# Supplementary material
Source: publisher site journal article supplement (https://www.degruyterbrill.com/publication/isbn/9783110432879/downloadAsset/9783110432879_Elektronischer_Anhang_2.zip)

# DAIMLER

Das Unternehmen 2011.

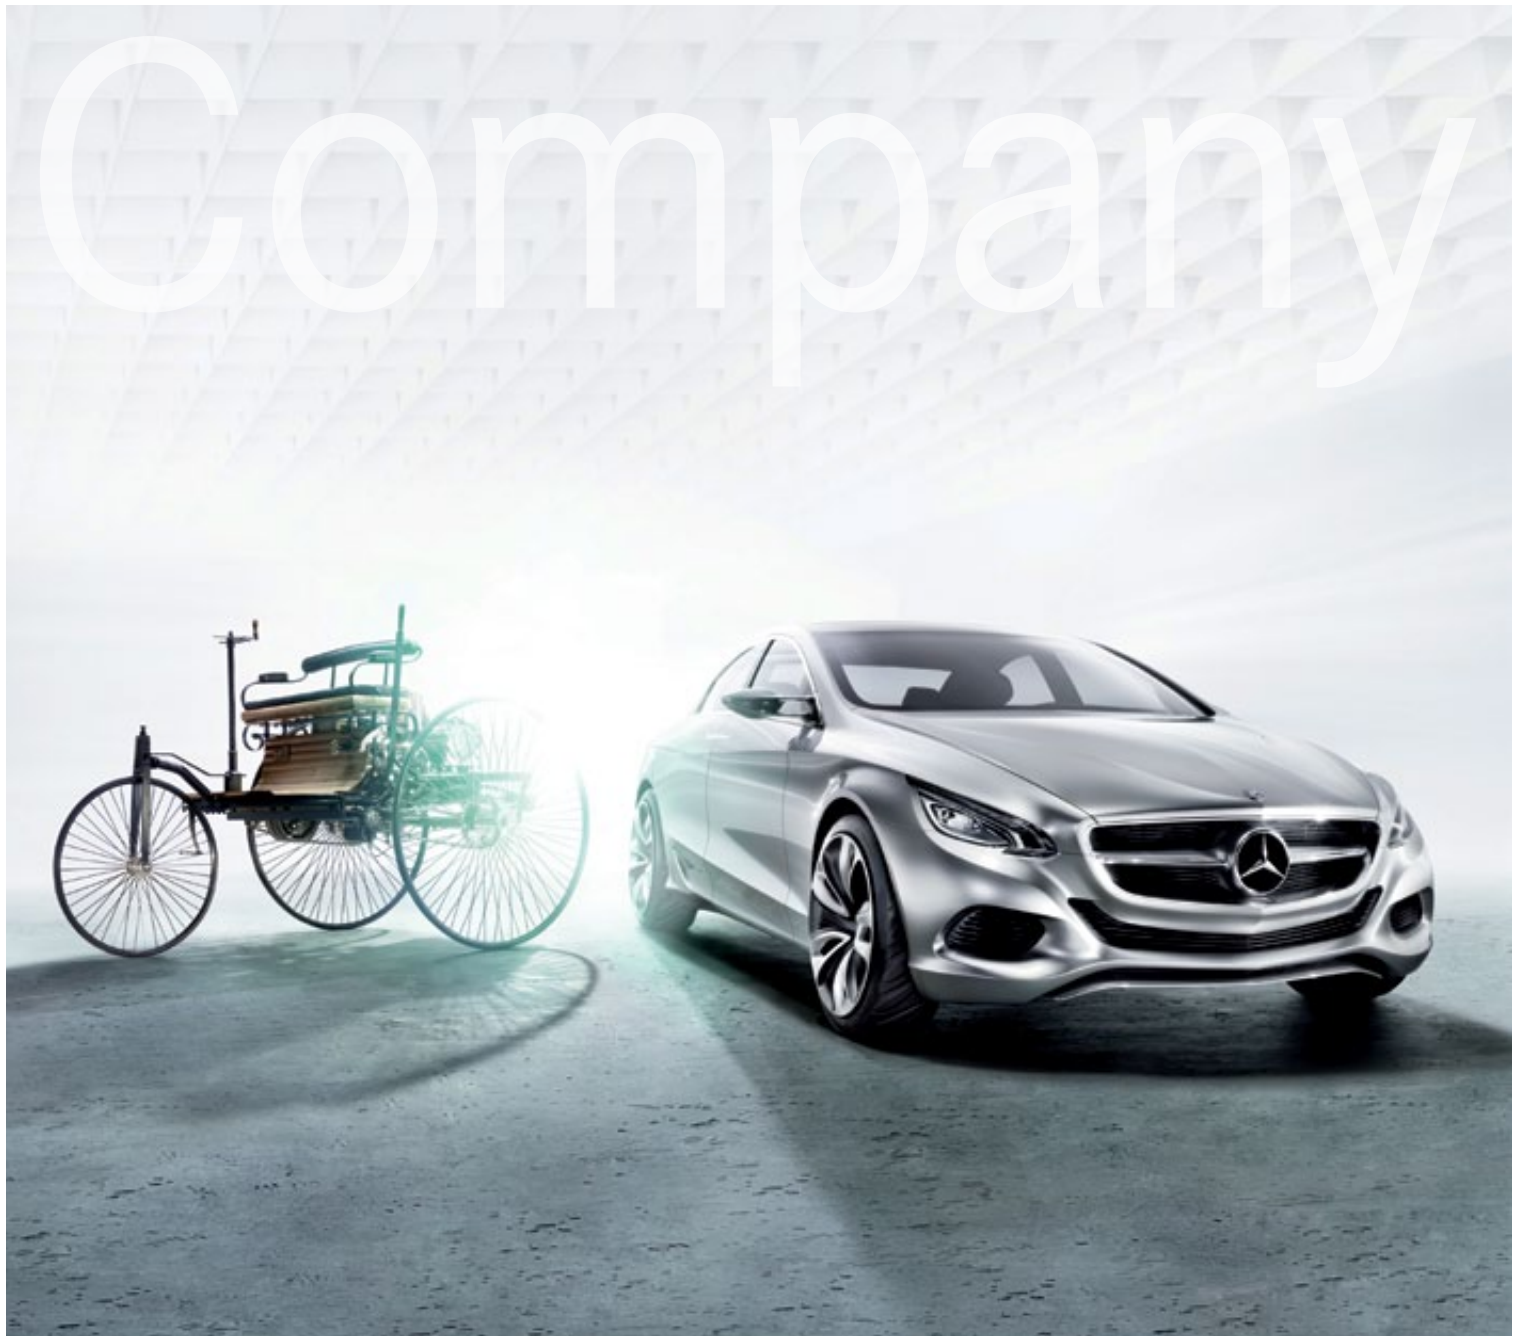

125! Jahre Erfinder des Automobils

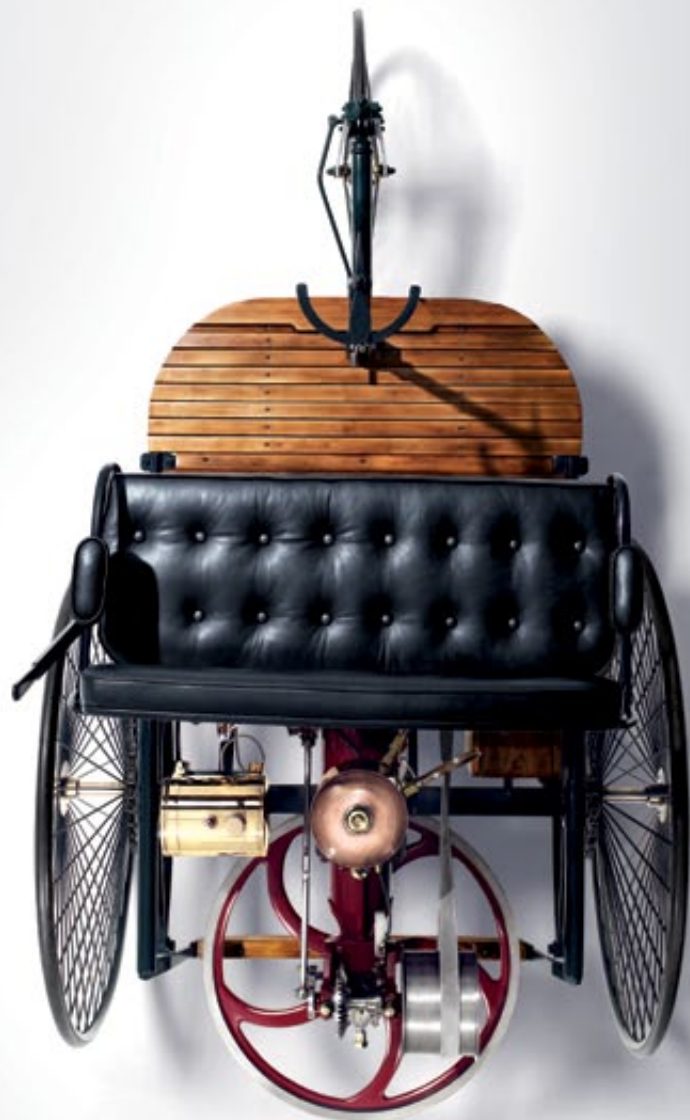

Vor 125 Jahren haben Carl Benz und Gottlieb Daimler unabhängig voneinander das Automobil erfunden. Als Geburtstag dieser bahnbrechenden Erfindung gilt der 29. Januar 1886 – der Tag, an dem Carl Benz seinen Motorwagen zum Patent anmeldete.

„Ich glaube an das Pferd. Das Automobil ist eine vorübergehende Erscheinung“, war die niederschmetternde Meinung Kaiser Wilhelms II. über das neue Fortbewegungsmittel. Ein grandioser Irrtum. 125 Jahre nach der Erfindung des „Patent-Motorwagens“ durch Carl Benz bewegen Automobile die Welt. Der Pioniergeist unserer Firmengründer und die Leidenschaft von damals, Visionen Wirklichkeit werden zu lassen, treibt uns bis heute an, das Automobil immer wieder neu zu erfinden.

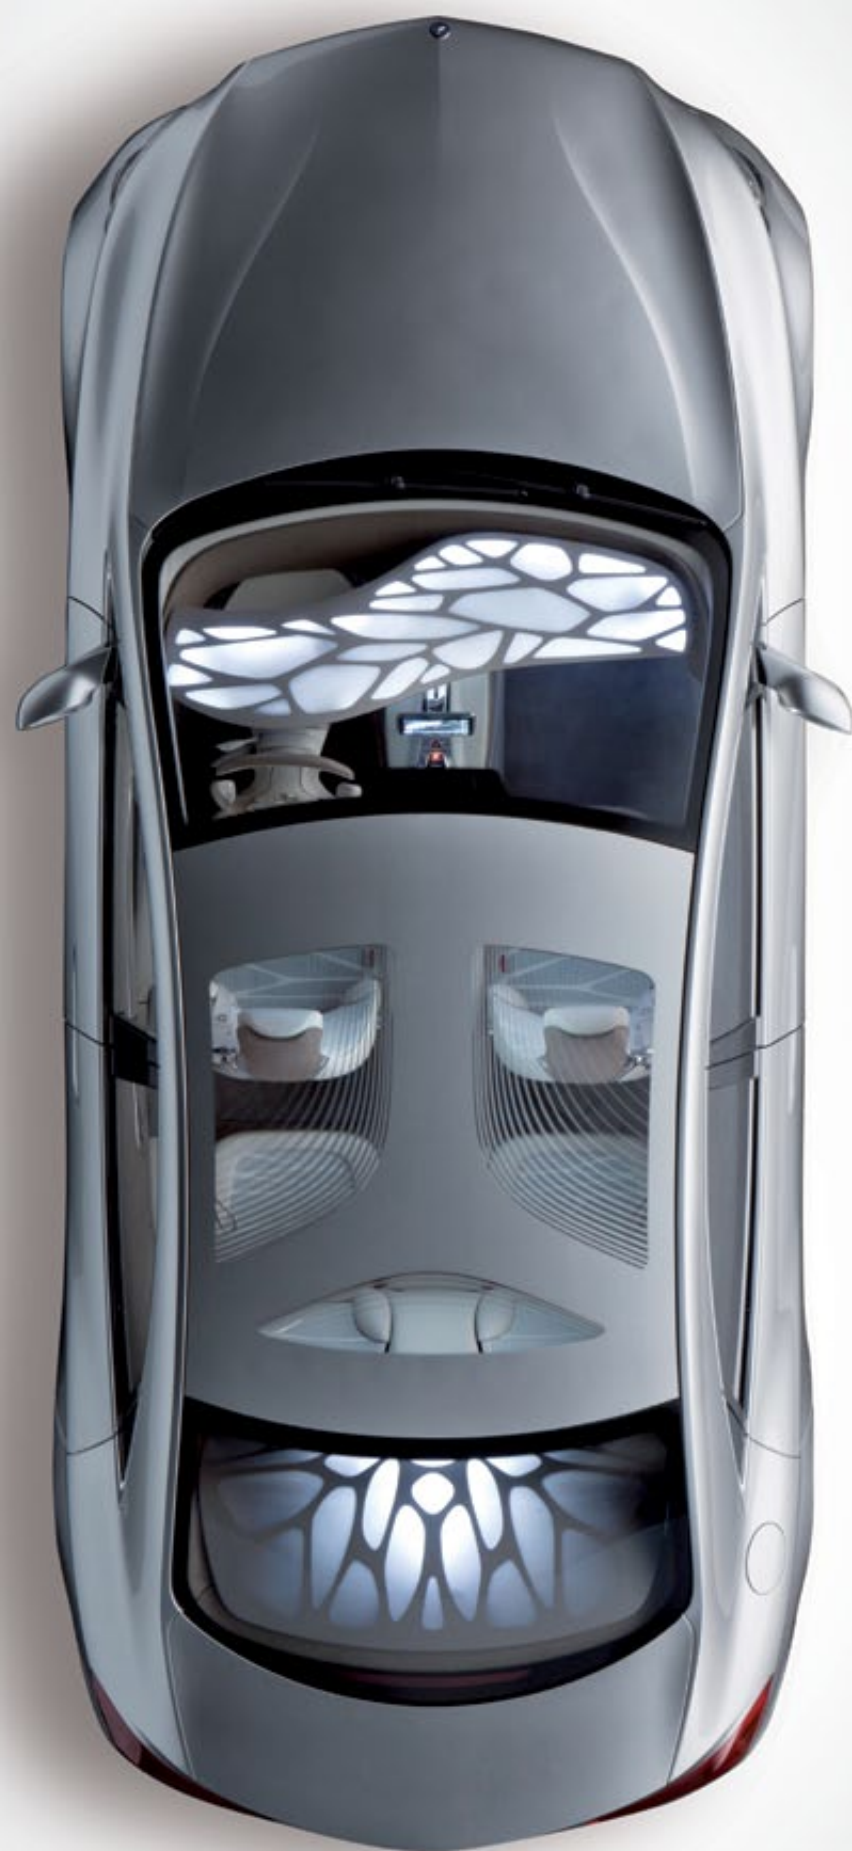

Als Erfinder des Automobils gestalten wir mit Leidenschaft seine Zukunft – beispielsweise mit dem Forschungsfahrzeug Mercedes-Benz F 800 Style. Dabei fühlen wir uns dem Klima- und Umweltschutz ebenso verpflichtet wie der Sicherheit unserer Fahrzeuge.

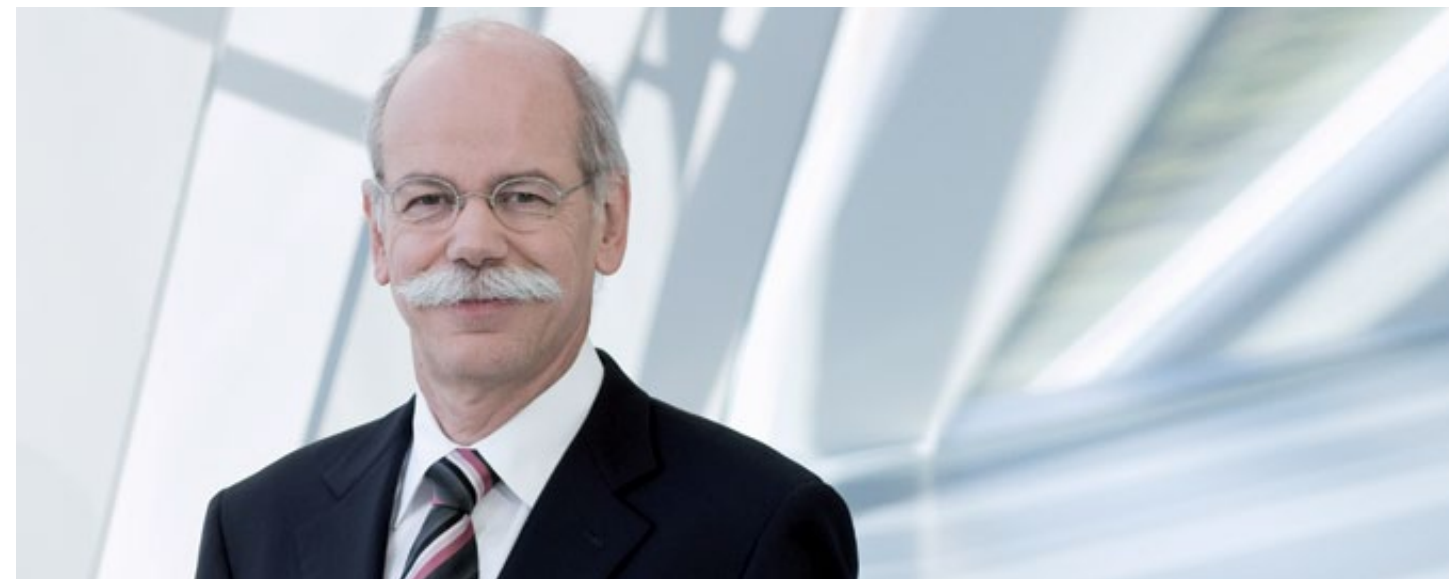

**Liebe Leserin, lieber Leser,** seit 125 Jahren verändert das Automobil die Welt – und es wird dies auch weiter tun. Stärker als vielleicht je zuvor verändert die Welt heute aber auch das Automobil. Denn einerseits steht dessen Karriere gerade in den bevölkerungsreichsten Ländern der Erde noch am Anfang; andererseits ist der Vorrat an Erdöl begrenzt – und die Belastbarkeit unseres Ökosystems erst recht. Die Aufgabe besteht also darin, wachsenden Mobilitätsbedarf und wirksamen Klimaschutz unter einen Hut zu bringen. Das ist keine geringe Herausforderung, aber niemand ist so gut auf sie vorbereitet wie der Erfinder des Automobils.

Nur Daimler verfügt schon heute über die Produkte und Technologien, um das komplette Spektrum nachhaltiger Mobilität zu bieten. So optimieren wir effiziente Hightech-Benziner und -Dieselmotoren in allen Klassen: Mit dem S 250 CDI BlueEFFICIENCY beispielsweise bringen wir 2011 die erste Fünf-Liter-S-Klasse auf den Markt. Gleichzeitig ist der batteriebetriebene smart electric drive bereits mit null Emissionen lokal unterwegs – und der Countdown für die Großserienproduktion läuft. Wie zuverlässig das vollelektrische Fahren auf langen Strecken funktioniert, demonstriert im Jubiläumsjahr eine bisher einzigartige Erdumrundung mit drei brennstoffzellenbetriebenen Fahrzeugen der Mercedes-Benz B-Klasse – die F-CELL World Drive.

Wir wollen die Mobilität der Zukunft aber nicht nur so sauber wie möglich machen; wir sind und bleiben auch beim Thema Sicherheit ganz vorn. Die Verwirklichung unserer Vision vom unfallfreien Fahren rückt näher – und wann immer ein Unfall nicht mehr zu verhindern ist, minimieren innovative Sicherheitssysteme den Schaden für die Verkehrsteilnehmer, inner- wie außerhalb des Fahrzeugs. Nicht zuletzt bringen wir unser Know-how in die Entwicklung einer intelligenten Verkehrsinfrastruktur ein.

Hinter all diesen Leistungen steht mehr als eine Viertelmillion Daimler-Mitarbeiterinnen und -Mitarbeiter weltweit. In ihrer Vielfalt sind sie ein Spiegelbild unserer Kundinnen und Kunden und unserer Märkte. Spitzenleistung hat nichts mit Geschlecht, Alter oder Herkunft zu tun. Gerade unterschiedliche Perspektiven und Kompetenzen bilden einen kreativen Nährboden, um Fahrzeuge zu bauen, die unsere Kundinnen und Kunden weltweit begeistern. Dabei sind wirtschaftlicher Erfolg und integre Geschäftspraxis für uns zwei Seiten derselben Medaille. Mit einer Kultur, die höchsten ethischen Ansprüchen genügt, wollen wir Maßstäbe setzen: Genauso wichtig wie saubere und sichere Produkte sind uns saubere und rechts-sichere Geschäfte.

Ich lade Sie herzlich ein, auf den folgenden Seiten einen Streifzug durch die Automobilgeschichte zu unternehmen und sich über unsere aktuellen Technologien, Konzepte und Initiativen zu informieren.

Viel Vergnügen bei der Lektüre!

Ihr

*Dieter Zetsche*

Dieter Zetsche



**Meilensteine Antriebstechnik**

- 1886 Erstes Automobil der Welt
- 1896 Erster Lastwagen mit Benzinmotor
- 1900 Erstes modernes Automobil
- 1921 Serien-Pkw mit Kompressormotor
- 1924 Serien-Lkw mit Dieselmotor
- 1936 Serien-Pkw mit Dieselmotor
- 1954 Serien-Pkw mit Benzin-Direkteinspritzung
- 1977 Serien-Pkw mit Turbodieselmotor
- 1985 Elektronisch gesteuerter Allradantrieb 4MATIC
- 1986 3-Wege-Katalysator in Serie
- 1993 Oxidationskatalysator in Serie
- 1994 NECAR Versuchsfahrzeug mit Brennstoffzellenantrieb
- 1997 Serien-Pkw mit Common-Rail-Direkteinspritzung
- 2003 Elektronisch gesteuertes 7-Gang-Automatikgetriebe 7G-TRONIC
- 2005 Serien-Lkw mit BlueTec-Dieselseltechnologie
- 2006 Benzin-Direkteinspritzung mit strahlgeführtem Brennverfahren
- 2009 Serien-Pkw mit Hybridantrieb und Lithium-Ionen-Batterie
- 2009 Brennstoffzellen-Pkw in Kleinserie
- 2010 BlueDIRECT-Motoren
- 2010 Elektro-Pkw und -Transporter mit Lithium-Ionen-Batterie in Kleinserie

# Der Weg zum emissionsfreien Fahren.

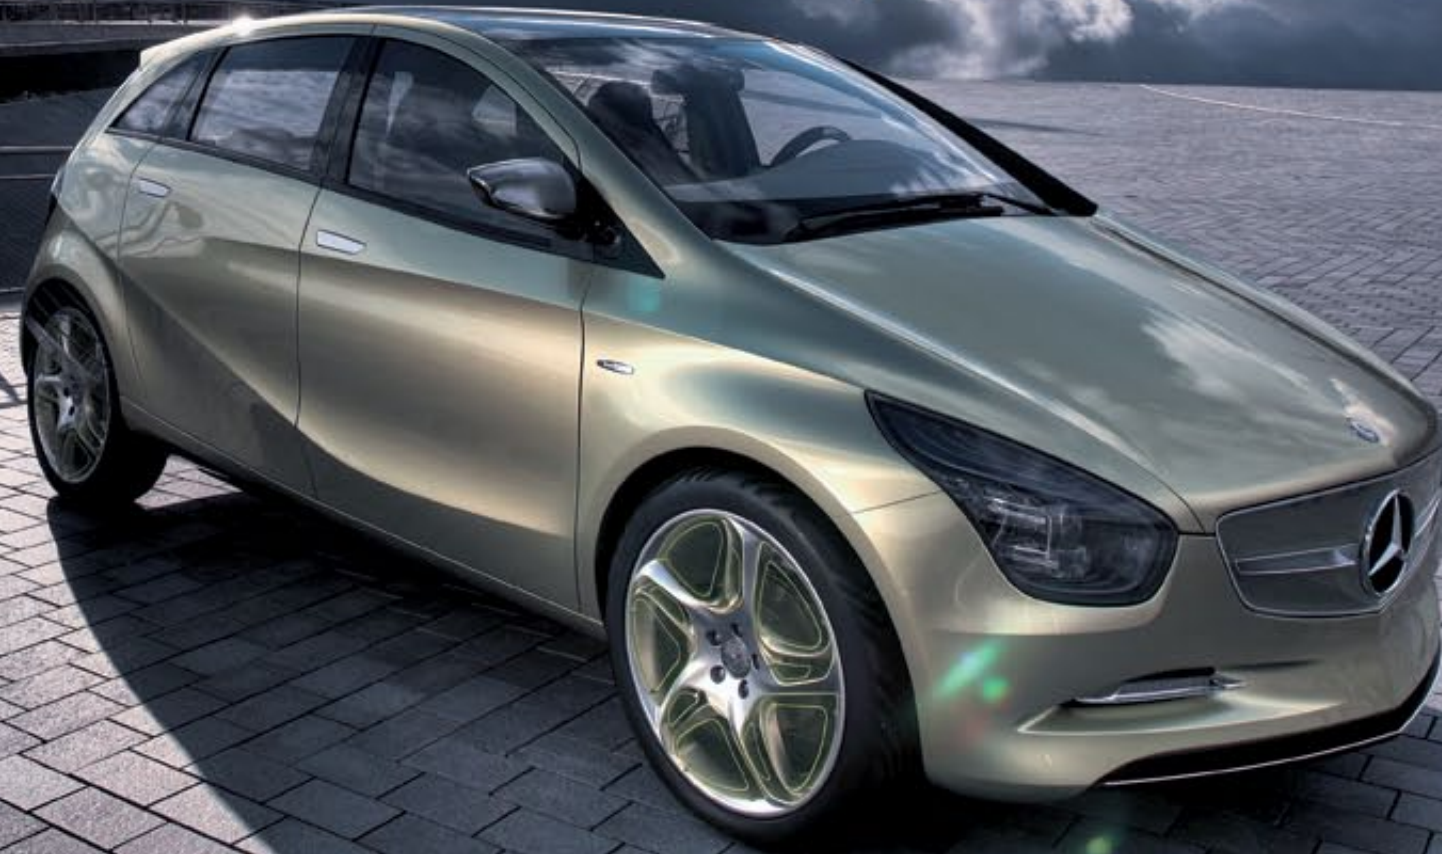

Das "Concept BlueZERO" ermöglicht umweltverträgliche Elektromobilität durch drei verschiedene Antriebskonfigurationen.

## 125! Jahre Erfinder des Automobils

1886

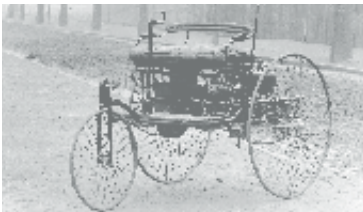

Carl Benz meldet sein „Fahrzeug mit Gasmotorenbetrieb“ am 29. Januar zum Patent an. Der Benz-Patent-Motorwagen ist das erste Automobil der Welt.

1888

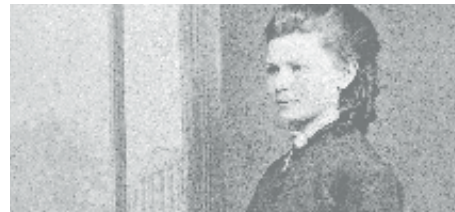

Bertha Benz unternimmt mit der Serienausführung des Patent-Motorwagens die erste Automobil-Fernfahrt. Sie fährt die Strecke Mannheim, Heidelberg, Bruchsal, Durlach, Pforzheim und zurück.

1895

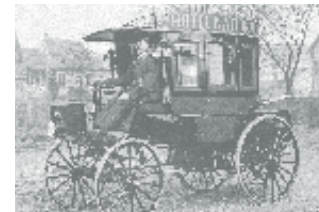

Am 18. März 1895 startet der erste Linienverkehr mit einem benzinbetriebenen Bus zwischen Siegen, Netphen und Deuz. Der erste Kraftomnibus der Welt ist eine Entwicklung der Firma Benz & Cie. in Mannheim.



# Wir gestalten Zukunft. Und liefern nachhaltige Ideen für die Mobilität von heute und morgen.

## Als Erfinder des Automobils übernimmt Daimler die Verantwortung für dessen Zukunft.

Daimler ist seit 125 Jahren eine treibende Kraft bei der Entwicklung des gesamten Straßenverkehrs: von der individuellen Mobilität mit dem Pkw bis hin zum Gütertransport mit Nutzfahrzeugen. Diesen Entwicklungsvorsprung nutzen wir, um die nachhaltige Mobilität in all diesen Bereichen auch in Zukunft zu sichern. Unsere Kundinnen und Kunden erwarten sichere, komfortable und leistungsfähige Fahrzeuge, die gleichzeitig immer sparsamer und umweltverträglicher sein müssen. Als Erfinder des Automobils investieren wir viel, um diese Ansprüche zu erfüllen.

## Unsere Vision: ein intelligenter Antriebsmix.

Gut ein Jahrhundert lang wurden Automobile nahezu ausschließlich auf der Basis von Erdöl betrieben. Vor dem Hintergrund des weltweit dynamisch wachsenden Mobilitätsbedarfs, schrumpfender Ölreserven, steigender Energiepreise und eines immer größer werdenden Umweltbewusstseins setzt Daimler auf maßgeschneiderte Lösungen für die vielfältigen Mobilitätsansprüche in allen Bereichen des Straßenverkehrs.

Unser Ziel ist es, mit einem intelligenten Antriebsmix für jeden Bedarf Verbrauch und Emissionen unserer Fahrzeuge zu verringern und langfristig ganz zu vermeiden.

Die zentralen Entwicklungsschwerpunkte haben wir in unserer Roadmap „Der Weg zum emissionsfreien Fahren“ festgelegt:

- die Weiterentwicklung und Optimierung von Fahrzeugen mit modernsten Verbrennungsmotoren
  - die weitere Effizienzsteigerung durch maßgeschneiderte Hybridisierung
  - das lokal emissionsfreie Fahren mit Brennstoffzellen- und Batteriefahrzeugen
- Dieser intelligente Antriebsmix ist für Daimler der Schlüssel zu nachhaltiger Mobilität.

**Gemeinsam mehr erreichen.** Bestandteil des integrierten Ansatzes unserer Roadmap „Der Weg zum emissionsfreien Fahren“ sind Partnerschaften mit anderen Unternehmen aus den Bereichen Technologie, Energie und Infrastruktur sowie der öffentlichen Hand. Im Rahmen von Initiativen wie den internationalen „e-mobility“-Projekten, den Brennstoffzellen-Testflotten in Berlin, Hamburg und Los Angeles oder den Car-Sharing-Projekten „car2go“ in Ulm, Hamburg und Austin (Texas) werden neue Fahrzeug- und Mobilitätskonzepte im Praxiseinsatz erprobt.

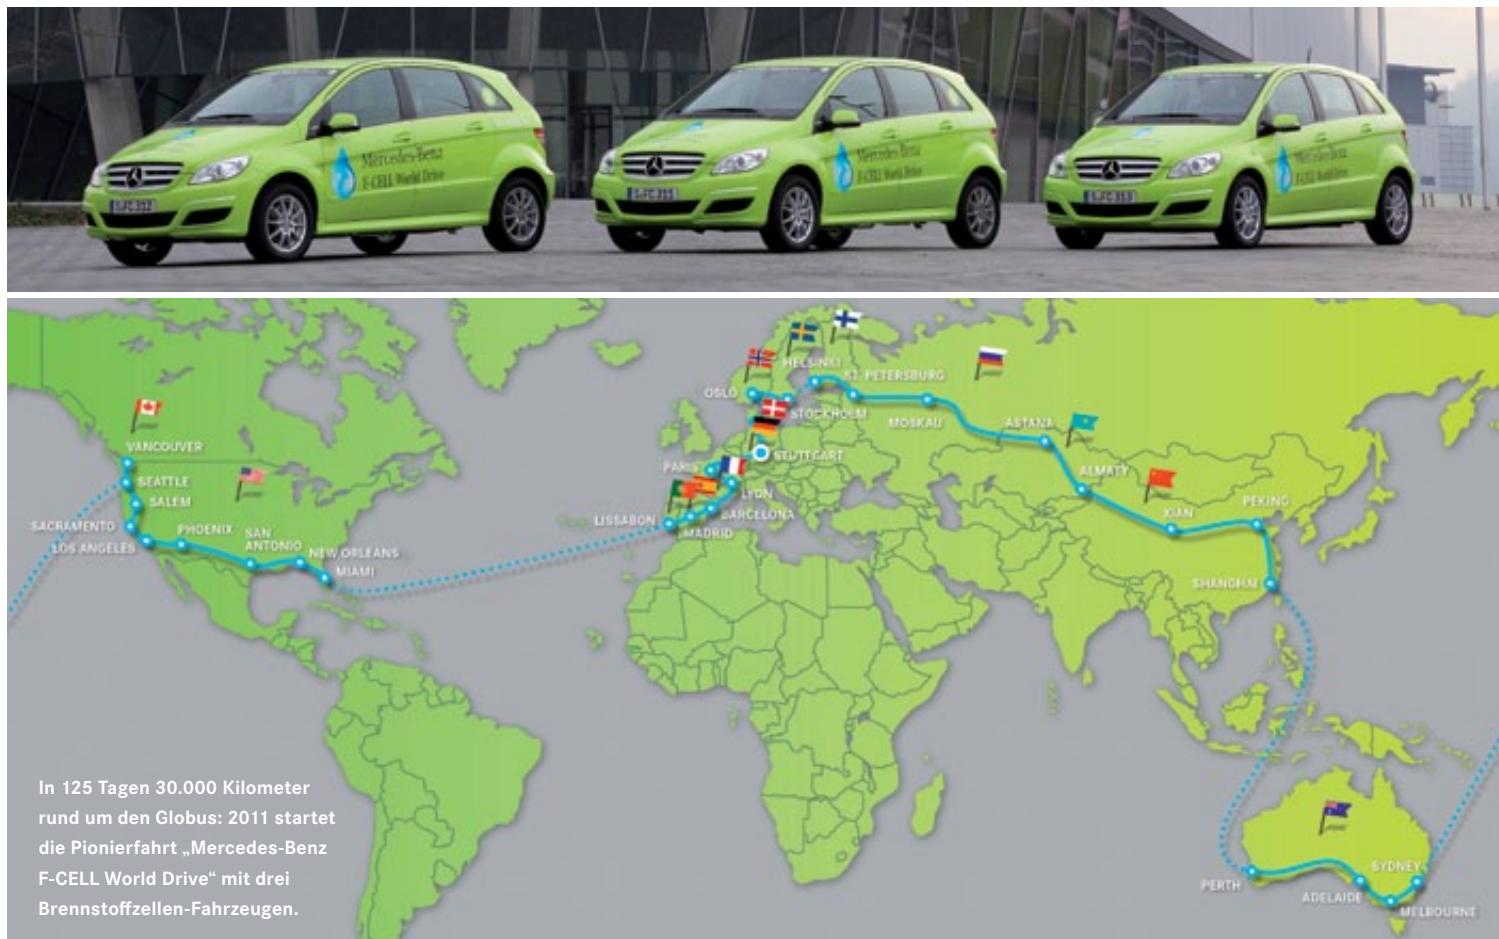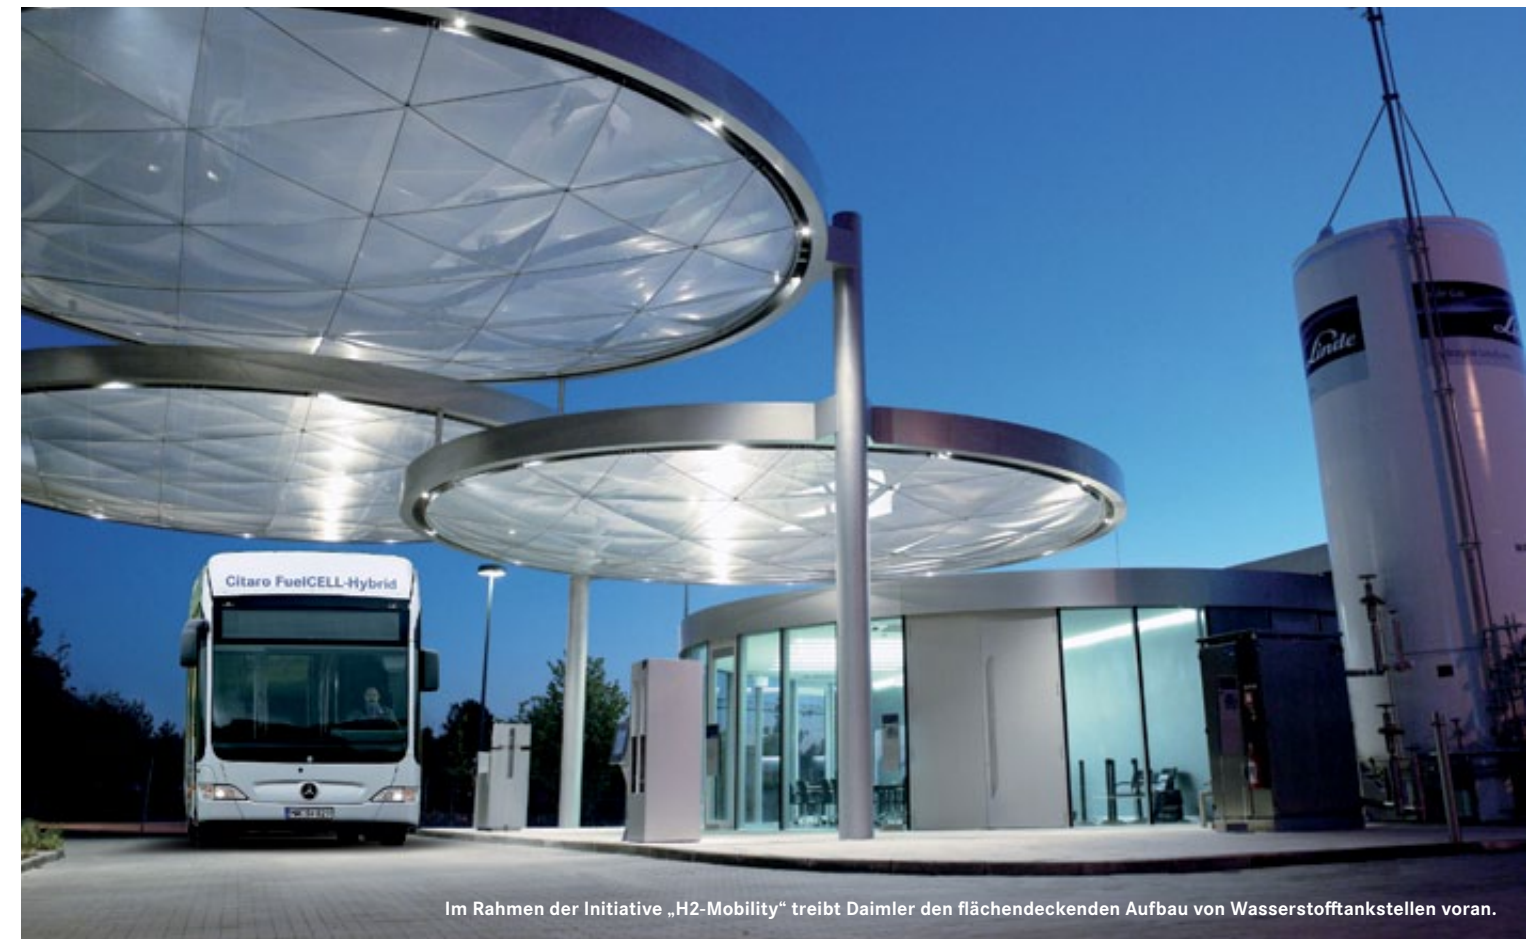

1896

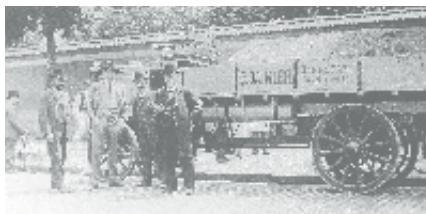

Im September 1896 liefert die Daimler-Motoren-Gesellschaft den ersten Lastwagen mit Verbrennungsmotor aus. Vier Typen mit Nutzlasten von 1,5 bis fünf Tonnen werden angeboten.

1900

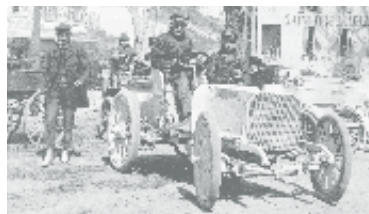

Daimler-Chefkonstrukteur Wilhelm Maybach entwickelt den Mercedes 35 PS, nach heutigen Maßstäben das erste moderne Automobil.

1906

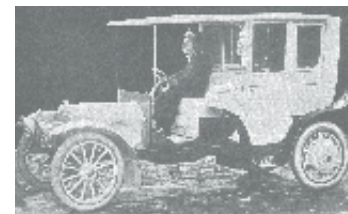

„Mercedes-Electrique“-Fahrzeuge mit batterieelektrischem Antrieb und „Mercedes-Mixte“-Hybridfahrzeuge ergänzen die Daimler-Modellpalette.

125! Jahre Erfinder des Automobils



# Innovation statt Verzicht. Der Verbrennungsmotor bleibt noch lange das Rückgrat der Mobilität.

**Der größte Hebel zur Senkung von Verbrauch und Emissionen sind innovative, energieeffiziente Diesel- und Benzinmotoren.**

Moderne Diesel und Benziner bleiben aufgrund ihrer Leistungsfähigkeit auch weiterhin die treibende Kraft der Mobilität. Das gilt für den Individualverkehr mit Pkw – insbesondere auf Langstrecken – ebenso wie für den Personenverkehr oder Gütertransport mit Lastwagen. Die Qualität unserer Verbrennungsmotoren entscheidet deshalb darüber, wie viel Kraftstoff in den nächsten Jahren tatsächlich eingespart wird und welche Mengen an Emissionen damit vermieden werden können. Der erste von drei Schwerpunkten auf unserer „Roadmap“ ist daher die Optimierung von Fahrzeugen mit Verbrennungsmotor. Auch hier setzt Daimler auf die intelligente Bündelung verschiedener Strategien, die dazu dienen, sowohl Pkw als auch Nutzfahrzeuge noch sauberer und sparsamer und damit fit für die Zukunft zu machen.

**Nutzfahrzeuge im Fokus.** Mit den „CleanDrive-Technologies“ im Rahmen der Initiative „Shaping Future Transportation“ – saubere Antriebssysteme und alternative Kraftstoffe – gestaltet der Nutzfahrzeugbereich von Daimler die Zukunft der Mobilität. So sorgen etwa mit der BlueTec-Technologie effiziente Dieselmotoren für einen geringeren Verbrauch und dank optimierter Verbrennung und Abgasnachbehandlung auch für weniger Schadstoffe. Vor allem im Stadtverkehr sind

emissionsarme und leise Erdgas- und Hybridantriebe bei Nutzfahrzeugen eine gute und erprobte Alternative zu reinen Dieselmotoren. Bereits jetzt sind bei allen Konzernmarken weltweit mehr als 400.000 Fahrzeuge mit „CleanDrive-Technologies“ in Kundenhand und weisen den Weg zum anspruchsvollen Ziel: dem emissionsfreien Nutzfahrzeug.

**Individuell, schnell, sauber, sicher.** Unsere Pkw stehen für Komfort, Sicherheit, Fahrspaß und Umweltverträglichkeit – darauf können unsere Kundinnen und Kunden auch in Zukunft bauen. Neuentwicklungen wie der Vierzylinder-Diesel und die neueste Generation von aufgeladenen Benzin-Direkteinspritzern sowie der Einsatz alternativer Kraftstoffe sind richtungsweisend. Doch beim Antrieb hören die Optimierungsmöglichkeiten nicht auf. Unsere BlueEFFICIENCY-Pakete bündeln weitere Maßnahmen zur Kraftstoffeinsparung bei Benzin- und Diesel-Pkw-Modellen. Dazu gehören – je nach Baureihe – unterschiedliche innermotorische Maßnahmen ebenso wie eine Kombination verschiedener Technologien zur Gewichtseinsparung im Karosseriebereich. Leichtlaufreifen, Aerodynamik-Optimierungen oder die ECO Start-Stopp-Funktion als Vorstufe zur Hybridisierung runden die maßgeschneiderten Pakete ab.

Die Effizienz unserer Verbrennungsmotoren entscheidet darüber, wie viel Kraftstoff in den nächsten Jahren tatsächlich eingespart wird. Und welche Mengen an Emissionen damit vermieden werden können.

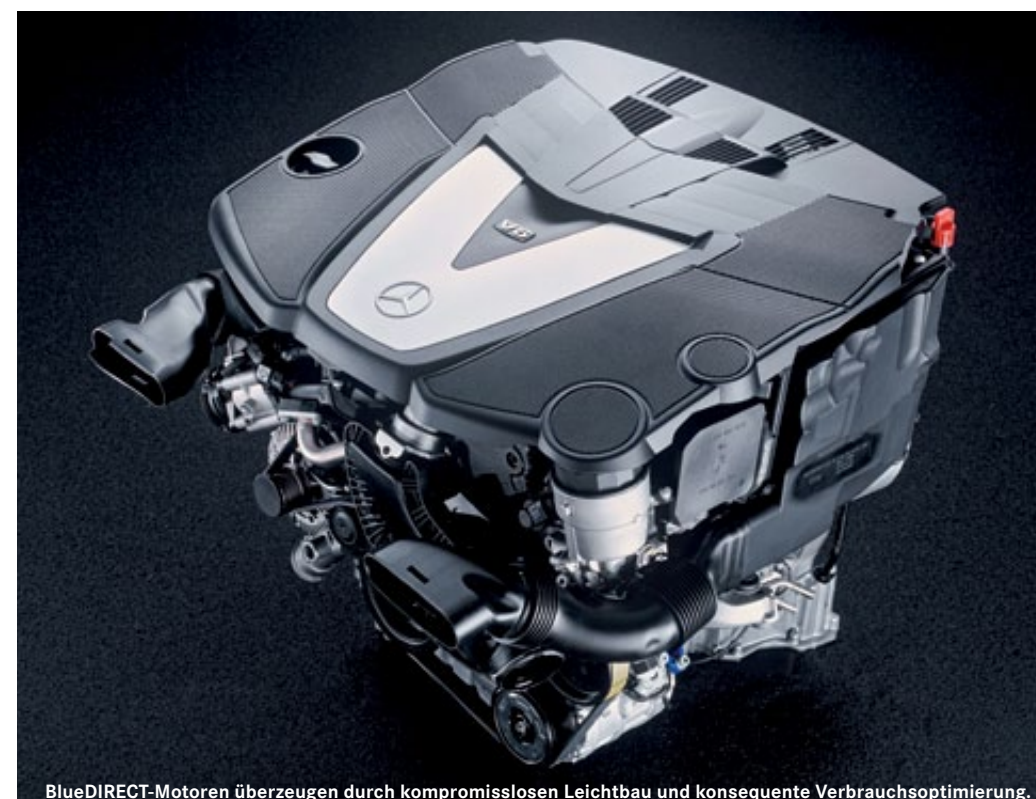

BlueDIRECT-Motoren überzeugen durch kompromisslosen Leichtbau und konsequente Verbrauchsoptimierung.

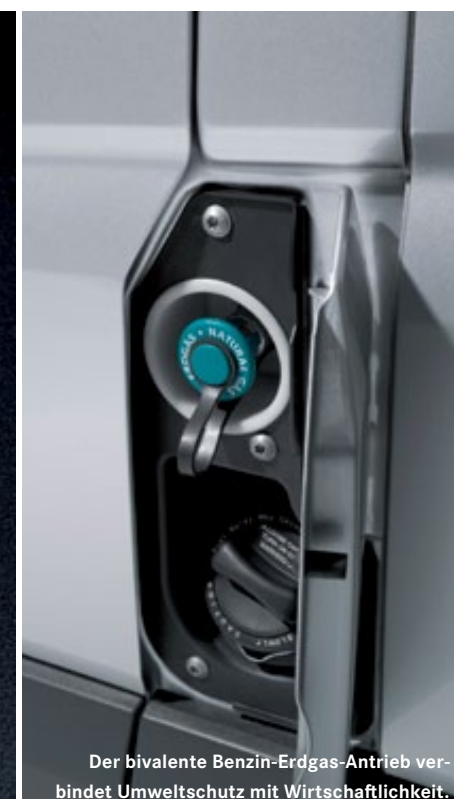

Der bivalente Benzin-Erdgas-Antrieb verbindet Umweltschutz mit Wirtschaftlichkeit.

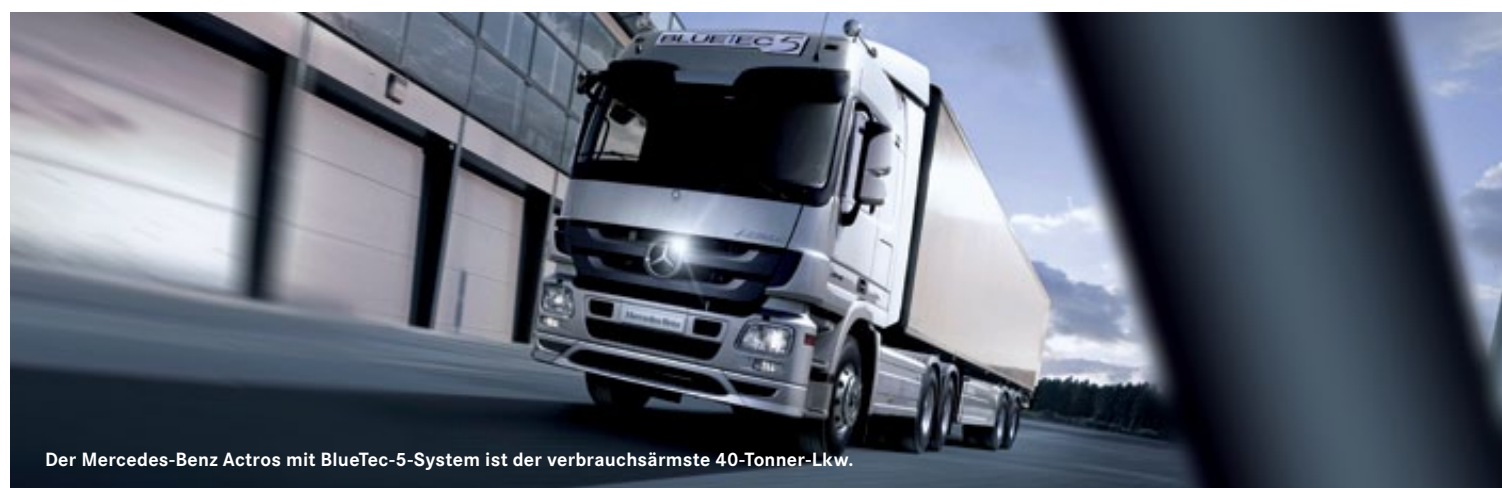

Der Mercedes-Benz Actros mit BlueTec-5-System ist der verbrauchsärmste 40-Tonner-Lkw.

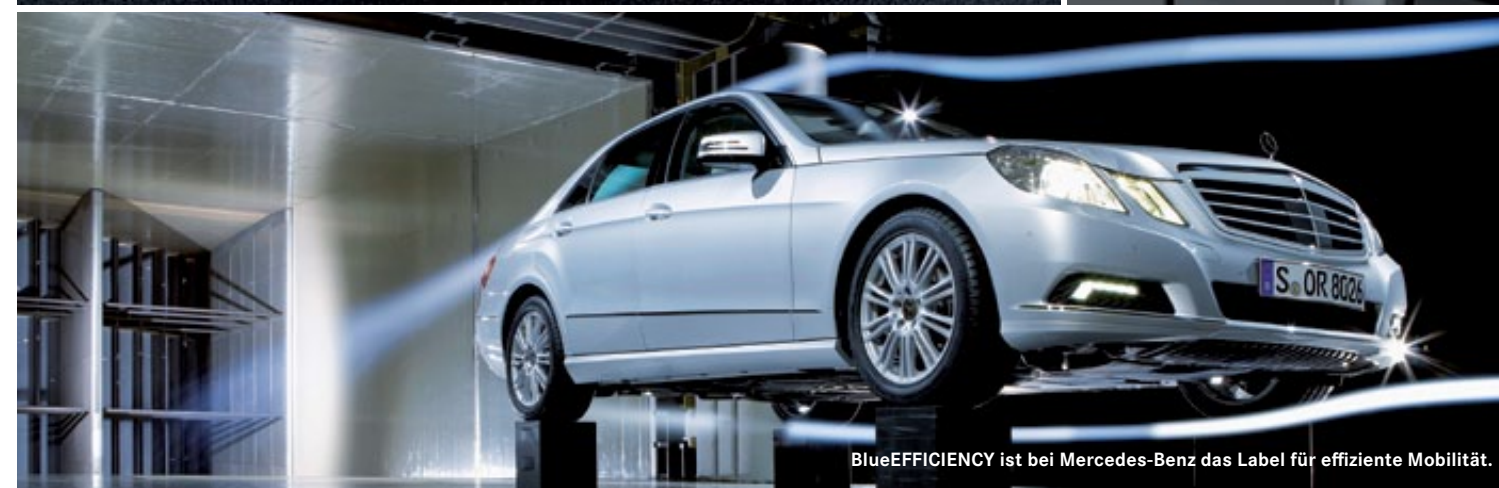

BlueEFFICIENCY ist bei Mercedes-Benz das Label für effiziente Mobilität.

125! Jahre Erfinder des Automobils

1924

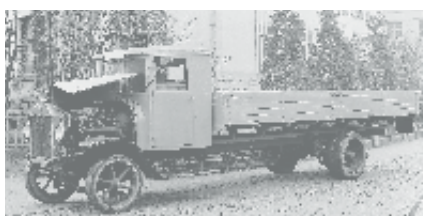

Der erste serienmäßig gebaute Diesel-Lastwagen der Welt ist ein Benz-5-Tonner mit einem Vierzylinder-Vorkammer-Dieselmotor.

1934

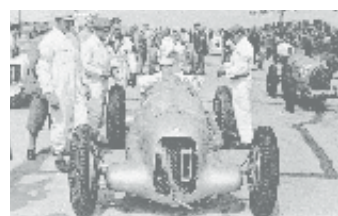

Die Ära der „Silberpfeile“ beginnt mit dem Grand-Prix-Rennwagen W 25, der gleich bei seiner Premiere auf dem Nürburgring zum Sieg fährt.

1936

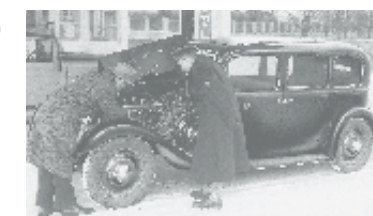

Der Mercedes-Benz 260 D ist der erste in Serie gefertigte Personenwagen mit Dieselmotor.



# Meilenstein der Effizienzsteigerung. Maßgeschneiderte Hybridisierung für jeden Mobilitätsbedarf.

**Der Schlüssel zu mehr Effizienz und Umweltverträglichkeit liegt in der Elektrifizierung des Antriebs. Dafür hat Daimler einen modularen Hybrid-Systembaukasten entwickelt.**

Ein wichtiger Teil der Daimler-Strategie für nachhaltige Mobilität sind Hybridantriebe. Abhängig von Fahrzeugtyp und Fahrsituation werden bei Hybridantrieben Verbrennungs- und Elektromotoren einzeln oder gemeinsam betrieben. Insbesondere im innerstädtischen Verkehr lassen sich so bis zu 20 Prozent Kraftstoff einsparen. Schlüsselkomponente bei der Elektrifizierung ist der Energiespeicher. Als weltweit erstem Hersteller ist es Daimler gelungen, die Lithium-Ionen-Batterietechnologie auf die hohen Anforderungen im Automobilbereich abzustimmen und reif für den Serieneinsatz zu machen.

**Flexibilität im Pkw.** Hybridfahrzeuge mit modularen elektrischen Antriebskomponenten können die Effizienz optimierter Verbrennungsmotoren weiter steigern – vor allem im innerstädtischen Verkehr.

Welche Hybridarchitektur ökologisch und ökonomisch am sinnvollsten ist, hängt auch davon ab, wie groß das Fahrzeug ist und wie es eingesetzt wird. Hybridlösungen sind im Pkw-Segment vom kleinen smart bis zum Premiumfahrzeug S-Klasse von Mercedes-Benz verwirklicht. Dass Sparsamkeit und Fahrspaß stets unter einen Hut passen, garantiert der modulare Hybrid-Systembaukasten, der in puncto Leistung und Einsatzspektrum viel Flexibilität bietet. Die Bandbreite hybrider Lösungen bei Mercedes-Benz reicht von der komfortablen Start-Stopp-Funktion über die Rekuperation von Bremsenergie bis hin zum rein elektrischen Fahren. Eine weitere Variante ist die Plug-in-Technologie. Sie ermöglicht, die Batterie zur Steigerung der „elektrischen“ Reichweite zusätzlich an der Steckdose aufzuladen. Allen Hybridlösungen ist gemeinsam: Der Verbrauch sinkt, der Fahrspaß bleibt.

## Hybridantriebe verbinden Verbrennungs- und Elektromotoren und bieten damit das Beste aus zwei Welten.

**Führend bei Nutzfahrzeugen.** Auch bei Nutzfahrzeugen treibt Daimler mit Hochdruck die drastische Reduzierung des Kraftstoffverbrauchs, des CO<sub>2</sub>-Ausstoßes sowie der Abgasemissionen voran. Gebündelt werden diese Aktivitäten im Rahmen der Initiative „Shaping Future Transportation“. Eine Schlüsselfunktion nehmen auch hier Hybridtechniken ein, die je nach Einsatzart Einsparungen beim Dieselsonsum von bis zu einem Drittel erwarten lassen. Der Weg zum Erfolg führt ebenfalls über maßgeschneiderte Konzepte. Bei Lkw setzt Daimler auf den parallelen Hybridantrieb, mit dem Verbrennungs- und Elektromotor das Fahrzeug getrennt oder gemeinsam antreiben. Sie sind derzeit der Königsweg im Spannungsfeld von Bauaufwand, Abmessung, Gewicht, Leistung, Einsatzbedingung und Energieeffizienz und erlauben auch rein elektrisches Fahren. Für diesen realisierten Ansatz im Mercedes-Benz Atego BlueTec Hybrid wurde Daimler

mit dem „Deutschen Nachhaltigkeitspreis 2010“ ausgezeichnet. Bei Stadtbussen sind serielle Antriebe die erste Wahl. Der Verbrennungsmotor speist über einen Generator eine Pufferbatterie und läuft stets im verbrauchsgünstigen Optimum. Dank Elektroantrieb können die Busse in Innenstädten abgasfrei fahren.

**Herzstück Batterie.** Als Kernkomponente der Hybridtechnik kommt bei Daimler eine in puncto Leistung und Speicherkapazität überlegene Batterie auf der Basis der Lithium-Ionen-Technik zum Einsatz. Wesentliche Vorteile von Lithium-Ionen-Batterien sind die höhere Energiedichte und der bessere elektrische Wirkungsgrad bei kompakteren Abmessungen und geringerem Eigengewicht. Die Zyklenfestigkeit der Batterie ist außergewöhnlich hoch, was unter normalen Einsatzbedingungen eine Lebensdauer von mindestens zehn Jahren verspricht.

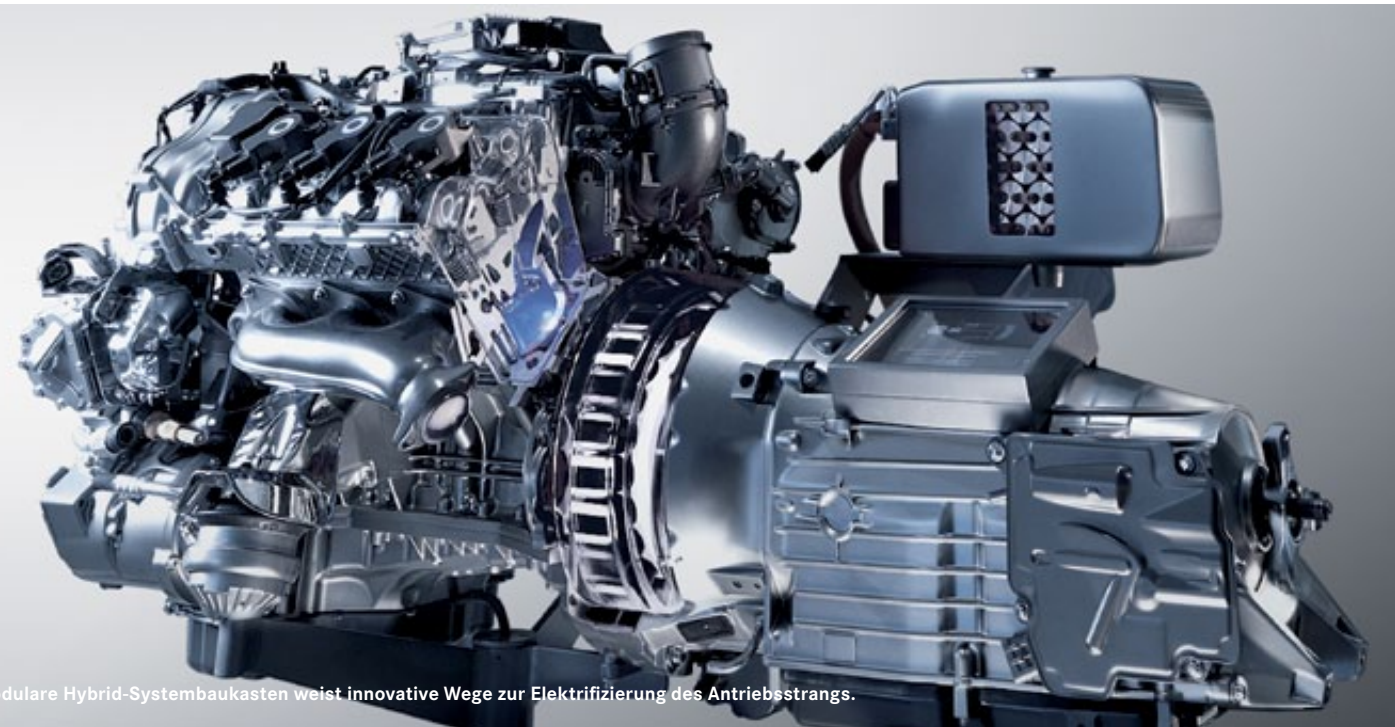

Der modulare Hybrid-Systembaukasten weist innovative Wege zur Elektrifizierung des Antriebsstrangs.

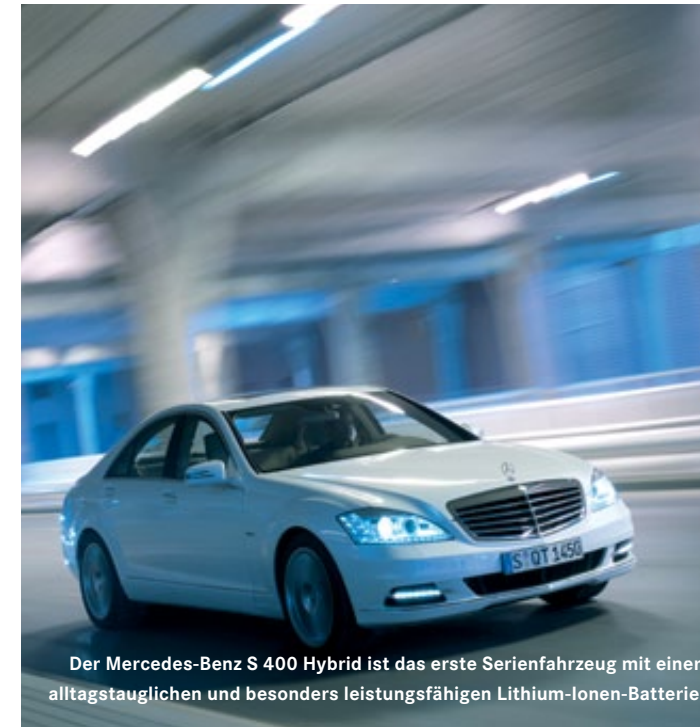

Der Mercedes-Benz S 400 Hybrid ist das erste Serienfahrzeug mit einer alltagstauglichen und besonders leistungsfähigen Lithium-Ionen-Batterie.

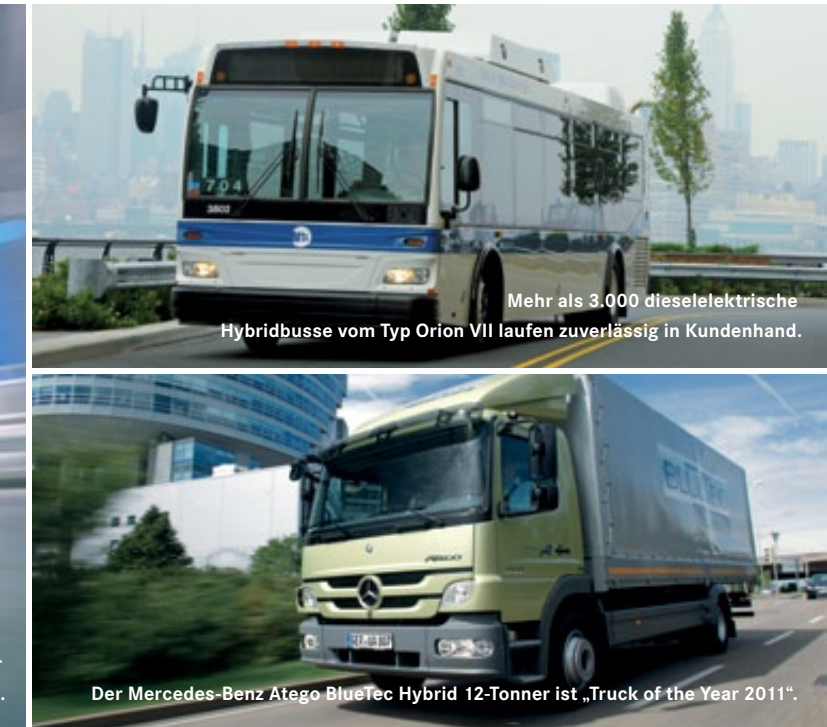

Mehr als 3.000 dieselelektrische Hybridbusse vom Typ Orion VII laufen zuverlässig in Kundenhand.

Der Mercedes-Benz Atego BlueTec Hybrid 12-Tonner ist „Truck of the Year 2011“.

1945

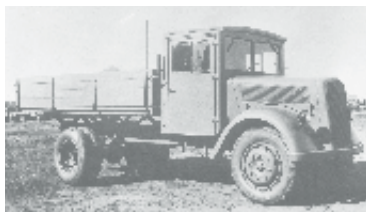

In den Mercedes-Benz Werken beginnt die Nachkriegsproduktion mit dem 3-Tonnen-Lastwagen L 701. 1946 folgt der Pkw-Typ 170 V als Kasten-, Liefer- und Krankenwagen.

1951

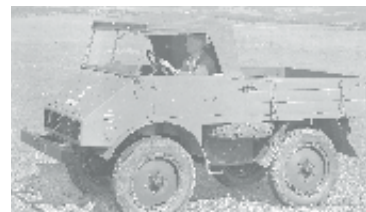

Das Werk Gaggenau übernimmt die Produktion des Universal-Motorgeräts Unimog, das ehemalige Flugmotoren-Ingenieure 1946 entwickelt haben.

1954

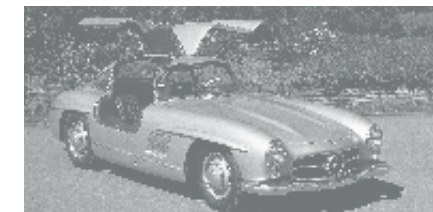

Mit Flügeltüren und neuer Kühlermaske ist der Mercedes-Benz 300 SL eine Design-Sensation. Mit der innovativen Benzin-Direkteinspritzung setzt er neue Maßstäbe in Sachen Effizienz.

125! Jahre Erfinder des Automobils



# Emissionsfreies Fahren. Elektrofahrzeuge mit Batterie und Brennstoffzelle sind Bausteine nachhaltiger Mobilität.

**Die Zukunft hat begonnen. Elektrofahrzeuge mit Batterie und Brennstoffzelle haben sich in der Praxis bewährt. Lokal emissionsfreies Fahren ist im urbanen Umfeld bereits Realität. Als Pionier entwickelt Daimler die Technologien konsequent weiter.**

Als erster Automobilhersteller fährt Daimler schon 2011 mit drei Serienmodellen ins emissionsfreie Zeitalter der Elektromobilität. Neben dem Pionier unter den batterieelektrisch angetriebenen Fahrzeugen, dem smart fortwo electric drive, fahren nun auch die Mercedes-Benz A-Klasse E-CELL sowie die Mercedes-Benz B-Klasse F-CELL flüsterleise und ressourcenschonend. Der Supersportwagen Mercedes-Benz SLS AMG E-CELL und der Stadttransporter Mercedes-Benz Vito E-CELL weisen ebenso den Weg zum emissionsfreien Fahren. Auch bei Bussen und Lkw setzt Daimler mit Modellen wie dem Fuso Canter E-CELL und dem Mercedes-Benz Citaro FuelCELL-Hybrid Zeichen. Beste Belege dafür, dass Daimler auch im Bereich der Elektromobilität auf maßgeschneiderte Fahrzeugkonzepte setzt. Um alle Mobilitätsansprüche zu erfüllen, fahren wir konsequent mehrspurig in die Zukunft. Der Elektroantrieb ist sowohl mit Batterie als auch mit Brennstoffzelle integraler Bestandteil unserer Strategie des emissionsfreien Fahrens.

**Emissionsfrei in den Städten.** Hundert Elektrosamts in London haben bis 2009 deutlich gemacht, wo Fahrzeuge der ersten Generation mit batterieelektrischem Antrieb als Alternative infrage kommen. In urbanen Zentren, in denen Einfahrtsbeschränkungen und Umweltzonen keine Ausnahme mehr sind, spielen lokal emissionsfreie, leise und hoch effiziente Fahrzeuge ihre Vorteile aus. Beim aktuellen neuen Modell der zweiten Generation genügt eine Batterieladung nach dem „Neuen Europäischen Fahrzyklus“ (NEFZ) für bis zu 135 Kilometer Reichweite. Das garantiert volle Alltagstauglichkeit im innerstädtischen Bereich. Seit 2009 fördert das Bundesministerium für Verkehr, Bau und Stadtentwicklung acht Modellregionen in Deutschland. Die Leuchtturmprojekte der Elektromobilität in Hamburg, Bremen/Oldenburg, Berlin-Potsdam, Rhein-Ruhr, Rhein-Main, Sachsen, Stuttgart und München werden bis Ende 2011 mit 130 Millionen Euro unterstützt.

**Schlüssel Energiespeicher.** Voraussetzung für alle Elektroantriebssysteme – vom Hybrid bis zum reinen Elektromotor sowohl für Pkw als auch für Transporter, Nutzfahrzeuge und Omnibusse – sind leistungsfähige, sichere und zuverlässige Energiespeicher. Um seine Vorreiterrolle langfristig zu sichern, beteiligt sich Daimler an der Evonik-Tochter Li-Tec Battery GmbH. Darüber hinaus wurde das gemeinsame Joint Venture „Deutsche ACCUmotive GmbH & Co. KG“ gegründet. Ziel dieser Kooperation sind die Entwicklung und Produktion von Lithium-Ionen-Batterien, die speziell auf den Einsatz im Automobil abgestimmt sind. Damit hat Daimler direkten Zugriff auf die Schlüsseltechnologie für emissionsfreies Fahren.

**Weiter kommen.** Mit Wasserstoff angetriebene Brennstoffzellenautos eignen sich dank ihrer größeren Reichweite auch für Langstrecken. Dabei sind sie im Betrieb emissionsfrei und leise, verfügen über eine hohe Fahrdynamik sowie eine gute Beschleunigung und sind hoch effizient. Im Pkw-Segment sind Kleinserien der Mercedes-Benz A-Klasse F-CELL und der aktuellen B-Klasse F-CELL längst im Praxiseinsatz. Der Mercedes-Benz Citaro FuelCELL-Hybrid wiederum steht stellvertretend für die Zukunft des öffentlichen Nahverkehrs.

**Trio mit Potenzial.** Schon mit dem seriennahen Concept BlueZERO zeigte Mercedes-Benz, wie flexibel Elektromobilität sein kann. Die modulare Bauweise der fahrbereiten Studie ermöglicht es, in dem aus der A- und B-Klasse bekannten Sandwichboden drei elektrische Antriebskonzepte zu verwirklichen, die unterschiedliche Energiequellen nutzen. Das E-CELL-Modell integriert den Batterieantrieb in Reinkultur, die F-CELL-Variante schafft mit Brennstoffzelle rund 400 Kilometer ohne lokale Emissionen und die Variante BlueZERO E-CELL PLUS ermöglicht mit dem Range Extender (einem Verbrennungsmotor als Generator) eine Gesamtreichweite von bis zu 600 Kilometern, davon bis zu 100 Kilometer rein elektrisch.

Auch in der Elektromobilität setzt Daimler auf maßgeschneiderte Fahrzeugkonzepte. Um alle Mobilitätsansprüche zu erfüllen, fahren wir konsequent mehrspurig in die Zukunft.

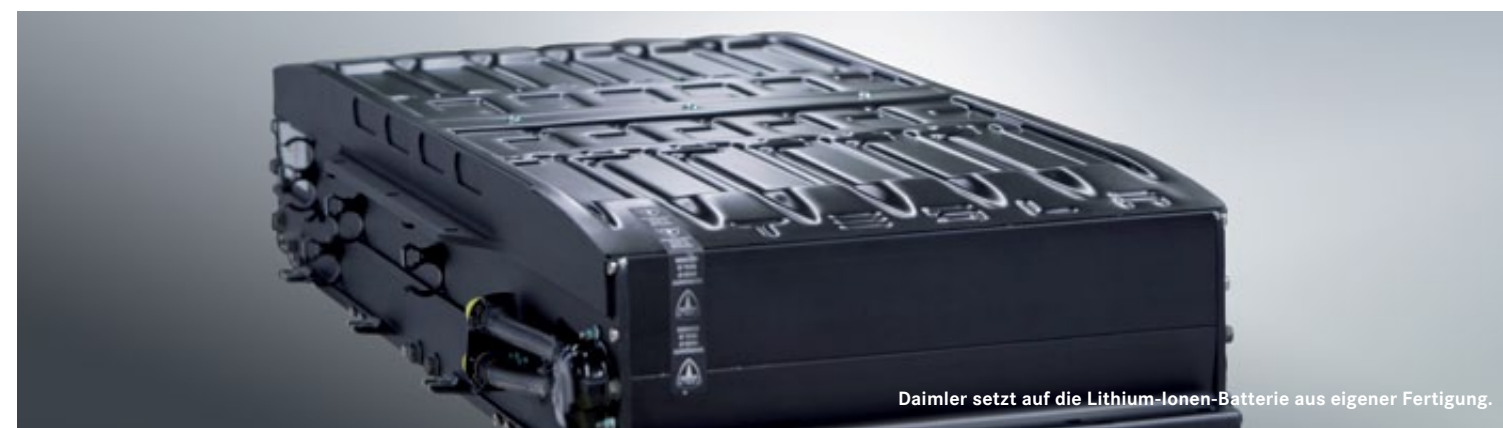

Daimler setzt auf die Lithium-Ionen-Batterie aus eigener Fertigung.

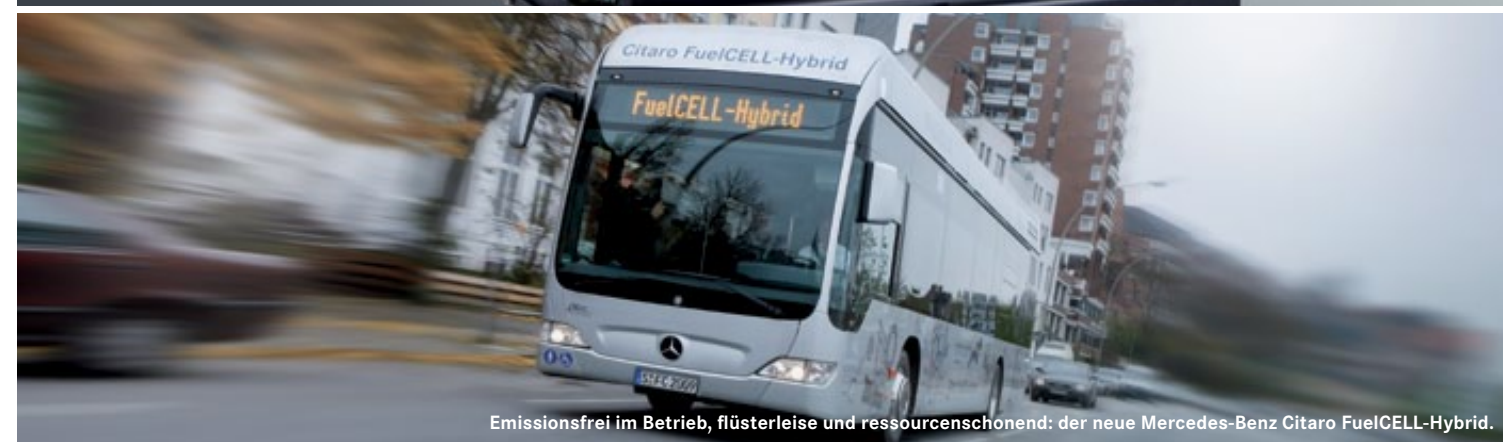

Emissionsfrei im Betrieb, flüsterleise und ressourcenschonend: der neue Mercedes-Benz Citaro FuelCELL-Hybrid.

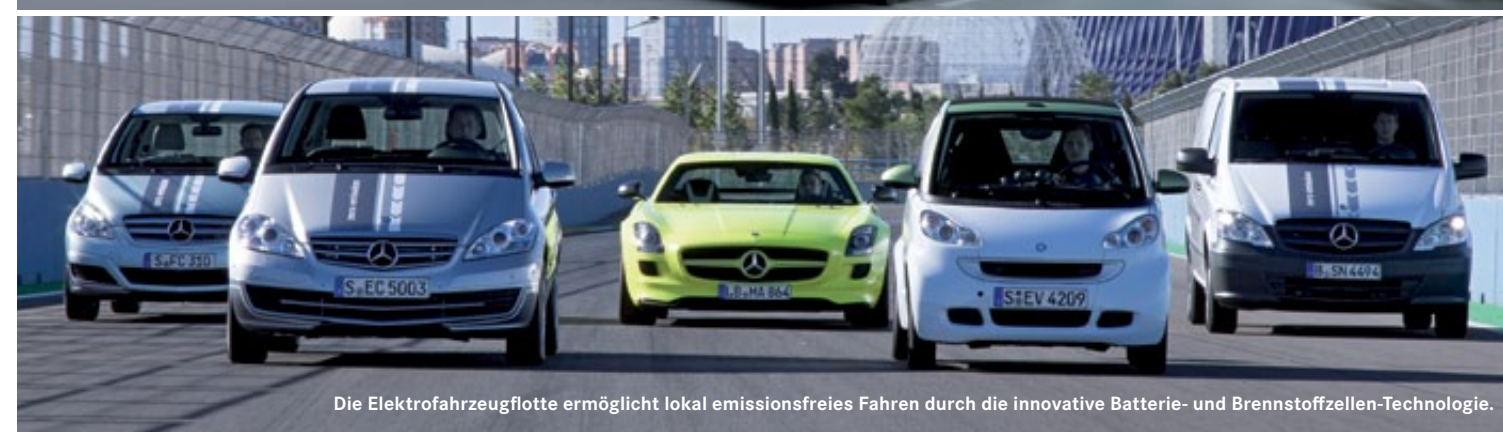

Die Elektrofahrzeugflotte ermöglicht lokal emissionsfreies Fahren durch die innovative Batterie- und Brennstoffzellen-Technologie.

1959

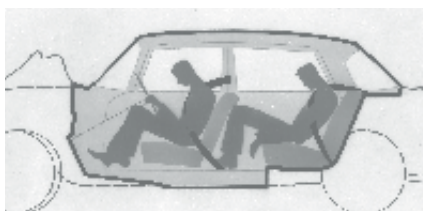

125! Jahre Erfinder des Automobils

Bei den Mercedes-Benz „Heckflossen-Modellen“ ist die Sicherheitsfahrpasszelle mit Knautschzonen zum ersten Mal in einem Serien-Pkw realisiert. Im Werk Sindelfingen beginnen systematische Crashtests, die zum festen Bestandteil der Fahrzeugentwicklung werden.

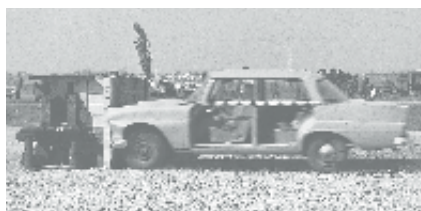

1964

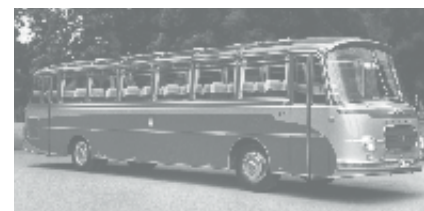

Der Setra von Kässbohrer ist der erste Omnibus mit verschleißfreier Bremse (Retarder).

1965

Im Werk Wörth, dem bis heute größten Lkw-Montagewerk Europas, läuft der erste Lkw vom Band.



# Umfassendes Engagement. Infrastrukturausbau und Mobilitätsinitiativen fördern wir mit Nachdruck.

Ob Stromlade- stationen oder Wasserstofftank- stellen, intelligente Verkehrsführung oder Telematik – bei der Entwicklung des Straßenverkehrs der Zukunft sind viele gefordert.

Daimler bietet nicht nur einen einmaligen Produktmix mit unterschiedlichsten Antriebskonzepten, als Unternehmen stehen wir auch in der Verantwortung, den passenden Rahmen für unsere Mobilitätskonzepte zu entwickeln. Insbesondere der Aufbau einer Infrastruktur, die kundenfreundlich, praktikabel und bezahlbar ist, kann nur von Politik, Energieversorgern und der Automobilindustrie gemeinsam bewältigt werden. In zahlreichen Kooperationen und Initiativen zeigt Daimler umfassendes Engagement, um auch das Umfeld fit für die Automobile von morgen zu machen.

**Schnell aufgeladen.** Die Akzeptanz und damit der Erfolg von Elektrofahrzeugen hängen nicht zuletzt von einer flächendeckenden Ladeinfrastruktur ab. Beispielhaft für eine lösungsorientierte Vorgehensweise ist das Projekt „e-mobility Berlin“, das mit einem intelligenten Lademanagement die Rahmenbedingungen für emissionsfreies Fahren mit batterie-

elektrischen Antrieben schafft. Ähnliche Projekte wurden inzwischen auch in anderen europäischen Städten gestartet.

**Die neuen Tankstellen.** Die Initiative „H2-Mobility“ trägt der immer größeren Anzahl von Fahrzeugen mit Brennstoffzellenantrieb Rechnung. Zusammen mit Daimler haben sich führende Industrieunternehmen zum Ziel gesetzt, ein flächendeckendes Wasserstoff-tankstellennetz aufzubauen. Für dieses Engagement wurde Daimler schon mehrfach ausgezeichnet – unter anderem mit dem „ÖkoGlobe“ für die Entwicklung nachhaltiger Infrastrukturmaßnahmen.

**Mobilität teilen.** Das Pilotprojekt car2go in Ulm hat gezeigt, wie moderne Mobilitätskonzepte in der City aussehen können. Nach einmaliger Registrierung konnten die Nutzerinnen und Nutzer smart fortwo Fahrzeuge mieten und nach Gebrauch auf einem

Innovative Ideen, nachhaltige Konzepte, intelligente Visionen. Gemeinsam mit Partnern können wir mehr bewegen.

beliebigen oder besonders markierten Parkplatz abstellen. Die Bilanz nach einem Jahr war so positiv, dass eine neu gegründete car2go GmbH als Tochterunternehmen der Daimler AG die internationale Kommerzialisierung vorantreiben wird. Jetzt hat die Daimler AG ein weiteres innovatives Konzept für urbane Mobilität entwickelt: car2gether ist eine web-basierte Mitfahr-Community, die über Smartphones eingehende Mitfahrangebote und -gesuche weitervermittelt. Ein weiterer Weg, ohne eigenes Auto flexibel und unabhängig mobil zu sein.

**Vorfahrt für Busse.** Besonders in schnell wachsenden Metropolen steht der öffentliche Nahverkehr vor Herausforderungen. Im Mobilitätskonzept „Bus Rapid Transit“ (BRT) befahren Linienbusse in einer schnellen Taktfrequenz eigens für sie abgetrennte Spuren mit separaten Ampelschaltungen. So ist ein rasches, kom-

fortables Vorankommen auch in der Hauptverkehrszeit möglich. BRT ist ein nachhaltiges Zukunftskonzept, das Daimler bereits erfolgreich in Städten wie Istanbul, Nantes und Bogotá umgesetzt hat.

**Das passende Umfeld.** Unabhängig von einzelnen Fahrzeugen ist eine intelligente Verkehrsinfrastruktur unabdingbar für den Verkehr von morgen. Daher ist Daimler schon seit Jahren mit Automobilherstellern, Zulieferern sowie Forschungsexperten für Verkehrsmanagement und Telekommunikation an Forschungsprojekten rund um den intelligenten Verkehr beteiligt. Initiativen wie AKTIV, NoW: „Network on Wheels“ oder sim<sup>TD</sup>: „Sichere, intelligente Mobilität Testfeld Deutschland“ – beschäftigen sich mit der Vernetzung sowohl von Fahrzeugen untereinander als auch mit intelligenter Verkehrsinfrastruktur.

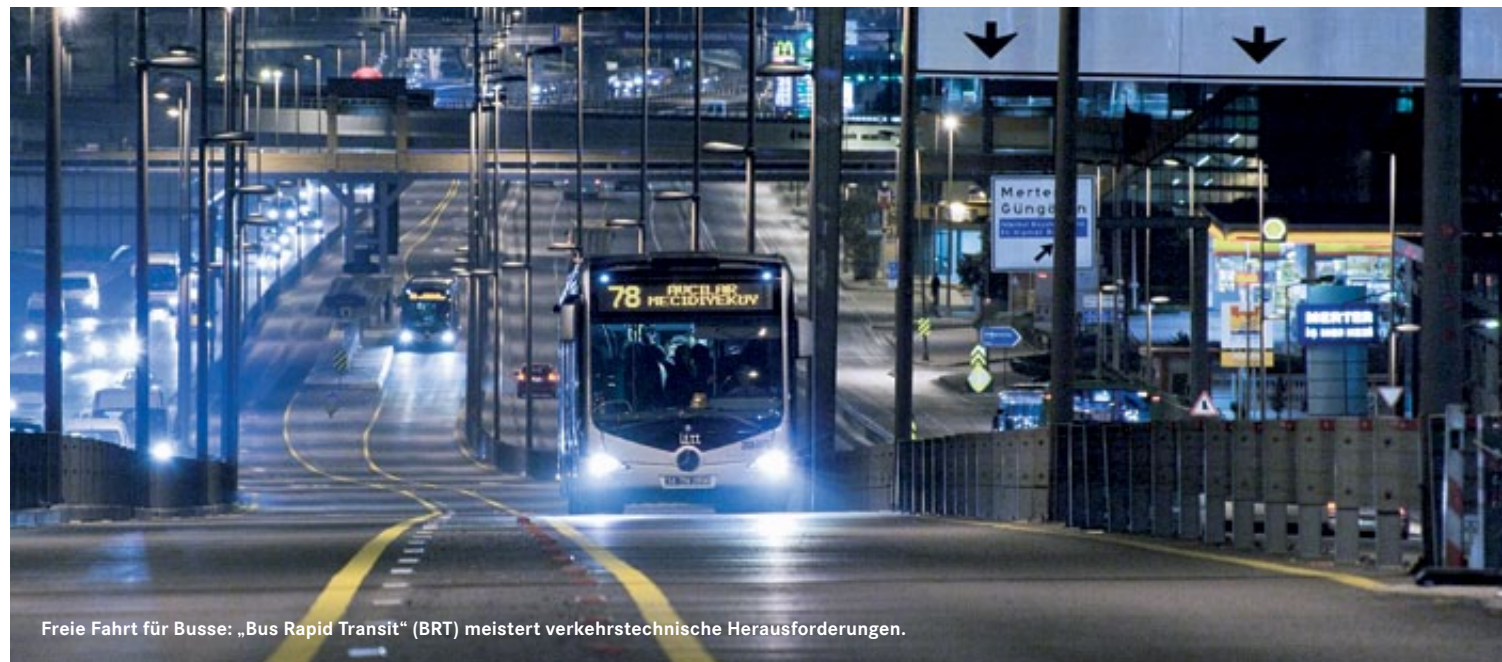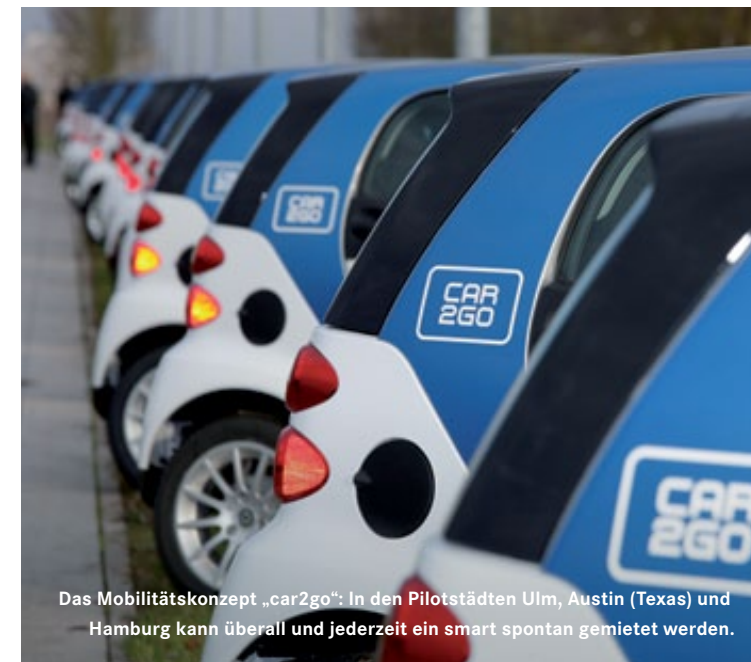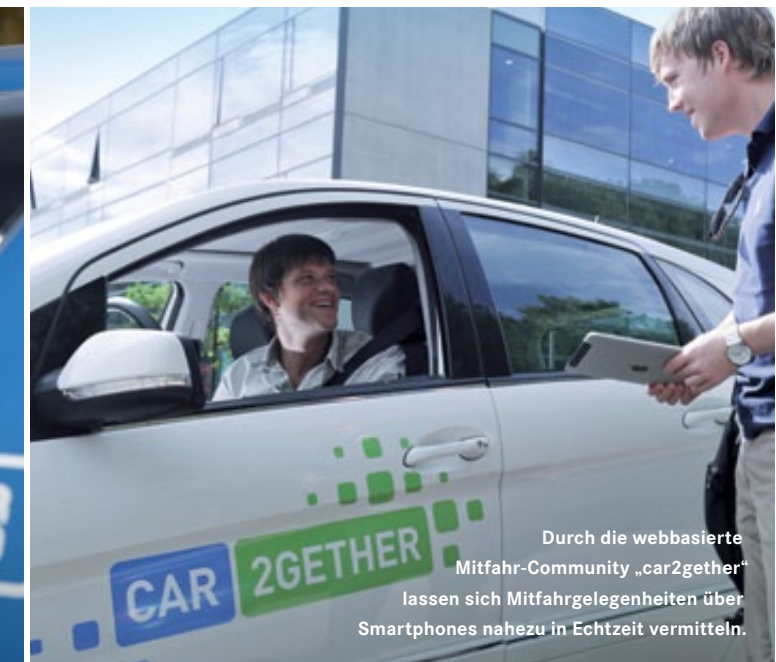

1969

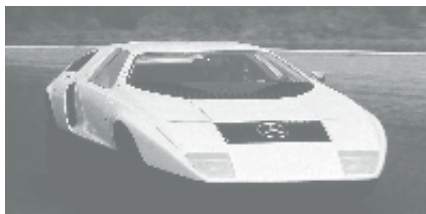

Auf der IAA debütieren der C 111, ein „rollendes Versuchslabor“ mit Wankelmotor, und der Elektro-Versuchsomnibus OE 302. Der Elektromotor wird aus einer Batterie gespeist, die von einem Diesel-Generator-Aggregat aufgeladen wird.

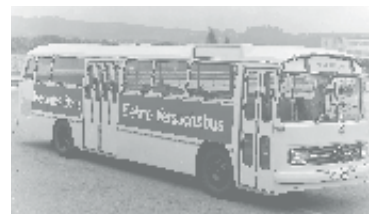

1972

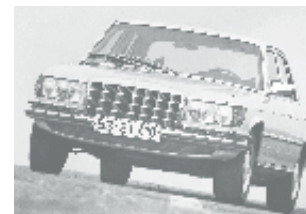

Die neue Mercedes-Benz S-Klasse geht mit einem umfassenden integralen Sicherheitskonzept an den Start.

1975

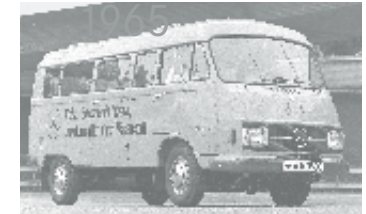

Daimler-Benz stellt das erste Wasserstoff-Versuchsfahrzeug mit Metallhydridtank vor. Es basiert auf dem Kleinbus L 307.

125! Jahre Erfinder des Automobils



**Meilensteine Sicherheitstechnik**

- 1931 Großserien-Pkw mit Einzerradaufhängung und hydraulischer Bremsanlage
- 1959 Sicherheitkarosserie mit Knautschzonen und entschärftem Innenraum
- 1967 Sicherheitslenkung mit Teleskoplenksäule und Pralltopf
- 1971 Serien-Pkw mit integrelem Sicherheitskonzept
- 1978 Anti-Blockier-System ABS im Serien-Pkw
- 1981 Airbag im Serien-Pkw
- 1982 Raumlener-Hinterachse
- 1995 Fahrsicherheitssystem ESP® (Elektronisches Stabilitäts-Programm)
- 1996 Bremsassistent BAS
- 1998 tridion Sicherheitszelle
- 1998 DISTRONIC Abstandsregeltempomat
- 1999 ABC-Fahrwerk (Active Body Control) im Serien-Pkw
- 2000 Spurassistent und Abstandsregelung im Serien-Lkw
- 2001 Stabilitätsregelung im Serien-Lkw
- 2002 Vorbeugendes Insassenschutzsystem PRE-SAFE®
- 2005 Aktiver Nachtsicht-Assistent
- 2006 Intelligent Light System
- 2006 Notbremsassistent ABA 1 im Lkw und PRE-SAFE® Bremse im Pkw
- 2009 Aufmerksamkeits-Assistent ATTENTION ASSIST
- 2010 Active Brake Assist ABA 2 im Lkw
- 2010 Aktiver Spurhalte-Assistent und Aktiver Totwinkel-Assistent

# Der Weg zum unfallfreien Fahren.

Der neue Fahrsimulator im Mercedes-Benz Technology Center in Sindelfingen. Realitätsnahe Simulation gibt Impulse für Forschung und Entwicklung – auch zur Unfallvermeidung.

125! Jahre Erfinder des Automobils

1978

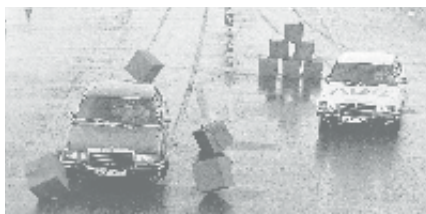

Das Anti-Blockier-System (ABS) für die Limousinen der Mercedes-Benz S-Klasse revolutioniert die Fahrzeugsicherheit. Ab 1981 ist das ABS auch für Mercedes-Benz Nutzfahrzeuge erhältlich.

1981

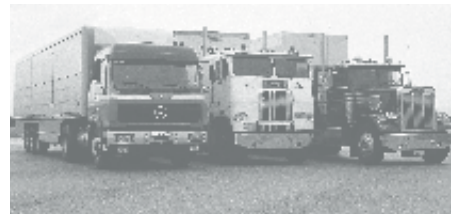

Daimler übernimmt den Schwerlastwagenhersteller Freightliner und steigt damit in das US-Nutzfahrzeuggeschäft ein. Zu Daimler Trucks North America gehören heute zudem die Marken Western Star Trucks, Thomas Built Buses und Detroit Diesel.

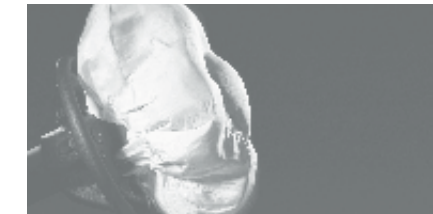

Daimler-Benz führt als erster Hersteller weltweit den Airbag und den Gurtstraffer im Serienautomobil ein.



# Sicher ankommen. Als Pionier der Verkehrssicherheit verfolgen wir weiterhin den Weg zum unfallfreien Fahren.

**Daimler definiert Sicherheit als ganzheitliche Aufgabe – fest verankert als Kernelement der Unternehmensstrategie.**

Täglich sind rund 5,5 Milliarden Menschen weltweit am Verkehrsgeschehen beteiligt. Für sie wollen wir die Mobilität der Zukunft so sicher wie möglich gestalten. Als Pionier in Sachen Sicherheit verfolgen wir weiterhin unseren Weg zum unfallfreien Fahren. Dabei definiert Daimler Verkehrssicherheit als ganzheitliche Aufgabe. Neben der Weiter- und Neuentwicklung von Systemen für den Insassen- und Partnerschutz liegt die Herausforderung für uns deshalb auch darin, eine intelligente Verkehrsinfrastruktur mit zu entwickeln. Damit Unfälle erst gar nicht geschehen.

**Pionier beim Insassenschutz.** Als Vordenker der passiven Sicherheit prägte Béla Barényi in den 1950er-Jahren bei Daimler die Vision des unfallfreien Fahrens. Ein Ergebnis war die „gestaltfeste Fahrgastzelle“ mit Knautschzonen, die 1959 in der Baureihe W 111 debütierte. Die Weiterentwicklung der Knautschzone sorgt nach wie vor für den sicheren Fahrzeuginnenraum. Adaptive Airbags, Gurtstraffer und Gurtkraftbegrenzer oder sensorgesteuerte crash-aktive NECK-PRO-Kopfstützen leisten ein Übriges, um Fahrzeuginsassen zu schützen. Eine einzigartige Synergie von aktiver und passiver Sicherheit bietet

das vorbeugende Insassenschutzsystem PRE-SAFE®. Erkennt das System anhand von Sensorinformationen eine unfallkritische Situation, aktiviert es reflexartig Schutzmaßnahmen für die Insassen. Ähnlich richtungsweisend sind die in der Initiative „Shaping Future Transportation“ entwickelten Systeme zur passiven Sicherheit auch in Daimler-Nutzfahrzeugen. Optimalen Schutz für Fahrer und Begleiter bei einem Frontalaufprall im Omnibus bietet beispielsweise das System Front Collision Guard (FCG), serienmäßig eingesetzt in den Reisebussen Mercedes-Benz Travego und Setra TopClass 400.

**Erfahrung zählt.** Verkehrssicherheit ist eine ganzheitliche Aufgabe. Daimler möchte alle Verkehrsteilnehmer in allen Situationen optimal schützen und unterstützen. Bei der Entwicklung aktiver Sicherheitssysteme zur Gefahrenvermeidung und bei Systemen zur Unfallfolgenminderung orientiert sich Daimler im Sinne der „Real Life Safety“-Philosophie am realen Unfallgeschehen. Seit 1969 untersuchen wir Unfälle auf deutschen Straßen. Diese Erkenntnisse geben wichtige Impulse für die Entwicklung neuer Sicherheitstechnologien.

Von der ersten Knautschzone bis zum Fahrzeug als mitdenkendem Partner: Daimler war und ist Vorreiter bei Entwicklungen rund um Fahrzeug- und Verkehrssicherheit.

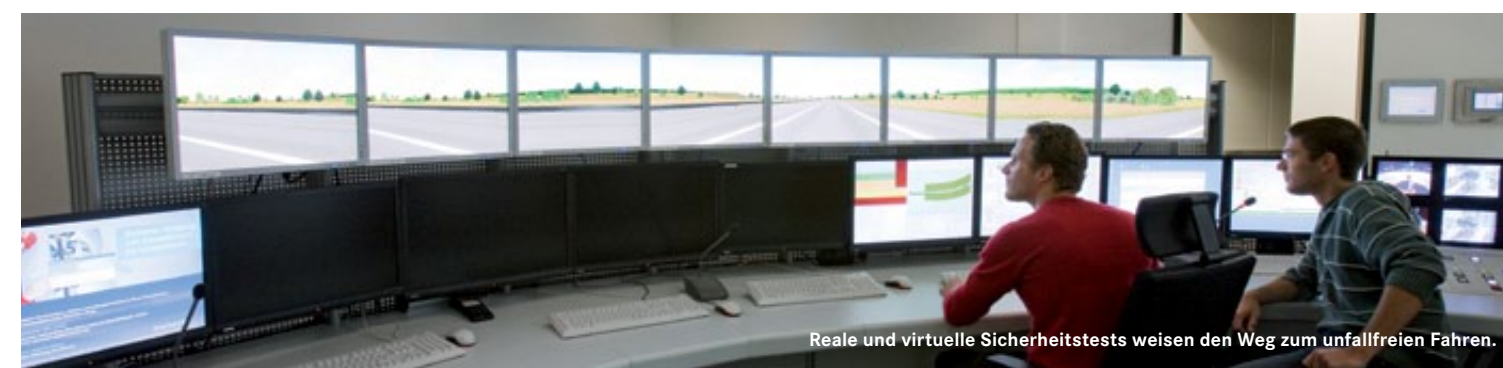

Reale und virtuelle Sicherheitstests weisen den Weg zum unfallfreien Fahren.

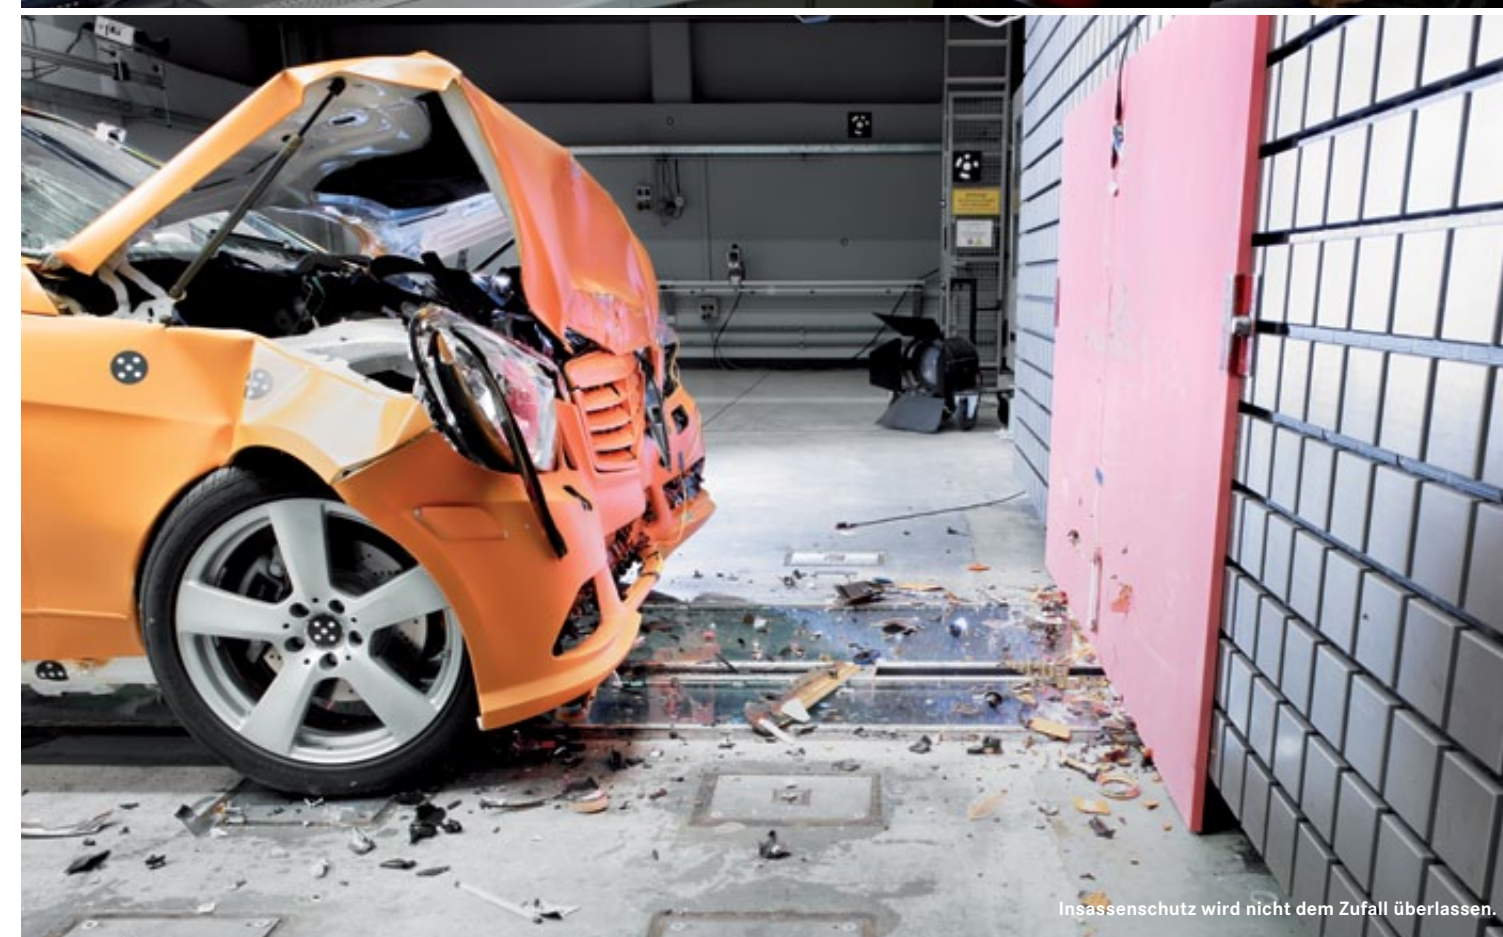

Insassenschutz wird nicht dem Zufall überlassen.

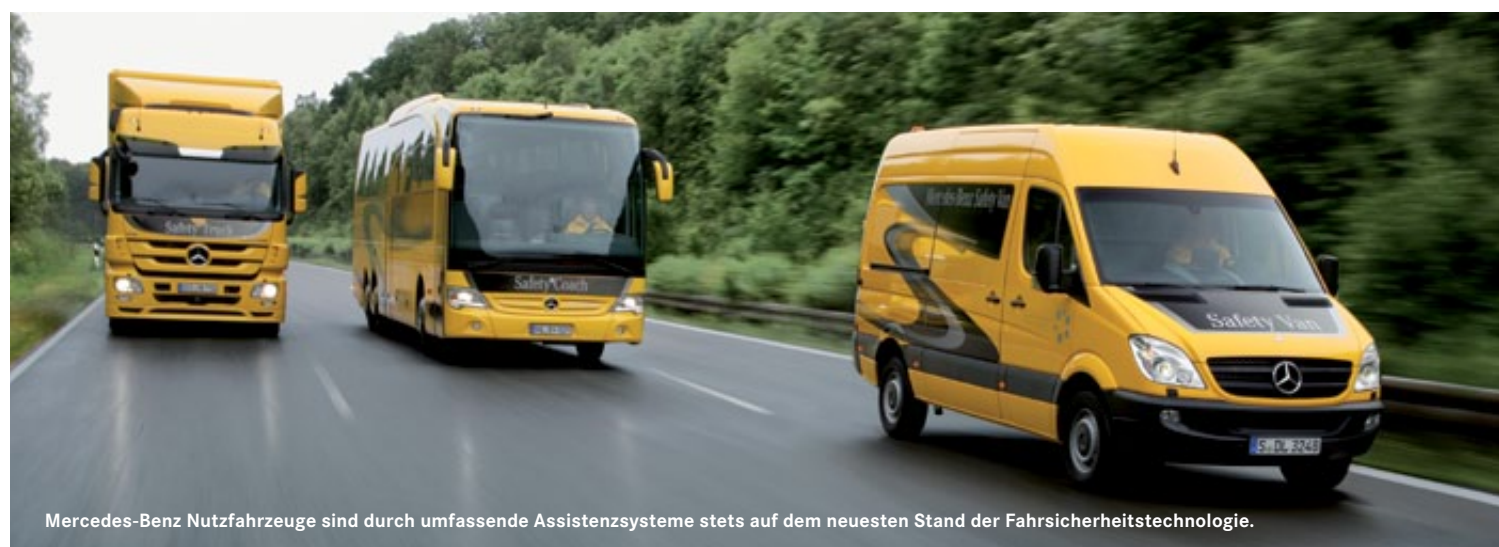

Mercedes-Benz Nutzfahrzeuge sind durch umfassende Assistenzsysteme stets auf dem neuesten Stand der Fahrsicherheitstechnologie.

**1982** In der neuen Mercedes-Benz Kompaktklasse debütiert die Raumlenkerachse, die heute noch als optimale Hinterachskonstruktion gilt.

**1986**

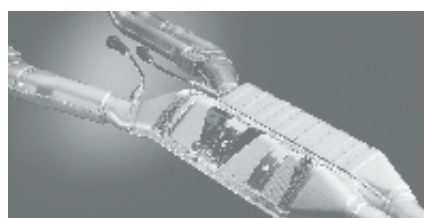

Der geregelte 3-Wege-Katalysator senkt die Abgasemissionen und ist serienmäßig für alle Mercedes-Benz Personenwagen mit Benzinmotor erhältlich.

**1987**

Die Daimler-Benz AG gründet die Mercedes-Benz Finanz GmbH, um Fahrzeuge, Leasing und Finanzierungen aus einer Hand anbieten zu können.

**1989**

Der erste automatisch ausfahrende Überrollbügel sorgt für Sicherheit bei einem Überschlag mit dem Sportwagen.

**1993**

Mercedes-Benz bietet erstmals integrierte Kindersitze für die Fond-Sitzbank an.

125! Jahre Erfinder des Automobils



# Das Fahrzeug als intelligenter Partner. Radar- und kamerabasierte Systeme unterstützen den Fahrer.

**Das Zusammenspiel moderner Radar- und Bremstechnik verhindert laut unabhängiger Studien rund 36 Prozent aller Auffahrunfälle auf deutschen Autobahnen.**

Moderne und komfortable Fahrassistenzsysteme machen es dem Fahrer leichter, sich auf seine Aufgaben im Verkehr zu konzentrieren. Und ein Fahrer in „Topform“ ist Voraussetzung zur Unfallvermeidung. Daimler verleiht Fahrzeugen mithilfe radar- und sensorbasierter Assistenzsysteme „Sinne“. Sie handeln „reflexartig“ und „intelligent“ und machen so das Fahrzeug zum mitdenkenden Partner.

**Verlässliches Radar.** Daimler baut ganz bewusst auf Radar zur Erkennung des Fahrzeugumfelds, unter anderem, weil ein radarbasiertes System bei fast allen Witterungsverhältnissen einsetzbar und wenig störanfällig ist. So hält der Abstandsregelautomat DISTRONIC PLUS® das Auto im gewählten Abstand zum Vordermann und der Bremsassistent BAS PLUS bremst es je nach Verkehrssituation bis zum Stillstand ab. Das vorbeugende Insassenschutzsystem PRE-SAFE® im Pkw leitet eine Vollbremsung ein, was die Unfallschwere erheblich reduzieren kann. Reagiert der Fahrer noch rechtzeitig, baut der Bremsassistent BAS PLUS in Sekundenbruchteilen den erforderlichen Bremsdruck auf. Der von Mercedes-Benz entwickelte Totwinkel-Assistent nutzt Radar-Technologie, um den Bereich unmittelbar neben und hinter dem Auto zu überwachen. Er warnt den Autofahrer, wenn der Spurwechsel zu gefährlich ist.

Der Active Brake Assist und der Abstandsregel-Tempomat im Lkw und Reisebus sorgen für elektronische Unterstützung im Nutzfahrzeugbereich. Der neue Active Brake Assist 2 (Notbrems-Assistent) im Schwerlastwagen Mercedes-Benz Actros leitet nun auch Bremsmanöver bei stehenden Hindernissen ein, beispielsweise bei einem überraschenden Stau auf der Autobahn. Sein entscheidendes Plus: Bei allen Witterungs- und Sichtverhältnissen ist das radargesteuerte System von 0 bis 89 km/h wirksam.

**Die Kamera: das zusätzliche Auge.** Rund jeder sechste Unfall in Deutschland passiert, weil das Auto von der Fahrbahn abkommt. Der Spurhalte-Assistent im Pkw, das Lane Departure Warning im Lkw sowie der Spurassistent (SPA) im Bus schaffen Abhilfe. Für bessere Sicht sorgt der Adaptive Fernlicht-Assistent im Pkw. Seine Kamera erfasst das Verkehrsgeschehen und kann dank einem intelligenten Bildverarbeitungsalgorithmus andere beleuchtete Fahrzeuge nicht nur erkennen, sondern auch deren Entfernung berechnen. Eine Weltpremiere im neuen Mercedes-Benz CLS ist der Aktive Nachtsicht-Assistent PLUS mit Spotlight-Funktion. Im unmittelbaren Sichtfeld des Fahrers wird die mögliche Gefahrenquelle hervorgehoben, indem erkannte Personen auf der Fahrbahn gezielt angeblinkt werden können.

**Trotz allem.** Der Fahrer bleibt in der Verantwortung. „Konditionssicherheit“ ist Teil der Sicherheitsphilosophie unseres Unternehmens. Sie beginnt bei der Maßkonzeption des Innenraums, umfasst alle Aspekte des Federungs-, Klima-, Sitz- und Geräuschkomforts und beinhaltet die Entwicklung intelligenter Assistenzsysteme.

Physiologische Messungen typischer Stressindikatoren und tiefenpsychologische Interviews der Fahrer vor und nach Testfahrten gehören ebenfalls dazu. An Bord eines rollenden Forschungslabors – des sogenannten Mind-Labs – erlauben auf neurophysiologischer Methodik basierende Messungen einen vom Fahrer nicht zu beeinflussenden Blick ins kognitive, unbewusste Fahrverhalten. Die Auswertungen aller Messungen helfen, Assistenzsysteme stetig zu verbessern, denn letztlich sitzt immer ein Mensch am Steuer. Professionelle Fahrsicherheitstrainings für Pkw- und Nutzfahrzeug-Fahrerinnen und -Fahrer sind daher eine wichtige Ergänzung zur Unfallvermeidung.

Mit Assistenzsystemen verleiht Daimler dem Fahrzeug „Sinne“. Sie reagieren vernetzt und tauschen Daten aus.

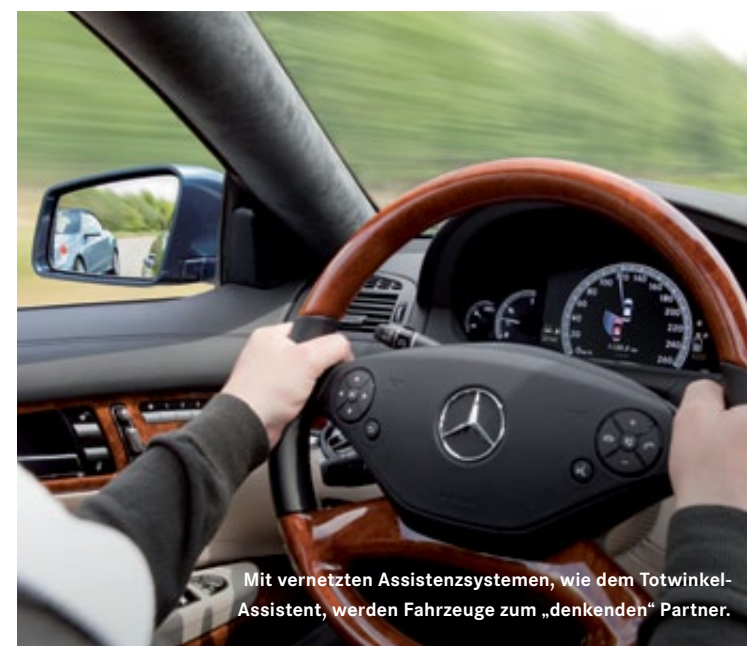

Mit vernetzten Assistenzsystemen, wie dem Totwinkel-Assistent, werden Fahrzeuge zum „denkenden“ Partner.

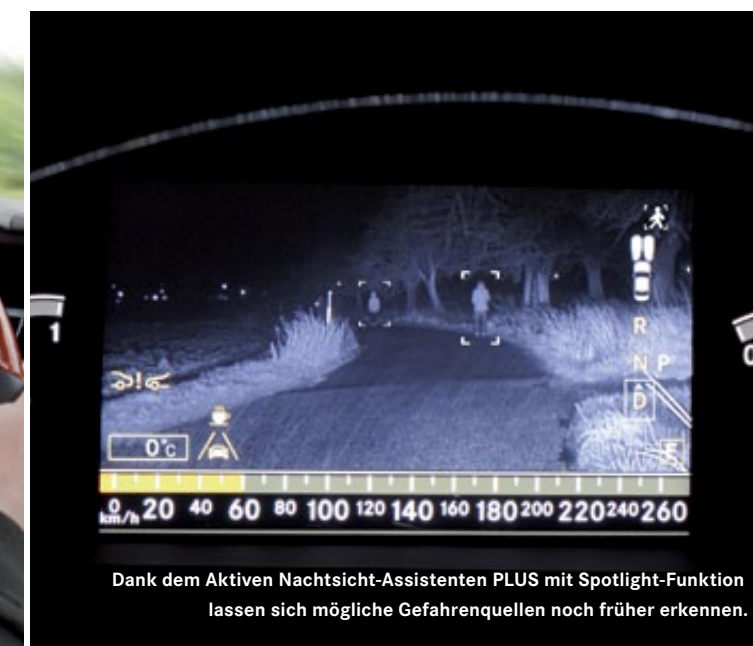

Dank dem Aktiven Nachtsicht-Assistenten PLUS mit Spotlight-Funktion lassen sich mögliche Gefahrenquellen noch früher erkennen.

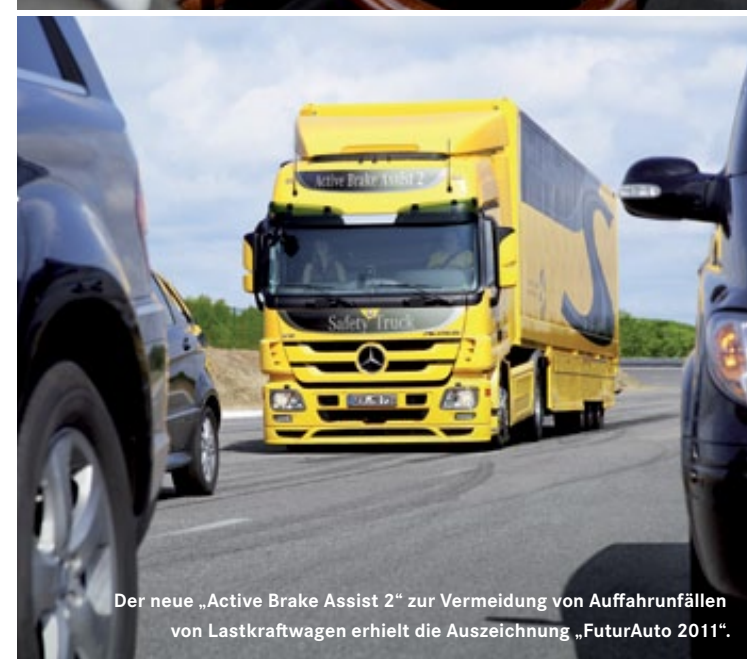

Der neue „Active Brake Assist 2“ zur Vermeidung von Auffahrunfällen von Lastkraftwagen erhielt die Auszeichnung „FuturAuto 2011“.

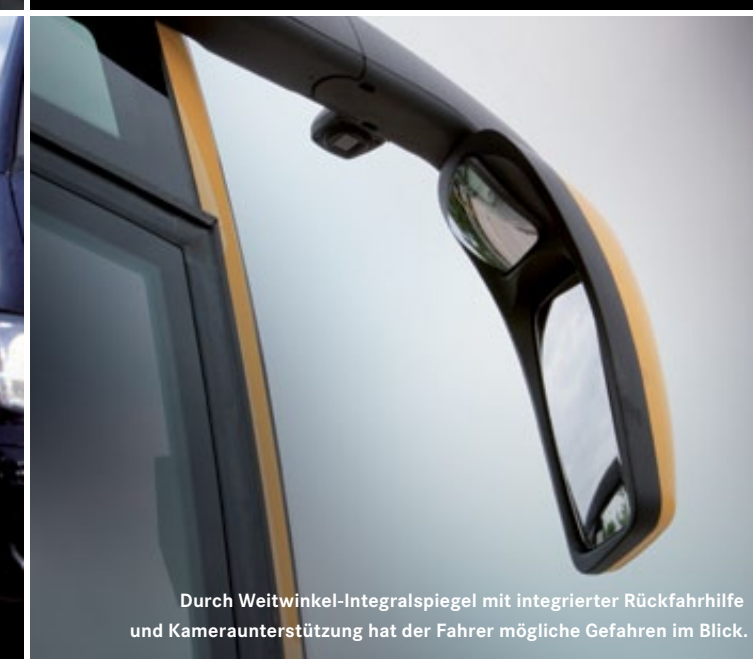

Durch Weitwinkel-Integralspiegel mit integrierter Rückfahrhilfe und Kameraunterstützung hat der Fahrer mögliche Gefahren im Blick.

1994

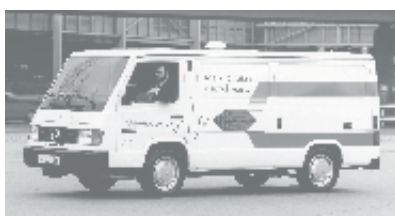

Im Forschungszentrum Ulm stellt Daimler-Benz ein Brennstoffzellen-Fahrzeug unter dem Namen NECAR (New Electric Car) vor. 1997 folgt der Brennstoffzellen-Omnibus NEBUS.

1995

Mercedes-Benz führt das Fahrsicherheitssystem „Electronic Stability Program“ (ESP®) in der S-Klasse und im SL ein. Bis 1999 folgen alle anderen Mercedes-Benz Pkw-Baureihen.

1996

Der Bremsassistent (BAS) verkürzt den Bremsweg in Notsituationen: Wenn der Autofahrer in kritischen Momenten zu zögerlich bremst, verstärkt er die Bremskraft automatisch.

1997

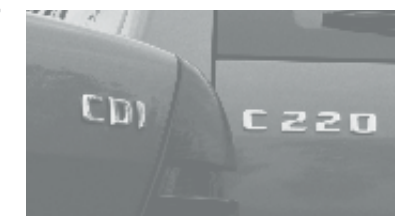

Mit den CDI-Dieselmotoren setzt Mercedes-Benz neue Maßstäbe bei Agilität und Effizienz.

125! Jahre Erfinder des Automobils



# Symbiose. Sichere Fahrzeuge und eine intelligente Verkehrsinfrastruktur gehören zusammen.

## Unsere Forschung bündelt Trends, Kundenwünsche und Anforderungen an die Mobilität von morgen.

Schon heute denken unsere Forschungs- und Entwicklungsabteilungen über das sichere Autofahren von morgen nach – und das ist nicht nur abhängig von innovativen Fahrzeugen. Daimler zieht daher mit Spezialisten aus der Automobilindustrie, der Telekommunikation und dem Verkehrsmanagement an einem Strang. Unter dem Dach der Forschungsinitiative „AKTIV“ werden die Synergien gebündelt, um die Sicherheit und Effizienz des Straßenverkehrs zu erhöhen.

**Brennpunkt Kreuzung.** Kreuzungen sind im innerstädtischen Verkehr der Unfallschwerpunkt Nummer eins. Fahrerassistenzsysteme können hier für mehr Verkehrssicherheit sorgen, indem sie Fahrer entlasten und rechtzeitig vor drohenden Gefahren warnen. Daimler hat deshalb innerhalb der Forschungsinitiative AKTIV Basistechnologien für Kreuzungsassistenzsysteme weiterentwickelt.

Daimler arbeitet mit Hochdruck an der Sicherheit der eigenen Fahrzeuge und am Erfolg des gesamten Verkehrssystems – denn ohne das eine funktioniert das andere nicht.

**Kommunikation bringt weiter.** Eine Voraussetzung für Verkehrssicherheit und die Mobilität der Zukunft ist die gebündelte, zeitnahe und umfassende Information aller Verkehrsteilnehmer über den Verkehrsfluss und Gefahrensituationen. Entwicklungsschwerpunkt sind daher Technologien, die sowohl die Fahrzeug-Fahrzeug-Kommunikation als auch die Fahrzeug-Infrastruktur-Kommunikation ermöglichen. Der Verkehr der Zukunft ist geprägt vom Austausch von Informationen zwischen „öffentlichen“ und „privaten“ Partnern.

**Zukunft beginnt heute.** Das Programm der Experimental-Sicherheits-Fahrzeuge (ESF) stammt aus den frühen 1970er-Jahren. In diesen Fahrzeugen entwickelte Daimler nahezu alle wesentlichen Systeme zur Verbesserung der aktiven und passiven Sicherheit. Auch das aktuelle Forschungsfahrzeug ESF 2009 zeigt neue, unkonventionelle Ansatzpunkte zur Steigerung der Fahrzeugsicherheit und gibt einen detaillierten Einblick in die derzeitigen Entwicklungsprojekte.

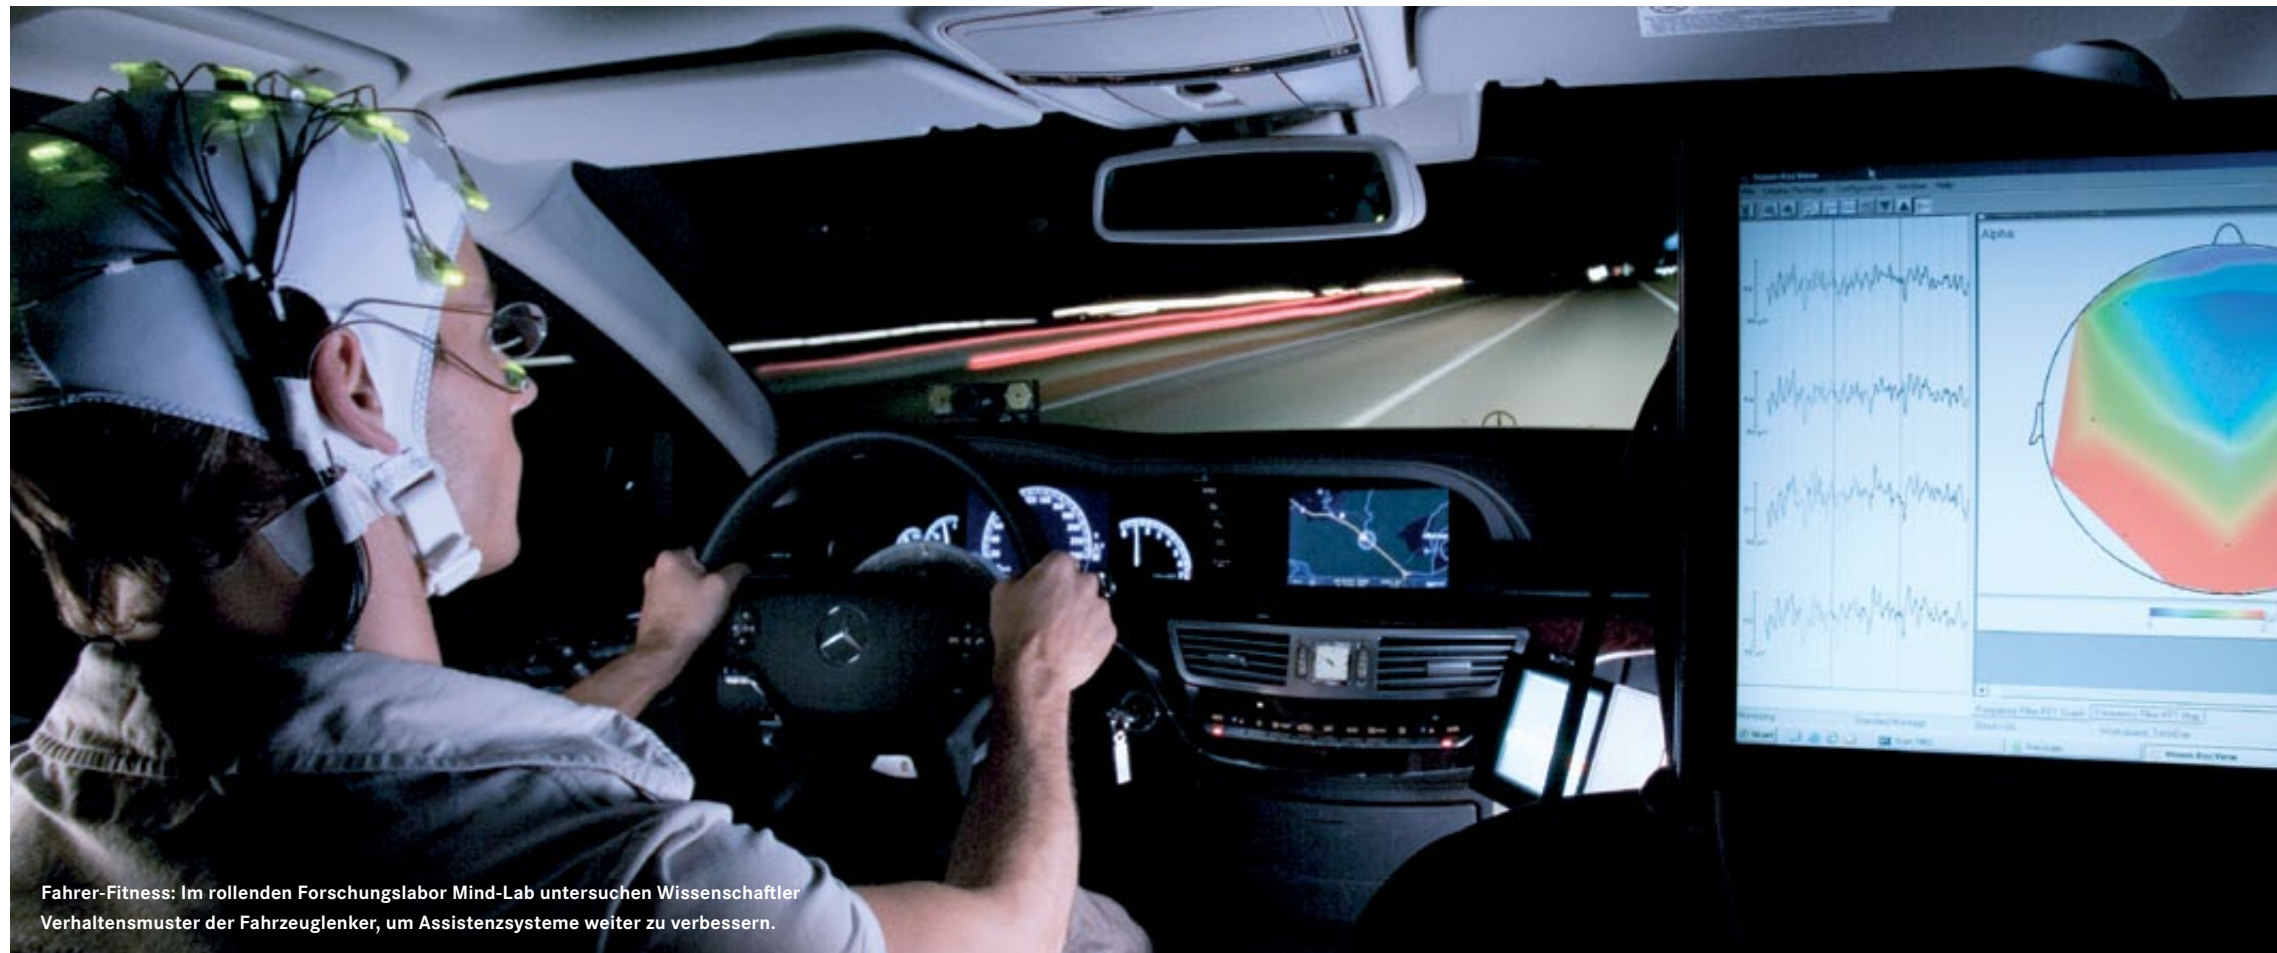

Fahrer-Fitness: Im rollenden Forschungslabor Mind-Lab untersuchen Wissenschaftler Verhaltensmuster der Fahrzeugenker, um Assistenzsysteme weiter zu verbessern.

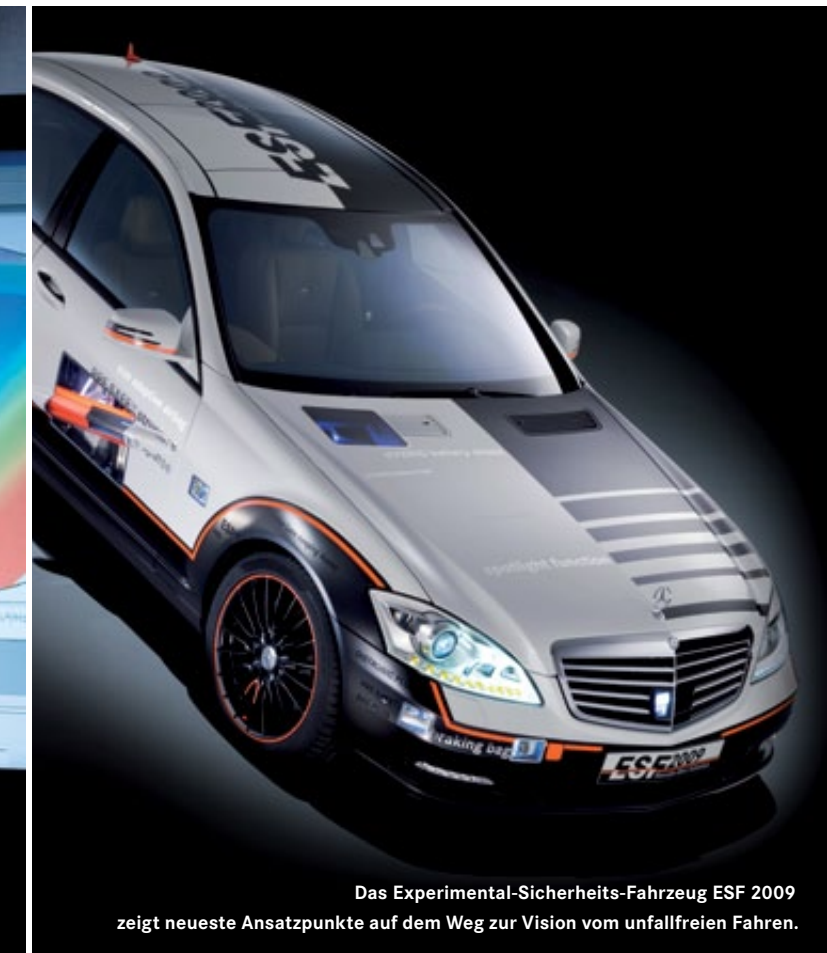

Das Experimental-Sicherheits-Fahrzeug ESF 2009 zeigt neueste Ansatzpunkte auf dem Weg zur Vision vom unfallfreien Fahren.

125! Jahre Erfinder des Automobils

1998

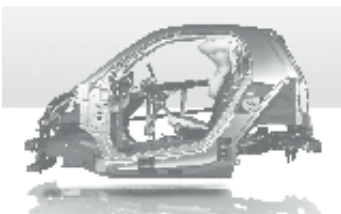

Im neuen smart sorgt die patentierte tridion Sicherheitszelle für großen Schutz im kleinen Auto.

In New York beginnt die Erprobung von Orion Hybrid-Omnibussen im Linienbetrieb. Heute fahren dort mehr als 1.600 Omnibusse der Marke mit dieselelektrischem Hybridantrieb.

2000

Mercedes-Benz bietet den Spurassistenten und die Abstandsregelung für Serien-Lkw an. Ab 2001 ist auch die dem ESP® entsprechende Stabilitätsregelung „Telligent“ verfügbar.

2002

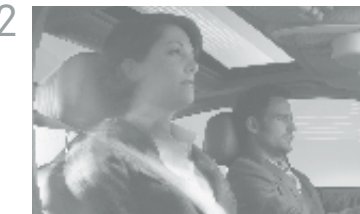

Mit dem vorbeugenden Insassenschutzsystem PRE-SAFE® revolutioniert Mercedes-Benz erneut die Fahrsicherheit.



# Menschen gestalten die Zukunft.

**Der Name Daimler bedeutet für unsere Kundinnen und Kunden faszinierende Automobile und wegweisende Mobilitätstechnologie.** Für uns steht er stellvertretend auch für die Menschen, die hier arbeiten und die mit ihrer Kompetenz, Begeisterung und Vielfalt Motor unseres Erfolgs sind. Für uns bedeutet es die Förderung der Potenziale aller und die Gestaltung von Vielfalt im Unternehmen.

Die Zusammenarbeit von Jüngeren und Älteren, von Frauen und Männern, von Menschen unterschiedlicher Ausbildung, Nationalität, Kultur und körperlicher Konstitution schafft Fahrzeuge, die weltweit begeistern. Als Arbeitgeber ist es uns wichtig, unseren Mitarbeiterinnen und Mitarbeitern im Beruf und im Privatleben Entwicklungschancen, angepasst an ihre individuellen Bedürfnisse und Fähigkeiten, zu geben. Dabei stellen wir uns den Herausforderungen, die an ein modernes Unternehmen in Bezug auf Work-Life-Integration und flexibles Arbeiten gestellt werden, und sorgen für die Vereinbarkeit unterschiedlicher Ansprüche von Unternehmen und Mitarbeiterinnen und Mitarbeitern.

Mit herausragenden Aus- und Weiterbildungsmöglichkeiten leisten wir als globales Unternehmen und als Teil der Gesellschaft einen Beitrag zu Bildung, sozialer Entwicklung, Kultur und Wissenschaft.

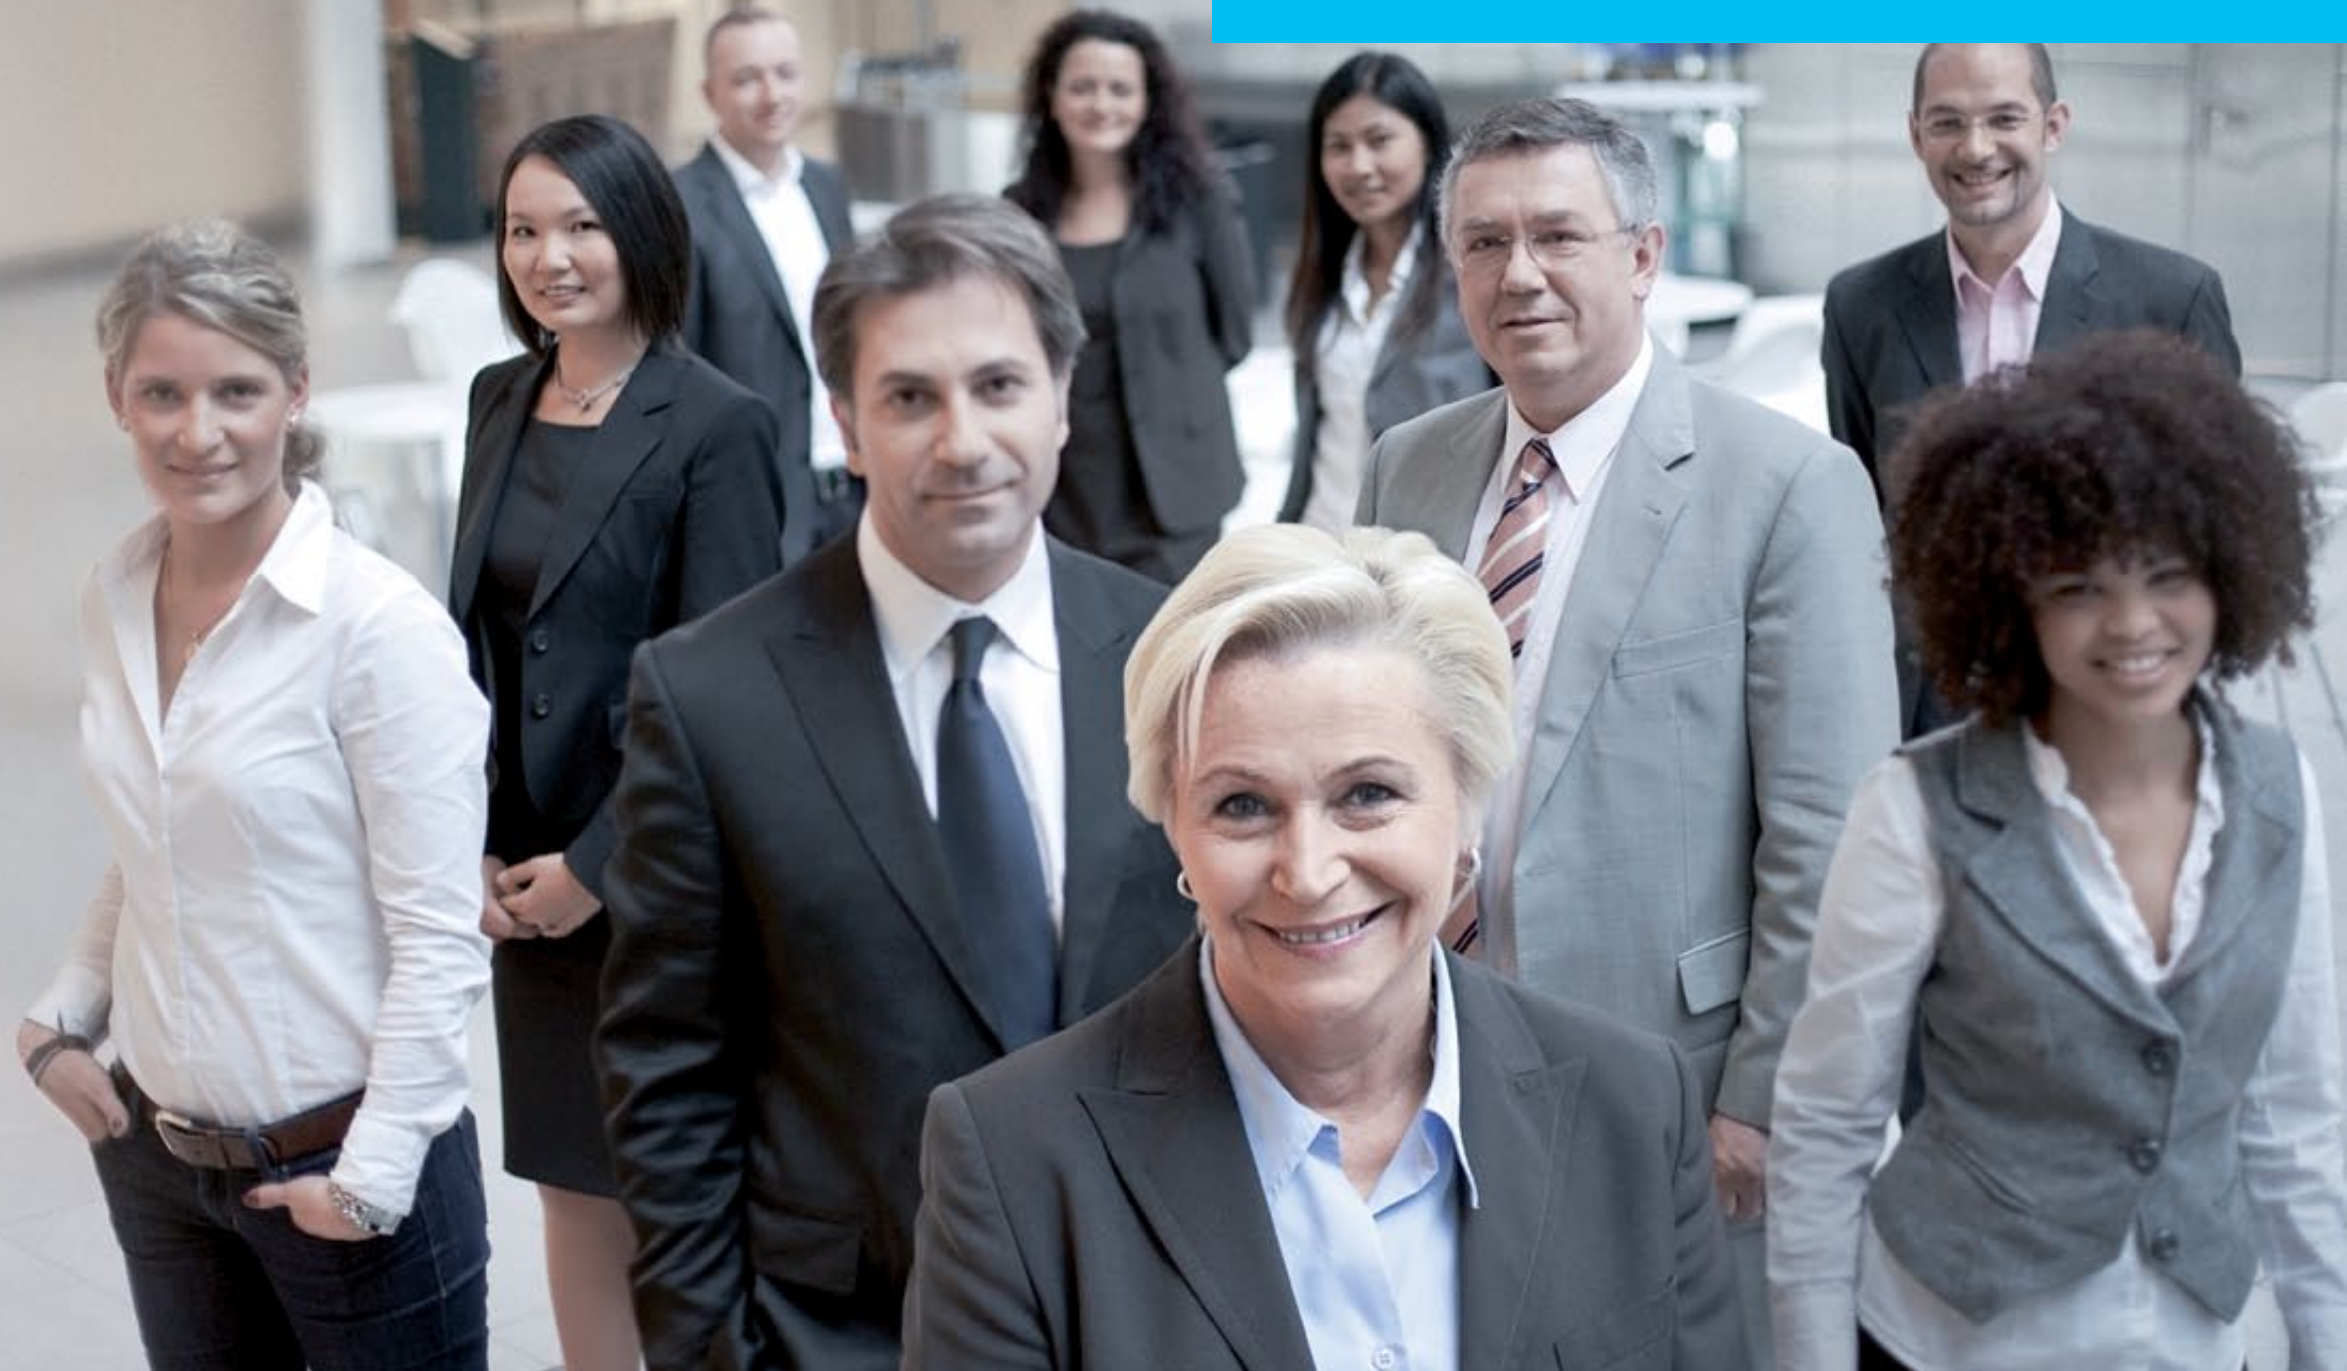

2003

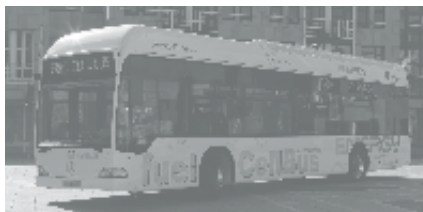

Mercedes-Benz Brennstoffzellen-Fahrzeuge starten einen groß angelegten Flottentest auf drei Kontinenten: 36 Stadtbusse auf der Basis des Mercedes-Benz Citaro und 60 Fahrzeuge der A-Klasse F-CELL legen bis 2009 rund 4,4 Millionen Kilometer zurück.

125! Jahre Erfinder des Automobils

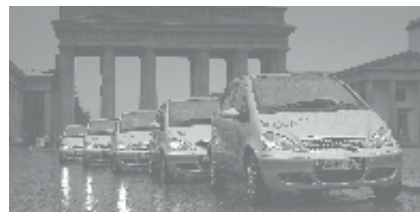

2004

Erstmals gehen Freightliner Transporter mit Hybridantrieb in den USA in den Alltagsbetrieb.

2005

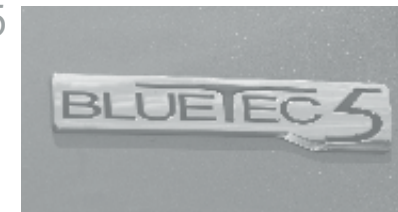

Mercedes-Benz liefert die ersten Actros Schwerlastwagen mit BlueTec-Technologie aus, der neuen Generation von Dieselantrieben mit optimierter Verbrennung und Abgasnachbehandlung.



# Wir tragen Verantwortung. Für die Mobilität der Zukunft und für die Zukunft unserer Mitarbeiterinnen und Mitarbeiter.

Als attraktiver Arbeitgeber möchte Daimler weiterhin im Wettbewerb um die beste Technik das Unternehmen der Wahl sein.

Mobilitätsansprüche und damit die Wünsche und Bedürfnisse unserer Kundinnen und Kunden verändern sich ständig. Daher sind es immer neue, zukunftsweisende Ideen und Visionen, die aus dem Unternehmen Daimler das gemacht haben, was es heute ist: ein weltweit führender Anbieter von Pkw mit Premiumanspruch, weltgrößter Hersteller von Nutzfahrzeugen und Impulsgeber für Mobilitätskonzepte der Zukunft. Unsere Mitarbeiterinnen und Mitarbeiter gestalten unsere Zukunft. In ihrer ganzen Vielfalt spiegeln sie unsere Märkte und sind unser wichtigster Wettbewerbsvorteil.

**Durchstarten – von Anfang an.** In Nachwuchskräfte zu investieren, heißt, in die Zukunft zu investieren. CAREer, das konzernweite Nachwuchsprogramm für Hochschulabsolventinnen und Hochschulabsolventen, Berufseinsteigerinnen und Berufseinsteiger mit erster Praxiserfahrung, ist der optimale Start für eine langfristige Karriere bei Daimler. Teilnehmer aus über 30 Nationen – davon rund 35 Prozent Frauen – durchlaufen in zwölf bis 15 Monaten vielfältige Projekteinsätze und lernen das Unternehmen intensiv kennen. CAREer ist international aufgestellt und sichert Daimler weltweit eine Poleposition am Arbeitsmarkt. Aber nicht nur die fachliche Kompetenz zählt. Mit dem „Knowledge College“ bietet Daimler auch Seminare zur Stärkung der sozialen Kompetenzen an.

**Erste Einblicke.** Schon Praktikantinnen und Praktikanten erleben die Arbeitsweise unseres weltweit agierenden Konzerns hautnah. Ob Schülerin oder Schüler, Studentin oder Student: Praktikantinnen und Praktikanten werden in wichtige Prozesse eingebunden und übernehmen verantwortungsvolle Aufgaben. Das Daimler-Studienförderprogramm „Daimler Student Partnership“ wurde bereits mehrfach mit dem Praktika-Award ausgezeichnet. Im Mittelpunkt stehen die individuelle Förderung und Entwicklung der Teilnehmerinnen und Teilnehmer. Sie werden persönlich betreut und mit Praxiseinsätzen im In- und Ausland für einen erfolgreichen Berufseinstieg fit gemacht.

**Erfahrung willkommen.** Ob als Betriebswirt, Controller, in der Produktion oder in der Forschung: Neben fachlicher Qualifikation sind unternehmerisches Handeln, Kommunikationsstärke und Teamgeist wichtige Werte, die zukünftige Daimler-Mitarbeiterinnen und -Mitarbeiter mitbringen sollten. Das Einarbeitungsprogramm „Learning on the Job“ ermöglicht einen unkomplizierten Einstieg und die Chance, schnell das eigene Wissen einzubringen und zu vertiefen.

**Potenziale fördern.** Die Bereitschaft, lebenslang zu lernen, ist in unserer sich schnell ändernden Welt eine Grundvoraussetzung. Mit LEAD (Leadership Evaluation And Development), einem Planungstool zur individuellen Mitarbeiterförderung, unterstützt Daimler Mitarbeiterinnen und Mitarbeiter weltweit dabei, sich weiterzuentwickeln. Darüber hinaus bieten wir zahlreiche fachliche und persönliche Professionalisierungsmöglichkeiten an.

Nur wer die Menschen und ihre Kompetenzen und Talente unabhängig von Herkunft, Geschlecht, Alter und Kultur annimmt und fördert, kann ihre Fähigkeiten in jeder Lebensphase erfolgreich nutzen.

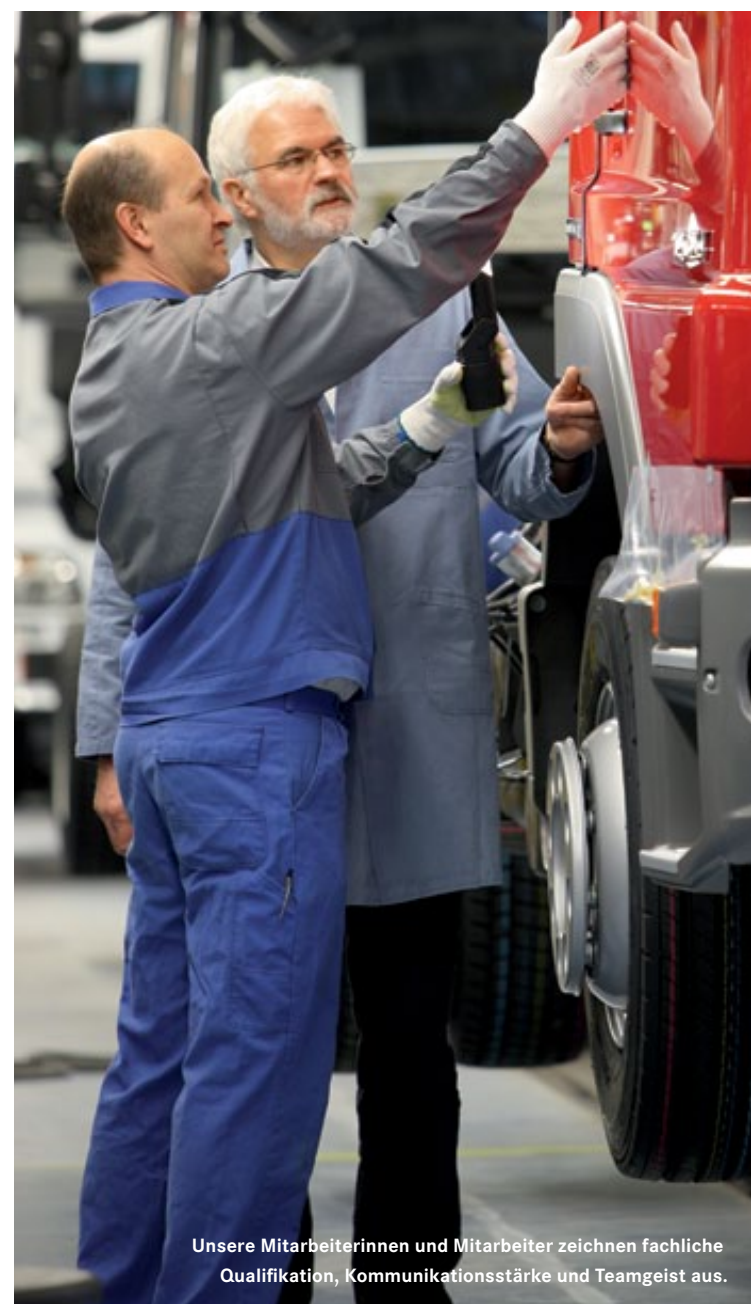

Unsere Mitarbeiterinnen und Mitarbeiter zeichnen fachliche Qualifikation, Kommunikationsstärke und Teamgeist aus.

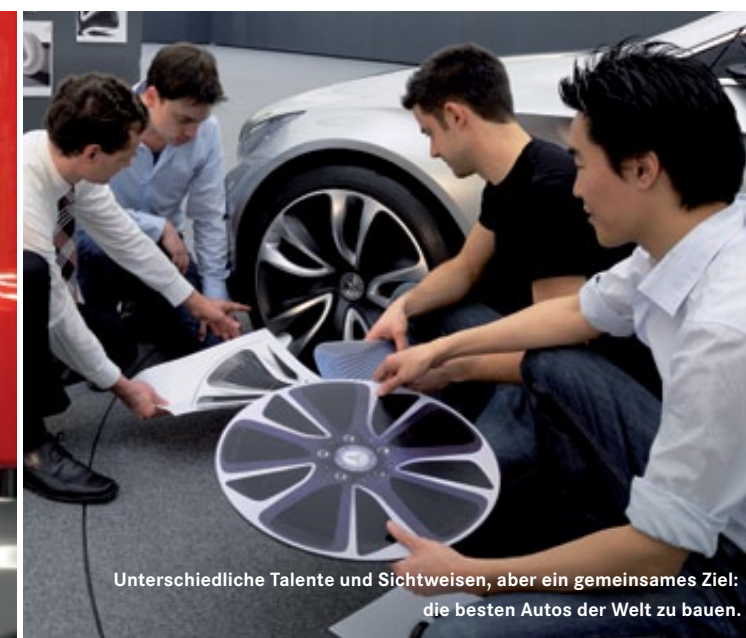

Unterschiedliche Talente und Sichtweisen, aber ein gemeinsames Ziel: die besten Autos der Welt zu bauen.

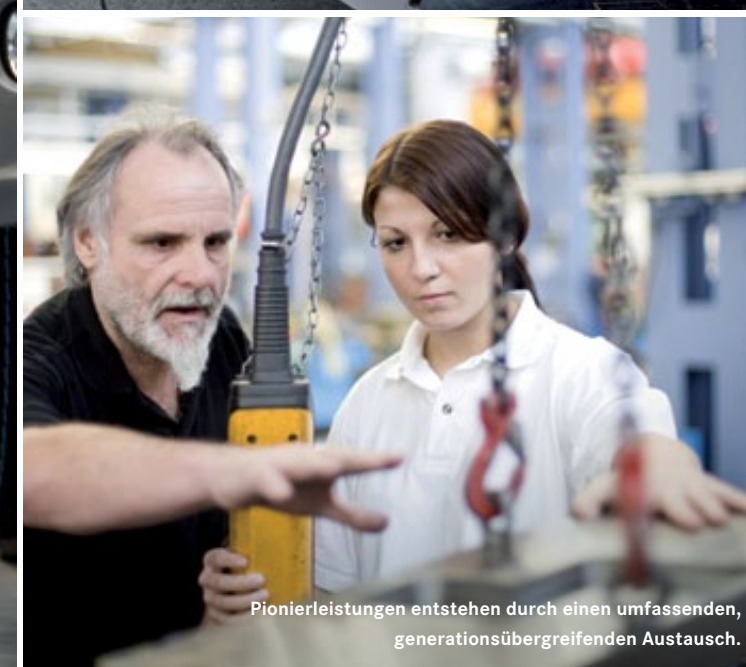

Pionierleistungen entstehen durch einen umfassenden, generationsübergreifenden Austausch.

2006

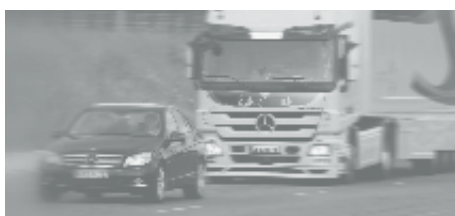

Mercedes-Benz präsentiert die PRE-SAFE® Bremse, die bei Lastwagen und Omnibussen als Aktiver Notbrems-Assistent angeboten wird.

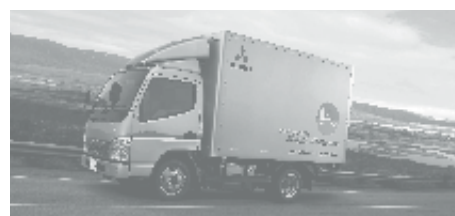

Der Fuso Canter Eco Hybrid geht als umweltfreundlichster Leichtlastwagen der Welt in Serie.

2007

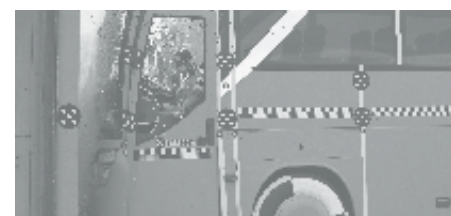

Der Front Collision Guard (FCG) im Omnibus sorgt für Schutz beim Frontalaufprall.

125! Jahre Erfinder des Automobils



# Die richtige Mischung macht den Unterschied.

## Das Diversity Management bei Daimler öffnet Horizonte.

**Alle sollen sich in unseren Mobilitätskonzepten wiederfinden können. Das erreichen wir mit unseren Mitarbeiterinnen und Mitarbeitern, deren Unterschiedlichkeit die Vielfalt unserer Märkte widerspiegelt.**

Im Diversity Management will Daimler als Vordenker und Schrittmacher weiter eine Führungsrolle besetzen. Für uns ist es selbstverständlich, dass alle Führungskräfte sich dafür einsetzen, Diversity in ihrem Verantwortungsbereich zu verankern. Schon seit Jahren ist Diversity Management eines der LEAD-Kriterien zur Leistungs- und Potenzialbewertung von Daimler-Führungskräften. Die Aufnahme qualitativer und quantitativer Diversity-Ziele in ihre Zielvereinbarungen fördert den konzernweiten Aufbau von Diversity-Kompetenz. Denn wir sehen die besondere Vielfalt bei Daimler als Chance, gemeinsam mehr zu bewegen.

**Diversity ist mehr.** Die Unterschiedlichkeit unserer Mitarbeiterinnen und Mitarbeiter ist die treibende Kraft, mit der wir auch in Zukunft gemeinsam etwas bewegen wollen. Ihre Erfahrungen, Perspektiven und Kompetenzen spiegeln die Vielfalt unserer Kundschaft, unserer Lieferanten, Investoren und der Umwelt wider. Dabei fragt Spitzenleistung nicht nach Geschlecht, Alter und Herkunft. Jeder Mensch besitzt ein ganz persönliches Profil. Das respektieren wir und nutzen die kreativen Synergien, die sich aus unterschiedlichen Expertisen und Sichtweisen ergeben. Zunächst steht für uns die Förderung von Frauen im Mittelpunkt, doch auch Dimensionen wie Multikulturalität sowie eine älter werdende Gesellschaft sind für uns wesentlich und zeigen, dass wir ein breites Verständnis von Diversity haben.

Vielfalt ist immer der Monokultur voraus. Sie ist befruchtender und am Ende erfolgreicher. Diversity ist eine Basis für unseren wirtschaftlichen Erfolg.

Diversity Management ist eine Kompetenz in Führung, Kommunikation und Zusammenarbeit, die bei Daimler lokal, regional und global aufgebaut und trainiert wird. Und dies nicht nur, weil es politisch korrekt ist, sondern weil es sozial und geschäftlich nutzt.

**Individualität zählt.** Durch die Vielfalt von Lebensformen gewinnt die Vereinbarkeit von Beruf, Familie und Privatleben einen immer höheren Stellenwert. Dem tragen wir mit zahlreichen flexiblen Arbeitszeitmodellen und unserem umfassenden Betreuungsangebot in den sternchen-Kinderkrippen Rechnung. Der Frage „Familie oder Beruf“ muss sich bei Daimler kein Elternteil mehr stellen. Aber auch den demografischen Wandel sehen wir als Herausforderung und Chance.

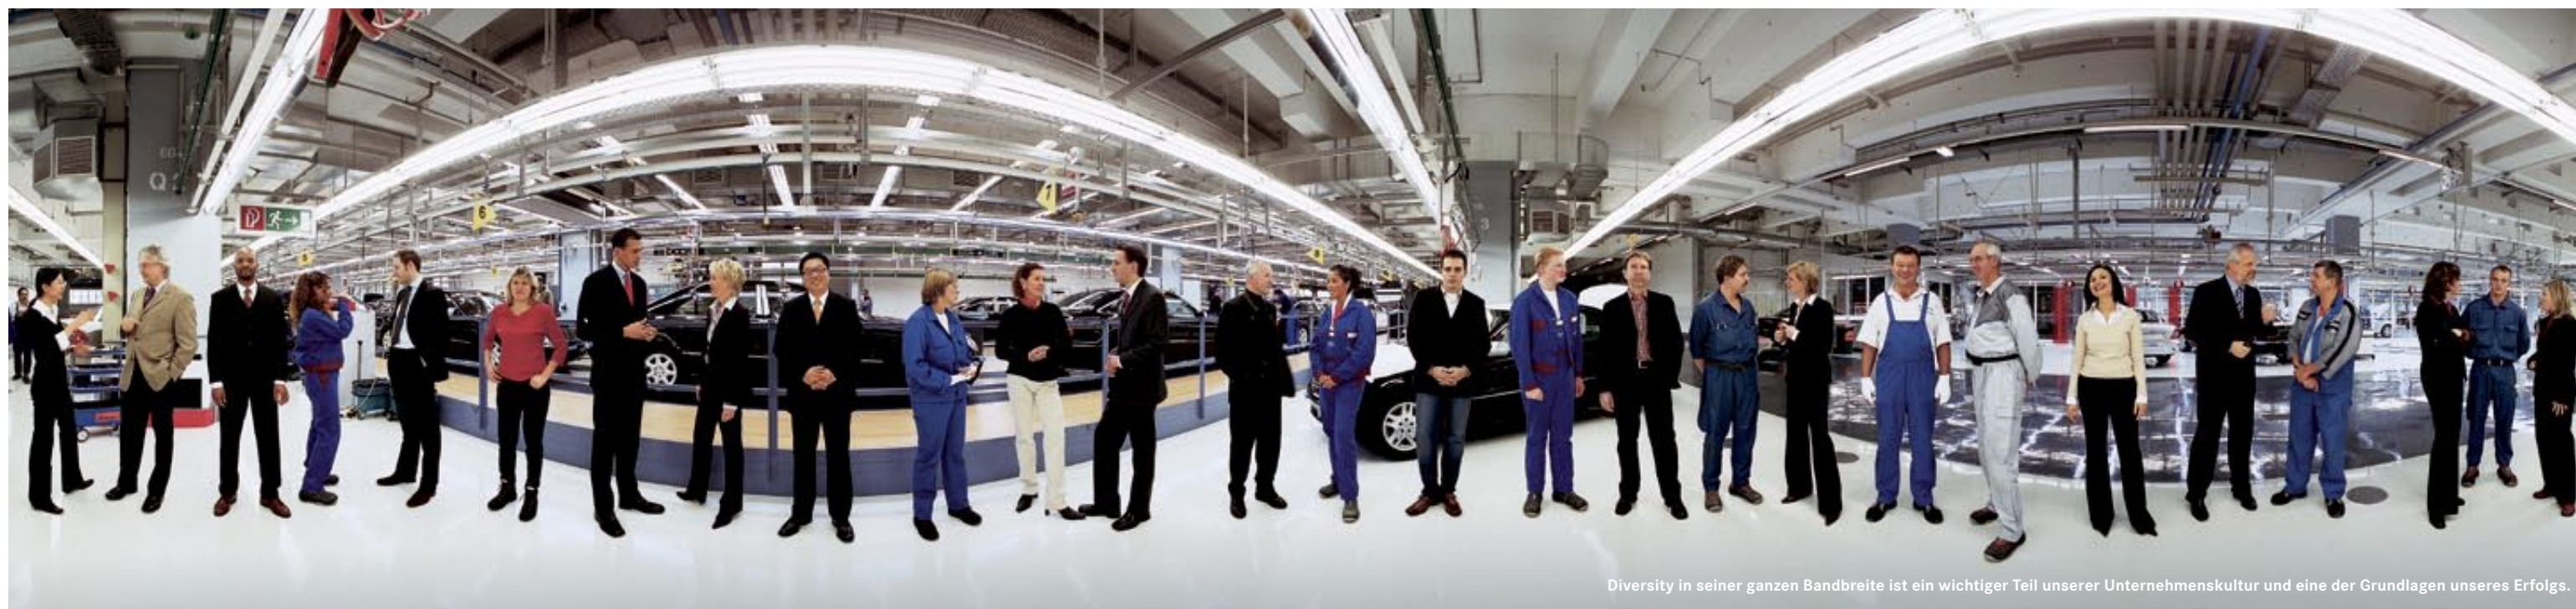

Diversity in seiner ganzen Bandbreite ist ein wichtiger Teil unserer Unternehmenskultur und eine der Grundlagen unseres Erfolgs.

2008

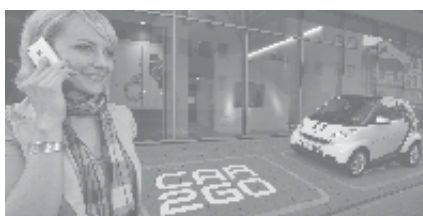

125! Jahre Erfinder des Automobils

Die Pilotphase des Mobilitätskonzepts car2go startet in Ulm. Heute nutzen 20.000 Personen car2go. Die Stadt Austin (Texas, USA) führte das Erfolgskonzept ebenfalls ein; 2011 folgt Hamburg.

2009

Der weltgrößte Elektroautofeldversuch „e-mobility-Berlin“ startet mit Fahrzeugen von Daimler.

Mercedes-Benz bringt den S 400 HYBRID auf den Markt – das erste Automobil mit Hybridantrieb und Lithium-Ionen-Batterie.

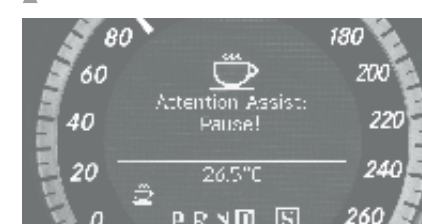

Der ATTENTION ASSIST erkennt die Müdigkeit des Fahrers, in akuten Gefahrensituationen sorgt die PRE-SAFE® Bremse für eine autonome Vollbremsung und der Nachtsicht-Assistent PLUS erkennt Fußgänger bei Dunkelheit: Helfer in der Mercedes-Benz E-Klasse.



# Gesellschaftliche Verantwortung – für uns eine globale Chance.

Als guter Unternehmensbürger und global agierendes Unternehmen blickt Daimler über die Konzerngrenzen hinaus und kümmert sich um positive und nachhaltige gesellschaftliche Entwicklungen.

Bei unseren mehr als 260.000 Mitarbeiterinnen und Mitarbeitern beginnt unsere soziale Verantwortung – aber hier hört sie noch lange nicht auf. Unsere Präsenz in vielen Ländern dieser Welt bietet uns die Chance, das gesellschaftliche Umfeld aktiv mitzugestalten und den Dialog zwischen den Kulturen zu fördern. Es ist unser Anspruch, ökonomische, ökologische und soziale Belange in Einklang zu bringen, und das wird anerkannt: Im Rating von oekom research hat Daimler erneut den Status „Prime Investment“ erhalten. Dies ist für uns eine Bestätigung, die Strategie des nachhaltigen und gesellschaftlich verantwortlichen Wirtschaftens konsequent fortzusetzen.

**Tradition verpflichtet.** Unsere Vorreiterrolle als Pionier der Automobiltechnik verpflichtet uns dazu, nachhaltige Mobilität und damit Umweltschutz, Innovation und Sicherheit als die wichtigsten Herausforderungen unseres Unternehmens zu sehen. Von der Forschung und Entwicklung bis zur Produktion setzen wir auf effiziente Ressourcennutzung, Emissions- und Lärminderung. Zum siebten Mal hat Daimler 2010 den „Environmental Leadership Award“ (ELA) für wegweisende Projekte zur Weiterentwicklung von Umweltschutz und Nachhaltigkeit im Unternehmen durchgeführt. Die zahlreichen Projekte, die internationale Teams aus allen Konzernteilen eingebracht haben, stehen stellvertretend für den ganzheitlichen Ansatz zu Umweltschutz und Nachhaltigkeit.

**Nachwuchs ist Zukunft.** Verantwortung tragen bedeutet unter anderem auch, langfristige Nachwuchssicherung zu betreiben. Mit „Genius“, der deutschlandweiten Bildungsinitiative für Kinder und Jugendliche, möchte Daimler deshalb schon früh Einblicke in Zukunftstechnologien und Berufsbilder in der Automobilindustrie geben und damit Interesse an Ingenieurberufen wecken. „Genius – Die junge WissensCommunity“ beschäftigt sich schwerpunktmäßig mit dem Thema „Mobilität der Zukunft“ und spricht mit zahlreichen Aktivitäten, Kooperationen und einem eigenen Internetauftritt Kinder und Jugendliche ebenso an wie Eltern und Lehrer.

**Sicherheit durch Aufklärung.** Mit der Sicherheitsinitiative MobileKids haben wir seit 2001 schon über 1,3 Millionen Kinder „fit für den Verkehr“ gemacht. Denn auch hier stehen wir in der Verantwortung: beim Schutz der schwächsten Verkehrsteilnehmer. Im Zentrum der Initiative stehen die Themen „Sicherheit im Straßenverkehr“ und „Zukunft der Mobilität“, die für Kinder im Alter von sechs bis zehn Jahren und Erwachsene individuell aufbereitet werden. Ziel ist es, das Thema Sicherheit im Straßenverkehr und die Prävention von Unfällen zu einem selbstverständlichen Bestandteil des Alltags von Eltern und Kindern werden zu lassen. MobileKids zeigt, dass Verkehrserziehung und Verhaltensschulung auf dem neuesten Entwicklungsstand auch Spaß machen kann. Eine Verbindung von virtueller und realer Schulung schafft beispielsweise die Safety Map, mit der Kinder und Eltern gemeinsam und ganz bewusst Besonderheiten im Straßenverkehr wahrnehmen und so den sichersten Weg in die Schule oder den Kindergarten finden können. Den spielerischen Ansatz unterstützt auch die Kinderverkehrsschule, die im April 2011 in Kooperation mit dem Ravensburger Spieleland ihre Pforten öffnet.

**Helfen, unterstützen, vorantreiben.** In unserer Rolle als Corporate Citizen fördern wir zahlreiche Initiativen durch Spenden und Sponsoring. Dabei legen wir hohe Qualitätsmaßstäbe an unser Engagement an und haben für die Vergabe von Mitteln transparente Strukturen und klare Verantwortlichkeiten geschaffen. Im Mittelpunkt unserer Spendentätigkeit stehen die Förderung von Wissenschaft und Bildung, die Unterstützung karitativer Projekte sowie die Katastrophenhilfe. Aber auch privates Engagement honorieren wir. Mit der Initiative „Wir bewegen was!“ fördert Daimler in diesem Jahr 125 gesellschaftliche und ökologische Projekte, bei denen Daimler-Mitarbeiterinnen und -Mitarbeiter ehrenamtlich tätig sind, mit Spenden bis zu jeweils 5.000 Euro. Mit unseren Sponsoring-Aktivitäten wollen wir eine nachhaltige Entwicklung in Kernbereichen gesellschaftlicher Verantwortung vorantreiben, wie etwa der Bildung, Umwelt, Kunst und Kultur.

Es ist unser Anspruch, ökonomische, ökologische und soziale Belange in Einklang zu bringen und damit unserer gesellschaftlichen Verantwortung gerecht zu werden.

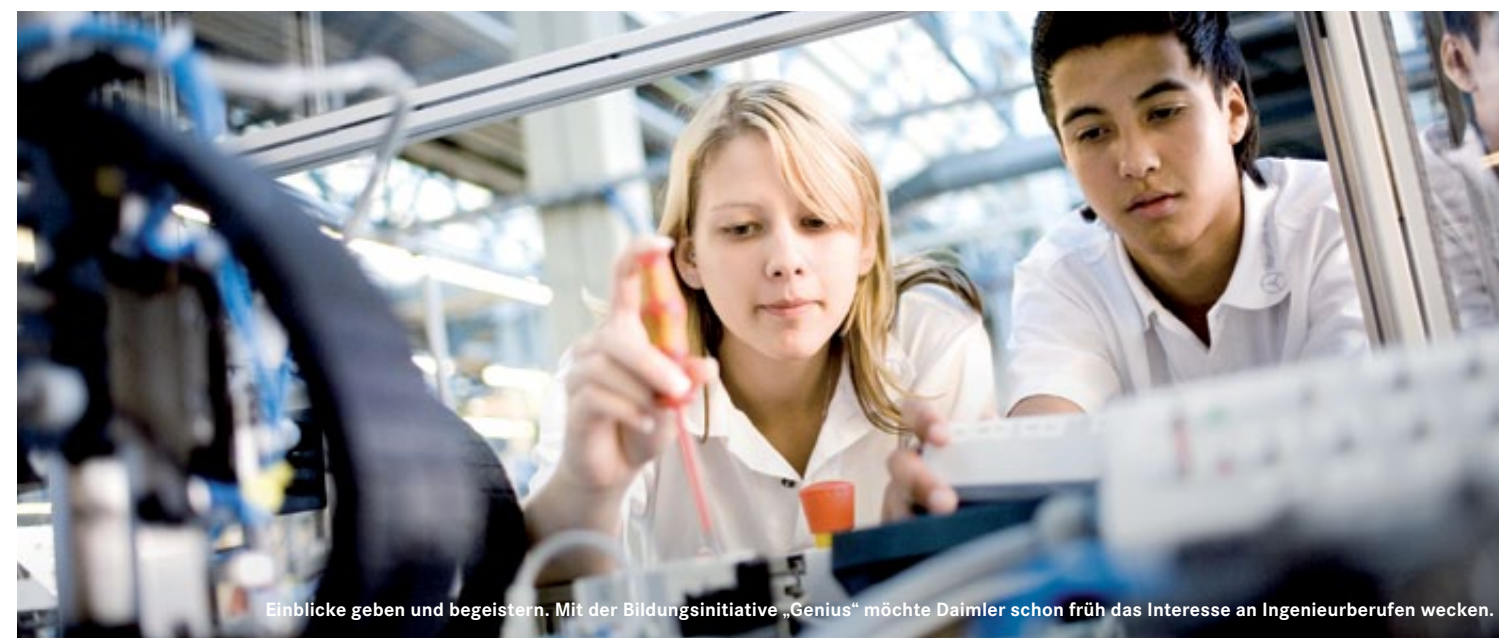

Einblicke geben und begeistern. Mit der Bildungsinitiative „Genius“ möchte Daimler schon früh das Interesse an Ingenieurberufen wecken.

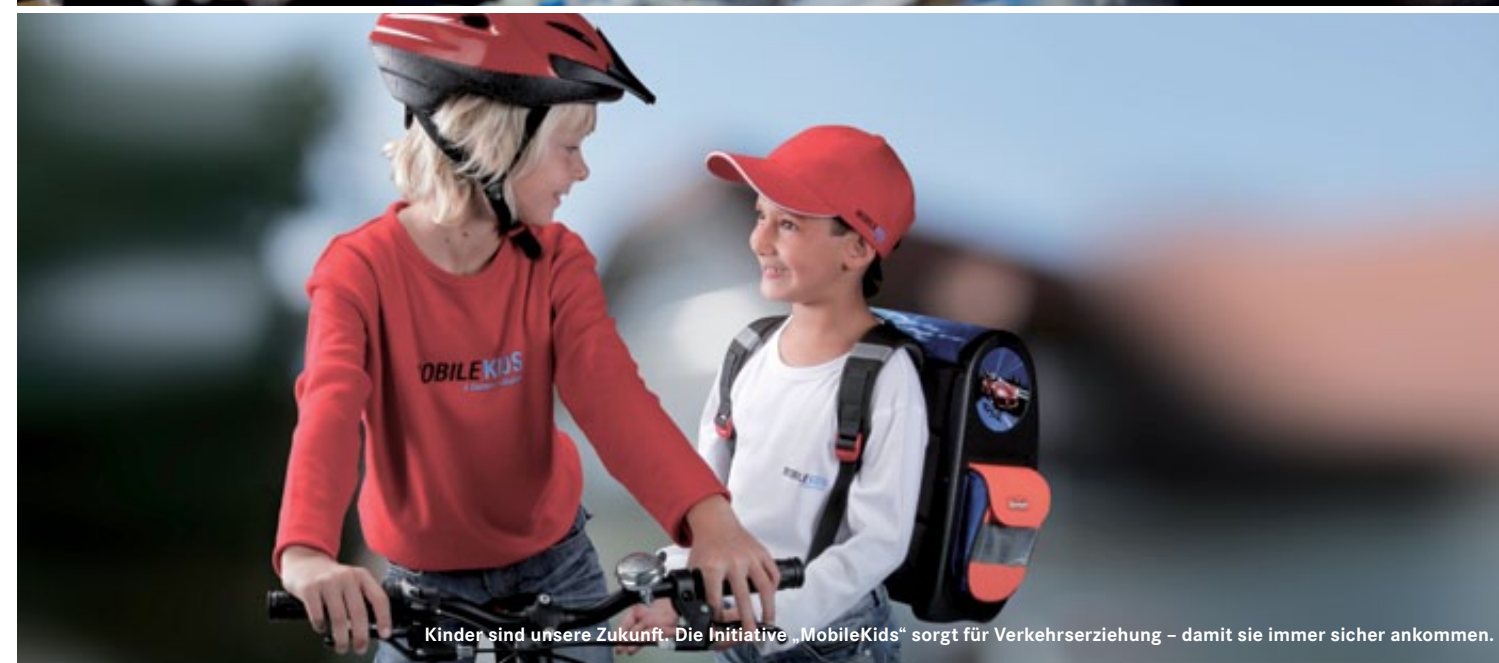

Kinder sind unsere Zukunft. Die Initiative „MobileKids“ sorgt für Verkehrserziehung – damit sie immer sicher ankommen.

2010

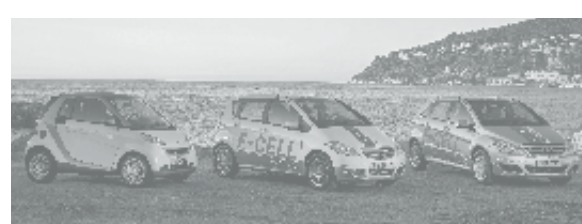

Mit dem smart electric drive, der Mercedes-Benz A-Klasse E-CELL und der B-Klasse F-CELL, dem Mercedes-Benz Vito E-CELL und dem Fuso Canter E-CELL weist Daimler den Weg in die lokal emissionsfreie Zukunft.

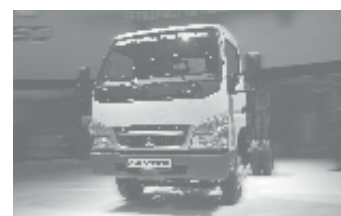

Die neuen BlueTec-Motoren bei Daimler Trucks erfüllen die weltweit strengste Abgasrichtlinie der NAFTA-Staaten.

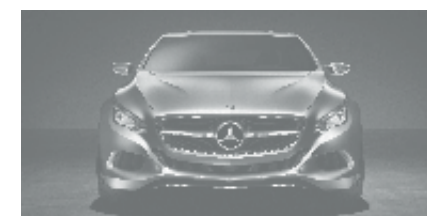

Mit innovativer Sicherheitstechnologie wie zum Beispiel dem Staufolgeassistenten, neuem Design und einem zukunftssträchtigen Antriebskonzept repräsentiert das Forschungsfahrzeug Mercedes-Benz F 800 Style das Auto von morgen.

125! Jahre Erfinder des Automobils



# Integrität und Recht sind zentrale Bestandteile unserer Unternehmenskultur.

**Integrität, Begeisterung, Wertschätzung und Disziplin sind Werte, zu denen wir stehen – heute und in Zukunft.**

Als global agierendes Unternehmen sehen wir uns Richtlinien und Gesetzgebungen gegenüber, die immer anspruchsvoller und komplexer werden. Um dem nicht nur gerecht zu werden, sondern auch in diesem Bereich neue Standards zu setzen, hat Daimler das Vorstandsressort „Integrität und Recht“ geschaffen. Dr. Christine Hohmann-Dennhardt leitet das Ressort und ist unter anderem verantwortlich für die globale Rechts- und Compliance-Organisation, die Geschäftsethik sowie eine nachhaltige Verankerung von Integrität und Compliance im gesamten Unternehmen. Als Erfinder des Automobils wollen wir eine Unternehmenskultur fördern, die nicht nur die gesetzlichen Anforderungen erfüllt, sondern auch höchsten ethischen Ansprüchen genügt. Denn das Ansehen unseres Unternehmens ist eine unserer größten Stärken. Wir dürfen und werden es nicht aufs Spiel setzen.

**Wirtschaftlicher Erfolg kann nur nachhaltig sein, wenn er legal und korrekt zustande gekommen ist.**

Es ist unser Anspruch, Spitzenleistungen ehrlich und fair zu erzielen. Dies erwarten wir von allen Mitarbeiterinnen und Mitarbeitern. Integres Verhalten ist aber auch Voraussetzung für vertrauensvolle Partnerschaft und Zusammenarbeit. Von Geschäftspartnern erwarten wir daher uneingeschränkt regelkonformes Verhalten. Integrität ist bei Daimler nicht optional, sondern ein integraler und bleibender Bestandteil unserer Unternehmenskultur.

**Was bedeutet Compliance in diesem Zusammenhang?**

Wir verstehen darunter die Einhaltung aller maßgeblichen Gesetze, Vorschriften und Regelungen sowie der zugehörigen internen Richtlinien. Eine nachhaltige Kultur der Compliance können wir nur etablieren, wenn jeder Einzelne die Regeln verinnerlicht und Verantwortung übernimmt. Eine integre Geschäftspraxis und nachhaltiges Wachstum sind eng verbunden, denn Wertegemeinschaften sind auf Dauer auch Wertschöpfungsgemeinschaften.

„Kein Geschäftsabschluss der Welt ist es wert, dafür den Ruf unseres Unternehmens aufs Spiel zu setzen.“

Dr. Dieter Zetsche, Vorstandsvorsitzender der Daimler AG und Leiter Mercedes-Benz Cars

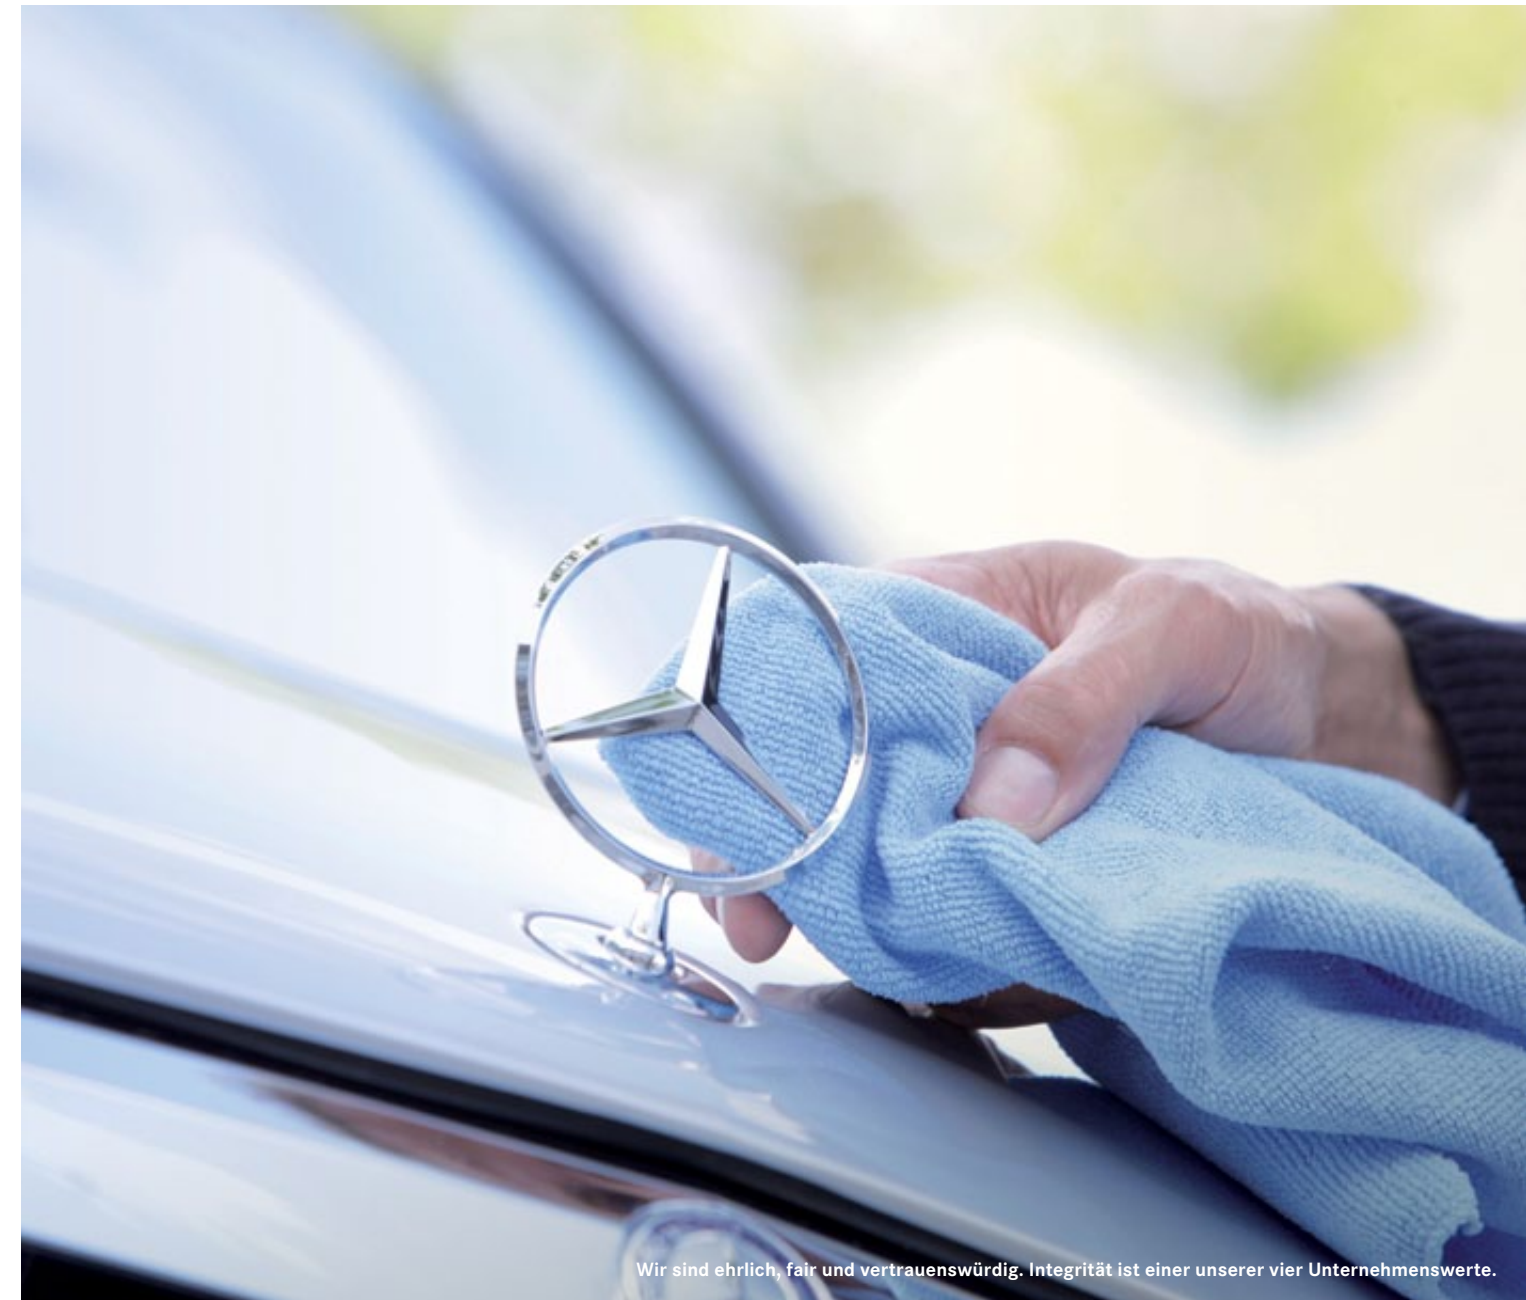

Wir sind ehrlich, fair und vertrauenswürdig. Integrität ist einer unserer vier Unternehmenswerte.

▲  
2010

Aktiver Spurhalte-Assistent, Aktiver Totwinkel-Assistent und die hoch effizienten BlueDIRECT-Motoren debütieren in der neuen Generation der Mercedes-Benz CL-Klasse.

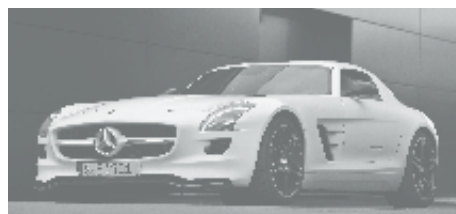

Mercedes-Benz stellt den SLS AMG E-CELL Supersportwagen-Prototyp mit reinem Elektroantrieb vor.

▲  
2011

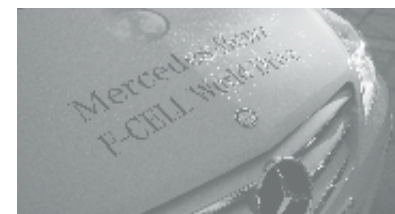

Im Rahmen des Jubiläums „125! Jahre Erfinder des Automobils“ präsentiert Daimler die Skulptur „Aesthetics 125“ und startet den F-CELL World Drive mit drei Fahrzeugen der B-Klasse F-CELL.

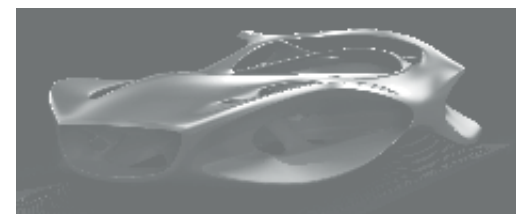

125! Jahre Erfinder des Automobils



## Daimler AG: Geschäftsfelder im Überblick.

Daimler steht für starke Marken mit hochwertigen Produkten. Mit den Geschäftsfeldern Mercedes-Benz Cars, Daimler Trucks, Mercedes-Benz Vans, Daimler Buses sowie Daimler Financial Services sind wir weltweit führender Anbieter von Fahrzeugen mit Premiumanspruch und der größte Hersteller von Nutzfahrzeugen. Daimler Financial Services ergänzt unser Spektrum um ein umfassendes, automobilnahes Finanzdienstleistungsangebot.

**Mercedes-Benz Cars** bietet hochwertige Produkte vom Kleinwagen über Premiumfahrzeuge bis zu Luxuslimousinen.

**Daimler Trucks** bündelt sechs starke Fahrzeugmarken mit weltweit 33 Produktionsstätten für Lkw und Schulbusse. Dies sichert die Mobilität im Transportbereich nachhaltig.

**Mercedes-Benz Vans** produziert an sieben Standorten in Deutschland, Spanien, den USA, Argentinien und Vietnam Kleintransporter in den Gewichtsklassen von 1,9 bis 7,5 Tonnen.

**Daimler Buses** ist der weltweit führende Hersteller von Omnibussen über acht Tonnen. Das Angebot von Daimler Buses umfasst Stadt-, Überland- und Reisebusse sowie Fahrgestelle.

**Daimler Financial Services** unterstützt mit maßgeschneiderten Finanzdienstleistungen weltweit den Absatz von Fahrzeugen des Daimler-Konzerns.

A low-angle photograph of the Daimler Konzernzentrale building in Stuttgart. The building is a modern skyscraper with a glass facade, reflecting the sky. The word "DAIMLER" is prominently displayed in large, blue, serif capital letters on a white horizontal band across the middle of the building. Below it, the words "Konzernzentrale" are written in a smaller, black, sans-serif font. The building is surrounded by other modern buildings, and the sky is a clear, pale blue.

**DAIMLER**  
Konzernzentrale



# Der Daimler-Konzern. Mit Innovationen und Know-how setzen wir weltweit Maßstäbe für die Zukunft.

**Als Pionier des Automobilbaus gestalten wir heute die Zukunft der Mobilität.** Die Firmengründer Gottlieb Daimler und Carl Benz haben mit der Erfindung des Automobils im Jahr 1886 Geschichte geschrieben. 125 Jahre später, im Jubiläumsjahr 2011, ist die Daimler AG eines der erfolgreichsten Automobilunternehmen der Welt.

Mit den Geschäftsfeldern Mercedes-Benz Cars, Daimler Trucks, Mercedes-Benz Vans, Daimler Buses und Daimler Financial Services gehört der Fahrzeughersteller zu den größten Anbietern von Pkw mit Premiumanspruch und ist der größte weltweit aufgestellte Nutzfahrzeug-Hersteller. Daimler Financial Services bietet umfassende Finanzdienstleistungen mit Finanzierung, Leasing, Versicherungen und Flottenmanagement.

Als Pionier des Automobilbaus gestaltet Daimler auch heute die Zukunft der Mobilität: Das Unternehmen setzt dabei auf innovative und grüne Technologien sowie auf sichere und hochwertige Fahrzeuge, die ihre Kundschaft faszinieren und begeistern. Daimler investiert bei der Entwicklung alternativer Antriebe als einziger Automobilhersteller sowohl in den Hybrid- als auch in den Elektromotor und in die Brennstoffzelle mit dem Ziel, langfristig das emissionsfreie Fahren zu ermöglichen. Denn Daimler betrachtet es als Verpflichtung, seiner Verantwortung für Gesellschaft und Umwelt gerecht zu werden.

Als Unternehmen mit Anspruch auf Spitzenleistung bieten wir Lösungen für die automobilen Anforderungen von heute und morgen – mit unserem einzigartigen Produktmix, bahnbrechenden Technologien und maßgeschneiderten Services.

## Die Daimler-Marken.

Mercedes-Benz Cars: Mercedes-Benz, smart, Maybach

Daimler Trucks: Mercedes-Benz, Fuso, Freightliner, Western Star, Thomas Built Buses, BharatBenz

Mercedes-Benz Vans: Mercedes-Benz

Daimler Buses: Mercedes-Benz, Setra, Orion

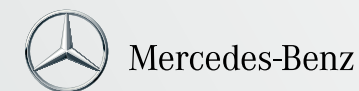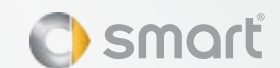

MAYBACH

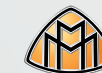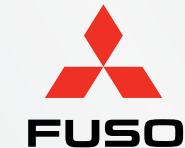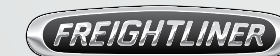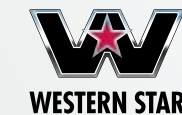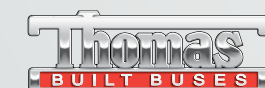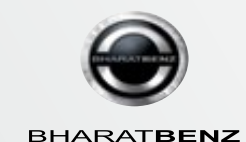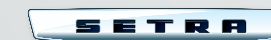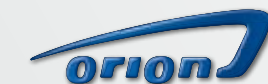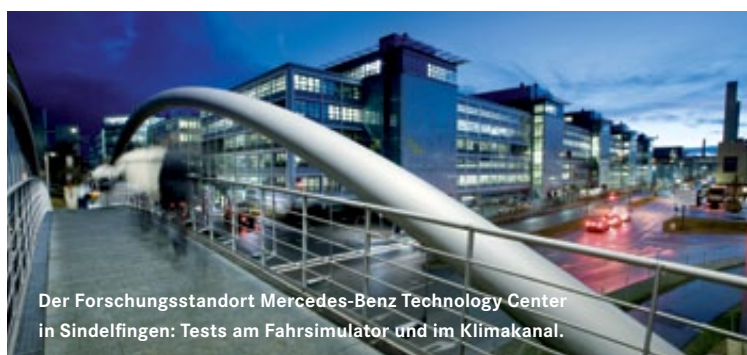

Der Forschungsstandort Mercedes-Benz Technology Center in Sindelfingen: Tests am Fahrsimulator und im Klimakanal.

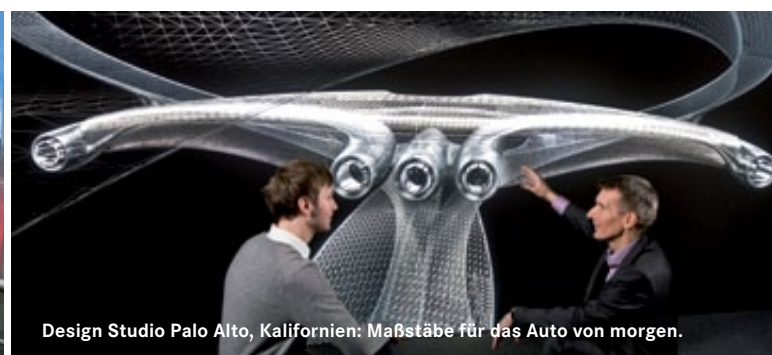

Design Studio Palo Alto, Kalifornien: Maßstäbe für das Auto von morgen.

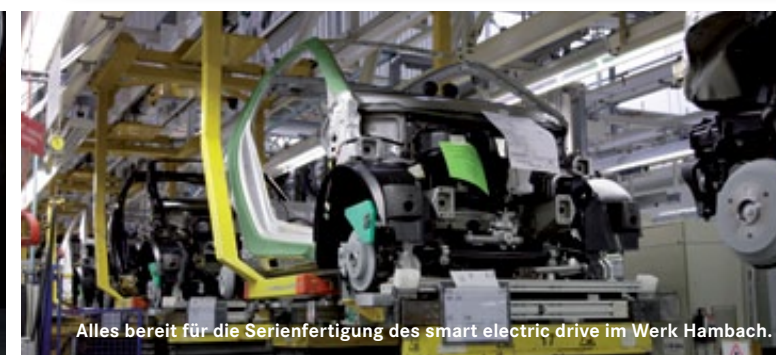

Alles bereit für die Serienfertigung des smart electric drive im Werk Hambach.

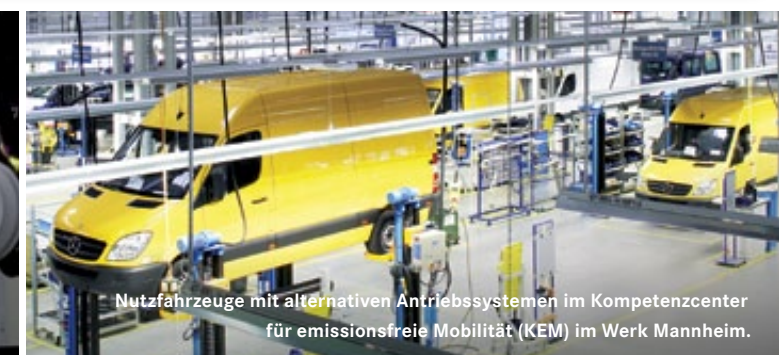

Nutzfahrzeuge mit alternativen Antriebssystemen im Kompetenzzentrum für emissionsfreie Mobilität (KEM) im Werk Mannheim.



Seit 125 Jahren verkörpert das Automobil Faszination, Freiheit und Fahrspaß. Mercedes-Benz steht für den bedingungslosen Willen, die Zukunft des Automobils zu gestalten.

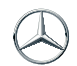

Mercedes-Benz

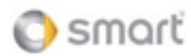

MAYBACH

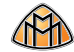

**Gottlieb Daimlers Leitspruch „Das Beste oder nichts“ spiegelt sich in unserer einzigartigen Produktpalette wider.**

**Mercedes-Benz:** Der Stern symbolisiert die Spitze des Automobilbaus wie kein anderes Markenzeichen. Mercedes-Benz Fahrzeuge reklamieren den Führungsanspruch hinsichtlich Faszination, Perfektion, Design

und Verantwortung für nachhaltige Mobilität. Mit Engagements in den Bereichen Sport, Lifestyle und Mode ist die Marke auch in anderen Lebenswelten präsent und erlebbar.

**smart:** Der zukunftsweisende Kleinwagen ist in mehr als 40 Märkten weltweit vertreten. Er steht für Umweltbewusstsein und Nachhaltigkeit und kombiniert innovative Technologie mit urbaner Mobilität.

**Maybach:** Die High-End-Luxuslimousinen von Maybach sind Ausdruck des Premiumanspruchs in der Luxusklasse: Über zwei Millionen Individualisierungsmöglichkeiten erfüllen die Wünsche anspruchsvoller Kundinnen und Kunden. Von Hand gefertigt, ist jeder Maybach ein Unikat – und ein Meisterwerk an Ästhetik, Perfektion und Eleganz.

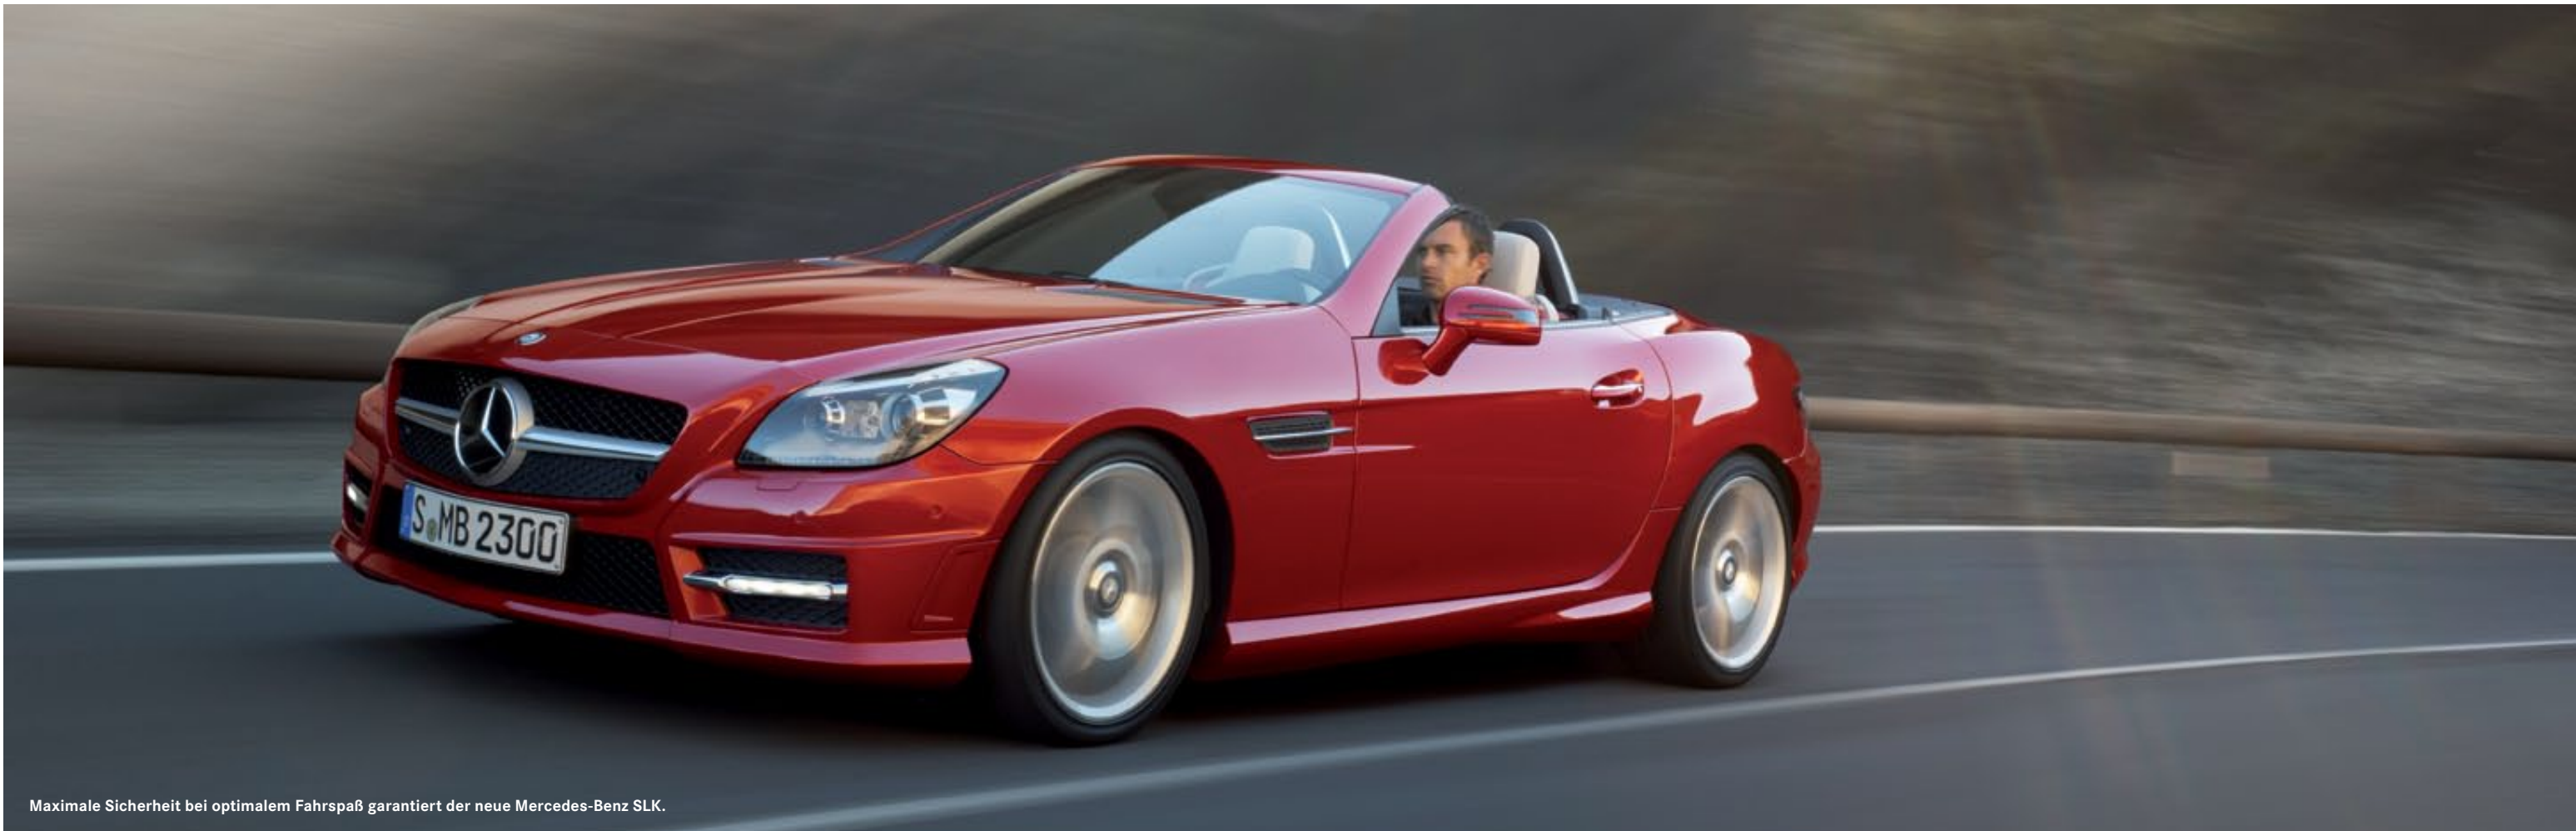

Maximale Sicherheit bei optimalem Fahrspaß garantiert der neue Mercedes-Benz SLK.

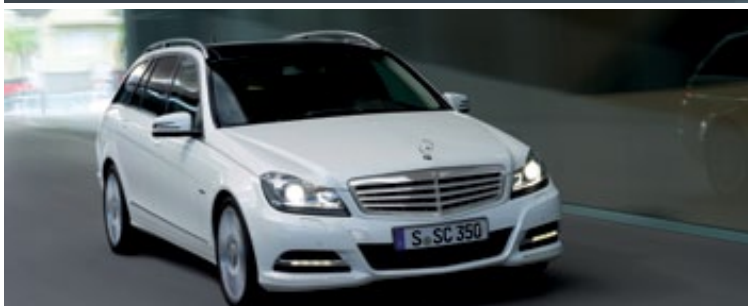

Die neue Mercedes-Benz C-Klasse überzeugt durch Raum, Stil und Sportlichkeit.

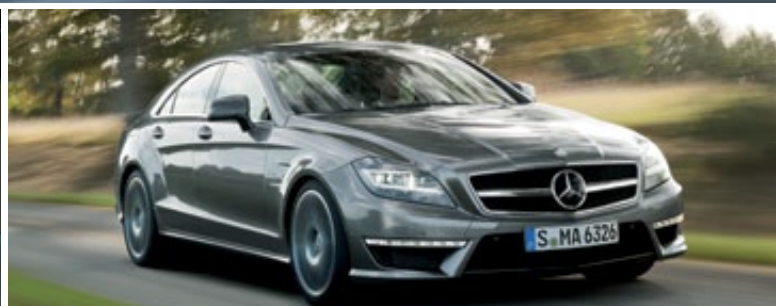

Kultivierte Sportlichkeit in einzigartigem Design: der neue Mercedes-Benz CLS.

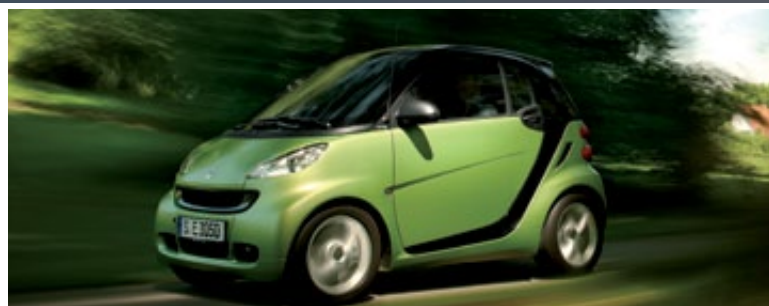

Der smart verspricht Fahrspaß mit Kultcharakter.

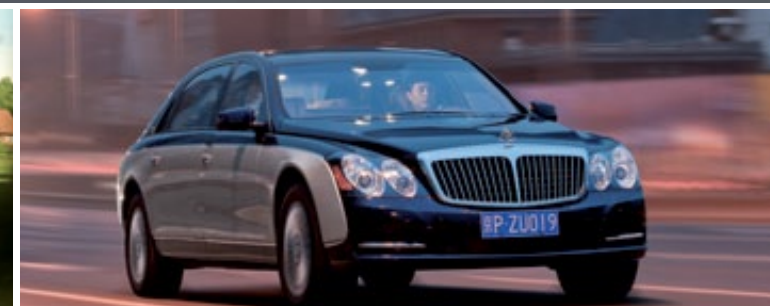

Maybach – jedes Fahrzeug ein Unikat der Luxusklasse.



# Daimler Trucks. Sechs Fahrzeugmarken unter einem Dach: sechsfach stark im Transport.

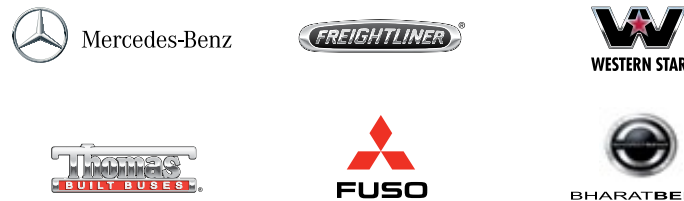

**Sechs starke, unabhängige Fahrzeugmarken prägen die Welt der Nutzfahrzeuge. Gemeinsam haben sie den Anspruch an höchste Qualität.**

**Mercedes-Benz:** Erstklassige Produkt- und Service-Qualität, Wirtschaftlichkeit, Zuverlässigkeit und Nachhaltigkeit – dafür steht das Versprechen „Trucks you can trust“ in Europa und Lateinamerika. Mercedes-Benz bietet individuelle und zuverlässige Lösungen im mittleren und schweren Lkw-Segment.

**Freightliner:** Das größte Standbein von Daimler Trucks North America ist Freightliner Trucks. Sie stellen Leicht- bis Schwerlastwagen her und decken damit einen breiten Einsatzbereich im Nutzfahrzeug-segment ab.

## Der Markt für effiziente, zuverlässige und umweltfreundliche Nutzfahrzeuge boomt. Wir bauen sie.

**Western Star:** Die schweren Western Star Lkw sind markant gestaltete Fahrzeuge mit Premiumanspruch, die sich im Spezial-, Bau- und Langstreckentransport in Nordamerika durchgesetzt haben. Sie sind für besonders unwegsames Gelände geeignet und damit ein Muss für eingefleischte Trucker.

**Thomas Built Buses:** Thomas Built Buses ist der führende Hersteller von Schulbussen in Nordamerika und steht seit 1916 für innovatives Design, Sicherheit und höchste Qualität.

**Fuso:** Die Mitsubishi Fuso Truck and Bus Corporation brilliert weltweit als Kompetenzzentrum für modernste Hybridtechnologie und liefert ein breites Fahrzeug-

spektrum. Qualitätsbewusstsein, Wirtschaftlichkeit und Kundenorientierung prägen Fuso.

**BharatBenz:** Die Einführung von BharatBenz als fünfte Lkw-Marke im Februar 2011 stärkt das Engagement von Daimler Trucks in Indien und ist die Basis für die Einführung einer neuen lokalen Lkw-Generation. Unter dem Markendach wird ein umfassendes Lkw-Produktportfolio in den Gewichtsklassen von sechs bis 49 Tonnen angeboten.

**Detroit Diesel:** Mit Hauptsitz in Detroit, Michigan, ist Detroit Diesel Weltmarktführer von Hochleistungsdieselmotoren der Extraklasse. Die Produkte überzeugen weltweit im kommerziellen Berufsalltag und sind in Nutzfahrzeugen nicht wegzudenken.

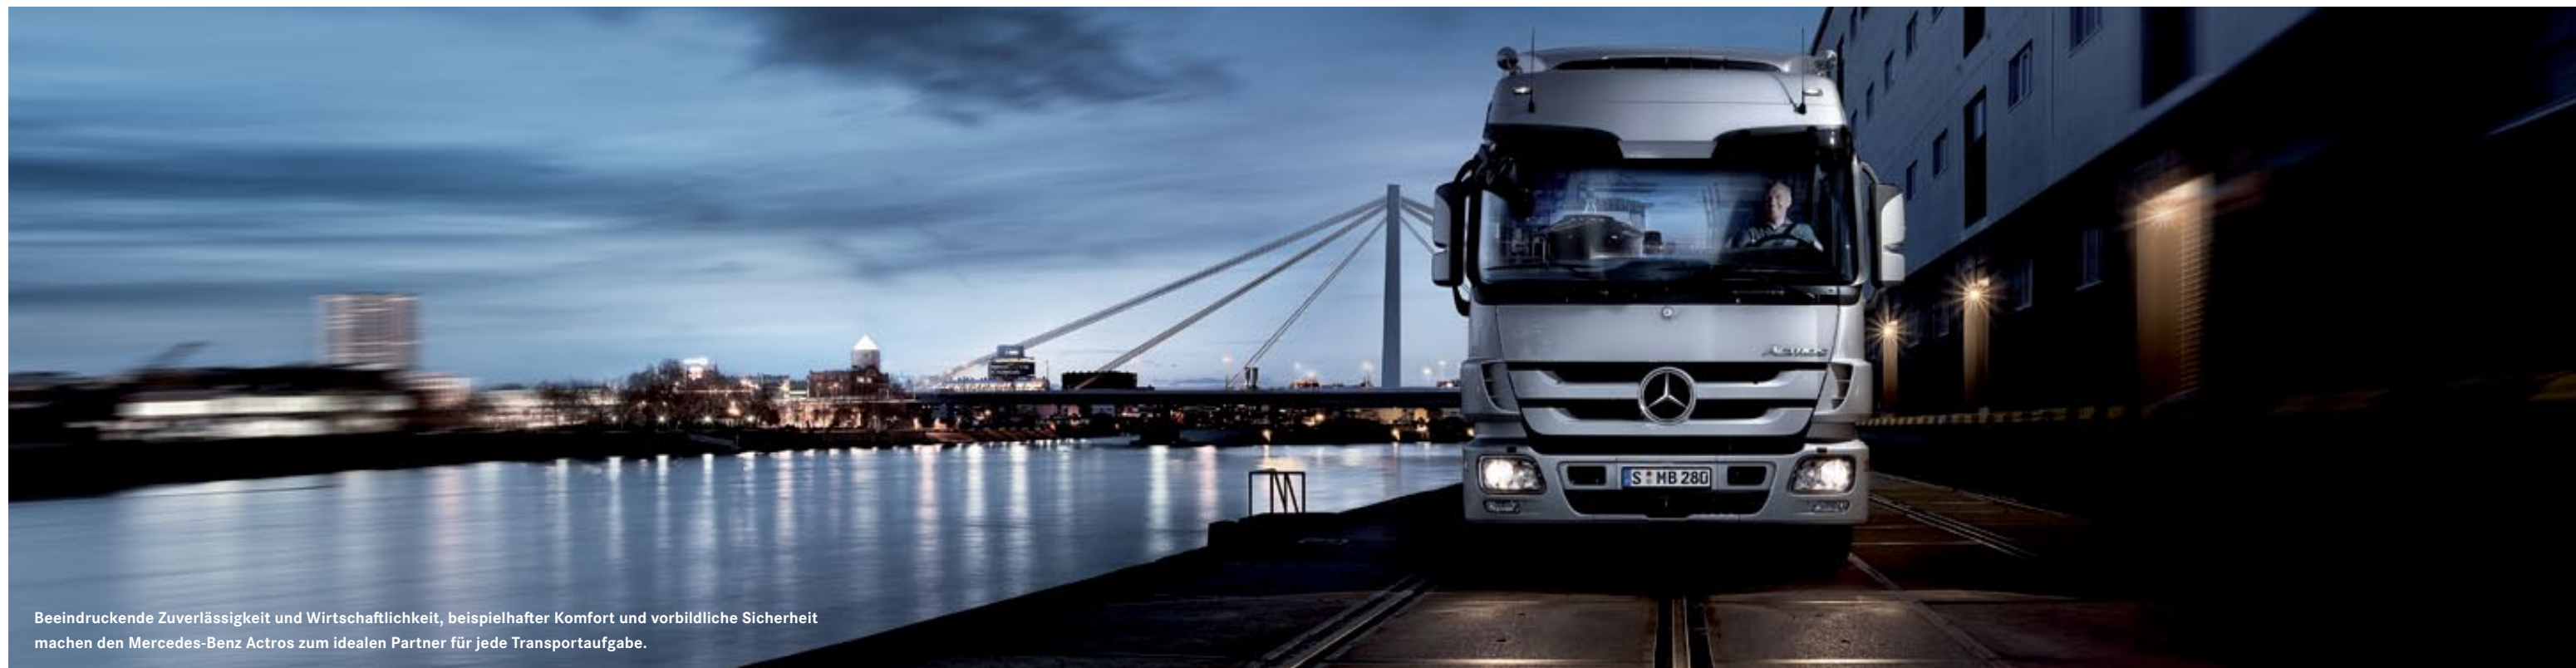

Beeindruckende Zuverlässigkeit und Wirtschaftlichkeit, beispielhafter Komfort und vorbildliche Sicherheit machen den Mercedes-Benz Actros zum idealen Partner für jede Transportaufgabe.

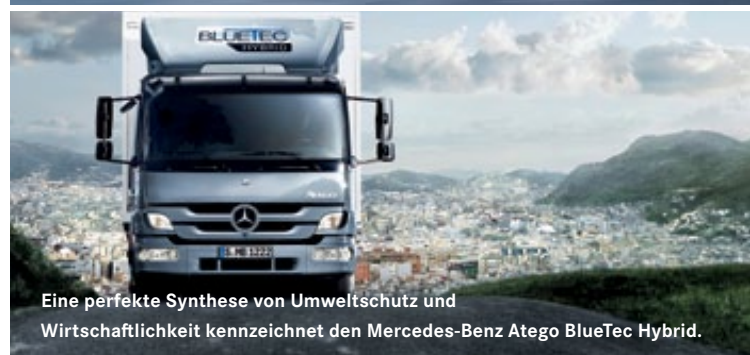

Eine perfekte Synthese von Umweltschutz und Wirtschaftlichkeit kennzeichnet den Mercedes-Benz Atego BlueTec Hybrid.

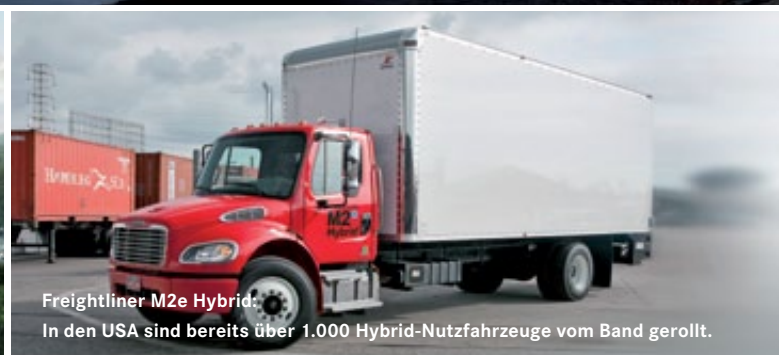

Freightliner M2e Hybrid: In den USA sind bereits über 1.000 Hybrid-Nutzfahrzeuge vom Band gerollt.

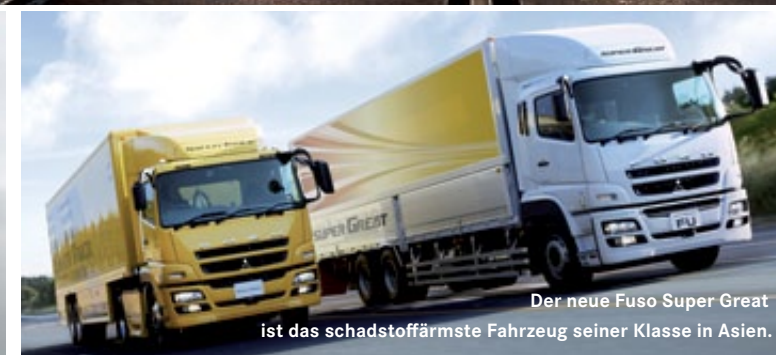

Der neue Fuso Super Great ist das schadstoffärmste Fahrzeug seiner Klasse in Asien.

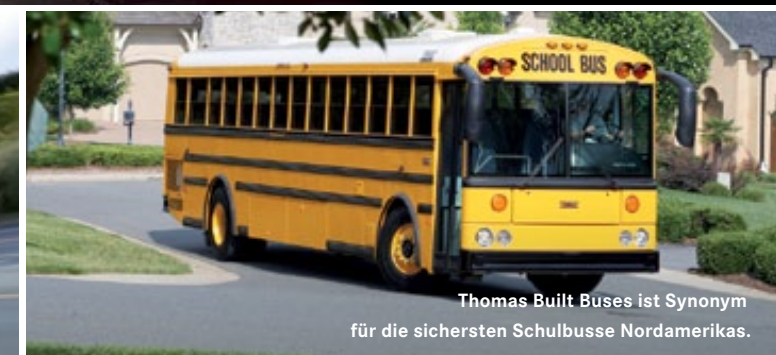

Thomas Built Buses ist Synonym für die sichersten Schulbusse Nordamerikas.



# Mercedes-Benz Vans. Die flexiblen und multifunktionalen Transportspezialisten werden jedem Anspruch gerecht.

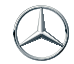

Mercedes-Benz

**Vier Modellreihen garantieren kundengerechte Lösungen für unübertroffene Flexibilität mit höchster Leistung. In zahlreichen Versionen.**

**Mercedes-Benz Vito:** Im Mid-Size-Van-Segment siegte der Vito das fünfte Jahr in Folge als „Kurier-, Express- und Post-Transporter des Jahres“. Er ist als Kastenwagen, Kombi und Mixto erhältlich. Als einziger Wettbewerber der traditionellen „Black Cabs“ prägt er das Londoner Straßenbild.

Mercedes-Benz Vans überzeugen mit der technisch und wirtschaftlich besten Lösung in Verteilerverkehr und Freizeit.

**Mercedes-Benz Sprinter:** Die Transporter-Baureihe Sprinter ist in der NAFTA-Region unter den Marken Freightliner und Mercedes-Benz erhältlich. Der Sprinter wartet mit zukunftsweisender Technologie auf und ist bekannt für lange Haltbarkeit und emissionsarme Motoren – wofür er mehrfach die Auszeichnung „KEP-Transporter des Jahres“ in seiner Klasse bis 3,5 Tonnen erhielt.

**Mercedes-Benz Vario:** Die Modelle des Leichtlastwagens Vario gibt es als Kombi-, Kasten- oder Pritschenwagen, als Kipper oder mit Doppelkabine. Mit einem zulässigen Gesamtgewicht von 5,99 bis 7,49 Tonnen sorgen sie bei größeren Transporten für eine zuverlässige und effiziente Beförderung.

**Mercedes-Benz Viano:** Er ist bekannt für nahezu unbegrenzte Möglichkeiten: Drei Ausstattungslinien in drei Längen mit unterschiedlichen Motorisierungen verleihen dem Viano einen unverwechselbaren Charakter.

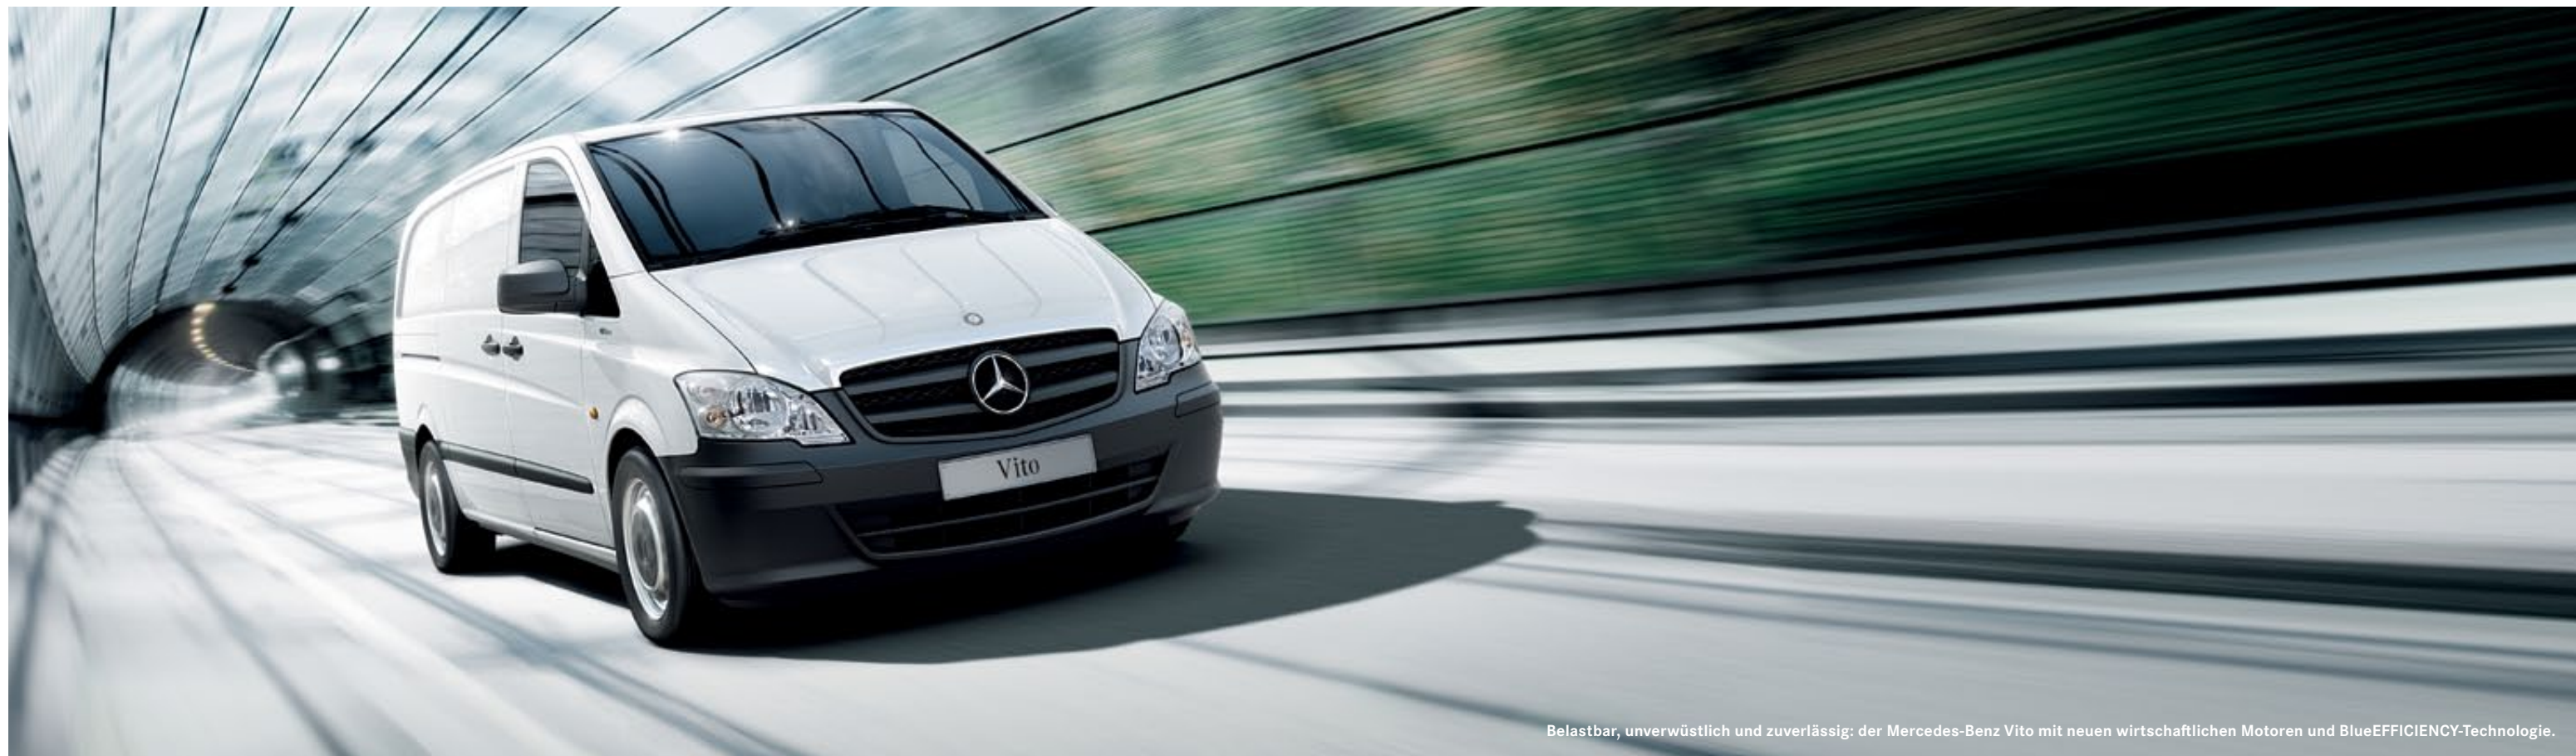

Belastbar, unverwundlich und zuverlässig: der Mercedes-Benz Vito mit neuen wirtschaftlichen Motoren und BlueEFFICIENCY-Technologie.

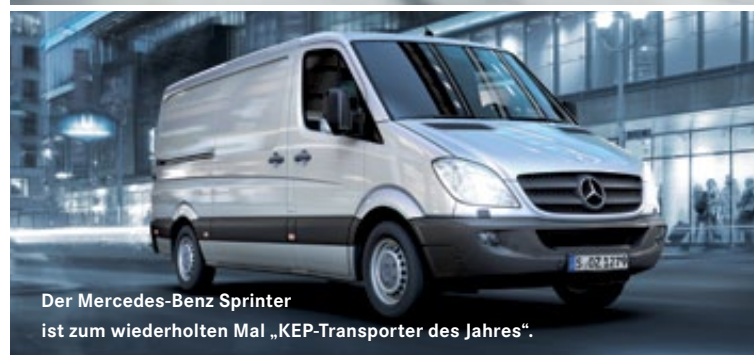

Der Mercedes-Benz Sprinter ist zum wiederholten Mal „KEP-Transporter des Jahres“.

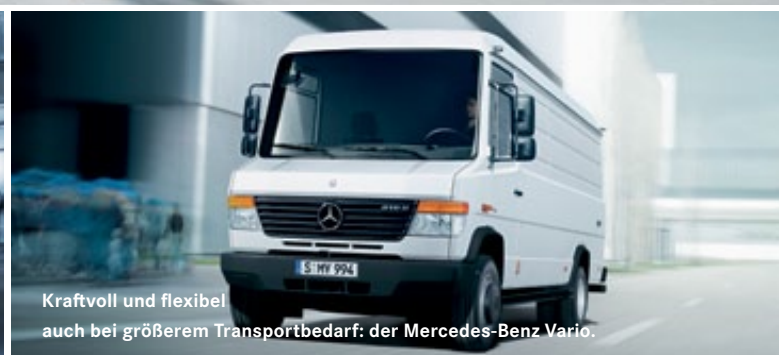

Kraftvoll und flexibel auch bei größerem Transportbedarf: der Mercedes-Benz Vario.

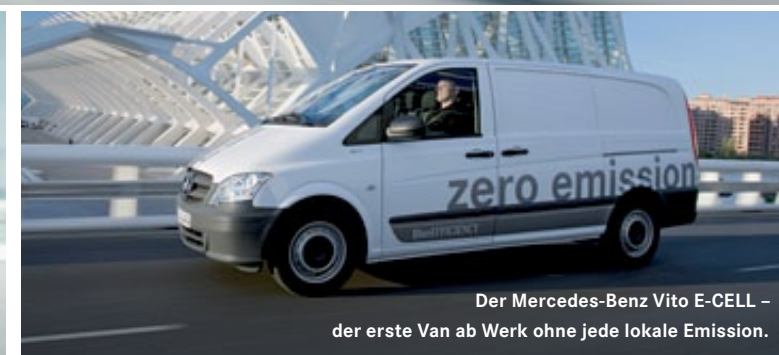

Der Mercedes-Benz Vito E-CELL – der erste Van ab Werk ohne jede lokale Emission.

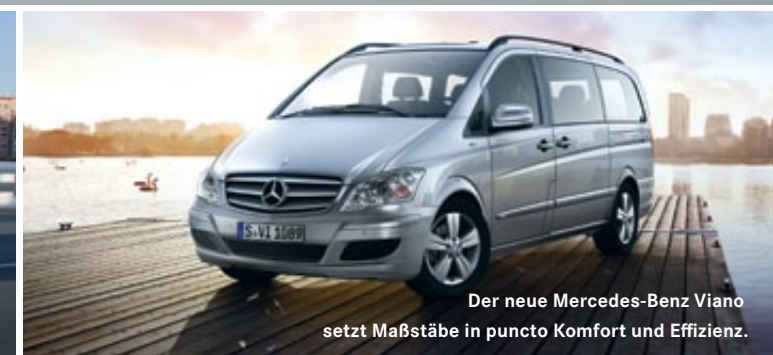

Der neue Mercedes-Benz Viano setzt Maßstäbe in puncto Komfort und Effizienz.



# Daimler Buses. Der Weltmarktführer im Busgeschäft weist neue Wege im umweltfreundlichen Verkehr.

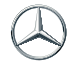

Mercedes-Benz

SETRA

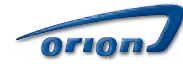

Alle drei Marken verbinden höchste Sicherheit, größter Komfort und ausgezeichnete Wirtschaftlichkeit.

**Mercedes-Benz** bietet als Technologieführer eine umfangreiche Omnibus-Produktpalette. Die professionelle und globale Vertriebsstruktur sorgt für eine lösungsorientierte, verantwortungsvolle Kundenbetreuung weltweit.

Die Vision von einer „grünen Zukunft“ im Personenverkehr ist schon Realität: In Nordamerika wie in Europa überzeugen unsere Hybrid- und Brennstoffzellenbusse.

**Setra**-Busse sind „Best in Class“ und erfüllen höchste Ansprüche. Komfort, Individualität und Qualität zeichnen diese Busse aus: Setra setzt Akzente in Technik, Ausstattung und Design. Und bietet hohe Sicherheitsstandards, Wirtschaftlichkeit sowie umfassende Serviceleistungen.

**Orion** ist Weltmarktführer bei Hybridbussen. Orion ist die Marke des Vertrauens im nordamerikanischen Markt: Über 230 Städte und Metropolen in den Vereinigten Staaten setzen seit Jahrzehnten auf die hohe Zuverlässigkeit der Orion-Busse.

**OMNIplus** ist die Dienstleistungsmarke für Mercedes-Benz- und Setra-Omnibusse. In ganz Europa bieten Omnibusspezialisten vielseitigen Service sowie kundenorientierte Angebote und Leistungen.

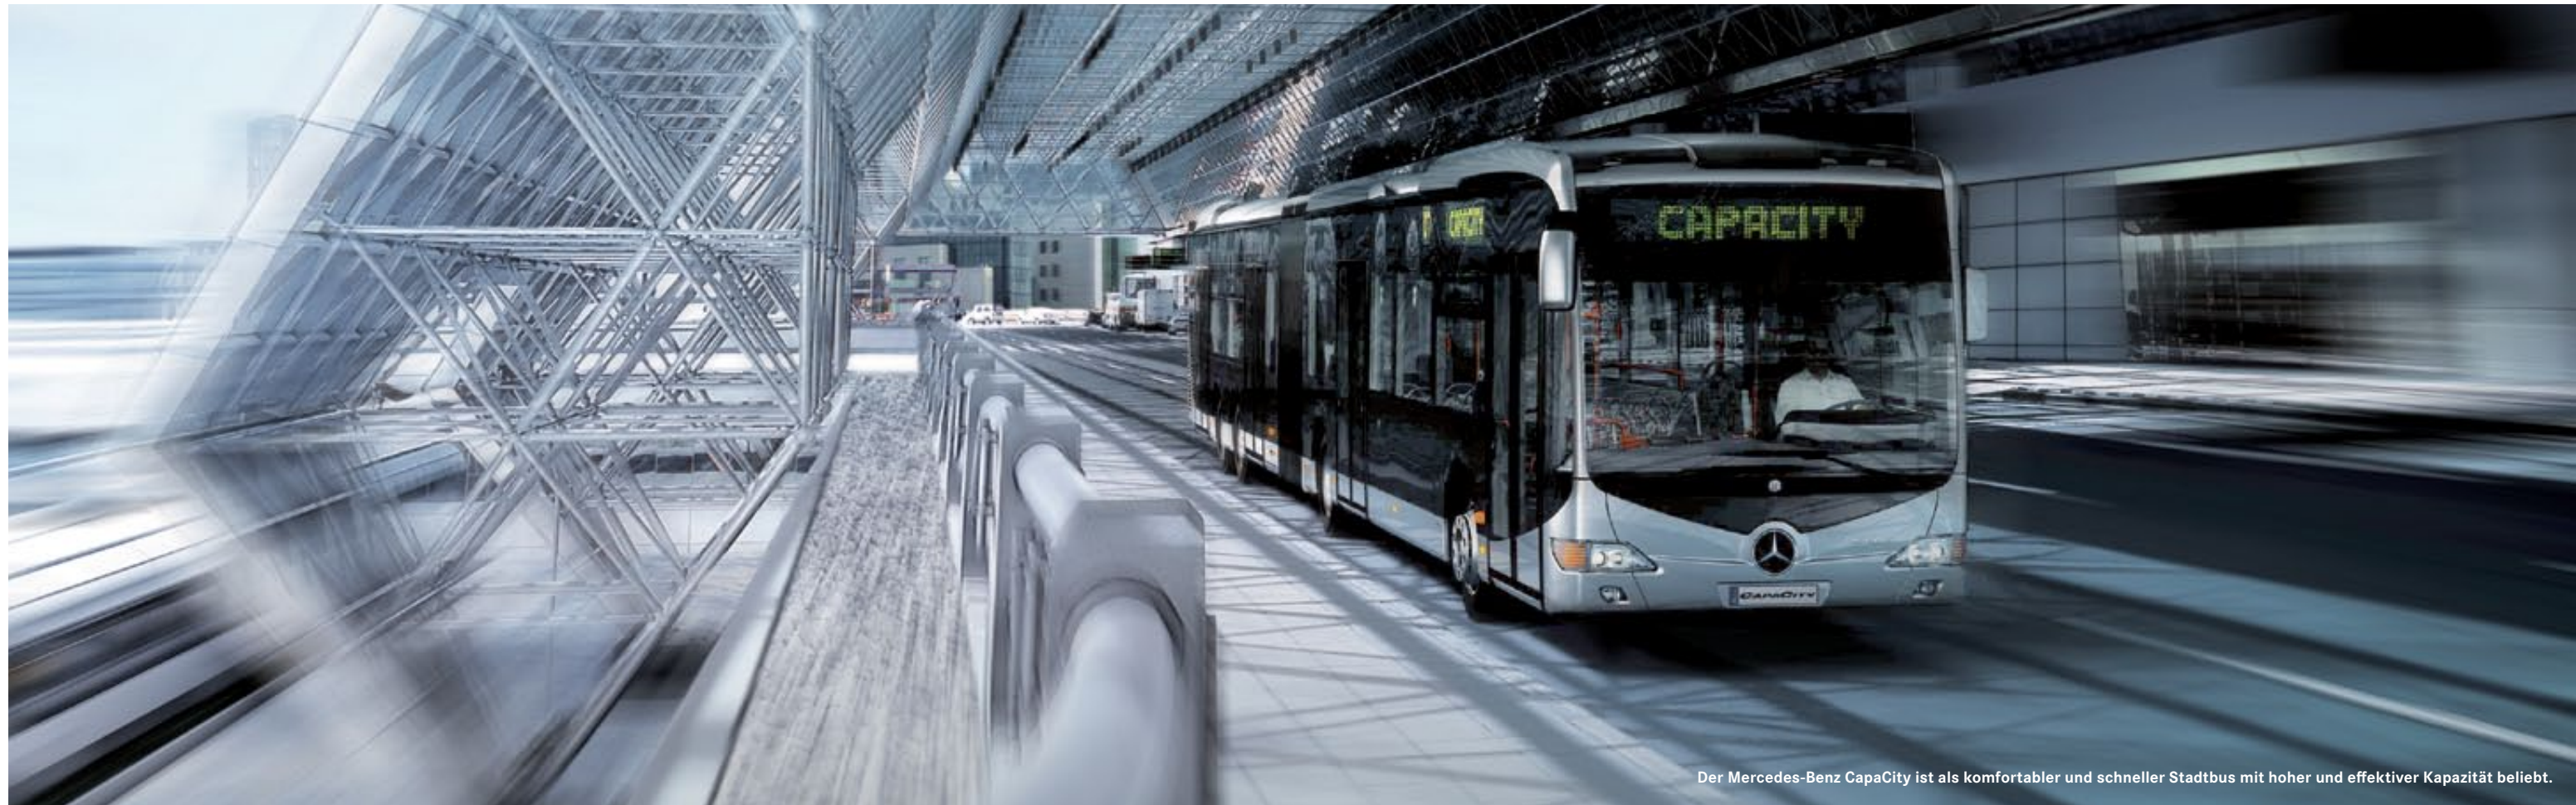

Der Mercedes-Benz CapaCity ist als komfortabler und schneller Stadtbuss mit hoher und effektiver Kapazität beliebt.

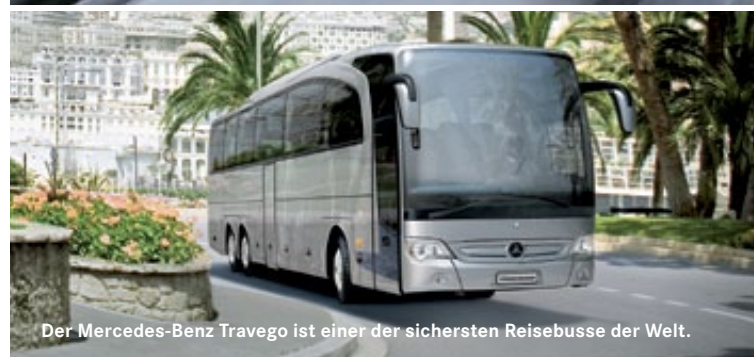

Der Mercedes-Benz Travego ist einer der sichersten Reisebusse der Welt.

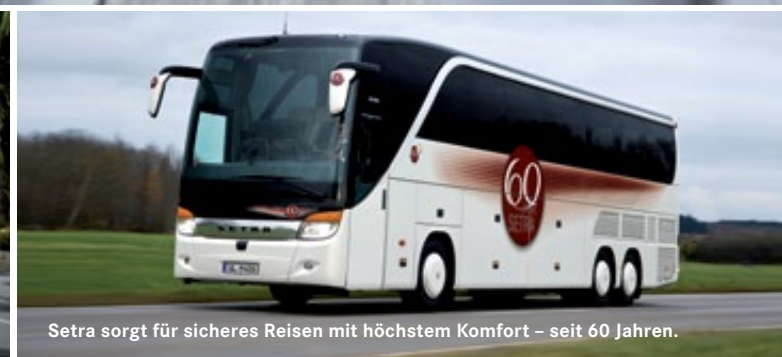

Setra sorgt für sicheres Reisen mit höchstem Komfort – seit 60 Jahren.

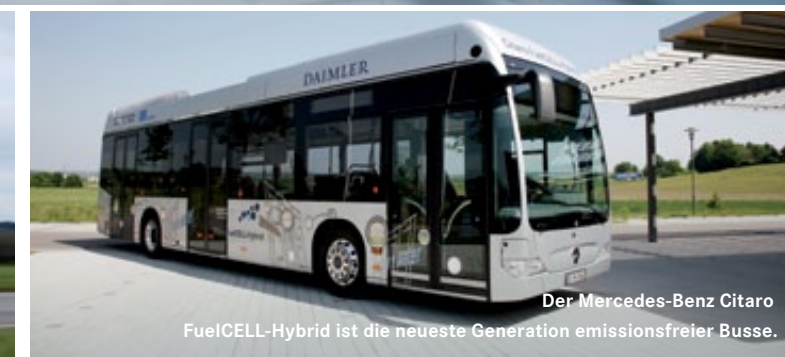

Der Mercedes-Benz Citaro FuelCELL-Hybrid ist die neueste Generation emissionsfreier Busse.

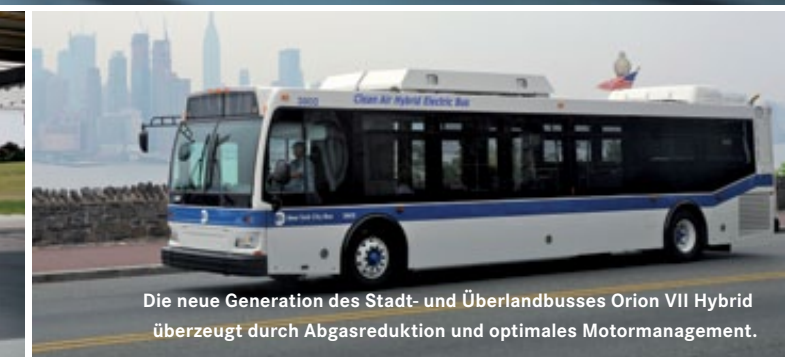

Die neue Generation des Stadt- und Überlandbusses Orion VII Hybrid überzeugt durch Abgasreduktion und optimales Motormanagement.



# Daimler Financial Services. Exzellente Dienstleistungen und Finanzierungskonzepte erfüllen Autoträume weltweit.

Für langfristigen Erfolg braucht man neben faszinierenden Automobilen auch erstklassige Dienstleistungen und Finanzlösungen.

Mercedes-Benz Bank

Mercedes-Benz Financial

Daimler Truck Financial

**Daimler Financial Services AG** kümmert sich weltweit um ausgezeichnete und maßgeschneiderte Finanzierungs- und Versicherungsleistungen. Rund 7.000 Mitarbeiterinnen und Mitarbeiter in mehr als 40 Ländern betreuen fast 2,5 Millionen laufende Verträge im Gesamtwert von 64 Milliarden Euro.

**Das Erfolgskonzept:** Premiumleistungen aus einer Hand. Daimler Financial Services finanziert und verleast mehr als jedes dritte Fahrzeug aus der weltweiten Produktion von Daimler. Alle 30 Sekunden schließt sie einen Leasing- oder Finanzierungsvertrag für ein Fahrzeug des Konzerns ab. Die Leistungspalette umfasst Finanzierung, Leasing, Versicherungen, Fuhrparkmanagement und Banking.

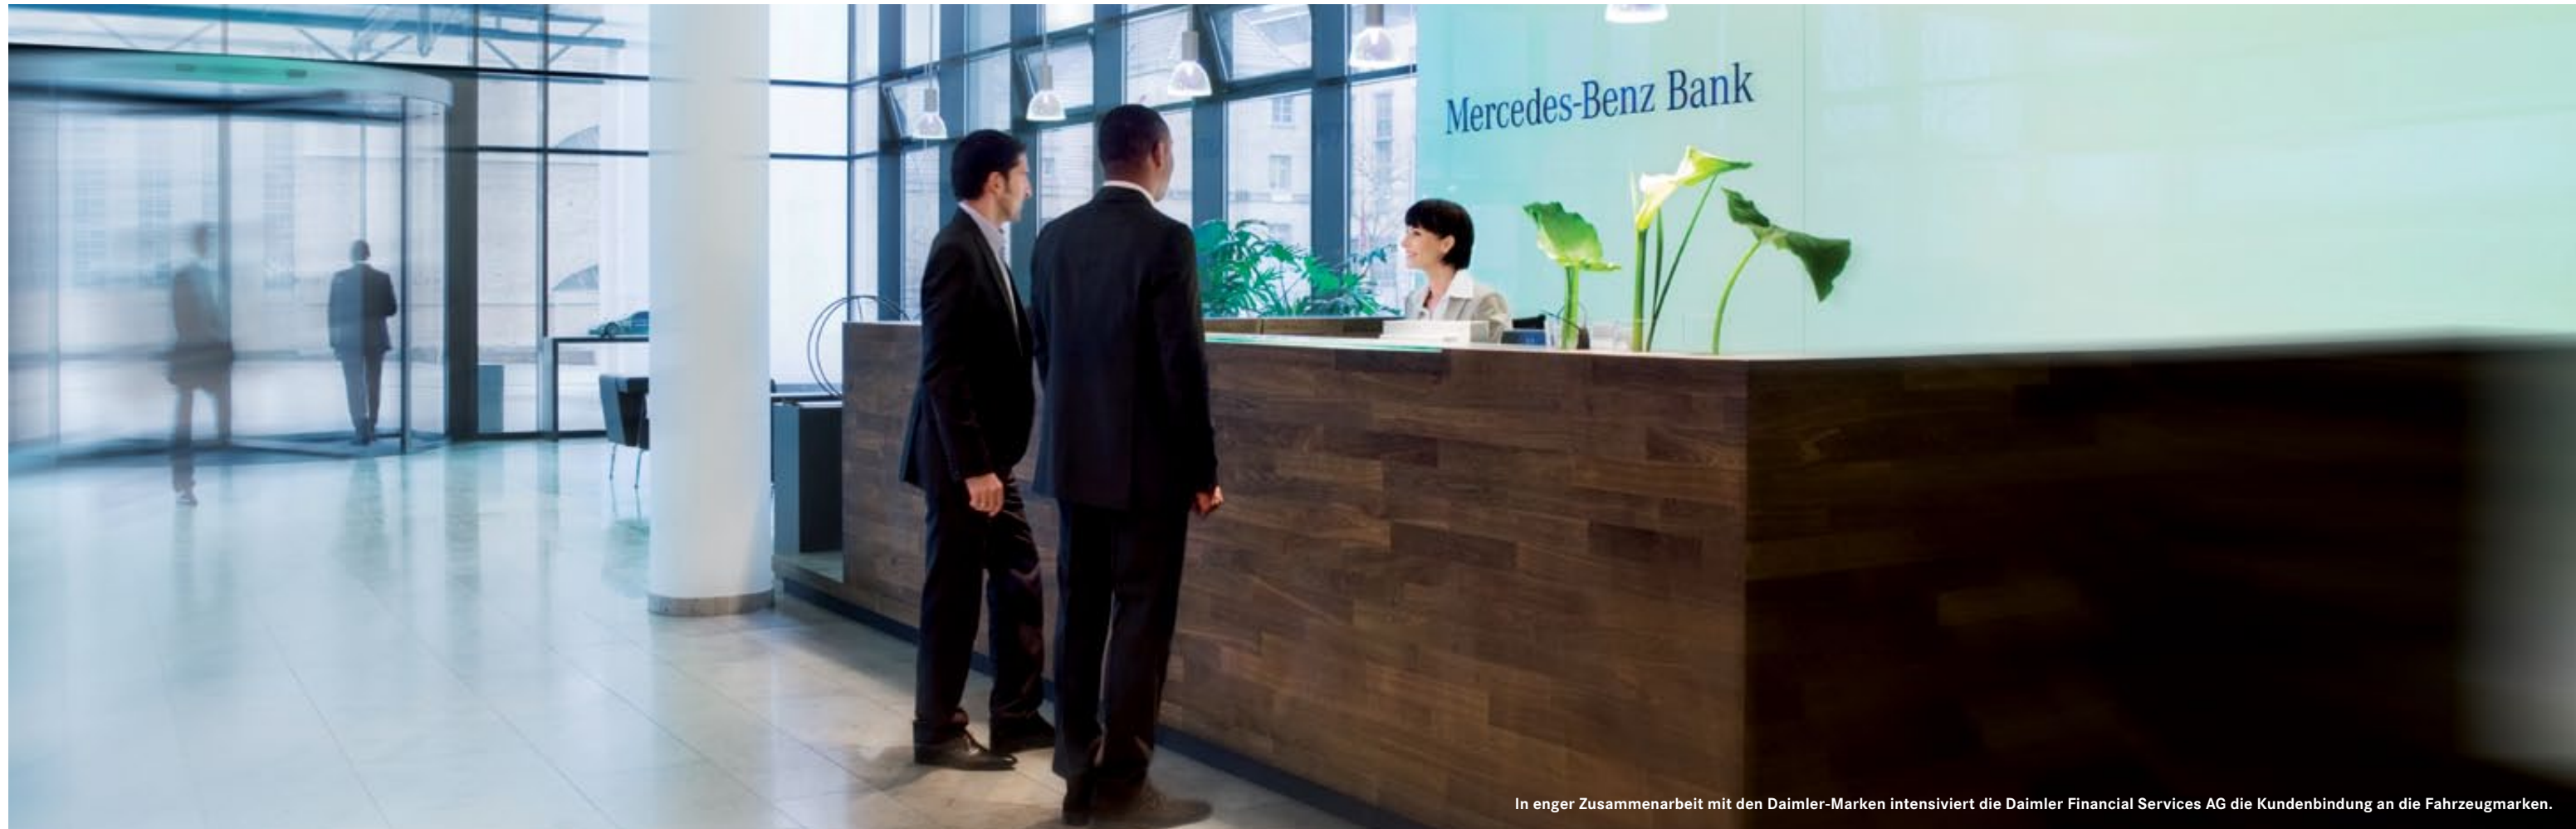

In enger Zusammenarbeit mit den Daimler-Marken intensiviert die Daimler Financial Services AG die Kundenbindung an die Fahrzeugmarken.

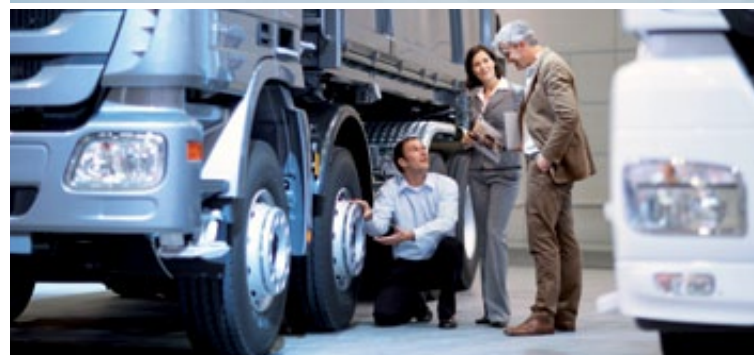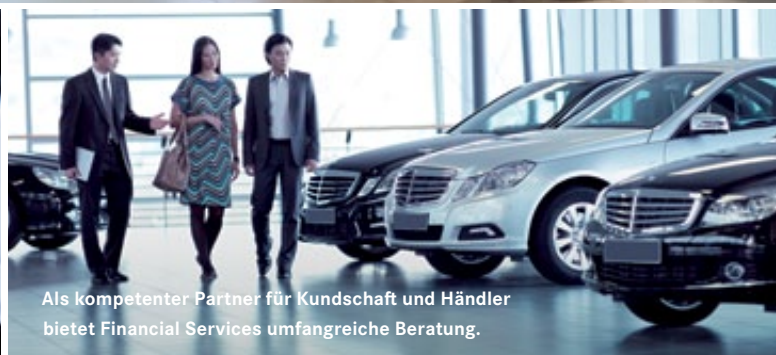

Als kompetenter Partner für Kundschaft und Händler bietet Financial Services umfangreiche Beratung.

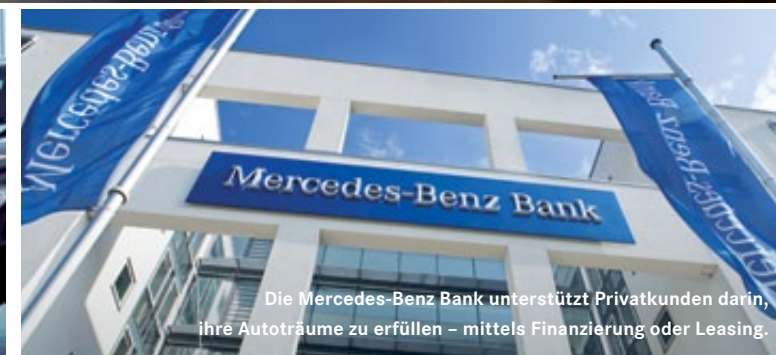

Die Mercedes-Benz Bank unterstützt Privatkunden darin, ihre Autoträume zu erfüllen – mittels Finanzierung oder Leasing.

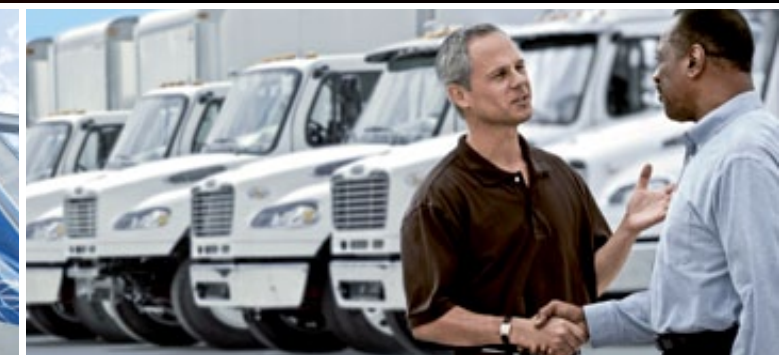



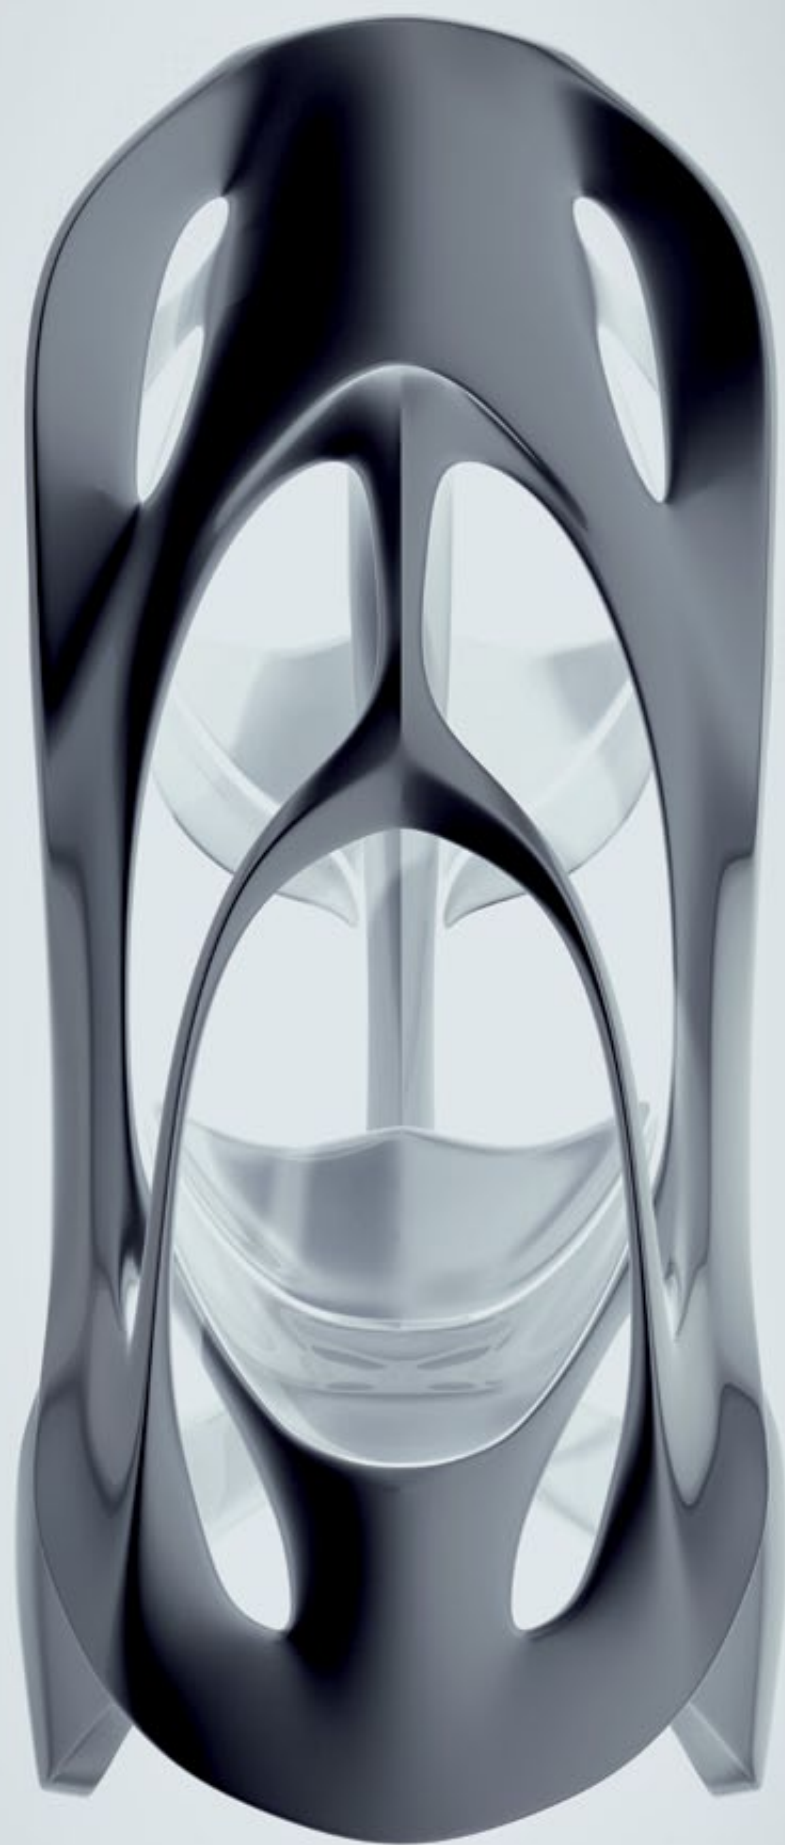

Zukunft lebt von Visionen. Unsere Entwickler und Konstrukteure haben sie. Sie entwickeln vorausschauend innovative Lösungen, die Umweltbewusstsein, Sicherheit und Fahrspaß vereinen. Die Mercedes-Benz Skulptur „Aesthetics 125“, gewährt den Ausblick auf eine zukünftige Formsprache im Fahrzeugdesign.

**Die Zukunft hat schon begonnen.** Wie auch immer sich die Mobilität in den nächsten Jahrzehnten entwickeln wird – sie gründet auf einer von Leidenschaft geprägten Vision, die vor 125 Jahren ihren Anfang nahm. Der Pioniergeist, der Wagemut und die Innovationskraft von damals sind noch heute unser Antrieb. Als Erfinder des Automobils stellen wir uns den Mobilitätsanforderungen der Zukunft: mit zukunftsweisenden Technologien und Mobilitätskonzepten, die unserer Umwelt und unserer Gesellschaft gleichermaßen gerecht werden.



Daimler im Überblick. Wichtige Kennzahlen.

| Daimler-Konzern                                        | 2010    | 2009    | 2010 / 2009      | Geschäftsfelder               | 2010      | 2009      | 2010 / 2009  |
|--------------------------------------------------------|---------|---------|------------------|-------------------------------|-----------|-----------|--------------|
| €-Werte in Millionen                                   |         |         | Veränd. in %     |                               |           |           | Veränd. in % |
| Umsatz insgesamt                                       | 97.761  | 78.924  | +24 <sup>1</sup> | Mercedes-Benz Cars            |           |           |              |
| Umsatz Westeuropa                                      | 38.478  | 36.458  | +6               | Umsatz (€-Werte in Millionen) | 53.426    | 41.318    | +29          |
| davon Deutschland                                      | 19.281  | 18.788  | +3               | Absatz (Einheiten)            | 1.276.827 | 1.093.905 | +17          |
| Umsatz NAFTA                                           | 23.582  | 19.380  | +22              | Beschäftigte (31.12.)         | 96.281    | 93.572    | +3           |
| davon USA                                              | 20.216  | 16.569  | +22              | Daimler Trucks                |           |           |              |
| Umsatz Asien                                           | 19.659  | 12.435  | +58              | Umsatz (€-Werte in Millionen) | 24.024    | 18.360    | +31          |
| davon China                                            | 9.094   | 4.349   | +109             | Absatz (Einheiten)            | 355.263   | 259.328   | +37          |
| Umsatz übrige Märkte                                   | 16.042  | 10.651  | +51              | Beschäftigte (31.12.)         | 71.706    | 70.699    | +1           |
| Beschäftigte (31.12.)                                  | 260.100 | 256.407 | +1               | Mercedes-Benz Vans            |           |           |              |
| Sachinvestitionen                                      | 3.653   | 2.423   | +51              | Umsatz (€-Werte in Millionen) | 7.812     | 6.215     | +26          |
| Forschungs- und Entwicklungsleistungen davon aktiviert | 4.849   | 4.181   | +16              | Absatz (Einheiten)            | 224.224   | 165.576   | +35          |
| EBIT                                                   | 7.274   | -1.513  | •                | Beschäftigte (31.12.)         | 14.557    | 15.226    | -4           |
| Konzernergebnis                                        | 4.674   | -2.644  | •                | Daimler Buses                 |           |           |              |
| Ergebnis je Aktie (in €)                               | 4,28    | -2,63   | •                | Umsatz (€-Werte in Millionen) | 4.558     | 4.238     | +8           |
| Dividendensumme                                        | 1.971   | 0       | •                | Absatz (Einheiten)            | 39.118    | 32.482    | +20          |
| Dividende je Aktie (in €)                              | 1,85    | 0,00    | •                | Beschäftigte (31.12.)         | 17.134    | 17.188    | -0           |
|                                                        |         |         |                  | Daimler Financial Services    |           |           |              |
|                                                        |         |         |                  | Umsatz (€-Werte in Millionen) | 12.788    | 11.996    | +7           |
|                                                        |         |         |                  | Beschäftigte (31.12.)         | 6.742     | 6.800     | -1           |

<sup>1</sup> Bereinigt um Wechselkurseffekte und Konsolidierungskreisveränderungen  
Umsatzanstieg um 19 %.

**Als Pionier des Automobilbaus gestaltet Daimler auch heute die Zukunft der Mobilität:** Das Unternehmen setzt dabei auf innovative und grüne Technologien sowie auf sichere und hochwertige Fahrzeuge, die ihre Kundinnen und Kunden faszinieren und begeistern. Daimler investiert bei der Entwicklung alternativer Antriebe als einziger Automobilhersteller sowohl in den Hybrid- als auch in den Elektromotor und in die Brennstoffzelle mit dem Ziel, langfristig das emissionsfreie Fahren zu ermöglichen. Denn Daimler betrachtet es als Anspruch und Verpflichtung, seiner Verantwortung für Gesellschaft und Umwelt gerecht zu werden. Mit den Geschäftsfeldern Mercedes-Benz Cars, Daimler Trucks, Mercedes-Benz Vans, Daimler Buses und Daimler Financial Services gehört der Fahrzeughersteller zu den größten Anbietern von Pkw mit Premiumanspruch und ist der größte weltweit aufgestellte Nutzfahrzeug-Hersteller. Daimler Financial Services bietet umfassende Finanzdienstleistungen mit Finanzierung, Leasing, Versicherungen und Flottenmanagement. Das Unternehmen ist an den Börsen Frankfurt und Stuttgart notiert.

Daimler-Personenkraftwagen. Kraftstoffverbrauch\* und CO<sub>2</sub>-Emissionen\*\*.

\* Die angegebenen Werte wurden nach dem vorgeschriebenen Messverfahren (Richtlinie 80/1268/EWG) in der jeweils gegenwärtig geltenden Fassung ermittelt. Die Angaben beziehen sich nicht auf ein einzelnes Fahrzeug und sind nicht Bestandteil des Angebots, sondern dienen allein Vergleichszwecken zwischen verschiedenen Fahrzeugtypen.

\*\* Angaben nach Richtlinie 91/21/EG in der Fassung 95/48/EG (Masse in fahrbereitem Zustand, Kraftstofftank zu 90 % gefüllt, mit Fahrer 68 kg und Gepäck 7 kg), für Fahrzeuge in serienmäßiger Ausstattung, Sonderausstattungen und Zubehör erhöhen i. d. R. diesen Wert, wodurch sich die Nutzlast entsprechend verringert.

| Fahrzeuge          | Kraftstoffverbrauch                                     |         |           |         |            |         | CO <sub>2</sub> -Emissionen |         |
|--------------------|---------------------------------------------------------|---------|-----------|---------|------------|---------|-----------------------------|---------|
|                    | innerorts                                               |         | außerorts |         | kombiniert |         | kombiniert                  |         |
|                    | [l/100 km] oder [m³/100 km] nach Richtlinie 80/1268/EWG |         |           |         |            |         | [g/km]                      |         |
|                    | minimal                                                 | maximal | minimal   | maximal | minimal    | maximal | minimal                     | maximal |
| Mercedes-Benz Cars |                                                         |         |           |         |            |         |                             |         |
| smart              |                                                         | 6,8     |           | 4,6     |            | 5,4     | 87                          | 124     |
| A-Klasse           | 5,3                                                     | 10,3    | 3,8       | 6,6     | 4,4        | 8,1     | 116                         | 192     |
| B-Klasse           | 6,4                                                     | 10,7    | 4,1       | 6,8     | 4,9        | 8,2     | 135                         | 197     |
| C-Klasse           | 6,2                                                     | 20,4    | 4,0       | 9,6     | 4,8        | 13,6    | 127                         | 316     |
| CLC-Klasse         | 7,5                                                     | 14,5    | 4,5       | 7,8     | 5,6        | 10,2    | 141                         | 239     |
| E-Klasse           | 6,6                                                     | 18,8    | 4,2       | 9,3     | 5,1        | 12,8    | 133                         | 299     |
| CLS-Klasse         | 7,8                                                     | 22,6    | 5,4       | 9,9     | 6,0        | 14,5    | 159                         | 345     |
| S-Klasse           | 9,3                                                     | 21,8    | 5,3       | 10,0    | 6,8        | 14,3    | 177                         | 340     |
| CL-Klasse          | 13,5                                                    | 21,8    | 7,2       | 9,9     | 9,5        | 14,3    | 224                         | 334     |
| SLK-Klasse         | 11,0                                                    | 17,7    | 5,7       | 8,8     | 7,7        | 12,0    | 182                         | 288     |
| SL-Klasse          | 13,5                                                    | 21,7    | 6,8       | 9,7     | 9,3        | 14,1    | 217                         | 333     |
| SLS                | 19,9                                                    | 19,9    | 9,3       | 9,3     | 13,2       | 13,2    | 308                         | 308     |
| M-Klasse           | 10,6                                                    | 24,1    | 6,7       | 12,2    | 8,4        | 16,5    | 224                         | 392     |
| R-Klasse           | 9,6                                                     | 18,8    | 6,4       | 10,2    | 7,6        | 13,4    | 199                         | 311     |
| GLK-Klasse         | 7,2                                                     | 14,6    | 5,1       | 8,5     | 5,8        | 10,8    | 153                         | 251     |
| GL-Klasse          | 11,1                                                    | 19,0    | 7,5       | 10,8    | 8,9        | 13,8    | 235                         | 322     |
| G-Klasse           | 19,3                                                    | 21,4    | 12,0      | 12,7    | 11,3       | 15,9    | 299                         | 378     |
| Maybach            |                                                         | 24,6    |           | 11,8    |            | 16,4    | 350                         | 390     |
| Mercedes-Benz Vans |                                                         |         |           |         |            |         |                             |         |
| Viano              | 8,8                                                     | 16,5    | 6,4       | 9,5     | 7,2        | 12,1    | 190                         | 284     |
| Vito               | 8,4                                                     | 16,5    | 6,1       | 9,5     | 6,9        | 12,1    | 182                         | 284     |
| Sprinter           |                                                         | 20,0    |           | 11,5    |            | 14,6    | 231                         | 348     |

Oben stehende Tabelle zeigt die Kraftstoffverbrauchs- und CO<sub>2</sub>-Emissionswerte aller in Deutschland zum Zeitpunkt der Drucklegung verfügbaren Pkw-Modellreihen des Daimler-Konzerns. Sie basiert auf dem „VDA-Leitfaden zu Kraftstoffverbrauch und CO<sub>2</sub>-Emissionen“, Ausgabe 1. Quartal 2011. Pro Fahrzeugklasse sind die niedrigsten und höchsten Werte der im Markt angebotenen Modelle ausgewiesen. Mehr Details zu einzelnen Fahrzeugtypen finden Sie im Internet. Verbrauchswerte im realen Fahrbetrieb können je nach individueller Fahrweise von den Prüfwerten abweichen.



Das Unternehmen 2011.

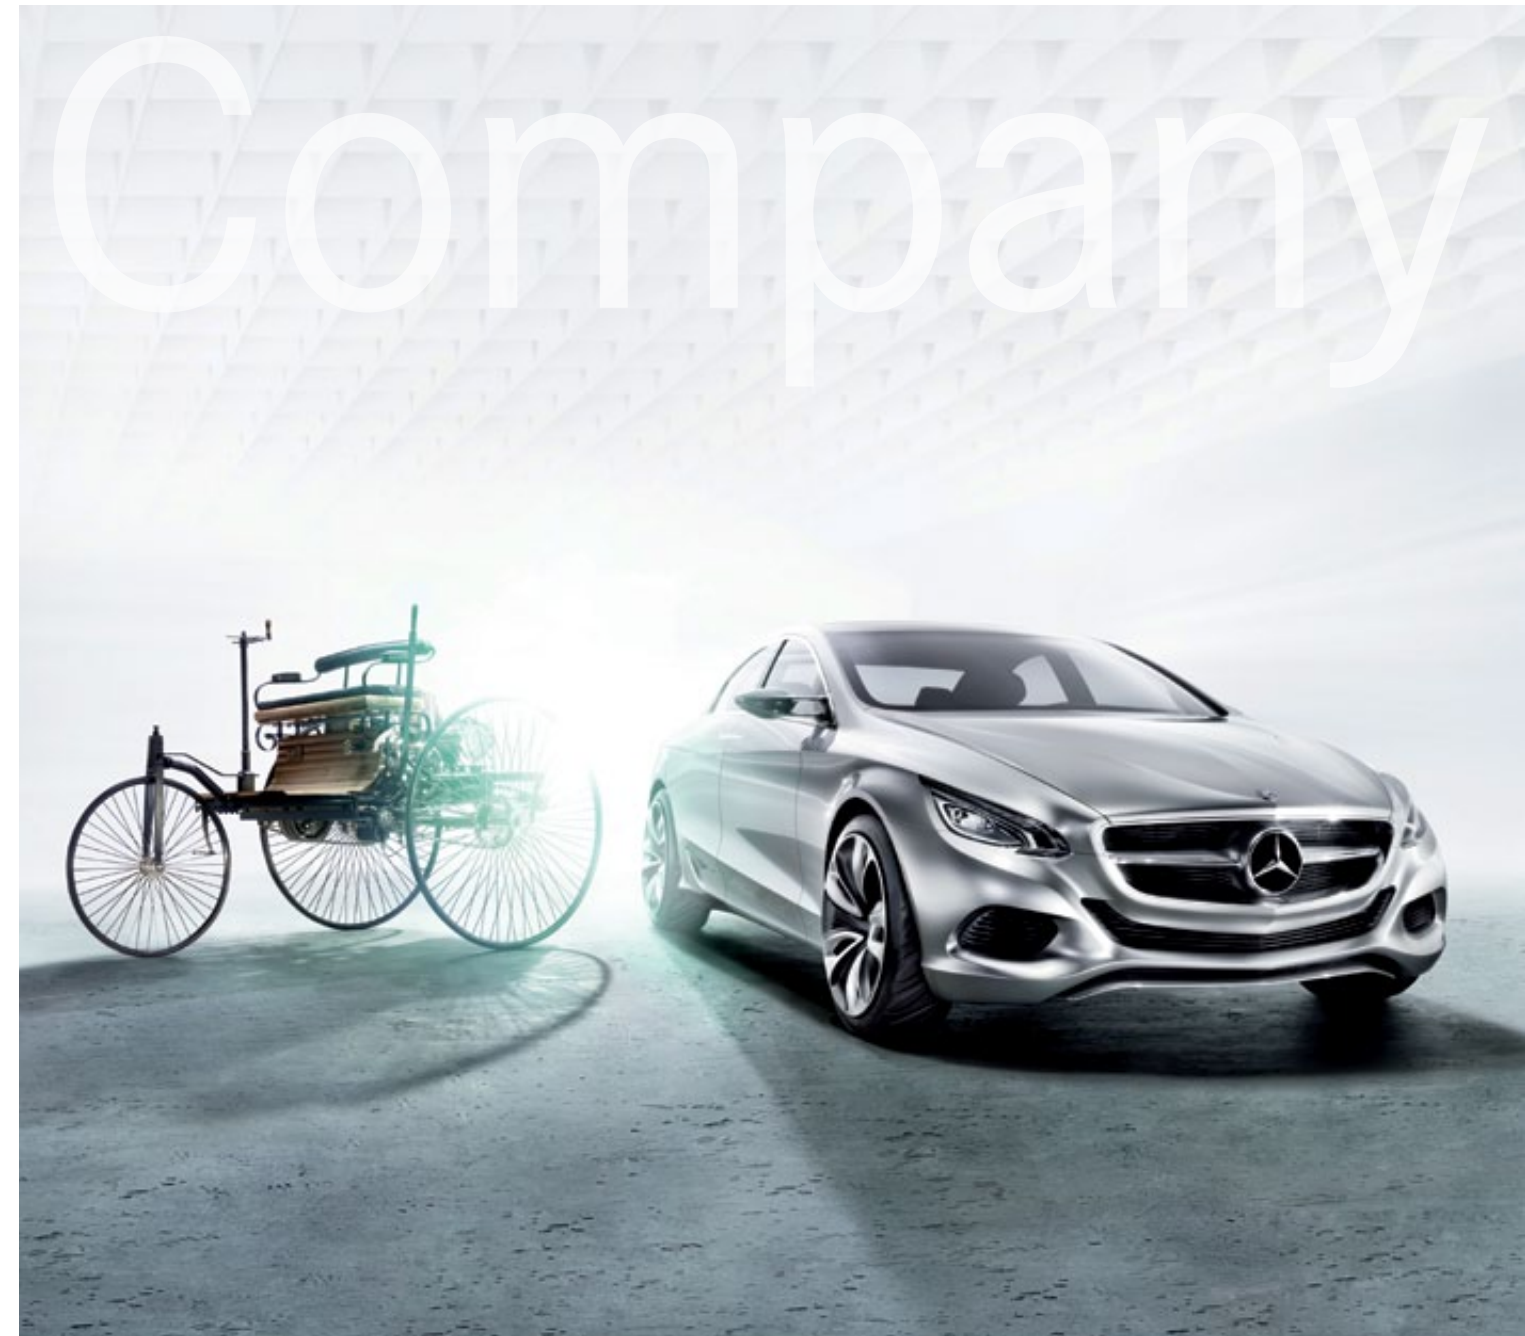

Supplement: Supplementary file 29 [file Daimler Das Unternehmen 2011.pdf › Korpustexte/Korpustexte pdf/Daimler/Daimler Das Unternehmen 2011.pdf]
