# Supplementary material
Source: publisher site journal article supplement (https://www.degruyterbrill.com/publication/isbn/9783110432879/downloadAsset/9783110432879_Elektronischer_Anhang_2.zip)

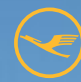

**Lufthansa**

Geschäftsbericht 2010

# Weitblick

## Kennzahlen Lufthansa Konzern

|                                                      |        | 2010      | 2009    | Veränderung<br>in % |
|------------------------------------------------------|--------|-----------|---------|---------------------|
| <b>Umsatz und Ergebnis</b>                           |        |           |         |                     |
| Umsatzerlöse                                         | Mio. € | 27 324    | 22 283  | 22,6                |
| davon Verkehrserlöse                                 | Mio. € | 22 268    | 17 604  | 26,5                |
| Operatives Ergebnis                                  | Mio. € | 876       | 130     | 573,8               |
| EBIT                                                 | Mio. € | 1 335     | 191     | 599,0               |
| EBITDA                                               | Mio. € | 3 049     | 1 838   | 65,9                |
| Konzernergebnis                                      | Mio. € | 1 131     | -34     |                     |
| <b>Kennzahlen zu Bilanz und Kapitalflussrechnung</b> |        |           |         |                     |
| Bilanzsumme                                          | Mio. € | 29 320    | 26 392  | 11,1                |
| Eigenkapitalquote                                    | %      | 28,4      | 23,5    | 4,9 P.              |
| Nettokreditverschuldung                              | Mio. € | 1 596     | 2 195   | -27,3               |
| Operativer Cashflow                                  | Mio. € | 3 075     | 1 991   | 54,4                |
| Investitionen (brutto)                               | Mio. € | 2 273     | 2 405   | -5,5                |
| <b>Rentabilitäts- und Wertschaffungskennzahlen</b>   |        |           |         |                     |
| Vergleichbare operative Marge <sup>1)</sup>          | %      | 4,1       | 1,4     | 2,7 P.              |
| EBITDA-Marge                                         | %      | 11,2      | 8,2     | 3,0 P.              |
| CVA                                                  | Mio. € | 71        | -858    |                     |
| CFROI                                                | %      | 9,4       | 4,2     | 5,2 P.              |
| <b>Lufthansa Aktie</b>                               |        |           |         |                     |
| Jahresschlusskurs                                    | €      | 16,36     | 11,75   | 39,2                |
| Ergebnis pro Aktie                                   | €      | 2,47      | -0,07   |                     |
| Dividendenvorschlag                                  | €      | 0,60      | -       |                     |
| <b>Leistungsdaten<sup>2)</sup></b>                   |        |           |         |                     |
| Fluggäste                                            | Tsd.   | 91 157    | 77 315  | 17,9                |
| Fracht und Post                                      | Tsd. t | 2 023     | 1 712   | 18,2                |
| Sitzladefaktor                                       | %      | 79,3      | 77,9    | 1,3 P.              |
| Fracht-Nutzladefaktor                                | %      | 68,0      | 60,6    | 7,4 P.              |
| Flüge                                                | Anzahl | 1 021 266 | 899 928 | 13,5                |
| <b>Mitarbeiter</b>                                   |        |           |         |                     |
| Mitarbeiter im Jahresdurchschnitt                    | Anzahl | 117 066   | 112 320 | 4,2                 |
| Mitarbeiter zum Stichtag                             | Anzahl | 117 019   | 117 521 | -0,4                |

<sup>1)</sup> Kennzahl zur Vergleichbarkeit mit anderen Fluggesellschaften: (operatives Ergebnis + Rückstellungsauflösung) / Umsatz.

<sup>2)</sup> Lufthansa Konzern ohne Germanwings.

Veröffentlichungstag: 17. März 2011.

### Umsatz in Mio. €

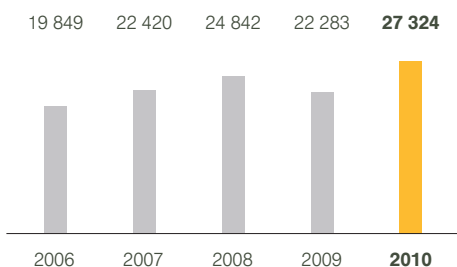

### Operatives Ergebnis in Mio. €

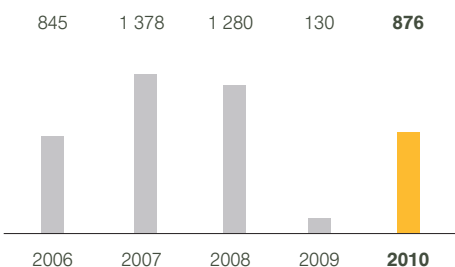

## Kennzahlen Geschäftsfelder

| Passage Airline Gruppe |        | 2010   | Veränderung in % |
|------------------------|--------|--------|------------------|
| Umsatz                 | Mio. € | 20 912 | 24,5             |
| davon Außenumsatz      | Mio. € | 20 233 | 24,7             |
| Operatives Ergebnis    | Mio. € | 436    | –                |
| Vgl. operative Marge   | %      | 3,0    | 2,2 P.           |
| Segmentergebnis        | Mio. € | 572    | –                |
| EBITDA <sup>1)</sup>   | Mio. € | 2 601  | 81,9             |
| CVA                    | Mio. € | –198   | 71,4             |
| Segmentinvestitionen   | Mio. € | 2 047  | 7,9              |
| Mitarbeiter zum 31.12. | Anzahl | 57 157 | –1,6             |

<sup>1)</sup> Vor Ergebnisübernahme anderer Gesellschaften.

| Logistik               |        | 2010  | Veränderung in % |
|------------------------|--------|-------|------------------|
| Umsatz                 | Mio. € | 2 795 | 43,3             |
| davon Außenumsatz      | Mio. € | 2 770 | 43,7             |
| Operatives Ergebnis    | Mio. € | 310   | –                |
| Vgl. operative Marge   | %      | 11,4  | 19,4 P.          |
| Segmentergebnis        | Mio. € | 330   | –                |
| EBITDA                 | Mio. € | 445   | –                |
| CVA                    | Mio. € | 233   | –                |
| Segmentinvestitionen   | Mio. € | 21    | –16,0            |
| Mitarbeiter zum 31.12. | Anzahl | 4 517 | 0,6              |

| Technik                |        | 2010   | Veränderung in % |
|------------------------|--------|--------|------------------|
| Umsatz                 | Mio. € | 4 018  | 1,4              |
| davon Außenumsatz      | Mio. € | 2 373  | 3,3              |
| Operatives Ergebnis    | Mio. € | 268    | –15,2            |
| Vgl. operative Marge   | %      | 7,4    | –0,9 P.          |
| Segmentergebnis        | Mio. € | 319    | –3,6             |
| EBITDA                 | Mio. € | 412    | –5,5             |
| CVA                    | Mio. € | 172    | 4,9              |
| Segmentinvestitionen   | Mio. € | 67     | –44,6            |
| Mitarbeiter zum 31.12. | Anzahl | 20 159 | 1,8              |

| IT Services            |        | 2010  | Veränderung in % |
|------------------------|--------|-------|------------------|
| Umsatz                 | Mio. € | 595   | –1,7             |
| davon Außenumsatz      | Mio. € | 232   | –4,9             |
| Operatives Ergebnis    | Mio. € | 10    | –37,5            |
| Vgl. operative Marge   | %      | 1,8   | –1,0 P.          |
| Segmentergebnis        | Mio. € | –6    | –                |
| EBITDA                 | Mio. € | 45    | –16,7            |
| CVA                    | Mio. € | –23   | –                |
| Segmentinvestitionen   | Mio. € | 36    | –30,8            |
| Mitarbeiter zum 31.12. | Anzahl | 2 935 | –3,0             |

| Catering               |        | 2010   | Veränderung in % |
|------------------------|--------|--------|------------------|
| Umsatz                 | Mio. € | 2 249  | 7,0              |
| davon Außenumsatz      | Mio. € | 1 716  | 8,0              |
| Operatives Ergebnis    | Mio. € | 76     | 5,6              |
| Vgl. operative Marge   | %      | 3,4    | –0,1 P.          |
| Segmentergebnis        | Mio. € | 87     | 16,0             |
| EBITDA                 | Mio. € | 174    | 45,0             |
| CVA                    | Mio. € | –28    | 58,8             |
| Segmentinvestitionen   | Mio. € | 38     | –34,5            |
| Mitarbeiter zum 31.12. | Anzahl | 28 499 | 0,4              |

**Passage Airline Gruppe** Die Fluggesellschaften der Passage Airline Gruppe nutzten die positive Nachfrageentwicklung. Die Passagierzahlen wurden deutlich erhöht, gleichzeitig setzten die Airlines ihr Kostenmanagement fort und realisierten wichtige Synergien. Mit gesteigerter Ertragskraft konnte trotz Sonderbelastungen wieder ein ordentlicher operativer Gewinn erzielt werden.

**Logistik** Stärker noch fiel die Ergebniswende in der Logistik aus. Lufthansa Cargo profitierte besonders vom Aufschwung der Weltwirtschaft und dem deutschen Exportboom. Die Ergebnissicherungsmaßnahmen aus den Vorjahren zeigten weiterhin deutliche Wirkung. Nach einem Vorjahresverlust erwirtschaftete Lufthansa Cargo 2010 einen Rekordgewinn.

**Technik** Lufthansa Technik war als Spätzykliker 2010 einer noch verhaltenen Nachfrage im MRO-Markt ausgesetzt. Dank höherer Produktionsflexibilität und erweiterter Produktpalette konnte sie jedoch den Wachstumspfad fortsetzen und den Umsatz steigern. Lufthansa Technik erzielte abermals einen hohen operativen Gewinn, der jedoch erwartungsgemäß unter dem Rekordniveau des Vorjahres lag.

**IT Services** Lufthansa Systems bietet IT-Lösungen für die Airline-Industrie und konnte in einem noch schwierigen Industrieumfeld neue Kunden und Aufträge gewinnen. Dennoch blieben Umsatz und Ergebnis unter Druck. 2010 wurde daher ein Programm zur Neuausrichtung des Unternehmens initiiert. Maßnahmen zur Kostensenkung und Umsatzsteigerung sollen die Wettbewerbsfähigkeit nachhaltig stärken.

**Catering** LSG Sky Chefs konnte durch eine Angebotserweiterung und Partnerschaften ihre Weltmarktführerschaft im Airline-Catering bestätigen und den Umsatz steigern. Der operative Gewinn lag sogar über dem durch Einmaleffekte geprägten Vorjahreswert. Dabei profitierte das Geschäftsfeld von den wachsenden Passagierzahlen sowie der Erholung im Premium-Segment.

**27,3**  
Umsatz  
in Mrd. EUR

**876**  
Operatives Ergebnis  
in Mio. EUR

**1.625**  
Free Cashflow  
in Mio. EUR

**71**  
Cash Value Added  
in Mio. EUR

**39,2**  
Total Shareholder  
Return in Prozent

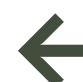

---

## **1** An unsere Aktionäre

- 2 Brief des Vorstands
- 4 Der Vorstand der Deutschen Lufthansa AG
- 6 Interview
- 8 Weitblick
- 34 Jahresrückblick
- 36 Lufthansa Aktie
- 40 Bericht des Aufsichtsrats
- 42 Corporate Governance

---

## **45** Konzernlagebericht

---

## **149** Konzernabschluss

---

## **230** Weitere Informationen

- 230 Zehn-Jahres-Übersicht
- 234 Glossar
- 236 Impressum/Kontakt
- Finanzkalender 2011/2012

**27,3**

Umsatz  
in Mrd. EUR

**876**

Operatives Ergebnis  
in Mio. EUR

**1.625**

Free Cashflow  
in Mio. EUR

**71**

Cash Value Added  
in Mio. EUR

**39,2**

Total Shareholder  
Return in Prozent

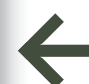

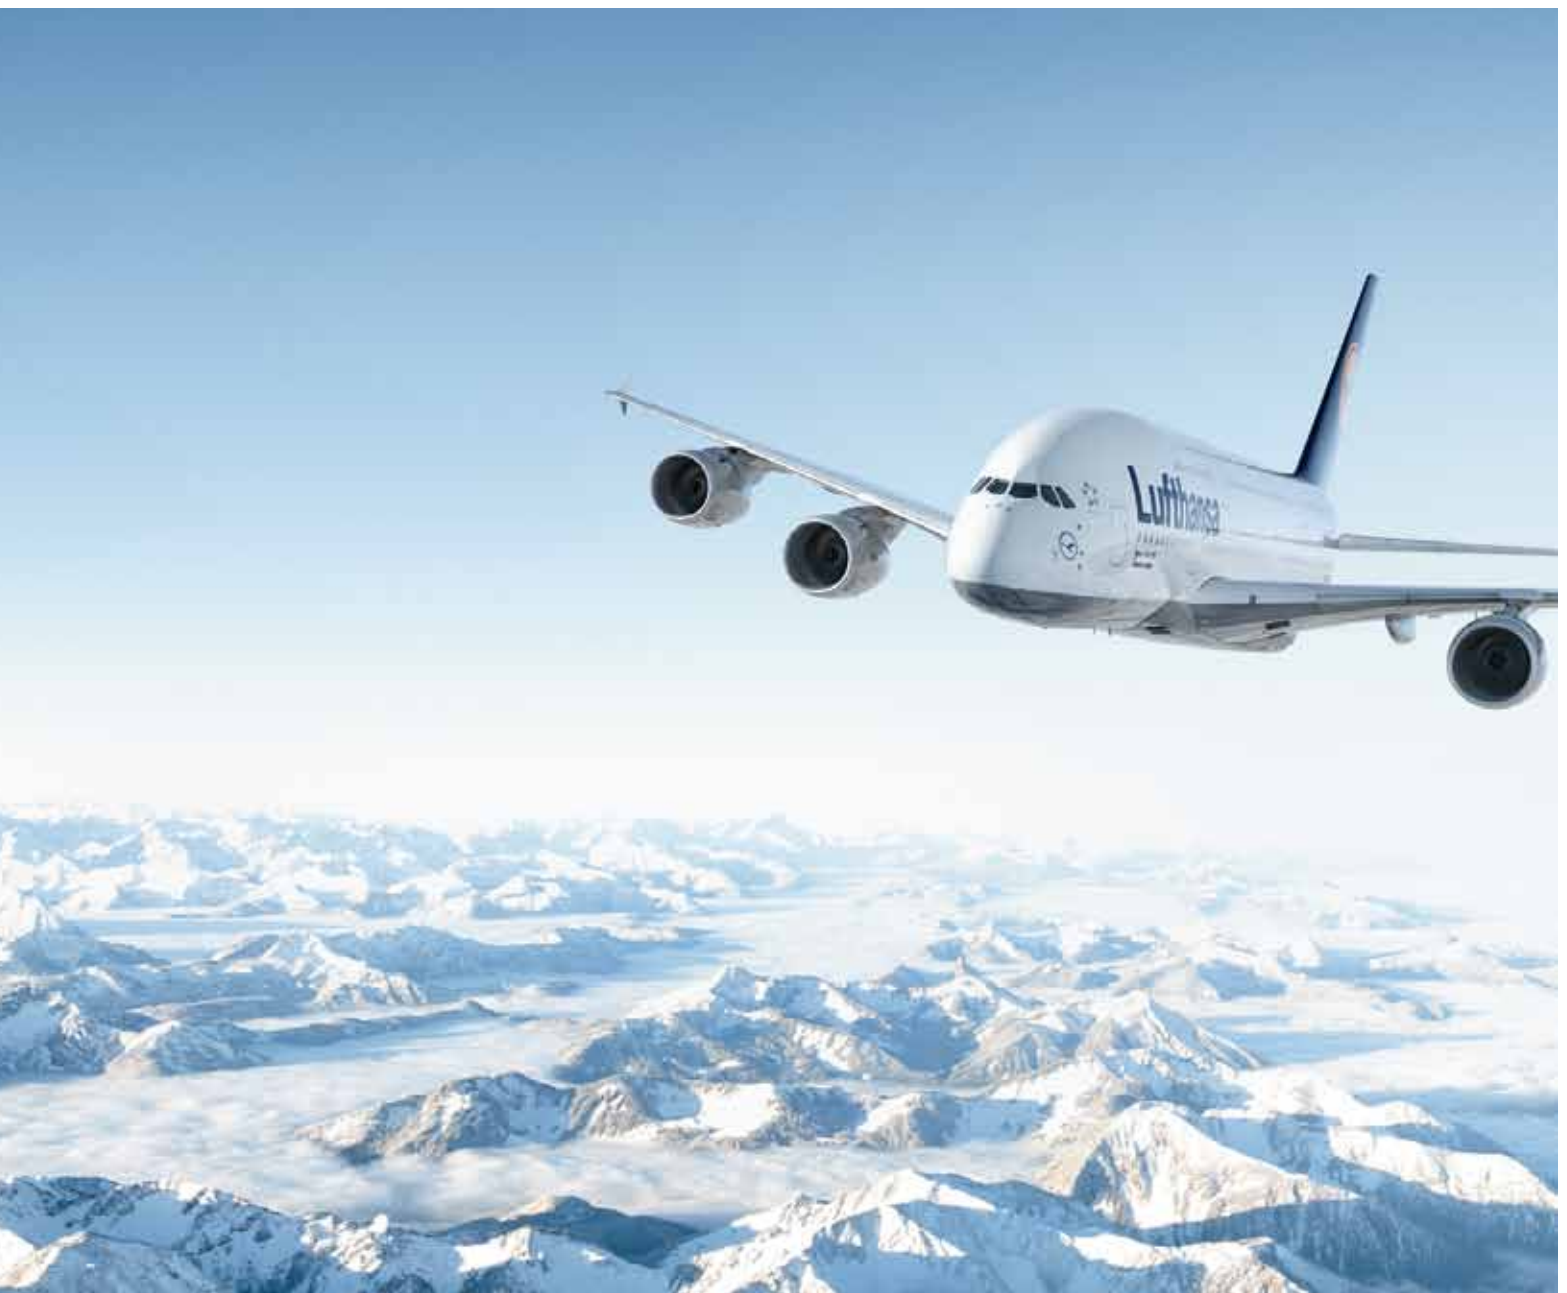

## Mit Weitblick die Zukunft gestalten

---

Auf solider Basis – und doch immer einen Schritt voraus: Es ist genau diese Kombination, die uns auf Erfolgskurs hält. Die Luftfahrt ist und bleibt ein Wachstumsmarkt, in dem wir unsere wirtschaftliche und qualitative Weiterentwicklung in einem herausfordernden Umfeld fortsetzen. So werden wir auch in Zukunft unserem Qualitätsanspruch gerecht – mit einer exzellenten Marke, einem starken Verbund von Airlines und Dienstleistungsgesellschaften, nachhaltiger Wertschaffung und hoher Innovationskraft.

*Sehr geehrte Damen und Herren,*

am 1. Januar 2011 habe ich den Vorstandsvorsitz der Deutschen Lufthansa AG von Wolfgang Mayrhuber übernommen. Gemeinsam mit den Vorstandskollegen Stephan Gemkow und Stefan Lauer haben Wolfgang Mayrhuber und ich ein ereignisreiches, anspruchsvolles, am Ende aber erfolgreiches Geschäftsjahr zu verantworten.

Zu Beginn des Jahres hatten wir noch mit den Auswirkungen der Finanz- und Wirtschaftskrise zu kämpfen, einem harten Winter, der uns auch am Ende des Jahres 2010 nochmals einholte, dem Pilotenstreik und der mehrtägigen Luftraumschließung wegen des Vulkanausbruchs auf Island. All diese Ereignisse haben unser Ergebnis stark belastet. Dank der spürbaren Marktbelebung und dem engagierten Einsatz unserer Mitarbeiter hat Lufthansa in der zweiten Jahreshälfte rasant aufgeholt und das Geschäftsjahr besser als zunächst erwartet abgeschlossen. Der operative Gewinn lag bei 876 Mio. EUR und stieg im Vergleich zum Vorjahr um mehr als das Fünffache. Auch das Konzernergebnis hat sich in 2010 überaus positiv entwickelt und betrug rund 1,1 Mrd. EUR. Getragen wurde dieser Steilflug durch die erfreulichen Absatz- und Umsatzentwicklungen im internationalen Passagiergeschäft und in der Fracht, durch die positiven Effekte unserer Kostensenkungsmaßnahmen sowie die weitere Ausschöpfung von Synergiepotenzialen in unserem Airline-Verbund. Durch die insgesamt positive Geschäftsentwicklung und die bislang guten Konjunkturaussichten für 2011 können Vorstand und Aufsichtsrat der Lufthansa zur Hauptversammlung am 3. Mai 2011 eine Dividendenzahlung von 60 Cent je Aktie vorschlagen.

Das Geschäftsjahr 2010 hat gezeigt, dass Lufthansa aus den Krisen der vergangenen Jahre gelernt hat und auf einen großen Erfahrungsschatz zu deren Bewältigung zurückgreifen kann. Lufthansa ist reaktionsschnell und hat mit einem höchstmöglichen Maß an Kapazitäts- und Kostenflexibilität auf die Marktveränderungen reagiert. Lufthansa ist strategisch, finanziell und operativ gut positioniert. Wir haben bewiesen, dass wir – in der Krise, aber auch danach – mit einem eingespielten und hoch engagierten Team von Mitarbeitern und Führungskräften den Abstand zu unseren Wettbewerbern weiter ausbauen können.

Ein kurzer Blick auf unsere Geschäftsfelder bestätigt das. Alle konnten das Geschäftsjahr 2010 mit einem positiven operativen Ergebnis abschließen. Die Entwicklung bei der Passage Airline Gruppe war geprägt durch eine deutliche Markterholung, vor allem im Premium-Segment. Im Interkontinentalverkehr hat Lufthansa ihre Position weiter ausgebaut und Marktanteile dazugewonnen. Rechtzeitig zur gestiegenen Nachfrage im Passagierverkehr konnten wir im vergangenen Jahr die ersten vier A380 in Einsatz nehmen. Gespart wird aber weiter: Das Ergebnissicherungsprogramm Climb 2011 wird unverändert fortgeführt und jährlich 1 Mrd. EUR an Einsparungen bringen.

Die Entwicklung unserer Airlines im Verbund verlief unterschiedlich. SWISS hat ihren operativen Gewinn verdreifacht. Austrian Airlines und bmi arbeiten weiter mit Hochdruck an der Restrukturierung. Erste Erfolge sind sichtbar und wirken sich bereits auf das Ergebnis bei beiden Airlines aus. Germanwings, die „Low Cost-Tochter“ der Lufthansa, konnte ihren Wachstumskurs fortführen, hat aber aufgrund von Sondereffekten nur ein negatives operatives Ergebnis erwirtschaftet.

Lufthansa Cargo hat im Geschäftsjahr 2010 ein Rekordergebnis erzielt. Damit ist unserer Frachtgesellschaft nach dem krisenbedingten Verlust im Jahr 2009 eine beeindruckende Wende gelungen. Lufthansa Technik wurde als letztes unserer Geschäftsfelder von den Auswirkungen der globalen Wirtschaftskrise erfasst und hat trotz Umsatzeinbußen zu Jahresbeginn ein deutlich positives operatives Ergebnis erwirtschaftet. Lufthansa Systems konnte in einem für die IT-Branche schwierigen wirtschaftlichen Umfeld die gesunkenen Umsätze nur teilweise durch die Fortführung ihrer Kostensenkungsmaßnahmen ergebnisseitig kompensieren. Das Mitte 2010 gestartete Programm „Jetzt!“ soll die Umsatz- und Ergebnissituation kurz- und mittelfristig verbessern. LSG Sky Chefs profitierte von der gestiegenen Nachfrage nach Catering-Leistungen und hat das Geschäftsjahr 2010 mit einem operativen Gewinn über dem des Vorjahres abgeschlossen.

Alles in allem können wir mit der Unternehmensentwicklung und den Ergebnissen im Geschäftsjahr 2010 also durchaus zufrieden sein. Auch die Lufthansa Aktie spiegelte den Aufwärtstrend wider. Sie ist – noch dazu in einem guten Börsenjahr – mehr als doppelt so stark gestiegen wie der DAX und hat 2010 einen Wertzuwachs von rund 39 Prozent verzeichnet.

Es hat sich bewährt, dass der Lufthansa Konzern auch in Schlechtwetterphasen an seinen Prinzipien festhält – an soliden Finanzstrukturen, an Qualitäts- und Kundenorientierung sowie an Innovationen und langfristigen Wertsteigerungen. Das sind die Fundamente für den nachhaltigen Erfolg und das profitable Wachstum Ihres Unternehmens. Aufgrund der positiven Entwicklung im Geschäftsjahr 2010 und der erfreulichen konjunkturellen Aussichten sind wir für das Jahr 2011 zuversichtlich gestimmt. Die neue Führungscrew der Lufthansa hat sich einiges vorgenommen. Ihr Unternehmen, sehr geehrte Aktionäre, wird auch weiterhin von vier Vorständen geführt. Neu in diesem Gremium ist Carsten Spohr, der die Lufthansa Passage leitet.

Wir wissen, dass das Geschäftsjahr 2011 kein Spaziergang werden wird. Der Wettbewerb in Europa und in den Langstreckenverkehren – vor allem nach Asien und Afrika – verschärft sich weiter. Die in Deutschland eingeführte Luftverkehrsteuer, die seit dem 1. Januar 2011 erhoben wird, trifft besonders deutsche und europäische Airlines und damit auch Lufthansa und unsere Kunden empfindlich. Die Kosten für Kerosin steigen aktuell auf neue Rekordhöhen. Daneben bergen politische Unruhen, Terroranschläge, Kriege oder Umweltkatastrophen zusätzliche Risiken für unsere Branche. Gemeinsam werden wir jedoch alles daran setzen, den erfolgreichen Kurs der Lufthansa fortzusetzen, damit Ihr Unternehmen weiter nachhaltig wachsen kann und Sie uns auch künftig Ihr Vertrauen schenken.

Frankfurt, im März 2011



Christoph Franz  
Vorsitzender des Vorstands der Deutschen Lufthansa AG



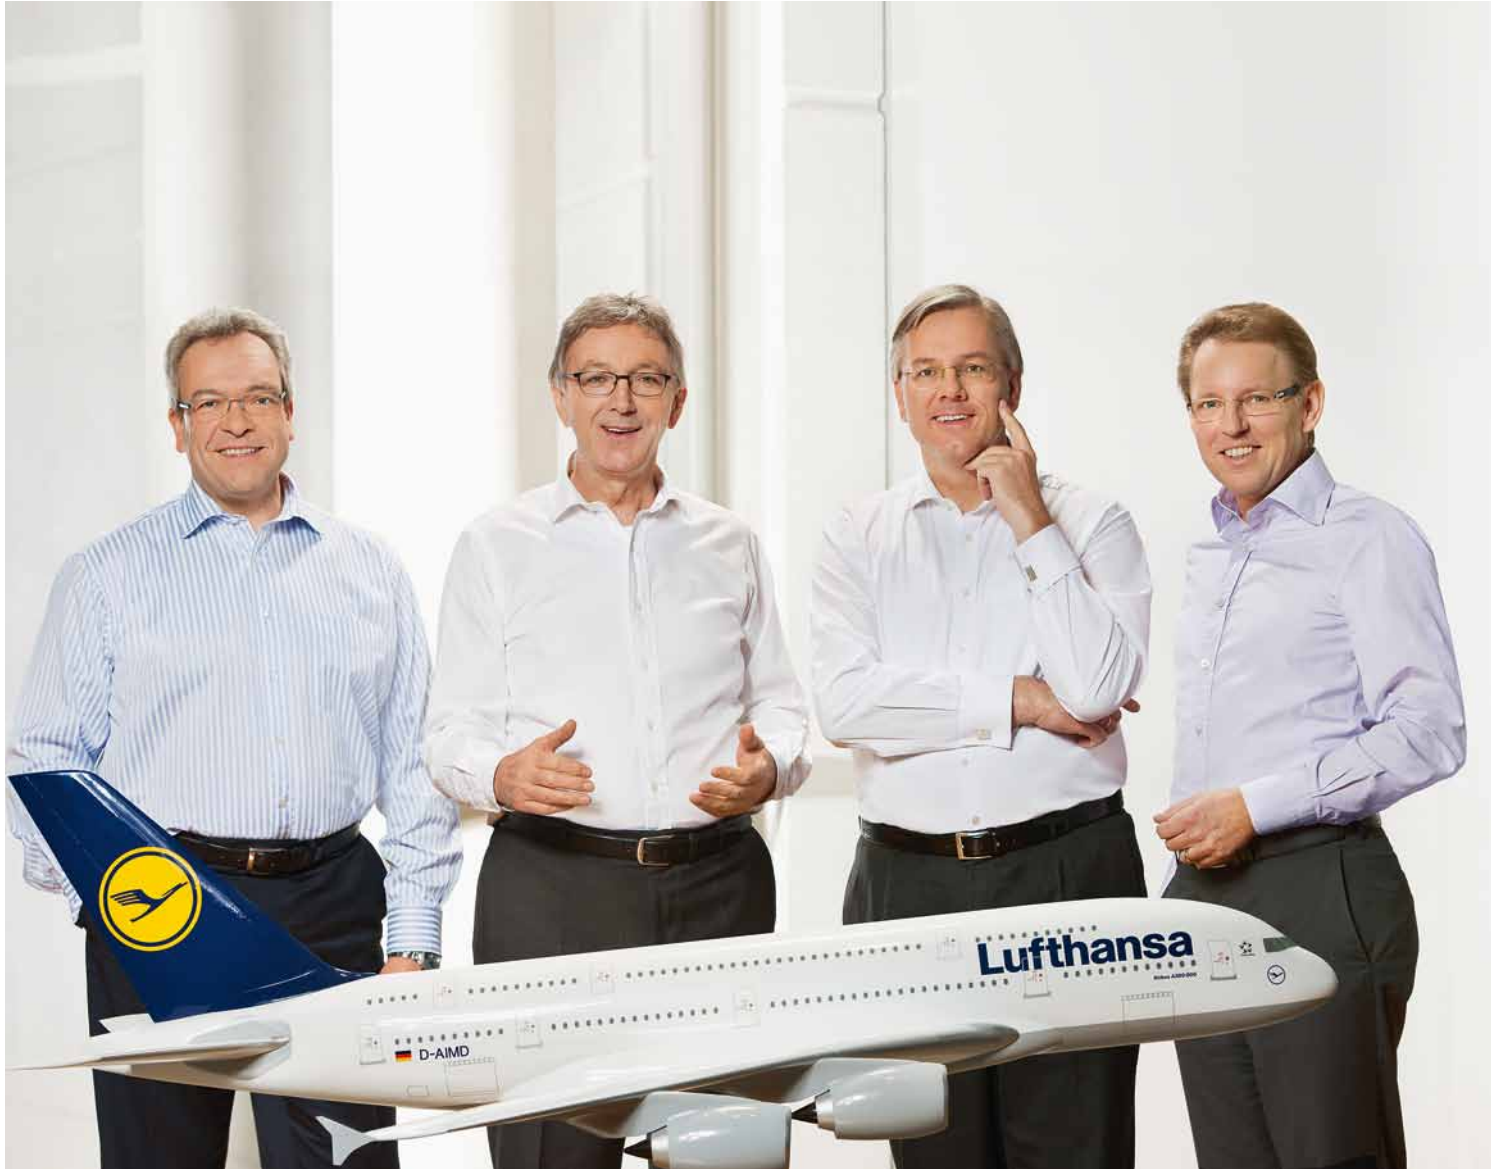

**Der Vorstand der Deutschen Lufthansa AG im Geschäftsjahr 2010 (v.l.n.r.):**  
Stefan Lauer, Wolfgang Mayrhuber, Christoph Franz, Stephan Gemkow



## ➤ Wolfgang Mayrhuber

---

### **Vorstandsvorsitzender bis 31. Dezember 2010**

Wolfgang Mayrhuber, am 22. März 1947 in Waizenkirchen/Österreich geboren, war von Juni 2003 bis Dezember 2010 Vorsitzender des Vorstands der Deutschen Lufthansa AG. Nach dem Maschinenbaustudium an der Höheren Technischen Bundeslehranstalt Steyr/Österreich sowie am Bloor Institute/Canada war Wolfgang Mayrhuber 40 Jahre für Lufthansa tätig. Als Projektleiter trug er Anfang der 90er Jahre maßgeblich zur Sanierung des Konzerns bei. Im Oktober 1994 folgte die Berufung zum Vorsitzenden des Vorstands der neu gegründeten Lufthansa Technik AG. Am 1. April 2002 wurde er zusätzlich stellvertretender Vorstandsvorsitzender des Lufthansa Konzerns. Am 18. Juni 2003 übernahm er das Amt des Vorstandsvorsitzenden. Schwerpunkte der Konzernentwicklung unter seiner Leitung lagen neben dem Ausbau der Star Alliance auf dem Aufbau eines Airline-Verbunds durch Zukäufe und Integration anderer Gesellschaften sowie die Stärkung der übrigen Geschäftsfelder.

## ➤ Stefan Lauer

---

### **Vorstandsmitglied und Arbeitsdirektor,**

#### **Ressort Verbund-Airlines und Konzern-Personalpolitik**

Stefan Lauer, geboren am 24. März 1955, ist seit dem 1. August 2000 Mitglied des Vorstands der Deutschen Lufthansa AG. Nach dem zweiten juristischen Staatsexamen 1983 trat er in den Dienst des Magistrats der Stadt Frankfurt. 1986 wurde er Leiter des Büros des Oberbürgermeisters. Am 1. Januar 1990 übernahm er bei der Deutschen Lufthansa AG die Leitung der Abteilung Führungskräftebetreuung. Anfang 2000 wurde er Vorsitzender des Vorstands der Lufthansa Cargo AG, nachdem er seit 1. Januar 1997 die Funktion des Vorstands Marketing und Vertrieb der Lufthansa Cargo AG innehatte. Neben seinen Aufgaben im Lufthansa Vorstand ist Stefan Lauer Mitglied des Präsidiums der BDA und des BDI. Außerdem ist er Vorsitzender des Vorstands der Deutschen Gesellschaft für Personalführung.

## ➤ Carsten Spohr

---

### **Ab 1. Januar 2011 Vorstandsmitglied,**

#### **Ressort Lufthansa Passage**

Carsten Spohr, geboren am 16. Dezember 1966, ist seit dem 1. Januar 2011 Mitglied des Vorstands der Deutschen Lufthansa AG und Vorsitzender des Lufthansa Passagevorstands. Nach dem Studium zum Diplom-Wirtschaftsingenieur erwarb Spohr die Verkehrspiloten-Lizenz und absolvierte im Anschluss das Trainee-Programm der Deutschen Aerospace AG. 1994 kehrte Spohr zur Deutschen Lufthansa zurück und übernahm die Leitung des Personalmarketings. Von 1995 bis 1998 war er als Referent des Vorstandsvorsitzenden tätig, bis er im August 1998 die Leitung des Regional-Partner-Managements übernahm. Im Oktober 2004 wurde Carsten Spohr in den Bereichsvorstand der Lufthansa Passage berufen. Mit Wirkung vom 15. Januar 2007 wurde er zum Vorsitzenden des Vorstands der Lufthansa Cargo AG ernannt. Im September 2010 bestellte der Aufsichtsrat ihn zum 1. Januar 2011 zum Mitglied des Konzernvorstands und Vorsitzenden des Lufthansa Passagevorstands.

## ➤ Christoph Franz

---

### **Vorstandsvorsitzender seit 1. Januar 2011**

Christoph Franz, geboren am 2. Mai 1960, ist seit dem 1. Januar 2011 Vorstandsvorsitzender der Deutschen Lufthansa AG. Nach dem Studium zum Wirtschaftsingenieur in Deutschland, Frankreich und den USA begann er 1990 seine Karriere bei der Deutschen Lufthansa AG in zahlreichen Projekten in den Bereichen Strategie, Verkauf und Controlling. Dabei war er wesentlich an der Sanierung des Unternehmens in den 1990er Jahren beteiligt. 1994 wechselte er zur Deutschen Bahn AG. Am 1. Juli 2004 wurde er zum Chief Executive Officer der Swiss International Air Lines AG berufen. Zum 1. Juni 2009 folgte die Berufung zum stellvertretenden Vorstandsvorsitzenden der Deutschen Lufthansa AG und in Personalunion der Vorsitz im Lufthansa Passagevorstand. Im September 2010 wurde Christoph Franz mit Wirkung vom 1. Januar 2011 vom Aufsichtsrat zum Vorstandsvorsitzenden der Deutschen Lufthansa AG bestellt.

## ➤ Stephan Gemkow

---

### **Vorstandsmitglied, Ressort Finanzen und Aviation Services**

Stephan Gemkow, geboren am 23. Januar 1960, ist seit dem 1. Juni 2006 Mitglied des Vorstands der Deutschen Lufthansa AG. Der Diplom-Kaufmann arbeitete ab 1988 als Unternehmensberater bei der BDO Deutsche Warentreuhand AG. Seine Karriere bei Lufthansa begann 1990 im Bereich Konzernorganisation und Strategische Unternehmensentwicklung. Nach verschiedenen Managementpositionen im operativen Bereich wurde er 1994 als Area Sales Manager in Washington D.C. tätig. 1997 übernahm er die Leitung des Bereichs Investor Relations, 2001 die Leitung der Konzernfinanzen, bevor er 2004 in den Vorstand der Lufthansa Cargo AG berufen wurde. Neben seinen Aufgaben im Lufthansa Vorstand nimmt Stephan Gemkow den Vorsitz im Aufsichtsrat zahlreicher Konzerngesellschaften wahr. Stephan Gemkow ist darüber hinaus Mitglied der Börsensachverständigenkommission.

„Mit Christoph Franz  
übernimmt ein Mann  
das Ruder, zu dem ich  
vollstes Vertrauen habe.“

**Wolfgang Mayrhuber und Christoph Franz im Interview über den  
am 1. Januar 2011 erfolgten Stabwechsel im Amt des Vorstandsvorsitzenden.**

» **Herr Mayrhuber, das Jahr 2010 ist insgesamt deutlich besser verlaufen als anfangs erwartet. Welche Bilanz ziehen Sie aus Ihrem letzten Geschäftsjahr als Vorstandsvorsitzender der Lufthansa?**

*Mayrhuber:* In der Tat blicken wir auf ein doch sehr erfolgreiches Geschäftsjahr zurück. Nach dem schwierigen Krisenjahr 2009 und einigen unvorhersehbaren Ereignissen in 2010 – wie etwa das Flugverbot durch den Vulkanausbruch auf Island im Frühling – war das so zunächst nicht zu erwarten. Wir sind der Krise, bildlich gesprochen, schneller entflohen als gedacht. Insgesamt haben alle Geschäftsfelder positive Ergebnisse erreicht, gerade bei den fliegenden Gesellschaften können wir von einer echten Ergebniserholung sprechen.

» **Was waren die Gründe dieses Erfolgs?**

*Mayrhuber:* Ein wesentlicher Treiber war die gestiegene Nachfrage, sowohl im Frachtsegment als auch im Passagierverkehr, hier vor allem im First- und Business-Class-Bereich. Hinzu kommt unsere finanzielle Stärke im Zusammenspiel mit unserem Krisenmanagement. Auf diese Weise waren wir auch während der Krise schon trotz stringentem Sparkurs in der Lage, weiter in die Zukunft des Unternehmens zu investieren. Davon profitieren wir nun stärker als viele Wettbewerber.

» **Und wenn Sie etwas weiter zurückblicken, wie sieht Ihr Fazit nach sieben Jahren an der Spitze von Lufthansa aus?**

*Mayrhuber:* Auf jeden Fall liegt eine sehr gute und objektiv betrachtet ja auch erfolgreiche Zeit hinter uns. Lufthansa ist heute nicht nur operativ, sondern auch finanziell „First Class“. Und wenn ich zurückschaue und die Veränderungen der vergangenen sieben-einhalb Jahre sehe, ist es immer noch nur ein kleiner Schritt gegenüber der Entwicklung des Kranichs und der gesamten Branche, wenn ich meine gesamte Karriere bei Lufthansa Revue passieren lasse. Schließlich war ich 40 Jahre lang Lufthanseat! Da habe ich immer wieder neue Meilensteine miterlebt, zum Beispiel die Aufstellung als Aviation-Konzern, die Gründung der Star Alliance oder den strategischen Aufbau in München.

» **Was zeichnet Lufthansa am Ende Ihrer Ära als Vorstandsvorsitzender aus?**

*Mayrhuber:* Das Geschäft ist mit der Zeit immer schneller und internationaler geworden – entsprechend hat sich auch das Unternehmen weiterentwickelt. Wir sind heute ein balanciert aufgestellter Aviation-Konzern und Airline-Verbund auf Wachstumskurs – dazu durfte ich meinen Beitrag leisten. Aber solch ein Erfolg ist ja nie eine Einzelleistung, sondern das Ergebnis intensiven Teamworks. Dafür bedanke ich mich bei den Kollegen im Vorstand, den Führungskräften, allen Mitarbeitern, Geschäftspartnern und Kunden, die meinen Weg bei Lufthansa begleitet haben.

» **Gibt es dennoch „Baustellen“, die Sie Ihrem Nachfolger überlassen?**

*Mayrhuber:* Das Unternehmen möchte ich sehen, in dem es keine Baustellen gibt! Und bei einem Blick zu unseren Nachbarn bei Fraport, mit all den Baugruben und -kränen für den Terminal- und Landebahnbau, erkennt man, dass Baustellen auch immer Bewegung und Fortschritt mit sich bringen. So herrscht auch bei Lufthansa niemals Stillstand. Und wer immer in Bewegung ist, hat auch immer mit Herausforderungen zu tun. In unserem Fall ist das beispielsweise der wachsende Wettbewerb, der uns vor allem im Kontinentalverkehr fordert, aber auch zunehmend im Langstreckengeschäft durch die unverhältnismäßigen Flottenbestellungen der Golf-Carrier. Auch die Kostenmanagementprogramme in allen Geschäftsfeldern gilt es trotz konjunkturellen Rückenwinds engagiert voranzutreiben, genauso wie die Einbindung unserer neuesten Beteiligungsgesellschaften. Aber all das bereitet mir keine Sorge – mit Christoph Franz übernimmt ein Mann das Ruder, zu dem ich vollstes Vertrauen habe. Mit ihm und dem Vorstandsteam ist Lufthansa weiterhin auf einem sehr guten Weg.

» **Herr Franz, worin sehen Sie die größten Herausforderungen Ihrer neuen Aufgabe als Konzernchef?**

*Franz:* Zunächst möchte ich Wolfgang Mayrhuber danken, denn ich bin in der glücklichen Lage, meine Position auf der Basis hervorragender Strukturen anzutreten. Mit ihm an der Spitze hat

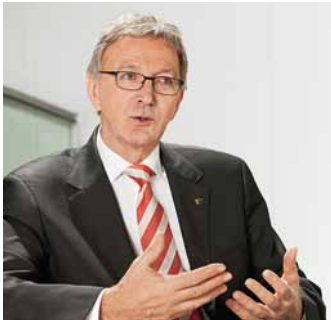

**Wolfgang Mayrhuber**

Vorstandsvorsitzender bis 31. Dezember 2010

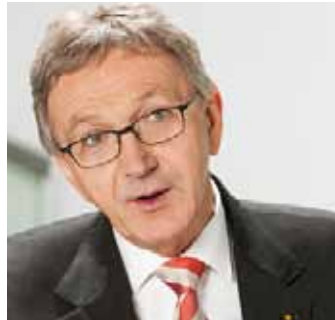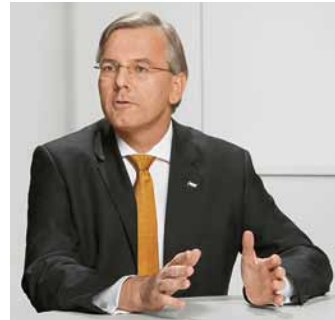

**Christoph Franz**

Vorstandsvorsitzender seit 1. Januar 2011

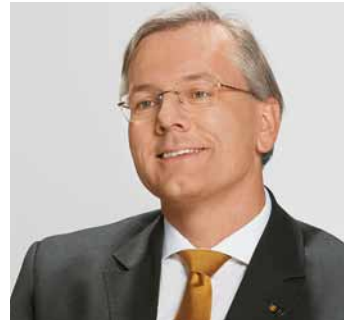

sich dieses Unternehmen in den letzten Jahren zukunftsfähig aufgestellt. Er hat wichtige Entscheidungen im Hinblick auf Wachstum und Profitabilität getroffen und entsprechende Maßnahmen ins Rollen gebracht. Meine Aufgabe sehe ich nun insbesondere darin, diesen Kurs gemeinsam mit dem neuen Vorstandsteam mit Hochdruck weiterzuverfolgen und den Konzern weiterzuentwickeln.

» **Künftiges Wachstum erfordert steigende Gewinne. Wie soll das in den nächsten Jahren konkret gelingen?**

*Franz:* Indem wir uns auf unsere wichtigsten Märkte und unsere strategische Entwicklung konzentrieren. Die Luftverkehrsindustrie ist im Umbruch. Hier können sich schnell Entwicklungsmöglichkeiten ergeben, die wir durch ein wachsames Auge und rasche Besetzung von Marktchancen nutzen können – durch die eigene Netzentwicklung, mit unseren bestehenden Partnern oder auch durch neue Partnerschaften und Beteiligungen, sofern strategisch und wirtschaftlich sinnvoll. Vor allem aber halten wir daran fest, unsere Kosten nachhaltig auf ein wettbewerbsfähiges Niveau zu senken – und gleichzeitig in unser ohnehin hohes Qualitätsniveau weiter zu investieren. Das gilt für alle Geschäftsfelder des Konzerns. Wie dieser Spagat funktioniert, zeigen zwei Beispiele aus 2010: Die Effizienz unserer Flotte konnten wir durch die A380 deutlich steigern und im Zuge des neuen Bordkonzepts im Kontinentalverkehr mehr Sitzplatzkapazität bei zugleich größerem Freiraum für die Passagiere schaffen.

» **Sie haben bereits ambitionierte Ziele formuliert, wie die Erzielung einer operativen Marge im Passagiergeschäft von 8 Prozent. Setzen Sie sich damit nicht gleich zu Beginn Ihrer Amtszeit ordentlich unter Druck?**

*Franz:* Ganz einfach: Wer keine anspruchsvollen Ziele hat, kann auch keine echten Erfolge erreichen. Wir dürfen sicherlich keine Luftschlösser bauen, aber wieso sollten wir nicht das Selbstbewusstsein haben, unsere eigene Messlatte so anzusetzen, dass wir uns aus eigener Kraft in einem Wachstumsmarkt entwickeln können? In den kommenden ein bis zwei Jahren ist ein solches Ergebnis wohl noch nicht realisierbar, aber mittelfristig müssen

wir den Gewinn im Passagierverkehr, der ja das Kerngeschäft unseres Konzerns ist, deutlich steigern. Andernfalls wird es schwierig sein, notwendiges Wachstum von Netz, Flotte und Arbeitsplätzen zu finanzieren und im Wettbewerb zu bestehen.

» **Wie passen der strikte Sparkurs und die Ankündigung, 4.000 neue Mitarbeiter einstellen zu wollen, zusammen?**

*Franz:* Dass wir Bedarf an so vielen neuen Mitarbeitern haben, ist eine überaus positive Nebenwirkung unseres Wachstumskurses. Die Maßnahmen, mit denen wir unsere Stückkosten reduzieren, und das Einstellen neuer Mitarbeiter schließen sich keinesfalls aus. Unsere Sparprogramme zielen auf Effizienzsteigerung. Durch die Erweiterung unserer Sitzplatzkapazitäten, etwa durch größere Regionalflugzeuge, mehr Sitze in der A320 oder auf Interkontinentalstrecken mit der A380, wächst der Bedarf an Personal in Cockpit und Kabine. Und mit steigenden Passagierzahlen brauchen wir auch mehr Mitarbeiter am Boden. Außerdem bleiben wir trotz aller Sparmaßnahmen ja eine Qualitäts-Airline mit Premium-Anspruch – das erfordert entsprechend ausgebildetes und motiviertes Personal.

» **Herr Franz, worauf freuen Sie sich bei Lufthansa am meisten – und was werden Sie, Herr Mayrhuber, am meisten vermissen?**

*Franz:* Das, worauf ich mich freue, habe ich bereits jeden Tag: ein gutes Gefühl, wenn ich morgens zu Lufthansa komme. Und das liegt nicht an der schönen Architektur unseres Bürogebäudes oder anderen äußerlichen Faktoren, sondern an den Menschen, die Lufthansa zu dem machen, was es ist: ein Erfolgsunternehmen mit großer Tradition und großer Zukunft.

*Mayrhuber:* Dem kann ich mich nur anschließen. Lufthansa gehört zu diesen ganz besonderen Unternehmen, die eine Seele haben und die schon allein mit ihrem Namen positive Emotionen auslösen können. Ich bin sehr stolz, so lange ein Teil davon gewesen zu sein. Zugleich freue ich mich aber auch, dass nun ein neuer Abschnitt beginnt, und bin wirklich gespannt, was die nächsten Jahre für mich bereithalten. Der Lufthansa bleibe ich aber selbstverständlich gewogen.

## Was wir erreicht haben:

---

2010 war ein sehr erfolgreiches Jahr:

- Wir haben trotz zahlreicher Sonderbelastungen ein starkes Jahresergebnis erzielt, mit positiven Beiträgen von allen Geschäftsfeldern. Austrian Airlines und bmi haben durch Restrukturierung ihre Verluste deutlich verringert.
- Unsere finanziellen Kennzahlen sind im ersten Jahr nach der Krise ihren Zielwerten ein großes Stück näher gekommen oder haben sie schon wieder erreicht. Wir haben wieder Wert geschaffen.
- Das Rating hat sich stabilisiert, der Ausblick wurde verbessert.
- Der Lufthansa Aktienkurs ist um 39 Prozent gestiegen – mehr als doppelt so viel wie der DAX.
- Basierend auf dem Geschäftserfolg können wir für 2010 wieder eine Dividendenzahlung von 0,60 EUR vorschlagen.

Es reflektiert auch die Erfolge unseres auf profitables Wachstum ausgerichteten Kurses:

- Lufthansa wahrte auch in den vergangenen Krisenjahren ihre Chancen. Mit vorausschauenden Maßnahmen konnte der Konzern nun optimal an der dynamischen Nachfrageerholung partizipieren.
- Die flexible Aufstellung ermöglichte unseren Geschäftsfeldern kurzfristige Anpassungen, sowohl beim Krisenmanagement als auch im Aufschwung. Das starke Finanzprofil wahrte stets die Handlungsalternativen.
- Die laufende Flottenmodernisierung hat den Treibstoffverbrauch abermals gesenkt und den CO<sub>2</sub>-Verbrauch weiter vom Verkehrswachstum abgekoppelt.
- Lufthansa hat nicht nur Stabilität in der Krise, sondern auch eine deutlich stärkere Ertragskraft im Aufschwung entwickelt.

## Was noch zu tun ist:

---

- Zur nachhaltigen Absicherung unseres Wachstumskurses und nachhaltiger Wertschaffung müssen wir wieder eine angemessene operative Marge verdienen.
- Dazu müssen in allen Geschäftsfeldern die Programme zur Ergebnissteigerung trotz konjunktureller Aufhellung konsequent fortgeführt werden.
- Unser Profil in den Wachstumsregionen gilt es weiter zu schärfen. Nach einer gelungenen Expansion auf dem afrikanischen Kontinent rücken im Passagierverkehr Lateinamerika und Asien in den Fokus unserer Aktivitäten.
- Wir müssen uns dabei in einem sich weiter internationalisierenden, vom intensiven Wettbewerb geprägten Markt behaupten, der zunehmend durch ungleiche Voraussetzungen und Standortbedingungen gekennzeichnet ist.

# Weitblick

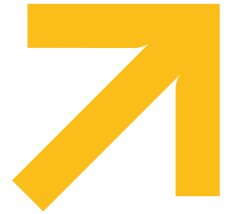

Die Deutsche Lufthansa AG beweist **↗ Weitblick**: Zielstrebig verfolgen wir unseren Kurs, der von nachhaltigem und profitabilem Wachstum geprägt ist. In den vergangenen Jahren haben wir trotz der Krise unsere führende Position in den **↗ Wachstumsmärkten** auf der Langstrecke ausgebaut und unseren Marktanteil auf der Kurz- und Mittelstrecke stabilisiert. Dabei konnten wir die Profitabilität unseres Geschäfts deutlich verbessern. Mit exzellenten **↗ Produkten** befriedigen wir die gestiegenen Kundenbedürfnisse in einem veränderten Wettbewerbsumfeld. Dabei setzen wir auf unser Erfolgsmodell einer modularen Airline- und Aviation-Gruppe, die im **↗ Verbund** jeden Unternehmensteil leistungsfähiger macht: In einem starken Konzern mit Größenvorteilen, einem weltweiten Netzwerk mit konsequenter Synergienutzung sowie einem systematischen Wissenstransfer können die Verbund-Airlines und die Service-Geschäftsfelder ihre individuellen Stärken besser ausspielen. Durch kontinuierliches Streben nach Sicherheit, Qualität und Innovationen, die unser Geschäft gesellschaftlich nachhaltiger und umweltverträglicher machen, verbessern wir mit **↗ Spitzentechnologie** unsere Chancen im Markt.



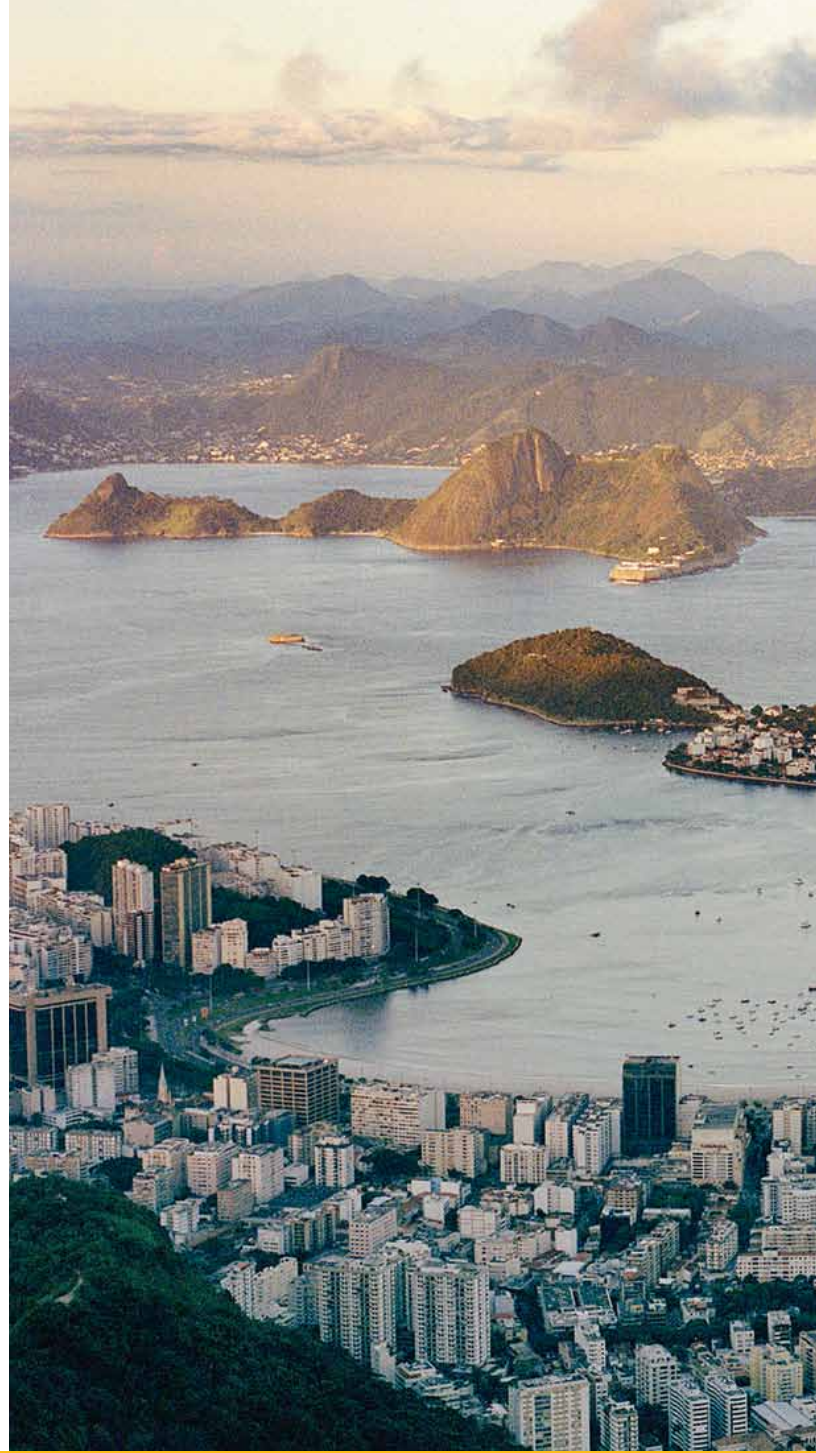

# Der Weitblick, die richtigen Wachstumschancen zu nutzen.

// Den Blick stets nach vorn zu richten und Potenziale auszuschöpfen – das zeichnet unsere Strategie aus. Der Erfolg zeigt sich im Ausbau unserer Spitzenposition auf der Langstrecke und der Sicherung des Marktanteils im Europaverkehr ebenso wie in der dynamischen Erholung unseres Frachtgeschäfts.



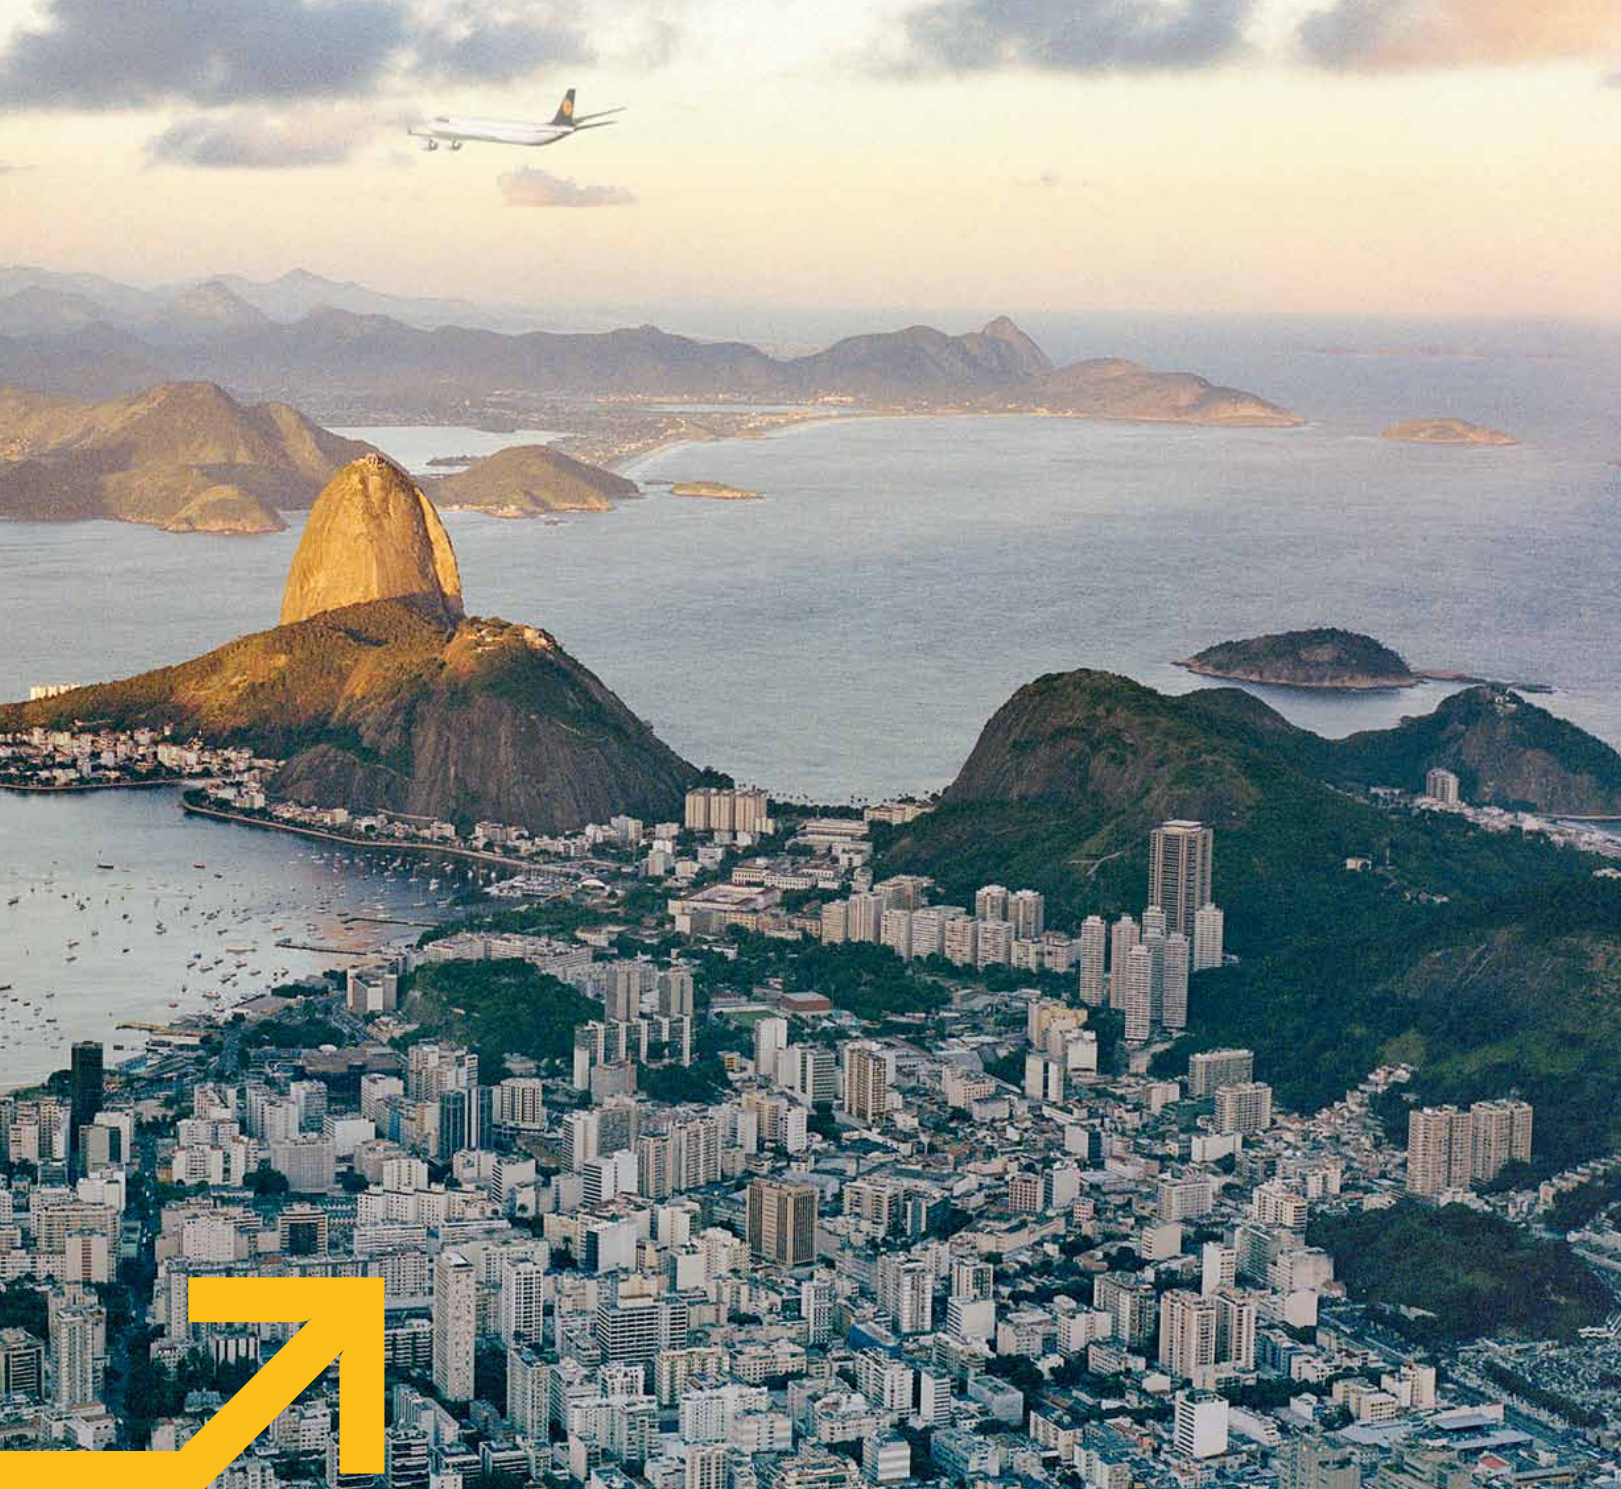

# Märkte



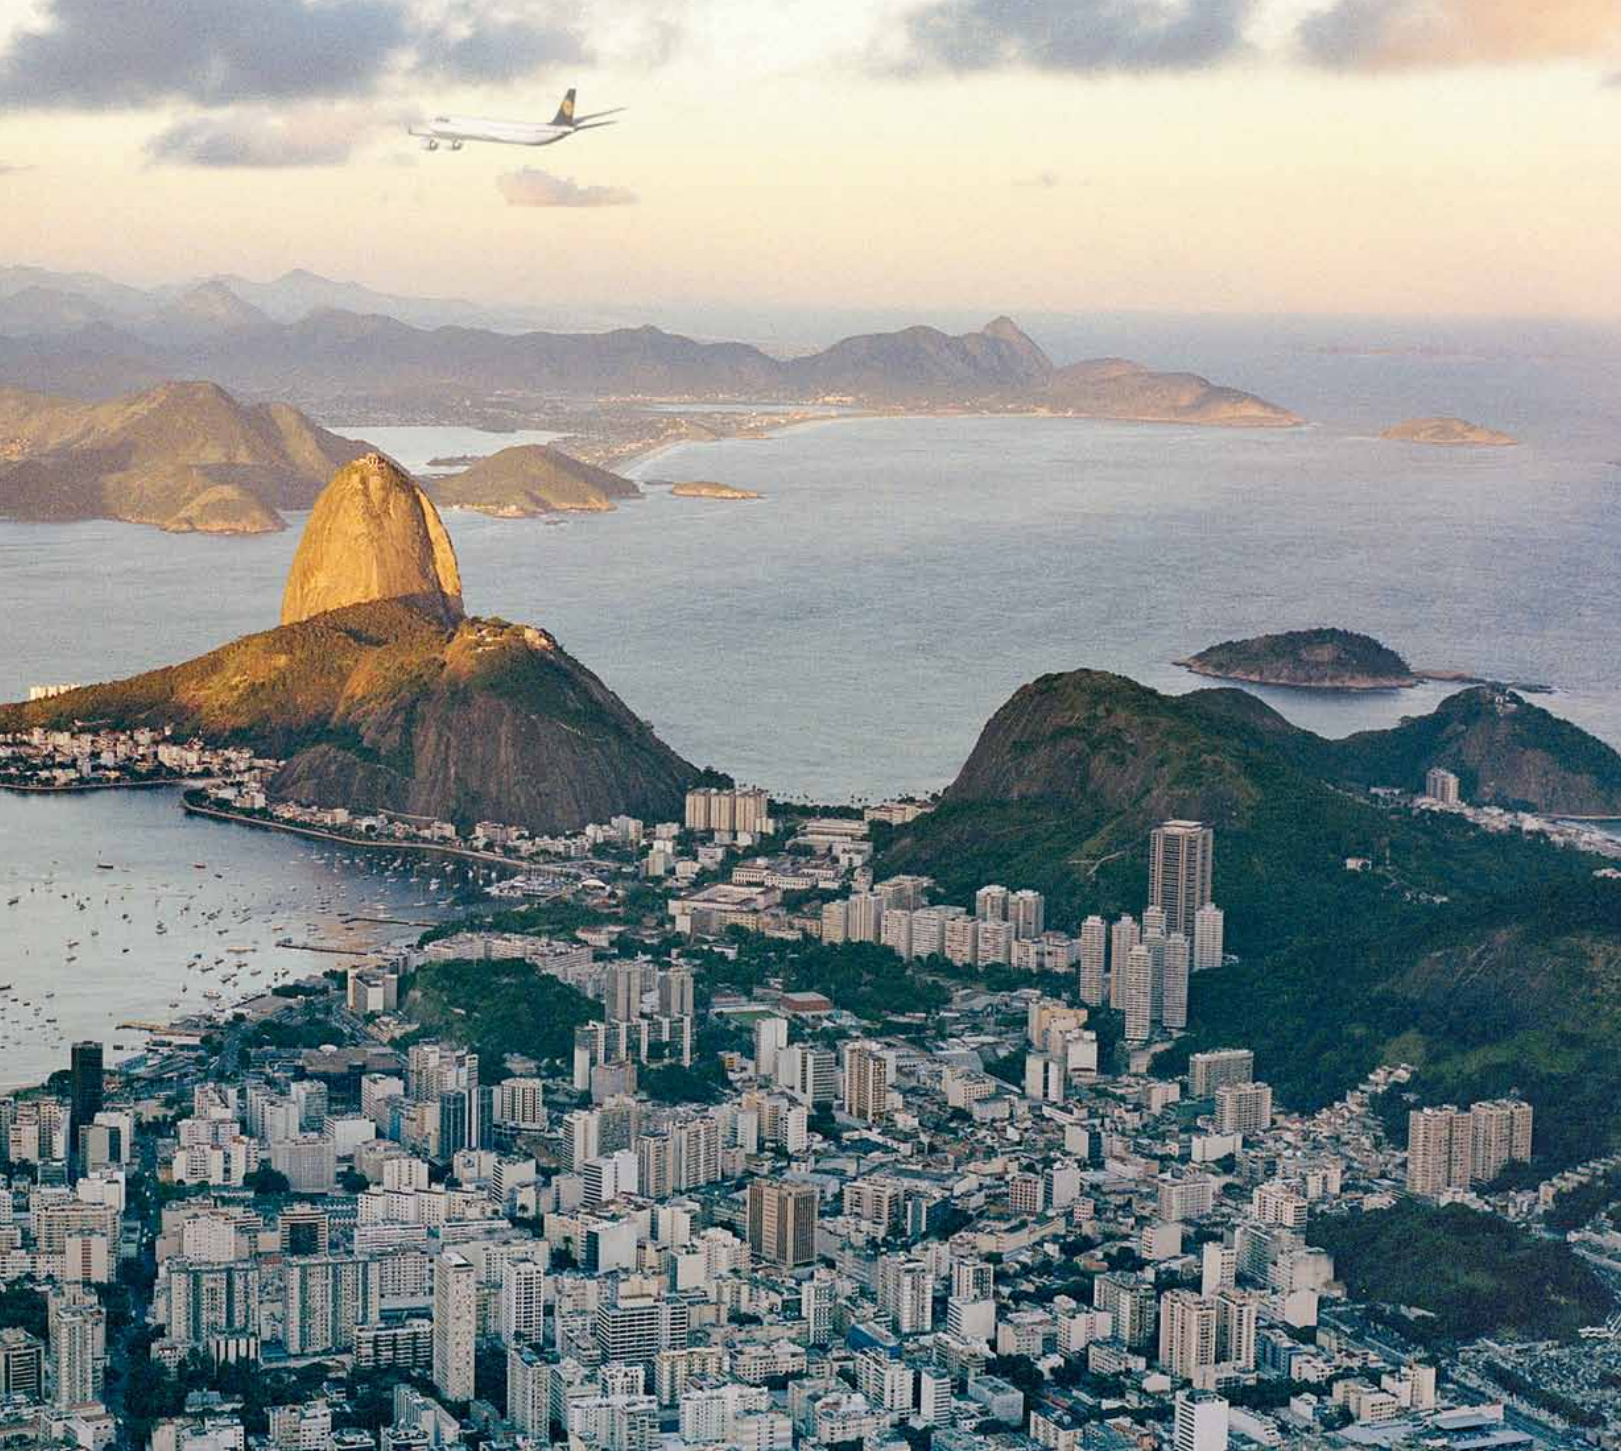

**Balance halten** // Flexibilität zählt zu unseren größten Stärken. In der Krise notwendig gewordene Veränderungen haben wir aktiv gestaltet – etwa durch Restrukturierungen im Kontinentalverkehr, wie zum Beispiel mit dem Projekt EU-DIRrection, durch das die Stückkosten im dezentralen Verkehr reduziert werden. Auch in unseren weiteren Geschäftsfeldern und bei unseren Verbund-Airlines treiben wir Kostenmanagement- und Sanierungsprojekte energisch voran. Gleichzeitig stärken wir unsere Marktposition und nutzen gezielt Wachstumschancen, indem wir zum Beispiel unsere Flotte weiter modernisieren und neue Märkte erschließen.

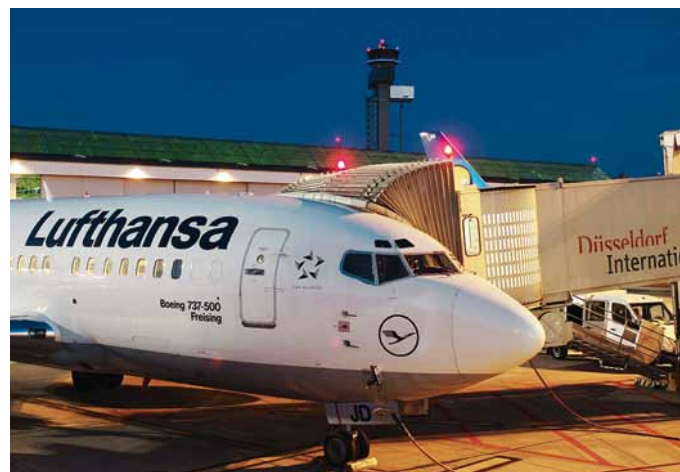

Stark durch Flexibilität: Im Europaverkehr zur Profitabilität zurückkehren.



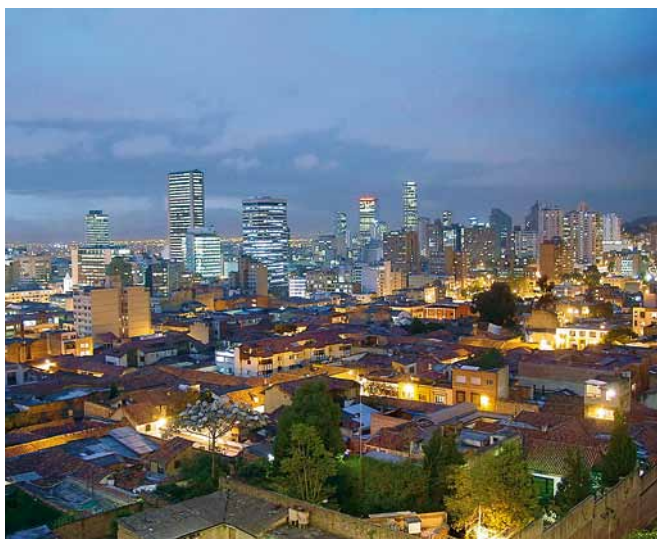

Bogotá ist wieder im Streckennetz der Lufthansa Passage.

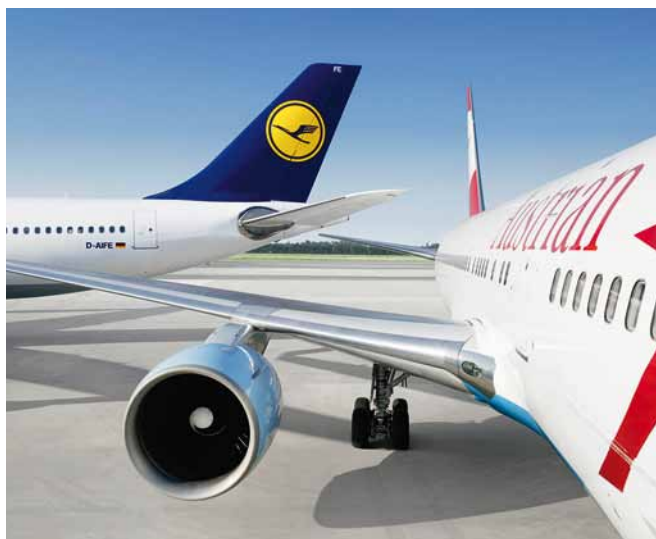

Starke Kombination: Lufthansa und Austrian Airlines.

// Trotz reduzierter Anzahl der Flüge konnte Lufthansa Passage 2010 ihre angebotenen Sitzkilometer im Vergleich zum Vorjahr deutlich erweitern. Zurückzuführen ist dies vor allem auf die laufende Flottenrestrukturierung und den gezielten Netzausbau.

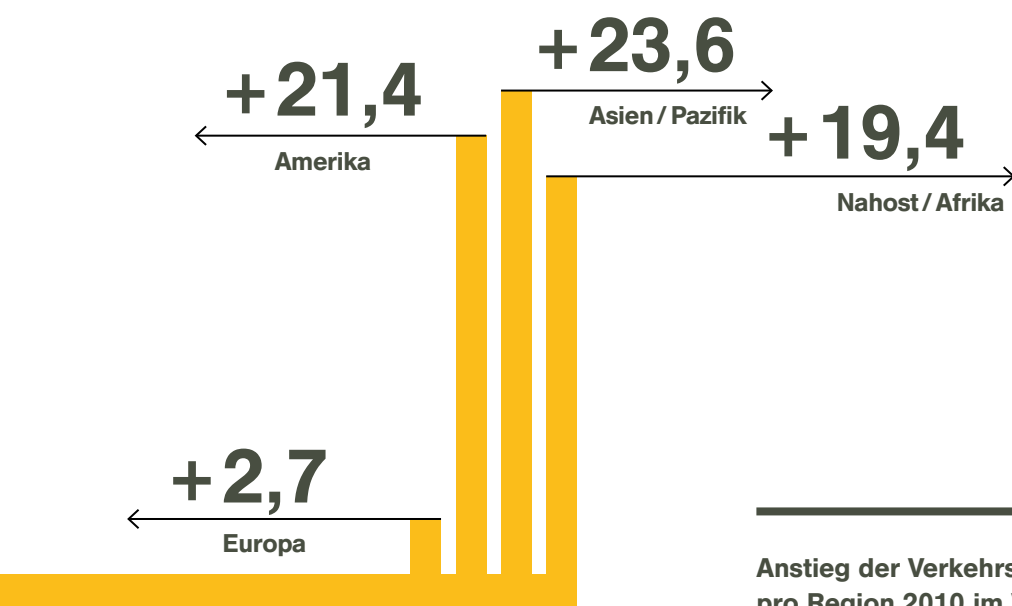

**Anstieg der Verkehrserlöse von Lufthansa Passage pro Region 2010 im Vergleich zu 2009 in %**

**Neue Horizonte** // Unsere führende Position auf der Langstrecke stärken wir durch die Intensivierung unserer Partnerschaften in etablierten Märkten, etwa im Joint Venture Atlantic++. Darüber hinaus zeigen wir Präsenz in Wachstumsregionen wie Süd- und Mittelamerika: So haben wir Bogotá und Rio de Janeiro wieder ins Streckennetz aufgenommen und Kooperationen mit den Fluggesellschaften TAM, Avianca-TACA und Copa Airlines gestartet.

**Gut aufgestellt** // Unsere Top-Position im Heimatmarkt Europa eröffnet uns eine optimale Ausgangslage für die Erschließung weltweiter Märkte. Auch auf dem Kontinent erweitern wir unser Netz kontinuierlich um neue interessante Ziele. Eine herausragende Stellung im vielversprechenden osteuropäischen Markt erreichen wir zum Beispiel durch die Kombination der starken Streckennetze von Lufthansa Passage und Austrian Airlines.

// Unsere starke Position auf den Langstrecken zahlt sich aus: 2010 war von deutlichem Wachstum geprägt, vor allem dank der Preiserholung und der gestiegenen Nachfrage nach First- und Business-Class-Tickets. Die Durchschnittserlöse haben auf den Interkontinentalrouten wieder das Niveau von vor der Finanzkrise erreicht.

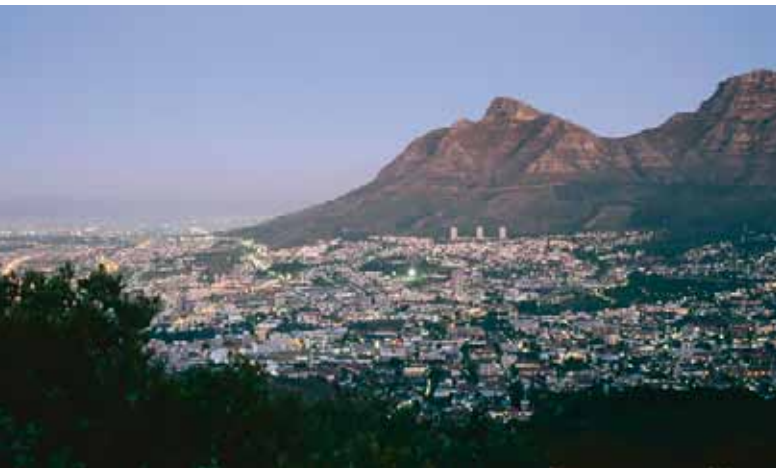

Afrika ist für die Luftfahrt ein starker Wachstumsmarkt.

**Kontinent mit Potenzial** // Afrika weist weltweit mit das stärkste Luftverkehrswachstum auf. Wir sind bestens gerüstet, um daran teilzuhaben. So ist beispielsweise Brussels Airlines mit 18 Zielen in diesem Markt besonders stark vertreten. Lufthansa Passage hat 2010 Pointe Noire (Republik Kongo) in den Flugplan aufgenommen.

**Wachstum Marktanteil Passage Airline Gruppe unter den AEA-Fluggesellschaften, 2010 im Vergleich zu 2002 in Prozentpunkten**

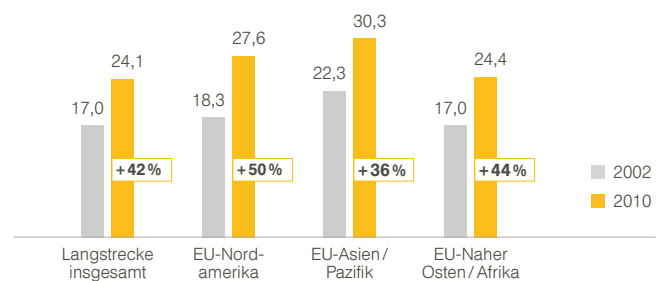

Gemeinsam mit allen Partnern umfasst unser Streckennetz nun 32 Ziele in dieser Wachstumsregion, weitere sind in Planung. Auch die Star Alliance wächst in Afrika: Mit South African Airways und Egypt Air haben wir bereits starke Partner in Afrika. Voraussichtlich 2011 wird auch Ethiopian Airlines Mitglied des weltweit führenden Luftfahrtbündnisses werden.

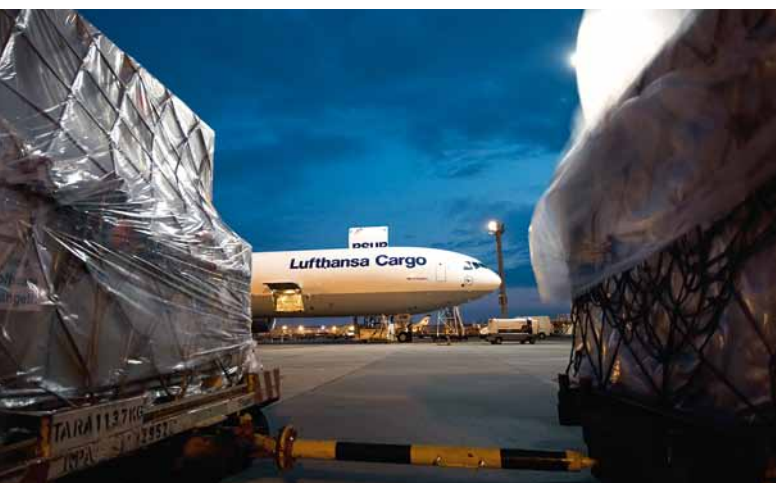

Wettbewerbsvorteile durch weitsichtiges Krisenmanagement.

**Markterholung genutzt** // Lufthansa Cargo konnte 2010 den wirtschaftlichen Aufschwung optimal nutzen. Die Erfolge sind dabei zwar auch auf äußere Einflüsse wie die gestiegene Nachfrage im Frachtsektor zurückzuführen. Ein großer Anteil am Erfolg ist aber hausgemacht und das Resultat des Krisenmanagements in den Vorjahren. Das beherrzte Kapazitätsmanagement ließ die Strukturen intakt und so konnte Lufthansa Cargo den Aufschwung besser als viele Wettbewerber für sich nutzen. Ausgezahlt hat sich auch die Strategie, gezielt Marktchancen wahrzunehmen und in Wachstumsmärkte zu investieren.

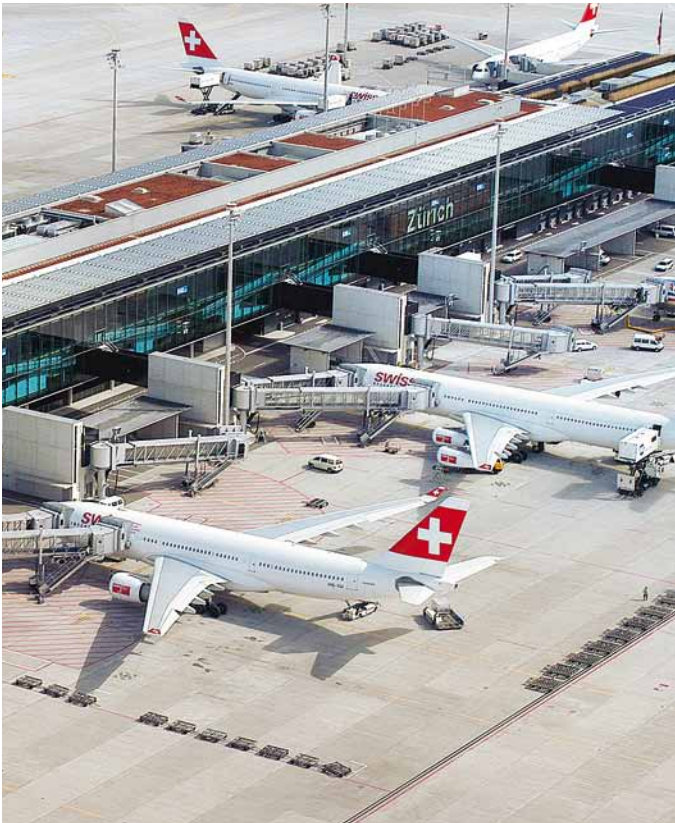

Von Zürich mit SWISS in die Welt.

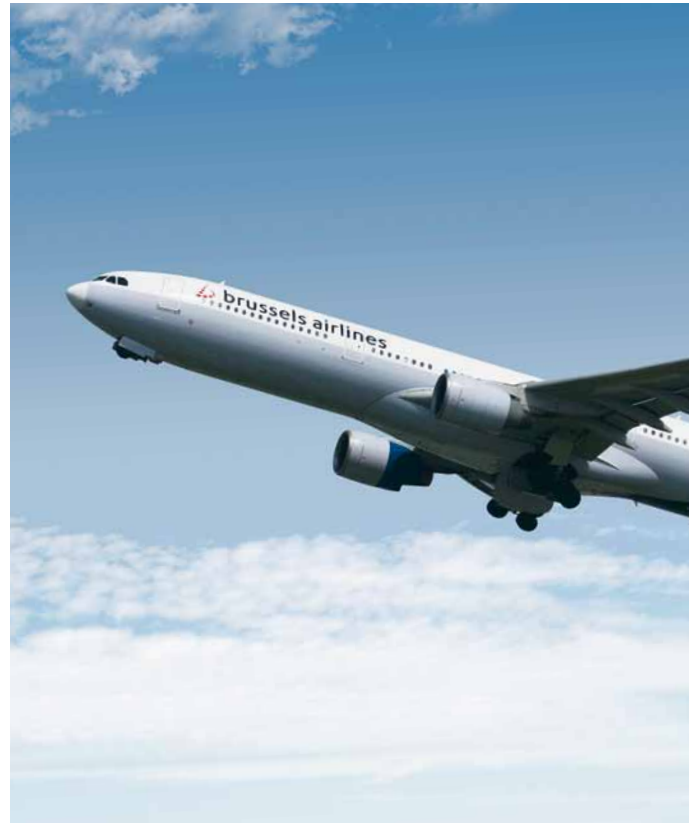

Mit Brussels Airlines auf den afrikanischen Kontinent.

**1. SWISS** // SWISS hat ihr Netzwerk erweitert. Seit Juni 2010 bietet sie die Strecke Zürich – San Francisco an. Seit Anfang 2010 fliegt SWISS sechsmal täglich von Genf nach London-Heathrow. Darüber hinaus wurde die Strecke Genf – Madrid in den Flugplan aufgenommen und die Frequenzen ab Zürich und Genf zu weiteren Zielen aufgestockt.

**2. Austrian Airlines** // Zwei wichtige Ziele sind seit 2010 zurück im Flugplan der Austrian Airlines: Neben Dnepropetrowsk, der drittgrößten Stadt der Ukraine, wird auch die indische Metropole Mumbai wieder angeflogen.

**3. Brussels Airlines** // Zum bereits breit gefächerten Flugplan auf dem afrikanischen Kontinent gehören bei Brussels Airlines seit 2010 die neuen Ziele Accra, Cotonou, Ouagadougou und Lomé.

# 70,5 Mio.

Passagiere in Europa 2010

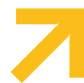

// Im Europaverkehr befinden wir uns mit allen Verbund-Airlines im intensiven Wettbewerb mit No-Frills-Carriern. Umso wichtiger ist, dass wir unsere Kostenmanagementprogramme konsequent fortführen und Synergien im Verbund systematisch nutzen.



Die A380 bietet  
exzellenten Komfort – nicht  
nur in der First Class.

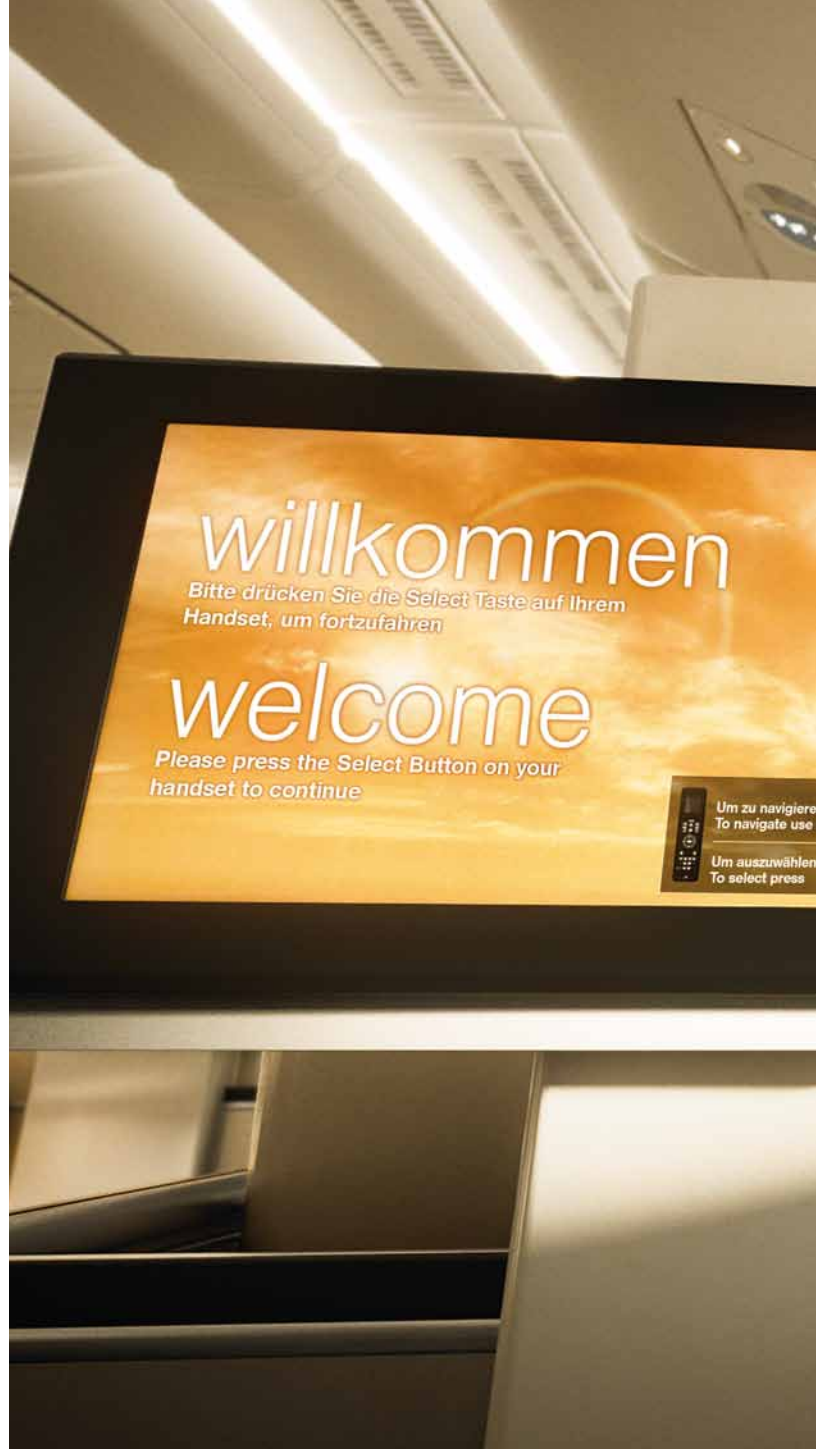

# Der Weitblick, für den Kunden keine Kompromisse zu machen.

// Mit den Kundenbedürfnissen steigen auch die Anforderungen an unsere Produkte. Um das Reiseerlebnis immer angenehmer zu gestalten, entwickeln wir exzellente Lösungen, die uns vom Wettbewerb abheben und den Zeitgeist nicht nur treffen, sondern ihm oft voraus sind.



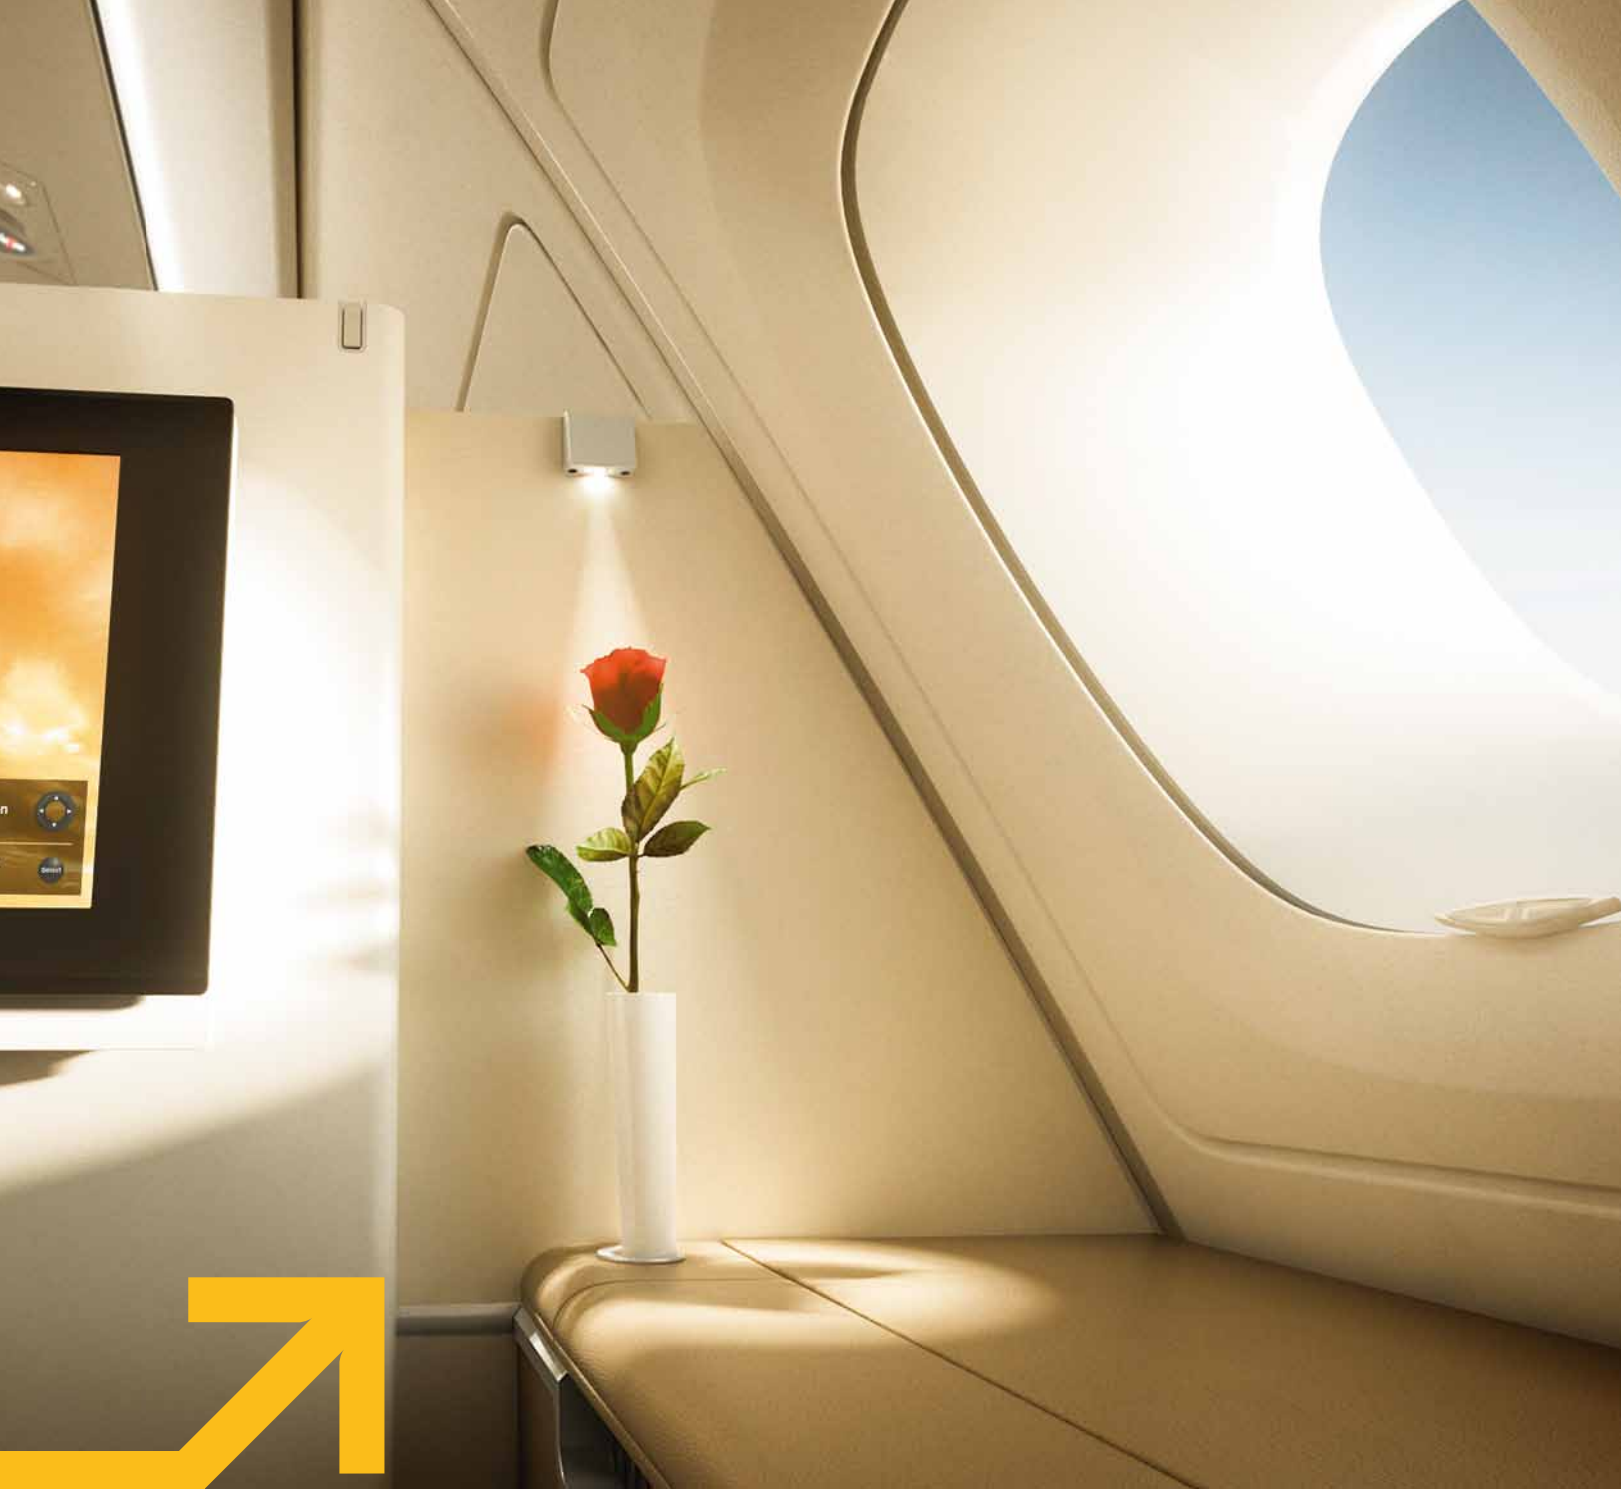

Produkt

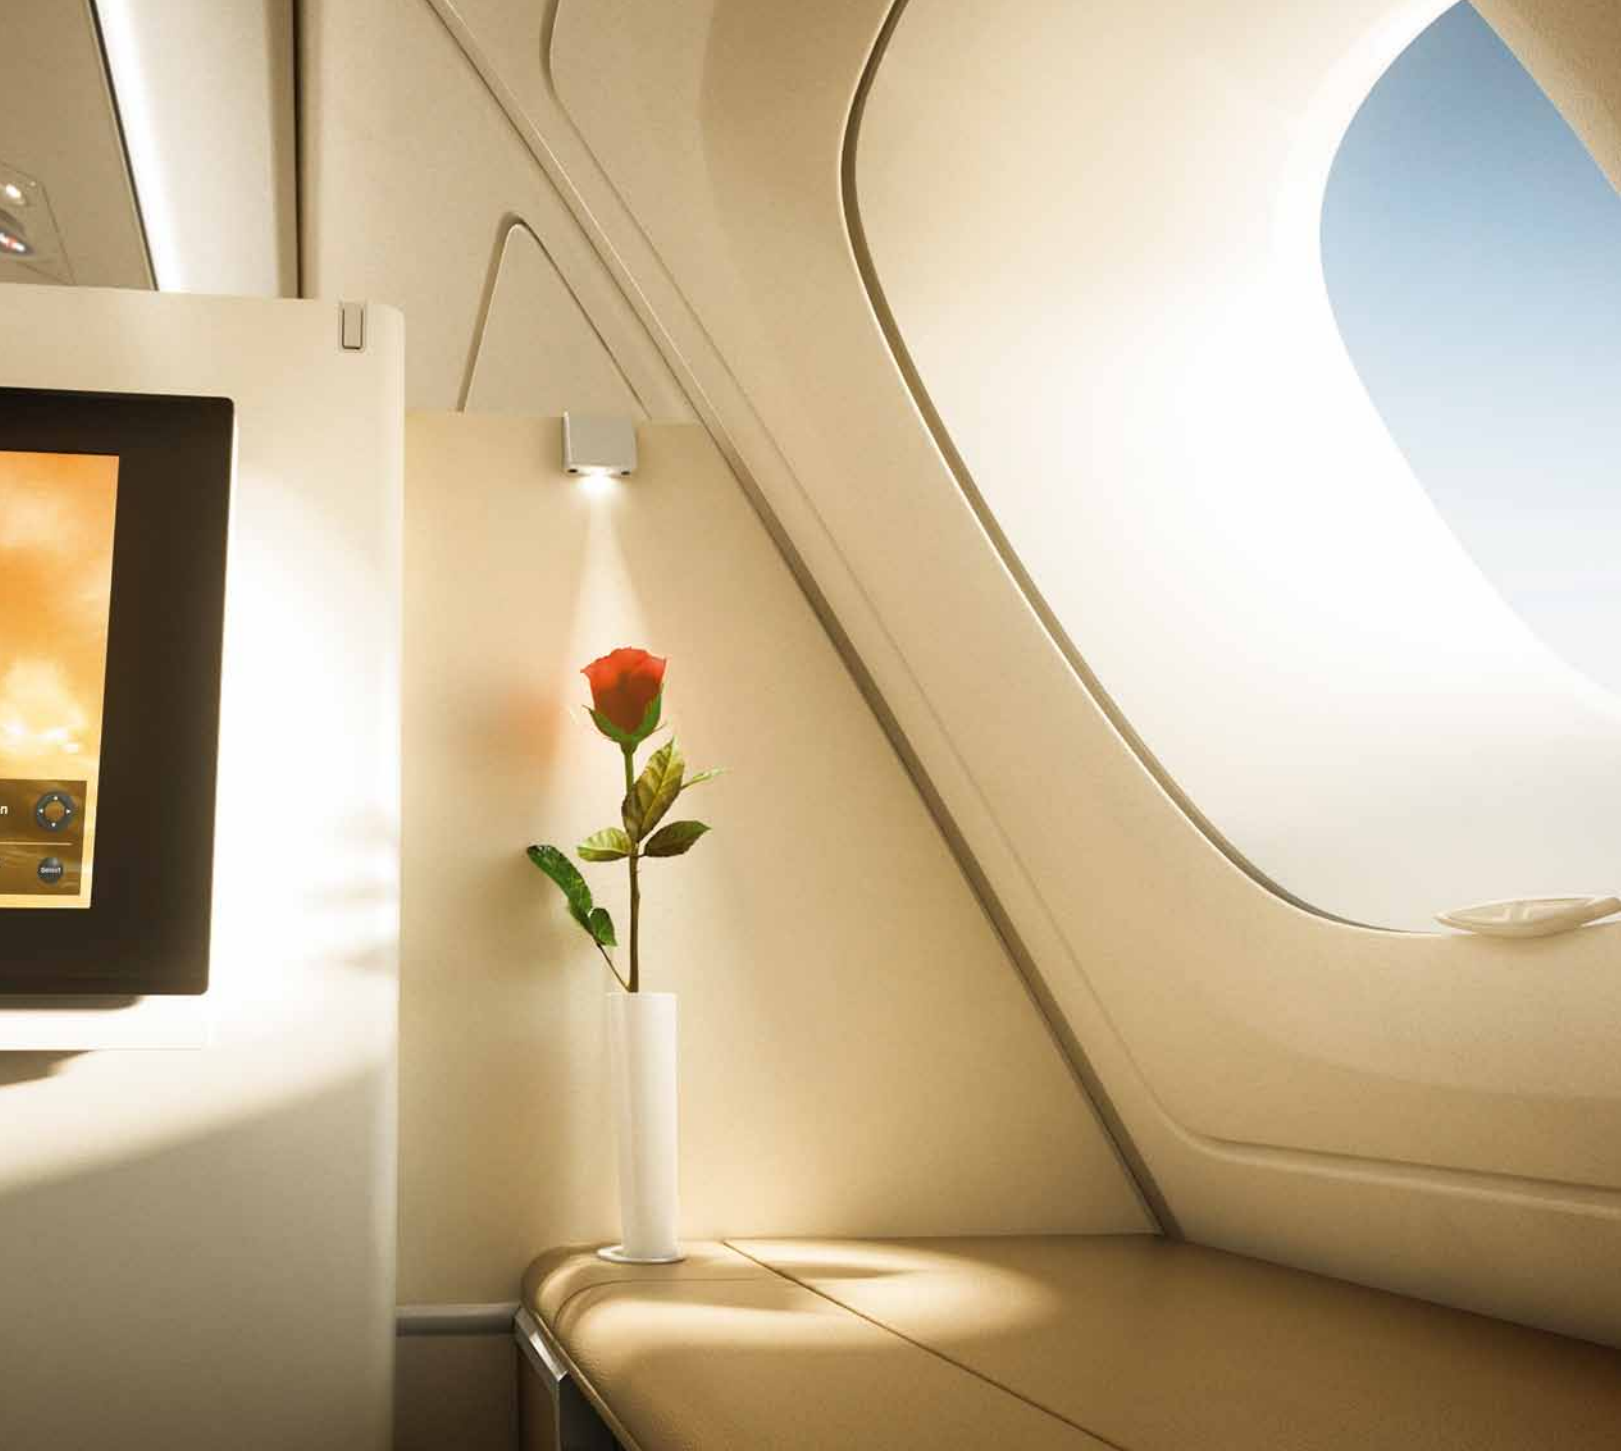

**Vorausschauend denken und handeln** // Attraktiv und komfortabel, aber auch wirtschaftlich und funktional – ein gutes Produkt muss viel leisten und unseren traditionell hohen Qualitätsansprüchen genügen. Diese vielschichtigen Faktoren bringen wir seit jeher mit sorgfältigen Planungen und weitsichtigen Entscheidungen in Einklang. Das Ergebnis sind hervorragende Produkte am Boden wie auch an Bord, die jedem Vergleich standhalten. Die Kunden schätzen unser durchdachtes Angebot mit viel Funktion und klarem Konzept. Das sich stetig verändernde Wettbewerbsumfeld erfordert mehr denn je zukunftsweisende Innovationen. Deshalb

investieren wir bis zum Jahr 2015 über 1 Mrd. EUR in neue Produkte: Europa-Kabine, Inflight Entertainment-System oder FlyNet an Bord, der Ausbau der Gates in Frankfurt und des Münchner Terminals 2 oder die Erweiterung des Lounge-Angebots am Boden – momentan sind so viele Neuerungen gleichzeitig in Planung und in Arbeit wie noch nie zuvor. Dabei richten wir unsere Investitionen strikt daran aus, was für unsere Kunden den höchsten Nutzen bringt und zugleich für uns wirtschaftlich möglich und sinnvoll ist. Die ständige Produktoptimierung auf Basis von Effizienz und Funktionalität hat sich für uns bewährt – und bleibt auch weiterhin unser Prinzip.

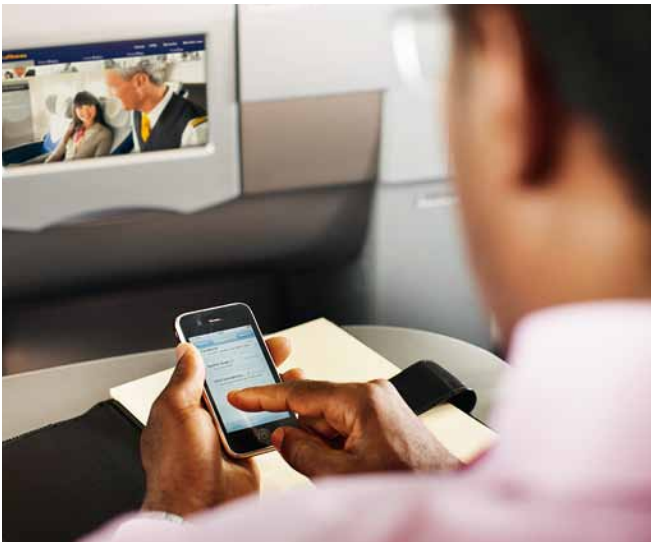

Mit FlyNet an Bord im Internet surfen.

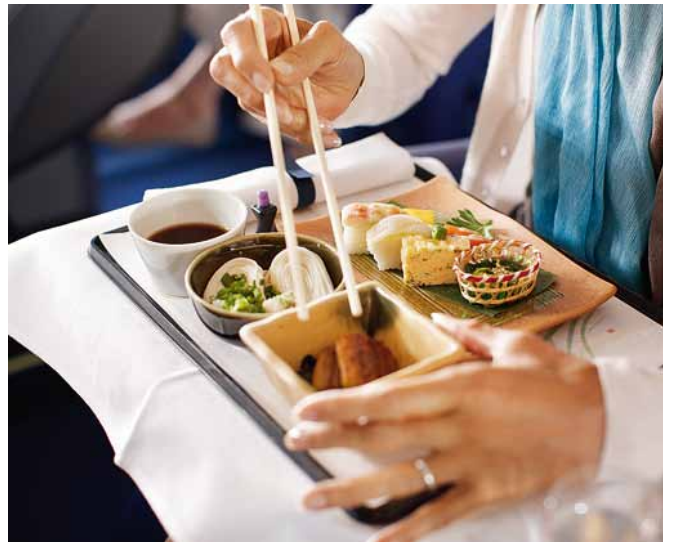

Hervorragende Produkte in der Kabine und am Boden.

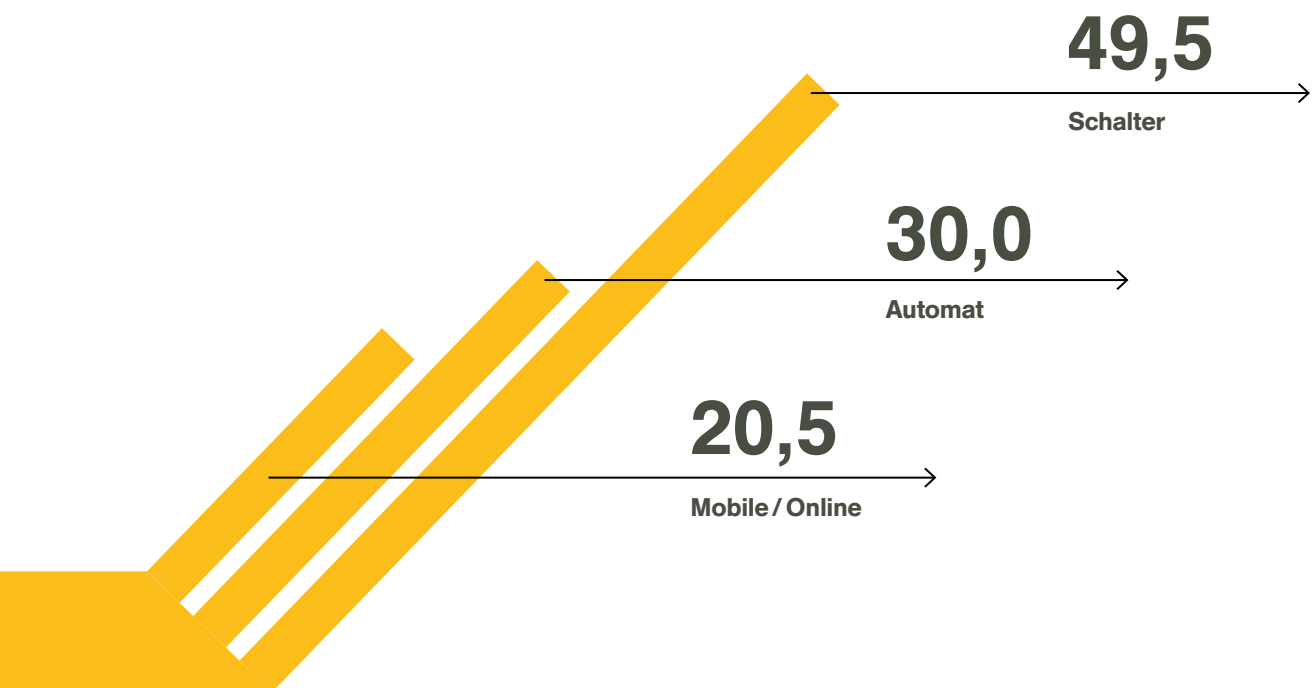

**Nutzung der unterschiedlichen  
Check-in-Möglichkeiten 2010 in %**

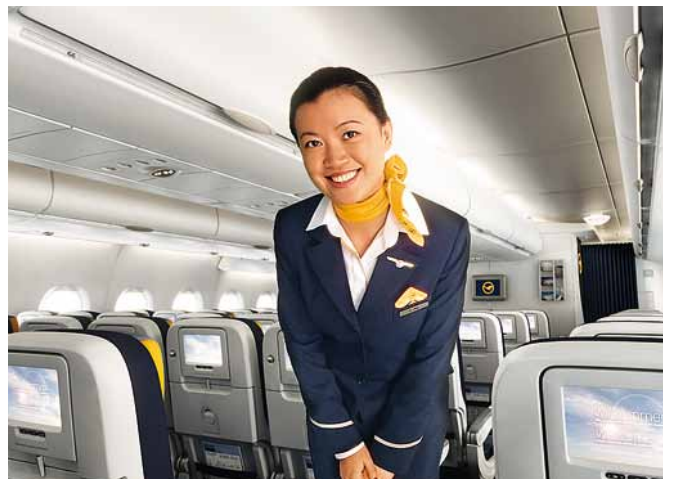

Lufthansa setzt seit jeher auf Qualität und Service.

# Top am Boden, top in der Luft.

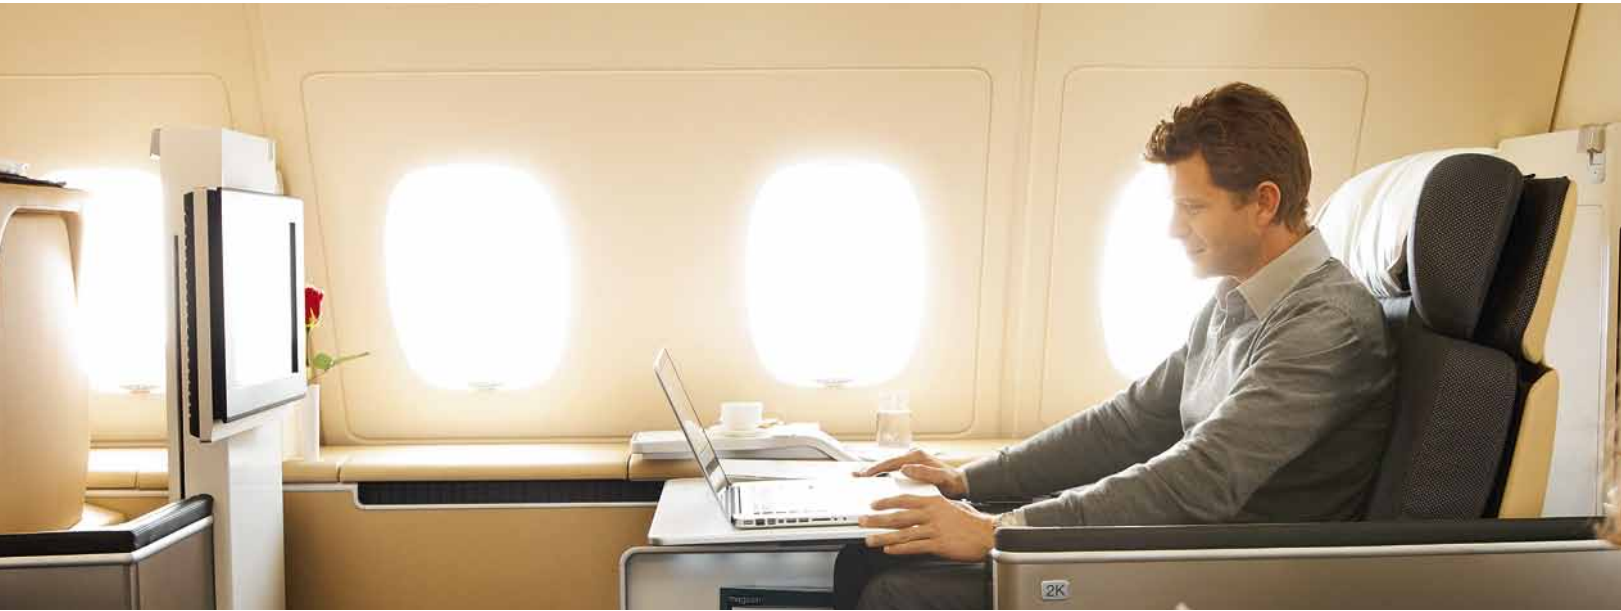

Wohlfühlatmosphäre in der A380 zum Arbeiten und Entspannen.

// Was erwarten unsere Kunden? Reisekomfort in jeder Klasse, reibungslose Prozesse am Boden, Abwechslung und aufmerksamen Service an Bord. Wer den Wünschen seiner Kunden gerecht werden will, muss ihnen zunächst einmal zuhören. Deshalb beziehen wir unsere Kunden frühzeitig in Entwicklungsprozesse ein.

**Erwartungen erfüllen und übertreffen** // Die Aufgabenstellung für neue Produkte und Services geben die Kunden selbst vor. Unsere Herausforderung besteht darin, sie optimal umzusetzen. Dass uns dies auch gelingt, zeigt sich zum Beispiel an der leisesten First Class der Welt an Bord der A380. Durch schallisolierende Trennvorhänge zur restlichen Kabine, eine spezielle Außenhautdämmung und einen Teppichboden mit Trittschallschutz befriedigen wir ein wesentliches Kundenbedürfnis: Ruhe.

Für ein angenehmes Ambiente in der ersten Klasse sorgt das exklusive Kabinendesign mit hochwertigen Materialien, dezenten Farben und klaren Formen. Der neu entwickelte Sitz verbindet Ergonomie mit Komfort und lässt sich zum besten flachen Bett seiner Klasse ausfahren. Die Business und Economy Class in der A380 setzen ebenfalls neue Maßstäbe in puncto Großzügigkeit und Freiraum. Das besondere Lichtkonzept in der gesamten Kabine trägt zusätzlich zur Wohlfühlatmosphäre über den Wolken bei.



**Komfort und Effizienz in Einklang bringen** // Mit der neuen Europa-Kabine ging im Dezember 2010 ein innovatives Bordprodukt für den Deutschland- und Kontinentalverkehr an den Start. Ziel war, ein attraktiveres Kabinendesign zu entwickeln, das mehr Raum für die Passagiere bei höherem Sitzkomfort bietet. Die neu konstruierten, schlankeren Sitze bringen nun gleich zwei entscheidende Vorteile mit sich: Sie geben den Gästen mehr Bewegungsfreiheit und ermöglichen aufgrund der besseren Raumausnutzung den Einbau zusätzlicher Sitze. Zusätzlich zur Neugestaltung des Kabineninterieurs wird ein neues Servicekonzept eingeführt, in dessen Rahmen dem Kunden auf innerdeutschen Strecken Snacks angeboten werden.

Um verbesserte Abfertigungsprozesse am Frankfurter Flughafen geht es beim Projekt „Jump“. Hier bringen vor allem diejenigen ihre Optimierungsvorschläge ein, die mitten im Geschehen sind: die Beschäftigten vor Ort. Rund 1.500 operative Mitarbeiter der Fluggastdienste haben mehr als 30 Verbesserungsmaßnahmen entwickelt, mit denen im Sinne der Kunden die Abfertigung in den Terminalbereichen A und B so reibungslos wie möglich gestaltet werden soll.

**LSG Sky Chefs** // Durch den Einsatz neuester Technologie bei der Produktion von Tiefkühlgerichten und innovativer Frische-Konzepte verbessert LSG Sky Chefs kontinuierlich kulinarische Genüsse über den Wolken.

**Lufthansa Cargo** // Die Testphase der RTLS-Technologie (Real Time Location System) ist abgeschlossen. Das Verfahren ermöglicht, Sendungen ständig in Echtzeit zu lokalisieren. Dies steigert die Qualität und spart Kosten.

**Lufthansa Technik** // Neben neuen Anwendungen für das Kabinenmanagement- und Bordunterhaltungs-System „nice®“ wurde auch die neue Generation des Produkts FlyNet auf den Weg gebracht. Damit bietet Lufthansa ihren Passagieren auf Interkontinentalflügen als erste Fluggesellschaft einen Breitband-Internetzugang an.

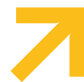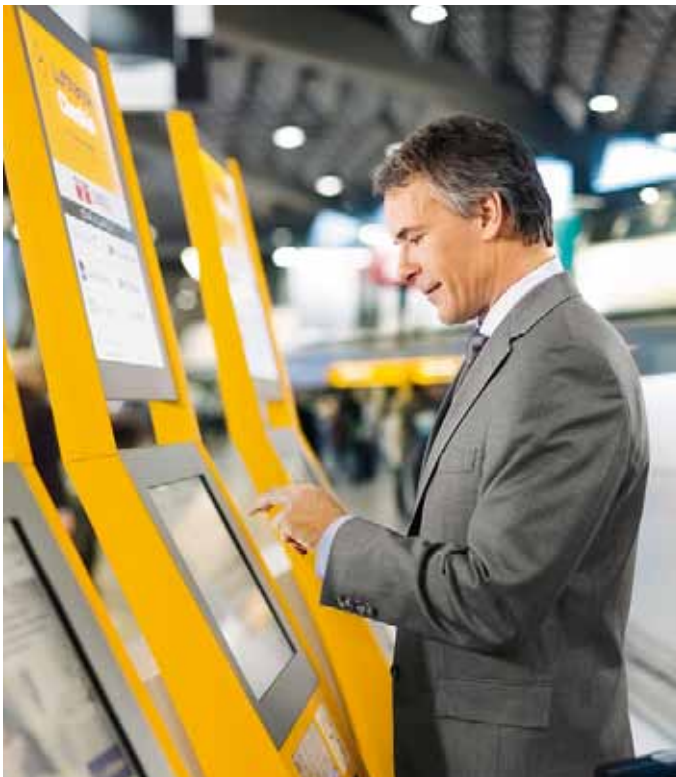

Service am Boden: Quick Check-in.

---

// Die Flotte der Lufthansa Gruppe wächst: 2010 hat der Konzern 56 neue Flugzeuge bestellt. Davon sollen acht Airbus A330-300 auf der Langstrecke eingesetzt werden, die 48 übrigen Flugzeuge im Europaverkehr. Neben Neuanschaffungen für die Lufthansa Passage und den Lufthansa Regionalverkehr ist auch eine Flottenaufstockung bei den Verbund-Airlines SWISS und Germanwings vorgesehen. Insgesamt hat der Lufthansa Konzern 155 moderne und treibstoffeffiziente Flugzeuge auf der Bestellliste, die bis 2015 sukzessive ausgeliefert werden.

---

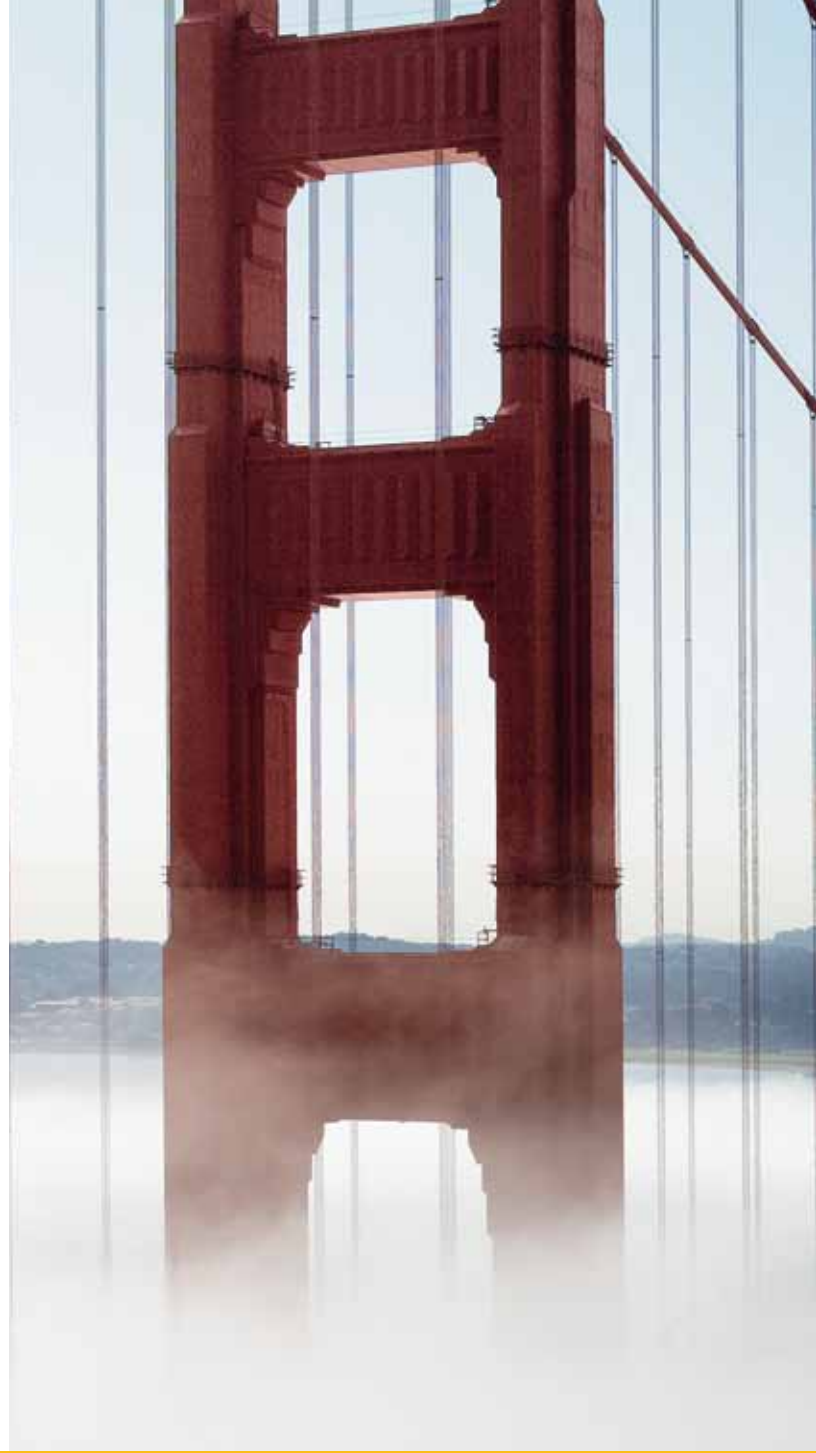

# Der Weitblick, Größe und individuelle Stärke zu verbinden.

// Viele einzelne Teile, die sich ergänzen und ein starkes Ganzes ergeben – so funktioniert, kurz gesagt, unser Erfolgsmodell. Unter dem gemeinsamen Konzerndach bringen die Verbund-Airlines ebenso wie alle Geschäftsfelder ihre Stärken ein und lassen so ein kraftvolles Netzwerk entstehen.



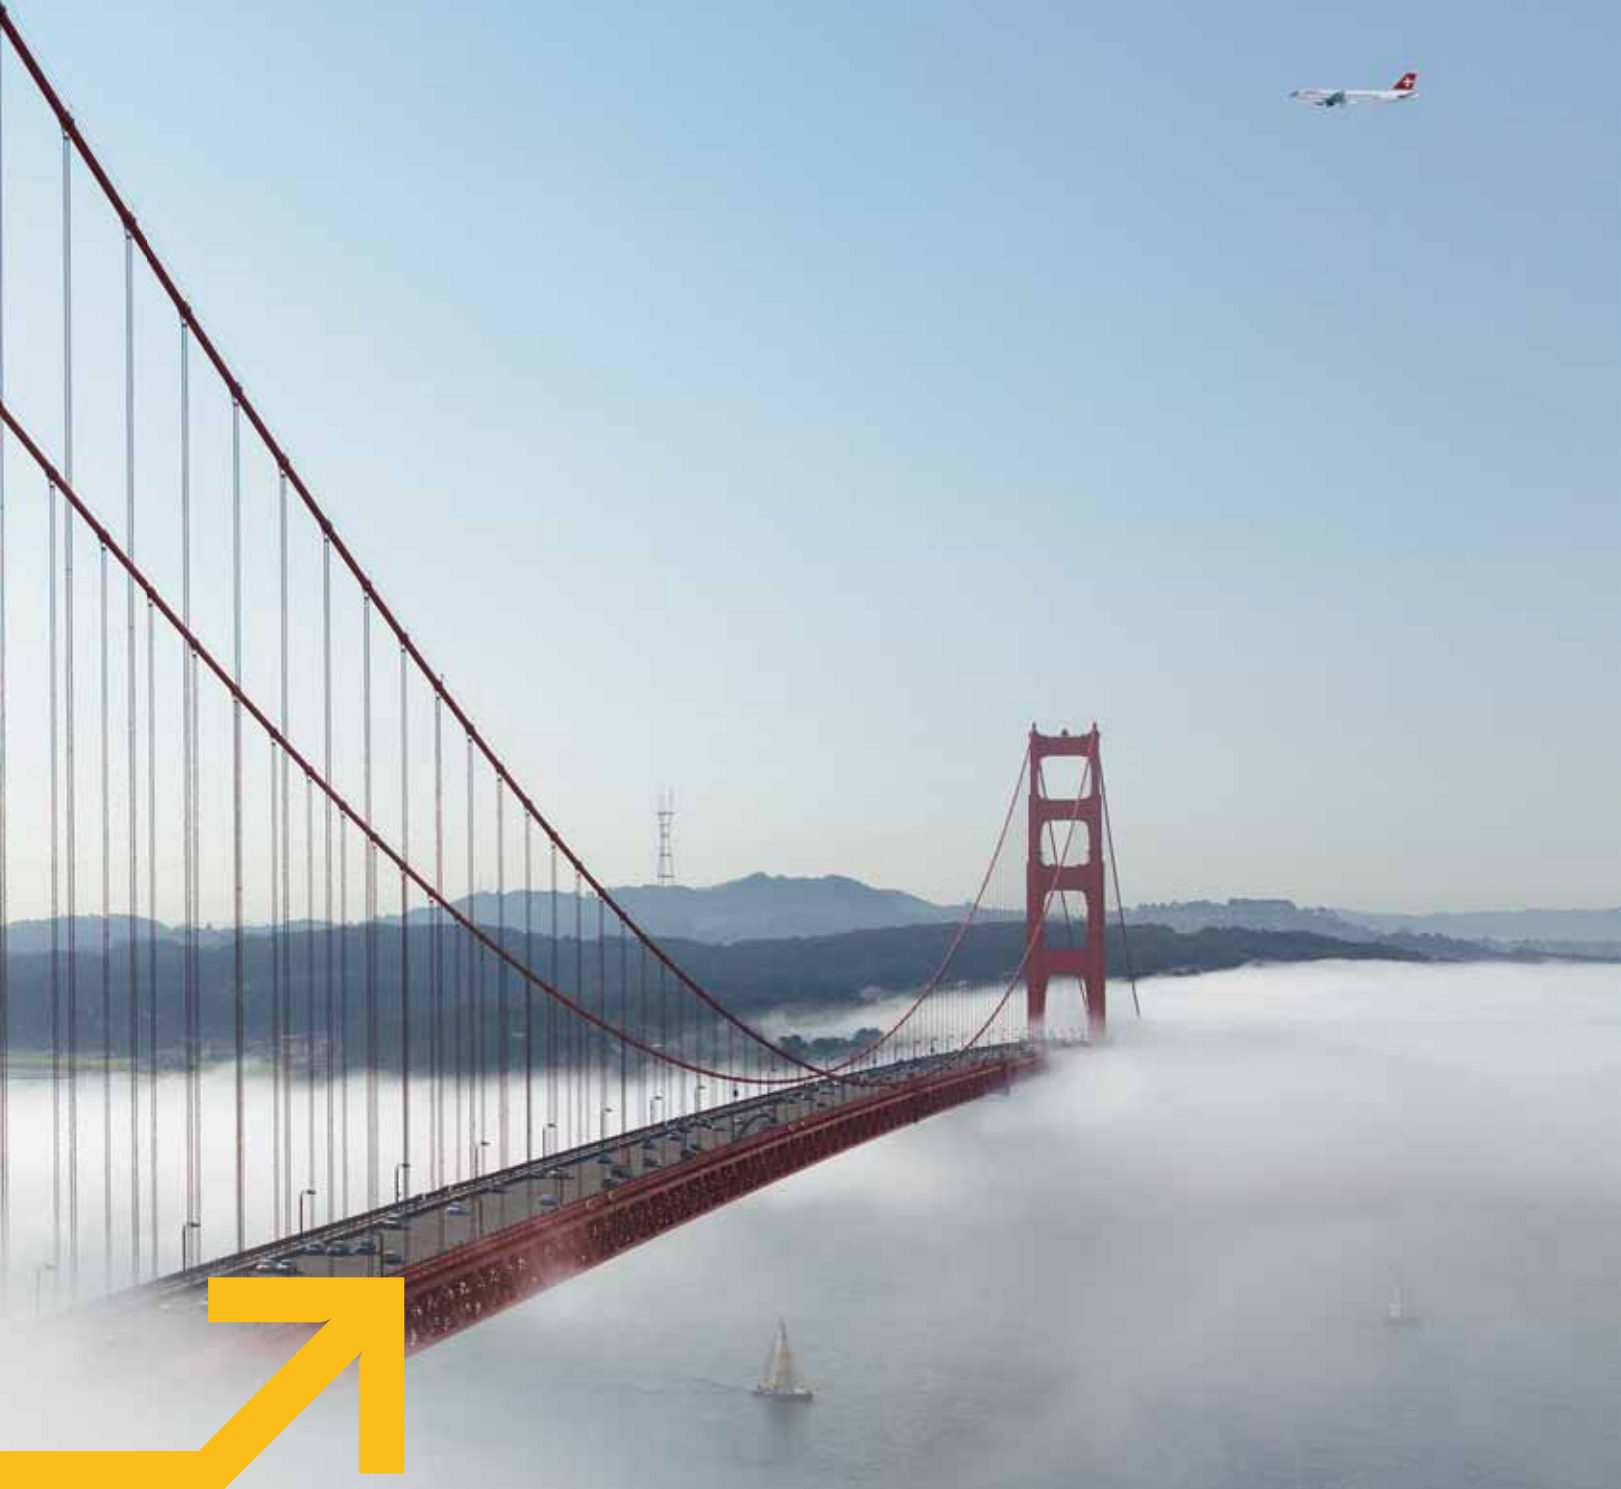

# Verbund

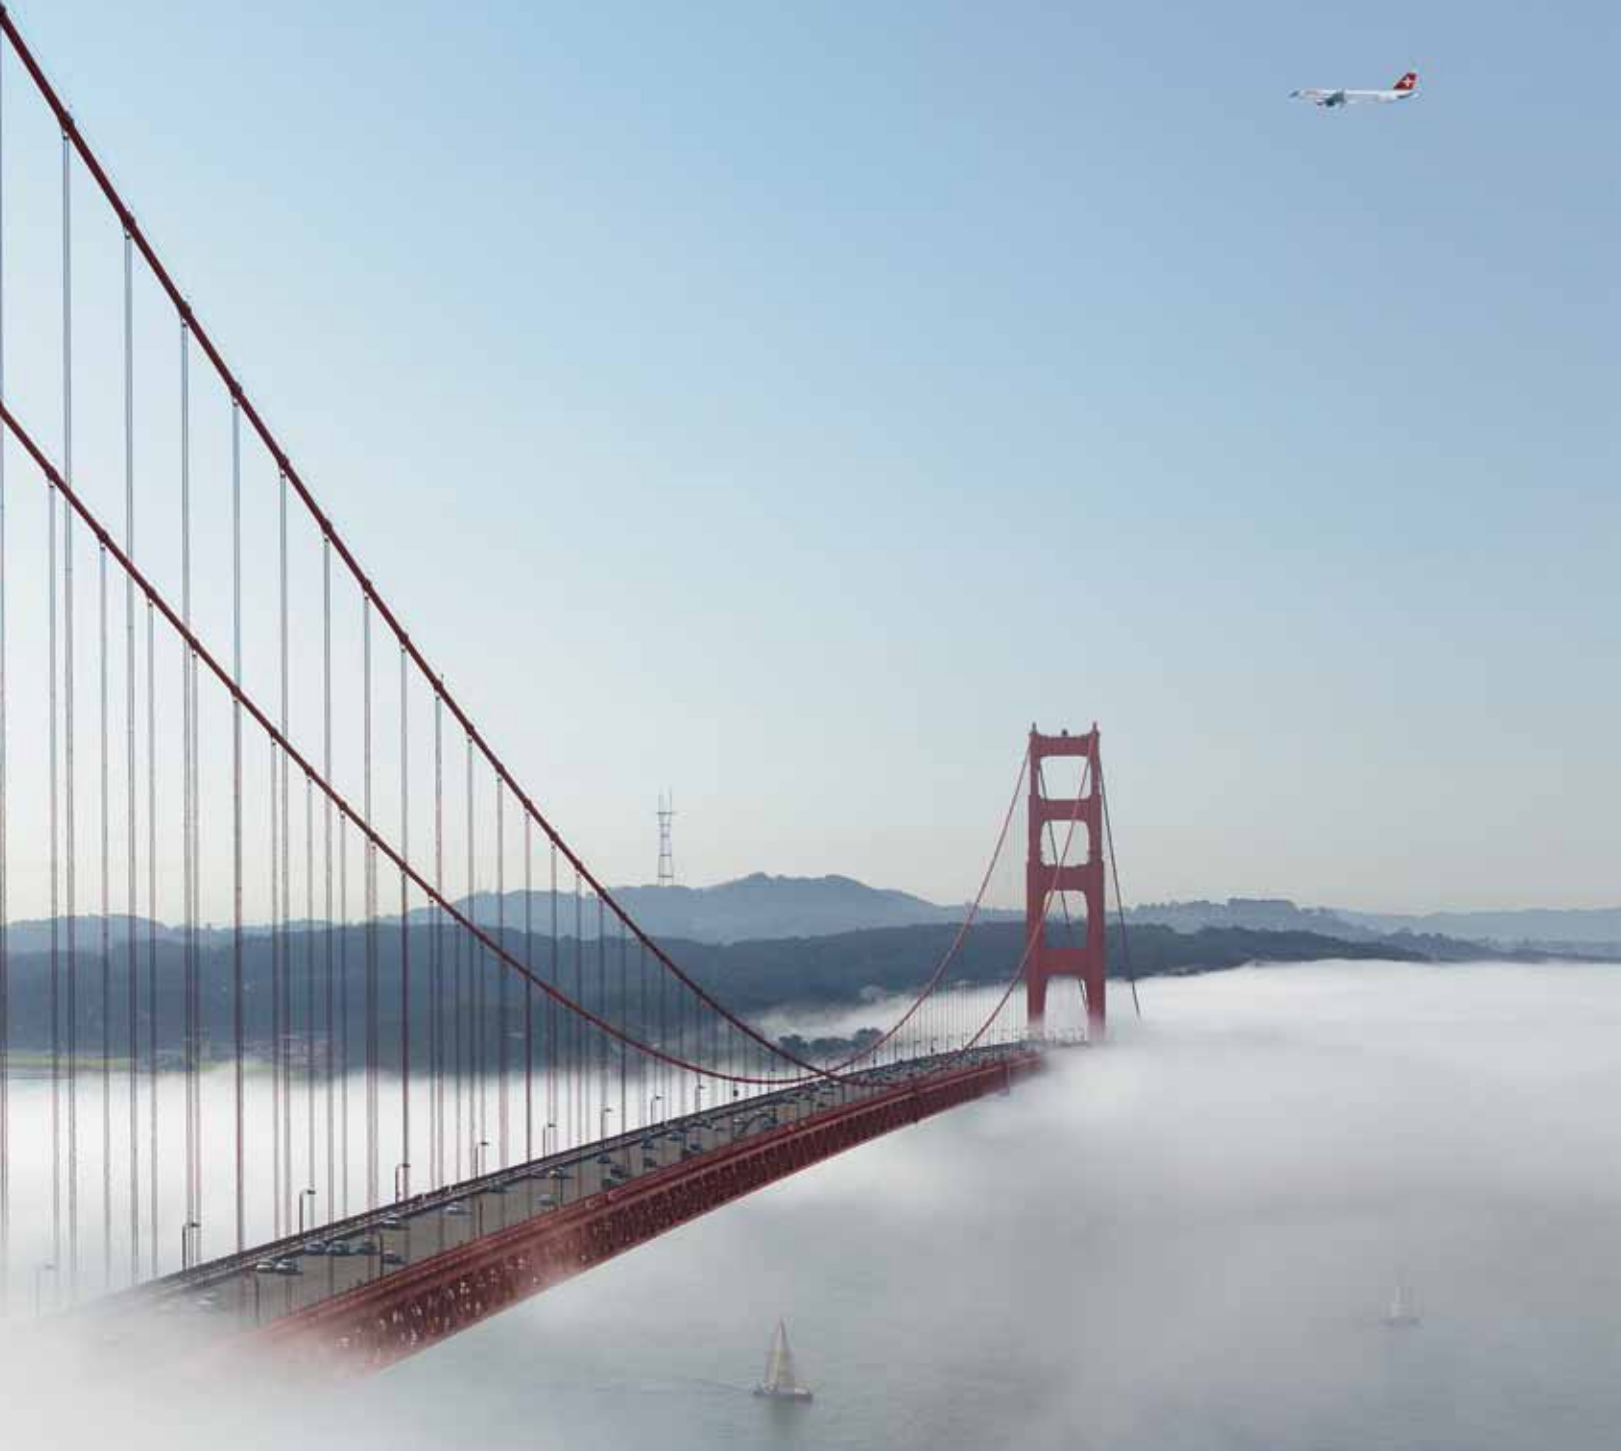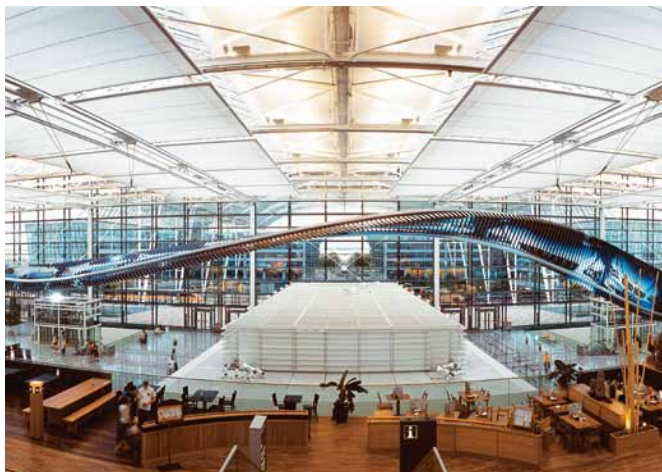

Drehkreuz München: Grundstein für die Erweiterung des Airline-Verbunds.

**Kräfte bündeln** // Eine weltweit wie regional vielschichtige Aufstellung und eine breite Kundenstruktur zählen zu den Erfolgsfaktoren unserer Verbundstrategie im Passagierverkehr. Um Wachstumsperspektiven zu sichern, haben wir als Ergänzung zu unserem Heimat-Hub Frankfurt frühzeitig ein zweites Drehkreuz in München gegründet. Eine zukunftssträchtige Entscheidung, legte sie doch den Grundstein für die Integration weiterer Drehkreuze im Zuge der Erweiterung des Airline-Verbunds. Mit SWISS, Austrian Airlines und bmi sind auch die strategisch wichtigen Drehkreuze Zürich und Wien

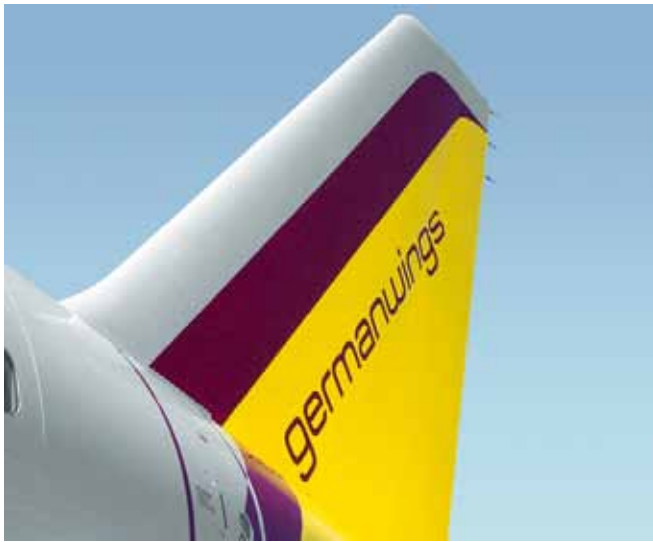

Im europäischen Markt vertritt Germanwings den Verbund im No-Frills-Segment.

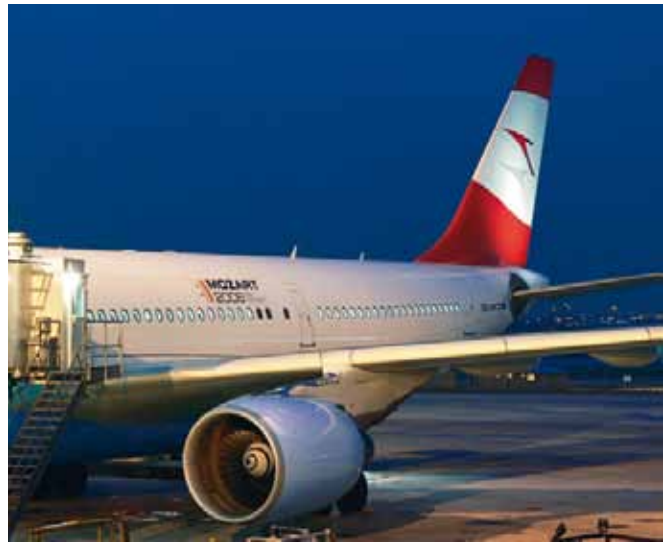

Lufthansa Cargo und Austrian Cargo bündeln ihre weltweiten Aktivitäten.

// Effizienz rauf, Kosten runter: Die Nutzung von Synergien im Konzernverbund eröffnet viele Möglichkeiten. Dies betrifft das dadurch immer attraktiver werdende Streckennetz und die Zusammenarbeit mit den Geschäftsfeldern Technik, IT Services und Catering.

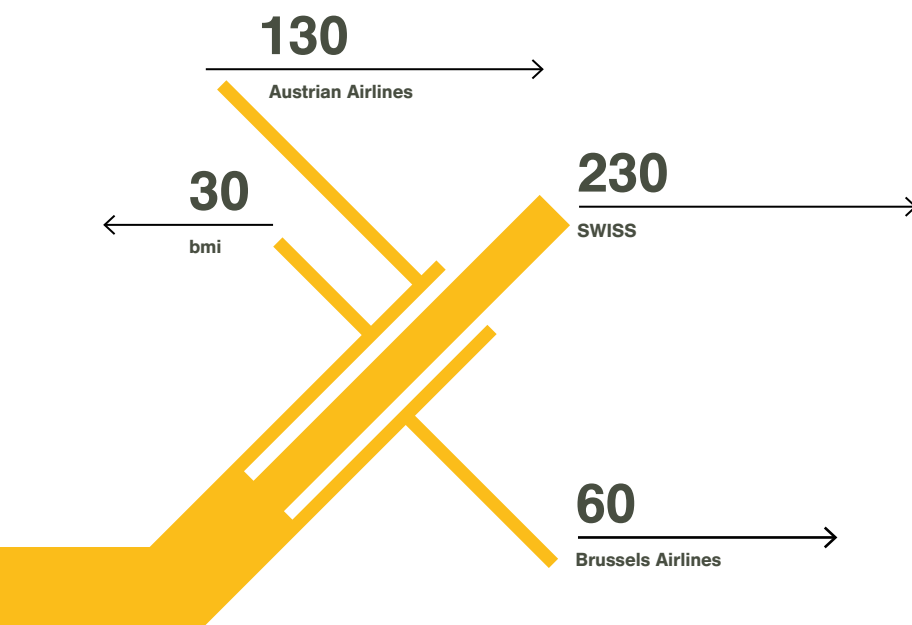

**Derzeit erwartete Synergien im Verbund in Mio. €**

hinzugekommen. Und obwohl wir bei Brussels Airlines bislang noch mit einer Minderheitsbeteiligung aktiv sind, trägt auch diese Gesellschaft bereits zu unserem Netzwerk bei und verstärkt dieses zum Beispiel in Afrika. Im No-Frills-Segment ergänzt Germanwings den Verbund. Auch im Luftfrachtbereich bündeln wir unsere Aktivitäten:

Lufthansa Cargo und Austrian Airlines optimieren die Frachtverkehrsströme über die Drehkreuze Frankfurt, München und Wien, legen den weltweiten Vertrieb zusammen und vereinheitlichen Produkte und Prozesse. Neben dem erhöhten Kundennutzen ist dies auch ein wichtiger Beitrag zur Synergieerzielung.

# Individuell stark, gemeinsam erfolgreich.

// Im Verbund auf Kurs: In der Philosophie der Lufthansa kommt der dezentralen Marktstrategie eine Schlüsselrolle zu. Dies gilt für die Geschäftsfelder des Konzerns ebenso wie für die Verbund-Airlines, die eigenständig in ihrem Heimatmarkt arbeiten – mit eigener Identität und eigenem Produkt.

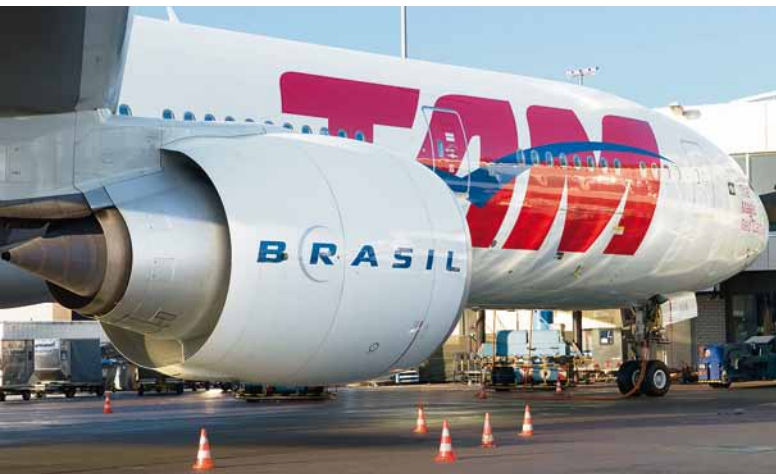

TAM ist seit Mai 2010 Mitglied der Star Alliance.

**Starkes Bündnis** // Lufthansa und die Verbund-Airlines stärken ihr Netzwerk durch eigenes Wachstum und das ihrer Partner. So wächst auch die Star Alliance, das größte Luftfahrtbündnis der Welt, weiter: Seit Mai 2010 ist die brasilianische Fluggesellschaft TAM neues Mitglied. Von hoher strategischer Bedeutung ist auch der für 2012 geplante Beitritt von Avianca-TACA und Copa Airlines. Er ermöglicht einen deutlichen Ausbau der Präsenz im Wachstumsmarkt Lateinamerika. Lufthansa begleitet Avianca-TACA als eine Art Mentor bei den Vorbereitungen zur Aufnahme in das Bündnis. Und sie unterstützt auch die afrikanische Ethiopian Airlines auf dem Weg zu ihrer für 2011 angestrebten Star Alliance-Mitgliedschaft.

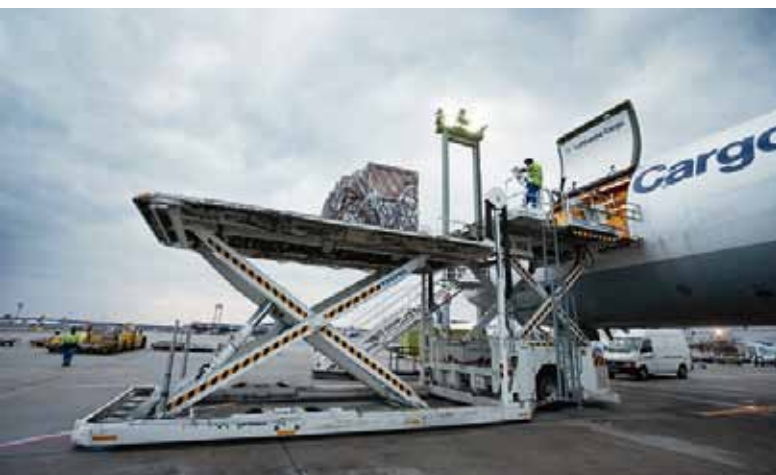

Gemeinsamer Erfolg im Luftfrachtbereich.

**Konzernweite Zusammenarbeit** // Die Kooperation im Konzern geht über Geschäftsfeldgrenzen hinweg. So hat Lufthansa Cargo 2010 nicht nur den wirtschaftlichen Aufschwung für eine beeindruckende Ergebniswende genutzt, sondern auch ihr Angebot durch Partnerschaften weiterentwickelt. Die Integration der Austrian Cargo verdichtet das Netzwerk weiter und bietet mehr Kapazität und Flexibilität.

Dies ist nur ein Erfolgsbeispiel aus dem Konzernverbund, in dem 2010 alle Geschäftsfelder zum positiven Gesamtergebnis beigetragen haben. Sämtliche Bereiche profitieren dabei von zielgerichteten Kostensenkungsprogrammen und Synergiepotenzialen, mit denen sie die Effizienz und damit die Wettbewerbsfähigkeit steigern.



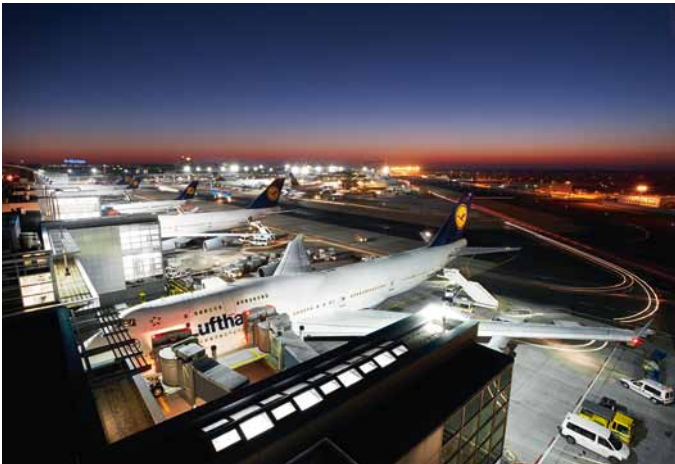

Kostensenkung durch optimierte Netz- und Wartungsplanung.

**Maßnahmen tragen Früchte** // Das umfassendste Programm vollzieht Lufthansa Passage mit Climb 2011. Dem Ziel, bis Ende 2011 nachhaltig 1 Mrd. EUR einzusparen, sind wir mit rund 230 Mio. EUR Kostensenkung 2010 bereits näher gekommen. Auch an den Schnittstellen zu den Partnern der Lufthansa Passage wurden Sparpotenziale identifiziert: So können zum Beispiel bei der Flugzeugwartung durch eine verbesserte Abstimmung zwischen Netz- und Wartungsplanung Ressourcen kostensparender eingesetzt werden. Mit EU-DIREction startete ein Teilprojekt von Climb 2011, das unter anderem eine Reduzierung der im Kontinentalverkehr eingesetzten Flotten von neun auf vier vorsieht. Auf Kurs befinden sich auch das Sanierungsprogramm „Austrian Next Generation“ der Austrian Airlines und die Restrukturierung der bmi. SWISS hat die Sanierung bereits geschafft, doch auch hier wurden in der Finanzkrise Maßnahmen zur weiteren Kostensenkung mit Energie vorangetrieben.

# 1,0 Mrd. EUR

**nachhaltige Ergebnisverbesserung  
durch Climb 2011 angestrebt**

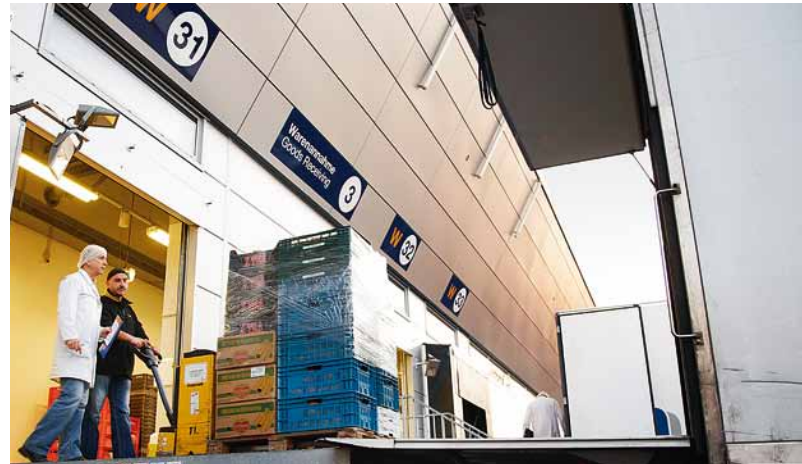

LSG Sky Chefs trägt mit gestiegenem Gewinn zum Konzernergebnis bei.

**Solide Basis für Aufwärtstrend** // Von hoher Bedeutung für die finanzielle Stabilität des Konzerns sind auch die Dienstleistungsgesellschaften. Mit soliden Ergebnissen sorgen sie für den Schub, mit dem das Airline-Geschäft abheben kann. So lieferte Lufthansa Technik als weltweit führender Dienstleister für Wartung, Reparatur und Überholung ziviler Flugzeuge auch 2010 hohe Ergebnisbeiträge. Lufthansa Systems, unser Anbieter von Lösungen, die Airline- mit IT-Know-how verbinden, steuerte ebenfalls einen operativen Gewinn zum Konzernergebnis bei. Das Gleiche gilt für LSG Sky Chefs, die weltweite Nummer eins unter den Catering-Dienstleistern, die 2010 ihren operativen Gewinn weiter steigerte.

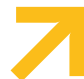

Striktes Kostenmanagement und Ausrichtung auf Qualität und Wachstum – nach diesem Prinzip arbeiten wir weiter an unseren Zielvorgaben. Ein reger Wissensaustausch im Konzern trägt dazu entscheidend bei. Unsere Vielfalt ist eine wichtige Quelle für Know-how und Innovationen. Eines von vielen Beispielen ist das Projekt „Fuel Efficiency“ – eine konzernweit angelegte Initiative zur Erhöhung der Treibstoffeffizienz. Durch den „Fuel Day“, ein Treffen von Vertretern aller Verbund-Airlines zum Thema, wird der Wissensaustausch in diesem Bereich vorangetrieben.

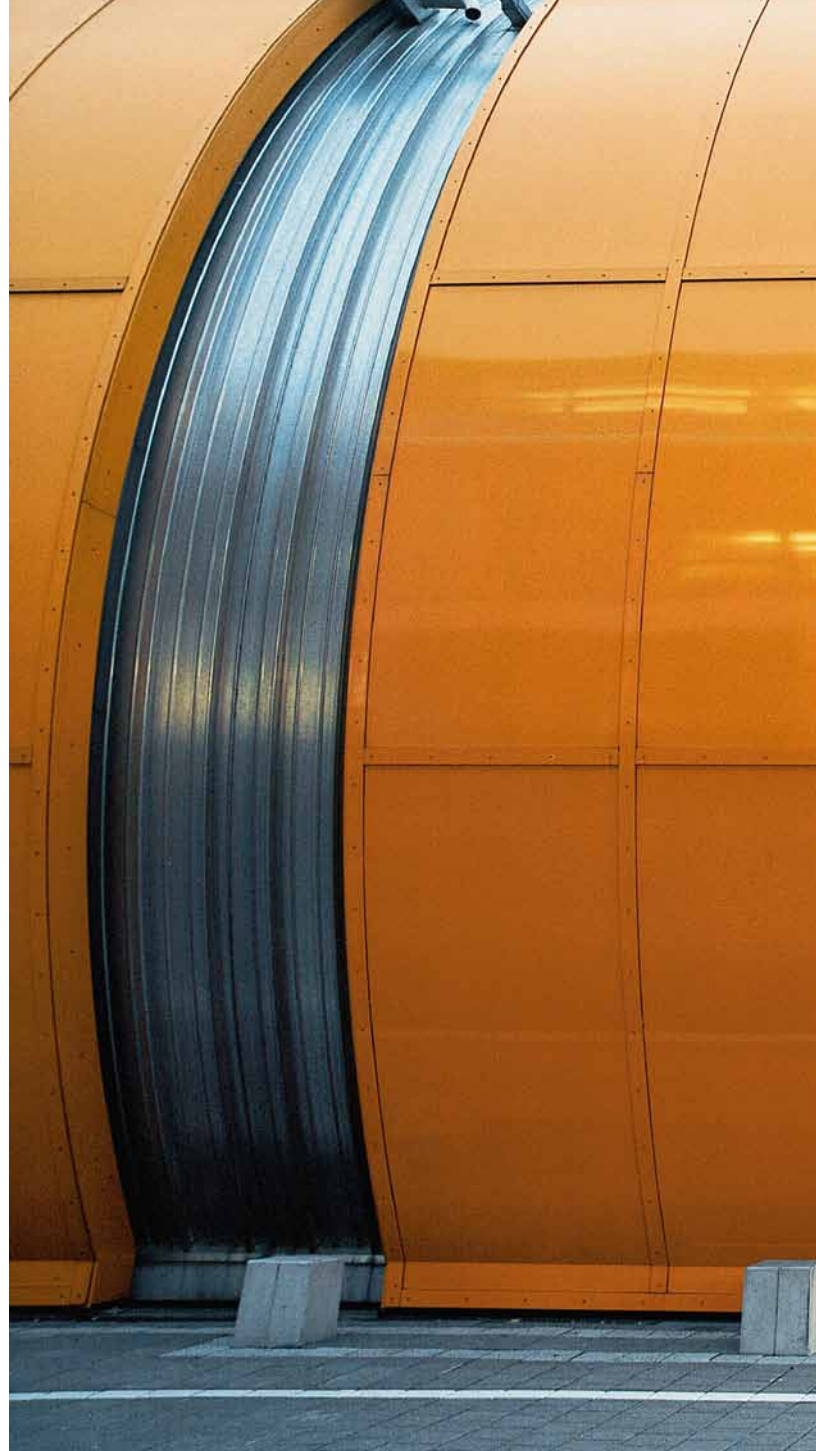

# Der Weitblick, mit Spitzentechnik das Wachstum zu beflügeln.

// Lufthansa steht traditionell für Technologie auf höchstem Niveau. Bei der Entwicklung zukunftsweisender Lösungen orientieren wir uns an Sicherheit und Kundenmehrwert. Wir streben nach Innovationen, die auch der Gesellschaft und Umwelt nutzen. Denn nachhaltiges Wirtschaften ist wesentlicher Bestandteil unserer Unternehmensphilosophie.



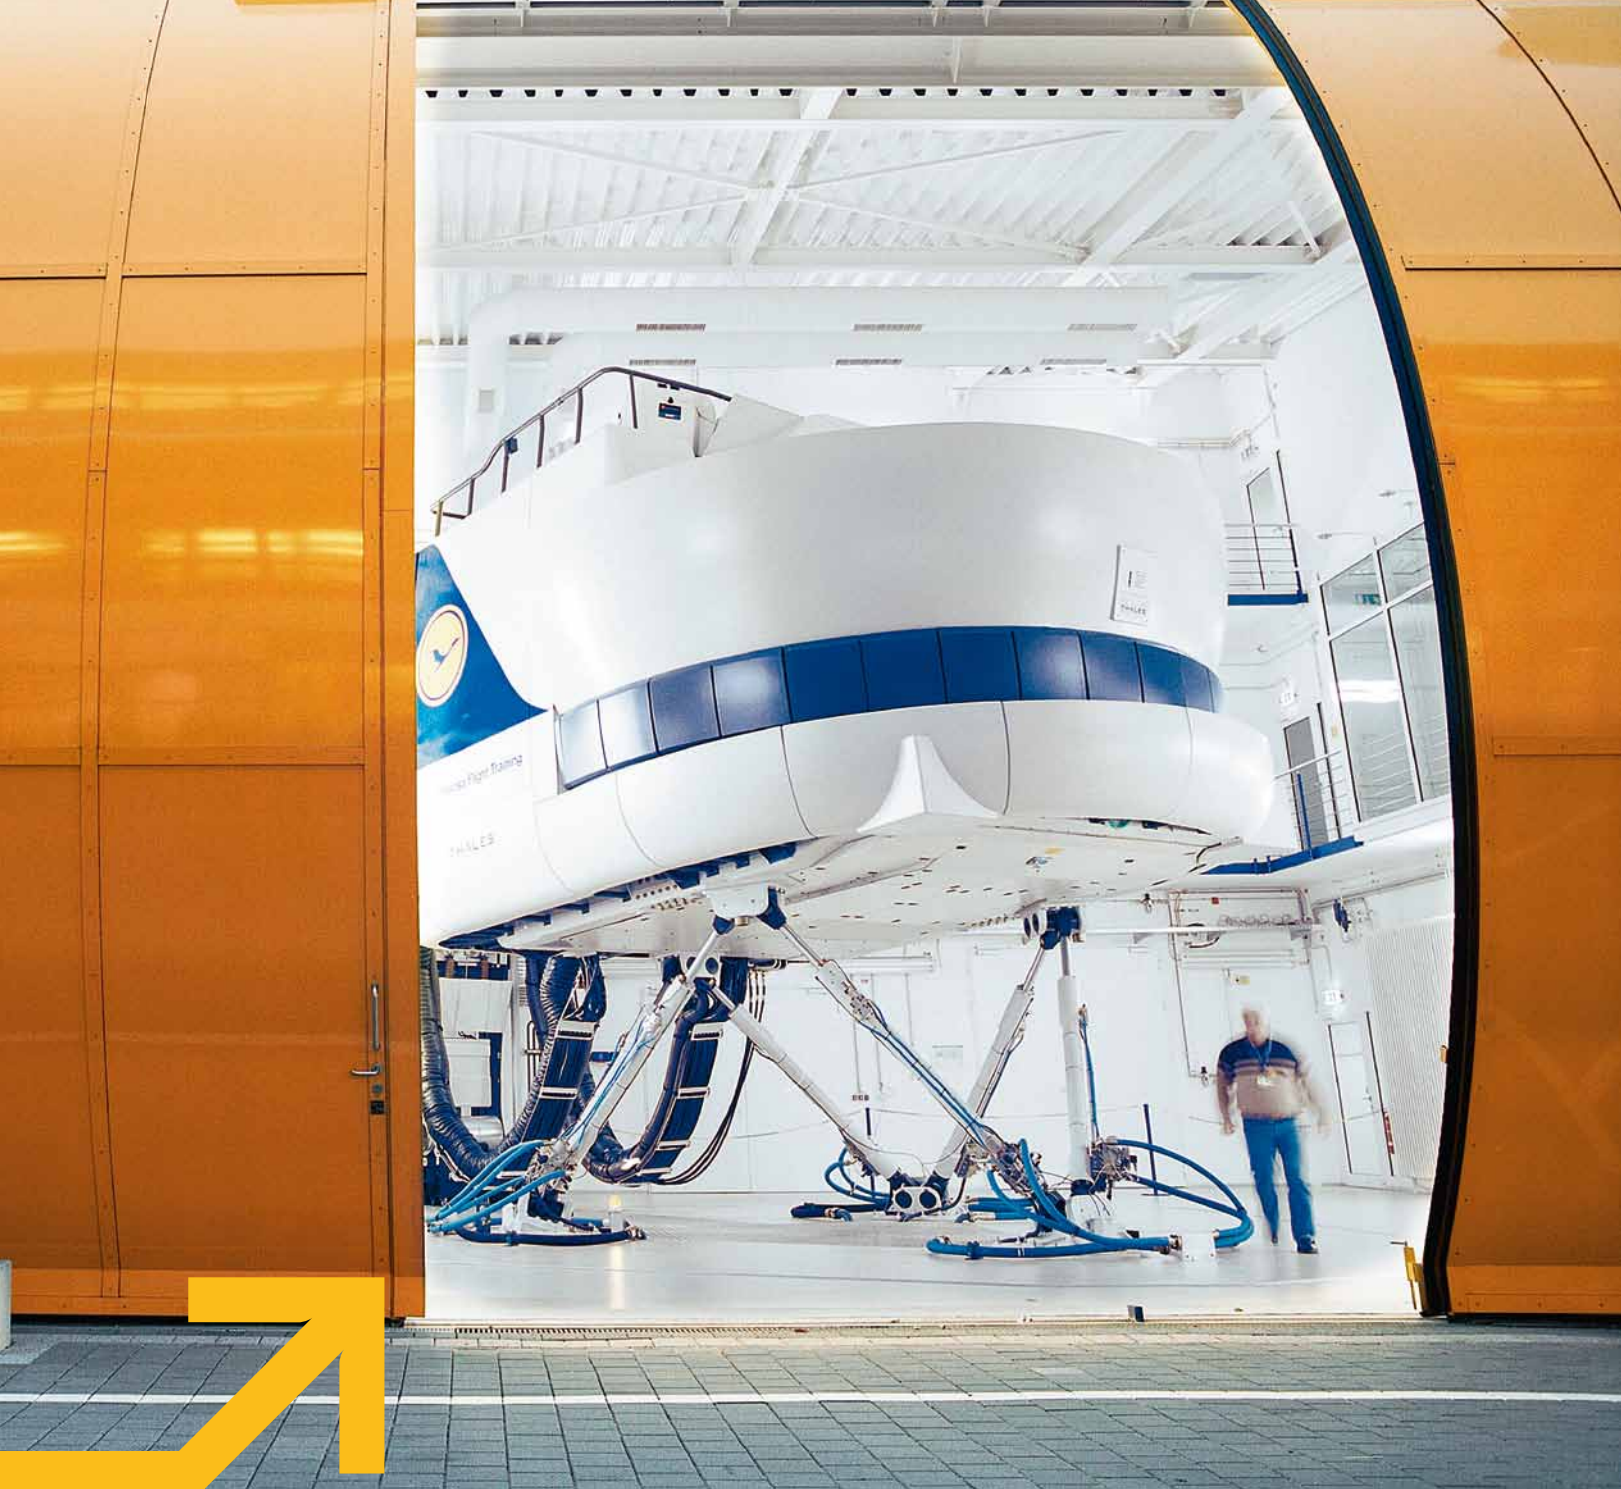

# Technologie



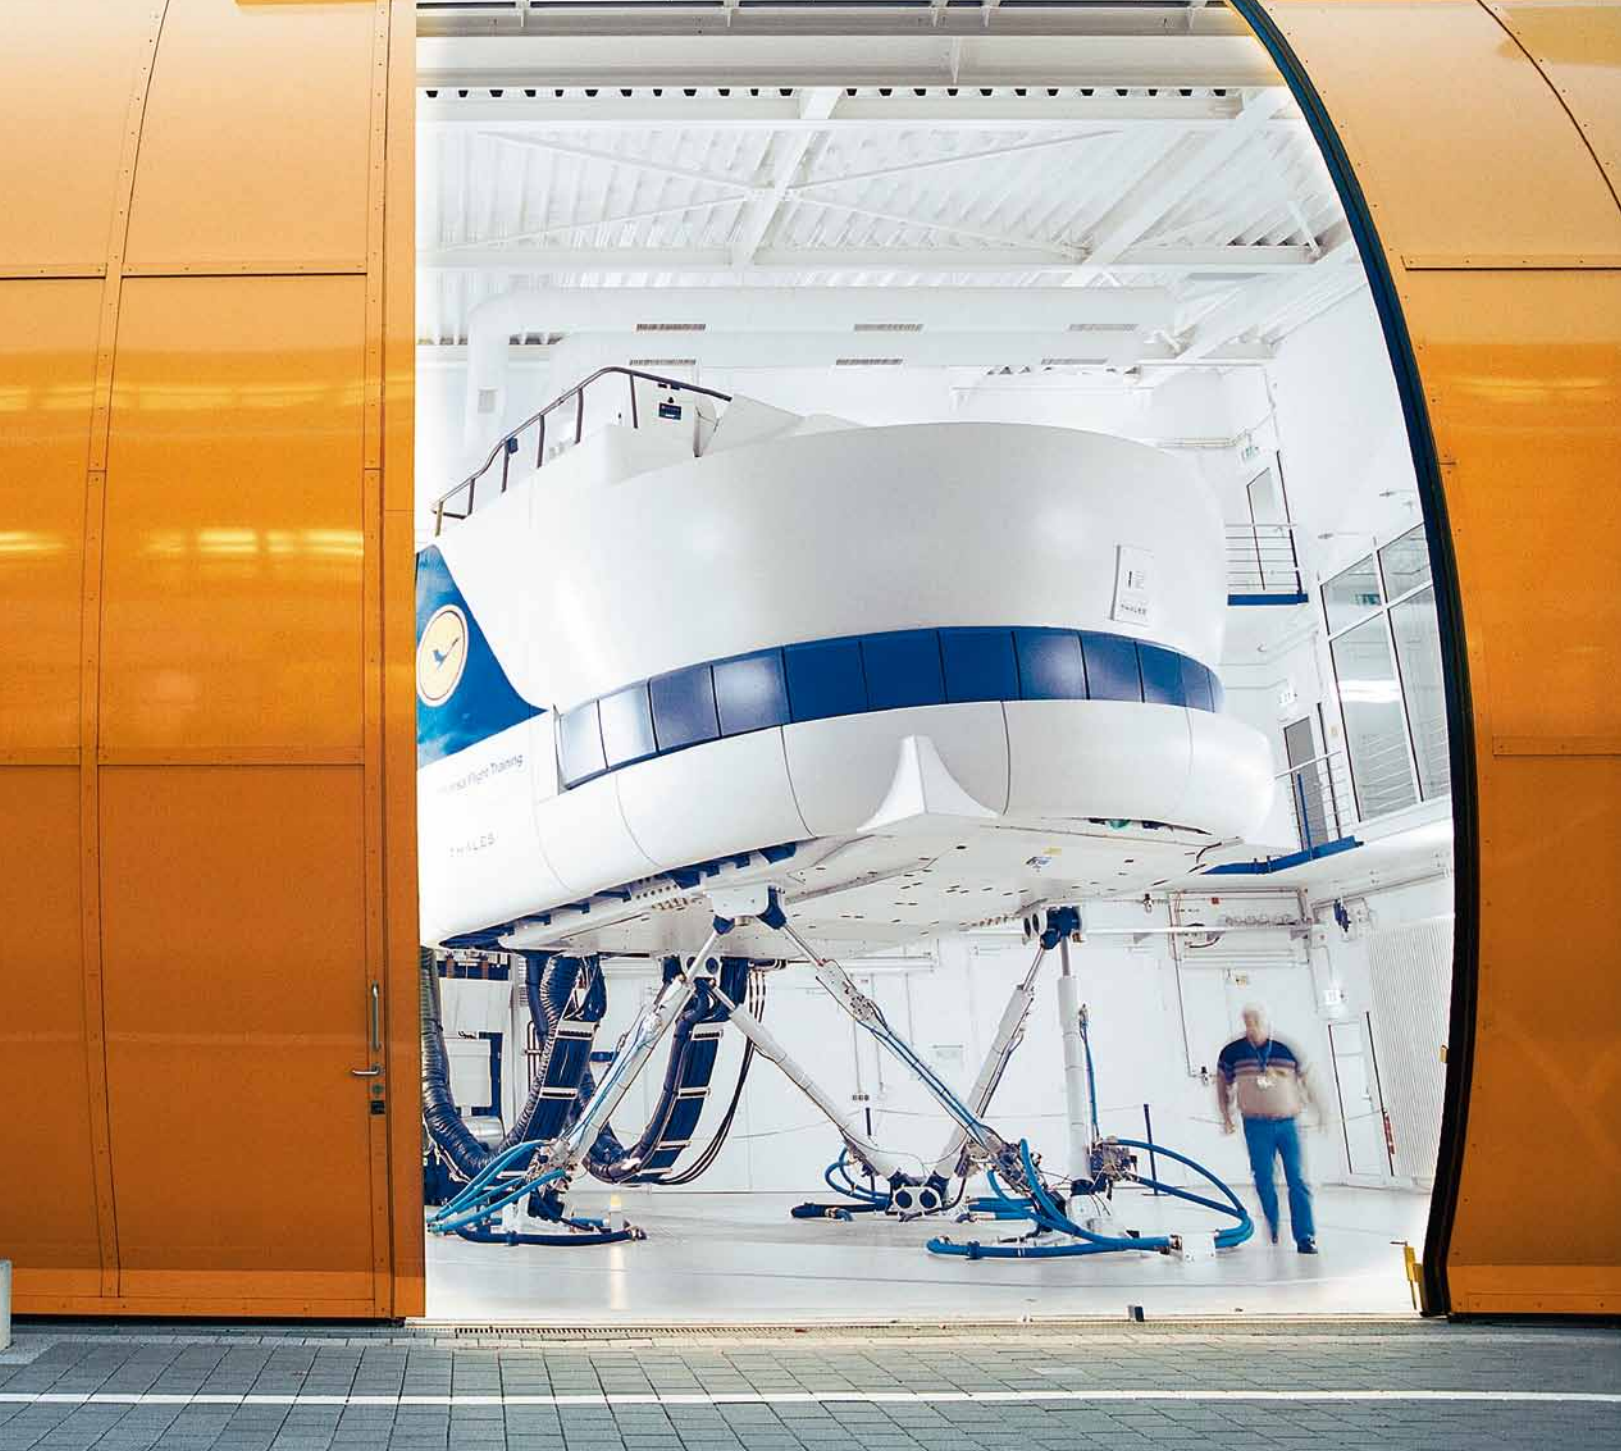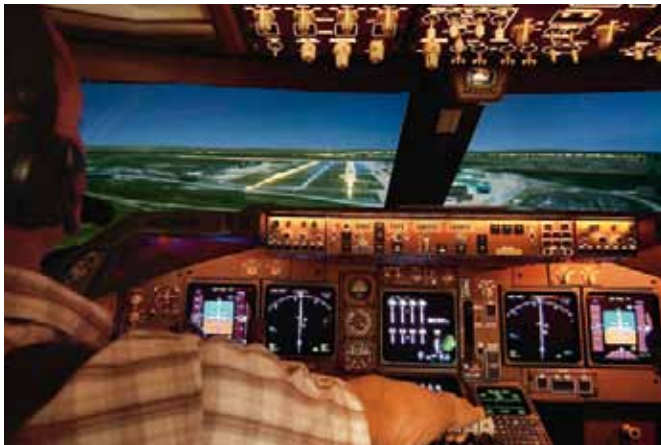

Training im Flugsimulator für die B747.

**Hightech ist unser Motor** // Technische Kompetenz gehört seit jeher zu unseren Stärken. In der Spitzentechnologie made by Lufthansa sehen wir einen bedeutenden Wachstumstreiber und wichtigen Beitrag zur unternehmerischen Verantwortung. Mit großem Engagement arbeiten wir daran, sie vorausschauend und kontinuierlich weiterzuentwickeln – unabhängig von den Rahmenbedingungen, in denen wir uns befinden. Know-how gepaart mit höchster Sicherheit: Darin sind unsere Geschäftsbereiche täglich Schrittmacher – von den Spezialisten der Lufthansa Technik bis hin zur Lufthansa Flight Training, die mit modernster Simulatortechnik praxisnahe Ausbildung garantiert.

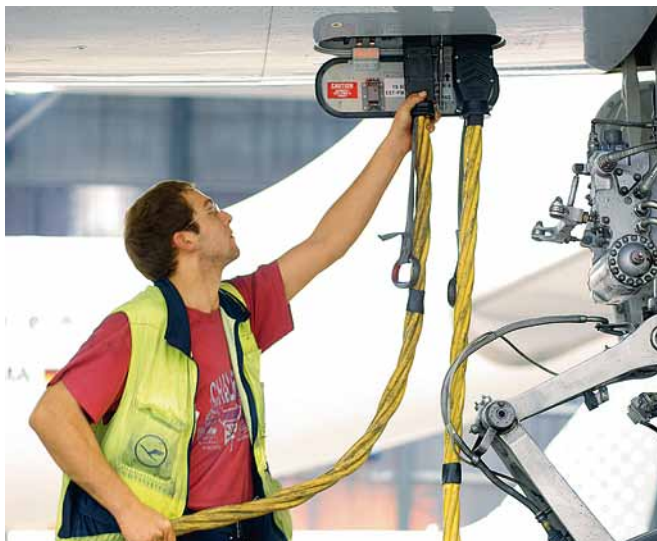

Technisch kompetent in der Flugzeugwartung.

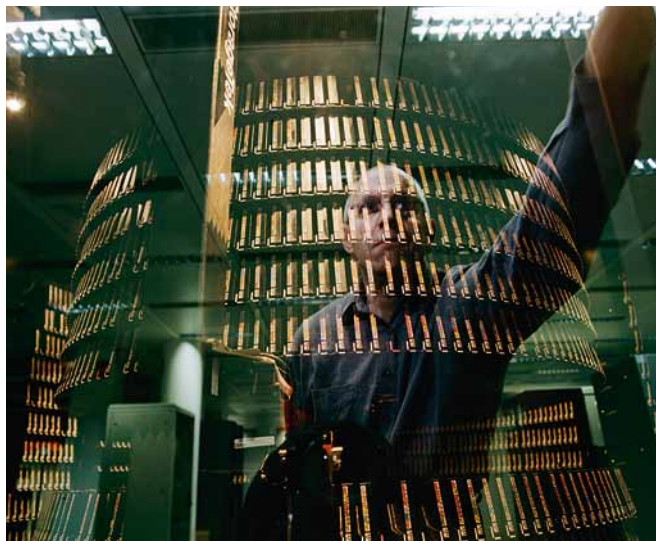

Sparen mit modernsten IT-Systemen.

**Neue Standards** // Effizienzsteigerung ist oftmals eine Frage der Prozesse. Wie sich diese im Bereich Ladeplanung optimieren lassen, stellte Lufthansa Systems 2010 unter Beweis. Die erweiterte Version des Ladeplanungssystems NetLine/Load ermöglicht,

den Beladungsprozess weiter zu verbessern und dadurch Zeit und Kosten zu sparen. Durch seinen Einsatz kann der Treibstoffverbrauch einer mittelgroßen Fluggesellschaft um rund 5 Mio. Liter Kerosin im Jahr gesenkt werden.

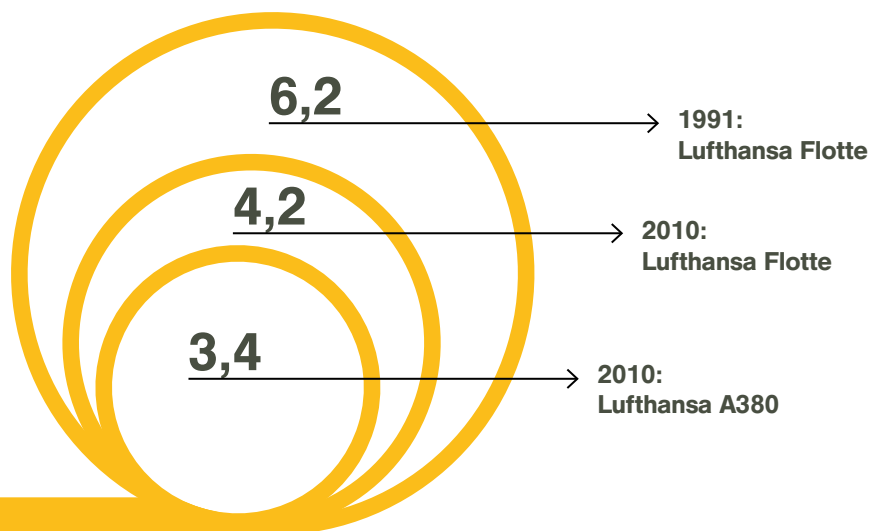

#### Treibstoffverbrauch auf 100 Kilometern pro Passagier in Litern

Der weltweite Luftverkehr erzeugt (nur) 2 Prozent aller von Menschen verursachten CO<sub>2</sub>-Emissionen. Dennoch streben wir nach Lösungen, um unseren Beitrag zum Klimaschutz zu leisten. Der spezifische Treibstoffverbrauch der Konzernflotte erreichte 2010 mit 4,20 l/100 RPK erneut einen historischen Tiefstand – ein Trend, den wir weiter fortsetzen wollen.



// Flottenerneuerung, leichtere Materialien, verbesserte Infrastruktur, Testprogramme mit alternativen Treibstoffen und leiseren Triebwerken: Unsere hohen Umweltstandards verfolgen wir mit technologischem Fortschritt. Klimaschutz und Lärminderung stehen dabei ganz oben auf der Agenda – eindrucksvoll belegt etwa durch das 3-Liter-Flugzeug A380.

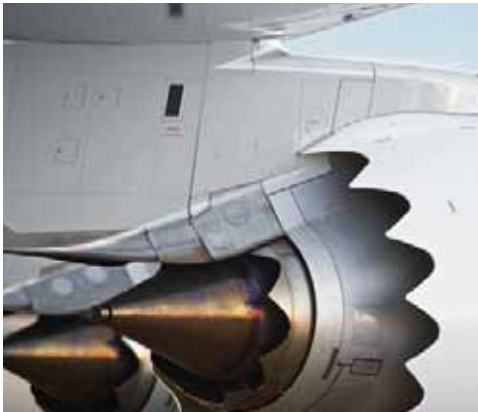

Moderne Flugzeuge wie die B747-8i fliegen mit deutlich weniger Treibstoff.

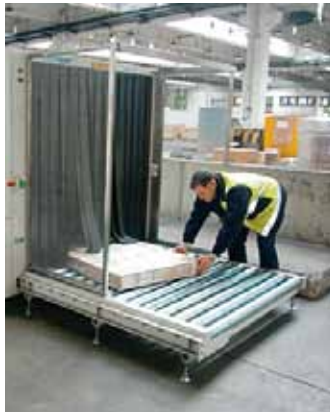

Modernste Sicherheitstechnologien im Einsatz.

Entwicklung des CO<sub>2</sub>-Ausstoßes pro RPK in Gramm

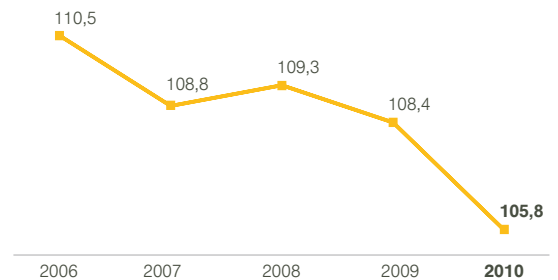

**Die Zukunft beginnt jetzt** // Das Thema Treibstoffeffizienz steht in der Luftfahrtindustrie schon lange im Mittelpunkt des Interesses. Bis 2050 will die Branche die CO<sub>2</sub>-Werte im Vergleich zu 2005 halbieren. Ein ambitioniertes Ziel, für das Lufthansa Pionierarbeit leistet, so zum Beispiel im Projekt „Fuel Efficiency“. Und auch unser Flottenerneuerungsprogramm bringt positive Effekte für die Umwelt. Denn moderne Flugzeuge fliegen deutlich leiser und treibstoffeffizienter. Dazu tragen die Langstreckenflugzeuge Airbus A380 und ab 2012 die Boeing B747-8i ebenso bei wie die neuen Flugzeuge der C-Series von Bombardier, mit denen SWISS ab 2014 die Europaflotte ausstatten wird. Dank ultramoderner Flüstertriebwerke und extrem leichter Hightech-Materialien setzen auch sie Maßstäbe in Wirtschaftlichkeit und Umweltverträglichkeit.

**1. Lufthansa Cargo** // Durch Investitionen in modernste Technologie hat Lufthansa Cargo bereits vor dem offiziellen Inkrafttreten verschärfter Sicherheitsauflagen der US-Luft-sicherheitsbehörde TSA die gesetzlichen Anforderungen erfüllt. Seit Juli 2010 durchleuchtet der Geschäftsbereich alle Frachtsendungen, die auf Passagiermaschinen in Richtung USA befördert werden.

**2. LSG Sky Chefs** // Der von LSG Sky Chefs entwickelte Leichtbautrolley „Quantum“ wurde mit dem „Crystal Cabin Award 2010“ als innovativstes Kabinenprodukt ausgezeichnet. Überzeugend war insbesondere das reduzierte Gewicht im Vergleich zum traditionellen Trolley, was den Treibstoffverbrauch verringert.

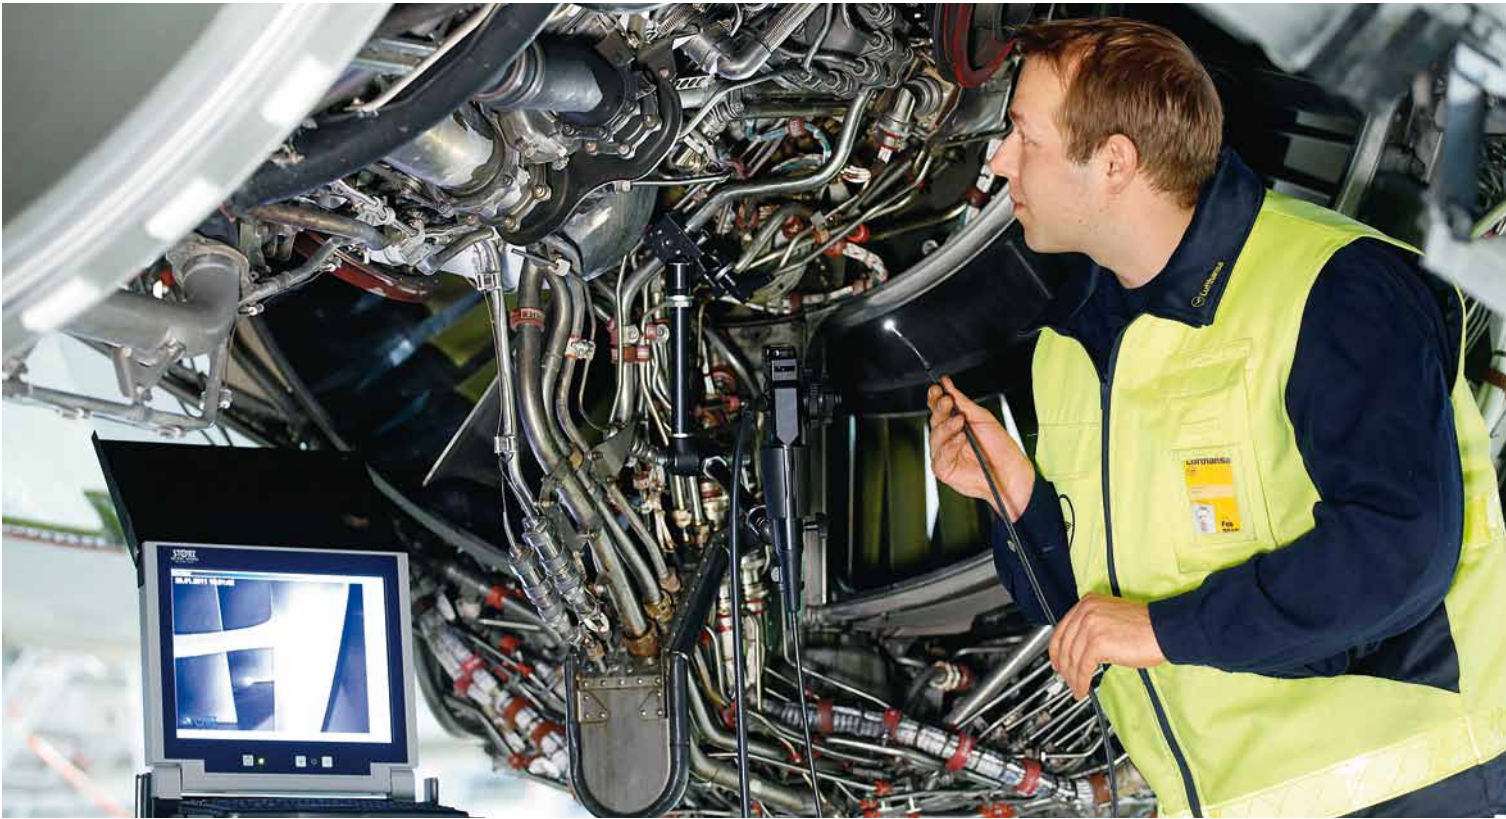

Im Testbetrieb mit Biokraftstoffen werden die Triebwerke auf Wartungsintensität und Lebensdauer untersucht.

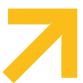

– 25 %

**Zielwert der Reduzierung des CO<sub>2</sub>-Ausstoßes pro Passagier im Jahr 2020 im Vergleich zu 1996**

**Vorreiter beim Biokraftstoff** // Wir treiben die Entwicklung von Biokraftstoffen für den Luftverkehr voran, indem wir in den nächsten Jahren Biosprit auf unseren Flügen testen. Als erste Airline startet Lufthansa voraussichtlich ab Frühjahr 2011 eine Testreihe mit Biosprit im regulären Flugbetrieb. In einem Airbus A321 auf der Strecke Hamburg – Frankfurt setzen wir eine Treibstoffmischung mit 50 Prozent biosynthetischem Kerosin ein. Hergestellt wird es unter anderem aus dem Kernöl der Jatropha-Pflanze. Von dem einjährigen Praxistest versprechen wir uns wertvolle Erkenntnisse zur Auswirkung von Biokraftstoffen auf Wartung und Lebensdauer von Triebwerken. Allein in dieser Zeit werden wir rund 1.500 Tonnen CO<sub>2</sub> einsparen.



## Jahresrückblick

### ➤ Q1 // 2010

---

#### ➤ Pilotenstreik unterbricht Flugbetrieb

Ende Februar begann die Pilotenvereinigung Cockpit (VC) einen auf vier Tage angelegten Streik, der große Teile des Lufthansa Flugverkehrs beeinträchtigte. Insgesamt 2.825 Flüge mussten gestrichen werden. Ein vor dem Arbeitsgericht Frankfurt geschlossener Vergleich schaffte die Grundlage für konstruktive Gespräche am Verhandlungstisch; der Streik wurde nach einem Tag ausgesetzt.

#### ➤ Lufthansa und SWISS feiern fünften Jahrestag

Im März feierten Lufthansa und SWISS den fünften Jahrestag des erfolgreichen Zusammenschlusses, der mittlerweile zum Modell für die Integration neuer Fluggesellschaften in den Lufthansa Konzern geworden ist. Nach dem gelungenen Turnaround erbringt SWISS heute einen wesentlichen Ergebnisbeitrag innerhalb der Passage Airline Gruppe, die von wichtigen Synergien der Fluggesellschaften profitiert.

#### ➤ Lufthansa Cargo setzt Kurzarbeit aus

Die positive wirtschaftliche Entwicklung und die damit verbundene erfreuliche Nachfrageentwicklung bei Lufthansa Cargo führte Ende März zum Beschluss der Aussetzung der im Rahmen des Krisenmanagements eingeführten Kurzarbeit. Sie konnte schließlich im April vollständig beendet werden.

#### ➤ Lufthansa weitet Zusammenarbeit mit Brussels Airlines aus

Lufthansa erweitert ihr Streckenangebot auf dem afrikanischen Kontinent und profitiert von der starken Präsenz ihrer Verbundpartner. Nach einer weiteren Intensivierung der Kooperation zwischen Lufthansa und Brussels Airlines konnte das Streckennetz von Lufthansa um drei Codeshare-Flüge von Brüssel nach Conakry (Guinea), Freetown (Sierra Leone) und Kigali (Ruanda) sowie zwei neue Frequenzen von Brüssel nach Luanda (Angola) ergänzt werden.

### ➤ Q3 // 2010

---

#### ➤ Austrian Lufthansa Cargo erfolgreich gestartet

Am 1. Juli 2010 ist die neu gegründete Austrian Lufthansa Cargo GmbH erfolgreich gestartet. Die Gesellschaft, unter deren Dach Lufthansa Cargo und Austrian Airlines ihre Frachtkapazitäten integrieren, vermarktet die Frachtkapazitäten beider Airlines in Österreich. Durch die Integration steht den Kunden ein noch umfassenderes Angebot zur Verfügung.

#### ➤ Lufthansa Cargo Flugzeug in Riad verunglückt

Der Frachtflug LH 8460 auf dem Weg von Frankfurt über Riad und Sharjah nach Hongkong verunglückte im Anflug auf den Flughafen Riad. Beide Besatzungsmitglieder konnten das Flugzeug über Notfallrutschen verlassen. Die MD-11-Frachtmaschine mit der Kennung D-ALCQ wurde jedoch schwerst beschädigt.

#### ➤ Christoph Franz zum zukünftigen Vorstandsvorsitzenden bestellt

Im September bestellte der Aufsichtsrat Christoph Franz zum zukünftigen Vorstandsvorsitzenden der Deutschen Lufthansa AG. Er folgt damit ab dem 1. Januar 2011 Wolfgang Mayrhuber. Mit gleichzeitiger Wirkung wurde Carsten Spohr als Leiter des Ressorts Lufthansa Passage in den Vorstand berufen.

#### ➤ Lufthansa bestellt 56 neue Flugzeuge für den Konzern

Der Aufsichtsrat hat im September der Bestellung von 48 neuen Flugzeugen zugestimmt. Die Bestellung ist Teil des laufenden Flottenmodernisierungsprogramms. 2010 wurden insgesamt 56 neue Flugzeuge bestellt, die ab 2012 sukzessive ausgeliefert werden sollen.

## ➤ Q2 // 2010

---

### ➤ Luftraum über Europa wegen Vulkanausbruch gesperrt

Die durch den Ausbruch des Vulkans Eyjafjallajökull auf Island entstandene Aschewolke veranlasste die Regierungen Mitte April zu einer mehrtägigen Sperrung weiter Teile des europäischen Luftraums. Erst nach mehreren Tagen wurde der Flugbetrieb sukzessive wieder freigegeben. Alleine Lufthansa Passage hatte 10.562 Flüge streichen müssen.

### ➤ Lufthansa übernimmt ersten Airbus A380

Am 11. Juni 2010 nahm der erste Airbus A380 der Lufthansa den regulären Linienflugbetrieb auf der Strecke zwischen Frankfurt am Main und Tokio auf. Mit der Einführung des neuen Flaggschiffs wurde auch die neu entwickelte First Class präsentiert. Neben einem erhöhten Reisekomfort setzt das neueste Flugzeug der Lufthansa Flotte Maßstäbe in Sachen Umweltfreundlichkeit. So verbraucht es pro Person auf 100 Kilometern nur rund 3 Liter Kerosin.

### ➤ Einigung mit Gewerkschaften erzielt

Die seit über einem Jahr offene Tarifrunde zwischen Lufthansa und der Vereinigung Cockpit wurde im Juni erfolgreich beendet. Die beschlossene rückwirkende 24-monatige Nullrunde bis zum 31. März 2011 bringt insbesondere im Bereich der Direktverkehre außerhalb der Drehkreuze wichtige Entlastungen für das Unternehmen mit sich. Zudem einigten sich der Arbeitgeberverband Luftverkehr und die Gewerkschaft ver.di darauf, den aktuell gültigen Vergütungsstarifvertrag für die Mitarbeiter am Boden bis zum 31. Dezember 2011 zu verlängern.

### ➤ Gesellschaften des Lufthansa Konzerns erhalten Auszeichnungen

Bei der seit 1999 jährlich vom Meinungsforschungsinstitut Skytrax durchgeführten weltweit größten Passagierbefragung im Luftverkehr wurde Lufthansa 2010 zur besten Airline Europas gewählt. Auf Platz zwei folgte SWISS. Zudem wurde Lufthansa Cargo als beste europäische Frachtfluggesellschaft bei den „Cargo Airline of the Year Awards“ prämiert.

## ➤ Q4 // 2010

---

### ➤ Lufthansa und Lufthansa Cargo erweitern Angebot in Südamerika

Nach der Aufnahme von Bogotá in das Streckennetz von Lufthansa wurden mit der kolumbianischen Fluggesellschaft Avianca neue Codeshare-Verbindungen zu sechs Anschlusszielen innerhalb Kolumbiens vereinbart. Auch Lufthansa Cargo weitet ihr Streckennetz in Südamerika aus. Ab Ende Februar 2011 fliegt sie die brasilianische Industriemetropole Manaus zweimal wöchentlich ab Frankfurt an.

### ➤ Anhebung des Rating-Ausblicks für Lufthansa

Die Ratingagentur Standard & Poor's hat ihr Investment Grade Rating für Lufthansa im November bestätigt. Der Ausblick wurde von negativ auf stabil angehoben. Gründe hierfür waren das verbesserte Finanzprofil des Lufthansa Konzerns, die Erholung der fliegenden Gesellschaften und die stabilen Ergebnisbeiträge der Geschäftsfelder im Dienstleistungsbereich sowie die effiziente Kostenkontrolle.

### ➤ Lufthansa wieder mit Internet an Bord

Seit Ende November 2010 stellt Lufthansa ihren Passagieren als weltweit einzige Airline wieder einen Breitband-Internetzugang auf Langstreckenflügen zur Verfügung. Zunächst ist dieser Service nur auf ausgewählten Transatlantikflügen verfügbar; bis Ende 2011 soll er jedoch praktisch auf das gesamte interkontinentale Streckennetz ausgeweitet werden.

### ➤ Produktinnovationen und mehr Service auf der Kurzstrecke

Im Dezember stellte Lufthansa Passage ihr neues Kabinenlayout für den Europaverkehr vor. Ein neuer Sitz mit schlankerem Rückenlehne und ergonomisch optimierter Sitzform gibt dem Passagier durchschnittlich bis zu vier Zentimeter zusätzliche Beinfreiheit. Durch die Platzersparnis wird der Einbau von bis zu zwei weiteren Sitzreihen pro Flugzeug ermöglicht. An Bord werden den Passagieren der Economy Class zudem auch auf innerdeutschen Strecken wieder kleine Snacks serviert.

## Lufthansa Aktie

➤ Der Kurs der Lufthansa Aktie ist in einem volatilen Marktumfeld um 39 Prozent gestiegen. ➤ Damit war der Wertzuwachs mehr als doppelt so hoch wie der des DAX. ➤ Die Mehrheit der Analysten sieht Lufthansa als Gewinner der Branchenentwicklung und empfiehlt die Aktie zum Kauf. ➤ Die Investor Relations-Arbeit wurde weiter intensiviert. ➤ Für 2010 soll wieder eine Dividende von 0,60 EUR pro Aktie ausgeschüttet werden.

### Gutes Börsenjahr 2010

2010 war insgesamt ein sehr positives Börsenjahr. Es war jedoch, vor allem im ersten Halbjahr, auch von hoher Volatilität geprägt. Während die weltweiten Aktienmärkte im ersten Quartal deutliche Kursgewinne verzeichneten, verbuchten sie im zweiten Quartal überwiegend Verluste. Diese waren auf die Sorge vor einer erneuten Rezession und einem sogenannten „Double Dip“ in den USA zurückzuführen. Erst nach positiven Fundamentaldaten setzte sich zur Jahresmitte die positive Stimmung nachhaltig durch und führte in der zweiten Jahreshälfte schließlich zu starken Kursanstiegen. Deutsche Aktien partizipierten besonders stark an dieser Entwicklung. Das dynamische Wachstum deutscher Exportbranchen und das im europäischen Vergleich stärkste Wirtschaftswachstum spiegelten sich hier wider. Der DAX, der zur Jahresmitte unverändert gegenüber Jahresbeginn bei 5.966 Punkten notiert hatte, stieg bis zum Jahresende um insgesamt 16,1 Prozent auf 6.914 Punkte.

### Die Lufthansa Aktie steigt mehr als doppelt so stark wie der DAX

Das Börsenjahr 2010 bestätigte, dass Aktien von Fluggesellschaften generell überdurchschnittlich stark von konjunkturellen Aufschwüngen profitieren können. So spiegelte sich auch 2010 die wirtschaftliche Erholung in einer deutlichen Belebung des Geschäfts bei vielen Airlines, insbesondere im Langstreckengeschäft, wider. Entsprechend positiv entwickelten sich die Aktienkurse der Netzwerk-Carrier, während No-Frills-Airlines aufgrund ihres stärkeren Fokusses auf den Kontinentalverkehr und Privatreisende nur moderate Kursanstiege erzielten oder sogar Kursrückgänge verbuchten.

In diesem Umfeld konnte die Lufthansa Aktie eine deutliche Out-performance des DAX vorweisen. Nach einem Kursanstieg von 4,5 Prozent im ersten Quartal musste sie zunächst im zweiten Quartal, auch wegen der durch die Luftraumsperrungen ausgelösten Unsicherheiten, einen Verlust von 7,9 Prozent hinnehmen.

### Kennzahlen zur Lufthansa Aktie

|                                       |        | 2010  | 2009  | 2008  | 2007  | 2006  |
|---------------------------------------|--------|-------|-------|-------|-------|-------|
| Börsenkurs (zum Jahresende)           | €      | 16,36 | 11,75 | 11,19 | 18,22 | 20,85 |
| Höchster Kurs                         | €      | 17,77 | 12,31 | 18,32 | 22,72 | 21,03 |
| Niedrigster Kurs                      | €      | 10,34 | 7,86  | 8,99  | 17,17 | 12,29 |
| Anzahl der Aktien                     | Mio.   | 457,9 | 457,9 | 457,9 | 457,9 | 457,9 |
| Marktkapitalisierung (zum Jahresende) | Mrd. € | 7,5   | 5,4   | 5,1   | 8,3   | 9,6   |
| Ergebnis je Aktie                     | €      | 2,47  | -0,07 | 1,18  | 3,61  | 1,75  |
| Operativer Cashflow je Aktie          | €      | 6,71  | 4,35  | 5,40  | 6,25  | 4,60  |
| Dividende je Aktie                    | €      | 0,60  | -     | 0,70  | 1,25  | 0,70  |
| Dividendenrendite (brutto)            | %      | 3,7   | -     | 6,3   | 6,9   | 3,4   |
| Ausschüttungssumme                    | Mio. € | 274,8 | -     | 320,5 | 572,4 | 321,0 |
| Total Shareholder Return              | %      | 39,2  | 11,3  | -31,7 | -9,3  | +70,7 |

Im dritten Quartal trat die grundlegende wirtschaftliche Entwicklung bei den Anlegern wieder in den Vordergrund. Die zunehmend bessere Verkehrs- und Erlösentwicklung in den Sommermonaten führten schließlich zu einem Kursanstieg von 18,4 Prozent im dritten Quartal. Der Lufthansa Konzern bestätigte die starke operative Entwicklung schließlich im Herbst durch Vorlage eines hohen Gewinns nach neun Monaten und die Erhöhung der Gewinnprognose für das Gesamtjahr. Dadurch erhielt der Aktienkurs im vierten Quartal weiteren Auftrieb (+14,0 Prozent). Ende Dezember konnten sich Lufthansa Aktionäre bei einem Jahresendstand der Aktie von 16,36 EUR über einen Wertzuwachs und Total Shareholder Return von 39,2 Prozent im Gesamtjahr freuen – mehr als doppelt so viel wie der DAX.

➤ Auf Basis der starken Wettbewerbsposition ist das mittelfristige Gewinnpotenzial durch organisches Wachstum und Integration der neuen Airlines im Vergleich zu früheren Marktzyklen deutlich gestiegen.

#### Die Analysten sehen weiteres Potenzial

Trotz des bereits deutlichen Kursanstiegs empfiehlt die klare Mehrheit der Analysten die Lufthansa Aktie nach wie vor zum Kauf, da sie Lufthansa als einen der Gewinner der Branchenentwicklung sehen. Auf Basis der starken Wettbewerbsposition und unterstützt durch eine solide finanzielle Ausstattung sei über organisches Wachstum, den Netzausbau und die Integration der

#### Analystenempfehlungen\* Stand zum 31.12.2010

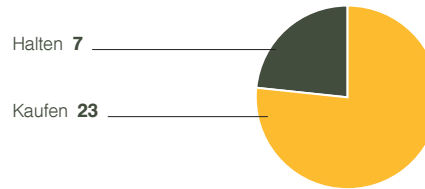

\* Durchschnittliches Kursziel: 18,84 EUR, Durchschnitt von 30 Analysten. Spanne: 15,90 EUR bis 25,50 EUR.

neuen Verbundpartner das mittelfristige Gewinnpotenzial des Konzerns, verglichen mit früheren Marktzyklen, deutlich gestiegen. Dieses vergrößerte Profitabilitätsniveau werde durch die Ergebnisverbesserungsprogramme und Restrukturierungen sowie durch die zunehmenden Synergieeffekte im Airline-Verbund weiter verstärkt. Risiken werden im Kapazitätswachstum, in steigenden Ölpreisen, der laufenden Restrukturierung im Europaverkehr sowie der stark wachsenden Konkurrenz auf den Langstrecken durch die Airlines der Golfstaaten gesehen. 77 Prozent der Analysten empfahlen die Lufthansa Aktie zum Jahresultimo zum Kauf, 23 Prozent rieten zum Halten, während kein Institut die Aktie auf Verkauf gesetzt hatte. Das durchschnittliche Kursziel lag bei 18,84 EUR, das höchste Kursziel bei 25,50 EUR.

#### 0,60 EUR Dividendenvorschlag für das Jahr 2010

Unsere Dividendenpolitik ist auf Kontinuität ausgerichtet. So sollen die Aktionäre unmittelbar am wirtschaftlichen Erfolg des Unternehmens beteiligt werden. Die Dividendenzahlung orientiert sich primär am operativen Ergebnis des Konzerns, wobei eine Ausschüttungsquote von 30 bis 40 Prozent angestrebt wird.

#### Kursverlauf der Lufthansa Aktie, indiziert auf 31.12.2009, im Vergleich zum DAX und zu Wettbewerbern

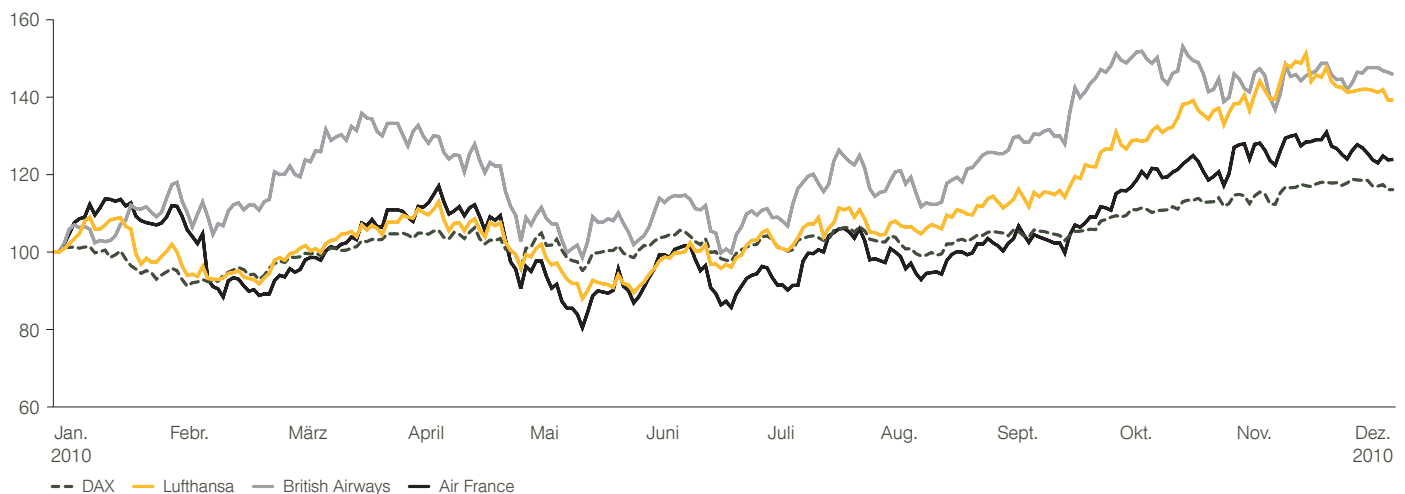

Voraussetzung für eine Dividendenzahlung ist, dass der Jahresüberschuss des Konzern- und vor allem des Einzelabschlusses der Deutschen Lufthansa AG eine Ausschüttung in dieser Höhe ermöglicht, siehe auch Kapitel „Finanzstrategie“ auf [S. 53](#).

Für das Geschäftsjahr 2010 ist diese Voraussetzung dank der positiven Geschäftsentwicklung erfüllt, sodass Vorstand und Aufsichtsrat der Hauptversammlung am 3. Mai 2011 eine Dividende von 0,60 EUR pro Aktie vorschlagen werden.

### Lufthansa Aktien befinden sich mehrheitlich in deutschen Händen

Um internationale Luftverkehrsrechte und die Luftverkehrsbetriebsgenehmigung aufrechtzuerhalten, werden Lufthansa Aktien gemäß Luftverkehrsnachweissicherungsgesetz (LuftNaSiG) als vinkulierte Namensaktien gehandelt. Hierdurch kann die Nationalitätenstruktur der Lufthansa Aktionäre nachvollzogen und der Nachweis geführt werden, dass sich die Lufthansa Aktien mehrheitlich in deutschem Eigentum befinden. Im Verlauf des Jahres 2010 waren dabei nur leichte Verschiebungen innerhalb der Aktionärsstruktur zu verzeichnen. Zum Jahresende lag der Anteil deutscher Investoren bei 68,5 Prozent (Vorjahr: 74,2 Prozent) und somit weiterhin deutlich über den gesetzlichen Mindestanforderungen. Investoren aus den USA haben 2010 mit 9,9 Prozent luxemburgische Aktionäre (9,3 Prozent) als größte ausländische Gruppe abgelöst. Auf Anleger aus Großbritannien entfielen 3,4 Prozent des Kapitals.

**Aktionärsstruktur nach Nationalitäten** Stand zum 31.12.2010 in %

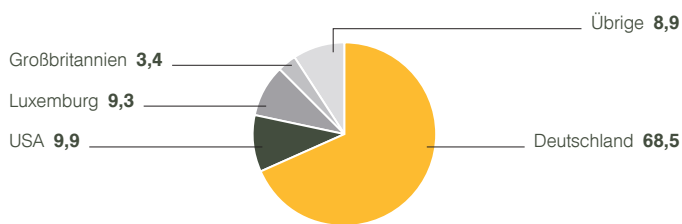

Streubesitz: 100 %

Unverändert zum Vorjahr befanden sich 100 Prozent des Aktienkapitals in Streubesitz. Dabei entfielen zum Bilanzstichtag 32,8 Prozent auf Privataktionäre, während institutionelle Investoren 67,2 Prozent hielten. Die größten Investoren waren zum Jahresende die amerikanischen Institute BlackRock Inc. und Janus Capital Management LCC mit Aktienanteilen von 4,997 beziehungsweise 3,29 Prozent. Die während des Geschäftsjahres 2010 veröffentlichten meldepflichtigen Transaktionen finden Sie im „Konzernanhang“ ab [S. 189](#). Sie werden ebenso wie die quartalsweise aktualisierte Aktionärsstruktur auf unserer Internetseite [www.lufthansa.com/investor-relations](http://www.lufthansa.com/investor-relations) veröffentlicht.

### Die Investor Relations-Arbeit wurde weiter intensiviert und honoriert

Was in Zeiten der Krise gilt, ist für uns auch im Aufschwung maßgeblich: alle Teilnehmer des Kapitalmarkts transparent, zeitnah und ausführlich über aktuelle Unternehmensentwicklungen, die eingeschlagene Strategie und strukturelle Veränderungen zu informieren. Daher haben wir unsere Aktivitäten 2010 nochmals gesteigert, auch im Vergleich zu den bereits intensiven Investorenkontakten im Krisenjahr 2009. Vorstand und Investor Relations informierten 2010 auf 37 Roadshows und 14 Investorenkonferenzen über die aktuellen und strategischen Entwicklungen des Konzerns. Insgesamt haben wir rund 450 Einzel- und Gruppengespräche mit institutionellen Investoren und Analysten geführt.

Neben den regulären Präsenz- und Telefonkonferenzen zu den Jahres- und Quartalsergebnissen fanden im Januar 2010 erstmalig ein Jahresauftakttreffen mit Analysten sowie im Juni 2010 der jährliche Investorentag im Lufthansa Aviation Center in Frankfurt statt. Themenschwerpunkte dieser Veranstaltung waren Hintergrundinformationen zu Geschäftsstrategie und -verlauf der fliegenden Gesellschaften des Konzerns, mit Präsentationen von Vertretern der Passage Airline Gruppe und der Lufthansa Cargo.

Neben dem Geschäfts- und den drei Zwischenberichten informieren wir den Kapitalmarkt regelmäßig mit der „Investor Info“ über die monatlichen Verkehrszahlen der fliegenden Gesellschaften und weitere Nachrichten aus den Unternehmen des Lufthansa Konzerns. Daneben erhalten Kredit- und Anleiheinvestoren mehrmals im Jahr eine „Creditor Info“. Eine hohe Bedeutung hat auch die Kommunikation mit unseren Privataktionären. Die mehrmals im Jahr erscheinende „Aktionärsinfo“ mit Informationen zum Unternehmen haben wir 2010 komplett überarbeitet und als weitere Informationsquelle an unsere Privataktionäre versendet. Sie kann über unsere Internetseite bestellt werden. Dort sind auch die Termine der Aktionärsforen ersichtlich, an denen Lufthansa teilnimmt. 2010 haben wir Lufthansa auf fünf Privataktionärsforen präsentiert und standen dort den Aktionären Rede und Antwort.



Die nächste Hauptversammlung findet am 3. Mai 2011 in Berlin statt. Unseren gesamten Finanzkalender sowie unsere Kontaktdaten finden Sie auf [S. 236](#) dieses Geschäftsberichts sowie unter [www.lufthansa.com/investor-relations](http://www.lufthansa.com/investor-relations). Diese 2009 neu aufgesetzte Online-Präsenz erfreut sich großer Beliebtheit. Die Zahl der Aufrufe hat sich mit 4,9 Mio. im Jahr auf hohem Niveau stabilisiert. Neben den Veröffentlichungen unserer Finanzberichte, Präsentationen und Reden sowie aktuellen Nachrichten stehen auf der Internetseite Instrumente zur individuellen Analyse der Abschlüsse und Finanz- und Verkehrskennzahlen sowie eine Online-Version des Geschäftsberichts zur Verfügung. Die Seite ist „barrierefrei“, das heißt, sie kann von allen Nutzern unabhängig von körperlichen Möglichkeiten eingesehen und verwendet werden.

Unsere Bestrebungen, allen interessierten Kapitalmarktteilnehmern ein aktuelles und transparentes Bild von Lufthansa und ihren Perspektiven zu vermitteln, wurden 2010 abermals honoriert. Von „Thomson Extel“, „IR Magazine“ und „Institutional Investor“ erhielt Lufthansa teilweise mehrfache Auszeichnungen für die Investor Relations-Arbeit.

#### **Lufthansa ist in wesentlichen Indizes vertreten, hat sich jedoch nicht für DJSI qualifiziert**

Lufthansa gehört als DAX-Wert zu den 30 größten börsennotierten Gesellschaften Deutschlands. Im DAX war unsere Aktie zum Jahresende mit einer Gewichtung von 1,24 Prozent vertreten. Gemessen an der Marktkapitalisierung (7,5 Mrd. EUR) lag sie auf Platz 23 (Vorjahr: 24) und ist damit gleichzeitig der Luftfahrtkonzern mit dem höchsten Börsenwert in Europa. Darüber hinaus ist die Lufthansa Aktie in weiteren internationalen Indizes enthalten, wie beispielsweise dem Dow Jones EURO STOXX Mid, MSCI Euro und FTSE Eurofirst 300.

In den USA können Anleger auch über das „Sponsored American Depositary Receipt Program“ (ADR) in Lufthansa investieren. Das ADR-Handelsvolumen liegt derzeit bei unter 1 Prozent des Aktienkapitals. Zur Erhöhung der Visibilität und Liquidität im US-amerikanischen Kapitalmarkt wird Lufthansa voraussichtlich ab Mai 2011 auch am OTC-Handelssystem OTCQX registriert.

Das vorbildliche Engagement des Konzerns in Bezug auf unternehmerische Verantwortung wird seit längerem von Experten anerkannt. So ist Lufthansa in zahlreichen Nachhaltigkeitsindizes und -verzeichnissen wie FTSE4Good, Ethibel und ASPI enthalten. Lufthansa konnte sich jedoch erstmals seit 2005 nicht für eine Mitgliedschaft im Dow Jones Sustainability Index qualifizieren, dessen Bedingungen weiter verschärft wurden.

In einigen Bereichen, wie gesellschaftlichem Engagement, Bedingungen für Lieferanten und Engagement mit unternehmensexternen Interessentengruppen, sehen die Analysten Verbesserungspotenzial. Positiv hervorgehoben wurden hingegen die Bereiche Klimastrategie, Lärmschutz und lokale Luftqualität. Die Bewertungen, die zu diesem Ausschluss geführt haben, werden nun geprüft und anschließend Maßnahmen zur Verbesserung eingeleitet.

Das Börsenjahr 2010 war auch mit einem hohen Handelsaufkommen der Aktie verbunden. 1,0 Mrd. Lufthansa Aktien wurden insgesamt gehandelt; dies entspricht einem Transaktionsvolumen von 12,6 Mrd. EUR. Bezogen auf die ausgegebenen Aktien (457,9 Mio. Stück) ergab sich so eine Umschlagshäufigkeit von 2,1. Der weitaus überwiegende Anteil (97,4 Prozent) erfolgte über das elektronische Handelssystem Xetra. Besonders handelsintensiv waren die Monate April und November mit einem Umsatz von jeweils rund 1,3 Mrd. EUR.

#### **Daten zur Lufthansa Aktie**

|                                                   |                                                                                                                                             |
|---------------------------------------------------|---------------------------------------------------------------------------------------------------------------------------------------------|
| ISIN International Security Identification Number | DE0008232125                                                                                                                                |
| Wertpapierkennnummer                              | 823212                                                                                                                                      |
| Kürzel ADR-Programm                               | DLAKY                                                                                                                                       |
| Börsenkürzel                                      | LHA                                                                                                                                         |
| Tickersymbol Reuters                              | LHAG.DE, Xetra                                                                                                                              |
| Tickersymbol Bloomberg                            | LHA GY für Xetra, LHA GF für Frankfurt Parkett, LHA GR für alle LH Kurse                                                                    |
| Börsenplätze                                      | Frankfurt, Stuttgart, München, Hannover, Düsseldorf, Berlin, Bremen, Hamburg, Xetra                                                         |
| Prime-Sektor                                      | Transport & Logistik                                                                                                                        |
| Industriegruppe                                   | Airlines                                                                                                                                    |
| Zugehörigkeit zu Indizes (Auswahl)                | DAX, Dow Jones STOXX 600, Dow Jones EURO STOXX, Dow Jones STOXX Global 1800, FTSE4Good, FTSE Eurofirst 300, S&P Global 1200, S&P Europe 350 |

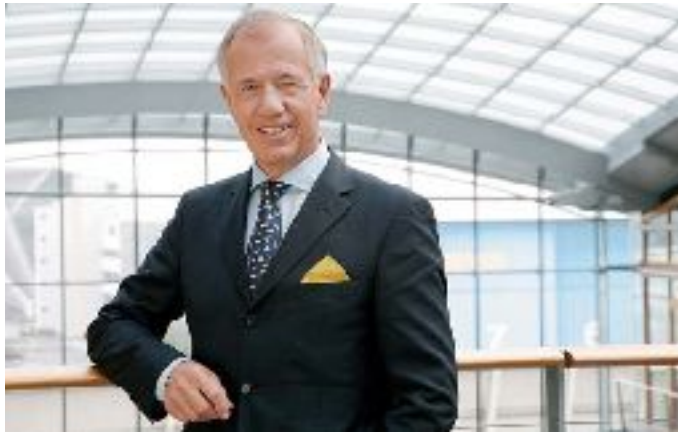

*Sehr geehrte Damen und Herren,*

in dem besonderen Geschäftsjahr 2010 hat der Aufsichtsrat erneut gut und effektiv mit dem Vorstand zusammengearbeitet. Dabei haben wir die Aufgaben wahrgenommen, für die wir nach Gesetz, Satzung und Geschäftsordnungen verantwortlich sind: die Mitglieder des Vorstands zu bestellen, deren Arbeit zu überwachen und sie beratend zu begleiten.

Der Vorstand hat uns zeitnah und umfassend über das Wettbewerbsumfeld, alle strategischen und wichtigen operativen Entscheidungen und die beabsichtigte Geschäftspolitik informiert. Die Investitions- und Beteiligungsvorhaben sowie die geplanten Maßnahmen zur Konzernfinanzierung wurden mit uns abgestimmt. Die Berichtspflichten des Vorstands und der Katalog zustimmungspflichtiger Geschäfte sind in einer Geschäftsordnung festgelegt.

Als Vorsitzender des Aufsichtsrats habe ich die Protokolle der Vorstandssitzungen eingesehen und mit dem Vorstandsvorsitzenden laufend die aktuelle Geschäftsentwicklung erörtert.

Im Jahr 2010 hat sich der Aufsichtsrat zu vier ordentlichen Sitzungen am 10. März, 28. April, 22. September und 6. Dezember getroffen. Kein Mitglied des Aufsichtsrats hat an weniger als der Hälfte der Sitzungen teilgenommen.

Die Effizienz unserer Arbeit haben wir im Dezember erneut geprüft und gemeinsam mit dem Vorstand eine aktualisierte Entsprechenserklärung zum Deutschen Corporate Governance Kodex abgegeben. Anzeigepflichtige Interessenkonflikte lagen 2010 nicht vor.

In der Entsprechenserklärung hat der Aufsichtsrat die grundsätzliche Bedeutung von Vielfalt bei seiner Zusammensetzung für das Unternehmen unterstützt. Zugleich strebt er eine stärkere Repräsentanz von Frauen an. Anders als in Ziffer 5.4.1 des Kodexes gefordert, werden hierfür jedoch keine konkreten Ziele benannt. Der Aufsichtsrat wird sich bei seinen Wahlvorschlägen an die Hauptversammlung von Kenntnissen, Fähigkeiten und fachlichen Erfahrungen infrage kommender Personen leiten lassen.

Im Mittelpunkt der Sitzungen des Aufsichtsrats stand die wirtschaftliche Entwicklung bei Lufthansa und ihren Konzern- und Beteiligungsgesellschaften. Besonderes Augenmerk fanden dabei der Streik des Cockpit-Personals Ende Februar und die mehrtägige behördliche Luftraumschließung im April nach dem Vulkanausbruch auf Island, die bei Lufthansa zu erheblichen negativen Ergebniseffekten geführt haben. Ferner ließ sich der Aufsichtsrat ausführlich über die Fortschritte bei der Integration von Austrian Airlines und British Midland in den Konzern unterrichten.

Weitere wichtige Tagesordnungspunkte betrafen die Zustimmung zur Anschaffung von insgesamt 56 Flugzeugen verschiedener Muster für die Fluggesellschaften des Konzerns, zur weiteren Zusammenarbeit mit dem Münchener Flughafen bei der Erweiterung des Terminals 2, zur Veräußerung von Amadeus-Aktien im Rahmen eines Börsengangs und zur Restrukturierung des Teilkonzerns Lufthansa Systems AG.

Turnusmäßig hat uns der Vorstand über die Veränderungen der Aktionärsstruktur, die Geschäfte mit derivativen Instrumenten sowie über die Dotierung und Rendite des Lufthansa Pensionsfonds unterrichtet. Zu den Angaben des Vorstands in den Lageberichten gemäß §§ 289 Abs. 4 und 315 Abs. 4 HGB sind keine weiteren Erläuterungen erforderlich.

Über die Tätigkeit der Ausschüsse des Aufsichtsrats wurde jeweils zu Beginn der Aufsichtsratssitzungen informiert.

Der nach § 27 Abs. 3 Mitbestimmungsgesetz obligatorische Vermittlungsausschuss musste im Berichtsjahr nicht einberufen werden. Der Nominierungsausschuss des Aufsichtsrats hat im Frühjahr einmal zur Vorbereitung von Neuwahlen in den Aufsichtsrat getagt. Im Prüfungsausschuss, der 2010 viermal, davon dreimal im Beisein der Wirtschaftsprüfer, getagt hat, wurden mit dem Finanzvorstand die Zwischenberichte vor ihrer Veröffentlichung erörtert. Ferner befasste sich der Ausschuss mit der Überwachung des Rechnungslegungsprozesses sowie der Wirksamkeit des internen Kontrollsystems, des Risikomanagement-Systems und des internen Revisionssystems. Dazu wurden Berichte über Risikomanagement, Compliance und die Prüftätigkeit der internen Konzernrevision zur Kenntnis genommen.

Die von der Hauptversammlung 2010 als Abschlussprüfer und Konzernabschlussprüfer gewählte PricewaterhouseCoopers Aktiengesellschaft Wirtschaftsprüfungsgesellschaft, Düsseldorf, ist vom Aufsichtsrat beauftragt worden, den Jahres- und Konzernabschluss, die Lageberichte und das Risikomanagement-System zu prüfen. Der Prüfungsausschuss hat die von PricewaterhouseCoopers vorgelegte Unabhängigkeitserklärung zur Kenntnis genommen und die Schwerpunkte der Abschlussprüfung abgestimmt. Während der Prüfung sind keine möglichen Ausschluss- oder Befangenheitsgründe aufgetreten.

Der Konzernabschluss wurde nach Maßgabe der International Financial Reporting Standards (IFRS) des International Accounting Standards Board (IASB) unter Berücksichtigung der Interpretationen des International Financial Reporting Interpretations Committee (IFRIC) aufgestellt, wie sie in der Europäischen Union anzuwenden sind. Der Prüfer hat den Jahres- und den Konzernabschluss der Deutschen Lufthansa AG und die jeweiligen Lageberichte zum 31. Dezember 2010 entsprechend den gesetzlichen Vorschriften geprüft und den uneingeschränkten Bestätigungsvermerk erteilt. Der Prüfer hat weiter bestätigt, dass das vom Vorstand eingerichtete Risikomanagement-System geeignet ist, Entwicklungen frühzeitig zu erkennen, die den Fortbestand der Gesellschaft gefährden könnten. Während der Abschlussprüfung hat der Prüfer keine Tatsachen festgestellt, die der Entsprechenserklärung widersprechen.

Der Prüfungsausschuss hat Anfang März 2011 die Prüfungsberichte in meinem Beisein und in Anwesenheit der beiden den Jahresabschluss unterzeichnenden Prüfer mit dem Finanzvorstand eingehend erörtert. In der Bilanzsitzung des Aufsichtsrats haben die Prüfer über ihre Prüfungsergebnisse berichtet und Fragen beantwortet. Den Jahres- und Konzernabschluss der Deutschen Lufthansa AG, die jeweiligen Lageberichte und den Vorschlag zur Gewinnverwendung haben wir eingehend geprüft und keine Einwendungen erhoben. Jahres- und Konzernabschluss wurden gebilligt. Damit ist der vom Vorstand aufgestellte Jahresabschluss 2010 der Deutschen Lufthansa AG festgestellt. Dem Vorschlag für die Verwendung des Bilanzgewinns haben wir uns angeschlossen.

Die Herren Ulrich Hartmann und Dr. Herbert Walter haben ihr Mandat im Aufsichtsrat der Deutschen Lufthansa AG zum Ablauf der Hauptversammlung am 29. April 2010 niedergelegt. An ihrer Stelle wurden die Herren Herbert Hainer, Vorstandsvorsitzender der adidas AG, und Dr. h.c. Robert M. Kimmitt, Senior International Counsel in der Anwaltssozietät WilmerHale, in den Aufsichtsrat gewählt. Im Aufsichtsrat bestätigt wurde Herr Martin Koehler, Managing Director der Boston Consulting Group, Inc., der bereits Anfang März 2010 vom Amtsgericht als Nachfolger für den Ende 2009 ausgeschiedenen Herrn John Allan in den Aufsichtsrat bestellt worden war. Der Aufsichtsrat dankt Herrn Hartmann, der dem Aufsichtsrat seit 1998 und dem Prüfungsausschuss seit seiner Gründung 2002 angehört hat, und Herrn Dr. Walter für ihre Mitarbeit und Unterstützung sowie für die während ihrer Zugehörigkeit zum Aufsichtsrat getragene Verantwortung.

Auf Empfehlung des Präsidiums, das 2010 fünfmal getagt hat, hat der Aufsichtsrat im September Dr. Christoph Franz, bis Ende 2010 stellvertretender Vorstandsvorsitzender und Vorstand Lufthansa Passage, mit Wirkung zum 1. Januar 2011 zum Vorstandsvorsitzenden und damit zum Nachfolger von Herrn Wolfgang Mayrhuber bestellt. Gleichzeitig wurde seine Bestellung bis zum 31. Mai 2014 verlängert. Zum Nachfolger von Herrn Franz als Vorstand Lufthansa Passage wurde auf Vorschlag des

Präsidiums Herr Carsten Spohr, bis Ende 2010 Vorstandsvorsitzender der Lufthansa Cargo AG, mit Wirkung vom 1. Januar 2011 bis 31. Dezember 2013 bestellt.

Ebenfalls in seiner September-Sitzung hat der Aufsichtsrat eine neue Vergütungsstruktur für den Vorstand verabschiedet, die ab dem Geschäftsjahr 2011 für alle vier Vorstandsmitglieder gilt. Dabei wurden die geänderten Regelungen berücksichtigt, die sich aus dem seit Sommer 2009 geltenden Gesetz zur Angemessenheit der Vorstandsvergütung (VorstAG) und aus dem Deutschen Corporate Governance Kodex (DCGK) ergeben. Börsennotierte Gesellschaften sind hiernach aufgefordert, die Vergütungsstruktur stärker auf eine nachhaltige Unternehmensentwicklung auszurichten. Außerdem war es ein Anliegen des Aufsichtsrats, die in den letzten Jahren weit überdurchschnittlich schwankenden Vorstandsbezüge im zyklischen Luftverkehrsgeschäft spürbar zu glätten. Der Aufsichtsrat hat daher bei den variablen Vergütungsbestandteilen kurzfristige finanzielle Anreize reduziert, indem ein Teil der einjährigen variablen Vergütung in die Grundvergütung übertragen und die variable Vergütung auf eine überwiegend mehrjährige Bemessungsgrundlage gestellt wurde. Die neue Struktur ist in ihrer Gesamtheit im Vergütungsbericht dargestellt und wird der Hauptversammlung 2011 zur Billigung vorgelegt werden.

Mit Ablauf des Geschäftsjahres hat Herr Wolfgang Mayrhuber, der dem Vorstand seit Anfang 2001 und damit genau zehn Jahre angehörte, seine fast achtjährige Tätigkeit als Vorstandsvorsitzender der Deutschen Lufthansa AG beendet. In dieser Zeit hat er den Ausbau des Aviation-Konzerns zum führenden Airline-Verbund maßgeblich vorangetrieben und Lufthansa sicher durch die diversen Krisen der letzten Jahre gesteuert. Damit hat sich Wolfgang Mayrhuber, der auf eine insgesamt 40 Jahre umfassende Laufbahn im Lufthansa Konzern zurückblicken kann, in besonderer Weise um das Unternehmen verdient gemacht.

Am 19. September 2010 ist Herr Dr. Rolf Jetzer, Präsident des Verwaltungsrats des Konzernunternehmens SWISS, im Alter von 59 Jahren verstorben. Herr Dr. Jetzer hat an der reibungslosen Integration der SWISS in den Lufthansa Konzern äußerst verdienstvoll mitgewirkt. Wir werden sein Andenken in Ehren halten.

Dem Vorstand und allen Mitarbeitern des Konzerns und seiner Beteiligungsgesellschaften sprechen wir für ihre persönlichen Beiträge zum unerwartet großen Erfolg des Lufthansa Konzerns im Geschäftsjahr 2010 unseren besonderen Dank aus.

Köln, 16. März 2011



Für den Aufsichtsrat  
Jürgen Weber, Vorsitzender

## Corporate Governance

➤ Lufthansa entspricht den aktuellen Empfehlungen des Deutschen Corporate Governance Kodexes mit wenigen Ausnahmen. ➤ Vorstand und Aufsichtsrat arbeiten im Unternehmensinteresse und im Rahmen von festgelegten Geschäftsordnungen eng und vertrauensvoll zusammen. ➤ Aktionäre, Analysten und Öffentlichkeit werden gleichberechtigt und zeitnah informiert. ➤ Ein umfassendes Compliance-Programm sichert das rechtmäßige Verhalten hinsichtlich gesetzlicher Ge- und Verbote.

### Entsprechenserklärung zum Deutschen Corporate Governance Kodex

Vorstand und Aufsichtsrat haben auf ihrer Sitzung am 6. Dezember 2010 folgende Erklärung zum Deutschen Corporate Governance Kodex (DCGK) verabschiedet:

„Vorstand und Aufsichtsrat der Deutschen Lufthansa AG erklären gemäß § 161 AktG, dass den vom Bundesministerium der Justiz am 2. Juli im amtlichen Teil des elektronischen Bundesanzeigers bekanntgemachten Empfehlungen des Deutschen Corporate Governance Kodexes (Kodex) seit der letzten Entsprechenserklärung mit folgenden Ausnahmen entsprochen wurde und zukünftig entsprochen werden wird:

Die Vorstandsmitglieder Wolfgang Mayrhuber und Stephan Gemkow halten mehr als drei Aufsichtsratsmandate in konzernexternen börsennotierten Gesellschaften oder in Aufsichtsgremien von Gesellschaften mit vergleichbaren Anforderungen. Durch Ziffer 5.4.5 des neugefassten Kodexes werden nunmehr auch Mandate in Aufsichtsgremien von Gesellschaften mit vergleichbaren Anforderungen an Mandate in konzernexternen börsennotierten Gesellschaften für die empfohlene Höchstzahl von drei berücksichtigt. Dieser veränderten Empfehlung kann ohne Verletzung des in die Mandatswahrnehmung gesetzten Vertrauens nicht ohne einen gewissen zeitlichen Vorlauf entsprochen werden. Herr Mayrhuber wird mit Wirkung zum 31. Dezember 2010 aus dem Vorstand ausscheiden und danach nicht mehr an die Beschränkung gebunden sein. Herr Gemkow wird im ersten Halbjahr 2011 eines seiner vier hier relevanten Mandate aufgeben.

Der Aufsichtsrat unterstützt die grundsätzliche Bedeutung von Vielfalt bei seiner Zusammensetzung für das Unternehmen und strebt zugleich eine stärkere Repräsentanz von Frauen an. Es werden jedoch – anders als in Ziffer 5.4.1 des Kodexes gefordert – hierfür

keine konkreten Ziele in Form von Quoten oder absoluten Zahlen benannt. Der Aufsichtsrat wird sich bei seinen Wahlvorschlägen an die Hauptversammlung von Kenntnissen, Fähigkeiten und fachlichen Erfahrungen infrage kommender Personen leiten lassen. Eine Altersgrenze von im Grundsatz 70 Jahren ist bereits in § 8 (2) der Satzung festgelegt.“

Diese und die darüber hinaus freiwillig erfüllten Anregungen des Kodexes können Sie auf unserer Website [www.lufthansa.com/investor-relations](http://www.lufthansa.com/investor-relations) nachlesen.

### Aktionäre und Hauptversammlung

Lufthansa Aktien sind vinkulierte Namensaktien, die alle über das gleiche Stimmrecht verfügen. Hiermit sind unsere Aktionäre in der Hauptversammlung an allen grundlegenden Beschlüssen beteiligt. Die Eintragung in unser Aktienregister erfolgt anhand der elektronisch übermittelten Aktionärsdaten über die Banken und das Clearingsystem. Als Besonderheit sind bei Lufthansa hierbei neben dem Aktiengesetz auch die Eintragungsvoraussetzungen des LuftNaSiG zu beachten. Auf der Hauptversammlung können grundsätzlich alle Aktionäre, die im Aktienregister eingetragen sind, ihr Stimmrecht ausüben. Der elektronische Service für den aktienrechtlichen Anmeldeprozess umfasst die Möglichkeit, auch Kreditinstituten und Aktionärsvereinigungen per Internet die Stimmrechte zu übertragen. Darüber hinaus haben die Aktionäre auch die Möglichkeit, die Ansprachen des Aufsichtsrats- und des Vorstandsvorsitzenden in der Hauptversammlung per Internet zu verfolgen. Weitere Informationen finden Sie ebenfalls auf unserer Website.

### Vorstand und Aufsichtsrat

Vorstand und Aufsichtsrat arbeiten im Interesse des Unternehmens eng und vertrauensvoll zusammen. Es ist ihr gemeinsames Ziel, den Unternehmenswert nachhaltig zu steigern.



Vorstand und Aufsichtsrat der Deutschen Lufthansa AG haben Geschäftsordnungen festgelegt, in denen die Arbeit innerhalb dieser Gremien und die Zusammenarbeit beider Organe verbindlich geregelt werden. Die vier Mitglieder des Vorstands tragen für die gesamte Geschäftsführung gemeinschaftlich Verantwortung und unterrichten sich gegenseitig über alle wesentlichen Vorgänge und Geschäfte. Der Vorstandsvorsitzende erstattet dem paritätisch besetzten Aufsichtsrat regelmäßig Bericht. Er unterrichtet den Aufsichtsratsvorsitzenden darüber hinaus bei wichtigen Anlässen.

Der Vorstand fasst Beschlüsse mit einfacher Mehrheit der abgegebenen Stimmen. Für eine Reihe von Geschäften muss der Vorstand vorher die Zustimmung des Aufsichtsrats einholen. Darunter fallen insbesondere: die Aufnahme neuer Geschäftszweige, der Abschluss oder die Aufhebung von Unternehmensverträgen und strategisch bedeutsamen Kooperationsverträgen, das langfristige Leasing von Flugzeugen und – ab einer bestimmten Wertgrenze – die Gründung von Unternehmen, die Aufnahme von Anleihen und langfristigen Krediten sowie Investitionen in das Anlagevermögen. Viermal im Jahr informiert der Vorstand den Aufsichtsrat über die Geschäftsentwicklung des Konzerns und der Beteiligungsunternehmen. Einmal jährlich unterrichtet er ihn über die operative Konzernplanung sowie die Finanzplanung des Konzerns.

Der Aufsichtsrat wählt aus seiner Mitte ein paritätisch besetztes vierköpfiges Präsidium, das ihm Beschlussempfehlungen für Inhalt, Gestaltung und Abschluss der Anstellungsverträge mit den Vorstandsmitgliedern gibt. Das Präsidium ist außerdem für sonstige personelle Angelegenheiten von Vorständen und Prokuristen zuständig.

Daneben wird ein ebenfalls paritätisch besetzter sechsköpfiger Prüfungsausschuss gewählt, der im Wesentlichen für Fragen der Rechnungslegung, des Risikomanagements, des internen Kontrollsystems und der Compliance zuständig ist. Dieser erörtert auch die Quartalszwischenberichte vor ihrer Veröffentlichung mit dem Vorstand.

Der Nominierungsausschuss besteht aus drei Mitgliedern. Er schlägt dem Aufsichtsrat geeignete Kandidaten vor, welche dieser wiederum der Hauptversammlung für die Wahl neuer Aufsichtsratsmitglieder vorschlagen kann.

Der nach § 27 Abs. 3 des Mitbestimmungsgesetzes zwingend vorgeschriebene Vermittlungsausschuss tritt nur dann zusammen, wenn bei einer Vorstandsbestellung oder einem Widerruf der Bestellung nicht die notwendige Zweidrittelmehrheit der Stimmen erreicht wird. Der Ausschuss hat dann dem Aufsichtsrat innerhalb eines Monats einen Vorschlag zu unterbreiten.

Das Mitglied des Aufsichtsrats Herr Matthias Wissmann ist Partner und das Mitglied des Aufsichtsrats Herr Robert Kimmitt ist Senior International Counsel der Rechtsanwaltskanzlei WilmerHale. Das Mitglied des Aufsichtsrats Herr Martin Koehler ist Partner des Beratungsunternehmens The Boston Consulting Group (BCG). Die Gesellschaft hat in der Vergangenheit und wird voraussichtlich in der Zukunft Beratungsverträge sowohl mit WilmerHale als auch mit BCG abschließen. Weder Herr Wissmann noch Herr Kimmitt noch Herr Koehler beraten die Gesellschaft im Rahmen dieser Mandate. Auch haben sowohl WilmerHale als auch BCG schriftlich bestätigt, dass organisatorische Maßnahmen getroffen wurden, wonach in den Vergütungen der genannten Herren, die aus ihrer jeweiligen Stellung in der Rechtsanwaltskanzlei beziehungsweise dem Beratungsunternehmen resultieren, weder direkt noch indirekt Honorare aus Mandaten der Gesellschaft Berücksichtigung finden. Ein potenzieller Interessenkonflikt oder eine Abhängigkeit der genannten Aufsichtsratsmitglieder und somit die Voraussetzungen des § 114 AktG liegen damit nicht vor, und es bedarf keiner Zustimmung des Aufsichtsrats zu diesen Mandatsverträgen.

Vorstand und Aufsichtsrat sind bei schuldhafter Verletzung ihrer Pflichten der Gesellschaft gegenüber zu Schadensersatz verpflichtet. Für beide Gremien wurde eine Vermögensschaden-Haftpflichtversicherung (D&O) mit einem den Anforderungen des AktG und des Deutschen Corporate Governance Kodexes entsprechenden Selbstbehalt abgeschlossen.

Die Namen der Mitglieder von Vorstand und Aufsichtsrat und deren Mandate sowie die Zusammensetzung und Aufgaben der Ausschüsse sind ab [S. 217](#) aufgeführt.

### Transparente Rechnungslegung und Finanzkommunikation

Lufthansa erstellt den Konzernabschluss und die Zwischenberichte nach den International Financial Reporting Standards (IFRS) des International Accounting Standards Board (IASB) unter Berücksichtigung der Interpretationen des International Financial Reporting Interpretations Committee (IFRIC), wie sie in der Europäischen Union (EU) anzuwenden sind. Der gesetzlich vorgeschriebene und für die Dividendenzahlung maßgebliche Einzelabschluss der Deutschen Lufthansa AG wird nach den Vorschriften des HGB erstellt. Mit der Prüfung der Jahresabschlüsse 2010 wurde die PricewaterhouseCoopers Aktiengesellschaft Wirtschaftsprüfungsgesellschaft, Düsseldorf, beauftragt.

Die Honorare der Prüfer für das Geschäftsjahr 2010 sind im Konzernanhang „Erläuterung 51“ auf [S. 214](#) zusammengestellt. Lufthansa informiert Aktionäre, Analysten und Öffentlichkeit gleichberechtigt und zeitnah. Nähere Informationen über diesbezügliche Aktivitäten finden Sie im Kapitel „Lufthansa Aktie“ auf [S. 38](#) und auf unserer Website [www.lufthansa.com/investor-relations](http://www.lufthansa.com/investor-relations).

Sollten Vorstands- oder Aufsichtsratsmitglieder sowie Mitglieder des Passagevorstands mit Lufthansa Aktien, Optionen oder sonstigen Derivaten auf die Lufthansa Aktie handeln – sogenannte Directors' Dealings –, werden diese umgehend bekannt gegeben, wenn sie die Wertgrenze von 5.000 EUR im Kalenderjahr überschreiten. Dies umfasst auch natürliche und juristische Personen, die in enger Beziehung zum oben genannten Personenkreis stehen. Der Gesamtbesitz von Aktien, Optionen oder Derivaten aller Vorstands- und Aufsichtsratsmitglieder übersteigt nicht den Wert von 1 Prozent der ausgegebenen Aktien.

### Vergütung von Aufsichtsrat und Vorstand

Die Mitglieder des Aufsichtsrats erhalten gemäß § 13 Abs. 1 der Satzung neben einer fixen Vergütung eine variable Vergütung in Abhängigkeit vom Konzernergebnis. Dabei darf die Gesamtvergütung für ein ordentliches Mitglied 100.000 EUR im Jahr nicht übersteigen. Der Vorsitzende erhält das Dreifache, der stellvertretende Vorsitzende das Anderthalbfache der Vergütung für ordentliche Mitglieder. Darüber hinaus erhält das Mitglied eines Ausschusses 25 Prozent, der Vorsitzende eines Ausschusses 50 Prozent dieser Beträge. Vergütungen für Ausschusstätigkeiten stehen unter dem Vorbehalt, dass der Ausschuss im Geschäftsjahr mindestens einmal getagt hat.

Die Mitglieder des Vorstands erhielten im Jahr 2010 neben der Grundvergütung eine vom operativen Ergebnis abhängige und damit einjährige variable Vergütung. Daneben konnten sie am mehrjährigen LH-Performance-Programm teilnehmen.

Einzelheiten zu Vergütung und Versorgungszusagen der Mitglieder des Vorstands und zur Vergütung der Mitglieder des Aufsichtsrats finden Sie im Vergütungsbericht auf [S. 48](#) des Lageberichts. Die auf die einzelnen Vorstands- und Aufsichtsratsmitglieder entfallenden Beträge sind im Konzernanhang „Erläuterung 49“ ab [S. 210](#) veröffentlicht.

Der Aufsichtsrat hat im Jahr 2010 eine neue Vergütungsstruktur für den Vorstand verabschiedet, die ab dem Geschäftsjahr 2011 gilt. Dabei wurden die Neuregelungen des Gesetzes zur Angemessenheit der Vorstandsvergütung (VorstAG) und des Deutschen Corporate Governance Kodex (DCGK) umgesetzt. Börsennotierte Gesellschaften sind hiernach gefordert, die Vergütungsstruktur stärker auf eine nachhaltige Unternehmensentwicklung auszurichten. Außerdem war es ein Anliegen des Aufsichtsrats, die in den letzten Jahren weit überdurchschnittlich schwankenden Vorstandsbezüge im zyklischen Luftverkehrsgeschäft spürbar zu glätten.

Zur Erreichung dieser Ziele hat der Aufsichtsrat beschlossen, bei den variablen Vergütungsbestandteilen kurzfristige finanzielle Anreize durch einjährige Boni zu reduzieren und die variable Vergütung auf eine überwiegend mehrjährige Bemessungsgrundlage zu stellen. Zu diesem Zweck wird ein Teil der einjährigen variablen

Vergütung in die Grundvergütung übertragen. Der verbleibende, in seiner Höhe reduzierte variable Vergütungsanteil misst sich zukünftig an der operativen Marge. Er wird nur noch zu 75 Prozent im Folgejahr und somit im einjährigen Turnus ausgezahlt. Die übrigen 25 Prozent werden zwei weitere Jahre vorgetragen. Am Ende des insgesamt dreijährigen Betrachtungszeitraums wird der vorgetragene Betrag mit einem Faktor multipliziert, der zwischen 0 und 2 liegen kann. Die Ausprägung des Faktors hängt zu 70 Prozent von dem über drei Jahre erreichten CVA und zu 30 Prozent von auf Basis objektiver Kennzahlen festzulegenden Nachhaltigkeitsparametern wie Umweltschutz, Kundenzufriedenheit und Mitarbeiter-Commitment ab. Da der Vorstand zudem zukünftig am LH-Performance-Programm, dessen Dauer ab 2011 von drei auf vier Jahre verlängert wird, verpflichtend teilnehmen muss, ist die überwiegende Mehrjährigkeit der variablen Vergütungskomponenten sichergestellt.

Auf Basis eines Zehnjahresdurchschnitts historischer Jahresergebnisse und unterstellter zukünftiger Planungen ist die Gesamtvergütung so ausgestaltet worden, dass deren durchschnittliche Höhe insgesamt unverändert bleibt. Hätte der Vergütung für 2010 schon die neue Struktur zugrunde gelegen, wäre bei einem ordentlichen Vorstandsmitglied die Jahresgrundvergütung um rund 288.000 EUR höher, die variable Vergütung hingegen um rund 640.000 EUR niedriger ausgefallen. Die Gesamtvergütung (ohne LH-Performance) wäre hiernach um rund 21 Prozent niedriger ausgefallen. Das neue Vergütungssystem bewirkt somit, dass die Vorstandsmitglieder einerseits weniger stark an einer positiven Entwicklung des Unternehmens teilnehmen werden, andererseits aber in schlechteren Jahren auch nicht mehr so große gehaltliche Einbußen erleiden wie in der Vergangenheit. Nur für den Fall herausragend guter Ergebnisse kann es zu einer Erhöhung der Gesamtvergütung kommen, da die bereits bisher vereinbarte Begrenzung der variablen Vergütung um 12,5 Prozent angehoben wurde. Alle Mitglieder des Vorstands haben das neue Vergütungssystem ab dem Geschäftsjahr 2011 akzeptiert.

### Compliance

Compliance beschreibt alle Maßnahmen, die das rechtmäßige Verhalten von Unternehmen, ihrer Leitungsorgane und ihrer Mitarbeiter im Hinblick auf gesetzliche Ge- und Verbote gewährleisten. Mit dem Lufthansa Compliance-Programm sollen unsere Mitarbeiter vor Gesetzesverstößen bewahrt und dabei unterstützt werden, Gesetze richtig anzuwenden. Das Lufthansa Compliance-Programm setzt sich aus den Bausteinen Wettbewerb, Kapitalmarkt, Integrity und Corporate Compliance zusammen. Über ein Ombudssystem besteht die Möglichkeit, Verdachtsmeldungen im Hinblick auf wirtschaftskriminelle Handlungen oder Verstöße gegen die Compliance-Regelungen abzugeben. Das zentrale Compliance Office und die Compliance-Beauftragten in den Konzerngesellschaften sorgen dafür, dass das Compliance-Programm konzernweit umgesetzt wird. Der Prüfungsausschuss wird regelmäßig über Compliance-Berichte informiert.

# Konzernlagebericht

---

## **46 Unternehmen und Organisation**

- 46 Geschäftstätigkeit und Konzernstruktur
- 47 Leitung und Kontrolle
- 48 Wertorientierte Steuerung und Ziele

---

## **51 Konzernstrategie**

---

## **54 Rahmenbedingungen und Geschäftsverlauf**

- 54 Gesamtwirtschaftliche Lage
- 56 Branchenentwicklung
- 58 Regulatorische und weitere Einflussfaktoren
- 60 Überblick über den Geschäftsverlauf
- 60 Wesentliche Ereignisse
- 61 Gesamteinschätzung der Geschäftsentwicklung
- 61 Angewendete Standards

---

## **62 Ertragslage**

- 62 Umsatz und Erträge
- 64 Aufwendungen
- 65 Ergebnisentwicklung
- 67 Gewinnverwendung und Abschluss der Deutschen Lufthansa AG

---

## **69 Finanz- und Vermögenslage**

- 69 Investitionen
- 70 Cashflow
- 71 Vermögenslage
- 74 Flotte
- 76 Finanzierung

---

## **78 Geschäftsfeld Passage Airline Gruppe**

- 92 Geschäftsfeld Logistik**
- 100 Geschäftsfeld Technik**
- 106 Geschäftsfeld IT Services**
- 112 Geschäftsfeld Catering**
- 118 Sonstige**

---

## **120 Mitarbeiter**

---

## **125 Verantwortung**

---

## **130 Übernahmerechtliche Angaben nach § 315 Abs. 4 HGB**

---

## **131 Nachtragsbericht**

---

## **132 Risiko- und Chancenbericht**

- 132 Chancen- und Risikomanagement-System
- 133 Risikokategorien und Einzelrisiken
- 142 Gesamtaussage zur Risikosituation des Konzerns
- 143 Beschreibung des internen Kontroll- und Risikomanagement-Systems gemäß § 315 Abs. 2 Nr. 5 HGB

---

## **145 Prognosebericht**

- 145 Gesamtwirtschaftlicher Ausblick
- 146 Branchenausblick
- 147 Änderungen in Geschäft und Organisation
- 147 Ausblick Lufthansa Konzern
- 148 Gesamtaussage zur voraussichtlichen Entwicklung des Konzerns

Soweit der Konzernlagebericht auf Quellen außerhalb des Konzernlageberichts oder des Konzernabschlusses (zum Beispiel Internetseiten) verweist, sind die Inhalte dieser Quellen nicht Bestandteil des Konzernlageberichts und dienen ausschließlich der weiteren Information.

## Unternehmen und Organisation

- Lufthansa verfügt über fünf Geschäftsfelder mit führenden Marktpositionen.
- Die Passagier- und Frachtfluggesellschaften des Konzerns positionieren sich als Qualitäts-Airlines und bilden das Kerngeschäft. ➤ Unser Ziel ist es, den Unternehmenswert nachhaltig zu steigern. ➤ Das wertorientierte Managementsystem beeinflusst auch die erfolgsorientierte Vergütung der Führungskräfte.
- 2010 konnten wir so gut wie alle gesteckten finanziellen Ziele erreichen und viele sogar übertreffen.

## Geschäftstätigkeit und Konzernstruktur

### Weltweit führend in Passagierbeförderung, Luftfracht und Dienstleistungen für Fluggesellschaften

Die Deutsche Lufthansa AG ist ein weltweit operierendes Luftverkehrsunternehmen mit insgesamt über 400 Tochterunternehmen und Beteiligungsgesellschaften. Die Aktivitäten im Bereich der Passagierbeförderung, der Luftfracht und der Dienstleistungen für Fluggesellschaften sind in fünf Geschäftsfelder gegliedert: Passage Airline Gruppe, Logistik sowie die Luftverkehrs-Dienstleistungsgeschäftsfelder Technik, IT Services und Catering. Sie nehmen führende Positionen, teilweise auch die globale Marktführerschaft, in ihren Branchen ein.

Der strategische Fokus liegt auf den Fluggesellschaften des Lufthansa Konzerns. Die Airlines positionieren sich in ihren Segmenten als Qualitäts-Carrier. Durch ihr Wachstum und die laufende Industriekonsolidierung hat Lufthansa 2010 eine deutlich stärkere Marktposition im Heimatmarkt Europa eingenommen. Gemessen an Passagier- und Umsatzzahlen ist sie nun die größte Airline Europas. Auch das Segment Logistik zählt zu den Marktführern im internationalen Luftfrachtverkehr.

Die Geschäftsfelder Technik, IT Services und Catering ergänzen das Spektrum um Dienstleistungen für eigene und zunehmend auch konzernfremde Fluggesellschaften. Weltweit führend ist Lufthansa Technik in der Wartung, Reparatur und Überholung von

### Konzernstruktur

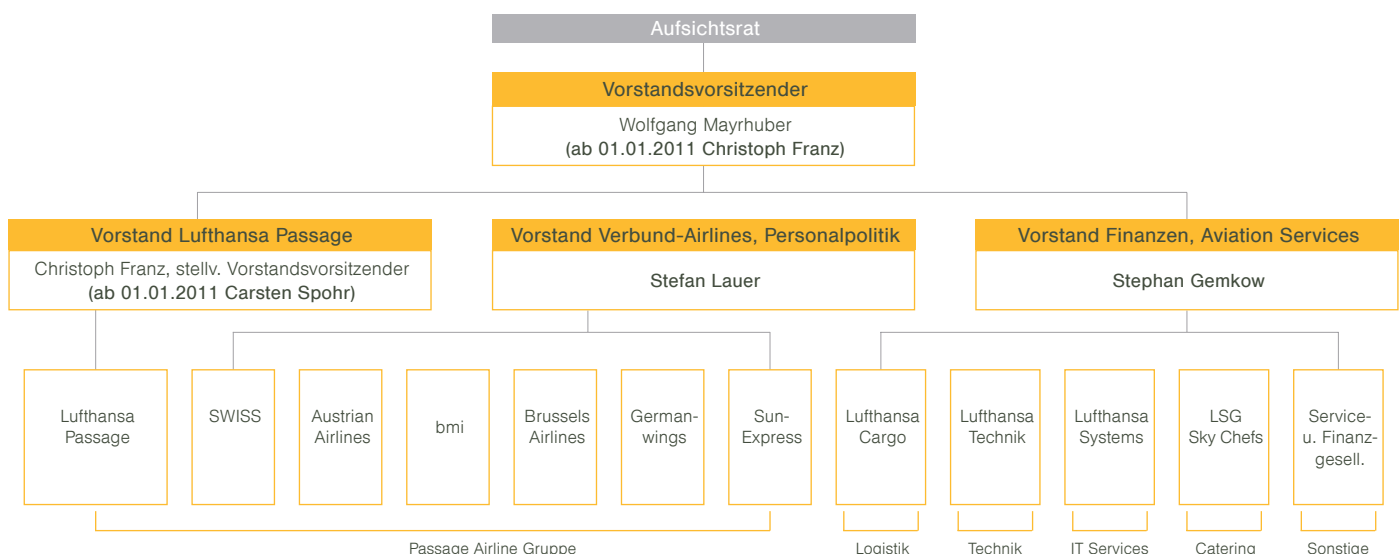



zivilen Flugzeugen. Sie deckt die gesamte Bandbreite vom Einzelauftrag bis zur Betreuung ganzer Flotten ab. Mit dem Geschäftsfeld IT Services ist Lufthansa einer der global führenden IT-Dienstleister für die Luftfahrtindustrie. Die Produkt- und Dienstleistungspalette von Lufthansa Systems umfasst maßgeschneiderte IT-Lösungen ebenso wie den Betrieb kompletter Infrastrukturen. Das Geschäftsfeld Catering, die LSG Sky Chefs-Gruppe, ist mit rund 130 Unternehmen Weltmarktführer im Airline-Catering und versorgt internationale, nationale und regionale Fluggesellschaften. Darüber hinaus positioniert sich LSG Sky Chefs zunehmend als Anbieter weiterer Dienstleistungen aus dem Bereich der Entwicklung, Beschaffung und Logistik von Bordartikeln sowie in angrenzenden Märkten. Detaillierte Informationen zu den einzelnen Geschäftsfeldern finden Sie auf [S. 78–119](#). Einzelheiten zu wesentlichen Beteiligungsgesellschaften finden Sie ab [S. 220](#).

Im Jahr 2010 beschäftigte der Konzern durchschnittlich 117.066 Mitarbeiter und erzielte einen Jahresumsatz von rund 27,3 Mrd. EUR.

## Leitung und Kontrolle

### Zweigeteilte Führungs- und Überwachungsstruktur

Die Deutsche Lufthansa AG verfügt über die in Deutschland übliche zweigeteilte Leitungs- und Überwachungsstruktur. Der Vorstand leitet das Unternehmen in eigener Verantwortung, legt die strategische Ausrichtung fest und sorgt für die nachhaltige Steigerung des Unternehmenswerts. Der Aufsichtsrat bestellt, berät und überwacht den Vorstand.

### Wechsel im Vorstand

Im September 2010 hat der Aufsichtsrat den stellvertretenden Vorstandsvorsitzenden der Deutschen Lufthansa AG, Christoph Franz, zum Vorstandsvorsitzenden ernannt. Er löste damit zum 1. Januar 2011 Wolfgang Mayrhuber an der Konzernspitze ab. Christoph Franz hatte seine Karriere 1990 bei Lufthansa begonnen. Zwischen 1992 bis 1994 war er Mitglied des Stabs, der unter dem damaligen Vorstandschef und heutigen Aufsichtsratsvorsitzenden Jürgen Weber für die Sanierung von Lufthansa verantwortlich zeichnete. 1994 wechselte Christoph Franz zur Deutschen Bahn AG und später als CEO zur Swiss International Air Lines AG. Im März 2005 kehrte er mit ihrer Integration in den Lufthansa Konzern zurück. Im April 2009 wurde er schließlich zum stellvertretenden Vorstandsvorsitzenden der Deutschen Lufthansa AG berufen und übernahm den Vorsitz des Passagevorstands.

Ebenfalls mit Wirkung zum 1. Januar 2011 beriefen die Mitglieder des Aufsichtsrats Carsten Spohr in den Vorstand. Als Leiter des Ressorts Lufthansa Passage übernimmt er den Vorsitz des Passagevorstands von Christoph Franz. Sein Nachfolger im Amt des Vorstandsvorsitzenden der Lufthansa Cargo AG ist Karl Ulrich Garnadt, bis Ende 2010 Mitglied des Passagevorstands.

Der Lufthansa Konzern wird somit auch weiterhin durch vier Vorstände geführt: den Vorstandsvorsitzenden, den Vorstand des Ressorts Lufthansa Passage, den Vorstand für Finanzen und Aviation Services sowie den Vorstand für Verbund-Airlines und Konzern-Personalpolitik. Die Deutsche Lufthansa AG fungiert dabei als Obergesellschaft und ist gleichzeitig die größte operative Einzelgesellschaft des Konzerns. Die einzelnen Geschäftsfelder werden mit Ausnahme von Teilen des Geschäftsfelds Passage Airline Gruppe in jeweils eigenen Konzerngesellschaften geführt. Sie besitzen eigene Geschäfts- und Ergebnisverantwortung und werden von ihren jeweiligen Aufsichtsräten überwacht, in denen auch Mitglieder des Konzernvorstands vertreten sind. Weitere Informationen finden Sie im Konzernanhang unter „Erläuterung 49“ auf [S. 210](#).

### Erfolgsorientierte Vergütung für Führungskräfte

Seit langem verfügt Lufthansa über Anreizprogramme in der Vergütung von Vorstand, Führungskräften und Mitarbeitern. Führungskräfte erhalten in diesem Rahmen neben der Grundvergütung eine zweistufige, erfolgsabhängige Entlohnung.

Das Programm „LH-Bonus“ beinhaltet eine auf die Berichtsperiode bezogene, variable Vergütungskomponente. Diese bemisst sich an der Wertschaffung des Unternehmens (gemessen am CVA, siehe Kapitel „Wertorientierte Steuerung und Ziele“ ab [S. 48](#)) und der persönlichen Zielerreichung der jeweiligen Führungskraft. Abhängig von der Leitungsebene entfallen dabei zwischen 30 und 60 Prozent der variablen Vergütung auf das Erreichen des geplanten Cash Value Added (CVA). Seit 1997 bieten wir unseren Führungskräften im Rahmen des jährlich neu aufgelegten Programms „LH-Performance“ zusätzlich eine übergreifende und längerfristige Komponente an. Dieses Programm verbindet ein persönliches Investment der Teilnehmer in Lufthansa Aktien mit der Gewährung von Wertsteigerungsrechten.

Seit 2002 kann auch der Vorstand an diesem Programm teilnehmen, seit 2003 gilt dies auch für die außertariflichen Mitarbeiter. Für die im Rahmen von „LH-Performance“ erworbenen Aktien gewährt Lufthansa einen Rabatt. Im Gegenzug unterliegen die Aktien dafür einer Sperrfrist bis zum Programmende nach drei Jahren. Die Wertsteigerungsrechte setzen sich seit 2007 aus einer Performance- und einer Outperformance-Option zusammen. Zum Ende des Programms erfolgt eine Auszahlung aus der Performance-Option, wenn die Wertsteigerung der Lufthansa Aktie über die gesamte Laufzeit eine festgelegte Schwelle überschritten hat, die sich an den Eigenkapitalkosten von Lufthansa orientiert. Aus der Outperformance-Option wird bei Programmende eine Zahlung ausgelöst, wenn sich der Aktienkurs von Lufthansa über die Laufzeit hinweg besser entwickelt hat als ein Vergleichskorb aus Aktien der wichtigsten europäischen Konkurrenzunternehmen. Der Betrag hängt vom Grad der Performance beziehungsweise der Outperformance ab, wobei eine Obergrenze definiert ist.

Damit werden die Programmteilnehmer zum einen Aktionäre von Lufthansa mit den damit verbundenen Chancen und Risiken. Zum anderen werden sie für eine besondere, vom Kapitalmarkt honorierte Leistung des Unternehmens von der Gesellschaft belohnt. Nähere Informationen zu unseren Aktienprogrammen finden Sie unter [www.lufthansa.com/investor-relations](http://www.lufthansa.com/investor-relations).

#### Ergebnisse „LH-Performance“

|                     | Programm-<br>ende | Outper-<br>formance zum<br>31.12.2010<br>in % | Performance<br>zum<br>31.12.2010<br>in % |
|---------------------|-------------------|-----------------------------------------------|------------------------------------------|
| LH-Performance 2010 | 2013              | 6                                             | 19                                       |
| LH-Performance 2009 | 2012              | 16                                            | 41                                       |
| LH-Performance 2008 | 2011              | 1                                             | 30                                       |
| LH-Performance 2007 | 2010              | 25                                            | -9                                       |

#### Vergütungsbericht nach § 315 Abs. 2 Nr. 4 HGB

Mit der aktuellen Struktur der Vorstandsvergütung wird angestrebt, die drei Komponenten fixe Jahresgrundvergütung, variable Jahresvergütung und Vergütung mit langfristiger Anreizwirkung und Risikocharakter in etwa gleich zu bemessen. Voraussetzung dafür sind ein zufriedenstellendes operatives Ergebnis und eine nennenswerte Performance beziehungsweise Outperformance des Lufthansa Aktienkurses. Den Aufsichtsratsmitgliedern wird neben festen Bezügen auch eine variable Vergütung in Abhängigkeit vom Konzernergebnis gezahlt, wobei die Gesamtvergütung 100.000 EUR nicht übersteigen darf. Der ausführliche Vergütungsbericht für Vorstand und Aufsichtsrat sowie die auf die einzelnen Vorstands- und Aufsichtsratsmitglieder entfallenden Beträge sind im Konzernanhang „Erläuterung 49“ ab [S. 210](#) nachzulesen.

## Wertorientierte Steuerung und Ziele

#### Der Unternehmenswert soll nachhaltig gesteigert werden

Zur Führung und Steuerung des Konzerns verwendet Lufthansa seit mehr als zehn Jahren ein wertorientiertes Managementsystem. Dieser Ansatz findet sich in allen Prozessen der Planung, Steuerung und Kontrolle wieder, sodass die Anforderungen der Kapitalgeber an einen nachhaltigen Wertzuwachs unseres Unternehmens in der gesamten Unternehmenssteuerung verankert sind. Unser Ziel ist dabei die nachhaltige Wertschaffung über den Zyklus hinweg.

Wir überprüfen regelmäßig den Zielerreichungsgrad und lassen die Ergebnisse in unser internes und externes Berichtswesen einfließen. Das wertorientierte Managementsystem schlägt sich auch in der erfolgsorientierten Vergütung nieder, siehe „Erfolgsorientierte Vergütung für Führungskräfte“ auf [S. 47](#).

#### Der Wertzuwachs wird am CVA gemessen

Der Lufthansa Konzern nutzt den Cash Value Added (CVA) als zentrale Steuerungskennzahl. Dieser misst den Wertbeitrag, der in einer Berichtsperiode vom Konzern insgesamt sowie von jedem einzelnen Geschäftsfeld erwirtschaftet wurde.

Der CVA ist eine absolute Überschussgröße, die berechnet wird, indem von dem erwirtschafteten Cashflow die Kosten für das gebundene Kapital als zur Werterhaltung notwendigem Mindest-Cashflow abgezogen werden. Übersteigt der erwirtschaftete den Mindest-Cashflow, drückt der dann positive CVA eine entsprechende Wertschöpfung aus. Die einzelnen Parameter ergeben sich wie folgt:

#### Ermittlung des Cash Value Added (CVA)

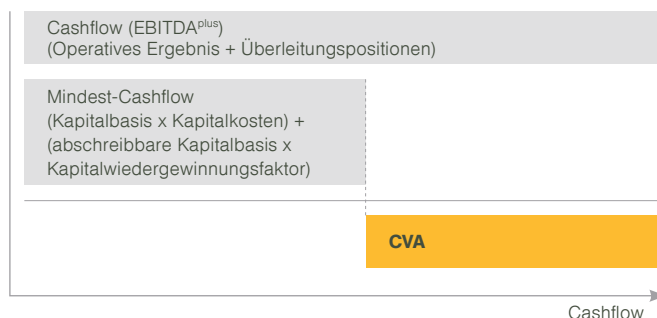

Der Mindest-Cashflow besteht aus der Summe der Verzinsung des eingesetzten Kapitals, der Kapitalwiedergewinnung und der pauschaliert ermittelten Steuerlast. Die Kapitalbasis wiederum errechnet sich aus der Summe aus Anlage- und Umlaufvermögen abzüglich der zinslosen Verbindlichkeiten. Hierbei wird die Kapitalbasis anhand der historischen Anschaffungskosten bestimmt. So bleibt die Wertermittlung und -entwicklung unabhängig von den jeweiligen Abschreibungsbedingungen. Die Kapitalverzinsung berechnen wir mit einem gewichteten Durchschnitt der Fremd- und Eigenkapitalkosten (Weighted Average Cost of Capital – WACC). Die Faktoren für die Kapitalkosten des Geschäftsjahres 2010 sind in der folgenden Tabelle ersichtlich:

#### Kapitalverzinsung 2010

| in %                       |             |
|----------------------------|-------------|
| Risikoloser Marktzins      | 4,2         |
| Marktrisikoprämie          | 5,7         |
| Betafaktor                 | 1,1         |
| Anteil Eigenkapital        | 50          |
| Anteil Fremdkapital        | 50          |
| <b>Kosten Eigenkapital</b> | <b>10,5</b> |
| <b>Kosten Fremdkapital</b> | <b>5,4</b>  |

Wir überprüfen diese Faktoren jährlich und aktualisieren sie bei Bedarf für die Unternehmensplanung und Erfolgsmessung des Folgejahres. Dabei berücksichtigen wir die langfristige Ausrichtung des Konzepts und versuchen, kurzfristige Schwankungen zu glätten. In der Folge kann der WACC in Einzeljahren selbst dann konstant bleiben, wenn sich einzelne Werte kurzfristig ändern sollten. Aufgrund der stark gesunkenen Basiszinsen, die den Effekt höherer Risikozuschläge mehr als kompensierten, hat sich so bei der turnusmäßigen Überprüfung der Einzelparameter für 2010 rechnerisch ein niedrigerer WACC ergeben. In Erwartung wieder steigender Zinsen hatten wir uns aber dafür entschieden, den WACC bei dem bestehenden Wert von 7,9 Prozent zu belassen. Für 2011 wurde er zwischenzeitlich angepasst und auf 7,0 Prozent reduziert.

Auf Basis unserer Finanzstrategie wird zur Berechnung des WACC eine Zielkapitalstruktur von 50 Prozent marktbewerteten Eigenkapitals und 50 Prozent Fremdkapitals gleichermaßen für den Konzern wie auch die Geschäftsfelder angesetzt. Die unterschiedlichen Risiken der Geschäftsfelder bilden wir über individuelle Eigen- und damit auch Gesamtkapitalkosten ab, um so auch eine risikoadäquate Kapitalfreigabe für die Projekte der Geschäftsfelder zu gewährleisten. Die Differenzierung erfolgt über Betafaktoren, die in einem zweijährigen Turnus überprüft werden.

Die nachfolgende Tabelle veranschaulicht die geforderte Kapitalverzinsung für den Konzern und die einzelnen Geschäftsfelder.

#### Kapitalkosten (WACC) für den Konzern und die Geschäftsfelder

| in %                   | 2010 | 2009 | 2008 | 2007 | 2006 |
|------------------------|------|------|------|------|------|
| Konzern                | 7,9  | 7,9  | 7,9  | 7,9  | 7,9  |
| Passage Airline Gruppe | 7,9  | 7,9  | 7,9  | 7,9  | 7,9  |
| Logistik               | 8,2  | 8,2  | 8,2  | 8,2  | 8,2  |
| Technik                | 7,6  | 7,6  | 7,6  | 7,6  | 7,6  |
| IT Services            | 7,6  | 7,6  | 7,6  | 7,6  | 7,6  |
| Catering               | 7,9  | 7,9  | 7,9  | 7,9  | 7,9  |

Um den Wertverlust, der sich durch den Verschleiß betrieblichen Anlagevermögens im Produktionsprozess ergibt, zu berücksichtigen, fließt die sogenannte Kapitalwiedergewinnung (ökonomische Abschreibung) in den Mindest-Cashflow mit ein. Sie bezieht sich auf das abschreibbare Anlagevermögen und entspricht dem Betrag, den wir jedes Jahr, angelegt zum WACC, zurücklegen müssen, um am Ende der Nutzungsdauer wieder über Mittel in Höhe des Anschaffungswerts zu verfügen. Darüber hinaus wird die erwartete Steuerlast durch einen prozentualen Zuschlag von derzeit 1,2 Prozent auf die Kapitalbasis berücksichtigt. Der so berechnete Mindest-Cashflow lag für das Jahr 2010 bei 3,2 Mrd. EUR (Vorjahr: 2,9 Mrd. EUR).

Als Kennzahl für den tatsächlich erwirtschafteten Cashflow wird im Lufthansa Konzern das EBITDA<sup>plus</sup> verwendet, das sich aus einer operativen und einer finanziellen Komponente zusammensetzt. Dabei leiten wir den operativen EBITDA<sup>plus</sup> aus dem operativen Ergebnis ab, indem dieses um die nicht zahlungswirksamen Positionen adjustiert wird. Es handelt sich hierbei vor allem um Abschreibungen, Erträge aus Rückstellungsaufösungen und die Nettoveränderung der Pensionsrückstellungen. Hinzu kommt der finanzielle EBITDA<sup>plus</sup> mit den Positionen der anteiligen Vorsteuerergebnisse nicht vollkonsolidierter Beteiligungen, Zinserträge und Ergebniseffekte aus dem Abgang von Finanzanlagen. Damit werden im EBITDA<sup>plus</sup> alle wesentlichen cashrelevanten Posten berücksichtigt. Der Lufthansa EBITDA<sup>plus</sup> betrug im Berichtsjahr 3,3 Mrd. EUR (Vorjahr: 2,0 Mrd. EUR).

#### Überleitung EBITDA<sup>plus</sup>

| in Mio. €                                                           | 2010         | 2009         |
|---------------------------------------------------------------------|--------------|--------------|
| <b>Operatives Ergebnis</b>                                          | <b>876</b>   | <b>130</b>   |
| Abschreibungen                                                      | 1 609        | 1 387        |
| Ergebniseffekt aus dem Abgang von Sachanlagen                       | 36           | 9            |
| Erträge aus der Auflösung von Rückstellungen                        | 234          | 187          |
| Außerplanmäßige Abschreibungen auf immaterielle Vermögenswerte      | -82          | -84          |
| Veränderung Pensionsrückstellungen vor Zinsen                       | 54           | 65           |
| <b>Operativer EBITDA<sup>plus</sup></b>                             | <b>2 727</b> | <b>1 694</b> |
| Anteiliges Vorsteuerergebnis nicht vollkonsolidierter Beteiligungen | 181          | 178          |
| Zinserträge                                                         | 175          | 117          |
| Ergebniseffekt Abgang Finanzanlagen                                 | 189          | 23           |
| <b>Finanzieller EBITDA<sup>plus</sup></b>                           | <b>545</b>   | <b>318</b>   |
| <b>EBITDA<sup>plus</sup></b>                                        | <b>3 272</b> | <b>2 012</b> |

Für die Berechnung des CVA wird schließlich vom EBITDA<sup>plus</sup> der Mindest-Cashflow abgezogen. Für den Konzern ergab sich so für 2010 ein CVA von 71 Mio. EUR. Damit haben wir im ersten Jahr nach der Krise wieder Wert geschaffen. Die deutliche Verbesserung gegenüber dem Vorjahreswert (-858 Mio. EUR) ist vor allem auf die verbesserte Ergebnislage zurückzuführen, die den gegenläufigen Effekt aus dem gestiegenen Mindest-Cashflow übersteigt. Dies wollen wir auch im laufenden Geschäftsjahr erreichen. Denn der Ausblick auf die kommenden Jahre hat sich im Zuge der Ergebnisentwicklung deutlich aufgehellt. Damit können wir an den seit Einführung des Konzepts bislang geschaffenen Wert von insgesamt 2,1 Mrd. EUR wieder anknüpfen und wollen ihn weiter steigern.

### Wertschaffung (CVA) des Lufthansa Konzerns und der Geschäftsfelder

| in Mio. €              | 2010 | 2009 | 2008 | 2007  | 2006 |
|------------------------|------|------|------|-------|------|
| Konzern                | 71   | -858 | 654  | 1 546 | 552  |
| Passage Airline Gruppe | -198 | -691 | 346  | 768   | 317  |
| Logistik               | 233  | -264 | 71   | 59    | 37   |
| Technik                | 172  | 164  | 188  | 205   | 85   |
| IT Services            | -23  | 3    | 29   | -16   | 32   |
| Catering               | -28  | -68  | -17  | 21    | -50  |

### Wertentwicklung des Lufthansa Konzerns

Cash Value Added in Mio. €

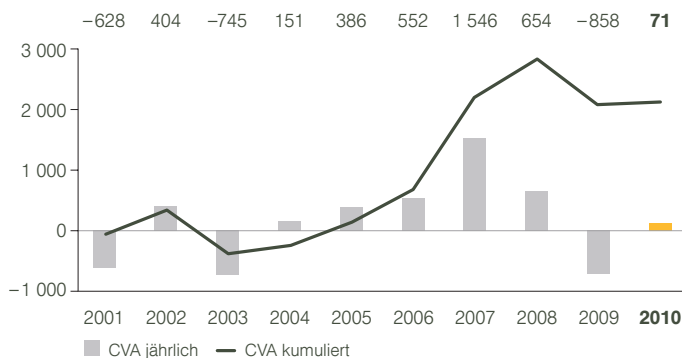

Neben der Wertschaffung bestehen eine Reihe weiterer finanzieller Ziele, auf die wir im folgenden Kapitel sowie im Abschnitt „Finanzstrategie“ auf [S. 53](#) näher eingehen.

### Wir haben viele Ziele für 2010 übertroffen

Als wir vor einem Jahr unsere Ziele für das Geschäftsjahr 2010 formuliert hatten, siehe „Prognosebericht“ im Geschäftsbericht 2009 auf [S. 141](#), gingen wir von einer Verbesserung der Nachfragesituation im Laufe des Jahres aus. Doch herrschte noch große Unsicherheit bezüglich des Zeitpunkts und der Intensität dieser Erholung. Auch die weiteren Rahmenbedingungen, wie zum Beispiel der Ölpreis, hätten sich aus dieser Perspektive förderlich oder hemmend auf die Zielerreichung auswirken können. Gleichwohl war es unser Anspruch, unabhängig von der Entwicklung der Rahmenparameter das Bestmögliche für den Lufthansa Konzern daraus zu machen und unserem Führungsanspruch hinsichtlich der Profitabilität in der Airline-Industrie gerecht zu werden.

2010 wurde ein Geschäftsjahr, in dem sich die Wirtschaft deutlich besser erholte als prognostiziert, wenn auch mit regional sehr unterschiedlicher Dynamik. Diese Erholung wurde begleitet von einem ebenfalls ansteigenden Ölpreis und gestört durch viele Sondereffekte, bis hin zu weitreichenden Lufttraumsperrungen. Der Lufthansa Konzern konnte aufgrund seiner starken und breiten Aufstellung, der soliden Finanzlage und des professionellen Managements in allen Geschäftsfeldern im Umgang mit diesen Entwicklungen das Wachstum für sich sehr erfolgreich nutzen.

Wir waren konzernweit, anders als viele Wettbewerber, auf die Nachfragerückkehr vorbereitet. Geholfen hat uns dabei, dass wir bereits während des Krisenmanagements in den vergangenen Jahren die mittelfristige Perspektive nicht aus den Augen gelassen und Wachstumschancen vorbereitet beziehungsweise bereits genutzt hatten. Die Bestätigung dieses Kurses erfolgte nach der deutlich stabileren Krisenbewältigung 2009 nun auch in der Performance im Aufschwungjahr 2010.

Fast alle wirtschaftlichen Ziele, die wir uns für das Berichtsjahr gesetzt hatten, konnten wir erreichen und haben sie teilweise sogar übertroffen. Selbstverständlich bleiben auch weiterhin viele Herausforderungen bestehen. Auf sie gehen wir in den kommenden Kapiteln näher ein. Mit dem Geschäftsverlauf 2010 ist der Vorstand der Deutschen Lufthansa AG aber ausgesprochen zufrieden und spricht allen Führungskräften und Mitarbeitern des Konzerns seinen aufrichtigen Dank für ihren Einsatz aus.

Die nachfolgende Tabelle gibt einen Überblick über die Erreichung unserer Ziele. Auf die einzelnen Dimensionen gehen wir in den jeweiligen Kapiteln detailliert ein.

| Zielaussage                                                                                                       | Zielerreichung 2010                                                                                             |
|-------------------------------------------------------------------------------------------------------------------|-----------------------------------------------------------------------------------------------------------------|
| Fortsetzung des profitablen Wachstumskurses durch Belebung des Umsatzes und Steigerung des operativen Ergebnisses | 27,3 Mrd. EUR Umsatz (+ 22,6 Prozent) und 876 Mio. EUR operativer Gewinn (+ 746 Mio. EUR)                       |
| Mittelfristig Wiedererlangung einer angemessenen operativen Marge                                                 | 4,1 Prozent vergleichbare operative Marge (+ 2,7 Prozentpunkte) im ersten Jahr nach der Krise                   |
| Alle Geschäftsfelder behaupten ihre starke Position im Wettbewerb                                                 | Alle Geschäftsfelder sind profitabel, Passage Airline Gruppe, Logistik und Catering erhöhen die operative Marge |
| Restrukturierung der neuen Airlines und Realisierung von Synergien im Airline-Verbund                             | Ergebnisverbesserungen bei Austrian Airlines und bmi und zahlreiche Kooperationen zur Synergiezielung           |
| Halten der Mindestliquidität von 2,3 Mrd. EUR                                                                     | 5,6 Mrd. EUR Liquidität                                                                                         |
| Wahrung der Bilanzstärke durch einen hohen Anteil unbelasteter Flugzeuge                                          | 68 Prozent der Konzernflotte unbelastet, (80 Prozent der Kernflotte von Lufthansa Passage und Lufthansa Cargo)  |
| Mittelfristig Erreichung einer nachhaltigen Eigenkapitalquote von 30 Prozent                                      | 28,4 Prozent Eigenkapitalquote (+ 4,9 Prozentpunkte)                                                            |
| Rückführung des Gearing in den Zielkorridor von 40 bis 60 Prozent                                                 | Gearing: 50 Prozent (- 29,1 Prozentpunkte)                                                                      |
| Wiederaufnahme von Dividendenzahlungen, sobald Voraussetzungen der Dividendenpolitik erfüllt werden               | 0,60 EUR Dividendenvorschlag für das Geschäftsjahr 2010                                                         |
| Erzielung eines Free Cashflows trotz laufender Flottenmodernisierung                                              | 1,6 Mrd. EUR Free Cashflow bei 3,1 Mrd. EUR Operativem Cashflow                                                 |
| Fortsetzung der Pensions-Ausfinanzierung mit flexiblem Ansatz                                                     | Zuführung im geplanten Volumen durch Fraport-Anteil und Bardotierung                                            |
| Investment Grade Rating erhalten                                                                                  | S&P's: BBB-, Ausblick auf „stabil“ verbessert. Moody's: Ba1, stabiler Ausblick                                  |
| Nachhaltige Wertschaffung (positiver CVA) über den Zyklus hinweg                                                  | 2,1 Mrd. EUR CVA seit 2000, inkl. 71 Mio. EUR CVA in 2010                                                       |



## Konzernstrategie

➤ Der weltweite Luftverkehr wächst bei gleichzeitiger ausgeprägter Zyklichkeit.  
 ➤ Lufthansa verfolgt in diesem Branchenumfeld einen auf nachhaltiges, profitables Wachstum ausgerichteten Kurs. ➤ Unsere Kernkompetenzen bilden hierfür die Basis. ➤ Das weitere Wachstum im Airline-Geschäft kann organisch oder gemeinsam mit Partnern erfolgen. ➤ Die konsequente Weiterentwicklung des Konzerns bleibt ein Erfolgsfaktor unserer Strategie.  
 ➤ Die Finanzstrategie unterstützt und schafft die Handlungsfreiheit für die weitere operative und strategische Unternehmensentwicklung.

### ➤ Chancen zur Wertsteigerung wahrnehmen

Das internationale Luftfahrtgeschäft steht für solide Wachstumsraten, gleichzeitig aber auch für ausgeprägte Zyklichkeit. Vor diesem Hintergrund haben wir die Geschäftsfelder des Lufthansa Konzerns mit dem Ziel, profitabel zu wachsen, positioniert und weiterentwickelt. Dabei verlieren wir die langfristigen Ziele der Wertschaffung in konjunkturell anspruchsvollen Phasen nicht aus dem Auge, sondern nutzen auch in Krisenzeiten Chancen, die sich am Markt und in Bezug auf Partnerschaften ergeben. Mit Weitblick untersuchen wir strategische Optionen auf ihren langfristigen Wertbeitrag zum Konzern. Von den auf diese Weise geschaffenen Wachstumsperspektiven und der gesteigerten Wettbewerbsfähigkeit des Lufthansa Konzerns profitieren alle Interessengruppen: unsere Kunden, Aktionäre und Mitarbeiter sowie nicht zuletzt der Luftverkehrsstandort Deutschland und Europa. Ein wettbewerbsfähiger Standort trägt maßgeblich zu einem ausgewogenen Mobilitätsangebot und Wohlstand der Bevölkerung bei. Profitabilität bleibt bei alledem unser primäres Ziel. Da sich Ökologie und Ökonomie gerade im Luftverkehr auf besondere Weise ergänzen, sehen wir uns in der Verantwortung, die Umwelt zu entlasten und Ressourcen zu schonen, beispielsweise über umfassende Investitionen in eine moderne, treibstoffeffiziente Flugzeugflotte.

Unser Kurs ist dabei klar vorgegeben:

- Wir schreiben weiter Erfolgsgeschichte als einer der attraktivsten, profitablen Luftfahrtkonzerne mit globalem Netz- und Serviceangebot.
- Wir bieten unseren Kunden exzellente Qualität und innovativen Service in allen Segmenten.
- Wir richten unser Prozess- und Produktprofil konsequent an den heutigen und sich für die Zukunft abzeichnenden Kundenbedürfnissen und ihrem Nachfrageverhalten aus.

- Wir bieten unseren Kunden, Anteilseignern und Mitarbeitern nachhaltig attraktive Perspektiven.
- Wir wachsen weiter profitabel: organisch, in Partnerschaften und durch Akquisitionen.
- Wir fühlen uns der Wertschaffung verpflichtet.

Alle Unternehmensbereiche werden im Rahmen des wertorientierten Managements über das Cash Value Added-Konzept gesteuert, siehe Kapitel „Wertorientierte Steuerung und Ziele“ ab [S. 48](#). Bei der Sicherstellung unserer Ziele kommt dem kontinuierlichen Kostenmanagement eine besondere Rolle zu. Hierzu unternehmen alle Geschäftsfelder wesentliche Anstrengungen. Die Konzerninitiative „Upgrade to Industry Leadership“, in der bis zum Februar 2010 rund 140 Projekte in allen Geschäftsfeldern mit einem jährlichen nachhaltigen Ergebnisbeitrag von rund 700 Mio. EUR identifiziert wurden, ist inzwischen erfolgreich abgeschlossen. Darüber hinaus haben wir weitere Initiativen in allen Konzerngesellschaften zur Sicherung der Wettbewerbsfähigkeit und Stückkostenverbesserung lanciert. So hat zum Beispiel das Projekt Climb 2011 in der Lufthansa Passage eine nachhaltige Ergebnisverbesserung von 1 Mrd. EUR bis Ende 2011 zum Ziel, siehe Kapitel „Lufthansa Passage“ ab [S. 85](#).

### ➤ Mobilität à la carte – hochwertige Produkte in allen Kundensegmenten

Die Fluggesellschaften der Passage Airline Gruppe und Lufthansa Cargo bieten in jedem Segment nachfragegerechte Mobilität für Passagiere und Fracht. Alle Kundensegmente werden abgedeckt, vom Budgetangebot unserer Tochter Germanwings bis hin zum Premium-Produkt von Lufthansa Private Jet. So erhält jeder Kunde auf seiner gewünschten Reiseroute und entsprechend seiner Bedürfnisse die für ihn passenden Angebote aus einer Hand.

Ergänzend bieten unsere drei weiteren Geschäftsfelder Technik, IT Services und Catering hochwertige Serviceleistungen für Airline-Kunden innerhalb und außerhalb des Lufthansa Konzerns. Alle Geschäftsfelder profitieren untereinander von der Wechselwirkung der hohen Produktstandards und der hohen Reputation von Lufthansa in der globalen Luftverkehrsbranche. So prägt beispielsweise Lufthansa Technik das Image der Kernmarke Lufthansa hinsichtlich Qualität, Sicherheit und technischer Zuverlässigkeit entscheidend mit.

### **7 Kernkompetenzen sind Garant für die anhaltende Erfolgsgeschichte**

Durch unsere exzellent ausgebildeten Mitarbeiter und eine erfahrene Führungsmannschaft sind wir in der Lage, Ressourcen erfolgreich zu steuern und laufend zu optimieren. Wir beherrschen die Kernprozesse des Luftverkehrs, wie etwa operative Abläufe am Boden und in der Luft. Unser Ziel ist dabei, Qualität, Kosten und Flexibilität ständig zu verbessern – unter Beibehaltung unseres sehr hohen Sicherheitsniveaus. Auch im Bereich Innovationen können unsere Gesellschaften immer wieder neue Ideen zur Marktreife bringen und so allen Kunden neue Produkte anbieten. Um unser Produktangebot stetig zu optimieren, setzen unsere Geschäftsfelder maßgeschneiderte Lösungen um, beispielsweise durch eine Vielzahl lokaler Produktionsstätten im Catering-Bereich oder durch den Ausbau des Streckennetzes für unsere Passagiere. Dem übergreifenden Management von Netzwerken kommt hierbei in der Luftverkehrsbranche eine herausragende Rolle zu. Der Lufthansa Konzern hat seine Fähigkeit zur erfolgreichen Integration neuer Verbundpartner bereits mehrfach bewiesen und kann künftig darauf aufbauen.

### **7 Profitables Wachstum untermauert den Führungsanspruch in der europäischen Airline-Industrie**

Unsere Krisenstrategie und die Steuerung in der Finanz- und Wirtschaftskrise haben sich bewährt und bilden gleichzeitig die Basis, um am derzeitigen Wachstumsschub im Luftverkehr partizipieren zu können. In konjunkturell soliden Phasen hatten wir bereits die Weichen gestellt, um vor dem Hintergrund der ausgeprägten Zyklizität unserer Branche auch für einen konjunkturellen Abschwung gerüstet zu sein. Dazu zählen ein größtmögliches Maß an Kapazitäts- und Kostenflexibilität, eine schnelle Reaktion auf Marktveränderungen, lokales Unternehmertum, das Wahrnehmen von Opportunitäten sowie ein solides Finanzprofil. Auf Konzern- und Geschäftsfeldebene bewerten wir kontinuierlich die Chancen und Risiken in den Märkten und richten die Wachstumsszenarien flexibel darauf aus.

Wir wollen an dem erwarteten weiteren Wachstum, insbesondere in unserem Kerngeschäft der Passagierbeförderung, partizipieren. Dies kann sowohl über organisches Wachstum als auch – sofern sich strategisch und wirtschaftlich wertschaffende Opportunitäten ergeben – über die Integration von Partnern in unseren Airline-Verbund oder weitere Partnerschaften, insbesondere in der Star Alliance, erfolgen. Der Aus- und Aufbau von Kooperationen und Allianzen bietet den Vorteil eines raschen Marktzugangs bei geringem Investitionsvolumen und begrenztem Markteintrittsrisiko. Durch intensivierte Partnerschaften, wie im Rahmen des Transatlantik-Joint Ventures Atlantic++, können dabei weitere Erlös- und Ergebnispotenziale realisiert werden. Nähere Ausführungen zur Entwicklung der Star Alliance und zu Atlantic++ finden Sie im Kapitel „Passage Airline Gruppe“ ab [S. 78](#).

### **7 Unternehmertum und Flexibilität für die erfolgreiche Weiterentwicklung des Konzerns**

Die Weiterentwicklung des Konzerns und seiner Organisation bleibt ein elementarer Bestandteil und Erfolgsfaktor unserer Strategie: Hiermit können wir den Anforderungen der sich stetig wandelnden Umwelt- und Marktgegebenheiten gerecht werden. Nachdem Lufthansa in den 1990er Jahren die Fertigungstiefe flexibilisiert und das Airline-Profil geschärft hatte, entwickelt sich der Konzern zu einem Verbund operativ eigenständiger Fluggesellschaften. In diesem Multi-Airline- und Service-Verbund profitieren alle Partner von dem gegenseitigen Austausch von Best Practices sowie umfangreichen Kosten- und Erlössynergien. Im Airline Development Board, in dem der Konzernvorstand und die CEOs der Verbund-Airlines regelmäßig zusammenkommen, wird der Verbund kontinuierlich weiterentwickelt. Über die dezentralen Strukturen im gesamten Konzern fördern wir zudem Ergebnisverantwortung und Unternehmertum.

Angesichts limitierter finanzieller Mittel und Managementressourcen ist es dabei jedoch mehr denn je erforderlich, sich auf die Kernkompetenzen zu konzentrieren. Dies gilt für den Konzern ebenso wie für alle Geschäftsfelder. Ihre Relevanz wiederum bestimmt sich im Wesentlichen dadurch, wie wichtig sie für die Wettbewerbsfähigkeit, die Wechselwirkungen und den „Kompetenz-Fit“ mit dem strategischen Geschäftsfeld der Passage Airline Gruppe sind. Wenn die Aktivitäten eines Geschäftsfelds für die Passage Airline Gruppe weniger relevant sind, prüfen wir auch Lösungen außerhalb des Konzerns, um das betreffende Geschäftsfeld weiterzuentwickeln. Wie bisher werden wir auch bei künftigen Portfoliomaßnahmen das Wertsteigerungspotenzial einer Transaktion für eine solche Entscheidung zu Grunde legen.

## Finanzstrategie

### 7 Starkes Finanzprofil begleitet Unternehmensentwicklung

Unsere Finanzstrategie ist darauf ausgerichtet, jederzeit weitgehende Handlungsfreiheit hinsichtlich der operativen, finanziellen und strategischen Unternehmensentwicklung für den Konzern zu sichern. So wird die Unternehmensentwicklung von einem starken Finanzprofil begleitet und abgesichert.

Lufthansa hat in der globalen Finanz- und Wirtschaftskrise der vergangenen Jahre von dieser Finanzstrategie profitiert. Ausgerüstet mit einer guten Liquiditätsvorsorge und finanziellen Konstitution verfügte Lufthansa auch in der Krise über einen deutlichen Vorteil gegenüber ihren Wettbewerbern. Somit waren wir in der Lage, trotz des starken Gegenwinds an unserem strategischen Kurs, insbesondere an unseren Investitionen, festzuhalten und neben dem Krisenmanagement auch aktiv die zukünftige Wettbewerbsposition zu gestalten.

Die Konsolidierung der neuen Airlines und das Krisenjahr 2009 hatten spürbare Auswirkungen auf das Finanzprofil des Konzerns. Unsere Zielwerte der Kapitalstruktur wurden in der Konsequenz unterschritten. Die erfreuliche Ergebnisentwicklung des Geschäftsjahres 2010 hat sich jedoch positiv auf diese Werte ausgewirkt und lässt eine Zielerreichung – wo noch nicht erfolgt – absehbar erscheinen, um in Zukunft wieder für mögliche wirtschaftliche Chancen oder Turbulenzen gerüstet zu sein.

### 7 Die Finanzstrategie folgt klar definierten Zieldimensionen

Die Finanzstrategie ist ein integraler Bestandteil der Gesamtstrategie des Lufthansa Konzerns. Ihre zentralen Aspekte fließen in alle wesentlichen Entscheidungen des Unternehmens ein. Umgesetzt wird die Finanzstrategie über eine Reihe klar definierter Zieldimensionen. Im Jahr 2010 haben wir diese um eine weitere Zielgröße erweitert. Zur Beurteilung und Planung einer für den Konzern tragfähigen Verschuldung wurde die Kennzahl „Dynamische Tilgungsquote“ eingeführt. Sie ist ein Maß für die Tilgungsfähigkeit des Konzerns. Der Zielwert von mindestens 60 Prozent wurde so bestimmt, dass bei dessen Erreichung die Zielgrößen vergleichbarer Kennzahlen der Ratingagenturen für eine Investment Grade Beurteilung nachhaltig erfüllt werden.

Darüber hinaus haben folgende Eckpfeiler weiterhin Bestand:

- Der Konzern benötigt eine angemessene Liquiditätsausstattung zur Reduzierung von Refinanzierungsrisiken. Dies ist insbesondere vor dem Hintergrund zeitweise volatiler Kunden- und Finanzmärkte entscheidend. Als strategische Reserve hält Lufthansa eine jederzeit verfügbare Mindestliquidität von 2,3 Mrd. EUR vor.

- Der Zyklizität in unserer Industrie begegnen wir auch durch eine starke Kapitalstruktur:
  - Wir streben eine nachhaltige Eigenkapitalquote von 30 Prozent an.
  - Das Gearing inklusive Pensionsverbindlichkeiten soll sich in einem Zielkorridor von 40 bis 60 Prozent bewegen.
- Wir bewahren unsere finanzielle und operative Flexibilität durch einen hohen Anteil unbelasteter Flugzeuge.
- Wir legen Wert auf eine hohe Unternehmensbonität aus Sicht der kreditgebenden Institutionen und Ratingagenturen. Unser Ziel ist die Sicherung des Investment Grade Ratings.
- Wir steuern die Finanzrisiken durch ein integriertes Risikomanagement mit dem Ziel der Glättung von Preisschwankungen.

#### Dynamische Tilgungsquote

| in Mio. €                                    | 2010         | 2009         |
|----------------------------------------------|--------------|--------------|
| Operativer Cashflow                          | 3 075        | 1 991        |
| Veränderung des Working Capitals             | -475         | -129         |
| Zinseinnahmen                                | 314          | 214          |
| Zinsausgaben                                 | -451         | -281         |
| <b>Adjustierter operativer Cashflow</b>      | <b>2 463</b> | <b>1 795</b> |
| <b>Nettokreditverschuldung und Pensionen</b> | <b>4 167</b> | <b>4 905</b> |
| <b>Dynamische Tilgungsquote in %</b>         | <b>59,1</b>  | <b>36,6</b>  |

### 7 Die Dividendenpolitik wahrt die Balance zwischen Gewinnbeteiligung und Substanzerhalt

Unsere Dividendenpolitik folgt einer klaren Logik und fügt sich in die Finanzstrategie ein: Dividendenzahlungen orientieren sich primär am operativen Gewinn des Konzerns nach IFRS. Nach erfolgreichen Geschäftsjahren haben wir in der Vergangenheit zwischen 30 und 40 Prozent des operativen Gewinns als Dividende ausgeschüttet. Voraussetzung hierfür ist jedoch die Möglichkeit einer Dividendenzahlung aus dem Jahresüberschuss des Einzelabschlusses nach HGB der Deutschen Lufthansa AG. Dabei berücksichtigt die vorgeschlagene Höhe der Dividendenzahlungen auch die Aufrechterhaltung beziehungsweise sukzessive Erreichung unserer finanzstrategischen Ziele. Durch die Kontinuität dieser Dividendenpolitik beteiligen wir unsere Aktionäre am Erfolg des Lufthansa Konzerns und erhalten die finanzielle Substanz des Unternehmens.

#### Dividende in €

| 2010 | 2009 | 2008 | 2007 | 2006 |
|------|------|------|------|------|
| 0,60 | –    | 0,70 | 1,25 | 0,70 |

## Rahmenbedingungen und Geschäftsverlauf

➤ Der weltweite Luftverkehr hat sich mit der gesamtwirtschaftlichen Belebung schnell von der Krise erholt. ➤ Der Absatz stieg weltweit im Passagier- und stärker noch im Frachtverkehr. ➤ Der Sektor bleibt von Konsolidierungen geprägt. ➤ Im regulatorischen Umfeld fehlt es weiterhin an globalen Lösungen, vor allem beim Klimaschutz. ➤ Lufthansa profitierte 2010 von der positiven Entwicklung und fand zu alter Stärke zurück. ➤ Das Geschäftsjahr war insgesamt überplanmäßig erfolgreich.

## Gesamtwirtschaftliche Lage

### Die Weltwirtschaft erholt sich schneller als erwartet

Nach dem starken Einbruch im Jahr 2009 erholte sich die Weltwirtschaft 2010 überraschend schnell, vor allem im ersten Halbjahr. Maßgeblich hierfür waren insbesondere die expansive Geld- und Fiskalpolitik vieler Länder sowie der verlängerte Lagerzyklus. Zugleich legte der Welthandel deutlich zu. Die wirtschaftliche Erholung verlief jedoch insgesamt heterogen und wurde vor allem von den lateinamerikanischen und asiatischen Schwellenländern getragen. Wegen zurückgehender Impulse des Lagerzyklus sowie der auslaufenden Konjunkturprogramme und der notwendigen Konsolidierung einiger Länder schwächte sich die Erholung im zweiten Halbjahr leicht ab. Auch das Wachstum des Welthandels büßte an Tempo ein. Überlagert wurde die wirtschaftliche Entwicklung von internationalen Währungskonflikten, die Sorge um den Welthandel hervorriefen. Insgesamt wird für das Gesamtjahr 2010 dennoch von einem weltweiten Wirtschaftswachstum von 4,1 Prozent ausgegangen (Vorjahr: – 1,9 Prozent).

### Unterschiedliche Dynamik in den Regionen

In der ersten Jahreshälfte hat sich die Wirtschaft in den USA spürbar erholt. Wachstumsbeiträge lieferten trotz hoher Arbeitslosigkeit und gestiegener Sparquote der Lagerzyklus und die privaten Konsumausgaben. Die expansive Geld- und Finanzpolitik wurde auch in der zweiten Jahreshälfte fortgesetzt. So hat die US-Notenbank etwa zur Belebung der Binnennachfrage beschlossen, US-Staatsanleihen in Höhe von weiteren 600 Mrd. USD bis Mitte 2011 zu kaufen. Für 2010 wird ein Wachstum von 2,9 Prozent erwartet (Vorjahr: – 2,6 Prozent).

### Entwicklung des Bruttoinlandsprodukts (BIP)

| in %            | 2010* | 2009  | 2008 | 2007 | 2006 |
|-----------------|-------|-------|------|------|------|
| Welt            | 4,1   | – 1,9 | 1,8  | 4,1  | 4,2  |
| Europa          | 2,0   | – 4,1 | 0,5  | 3,1  | 3,4  |
| Deutschland     | 3,6   | – 4,7 | 0,7  | 2,8  | 3,6  |
| Nordamerika     | 2,9   | – 2,6 | 0,0  | 2,0  | 2,7  |
| Südamerika      | 5,6   | – 1,9 | 4,1  | 5,4  | 5,4  |
| Asien / Pazifik | 7,0   | 1,4   | 3,6  | 6,8  | 5,8  |
| China           | 10,1  | 9,1   | 9,6  | 14,2 | 12,7 |
| Naher Osten     | 4,1   | 0,6   | 5,7  | 5,8  | 7,7  |
| Afrika          | 4,6   | 2,5   | 5,1  | 6,1  | 5,8  |

Quelle: Global Insight World Overview per 14.01.2011.

\* Prognosewerte.

Die Volkswirtschaften Asiens zeigen ein gewohnt differenziertes Bild hinsichtlich der Wirtschaftsdynamik. In Japan schwächte sich die Konjunkturdynamik im Laufe des Jahres 2010 ab. Ein gegenüber dem US-Dollar stark aufgewerteter Yen erschwerte die Ausweitung der Exporte; neue Konjunkturpakete wurden initiiert. Der hierdurch gestiegene private Verbrauch dürfte jedoch nicht nachhaltig sein. Für 2010 wird mit einem Wachstum der japanischen Wirtschaft von 4,3 Prozent gerechnet (Vorjahr: – 6,3 Prozent). Die weiteren Volkswirtschaften Asiens wuchsen im Laufe des Jahres 2010 kräftig, wenn auch zunehmend langsamer. Für sie wird 2010 insgesamt ein Wachstum von 8,2 Prozent erwartet (Vorjahr: 5,2 Prozent). Mittlerweile wirken deshalb einige Länder einer drohenden konjunkturellen Überhitzung durch Straffung der geldpolitischen Zügel entgegen, etwa durch Zinserhöhungen.



Infolge stark zunehmender Bauinvestitionen sowie einer sehr robusten privaten Konsumnachfrage führt China die positive konjunkturelle Entwicklung an. Die chinesische Wirtschaft ist 2010 voraussichtlich um 10,1 Prozent gewachsen (Vorjahr: 9,1 Prozent). Für Indien wird für 2010 ein Wachstum des Bruttoinlandsprodukts von 8,5 Prozent prognostiziert (Vorjahr: 6,8 Prozent).

Die europäische Wirtschaft entwickelte sich Anfang des Jahres auch wegen ungünstiger Witterungsverhältnisse eher moderat, seit dem zweiten Quartal dann aber positiv. Allerdings besteht eine große Heterogenität innerhalb der Länder Europas. Von der weltwirtschaftlichen Erholung profitierten vor allem die exportorientierten Volkswirtschaften, allen voran Deutschland. Spanien, Irland, Italien und Griechenland erholten sich unter anderem aufgrund fehlender Anpassungsprozesse in der Bauwirtschaft und im Finanzsektor sowie der angespannten Lage der Staatsfinanzen langsamer. Das Wachstum des Bruttoinlandsprodukts wird für Europa auf 2,0 Prozent prognostiziert. Für Deutschland wird ein Wachstum von 3,6 Prozent erwartet.

#### Währungsentwicklungen sind ohne bedeutenden Einfluss

Die Besorgnis bezüglich der Staatsverschuldungen einiger Euroländer und der USA spiegelte sich in einer hohen Schwankungsbreite der Währungsparitäten wider. Insgesamt gewann der US-Dollar im Vorjahresvergleich gegenüber dem Euro an Stärke. Zum Jahresende lag der US-Dollar-Kurs um 7,0 Prozent über dem des Vorjahresresultimos. Im Durchschnitt stieg er um 5,1 Prozent. Die Aufwertung des US-Dollars führte zu einer Nettoszunahme der Kosten von Lufthansa, insbesondere für Treibstoff sowie für Flugzeuginvestitionen.

**Wechselkursentwicklung 2010** 1 EUR zu Fremdwährung  
indiziert auf 100%

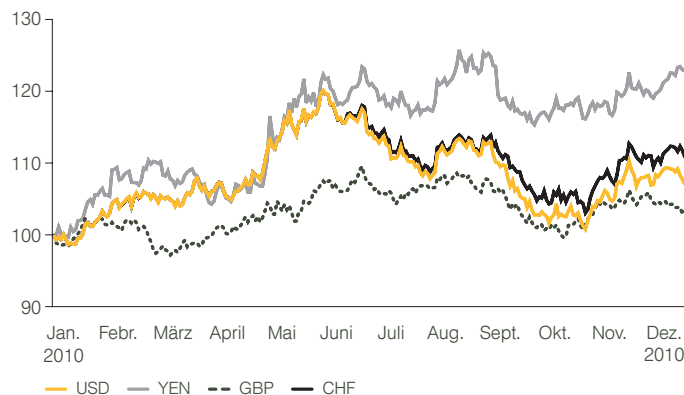

**Währungsentwicklung** 1 EUR zu Fremdwährung

|     | 2010   | 2009   | 2008   | 2007   | 2006   |
|-----|--------|--------|--------|--------|--------|
| USD | 1,3239 | 1,3945 | 1,4743 | 1,3615 | 1,2565 |
| YEN | 115,94 | 130,39 | 153,59 | 161,04 | 146,14 |
| GBP | 0,8574 | 0,8907 | 0,7901 | 0,6807 | 0,6817 |
| CHF | 1,3780 | 1,5095 | 1,5896 | 1,643  | 1,573  |

Quelle: Reuters, Tagesendkurse im Jahresdurchschnitt.

Auf der Einnahmenseite profitierte Lufthansa sowohl von einem stärkeren Chinesischen Renminbi, der im Jahresvergleich durchschnittlich um 5,7 Prozent aufwertete, als auch von einem stärkeren Japanischen Yen, der im Durchschnitt um 10,9 Prozent gegenüber Vorjahr zunahm. Durch Ausnutzung von Natural Hedges im Konzern und einer strukturierten Absicherung des verbleibenden Exposures versuchen wir, die Auswirkungen der Währungsschwankungen zu glätten. Einzelheiten zur Währungssicherung finden Sie im „Risiko- und Chancenbericht“ auf [S. 141](#) sowie im Konzernanhang „Erläuterung 2“ ab [S. 161](#). Unter Berücksichtigung dieser Sicherungen hatten die Währungseffekte insgesamt einen positiven Effekt auf das operative Ergebnis in Höhe von 204 Mio. EUR.

#### Kurz- und langfristige Zinsen waren zwischenzeitlich auf historisch niedrigen Niveaus

Sowohl kurz- als auch langfristige Zinsen haben im Verlauf des Jahres 2010 historische Tiefstände erreicht. So setzte der 6-Monats-Euribor seinen Abwärtstrend im ersten Quartal um 5 Basispunkte bis auf unter 1 Prozent fort. Der 10-Jahres-Swap-Satz verlor um bis zu 130 Basispunkte und erreichte ein Allzeittief von knapp 2,3 Prozent. Bis zum Jahresende verzeichneten beide Zinskurven jedoch wieder moderate Anstiege, die kurzfristigen Zinsen lagen sogar wieder über Vorjahresniveau.

Wir nutzen die positive Korrelation des konjunkturabhängigen operativen Ergebnisses mit der Entwicklung der kurzfristigen Zinssätze als Natural Hedge und halten den überwiegenden Anteil der Finanzverbindlichkeiten variabel. Einzelheiten hierzu sind ebenfalls im „Risiko- und Chancenbericht“ auf [S. 141](#) erläutert.

## Der Ölpreis steigt 2010 wieder deutlich an

Auch 2010 schwankten die Ölpreise stark: Die Preise für ein Barrel (bbl) der Sorte ICE Brent bewegten sich mit hoher Volatilität in einer Bandbreite zwischen rund 70 USD/bbl und 95 USD/bbl. Zum Jahresende stieg der Preis bis knapp 95 USD/bbl. Der Durchschnittspreis lag bei 80,36 USD/bbl, rund 28 Prozent höher als im Vorjahr (62,74 USD/bbl).

Der Jet Fuel Crack, die Preisdifferenz zwischen Rohöl und Kerosin, bewegte sich in der ersten Jahreshälfte 2010 zwischen 7,50 und 12 USD/bbl. Anfang der zweiten Jahreshälfte 2010 brach der Jet Fuel Crack aus einer fast 12-monatigen Seitwärtsbewegung nach oben aus und quotierte bei über 13,50 USD/bbl. Dieser schnelle und starke Anstieg war aufgrund komfortabler Kerosinbestände sowie einer soliden Raffinerieproduktion im dritten Quartal 2010 nicht nachhaltig. Die tendenziell steigende Nachfrage und der frühe Wintereinbruch in Europa festigten die Preisdifferenz zwischen Rohöl und Kerosin im vierten Quartal bei ca. 13 USD/bbl.

Preisentwicklung Brent und Kerosin in USD/t

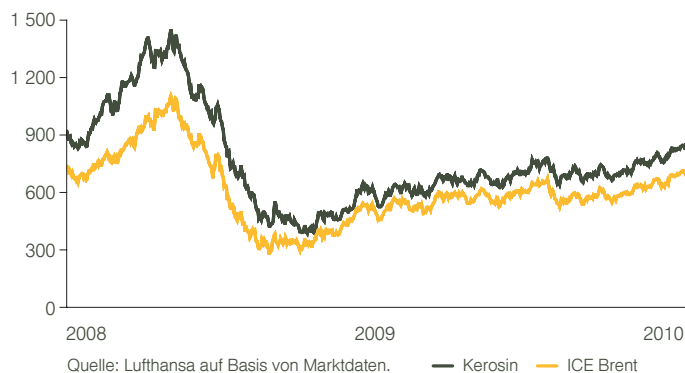

Im Zusammenhang mit den gestiegenen Rohölpreisen erhöhten sich im Laufe des Jahres 2010 dementsprechend auch die Preise für Kerosin. Dabei schwankten sie im Jahresverlauf zwischen rund 625 USD und 845 USD je Tonne. Im Jahresdurchschnitt betrug der Preis für Kerosin rund 721 USD je Tonne und lag damit um ca. 160 USD je Tonne, beziehungsweise 28,5 Prozent, über dem Vorjahreswert. Aufgrund der hohen Bedeutung der Treibstoffkosten für die Profitabilität des Konzerns verfolgen wir eine kontinuierliche Sicherungspolitik mit dem Ziel, die Schwankungsbreiten zu reduzieren. Deren Ansatzpunkte, Instrumente und Auswirkungen werden im „Risiko- und Chancenbericht“ auf [S. 140](#) näher erläutert.

## Branchenentwicklung

### Luftverkehr im Steigflug

Einhergehend mit der allgemeinen wirtschaftlichen Wiederbelebung hat sich auch der globale Passagier- und Luftfrachtverkehr 2010 schnell von der Krise erholt. Seit Anfang des Jahres verzeichnete er trotz der europäischen Luftraumsperrung im April ein rasantes Wachstum. Bis zur Jahresmitte stieg der Absatz im weltweiten Passagier- und Frachtverkehr bereits wieder auf das Niveau von Anfang 2008 an. Nach aktuellen Berichten der IATA hat die Airline-Industrie im Jahr 2010 einen Zuwachs von 8,2 Prozent im internationalen Passagierverkehr und 20,6 Prozent im internationalen Frachtverkehr erzielt. Die während der Krise eingebrochenen Durchschnittserlöse erholten sich allerdings nur zögerlich und liegen zum Teil noch deutlich unter Vorkrisenniveau.

Als wichtigster Ergebnistreiber der Netzwerk-Airlines hat das hochwertige Geschäft mit First- und Business-Class-Kunden im Langstreckenbereich wieder kräftig zugelegt, insbesondere in Asien. Der innereuropäische Flugverkehr verzeichnete hingegen nur eine verzögerte Erholung. Bis zum November 2010 legte der Ticketverkauf für die First- und Business-Class im internationalen Verkehr um 9,3 Prozent zu, wobei das Wachstum im innereuropäischen Verkehr lediglich bei 3,0 Prozent lag. Insgesamt rechnet die IATA für das Geschäftsjahr 2010 nach mehrmaligen Prognosekorrekturen nunmehr mit einem branchenweiten Gewinn in Höhe von 15,1 Mrd. USD (Vorjahr: -9,9 Mrd. USD).

Nachfrageentwicklung in der Luftfahrt in transportierten Passagierkilometern (PKT) und verkauften Fracht-Tonnenkilometern (FTK), indiziert 1984 = 100

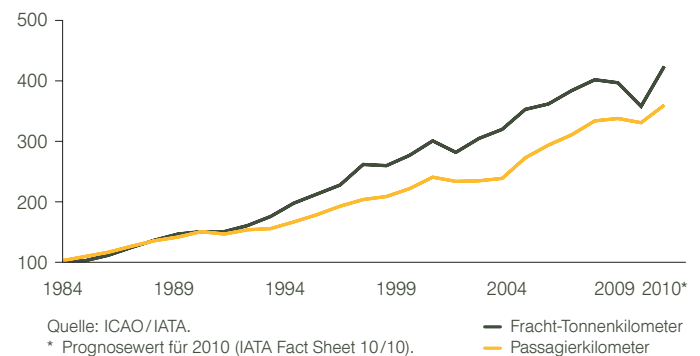

### Große geografische Unterschiede in der Verkehrsentwicklung

Das größte Verkehrswachstum war vor allem in Asien, Afrika und dem Nahen Osten zu beobachten. Hervorzuheben ist dabei die Expansion der Fluggesellschaften aus dem Nahen Osten. Im Jahr 2010 verzeichneten diese eine Zunahme der Passagierbeförderung von 17,8 Prozent. Die Fluggesellschaften in Asien und Afrika wiesen ein Absatzwachstum im Passagierverkehr von 9,0 beziehungsweise 12,9 Prozent aus. Nordamerika verzeichnete mit 7,4 Prozent einen verhältnismäßig moderaten Zuwachs. Als Folge langsamerer Wirtschaftserholung, verschiedener Streiks und der temporären Luftraumsperrung betrug das Absatzwachstum europäischer Fluggesellschaften lediglich 5,1 Prozent.

### Rasante Erholung des Luftfrachtverkehrs

Infolge der wieder zunehmenden Wirtschaftsaktivitäten, die sich unmittelbar auf den Frachtverkehr auswirken, hat sich der weltweite Luftfrachtmarkt 2010 rasant erholt. Im ersten Halbjahr wurde im internationalen Luftfrachtverkehr ein kräftiges Wachstum von 30 Prozent verzeichnet. Seit dem dritten Quartal lässt die Wachstumsdynamik aufgrund des Basiseffekts jedoch erwartungsgemäß nach. Gemäß IATA-Prognose ist der internationale Frachtverkehr 2010 um insgesamt 20,6 Prozent gewachsen. Und auch hier gibt es regionale Unterschiede: Während die meisten Regionen ein Wachstum des Luftfrachtaufkommens von über 20 Prozent verzeichnen, wird in Europa ein vergleichsweise geringeres Wachstum von 10,8 Prozent erzielt.

#### Absatzentwicklung 2010

| in % gegenüber Vorjahr | Passagierkilometer | Fracht-Tonnenkilometer |
|------------------------|--------------------|------------------------|
| Europa                 | 5,1                | 10,8                   |
| Nordamerika            | 7,4                | 21,8                   |
| Mittel- und Südamerika | 8,2                | 29,1                   |
| Asien / Pazifik        | 9,0                | 24,0                   |
| Naher Osten            | 17,8               | 26,7                   |
| Afrika                 | 12,9               | 23,8                   |
| <b>Industrie</b>       | <b>8,2</b>         | <b>20,6</b>            |

Quelle: IATA Carrier Tracker 12/10.

### Die Konsolidierung der Branche setzt sich fort

Die Fluggesellschaften versuchen, ihre strategische Position zunehmend durch Fusionen und Allianzen zu stärken und so ihr Netzwerk zu erweitern. So wurde im März 2010 Air China Mehrheitseigentümerin von Shenzhen Airlines. Im September schlossen sich die zwei amerikanischen Star Alliance-Mitglieder United und Continental zusammen. In Lateinamerika wollen LAN Airlines und die brasilianische TAM fusionieren. Ferner wurde die transatlantische Allianz aus den drei Oneworld-Mitgliedern British Airways, American Airlines und Iberia unterzeichnet und British Airways und Iberia schlossen sich zu einer der weltweit größten Fluggesellschaften zusammen.

Durch die Aufnahme der drei lateinamerikanischen Airlines TAM, Avianca-TACA und Copa Airlines hat die Star Alliance ihre Präsenz auf dem südamerikanischen Kontinent ausgeweitet. Auch die Aufnahme von Aegean Airlines und die Anerkennung von Air India und Ethiopian Airlines als zukünftige Mitglieder tragen zu einer weiteren Stärkung des Streckennetzes dieser Allianz bei. Air Berlin und die russische Fluggesellschaft S7 Airlines gaben 2010 ihren Beitritt in das Airline-Bündnis Oneworld bekannt. Zudem verkündete Skyteam die Aufnahme der neuen Mitglieder-Airlines Shanghai Airlines, Garuda Indonesia und Aerolineas Argentinas.

Auch 2010 kam es jedoch zu einigen Insolvenzfällen in der Luftverkehrsbranche. Dazu zählten die japanische Fluggesellschaft Japan Airlines (JAL), die deutschen Fluggesellschaften Blue Wings und Hamburg International sowie die slowakische Air Slovakia.

Weitere Informationen zu den relevanten Branchen für unsere Geschäftsfelder erhalten Sie in den jeweiligen Kommentierungen ab [S. 78](#).

## Regulatorische und weitere Einflussfaktoren

Die Geschäftsfelder des Lufthansa Konzerns sind zahlreichen rechtlichen und regulatorischen Einflussfaktoren ausgesetzt. 2010 wurden in einigen Bereichen, wie zum Beispiel dem Single European Sky, verhaltene Fortschritte erzielt. In vielen Fällen besteht jedoch weiterhin Klärungs- und politischer Korrekturbedarf, um einseitige wettbewerbsverzerrende Lösungen zu vermeiden. Dies gilt insbesondere für den Klimaschutz.

### International unterschiedliche Sicherheitsstandards

Im internationalen Luftverkehr variieren die geforderten Sicherheitsmaßnahmen von Staat zu Staat. Dadurch kommt es zu einem ständigen Anstieg der an die zuständigen Stellen zu übermittelnden Informationen über Passagiere und Besatzungen. Diese Entwicklung hat nicht nur einen kontinuierlichen Änderungsbedarf der betrieblichen Abläufe der Fluggesellschaften zur Folge, sondern verursacht darüber hinaus hohe Zusatzkosten sowie andauernde Rechtsunsicherheit aufgrund konfliktärer Rechtsnormen. Deswegen wirkt Lufthansa mit anderen Partnern darauf hin, die Rahmenbedingungen und Verfahren weltweit zu vereinheitlichen. Nach den Vorfällen im Luftfrachtverkehr rücken zudem Luftsicherheitsmaßnahmen in Drittstaaten außerhalb der EU erneut in den Fokus. Lufthansa setzt sich dafür ein, dass nationale und europäische Behörden die Luftsicherheitsprozesse in Drittstaaten verstärkt beobachten.

### Regionale Alleingänge statt notwendiger globaler Lösungen beim Klimaschutz

Das Thema Klimaschutz hat für die Luftfahrtindustrie einen unverändert hohen Stellenwert. Sie hat sich daher – aufbauend auf der von Lufthansa mitentwickelten und umfassenden 4-Säulen-Strategie zum Klimaschutz – als erste Branche weltweit selbst Ziele zur CO<sub>2</sub>-Reduzierung gesetzt. Der Ansatz und Vorteil dieses „IATA-Global Approach“ ist, dass er einen globalen Lösungsansatz für ein weltweites Problem darstellt.

Auch der ab dem 1. Januar 2012 beginnende EU-Emissionshandel für den Luftverkehr hat den Klimaschutz als Ziel definiert, stellt aber nur einen regionalen Regelungsansatz dar. Wettbewerbsverzerrungen und Ineffizienzen werden dabei bewusst in Kauf genommen. Zudem sieht Lufthansa bei der Umsetzung der Richtlinie in nationales Recht noch erheblichen Handlungsbedarf seitens der EU und ihrer Mitgliedsstaaten, zum Beispiel hinsichtlich der Bewertungsgrundlage angesichts der Verzerrungen im Basisjahr 2010 sowie hinsichtlich eines einheitlichen Berichtswesens. So müssen beispielsweise die vom Emissionshandel betroffenen 17 Unternehmen im Lufthansa Konzern an sieben verschiedene nationale Behörden berichten – mit jeweils unterschiedlichen Formaten und Anforderungen. Hierdurch entstehen für die Unternehmen erhebliche Mehrkosten, die zu vielen weiteren

Einzelbelastungen hinzukommen. Entsprechend den von der deutschen Bundesregierung im Koalitionsvertrag formulierten Zielen bleibt Wettbewerbsneutralität auch für den Lufthansa Airline-Verbund bei der Einführung des Emissionshandels im Luftverkehr von enormer Bedeutung.

Trotz der teils schwierigen Rahmenbedingungen sind die Vorbereitungen für den Emissionshandel in allen Gesellschaften des Lufthansa Konzerns weit fortgeschritten. Gemeinsam mit der gesamten Luftverkehrsbranche fordert Lufthansa unverändert einen global einheitlichen Ansatz – und konnte dabei bereits erste Erfolge erzielen. So beschloss die Internationale Zivilluftfahrtorganisation (ICAO) in Zusammenarbeit mit der Industrie als erste UN-Organisation weltweit anzustrebende CO<sub>2</sub>-Reduktionsziele. Bis 2020 sollen danach Effizienzgewinne von 2 Prozent und ab 2021 weitere 2 Prozent pro Jahr erzielt werden. Ab 2020 sollen die Emissionen trotz eines zu erwartenden Verkehrswachstums konstant bleiben. Der Luftverkehr ist damit die erste Branche, die sich – unter maßgeblicher Beteiligung von Lufthansa – weltweit verpflichtend diesem Thema gewidmet hat. Die weitere Entwicklung dieses vielversprechenden Ansatzes liegt nun bei den nationalen Regierungen, insbesondere denen der USA, China, Indien, Russland und Brasilien sowie denen der Europäischen Union.

Die von der deutschen Bundesregierung beschlossene Einführung einer nationalen Luftverkehrsteuer ab dem 1. Januar 2011 trägt nicht zu einer globalen Lösung bei. Mit der einseitigen Belastung von Abflügen ab Deutschland mit einer fluglängenabhängigen Abgabe werden die Wettbewerbsbedingungen der Gesellschaften des deutschen Luftverkehrs und der Export- und Tourismusindustrie im internationalen Wettbewerb massiv negativ beeinflusst.

### Fortschritte auf dem Weg zum Single European Sky erzielt

Ein grenzüberschreitend organisiertes Luftraummanagement der Flugsicherungen stellt eine wichtige Säule einer umfassenden Klima- und Nachhaltigkeitspolitik dar. Die EU hatte daher 2004 den Single European Sky (SES) verabschiedet, dessen Umsetzung allerdings weiterhin schleppend verläuft. 2009 wurde von der EU eine Verordnung zur Überarbeitung des SES in Kraft gesetzt (SES II), die die Realisierung des SES sachlich vertiefen und zeitlich beschleunigen soll. 2010 wurde ein Verfahren eingeführt, das den Flugsicherungen verbindliche Leistungsziele vorgibt. Im Dezember 2010 schlossen Deutschland, Belgien, Frankreich, Luxemburg, die Niederlande und die Schweiz darüber hinaus einen Staatsvertrag zur Errichtung des Functional Airspace Block Europe Central (FABEC). Dieser soll das europäische Luftraummanagement schrittweise erheblich effizienter machen. Zugleich gilt es, die Anbieter von Flugsicherungsdienstleistungen zu mehr Effizienz zu verpflichten. Für Lufthansa bedeutet dies bei erfolgreicher Umsetzung mehr Luftraumkapazität, weniger Verspätungen, stabilere Flugpläne, geringere Flugsicherungsgebühren und erhebliche Einsparungen von Treibstoff und Emissionen.



### **Das Drehkreuz Frankfurt wird weiterhin durch mögliche restriktive Nachtflugregelung belastet**

Um das weitere Luftverkehrswachstum in Deutschland zu sichern, ist die Umsetzung des genehmigten Ausbaus des Frankfurter Flughafens sehr wichtig. Der Planfeststellungsbeschluss enthält jedoch eine Betriebsregelung, die dem Bedarf, den die Lufthansa Konzerngesellschaften im bisherigen Verwaltungsverfahren geltend gemacht haben, nicht in ausreichendem Maße gerecht wird. Unter anderem wird die Zahl der Nachtflüge für die Zeit zwischen 23 und 5 Uhr auf 17 beschränkt. Diese sollen am Frankfurter Flughafen ansässige Fluggesellschaften vorrangig für reine Frachtflüge nutzen dürfen.

Beim Verwaltungsgerichtshof (VGH) in Kassel haben die Deutsche Lufthansa AG und die Lufthansa Cargo AG vor allem gegen die Beschränkung der Nachtflüge geklagt; jedoch wurden die Klagen durch ein Urteil vom 21. August 2009 abgewiesen. Das Gericht hat somit den Ausbauplan bestätigt. Selbst die im Planfeststellungsbeschluss zugelassenen Flugbewegungen würden dem gesetzlich gebotenen Schutz der Nachtruhe nicht hinreichend Rechnung tragen. Für die Zulassung planmäßiger Flüge in dieser Zeit bestehe laut VGH Kassel kaum Spielraum. Hinsichtlich der aufgehobenen Nachtflugregelung wurde eine Revision sowohl der Ausbaugesner als auch des beklagten Landes, nicht aber der Lufthansa zugelassen. Seitens des Landes wurde Revision eingelegt. Lufthansa versucht, die Zulassung der Revision durch eine Nichtzulassungsbeschwerde zu erstreiten. Über den Ausgang der Verfahren lässt sich derzeit keine belastbare Aussage treffen.

### **Weitere Verschärfungen im Verbraucherschutz**

Dem Verbraucherschutz wird durch zahlreiche Bestimmungen Rechnung getragen. In diesen ist zum Beispiel festgelegt, dass bei Ticketpreisen alle Kosten umfassend auszuweisen sind und dass es für Kunden in Europa keine Preisdiskriminierung geben darf. Auch durch das Internet wird Preistransparenz geschaffen und so der Einfluss der Konsumenten gesteigert. Für Lufthansa erfordert dies, sich weiter durch maßgeschneiderte Produkte und besonderen Service für die unterschiedlichen Kundengruppen im Markt als Qualitätsanbieter zu positionieren. Das industrieübliche Verfahren zur Preisgestaltung wurde nach einer Klage durch die Verbraucherzentralen in Deutschland gerichtlich überprüft. Die angegriffenen allgemeinen Geschäftsbedingungen sahen vor, dass Flugscheine nur vollständig und in der kontrahierten Reihenfolge abgefliegen werden dürfen. Andernfalls verloren sie ihre Gültigkeit und der Flugpreis wurde entsprechend der tatsächlich geflogenen Strecke neu berechnet.

Im April 2010 hat der Bundesgerichtshof diese Klausel für unwirksam erklärt. Allerdings eröffnen die Urteilsgründe die Möglichkeit, die Beförderung von der Zahlung eines Aufpreises auf Basis der tatsächlichen Streckenführung abhängig zu machen. Im Ergebnis trägt das Gericht damit dem Interesse der Lufthansa Rechnung, ein Unterlaufen des Tarifsystems zu unterbinden. Da die betroffene Regel zur Couponreihenfolge industrieüblich und auch in den Handlungsempfehlungen der IATA enthalten ist, hat die rechtskräftige und im Ergebnis positive Entscheidung für Lufthansa keine negativen Auswirkungen.

Im Dezember 2008 hat der Europäische Gerichtshof (EuGH) entschieden, dass es nur in Ausnahmefällen als Entlastungsgrund für die Fluggesellschaft angesehen werden kann, wenn ein Flug wegen technischer Probleme annulliert wird. Wenn diese sich nicht entlasten kann, muss sie Ausgleichsleistungen („Denied Boarding Compensation“, DBC) zwischen 250 EUR und 600 EUR pro Passagier zahlen. Laut einem Urteil des EuGH vom November 2009 sind Fluggesellschaften zudem verpflichtet, auch bei Ankunftsverspätungen von mehr als drei Stunden eine solche Ausgleichsleistung zu zahlen. Dieses Urteil ist juristisch fragwürdig, da der EuGH die DBC-Verordnung (Verordnung (EG) 261/2004) gegen ihren Wortlaut auslegt und damit in die Kompetenzen der Legislative eingreift. Erschwerend kommt hinzu, dass die Auslegung zu einer Rückwirkung führt, was gegen den Grundsatz des Vertrauensschutzes verstößt. Gegen das Urteil sind keine Rechtsmittel gegeben. Der High Court in London hat die strittigen Fragen im Sommer 2010 erneut dem EuGH zur Entscheidung vorgelegt.

Vor den nationalen Gerichten wird eine Entlastung wegen technischer Probleme in aller Regel restriktiv gehandhabt und nur noch in engem Rahmen anerkannt. In Großbritannien wurden nach der Vorlageentscheidung Verfahren wegen Ausgleichsleistung aufgrund Verspätung ruhend gestellt. Im Übrigen wenden die meisten nationalen Gerichte die Verordnung inzwischen auch auf Verspätungsfälle an. Es besteht die Hoffnung, dass es zu weiteren Vorlageverfahren nationaler Gerichte kommen wird. Ob der EuGH seine Rechtsprechung revidieren wird, ist nicht vorherzusagen. Verschärft wird die Situation dadurch, dass der zunehmende öffentliche Druck das Luftfahrtbundesamt veranlasst hat, für jeden Fall der Zuwiderhandlung gegen die Verordnung zur DBC Ordnungswidrigkeitenverfahren mit Bußgeldern von bis zu 25.000 EUR einzuleiten. Entgegen allgemeinem Rechtsverständnis wird dem Luftfahrtbundesamt durch die Verordnung die Möglichkeit gegeben, die Durchsetzung zivilrechtlicher Ansprüche mit Hilfe des Ordnungswidrigkeitenrechts durchzusetzen. Wie viele Verfahren zu erwarten sind und inwieweit Lufthansa sich gegenüber dem Luftfahrtbundesamt oder im Rechtsmittelverfahren vor dem Amtsgericht erfolgreich gegen die Vorwürfe verteidigen kann, ist insbesondere angesichts der Rechtsprechung des EuGH nicht zu beurteilen.

### **Regulierung des außerbörslichen Derivatehandels (OTC)**

Sowohl auf europäischer als auch auf amerikanischer Seite gibt es derzeit Bemühungen zur Regulierung von OTC („over the counter“)-Derivaten. Für Lufthansa ist die Absicherung mit Derivaten essenzieller Bestandteil des Risikomanagements, um damit Schwankungen des Ölpreises sowie der Wechselkurse und Zinsen, beispielsweise bei der Flugzeugfinanzierung, abzufedern. Bisher konnte Lufthansa diese Geschäfte direkt abwickeln. Die Diskussion, auch bei Realgeschäften, wie etwa der Absicherung von Rohstoffgeschäften, einen Handel über Dritte vorzuschreiben (sogenannte „central counterparties“) oder sie mit Eigenkapital zu unterlegen, ist noch nicht endgültig abgeschlossen. Beides würde die Liquidität des Unternehmens belasten. Lufthansa setzt sich weiter dafür ein, eine spezifische Regulierung für Unternehmen zu schaffen, wenn diese nicht der Finanzindustrie angehören und Derivate nur einsetzen, um ihre industriebezogenen Grundgeschäfte abzusichern.

## **Überblick über den Geschäftsverlauf**

### **Lufthansa erholt sich rasch nach der Finanz- und Wirtschaftskrise**

Der Lufthansa Konzern profitierte im Geschäftsjahr 2010 von der weltweiten konjunkturellen Belebung und fand nach dem Krisenjahr 2009 rasch wieder zur Stärke vergangener Jahre zurück. Die Treiber für ein erfolgreiches Geschäftsjahr waren insbesondere die erfreuliche Absatz- und Umsatzentwicklung im Fracht- und interkontinentalen Passagiergeschäft, die positiven Effekte der Kostensenkungsmaßnahmen sowie die zunehmende Ausschöpfung von Synergiepotenzialen im Airline-Verbund.

Zu Beginn des Jahres standen der einsetzenden positiven Marktentwicklung diverse turbulente Sonderereignisse gegenüber. Sowohl der strenge Winter als auch die durch Pilotenstreik und Luftraumsperrung hervorgerufenen Flugausfälle belasteten das Ergebnis. Hohe Zuwachsraten bei Absatz, Auslastung und Preisniveau führten den Konzern schließlich zu einem Rekordergebnis im dritten Quartal. Lufthansa Passage reagierte auf die konjunkturelle Erholung mit Kapazitätsanpassungen, ohne dabei das Preisniveau senken zu müssen. Lufthansa Cargo profitierte besonders stark von der anziehenden Nachfrage und erzielte 2010 einen Rekordgewinn. Dämpfend wirkte sich bei den fliegenden Gesellschaften der wieder steigende Ölpreis und der steigende Preisdruck im Europaverkehr aus.

Die nicht fliegenden Gesellschaften leisteten in Summe einen recht stabilen Ergebnisbeitrag. Lufthansa Technik musste als Spätzyklischer erwartungsgemäß einen Rückgang des operativen Ergebnisses gegenüber dem Rekordniveau von 2009 hinnehmen. Auch Lufthansa Systems verbuchte einen Ergebnissrückgang und begegnet den anhaltenden strukturellen Veränderungen in ihrem Markt durch ein 2010 gestartetes umfassendes Restrukturierungsprogramm. LSG Sky Chefs hingegen profitierte besonders vom wieder anziehenden Premium-Geschäft und erwirtschaftete einen operativen Gewinn, der sogar das durch einen Einmaleffekt positiv geprägte Niveau von 2009 überstieg.

Die im letzten Jahr konsolidierten Gesellschaften bmi und Austrian Airlines belasteten erwartungsgemäß noch deutlich das Ergebnis. Die unternommenen Restrukturierungsmaßnahmen liegen jedoch im Plan und führten bereits zu ersten Erfolgen. Die laufenden Kostensenkungsmaßnahmen im Konzern werden ebenfalls fortgeführt, um das Profitabilitätsniveau nachhaltig zu steigern und Wert zu schaffen.

## **Wesentliche Ereignisse**

### **Portfoliomaßnahmen stärken Bilanz und Cashflow**

Der Lufthansa Konzern konnte im Geschäftsjahr 2010 seine Eigenkapitalquote und den Cashflow durch mehrere Portfoliomaßnahmen stärken. So wurde im April 2010 durch den Börsengang der Amadeus IT Holding S.A. ein positiver Eigenkapitaleffekt von 464 Mio. EUR verbucht. Lufthansa hielt zum Zeitpunkt des Börsengangs Anteile von rund 11,6 Prozent an dem spanischen Unternehmen. Durch den Verkauf eigener Aktien im Rahmen des Börsengangs sank dieser Anteil auf aktuell rund 7,6 Prozent. Hieraus resultierten Zusatzeinnahmen von insgesamt 97 Mio. EUR und ein Buchgewinn von 67 Mio. EUR. Die Beteiligung an der Amadeus IT Holding S.A. hatte zum 31. Dezember 2010 einen Marktwert von 534 Mio. EUR.

Ende Juni übertrug Lufthansa rund 8,5 Prozent der Fraport-Anteile zur Ausfinanzierung der Pensionsverpflichtungen in den Pensionsfonds. Dabei wurde ein Buchgewinn von 94 Mio. EUR realisiert. Eine weitere Dotierung erfolgte im zweiten Halbjahr mit Barmitteln.

Die Verbesserung unseres Finanzprofils und des wirtschaftlichen Umfelds in der Luftverkehrsbranche führte zu einer Stärkung unseres Ratings. Die Ratingagentur Standard & Poor's verbesserte den Ausblick für die Kreditratings der Deutschen Lufthansa AG (BBB-/A-3) von negativ auf stabil.

### Sondereffekte beeinflussen den Geschäftsverlauf im ersten Halbjahr

Das strenge Winterwetter im Januar sowie im Dezember wirkte sich in erheblichem Maße auf den Flugbetrieb aus und führte zu zahlreichen Flugausfällen. Diese generierten Zusatzkosten, beispielsweise durch erhöhte Ausgaben für die Enteisung der Flugzeuge. Im Februar führte ein eintägiger Streik des Cockpit-Personals zu einer schweren Beeinträchtigung des Flugbetriebs.

Der Ausbruch des isländischen Vulkans Eyjafjallajökull im April wirkte sich in großräumigen Luftraumsperrungen über ganz Europa aus. So sperrten einige Länder ihre Flughäfen komplett; auch in Deutschland waren Starts und Landungen nur noch sehr begrenzt möglich und Flughäfen teilweise geschlossen. Auf Anweisung der Flugsicherheitsbehörden war der Luftverkehr zeitweise vollständig untersagt. Erst nach fünf Tagen hatte sich der Flugbetrieb wieder weitgehend normalisiert. Insgesamt mussten allein bei Lufthansa Passage im April 10.562 Flüge gestrichen werden.

### Wesentliche Personal- und Investitionsentscheidungen für die Zukunft getroffen

Der Aufsichtsrat der Deutschen Lufthansa AG hat im September 2010 den stellvertretenden Vorstandsvorsitzenden, Christoph Franz, mit Wirkung zum 1. Januar 2011 zum Vorstandsvorsitzenden bestellt. Er tritt damit die Nachfolge von Vorstandschef Wolfgang Mayrhuber an. Des Weiteren wurde Carsten Spohr ebenfalls zum 1. Januar 2011 als Vorstand Lufthansa Passage in den Vorstand berufen. Ausführliche Informationen zu den Veränderungen im Vorstand finden Sie auf [S. 47](#).

Ebenfalls zugestimmt hat der Aufsichtsrat der Bestellung neuer Flugzeuge, mit denen die Modernisierung und Erweiterung der Konzernflotte weiter vorangetrieben wird. Insgesamt hat Lufthansa im Berichtsjahr 56 neue Flugzeuge für die Fluggesellschaften des Konzerns bestellt, die ab 2012 sukzessive ausgeliefert werden sollen. Nähere Informationen zur Flotte des Lufthansa Konzerns finden Sie ab [S. 74](#).

## Gesamteinschätzung der Geschäftsentwicklung

Der Lufthansa Konzern hat nach Überzeugung des Vorstands im Geschäftsjahr 2010 eine sehr gute Leistung erbracht. Trotz des wieder ansteigenden Ölpreises und zahlreicher Sonderbelastungen, wie zum Beispiel dem Pilotenstreik und den Flugraumbeschränkungen, hat der Konzern ein Ergebnis erwirtschaftet, das deutlich besser als erwartet und höher als das vieler Wettbewerber ausgefallen ist. Alle Geschäftsfelder haben diesen Erfolg mit positiven Ergebnisbeiträgen unterstützt, einige haben die Nachfragerückkehr in ihren Märkten für eine beeindruckende Ergebnisdynamik nutzen können.

Die Voraussetzungen für diese Entwicklung wurden bereits im Rahmen des Krisenmanagements der vergangenen Jahre geschaffen, in dem, bei allem Fokus auf kurzfristig wirksames Kosten- und Kapazitätsmanagement, die mittelfristigen Entwicklungsmöglichkeiten nicht aus dem Auge gelassen wurden. Auf dieser Basis konnten die Geschäftsfelder des Konzerns nun aufbauen. Sowohl das Krisenmanagement als auch die Nutzung des Aufschwungs gelangen Lufthansa aufgrund ihrer finanziellen Stabilität, der Flexibilität in ihrer Kosten- und Kapazitätsbasis und vor allem des tatkräftigen Einsatzes der Führungskräfte und Mitarbeiter des Konzerns.

Zusammen mit der Ertragslage hat sich auch das Finanzprofil des Konzerns verbessert. Unterstützt wurde es weiter durch Portfoliomaßnahmen (zum Beispiel Amadeus, Fraport). Die Eigenkapitalquote liegt mit 28,4 Prozent nur noch knapp unterhalb ihrer Zielmarke. Die Nettokreditverschuldung und das Gearing haben sich reduziert. Die Stärkung des Finanzprofils führte auch zu einer Verbesserung des Ratingausblicks.

Der Cash Value Added, die zentrale Kennzahl für die Wertschaffung im Konzern, konnte mit der gezeigten Leistung gegenüber Vorjahr deutlich auf 71 Mio. EUR verbessert werden. Damit wurde im ersten Jahr nach der Krise wieder eine Verzinsung der Kapitalkosten und Wertschaffung erreicht. Die Anstrengungen der Geschäftsfelder bleiben unverändert darauf gerichtet, die Kosten im Griff zu behalten, Wachstumschancen zu nutzen und die Profitabilität weiter zu stärken.

## Angewendete Standards

Der Konzernabschluss 2010 und die Quartalsberichte sind nach den International Financial Reporting Standards (IFRS) unter Berücksichtigung der Interpretationen des International Financial Reporting Interpretations Committee (IFRIC) erstellt, wie sie in der Europäischen Union (EU) anzuwenden sind. Ergänzend wurden die nach § 315 a Abs.1 HGB zu beachtenden handelsrechtlichen Vorschriften berücksichtigt. Alle für das Geschäftsjahr 2010 verpflichtend anzuwendenden Standards und Interpretationen wurden beachtet.

Aus den ab 1. Januar 2010 verpflichtend anzuwendenden Änderungen des IAS 39 „Finanzinstrumente: Ansatz und Bewertung“ haben sich Veränderungen im Berichtsstandard ergeben. Die in diesem Bericht aufgeführten Vorjahreszahlen wurden zur besseren Vergleichbarkeit so errechnet, als wären die veränderten Standards bereits im Vorjahr angewendet worden. Die übrigen zum 1. Januar 2010 erstmals anzuwendenden Standards und Interpretationen hatten im Berichtszeitraum keine wesentlichen Auswirkungen auf die Vermögens-, Finanz- und Ertragslage des Konzerns, für weitere Informationen siehe „Konzernanhang“ ab [S. 156](#).

## Ertragslage

➤ Die starke Geschäftsentwicklung und der größere Konsolidierungskreis führten zu einem Anstieg der betrieblichen Erträge um 20 Prozent auf 30 Mrd. EUR. ➤ Dieses Wachstum basiert vor allem auf höheren Verkehrserlösen. ➤ Die betrieblichen Aufwendungen erhöhten sich deutlich unterproportional um 17 Prozent. ➤ Alle Geschäftsfelder erzielten einen operativen Gewinn; für den Konzern betrug er 876 Mio. EUR. ➤ Lufthansa erwirtschaftete 2,47 EUR Gewinn pro Aktie.

## Umsatz und Erträge

### Leistungsdaten der Luftverkehrsgesellschaften im Lufthansa Konzern\*

|                                   |        | 2010      | 2009    | Veränderung<br>in % |
|-----------------------------------|--------|-----------|---------|---------------------|
| Fluggäste                         | Tsd.   | 91 157    | 77 315  | 17,9                |
| Angebotene Sitzkilometer          | Mio.   | 235 837   | 208 226 | 13,3                |
| Verkaufte Sitzkilometer           | Mio.   | 187 000   | 162 286 | 15,2                |
| Sitzladefaktor                    | %      | 79,3      | 77,9    | 1,4 P.              |
| Fracht/Post                       | Tsd. t | 2 023     | 1 712   | 18,2                |
| Angebotene Fracht-Tonnenkilometer | Mio.   | 15 430    | 14 372  | 7,4                 |
| Verkaufte Fracht-Tonnenkilometer  | Mio.   | 10 491    | 8 706   | 20,5                |
| Fracht-Nutzladefaktor             | %      | 68,0      | 60,6    | 7,4 P.              |
| Angebotene Gesamt-Tonnenkilometer | Mio.   | 39 000    | 35 469  | 10,0                |
| Verkaufte Gesamt-Tonnenkilometer  | Mio.   | 29 033    | 24 943  | 16,4                |
| Gesamt-Nutzladefaktor             | %      | 74,4      | 70,3    | 4,1 P.              |
| Flüge                             | Anzahl | 1 021 266 | 899 928 | 13,5                |

\* Lufthansa Konzern ohne Germanwings.

Aufgrund der deutlich verbesserten Geschäftsentwicklung sowie der Effekte des erweiterten Konsolidierungskreises haben sich im abgelaufenen Geschäftsjahr die betrieblichen Erträge des Lufthansa Konzerns um 5,1 Mrd. EUR auf 30,1 Mrd. EUR (+20,4 Prozent) erhöht. Konsolidierungskreisbereinigt hat sich ein Anstieg um 12,6 Prozent ergeben. Diese Entwicklung ist in erster Linie auf eine positive Entwicklung der Verkehrserlöse zurückzuführen. Doch auch die anderen Betriebserlöse und die sonstigen betrieblichen Erträge legten im Berichtsjahr zu.

### Die Verkehrserlöse wachsen um 26,5 Prozent

Die Verkehrserlöse des Konzerns erhöhten sich deutlich um 26,5 Prozent auf 22,3 Mrd. EUR (konsolidierungskreisbereinigt: +16,2 Prozent). Dabei wirkten sich die Mengenentwicklung mit 7,3 Prozent, die Währungseffekte mit 4,6 Prozent und die Veränderungen des Konsolidierungskreises mit 10,3 Prozent positiv auf die Verkehrserlöse aus. Höhere Preise führten zu einem Erlösanstieg von 4,3 Prozent.

### Umsatz und Erträge

|                                                             | 2010          | 2009          | Veränderung | Veränderung<br>konsolidie-<br>rungskreis-<br>bereinigt |
|-------------------------------------------------------------|---------------|---------------|-------------|--------------------------------------------------------|
|                                                             | in Mio. €     | in Mio. €     | in %        | in %                                                   |
| Verkehrserlöse                                              | 22 268        | 17 604        | 26,5        | 16,2                                                   |
| Andere Betriebserlöse                                       | 5 056         | 4 679         | 8,1         | 7,6                                                    |
| <b>Umsatzerlöse</b>                                         | <b>27 324</b> | <b>22 283</b> | <b>22,6</b> | <b>14,4</b>                                            |
| Bestandsveränderungen und andere aktivierte Eigenleistungen | 165           | 225           | -26,7       | -26,7                                                  |
| Sonstige betriebliche Erträge                               | 2 655         | 2 531         | 4,9         | 0,1                                                    |
| <b>Summe betriebliche Erträge</b>                           | <b>30 144</b> | <b>25 039</b> | <b>20,4</b> | <b>12,6</b>                                            |

Der größte Anteil der Verkehrserlöse entfiel mit 86,2 Prozent auf das Geschäftsfeld Passage Airline Gruppe. Es erwirtschaftete mit rund 19,2 Mrd. EUR ein Plus von 24,3 Prozent im Vergleich zum Vorjahr. Dabei führten insbesondere die Mengenentwicklung sowie der im Vorjahr erweiterte Konsolidierungskreis zu einem Anstieg der Erlöse um 5,5 Prozent beziehungsweise 11,3 Prozent. Zusätzlich wirkten höhere Preise (+3,2 Prozent) und positive Währungseffekte (+4,3 Prozent) erlössteigernd.



**Verkehrserlöse Konzern in %**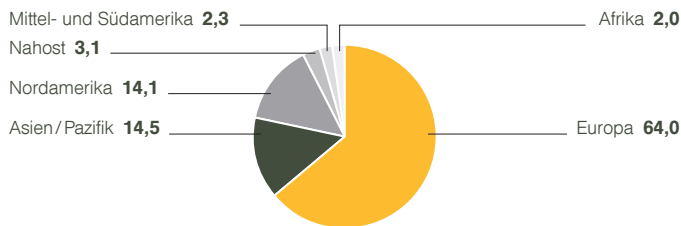

Im Geschäftsfeld Logistik führte die enorme Erholung der gesamtwirtschaftlichen Konjunktur zu einem noch stärkeren Anstieg der Verkehrserlöse um 42,8 Prozent auf 2,6 Mrd. EUR. Hiervon entfielen 19,9 Prozent auf die gestiegene Menge und 14,8 Prozent auf höhere Preise. Die Währungseffekte wirkten sich mit 8,1 Prozent positiv auf die Verkehrserlöse aus. Insgesamt trugen die Verkehrserlöse des Konzerns 81,5 Prozent zu den Gesamtumsätzen bei (Vorjahr: 79,0 Prozent).

**Andere Betriebserlöse steigen um 8,1 Prozent**

Die anderen Betriebserlöse werden größtenteils in den Geschäftsfeldern Technik, Catering und IT Services erwirtschaftet, in einem kleineren Umfang ebenfalls in den Bereichen Passage Airline Gruppe und Logistik. Mit 5,1 Mrd. EUR lagen diese um 8,1 Prozent über dem Vorjahreswert.

Während das Geschäftsfeld Technik die anderen Betriebserlöse auf 2,4 Mrd. EUR (+3,3 Prozent) erhöhen konnte, verzeichnete Catering einen Erlösanstieg von 8,0 Prozent auf 1,7 Mrd. EUR. Die Erlöse im Geschäftsfeld IT Services verminderten sich um 4,9 Prozent auf 232 Mio. EUR. Die fliegenden Gesellschaften der Passage Airline Gruppe und der Logistik trugen 1,2 Mrd. EUR (+34,7 Prozent, konsolidierungskreisbereinigt: +32,0 Prozent) zu den anderen Betriebserlösen bei.

**Umsatz** in Mio. €**Veränderung Umsatz** in %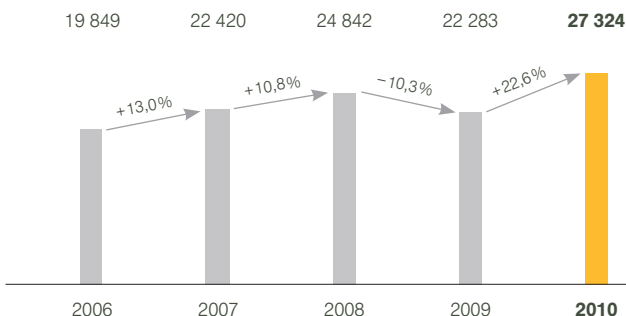**Außenumsatz nach Geschäftsfeldern**

| 2010                   | Außenumsatz<br>in Mio. € | Veränderung<br>gegenüber<br>Vorjahr<br>in % | Anteil am<br>Konzernumsatz<br>in % |
|------------------------|--------------------------|---------------------------------------------|------------------------------------|
| Passage Airline Gruppe | 20 233                   | 24,7                                        | 74,0                               |
| Logistik               | 2 770                    | 43,7                                        | 10,1                               |
| Technik                | 2 373                    | 3,3                                         | 8,7                                |
| IT Services            | 232                      | -4,9                                        | 0,9                                |
| Catering               | 1 716                    | 8,0                                         | 6,3                                |

**Umsatzerlöse werden durch die Passage Airline Gruppe geprägt**

Der Außenumsatz des Konzerns erhöhte sich in Summe um 22,6 Prozent auf 27,3 Mrd. EUR. Der Anteil des Geschäftsfelds Passage Airline Gruppe am Gesamtumsatz stieg aufgrund der verbesserten Geschäftsentwicklung sowie konsolidierungskreisbedingt auf 74,0 Prozent. Während der Umsatzanteil des Geschäftsfelds Logistik auf 10,1 Prozent zulegte, waren die Anteile der anderen Geschäftsfelder rückläufig.

Die regionale Betrachtung der Umsatzerlöse nach Verkaufsorten wird in der Segmentberichterstattung im Konzernanhang „Erläuterung 47“ ab [S. 204](#) dargestellt. Die regionalen Aufteilungen der Verkehrserlöse nach Verkehrsgebieten für die Passage Airline Gruppe und Logistik finden Sie in den Kapiteln zum jeweiligen Geschäftsfeld auf [S. 82](#) und [S. 97](#).

**Sonstige betriebliche Erträge sind von Buchgewinnen beeinflusst**

Die sonstigen betrieblichen Erträge erhöhten sich um 4,9 Prozent auf 2,7 Mrd. EUR. Die höheren Erträge sind vor allem auf Buchgewinne aus dem Verkauf von Anlagevermögen in Höhe von 246 Mio. EUR (Vorjahr: 51 Mio. EUR) zurückzuführen. Hierin enthalten sind realisierte Gewinne aus der Übertragung von 8,5 Prozent der Anteile an Fraport in den Lufthansa Pension Trust (94 Mio. EUR) sowie Buchgewinne in Höhe von 67 Mio. EUR aus dem Verkauf von 6,2 Mio. Aktien der Amadeus IT Holding S.A.. Erträge aus Zuschreibungen in Höhe von 39 Mio. EUR (Vorjahr: 14 Mio. EUR) beinhalten unter anderem 15 Mio. EUR aus einer zuvor wertberichtigten Darlehensforderung sowie 9 Mio. EUR wechselkursbedingte Aufwertungen von Ausleihungen in Fremdwährung. Die Erträge aus Rückstellungsaufösungen erhöhten sich auf 234 Mio. EUR (Vorjahr: 187 Mio. EUR).

In den Erträgen aus Schadensersatzleistungen von 67 Mio. EUR (Vorjahr: 132 Mio. EUR) sind in Höhe von 25 Mio. EUR Erträge aus Versicherungsleistungen im Zusammenhang mit der im Juli 2010 verunglückten MD-11 der Lufthansa Cargo enthalten. Im Vorjahr waren hier Ausgleichszahlungen für das Internetsystem FlyNet sowie Erträge aus Versicherungsleistungen im Zusammenhang mit einem Schadensfall der LSG Sky Chefs in Skandinavien von insgesamt 69 Mio. EUR erfasst. Die Kursgewinne aus der Umrechnung von in Fremdwährung valutierenden Forderungen und Verbindlichkeiten sowie aus der Realisierung von Devisensicherungsgeschäften verminderten sich um 72 Mio. EUR. Ihnen stehen korrespondierend Kursverluste in den sonstigen betrieblichen Aufwendungen gegenüber. Auch die Erträge aus EDV-Vertriebssystemen gingen um 34 Mio. EUR zurück.

Die übrigen Positionen weisen keine nennenswerten Abweichungen gegenüber dem Vorjahr auf. Der Konzernanhang „Erläuterung 6“ auf [S. 168](#) enthält eine detaillierte Liste der sonstigen betrieblichen Erträge.

## Aufwendungen

Die betrieblichen Aufwendungen wuchsen um 16,7 Prozent, und damit deutlich unterproportional zur Ertragsentwicklung, auf 28,9 Mrd. EUR. Bereinigt um die Effekte aus dem im Vorjahr erweiterten Konsolidierungskreis ergab sich ein Anstieg von 8,3 Prozent. Die Auswirkungen der nunmehr ganzjährigen Einbeziehung von bmi und Austrian Airlines schlagen sich dabei in sämtlichen betrieblichen Aufwandsarten nieder und werden insbesondere im Material- und Personalaufwand deutlich sichtbar.

### Materialaufwand von erhöhtem Treibstoffaufwand geprägt

Der Materialaufwand stieg im Geschäftsjahr 2010 um 21,0 Prozent auf 15,4 Mrd. EUR (konsolidierungskreisbereinigt: + 11,7 Prozent). Diese Entwicklung war entscheidend von dem höheren Treibstoffaufwand geprägt. Die erhebliche Zunahme von 41,5 Prozent auf 5,2 Mrd. EUR ist dabei mit 21,2 Prozent auf die höheren Preise (inklusive Preissicherung) und mit 11,2 Prozent auf die Veränderung des Konsolidierungskreises zurückzuführen. Darüber hinaus führten die um 1,9 Prozent gestiegene Menge sowie der stärkere US-Dollar-Kurs (+ 7,2 Prozent) ebenfalls zu Aufwandssteigerungen. Die Maßnahmen zur Preissicherung haben die Treibstoffkosten im Geschäftsjahr um insgesamt 21 Mio. EUR entlastet.

Die anderen Roh-, Hilfs- und Betriebsstoffe erhöhten sich um 7,0 Prozent auf 2,6 Mrd. EUR. Bereinigt um Änderungen des Konsolidierungskreises nahmen sie um 4,3 Prozent zu.

Die Gebühren stiegen insbesondere konsolidierungskreisbedingt um 21,8 Prozent auf 4,6 Mrd. EUR. Ohne die im Vorjahr neu einbezogenen Gesellschaften ergab sich eine Steigerung von 6,9 Prozent, die vor allem durch gestiegene Abfertigungsgebühren (+ 7,1 Prozent) sowie höhere Flugsicherungsgebühren (+ 6,9 Prozent) verursacht wurde. Die übrigen bezogenen Leistungen stiegen nahezu ausschließlich konsolidierungskreisbedingt um 5,8 Prozent auf 3,1 Mrd. EUR.

### Der Personalaufwand steigt um 11,1 Prozent

Der Personalaufwand legte um 11,1 Prozent auf 6,7 Mrd. EUR zu. Im Jahresdurchschnitt beschäftigte der Konzern mit 117.066 Mitarbeitern 4,2 Prozent mehr als im Vorjahr. Ohne die Veränderungen des Konsolidierungskreises erhöhte sich der Personalaufwand bei einer um 2,2 Prozent zurückgehenden durchschnittlichen Mitarbeiterzahl um 4,4 Prozent. Ausschlaggebend hierfür waren im Wesentlichen gestiegene Zuführungen zu Pensionsrückstellungen, höhere ergebnisabhängige Vergütungen und Sonderzahlungen sowie währungsbedingte Aufwandssteigerungen.

## Aufwendungen

|                                                    | 2010          | 2009          | Veränderung | Anteil am Gesamtaufwand | Veränderung konsolidierungskreisbereinigt |
|----------------------------------------------------|---------------|---------------|-------------|-------------------------|-------------------------------------------|
|                                                    | in Mio. €     | in Mio. €     | in %        | in %                    | in %                                      |
| Materialaufwand                                    | 15 370        | 12 700        | 21,0        | 53,2                    | 11,7                                      |
| davon Treibstoff                                   | 5 158         | 3 645         | 41,5        | 17,8                    | 30,3                                      |
| davon Gebühren                                     | 4 582         | 3 762         | 21,8        | 15,9                    | 6,9                                       |
| davon Operating Lease                              | 246           | 281           | - 12,5      | 0,9                     | - 27,0                                    |
| Personalaufwand                                    | 6 659         | 5 996         | 11,1        | 23,0                    | 4,4                                       |
| Abschreibungen                                     | 1 682         | 1 475         | 14,0        | 5,8                     | 5,2                                       |
| Sonstiger betrieblicher Aufwand                    | 5 193         | 4 597         | 13,0        | 18,0                    | 5,1                                       |
| davon Agenturprovisionen                           | 500           | 447           | 11,9        | 1,7                     | 0,9                                       |
| davon indirekter Personalaufwand und Fremdpersonal | 780           | 777           | 0,4         | 2,7                     | - 5,3                                     |
| davon Miet- und Erhaltungsaufwand                  | 789           | 717           | 10,0        | 2,7                     | 2,5                                       |
| <b>Summe betriebliche Aufwendungen</b>             | <b>28 904</b> | <b>24 768</b> | <b>16,7</b> | <b>100,0</b>            | <b>8,3</b>                                |

### Die Abschreibungen erhöhen sich um 14,0 Prozent

Die Abschreibungen betrugen im Geschäftsjahr insgesamt 1,7 Mrd. EUR (+14,0 Prozent). Der Anstieg entfiel mit 197 Mio. EUR auf planmäßige Abschreibungen auf Flugzeuge, im Wesentlichen aufgrund der Flugzeugneuzugänge im vergangenen und laufenden Jahr sowie der Veränderungen des Konsolidierungskreises. Außerplanmäßige Abschreibungen (72 Mio. EUR) betrafen mit 47 Mio. EUR fünf Boeing B737-500, zwei Airbus A330-200, einen Airbus A321-200, 18 Canadair Regional Jet 200 und vier Cessna Citation. Die betroffenen Flugzeuge sind teilweise bereits stillgelegt; andere werden aufgrund der aktuellen Unternehmensplanungen bis Ende 2011 sukzessive freigestellt beziehungsweise verkauft. Weitere Wertminderungen in Höhe von 16 Mio. EUR auf Flugzeuge und reparaturfähige Flugzeugersatzteile, die in der Konzernbilanz unter zum Verkauf stehenden Vermögenswerten ausgewiesen werden, sind unter den sonstigen betrieblichen Aufwendungen erfasst. Darüber hinaus resultieren außerplanmäßige Abschreibungen aus dem Verlust einer MD-11 von Lufthansa Cargo im Juli 2010 (9 Mio. EUR) sowie in Höhe von insgesamt 15 Mio. EUR aus in der Erstellung befindlichen, nicht mehr werthaltigen immateriellen Vermögenswerten.

### Die sonstigen betrieblichen Aufwendungen wachsen um 13,0 Prozent

Die sonstigen betrieblichen Aufwendungen erhöhten sich um 13,0 Prozent, bereinigt um die Veränderung des Konsolidierungskreises betrug der Anstieg 5,1 Prozent. Ursache hierfür waren insbesondere die um 216 Mio. EUR höheren Kursverluste, welche maßgeblich durch den gestiegenen US-Dollar-Kurs getrieben wurden. Ihnen stehen korrespondierend Kursgewinne in den sonstigen betrieblichen Erträgen gegenüber. Reduzierte Aufwendungen für EDV-Vertriebssysteme (–31 Mio. EUR), verminderte Verluste aus kurzfristigen Finanzinvestitionen und Forderungen (–37 Mio. EUR) und geringere Aufwendungen für Werbung und Verkaufsförderung sorgten demgegenüber für Aufwandsentlastungen. Auch die personalabhängigen sonstigen Aufwendungen gingen um 41 Mio. EUR zurück. Aus der Veränderung des Konsolidierungskreises ergaben sich insgesamt aufwandserhöhende Effekte von 7,9 Prozent. Die übrigen Positionen zeigen keine nennenswerten Veränderungen zum Vorjahr.

## Ergebnisentwicklung

Die operativen Ergebniskennzahlen reflektieren die wieder verbesserte Geschäftsentwicklung, insbesondere der fliegenden Gesellschaften. Dabei konnten alle Geschäftsfelder einen operativen Gewinn erwirtschaften.

### Das operative Ergebnis ist mit 876 Mio. EUR deutlich positiv

Das Ergebnis der betrieblichen Tätigkeit nach IFRS verbesserte sich im Geschäftsjahr um 969 Mio. EUR auf 1,2 Mrd. EUR. Wie in den vergangenen Jahren wurde es um Nettobuchgewinne, aufgelöste Rückstellungen, außerplanmäßige Abschreibungen, Ergebnisse aus Finanzinvestitionen und aus der Stichtagskursbewertung von Finanzschulden bereinigt. Das so ermittelte operative Ergebnis ermöglicht eine bessere Vergleichbarkeit der wirtschaftlichen Leistung mit anderen Geschäftsjahren. Die Anpassungen sind in der Tabelle auf [S. 67](#) aufgeführt. Im Jahr 2010 wurden insgesamt Nettoerträge von 364 Mio. EUR (Vorjahr: 141 Mio. EUR) abgezogen.

Nach dieser Bereinigung ergab sich ein operativer Gewinn von 876 Mio. EUR (Vorjahr: 130 Mio. EUR). Die mit dem Wettbewerb vergleichbare operative Marge, die sich durch Hinzurechnung der Rückstellungsaufösungen ergibt, beträgt 4,1 Prozent (Vorjahr: 1,4 Prozent).

Die Anteile der einzelnen Geschäftsfelder am operativen Gewinn sind dabei sehr unterschiedlich. Hervorzuheben ist die erhebliche Ergebnisverbesserung in den Geschäftsfeldern Passage Airline Gruppe und Logistik. Während die Passage Airline Gruppe nach einem knapp negativen Vorjahresergebnis von –8 Mio. EUR einen deutlichen Gewinn von 436 Mio. EUR erwirtschaftete, konnte die Logistik den operativen Verlust des Vorjahres von 171 Mio. EUR sogar in einen Rekordgewinn von 310 Mio. EUR drehen. Auch das Geschäftsfeld Catering verzeichnete einen um 5,6 Prozent auf 76 Mio. EUR erhöhten operativen Gewinn. Die operativen Ergebnisse der Geschäftsfelder Technik und IT Services waren ebenfalls positiv, mit 268 Mio. EUR (–15,2 Prozent) beziehungsweise 10 Mio. EUR (–37,5 Prozent) gegenüber Vorjahr jedoch rückläufig. Die übrigen, nach IFRS 8 nicht separat berichtspflichtigen Konzerngesellschaften sowie die zentralen Konzernfunktionen gingen mit insgesamt –226 Mio. EUR (Vorjahr: –134 Mio. EUR) in das operative Ergebnis ein.

#### Ergebnisstabilisierung durch unterschiedliche Zyklen

Operative Marge der Lufthansa Geschäftsfelder in %

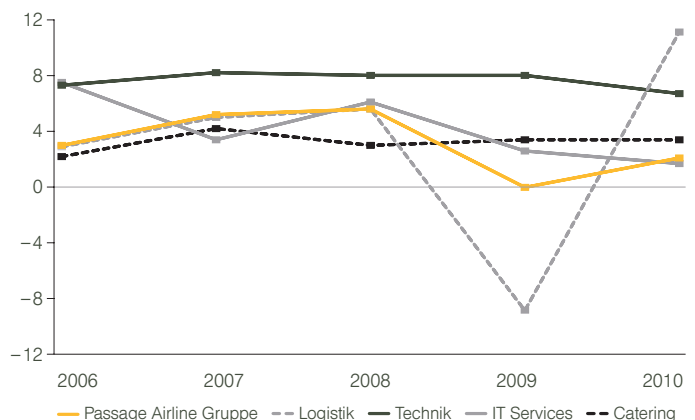

#### Entwicklung operatives Ergebnis je Quartal in Mio. €

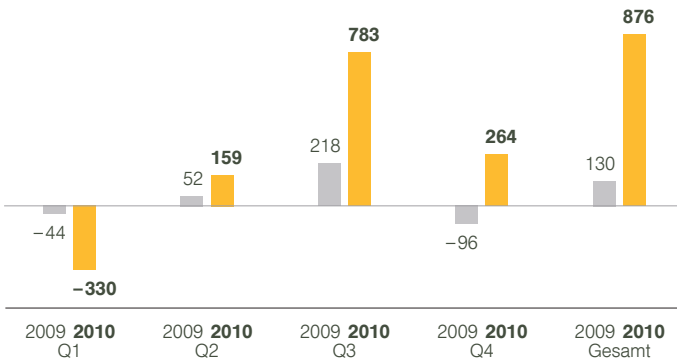

Der saisonale Ergebnisverlauf variierte dabei sehr stark. Die einzelnen Geschäftsfelder des Konzerns weisen zudem unterschiedliche Verteilungen und Schwankungsbreiten auf. Insgesamt hatte dies jedoch einen stabilisierenden Effekt und führte zu einem operativen Ergebnissockel für den Konzern. Auf dieser Basis konnte Lufthansa im Geschäftsjahr 2010 von der deutlichen Konjunkturerholung profitieren und ein auch im Verhältnis zu den Wettbewerbern beachtliches positives operatives Konzernergebnis erzielen.

#### Das Finanzergebnis verbessert sich weiter

Das Finanzergebnis verbesserte sich um 143 Mio. EUR auf -262 Mio. EUR. Das Beteiligungsergebnis stieg, im Wesentlichen aufgrund des im Vorjahr enthaltenen negativen Equity-Ergebnisses der bmi sowie teils erheblich verbesserter Beteiligungserträge in den Geschäftsfeldern Logistik und Technik, um 46 Mio. EUR auf 104 Mio. EUR. Das Zinsergebnis verringerte sich um 32 Mio. EUR auf -357 Mio. EUR (Vorjahr: -325 Mio. EUR). Grund hierfür waren insbesondere die 2009 neu aufgenommenen Finanzschulden sowie die Effekte aus dem erweiterten Konsolidierungskreis. Der Aufwand aus den übrigen Finanzposten verminderte sich um 129 Mio. EUR auf 9 Mio. EUR. Hierbei entfielen auf positive Wertänderungen von Sicherungsinstrumenten, die nach IAS 39 als Handelsgeschäfte angesehen werden, Erträge von 25 Mio. EUR. Die seit 1. Januar 2010 ebenfalls im Finanzergebnis zu erfassende Veränderung des Zeitwerts von zur Sicherung eingesetzten Optionen, siehe Konzernanhang auf [S. 182](#), führte zu einer Ergebnisbelastung von 18 Mio. EUR. Im Vorjahr war unter den übrigen Finanzposten auch eine Wertberichtigung auf die Fraport-Anteile in Höhe von 140 Mio. EUR erfasst.

Das international geläufige Ergebnis vor Steuern und Zinsen (EBIT) betrug 1,3 Mrd. EUR und lag damit um 1,1 Mrd. EUR über dem Vorjahreswert. Es beinhaltet das Ergebnis der betrieblichen Tätigkeit sowie das Beteiligungsergebnis und die übrigen Finanzposten. Unter Hinzurechnung der Abschreibungen ergibt sich ein EBITDA von 3,0 Mrd. EUR (65,9 Prozent über Vorjahr).

#### Ergebnisstruktur Lufthansa Konzern

|                                                                              | 2010<br>in Mio. € | 2009<br>in Mio. € | Veränderung<br>in % |
|------------------------------------------------------------------------------|-------------------|-------------------|---------------------|
| Betriebliche Erträge                                                         | 30 144            | 25 039            | 20,4                |
| Betriebliche Aufwendungen                                                    | -28 904           | -24 768           | 16,7                |
| <b>Ergebnis der betrieblichen Tätigkeit</b>                                  | <b>1 240</b>      | <b>271</b>        | <b>357,6</b>        |
| Finanzergebnis                                                               | -262              | -405              | 35,3                |
| <b>Ergebnis vor Ertragsteuern</b>                                            | <b>978</b>        | <b>-134</b>       |                     |
| Ertragsteuern                                                                | 165               | 112               | 47,3                |
| Auf Minderheiten entfallendes Ergebnis                                       | -12               | -12               | 0,0                 |
| <b>Auf Aktionäre der Deutschen Lufthansa AG entfallendes Konzernergebnis</b> | <b>1 131</b>      | <b>-34</b>        |                     |

#### 1,1 Mrd. EUR Konzerngewinn beinhaltet steuerlichen Einmaleffekt

Die Summe aus dem Ergebnis der betrieblichen Tätigkeit und dem Finanzergebnis ergibt ein deutlich positives Ergebnis vor Ertragsteuern von 978 Mio. EUR (Vorjahr: -134 Mio. EUR). Es lag damit um 1,1 Mrd. EUR über dem negativen Vorjahresergebnis. Aus den Ertragsteuern ergaben sich Erträge von insgesamt 165 Mio. EUR. Trotz des positiven Vorsteuerergebnisses führten im Wesentlichen die im Zuge der finanziellen Umstrukturierung des Geschäftsfelds Catering resultierende Nutzung bisher nicht aktivierungsfähiger steuerlicher Verlustvorträge der LSG Sky Chefs USA-Gruppe sowie in diesem Zusammenhang gewährte Forderungsverzichte zu Steuerentlastungseffekten von insgesamt rund 400 Mio. EUR. Im Vorjahr waren Erträge von 112 Mio. EUR angefallen. Das Ergebnis nach Ertragsteuern belief sich somit auf 1,1 Mrd. EUR (Vorjahr: -22 Mio. EUR). Nach Abzug des auf Minderheiten entfallenden Ergebnisses von 12 Mio. EUR (Vorjahr: 12 Mio. EUR) entfällt auf die Aktionäre der Deutschen Lufthansa AG ein Konzernergebnis von 1,1 Mrd. EUR (Vorjahr: -34 Mio. EUR).

#### Entwicklung operatives Ergebnis in Mio. € und vergleichbare operative Marge in %

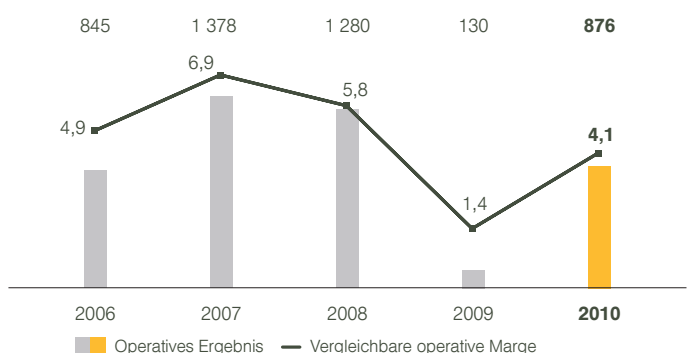



Das Ergebnis je Aktie beträgt unverwässert wie verwässert 2,47 EUR (Vorjahr: –0,07 EUR), siehe auch [S. 172](#) im Konzernanhang.

### Mehrperiodenübersicht über die Ertragslage

Lufthansa hat in den vergangenen Jahren demonstriert, dass sie eine höhere Stabilität in der Krise mit der Nutzung von Perspektiven im Aufschwung kombinieren kann. So erzielte der Konzern im Vorfeld der Finanz- und Wirtschaftskrise ein operatives Rekordergebnis von rund 1,4 Mrd. EUR. Im Krisenjahr 2009 gelang es dem Unternehmen, als eine von wenigen Fluggesellschaften operativ profitabel zu bleiben. Im ersten Jahr des Aufschwungs erholte sich der Konzern rasch und erzielte schnell wieder ein auch im Wettbewerbsvergleich beachtliches operatives Ergebnis von 876 Mio. EUR. Lufthansa setzt damit ihren auf nachhaltiges, profitables Wachstum ausgerichteten Kurs weiter fort.

## Gewinnverwendung und Abschluss der Deutschen Lufthansa AG

Die Dividendenpolitik der Lufthansa basiert auf dem Prinzip der Kontinuität auf Basis einer stabilen Ausschüttungsquote vom operativen Ergebnis. Voraussetzung hierfür ist, dass eine Ausschüttung aus dem Jahresüberschuss des nach handelsrechtlichen Vorschriften ermittelten Einzelabschlusses der Deutschen Lufthansa AG möglich ist, siehe auch Kapitel „Finanzstrategie“ [S. 53](#). Der für die Dividendenausschüttung relevante Einzelabschluss der Deutschen Lufthansa AG als Obergesellschaft des Konzerns weist für das Geschäftsjahr 2010 nach HGB einen Jahresüberschuss von 483 Mio. EUR aus. Nach einer Einstellung in andere Gewinnrücklagen von 208 Mio. EUR ergibt sich ein Bilanzgewinn von 275 Mio. EUR. Vorstand und Aufsichtsrat werden der Hauptversammlung am 3. Mai 2011 vorschlagen, diesen Bilanzgewinn in Höhe einer Dividende von 0,60 EUR je Aktie auszuschütten.

### Überleitung Ergebnisse

| in Mio. €                                                                      | 2010           |                                 | 2009           |                                 |
|--------------------------------------------------------------------------------|----------------|---------------------------------|----------------|---------------------------------|
|                                                                                | GuV            | Überleitung operatives Ergebnis | GuV            | Überleitung operatives Ergebnis |
| <b>Umsatzerlöse</b>                                                            | <b>27 324</b>  | <b>–</b>                        | <b>22 283</b>  | <b>–</b>                        |
| Bestandsveränderungen                                                          | 165            | –                               | 225            | –                               |
| Sonstige betriebliche Erträge                                                  | 2 655          | –                               | 2 531          | –                               |
| davon Erträge aus Buchgewinnen und kurzfristigen Finanzinvestitionen           | –              | –275                            | –              | –83                             |
| davon Erträge aus Auflösung von Rückstellungen                                 | –              | –234                            | –              | –187                            |
| davon Zuschreibungen Anlagevermögen                                            | –              | –39                             | –              | –14                             |
| davon Stichtagskursbewertung langfristiger Finanzschulden                      | –              | –52                             | –              | 0*                              |
| <b>Summe betriebliche Erträge</b>                                              | <b>30 144</b>  | <b>–600</b>                     | <b>25 039</b>  | <b>–284</b>                     |
| Materialaufwand                                                                | –15 370        | –                               | –12 700        | –                               |
| Personalaufwand                                                                | –6 659         | –                               | –5 996         | –                               |
| davon nachzuverrechnender Dienstzeitaufwand                                    | –              | 19                              | –              | –6                              |
| Abschreibungen                                                                 | –1 682         | –                               | –1 475         | –                               |
| davon außerplanmäßige Abschreibungen                                           | –              | 72                              | –              | 88                              |
| Sonstige betriebliche Aufwendungen                                             | –5 193         | –                               | –4 597         | –                               |
| davon außerplanmäßige Abschreibungen auf Vermögen zum Verkauf – nicht operativ | –              | 16                              | –              | 4                               |
| davon Aufwendungen aus Buchverlusten und kurzfristigen Finanzinvestitionen     | –              | 53                              | –              | 51                              |
| davon Stichtagskursbewertung langfristiger Finanzschulden                      | –              | 76                              | –              | 6                               |
| <b>Summe betriebliche Aufwendungen</b>                                         | <b>–28 904</b> | <b>236</b>                      | <b>–24 768</b> | <b>143</b>                      |
| <b>Ergebnis der betrieblichen Tätigkeit</b>                                    | <b>1 240</b>   | <b>–</b>                        | <b>271</b>     | <b>–</b>                        |
| Summe Überleitung operatives Ergebnis                                          | –              | –364                            | –              | –141                            |
| <b>Operatives Ergebnis</b>                                                     | <b>–</b>       | <b>876</b>                      | <b>–</b>       | <b>130</b>                      |
| Beteiligungsergebnis                                                           | 104            | –                               | 58             | –                               |
| Übrige Finanzposten                                                            | –9             | –                               | –138           | –                               |
| <b>EBIT</b>                                                                    | <b>1 335</b>   | <b>–</b>                        | <b>191</b>     | <b>–</b>                        |
| Abschreibungen (aus betrieblichem Ergebnis)                                    | 1 682          | –                               | 1 475          | –                               |
| Abschreibungen auf Finanzanlagen, Wertpapiere und Vermögenswerte zum Verkauf   | 32             | –                               | 172            | –                               |
| <b>EBITDA</b>                                                                  | <b>3 049</b>   | <b>–</b>                        | <b>1 838</b>   | <b>–</b>                        |

\* Gerundet unter 1 Mio. EUR.

## Verkürzte Gewinn- und Verlustrechnung der Deutschen Lufthansa AG nach HGB

|                                                     | 2010<br>in Mio. € | 2009<br>in Mio. € | Veränderung<br>in % |
|-----------------------------------------------------|-------------------|-------------------|---------------------|
| <b>Umsatzerlöse</b>                                 | <b>13 792</b>     | <b>12 199</b>     | <b>13,1</b>         |
| Andere betriebliche Erträge                         | 1 976             | 1 854             | 6,6                 |
| Betriebliche Erträge                                | 15 768            | 14 053            | 12,2                |
| Betriebliche Aufwendungen                           | 15 538            | 14 457            | 7,5                 |
| <b>Ergebnis der betrieblichen Tätigkeit</b>         | <b>230</b>        | <b>-404</b>       | <b>-</b>            |
| Finanzergebnis                                      | 488               | 298               | 63,8                |
| <b>Ergebnis der gewöhnlichen Geschäftstätigkeit</b> | <b>718</b>        | <b>-106</b>       | <b>-</b>            |
| <b>Außerordentliches Ergebnis</b>                   | <b>-37</b>        | <b>0</b>          | <b>-</b>            |
| Sonstige Steuern                                    | -26               | -42               | 38,1                |
| <b>Ergebnis vor Ertragsteuern</b>                   | <b>655</b>        | <b>-148</b>       | <b>-</b>            |
| Ertragsteuern                                       | -172              | 0                 | -                   |
| <b>Jahresergebnis</b>                               | <b>483</b>        | <b>-148</b>       | <b>-</b>            |
| Entnahmen aus den Gewinnrücklagen                   | 0                 | 148               | -100,0              |
| Einstellungen in die Gewinnrücklagen                | -208              | 0                 | -                   |
| <b>Bilanzergebnis</b>                               | <b>275</b>        | <b>0</b>          | <b>-</b>            |

## Bilanz der Deutschen Lufthansa AG nach HGB

|                                                      | 31.12.2010<br>in Mio. € | 31.12.2009<br>in Mio. € | Veränderung<br>in % |
|------------------------------------------------------|-------------------------|-------------------------|---------------------|
| <b>Aktiva</b>                                        |                         |                         |                     |
| Immaterielle Vermögensgegenstände                    | 140                     | 138                     | 1,4                 |
| Flugzeuge                                            | 4 338                   | 3 828                   | 13,3                |
| Übrige Sachanlagen                                   | 101                     | 110                     | -8,2                |
| Finanzanlagen                                        | 8 583                   | 11 128                  | -22,9               |
| <b>Anlagevermögen</b>                                | <b>13 162</b>           | <b>15 204</b>           | <b>-13,4</b>        |
| Vorräte                                              | 27                      | 24                      | 12,5                |
| Forderungen und übrige Aktiva                        | 2 120                   | 2 007                   | 5,6                 |
| Flüssige Mittel und Wertpapiere                      | 3 057                   | 1 922                   | 59,1                |
| <b>Umlaufvermögen</b>                                | <b>5 204</b>            | <b>3 953</b>            | <b>31,6</b>         |
| <b>Bilanzsumme</b>                                   | <b>18 366</b>           | <b>19 157</b>           | <b>-4,1</b>         |
| <b>Passiva</b>                                       |                         |                         |                     |
| Gezeichnetes Kapital                                 | 1 172                   | 1 172                   | 0,0                 |
| Kapitalrücklage                                      | 857                     | 857                     | 0,0                 |
| Gewinnrücklagen                                      | 1 567                   | 1 318                   | 18,9                |
| Bilanzergebnis                                       | 275                     | 0                       | -                   |
| <b>Eigenkapital</b>                                  | <b>3 871</b>            | <b>3 347</b>            | <b>15,7</b>         |
| Pensionsrückstellungen                               | 1 823                   | 4 853                   | -62,4               |
| Langfristige Verbindlichkeiten                       |                         |                         |                     |
| Restlaufzeit > 5 Jahre                               | 2 087                   | 1 786                   | 69,5                |
| Restlaufzeit 1 bis 5 Jahre                           | 3 027                   | 2 901                   | -28,1               |
| <b>Langfristiges Kapital</b>                         | <b>10 808</b>           | <b>12 887</b>           | <b>-16,1</b>        |
| Rückstellungen Flugdokumente und Miles & More        | 2 339                   | 1 967                   | 18,9                |
| Andere Rückstellungen und Rechnungsabgrenzungsposten | 2 227                   | 2 111                   | 5,5                 |
| Übrige Verbindlichkeiten                             | 2 992                   | 2 192                   | 36,5                |
| <b>Kurzfristiges Kapital</b>                         | <b>7 558</b>            | <b>6 270</b>            | <b>20,5</b>         |
| <b>Bilanzsumme</b>                                   | <b>18 366</b>           | <b>19 157</b>           | <b>-4,1</b>         |

## Finanz- und Vermögenslage

➤ Lufthansa investiert weiter in die Zukunft und hat ihr umfassendes Flottenmodernisierungsprogramm 2010 fortgesetzt. ➤ Mit 3,1 Mrd. EUR operativem Cashflow wurde wieder ein deutlicher Free Cashflow erzielt. ➤ Die Kapitalstruktur hat sich weiter verbessert. ➤ Unsere unbelastete Flugzeugflotte bildet den größten Vermögenswert des Konzerns. ➤ Die Pensionsausfinanzierung wurde fortgesetzt. ➤ Die Verbesserung des Finanzprofils führte zur Anhebung unseres Ratingausblicks.

### Investitionen

#### Lufthansa investiert weiter in die Zukunft

Bei weiterhin straffem Kostenmanagement hat der Lufthansa Konzern im abgelaufenen Geschäftsjahr wesentliche Investitionen getätigt und damit weitere Gestaltungsperspektiven für die Zukunft geschaffen. So wurde das umfassende Flottenmodernisierungsprogramm auch im Jahr 2010 konsequent fortgeführt, um die Kostenbasis durch treibstoffeffiziente Flugzeuge weiter zu verbessern. Das Investitionsvolumen lag im Konzern mit 2,3 Mrd. EUR um 5,5 Prozent unter dem Vorjahreswert. Die darin enthaltenen Primärinvestitionen, das sind An- und Schlusszahlungen für Flugzeuge, Flugzeugüberholungen und -zubehör sowie Reservetriebwerke, erhöhten sich allerdings um 8,4 Prozent auf 2,0 Mrd. EUR.

Sekundärinvestitionen, das heißt Investitionen in andere Sachanlagen und immaterielle Vermögensgegenstände, wurden hingegen um 32,4 Prozent auf 227 Mio. EUR reduziert. Davon entfielen insgesamt 173 Mio. EUR (Vorjahr: 261 Mio. EUR) auf Sachanlagen, wie etwa technische Anlagen und Maschinen sowie Betriebs- und Geschäftsausstattung. 54 Mio. EUR (Vorjahr: 75 Mio. EUR) wurden in immaterielle Vermögenswerte, wie Lizenzen, Geschäfts- und Firmenwerte, investiert.

Für Finanzinvestitionen, die neben Kapitalausstattungen von Beteiligungen und sonstigen Ausleihungen auch kleinere Anteilserwerbe umfassten, wurden insgesamt 49 Mio. EUR (Vorjahr: 127 Mio. EUR) aufgebracht.

Primär-, Sekundär- und Finanzinvestitionen in Mio. €\*

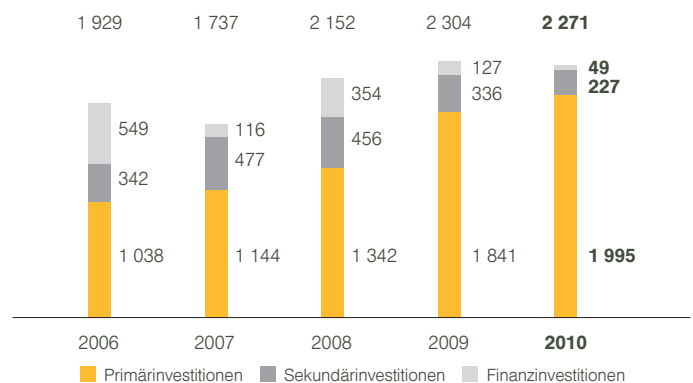

Auf das Geschäftsfeld Passage Airline Gruppe entfiel auch 2010 das größte Investitionsvolumen in Höhe von 2,0 Mrd. EUR (Vorjahr: 1,9 Mrd. EUR). Hier wurde vor allem in neues Fluggerät und Anzahlungen für Flugzeuge investiert. Die Investitionen im Geschäftsjahr 2010 betrafen vier Airbus A380, fünf Airbus A330, vier Airbus A321, zehn Airbus A320, zehn Airbus A319, eine Boeing B737, sieben Bombardier CRJ900, eine Embraer 195, acht Embraer E190, eine ATR 700, eine ATR 42-500 und drei Dash 8-400.

Die Investitionen im Geschäftsfeld Logistik sind aufgrund der eingeschränkten Investitionstätigkeit im Rahmen des Programms zur Ergebnisstabilisierung auf 21 Mio. EUR (Vorjahr: 25 Mio. EUR) gesunken. Auch im Geschäftsfeld Technik verminderten sich die Investitionen auf 67 Mio. EUR (Vorjahr: 121 Mio. EUR). Der Rückgang resultierte aus den hohen Vorjahresinvestitionen für den Kauf von Reservetriebwerken und die Ausstattung der A380-Wartungshalle.

Die Investitionen im Geschäftsfeld IT Services sanken auf 36 Mio. EUR (Vorjahr: 52 Mio. EUR) und dienten im Wesentlichen der Sicherung des bestehenden Geschäfts. Das Geschäftsfeld Catering reduzierte auch im Geschäftsjahr 2010 seine Investitionen. Im Geschäftsjahr 2010 lagen diese bei 38 Mio. EUR (Vorjahr: 58 Mio. EUR). Die Mittel flossen auch hier insbesondere in die Sicherung der bestehenden Produktionsstätten.

## Cashflow

### 3,1 Mrd. EUR operativer Cashflow erwirtschaftet

Die verbesserte Geschäftsentwicklung spiegelte sich auch in dem bislang höchsten operativen Cashflow in der Unternehmensgeschichte in Höhe von 3,1 Mrd. EUR wider. Dieser lag rund 1,1 Mrd. EUR oder 54,4 Prozent über dem Vorjahr. Der Anstieg ist insbesondere auf das um 1,1 Mrd. EUR höhere Ergebnis vor Ertragsteuern zurückzuführen. Darüber hinaus resultierte aus der starken Erholung des operativen Geschäfts eine Verbesserung des Working Capitals, was sich im Vergleich zum Vorjahr mit 346 Mio. EUR positiv auf den Cashflow auswirkte. Negative Effekte von -158 Mio. EUR ergaben sich hingegen aus gezahlten Ertragsteuern. Im Ergebnis vor Ertragsteuern enthaltene Buchgewinne aus Anlageverkäufen sowie Beteiligungserträge sind der Investitionstätigkeit zuzurechnen.

Investitionen, operativer Cashflow und Abschreibungen in Mio. €

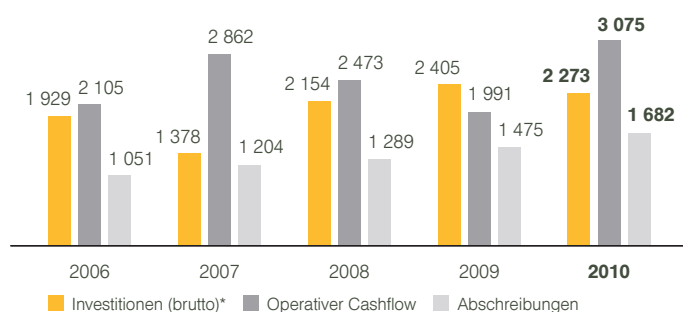

\* Ausweis der Investitionen ohne anteilige Jahresergebnisse aus der Equity-Bewertung.

Operativer Cashflow und Free Cashflow in Mio. €

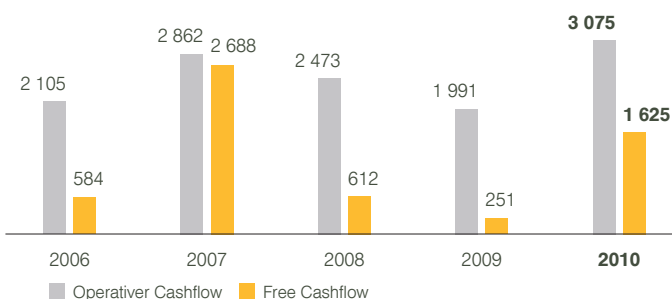

### Der Free Cashflow wächst deutlich auf 1,6 Mrd. EUR

Die Bruttoinvestitionen des Lufthansa Konzerns lagen bei 2,3 Mrd. EUR und enthalten die oben beschriebenen Primär-, Sekundär- und Finanzinvestitionen sowie reparaturfähige Flugzeugsatzteile.

Die Veräußerungen von Vermögenswerten einschließlich des Verkaufs nicht konsolidierter Anteile hatten Einnahmen von 511 Mio. EUR zur Folge. Davon entfielen 205 Mio. EUR auf den Verkauf von Flugzeugen, 129 Mio. EUR auf die Veräußerung von Wertpapieren und 45 Mio. EUR auf die Tilgung von Ausleihungen. Aus dem Verkauf von 6,2 Mrd. A-Aktien sowie dem Einzug bestehender B-Aktien der Amadeus IT Holding S.A. wurden Einnahmen in Höhe von 97 Mio. EUR erzielt.

Die Zins- und Dividendeneinnahmen erhöhten sich um 34,7 Prozent auf 388 Mio. EUR. Insgesamt betrugen die für die Investitionstätigkeit eingesetzten Nettzahlungsmittel 1,5 Mrd. EUR (Vorjahr: 1,7 Mrd. EUR).

Nach Abzug dieser Nettzahlungsbflüsse aus Investitionstätigkeit ergab sich für das Geschäftsjahr 2010 ein wieder deutlich verbesserter Free Cashflow von 1,6 Mrd. EUR (Vorjahr: 251 Mio. EUR). Der Anteil der aus dem Cashflow finanzierten Investitionen, die Innenfinanzierungsquote, belief sich auf 135,3 Prozent (Vorjahr: 82,8 Prozent).

### Der Finanzierungsbedarf reduziert sich gegenüber Vorjahr

Im abgelaufenen Geschäftsjahr haben wir unsere Politik der mittelfristigen, flexiblen Ausfinanzierung unserer Pensionsverpflichtungen fortgesetzt. Um die Unternehmensliquidität zu schonen, haben wir eine von zwei planmäßigen Tranchen durch die Übertragung von 8,5 Prozent der Anteile an Fraport mit einem Wert von 283 Mio. EUR in den Lufthansa Pension Trust vorgenommen. Für die weitere Ausfinanzierung von Pensionsverpflichtungen im In- und Ausland wurden darüber hinaus 407 Mio. EUR verwendet. Durch den Erwerb von Wertpapieren in Höhe von 2,3 Mrd. EUR und Erlöse aus dem Verkauf von Wertpapieren (823 Mio. EUR) ergaben sich Nettoabflüsse von 1,4 Mrd. EUR (Vorjahr: 1,8 Mrd. EUR).



Aus dem Saldo der Finanzierungstätigkeit ergab sich insgesamt ein Abfluss an Nettozahlungsmitteln in Höhe von 300 Mio. EUR (Vorjahr: Zahlungsmittelzufluss von 1,3 Mrd. EUR). Er entfiel im Wesentlichen auf neu aufgenommene Finanzmittel (925 Mio. EUR), insbesondere aus Flugzeugfinanzierungen, regelmäßige Tilgungen (756 Mio. EUR, davon 93 Mio. EUR auf Anleihen) sowie Zinsausgaben (451 Mio. EUR). Die Ausschüttungen an die Minderheitsgesellschafter anderer Konzernunternehmen betrugen 18 Mio. EUR.

### Die flüssigen Mittel steigen um 21,2 Prozent

Die Zahlungsmittel verringerten sich im Geschäftsjahr um 39 Mio. EUR und lagen so bei rund 1,1 Mrd. EUR. Darin enthalten sind wechselkursbedingte Aufwertungen des Zahlungsmittelbestands von 64 Mio. EUR. Insgesamt beliefen sich die flüssigen Mittel (einschließlich kurzfristiger Wertpapiere) auf 5,4 Mrd. EUR und übertrafen damit das Vorjahr um 21,2 Prozent.

## Vermögenslage

### Die Bilanzsumme wächst auf 29,3 Mrd. EUR

Die Konzernbilanzsumme lag zum Ende des Geschäftsjahres 2010 bei 29,3 Mrd. EUR und damit 2,9 Mrd. EUR über der Bilanzsumme des Vorjahres. Dabei stiegen auf der Aktivseite die langfristigen Vermögenswerte um 1,3 Mrd. EUR auf 19,0 Mrd. EUR, während sich die kurzfristigen Vermögenswerte sogar um 1,6 Mrd. EUR auf 10,3 Mrd. EUR erhöhten.

Innerhalb des langfristigen Vermögens stieg die Position Flugzeuge und Reservetriebwerke um 709 Mio. EUR auf 11,2 Mrd. EUR. Der im Jahresabschluss 2009 noch zum Buchwert bilanzierte Anteil an der Amadeus IT Holding S.A. (34 Mio. EUR) wird seit dem Börsengang der Amadeus IT Holding S.A. im April 2010 zum Marktwert in der Konzernbilanz angesetzt. Zum 31. Dezember 2010 betrug der Marktwert 534 Mio. EUR. Im Rahmen des Börsengangs hat Lufthansa 6,2 Mio. A-Aktien veräußert und einschließlich des Einzugs bestehender B-Aktien Einnahmen von rund 97 Mio. EUR erzielt.

### Verkürzte Kapitalflussrechnung Lufthansa Konzern

|                                                                   | 2010<br>in Mio. € | 2009<br>in Mio. € | Veränderung<br>in % |
|-------------------------------------------------------------------|-------------------|-------------------|---------------------|
| Ergebnis vor Ertragsteuern                                        | 978               | -134              |                     |
| Abschreibungen/ Zuschreibungen                                    | 1 688             | 1 708             | -1,2                |
| Ergebnis aus dem Abgang von Anlagevermögen                        | -209              | -27               | 674,1               |
| Zinsergebnis/ Beteiligungsergebnis                                | 253               | 267               | -5,2                |
| Gezahlte Ertragsteuern                                            | -110              | 48                |                     |
| Veränderung des Working Capitals                                  | 475               | 129               | 268,2               |
| <b>Operativer Cashflow</b>                                        | <b>3 075</b>      | <b>1 991</b>      | <b>54,4</b>         |
| Investitionen und Zugänge reparaturfähige Ersatzteile             | -2 349            | -2 570            | -8,6                |
| Einnahmen aus Verkäufen von Anteilen/ Abgang von Anlagevermögen   | 511               | 542               | -5,7                |
| Zinseinnahmen und Dividenden                                      | 388               | 288               | 34,7                |
| <b>Für Investitionstätigkeit eingesetzte Nettozahlungsmittel</b>  | <b>-1 450</b>     | <b>-1 740</b>     | <b>-16,7</b>        |
| <b>Free Cashflow</b>                                              | <b>1 625</b>      | <b>251</b>        | <b>547,4</b>        |
| Erwerb/ Veräußerung von Wertpapieren/ Geldanlagen in Fonds        | -1 428            | -1 823            | -21,7               |
| Kapitalerhöhung                                                   | -                 | 6                 |                     |
| Aufnahme/ Rückführung langfristiger Finanzschulden                | 169               | 1 879             | -91,0               |
| Dividenden                                                        | -18               | -333              | -94,6               |
| Zinsausgaben                                                      | -451              | -281              | 60,5                |
| <b>Für Finanzierungstätigkeit eingesetzte Nettozahlungsmittel</b> | <b>-300</b>       | <b>1 271</b>      |                     |
| Veränderung Zahlungsmittel aus Wechselkursänderungen              | 64                | -7                |                     |
| <b>Zahlungsmittel und Zahlungsmittel-Äquivalente 01.01.</b>       | <b>1 136</b>      | <b>1 444</b>      | <b>-21,3</b>        |
| <b>Zahlungsmittel und Zahlungsmittel-Äquivalente 31.12.</b>       | <b>1 097</b>      | <b>1 136</b>      | <b>-3,4</b>         |

Darüber hinaus wurden im zweiten Quartal 8,5 Prozent der Anteile an Fraport (Buchwert: 283 Mio. EUR) zur weiteren Ausfinanzierung der Pensionsverpflichtungen in den Lufthansa Pension Trust eingebracht. In der Folge nahm die Position übrige Beteiligungen insgesamt um 250 Mio. EUR zu. Zudem erhöhten sich die positiven Marktwerte derivativer Finanzinstrumente (vorwiegend aus Devisen- und Zinssicherungen) um 95 Mio. EUR. Während die Ausleihungen und Forderungen ebenfalls um 114 Mio. EUR zulegten, sanken die langfristigen Wertpapiere im Wesentlichen aufgrund von Verkäufen um 99 Mio. EUR.

Im kurzfristigen Vermögen erhöhten sich die Forderungen, insbesondere aufgrund des positiven Geschäftsverlaufs, um 368 Mio. EUR. Darüber hinaus wuchsen die Marktwerte kurzfristiger Finanzderivate (vorwiegend aus Treibstoffpreis- und Devisensicherungen) um 232 Mio. EUR. Die flüssigen Mittel – bestehend aus kurzfristigen Wertpapieren sowie Bankguthaben und Kassenbeständen – stiegen um 941 Mio. EUR auf 5,4 Mrd. EUR.

#### Die Kapitalstruktur verbessert sich deutlich

Auf der Passivseite erhöhte sich das Eigenkapital (inklusive der Anteile der Minderheitsgesellschafter) um 2,1 Mrd. EUR (+34,5 Prozent) und betrug zum Bilanzstichtag 8,3 Mrd. EUR. Diese Zunahme ist im Wesentlichen auf das positive Nachsteuerergebnis von 1,1 Mrd. EUR, die im Geschäftsjahr 2010 erstmals vorgenommene Marktbewertung des Anteils an der Amadeus IT Holding S.A. (+524 Mio. EUR), die Marktwertveränderungen sonstiger finanzieller Vermögenswerte (+170 Mio. EUR) sowie

positive Währungsumrechnungsdifferenzen (+311 Mio. EUR) zurückzuführen. Die Eigenkapitalquote stieg in der Folge auf 28,4 Prozent (Jahresende 2009: 23,5 Prozent) und nähert sich damit wieder ihrer mittelfristigen Zielmarke von 30 Prozent.

#### Entwicklung von Ergebnis, Eigenkapital und Eigenkapitalquote

|                    |        | 2010  | 2009  | 2008  | 2007  | 2006  |
|--------------------|--------|-------|-------|-------|-------|-------|
| Ergebnis*          | Mio. € | 1 143 | -22   | 552   | 1 760 | 897   |
| Eigenkapital*      | Mio. € | 8 340 | 6 202 | 6 594 | 6 900 | 4 903 |
| Eigenkapitalquote* | %      | 28,4  | 23,5  | 29,4  | 30,9  | 25,2  |

\* Inkl. Minderheiten.

Die langfristigen Verbindlichkeiten und Rückstellungen verminderten sich im Berichtsjahr um 260 Mio. EUR auf 11,2 Mrd. EUR, während die kurzfristigen Fremdmittel um 1,1 Mrd. EUR auf 9,8 Mrd. EUR zunahmen. Innerhalb der langfristigen Fremdmittel stiegen die Finanzschulden insbesondere aufgrund von Flugzeugfinanzierungen um 118 Mio. EUR, während sich die negativen Marktwerte derivativer Finanzinstrumente (vorwiegend aus Devisen- und Zinssicherungen) um 114 Mio. EUR verminderten. Die Pensionsrückstellungen reduzierten sich im Zuge der fortlaufenden Ausfinanzierung um 139 Mio. EUR auf 2,6 Mrd. EUR. Die Verminderung der latenten Ertragsteuerverpflichtungen um 258 Mio. EUR ist im Wesentlichen auf die Effekte aus einer finanziellen Umstrukturierung des Geschäftsfelds Catering zurückzuführen.

#### Bilanzstruktur in %

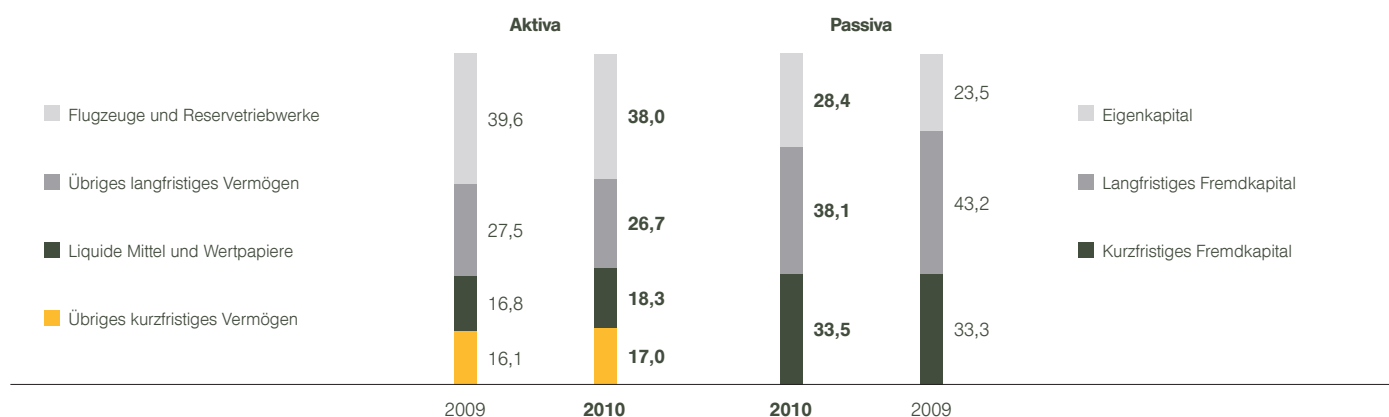

## Eigenkapitalrendite in %

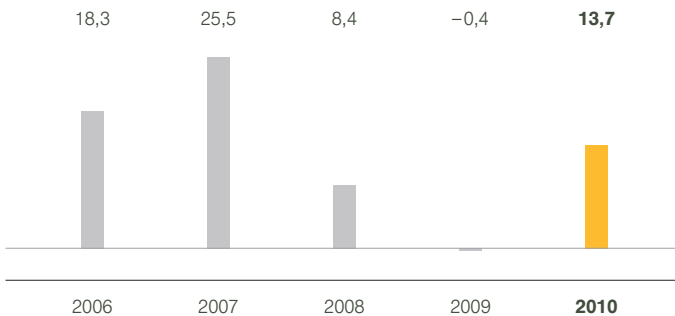

Der Anstieg im Bereich der kurzfristigen Verbindlichkeiten und Rückstellungen resultierte im Wesentlichen aus erhöhten Verbindlichkeiten aus Lieferungen und Leistungen und sonstigen finanziellen Verbindlichkeiten (+397 Mio. EUR) sowie gestiegenen Verbindlichkeiten aus nicht ausgeflogenen Flugdokumenten (+483 Mio. EUR). Diese Entwicklung ist auf die erhebliche Zunahme des operativen Geschäfts zurückzuführen. Der Rückgang der sonstigen Rückstellungen um 241 Mio. EUR entfällt unter anderem auf geleistete Zahlungen für Restrukturierungsmaßnahmen und Verpflichtungen aus Altersteilzeitverträgen. Die kurzfristigen Finanzschulden stiegen im Wesentlichen fristigkeitsbedingt um 264 Mio. EUR.

Der Anteil der langfristigen Mittel – bestehend aus Eigenkapital und langfristigem Fremdkapital – an der Bilanzsumme beträgt 66,5 Prozent (Vorjahr: 66,7 Prozent). Die langfristig zur Verfügung stehenden Mittel decken die langfristigen Vermögenswerte zu 102,8 Prozent (Vorjahr: 99,5 Prozent).

Die Nettokreditverschuldung des Konzerns wurde bis zum Ende des Geschäftsjahres 2010 auf 1,6 Mrd. EUR reduziert. Zum Jahresende 2009 hatte sie noch 2,2 Mrd. EUR betragen. Die Nettokreditverschuldung errechnet sich dabei als Saldo aus den Bruttofinanzschulden und dem vorhandenen Finanzvermögen zuzüglich der jederzeit liquidierbaren langfristigen Wertpapiere.

Das Gearing verminderte sich auf 50,0 Prozent (Vorjahr: 79,1 Prozent) und liegt damit wieder innerhalb des Zielkorridors von 40 bis 60 Prozent. Es wird aus dem Verhältnis der Nettokreditverschuldung zuzüglich Pensionsrückstellungen zum Eigenkapital ermittelt. Eine Zehn-Jahres-Übersicht über die wesentlichen wirtschaftlichen Kennzahlen finden Sie im Kapitel „Zehn-Jahres-Übersicht“ ab [S. 230](#).

## Berechnung Nettokreditverschuldung und Gearing

|                                                | 2010<br>in Mio. € | 2009<br>in Mio. € | Veränderung<br>in % |
|------------------------------------------------|-------------------|-------------------|---------------------|
| Verbindlichkeiten Kreditinstitute              | 1 925             | 1 909             | 0,8                 |
| Anleihen                                       | 2 177             | 2 264             | -3,8                |
| Übrige langfristige Finanzschulden             | 3 082             | 2 629             | 17,2                |
|                                                | <b>7 184</b>      | <b>6 802</b>      | <b>5,6</b>          |
| Übrige Bankverbindlichkeiten                   | 23                | 58                | -60,3               |
| <b>Konzernkreditverschuldung</b>               | <b>7 207</b>      | <b>6 860</b>      | <b>5,1</b>          |
| Flüssige Mittel                                | 1 097             | 1 136             | -3,4                |
| Wertpapiere                                    | 4 283             | 3 303             | 29,7                |
| Langfristige Wertpapiere (Liquiditätsreserve)* | 231               | 226               | 2,2                 |
| <b>Nettokreditverschuldung</b>                 | <b>1 596</b>      | <b>2 195</b>      | <b>-27,3</b>        |
| Pensionsrückstellungen                         | 2 571             | 2 710             | -5,1                |
| <b>Nettokreditverschuldung und Pensionen</b>   | <b>4 167</b>      | <b>4 905</b>      | <b>-15,0</b>        |
| <b>Gearing in %</b>                            | <b>50,0</b>       | <b>79,1</b>       | <b>-29,1 P.</b>     |

\* Jederzeit liquidierbar.

## Flotte

### Die Konzernflotte wird durch Neuzugänge moderner und umweltschonender

Den mit Abstand größten Vermögenswert in der Bilanz des Lufthansa Konzerns bildet die Flugzeugflotte. Sie ist das zentrale Betriebsmittel und Kern der Wertschöpfungskette in den Fluggesellschaften des Konzerns. Eine ausgewogene Flottenstruktur bildet für uns die Basis, um ein nachfragegerechtes Angebot ermöglichen zu können. So besteht die Konzernflotte zum großen Teil aus Flugzeugen der Hersteller Airbus und Boeing sowie im Regionalsegment auch von Bombardier und Embraer.

Die Konzernflotte umfasste zum Bilanzstichtag 710 Flugzeuge mit einem Durchschnittsalter von 10,9 Jahren. Der spezifische Treibstoffverbrauch wurde durch die laufende Modernisierung im Berichtsjahr um 2,4 Prozent auf 4,20 Liter pro 100 pkm weiter gesenkt. So wurde beispielsweise der 2009 im Rahmen des Ergebnisverbesserungsprogramms Climb 2011 beschlossene Ausstieg aus dem Segment der 50-sitzigen Regionalflugzeuge weiter vorangetrieben. Diese kleineren Flugzeuge, die gegenüber größerem Fluggerät Effizienz Nachteile haben, wurden durch modernste und umweltschonendere Flugzeuge mit deutlich höherer Sitzplatzkapazität ersetzt. Dies ist ein wesentliches Beispiel dafür, wie die Investitionen in die Flotte auch aktiv dem Umweltschutz dienen – nicht nur durch einen geringeren spezifischen Treibstoffverbrauch und damit CO<sub>2</sub>-Ausstoß, sondern auch durch erheblich niedrigere Lärmemissionen.

#### Konzernflotte – Bestand Verkehrsflugzeuge und Bestellungen

Deutsche Lufthansa AG (LH), SWISS (LX), Austrian Airlines (OS), British Midland (bmi), Germanwings (4U), Lufthansa CityLine (CLH), Air Dolomiti (EN), Eurowings (EW) und Lufthansa Cargo (LCAG) am 31.12.2010

| Hersteller / Typ        | LH               | LX              | OS              | bmi       | 4U        | CLH       | EN       | EW        | LCAG      | Konzernflotte | davon<br>Finance<br>Lease | davon<br>Operating<br>Lease | Veränderung<br>zum<br>31.12.09 | Zugänge<br>2011 bis<br>2016 | Zusätzliche<br>Optionen |
|-------------------------|------------------|-----------------|-----------------|-----------|-----------|-----------|----------|-----------|-----------|---------------|---------------------------|-----------------------------|--------------------------------|-----------------------------|-------------------------|
| Airbus A300             | 0                |                 |                 |           |           |           |          |           |           | 0             |                           |                             | -6                             |                             |                         |
| Airbus A310             | 2 <sup>4)</sup>  |                 |                 |           |           |           |          |           |           | 2             |                           |                             | -1                             |                             |                         |
| Airbus A319             | 30               | 7               | 7               | 11        | 30        |           |          |           |           | 85            | 4                         | 21                          | +8                             | 14                          |                         |
| Airbus A320             | 46               | 23              | 8               | 7         |           |           |          |           |           | 84            | 10                        | 5                           | +5                             | 27                          | 10 <sup>3)</sup>        |
| Airbus A321             | 44               | 7               | 6               | 7         |           |           |          |           |           | 64            | 5                         | 5                           | +1                             | 22                          |                         |
| Airbus A330             | 15               | 16              | 1 <sup>4)</sup> | 2         |           |           |          |           |           | 34            |                           | 7                           | +4                             | 10                          | 3                       |
| Airbus A340             | 51               | 13              | 2 <sup>2)</sup> |           |           |           |          |           |           | 66            | 2                         | 2                           | -1                             |                             |                         |
| Airbus A380             | 4                |                 |                 |           |           |           |          |           |           | 4             |                           |                             | +4                             | 11                          | 5                       |
| Boeing 737              | 63               |                 | 11              | 14        |           |           |          |           |           | 88            | 1                         | 13                          | -3                             |                             |                         |
| Boeing 747              | 30               |                 |                 |           |           |           |          |           |           | 30            |                           |                             | -                              | 20                          |                         |
| Boeing 767              |                  |                 | 6               |           |           |           |          |           |           | 6             |                           | 2                           | -                              |                             |                         |
| Boeing 777              |                  |                 | 4               |           |           |           |          |           |           | 4             |                           |                             | -                              |                             |                         |
| Boeing MD-11F           |                  |                 |                 |           |           |           |          |           | 18        | 18            |                           |                             | -1                             |                             |                         |
| Bombardier CRJ          | 24 <sup>1)</sup> |                 | 3               |           |           | 40        |          | 10        |           | 77            |                           | 10                          | -13                            | 7                           |                         |
| Bombardier C-Series     |                  |                 |                 |           |           |           |          |           |           | 0             |                           |                             | -                              | 30                          | 30                      |
| Bombardier Q-Series     |                  |                 | 19              |           |           |           |          |           |           | 19            | 1                         |                             | -1                             |                             |                         |
| ATR                     | 5 <sup>1)</sup>  |                 |                 |           |           |           | 8        | 3         |           | 16            |                           | 8                           | -8                             |                             |                         |
| Avro RJ                 |                  | 20              |                 |           |           | 16        |          |           |           | 36            |                           | 17                          | -2                             |                             |                         |
| BAe 146                 |                  |                 |                 |           |           |           |          |           |           | 0             |                           |                             | -8                             |                             |                         |
| Embraer                 | 24 <sup>1)</sup> | 4 <sup>4)</sup> | 3 <sup>4)</sup> | 18        |           |           |          |           |           | 49            | 3                         | 8                           | +10                            | 14                          |                         |
| Fokker F70              |                  |                 | 9               |           |           |           |          |           |           | 9             | 1                         |                             | -                              |                             |                         |
| Fokker F100             |                  |                 | 15              |           |           |           |          |           |           | 15            |                           |                             | -                              |                             |                         |
| Cessna Citation         | 4 <sup>2)</sup>  |                 |                 |           |           |           |          |           |           | 4             |                           |                             | -                              |                             |                         |
| <b>Flugzeuge gesamt</b> | <b>342</b>       | <b>90</b>       | <b>94</b>       | <b>59</b> | <b>30</b> | <b>56</b> | <b>8</b> | <b>13</b> | <b>18</b> | <b>710</b>    | <b>27</b>                 | <b>98</b>                   | <b>-12</b>                     | <b>155</b>                  | <b>48</b>               |

<sup>1)</sup> Vermietet an Lufthansa Regionalgesellschaften.

<sup>2)</sup> Vermietet an SWISS.

<sup>3)</sup> A320-Familie.

<sup>4)</sup> Vermietet an konzernexterne Gesellschaft.



## Flottenbestellungen

|                           |                        | Auslieferungszeitraum       |
|---------------------------|------------------------|-----------------------------|
| <b>Langstreckenflotte</b> |                        |                             |
| 11                        | Airbus A380            | 2011 bis 2015               |
| 20                        | Boeing 747-8i          | 2012 bis 2015               |
| 3                         | Airbus A330            | 2012                        |
| 7                         | Airbus A330            | 2011 bis 2013 (SWISS)       |
| <b>Kurzstreckenflotte</b> |                        |                             |
| 46                        | Airbus A320-Familie    | 2011 bis 2015               |
| 8                         | Airbus A320-Familie    | 2012 bis 2014 (Germanwings) |
| 6                         | Airbus A320-Familie    | 2011 bis 2014 (SWISS)       |
| 3                         | Airbus A320-Familie    | 2012 (bmi)                  |
| <b>Regionalflotte</b>     |                        |                             |
| 30                        | Bombardier C-Series    | 2014 bis 2016 (SWISS)       |
| 14                        | Embraer EMB190-Familie | 2011 bis 2012               |
| 7                         | Bombardier CRJ900      | 2011                        |

Durch diese kontinuierliche Modernisierung sowie eine an der zukünftigen Bedarfsplanung ausgerichtete Erweiterung der Flotte sichern und stärken wir unsere zukünftige Wettbewerbsfähigkeit. Unsere Flotten- und Bestellpolitik ermöglicht es uns auch, auf die industrietypischen Nachfrageschwankungen bestmöglich reagieren zu können. So befindet sich der überwiegende Teil der Flotte im Eigentum der Konzerngesellschaften und ist darüber hinaus finanziell unbelastet; der Anteil an extern geleasten Flugzeugen wird gering gehalten. Dies ermöglicht es dem Konzern, in Zeiten hoher Nachfrage schnell auf verfügbares Fluggerät zuzugreifen zu können. Bei sinkender Nachfrage führt eine Reduzierung des Angebots auch zu einer entsprechend geringeren Kostenbelastung. Vor diesem Hintergrund veranlassen wir die gestaffelte Auslieferung bestellter Flugzeuge. Je nach Bedarf kann dann entschieden werden, ob bereits vorhandene Flugzeuge noch weiter genutzt oder durch neues Gerät ersetzt werden sollen.

Während 2009 noch alle Auslieferungen als Ersatz für bereits genutzte Flugzeuge eingesetzt wurden, dienten Auslieferungen im Berichtsjahr auch wieder dazu, zu wachsen. Dies und das erwartete Verkehrsaufkommen sind auch der Gradmesser für die Zahl und Größe neuer Flugzeuge. Je nach Einsatzgebiet werden dabei konzernweit Lang-, Mittel- und Kurzstreckenflugzeuge bestellt, um für die zu bedienenden Strecken das jeweils optimale Fluggerät einsetzen zu können. Eine weitgehende Harmonisierung der Konfigurationen ermöglicht es uns darüber hinaus, die Flugzeuge mit größtmöglicher Flexibilität innerhalb des Airline-Verbunds einzusetzen.

Damit wird die notwendige Flexibilität geschaffen, um das Angebot bedarfsgerecht auf die Nachfrage in einzelnen Zielmärkten abzustimmen.

Neben der Bestellung neuer Flugzeuge verfolgen wir eng den technischen Fortschritt und modifizieren laufend die bereits vorhandenen Flugzeuge. Somit wird die stetige Modernisierung der Flotte insbesondere hinsichtlich Treibstoffverbrauch, Lärmemissionen und Zuverlässigkeit nicht nur über die Neubestellungen getrieben, sondern konsequent auch in der Bestandsflotte durchgeführt. So wird beispielsweise die Boeing 737-Flotte der Lufthansa umgerüstet und an die aktuellen technischen Standards angepasst, siehe [S. 127](#).

Im Mai 2010 wurde die erste Maschine unseres neuen Flaggschiffs, des Airbus A380-800, an uns ausgeliefert. Bis zum Jahresende wurden vier A380 in Dienst gestellt und auf Verbindungen mit hohem Passagieraufkommen nach Asien und Südafrika eingesetzt. Dieses hochmoderne Flugzeug bietet neben einer vorteilhaften Stückkostenposition auch klare Vorteile für den Umweltschutz und unterstützt uns in dem Bemühen, den spezifischen Treibstoffverbrauch der gesamten Flotte nachhaltig zu senken.

Die vier A380 sind Teil von insgesamt 47 neuen Flugzeugen, die im Berichtsjahr an den Lufthansa Konzern ausgeliefert wurden. Dies waren überwiegend Flugzeuge für die Kurz- und Mittelstrecke. Für 2011 rechnen wir derzeit mit 34 weiteren Flugzeugauslieferungen, von denen knapp die Hälfte zur Airbus A320-Familie gehören wird.

Der Aufsichtsrat hat 2010 der Bestellung von insgesamt 56 neuen Flugzeugen zugestimmt: acht Langstreckenflugzeuge vom Typ Airbus A330 sowie 32 Flugzeuge aus der A320-Familie und 16 Regionalflugzeuge. Damit sind bis zum Jahr 2016 insgesamt 155 Flugzeuge bestellt, darunter auch 20 Boeing 747-8 Intercontinental als weiteres hochmodernes Langstreckengerät.

## Finanzierung

### Das Finanzmanagement wird zentral gesteuert

Die Finanzstrategie von Lufthansa hat zum Ziel, hinsichtlich der operativen, finanziellen und strategischen Unternehmensentwicklung eine permanente Handlungsfreiheit für den Konzern zu sichern, siehe Kapitel „Finanzstrategie“ auf [S. 53](#). Sie ermöglicht es dem Unternehmen, sich unabhängig vom Finanzmarktumfeld zu entwickeln. Eine wesentliche Grundlage für ein effizientes Finanzmanagement liegt deshalb darin, die kurz- und mittelfristigen Liquiditätsflüsse zu optimieren. Daher verfügt der Lufthansa Konzern über ein zentrales Finanzmanagement, in dem alle Zahlungsströme zusammenlaufen und überschüssige Liquidität angelegt wird beziehungsweise bei Bedarf neue Finanzmittel extern aufgenommen werden.

Auf Basis einer konzernweit integrierten Finanz- und Liquiditätsplanung stellen wir sicher, dass das Unternehmen und seine Geschäftsfelder stets über ausreichende Liquidität verfügen. Allen zum Lufthansa Konzern gehörenden Gesellschaften werden durch ein zentrales Finanzberichtssystem Informationen über den tatsächlichen Finanzstatus und zu erwartende Zahlungsströme zur Verfügung gestellt. Jeweils zum Monatsende wird die Planung der Zahlungsströme aller Konzerngesellschaften für die nächsten 24 Monate hinterlegt. Daraus ergibt sich ein jederzeit aktuelles Bild hinsichtlich der künftigen Entwicklung der Konzernliquidität. Über den konzerninternen Finanzausgleich und ein Cash-Managementsystem reduzieren wir das Kreditvolumen und optimieren die Anlage der Liquidität des Konzerns.

### Unser Finanzierungsmix sichert Stabilität und vorteilhafte Finanzierungskonditionen

Im Wesentlichen nimmt die Deutsche Lufthansa AG den externen Finanzmittelbedarf des Konzerns auf und reicht diesen dann durch konzerninterne Darlehen teilweise an Tochtergesellschaften weiter. Nur in Ausnahmefällen – wenn es notwendig oder vorteilhaft ist – schließen Tochtergesellschaften in Abstimmung mit dem Konzernfinanzmanagement direkt externe Finanzierungen ab.

Die Eckpfeiler unserer Finanzstrategie geben grundsätzlich die Auswahl der jeweiligen Finanzierungsinstrumente vor. Der Finanzierungsmix zielt darauf ab, die Finanzierungskonditionen zu optimieren, ein ausgeglichenes Fälligkeitsprofil zu wahren und die Kapitalgeber zu diversifizieren.

Entwicklung der Finanzschulden und Nettokreditverschuldung in Mio. €

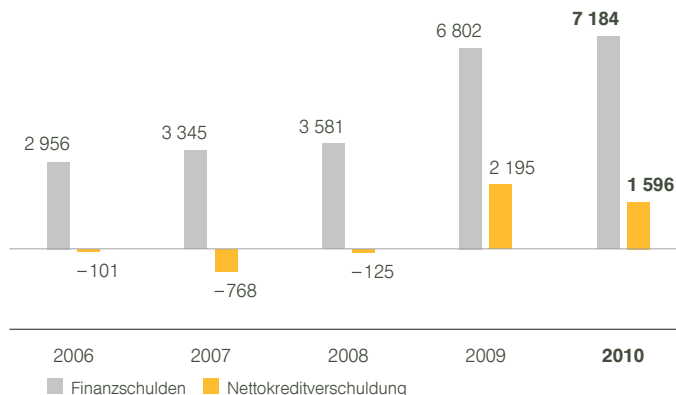

Dank der im Industrievergleich hohen Unternehmensbonität steht uns die volle Bandbreite der verschiedenen Finanzierungsinstrumente zur Verfügung. Flugzeugfinanzierungen spielen dabei eine wesentliche Rolle, da sie in Verbindung mit der guten Unternehmensbonität sehr vorteilhafte Konditionen mit sich bringen. In den kommenden Jahren erwarten wir weiterhin viele Flugzeugauslieferungen, sodass flugzeugbasierte Finanzierungsformen auch künftig einen zentralen Bestandteil unserer Finanzierung bilden werden.

Darüber hinaus führen wir regelmäßig erfolgreich Transaktionen am Kapitalmarkt durch und verbreitern damit den Kreis unserer Kapitalgeber und Finanzierungsinstrumente. Unsere Creditor Relations-Aktivitäten ermöglichen uns einen kontinuierlichen Austausch mit Fremdkapitalgebern und stärken somit zusätzlich unsere Investorenbasis.

Außerdem haben uns eine Vielzahl von Banken bilaterale Kreditlinien mit einer Laufzeit von einem Jahr eingeräumt. Zum Ende des Geschäftsjahres 2010 standen Lufthansa freie Kreditlinien in Höhe von rund 1,9 Mrd. EUR zur Verfügung.

Lufthansa refinanziert sich hauptsächlich in ihrer Bilanzwährung Euro. 85 Prozent der Finanzverbindlichkeiten sollen variabel verzinst werden. Weitere Informationen hierzu finden Sie im Konzernanhang „Erläuterung 46“ ab [S. 200](#). Der Verschuldungsgrad im Konzern belief sich zum Ende des Geschäftsjahres auf 5,4 Prozent (Vorjahr: 8,3 Prozent). Die aktuelle Finanzierungsstruktur finden Sie im Konzernanhang „Erläuterung 39“ auf [S. 196](#). Für die wesentlichen Finanzverbindlichkeiten der Deutschen Lufthansa AG existieren keine Financial Covenants.

## Flugzeugfinanzierungen stehen im Vordergrund

Nachdem 2009 zwei Anleihen und ein Schuldscheindarlehen den wesentlichen Teil der externen Finanzierung des Lufthansa Konzerns darstellten, standen 2010 wieder Flugzeugfinanzierungen im Vordergrund.

Durch mehrere Transaktionen dieser Art haben wir im Berichtsjahr insgesamt rund 800 Mio. EUR aufgenommen. Dazu zählen in erster Linie zwei Finanzierungstransaktionen, bei denen zwei der neu zugegangenen Airbus A380 in sogenannte French-Lease-Strukturen eingebracht wurden. Mit diesen von Lufthansa erstmals abgeschlossenen Finanzierungen konnte langfristiges Fremdkapital zu sehr vorteilhaften Konditionen gesichert werden. Auch 2010 haben wir darüber hinaus wieder erfolgreich eine Reihe von Japanese-Operating-Lease-Finanzierungen abgeschlossen. Mit insgesamt sieben Transaktionen wurden ein Airbus A340-600, fünf A320 und eine A319 für diese bewährte attraktive Finanzierungsform verwendet. Weiteres Fremdkapital haben wir durch zwei Bankdarlehen aufgenommen, die mit zwei Airbus A321 und 14 Bombardier CRJ900-Flugzeugen besichert wurden.

Die 2004 begonnene Ausfinanzierung der Pensionsverpflichtungen haben wir 2010 durch 8,5 Prozent der Anteile an Fraport und Barmittel fortgesetzt. Die Absicherung des bereits ausfinanzierten Vermögens wurde zum Jahresende 2009 vollständig aufgelöst. So konnte das Vermögen vollständig an der Marktpformance des Jahres 2010 partizipieren.

Wesentliche Finanzierungen außerhalb der Bilanz haben im abgelaufenen Geschäftsjahr nicht stattgefunden. Verschiedene Gesellschaften des Lufthansa Konzerns haben jedoch eine Reihe von Miet- oder Operating-Lease-Verträgen abgeschlossen. Im Wesentlichen handelt es sich hierbei um das Leasing von Flugzeugen und die Miete von Gebäuden, siehe Konzernanhang „Erläuterung 21“ [S. 179](#).

## Das Rating hat sich stabilisiert, der Ausblick wurde verbessert

### Entwicklung der Ratings

| Rating / Ausblick | 2010        | 2009         | 2008         | 2007         | 2006        |
|-------------------|-------------|--------------|--------------|--------------|-------------|
| Standard & Poor's | BBB-/stabil | BBB-/negativ | BBB-/negativ | BBB/stabil   | BBB/stabil  |
| Moody's           | Ba1/stabil  | Ba1/stabil   | Baa3/stabil  | Baa3/positiv | Baa3/stabil |

Mit ihren aktuellen Kreditratings ist Lufthansa die am besten bewertete europäische Fluggesellschaft und eine von drei Airlines weltweit, die über ein Investment Grade Rating verfügen. Im November 2010 hat Standard & Poor's den Ausblick für die Kreditratings der Lufthansa von negativ auf stabil angehoben. Dies reflektiert das verbesserte Finanzprofil aufgrund der Verbesserung des wirtschaftlichen Umfelds in der Airline-Industrie, der Erholung von Lufthansa Cargo, des stabilen Beitrags der anderen Geschäftsfelder sowie der effizienten Kostenkontrolle. Ein nachhaltiger Industrieaufschwung in Verbindung mit einer weiteren Stärkung des Finanzprofils des Lufthansa Konzerns könnte nach Angaben der Agentur das Rating noch weiter verbessern.

### Lufthansa Bewertung der Rating-Agenturen

| Standard & Poor's<br>(21. Dezember 2010)*                                                                                                                                                                                                                                                                                                                                                                                                                                                                                                                                                                                                       | Moody's Investors Service<br>(19. Juli 2010)*                                                                                                                                                                                                                                                                                                                                                                                                                          |
|-------------------------------------------------------------------------------------------------------------------------------------------------------------------------------------------------------------------------------------------------------------------------------------------------------------------------------------------------------------------------------------------------------------------------------------------------------------------------------------------------------------------------------------------------------------------------------------------------------------------------------------------------|------------------------------------------------------------------------------------------------------------------------------------------------------------------------------------------------------------------------------------------------------------------------------------------------------------------------------------------------------------------------------------------------------------------------------------------------------------------------|
| Langfristig: BBB–<br>Kurzfristig: A-3<br>Ausblick: Stabil                                                                                                                                                                                                                                                                                                                                                                                                                                                                                                                                                                                       | Langfristig: Ba1<br>Kurzfristig: Not Prime<br>Ausblick: Stabil                                                                                                                                                                                                                                                                                                                                                                                                         |
| <b>Stärken</b>                                                                                                                                                                                                                                                                                                                                                                                                                                                                                                                                                                                                                                  | <b>Stärken</b>                                                                                                                                                                                                                                                                                                                                                                                                                                                         |
| <ul style="list-style-type: none"> <li>➤ Eine der weltweit führenden Fluggesellschaften mit einer starken Position an den Drehkreuzen Frankfurt und München, großes Streckennetz</li> <li>➤ Diversifikation der Umsätze als einer der führenden europäischen Anbieter von Frachtbeförderung, Wartungs-, Reparatur- und Überholungsleistungen sowie Airline-Catering</li> <li>➤ Starke Liquiditätsposition, Fokus auf Kostenkontrolle</li> <li>➤ Starke Position im profitablen Langstreckengeschäft und Premium-Verkehr</li> <li>➤ Wachstumspotenzial durch starke Position im profitablen und schnell wachsenden Asien/Pazifik-Raum</li> </ul> | <ul style="list-style-type: none"> <li>➤ Eine der größten Fluggesellschaften weltweit</li> <li>➤ Robustes Geschäftsprofil mit diversifiziertem Streckennetz und diversifizierten Geschäftsbereichen</li> <li>➤ Solide Liquiditätsposition, großer Anteil der Flotte im Eigentum, vergleichsweise niedriger Leverage</li> <li>➤ Climb 2011-Initiative zur Sicherung der langfristigen Konkurrenzfähigkeit und Verbesserung der Kostenstruktur und der Erlöse</li> </ul> |
| <b>Schwächen</b>                                                                                                                                                                                                                                                                                                                                                                                                                                                                                                                                                                                                                                | <b>Schwächen</b>                                                                                                                                                                                                                                                                                                                                                                                                                                                       |
| <ul style="list-style-type: none"> <li>➤ Profitabilität abhängig von volatilen Treibstoffkosten</li> <li>➤ Schwieriges Umfeld, zyklische Industrie, starker Preiswettbewerb und Kapitalintensivität</li> <li>➤ Akquisition der defizitären Austrian Airlines und bmi</li> <li>➤ Heimat- und europäischer Markt mit starker Konkurrenz, Druck durch No-Frills-Carrier</li> </ul>                                                                                                                                                                                                                                                                 | <ul style="list-style-type: none"> <li>➤ Kostenstruktur stark durch Treibstoffkosten beeinflusst, konservative Hedging-Strategie führt zu eingeschränkter Flexibilität während einer Rezessionsphase</li> <li>➤ Beeinflussung der Margen durch Nicht-Passagiergeschäft und Akquisitionen</li> <li>➤ Wachstum der No-Frills-Carrier mit besseren Kostenstrukturen</li> </ul>                                                                                            |

\* Jüngster Bericht.

## Geschäftsfeld Passage Airline Gruppe

➤ Unser Kerngeschäft Passagierbeförderung bauen wir auf Basis des erfolgreichen Integrations- und Verbundkonzepts kontinuierlich aus.  
 ➤ Trotz negativer Sondereffekte setzte sich 2010 die Nachfrageerholung durch. ➤ Der Absatz und die Auslastung sowie die Verkehrserlöse wurden deutlich gesteigert. ➤ Das Geschäftsfeld hat wieder einen operativen Gewinn erzielt. ➤ Die verschiedenen Maßnahmen zu Kostensenkung und Restrukturierung werden unverändert fortgeführt.

Anteil am Konzernumsatz 74,0%

Kennzahlen Passage Airline Gruppe

Davon  
Lufthansa Passage<sup>2)</sup>

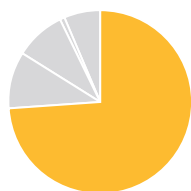

➤ Führender europäischer  
Qualitäts-Carrier

|                                                    |        | 2010    | 2009    | Veränderung<br>in % | 2010    | Veränderung<br>in % |
|----------------------------------------------------|--------|---------|---------|---------------------|---------|---------------------|
| Umsatz                                             | Mio. € | 20 912  | 16 798  | 24,5                | 13 986  | 13,4                |
| davon mit Gesellschaften<br>des Lufthansa Konzerns | Mio. € | 679     | 573     | 18,5                |         |                     |
| Operatives Ergebnis                                | Mio. € | 436     | -8      | -                   | 382     | -                   |
| Vergleichbare operative Marge                      | %      | 3,0     | 0,8     | 2,2 P.              | 3,5     | 3,5 P.              |
| Segmentergebnis                                    | Mio. € | 572     | 78      | -                   |         |                     |
| EBITDA <sup>3)</sup>                               | Mio. € | 2 601   | 1 430   | 81,9                | 1 988   | 87,0                |
| CVA                                                | Mio. € | -198    | -691    | 71,4                |         |                     |
| Segmentinvestitionen                               | Mio. € | 2 047   | 1 898   | 7,9                 |         |                     |
| Mitarbeiter zum 31.12.                             | Anzahl | 57 157  | 58 083  | -1,6                | 37 689  | 1,2                 |
| Mitarbeiter im Jahresdurchschnitt                  | Anzahl | 57 226  | 52 317  | 9,4                 | 37 257  | -0,9                |
| Fluggäste <sup>1)</sup>                            | Tsd.   | 91 157  | 77 315  | 17,9                | 58 841  | 5,9                 |
| Angebotene Sitzkilometer <sup>1)</sup>             | Mio.   | 235 837 | 208 226 | 13,3                | 163 178 | 3,1                 |
| Verkaufte Sitzkilometer <sup>1)</sup>              | Mio.   | 187 000 | 162 286 | 15,2                | 129 630 | 5,4                 |
| Sitzladefaktor <sup>1)</sup>                       | %      | 79,3    | 77,9    | 1,4 P.              | 79,4    | 1,7 P.              |

<sup>1)</sup> Lufthansa Passage, SWISS (ab 2010 inkl. Edelweiss Air), British Midland (ab Juli 2009) und Austrian Airlines (ab September 2009), ohne Germanwings.

<sup>2)</sup> Inkl. Regionalpartnern.

<sup>3)</sup> Vor Ergebnisübernahme anderer Gesellschafter.



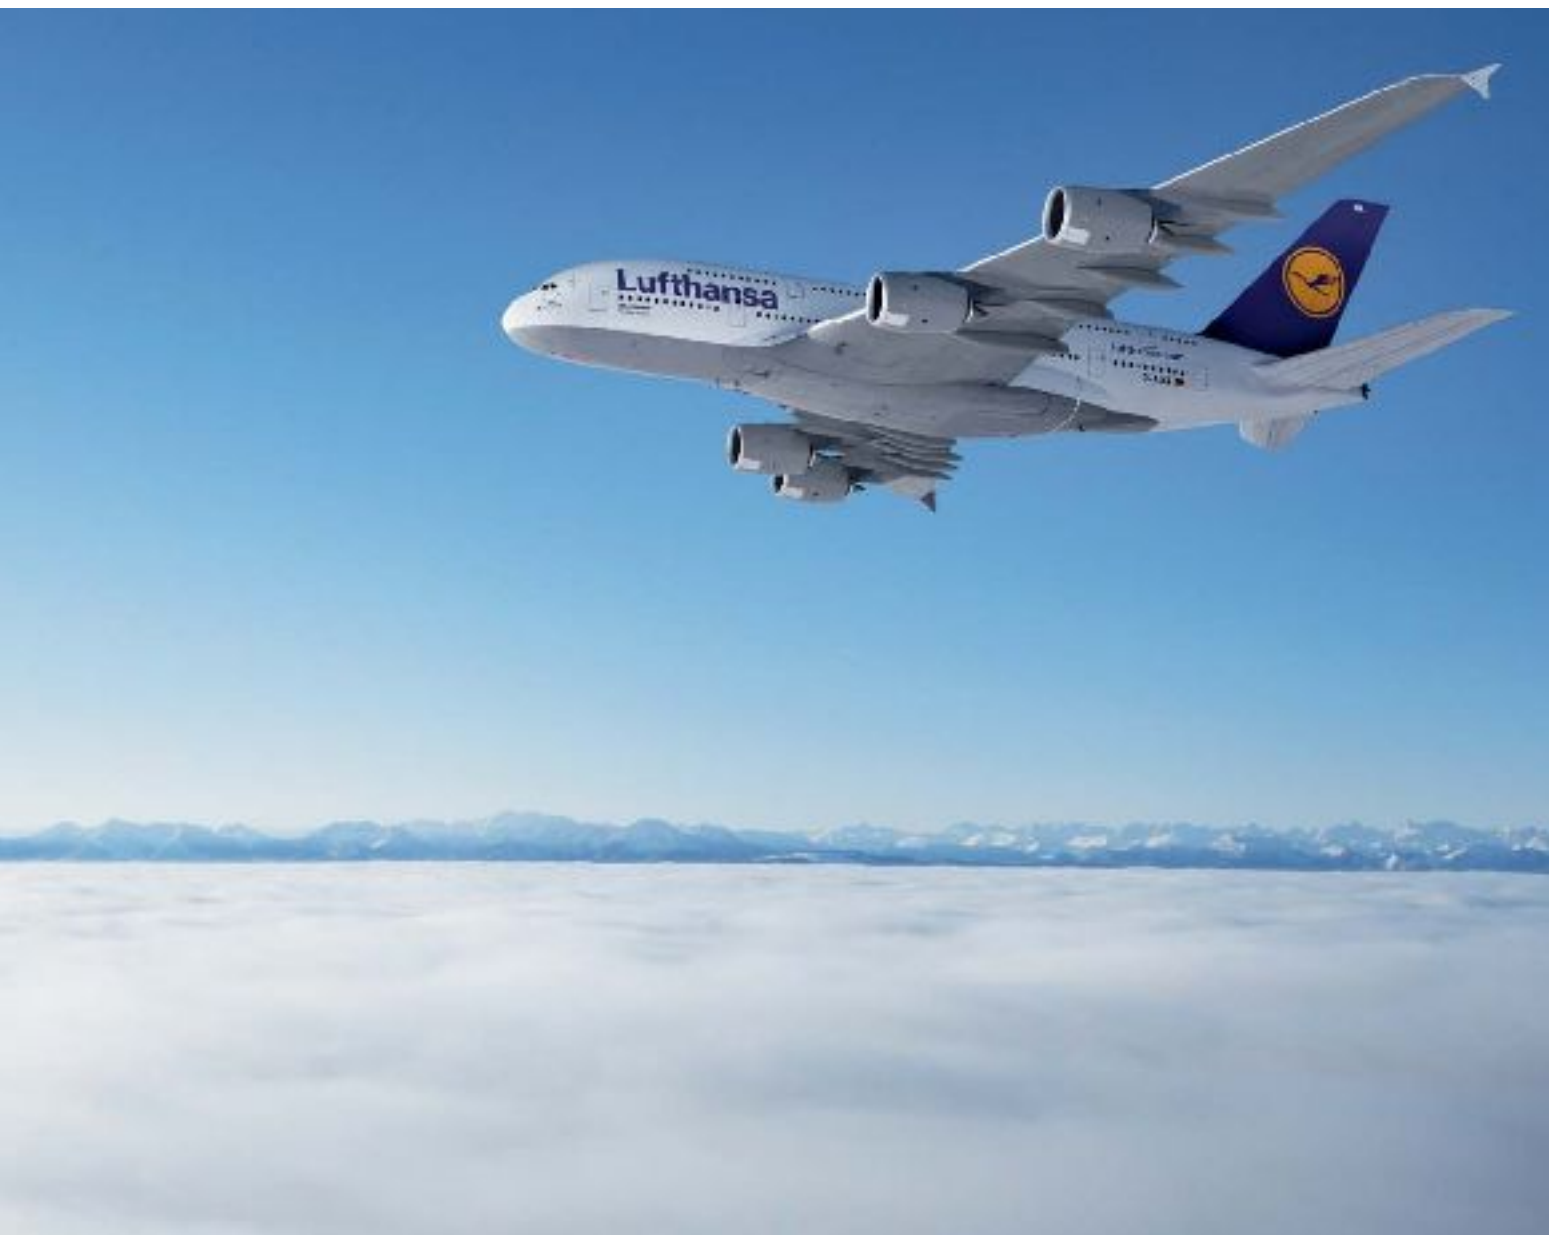

➤ 20,9 Mrd. EUR Umsatz

➤ 436 Mio. EUR Operatives Ergebnis

## Geschäftstätigkeit und Strategie

### Führender Verbund europäischer Qualitäts-Carrier

Das Kerngeschäft im Lufthansa Konzern ist die Passagierbeförderung. Zum Geschäftsfeld Passage Airline Gruppe gehören Lufthansa Passage, SWISS, Austrian Airlines, bmi, Germanwings sowie die Beteiligungen an Brussels Airlines, JetBlue und SunExpress. In der Zusammenarbeit dieses Airline-Verbunds werden wichtige Synergien realisiert, wie bereits bei der Integration von SWISS in den Konzern vor nunmehr fünf Jahren unter Beweis gestellt. Das zu Grunde liegende Integrations- und Verbundkonzept ist daher auch zum Modell für die Aufnahme neuer Fluggesellschaften in den Konzern geworden. Durch die operative Eigenständigkeit und das lokale Management der Partner sollen dabei eine größtmögliche Marktnähe und ein ergebnisverantwortliches Unternehmen vor Ort erhalten werden. Im Airline Development Board entwickeln der Konzernvorstand und die CEOs der Fluggesellschaften den Airline-Verbund kontinuierlich weiter.

Erklärtes Ziel von Lufthansa ist es, die Position als führender Verbund eigenständiger europäischer Qualitäts-Carrier auszubauen und Chancen zu nutzen, die sich aus der weltwirtschaftlichen Erholung ergeben. Sicherheit, Pünktlichkeit, Zuverlässigkeit und professioneller Service haben dabei Priorität. Alle Fluggesellschaften des Verbunds haben das Ziel, profitabel zu wachsen. Dies schafft die Voraussetzung für Investitionen in moderne Flotten, finanzielle Stabilität in einer volatilen Branche und sichere Arbeitsplätze mit attraktiven Entwicklungsperspektiven. Zugleich werden die Gesellschaften durch nachhaltiges Wirtschaften ihrer Verantwortung für den Erhalt natürlicher Ressourcen gerecht.

### Weiterer Ausbau der Marktstellung

Die Gründung und Weiterentwicklung des Airline-Verbunds folgt einer klaren Logik: Heimatmarkt der Lufthansa ist Europa, wobei Deutschland als größter Einzelmarkt der zentrale Standort ist. Wachstumspotenzial bieten hingegen die globalen Langstreckenmärkte. Um diese mit dem Heimatmarkt bestmöglich zu verbinden, gilt es, die Marktstellung im Heimatmarkt abzusichern und auszubauen. Denn mit einer Spitzenposition in Europa wird zum einen das Angebot für Kunden immer attraktiver, zum anderen steigt die Relevanz als Partner zur Erschließung außereuropäischer Wachstumsmärkte.

Die Multi-Hub-Strategie ermöglicht es, am jeweiligen Drehkreuz ein umfassendes Streckennetz anbieten zu können. Durch die Zubringerflüge aus dem europäischen Umland können Interkontinentalflüge zudem profitabler ausgelastet und das Angebot für die lokalen Kunden erweitert werden. Flankiert wird das Wachstum durch die kontinuierliche und nachhaltige Senkung der Stückkosten, beispielsweise durch die Modernisierung der Flotte und Steigerung ihrer Produktivität. Lufthansa kann in diesem Bereich von ihrer finanziell weitgehend unbelasteten Flotte und der damit verbundenen hohen Flexibilität im Kapazitäts- und Kostenmanagement in besonderem Maße profitieren.

### An Absatzmärkten ausgerichtete Netzstrategie

Lufthansa und die Verbund-Airlines verfolgen eine abgestimmte Netzstrategie in den verschiedenen Absatzmärkten. Sie basiert in Europa auf mehreren Drehkreuzen und Einzugsgebieten. Der Megahub Frankfurt deckt dabei ein umfassendes Angebot ab und maximiert dadurch das Umsteigeangebot. Daneben fokussieren sich die Drehkreuze München, Zürich, Wien, Brüssel und Düsseldorf überwiegend auf die lokale Nachfrage und bieten ein auf den jeweiligen Quellmarkt ausgerichtetes Streckennetz an. Zusätzlich werden in den wichtigen deutschen Einzugsgebieten Hamburg, Stuttgart und Berlin attraktive Kurz- und Mittelstreckenziele mit Direktflügen angeboten.

Daneben werden auch die Kooperationen und Allianzen ausgebaut. 2010 sind die brasilianische TAM sowie die griechische Aegean Airlines dem größten und erfolgreichsten globalen Airline-Bündnis Star Alliance beigetreten. 2011 werden sich Air India und Ethiopian Airlines sowie die lateinamerikanischen Fluggesellschaften Avianca (Kolumbien), TACA (El Salvador) und Copa Airlines (Panama) anschließen. Das Netz der Star Alliance umfasst derzeit 1.160 Ziele in 181 Ländern.

Ein wichtiger Ausbau des Streckennetzes nach Nordamerika wurde mit der Gründung des größten transatlantischen Joint Ventures Atlantic++ zwischen Lufthansa Passage und den Partnern Air Canada, Continental und United Airlines vollzogen. Die enge Kooperation umfasst den gesamten Verkehr zwischen Nordamerika und Europa sowie Afrika, dem Nahen Osten und dem indischen Subkontinent. Im Kern beläuft sich das gemeinsame

### Berichterstattung Passage Airline Gruppe

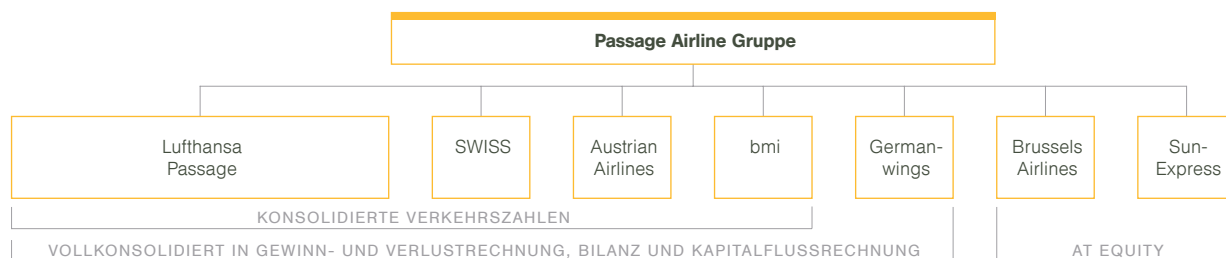

Angebot täglich auf rund 280 Transatlantikflügen zu 61 Destinationen in 23 Ländern an 15 Hubs. Atlantic++ hat einen Marktanteil von 29 Prozent bei einem Umsatzvolumen von über 7 Mrd. EUR.

In Asien konnte durch den Einsatz des Airbus A380 auf den Strecken nach Tokio und Peking die Kapazität ausgeweitet werden. Im Verkehrsgebiet Naher Osten/Afrika wurde die Angebotsstruktur durch eine verstärkte Direktbedienung verbessert und Pointe Noire als neue Destination in Westafrika aufgenommen. Auf dem afrikanischen Kontinent bleibt der Wachstumsfokus auf der Branche „Oil & Energy“. Das Destinationsportfolio in Südamerika konnte, in Zusammenarbeit mit dem Codeshare-Partner Avianca, durch die Aufnahme von Lufthansa Flügen nach Bogotá ausgebaut werden.

## Absatzmärkte und Wettbewerb

### Gewachsenes und balanciertes Netzwerk

Das regionale Exposure der Verkehrsströme ist stark gewachsen, hat sich dabei aber zugleich deutlich ausgewogener entwickelt als noch vor einigen Jahren.

Zu den Wettbewerbern zählen Air Berlin in Deutschland sowie in Europa neben Air France-KLM und British Airways auch No-Frills-Carrier, wie Ryanair und Easyjet. Im interkontinentalen Verkehr gehören amerikanische Fluggesellschaften, wie American Airlines und Delta Airlines, sowie die stark wachsenden Gesellschaften aus dem Nahen Osten und Asien zu den Hauptwettbewerbern. Mit ihrer Positionierung im Markt, ihrem Produkt- und Serviceangebot,

dem weltumspannenden Netzwerk und der Bündelung der Kräfte, wie im Joint Venture Atlantic++, ist das Geschäftsfeld jedoch für den globalen Wettbewerb gut positioniert.

## Vertrieb und Kunden

### Miles & More zählt mehr als 20 Mio. Teilnehmer

Im Rahmen der Verbundstrategie richten die Airlines ihre Vertriebsaufstellung an den Märkten aus, in denen sie tätig sind. Erläuterungen zur Kundenbasis und Vertriebsaufstellung der einzelnen Gesellschaften finden Sie daher ab [S. 85](#). Das übergreifende Kundenbindungsprogramm Miles & More ist auch im siebenzehnten Jahr seines Bestehens gewachsen. Mit nunmehr über 20 Mio. Teilnehmern und über 250 Kooperationspartnern konnte es seine Rolle als führendes europäisches Vielfliegerprogramm weiter ausbauen. Sehr positiv wurden von den Kunden die neu geschaffene Meilensammelfunktion auf allen Flügen von Germanwings, die verbesserten Konditionen auf bmi-Flügen sowie die neu eingeführten Social Marketing-Aktivitäten aufgenommen. 2011 soll die Internationalisierung von Miles & More in strategischen Märkten wie China und Indien mit neuen lokalen Partnerschaften vorangetrieben werden.

## Geschäftsverlauf

### Konjunkturelle Erholung und Einmaleffekte

Die im Jahr 2010 grundsätzlich positive konjunkturelle Entwicklung wurde durch mehrere Ereignisse, wie den Pilotenstreik, die Luftsperrungen und den strengen Winter, gedämpft. Allein durch

**Ziele Lufthansa und Verbund-Airlines\* und Anteil an den Verkehrserlösen in %**

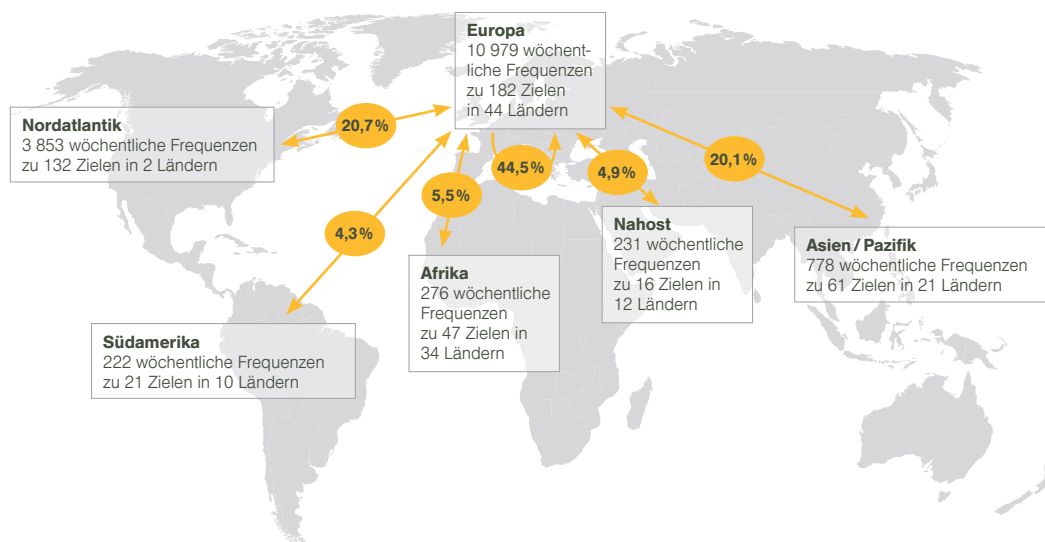

\* Frequenzen pro Woche, Lufthansa inkl. Codeshare.

Anteil an den Verkehrserlösen der Passage Airline Gruppe.

die Luftraumsperrungen verzeichnete die Passage Airline Gruppe einen Umsatz- und Ergebnisausfall in dreistelliger Millionenhöhe. In der zweiten Jahreshälfte setzte sich aber die konjunkturelle Erholung durch. Dabei wurden sowohl Premium-Passagiere zurückgewonnen als auch – vor allem in Europa – die Absatzmenge deutlich gesteigert. Im besonders stark anziehenden Langstreckenverkehr profitierte insbesondere Lufthansa Passage und baute ihre Marktanteile aus. Austrian Airlines und bmi verfolgen mit Nachdruck ihre Restrukturierungsprogramme. Gleichzeitig realisieren alle Airlines im Verbund wichtige Synergien durch Kooperationen und eine optimierte Netzabstimmung.

## Operative Entwicklung

### Nachfrageerholung und Konsolidierung

Die positive konjunkturelle Entwicklung und die Konsolidierung der neuen Gesellschaften führten zu einem deutlichen Anstieg von Absatz und Auslastung im Berichtsjahr. Die Passage Airline Gruppe (exklusive Germanwings) beförderte so insgesamt 91,2 Mio. Passagiere (+ 17,9 Prozent). Bereinigt um die Konsolidierungseffekte betrug der Anstieg 6,1 Prozent.

Das Angebot der Passage Airline Gruppe stieg im Berichtszeitraum um 13,3 Prozent, bereinigt um die Konsolidierungseffekte lediglich um 4,6 Prozent. Der Absatz konnte im selben Zeitraum um 15,2 Prozent gesteigert werden (bereinigt: + 7,1 Prozent), was bezogen auf den Sitzladefaktor einen Anstieg von 1,4 Prozentpunkten auf 79,3 Prozent bedeutet. Dieser positive Trend wurde im Wesentlichen durch die Entwicklung bei der Lufthansa Passage geprägt, siehe Kommentierung ab [S. 86](#).

Die Sonderereignisse zum Jahresbeginn konnten die positive Entwicklung der Verkehrserlöse nicht nachhaltig trüben. Durch die mit der wirtschaftlichen Erholung gestiegene Nachfrage im Premium-Segment erhöhten sich die Durchschnittserlöse gegenüber dem Vorjahr deutlich um insgesamt 8,4 Prozent. Dazu trug auch das vierte Quartal mit einem Anstieg von 6,6 Prozent gegenüber dem Vorjahr bei.

### Erlössteigerungen in allen Verkehrsgebieten

Die Betrachtung der einzelnen Verkehrsgebiete zeigt, dass die Erlöse in allen Regionen deutlich gesteigert werden konnten. Das Angebot in Europa wurde, vor allem aufgrund der Konsolidierung von Austrian Airlines und bmi, um 19,8 Prozent ausgeweitet (bereinigt: + 4,3 Prozent). Durch eine gleichzeitige Absatzsteigerung von 23,3 Prozent (bereinigt: + 7,3 Prozent) verbesserte sich der Sitzladefaktor um 2,0 Prozentpunkte auf 71,4 Prozent. Die Durchschnittserlöse lagen 3,6 Prozent unter Vorjahr. Die Verkehrserlöse kletterten hingegen um 18,9 Prozent auf 8,2 Mrd. EUR (bereinigt: + 4,7 Prozent).

Das Angebot in Nord- und Südamerika wurde um 7,4 Prozent (bereinigt: + 4,2 Prozent) erhöht. Durch eine Absatzsteigerung von 7,9 Prozent (bereinigt: + 4,9 Prozent) konnte das Angebot vollkommen im Markt abgesetzt und der Sitzladefaktor um 0,3 Prozentpunkte auf 85,0 Prozent gesteigert werden. Die Durchschnittserlöse stiegen dabei um 17,9 Prozent. Dies spiegelt sich auch in um 27,2 Prozent höheren Verkehrserlösen wider (bereinigt: + 24,2 Prozent).

Ebenfalls deutlich positiv entwickelte sich die Verkehrsregion Asien/Pazifik, in der das Angebot konsolidierungsbedingt um 7,7 Prozent ausgeweitet wurde (bereinigt: – 0,3 Prozent). Aufgrund eines um 11,7 Prozent erhöhten Absatzes (bereinigt: + 4,2 Prozent) stieg der Sitzladefaktor um 3,1 Prozentpunkte auf 84,9 Prozent. Ebenso erhöhten sich die Durchschnittserlöse um 17,6 Prozent. Die Verkehrserlöse stiegen um 31,4 Prozent (bereinigt: + 24,8 Prozent).

Im Verkehrsgebiet Nahost/Afrika wurde das Angebot im Zuge der Konsolidierung um 16,6 Prozent ausgebaut und der Absatz um 19,3 Prozent gesteigert. Der Sitzladefaktor konnte hierdurch um 1,7 Prozentpunkte auf 75,4 Prozent verbessert werden. Bereinigt um die Konsolidierungseffekte wuchs das Angebot um 6,3 Prozent und der Absatz stieg um 8,6 Prozent. Aufgrund einer Verbesserung der Durchschnittserlöse um 8,3 Prozent konnten die Verkehrserlöse um 29,3 Prozent zulegen (bereinigt: + 15,7 Prozent).

### Entwicklung der Verkehrsgebiete

Passage Airline Gruppe\*

|                      | Nettoverkehrserlöse<br>in Mio. € Außenumsatz |                  | Fluggäste<br>in Tsd. |                  | Angebotene Sitzkilometer<br>in Mio. |                  | Verkaufte Sitzkilometer<br>in Mio. |                  | Sitzladefaktor<br>in % |                   |
|----------------------|----------------------------------------------|------------------|----------------------|------------------|-------------------------------------|------------------|------------------------------------|------------------|------------------------|-------------------|
|                      | 2010                                         | Veränderung in % | 2010                 | Veränderung in % | 2010                                | Veränderung in % | 2010                               | Veränderung in % | 2010                   | Veränderung in P. |
| Europa               | 8 172                                        | 18,9             | 70 472               | 19,0             | 77 574                              | 19,8             | 55 400                             | 23,3             | 71,4                   | 2,0               |
| Amerika              | 4 594                                        | 27,2             | 8 415                | 7,5              | 72 960                              | 7,4              | 62 016                             | 7,9              | 85,0                   | 0,3               |
| Asien/Pazifik        | 3 698                                        | 31,4             | 5 817                | 11,3             | 53 380                              | 7,7              | 45 323                             | 11,7             | 84,9                   | 3,1               |
| Nahost/Afrika        | 1 920                                        | 29,3             | 5 257                | 22,8             | 27 941                              | 16,6             | 21 075                             | 19,3             | 75,4                   | 1,7               |
| <b>Linienverkehr</b> | <b>18 384</b>                                | <b>24,3</b>      | <b>89 961</b>        | <b>17,5</b>      | <b>231 855</b>                      | <b>12,4</b>      | <b>183 814</b>                     | <b>14,4</b>      | <b>79,3</b>            | <b>1,4</b>        |
| Charter              | 181                                          | 145,3            | 1 196                | 55,9             | 3 982                               | 97,2             | 3 186                              | 95,3             | 80,0                   | – 0,8             |
| <b>Gesamtverkehr</b> | <b>18 565</b>                                | <b>24,9</b>      | <b>91 157</b>        | <b>17,9</b>      | <b>235 837</b>                      | <b>13,3</b>      | <b>187 000</b>                     | <b>15,2</b>      | <b>79,3</b>            | <b>1,4</b>        |

\* Inkl. Lufthansa Passage, SWISS (ab 2010 inkl. Edelweiss Air), Austrian Airlines (ab September 2009) und British Midland (ab Juli 2009), ohne Germanwings.



## Umsatz- und Ergebnisentwicklung

### Der Umsatz steigt um rund ein Viertel

Aufgrund der positiven Geschäftsentwicklung und der Erweiterung des Konsolidierungskreises erhöhten sich die Verkehrserlöse der Passage Airline Gruppe gegenüber Vorjahr auf 19,2 Mrd. EUR (+24,3 Prozent). Bereinigt betrug der Anstieg 13,0 Prozent. Neben dem konsolidierungsbedingten Wachstum führten die konsolidierungskreisbereinigt um 5,5 Prozent gestiegene Absatzmenge, höhere Preise (+3,2 Prozent) und positive Währungseffekte von 4,3 Prozent ebenfalls zur Erlössteigerung. Der Umsatz kletterte insgesamt auf 20,9 Mrd. EUR (+24,5 Prozent, bereinigt: +13,3 Prozent).

**Umsatz Passage Airline Gruppe** in Mio. €

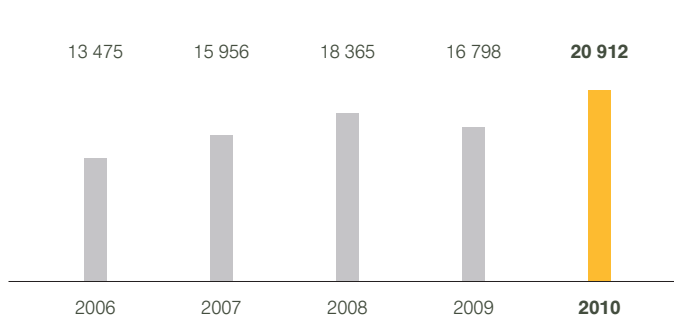

Die sonstigen operativen Erträge verminderten sich konsolidierungskreisbereinigt unter anderem aufgrund gesunkener Erträge für EDV-Vertriebssysteme (–38 Mio. EUR) sowie verringerter Erträge aus Schadensersatzleistungen (–27 Mio. EUR) um insgesamt 91 Mio. EUR auf 1,2 Mrd. EUR. Im Vorjahr waren hier unter anderem Ausgleichszahlungen für das von Boeing eingestellte Internetsystem FlyNet in Höhe von 29 Mio. EUR erfasst. Die operativen Gesamterlöse erhöhten sich um 22,3 Prozent auf 22,1 Mrd. EUR. Ohne die Einbeziehung von Austrian Airlines und bmi stiegen sie um 11,5 Prozent.

### Die Aufwendungen erhöhen sich um 19,8 Prozent

Die operativen Aufwendungen erhöhten sich im Vergleich zum Vorjahr um 19,8 Prozent auf 21,7 Mrd. EUR. Bereinigt nahmen sie um 8,4 Prozent zu. Ursache für den Anstieg war im Wesentlichen der deutlich erhöhte Materialaufwand von 13,3 Mrd. EUR (+21,5 Prozent, bereinigt: +9,8 Prozent), vor allem bedingt durch die um 1,4 Mrd. EUR oder 41,8 Prozent auf 4,8 Mrd. EUR erhöhten Treibstoffkosten (bereinigt: +29,7 Prozent). Zusätzlich zu den um 20,7 Prozent höheren Treibstoffpreisen (nach Sicherung) führten die Erweiterung des Konsolidierungskreises sowie der stärkere US-Dollar zu weiteren nennenswerten Aufwandserhöhungen von 12,1 Prozent beziehungsweise 7,2 Prozent. Die Mengenentwicklung wirkte sich mit +1,8 Prozent hingegen nur geringfügig auf den Treibstoffaufwand aus. Die Gebühren legten im Wesentlichen konsolidierungsbedingt sowie aufgrund gestiegener Abfertigungs- und Flugsicherungsgebühren um 22,0 Prozent auf 4,3 Mrd. EUR (bereinigt: +6,3 Prozent) zu. Die übrigen bezogenen

Leistungen stiegen ausschließlich aufgrund der Veränderung des Konsolidierungskreises um 3,5 Prozent auf 3,8 Mrd. EUR. Bereinigt entspricht dies einem Rückgang von 3,8 Prozent, der unter anderem auf geringeren bezogenen Technikleistungen (–3,6 Prozent) beruht.

### Aufwendungen Passage Airline Gruppe

|                                     | 2010          | 2009          | Veränderung | Veränd. konsolidierungskreisbereinigt |
|-------------------------------------|---------------|---------------|-------------|---------------------------------------|
|                                     | in Mio. €     | in Mio. €     | in %        | in %                                  |
| Materialaufwand                     | 13 250        | 10 904        | 21,5        | 9,8                                   |
| davon Treibstoff                    | 4 793         | 3 381         | 41,8        | 29,7                                  |
| davon Gebühren                      | 4 335         | 3 552         | 22,0        | 6,3                                   |
| davon Technikleistungen             | 1 869         | 1 790         | 4,4         | –3,6                                  |
| davon Operating Lease               | 247           | 281           | –12,1       | –26,7                                 |
| Personalaufwand                     | 3 829         | 3 330         | 15,0        | 3,9                                   |
| Abschreibungen                      | 1 261         | 1 032         | 22,2        | 10,4                                  |
| Sonstiger operativer Aufwand        | 3 310         | 2 805         | 18,0        | 7,3                                   |
| davon Agenturprovisionen            | 433           | 356           | 21,6        | 8,1                                   |
| davon Fremdpersonal                 | 539           | 499           | 8,0         | –0,4                                  |
| <b>Summe operative Aufwendungen</b> | <b>21 650</b> | <b>18 071</b> | <b>19,8</b> | <b>8,4</b>                            |

Während sich die durchschnittliche Mitarbeiterzahl im Geschäftsjahr um 9,4 Prozent auf 57.226 erhöhte, stieg der Personalaufwand um 15,0 Prozent auf 3,8 Mrd. EUR. Ohne die neuen Gesellschaften stieg der Personalaufwand bei einer um 1,9 Prozent reduzierten durchschnittlichen Mitarbeiterzahl um 3,9 Prozent an. Gründe hierfür waren höhere Zuführungen zu Pensionsrückstellungen, Aufwendungen für Ergebnisbeteiligungen sowie währungsbedingte Aufwandssteigerungen.

Die planmäßigen Abschreibungen wuchsen um 22,2 Prozent auf 1,3 Mrd. EUR. Der konsolidierungskreisbereinigte Anstieg von 10,4 Prozent resultierte im Wesentlichen aus den im vergangenen und laufenden Jahr neu zugegangenen Flugzeugen.

Die sonstigen operativen Aufwendungen stiegen um 18,0 Prozent auf 3,3 Mrd. EUR. Konsolidierungskreisbereinigt wuchsen sie um 7,3 Prozent. Dies ist auf höhere Kursverluste (+216 Mio. EUR) sowie Agentur- und Kreditkartenprovisionen (+62 Mio. EUR) zurückzuführen. Gegenläufig wirkten sich verminderte Aufwendungen für EDV-Vertriebssysteme (–36 Mio. EUR) und Aufwendungen für Werbung und Verkaufsförderung (–14 Mio. EUR) aus.

### Das operative Ergebnis verbessert sich

Das operative Ergebnis des Geschäftsfelds verbesserte sich aufgrund der guten Geschäftsentwicklung deutlich gegenüber Vorjahr. Trotz erheblicher Sonderbelastungen erzielte die Passage Airline Gruppe 2010 einen operativen Gewinn von 436 Mio. EUR, nachdem sie im Vorjahr ein knapp negatives Ergebnis von –8 Mio. EUR ausgewiesen hatte.

#### Operatives Ergebnis Passage Airline Gruppe in Mio. €

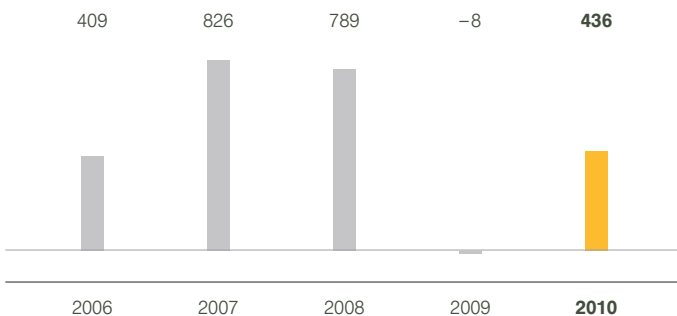

Die Ergebnisbeiträge von Austrian Airlines und bmi belasteten das operative Ergebnis mit insgesamt 211 Mio. EUR. Im Vorjahr hatten sich aus der erstmaligen Einbeziehung von bmi und Austrian Airlines – einschließlich des erfolgswirksam aufzulösenden Badwillis – Ergebnisbelastungen von insgesamt 23 Mio. EUR ergeben.

Die übrigen Segmenterträge kletterten insbesondere aufgrund höherer Rückstellungsaufhebungen (+ 55 Mio. EUR) und Buchgewinne (+25 Mio. EUR) um 61 Mio. EUR auf 244 Mio. EUR. Die übrigen Segmentaufwendungen beliefen sich auf 98 Mio. EUR. Außerplanmäßige Abschreibungen (49 Mio. EUR) entfielen mit insgesamt 47 Mio. EUR auf fünf Boeing B737-500, zwei Airbus A330-200, einen Airbus A321-200 und 18 Canadair Regional Jet 200. Die betroffenen Flugzeuge sind teilweise bereits stillgelegt; andere werden aufgrund der aktuellen Unternehmensplanungen bis Ende 2011 sukzessive freigestellt beziehungsweise verkauft. Darüber hinaus sind in den übrigen Segmentaufwendungen Wertminderungen auf Flugzeuge und reparaturfähige Flugzeugersatzteile in Höhe von 16 Mio. EUR erfasst, die in der Bilanz unter zum Verkauf stehenden Vermögenswerten ausgewiesen werden.

Das Ergebnis aus der Equity-Bewertung von – 10 Mio. EUR (Vorjahr: – 9 Mio. EUR) betraf insbesondere SunExpress (– 9 Mio. EUR) und SN Airholding (– 2 Mio. EUR). Das Segmentergebnis verbesserte sich insgesamt um 494 Mio. EUR auf 572 Mio. EUR.

#### Die Segmentinvestitionen erhöhen sich um 7,9 Prozent

Die Segmentinvestitionen stiegen um 149 Mio. EUR auf 2,0 Mrd. EUR. Sie betrafen im Wesentlichen Investitionen in Flugzeuge, siehe [S. 74](#).

#### Die Mehrperiodenübersicht zeigt erhebliche Volatilität

In der Mehrperiodenübersicht sind die Ertragskraft des Geschäftsfelds, aber auch die konjunkturellen Einflüsse auf die Ergebnisentwicklung deutlich zu erkennen. In den Jahren 2005 bis 2007 hatte sich die Ertragskraft stetig verbessert. Auch 2008 wies das Geschäftsfeld trotz der bereits belastenden Finanzkrise in vielen Regionen noch ein hohes positives Ergebnis aus.

Anschließend schlugen sich jedoch die immensen Auswirkungen der weltweiten Wirtschaftskrise im Geschäftsjahr 2009 auch bei der Passage Airline Gruppe nieder. Das Geschäftsfeld erholte sich jedoch rasch und wies bereits im ersten Jahr nach der Krise wieder ein ordentliches operatives Ergebnis aus.

## Ausblick

#### Weitere Erholung in Sicht

Für 2011 wird von einem normalisierten Wirtschaftswachstum mit entsprechend positiver Nachfrageentwicklung im Passagierverkehr ausgegangen. Von dieser Erholung werden die Fluggesellschaften besonders profitieren, die nicht nur in Europa, sondern auch im Langstreckenverkehr gut aufgestellt sind und über ein breites Netzwerk und kundenorientierte Produkte die Kunden an sich binden können. Gleichzeitig muss jedoch von einem weiteren Anstieg des Ölpreises ausgegangen werden, der in Extremszenarien auch zur Überschreitung der bisherigen Höchstwerte führen kann. Seine Auswirkungen auf die Ertragslage werden durch die systematische Absicherungspolitik des Konzerns reduziert. Andere Sonderbelastungen aus dem Jahr 2010 sollten nicht zu vergleichbaren Effekten führen. Allerdings haben die deutsche und die österreichische Bundesregierung mit der Einführung und Ankündigung einer Luftverkehrssteuer eine neue Belastung besonderer Art eingeführt, die sich ab 2011 nachteilig auf die Nachfrage der betroffenen Fluggesellschaften auswirken kann. Über ihre Wirkung kann noch keine belastbare Aussage getroffen werden. Weitere Risiken für die Geschäftsentwicklung liegen in den wachsenden Kapazitäten der Golf-Carrier sowie in einem sich weiter intensivierenden Wettbewerb mit den No-Frills-Carriern.

Dem anhaltenden Preisdruck begegnen alle Gesellschaften des Airline-Verbunds mit auf sie zugeschnittenen Ergebnissicherungsprogrammen, die auch 2011 weiter vorangetrieben werden. Die im Rahmen der Stückkostensenkung verfolgten Maßnahmen tragen dabei wesentlich zur Angebotsentwicklung des Geschäftsfelds bei. Die Restrukturierungen von Austrian Airlines und bmi werden 2011 mit Vehemenz fortgeführt.

Alle Airlines werden ihre Stellung in ihren Märkten weiter stärken und dabei von ihren eigenen Maßnahmen zur Effizienzsteigerung ebenso profitieren wie von der vertieften Zusammenarbeit im Airline-Verbund. Diese strukturellen Entwicklungen werden das Geschäftsfeld und seine Profitabilität absehbar nachhaltig stärken. So wird für die Passage Airline Gruppe auch 2011 eine Steigerung des Umsatzes und des operativen Ergebnisses erwartet. Auf Basis der aktuellen Prognosen für die weitere Wirtschaftsentwicklung soll dieser Trend auch 2012 fortgesetzt werden. Besonders geprägt wird die Ertragsentwicklung des Geschäftsfelds von Lufthansa Passage als der mit Abstand größten Airline im Verbund.

## Lufthansa Passage

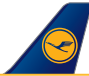

### Lufthansa Passage profitiert von der Nachfrageerholung

Lufthansa Passage versteht sich als Qualitäts-Carrier und verfolgt die Strategie eines Vollsortimenters. Das Streckennetz deckt 206 Destinationen in 82 Ländern ab. Ihre Hauptdrehkreuze befinden sich in Frankfurt und München. Hinzu kommen ein lokales Drehkreuz in Düsseldorf und europaweite Direktverkehre. Die Leistungs- und Wirtschaftsdaten der Lufthansa Passage beinhalten die vollkonsolidierten Produktionsgesellschaften im Regionalverkehr (zum Beispiel Lufthansa CityLine, Air Dolomiti) und Lufthansa Italia.

Die weltweite Konjunkturerholung und die Stärke der deutschen Exportwirtschaft prägten 2010 den Geschäftsverlauf der Lufthansa Passage. Störungen durch den Pilotenstreik und die behördlichen Luftraumsperrungen wirkten der positiven Tendenz entgegen. Insgesamt brachte die verbesserte wirtschaftliche Lage jedoch eine deutlich positive Nachfrageentwicklung mit sich. Aufgrund kundenorientierter Angebote, der hohen Marktdurchdringung im Firmen- und Privatkundensegment sowie der Loyalitätsprogramme im Firmenkundensegment profitierte Lufthansa Passage überdurchschnittlich von der Nachfrageerholung. Während im Interkontinentalverkehr eine starke Erholung der Premium-Nachfrage und damit der Durchschnittserlöse zu verzeichnen war, blieb das Preisniveau im Kontinentalbereich aufgrund strukturell veränderter Kundenpräferenzen auf dem niedrigen Niveau des Krisenjahres 2009.

### Wichtige Fortschritte bei Climb 2011 erzielt

Lufthansa Passage hatte im Sommer 2009 im Zuge der weltweiten konjunkturellen Schwäche und der sich langfristig verändernden Marktgegebenheiten das Kostensenkungsprogramm Climb 2011 initiiert. Die Maßnahmen der darin enthaltenen Fokusthemen sollen das Ergebnis jährlich um insgesamt 1 Mrd. EUR verbessern. 2010 leisteten die etablierten Projekte einen Ergebnisbeitrag von 230 Mio. EUR. Ergänzend wurde 2010 das Projekt „Lean Management“ initiiert.

#### Climb 2011: Fokusthemen mit klarem Schwerpunkt auf Kosteneinsparungen

|                       |                |
|-----------------------|----------------|
| Flottenstruktur       | Lieferanten    |
| Kapazitäten           | Administration |
| Personalproduktivität | Erlöse         |

#### 1. Flottenstruktur und Kapazitäten:

Der Ausstieg aus dem 50-Sitzer-Segment und der Wechsel auf effizientere Flugzeugtypen im Regionalsegment, wie den Bombardier CRJ900 und den Embraer 195, wird bis zum Sommer 2011 abgeschlossen.

Im dezentralen Verkehr wurde durch den Flotten-Rollover seit Oktober 2009 die durchschnittliche Flugzeuggröße von 76 auf 91 Sitze gesteigert. Dadurch ergaben sich signifikante Stückkostenverbesserungen. Die zusätzlichen Sitze konnten 2010 vollständig vermarktet werden. Dies belegt den Vertriebs Erfolg, dass Lufthansa als Qualitäts-Airline auch im preissensiblen Kundensegment als relevanter und erfolgreicher Anbieter wahrgenommen wird.

- Projekt EU-DIRection: Im dezentralen Verkehr wurden eine veränderte Marktbearbeitung, ein angepasstes Kapazitätsmanagement und ein striktes Kostenmanagement identifiziert, um eine Reduktion der Stückkosten um 40 Prozent zu erreichen. Durch die neue Vermarktungsstrategie konnten ein starkes Passagierwachstum erzielt und die Attraktivität in Europa gesteigert werden.
- Projekt Zukunft Regional: Im Rahmen der Neuausrichtung der Regionalfluggesellschaften der Lufthansa Passage (CityLine, Eurowings und Air Dolomiti) erfolgt eine nachhaltige Stückkostensenkung durch das Ausschöpfen von Synergieeffekten und eine Optimierung der Produktions- und Wartungsstandorte.

#### 2. Personalproduktivität:

Ziel ist eine Senkung der Personalstückkosten um 10 Prozent. Durch die Tarifabschlüsse konnten hierzu im Jahr 2010 wichtige Beiträge erzielt werden. Die Nullrunden und insbesondere die dynamische Gestaltung der 95-Sitzer-Regelung im Regionalsegment sind von zentraler Bedeutung, um dort langfristig die Wettbewerbsfähigkeit zu erhalten.

#### 3. Lieferanten:

Gemeinsame Projekte zur Prozessoptimierung und Kostensenkung mit externen und internen Lieferanten befinden sich in Umsetzung. Erste Erfolge wurden hierbei durch die Senkung der Vertriebskosten und Abfertigungsentgelte im europäischen Ausland erzielt. Mit LSG Sky Chefs wurden neue Verträge vereinbart, die über die nächsten drei Jahre deutliche Kostenentlastungen ermöglichen. Auch mit Lufthansa Technik werden im Wesentlichen durch die Schaffung bedarfsgerechter Lieferbeziehungen an den einzelnen Drehkreuzen Einsparungen erzielt.

#### 4. Administration:

Durch den Abbau von 400 Stellen (ca. 20 Prozent) im administrativen Bereich bis Ende 2011 soll die Fixkostenbasis weiter verbessert werden. Bis Ende 2010 wurden dafür knapp 300 Verträge, beispielsweise durch Abfindungen oder im Rahmen von Altersteilzeit, auf freiwilliger Basis sozialverträglich abgeschlossen.

#### 5. Erlöse:

Durch die Überarbeitung des Kabinenlayouts und die damit verbundene Erhöhung der Sitzplatzkapazität durch den Einbau eines neuen Sitzmodells für die Europaflotte werden pro Jahr Zusatzerlöse von bis zu 276 Mio. EUR erwartet. Im Dezember 2010 wurde das erste umgerüstete Flugzeug der Öffentlichkeit vorgestellt, bis Ende 2011 soll die gesamte Kontinentalflotte umgerüstet werden.

### Der Ausbau der Drehkreuze wird weiter vorangetrieben

Am Drehkreuz Frankfurt hat Lufthansa Passage ihre erfolgreiche Systempartnerschaft mit Fraport fortgesetzt. Neben dem Richtfest für den im Bau befindlichen Flugsteig A-Plus wurden 2010 wesentliche kommerzielle Abkommen, wie etwa der Einkauf von Bodenabfertigungsleistungen, partnerschaftlich verhandelt. Die daraus resultierende langfristige Planungssicherheit schafft eine solide Basis für das zukünftige Wachstum am Standort Frankfurt.

Mit 8,9 Prozent Passagierzuwachs war der Hub München für Lufthansa Passage 2010 der stärkste Wachstumstreiber. Der Flughafen gewann zum fünften Mal seit 2005 den Titel „Europas bester Airport“. Die Vorplanungen zur Erweiterung des Terminals 2 um einen Satelliten-Terminal, dessen Eröffnung für 2015 geplant ist, konnten gemeinsam mit der Flughafengesellschaft München abgeschlossen und eine langfristige Vereinbarung zum gemeinschaftlichen Betrieb des Terminals 2 getroffen werden. Das Streckennetz des Hubs München wurde 2010 mit dem Fokus auf eine verbesserte Rentabilität um vier Langstrecken-destinationen erweitert.

Der dezentrale Punkt-zu-Punkt-Verkehr außerhalb der Drehkreuze steht unter besonderem Wettbewerbsdruck. Die im Rahmen von Climb 2011 getroffenen Maßnahmen zeigten 2010 bereits erste Wirkung. Durch die Stilllegung aller Turbo-Prop-Flugzeuge und den sukzessiven Ersatz von 50- und 70-Sitzern durch größere Flugzeuge wie Bombardier CRJ900, Embraer 195 und Airbus A320 konnte eine Stückkostensenkung von 14 Prozent erzielt werden. Erfolgreich entwickelte sich der Interkontinentalverkehr ab Düsseldorf. Er eroberte seit der Umstellung auf den Airbus A330 die Marktführerschaft im Ruhrgebiet nach Nordamerika zurück.

Lufthansa Italia hat im zweiten Jahr ihres Bestehens mit neun Airbus A319 rund 1,2 Mio. Passagiere zu 15 Destinationen in Italien und Europa befördert. Zum Winter 2010/2011 wurde Prag neu in den Flugplan aufgenommen. Im Zuge der Restrukturierung des Italien-Geschäfts wird Lufthansa Italia zukünftig gemeinsam mit Air Dolomiti ihre Kräfte bündeln, um dem intensiven Wettbewerb in Italien noch besser begegnen zu können.

### Deutlich verbesserte Verkehrs- und Ergebnisentwicklung

Mit 58,8 Mio. Fluggästen verzeichnete Lufthansa Passage einen Passagierzuwachs von 5,9 Prozent. Das Angebot wurde um 3,1 Prozent ausgeweitet, bei gleichzeitiger Reduzierung der Flüge um 2,9 Prozent. Hierin spiegelt sich die Restrukturierung der Europaflotte wider. Der Absatz kletterte um 5,4 Prozent und führte zu einer Steigerung des Sitzladefaktors auf 79,4 Prozent (+ 1,7 Prozentpunkte). Bei einer Erhöhung der Durchschnittserlöse um 7,6 Prozent erreichte Lufthansa Passage im Berichtsjahr einen Anstieg der Verkehrserlöse um 13,4 Prozent auf 12,9 Mrd. EUR.

Insgesamt stiegen die Umsatzerlöse auf 14,0 Mrd. EUR (+13,4 Prozent). Trotz der zahlreichen Sonderbelastungen und des wieder ansteigenden Ölpreises konnte Lufthansa Passage bereits ein Jahr nach der Finanz- und Wirtschaftskrise das operative Ergebnis um 489 Mio. EUR auf einen Gewinn von 382 Mio. EUR steigern.

### Lufthansa Kunden profitieren von innovativen Produkten

Trotz nachhaltiger Kostensenkungspläne investiert Lufthansa Passage kontinuierlich in den Ausbau ihres Bord- und Bodenprodukts. So bietet sie den Kunden mit der Wiedereinführung des Systems FlyNet seit Dezember 2010 die volle Kommunikationsfreiheit des Internets über den Wolken und übernimmt wieder ihre weltweite Führungsrolle im Bereich „Inflight Connectivity“.

Die First Class zeigte Mitte 2010 im Rahmen der Einführung des Airbus A380 erstmalig ihr neues Gesicht. Im Zuge der Modernisierung wurde das gesamte Kabinenprodukt, wie das Sitzkonzept, die Gestaltung von Kabine und Waschräumen und das Unterhaltungsangebot, aufgewertet. Auch die Economy Class wurde hier weiterentwickelt und verfügt nun über persönliche Bildschirme mit umfassendem Entertainment-Programm. Künftig wird die komplette Airbus-Flotte mit der neuen First Class ausgestattet sein. Bereits seit März 2010 verfügt die Airbus-Flotte über persönliche Bildschirme in der Economy Class. 2011 werden weitere Boeing 747-400 mit einer neuen First Class und der neuen Economy Class ausgestattet.

Auch das Bodenprodukt entwickelt sich weiter. In Frankfurt wurde die größte Senator Lounge mit dem ersten integrierten Jet Friends-Bereich für Kinder eröffnet. Zusätzlich wird das Lounge-Angebot durch zwei Sports Corners für sportbegeisterte Vielflieger ergänzt. In München wurde die Zahl der Senator Lounges verdoppelt und der erste Lufthansa Indoor-Biergarten mit Alpenpanorama eröffnet.

**Premium-Anteil an Interkontinental-Verkehrserlösen Lufthansa Passage**  
in %

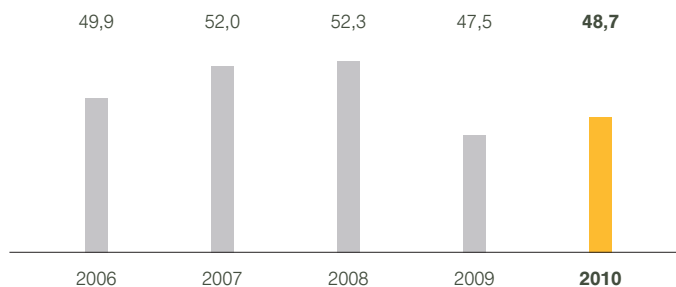

Dieser Kundenfokus wird honoriert: Nach den Auszeichnungen als „Beste Business Class auf innerdeutschen und europäischen Flügen“ sowie „Beste Airline-Webseite für Geschäftsreisende“ durch die Leser des Geschäftsreisemagazins Business Traveller Deutschland erhielt Lufthansa 2010 auch den „Skytrax World Airline Award“ als beste Fluggesellschaft Europas.

### Die Vertriebsstrategie baut auf vier Eckpfeiler

Vier Eckpfeiler stützen die Vermarktungsstrategie der Lufthansa Passage 2010: Fokus auf das Firmenkundenmanagement, systematischer Ausbau hochwertiger Marktsegmente, fortgesetzte Erschließung volumenstarker Privatreisenachfrage in Wachstumsmärkten wie den USA, China und Indien sowie Realisierung von Vertriebs synergien innerhalb des Verbunds.

Im Firmenkundensegment konnte der Erlös über vielfältige Vermarktungs- und Kundengewinnungsmaßnahmen erfolgreich gesteigert werden. Dabei kann Lufthansa auf ein sehr ausgewogenes Branchenportfolio in den Firmenkundenbeziehungen blicken. Der Umsatz mit Firmenkunden wuchs 2010 um 12 Prozent, getrieben durch starkes Wachstum in Asien und Nordamerika sowie einen höheren Buchungsanteil in der Business- und First-Class. Der Anteil der Business- und First-Class-Erlöse an den Verkehrserlösen lag mit rund 40 Prozent deutlich über dem Krisenniveau. Im Langstreckenverkehr stieg die Passagierzahl im Jahr 2010 insgesamt um 5 Prozent; die Zahl der Premium-Passagiere stieg sogar um 12 Prozent im Vergleich zum Vorjahr. Rund 49 Prozent der Verkehrserlöse im Langstreckenverkehr werden von den Premium-Passagieren generiert, die 18 Prozent der Gesamtpassagiere darstellen.

Daneben wurde der bereits 2009 gesetzte Fokus auf volumenstarke Vertriebskanäle weiter verstärkt. So stieg der Online-Ticketabsatz durch gezielte Vermarktungsmaßnahmen deutlich auf rund 26 Prozent an.

### Branchenzusammensetzung Firmenkunden der Lufthansa Passage in %

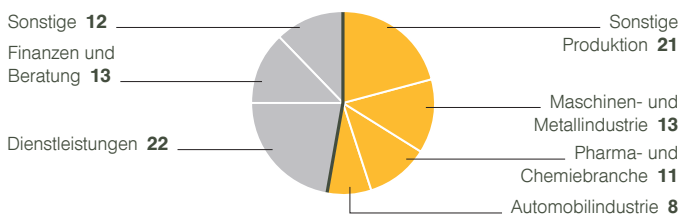

### Organisationsstruktur des Lufthansa Passagevorstands (seit 2011)

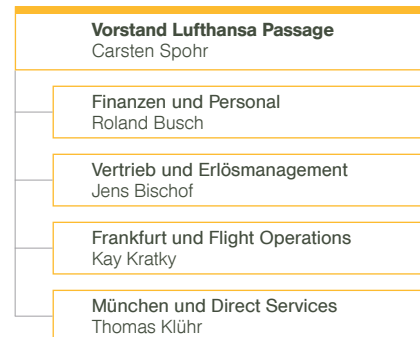

### Lufthansa Passage ordnet ihre Organisationsstruktur neu

Nachdem zum 1. Januar 2011 Carsten Spohr den Vorstandsvorsitz der Lufthansa Passage von Christoph Franz übernommen hat, wurde mit Wirkung zum 1. April 2011 auch die Organisationsstruktur an das veränderte Marktumfeld angepasst. Mit ihr soll eine stärkere Fokussierung auf Kunden und Wettbewerb erreicht sowie die internen Entscheidungs- und Managementprozesse beschleunigt werden. Mit der neuen Organisation setzt Lufthansa Passage gleichzeitig ihre Strategie der Divisionalisierung fort.

### Ausblick Lufthansa Passage

Die ergriffenen Initiativen und die positive Ergebnisentwicklung sollen weiter fortgesetzt werden. So wird für 2011 eine weitere Verbesserung des Umsatzes und operativen Ergebnisses erwartet. Die Maßnahmen zur Senkung der Stückkosten und die Zusammenarbeit mit den Verbund-Airlines werden die Position der Lufthansa Passage im Europa-Verkehr nachhaltig stärken. Auch Climb 2011 wird unverändert fortgeführt, das volle Potenzial des insgesamt 1 Mrd. EUR schweren Programms wird 2012 in den wirtschaftlichen Kennziffern sichtbar werden. Für 2011 ist ein Ergebnisbeitrag von mindestens 350 Mio. EUR vorgesehen. Inwieweit eine Kompensation der steigenden Treibstoffkosten sowie die Weiterleitung der ab 2011 eingeführten Luftverkehrsteuer durch Zuschläge an die Passagiere möglich sein wird, kann die Ertragsentwicklung maßgeblich beeinflussen. Dies gilt auch für den Verlauf und die Ergebnisse der 2011 wieder anstehenden Tarifgespräche, beginnend mit der Ende März auslaufenden Tarifvereinbarung für das Cockpit-Personal.

Eine besondere Rolle für die Kostensenkung wie für das Wachstum trägt die laufende Modernisierung der Flotte. 31 Flugzeuge sind 2011 zur Auslieferung an die Lufthansa Passage vorgesehen, darunter auch vier weitere Airbus A380. Die Entwicklung der Drehkreuze bietet weiteres Potenzial. Mit der für Ende 2011 geplanten Eröffnung der neuen Landebahn in Frankfurt und dem vereinbarten Ausbau des Satelliten-Terminals in München verfügt Lufthansa im europäischen Wettbewerb über einzigartige Entwicklungsperspektiven.



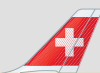

## SWISS\*

|                        |        | 2010   | Veränderung<br>in % |
|------------------------|--------|--------|---------------------|
| Umsatz                 | Mio. € | 3 459  | 24,9                |
| Operatives Ergebnis    | Mio. € | 298    | 220,4               |
| EBITDA                 | Mio. € | 531    | 90,9                |
| Fluggäste              | Tsd.   | 15 153 | 6,8                 |
| Mitarbeiter zum 31.12. | Anzahl | 7 640  | 6,2                 |

\* Weitere Informationen zur SWISS unter [www.swiss.com](http://www.swiss.com).

### SWISS blickt auf ein erfolgreiches Jahr 2010 zurück

Swiss International Air Lines (SWISS) blickt auf ein sehr erfolgreiches Geschäftsjahr 2010. Im Winterflugplan 2010/2011 bedient sie von ihrem Drehkreuz Zürich und den Flughäfen Basel, Genf und Lugano 72 Destinationen in 39 Ländern. Mit einem modernen Produkt positioniert sie sich dabei durchgängig in allen drei Klassen als Qualitäts-Airline und Premium-Marke und verkörpert als nationale Fluggesellschaft der Schweiz und Mitglied der Star Alliance insbesondere die Markenwerte persönliche Betreuung, höchste Qualität, Zuverlässigkeit und Schweizer Gastfreundschaft. Zur Zielgruppe von SWISS gehören vor allem Geschäftsreisende, aber auch im Privatreisesegment ist sie stark vertreten. In diesem Segment wird sie ergänzt um die Ferienfluggesellschaft Edelweiss Air, die in den Zahlen der SWISS Gruppe ebenfalls konsolidiert ist. Im März 2010 feierte SWISS das fünfjährige Jubiläum des erfolgreichen Zusammengehens mit der Lufthansa Gruppe als weitgehend eigenständige Airline. Seit 2005 konnte SWISS die jährliche Passagierzahl um 50 Prozent steigern und rund 1.000 neue Mitarbeiter einstellen.

### Starke Absatzentwicklung auf dem Heimatmarkt

Maßgeblich für den Erfolg von SWISS sind vor allem das effektive Kostenmanagement, aber auch die starke Nachfrage und der Aufwärtstrend im Interkontinental- und Frachtgeschäft sowie der gute Absatz im Heimatmarkt Schweiz. Vor allem im Premium-Segment der Langstrecke war eine erfreuliche Buchungszunahme zu beobachten. Im Europaverkehr bleiben die Durchschnittserlöse hingegen stark unter Druck. SWISS setzt daher nach wie vor auf konsequente Kostendisziplin und Flexibilität, um auf Nachfrageschwankungen rasch reagieren zu können.

Im Oktober wurde der 100-millionste SWISS Passagier seit der Firmengründung im Frühjahr 2002 gezählt. 2010 beförderte SWISS (ohne Edelweiss Air) mehr als 14 Mio. Passagiere – ein Rekordwert in der Firmengeschichte. Die Kapazitäten wurden während des Berichtsjahres flexibel, punktuell und nachfragegerecht angepasst. Insgesamt wurden sie gegenüber 2009 um 4,4 Prozent erhöht. Die Flüge waren mit durchschnittlich 82,3 Prozent besser ausgelastet als im Vorjahr – ein auch im Vergleich mit der Passage Airline Gruppe und im Branchenvergleich hoher Wert.

Seit Mitte 2010 bedient SWISS von Zürich aus mit San Francisco eine neue Langstreckendestination und verzeichnet auf dieser Strecke seit dem ersten Monat eine hohe Auslastung. Darüber hinaus fliegt SWISS seit Anfang 2010 sechsmal täglich von Genf aus nach London-Heathrow. Im Dezember wurde die Strecke Genf–Madrid neu eröffnet. Zudem wurden ab Zürich und Genf die Frequenzen zu weiteren Zielen aufgestockt. Damit wurde in Genf in den letzten fünf Jahren das Angebot verdoppelt. Aus Basel bietet SWISS in Kooperation mit bmi neue Strecken nach London-Heathrow sowie nach Kopenhagen und Rom an. Die Kapazitäten aus Basel werden hierdurch um rund 70 Prozent gesteigert.

### Veränderungen im Verwaltungsrat

Im September verlor der SWISS Verwaltungsrat seinen langjährigen und geschätzten Präsidenten Dr. Rolf Jetzer, der mit 59 Jahren unerwartet verstarb. Im November wurde daraufhin Dr. Bruno Gehrig, Präsident der Swiss Luftfahrtstiftung, zum neuen Präsidenten des Verwaltungsrats berufen.

### SWISS baut ihre Flotte weiter aus und investiert in ihr Produkt

SWISS engagiert sich auf verschiedenen Ebenen für den sorgsamen Umgang mit Ressourcen. So senkte sie den spezifischen Treibstoffverbrauch in den letzten fünf Jahren kontinuierlich. Mit Investitionen in den technologischen Fortschritt wird dieser Kurs durch die Flottenerneuerung und -erweiterung weiter vorangetrieben. Im Rahmen dieses Flottenprogramms erwartet SWISS in den kommenden Jahren die Auslieferung von sieben Airbus A320-300 und fünf Airbus A320. Ab 2014 wird sie ihre Avro-RJ Regionalflotte durch umweltfreundlichere und deutlich leisere Flugzeuge der Bombardier C-Serie vollständig ersetzen. Insgesamt hat SWISS somit 42 Flugzeuge auf der Bestellliste.

Darüber hinaus investiert SWISS bis Mitte 2011 in ein durchgängiges und modernes Dreiklassen-Produkt ihrer Langstreckenflotte. Neben den Investitionen in die Business- und First-Class hat das Unternehmen 2010 auch in die Economy Class investiert. Der unverminderte Fokus auf ein hochwertiges Produkt zahlt sich aus: Im ersten Halbjahr 2010 erhielt SWISS mehrere Auszeichnungen, darunter den „Skytrax 2010 World Airline Award“ für „Staff Service Excellence“ in Europa. Anfang 2011 wurde SWISS von den Lesern des Magazins Business Traveller zur besten Fluggesellschaft Europas gewählt und für das beste Business Class-Angebot auf den Strecken nach Nord- und Südamerika ausgezeichnet.

### Der nachhaltige Wachstumskurs wird konsequent weiterverfolgt

Nach einem schwierigen Start entwickelte sich das Geschäftsjahr 2010 äußerst positiv. SWISS erzielte einen Umsatz von 3,5 Mrd. EUR (+ 24,9 Prozent) und einen operativen Gewinn von 298 Mio. EUR (Vorjahr: 93 Mio. EUR). SWISS will auch 2011 eine moderate Ergebnisverbesserung erreichen und wird den eingeschlagenen nachhaltigen Wachstumskurs konsequent weiterverfolgen.

## Austrian Airlines

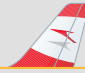

### Austrian Airlines<sup>1) 2)</sup>

|                        |        | 2010   | Veränderung<br>in % |
|------------------------|--------|--------|---------------------|
| Umsatz                 | Mio. € | 2 033  | –                   |
| Operatives Ergebnis    | Mio. € | –66    | –                   |
| EBITDA                 | Mio. € | 169    | –                   |
| Fluggäste              | Tsd.   | 10 895 | –                   |
| Mitarbeiter zum 31.12. | Anzahl | 6 943  | –                   |

<sup>1)</sup> Weitere Informationen zu Austrian Airlines unter [www.aua.com](http://www.aua.com).

<sup>2)</sup> Austrian Airlines wird seit dem 3. September 2009 vollkonsolidiert.

### Drei Fluggesellschaften mit Heimatmarkt Österreich

Mit Austrian Airlines, Lauda Air und Tyrolean Airways umfasst die Austrian Airlines AG drei Fluggesellschaften. Neben dem Heimatmarkt Österreich, in dem die Gesellschaft als umsatzstärkste Fluggesellschaft Marktführerin ist, hat sie sich erfolgreich auf die Wachstumsregionen Zentral- und Osteuropa sowie den Nahen Osten spezialisiert. Insgesamt betreibt Austrian Airlines ein weltweites Streckennetz mit mehr als 130 Flugzielen, das schrittweise ausgebaut wird. Nach der erwarteten Rückkehr in die Gewinnzone wird der Fokus auf profitables Wachstum gelegt werden. Ab Sommer 2011 werden zwei Airbus A320 die Kontinentalflotte verstärken.

Im Rahmen der neu etablierten zentralen Vertriebssteuerung bei Austrian Airlines wurde der Ausbau des Eigenvertriebs insbesondere über das Internet und durch gezielte Vermarktungsaktionen vorangetrieben. Durch die infolge der Integration in den Lufthansa Konzern größere Präsenz in allen relevanten Vertriebskanälen verbesserte sich auch die Kundenzufriedenheit. Die Fokussierung auf krisenresistente Marktsegmente trug darüber hinaus zum Passagierwachstum bei. Mit der Einführung der Verbundvertriebsstrategie und dem gemeinsamen Corporate Contract Management innerhalb des Lufthansa Verbunds verbesserten sich die Umsätze auch im Firmenkundenbereich.

### Erste Erfolge aus Restrukturierung und Synergien erzielt

Das Geschäftsjahr 2010 war durch die Sanierung und die Integration von Austrian Airlines in den Lufthansa Konzern geprägt. In deren Folge sank die Kostenbasis um 250 Mio. EUR, die internen Prozesse wurden verbessert und der Mitarbeiterstand von 7.600 Vollzeitstellen im Jahr 2008 auf rund 6.000 Stellen reduziert. Schritt für Schritt werden zudem Einsparungen durch Verhandlungen mit Lieferanten realisiert. Für die Restrukturierung ist insbesondere das Programm „Austrian Next Generation“ wichtig, das auf drei Säulen beruht: Senkung der Kostenbasis, Einführung einer neuen, aktiven Marktstrategie und Nutzung von Synergien im Lufthansa Verbund.

Mit den Maßnahmen zur Kostensenkung bringt Austrian Airlines ihre Kosten auf ein konkurrenzfähiges Niveau; durch die neue Marktstrategie soll die Zahl der Passagiere um 1 Mio. Passagiere pro Jahr gesteigert werden. Synergien werden bereits intensiv durch Maßnahmen wie die Integration der Vertriebsaktivitäten und Kooperationen mit Lufthansa und den anderen Verbund-Airlines genutzt.

Erste wesentliche Erfolge aus den Maßnahmen zeigten sich im Geschäftsjahr 2010: So stärkte Austrian Airlines ihre Marktposition am Drehkreuz Wien weiter und steigerte ihren Marktanteil um 1,4 Prozentpunkte auf 50,9 Prozent. Das Erlösniveau im Kontinentalverkehr liegt jedoch weiterhin unter den Erwartungen. Eine deutliche Erholung zeichnete sich dagegen im Langstreckenverkehr ab. Das anziehende Firmenkundengeschäft führte hier zu einer positiven Entwicklung der Durchschnittserlöse.

Der Aufsichtsrat hat mit Wirkung vom 1. April 2011 Thierry Antinori zum Vorstandsvorsitzenden von Austrian Airlines berufen. Er verantwortete bislang als Vorstand der Lufthansa Passage die Bereiche Marketing und Vertrieb. Der Vorstand von Austrian Airlines wurde damit auf drei Mitglieder erweitert.

### Die Restrukturierungserfolge wirken sich auf das Ergebnis aus

Im Geschäftsjahr 2010 zeigten sich die Auswirkungen der erheblichen Restrukturierungsmaßnahmen deutlich. Besonders die Einbeziehung des Vertriebs von Austrian Airlines in den Lufthansa Vertrieb hatte zur Folge, dass die Auslastung mit 76,8 Prozent klar über Vorjahr lag (+ 2,8 Prozentpunkte). Insgesamt wurden 10,9 Mio. Passagiere befördert, beinahe 1 Mio. mehr als noch 2009. Das Angebot erhöhte sich dabei nur leicht um 0,3 Prozent. Der Umsatz wurde mit über 2,0 Mrd. EUR stabil gehalten. Im Vorjahr hatte sich konsolidierungsbedingt lediglich ein Umsatz von 665 Mio. EUR im Lufthansa Konzernabschluss gezeigt. Im Jahr 2010 war das operative Ergebnis der Austrian Airlines mit –66 Mio. EUR noch negativ, es hat sich damit jedoch deutlich verbessert. Im Vorjahr hatte das operative Ergebnis allein für den im Lufthansa Abschluss konsolidierten Zeitraum September bis Dezember –31 Mio. EUR betragen.

### Operativer Gewinn für 2011 erwartet

Für 2011 hat sich Austrian Airlines das Ziel gesetzt, ein positives operatives Ergebnis zu erwirtschaften, und ist zuversichtlich, dieses Ziel zu erreichen. Die Sanierung wird hierfür konsequent fortgesetzt, wobei auch die Systempartner ihren Beitrag zu einem notwendigen nachhaltigen Wachstum erbringen. Austrian Airlines will dieses Ziel trotz der 2011 in Österreich neu eingeführten Luftverkehrsabgabe erreichen. Deren Auswirkungen sind allerdings noch nicht vorhersehbar.

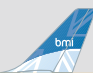British Midland<sup>1) 2)</sup>

|                        |        | 2010  | Veränderung<br>in % |
|------------------------|--------|-------|---------------------|
| Umsatz                 | Mio. € | 896   | –                   |
| Operatives Ergebnis    | Mio. € | – 145 | –                   |
| EBITDA                 | Mio. € | – 117 | –                   |
| Fluggäste              | Tsd.   | 6 194 | –                   |
| Mitarbeiter zum 31.12. | Anzahl | 3 613 | –                   |

<sup>1)</sup> Weitere Informationen zu British Midland unter [www.flybmi.com](http://www.flybmi.com).

<sup>2)</sup> British Midland wird seit dem 1. Juli 2009 vollkonsolidiert.

### bmi wurde erfolgreich in den Lufthansa Konzern integriert

Seit November 2009 ist Lufthansa über die britische Holdinggesellschaft LHBD Holding Ltd. wirtschaftlich alleinige Gesellschafterin von British Midland Ltd. (bmi). 2010 wurde die Gesellschaft erfolgreich in den Lufthansa Konzern integriert. Gleichzeitig wurden umfangreiche Restrukturierungsmaßnahmen durchgeführt, um bmi mittelfristig profitabel zu machen.

### Drei Fluggesellschaften mit Kernmarkt Großbritannien

Die bmi Gruppe umfasst drei Fluggesellschaften: British Midland International, bmi Regional und bmibaby, die jeweils verschiedene Märkte und Kundengruppen abdecken. Die Kernmärkte aller drei Fluggesellschaften befinden sich dabei in Großbritannien.

Das Streckennetz von British Midland International als klassischem Anbieter deckt ab London-Heathrow Ziele im Heimatmarkt Großbritannien, in Europa, den GUS-Staaten, dem Nahen Osten und Afrika ab. Die Slots am Flughafen London-Heathrow sind dabei von hohem strategischen Wert für die Gruppe. Im Verlauf des Berichtsjahres wurden Strecken innerhalb Großbritanniens zu Gunsten neuer Strecken im Nachbarschaftsverkehr und im Verkehr mit dem Nahen Osten aufgegeben, um der ertragsoptimierten Neuausrichtung des Netzes zu entsprechen.

bmi Regional bietet mit ihrer Embraer-Flotte Kurzstreckenflüge innerhalb Großbritanniens und Europas an. Mit ihrem hochwertigen Produkt und hoher Pünktlichkeit richtet sie sich vor allem an Geschäftsreisende. Das Chartergeschäft der Linie bringt positive Ergebnisbeiträge.

Mit 14 Flugzeugen der Boeing 737-Familie operiert bmibaby als Low-Cost-Airline vor allem aus East Midlands und Birmingham, wo sie eine hohe Marktpräsenz aufweisen kann. 2010 wurden von East Midlands aus auch Flüge nach Deutschland ins Programm aufgenommen.

### Die Restrukturierungsmaßnahmen zeigen Wirkung

Die Restrukturierung von bmi verlief im Geschäftsjahr plangemäß. Dabei wurde die Anzahl der Flugzeuge um 10 und die Kapazität deutlich reduziert. Gleichzeitig wurde die Produktivität der Flugzeuge erhöht. Die mit der Restrukturierung verbundenen Personalabbaumaßnahmen konnten im Laufe des Jahres abgeschlossen werden; insgesamt wurden rund 750 Stellen abgebaut. Weitere Maßnahmen auf der Kostenseite zeigten entsprechende Wirkung und trugen zur Ergebnisverbesserung bei.

Auf der Ertragsseite konnten die gesetzten Ziele nicht vollständig erreicht werden, unter anderem bedingt durch außerordentliche externe Einflüsse (wie zum Beispiel die wiederholten Luftraum- und wetterbedingten Flughafensperrungen). Die wirtschaftliche Entwicklung in Großbritannien ist weiterhin mit hohen Unsicherheiten behaftet. Dies und die im Heimatmarkt Großbritannien hohe Präsenz von No-Frills-Carriern führen dazu, dass die Durchschnittserlöse dort nachhaltig auf niedrigem Niveau liegen. Die Strecken nach Europa, in den Nahen Osten und in die GUS-Staaten weisen hingegen eine anhaltend positive Entwicklung auf. Durch das auf die Kurz- und Mittelstrecke beschränkte Streckennetz konnte bmi aber nicht vom weltweiten Aufschwung des Interkontinentalverkehrs profitieren.

Darüber hinaus belasteten die Flugausfälle aufgrund der Luftraumsperrungen und der ungünstige Kurs des Britischen Pfunds die Ergebnisentwicklung. Insgesamt erwirtschaftete bmi 2010 einen Umsatz von umgerechnet 896 Mio. EUR und einen operativen Verlust, der sich auf 145 Mio. EUR belief.

Im Jahresverlauf wurde die Vertriebsintegration mit der Lufthansa Gruppe in allen wesentlichen Märkten außerhalb Großbritanniens abgeschlossen, sodass die Gesellschaft in Zukunft von dem größeren Vertriebsnetz der Lufthansa profitieren kann. Darüber hinaus wurden Investitionen in die Produktqualität, insbesondere in die Flotten- und Kabinenausstattung sowie in EDV-Steuerungssysteme, beschlossen.

Das finanzielle Profil der Gesellschaft wurde im Juli 2010 durch die Umwandlung eines kurzfristigen Darlehens von Lufthansa in Höhe von 45 Mio. GBP in Eigenkapital gestärkt.

Die Strategie, defizitäre Kurzstrecken durch profitablere Strecken in die Nachbarmärkte und auf der Mittelstrecke zu ersetzen, wird fortgesetzt. Dabei wird sichergestellt, dass die Slots der Gesellschaft in London-Heathrow erhalten bleiben. Es ist verstärkt geplant, mit bmi Regional aus England die Hubs der Lufthansa Gruppe anzufügen.

### Der Ausblick ist mittelfristig positiv

Für 2011 wird aufgrund der strukturellen Situation von bmi noch ein negatives operatives Ergebnis erwartet. Das Ziel, mittelfristig wieder profitabel zu werden, wird jedoch unverändert bestätigt.

## Germanwings

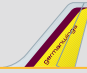

### Germanwings\*

|                        |        | 2010  | Veränderung<br>in % |
|------------------------|--------|-------|---------------------|
| Umsatz                 | Mio. € | 630   | 8,6                 |
| Operatives Ergebnis    | Mio. € | -39   |                     |
| EBITDA                 | Mio. € | -9    | -113,5              |
| Fluggäste              | Tsd.   | 7 730 | 7,9                 |
| Mitarbeiter zum 31.12. | Anzahl | 1 272 | 14,5                |

\* Weitere Informationen zu Germanwings unter [www.germanwings.com](http://www.germanwings.com).

### Germanwings erweitert ihr Angebot im Low-Cost-Segment

Mit einer Flotte von 30 Airbus A319 bietet Germanwings von ihren fünf Standorten Köln/Bonn, Stuttgart, Berlin-Schönefeld, Hannover und Dortmund aus Flüge in über 75 europäische Destinationen an. Um die langfristige Wettbewerbsfähigkeit zu stärken, hat das Unternehmen im April 2010 drei Flugzeuge am Flughafen Hannover-Langenhagen stationiert und diesen Standort als neue Basis ausgebaut. In der Hauptreisezeit wurden von Germanwings 14 europäische Non-Stop-Ziele aus Hannover heraus angeboten. Durch Umsteigeverbindungen über den Flughafen Stuttgart konnten die Passagiere von hier aus weitere 13 Ziele erreichen.

2010 hat Germanwings mit der Einführung einer neuen Tarifstruktur in Deutschland einen neuen Branchentrend gesetzt. Reisende haben die Möglichkeit, zwischen den Tarifen „Basic“, „Best“ oder „Flex“ zu entscheiden. Der neue „Best“-Tarif bietet den Passagieren deutliche Preisvorteile und ermöglicht ihnen, einige Zusatzleistungen zu einem Paket zu bündeln. Für die Kunden bietet diese Kombination Vorteile, da diese Zusatzleistungen um 25 Prozent günstiger sind als bei separater Buchung aller einzelnen Bestandteile.

Darüber hinaus erhöht Germanwings beständig ihre Attraktivität für die Passagiere. Seit dem 1. September 2010 können Miles & More-Teilnehmer auf allen Germanwings Flügen Prämienmeilen für das Miles & More-Programm sammeln. Hierbei gelten die gleichen Meilenwerte wie auf Lufthansa Flügen. Bereits seit Dezember 2009 können Miles & More-Teilnehmer im gesamten Streckennetz von Germanwings außerdem ihre Meilen gegen Flüge einlösen.

Germanwings erhielt auch 2010 mehrere Auszeichnungen. So wurde das Unternehmen von Profiles International zu Deutschlands produktivster Airline gewählt. Im aktuellen „Flugatlas“, einer Untersuchung von Mobil in Deutschland e.V., wurde Germanwings Testsieger und erreichte Spitzenwerte in den Kategorien Pünktlichkeit, Vielfliegerprogramm, Preis und Buchungsfunktionalität.

### Das Ergebnis ist aufgrund von Sonderfaktoren unter Druck

Der innereuropäische Flugverkehr ist auch weiterhin von einer hohen Wettbewerbsintensität und niedrigen Durchschnittserlösen geprägt. In diesem Umfeld wurde das operative Ergebnis von Germanwings im ersten Halbjahr 2010 zusätzlich durch exogene Effekte wie den Pilotenstreik und die vorübergehende Luftraumsperrung belastet. Darüber hinaus entstanden Start-up-Kosten für den Aufbau der Station in Hannover-Langenhagen. Im Dezember schließlich schlug der harte Winter abermals ins Kontor. In diesem Marktumfeld konnte das Angebot nicht vollständig abgesetzt werden. Die eingeleiteten Maßnahmen zur Ergebnissicherung konnten die Einmaleffekte zum Jahresende nicht vollständig kompensieren.

Trotz der beschriebenen Sondereffekte setzte Germanwings ihren Wachstumskurs fort. So steigerte Germanwings die Passagierzahl im Geschäftsjahr 2010 um 7,9 Prozent auf 7,7 Mio. Der Sitzladefaktor erreichte mit 77,2 Prozent beinahe das hohe Vorjahresniveau. Die Umsatzerlöse erhöhten sich auf 630 Mio. EUR (+8,6 Prozent). Insgesamt weist Germanwings für das Geschäftsjahr 2010 jedoch ein durch die Sondereffekte geprägtes operatives Ergebnis von -39 Mio. EUR aus (Vorjahr: +24 Mio. EUR).

### Neue Vertriebskooperation und Ergebnisverbesserung im Jahr 2011

Für 2011 erwartet Germanwings, dass der Druck auf die Nachfrage und die Ergebnisse durch die neue staatliche Luftverkehrssteuer sowie die anhaltenden Überkapazitäten und den wieder steigenden Ölpreis hoch bleiben wird.

Um die Durchschnittserlöse und die Nachfrage stabilisieren zu können, baut Germanwings im kommenden Jahr ihre Vertriebsstruktur weiter aus. So werden ab 2011 Tarife von Germanwings und Lufthansa kombinierbar sein und beide Fluggesellschaften werden im Firmenkundengeschäft noch enger zusammenarbeiten. Kunden können so zukünftig von einem gemeinsamen Angebot profitieren. Zudem wird Germanwings zukünftig in allen globalen Distributionssystemen buchbar sein. Germanwings hat das Ergebnissicherungsprogramm WIN4U aufgesetzt, das sowohl Einsparungen als auch strukturelle Kostensenkungsmaßnahmen, wie eine strategische Zusammenarbeit mit Lufthansa Technik, umfasst. Für das Geschäftsjahr 2011 wird daher insgesamt ein über dem Vorjahr liegender Umsatz und operatives Ergebnis erwartet.

Neben der laufenden Ergebnisverbesserung investiert Germanwings auch weiterhin in ihr Produkt, beispielsweise in neue Qualitätssitze, um noch komfortabler an Bord zu werden und den Kunden eine verbesserte Sitzkonfiguration zu bieten. Auch die Flotte wird weiterentwickelt. Acht neue Airbus A319 werden in den Jahren 2012 bis 2014 sukzessive die bestehende Flotte ergänzen.

## Geschäftsfeld Logistik

- 2010 erholten sich alle Absatzmärkte, insbesondere China und Amerika.
- Lufthansa Cargo war bestens positioniert, um die dynamische Entwicklung für sich zu nutzen.
- Starke Verkehrserlöse bewirken ein Umsatzwachstum von 43 Prozent.
- Das operative Ergebnis erreichte ein Rekordniveau.
- Innovationen und Partnerschaften führen zu hoher Produktqualität und Kundenbindung.
- Trotz weiterhin positiver Aussichten bleibt Kostenmanagement ein wichtiges Thema.

Anteil am Konzernumsatz 10,1 %

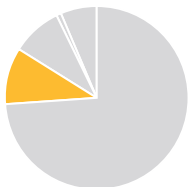

➤ Eine der größten  
Frachtfluggesellschaften

Kennzahlen Logistik

|                                                 |        | 2010   | 2009   | Veränderung<br>in % |
|-------------------------------------------------|--------|--------|--------|---------------------|
| Umsatz                                          | Mio. € | 2 795  | 1 951  | 43,3                |
| davon mit Gesellschaften des Lufthansa Konzerns | Mio. € | 25     | 23     | 8,7                 |
| Operatives Ergebnis                             | Mio. € | 310    | - 171  | -                   |
| Vergleichbare operative Marge                   | %      | 11,4   | - 8,0  | 19,4 P.             |
| Segmentergebnis                                 | Mio. € | 330    | - 152  | -                   |
| EBITDA                                          | Mio. € | 445    | - 28   | -                   |
| CVA                                             | Mio. € | 233    | - 264  | -                   |
| Segmentinvestitionen                            | Mio. € | 21     | 25     | - 16,0              |
| Mitarbeiter zum 31.12.                          | Anzahl | 4 517  | 4 488  | 0,6                 |
| Mitarbeiter im Jahresdurchschnitt               | Anzahl | 4 469  | 4 568  | - 2,2               |
| Fracht und Post                                 | Tsd. t | 1 795  | 1 519  | 18,2                |
| Angeborene Fracht-Tonnenkilometer               | Mio.   | 12 564 | 11 681 | 7,6                 |
| Verkaufte Fracht-Tonnenkilometer                | Mio.   | 8 905  | 7 425  | 19,9                |
| Nutzladefaktor                                  | %      | 70,9   | 63,6   | 7,3 P.              |



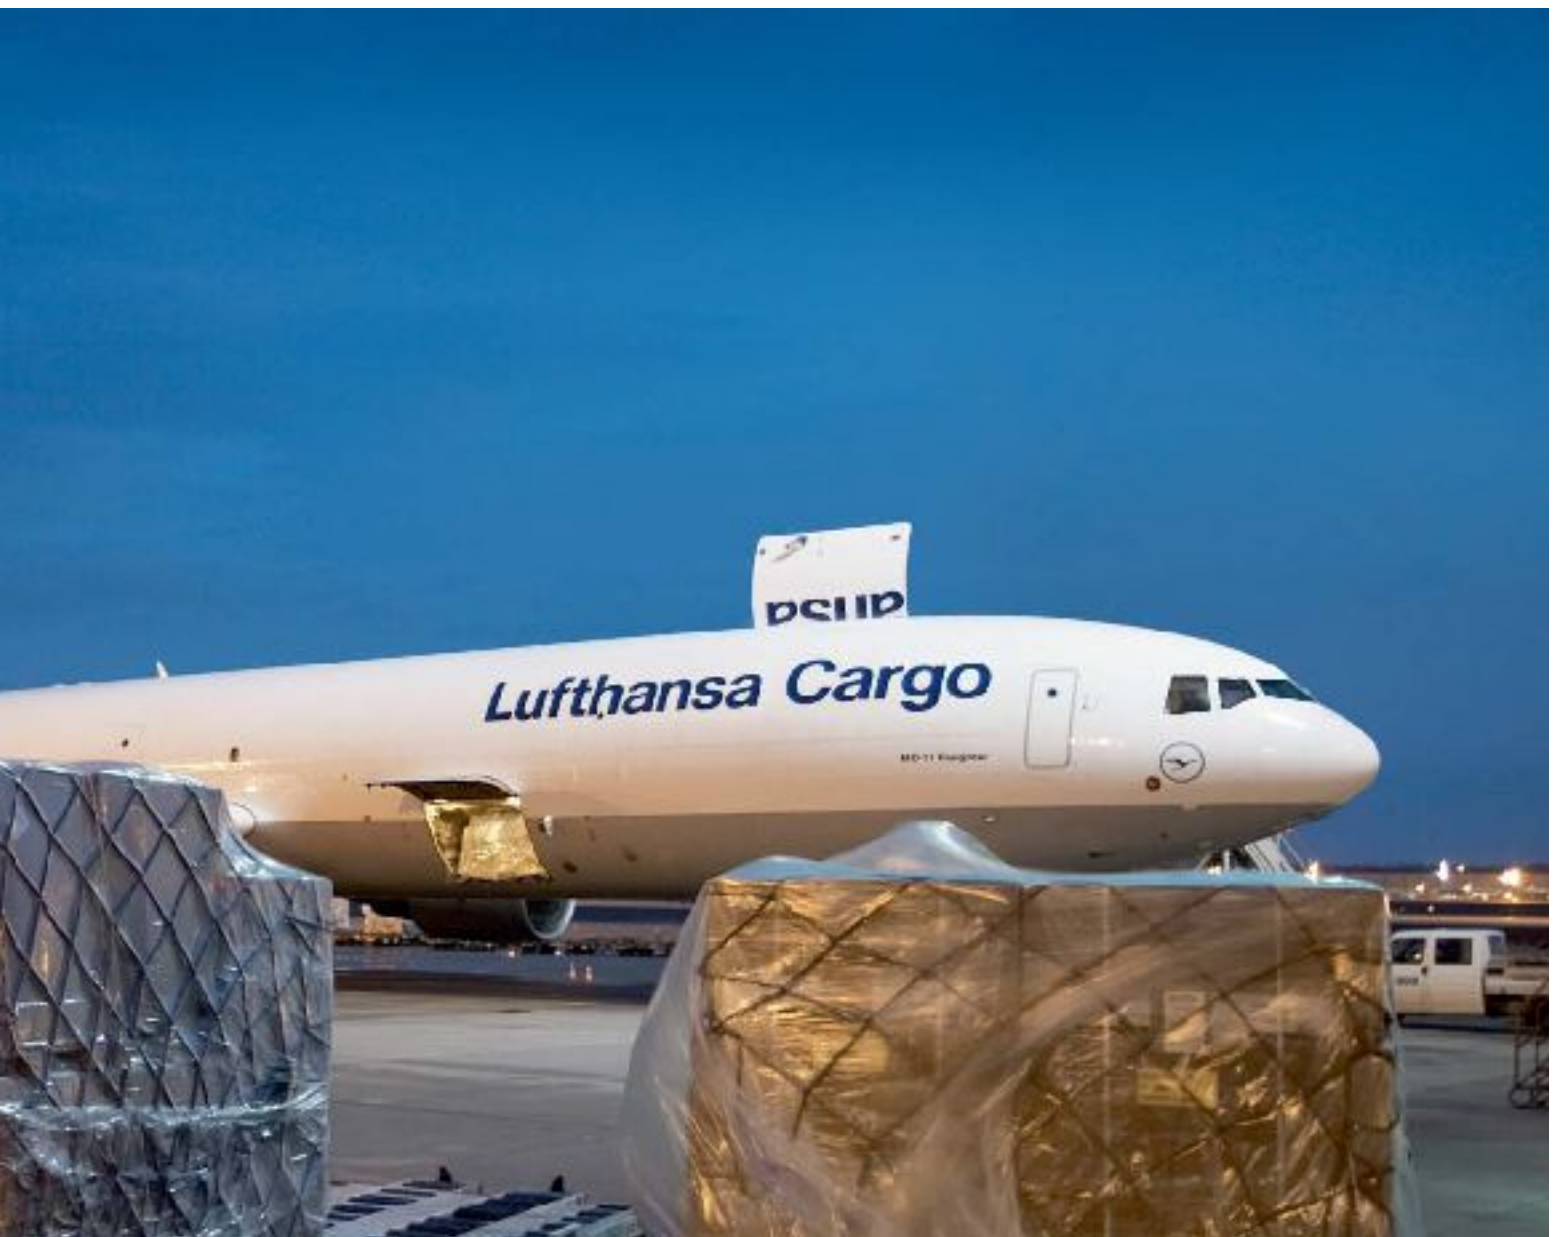

➤ 2,8 Mrd. EUR Umsatz

➤ 310 Mio. EUR Operatives Ergebnis

## Geschäftstätigkeit und Strategie

### Eine der weltweit größten Frachtfluggesellschaften

Im Lufthansa Konzern ist Lufthansa Cargo der Dienstleister für das Logistikgeschäft. Mit 18 eigenen Frachtflugzeugen vom Typ MD-11, Beteiligungen wie AeroLogic und Jade Cargo International sowie weiterer Frachtkapazität auf Passagierflugzeugen ist die Gesellschaft eine der weltweit größten Frachtfluggesellschaften. Die Frachtsendungen werden per Flugzeug oder im Rahmen sogenannter Road Feeder Services per Lkw transportiert. Diese kommen vor allem auf Zu- und Abbringerstrecken zum Einsatz. Die Lufthansa Cargo Charter Agency ist auf Ad-hoc-Charterlösungen für besonders individuelle Transporte, beispielsweise Fracht mit außergewöhnlichen Maßen, spezialisiert. Das Produktportfolio von Lufthansa Cargo umfasst sowohl Standard- als auch Expressfracht und als wesentlichen Eckpfeiler Spezialfracht. Dazu zählen lebende Tiere, Wertfracht, Post, Gefahrgut und auch die Beförderung temperatursensibler Güter.

### Ein weltumfassendes Netz mit mehreren Anbietern

Alle Produktsegmente profitieren vom dichten, weltumspannenden Netz der Lufthansa Cargo und ihrer Produktionsplattformen mit über 300 Zielorten in mehr als 100 Ländern. Rund 37 Prozent ihres Angebots stellt Lufthansa Cargo dabei durch ihre MD-11-Flotte dar. Darüber hinaus vermarktet Lufthansa Cargo die Frachtkapazitäten an Bord der Lufthansa Passage Flugzeuge, die rund 46 Prozent zur Gesamtkapazität der Lufthansa Cargo beitragen. Weitere Frachtkapazitäten bestehen über Joint Ventures, wie AeroLogic in Leipzig, an dem Lufthansa Cargo und DHL Express zu jeweils 50 Prozent beteiligt sind. Das Joint Venture Jade Cargo International in Shenzhen, China, bedient zudem mit sechs Boeing 747F-Flugzeugen vor allem Strecken von und nach China. Im Geschäftsjahr 2010 flog es erstmals Transpazifikstrecken von Asien in die USA. Lufthansa Cargo hält 25 Prozent an Jade Cargo; weitere Anteilseigner sind mit 51 Prozent Shenzhen Airlines und mit 24 Prozent die Deutsche Entwicklungsgesellschaft.

### Standorte Lufthansa Cargo

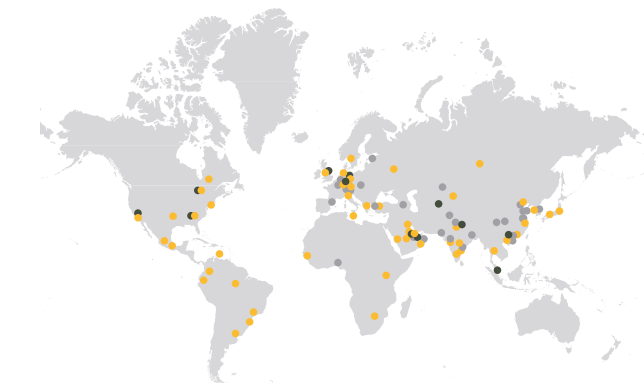

● Zielorte Lufthansa Cargo    ● Zielorte Jade Cargo International    ● Zielorte AeroLogic

### Kapazitätszusammensetzung Logistik in %

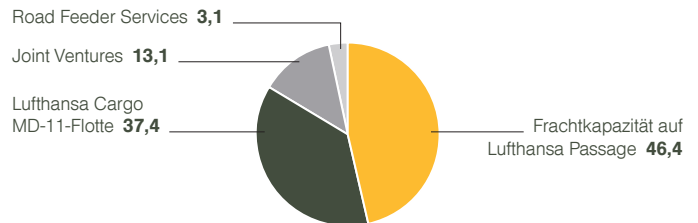

Seit 1. Juli 2010 ergänzt auch das Frachtgeschäft von Austrian Airlines das Netzwerk, vor allem in Osteuropa. Der Flughafen Wien wurde neben den bestehenden Hubs zu einem weiteren Frachtdrehkreuz ausgebaut. Mit den Konzerngesellschaften SWISS, bmi und Brussels Airlines, die ihre Frachtkapazitäten selbst vermarkten, besteht ebenfalls eine enge Zusammenarbeit.

Der Aufsichtsrat der Lufthansa Cargo AG hat Karl Ulrich Garnadt, bislang Mitglied im Vorstand der Lufthansa Passage, mit Wirkung vom 1. Januar 2011 zum Nachfolger von Carsten Spohr als Vorstandsvorsitzender der Lufthansa Cargo AG bestellt.

### Beteiligungen spiegeln den strategischen Fokus wider

Lufthansa Cargo hat in den vergangenen Jahren wichtige Tochtergesellschaften und Beteiligungen aufgebaut. Dazu zählen etwa die Jettainer GmbH als globale Anbieterin für das Management von Lademitteln wie Containern und Paletten oder auch die handling counts GmbH, die rund 300 Mitarbeiter in der Frachtanfertigung am Frankfurter Flughafen beschäftigt.

Im Wachstumsmarkt China ist Lufthansa Cargo über Beteiligungen und Joint Ventures ebenfalls stark positioniert. Neben Jade Cargo sind auch die Beteiligungen am Shanghai Pudong International Airport Cargo Terminal, am International Cargo Center Shenzhen und am Tianjin Aircargo Terminal Ltd. Eckpfeiler der China-Strategie.

## Absatzmärkte und Wettbewerb

### Lufthansa Cargo profitiert besonders von der Markterholung

Im Geschäftsjahr 2010 haben sich alle Absatzmärkte deutlich erholt. Dabei blieb Asien/Pazifik für Lufthansa Cargo mit rund 50 Prozent der Verkehrserlöse wichtigster Absatzmarkt. Der bereits im vierten Quartal 2009 in China begonnene Aufwärtstrend setzte sich im Berichtsjahr fort. Auch das Verkehrsgebiet Amerika verzeichnete eine signifikante Erholung der Nachfrage. Hier stieg die beförderte Frachtmenge sogar noch stärker als in Asien.

Aufgrund des weltweiten Nachfrageeinbruchs in der Wirtschaftskrise hatten zahlreiche Fluggesellschaften in den Vorjahren ihre Kapazitäten reduziert. Auch bei Lufthansa Cargo wurden Flugzeuge stillgelegt. Dies führte dazu, dass die Überkapazitäten abnahmen und bei einer anziehenden wirtschaftlichen Lage wieder deutlich höhere Durchschnittspreise erzielt werden konnten. Lufthansa Cargo hat die Marktchancen, die sich seit Ende der Krise ergaben, zielgerichtet genutzt. So wurde etwa die Frachterkapazität nach Japan deutlich aufgestockt, nachdem die japanische Fluggesellschaft JAL ihren Frachterdienst eingestellt hatte.

Lufthansa Cargo steht im Wettbewerb mit anderen internationalen Frachtfluggesellschaften, wie beispielsweise Air France-KLM, Cargolux oder Korean Airlines. Bei insgesamt intensivem Wettbewerb ist Lufthansa Cargo traditionell unter den größten Frachtfluggesellschaften der Welt positioniert und wuchs auch im Jahr 2010 mit dem Markt. Unangefochtener Marktführer bleibt Lufthansa Cargo im Heimatmarkt Deutschland mit einem Marktanteil von deutlich über 20 Prozent.

## Vertrieb und Kunden

### Gemeinsam mit Partnern wachsen und die Qualität steigern

Nach dem von Partnerschaft und großer Loyalität geprägten Krisenjahr 2009 gelang es Lufthansa Cargo 2010, die strategischen und langfristigen Partnerschaften mit ihren Kunden wieder auszubauen. Bedeutend ist dafür das etablierte „Global Partnership Program“. Mit ihren zwölf Global Partnern erzielte Lufthansa Cargo 2010 rund 51 Prozent ihres Umsatzes. Ziel des Programms ist es, gemeinsam am weltweiten Wachstum des Luftfrachtmarkts zu partizipieren. Im Rahmen des achten Global Partner Council, dem jährlichen Spitzentreffen, wurde UPS mit dem „Planet Award of Partner Excellence“ ausgezeichnet. Auch kleinere und mittelgroße Speditionen sind für Lufthansa Cargo sehr wichtig und werden deshalb intensiv im „Business Partnership Program“ durch ein spezielles Key Account Management betreut.

2010 hat Lufthansa Cargo erstmals einen Qualitätspreis für den Speditionskunden mit der besten Anlieferqualität in Deutschland ausgelobt. Rund 30 Speditionen nahmen an der Ausschreibung teil, den ersten Preis gewann die Spedition Streck Transport. In der Bewertung wurden wesentliche Parameter, wie etwa die Einhaltung von Lieferumfängen, Pünktlichkeit oder Sorgfalt im Handling, berücksichtigt. Prozessfehler, die negative Auswirkungen auf die Qualität haben, sollen so bereits zu Beginn der Transportkette vermieden werden. So gelingt es Lufthansa Cargo, wichtige Impulse für eine nachhaltig höhere Qualität zu setzen.

### Innovationen für die Zukunft eingeführt

Die Entwicklung und Einführung von Innovationen haben für Lufthansa Cargo einen hohen Stellenwert. So wurden im vergangenen Jahr die Ausweitung der papierlosen Luftfracht (eFreight) vorangetrieben und zahlreiche neue Stationen in das eFreight-Netzwerk integriert. Die Einführung des elektronischen Luftfrachtbriefts (eAWB) Anfang 2011 ist ein weiterer Meilenstein auf dem Weg zu papierlosen Luftfrachtprozessen. Ebenfalls erfolgreich abgeschlossen wurden die Tests an der weltweit größten Pilotanlage für Ortung und Identifikation mit passiver RFID-Technologie in der Luftfrachtindustrie. Weitere erfolgreiche Tests mit Leichtgewichtcontainers ermöglichen in Zukunft signifikante Treibstoff- und CO<sub>2</sub>-Einsparungen. Einen deutlichen Beweis für ihre Innovationsführerschaft erbrachte Lufthansa Cargo im Februar 2010: Mit gleich drei Projekten war sie im Spitzencluster-Wettbewerb der Bundesregierung erfolgreich, der die Förderung von Innovationsprojekten zum Ziel hat.

Ein Fokus des weltweiten Vertriebs im Jahr 2010 lag auf der Weiterentwicklung der Verkaufsorganisation. Dabei konnten die Geschäftsbeziehungen zu bestehenden Kunden intensiviert und gleichzeitig Neugeschäft generiert werden. Auch die Verlagerung der Buchungen von Standardsendungen auf eigene elektronische Kanäle wie die Online-Plattform eServices wurde weiter vorangetrieben. 2010 erfolgten so bereits 45 Prozent der Buchungen über diesen Kanal. 2011 soll diese Zahl auf über 50 Prozent gesteigert werden.

Die Leistungen und die Qualität von Lufthansa Cargo fanden 2010 sowohl im direkten Kundenfeedback als auch über bedeutende Preise Anerkennung. Im Mai erhielt das Unternehmen den begehrten Preis bei den „Cargo Airline of the Year Awards“ in London. Nur einen Monat später wurde Lufthansa Cargo auch in Asien bei den „Asian Freight & Supply Chain Awards“ zur besten europäischen Cargo-Airline gewählt.

## Geschäftsverlauf

### Markterholung und Kostenmanagement sorgen für Ergebnisverbesserung

Im abgelaufenen Geschäftsjahr hat Lufthansa Cargo stark vom Aufschwung der Weltwirtschaft und dem deutschen Exportboom profitiert. Die umfangreichen Ergebnissicherungsmaßnahmen hatten den Verlust im Geschäftsjahr 2009 deutlich begrenzt und zeigten auch im Jahr 2010 positive Wirkung. Dank der weiterhin greifenden Kostensenkungsmaßnahmen und einer gestiegenen Frachtnachfrage konnte schon das erste Quartal deutlich über den Erwartungen abgeschlossen werden. Die bereits im Herbst 2009 eingeleiteten Preisanpassungen setzte Lufthansa Cargo im Frühjahr und Herbst 2010 fort.

Mit der wachsenden Nachfrage nach Luftfrachtdienstleistungen stieg auch der Kapazitätsbedarf von Lufthansa Cargo. Das Gemeinschaftsunternehmen AeroLogic erweiterte seine Flotte im Jahresverlauf planmäßig um vier Boeing 777-Frachter und nahm Direktflüge von Leipzig nach Hongkong, Chicago und Atlanta sowie weitere Neuanflüge auf. Zeitgleich setzte Lufthansa Cargo die zielgerichtete Anpassung des Streckennetzes und fokussierte Kapazitätsausweitungen fort. So nahm sie die chinesische Metropole Tianjin neu in ihr Streckennetz auf und bot ihren Kunden mehr Flüge, unter anderem nach Mumbai, Hyderabad, São Paulo und Atlanta, an. Zudem verdoppelte Lufthansa Cargo nahezu die wöchentlichen Verbindungen von Frankfurt nach Tokio und Osaka.

Die gute wirtschaftliche Entwicklung ermöglichte es, die Einschnitte auf der Personalebene sukzessive zu reduzieren. Nach einer Senkung von 25 auf 20 Prozent im Februar wurde die Kurzarbeit, die seit März 2009 für alle Bodenmitarbeiter in Deutschland galt, im April zunächst ausgesetzt und schließlich vollständig beendet. Der dynamische Aufschwung ermöglichte auch die Wiederinbetriebnahme der vier zeitweise stillgelegten Frachtflugzeuge. Nachdem das erste Flugzeug im Mai nach Frankfurt zurückgekehrt war, folgten die weiteren drei MD-11 bis Ende des Jahres.

Den positiven Nachrichten rund um die Lufthansa Cargo stand im Juli der Totalverlust einer MD-11 gegenüber. Bei der Landung in Riad verunglückte die Maschine und erlitt einen Totalschaden. Glücklicherweise konnten sich beide Piloten aus dem Flugzeug retten und fliegen mittlerweile wieder für Lufthansa Cargo. Der wirtschaftliche Schaden des Unglücks war durch Versicherungen gedeckt.

### Die Lufthansa Cargo-Gruppe wird beständig weiterentwickelt

Die Integration des Frachtgeschäfts von Austrian Airlines war ein Meilenstein für die Lufthansa Cargo Gruppe. Zum 1. Juli 2010 wurde gemeinsam mit Austrian Airlines die Austrian Lufthansa Cargo GmbH mit Firmensitz in Wien gegründet. Die Gesellschaft vermarktet die Frachtkapazitäten von Austrian Airlines und Lufthansa Cargo im Markt Österreich und verantwortet die gesamte Frachtabfertigung an den österreichischen Flughäfen. In allen anderen Ländern wurden die Frachtaktivitäten unter der Leitung von Lufthansa Cargo zusammengelegt. Durch die Kooperation baute Lufthansa Cargo ihre Kapazität weiter aus; vor allem in der Wachstumsregion Osteuropa profitieren die Kunden seit Juli 2010 von einem noch dichteren Streckennetz und mehr Flexibilität.

### Grundpfeiler des Kooperationsmodells

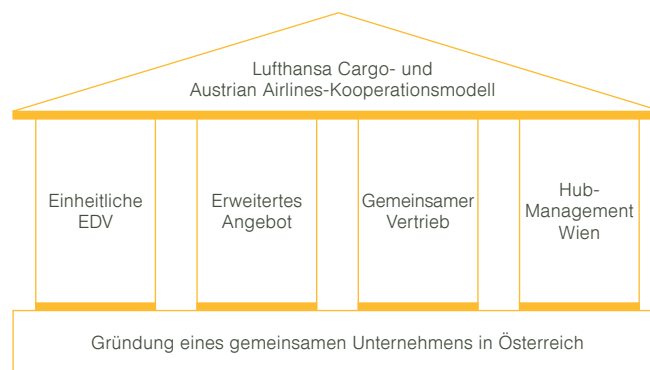

Aufgrund einer wachsenden Nachfrage nach temperaturgeführten Transporten wurde die Produktentwicklung in diesem Segment weiter forciert. Im Sommer 2010 präsentierte Lufthansa Cargo ihren Kunden aus der Pharmabranche mit dem „Opticooler“ den modernsten Kühlcontainer der Luftfrachtindustrie. Zudem wurde im Dezember mit dem Flughafen Hyderabad eine Absichtserklärung für die Entwicklung des Flughafens zum wichtigsten Drehkreuz für temperaturgeführte Transporte in Südasien unterzeichnet. Lufthansa Cargo will durch diese Partnerschaft in dem stark wachsenden und hochprofitablen Segment weitere Marktanteile gewinnen und profitabel wachsen.

### Sicherheit hat höchste Priorität

Gestiegene Sicherheitsanforderungen in der Luftfrachtindustrie waren 2010 eines der zentralen Themen für Lufthansa Cargo. Neue Auflagen in der EU und den USA führten bereits im Frühjahr und Sommer zu zahlreichen Änderungen. Nach den vereitelten Paketbombenanschlägen im Oktober verschärfte sich die Debatte erneut. Viele Länder erließen strengere Sicherheitsbestimmungen, die zu teilweise deutlichen Prozessveränderungen für Luftfrachtgesellschaften und ihre Kunden führten. Lufthansa Cargo räumt dem Thema Sicherheit jedoch bereits seit Jahren höchste Priorität ein und hat frühzeitig entsprechende Maßnahmen ergriffen. Dadurch gelang es ihr, die neuen Anforderungen ohne größere Schwierigkeiten umzusetzen. Zudem hat Lufthansa Cargo auch 2010 wieder zwei Sicherheitskonferenzen in Frankfurt und New York ausgerichtet. Im Herbst waren Experten der Lufthansa Cargo als einzige Vertreter einer ausländischen Fluggesellschaft in den US-Kongress geladen, um zu Fragen der Luftfrachtsicherheit zu referieren. Mit diesem sich ständig weiterentwickelnden Know-how will das Unternehmen auch in Zukunft die industrieweit führende Rolle in Fragen der Luftfrachtsicherheit einnehmen.



Neben den operativen Aufgaben war das gesellschaftliche Engagement von Lufthansa Cargo auch im letzten Jahr ein wichtiges Thema. Sowohl für die Erdbebenopfer in Haiti als auch für die nach der Flutkatastrophe Not leidende Bevölkerung Pakistans stellte das Unternehmen kostenlose Frachtflüge zum Transport von Hilfsgütern zur Verfügung. Und auch das Hilfsprojekt Cargo Human Care in Nairobi, das von Mitarbeitern der Lufthansa Cargo gegründet wurde, wird weiter in hohem Maße unterstützt.

## Operative Entwicklung

2010 erholte sich das Geschäftsfeld Logistik deutlich und knüpfte hinsichtlich der transportierten Mengen an das Niveau vor der Finanzkrise an: Gegenüber 2009 stiegen die Mengen um 18,2 Prozent, der Absatz erhöhte sich um 19,9 Prozent. Das Angebot wurde um 7,6 Prozent gesteigert, der Ladefaktor stieg, leicht gebremst durch die schlechten Witterungsverhältnisse im Dezember, um 7,3 Prozentpunkte.

Das Verkehrsgebiet Amerika erzielte mit einem Plus von 24,9 Prozent gegenüber Vorjahr das größte Mengenwachstum aller Verkehrsgebiete. Der Motor dieser Entwicklung waren die Verkehre nach Amerika. Das Angebot wurde um 6,1 Prozent gesteigert, der Ladefaktor um 9,9 Prozentpunkte.

Das Gebiet Asien/Pazifik entwickelte sich mit 20,6 Prozent Tonnagewachstum ebenfalls überdurchschnittlich und wurde dabei vom Verkehr in beide Richtungen getragen. Die überdurchschnittliche

Verkehrserlöse nach Verkehrsgebieten Logistik in %

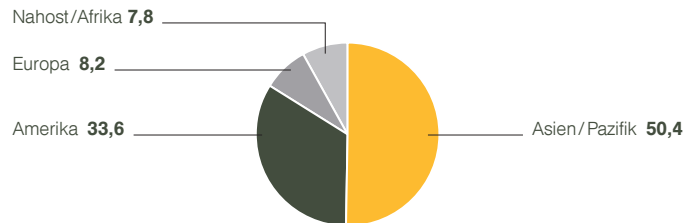

Ertragskraft der Verkehre aus Asien heraus führte zur höchsten Angebotssteigerung im Vorjahresvergleich: Die Kapazität wurde um 10,7 Prozent gesteigert. Der Ladefaktor lag 7,1 Prozentpunkte über Vorjahr und war damit der beste Ladefaktor aller Verkehrsgebiete.

Die Nachfrage im Verkehrsgebiet Nahost/Afrika stagnierte gegenüber 2009 – die transportierte Tonnage und die Auslastung blieben stabil. Die Hauptmärkte Kenia und Südafrika zeigen weiterhin keine Erholung, was im Wesentlichen auf dürrebedingte Produktionsausfälle verderblicher Güter zurückzuführen ist.

Die Frachtmenge innerhalb Europas stieg um 15,8 Prozent. Der Absatz entwickelte sich mit einer Zunahme von 11,2 Prozent noch stärker als die Angebotssteigerung von 7,2 Prozent, sodass Lufthansa Cargo die Auslastung um 1,7 Prozentpunkte verbessern konnte.

### Entwicklung der Verkehrsgebiete

Lufthansa Cargo

|                      | Nettoverkehrserlöse<br>in Mio. €<br>Außenumsatz |                  | Fracht/Post<br>in Tsd. t |                  | Angebotene Fracht-<br>Tonnenkilometer<br>in Mio. |                  | Verkaufte Fracht-<br>Tonnenkilometer<br>in Mio. |                  | Fracht-Nutzladefaktor<br>in % |                   |
|----------------------|-------------------------------------------------|------------------|--------------------------|------------------|--------------------------------------------------|------------------|-------------------------------------------------|------------------|-------------------------------|-------------------|
|                      | 2010                                            | Veränderung in % | 2010                     | Veränderung in % | 2010                                             | Veränderung in % | 2010                                            | Veränderung in % | 2010                          | Veränderung in P. |
| Europa               | 215                                             | 28,5             | 616                      | 15,8             | 792                                              | 7,2              | 368                                             | 11,2             | 46,4                          | 1,7               |
| Amerika              | 886                                             | 58,3             | 525                      | 24,9             | 5 013                                            | 6,1              | 3 676                                           | 22,7             | 73,3                          | 9,9               |
| Asien/ Pazifik       | 1 328                                           | 54,0             | 515                      | 20,6             | 5 595                                            | 10,7             | 4 169                                           | 22,3             | 74,5                          | 7,1               |
| Nahost/Afrika        | 205                                             | 25,0             | 139                      | 0,1              | 1 164                                            | 0,0              | 693                                             | 0,5              | 59,5                          | 0,3               |
| <b>Gesamtverkehr</b> | <b>2 634</b>                                    | <b>50,2</b>      | <b>1 795</b>             | <b>18,2</b>      | <b>12 564</b>                                    | <b>7,6</b>       | <b>8 905</b>                                    | <b>19,9</b>      | <b>70,9</b>                   | <b>7,3</b>        |



## Umsatz- und Ergebnisentwicklung

### Der Umsatz erholt sich deutlich

Im Berichtszeitraum stieg der Umsatz von Lufthansa Cargo um 43,3 Prozent auf 2,8 Mrd. EUR. Wesentlicher Bestandteil und Haupttreiber für dieses Wachstum waren die Verkehrserlöse, die mit 2,6 Mrd. EUR insgesamt 42,8 Prozent über dem Vorjahr lagen. Die Wechselkursänderungen hatten mit 8,1 Prozent einen positiven Einfluss. Die Preisentwicklung wirkte sich mit 14,8 Prozent positiv auf die Verkehrserlöse aus. Nachdem die bis Mitte 2009 von Lufthansa Cargo für DHL durchgeführten Frachtflüge nunmehr durch das gemeinsame Tochterunternehmen AeroLogic abgewickelt werden, sanken die in den Verkehrserlösen enthaltenen Frachtchartererlöse um 54,3 Prozent auf 71 Mio. EUR.

Umsatz Logistik in Mio. €

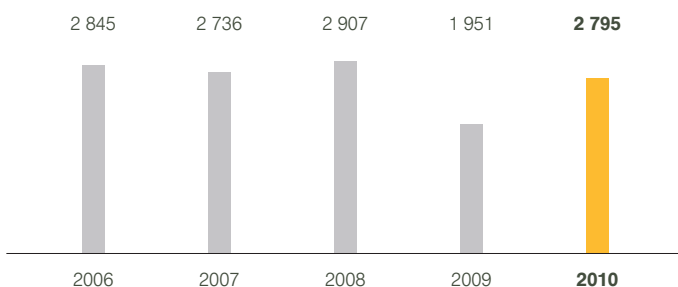

Die anderen Betriebserlöse beliefen sich auf 145 Mio. EUR (+60,5 Prozent). Wesentliche Bestandteile waren die Erlöse aus dem Ad-hoc-Flugzeugchartergeschäft und der Frachtabfertigung.

Die sonstigen operativen Erträge sanken um 14,4 Prozent auf 95 Mio. EUR, was vor allem auf stark gesunkene Kursgewinne zurückzuführen ist. Gegenläufig wirkte sich die Zunahme der erhaltenen Schadensersatzleistungen aus, insbesondere infolge der Versicherungserstattung in Höhe von 25 Mio. EUR im Zusammenhang mit dem Flugzeugunfall in Riad.

Die operativen Gesamterlöse lagen mit 2,9 Mrd. EUR um 40,2 Prozent über dem Vorjahreswert.

### Operative Aufwendungen steigen deutlich unterproportional

Die operativen Aufwendungen stiegen im Berichtszeitraum um 15,5 Prozent auf 2,6 Mrd. EUR, blieben damit jedoch deutlich hinter dem Umsatzanstieg zurück. Wesentliche Ursache war die deutliche Zunahme des Materialaufwands. So erhöhte sich der Treibstoffaufwand sowohl mengen- als auch preisbedingt um 37,0 Prozent auf 363 Mio. EUR. Die Gebühren nahmen aufgrund der gesteigerten Transportleistung auf 282 Mio. EUR (+18,5 Prozent) zu.

Der Charteraufwand stieg um 21,5 Prozent auf 996 Mio. EUR. Neben den zusätzlich von AeroLogic zur Verfügung gestellten Transportkapazitäten wirkten sich höhere Aufwendungen für die Frachträume der Passagierflugzeuge von Lufthansa Passage und Austrian Airlines aus.

Aufwendungen Logistik

|                                     | 2010<br>in Mio. € | 2009<br>in Mio. € | Veränderung<br>in % |
|-------------------------------------|-------------------|-------------------|---------------------|
| Materialaufwand                     | 1 846             | 1 511             | 22,2                |
| davon Treibstoff                    | 363               | 265               | 37,0                |
| davon Gebühren                      | 282               | 238               | 18,5                |
| davon Charter                       | 996               | 820               | 21,5                |
| davon Technikleistungen             | 125               | 114               | 9,6                 |
| Personalaufwand                     | 338               | 311               | 8,7                 |
| Abschreibungen                      | 107               | 123               | -13,0               |
| Sonstiger operativer Aufwand        | 289               | 288               | 0,3                 |
| <b>Summe operative Aufwendungen</b> | <b>2 580</b>      | <b>2 233</b>      | <b>15,5</b>         |

Infolge der Wiederinbetriebnahme der stillgelegten MD-11-Flugzeuge und aufgrund der Mehrflüge durch neue oder wieder aufgenommene Ziele erhöhten sich die Technikaufwendungen um 9,6 Prozent auf 125 Mio. EUR.

Der Personalaufwand stieg um 8,7 Prozent auf 338 Mio. EUR. Der Anstieg war wesentlich geprägt durch den Wegfall der Kurzarbeit und die höheren erfolgsabhängigen Vergütungsbestandteile. Insgesamt waren im Geschäftsfeld Logistik im Jahresdurchschnitt 4.469 Mitarbeiter beschäftigt. Dies entspricht einem Rückgang um 2,2 Prozent.

Die Abschreibungen fielen mit 107 Mio. EUR um 13,0 Prozent niedriger aus als im Vorjahr. Ursächlich hierfür war das Auslaufen der planmäßigen Abschreibungen für die im Jahre 1998 zugegangenen Frachtflugzeuge.

Die sonstigen operativen Aufwendungen lagen mit 289 Mio. EUR auf Vorjahresniveau. Während unter anderem Kursverluste und Reiseaufwendungen höher ausfielen als im Vorjahr, verringerten sich Agenturprovisionen und Wertberichtigungen.

### Operatives Rekordergebnis von 310 Mio. EUR erzielt

Insgesamt gelang Lufthansa Cargo nach dem operativen Verlust von 171 Mio. EUR im Vorjahr mit einem operativen Gewinn von 310 Mio. EUR eine beeindruckende Wende. Das Geschäftsfeld profitierte dabei nicht nur von Absatzpreissteigerungen und der Zunahme der abgesetzten Mengen, sondern auch von den im Vorjahr eingeleiteten Kostensenkungsmaßnahmen.

Die übrigen Segmenterträge reduzierten sich auf 9 Mio. EUR (Vorjahr: 15 Mio. EUR), im Wesentlichen aufgrund geringerer Erträge aus der Auflösung von Rückstellungen. Die übrigen Segmentaufwendungen erhöhten sich hingegen auf 12 Mio. EUR (Vorjahr: 1 Mio. EUR). Hierin enthalten sind die außerordentliche Abschreibung auf die verunglückte MD-11 in Höhe von 9 Mio. EUR sowie nachzuverrechnender Dienstzeitaufwand in Höhe von 2 Mio. EUR. Von allen nach der At-Equity-Methode bilanzierten Tochtergesellschaften wurden steigende Gewinnbeiträge verinnahmt, sodass das Equity-Ergebnis auf 23 Mio. EUR anstieg (Vorjahr: 5 Mio. EUR). Das Segmentergebnis betrug im Berichtsjahr 330 Mio. EUR (Vorjahr: –152 Mio. EUR).

### Die Segmentinvestitionen sinken um 16 Prozent

Die Segmentinvestitionen reduzierten sich um 21 Mio. EUR (–16,0 Prozent) und betrafen im Wesentlichen aktivierungspflichtige Wartungsereignisse und Investitionen in die Betriebs- und Geschäftsausstattung.

### Die Mehrperiodenübersicht zeigt Ergebnisvolatilität

Die Logistik ist das volatilste Geschäftsfeld im Lufthansa Konzern. In den vergangenen fünf Jahren musste das Geschäftsfeld jedoch lediglich 2009 einen operativen Verlust hinnehmen. Nach einer stetigen Ergebnisverbesserung zwischen 2006 und 2008 fiel das operative Ergebnis 2009 auf –171 Mio. EUR. Im Zuge der deutlichen Markterholung konnte Lufthansa Cargo jedoch bereits ein Jahr darauf ein neues Rekordergebnis in Höhe von 310 Mio. EUR erwirtschaften.

Operatives Ergebnis Logistik in Mio. €

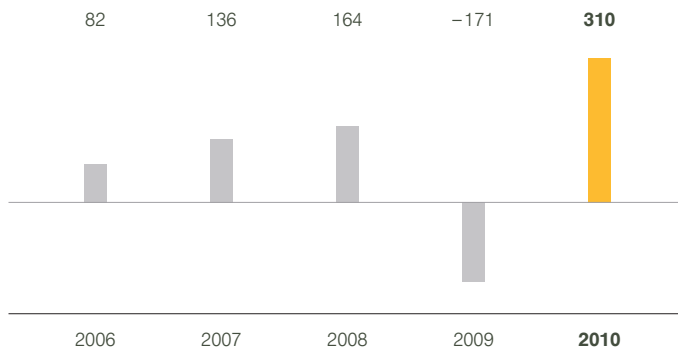

## Ausblick

### Weiterhin freundliche Aussichten

Nach dem Rekordjahr 2010 ist Lufthansa Cargo auch für das Geschäftsjahr 2011 optimistisch. Es wird erwartet, dass die Nachfrageentwicklung anhaltend positiv verläuft. Daher hat Lufthansa Cargo im Laufe des vergangenen Jahres die Kapazität wieder erhöht, unter anderem durch die Reaktivierung der vier vorübergehend stillgelegten MD-11-Frachtflugzeuge. Mit dieser Angebotssteigerung und der Ausweitung profitabler Transportsegmente wird für das Jahr 2011 ein weiterer Ausbau der Marktposition und des Umsatzes erwartet.

Auch nach der überwundenen Wirtschaftskrise bleibt Kostenmanagement für Lufthansa Cargo von hoher Priorität. So soll auch 2011 ein deutlich positives operatives Ergebnis erwirtschaftet werden. Eine Wiederholung des Rekordergebnisses aus dem Jahr 2010 ist allerdings nicht zu erwarten, da dieses stark durch Nachholeffekte der Weltwirtschaftskrise geprägt war. Auch für das Folgejahr 2012 rechnet Lufthansa Cargo derzeit mit einer positiven Umsatz- und Ergebnisentwicklung.

## Geschäftsfeld Technik

➤ Zeitlich verzögert zur Gesamtwirtschaft setzte auch die Erholung des MRO-Markts ein. ➤ Lufthansa Technik konnte im Verlauf des Jahres zunehmend davon profitieren. ➤ Der Umsatz liegt leicht über Vorjahr. ➤ Lufthansa Technik erwirtschaftete abermals einen hohen Ergebnisbeitrag für den Konzern, der aber unter dem Rekordniveau von 2009 liegt. ➤ Mit ihrer umfassenden Produktpalette und ihrem internationalen Produktionsverbund ist Lufthansa Technik gut gerüstet, künftig wieder Umsatz und Ergebnis zu steigern.

Anteil am Konzernumsatz 8,7 %

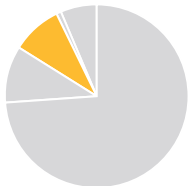

➤ Weltweit führender Anbieter von Wartungs-, Reparatur- und Überholungsleistungen

Kennzahlen Technik

|                                                    |        | 2010   | 2009   | Veränderung<br>in % |
|----------------------------------------------------|--------|--------|--------|---------------------|
| Umsatz                                             | Mio. € | 4 018  | 3 963  | 1,4                 |
| davon mit Gesellschaften<br>des Lufthansa Konzerns | Mio. € | 1 645  | 1 666  | -1,3                |
| Operatives Ergebnis                                | Mio. € | 268    | 316    | -15,2               |
| Vergleichbare operative Marge                      | %      | 7,4    | 8,3    | -0,9 P.             |
| Segmentergebnis                                    | Mio. € | 319    | 331    | -3,6                |
| EBITDA                                             | Mio. € | 412    | 436    | -5,5                |
| CVA                                                | Mio. € | 172    | 164    | 4,9                 |
| Segmentinvestitionen                               | Mio. € | 67     | 121    | -44,6               |
| Mitarbeiter zum 31.12.                             | Anzahl | 20 159 | 19 796 | 1,8                 |
| Mitarbeiter im Jahresdurchschnitt                  | Anzahl | 20 297 | 19 758 | 2,7                 |

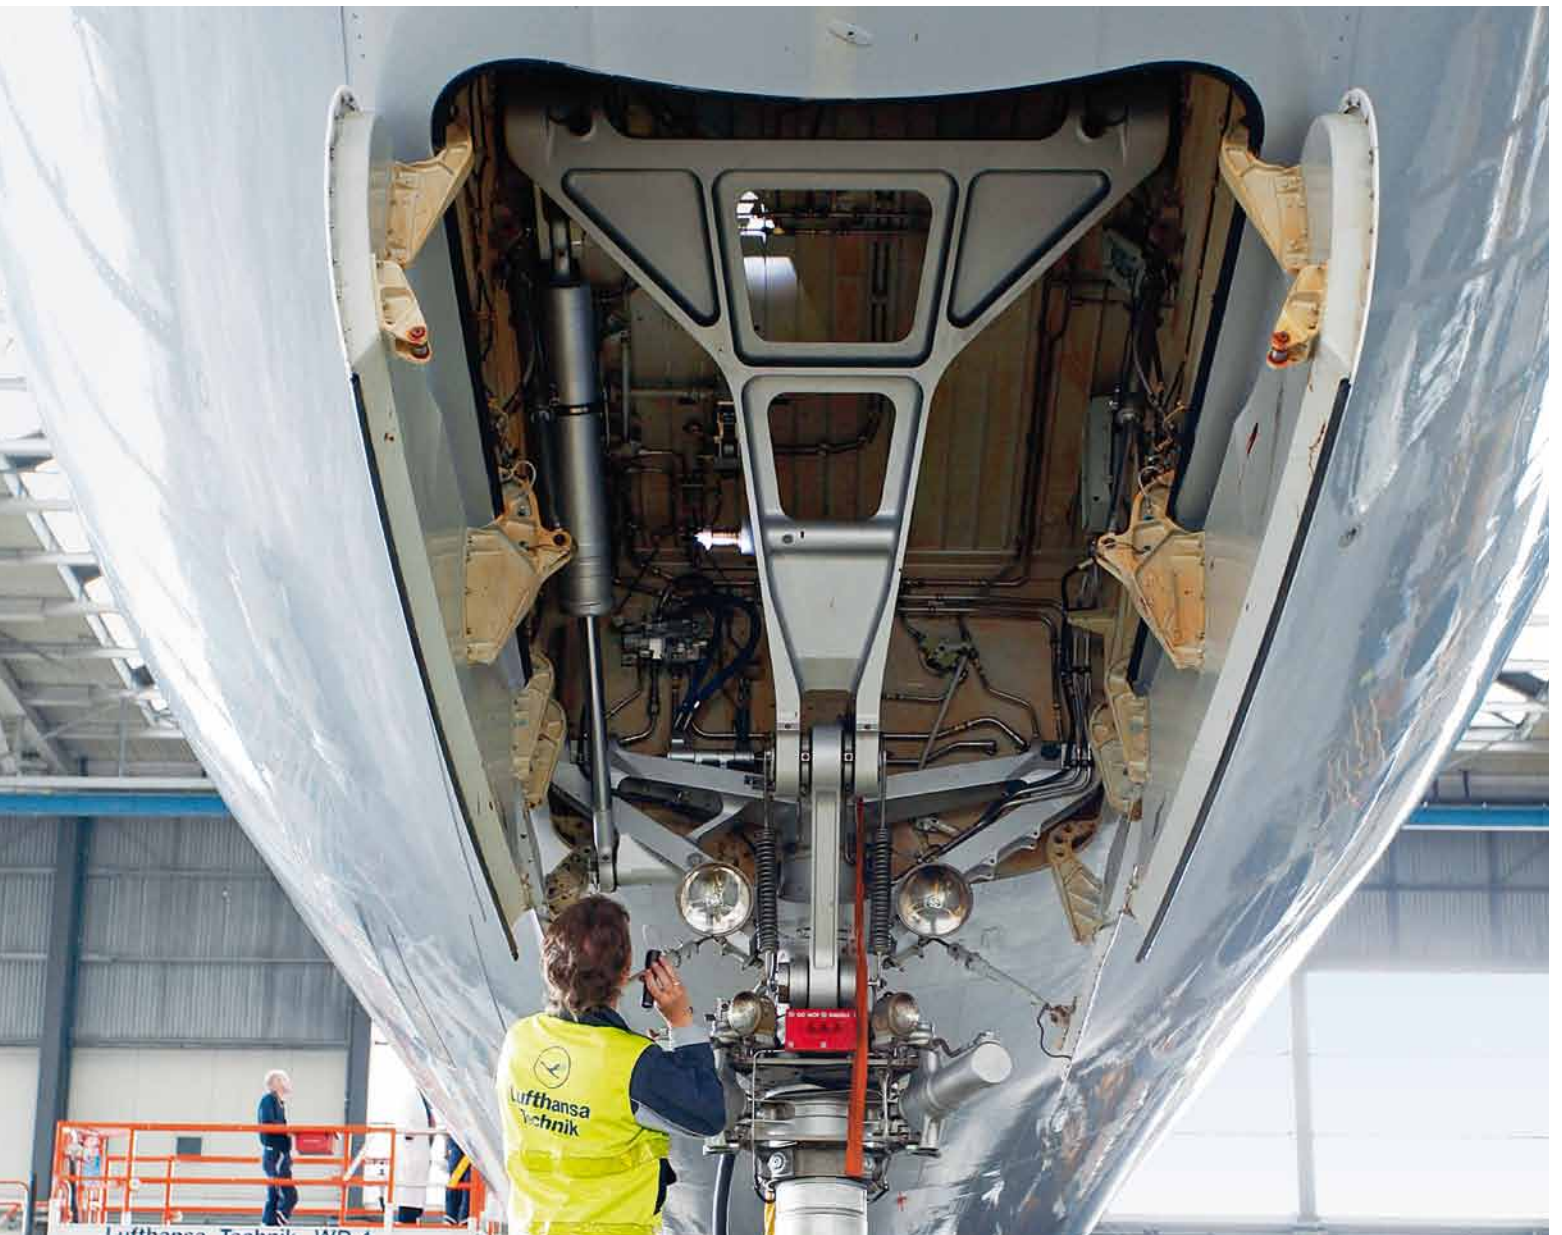

➤ 4,0 Mrd. EUR Umsatz

➤ 268 Mio. EUR Operatives Ergebnis

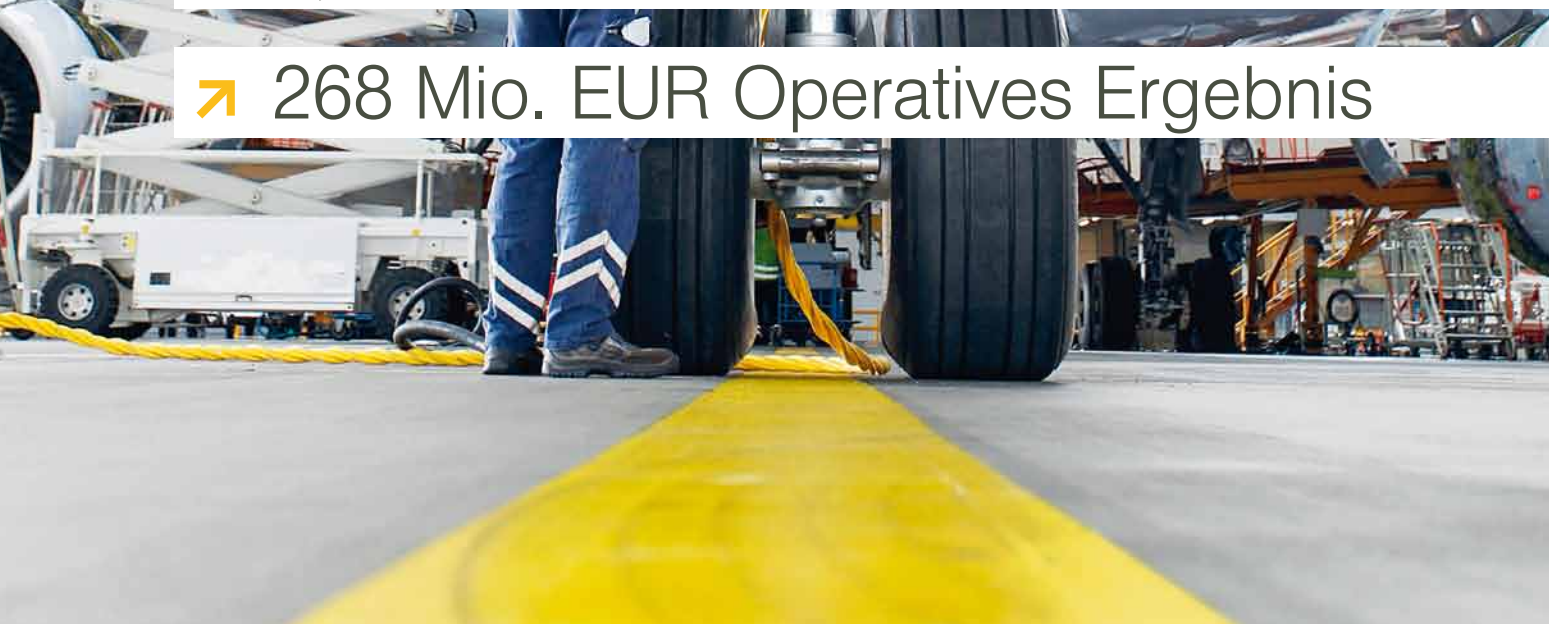



## Geschäftstätigkeit und Strategie

### Führender Anbieter auf dem MRO-Markt

Lufthansa Technik ist der weltweit führende und herstellerunabhängige Anbieter von Leistungen zur Wartung, Reparatur und Überholung (Maintenance, Repair & Overhaul – MRO) von zivilen, kommerziellen Flugzeugen. Zu dem Technikverbund gehören weltweit 30 technische Instandhaltungsbetriebe. Das Unternehmen ist direkt und indirekt an 54 Gesellschaften beteiligt.

Seit mehr als 50 Jahren beteiligt sich Lufthansa Technik an der Entwicklung neuer Wartungs- und Instandhaltungsverfahren für Produkte großer Hersteller und unterstützt Fluggesellschaften bei der Einführung neuer Flugzeugtypen in den Linienbetrieb. Nach der erfolgreichen Aufnahme der technischen Dienstleistungen für den Airbus A380 bereitet sich das Unternehmen bereits jetzt auf die technische Betreuung der neuen Flugzeugmuster Boeing 787 und 747-8i vor.

Das komplette Leistungsspektrum der Lufthansa Technik wird durch insgesamt sechs Produktdivisionen angeboten: Wartung, Flugzeugüberholung, Triebwerke, Geräte, Fahrwerke sowie die Erstausrüstung und Wartung von VIP-Flugzeugen. Dabei bietet das Unternehmen unterschiedlich strukturierte Produkte und Produktkombinationen an – von der Einzelreparatur eines Geräts bis zur vollintegrierten Versorgung ganzer Flotten einschließlich Reservetriebwerken und -komponenten. Die sogenannten Total Support Leistungen garantieren dem Kunden eine umfangreiche Betreuung bis hin zum kompletten Flottenmanagement und sind eines der erfolgreichsten Leistungspakete auf dem Weltmarkt.

Für den Instandhaltungsbetrieb ist Hamburg mit der Flugzeugüberholung, der Erstausrüstung von VIP-Flugzeugen, der Triebwerks- und Geräteinstandhaltung, dem Logistikzentrum sowie dem Entwicklungs- und Herstellerbetrieb der wichtigste Standort und Hauptsitz von Lufthansa Technik. Die größten Wartungsstationen sind in Frankfurt, München und Berlin, weitere Stationen befinden sich an allen größeren deutschen Flughäfen und an 50 weiteren Standorten weltweit. Lufthansa Technik nutzt ihr internationales Netzwerk, um Leistungen bei ihren Kunden vor Ort erbringen zu können, wie zum Beispiel seit 2010 auch in Riga, Lettland, mit der neuen Wartungsstation der Lufthansa Bombardier Aviation Services für Geschäftsreiseflugzeuge. Mit kostengünstigen Standorten erhöht Lufthansa Technik ihre Wettbewerbsfähigkeit; dazu trägt auch der schon vor Jahren erfolgte Eintritt in den asiatischen Markt bei. Heute unterhält Lufthansa Technik Wartungseinrichtungen in fünf asiatischen Ländern, wie zum Beispiel seit 10 Jahren Lufthansa Technik Philippines sowie Lufthansa Technik Shenzhen, Lufthansa Technik Services India und Ameco Beijing. 2011 wird die Marktpräsenz in Deutschland durch die Errichtung eines neuen Hangars für die Flugzeugwartung mit drei Stellplätzen für Kurz- und Mittelstreckenflugzeuge am künftigen Flughafen Berlin-Brandenburg International weiter ausgebaut.

### Die Produktpalette wurde auch 2010 erweitert

Im Berichtsjahr stellte Lufthansa Technik eine Vielzahl neuer Produkte vor. Dazu zählten etwa ein neues, bordeigenes Kamera-Überwachungssystem sowie ein flexibles Schnell-Wechsel-Kit für VIP-Kabinen in Airbus- und Boeing-Flugzeugen. Mit diesem Kit können Airline-Kunden bei Bedarf in kurzer Zeit einen Teilbereich einer Flugzeugkabine in ein exklusives VIP-Compartment umrüsten.

### Produktportfolio und -divisionen von Lufthansa Technik

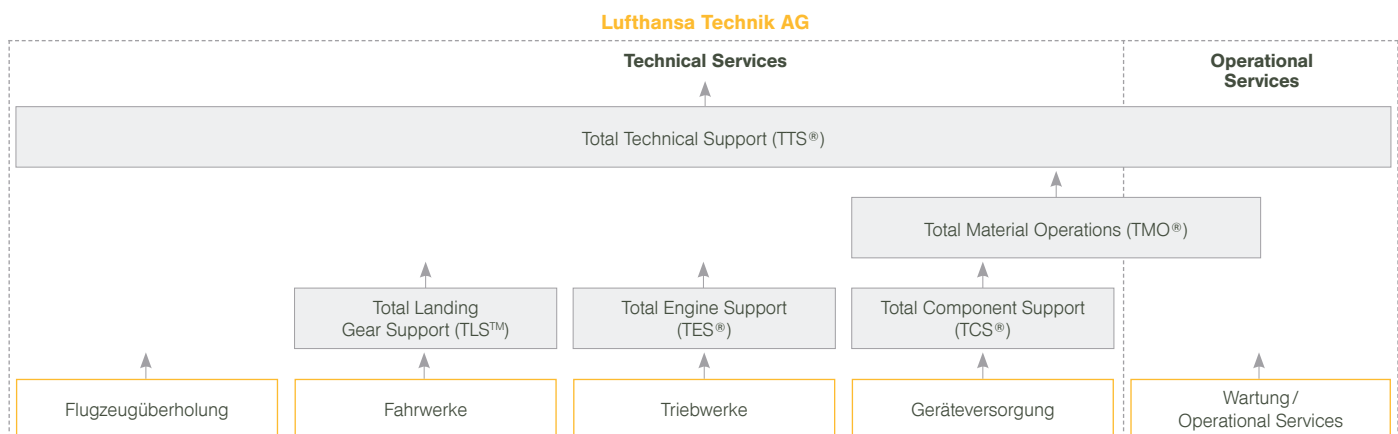



**Standorte Lufthansa Technik**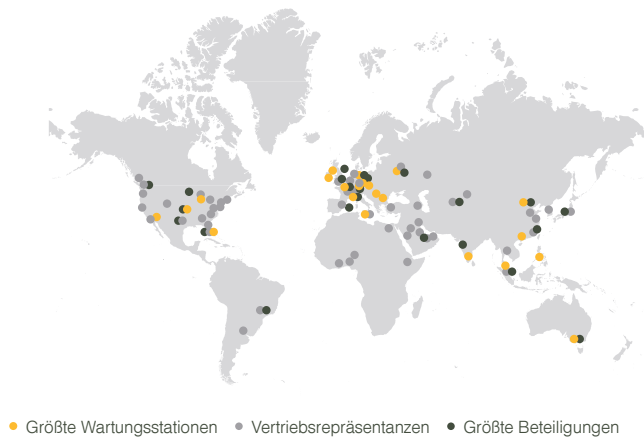

Außerdem wird das „Mobile Aircraft and Cabin Services“-Team eingesetzt, um zahlreiche VIP- und Geschäftsflugzeugkunden nunmehr weltweit vor Ort zu betreuen.

Auch die Produktpalette im Triebwerksbereich wurde erweitert. So können nun Wartungs- und Überholungsarbeiten am Trent 900 des Airbus A380 sowie an der Hilfsturbine der Embraer E-Jets durchgeführt werden. Mit Volvo Aero Corporation unterzeichnete Lufthansa Technik ein Kooperationsabkommen, um gemeinsam neue Reparaturmethoden für Triebwerkseinzelteile zu entwickeln und zu vermarkten. Zudem plant das Unternehmen eine Zusammenarbeit mit Panasonic Avionics Corporation bei der Entwicklung, Herstellung und Vermarktung von Bordunterhaltungs- und Kommunikations- sowie Kabinenmanagement-Systemen für VIP-Flugzeuge im Rahmen eines Joint Ventures.

**Absatzmärkte und Wettbewerb****Der MRO-Markt erholt sich wieder**

Die sich fortsetzende Erholung des Weltluftverkehrs ließ mit einiger Verzögerung auch die weltweite Nachfrage nach technischen Instandhaltungsleistungen für die Luftfahrtindustrie wieder ansteigen. Der Gesamtmarkt für technische Dienstleistungen an Verkehrsflugzeugen hatte im Jahr 2010 ein geschätztes Volumen von 45 Mrd. USD und wuchs gegenüber dem Vorjahr um 2,5 Prozent. Das moderne Portfolio der Lufthansa Technik deckt 82 Prozent des Marktvolumens ab. Der Portfoliomarkt wuchs durch den Roll-over auf junge Flotten noch stärker, nämlich um 3,9 Prozent. Aufgrund des moderaten Umsatzwachstums der Lufthansa Technik im Jahr 2010 reduzierte sich der Marktanteil leicht auf 14 Prozent.

Zu den Wettbewerbern der Lufthansa Technik zählen auf der einen Seite Flugzeug-, Triebwerks- und Gerätehersteller (Original Equipment Manufacturer – OEM). Auf der anderen Seite bieten auch andere Fluggesellschaften wie Air France-KLM Wartungsleistungen an, ebenso wie unabhängige Anbieter (zum Beispiel ST AERO, SR Technics). Dabei nimmt der Wettbewerb weiter zu: Neue MRO-Kapazitäten drängen in den Markt und verstärken den Preisdruck bei einem gleichzeitig weiterhin hohen Kosten- und Margendruck der Airlines. Lufthansa Technik hat jedoch als Gegenmaßnahme frühzeitig Programme eingeführt, auf deren Basis Kapazitäten flexibler gestaltet, Kosten gesenkt und die Effizienz gesteigert werden können.

**Vertrieb und Kunden****Der Umsatzanteil mit Drittkunden steigt**

Lufthansa Technik betreut rund 750 Kunden weltweit, darunter vor allem Fluggesellschaften und VIP-Jet-Betreiber, aber auch Flugzeug-Leasinggesellschaften. Dabei entwickelte sich der Umsatz mit Kunden außerhalb des Lufthansa Konzerns 2010 weiter positiv. Er wuchs um 1,1 Prozentpunkte auf 59,1 Prozent der Umsatzerlöse. Die wichtigste Absatzregion bildete mit einem Umsatzanteil von rund 68 Prozent im Jahr 2010 unverändert Europa einschließlich der GUS-Staaten. In Asien betrug der Anteil 13 Prozent, in den Regionen Nahost/Afrika und Amerika lag er bei 10 Prozent beziehungsweise 9 Prozent.

Ihre Leistungen vertreibt Lufthansa Technik in erster Linie zentral über den Direktvertrieb; Einzelprodukte werden jedoch auch dezentral verkauft. Vor dem Hintergrund eines grundsätzlich regional gegliederten Vertriebs werden große und bedeutende Kunden auch von Key Accounts betreut, teilweise direkt vor Ort. Im Rahmen des E-Marketings, gibt das Kundenportal einen schnellen Überblick über die Produkte, Standorte und Neuerungen von Lufthansa Technik. Ihre Kundenbeziehungen festigt und erweitert Lufthansa Technik außerdem durch die Herausgabe unterschiedlicher Printmedien, die Teilnahme an internationalen Fachmessen sowie durch eigene produktorientierte Fachkonferenzen. Regelmäßig durchgeführte Kundenzufriedenheitsstudien sowie das direkte Kundenfeedback gegenüber Vertriebsmitarbeitern und den dezentralen Kundendiensten ergeben ein genaues Bild der Kundenwünsche.

## Geschäftsverlauf

### Gute Vertragsabschlüsse sorgen für Erholung im Jahresverlauf

Lufthansa Technik musste als Spätzykliker in der Luftverkehrsbranche 2010 zunächst Einbußen im Umsatz in Kauf nehmen, der aber in der zweiten Jahreshälfte zunehmend an das Niveau des Vorjahres anknüpfte. Insgesamt wurde mit 34 neuen Kunden und 460 neuen Verträgen ein gegenüber dem Vorjahr um 2,3 Prozent gesteigertes Vertragsvolumen von 504 Mio. EUR für das Gesamtjahr 2010 erreicht. Einige Kunden gingen aber auch krisenbedingt durch Insolvenzen verloren, woraus sich Umsatzverluste sowie Ergebnisausfälle und Wertberichtigungen auf Forderungen ergeben haben. Dennoch konnte der Kundenverlust im Jahr 2010 überkompensiert und die betreute Flotte um 27 Flugzeuge auf insgesamt 2.055 Flugzeuge vergrößert werden.

Im Berichtsjahr übergab Lufthansa Technik den zweiten Airbus A319 an die Flugbereitschaft des Bundesministeriums der Verteidigung. Während einer Liegezeit von sieben Monaten wurde dieser mit einer VIP-Kabine ausgestattet. Daneben wird in Hamburg derzeit ein weiterer Airbus A340 für die Bundesregierung ausgestattet. Lufthansa Technik und China Airlines haben des Weiteren einen langfristigen Vertrag über Komponenten-Services für 24 Airbus A330/A340 der Fluggesellschaft unterzeichnet. Außerdem hat Lufthansa Technik für Aeromexico die Komponentenversorgung für die 34 Boeing B737NG übernommen.

Auch Lufthansa Technik AERO Alzey gelangen im abgelaufenen Jahr zahlreiche Auftragsgewinne. Dazu zählen beispielsweise die Instandhaltungsmaßnahmen für die Triebwerke und -motoren einer Vielzahl von Flugzeugen der Lufthansa CityLine, Eurowings, der österreichischen Regionalflygesellschaft InterSky, der spanischen Regionalflygesellschaft Air Nostrum sowie Air Mauritius.

Lufthansa Technik konnte einen über zehn Jahre laufenden Kooperationsvertrag mit der National Air Services (NAS) in Saudi-Arabien abschließen. Dieser beinhaltet die Wartungsleistungen für Triebwerke und Komponenten der gesamten NAS-Flotte. Daneben unterstützen Ingenieure und technische Berater von Lufthansa Technik die neue Technik-Tochter des Kunden, die NAS Tech, beim Aufbau von eigenem Instandhaltungs-Know-how vor Ort.

Von Austrian Airlines kam der Auftrag für die Überholung der Triebwerke ihrer Airbus A320-Familie für die nächsten acht Jahre. Damit wird die langjährige Kooperation und Partnerschaft mit Austrian Airlines, die seit September 2009 Teil des Lufthansa Konzerns ist, auch im Wartungsbereich weiter ausgebaut.

## Umsatz- und Ergebnisentwicklung

### Die Umsätze steigen um 1,4 Prozent

Im Berichtszeitraum wurde der Konsolidierungskreis des Geschäftsfelds um die Flugzeugüberholungsbetriebe Lufthansa Technik Malta und Lufthansa Technik Budapest erweitert.

Lufthansa Technik konnte durch ein starkes viertes Quartal ihren Wachstumspfad fortsetzen und die Umsatzerlöse im Vergleich zum Vorjahr um 1,4 Prozent auf 4,0 Mrd. EUR steigern. Während der Umsatz mit Gesellschaften des Lufthansa Konzerns leicht um 1,3 Prozent sank, konnte Lufthansa Technik das konzernexterne Geschäft um 3,3 Prozent auf 2,4 Mrd. EUR weiter ausbauen.

Umsatz Technik in Mio. €

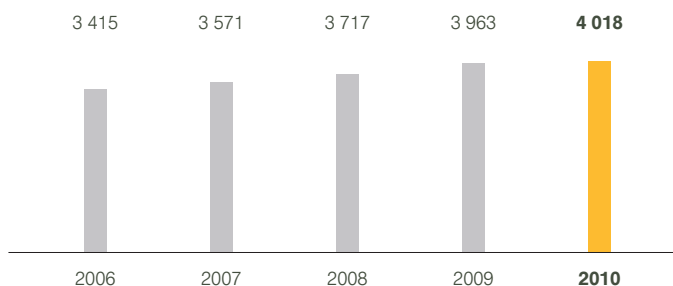

Die sonstigen operativen Erträge wuchsen infolge positiver Bestandsveränderungen sowie gestiegener Erträge aus Personalüberlassungen und Serviceleistungen um 54 Mio. EUR auf 211 Mio. EUR.

Das Geschäftsfeld erwirtschaftete operative Gesamterlöse in Höhe von 4,2 Mrd. EUR (+2,6 Prozent).

### Operative Aufwendungen nehmen um 4,1 Prozent zu

Die operativen Aufwendungen stiegen um 4,1 Prozent auf 4,0 Mrd. EUR. Der größte Zuwachs entfiel auf den Materialaufwand, der um 3,9 Prozent auf 2,1 Mrd. EUR anstieg. Hier schlug sich das Umsatzwachstum der Triebwerks- und Geräteinstandhaltung nieder.

Der Personalaufwand erhöhte sich um 4,0 Prozent auf 1,1 Mrd. EUR. Die durchschnittliche Anzahl der Mitarbeiter im Geschäftsfeld Technik wuchs gegenüber dem Vorjahr durch die neu konsolidierten Gesellschaften um 955. In mehreren Betrieben wurde die Beschäftigtenzahl jedoch reduziert, sodass im Jahresdurchschnitt ein Zuwachs von 539 auf 20.297 verblieb.

**Aufwendungen Technik**

|                                                 | 2010<br>in Mio. € | 2009<br>in Mio. € | Veränderung<br>in % |
|-------------------------------------------------|-------------------|-------------------|---------------------|
| Materialaufwand                                 | 2 056             | 1 979             | 3,9                 |
| davon übrige Roh-, Hilfs-<br>und Betriebsstoffe | 1 329             | 1 243             | 6,9                 |
| davon Fremdleistungen                           | 604               | 617               | -2,1                |
| Personalaufwand                                 | 1 101             | 1 059             | 4,0                 |
| Abschreibungen                                  | 94                | 87                | 8,0                 |
| Sonstiger operativer Aufwand                    | 710               | 679               | 4,6                 |
| <b>Summe operative Aufwendungen</b>             | <b>3 961</b>      | <b>3 804</b>      | <b>4,1</b>          |

Die Abschreibungen wuchsen um 8,0 Prozent auf 94 Mio. EUR. Der sonstige operative Aufwand stieg durch erhöhte Rückstellungsbildungen, vermehrte Miet- und Erhaltungsaufwendungen und den verstärkten Einsatz von Fremdpersonal um 4,6 Prozent auf 710 Mio. EUR.

**Das operative Ergebnis liegt erwartungsgemäß unter Vorjahr**

Das operative Ergebnis konnte erwartungsgemäß nicht auf dem hohen Vorjahresniveau gehalten werden. Es sank um 15,2 Prozent auf 268 Mio. EUR.

Die übrigen Segmenterträge stiegen infolge von Rückstellungsaufösungen und einer Zuschreibung auf Finanzanlagen um 16 Mio. EUR auf 34 Mio. EUR. Die übrigen Segmentaufwendungen blieben auf Vorjahresniveau. Das Ergebnis aus der Equity-Bewertung wuchs deutlich um 20 Mio. EUR auf 19 Mio. EUR. Zurückzuführen ist dies auf die 2010 zusätzlich berücksichtigten Equity-Ergebnisse der Technik-Gesellschaften N 3 (Triebwerks-Joint Venture mit Rolls Royce), Spairliners (A380 Komponenten-Joint Venture mit Air France) und Lufthansa Bombardier Aviation Services sowie verbesserte Ergebnisse der Beteiligungen Heico und Ameco und den Verkauf der verlustbringenden Alitalia Maintenance Services. Dadurch gelang es, das Segmentergebnis auf 319 Mio. EUR zu halten (-3,6 Prozent).

**Operatives Ergebnis Technik in Mio. €**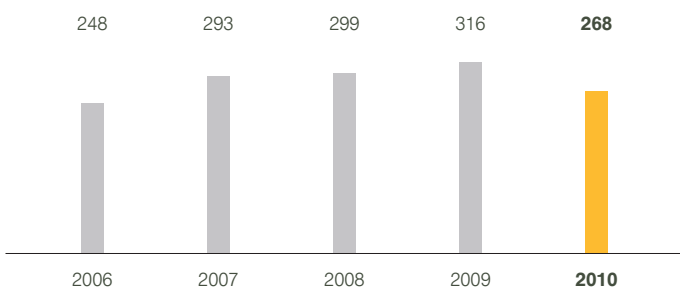**Die Segmentinvestitionen liegen deutlich unter Vorjahr**

Die Segmentinvestitionen lagen mit 67 Mio. EUR um 54 Mio. EUR unter dem relativ hohen Vorjahreswert, in dem der Kauf von Reservetriebwerken und die Ausstattung der A380-Wartungshalle enthalten waren.

**Die Mehrperiodenübersicht bestätigt Lufthansa Technik als verlässlichen Ergebnisträger**

Das Geschäftsfeld Technik ist der Spätzykler im Lufthansa Konzern, aber auch verlässlicher Träger bedeutender operativer Ergebnisbeiträge. So ist es Lufthansa Technik in den vergangenen Jahren auch unter wechselnden wirtschaftlichen Rahmenbedingungen gelungen, durch stetiges Umsatzwachstum, consequentes Kostenmanagement, eine moderne Produktpalette und einen internationalen Produktionsverbund kontinuierlich hohe operative Gewinne zu erzielen. Das bisherige Rekordergebnis erzielte das Geschäftsfeld 2009, dem Jahr, das für viele Luftverkehrsunternehmen als das Krisenjahr in die Unternehmensgeschichte eingeht. Das Ergebnis 2010 liegt um 15 Prozent erwartungsgemäß hinter dieser Marke zurück.

**Ausblick****Wieder Wachstum in anziehendem Marktumfeld**

Die MRO-Industrie schaut vor dem Hintergrund weltweit wachsender Flugzeugflotten grundsätzlich optimistisch in die Zukunft und erwartet mittelfristig ein Wachstum von durchschnittlich 4,6 Prozent pro Jahr. Dabei soll der vom Produktportfolio der Lufthansa Technik bediente Markt sogar um 5,2 Prozent pro Jahr wachsen. Durch den kontinuierlichen Markteintritt neuer MRO-Kapazitäten wird der bestehende Wettbewerb jedoch noch intensiver werden. Zudem ist eine weitere Verschärfung des Preis- und Kostendrucks durch die krisenbelasteten Fluggesellschaften zu erwarten. Von diesem Marktwachstum werden daher nur MRO-Betriebe mit wettbewerbsfähigen Stückkosten profitieren.

Lufthansa Technik ist dank ihres modernen, innovativen Produktportfolios, ihrer kostengünstigen Standorte und der permanent vorangetriebenen Kostensenkungs-, Effizienzsteigerungs- und Flexibilisierungsprojekte für die Herausforderungen des Wettbewerbs gut aufgestellt. Für 2011 und 2012 rechnet Lufthansa Technik wieder mit einem Anstieg der Umsätze und operativen Ergebnisse.

## Geschäftsfeld IT Services

➤ Lufthansa Systems deckt weltweit als einziger Anbieter die gesamte Prozesskette des Luftverkehrs ab. ➤ Ein noch rückläufiger Markt mit hohem Wettbewerb führte 2010 zu gesunkenen Umsätzen. ➤ Dies konnte weitgehend durch striktes Kostenmanagement kompensiert werden. ➤ Mit dem Programm „Jetzt!“ stellt sich Lufthansa Systems neu auf, um Umsatz und Ergebnis wieder nachhaltig zu steigern.

Anteil am Konzernumsatz 0,9 %

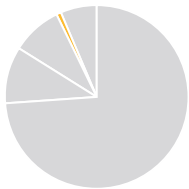

➤ Führender IT-Dienstleister der Luftfahrtindustrie

Kennzahlen IT Services

|                                                    |        | 2010  | 2009  | Veränderung<br>in % |
|----------------------------------------------------|--------|-------|-------|---------------------|
| Umsatz                                             | Mio. € | 595   | 605   | -1,7                |
| davon mit Gesellschaften<br>des Lufthansa Konzerns | Mio. € | 363   | 361   | 0,6                 |
| Operatives Ergebnis                                | Mio. € | 10    | 16    | -37,5               |
| Vergleichbare operative Marge                      | %      | 1,8   | 2,8   | -1,0 P.             |
| Segmentergebnis                                    | Mio. € | -6    | 16    |                     |
| EBITDA                                             | Mio. € | 45    | 54    | -16,7               |
| CVA                                                | Mio. € | -23   | 3     |                     |
| Segmentinvestitionen                               | Mio. € | 36    | 52    | -30,8               |
| Mitarbeiter zum 31.12.                             | Anzahl | 2 935 | 3 027 | -3,0                |
| Mitarbeiter im Jahresdurchschnitt                  | Anzahl | 2 974 | 3 041 | -2,2                |

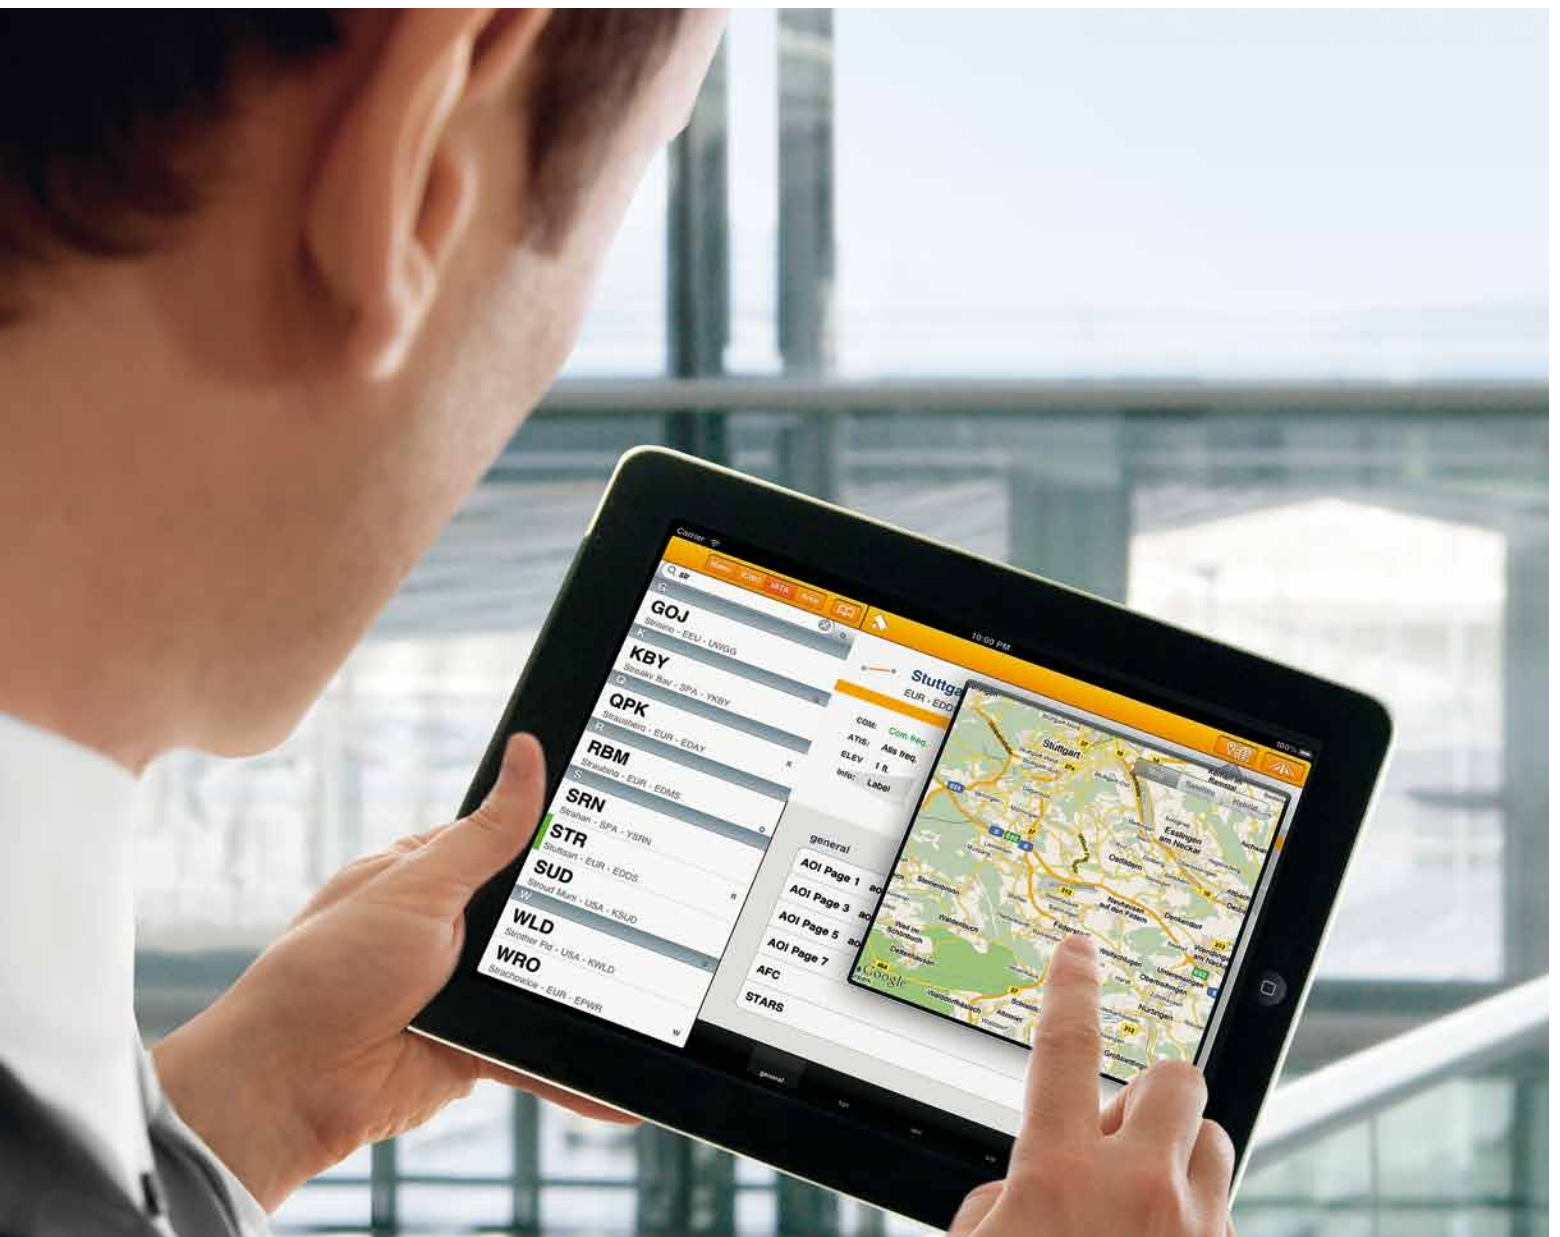

➤ 595 Mio. EUR Umsatz

➤ 10 Mio. EUR Operatives Ergebnis



## Geschäftstätigkeit und Strategie

### Führender Anbieter von IT-Lösungen für die Luftverkehrsindustrie

Lufthansa Systems bietet Beratungs- und IT-Dienstleistungen für ausgewählte Branchen und hat eine weltweit führende Position in der Luftverkehrsindustrie. Zu ihren Kunden gehören mehr als 200 Fluggesellschaften, aber auch Unternehmen aus anderen Branchen.

Das Unternehmen hat seinen Hauptsitz in Kelsterbach bei Frankfurt am Main und unterhält mehrere andere Standorte in Deutschland sowie in 14 weiteren Ländern. Als international operierender IT-Dienstleister ist Lufthansa Systems weltweit präsent. Das Rechenzentrum in Kelsterbach ist eines der modernsten und leistungsfähigsten in Europa. Seit dem 1. Juli 2010 ist Stefan Hansen Vorsitzender des Vorstands der Lufthansa Systems AG.

Mit ihrem Portfolio bietet Lufthansa Systems maßgeschneiderte Lösungen für ihre Kunden an. Ihre Produkte und Beratungsleistungen liefern einen besonderen Mehrwert, indem sie dazu beitragen, die Effizienz zu steigern, Kosten zu senken oder zusätzliche Erlöse zu generieren. Das branchenübergreifende Leistungsangebot von Lufthansa Systems reicht von der IT-Beratung über die Entwicklung individueller Anwendungen, die Vermarktung eigener Branchenlösungen und die Anpassung branchenspezifischer Software bis zur Betreuung der Anwendung im Routinebetrieb.

### Umfangreiches Airline-Portfolio und Expertise in Beratung und Projektmanagement

Bei der Entwicklung von IT-Applikationen für Fluggesellschaften kann Lufthansa Systems auf ihre langjährige Erfahrung zurückgreifen. Als weltweit einziger Anbieter deckt sie die gesamte Prozesskette des Luftverkehrs ab. Mit den integrierten Plattformlösungen, in denen zusammenhängende Teilprozesse zu einer Gesamtfunktion kombiniert werden, hält das Unternehmen eine führende Position am Markt.

In anderen Branchen bietet das Unternehmen maßgeschneiderte Produkte sowie seine umfangreiche Expertise im Management von Projekten aller Größenordnungen an. Dies umfasst beispielsweise die Optimierung von Vertriebsprozessen, hochentwickelte Online-Lösungen oder die Einführung komplett neuer IT-Landschaften. Dabei profitieren die Kunden nicht nur von der langjährigen Projekterfahrung, sondern auch von dem umfassenden Verständnis komplexer Geschäftsprozesse und dem fundierten Technologie-Know-how.

## Absatzmärkte und Wettbewerb

### Zunehmender Wettbewerb in leicht rückläufigem Markt

Der weltweite Airline-IT-Markt ist in der Krise geschrumpft und hat nun ein Volumen von etwa 7,5 Mrd. EUR (Vorjahr: 7,8 Mrd. EUR) erreicht. Davon wenden die Fluggesellschaften im Durchschnitt etwa 50 Prozent für Betriebsleistungen, 30 Prozent für Projekte und 20 Prozent für IT-Produkte auf. Im Markt Europa/Nahost/Afrika (EMEA) hat Lufthansa Systems an den extern vergebenen IT-Leistungen einen Anteil von 35 Prozent; in Asien und Amerika liegt der Marktanteil bei jeweils 3 Prozent. Insgesamt ist in diesem Segment des IT-Markts in den kommenden Jahren bei anhaltend schwacher Investitionsneigung auf Kundenseite nur ein geringes Wachstum zu erwarten, sodass das Vor-Krisen-Volumen voraussichtlich erst 2015 wieder erreicht werden wird.

Neben den etablierten Wettbewerbern Amadeus, Sabre Airline Solutions, EDS, SITA sowie Boeing mit seiner Tochtergesellschaft Jeppesen drängen zunehmend auch Google, beispielsweise durch die Übernahme von ITA Software, und Amazon in den Markt für Airline-IT. Wettbewerber im Bereich Aviation & Industry sind alle großen Anbieter von Beratungsleistungen und IT-Outsourcing.

Bedingt durch die Kostenvorteile der Schwellenländer gibt es einen weiterhin anhaltenden Preisverfall und damit einen Trend zur Verlagerung bestimmter Tätigkeiten ins Ausland. Wachsende Bedeutung haben außerdem integrierte Lösungen, wie Lufthansa Systems sie im Airline-Bereich bereits anbietet. Wettbewerbsfähige Kostenstrukturen sowie die Fähigkeit, in neue technologische Entwicklungen investieren zu können, sind in diesem Umfeld zentrale Erfolgsfaktoren.

## Vertrieb und Kunden

### Umfangreiches Produktportfolio für eine breite Kundenbasis

Die Kundenbasis von Lufthansa Systems umfasst über 300 Unternehmen. Rund zwei Drittel von ihnen sind Fluggesellschaften aus aller Welt, darunter internationale Netzwerk-Carrier ebenso wie No-Frills-Airlines und Regionalfluggesellschaften. Ihnen bietet Lufthansa Systems unabhängig vom Geschäftsmodell ein umfassendes Spektrum an IT-Lösungen für ihre Geschäftsprozesse. Die Kunden außerhalb der Luftfahrt kommen überwiegend aus den Bereichen Logistik und Transport, Medien und Verlage sowie Gesundheitswesen. Die Zusammenarbeit mit den Kunden erfolgt, abgesehen von Einzelprojekten, überwiegend auf Basis langjähriger Verträge.

Der Vertrieb ist nach den Regionen Europa/Nahost/Afrika (EMEA), Asien/Pazifik und Amerika ausgerichtet. Ansprechpartner vor Ort ermöglichen dabei kurze Reaktionszeiten und größtmögliche Kundennähe. Das Key Account Management für die Lufthansa

## Standorte Lufthansa Systems

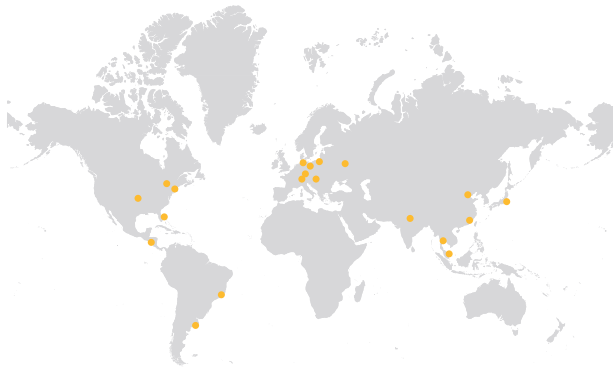

Passage als größte Einzelkundin wird derzeit um den Vertrieb für die weiteren Fluggesellschaften im Lufthansa Konzern erweitert und agiert künftig als Bereich „Lufthansa Passage & Verbund-Airlines“.

Mit der Einführung der Integrated Commercial Platform (ICP) im Jahr 2010 setzte Lufthansa Systems ihre Produktstrategie mit Fokus auf integrierten Plattformlösungen fort. Die ICP deckt sämtliche Prozesse des Netzmanagements und der Ertragssteuerung ab und ermöglicht so eine konsistente, ganzheitliche Sicht auf alle für die kommerzielle Planung relevanten Informationen. Darüber hinaus können Fluggesellschaften, die für die Abrechnung von Tickets mit ihren Interline-Partnern die Sirax AirFinance Plattform nutzen, dank exakterer Kalkulation Mehrerlöse von bis zu 2 USD pro Passagier erzielen. Darüber hinaus erhalten sie einen zeitnahen, umfassenden Überblick über ihre Finanzlage und können so schnell auf veränderte Bedingungen reagieren.

Eine besondere Stärke im Geschäft mit Kunden anderer Branchen liegt in der Analyse komplexer Geschäftsprozesse und deren Optimierung mit Hilfe maßgeschneiderter IT-Lösungen. Im vergangenen Geschäftsjahr unterstrichen erfolgreiche Projektabschlüsse im SAP-Umfeld das Know-how und die langjährige Erfahrung von Lufthansa Systems. Als zertifizierter SAP-Partner bietet das Unternehmen das gesamte Leistungsspektrum von der Konzeption und Anpassung über die Implementierung und Konsolidierung bis zur Wartung von SAP-Systemen an.

## Geschäftsverlauf

### Schwieriges Umfeld legt Fokus auf Kostenmanagement

Lufthansa Systems hat sich 2010 in einem schwierigen wirtschaftlichen Umfeld bewegt, das von sinkenden Umsatzzahlen bei Fluggesellschaften wie auch bei sonstigen Industriekunden geprägt war. Obwohl die Fluggesellschaften auf globaler Basis wieder schwarze Zahlen schreiben, ist die Bereitschaft zu Investitionen nach wie vor gering. Hinzu kommt, dass die Erholung des Luftverkehrs in Europa nicht so ausgeprägt ist wie in den USA und Asien. Auch in anderen

Branchen war 2010 noch eine deutliche Zurückhaltung bei IT-Investitionen zu spüren, sodass Lufthansa Systems noch nicht von der teilweise kräftigen Erholung der Konjunktur profitieren konnte. Durch die konsequente Fortführung der bereits 2009 eingeleiteten Kostensenkungsmaßnahmen ist es im abgelaufenen Geschäftsjahr aber gelungen, die gesunkenen Umsätze ergebnisseitig zu kompensieren.

### Neue Kunden und Aufträge im Luftverkehr sowie in anderen Branchen

In dem insgesamt schwierigen wirtschaftlichen Umfeld konnte Lufthansa Systems ihr Geschäft mit Neu- und Bestandskunden weiter ausbauen. So entschieden sich mit Transaero und Tunisair zwei Fluggesellschaften für die Steuerung ihres operativen Flugbetriebs mit der Integrated Operations Control Center Plattform (IOCC), wobei Tunisair ebenfalls wesentliche Komponenten der Integrated Commercial Platform (ICP) einführen wird. Auch im Bereich der Navigationslösungen konnte Lufthansa Systems ihre Marktposition deutlich ausbauen. Mit dem Lido/eRouteManual machen Fluggesellschaften den Schritt ins papierlose Cockpit und können in diesem Bereich ihre Prozesse spürbar vereinfachen.

Zahlreiche Neukunden und Vertragsverlängerungen konnten zum Beispiel auch für Lido/Flight, das zu den leistungsstärksten Flugwegplanungslösungen weltweit gehört, gewonnen werden. Es erlaubt für jeden einzelnen Flug die Optimierung der Streckenführung in Abhängigkeit von Wetter, Luftraumsituation und anderen Parametern. Fluggesellschaften können so ihre Treibstoffkosten um bis zu 5 Prozent senken und damit auch die Umwelt spürbar entlasten. Zugleich sinkt dank eines hohen Grades an Automatisierung der Aufwand für die Planung, sodass sich für die Kunden auch hier Kostensenkungen ergeben. Wichtige Verträge wurden außerdem mit Lufthansa Passage und Lufthansa Cargo über die Verlängerung des Server- und Applikationsbetriebs geschlossen.

Im Industriebereich erteilte die Hamburg Port Authority den Auftrag zur Modernisierung ihrer Systeme für den Schienengüterverkehr im Hamburger Hafen. Nachdem Lufthansa Systems bereits die Konzeption für die Entwicklung eines Nachfolgers für das derzeitige Betriebs- und Informationssystem entwickelt hat, wird sie nun auch die neue Integrationsplattform bis 2012 realisieren. Dank ihrer umfangreichen Erfahrung mit komplexen logistischen Systemen wird sie dazu beitragen, dass die Bahninfrastruktur im Hamburger Hafen für weiteres Wachstum gerüstet ist.

### Das Programm „Jetzt!“ soll Umsatz und Ergebnis kurz- und mittelfristig verbessern

Vor dem Hintergrund einer fortschreitenden Marktkonsolidierung in der IT-Industrie und eines zunehmenden Wettbewerbsdrucks hat Lufthansa Systems im zweiten Halbjahr das Programm „Jetzt!“ gestartet. Zu den Zielen des Programms gehört es, jeweils 25 Mio. EUR Kostensenkungen und zusätzliche Umsätze bis zum 30. Juni 2011 zu realisieren. Darüber hinaus soll Lufthansa Systems so ausgerichtet werden, dass die Profitabilität dauerhaft gesichert

wird und das Unternehmen mittelfristig auf einen Wachstumspfad zurückkehren kann. Gemäß dem neuen Zielbild einer schlankeren Unternehmensstruktur wird Lufthansa Systems in Zukunft über drei kundenorientierte Profit-Center gesteuert, die die Projekte und Leistungen gegenüber ihren Kunden verantworten. Das Portfolio wird weiter bereinigt, Querschnittsfunktionen werden in der Lufthansa Systems AG gebündelt und für alle Bereiche bereitgestellt. Der Infrastrukturbetrieb wird künftig als Cost-Center geführt.

#### Ziele der Neuausrichtung von Lufthansa Systems

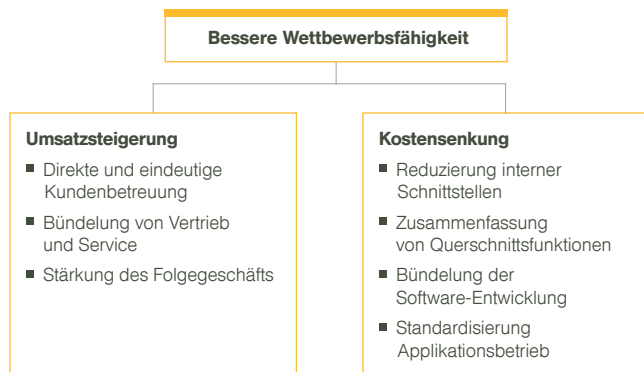

## Umsatz- und Ergebnisentwicklung

### Leichter Umsatzrückgang um 1,7 Prozent

Für das Geschäftsjahr 2010 verzeichnete Lufthansa Systems Umsatzerlöse, die mit 595 Mio. EUR rund 1,7 Prozent unter dem Vorjahresniveau lagen. Mit den Lufthansa Konzerngesellschaften wurden Erlöse in Höhe von 363 Mio. EUR (+0,6 Prozent) erzielt. Dieser leichte Anstieg resultiert hauptsächlich aus Konsolidierungseffekten. Bereinigt um diese Effekte gingen die konzerninternen Erlöse aufgrund von Preissenkungen für Betreibermodelle und den Betrieb spezifischer Applikationen sowie der Auslagerung von IT-Leistungen im Bereich Passagiersysteme zurück. Die Umsatzerlöse mit externen Kunden betrugen 232 Mio. EUR (–4,9 Prozent) und trugen mit rund 39,0 Prozent des Gesamtumsatzes wesentlich zum Geschäftserfolg bei.

#### Umsatz IT Services in Mio. €

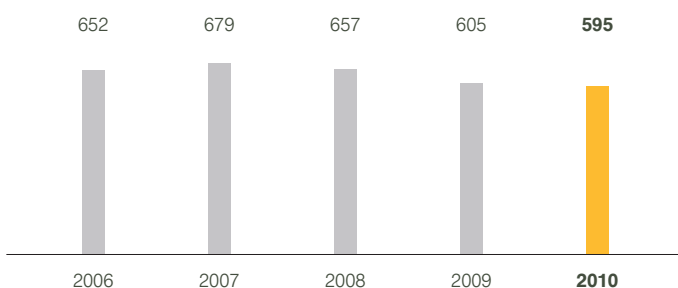

Die sonstigen operativen Erträge sanken im Wesentlichen bedingt durch rückläufige Investitionen für Kundenprojekte um 15,8 Prozent auf 32 Mio. EUR.

Die operativen Gesamterlöse gingen um 2,5 Prozent auf 627 Mio. EUR zurück.

### Operative Aufwendungen um 1,6 Prozent reduziert

Der um 7,4 Prozent auf 75 Mio. EUR reduzierte Materialaufwand steht im Zusammenhang mit rückläufigen Umsatzerlösen.

Im Jahresdurchschnitt 2010 beschäftigte Lufthansa Systems 2.974 Mitarbeiter, das waren 2,2 Prozent weniger als im vergangenen Geschäftsjahr. Demgegenüber stiegen die Personalaufwendungen auf 247 Mio. EUR (+6,0 Prozent). Zurückzuführen ist dies vor allem auf Veränderungen im Personalbereich und Restrukturierungsmaßnahmen im Zusammenhang mit dem Programm „Jetzt!“.

Die im Vergleich zum Vorjahr rückläufigen Investitionstätigkeiten führten zu einer Abnahme der Abschreibungen auf 34 Mio. EUR (–8,1 Prozent).

Die sonstigen operativen Aufwendungen konnten im Wesentlichen durch den erheblichen Abbau von Fremdpersonal und eine Reduzierung der Zukaufleistungen auf Stundenbasis um 5,4 Prozent auf 261 Mio. EUR reduziert werden.

Die operativen Gesamtaufwendungen reduzierten sich damit auf insgesamt 617 Mio. EUR (–1,6 Prozent).

#### Aufwendungen IT Services

|                                     | 2010<br>in Mio. € | 2009<br>in Mio. € | Veränderung<br>in % |
|-------------------------------------|-------------------|-------------------|---------------------|
| Materialaufwand                     | 75                | 81                | –7,4                |
| Personalaufwand                     | 247               | 233               | 6,0                 |
| Abschreibungen                      | 34                | 37                | –8,1                |
| Sonstiger operativer Aufwand        | 261               | 276               | –5,4                |
| davon Fremdpersonal                 | 59                | 75                | –21,3               |
| davon Miete/Erhaltung IT            | 106               | 104               | 1,9                 |
| <b>Summe operative Aufwendungen</b> | <b>617</b>        | <b>627</b>        | <b>–1,6</b>         |

### Laufende Restrukturierung beeinflusst das Ergebnis

Das operative Ergebnis der Lufthansa Systems verminderte sich aufgrund der eingeleiteten Maßnahmen des Programms „Jetzt!“ auf 10 Mio. EUR (–37,5 Prozent). Darin enthalten sind 9,0 Mio. EUR Restrukturierungsaufwendungen.

Während die übrigen Segmenterträge mit 1 Mio. EUR konstant blieben, erhöhten sich die übrigen Segmentaufwendungen auf 17 Mio. EUR (Vorjahr: 1 Mio. EUR). Dies ist im Wesentlichen auf Wertberichtigungen im Rahmen der Repriorisierung von Entwicklungsprojekten zurückzuführen. Das Segmentergebnis ging infolge deutlich zurück auf –6 Mio. EUR (Vorjahr: 16 Mio. EUR).

### Die Konzentration auf das Bestandsgeschäft führt zu geringeren Investitionen

Die Investitionen von Lufthansa Systems in Sachanlagen und immaterielle Vermögenswerte erreichten im Geschäftsjahr 2010 insgesamt 36 Mio. EUR (–30,8 Prozent). Der Rückgang im Vergleich zum Vorjahr resultiert aus der im Rahmen der Wirtschaftskrise getroffenen Entscheidung, die Investitionen deutlich zu reduzieren und sich vorrangig auf die Erhaltung des Bestandsgeschäfts zu konzentrieren.

Operatives Ergebnis IT Services in Mio. €

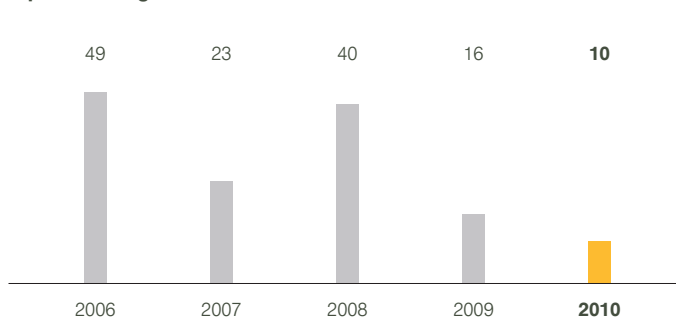

### Mehrperiodenübersicht zeigt Handlungsbedarf auf

Lufthansa Systems hat auch 2010 einen positiven operativen Ergebnisbeitrag erwirtschaftet. Die Umsätze sind jedoch seit 2007 leicht rückläufig. Neben den vorgenommenen Veränderungen im Produkt- und Beteiligungsportfolio sind sinkende Absatzpreise und eine krisenbedingt schwächere Nachfrage ursächlich für diese Entwicklung. Kostensenkungsmaßnahmen konnten im Betrachtungszeitraum den mit dem Umsatzrückgang verbundenen Margendruck zwar mindern, jedoch nicht vollständig ausgleichen. Lufthansa Systems hat Mitte 2010 zur Reorganisation und Verschlingung des Unternehmens das Programm „Jetzt!“ gestartet. Einmalauflagen im Rahmen dieses Programms führten 2010 zu einer weiteren Verminderung des operativen Ergebnisses.

## Ausblick

### Lufthansa Systems passt ihre Strukturen an die Marktentwicklungen an

Unternehmen aller Branchen stehen auch angesichts einer wieder anziehenden Weltkonjunktur vor der Herausforderung, dass sie ihre Kosten nachhaltig senken und ihre Anpassungsfähigkeit in einem volatilen ökonomischen Umfeld verbessern müssen.

Voraussetzung dafür ist eine weitere Optimierung von Geschäftsprozessen, bei der dem IT-Bereich branchenunabhängig eine Schlüsselrolle zukommt.

Mit innovativen, technologisch führenden Produkten und einer umfassenden IT-Kompetenz unterstützt Lufthansa Systems ihre Kunden innerhalb und außerhalb der Luftverkehrsbranche bei den notwendigen Veränderungen, indem sie ihnen Lösungen von hohem Nutzen bietet. Damit ist das Unternehmen mit seinen Produkten und seinem Know-how in Bezug auf die Bedürfnisse der Kunden gut positioniert.

Insbesondere für Fluggesellschaften besteht die Notwendigkeit, die Effizienz und die Flexibilität zu steigern, um dem Wettbewerbsdruck und dem Verfall der Preise zu begegnen. Dennoch ist es nicht abzusehen, dass die IT-Ausgaben in der Airline-Industrie in den nächsten Jahren wesentlich steigen werden. Bedingt durch zahlreiche Faktoren unterliegt der IT-Markt insgesamt einem anhaltend hohen Veränderungsdruck. Wichtige technologische Treiber sind dabei Zukunftstechnologien, wie etwa Tablet-PCs und Cloud Computing. Durch gezielte Investitionen in die IT-Infrastruktur und in die Produktentwicklung schafft Lufthansa Systems aber die Voraussetzungen, dass ihre Kunden von den Vorteilen neuer Technologien profitieren können.

Der Umsatz von Lufthansa Systems wird 2011 und 2012 erwartungsgemäß zunächst weiter zurückgehen. Ursache hierfür ist der Wechsel zu neuen, für den Kunden kostengünstigeren Technologien. Hinzu kommt die Beendigung von Verträgen im Zusammenhang mit der Bereinigung des Portfolios. Beides kann nur zum Teil durch Neugeschäft kompensiert werden. Deshalb wird Lufthansa Systems ihre Produktionsstrukturen diesem Wandel anpassen. Um die Kosten dauerhaft zu senken, ist für 2011 im Rahmen des Programms „Jetzt!“ der Abbau von Führungspositionen und Arbeitsplätzen geplant. Gleichzeitig wird Lufthansa Systems in die Weiterbildung der Mitarbeiter investieren, um das Qualifikationsspektrum zu verbreitern und die Voraussetzung zu schaffen, neben dem Luftverkehr auch in anderen Märkten erfolgreich bestehen zu können.

Neben der Verringerung der Schnittstellen in der Lufthansa Systems-Gruppe soll die Wettbewerbsfähigkeit durch die Senkung der Entwicklungs-, Wartungs- und Betriebskosten gesteigert werden. Die Umsetzung dieser Maßnahmen wurde teilweise bereits 2010 eingeleitet. Einen wichtigen Anteil an der Reduzierung von Kosten und Komplexität wird die für Anfang 2011 geplante Verschmelzung von fünf Tochtergesellschaften auf die Lufthansa Systems AG haben. Mit diesem Maßnahmenpaket wird für 2011 wieder eine Umkehr des Ergebnistrends erwartet. 2012 soll eine weitere Steigerung des operativen Ergebnisses erreicht werden.

## Geschäftsfeld Catering

➤ LSG Sky Chefs behauptete die weltweite Marktführerschaft in dem wieder wachsenden Airline-Catering-Markt. ➤ Die Nachfragebelebung und gezieltes Wachstum führten zu steigenden Erlösen in allen Regionen. ➤ Bereinigt um Einmaleffekte hat sich das operative Ergebnis mehr als verdoppelt. ➤ Produkte und Prozessoptimierungen der LSG Sky Chefs wurden ausgezeichnet. ➤ Durch Kundenbindung, Innovation und Kostenmanagement sollen Umsatz und Ergebnis auch künftig weiter ansteigen.

Anteil am Konzernumsatz 6,3 %

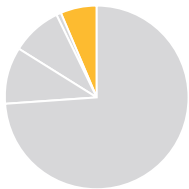

➤ Weltweiter Marktführer  
im Airline-Catering

Kennzahlen Catering

|                                                    |        | 2010   | 2009   | Veränderung<br>in % |
|----------------------------------------------------|--------|--------|--------|---------------------|
| Umsatz                                             | Mio. € | 2 249  | 2 102  | 7,0                 |
| davon mit Gesellschaften<br>des Lufthansa Konzerns | Mio. € | 533    | 513    | 3,9                 |
| Operatives Ergebnis                                | Mio. € | 76     | 72     | 5,6                 |
| Vergleichbare operative Marge                      | %      | 3,4    | 3,5    | -0,1 P.             |
| Segmentergebnis                                    | Mio. € | 87     | 75     | 16,0                |
| EBITDA                                             | Mio. € | 174    | 120    | 45,0                |
| CVA                                                | Mio. € | -28    | -68    | 58,8                |
| Segmentinvestitionen                               | Mio. € | 38     | 58     | -34,5               |
| Mitarbeiter zum 31.12.                             | Anzahl | 28 499 | 28 390 | 0,4                 |
| Mitarbeiter im Jahresdurchschnitt                  | Anzahl | 28 369 | 28 935 | -2,0                |



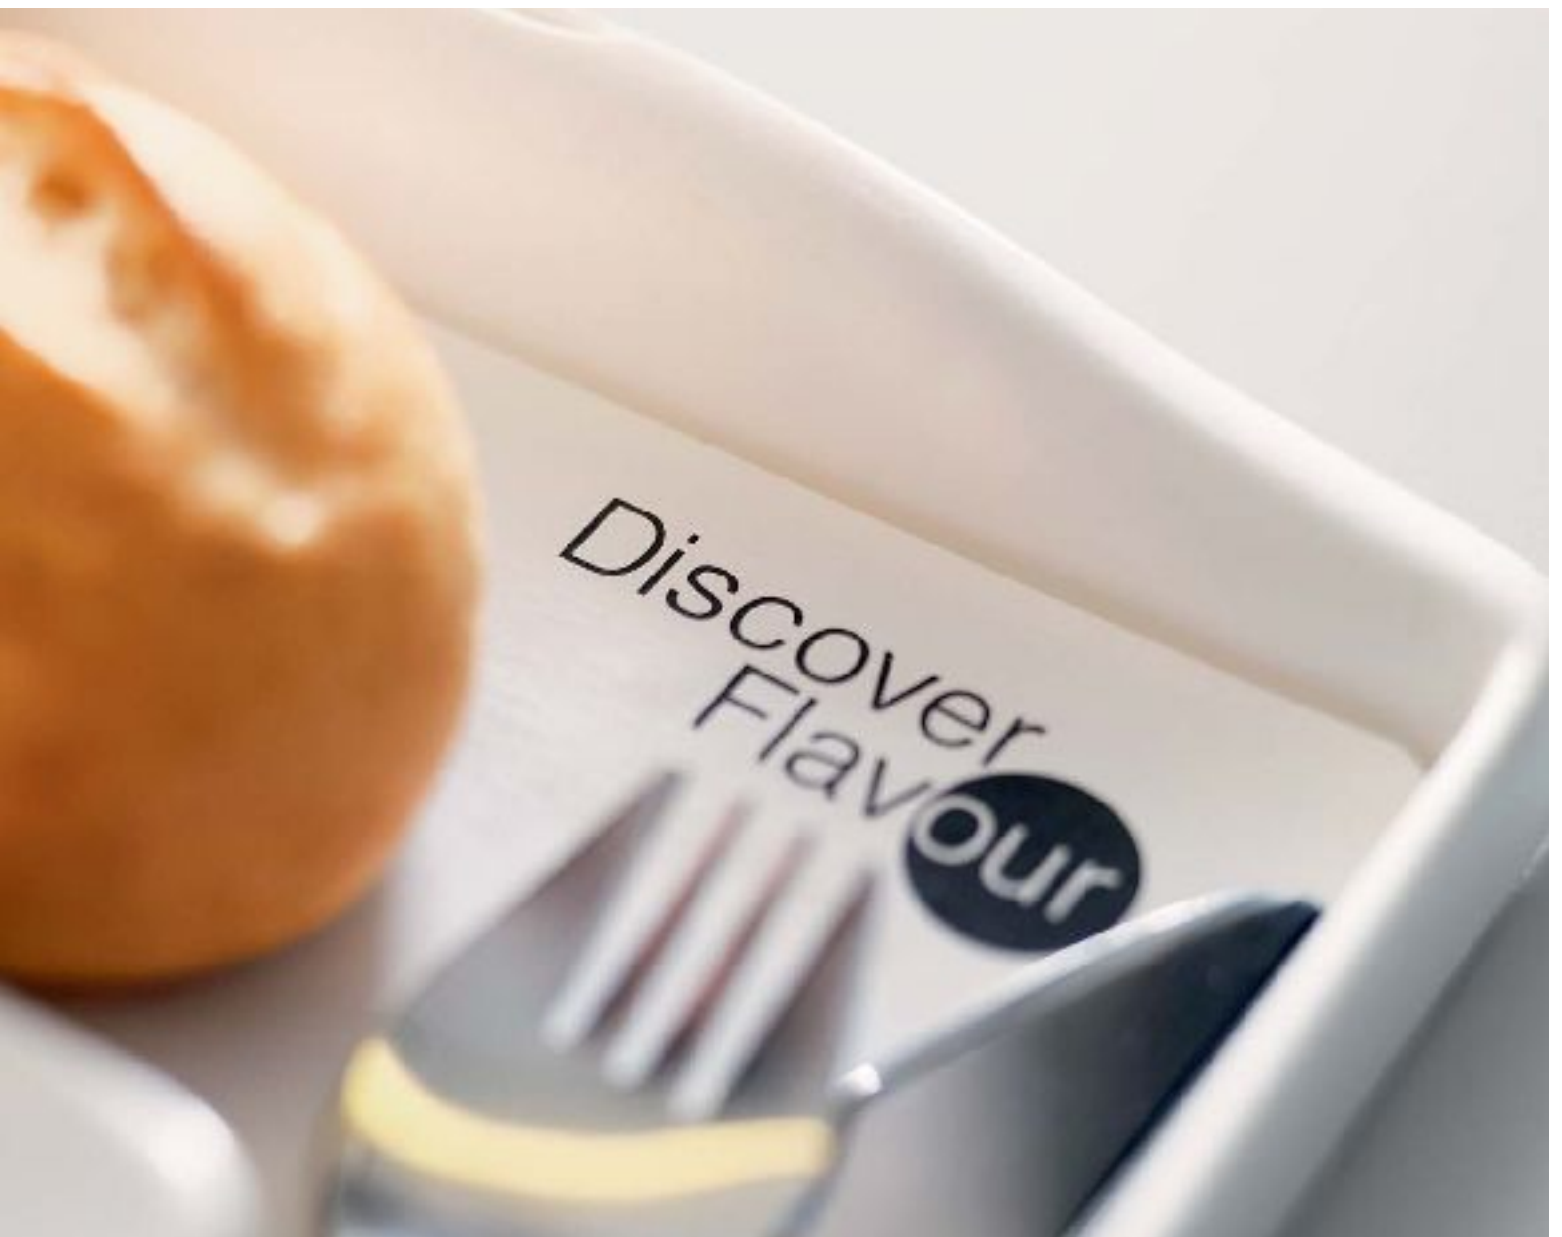

➤ 2,2 Mrd. EUR Umsatz

➤ 76 Mio. EUR Operatives Ergebnis

## Geschäftstätigkeit und Strategie

### Weltmarktführerschaft im Airline-Catering behauptet

Die LSG Sky Chefs-Gruppe hält die weltweit führende Marktposition im Bereich Airline-Catering und den dem Bordservice vor- und nachgelagerten Dienstleistungen. Nach eigenen Berechnungen hat das Unternehmen einen Weltmarktanteil von rund 30 Prozent. Die Gruppe umfasst 133 Unternehmen und ist an rund 200 Standorten in 50 Ländern aktiv. Muttergesellschaft ist die LSG Lufthansa Service Holding AG mit Sitz in Neu-Isenburg.

In nahezu 70 Jahren hat LSG Sky Chefs fundiertes und weitreichendes Wissen im Management des Airline-Bordservice aufgebaut. Seit 1990 hat das Unternehmen, ausgehend von der LSG Lufthansa Service, kontinuierlich und erfolgreich die Expansion in Wachstumsmärkte vorangetrieben. Der Durchbruch zum Weltmarktführer gelang im Sommer 2001 mit dem vollständigen Erwerb der Anteile an Sky Chefs, der ehemaligen Tochtergesellschaft von American Airlines, mit Standorten in Nord- und Südamerika sowie in Westeuropa. Nach erfolgreicher Restrukturierung des Unternehmens standen in den vergangenen Jahren auch wieder Expansionsaktivitäten, vor allem in Märkten mit hohem Zukunftspotenzial in Asien, Osteuropa und Afrika, im Fokus. Zudem treibt LSG Sky Chefs ihr Wachstum aktiv voran, indem sie ihr Produkt- und Dienstleistungsportfolio für Airline-Kunden erweitert sowie stufenweise in angrenzende Märkte eintritt.

### Mit strategischen Maßnahmen Wachstumschancen ergreifen

Im letzten Jahrzehnt ist die Nachfrage nach Airline-Catering in den reifen Märkten Nordamerikas und Europas aufgrund der Reduktion des Bordservice bei Netzwerk-Carriern und des Wachstums der No-Frills-Carrier zurückgegangen. Die Mehrzahl der Wachstumsmärkte Asiens, Lateinamerikas und Afrikas zeichnet sich hingegen nach wie vor durch eine höhere Wertschätzung des Bordservice aus. Daher haben wirtschaftliche Krisen in diesen Regionen weniger langfristige Folgen für das Catering-Geschäft. Insgesamt

üben die Fluggesellschaften jedoch einen unverändert hohen Preisdruck aus, der durch neue Wettbewerber, vor allem im weniger anspruchsvollen Catering für Kurz- und Mittelstrecken, noch verschärft wird.

LSG Sky Chefs überprüft im Rahmen ihres jährlichen Strategieprozesses kontinuierlich ihre Positionierung. Die vor wenigen Jahren formulierte strategische Grundrichtung bestimmt auch heute die Unternehmensentwicklung und besteht aus vier wesentlichen Initiativen: Fortlaufende Verbesserung durch Standardisierung der Abläufe in Produktion und Verwaltung, Ausbau der bestehenden Kundenbeziehungen über erweiterte Dienstleistungen, Eingehen von Partnerschaften zur Erweiterung des Portfolios und zum Eintritt in neue Märkte sowie Verfolgen von ausgewählten Wachstumschancen in angrenzenden Märkten wie Catering für Züge, Schulen, Gesundheitseinrichtungen oder den Vertrieb an den Einzelhandel.

Mit Erdmann Rauer wurde der Vorstand der LSG Lufthansa Service Holding AG durch Beschluss des Aufsichtsrats mit Wirkung zum 1. Januar 2011 um einen Vertriebsvorstand erweitert.

Die Aktivitäten im Kerngeschäft Airline-Catering wurden auf die stark variierenden Marktbedingungen in den Regionen Nordamerika, Lateinamerika, Europa, Deutschland, Emerging Markets und Asien/Pazifik ausgerichtet. Diese werden durch übergreifende Kompetenzzentren für die Bereiche Tiefkühlkost, Bordverkaufsprogramme, Logistik und Bordservice-Equipment unterstützt. Darüber hinaus wurden im Jahresverlauf 2010 Kompetenzzentren zum Eintritt in die angrenzenden Märkte gebildet.

## Absatzmärkte und Wettbewerb

### Partnerschaften zur geografischen Expansion und Erweiterung des Angebots

Der weltweite Airline-Catering-Markt hat sich seit dem Frühsommer 2010 – nach Überwindung der Wirtschafts- und Finanzkrise und den Auswirkungen des Vulkanausbruchs auf Island – nachhaltig erholt. Auch die Zunahme von Passagieren in den Premium-Klassen macht sich positiv bemerkbar. Regional betrachtet wächst die Nachfrage vor allem in Asien und Südamerika, während die Volumina in den reifen Märkten Nordamerikas und Europas moderater steigen.

Die weltweite Marktführerschaft von LSG Sky Chefs zeigt sich auch in einer starken Präsenz in den wichtigsten Absatzmärkten. Mit Gate Gourmet existiert nur ein Wettbewerber mit ebenfalls weltweitem Netzwerk, während andere Catering-Unternehmen derzeit lediglich regional oder gar lokal präsent sind. Die Branche ist jedoch zunehmend von Konsolidierungen geprägt. In Amerika und Europa liegt der Marktanteil von LSG Sky Chefs nach eigenen Berechnungen jeweils zwischen 35 und 40 Prozent. In Asien, dem Nahen Osten und Afrika betreibt die Mehrzahl der nationalen

### Standorte Catering

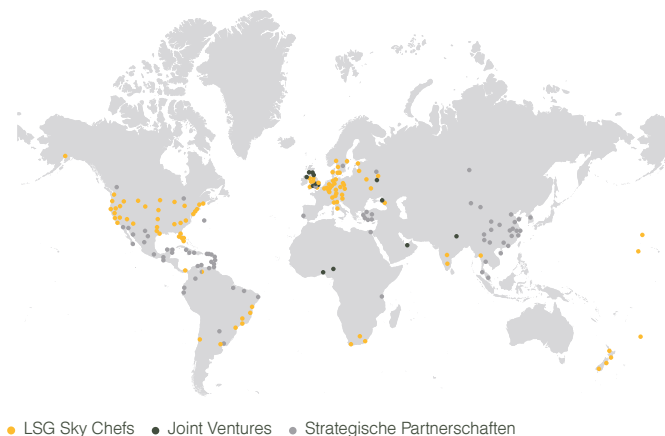

Fluggesellschaften an ihren Drehkreuzen noch ihr eigenes Catering. In diesen Märkten baut LSG Sky Chefs ihre Präsenz über Joint Venture-Abkommen und Managementverträge erfolgreich aus. Während LSG Sky Chefs fundiertes Catering-Know-how sowie den Zugriff auf ihr weltweites Netzwerk beisteuert, verfügen die Partner vor Ort über die erforderlichen Marktkenntnisse und das lokale Netzwerk. Über die geografische Expansion hinaus setzt LSG Sky Chefs auch zunehmend auf Partnerschaften zur Erweiterung ihres Angebots an Produkten und Dienstleistungen in den Bereichen Logistik, Equipment und IT.

## Vertrieb und Kunden

### Mehr als 300 Unternehmen in aller Welt zählen zu den Kunden

LSG Sky Chefs zählt fast alle internationalen sowie zahlreiche nationale und regionale Netzwerk-Carrier, Chartergesellschaften sowie No-Frills-Airlines zu ihren Kunden. Insgesamt bedient das Unternehmen rund 300 Hauptkunden. Die größten Kunden werden innerhalb einer oder mehrerer Regionen an nahezu allen Stationen mit Catering versorgt und beziehen darüber hinaus Dienstleistungen wie die Entwicklung, Beschaffung und Logistik von Bordartikeln. Andere Fluggesellschaften, die beispielsweise über eigenes Catering verfügen, werden zum Teil nur an einzelnen Stationen bedient. Die Kundenbeziehungen variieren auch bezüglich ihrer Vertragslaufzeiten. Deren Dauer liegt zwischen wenigen Monaten und mehreren Jahren.

In den regionalen Vertriebsteams betreuen Key Account Manager ihre Kunden ganzheitlich in strategischen und vertraglichen Themen. Bei regionenübergreifenden Ausschreibungen, die über das Airline-Catering hinaus auch Beratungs-, Entwicklungs- und Logistikdienstleistungen umfassen, werden die Regionen durch ein zentrales Vertriebsteam und Kompetenzzentren unterstützt. Das Vertriebsteam ist darüber hinaus, in enger Abstimmung mit den Regionen, für die Ausarbeitung der weltweiten Vertriebsstrategie und ihre Verfolgung verantwortlich.

## Geschäftsverlauf

### LSG Sky Chefs profitiert von Nachfragebelebung und Expansion

Die zu Jahresbeginn noch moderate Nachfrage nach Catering-Leistungen zog in den asiatischen und südamerikanischen Märkten im ersten Quartal zügig an und belebte sich ab dem zweiten Quartal auch in Europa und Nordamerika. Das Premium-Segment konnte ebenfalls zulegen. Trotz der vorübergehenden Sperrung großer Teile des europäischen Luftraums im Frühjahr 2010 lag der Umsatz für das Gesamtjahr 2010 in allen Regionen über Vorjahr.

Catering Umsatz nach Regionen in %

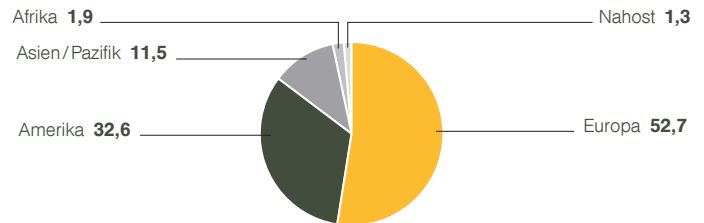

Im Berichtsjahr konnte LSG Sky Chefs nahezu alle bestehenden Kundenaufträge sichern und auf neue Standorte ausdehnen. Wesentliche Vertragsfortführungen wurden mit Lufthansa, Virgin Atlantic, Thomson Airways, Condor, Emirates, Virgin America, American Airlines und Air Canada abgeschlossen. Auch im neuen Bereich Schulcatering sowie im Retail-Geschäft konnte die Kundenbasis in Asien/Pazifik beziehungsweise Amerika verstärkt werden.

Das Unternehmen setzte seine regional fokussierte Expansionspolitik im Kerngeschäft Airline-Catering im Berichtsjahr konsequent fort. In Russland wurden mit jeweils lokalen Anbietern in Krasnodar und Vnukovo eine Vereinbarung zur Optimierung der Material- und Produktionsprozesse und zum Aufbau eines Qualitätsmanagementsystems beziehungsweise ein Managementvertrag unterzeichnet. Im Frühjahr nahmen zwei neue Joint Venture Catering-Betriebe an den chinesischen Flughäfen in Lanzhou und Urumqi ihren Betrieb auf. Im Sommer wurde in Bulgarien ein Joint Venture-Vertrag zur Eröffnung eines Catering-Betriebs am Flughafen Sofia unterzeichnet. Des Weiteren wurde in der Türkei mit einem lokalen Partner ein Joint Venture zur Einrichtung einer Produktion von Fertiggerichten, Backwaren und vorgefertigten Lebensmitteln geschlossen. Dieses wird nach Fertigstellung gemeinsam mit den Vorproduktionsbetrieben in Deutschland (Tiefkühlkost) sowie Italien (vorbereitete Speisen, Tiefkühlkost) als Zulieferer für die europäischen Catering-Betriebe etabliert. Im Berichtszeitraum wurden vier kleine Betriebe in Norwegen und den USA aufgrund veränderter Servicekonzepte und der verstärkten Umstellung auf Rückbeladung stillgelegt.

Zur Erweiterung des Portfolios im Bordservice ging LSG Sky Chefs eine Kooperation mit Formia, einem Anbieter von Bordservice-Artikeln mit Sitz in Hongkong, ein. Um den Einstieg in den Catering-Markt für Gesundheitseinrichtungen zu forcieren, wurde mit der deutschen Ahr Service GmbH eine Kooperation zur gemeinsamen Versorgung von Krankenhäusern und Seniorenheimen geschlossen.

### Produkte und Prozessoptimierungen wurden prämiert

LSG Sky Chefs setzt weiterhin verstärkt auf Differenzierung über Innovation und Umweltbewusstsein. Das Kreativpotenzial des Unternehmens zeigte sich auch 2010 in einer Reihe von neuen Produkten und Prozessoptimierungen, die sowohl von Branchenvertretern als auch branchenübergreifend anerkannt und prämiert wurden.

Der neue Leichtbau-Trolley „Quantum“ bringt gegenüber herkömmlichen Modellen eine Gewichtsersparnis von bis zu 40 Prozent. Er wurde im Frühjahr von einer Jury internationaler Luftfahrtexperten als innovativstes Kabinenprodukt mit dem „Crystal Cabin Award“ ausgezeichnet. Nach sehr positiven Tests soll er künftig auf der gesamten Langstreckenflotte von Lufthansa zum Einsatz kommen. Weitere Airlines haben ebenfalls bereits Interesse bekundet. Zudem wurden erneut einige vom LSG Sky Chefs Design Team entwickelte Bordprodukte prämiert: Dazu zählt die im Rahmen des Lufthansa Bordprogramms „Special Moments“ entwickelte „Starter-Box“, die den international anerkannten red dot Award gewann. Die im Vorjahr als „red dot – best of the best“ ausgezeichnete Lufthansa Economy Class-Geschirrsreihe „Leaves“, die auf der 2010 Expo Weltausstellung in Shanghai im Deutschen Pavillon ausgestellt war, erhielt zudem den Good Design Award vom japanischen Ministerium für Wirtschaft, Handel und Industrie. Die aus Zuckerrohr hergestellten Bordservice-Produkte, die seit Frühjahr an Bord der brasilianischen TAM präsentiert werden, erhielten auf der jährlich in Paris stattfindenden „observeur du design“-Ausstellung den gleichnamigen Preis.

Für Prozessoptimierungen wurde LSG Sky Chefs gleich zweifach ausgezeichnet: Die Jury des International Quality and Productivity Centers (IQPC) verlieh dem Unternehmen den „Best Green Improvement Project Award“ für die weltweite Optimierung der Spülprozesse sowie eine Auszeichnung für das „Best Start-up Program“ zur Würdigung der Lean-Enterprise-Initiative.

Im Herbst 2010 startete das Unternehmen in vier Betrieben die Pilotphase zur weltweiten Einführung eines neuen Produktionssystems. Aufbauend auf den Erfolgen der Lean-Initiative werden Produktions- und Materialfluss ganzheitlich betrachtet und optimiert. Damit soll dem hohen Qualitätsanspruch der Kunden bei gleichzeitiger Kostensenkung Rechnung getragen werden.

### Upgrade<sup>plus</sup> hebt Potenziale im Kostenmanagement

Das 2009 gestartete unternehmensweite Programm Upgrade<sup>plus</sup> verläuft planmäßig. Es zielt darauf ab, bis Ende 2011 die Kosten gegenüber 2008 um 200 Mio. EUR zu senken und 50 Mio. EUR zusätzliches Ergebnis über Neugeschäft mit Fluggesellschaften und in angrenzenden Märkten zu generieren. Langfristig betrachtet soll das Programm die Wettbewerbsfähigkeit weiter verbessern. Die Umsetzung wird durch die Einführung eines einheitlichen Projektreportings und -monitorings unterstützt. Dieses erhöht die

Transparenz und Vergleichbarkeit im Unternehmen, führt zum Austausch von Best Practices und unterstützt die Erreichung der kurz- und langfristigen Ziele. Bei den US-amerikanischen Tochtergesellschaften wurde die Finanzierungsstruktur durch Umwandlung von Darlehen in Eigenkapital vereinfacht. Es ergaben sich hieraus jedoch vernachlässigbare Auswirkungen auf die Ertragslage des Geschäftsfelds.

## Umsatz- und Ergebnisentwicklung

### Der Umsatz steigt um 7,0 Prozent

Im Geschäftsjahr 2010 ist der Umsatz der LSG Sky Chefs-Gruppe um 7,0 Prozent auf 2,2 Mrd. EUR angestiegen (wechselkursbereinigt: +2,7 Prozent). Diese Entwicklung ist hauptsächlich auf die wachsenden Passagiervolumina sowie die höhere Nachfrage im Premium-Segment zurückzuführen. Der Außenumsatz erhöhte sich dabei um 8,0 Prozent auf 1,7 Mrd. EUR, während der Innenumsatz um 3,9 Prozent auf 533 Mio. EUR gestiegen ist. Aus Veränderungen im Konsolidierungskreis ergab sich ein zusätzlicher Umsatzbeitrag in Höhe von 32 Mio. EUR im Vergleich zum Vorjahr.

Umsatz Catering in Mio. €

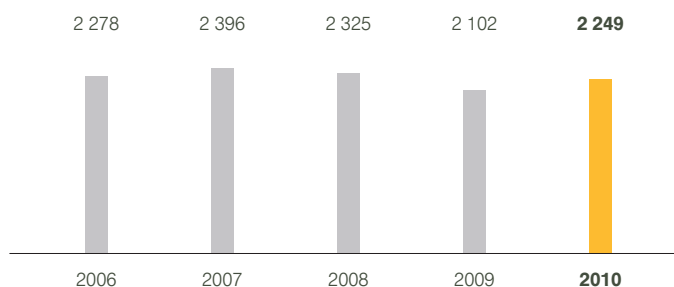

Die sonstigen operativen Erträge sind im Wesentlichen aufgrund von Einmaleffekten im Vorjahr (40 Mio. EUR aus einer D&O-Police) sowie durch negative Wechselkurseffekte um 46,4 Prozent auf 67 Mio. EUR gesunken. Insgesamt erhöhten sich die operativen Gesamterlöse um 4,0 Prozent auf 2,3 Mrd. EUR.

### Operative Aufwendungen erhöhen sich um 3,9 Prozent

Die operativen Aufwendungen stiegen im Vergleich zum Vorjahr unterproportional zum Umsatz um 3,9 Prozent und betrugen im Geschäftsjahr 2,2 Mrd. EUR.

Infolge der höheren Absatzmengen sowie negativer Wechselkurseffekte hat sich der Materialaufwand um 6,0 Prozent auf 997 Mio. EUR erhöht. Die Materialkostenquote sank um 0,5 Prozentpunkte auf 44,3 Prozent. Maßgeblich für diese Entwicklung waren die im Einkauf erzielten Einsparungen.

Die Zahl der durchschnittlich beschäftigten Mitarbeiter hat sich im Berichtsjahr im Vergleich zum Vorjahr um 2,0 Prozent auf 28.369 Mitarbeiter vermindert. Dem überwiegend in Skandinavien und Deutschland erfolgten Personalabbau stand ein Aufbau in China gegenüber. Trotz der reduzierten Mitarbeiterzahl erhöhte sich der Personalaufwand – im Wesentlichen wechselkursbedingt – um 4,6 Prozent auf 811 Mio. EUR, die Personalkostenquote sank jedoch um 0,8 Prozentpunkte auf 36,1 Prozent.

Die Abschreibungen beliefen sich auf 59 Mio. EUR und entsprachen damit in etwa dem Vorjahresniveau (58 Mio. EUR).

Die sonstigen operativen Aufwendungen lagen mit 373 Mio. EUR leicht unter dem Vorjahreswert (–2,1 Prozent).

#### Aufwendungen Catering

|                                     | 2010<br>in Mio. € | 2009<br>in Mio. € | Veränderung<br>in % |
|-------------------------------------|-------------------|-------------------|---------------------|
| Materialaufwand                     | 997               | 941               | 6,0                 |
| Personalaufwand                     | 811               | 775               | 4,6                 |
| Abschreibungen                      | 59                | 58                | 1,7                 |
| Sonstiger operativer Aufwand        | 373               | 381               | –2,1                |
| <b>Summe operative Aufwendungen</b> | <b>2 240</b>      | <b>2 155</b>      | <b>3,9</b>          |

#### LSG Sky Chefs steigert das operative Ergebnis weiter

LSG Sky Chefs weist für 2010 einen operativen Gewinn von 76 Mio. EUR aus. Er lag damit über dem Vorjahreswert von 72 Mio. EUR, der zudem durch den genannten Einmaleffekt aus der D&O-Police geprägt war. Bereinigt um diesen Einfluss hat sich das operative Ergebnis gegenüber dem Vorjahreswert um 44 Mio. EUR verbessert und damit mehr als verdoppelt.

Der Saldo aus den übrigen Segmenterträgen und Segmentaufwendungen in Höhe von insgesamt –3 Mio. EUR lag in etwa auf Vorjahresniveau (Vorjahr: –5 Mio. EUR). Das Ergebnis aus der Equity-Bewertung fiel hingegen mit 14 Mio. EUR um 75,0 Prozent höher als im Vorjahr aus.

#### Operatives Ergebnis Catering in Mio. €

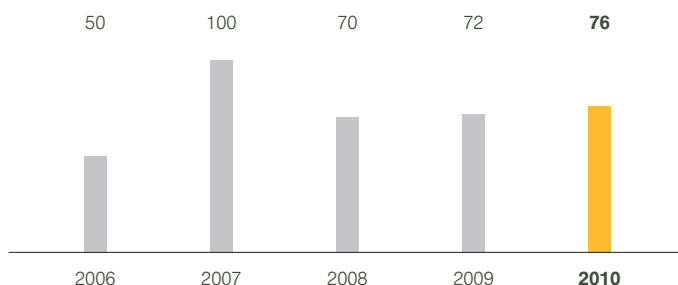

Das Segmentergebnis von LSG Sky Chefs betrug insgesamt 87 Mio. EUR (Vorjahr: 75 Mio. EUR). Gegenüber dem um den vorgenannten Einmaleffekt bereinigten Vorjahreswert hat es sich somit um 52 Mio. EUR verbessert.

#### Die Mehrperiodenübersicht zeigt die verbesserte Ertragskraft

LSG Sky Chefs konnte in 2010 ihr operatives Ergebnis gegenüber dem bereinigten Vorjahreswert mehr als verdoppeln und sogar das Niveau des Geschäftsjahres 2008 übertreffen. Wesentliche Einflüsse sind höhere Auslastung aufgrund gestiegener Volumina, die Schaffung von Synergien als Folge konsequenter Prozessstandardisierung sowie striktes Kostenmanagement. Der weitere Fokus auf Standardisierung und profitables Wachstum soll dazu führen, die Ertragslage weiter auszubauen.

#### Die Segmentinvestitionen sind um ein Drittel gekürzt

Im Rahmen der eingeleiteten Ergebnissicherungsmaßnahmen wurden die Investitionen weltweit auf ein zur Instandhaltung und Betriebssicherung erforderliches Maß reduziert. Die Segmentinvestitionen fielen daher mit 38 Mio. EUR um 34,5 Prozent niedriger als im Vorjahr aus.

## Ausblick

#### Weitere Ergebnissteigerung in zunehmend besserem Marktumfeld erwartet

Für das Geschäftsjahr 2011 erwartet LSG Sky Chefs eine Fortsetzung der aktuellen Marktentwicklung mit moderatem Wachstum in den entwickelten Märkten Europas und Nordamerikas sowie einer stärker anziehenden Nachfrage im Rest der Welt. Das Wettbewerbsumfeld wird weiterhin von Konsolidierung und hartem Preiskampf gekennzeichnet sein.

Um die Marktposition im Kerngeschäft zu sichern und auszubauen, setzt das Unternehmen auf die Erweiterung seiner bestehenden Kundenbeziehungen über den Vertrieb zusätzlicher Dienstleistungen sowie die Gewinnung von Neukunden. In den angrenzenden Märkten wird die fokussierte Verfolgung von Marktopportunitäten durch neu etablierte Expertenteams in den kommenden Jahren Wachstum generieren. Die konsequente Prozessstandardisierung in Produktion und Verwaltung wird die Qualität und Transparenz im Unternehmen erhöhen und gleichzeitig wettbewerbsfähige Kostenstrukturen schaffen. Das Ergebnis der Neugestaltung der heute nur teilweise wettbewerbsfähigen Tarifstrukturen in den beiden größten Märkten Deutschland und USA, in denen rund die Hälfte der Belegschaft beschäftigt ist, wird auch im Jahr 2011 die Unternehmenssituation prägen. Insgesamt erwartet LSG Sky Chefs für die Jahre 2011 und 2012 einen weiteren Anstieg des Umsatzes und operativen Gewinns.



## Sonstige

➤ Die Konzernfunktionen sowie die Service- und Finanzgesellschaften werden unter Sonstige zusammengefasst. ➤ Die operativen Gesamterlöse blieben stabil. ➤ Aufgrund von Kursschwankungen und Sonderzahlung liegt das operative Ergebnis unter Vorjahr. ➤ Dabei konnten AirPlus und Lufthansa Flight Training ihre Gewinne steigern.

### Sonstige

|                                   | 2010<br>in Mio. € | 2009<br>in Mio. € | Veränderung<br>in % |
|-----------------------------------|-------------------|-------------------|---------------------|
| Operative Gesamterlöse            | 1 232             | 1 230             | 0,2                 |
| Operatives Ergebnis               | -226              | -134              | -68,7               |
| Segmentergebnis                   | -196              | -94               | -108,5              |
| EBITDA                            | 268               | 49                | 446,9               |
| Segmentinvestitionen              | 17                | 65                | -73,8               |
| Mitarbeiter zum 31.12.            | 3 752             | 3 737             | 0,4                 |
| Mitarbeiter im Jahresdurchschnitt | 3 731             | 3 701             | 0,8                 |

### Service- und Finanzgesellschaften und die Konzernfunktionen werden unter Sonstige erfasst

Der Bereich Sonstige umfasst zum einen die Service- und Finanzgesellschaften, unter deren Dach die Aktivitäten des Lufthansa Konzerns im Finanz- und Dienstleistungsbereich gebündelt sind. Hierzu gehören zum Beispiel die AirPlus Servicekarten GmbH (AirPlus), die Lufthansa Flight Training GmbH und die Lufthansa Commercial Holding GmbH. Zum anderen werden seit 1. Januar 2009 gemäß dem IFRS 8 „Operating Segments“ die zentralen Konzernfunktionen der Deutschen Lufthansa AG in diesem Segment berichtet.

### Der Umsatz ist stabil, das Ergebnis liegt unter Vorjahr

Die operativen Gesamterlöse des Bereichs Sonstige lagen mit 1,2 Mrd. EUR auf dem Niveau des Vorjahres. Die Aufwendungen stiegen hingegen um 94 Mio. EUR auf 1,5 Mrd. EUR an. Das operative Ergebnis sank entsprechend auf -226 Mio. EUR (Vorjahr: -134 Mio. EUR).

### Struktur Sonstige

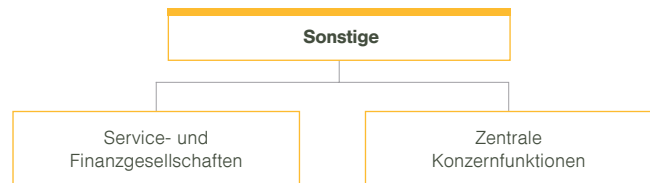

Die übrigen Segmenterträge verringerten sich um 20 Mio. EUR auf 49 Mio. EUR, die übrigen Segmentaufwendungen um 10 Mio. EUR auf 19 Mio. EUR. Der Bereich weist damit ein Segmentergebnis von -196 Mio. EUR aus (Vorjahr: -94 Mio. EUR).

Zurückzuführen ist der Ergebnissrückgang auf die zentralen Konzernfunktionen, während sowohl AirPlus als auch Lufthansa Flight Training höhere Ergebnisbeiträge beisteuerten.

### Währungseffekte und Einmalzahlung prägen das Ergebnis der Konzernfunktionen

Wesentlich geprägt wird die Ergebnisentwicklung des Bereichs Sonstige regelmäßig durch die seit 2009 einbezogenen Konzernfunktionen. Ihre Ergebnissituation bestimmt sich dabei aus der Währungssicherungs- und Finanzierungsfunktion der Deutschen Lufthansa AG für die Konzerngesellschaften, sodass sich Kursschwankungen in der Volatilität des Segmentergebnisses besonders stark widerspiegeln.

Die operativen Gesamterlöse der Konzernfunktionen blieben im Vergleich zum Vorjahr mit 742 Mio. EUR nahezu unverändert. Die operativen Aufwendungen nahmen demgegenüber aufgrund von Währungseffekten und einer vom Konzern getragenen Sonderzahlung an die Mitarbeiter in Höhe von rund 50 Mio. EUR auf insgesamt 1,0 Mrd. EUR zu. Somit wurde ein Rückgang des operativen Ergebnisses der Konzernfunktionen auf –288 Mio. EUR verzeichnet (Vorjahr: –183 Mio. EUR).

### **AirPlus ist Spezialist für globale Travel Management-Lösungen**

AirPlus gilt als einer der führenden weltweiten Anbieter von Lösungen, die das Bezahlen und Auswerten von Geschäftsreisen ermöglichen. Die Gesellschaft stellt unter der Marke AirPlus International maßgeschneiderte Produkte und integrierte Lösungen zur Verfügung, mit denen Unternehmen ihr tägliches Travel Management einfacher und kostengünstiger gestalten können. AirPlus ermöglicht ihren Kunden dabei eine unternehmensweite Transparenz hinsichtlich sämtlicher Geschäftsreiseausgaben und liefert so alle Voraussetzungen für ein effektives Reisekostencontrolling.

Hauptsitz des Unternehmens ist Neu-Isenburg. Daneben ist AirPlus mittlerweile in über 25 Ländern mit Niederlassungen und eigenen Tochtergesellschaften vertreten. Weltweit betreuten im Berichtsjahr ca. 900 Mitarbeiter mehr als 33.000 Firmenkunden.

2010 erlebten Geschäftsreisen weltweit einen deutlichen Aufschwung – ein klarer Indikator für das Ende der globalen Rezession. Dank der gestiegenen Reisetätigkeit internationaler Unternehmenskunden und der Gewinnung von Neukunden konnte AirPlus im Berichtsjahr in allen Märkten ein signifikantes Umsatzwachstum verzeichnen. Der gesamte Abrechnungsumsatz stieg auf 19,8 Mrd. EUR. Die Anzahl der über AirPlus abgerechneten Transaktionen lag bei 125 Mio. (+13,8 Prozent). Hauptwachstumstreiber waren dabei erneut die internationalen Märkte, die mit einem Zuwachs von 34,0 Prozent zur starken Expansion von AirPlus beitrugen. Inzwischen liegt der Anteil der internationalen Märkte am gesamten Abrechnungsumsatz im Geschäftsreisemanagement bei 50 Prozent. Auch 2010 hat AirPlus zum wiederholten Mal ihre klare Marktführerschaft in Deutschland verteidigt.

Die positive Geschäftsentwicklung spiegelte sich auch im Ergebnis wider. Im Geschäftsjahr wurden operative Erlöse in Höhe von 281 Mio. EUR erwirtschaftet. Der operative Gewinn der Gesellschaft lag mit 20 Mio. EUR um 17,6 Prozent über dem Vorjahreswert.

### **Lufthansa Flight Training verzeichnet eine steigende Nachfrage bei Trainingsdienstleistungen für Airlines**

Lufthansa Flight Training ist einer der weltweit führenden Anbieter von Trainingsdienstleistungen für Fluggesellschaften. An ihren Standorten in Frankfurt am Main, Berlin, Wien, Bremen, München und Phoenix/Arizona verfügt sie über jahrzehntelange Erfahrung bei der Ausbildung von Cockpit- und Kabinenbesatzungen in Bereichen wie Simulatortraining, Service- und Emergency-Schulungen sowie bei computergestützten Lernprogrammen.

Zum Kundenstamm von Lufthansa Flight Training zählen neben den Lufthansa Konzerngesellschaften rund 150 weitere Fluggesellschaften. Die steigende Nachfrage nach Simulator- und Kabinentraining sowie die langfristige Zusammenarbeit mit wichtigen Kunden der Luftfahrtbranche bringen stabile Ergebnisbeiträge. Im Bereich Aviation Safety & Service Training führt etwa die Umstellung bei Lufthansa Passage auf eine neue regionale Einteilung des Kabinenpersonals zu einer erhöhten Nachfrage nach Umschulungen. Die höhere Anzahl an Grundkursen zur Flugbegleiterausbildung bestätigt daneben den positiven wirtschaftlichen Trend. Das kontinuierliche Kostenmanagement im Rahmen des 2007 begonnenen Programms ESP 8+2 trägt darüber hinaus nachhaltig zur positiven Ergebnisentwicklung bei. Die operativen Gesamterlöse von Lufthansa Flight Training konnten um 14,9 Prozent auf 170 Mio. EUR gesteigert werden. Das operative Ergebnis erhöhte sich gegenüber Vorjahr um 36,4 Prozent auf 30 Mio. EUR.

Die CityLine Canadair Simulator und Training GmbH (CCST) ist seit dem 1. Juli 2010 Teil der Lufthansa Flight Training. Der Kaufvertrag über die zukünftige „Lufthansa Flight Training – CST GmbH“ wurde am 28. Juni 2010 in Frankfurt von den Anteilseignern der CCST und von Lufthansa Flight Training unterzeichnet. In direkter Nachbarschaft zur Lufthansa Flight Training Berlin betreibt die CCST drei Full Flight-Simulatoren für den Canadair Regional Jet, wodurch die Präsenz im wachsenden Markt der Regionalflugzeuge gestärkt wird.

Angesichts der steigenden Nachfrage nach Trainingsdienstleistungen hat Lufthansa Flight Training zusätzliche Anlagen in Betrieb genommen. In Frankfurt wird seit März 2010 eine weitere Simulatorhalle mit acht Simulatorstellplätzen bezogen, in der bis März 2011 fast alle Stellplätze belegt sein werden. In München wurden die bestehenden Trainingskapazitäten um einen A320 Simulator erweitert, der zum zweiten Quartal 2011 in Betrieb gehen wird.

## Mitarbeiter

➤ Unsere Mitarbeiter bilden die Basis für unseren Erfolg. ➤ Die gute Geschäftsentwicklung führte zu einer gestiegenen Mitarbeiterzahl und einer einmaligen Sonderzahlung. ➤ Der neue „Arbeitgeberverband Luftverkehr“ hat seine Arbeit aufgenommen. ➤ 2010 wurden intensive Tarifgespräche geführt und wichtige Verträge abgeschlossen. ➤ Neben der Aus- und Weiterbildung investieren wir in die Gesundheit unserer Mitarbeiter. ➤ Lufthansa gilt unverändert als einer der beliebtesten Arbeitgeber Deutschlands.

### Mitarbeiter zum 31.12.

|                              |        | 2010    | 2009    | Veränderung in % |
|------------------------------|--------|---------|---------|------------------|
| Konzernmitarbeiter           | Anzahl | 117 019 | 117 521 | -0,4             |
| davon Passage Airline Gruppe | Anzahl | 57 157  | 58 083  | -1,6             |
| davon Logistik               | Anzahl | 4 517   | 4 488   | 0,6              |
| davon Technik                | Anzahl | 20 159  | 19 796  | 1,8              |
| davon IT Services            | Anzahl | 2 935   | 3 027   | -3,0             |
| davon Catering               | Anzahl | 28 499  | 28 390  | 0,4              |
| davon Sonstige               | Anzahl | 3 752   | 3 737   | 0,4              |
| Umsatz je Mitarbeiter        | Tsd. € | 233     | 198     | 17,7             |
| Umsatz je Beschäftigungsjahr | Tsd. € | 268     | 231     | 16,2             |

### Die Personalpolitik bewältigt das außergewöhnliche Geschäftsjahr 2010 mit umfassenden Maßnahmen

Das erste Halbjahr 2010 stand aufgrund der Wirtschaftskrise auch für den Lufthansa Konzern im Zeichen des Krisenmanagements. Im Rahmen von Ergebnissicherungsprogrammen galt es in fast allen Gesellschaften, mit den zur Verfügung stehenden betrieblichen Instrumenten Personalkosten zu senken und Personalkapazitäten den Erfordernissen anzupassen.

Lufthansa hat aus den Krisen der vergangenen Jahre gelernt und kann auf einen reichhaltigen Erfahrungsschatz im Umgang mit unterschiedlichen Szenarien zurückgreifen. Neben einem externen Einstellungsstopp wurden freiwillige Ausstiegsmodelle wie etwa Sonderurlaubsverträge, (Alters-)Teilzeitverträge oder Aufhebungsverträge mit Abfindungszahlungen angeboten. Mitunter waren Maßnahmen wie die Einführung von Kurzarbeit und ein Nichtverlängern befristeter Verträge notwendig. Die erfolgreiche Umsetzung basierte dabei nicht zuletzt auf der konstruktiven Zusammenarbeit mit den Mitbestimmungspartnern. Daneben wurden mit Hilfe des konzernweiten Vermittlungsprozesses „JobChange“ auch im

### Umsatz je Beschäftigungsjahr Lufthansa Konzern in Tsd. €

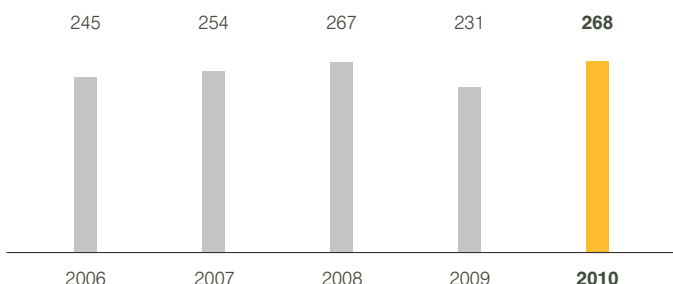

Krisenjahr 2010 betriebsbedingte Umstrukturierungen unterstützt. Vielen Mitarbeitern eröffneten sich so neue berufliche Perspektiven innerhalb des Konzerns.

Die gewählte Form der Anpassung der Personalkapazitäten ermöglichte es uns auch, unmittelbar auf das einsetzende und dynamischer als erwartete wirtschaftliche Wachstum zu reagieren. So konnte die in einigen Konzernbereichen eingeführte Kurzarbeit zeitnah beendet werden.

Die hinsichtlich ihrer Dynamik nicht vorhersehbare Ergebnisentwicklung im Lufthansa Konzern schaffte den Spielraum für ein besonderes Dankeschön an unsere tariflichen und außertariflichen Beschäftigten. Auf Basis des guten Ergebnisses für 2010 hat der Vorstand im Dezember eine einmalige Sonderzahlung von 700 EUR pro Vollzeitbeschäftigten beschlossen und im Januar 2011 ausgezahlt.

Auch für 2011 und darüber hinaus gehen wir von weiterem Nachfragewachstum aus. Die vor diesem Hintergrund geplante Flotten-erweiterung wird einen erhöhten Personalbedarf zur Folge haben. Dies gilt vor allem für die operativen Bereiche, für die intensive Anwerbekampagnen gestartet wurden.

Darüber hinaus war die bereits 2009 begonnene Integration der Verbund-Airlines ein prägendes personalpolitisches Thema. Dabei wurden auch Themenfelder in den Personalbereichen (Human Resources, HR) für wechselseitige Synergien identifiziert und verbundübergreifend geregelt, wie etwa der gesellschaftsübergreifende Wechsel von Mitarbeitern.

Die Zugehörigkeit der neuen Partner-Airlines zum Lufthansa Verbund ermöglicht ihnen die Inanspruchnahme der im Rahmen der HR Shared Service Organisation angebotenen Dienstleistungen. Dank der neuen HR-IT-Plattform des Lufthansa Business Service Center können auch die Verbund-Airlines ihre Standardprozesse im Personalbereich, wie beispielsweise Personalabrechnungen oder die operative Personalbetreuung, nunmehr im Konzern einkaufen und dabei Synergien realisieren.

Lufthansa hat in der Krise erfolgreich ihre interne Kommunikation intensiviert. Die dabei eingesetzte Kommunikationsplattform eTeaming erhielt in der Kategorie „Beste interne Kommunikationsstrategie“ eine Auszeichnung anlässlich des „7. IIR Technology Web 2.0 Kongresses“ im April 2010. Sie ermöglicht die effektive Zusammenarbeit in Arbeits- und Projektgruppen, fördert die Vernetzung der Mitarbeiter und bildet das Unternehmenswissen ab. So hat sich zum Thema „Fuel Efficiency“ beispielsweise eine Gruppe von rund 100 Experten aus unterschiedlichsten Unternehmensbereichen gebildet, die eTeaming nutzt, um Maßnahmen der Treibstoffeinsparungen zu diskutieren und zu koordinieren. Im „Digital Innovators Club“ wiederum erörtern die Mitarbeiter Ideen und Best Practices. Konzernweit wird eTeaming bereits von über 25.000 Mitarbeitern genutzt.

### Die Mitarbeiterzusammensetzung ist durch Vielfalt geprägt

Im Lufthansa Konzern waren zum Jahresende 2010 weltweit 117.019 Mitarbeiter beschäftigt. Dies entspricht einem leichten Rückgang von 0,4 Prozent gegenüber 2009, der im Wesentlichen auf einen Personalrückgang bei Austrian Airlines und bmi zurückzuführen ist. 6.341 externen Einstellungen standen 7.702 Austritte gegenüber. Die Fluktuationsrate bei den deutschen Gesellschaften verringerte sich leicht von 6,7 auf 6,0 Prozent.

#### Mitarbeiter nach Regionen in %

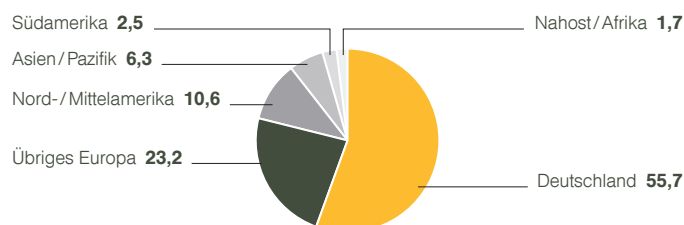

Der Frauenanteil im Konzern war mit 44,2 Prozent um 0,9 Prozentpunkte leicht rückläufig. Die durchschnittliche Firmenzugehörigkeitsdauer erhöhte sich leicht um 0,2 auf 13,4 Jahre. Rund 27 Prozent der Mitarbeiter nutzen eines der Teilzeitmodelle im Konzern.

Im Rahmen seiner Entsprechenserklärung zum Deutschen Corporate Governance Kodex unterstützt der Aufsichtsrat die grundsätzliche Bedeutung von Vielfalt bei seiner Zusammensetzung und strebt zugleich eine stärkere Repräsentanz von Frauen an. Nicht nur im Kontext der Neufassung dieses Kodexes, siehe [S. 42](#), blieb Chancengleichheit zwischen Frauen und Männern auch 2010 ein zentrales Thema. Zum 31. Dezember 2010 betrug in den Lufthansa Gesellschaften der Anteil von Frauen bei den Vorgesetzten-Positionen mit Personalverantwortung unterhalb der Leitungsebene 37,8 Prozent. Bei den leitenden Angestellten betrug der Anteil der Frauen in diesem Zeitraum 13,3 Prozent. Bereits bewährte Programme, wie das von Lufthansa 1998 initiierte Cross-Mentoring für weibliche Nachwuchskräfte, wurden mit einer neuen Generation gestartet. 43 Prozent der bisherigen Teilnehmerinnen arbeiten inzwischen als Führungskraft. Ein weiterer wesentlicher Baustein des Programms ist die Bereitstellung von Kinderbetreuungsplätzen.

#### Anzahl der Beschäftigten Aufteilung nach Geschlecht

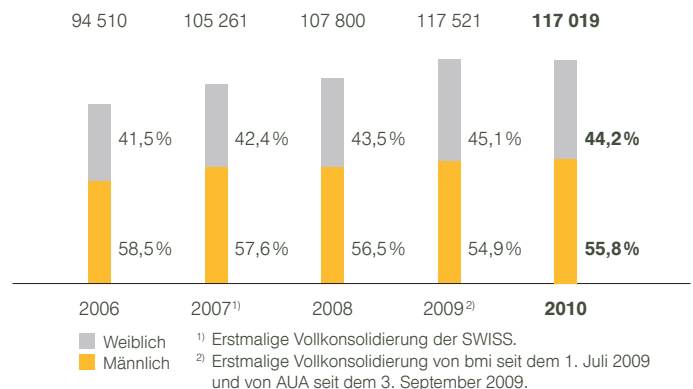

Die Quote der Mitarbeiter mit Behinderung hat sich im Konsolidierungskreis in Deutschland mit 3,5 Prozent gegenüber 2009 stabil gehalten. Das Durchschnittsalter der Mitarbeiterschaft erhöhte sich um 0,4 auf 40,7 Jahre. Auch in den Folgejahren ist mit einem steigenden Durchschnittsalter zu rechnen. Für den Lufthansa Konzern ist der demografische Wandel ein wichtiges personalpolitisches Thema. Aufgrund der unterschiedlichen Herausforderungen der einzelnen Gesellschaften werden Maßnahmen für den Umgang mit einer alternden Gesellschaft überwiegend dezentral umgesetzt.

#### Anzahl der Beschäftigten in Voll- und Teilzeit

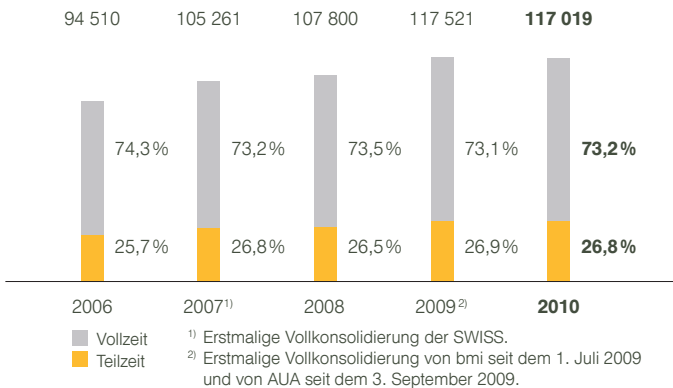

Für seinen innovativen Umgang mit den Auswirkungen des demografischen Wandels und die Förderung älterer Mitarbeiter wurde der Lufthansa Konzern im November 2010 mit dem „International Innovative Employer Award“ der amerikanischen Seniorenorganisation AARP ausgezeichnet.

Die Leistungsfähigkeit und Gesundheit zu erhalten, wird wegen der demografischen Veränderungen zunehmend wichtig für Lufthansa und ihre Mitarbeiter. Auch 2010 wurden wertvolle Beiträge zur Gesundheitsförderung in den verschiedenen Bereichen des Lufthansa Konzerns erbracht. Das Gesundheitsmanagement etwa umfasst standort- und gesellschaftsspezifische Maßnahmen zur Erhaltung und Förderung der Gesundheit der Mitarbeiter aller Konzerngesellschaften, wie zahlreiche medizinische Spezialtage und sogenannte Gesundheitswochen. Schwerpunkte bildeten 2010 dabei klassische Beratungsthemen wie Ernährung, Bewegung, gesunde Lebensweise, Stressabbau sowie das Erkennen und Reduzieren von Gesundheitsrisikofaktoren. Abgerundet wurde das Angebot durch konkrete Maßnahmen wie konzernweite Initiativen zur sportlichen Betätigung und das jährliche Angebot zur kostenfreien Grippeimpfung.

#### Neuer „Arbeitgeberverband Luftverkehr“ übernimmt die Aufgaben der Tarifpolitik

In der Tarifpolitik des Lufthansa Konzerns war das Jahr 2010 erneut von intensiven Verhandlungen für alle Mitarbeitergruppen in den Bereichen Boden, Kabine und Cockpit geprägt. Als nachhaltig wirkender struktureller Beitrag konnte für das Boden-, Kabinen- und Cockpit-Personal jeweils ein längerfristiger Tarifabschluss mit dem Ergebnis einer Nullrunde vereinbart werden.

Der am 15. Oktober 2009 neu gegründete Arbeitgeberverband Luftverkehr e.V. (AGVL) hat am 1. Januar 2010 offiziell seine Arbeit zur Wahrnehmung der konzernübergreifenden tarifpolitischen Aufgaben aufgenommen. Damit trägt der Konzern den veränderten Anforderungen in der tarifpolitischen Zusammenarbeit Rechnung,

#### Personalaufwand Lufthansa Konzern in Mio. €

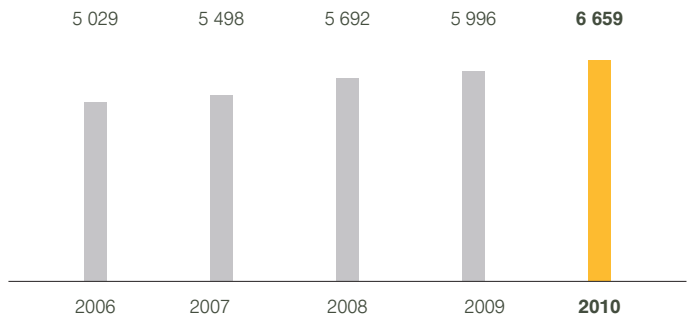

gewährleistet unter anderem eine geschäftsfeldspezifische Tarifpolitik und schafft die Voraussetzungen für eine luftfahrtspezifische Verbandstätigkeit, zum Beispiel bei Gesetzgebungsverfahren und im Rahmen einer verstärkten Repräsentation in Dachverbänden. Der AGVL ist seit Anfang 2010 an Stelle des bisherigen Arbeitgeberverbands „Arbeitsrechtliche Vereinigung Hamburg“ (AVH) neuer Tarifpartner für die Gewerkschaften im Lufthansa Konzern. Dies gilt sowohl für alle in der Vergangenheit mit der AVH abgeschlossenen Tarifverträge als auch für die ab dem Jahr 2010 neu geschlossenen Tarifverträge. Alle bisherigen Gesellschaften des Konzerns in der AVH sind mit Wirkung vom 31. Dezember 2010 aus der AVH in den neu gegründeten Arbeitgeberverband Luftverkehr übergetreten.

#### Tarifverhandlungen und Abschluss neuer Tarifverträge

Für die Beschäftigten des Bodenpersonals der Deutschen Lufthansa AG wurde im Juli 2010 zwischen dem AGVL und der Gewerkschaft ver.di ein Tarifabschluss erzielt. Als Teil eines Gesamtpakets wurde unter anderem die Laufzeit der Vergütungstarifverträge ohne Anpassung der Gehälter bis zum 31. Dezember 2011 verlängert. Für den Fall, dass das operative Konzernergebnis 2011 eine festgelegte Grenze überschreitet, wurde die Auszahlung einer einmaligen Sonderzahlung vereinbart. Außerdem wurde die Systematik der Ergebnismeteiligung neu geregelt. Nach dem neuen Modell bemisst sich die Ergebnismeteiligung nach der operativen Marge des Geschäftsfelds und des Konzerns.

#### Operative Marge\* für den Konzern und die Geschäftsfelder in %

|                        | 2010 | 2009 | Veränderung in P. |
|------------------------|------|------|-------------------|
| Passage Airline Gruppe | 2,1  | 0,0  | 2,1               |
| Lufthansa Passage      | 2,7  | -0,9 | 3,6               |
| Logistik               | 11,1 | -8,8 | 19,9              |
| Technik                | 6,7  | 8,0  | -1,3              |
| IT Services            | 1,7  | 2,6  | -0,9              |
| Catering               | 3,4  | 3,4  | 0,0               |
| Konzern                | 3,2  | 0,6  | 2,6               |

\* Operatives Ergebnis/Umsatz.



Ein neuer Rahmentarifvertrag zur Ausgestaltung des Bildungsfonds für Schichtgänger regelt die Förderung von beruflichen Bildungsmaßnahmen für diese. Die Tarifpartner tragen zudem der erhöhten Belastung der Mitarbeiter im Schichtdienst durch einen neuen Tarifvertrag Altersteilzeitarbeit Rechnung. Auch ist es gelungen, einen Tarifvertrag zur Bewältigung von kurzfristig eintretenden Krisenereignissen abzuschließen. So kann unmittelbar reagiert werden, beispielsweise durch die Umverteilung von Arbeitszeit. Ferner wurde eine Vereinbarung zur Leiharbeit im Konzern getroffen.

### **Neue Vereinbarungen für Cockpit und Kabine nach Schlichtungen**

Sowohl der Vergütungstarifvertrag für das Cockpit-Personal der Deutschen Lufthansa AG als auch der Vertrag für die Germanwings-Piloten befanden sich bereits seit März beziehungsweise Juni 2009 in der Nachwirkung. Die äußerst schwierigen Verhandlungen spitzten sich im Februar 2010 zu einem Streikaufruf zu. Der für vier Tage angesetzte Ausstand wurde am ersten Tag nach einem gerichtlichen Vergleich abgebrochen. In den darauf folgenden Verhandlungen verständigten sich beide Parteien auf die Durchführung einer Schlichtung. Als Schlichter wurde der ehemalige Bundesminister und Hamburger Bürgermeister Dr. Klaus von Dohnanyi bestellt. Das zweimonatige Schlichtungsverfahren wurde am 23. Juni 2010 durch die Schlichtungsschlussempfehlung beendet. Mit der getroffenen Vereinbarung ist eine Balance zwischen den Arbeitsplatzschutzinteressen der Piloten und notwendigen unternehmerischen Handlungsspielräumen gefunden worden.

Das Schlichtungsergebnis sieht eine 24-monatige Nullrunde sowie eine Verlängerung des Manteltarifvertrags bis zum 31. Dezember 2012 vor. Kostensenkend wirken außerdem eine andere Form der Arbeitszeitberechnung und eine Erhöhung der Auslösegrenze für die zusätzlich vergüteten Mehrflugstunden. Auch in Bezug auf strittige Forderungen bezüglich Lufthansa Italia und zu Nachbarschaftsverkehr konnte eine Einigung erzielt werden. Die sogenannte 70-Sitzer-Regelung, die vorsah, dass Flugzeuge ab 70 Sitzen zu den Arbeitsbedingungen des Konzerntarifvertrags bereedert werden müssen, wurde auf 95 Sitze angehoben. Zusätzlich wurde die starre Regelung durch eine dynamische Klausel ergänzt, nach der 21 Prozent der kleinsten Flugzeuge der Lufthansa Flotte außerhalb des Konzerntarifvertrags betrieben werden können.

Für das Kabinenpersonal befand sich der Vergütungs- und Manteltarifvertrag seit dem 28. Februar 2010 in der Nachwirkung. Die intensiv geführten Verhandlungen brachten zwar in einigen Punkten eine Annäherung, strittig blieb jedoch vor allem eine Regelung zur Erhöhung der Stabilität von Einsatz- und Dienstplänen. Nachdem am Verhandlungstisch keine Einigung erzielt werden konnte, verständigten sich beide Tarifparteien Anfang November auf eine Schlichtung. Den Vorsitz übernahm die ehemalige Ministerpräsidentin von Schleswig-Holstein, Heide Simonis. Das Schlichtungsver-

fahren wurde am 19. Januar 2011 abgeschlossen. Das Ergebnis sieht unter anderem eine 22-monatige Nullrunde bis Ende 2011 vor. Der neue Manteltarifvertrag hat eine Laufzeit bis Februar 2014 und legt unter anderem Verbesserungen bei den Arbeitsbedingungen fest. So wird die Anzahl der möglichen Dienstplanänderungen reduziert und damit einhergehend eine höhere Planungssicherheit für die Kabinenmitarbeiter hergestellt. Um die besonderen Belastungen auf der Langstrecke zu reduzieren, wurden verbindliche Regeln festgelegt, nach denen sich die Ruhezeiten an bestimmten Destinationen verlängern. Als Ausgleich für die erst sukzessive umsetzbaren Änderungen erhalten die Kabinenmitarbeiter eine Strukturausgleichszahlung von 1.000 EUR. Das Ergebnis der Schlichtung findet die Balance zwischen den Forderungen der Gewerkschaft UFO nach verbesserten Arbeitsbedingungen einerseits und den notwendigen strukturellen Kostenentlastungen andererseits.

### **Ausbildungs- und Qualifizierungsmöglichkeiten erweitert**

Lufthansa bietet seit vielen Jahren ein breites Spektrum an Ausbildungs- und Qualifikationsmöglichkeiten. 2010 gab sie 1.128 jungen Menschen in Deutschland als Auszubildenden eine berufliche Zukunftsperspektive. Im Fokus stehen dabei nicht nur die traditionellen Ausbildungsberufe, von denen Lufthansa im vergangenen Jahr 24 unterschiedliche Ausrichtungen anbot. Immer bedeutender werden duale Studiengänge – 2010 unterstützte Lufthansa 353 Nachwuchskräfte in 18 Studiengängen darin, eine Berufsausbildung mit einem Bachelor-Abschluss zu verbinden.

Auch in anderen Berufsgruppen bietet Lufthansa vielen Menschen eine berufliche Zukunft. 2010 wurden 3.115 neue Mitarbeiter für die Kabine qualifiziert und 144 Kabinenmitarbeiter zum Purser weiterentwickelt. Außerdem wurden in diesem Jahr 240 neue Flugschüler für das Cockpit eingestellt. An ihren Flughäfen, insbesondere an den Drehkreuzen Frankfurt und München, bildete Lufthansa knapp 800 neue Mitarbeiter aus.

### **Lufthansa School of Business – Deutschlands erste Corporate University**

Wir sind unabhängig von der allgemeinen wirtschaftlichen Entwicklung überzeugt, dass sich Investitionen in die Entwicklung und Weiterbildung unserer Mitarbeiter und Führungskräfte auszahlen. So wurden auch im Berichtsjahr umfangreiche Bildungsmaßnahmen durchgeführt.

Die Lufthansa School of Business (LHSB), seit 1998 Deutschlands erste Corporate University, optimierte 2010 insbesondere die fachübergreifenden Trainings im Konzern. Dabei konnten die Mitarbeiter der Verbund-Airlines das Angebot ebenfalls weitestgehend nutzen. Insgesamt stieg das interne Bildungsbudget um 3 Prozent auf 102 Mio. EUR und die Zahl der Teilnehmertage um 5 Prozent auf 619.000.

Die Führungskräfteentwicklung der Lufthansa basiert auf dem konzernweit eingesetzten Kompetenzprofil „Aviation Leadership Compass“. Dieser ermöglicht eine bedarfsgerechte Führungskräfteentwicklung und zielgerichtete Besetzung von Führungspositionen über Geschäftsfeld- und Verbund-Airline-Grenzen hinweg.

Lufthansa beschäftigt sich zudem mit der Gestaltung digitaler Lernwelten in Form von Web Based Trainings. Zu den Schwerpunktthemen des vergangenen Jahres gehörten Arbeitssicherheit, Corporate Compliance sowie das Allgemeine Gleichbehandlungsgesetz.

#### Arbeitgeberattraktivität – Lufthansa ist in der Spitzengruppe

Lufthansa ist weiterhin einer der beliebtesten Arbeitgeber Deutschlands und konnte bei Umfragen unter Studenten, Wirtschaftswissenschaftlern, Ingenieuren und Informatikern Spitzenplätze in Arbeitgeber-Rankings erzielen. Bestätigt wird das Ergebnis von der Umfrage des trendence Instituts, in der vergleichbare Ergebnisse erzielt wurden.

**Universum Student Survey 2010**  
(veröffentlicht in der „Wirtschaftswoche“)

| Studienrichtung           | Platzierung 2010 | Platzierung 2009 |
|---------------------------|------------------|------------------|
| Wirtschaftswissenschaften | 2. Platz         | 2. Platz         |
| Ingenieure                | 7. Platz         | 9. Platz         |
| Informatik                | 14. Platz        | 18. Platz        |

Diese Attraktivität zeigt sich auch durch ein großes Interesse am Lufthansa Karriereportal [www.be-lufthansa.com](http://www.be-lufthansa.com), der zentralen Konzern-Plattform für Personalmarketing und Recruiting. Die Homepage verzeichnet durchschnittlich 138.255 Besucher pro Monat. Die Zahl der Bewerbungen bewegte sich 2010 mit 115.000 Eingängen für 2.000 ausgeschriebene Stellen erneut auf hohem Niveau. Der seit April 2010 etablierte Facebook-Auftritt des Karriereportals erfreut sich ebenfalls größter Beliebtheit und ist dort eines der beliebtesten Karriereportale deutscher Unternehmen. Über diese zusätzliche Kommunikationsplattform kann Lufthansa zielgruppengerecht und speziell mit jüngeren Bewerbern und Interessenten in Kontakt treten sowie schnell und effektiv Informationen verbreiten.

Die Nachfrage für die diversen Nachwuchsprogramme von Lufthansa ist auch über den deutschen Arbeitsmarkt hinaus groß: Für unser Trainee-Programm ProTeam wurden Hochschulabsolventen aus Frankreich, der Ukraine und Vietnam eingestellt, die so zur weiteren Internationalisierung des Lufthansa Konzerns beitragen.

#### Internationalisierungsstrategie im Recruiting fortgeführt

Lufthansa wird sich auch künftig als attraktiver Arbeitgeber in der internationalen Hochschullandschaft positionieren und so personalpolitisch der zunehmenden Internationalisierung des Konzerns gerecht werden. So wurde in Zusammenarbeit mit der EBS Business School erstmals ein Wettbewerb zum Thema „Social Media“ von Lufthansa an internationalen Hochschulen ausgeschrieben. Die erste „Lufthansa Case Challenge“ gab Studenten die Möglichkeit, innovative Konzepte zu entwickeln und Lufthansa vorzustellen. 130 Teams aus der ganzen Welt haben sich um einen Platz im Finale beworben, bei dem im Lufthansa Trainings- und Conference Center Seeheim die besten sechs Teams die Gelegenheit hatten, ihr Konzept vor einer Jury zu präsentieren. Darüber hinaus wurde, wie in den Vorjahren, auch 2010 der „Lufthansa Award für exzellente Leistungen in deutscher Sprache“ an insgesamt drei Hochschulen verliehen. Die Preise gingen an Studenten des Boston College und des MIT in den USA sowie an Teilnehmer des Chinesisch-Deutschen Hochschulkollegs in Shanghai.

#### Ideenmanagement führt zu umfassenden Kosteneinsparungen

Die Initiative „Deutschland – Land der Ideen“ unter der Schirmherrschaft des Bundespräsidenten geht davon aus, dass „... die Zukunft von den Ideen der Menschen in diesem Land bestimmt ist“. Derselben Überzeugung ist Lufthansa in Bezug auf ihre Mitarbeiter. So haben Lufthansa-seiten auch 2010 dazu beigetragen, die Wettbewerbs- und Innovationsfähigkeit des Konzerns zu stärken. Das Ideenmanagement „Impulse“ ist bei uns ein wichtiges Instrument, um Mitarbeitern aller Konzernbereiche die Möglichkeit zur Mitgestaltung einzuräumen. Dass dieser Gestaltungsraum genutzt wird, spiegelt sich in den Zahlen des zurückliegenden Jahres wider. Die Mitarbeiter waren dem Aufruf „Wir suchen überall nach guten Ideen“ gefolgt und haben 3.406 Vorschläge eingereicht. Aus den insgesamt rund 838 weiterentwickelten Ideen konnte ein Einsparpotenzial von rund 11,3 Mio. EUR identifiziert werden, beispielsweise durch die eigenständige Entwicklung eines IT-gestützten Suchfilters, mit dessen Hilfe kurzfristig noch freie Kapazitäten auf Linienflügen für den Transport von Fracht festgestellt werden können.

## Verantwortung

- Lufthansa hat ihre bisherige Aufstellung weiterentwickelt und in eine Struktur unter dem Begriff „Verantwortung“ eingebettet. ➤ Das Corporate Responsibility Council wird noch enger mit der Konzernstrategie und -steuerung verzahnt.
- Lufthansa ist in vielen Nachhaltigkeitsindizes vertreten. ➤ Nachhaltiges Wirtschaften bildet die Basis für unsere Aktivitäten im Sinne aller Stakeholder.
- Wir engagieren uns weltweit seit vielen Jahren in den Bereichen Umwelt, Soziales, Bildung, Sport und Kultur.

Die Prinzipien der unternehmerischen Verantwortung sind fest im Leitbild sowie den Unternehmenswerten und Führungsprinzipien des Lufthansa Konzerns verankert. Im Berichtsjahr haben wir unsere bisherige Aufstellung weiterentwickelt und sämtliche Aspekte zu diesem Thema in eine Struktur unter dem Begriff „Verantwortung“ eingebettet. Dieser umfasst neben der Nachhaltigkeit und damit Ökonomie, Ökologie und Soziales auch unsere Tätigkeiten in Hinblick auf Grundsätze nachhaltiger Unternehmensführung (Corporate Governance) und gesellschaftliches Engagement (Corporate Citizenship).

Um alle Tätigkeiten, die im Bezug zur unternehmerischen Verantwortung und zum nachhaltigen Wirtschaften im Lufthansa Konzern stehen, noch effektiver steuern zu können, wurde das bisher ver-

antwortliche Nachhaltigkeits-Board erweitert und enger mit der Konzernstrategie verzahnt. Das so entstandene, weiterhin interdisziplinäre und bereichsübergreifende Corporate Responsibility Council wird vom Leiter der Konzernstrategie koordiniert. In dem Gremium wirken die Leiter der Konzernabteilungen Politik, Umweltkonzepte, Personalpolitik, Recht, Kommunikation, Investor Relations und Konzerncontrolling. Über das Controlling wird zudem eine engere Verzahnung der Nachhaltigkeitsziele mit den konzernweiten Steuerungs- und Berichtsprozessen vorgenommen. Um auch in der Lieferkette die Kriterien unserer Verantwortung sicherzustellen, wird die Konzernabteilung Corporate Sourcing in beratender Rolle hinzugezogen. Der hohen Relevanz aller Aspekte messen wir großes Gewicht bei – insofern berichtet das Gremium unmittelbar an den Konzernvorstand, der die Gesamtverantwortung trägt.

### Unternehmerische Verantwortung bei Lufthansa

|                                            |                                                                                                                                                                                                                                                                                                                                                                                                                                          |
|--------------------------------------------|------------------------------------------------------------------------------------------------------------------------------------------------------------------------------------------------------------------------------------------------------------------------------------------------------------------------------------------------------------------------------------------------------------------------------------------|
| <b>Wirtschaftliche Nachhaltigkeit</b>      | Langfristige und nachhaltige Wertschöpfung, Chancen- und Risikosteuerung, Supply Chain Management/ Sourcing, Investorendialog                                                                                                                                                                                                                                                                                                            |
| <b>Klima- und Umweltverantwortung</b>      | Emissionsminderung, Umweltmanagementsysteme, Ressourcenmanagement, Umweltvorsorge, Green IT, Umweltförderung (Biodiversität), Reisemanagement                                                                                                                                                                                                                                                                                            |
| <b>Soziale Verantwortung</b>               | Beschäftigungs- und Vergütungsbedingungen, Vereinigungsfreiheit/ Kollektivrechtliche Vereinbarungen, Arbeitsplatzsicherungspolicy, Rekrutierungspolitik, Versorgungsregelungen, Führungsgrundsätze/-kultur, Mitarbeiterbildung/ Personalentwicklung, Diversitätsmanagement/ Antidiskriminierung, Gesundheitsmanagement/ Arbeitssicherheit, Work-Life-Balance, Menschenrechte/ Internationale Sozialstandards, interne Stakeholderdialoge |
| <b>Corporate Governance und Compliance</b> | Corporate Governance, Corporate Compliance, Recht, Steuern, Vorstands- und Aufsichtsratsvergütung, Datenschutz                                                                                                                                                                                                                                                                                                                           |
| <b>Corporate Citizenship</b>               | Politik, externe Stakeholderdialoge, Mitgliedschaften, Sponsoring, Hilfsprojekte, Unterstützung von Bildungsprojekten, Spenden                                                                                                                                                                                                                                                                                                           |

## Hohes externes Interesse am Bereich Verantwortung

Wie in den Vorjahren wurden auch 2010 die Tätigkeiten von Lufthansa, die sich mit verantwortlichem Handeln befassen, von unternehmensexternen Experten und Ratingagenturen bewertet und anerkannt. Lufthansa ist weiterhin in zahlreichen Nachhaltigkeitsindizes, beispielsweise FTSE4Good, ASPI (Advanced Sustainable Performance Indices) und ESI (Ethibel Sustainability Index), vertreten.

Trotz vielfältiger Bemühungen ist es Lufthansa, neben anderen DAX-Konzernen, erstmals seit 2005 jedoch nicht gelungen, die verschärften Bedingungen für die Mitgliedschaft im Dow Jones Sustainability Index zu erfüllen. Verbesserungspotenzial sahen die Analysten vor allem in den Bereichen des gesellschaftlichen Engagements, den Bedingungen für Lieferanten und dem unternehmerischen Engagement mit unternehmensexternen Interessentengruppen. Sehr positiv hingegen fiel die Bewertung in den Bereichen Klimastrategie, Lärmschutz und lokale Luftqualität aus.

Der Vorstand und das Corporate Responsibility Council nehmen die Bewertungen und Empfehlungen sehr ernst. Gemeinsam mit den Experten im Unternehmen werden die genannten Verbesserungsbereiche untersucht und notwendige Maßnahmen eingeleitet.

Lufthansa bekennt sich zu den Grundsätzen des UN Global Compact und unterstützt dessen Tätigkeiten. Seit 2002 hatte Lufthansa außerdem allen Empfehlungen des Corporate Governance Kodexes entsprochen und auch die meisten fakultativen Anregungen befolgt. In der Aufsichtsratssitzung vom 6. Dezember 2010 wurde die Entsprechenserklärung mit wenigen Einschränkungen aktualisiert. Nähere Erläuterungen finden Sie im Kapitel „Corporate Governance“ auf [S. 42](#).

## Unsere Umweltschutzstrategie mit 15 Leitsätzen ist die Basis für umweltgerechtes Handeln

Das 15 Leitsätze umfassende „Strategische Umweltprogramm“ besteht bei Lufthansa seit 2008. Es spiegelt den hohen Stellenwert wider, den die Umweltvorsorge in den Unternehmenszielen einnimmt. Unsere vorrangige Priorität ist es, bis zum Jahr 2020 weitere entscheidende Fortschritte und qualitative Ziele im Umweltschutz zu erreichen. Umweltgerechtes Handeln soll noch mehr als bisher als eines der Entscheidungskriterien in das alltägliche Geschäft integriert werden. Unsere Leitsätze und eine Übersicht über unsere

aktuellen Umweltziele einschließlich ihres Status, erzielter Fortschritte und auch noch nicht erreichter Ziele ebenso wie die Maßnahmen, mit deren Hilfe wir unsere Ziele erreichen wollen, finden Sie auf unserer Website [www.lufthansa.com/verantwortung](http://www.lufthansa.com/verantwortung).

Mit Hilfe der umfassenden Umweltdatenbank werden alle sich auf die Umwelt auswirkenden betrieblichen Vorgänge und Tätigkeiten im Lufthansa Konzern systematisch erfasst, dokumentiert und bewertet. So können wir unsere Leistungen und den Erfolg unserer Bestrebungen für den Klima- und Umweltschutz anhand diverser Schlüsselkennzahlen messen. Dazu gehören beispielsweise Informationen zu Energie- und Kerosinverbrauch, Emissionen, Lärm, Abfall sowie Wasser und Abwasser. Diese Kennzahlen helfen unseren Umweltexperten, den Umweltschutz im und durch den Konzern kontinuierlich zu verbessern. Mittelfristig soll dies auch dazu führen, in allen großen Konzerngesellschaften ein zertifizierungsfähiges Umweltmanagementsystem implementieren zu können.

Oberste Priorität hat die Reduzierung der CO<sub>2</sub>-Emissionen. Das konkrete Ziel besteht darin, den CO<sub>2</sub>-Ausstoß pro geflogenem Passagierkilometer (pkm) bis zum Jahr 2020 um 25 Prozent im Vergleich zu 2006 (110,5 g/pkm) zu reduzieren. Daraus ergäbe sich ein reduzierter CO<sub>2</sub>-Ausstoß von ca. 84 g/pkm. Im abgeschlossenen Geschäftsjahr 2010 lag diese Marke bei 105,8 g/pkm, gegenüber 108,4 g/pkm im Vorjahr – eine Verbesserung um 2,4 Prozent.

Misst man den absoluten CO<sub>2</sub>-Ausstoß, so entstanden 2010 durch Transportleistungen des Lufthansa Konzerns insgesamt 26,6 Mio. Tonnen CO<sub>2</sub>. Dem Anstieg von 10,1 Prozent zum Vorjahr stand eine Erhöhung der Transportleistung um 15,6 Prozent gegenüber. Das weiterhin voranschreitende Flottenmodernisierungsprogramm und damit einhergehend neue Flugzeuge mit modernen und sparsamen Triebwerken führen also unmittelbar und sichtbar dazu, dass der CO<sub>2</sub>-Ausstoß weiter von der Transportleistung entkoppelt wird. Ebenso führt das Programm auch zu einer weiteren Optimierung des Treibstoffverbrauchs, der in Litern pro geflogenen 100 Passagierkilometern gemessen wird. Mit 4,20 Litern für das Geschäftsjahr 2010 lag dieser Wert erneut unter dem des Vorjahres (4,30 l/100 pkm) und auch dem des Vorvorjahres (4,34 l/100 pkm). Weitere und noch ausführlichere Umweltkennzahlen für das Geschäftsjahr 2010 können Sie ab Mitte des Jahres unter [www.lufthansa.com/verantwortung](http://www.lufthansa.com/verantwortung) abrufen.

### Wesentliche Umweltkennzahlen der operativen Flotte des Lufthansa Konzerns

|                                   |              | 2010  | Veränderung in % | 2009  | Veränderung in % | 2008  |
|-----------------------------------|--------------|-------|------------------|-------|------------------|-------|
| Treibstoffverbrauch               | in l/100 pkm | 4,20  | -2,3             | 4,30  | -0,9             | 4,34  |
| CO <sub>2</sub> -Ausstoß (direkt) | in g/pkm     | 105,8 | -2,4             | 108,4 | -0,8             | 109,3 |

Neben den ökologischen Auswirkungen auf Klima und Umwelt bieten Einsparungen beim Treibstoffverbrauch auch ökonomische Vorteile. So senken sie die Treibstoffkosten, die neben dem Personalaufwand grundsätzlich eine der größten Kostenpositionen in der Gewinn- und Verlustrechnung von Lufthansa sind. Hinzu kommt nach den derzeitigen Vorgaben der Europäischen Union ab 2012 auch die Einbeziehung des Luftverkehrs in den europaweiten Emissionshandel, dessen negative finanzielle Auswirkungen durch eine treibstoffeffiziente Flotte gedämpft werden. Näheres siehe auch Kapitel „Regulatorische und weitere Einflussfaktoren“ auf [S. 58](#).

### Zukunftsweisende Forschungsprojekte

Als Dienstleistungsunternehmen betreibt Lufthansa keine eigene Forschungs- und Entwicklungsabteilung im klassischen Sinne. Stattdessen sind wir an zahlreichen Forschungsprojekten beteiligt und unterstützen diese aktiv. Ausführlich werden diese in unserem Nachhaltigkeitsbericht „Balance“ dargestellt. Als Beispiel dient hier das EU-Forschungsprojekt CARIBIC mit dem Ziel, die komplexen chemischen und physikalischen Abläufe in der Atmosphäre zu untersuchen. Ein an Bord eines Airbus-Langstreckenflugzeugs installiertes Messlabor liefert detaillierte und präzise Daten über verschiedenste Spurenstoffe und die Konzentration und Größenverteilung von Aerosolen. Im Frühjahr 2010 konnten die Gerätschaften zudem genutzt werden, um verlässliche Messergebnisse zur Aschekonzentration im Luftraum über Europa nach Ausbruch des isländischen Vulkans Eyjafjallajökull zu erhalten.

Im November 2010 hat Lufthansa gemeinsam mit dem Koordinator der Bundesregierung für die Luft- und Raumfahrt und dem Deutschen Zentrum für Luft- und Raumfahrt (DLR) ein im Rahmen des Luftfahrtforschungsprogramms der Bundesregierung gefördertes Biokraftstoff-Projekt zur Nachhaltigkeit des Luftverkehrs vorgestellt: Nach erfolgter Zulassung wird Lufthansa voraussichtlich ab Frühjahr 2011 einen Airbus A321 für sechs Monate im regulären Flugbetrieb auf der Strecke Hamburg–Frankfurt–Hamburg einsetzen, der eine Treibstoffmischung mit 50 Prozent biosynthetischem Kerosin auf einem Triebwerk verwendet.

Wesentliches Ziel des Vorhabens ist im Rahmen eines Langzeitversuchs, die Auswirkungen von Biokraftstoffen auf Wartung und Lebensdauer von Triebwerken zu untersuchen. In den sechs Monaten Erprobung werden allein dadurch rund 1.500 Tonnen CO<sub>2</sub> eingespart. Lufthansa wird damit weltweit die erste Airline sein, die im Rahmen eines Langzeitversuchs Biokraftstoff im Flugbetrieb einsetzt. Dieses Projekt mit dem Namen BurnFAIR ist Teil des von der Bundesregierung geförderten Gesamtprojekts „FAIR“ (Future Aircraft Research), in dem neben der Verträglichkeit von Biokraftstoffen auch andere Themen wie neue Antriebs- und Flugzeugkonzepte oder andere Kraftstoffe, wie zum Beispiel Flüssiggas, untersucht werden. Aufgrund aufwendiger Beschaffungs- und Ablaufprozesse kalkulieren wir die Gesamtkosten für Lufthansa zur Durchführung des Projekts BurnFAIR mit rund 4,1 Mio. EUR.

Der Einsatz von biosynthetischem Kerosin ist ein Element der 4-Säulen-Klimaschutzstrategie des Luftverkehrssektors, die auch vom UN-Luftfahrtverband ICAO anerkannt ist und den Luftverkehrsgesellschaften effektive Maßnahmen zur CO<sub>2</sub>-Reduzierung bietet. Nur mit einer Kombination aus unterschiedlichsten Maßnahmen, etwa einer kontinuierlichen Flottenerneuerung, operativer Maßnahmen wie Triebwerkswäsche oder dem Einsatz von leichteren Materialien und einer verbesserten Infrastruktur, wird es gelingen, die ambitionierten Umweltziele zu erreichen. Auch zu diesen Themen laufen bereits entsprechende Förderprojekte im Rahmen des Luftfahrtforschungsprogramms.

Daneben treiben wir unser Engagement im Bereich der Lärmforschung weiter voran. So investiert Lufthansa in aktive Schallschutzmaßnahmen, indem bis Ende 2011 die gesamte in Frankfurt stationierte Boeing 737-Flotte umgerüstet wird und die Triebwerke von Flugzeugen des Typs Boeing 737-300 und 737-500 technisch angepasst werden. Rund ein Fünftel der Flugbewegungen der Lufthansa in Frankfurt werden künftig mit diesen Flugzeugtypen durchgeführt. Durch die Maßnahme werden die Lärmemissionen bei An- und Abflug um bis zu 2,4 Dezibel reduziert, womit wir auch unsere Verantwortung gegenüber den Flughafenanwohnern wahrnehmen.

Weitere Erläuterungen zur 4-Säulen-Strategie im Luftverkehr können Sie in unserem Nachhaltigkeitsbericht „Balance“ nachlesen.



### **Wahrnehmung unserer Verantwortung als Arbeitgeber**

Für ein Dienstleistungsunternehmen wie Lufthansa ist die Bedeutung motivierter Mitarbeiter ausgesprochen hoch, ebenso wie der Ausbau und das Wahren von Fachwissen. Die Maßnahmen, die im Lufthansa Konzern vorangetrieben werden, um die Attraktivität des Unternehmens als Arbeitgeber für bestehende und künftige Mitarbeiter sicherzustellen, werden im Kapitel „Mitarbeiter“ auf [S. 124](#) ausführlich beschrieben.

### **Vielfältige Aktivitäten im Bereich Corporate Citizenship**

Als international tätiger Luftverkehrskonzern ist sich Lufthansa ihrer gesellschaftlichen Verantwortung (Corporate Citizenship) bewusst und engagiert sich weltweit seit vielen Jahren in den Bereichen Kultur, Umwelt, Soziales, Bildung und Sport.

In der Kultur hat sich das jährlich stattfindende „Lufthansa Festival of Baroque Music“ in London in den 26 Jahren seines Bestehens bereits zu einem international beachteten Festival entwickelt. Darüber hinaus fördern wir seit 2010 als „First Global Partner“ das Gürzenich-Orchester in Köln und unterstützen es mit 250.000 EUR pro Jahr. Das Orchester zählt im Konzert- wie im Opernbereich zu den führenden Deutschlands. Mit der jährlichen Sponsoring-Einnahme plant es die weitere Stärkung seines musikpädagogischen Angebots „Ohren auf!“ für Kinder und Jugendliche in Form von gemeinsamen Proben- und Konzertbesuchen, Musikprojekten, Workshops und Begegnungen.

Im Bereich Natur und Umwelt kooperiert Lufthansa mit über zehn nationalen und internationalen Naturschutz- und Umweltverbänden in Projekten zum Erhalt der biologischen Vielfalt. Schwerpunkt ist hierbei der Artenschutz. Lufthansa engagiert sich insbesondere in grenzüberschreitenden Maßnahmen für wandernde Tierarten und ihre Lebensräume. Traditionell groß ist unser Engagement für den Schutz bedrohter Kranicharten. Zudem haben Lufthansa und die Nachhaltigkeitsstiftung NatureLife-International 2010 die Wanderausstellung „World Champions of Nature“ konzipiert, die in zahlreichen deutschen Großstädten präsentiert wird. Sie versteht sich als konkreter Beitrag zur stärkeren Etablierung von Naturwissen und Sensibilisierung für den Artenschutz. Dazu zählt auch, dass mit „Vielfalt Leben – Faszination Natur“ ein neuer Artenschutz-Kurzfilm an Bord unserer Flugzeuge gezeigt wird.

Herausragendes Beispiel für das soziale Engagement des Lufthansa Konzerns ist die HelpAlliance. Sie wurde 1999 von Mitarbeitern aus allen Teilen des Lufthansa Konzerns gegründet. Der Verein arbeitet ehrenamtlich sowie politisch und konfessionell unabhängig. Zu den von der HelpAlliance betreuten Projekten zählen Schulen,

Ausbildungseinrichtungen, Waisenhäuser, Straßenkinderprojekte, Existenzgründungen und Buschkrankenhäuser in Afrika, Asien, Europa und Lateinamerika. Wir unterstützen die HelpAlliance seit ihrem Bestehen finanziell, logistisch und kommunikativ. So wurde beispielsweise der Gesamtbetrag, der von Lufthansa Mitarbeitern 2010 im Rahmen einer Aktion zur Unterstützung des HelpAlliance-Projekts in Pakistan zur Hilfe in den dort von der Flutkatastrophe betroffenen Gebieten gespendet wurde, von Lufthansa verdoppelt.

2004 haben Mitarbeiter von Lufthansa Cargo gemeinsam mit deutschen Ärzten außerdem den gemeinnützigen Verein „Cargo Human Care“ gegründet. Unkomplizierte und professionelle medizinische Hilfe für die Not leidende Bevölkerung Nairobis ist die Grundidee dieses humanitären Hilfsprojekts. Lufthansa Cargo stellt dafür unentgeltlich die Flugtickets für Ärzte sowie freie Transportkapazitäten an Bord ihrer Frachtflugzeuge zur Verfügung. Bei Katastrophen wie dem Erdbeben in Haiti oder der Flut in Pakistan leistet Lufthansa Cargo zudem durch Hilfsgütertransporte schnelle und unmittelbare Hilfe, zum Beispiel zur Unterstützung der medizinischen Behandlung von Kindern.

SWISS engagiert sich daneben seit Jahren für SOS-Kinderdörfer. So ist beispielsweise das SWISS-Haus eines von 13 Familienhäusern im SOS-Kinderdorf Daressalam in Tansania. Ermöglicht wurde die Errichtung durch Spenden von SWISS-Fluggästen und -Mitarbeitern. Die starke Verbundenheit mit dem afrikanischen Kontinent drückt sich auch bei der Verbund-Airline Brussels Airlines in der Unterstützung zahlreicher humanitärer Projekte aus. Um das Engagement bestmöglich zu bündeln, arbeitet Brussels Airlines unter anderem eng mit zwei belgischen Nichtregierungsorganisationen zusammen.

Das Thema Bildung besitzt bei uns ebenfalls einen traditionell hohen Stellenwert. Mit dem innovativen Bildungsangebot „Lufthansa Erlebnis Wissen“ werden die vielfältigen Arbeits- und Berufswelten im Lufthansa Konzern vorgestellt, um so Kinder und Jugendliche über die Luftfahrt zu informieren. Die Schülerinnen und Schüler erhalten so zusätzlich eine erste berufliche Orientierung. Seit 2008 unterstützt Lufthansa außerdem die gemeinnützige Initiative „Teach First Deutschland“, die sich für mehr Chancengerechtigkeit für Schülerinnen und Schüler auf dem Weg in den Arbeitsmarkt einsetzt. Ziel der im Jahr 1998 von der Unternehmensberatung Boston Consulting Group gegründeten Initiative „business@school“ ist es, Schüler der Klassen 10 bis 13 praxisnah mit Wirtschaftsthemen vertraut zu machen. Wir unterstützen seit 2002 auch diese Bildungsinitiative, an der jährlich mehr als 70 Schulen mit gymnasialer Oberstufe in Deutschland, Österreich, der Schweiz, Singapur, Italien und Norwegen teilnehmen.

Auch die Pflege von Traditionen wird im Unternehmen als Teil des verantwortlichen Handelns verstanden. In diesem Sinne unterstützen wir auch die Deutsche Lufthansa Berlin-Stiftung. Als ein Leuchtturmprojekt baut die Stiftung in detailreicher Arbeit und mit hoher Expertise gemeinsam mit Kollegen der Lufthansa Technik und externen Fachleuten ein Flugzeug der legendären Lockheed Super Constellation-Reihe neu auf. Zudem wird es wieder flugfähig gemacht sowie Cockpit-Personal geschult und mit den benötigten Lizenzen ausgestattet. Anhaltend großer Beliebtheit erfreut sich auch die Junkers Ju 52 („Tante Ju“) mit dem Namen „Berlin-Tempelhof“, mit der in zahlreichen Städten Rundflüge angeboten werden.

Außerdem tritt das Unternehmen seit vielen Jahren als Partner des Sports auf. Das Sport-Engagement ist sowohl Bekenntnis zu Leistungsbereitschaft im Wettbewerb als auch ein Bekenntnis zur sozialen Verantwortung des Unternehmens. Zu dem Engagement zählen unter anderem die Partnerschaft mit der Stiftung „Deutsche Sporthilfe“, die Unterstützung von München als Austragungsort der Olympischen Winterspiele 2018 als Nationaler Förderer sowie die Partnerschaft mit dem Deutschen Olympischen Sportbund und dem Deutschen Behindertensportverband zur Unterstützung der deutschen Leistungssportler bei den Olympischen Spielen und den Paralympics.

### **Beschaffungsprozesse werden konzernweit professionalisiert**

Im Bereich Beschaffung haben wir Anfang 2009 das Projekt „Procurement Leadership“ aufgesetzt, um die konzernweiten Beschaffungsprozesse weiter zu professionalisieren. Im Fokus steht dabei die Einführung eines strategischen Warengruppenmanagements, durch das die Einkaufsbereiche bis 2011 rund 300 Mio. EUR pro Jahr zum operativen Ergebnis beitragen sollen. Begleitet wird die Strategieentwicklung durch eine intensive Arbeit an Grundlagenthemen. Dazu zählt neben neuen IT-Systemen und diversen Prozessveränderungen eine grundlegende Neuausrichtung des Lieferantenmanagements, mit der wir unseren Anspruch an Verantwortung auch in unserer Einkaufsorganisation und entlang der gesamten Lieferantenkette bekräftigen.

In diesem Zusammenhang fordert Lufthansa als „Procurement Leader“ von ihren Lieferanten künftig nicht mehr nur dezentral über ihre Gesellschaften die Einhaltung von verbindlichen Verantwortungskriterien ein, sondern verankert diese nun konzernweit in allen Verträgen und internen Richtlinien mittels eines Einkaufshandbuchs. Dabei orientieren wir uns an international anerkannten Konventionen zum Umwelt- und Arbeitsschutz, den gesetzlichen Vorschriften zur Bekämpfung von Korruption sowie Sicherheitsrichtlinien bei der Informationsverarbeitung.

### **Fortwährender Fokus auf nachhaltigem Wirtschaften**

Grundlage aller Aktivitäten des Lufthansa Konzerns und wesentliche Voraussetzung für verantwortliches Handeln ist die langfristige Steigerung des Unternehmenswerts durch nachhaltiges Wirtschaften. Hierzu steuern wir das Unternehmen mit Hilfe einer Wertorientierung und messen den Erfolg am Cash Value Added (CVA), siehe „Wertorientierte Steuerung und Ziele“ ab [S. 48](#). Die variablen Vergütungsanteile der Führungskräfte und des Vorstands orientieren sich ebenfalls am CVA. Damit ist gewährleistet, dass die Führung des Unternehmens unmittelbaren Anteil an der nachhaltigen Entwicklung des Konzerns hat. Gleichzeitig minimiert es die Gefahr, kurzfristig Erfolg versprechende, jedoch nicht dauerhaft wirkende Entscheidungen als attraktiv anzusehen.

Auch das Risikomanagement einschließlich des Managements der Finanzrisiken trägt zur Sicherung des langfristigen Unternehmenserfolgs bei. Eine ausführliche Darstellung der Ansätze und Maßnahmen finden Sie im „Risiko- und Chancenbericht“ ab [S. 132](#).

Das deutsche Aktien-, Mitbestimmungs- und Kapitalmarktrecht sowie unsere Satzung und der unternehmensspezifisch umgesetzte Corporate Governance Kodex dienen als Grundlage für die Ausgestaltung der Führungs- und Überwachungsstruktur im Konzern. Dazu gehört auch, dass für alle Lufthansa Mitarbeiter die Regeln der „Competition Compliance“ sowie der „Integrity Compliance“ verbindlich sind.

Offene und transparente Kommunikation ist unser oberstes Gebot im regelmäßigen Dialog mit allen Stakeholdern. Damit schaffen wir die wesentlichen Voraussetzungen für das Vertrauen, das Lufthansa bei ihren Kapitalgebern, Mitarbeitern und in der Öffentlichkeit genießt.

# Übernahmerechtliche Angaben nach § 315 Abs. 4 HGB

## **Zusammensetzung des gezeichneten Kapitals, Aktiengattungen, Rechte und Pflichten**

Das Grundkapital der Deutschen Lufthansa AG beträgt 1.172 Mio. EUR, aufgeteilt in 457.937.572 auf den Namen lautende Stückaktien. Auf jede Stückaktie entfällt ein Anteil von 2,56 EUR am Grundkapital. Die Übertragung der Aktien ist an die Zustimmung der Gesellschaft gebunden (Vinkulierung). Die Gesellschaft darf die Zustimmung dazu nur verweigern, wenn durch die Eintragung des neuen Aktionärs in das Aktienregister die Aufrechterhaltung der luftverkehrsrechtlichen Befugnisse gefährdet sein könnte. Jede Namensaktie gewährt eine Stimme. Die Aktionäre nehmen nach Maßgabe der gesetzlichen Vorschriften und der Satzung ihre Rechte in der Hauptversammlung wahr und üben dort ihr Stimmrecht aus.

## **Stimmrechts- oder Übertragungsbeschränkungen**

Damit die Luftverkehrsbetriebsgenehmigung nach Europarecht und die Luftverkehrsrechte zum Anflug internationaler außer-europäischer Ziele gewahrt bleiben, darf der Anteil ausländischer Aktionäre 50 Prozent des Grundkapitals der Gesellschaft nicht übersteigen. Erreicht der Anteil ausländischer Aktionäre 40 Prozent, so wird die Deutsche Lufthansa AG gemäß § 4 Abs. 1 Luftverkehrsnachweissicherungsgesetz (LuftNaSiG) in Verbindung mit § 71 Abs. 1 Nr. 1 AktG in die Lage versetzt, eigene Aktien zu erwerben, um eine drohende Überfremdung abzuwehren. Wird ein Ausländeranteil von 45 Prozent im Aktienregister erreicht, ist die Gesellschaft ermächtigt, mit Zustimmung des Aufsichtsrats das Grundkapital gegen Bareinlage durch die Ausgabe neuer Aktien um bis zu 10 Prozent zu erhöhen und hierbei das Bezugsrecht der Aktionäre auszuschließen (§ 4 Abs. 2 und 3 LuftNaSiG i. V. m. § 4 Abs. 4 der Satzung der Gesellschaft). Nähert sich der Anteil ausländischer Aktionäre der 50 Prozent-Grenze, hat die Gesellschaft das Recht, die Zustimmung zur Eintragung neuer ausländischer Aktionäre ins Aktienregister zu verweigern (§ 5 Abs. 1 der Satzung der Gesellschaft). Sollte gleichwohl der 50-prozentige Anteil ausländischer Aktionäre überschritten werden, ist die Deutsche Lufthansa AG mit Zustimmung des Aufsichtsrats befugt, zuletzt eingetragene Aktionäre aufzufordern, ihre Aktien zu veräußern. Wird dieser Aufforderung nicht binnen vier Wochen nachgekommen, ist die Gesellschaft nach Verstreichen einer Nachfrist von drei Wochen berechtigt, die betreffenden Aktien gegen Entschädigung für verlustig zu erklären (§ 5 LuftNaSiG).

Am 31. Dezember 2010 lag der Anteil ausländischer Aktionäre bei 31,5 Prozent. Detaillierte Informationen zum LuftNaSiG und die quartalsweise aktualisierte Aktionärsstruktur finden Sie auf unserer Internetseite  [www.lufthansa.com/investor-relations](http://www.lufthansa.com/investor-relations).

## **Direkte oder indirekte Beteiligungen am Kapital von mehr als 10 Prozent der Stimmrechte**

Zum 31. Dezember 2010 gab es keine Aktionäre mit einem Anteil am Grundkapital von mehr als 10 Prozent.

## **Inhaber von Aktien mit Sonderrechten**

Aktien mit Sonderrechten sind bei Lufthansa nicht vorhanden.

## **Stimmrechtskontrolle von Mitarbeiteraktien bei mittelbarer Kontrollrechtsausübung**

In Deutschland wird diese Regelung nicht angewendet.

## **Gesetzliche Vorschriften und Bestimmungen der Satzung über die Ernennung bzw. Abberufung der Vorstandsmitglieder und Änderung der Satzung**

Der Aufsichtsrat bestellt die Vorstandsmitglieder und bestimmt deren Anzahl. Der Aufsichtsrat kann die Bestellung zum Vorstandsmitglied und die Ernennung zum Vorsitzenden des Vorstands widerrufen, wenn ein wichtiger Grund vorliegt. Jede Satzungsänderung bedarf eines Hauptversammlungsbeschlusses mit einer Mehrheit von mindestens drei Vierteln des bei der Beschlussfassung durch die Aktionäre vertretenen Grundkapitals.

## **Befugnisse des Vorstands (Aktienrückkauf, Aktienemission)**

Die Deutsche Lufthansa AG verfügt über ein genehmigtes Kapital in Höhe von 586.160.092 EUR:

Durch Beschluss der ordentlichen Hauptversammlung vom 29. April 2010 wurde der Vorstand ermächtigt, bis zum 28. April 2015 mit Zustimmung des Aufsichtsrats das Grundkapital der Gesellschaft um bis zu 561.160.092 EUR durch ein- oder mehrmalige Ausgabe von neuen, auf den Namen lautenden Stückaktien gegen Bar- oder Sacheinlagen zu erhöhen (Genehmigtes Kapital A). Den Aktionären ist grundsätzlich ein Bezugsrecht einzuräumen.

Durch Beschluss der ordentlichen Hauptversammlung vom 24. April 2009 wurde der Vorstand ermächtigt, bis zum 23. April 2014 mit Zustimmung des Aufsichtsrats das Grundkapital der Gesellschaft um bis zu 25 Mio. EUR durch ein- oder mehrmalige Ausgabe von neuen, auf den Namen lautenden Stückaktien an die Mitarbeiter gegen Bareinlage zu erhöhen (Genehmigtes Kapital B). Das Bezugsrecht der Aktionäre ist ausgeschlossen.

## Nachtragsbericht

Der Vorstand wurde ferner ermächtigt, bis zum 16. Mai 2011 Wandel-, Options-, Gewinnschuldverschreibungen oder Genussrechte – oder Kombinationen hieraus – bis zu einem Gesamtnennbetrag von 1,5 Mrd. EUR zu begeben und das Grundkapital in diesem Zusammenhang um bis zu 117.227.520 EUR durch Ausgabe von bis zu 45.792.000 neuen Aktien (rund 10 Prozent) zu erhöhen.

Darüber hinaus ist die Gesellschaft durch Beschluss der ordentlichen Hauptversammlung vom 29. April 2010 ermächtigt, bis zum 28. April 2015 eigene Aktien zu erwerben. Die Ermächtigung kann unter anderem dazu genutzt werden, die Finanzierungsmöglichkeiten für den Fall eines Erwerbs eines Unternehmens oder einer Unternehmensbeteiligung zu erweitern. Dabei darf der rechnerische Anteil der aufgrund dieser Ermächtigung erworbenen Aktien zusammen mit anderen Aktien der Gesellschaft, die die Gesellschaft bereits erworben hat und noch besitzt, zu keinem Zeitpunkt mehr als 10 Prozent des Grundkapitals betragen.

Weitere Angaben zum genehmigten Kapital, bedingten Kapital und zum Erwerb eigener Aktien sind im Konzernanhang „Erläuterung 33“ ab [S. 188](#) aufgeführt.

### Kontrollwechselbezogene Vereinbarungen des Mutterunternehmens

Derartige Vereinbarungen sind bei Lufthansa nicht vorhanden.

### Entschädigungsvereinbarungen mit Mitgliedern des Vorstands oder mit Arbeitnehmern für den Fall eines Übernahmeangebots

Für den Fall eines im Anstellungsvertrag näher definierten Kontrollwechsels bei der Deutschen Lufthansa AG haben das Vorstandsmitglied und die Gesellschaft das Recht, den Vertrag innerhalb eines Zeitraums von zwölf Monaten seit dem Kontrollwechsel zu kündigen.

Falls der Vertrag endet, weil das Sonderkündigungsrecht ausgeübt oder der Vertrag innerhalb eines Zeitraums von zwölf Monaten seit und im Zusammenhang mit dem Kontrollwechsel einvernehmlich aufgehoben wurde, hat das Vorstandsmitglied Anspruch auf eine Abfindung seiner Vergütungsansprüche für die Restlaufzeit des Vertrags.

Gemäß der entsprechenden Empfehlung des Deutschen Corporate Governance Kodexes darf die Höhe der Abfindung 150 Prozent der vertraglich vereinbarten Abfindungshöchstgrenze, siehe Konzernanhang „Erläuterung 49“ ab [S. 210](#), nicht übersteigen.

Am 19. Januar 2011 haben die Deutsche Lufthansa AG und die Unabhängige Flugbegleiter Organisation UFO e.V. eine Empfehlung zur Schlichtung des Tarifkonflikts angenommen und damit die seit März 2010 andauernde Tarifrunde abgeschlossen.

Mit Hilfe des Schlichterspruchs wurden Regelungen zu einer Verlängerung des Vergütungs- und Neufassung des Manteltarifvertrags getroffen, die für die rund 16.000 Lufthansa Flugbegleiter Anwendung finden. Im Rahmen des Vergütungstarifvertrags, der ohne Änderungen mit einer Laufzeit von 22 Monaten, bis zum 31. Dezember 2011, neu abgeschlossen wurde, vereinbarten die Parteien eine Nullrunde. Für den neuen Manteltarifvertrag gilt eine Laufzeit bis zum 28. Februar 2014.

Inbegriffen in den neuen Verträgen sind auch Vereinbarungen zur weiteren Verbesserung der Arbeitsbedingungen, unter anderem eine Reduzierung von Dienstplanänderungen und einhergehend damit eine höhere Planungssicherheit für Kabinenbeschäftigte sowie Regelungen zu Ruhe- und Pausenzeiten. Außerdem wurde eine Strukturausgleichszahlung in Höhe von 1.000 EUR beschlossen, die im März 2011 ausbezahlt wird.

Die Einigung trägt sowohl dem Bedürfnis der Kabinenmitarbeiter nach Planstabilität und den besonderen Belastungsgrenzen im Flugverkehr Rechnung als auch der Notwendigkeit, im Unternehmen Flexibilität und Wirtschaftlichkeit zu erhöhen.

## Risiko- und Chancenbericht

➤ Die bewusste Steuerung von Chancen und Risiken ist fest in unserer Unternehmensführung verankert. ➤ Ein Risikomanagement-Ausschuss beschäftigt sich gezielt mit allen Geschäftsrisiken und verbessert kontinuierlich das Risikomanagement-System. ➤ Alle relevanten Risiken werden in einer Risikolandkarte zusammengefasst. ➤ Quartalsweise erscheint ein Chancen- und Risikobericht. ➤ Es ist keine aktuell den Fortbestand des Konzerns gefährdende Entwicklung erkennbar.

### Chancen- und Risikomanagement-System

Als international tätiges Luftfahrtunternehmen ist Lufthansa gesamtwirtschaftlichen, branchenspezifischen und unternehmerischen Risiken ausgesetzt. Dank unserer auf aktuellem Stand gehaltenen Managementsysteme erkennen wir frühzeitig Risiken und Chancen und richten unser Handeln daran aus. Unsere bewährte Risikostrategie erlaubt es uns, günstige Geschäftsmöglichkeiten zu nutzen, sofern das Rendite-Risiko-Verhältnis marktgerecht ist. Darüber hinaus müssen die Risiken in Bezug auf unsere Wertschaffung angemessen und tragbar sein.

Ein integraler Faktor unserer Unternehmensführung ist die bewusste Steuerung von Chancen und Risiken. Unser Risikomanagement ist daher in die bestehenden Geschäftsprozesse integriert. Das System, mit dem Risiken früh erkannt und gemanagt werden, besteht aus mehreren Modulen. Deren Bausteine sind systematisch miteinander verknüpft – mit Ausnahme der Organisation des Finanzrisikomanagements, das zentral verantwortet wird. Auf diese Weise lässt sich sicherstellen, dass homogene Risiken gesamthaft erkannt und mit der erforderlichen Kompetenz wirtschaftlich verantwortungsvoll gesteuert werden. Die Funktionen des Handels, der Abwicklung und des Finanzrisikocontrollings sind dabei streng voneinander getrennt und in eigenständigen Organisationseinheiten angesiedelt. Das Risikomanagement-System für Finanzinstrumente ist Teil des zentralen Finanzmanagements. Es wird im Abschnitt „Finanzwirtschaftliche Chancen und Risiken“ ab [S. 139](#) und im Konzernanhang „Erläuterung 46“ ab [S. 200](#) detailliert dargestellt.

Unser Risikomanagement-Ausschuss stellt im Auftrag des Vorstands sicher, dass Geschäftsrisiken laufend über alle Funktionen und Prozesse hinweg erkannt und bewertet werden. Der Ausschuss besteht aus acht Direct Reports des Lufthansa Vorstands aus den Bereichen Konzerncontrolling, -justitiariat, -finanzen, -rechnungswesen, -revision (permanentes Mitglied ohne Stimmrecht), IT,

Controlling Lufthansa Passage sowie der Delvag Gruppe. Er ist dafür verantwortlich, das Risikosystem in Effektivität und Effizienz ständig zu verbessern.

Ein wichtiges Instrument dafür ist die Risikolandkarte, in der alle wesentlichen Risiken, die das Ergebnis und den Bestand des Unternehmens gefährden könnten, aufgeführt werden. Zugleich werden darin alle Instrumente zum Management dieser Risiken identifiziert. Wesentliche Risiken sind danach solche, die zu einem Verlust von mindestens einem Drittel des operativen Ergebnisses führen können, das zum Werterhalt notwendig ist. Für 2010 wurde dieser Wert für den Lufthansa Konzern unverändert mit 300 Mio. EUR beziffert. Auf Ebene der Geschäftsfelder werden die jeweiligen Wesentlichkeitsgrenzen nach dem gleichen Prinzip individuell berechnet.

Die Risikolandkarte wird regelmäßig aktualisiert und orientiert sich in ihrer Struktur am Prozess des gesamten Risikomanagements: Identifikation, Steuerung, Kommunikation und Kontrolle. Beim Risikomanagement wendet Lufthansa konzerneinheitliche Standards an. In allen Geschäftsfeldern werden zudem Risikomanagement-Beauftragte durch die jeweiligen Geschäftsführungen der Konzerngesellschaften ernannt. Diese sind für die Umsetzung der Konzernrichtlinie in ihren jeweiligen Gesellschaften verantwortlich und stehen in engem und regelmäßigem Kontakt zum Risikomanagement-Ausschuss. Auf diese Weise kann beispielsweise auch die kurzfristige Integration neuer Töchter, wie Austrian Airlines oder British Midland, sichergestellt werden.

Das Chancen- und Risikocontrolling stellt einen weiteren Baustein im Rahmen der Planungs- und Steuerungsprozesse dar. Dabei werden vor allem durch die Analyse des Markt- und Wettbewerbsumfelds die Ergebnisziele, die die Risiko- und Chancenpotenziale beeinflussen, identifiziert, bewertet und Maßnahmen zu ihrer Steuerung eingeleitet. Da gleichermaßen positive wie negative



Planabweichungen im Fokus stehen, bedeutet dies, dass Risiken und Chancen mit den gleichen Instrumenten identifiziert, bewertet, gesteuert und kontrolliert werden. In der Planung werden zusätzlich verstärkt Szenariotechniken angewendet.

Über das gesamte Jahr hinweg verfolgen wir die identifizierten Chancen und Risiken mit Bezug zum geplanten Ergebnis mit Hilfe eines quartalsweise erscheinenden Chancen- und Risikoberichts. Um das Augenmerk auf die wichtigsten Faktoren zu legen, werden die potenziellen Planabweichungen zum operativen Ergebnis von den Risikoverantwortlichen quantifiziert. Dabei werden sowohl positive als auch negative Abweichungen, also Chancen und Risiken, in Form einer Best-/Worst-Case-Analyse bewertet. Auch ist die Diskussion der Chancen und Risiken fester Bestandteil der regelmäßigen Gespräche des Konzerncontrollings mit den jeweiligen Geschäftsführungen der Konzerngesellschaften.

Darüber hinaus werden potenzielle Planabweichungen in separaten Gesprächen mit den Risikoträgern erörtert. Der Fokus liegt hier darauf, den Handlungsbedarf beziehungsweise den Umsetzungsstand der ergriffenen Maßnahmen zur systematischen Steuerung der entsprechenden Chancen und Risiken zu identifizieren.

Die PricewaterhouseCoopers Aktiengesellschaft Wirtschaftsprüfungsgesellschaft (PwC) hat das Risikofrüherkennungssystem der Deutschen Lufthansa AG im Rahmen der Jahresabschlussprüfung hinsichtlich der aktienrechtlichen Anforderungen untersucht. Es erfüllt alle gesetzlichen Anforderungen, die an ein solches System gestellt werden.

## Risikokategorien und Einzelrisiken

Für den Lufthansa Konzern ergeben sich gemäß den Kategorien der Risikolandkarte insbesondere die folgenden Risiken:

### Gesamtwirtschaftliche Chancen und Risiken

Die Weltkonjunktur erholt sich von dem Produktionseinbruch der Jahre 2008 und 2009 bislang schneller als erwartet. Vor allem aufgrund der hohen Wachstumsdynamik in den asiatischen Schwellenländern wird sie sich auch weiter erholen, allerdings dürfte sich das Expansionstempo abschwächen. Nähere Ausführungen zum Verlauf und den Erwartungen der konjunkturellen Entwicklung finden Sie in den Kapiteln „Gesamtwirtschaftliche Lage“ ab [S. 54](#) und „Gesamtwirtschaftlicher Ausblick“ ab [S. 145](#).

Vor dem Hintergrund ihrer weltweiten Geschäftstätigkeit ist Lufthansa sowohl globalen als auch regionalen gesamtwirtschaftlichen Veränderungen in starkem Maße ausgesetzt. Von großer Bedeutung ist dafür das Wachstum des Bruttoinlandsprodukts (BIP) in den verschiedenen Wirtschaftsregionen der Welt. Hiervon hängt auch das Wachstum der Luftverkehrsnachfrage ab. So korreliert auf Basis historischer Werte beispielsweise ein BIP-Wachstum von 1 Prozent positiv mit einem Wachstum des Passagierluftverkehrs von ca. 1,5 Prozent in reifen Märkten und bis zu 2,5 Prozent in den Wachstumsmärkten Asiens, Lateinamerikas und Osteuropas.

Sollten sich die Prognosen eines, wenn auch abgeschwächten, konjunkturellen Wachstums als falsch erweisen, so besteht das Risiko einer geringer als geplant ausfallenden Nachfrage nach Luftverkehrsleistungen.

### Risikomanagement bei Lufthansa

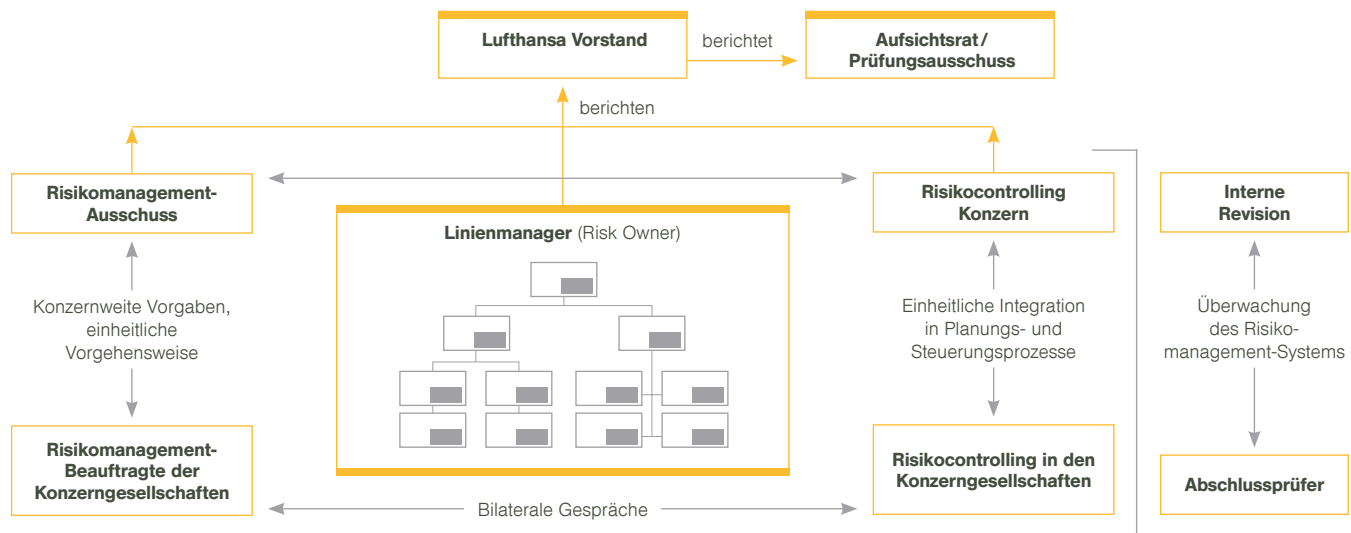

Dies ist insbesondere dann relevant, wenn die geringe konjunkturelle Dynamik in den USA unter den Erwartungen bleiben sollte. Aufgrund der Nachfrageentwicklung bei den Fluggesellschaften des Konzerns wäre dann auch davon auszugehen, dass sich die Auftrageingänge in den übrigen Geschäftsfeldern schwächer entwickeln als ursprünglich für 2011 angenommen. Durch die unterschiedlichen Geschäftsmodelle würden die Ergebnisse der Geschäftsfelder dadurch jedoch in ungleichem Maß und zu abweichenden Zeitpunkten beeinflusst.

Regelmäßig führen Änderungen des weltwirtschaftlichen Wachstums auch zu Veränderungen der Währungsparitäten und Zinsen. Zu den Auswirkungen und dem Management dieser Risiken verweisen wir auf die Darstellungen im Abschnitt „Finanzwirtschaftliche Chancen und Risiken“ ab [S. 139](#) dieses Berichts.

Die konjunkturelle Entwicklung, insbesondere in den Wachstumsmärkten Asiens, wird sich auch erheblich auf die Nachfrage nach Öl und damit auf die Preisentwicklung des Treibstoffs Kerosin auswirken. Es besteht das Risiko, dass der Anstieg der Treibstoffpreise stärker ausfällt als das Nachfragewachstum in den für Lufthansa wichtigsten Märkten. Gegenüber ungesicherten Wettbewerbern ergeben sich durch unsere Treibstoffsicherungsmaßnahmen hingegen Chancen, bei einem Anstieg der Treibstoffpreise von unseren Sicherungsgeschäften zu profitieren. Nähere Erläuterungen zur Systematik und Wirkung der Treibstoffpreissicherung finden Sie im Abschnitt „Finanzwirtschaftliche Chancen und Risiken“ ab [S. 139](#).

## **Branchenspezifische Chancen und Risiken**

### **Markt- und Wettbewerbsrisiken mit Auswirkung auf Kapazität und Auslastung**

Beeinflusst von der gesamtwirtschaftlichen Entwicklung hat sich auch der internationale Passagierluftverkehr 2010 schneller erholt als erwartet. Und auch hier ist davon auszugehen, dass das starke Nachfragewachstum an Dynamik verlieren wird. Laut IATA-Prognose wird sich die Steigerung der weltweiten Passagiernachfrage 2011 wieder auf den langjährigen Durchschnitt von etwa 5 Prozent einpendeln. Gleichwohl sind die Prognosen für die erwartete Nachfrageentwicklung mit hohen Unsicherheiten behaftet. Nähere Ausführungen finden Sie in den Kapiteln „Branchenentwicklung“ ab [S. 56](#) und „Branchenausblick“ ab [S. 146](#).

Neben der Nachfrageentwicklung bestimmt aber auch die Entwicklung des Kapazitätsangebots der Fluggesellschaften wesentlich das Risikoprofil der Industrie. Aufgrund der Flugzeugneubestellungen, insbesondere durch die stark wachsenden Fluggesellschaften aus der Golfregion und Asien, sowie der Reaktivierungen stillgelegter Flugzeuge weltweit ist mit Überkapazitäten zu rechnen, was den Druck auf die Auslastung und Durchschnittserlöse erhöhen wird. In diesem Umfeld wird die Wettbewerbsfähigkeit der Fluggesellschaften wesentlich davon beeinflusst, wie schnell sie auf Veränderungen der Nachfrage reagieren können.

Die Kosten variabel zu halten, ist in diesem Umfeld ein entscheidender Faktor. An erster Stelle steht hierbei die Flexibilität, die eigenen Flugzeugkapazitäten potenziellen Nachfrageveränderungen anpassen zu können. Unsere vorausschauende Orderpolitik mit gestaffelten Flugzeugbestellungen und der Möglichkeit, jederzeit einen Teil älterer Flugzeuge durch neu ausgelieferte Flugzeuge auszutauschen, ermöglicht es uns, eine der Nachfrage entsprechende Kapazität anbieten zu können. Da der Großteil der Flugzeuge finanziell unbelastet und teilweise bereits abgeschrieben ist, kann bei Bedarf eine temporäre Stilllegung schnell und ohne hohe Remanenzkosten erfolgen.

Alle Geschäftsfelder des Lufthansa Konzerns sind in wettbewerbsintensiven Märkten tätig. Die vielerorts zu beobachtenden Subventionen könnten den Wettbewerb für Lufthansa nachteilig verzerren. Andere Wettbewerber entwickeln sich ihrerseits ebenfalls weiter und prägen beispielsweise mit neuen Geschäftsmodellen und günstigeren Kostenstrukturen sowohl auf europäischer als auch auf internationaler Ebene den Markt. Die Gesellschaften des Lufthansa Konzerns stellen sich darauf vor allem mit kundenorientierten und qualitativ hochwertigen Produkten und Dienstleistungen ein. In den Erläuterungen zu den jeweiligen „Geschäftsfeldern“ ab [S. 78](#) wird hierauf detailliert eingegangen.

Entscheidend im Wettbewerb ist zudem die Fähigkeit, die Kostenstruktur beständig zu optimieren. Im Lufthansa Konzern setzen wir dies um, indem wir bedarfsgerechte Ergebnissicherungsprogramme initiieren beziehungsweise umsetzen und gleichzeitig die Kostenbasis im Tagesgeschäft stetig senken und flexibilisieren. In der Lufthansa Passage sollen auf Basis des Programms Climb 2011 bis Ende 2011 die Kosten nachhaltig um 1 Mrd. EUR reduziert werden, [siehe auf S. 85](#). Durch die Sanierung von Austrian Airlines und bmi sowie durch die Nutzung entstehender Synergien sollen auch diese Gesellschaften kurz- beziehungsweise mittelfristig einen positiven Ergebnis- und Wertbeitrag liefern. Alle übrigen Konzerngesellschaften setzen ebenfalls umfangreiche Kostensenkungsmaßnahmen um. Wie bei jeder Maßnahme, die auf eine Reduzierung der Risiken abzielt, gilt auch hier, dass eine verzögerte Ergebniswirkung der Maßnahmen grundsätzlich ein Risiko darstellt. Die geplante Ergebniswirkung von 1 Mrd. EUR allein durch Climb 2011 verdeutlicht die wirtschaftliche Bedeutung der konsequenten Umsetzung.

Der internationale Wettbewerb weitet sich zunehmend auf einen Wettbewerb der Gesamtsysteme bestehend aus Flughäfen, Flugsicherung und Fluggesellschaften aus. Denn diese haben erheblichen Einfluss auf die Effizienz der gesamten Wertschöpfungskette des Standorts und damit auf die Wettbewerbsfähigkeit der ansässigen Fluggesellschaft. Die Bedeutung des infrastrukturellen Umfelds erstreckt sich sowohl auf die erforderlichen Kapazitäten als auch auf reibungslose Prozesse sowie wettbewerbsfähige Kosten- und Preisstrukturen. Die Initiative „Luftverkehr für Deutschland“ bietet

uns und unseren Partnern aus Flughäfen, Flugsicherung und Behörden eine gemeinsame Plattform zur Sicherung und zum Ausbau des Luftverkehrsstandorts Deutschland. Um die derzeitige Position als führendes Luftverkehrsdrehkreuz beibehalten zu können, ist der Ausbau der Landebahn- und Terminalsysteme an den Flughäfen Frankfurt und München eine wichtige Voraussetzung. Dies gilt insbesondere angesichts der in anderen Regionen der Welt entstehenden Megahubs, die mit kostengünstigen Strukturen versuchen, globale Verkehrsströme über sich zu leiten. Für Lufthansa bedeutet der Ausbau des heimischen Drehkreuzes hingegen die Chance, umfangreiche Produkt- und Prozessverbesserungen umsetzen und damit die eigene Wettbewerbsfähigkeit steigern zu können, vorausgesetzt, die Produktivitäts- und Kostenziele sind an den Erfordernissen des Wettbewerbs ausgerichtet.

Ein ernstzunehmendes Problem sind zudem die Engpässe in der fragmentierten europäischen Flugsicherung. Sie führen noch immer zu erheblichen Verspätungen im Luftverkehr, zu unnötigen Umwegen, Wartezeiten, erhöhtem Treibstoffverbrauch und vermeidbaren Emissionen. Dies belastet die wirtschaftliche Entwicklung aller europäischen Fluggesellschaften ebenso wie die Umwelt und gefährdet zudem das Wachstum des Luftverkehrs. Gemeinsam mit ihren Wettbewerbern fordert Lufthansa deshalb von der EU-Kommission und den nationalen Regierungen weiterhin mit Nachdruck, kurzfristig ein leistungsfähiges europäisches Flugsicherungssystem zu schaffen. Zu den hierbei erzielten Fortschritten, [siehe auch S. 58](#).

Durch „Open Skies“-Abkommen, wie dem, das zwischen den USA und der Europäischen Union besteht, ergeben sich für Lufthansa sowohl Chancen als auch Risiken. Der ungehinderte Zugang für Fluggesellschaften der EU-Staaten und der USA zu den jeweiligen Lufträumen wird den Wettbewerb im Transatlantikverkehr deutlich erhöhen und zu einem größeren Preisdruck führen. Gleichzeitig entstehen neue Potenziale in benachbarten Märkten, die Lufthansa systematisch beobachten und wirtschaftlich sinnvoll nutzen wird. So ergeben sich durch das Joint Venture Atlantic++ neue Erlöschancen, unter anderem durch die Abstimmung von Flugplänen, integrierte Vertriebsprogramme sowie eine gemeinsame Preisgestaltung. Durch die steigende Komplexität, zum Beispiel bei der Erlösaufteilung, aber auch bei der Abstimmung unter den Carriern, entstehen jedoch gleichzeitig neue Risiken, die im Rahmen der Projektarbeit zu Atlantic++ identifiziert, gesteuert und berichtet werden.

In diesem Wettbewerbsumfeld spielen Allianzen und tiefer gehende Kooperationen insgesamt eine zunehmend wichtige Rolle. Die Star Alliance ist nach wie vor das führende Bündnis mit dem weltweit breitesten Angebot. Lufthansa ergänzt deren Angebot, indem sie gezielt regionale Kooperationen entwickelt und eingeht. Nähere Ausführungen zur Entwicklung der Star Alliance und Atlantic++ finden Sie im Kapitel „Passage Airline Gruppe“ ab [S. 78](#).

Schließlich verfügt Lufthansa über das seit Jahren bewährte Kundenbindungsprogramm Miles & More. Dessen Angebote werden stetig weiterentwickelt, was sich nicht nur in beständig steigenden Mitgliederzahlen, sondern auch in der hohen Attraktivität des HONCircles, dem exklusivsten Kundenkreis für Vielflieger, auswirkt.

### Rechts- und Haftungsrisiken

Auch Gesetze und Änderungen im nationalen und internationalen Regelwerk wirken sich entscheidend auf den künftigen Geschäftserfolg von Lufthansa aus. Dabei sind Verkehrsrechte, Sicherheitsbestimmungen und Regelungen im Bereich Compliance ebenso wichtig wie Vorschriften und Entwicklungen in der Rechtsprechung im In- und Ausland im Bereich Steuern, Kapitalmarkt- und Kartellrecht. Die jüngsten rechtlichen Änderungen, die sich auf die Geschäftsentwicklung der Lufthansa auswirken könnten, sind im Kapitel „Regulatorische und weitere Einflussfaktoren“ ab [S. 58](#) dargestellt. Risiken bestehen auch in Verstößen gegen wettbewerbsrechtliche Anforderungen. Lufthansa verfügt dabei über ein Compliance-Programm, das im Kapitel „Corporate Governance“ auf [S. 44](#) detailliert erläutert wird.

### Politische, geopolitische und regulatorische Risiken

Nach wie vor beeinflussen geopolitische Ereignisse wie Kriege, Terroranschläge oder Umweltkatastrophen die Luftfahrtbranche in hohem Maße. Doch auch politische Entscheidungen – insbesondere auf nationaler und europäischer Ebene – können sich erheblich auswirken. Dies trifft insbesondere dann zu, wenn durch sie in den Wettbewerb eingegriffen wird, wie beispielsweise durch Subventionen oder einseitige Belastungen für bestimmte Marktteilnehmer.

Einen massiven Eingriff im Bereich der Fiskalpolitik stellt die in Deutschland eingeführte und ab dem 1. Januar 2011 geltende Luftverkehrsteuer dar. Danach werden Abflüge ab Deutschland mit einer fluglängenabhängigen Abgabe besteuert. So wird eine Flugstrecke von bis zu 2.500 km mit 8 EUR belastet, eine Strecke bis 6.000 km mit 25 EUR und Langstreckenflüge ab 6.000 km mit 45 EUR. Ausgenommen von dieser Regelung sind internationale Umsteiger und Frachtflüge. Obwohl man so zumindest in gewissem Maße auf Deutschlands Luftverkehrsstrukturen Rücksicht genommen hat, werden der deutsche Luftverkehr sowie die Export- und Tourismusindustrie dennoch durch den Beschluss beeinträchtigt. Insgesamt plant die Bundesregierung, mit der Steuer Einnahmen von jährlich 1 Mrd. EUR zu erzielen. Ähnliche nationale Steuern bestehen in Großbritannien, Frankreich, Irland und Österreich. Andere Staaten, wie beispielsweise die Niederlande, haben nach signifikant negativen volkswirtschaftlichen Effekten eine derartige Steuer kurzfristig wieder abgeschafft beziehungsweise auf eine geplante Erhebung verzichtet. Der internationale Konsens, dass der Luftverkehr seine externen Kosten über die Infrastrukturgebühren internalisiert, verliert durch diese unilateralen Zusatzbelastungen weiter an Gültigkeit.

Ähnliches geschieht durch den ab dem 1. Januar 2012 beginnenden EU-Emissionshandel, der einen regionalen Regelungsansatz für ein weltweites Problem in einer globalen Industrie darstellt. Selbst unter Einbeziehung aller Fluggesellschaften, die die Europäische Union anfliegen, belastet er europäische Wettbewerber in einem wesentlich höheren Maße als nicht-europäische Unternehmen. Weitere Informationen hierzu finden Sie auf [S. 58](#).

Im Zusammenhang mit Umweltthemen bestehen weitere Risiken. So könnte zum Beispiel eine restriktive Nachtflugregelung, insbesondere am Flughafen Frankfurt, die Ergebnisentwicklung und Wachstumsperspektiven an diesem Drehkreuz negativ beeinflussen. Für eine wirtschaftliche und bedarfsgerechte Nutzung der Kapazitäten ist, eine praktikable Regelung am Flughafen Frankfurt unabdingbar, zum Stand des Verfahrens [siehe S. 59](#).

Neben den genannten umweltrechtlichen Vorschriften und Regularien ist in den kommenden Jahren auch mit weiteren Verschärfungen verbraucherrechtlicher Vorschriften zu rechnen. Für Lufthansa als Full-Service-Carrier sind die meisten der im Gespräch befindlichen Standards allerdings schon selbstverständlich. Kritisch ist insbesondere, wenn sich europäische Regelungen, beispielsweise hinsichtlich der Höhe von Ausgleichsleistungen oder hinsichtlich der Verantwortung für Flugunregelmäßigkeiten, nicht am international üblichen Standard orientieren und die europäische Industrie dadurch einseitig im globalen Wettbewerb benachteiligt wird.

Darüber hinaus können sich plötzlich und ohne Vorwarnung Umwelttrisiken konkretisieren. Ein solcher Fall war im Frühjahr 2010 die Sperrung weiter Teile des europäischen Luftraums wegen der möglichen Ausbreitung von Vulkanasche. Um ähnlichen Szenarien in Zukunft angemessen begegnen zu können, wurde auf europäischer Ebene eine Krisenkoordinationsstelle geschaffen, der „ICAO Volcanic Ash Contingency Plan“ für Europa aktualisiert und eine bessere Abstimmung unter den Staaten der Europäischen Union in die Wege geleitet. Die „ICAO Volcanic Ash Task Force“ ist mit der Weiterentwicklung globaler Standards für anzuwendende Verfahren und die Bestimmung der Grenzwerte befasst. Lufthansa strebt gemeinsam mit anderen Fluggesellschaften an, hier mehr Entscheidungskompetenzen zu erhalten. Umfassende Informationen über Atmosphärenverhältnisse würden selbständige und dezentrale Entscheidungen ermöglichen, ob und inwieweit der Betrieb eingestellt oder aufrechterhalten werden sollte.

Um diesen Risiken wirkungsvoll zu begegnen, unterhält Lufthansa ein ausgedehntes politisches Risikomanagement und Mitgliedschaften in zahlreichen Verbänden, in deren Führungsgremien zumeist Mitglieder des Vorstands vertreten sind. Um die Effizienz und Effektivität der Verbandsarbeit der Luftverkehrsbranche weiter zu steigern, wurde Ende 2010 der Bundesverband der Deutschen Luftverkehrswirtschaft gegründet, der sowohl Fluggesellschaften als auch Luftverkehrskontrolle, Hersteller und Flughäfen miteinander vereint und voraussichtlich Mitte 2011 die Arbeit aufnehmen soll.

## Unternehmensspezifische Chancen und Risiken

Die jüngste Wirtschaftskrise hat die Dynamik marktstruktureller Veränderungen beschleunigt. Während im Interkontinentalverkehr eine deutliche Erholung zu spüren ist, hat sich das Reise- und Buchungsverhalten im Europaverkehr nachhaltig verändert. Hier ist nicht davon auszugehen, dass sich die Durchschnittserlöse wieder auf das Vorkrisenniveau anheben lassen. Lufthansa reagiert darauf durch eine entsprechende strukturelle Anpassung ihrer Aufstellung im Europaverkehr und Absenkung der Stückkosten, Details siehe Kapitel „[Passage Airline Gruppe](#)“ [S. 85](#). Die Produktivitätsverbesserungen führen zu einer Anhebung der Kapazitäten. Die Zielerreichung einer stärkeren Kostenentlastung gegenüber den zu erwartenden Rückgängen in den Durchschnittserlösen wird eng beobachtet. Bei Bedarf wird zu bereits festgelegten Parametern und Auslösegrenzen eine Anpassung der angebotenen Kapazitäten vorgenommen.

Der Erfolg eines global operierenden Netzwerk-Carriers hängt wesentlich von einem weltweiten und dichten Streckennetzwerk ab. Gemeinsam mit den Fluggesellschaften des Airline-Verbunds und unseren Partnern der Star Alliance stellen wir unseren Kunden das größte globale Streckennetz zur Verfügung. Durch ein systematisches Airline-Verbund- und Allianzmanagement können Risiken frühzeitig erkannt und Chancen effektiv genutzt werden. So sind wir in den Wachstumsmärkten Asiens gut aufgestellt und auch in Afrika hat sich die Positionierung der Lufthansa Gruppe, nicht zuletzt durch die Netzwerke der SWISS und Brussels Airlines, entscheidend verbessert. In beiden Regionen rechnen wir uns weiterhin gute Entwicklungschancen aus. In Lateinamerika konnte die Position mit dem Star Alliance-Beitritt von TAM und den beabsichtigten Neuzugängen Avianca-TACA sowie Copa deutlich verbessert werden. Im Falle einer geplanten Fusion von TAM mit dem Oneworld-Mitglied LAN Airlines würde eine Entscheidung zur zukünftigen Allianzzugehörigkeit der neuen Gesellschaft anstehen. Eine erweiterte Kooperation in der Wachstumsregion Lateinamerika birgt für Lufthansa hohes Wachstumspotenzial.

Im Rahmen der Industriekonsolidierung hat Lufthansa eine aktive Rolle eingenommen. Die Erweiterung der Passage Airline Gruppe stärkt das Airline-Profil im Beteiligungsportfolio von Lufthansa. Dadurch gewinnen spezifische Risiken des Airline-Geschäfts, wie der Druck auf die Durchschnittserlöse und Ölpreisentwicklungen, für den Konzern an Gewicht.

Lufthansa investiert weiterhin in Modernisierung und Wachstum. So standen zum Jahresende alleine 155 Flugzeuge zur Modernisierung und Erweiterung der Flotte auf der Bestellliste des Konzerns. Es bedarf frühzeitig vielfältiger Investitionsentscheidungen, um Zukunftschancen im Markt nutzen zu können. Risiken ergeben sich hierbei aus dem insgesamt volatilen Branchenumfeld.

Dennoch sind auf Basis des erwarteten Wachstumspfad der Branche längerfristig globale Marktchancen zu erwarten. Gemeinsam mit den Allianzpartnern und ihren Standorten in den Regionen der Welt sowie der vertieften Kooperation im Transatlantikverkehr bieten sich hier unternehmensstrategische Chancen. Risiken können vor allem bei Verschiebungen in den Allianzsystemen oder im Handlungsrahmen entstehen. Die kundenorientierte Strategie von Multi-Market, Multi-Hub und Multi-Brand wird weiter fortgesetzt. Sie fördert lokales Unternehmertum und vereint die typischen Stärken eines Großunternehmens mit den Vorteilen weitgehend selbständiger standort- und marktplatzorientierter Einheiten.

Die erfolgreiche Umsetzung der Verbundstrategie hängt wesentlich davon ab, inwieweit die Synergiepotenziale im Verbund erschlossen werden und die neuen Partner Austrian Airlines und bmi zur Profitabilität zurückkehren können. Die Chancen im Verbund sollen durch den weiteren Ausbau der Zusammenarbeit genutzt werden. Bei der Integration der neuen Partner können sich durch die operative Entwicklung und das Finanzprofil der Unternehmen im aktuellen und zukünftigen Marktumfeld Risiken, aber auch Chancen ergeben. In die Integrationsaktivitäten fließen die bisherigen Erfahrungen, insbesondere aus der Integration von SWISS, ein. Zur Verbundentwicklung wurde ein Airline Development Board etabliert, dem neben dem Vorstand der Deutschen Lufthansa AG die CEOs der Verbund-Airlines angehören.

Andere Konsolidierungsprojekte wurden in den vergangenen Jahren geprüft und aufgrund mangelnder Wirtschaftlichkeit und strategischer Perspektiven nicht weiterverfolgt. Im norditalienischen Markt wurde hingegen 2009 unter der Marke Lufthansa Italia ein eigener Flugbetrieb etabliert. Risiken liegen hier unter anderem in der weiteren Entwicklung des lokalen Markts und in den Wettbewerbsbedingungen. Anfang 2011 wurde die Zusammenführung der italienischen Aktivitäten in einem eigenen Bereich gebündelt.

Die Bedeutung von Lufthansa Cargo und der Servicegesellschaften für den Konzern wird sich auch zukünftig vor allem an ihrer jeweiligen finanziellen und strategischen Entwicklungsfähigkeit sowie ihrer Bedeutung für das strategische Geschäftsfeld der Passage Airline Gruppe orientieren. Die Perspektive von Lufthansa Cargo am Standort Frankfurt steht zudem unter dem spezifischen Risiko eines drohenden Nachtflugverbots.

### Personal

Die ungewöhnlich raschen Veränderungen der gesamtwirtschaftlichen Rahmenbedingungen sowie bislang unbekannte kurzfristig auftretende Krisensituationen kennzeichneten das Umfeld im Personalbereich 2010. Die Beschäftigten im Konzern haben diese Belastungsprobe bestanden – nicht zuletzt dank der Leistungsfähigkeit und -bereitschaft der Mitarbeiter. Risikofaktoren sind weiterhin die Reaktionshebel und -geschwindigkeit, die wir durch noch-maligen Ausbau flexibilisierender Elemente beim Personaleinsatz bearbeiten.

Eine zunehmende personalpolitische Herausforderung ist es dabei, im Konzern beim Einsatz lang- und kurzfristiger Steuerungsmaßnahmen verstärkt zu differenzieren. Die Größe und Heterogenität der Unternehmen und die beschriebene Volatilität des Geschäfts, die die Konzernbeschäftigten an unterschiedlichen Stellen und zu unterschiedlichen Zeitpunkten treffen, verlangen, Personal parallel sowohl ab- als auch aufzubauen, siehe auch Kapitel „Mitarbeiter“ ab [S. 120](#). So müssen aktuell besonders im administrativen Bereich Personalkapazitäten weiter reduziert werden. Einige Konzerngesellschaften, wie Austrian Airlines, bmi oder Lufthansa Systems, sind derzeit mit umfangreichen Restrukturierungsmaßnahmen konfrontiert. Betriebsbedingte Kündigungen stellen dabei zwar nur die Ultima Ratio des Handelns dar, sind jedoch leider nicht immer zu vermeiden. Der klare Vorrang sozialverträglicher Maßnahmen und eine aktive konzerninterne Vermittlungspolitik kennzeichnen unsere Vorgehensweise. Davon profitiert auch unsere Stellung im Arbeitsmarkt. Sie hilft uns, an anderen Stellen im Konzern rasch wieder Personalkapazitäten aufzubauen. So stellte sich im Berichtsjahr im Bereich Passage-Flugbetrieb wieder eine Wachstumssituation mit deutlichem Personalbedarf ein. Hier bewährt sich die Strategie, in wirtschaftlich schwächeren Phasen an der Professionalisierung der Personalsysteme für spätere Hochphasen zu arbeiten. Unsere modernen Systeme und Methoden im Personalmarketing und der Personalentwicklung nutzen wir erfolgreich, um unsere qualitativen und quantitativen Personalziele zu erreichen. Dabei gilt es schon heute, die Voraussetzungen dafür zu schaffen, auch künftig, unter sich verändernden demografischen Bedingungen und in unterschiedlich wieder anziehenden Arbeitsmärkten, neue Mitarbeiter unter den Besten auswählen zu können.

Weitere klassische Personalrisiken sind im Bereich tarifvertraglicher und betriebsverfassungsrechtlicher Vereinbarungen angesiedelt. Dabei stehen tarifliche Vergütungs- und Versorgungsregelungen im Mittelpunkt. Die in den verschiedenen Gesellschaften zu führenden Verhandlungen bergen umso größere Risiken, als stärkere Differenzierungen in den unterschiedlichen Wettbewerbsumfeldern der Unternehmen abzubilden sind. Im traditionell intensiven Dialog mit den Tarif- und Betriebspartnern versuchen wir, durch langfristige Vereinbarungen mit unternehmensspezifischen und erfolgsabhängigen Komponenten, für den Konzern und seine Beschäftigten Planbarkeit und Sicherheit wie auch angemessene Teilhabe am wirtschaftlichen Erfolg sicherzustellen.

Tarifauseinandersetzungen bis hin zu Arbeitskämpfen sind jedoch systemimmanent und können auch für 2011 nicht ausgeschlossen werden. Neben der Schädigung des Images von Lufthansa als zuverlässigem Dienstleister bergen Arbeitskämpfe auch das Risiko erheblicher Erlösausfälle und Zusatzkosten.



Die Wahrnehmung konzernübergreifender tarifpolitischer Aufgaben im Konzern erfolgt seit Anfang 2010 im Rahmen einer Arbeitgeberverbandsstruktur (Arbeitgeberverband Luftverkehr e.V.). Dies trägt den veränderten Anforderungen in der tarifpolitischen Zusammenarbeit im Konzern Rechnung und schafft daneben die Voraussetzungen für eine luftfahrtspezifische Verbandstätigkeit, beispielsweise bei Gesetzgebungsverfahren und der verstärkten Repräsentation in Dachverbänden.

Die Abkehr der Rechtsprechung des Bundesarbeitsgerichts vom Grundsatz der Tarifeinheit hat Rechtsunsicherheit zur Folge und ebnet den Weg für Tarifpartner, die partikulare Interessen noch stärker vertreten. Damit verbunden sind Gefahren für den Tariffrieden mit betrieblichen und volkswirtschaftlichen Auswirkungen.

Im Wettbewerb entscheidend sind sowohl die Qualifikationen der Mitarbeiter als auch eine auf die Schaffung eines leistungsfähigen Führungsteams ausgerichtete Personalentwicklung. Hier zeigen Investitionen in Schulung und Fortbildung in Höhe von 189 Mio. EUR im Jahr 2010 sowie nachhaltige ausgefeilte Personalentwicklungsinstrumente die Intensität unseres diesbezüglichen Risikomanagements.

Nach der Erweiterung des Konzernbeteiligungsportfolios haben wir unsere dezentrale Führungsphilosophie beibehalten. Unsere Diversity-Kultur trägt dazu bei, die spezifische Leistungsbereitschaft aller Mitarbeiter zu erhalten.

Sollten erneut Risiken aufgrund epidemischer Gefahren auftreten, stehen professionelle medizinische Dienste und ausgearbeitete Pandemiepläne bereit.

Vorstand und Aufsichtsrat sind bei schuldhafter Verletzung ihrer Pflichten der Gesellschaft gegenüber zu Schadensersatz verpflichtet. Für beide Gremien wurde eine Vermögensschaden-Haftpflichtversicherung (D&O) mit einem dem Deutschen Corporate Governance Kodex entsprechenden Selbstbehalt abgeschlossen.

### Informationstechnologie

Die Geschäftsprozesse werden bei Lufthansa durch entsprechende IT-Systeme in allen Bereichen unterstützt. Mit dem Einsatz von IT gehen auch Risiken für die Verfügbarkeit und Stabilität der Geschäftsprozesse sowie der Vertraulichkeit von Daten einher. Unser IT-Risikomanagementprozess sorgt dafür, dass die IT-Risiken erkannt und bewertet werden sowie dass gegebenenfalls entsprechende Maßnahmen zur Risikoreduzierung eingeleitet werden. Die IT-Systeme werden regelmäßig hinsichtlich ihres Sicherheitsniveaus bewertet. Dabei wird berücksichtigt, inwieweit die Prozessverantwortlichen die Geschäftsprozesse als kritisch und unterstützungswürdig eingestuft haben. Die Betrachtung umfasst kritische Anwendungen und gemeinsame Infrastrukturen, wobei unterschiedliche Bedrohungsszenarien, wie zum Beispiel Systemausfälle, Hackerangriffe oder Datendiebstahl/-manipulation, in Betracht gezogen

werden. Der IT-Risikomanagementprozess ist geschäftsfeldübergreifend organisiert. Die Ergebnisse werden jährlich auf Konzernebene konsolidiert und im Risikomanagement-Ausschuss diskutiert.

Sicherheitslücken werden mit organisatorischen und technischen Maßnahmen adressiert. Die IT-Sicherheitspolitik des Lufthansa Konzerns wird stets an die aktuellen Anforderungen zur IT-Sicherheit angepasst. Um die Sicherungsregularien umzusetzen, wurde eine IT-Sicherheitsorganisation, bestehend aus einem Corporate Information Security Officer für den Konzern und Information Security Officers für die Gesellschaften, etabliert. Sie sind dafür verantwortlich, die IT-Sicherheitsstandards in den Gesellschaften umzusetzen sowie mit gezielten Schulungsmaßnahmen allen Mitarbeitern die Notwendigkeit von IT-Sicherheit zu verdeutlichen. Auf diese Weise können wir ein hohes IT-Sicherheitsniveau halten und garantieren, sodass Risiken wirtschaftlich sinnvoll reduziert werden. Die Risiko- und Sicherheitsmanagement-Systeme sowie ausgewählte Maßnahmen werden regelmäßig durch die Revision überprüft.

In diesem Zusammenhang erhält das Thema Datenschutz eine besondere Bedeutung. Der Datenschutz soll die Kunden, Aktionäre, Lieferanten und Mitarbeiter des Lufthansa Konzerns davor schützen, dass ihr Persönlichkeitsrecht durch falschen Umgang mit ihren personenbezogenen Daten verletzt wird. Der Bereich Konzernschutz wirkt einerseits darauf hin, dass die Regelungen des Bundesdatenschutzgesetzes im Lufthansa Konzern befolgt, die Mitarbeiter mit den entsprechenden Vorgaben aus dem Gesetz vertraut gemacht und Datenschutzaudits durchgeführt werden. Andererseits beraten die Datenschutzexperten die Fachbereiche bei der Einführung von neuen Systemen sowie der Gestaltung oder Veränderung von Prozessen, um datenschutzrechtliche und wirtschaftliche Belange frühzeitig optimal aufeinander abzustimmen.

Durch den Einsatz moderner Informationstechnologie, zum Beispiel im Bereich mobiler Services für unsere Kunden, wie das papierlose Reisen, ergeben sich Chancen für eine Differenzierung vom Wettbewerb, die gleichzeitig dem Premium-Anspruch des Lufthansa Konzerns Rechnung tragen. Innovative IT-Lösungen für interne Prozesse wie zum Beispiel beim Crew Management oder Revenue Management erhöhen die Effizienz und Effektivität.

### Qualität

Für das Jahr 2011 wird ein hohes Mengenwachstum in Passagierzahlen und Flugbewegungen erwartet. Dies stellt ein Risiko für die Stabilität der Flugabfertigung dar, vor allem, da eine adäquate Infrastruktur, wie etwa die neue Landebahn und der Terminalausbau am Flughafen Frankfurt, noch nicht zur Verfügung steht. Durch die zunehmende Automatisierung der Prozesse, wie beispielsweise durch Check-in-Automaten und Self Boarding, hat Lufthansa Maßnahmen getroffen, die den Ablauf der Bodenprozesse vereinfachen und beschleunigen. Weiterhin sind jedoch externe Einflüsse nicht auszuschließen. So wird der Personalengpass bei der Deutschen Flugsicherung auch im Jahre 2011 voraussichtlich weiter bestehen.

## Kommunikation

Für jeden Großkonzern existieren Kommunikationsrisiken – so auch für Lufthansa. Die Bereiche Konzernkommunikation und Investor Relations gewährleisten, die richtigen Informationen den entsprechenden Adressaten stets aktuell zur Verfügung zu stellen. Ein Ad-hoc-Komitee, dem der Chefsyndikus und die Leiter Investor Relations und Konzernkommunikation angehören, prüft darüber hinaus alle wesentlichen Sachverhalte darauf, ob sie für eine Ad-hoc-Veröffentlichung gemäß Wertpapierhandelsgesetz relevant sind.

## Rechnungslegung

Hinsichtlich der Rechnungslegung und Erstellung der Abschlüsse gelten für Lufthansa ebenso wie für alle anderen börsennotierten Unternehmen in Deutschland zahlreiche nationale und europaweit gültige Vorschriften und Gesetze. Aus einer unzutreffenden Rechnungslegung könnten sich Risiken ergeben. Die Organisation unseres Rechnungswesens trägt dafür Sorge, dass bei der Rechnungslegung und Erstellung der Abschlüsse die nationalen und europaweit gültigen Vorschriften und Gesetze angewendet werden. Informationen dazu finden Sie im Kapitel „Corporate Governance“ auf [S. 43](#), im Kapitel „Beschreibung des internen Kontroll- und Risikomanagement-Systems“ ab [S. 143](#) sowie im „Konzernanhang“ ab [S. 156](#).

## Steuerliche Risiken

Zu den steuerlichen Risiken zählen unter anderem Betriebsprüfungsrisiken. Diese beinhalten im Wesentlichen vor 2008 vorgenommene Teilwertabschreibungen auf Gesellschafterdarlehen an diverse in- und ausländische Konzerngesellschaften. Daneben sind einzelne Leasingstrukturen, die Behandlung von Erträgen aus Spezialfonds sowie diverse Rückstellungsthemen weitere risikobehaftete Diskussionspunkte mit der Finanzverwaltung.

Für steuerliche Risiken wurde im Abschluss in ausreichender Höhe bilanzielle Vorsorge getroffen. Durch die Erweiterung des Lufthansa Konzerns um ausländische Fluggesellschaften und die damit einhergehende Erbringung von grenzüberschreitenden konzerninternen Dienstleistungen ergeben sich steuerliche Unsicherheiten bei der Gestaltung der Verrechnungspreise und dem Ort der Besteuerung im Lichte der statischen Auslegung von Art. 8 OECD-MA (Prinzip der Heimatstaatbesteuerung bei Fluggesellschaften).

## Operationelle Risiken

Lufthansa ist wie jede Fluggesellschaft potenziellen Flug- und technischen Betriebsrisiken ausgesetzt. Darunter ist zum einen das Risiko zu verstehen, den Flugbetrieb aus technischen oder externen Gründen nicht regelmäßig abwickeln zu können. Wenn Flugzeuge etwa aus Witterungsgründen nicht pünktlich starten oder landen können, hat dies möglicherweise negativen Einfluss auf die Kundenzufriedenheit und die zukünftige Kaufentscheidung des Kunden.

Darüber hinaus zählt auch das Flugunfallrisiko mit der Gefahr von Sach- und Personenschäden zu den Flug- und technischen Betriebsrisiken. Bedrohungen, die das Unfallrisiko beeinflussen, werden in vier Gruppen unterteilt: Umweltfaktoren (zum Beispiel Wetter, Vogelschlag), technische Faktoren (beispielsweise Triebwerksausfälle), Organisationsfaktoren (etwa Fehler bei der Personalauswahl, widersprüchliche Vorschriften) und – von besonderer Bedeutung – der Faktor Mensch. Lufthansa forscht systematisch nach solchen Bedrohungen, um durch geeignete Abwehrmaßnahmen das jeweilige Risiko zu steuern und das Flugsicherheitsniveau weiter zu steigern. So wird etwa jeder einzelne Lufthansa Flug anhand der in den Flugdatenschreibern („Black Box“) aufgezeichneten Parameter routinemäßig analysiert, um frühzeitig auf Besonderheiten aufmerksam zu werden. Auch andere Informationsquellen, zum Beispiel weltweit bekannt gewordene Unfälle und Gefahrensituationen, werden analysiert und die Ergebnisse gegebenenfalls in Vorsorgemaßnahmen wie beispielsweise Schulungen integriert. Das Sicherheitsmanagement-System von Lufthansa kann so das operationelle Risiko von Lufthansa verringern – etwa durch gezielte Maßnahmen in der Pilotenschulung oder durch technische Modifikationen wie dem Nachrüsten neuartiger Warnsysteme. Dabei wird auch das Sicherheitsmanagement-System laufend verbessert und weiterentwickelt.

## Finanzwirtschaftliche Chancen und Risiken

Als international tätiger Luftverkehrskonzern trägt Lufthansa auch finanzwirtschaftliche Risiken aus der Änderung von Treibstoffpreisen, Zinsen und Devisenkursen. Die grundsätzlich konservative Ausrichtung beim Management der Finanz- und Rohstoffrisiken spiegelt sich in einem systematischen Finanzmanagement wider. Dafür setzen wir geeignete Management- und Kontrollsysteme ein, mit denen wir die Risiken messen, steuern und überwachen. Dabei sind die Funktionen des Handels, der Abwicklung und des Finanzrisikocontrollings organisatorisch strikt voneinander getrennt. Hierbei stützt sich Lufthansa auf interne Richtlinien, die vom Vorstand vorgegeben und ständig weiterentwickelt werden. Das Konzernfinanzrisikocontrolling und die Konzernrevision wachen darüber, dass diese Richtlinien eingehalten werden. Darüber hinaus wird die aktuelle Sicherungspolitik laufend in bereichsübergreifenden Managementgremien erörtert. Zudem wird der Aufsichtsrat regelmäßig über die Risikopositionen informiert. Auskunft über den Stand der Währungs-, Zins- und Treibstoffpreissicherungsgeschäfte im Einzelnen finden Sie im Konzernanhang „Erläuterung 46“ ab [S. 200](#).

Die eingesetzten derivativen Finanzinstrumente dienen ausschließlich dazu, Grundgeschäfte abzusichern. Die Marktwerte der Derivate müssen daher im Zusammenhang mit dem Grundgeschäft betrachtet werden. Aus der geplanten Regulierung der OTC-Derivate könnte sich, je nach Ausgestaltung, ein wesentliches Liquiditätsrisiko für den Lufthansa Konzern ergeben, siehe hierzu auch [S. 60](#).

Das wesentliche Ziel der Treibstoffpreis- und Devisensicherungen ist es, Schwankungen bei den Ergebnissen zu verringern. Dies wird dadurch erreicht, dass über eine Regelsicherung Durchschnittskurse gebildet werden. Die Zinssicherung verfolgt das Ziel, die Zinskosten zu reduzieren und gleichzeitig Schwankungen beim Zinsaufwand zu minimieren. Alle Grund- und Sicherungsgeschäfte werden in einem Treasury-System abgebildet, sodass sie jederzeit bewertet werden können. Wir arbeiten bei dieser Art von Geschäften grundsätzlich nur mit Kontrahenten zusammen, die mindestens über ein „BBB“ oder ein vergleichbares Langfrist-Rating verfügen.

Die Bonitätsbewertungen der Lufthansa wurden 2009 von den Ratingagenturen Moody's und Standard & Poor's herabgestuft. Das sich dadurch ergebende sogenannte „Split Rating“ mit einer Investment- und einer Non-Investment-Grade-Bewertung hat jedoch zu keiner wesentlichen Verteuerung der Finanzierungsbedingungen geführt. Eine weitere Herabstufung der Bewertung durch eine Ratingagentur, insbesondere ein Downgrade in den Non-Investment-Grade-Bereich auch durch Standard & Poor's, könnte zu einer deutlichen Verschlechterung der Konditionen in der Finanzierung und im Finanzrisikomanagement führen und den Zugang zu neuen Finanzierungsmitteln und Absicherungsinstrumenten erschweren. Derzeit rechnen wir jedoch nicht mit einer Herabstufung. Vielmehr hat Standard & Poor's Ende 2010 den Ausblick für das Lufthansa Rating auf „stabil“ verbessert. Zur aktuellen Bewertung der Ratingagenturen, siehe [S. 77](#).

### Treibstoffpreissrisiken

Der Treibstoffverbrauch des Lufthansa Konzerns lag im Berichtsjahr bei rund 9 Mio. Tonnen Kerosin. Er stellt aktuell mit rund 17,8 Prozent der betrieblichen Aufwendungen für den Lufthansa Konzern einen wesentlichen Kostenfaktor dar. Starke Veränderungen der Treibstoffpreise können somit das operative Ergebnis erheblich beeinflussen. So würde eine Veränderung des Treibstoffpreises um +10 Prozent (–10 Prozent) im Jahr 2011 den Treibstoffaufwand im Lufthansa Konzern um 175 Mio. EUR (– 236 Mio. EUR) nach Sicherung erhöhen (senken).

#### Ölpreisszenario Lufthansa Konzern 2011 \*

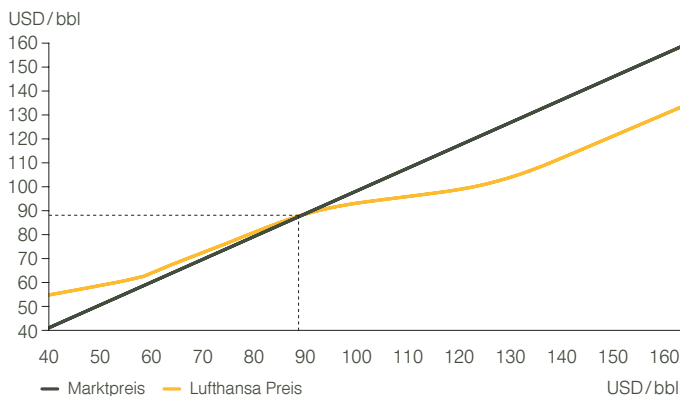

\* Stand 01.02.2011.

Lufthansa setzt deswegen eine regelbasierte Treibstoffpreissicherung mit einem Zeithorizont von bis zu 24 Monaten ein. Ziel ist es, die Schwankungen der Treibstoffpreise zu verringern. Sicherungsgrad und Zeithorizont sind abhängig von dem Risikoprofil, das sich aus dem Geschäftsmodell der jeweiligen Konzerngesellschaft ergibt. Die in der Grafik dargestellte Hedging-Politik und -Struktur wird so für Lufthansa Passage, SWISS und das Liniengeschäft von Austrian Airlines umgesetzt.

Bei der Treibstoffpreissicherung bedienen wir uns der marktüblichen Instrumente und sichern Treibstoffpreissrisiken mit einem Vorlauf von bis zu 24 Monaten überwiegend durch Optionskombinationen. Die Sicherungen erfolgen aus Gründen der Marktliquidität mehrheitlich in Rohöl. Den Sicherungsgeschäften liegt eine feste Regel zu Grunde; sie bilden damit einen Durchschnittskurs der Rohölpreise ab. Je nach Konzerngesellschaft werden über monatliche Sicherungen bis zu 85 Prozent des geplanten Treibstoffverbrauchs gesichert. Die jeweils nächsten sechs Monate sind zum Beispiel für die Lufthansa Passage bis zu 85 Prozent gesichert. Anfang Februar bestanden für 72 Prozent des voraussichtlichen konzernweiten Treibstoffbedarfs des Jahres 2011 Rohöl- und Kerosinpreissicherungen in Form von bedingten und unbedingten Termingeschäften. Für das Jahr 2012 bestanden für rund 29 Prozent des voraussichtlichen Treibstoffbedarfs Sicherungen. Als Maßnahme zur Risikoreduktion hat sich zudem der Treibstoffzuschlag im Markt etabliert. Es ist jedoch ungewiss, in welchem Umfang sich der Zuschlag weiter durchsetzen lässt. Im Falle eines Rückgangs der Treibstoffpreise um 20 Prozent unter das aktuelle Preisniveau würde sich der Aufwand des Lufthansa Konzerns von den erwarteten rund 6,6 Mrd. EUR auf rund 5,9 Mrd. EUR reduzieren. Die hiermit verbundene Ergebnisentlastung würde durch reduzierte Treibstoffzuschläge jedoch wieder eingeschränkt. Da der Treibstoff in US-Dollar abgerechnet wird, können Schwankungen des Euro/US-Dollar-Wechselkurses die Treibstoffpreise in Euro zusätzlich positiv oder negativ beeinflussen. Dies ist jedoch bereits im Währungsexposure berücksichtigt.

#### Lufthansa Hedging-Politik Mittelfristiges Rohöl-Hedging

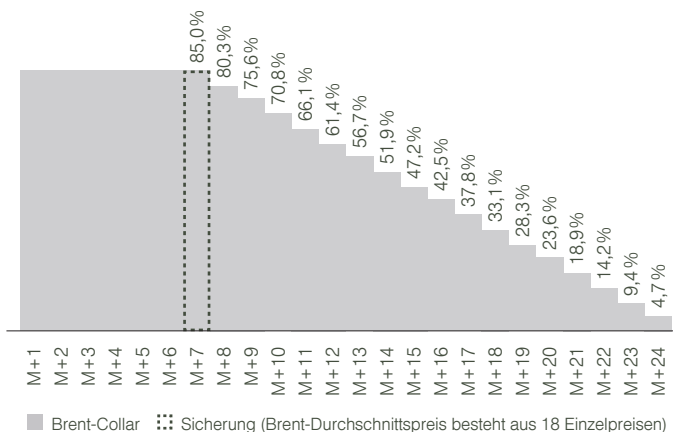

■ Brent-Collar    ::::: Sicherung (Brent-Durchschnittspreis besteht aus 18 Einzelpreisen)

### Währungsrisiken

Aus internationalen Ticketverkäufen und dem Einkauf von Treibstoffen, Flugzeugen und Ersatzteilen ergeben sich Fremdwährungsrisiken für den Lufthansa Konzern. Alle Tochtergesellschaften melden ihre Währungsexposures mit einem Zeithorizont von mindestens 24 Monaten an den Konzern. Auf Konzernebene wird eine aggregierte Nettoposition pro Währung gebildet und so die Möglichkeit des „natural hedging“ genutzt. Von den 69 Währungen des Lufthansa Konzerns werden für 22 Positionen Sicherungen abgeschlossen. Die wichtigsten Währungen sind US-Dollar, Yen und Britisches Pfund. Mit dem operativen US-Dollar-Exposure werden dabei auch hoch korrelierte Fremdwährungen verrechnet. Das operative Exposure sowie weitere Informationen zur Absicherung der allgemeinen Währungspositionen und zur Absicherung der Währungsrisiken aus Flugzeuginvestitionen sind im Konzernanhang „Erläuterung 46“ ab [S. 200](#) zu finden.

### Liquiditäts-, Finanzierungs- und Zinsrisiken

Eine jederzeit ausreichende Liquidität zu gewährleisten, ist eine zentrale Aufgabe des Finanzmanagements der Lufthansa. Durch unser Finanzberichtssystem werden Informationen über den tatsächlichen Finanzstatus und über zu erwartende Zahlungsströme der einzelnen Konzerngesellschaften zentral zur Verfügung gestellt. Daraus ergibt sich jederzeit ein aktuelles Bild über die Liquiditätsentwicklung des Konzerns. Um immer handlungsfähig zu sein, hat Lufthansa im Rahmen ihrer Finanzstrategie definiert, eine kurzfristig verfügbare, strategische Mindestliquidität von 2,3 Mrd. EUR vorzuhalten. Zum 31. Dezember 2010 verfügte der Konzern über eine Gesamliquidität von 5,6 Mrd. EUR. Darüber hinaus standen Lufthansa zum Jahresende bilateral zugesagte freie Kreditlinien in Höhe von weiteren 1,9 Mrd. EUR zur Verfügung.

Um die anstehenden Investitionen der kommenden Jahre umsetzen zu können, wird Lufthansa auch zukünftig regelmäßig auf die Aufnahme von Fremdkapital angewiesen sein. Aufgrund ihrer insbesondere im Branchenvergleich hohen Bonität sowie ihrer Marktposition ist Lufthansa nach wie vor ein bevorzugter Partner von Banken und Investoren. Damit dies auch zukünftig der Fall ist, bauen wir auf ein nachhaltig stabiles Finanzprofil. Auf die Eckpfeiler unserer Finanzstrategie gehen wir im Abschnitt „Finanzstrategie“ auf [S. 53](#) dieses Berichts detailliert ein.

Aus der Finanzierung der Geschäftstätigkeit resultieren Zinsänderungsrisiken. Die Gesamthöhe der ausstehenden Finanzierungen belief sich zum 31. Dezember 2010 auf 7,2 Mrd. EUR. Um das allgemeine Zinsänderungsrisiko zu steuern, nutzt Lufthansa die gleichlaufenden Bewegungen des konjunkturabhängigen operativen Ergebnisses und der Entwicklung der kurzfristigen Zinssätze (Natural Hedge). So werden 85 Prozent der Finanzverbindlichkeiten entweder bereits originär variabel aufgenommen oder per Derivat in variabel gewandelt. Damit minimiert Lufthansa gleichzeitig den durchschnittlichen langfristigen Zinsaufwand. Fremdwährungsrisiken aus Finanzierungen werden grundsätzlich zu 100 Prozent

gesichert. Bei den benutzten Derivaten handelt es sich um Zinsswaps und Cross Currency Swaps. Weitere Informationen sind im Konzernanhang „Erläuterung 46“ ab [S. 200](#) aufgeführt.

### Kreditrisiken

Aus den Geschäftsabschlüssen im Rahmen des Finanzmanagements ergeben sich Adressausfallrisiken. Dies wird durch eine Kontrahentenlimitsystematik gesteuert, mit der wir kontinuierlich das Kontrahentenausfallrisiko einschätzen können. Je Kontrahent ist eine maximale Risikobereitschaft festgelegt. Diese leitet sich überwiegend aus der Bonitätseinstufung anerkannter Ratingagenturen sowie aus der Überwachung der jeweiligen CDS-Werte (Credit Default Swap) ab. Für Mineralölgesellschaften ohne Rating liegt der maximale Kreditrahmen in der Regel bei 20 Mio. EUR. In welchem Ausmaß die Kontrahentenlimits durch bestehende Finanzmarktgeschäfte tatsächlich genutzt werden, ermitteln und überwachen wir werktäglich. Bei Überschreitung eines Limits wird ein dokumentierter Eskalationsprozess angestoßen und dabei entschieden, welche Maßnahmen zu ergreifen sind.

In Zeiten hoher wirtschaftlicher Schwankungen steigen auch die Risiken des Ausfalls von Kundenforderungen. Wir beobachten auch hier zeitnah die Entwicklung der Forderungen auf Ebene des Konzerns und der einzelnen Geschäftsfelder. Zudem werden Präventivmaßnahmen durchgeführt. So erfolgt der Verkauf von Passagier- und Frachtdokumenten größtenteils über Vermittler, deren Bonität überprüft und teilweise über Bürgschaften oder ähnliche Instrumente abgesichert wird. Kontrahentenrisiken in Zusammenhang mit Kreditkartengesellschaften werden ebenfalls eng überwacht, Zahlungseingänge täglich überprüft. Um das Ausfallrisiko zu senken, wurden außerdem Zahlungsziele mit einzelnen Kreditkartengesellschaften deutlich reduziert.

Weitere Informationen sowie die zum Jahresende 2010 bestehenden Kreditrisikopositionen sind im Konzernanhang „Erläuterung 46“ auf [S. 203](#) zu finden.

### Marktrisiko aus Kapitalanlagen

Die Kapitalanlagen von Lufthansa werden im Rahmen der operativen und der strategischen Liquidität verwaltet. Zusätzlich finden Anlagen durch den Lufthansa Pension Trust statt.

Die Risiken erstrecken sich hierbei im Wesentlichen auf Kursänderungsrisiken bei Aktien, Renten und Zinsen sowie auf Bonitätsrisiken. Durch ein Risikomanagement-System wird das Risiko jedes einzelnen Bausteins der Kapitalanlagen eigenständig überwacht und gegebenenfalls steuernd eingegriffen.

Hinsichtlich der operativen Liquidität der Lufthansa erfolgt die Anlage gemäß Konzernfinanzrichtlinie. Die Anlagedauer erstreckt sich auf maximal zwölf Monate, wobei mindestens 300 Mio. EUR in Anlagen mit einer täglichen Verfügbarkeit investiert sein müssen. Lufthansa nutzt in der operativen Liquidität im Wesentlichen täglich

liquidierbare Geldmarktfonds, Tages- und Termingelder sowie kurzlaufende Wertpapiere, insbesondere Commercial Papers, von kreditwürdigen Emittenten. Die Anlagen müssen bei Kontrahenten erfolgen, die ein Rating von mindestens „BBB“ vorweisen können.

Nur 20 Prozent der Anlagen der operativen Liquidität dürfen bei Kontrahenten mit einem geringeren Rating als „A–“ angelegt sein. Bei der Investition in Geldmarktfonds darf ein Anteil von 10 Prozent am Gesamtvermögen des Fonds nicht überschritten werden. Die besondere Herausforderung im Jahr 2010 bestand darin, trotz der geringen Renditen auf dem Geldmarkt eine nachhaltige Outperformance gegenüber der Benchmark EONIA (Euro OverNight Index Average) zu erzielen.

Die Anlagestruktur der strategischen Mindestliquidität haben wir für den Lufthansa Konzern mittels einer stochastischen Allokationsstudie entwickelt. Grundlage hierfür waren die Liquiditätsanforderungen und unsere konservativen Anlagegrundsätze. Der größte Teil dieser Anlagen ist in geldmarktnahe Produkte investiert. Die strategische Mindestliquidität ist in verschiedene Bausteine mit unterschiedlichen Anlagehorizonten unterteilt. Diese werden von mehreren externen Asset-Managern in separaten Mandaten verwaltet. Als Vorgabe ist unter anderem eine Liquidierbarkeit innerhalb von maximal vier Wochen zu berücksichtigen. Jeder Manager hat dabei eigene, von den allgemeinen Lufthansa Anlagegrundsätzen abgeleitete Anlagerichtlinien zu befolgen. Die Asset-Allokation wird regelmäßig überprüft und gegebenenfalls angepasst. Insbesondere die Erfahrung aus der letztjährigen Krise hat zu einem noch stärkeren Fokus auf Liquidität und Kontrahentenrisiken geführt.

Lufthansa steht beim Anlagemanagement in ständigem Kontakt mit den mandatierten Asset-Managern und überwacht die Wertentwicklung mittels täglicher und monatlicher Performance- und Risikoberichte. 2010 betrug die Performance der strategischen Liquidität 1,1 Prozent.

Die Anlagen des Lufthansa Pension Trust erfolgen auf Basis einer Allokationsstudie, die im Jahr 2010 aktualisiert wurde. Auch hier sind die konservativen Anlagegrundsätze der Lufthansa maßgeblich, sie bilden die Grundlage für die speziellen Anlagerichtlinien der einzelnen Asset-Manager. Durch eine breite Aufteilung auf Anlageklassen und Manager folgen wir hier dem Prinzip der Risikodiversifikation. Zusätzlich existiert ein Risikomanagement-System, das eine Risikosteuerung auf täglicher Basis zulässt. Die während der Finanzkrise abgeschlossenen Sicherungsmaßnahmen wurden bis zum Ende des Jahres 2009 vollständig zurückgefahren, sodass an der Erholung der weltweiten Finanzmärkte im Jahr 2010 entsprechend partizipiert werden konnte.

Die planmäßige Dotierung des Pensionsvermögens wurde im ersten Halbjahr in Form der Übertragung von 8,5 Prozent der Anteile an Fraport sowie im zweiten Halbjahr durch eine Dotierung mit Barmitteln vollzogen. Für das Pensionsvermögen wurde im Jahr 2010 eine Performance von 6,9 Prozent erreicht.

## Gesamtaussage zur Risikosituation des Konzerns

Die Chancen und Risiken des Lufthansa Konzerns werden ganz wesentlich von den gesamtwirtschaftlichen Einflussfaktoren und den hieraus resultierenden Einflüssen auf die Luftverkehrsmärkte und den Wettbewerb geprägt. Die Entwicklung der externen Parameter ist erfahrungsgemäß mit hohen Unsicherheiten behaftet. Aktuell wird mit einer weiterhin positiven Entwicklung der Weltwirtschaft gerechnet, jedoch mit rückläufigen Wachstumsraten. Als Folge der Finanz- und Wirtschaftskrise ist eine spürbare Prognoseunsicherheit in der Einschätzung der weiteren konjunkturellen Entwicklung zu beobachten. Für die Zukunft werden höhere Volatilitäten erwartet als bisher beobachtet. Folglich ist das unterstellte Wachstum der globalen Passagier- und Frachtnachfrage mit hohen Chancen und Risiken für Lufthansa behaftet. Weiterhin stellt eine Erhöhung des Treibstoffpreises ein unverändert großes Risiko dar. Aufgrund der Zusatzbelastung durch die in Deutschland und Österreich beschlossene und in Österreich geplante Einführung einer Luftverkehrsteuer ist die vollständige Kompensation von Treibstoffmehrkosten nicht vorstellbar. Hinzu kommt, dass durch die erhöhte Steuerbelastung Absatzrückgänge im preissensiblen Segment wahrscheinlich sind. Als Folge der Diskussion über die Sicherheit von Luftfracht sind zudem weitere regulatorische Eingriffe in den Luftfrachtverkehr möglich. Diesen Risiken stehen entsprechende Chancen gegenüber, wenn sich die Parameter Nachfrage, Durchschnittserlös und Treibstoffpreis besser als unterstellt entwickeln.

Lufthansa baut in diesem Umfeld auf ihre Fähigkeit, Kapazitäten und Ressourcen flexibel den sich ändernden Marktbedingungen anpassen sowie Kosten senken zu können. Trotz der besser als erwartet ausfallenden Nachfrage- und Erlösentwicklung und der nur moderat gestiegenen Treibstoffpreise hält Lufthansa an der Umsetzung der Programme zur Ergebnissicherung fest, unter anderem im Rahmen des Programms Climb 2011. Auch in den anderen Geschäftsfeldern werden die Maßnahmen zur Ergebnisverbesserung fortgesetzt. Dies gilt insbesondere für die noch nicht abgeschlossenen Restrukturierungen der Gesellschaften Austrian Airlines und bmi.

Aufgrund der positiven Entwicklung 2010 und der aktuell erfreulichen konjunkturellen Aussichten haben sich die finanzwirtschaftlichen Risiken, wie etwa der vollständige Verlust des Ratings und die Kontrahentenrisiken, reduziert.

Insgesamt ist unter Berücksichtigung aller bekannten sonstigen Sachverhalte und Umstände derzeit keine den Fortbestand des Konzerns gefährdende Entwicklung erkennbar.



## Beschreibung des internen Kontroll- und Risikomanagement-Systems gemäß § 315 Abs. 2 Nr. 5 HGB

### Grundzüge des rechnungslegungsbezogenen internen Kontroll- und Risikomanagement-Systems

Das interne Kontrollsystem im Lufthansa Konzern umfasst alle Grundsätze, Verfahren und Maßnahmen, die die Wirksamkeit, Wirtschaftlichkeit und Ordnungsmäßigkeit der Rechnungslegung sowie die Einhaltung der maßgeblichen rechtlichen Vorschriften sicherstellen sollen. Es orientiert sich am „COSO“-Modell (Committee of the Sponsoring Organizations of the Treadway Commission). Seit dem Bilanzstichtag haben sich keine maßgeblichen Änderungen ergeben.

Die Gesamtverantwortung für das zur Risikoabsicherung erforderliche interne Kontrollsystem liegt beim Vorstand der Deutschen Lufthansa AG, der den Umfang und die Ausrichtung der eingerichteten Systeme anhand spezifischer Anforderungen im Lufthansa Konzern ausgestaltet.

Prozessintegrierte und prozessunabhängige Überwachungsmaßnahmen bilden die Elemente des internen Überwachungssystems im Lufthansa Konzern. Neben manuellen Prozesskontrollen – wie zum Beispiel dem „Vier-Augen-Prinzip“ – sind auch die maschinellen IT-Prozesskontrollen ein wesentlicher Teil der prozessintegrierten Maßnahmen.

Der Aufsichtsrat, hier insbesondere der Prüfungsausschuss der Deutschen Lufthansa AG, und die Konzernrevision der Deutschen Lufthansa AG sowie die dezentralen internen Revisionen in den Konzerngesellschaften sind mit prozessunabhängigen Prüfungstätigkeiten in das interne Überwachungssystem im Lufthansa Konzern eingebunden.

Der Konzernabschlussprüfer und sonstige Prüfungsorgane, wie zum Beispiel die steuerliche Betriebsprüfung, sind mit prozessunabhängigen Prüfungstätigkeiten in das Kontrollumfeld des Lufthansa Konzerns einbezogen. Insbesondere die Prüfung der Konzernabschlüsse durch den Konzernabschlussprüfer beziehungsweise die Prüfung der einbezogenen Formularabschlüsse der Konzerngesellschaften bilden die wesentlichen prozessunabhängigen Überwachungsmaßnahmen im Hinblick auf den Konzernrechnungslegungsprozess.

Risikomanagement ist im Lufthansa Konzern definiert als ein nachvollziehbares, alle Unternehmensaktivitäten umfassendes Regelsystem, das auf Basis einer definierten Risikostrategie ein systematisches und permanentes Vorgehen mit folgenden Elementen umfasst: Risikoidentifikation (Identifikation, Analyse, Bewertung), Risikosteuerung und Risikokommunikation (Dokumentation und interne Kommunikation) sowie Überwachung dieser Aktivitäten.

Das Risikomanagement-System als Bestandteil des internen Kontrollsystems ist mit Bezug auf die Konzernrechnungslegung auf das Risiko der Falschaussage in der Konzernbuchführung sowie in der externen Berichterstattung ausgerichtet. Ziel des internen Kontrollsystems des Rechnungslegungsprozesses ist es, durch die Implementierung von Kontrollen hinreichende Sicherheit zu gewährleisten, dass trotz der identifizierten Risiken ein regelungskonformer Konzernabschluss erstellt wird.

### Wesentliche Strukturen, Prozesse und Kontrollen

Die Lufthansa Bilanzierungsrichtlinien regeln entsprechend den Vorschriften zur Rechnungslegung nach den International Financial Reporting Standards (IFRS) die einheitlichen Bilanzierungs- und Bewertungsgrundsätze für die in den Lufthansa Konzernabschluss einbezogenen inländischen und ausländischen Unternehmen. Neben allgemeinen Bilanzierungsgrundsätzen und -methoden sind vor allem Regelungen zu Bilanz, Gewinn- und Verlustrechnung, Anhang, Cashflow-Rechnung und Segmentberichterstattung bei Einhaltung der in der EU geltenden Rechtslage getroffen. Für inländische Konzerngesellschaften werden entsprechende Regelungen für die Bilanzierung der Einzelabschlüsse nach HGB in einer Richtlinie vorgegeben.

Die auf die Ordnungsmäßigkeit und Verlässlichkeit der Konzernrechnungslegung ausgerichteten Maßnahmen des internen Kontrollsystems stellen sicher, dass Geschäftsvorfälle in Übereinstimmung mit den gesetzlichen und satzungsmäßigen Vorschriften vollständig und zeitnah erfasst werden. Weiterhin ist gewährleistet, dass Inventuren ordnungsgemäß durchgeführt werden, Vermögensgegenstände und Schulden im Konzernabschluss zutreffend angesetzt, bewertet und ausgewiesen werden. Die Regelungsaktivitäten stellen ebenfalls sicher, dass durch die Buchungsunterlagen verlässliche und nachvollziehbare Informationen zur Verfügung gestellt werden.

Die Kontrollaktivitäten zur Sicherstellung der Ordnungsmäßigkeit und Verlässlichkeit der Rechnungslegung umfassen die analytische Prüfung anhand spezifischer Kennzahlenanalysen sowie die Bearbeitung und Kontrolle wesentlicher und komplexer Geschäftsvorfälle durch verschiedene Personen. Die Trennung von Verwaltungs-, Ausführungs-, Abrechnungs- und Genehmigungsfunktionen und deren Wahrnehmung durch verschiedene Personen (Vier-Augen-Prinzip) reduzieren die Risiken aus dolosen Handlungen.

Die konzerninternen Richtlinien regeln auch konkrete formale Anforderungen an den Konzernabschluss. Neben der Festlegung des Konsolidierungskreises sind auch die Bestandteile der durch die Konzerngesellschaften zu erstellenden Berichtspakete und ihre Übermittlung an das zentrale Konsolidierungssystem im Detail festgelegt. Die formalen Anforderungen regeln unter anderem die verbindliche Verwendung eines standardisierten und vollständigen Formularsatzes und die Anwendung eines konzernweit einheitlichen

Kontenrahmens. Die konzerninternen Richtlinien enthalten weiterhin zum Beispiel konkrete Vorgaben zur Abbildung und Abwicklung des Konzernverrechnungsverkehrs und der darauf aufbauenden Saldenabstimmungen. Die konzernweite Saldenabstimmung findet weltweit über eine internetbasierte Plattform statt.

Auf Konzernebene umfassen die spezifischen Kontrollaktivitäten zur Sicherstellung der Ordnungsmäßigkeit und Verlässlichkeit der Konzernrechnungslegung die Analyse und gegebenenfalls Korrektur der durch die Konzerngesellschaften vorgelegten Einzelabschlüsse unter Beachtung der von den Abschlussprüfern erstellten Berichte beziehungsweise der hierzu geführten Abschlussbesprechungen. Die Richtigkeit und Vollständigkeit der von den einzelnen Konzernunternehmen vorgelegten Berichtspakete werden durch einen Prüfungsvermerk der jeweiligen Abschlussprüfer bestätigt. Auf Grundlage bereits systemtechnisch in der Konsolidierungssoftware SAP SEM-BCS festgelegter Kontrollmechanismen beziehungsweise durch systemtechnische Plausibilitätskontrollen werden fehlerbehaftete Einzelabschlüsse selektiert und auf Konzernebene gegebenenfalls korrigiert. Über das Konsolidierungssystem werden die verschiedenen Termine für die unterschiedlichen Teile des Berichtspakets vorgegeben und im Verlauf des Erstellungsprozesses zentral überwacht. Änderungen bereits abgeschlossener Abschlussbestandteile sind dann nur noch durch systemtechnische Freigabe durch die für den Konzernabschluss zuständige Abteilung möglich. Mit der zentralen Kontrolle durchgeführter Werthaltigkeitstests für die aus Konzernsicht spezifischen zahlungsmittelgenerierenden Geschäftseinheiten wird die Anwendung einheitlicher und standardisierter Bewertungskriterien sichergestellt.

Der Regelungsumfang erstreckt sich auf Konzernebene unter anderem auch auf die zentrale Festlegung der für die Bewertung von Pensionsrückstellungen anzuwendenden Parameter. Darüber hinaus erfolgt auf Konzernebene die Aufbereitung und Aggregation der Daten für die Erstellung externer Informationen im Anhang und Lagebericht.

Die rechnungslegungsrelevanten Prozesse werden prozessunabhängig regelmäßig durch die Konzernrevision beziehungsweise die dezentralen internen Revisionen in den Konzerngesellschaften überprüft.

### **Einsatz von IT-Systemen**

Die Erfassung buchhalterischer Vorgänge erfolgt in den Einzelabschlüssen der Tochterunternehmen der Deutschen Lufthansa AG im Wesentlichen durch lokale Buchhaltungssysteme des Herstellers SAP. Zur Aufstellung des Konzernabschlusses der Deutschen Lufthansa AG werden durch die Tochterunternehmen die jeweiligen Einzelabschlüsse durch weitere Informationen zu standardisierten Berichtspaketen ergänzt, die dann durch die Tochterunternehmen mittels einer automatisierten Übertragung über entsprechende Schnittstellen oder mittels eines Erfassungsmoduls in die Konsolidierungssoftware SAP SEM-BCS eingestellt werden. Durch den Konzernabschlussprüfer wurde SAP SEM-BCS bei Einführung einer gesonderten Systemprüfung unterzogen. Durchgeführte Systemanpassungen unterliegen der regelmäßigen Prüfung des Abschlussprüfers.

In SAP SEM-BCS werden sämtliche Konsolidierungsvorgänge zur Erstellung des Konzernabschlusses der Deutschen Lufthansa AG, wie zum Beispiel die Kapitalkonsolidierung, die Schuldenkonsolidierung sowie die Aufwands- und Ertragseliminierung einschließlich der Equity-Bewertung, generiert und vollständig dokumentiert. Die Konsolidierung erfolgt in einem Schritt.

Die im Bereich Rechnungslegung verwendeten IT-Systeme sind durch spezielle Sicherheitseinrichtungen gegen unbefugte Zugriffe geschützt.

### **Einschränkende Hinweise**

Das interne Kontroll- und Risikomanagement-System ermöglicht durch die im Lufthansa Konzern festgelegten Organisations-, Kontroll- und Überwachungsstrukturen die vollständige Erfassung, Aufbereitung und Würdigung von unternehmensbezogenen Sachverhalten sowie deren sachgerechte Darstellung in der Konzernrechnungslegung.

Insbesondere persönliche Ermessensentscheidungen, fehlerbehaftete Kontrollen, kriminelle Handlungen involvierter Personen oder sonstige Umstände können die Wirksamkeit und Verlässlichkeit des eingesetzten internen Kontroll- und des Risikomanagement-Systems einschränken, sodass auch die konzernweite Anwendung der eingesetzten Systeme keine vollständige Sicherheit hinsichtlich der richtigen, vollständigen und zeitnahen Erfassung von Sachverhalten in der Konzernrechnungslegung gewährleisten kann.

Die getroffenen Aussagen beziehen sich nur auf die in den Konzernabschluss der Deutschen Lufthansa AG einbezogenen wesentlichen Tochterunternehmen, die unter der rechtlichen und/oder faktischen Kontrolle der Deutschen Lufthansa AG stehen.

## Prognosebericht

➤ Die Weltwirtschaft soll sich 2011 weiter erholen, jedoch mit moderaten und regional unterschiedlichen Wachstumsraten. ➤ Für die Luftverkehrsbranche wird dies zu differenzierten Nachfrageentwicklungen führen. ➤ Der Ölpreis bildet einen wesentlichen Unsicherheitsfaktor. ➤ Lufthansa ist hervorragend aufgestellt, um die sich ergebenden Chancen für sich zu nutzen und Umsatz und Ergebnis weiter zu steigern. ➤ Auch 2011 soll Wert geschaffen werden.

## Gesamtwirtschaftlicher Ausblick

**Entwicklung des Bruttoinlandprodukts (BIP)**  
Prognose 2010 bis 2014 gegenüber Vorjahr

| in %            | 2010* | 2011* | 2012* | 2013* | 2014* |
|-----------------|-------|-------|-------|-------|-------|
| Welt            | 4,1   | 3,7   | 3,8   | 4,0   | 4,2   |
| Europa          | 2,0   | 1,9   | 2,0   | 2,2   | 2,4   |
| Deutschland     | 3,6   | 2,7   | 2,0   | 1,7   | 1,8   |
| Nordamerika     | 2,9   | 3,1   | 2,9   | 3,1   | 3,3   |
| Südamerika      | 5,6   | 4,5   | 4,5   | 4,5   | 4,8   |
| Asien / Pazifik | 7,0   | 5,3   | 5,7   | 5,9   | 6,1   |
| China           | 10,1  | 9,5   | 8,8   | 8,9   | 8,8   |
| Naher Osten     | 4,1   | 5,4   | 5,3   | 4,9   | 4,7   |
| Afrika          | 4,6   | 5,1   | 5,0   | 4,8   | 4,8   |

Quelle: Global Insight World Overview per 14.01.2011.  
\* Prognosewerte.

### Für 2011 wird ein moderates Wachstum der Weltwirtschaft erwartet

Im Jahr 2011 soll sich die weltwirtschaftliche Erholung fortsetzen, jedoch mit reduziertem Tempo, sodass eine moderate Expansion der Weltwirtschaft erwartet wird. Ursächlich hierfür ist zum einen eine weiterhin angespannte Situation auf den Finanz- und Immobilienmärkten der Industrieländer. Zum anderen ist in den Schwellenländern, die bislang Motor der weltwirtschaftlichen Konjunktur waren, mit einer leichten Eintrübung der Konjunkturperspektiven zu rechnen. So besteht etwa die Sorge, dass die sprunghafte Entwicklung der Immobilienpreise in China zu einem abrupten Ende kommt. Gleichzeitig stehen viele Industrieländer vor der Herausforderung, ihre stark gestiegene Verschuldung durch Sparmaßnahmen zurückzuführen. Der Welthandel wird sich zwar weiter ausweiten, allerdings mit reduziertem Tempo. Der Inflationsdruck dürfte moderat bleiben.

Insgesamt wird für die Weltwirtschaft 2011 mit einem Wachstum von 3,7 Prozent gerechnet, das sich im Folgejahr leicht erhöhen soll.

Die Konjunktur in den USA wird sich voraussichtlich 2011 allmählich aufhellen. Vieles deutet darauf hin, dass die Investitionstätigkeit, gestützt durch ein sehr günstiges Zinsniveau und eine expansive Geldpolitik, anziehen wird. Belastend dürfte hingegen die zurückhaltende private Nachfrage wirken, basierend auf dem Schuldenabbau bei den privaten Haushalten sowie der hohen Arbeitslosigkeit. Ein kräftiger Aufschwung ist aufgrund des Fortbestehens der strukturellen Probleme vorerst nicht in Sicht. Insgesamt wird für 2011 ein Wachstum um 3,1 Prozent prognostiziert, das 2012 leicht zurückgehen soll.

Die wirtschaftliche Dynamik der asiatischen Volkswirtschaften bleibt insgesamt auch weiterhin hoch. Allerdings wird erwartet, dass das Wachstum vor dem Hintergrund des sich abschwächenden Welthandels geringer ausfallen wird. Gleichzeitig scheint sich die Binnennachfrage zu beleben. Die eingeleiteten fiskal- und geldpolitischen Maßnahmen sollen das Wachstum in China bremsen. Die chinesische Wirtschaft wird 2011 voraussichtlich um 9,5 Prozent wachsen. Die konjunkturelle Entwicklung Japans wird 2011 voraussichtlich durch einen starken Außenwert des Yen und ein schwächeres außenwirtschaftliches Umfeld gebremst. Das Wachstum soll etwa 1,2 Prozent betragen. Für die Region Asien / Pazifik wird insgesamt mit einem Wachstum von 5,3 Prozent gerechnet, mit leicht steigender Tendenz im Folgejahr.

Für den Euroraum wird erwartet, dass die fiskalischen Konsolidierungsmaßnahmen der Regierungen die Nachfrage dämpfen werden. In einigen Mitgliedsländern werden zudem die anhaltenden Probleme auf den Immobilienmärkten private Investitionen belasten. Auch 2011 wird sich deshalb die Konjunktur im Euroraum heterogen entwickeln. Während für die Mitgliedsländer im nördlichen Europa weiterhin von einer schwungvollen Erholung ausgegangen werden kann, soll sich die Konjunktur in den Peripherieländern Griechenland, Spanien und Portugal allenfalls schleppend entwickeln. In diesen Ländern gibt es deutliche realwirtschaftliche Probleme, die durch die Sanierung der öffentlichen Haushalte nur langsam gelöst werden können. Insgesamt wird für 2011 ein Wachstum von 1,9 Prozent für Europa vorhergesagt, das in den Folgejahren leicht ansteigen wird. Deutschland wird weiterhin eine prägende Rolle beim europäischen Wirtschaftswachstum einnehmen, die hohe Wachstumsrate aus 2010 im neuen Jahr aber voraussichtlich nicht erneut erreichen können. Gleichwohl wird ein weiteres Wachstum erwartet, das 2011 bei 2,7 Prozent liegen soll.

#### **Die Zins- und Währungsentwicklungen bleiben volatil**

Aufgrund der Verschuldungssituation im Euroraum und einer unsicheren Konjunkturentwicklung in den Industrienationen wird die Volatilität der Währungsmärkte weiterhin auf einem hohen Niveau bleiben. Für das Zinsumfeld wird 2011 ebenfalls ein hohes Volatilitätsniveau erwartet, in dem eine Fortsetzung der moderat ansteigenden Zinsstruktur denkbar ist. Dies gilt insbesondere, wenn sich Anzeichen einer Leitzinsanhebung in der zweiten Jahreshälfte verdichten sollten.

#### **Die Ölpreisentwicklung ist weiterhin unsicher**

Auf Basis der weiteren weltweiten konjunkturellen Erholung wird mit einer wachsenden Nachfrage nach Rohöl vor allem aus den Schwellenländern Asiens und Lateinamerikas gerechnet. Vor diesem Hintergrund ist auf dem derzeitigen hohen Niveau kurz- bis mittelfristig von stabilen bis weiter steigenden Preisen auszugehen. Preissteigernd können sich politische Entwicklungen, zum Beispiel im Nahen Osten, aber auch nichtfundamentale Faktoren, wie beispielsweise spekulative Investitionen von Fonds und Hedge Fonds, auswirken.

## **Branchenausblick**

### **Die Luftverkehrsindustrie erwartet ein moderates Nachfragewachstum in den kommenden Jahren**

Einhergehend mit der positiven Wirtschaftsentwicklung wird für die kommenden Jahre ein moderates Wachstum in der Luftverkehrsbranche erwartet. Die IATA rechnet für 2011 mit einem Wachstum im internationalen Passagierverkehr, das sich mit rund 5 Prozent wieder auf den langjährigen Durchschnitt einpendeln wird. Bis 2014 soll die durchschnittliche Wachstumsrate laut IATA bei 6,1 Prozent pro Jahr für den internationalen Verkehr liegen. Das Wachstum im internationalen Verkehr wäre damit doppelt so hoch wie das prognostizierte globale Wirtschaftswachstum von 3 Prozent pro Jahr bis 2014, was dem historischen Verhältnis zwischen den beiden Größen entspräche.

### **Die regionale Entwicklung bleibt sehr unterschiedlich**

Die regionale Entwicklung der Märkte wird auch künftig sehr verschieden sein. Laut IATA wird zwischen 2010 und 2014 das stärkste Wachstum im internationalen Passagierverkehr im Nahen Osten erwartet. Auch der internationale Passagierverkehr im Raum Asien/Pazifik soll deutlich zulegen. Das starke Wirtschaftswachstum sowie eine weitere Liberalisierung des Luftverkehrsmarkts machen Asien zu einem wichtigen Treiber des Passagierverkehrs in den nächsten Jahren. Relativ dazu werden für die europäischen und nordamerikanischen Märkte eher moderate Zuwachsraten prognostiziert.

### **Die Wachstumsdynamik im Luftfrachtverkehr normalisiert sich**

Nach einer rasanten Erholung des Luftfrachtverkehrs 2010 wird die Dynamik in den kommenden Jahren insgesamt etwas abnehmen. Laut IATA-Prognose wird die weltweite Luftfrachtnachfrage ab 2011 wieder in Höhe des langjährigen Durchschnitts von rund 6 Prozent pro Jahr erwartet. Dies wäre etwas niedriger als die Wachstumsrate des Welthandels, der historisch gesehen immer mit einer ähnlichen Rate wie der internationale Frachtverkehr gewachsen ist. Grund dafür ist, dass die Luftfracht bereits 2010 in hohem Maße von dem dringenden Bedarf der Industrie an schnellem Lageraufbau profitiert hat. Noch nicht eingeschätzt werden kann, ob und gegebenenfalls inwieweit sich verschärfte Regeln für Luftfrachtkontrollen in Europa und den USA auf die Gewinnaussichten des Luftfrachtsektors auswirken werden.

### **Für das Jahr 2011 wird eine Reduzierung des Branchengewinns erwartet**

Angesichts der steigenden Treibstoffpreise, der Zusatzkapazität auf dem Markt und des sich zögerlich erholenden Preisniveaus erwartet die IATA für die weltweite Airline-Industrie nach einem

Branchengewinn von 15,1 Mrd. USD im Jahr 2010 einen Rückgang auf 9,1 Mrd. USD im Jahr 2011. Das positive Ergebnis soll im Wesentlichen durch die Airlines in Asien/Pazifik mit einem Gewinn von 4,8 Mrd. USD getragen werden. Fluggesellschaften aus Nordamerika, dem Nahen Osten und Afrika werden leichte Gewinnrückgänge gegenüber dem Vorjahr verzeichnen, aber weiterhin positive Ergebnisse berichten. Für die europäischen Fluggesellschaften ist ein Break-even-Ergebnis für 2011 vorgesehen. Auf dem deutschen Markt repräsentiert die Einführung der Luftverkehrsteuer ab 2011 eine Zusatzbelastung und führt zu einer Verschlechterung der Wettbewerbsfähigkeit der deutschen Airlines im Vergleich zur internationalen Konkurrenz. Insbesondere die im preissensiblen Segment operierenden No-Frills-Airlines werden davon stark betroffen.

Entwicklung Branchennettoergebnis in Mrd. USD

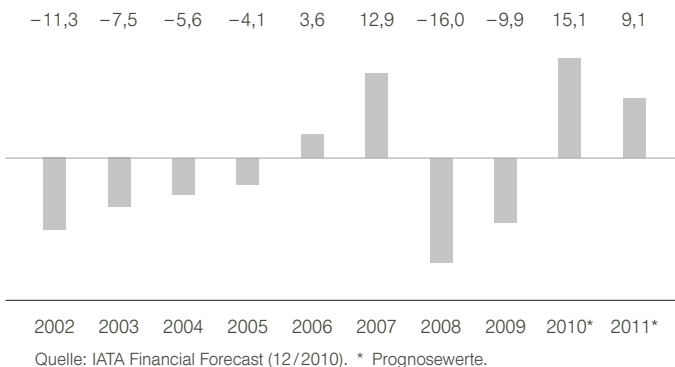

## Änderungen in Geschäft und Organisation

Die Luftverkehrsindustrie ist in stetigem Wandel. Lufthansa stellt ihre Ausrichtung kontinuierlich darauf ein und überprüft dabei auch fortlaufend ihre Organisationsstruktur. Bei Bedarf passt sie diese an veränderte Marktgegebenheiten an. So wurden im Zusammenhang mit dem Wechsel des Vorstandsvorsitzenden mit Wirkung vom 1. Januar 2011 auch einige Veränderungen in der Geschäftsordnung vorgenommen. Lufthansa Passage hat ihre Organisationsstruktur ebenfalls überarbeitet und stärker an Kunden und Wettbewerb ausgerichtet, siehe [S. 87]. Mit Wirkung vom 1. April 2011 werden dort die neuen Ressorts ihre Arbeit aufnehmen. Das Geschäftsfeld IT Services befindet sich in einer Restrukturierung, die ebenfalls organisatorische Veränderungen beinhalten wird. Einzelheiten zu den organisatorischen Entwicklungen der Geschäftsfelder sowie zu ihren wirtschaftlichen, Produkt- und anderen Entwicklungen können Sie den jeweiligen Kommentierungen entnehmen.

## Ausblick Lufthansa Konzern

### Anpassung an unsichere Rahmenbedingungen erforderlich

Lufthansa hat 2010 ihren Kurs des profitablen Wachstums wieder aufgenommen. Der Konzern hat in den vergangenen Jahren gezeigt, dass er sich in wirtschaftlich schwierigen Zeiten stabiler als der Wettbewerb entwickelt und sich im Aufschwung ergebende Chancen rasch ergreifen und für sich nutzen kann. Von diesen Fähigkeiten wird Lufthansa auch in den kommenden Jahren profitieren. Dabei ist die Dynamik der weiteren konjunkturellen Entwicklung alles andere als klar vorgezeichnet. Insgesamt gehen wir aber von einem weiteren Wirtschaftswachstum aus, siehe [S. 145], das sich in unseren Geschäftsfeldern auch in entsprechender Nachfrageentwicklung widerspiegeln wird. Gegenwind erwarten wir von dem wieder angestiegenen Ölpreis sowie vom intensiven Wettbewerb, dem sich alle Geschäftsfelder des Konzerns ausgesetzt sehen. Auf die einzelnen Ausblicke der Geschäftsfelder gehen wir in den entsprechenden Kommentierungen ab [S. 78] näher ein.

Übergreifend können sich die 2011 wieder anstehenden Tarifgespräche förderlich oder hemmend auf die weitere Unternehmensentwicklung auswirken. Konstruktive Diskussionen und maßvolle Abschlüsse, die die Mitarbeiter am profitablen Wachstum beteiligen, dieses aber nicht blockieren, stehen dabei im Mittelpunkt der Zielsetzung für eine Unternehmensentwicklung im Sinne aller Stakeholder. Unverändert vorangetrieben werden die Maßnahmen zur Effizienzerhöhung in allen Geschäftsfeldern oder – wo erforderlich – zur notwendigen Restrukturierung einiger Gesellschaften.

### Wir erwarten ein weiteres Umsatz- und Ergebniswachstum

Für das Geschäftsjahr 2011 erwarten wir insgesamt eine Fortsetzung des Umsatzwachstums und eine weitere Steigerung des operativen Ergebnisses. Sofern die prognostizierten Konjunkturerwartungen eintreten und der Geschäftsverlauf nicht durch einen unverhältnismäßigen Anstieg der Treibstoffpreise oder andere unvorhersehbare Einflussfaktoren beeinträchtigt wird, ist nach heutiger Einschätzung davon auszugehen, dass sich Umsatz und Ergebnis auch 2012 weiter positiv entwickeln werden. Das Ausmaß der durch die vorgesehene Luftverkehrsteuer verursachten Nachfragedämpfung bleibt allerdings weiterhin eine schwer zu prognostizierende Unwägbarkeit. Dennoch halten wir unseren Anspruch unverändert aufrecht, in der Luftfahrtindustrie hinsichtlich Profitabilität und nachhaltiger Wertschaffung auch weiterhin eine führende Position einzunehmen.



Die erwartete positive Geschäftsentwicklung wird sich auch im Konzernergebnis und Ergebnis pro Aktie widerspiegeln. Diese sind aufgrund der zahlreichen Einflussfaktoren und Stichtageffekte jedoch zum gegenwärtigen Zeitpunkt nicht näher quantifizierbar. Wir gehen heute aber davon aus, dass auch im Geschäftsjahr 2011 die Voraussetzungen für die Ausschüttung einer Dividende erfüllt werden dürften.

#### **Das Finanzprofil wird weiter gestärkt**

Die erfreuliche Ergebnisentwicklung wird sich weiter positiv auf das Finanzprofil der Lufthansa auswirken. So erwarten wir, trotz eines weiterhin investitionsintensiven Flottenerneuerungsprogramms auch im laufenden Jahr einen Free Cashflow zu erzielen. Dabei gehen wir derzeit für 2011 von einem Investitionsvolumen von insgesamt 2,6 Mrd. EUR aus.

Die definierte Mindestliquidität von 2,3 Mrd. EUR wird angesichts der verfügbaren liquiden Mittel und Cashflow-Generierung nicht angetastet. Die Vermögenslage der Lufthansa bleibt werthaltig, der überwiegende Teil der Flotte in unbelastetem Eigentum. Die Eigenkapitalquote wird sich ihrer Zielmarke von 30 Prozent weiter annähern oder sie gar erreichen. Das Gearing bleibt im Zielkorridor von 40 bis 60 Prozent. Auch die neu eingeführte „Dynamische Tilgungsquote“, siehe Kapitel „Finanzstrategie“ [S. 53], wird ihre Zielvorgabe erreichen. Damit werden unsere Kreditratings weiter gestärkt, was sich auch in den Kommentierungen der Ratingagenturen ausdrücken sollte.

#### **Lufthansa will 2011 Wertschaffung fortsetzen**

Die Anforderungen unserer Eigenkapital- und Fremdkapitalgeber spiegeln sich in unserem Konzept der werthaltigen Unternehmensführung nach Cash Value Added (CVA), siehe [S. 48], wider. Unser Bestreben ist es, über den Luftverkehrszyklus hinweg nachhaltigen Wert in Form eines positiven Cash Value Added zu schaffen. Nachdem im Krisenjahr 2009 eine Wertschaffung nicht möglich war, konnten wir bereits im ersten Jahr des Aufschwungs wieder einen positiven CVA erzielen. Wir wollen auch 2011 einen positiven CVA erwirtschaften und damit die anspruchsvollste Zieldimension unseres profitablen Wachstumskurses abermals erfüllen.

## **Gesamtaussage zur voraussichtlichen Entwicklung des Konzerns**

#### **Lufthansa verbindet Weitblick mit Flexibilität und setzt profitables Wachstum fort**

Die Aussichten des Lufthansa Konzerns bewerten wir sehr positiv. Die vergangenen Jahre haben gezeigt, dass die Aufstellung des Konzerns mehr Stabilität in wirtschaftlich schwierigen Zeiten bietet und diese mit hoher Ertragskraft im Aufschwung kombiniert. Damit kann der Konzern auch weiterhin das enorme Potenzial der Wachstumsindustrie Luftverkehr bestmöglich nutzen.

Der Konzern verbindet dabei strategischen Weitblick mit operativer Anpassungsfähigkeit und sichert seine Entwicklung durch ein starkes Finanzprofil und etabliertes Risikomanagement ab. Lufthansa profitiert von den hohen Qualitäts- und Sicherheitsstandards sowie der Kunden- und Serviceorientierung in allen Geschäftsfeldern. Der Kranich mit seiner weltweiten Reputation steht für Zuverlässigkeit, bei den Kunden ebenso wie bei den Aktionären und den Mitarbeitern. Sie alle verbindet das Interesse an einer nachhaltigen Entwicklung des Unternehmens. Dafür setzen wir unseren Kurs des profitablen Wachstums fort.

# Konzernabschluss

---

## **150** Konzern-Gewinn- und Verlustrechnung

---

## **151** Konzern-Gesamtergebnisrechnung

---

## **152** Konzernbilanz

---

## **154** Entwicklung des Konzern-Eigenkapitals

---

## **155** Konzern-Kapitalflussrechnung

---

## **156** Konzernanhang

- 156 Erläuterungen zur Konsolidierung und Bilanzierung
- 167 Erläuterungen zur Konzern-Gewinn- und Verlustrechnung
- 173 Erläuterungen zur Konzernbilanz
  - 173 Aktiva
  - 188 Passiva
- 200 Sonstige Erläuterungen
- 204 Segmentberichterstattung
- 215 Versicherung der gesetzlichen Vertreter
- 216 Bestätigungsvermerk des Abschlussprüfers
- 217 Aufsichtsrat und Vorstand
- 220 Wesentliche Beteiligungsgesellschaften
- 226 Übrige Anteile

## Konzern-Gewinn- und Verlustrechnung für das Geschäftsjahr 2010

| in Mio. €                                                                    | Anhang | 2010          | 2009          |
|------------------------------------------------------------------------------|--------|---------------|---------------|
| Erlöse aus den Verkehrsleistungen                                            | 3      | 22 268        | 17 604        |
| Andere Betriebserlöse                                                        | 4      | 5 056         | 4 679         |
| <b>Umsatzerlöse</b>                                                          |        | <b>27 324</b> | <b>22 283</b> |
| Bestandsveränderungen und andere aktivierte Eigenleistungen                  | 5      | 165           | 225           |
| Sonstige betriebliche Erträge                                                | 6      | 2 655         | 2 531         |
| Materialaufwand                                                              | 7      | -15 370       | -12 700       |
| Personalaufwand                                                              | 8      | -6 659        | -5 996        |
| Abschreibungen                                                               | 9      | -1 682        | -1 475        |
| Sonstige betriebliche Aufwendungen                                           | 10     | -5 193        | -4 597        |
| <b>Ergebnis der betrieblichen Tätigkeit</b>                                  |        | <b>1 240</b>  | <b>271</b>    |
| Ergebnis aus at equity bewerteten Finanzanlagen                              | 11     | 46            | 5             |
| Übriges Beteiligungsergebnis                                                 | 11     | 58            | 53            |
| Zinserträge                                                                  | 12     | 198           | 181           |
| Zinsaufwendungen                                                             | 12     | -555          | -506          |
| Übrige Finanzposten                                                          | 13     | -9            | -138          |
| <b>Finanzergebnis</b>                                                        |        | <b>-262</b>   | <b>-405</b>   |
| <b>Ergebnis vor Ertragsteuern</b>                                            |        | <b>978</b>    | <b>-134</b>   |
| Ertragsteuern                                                                | 14     | 165           | 112           |
| <b>Ergebnis nach Ertragsteuern</b>                                           |        | <b>1 143</b>  | <b>-22</b>    |
| Auf Minderheiten entfallendes Ergebnis                                       |        | -12           | -12           |
| <b>Auf Aktionäre der Deutschen Lufthansa AG entfallendes Konzernergebnis</b> |        | <b>1 131</b>  | <b>-34</b>    |
| „Unverwässertes“ Ergebnis je Aktie in €                                      | 15     | 2,47          | -0,07         |
| „Verwässertes“ Ergebnis je Aktie in €                                        | 15     | 2,47          | -0,07         |

## Konzern-Gesamtergebnisrechnung

### für das Geschäftsjahr 2010

| in Mio. €                                                                                         | 2010         | 2009        |
|---------------------------------------------------------------------------------------------------|--------------|-------------|
| <b>Ergebnis nach Ertragsteuern</b>                                                                | <b>1 143</b> | <b>-22</b>  |
| <b>Erfolgsneutrale Aufwendungen und Erträge</b>                                                   |              |             |
| Differenzen aus Fremdwährungsumrechnung                                                           | 311          | -18         |
| Folgebewertung von zur Veräußerung verfügbaren finanziellen Vermögenswerten                       | 485          | 193         |
| Folgebewertung von Cashflow Hedges                                                                | 288          | -188        |
| Erfolgsneutrale Aufwendungen und Erträge von nach der Equity-Methode bewerteten Beteiligungen     | -4           | -7          |
| Neubewertung von Anteilen im Rahmen von Sukzessiverwerben                                         | -            | -44         |
| Sonstige erfolgsneutrale Aufwendungen und Erträge                                                 | 14           | -13         |
| Für erfolgsneutrale Aufwendungen und Erträge erfasste Ertragsteuern                               | -79          | 34          |
| <b>Erfolgsneutrale Aufwendungen und Erträge („other comprehensive income“) nach Ertragsteuern</b> | <b>1 015</b> | <b>-43</b>  |
| <b>Gesamte Aufwendungen und Erträge („total comprehensive income“)</b>                            | <b>2 158</b> | <b>-65</b>  |
| Auf Minderheiten entfallende gesamte Aufwendungen und Erträge                                     | -16          | -52         |
| <b>Auf Aktionäre der Deutschen Lufthansa AG entfallende gesamte Aufwendungen und Erträge</b>      | <b>2 142</b> | <b>-117</b> |

# Konzernbilanz

## zum 31. Dezember 2010

### Aktiva

| in Mio. €                                                           | Anhang | 31.12.2010    | 31.12.2009    | 01.01.2009    |
|---------------------------------------------------------------------|--------|---------------|---------------|---------------|
| Immaterielle Vermögenswerte mit unbegrenzter Nutzungsdauer *        | 16     | 1 582         | 1 511         | 821           |
| Sonstige immaterielle Vermögenswerte                                | 17     | 329           | 328           | 261           |
| Flugzeuge und Reservetriebwerke                                     | 18 21  | 11 153        | 10 444        | 8 764         |
| Reparaturfähige Flugzeugersatzteile                                 |        | 877           | 810           | 669           |
| Übriges Sachanlagevermögen                                          | 19 21  | 2 120         | 2 157         | 1 931         |
| Als Finanzinvestition gehaltene Immobilien                          | 20     | –             | 3             | 3             |
| Nach der Equity-Methode bewertete Finanzanlagen                     | 22     | 385           | 320           | 298           |
| Übrige Beteiligungen                                                | 23 24  | 1 128         | 878           | 790           |
| Langfristige Wertpapiere                                            | 23 24  | 250           | 349           | 509           |
| Ausleihungen und Forderungen                                        | 23 25  | 620           | 506           | 475           |
| Derivative Finanzinstrumente                                        | 23 26  | 350           | 255           | 339           |
| Aktiver Rechnungsabgrenzungsposten                                  | 29     | 26            | 31            | 15            |
| Effektive Ertragsteuerforderungen                                   | 14     | 61            | 69            | 72            |
| Latente Ertragsteuer-Erstattungsansprüche                           | 14     | 82            | 35            | 28            |
| <b>Langfristige Vermögenswerte</b>                                  |        | <b>18 963</b> | <b>17 696</b> | <b>14 975</b> |
| Vorräte                                                             | 27     | 662           | 646           | 581           |
| Forderungen aus Lieferungen und Leistungen und sonstige Forderungen | 23 28  | 3 401         | 3 033         | 3 015         |
| Derivative Finanzinstrumente                                        | 23 26  | 484           | 252           | 213           |
| Aktiver Rechnungsabgrenzungsposten                                  | 29     | 146           | 128           | 119           |
| Effektive Ertragsteuerforderungen                                   |        | 98            | 105           | 130           |
| Wertpapiere                                                         | 23 30  | 4 283         | 3 303         | 1 834         |
| Bankguthaben und Kassenbestände                                     | 23 31  | 1 097         | 1 136         | 1 444         |
| Zum Verkauf stehende Vermögenswerte                                 | 32     | 186           | 93            | 97            |
| <b>Kurzfristige Vermögenswerte</b>                                  |        | <b>10 357</b> | <b>8 696</b>  | <b>7 433</b>  |
| <b>Bilanzsumme</b>                                                  |        | <b>29 320</b> | <b>26 392</b> | <b>22 408</b> |

\* Inkl. Geschäfts- oder Firmenwerte.



**Passiva**

| in Mio. €                                                                                             | Anhang | 31.12.2010    | 31.12.2009    | 01.01.2009    |
|-------------------------------------------------------------------------------------------------------|--------|---------------|---------------|---------------|
| Gezeichnetes Kapital                                                                                  | 33 34  | 1 172         | 1 172         | 1 172         |
| Kapitalrücklage                                                                                       | 35     | 1 366         | 1 366         | 1 366         |
| Gewinnrücklagen                                                                                       | 35     | 2 944         | 2 972         | 2 750         |
| Übrige neutrale Rücklagen                                                                             | 35     | 1 629         | 618           | 701           |
| Konzernergebnis                                                                                       |        | 1 131         | -34           | 542           |
| <b>Anteile der Aktionäre der Deutschen Lufthansa AG am Eigenkapital</b>                               |        | <b>8 242</b>  | <b>6 094</b>  | <b>6 531</b>  |
| Minderheitenanteile                                                                                   |        | 98            | 108           | 63            |
| <b>Eigenkapital</b>                                                                                   |        | <b>8 340</b>  | <b>6 202</b>  | <b>6 594</b>  |
| Pensionsrückstellungen                                                                                | 36     | 2 571         | 2 710         | 2 400         |
| Sonstige Rückstellungen                                                                               | 37     | 643           | 620           | 291           |
| Finanzschulden                                                                                        | 38 39  | 6 227         | 6 109         | 3 161         |
| Sonstige finanzielle Verbindlichkeiten                                                                | 40     | 110           | 87            | 51            |
| Erhaltene Anzahlungen, Rechnungsabgrenzungsposten<br>und sonstige nicht finanzielle Verbindlichkeiten | 41     | 1 087         | 1 000         | 1 024         |
| Derivative Finanzinstrumente                                                                          | 26 38  | 111           | 225           | 118           |
| Latente Ertragsteuerverpflichtungen                                                                   | 14     | 405           | 663           | 710           |
| <b>Langfristige Rückstellungen und Verbindlichkeiten</b>                                              |        | <b>11 154</b> | <b>11 414</b> | <b>7 755</b>  |
| Sonstige Rückstellungen                                                                               | 37     | 881           | 1 122         | 847           |
| Finanzschulden                                                                                        | 38 39  | 957           | 693           | 420           |
| Verbindlichkeiten aus Lieferungen und Leistungen<br>sowie sonstige finanzielle Verbindlichkeiten      | 38 42  | 4 193         | 3 796         | 3 626         |
| Verbindlichkeiten aus nicht ausgeflogenen Flugdokumenten                                              |        | 2 389         | 1 906         | 1 693         |
| Erhaltene Anzahlungen, Rechnungsabgrenzungsposten<br>und sonstige nicht finanzielle Verbindlichkeiten | 43     | 1 066         | 1 008         | 882           |
| Derivative Finanzinstrumente                                                                          | 26 38  | 103           | 106           | 492           |
| Effektive Ertragsteuerverpflichtungen                                                                 |        | 237           | 145           | 99            |
| Rückstellung und Verbindlichkeiten aus zum Verkauf stehenden Vermögenswerten                          | 44     | -             | -             | -             |
| <b>Kurzfristige Rückstellungen und Verbindlichkeiten</b>                                              |        | <b>9 826</b>  | <b>8 776</b>  | <b>8 059</b>  |
| <b>Bilanzsumme</b>                                                                                    |        | <b>29 320</b> | <b>26 392</b> | <b>22 408</b> |

## Entwicklung des Konzern-Eigenkapitals zum 31. Dezember 2010

|                                                         | Gezeichnetes<br>Kapital | Kapital-<br>rücklage | Marktbe-<br>wertung<br>Finanz-<br>instru-<br>mente | Unter-<br>scheid-<br>betrag<br>aus Wäh-<br>rungs-<br>rechnung | Neu-<br>bewer-<br>tungs-<br>rücklage<br>(Sukzessiv-<br>erwerbe) | Sonstige<br>neutrale<br>Rück-<br>lagen | Summe<br>übrige<br>neutrale<br>Rück-<br>lagen | Gewinn-<br>rück-<br>lagen | Konzern-<br>ergebnis | Anteil der<br>Aktionäre<br>der<br>Deutschen<br>Lufthansa<br>AG<br>am Eigen-<br>kapital | Minder-<br>heiten-<br>anteile | Gesamt<br>Eigen-<br>kapital |
|---------------------------------------------------------|-------------------------|----------------------|----------------------------------------------------|---------------------------------------------------------------|-----------------------------------------------------------------|----------------------------------------|-----------------------------------------------|---------------------------|----------------------|----------------------------------------------------------------------------------------|-------------------------------|-----------------------------|
| in Mio. €                                               |                         |                      |                                                    |                                                               |                                                                 |                                        |                                               |                           |                      |                                                                                        |                               |                             |
| <b>Stand am 31.12.2008</b>                              | <b>1 172</b>            | <b>1 366</b>         | <b>1</b>                                           | <b>-52</b>                                                    | <b>237</b>                                                      | <b>393</b>                             | <b>579</b>                                    | <b>2 872</b>              | <b>542</b>           | <b>6 531</b>                                                                           | <b>63</b>                     | <b>6 594</b>                |
| Änderungen von Bilanzierungs-<br>und Bewertungsmethoden | -                       | -                    | 122                                                | -                                                             | -                                                               | -                                      | 122                                           | -122                      | -                    | -                                                                                      | -                             | -                           |
| <b>Angepasster Stand<br/>am 31.12.2008</b>              | <b>1 172</b>            | <b>1 366</b>         | <b>123</b>                                         | <b>-52</b>                                                    | <b>237</b>                                                      | <b>393</b>                             | <b>701</b>                                    | <b>2 750</b>              | <b>542</b>           | <b>6 531</b>                                                                           | <b>63</b>                     | <b>6 594</b>                |
| Kapitalerhöhungen/-herabsetzungen                       | -                       | -                    | -                                                  | -                                                             | -                                                               | -                                      | -                                             | -                         | -                    | -                                                                                      | 6                             | 6                           |
| Umbuchungen*                                            | -                       | -                    | -                                                  | -                                                             | -                                                               | 1                                      | 1                                             | 222                       | -222                 | 1                                                                                      | -1                            | -                           |
| Dividenden an Lufthansa Aktionäre/<br>Minderheiten      | -                       | -                    | -                                                  | -                                                             | -                                                               | -                                      | -                                             | -                         | -320                 | -320                                                                                   | -13                           | -333                        |
| Konzern-/Minderheitenergebnis                           | -                       | -                    | -                                                  | -                                                             | -                                                               | -                                      | -                                             | -                         | -34                  | -34                                                                                    | 12                            | -22                         |
| Übrige erfolgsneutrale<br>Aufwendungen und Erträge*     | -                       | -                    | 39                                                 | -18                                                           | -44                                                             | -61                                    | -84                                           | -                         | -                    | -84                                                                                    | 41                            | -43                         |
| <b>Angepasster Stand<br/>am 31.12.2009</b>              | <b>1 172</b>            | <b>1 366</b>         | <b>162</b>                                         | <b>-70</b>                                                    | <b>193</b>                                                      | <b>333</b>                             | <b>618</b>                                    | <b>2 972</b>              | <b>-34</b>           | <b>6 094</b>                                                                           | <b>108</b>                    | <b>6 202</b>                |
| <b>Stand am 31.12.2009</b>                              | <b>1 172</b>            | <b>1 366</b>         | <b>118</b>                                         | <b>-70</b>                                                    | <b>193</b>                                                      | <b>333</b>                             | <b>574</b>                                    | <b>3 094</b>              | <b>-112</b>          | <b>6 094</b>                                                                           | <b>108</b>                    | <b>6 202</b>                |
| Änderungen von Bilanzierungs-<br>und Bewertungsmethoden | -                       | -                    | 44                                                 | -                                                             | -                                                               | -                                      | 44                                            | -122                      | 78                   | -                                                                                      | -                             | -                           |
| <b>Angepasster Stand<br/>am 31.12.2009</b>              | <b>1 172</b>            | <b>1 366</b>         | <b>162</b>                                         | <b>-70</b>                                                    | <b>193</b>                                                      | <b>333</b>                             | <b>618</b>                                    | <b>2 972</b>              | <b>-34</b>           | <b>6 094</b>                                                                           | <b>108</b>                    | <b>6 202</b>                |
| Kapitalerhöhungen/-herabsetzungen                       | -                       | -                    | -                                                  | -                                                             | -                                                               | -                                      | -                                             | -                         | -                    | -                                                                                      | -                             | -                           |
| Umbuchungen                                             | -                       | -                    | -                                                  | -                                                             | -                                                               | -                                      | -                                             | -34                       | 34                   | -                                                                                      | -                             | -                           |
| Dividenden an Lufthansa Aktionäre/<br>Minderheiten      | -                       | -                    | -                                                  | -                                                             | -                                                               | -                                      | -                                             | -                         | -                    | -                                                                                      | -18                           | -18                         |
| Transaktionen mit Minderheiten                          | -                       | -                    | -                                                  | -                                                             | -                                                               | -                                      | -                                             | 6                         | -                    | 6                                                                                      | -8                            | -2                          |
| Konzern-/Minderheitenergebnis                           | -                       | -                    | -                                                  | -                                                             | -                                                               | -                                      | -                                             | -                         | 1 131                | 1 131                                                                                  | 12                            | 1 143                       |
| Übrige erfolgsneutrale<br>Aufwendungen und Erträge*     | -                       | -                    | 694                                                | 311                                                           | -                                                               | 6                                      | 1 011                                         | -                         | -                    | 1 011                                                                                  | 4                             | 1 015                       |
| <b>Stand am 31.12.2010</b>                              | <b>1 172</b>            | <b>1 366</b>         | <b>856</b>                                         | <b>241</b>                                                    | <b>193</b>                                                      | <b>339</b>                             | <b>1 629</b>                                  | <b>2 944</b>              | <b>1 131</b>         | <b>8 242</b>                                                                           | <b>98</b>                     | <b>8 340</b>                |

\* Hinsichtlich weiterer Informationen zu den erfolgsneutralen Aufwendungen und Erträgen verweisen wir auf die Anhangsangabe 35.

## Konzern-Kapitalflussrechnung

### für das Geschäftsjahr 2010

| in Mio. €                                                                                     | Anhang  | 2010          | 2009          |
|-----------------------------------------------------------------------------------------------|---------|---------------|---------------|
| <b>Zahlungsmittel und Zahlungsmittel-Äquivalente 01.01.</b>                                   |         | <b>1 136</b>  | <b>1 444</b>  |
| Ergebnis vor Ertragsteuern                                                                    |         | 978           | -134          |
| Abschreibungen auf Anlagevermögen (saldiert mit Zuschreibungen)                               | 9 13    | 1 665         | 1 634         |
| Abschreibungen auf Umlaufteile                                                                |         | 23            | 74            |
| Ergebnis aus dem Abgang von Anlagevermögen                                                    | 6       | -209          | -27           |
| Beteiligungsergebnis                                                                          | 11      | -104          | -58           |
| Zinsergebnis                                                                                  | 12      | 357           | 325           |
| Erstattete/Gezahlte Ertragsteuern                                                             |         | -110          | 48            |
| Veränderung des Working Capitals <sup>1)</sup>                                                |         | 475           | 129           |
| <b>Operativer Cashflow</b>                                                                    |         | <b>3 075</b>  | <b>1 991</b>  |
| Investitionen in Sachanlagen und immaterielle Vermögenswerte                                  | 16 – 20 | -2 222        | -2 174        |
| Investitionen in Finanzanlagen                                                                | 24 25   | -38           | -29           |
| Zugänge an reparaturfähigen Flugzeuersatzteilen                                               |         | -76           | -165          |
| Einnahmen aus Verkäufen von nicht konsolidierten Anteilen                                     |         | 113           | 94            |
| Einnahmen aus Verkäufen von konsolidierten Anteilen                                           |         | -             | -             |
| Ausgaben aus Käufen von nicht konsolidierten Anteilen                                         | 22 – 24 | -11           | -98           |
| Ausgaben aus Käufen von konsolidierten Anteilen <sup>2)</sup>                                 | 1       | -2            | -104          |
| Einnahmen aus dem Abgang von immateriellen Vermögenswerten, Sach- und sonstigen Finanzanlagen |         | 398           | 448           |
| Zinseinnahmen                                                                                 |         | 314           | 214           |
| Erhaltene Dividenden                                                                          |         | 74            | 74            |
| <b>Nettozu-/ -abflüsse aus der Investitionstätigkeit</b>                                      |         | <b>-1 450</b> | <b>-1 740</b> |
| Erwerb von Wertpapieren/ Geldanlagen in Fonds <sup>3)</sup>                                   |         | -2 251        | -3 107        |
| Veräußerung von Wertpapieren/ Geldanlagen in Fonds                                            |         | 823           | 1 284         |
| <b>Nettozu-/ -abflüsse aus der Investitionstätigkeit und Geldanlagen</b>                      |         | <b>-2 878</b> | <b>-3 563</b> |
| Kapitalerhöhung <sup>4)</sup>                                                                 | 33 – 35 | -             | 6             |
| Aufnahme langfristiger Finanzschulden                                                         |         | 925           | 2 633         |
| Rückführung langfristiger Finanzschulden                                                      |         | -720          | -755          |
| Übrige Finanzschulden                                                                         |         | -36           | 1             |
| Gewinnausschüttung                                                                            |         | -18           | -333          |
| Zinsausgaben                                                                                  |         | -451          | -281          |
| <b>Nettozu-/ -abflüsse aus der Finanzierungstätigkeit</b>                                     |         | <b>-300</b>   | <b>1 271</b>  |
| <b>Nettozu-/ -abnahme von Zahlungsmitteln und Zahlungsmittel-Äquivalenten</b>                 |         | <b>-103</b>   | <b>-301</b>   |
| Veränderung Zahlungsmittel aus Wechselkursänderungen                                          |         | 64            | -7            |
| <b>Zahlungsmittel und Zahlungsmittel-Äquivalente 31.12.</b>                                   | 31      | <b>1 097</b>  | <b>1 136</b>  |
| Wertpapiere                                                                                   |         | 4 283         | 3 303         |
| <b>Flüssige Mittel gesamt</b>                                                                 | 30      | <b>5 380</b>  | <b>4 439</b>  |
| Nettozu-/ -abnahme der flüssigen Mittel gesamt                                                |         | 941           | 1 161         |

<sup>1)</sup> Das Working Capital besteht aus Vorräten, Forderungen, Verbindlichkeiten und Rückstellungen.

<sup>2)</sup> Im Vorjahr abzüglich erworbener Zahlungsmittel von 431 Mio. EUR.

<sup>3)</sup> Inkl. Dotierung des LH Pension Trust in Höhe von 293 Mio. EUR (Vorjahr: 283 Mio. EUR).

<sup>4)</sup> Im Vorjahr Kapitalerhöhung von Minderheitsgesellschaftern.

Die Kapitalflussrechnung zeigt, wie sich die Zahlungsmittel und Zahlungsmittel-Äquivalente des Lufthansa Konzerns im Berichtsjahr verändert haben. Dabei wurden die Zahlungsströme entsprechend IAS 7 nach dem operativen Cashflow, der dem Mittelzufluss aus der laufenden Geschäftstätigkeit entspricht, nach der Investitionstätigkeit und der Finanzierungstätigkeit gegliedert. Die in der Kapitalflussrechnung ausgewiesenen Zahlungsmittel und Zahlungsmittel-Äquivalente umfassen die Bilanzposition Bankguthaben und Kassenbestände. Der Bestand an flüssigen Mitteln im weiteren Sinne ergibt sich unter Hinzurechnung der kurzfristigen Wertpapiere.

# Konzernanhang

## der Deutschen Lufthansa AG 2010

### Erläuterungen zur Konsolidierung und Bilanzierung

#### Angewendete International Financial Reporting Standards (IFRS) und Interpretationen (IFRIC)

Der Konzernabschluss der Deutschen Lufthansa AG, Köln, und ihrer Tochtergesellschaften wurde nach den International Financial Reporting Standards (IFRS) des International Accounting Standards Board (IASB) unter Berücksichtigung der Interpretationen des International Financial Reporting Interpretations Committee (IFRIC) erstellt, wie sie in der Europäischen Union (EU) anzuwenden sind.

Nach der Änderung des IAS 27 „Konzern- und Einzelabschlüsse“ sind Anteilserwerbe beziehungsweise -verkäufe nach und unter Beibehaltung der Beherrschungsmöglichkeit gemäß dem sogenannten „Economic Entity Approach“ zu erfassen. Derartige Transaktionen werden als Geschäftsvorfälle auf Ebene der Gesellschafter betrachtet und erfolgsneutral im Eigenkapital erfasst. Das bisher bestehende Wahlrecht wurde von Lufthansa bereits in entsprechender Weise ausgeübt.

Der neu gefasste IFRS 3 „Unternehmenszusammenschlüsse“ umfasst Regelungen zum Anwendungsbereich, zu Kaufpreisbestandteilen, der Behandlung von Minderheitenanteilen und des Geschäfts- und Firmenwerts sowie zum Umfang der anzusetzenden Vermögenswerte, Schulden und Eventualschulden. Da im Geschäftsjahr 2010 keine Unternehmenserwerbe im Sinne von IFRS 3 stattgefunden haben, hatten diese Änderungen keine Auswirkungen auf die Vermögens-, Finanz- und Ertragslage des Konzerns.

Nach der Änderung des IAS 39 „Finanzinstrumente: Ansatz und Bewertung“ ist es ab dem Geschäftsjahr 2010 nicht mehr zulässig, die Veränderung des gesamten Marktwerts einer zur Sicherung eingesetzten Option (Full Fair Value-Methode) erfolgsneutral im Rahmen des Hedge Accountings abzubilden, sondern lediglich den „inneren Wert“ der Option. Die Veränderung des Zeitwerts (Time Value) wird im Finanzergebnis erfasst, was zu entsprechenden Schwankungen des Konzernergebnisses führt. Auswirkungen auf die realisierten Sicherungsergebnisse zu Gunsten oder zu Lasten der gesicherten Grundgeschäfte ergeben sich nicht. Die Veränderungen der Zeitwerte der Optionen werden sich bis zum Realisierungszeitpunkt vollständig ausgleichen, da der Zeitwert der vorwiegend eingesetzten Sicherungskombinationen bei Abschluss

des Sicherungsgeschäfts und bei Realisierung des Finanzderivats stets null ist. Auswirkungen auf die Vermögens- und Finanzlage des Konzerns ergeben sich insofern nicht. Die Änderung wird im Lufthansa Konzern ab dem Geschäftsjahr 2010 retrospektiv dargestellt, d. h. die Vorjahreszahlen wurden so angepasst, als wären die Änderungen des IAS 39 bereits in Vorjahren angewandt worden. Bei Anwendung des geänderten IAS 39 bereits im Geschäftsjahr 2009 wäre das Ergebnis vor Ertragsteuern um 95 Mio. EUR, das Ergebnis nach Ertragsteuern um 78 Mio. EUR höher ausgewiesen worden.

Die nachfolgenden, zum 1. Januar 2010 anzuwendenden Standards und Interpretationen hatten im Berichtszeitraum keine wesentlichen Auswirkungen auf die Vermögens-, Finanz- und Ertragslage des Konzerns.

Die Änderungen des IFRS 2 „Aktienbasierte Vergütungstransaktionen mit Barausgleich im Konzern“ zum Anwendungsbereich des Standards sowie der Standard „IFRS für kleine und mittelgroße Unternehmen“ hatten keine Auswirkungen auf die Vermögens-, Finanz- und Ertragslage des Konzerns.

Daneben wurden im Rahmen des Annual Improvement Project 2009 bestimmte redaktionelle Änderungen an den bestehenden Standards IFRS 5 „Zur Veräußerung gehaltene langfristige Vermögenswerte und aufgegebene Geschäftsbereiche“, IFRS 8 „Geschäftssegmente“, IAS 1 „Darstellung des Abschlusses“, IAS 7 „Kapitalflussrechnungen“, IAS 17 „Leasingverhältnisse“, IAS 36 „Wertminderung von Vermögenswerten“ und IAS 39 „Finanzinstrumente: Ansatz und Bewertung“ vorgenommen. Einige Änderungen sind dabei bereits zwingend für Geschäftsjahre anzuwenden, die am oder nach dem 1. Juli 2009 beginnen. Dies betrifft Änderungen an IFRS 2 „Anteilsbasierte Vergütung“, IAS 38 „Immaterielle Vermögenswerte“, IFRIC 9 „Neubeurteilung eingebetteter Derivate“ sowie IFRIC 16 „Absicherung einer Nettoinvestition in einen ausländischen Geschäftsbetrieb“.

Die Änderungen des IFRS 1 „Erstmalige Anwendung der IFRS“ sind für den Konzern ohne Relevanz. Dies gilt ebenso für IFRIC 12 „Dienstleistungskonzessionsvereinbarungen“, in dem die Bilanzierung von Auftragsvergaben der öffentlichen Hand an private Unternehmen zur Erfüllung öffentlicher Aufgaben im Wege der Konzessionsvergabe geregelt wird.

Die Interpretation IFRIC 15 „Verträge über die Errichtung von Immobilien“ legt dar, bei welchen Transaktionen IAS 18 „Umsatzerlöse“ beziehungsweise IAS 11 „Fertigungsaufträge“ anzuwenden ist.

IFRIC 16 „Absicherung einer Nettoinvestition in einen ausländischen Geschäftsbetrieb“ präzisiert die bilanzielle Behandlung von Sicherungen für Investitionen in Unternehmen, deren funktionale Währung nicht der Konzernwährung entspricht.

IFRIC 17 „Sachdividenden an Eigentümer“ regelt die bilanzielle Behandlung von Sachausschüttungen an Parteien außerhalb des Konzerns.

IFRIC 18 „Übertragungen von Vermögenswerten von Kunden“ wurde als primär für den Energiesektor relevante Verlautbarung im Januar 2009 veröffentlicht.

IFRIC 15, 16, 17 und 18 haben derzeit für den Lufthansa Konzern keine Relevanz.

Ergänzend wurden die nach § 315a Abs. 1 HGB zu beachtenden handelsrechtlichen Vorschriften berücksichtigt. Sämtliche vom IASB herausgegebenen und zum Zeitpunkt der Aufstellung des vorliegenden Konzernabschlusses geltenden und von der Deutschen Lufthansa AG angewendeten IFRS wurden von der Europäischen Kommission für die Anwendung in der EU übernommen. Der in Mio. EUR aufgestellte Konzernabschluss der Deutschen Lufthansa AG entspricht damit den IFRS, wie sie in der EU anzuwenden sind, und den ergänzend nach § 315a Abs. 1 HGB zu beachtenden handelsrechtlichen Vorschriften.

Der Konzernabschluss 2010 wird vom Aufsichtsrat der Deutschen Lufthansa AG in seiner Sitzung am 16. März 2011 geprüft und gebilligt und ist damit zur Veröffentlichung freigegeben.

#### **Veröffentlichte, aber noch nicht verpflichtend anzuwendende International Financial Reporting Standards (IFRS) und Interpretationen (IFRIC)**

Die nachfolgend beschriebenen Standardänderungen sind überwiegend ab dem Geschäftsjahr 2011 anzuwenden. Sofern die im Folgenden dargestellten Änderungen erst zu einem späteren Zeitpunkt anzuwenden sind, wird hierauf gesondert hingewiesen.

Mit der Neufassung von IAS 24 „Angaben über Beziehungen zu nahestehenden Unternehmen und Personen“ wird unter anderem die Definition einer „related party“ präzisiert. Die Änderungen sind für den Konzern ohne Relevanz.

Der IAS 32 „Finanzinstrumente: Darstellung“ wurde dahingehend ergänzt, dass bisher als finanzielle Verbindlichkeiten auszuweisende Bezugsrechte sowie Optionen oder Optionsrechte auf Aktien in anderer Währung als der funktionalen Währung des Unternehmens unter bestimmten Bedingungen als Eigenkapitalinstrumente auszuweisen sind. Diese Änderung ist für den Lufthansa Konzern nicht relevant.

Die Änderungen des IFRS 1 „Erstmalige Anwendung der IFRS“ betreffen Erleichterungen für erstmalige Anwender der IFRS. Darüber hinaus haben sich kleinere redaktionelle Änderungen ergeben. Die Änderungen sind für den Konzern ohne Relevanz.

Im Rahmen des Annual Improvement Project 2010 wurden redaktionelle Überarbeitungen und kleinere Änderungen an sechs IFRS und einer Interpretation vorgenommen. Diese betreffen IFRS 1 „Erstmalige Anwendung der IFRS“, IFRS 3 „Unternehmenszusammenschlüsse“, IFRS 7 „Finanzinstrumente: Angaben“, IAS 1 „Darstellung des Abschlusses“, IAS 27 „Konzern- und separate Einzelabschlüsse“, IAS 34 „Zwischenberichterstattung“ und IFRIC 13 „Kundenbindungsprogramme“. Die Änderungen sind für am oder nach dem 1. Juli 2010 beziehungsweise 1. Januar 2011 beginnende Geschäftsjahre anzuwenden, werden jedoch nach derzeitigem Stand keine wesentlichen Auswirkungen auf die Vermögens-, Finanz- und Ertragslage des Konzerns haben.

Die Änderungen des IFRS 7 „Finanzinstrumente: Angaben“ betreffen die Ausdehnung von Angabepflichten bei Transaktionen zum Zwecke der Übertragung von finanziellen Vermögenswerten, bei denen bestimmte Rechte und Pflichten beim übertragenden Unternehmen verbleiben beziehungsweise im Rahmen der Transaktion übernommen wurden. Die Angaben sollen die Beziehungen zwischen der Übertragung von finanziellen Vermögenswerten und den korrespondierenden finanziellen Verbindlichkeiten aufzeigen. Eine Übernahme in europäisches Recht ist bislang noch nicht erfolgt. Die Änderungen sind für am oder nach dem 1. Juli 2011 beginnende Geschäftsjahre anzuwenden. Mögliche Auswirkungen für den Konzern werden gegenwärtig geprüft.

Das IASB hat im November 2009 den IFRS 9 „Finanzinstrumente: Klassifizierung und Bewertung – Finanzielle Vermögenswerte“ verabschiedet. Der neue Standard umschreibt Klassifizierungs- und Bewertungsanforderungen von finanziellen Vermögenswerten und beendet unter dem Stichwort „Classification and Measurement“ die erste von insgesamt drei Phasen, an deren Ende der bestehende IAS 39 „Financial Instruments: Recognition and Measurement“ abgeschafft werden soll. Die Verabschiedung der Phasen II („Impairment“) und III („Hedge Accounting“) ist zum Zeitpunkt der Erstellung des Jahresabschlusses noch nicht erfolgt. Die Übernahme in europäisches Recht steht noch aus. Die neuen Vorschriften sind für Geschäftsjahre, die am oder nach dem 1. Januar 2013 beginnen, anzuwenden. Die Auswirkungen von IFRS 9 für die Vermögens-, Finanz- und Ertragslage sowie die Darstellung des Konzerns werden gegenwärtig und fortlaufend geprüft.



Zusätzlich zu den im November 2009 herausgegebenen Regelungen des IFRS 9 hat das IASB am 28. Oktober 2010 IFRS 9 „Finanzinstrumente: Klassifizierung und Bewertung – Finanzielle Verbindlichkeiten“ herausgegeben. Finanzielle Verbindlichkeiten können weiterhin den Bewertungskategorien „Fortgeführte Anschaffungskosten“ („Amortised Cost“) oder „Beizulegender Zeitwert“ („Fair Value“) zugeordnet werden. Nach den neuen Vorschriften hat ein Unternehmen, das für die Bilanzierung seiner finanziellen Verbindlichkeiten die sogenannte Fair Value-Option gewählt hat, Wertänderungen des beizulegenden Zeitwerts, die durch eine Veränderung des eigenen Kreditrisikos hervorgerufen wurden, nicht mehr erfolgswirksam in der Gewinn- und Verlustrechnung, sondern erfolgsneutral in der Gesamtergebnisrechnung im sonstigen Ergebnis („Other Comprehensive Income“) – und somit direkt im Eigenkapital – zu erfassen. Eine Abweichung von dieser Regelung soll dann möglich sein, wenn eine solche Darstellung zu einer Bewertungsinkongruenz in der Gewinn- und Verlustrechnung führt. Eine Übernahme der Neuregelung in europäisches Recht ist bislang noch nicht erfolgt. Die neuen Vorschriften sind für Geschäftsjahre, die am oder nach dem 1. Januar 2013 beginnen, anzuwenden. Die Auswirkungen von IFRS 9 für die Vermögens-, Finanz- und Ertragslage sowie die Darstellung des Konzerns werden gegenwärtig und fortlaufend geprüft.

Die punktuelle Änderung des IAS 12 „Ertragsteuern“ beinhaltet für bestimmte Fälle eine verpflichtende Ausnahmenvorschrift von der Grundsatzregelung des IAS 12.51, wonach Steuerlatenzen mit der aus der geplanten Verwendungsabsicht des zu Grunde liegenden Vermögenswerts (oder der Schuld) zu erwartenden Steuerkonsequenz zu bewerten sind. Die Änderungen sind für Geschäftsjahre, die am oder nach dem 1. Januar 2012 beginnen, anzuwenden. Die Auswirkungen der Änderungen für die Vermögens-, Finanz- und Ertragslage sowie die Darstellung des Konzerns werden gegenwärtig und fortlaufend geprüft.

Die Änderungen des IFRIC 14 „Vorauszahlungen einer Mindestdotierungsverpflichtung“ betreffen die bilanzielle Behandlung von geleisteten Vorauszahlungen auf im Zusammenhang mit Pensionsplänen bestehenden Mindestdotierungsverpflichtungen. Die Änderung der Interpretation ermöglicht bei Vorliegen der Voraussetzungen, den Nutzen aus diesen Vorauszahlungen als Vermögenswert anzusetzen. Die Änderungen des IFRIC 14 sind für am oder nach dem 1. Januar 2011 beginnende Geschäftsjahre anzuwenden. Die Auswirkungen für die Vermögens-, Finanz- und Ertragslage sowie die Darstellung des Konzerns werden gegenwärtig und fortlaufend geprüft.

Der IFRIC 19 „Tilgung finanzieller Verbindlichkeiten durch Eigenkapitalinstrumente“ beinhaltet Anforderungen, wenn ein Unternehmen die Bedingungen einer finanziellen Verbindlichkeit mit dem Gläubiger neu verhandelt und der Gläubiger dabei Aktien oder andere Eigenkapitalinstrumente des Unternehmens zur vollen oder teilweisen Tilgung der finanziellen Verbindlichkeit erhält. IFRIC 19 ist für am oder nach dem 1. Juli 2010 beginnende Geschäftsjahre anzuwenden. Die Auswirkungen für die Vermögens-, Finanz- und Ertragslage sowie die Darstellung des Konzerns werden gegenwärtig und fortlaufend geprüft.

Der Konzern hat keine der genannten neuen oder geänderten Vorschriften freiwillig vorzeitig angewendet.

#### **1 Konsolidierungskreis**

Alle wesentlichen Tochterunternehmen, die unter der rechtlichen und/oder faktischen Kontrolle der Deutschen Lufthansa AG stehen, sind in den Konzernabschluss einbezogen. Wesentliche Joint Ventures beziehungsweise assoziierte Unternehmen werden nach der Equity-Methode bilanziert, sofern der Konzern 20 bis 50 Prozent der Anteile hält und/oder gemeinsam mit anderen Gesellschaftern Kontrolle beziehungsweise einen maßgeblichen Einfluss ausüben kann.

Eine Aufstellung der wesentlichen Tochterunternehmen, Joint Ventures und assoziierten Unternehmen befindet sich auf den **S. 220 - 229**. Die Liste des Anteilsbesitzes ist dem Anhang als Anlage beigelegt.

Die LSG Sky Chefs/GCC Ltd. ist in den Kreis der vollkonsolidierten verbundenen Unternehmen trotz eines Stimmrechtsanteils von 50 Prozent einbezogen, weil die wirtschaftliche und finanzielle Führung der Gesellschaft durch den Lufthansa Konzern erfolgt.

Zweckgesellschaften, bei denen der Konzern nicht über die Mehrheit der Stimmrechte verfügt, sind dennoch dem Kreis der Tochterunternehmen zugeordnet, wenn der Konzern die Mehrheit des Nutzens aus der Tätigkeit der Zweckgesellschaft zieht beziehungsweise den wesentlichen Teil des Risikos trägt. Die betreffenden Gesellschaften sind in der Liste der wesentlichen Konzernunternehmen gekennzeichnet.

Der Konsolidierungskreis umfasst neben der Deutschen Lufthansa AG als Obergesellschaft inklusive Zweckgesellschaften 67 inländische und 155 ausländische Gesellschaften (Vorjahr: 70 inländische und 135 ausländische Gesellschaften).

Die Veränderungen des Konsolidierungskreises im Geschäftsjahr 2010 sind in der folgenden Tabelle zusammengefasst:

#### Veränderungen des Konsolidierungskreises

| Name, Sitz                                                                     | Zugang zum | Abgang zum | Grund                 |
|--------------------------------------------------------------------------------|------------|------------|-----------------------|
| <b>Geschäftsfeld Passage Airline Gruppe</b>                                    |            |            |                       |
| AirNavigator Ltd., Tokio, Japan                                                | 29.06.10   |            | Gründung              |
| Edelweiss Air AG, Kloten, Schweiz                                              | 01.01.10   |            | Erstmals konsolidiert |
| Ellen Finance 2010 S.N.C., Paris, Frankreich                                   | 25.06.10   |            | Gründung              |
| FI Beauty Leasing Ltd., Tokio, Japan                                           | 28.06.10   |            | Gründung              |
| First Valley Highway Kumiai, Tokio, Japan                                      | 29.06.10   |            | Gründung              |
| Second Valley Highway Kumiai, Tokio, Japan                                     | 29.06.10   |            | Gründung              |
| Third Valley Highway Kumiai, Tokio, Japan                                      | 29.06.10   |            | Gründung              |
| Global Brand Management AG, Basel, Schweiz                                     | 15.11.10   |            | Gründung              |
| Ingrid Finance 2010 S.N.C., Paris, Frankreich                                  | 15.05.10   |            | Gründung              |
| Jour Leasing Co., Ltd., Tokio, Japan                                           | 16.07.10   |            | Gründung              |
| Lufthansa Leasing Austria GmbH & Co. OG Nr. 2, Salzburg, Österreich            | 06.07.10   |            | Gründung              |
| Lufthansa Leasing Austria GmbH & Co. OG Nr. 3, Salzburg, Österreich            | 06.07.10   |            | Gründung              |
| Lufthansa Leasing Austria GmbH & Co. OG Nr. 4, Salzburg, Österreich            | 06.07.10   |            | Gründung              |
| Lufthansa Leasing Austria GmbH & Co. OG Nr. 5, Salzburg, Österreich            | 06.07.10   |            | Gründung              |
| Lufthansa Leasing Austria GmbH & Co. OG Nr. 6, Salzburg, Österreich            | 06.07.10   |            | Gründung              |
| Lufthansa Leasing Austria GmbH & Co. OG Nr. 7, Salzburg, Österreich            | 06.07.10   |            | Gründung              |
| Lufthansa Leasing Austria GmbH & Co. OG Nr. 8, Salzburg, Österreich            | 06.07.10   |            | Gründung              |
| Lufthansa Leasing Austria GmbH & Co. OG Nr. 9, Salzburg, Österreich            | 06.07.10   |            | Gründung              |
| Lufthansa Leasing Austria GmbH & Co. OG Nr. 10, Salzburg, Österreich           | 06.07.10   |            | Gründung              |
| Soir Leasing Co., Ltd., Tokio, Japan                                           | 25.06.10   |            | Gründung              |
| GOAL Verwaltungsgesellschaft mbH & Co. Projekt Nr. 5 KG, Grünwald, Deutschland |            | 31.12.10   | Liquidation           |
| Lufthansa Leasing GmbH & Co. Fox-Bravo oHG, Grünwald, Deutschland              |            | 15.07.10   | Liquidation           |
| Lufthansa Leasing GmbH & Co. Fox-Charlie oHG, Grünwald, Deutschland            |            | 15.07.10   | Liquidation           |
| Suriba Beteiligungsverwaltungs GmbH, Wien, Österreich                          |            | 10.06.10   | Fusion                |
| UIA Beteiligungsgesellschaft mbH, Wien, Österreich                             |            | 01.04.10   | Verkauf               |
| <b>Geschäftsfeld Technik</b>                                                   |            |            |                       |
| Lufthansa Technik Budapest Repülőgép Nagyjavító Kft., Budapest, Ungarn         | 01.01.10   |            | Erstmals konsolidiert |
| Lufthansa Technik Malta Limited, Malta                                         | 01.01.10   |            | Erstmals konsolidiert |
| Lufthansa Technik Aircraft Services Ireland Limited, Shannon, Irland           |            | 26.02.10   | Liquidation           |
| <b>Geschäftsfeld Catering</b>                                                  |            |            |                       |
| Starfood Antalya Gıda Sanayi ve Ticaret A.Ş., Istanbul, Türkei                 | 10.08.10   |            | Gründung              |

Folgende vollkonsolidierte deutsche Konzerngesellschaften machten im Geschäftsjahr 2010 von der Befreiungsvorschrift des § 264 Abs. III HGB beziehungsweise § 264b HGB Gebrauch.

| Name der Gesellschaft                                               | Sitz              |
|---------------------------------------------------------------------|-------------------|
| Germanwings GmbH                                                    | Köln              |
| Hamburger Gesellschaft für Flughafenanlagen mbH                     | Hamburg           |
| In-Flight Management Solutions GmbH                                 | Neu-Isenburg      |
| LSG Asia GmbH                                                       | Neu-Isenburg      |
| LSG-Food & Nonfood Handel GmbH                                      | Frankfurt am Main |
| LSG Lufthansa Service Catering- und Dienstleistungsgesellschaft mbH | Neu-Isenburg      |
| LSG Lufthansa Service Europa/ Afrika GmbH                           | Neu-Isenburg      |
| LSG Lufthansa Service Holding AG                                    | Neu-Isenburg      |
| LSG Sky Chefs Catering Logistics GmbH                               | Neu-Isenburg      |
| LSG Sky Chefs Deutschland GmbH                                      | Neu-Isenburg      |
| LSG Sky Chefs Lounge GmbH                                           | Neu-Isenburg      |
| LSG-Sky Food GmbH                                                   | Alzey             |
| LSG South America GmbH                                              | Neu-Isenburg      |
| Lufthansa Technik AERO Alzey GmbH                                   | Alzey             |
| Lufthansa Cargo AG                                                  | Kelsterbach       |
| Lufthansa Cargo Charter Agency GmbH                                 | Kelsterbach       |
| Lufthansa CityLine GmbH                                             | Köln              |
| Lufthansa Commercial Holding GmbH                                   | Köln              |
| Lufthansa Flight Training Berlin GmbH                               | Berlin            |
| Lufthansa Flight Training GmbH                                      | Frankfurt am Main |
| Lufthansa Leasing GmbH & Co Echo-Zulu oHG                           | Grünwald          |
| Lufthansa Systems Aeronautics GmbH                                  | Raunheim          |
| Lufthansa Systems Airline Services GmbH                             | Kelsterbach       |
| Lufthansa Systems Aktiengesellschaft                                | Kelsterbach       |

| Name der Gesellschaft                                        | Sitz              |
|--------------------------------------------------------------|-------------------|
| Lufthansa Systems AS GmbH                                    | Norderstedt       |
| Lufthansa Systems Berlin GmbH                                | Berlin            |
| Lufthansa Systems Business Solutions GmbH                    | Raunheim          |
| Lufthansa Systems Infratec GmbH                              | Kelsterbach       |
| Lufthansa Systems Passenger Services GmbH                    | Kelsterbach       |
| Lufthansa Process Management GmbH                            | Neu-Isenburg      |
| Lufthansa Technik AG                                         | Hamburg           |
| Lufthansa Technik Immobilien und Verwaltungsgesellschaft mbH | Hamburg           |
| Lufthansa Technik Logistik GmbH                              | Hamburg           |
| Lufthansa Technik Maintenance International GmbH             | Frankfurt am Main |
| Lufthansa Technik Objekt- und Verwaltungsgesellschaft mbH    | Hamburg           |
| Lufthansa Training & Conference Center GmbH                  | Seeheim-Jugenheim |
| Lufthansa WorldShop GmbH                                     | Frankfurt am Main |
| MARDU Grundstücks-Verwaltungsgesellschaft mbH & Co. oHG      | Grünwald          |
| Miles & More International GmbH                              | Neu-Isenburg      |

Im Konzernabschluss sind Beteiligungen an 60 Joint Ventures und 41 assoziierten Unternehmen bilanziert (Vorjahr: 65 Joint Ventures und 40 assoziierte Unternehmen), von denen 11 Joint Ventures (Vorjahr: 9) und 17 assoziierte Unternehmen (Vorjahr: 17) at equity bewertet werden. Die übrigen Joint Ventures und assoziierten Unternehmen werden wegen ihrer insgesamt nachrangigen Bedeutung zu fortgeführten Anschaffungskosten angesetzt.

Aufgrund der Anteilsquote am jeweiligen Joint Venture beziehungsweise assoziierten Unternehmen sind dem Konzern folgende Vermögenswerte, Schulden sowie Aufwendungen und Erträge zuzurechnen:

| in Mio. €                   | 2010           |                         |                                                   | 2009           |                         |                                                   |
|-----------------------------|----------------|-------------------------|---------------------------------------------------|----------------|-------------------------|---------------------------------------------------|
|                             | Joint Ventures | Assoziierte Unternehmen | Nicht at equity bewertete assoziierte Unternehmen | Joint Ventures | Assoziierte Unternehmen | Nicht at equity bewertete assoziierte Unternehmen |
| Langfristige Vermögenswerte | 146            | 252                     | 351                                               | 79             | 246                     | 357                                               |
| Kurzfristige Vermögenswerte | 205            | 117                     | 28                                                | 132            | 117                     | 20                                                |
| Eigenkapital                | 128            | 131                     | 28                                                | 95             | 122                     | 27                                                |
| Langfristiges Fremdkapital  | 51             | 171                     | 219                                               | 22             | 148                     | 230                                               |
| Kurzfristiges Fremdkapital  | 172            | 67                      | 132                                               | 94             | 93                      | 120                                               |
| Erträge                     | 512            | 201                     | 57                                                | 324            | 308                     | 57                                                |
| Aufwendungen                | 491            | 187                     | 50                                                | 313            | 289                     | 52                                                |

## 2 Zusammenfassung der wesentlichen Bilanzierungs- und Bewertungsmethoden und der zu Grunde liegenden Schätzannahmen

Bei Anwendung der von den IFRS und IFRIC vorgegebenen Bilanzierungs- und Bewertungsmethoden müssen zahlreiche Einschätzungen vorgenommen und Annahmen getroffen werden, welche die Zukunft betreffen und naturgemäß nicht den später tatsächlich eintretenden Verhältnissen entsprechen müssen. Alle im Rahmen der Bilanzierung und Bewertung zu Grunde gelegten Schätzungen und Annahmen werden aber fortlaufend überprüft und basieren entweder auf historischen Erfahrungen und/oder auf Erwartungen über das Eintreten künftiger Ereignisse, die unter den gegebenen Umständen kaufmännisch vernünftig erscheinen.

Schätzungen und Annahmen, die bei der Ermittlung der Buchwerte von Vermögenswerten und Schulden eine wesentliche Rolle spielen, werden im Rahmen der folgenden Beschreibung der Bilanzierungs- und Bewertungsmethoden wesentlicher Bilanzpositionen erläutert.

Als grundlegendes Bewertungskonzept wird im Konzernabschluss das Anschaffungskostenprinzip angewendet. Dort, wo die IFRS andere Bewertungskonzepte vorschreiben, werden diese verwendet; in den folgenden Ausführungen zur Bewertung von Aktiv- und Passivposten wird hierauf gesondert hingewiesen.

### Ertrags- und Aufwandsrealisierung

Umsatzerlöse beziehungsweise sonstige betriebliche Erträge werden mit Erbringung der Leistung beziehungsweise mit Übergang der Gefahren auf den Kunden realisiert. Erlöse aus den Verkehrsleistungen der Geschäftsfelder Passage Airline Gruppe und Logistik werden nach Abflug eines Passagiercoupons beziehungsweise Luftfrachtbriefs erfolgswirksam. Dabei wird der realisierte Betrag anteilig aus dem für das Dokument vereinnahmten Gesamtbetrag ermittelt. Bei kundenbezogener, längerfristiger Fertigung in den Segmenten Technik und IT Services werden die Umsätze nach der Percentage-of-Completion-Methode dem Leistungsfortschritt entsprechend erfasst. Dabei wird einerseits der Anteil der erbrachten Leistungen im Verhältnis zum Gesamtvolumen des Kundenauftrags, andererseits der Gewinn des gesamten Auftrags geschätzt. Das Gesamtvolumen der realisierten Gewinnanteile aus langfristigen Aufträgen betrug im Geschäftsjahr 2010 36 Mio. EUR (Vorjahr: 50 Mio. EUR).

Betriebliche Aufwendungen werden mit Inanspruchnahme der Leistung beziehungsweise zum Zeitpunkt ihrer Verursachung ergebniswirksam. Rückstellungen für Gewährleistungen werden zum Zeitpunkt der Realisierung der entsprechenden Umsatzerlöse gebildet. Zinserträge und -aufwendungen werden periodengerecht erfasst. Dividenden aus Beteiligungen, die nicht at equity bewertet sind, werden mit Entstehen des Rechtsanspruchs vereinnahmt.

### Erstkonsolidierung und Firmenwerte

Die Erstkonsolidierung von Konzernunternehmen wird nach der Erwerbsmethode vorgenommen. Dabei werden die nach den Vorschriften des IFRS 3 identifizierten Vermögenswerte, Schulden und Eventualverbindlichkeiten des erworbenen Unternehmens mit dem beizulegenden Zeitwert zum Erwerbszeitpunkt bewertet und den Kosten des Erwerbers gegenübergestellt (Kaufpreisallokation). Die nicht erworbenen Anteile an den beizulegenden Zeitwerten von Vermögenswerten und Schulden werden unter den Minderheitenanteilen ausgewiesen.

Ein Überhang der Kosten über den Wert des erworbenen Eigenkapitals wird als Firmenwert aktiviert und in der Folgezeit einem regelmäßigen, jährlichen Werthaltigkeitstest unterzogen.

Übersteigt der erworbene Wert des Eigenkapitals die hierfür aufgewendeten Kosten des Erwerbers, so wird der Differenzbetrag sofort erfolgswirksam vereinnahmt.

Differenzbeträge aus nach Übernahme der Kontrolle erworbenen Minderheitenanteilen werden direkt gegen das Eigenkapital verrechnet.

Die jährlich vorzunehmenden Werthaltigkeitstests für Firmenwerte werden mittels anerkannter Discounted Cashflow-Methoden durchgeführt. Dabei werden die zukünftig zu erwartenden Cashflows aus der jüngsten Managementplanung zu Grunde gelegt, mit langfristigen Umsatzwachstumsraten sowie Annahmen über die Margenentwicklung fortgeschrieben und mit den Kapitalkosten der Unternehmenseinheit abgezinst. Getestet wird auf der Ebene der zahlungsmittelgenerierenden Einheit. Zu einzelnen für die Werthaltigkeitstests im Geschäftsjahr 2010 verwendeten Prämissen siehe „Erläuterung 16“ ab [S. 173](#).

Darüber hinaus wird ein Werthaltigkeitstest zusätzlich während des Jahres dann durchgeführt, wenn aufgrund eingetretener Ereignisse ein Verdacht besteht, dass der Wert nachhaltig gesunken sein könnte.

### Währungsumrechnung und Konsolidierungsmethoden

Die Jahresabschlüsse der ausländischen Konzerngesellschaften werden nach dem Konzept der funktionalen Währung in Euro umgerechnet. Ihre funktionale Währung ist überwiegend die jeweilige Landeswährung, in Einzelfällen weicht die funktionale Währung von der Landeswährung ab. Vermögenswerte und Schulden werden mit den Mittelkursen am Bilanzstichtag, die Gewinn- und Verlustrechnungen mit den Jahresdurchschnittskursen umgerechnet.

Diese Translationsdifferenzen werden ergebnisneutral im Eigenkapital erfasst. Geschäftswerte, die bei ausländischen Tochtergesellschaften aus der Kapitalkonsolidierung vor 2005 entstanden sind, werden zu historischen Anschaffungswerten abzüglich der bis Ende 2004 aufgelaufenen Abschreibungen fortgeführt.

Nach 2005 entstandene Firmenwerte werden in der Währung des erworbenen Unternehmens bilanziert.

Transaktionsdifferenzen werden dagegen erfolgswirksam erfasst. Sie entstehen in den Abschlüssen der konsolidierten Gesellschaften aus Vermögenswerten und Verpflichtungen, deren Basis eine von der funktionalen Währung der Gesellschaft abweichende Währung ist. Kursdifferenzen hieraus sind in den sonstigen betrieblichen Erträgen (Kursgewinne) beziehungsweise sonstigen betrieblichen Aufwendungen (Kursverluste) enthalten.

Die wichtigsten im Konzernabschluss verwendeten Kurse haben sich in Relation zum Euro wie folgt entwickelt:

|     | 2010       |                       | 2009       |                       |
|-----|------------|-----------------------|------------|-----------------------|
|     | Bilanzkurs | GuV-Durchschnittskurs | Bilanzkurs | GuV-Durchschnittskurs |
| USD | 0,74864    | 0,75815               | 0,69730    | 0,71635               |
| YEN | 0,00920    | 0,00863               | 0,00754    | 0,00765               |
| GBP | 1,16044    | 1,16902               | 1,12120    | 1,11784               |
| CAD | 0,74918    | 0,72974               | 0,66046    | 0,62882               |
| HKD | 0,09630    | 0,09761               | 0,08994    | 0,09247               |
| THB | 0,02495    | 0,02384               | 0,02092    | 0,02086               |
| SEK | 0,11145    | 0,10425               | 0,09741    | 0,09429               |
| NOK | 0,12793    | 0,12431               | 0,12029    | 0,11457               |
| DKK | 0,13414    | 0,13428               | 0,13438    | 0,13430               |
| CHF | 0,79847    | 0,72014               | 0,67283    | 0,66078               |
| KRW | 0,00067    | 0,00065               | 0,00060    | 0,00056               |

Im Rahmen der Konsolidierung werden die Auswirkungen konzerninterner Geschäftsvorfälle vollständig eliminiert. Forderungen und Verbindlichkeiten zwischen den konsolidierten Gesellschaften werden gegeneinander aufgerechnet, Zwischengewinne und -verluste im Anlage- und Vorratsvermögen werden eliminiert. Konzerninterne Erträge werden mit den korrespondierenden Aufwendungen verrechnet. Auf temporäre Unterschiede aus der Konsolidierung werden die nach IAS 12 erforderlichen Steuerabgrenzungen vorgenommen.

### Sonstige immaterielle Vermögenswerte (außer Geschäfts- oder Firmenwerte)

Erworbene immaterielle Vermögenswerte werden zu Anschaffungskosten, selbst erstellte immaterielle Vermögenswerte, aus denen dem Konzern wahrscheinlich ein künftiger Nutzen zufließt und die verlässlich bewertet werden können, werden mit ihren Herstellungskosten aktiviert und jeweils über eine geschätzte Nutzungsdauer planmäßig linear abgeschrieben. Die Herstellungskosten umfassen dabei alle direkt dem Herstellungsprozess zurechenbaren Kosten einschließlich der nach IAS 23 zu berücksichtigenden Fremdkapitalkosten sowie angemessene Teile der fertigungsbezogenen Gemeinkosten.

Immaterielle Vermögenswerte mit einer unbestimmten Nutzungsdauer sowie noch nicht genutzte immaterielle Vermögenswerte werden nicht planmäßig abgeschrieben, sondern wie Firmenwerte einem regelmäßigen, jährlichen Werthaltigkeitstest unterzogen.

### Sachanlagen

Materielle Vermögenswerte, die im Geschäftsbetrieb länger als ein Jahr genutzt werden, sind mit ihren Anschaffungs- beziehungsweise Herstellungskosten abzüglich planmäßiger linearer Abschreibungen bewertet. Die Herstellungskosten umfassen alle direkt dem Herstellungsprozess zurechenbaren Kosten sowie angemessene Teile der fertigungsbezogenen Gemeinkosten.

Aufgrund der letztjährigen Änderung des IAS 23 werden Fremdkapitalkosten, die in engem Zusammenhang mit der Finanzierung von Kauf oder Herstellung eines qualifizierten Vermögenswerts stehen, aktiviert. Im Berichtsjahr wurden Fremdkapitalkosten in Höhe von 2 Mio. EUR aktiviert. Die zu Grunde gelegten Nutzungsdauern entsprechen den geschätzten/erwarteten Nutzungsdauern im Konzern.

Neue Verkehrsflugzeuge und Reservetriebwerke werden über zwölf Jahre bis auf einen Restwert von 15 Prozent abgeschrieben.

Für Gebäude werden Nutzungsdauern zwischen 20 und 45 Jahren zu Grunde gelegt, Bauten und Einbauten auf fremden Grundstücken werden entsprechend der Laufzeit der Mietverträge beziehungsweise einer niedrigeren Nutzungsdauer abgeschrieben. Die Abschreibungssätze liegen überwiegend zwischen 10 und 20 Prozent pro Jahr. Als Nutzungsdauer von technischen Anlagen und Maschinen werden bis zu zehn Jahre angesetzt. Betriebs- und Geschäftsausstattung wird bei normaler Beanspruchung über drei bis zehn Jahre abgeschrieben.

Gebraucht erworbene Vermögenswerte werden über die erwartete Restnutzungsdauer abgeschrieben.



### Finanzierungsleasing

Das wirtschaftliche Eigentum an Leasinggegenständen wird gemäß IAS 17 dann dem Leasingnehmer zugerechnet, wenn dieser im Wesentlichen alle mit dem Eigentum verbundenen Risiken und Chancen aus dem Leasinggegenstand trägt. Hierbei wird neben der Länge der unkündbaren Grundmietzeit und dem Anteil des Barwerts der Leasingraten am Gesamtinvestment insbesondere die Verteilung von Chancen und Risiken aus dem während der Laufzeit nicht amortisierten Restwert des Vermögenswerts betrachtet. Sofern das wirtschaftliche Eigentum dem Lufthansa Konzern zuzurechnen ist, erfolgt die Aktivierung zum Zeitpunkt des Vertragsabschlusses zum Barwert der Leasingraten (höchstens aber zum Zeitwert des Vermögenswerts) zuzüglich gegebenenfalls vom Leasingnehmer getragener Nebenkosten. Die Abschreibungsmethoden und Nutzungsdauern entsprechen denen vergleichbarer erworbener Vermögenswerte.

### Außerplanmäßige Abschreibungen auf abschreibbare immaterielle Vermögenswerte und Sachanlagen

Immaterielle Vermögenswerte sowie Sachanlagen werden über die planmäßige Abschreibung hinaus dann zusätzlich zum Bilanzstichtag außerplanmäßig abgeschrieben, wenn der „erzielbare Betrag“ des Vermögenswerts unter den Buchwert gesunken ist. Der „erzielbare Betrag“ wird als der jeweils höhere Wert aus dem beizulegenden Zeitwert abzüglich Verkaufskosten („Nettoveräußerungswert“) beziehungsweise dem Barwert des erwarteten Nettomittelzuflusses aus der fortgeführten Nutzung des Vermögenswerts („Nutzungswert“) ermittelt.

Der Nettoveräußerungswert wird dabei – soweit vorhanden – aus zuletzt beobachteten Markttransaktionen abgeleitet.

Ist eine Prognose eines erwarteten Mittelzuflusses für einen einzelnen Vermögenswert nicht möglich, so wird der Mittelzufluss für die nächste größere Gruppe von Vermögenswerten geschätzt, mit einem Risikozinssatz diskontiert und der erzielbare Betrag proportional zu den Buchwerten der einzelnen Vermögenswerte auf diese verteilt.

Entfällt der Grund für eine in Vorjahren vorgenommene außerplanmäßige Abschreibung ganz oder teilweise in Folgeperioden wieder, wird eine entsprechende Wertaufholung vorgenommen.

### Reparaturfähige Flugzeugersatzteile

Reparaturfähige Flugzeugersatzteile werden zu laufend angepassten Preisen, die auf durchschnittlichen Anschaffungskosten basieren, erfasst. Für die Bewertung werden die Ersatzteile den einzelnen Flugzeugmustern zugerechnet und grundsätzlich wie Flugzeuge der Flottenmuster, für die sie verwendet werden können, abgeschrieben.

### Als Finanzinvestition gehaltene Immobilien

Immobilien, die im Konzern ausschließlich der Vermietung an Konzernfremde dienen, sind als Finanzinvestition klassifiziert und zu fortgeschriebenen Anschaffungskosten bewertet.

### Nach der Equity-Methode bewertete Beteiligungen

Nach der Equity-Methode bewertete Beteiligungen werden zum Erwerbszeitpunkt zu Anschaffungskosten aktiviert.

In den Folgeperioden werden die Buchwerte jährlich um die auf den Lufthansa Konzern entfallenden Veränderungen des Eigenkapitals des assoziierten Unternehmens beziehungsweise Joint Ventures erhöht beziehungsweise vermindert. Auf die erstmalige Bewertung eines in dem Beteiligungsansatz enthaltenen Unterschiedsbetrags zwischen den Anschaffungskosten der Beteiligung und dem anteiligen Eigenkapital der Gesellschaft werden die für die Vollkonsolidierung geltenden Grundsätze der Kaufpreisallokation entsprechend angewendet. Ein Werthaltigkeitstest für einen im Beteiligungsansatz enthaltenen Firmenwert wird in Folgeperioden nur durchgeführt, sofern ein Hinweis auf eine mögliche Wertminderung des gesamten Beteiligungsansatzes vorliegt. Zwischen Gewinne und -verluste aus Verkäufen zwischen Konzerngesellschaften und at equity bewerteten Gesellschaften werden in Höhe des Beteiligungsprozentsatzes eliminiert.

### Finanzielle Vermögenswerte

Finanzielle Vermögenswerte werden im Lufthansa Konzern in die Kategorien „Zum beizulegenden Zeitwert über die Gewinn- und Verlustrechnung (GuV)“, „Ausleihungen und Forderungen“ sowie „Zur Veräußerung verfügbar“ eingeteilt.

Die Kategorie „Zum beizulegenden Zeitwert über die GuV“ umfasst finanzielle Vermögenswerte, die zu Handelszwecken gehalten werden, wie zum Beispiel Derivate, die nicht als Sicherungsgeschäfte im Rahmen einer Sicherungsbeziehung qualifizieren.

Die Kategorie „Ausleihungen und Forderungen“ besteht aus finanziellen Vermögenswerten mit festgelegten Zahlungsmodalitäten, die nicht an einem aktiven Markt gehandelt werden. Je nach Restlaufzeit werden sie als langfristige beziehungsweise kurzfristige Vermögenswerte ausgewiesen.

„Zur Veräußerung verfügbare finanzielle Vermögenswerte“ sind nicht derivative finanzielle Vermögenswerte, die keiner der beiden anderen Kategorien zuordenbar sind. Als zur Veräußerung verfügbar gelten Wertpapiere, Beteiligungen sowie Kassen- und Bankbestände.

Derivate, die als Sicherungsgeschäfte im Rahmen einer Sicherungsbeziehung qualifizieren, sind keiner der genannten Kategorien zugeordnet.

Finanzielle Vermögenswerte werden am Erfüllungstag, d. h. zum Zeitpunkt des Entstehens beziehungsweise der Übertragung des Vermögenswerts, zum beizulegenden Zeitwert zuzüglich Kosten der Transaktion aktiviert. Langfristige unter- beziehungsweise nicht-verzinsliche Ausleihungen werden dabei zum Barwert unter Anwendung der Effektivzinismethode angesetzt.

Kundenforderungen aus zum Bilanzstichtag noch nicht abgeschlossenen Fertigungs- beziehungsweise Dienstleistungsaufträgen sind mit ihren Herstellungskosten einschließlich der nach IAS 23 zu berücksichtigenden Fremdkapitalkosten zuzüglich eines ihrem Fertigstellungsgrad entsprechenden Gewinnaufschlags aktiviert, soweit das Ergebnis des Fertigungsauftrags verlässlich geschätzt werden kann. Übrige unfertige Kundenaufträge sind in Höhe der entstandenen Herstellungskosten aktiviert, soweit diese voraussichtlich durch Erlöse gedeckt sind.

Die der Kategorie der finanziellen Vermögenswerte „Zum beizulegenden Zeitwert über die GuV“ zugeordneten Vermögenswerte werden immer zum beizulegenden Zeitwert angesetzt. Wertschwankungen sind erfolgswirksam und im Finanzergebnis enthalten.

Die Folgebewertung von Ausleihungen und Forderungen erfolgt zu fortgeschriebenen Anschaffungskosten unter Berücksichtigung der Effektivzinismethode bei unter- oder nichtverzinslichen Forderungen.

Bestehen an der Einbringbarkeit von Forderungen Zweifel, werden diese mit dem niedrigeren realisierbaren Betrag angesetzt. Spätere Wertaufholungen (Zuschreibungen) werden erfolgswirksam vorgenommen.

In Fremdwährung valutierende Forderungen werden zum Stichtagskurs bewertet.

Die zur Veräußerung verfügbaren Finanzanlagen werden dagegen in den Folgeperioden zum beizulegenden Zeitwert angesetzt, sofern dieser verlässlich bestimmbar ist.

Für Wertpapiere wird der beizulegende Zeitwert aus dem an einem aktiven Markt notierten Preis ermittelt. Im Fall festverzinslicher Wertpapiere, die nicht notiert sind, wird der beizulegende Zeitwert aus der Differenz zwischen Effektiv- und Marktzinssatz zum Bewertungsstichtag ermittelt.

Wertschwankungen im beizulegenden Zeitwert zwischen den Bilanzstichtagen werden erfolgsneutral in die Rücklagen eingestellt. Die erfolgswirksame Auflösung der Rücklagen erfolgt entweder mit der Veräußerung oder bei nachhaltigem Absinken des Marktwerts unter die Buchwerte. Ist aufgrund des nachhaltigen

Absinkens des beizulegenden Zeitwerts unter den Buchwert eine Wertberichtigung in Vorjahren erfolgswirksam vorgenommen worden und später eine Wertaufholung erforderlich, so wird diese bei Wertpapieren, die Eigenkapitaltitel darstellen, erfolgsneutral, bei Wertpapieren, die Fremdkapitaltitel darstellen, erfolgswirksam vorgenommen.

Die Folgebewertung von Beteiligungen, für die kein an einem aktiven Markt notierter Wert existiert, erfolgt dagegen zu Anschaffungskosten. Sinkt der erzielbare Betrag zum Bilanzstichtag unter den Buchwert, werden erfolgswirksame Wertberichtigungen vorgenommen. Spätere Wertaufholungen sind ausgeschlossen.

Derivative Finanzinstrumente sind zum beizulegenden Zeitwert auf Basis von veröffentlichten Marktpreisen bewertet. Sofern kein an einem aktiven Markt notierter Preis existiert, wird auf andere geeignete Bewertungsmethoden zurückgegriffen.

Geeignete Bewertungsmethoden umfassen alle Faktoren, die unabhängige, sachkundige Marktteilnehmer bei der Preisbildung berücksichtigen würden und die anerkannte, gängige ökonomische Modelle zur Preisbildung von Finanzinstrumenten darstellen.

Der Lufthansa Konzern setzt entsprechend einer konzerninternen Richtlinie derivative Finanzinstrumente zur Sicherung von Zins- und Devisenkursänderungsrisiken sowie zur Absicherung des Treibstoffpreissrisikos ein. Basis ist die vom Vorstand definierte und von einem Ausschuss überwachte Sicherungspolitik. Dabei werden auch Zins- und Devisenkurssicherungsgeschäfte mit nicht konsolidierten Konzerngesellschaften abgeschlossen.

Zur Steuerung des Zinsrisikos werden Zinsswaps und Zins-Währungsswaps abgeschlossen. Letztere sichern gleichzeitig das Devisenkursänderungsrisiko aus Finanzierungen in Fremdwährungen.

Devisentermingeschäfte und Devisenoptionen setzt der Lufthansa Konzern zur Absicherung von Wechselkursrisiken ein. Dabei kommen auch Bandbreitenoptionen zum Einsatz, die Kauf und gleichzeitigen Verkauf von Devisenoptionen derselben Währung kombinieren. Die Bandbreitenoptionen werden als Zero-Cost-Optionen abgeschlossen, d. h. die zu zahlende Prämie entspricht der Prämie, die aus dem Optionsverkauf resultiert.

Treibstoffpreissicherungen werden in Form von Bandbreitenoptionen und anderen Sicherungskombinationen primär in Rohöl abgeschlossen. In begrenztem Umfang werden darüber hinaus auch Sicherungen in anderen Produkten wie Gasöl abgeschlossen.

Sicherungsgeschäfte dienen entweder der Absicherung beizulegender Zeitwerte oder der Absicherung künftiger Cashflows.

Soweit die eingesetzten Finanzinstrumente wirksame Cashflow-Sicherungen im Rahmen einer Sicherungsbeziehung nach den Vorschriften des IAS 39 sind, führen die Veränderungen des Marktwerts grundsätzlich nicht zu Auswirkungen auf das Periodenergebnis während der Laufzeit des Derivats. Sie werden erfolgsneutral in der entsprechenden Rücklagenposition erfasst. Nach einer Änderung des IAS 39 „Finanzinstrumente: Ansatz und Bewertung“ ist es ab dem Geschäftsjahr 2010 jedoch nicht mehr zulässig, die Veränderungen des gesamten Marktwerts einer zur Sicherung eingesetzten Option (Full Fair Value-Methode) erfolgsneutral im Rahmen des Hedge Accountings abzubilden, sondern lediglich den „inneren Wert“ einer Option. Die Veränderung des Zeitwerts (Time Value) der Option wird im Finanzergebnis erfasst.

Ist der gesicherte Zahlungsstrom eine Investition, wird zum Zeitpunkt des Fälligwerdens des Grundgeschäfts das bis dahin im Eigenkapital erfasste Ergebnis aus dem Sicherungsgeschäft mit den Anschaffungskosten der Investition verrechnet.

In allen anderen Fällen wird der angesammelte Wert im Eigenkapital bei Fälligwerden des gesicherten Zahlungsstroms als Gewinn oder Verlust im Periodenergebnis berücksichtigt.

Im Falle des effektiven Teils einer wirksamen Absicherung von beizulegenden Zeitwerten gleichen sich die Marktwertschwankungen des gesicherten Vermögenswerts beziehungsweise der gesicherten Schulden und die des Finanzinstruments in der Gewinn- und Verlustrechnung aus.

Soweit die eingesetzten Finanzinstrumente nicht als wirksame Sicherungsgeschäfte, sondern als Handelsgeschäfte nach IAS 39 qualifiziert werden, wirken sich alle Marktwertschwankungen unmittelbar als Gewinn oder Verlust in der Gewinn- und Verlustrechnung aus. Auch „eingebettete Derivate“ sind, soweit sie nicht vom finanziellen Basiskontrakt separierbar sind, gemeinsam mit diesem für Bewertungszwecke als Handelsgeschäfte anzusehen. Marktwertschwankungen wirken sich ebenfalls unmittelbar als Gewinn oder Verlust in der Gewinn- und Verlustrechnung aus. Beide sind der Kategorie „Zum beizulegenden Zeitwert über die Gewinn- und Verlustrechnung“ zuzurechnen.

Sicherungspolitik des Konzerns („Erläuterung 46“ auf [S. 200](#)) ist es, ausschließlich wirksame Derivate zur Absicherung von Zins-, Währungs- und Treibstoffpreisrisiken abzuschließen.

Die Geschäfte mit nicht konsolidierten Konzerngesellschaften sowie Zins-Währungsswaps erfüllen in der Regel dennoch nicht die speziellen Wirksamkeitsdefinitionen des IAS 39. Marktwertschwankungen aus diesen Geschäften sind daher unmittelbar in der Gewinn- und Verlustrechnung berücksichtigt.

## Vorräte

Der Posten Vorräte umfasst nicht reparaturfähige Ersatzteile, Roh-, Hilfs- und Betriebsstoffe sowie bezogene Waren und geleistete Anzahlungen auf Vorräte. Der Ansatz erfolgt zu Anschaffungskosten, die auf Basis von Durchschnittspreisen ermittelt werden, oder zu Herstellungskosten. Die Herstellungskosten umfassen alle direkt dem Herstellungsprozess zurechenbaren Kosten einschließlich der nach IAS 23 zu berücksichtigenden Fremdkapitalkosten sowie angemessene Teile der fertigungsbezogenen Gemeinkosten. Die Bewertung zum Bilanzstichtag erfolgt zum jeweils niedrigeren Betrag aus Anschaffungs-/Herstellungskosten einerseits und realisierbarem Nettoveräußerungspreis abzüglich noch anfallender Kosten andererseits. Bei der Ermittlung der Herstellungskosten wurde ein Beschäftigungsgrad von durchschnittlich 95 Prozent berücksichtigt. Dabei wird grundsätzlich der Nettoveräußerungspreis des Endprodukts zu Grunde gelegt.

## Zum Verkauf stehende Vermögenswerte

Einzelne, ehemals langfristige Vermögenswerte oder Gruppen von Vermögenswerten, deren Verkauf innerhalb der nächsten zwölf Monate zu erwarten ist, sind mit dem niedrigeren Betrag aus fortgeschriebenem Buchwert zum Umgliederungszeitpunkt beziehungsweise erzielbarem Nettoveräußerungswert aktiviert.

## Rückstellungen

Die Bewertung der Pensionsrückstellungen beruht auf dem in IAS 19 vorgeschriebenen Anwartschafts-Barwertverfahren für leistungsorientierte Altersversorgungspläne. Der bilanziellen Bewertung der Verpflichtung liegen verschiedene Schätzannahmen zu Grunde.

Dabei sind insbesondere Annahmen über den langfristigen Gehalts- und Rentenentwicklungstrend sowie die durchschnittliche Lebenserwartung zu treffen. Die Annahmen zum Gehalts- und Rententrend stützen sich auf in der Vergangenheit beobachtete Entwicklungen, berücksichtigen das länderspezifische Zins- und Inflationsniveau und die jeweiligen Arbeitsmarktentwicklungen. Basis für die Schätzung der durchschnittlichen Lebenserwartung bilden anerkannte biometrische Rechnungsgrundlagen.

Der für die Abzinsung der künftigen Zahlungsverpflichtungen verwendete Zinssatz ist der länderspezifische Marktzinssatz für risikoadäquate langfristige Geldanlagen mit einer vergleichbaren Laufzeit.

Die erwartete langfristige Entwicklung eines vorhandenen Planvermögens wird ebenfalls länderspezifisch und in Abhängigkeit von der Fondsstruktur sowie unter Berücksichtigung historischer Erfahrungswerte festgelegt.

Veränderungen der Schätzannahmen von Jahr zu Jahr sowie Abweichungen zu den tatsächlichen Jahreseffekten sind in den versicherungsmathematischen Gewinnen/Verlusten abgebildet und werden, soweit ihre Höhe 10 Prozent des höheren Werts aus Verpflichtung und Planvermögen übersteigt, über die Restdienstzeit der Anspruchsberechtigten ratierlich über die Gewinn- und Verlustrechnung amortisiert. Mit der Anwendung der 10-Prozent-Korridor-Regel werden von Jahr zu Jahr auftretende Schwankungen in Bilanz und Gewinn- und Verlustrechnung vermieden.

Die zum 31. Dezember 2010 nicht bilanzierten versicherungsmathematischen Verluste betragen 1.416 Mio. EUR (Vorjahr: 866 Mio. EUR), 15 Mio. EUR (Vorjahr: 21 Mio. EUR) wurden im Geschäftsjahr 2010 über den Personalaufwand amortisiert.

Sonstige Rückstellungen sowie Steuerrückstellungen (effektive Ertragsteuerverpflichtungen) werden gebildet, wenn eine aus einem vergangenen Ereignis resultierende Verpflichtung gegenüber Dritten besteht, die künftig wahrscheinlich zu einem Vermögensabfluss führt und sich dieser zuverlässig schätzen lässt. Konnte keine Rückstellung gebildet werden, weil eines der genannten Kriterien nicht erfüllt war, sind die entsprechenden Verpflichtungen unter den Eventualschulden ausgewiesen.

Die Rückstellungshöhe wird durch den Betrag determiniert, der die höchste Eintrittswahrscheinlichkeit aufweist.

Rückstellungen für Verpflichtungen, die voraussichtlich nicht bereits im Folgejahr zu einer Vermögensbelastung führen, werden in Höhe des Barwerts des erwarteten Vermögensabflusses unter Berücksichtigung absehbarer Preissteigerungen gebildet.

Der Wertansatz der Rückstellungen wird zu jedem Bilanzstichtag überprüft. Rückstellungen in Fremdwährung sind zum Stichtagskurs umgerechnet.

### **Finanzielle Verbindlichkeiten**

Verbindlichkeiten aus Finanzierungsleasingverträgen werden zum Zeitpunkt des Vertragsabschlusses mit dem Barwert der Leasingraten, übrige finanzielle Verbindlichkeiten zum beizulegenden Zeitwert angesetzt. Dabei werden nicht zum Marktzins verzinsten Verbindlichkeiten zum Barwert passiviert.

In den Folgeperioden erfolgt die Bewertung zu fortgeschriebenen Anschaffungskosten unter Berücksichtigung der Effektivzinsmethode bei über- oder unterverzinslichen Verbindlichkeiten.

In Fremdwährung valutierende Verbindlichkeiten werden zum Stichtagskurs bewertet.

Für aktienbasierte Verbindlichkeiten aus Führungskräfte-Optionsprogrammen wurde eine nach IFRS 2 „Anteilsbasierte Vergütung“ vorgeschriebene Bewertung zu beizulegenden Zeitwerten durchgeführt. Die Ermittlung des beizulegenden Zeitwerts erfolgte mit Hilfe der finanzmathematischen Methode der Monte-Carlo-Simulation.

Die Verpflichtung wurde auf Basis des so ermittelten beizulegenden Zeitwerts unter Berücksichtigung der noch verbliebenen Programmlaufzeit passiviert.

Einzelheiten der in das Modell eingeflossenen Prämissen und der Ausgestaltung der Optionsprogramme finden sich in „Erläuterung 41“ ab [S. 197](#).

### **Verbindlichkeiten aus nicht ausgeflogenen Flugdokumenten**

Verkaufte Flugdokumente werden bis zu ihrer Ausnutzung als Verpflichtung aus nicht ausgeflogenen Flugdokumenten passiviert. Nach Abflug eines Passagier-Coupons oder eines Luftfrachtbriefs wird der passivierte Betrag erfolgswirksam vereinnahmt und als „Erlöse aus Verkehrsleistungen“ in der Gewinn- und Verlustrechnung ausgewiesen. Coupons, die voraussichtlich nicht mehr abgeflogen werden, werden in Höhe ihres geschätzten Werts zum Jahresende ebenfalls erfolgswirksam als Erlöse aus den Verkehrsleistungen vereinnahmt. Die Schätzung stützt sich dabei auf statistische Vergangenheitsdaten.

### **Verpflichtungen aus Meilenbonusprogrammen**

Der Bewertung der Verpflichtungen aus Meilenbonusprogrammen liegen verschiedene Schätzannahmen zu Grunde.

Gemäß IFRIC 13 „Kundenbindungsprogramme“ werden angesammelte, noch nicht ausgenutzte Bonusmeilen, soweit sie voraussichtlich auf Flügen von Fluggesellschaften des Lufthansa Konzerns ausgenutzt werden, nach der Deferred Revenue-Methode zum beizulegenden Zeitwert abgegrenzt. Dabei werden die beizulegenden Zeitwerte der auf eigenen Flügen angesammelten Meilen unter den passiven Rechnungsabgrenzungsposten und die bei Dritten angesammelten Prämienansprüche unter den sonstigen nicht finanziellen Verbindlichkeiten ausgewiesen. Der beizulegende Zeitwert bemisst sich dabei nach dem Wert, zu dem die Flugprämie separat veräußert werden könnte, d. h. den durchschnittlichen Erlösen unter Berücksichtigung von Buchungsklasse und Verkehrsgebiet.

Meilen, die voraussichtlich bei Partnern ausgenutzt werden, werden mit dem an den jeweiligen Partner zu entrichtenden Preis je Meile bewertet.

## Konzernanhang

Erläuterungen zur Konsolidierung und Bilanzierung

Erläuterungen zur Konzern-Gewinn- und Verlustrechnung

Für wahrscheinlich verfallende Meilen wird keine Abgrenzung gebildet. Für die Schätzung der Anzahl wahrscheinlich verfallender Meilen wird auf die bisher beobachtete Verfallsquote unter Berücksichtigung aktueller Verfallsregeln zurückgegriffen.

Zum 31. Dezember 2010 waren 198 Mrd. Meilen zu bewerten. Die daraus resultierenden Verpflichtungen wurden mit 605 Mio. EUR (Vorjahr: 549 Mio. EUR) unter den sonstigen nicht finanziellen Verbindlichkeiten und mit 944 Mio. EUR (Vorjahr: 887 Mio. EUR) unter den passiven Rechnungsabgrenzungsposten erfasst, „Erläuterung 41“ auf [S. 197](#) und „Erläuterung 43“ auf [S. 199](#).

### Finanzielle Garantien

Wird eine Inanspruchnahme aus Dritten gewährten finanziellen Garantiezusagen wahrscheinlich, so wird die Verpflichtung in Höhe des beizulegenden Zeitwerts passiviert. Für die Folgebewertung wird der jeweils höhere Wert aus Erstbewertung beziehungsweise der bestmöglichen Schätzung der Ausgabe, die zur Erfüllung der Verpflichtung am Bilanzstichtag erforderlich wäre, angesetzt.

### Latente Steuerposten

Latente Steuern werden gemäß IAS 12 für Ansatz- und Bewertungsunterschiede zwischen den Steuerbilanzen der Einzelgesellschaften und dem Konzernabschluss gebildet. Steuerliche Verlustvorträge, die wahrscheinlich zukünftig genutzt werden können, werden in Höhe des latenten Steueranspruchs aktiviert. Zur Beurteilung der Frage, ob latente Steueransprüche aus steuerlichen Verlustvorträgen nutzbar, d. h. werthaltig sind, wird auf die Ergebnisplanungen der Gesellschaft sowie konkret umsetzbare Steuerstrategien zurückgegriffen.

Die Höhe der insgesamt zum 31. Dezember 2010 nicht aktivierbaren latenten Steueransprüche aus steuerlichen Verlustvorträgen beträgt 564 Mio. EUR (Vorjahr: 834 Mio. EUR).

Die latenten Steuersätze im Ausland betrugen im Geschäftsjahr 2010 wie im Vorjahr 5 bis 40 Prozent. Für die Bewertung der latenten Steuern werden die zum Abschlussstichtag gültigen beziehungsweise verabschiedeten relevanten Steuervorschriften herangezogen.

Latente Steuerforderungen und -verbindlichkeiten werden saldiert, wenn ein einklagbarer entsprechender Rechtsanspruch auf Aufrechnung besteht und wenn die latenten Steuerforderungen und -verbindlichkeiten gegen dieselbe Steuerbehörde bestehen.

## Erläuterungen zur Konzern-Gewinn- und Verlustrechnung

### 3 Erlöse aus den Verkehrsleistungen

#### Verkehrserlöse nach Tätigkeitsbereichen

| in Mio. €       | 2010          | 2009          |
|-----------------|---------------|---------------|
| Passage         | 19 186        | 15 430        |
| Fracht und Post | 3 082         | 2 174         |
|                 | <b>22 268</b> | <b>17 604</b> |
| Liniendienste   | 21 829        | 17 262        |
| Charter         | 439           | 342           |
|                 | <b>22 268</b> | <b>17 604</b> |

Von den Fracht- und Posterlösen sind 2.633 Mio. EUR im Geschäftsfeld Logistik erwirtschaftet worden. Die Fracht- und Posterlöse der SWISS, der Austrian Airlines, der British Midland sowie der Germanwings aus der Vermarktung der Frachträume auf Passagierflügen in Höhe von 449 Mio. EUR (Vorjahr: 330 Mio. EUR) sind in der Segmentberichterstattung in den übrigen Umsatzerlösen des Geschäftsfelds Passage Airline Gruppe enthalten.

### 4 Andere Betriebserlöse

#### Aufteilung nach Tätigkeitsbereichen

| in Mio. €                     | 2010         | 2009         |
|-------------------------------|--------------|--------------|
| Technikleistungen             | 2 207        | 2 162        |
| Catering-Leistungen           | 1 539        | 1 450        |
| Reiseleistungen (Provisionen) | 183          | 133          |
| EDV-Leistungen                | 248          | 254          |
| Abfertigungsleistungen        | 98           | 77           |
| Sonstige Leistungen           | 781          | 603          |
|                               | <b>5 056</b> | <b>4 679</b> |

Die Technikleistungen stellen den größten Teil der Außenumsätze des Geschäftsfelds Technik dar. Weitere Umsätze des Geschäftsfelds Technik aus Materialverkäufen, Material- und Triebwerksverleih sowie logistische Leistungen sind den sonstigen Leistungen zugeordnet.



Die als Catering-Leistungen bezeichneten Umsatzerlöse wurden ausschließlich vom Geschäftsfeld Catering erbracht. Insbesondere von der LSG Food & Nonfood Handel GmbH und der LSG Airport Gastronomiegesellschaft mbH werden im Geschäftsfeld Catering außerdem Umsätze erwirtschaftet, die nicht Catering-Leistungen betreffen, sondern unter den sonstigen Leistungen ausgewiesen werden.

Unter den EDV-Leistungen sind die Umsätze des Geschäftsfelds IT Services abgebildet.

Die anderen Betriebserlöse enthalten auch Erlöse aus unfertigen Leistungen im Zusammenhang mit längerfristigen Fertigungsbeziehungsweise Dienstleistungsaufträgen in Höhe von 188 Mio. EUR (Vorjahr: 230 Mio. EUR). Diese Erlöse wurden in Höhe der geschätzten, dem Fertigstellungsgrad entsprechenden anteiligen Auftragsenerlöse erfasst. Wenn das Ergebnis des gesamten Auftrags nicht verlässlich geschätzt werden konnte, wurden die angefallenen Auftragskosten angesetzt. Liegen in diesen Fällen die erzielbaren Erlöse unter den Auftragskosten, werden entsprechende Wertberichtigungen vorgenommen. Der Fertigstellungsgrad wurde anhand des Verhältnisses der zum Bilanzstichtag angefallenen Auftragskosten zu den geschätzten gesamten Auftragskosten abgeleitet.

Kumulativ, d. h. unter Berücksichtigung in Vorjahren erfasster Beträge, ergeben sich Kosten für unfertige Aufträge in Höhe von 213 Mio. EUR (Vorjahr: 229 Mio. EUR). Die hierauf verrechneten Gewinne betragen 36 Mio. EUR (Vorjahr: 50 Mio. EUR). Von Kunden bereits angezahlt wurden 201 Mio. EUR (Vorjahr: 233 Mio. EUR). Unfertige Aufträge mit aktivischem Saldo werden – soweit erforderlich – um Wertberichtigungen vermindert – unter den Forderungen aus Lieferungen und Leistungen („Erläuterung 28“ auf [S. 187](#)) ausgewiesen. Unfertige Aufträge, bei denen die erhaltenen Anzahlungen die Kosten zuzüglich gegebenenfalls verrechneter Gewinnanteile übersteigen, sind als erhaltene Anzahlungen („Erläuterung 43“ auf [S. 199](#)) passiviert. Von Kunden wurden keine Beträge einbehalten.

## 5 Bestandsveränderungen und andere aktivierte Eigenleistungen

| Bestandsveränderungen und andere aktivierte Eigenleistungen                  |            |            |
|------------------------------------------------------------------------------|------------|------------|
| in Mio. €                                                                    | 2010       | 2009       |
| Erhöhung / Verminderung des Bestands an fertigen und unfertigen Erzeugnissen | 5          | –4         |
| Andere aktivierte Eigenleistungen                                            | 160        | 229        |
|                                                                              | <b>165</b> | <b>225</b> |

## 6 Sonstige betriebliche Erträge

### Sonstige betriebliche Erträge

| in Mio. €                                                                                                                      | 2010         | 2009         |
|--------------------------------------------------------------------------------------------------------------------------------|--------------|--------------|
| Erträge aus dem Abgang von Sachanlagevermögen                                                                                  | 65           | 24           |
| Erträge aus dem Abgang von langfristigen finanziellen Vermögenswerten, die der Kategorie „Zur Veräußerung verfügbar“ angehören | 181          | 27           |
| Erträge aus der Wertaufholung von Anlagevermögen                                                                               | 39           | 14           |
| Kursgewinne aus Fremdwährungsposten                                                                                            | 990          | 1 062        |
| Auflösung von Rückstellungen und Abgrenzungen                                                                                  | 234          | 187          |
| Provisionserträge                                                                                                              | 185          | 165          |
| Weiterberechnete Gebühren für EDV-Vertriebssysteme                                                                             | 8            | 42           |
| Auflösung von Wertberichtigungen auf Forderungen                                                                               | 52           | 43           |
| Personalüberlassung                                                                                                            | 47           | 42           |
| Schadensersatzleistungen                                                                                                       | 67           | 132          |
| Mieterträge                                                                                                                    | 25           | 20           |
| Sublease-Erträge Fluggerät                                                                                                     | 30           | 29           |
| Erträge aus dem Abgang von kurzfristigen Finanzinvestitionen, die der Kategorie „Zur Veräußerung verfügbar“ angehören          | 29           | 32           |
| Passivischer Unterschiedsbetrag (Badwill)                                                                                      | 2            | 86           |
| Übrige betriebliche Erträge                                                                                                    | 701          | 626          |
|                                                                                                                                | <b>2 655</b> | <b>2 531</b> |

Die Erträge aus dem Abgang von langfristigen finanziellen Vermögenswerten betreffen mit 94 Mio. EUR realisierte Gewinne aus der Übertragung von 8,5 Prozent der Anteile an Fraport in den Lufthansa Pension Trust sowie Buchgewinne aus dem Verkauf von 6,2 Mio. Aktien der Amadeus IT Holding S.A. in Höhe von 67 Mio. EUR.

Erträge aus der Wertaufholung von Anlagevermögen beinhalten unter anderem 15 Mio. EUR aus einer zuvor wertberichtigten Darlehensforderung sowie 9 Mio. EUR wechsellkursbedingte Aufwertungen von Ausleihungen in Fremdwährung.

Die Kursgewinne aus Fremdwährungsposten enthalten im Wesentlichen Gewinne aus Kursveränderungen zwischen Entstehungszeitpunkt (Monatsdurchschnittskurs) und Zahlungszeitpunkt (Kassakurs) sowie Kursgewinne aus der Bewertung zum Stichtagskurs. Kursverluste aus diesen Vorgängen werden unter den sonstigen betrieblichen Aufwendungen („Erläuterung 10“ auf [S. 170](#)) ausgewiesen.

Die Rückstellungsaufösungen betreffen eine Vielzahl von in Vorjahren gebildeten und nicht vollständig verbrauchten Rückstellungen. Dagegen ist der Aufwand aus in Vorjahren nicht ausreichend gebildeten Rückstellungen der jeweiligen primären Aufwandsart zugeordnet.

In den Erträgen aus Schadensersatzleistungen sind in Höhe von 25 Mio. EUR Erträge aus Versicherungsleistungen im Zusammenhang mit einer im Juli 2010 verunglückten MD-11 der Lufthansa Cargo enthalten. Im Vorjahr waren hier Ausgleichszahlungen für das Internetsystem FlyNet sowie Erträge aus Versicherungsleistungen im Zusammenhang mit einem Schadensfall der LSG Sky Chefs in Skandinavien von insgesamt 69 Mio. EUR erfasst.

Aus der Wertveränderung des im Rahmen des Unternehmenserwerbs der AUA begebenen Besserungsscheins ergeben sich im Geschäftsjahr Erträge von 2 Mio. EUR.

Die übrigen betrieblichen Erträge enthalten Posten, die sich keiner der bereits genannten Positionen zuordnen lassen, unter anderem Erträge aus Schulungsleistungen, Reisemanagement und sonstige Serviceleistungen des Konzerns.

## 7 Materialaufwand

| Materialaufwand                                                                       |               |               |
|---------------------------------------------------------------------------------------|---------------|---------------|
| in Mio. €                                                                             | 2010          | 2009          |
| Betriebsstoffe für Flugzeuge                                                          | 5 158         | 3 645         |
| Übrige Roh-, Hilfs- und Betriebsstoffe                                                | 2 175         | 2 028         |
| Bezogene Waren                                                                        | 396           | 374           |
| <b>Aufwendungen für Roh-, Hilfs- und Betriebsstoffe und für bezogene Waren gesamt</b> | <b>7 729</b>  | <b>6 047</b>  |
| Gebühren                                                                              | 4 582         | 3 762         |
| Charteraufwendungen                                                                   | 671           | 649           |
| Fremdleistungen Technik                                                               | 1 112         | 1 066         |
| Borddienstleistungen                                                                  | 340           | 250           |
| Operating Lease                                                                       | 246           | 281           |
| Fremdleistungen EDV                                                                   | 117           | 106           |
| Übrige bezogene Leistungen                                                            | 573           | 539           |
| <b>Aufwendungen für bezogene Leistungen gesamt</b>                                    | <b>7 641</b>  | <b>6 653</b>  |
|                                                                                       | <b>15 370</b> | <b>12 700</b> |

## 8 Personalaufwand

| Personalaufwand                                         |              |              |
|---------------------------------------------------------|--------------|--------------|
| in Mio. €                                               | 2010         | 2009         |
| Löhne und Gehälter                                      | 5 444        | 4 909        |
| Soziale Abgaben                                         | 787          | 678          |
| Aufwendungen für Altersversorgung und für Unterstützung | 428          | 409          |
|                                                         | <b>6 659</b> | <b>5 996</b> |

Als Aufwendungen für Altersversorgung werden im Wesentlichen Zuführungen zu den Pensionsrückstellungen („Erläuterung 36“ ab [S. 191](#)) ausgewiesen.

## Mitarbeiter

|                            | Im Jahres-<br>durchschnitt<br>2010 | Im Jahres-<br>durchschnitt<br>2009 | Zum<br>31.12.2010 | Zum<br>31.12.2009 |
|----------------------------|------------------------------------|------------------------------------|-------------------|-------------------|
| Bodenpersonal              | 81 803                             | 80 123                             | 81 097            | 82 645            |
| Bordpersonal<br>im Einsatz | 33 770                             | 30 759                             | 34 319            | 33 288            |
| Personal in<br>Ausbildung  | 1 493                              | 1 438                              | 1 603             | 1 588             |
|                            | <b>117 066</b>                     | <b>112 320</b>                     | <b>117 019</b>    | <b>117 521</b>    |

Der Jahresdurchschnitt wird unter Berücksichtigung des Zeitpunkts der Erst- beziehungsweise Entkonsolidierung zeitanteilig berechnet.

## 9 Abschreibungen

Eine Aufteilung der Abschreibungen auf immaterielle Vermögenswerte, Flugzeuge und übrige Sachanlagen ist den Erläuterungen der jeweiligen Position zu entnehmen. Die Gesamtabschreibungen betragen 1.682 Mio. EUR (Vorjahr: 1.475 Mio. EUR).

Im Geschäftsjahr 2010 wurden außerplanmäßige Abschreibungen in Höhe von 72 Mio. EUR vorgenommen. Sie entfallen mit 47 Mio. EUR auf insgesamt 30 Flugzeuge, die zum Verkauf stehen beziehungsweise nach den aktuellen Unternehmensplanungen sukzessive freigestellt werden und zum Nettoveräußerungswert beziehungsweise dem Barwert der erwarteten Nettomittelzuflüsse angesetzt wurden. Unter den sonstigen betrieblichen Aufwendungen sind zusätzlich Wertminderungen auf Flugzeuge und reparaturfähige Flugzeugersatzteile in Höhe von 16 Mio. EUR erfasst, die in der Konzernbilanz unter den zum Verkauf stehenden Vermögenswerten ausgewiesen werden. Weitere außerplanmäßige Abschreibungen resultieren aus dem Verlust einer MD-11 der Cargo im Juli 2010 (9 Mio. EUR) sowie in Höhe von 15 Mio. EUR aus nicht mehr werthaltigen immateriellen Vermögenswerten.

Im Geschäftsjahr 2009 wurden außerplanmäßige Abschreibungen in Höhe von 88 Mio. EUR vorgenommen. Hiervon entfielen 80 Mio. EUR auf insgesamt 33 Flugzeuge, die zum Verkauf standen beziehungsweise nach den aktuellen Unternehmensplanungen sukzessive freigestellt werden sollten und zum Nettoveräußerungswert beziehungsweise dem Barwert der erwarteten Nettomittelzuflüsse angesetzt wurden. Weitere 8 Mio. EUR betrafen immaterielle Vermögenswerte und sonstige Sachanlagen, die auf den Nettoveräußerungswert abzuschreiben waren, weil keine weitere Nutzung mehr zu erwarten war.

Im Geschäftsjahr 2010 und 2009 waren aufgrund der jährlich durchzuführenden Werthaltigkeitstests keine außerplanmäßigen Abschreibungen auf Firmenwerte vorzunehmen.

Weitere Angaben zu den Werthaltigkeitstests enthält „Erläuterung 16“ ab [S. 173](#).

## 10 Sonstige betriebliche Aufwendungen

### Sonstige betriebliche Aufwendungen

| in Mio. €                                                                                               | 2010         | 2009         |
|---------------------------------------------------------------------------------------------------------|--------------|--------------|
| Verkaufsprovisionen für Agenturen                                                                       | 500          | 447          |
| Mieten und Erhaltungsaufwendungen                                                                       | 789          | 717          |
| Personalabhängiger Aufwand                                                                              | 780          | 777          |
| Aufwendungen für EDV-Vertriebssysteme                                                                   | 343          | 339          |
| Werbung und Verkaufsförderung                                                                           | 322          | 301          |
| Kursverluste aus Fremdwährungsposten                                                                    | 1 073        | 797          |
| Prüfungs-, Beratungs- und Rechtsaufwendungen                                                            | 146          | 136          |
| Sonstige Serviceleistungen                                                                              | 130          | 110          |
| Versicherungsaufwendungen für den Flugbetrieb                                                           | 64           | 52           |
| Wertberichtigungen auf Forderungen                                                                      | 110          | 129          |
| Aufwand für Nachrichtenübermittlung                                                                     | 59           | 54           |
| Sonstige Steuern                                                                                        | 63           | 67           |
| Verluste aus Abgängen von Sachanlagevermögen                                                            | 37           | 24           |
| Verluste aus kurzfristigen Finanzinvestitionen, die der Kategorie „Zur Veräußerung verfügbar“ angehören | 15           | 27           |
| Beratungskosten in Zusammenhang mit finanziellen Transaktionen                                          | 0*           | 14           |
| Verluste aus dem Abgang von übrigem Umlaufvermögen                                                      | 0*           | –            |
| Übrige betriebliche Aufwendungen                                                                        | 762          | 606          |
|                                                                                                         | <b>5 193</b> | <b>4 597</b> |

\* Gerundet unter 1 Mio. EUR.

Die Kursverluste aus Fremdwährungsposten enthalten im Wesentlichen Verluste aus Kursveränderungen zwischen Entstehungszeitpunkt (Monatsdurchschnittskurs) und Zahlungszeitpunkt (Kassakurs) sowie Kursverluste aus der Bewertung zum Stichtagskurs, „Erläuterung 6“ auf [S. 168](#).

Verluste aus Abgängen von Sachanlagevermögen resultieren mit insgesamt 11 Mio. EUR aus dem Verkauf von einem Airbus A310, drei Airbus A300, sechs Canadair Regional Jet 200 sowie sechs ATR 42-500.

## 11 Beteiligungsergebnis

### Beteiligungsergebnis

| in Mio. €                                                  | 2010       | 2009      |
|------------------------------------------------------------|------------|-----------|
| Ergebnis aus at equity bewerteten Joint Ventures           | 28         | 5         |
| Ergebnis aus at equity bewerteten assoziierten Unternehmen | 18         | 0*        |
| <b>Ergebnis aus at equity bewerteten Finanzanlagen</b>     | <b>46</b>  | <b>5</b>  |
| Dividenden aus sonstigen Joint Ventures                    | 2          | 3         |
| Dividenden aus sonstigen assoziierten Unternehmen          | 16         | 7         |
| Erträge aus Gewinnabführungsverträgen                      | 33         | 27        |
| Aufwendungen aus Verlustübernahme                          | –10        | –5        |
| Dividenden aus übrigen Beteiligungen                       | 17         | 21        |
| <b>Übriges Beteiligungsergebnis</b>                        | <b>58</b>  | <b>53</b> |
|                                                            | <b>104</b> | <b>58</b> |

\* Gerundet unter 1 Mio. EUR.

Erträge und Aufwendungen aus Gewinnabführungsverträgen sind einschließlich Organsteuerumlagen/-gutschriften ausgewiesen.

Das Ergebnis aus at equity bewerteten Beteiligungen stieg insbesondere aufgrund der teilweise erheblich verbesserten Beteiligungserträge in den Geschäftsfeldern Logistik und Technik.

## 12 Zinsergebnis

### Zinsergebnis

| in Mio. €                                                                   | 2010        | 2009        |
|-----------------------------------------------------------------------------|-------------|-------------|
| Erträge aus anderen Wertpapieren und Ausleihungen des Finanzanlagevermögens | 6           | 10          |
| Sonstige Zinsen und ähnliche Erträge                                        | 192         | 171         |
| <b>Zinserträge</b>                                                          | <b>198</b>  | <b>181</b>  |
| Zinsaufwand Pensionsverpflichtungen                                         | –182        | –183        |
| Zinsaufwand sonstige Rückstellungen                                         | –42         | –29         |
| Zinsen und ähnliche Aufwendungen                                            | –331        | –294        |
| <b>Zinsaufwendungen</b>                                                     | <b>–555</b> | <b>–506</b> |
|                                                                             | <b>–357</b> | <b>–325</b> |

Das nach der Effektivzinsmethode ermittelte Zinsergebnis aus Finanzinstrumenten beträgt –133 Mio. EUR (Vorjahr: –113 Mio. EUR) und stammt ausschließlich aus Finanzinstrumenten, die nicht zum beizulegenden Zeitwert über die GuV klassifiziert sind.

### 13 Übrige Finanzposten

#### Übrige Finanzposten

| in Mio. €                                                                                                                                    | 2010      | 2009        |
|----------------------------------------------------------------------------------------------------------------------------------------------|-----------|-------------|
| Abschreibungen auf zur Veräußerung verfügbare finanzielle Vermögenswerte                                                                     | -5        | -145        |
| Abschreibungen auf Ausleihungen                                                                                                              | -11       | -21         |
| Gewinne/Verluste aus der Veränderung der Zeitwerte von gesicherten Grundgeschäften                                                           | -43       | 3           |
| Gewinne/Verluste aus der Veränderung der beizulegenden Zeitwerte von Derivaten, die der Sicherung von Zeitwerten dienen                      | 43        | 5           |
| Ergebnis aus der Bewertung von Derivaten, die als Handelsgeschäfte „Erfolgswirksam zum beizulegenden Zeitwert bewertet“ klassifiziert wurden | 25        | -75         |
| Ineffektiver Teil von Derivaten, die der Sicherung von Cashflows dienen                                                                      | -18       | 95          |
|                                                                                                                                              | <b>-9</b> | <b>-138</b> |

Aufgrund der ab 1. Januar 2010 rückwirkend anzuwendenden Änderung des IAS 39, wonach die Veränderungen der Zeitwerte von zur Sicherung eingesetzten Optionen im Finanzergebnis zu erfassen sind, wurde das Vorjahresergebnis um 95 Mio. EUR höher ausgewiesen.

Im Vorjahr war unter den übrigen Finanzposten eine Wertberichtigung auf die Fraport-Anteile in Höhe von 140 Mio. EUR erfasst.

### 14 Ertragsteuern

#### Ertragsteuern

| in Mio. €                  | 2010        | 2009        |
|----------------------------|-------------|-------------|
| Tatsächliche Ertragsteuern | 221         | 35          |
| Latente Steuern            | -386        | -147        |
|                            | <b>-165</b> | <b>-112</b> |

Die tatsächlichen Ertragsteuern für das Jahr 2010 enthalten die Körperschaftsteuer, den Solidaritätszuschlag, die Gewerbesteuer sowie sonstige im Ausland angefallene Ertragsteuern in Höhe von insgesamt 112 Mio. EUR (Vorjahr: 38 Mio. EUR). Darüber hinaus entfallen Steueraufwendungen von 109 Mio. EUR (Vorjahr: Steuererträge von 3 Mio. EUR) auf Vorjahre.

Die folgende Tabelle zeigt eine Überleitungsrechnung vom erwarteten zum tatsächlich ausgewiesenen Steueraufwand. Zur Ermittlung des erwarteten Steueraufwands wird das Ergebnis vor Ertragsteuern mit einem Steuersatz der Konzernobergesellschaft von 25 Prozent (Vorjahr: 25 Prozent) multipliziert. Dieser setzt sich aus einem Steuersatz von 15 Prozent (Vorjahr: 15 Prozent) für Körperschaftsteuer und 10 Prozent für Gewerbeertragsteuer/Solidaritätszuschlag zusammen.

|                                                                                                      | 2010                |                | 2009                |                |
|------------------------------------------------------------------------------------------------------|---------------------|----------------|---------------------|----------------|
| in Mio. €                                                                                            | Bemessungsgrundlage | Steuer-aufwand | Bemessungsgrundlage | Steuer-aufwand |
| Erwartete(r) Ertragsteueraufwand/-erstattung                                                         | 978                 | 244            | -134                | -34            |
| Steuerfreie Einnahmen, sonstige Abzugsbeträge und permanente Differenzen                             | -                   | -133           | -                   | -113           |
| Bei Beteiligungen angefallene Gewinne, die nicht mit latenten Steuern belastet sind                  | -                   | -16            | -                   | -5             |
| Abweichung lokale Steuern vom latenten Steuersatz der Konzernobergesellschaft*                       | -                   | -46            | -                   | 15             |
| Nichtansatz steuerlicher Verlustvorträge bzw. Nichtansatz von aktiven latenten Steuern bei Verlusten | -                   | -213           | -                   | 27             |
| Sonstige                                                                                             | -                   | -1             | -                   | -2             |
| <b>Ausgewiesener Ertragsteueraufwand</b>                                                             | <b>-</b>            | <b>-165</b>    | <b>-</b>            | <b>-112</b>    |

\* Inkl. im tatsächlichen Steueraufwand enthaltener periodenfremder Steuern.

In der Zeile „Nichtansatz steuerlicher Verlustvorträge beziehungsweise Nichtansatz von aktiven latenten Steuern bei Verlusten“ betreffen 190 Mio. EUR Erträge aus bisher nicht aktivierungsfähigen steuerlichen Verlustvorträgen der LSG Sky Chefs USA-Gruppe, die im Zuge der finanziellen Umstrukturierung des Geschäftsfelds Catering steuerwirksam verrechnet werden konnten.

Im Rahmen der Equity-Bewertung werden latente Steuern auf thesaurierte Gewinne der Beteiligungen in Höhe der bei Ausschüttung fälligen Steuern gebildet.

Auf temporäre Unterschiede in Anteilswerten an Tochterunternehmen zwischen Steuerbilanz und Konzernabschluss wurden in Höhe von 21 Mio. EUR (Vorjahr: 9 Mio. EUR) keine latenten Steuerschulden bilanziert, da eine Veräußerung der Gesellschaften in absehbarer Zeit nicht wahrscheinlich ist.

Im Geschäftsjahr 2010 wurden passive latente Steuern erfolgsneutral in Höhe von 82 Mio. EUR (Vorjahr: 92 Mio. EUR) gebildet.

Die Steuerabgrenzungen 2010 und 2009 sind den folgenden Sachverhalten zuzuordnen:

|                                                     | 31.12.2010 |            | 31.12.2009 |            |
|-----------------------------------------------------|------------|------------|------------|------------|
| in Mio. €                                           | aktivisch  | passivisch | aktivisch  | passivisch |
| Verlust- bzw. Zinsvorträge und Steuergutschriften   | 89         | –          | 205        | –          |
| Pensionsrückstellungen                              | 342        | –          | 238        | –          |
| Finanzierungsleasing Fluggeräte                     | –          | –          | –          | 2          |
| Immaterielles und Sachanlagevermögen                | –          | 684        | –          | 815        |
| Finanzanlagevermögen                                | 112        | –          | 152        | –          |
| Marktbewertung Finanzinstrumente                    | 10         | –          | –          | 28         |
| Drohverlustrückstellung                             | 40         | –          | 37         | –          |
| Forderungen/Verbindlichkeiten/Übrige Rückstellungen | –          | 315        | –          | 500        |
| Saldierungen                                        | –594       | –594       | –682       | –682       |
| Sonstiges                                           | 83         | –          | 85         | –          |
|                                                     | <b>82</b>  | <b>405</b> | <b>35</b>  | <b>663</b> |

Es wird erwartet, dass sich die aus Forderungen/Verbindlichkeiten/übrigen Rückstellungen bestehenden Steuerabgrenzungen innerhalb von zwölf Monaten nach dem Bilanzstichtag umkehren werden.

Neben den aktivierten latenten Steueransprüchen aus Verlustbeziehungsweise Zinsvorträgen und Steuergutschriften bestehen noch steuerliche Verlustvorträge und temporäre Differenzen in Höhe von 2.737 Mio. EUR (Vorjahr: 3.742 Mio. EUR), für die keine aktiven latenten Steuern gebildet werden konnten.

Von den nicht aktivierten steuerlichen Verlustvorträgen sind 1 Mio. EUR nur bis 2014, 63 Mio. EUR bis 2015, 2 Mio. EUR bis 2016, 1 Mio. EUR bis 2017, 5 Mio. EUR bis 2018, 1 Mio. EUR bis 2019 und 2.035 Mio. EUR bis nach 2019 nutzbar. Insgesamt wurden 564 Mio. EUR (Vorjahr: 834 Mio. EUR) aktive latente Steueransprüche nicht aktiviert.

## 15 Ergebnis je Aktie

Das „unverwässerte“ Ergebnis je Aktie wird als Quotient aus dem Konzernergebnis und dem gewichteten Durchschnitt der während des Geschäftsjahres in Umlauf befindlichen Aktienzahl ermittelt. Zur Ermittlung der durchschnittlichen Aktienzahl wurden die für die Mitarbeiterbeteiligungsprogramme zurückgekauften und wieder ausgegebenen Aktien in der Berechnung zeitanteilig berücksichtigt. Zur Ermittlung des „verwässerten“ Ergebnisses je Aktie werden dem Durchschnitt außerdem die Stammaktien zugerechnet, die bei Ausübung der Wandlungsrechte aus der am 4. Januar 2002 begebenen Wandelanleihe der Deutschen Lufthansa AG maximal ausgegeben werden könnten. Gleichzeitig wird das Konzernergebnis um die für die Wandelanleihe aufgewendeten Beträge erhöht. Nach einer im Geschäftsjahr 2010 erfolgten teilweisen Tilgung der Wandelanleihe betrug die aus einer möglichen Wandlung entstehende maximale Aktienzahl zum Jahresende 336.404 Aktien (Vorjahr: 2.524.622 Aktien).

|                                             | 2010        | 2009         |
|---------------------------------------------|-------------|--------------|
| <b>„Unverwässertes“ Ergebnis je Aktie</b> € | <b>2,47</b> | <b>–0,07</b> |
| Konzernergebnis Mio. €                      | 1 131       | –34          |
| Gewichteter Durchschnitt der Aktienanzahl   | 457 934 014 | 457 875 372  |
| <b>„Verwässertes“ Ergebnis je Aktie</b> €   | <b>2,47</b> | <b>–0,07</b> |
| Konzernergebnis Mio. €                      | 1 131       | –34          |
| + Zinsaufwand Wandelanleihe Mio. €          | 0*          | +3           |
| – Laufende und latente Steuern Mio. €       | 0*          | –1           |
| Berichtigtes Periodenergebnis Mio. €        | 1 131       | –32          |
| Gewichteter Durchschnitt der Aktienanzahl   | 458 270 418 | 460 399 994  |

\* Gerundet unter 1 Mio. EUR.

Aufgrund der Änderung des IAS 39 und der damit verbundenen Anpassung der Vorjahreswerte hat sich das Ergebnis je Aktie des Jahres 2009 („unverwässert“ und „verwässert“) von –0,24 EUR je Aktie auf –0,07 EUR je Aktie erhöht.

Die Deutsche Lufthansa AG als Obergesellschaft des Konzerns weist für das Geschäftsjahr 2010 einen Bilanzgewinn von 275 Mio. EUR aus. Vorstand und Aufsichtsrat werden der Hauptversammlung am 3. Mai 2011 vorschlagen, diesen Bilanzgewinn in Höhe einer Dividende von 0,60 EUR je Aktie auszuschütten.

Im Geschäftsjahr 2010 wurde für das Geschäftsjahr 2009 keine Dividende ausgeschüttet.



## Erläuterungen zur Konzernbilanz

### AKTIVA

#### 16 Geschäfts- oder Firmenwerte sowie immaterielle Vermögenswerte mit einer unbestimmten Nutzungsdauer

| in Mio. €                        | Geschäfts- oder Firmenwerte aus der Konsolidierung | Immaterielle Vermögenswerte mit unbeschränkter Nutzungsdauer | Gesamt       |
|----------------------------------|----------------------------------------------------|--------------------------------------------------------------|--------------|
| Anschaffungskosten am 01.01.2009 | 895                                                | 226                                                          | 1 121        |
| Kumulierte Abschreibungen        | -300                                               | -                                                            | -300         |
| <b>Buchwert 01.01.2009</b>       | <b>595</b>                                         | <b>226</b>                                                   | <b>821</b>   |
| Währungsdifferenzen              | 1                                                  | -25                                                          | -24          |
| Zugänge Konsolidierungskreis     | -                                                  | 705                                                          | 705          |
| Zugänge                          | 3                                                  | 6                                                            | 9            |
| Umbuchungen                      | -                                                  | -                                                            | -            |
| Abgänge Konsolidierungskreis     | -                                                  | -                                                            | -            |
| Abgänge                          | -                                                  | -                                                            | -            |
| Zum Verkauf vorgesehen           | -                                                  | -                                                            | -            |
| Abschreibungen                   | -                                                  | -                                                            | -            |
| Zuschreibungen                   | -                                                  | -                                                            | -            |
| <b>Buchwert 31.12.2009</b>       | <b>599</b>                                         | <b>912</b>                                                   | <b>1 511</b> |
| Anschaffungskosten am 01.01.2010 | 899                                                | 912                                                          | 1 811        |
| Kumulierte Abschreibungen        | -300                                               | -                                                            | -300         |
| <b>Buchwert 01.01.2010</b>       | <b>599</b>                                         | <b>912</b>                                                   | <b>1 511</b> |
| Währungsdifferenzen              | 6                                                  | 65                                                           | 71           |
| Zugänge Konsolidierungskreis     | -                                                  | -                                                            | -            |
| Zugänge                          | -                                                  | 0*                                                           | 0*           |
| Umbuchungen                      | -                                                  | -                                                            | -            |
| Abgänge Konsolidierungskreis     | -                                                  | -                                                            | -            |
| Abgänge                          | -                                                  | -                                                            | -            |
| Zum Verkauf vorgesehen           | -                                                  | -                                                            | -            |
| Abschreibungen                   | -                                                  | -                                                            | -            |
| Zuschreibungen                   | -                                                  | -                                                            | -            |
| <b>Buchwert 31.12.2010</b>       | <b>605</b>                                         | <b>977</b>                                                   | <b>1 582</b> |
| Anschaffungskosten am 31.12.2010 | 906                                                | 977                                                          | 1 883        |
| Kumulierte Abschreibungen        | -301                                               | -                                                            | -301         |

\* Gerundet unter 1 Mio. EUR.

Alle Firmenwerte sowie immaterielle Vermögenswerte mit einer unbestimmten Nutzungsdauer wurden im Geschäftsjahr 2010 wie im Vorjahr einem regelmäßigen Werthaltigkeitstest nach IAS 36 unterzogen. Die Tests wurden auf der Ebene der kleinsten zahlungsmittelgenerierenden Einheit („CGU“) auf Basis des Nutzungswerts durchgeführt. Die aus dem Erwerb der Air Dolomiti S.p.A. und der Eurowings-Gruppe stammenden Firmenwerte wurden dabei auf der Ebene der Deutschen Lufthansa AG und ihrer Regionalpartner als kleinste unabhängige zahlungsmittelgenerierende Einheit getestet.

Die folgende Tabelle gibt einen Überblick über die getesteten Firmenwerte und die in die jeweiligen Werthaltigkeitstests eingeflossenen Annahmen.

| Bezeichnung der CGU                                  | Deutsche Lufthansa AG und Regionalpartner | SWISS Aviation Training Ltd. | LSG Sky Chefs USA-Gruppe | LSG Sky Chefs Korea | LSG Sky Chefs Havacilik Hizmetleri A.S. | ZAO AeroMEAL    | Verschiedene LSG-Gesellschaften * |
|------------------------------------------------------|-------------------------------------------|------------------------------|--------------------------|---------------------|-----------------------------------------|-----------------|-----------------------------------|
| Segment                                              | Passage Airline Gruppe                    | Passage Airline Gruppe       | Catering                 | Catering            | Catering                                | Catering        | Catering                          |
| Buchwert Firmenwert                                  | 249 Mio. EUR                              | 2 Mio. EUR                   | 277 Mio. EUR             | 52 Mio. EUR         | 7 Mio. EUR                              | 6 Mio. EUR      | 12 Mio. EUR                       |
| Außerplanmäßige Abschreibungen                       | –                                         | –                            | –                        | –                   | –                                       | –               | –                                 |
| Umsatzwachstum p. a. Planungszeitraum                | 5,6% bis 10,4%                            | 1,3% bis 2,6%                | 1,3% bis 3,5%            | 5,0% bis 7,1%       | 4,0% bis 5,0%                           | 5,5% bis 10,0%  | 1,0% bis 12,3%                    |
| EBITDA-Marge Planungszeitraum                        | 9,5% bis 11,4%                            | 19,9% bis 25,9%              | 6,3% bis 8,3%            | 27,4% bis 28,7%     | 14,5% bis 15,1%                         | 17,5% bis 19,7% | 5,4% bis 29,5%                    |
| Investitionsquote Planungszeitraum                   | 7,4% bis 10,1%                            | 5,2% bis 26,2%               | 1,5% bis 3,7%            | 1,6% bis 2,0%       | 1,5% bis 4,0%                           | 0,7% bis 1,0%   | 0,0% bis 4,0%                     |
| Dauer des Planungszeitraums                          | 3 Jahre                                   | 3 Jahre                      | 5 Jahre                  | 5 Jahre             | 5 Jahre                                 | 5 Jahre         | 5 Jahre                           |
| Umsatzwachstum p. a. nach Ende des Planungszeitraums | 4,1%                                      | 1,0%                         | 2,0%                     | 3,3%                | 4,0%                                    | 5,0%            | 1,0% bis 5,0%                     |
| EBITDA-Marge nach Ende des Planungszeitraums         | 11,3%                                     | 25,9%                        | 8,0%                     | 28,7%               | 15,0%                                   | 19,0%           | 8,0% bis 29,0%                    |
| Investitionsquote nach Ende des Planungszeitraums    | 7,4%                                      | 8,8%                         | 1,5%                     | 2,0%                | 1,5%                                    | 1,0%            | 1,0% bis 4,0%                     |
| Diskontierungssatz                                   | 7,4%                                      | 8,5%                         | 8,1%                     | 7,8%                | 7,4%                                    | 7,4%            | 7,4% bis 8,1%                     |

\* Firmenwerte mit einem Buchwert von im Einzelfall unter 5 Mio. EUR.

Die für die Werthaltigkeitstests verwendeten Umsatzwachstumsannahmen basieren im Planungszeitraum auf extern veröffentlichten Quellen. Sie wurden teilweise mit Risikoabschlägen für regionale Besonderheiten beziehungsweise gesellschaftsspezifische Marktanteilsentwicklungen versehen. Unter Zugrundelegung der in der Tabelle beschriebenen Annahme eines nachhaltigen Umsatzwachstums der Deutschen Lufthansa AG und Regionalpartner von am Ende des Planungszeitraums 4 Prozent liegt der erzielbare Betrag deutlich über dem Buchwert. Auch bei einer erheblichen, nicht zu erwartenden Reduzierung der Annahmen zu Umsatzentwicklung und/oder Diskontierungssatz ergäbe sich ein über dem Buchwert liegender erzielbarer Betrag.

Ausgehend von der in der Tabelle beschriebenen Annahme eines nachhaltigen Umsatzwachstums der LSG Sky Chefs USA-Gruppe am Ende des Planungszeitraums von 2 Prozent, übersteigt der erzielbare Betrag den Buchwert erheblich. Auch bei einer deutlichen, nicht zu erwartenden Reduzierung der Annahmen zu Umsatzentwicklung und/oder Diskontierungssatz ergäbe sich ein über dem Buchwert liegender erzielbarer Betrag.

Die verwendeten EBITDA-Margen basieren auf vergangenen Erfahrungswerten beziehungsweise wurden auf Basis eingeleiteter kostenreduzierender Maßnahmen weiterentwickelt. Investitionsquoten stützen sich auf Erfahrungswerte der Vergangenheit und berücksichtigen im Planungszeitraum vorgesehene Ersatzbeschaffungen von Produktionsmitteln.

Bei den immateriellen Werten mit unbestimmter Nutzungsdauer handelt es sich um im Rahmen von Unternehmenserwerben erworbene Slots sowie erworbene Markennamen.

Der regelmäßige Werthaltigkeitstest für die erworbenen Marken wurde auf Basis des jeweils beizulegenden Zeitwerts abzüglich Veräußerungskosten beziehungsweise des Nutzungswerts durchgeführt. Hierbei wurden insbesondere die mit der jeweiligen Marke generierten Umsätze zu Grunde gelegt.

Für den Werthaltigkeitstest der erworbenen Marken wurden folgende weitere Prämissen verwendet:

| Konzerngesellschaft                                                     | SWISS         | AUA            | bmi            |
|-------------------------------------------------------------------------|---------------|----------------|----------------|
| Buchwert Marke                                                          | 207 Mio. EUR  | 109 Mio. EUR   | 21 Mio. EUR    |
| Außerplanmäßige Abschreibungen                                          | –             | –              | –              |
| Umsatzwachstum Marke p. a. Planungszeitraum                             | 5,2% bis 6,4% | 1,5% bis 11,7% | 4,1% bis 12,8% |
| Dauer des Planungszeitraums                                             | 3 Jahre       | 3 Jahre        | 3 Jahre        |
| Umsatzwachstum Marke p. a. nach Ende des Planungszeitraums              | 2,0%          | 2,0%           | 2,0%           |
| Ersparnis an hypothetischen Leasingzahlungen vor Steuern (Royalty Rate) | 0,6%          | 0,35%          | 0,2%           |
| Diskontierungssatz *                                                    | 6,4%          | 6,4%           | 6,4%           |

\* Nachsteuersatz.

Unter der Annahme eines nachhaltigen markenbezogenen Umsatzwachstums nach Ende der Planungsperiode von 2,0 Prozent übersteigt der erzielbare Betrag der Marke SWISS den Buchwert um 330 Mio. EUR. Auch bei einer erheblichen, nicht absehbaren Reduzierung der Annahmen zur Entwicklung des markenbezogenen Umsatzes ergäbe sich ein über dem Buchwert liegender erzielbarer Betrag.

Unter der Annahme eines nachhaltigen markenbezogenen Umsatzwachstums nach Ende der Planungsperiode von 2,0 Prozent übersteigt der erzielbare Betrag der Markennamen der AUA den Buchwert um 68 Mio. EUR. Auch bei einer erheblichen, nicht zu erwartenden Reduzierung der Annahmen zur Entwicklung des markenbezogenen Umsatzes ergäbe sich ein über dem Buchwert liegender erzielbarer Betrag.

Unter der Annahme eines nachhaltigen markenbezogenen Umsatzwachstums nach Ende der Planungsperiode von 2,0 Prozent übersteigt der erzielbare Betrag der Marke bmi den Buchwert um 10 Mio. EUR. Unter der Annahme eines nachhaltigen Umsatzrückgangs von 0,5 Prozent entspräche der erzielbare Betrag dem Buchwert.

Die Werthaltigkeit der erworbenen Slots mit einem Buchwert in Höhe von 640 Mio. EUR wurde auf Basis des beizulegenden Zeitwerts abzüglich Veräußerungskosten beziehungsweise im Rahmen der Ermittlung des Nutzungswerts der jeweiligen kleinsten zahlungsmittelgenerierenden Einheit („CGU“) getestet. Für die Bewertung auf Basis des beizulegenden Zeitwerts abzüglich Veräußerungskosten wurden aktuelle, veröffentlichte Transaktionspreise, die für Käufe/Verkäufe von Slots zwischen Marktteilnehmern erzielt wurden, zu Grunde gelegt. Es ergab sich kein Abschreibungsbedarf im Geschäftsfeld Passage Airline Gruppe.

## 17 Sonstige immaterielle Vermögenswerte

|                                  | Konzessionen,<br>gewerbliche<br>Schutzrechte und<br>ähnliche Rechte<br>sowie Lizenzen an<br>solchen Rechten<br>und Werten | Selbst erstellte<br>Software | Geleistete<br>Anzahlungen | Gesamt     |
|----------------------------------|---------------------------------------------------------------------------------------------------------------------------|------------------------------|---------------------------|------------|
| in Mio. €                        |                                                                                                                           |                              |                           |            |
| Anschaffungskosten am 01.01.2009 | 646                                                                                                                       | 96                           | 82                        | 824        |
| Kumulierte Abschreibungen        | -438                                                                                                                      | -81                          | -44                       | -563       |
| <b>Buchwert 01.01.2009</b>       | <b>208</b>                                                                                                                | <b>15</b>                    | <b>38</b>                 | <b>261</b> |
| Währungsdifferenzen              | 0*                                                                                                                        | 0*                           | 0*                        | 0*         |
| Zugänge Konsolidierungskreis     | 51                                                                                                                        | -                            | 15                        | 66         |
| Zugänge                          | 27                                                                                                                        | 0*                           | 39                        | 66         |
| Umbuchungen                      | 12                                                                                                                        | 14                           | -23                       | 3          |
| Abgänge Konsolidierungskreis     | -                                                                                                                         | -                            | -                         | -          |
| Abgänge                          | -1                                                                                                                        | -1                           | 0*                        | -2         |
| Zum Verkauf vorgesehen           | -                                                                                                                         | -                            | -                         | -          |
| Abschreibungen                   | -55                                                                                                                       | -11                          | -                         | -66        |
| Zuschreibungen                   | -                                                                                                                         | -                            | -                         | -          |
| <b>Buchwert 31.12.2009</b>       | <b>242</b>                                                                                                                | <b>17</b>                    | <b>69</b>                 | <b>328</b> |
| Anschaffungskosten am 01.01.2010 | 726                                                                                                                       | 109                          | 112                       | 947        |
| Kumulierte Abschreibungen        | -484                                                                                                                      | -92                          | -43                       | -619       |
| <b>Buchwert 01.01.2010</b>       | <b>242</b>                                                                                                                | <b>17</b>                    | <b>69</b>                 | <b>328</b> |
| Währungsdifferenzen              | 25                                                                                                                        | 0*                           | 1                         | 26         |
| Zugänge Konsolidierungskreis     | 7                                                                                                                         | -                            | -                         | 7          |
| Zugänge                          | 31                                                                                                                        | 1                            | 22                        | 54         |
| Umbuchungen                      | 26                                                                                                                        | 30                           | -51                       | 5          |
| Abgänge Konsolidierungskreis     | -                                                                                                                         | -                            | -                         | -          |
| Abgänge                          | -                                                                                                                         | -                            | -1                        | -1         |
| Zum Verkauf vorgesehen           | -                                                                                                                         | -                            | -                         | -          |
| Abschreibungen                   | -64                                                                                                                       | -26                          | -                         | -90        |
| Zuschreibungen                   | -                                                                                                                         | -                            | -                         | -          |
| <b>Buchwert 31.12.2010</b>       | <b>267</b>                                                                                                                | <b>22</b>                    | <b>40</b>                 | <b>329</b> |
| Anschaffungskosten am 31.12.2010 | 800                                                                                                                       | 140                          | 41                        | 981        |
| Kumulierte Abschreibungen        | -533                                                                                                                      | -118                         | -1                        | -652       |

\* Gerundet unter 1 Mio. EUR.

Im Wege des Finanzierungsleasings sind immaterielle Vermögenswerte mit einem Buchwert von 5 Mio. EUR (Vorjahr: 5 Mio. EUR) beschafft worden. Nicht aktivierte Forschungs- und Entwicklungskosten für immaterielle Vermögenswerte sind in Höhe von 8 Mio. EUR (Vorjahr: 7 Mio. EUR) angefallen. Immaterielle Vermögenswerte im Wert von 8 Mio. EUR (Vorjahr: 7 Mio. EUR) wurden bereits fest bestellt, sind aber noch nicht in die wirtschaftliche Verfügungsmacht des Konzerns gelangt.

## 18 Flugzeuge und Reservetriebwerke

| in Mio. €                        | Flugzeuge und Reservetriebwerke | Anzahlungen auf Flugzeuge und Reservetriebwerke | Gesamt        |
|----------------------------------|---------------------------------|-------------------------------------------------|---------------|
| Anschaffungskosten am 01.01.2009 | 17 918                          | 1 393                                           | 19 311        |
| Kumulierte Abschreibungen        | -10 547                         | -                                               | -10 547       |
| <b>Buchwert 01.01.2009</b>       | <b>7 371</b>                    | <b>1 393</b>                                    | <b>8 764</b>  |
| Währungsdifferenzen              | 0*                              | 0*                                              | 0*            |
| Zugänge Konsolidierungskreis     | 1 130                           | 19                                              | 1 149         |
| Zugänge                          | 1 423                           | 418                                             | 1 841         |
| Umbuchungen                      | 548                             | - 548                                           | 0*            |
| Abgänge Konsolidierungskreis     | -                               | -                                               | -             |
| Abgänge                          | - 39                            | -                                               | -39           |
| Zum Verkauf vorgesehen           | - 86                            | -                                               | -86           |
| Abschreibungen                   | -1 185                          | -                                               | -1 185        |
| Zuschreibungen                   | -                               | -                                               | -             |
| <b>Buchwert 31.12.2009</b>       | <b>9 162</b>                    | <b>1 282</b>                                    | <b>10 444</b> |
| Anschaffungskosten am 01.01.2010 | 19 973                          | 1 282                                           | 21 255        |
| Kumulierte Abschreibungen        | -10 811                         | -                                               | -10 811       |
| <b>Buchwert 01.01.2010</b>       | <b>9 162</b>                    | <b>1 282</b>                                    | <b>10 444</b> |
| Währungsdifferenzen              | 271                             | 42                                              | 313           |
| Zugänge Konsolidierungskreis     | 0*                              | -                                               | 0*            |
| Zugänge                          | 1 434                           | 561                                             | 1 995         |
| Umbuchungen                      | 731                             | - 726                                           | 5             |
| Abgänge Konsolidierungskreis     | -                               | -                                               | -             |
| Abgänge                          | - 53                            | - 6                                             | - 59          |
| Zum Verkauf vorgesehen           | - 187                           | -                                               | - 187         |
| Abschreibungen                   | -1 358                          | -                                               | -1 358        |
| Zuschreibungen                   | -                               | -                                               | -             |
| <b>Buchwert 31.12.2010</b>       | <b>10 000</b>                   | <b>1 153</b>                                    | <b>11 153</b> |
| Anschaffungskosten am 31.12.2010 | 21 699                          | 1 153                                           | 22 852        |
| Kumulierte Abschreibungen        | -11 699                         | -                                               | -11 699       |

\* Gerundet unter 1 Mio. EUR.

In der Position Flugzeuge sind 16 Flugzeuge (13 Boeing MD-11F und drei Boeing B747-400) mit einem Buchwert von 336 Mio. EUR (Vorjahr: 429 Mio. EUR) ausgewiesen, die Gegenstand von Transaktionen sind, die der Realisierung von Barwertvorteilen aus Cross-border Leasing-Konstruktionen dienen. Bei diesen Transaktionen wird in der Regel ein 40- oder 50-jähriger Headlease-Vertrag mit einem Leasingnehmer auf den Bermudas abgeschlossen. Die von diesem zu entrichtenden Leasingraten werden in einer Summe an den Leasinggeber gezahlt. Gleichzeitig schließt der Leasinggeber einen Sublease-Vertrag mit kürzerer Laufzeit (zwischen 14 und 16 Jahren) mit dem Leasingnehmer ab und entrichtet die hieraus entstehenden Leasingzahlungsverpflichtungen in einer Summe schuldbefreiend an eine Bank.

Da wie vor der Transaktion Risiken und Chancen an dem Flugzeug ebenso wie das juristische Eigentum im Lufthansa Konzern verbleiben, werden die Flugzeuge gemäß SIC 27 nicht als Leasinggegenstände nach IAS 17 behandelt, sondern so, wie sie ohne diese Transaktion behandelt werden würden.

Mit der Transaktion sind operative Einschränkungen verbunden; die Flugzeuge dürfen nicht überwiegend im amerikanischen Luftraum eingesetzt werden.

Der realisierte Barwertvorteil aus diesen Transaktionen wird über die Laufzeit des Sublease-Vertrags ratierlich ergebniswirksam vereinnahmt. Im Jahr 2010 wurden hieraus wie im Vorjahr 7 Mio. EUR im sonstigen betrieblichen Ertrag realisiert.

Darüber hinaus enthält die Position 56 Flugzeuge mit einem Buchwert von 1.728 Mio. EUR (Vorjahr: 57 Flugzeuge mit einem Buchwert von 1.928 Mio. EUR), die überwiegend mit dem Ziel der Realisierung günstiger Finanzierungsbedingungen an japanische und britische Leasinggesellschaften, Leasinggesellschaften auf den Bermudas beziehungsweise an eine schwedische Bank verkauft und zurückgeleast wurden. Die Laufzeit der Leasingverträge beträgt zwischen zehn und 26 Jahren. Der Konzern hat das Recht, zu einem bestimmten Zeitpunkt die Flugzeuge zu einem festgelegten Preis zurückzuerwerben.

Da Risiko und Chancen an diesen Flugzeugen beim Lufthansa Konzern verbleiben, werden die Flugzeuge ebenfalls nach SIC 27 nicht als Leasinggegenstände behandelt.

Operative Einschränkungen bestehen für zwei dieser über Leasinggesellschaften auf den Bermudas finanzierten Flugzeuge. Diese dürfen nicht überwiegend im amerikanischen Luftraum eingesetzt werden.

Das Bestellobligo für Flugzeuge und Reservetriebwerke beträgt 6,8 Mrd. EUR (Vorjahr: 6,4 Mrd. EUR).

Von der Position Flugzeuge dienen 3.245 Mio. EUR (Vorjahr: 2.700 Mio. EUR) als Sicherheiten für bestehende Finanzierungen, Flugzeuge im Buchwert von 342 Mio. EUR (Vorjahr: 277 Mio. EUR) sind zudem im Wege des Finanzierungsleasings beschafft worden, „Erläuterung 21“ ab [S. 179](#).

## 19 Übriges Sachanlagevermögen

|                                  | Grundstücke<br>und Bauten | Technische Anlagen<br>und Maschinen | Andere Anlagen,<br>Betriebs- und<br>Geschäfts-<br>ausstattung | Geleistete<br>Anzahlungen und<br>Anlagen im Bau | Gesamt       |
|----------------------------------|---------------------------|-------------------------------------|---------------------------------------------------------------|-------------------------------------------------|--------------|
| in Mio. €                        |                           |                                     |                                                               |                                                 |              |
| Anschaffungskosten am 01.01.2009 | 1 982                     | 925                                 | 1 178                                                         | 191                                             | 4 276        |
| Kumulierte Abschreibungen        | -795                      | -666                                | -883                                                          | -1                                              | -2 345       |
| <b>Buchwert 01.01.2009</b>       | <b>1 187</b>              | <b>259</b>                          | <b>295</b>                                                    | <b>190</b>                                      | <b>1 931</b> |
| Währungsdifferenzen              | 2                         | 0*                                  | 0*                                                            | 0*                                              | 2            |
| Zugänge Konsolidierungskreis     | 152                       | 27                                  | 24                                                            | 8                                               | 211          |
| Zugänge                          | 68                        | 43                                  | 97                                                            | 53                                              | 261          |
| Umbuchungen                      | 120                       | 30                                  | 31                                                            | -184                                            | -3           |
| Abgänge Konsolidierungskreis     | -                         | -                                   | -                                                             | -                                               | -            |
| Abgänge                          | -13                       | -5                                  | -2                                                            | -2                                              | -22          |
| Zum Verkauf vorgesehen           | -                         | -                                   | -                                                             | -                                               | -            |
| Abschreibungen                   | -72                       | -49                                 | -102                                                          | -                                               | -223         |
| Zuschreibungen                   | -                         | -                                   | -                                                             | -                                               | -            |
| <b>Buchwert 31.12.2009</b>       | <b>1 444</b>              | <b>305</b>                          | <b>343</b>                                                    | <b>65</b>                                       | <b>2 157</b> |
| Anschaffungskosten am 01.01.2010 | 2 297                     | 1 008                               | 1 218                                                         | 65                                              | 4 588        |
| Kumulierte Abschreibungen        | -853                      | -703                                | -875                                                          | -                                               | -2 431       |
| <b>Buchwert 01.01.2010</b>       | <b>1 444</b>              | <b>305</b>                          | <b>343</b>                                                    | <b>65</b>                                       | <b>2 157</b> |
| Währungsdifferenzen              | 18                        | 7                                   | 6                                                             | 1                                               | 32           |
| Zugänge Konsolidierungskreis     | 13                        | 2                                   | 6                                                             | 0*                                              | 21           |
| Zugänge                          | 16                        | 24                                  | 87                                                            | 46                                              | 173          |
| Umbuchungen                      | 18                        | 11                                  | 25                                                            | -64                                             | -10          |
| Abgänge Konsolidierungskreis     | -                         | -                                   | -                                                             | -                                               | -            |
| Abgänge                          | -5                        | -4                                  | -8                                                            | -4                                              | -21          |
| Zum Verkauf vorgesehen           | -                         | -                                   | -                                                             | -                                               | -            |
| Abschreibungen                   | -77                       | -52                                 | -104                                                          | -                                               | -233         |
| Zuschreibungen                   | 1                         | -                                   | -                                                             | -                                               | 1            |
| <b>Buchwert 31.12.2010</b>       | <b>1 428</b>              | <b>293</b>                          | <b>355</b>                                                    | <b>44</b>                                       | <b>2 120</b> |
| Anschaffungskosten am 31.12.2010 | 2 372                     | 1 015                               | 1 265                                                         | 44                                              | 4 696        |
| Kumulierte Abschreibungen        | -944                      | -722                                | -910                                                          | -                                               | -2 576       |

\* Gerundet unter 1 Mio. EUR.



Im Zusammenhang mit Grundstücken und Gebäuden existieren Grundschulden in Höhe von 21 Mio. EUR (Vorjahr: 26 Mio. EUR). Für Grundvermögen im Wert von 251 Mio. EUR (Vorjahr: 259 Mio. EUR) besteht wie im Vorjahr ein grundbücherliches Ankaufsrecht. Von dem gesamten übrigen Sachanlagevermögen dienen außerdem 39 Mio. EUR (Vorjahr: 40 Mio. EUR) als Sicherheiten für bestehende Finanzierungen. Im Wege des Finanzierungsleasings sind zudem übrige Sachanlagen mit einem Buchwert in Höhe von 192 Mio. EUR (Vorjahr: 203 Mio. EUR) beschafft worden, „Erläuterung 21“ ab [S. 179](#).

Fest bestellte, aber noch nicht in die wirtschaftliche Verfügungsmacht des Konzerns übergegangene Sachanlagen weisen folgende Werte auf:

| in Mio. €                          | 31.12.2010 | 31.12.2009 |
|------------------------------------|------------|------------|
| Grundstücke und Bauten             | 2          | 3          |
| Technische Anlagen                 | 23         | 13         |
| Betriebs- und Geschäftsausstattung | 35         | 21         |
|                                    | <b>60</b>  | <b>37</b>  |

## 20 Als Finanzinvestition gehaltene Immobilien

| in Mio. €                        | Als Finanzinvestition gehaltene Grundstücke und Bauten |
|----------------------------------|--------------------------------------------------------|
| Anschaffungskosten am 01.01.2009 | 3                                                      |
| Kumulierte Abschreibungen        | 0*                                                     |
| <b>Buchwert 01.01.2009</b>       | <b>3</b>                                               |
| Währungsdifferenzen              | 0*                                                     |
| Zugänge Konsolidierungskreis     | –                                                      |
| Zugänge                          | –                                                      |
| Umbuchungen                      | –                                                      |
| Abgänge Konsolidierungskreis     | –                                                      |
| Abgänge                          | –                                                      |
| Zum Verkauf vorgesehen           | –                                                      |
| Abschreibungen                   | –                                                      |
| Zuschreibungen                   | –                                                      |
| <b>Buchwert 31.12.2009</b>       | <b>3</b>                                               |
| Anschaffungskosten am 01.01.2010 | 3                                                      |
| Kumulierte Abschreibungen        | 0*                                                     |
| <b>Buchwert 01.01.2010</b>       | <b>3</b>                                               |
| Währungsdifferenzen              | 0*                                                     |
| Zugänge Konsolidierungskreis     | –                                                      |
| Zugänge                          | –                                                      |
| Umbuchungen                      | –                                                      |
| Abgänge Konsolidierungskreis     | –                                                      |
| Abgänge                          | –3                                                     |
| Zum Verkauf vorgesehen           | –                                                      |
| Abschreibungen                   | –                                                      |
| Zuschreibungen                   | –                                                      |
| <b>Buchwert 31.12.2010</b>       | <b>0*</b>                                              |
| Anschaffungskosten am 31.12.2010 | 0*                                                     |
| Kumulierte Abschreibungen        | 0*                                                     |

\* Gerundet unter 1 Mio. EUR.

Ein ausschließlich als Finanzinvestition gehaltenes Grundstück hat einen Buchwert von 0,1 Mio. EUR. Der beizulegende Zeitwert beträgt 1 Mio. EUR und wurde von Sachverständigen unter Berücksichtigung der jeweiligen Marktgegebenheiten geschätzt. Im Geschäftsjahr 2010 wurde ein bisher als Finanzinvestition gehaltenes Grundstück mit einem Buchwert und einem beizulegenden Zeitwert von jeweils 3 Mio. EUR zu einem Verkaufspreis von 3 Mio. EUR veräußert.

Im Vorjahr betrugen die beizulegenden Zeitwerte von beiden Grundstücken 4 Mio. EUR.

**21 Gemietete und vermietete Vermögenswerte**

Im Sachanlagevermögen sind gemietete Vermögenswerte enthalten, die wegen der Gestaltung der zu Grunde liegenden Verträge als Finanzierungsleasing dem wirtschaftlichen Eigentum des Konzerns zugerechnet werden. Gemietete sowie vermietete Vermögenswerte können der folgenden Tabelle entnommen werden:

| in Mio. €                        | Vermietete Flugzeuge und Reservetriebwerke | Gemietete Flugzeuge und Reservetriebwerke | Gemietete und weitervermietete Flugzeuge und Reservetriebwerke | Gemietete Bauten | Vermietete Bauten und Grundstücke | Gemietete immaterielle und technische Anlagen | Gemietete andere Anlagen, Betriebs- und Geschäftsausstattung |
|----------------------------------|--------------------------------------------|-------------------------------------------|----------------------------------------------------------------|------------------|-----------------------------------|-----------------------------------------------|--------------------------------------------------------------|
| Anschaffungskosten am 01.01.2009 | 243                                        | 239                                       | 5                                                              | 170              | –                                 | 6                                             | 17                                                           |
| Kumulierte Abschreibungen        | –190                                       | –95                                       | –2                                                             | –65              | –                                 | 0*                                            | –17                                                          |
| <b>Buchwert 01.01.2009</b>       | <b>53</b>                                  | <b>144</b>                                | <b>3</b>                                                       | <b>105</b>       | <b>–</b>                          | <b>6</b>                                      | <b>1</b>                                                     |
| Währungsdifferenzen              | –                                          | 3                                         | –                                                              | 0*               | –                                 | 0*                                            | 0*                                                           |
| Zugänge Konsolidierungskreis     | 43                                         | –                                         | –                                                              | 108              | –                                 | –                                             | –                                                            |
| Zugänge                          | 0*                                         | 195                                       | –                                                              | 9                | –                                 | –                                             | –                                                            |
| Umbuchungen                      | 2                                          | 5                                         | –2                                                             | –8               | –                                 | –                                             | –                                                            |
| Abgänge Konsolidierungskreis     | –                                          | –                                         | –                                                              | –                | –                                 | –                                             | –                                                            |
| Abgänge                          | 0*                                         | –8                                        | –                                                              | –2               | –                                 | 0*                                            | –                                                            |
| Zum Verkauf vorgesehen           | –                                          | –10                                       | –                                                              | –                | –                                 | –                                             | –                                                            |
| Abschreibungen                   | –4                                         | –52                                       | –1                                                             | –10              | –                                 | 0*                                            | 0*                                                           |
| Zuschreibungen                   | –                                          | –                                         | –                                                              | –                | –                                 | –                                             | –                                                            |
| <b>Buchwert 31.12.2009</b>       | <b>94</b>                                  | <b>277</b>                                | <b>–</b>                                                       | <b>202</b>       | <b>–</b>                          | <b>6</b>                                      | <b>0*</b>                                                    |
| Anschaffungskosten am 01.01.2010 | 269                                        | 387                                       | –                                                              | 273              | –                                 | 6                                             | 16                                                           |
| Kumulierte Abschreibungen        | –175                                       | –110                                      | –                                                              | –71              | –                                 | 0*                                            | –16                                                          |
| <b>Buchwert 01.01.2010</b>       | <b>94</b>                                  | <b>277</b>                                | <b>–</b>                                                       | <b>202</b>       | <b>–</b>                          | <b>6</b>                                      | <b>0*</b>                                                    |
| Währungsdifferenzen              | –                                          | 49                                        | –                                                              | 7                | –                                 | 0*                                            | 0*                                                           |
| Zugänge Konsolidierungskreis     | –                                          | –                                         | –                                                              | –                | –                                 | –                                             | –                                                            |
| Zugänge                          | –                                          | 76                                        | –                                                              | 1                | –                                 | 0*                                            | –                                                            |
| Umbuchungen                      | 78                                         | 5                                         | 9                                                              | –5               | –                                 | 0*                                            | –                                                            |
| Abgänge Konsolidierungskreis     | –                                          | –                                         | –                                                              | –                | –                                 | –                                             | –                                                            |
| Abgänge                          | –24                                        | –                                         | –                                                              | 0*               | –                                 | 0*                                            | –                                                            |
| Zum Verkauf vorgesehen           | –40                                        | –3                                        | –                                                              | –                | –                                 | –                                             | –                                                            |
| Abschreibungen                   | –5                                         | –62                                       | –1                                                             | –14              | –                                 | 0*                                            | 0*                                                           |
| Zuschreibungen                   | –                                          | –                                         | –                                                              | –                | –                                 | –                                             | –                                                            |
| <b>Buchwert 31.12.2010</b>       | <b>103</b>                                 | <b>342</b>                                | <b>8</b>                                                       | <b>191</b>       | <b>–</b>                          | <b>6</b>                                      | <b>0*</b>                                                    |
| Anschaffungskosten am 31.12.2010 | 219                                        | 489                                       | 9                                                              | 275              | –                                 | 7                                             | 1                                                            |
| Kumulierte Abschreibungen        | –116                                       | –147                                      | –1                                                             | –84              | –                                 | –1                                            | –1                                                           |

\* Gerundet unter 1 Mio. EUR.

## Finanzierungsleasing

Die Summe der gemieteten Vermögenswerte, die dem wirtschaftlichen Eigentum des Konzerns gemäß IAS 17 zuzurechnen sind, beträgt 547 Mio. EUR (Vorjahr: 485 Mio. EUR), davon entfallen 350 Mio. EUR (Vorjahr: 277 Mio. EUR) auf Flugzeuge (zwei Airbus A340, fünf Airbus A321, zehn Airbus A320, vier Airbus A319, eine Boeing B737, drei Embraer 145, eine Dash 8-300 und eine Fokker 70).

Die Flugzeugfinanzierungsleasingverträge sind in der Regel im Rahmen einer festen Grundmietzeit, die mindestens vier Jahre beträgt, unkündbar und haben eine maximale Gesamtlaufzeit von zwölf Jahren.

Nach Ablauf der Mietzeit besteht in der Regel ein Ankaufsrecht für den Leasingnehmer zum jeweiligen Restwert. Übt der Leasingnehmer in diesen Fällen die Option nicht aus, wird der Leasinggeber das Flugzeug bestmöglich am Markt verwerten. Liegt der Vermarktungserlös unter dem Restwert, ist die Differenz vom Leasingnehmer auszugleichen. In den Verträgen sind teilweise variable Leasingzahlungen insoweit vereinbart, als der darin enthaltene Zinsanteil an die Marktzinsentwicklung, in der Regel an den 3- oder 6-Monats-Libor, gekoppelt wurde.

Daneben bestehen Finanzierungsleasingverträge für Gebäude und Gebäudeteile sowie Betriebs- und Geschäftsausstattung in unterschiedlichsten Ausprägungen. Für Gebäude und Gebäudeteile liegen die Vertragslaufzeiten zwischen 15 und 30 Jahren. Die Leasingverträge beinhalten Leasingraten, die teilweise auf variablen, teilweise auf fixen Zinssätzen basieren, außerdem zum Teil Kaufoptionen zum Ende der vertraglichen Laufzeit. Eine Auflösung der Verträge ist nicht möglich. Vertragsverlängerungsoptionen liegen – soweit vorhanden – in der Regel auf Seiten des Mieters.

Für technische Anlagen und Betriebs- und Geschäftsausstattung liegen die Vertragslaufzeiten zwischen vier und fünf Jahren. Die Verträge enthalten in der Regel fixe Leasingraten sowie in Einzelfällen Kaufoptionen zum Ende der Leasinglaufzeit. Eine Verlängerung der Verträge seitens des Leasingnehmers ist in der Regel nicht möglich. Die Verträge sind nicht auflösbar.

Aus den Finanzierungsleasingverträgen werden in den Folgeperioden folgende Leasingzahlungen fällig, wobei die variablen Leasingraten auf Basis des zuletzt gültigen Zinssatzes fortgeschrieben wurden.

| in Mio. €                                 | 2011 | 2012–2015 | ab 2016 |
|-------------------------------------------|------|-----------|---------|
| Leasingzahlungen                          | 92   | 338       | 261     |
| Abzinsungsbeträge                         | 7    | 69        | 129     |
| Barwerte                                  | 85   | 269       | 132     |
| Einzahlung aus Untervermietung (Sublease) | 2    | 4         | 0       |

Im Vorjahr sind aus den Finanzierungsleasingverträgen folgende Beträge genannt worden:

| in Mio. €                                 | 2010 | 2011–2014 | ab 2015 |
|-------------------------------------------|------|-----------|---------|
| Leasingzahlungen                          | 78   | 257       | 266     |
| Abzinsungsbeträge                         | 4    | 55        | 132     |
| Barwerte                                  | 74   | 202       | 134     |
| Einzahlung aus Untervermietung (Sublease) | 2    | 6         | –       |

Ein Flugzeug, das Ende 2010 im juristischen Eigentum des Konzerns steht, ist im Wege eines bis 2016 laufenden Finanzierungsleasingvertrags vermietet. Aus diesem Vertrag werden in den Folgeperioden folgende Einzahlungen erzielt:

| in Mio. €         | 2011 | 2012–2015 | ab 2016 |
|-------------------|------|-----------|---------|
| Leasingzahlungen  | 2    | 8         | 5       |
| Abzinsungsbeträge | 0    | 2         | 2       |
| Barwerte          | 2    | 6         | 3       |

Im Vorjahr sind aus diesem Finanzierungsleasingvertrag folgende Beträge genannt worden:

| in Mio. €         | 2010 | 2011–2014 | ab 2015 |
|-------------------|------|-----------|---------|
| Leasingzahlungen  | 2    | 7         | 6       |
| Abzinsungsbeträge | 0    | 2         | 2       |
| Barwerte          | 2    | 5         | 4       |

## Operating Leases

Neben den Finanzierungsleasingverträgen sind in erheblichem Umfang Mietverträge abgeschlossen, die von ihrem wirtschaftlichen Inhalt her als Operating Lease-Verträge zu qualifizieren sind, sodass der Leasinggegenstand dem Leasinggeber zuzurechnen ist. Neben weiteren 98 Flugzeugen, für die Operating Lease-Vereinbarungen bestehen, handelt es sich hauptsächlich um die im Rahmen des Lufthansa-Regional-Konzepts gemieteten Flugzeuge sowie um Gebäudemietverträge.

Die Operating Lease-Verträge für Flugzeuge haben Laufzeiten zwischen ein und neun Jahren. Die Verträge enden in der Regel automatisch nach Ablauf der Vertragslaufzeit, zum Teil bestehen Mietverlängerungsoptionen.

Die Mietverträge für Gebäude haben in der Regel Laufzeiten bis zu 25 Jahren. Die Einrichtungen auf den Flughäfen Frankfurt und München sind für 30 Jahre gemietet.

Folgende Beträge werden in den Folgeperioden fällig:

| in Mio. €                                   | 2011       | 2012–2015    | ab 2016          |
|---------------------------------------------|------------|--------------|------------------|
| Flugzeuge                                   | 210        | 377          | 30 p. a.         |
| Diverse Gebäude                             | 237        | 886          | 198 p. a.        |
| Übrige Mietverträge                         | 75         | 256          | 54 p. a.         |
|                                             | <b>522</b> | <b>1 519</b> | <b>282 p. a.</b> |
| Einzahlungen aus Untervermietung (Sublease) | 17         | 39           | 2 p. a.          |

Im Vorjahr wurden folgende Beträge aus Operating Lease-Verträgen genannt:

| in Mio. €                                   | 2010       | 2011–2014    | ab 2015          |
|---------------------------------------------|------------|--------------|------------------|
| Flugzeuge                                   | 227        | 351          | 14 p. a.         |
| Diverse Gebäude                             | 229        | 898          | 186 p. a.        |
| Übrige Mietverträge                         | 81         | 279          | 63 p. a.         |
|                                             | <b>537</b> | <b>1 528</b> | <b>263 p. a.</b> |
| Einzahlungen aus Untervermietung (Sublease) | 11         | 34           | 2 p. a.          |

Elf Flugzeuge sowie Reservetriebwerke und immaterielle Vermögenswerte, die Ende 2010 im wirtschaftlichen und juristischen Eigentum des Konzerns stehen, sind im Wege von nicht kündbaren Operating Leases vermietet. Aus diesen Verträgen, die Laufzeiten bis zu zehn Jahren haben, resultieren folgende Einzahlungen:

| in Mio. €                   | 2011      | 2012–2015 | ab 2016        |
|-----------------------------|-----------|-----------|----------------|
| Flugzeuge                   | 19        | 12        | 5 p. a.        |
| Immaterielle Vermögenswerte | 11        | 8         | –              |
|                             | <b>30</b> | <b>20</b> | <b>5 p. a.</b> |

Neun Flugzeuge sowie Reservetriebwerke, die Ende 2009 im wirtschaftlichen und juristischen Eigentum des Konzerns standen, waren im Wege von nicht kündbaren Operating Leases vermietet. Aus den Verträgen resultierten folgende Einzahlungen:

| in Mio. €                                  | 2010 | 2011–2014 | ab 2015 |
|--------------------------------------------|------|-----------|---------|
| Einzahlungen aus Operating Lease-Verträgen | 17   | 30        | 5 p. a. |

## 22 Nach der Equity-Methode bewertete Beteiligungen

| in Mio. €                        | Anteile an Joint Ventures | Anteile an assoziierten Unternehmen | Gesamt     |
|----------------------------------|---------------------------|-------------------------------------|------------|
| Anschaffungskosten am 01.01.2009 | 165                       | 140                                 | 305        |
| Kumulierte Abschreibungen        | –                         | –7                                  | –7         |
| <b>Buchwert 01.01.2009</b>       | <b>165</b>                | <b>133</b>                          | <b>298</b> |
| Währungsdifferenzen              | –2                        | –2                                  | –4         |
| Zugänge Konsolidierungskreis     | –                         | 4                                   | 4          |
| Zugänge                          | 17                        | 79                                  | 96         |
| Umbuchungen                      | 5                         | 0*                                  | 5          |
| Abgänge Konsolidierungskreis     | –4                        | –14                                 | –18        |
| Abgänge                          | –33                       | –25                                 | –58        |
| Zum Verkauf vorgesehen           | –1                        | –                                   | –1         |
| Abschreibungen                   | –2                        | –                                   | –2         |
| Zuschreibungen                   | –                         | –                                   | –          |
| <b>Buchwert 31.12.2009</b>       | <b>145</b>                | <b>175</b>                          | <b>320</b> |
| Anschaffungskosten am 01.01.2010 | 145                       | 183                                 | 328        |
| Kumulierte Abschreibungen        | –                         | –8                                  | –8         |
| <b>Buchwert 01.01.2010</b>       | <b>145</b>                | <b>175</b>                          | <b>320</b> |
| Währungsdifferenzen              | 11                        | 7                                   | 18         |
| Zugänge Konsolidierungskreis     | –                         | –                                   | –          |
| Zugänge                          | 39                        | 18                                  | 57         |
| Umbuchungen                      | 31                        | –                                   | 31         |
| Abgänge Konsolidierungskreis     | –                         | –                                   | –          |
| Abgänge                          | –28                       | –7                                  | –35        |
| Zum Verkauf vorgesehen           | –2                        | –4                                  | –6         |
| Abschreibungen                   | –                         | –                                   | –          |
| Zuschreibungen                   | –                         | –                                   | –          |
| <b>Buchwert 31.12.2010</b>       | <b>196</b>                | <b>189</b>                          | <b>385</b> |
| Anschaffungskosten am 31.12.2010 | 196                       | 194                                 | 390        |
| Kumulierte Abschreibungen        | –                         | –5                                  | –5         |

\* Gerundet unter 1 Mio. EUR.

Die Buchwerte der assoziierten Unternehmen wurden in einem Fall (Vorjahr: zwei Fälle) bei einem Wert von null Mio. EUR angehalten. Verluste bei assoziierten Unternehmen in Höhe von 16 Mio. EUR (Vorjahr: 21 Mio. EUR) blieben unberücksichtigt.

## 23 Finanzielle Vermögenswerte nach Kategorien

### Finanzielle Vermögenswerte in der Bilanz zum 31.12.2010

| in Mio. €                                                                        | Ausleihungen und Forderungen | Zum beizulegenden Zeitwert über die GuV | Zur Veräußerung verfügbar | Derivative Finanzinstrumente, die wirksamer Teil einer Sicherungsbeziehung sind |
|----------------------------------------------------------------------------------|------------------------------|-----------------------------------------|---------------------------|---------------------------------------------------------------------------------|
| Übrige Beteiligungen                                                             | –                            | –                                       | 1 128                     | –                                                                               |
| Langfristige Wertpapiere                                                         | –                            | –                                       | 250                       | –                                                                               |
| Ausleihungen                                                                     | 170                          | –                                       | –                         | –                                                                               |
| Langfristige Forderungen                                                         | 450                          | –                                       | –                         | –                                                                               |
| Langfristige derivative Finanzinstrumente                                        | –                            | 124                                     | –                         | 226                                                                             |
| Forderungen aus Lieferungen und Leistungen und Sonstige kurzfristige Forderungen | 3 401                        | –                                       | –                         | –                                                                               |
| Kurzfristige derivative Finanzinstrumente                                        | –                            | 167                                     | –                         | 317                                                                             |
| Kurzfristige Wertpapiere                                                         | –                            | 7                                       | 4 276                     | –                                                                               |
| Bankguthaben und Kassenbestände                                                  | –                            | –                                       | 1 097                     | –                                                                               |
| <b>Summe</b>                                                                     | <b>4 021</b>                 | <b>298</b>                              | <b>6 751</b>              | <b>543</b>                                                                      |

### Finanzielle Vermögenswerte in der Bilanz zum 31.12.2009

| in Mio. €                                                                        | Ausleihungen und Forderungen | Zum beizulegenden Zeitwert über die GuV | Zur Veräußerung verfügbar | Derivative Finanzinstrumente, die wirksamer Teil einer Sicherungsbeziehung sind |
|----------------------------------------------------------------------------------|------------------------------|-----------------------------------------|---------------------------|---------------------------------------------------------------------------------|
| Übrige Beteiligungen                                                             | –                            | –                                       | 878                       | –                                                                               |
| Langfristige Wertpapiere                                                         | –                            | –                                       | 349                       | –                                                                               |
| Ausleihungen                                                                     | 132                          | –                                       | –                         | –                                                                               |
| Langfristige Forderungen                                                         | 374                          | –                                       | –                         | –                                                                               |
| Langfristige derivative Finanzinstrumente                                        | –                            | 121                                     | –                         | 134                                                                             |
| Forderungen aus Lieferungen und Leistungen und Sonstige kurzfristige Forderungen | 3 033                        | –                                       | –                         | –                                                                               |
| Kurzfristige derivative Finanzinstrumente                                        | –                            | 107                                     | –                         | 145                                                                             |
| Kurzfristige Wertpapiere                                                         | –                            | 9                                       | 3 294                     | –                                                                               |
| Bankguthaben und Kassenbestände                                                  | –                            | –                                       | 1 136                     | –                                                                               |
| <b>Summe</b>                                                                     | <b>3 539</b>                 | <b>237</b>                              | <b>5 657</b>              | <b>279</b>                                                                      |

In der Kategorie „Zum beizulegenden Zeitwert über die GuV“ enthaltene, finanzielle Vermögenswerte beider Geschäftsjahre sind neben zu Handelszwecken gehaltenen Vermögenswerten auch Zeitwerte von zur Sicherung eingesetzten Optionen von 218 Mio. EUR (Vorjahr: 179 Mio. EUR) enthalten, deren Wertveränderungen nach einer entsprechenden Änderung des IAS 39 im Finanzergebnis zu erfassen sind. Darüber hinaus wurden keine finanziellen Vermögenswerte der Kategorie „Zum beizulegenden Zeitwert über die GuV“ zugeordnet.



Das Nettoergebnis der verschiedenen Kategorien von finanziellen Vermögenswerten setzt sich wie folgt zusammen:

**2010**

| in Mio. €                                                                   | Sonstige betriebliche Erträge | Sonstige betriebliche Aufwendungen | Beteiligungs-<br>ergebnis | Übrige<br>Finanzposten | Nettoergebnis |
|-----------------------------------------------------------------------------|-------------------------------|------------------------------------|---------------------------|------------------------|---------------|
| Ausleihungen und Forderungen                                                | 52                            | -110                               | -                         | -11                    | <b>-69</b>    |
| Zum beizulegenden Zeitwert über die GuV erfasste finanzielle Vermögenswerte | -                             | -                                  | -                         | 25                     | <b>25</b>     |
| Ineffektiver Teil von Derivaten, die der Sicherung von Cashflows dienen     | -                             | -                                  | -                         | -18                    | <b>-18</b>    |
| Zur Veräußerung verfügbare finanzielle Vermögenswerte                       | 210                           | -15                                | -                         | -5                     | <b>190</b>    |

**2009**

| in Mio. €                                                                   | Sonstige betriebliche Erträge | Sonstige betriebliche Aufwendungen | Beteiligungs-<br>ergebnis | Übrige<br>Finanzposten | Nettoergebnis |
|-----------------------------------------------------------------------------|-------------------------------|------------------------------------|---------------------------|------------------------|---------------|
| Ausleihungen und Forderungen                                                | 43                            | -129                               | -                         | -21                    | <b>-107</b>   |
| Zum beizulegenden Zeitwert über die GuV erfasste finanzielle Vermögenswerte | -                             | -                                  | -                         | -75                    | <b>-75</b>    |
| Ineffektiver Teil von Derivaten, die der Sicherung von Cashflows dienen     | -                             | -                                  | -                         | 95                     | <b>95</b>     |
| Zur Veräußerung verfügbare finanzielle Vermögenswerte                       | 59                            | -27                                | -                         | -145                   | <b>-113</b>   |

### Zum beizulegenden Zeitwert bilanzierte finanzielle Vermögenswerte nach Bewertungskategorien

In der nachfolgenden Tabelle sind die zum beizulegenden Zeitwert bilanzierten finanziellen Vermögenswerte nach Bewertungskategorien gegliedert. Die Bewertungskategorien sind dabei folgendermaßen definiert:

## Kategorie 1:

- Auf aktiven Märkten gehandelte Finanzinstrumente, deren notierte Preise unverändert für die Bewertung übernommen wurden.

## Kategorie 2:

- Die Bewertung erfolgt auf Basis von Bewertungsverfahren, deren verwendete Einflussfaktoren direkt oder indirekt aus beobachtbaren Marktdaten abgeleitet werden.

## Kategorie 3:

- Die Bewertung erfolgt auf Basis von Bewertungsverfahren, deren verwendete Einflussfaktoren nicht ausschließlich auf beobachtbaren Marktdaten beruhen.

Im Geschäftsjahr 2009 ergab sich folgende Untergliederung der zum beizulegenden Zeitwert bilanzierten finanziellen Vermögenswerte nach Bewertungskategorien:

#### Vermögenswerte zum 31.12.2010

| in Mio. €                                                                              | Kategorie 1  | Kategorie 2  | Kategorie 3 | Gesamt       |
|----------------------------------------------------------------------------------------|--------------|--------------|-------------|--------------|
| Finanzielle Vermögenswerte zum Fair Value über GuV                                     | –            | –            | –           | –            |
| Als Handelsgeschäfte klassifizierte Finanzderivate                                     | –            | 291          | –           | 291          |
| Kurzfristige Wertpapiere                                                               | –            | 3            | 4           | 7            |
| <b>Finanzielle Vermögenswerte über GuV gesamt</b>                                      | <b>–</b>     | <b>294</b>   | <b>4</b>    | <b>298</b>   |
| <b>Derivative Finanzinstrumente, die wirksamer Teil einer Sicherungsbeziehung sind</b> | <b>–</b>     | <b>543</b>   | <b>–</b>    | <b>543</b>   |
| <b>Zur Veräußerung verfügbare finanzielle Vermögenswerte</b>                           |              |              |             |              |
| Eigenkapitalinstrumente                                                                | 841          | –            | –           | 841          |
| Fremdkapitalinstrumente                                                                | 809          | 3 684        | 20          | 4 513        |
|                                                                                        | <b>1 650</b> | <b>3 684</b> | <b>20</b>   | <b>5 354</b> |
| <b>Vermögenswerte gesamt</b>                                                           | <b>1 650</b> | <b>4 521</b> | <b>24</b>   | <b>6 195</b> |

#### Vermögenswerte zum 31.12.2009

| in Mio. €                                                                              | Kategorie 1  | Kategorie 2  | Kategorie 3 | Gesamt       |
|----------------------------------------------------------------------------------------|--------------|--------------|-------------|--------------|
| Finanzielle Vermögenswerte zum Fair Value über GuV                                     | –            | –            | –           | –            |
| Als Handelsgeschäfte klassifizierte Finanzderivate                                     | –            | 228          | –           | 228          |
| Kurzfristige Wertpapiere                                                               | –            | 6            | 3           | 9            |
| <b>Finanzielle Vermögenswerte über GuV gesamt</b>                                      | <b>–</b>     | <b>234</b>   | <b>3</b>    | <b>237</b>   |
| <b>Derivative Finanzinstrumente, die wirksamer Teil einer Sicherungsbeziehung sind</b> | <b>–</b>     | <b>279</b>   | <b>–</b>    | <b>279</b>   |
| <b>Zur Veräußerung verfügbare finanzielle Vermögenswerte</b>                           |              |              |             |              |
| Eigenkapitalinstrumente                                                                | 652          | –            | –           | 652          |
| Fremdkapitalinstrumente                                                                | 780          | 2 694        | 24          | 3 498        |
|                                                                                        | <b>1 432</b> | <b>2 694</b> | <b>24</b>   | <b>4 150</b> |
| <b>Vermögenswerte gesamt</b>                                                           | <b>1 432</b> | <b>3 207</b> | <b>27</b>   | <b>4 666</b> |

#### Zusätzliche Angaben zu finanziellen Vermögenswerten der Bewertungskategorie 3 zum 31.12.2010

| in Mio. €                                                                   | 01.01.2010 | Im Periodenergebnis erfasst | Marktwertveränderung im Eigenkapital erfasst | Zu-/ Abgänge | 31.12.2010 |
|-----------------------------------------------------------------------------|------------|-----------------------------|----------------------------------------------|--------------|------------|
| Zum beizulegenden Zeitwert über die GuV erfasste finanzielle Vermögenswerte | 3          | 1                           | –                                            | 0*           | 4          |
| Zur Veräußerung verfügbare finanzielle Vermögenswerte                       | 24         | 0*                          | 0*                                           | –4           | 20         |
| <b>Gesamt</b>                                                               | <b>27</b>  | <b>1</b>                    | <b>0*</b>                                    | <b>–4</b>    | <b>24</b>  |

\* Gerundet unter 1 Mio. EUR.

#### Zusätzliche Angaben zu finanziellen Vermögenswerten der Bewertungskategorie 3 zum 31.12.2009

| in Mio. €                                                                   | 01.01.2009 | Im Periodenergebnis erfasst | Marktwertveränderung im Eigenkapital erfasst | Zu-/ Abgänge | 31.12.2009 |
|-----------------------------------------------------------------------------|------------|-----------------------------|----------------------------------------------|--------------|------------|
| Zum beizulegenden Zeitwert über die GuV erfasste finanzielle Vermögenswerte | 4          | –1                          | –                                            | –            | 3          |
| Zur Veräußerung verfügbare finanzielle Vermögenswerte                       | 27         | –2                          | –1                                           | –            | 24         |
| <b>Gesamt</b>                                                               | <b>31</b>  | <b>–3</b>                   | <b>–1</b>                                    | <b>–</b>     | <b>27</b>  |

**24 Übrige Beteiligungen und langfristige Wertpapiere**

Die übrigen Beteiligungen und langfristigen Wertpapiere zeigten in den Jahren 2010 und 2009 folgende Bewegungen:

| in Mio. €                        | Anteile an<br>nahestehenden<br>Unternehmen | Beteiligungen | Wertpapiere des<br>Anlagevermögens | Gesamt       |
|----------------------------------|--------------------------------------------|---------------|------------------------------------|--------------|
| Anschaffungskosten am 01.01.2009 | 272                                        | 674           | 516                                | 1 462        |
| Kumulierte Abschreibungen        | -43                                        | -113          | -7                                 | -163         |
| <b>Buchwert 01.01.2009</b>       | <b>229</b>                                 | <b>561</b>    | <b>509</b>                         | <b>1 299</b> |
| Währungsdifferenzen              | 0*                                         | -2            | 0*                                 | -2           |
| Zugänge Konsolidierungskreis     | 93                                         | 2             | 175                                | 270          |
| Zugänge                          | 16                                         | 194           | 12                                 | 222          |
| Umbuchungen                      | -5                                         | -             | -                                  | -5           |
| Abgänge Konsolidierungskreis     | -10                                        | -             | -                                  | -10          |
| Abgänge                          | -4                                         | -53           | -346                               | -403         |
| Zum Verkauf vorgesehen           | 2                                          | -             | -                                  | 2            |
| Abschreibungen                   | -4                                         | -141          | -1                                 | -146         |
| Zuschreibungen                   | -                                          | -             | -                                  | -            |
| <b>Buchwert 31.12.2009</b>       | <b>317</b>                                 | <b>561</b>    | <b>349</b>                         | <b>1 227</b> |
| Anschaffungskosten am 01.01.2010 | 361                                        | 814           | 354                                | 1 529        |
| Kumulierte Abschreibungen        | -44                                        | -253          | -5                                 | -302         |
| <b>Buchwert 01.01.2010</b>       | <b>317</b>                                 | <b>561</b>    | <b>349</b>                         | <b>1 227</b> |
| Währungsdifferenzen              | 4                                          | 0*            | 0*                                 | 4            |
| Zugänge Konsolidierungskreis     | -                                          | -             | -                                  | -            |
| Zugänge                          | 12                                         | 667           | 3                                  | 682          |
| Umbuchungen                      | -34                                        | -1            | -                                  | -35          |
| Abgänge Konsolidierungskreis     | -11                                        | -             | -                                  | -11          |
| Abgänge                          | -5                                         | -377          | -102                               | -484         |
| Zum Verkauf vorgesehen           | -                                          | -             | -                                  | -            |
| Abschreibungen                   | -5                                         | -             | 0*                                 | -5           |
| Zuschreibungen                   | -                                          | -             | -                                  | -            |
| <b>Buchwert 31.12.2010</b>       | <b>278</b>                                 | <b>850</b>    | <b>250</b>                         | <b>1 378</b> |
| Anschaffungskosten am 31.12.2010 | 327                                        | 979           | 250                                | 1 556        |
| Kumulierte Abschreibungen        | -49                                        | -129          | 0*                                 | -178         |

\* Gerundet unter 1 Mio. EUR.

Beteiligungen sowie Wertpapiere sind, soweit ein aktiver Markt mit öffentlich zugänglichen Marktpreisen besteht, zum beizulegenden Zeitwert angesetzt. Für Beteiligungen mit einem Buchwert von 20 Mio. EUR (Vorjahr: 51 Mio. EUR) und langfristige Wertpapiere mit einem Buchwert von 8 Mio. EUR (Vorjahr: 9 Mio. EUR) existiert kein aktiver Markt mit öffentlich zugänglichen Marktpreisen. Der im Jahresabschluss 2009 noch zum Buchwert bilanzierte Anteil an der Amadeus IT Holding S.A. (34 Mio. EUR) wird nach erfolgtem Börsengang der Amadeus IT Holding S.A. im April 2010 zum Marktwert in der Konzernbilanz angesetzt.

Zum 31. Dezember 2010 betrug der Marktwert 534 Mio. EUR. Im Geschäftsjahr 2010 wurden Beteiligungen mit einem Buchwert von 34 Mio. EUR verkauft, die vorher nicht zum beizulegenden Zeitwert bewertet werden konnten, da kein aktiver Markt bestand.

Hierbei wurde ein Gewinn von 73 Mio. EUR erzielt. Gewinne in Höhe von 67 Mio. EUR entfielen dabei auf den Verkauf von 6,2 Mio. Aktien der Amadeus IT Holding S.A.

Von den Wertpapieren waren 11 Mio. EUR (Vorjahr: 26 Mio. EUR) als Sicherheit für Verbindlichkeiten begeben.

## 25 Langfristige Ausleihungen und Forderungen

### Ausleihungen und Forderungen

| in Mio. €                                                   | 31.12.2010 | 31.12.2009 |
|-------------------------------------------------------------|------------|------------|
| Ausleihungen und Forderungen gegen nahestehende Unternehmen | 84         | 91         |
| Ausleihungen und Forderungen gegen übrige Beteiligungen     | 0*         | 1          |
| Sonstige Ausleihungen und Forderungen                       | 535        | 414        |
| Vorfinanzierte Mietobjekte                                  | 1          | 0*         |
|                                                             | <b>620</b> | <b>506</b> |

\* Gerundet unter 1 Mio. EUR.

Der Buchwert der langfristigen Ausleihungen und Forderungen entspricht deren beizulegendem Zeitwert, da sie variabel verzinst sind beziehungsweise marktübliche Verzinsungen aufweisen.

Für sonstige Ausleihungen erhaltene Sicherheiten weisen einen beizulegenden Zeitwert von 3 Mio. EUR auf.

Die sonstigen Forderungen enthalten erwartete Erstattungen für zurückgestellte Verpflichtungen in Höhe von 2 Mio. EUR (Vorjahr: 5 Mio. EUR).

Von den langfristigen Forderungen dienen 122 Mio. EUR (Vorjahr: 113 Mio. EUR) der Besicherung von Verbindlichkeiten.

## 26 Derivative Finanzinstrumente

Die derivativen Finanzinstrumente, die sich als wirksame Sicherungsgeschäfte im Rahmen einer Sicherungsbeziehung qualifizieren, weisen folgenden Saldo auf:

| in Mio. €                         | 31.12.2010 | 31.12.2009 |
|-----------------------------------|------------|------------|
| Positive Marktwerte – langfristig | 226        | 134        |
| Positive Marktwerte – kurzfristig | 317        | 145        |
| Negative Marktwerte – langfristig | –78        | –137       |
| Negative Marktwerte – kurzfristig | –85        | –100       |
|                                   | <b>380</b> | <b>42</b>  |

Sie entfallen auf folgende Sicherungsinstrumente:

| in Mio. €                | 31.12.2010 | 31.12.2009 |
|--------------------------|------------|------------|
| Treibstoffpreissicherung | 311        | 192        |
| Devisensicherung         | –76        | –251       |
| Zinssicherung            | 145        | 101        |

Die derivativen Finanzinstrumente, die zum beizulegenden Zeitwert über die GuV bewertet werden, sind der folgenden Tabelle zu entnehmen:

| in Mio. €                         | 31.12.2010 | 31.12.2009 |
|-----------------------------------|------------|------------|
| Positive Marktwerte – langfristig | 124        | 121        |
| Positive Marktwerte – kurzfristig | 167        | 107        |
| Negative Marktwerte – langfristig | –33        | –88        |
| Negative Marktwerte – kurzfristig | –18        | –6         |
|                                   | <b>240</b> | <b>134</b> |

Die ausgewiesenen positiven und negativen Marktwerte entfallen auf Derivate, die sich nicht als wirksame Sicherungsgeschäfte im Rahmen einer Sicherungsbeziehung nach IAS 39 qualifizieren.

Die beizulegenden Zeitwerte werden ausschließlich mit Hilfe anerkannter finanzmathematischer Methoden unter Verwendung öffentlich zugänglicher Marktinformationen ermittelt.

## 27 Vorräte

### Vorräte

| in Mio. €                                   | 31.12.2010 | 31.12.2009 |
|---------------------------------------------|------------|------------|
| Roh-, Hilfs- und Betriebsstoffe             | 550        | 536        |
| Fertige und unfertige Erzeugnisse und Waren | 111        | 110        |
| Geleistete Anzahlungen                      | 1          | 0*         |
|                                             | <b>662</b> | <b>646</b> |

\* Gerundet unter 1 Mio. EUR.

Vorräte im Wert von 39 Mio. EUR (Vorjahr: 32 Mio. EUR) sind als Kreditsicherheiten verpfändet.

Der Bruttowert der Vorräte betrug zum 31. Dezember 2010 insgesamt 841 Mio. EUR (Vorjahr: 810 Mio. EUR). Vorräte mit einem Buchwert von 499 Mio. EUR (Vorjahr: 516 Mio. EUR) sind zum niedrigeren beizulegenden Zeitwert abzüglich Verkaufskosten („Nettoveräußerungswert“) angesetzt. Abwertungen auf den Nettoveräußerungswert bestanden in Höhe von 179 Mio. EUR (Vorjahr: 164 Mio. EUR). Im Berichtsjahr wurden neue Wertberichtigungen in Höhe von 30 Mio. EUR (Vorjahr: 15 Mio. EUR) vorgenommen. Im Vorjahr vorgenommene Wertberichtigungen wurden in Höhe von 4 Mio. EUR (Vorjahr: 2 Mio. EUR) wieder aufgeholt.

**28 Forderungen aus Lieferungen und Leistungen und sonstige Forderungen**

| in Mio. €                                                                 | 31.12.2010   | 31.12.2009   |
|---------------------------------------------------------------------------|--------------|--------------|
| <b>Forderungen aus Lieferungen und Leistungen</b>                         |              |              |
| Forderungen aus Lieferungen und Leistungen gegen nahestehende Unternehmen | 117          | 102          |
| Forderungen aus Lieferungen und Leistungen gegen übrige Beteiligungen     | 3            | 1            |
| Forderungen aus Lieferungen und Leistungen gegen Konzernfremde            | 2 542        | 1 937        |
|                                                                           | <b>2 662</b> | <b>2 040</b> |
| davon aus unfertigen Aufträgen abzüglich erhaltener Anzahlungen           | (148)        | (116)        |
| <b>Sonstige Forderungen</b>                                               |              |              |
| Forderungen gegen nahestehende Unternehmen                                | 93           | 88           |
| Forderungen gegen übrige Beteiligungen                                    | 0*           | 0*           |
| Sonstige Forderungen                                                      | 646          | 905          |
|                                                                           | <b>739</b>   | <b>993</b>   |
| <b>Summe</b>                                                              | <b>3 401</b> | <b>3 033</b> |

\* Gerundet unter 1 Mio. EUR.

Der Buchwert dieser Forderungen entspricht dem beizulegenden Zeitwert.

Für Forderungen aus Lieferungen und Leistungen erhaltene Sicherheiten weisen einen beizulegenden Zeitwert von 1 Mio. EUR auf.

Von den Forderungen aus Lieferungen und Leistungen waren 61 Mio. EUR (Vorjahr: 5 Mio. EUR) als Kreditsicherheiten begeben.

Die sonstigen Forderungen enthalten erwartete Erstattungen für zurückgestellte Verpflichtungen in Höhe von 5 Mio. EUR (Vorjahr: 4 Mio. EUR).

Von den sonstigen Forderungen dienten im Vorjahr 30 Mio. EUR der Besicherung von Verbindlichkeiten.

**29 Aktive Rechnungsabgrenzungsposten**

Die aktiven Rechnungsabgrenzungsposten beinhalten im Wesentlichen vorausbezahlte Mieten, Versicherungsprämien und Zinsen, die Folgeperioden betreffen.

**30 Kurzfristige Wertpapiere**

Bei den kurzfristigen Wertpapieren handelt es sich nahezu ausschließlich um Rentenpapiere, Genussscheine sowie Anteile an Geldmarktfonds. Sie sind zum beizulegenden Zeitwert, fast vollständig abgeleitet aus öffentlich zugänglichen Marktpreisen an aktiven Märkten, angesetzt.

**31 Bankguthaben und Kassenbestände**

Die Euro-Guthaben bei Kreditinstituten waren zum Bilanzstichtag bei verschiedenen Banken überwiegend zu Zinssätzen zwischen 0,3 und 1,5 Prozent (Vorjahr: zwischen 0,2 und 0,9 Prozent) verzinst. USD-Guthaben waren zum Zinssatz von durchschnittlich 1,5 Prozent (Vorjahr: 0,1 Prozent), Guthaben in Schweizer Franken zu einem durchschnittlichen Zinssatz von 0,25 Prozent (Vorjahr: 0,25 Prozent) angelegt.

Von den Guthaben bei Kreditinstituten waren 47 Mio. EUR (Vorjahr: 27 Mio. EUR) als Sicherheiten für Verbindlichkeiten begeben.

Fremdwährungsguthaben sind zum Stichtagskurs bewertet.

**32 Zum Verkauf stehende Vermögenswerte**

Zum Jahresende 2010 werden ein Airbus A340-300, ein Airbus A330-200, zwei Airbus A330-300, sechs Canadair Regional Jet 200, fünf ATR 42-500, zwei Dash 8-300 und vier Cessna Citation als zum Verkauf stehende Vermögenswerte ausgewiesen. Auf diese Vermögenswerte entfielen außerplanmäßige Abschreibungen in Höhe von 24 Mio. EUR.

Zum Jahresende 2009 enthielt diese Position einen Airbus A340-300, sechs Airbus A300-600, zwölf Canadair Regional Jet 200, drei ATR 42-500 und zwei Dash 8-300. Alle Vermögenswerte wurden im Geschäftsjahr 2010 verkauft, „Erläuterung 44“ auf [S. 200](#).



## PASSIVA

### 33 Gezeichnetes Kapital

Das Grundkapital der Deutschen Lufthansa AG beträgt 1.172,3 Mio. EUR. Das Grundkapital ist in 457.937.572 auf den Namen lautende Stückaktien eingeteilt, auf jede Stückaktie entfällt ein Anteil von 2,56 EUR am Grundkapital.

Durch Beschluss der ordentlichen Hauptversammlung vom 29. April 2010 wurde der Vorstand dazu ermächtigt, bis zum 28. April 2015 mit Zustimmung des Aufsichtsrats das Grundkapital der Gesellschaft um bis zu 561.160.092 EUR durch ein- oder mehrmalige Ausgabe von neuen, auf den Namen lautenden Stückaktien gegen Bar- und Sacheinlagen zu erhöhen (Genehmigtes Kapital A). Den Aktionären ist grundsätzlich ein Bezugsrecht einzuräumen. Bei Aktienausgabe gegen Sacheinlagen kann das Bezugsrecht ausgeschlossen werden, im Falle der Aktienausgabe gegen Bareinlagen können Spitzenbeträge vom Bezugsrecht der Aktionäre ausgenommen werden. Darüber hinaus wird der Vorstand ermächtigt, im Falle der Kapitalerhöhung gegen Bareinlagen, mit Zustimmung des Aufsichtsrats das Bezugsrecht der Aktionäre auszuschließen mit der Maßgabe, dass die unter Ausschluss des Bezugsrechts ausgegebenen Aktien insgesamt zehn vom Hundert des Grundkapitals nicht überschreiten dürfen und der Ausgabebetrag den Börsenpreis nicht wesentlich unterschreitet. Die durch Beschluss der ordentlichen Hauptversammlung vom 25. Mai 2005 erteilte und bis zum 24. Mai 2010 befristete Ermächtigung des Vorstands wird für die Zeit ab Wirksamwerden dieser neuen Ermächtigung in dem Umfang aufgehoben, in dem noch nicht von ihr Gebrauch gemacht wurde.

Durch Beschluss der Hauptversammlung vom 17. Mai 2006 wurde der Vorstand bis zum 16. Mai 2011 ermächtigt, mit Zustimmung des Aufsichtsrats einmalig oder mehrmals auf den Inhaber oder auf den Namen lautende Wandelschuldverschreibungen, Optionsschuldverschreibungen, Genussrechte oder Gewinnschuldverschreibungen bis zu 1,5 Mrd. EUR mit oder ohne Laufzeitbegrenzung zu begeben. In diesem Zusammenhang wurde bedingtes Kapital (Bedingtes Kapital II) zur bedingten Erhöhung des Grundkapitals um bis zu 117.227.520 EUR durch Ausgabe von bis zu 45.792.000 neuen, auf den Namen lautenden Stückaktien geschaffen. Die bedingte Kapitalerhöhung wird nur insoweit durchgeführt, als die Inhaber von Wandelschuldverschreibungen oder von Optionsscheinen aus Optionsschuldverschreibungen von ihrem Wandlungs- und/oder Optionsrecht Gebrauch machen.

Im Rahmen der Ermächtigung vom 16. Juni 1999 hatte die Deutsche Lufthansa AG mit Wirkung zum 4. Januar 2002 eine Wandelanleihe über 750 Mio. EUR begeben. Das Bezugsrecht der Altaktionäre wurde ausgeschlossen. Es wurden insgesamt 750.000 Wandlungsrechte ausgegeben, die nach der Kapitalerhöhung in 2004 das Recht zur Wandlung in bis zu 37.764.350 Aktien der Deutschen Lufthansa AG zu einem Kurs von 19,86 EUR verbriefen. Nach vorzeitiger Rückzahlung von Wandelanleihen zum 4. Januar 2006 zu einem Gesamtbetrag von 699 Mio. EUR sowie der Ausübung von 309 Wandlungsrechten (15.558 Aktien) in 2006, weiteren 40 Wandlungsrechten (2.014 Aktien) in 2007, einer Rückzahlung von Wandelanleihen zum 4. Januar 2008 zu einem Gesamtbetrag von 205 TEUR und am 4. Januar 2010 in Höhe von 43.458.000 EUR bestanden zum Bilanzstichtag noch 6.681 Wandlungsrechte, die das Recht zur Wandlung in bis zu 336.404 Aktien der Deutschen Lufthansa AG zu einem Kurs von 19,86 EUR verbriefen.

Es besteht danach noch bedingtes Kapital (Bedingtes Kapital I) zur bedingten Erhöhung des Grundkapitals um 97.644.615,68 EUR durch Ausgabe von 38.142.428 neuen, auf den Namen lautenden Stückaktien.

Durch Beschluss der ordentlichen Hauptversammlung vom 24. April 2009 wurde der Vorstand ermächtigt, bis zum 23. April 2014 mit Zustimmung des Aufsichtsrats das Grundkapital um 25 Mio. EUR durch Ausgabe von neuen, auf den Namen lautenden Aktien an die Mitarbeiter (Genehmigtes Kapital B) gegen Bareinlage zu erhöhen. Das Bezugsrecht der Aktionäre ist ausgeschlossen.

Durch Beschluss der ordentlichen Hauptversammlung vom 29. April 2010 wurde der Vorstand gemäß § 71 Abs. 1 Nr. 8 AktG bis zum 28. April 2015 zum Erwerb eigener Aktien ermächtigt. Der Erwerb ist auf 10 Prozent des derzeitigen Grundkapitals beschränkt und kann über die Börse oder mittels eines an sämtliche Aktionäre gerichteten öffentlichen Kaufangebots erfolgen. In derselben Hauptversammlung wurde die derzeit bestehende und bis zum 23. Oktober 2010 befristete Ermächtigung zum Erwerb eigener Aktien aufgehoben.

Im Geschäftsjahr 2010 hat die Deutsche Lufthansa AG insgesamt 495.122 eigene Aktien zum Durchschnittskurs von 16,14 EUR erworben. Dies entspricht 0,11 Prozent vom Grundkapital.

Die Aktien wurden wie folgt verwendet:

- 493.610 als Teil der leistungsorientierten variablen Vergütung 2010 für Führungskräfte und außertariflich beschäftigte Mitarbeiter der Deutschen Lufthansa AG und 24 weiterer verbundener Unternehmen und Beteiligungsgesellschaften zum Kurs von 15,38 EUR.
- 372 Aktien wurden noch aus der leistungsorientierten variablen Vergütung des Jahres 2008 Führungskräften und außertariflich beschäftigten Mitarbeitern zum Kurs von 10,73 EUR zugeteilt.
- 1.140 Aktien wurden noch aus der leistungsorientierten variablen Vergütung des Jahres 2009 Führungskräften und außertariflich beschäftigten Mitarbeitern zum Kurs von 10,50 EUR zugeteilt.

Zum Bilanzstichtag waren keine eigenen Aktien mehr im Bestand.

#### Zusätzliche Angaben zur Entwicklung des Eigenkapitals

Der Lufthansa Konzern verfolgt weiterhin das Ziel einer nachhaltigen Eigenkapitalquote von 30 Prozent, um dauerhafte finanzielle Flexibilität und Stabilität als Basis für seine Wachstumsziele sicherzustellen. Eigenkapital und Bilanzsumme betrugen zum 31. Dezember 2010 und 2009:

| in Mio. €            | 31.12.2010    | 31.12.2009    |
|----------------------|---------------|---------------|
| Eigenkapital         | 8 340         | 6 202         |
| In % der Bilanzsumme | 28,4          | 23,5          |
| Fremdkapital         | 20 980        | 20 190        |
| In % der Bilanzsumme | 71,6          | 76,5          |
| <b>Gesamtkapital</b> | <b>29 320</b> | <b>26 392</b> |

Im Geschäftsjahr 2010 stieg die Eigenkapitalquote gegenüber dem Vorjahr um 4,9 Prozentpunkte auf 28,4 Prozent. Diese Zunahme ist im Wesentlichen auf das positive Nachsteuerergebnis von 1.143 Mio. EUR, die im Geschäftsjahr 2010 erstmals vorgenommene Marktbewertung des Anteils an der Amadeus IT Holding S.A. (+ 524 Mio. EUR), die Marktwertveränderungen sonstiger finanzieller Vermögenswerte (+ 170 Mio. EUR) sowie positive Währungsumrechnungsdifferenzen (+ 311 Mio. EUR) zurückzuführen.

Lufthansa unterliegt keinen satzungsmäßigen Kapitalerfordernissen. Verpflichtungen zur Ausgabe von Aktien bestehen in Zusammenhang mit den noch bestehenden Rechten aus der Wandelanleihe, soweit diese noch zur Wandlung genutzt werden. Im Geschäftsjahr 2010 wurden keine Wandlungsrechte genutzt. Die noch bestehenden Wandlungsrechte sind den Ausführungen zum bedingten Kapital zu entnehmen.

## 34 Mitteilungen zur Eigentümerstruktur

### Mitteilungen zur Eigentümerstruktur

#### gemäß § 26 Abs. 1 WpHG vom 19. April 2010

Die Deka Investment GmbH, Frankfurt, Deutschland, hat uns namens und mit Vollmacht der Deka International S.A., Luxemburg, am 14. April 2010 mitgeteilt, dass der Stimmrechtsanteil der Deka International S.A., Luxemburg, am 9. April 2010 die Schwelle von 3 Prozent der Stimmrechte an der Deutschen Lufthansa AG überschritten hat und zu diesem Tag 3,21 Prozent (14.690.725 Stimmrechte) betrug.

### Mitteilungen zur Eigentümerstruktur

#### gemäß § 26 Abs. 1 WpHG vom 23. April 2010

Die Deka Investment GmbH, Frankfurt, Deutschland, hat uns namens und mit Vollmacht der Deka International S.A., Luxemburg, am 21. April 2010 mitgeteilt, dass der Stimmrechtsanteil der Deka International S.A., Luxemburg, am 19. April 2010 die Schwelle von 3 Prozent der Stimmrechte an der Deutschen Lufthansa AG unterschritten hat und zu diesem Tag 2,55 Prozent (11.690.725 Stimmrechte) betrug.

### Mitteilungen zur Eigentümerstruktur

#### gemäß § 26 Abs. 1 WpHG vom 4. Mai 2010

Die Janus Capital Management LLC, Denver, Colorado, USA, hat uns mit Schreiben vom 30. April 2010 gemäß § 21 Abs. 1 WpHG mitgeteilt, dass ihr Stimmrechtsanteil an der Deutschen Lufthansa AG am 29. April 2010 die Schwelle von 3 Prozent überschritten hat und zu diesem Zeitpunkt 3,29 Prozent (15.088.270 Stimmrechte) beträgt. Davon sind ihr 3,29 Prozent (15.088.270 Stimmrechte) gemäß § 22 Abs. 1 Satz 1 Nr. 6 WpHG zuzurechnen.

### Mitteilungen zur Eigentümerstruktur

#### gemäß § 26 Abs. 1 WpHG vom 18. Januar 2011

Die BlackRock Investment Management (UK) Limited, London, Großbritannien, hat uns namens und mit Vollmacht der nachfolgenden Gesellschaften am 14. Januar 2011 mitgeteilt, dass der Stimmrechtsanteil der BlackRock, Inc., New York, USA, am 10. Januar 2011 die Schwelle von 5 Prozent der Stimmrechte an der Deutschen Lufthansa AG überschritten hat und zu diesem Tag 5,08 Prozent (23.255.011 Stimmrechte) betrug. Davon sind ihr 5,08 Prozent (23.255.011 Stimmrechte) gemäß § 22 Abs. 1 Satz 1 Nr. 6 i.V.m. Satz 2 WpHG zuzurechnen.

Der Stimmrechtsanteil der BlackRock Financial Management, Inc., New York, USA, hat am 10. Januar 2011 die Schwelle von 5 Prozent der Stimmrechte an der Deutschen Lufthansa AG überschritten und betrug zu diesem Tag 5,003 Prozent (22.912.821 Stimmrechte). Davon sind ihr 5,003 Prozent (22.912.821 Stimmrechte) gemäß § 22 Abs. 1 Satz 1 Nr. 6 i.V.m. Satz 2 WpHG zuzurechnen.

Der Stimmrechtsanteil der BlackRock Holdco 2, Inc., Wilmington, Delaware, USA, hat am 10. Januar 2011 die Schwelle von 5 Prozent der Stimmrechte an der Deutschen Lufthansa AG überschritten und betrug zu diesem Tag 5,003 Prozent (22.912.821 Stimmrechte). Davon sind ihr 5,003 Prozent (22.912.821 Stimmrechte) gemäß § 22 Abs. 1 Satz 1 Nr. 6 i.V.m. Satz 2 WpHG zuzurechnen.

### 35 Rücklagen

Die Kapitalrücklage enthält nur das Agio aus Kapitalerhöhungen sowie einer Wandelanleihe. Im Geschäftsjahr 2010 wurden wie im Vorjahr keine Wandlungsrechte genutzt.

Die in den Gewinnrücklagen enthaltene gesetzliche Rücklage beträgt unverändert 26 Mio. EUR, im Übrigen handelt es sich um andere Gewinnrücklagen.

Die übrigen neutralen Rücklagen haben sich im Geschäftsjahr 2010 wie folgt entwickelt:

#### Erläuterung der erfolgsneutralen Aufwendungen und Erträge (other comprehensive income / OCI)

| in Mio. €                                                                                            | 2010         | 2009       |
|------------------------------------------------------------------------------------------------------|--------------|------------|
| <b>Erfolgsneutrale Aufwendungen und Erträge (other comprehensive income) nach Ertragsteuern</b>      |              |            |
| <b>Differenzen aus Fremdwährungsumrechnung</b>                                                       | 311          | -18        |
| davon erfolgswirksame Reklassifizierung                                                              | -            | -          |
| <b>Folgebewertung von zur Veräußerung verfügbaren finanziellen Vermögenswerten</b>                   |              |            |
| Gewinne/Verluste der Periode                                                                         | 666          | 117        |
| Abzüglich erfolgswirksamer Reklassifizierung von Gewinnen/Verlusten                                  | -181         | 76         |
| <b>Folgebewertung von Cashflow Hedges</b>                                                            |              |            |
| Gewinne/Verluste der Periode                                                                         | 396          | -205       |
| Abzüglich erfolgswirksamer Reklassifizierung von Gewinnen/Verlusten                                  | -11          | -94        |
| Abzüglich Übertragung auf Anschaffungskosten gesicherter Posten                                      | -97          | 111        |
| <b>Erfolgsneutrale Aufwendungen und Erträge von nach der Equity-Methode bewerteten Beteiligungen</b> | -4           | -7         |
| <b>Neubewertung von Anteilen im Rahmen von Sukzessiverwerben</b>                                     | -            | -44        |
| <b>Sonstige erfolgsneutrale Aufwendungen und Erträge</b>                                             | 14           | -13        |
| <b>Für erfolgsneutrale Aufwendungen und Erträge erfasste Ertragsteuern</b>                           | -79          | 34         |
| <b>Erfolgsneutrale Aufwendungen und Erträge nach Ertragsteuern</b>                                   | <b>1 015</b> | <b>-43</b> |

#### Erläuterung der für erfolgsneutrale Aufwendungen und Erträge erfassten Ertragsteuern

| in Mio. €                                                                                     | 2010                   |                         |                         | 2009                   |                         |                         |
|-----------------------------------------------------------------------------------------------|------------------------|-------------------------|-------------------------|------------------------|-------------------------|-------------------------|
|                                                                                               | Wert vor Ertragsteuern | Steueraufwand / -ertrag | Wert nach Ertragsteuern | Wert vor Ertragsteuern | Steueraufwand / -ertrag | Wert nach Ertragsteuern |
| Differenzen aus Fremdwährungsumrechnung                                                       | 311                    | -                       | 311                     | -18                    | -                       | -18                     |
| Folgebewertung von zur Veräußerung verfügbaren finanziellen Vermögenswerten                   | 485                    | -15                     | 470                     | 193                    | -5                      | 188                     |
| Folgebewertung von Cashflow Hedges                                                            | 288                    | -64                     | 224                     | -188                   | 39                      | -149                    |
| Erfolgsneutrale Aufwendungen und Erträge von nach der Equity-Methode bewerteten Beteiligungen | -4                     | -                       | -4                      | -7                     | -                       | -7                      |
| Neubewertung von Anteilen im Rahmen von Sukzessiverwerben                                     | -                      | -                       | -                       | -44                    | -                       | -44                     |
| Sonstige erfolgsneutrale Aufwendungen und Erträge                                             | 14                     | -                       | 14                      | -13                    | -                       | -13                     |
| <b>Erfolgsneutrale Aufwendungen und Erträge</b>                                               | <b>1 094</b>           | <b>-79</b>              | <b>1 015</b>            | <b>-77</b>             | <b>34</b>               | <b>-43</b>              |

Die Veränderung des Eigenkapitals insgesamt ist der Entwicklung des Lufthansa Konzern-Eigenkapitals zu entnehmen.

**36 Pensionsrückstellungen**

Für Mitarbeiter im Inland sowie für die ins Ausland entsandten Mitarbeiter bestehen betriebliche Altersversorgungszusagen. Für Mitarbeiter, die vor 1995 in den Konzern eingetreten waren, wurde zunächst die Gesamtversorgungszusage der Versorgungsanstalt des Bundes und der Länder als Betriebsrentenzusage fortgeführt. Mit den im Jahr 2003 abgeschlossenen Tarifverträgen zur Vereinheitlichung der betrieblichen Altersversorgung für das Boden- und Kabinenpersonal wurde die betriebliche Versorgungszusage für Mitarbeiter des Boden- und Kabinenpersonals, im Rahmen der Tarifvereinbarung vom 4. Dezember 2004 auch für Mitarbeiter des Cockpit-Personals, auf einen Durchschnittsgehaltsplan umgestellt. Die Zusage entspricht nunmehr der auch bisher schon für die Mitarbeiter, die nach 1994 neu eingestellt wurden, gültigen Versorgung. Dabei wird jährlich in Abhängigkeit von Vergütung und Lebensalter ein Rentenbaustein verdient und die Altersrente als Summe der Rentenbausteine definiert. Nach IAS 19 sind diese Zusagen als leistungsorientierte Zusagen einzustufen und dementsprechend im Verpflichtungsumfang und bei den Kosten berücksichtigt.

Mitarbeitern des Bordpersonals wird zusätzlich eine Übergangsversorgung zugesagt, die den Zeitraum ab Beendigung des fliegerischen Beschäftigungsverhältnisses bis zum Einsetzen der gesetzlichen/betrieblichen Altersversorgung abdeckt. Die Versorgung hängt vom Endgehalt vor dem Ausscheiden ab (Endgehaltspläne).

Darüber hinaus bestehen innerhalb des Konzerns beitragsorientierte Versorgungszusagen, deren Leistungen vollständig durch Beiträge an einen externen Versorgungsträger finanziert werden. Lufthansa trägt aus diesen Zusagen keinerlei finanzielle oder aktuarielle Risiken. Im Jahr 2010 beliefen sich die Beiträge in beitragsorientierte Pläne auf 358 Mio. EUR (Vorjahr: 345 Mio. EUR).

Die Finanzierung der betrieblichen Alters- und Übergangsversorgung erfolgt für die inländischen Pläne durch Planvermögen und bzgl. der übersteigenden Beträge über Pensionsrückstellungen. Die zugesagten Leistungen werden jährlich unter Anwendung des Verfahrens der laufenden Einmalprämie (Projected Unit Credit Methode) bewertet. Im Geschäftsjahr 2004 war mit dem Aufbau eines Fondsvermögens zur Finanzierung künftiger Rentenzahlungen und dessen Übertragung an den Lufthansa Pension Trust mit dem Ziel der vollständigen Ausfinanzierung der Versorgungsverpflichtungen innerhalb von 10 bis 15 Jahren begonnen worden. Im Geschäftsjahr 2010 wurden für die Mitarbeiter weitere 576 Mio. EUR dotiert, insgesamt sind damit bereits Mittel in Höhe von 4.342 Mio. EUR an den Trust übertragen worden.

Für die Mitarbeiter im Ausland bestehen ebenfalls Ansprüche auf Alters- und zum Teil auf medizinische Versorgung, die im Wesentlichen von der Dienstzugehörigkeit und dem bezogenen Gehalt abhängig sind. Die Leistungen werden in der Regel über externe Fonds finanziert.

Mit dem Erwerb der Swiss International Air Lines im Geschäftsjahr 2007 wurden Pensionsverpflichtungen übernommen, die zum überwiegenden Teil auf gesetzlichen Verpflichtungen beruhen. Die Versorgungsleistungen werden über Pensionskassen, sogenannte Sammelstiftungen, finanziert.

Bei der Bewertung der Pensionsrückstellungen und der Ermittlung der Pensionskosten wird die 10-Prozent-Korridor-Regel angewendet. Versicherungsmathematische Gewinne oder Verluste werden nicht berücksichtigt, soweit sie 10 Prozent des Verpflichtungsumfangs beziehungsweise 10 Prozent des beizulegenden Zeitwerts des vorhandenen Planvermögens nicht übersteigen. Der den Korridor übersteigende Betrag wird über die durchschnittliche Restdienstzeit der aktiven Belegschaft ergebniswirksam verteilt und bilanziell erfasst.

Der Ermittlung der Pensionsverpflichtungen wurden folgende Prämissen zu Grunde gelegt:

**Versicherungsmathematische Annahmen**

| in %                                                 | 31.12.2010  | 31.12.2009 | 31.12.2008 |
|------------------------------------------------------|-------------|------------|------------|
| Zinssatz Inland                                      | 5,0         | 5,5        | 6,0        |
| Gehaltssteigerungstrend Inland                       | 2,75        | 2,75       | 2,75       |
| Rentensteigerungstrend Inland                        | 1,0 – 2,75  | 1,0 – 2,75 | 1,0 – 2,75 |
| Zinssätze Ausland                                    | 2,75 – 5,75 | 3,3 – 5,9  | 3,9 – 6,7  |
| Gehaltssteigerungstrends Ausland                     | 1,5 – 5,0   | 1,5 – 5,0  | 1,5 – 4,5  |
| Rentensteigerungstrends Ausland                      | 0,0 – 3,7   | 0,0 – 3,5  | 0,0 – 2,8  |
| Krankenkostentrend Rentner Ausland                   | 7,5         | 12,0       | 10,0       |
| Erwarteter Ertrag des externen Planvermögens Inland* | 5,2         | 5,2        | 5,2        |
| Erwartete Erträge des externen Planvermögens Ausland | 2,4 – 8,3   | 2,8 – 8,3  | 3,5 – 8,3  |

\* Seit 2008 Nachsteuerzins.

Als biometrische Rechnungsgrundlage werden im Inland seit dem 31. Dezember 2005 die Richttafeln Heubeck 2005 G verwendet, die Fluktuationswahrscheinlichkeit wurde alters- und geschlechtsspezifisch geschätzt.

Die Festlegung des erwarteten Ertrags aus dem Planvermögen folgt grundsätzlich der Anlagenpolitik des Plans in Bezug auf die Zusammensetzung der Anlageklassen. Die erwartete Verzinsung von Eigenkapitaltiteln berücksichtigt die historische Verzinsung, künftige Inflationsraten, erwartete Dividenden und das ökonomische Wachstum. Die erwarteten Erträge aus festverzinslichen Anlagen basieren auf dem gegenwärtigen Zinsniveau für langfristige Wertpapiere, gegebenenfalls korrigiert um einen Risikoabschlag. Die erwarteten Erträge aus Immobilienvermögen entsprechen denen von Eigenkapitaltiteln. Für sonstige Anlagen, in der Regel Bankguthaben, wurde das Zinsniveau für kurzfristige Geldanlagen zum Bilanzstichtag angesetzt.

Bei Erhöhung beziehungsweise Minderung des angenommenen Krankenkostentrends für Rentner um 1 Prozent ergeben sich folgende Auswirkungen:

| in Tsd. €                                             | Erhöhung | Minderung |
|-------------------------------------------------------|----------|-----------|
| Dienstzeit- und Zinsaufwand                           | +21      | -22       |
| Verpflichtung aus medizinischen Versorgungsleistungen | +420     | -427      |

Der Barwert der Pensionsverpflichtungen und die beizulegenden Zeitwerte des Planvermögens betrugen zum Bilanzstichtag:

| in Mio. €                                                          | 31.12.2010   | 31.12.2009   | 31.12.2008   | 31.12.2007   | 31.12.2006   |
|--------------------------------------------------------------------|--------------|--------------|--------------|--------------|--------------|
| Barwert der fondsfinanzierten Pensionsverpflichtungen Inland       | 5 485        | 4 730        | 4 081        | 4 068        | 4 455        |
| Planvermögen Inland                                                | 4 805        | 3 921        | 3 445        | 3 580        | 1 839        |
| <b>Unter- (+) / Überdeckung (-)</b>                                | <b>680</b>   | <b>809</b>   | <b>636</b>   | <b>488</b>   | <b>2 616</b> |
| Barwert der fondsfinanzierten Pensionsverpflichtungen Ausland      | 3 266        | 2 726        | 1 712        | 1 603        | 532          |
| Planvermögen Ausland                                               | 2 682        | 2 212        | 1 476        | 1 648        | 469          |
| <b>Unter- (+) / Überdeckung (-)</b>                                | <b>584</b>   | <b>514</b>   | <b>236</b>   | <b>-45</b>   | <b>63</b>    |
| <b>Barwert der nicht fondsfinanzierten Pensionsverpflichtungen</b> | <b>2 411</b> | <b>2 157</b> | <b>1 961</b> | <b>1 948</b> | <b>2 042</b> |

Das Portfolio der externen Planvermögen setzt sich zum Bilanzstichtag 2010 wie folgt zusammen:

|                  | Planvermögen Inland |              | Planvermögen Ausland |              |
|------------------|---------------------|--------------|----------------------|--------------|
|                  | in Mio. €           | in %         | in Mio. €            | in %         |
| Aktien           | 1 494               | 31,1         | 1 155                | 43,1         |
| Renten, Anleihen | 2 220               | 46,2         | 1 135                | 42,3         |
| Immobilien       | -                   | -            | 283                  | 10,5         |
| Sonstiges        | 1 091               | 22,7         | 109                  | 4,1          |
|                  | <b>4 805</b>        | <b>100,0</b> | <b>2 682</b>         | <b>100,0</b> |

Der tatsächliche Gewinn aus dem Planvermögen betrug im Geschäftsjahr 2010 426 Mio. EUR (Vorjahr: Gewinn von 392 Mio. EUR).

| Entwicklung des Barwerts der Pensionsverpflichtungen |               |              |
|------------------------------------------------------|---------------|--------------|
| in Mio. €                                            | 2010          | 2009         |
| Vortrag 01.01.                                       | 9 613         | 7 754        |
| Währungsdifferenzen Vortrag                          | 304           | -13          |
| Zugänge aus Unternehmenserwerben                     | -             | 901          |
| Sonstige Änderungen Konsolidierungskreis             | 17            | -            |
| Laufender Dienstzeitaufwand                          | 353           | 299          |
| Nachzuverrechnender Dienstzeitaufwand                | 23            | -73          |
| Zinsaufwand                                          | 497           | 444          |
| Beiträge der Planteilnehmer                          | 27            | 29           |
| Versicherungsmathematische Gewinne/Verluste          | 652           | 557          |
| Rentenzahlungen                                      | -290          | -268         |
| Plankürzungen/Abgeltungen                            | -34           | -17          |
| <b>Stand 31.12.</b>                                  | <b>11 162</b> | <b>9 613</b> |



**Entwicklung des Planvermögens zu beizulegenden Zeitwerten**

| in Mio. €                                   | 2010         | 2009         |
|---------------------------------------------|--------------|--------------|
| Vortrag 01.01.                              | 6 133        | 4 921        |
| Währungsdifferenzen Vortrag                 | 282          | -3           |
| Zugänge aus Unternehmenserwerben            | -            | 479          |
| Sonstige Änderungen Konsolidierungskreis    | 17           | -            |
| Erwartete Erträge aus Planvermögen          | 315          | 261          |
| Versicherungsmathematische Gewinne/Verluste | 111          | 133          |
| Beiträge der Planteilnehmer                 | 27           | 29           |
| Beiträge des Arbeitgebers                   | 690          | 380          |
| Rentenzahlungen                             | -83          | -67          |
| Plankürzungen/Abgeltungen                   | -5           | -            |
| <b>Stand 31.12.</b>                         | <b>7 487</b> | <b>6 133</b> |

Wegen nicht erfasster versicherungsmathematischer Verluste sind die bilanzierten Pensionsrückstellungen niedriger als der Barwert der Pensionsverpflichtungen:

**Finanzierungsstand**

| in Mio. €                                                     | 2010         | 2009         |
|---------------------------------------------------------------|--------------|--------------|
| Barwert der nicht fondsfinanzierten Pensionsverpflichtungen   | 2 411        | 2 157        |
| Barwert fondsfinanzierter Pensionsverpflichtungen Ausland     | 3 266        | 2 726        |
| Barwert fondsfinanzierter Pensionsverpflichtungen Deutschland | 5 485        | 4 730        |
| Externes Planvermögen Ausland                                 | -2 682       | -2 212       |
| Externes Planvermögen Deutschland                             | -4 805       | -3 921       |
| Nicht erfasste versicherungsmathematische Verluste            | -1 416       | -866         |
| Nicht erfasster nachzuverrechnender Dienstzeitaufwand         | 75           | 68           |
| „Unechte“ Vermögensüberhänge                                  | 237          | 28           |
|                                                               | <b>2 571</b> | <b>2 710</b> |

Die Veränderung des Finanzierungsstands gegenüber dem Vorjahr resultiert im Wesentlichen aus den Dotierungen in inländisches und ausländisches Planvermögen sowie gegenläufig dazu aus der Absenkung des Zinssatzes auf inländische Pensionsverpflichtungen.

In den Geschäftsjahren 2010 und 2009 entwickelten sich die Pensionsrückstellungen wie folgt:

**Pensionsrückstellungen**

| in Mio. €                                     | 2010         | 2009         |
|-----------------------------------------------|--------------|--------------|
| Vortrag                                       | 2 710        | 2 400        |
| Währungsdifferenz Vortrag                     | 9            | -7           |
| Änderung Konsolidierungskreis                 | -            | 421          |
| Gezahlte Renten                               | -207         | -201         |
| Zuführung                                     | 545          | 480          |
| Dotierung von Planvermögen/Mitarbeiterwechsel | -486         | -383         |
| <b>Stand 31.12.</b>                           | <b>2 571</b> | <b>2 710</b> |

Zusätzlich zu den rückstellungsmindernd erfassten Dotierungen wird weiteres Planvermögen von insgesamt 237 Mio. EUR gemäß IAS 19 als „unechte“ Vermögensüberhänge auf der Aktivseite der Konzernbilanz ausgewiesen.

Der in der Gewinn- und Verlustrechnung enthaltene Aufwand aus der Dotierung der Pensionsrückstellung setzt sich wie folgt zusammen:

| in Mio. €                                                                 | 2010       | 2009       |
|---------------------------------------------------------------------------|------------|------------|
| Dienstzeitaufwand                                                         | 353        | 299        |
| Amortisierte versicherungsmathematische Verluste                          | 15         | 21         |
| Amortisierte versicherungsmathematische Gewinne                           | -          | -          |
| Nachzuverrechnender Dienstzeitaufwand                                     | 19         | -6         |
| Plankürzungen/-abgeltungen                                                | -29        | -17        |
| Aufzinsung der erwarteten Pensionsverpflichtungen                         | 497        | 444        |
| Erwarteter Ertrag des externen Planvermögens                              | -315       | -261       |
| Nettoeffekt aus der Korrektur der Vermögenswertbegrenzung (asset ceiling) | 5          | -          |
|                                                                           | <b>545</b> | <b>480</b> |

Der Dienstzeitaufwand und die amortisierten versicherungsmathematischen Verluste/Gewinne werden als Personalaufwand, die Aufzinsung der erwarteten Pensionsverpflichtungen, gemindert um den erwarteten Ertrag des externen Planvermögens, als Zinsaufwand ausgewiesen.

Die erfahrungsbedingten Anpassungen betrugen, bezogen auf die Pensionsverpflichtungen beziehungsweise das Planvermögen:

**Erfahrungsbedingte Anpassungen**

| in Mio. €               | 2010        | 2009        | 2008          | 2007        | 2006      |
|-------------------------|-------------|-------------|---------------|-------------|-----------|
| Pensionsverpflichtungen | -111        | -139        | +122          | +30         | +7        |
| Planvermögen            | +111        | +132        | -1 006        | -77         | 0*        |
| <b>Gesamt</b>           | <b>+222</b> | <b>+271</b> | <b>-1 128</b> | <b>-107</b> | <b>-7</b> |

\* Gerundet unter 1 Mio. EUR.

In der Tabelle bedeutet ein negatives Vorzeichen bei den Pensionsverpflichtungen eine Minderung der Verpflichtung und daher einen Gewinn. Ein positives Vorzeichen beim Planvermögen bedeutet ebenfalls einen Gewinn. In der Gesamtsumme bedeutet ein positives Vorzeichen einen Gesamtgewinn.

Im Geschäftsjahr 2011 werden voraussichtlich 950 Mio. EUR in Pläne eingezahlt werden. Die Einzahlungen umfassen die geplanten Dotierungen sowie die Zahlungen von Versorgungsleistungen, die nicht durch entsprechende Erstattungen aus Planvermögen gedeckt sind.

### 37 Sonstige Rückstellungen

Die in der Bilanz unter lang- und kurzfristig ausgewiesenen sonstigen Rückstellungen setzen sich wie folgt zusammen:

| in Mio. €                                    | 31.12.2010   |             |             | 31.12.2009   |             |              |
|----------------------------------------------|--------------|-------------|-------------|--------------|-------------|--------------|
|                                              | Gesamt       | Langfristig | Kurzfristig | Gesamt       | Langfristig | Kurzfristig  |
| Verpflichtungen aus Altersteilzeitverträgen  | 41           | 6           | 35          | 64           | 10          | 54           |
| Übrige Personalkosten                        | 279          | 219         | 60          | 284          | 214         | 70           |
| Drohende Verluste aus schwebenden Geschäften | 197          | 126         | 71          | 142          | 73          | 69           |
| Umweltlastensanierungen                      | 32           | 28          | 4           | 30           | 25          | 5            |
| Prozesse                                     | 72           | 17          | 55          | 77           | 15          | 62           |
| Restrukturierungen/Abfindungen               | 61           | 3           | 58          | 199          | 4           | 195          |
| Festpreis Kundenverträge Technik             | 104          | 19          | 85          | 139          | 22          | 117          |
| Überholung Operating Lease-Flugzeuge         | 363          | 175         | 188         | 402          | 209         | 193          |
| Gewährleistungen                             | 38           | –           | 38          | 30           | –           | 30           |
| Übrige Rückstellungen                        | 337          | 50          | 287         | 375          | 48          | 327          |
| <b>Summe</b>                                 | <b>1 524</b> | <b>643</b>  | <b>881</b>  | <b>1 742</b> | <b>620</b>  | <b>1 122</b> |

Die Rückstellungen für Personalkosten betreffen im Wesentlichen Verpflichtungen gegenüber Mitarbeitern aus Jubiläumsgratifikationen, aus variablen Vergütungsanteilen und sonstigen kurzfristigen Verpflichtungen. Drohende Verluste aus schwebenden Geschäften resultieren aus schwebenden Dauerschuldverhältnissen oder aus sonstigen Vertragsverhältnissen, bei denen Leistung und Gegenleistung nicht ausgeglichen sind. Rückstellungen für Umweltlastensanierung werden auf Basis eines Sachverständigengutachtens

unter der Annahme gebildet, dass der Schaden in zehn Jahren vollständig beseitigt ist und die öffentlichen Auflagen zur Sanierung entfallen. Rückstellungen für laufende Prozesse sind unter Einschätzung des voraussichtlichen Prozessausgangs gebildet.

Im Geschäftsjahr 2010 haben sich die einzelnen Rückstellungsgruppen wie folgt entwickelt:

| in Mio. €                     | Verpflichtungen aus Altersteilzeitverträgen | Übrige Personalkosten | Drohende Verluste aus schwebenden Geschäften | Umweltlastensanierungen | Prozesse  | Restrukturierungen/Abfindungen |
|-------------------------------|---------------------------------------------|-----------------------|----------------------------------------------|-------------------------|-----------|--------------------------------|
| Stand 01.01.2010              | 64                                          | 284                   | 142                                          | 30                      | 77        | 199                            |
| Änderung Konsolidierungskreis | –                                           | 0*                    | –                                            | –                       | –         | –                              |
| Währungsdifferenzen           | –                                           | 2                     | 7                                            | 0*                      | 1         | 0*                             |
| Verbrauch                     | –64                                         | –36                   | –59                                          | –2                      | –7        | –109                           |
| Zuführung/Neubildung          | 34                                          | 39                    | 112                                          | 3                       | 17        | 27                             |
| Aufzinsung                    | 7                                           | 16                    | 2                                            | 1                       | 0*        | 0*                             |
| Auflösung                     | 0*                                          | –11                   | –7                                           | 0*                      | –16       | –56                            |
| Umgliederungen                | 0*                                          | –15                   | –                                            | –                       | 0*        | 0*                             |
| <b>Stand 31.12.2010</b>       | <b>41</b>                                   | <b>279</b>            | <b>197</b>                                   | <b>32</b>               | <b>72</b> | <b>61</b>                      |

\* Gerundet unter 1 Mio. EUR.

| in Mio. €                     | Festpreis<br>Kundenverträge<br>Technik | Überholung<br>Operating Lease-<br>Flugzeuge | Gewährleistungen | Übrige<br>Rückstellungen | Summe        |
|-------------------------------|----------------------------------------|---------------------------------------------|------------------|--------------------------|--------------|
| Stand 01.01.2010              | 139                                    | 402                                         | 30               | 375                      | 1 742        |
| Änderung Konsolidierungskreis | –                                      | 5                                           | 1                | –                        | 6            |
| Währungsdifferenzen           | 0*                                     | 10                                          | 0*               | 2                        | 22           |
| Verbrauch                     | –89                                    | –160                                        | –14              | –130                     | –670         |
| Zuführung/Neubildung          | 60                                     | 106                                         | 24               | 123                      | 545          |
| Aufzinsung                    | 1                                      | 12                                          | –                | 1                        | 40           |
| Auflösung                     | –7                                     | –3                                          | –3               | –20                      | –123         |
| Umgliederungen                | –                                      | –9                                          | –                | –14                      | –38          |
| <b>Stand 31.12.2010</b>       | <b>104</b>                             | <b>363</b>                                  | <b>38</b>        | <b>337</b>               | <b>1 524</b> |

\* Gerundet unter 1 Mio. EUR.

Die Rückstellungen für Verpflichtungen gegenüber Mitarbeitern aus Altersteilzeitverträgen zeigen folgenden Finanzierungsstand:

| Finanzierungsstand                                                        |           |           |
|---------------------------------------------------------------------------|-----------|-----------|
| in Mio. €                                                                 | 2010      | 2009      |
| Barwert der fondsfinanzierten Verpflichtungen aus Altersteilzeitverträgen | 190       | 219       |
| Externes Planvermögen                                                     | –149      | –155      |
|                                                                           | <b>41</b> | <b>64</b> |

Im Jahr 2005 sind zur Insolvenzversicherung der Erfüllungsrückstände des Arbeitgebers aus Altersteilzeitverträgen, in denen der Mitarbeiter im sogenannten Blockmodell zunächst die volle Arbeitsleistung gegen ein reduziertes Entgelt erbringt und danach unter Fortzahlung des reduzierten Entgelts von der Arbeit freigestellt wird, 97 Mio. EUR, in den Jahren 2007 und 2009 weitere 39 Mio. EUR beziehungsweise 2 Mio. EUR an ein externes Treuhandvermögen übertragen worden. Dieses ausgelagerte Vermögen, das die Anforderungen an Planvermögen erfüllt und daher den Nettoverpflichtungsumfang entsprechend mindert, wird am Bilanzstichtag zu Marktwerten bewertet.

Der Ermittlung der Verpflichtungen aus Altersteilzeitverträgen wurden folgende Annahmen zu Grunde gelegt:

| Annahmen                                     |      |      |      |
|----------------------------------------------|------|------|------|
| in %                                         | 2010 | 2009 | 2008 |
| Zinssatz                                     | 2,2  | 5,5  | 6,0  |
| Erwarteter Ertrag des externen Planvermögens | 3,1  | 3,2  | 6,0  |

Für den langfristigen Anteil der übrigen Rückstellungsgruppen werden folgende Zahlungsabflüsse geschätzt:

| in Mio. €                                    | 2012 | 2013 | 2014 | 2015 und<br>Folgejahre |
|----------------------------------------------|------|------|------|------------------------|
| Drohende Verluste aus schwebenden Geschäften | 43   | 18   | 16   | 57                     |
| Umweltlastensanierungen                      | 4    | 3    | 3    | 20                     |
| Restrukturierungen/Abfindungen               | 2    | 0*   | 0*   | 0*                     |
| Festpreis Kundenverträge Technik             | 11   | 7    | 0*   | 2                      |
| Überholung Operating Lease-Flugzeuge         | 89   | 42   | 22   | 35                     |
| Übrige Rückstellungen                        | 22   | 18   | 5    | 47                     |

\* Gerundet unter 1 Mio. EUR.

Zum Ende des Geschäftsjahres 2009 waren folgende Zahlungsabflüsse geschätzt worden:

| in Mio. €                                    | 2011 | 2012 | 2013 | 2014 und<br>Folgejahre |
|----------------------------------------------|------|------|------|------------------------|
| Drohende Verluste aus schwebenden Geschäften | 35   | 15   | 23   | 10                     |
| Umweltlastensanierungen                      | 3    | 3    | 3    | 19                     |
| Restrukturierungen/Abfindungen               | 1    | 1    | 0*   | 0*                     |
| Festpreis Kundenverträge Technik             | 17   | 6    | –    | –                      |
| Überholung Operating Lease-Flugzeuge         | 99   | 63   | 30   | 36                     |
| Übrige Rückstellungen                        | 12   | 6    | 4    | 46                     |

\* Gerundet unter 1 Mio. EUR.

### 38 Finanzielle Verbindlichkeiten nach Kategorien

#### Finanzielle Verbindlichkeiten in der Bilanz zum 31.12.2010

| in Mio. €                                        | Verbindlichkeiten zum beizulegenden Zeitwert über die GuV | Derivative Finanzinstrumente, die wirksamer Teil einer Sicherungsbeziehung sind | Andere finanzielle Verbindlichkeiten zu Anschaffungskosten |
|--------------------------------------------------|-----------------------------------------------------------|---------------------------------------------------------------------------------|------------------------------------------------------------|
| Finanzschulden                                   | –                                                         | –                                                                               | 7 184                                                      |
| Derivative Finanzinstrumente                     | 51                                                        | 163                                                                             | –                                                          |
| Verbindlichkeiten aus Lieferungen und Leistungen | –                                                         | –                                                                               | 2 902                                                      |
| Sonstige finanzielle Verbindlichkeiten           | –                                                         | –                                                                               | 1 401                                                      |
| <b>Summe</b>                                     | <b>51</b>                                                 | <b>163</b>                                                                      | <b>11 487</b>                                              |

#### Finanzielle Verbindlichkeiten in der Bilanz zum 31.12.2009

| in Mio. €                                        | Verbindlichkeiten zum beizulegenden Zeitwert über die GuV | Derivative Finanzinstrumente, die wirksamer Teil einer Sicherungsbeziehung sind | Andere finanzielle Verbindlichkeiten zu Anschaffungskosten |
|--------------------------------------------------|-----------------------------------------------------------|---------------------------------------------------------------------------------|------------------------------------------------------------|
| Finanzschulden                                   | –                                                         | –                                                                               | 6 802                                                      |
| Derivative Finanzinstrumente                     | 94                                                        | 237                                                                             | –                                                          |
| Verbindlichkeiten aus Lieferungen und Leistungen | –                                                         | –                                                                               | 2 552                                                      |
| Sonstige finanzielle Verbindlichkeiten           | –                                                         | –                                                                               | 1 331                                                      |
| <b>Summe</b>                                     | <b>94</b>                                                 | <b>237</b>                                                                      | <b>10 685</b>                                              |

Für die zum beizulegenden Zeitwert bilanzierten derivativen Finanzinstrumente erfolgte die Bewertung auf Basis beobachtbarer Marktdaten.

### 39 Finanzschulden

Die Finanzschulden setzen sich aus einem langfristigen Teil, der eine Restlaufzeit von mehr als einem Jahr aufweist und einem unter den kurzfristigen Verbindlichkeiten ausgewiesenen Teil mit einer Restlaufzeit von unter einem Jahr zusammen. Die Gesamtsumme ist der folgenden Tabelle zu entnehmen:

#### Finanzschulden 31.12.2010

| in Mio. €                                      | Gesamt       | Langfristig | Kurzfristig |
|------------------------------------------------|--------------|-------------|-------------|
| Anleihen                                       | 2 177        | 2 177       | 0*          |
| Verbindlichkeiten gegenüber Kreditinstituten   | 1 925        | 1 358       | 567         |
| Leasingverbindlichkeiten und sonstige Darlehen | 3 082        | 2 692       | 390         |
| <b>7 184</b>                                   | <b>6 227</b> | <b>957</b>  |             |

\* Gerundet unter 1 Mio. EUR.

#### Finanzschulden 31.12.2009

| in Mio. €                                      | Gesamt       | Langfristig | Kurzfristig |
|------------------------------------------------|--------------|-------------|-------------|
| Anleihen                                       | 2 264        | 2 170       | 94          |
| Verbindlichkeiten gegenüber Kreditinstituten   | 1 909        | 1 535       | 374         |
| Leasingverbindlichkeiten und sonstige Darlehen | 2 629        | 2 404       | 225         |
| <b>6 802</b>                                   | <b>6 109</b> | <b>693</b>  |             |

Die nachfolgende Tabelle enthält die Buch- und Marktwerte der einzelnen Klassen von Finanzschulden. Die angegebenen Marktwerte der Anleihen entsprechen ihren Börsennotierungen. Die Marktwerte für die übrigen Finanzschulden wurden auf Basis der am Bilanzstichtag gültigen Zinssätze für entsprechende Restlaufzeiten/Tilgungsstrukturen unter Zugrundelegung von zugänglichen Marktinformationen (Reuters) ermittelt.

| Finanzschulden                                 | 31.12.2010   |              | 31.12.2009   |              |
|------------------------------------------------|--------------|--------------|--------------|--------------|
| in Mio. €                                      | Buchwert     | Marktwert    | Buchwert     | Marktwert    |
| Anleihen                                       | 2 177        | 2 462        | 2 264        | 2 597        |
| Verbindlichkeiten gegenüber Kreditinstituten   | 1 925        | 2 089        | 1 909        | 1 961        |
| Leasingverbindlichkeiten und sonstige Darlehen | 3 082        | 3 133        | 2 629        | 2 752        |
| <b>Summe</b>                                   | <b>7 184</b> | <b>7 684</b> | <b>6 802</b> | <b>7 310</b> |

Von den Verbindlichkeiten gegenüber Kreditinstituten waren 1.155 Mio. EUR (Vorjahr: 1.095 Mio. EUR) besichert.

Weder im Geschäftsjahr 2010 noch im Geschäftsjahr 2009 sind Zahlungsverpflichtungen unter den genannten Darlehensverträgen nicht beziehungsweise nur verzögert erfüllt worden.

Die Leasingverbindlichkeiten und sonstigen Darlehen stehen ausschließlich in Zusammenhang mit den unter „Erläuterung 21“ ab [S. 179] geschilderten Finanzierungsleasingverträgen und den unter „Erläuterung 18“ auf [S. 176] beschriebenen Flugzeugfinanzierungen.

#### 40 Langfristige sonstige finanzielle Verbindlichkeiten

##### Langfristige sonstige finanzielle Verbindlichkeiten

| in Mio. €                                             | 31.12.2010 | 31.12.2009 |
|-------------------------------------------------------|------------|------------|
| Verbindlichkeiten gegenüber Kreditinstituten          | –          | –          |
| Verbindlichkeiten gegenüber nahestehenden Unternehmen | –          | –          |
| Verbindlichkeiten gegenüber übrigen Beteiligungen     | –          | –          |
| Sonstige finanzielle Verbindlichkeiten                | 110        | 87         |
|                                                       | <b>110</b> | <b>87</b>  |

Der Buchwert der finanziellen Verbindlichkeiten entspricht deren beizulegendem Zeitwert, da sie variabel beziehungsweise marktüblich verzinst sind.

#### 41 Langfristige erhaltene Anzahlungen, Rechnungsabgrenzungsposten und sonstige nicht finanzielle Verbindlichkeiten

##### Langfristige erhaltene Anzahlungen, Rechnungsabgrenzungsposten und sonstige nicht finanzielle Verbindlichkeiten

| in Mio. €                                    | 31.12.2010   | 31.12.2009   |
|----------------------------------------------|--------------|--------------|
| Erhaltene Anzahlungen                        | 5            | 4            |
| Passiver Rechnungsabgrenzungsposten          | 666          | 623          |
| Sonstige nicht finanzielle Verbindlichkeiten | 416          | 373          |
|                                              | <b>1 087</b> | <b>1 000</b> |

Der passive Rechnungsabgrenzungsposten enthält mit 630 Mio. EUR (Vorjahr: 581 Mio. EUR) abzugrenzende Beträge für Verpflichtungen aus Meilenbonusprogrammen. Unter den sonstigen nicht finanziellen Verbindlichkeiten sind Verpflichtungen aus Meilenbonusprogrammen von 401 Mio. EUR (Vorjahr: 364 Mio. EUR) erfasst.

Die sonstigen nicht finanziellen Verbindlichkeiten beinhalten mit 4 Mio. EUR (Vorjahr: 4 Mio. EUR) Materialherausgabeverpflichtungen und mit 6 Mio. EUR (Vorjahr: 4 Mio. EUR) den Langfristanteil der zum beizulegenden Zeitwert bewerteten Verpflichtungen aus aktienbasierten Vergütungsvereinbarungen, die Teil der variablen Vergütung von Vorstand, Führungskräften und außertariflichen Mitarbeitern sind. In den kurzfristigen sonstigen nicht finanziellen Verbindlichkeiten sind weitere 7 Mio. EUR (Vorjahr: 7 Mio. EUR) enthalten.

Im Rahmen der aktienbasierten Vergütungsvereinbarungen gewähren Lufthansa und weitere beteiligte Konzerngesellschaften auf ein Eigeninvestment in Lufthansa Aktien einen Abschlag von 50 Prozent für Vorstand, Führungskräfte und außertarifliche Mitarbeiter. Die gewährten Optionspakete 2008, 2009 und 2010 beinhalten eine Outperformance-Option und eine Performance-Option. Die Outperformance-Option ist an die Entwicklung der Lufthansa Aktie im Vergleich zu einem fiktiven Index aus Aktien europäischer Wettbewerber geknüpft, während die Performance-Option an die absolute Entwicklung des Aktienkurses der Lufthansa Aktie gebunden ist. Aus der Outperformance-Option erhält der Inhaber je Prozentpunkt Outperformance bei Ausübung eine Barzahlung. Bei einer Outperformance von mehr als 20 Prozent ist die Barzahlung auf einen festgelegten Betrag beschränkt.

Aus den Performance-Optionen 2008 und 2009 ist eine Barzahlung fällig, wenn sich der Aktienkurs um mehr als 33 Prozent verbessert. Diese ist bei mehr als 49 Prozent (außertarifliche Mitarbeiter: 48 Prozent) auf einen Maximalbetrag begrenzt. Aus der Performance-Option 2010 ist eine Barzahlung fällig, wenn sich der Aktienkurs um mehr als 29 Prozent verbessert. Diese ist bei mehr als 45 Prozent (außertarifliche Mitarbeiter: 44 Prozent) auf einen Maximalbetrag begrenzt.

##### Programm 2008, 2009 und 2010 Outperformance-Option

|                             | € je Prozentpunkt<br>ab 1 % | Maximalbetrag<br>pro Tranche in € |
|-----------------------------|-----------------------------|-----------------------------------|
| Vorstand                    | 1 000                       | 20 000                            |
| Führungskräfte              | 400                         | 8 000                             |
| Außertarifliche Mitarbeiter | 200                         | 1 000                             |

##### Programm 2008, 2009 Performance-Option

|                             | € je Prozentpunkt<br>ab 33 % Performance | Maximalbetrag<br>pro Tranche in € |
|-----------------------------|------------------------------------------|-----------------------------------|
| Vorstand                    | 10 000 + 1 250 je P.                     | 20 000                            |
| Führungskräfte              | 4 000 + 500 je P.                        | 8 000                             |
| Außertarifliche Mitarbeiter | 500 + 100 je P.                          | 1 000                             |

##### Programm 2010 Performance-Option

|                             | € je Prozentpunkt<br>ab 29 % Performance | Maximalbetrag<br>pro Tranche in € |
|-----------------------------|------------------------------------------|-----------------------------------|
| Vorstand                    | 10 000 + 625 je P.                       | 20 000                            |
| Führungskräfte              | 4 000 + 250 je P.                        | 8 000                             |
| Außertarifliche Mitarbeiter | 500 + 100 je drei P.                     | 1 000                             |

Die Laufzeit der Programme 2008, 2009 und 2010 beträgt jeweils drei Jahre.



Alle Optionen sind jeweils im letzten Jahr der Laufzeit zu einem festgelegten Zeitpunkt ausübbar. Die Outperformance-Abrechnung erfolgt in allen Programmen nach dem „Total-Shareholder-Return-Prinzip“. Die Aktien des Eigeninvestments sind bis zur Ausübung gesperrt.

Die Outperformance-Option des Jahres 2007 für Vorstand, Führungskräfte und außertarifliche Mitarbeiter wurde im Geschäftsjahr 2010 zur Ausübung fällig. Aus der Outperformance-Option 2007 wurden insgesamt 16 Mio. EUR ausgezahlt. Aus der Performance-Option 2007 erfolgte wegen Unterschreiten des Schwellenwerts von 33 Prozent keine Auszahlung. Die Outperformance-Option des Jahres 2006 war im Geschäftsjahr 2010 letztmalig ausübbar und führte zu Auszahlungen von 0,4 Mio. EUR.

Insgesamt hat sich im Laufe des Geschäftsjahres 2010/2009 der Bestand an Optionen wie folgt verändert:

|                                       | 2010                                   |                           | 2009                                   |                           |
|---------------------------------------|----------------------------------------|---------------------------|----------------------------------------|---------------------------|
|                                       | Anzahl an Optionen/<br>Optionspaketen* | Barausgleich<br>in Tsd. € | Anzahl an Optionen/<br>Optionspaketen* | Barausgleich<br>in Tsd. € |
| Ausstehende Optionen zum 01.01.       | 9 884                                  | –                         | 8 547                                  | –                         |
| Gewährte Optionen                     | 3 697                                  | –                         | 3 464                                  | –                         |
| Ausgelaufene bzw. verfallene Optionen | 126                                    | –                         | 80                                     | –                         |
| Ausgeübte Optionen                    | 3 126                                  | 16 231                    | 2 047                                  | 12 562                    |
| Ausstehende Optionen zum 31.12.       | 10 329                                 | –                         | 9 884                                  | –                         |

\* Die Outperformance-Option sowie die Performance-Option der Programme 2009 bzw. 2008 werden als Optionspaket bezeichnet.

Zum 1. Januar 2010 haben Vorstand, Führungskräfte und außertariflich angestellte Mitarbeiter im Rahmen der Programme insgesamt 2.483.781 Aktien, zum 31. Dezember 2010 insgesamt 2.481.196 Aktien gehalten.

Die beizulegenden Zeitwerte der insgesamt neun noch laufenden Optionsprogramme wurden mit Hilfe von Monte-Carlo-Simulationen ermittelt. Hierbei werden die zukünftigen Renditen der Aktien des Vergleichsindex sowie der Deutschen Lufthansa AG simuliert und der Wert der Optionsrechte als zu erwartender Ausschüttungsbetrag ermittelt.

Insgesamt wurden folgende beizulegende Werte ermittelt:

| in € pro Option                    | Eigeninvestition | Beizulegender Zeitwert |
|------------------------------------|------------------|------------------------|
| <b>Vorstand</b>                    |                  |                        |
| Optionen 2008                      | 2 000            | 10 949                 |
| Optionen 2009                      | 2 000            | 16 131                 |
| Optionen 2010                      | 2 000            | 14 337                 |
| <b>Führungskräfte</b>              |                  |                        |
| Optionen 2008                      | 2 000            | 4 379                  |
| Optionen 2009                      | 2 000            | 6 452                  |
| Optionen 2010                      | 2 000            | 5 735                  |
| <b>Außertarifliche Mitarbeiter</b> |                  |                        |
| Optionen 2008                      | 1 000            | 555                    |
| Optionen 2009                      | 1 000            | 810                    |
| Optionen 2010                      | 1 000            | 723                    |

In die Monte-Carlo-Simulation sind die gewichteten durchschnittlichen Aktienkurse zum Stichtag eingeflossen. Gemäß Programmbedingungen handelt es sich dabei um die 100-Tage-Durchschnittskurse (Programme 2008, 2009 und 2010: 50-Tage-Durchschnittskurse) der Deutschen Lufthansa AG sowie der jeweils im Vergleichsindex enthaltenen Aktien der Wettbewerber. Die verwendeten Volatilitäten und Korrelationen stellen stichtagsbezogene und laufzeitabhängige Erwartungswerte auf Basis aktueller Markteinschätzungen dar.

Als Zinssatz wurden der Restlaufzeit der Outperformance-Option jeweils entsprechende Swap-Rates verwendet. Für die Bewertung wurden die maximalen Laufzeiten der Programme berücksichtigt.

Die vom externen Dienstleister verwendeten Parameter sind in folgender Übersicht zusammengestellt.

| <b>Referenzpreis</b> |               |               |               |
|----------------------|---------------|---------------|---------------|
| in EUR/GBP           | Optionen 2008 | Optionen 2009 | Optionen 2010 |
| Lufthansa            | 13,54         | 11,57         | 13,74         |
| Air France-KLM       | 15,14         | 11,51         | 11,60         |
| British Airways      | 191,45        | 209,98        | 246,88        |
| Iberia               | 1,82          | 2,00          | 2,90          |
| Ryanair              | 2,46          | 3,33          | 4,19          |
| easyJet              | 326,86        | 365,33        | 400,87        |
| Air Berlin           | 3,46          | 3,78          | 3,27          |

**Erwartete Volatilitäten für**

| in %                 | Optionen 2008                                                      | Optionen 2009 | Optionen 2010 |
|----------------------|--------------------------------------------------------------------|---------------|---------------|
| Lufthansa            | 28,14                                                              | 33,70         | 37,69         |
| Air France-KLM       | 36,54                                                              | 44,36         | 48,82         |
| British Airways      | 35,67                                                              | 47,23         | 56,01         |
| Iberia               | 35,93                                                              | 38,88         | 48,15         |
| Ryanair              | 32,68                                                              | 39,54         | 52,41         |
| easyJet              | 30,88                                                              | 38,35         | 50,89         |
| Air Berlin           | 30,32                                                              | 40,60         | 56,26         |
| Risikoloser Zinssatz | 0,67 % – 1,16 % für Eurozone<br>0,58 % – 1,20 % für Großbritannien |               |               |
| Fluktuation          | 5,1 %                                                              |               |               |

Der im Personalaufwand enthaltene Gesamtaufwand für Optionsprogramme betrug 19 Mio. EUR (Vorjahr: 10 Mio. EUR).

**42 Verbindlichkeiten aus Lieferungen und Leistungen sowie sonstige kurzfristige finanzielle Verbindlichkeiten**

| in Mio. €                                                                            | 31.12.2010   | 31.12.2009   |
|--------------------------------------------------------------------------------------|--------------|--------------|
| <b>Verbindlichkeiten aus Lieferungen und Leistungen</b>                              |              |              |
| Verbindlichkeiten aus Lieferungen und Leistungen gegenüber nahestehenden Unternehmen | 107          | 105          |
| Verbindlichkeiten aus Lieferungen und Leistungen gegenüber übrigen Beteiligungen     | 18           | 12           |
| Verbindlichkeiten aus Lieferungen und Leistungen gegenüber Konzernfremden            | 2 777        | 2 435        |
|                                                                                      | <b>2 902</b> | <b>2 552</b> |
| <b>Sonstige Verbindlichkeiten</b>                                                    |              |              |
| Verbindlichkeiten gegenüber Kreditinstituten                                         | 23           | 58           |
| Sonstige Verbindlichkeiten gegenüber nahestehenden Unternehmen                       | 197          | 185          |
| Sonstige Verbindlichkeiten gegenüber übrigen Beteiligungen                           | 1            | –            |
| Sonstige finanzielle Verbindlichkeiten                                               | 1 070        | 1 001        |
|                                                                                      | <b>1 291</b> | <b>1 244</b> |
| <b>Summe</b>                                                                         | <b>4 193</b> | <b>3 796</b> |

Der Buchwert dieser Verbindlichkeiten entspricht dem beizulegenden Zeitwert.

**43 Kurzfristige erhaltene Anzahlungen, Rechnungsabgrenzungsposten und sonstige nicht finanzielle Verbindlichkeiten**

| in Mio. €                                                                              | 31.12.2010   | 31.12.2009   |
|----------------------------------------------------------------------------------------|--------------|--------------|
| Erhaltene Anzahlungen                                                                  | 187          | 192          |
| Passivischer Saldo aus erhaltenen Anzahlungen und Forderungen aus unfertigen Aufträgen | 107          | 81           |
| Passiver Rechnungsabgrenzungsposten                                                    | 351          | 344          |
| Sonstige nicht finanzielle Verbindlichkeiten                                           | 421          | 391          |
|                                                                                        | <b>1 066</b> | <b>1 008</b> |

Verpflichtungen aus Meilenbonusprogrammen, „Erläuterung 37“ ab [S. 194](#) und „Erläuterung 41“ ab [S. 197](#), sind in Höhe von 314 Mio. EUR (Vorjahr: 306 Mio. EUR) unter den passiven Rechnungsabgrenzungsposten und mit 204 Mio. EUR (Vorjahr: 185 Mio. EUR) unter den sonstigen nicht finanziellen Verbindlichkeiten erfasst.

Der passive Rechnungsabgrenzungsposten enthält zudem 10 Mio. EUR (Vorjahr: 7 Mio. EUR) aus für Investitionen erhaltenen Zuschüssen und Zulagen, die entsprechend der Nutzungsdauer der Investitionsgüter in Folgejahren aufgelöst werden.

Die sonstigen Verbindlichkeiten enthalten mit 210 Mio. EUR (Vorjahr: 199 Mio. EUR) abgegrenzte Beträge für nicht genomme Urlaubstage und Überstunden und mit 7 Mio. EUR (Vorjahr: 7 Mio. EUR) den Kurzfristanteil der zum beizulegenden Zeitwert bewerteten Verpflichtungen aus aktienbasierten Vergütungsvereinbarungen, „Erläuterung 41“ ab [S. 197](#).

## Sonstige Erläuterungen

### 44 Erfolgsunsicherheiten und Ereignisse nach dem Bilanzstichtag

#### Eventualverbindlichkeiten

| in Mio. €                                                        | 31.12.2010 | 31.12.2009 |
|------------------------------------------------------------------|------------|------------|
| Aus Bürgschaften, Wechsel- und Scheckbürgschaften                | 883        | 855        |
| Aus Gewährleistungsverträgen                                     | 960        | 897        |
| Aus der Bestellung von Sicherheiten für fremde Verbindlichkeiten | 14         | 13         |

In den Bürgschaften ist ein Betrag von 867 Mio. EUR (Vorjahr: 831 Mio. EUR), in den Gewährleistungen ein Betrag von 296 Mio. EUR (Vorjahr: 290 Mio. EUR) enthalten, der jeweils Eventualverbindlichkeiten gegenüber Gläubigern von Joint Ventures betrifft. Insgesamt 1.157 Mio. EUR (Vorjahr: 1.114 Mio. EUR) entfallen auf die Übernahme gesamtschuldnerischer Bürgschaften und Gewährleistungen. Diesem Betrag stehen Ausgleichsansprüche gegen die übrigen Gesamtschuldner in Höhe von 1.062 Mio. EUR (Vorjahr: 1.022 Mio. EUR) gegenüber. Soweit Jahresabschlüsse noch nicht vorliegen, sind die vorgenannten Beträge vorläufig.

Wegen geringer Wahrscheinlichkeit der Inanspruchnahme musste die Bildung verschiedener Rückstellungen mit einer gesamten möglichen finanziellen Ergebnisauswirkung von 210 Mio. EUR (Vorjahr: 163 Mio. EUR) für Folgejahre unterbleiben.

Aus den bereits im Vorjahr fest kontrahierten Flugzeugkaufverträgen über sechs Airbus A300-600 wurden im Geschäftsjahr 2010 Gewinne von 12 Mio. EUR erzielt. Aus diesen Verkäufen sowie ebenfalls im Geschäftsjahr 2009 bereits fest kontrahierten Flugzeugkaufverträgen über zwölf Canadair Regional Jet 200 flossen im Jahr 2010 insgesamt 77 Mio. EUR zu.

Aus fest kontrahierten Flugzeugkaufverträgen über fünf Canadair Regional Jet 200 werden für das Geschäftsjahr 2011 Gewinne von 3 Mio. EUR und finanzielle Zuflüsse von 16 Mio. EUR erwartet.

Angaben zu den Ereignissen nach dem Bilanzstichtag sind im Lagebericht auf [S. 131](#) zu finden.

### 45 Sonstige finanzielle Verpflichtungen

Zum 31. Dezember 2010 besteht ein Bestellobligo für Investitionen in das Sachanlagevermögen und für immaterielle Vermögenswerte von insgesamt 6,8 Mrd. EUR (Vorjahr: 6,4 Mrd. EUR). Darüber hinaus bestehen aus Beteiligungsverhältnissen Eigenkapitalbeziehungsweise Gesellschafterdarlehenszusagen von 34 Mio. EUR (Vorjahr: 49 Mio. EUR). Aus Kaufverträgen und gewährten Put-Optionen bestehen Übernahmeverpflichtungen für Gesellschaftsanteile in Höhe von 14 Mio. EUR (Vorjahr: 15 Mio. EUR).

### 46 Sicherungspolitik und Finanzderivate

Der Lufthansa Konzern ist als international tätiger Luftverkehrskonzern Wechselkurs-, Zins- und Treibstoffpreisänderungsrisiken sowie Kredit- und Liquiditätsrisiken ausgesetzt. Unternehmenspolitik ist es, diese Risiken durch ein systematisches Finanzmanagement zu begrenzen.

#### Preisrisiko

Wechselkursschwankungen zwischen dem Euro und anderen Währungen, Zinsschwankungen an den internationalen Geld- und Kapitalmärkten sowie Preisschwankungen an den Märkten für Rohöl und Ölprodukte stellen die wesentlichen Preisrisiken für den Lufthansa Konzern dar. Die Sicherungspolitik zur Eingrenzung dieser Risiken wird vom Vorstand vorgegeben und ist in konzern-internen Richtlinien dokumentiert. Sie sieht auch den Einsatz derivativer Finanzinstrumente vor. Die entsprechenden Finanztransaktionen werden nur mit bonitätsmäßig erstklassigen Kontrahenten abgeschlossen.

Im Hinblick auf Währungsrisiken aus dem operativen Geschäft befindet sich Lufthansa im Wesentlichen im US-Dollar aufgrund der dollarabhängigen Treibstoffzahlungen in einer Nettozahlerposition. In den übrigen Währungen liegen grundsätzlich Nettoüberschüsse vor. Als Hauptrisiken gelten hier das Britische Pfund und der Japanische Yen. Währungsrisiken aus dem geplanten operativen Exposure werden in der Regel schrittweise über einen Zeitraum von 24 Monaten mittels Termingeschäften gesichert. Angestrebt wird ein durchschnittlicher Sicherungsgrad von 50 Prozent.

Das Exposure zum Ende des Geschäftsjahres 2010 zeigt im operativen Geschäft für die nächsten 24 Monate folgende Werte:

| in Mio.                      | USD     | YEN     | GBP   |
|------------------------------|---------|---------|-------|
| Exposure (Währung)           | -11 645 | 161 414 | 1 091 |
| Exposure (EUR zum Kassakurs) | -8 715  | 1 486   | 1 267 |
| Sicherungen (Währung)        | 4 967   | -73 529 | -387  |
| Sicherungsgrad               | 43 %    | 46 %    | 35 %  |

Währungsrisiken aus Flugzeuginvestitionen werden grundsätzlich zu 50 Prozent bei Vertragsabschluss gesichert. Der Sicherungsgrad wird erhöht, wenn während der Vertragslaufzeit der Kalkulationskurs des Investvorhabens deutlich über- oder unterschritten wird. In den letzten 24 Monaten vor Zahlung wird der Sicherungsgrad in halbjährlichen 10 Prozent-Schritten erhöht, sodass der Sicherungsgrad am Ende 90 Prozent entspricht. Als Sicherungsinstrumente kommen neben Termingeschäften auch Bandbreitenoptionen zum Einsatz.

Das Exposure für Investitionen betrug aus Sicht des Jahresendes 2010:

| in Mio.                                          | 2011   | 2012   | 2013   | 2014 | 2015 | 2016 | 2017 |
|--------------------------------------------------|--------|--------|--------|------|------|------|------|
| Exposure Netto-investitionen (USD)               | -2 235 | -1 902 | -1 081 | -742 | -457 | -280 | -    |
| Exposure Netto-investitionen (EUR zum Kassakurs) | -1 673 | -1 424 | -809   | -555 | -342 | -210 | -    |
| Sicherungen (USD)                                | 1 946  | 1 504  | 900    | 604  | 329  | 207  | -    |
| Sicherungsgrad                                   | 87 %   | 79 %   | 83 %   | 81 % | 72%  | 74%  | -    |

Lufthansa verfolgt das Ziel, 85 Prozent ihrer Finanzverbindlichkeiten variabel zu verzinsen. Mit diesem Prozentsatz wird sowohl dem Ziel der langfristigen Zinsaufwandsminimierung als auch dem Ziel der Reduzierung der Ergebnisvolatilität Rechnung getragen. Zinsänderungsrisiken aus Finanzverbindlichkeiten werden daher nur zu 15 Prozent gesichert.

Die Float/Fix-Ratio der langfristigen Geldaufnahmen betrug aus Sicht des Geschäftsjahresendes 2010:

#### Exposure

| in Mio. €         | 2011  | 2012  | 2013  | 2014  | 2015  | 2016 | 2017 | 2018 | 2019 | 2020 |
|-------------------|-------|-------|-------|-------|-------|------|------|------|------|------|
| Fix               | 1 100 | 858   | 669   | 558   | 464   | 388  | 301  | 230  | 151  | 82   |
| Variabel          | 4 972 | 4 391 | 3 674 | 2 260 | 1 870 | 864  | 693  | 509  | 318  | 237  |
| Float / Fix-Ratio | 82 %  | 84 %  | 85 %  | 80 %  | 80 %  | 69 % | 70 % | 69 % | 68 % | 74 % |

Fremdwährungsrisiken aus Finanzverbindlichkeiten werden dagegen grundsätzlich mittels Zins-Währungsswaps zu 100 Prozent gesichert. Diese Sicherungsgeschäfte werden nach IAS 39 als Handelsgeschäfte behandelt.

Im Geschäftsjahr 2010 betrug der Anteil der Treibstoffaufwendungen an den betrieblichen Aufwendungen des Lufthansa Konzerns 17,8 Prozent (Vorjahr: 14,7 Prozent). Starke Veränderungen der Treibstoffpreise können daher das Ergebnis des Konzerns erheblich beeinflussen.

Zur Begrenzung des Treibstoffpreissrisikos werden in der Regel Rohöl-Preissicherungsgeschäfte abgeschlossen. Sicherungsgrad und Sicherungshorizont sind abhängig von dem Risikoprofil, das sich aus dem Geschäftsmodell einer Konzerngesellschaft ergibt. Grundsätzlich erfolgt hierbei eine monatliche Absicherung von jeweils bis zu 5 Prozent des Exposures für bis zu 24 Monate in Bandbreitenoptionen und sonstigen Sicherungskombinationen. Der so erreichte maximale Sicherungsgrad im Monat sieben beträgt bis zu 85 Prozent.

Von dem beschriebenen, regelbasierten Sicherungsvorgehen kann in einem durch eine Limitsystematik begrenzten Umfang abgewichen werden.

Die Treibstoffexposures betrugen aus Sicht des Geschäftsjahresendes:

#### Treibstoffexposures

|                  |        | 2011  | 2012   |
|------------------|--------|-------|--------|
| Treibstoffbedarf | Tsd. t | 9 854 | 10 579 |
| Sicherungen      | Tsd. t | 6 951 | 2 681  |
| Sicherungsgrad   | in %   | 70,5  | 25,3   |

Zur Absicherung der Wechselkurs-, Zins- und Treibstoffpreissrisiken bestehen zum Bilanzstichtag folgende Sicherungsgeschäfte:

|                                                  | Absicherung von Zeitwerten |                      | Absicherung von Cashflows |                      |
|--------------------------------------------------|----------------------------|----------------------|---------------------------|----------------------|
| in Mio. €                                        | Marktwert 31.12.2010       | Marktwert 31.12.2009 | Marktwert 31.12.2010      | Marktwert 31.12.2009 |
| Zinsswaps                                        | 145                        | 101                  | -                         | -                    |
| Bandbreitenoptionen                              |                            |                      |                           |                      |
| Treibstoffpreissicherung                         | -                          | -                    | 43                        | 142                  |
| Sicherungskombinationen Treibstoffpreissicherung | -                          | -                    | 268                       | 49                   |
| Termingeschäfte                                  |                            |                      |                           |                      |
| Devisensicherung                                 | -6                         | -14                  | -152                      | -227                 |
| Bandbreitenoptionen                              |                            |                      |                           |                      |
| Devisensicherung                                 | -                          | -                    | 82                        | -9                   |
| <b>Gesamt</b>                                    | <b>139</b>                 | <b>87</b>            | <b>241</b>                | <b>-45</b>           |

Die angegebenen Marktwerte der Finanzderivate entsprechen jeweils dem Preis, zu dem ein unabhängiger Dritter die Rechte und/oder Pflichten aus diesem Finanzinstrument übernehmen würde.

Die beizulegenden Zeitwerte der Zinsderivate entsprechen dem jeweiligen Marktwert, der durch geeignete finanzmathematische Verfahren, wie durch Diskontierung erwarteter künftiger Cashflows, bestimmt wird. Die Diskontierung berücksichtigt marktübliche Zinsen und die Restlaufzeiten der jeweiligen Instrumente.

Devisentermingeschäfte und -swaps werden einzeln mit ihren jeweiligen Terminkursen bewertet und auf Basis der entsprechenden Zinskurve auf den Stichtag diskontiert. Die Marktpreise von Devisenoptionen sowie den Optionen, die im Rahmen der Treibstoffpreissicherung verwendet werden, werden über anerkannte Optionspreismodelle ermittelt.

Die Treibstoffpreis- und Devisensicherungsgeschäfte zur Absicherung von Cashflows werden sich im Periodenergebnis beziehungsweise in den Anschaffungskosten von gesicherten Investitionen nach derzeitigem Kenntnisstand zum Fälligkeitszeitpunkt wie folgt auswirken:

| Geschäftsjahr<br>in Mio. € | Perioden-<br>ergebnis | Erstmalige Bewer-<br>tung von Anschaf-<br>fungskosten** | Gesamt     |
|----------------------------|-----------------------|---------------------------------------------------------|------------|
| 2011                       | 215                   | 14                                                      | 229        |
| 2012                       | 40                    | 17                                                      | 57         |
| 2013                       | 0*                    | 24                                                      | 24         |
| 2014                       | 0*                    | -10                                                     | -10        |
| 2015                       | 0*                    | -31                                                     | -31        |
| 2016                       | -1                    | -27                                                     | -28        |
| <b>Gesamt</b>              | <b>254</b>            | <b>-13</b>                                              | <b>241</b> |

\* Gerundet unter 1 Mio. EUR.

\*\* Negative Vorzeichen bedeuten eine Erhöhung der Anschaffungskosten.

Im Geschäftsjahr 2010 wurden aus fälligen Treibstoffpreissicherungsgeschäften aus dem Eigenkapital 136 Mio. EUR aufwandsmindernd in den Treibstoffaufwand gebucht. Aus Devisensicherungsgeschäften wurden 541 Mio. EUR aus dem Eigenkapital in den sonstigen betrieblichen Ertrag und 502 Mio. EUR in den sonstigen betrieblichen Aufwand gebucht. Weitere 111 Mio. EUR wurden als Anschaffungskostenminderungen von Flugzeugen erfasst.

Die Marktwertentwicklung der Derivate, die nicht als wirksame Sicherungsgeschäfte nach IAS 39 qualifiziert werden konnten, ist der Gewinn- und Verlustrechnung, „Erläuterung 13“ auf [S. 171](#), zu entnehmen.

Die folgenden Sensitivitätsanalysen nach IFRS 7 zeigen, wie Ergebnis und Eigenkapital sich verändern, wenn die Preisrisikvariablen aus Sicht des Bilanzstichtags anders ausgefallen wären.

| in Mio. €              | Auswirkungen auf<br>das Ergebnis* | Auswirkungen auf<br>das Eigenkapital* |
|------------------------|-----------------------------------|---------------------------------------|
| <b>Treibstoffpreis</b> |                                   |                                       |
| + 10 %                 | - 114                             | + 344                                 |
| - 10 %                 | - 25                              | - 179                                 |
| <b>Währung – USD</b>   |                                   |                                       |
| + 10 %                 | - 182                             | + 516                                 |
| - 10 %                 | + 169                             | - 646                                 |
| <b>Währung – YEN</b>   |                                   |                                       |
| + 10 %                 | - 10                              | - 46                                  |
| - 10 %                 | + 8                               | + 56                                  |
| <b>Währung – GBP</b>   |                                   |                                       |
| + 10 %                 | + 19                              | - 36                                  |
| - 10 %                 | - 15                              | + 44                                  |
| <b>Zins</b>            |                                   |                                       |
| - 100 Basispunkte      | + 30                              | + 23                                  |
| + 100 Basispunkte      | - 30                              | - 22                                  |

\* Alle Beträge nach Berücksichtigung latenter Steuereffekte;  
Vorzeichen stehen in Bezug zum Ergebnis bzw. Eigenkapital.

Die obigen Werte für die Zinsrisikokomponente enthalten keine Sensitivierung für ein Schulscheindarlehen, für das eine Value-at-Risk-Betrachtung durchgeführt wurde. Die Wertentwicklung dieses Schulscheindarlehens ist an ein spezielles Anlagenportfolio geknüpft.

Die durchgeführte historische Value-at-Risk-Analyse zeigt, dass in 99 Prozent aller Fälle in den folgenden 10 Tagen der Wertverlust 2,0 Prozent (2 Mio. EUR) nicht überschritten hat.

### Liquiditätsrisiko

Komplexe Finanzplanungssysteme sichern die frühzeitige Erkennung der künftigen Liquiditätssituation. Auf Basis der Ergebnisse der Konzernstrategie und Konzernplanungsprozesse erfolgt eine monatliche rollierende und grundsätzlich währungsdifferenzierte Liquiditätsplanung mit einem Planungshorizont von 24 Monaten. Diese Planung bietet ein aktuelles Bild der zu erwartenden Liquiditätsentwicklung auf Gesellschafts- und Währungsebene.

Als Liquiditätsreserve hält Lufthansa grundsätzlich eine kurzfristig verfügbare Liquidität in Höhe von mindestens 2,3 Mrd. EUR vor. Zum 31. Dezember 2010 verfügte der Lufthansa Konzern über zugesagte freie Kreditlinien in Höhe von 1,9 Mrd. EUR (Vorjahr: 1,7 Mrd. EUR).

Eine Laufzeitenanalyse für die unter „Erläuterung 39“ ab [S. 196](#) aufgeführten Finanzschulden sowie die unter „Erläuterung 26“ auf [S. 186](#) aufgeführten derivativen Finanzinstrumente, basierend auf undiskontierten Bruttozahlungsströmen inklusive zugehöriger Zinszahlungen, zeigt die folgenden zu erwartenden Zahlungszu- und -abflüsse aus Sicht des Bilanzstichtags 31. Dezember 2010.



Aufgrund der eingesetzten Sicherungsgeschäfte bestehen zum überwiegenden Teil unmittelbare Zusammenhänge zwischen den dargestellten Zahlungsmittelzuflüssen und -abflüssen der derivativen Finanzinstrumente.

#### Derivative Finanzinstrumente

| in Mio. €                | Zuflüsse | Abflüsse | Netto      |
|--------------------------|----------|----------|------------|
| Im 1. Quartal            | 3 865    | -3 757   | <b>108</b> |
| Bis 1 Jahr <sup>1)</sup> | 6 492    | -6 287   | <b>205</b> |
| 1 – 5 Jahre              | 7 692    | -7 522   | <b>170</b> |
| Später                   | 1 007    | -987     | <b>20</b>  |

<sup>1)</sup> Ohne Zahlungen des ersten Quartals.

#### Nicht-derivative Finanzinstrumente

| in Mio. €                | Zuflüsse <sup>2)</sup> | Abflüsse | Netto         |
|--------------------------|------------------------|----------|---------------|
| Im 1. Quartal            | 3                      | -459     | <b>-456</b>   |
| Bis 1 Jahr <sup>1)</sup> | 4                      | -852     | <b>-848</b>   |
| 1 – 5 Jahre              | 90                     | -4 630   | <b>-4 540</b> |
| Später                   | 0                      | -2 844   | <b>-2 844</b> |

<sup>1)</sup> Ohne Zahlungen des ersten Quartals.

<sup>2)</sup> Die hier dargestellten Zuflüsse aus Finanzschulden sind Zuflüsse aus einem Deposit, welches zur Tilgung des Darlehens verwendet wird. Den Zuflüssen stehen Abflüsse in gleicher Höhe gegenüber.

#### Kreditrisiko

Der Verkauf von Passage- und Frachtdokumenten wird größtenteils über Agenturen abgewickelt. Diese Agenturen sind überwiegend länderspezifischen Clearingsystemen für die Abrechnung von Passage- beziehungsweise Frachtverkäufen angeschlossen. Die Bonität der Agenten wird von den jeweiligen Clearingstellen überprüft. Das Kreditrisiko bei Verkaufsagenten ist aufgrund der breiten Streuung weltweit relativ gering.

Forderungen und Verbindlichkeiten zwischen den Luftverkehrsgesellschaften werden auf bilateraler Basis oder mittels Verrechnung über ein Clearing House der International Air Transport Association (IATA) beglichen, soweit die einer Leistung zu Grunde liegenden Verträge nicht ausdrücklich etwas anderes vorsehen. Die grundsätzliche Verrechnung mittels Saldierung aller Forderungen und Verbindlichkeiten in wöchentlichen Intervallen führt zu einer deutlichen Reduzierung des Ausfallrisikos. Zusätzlich besteht eine Vertrauensschadensversicherung, die Teilrisiken innerhalb einer bestimmten Bandbreite abdeckt. Im Einzelfall wird im jeweiligen Leistungsvertrag bei sonstigen Geschäften eine gesonderte Sicherheit gefordert.

Für alle übrigen Leistungsbeziehungen gilt, dass zur Vermeidung von Zahlungsausfällen in Abhängigkeit von Art und Höhe der jeweiligen Leistung Sicherheiten verlangt, Kreditauskünfte/Referenzen eingeholt oder historische Daten aus der bisherigen Geschäftsbeziehung, insbesondere dem Zahlungsverhalten, genutzt werden.

Kontrahentenrisiken in Zusammenhang mit Kreditkartengesellschaften werden eng überwacht, Zahlungseingänge täglich überprüft. Neben dem Forderungsmonitoring auf Gesellschafts- beziehungsweise Geschäftsfeldebene besteht ein konzernweites Kontrahentenmonitoring mit individuell zugeordneten Limits, um konzernübergreifende, sich akkumulierende Risiken im Portfolio zu erkennen und bei Bedarf geeignete Gegenmaßnahmen ergreifen zu können.

Bei erkennbaren Risiken werden angemessene Wertberichtigungen auf Forderungen gebildet.

Das maximale Kreditrisiko aus einer möglichen Zahlungsunfähigkeit von Schuldern aus Ausleihungen und Forderungen beträgt zum 31. Dezember 2010 4.021 Mio. EUR und setzt sich wie folgt zusammen:

| in Mio. €                                                                        | 31.12.2010   | 31.12.2009   |
|----------------------------------------------------------------------------------|--------------|--------------|
| Ausleihungen                                                                     | 170          | 132          |
| Langfristige Forderungen                                                         | 450          | 374          |
| Forderungen aus Lieferungen und Leistungen und sonstige kurzfristige Forderungen | 3 401        | 3 033        |
|                                                                                  | <b>4 021</b> | <b>3 539</b> |

Die wertberichtigten Ausleihungen und Forderungen haben sich wie folgt entwickelt:

| in Mio. €                  | 01.01.2010 |
|----------------------------|------------|
| Bruttowert                 | 211        |
| Wertberichtigung           | -188       |
| <b>Buchwert 01.01.2010</b> | <b>23</b>  |

| in Mio. €                  | 31.12.2010 |
|----------------------------|------------|
| Bruttowert                 | 193        |
| Wertberichtigung           | -171       |
| <b>Buchwert 31.12.2010</b> | <b>22</b>  |

Weitere 116 Mio. EUR (Vorjahr: 127 Mio. EUR) waren bereits überfällig, aber nicht abgeschrieben.

Die Altersstruktur der überfälligen Forderungen stellt sich wie folgt dar:

| in Mio. €                 |    |
|---------------------------|----|
| Bis zu 90 Tagen           | 80 |
| Zwischen 90 und 180 Tagen | 19 |
| Älter als 180 Tage        | 17 |

Sicherheiten für wertberichtigte Forderungen bestehen in Höhe von 4 Mio. EUR (Vorjahr: 13 Mio. EUR). Für überfällige, noch nicht wertberichtigte Forderungen bestehen keine Sicherheiten.

Das Kreditrisiko aus zur Veräußerung verfügbaren finanziellen Vermögenswerten besteht in Höhe der Wertpapiere, die keine Eigenkapitalinstrumente darstellen. Die lang- und kurzfristig klassifizierten Wertpapiere entfallen auf:

| in Mio. €                 |  | 31.12.2010   |
|---------------------------|--|--------------|
| Fremdkapitalinstrumente   |  | 4 521        |
| Eigenkapitalinstrumente   |  | 12           |
| <b>Wertpapiere gesamt</b> |  | <b>4 533</b> |

Die Wertpapiere, die Fremdkapitaltitel sind, weisen folgende Ratings (Standard & Poor's) auf:

| in Mio. €                  |              |
|----------------------------|--------------|
| AAA                        | 2 028        |
| AAA–                       | –            |
| AA+                        | 85           |
| AA                         | 288          |
| AA–                        | 194          |
| A+                         | 696          |
| A                          | 521          |
| A–                         | 367          |
| BBB+                       | 161          |
| BBB                        | 139          |
| Unter BBB bzw. kein Rating | 42           |
| <b>Gesamt</b>              | <b>4 521</b> |

Das Kreditrisiko aus derivativen Finanzinstrumenten besteht in der Gefahr des Ausfalls eines Vertragspartners. Das maximale Kreditrisiko ergibt sich aus der Summe an Geschäften mit den Vertragspartnern, bei denen per saldo positive Marktwerte vorliegen.

Zum 31. Dezember 2010 betrug das Kreditrisiko aus derivativen Finanzinstrumenten, die wirksamer Teil einer Sicherungsbeziehung sind, 543 Mio. EUR, zum 31. Dezember 2009 458 Mio. EUR. Das Kontrahentenausfallrisiko aus Finanzmarktgeschäften ist durch die Festlegung des maximalen Risikos unter Berücksichtigung der Bonitätseinstufung anerkannter Ratingagenturen begrenzt.

Die zum Bilanzstichtag vorliegenden positiven Marktwerte stammen aus Geschäften mit Vertragspartnern, die folgende Ratings (Standard & Poor's) aufweisen:

| in Mio. €     |            |
|---------------|------------|
| AA            | 154        |
| AA–           | 122        |
| A+            | 247        |
| A             | 5          |
| A–            | 11         |
| BBB+          | 2          |
| Kein Rating   | 2          |
| <b>Gesamt</b> | <b>543</b> |

Das Kreditrisiko aus derivativen Finanzinstrumenten, die zum beizulegenden Zeitwert über die GuV bilanziert sind, besteht am 31. Dezember 2010 in Höhe von 290 Mio. EUR und ergibt sich aus der Summe an Geschäften mit den Vertragspartnern, bei denen per saldo positive Marktwerte vorliegen. Dieser Wert umfasst in Höhe von 218 Mio. EUR auch die Zeitwerte zur Sicherung eingesetzter Optionen, deren Veränderungen ab dem 1. Januar 2010 im Finanzergebnis zu erfassen sind. Die Vertragspartner weisen folgende Ratings (Standard & Poor's) auf:

| in Mio. €     |            |
|---------------|------------|
| AA–           | 75         |
| A+            | 12         |
| A             | 187        |
| A–            | 2          |
| BBB+          | 5          |
| BBB           | 9          |
| <b>Gesamt</b> | <b>290</b> |

#### 47 Segmentberichterstattung

Der Lufthansa Konzern ist in fünf wesentlichen Geschäftsfeldern tätig, im Passagier-Linienluftverkehr („Passage Airline Gruppe“) durch die Deutsche Lufthansa AG, die Lufthansa CityLine GmbH, die Swiss International Air Lines AG, die Austrian Airlines AG, die British Midland Ltd., die Air Dolomiti S.p.A., die Eurowings Luftverkehrs AG und die Germanwings GmbH, im Fracht-Linienluftverkehr („Logistik“) durch die Lufthansa Cargo-Gruppe, in der Flugzeugwartung und -überholung („Technik“) durch die Lufthansa-Technik-Gruppe, im Bereich EDV-Dienstleistungen („IT Services“) durch die Lufthansa Systems-Gruppe und im Bereich Catering durch die LSG Lufthansa Service/Sky Chefs-Gruppe.

Die Erträge und Aufwendungen der Lufthansa Commercial Holding GmbH, der Lufthansa AirPlus Servicekarten GmbH, der Lufthansa Flight Training GmbH und weiterer Konzerngesellschaften, die keinem berichtspflichtigen Segment zugeordnet sind, werden

gemeinsam mit den Erträgen und Aufwendungen der zentralen Konzernfunktionen in der Spalte „Sonstige“ der Segmentberichterstattung dargestellt.

Verkäufe und Erlöse zwischen den Geschäftsfeldern werden grundsätzlich zu Preisen erbracht, wie sie auch mit Dritten vereinbart würden. Verwaltungsleistungen werden als Kostenumlagen berechnet.

Zu den Außenumsätzen bei den Verkehrserlösen siehe auch „Erläuterung 3“ auf [S. 167](#).

## Segmentinformationen nach Geschäftsfeldern 2010

|                                          | Passage<br>Airline<br>Gruppe <sup>2)</sup> | Logistik     | Technik <sup>2)</sup> | IT Services | Catering <sup>2)</sup> | Summe<br>berichts-<br>pflichtiger<br>operativer<br>Segmente | Sonstige     | Überleitung         |                     | Konzern       |
|------------------------------------------|--------------------------------------------|--------------|-----------------------|-------------|------------------------|-------------------------------------------------------------|--------------|---------------------|---------------------|---------------|
| in Mio. €                                |                                            |              |                       |             |                        |                                                             |              | Nicht<br>zugeordnet | Konsoli-<br>dierung |               |
| Außenumsätze                             | 20 233                                     | 2 770        | 2 373                 | 232         | 1 716                  | 27 324                                                      | –            | –                   | –                   | 27 324        |
| davon Verkehrserlöse                     | 19 186                                     | 2 633        | –                     | –           | –                      | 21 819                                                      | –            | 449                 | –                   | 22 268        |
| Konzerninnenumsätze                      | 679                                        | 25           | 1 645                 | 363         | 533                    | 3 245                                                       | –            | –                   | –3 245              | –             |
| <b>Umsatzerlöse</b>                      | <b>20 912</b>                              | <b>2 795</b> | <b>4 018</b>          | <b>595</b>  | <b>2 249</b>           | <b>30 569</b>                                               | <b>–</b>     | <b>–</b>            | <b>–3 245</b>       | <b>27 324</b> |
| Operative sonstige Erträge               | 1 174                                      | 95           | 211                   | 32          | 67                     | 1 579                                                       | 1 232        | –                   | –592                | 2 219         |
| <b>Operative Gesamterlöse</b>            | <b>22 086</b>                              | <b>2 890</b> | <b>4 229</b>          | <b>627</b>  | <b>2 316</b>           | <b>32 148</b>                                               | <b>1 232</b> | <b>–</b>            | <b>–3 837</b>       | <b>29 543</b> |
| Operative Aufwendungen                   | 21 650                                     | 2 580        | 3 961                 | 617         | 2 240                  | 31 048                                                      | 1 458        | –                   | –3 839              | 28 667        |
| davon Materialaufwand                    | 13 250                                     | 1 846        | 2 056                 | 75          | 997                    | 18 224                                                      | 100          | –                   | –2 954              | 15 370        |
| davon Personalaufwand                    | 3 829                                      | 338          | 1 101                 | 247         | 811                    | 6 326                                                       | 320          | –                   | –6                  | 6 640         |
| davon Abschreibungen<br>(planmäßig)      | 1 261                                      | 107          | 94                    | 34          | 59                     | 1 555                                                       | 44           | –                   | 10                  | 1 609         |
| davon operative sonstige<br>Aufwendungen | 3 310                                      | 289          | 710                   | 261         | 373                    | 4 943                                                       | 994          | –                   | –889                | 5 048         |
| <b>Operatives Ergebnis <sup>1)</sup></b> | <b>436</b>                                 | <b>310</b>   | <b>268</b>            | <b>10</b>   | <b>76</b>              | <b>1 100</b>                                                | <b>–226</b>  | <b>–</b>            | <b>2</b>            | <b>876</b>    |
| Übrige Segmenterträge                    | 244                                        | 9            | 34                    | 1           | 2                      | 290                                                         | 49           | 387                 | –125                | 601           |
| Übrige Segmentaufwendungen               | 98                                         | 12           | 2                     | 17          | 5                      | 134                                                         | 19           | 139                 | –55                 | 237           |
| davon außerplanmäßige<br>Abschreibungen  | 65                                         | 9            | –                     | 14          | 0*                     | 88                                                          | 0*           | –                   | –                   | 88            |
| Ergebnis Equity-Bewertung                | –10                                        | 23           | 19                    | –           | 14                     | 46                                                          | 0*           | –                   | –                   | 46            |
| <b>Segmentergebnis<sup>3)</sup></b>      | <b>572</b>                                 | <b>330</b>   | <b>319</b>            | <b>–6</b>   | <b>87</b>              | <b>1 302</b>                                                | <b>–196</b>  | <b>248</b>          | <b>–68</b>          | <b>1 286</b>  |
| Übriges Finanzergebnis                   |                                            |              |                       |             |                        |                                                             |              |                     |                     | –308          |
| Ergebnis vor Ertragsteuern               |                                            |              |                       |             |                        |                                                             |              |                     |                     | 978           |
| Segmentvermögen <sup>4)</sup>            | 14 839                                     | 805          | 3 030                 | 222         | 1 215                  | 20 111                                                      | 1 337        | 14 691              | –6 819              | 29 320        |
| davon aus Equity-Bewertung               | 112                                        | 46           | 155                   | –           | 67                     | 380                                                         | 5            | –                   | –                   | 385           |
| Segmentsschulden <sup>5)</sup>           | 9 416                                      | 431          | 1 376                 | 221         | 479                    | 11 923                                                      | 1 196        | 10 632              | –2 771              | 20 980        |
| Segmentinvestitionen <sup>6)</sup>       | 2 047                                      | 21           | 67                    | 36          | 38                     | 2 209                                                       | 17           | 998                 | –951                | 2 273         |
| davon aus Equity-Bewertung               | –                                          | –            | –                     | –           | –                      | –                                                           | –            | –                   | –                   | –             |
| Mitarbeiter zum Stichtag                 | 57 157                                     | 4 517        | 20 159                | 2 935       | 28 499                 | 113 267                                                     | 3 752        | –                   | –                   | 117 019       |
| Mitarbeiter im Jahresdurchschnitt        | 57 226                                     | 4 469        | 20 297                | 2 974       | 28 369                 | 113 335                                                     | 3 731        | –                   | –                   | 117 066       |

\* Gerundet unter 1 Mio. EUR.

<sup>1)</sup> Zur Überleitung vom operativen Ergebnis zum Ergebnis der betrieblichen Tätigkeit siehe Seite 67 des Lageberichts.

<sup>2)</sup> Vorjahreszahlen aufgrund von Konsolidierungskreisänderungen nur bedingt vergleichbar.

<sup>3)</sup> Ergebnis der betrieblichen Tätigkeit inkl. des Ergebnisses aus Equity-Bewertung.

<sup>4)</sup> Immaterielle Vermögensgegenstände, Sachanlagevermögen, at equity bewertete Beteiligungen, Vorräte, Forderungen aus LuL sowie sonstige Vermögensgegenstände – unter „Konzern“ sind sämtliche Vermögenswerte ausgewiesen.

<sup>5)</sup> Sämtliche Schulden mit Ausnahme der Finanzschulden, Verbindlichkeiten gegenüber Konzerngesellschaften, derivative Finanzinstrumente, sonstige Rechnungsabgrenzungsposten, Steuerverpflichtungen – unter „Konzern“ sind sämtliche Schulden ausgewiesen.

<sup>6)</sup> Investitionen in immaterielle Vermögensgegenstände und Sachanlagevermögen sowie in at equity bewertete Beteiligungen.

## Segmentinformationen nach Geschäftsfeldern 2009

|                                          | Passage<br>Airline<br>Gruppe <sup>2)</sup> | Logistik <sup>2)</sup> | Technik      | IT Services | Catering <sup>2)</sup> | Summe<br>berichts-<br>pflichtiger<br>operativer<br>Segmente | Sonstige     | Überleitung         |                     | Konzern       |
|------------------------------------------|--------------------------------------------|------------------------|--------------|-------------|------------------------|-------------------------------------------------------------|--------------|---------------------|---------------------|---------------|
| in Mio. €                                |                                            |                        |              |             |                        |                                                             |              | Nicht<br>zugeordnet | Konsoli-<br>dierung |               |
| Außenumsätze                             | 16 225                                     | 1 928                  | 2 297        | 244         | 1 589                  | 22 283                                                      | –            | –                   | –                   | 22 283        |
| davon Verkehrserlöse                     | 15 430                                     | 1 844                  | –            | –           | –                      | 17 274                                                      | –            | 330                 | –                   | 17 604        |
| Konzerninnenumsätze                      | 573                                        | 23                     | 1 666        | 361         | 513                    | 3 136                                                       | –            | –                   | –3 136              | –             |
| <b>Umsatzerlöse</b>                      | <b>16 798</b>                              | <b>1 951</b>           | <b>3 963</b> | <b>605</b>  | <b>2 102</b>           | <b>25 419</b>                                               | <b>–</b>     | <b>–</b>            | <b>–3 136</b>       | <b>22 283</b> |
| operative sonstige Erträge               | 1 265                                      | 111                    | 157          | 38          | 125                    | 1 696                                                       | 1 230        | –                   | –454                | 2 472         |
| <b>Operative Gesamterlöse</b>            | <b>18 063</b>                              | <b>2 062</b>           | <b>4 120</b> | <b>643</b>  | <b>2 227</b>           | <b>27 115</b>                                               | <b>1 230</b> | <b>–</b>            | <b>–3 590</b>       | <b>24 755</b> |
| Operative Aufwendungen                   | 18 071                                     | 2 233                  | 3 804        | 627         | 2 155                  | 26 890                                                      | 1 364        | –                   | –3 629              | 24 625        |
| davon Materialaufwand                    | 10 904                                     | 1 511                  | 1 979        | 81          | 941                    | 15 416                                                      | 89           | –                   | –2 805              | 12 700        |
| davon Personalaufwand                    | 3 330                                      | 311                    | 1 059        | 233         | 775                    | 5 708                                                       | 299          | –                   | –5                  | 6 002         |
| davon Abschreibungen<br>(planmäßig)      | 1 032                                      | 123                    | 87           | 37          | 58                     | 1 337                                                       | 44           | –                   | 6                   | 1 387         |
| davon operative sonstige<br>Aufwendungen | 2 805                                      | 288                    | 679          | 276         | 381                    | 4 429                                                       | 932          | –                   | –825                | 4 536         |
| <b>Operatives Ergebnis<sup>1)</sup></b>  | <b>–8</b>                                  | <b>–171</b>            | <b>316</b>   | <b>16</b>   | <b>72</b>              | <b>225</b>                                                  | <b>–134</b>  | <b>–</b>            | <b>39</b>           | <b>130</b>    |
| Übrige Segmenterträge                    | 183                                        | 15                     | 18           | 1           | 3                      | 220                                                         | 69           | 487                 | –492                | 284           |
| Übrige Segmentaufwendungen               | 88                                         | 1                      | 2            | 1           | 8                      | 100                                                         | 29           | 432                 | –418                | 143           |
| davon außerplanmäßige<br>Abschreibungen  | 80                                         | –                      | –            | –           | 8                      | 88                                                          | –            | –                   | –                   | 88            |
| Ergebnis Equity-Bewertung                | –9                                         | 5                      | –1           | –           | 8                      | 3                                                           | –            | –                   | –                   | 3             |
| <b>Segmentergebnis<sup>3)</sup></b>      | <b>78</b>                                  | <b>–152</b>            | <b>331</b>   | <b>16</b>   | <b>75</b>              | <b>348</b>                                                  | <b>–94</b>   | <b>55</b>           | <b>–35</b>          | <b>274</b>    |
| Übriges Finanzergebnis                   |                                            |                        |              |             |                        |                                                             |              |                     |                     | –503          |
| Ergebnis vor Ertragsteuern               |                                            |                        |              |             |                        |                                                             |              |                     |                     | –229          |
| Segmentvermögen <sup>4)</sup>            | 13 612                                     | 798                    | 2 843        | 241         | 1 184                  | 18 678                                                      | 1 372        | 11 366              | –5 024              | 26 392        |
| davon aus Equity-Bewertung               | 127                                        | 30                     | 110          | –           | 49                     | 316                                                         | 4            | –                   | –                   | 320           |
| Segmentsschulden <sup>5)</sup>           | 8 840                                      | 454                    | 1 318        | 199         | 466                    | 11 277                                                      | 1 187        | 11 099              | –3 373              | 20 190        |
| Segmentinvestitionen <sup>6)</sup>       | 1 898                                      | 25                     | 121          | 52          | 58                     | 2 154                                                       | 65           | 387                 | –201                | 2 405         |
| davon aus Equity-Bewertung               | 65                                         | 5                      | –            | –           | –                      | 70                                                          | –            | –                   | –                   | 70            |
| Mitarbeiter zum Stichtag                 | 58 083                                     | 4 488                  | 19 796       | 3 027       | 28 390                 | 113 784                                                     | 3 737        | –                   | –                   | 117 521       |
| Mitarbeiter im Jahresdurchschnitt        | 52 317                                     | 4 568                  | 19 758       | 3 041       | 28 935                 | 108 619                                                     | 3 701        | –                   | –                   | 112 320       |

<sup>1)</sup> Zur Überleitung vom operativen Ergebnis zum Ergebnis der betrieblichen Tätigkeit siehe Seite 67 des Lageberichts.

<sup>2)</sup> Vorjahreszahlen aufgrund von Konsolidierungskreisänderungen nur bedingt vergleichbar.

<sup>3)</sup> Ergebnis der betrieblichen Tätigkeit inkl. des Ergebnisses aus Equity-Bewertung.

<sup>4)</sup> Immaterielle Vermögensgegenstände, Sachanlagevermögen, at equity bewertete Beteiligungen, Vorräte, Forderungen aus LuL sowie sonstige Vermögensgegenstände – unter „Konzern“ sind sämtliche Vermögenswerte ausgewiesen.

<sup>5)</sup> Sämtliche Schulden mit Ausnahme der Finanzschulden, Verbindlichkeiten gegenüber Konzerngesellschaften, derivative Finanzinstrumente, sonstige Rechnungsabgrenzungsposten, Steuerverpflichtungen – unter „Konzern“ sind sämtliche Schulden ausgewiesen.

<sup>6)</sup> Investitionen in immaterielle Vermögensgegenstände und Sachanlagevermögen sowie in at equity bewertete Beteiligungen.

In der Überleitungsspalte sind die aus Konsolidierungsvorgängen resultierenden Effekte ebenso enthalten wie die Beträge, die sich aus der unterschiedlichen Definition von Inhalten der Segmentposten im Vergleich zu den dazugehörigen Konzernposten ergeben.

Die eliminierten Umsätze der Geschäftsfelder, die mit anderen, ebenfalls konsolidierten Geschäftsfeldern erzielt wurden, sind in der Überleitungsspalte zu den Umsatzerlösen erkennbar.

Bei den sonstigen operativen Erträgen wurden ebenfalls die Erträge eliminiert, die aus Beziehungen mit den anderen Geschäftsfeldern stammen (Überleitungsspalte operative Erträge). Im Geschäftsjahr 2010 waren dies insbesondere Mieterträge aus untervermieteten Gebäuden, Kursgewinne aus im Konzern vergebenen kurzfristigen Fremdwährungsdarlehen sowie Erträge aus Schulungen und Serviceleistungen im Konzern. Stehen den eliminierten Umsätzen und sonstigen operativen Erträgen bei den Gesellschaften, die die Leistungen in Anspruch genommen haben, operative Aufwendungen gegenüber, so wurden diese ebenfalls eliminiert (Überleitungsspalten operative Aufwandsarten).

Die Beträge in der Überleitungsspalte zum operativen Ergebnis beinhalten die Effekte aus erfolgswirksamen Konsolidierungsvorgängen, in denen Erträge und Aufwendungen bei zwei Partnern sich nicht in derselben Höhe oder derselben Periode gegenüberstehen.

Die übrigen Segmenterträge beinhalten zum Beispiel Erträge aus der Auflösung von Rückstellungen sowie Buchgewinne aus Veräußerungsvorgängen, die zwar dem Segmentergebnis, nicht aber dem operativen Ergebnis zugerechnet werden. Auch hier werden Erträge, die aus Beziehungen mit den anderen Geschäftsfeldern stammen, eliminiert (Überleitungsspalte übrige Segmenterträge). Umgekehrt enthalten die übrigen Segmentaufwendungen Aufwandsposten, die nicht dem operativen Bereich zugerechnet werden, aber in das Segmentergebnis einfließen müssen, wie

etwa Buchverluste oder außerplanmäßige Abschreibungen. In der jeweiligen Überleitungsspalte zu den übrigen Segmenterträgen und -aufwendungen werden außerdem die Bestandteile des betrieblichen Ergebnisses des Konzerns, die weder im operativen noch im Segmentergebnis enthalten sind, wie zum Beispiel Gewinne/Verluste aus kurzfristigen Finanzinvestitionen, wieder hinzugerechnet.

Das Ergebnis aus der Equity-Bewertung von Beteiligungen des Geschäftsfelds ist dagegen Bestandteil des Segmentergebnisses eines Geschäftsfelds, aus Konzernsicht aber nicht dem betrieblichen, sondern dem Finanzergebnis zuzurechnen.

Das Segmentvermögen umfasst in erster Linie Sachanlagen, immaterielle Vermögenswerte, at equity bewertete Beteiligungen, Vorräte und Forderungen.

Die Segmentschulden bestehen aus betrieblichen Verbindlichkeiten und Rückstellungen. Nicht den Segmenten zugeordnet wurden Steuer- und Finanzposten. Das Segmentvermögen und die Segmentschulden in der Spalte „Sonstige“ enthalten auch die finanziellen Vermögenswerte und Schulden der hierin zusammengefassten Konzerngesellschaften, für die nach IFRS 8 keine Berichtspflicht im Rahmen der Segmentberichterstattung besteht.

Die Segmentinvestitionen beinhalten Zugänge von Sachanlagen und immateriellen Vermögenswerten sowie Investitionen in at equity bewertete Beteiligungen.

## Angaben nach Regionen 2010

| in Mio. €                                    | Europa | Nordamerika | Mittel- und Südamerika | Asien/Pazifik | Nahost | Afrika | Summe der Segmente |
|----------------------------------------------|--------|-------------|------------------------|---------------|--------|--------|--------------------|
| Verkehrserlöse <sup>1)</sup>                 | 14 239 | 3 147       | 513                    | 3 239         | 681    | 449    | <b>22 268</b>      |
| Andere Betriebserlöse                        | 2 380  | 1 014       | 147                    | 975           | 305    | 235    | <b>5 056</b>       |
| Langfristige Vermögenswerte <sup>2)</sup>    | 14 829 | 155         | 10                     | 162           | 1      | 10     | <b>15 167</b>      |
| Investitionen in langfristige Vermögenswerte | 2 157  | 61          | 1                      | 6             | 0*     | 1      | <b>2 226</b>       |

Auf die wesentlichen Länder entfallen dabei folgende Werte:

| in Mio. €                                    | Deutschland | USA   |
|----------------------------------------------|-------------|-------|
| Verkehrserlöse <sup>1)</sup>                 | 5 809       | 2 748 |
| Andere Betriebserlöse                        | 930         | 901   |
| Langfristige Vermögenswerte <sup>2)</sup>    | 8 589       | 151   |
| Investitionen in langfristige Vermögenswerte | 1 149       | 61    |

\* Gerundet unter 1 Mio. EUR.

<sup>1)</sup> Die Aufteilung der Verkehrserlöse erfolgt hier nach Ursprungsverkaufsorten.

<sup>2)</sup> Die langfristigen Vermögenswerte beinhalten das Sachanlagevermögen und immaterielle Vermögenswerte exkl. reparaturfähiger Flugzeugsatzteile.



## Angaben nach Regionen 2009 \*\*

| in Mio. €                                    | Europa | Nordamerika | Mittel- und Südamerika | Asien/Pazifik | Nahost | Afrika | Summe der Segmente |
|----------------------------------------------|--------|-------------|------------------------|---------------|--------|--------|--------------------|
| Verkehrserlöse <sup>1)</sup>                 | 11 356 | 2 680       | 251                    | 2 376         | 635    | 306    | <b>17 604</b>      |
| Andere Betriebserlöse                        | 2 339  | 882         | 140                    | 813           | 274    | 231    | <b>4 679</b>       |
| Langfristige Vermögenswerte <sup>2)</sup>    | 14 082 | 146         | 11                     | 159           | 0*     | 9      | <b>14 407</b>      |
| Investitionen in langfristige Vermögenswerte | 2 111  | 29          | 2                      | 5             | 0*     | 2      | <b>2 149</b>       |

Auf die wesentlichen Länder entfallen dabei folgende Werte:

| in Mio. €                                    | Deutschland | USA   |
|----------------------------------------------|-------------|-------|
| Verkehrserlöse <sup>1)</sup>                 | 5 291       | 2 383 |
| Andere Betriebserlöse                        | 937         | 804   |
| Langfristige Vermögenswerte <sup>2)</sup>    | 8 673       | 146   |
| Investitionen in langfristige Vermögenswerte | 1 409       | 28    |

\* Gerundet unter 1 Mio. EUR

\*\* Anpassung der regionalen Zuordnung an den IATA-Standard.

<sup>1)</sup> Die Aufteilung der Verkehrserlöse erfolgt hier nach Ursprungsverkaufsorten.

<sup>2)</sup> Die langfristigen Vermögenswerte beinhalten das Sachanlagevermögen und immaterielle Vermögenswerte exkl. reparaturfähige Flugzeugersatzteile.

Die Aufteilung der Verkehrserlöse auf die Regionen erfolgt nach Ursprungsverkaufsorten, die der anderen Betriebserlöse nach dem geografischen Sitz des Kunden.

Die Definition der Regionen folgt grundsätzlich geografischen Regeln. Abweichend hiervon sind die in der Türkei erzielten Verkehrserlöse Europa zugeordnet.

Lufthansa steuert ihre Luftverkehrsaktivitäten über Netzergebnisse und nicht über regionale Ergebnisbeiträge. Ähnliches gilt für das Geschäftsfeld Catering. Eine Darstellung regionaler Segmentergebnisse ist daher für den Lufthansa Konzern nicht aussagekräftig.

Eine Aufteilung der Verkehrserlöse der Geschäftsfelder Passage Airline Gruppe und Logistik nach Verkehrsgebieten statt nach Ursprungsverkaufsorten befindet sich in den Erläuterungen zum jeweiligen Geschäftsfeld im Lagebericht.

## 48 Angaben über Beziehungen zu nahestehenden Unternehmen

Die Geschäftsfelder des Lufthansa Konzerns erbringen im Rahmen ihrer normalen Geschäftstätigkeit zahlreiche Leistungen auch für nahestehende Unternehmen. Umgekehrt erbringen die jeweiligen Konzernbeteiligungen im Rahmen ihres Geschäftszwecks auch Leistungen für den Lufthansa Konzern. Diese umfangreichen Liefer- und Leistungsbeziehungen werden zu Marktpreisen abgewickelt.

Darüber hinaus bestehen zwischen dem Konzern und nicht konsolidierten Tochterunternehmen zahlreiche Abrechnungsverträge, die zum Teil gegenseitige Inanspruchnahme von Dienstleistungen regeln. In diesen Fällen werden die erbrachten Verwaltungsleistungen als Kostenumlagen berechnet.

Das Cash-Management des Lufthansa Konzerns ist zentralisiert, insoweit nimmt der Lufthansa Konzern auch gegenüber den nicht konsolidierten Konzerngesellschaften eine „Bankenfunktion“ wahr. Die einbezogenen, nicht konsolidierten Konzerngesellschaften legen ihre baren Mittel im Konzern an beziehungsweise nehmen dort bare Mittel auf und tätigen dort ihre derivativen Sicherungsgeschäfte. Alle Transaktionen werden zu Marktkonditionen abgewickelt.

Aufgrund der zum Teil räumlichen Nähe existiert eine große Zahl von Untermietverträgen zwischen dem Lufthansa Konzern und nahestehenden Unternehmen, in denen in der Regel die vom Lufthansa Konzern selbst gezahlten Mieten und Umlagen anteilig weiterberechnet werden.

Aus der folgenden Tabelle ist das Volumen der wesentlichen an nahestehende Unternehmen erbrachten beziehungsweise von nahestehenden Unternehmen in Anspruch genommenen Leistungen ersichtlich:

| in Mio. €                                                                                    | Volumen der<br>erbrachten Leistungen |      | Volumen der in Anspruch<br>genommenen Leistungen |      |
|----------------------------------------------------------------------------------------------|--------------------------------------|------|--------------------------------------------------|------|
|                                                                                              | 2010                                 | 2009 | 2010                                             | 2009 |
| <b>Verbundene, nicht konsolidierte Unternehmen</b>                                           |                                      |      |                                                  |      |
| Airline Accounting Center Sp. z o.o., Polen                                                  | 0*                                   | 1    | 6                                                | 5    |
| Albatros Versicherungsdienste GmbH, Deutschland                                              | 10                                   | 6    | 53                                               | 47   |
| Austrian Airlines Technik-Bratislava, s.r.o., Slowakei                                       | 3                                    | 1    | 6                                                | 1    |
| Cargo Future Communications (CFC) GmbH, Deutschland                                          | 0*                                   | 0*   | 5                                                | 4    |
| City Net Catering Holdings Ltd., Großbritannien                                              | 3                                    | 0*   | 7                                                | –    |
| Delvag Luftfahrtversicherungs-AG, Deutschland                                                | 7                                    | 7    | 9                                                | 6    |
| DLH Fuel Company mbH, Deutschland                                                            | 2                                    | 3    | 508                                              | 370  |
| Global Tele Sales (PTY) Ltd., Südafrika                                                      | 1                                    | 1    | 13                                               | 11   |
| Global Tele Sales Ltd., Irland                                                               | 1                                    | 1    | 8                                                | 7    |
| Global Tele Sales Pty Limited, Australien                                                    | 0*                                   | 0*   | 5                                                | 3    |
| Global Telesales of Canada, Inc., Kanada                                                     | 0*                                   | 0*   | 8                                                | 6    |
| handling counts GmbH, Deutschland                                                            | 1                                    | 1    | 10                                               | 5    |
| LRS Lufthansa Revenue Services GmbH, Deutschland                                             | 7                                    | 7    | 46                                               | 45   |
| Lufthansa Cagri Merkezi ve Müsteri Hizmetleri A.S., Türkei                                   | 0*                                   | 0*   | 5                                                | 5    |
| Lufthansa Engineering and Operational Services GmbH, Deutschland                             | 4                                    | 5    | 30                                               | 31   |
| Lufthansa Global Tele Sales GmbH, Deutschland                                                | 1                                    | 1    | 12                                               | 11   |
| Lufthansa Service-Center Kassel GmbH, Deutschland                                            | 0*                                   | 0*   | 3                                                | 7    |
| Lufthansa Systems FlightNav AG, Schweiz                                                      | 2                                    | 2    | 15                                               | 13   |
| Lufthansa Systems Hungaria Kft., Ungarn                                                      | 2                                    | 2    | 28                                               | 29   |
| Lufthansa Systems Network Services GmbH, Deutschland                                         | 1                                    | 1    | 28                                               | 46   |
| Lufthansa Systems Poland Sp. z o.o., Polen                                                   | 1                                    | 0*   | 7                                                | 7    |
| Lufthansa Technical Training GmbH, Deutschland                                               | 5                                    | 7    | 25                                               | 26   |
| Lufthansa Technik Component Services LLC, USA                                                | 3                                    | 2    | 5                                                | 5    |
| Lufthansa Technik Logistik of America LLC, USA                                               | 5                                    | 5    | 13                                               | 12   |
| Lufthansa Technik Logistik Services GmbH, Deutschland                                        | 6                                    | 2    | 27                                               | 16   |
| Lufthansa Technik Milan s.r.l., Italien                                                      | 6                                    | 2    | 9                                                | 2    |
| Lufthansa Technik Services India Private Limited, Indien                                     | 10                                   | 1    | 7                                                | 9    |
| Lufthansa Technik Shenzhen Co., Ltd., China                                                  | 11                                   | 5    | 3                                                | 5    |
| Lufthansa Technik Sofia OOD, Bulgarien                                                       | 4                                    | 2    | 26                                               | 24   |
| Lufthansa Technik Tulsa Corporation, USA                                                     | 1                                    | 1    | 7                                                | 5    |
| Lufthansa Technik Turbine Shannon Limited, Irland                                            | 7                                    | 3    | 23                                               | 20   |
| LZ-Catering GmbH, Deutschland                                                                | 10                                   | 10   | 16                                               | 16   |
| Swiss Private Aviation AG, Schweiz                                                           | 4                                    | 2    | 0*                                               | 15   |
| <b>Joint Ventures</b>                                                                        |                                      |      |                                                  |      |
| Aerologic GmbH, Deutschland                                                                  | 5                                    | 2    | 68                                               | 8    |
| Aircraft Maintenance and Engineering Corp., China                                            | 7                                    | 9    | 11                                               | 13   |
| Airfoil Services Sdn. Bhd., Malaysia                                                         | 1                                    | 0*   | 6                                                | 4    |
| EFM - Gesellschaft für Enteisung und Flugzeugschleppen am Flughafen München mbH, Deutschland | 0*                                   | 0*   | 14                                               | 9    |
| FraCareServices GmbH, Deutschland                                                            | 10                                   | 11   | 1                                                | 2    |
| Günes Ekspres Havacilik Anonim Sirketi (Sun Express), Türkei                                 | 13                                   | 2    | 0*                                               | 0*   |
| LTQ Engineering Pty Limited, Australien                                                      | 2                                    | 2    | 22                                               | 7    |
| Lufthansa Bombardier Aviation Services GmbH, Deutschland                                     | 4                                    | 7    | 0*                                               | 0*   |
| N3 Engine Overhaul Services GmbH & Co. KG, Deutschland                                       | 5                                    | 5    | 0*                                               | 0*   |
| Shanghai Pudong International Airport Cargo Terminal Co. Ltd., China                         | 1                                    | 0*   | 5                                                | 5    |
| Spairliners GmbH, Deutschland                                                                | 11                                   | 11   | 1                                                | –    |
| Star Alliance Services GmbH, Deutschland                                                     | 8                                    | 7    | 7                                                | 7    |
| Terminal 2 Betriebsgesellschaft mbH & Co oHG, Deutschland                                    | 15                                   | 12   | 83                                               | 83   |
| Terminal One Group Association, L.P., USA                                                    | 0*                                   | 0*   | 10                                               | 9    |

\* Gerundet unter 1 Mio. EUR.

|                                                 | Volumen der erbrachten Leistungen |      | Volumen der in Anspruch genommenen Leistungen |      |
|-------------------------------------------------|-----------------------------------|------|-----------------------------------------------|------|
| in Mio. €                                       | 2010                              | 2009 | 2010                                          | 2009 |
| <b>Assoziierte Unternehmen</b>                  |                                   |      |                                               |      |
| Airmail Center Frankfurt GmbH, Deutschland      | 0*                                | 0*   | 7                                             | 6    |
| AviationPower GmbH, Deutschland                 | 0*                                | 0*   | 24                                            | 19   |
| BELAC LLC, USA                                  | 1                                 | 0*   | 9                                             | 5    |
| HEICO Aerospace Holdings Corp., USA             | 0*                                | 0*   | 17                                            | 16   |
| Jade Cargo International Company Limited, China | 12                                | 5    | 109                                           | 126  |

\* Gerundet unter 1 Mio. EUR.

Es gibt keine einzelnen Aktionäre der Deutschen Lufthansa AG mit maßgeblichem Einfluss auf den Konzern. Zu Beziehungen mit Vorständen und Aufsichtsratsmitgliedern, vgl. die Ausführungen in „Erläuterung 49“.

#### 49 Aufsichtsrat und Vorstand

Die Mitglieder des Aufsichtsrats und des Vorstands sind auf [S. 217](#) angegeben.

#### Vergütungsbericht Vorstand

Die Vorstandsvergütung setzt sich aus folgenden Komponenten zusammen:

- Die Grundvergütung wird monatlich als Gehalt ausbezahlt.
- Die variable Vergütung richtet sich nach dem operativen Ergebnis des Lufthansa Konzerns sowie der Veränderung dieses operativen Ergebnisses im Vorjahresvergleich. Das Präsidium kann dem Vorstand in Jahren mit auf außerordentlichen exogenen Einflüssen beruhenden schwachen operativen Ergebnissen eine Ermessenstantieme zuteilen.
- Den Vorstandsmitgliedern wird ferner die Teilnahme an den Optionsprogrammen für Führungskräfte ermöglicht, seit 2006 mit abweichend vom allgemeinen Führungskräfteprogramm strukturierten eigenen Parametern, „Erläuterung 41“ ab [S. 197](#).

Für die Mitglieder des Vorstands fielen im Einzelnen im Jahr 2010 folgende Vergütungen an:

| in €                                                     | Grundvergütung   | Variable Vergütung | Auszahlung von fälligen Optionsprogrammen | Veränderung des Zeitwerts der Optionsprogramme | Sonstiges*     | Gesamt            |
|----------------------------------------------------------|------------------|--------------------|-------------------------------------------|------------------------------------------------|----------------|-------------------|
| Wolfgang Mayrhuber                                       | 805 000          | 1 610 000          | 900 000                                   | 66 255                                         | 110 434        | 3 491 689         |
| Christoph Franz                                          | 700 000          | 1 378 700          | –                                         | 226 101                                        | 86 946         | 2 391 747         |
| Stephan Gemkow                                           | 575 000          | 1 135 400          | 600 000                                   | 44 170                                         | 86 701         | 2 441 271         |
| Stefan Lauer                                             | 575 000          | 1 135 400          | 600 000                                   | 36 262                                         | 110 536        | 2 457 198         |
| <b>Tatsächliche Vergütung für das Geschäftsjahr 2010</b> | <b>2 655 000</b> | <b>5 259 500</b>   | <b>2 100 000</b>                          | <b>372 788</b>                                 | <b>394 617</b> | <b>10 781 905</b> |

\* Sonstige Bezüge beinhalten insbesondere geldwerte Vorteile aus der Nutzung von Dienstwagen und der Rabattgewährung in Zusammenhang mit der Ausgabe von Optionsprogrammen (Erläuterung 41), aus Beförderungsgünstigungen unter Berücksichtigung einschlägiger IATA-Bestimmungen sowie Sitzungs- und Tagegelder aus der Tätigkeit in den Aufsichtsräten verbundener Unternehmen.

Für die Mitglieder des Vorstands fielen im Einzelnen im Jahr 2009 folgende Vergütungen an:

| in €                                                     | Grundvergütung   | Variable Vergütung | Auszahlung von fälligen Optionsprogrammen | Veränderung des Zeitwerts der Optionsprogramme | Sonstiges*     | Gesamt           |
|----------------------------------------------------------|------------------|--------------------|-------------------------------------------|------------------------------------------------|----------------|------------------|
| Wolfgang Mayrhuber                                       | 805 000          | 130 000            | 1 647 000                                 | –290 087                                       | 211 772        | 2 503 685        |
| Christoph Franz<br>(Vorstand seit 01.06.2009)            | 350 000          | 55 250             | –                                         | 35 477                                         | 79 066         | 519 793          |
| Stephan Gemkow                                           | 575 000          | 91 000             | 1 098 000                                 | –193 391                                       | 85 806         | 1 656 415        |
| Stefan Lauer                                             | 575 000          | 91 000             | 1 098 000                                 | –192 687                                       | 102 986        | 1 674 299        |
| <b>Tatsächliche Vergütung für das Geschäftsjahr 2009</b> | <b>2 305 000</b> | <b>367 250</b>     | <b>3 843 000</b>                          | <b>–640 688</b>                                | <b>479 630</b> | <b>6 354 192</b> |

\* Sonstige Bezüge beinhalten insbesondere geldwerte Vorteile aus der Nutzung von Dienstwagen und der Rabattgewährung in Zusammenhang mit der Ausgabe von Optionsprogrammen (Erläuterung 41), aus Beförderungsgünstigungen unter Berücksichtigung einschlägiger IATA-Bestimmungen sowie Sitzungs- und Tagegelder aus der Tätigkeit in den Aufsichtsräten verbundener Unternehmen.

In den derzeit laufenden Optionsprogrammen werden zum 31. Dezember 2010 (2009) von den Vorstandsmitgliedern folgende Aktien gehalten:

|                                               | Programm 2007                                      |                                                | Programm 2008                                      |                                                | Programm 2009                                      |                                                | Programm 2010                                      |                                                |
|-----------------------------------------------|----------------------------------------------------|------------------------------------------------|----------------------------------------------------|------------------------------------------------|----------------------------------------------------|------------------------------------------------|----------------------------------------------------|------------------------------------------------|
| Anzahl der Aktien                             | Anzahl aus<br>Eigenmitteln<br>erworbener<br>Aktien | Anzahl der<br>Outperfor-<br>mance-<br>Optionen |
| Wolfgang Mayrhuber                            | –<br>(11 714)                                      | –<br>(45)                                      | 16 740<br>(16 740)                                 | 45<br>(45)                                     | 17 100<br>(17 100)                                 | 45<br>(45)                                     | 11 700<br>(–)                                      | 45<br>(–)                                      |
| Christoph Franz<br>(Vorstand seit 01.06.2010) | –                                                  | –                                              | –                                                  | –                                              | 14 060<br>(14 060)                                 | 37<br>(37)                                     | 9 620<br>(–)                                       | 37<br>(–)                                      |
| Stephan Gemkow                                | –<br>(7 809)                                       | –<br>(30)                                      | 11 160<br>(11 160)                                 | 30<br>(30)                                     | 11 400<br>(11 400)                                 | 30<br>(30)                                     | 7 800<br>(–)                                       | 30<br>(–)                                      |
| Stefan Lauer                                  | –<br>(7 809)                                       | –<br>(30)                                      | 10 788<br>(10 788)                                 | 29<br>(29)                                     | 11 400<br>(11 400)                                 | 30<br>(30)                                     | 7 800<br>(–)                                       | 30<br>(–)                                      |

Zu den maximalen Auszahlungsbeträgen siehe „Erläuterung 41“ ab [S. 197](#).

Die auf das Jahr 2010 entfallende anteilige Veränderung der beizulegenden Zeitwerte der Optionsprogramme ist Bestandteil der Gesamtvergütung der einzelnen Vorstandsmitglieder und ist der Vergütungstabelle zu entnehmen.

Der gesamte beizulegende Zeitwert des Optionsprogramms 2010 betrug für Herrn Mayrhuber zum Ausgabezeitpunkt 645.165 EUR, für Herrn Franz 530.469 EUR, für Herrn Gemkow 430.110 EUR und für Herrn Lauer 430.110 EUR.

Den aktiven Vorstandsmitgliedern sind für den Fall der Beendigung ihrer Tätigkeit vertraglich verschiedene Zusagen erteilt worden.

Seit dem Geschäftsjahr 2006 ist für jeden Vorstand ein persönliches Versorgungskonto eingerichtet, dem die Deutsche Lufthansa AG während der Dauer des Anstellungsverhältnisses jährlich Beiträge in Höhe von jeweils 25 Prozent der vertraglich vereinbarten Jahresvergütung einschließlich der variablen Vergütung zuführt. Dabei richten sich die Anlageregeln des Versorgungskontos nach dem Anlagekonzept für den Lufthansa Pension Trust, das auch für die Mitarbeiter der Deutschen Lufthansa AG gilt.

Zum 31. Dezember 2010 betrug der Anspruch aus dem Versorgungsguthaben von Herrn Mayrhuber 11,3 Mio. EUR (Vorjahr: 10,9 Mio. EUR), von Herrn Franz 0,6 Mio. EUR (Vorjahr: 0,1 Mio. EUR), von Herrn Gemkow 4,1 Mio. EUR (Vorjahr: 3,7 Mio. EUR) und von Herrn Lauer 5,7 Mio. EUR (Vorjahr: 5,2 Mio. EUR). Weitere Ansprüche von Herr Mayrhuber in Höhe von 0,6 Mio. EUR resultieren aus einer Karenzentschädigung zur Kompensation des vertraglich vereinbarten zweijährigen Wettbewerbsverbots.

Endet das Arbeitsverhältnis vor Eintritt des Versorgungsfalles, bleibt die Anwartschaft aus dem Versorgungskonto erhalten und wird beitragsfrei fortgeführt. Bei Eintritt des Versorgungsfalles (Erreichen der Altersgrenze von 65 Jahren beziehungsweise der vorgezogenen Altersgrenze von 60 bis 65 Jahren oder bei Invalidität) erwerben die Berechtigten ein Versorgungsguthaben in Höhe des zu diesem Zeitpunkt aktuellen Stands des Versorgungskontos. Dabei garantiert Lufthansa den Bestand der bereitgestellten Beiträge.

Für die Herren Franz, Gemkow und Lauer sowie ab 2011 auch für Herrn Spohr wird bei Inanspruchnahme als Invaliden- oder Hinterbliebenenleistung das Versorgungsguthaben um ein ergänzendes Risikokapital angehoben. Dieses besteht aus dem Durchschnittsbetrag der letzten drei auf dem Versorgungskonto bereitgestellten Beiträge multipliziert mit der Anzahl der ab Eintritt des Versorgungsfalles bis zur Vollendung des 60. Lebensjahres fehlenden vollen Jahre.

Die Auszahlung des Versorgungsguthabens erfolgt grundsätzlich in zehn Raten. Auf Antrag des Vorstands oder von dessen Witwe wird das Versorgungsguthaben mit Zustimmung des Unternehmens verrentet; auf Antrag des Vorstands oder von dessen Hinterbliebenen ist mit Zustimmung des Unternehmens auch eine Auszahlung als Einmalkapital oder in weniger als zehn Teilbeträgen möglich.

Die Witwenrente beträgt 60 Prozent der Rentenansprüche des Verstorbenen. Tritt der Todesfall während des laufenden Anstellungsverhältnisses ein, erhält die Witwe bis zum Ende des laufenden Geschäftsjahres, mindestens jedoch für die Dauer von sechs Monaten, die Bezüge des Verstorbenen weiter.

Der Aufwand für die im Geschäftsjahr 2010 hierzu erworbenen Pensionsanswartschaften betrug für Herrn Mayrhuber 0,6 Mio. EUR, für Herrn Franz 0,5 Mio. EUR, für Herrn Gemkow 0,2 Mio. EUR und für Herrn Lauer 0,1 Mio. EUR. Der Gesamtbetrag von 1,4 Mio. EUR (Vorjahr: 0,9 Mio. EUR) zuzüglich der Gesamtvergütung gemäß Vergütungstabelle von 10,8 Mio. EUR (Vorjahr: 6,4 Mio. EUR) ist mit einem Betrag von 12,2 Mio. EUR (Vorjahr: 7,3 Mio. EUR) im Personalaufwand enthalten.

Herr Lauer hat Anspruch auf eine Übergangsversorgung bis zur Vollendung des 60. Lebensjahres, wenn das Anstellungsverhältnis ohne einen von ihm selbst zu vertretenden wichtigen Grund nicht fortgeführt wird. Der Übergangsversorgungsanspruch belief sich zum 31. Dezember 2010 auf 57 Prozent der Jahresgrundvergütung ohne Berücksichtigung der variablen Vergütung. Seit dem 1. Januar 2011 hat der Übergangsversorgungsanspruch den maximal möglichen Versorgungsgrad von 60 Prozent der Jahresgrundvergütung erreicht. Aufgrund der ab 2011 in der neuen Vergütungsstruktur („Erläuterung 49“ ab [S. 210](#)) erhöhten Jahresgrundvergütung wurde dieser Versorgungsgrad proportional auf 40 Prozent reduziert; die absolute Höhe der Übergangsversorgung bleibt somit unverändert.

Herr Gemkow hat Anspruch auf eine Übergangsversorgung bis zur Vollendung des 60. Lebensjahres, wenn er das 55. Lebensjahr vollendet hat und das Anstellungsverhältnis ohne einen von ihm selbst zu vertretenden wichtigen Grund nicht fortgeführt wird. Der Übergangsversorgungsanspruch belief sich zum 31. Dezember 2010 auf 36 Prozent der Jahresgrundvergütung. Aufgrund der ab 2011 in der neuen Vergütungsstruktur („Erläuterung 49“ ab [S. 210](#)) erhöhten Jahresgrundvergütung wurde dieser Versorgungsgrad proportional auf 24 Prozent reduziert; die absolute Höhe der Übergangsversorgung bleibt somit unverändert. Der Versorgungsgrad erhöht sich für jedes ab dem 1. Februar 2011 beginnende Jahr als ordentliches Vorstandsmitglied um zwei Prozentpunkte auf maximal 40 Prozent.

Herr Franz hat seit dem 1. Januar 2011 Anspruch auf eine Übergangsversorgung bis zur Vollendung des 60. Lebensjahres, wenn er das 55. Lebensjahr vollendet hat und das Anstellungsverhältnis ohne einen von ihm selbst zu vertretenden wichtigen Grund nicht fortgeführt wird. Der Übergangsversorgungsanspruch beläuft sich auf 10 Prozent der Jahresgrundvergütung und erhöht sich für jedes ab dem 1. Juni 2014 beginnende Jahr als ordentliches Vorstandsmitglied um zwei Prozentpunkte auf maximal 20 Prozent.

Herr Mayrhuber ist vertragsgemäß zum 31. Dezember 2010 aus dem Vorstand ausgeschieden. Für den Zeitraum vom 1. Januar 2011 bis zum Erreichen der Altersgrenze für Versorgungsleistungen erhält Herr Mayrhuber zur Kompensation des vertraglich vereinbarten zweijährigen Wettbewerbsverbots eine Karenzentschädigung in Höhe von 65 Prozent der Jahresgrundvergütung. Während dieser Zeit ruhen alle Versorgungsansprüche.

Bei einer vorzeitigen Beendigung des Vertrags, die nicht durch einen wichtigen Grund oder durch einen Kontrollwechsel veranlasst ist, wird die Gesellschaft gemäß der Empfehlung des Deutschen Corporate Governance Kodex nicht mehr als den Wert der Ansprüche für die Restlaufzeit des Vertrags vergüten, wobei die Zahlungen einschließlich Nebenleistungen zwei Jahresvergütungen nicht übersteigen dürfen (Abfindungshöchstgrenze). Die Berechnung der Abfindungshöchstgrenze bestimmt sich nach der Gesamtvergütung für das letzte volle Geschäftsjahr vor dem Ausscheiden aus dem Vorstand, wie sie im Vergütungsbericht ausgewiesen wird, unter Berücksichtigung der voraussichtlichen Gesamtvergütung für das laufende Geschäftsjahr.

Wird der Vertrag zwischen dem Vorstandsmitglied und der Deutschen Lufthansa AG im Zusammenhang mit einem Kontrollwechsel bei der Gesellschaft beendet, hat das Vorstandsmitglied Anspruch auf eine Abfindung seiner Vergütungsansprüche für die Restlaufzeit des Vertrags. Gemäß der entsprechenden Empfehlung des Deutschen Corporate Governance Kodex darf die Höhe der Abfindung 150 Prozent der vertraglich geregelten, zuvor beschriebenen Abfindungshöchstgrenze nicht übersteigen.

Die laufenden Zahlungen an ehemalige Vorstandsmitglieder und ihre Hinterbliebenen betrugen 3,2 Mio. EUR (3,2 Mio. EUR). Darin enthalten sind von Tochterunternehmen gewährte Bezüge sowie geldwerte Leistungen und Beförderungsvergünstigungen.

Für ehemalige Mitglieder des Vorstands und ihre Hinterbliebenen bestehen Pensionsverpflichtungen in Höhe von 39,5 Mio. EUR (38,3 Mio. EUR). Diese Beträge sind in den Pensionsrückstellungen unter „Erläuterung 36“ ab [S. 191](#) enthalten.



**Vergütungsbericht Aufsichtsrat**

Der Aufwand für die Bezüge des Aufsichtsrats enthält im Geschäftsjahr 2010 Aufwand für feste Vergütungen für die Aufsichtsrats-tätigkeit bei der Deutschen Lufthansa AG in Höhe von 1.304 TEUR (Vorjahr: 525 TEUR). Darüber hinaus fielen variable Vergütungen von 1.304 TEUR (Vorjahr: 0 TEUR) an. Ab dem Geschäftsjahr 2010 ist die variable Vergütung aufgrund einer entsprechenden Satzungsänderung an das Konzernergebnis je Aktie und nicht mehr an die für das Geschäftsjahr gezahlte Dividende gebunden. Auf die einzelnen Mitglieder des Aufsichtsrats entfallen die in der nachfolgenden Tabelle aufgelisteten Beträge.

Sonstige Bezüge, überwiegend Sitzungsgelder, fielen in Höhe von insgesamt 82 TEUR (Vorjahr: 76 TEUR) an. Im Vorjahr wurden an Herrn Dr. Schlede für seine Beratungsleistung in Zusammenhang mit der Integration der Swiss International Air Lines AG in den Lufthansa Konzern insgesamt 27 TEUR gezahlt. Diese Berater-tätigkeit endete im Oktober 2009.

Darüber hinaus erhielten Mitglieder des Aufsichtsrats der Deutschen Lufthansa AG, die Aufsichtsratsmandate bei Konzerngesellschaften wahrnehmen, für diese Tätigkeit 56 TEUR (Vorjahr: 50 TEUR) vergütet.

| in € *                                               | 2010              |                                   |                      |                       | 2009              |                                   |                      |                       |
|------------------------------------------------------|-------------------|-----------------------------------|----------------------|-----------------------|-------------------|-----------------------------------|----------------------|-----------------------|
|                                                      | Feste Vergütungen | Vergütung für Ausschuss-tätigkeit | Variable Vergütungen | AR-Vergütungen gesamt | Feste Vergütungen | Vergütung für Ausschuss-tätigkeit | Variable Vergütungen | AR-Vergütungen gesamt |
| Dipl.-Ing. Dr.-Ing. E. h. Jürgen Weber, Vorsitzender | 150 000           | 37 500                            | 187 500              | 375 000               | 60 000            | 15 000                            | 0                    | 75 000                |
| Frank Bsirske, stellvertretender Vorsitzender        | 75 000            | 12 500                            | 87 500               | 175 000               | 30 000            | 5 000                             | 0                    | 35 000                |
| Jacques Aigrain                                      | 50 000            | 0                                 | 50 000               | 100 000               | 20 000            | 0                                 | 0                    | 20 000                |
| John Allan (bis 31.12.2009)                          | 0                 | 0                                 | 0                    | 0                     | 20 000            | 0                                 | 0                    | 20 000                |
| Dr. Werner Brandt                                    | 50 000            | 12 500                            | 62 500               | 125 000               | 20 000            | 5 000                             | 0                    | 25 000                |
| Bernd Buresch                                        | 50 000            | 12 500                            | 62 500               | 125 000               | 20 000            | 5 000                             | 0                    | 25 000                |
| Jörg Cebulla                                         | 50 000            | 0                                 | 50 000               | 100 000               | 20 000            | 0                                 | 0                    | 20 000                |
| Dipl.-Vwt. Jürgen Erwert                             | 50 000            | 12 500                            | 62 500               | 125 000               | 20 000            | 5 000                             | 0                    | 25 000                |
| Herbert Hainer (ab 29.04.2010)                       | 33 750            | 0                                 | 33 750               | 67 500                | 0                 | 0                                 | 0                    | 0                     |
| Dr. Jürgen Hambrecht                                 | 50 000            | 20 950                            | 70 950               | 141 900               | 20 000            | 5 000                             | 0                    | 25 000                |
| Ulrich Hartmann (bis 29.04.2010)                     | 16 250            | 8 100                             | 24 350               | 48 700                | 20 000            | 10 000                            | 0                    | 30 000                |
| Dominique Hinkel                                     | 50 000            | 0                                 | 50 000               | 100 000               | 20 000            | 0                                 | 0                    | 20 000                |
| Dr. h.c. Robert Kimmitt (ab 29.04.2010)              | 33 750            | 0                                 | 33 750               | 67 500                | 0                 | 0                                 | 0                    | 0                     |
| Martin Koehler (ab 02.03.2010)                       | 41 800            | 8 450                             | 50 250               | 100 500               | 0                 | 0                                 | 0                    | 0                     |
| Dr. Nicola Leibinger-Kammüller                       | 50 000            | 0                                 | 50 000               | 100 000               | 20 000            | 0                                 | 0                    | 20 000                |
| Eckhard Lieb                                         | 50 000            | 12 500                            | 62 500               | 125 000               | 20 000            | 5 000                             | 0                    | 25 000                |
| Simon Reimann                                        | 50 000            | 0                                 | 50 000               | 100 000               | 20 000            | 0                                 | 0                    | 20 000                |
| Marlies Rose                                         | 50 000            | 0                                 | 50 000               | 100 000               | 20 000            | 0                                 | 0                    | 20 000                |
| Dr. Klaus G. Schlede                                 | 50 000            | 37 500                            | 87 500               | 175 000               | 20 000            | 15 000                            | 0                    | 35 000                |
| Dr. Herbert Walter (bis 29.04.2010)                  | 16 250            | 0                                 | 16 250               | 32 500                | 20 000            | 0                                 | 0                    | 20 000                |
| Matthias Wissmann                                    | 50 000            | 0                                 | 50 000               | 100 000               | 20 000            | 0                                 | 0                    | 20 000                |
| Dr. Michael Wollstadt                                | 50 000            | 12 500                            | 62 500               | 125 000               | 20 000            | 5 000                             | 0                    | 25 000                |
| Stefan Ziegler                                       | 50 000            | 0                                 | 50 000               | 100 000               | 20 000            | 0                                 | 0                    | 20 000                |
| <b>Gesamt</b>                                        | <b>1 116 800</b>  | <b>187 500</b>                    | <b>1 304 300</b>     | <b>2 608 600</b>      | <b>450 000</b>    | <b>75 000</b>                     | <b>0</b>             | <b>525 000</b>        |

\* Einzelbeträge auf glatte Euro gerundet.

#### 50 Entsprechenserklärung nach § 161 AktG

Die nach § 161 AktG geforderte Entsprechenserklärung zum Deutschen Corporate Governance Kodex wurde von Vorstand und Aufsichtsrat abgegeben und den Aktionären im Internet unter

<http://investor-relations.lufthansa.com/de/corporate-governance/erklaerung-zur-unternehmensfuehrung-289a-hgb/entsprechenserklaerung-161-aktg.html> zugänglich gemacht.

#### 51 Honorar des Abschlussprüfers

Das im Geschäftsjahr als Aufwand erfasste Honorar für den Abschlussprüfer nach § 319 Abs. 1 HGB setzt sich wie folgt zusammen:

| in Mio. €                     | 2010       | 2009       |
|-------------------------------|------------|------------|
| Abschlussprüfungsleistungen   | 2,8        | 2,8        |
| Andere Bestätigungsleistungen | 0,5        | 0,7        |
| Steuerberatungsleistungen     | 0,3        | 0,8        |
| Sonstige Leistungen           | 1,2        | 1,7        |
| <b>Gesamt</b>                 | <b>4,8</b> | <b>6,0</b> |

Im Ausland wurden zusätzlich mit Gesellschaften des weltweiten PricewaterhouseCoopers-Verbunds folgende Honorare als Aufwand erfasst:

| in Mio. €                     | 2010       | 2009       |
|-------------------------------|------------|------------|
| Abschlussprüfungsleistungen   | 2,5        | 2,4        |
| Andere Bestätigungsleistungen | 0,2        | 0,3        |
| Steuerberatungsleistungen     | 0,5        | 0,4        |
| Sonstige Leistungen           | 0,3        | 0,1        |
| <b>Gesamt</b>                 | <b>3,5</b> | <b>3,2</b> |

Der Vorstand, 9. März 2011



Dr. Christoph Franz  
Vorstandsvorsitzender

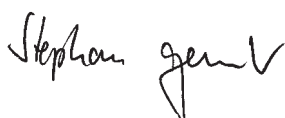

Stephan Gemkow  
Mitglied des Vorstands  
Finanzen und  
Aviation Services

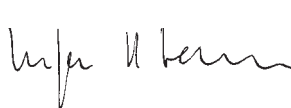

Stefan Lauer  
Mitglied des Vorstands  
Verbund-Airlines und  
Konzern-Personalpolitik



Carsten Spohr  
Mitglied des Vorstands  
Lufthansa Passage

## Versicherung der gesetzlichen Vertreter

Wir versichern nach bestem Wissen, dass gemäß den anzuwendenden Rechnungslegungsgrundsätzen der Konzernabschluss ein den tatsächlichen Verhältnissen entsprechendes Bild der Vermögens-, Finanz- und Ertragslage des Konzerns vermittelt und im Konzernlagebericht der Geschäftsverlauf einschließlich des Geschäftsergebnisses und die Lage des Konzerns so dargestellt sind, dass ein den tatsächlichen Verhältnissen entsprechendes Bild vermittelt wird, sowie die wesentlichen Chancen und Risiken der voraussichtlichen Entwicklung des Konzerns beschrieben sind.

Der Vorstand, 9. März 2011



Dr. Christoph Franz  
Vorstandsvorsitzender

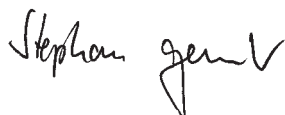

Stephan Gemkow  
Mitglied des Vorstands  
Finanzen und  
Aviation Services



Stefan Lauer  
Mitglied des Vorstands  
Verbund-Airlines und  
Konzern-Personalpolitik



Carsten Spohr  
Mitglied des Vorstands  
Lufthansa Passage

## Bestätigungsvermerk des Abschlussprüfers

Wir haben den von der Deutschen Lufthansa Aktiengesellschaft, Köln, aufgestellten Konzernabschluss – bestehend aus Bilanz, Gewinn- und Verlustrechnung und Gesamtergebnisrechnung, Eigenkapitalveränderungsrechnung, Kapitalflussrechnung und Anhang – sowie den Konzernlagebericht für das Geschäftsjahr vom 1. Januar 2010 bis 31. Dezember 2010 geprüft. Die Aufstellung von Konzernabschluss und Konzernlagebericht nach den IFRS, wie sie in der EU anzuwenden sind, und den ergänzend nach § 315a Abs. 1 HGB anzuwendenden handelsrechtlichen Vorschriften liegt in der Verantwortung des Vorstands der Gesellschaft. Unsere Aufgabe ist es, auf der Grundlage der von uns durchgeführten Prüfung eine Beurteilung über den Konzernabschluss und den Konzernlagebericht abzugeben.

Wir haben unsere Konzernabschlussprüfung nach § 317 HGB unter Beachtung der vom Institut der Wirtschaftsprüfer (IDW) festgestellten deutschen Grundsätze ordnungsmäßiger Abschlussprüfung unter ergänzender Beachtung der International Standards on Auditing (ISA) vorgenommen. Danach ist die Prüfung so zu planen und durchzuführen, dass Unrichtigkeiten und Verstöße, die sich auf die Darstellung des durch den Konzernabschluss unter Beachtung der anzuwendenden Rechnungslegungsvorschriften und durch den Konzernlagebericht vermittelten Bildes der Vermögens-, Finanz- und Ertragslage wesentlich auswirken, mit hinreichender Sicherheit erkannt werden. Bei der Festlegung der Prüfungshandlungen werden die Kenntnisse über die Geschäftstätigkeit und über das wirtschaftliche und rechtliche Umfeld des

Konzerns sowie die Erwartungen über mögliche Fehler berücksichtigt. Im Rahmen der Prüfung werden die Wirksamkeit des rechnungslegungsbezogenen internen Kontrollsystems sowie Nachweise für die Angaben im Konzernabschluss und Konzernlagebericht überwiegend auf der Basis von Stichproben beurteilt. Die Prüfung umfasst die Beurteilung der Jahresabschlüsse der in den Konzernabschluss einbezogenen Unternehmen, der Abgrenzung des Konsolidierungskreises, der angewandten Bilanzierungs- und Konsolidierungsgrundsätze und der wesentlichen Einschätzungen des Vorstands sowie die Würdigung der Gesamtdarstellung des Konzernabschlusses und des Konzernlageberichts. Wir sind der Auffassung, dass unsere Prüfung eine hinreichend sichere Grundlage für unsere Beurteilung bildet.

Unsere Prüfung hat zu keinen Einwendungen geführt.

Nach unserer Beurteilung aufgrund der bei der Prüfung gewonnenen Erkenntnisse entspricht der Konzernabschluss den IFRS, wie sie in der EU anzuwenden sind, und den ergänzend nach § 315a Abs. 1 HGB anzuwendenden handelsrechtlichen Vorschriften und vermittelt unter Beachtung dieser Vorschriften ein den tatsächlichen Verhältnissen entsprechendes Bild der Vermögens-, Finanz- und Ertragslage des Konzerns. Der Konzernlagebericht steht in Einklang mit dem Konzernabschluss, vermittelt insgesamt ein zutreffendes Bild von der Lage des Konzerns und stellt die Chancen und Risiken der zukünftigen Entwicklung zutreffend dar.

Düsseldorf, den 9. März 2011  
PricewaterhouseCoopers  
Aktiengesellschaft  
Wirtschaftsprüfungsgesellschaft

Dr. Norbert Vogelpoth  
Wirtschaftsprüfer

Frank Hübner  
Wirtschaftsprüfer

## Aufsichtsrat und Vorstand

### Aufsichtsrat

#### Dr. Wolfgang Röller

Ehemaliger Vorsitzender des Aufsichtsrats Deutsche Lufthansa AG  
Ehrenvorsitzender

### Stimmberechtigte Mitglieder des Aufsichtsrats

#### Dipl.-Ing. Dr.-Ing.

##### E. h. Jürgen Weber

Ehemaliger Vorsitzender des Vorstands  
Deutsche Lufthansa AG  
Vorsitzender

#### Frank Bsirske

Vorsitzender ver.di  
Arbeitnehmervertreter  
Stellvertretender Vorsitzender

#### Jacques Aigrain

Chairman  
LCH.Clearnet Group Limited,  
Großbritannien

#### Dr. Werner Brandt

Mitglied des Vorstands  
SAP AG

#### Bernd Buresch

Koordinator  
Enterprise Operation Center  
Arbeitnehmervertreter

#### Jörg Cebulla

Flugkapitän und  
Mitglied des Vorstands  
der Vereinigung Cockpit  
Arbeitnehmervertreter

#### Dipl.-Vwt. Jürgen Erwert

Kaufm. Angestellter  
Arbeitnehmervertreter

#### Herbert Hainer

Vorstandsvorsitzender  
adidas AG  
(seit 29. April 2010)

#### Dr. Jürgen Hambrecht

Vorsitzender des Vorstands  
BASF SE

#### Ulrich Hartmann

Vorsitzender des  
Aufsichtsrats  
E.ON AG  
(bis 29. April 2010)

#### Dominique Hiekel

Purser  
Arbeitnehmervertreterin

#### Dr. h.c. Robert Kimmitt

Senior International Counsel  
WilmerHale, USA  
(seit 29. April 2010)

#### Martin Koehler

Managing Director  
The Boston Consulting  
Group Inc.  
(seit 2. März 2010)

#### Dr. Nicola Leibinger-Kammüller

Geschäftsführende Gesellschafterin und Vorsitzende der Geschäftsführung  
TRUMPF GmbH + Co. KG

#### Eckhard Lieb

Triebwerksmechaniker  
Arbeitnehmervertreter

#### Simon Reimann

Flugbegleiter und Mitglied der Gewerkschaft UFO  
Arbeitnehmervertreter

#### Marlies Rose

Flight Manager  
Arbeitnehmervertreterin

#### Dr. Klaus G. Schlede

Ehemaliger stellvertretender  
Vorstandsvorsitzender  
Deutsche Lufthansa AG

#### Dr. Herbert Walter

Ehemaliger Vorsitzender des  
Vorstands Dresdner Bank AG  
und ehemaliges Mitglied des  
Vorstands Allianz SE  
(bis 29. April 2010)

#### Matthias Wissmann

Präsident des Verbands  
der Automobilindustrie e.V.  
(VDA)

#### Dr. Michael Wollstadt

Leiter IT-Entwicklung  
Netzmanagement  
Arbeitnehmervertreter

#### Stefan Ziegler

Flugkapitän  
Arbeitnehmervertreter

### Vorstand

#### Wolfgang Mayrhuber

Vorsitzender des Vorstands  
(bis 31. Dezember 2010)

#### Dr. Christoph Franz

Stellvertretender Vorsitzender des Vorstands  
Ressort Lufthansa Passage  
(bis 31. Dezember 2010)  
Vorsitzender des Vorstands  
(seit 1. Januar 2011)

#### Stephan Gemkow

Mitglied des Vorstands  
Ressort Finanzen und  
Aviation Services

#### Stefan Lauer

Mitglied des Vorstands  
Ressort Verbund-Airlines  
und Konzern-Personalpolitik

#### Carsten Spohr

Mitglied des Vorstands  
Ressort Lufthansa Passage  
(seit 1. Januar 2011)



## Ausschüsse des Aufsichtsrats

### Präsidium

**Dipl.-Ing. Dr.-Ing. E. h. Jürgen Weber**  
(Vorsitzender)

**Frank Bsirske** (stellv. Vorsitz)

**Bernd Buresch**

**Dr. Jürgen Hambrecht**

5 Sitzungen im Jahr 2010

Der Aufsichtsrat hat aus seiner Mitte ein paritätisch besetztes Präsidium gewählt, dem der Vorsitzende des Aufsichtsrats, sein Stellvertreter sowie zwei weitere Mitglieder des Aufsichtsrats angehören. Das Präsidium gibt dem Aufsichtsrat Beschlussempfehlungen hinsichtlich Inhalt, Gestaltung und Abschluss der Anstellungsverträge mit den Vorstandsmitgliedern und ist zuständig für sonstige personelle Angelegenheiten von Vorständen und Prokuristen (zum Beispiel Kreditgewährung gemäß § 89 AktG). Das Präsidium vertritt die Gesellschaft gegenüber den Vorstandsmitgliedern (§ 112 AktG). Es ist ferner zuständig für Verträge mit Aufsichtsratsmitgliedern (§ 114 AktG) sowie für die Kreditgewährung an Aufsichtsratsmitglieder (§ 115 AktG). Der Ausschuss beschließt ferner über sonstige Personalangelegenheiten, die dem Aufsichtsrat gemäß der Geschäftsordnung für den Vorstand zur Zustimmung vorzulegen sind. Bei Stimmengleichheit gibt die Stimme des Aufsichtsratsvorsitzenden den Ausschlag.

### Prüfungsausschuss

**Dr. Klaus G. Schlede** (Vorsitzender)

**Dr. Werner Brandt**

**Jürgen Erwert**

**Ulrich Hartmann** (bis 29. April 2010)

**Martin Koehler** (seit 29. April 2010)

**Eckhard Lieb**

**Dr. Michael Wollstadt**

4 Sitzungen im Jahr 2010

Der Aufsichtsrat hat aus seiner Mitte einen paritätisch besetzten Prüfungsausschuss gewählt, dem sechs Mitglieder des Aufsichtsrats angehören. Den Vorsitz übernimmt das dazu gewählte Mitglied des Aufsichtsrats. Die Mitglieder des Prüfungsausschusses sollen über besondere Kenntnisse auf dem Gebiet der Rechnungslegung sowie der Betriebs- und Finanzwirtschaft verfügen. Von den Mitgliedern des Aufsichtsrats qualifiziert sich unter anderem das Mitglied des Prüfungsausschusses Dr. Werner Brandt als Finanzvorstand der SAP AG als unabhängiger Finanzexperte. Der Prüfungsausschuss hat die Aufgabe, nach Zuweisung durch den Aufsichtsratsvorsitzenden insbesondere Fragen der Rechnungslegung, des Risikomanagements, des internen Kontrollsystems und der Compliance, der erforderlichen Unabhängigkeit des Abschlussprüfers, der Erteilung des Prüfungsauftrags an den Abschlussprüfer, der Bestimmung von Prüfungsschwerpunkten und der Honorarvereinbarung zu erörtern und dem Aufsichtsrat insbesondere zum Abschlussprüfer-Vorschlag an die Hauptversammlung und zur Billigung des Konzern- und Jahresabschlusses eine Beschlussempfehlung zu geben. Ferner erörtert der Prüfungsausschuss die Quartalszwischenberichte vor ihrer Veröffentlichung mit dem Vorstand. Der Prüfungsausschuss ist ermächtigt, die innere Ordnung der Ausschusstätigkeit in einer eigenen Geschäftsordnung zu regeln, und legt diese dem Aufsichtsrat zur Kenntnisnahme vor.

### Nominierungsausschuss

**Dr. Jürgen Hambrecht**

(seit 29. April 2010)

**Ulrich Hartmann** (bis 29. April 2010)

**Dr. Klaus G. Schlede**

**Dipl.-Ing. Dr.-Ing. E. h. Jürgen Weber**

1 Sitzung im Jahr 2010

Der Aufsichtsrat hat aus der Mitte der Anteilseignervertreter einen mit drei gleichberechtigten Mitgliedern besetzten Nominierungsausschuss gewählt. Der Ausschuss soll dem Aufsichtsrat für dessen Wahlvorschläge an die Hauptversammlung geeignete Kandidaten vorschlagen. Der Aufsichtsrat soll so zusammengesetzt sein, dass seine Mitglieder insgesamt über die zur ordnungsgemäßen Wahrnehmung der Aufgaben erforderlichen Kenntnisse, Fähigkeiten und fachlichen Erfahrungen verfügen. Unter Beachtung dieser Voraussetzung ist eine angemessene Beteiligung von Frauen und Mitgliedern mit langjähriger Erfahrung aus einer Geschäftstätigkeit außerhalb Deutschlands anzustreben.

### Vermittlungsausschuss

nach § 27 Abs. 3 MitbestG

**Dipl.-Ing. Dr.-Ing. E. h. Jürgen Weber**  
(Vorsitzender)

**Frank Bsirske** (stellv. Vorsitz)

**Dr. Jürgen Hambrecht**

**Dominique Hiekel**

Keine Sitzung im Jahr 2010

Der gemäß § 9 Abs. 2 der Satzung der Gesellschaft bestellte Ausschuss hat die Aufgabe, die Rechte gemäß § 31 Abs. 3 Satz 1 MitbestG bei der Bestellung der Vorstandsmitglieder sowie bei einem Widerruf der Bestellung wahrzunehmen.

## Andere Mandate der Aufsichtsratsmitglieder der Deutschen Lufthansa AG

Stand: 31. Dezember 2010

### Dipl.-Ing. Dr.-Ing. E. h. Jürgen Weber

- a) Allianz Lebensversicherungs-AG  
Bayer AG  
Voith GmbH  
Willy Bogner GmbH & Co. KGaA  
(AR-Vorsitz)
- b) Loyalty Partner GmbH  
(AR-Vorsitz)  
Tetra Laval Group

### Frank Bsirske

- a) Deutsche Postbank AG  
(stellv. AR-Vorsitz)  
IBM Central Holding GmbH  
RWE AG (stellv. AR-Vorsitz)

### Jacques Aigrain

- b) J.A. Consulting SA, Schweiz  
Resolution Limited, Großbritannien  
Swiss International Air Lines AG

### Dr. Werner Brandt

- a) Heidelberger Druckmaschinen AG
- b) QIAGEN N.V.

### Bernd Buresch

- a) Lufthansa Systems AG

### Herbert Hainer

- a) Allianz Deutschland AG  
FC Bayern München AG  
(stellv. AR-Vorsitz)  
Engelhorn KGaA

### Dr. Jürgen Hambrecht

- a) Daimler AG

### Ulrich Hartmann (Stand 29. April 2010)

- a) E.ON AG (AR-Vorsitz)

### Martin Koehler

- a) Delton AG

### Dr. Nicola Leibinger-Kammüller

- a) Axel Springer AG  
Siemens AG  
Voith GmbH

### Eckhard Lieb

- b) Albatros Versicherungsdienste GmbH

### Dr. Herbert Walter (Stand 29. April 2010)

- a) E.ON Ruhrgas AG
- b) Banco BPI S.A.  
Banco Popular Espaniol S.A.  
Depfa Bank plc., Dublin

### Matthias Wissmann

- a) Seeburger AG (stellv. Vorsitz)

## Mandate des Vorstands der Deutschen Lufthansa AG

Stand: 31. Dezember 2010

### Wolfgang Mayrhuber

- a) BMW AG  
Lufthansa Technik AG\*  
Münchener Rückversicherungs-  
Gesellschaft AG
- b) Austrian Airlines AG  
HEICO Corp., Florida  
Österreichische Luftverkehrs-Holding-  
GmbH (AR-Vorsitz)  
SN Airholding SA/NV  
UBS AG, Schweiz

### Dr. Christoph Franz

- a) DF Deutsche Forfait AG  
Lufthansa Technik AG\*
- b) JetBlue Airways Corp.  
Swiss International Air Lines AG\*

### Stephan Gemkow

- a) Delvag Luftfahrtversicherungs-AG\*  
(AR-Vorsitz)  
Evonik Industries AG  
GfK SE  
LSG Lufthansa Service Holding AG\*  
(AR-Vorsitz)  
Lufthansa AirPlus Servicekarten GmbH\*  
(AR-Vorsitz)  
Lufthansa Cargo AG\* (AR-Vorsitz)  
Lufthansa Systems Aktiengesellschaft\*  
(AR-Vorsitz)  
Lufthansa Technik AG\* (AR-Vorsitz)
- b) Amadeus IT Group S.A.  
Amadeus IT Holding S.A.  
JetBlue Airways Corp.

### Stefan Lauer

- a) Fraport AG  
LSG Lufthansa Service Holding AG\*  
Lufthansa Cargo AG\*  
Lufthansa Flight Training GmbH\*  
(AR-Vorsitz)  
Pensions-Sicherungs-Verein VVaG  
(Aufsichtsrat)
- b) Aircraft Maintenance and Engineering  
Corp. (stv. Vorsitz Board of Directors)  
Austrian Airlines AG (AR-Vorsitz)  
British Midland Ltd.\*  
(Vorsitz Board of Directors)  
ESMT European School  
of Management and Technology GmbH  
Landesbank Hessen-Thüringen  
Girozentrale  
SN Airholding SA/NV  
Günes Ekspres Havacilik A.S.  
(Sun Express)  
(stv. Vorsitz Board of Directors)  
Swiss International Air Lines AG\*

a) Mitgliedschaft in gesetzlich zu bildenden Aufsichtsräten.

b) Mitgliedschaft in vergleichbaren in- und ausländischen  
Kontrollgremien von Wirtschaftsunternehmen.

\* Konzernmandat.

## Wesentliche Beteiligungsgesellschaften

### Wesentliche verbundene Unternehmen zum 31.12.2010

|                                                                                                | Kapitalanteil | Stimmrechtsanteil    | Abweichendes<br>Geschäftsjahr |
|------------------------------------------------------------------------------------------------|---------------|----------------------|-------------------------------|
| Name, Sitz                                                                                     | in %          | in %                 |                               |
| <b>Geschäftsfeld Passage Airline Gruppe</b>                                                    |               |                      |                               |
| A319 LDA-LDB-LDC Ltd., George Town, Grand Cayman, Kaimaninseln                                 | 0,00          | 0,00                 | SPE                           |
| A319 LDD-LDE-LDF Ltd., George Town, Grand Cayman, Kaimaninseln                                 | 0,00          | 0,00                 | SPE                           |
| Air Dolomiti S.p.A. Linee Aeree Regionali Europee, Dossobuono di Villafranca (Verona), Italien | 100,00        | 100,00               |                               |
| AirNavigator Ltd., Tokio, Japan                                                                | 0,00          | 0,00                 | SPE                           |
| AirTrust AG, Zug, Schweiz                                                                      | 100,00        | 100,00               |                               |
| AUA 2006 MSN 263 Ltd., George Town, Grand Cayman, Kaimaninseln                                 | 0,00          | 0,00                 | SPE                           |
| AUA A320/A321 2001 Ltd., George Town, Grand Cayman, Kaimaninseln                               | 0,00          | 0,00                 | SPE                           |
| AUA Beteiligungen Gesellschaft m.b.H., Wien Flughafen, Österreich                              | 100,00        | 100,00               |                               |
| AUA LNR/LNS/LNT/LNU Ltd., George Town, Grand Cayman, Kaimaninseln                              | 0,00          | 0,00                 | SPE                           |
| Austrian Airlines AG, Wien Flughafen, Österreich                                               | 100,00        | 100,00               |                               |
| Austrian Airlines Lease and Finance Company Ltd., Guernsey, Channel Islands, Großbritannien    | 100,00        | 100,00               |                               |
| British Midland Airways Ltd., Donington Hall, Großbritannien                                   | 100,00        | 100,00               |                               |
| British Midland Ltd., Donington Hall, Großbritannien                                           | 100,00        | 100,00               |                               |
| Edelweiss Air AG, Kloten, Schweiz                                                              | 100,00        | 100,00               |                               |
| Ellen Finance 2010 S.N.C., Paris, Frankreich                                                   | 0,00          | 0,00                 | SPE                           |
| Eurowings Luftverkehrs AG, Düsseldorf                                                          | 100,00        | 100,00 <sup>1)</sup> |                               |
| FI Beauty Leasing Ltd, Tokio, Japan                                                            | 0,00          | 0,00                 | SPE                           |
| First Valley Highway Kumiai, Tokio, Japan                                                      | 0,00          | 0,00                 | SPE                           |
| Germanwings GmbH, Köln                                                                         | 100,00        | 100,00               |                               |
| Global Brand Management AG, Basel, Schweiz                                                     | 100,00        | 100,00               |                               |
| GOAL Verwaltungsgesellschaft mbH & Co. Projekt Nr. 7 oHG, Grünwald                             | 100,00        | 66,67                |                               |
| Ingrid Finance 2010 S.N.C., Paris, Frankreich                                                  | 0,00          | 0,00                 | SPE                           |
| Jour Leasing Co., Ltd., Tokio, Japan                                                           | 0,00          | 0,00                 | SPE                           |
| Lauda Air Luftfahrt GmbH, Wien Flughafen, Österreich                                           | 100,00        | 100,00               |                               |
| LeaseAir GmbH & Co. Verkehrsflugzeuge V KG, Dortmund                                           | 100,00        | 100,00               |                               |
| LHBD Holding Limited, London, Großbritannien                                                   | 100,00        | 100,00 <sup>2)</sup> |                               |
| LLG Nord GmbH & Co. Bravo KG, Grünwald                                                         | 100,00        | 66,67                |                               |
| LNN/LNO/LAE Ltd., George Town, Grand Cayman, Kaimaninseln                                      | 0,00          | 0,00                 | SPE                           |
| LPC/LNP/LNQ Finance Ltd., George Town, Grand Cayman, Kaimaninseln                              | 0,00          | 0,00                 | SPE                           |
| Lufthansa CityLine GmbH, Köln                                                                  | 100,00        | 100,00               |                               |
| Lufthansa Italia S.p.A., Milano, Italien                                                       | 100,00        | 100,00               |                               |
| Lufthansa Leasing Austria GmbH & Co. OG Nr. 1, Salzburg, Österreich                            | 100,00        | 66,67                |                               |
| Lufthansa Leasing Austria GmbH & Co. OG Nr. 2, Salzburg, Österreich                            | 100,00        | 66,67                |                               |
| Lufthansa Leasing Austria GmbH & Co. OG Nr. 3, Salzburg, Österreich                            | 100,00        | 66,67                |                               |
| Lufthansa Leasing Austria GmbH & Co. OG Nr. 4, Salzburg, Österreich                            | 100,00        | 66,67                |                               |
| Lufthansa Leasing Austria GmbH & Co. OG Nr. 5, Salzburg, Österreich                            | 100,00        | 66,67                |                               |
| Lufthansa Leasing Austria GmbH & Co. OG Nr. 6, Salzburg, Österreich                            | 100,00        | 66,67                |                               |
| Lufthansa Leasing Austria GmbH & Co. OG Nr. 7, Salzburg, Österreich                            | 100,00        | 66,67                |                               |
| Lufthansa Leasing Austria GmbH & Co. OG Nr. 8, Salzburg, Österreich                            | 100,00        | 66,67                |                               |
| Lufthansa Leasing Austria GmbH & Co. OG Nr. 9, Salzburg, Österreich                            | 100,00        | 66,67                |                               |
| Lufthansa Leasing Austria GmbH & Co. OG Nr. 10, Salzburg, Österreich                           | 100,00        | 66,67                |                               |
| Lufthansa Leasing GmbH & Co. Fox-Alfa oHG, Grünwald                                            | 100,00        | 66,67                |                               |
| Lufthansa Leasing GmbH & Co. Fox-Delta oHG, Grünwald                                           | 100,00        | 66,67                |                               |
| Lufthansa Leasing GmbH & Co. Fox-Echo oHG, Grünwald                                            | 100,00        | 66,67                |                               |
| Lufthansa Leasing GmbH & Co. Fox-Golf oHG, Grünwald                                            | 100,00        | 66,67                |                               |
| Lufthansa Leasing GmbH & Co. Fox-Hotel oHG, Grünwald                                           | 100,00        | 66,67                |                               |
| Lufthansa Leasing GmbH & Co. Fox-Quebec oHG, Grünwald                                          | 100,00        | 66,67                |                               |

|                                                                                                      | Kapitalanteil | Stimmrechtsanteil    | Abweichendes<br>Geschäftsjahr |
|------------------------------------------------------------------------------------------------------|---------------|----------------------|-------------------------------|
| Name, Sitz                                                                                           | in %          | in %                 |                               |
| Lufthansa Leasing GmbH & Co. Fox-Romeo oHG, Grünwald                                                 | 100,00        | 66,67                |                               |
| Lufthansa Leasing GmbH & Co. Fox-Sierra oHG, Grünwald                                                | 100,00        | 66,67                |                               |
| Lufthansa Leasing GmbH & Co. Fox-Tango oHG, Grünwald                                                 | 100,00        | 66,67                |                               |
| Lufthansa Leasing GmbH & Co. Fox-Uniform oHG, Grünwald                                               | 100,00        | 66,67                |                               |
| Lufthansa Leasing GmbH & Co. Fox-Victor oHG, Grünwald                                                | 100,00        | 66,67                |                               |
| Lufthansa Leasing GmbH & Co. Fox-Yankee oHG, Grünwald                                                | 100,00        | 66,67                |                               |
| Lufthansa Leasing GmbH & Co. Golf-Lima oHG, Grünwald                                                 | 100,00        | 66,67                |                               |
| Lufthansa Leasing GmbH & Co. Golf-Mike oHG, Grünwald                                                 | 100,00        | 66,67                |                               |
| Lufthansa Malta Aircraft-Leasing Ltd., St. Julians, Malta                                            | 100,00        | 100,00               |                               |
| Lufthansa Malta Holding Ltd., St. Julians, Malta                                                     | 100,00        | 100,00               |                               |
| Lufthansa Process Management GmbH, Neu-Isenburg                                                      | 100,00        | 100,00               |                               |
| Lufthansa WorldShop GmbH, Frankfurt am Main                                                          | 100,00        | 100,00               |                               |
| Miles & More International GmbH, Neu-Isenburg                                                        | 100,00        | 100,00               |                               |
| ÖLB Österreichische Luftverkehrs-Beteiligungs GmbH, Wien Flughafen, Österreich                       | 100,00        | 100,00               |                               |
| ÖLH Österreichische Luftverkehrs-Holding GmbH, Wien Flughafen, Österreich                            | 100,00        | 100,00 <sup>3)</sup> |                               |
| ÖLP Österreichische Luftverkehrs-Privatstiftung, Wien Flughafen, Österreich                          | 0,00          | 0,00 <sup>4)</sup>   |                               |
| Second Valley Highway Kumiai, Tokio, Japan                                                           | 0,00          | 0,00                 | SPE                           |
| Soir Leasing Co., Ltd., Tokio, Japan                                                                 | 0,00          | 0,00                 | SPE                           |
| Swiss Aviation Software AG, Basel, Schweiz                                                           | 100,00        | 100,00               |                               |
| Swiss Aviation Training Ltd., Basel, Schweiz                                                         | 100,00        | 100,00               |                               |
| Swiss European Air Lines AG, Basel, Schweiz                                                          | 100,00        | 100,00               |                               |
| Swiss International Air Lines AG, Basel, Schweiz                                                     | 100,00        | 100,00               |                               |
| Third Valley Highway Kumiai, Tokio, Japan                                                            | 0,00          | 0,00                 | SPE                           |
| TRAVIAUSTRIA Datenservice für Reise und Touristik Gesellschaft m.b.H. & Co NFG. KG, Wien, Österreich | 69,00         | 69,00                |                               |
| Tyrolean Airways Tiroler Luftfahrt GmbH, Innsbruck, Österreich                                       | 100,00        | 100,00               |                               |
| <b>Geschäftsfeld Logistik</b>                                                                        |               |                      |                               |
| Jettainer GmbH, Raunheim                                                                             | 100,00        | 100,00               |                               |
| Lufthansa Cargo AG, Kelsterbach                                                                      | 100,00        | 100,00               |                               |
| Lufthansa Cargo Charter Agency GmbH, Frankfurt am Main                                               | 100,00        | 100,00               |                               |
| Lufthansa Leasing GmbH & Co. Echo-Zulu oHG, Grünwald                                                 | 100,00        | 66,67                |                               |
| <b>Geschäftsfeld Technik</b>                                                                         |               |                      |                               |
| AirLiance Materials LLC, Roselle, IL 60172, USA                                                      | 50,21         | 50,21                |                               |
| BizJet International Sales & Support, Inc., Tulsa, USA                                               | 100,00        | 100,00               |                               |
| Hamburger Gesellschaft für Flughafenanlagen mbH, Hamburg                                             | 100,00        | 100,00               |                               |
| Hawker Pacific Aerospace Inc., Sun Valley, USA                                                       | 100,00        | 100,00               |                               |
| Hawker Pacific Aerospace Ltd., Kestrel Way, Hayes, Großbritannien                                    | 100,00        | 100,00               |                               |
| JASEN Grundstücksgesellschaft mbH & Co. oHG, Grünwald                                                | 100,00        | 50,00                | SPE                           |
| Lufthansa Technik AERO Alzey GmbH, Alzey                                                             | 100,00        | 100,00               |                               |
| Lufthansa Technik AG, Hamburg                                                                        | 100,00        | 100,00               |                               |
| Lufthansa Technik Airmotive Ireland Holdings Ltd., Co. Dublin, Irland                                | 100,00        | 100,00               |                               |
| Lufthansa Technik Airmotive Ireland Leasing Ltd., Co. Dublin, Irland                                 | 100,00        | 100,00               |                               |
| Lufthansa Technik Airmotive Ireland Ltd., Co. Dublin, Irland                                         | 100,00        | 100,00               |                               |
| Lufthansa Technik Budapest Repülögép Nagyjavító Kft., Budapest, Ungarn                               | 85,00         | 85,00                |                               |
| Lufthansa Technik Immobilien- und Verwaltungsgesellschaft mbH, Hamburg                               | 100,00        | 100,00               |                               |
| Lufthansa Technik Logistik GmbH, Hamburg                                                             | 100,00        | 100,00               |                               |
| Lufthansa Technik Maintenance International GmbH, Frankfurt am Main                                  | 100,00        | 100,00               |                               |
| Lufthansa Technik Malta Limited, Luqa, Malta                                                         | 92,00         | 92,00                |                               |

Fortsetzung auf S. 222

**Wesentliche verbundene Unternehmen zum 31.12.2010 (Fortsetzung)**

|                                                                        | <b>Kapitalanteil</b> | <b>Stimmrechtsanteil</b> | <b>Abweichendes<br/>Geschäftsjahr</b> |
|------------------------------------------------------------------------|----------------------|--------------------------|---------------------------------------|
| Name, Sitz                                                             | in %                 | in %                     |                                       |
| Lufthansa Technik North America Holding Corp., Wilmington, USA         | 100,00               | 100,00                   |                                       |
| Lufthansa Technik Objekt- und Verwaltungsgesellschaft mbH, Hamburg     | 100,00               | 100,00                   |                                       |
| Lufthansa Technik Philippines, Inc., Manila, Philippinen               | 51,00                | 51,00                    |                                       |
| Lufthansa Technik Switzerland GmbH, Basel, Schweiz                     | 100,00               | 100,00                   |                                       |
| Shannon Aerospace Ltd., Co. Claire, Irland                             | 100,00               | 100,00                   |                                       |
| <b>Geschäftsfeld IT Services</b>                                       |                      |                          |                                       |
| Lufthansa Systems Aeronautics GmbH, Raunheim                           | 100,00               | 100,00                   |                                       |
| Lufthansa Systems Airline Services GmbH, Kelsterbach                   | 100,00               | 100,00                   |                                       |
| Lufthansa Systems Aktiengesellschaft, Kelsterbach                      | 100,00               | 100,00                   |                                       |
| Lufthansa Systems Americas, Inc., Miami, USA                           | 100,00               | 100,00                   |                                       |
| Lufthansa Systems AS GmbH, Norderstedt                                 | 100,00               | 100,00                   |                                       |
| Lufthansa Systems Berlin GmbH, Berlin                                  | 100,00               | 100,00                   |                                       |
| Lufthansa Systems Business Solutions GmbH, Raunheim                    | 100,00               | 100,00                   |                                       |
| Lufthansa Systems Infratec GmbH, Kelsterbach                           | 100,00               | 100,00                   |                                       |
| Lufthansa Systems Passenger Services GmbH, Kelsterbach                 | 100,00               | 100,00                   |                                       |
| <b>Geschäftsfeld Catering</b>                                          |                      |                          |                                       |
| 41 / 42 Bartlett (Pty) Ltd., Johannesburg, Südafrika                   | 100,00               | 100,00                   |                                       |
| Aerococina S.A. de C.V., Mexico City, Mexiko                           | 51,00                | 51,00                    |                                       |
| AIRO Catering Services Eesti OÜ, Tallinn, Estland                      | 100,00               | 100,00                   |                                       |
| Airo Catering Services Latvija SIA, Marupe, Lettland                   | 100,00               | 100,00                   |                                       |
| AIRO Catering Services Sweden AB, Stockholm-Arlanda, Schweden          | 100,00               | 100,00                   |                                       |
| AIRO Catering Services - Ukraine, Boryspil, Ukraine                    | 100,00               | 100,00                   |                                       |
| Arlington Services, Inc., Wilmington, USA                              | 100,00               | 100,00                   |                                       |
| Arlington Services Mexico, S.A. de C.V., Mexico City, Mexiko           | 100,00               | 100,00                   |                                       |
| Arlington Services Panama S.A., Panama City, Panama                    | 100,00               | 100,00                   |                                       |
| AVIAPIT-SOCHI OOO, Sochi, Russland                                     | 100,00               | 100,00                   |                                       |
| Bahia Catering Ltda., Sao Cristovao (Salvador), Brasilien              | 95,00                | 95,00                    |                                       |
| Belém Serviços de Bordo Ltda., Belém, Brasilien                        | 70,00                | 70,00                    |                                       |
| Capital Gain International (1986) Ltd., Hongkong, China                | 100,00               | 100,00                   |                                       |
| Caterair Serviços de Bordo e Hotelaria S.A., Rio de Janeiro, Brasilien | 100,00               | 100,00                   |                                       |
| Caterair Taiwan In-Flight Services, Inc., Taipei, Taiwan               | 100,00               | 100,00                   |                                       |
| Cater Suprimento de Refeições, Ltda., Rio de Janeiro, Brasilien        | 100,00               | 100,00                   |                                       |
| CLS Catering Services Ltd., Richmond, Kanada                           | 70,00                | 70,00                    |                                       |
| Comercializadora de Servicios Limitada, Santiago de Chile, Chile       | 100,00               | 100,00                   |                                       |
| Comisariato de Baja California, S.A. de C.V., Tijuana, Mexiko          | 51,00                | 51,00                    |                                       |
| Comisariatos Gotre, S.A. de C.V., Torreon, Mexiko                      | 51,00                | 51,00                    |                                       |
| Fortaleza Serviços de Bordo Ltda., Fortaleza, Brasilien                | 70,00                | 70,00                    |                                       |
| Inflight Catering (Pty) Ltd., Johannesburg, Südafrika                  | 100,00               | 100,00                   |                                       |
| Inflight Catering Services Limited, Daressalam, Tansania               | 61,99                | 61,99                    |                                       |
| In-flight Management Solutions GmbH, Neu-Isenburg                      | 100,00               | 100,00                   |                                       |
| International Food Services Ltd., Hongkong, China                      | 100,00               | 100,00                   |                                       |
| Inversiones Turísticas Aeropuerto Panama, S.A., Panama City, Panama    | 100,00               | 100,00                   |                                       |
| LSG Asia GmbH, Neu-Isenburg                                            | 100,00               | 100,00                   |                                       |
| LSG Catering China Ltd., Hongkong, China                               | 100,00               | 100,00                   |                                       |
| LSG Catering Guam, Inc., Guam, USA                                     | 100,00               | 100,00                   |                                       |
| LSG Catering Hong Kong Ltd., Hongkong, China                           | 100,00               | 100,00                   |                                       |



|                                                                                             | Kapitalanteil | Stimmrechtsanteil    | Abweichendes<br>Geschäftsjahr |
|---------------------------------------------------------------------------------------------|---------------|----------------------|-------------------------------|
| Name, Sitz                                                                                  | in %          | in %                 |                               |
| LSG Catering Saipan, Inc., Saipan, Mikronesien                                              | 100,00        | 100,00               |                               |
| LSG Catering (Thailand) Ltd., Bangkok, Thailand                                             | 100,00        | 100,00               |                               |
| LSG-Food & Nonfood Handel GmbH, Frankfurt am Main                                           | 100,00        | 100,00               |                               |
| LSG Holding Asia Ltd., Hongkong, China                                                      | 86,88         | 86,88                |                               |
| LSG Lufthansa Service Asia Ltd., Hongkong, China                                            | 100,00        | 100,00               |                               |
| LSG Lufthansa Service Cape Town (Pty) Ltd., Kapstadt, Südafrika                             | 100,00        | 100,00               |                               |
| LSG Lufthansa Service Catering- und Dienstleistungsgesellschaft mbH, Neu-Isenburg           | 100,00        | 100,00               |                               |
| LSG Lufthansa Service Enterprises Ltd., Hongkong, China                                     | 100,00        | 100,00               |                               |
| LSG Lufthansa Service Europa/Afrika GmbH, Neu-Isenburg                                      | 100,00        | 100,00               |                               |
| LSG Lufthansa Service Guam, Inc., Guam, USA                                                 | 100,00        | 100,00               |                               |
| LSG Lufthansa Service Holding AG, Neu-Isenburg                                              | 100,00        | 100,00               |                               |
| LSG Lufthansa Service Hong Kong Ltd., Hongkong, China                                       | 41,62         | 47,90 <sup>5)</sup>  |                               |
| LSG Lufthansa Service Saipan, Inc., Saipan, Mikronesien                                     | 100,00        | 100,00               |                               |
| LSG Lufthansa Service - Sky Chefs do Brasil Catering, Refeições Ltda., São Paulo, Brasilien | 100,00        | 100,00               |                               |
| LSG Sky Chefs Australasia Pty Limited, Sydney, Australien                                   | 100,00        | 100,00               |                               |
| LSG Sky Chefs Belgium N.V., Zaventem, Belgien                                               | 100,00        | 100,00               |                               |
| LSG Sky Chefs Birmingham Ltd., Feltham, Großbritannien                                      | 100,00        | 100,00               |                               |
| LSG Sky Chefs Building AB, Stockholm, Schweden                                              | 100,00        | 100,00               |                               |
| LSG Sky Chefs Catering Logistics GmbH, Neu-Isenburg                                         | 100,00        | 100,00               |                               |
| LSG Sky Chefs Culinary Service GmbH, Neu-Isenburg                                           | 100,00        | 100,00               |                               |
| LSG Sky Chefs Danmark A/S, Kastrup, Dänemark                                                | 100,00        | 100,00               |                               |
| LSG Sky Chefs Deutschland GmbH, Neu-Isenburg                                                | 100,00        | 100,00               |                               |
| LSG Sky Chefs de Venezuela C.A., Caracas, Venezuela                                         | 99,99         | 99,93                |                               |
| LSG/Sky Chefs Europe Holdings Ltd., Horley, Großbritannien                                  | 100,00        | 100,00               |                               |
| LSG Sky Chefs/GCC Ltd., Feltham, Großbritannien                                             | 50,00         | 50,00                |                               |
| LSG Sky Chefs Gulf Solutions W.L.L., Manama, Bahrain                                        | 60,00         | 60,00                |                               |
| LSG Sky Chefs Havacilik Hizmetleri A.S., Sefaköy-Istanbul, Türkei                           | 100,00        | 100,00               |                               |
| LSG Sky Chefs (India) Private Ltd., Mumbai, Indien                                          | 100,00        | 100,00               |                               |
| LSG Sky Chefs In-Flight Logistics Asia Pacific Ltd., Hongkong, China                        | 100,00        | 100,00               |                               |
| LSG Sky Chefs Istanbul Catering Hizmetleri A.S., Istanbul, Türkei                           | 100,00        | 100,00 <sup>6)</sup> |                               |
| LSG Sky Chefs Korea Co Ltd., Incheon, Südkorea                                              | 80,00         | 80,00                |                               |
| LSG Sky Chefs Lounge GmbH, Neu-Isenburg                                                     | 100,00        | 100,00               |                               |
| LSG Sky Chefs New Zealand Limited, Auckland, Neuseeland                                     | 100,00        | 100,00               | März                          |
| LSG Sky Chefs Norge AS, Oslo, Norwegen                                                      | 100,00        | 100,00               |                               |
| LSG Sky Chefs North America Solutions, Inc., Wilmington, USA                                | 100,00        | 100,00               |                               |
| LSG Sky Chefs Objekt- und Verwaltungsgesellschaft mbH, Neu-Isenburg                         | 100,00        | 100,00               |                               |
| LSG Sky Chefs (Qingdao) Co., Ltd., Laixi City, China                                        | 100,00        | 100,00               |                               |
| LSG Sky Chefs Rus, Moskau, Russland                                                         | 100,00        | 100,00               |                               |
| LSG Sky Chefs Schweiz AG, Rümlang, Schweiz                                                  | 100,00        | 100,00               |                               |
| LSG Sky Chefs Solutions Asia Limited, Hongkong, China                                       | 100,00        | 100,00               |                               |
| LSG Sky Chefs South Africa (Proprietary) Ltd., Johannesburg, Südafrika                      | 100,00        | 100,00               |                               |
| LSG Sky Chefs S.p.A., Case Nuove di Somma Lombardo, Italien                                 | 100,00        | 100,00               |                               |
| LSG Sky Chefs Supply Chain Solutions, Inc., Wilmington, USA                                 | 100,00        | 100,00               |                               |
| LSG Sky Chefs Sverige AB, Stockholm, Schweden                                               | 100,00        | 100,00               |                               |
| LSG Sky Chefs (Thailand) Ltd., Bangkok, Thailand                                            | 64,30         | 100,00               |                               |
| LSG Sky Chefs UK Ltd., Feltham, Großbritannien                                              | 100,00        | 100,00               |                               |
| LSG Sky Chefs USA, Inc., Wilmington, USA                                                    | 100,00        | 100,00               |                               |
| LSG Sky Chefs Verwaltungsgesellschaft mbH, Neu-Isenburg                                     | 100,00        | 100,00               |                               |

Fortsetzung auf S. 224

**Wesentliche verbundene Unternehmen zum 31.12.2010 (Fortsetzung)**

|                                                                     | Kapitalanteil | Stimmrechtsanteil | Abweichendes<br>Geschäftsjahr |
|---------------------------------------------------------------------|---------------|-------------------|-------------------------------|
| Name, Sitz                                                          | in %          | in %              |                               |
| LSG-Sky Food GmbH, Alzey                                            | 100,00        | 100,00            |                               |
| LSG South America GmbH, Neu-Isenburg                                | 100,00        | 100,00            |                               |
| Myanmar LSG Lufthansa Service Ltd., Yangon, Myanmar                 | 100,00        | 100,00            |                               |
| Natal Catering Ltda., Natal, Brasilien                              | 70,00         | 70,00             |                               |
| Oakfield Farms Solutions, L.L.C., Wilmington, Delaware, USA         | 51,00         | 51,00             |                               |
| SC International Services, Inc., Wilmington, USA                    | 100,00        | 100,00            |                               |
| SCIS Air Security Corporation, Wilmington, USA                      | 100,00        | 100,00            |                               |
| ServCater Internacional Ltda., Guarulhos, Brasilien                 | 90,00         | 90,00             |                               |
| Siam Flight Services Ltd., Bangkok, Thailand                        | 49,00         | 66,67             |                               |
| Sky Chefs Argentine, Inc., Wilmington, USA                          | 100,00        | 100,00            |                               |
| Sky Chefs Chile S.A., Santiago de Chile, Chile                      | 100,00        | 100,00            |                               |
| Sky Chefs De Mexico, S.A. de C.V., Mexico City, Mexiko              | 51,00         | 51,00             |                               |
| Sky Chefs de Panama, S.A., Panama City, Panama                      | 100,00        | 100,00            |                               |
| Sky Chefs, Inc., Wilmington, USA                                    | 100,00        | 100,00            |                               |
| SkylogistiX GmbH, Neu-Isenburg                                      | 75,00         | 75,00             |                               |
| Starfood Antalya Gıda Sanayi ve Ticaret A.Ş., Istanbul, Türkei      | 51,00         | 51,00             |                               |
| Starfood S.r.l., Fiumicino, Italien                                 | 51,00         | 51,00             |                               |
| UAB Airo Catering Services Lietuva, Vilna (Vilnius), Litauen        | 100,00        | 100,00            |                               |
| Western Aire Chef, Inc., Wilmington, USA                            | 100,00        | 100,00            |                               |
| ZAO AeroMEAL, Yemelyanovo, Russland                                 | 55,00         | 55,00             |                               |
| <b>Sonstige</b>                                                     |               |                   |                               |
| AirPlus Air Travel Card Vertriebsgesellschaft mbH, Wien, Österreich | 66,67         | 66,67             |                               |
| AirPlus Holding GmbH, Wien, Österreich                              | 100,00        | 100,00            |                               |
| AirPlus International AG, Kloten, Schweiz                           | 100,00        | 100,00            |                               |
| AirPlus International, Inc., Springfield, USA                       | 100,00        | 100,00            |                               |
| AirPlus International Limited, London, Großbritannien               | 100,00        | 100,00            |                               |
| AirPlus International S.r.l., Bologna, Italien                      | 100,00        | 100,00            |                               |
| AirPlus Payment Management Co., Ltd., Shanghai, China               | 100,00        | 100,00            |                               |
| Lufthansa AirPlus Servicekarten GmbH, Neu-Isenburg                  | 100,00        | 100,00            |                               |
| Lufthansa Commercial Holding GmbH, Köln                             | 100,00        | 100,00            |                               |
| Lufthansa Flight Training Berlin GmbH, Berlin                       | 100,00        | 100,00            |                               |
| Lufthansa Flight Training GmbH, Frankfurt am Main                   | 100,00        | 100,00            |                               |
| Lufthansa Malta Finance plc, St. Julians, Malta                     | 100,00        | 100,00            |                               |
| Lufthansa SICAV-FIS-Fonds, Luxemburg, Luxemburg                     | 100,00        | 100,00            |                               |
| Lufthansa Training & Conference Center GmbH, Seeheim-Jugenheim      | 100,00        | 100,00            |                               |
| MARDU Grundstücks-Verwaltungsgesellschaft mbH & Co. oHG, Grünwald   | 100,00        | 50,00             | SPE                           |
| MUSA Grundstücks-Verwaltungsgesellschaft mbH & Co. oHG, Grünwald    | 100,00        | 50,00             | SPE                           |
| Quinto Grundstücksgesellschaft mbH & Co. oHG, Grünwald              | 99,73         | 49,75             | SPE                           |
| TGV DLH, Düsseldorf                                                 | 100,00        | 100,00            | SPE                           |

SPE: Konsolidierte Zweckgesellschaft (Special Purpose Entity).

<sup>1)</sup> 50,91 Prozent der Kapitalanteile bzw. Stimmrechte sind über eine Call-Option zuzurechnen.

<sup>2)</sup> 11,50 Prozent der Kapitalanteile bzw. 65,00 Prozent der Stimmrechte sind über eine Call-Option zuzurechnen.

<sup>3)</sup> 50,20 Prozent der Kapitalanteile bzw. Stimmrechte sind über die ÖLP zuzurechnen.

<sup>4)</sup> Eine Beherrschung der ÖLP resultiert aus der Möglichkeit, drei von fünf Vorstandsmitgliedern zu nominieren.

<sup>5)</sup> Die unternehmerische Führung der Gesellschaft liegt im Konzern.

<sup>6)</sup> 33,34 Prozent der Kapitalanteile bzw. 50,01 Prozent der Stimmrechte sind über eine Call-Option zuzurechnen.

**Wesentliche Joint Ventures zum 31.12.2010 \***

|                                                                                                             | Kapitalanteil | Stimmrechtsanteil | Abweichendes<br>Geschäftsjahr |
|-------------------------------------------------------------------------------------------------------------|---------------|-------------------|-------------------------------|
| Name, Sitz                                                                                                  | in %          | in %              |                               |
| <b>Geschäftsfeld Passage Airline Gruppe</b>                                                                 |               |                   |                               |
| CityLine Avro Simulator und Training GmbH Berlin, Berlin                                                    | 50,00         | 50,00             |                               |
| Günes Ekspres Havacilik Anonim Sirketi (Sun Express), Antalya, Türkei                                       | 50,00         | 50,00             |                               |
| <b>Geschäftsfeld Logistik</b>                                                                               |               |                   |                               |
| Aerologic GmbH, Leipzig                                                                                     | 50,00         | 50,00             |                               |
| Global Logistics System Europe Company for Cargo Information Services GmbH, Frankfurt am Main <sup>1)</sup> | 46,85         | 42,86             |                               |
| Shanghai Pudong International Airport Cargo Terminal Co. Ltd., Shanghai, China                              | 29,00         | 22,22             |                               |
| <b>Geschäftsfeld Technik</b>                                                                                |               |                   |                               |
| Aircraft Maintenance and Engineering Corp., Peking, China                                                   | 40,00         | 42,86             |                               |
| Lufthansa Bombardier Aviation Services GmbH, Schönefeld                                                     | 51,00         | 51,00             |                               |
| N3 Engine Overhaul Services GmbH & Co. KG, Arnstadt                                                         | 50,00         | 50,00             |                               |
| Spairliners GmbH, Hamburg                                                                                   | 50,00         | 50,00             |                               |
| <b>Geschäftsfeld Catering</b>                                                                               |               |                   |                               |
| Brahim's - LSG Sky Chefs Holdings Sdn Bhd, Bandar Baru Bangi, Malaysia                                      | 49,00         | 49,00             |                               |
| <b>Sonstige</b>                                                                                             |               |                   |                               |
| Diners Club Spain S.A., Madrid, Spanien                                                                     | 25,00         | 25,00             |                               |

\* Einbeziehung at equity.

**Wesentliche assoziierte Unternehmen zum 31.12.2010 \***

|                                                                          | Kapitalanteil | Stimmrechtsanteil | Abweichendes<br>Geschäftsjahr |
|--------------------------------------------------------------------------|---------------|-------------------|-------------------------------|
| Name, Sitz                                                               | in %          | in %              |                               |
| <b>Geschäftsfeld Passage Airline Gruppe</b>                              |               |                   |                               |
| Alpar Flug- und Flugplatz-Gesellschaft AG, Belp, Schweiz                 | 17,00         | 17,00             |                               |
| SN Airholding SA/NV, Brüssel, Belgien                                    | 45,00         | 45,00             |                               |
| <b>Geschäftsfeld Logistik</b>                                            |               |                   |                               |
| Jade Cargo International Company Limited, Shenzhen, China                | 25,00         | 28,57             |                               |
| time:matters Holding GmbH, Düsseldorf <sup>1)</sup>                      | 49,26         | 49,00             |                               |
| <b>Geschäftsfeld Technik</b>                                             |               |                   |                               |
| BELAC LLC, Oldsmar, USA                                                  | 21,05         | 21,05             |                               |
| HEICO Aerospace Holdings Corp., Hollywood, USA                           | 20,00         | 20,00             |                               |
| <b>Geschäftsfeld Catering</b>                                            |               |                   |                               |
| CateringPor - Catering de Portugal, S.A., Lissabon, Portugal             | 49,00         | 49,00             |                               |
| Hongkong Beijing Air Catering Ltd., Hongkong, China                      | 45,00         | 45,00             |                               |
| Hongkong Shanghai Air Catering Ltd., Hongkong, China                     | 45,00         | 45,00             |                               |
| Inflight Service Production Sweden AB, Sigtuna, Schweden                 | 25,00         | 25,00             |                               |
| Inflite Holdings (Cayman) Ltd., Grand Cayman, Kaimaninseln               | 49,00         | 49,00             | September                     |
| Inflite Holdings (St. Lucia) Ltd., Castries, St. Lucia                   | 49,00         | 49,00             | September                     |
| Nanjing Lukou International Airport LSG Catering Co Ltd., Nanjing, China | 40,00         | 40,00             |                               |
| Xian Eastern Air Catering Co. Ltd, Xian, China                           | 30,00         | 28,57             |                               |
| Yunnan Eastern Air Catering Co. Ltd., Kunming, China                     | 24,90         | 28,57             |                               |
| ZAO Aeromar, Moskau Region, Russland                                     | 49,00         | 49,00             |                               |
| Gansu HNA LSG Sky Chefs Co., Ltd, Lanzhou, China                         | 49,00         | 40,00             |                               |

\* Einbeziehung at equity.

<sup>1)</sup> Klassifizierung als „Held for Sale“.

## Übrige Anteile der Deutschen Lufthansa AG

| Übrige Anteile der Deutschen Lufthansa AG zum 31.12.2010                  | Kapitalanteil | Stimmrechtsanteil | Konsolidiert |
|---------------------------------------------------------------------------|---------------|-------------------|--------------|
| Name, Sitz                                                                | in %          | in %              |              |
| <b>Verbundene, nicht konsolidierte Unternehmen</b>                        |               |                   |              |
| ACS Aircontainer Services Gesellschaft m.b.H., Fischamend, Österreich     | 76,00         | 76,00             |              |
| Air Dolomiti Deutschland GmbH, München                                    | 100,00        | 100,00            |              |
| Airline Accounting Center de Mexico S.A. de C.V., Mexico City, Mexiko     | 100,00        | 100,00            |              |
| Airline Accounting Center Sp. z o.o., Krakau, Polen                       | 100,00        | 100,00            |              |
| Airline Administration Center (Thailand) Ltd., Bangkok, Thailand          | 100,00        | 100,00            |              |
| Airline Marketing Services India Private Limited, Mumbai 400 021, Indien  | 75,00         | 75,00             |              |
| Airline Training Center Arizona Inc., Goodyear, AZ 85338, USA             | 100,00        | 100,00            |              |
| AirPlus International GmbH, Neu-Isenburg                                  | 100,00        | 100,00            |              |
| Airport Services Dresden GmbH, Dresden                                    | 100,00        | 100,00            |              |
| Airport Services Friedrichshafen GmbH, Friedrichshafen                    | 100,00        | 100,00            |              |
| Airport Services Leipzig GmbH, Schkeuditz                                 | 100,00        | 100,00            |              |
| Albatros Service Center GmbH, Köln                                        | 100,00        | 100,00            |              |
| Albatros Versicherungsdienste GmbH, Köln                                  | 100,00        | 100,00            |              |
| AS InPro GmbH, Oldenburg                                                  | 100,00        | 100,00            |              |
| ATC - Austrian Technik Consulting, s.r.o., Trencin, Slowakei              | 100,00        | 100,00            |              |
| AUA Versicherungs-Service Gesellschaft m.b.H., Wien Flughafen, Österreich | 100,00        | 100,00            |              |
| Austrian Airlines Technik-Bratislava, s.r.o., Bratislava, Slowakei        | 100,00        | 100,00            |              |
| Austrian Airlines Technik Marketing GmbH, Wien, Österreich                | 100,00        | 100,00            |              |
| Austrian Airlines Tele Sales & Service GmbH, Innsbruck, Österreich        | 100,00        | 100,00            |              |
| Austrian Lufthansa Cargo GmbH, Wien Flughafen, Österreich                 | 100,00        | 100,00            |              |
| AVICON Aviation Consult Gesellschaft m.b.H., Wien Flughafen, Österreich   | 100,00        | 100,00            |              |
| Aviation Quality Services GmbH, Frankfurt am Main                         | 100,00        | 100,00            |              |
| BM Handling Services Ltd., Derby, Großbritannien                          | 100,00        | 100,00            |              |
| BMI Airways Ltd., Derby, Großbritannien                                   | 100,00        | 100,00            |              |
| bmibaby Ltd., Donington, Derby, Großbritannien                            | 100,00        | 100,00            |              |
| British Mediterranean Airways Limited, Derby, Großbritannien              | 59,38         | 79,68             |              |
| British Midland Engineering Ltd., Derby, Großbritannien                   | 100,00        | 100,00            |              |
| British Midland Holdings Ltd., Derby, Großbritannien                      | 100,00        | 100,00            |              |
| British Midland Regional Ltd., Aberdeen, Großbritannien                   | 100,00        | 100,00            |              |
| Cargo Future Communications (CFC) GmbH, Büchenbeuren                      | 65,00         | 65,00             |              |
| Caterair Portugal - Assistencia A Bordo, Lda., Sacavém, Portugal          | 100,00        | 100,00            |              |
| City Net Catering Holdings Ltd., Alcester, Großbritannien <sup>1)</sup>   | 100,00        | 100,00            |              |
| Crossair AG, Basel, Schweiz                                               | 100,00        | 100,00            |              |
| Cross Travel Club AG, Basel, Schweiz                                      | 100,00        | 100,00            |              |
| Diamond Insurance Company Limited, Douglas, Isle of Man, Großbritannien   | 100,00        | 100,00            |              |
| Delvag Luftfahrtversicherungs-AG, Köln                                    | 100,00        | 100,00            |              |
| Delvag Rückversicherungs-AG, Köln                                         | 100,00        | 100,00            |              |
| Deutsche Lufthansa Unterstützungswerk GmbH, Köln                          | 100,00        | 100,00            |              |
| DLH Fuel Company mbH, Hamburg                                             | 100,00        | 100,00            |              |
| DLH Malta Pension Ltd., St. Julians, Malta                                | 100,00        | 100,00            |              |
| Europe Continental Airways S.A. (i.L.), Saint Louis, Frankreich           | 100,00        | 100,00            |              |
| EW Beteiligungs- und Verwaltungsgesellschaft mbH, Dortmund                | 100,00        | 100,00            |              |
| GERANOS Grundstücksgesellschaft mbH & Co. IMMOBILIEN KG, Köln             | 85,00         | 100,00            |              |
| GGG Service for Airlines GmbH, Frankfurt am Main                          | 100,00        | 100,00            |              |
| Global Tele Sales Brno s.r.o., Brno, Tschechien                           | 100,00        | 100,00            |              |
| Global Tele Sales Ltd., Contaf, Dublin, Irland                            | 100,00        | 100,00            |              |
| Global Telesales of Canada, Inc., Peterborough, Kanada                    | 100,00        | 100,00            |              |
| Global Tele Sales Pty Limited, Melbourne, Australien                      | 100,00        | 100,00            |              |
| Global Tele Sales (PTY) Ltd., Kapstadt, Südafrika                         | 100,00        | 100,00            |              |
| GOAL Verwaltungsgesellschaft mbH & Co. Projekt Nr. 5 KG, Grünwald         | 100,00        | 83,33             |              |

|                                                                                 | Kapitalanteil | Stimmrechtsanteil | Konsolidiert |
|---------------------------------------------------------------------------------|---------------|-------------------|--------------|
| Name, Sitz                                                                      | in %          | in %              |              |
| handling counts GmbH, Frankfurt am Main                                         | 100,00        | 100,00            |              |
| Hinduja Lufthansa Cargo Holding B.V., Amsterdam, Niederlande                    | 100,00        | 100,00            |              |
| IBYKUS-KG THG Grundbuchtreuhandgesellschaft mbH & Co., Köln                     | 85,00         | 88,14             |              |
| In-Flight Management Solutions Latin America, S.A. de C.V., Mexico City, Mexiko | 100,00        | 100,00            |              |
| International Cargo Marketing Ltd., Derby, Großbritannien                       | 100,00        | 100,00            |              |
| LCAG Malta Pension Ltd., St. Julians, Malta                                     | 100,00        | 100,00            |              |
| LCAG USA, Inc., Wilmington, USA                                                 | 100,00        | 100,00            |              |
| LCH Grundstücksgesellschaft Berlin mbH, Köln                                    | 100,00        | 100,00            |              |
| LGHS Holding (Thailand) Limited i.L., Bangkok, Thailand                         | 49,00         | 90,74             |              |
| LH Cargo Holding GmbH, Kelsterbach                                              | 100,00        | 100,00            |              |
| LHT Malta Pension Ltd., St. Julians, Malta                                      | 100,00        | 100,00            |              |
| LRS Lufthansa Revenue Services GmbH, Norderstedt                                | 100,00        | 100,00            |              |
| LSG Malta Pension Ltd., St. Julians, Malta                                      | 100,00        | 100,00            |              |
| LSG Sky Chefs Argentina S.A. i.G., Buenos Aires, Argentinien                    | 100,00        | 100,00            |              |
| LSI Malta Pension Ltd., St. Julians, Malta                                      | 100,00        | 100,00            |              |
| LTMES FZE, Dubai, Vereinigte Arabische Emirate                                  | 100,00        | 100,00            |              |
| Lufthansa Cagrı Merkezi ve Müşteri Hizmetleri A.S., Istanbul, Türkei            | 100,00        | 100,00            |              |
| Lufthansa Cargo India (Priv) Ltd., Neu Delhi, Indien                            | 100,00        | 100,00            |              |
| Lufthansa Cargo Servicios Logísticos de Mexico, S.A. de C.V., Mexiko, Mexiko    | 100,00        | 100,00            |              |
| Lufthansa City Center International GmbH, Frankfurt am Main                     | 50,00         | 50,00             |              |
| Lufthansa Consulting GmbH, Köln                                                 | 92,50         | 100,00            |              |
| Lufthansa Consulting Managementbeteiligungs GmbH & Co. KG, Köln                 | 62,50         | 62,50             |              |
| Lufthansa Druck und Distribution GmbH, Köln                                     | 100,00        | 100,00            |              |
| Lufthansa Engineering and Operational Services GmbH, Frankfurt am Main          | 100,00        | 100,00            |              |
| Lufthansa Flight Training - CST GmbH, Berlin                                    | 100,00        | 100,00            |              |
| Lufthansa Flight Training Vienna GmbH, Wien Flughafen, Österreich               | 100,00        | 100,00            |              |
| Lufthansa Global Tele Sales GmbH, Berlin                                        | 100,00        | 100,00            |              |
| Lufthansa Inmobiliaria S. A. de C. V., Mexico City, Mexiko                      | 100,00        | 100,00            |              |
| Lufthansa International Finance (Netherlands) N. V., Amsterdam, Niederlande     | 100,00        | 100,00            |              |
| Lufthansa Malta Pension Holding Ltd., St. Julians, Malta                        | 100,00        | 100,00            |              |
| Lufthansa Pension Beteiligungs GmbH, Frankfurt am Main                          | 100,00        | 100,00            |              |
| Lufthansa Pension GmbH & Co. KG, Frankfurt am Main                              | 100,00        | 100,00            |              |
| Lufthansa Resource Technical Training Ltd., Cwmbran, Großbritannien             | 51,00         | 51,00             |              |
| Lufthansa Service-Center Kassel GmbH, Kassel                                    | 100,00        | 100,00            |              |
| Lufthansa Services (Thailand) Ltd., Bangkok, Thailand                           | 64,19         | 80,00             |              |
| Lufthansa Shenzhen Management Company Limited, Shenzhen, China                  | 100,00        | 100,00            |              |
| Lufthansa Systems 25. GmbH, Raunheim                                            | 100,00        | 100,00            |              |
| Lufthansa Systems Asia Pacific Pte. Ltd., Singapur, Singapur                    | 100,00        | 100,00            |              |
| Lufthansa Systems FlightNav AG, Opfikon, Schweiz                                | 100,00        | 100,00            |              |
| Lufthansa Systems Hungaria Kft, Budapest, Ungarn                                | 100,00        | 100,00            |              |
| Lufthansa Systems Infrastructure Services Inc., Dallas, Texas 75247-3726, USA   | 100,00        | 100,00            |              |
| Lufthansa Systems IS Consulting GmbH, Norderstedt                               | 100,00        | 100,00            |              |
| Lufthansa Systems Network GmbH, Norderstedt                                     | 100,00        | 100,00            |              |
| Lufthansa Systems Network Services GmbH, Norderstedt                            | 100,00        | 100,00            |              |
| Lufthansa Systems Poland Sp. z o.o., Danzig, Polen                              | 100,00        | 100,00            |              |
| Lufthansa Technical Training GmbH, Hamburg                                      | 100,00        | 100,00            |              |
| Lufthansa Technik Brussels N.V., Steenokkerzeel-Melsbroek, Belgien              | 100,00        | 100,00            |              |
| Lufthansa Technik Component Services LLC, Dallas, USA                           | 100,00        | 100,00            |              |
| Lufthansa Technik Intercoat GmbH, Kaltenkirchen                                 | 51,00         | 51,00             |              |
| Lufthansa Technik Logistik of America LLC, New York 11554, USA                  | 100,00        | 100,00            |              |
| Lufthansa Technik Logistik Services GmbH, Hamburg                               | 100,00        | 100,00            |              |

Fortsetzung auf S. 228



**Übrige Anteile der Deutschen Lufthansa AG zum 31.12.2010 (Fortsetzung)**

|                                                                                                                        | Kapitalanteil | Stimmrechtsanteil | Konsolidiert |
|------------------------------------------------------------------------------------------------------------------------|---------------|-------------------|--------------|
| Name, Sitz                                                                                                             | in %          | in %              |              |
| Lufthansa Technik Milan s.r.l., Somma Lombardo (VA), Italien                                                           | 100,00        | 100,00            |              |
| Lufthansa Technik Services India Private Limited, Gurgaon - 122002 (Hararyana), Indien                                 | 100,00        | 100,00            |              |
| Lufthansa Technik Shenzhen Co., Ltd., Shenzhen, China                                                                  | 90,00         | 71,40             |              |
| Lufthansa Technik Sofia OOD, Sofia, Bulgarien                                                                          | 80,00         | 80,00             |              |
| Lufthansa Technik Tulsa Corporation, Tulsa, USA                                                                        | 100,00        | 100,00            |              |
| Lufthansa Technik Turbine Shannon Limited, Shannon / Co. Clare, Irland                                                 | 100,00        | 100,00            |              |
| Lufthansa Technik Vostok OOO, Moskau, Russland                                                                         | 100,00        | 100,00            |              |
| Lufthansa Technik Vostok Services OOO, Moscow Region, Russland                                                         | 100,00        | 100,00            |              |
| LZ-Catering GmbH, Hamburg                                                                                              | 100,00        | 100,00            |              |
| Malta Pension Investments, St. Julians, Malta                                                                          | 0,00          | 100,00            |              |
| Maptext, Inc., Monmouth Junction, USA                                                                                  | 100,00        | 100,00            |              |
| Marriott Export Services, C.A., Caracas, Venezuela                                                                     | 99,99         | 100,00            |              |
| Marriott International Trade Services, C.A., Caracas, Venezuela                                                        | 99,99         | 100,00            |              |
| Österreichische Luftfahrtschule Aviation TRAINING CENTER Austria Gesellschaft m.b.H., Feldkirchen bei Graz, Österreich | 60,00         | 60,00             |              |
| OP-Fonds LVG, Köln                                                                                                     | 88,73         | 88,73             |              |
| Passage Services Holding GmbH, München                                                                                 | 100,00        | 100,00            |              |
| Pilot Training Network d.o.o. (i.L.), Zemunik Gornij, Kroatien                                                         | 100,00        | 100,00            |              |
| Pilot Training Network GmbH, Frankfurt am Main                                                                         | 100,00        | 100,00            |              |
| Quinto Grundstücks-Verwaltungsgesellschaft mbH, Grünwald                                                               | 94,80         | 94,80             |              |
| Reservation Data Maintenance India Private Ltd., Neu Delhi, Indien                                                     | 51,00         | 51,00             |              |
| Servicios Complementarios de Cabina, S.A. de C.V., Mexico, D.F., Mexiko                                                | 50,90         | 99,80             |              |
| Shared Services International India Private Limited, Neu Delhi - 110 001, Indien                                       | 100,00        | 100,00            |              |
| Shared Services International, Singapore PTE. LTD, Singapur 238871, Singapur                                           | 100,00        | 100,00            |              |
| SLL, s.r.o., Bratislava, Slowakei                                                                                      | 100,00        | 100,00            |              |
| Slovenske Aerolinie, a.s. (i.L.), Bratislava, Slowakei                                                                 | 62,00         | 62,00             |              |
| Star Risk Services Inc., Southlake, Texas 76092, USA                                                                   | 100,00        | 100,00            |              |
| Swiss Private Aviation AG, Kloten, Schweiz                                                                             | 100,00        | 100,00            |              |
| Swiss WorldCargo (India) Private Limited, Mumbai 400071, Indien                                                        | 75,00         | 75,00             |              |
| TATS - Travel Agency Technologies & Services GmbH, Frankfurt am Main                                                   | 100,00        | 100,00            |              |
| THG Grundbuchtreuhandgesellschaft mbH, Köln                                                                            | 85,00         | 85,00             |              |
| TRAINICO Training und Ausbildung Cooperation in Berlin-Brandenburg GmbH, Berlin                                        | 100,00        | 100,00            |              |
| TTI Travel Transport Innovation Consult GmbH i.L., Kelsterbach                                                         | 100,00        | 100,00            |              |
| TRAVI Holding GmbH, Wien, Österreich                                                                                   | 69,00         | 69,00             |              |
| VPF Malta Pension Ltd., St. Julians, Malta                                                                             | 100,00        | 100,00            |              |
| Wien Oberlaa Liegenschaftsentwicklungs GmbH, Wien Flughafen, Österreich                                                | 100,00        | 100,00            |              |
| <b>Beteiligungen</b>                                                                                                   |               |                   |              |
| Aerologic Management GmbH i.L., Bonn                                                                                   | 50,00         | 50,00             |              |
| Aerexchange Ltd., Wilmington, USA                                                                                      | 9,46          | 9,46              |              |
| AFC Aviation Fuel Company mbH, Hamburg                                                                                 | 50,00         | 50,00             |              |
| Airfoil Services Sdn. Bhd., Kuala Lumpur, Malaysia                                                                     | 50,00         | 50,00             |              |
| Airmail Center Frankfurt GmbH, Frankfurt am Main                                                                       | 40,00         | 40,00             |              |
| Amadeus IT Holding, S.A., Madrid, Spanien                                                                              | 7,61          | 7,61              |              |
| ATLECON Fuel Corporation, Atlanta, USA                                                                                 | 11,11         | 11,11             |              |
| AviationPower GmbH, Frankfurt am Main                                                                                  | 49,00         | 49,00             |              |
| AVS Privatkunden Versicherungsservice GmbH, Österreich                                                                 | 10,00         | 10,00             |              |
| Beijing Lufthansa Center Co. Ltd., Peking, China                                                                       | 11,23         | 12,50             |              |
| BGB-Gesellschaft der Gesellschafter der AFC Aviation Fuel Company mbH, Hamburg                                         | 0,00          | 50,00             |              |
| CommuniGate Kommunikationsservice GmbH, Passau                                                                         | 50,00         | 50,00             |              |
| Deutsche Akademie für Flug- und Reisemedizin gemeinnützige GmbH, Frankfurt am Main                                     | 90,00         | 90,00             |              |
| EFM - Gesellschaft für Enteisen und Flugzeugschleppen am Flughafen München mbH, Freising                               | 51,00         | 51,00             |              |
| Egyptian Aviation Services Company (S.A.E.), Kairo, Ägypten                                                            | 5,83          | 5,83              |              |
| ETACS GmbH, Frankfurt am Main                                                                                          | 25,20         | 25,20             |              |
| Finairport Service S.r.l., Turin, Italien                                                                              | 36,00         | 36,00             |              |
| Flughafen München Baugesellschaft mbH, München-Flughafen                                                               | 40,00         | 40,00             |              |

|                                                                                                                  | Kapitalanteil | Stimmrechtsanteil | Konsolidiert |
|------------------------------------------------------------------------------------------------------------------|---------------|-------------------|--------------|
| Name, Sitz                                                                                                       | in %          | in %              |              |
| FMO Passenger Services GmbH, Greven                                                                              | 33,33         | 33,33             |              |
| FM Terminal 2 Immobilien-Verwaltungsgesellschaft mbH & Co oHG, Freising                                          | 40,00         | 40,00             |              |
| FraCareServices GmbH, Frankfurt am Main                                                                          | 49,00         | 49,00             |              |
| Fraport AG, Frankfurt am Main                                                                                    | 9,95          | 9,95              |              |
| Global Airline Services S.r.l., Fiumicino, Italien                                                               | 40,00         | 40,00             |              |
| Global Logistics System Worldwide Company for Development of Freight Information Network GmbH, Frankfurt am Main | 25,00         | 25,00             |              |
| GOAL German Operating Aircraft Leasing GmbH & Co. KG, Grünwald                                                   | 40,00         | 39,99             |              |
| GOAL German Operating Aircraft Leasing GmbH, München                                                             | 40,00         | 40,00             |              |
| Guangzhou Baiyun International Airport LSG Sky Chefs Co Ltd, Guangzhou, China                                    | 30,00         | 28,57             |              |
| Gulf International Caterers, W.L.L., Bahrain, Bahrain                                                            | 49,00         | 49,00             |              |
| Hangzhou Xiaoshan Airport LSG Air Catering Co Ltd, Hangzhou, China                                               | 25,00         | 28,57             |              |
| Jetblue Airways Corporation, City of Dover, County of Kent, Delaware, USA                                        | 15,85         | 15,85             |              |
| LifeConEx, LLC, Miramar, USA                                                                                     | 50,00         | 50,00             |              |
| Link & Learn Aviation Training GmbH, Zirl, Österreich                                                            | 33,33         | 33,33             |              |
| LSG Gate Gourmet Paris S.A.S. i.L., Roissy, Frankreich                                                           | 50,00         | 50,00             |              |
| LSG-Hygiene Institute GmbH, Neu-Isenburg                                                                         | 25,00         | 25,00             |              |
| LSG Sky Chefs Catering Egypt S.A.E., Kairo, Ägypten                                                              | 15,00         | 15,00             |              |
| LSG Sky Chefs TAAG Angola S.A., Luanda, Angola                                                                   | 40,00         | 40,00             |              |
| LTQ Engineering Pty Limited, Tullamarine VIC 3043, Australien                                                    | 50,00         | 50,00             |              |
| Luftfahrzeugverwaltungsgesellschaft GOAL mbH, Grünwald                                                           | 40,00         | 40,00             |              |
| Lufthansa HNA Technical Training Co., Ltd., Meilan Airport, Hainan, 571126, China                                | 50,00         | 1,00              |              |
| Lufthansa LAN Technical Training S.A., Santiago de Chile, Chile                                                  | 50,00         | 50,00             |              |
| Lufthansa Leasing GmbH & Co. Bravo-Juliett KG i.L., Grünwald                                                     | 100,00        | 50,00             |              |
| Lufthansa Leasing GmbH, Grünwald                                                                                 | 49,00         | 49,00             |              |
| Luxair Société Luxembourgeoise de Navigation Aérienne S.A., Luxemburg, Luxemburg                                 | 14,44         | 14,44             |              |
| N3 Engine Overhaul Services Verwaltungsgesellschaft mbH, Hamburg                                                 | 50,00         | 50,00             |              |
| Nigerian Aviation Handling Company PLC., Lagos, Nigeria                                                          | 7,00          | 7,00              |              |
| North Hub Cleaning Services SIA, Marupe, Lettland                                                                | 49,00         | 49,00             |              |
| Portland Fueling Facilities Corporation, Portland, USA                                                           | 6,25          | 6,25              |              |
| Pro Flight GmbH, Bremen                                                                                          | 50,00         | 50,00             |              |
| SAEMS Special Airport Equipment and Maintenance Services GmbH & Co. KG, Hamburg                                  | 40,00         | 40,00             |              |
| S.A.E.M.S. Verwaltungs-GmbH, Hamburg                                                                             | 40,00         | 40,00             |              |
| Santander AirPlus Corporate Payment Solutions S.A., Pozuelo de Alarcón (Madrid), Spanien                         | 25,00         | 50,00             |              |
| Sanya LSG Air Catering Co. Ltd, Sanya, China                                                                     | 45,00         | 40,00             |              |
| SCA Schedule Coordination Austria GmbH, Wien, Österreich                                                         | 25,00         | 25,00             |              |
| Shenzhen Airport International Cargo Terminal Company Limited, Shenzhen, China                                   | 50,00         | 50,00             |              |
| Sichuan Airlines LSG Air Catering Co. Ltd., Chengdu, China                                                       | 49,00         | 40,00             |              |
| Skill Portal AG, Langen                                                                                          | 8,33          | 8,33              |              |
| Sky Bird Services Ltd., Hongkong, China                                                                          | 10,00         | 10,00             |              |
| Sky Chefs for Airlines Catering Company, Tripolis, Libyen                                                        | 44,50         | 44,50             |              |
| Star Alliance Services GmbH, Frankfurt am Main                                                                   | 5,56          | 5,56              |              |
| STARS Special Transport and Ramp Services GmbH & Co. KG, Hamburg                                                 | 49,00         | 49,00             |              |
| S.T.A.R.S. Verwaltungs-GmbH, Hamburg                                                                             | 49,00         | 49,00             |              |
| Tanklager & Hydranten Betriebsgesellschaft mbH (THBG BBI), Schönefeld                                            | 30,00         | 30,00             |              |
| Terminal 2 Betriebsgesellschaft mbH & Co oHG, Oberding                                                           | 40,00         | 40,00             |              |
| Terminal One Group Association, L.P., New York, USA                                                              | 24,75         | 0,00              |              |
| Terminal One Management Inc., New York, USA                                                                      | 25,00         | 25,00             |              |
| The Airline Group Limited, London, Großbritannien                                                                | 14,52         | 14,52             |              |
| Tianjin Airport Hua Yu Air Cargo Terminal Co. Ltd., Tianjin Airport, China                                       | 46,00         | 46,00             |              |
| Universal Air Travel Plan, Inc., Washington, DC, USA                                                             | 5,26          | 5,26              |              |
| Xinjiang HNA LSG Sky Chefs Co Ltd., Urumqi, China                                                                | 49,00         | 40,00             |              |
| Zentrum für Angewandte Luftfahrtforschung GmbH, Hamburg                                                          | 20,00         | 20,00             |              |
| ZFB Zentrum für Flugsimulation Berlin GmbH, Berlin                                                               | 50,00         | 50,00             |              |

<sup>1)</sup> 75,10 Prozent der Kapitalanteile bzw. Stimmrechte sind über eine Call-Option zuzurechnen.

# Zehn-Jahres-Übersicht

|                                                                       |        | 2010   | 2009   | 2008   |
|-----------------------------------------------------------------------|--------|--------|--------|--------|
| <b>Gewinn- und Verlustrechnung Lufthansa Konzern</b>                  |        |        |        |        |
| Umsatz                                                                | Mio. € | 27 324 | 22 283 | 24 842 |
| <b>Ergebnis</b>                                                       |        |        |        |        |
| Operatives Ergebnis                                                   | Mio. € | 876    | 130    | 1 280  |
| Ergebnis der betrieblichen Tätigkeit <sup>1)</sup>                    | Mio. € | 1 240  | 271    | 1 309  |
| Ergebnis vor Ertragsteuern <sup>1) 8)</sup>                           | Mio. € | 978    | -134   | 730    |
| Ertragsteuern <sup>8)</sup>                                           | Mio. € | -165   | -112   | 178    |
| Auf Aktionäre der Deutschen Lufthansa AG entfallendes Konzernergebnis | Mio. € | 1 131  | -34    | 542    |
| <b>Wesentliche Aufwandspositionen</b>                                 |        |        |        |        |
| Personalaufwand                                                       | Mio. € | 6 659  | 5 996  | 5 692  |
| Gebühren                                                              | Mio. € | 4 582  | 3 762  | 3 499  |
| Treibstoff                                                            | Mio. € | 5 158  | 3 645  | 5 377  |
| Abschreibungen                                                        | Mio. € | 1 682  | 1 475  | 1 289  |
| Zinssaldo                                                             | Mio. € | -357   | -325   | -172   |
| <b>Bilanz Lufthansa Konzern</b>                                       |        |        |        |        |
| <b>Vermögensstruktur</b>                                              |        |        |        |        |
| Langfristiges Vermögen <sup>4)</sup>                                  | Mio. € | 18 963 | 17 696 | 14 975 |
| Kurzfristiges Vermögen <sup>4)</sup>                                  | Mio. € | 10 357 | 8 696  | 7 433  |
| davon Flüssige Mittel                                                 | Mio. € | 5 380  | 4 439  | 3 278  |
| <b>Kapitalstruktur</b>                                                |        |        |        |        |
| Eigenkapital <sup>2)</sup>                                            | Mio. € | 8 340  | 6 202  | 6 594  |
| davon gezeichnetes Kapital <sup>3)</sup>                              | Mio. € | 1 172  | 1 172  | 1 172  |
| davon Rücklagen                                                       | Mio. € | 5 939  | 4 956  | 4 817  |
| davon Konzerngewinn/-verlust                                          | Mio. € | 1 131  | -34    | 542    |
| davon Minderheitenanteile                                             | Mio. € | 98     | 108    | 63     |
| Fremdkapital                                                          | Mio. € | 20 980 | 20 190 | 15 814 |
| davon Pensionsrückstellungen                                          | Mio. € | 2 571  | 2 710  | 2 400  |
| davon Finanzschulden                                                  | Mio. € | 7 184  | 6 802  | 3 581  |
| Bilanzsumme                                                           | Mio. € | 29 320 | 26 392 | 22 408 |
| <b>Sonstige Finanzdaten Lufthansa Konzern</b>                         |        |        |        |        |
| Investitionen                                                         | Mio. € | 2 271  | 2 304  | 2 152  |
| davon Sachanlagen                                                     | Mio. € | 2 222  | 2 177  | 1 798  |
| davon Finanzanlagen                                                   | Mio. € | 49     | 127    | 354    |
| Operativer Cashflow                                                   | Mio. € | 3 075  | 1 991  | 2 473  |
| Free Cashflow                                                         | Mio. € | 1 625  | 251    | 612    |
| <b>Kreditverschuldung</b>                                             |        |        |        |        |
| Brutto                                                                | Mio. € | 7 207  | 6 860  | 3 639  |
| Netto <sup>7)</sup>                                                   | Mio. € | 1 596  | 2 195  | -125   |
| <b>Deutsche Lufthansa AG</b>                                          |        |        |        |        |
| Jahresüberschuss/-fehlbetrag                                          | Mio. € | 483    | -148   | 276    |
| Verlustvortrag                                                        | Mio. € | -      | -      | -      |
| Rücklagenzuführung/-entnahme                                          | Mio. € | -208   | 148    | 44     |
| Ausschüttungssumme vorgeschlagen/ausgezahlt                           | Mio. € | 275    | -      | 320    |
| Dividende vorgeschlagen/ausgezahlt                                    | €      | 0,6    | -      | 0,7    |

|  | 2007   | 2006   | 2005   | 2004   | 2003   | 2002   | 2001   |
|--|--------|--------|--------|--------|--------|--------|--------|
|  | 22 420 | 19 849 | 18 065 | 16 965 | 15 957 | 16 971 | 16 690 |
|  | 1 378  | 845    | 577    | 383    | 36     | 718    | 28     |
|  | 1 586  | 1 078  | 719    | 954    | -176   | 1 544  | -378   |
|  | 2 125  | 1 129  | 875    | 541    | -814   | 904    | -807   |
|  | 365    | 232    | 263    | 133    | 164    | 182    | -202   |
|  | 1 655  | 803    | 453    | 404    | -984   | 717    | -633   |
|  | 5 498  | 5 029  | 4 853  | 4 813  | 4 612  | 4 660  | 4 481  |
|  | 3 174  | 2 824  | 2 543  | 2 542  | 2 290  | 2 239  | 2 311  |
|  | 3 860  | 3 355  | 2 662  | 1 819  | 1 352  | 1 347  | 1 621  |
|  | 1 204  | 1 051  | 1 398  | 1 112  | 1 930  | 1 243  | 1 714  |
|  | -194   | -254   | -248   | -331   | -341   | -415   | -398   |
|  | 14 076 | 12 969 | 12 318 | 11 543 | 10 885 | 12 103 | 13 244 |
|  | 8 244  | 6 492  | 6 954  | 6 527  | 5 847  | 7 034  | 4 962  |
|  | 3 607  | 2 538  | 3 598  | 3 788  | 2 721  | 3 638  | 1 182  |
|  | 6 900  | 4 903  | 4 522  | 4 014  | 2 696  | 4 172  | 3 528  |
|  | 1 172  | 1 172  | 1 172  | 1 172  | 977    | 977    | 977    |
|  | 4 018  | 2 648  | 2 707  | 2 398  | 2 660  | 2 431  | 3 154  |
|  | 1 655  | 803    | 453    | 404    | -984   | 717    | -633   |
|  | 55     | 280    | 190    | 40     | 43     | 47     | 30     |
|  | 15 420 | 14 558 | 14 750 | 14 056 | 14 036 | 14 965 | 14 678 |
|  | 2 461  | 3 814  | 4 022  | 4 132  | 4 327  | 4 020  | 3 701  |
|  | 3 345  | 2 956  | 3 563  | 3 306  | 3 240  | 4 713  | 4 446  |
|  | 22 320 | 19 461 | 19 272 | 18 070 | 16 732 | 19 137 | 18 206 |
|  | 1 737  | 1 929  | 1 829  | 1 783  | 1 155  | 880    | 2 979  |
|  | 1 621  | 1 380  | 1 221  | 1 647  | 992    | 646    | 2 549  |
|  | 116    | 549    | 608    | 136    | 163    | 234    | 430    |
|  | 2 862  | 2 105  | 1 956  | 1 881  | 1 581  | 2 312  | 1 736  |
|  | 2 688  | 584    | 815    | 1 061  | 1 024  | 2 813  | -796   |
|  | 3 369  | 2 971  | 3 605  | 3 370  | 3 312  | 4 771  | 4 995  |
|  | -768   | -101   | -143   | -418   | 591    | 1 133  | 3 812  |
|  | 1 123  | 523    | 455    | 265    | -1 223 | 1 111  | -797   |
|  | -      | -      | -      | -      | -      | -797   | -      |
|  | -551   | -202   | -226   | -128   | 1 223  | -85    | -      |
|  | 572    | 321    | 229    | 137    | -      | 229    | -      |
|  | 1,25   | 0,70   | 0,50   | 0,30   | -      | 0,60   | -      |

Fortsetzung auf S. 232

## Zehn-Jahres-Übersicht (Fortsetzung)

|                                                                                                                            |        | 2010      | 2009      | 2008      |
|----------------------------------------------------------------------------------------------------------------------------|--------|-----------|-----------|-----------|
| <b>Wirtschaftliche Kennzahlen Lufthansa Konzern</b>                                                                        |        |           |           |           |
| Umsatzrendite<br>(Ergebnis vor Ertragsteuern <sup>1) 8)</sup> / Umsatz                                                     | %      | 3,6       | -0,6      | 2,9       |
| Gesamtkapitalrendite<br>(Ergebnis vor Ertragsteuern <sup>1) 8)</sup> plus Zinsen auf Fremdkapital / Bilanzsumme)           | %      | 5,2       | 1,4       | 4,9       |
| Eigenkapitalrendite<br>(Ergebnis nach Ertragsteuern / Eigenkapital <sup>2)</sup> )                                         | %      | 13,7      | -0,4      | 8,4       |
| Eigenkapitalrendite<br>(Ergebnis vor Ertragsteuern <sup>1) 8)</sup> / Eigenkapital <sup>2)</sup> )                         | %      | 11,7      | -2,2      | 11,1      |
| Eigenkapitalquote<br>(Eigenkapital <sup>2)</sup> / Bilanzsumme)                                                            | %      | 28,4      | 23,5      | 29,4      |
| Gearing <sup>6)</sup><br>(Nettokreditverschuldung plus bilanzierter Pensionsverpflichtungen / Eigenkapital <sup>2)</sup> ) | %      | 50,0      | 79,1      | 34,5      |
| Verschuldungsgrad<br>(Nettokreditverschuldung / Bilanzsumme)                                                               | %      | 5,4       | 8,3       | -0,6      |
| Innenfinanzierung<br>(Cashflow / Investitionen)                                                                            | %      | 135,4     | 86,4      | 114,9     |
| Dynamischer Verschuldungsgrad<br>(Nettokreditverschuldung / Cashflow)                                                      | %      | 51,9      | 110,2     | -5,1      |
| Umsatzeffektivität<br>(Cashflow / Umsatz)                                                                                  | %      | 11,3      | 8,9       | 10,0      |
| Net Working Capital<br>(kurzfristige Vermögenswerte minus kurzfristiges Fremdkapital) <sup>4)</sup>                        | Mrd. € | 0,5       | -0,1      | -0,6      |
| Anlagenvermögensintensität<br>(Anlagevermögen / Gesamtvermögen)                                                            | %      | 64,7      | 67,1      | 66,8      |
| Abschreibungsquote Flugzeuge / Reservetriebwerke<br>(kumulierte Anschaffungskosten / kumulierte Abschreibung)              | %      | 53,9      | 54,2      | 58,9      |
| <b>Personalkennziffern</b>                                                                                                 |        |           |           |           |
| Mitarbeiter im Jahresdurchschnitt                                                                                          | Anzahl | 117 066   | 112 320   | 108 123   |
| Umsatz / Mitarbeiter                                                                                                       | €      | 233 407   | 198 384   | 229 757   |
| Personalaufwand / Umsatz                                                                                                   | %      | 24,4      | 26,9      | 22,9      |
| <b>Leistungsdaten Lufthansa Konzern <sup>5) 9)</sup></b>                                                                   |        |           |           |           |
| Angebote Tonnekilometer                                                                                                    | Mio.   | 39 000,0  | 35 469,4  | 34 960,2  |
| Verkaufte Tonnekilometer                                                                                                   | Mio.   | 29 033,4  | 24 942,7  | 24 972,5  |
| Nutzladefaktor                                                                                                             | %      | 74,4      | 70,3      | 71,4      |
| Angebote Sitzkilometer                                                                                                     | Mio.   | 235 837,4 | 208 225,7 | 195 430,8 |
| Verkaufte Sitzkilometer                                                                                                    | Mio.   | 187 000,1 | 162 286,2 | 154 155,5 |
| Sitzladefaktor                                                                                                             | %      | 79,3      | 77,9      | 78,9      |
| Fluggäste                                                                                                                  | Mio.   | 91,2      | 77,3      | 70,5      |
| Zahlgast-Tonnekilometer                                                                                                    | Mio.   | 18 542,0  | 16 236,3  | 15 462,6  |
| Fracht / Post                                                                                                              | t      | 2 022 670 | 1 712 167 | 1 914 925 |
| Fracht / Post-Tonnekilometer                                                                                               | Mio.   | 10 491,5  | 8 706,3   | 9 509,9   |
| Flüge                                                                                                                      | Anzahl | 1 021 266 | 899 928   | 830 832   |
| Flugkilometer                                                                                                              | Mio.   | 1 324,2   | 1 177,9   | 1 124,6   |
| Blockstunden                                                                                                               | Anzahl | 2 219 323 | 1 949 857 | 1 855 842 |
| Verkehrsflugzeuge                                                                                                          | Anzahl | 710       | 722       | 524       |

Die Zahlen wurden auf Mio.-EUR-Werte ohne Nachkommastelle gerundet. Dadurch ergeben sich Abweichungen von den früheren Geschäftsberichten.

\* Umgerechnet in EUR.

<sup>1)</sup> Ab 2005 Ergebnis der betrieblichen Tätigkeit und Ergebnis vor Ertragsteuern (bis 2004 Ergebnis vor Steuern) inkl. sonstiger Steuern; Vorjahre vergleichbar gerechnet.

<sup>2)</sup> Ab 2005 Eigenkapital inkl. Minderheitenanteil; Vorjahre vergleichbar gerechnet.

<sup>3)</sup> Kapitalerhöhung 2004 um 195.379.200 EUR (76.320.000 Aktien).

<sup>4)</sup> Abschlusszahlen ab 2004 gemäß neuem Bilanzschema IAS 1, die Vorjahreszahlen sind annähernd vergleichbar.



|  | 2007      | 2006      | 2005      | 2004      | 2003      | 2002      | 2001      |
|--|-----------|-----------|-----------|-----------|-----------|-----------|-----------|
|  | 9,5       | 5,7       | 4,8       | 3,2       | -5,1      | 5,3       | -4,8      |
|  | 11,2      | 8,2       | 7,0       | 5,8       | -1,7      | 7,6       | -1,7      |
|  | 25,5      | 18,3      | 13,5      | 10,2      | -36,3     | 17,3      | -17,1     |
|  | 30,8      | 23,0      | 19,3      | 13,5      | -30,2     | 21,7      | -22,9     |
|  | 30,9      | 25,2      | 23,5      | 22,2      | 16,1      | 21,8      | 19,4      |
|  | 24,5      | 75,7      | 85,8      | 92,5      | 182,4     | 123,5     | 213,0     |
|  | -3,4      | -0,5      | -0,7      | -2,3      | 3,5       | 5,9       | 20,9      |
|  | 164,8     | 109,1     | 106,9     | 105,5     | 136,9     | 262,7     | 58,3      |
|  | -26,8     | -4,8      | -7,3      | -22,2     | 37,4      | 49,0      | 219,6     |
|  | 12,8      | 10,6      | 10,8      | 11,1      | 9,9       | 13,6      | 10,4      |
|  | 0         | -0,2      | 0         | 0,9       | -0,3      | -0,4      | -1,5      |
|  | 63,1      | 66,6      | 63,9      | 62,2      | 65,1      | 61,2      | 70,8      |
|  | 58,0      | 57,9      | 55,7      | 53,4      | 55,5      | 53,8      | 49,5      |
|  | 100 779   | 93 541    | 90 811    | 92 743    | 94 798    | 94 135    | 87 975    |
|  | 222 467   | 212 196   | 198 930   | 182 925   | 168 326   | 180 284   | 189 713   |
|  | 24,5      | 25,3      | 26,9      | 28,4      | 28,9      | 27,5      | 26,8      |
|  | 30 339,3  | 26 666,8  | 26 485,6  | 25 950,3  | 23 237,3  | 22 755,6  | 23 941,3  |
|  | 22 612,8  | 19 215,7  | 18 726,6  | 18 445,0  | 16 226,5  | 16 080,8  | 16 186,9  |
|  | 74,5      | 72,1      | 70,7      | 71,1      | 69,8      | 70,7      | 67,6      |
|  | 169 108,4 | 146 719,6 | 144 181,9 | 140 647,7 | 124 026,6 | 119 876,9 | 126 400,4 |
|  | 135 011,3 | 110 329,5 | 108 184,5 | 104 063,7 | 90 708,2  | 88 570,0  | 90 388,5  |
|  | 79,8      | 75,2      | 75,0      | 74,0      | 73,1      | 73,9      | 71,5      |
|  | 62,9      | 53,4      | 51,3      | 50,9      | 45,4      | 43,9      | 45,7      |
|  | 13 569,4  | 11 112,3  | 10 897,5  | 10 484,0  | 9 137,9   | 8 922,8   | 9 105,4   |
|  | 1 910 846 | 1 758 968 | 1 735 771 | 1 752 900 | 1 580 430 | 1 624 983 | 1 655 870 |
|  | 9 043,4   | 8 103,4   | 7 829,1   | 7 961,0   | 7 088,6   | 7 158,0   | 7 081,5   |
|  | 749 431   | 664 382   | 653 980   | 647 785   | 543 549   | 517 922   | 540 674   |
|  | 979,3     | 794,6     | 794,1     | 798,7     | 703,6     | 668,1     | 687,9     |
|  | 1 629 416 | 1 341 810 | 1 340 948 | 1 351 932 | 1 172 034 | 1 112 062 | 1 157 982 |
|  | 513       | 430       | 432       | 377       | 382       | 344       | 345       |

<sup>5)</sup> Ab 2003 inkl. Air Dolomiti, ab 2006 inkl. Eurowings.

<sup>6)</sup> Ab 2004 Nettokreditverschuldung zzgl. bilanzierter Pensionsverpflichtungen; Vorjahre vergleichbar gerechnet.

<sup>7)</sup> Ab 2005 inkl. Schuldscheindarlehen (jederzeit liquidierbar).

<sup>8)</sup> Ab 2008 inkl. aufgegebenem Geschäftsfeld Touristik.

<sup>9)</sup> Lufthansa Passage, Lufthansa Regional (inkl. Air Dolomiti eigener Verkehr), Lufthansa Cargo, SWISS, (ab 2010 inkl. Edelweiss Air), British Midland (ab Juli 2009) und Austrian Airlines (ab September 2009).

# Glossar

## Begriffe aus dem Luftverkehr

**Blockstunden** Zeit, in der ein Flugzeug „off blocks“ ist, inklusive des Zeitpunkts vom Abrollen des Flugzeugs zum Start („off blocks“) bis zum Stillstand nach der Landung („on blocks“).

**Codeshare** Bei Chodeshare-Flügen wird eine Strecke unter der eigenen Flugnummer einer Fluggesellschaft verkauft, obwohl die Beförderung teilweise oder ganz von einer anderen Fluggesellschaft durchgeführt wird. Dabei treten beide Gesellschaften am Markt selbständig auf.

**Durchschnittserlöse/Yields** Die durchschnittlich pro Leistungseinheit erzielten Erlöse. Sie beziehen sich auf verkaufte Sitz-/Passagier- oder Tonnenkilometer, können aber auch für reine Mengeneinheiten – etwa pro Passagier oder Kilometer – ermittelt werden.

**Hub/Drehkreuz** In der Luftfahrt ist ein Hub ein zentraler Verkehrsknotenpunkt bzw. der „Umsteigeflughafen“ einer Fluggesellschaft. Fluggäste sowie Güter werden zunächst von ihrem Abflugort zu einem „Heimatflughafen“ der Airline (dem Hub) transportiert, um von dort mit Passagieren und Gütern aus anderen Abflugorten – aber mit dem gleichen Ziel – zu ihrem Zielort zu fliegen.

**IATA** International Air Transport Association – Internationaler Dachverband der Luftverkehrsgesellschaften.

**MRO** Abkürzung (Maintenance, Repair and Overhaul) für die Wartung, Reparatur und Überholung von Flugzeugen.

**Netzwerk-Carrier** Diese Fluggesellschaften bieten im Unterschied zu den No-Frills-Carriern ein ausgedehntes, meist weltweites Streckennetz über ein oder mehrere Drehkreuze (Hubs) mit aufeinander abgestimmten Anschlussflügen an.

**No-Frills-Carrier** No-Frills-Carrier sind Fluggesellschaften mit überwiegend niedrigen Ticketpreisen, jedoch mit reduziertem bzw. zusätzlich kostenpflichtigem Service an Bord und Boden. Die Abflüge erfolgen meist von Sekundärflughäfen, dementsprechend außerhalb der Ballungszentren (z. B. Hahn im Hunsrück).

**Sitzkilometer/Tonnenkilometer** Leistungseinheit im Luftverkehr. Ein verkaufter Sitz-/Passagierkilometer (PKT) bedeutet: Ein Passagier wird einen Kilometer weit befördert; ein verkaufter Tonnenkilometer (TKT): Eine Tonne Ladung (Fracht, Passagiere oder beides) wird einen Kilometer weit transportiert.

**Sitzladefaktor/Nutzladefaktor** Auslastung der Kapazitäten in Prozent. Der Nutzladefaktor bezeichnet das Verhältnis der verkauften zur angebotenen Leistung. Der Sitzladefaktor (SLF) gilt für die Passagierbeförderung, der Nutzladefaktor (NLF) für den Frachttransport oder die Gesamtleistung.

## Finanzbegriffe

**Call-Option** Kaufoption, mit der man das Recht erwirbt, einen bestimmten Bezugswert innerhalb eines festgelegten Zeitraums zum vereinbarten Preis zu erwerben.

**Cashflow** Kennzahl zur Beurteilung der Finanz- und Ertragskraft eines Unternehmens. Der Cashflow wird ermittelt aus dem Zufluss und Abfluss von Zahlungsmitteln und Zahlungsmittel-Äquivalenten aus der laufenden Geschäftstätigkeit, siehe „Konzern-Kapitalflussrechnung“ auf [S. 155](#).

**Cash Value Added – CVA** Kennzahl zur Erfolgsmessung der Wertschaffung. Wenn der in einer Periode erzielte Cashflow (EBITDA<sup>plus</sup>) größer ist als der zur Deckung der Kapitalkosten notwendige Mindest-Cashflow, fällt der CVA positiv aus und es wird Wert geschaffen, siehe „Wertorientierte Steuerung und Ziele“ ab [S. 48](#).

**Compliance** Compliance soll das rechtmäßige Verhalten eines Unternehmens, seiner Leitungsorgane und Mitarbeiter im Hinblick auf die Einhaltung relevanter gesetzlicher Ge- und Verbote sicherstellen.

**Directors' Dealings** Handel von Aufsichtsrats-, Vorstands- und Bereichsvorstandsmitgliedern oder deren Angehörigen mit Wertpapieren „ihres“ Unternehmens. Es besteht die gesetzliche Verpflichtung, diese Geschäfte zu melden, wenn die Geschäfte einen Betrag von 5.000 EUR im Kalenderjahr überschreiten.

**Dividendenrendite** Kennzahl für die Beurteilung der Rentabilität einer Aktienanlage. Sie wird ermittelt, indem man die Dividende durch den Aktienschlusskurs des Berichtsjahres dividiert und mit 100 multipliziert.

**Dynamische Tilgungsquote** Finanzkennzahl, die dem Verhältnis von adjustiertem operativen Cashflow zur Nettokreditverschuldung und Pensionen entspricht, vgl. [S. 53](#). Bei Erreichen des Zielwerts von mindestens 60 Prozent werden die vergleichbaren Zielgrößen der Ratingagenturen für ein Investment Grade Rating nachhaltig erfüllt.

**EBIT** Finanzkennzahl. Sie umfasst das Ergebnis vor Zinsen und Ertragsteuern.

**EBITDA** Finanzkennzahl. Sie wird ermittelt aus dem Ergebnis vor Zinsen, Ertragsteuern und Abschreibungen. Der Begriff Abschreibungen umfasst hier sowohl die Abschreibungen auf immaterielle Vermögenswerte und Sachanlagevermögen als auch auf lang- und kurzfristige Finanzvermögenswerte. Weiterhin sind die außerordentlichen Abschreibungen der nach der Equity-Methode bewerteten Beteiligungen und der zum Verkauf vorgesehenen Vermögenswerte enthalten.

**EBITDA<sup>plus</sup>** Beim EBITDA<sup>plus</sup> handelt es sich um das um nicht zahlungswirksame Positionen bereinigte operative Ergebnis. Im EBITDA<sup>plus</sup> werden alle cashrelevanten Posten berücksichtigt, die durch das Management beeinflussbar sind, siehe „Wertorientierte Steuerung und Ziele“ ab [S. 48](#).

**Eigenkapitalquote** Finanzkennzahl. Sie gibt den Anteil des Eigenkapitals am Gesamtkapital (Bilanzsumme) an.

**Eigenkapitalrendite** Finanzkennzahl. Damit bezeichnet man das Verhältnis von Ergebnis nach Ertragsteuern/Konzernergebnis zum eingesetzten Eigenkapital.

**Equity-Bewertung** Bilanzierungsmethode von Beteiligungen an assoziierten Unternehmen und Joint Ventures. Danach werden diese von der bilanzierenden Gesellschaft entsprechend ihrem Anteil am Reinvermögen (Equity) der Beteiligung bewertet.

**Financial Covenants** Covenants sind Verpflichtungen des Kreditnehmers, die im Rahmen von Kreditverträgen zwischen der finanzierenden Bank und dem kreditnehmenden Unternehmen vereinbart werden. Financial Covenants können dabei auch als Kapitalstrukturaufgaben beschrieben werden. Diese verpflichten den Kreditnehmer, während der Laufzeit des Kredits bestimmte Kennzahlen (z. B. zum Eigenkapital, zur Verschuldung oder Liquidität) einzuhalten. Unter den wesentlichen Finanzverbindlichkeiten der Deutschen Lufthansa AG existieren keine Financial Covenants.

**Free Cashflow** Finanzkennzahl. Zeigt die in der Berichtsperiode nach Abzug der für Investitionstätigkeit eingesetzten Nettoszahlungsmittel verbliebenen Zahlungsmittel aus dem operativen Cashflow.

**Gearing** Finanzkennzahl. Sie zeigt das Verhältnis der Summe Nettokreditverschuldung und Pensionsrückstellungen zum Eigenkapital.

**Innenfinanzierungsquote** Finanzkennzahl. Sie gibt an, bis zu welcher Quote die Investitionen aus dem Cashflow finanziert werden konnten.

**Jet Fuel Crack** Preisdifferenz zwischen Rohöl und Kerosin.

**Konsolidierungskreis** Gruppe der Tochterunternehmen eines Konzerns, die in den Konzernabschluss einbezogen werden.

**Latente Steuern** Posten zur Darstellung steuerlicher Bewertungsunterschiede. Latente Steuern bildet man bei zeitlich begrenzten Differenzen zwischen Konzernbilanz und Steuerbilanz, um den Steueraufwand entsprechend dem Konzernergebnis auszuweisen.

**Lufthansa Pension Trust** Fondsvermögen, das Lufthansa seit 2004 zur Ausfinanzierung künftiger Rentenzahlungen an Mitarbeiter im Inland sowie an ins Ausland entsandte Mitarbeiter aufbaut. Zur Dotierung sind jährliche Zuführungen geplant, Ziel ist die vollständige Ausfinanzierung der Versorgungsverpflichtungen.

**Nettokreditverschuldung/Nettoliiquidität** Finanzkennzahl. Sie zeigt die langfristigen Finanzschulden abzüglich der flüssigen Mittel und der Wertpapiere des Umlaufvermögens.

**Operatives Ergebnis** Ergebnisgröße. Das operative Ergebnis wird ermittelt aus dem Ergebnis der betrieblichen Tätigkeit, bereinigt um Buchgewinne und -verluste, Rückstellungsaufhebungen, Kursgewinne und -verluste aus Stichtagsbewertungen langfristiger Finanzschulden und sonstige aperiodische Erträge und Aufwendungen (aperiodische Posten), vgl. [S. 65](#).

**Put-Option** Verkaufsoption bzw. der dieser zu Grunde liegende Vertrag, durch den der Käufer der Option das Recht erwirbt, einen bestimmten Bezugswert innerhalb eines festgelegten Zeitraums zum vereinbarten Preis (Basispreis) zu verkaufen.

**Rating** Eine auf den internationalen Finanzmärkten standardisierte Kennziffer zur Bewertung und Einstufung der Bonität eines Unternehmens. Ein Rating kann Rückschlüsse darauf zulassen, ob ein Emittent in der Lage ist, seine in den Emissionsbedingungen getätigten Verpflichtungen in vollem Umfang zu erfüllen.

**Thesaurierung** Zuführung von einbehaltenen Gewinnen zum Eigenkapital. Sie dient der Stärkung der Finanzkraft eines Unternehmens.

**Total Shareholder Return** Finanzkennzahl. Sie zeigt die Rendite, die der Anleger aus der Steigerung des Börsenwerts bzw. Aktienkurses plus der Dividendenzahlung erwirtschaftet. Den Total Shareholder Return ermittelt man aus: Schlusskurs des Berichtsjahres plus ausgezahlter Dividende aus dem Vorjahr, multipliziert mit 100, dividiert durch den Schlusskurs des Vorjahres.

**Umsatzrendite** Finanzkennzahl. Sie gibt das Verhältnis von Ergebnis vor Ertragsteuern/Konzernergebnis zu Umsatzerlösen an.

**Verkehrserlöse** Erlöse aus dem reinen Flugbetrieb. Dazu zählen Umsätze, die im Passagier- und Frachttransport und mit damit zusammenhängenden Nebenleistungen erzielt wurden.

**Vinkulierte Namensaktien** Namensaktien, die nur mit Zustimmung der Gesellschaft übertragen werden dürfen.

**Weighted Average Cost of Capital – WACC** Durchschnittliche Verzinsung des Kapitals. Die Kapitalverzinsung wird mit einem gewichteten Durchschnitt der Fremd- und Eigenkapitalkosten errechnet.

**Wertberichtigung** Außerplanmäßige Abschreibung von Vermögenswerten. Eine Wertberichtigung wird notwendig, wenn der „erzielbare Betrag“ – der höhere der beiden Werte Nettoveräußerungspreis oder Nutzungswert – unter den Buchwert gesunken ist. Planmäßige Abschreibungen stellen dagegen die systematische Verteilung des Abschreibungsvolumens eines Vermögenswerts über dessen Nutzungsdauer dar.

**Working Capital** Finanzkennzahl. Zur Beurteilung der Liquidität eines Unternehmens wird die Differenz zwischen kurzfristigen Vermögenswerten und kurzfristigen Schulden ermittelt.

## Impressum

### Herausgeber

Deutsche Lufthansa AG  
Von-Gablenz-Str. 2–6  
50679 Köln

Registereintragung: Amtsgericht Köln HRB 2168

### Redaktion

Frank Hülsmann (Ltg.)  
Claudio Rizzo  
Anna-Maria Wehenkel

Deutsche Lufthansa AG, Investor Relations

### Fotos

Deutsche Lufthansa AG  
Andreas Teichmann, Essen

### Konzept und Gestaltung

HGB Hamburger Geschäftsberichte GmbH & Co. KG,  
Hamburg

### Druck

Broermann Druck + Medien GmbH, Troisdorf  
Gedruckt auf Circlesilk Premium White  
(100 Prozent Recyclingpapier, ausgezeichnet  
mit dem EU Ecolabel, Lizenznummer 03/05/5)

Printed in Germany  
ISSN 1616-0231

## Kontakt

### Frank Hülsmann

Leiter Investor Relations  
+49 69 696–28001

### Johannes Hildenbrock

+49 69 696–28003

### Jobst Honig

+49 69 696–28011

### Gregor Schleussner

+49 69 696–28012

Deutsche Lufthansa AG  
Investor Relations  
LAC, Airportring  
60546 Frankfurt am Main  
Telefon: +49 69 696–28008  
Telefax: +49 69 696–90990  
E-Mail: [investor.relations@dlh.de](mailto:investor.relations@dlh.de)

Geschäftsberichte und Quartalsberichte in  
deutscher und englischer Sprache können  
über unseren Bestellservice im Internet –  
[www.lufthansa.com/investor-relations](http://www.lufthansa.com/investor-relations) –  
oder unter oben genannter Adresse  
angefordert werden.

Aktuelle Finanzinformationen im Internet:  
[www.lufthansa.com/investor-relations](http://www.lufthansa.com/investor-relations)

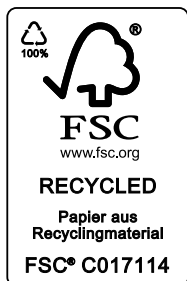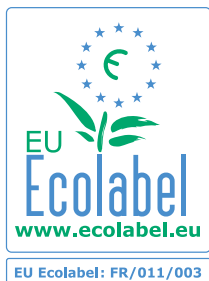

# Finanzkalender 2011 / 2012

## 2011

- 17. März** Bilanz-Pressekonferenz und Analystenkonferenz zum Jahresergebnis 2010
- 3. Mai** Hauptversammlung in Berlin
- 5. Mai** Veröffentlichung Zwischenbericht zum 1. Quartal 2011
- 28. Juli** Veröffentlichung Zwischenbericht zum 1. Halbjahr 2011
- 27. Okt.** Presse- und Analystenkonferenz zum Zwischenbericht Januar – September 2011

## 2012

- 15. März** Bilanz-Pressekonferenz und Analystenkonferenz zum Jahresergebnis 2011
- 3. Mai** Veröffentlichung Zwischenbericht zum 1. Quartal 2012
- 8. Mai** Hauptversammlung in Köln
- 2. Aug.** Veröffentlichung Zwischenbericht zum 1. Halbjahr 2012
- 31. Okt.** Presse- und Analystenkonferenz zum Zwischenbericht Januar – September 2012

### Vorbehalt bei zukunftsgerichteten Aussagen

Bei den in unserem Geschäftsbericht 2010 veröffentlichten Angaben, die sich auf die zukünftige Entwicklung des Lufthansa Konzerns und seiner Gesellschaften beziehen, handelt es sich lediglich um Prognosen und Einschätzungen und damit nicht um feststehende historische Tatsachen. Sie dienen allein informatischen Zwecken und sind gekennzeichnet durch Begriffe wie „glauben“, „erwarten“, „vorhersagen“, „beabsichtigen“, „prognostizieren“, „planen“, „schätzen“, „rechnen mit“ oder „bestreben“. Diese zukunftsgerichteten Aussagen beruhen auf allen uns derzeit erkennbaren und verfügbaren Informationen, Fakten und Erwartungen. Sie können daher nur zum Zeitpunkt der Veröffentlichung Gültigkeit beanspruchen.

Da zukunftsgerichtete Aussagen naturgemäß mit Ungewissheiten und in ihren Auswirkungen nicht einschätzbaren Risikofaktoren – wie etwa einer Änderung der wirtschaftlichen Rahmenbedingungen – behaftet sind oder zugrunde gelegte Annahmen nicht oder abweichend eintreffen können, besteht die Möglichkeit, dass sich die tatsächlichen Ergebnisse und die Entwicklung des Unternehmens von den Prognosen wesentlich unterscheiden. Lufthansa ist stets bemüht, die veröffentlichten Daten zu kontrollieren und auf dem aktuellen Stand zu halten. Dennoch kann seitens des Unternehmens keine Verpflichtung übernommen werden, zukunftsgerichtete Aussagen an später eintretende Ereignisse bzw. Entwicklungen anzupassen. Eine Haftung oder Garantie für Aktualität, Richtigkeit und Vollständigkeit dieser Daten und Informationen wird demnach weder ausdrücklich noch konkludent übernommen.

### Hinweis

Zur Vereinfachung der Sprache haben wir in unserem Bericht die maskuline Form verwendet. Wir bitten um Ihr Verständnis.

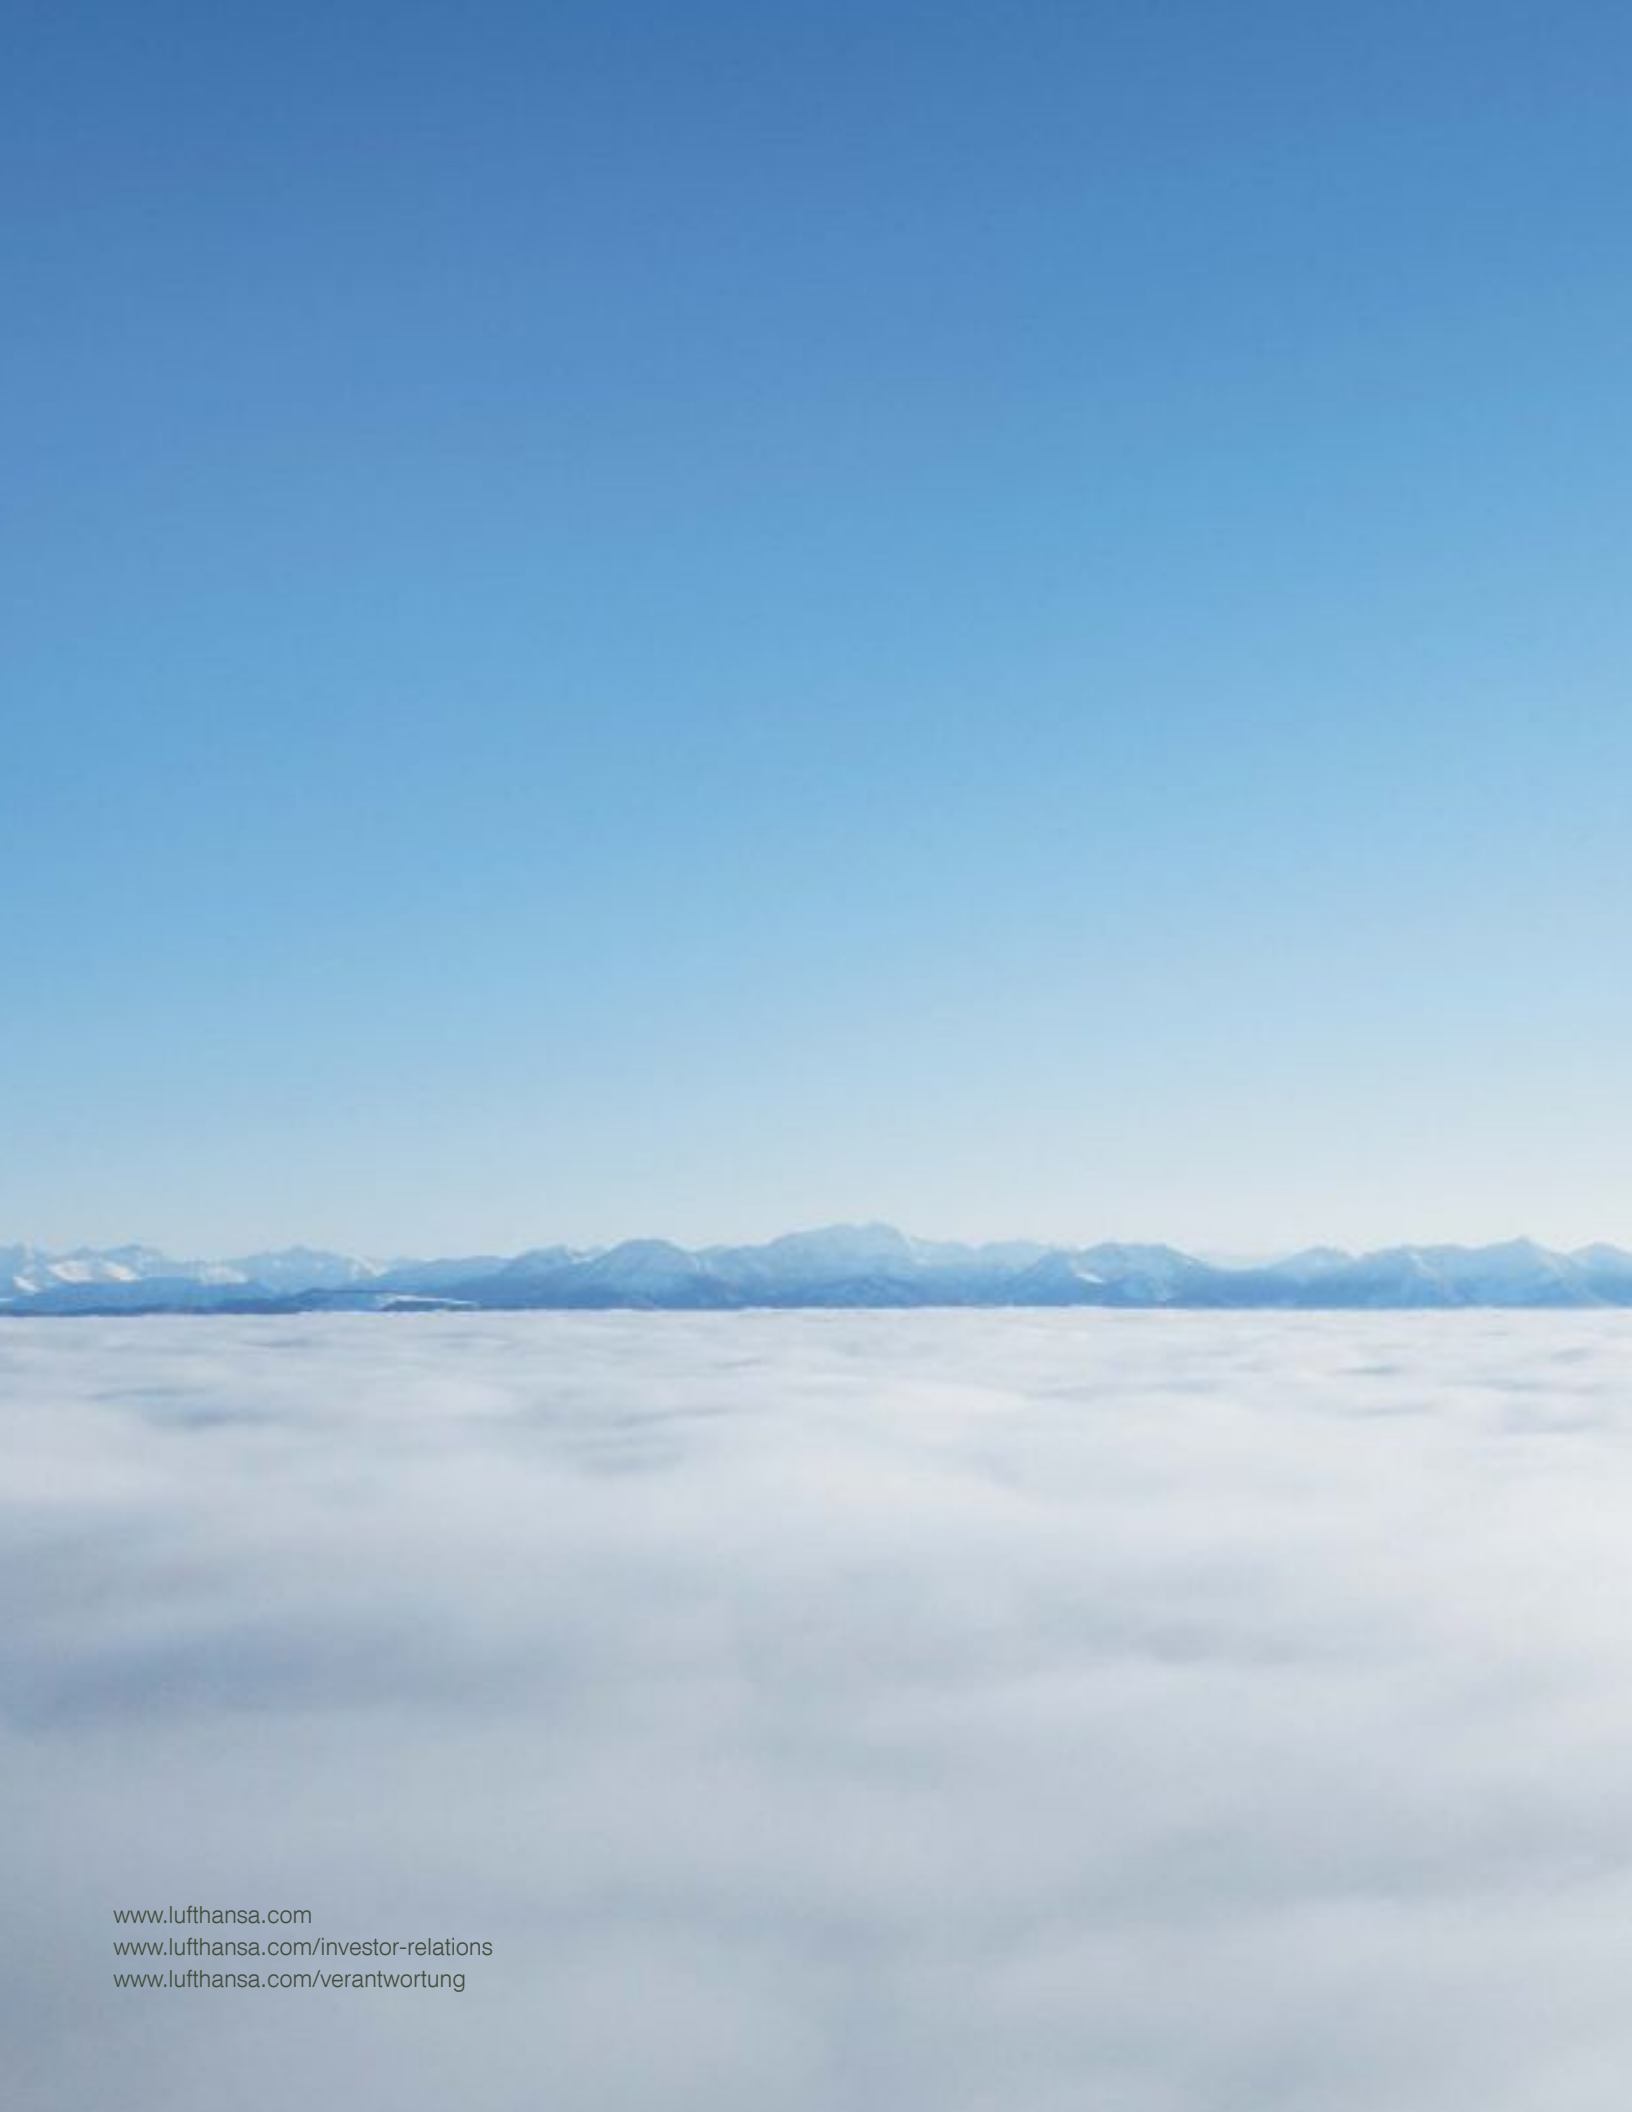

Supplement: Supplementary file 36 [file Lufthansa GB 2010.pdf › Korpustexte/Korpustexte pdf/Deutsche Lufthansa/Lufthansa GB 2010.pdf]
