# Supplementary material
Source: publisher site journal article supplement (https://www.degruyterbrill.com/publication/isbn/9783110432879/downloadAsset/9783110432879_Elektronischer_Anhang_2.zip)

## BASF → UNSERE STRATEGIE

→ Wir verdienen eine Prämie auf unsere Kapitalkosten.

Um noch effizienter produzieren zu können, arbeiten wir an Optimierungsprojekten in der Produktion, Instandhaltung und Logistik sowie bei den Absatz-, Planungs- und Beschaffungsprozessen. Wir verbessern und harmonisieren damit ständig unsere Geschäftsprozesse. Die Projekte werden das Ergebnis der BASF-Gruppe um mehrere hundert Millionen € pro Jahr steigern.

→ Wir bilden das beste Team der Industrie.

BASF ist es wichtig, auf die Bedürfnisse der Mitarbeiter nach Vereinbarkeit von Beruf und Familie einzugehen. Eine lebensphasenorientierte Personalpolitik trägt entscheidend zur Zukunftsfähigkeit eines Unternehmens bei. Ein gutes Beispiel dafür sind unsere flexiblen Arbeitszeitmodelle. Außerdem hat das Management die Arbeit der Mitarbeiter in der Krise besonders gewürdigt. Dafür hat der Vorstand in Summe weltweit 50 Millionen € für Sonderzahlungen bereitgestellt.

→ Wir helfen unseren Kunden, noch erfolgreicher zu sein.

Im Mittelpunkt unserer Arbeit steht die Zufriedenheit unserer Kunden. Dafür greifen wir die Impulse des Marktes auf. In unterschiedlichen Geschäftsmodellen arbeiten wir eng mit unseren Kunden zusammen. Unsere Leistung wurde auch 2010 honoriert: BASF erhielt in Indien Auszeichnungen von Tata Motors, Mahindra & Mahindra sowie Honda Motorcycle and Scooter India (HMSI). Gewürdigt wurden unter anderem Qualität, Liefertreue sowie Produktentwicklung.

→ Wir wirtschaften nachhaltig für eine lebenswerte Zukunft.

Wir arbeiten für eine nachhaltige Entwicklung. Als Erweiterung der Ökoeffizienz-Analyse haben wir SEEBALANCE® entwickelt. Diese Analyseverfahren setzt die Wirtschaftlichkeit eines Produktes ins Verhältnis zu seinen ökologischen und sozialen Auswirkungen. Dazu wird der gesamte Lebensweg eines Produkts betrachtet – von der Rohstoffgewinnung, über die Herstellung und Verwertung bis zu seiner Entsorgung.

## GESUNDHEIT UND ERNÄHRUNG

→ Globale Herausforderung

# 40%

der Kinder unter fünf Jahren in Entwicklungsländern leiden laut UNICEF an Vitamin-A-Mangel.

→ BASF handelt

### MANGELERNÄHRUNG BEKÄMPFEN, GESUNDHEIT FÖRDERN

In Zukunft müssen immer mehr Menschen mit Lebensmitteln und Gesundheitsprodukten versorgt werden. Weltweit helfen BASF-Produkte, Gesundheit und Ernährung zu verbessern.

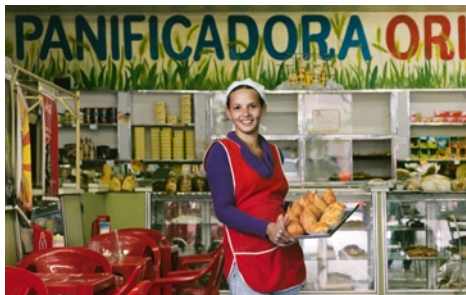

In vielen Ländern der Welt werden Grundnahrungsmittel wie Öl und Mehl mit dem lebenswichtigen Vitamin A angereichert, so auch in Brasilien.

Um Mangelernährung vorzubeugen, werden in vielen Ländern der Welt günstige Grundnahrungsmittel mit dem lebenswichtigen Vitamin A angereichert. Diese Methode heißt Food Fortification. Mittlerweile betreut das Food-Fortification-Team der BASF Programme in mehr als 30 Ländern.

[www.basf.com/zukunft/ernaehrung](http://www.basf.com/zukunft/ernaehrung)

## DER VERBUND

Im BASF-Verbund vernetzen wir Produktionsanlagen, Energiefluss, Logistik und Infrastruktur auf intelligente Weise miteinander. So steigern wir die Produktionsausbeute, senken Logistikkosten und sparen Ressourcen sowie Energie. Ein wesentlicher Faktor der Verbundidee ist der Wissensverbund, in dem BASF-Mitarbeiter sich weltweit untereinander austauschen. Dieses Expertenwissen bündeln und nutzen wir in unseren Forschungsplattformen.

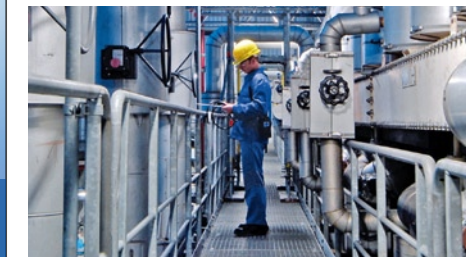

Im Verbund der BASF werden Produktionsanlagen bei der Versorgung mit Chemikalien und Energie intelligent miteinander vernetzt.

## ENERGIE UND KLIMASCHUTZ

→ Globale Herausforderung

# +36%

wird der weltweite Energieverbrauch bis zum Jahr 2035 laut der Internationalen Energieagentur (IEA) steigen.

→ BASF handelt

### PRODUKTE FÜR DEN KLIMASCHUTZ

Der Klimawandel betrifft uns alle. Wirtschaft, Wissenschaft, Politik und Gesellschaft sind gefordert, den weltweiten Ausstoß von Treibhausgasen zu reduzieren und die vorhandenen Ressourcen effizienter zu nutzen. Zahlreiche unserer Produkte leisten einen Beitrag zum

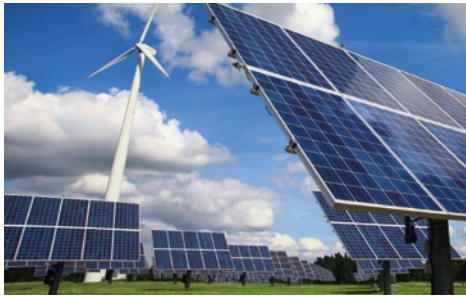

Lösungen von BASF für erneuerbare Energien helfen dabei, die Erzeugung von Solar- und Windstrom effizienter und kostengünstiger zu machen.

Klimaschutz. Unsere Produktpalette umfasst unter anderem Dämmstoffe und Betonadditive für klimaschonendes Bauen, Kraftstoffadditive und Kunststoffe für den Automobilleichtbau sowie Industriekatalysatoren, die den Ausstoß von Treibhausgasen reduzieren.

[www.basf.com/zukunft/energie](http://www.basf.com/zukunft/energie)

## BAUEN UND WOHNEN

→ Globale Herausforderung

# 6,9 Mrd.

Menschen leben heute auf der Erde. Bis zum Jahr 2030 werden nach Schätzungen der UN rund 60% der Weltbevölkerung in Städten leben.

→ BASF handelt

### SCHNELL UND NACHHALTIG BAUEN

Wirtschaftliche, soziale und ökologische Vorteile vereinen: Daran messen wir unsere Produkte für nachhaltiges Bauen und Wohnen. Im Neubau, in der Gebäudesanierung und im Innenausbau – in praktisch allen Bauvorhaben spielen BASF-Lösungen eine Rolle. Unsere Baumaterialien, Produkte und Systeme

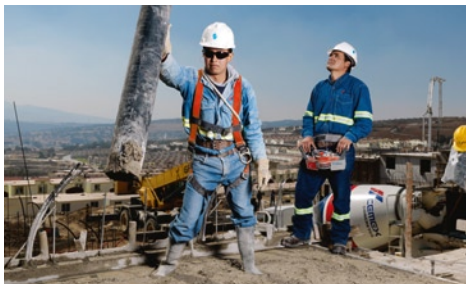

Unser Kunde Cemex stellt in Mexiko dank BASF-Betonzusatzmitteln Häuserrohbauten in nur einer Woche fertig.

helfen nicht nur Zeit und Kosten zu sparen, sondern schonen auch die Umwelt. Unsere Betonzusatzmittel Glenium®, Polyheed® und Pozzolith® etwa lassen Beton schneller aushärten. So können bei einem sozialen Wohnungsbauprojekt in Mexiko die Rohbauten von Häusern für einkommensschwache Familien in nur sieben Tagen fertiggestellt werden.

[www.basf.com/zukunft/bauen](http://www.basf.com/zukunft/bauen)

## MOBILITÄT

→ Globale Herausforderung

# 1,6 Mrd.

Fahrzeuge werden im Jahr 2025 nach Einschätzungen von Experten weltweit auf den Straßen unterwegs sein.

→ BASF handelt

### KLIMASCHONEND MOBIL SEIN

Unsere Produkte bieten umweltfreundliche Lösungen für die Automobilindustrie. Unser Angebot reicht von Katalysatoren, Rußgasfiltern, Kraftstoffadditiven und Kunststoffen bis hin zu Lacken und Chemikalien für Fahrzeugtextilien. Zudem arbeiten wir an der Entwick-

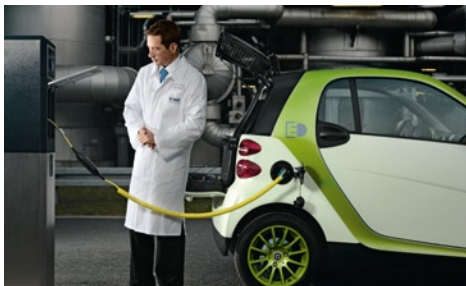

BASF-Forscher arbeiten gemeinsam mit internationalen Experten an Batteriematerialien und -komponenten für Elektrofahrzeuge.

lung leistungsfähigerer Lithium-Ionen-Akkus für die Elektromobilität und an der Optimierung klassischer Verbrennungsmotoren. Unsere Chemie leistet einen entscheidenden Beitrag für die umweltfreundliche Mobilität der Zukunft.

[www.basf.com/zukunft/mobilitaet](http://www.basf.com/zukunft/mobilitaet)

## WASSER

→ Globale Herausforderung

# 5,4 Mrd.

Menschen werden laut der UN im Jahr 2030 unter Wasserknappheit leiden.

→ BASF handelt

### WASSER VERANTWORTUNGSVOLL NUTZEN

Wasser ist eine wichtige Ressource, mit der wir nachhaltig umgehen wollen. Bei BASF dient Wasser als Kühl- und Reinigungsmittel sowie zur Herstellung von Produkten. Emissionen in das Wasser wollen wir so niedrig wie möglich halten und setzen uns dafür globale Ziele.

Darüber hinaus bieten wir Lösungen, die unseren Kunden helfen, Wasser zu reinigen und zu sparen sowie Emissionen in das Wasser zu verringern. Unser Angebot reicht von Chemikalien zur Aufbereitung kommunaler Abwässer bis hin zu Produkten für industrielle Prozesse. Dazu gehört beispielsweise die Trinkwasseraufbereitung, die energieeffiziente Entsalzung von Meerwasser oder auch das Verhindern von Belag oder Korrosion bei der Wasserverwendung in Industrieprozessen.

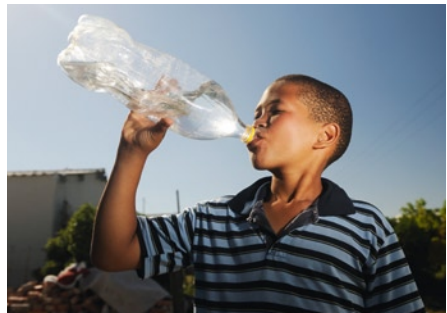

Der Zugang zu sauberem Trinkwasser gehört seit dem Jahr 2010 zu den Menschenrechten.

[www.basf.com/wasser](http://www.basf.com/wasser)

## Chemie, die verbindet

Daten und Fakten  
2010/2011

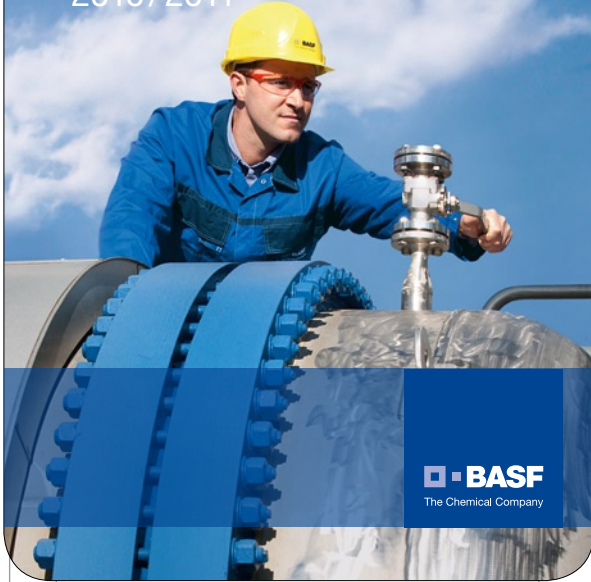

**BASF**  
The Chemical Company

## CHEMIE, DIE VERBINDET

BASF ist das führende Chemie-Unternehmen der Welt: The Chemical Company. Das Portfolio reicht von Chemikalien, Kunststoffen, Veredlungsprodukten und Pflanzenschutzmitteln bis hin zu Öl und Gas. Als zuverlässiger Partner hilft die BASF ihren Kunden in nahezu allen Branchen, noch erfolgreicher zu sein. Mit hochwertigen Produkten und intelligenten Lösungen trägt die BASF dazu bei, Antworten auf globale Herausforderungen wie Klimaschutz, Energieeffizienz, Ernährung und Mobilität zu finden. Das ist Chemie, die verbindet.

## WEITERE INFORMATIONEN

Diese und andere Publikationen finden Sie im Internet unter [www.basf.com](http://www.basf.com)

→ **Corporate Media Relations**

Michael Grabicki  
Tel.: +49 621 60-99938  
Fax: +49 621 60-92693

→ **Sustainability Center**

Dr. Eckhard Koch  
Tel.: +49 621 60-78638

→ **Investor Relations**

Magdalena Moll  
Tel.: +49 621 60-48002

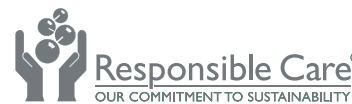

### ökologie liebt ökonomie

Erfahren Sie mehr über unsere globale Kampagne unter [www.basf.com/chemistry](http://www.basf.com/chemistry)

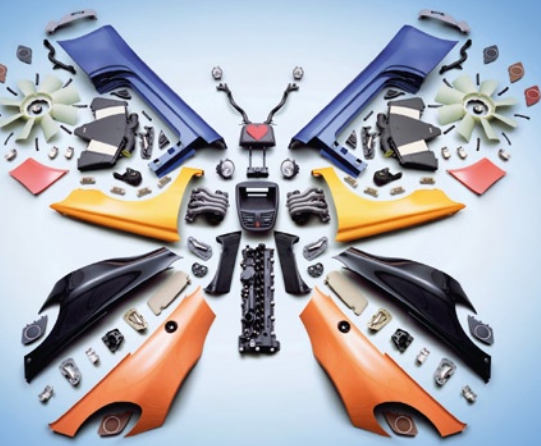

BASF SE  
Unternehmenskommunikation  
& Regierungsbeziehungen BASF-Gruppe  
67056 Ludwigshafen, Germany  
Tel.: +49 621 60-22149  
Fax: +49 621 60-20384

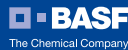



# BASF → WELTWEIT AKTIV

In der BASF-Gruppe arbeiten rund 109.000 Mitarbeiter daran, Kunden aus nahezu allen Branchen und in fast allen Ländern der Welt noch erfolgreicher zu machen. Wir betreiben weltweit sechs Verbundstandorte und rund 390 weitere Produktionsstandorte. In mehr als 80 Ländern ist die BASF mit Gesellschaften vertreten.

## HOHE ANFORDERUNGEN AN DEN BETON IM ONE WORLD TRADE CENTER

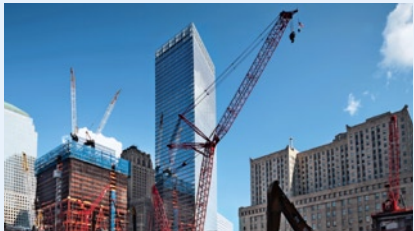

Hoch hinaus in Manhattan: Ab 2013 soll hier der Turm des neuen One World Trade Center (OWTC) 541 Meter in den Himmel ragen. Hohe Anforderungen an die Haltbarkeit und Druckfestigkeit des Betons konnte der Betonhersteller Eastern Concrete unter anderem dank Glenium® Zusatzmitteln der BASF erfüllen. Ein weiterer Schlüssel zum wirtschaftlichen und ökologischen Erfolg beim OWTC: das Programm Green Sense<sup>SM</sup>. Dabei handelt es sich um einen exklusiv von BASF im nordamerikanischen Markt angebotenen Service, mit dem Betonmischungen für die jeweiligen Anwendungen optimiert werden. Wiederverwertete Materialien können große Teile des Zementklinkers ersetzen, dessen Herstellung sehr viel Energie benötigt. Eine Ökoeffizienz-Analyse hat gezeigt, dass bei der Herstellung dieser OWTC-Betonmischung 27% Energie, 42% Kohlendioxidemissionen und 21% Rohstoffe eingespart werden.

### NORDAMERIKA

| UMSATZ <sup>1</sup> IN MIO. € | EBIT <sup>1</sup> IN MIO. € | MITARBEITER <sup>2</sup> |
|-------------------------------|-----------------------------|--------------------------|
| 13.246                        | 1.107                       | 16.487                   |

FREEPORT

GEISMAR

FLORHAM PARK

SÃO PAULO

LUDWIGSHAFEN

ANTWERPEN

## MIT DIGILAB PFLANZEN-KRANKHEITEN ERKENNEN

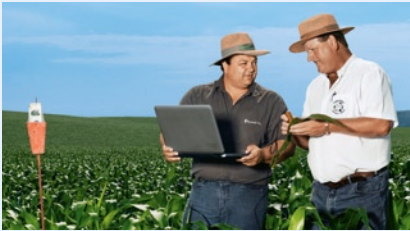

Mit dem tragbaren digitalen Mikroskop Digilab können Landwirte in Lateinamerika erkrankte Pflanzen jetzt schon auf dem Feld untersuchen. Eine BASF-Software identifiziert vor Ort Krankheit, Schädling oder Unkraut und schlägt geeignete Pflanzenschutzmaßnahmen vor. Danach gibt der Farmer seinen Standort und andere Daten ein. Diese ergänzen eine auf einer BASF-Website angebotene Karte der befallenen Gebiete. So erhalten die Landwirte der Region eine umfassende Übersicht.

### SÜDAMERIKA, AFRIKA, NAHER OSTEN

| UMSATZ <sup>1</sup> IN MIO. € | EBIT <sup>1</sup> IN MIO. € | MITARBEITER <sup>2</sup> |
|-------------------------------|-----------------------------|--------------------------|
| 3.829                         | 177                         | 6.879                    |

## KOMBIVERKEHRSTERMINALS REDUZIEREN EMISSIONEN

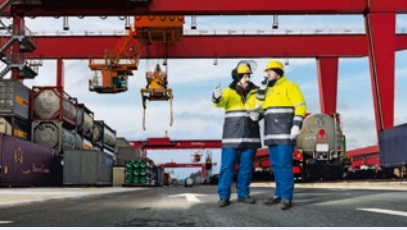

Intelligente Logistik reduziert Emissionen: Wenn Transporte von der Straße auf die Schiene verlagert werden, lässt sich der CO<sub>2</sub>-Ausstoß deutlich verringern. Das neue Combinant-Terminal an unserem Verbundstandort in Antwerpen haben wir im März 2010 eingeweiht. Es hilft uns, unsere Produkte umweltfreundlicher zu transportieren und jährlich rund 30.000 Tonnen CO<sub>2</sub> zu vermeiden.

### ASIEN, PAZIFISCHER RAUM

| UMSATZ <sup>1</sup> IN MIO. € | EBIT <sup>1</sup> IN MIO. € | MITARBEITER <sup>2</sup> |
|-------------------------------|-----------------------------|--------------------------|
| 11.642                        | 1.271                       | 15.965                   |

## INTELLIGENTE LÖSUNGEN FÜR DAS AUTO DER ZUKUNFT

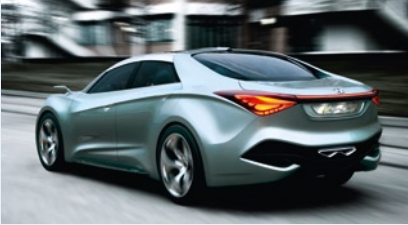

Das gemeinsam von Hyundai und BASF entwickelte Konzeptauto i-flow zeigt die Möglichkeiten künftiger Mobilität auf. Die Beiträge der BASF zum i-flow ermöglichen einen niedrigeren Kraftstoffverbrauch, eine geringere Umweltbelastung, neue Freiheiten für das Design sowie mehr Komfort und Sicherheit. Der i-flow demonstriert so den derzeitigen Stand der Entwicklung von Materialien und Technologien im Automobilbau.

● Regionale Zentren    ✕ Verbundstandorte    Ⓚ Ausgewählte Produktionsstandorte    ⓘ Wichtigste Forschungsstandorte    <sup>1</sup> Im Jahr 2010, nach Sitz der Gesellschaften    <sup>2</sup> Stand: 31. Dezember 2010

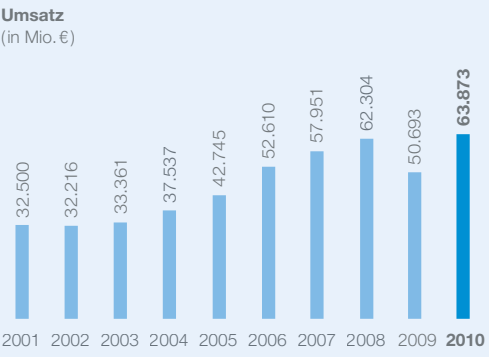

**Umsatz nach Branchen**  
(direkte Kunden)

| Branchen                                                 | Anteil |
|----------------------------------------------------------|--------|
| Chemie                                                   | > 15%  |
| Automobil   Versorger                                    | 10–15% |
| Bau   Landwirtschaft   Kunststoffindustrie   Ölindustrie | 5–10%  |
| Elektro / Elektronik   Möbel   Papier                    | < 5%   |
| Anteil sonstiger Branchen                                | 10–15% |

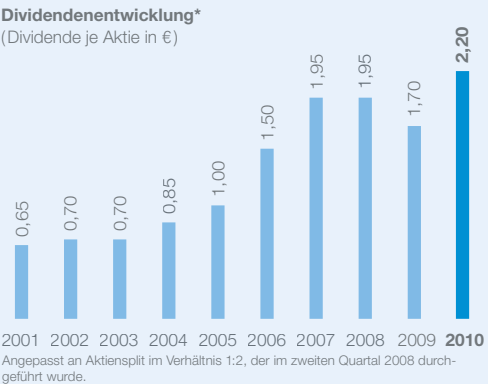

**Umsatz nach Segmenten**  
(im Jahr 2010)

| Segment                | Umsatz (Mio. €) |
|------------------------|-----------------|
| Chemicals              | 11.377          |
| Plastics               | 9.830           |
| Performance Products   | 12.288          |
| Functional Solutions   | 9.703           |
| Agricultural Solutions | 4.033           |
| Oil & Gas              | 10.791          |
| Sonstige               | 5.851           |

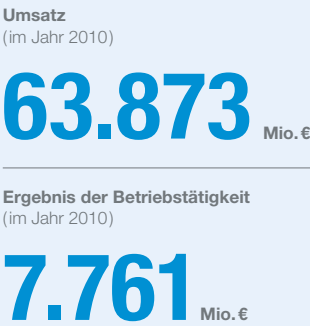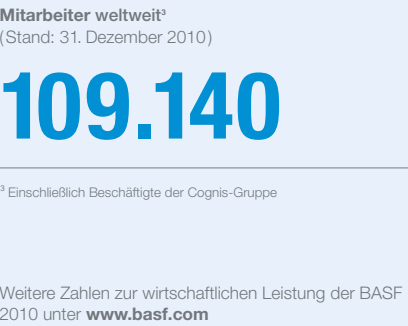

Supplement: Supplementary file 7 [file BASF Daten und Fakten 2011.pdf › Korpustexte/Korpustexte pdf/BASF/BASF Daten und Fakten 2011.pdf]
