# Supplementary material
Source: publisher site journal article supplement (https://www.degruyterbrill.com/publication/isbn/9783110432879/downloadAsset/9783110432879_Elektronischer_Anhang_2.zip)

EINZIGARTIG  
DER MERCK WEG

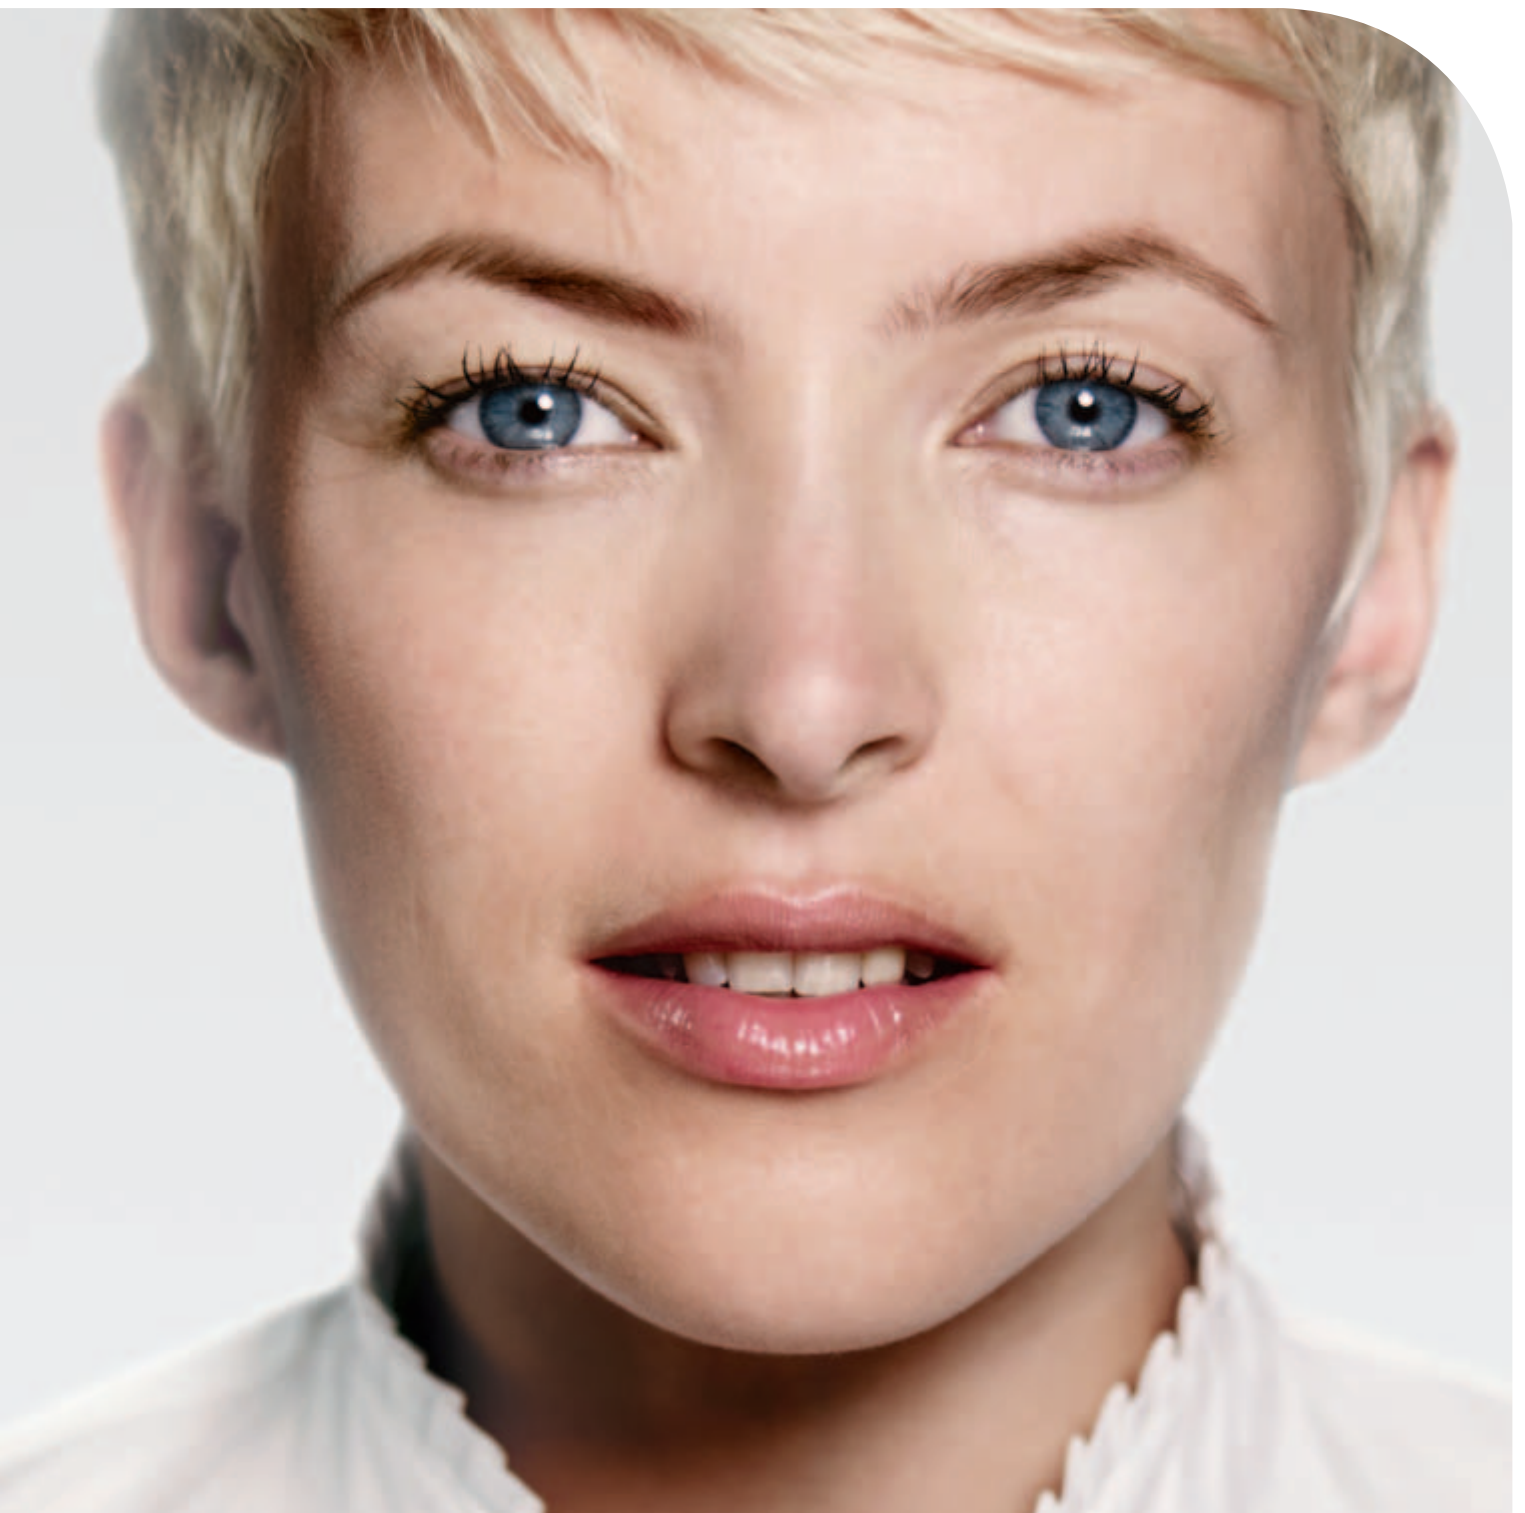

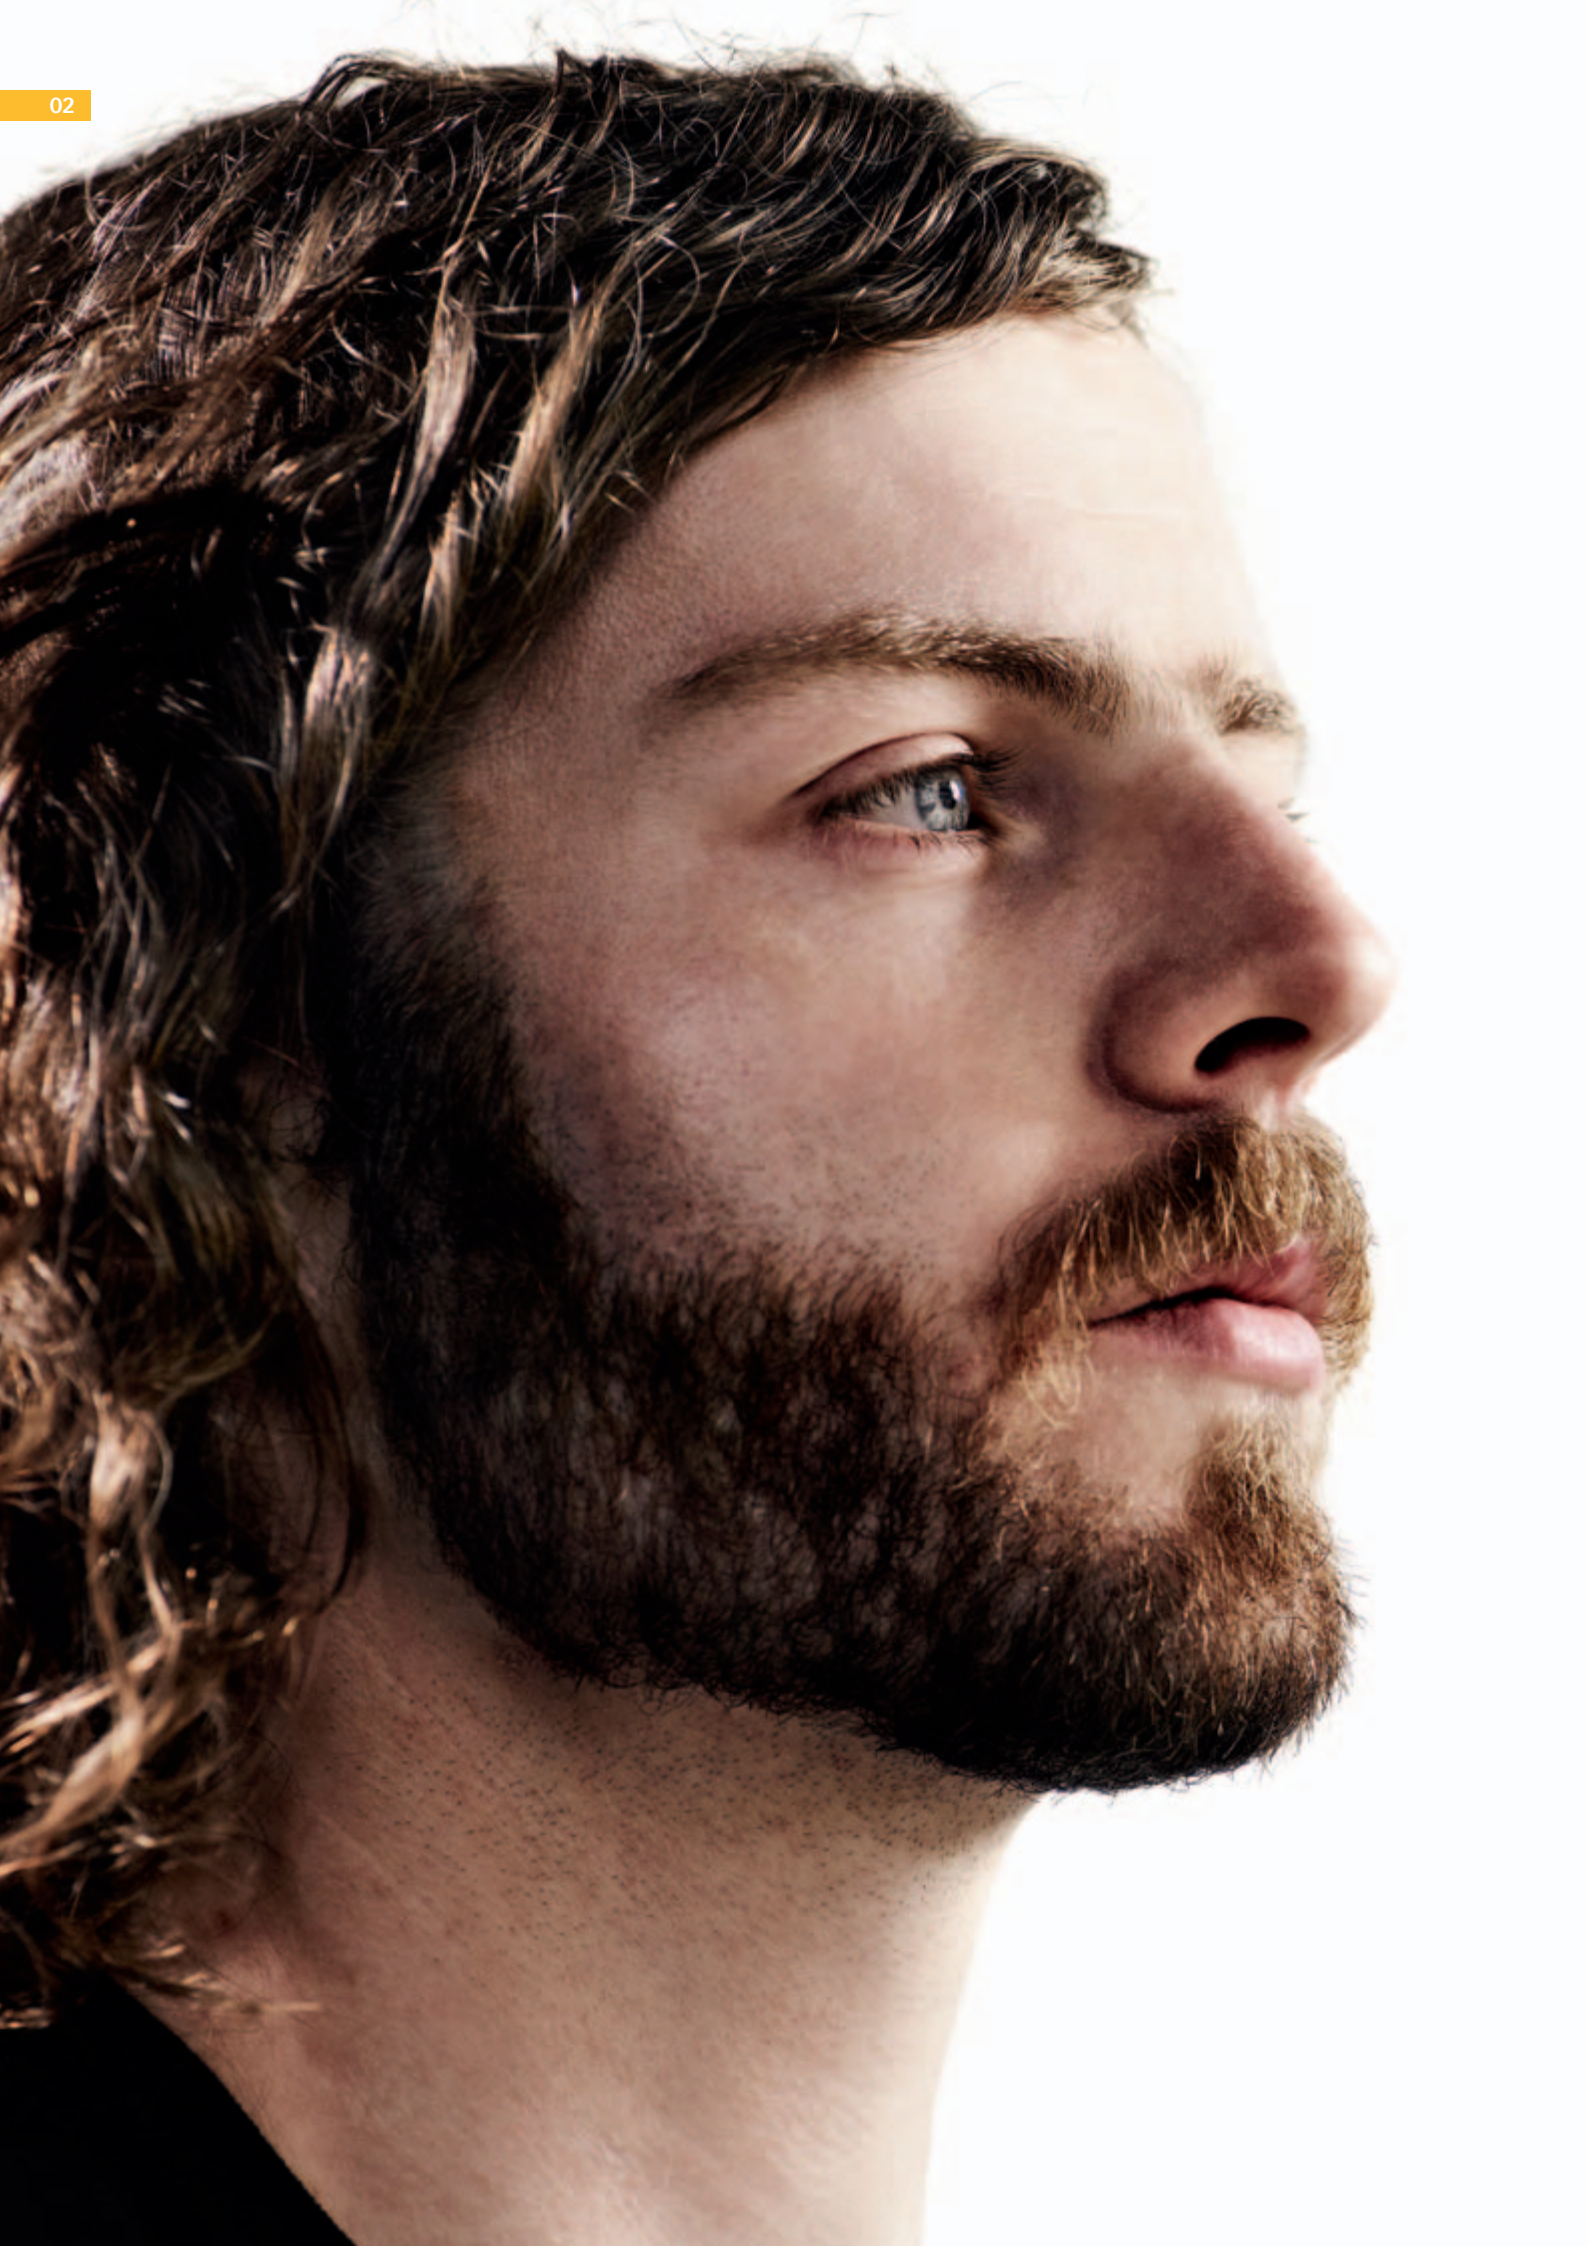



## VIELE UNTERNEHMEN ERACHTEN KULTUR ALS LUXUS – FÜR UNS IST SIE DAS FUNDAMENT UNSERES HANDELNS.

**Sich selber treu bleiben: Die Merck-Kultur.** Auf den ersten Blick sind es oft die Produkte, die ein Unternehmen von seinen Wettbewerbern unterscheiden. Auch bei Merck sind es die Arzneimittel und chemischen Produkte, die den Unternehmenserfolg vordergründig ausmachen. Es ist aber nicht nur wichtig, *was* ein Unternehmen am Markt anbietet, sondern auch, *wie* mit internen und externen Herausforderungen umgegangen wird, *wie* Wettbewerbsvorteile erzielt und *wie* Entscheidungen getroffen werden. Lebendig wird die Kultur eines Unternehmens erst durch die Menschen, die sie mit Leben erfüllen.

Unsere Haltung und unsere Handlungsweise sind

- gewachsen aus den Erfahrungen einer fast 350-jährigen Geschichte,
- getragen vom Willen unserer Mitarbeiter, ambitionierte Ziele auf Basis einer klaren Strategie und eindeutiger Unternehmenswerte zu erreichen,
- geprägt von Familieneigentümern, deren unternehmerisches Credo mit dem Satz anfängt: „Unternehmerischer Erfolg beginnt beim Menschen.“

Aus diesen Maximen ist eine Kultur entstanden, in der jeder Einzelne etwas bewegen kann. Eine Kultur, die gleichermaßen auf gegenseitigem Respekt und gelebter Zugehörigkeit basiert. Entscheidungen treffen wir auf der Basis von transparenten Fakten und im offenen Dialog, denn so lassen sie sich von den Betroffenen leichter tragen und umsetzen. Gleichzeitig weiß jeder, dass Konsenssuche nicht zur Blockade führen darf. Diese Kombination aus persönlicher Entfaltungsfreiheit und Team-Zugehörigkeit ist wie die DNA unseres Unternehmens – im Inneren verborgen und eigentlich nur für diejenigen zu verstehen, die dazugehören. Diese Kultur ist sowohl Grundlage für unseren nachhaltigen wirtschaftlichen Erfolg als auch Treiber für notwendige Veränderungen.

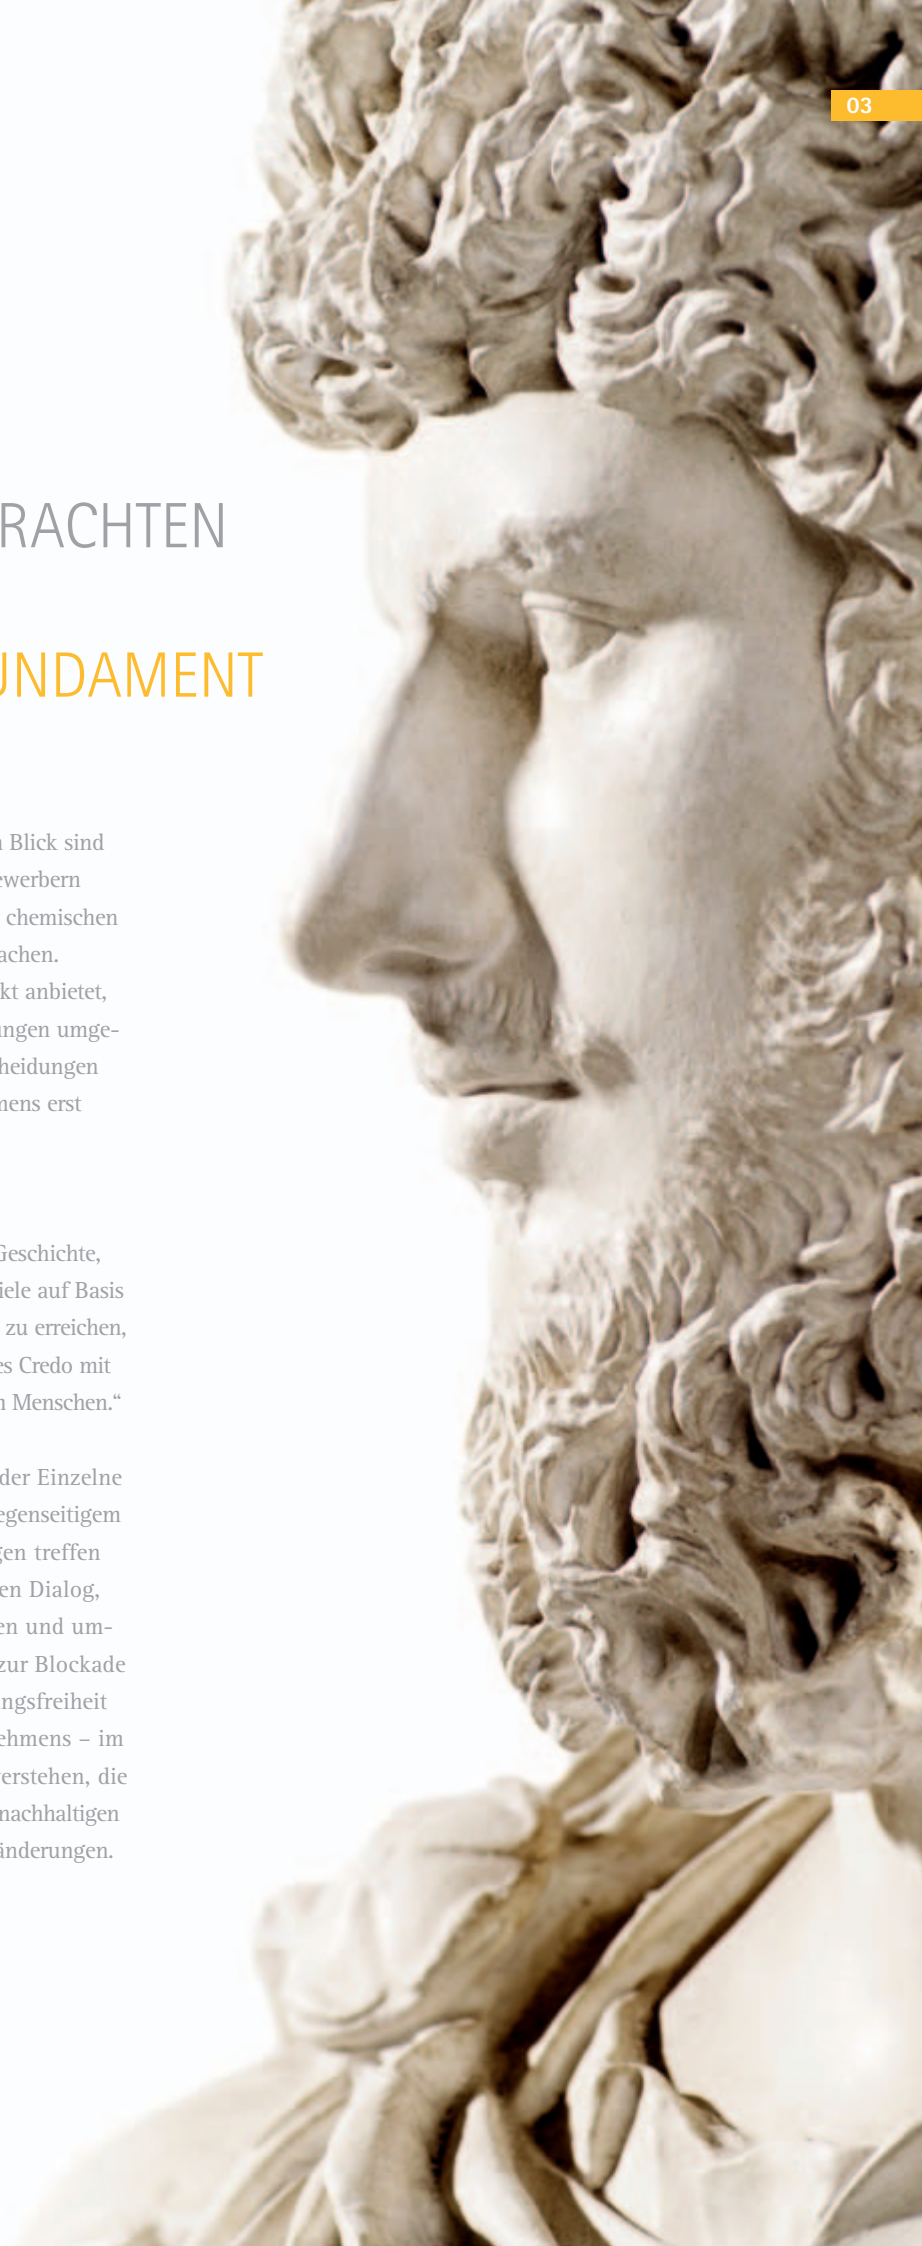

# ES GEHT NIE ALLEIN UM DIE PRODUKTE, SONDERN IMMER AUCH UM DIE MENSCHEN. UND ES GEHT UM KLARE WERTE.

**Kulturelle Vielfalt: Auf der ganzen Welt zu Hause.** Obwohl unsere kulturellen Wurzeln in Darmstadt liegen, sind wir geübt im Umgang mit unterschiedlichen Kulturen und wissen Unterschiede zu respektieren. Damit unsere weltweite Zusammenarbeit erfolgreich funktioniert, haben wir uns gemeinsamen Werten verpflichtet, die für alle Mitarbeiter verbindlich sind. Ohne Ausnahme. Sie sind der Kompass, nach dem wir unser wirtschaftliches und soziales Handeln steuern – gegenüber Kunden und Geschäftspartnern sowie in der Zusammenarbeit miteinander:

|                      |                                                |
|----------------------|------------------------------------------------|
| <b>Mut</b>           | eröffnet Zukunft.                              |
| <b>Leistung</b>      | ermöglicht unseren unternehmerischen Erfolg.   |
| <b>Verantwortung</b> | bestimmt unser unternehmerisches Handeln.      |
| <b>Respekt</b>       | begründet ein partnerschaftliches Miteinander. |
| <b>Integrität</b>    | sichert unsere Glaubwürdigkeit.                |
| <b>Transparenz</b>   | erlaubt gegenseitiges Vertrauen.               |

Mit dieser Orientierung schaffen wir Freiraum für unternehmerisches Handeln. Denn je solider eine Unternehmenskultur auf gemeinsamen Werten beruht, desto weniger behindern zentrale Kontrollinstanzen und bürokratische Prozesse die Arbeit. So viel Vertrauen wie möglich, so viel Kontrolle wie nötig. Gleichzeitig respektieren wir kulturelle Vielfalt. Regionale, kulturspezifische Unterschiede sehen wir nicht als Hindernis auf dem Weg zu einem einheitlich ausgerichteten Unternehmen, sondern als Potenzial für unternehmerische Erfolge.

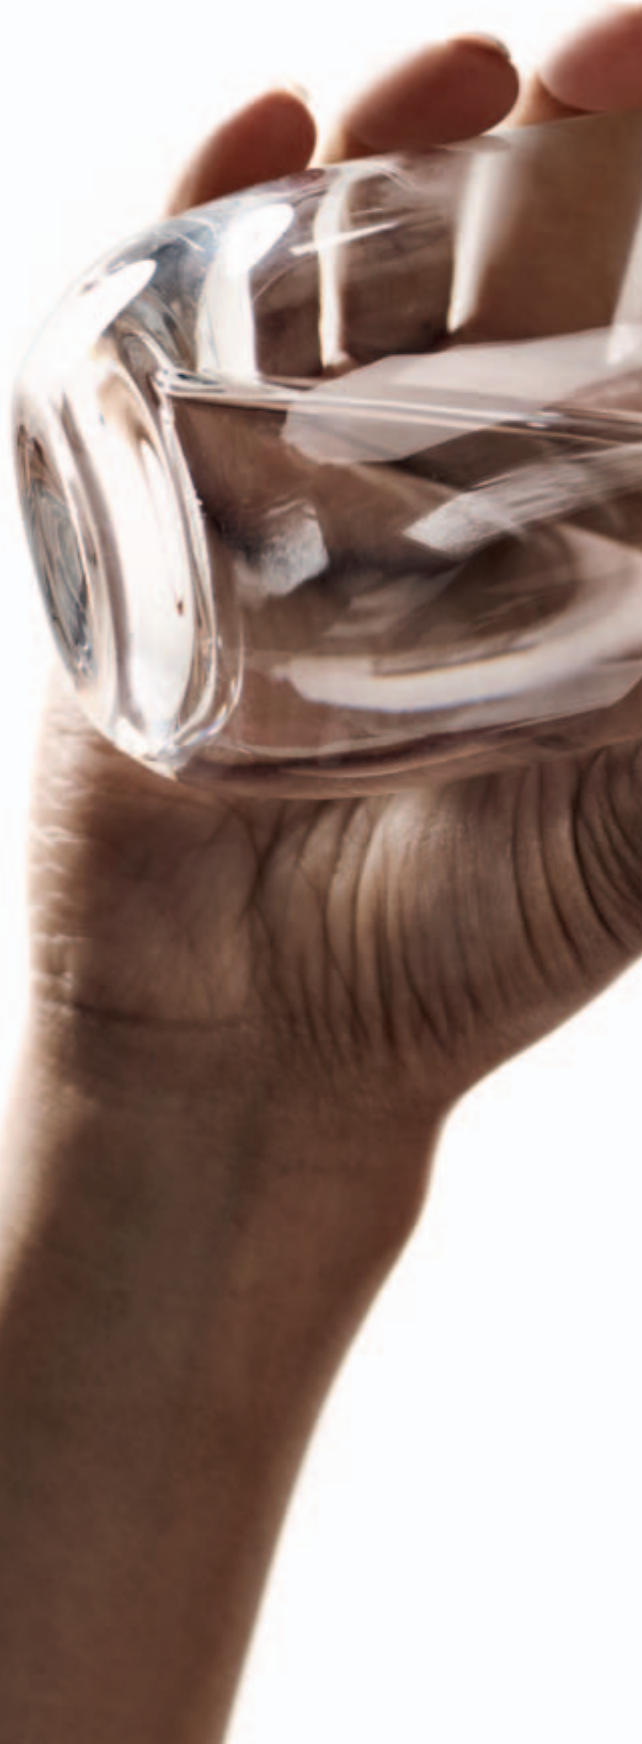



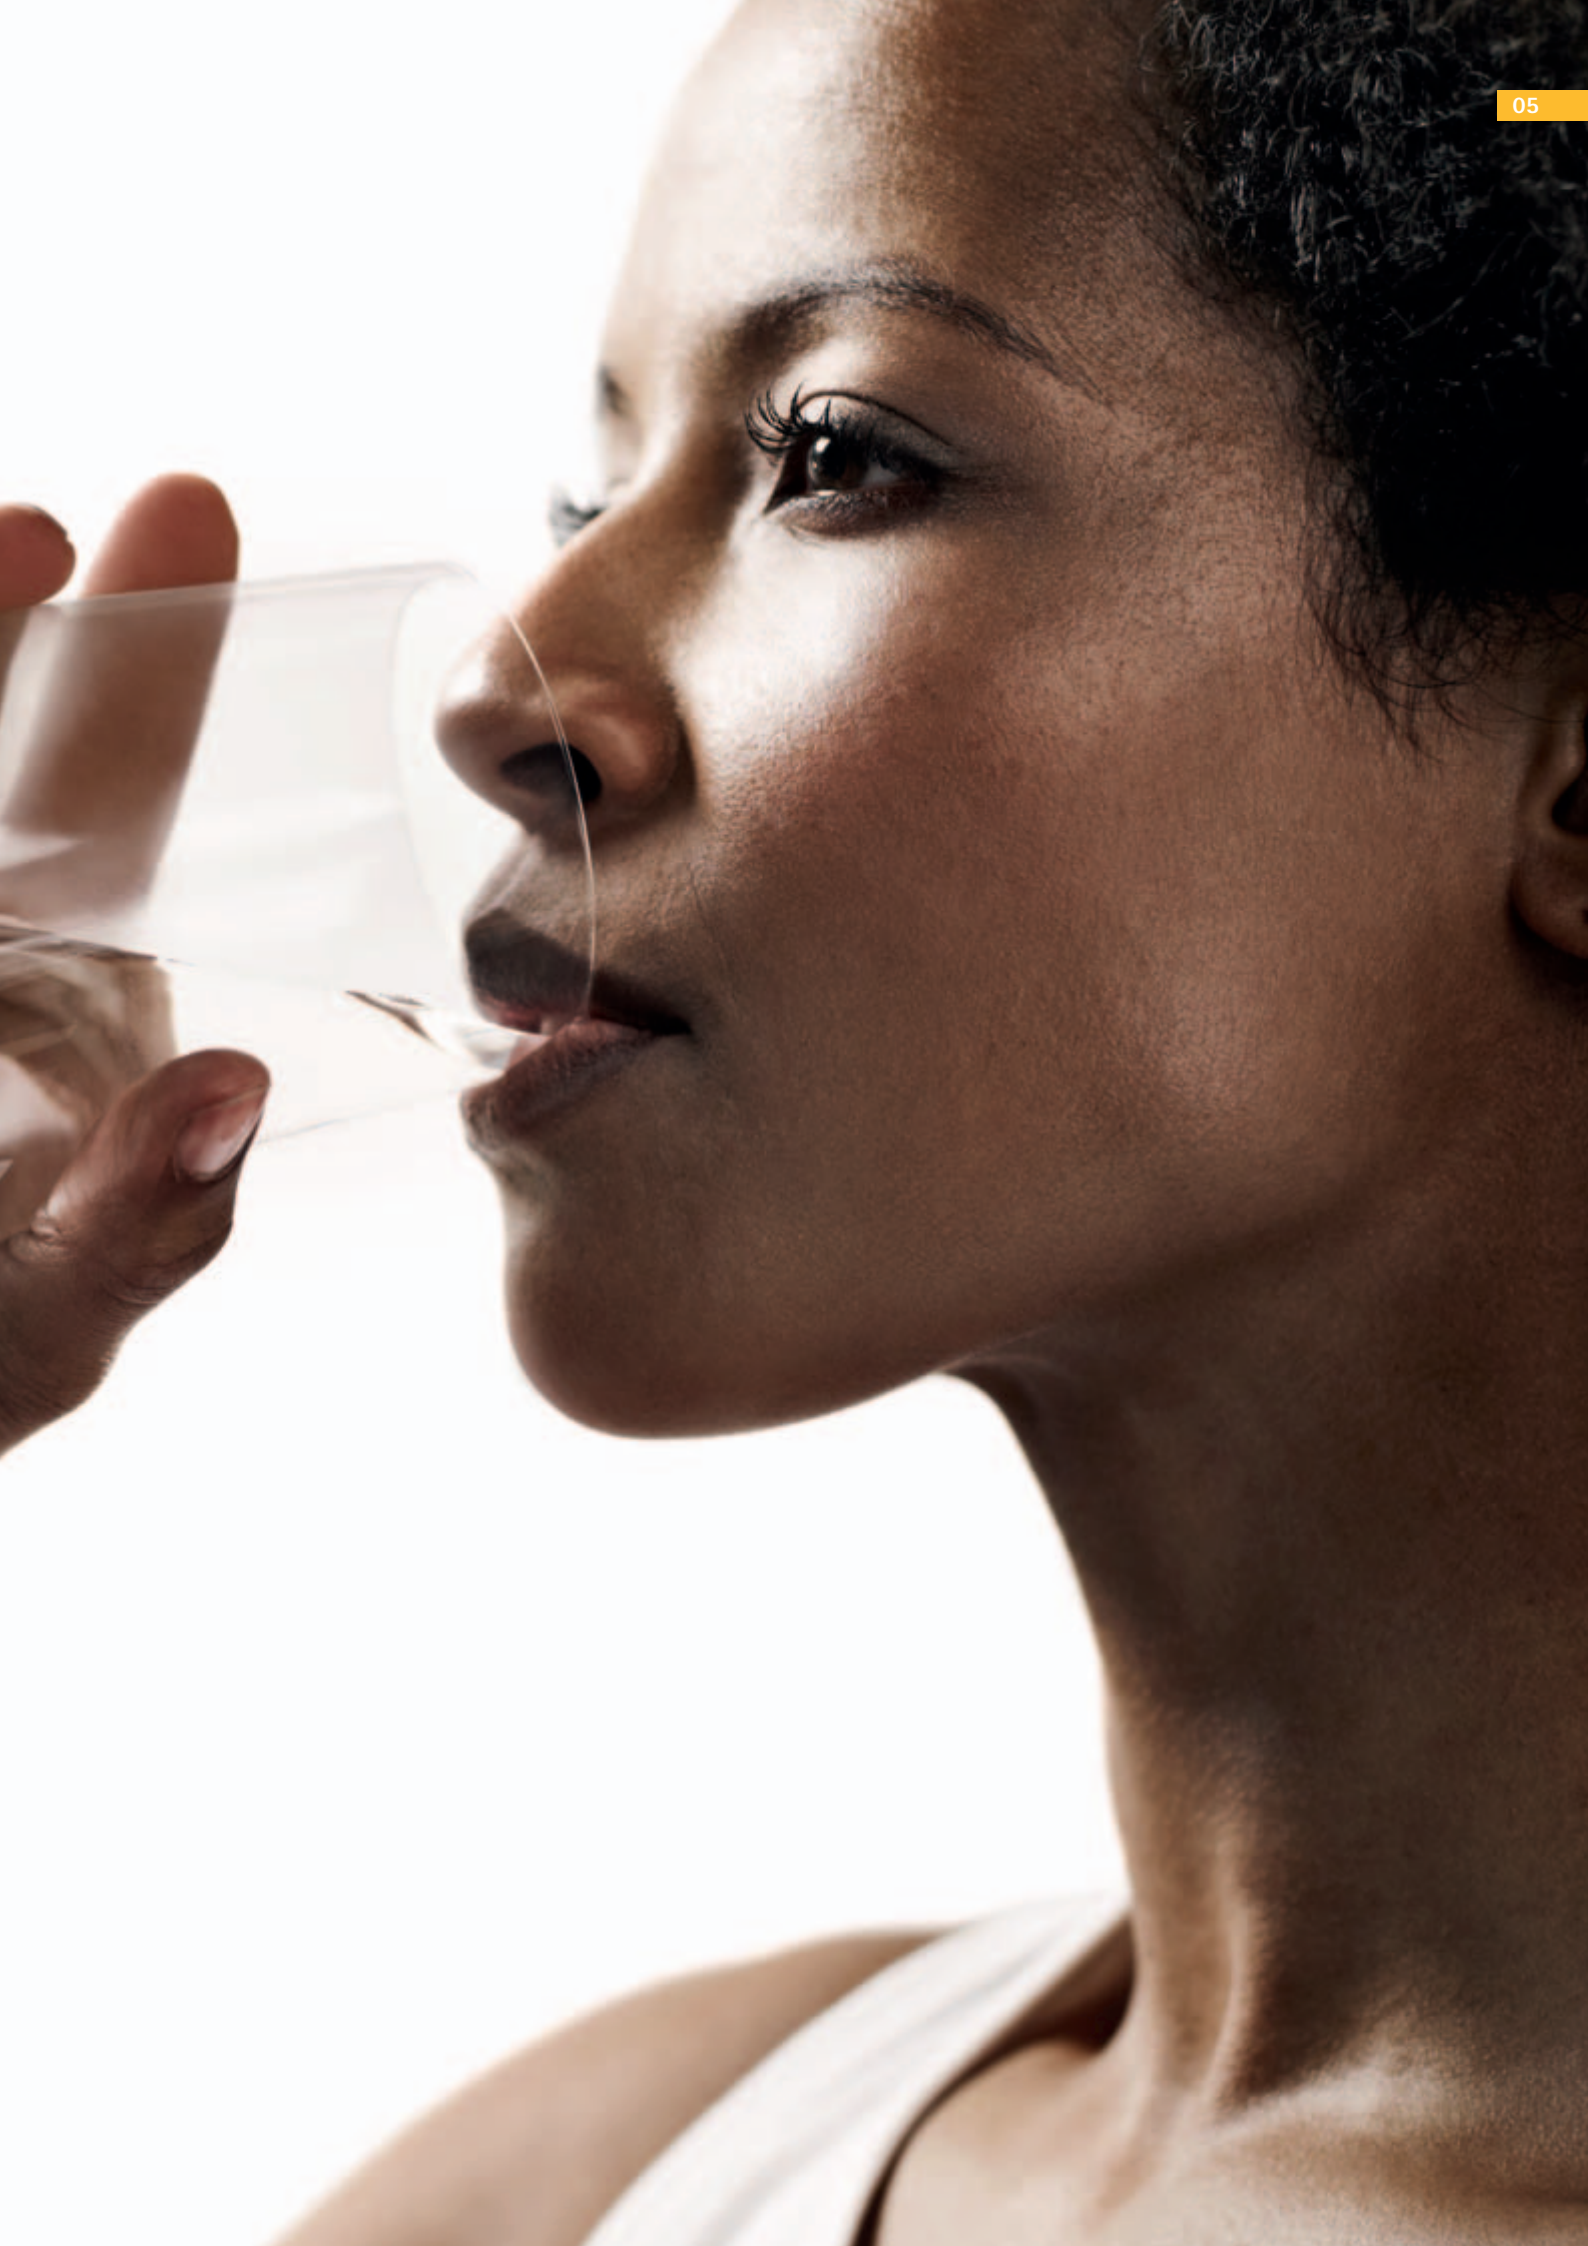

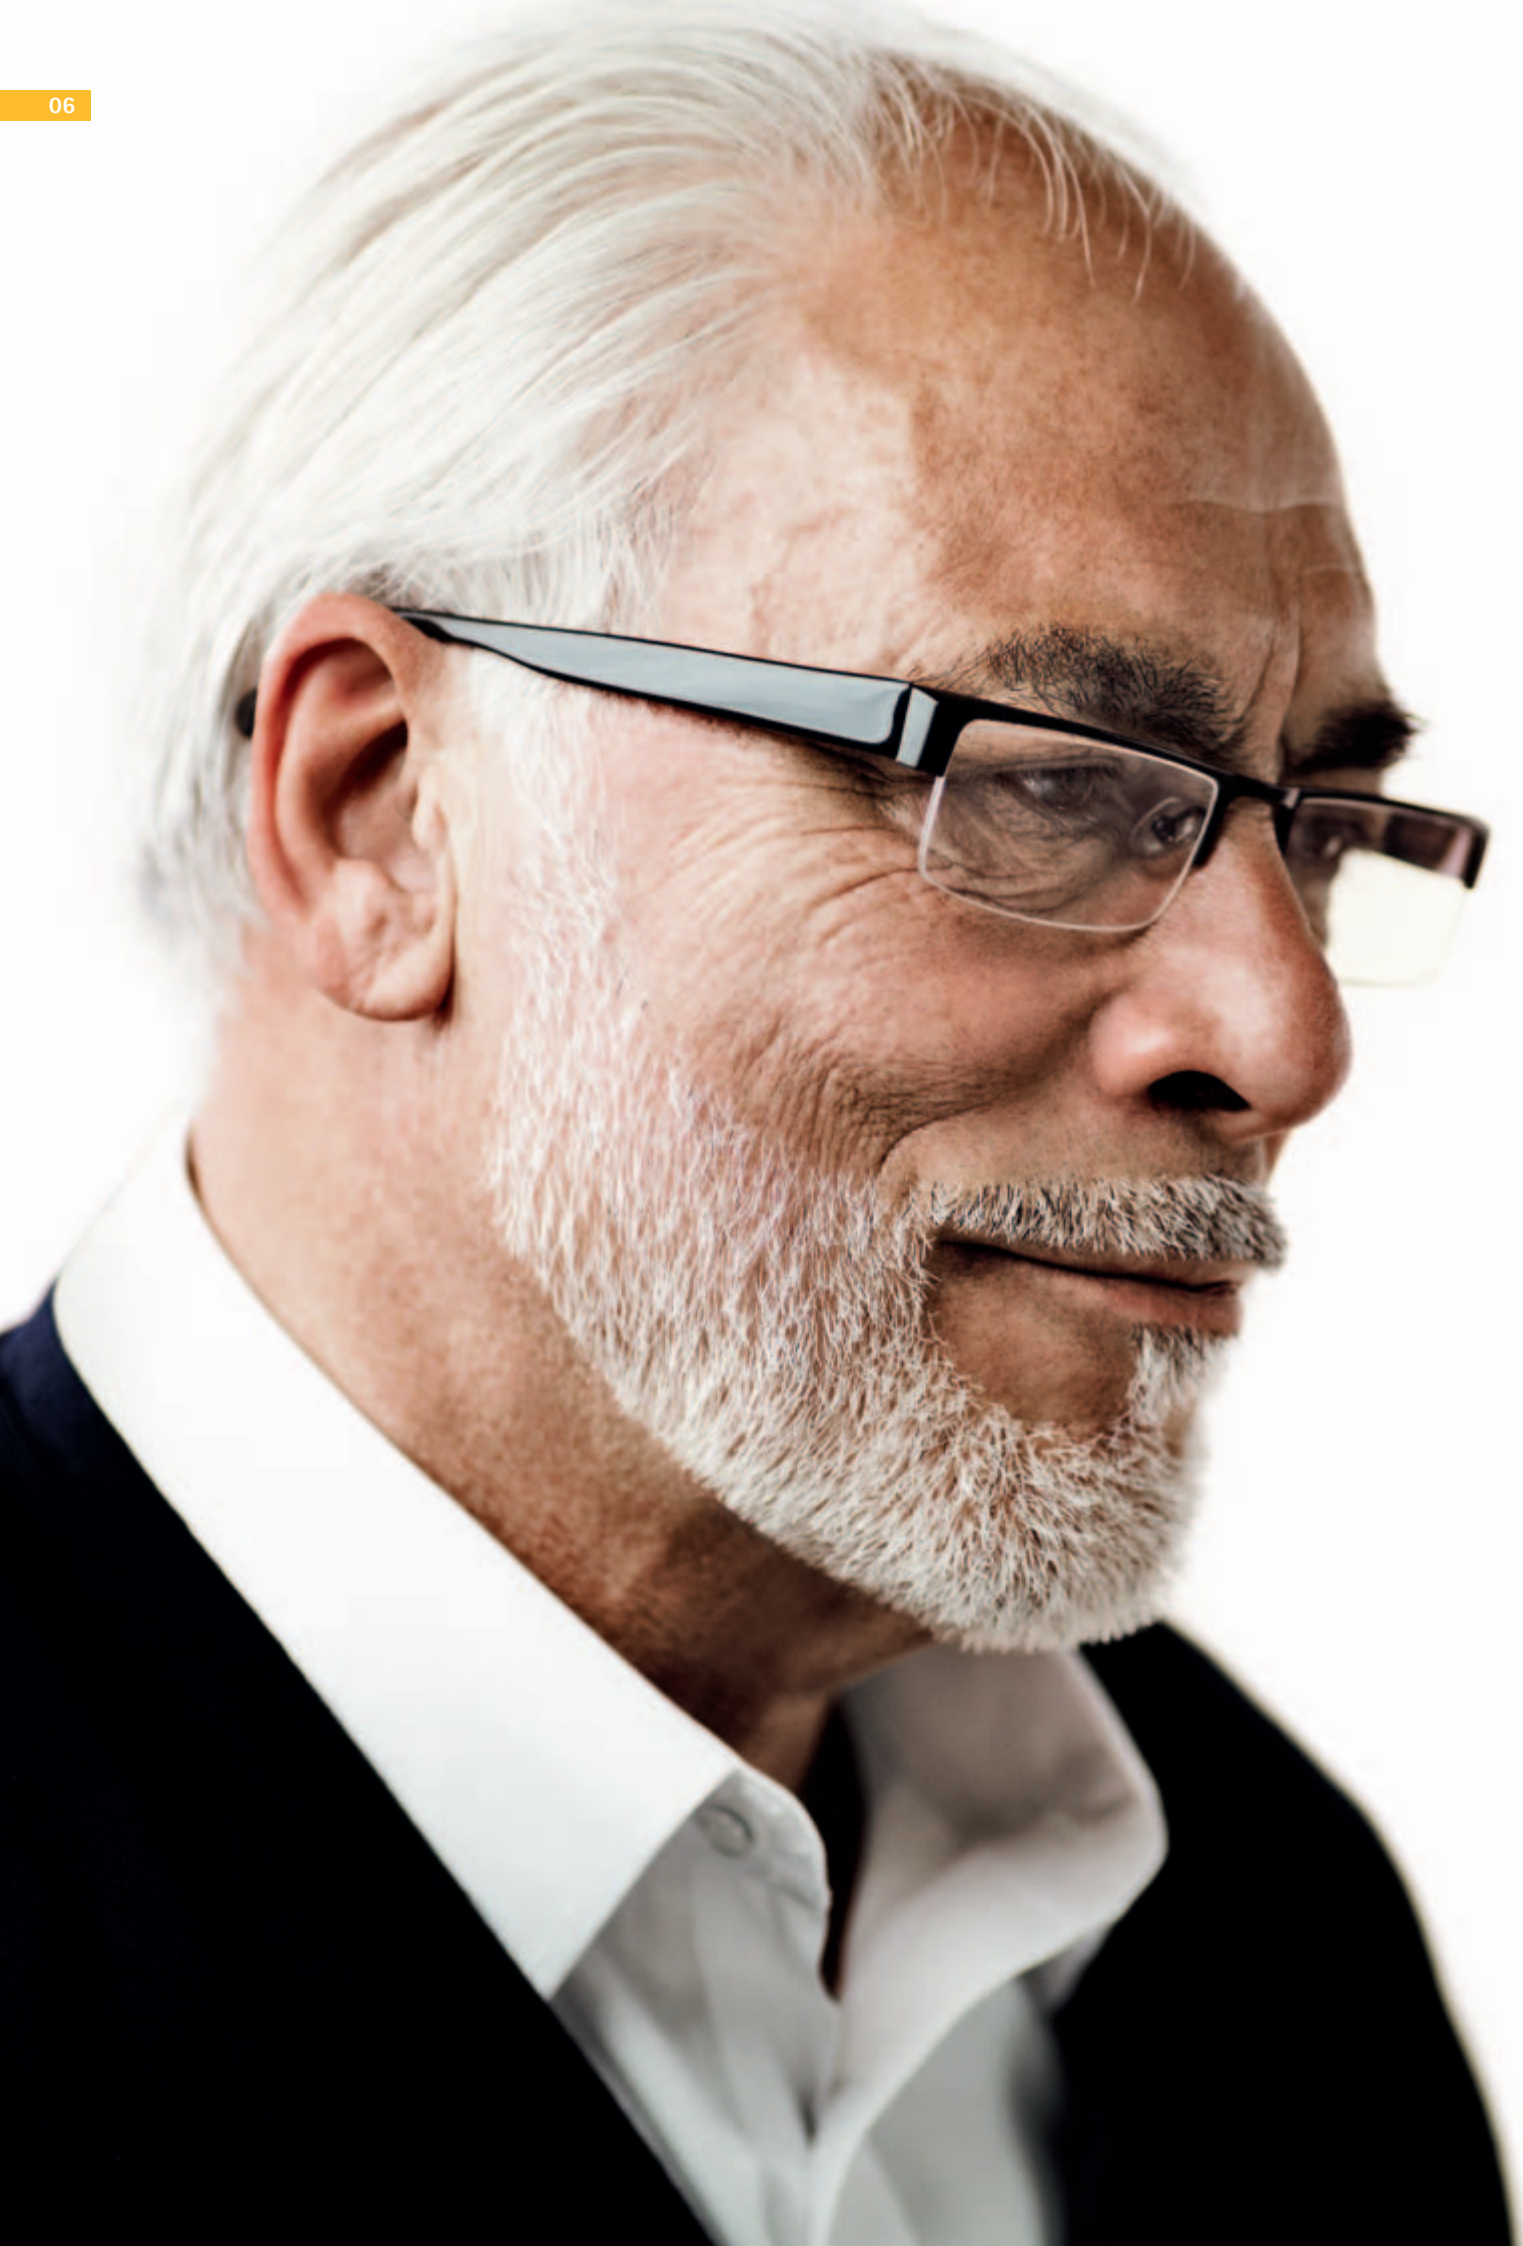



# WENN MAN SEIT ÜBER 300 JAHREN ERFOLGREICH AM MARKT IST, MUSS MAN SCHON EIN PAAR DINGE RICHTIG GEMACHT HABEN.

Wir haben Geschichte geschrieben. Aber das ist kein Grund, sich auszuruhen. Merck ist das älteste pharmazeutisch-chemische Unternehmen der Welt – seine Wurzeln reichen zurück in das Jahr 1668. Seitdem ist viel geschehen, wir haben eine Menge erreicht – und wir haben eine starke Zukunft vor uns.

- Mit dem Kauf der späteren Engel-Apotheke in Darmstadt – Keimzelle des Unternehmens und bis heute im Familienbesitz – wagt Friedrich Jacob Merck 1668 den Aufbruch.
- Um die Wende zum 18. Jahrhundert werden die Märkte stärker reguliert, der Verkauf von Arzneimitteln durch „Pfuscher, Bader und Krämer“ wird beschnitten – eine Chance für Apotheker mit unternehmerischem Weitblick.
- Den ersten Schritt von der Apotheke zum Weltunternehmen macht Emanuel Merck, der die Apotheke im Jahre 1816 übernimmt. Er leitet den Beginn der industriellen Produktion ein. In der Pharmazie legt er den Grundstein für den Übergang vom Handwerk zur Wissenschaft.

- Als Emanuel Merck stirbt, hat die Firma 50 Beschäftigte. Um 1900 arbeiten bereits 1.000 Mitarbeiter für das Unternehmen, dessen Produktpalette auf 10.000 Artikel angewachsen ist.
- Mit dem für das Unternehmen typischen Pioniergeist gründet Merck Ende des 19. Jahrhunderts zahlreiche Auslandsgesellschaften, darunter Merck & Co., die heute mit Merck nur noch den Namen gemein hat.
- In der zweiten Hälfte des 20. Jahrhunderts beginnen die Flüssigkristalle ihren Siegeszug.
- Durch die Übernahme der Schweizer Serono wird Merck zu einem weltweit führenden Biotechnologie-Unternehmen und dank der Akquisition der US-amerikanischen Millipore ein weltweit führendes Unternehmen der Life-Science-Industrie.
- Heute arbeiten für unser Unternehmen rund 40.000 Mitarbeiterinnen und Mitarbeiter. Sie werden auch in Zukunft mehr als nur ein paar Dinge richtig machen.

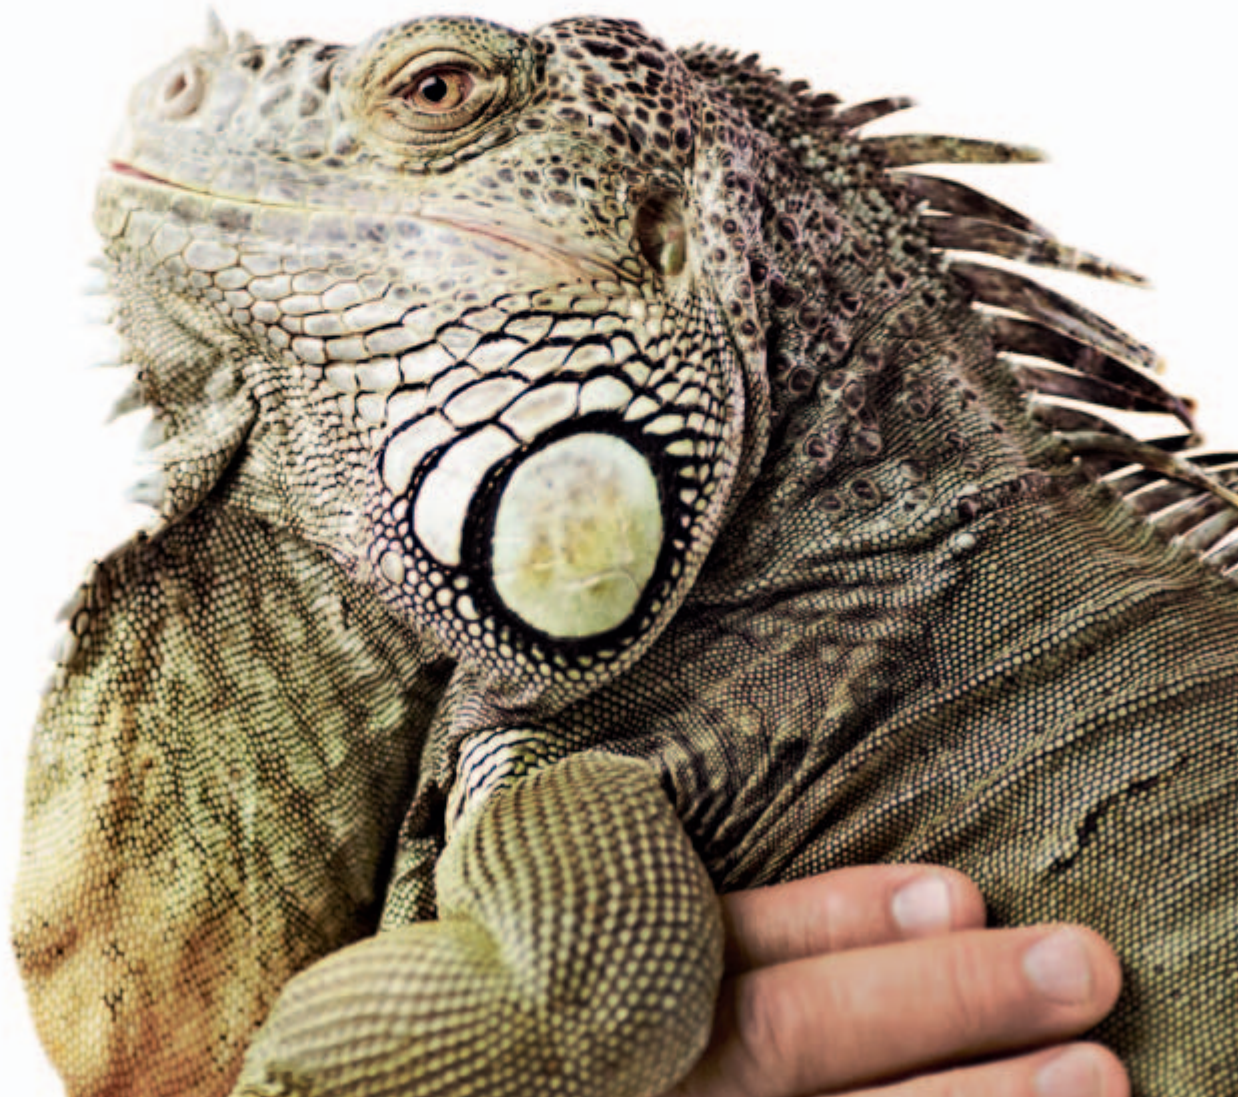



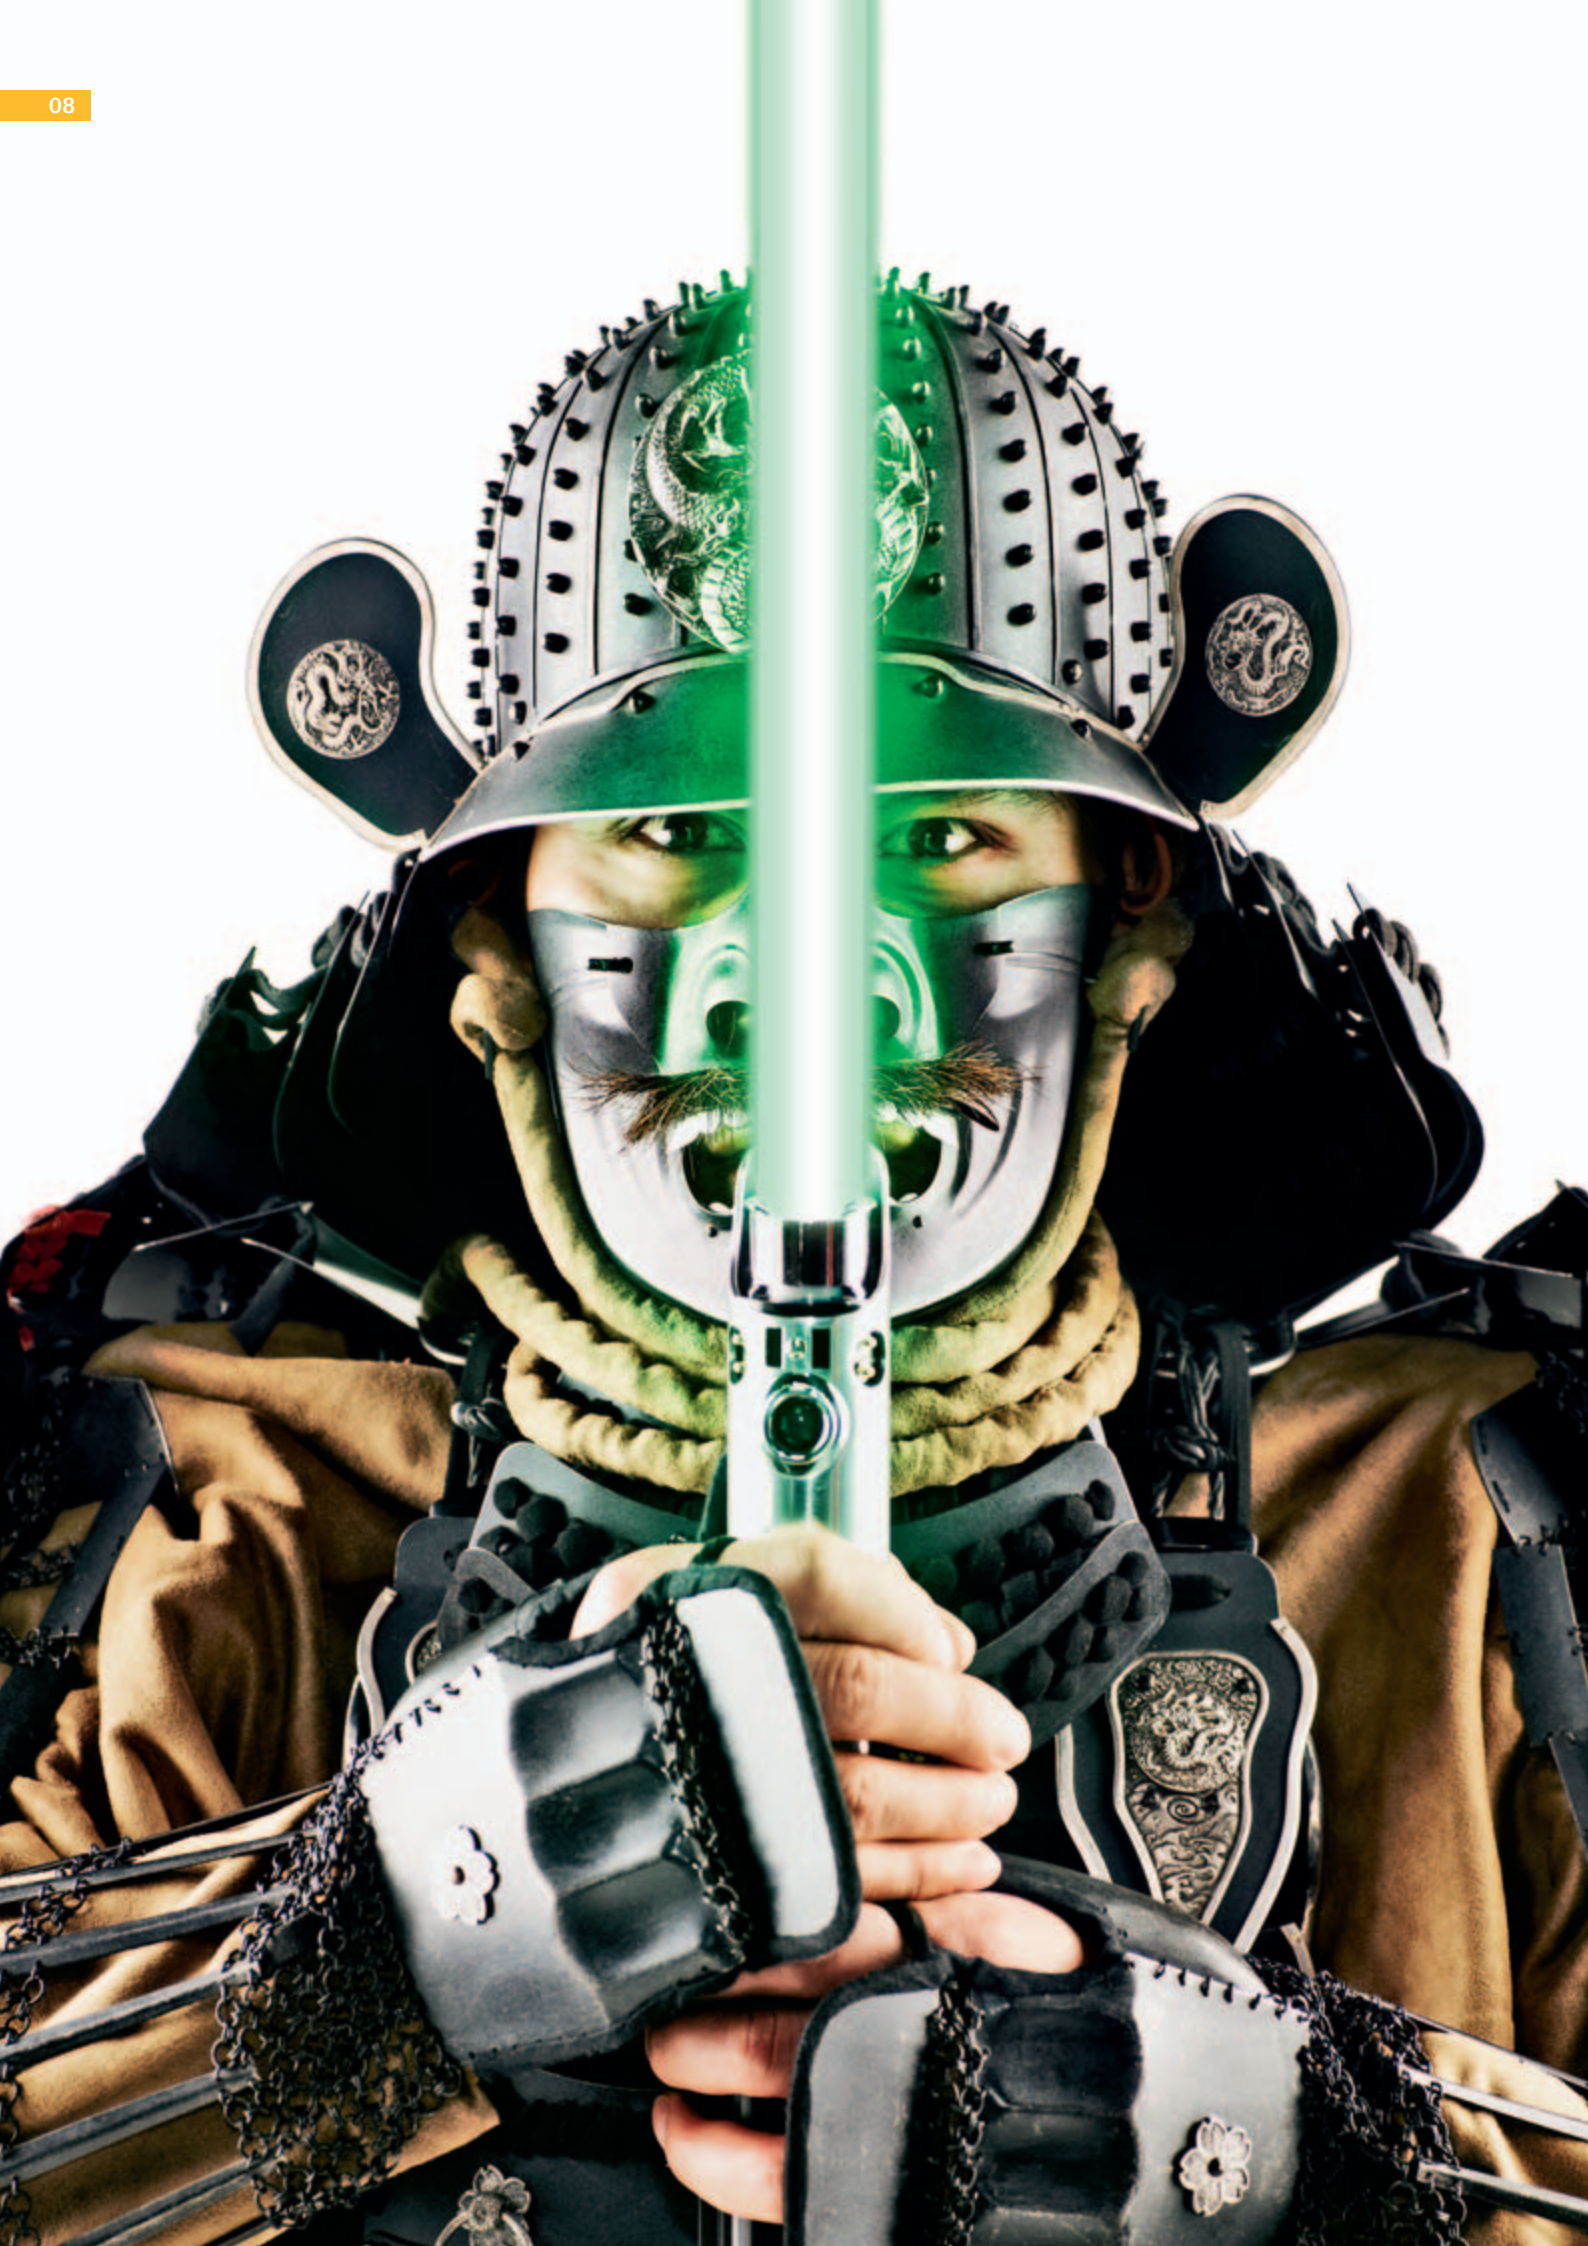



## GEGENSÄTZE ZIEHEN SICH AN. SEIT 1668.

**Unternehmerische Balance bedeutet auch: Gegensätzliches Denken.**

Unser Erfolg basiert im Wesentlichen auf dem, was viele für unvereinbar halten: Gegensätze, Dualität, die Gleichgewichtung zweier Welten. Das beginnt mit der bewussten Entscheidung für die beiden Standbeine Pharma und Chemie. Es setzt sich fort in einem erfolgreichen Nebeneinander von Tradition auf der einen Seite und Innovation auf der anderen. Oder von global geführten Geschäften und lokal gelebtem Unternehmertum. Es zeigt sich auch daran, wie wir bei der Integration unserer beiden größten Akquisitionen, Serono in Pharma und Millipore in der Chemie, das Beste aus zwei Welten miteinander vereinen konnten. Und es zeigt sich nicht zuletzt in der Dualität von Kapitalgesellschaft und Familienunternehmen.

Auf der einen Seite Forschergeist, auf der anderen die nötige Erfahrung. Auf der einen Seite Produkte, die das Leben vieler Menschen verbessern. Auf der anderen Seite steigern diese auch nachhaltig den Wert unseres Unternehmens. Und weil wir nicht nur Forscher und Entwickler, sondern auch zuverlässige Partner unserer Kunden sind, können wir Innovationen mit Markterfolg verbinden.

Wir sehen Gewinne als Chance, Verantwortung gegenüber allen zu übernehmen, die von unserem unternehmerischen Handeln berührt sind. Wir übernehmen Verantwortung für unsere Produkte, unsere Mitarbeiter und unsere Umwelt. Und wir übernehmen Verantwortung in der Gesellschaft, in der wir leben. Denn nicht nur Eigentum, sondern auch unternehmerischer Erfolg verpflichtet.

Merck bekennt sich ausdrücklich zu den zehn Prinzipien des „United Nations Global Compact“: Faire Arbeitsbeziehungen, Respektierung der Menschenrechte und weltweiter Umweltschutz seien hier nur stellvertretend genannt für diese Prinzipien verantwortungsbewussten Handelns weltweit tätiger Unternehmen.

2007 haben wir mit der Weltgesundheitsorganisation (WHO) eine Partnerschaft geschlossen, um die Bilharziose bei afrikanischen Kindern zu bekämpfen. Im Rahmen dieser Partnerschaft stellt Merck binnen zehn Jahren 200 Millionen Tabletten Cesol® 600 mit dem Wirkstoff Praziquantel kostenlos bereit. Das entspricht einem Wert von zirka 80 Millionen US-Dollar und ermöglicht die Behandlung von 27 Millionen Kindern. Nach der Malaria ist die durch Würmer verursachte Bilharziose die in Afrika am weitesten verbreitete Tropenkrankheit, unter der vor allem Kinder zu leiden haben.

Ein weiteres Beispiel ist die exklusive Unterstützung des Global Pharma Health Fund e.V., der mobile Kompaktlabore namens „Minilab“ weltweit gegen Arzneimittelfälschungen zum Einsatz bringt.

Sie sehen: Das bewusste Leben von Gegensätzen kann ganz schön produktiv sein.

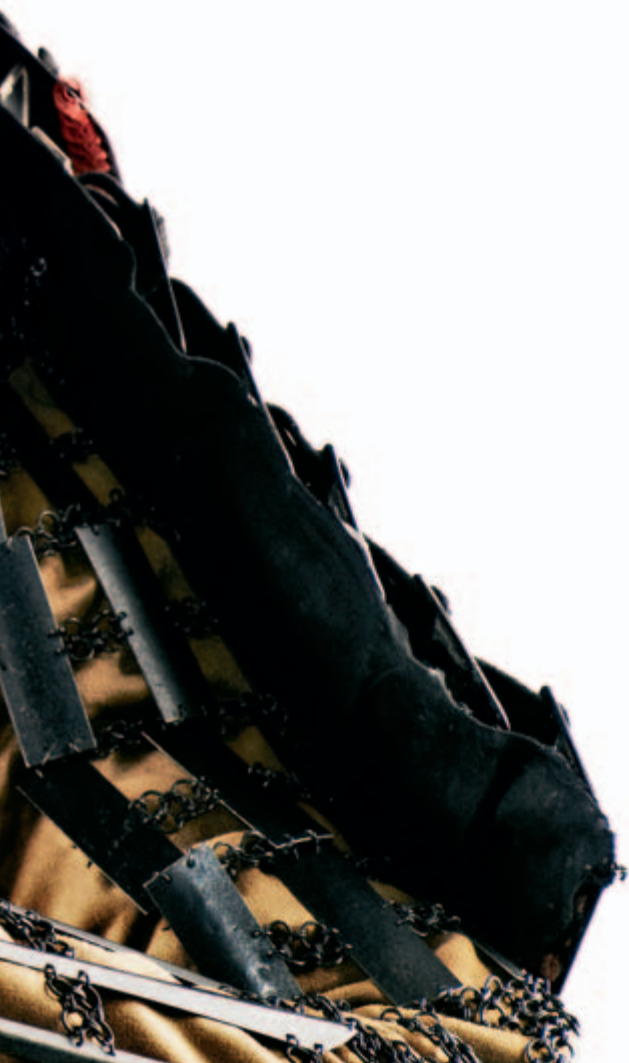

# UNSERE STRATEGIE FÜR DIE ZUKUNFT: WIR WISSEN, WAS WIR TUN – UND WARUM.

Nicht aufhören zu lernen. Das ist der einzig richtige Weg. Unsere Wachstumskraft beziehen wir bis heute aus der Balance zwischen Bewährtem und Neuem, zwischen Tradition, Fortführen und neuem Denken. Der Merck-Weg – oder das Geheimnis, wie ein Unternehmen auch nach mehr als 340 Jahren immer noch erfolgreich am Markt agiert – beruht für uns auf drei Grundsätzen:

■ **Bewahren:** Zu bewahren gilt es unser vor Ort gelebtes Unternehmertum, die strikte Kundenorientierung sowie die Loyalität unserer Mitarbeiter, die uns außerordentlich wichtig ist.

■ **Verändern:** Veränderungen erfolgen in dem Maße, wie wir unsere Geschäfte weltweit ausbauen sowie flexibel auf Kundenanforderungen reagieren. Und wie wir die dafür notwendigen Prozesse modernisieren sowie Organisationen jetzt und zukünftig strukturieren.

■ **Wachsen:** Unsere Wachstumschancen ergeben sich durch Innovationen, die Stärken unserer Präsenz in ausgewählten Märkten und durch Akquisitionen.

Als Kernkompetenzen sehen wir unsere Fähigkeit zur Innovation, unser traditionell hohes Qualitätsbewusstsein, unsere einzigartige Unternehmenskultur und unser partnerschaftliches Denken, das den Blick schärft für die Bedürfnisse von Kunden, Verbrauchern und Patienten.

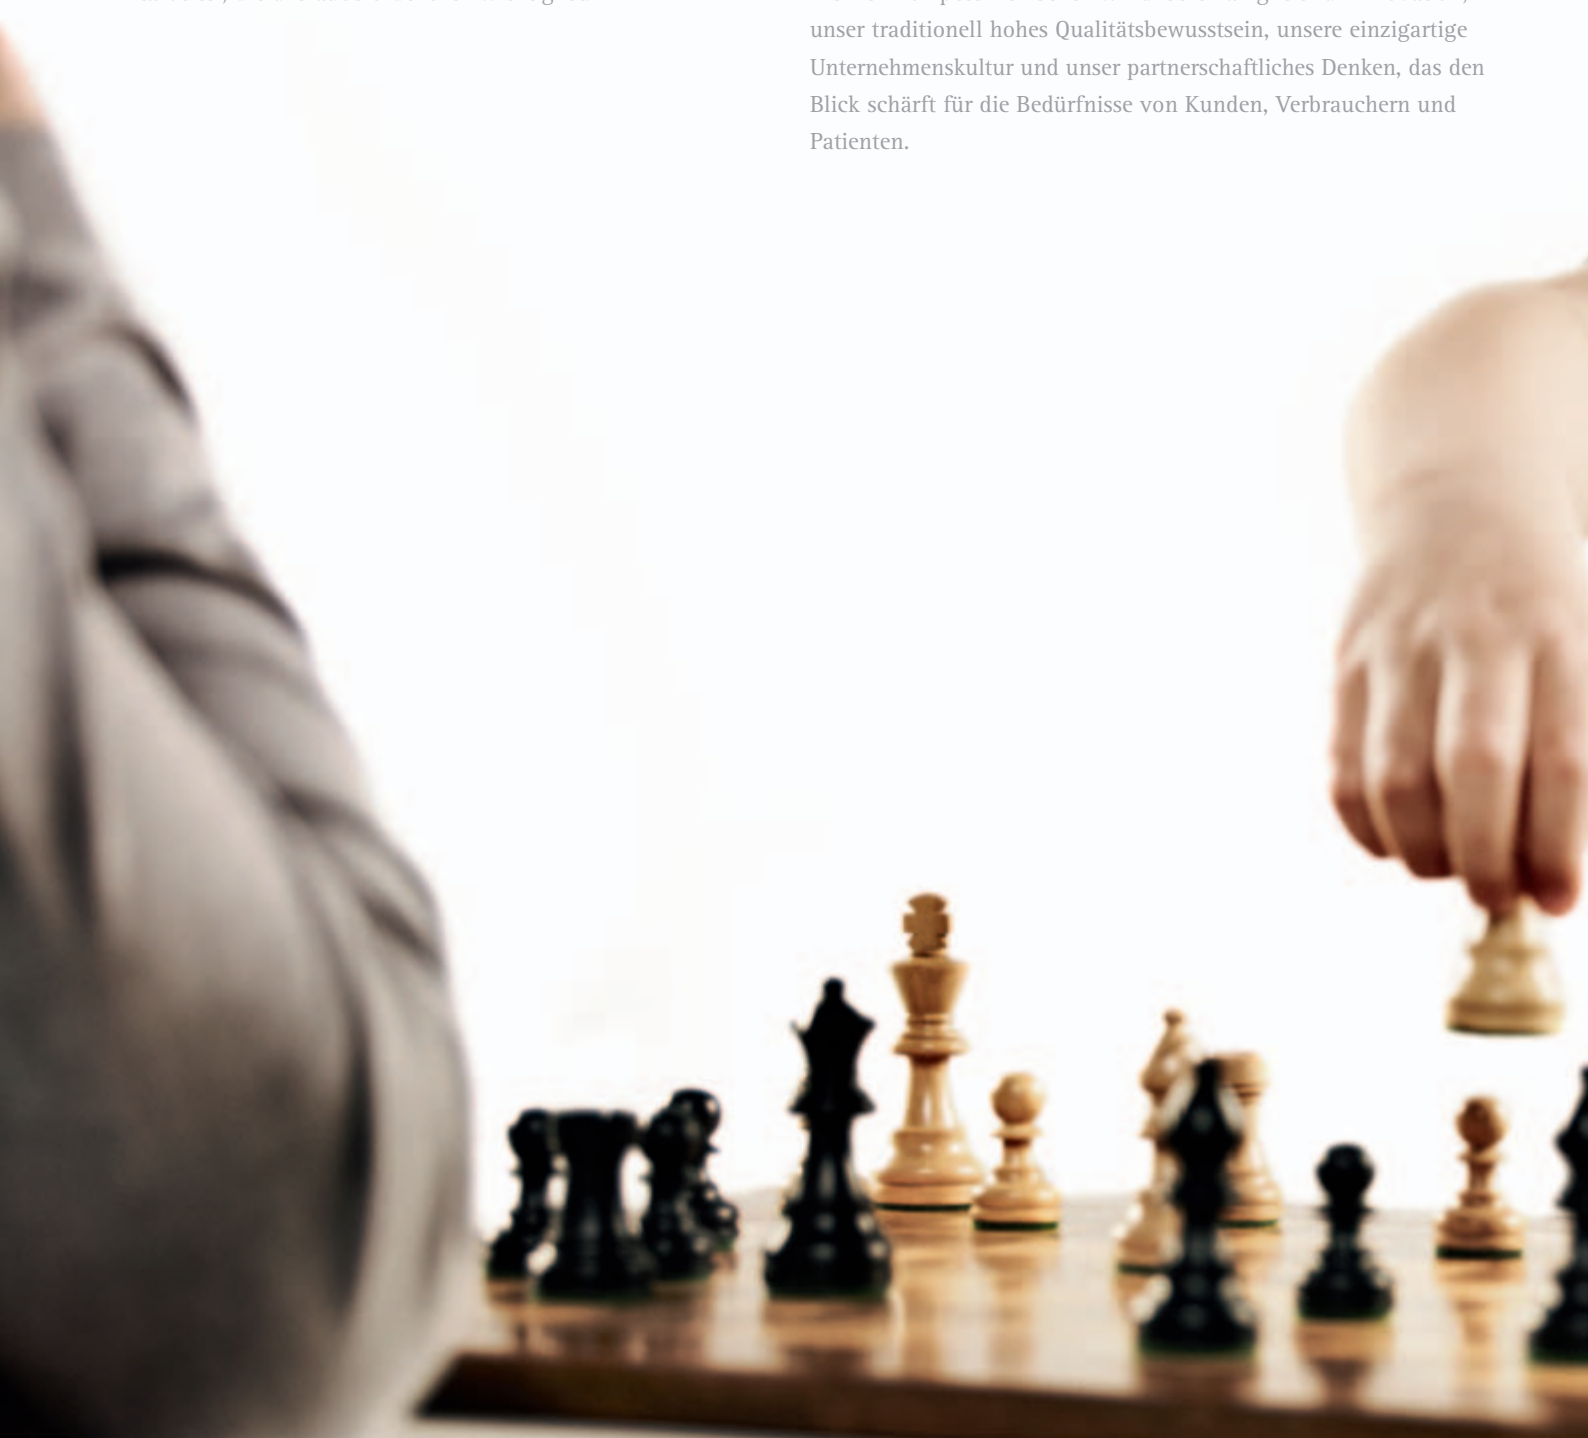



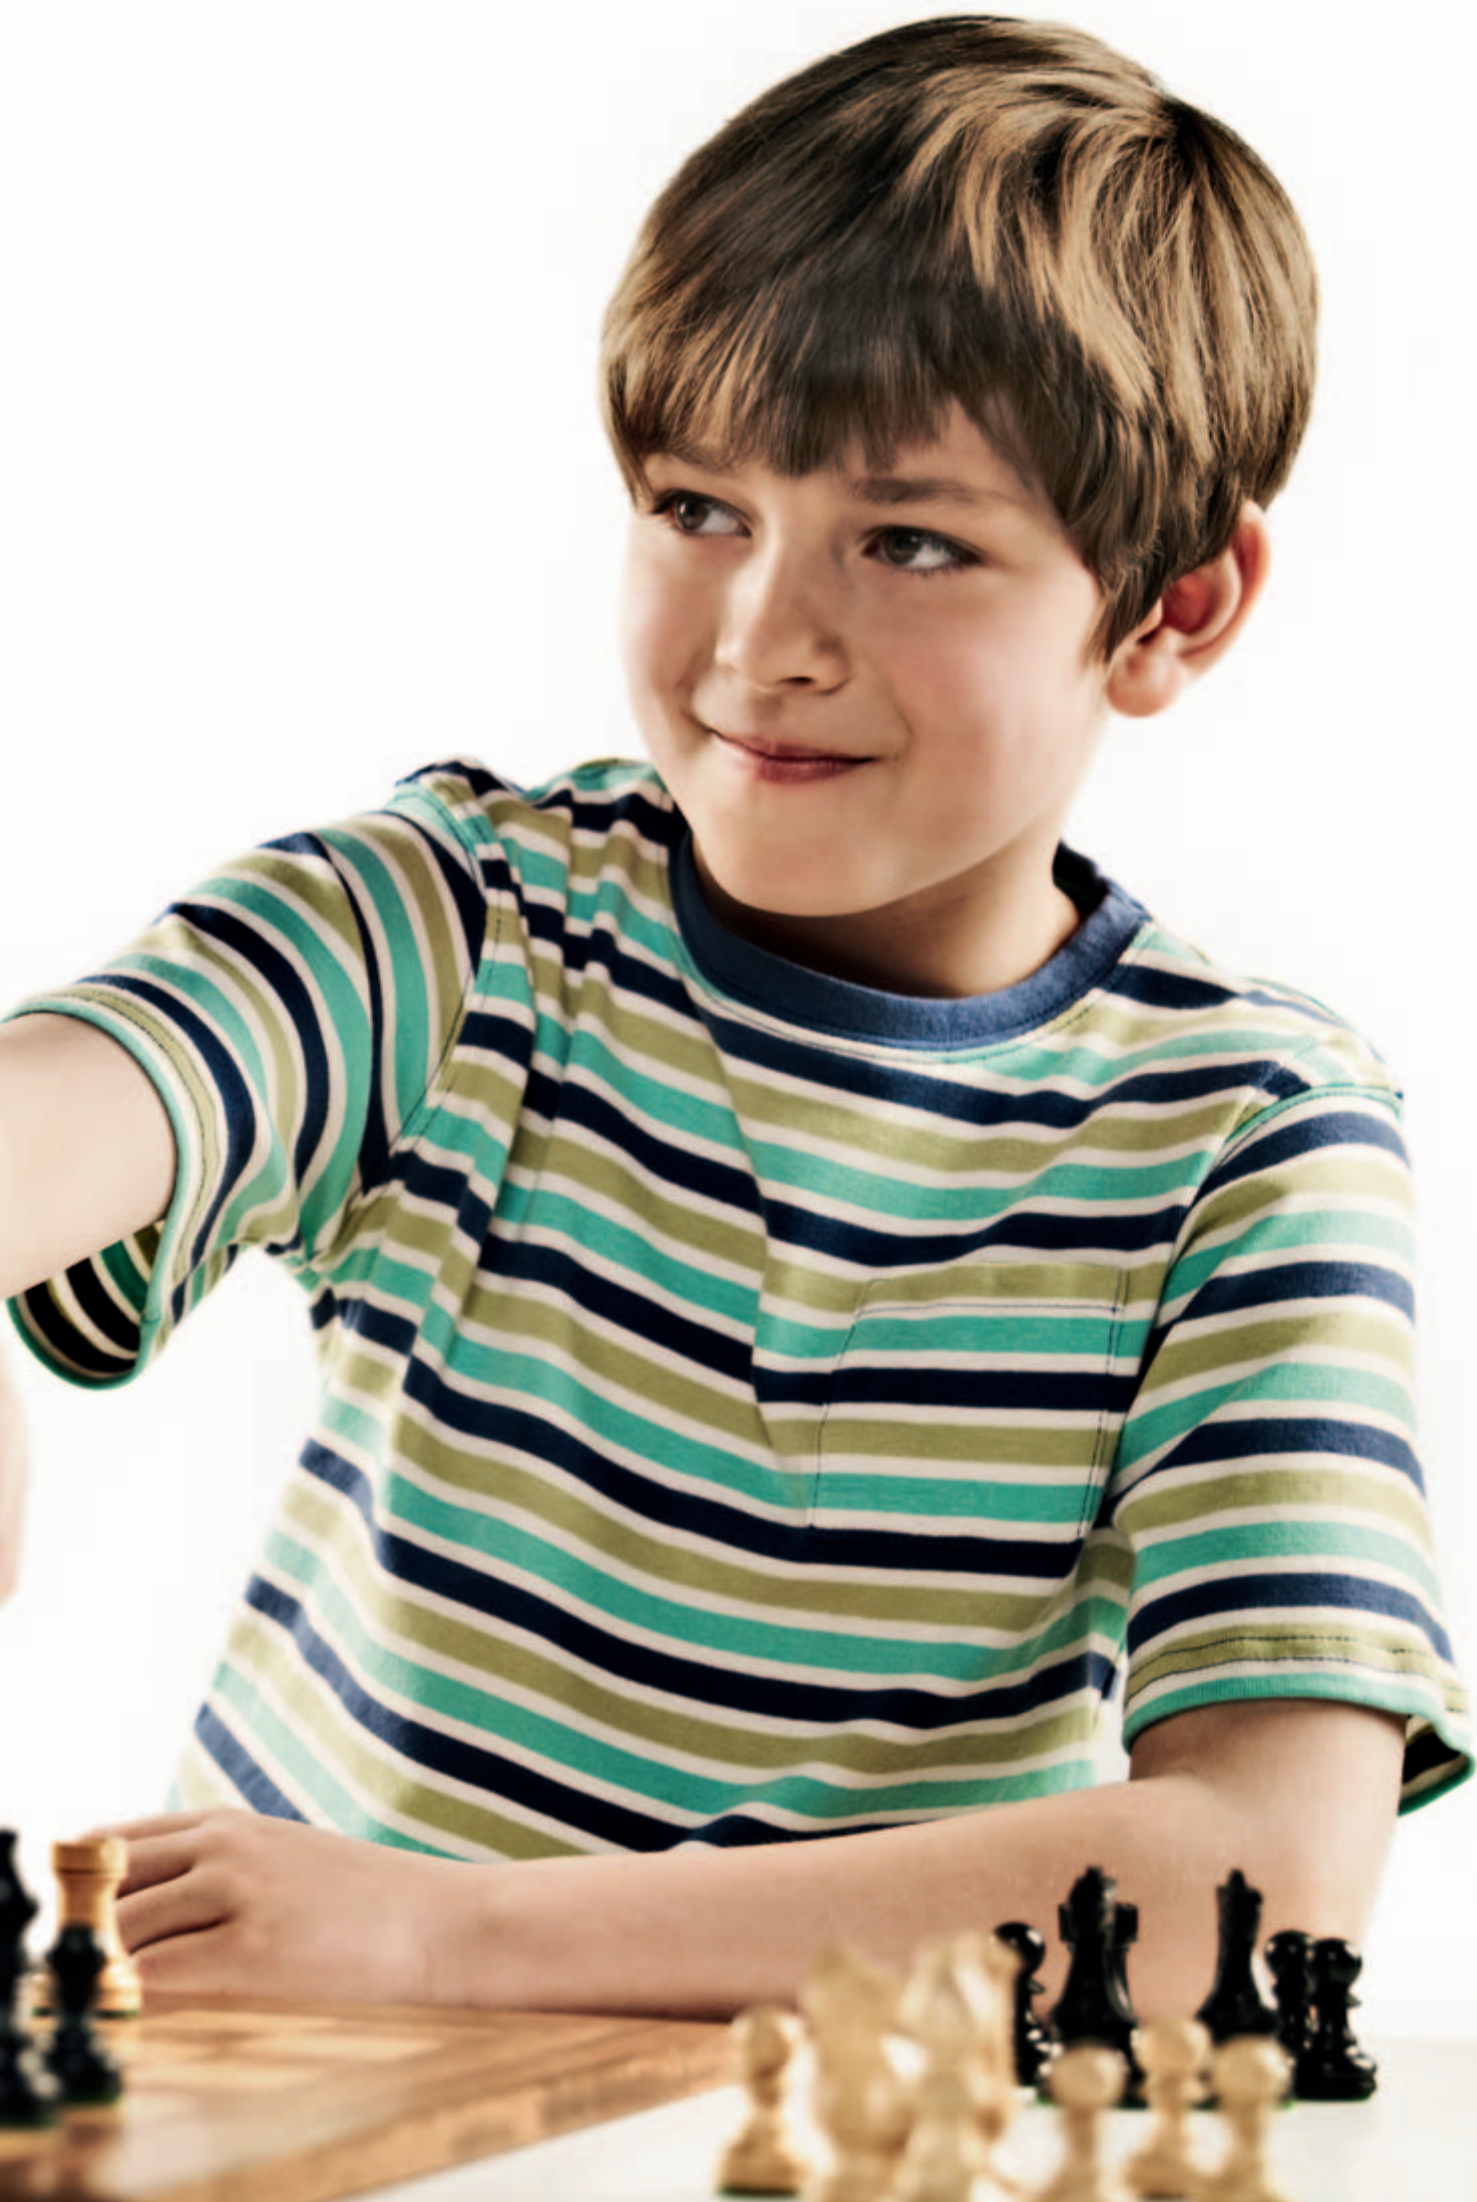

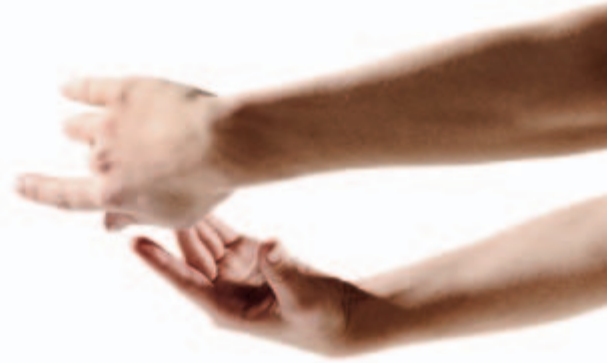

## VERTRAUEN, QUALITÄT, SICHERHEIT: DER WERT EINER STARKEN MARKE IST UNBEZAHLBAR.

**Merck – eine Qualitätsmarke, die weltweit Vertrauen schafft und genießt.** Auch wenn sie in keiner Bilanz steht, ist sie doch einer unserer bedeutendsten Vermögenswerte: die Marke Merck. Seit Friedrich Jacob Merck im Jahr 1668 den Grundstein legte, steht der Name Merck für Arzneimittel und chemische Produkte, die für das Leben von Menschen und für das Unternehmen unschätzbare Werte geschaffen haben.

Im Chemie-Geschäft gilt unsere Marke seit Generationen als Garant für höchste Qualität und Zuverlässigkeit, für Innovation und Kundennähe.

Im Arzneimittel-Markt hat unsere Marke eine lange Tradition. Nicht nur bei Selbstmedikationsprodukten aus der Apotheke, sondern auch und gerade bei rezeptpflichtigen Arzneimitteln. Heute steht Merck für innovative Therapien – sowohl aus der pharmazeutischen Chemie als auch aus der Biotechnologie.

Aufgrund unserer einzigartigen Geschichte gibt es heute zwei Unternehmen mit dem Namen Merck, die auf den gleichen Märkten tätig sind. „Unser“ Merck – gewissermaßen das Original – und das Pharmaunternehmen Merck & Co. in den USA. Die beiden Unternehmen haben sich über die territorialen Grenzen der Verwendung des Namens geeinigt: Die Rechte für Nordamerika liegen bei Merck & Co., im Rest der Welt haben wir das Recht am Namen Merck. Deshalb benutzen wir zwei Unternehmensmarken: „EMD“ – die Initialen von Emanuel Merck, Darmstadt – für Gesellschaften der Merck-Gruppe in Nordamerika und „Merck“ in der übrigen Welt.

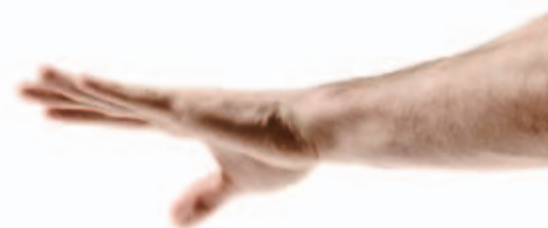



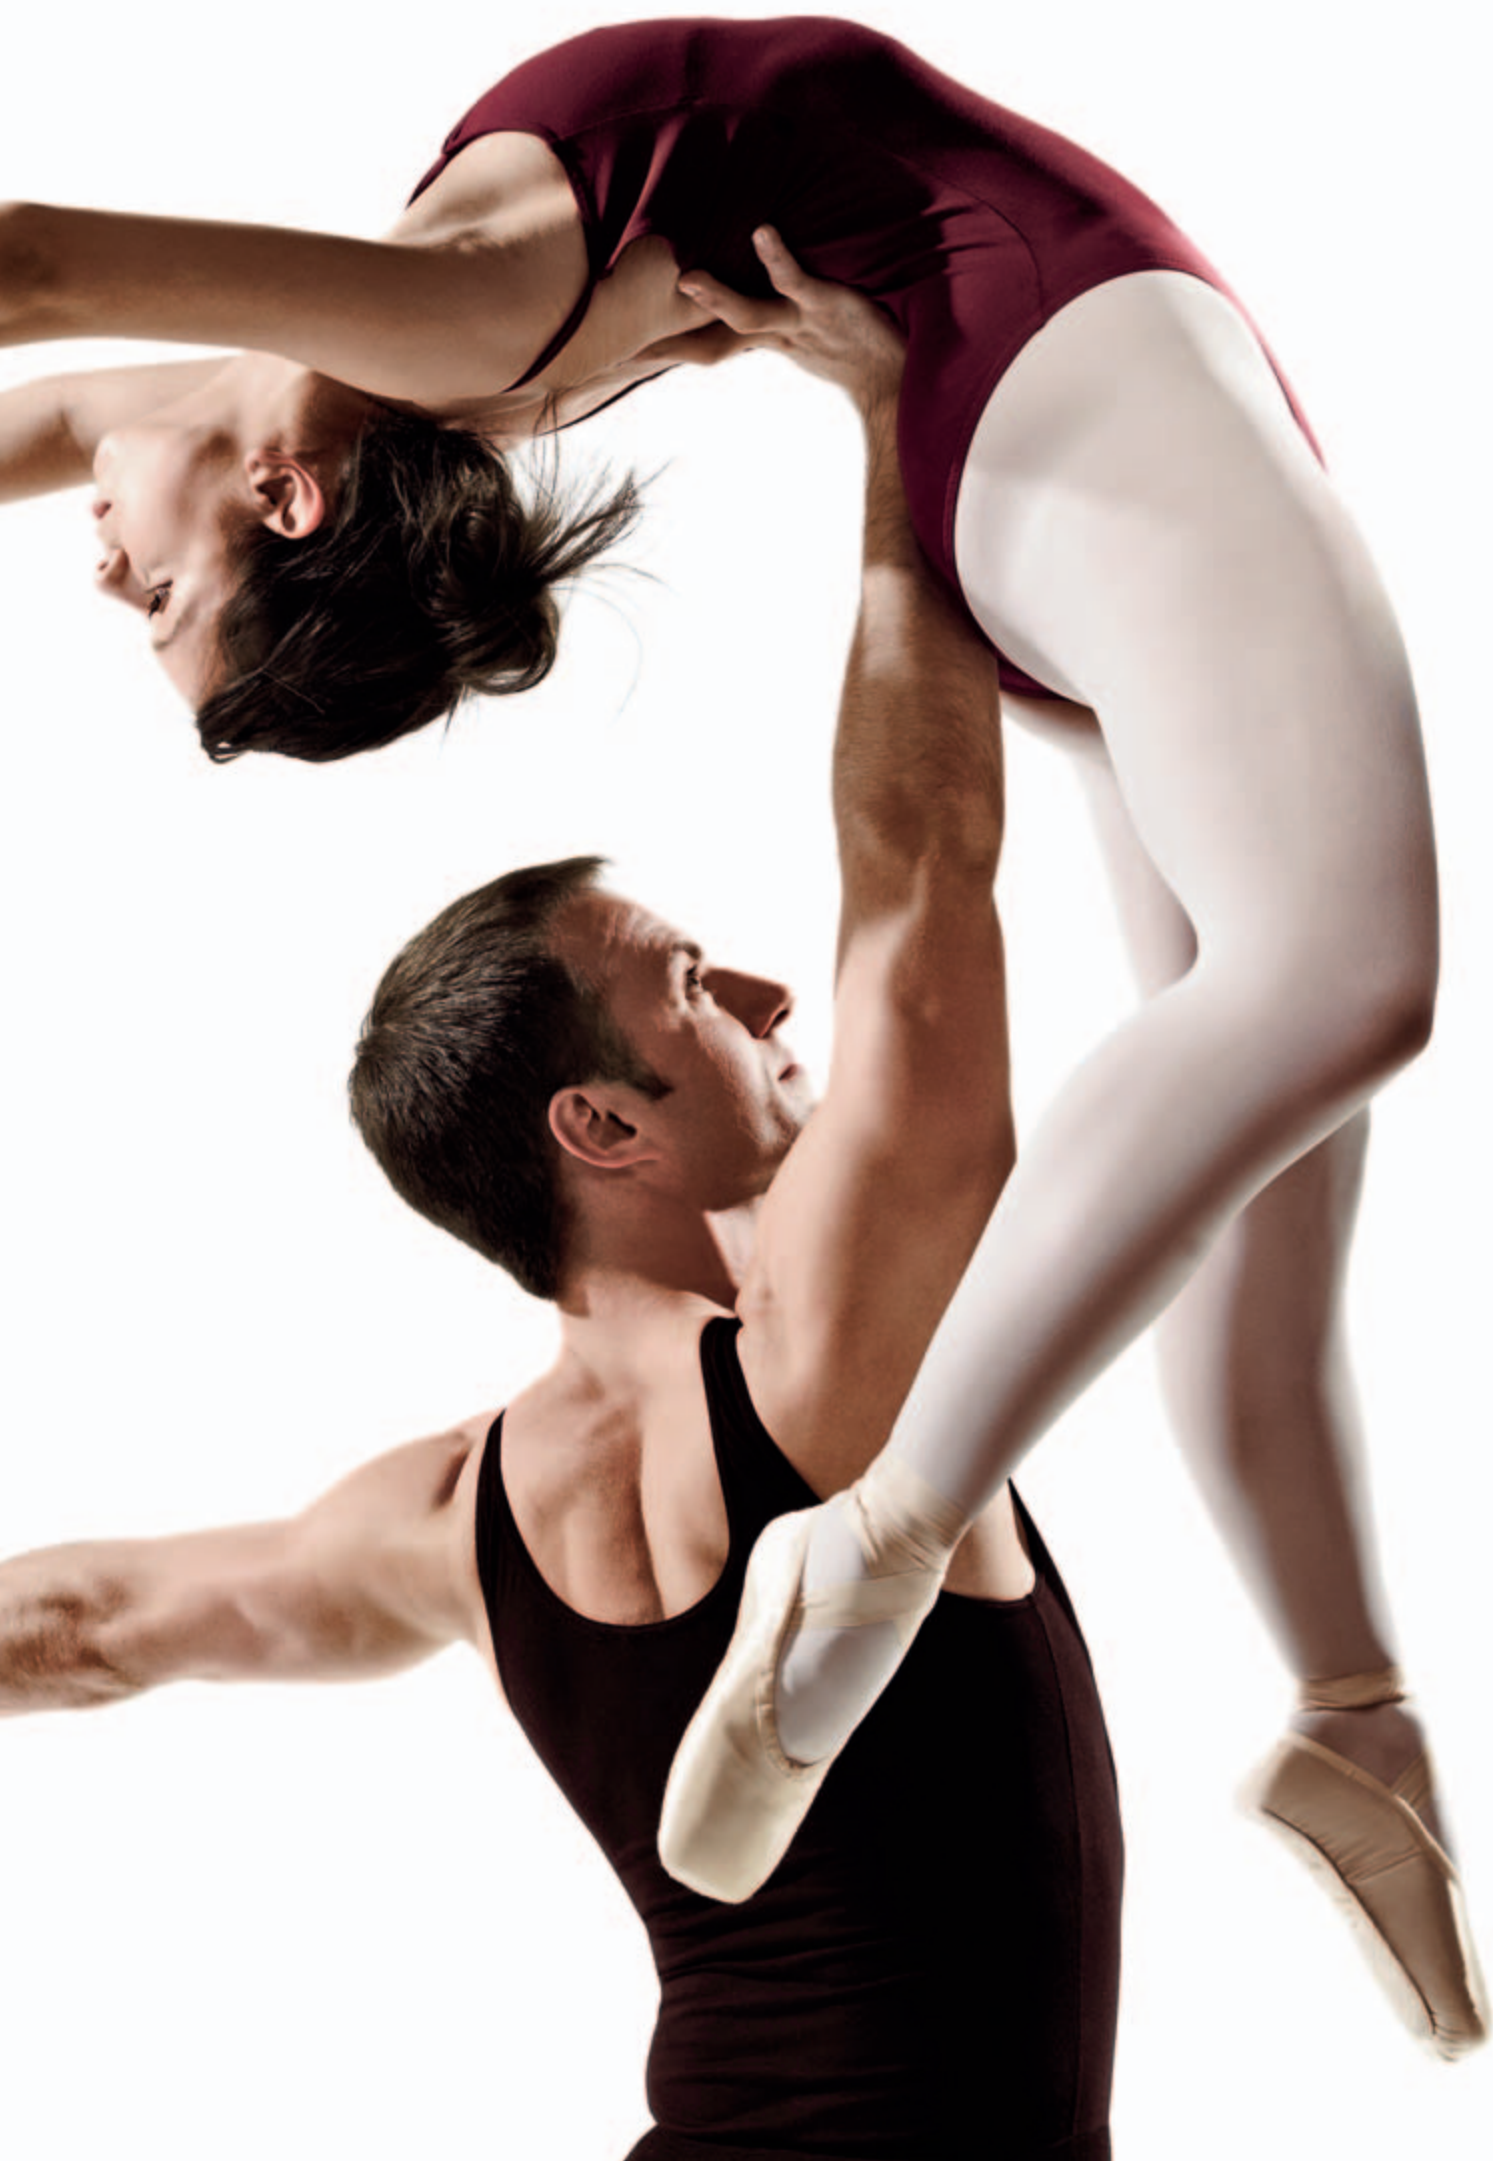

## VIELE ERFOLGREICHE UNTERNEHMEN BEGLEITEN DEN WANDEL IN GESELLSCHAFT, FORSCHUNG UND TECHNIK. WIR INITIIEREN UND GESTALTEN IHN.

Gute Geschäfte zu machen sollte vor allem bedeuten, sein Geschäft gut zu machen. Merck ist ein Wirtschaftsunternehmen. Selbstverständlich wollen wir Gewinn erzielen – um unsere Zukunft und die der Gesellschaft, in der wir leben, mitzugestalten. Wir erstreben unternehmerischen Erfolg, der auf gelebten Werten basiert und wirtschaftliche Werte schafft. Genau das ist unser Unternehmenszweck: Gute Geschäfte zu machen – indem wir unser Geschäft gut machen. Im doppelten Sinne eben.

Dabei setzen wir bewusst auf zwei Unternehmensbereiche: Pharma und Chemie. Denn in beiden Märkten haben wir das Wissen und die Erfahrung, als Vorreiter, gemeinsam mit unseren Kunden, neue Produkte

zu entwickeln, die das Leben der Menschen nachhaltig verbessern. Gleichzeitig streuen wir mit den zwei Arbeitsfeldern das unternehmerische Risiko unserer Eigentümer. Was übrigens auch unseren Kunden und Mitarbeitern Sicherheit gibt. Nicht zuletzt darauf basiert die Zuverlässigkeit von Merck.

Maßgebliche Innovationen in Forschung und Entwicklung, unsere Kompetenz in der Produktion und die Kundennähe beim Vertrieb prägen die Marktpräsenz von Merck. Aber über allem stehen die Fähigkeit und der Wille unserer Mitarbeiter, die Bedürfnisse von Verbrauchern und Patienten immer wieder zu hinterfragen, zu erkennen und zu erfüllen – für noch mehr Lebensqualität.



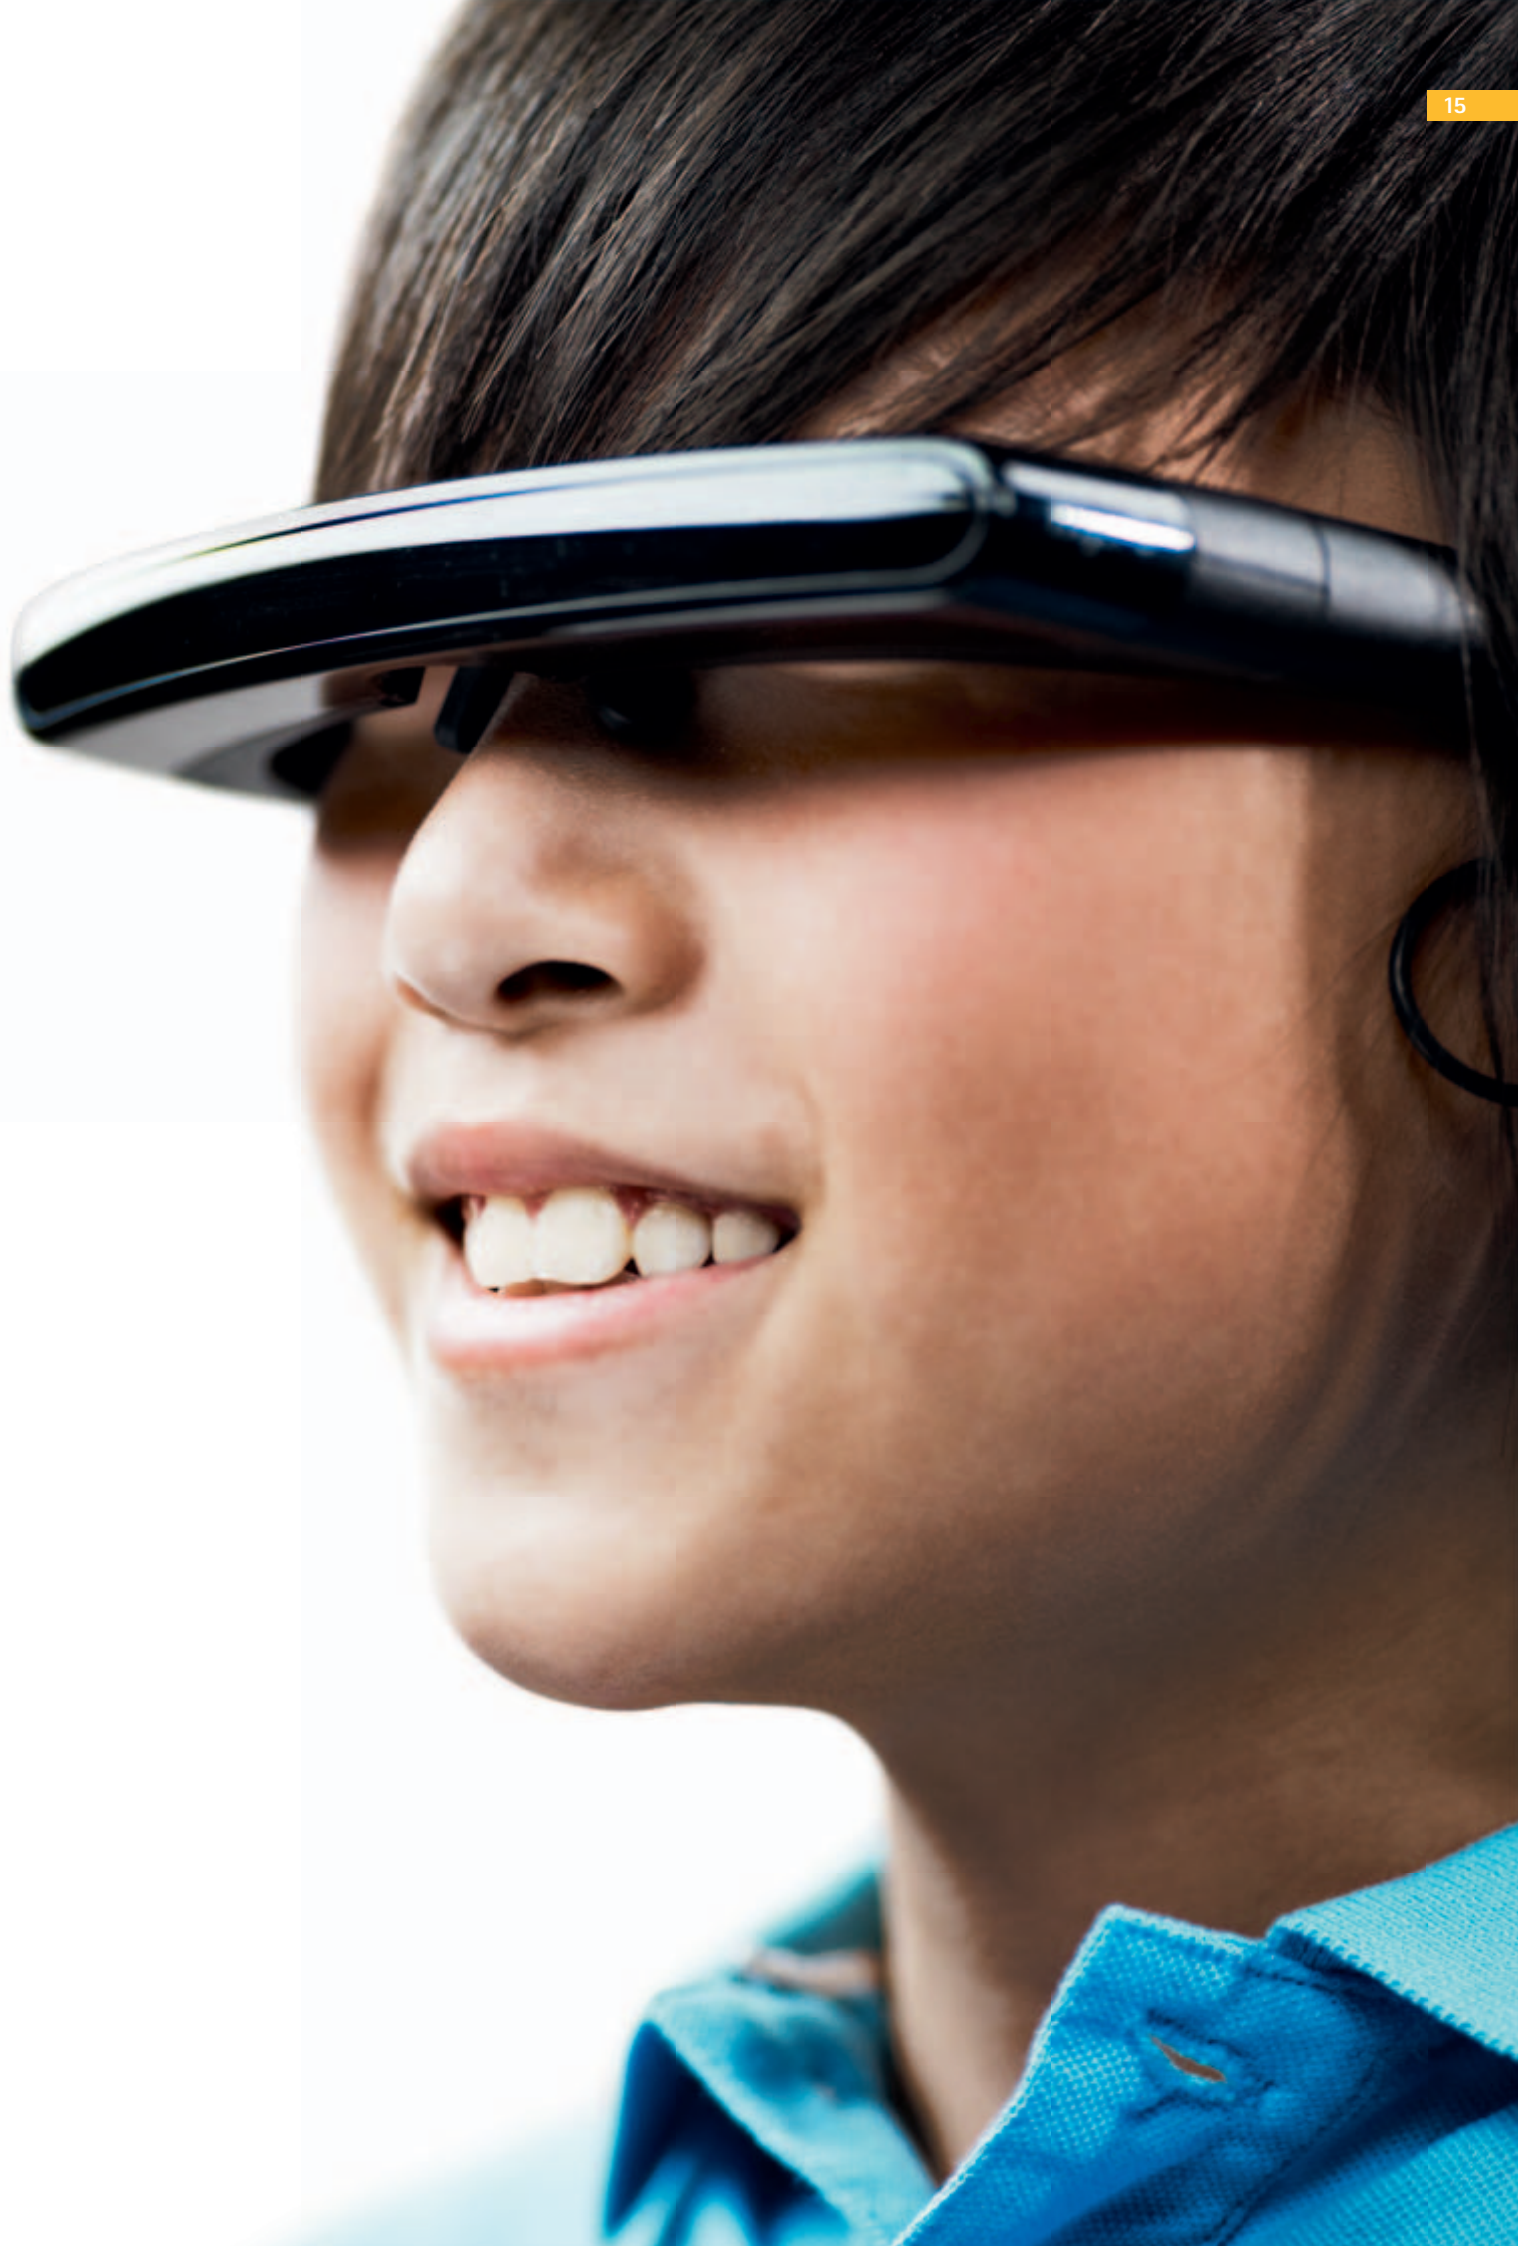



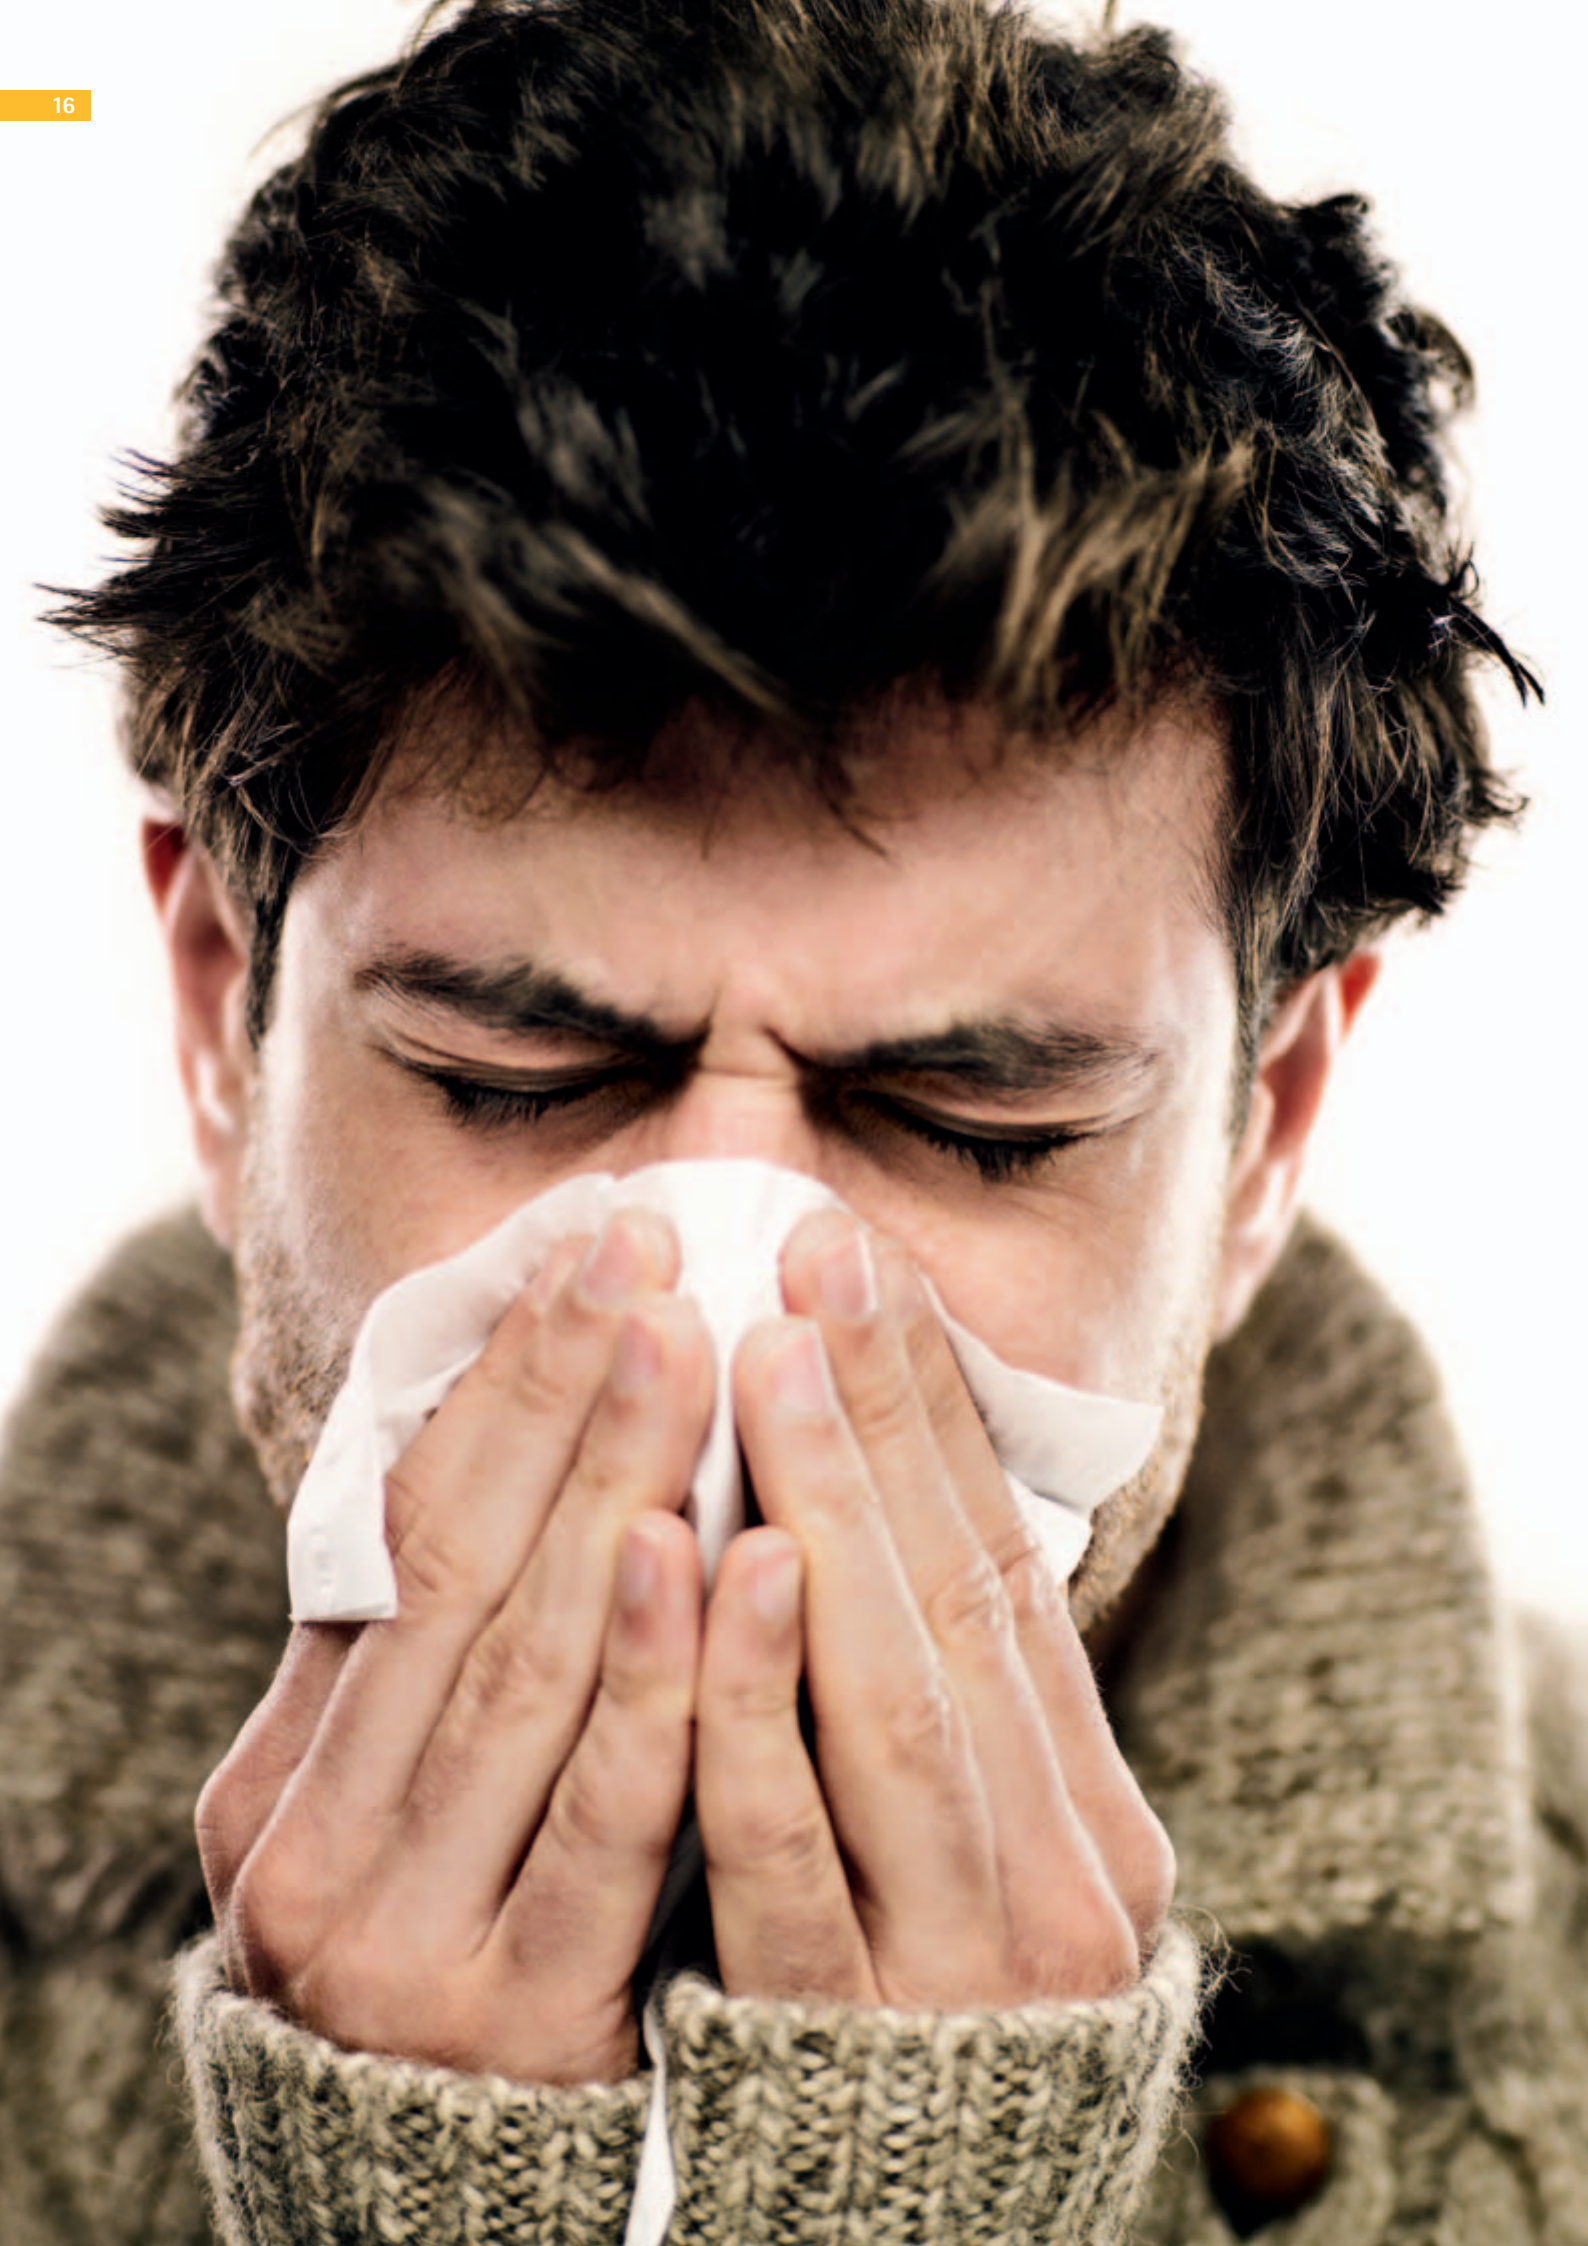



# DER BEGRIFF „PHARMA“ KLINGT FÜR DIE MEISTEN MENSCHEN ZIEMLICH ABSTRAKT. BIS MAN PLÖTZLICH KRANK WIRD – DANN WIRD ER ÜBERRASCHEND SCHNELL KONKRET.

**Unser Unternehmensbereich Pharma: Gesundheit und Lebensqualität.** Dafür hat Merck in seiner langen Geschichte schon immer wichtige und wegweisende Beiträge geliefert. Die Erforschung und Entwicklung neuer Arzneimittel hat bei uns lange Tradition. Dies gilt für verschreibungspflichtige Originalpräparate wie Erbitux®, Rebif® oder Concor® ebenso wie für hochwertige Produkte, die der Gesundheitsvorsorge oder Selbstmedikation dienen; Nasivin® ist eine unserer bekanntesten Marken auf diesem Gebiet.

Unsere größte Sparte, Merck Serono, erforscht, entwickelt, produziert und vertreibt verschreibungspflichtige und patentgeschützte Arzneimittel. Hier wurden die lange Tradition und Innovationskraft zweier Familienunternehmen – Merck und Serono – außerordentlich erfolgreich zusammengeführt. Dabei haben wir uns in der Forschung auf drei wachstumsstarke Therapiefelder mit hohem Spezialisierungsgrad konzentriert: Krebs, neurodegenerative Erkrankungen sowie Autoimmun- und Entzündungskrankheiten. Außerdem gehören zum

Sortiment Arzneimittel gegen Herz-Kreislauf-Erkrankungen, Hormon- und Stoffwechselstörungen sowie zur Behandlung von Unfruchtbarkeit.

Eine besondere Stärke von Merck Serono ist die Kompetenz bei der Entwicklung und Herstellung sowohl von chemisch definierten Arzneimitteln als auch von modernen, biotechnologisch hergestellten Medikamenten. Mehr als die Hälfte des Umsatzes von Merck Serono entfällt auf solche Biopharmazeutika.

Im Bereich Consumer Health Care besitzt Merck ebenfalls eine lange Tradition. Das Selbstmedikationsgeschäft ist das einzige im Portfolio, mit dem Merck unmittelbar den Endverbraucher anspricht. Hier sind unsere Vertriebspartner in der Regel Apotheken, in einzelnen Ländern aber auch der Versandhandel oder Handelsketten. Dabei bauen wir auf unsere bekannten Marken wie z.B. Bion® oder Seven Seas® sowie auf das Vertrauen der Konsumenten in Qualität, Wirksamkeit und Sicherheit.

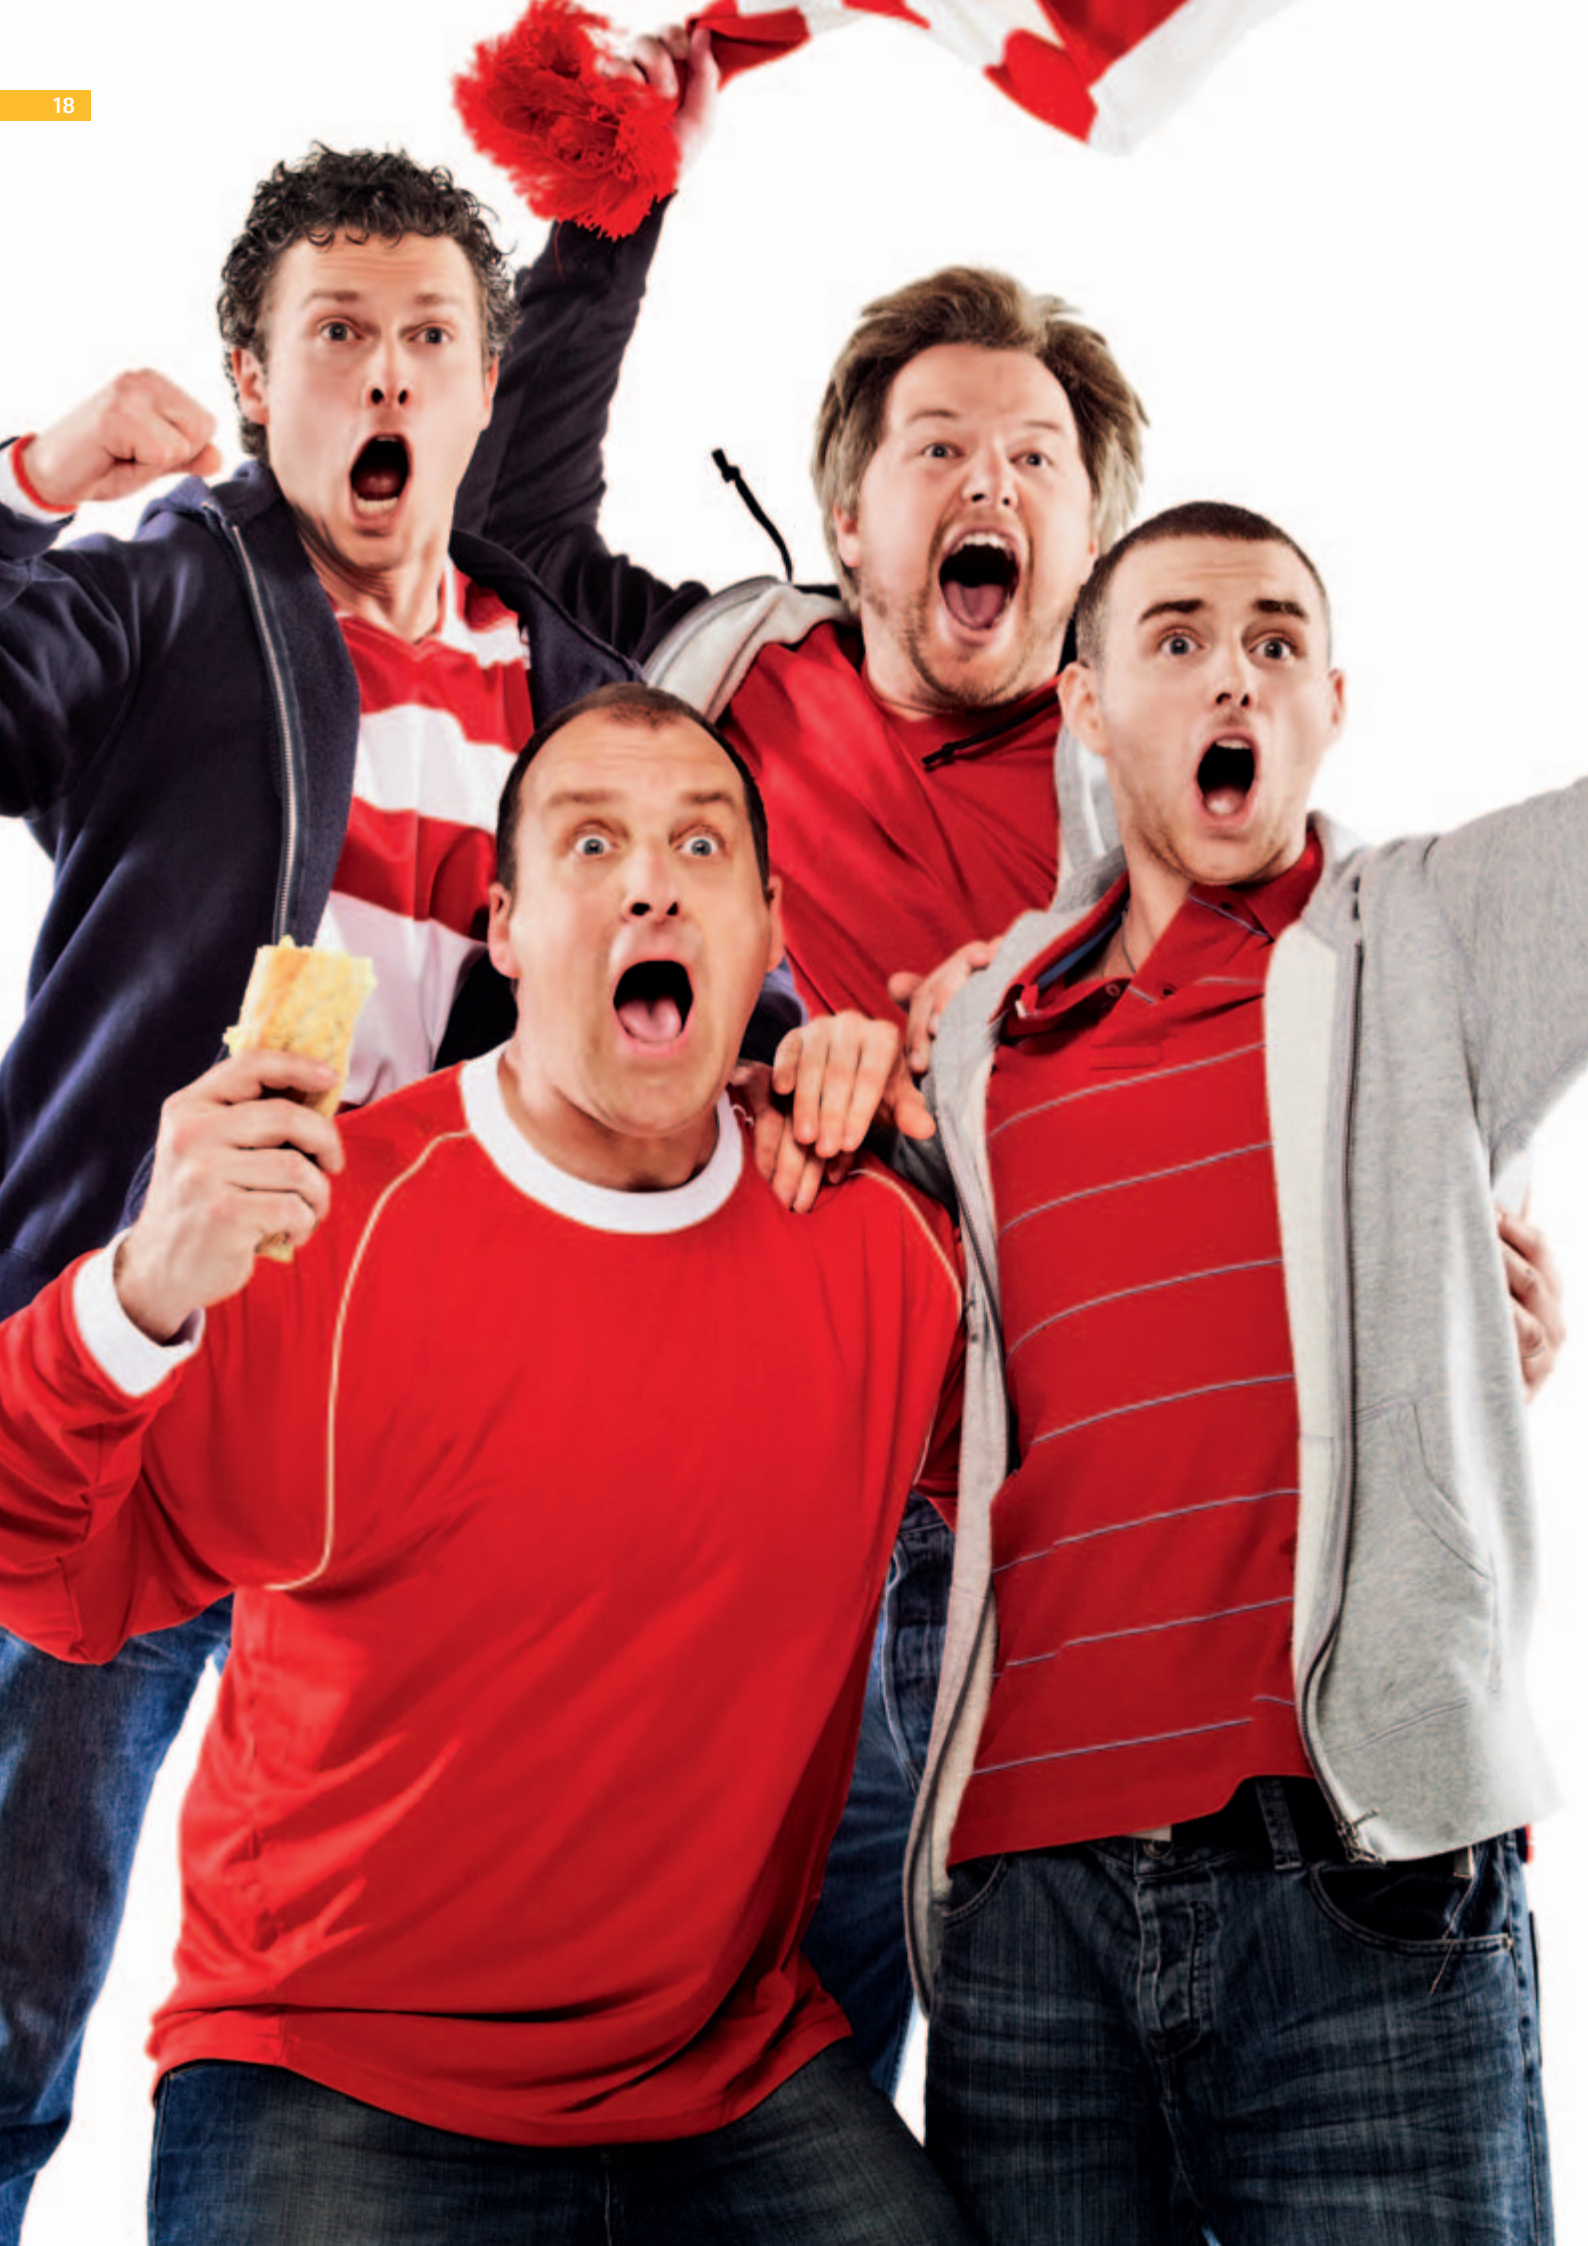



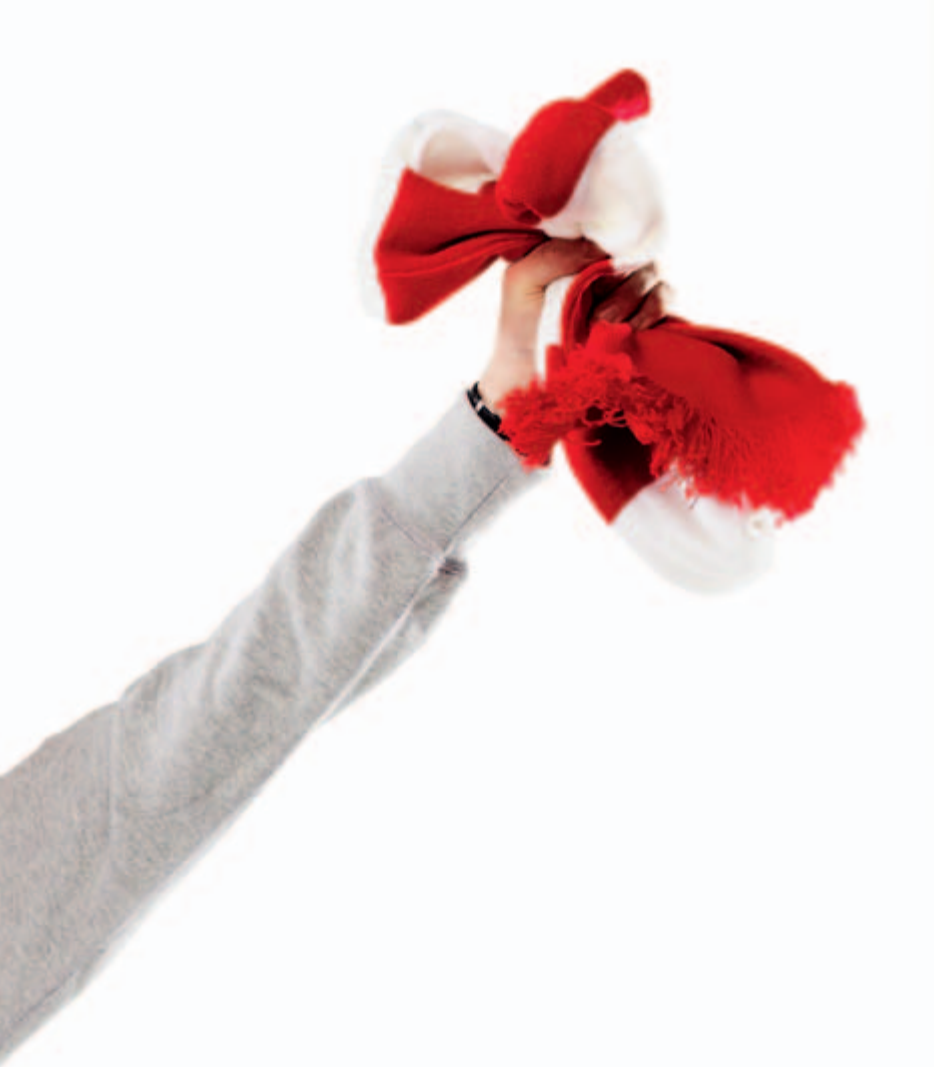

## FLÜSSIGKRISTALLE VERÄNDERN DIE WELT. UND IHR WOCHENENDE MIT FREUNDEN.

**Unser Unternehmensbereich Chemie: Wer zuerst kommt ...** Als Pionier im Bereich chemischer Spezialprodukte in Deutschland gehört Merck heute zu den führenden intensiv forschenden und weltweit tätigen Unternehmen. Dabei konzentrieren wir uns auf ertragsstarke Segmente, die durch regulierte Märkte und hohe Eintrittsbarrieren gekennzeichnet sind – Märkte, in denen wegen staatlicher Regulierungen oder hoher Qualitätsanforderungen nicht jeder, und schon gar nicht kurzfristig, reüssieren kann. Hier stellen wir unser ganzes langjähriges Know-how in den Dienst unserer Kunden. Gemeinsam mit ihnen entwickeln wir innovative Produkte und Lösungen, die sich im Markt bewähren. Diese meist langjährige, vertrauensvolle Partnerschaft sichert unseren Kunden entscheidende Vorteile im Markt – und uns gute Geschäfte.

Ein Musterbeispiel hierfür ist unsere Zusammenarbeit mit den weltweit führenden Displayherstellern in Asien: Flüssigkristalle von Merck spielen in flachen Fernsehern, in Notebooks oder in Mobiltelefonen eine Schlüsselrolle. Wir waren Pionier darin, Kommunikation sichtbar zu machen, und sind heute unangefochtener Innovations- und Marktführer. Weltweit befinden sich in den attraktiven Flachbildschirmen der bekannten Markenhersteller mit hoher Wahrscheinlichkeit unsere Produkte. Das macht uns stolz.

Das Verlangen der Menschen nach Schönheit, Ästhetik und Differenzierung erfüllen die Effektpigmente von Merck. Sie werden in

der Kosmetik eingesetzt, sorgen aber auch für besonders wertvolle Verpackungen oder effektvolle Autolacke. Die besonderen Farbeffekte lassen sich auch zum Schutz gegen Produktfälschungen einsetzen.

Ebenso erfolgreich sind wir mit Labor- und Produktionschemikalien, Reagenzien und Analytik-Produkten. Dieses Geschäftsfeld hat bei uns eine lange Tradition. Hier stehen wir für absolute Qualität und Kundenorientierung. Die Einsatzbereiche unserer Produkte reichen vom Forschungslabor bis zur Produktion, von Tests zur Qualitätskontrolle bis zu pharmazeutischen Wirkstoffen, von der Universität bis zur Pharma- und Lebensmittelindustrie. Mit der Übernahme von Millipore bietet unsere neue, weltweit operierende Life-Science-Sparte Merck Millipore eine umfangreiche Palette von mehr als 40.000 Produkten und Serviceleistungen an. Sie umfassen die gesamte Wertschöpfungskette der biopharmazeutischen Forschung, Entwicklung und Produktion. Merck Millipore kombiniert Mercks langjährige Erfahrung in der Chemie mit Millipores führender Marktposition in der Separationstechnologie.

Unseren Chemie-Produkten begegnen Verbraucher praktisch täglich: Auch wenn unser Name nicht draufsteht, so steht doch Merck dahinter, wenn Lebensmittel sicher sind, wenn Autolacke glänzen oder beim Siegtreffer Ihres Lieblingsvereins.

Merck Red Fluorine = U-unit

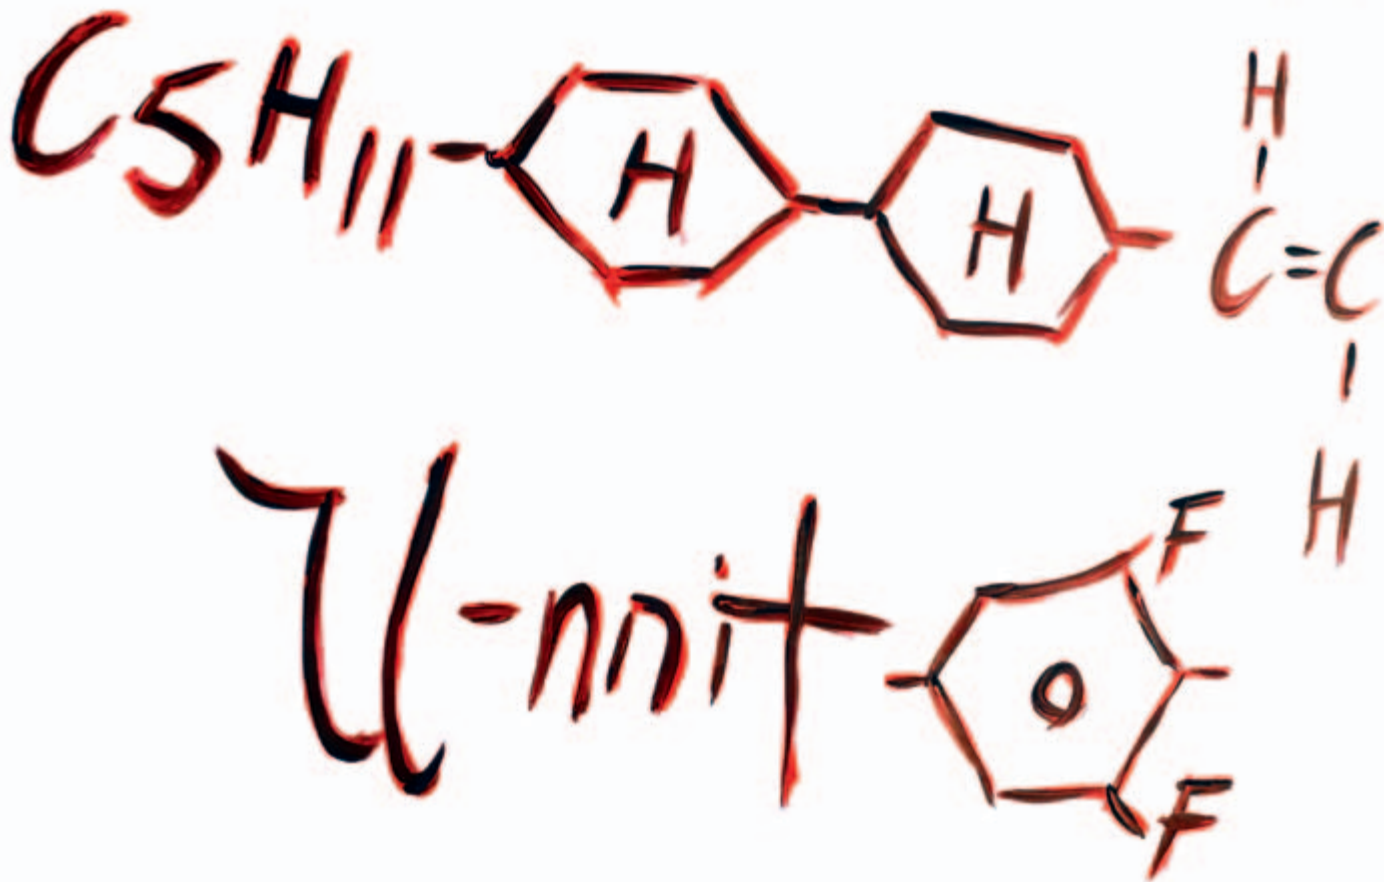

## DIE FORMEL FÜR EIN BESSERES LEBEN? WIR ARBEITEN DARAN – TÄGLICH!

**Ambitionierte Ziele:** Zum Beispiel mehr Lebensqualität. Dafür laufen wir nicht kurzlebigen Trends hinterher, sondern konzentrieren uns auf unsere Stärken in den Bereichen Pharma und Chemie. Nämlich auf die Entwicklung neuer, innovativer Produkte und Lösungen sowie auf die partnerschaftliche Zusammenarbeit mit unseren Kunden. Erst dieses Zusammenspiel sorgt dafür, dass aus guten Ideen marktfähige Produkte werden.

Dabei hat sich Merck mit seinem unbedingten Bekenntnis zur Qualität über Jahrzehnte den Ruf eines verlässlichen und vertrauens-

würdigen Partners erworben. Wir sind stolz darauf, wenn aus guten Ideen neue Produkte entstehen. Produkte, mit denen nicht nur wir, sondern auch unsere Kunden dauerhaft erfolgreich sind. Und besonders stolz sind wir, wenn wir damit auch einen Beitrag für jeden von uns Menschen leisten können: Produkte und Lösungen für mehr Lebensqualität.

Unsere Vision ist ganz einfach und klar: Wir sichern unseren nachhaltigen Erfolg durch innovative Produkte und Lösungen, die helfen, die Lebensqualität auf dieser Erde zu verbessern.



-CH<sub>3</sub>

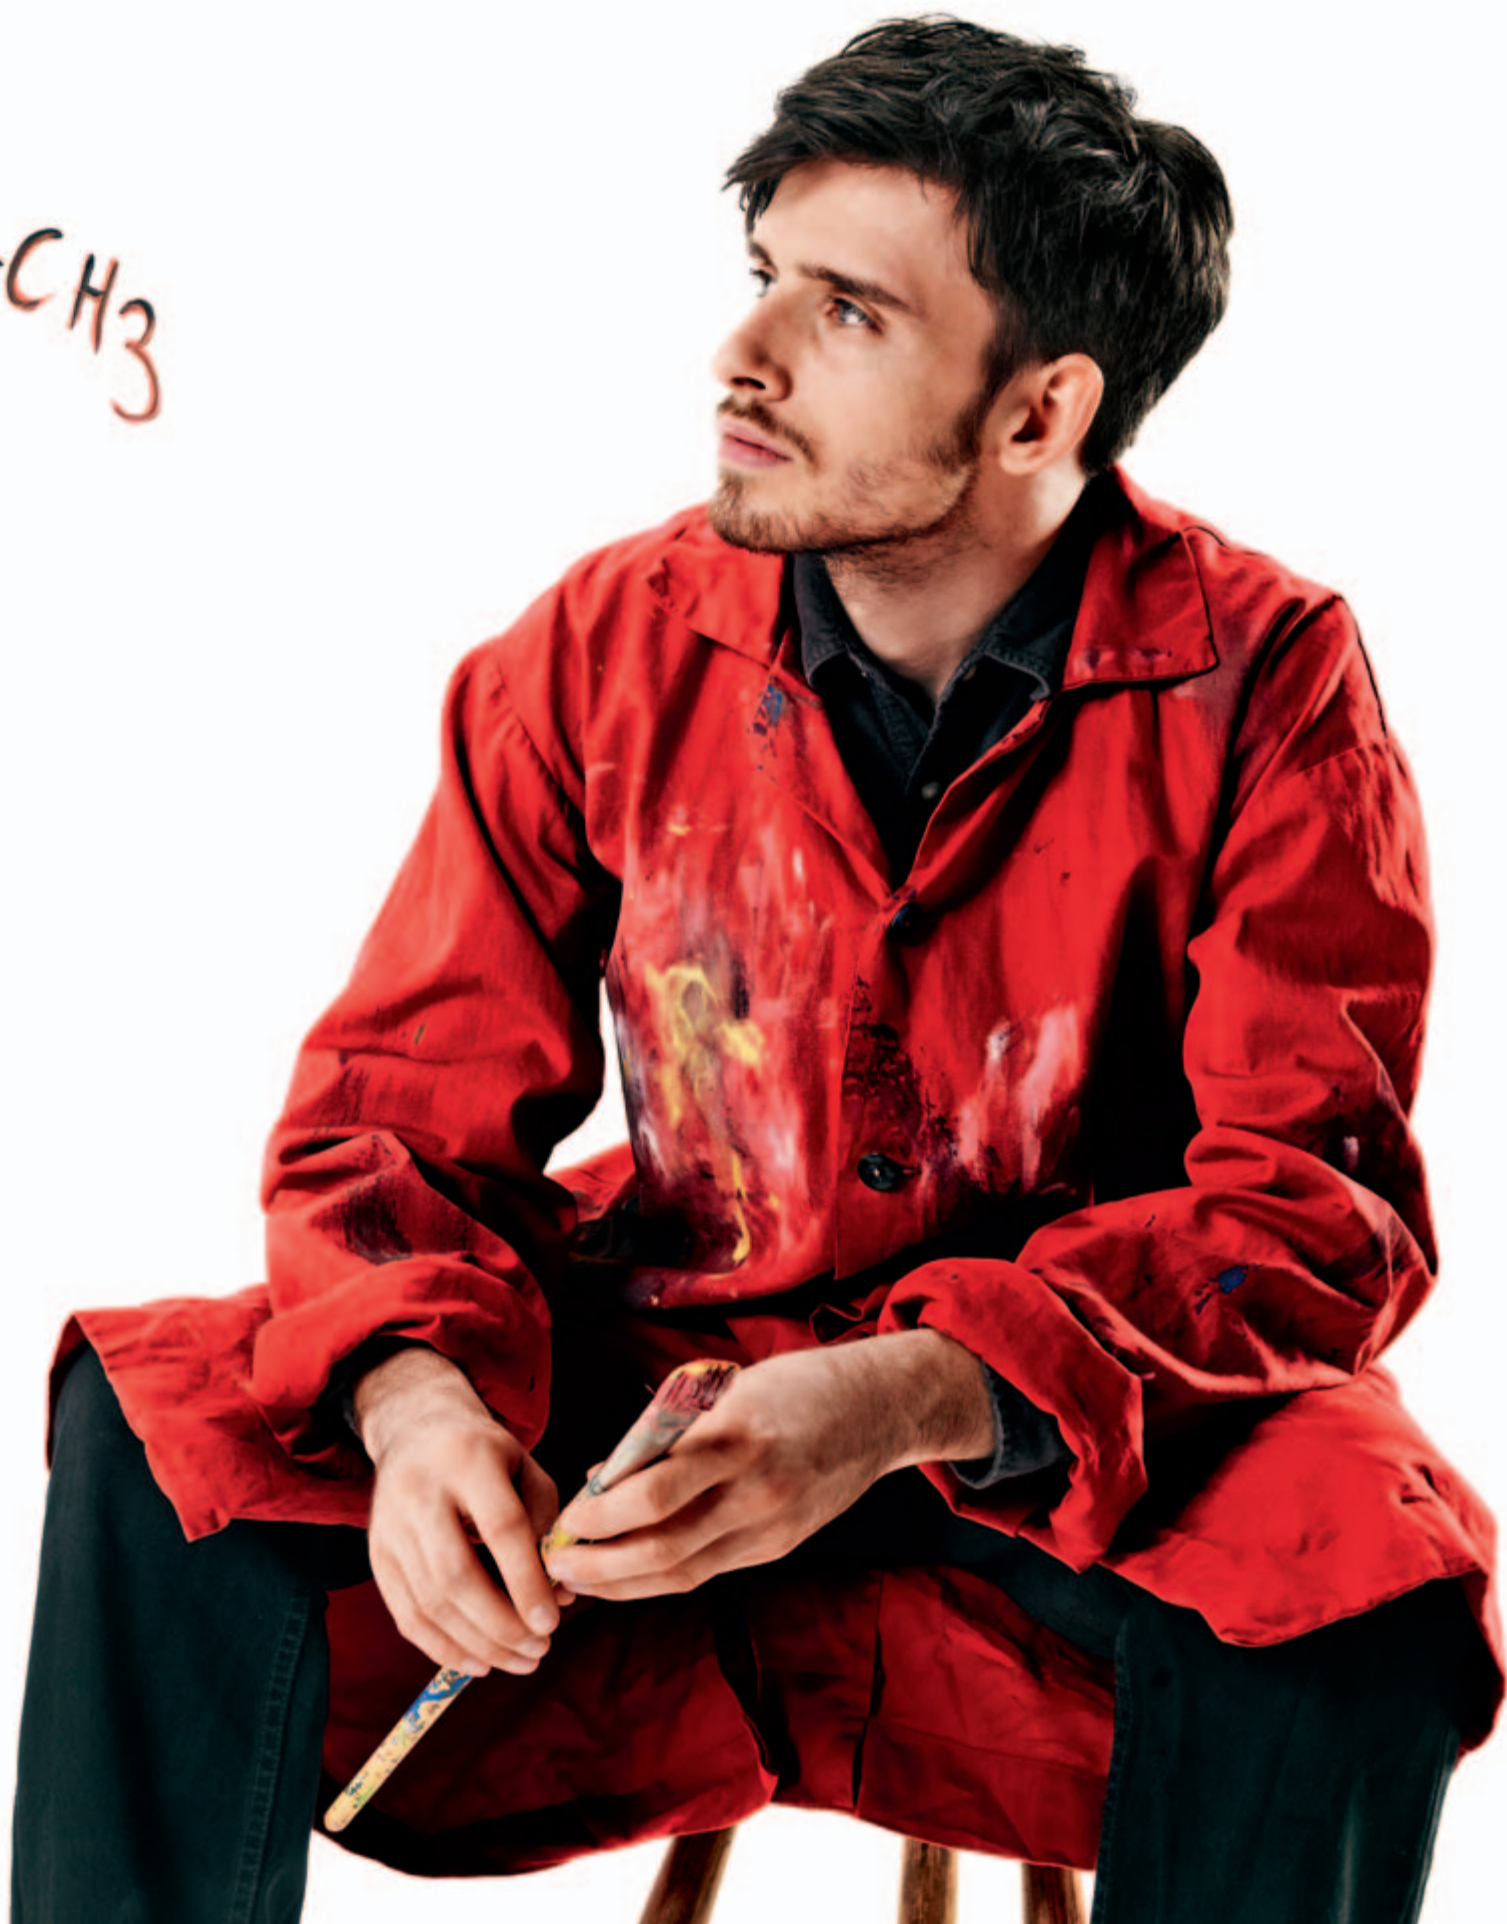

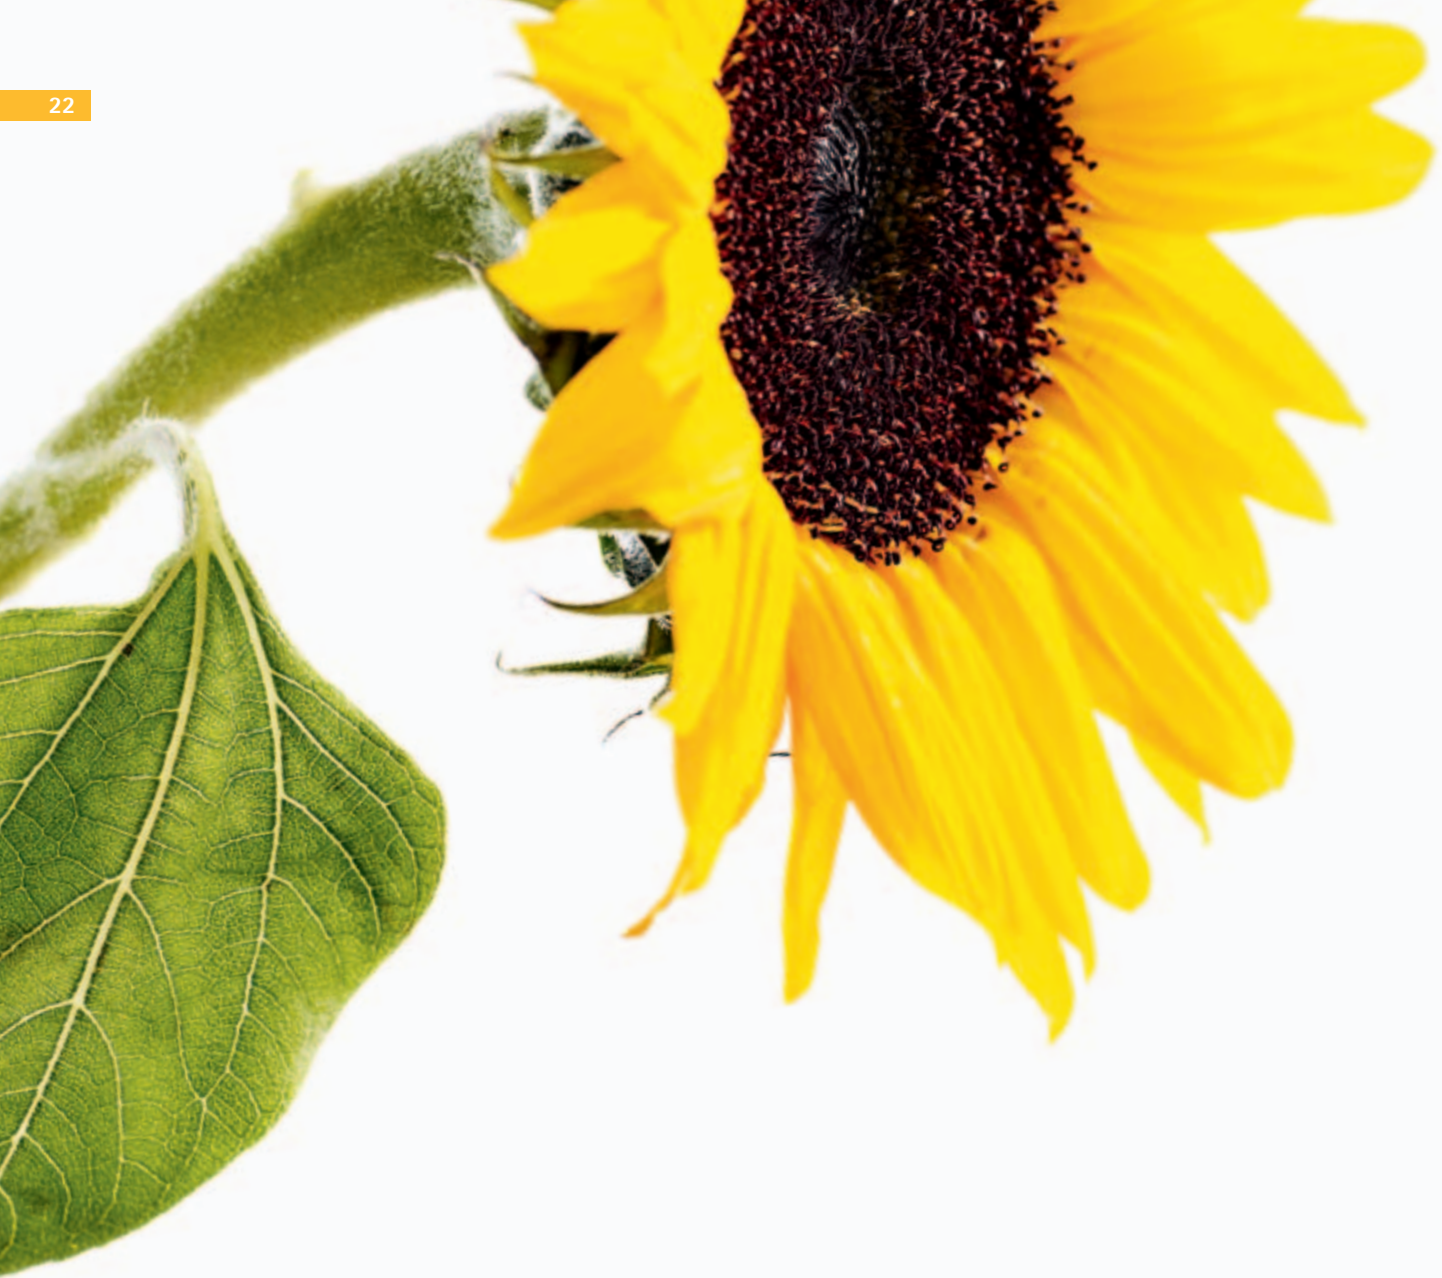

## ES GIBT NUR WENIGE KONSTANTEN, AUF DIE MAN SICH HEUTZUTAGE VERLASSEN KANN. EINE DAVON IST DIE VERÄNDERUNG.

Größe ist für uns kein Wert an sich – dafür aber sehr wohl die Qualität dessen, was wir tun. Deshalb wollen wir zu den Innovations-Treibern gehören. Wir sind Experten und Technologieführer in hoch spezialisierten Produktfeldern, von Flüssigkristallen bis hin zu biotechnologischen Medikamenten. Was uns antreibt, ist der Wille zur Veränderung. Durch stetige Transformation unseres Wissens und unserer Erfahrung entwickeln wir konsequent Innovationen und Produkte, die vor allem eines bewirken: Sie machen unser Leben ein Stückchen lebenswerter – und manchmal retten sie sogar Leben.

Wachstum ist kein reines Zahlenspiel. Sondern Grundlage für neue Investitionen. Wir wollen auch zukünftig unser unternehmerisches Potenzial entfalten und weiterentwickeln, um die vielen neuen Chancen, die sich am Markt bieten, optimal zu nutzen. Unser Ziel ist dabei der nachhaltige wirtschaftliche Erfolg. Wir streben ein Wachstum mit guter Qualität an, bei dem der Umsatz schneller zu-legt als die Kosten. Dieses „Qualitätswachstum“ schafft eine sichere Vertrauensbasis für unsere Aktionäre, Eigentümer und vor allem auch für unsere engagierten Mitarbeiterinnen und Mitarbeiter, sich heute und in Zukunft auf unsere originären Stärken verlassen zu können. Eine der wichtigsten davon ist die Veränderung.



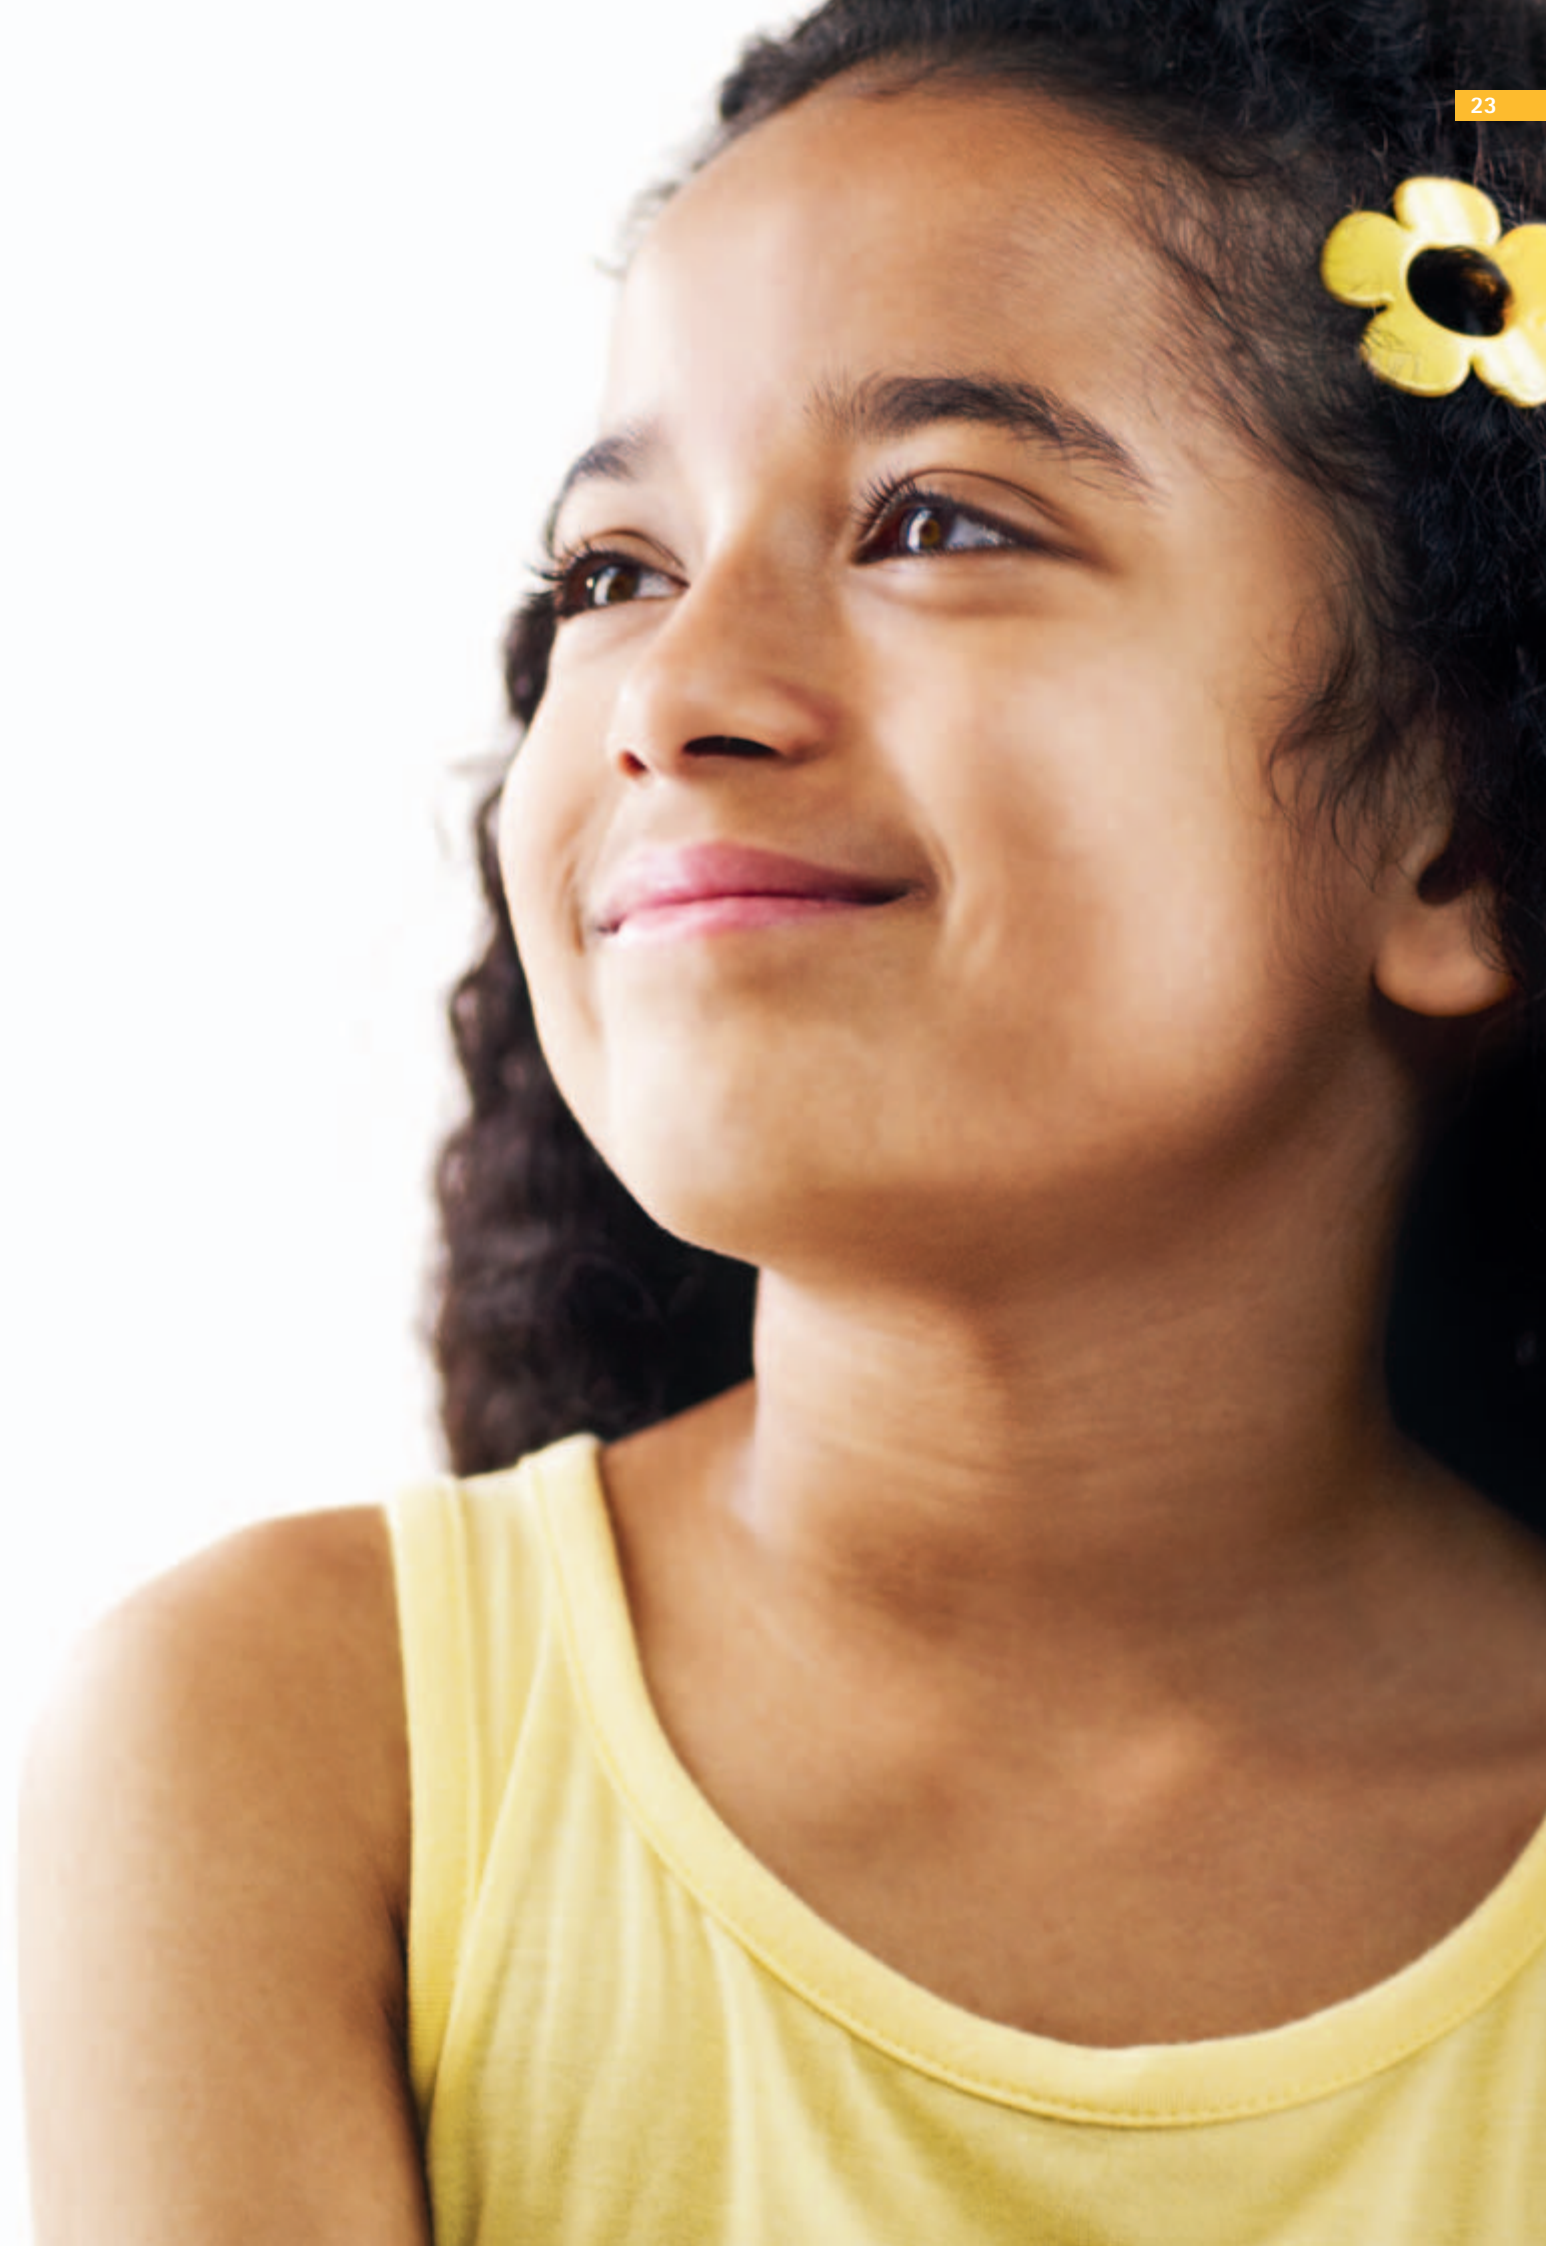



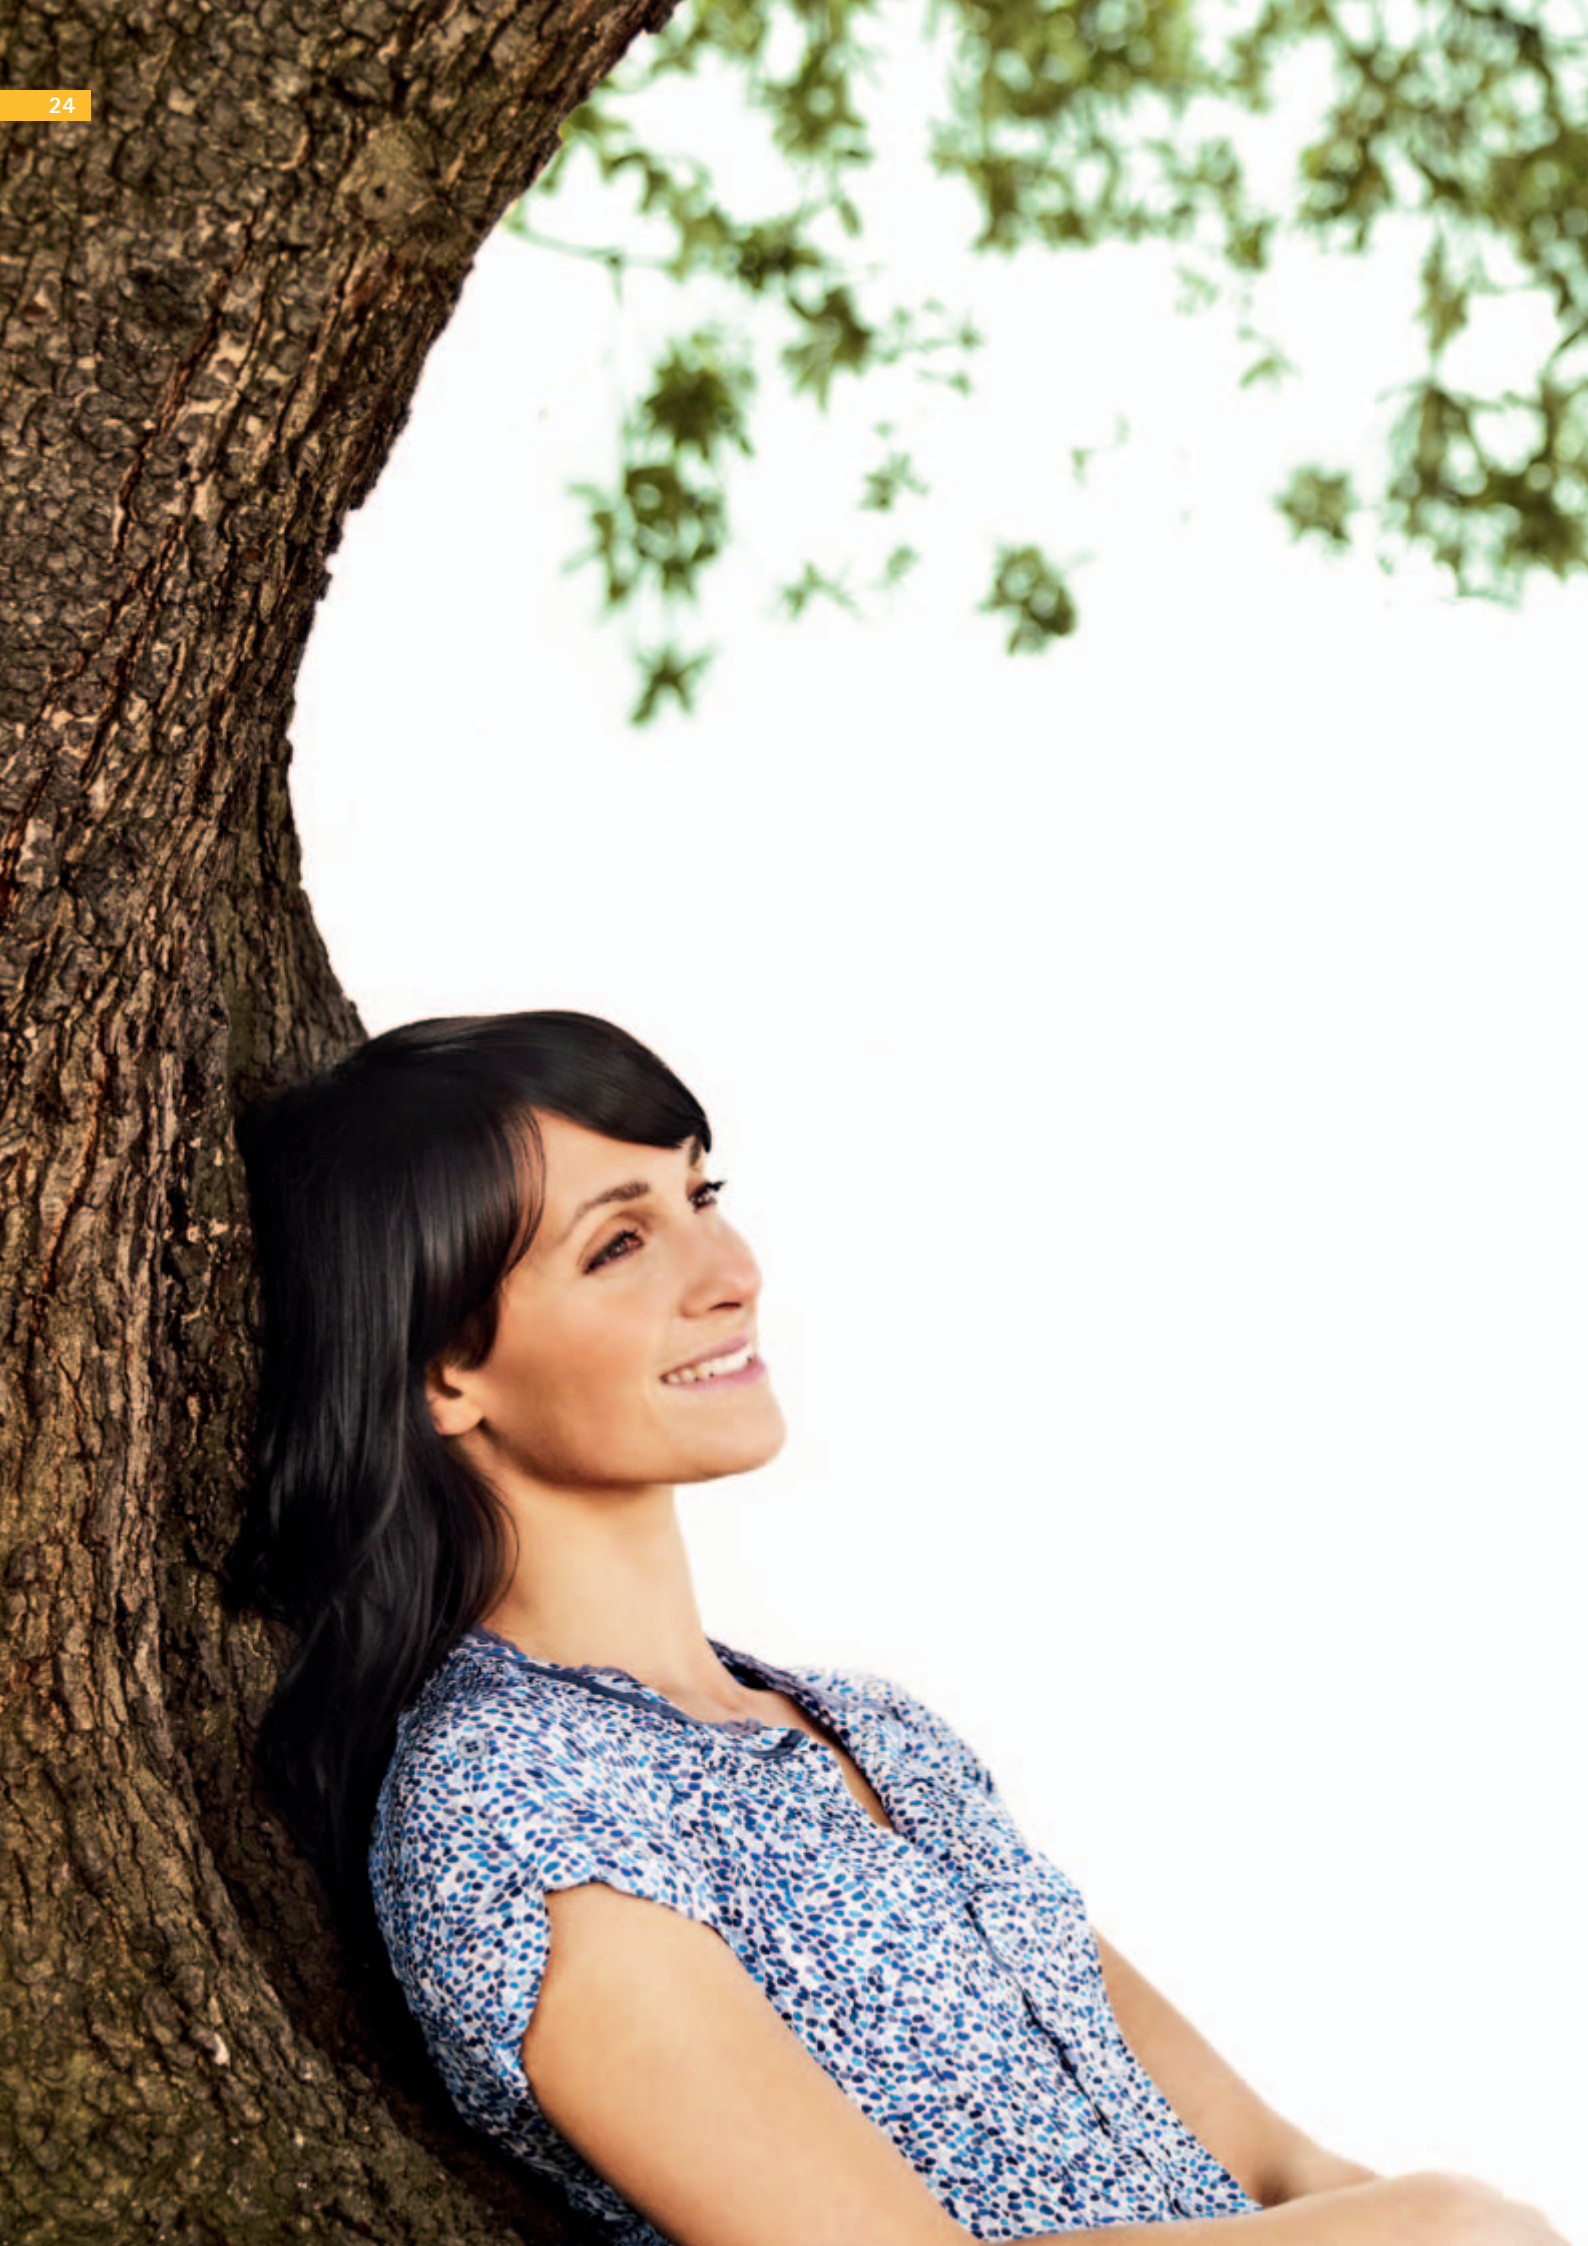



# SCHON IN DER ZWÖLFTEN GENERATION PRÄGT DIE FAMILIE MERCK UNSER UNTERNEHMEN – UND DAS SOLL AUCH SO BLEIBEN.

**Verlässliche Eigentümer: Nichts geht über starke Wurzeln.** Unsere Eigentümerstruktur erlaubt es uns, zwei oft gegenläufige Eigenschaften unternehmerischen Handelns miteinander zu kombinieren: Schnelligkeit und Nachhaltigkeit.

Die Geschäfte der Merck-Gruppe werden unter dem Dach der Merck KGaA, einer Kommanditgesellschaft auf Aktien, geführt. Seit dem 20. Oktober 1995 wird die Aktie an der Frankfurter Börse gehandelt. Das Emissionsvolumen von 2,4 Milliarden D-Mark war der bis dahin größte Börsengang der bundesdeutschen Geschichte.

An der KGaA halten Kommanditaktionäre heute rund 30% des Gesamtkapitals, die Familie Merck über die E. Merck KG als Komplementär rund 70%. Dadurch bleibt der Einfluss der Familie Merck weiterhin bestehen, auch wenn sich das Unternehmen mit dem Börsengang für externe Miteigentümer geöffnet hat und heute zwei Welten erfolgreich kombiniert: Merck wird geführt wie eine Publikumsgesellschaft und kontrolliert wie ein Familienunternehmen.

Unverändert bekennt sich die Familie zu „ihrem“ Unternehmen. Merck ist mehr als eine starke Marke: Merck ist gleichzeitig der

„gute Name“ der Unternehmerfamilie, die deshalb auch die unternehmerischen Prinzipien der Führung festlegt. Dazu zählen:

- Die Familiengeschafter wollen, dass Merck ein eigenständiges Unternehmen bleibt.
- Merck ist ein Pharma- und Chemieunternehmen – eine bewusste Diversifikation, die hilft, Risiken zu reduzieren.
- Die Geschafter wollen ein von seiner Forschungs- und Entwicklungstätigkeit geprägtes Unternehmen erhalten.
- Merck zielt auf nachhaltigen Erfolg und Zukunftssicherung, nicht auf kurzfristige Gewinnmaximierung. Denn für die Eigentümer, die großteils der zwölften Geschaftergeneration angehören, ist das „Denken in Generationen“ mehr als nur eine Metapher.

Die Mitglieder der Geschäftsleitung sind persönlich haftende Geschafter. Und wer persönlich haftet, folgt nicht riskanten kurzfristigen Trends, sondern orientiert sich automatisch am nachhaltigen Erfolg des Unternehmens.

## WIR SIND AUF DEM WEG. ABER NOCH LANGE NICHT AM ZIEL.

Unser Weg heißt: Verantwortung übernehmen, Qualitätsmaßstäbe setzen und mit neuen, großen Ideen weiterhin die Zukunft aktiv gestalten. Seit 1668 gehen wir gemeinsam mit unseren Partnern, Kunden und Mitarbeitern konsequent unseren Weg. Es sind bis heute der gemeinsame Schulterschluss, das Vertrauen ineinander und die gemeinsamen Werte, die diese einzigartige Erfolgsgeschichte ermöglicht haben. Und wir schreiben sie täglich weiter. Wir haben auf den vorangehenden Seiten unsere Unternehmens-Philosophie und unser Geschäftsmodell vorgestellt. Alle Elemente und Aspekte

machen, zusammengekommen, die Besonderheit des Unternehmens Merck aus. Wir nennen das den Merck-Weg. Er ist geprägt von menschlicher Schaffenskraft, Forscherdrang und dem Wunsch und dem Willen, Leben zu verbessern. Er wird uns alle auch weiterhin in eine spannende und erfolgreiche Zukunft führen. Und wenn wir unser Leitbild, das uns diese erfolgreiche Zukunft ermöglicht, in einem Satz zusammenfassen, der überall auf der Welt verstanden wird, so heißt dieser:

**MERCK. LIVE A BETTER LIFE.**

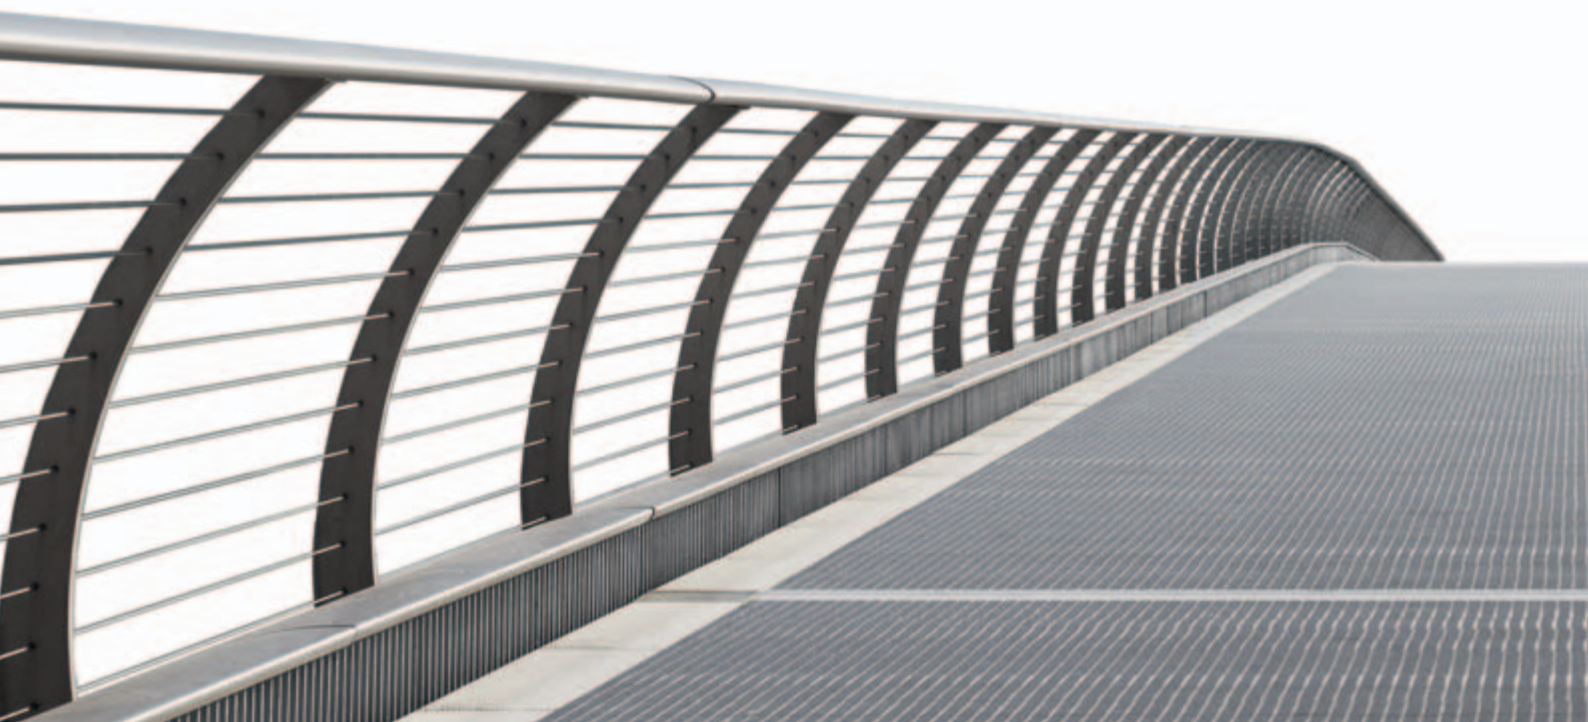



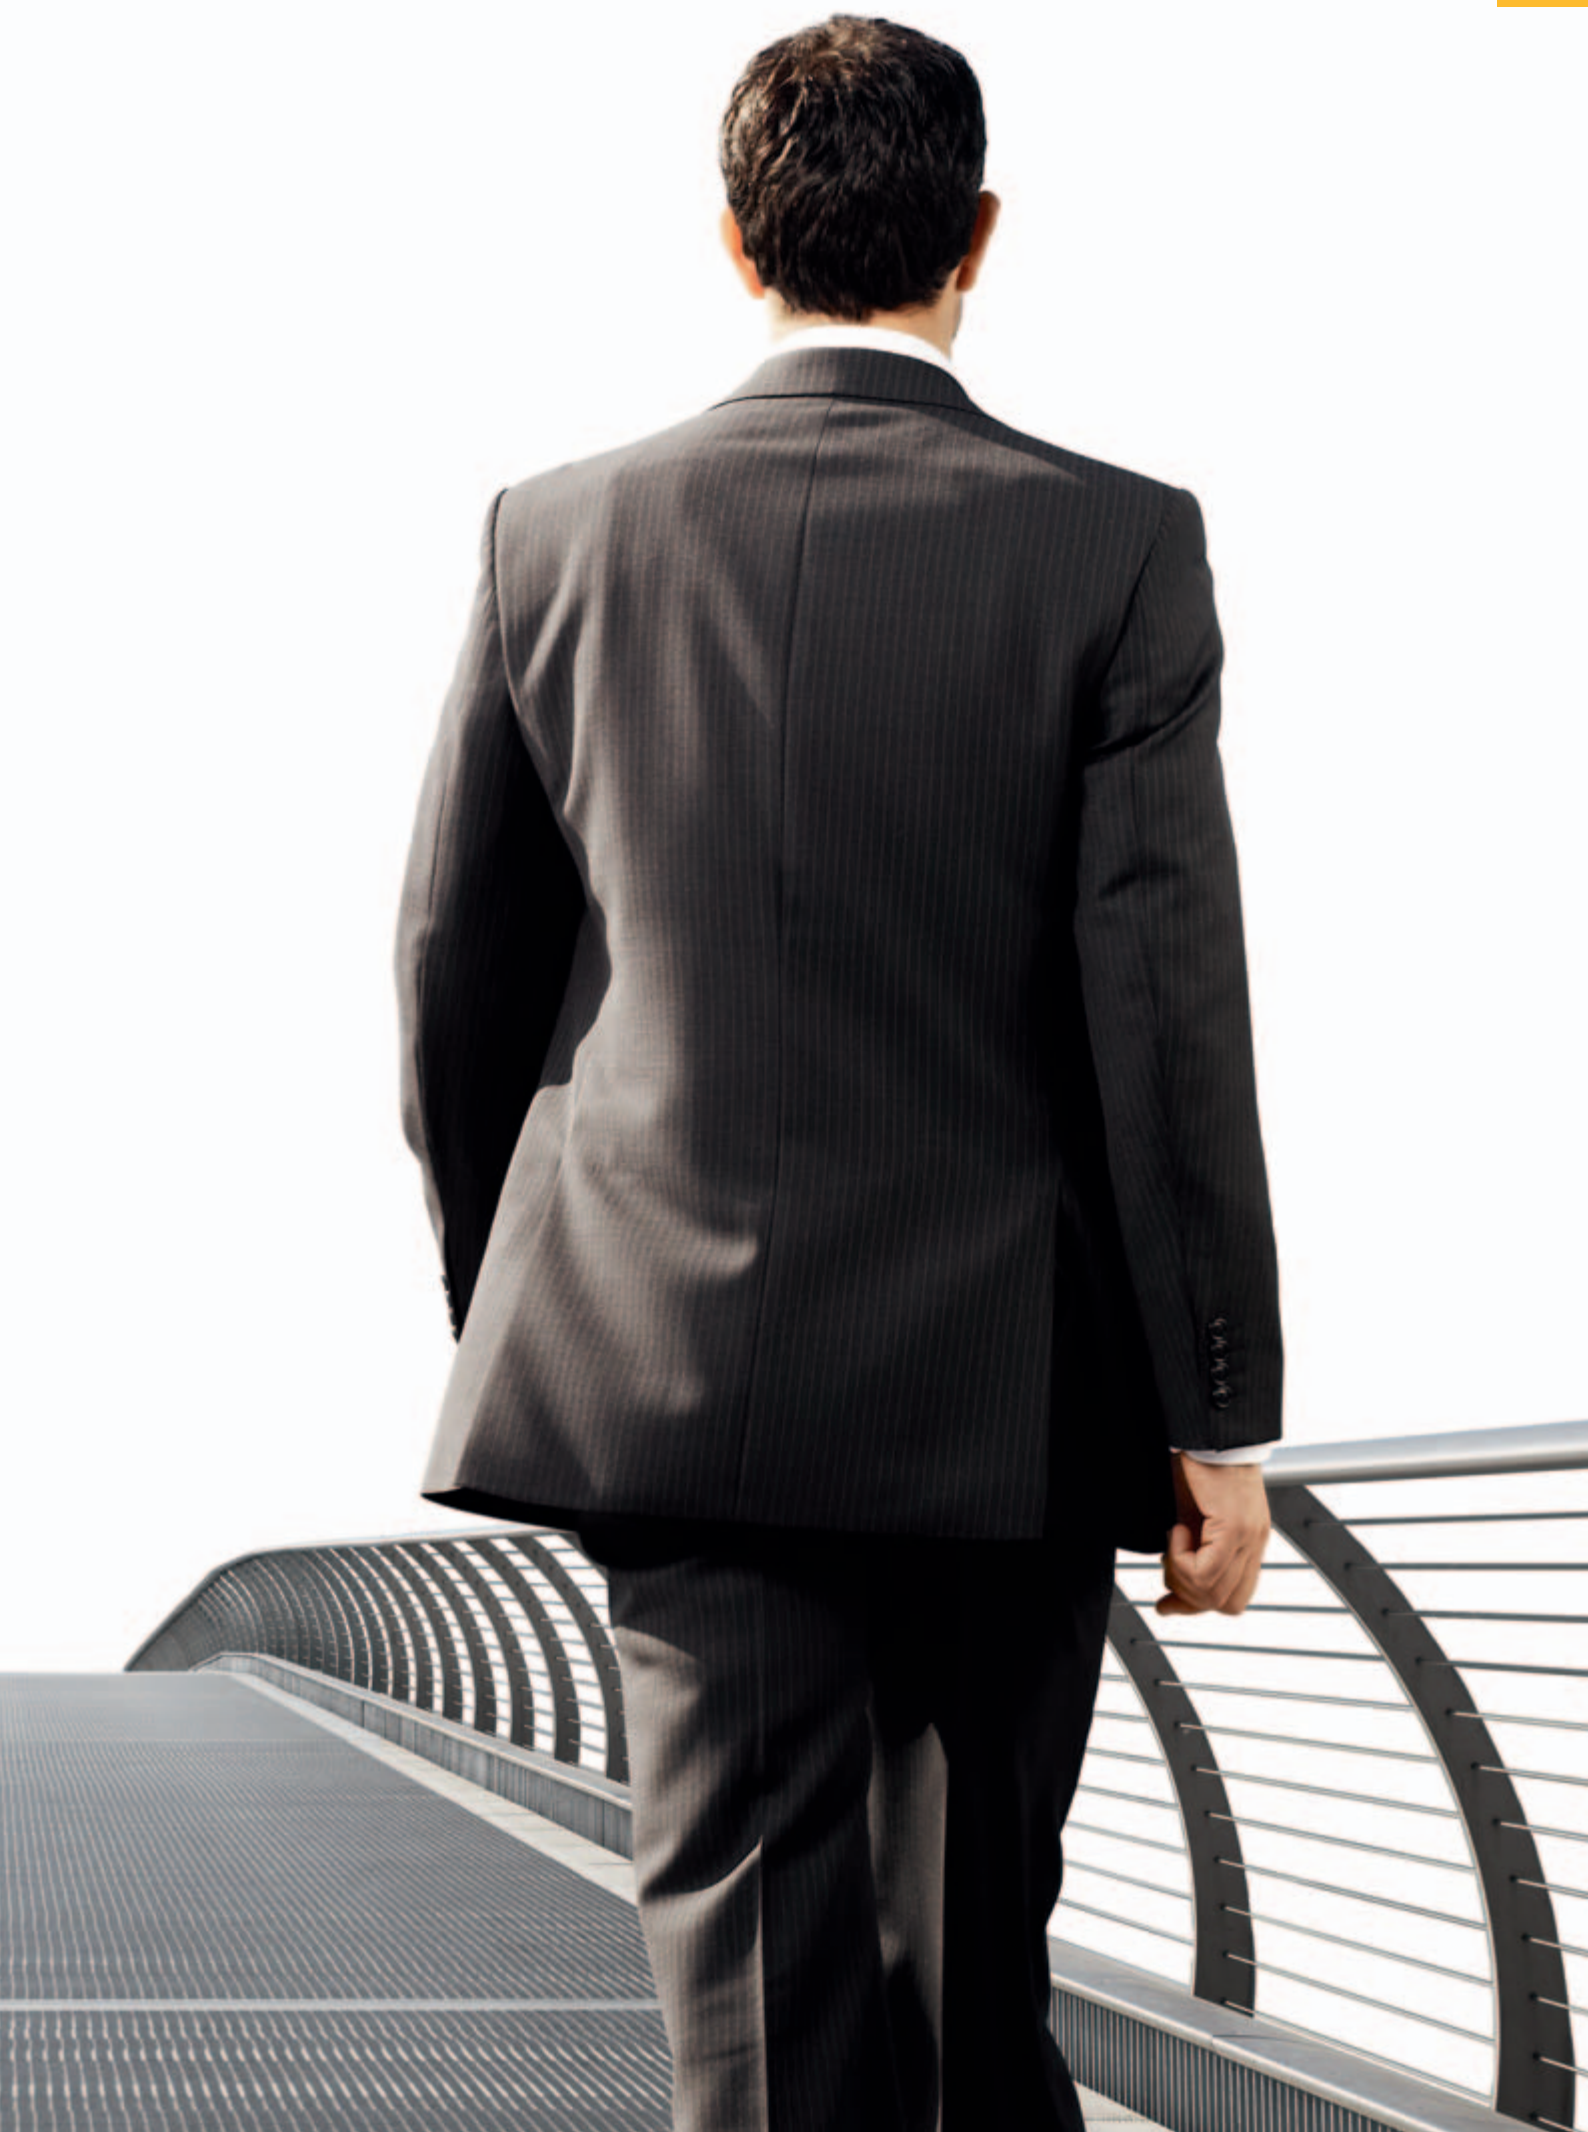

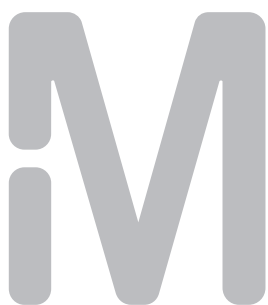

Der Merck Weg.  
Herausgegeben im September 2010  
von Merck KGaA, Corporate Communications,  
Frankfurter Straße 250, 64293 Darmstadt

Telefon: +49 (0) 6151-72 0,  
Fax: +49 (0) 6151-72 5577  
E-Mail: [corpcom@merck.de](mailto:corpcom@merck.de),  
Internet: [www.merck.de](http://www.merck.de)

Fotos: Robert Wilson, [www.robertjwilson.com](http://www.robertjwilson.com)  
Konzeption und Gestaltung: Nissen Carstensen GmbH & Co. KG, [www.nissen-carstensen.com](http://www.nissen-carstensen.com)  
Lithos: data-graphis GmbH, [www.data-graphis.de](http://www.data-graphis.de)  
Druck: ColorDruck Leimen GmbH, [www.colordruck.com](http://www.colordruck.com)

W 840 545

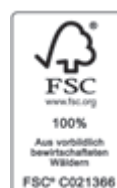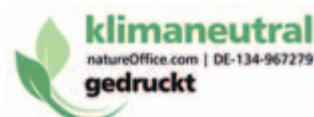

Supplement: Supplementary file 74 [file Merck Einzigartig. Der Merck Weg.pdf › Korpustexte/Korpustexte pdf/Merck/Merck Einzigartig. Der Merck Weg.pdf]
