# Supplementary material
Source: publisher site journal article supplement (https://www.degruyterbrill.com/publication/isbn/9783110432879/downloadAsset/9783110432879_Elektronischer_Anhang_2.zip)

# 2010

---

GESCHÄFTSBERICHT

---

# INHALT

|    |                                                                    |     |                                                    |     |                                                       |
|----|--------------------------------------------------------------------|-----|----------------------------------------------------|-----|-------------------------------------------------------|
| 2  | An unsere Aktionäre                                                | 99  | Gesamtaussage zur wirtschaftlichen Lage            | 117 | Konzernabschluss                                      |
| 6  | Das Geschäftsjahr im Überblick                                     | 99  | Chancen- und Risikobericht                         | 118 | Konzern-Gewinn- und Verlustrechnung                   |
| 8  | Fresenius-Aktien                                                   | 99  | Chancenmanagement                                  | 119 | Konzern-Gesamtergebnisrechnung                        |
| 14 | Erklärung zur Unternehmensführung und Corporate-Governance-Bericht | 99  | Risikomanagement                                   | 120 | Konzern-Bilanz                                        |
| 34 | Die Unternehmensbereiche                                           | 100 | Risikofelder                                       | 122 | Konzern-Kapitalflussrechnung                          |
| 34 | Fresenius Medical Care                                             | 106 | Beurteilung der Gesamtrisikosituation              | 124 | Konzern-Eigenkapitalveränderungsrechnung              |
| 38 | Fresenius Kabi                                                     | 106 | Rating des Unternehmens                            | 126 | Konzern-Segmentberichterstattung                      |
| 42 | Fresenius Helios                                                   | 107 | Nachtragsbericht                                   | 130 | Konzern-Anhang (siehe Detailverzeichnis Seite 130)    |
| 46 | Fresenius Vamed                                                    | 107 | Prognosebericht                                    | 131 | Allgemeine Erläuterungen                              |
|    |                                                                    | 107 | Gesamtaussage und mittelfristiger Ausblick         | 145 | Erläuterungen zur Konzern-Gewinn- und Verlustrechnung |
|    |                                                                    | 108 | Künftige Absatzmärkte                              | 150 | Erläuterungen zur Konzern-Bilanz                      |
|    |                                                                    | 109 | Gesamtwirtschaftlicher Ausblick                    | 177 | Sonstige Erläuterungen                                |
| 50 | Konzern-Lagebericht (siehe Detailverzeichnis Seite 50)             | 110 | Gesundheitssektor und Märkte                       | 199 | Erläuterungen nach dem Handelsgesetzbuch              |
| 51 | Geschäft und Rahmenbedingungen                                     | 113 | Konzernumsatz und Konzernergebnis                  |     |                                                       |
| 51 | Konzernstruktur und Geschäftstätigkeit                             | 113 | Umsatz und Ergebnis der Unternehmensbereiche       | 201 | Bestätigungsvermerk des Abschlussprüfers              |
| 56 | Unternehmenssteuerung, Ziele und Strategie                         | 114 | Finanzierung                                       |     |                                                       |
| 58 | Überblick über den Geschäftsverlauf                                | 114 | Investitionen                                      | 202 | Bericht des Aufsichtsrats                             |
| 66 | Ertrags-, Finanz- und Vermögenslage                                | 115 | Beschaffung                                        |     |                                                       |
| 66 | Ertragslage                                                        | 115 | Forschung und Entwicklung                          | 209 | Gremien                                               |
| 70 | Finanzlage                                                         | 116 | Unternehmensstruktur und Organisation              | 209 | Aufsichtsrat Fresenius SE & Co. KGaA                  |
| 75 | Vermögenslage                                                      | 116 | Geplante Änderungen im Personal- und Sozialbereich | 211 | Vorstand Fresenius Management SE                      |
| 77 | Nichtfinanzielle Leistungsindikatoren und weitere Erfolgsfaktoren  | 116 | Dividende                                          | 212 | Aufsichtsrat Fresenius Management SE                  |
| 77 | Mitarbeiterinnen und Mitarbeiter                                   |     |                                                    | 213 | Glossar                                               |
| 80 | Forschung und Entwicklung                                          |     |                                                    | 216 | Stichwortverzeichnis                                  |
| 87 | Beschaffung                                                        |     |                                                    |     |                                                       |
| 90 | Qualitätsmanagement                                                |     |                                                    |     |                                                       |
| 94 | Verantwortung, Umweltmanagement, Nachhaltigkeit                    |     |                                                    |     |                                                       |
| 98 | Vertrieb, Marketing und Logistik                                   |     |                                                    |     |                                                       |

**KONZERNZAHLEN**

| in Mio €                                                        | 2010                    | 2009              | 2008                | 2007           | 2006              |
|-----------------------------------------------------------------|-------------------------|-------------------|---------------------|----------------|-------------------|
| <b>Umsatz und Ergebnis</b>                                      |                         |                   |                     |                |                   |
| Umsatz                                                          | 15.972                  | 14.164            | 12.336              | 11.358         | 10.777            |
| EBIT                                                            | 2.418                   | 2.054             | 1.727 <sup>1</sup>  | 1.609          | 1.444             |
| Konzernergebnis <sup>2</sup>                                    | 660 <sup>1</sup>        | 514 <sup>1</sup>  | 450 <sup>1</sup>    | 410            | 330               |
| Abschreibungen                                                  | 639                     | 562               | 783                 | 421            | 399               |
| Ergebnis je Stammaktie in €                                     | 4,08 <sup>1</sup>       | 3,18 <sup>1</sup> | 2,85 <sup>1</sup>   | 2,64           | 2,15 <sup>8</sup> |
| Ergebnis je Vorzugsaktie in €                                   | 4,08 <sup>1</sup>       | 3,19 <sup>1</sup> | 2,86 <sup>1</sup>   | 2,65           | 2,16 <sup>8</sup> |
| <b>Cashflow und Bilanz</b>                                      |                         |                   |                     |                |                   |
| Operativer Cashflow                                             | 1.911                   | 1.553             | 1.074               | 1.296          | 1.052             |
| Operativer Cashflow in % vom Umsatz                             | 12,0 %                  | 11,0 %            | 8,7 %               | 11,4 %         | 9,8 %             |
| Bilanzsumme                                                     | 23.577                  | 20.882            | 20.544              | 15.324         | 15.024            |
| Langfristige Vermögenswerte                                     | 17.142                  | 15.519            | 15.466              | 11.033         | 10.918            |
| Eigenkapital <sup>3</sup>                                       | 8.844                   | 7.491             | 6.943               | 6.059          | 5.728             |
| Netto-Finanzverbindlichkeiten                                   | 8.015                   | 7.879             | 8.417               | 5.338          | 5.611             |
| Netto-Finanzverbindlichkeiten/EBITDA <sup>5,9</sup>             | 2,6                     | 3,0               | 3,6                 | 2,6            | 3,0               |
| Eigenkapitalquote <sup>3</sup>                                  | 38 %                    | 36 %              | 34 %                | 40 %           | 38 %              |
| Investitionen <sup>4</sup>                                      | 1.402                   | 931               | 4.617               | 1.318          | 4.314             |
| <b>Rentabilität</b>                                             |                         |                   |                     |                |                   |
| EBIT-Marge                                                      | 15,1 %                  | 14,5 %            | 14,0 % <sup>1</sup> | 14,2 %         | 13,4 %            |
| Eigenkapitalrendite nach Steuern (ROE) <sup>6,9,10</sup>        | 13,3 %                  | 12,1 %            | 10,5 %              | 12,0 %         | 10,4 %            |
| Rendite des betriebsnotwendigen Vermögens (ROOA) <sup>5,9</sup> | 11,6 %                  | 10,5 %            | 9,8 %               | 11,4 %         | 10,4 %            |
| Rendite des investierten Kapitals (ROIC) <sup>5,9</sup>         | 8,9 %                   | 8,2 %             | 7,3 %               | 8,4 %          | 7,4 %             |
| <b>Dividende je Stammaktie in €</b>                             | <b>0,86<sup>7</sup></b> | <b>0,75</b>       | <b>0,70</b>         | <b>0,66</b>    | <b>0,57</b>       |
| <b>Mitarbeiter (31.12.)</b>                                     | <b>137.552</b>          | <b>130.510</b>    | <b>122.217</b>      | <b>114.181</b> | <b>104.872</b>    |

<sup>1</sup> 2008 vor Sondereinflüssen aus der APP-Akquisition; 2010 und 2009 vor Sondereinflüssen aus den Marktwertveränderungen der Pflichtumtauschleihe und des Besserungsscheins. Diese sind nicht liquiditätswirksam.

<sup>2</sup> Ergebnis, das auf die Anteilseigner der Fresenius SE & Co. KGaA entfällt

<sup>3</sup> Eigenkapital inklusive Anteile anderer Gesellschafter am Eigenkapital

<sup>4</sup> Investitionen in Sachanlagen, immaterielle Vermögenswerte, Akquisitionen

<sup>5</sup> 2006 Pro-forma Renal Care Group, ohne Verkaufserlöse der US-Dialysekliniken sowie deren Ergebnis im 1. Quartal 2006

<sup>6</sup> 2006 Pro-forma Renal Care Group, ohne Ergebnis des 1. Quartals 2006 der verkauften US-Dialysekliniken

<sup>7</sup> Vorschlag

<sup>8</sup> Adjustiert um den Aktiensplit im Februar 2007

<sup>9</sup> 2008 Pro-forma APP, vor Sondereinflüssen aus der APP-Akquisition

<sup>10</sup> 2010 und 2009 vor Sondereinflüssen aus den Marktwertveränderungen der Pflichtumtauschleihe und des Besserungsscheins

Eine Zehnjahresübersicht finden Sie im Internet auf [www.fresenius.de](http://www.fresenius.de) unter „Investor Relations“.

## FRESENIUS MEDICAL CARE

DIALYSEPRODUKTE,  
DIALYSEDIENSTLEISTUNGEN

|                              | 2010<br>in Mio US\$ | 2009<br>in Mio US\$ | Veränderung |
|------------------------------|---------------------|---------------------|-------------|
| Umsatz                       | 12.053              | 11.247              | 7 %         |
| EBIT                         | 1.924               | 1.756               | 10 %        |
| Konzernergebnis <sup>1</sup> | 979                 | 891                 | 10 %        |
| Operativer Cashflow          | 1.368               | 1.339               | 2 %         |
| Investitionen/Akquisitionen  | 1.314               | 766                 | 72 %        |
| F & E-Aufwand                | 97                  | 94                  | 3 %         |
| Mitarbeiter (31.12.)         | 77.442              | 71.617              | 8 %         |

## FRESENIUS KABI

INFUSIONSTHERAPIE, I.V.-ARZNEIMITTEL,  
KLINISCHE ERNÄHRUNG,  
MEDIZINTECHNISCHE PRODUKTE/  
TRANSFUSIONSTECHNOLOGIE

|                              | 2010<br>in Mio € | 2009<br>in Mio € | Veränderung |
|------------------------------|------------------|------------------|-------------|
| Umsatz                       | 3.672            | 3.086            | 19 %        |
| EBIT                         | 737              | 607              | 21 %        |
| Konzernergebnis <sup>1</sup> | 294              | 200              | 47 %        |
| Operativer Cashflow          | 567              | 397              | 43 %        |
| Investitionen/Akquisitionen  | 205              | 157              | 31 %        |
| F & E-Aufwand                | 143              | 129              | 11 %        |
| Mitarbeiter (31.12.)         | 22.851           | 21.872           | 4 %         |

## FRESENIUS HELIOS

KRANKENHAUS-TRÄGERSCHAFT

|                              | 2010<br>in Mio € | 2009<br>in Mio € | Veränderung |
|------------------------------|------------------|------------------|-------------|
| Umsatz                       | 2.520            | 2.416            | 4 %         |
| EBIT                         | 235              | 205              | 15 %        |
| Konzernergebnis <sup>1</sup> | 131              | 107              | 22 %        |
| Operativer Cashflow          | 311              | 219              | 42 %        |
| Investitionen/Akquisitionen  | 179              | 203              | -12 %       |
| Auftragseingang              | n/a              | n/a              |             |
| Mitarbeiter (31.12.)         | 33.321           | 33.364           | 0 %         |

## FRESENIUS VAMED

ENGINEERING- UND DIENSTLEISTUNGEN  
FÜR KRANKENHÄUSER UND  
ANDERE GESUNDHEITSEINRICHTUNGEN

|                              | 2010<br>in Mio € | 2009<br>in Mio € | Veränderung |
|------------------------------|------------------|------------------|-------------|
| Umsatz                       | 713              | 618              | 15 %        |
| EBIT                         | 41               | 36               | 14 %        |
| Konzernergebnis <sup>1</sup> | 30               | 27               | 11 %        |
| Operativer Cashflow          | 47               | 29               | 62 %        |
| Investitionen/Akquisitionen  | 14               | 7                | 100 %       |
| Auftragseingang              | 625              | 539              | 16 %        |
| Mitarbeiter (31.12.)         | 3.110            | 2.849            | 9 %         |

<sup>1</sup> Ergebnis, das auf die Anteilseigner der Muttergesellschaft der jeweiligen Unternehmensbereiche entfällt

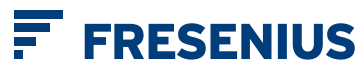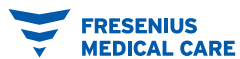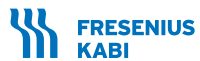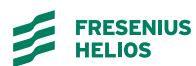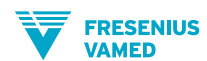

---

Fresenius ist ein Gesundheitskonzern mit Produkten und Dienstleistungen für die Dialyse, das Krankenhaus und die medizinische Versorgung von Patienten zu Hause. Weitere Arbeitsfelder sind das Krankenhausmanagement sowie Engineering- und Dienstleistungen für Krankenhäuser und andere Gesundheitseinrichtungen. Mehr als 137.000 Mitarbeiterinnen und Mitarbeiter arbeiten in rund 100 Ländern engagiert im Dienste der Gesundheit.

---

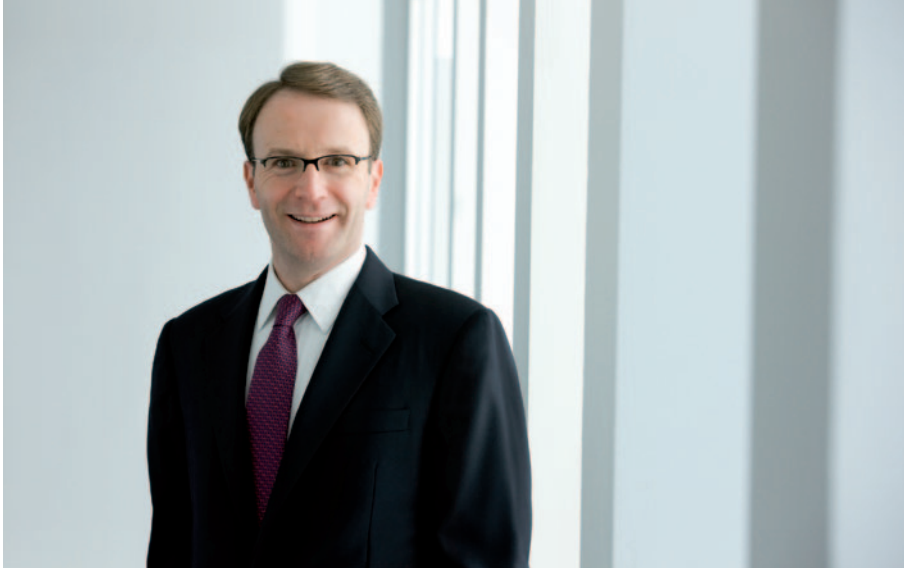

Sehr geehrte Damen und Herren,

ich freue mich, Ihnen für das Geschäftsjahr 2010 Bestwerte bei Umsatz und Ergebnis präsentieren zu können. Im Konzern erzielten wir einen währungsbereinigten Umsatzanstieg von 8 % auf 16,0 Milliarden Euro. Das Ergebnis konnten wir währungsbereinigt und vor Sondereinflüssen noch deutlich stärker um 23 % auf 660 Millionen Euro steigern. Die EBIT-Marge erreichte einen Höchststand von 15,1 %. Alle unsere Unternehmensbereiche haben ihre Ziele erreicht oder sogar übertroffen.

Übertroffen haben wir auch unser mittelfristiges Konzernziel „15/15“, das heißt einen Umsatz von 15 Milliarden Euro bei einer EBIT-Marge von 15 Prozent. Dieses Ziel hatten wir Ihnen im Februar 2007 für das Jahr 2010 angekündigt. Wir liegen damit noch über unserer Vorhersage, obwohl wir in diesem Zeitraum durch eine der schwersten Wirtschaftskrisen gegangen sind.

Ich danke allen Mitarbeiterinnen und Mitarbeitern weltweit ganz herzlich für ihren Einsatz. Sie haben mit Elan, Kompetenz und unermüdlicher Einsatzfreude entscheidend dazu beigetragen, dass wir unsere Ziele erreichen. Den Belegschaftsvertretern danke ich für die konstruktive Zusammenarbeit.

2010 war nicht nur ein Jahr mit ausgezeichneten operativen Erfolgen, wir haben auch wichtige strukturelle Schritte eingeleitet. Die Schaffung einer einzigen Aktiengattung, verbunden mit dem Rechtsformwechsel in eine KGaA, wird die Attraktivität unserer Aktie weiter erhöhen, das Handelsvolumen steigern und Fresenius einen besseren Zugang zum Kapitalmarkt ermöglichen. Die Kursentwicklung nach Ankündigung dieser Maßnahme und die außerordentlich hohe Zustimmungsquote auf der Hauptversammlung im Mai 2010 belegen, dass dieser Schritt von unseren Aktionärinnen und Aktionären sehr positiv aufgenommen wurde. Ich freue mich, dass wir die Beschlüsse der Hauptversammlung in diesem Jahr erfolgreich umsetzen konnten.

Was haben wir uns für die Zukunft vorgenommen? Die weltwirtschaftlichen Rahmenbedingungen werden auch künftig herausfordernd bleiben, und die Bestrebungen, Kosten im Gesundheitswesen einzusparen, werden sich fortsetzen. Diesen Entwicklungen müssen wir mit medizinischer Innovation einerseits und mit Kostenbewusstsein sowie Effizienzsteigerungen andererseits begegnen. Wir bauen weiterhin auf ein hohes organisches Wachstum in allen Unternehmensbereichen als Basis für unseren Erfolg. Darüber hinaus werden wir Gelegenheiten für kleine und mittelgroße Akquisitionen nutzen, die unser organisches Wachstum unterstützen.

Im Geschäftsjahr 2011 werden sich unsere Unternehmensbereiche vornehmlich den folgenden Themen widmen:

- **Fresenius Medical Care** steht 2011 im wichtigen US-Markt vor der Umstellung des Erstattungssystems auf eine Pauschalvergütung. Als integriertes Unternehmen, das sowohl Dialyseprodukte als auch Dialyседienstleistungen unter einem Dach vereint, hat Fresenius Medical Care die besten Voraussetzungen, um dieses neue Kostenerstattungssystem erfolgreich einzuführen. Hohes Wachstumspotenzial für Fresenius Medical Care sehe ich besonders außerhalb Nordamerikas, vor allem in der Region Asien-Pazifik und in Osteuropa. Der Ausbau des internationalen Geschäfts ist daher eine unserer Hauptaufgaben für die nächsten Jahre.

- ▶ **Fresenius Kabi** konzentriert sich darauf, sowohl neue Produkte in den Markt zu bringen als auch das bestehende Angebot regional weiter auszubauen. Besondere Anstrengungen richten wir auch künftig auf Produktqualität und Zuverlässigkeit. Gerade das Jahr 2010 hat angesichts zahlreicher Lieferengpässe bei Wettbewerbern in den USA im Bereich der I.V.-Arzneimittel gezeigt, dass dies wesentliche Erfolgsparameter sind. Fresenius Kabi konnte als verlässlicher Partner für die Kunden mit bester Qualität, neuen Produkten und zusätzlichen Verkäufen aufgrund der Lieferengpässe ein überdurchschnittlich hohes Wachstum erreichen.
- ▶ **Fresenius Helios** arbeitet daran, den Qualitätsgedanken in den Kliniken konsequent weiterzuentwickeln und Patienten mit Spitzenmedizin zu versorgen. Das Unternehmen hat zahlreiche Initiativen entwickelt, die die Qualität verbessern und Behandlungsfehler vermeiden sollen. Nachdem in den vergangenen zwei Jahren nur wenige Kliniken in Deutschland privatisiert wurden, erwarten wir, dass sich dieser Markt mittelfristig wieder belebt. Fresenius Helios wird daher auch durch Zukäufe weiter wachsen.
- ▶ **Fresenius Vamed** kann mit umfassender Kompetenz aus der Verbindung von Projekt- und Dienstleistungsgeschäft Gesundheitseinrichtungen über ihren gesamten Lebenszyklus begleiten. Das Unternehmen arbeitet daher verstärkt daran, neben Neuaufträgen auch Folgeaufträge zu gewinnen. Dabei werden nach wie vor Europa, die Region Asien-Pazifik und Afrika die Schwerpunktmärkte sein. Dank eines ausgezeichneten Auftragsbestands besitzt Fresenius Vamed eine sehr gute Basis für weiteres Wachstum.



Ich bin davon überzeugt, dass Fresenius mit seiner globalen Präsenz in wachsenden Märkten, seiner medizinischen und technologischen Kompetenz sowie einer flexiblen und dezentralen Organisationsstruktur ausgezeichnet aufgestellt ist. So sehen wir dem Jahr 2011 mit Zuversicht entgegen. Wir wollen den Umsatz währungsbereinigt um  $\geq 7\%$  und das Ergebnis währungsbereinigt um 8 bis 12 % steigern.

Sehr geehrte Damen und Herren, wir danken Ihnen für Ihr Vertrauen. Auch in Zukunft wollen wir das Beste für unsere Patienten erreichen und den Wert des Unternehmens nachhaltig steigern.

Mit freundlichen Grüßen



Dr. Ulf M. Schneider  
Vorsitzender des Vorstands

# DAS GESCHÄFTSJAHR IM ÜBERBLICK

**UMSATZ.** Fresenius steigerte den Konzernumsatz um 13 % auf 15.972 Mio € (2009: 14.164 Mio €). Das organische Wachstum betrug ausgezeichnete 7 %, Akquisitionen trugen 1 % zum Umsatzanstieg bei. Währungsumrechnungseffekte hatten einen positiven Einfluss von 5 %.

**ERGEBNIS.** Das operative Ergebnis (EBIT) stieg um 18 % auf 2.418 Mio € (2009: 2.054 Mio €). Zu diesem sehr guten Wachstum haben alle Unternehmensbereiche mit zweistelligen Zuwachsraten beigetragen. Die EBIT-Marge erreichte den Bestwert von 15,1 % (2009: 14,5 %).

## UMSATZ NACH REGIONEN

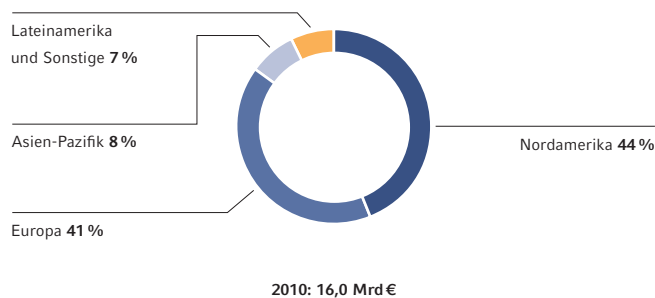

## ERGEBNIS

| in Mio €                                        | 2010         | 2009  | Veränd. | Veränd. währungs-bereinigt |
|-------------------------------------------------|--------------|-------|---------|----------------------------|
| <b>EBIT</b>                                     | <b>2.418</b> | 2.054 | 18 %    | 13 %                       |
| <b>Zinsergebnis</b>                             | <b>-566</b>  | -580  | 2 %     | 6 %                        |
| Steuern vom Einkommen und vom Ertrag, bereinigt | -609         | -463  | -32 %   | -26 %                      |
| Auf andere Gesellschafter entfallender Gewinn   | -583         | -497  | -17 %   | -12 %                      |
| <b>Konzernergebnis<sup>1</sup></b>              | <b>660</b>   | 514   | 28 %    | 23 %                       |

<sup>1</sup> Ergebnis, das auf die Anteilseigner der Fresenius SE & Co. KGaA entfällt, bereinigt um Marktwertveränderungen der Pflichtumtauschsanleihe und des Besserungsscheins

- ▶ In Nordamerika stieg der Umsatz währungsbereinigt um 9 % und organisch um 8 %. Diese hohe Steigerung ist im Wesentlichen der erfolgreichen Geschäftsentwicklung von APP Pharmaceuticals zu verdanken.
- ▶ In Europa betrug das Umsatzplus währungsbereinigt 7 %, organisch stieg der Umsatz um 6 %.
- ▶ Erneut erzielten wir hohe organische Zuwachsraten von 7 % in der Region Asien-Pazifik und 11 % in Lateinamerika.

- ▶ Das Zinsergebnis des Konzerns betrug -566 Mio € (2009: -580 Mio €). Dabei hatten niedrigere durchschnittliche Zinssätze auf Verbindlichkeiten einen positiven Einfluss. Gegenläufig wirkten sich Währungseffekte aufgrund der Stärke des US-Dollars zum Euro aus.
- ▶ Das Konzernergebnis<sup>1</sup> stieg um ausgezeichnete 28 % auf 660 Mio €. Das Ergebnis je Stamm- und Vorzugsaktie erhöhte sich um jeweils 28 %.

**CASHFLOW.** Der operative Cashflow stieg um 23 % auf 1.911 Mio €. Dies ist im Wesentlichen der sehr guten Ertragsentwicklung und einem konsequenten Management des Nettoumlaufvermögens zu verdanken.

**BILANZ.** Die Bilanzsumme des Konzerns stieg um 13 % auf 23.577 Mio €. Währungsbereinigt betrug der Zuwachs 7 %. Das Eigenkapital einschließlich der Anteile anderer Gesellschafter nahm um 18 % auf 8.844 Mio € zu.

#### OPERATIVER CASHFLOW

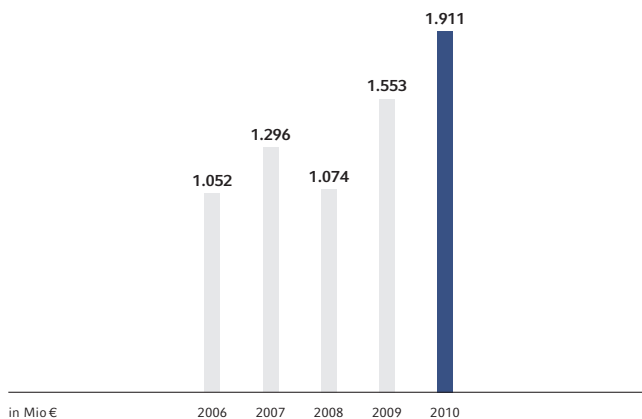

in Mio €

#### AKTIVA

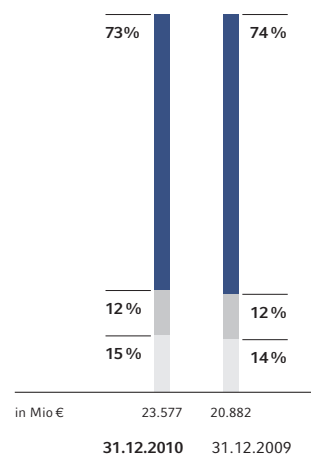

in Mio €

#### PASSIVA

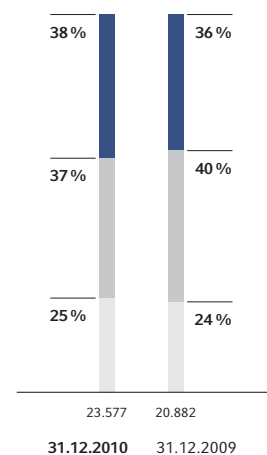

in Mio €

- Langfristige Vermögenswerte
- Eigenkapital und Anteile anderer Gesellschafter
- Forderungen aus Lieferungen und Leistungen
- Finanzverbindlichkeiten
- Sonstige, kurzfristige Vermögenswerte
- Sonstige Verbindlichkeiten

- Der operative Cashflow in Prozent vom Umsatz betrug 12,0 % (2009: 11,0 %).
- Der Cashflow vor Akquisitionen und Dividenden erhöhte sich deutlich auf 1.178 Mio € (2009: 891 Mio €).
- Nach Akquisitionen und Dividenden erreichten wir einen Cashflow von 345 Mio € (2009: 389 Mio €). Hier wirkten sich vor allem die gegenüber dem Jahr 2009 höheren Investitionen für Akquisitionen bei der Fresenius Medical Care aus.

- Die Eigenkapitalquote einschließlich der Anteile anderer Gesellschafter stieg auf 37,5 %.
- Die Finanzverbindlichkeiten des Konzerns stiegen auf 8.784 Mio € (31. Dezember 2009: 8.299 Mio €). Währungsbereinigt lagen sie um 1 % über dem Vorjahreswert.
- Die Kennziffer Netto-Finanzverbindlichkeiten/EBITDA verbesserte sich deutlich auf 2,6 (31. Dezember 2009: 3,0).

**FRESENIUS-AKTIE.** Das Börsenjahr 2010 war einerseits durch die europäische Staatsschuldenkrise und andererseits von der wirtschaftlichen Erholung in vielen Ländern geprägt. Kräftiges Wirtschaftswachstum führte zu einem Anstieg des DAX. Die Fresenius-Aktien zeigten dank der sehr guten Geschäftsergebnisse und der angekündigten Aktienumwandlung Stärke und übertrafen den DAX in seiner Entwicklung noch deutlich: Die Stammaktie schloss zum Jahresende mit einem Plus von 44 %, die Vorzugsaktie mit 28 %.

#### AKTIENMARKT

Die Aktienmärkte starteten das Jahr mit Kursabschlägen vor dem Hintergrund der **Schuldenkrise**, verbunden mit der Sorge, dass einzelne Länder Europas zusätzlichen Kapitalbedarf anmelden. Die damit einhergehende Unsicherheit und

die Abwertung des Euro wurden kompensiert durch Diskussionen über einen EU-Rettungsschirm, der dann Mitte Juni aufgelegt wurde. Daraufhin erhellte sich die Stimmung am Kapitalmarkt deutlich. Statt der allseits erwarteten Herbstkorrektur kletterten die Aktienkurse weiter nach oben und

STAMMAKTIE UND VORZUGSAKTIE RELATIV ZUM DAX

31.12.2009 = 100

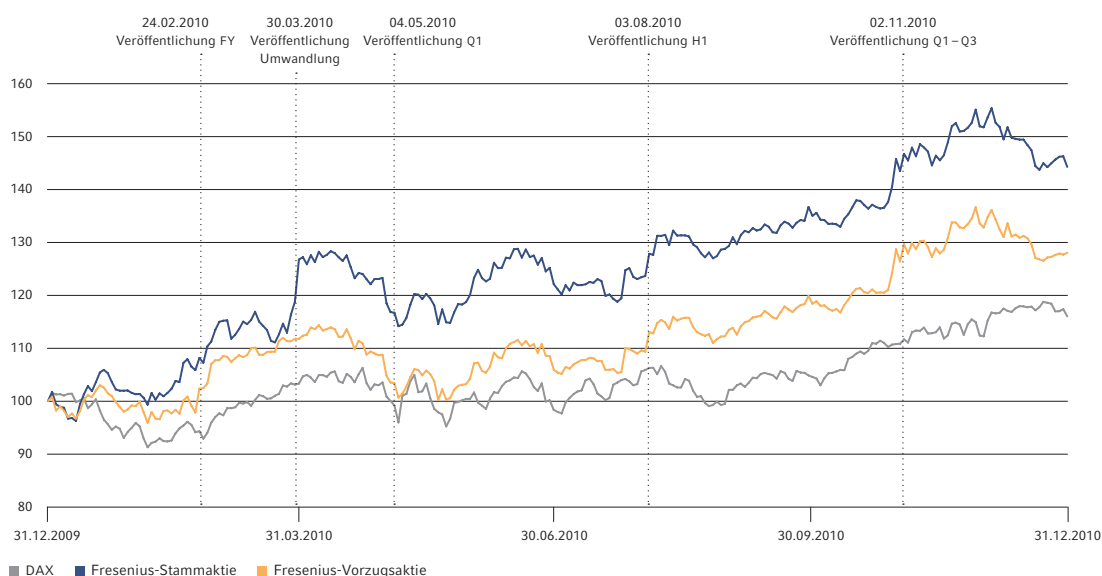

bescherten einigen Börsenplätzen die stärkste Performance seit vielen Jahren. Insbesondere in Deutschland etablierte sich ein Aufwärtstrend, der – abgesehen von kleineren Kurskorrekturen – bis kurz vor Jahresende anhielt.

Der **DAX** verzeichnete Anfang Februar 2010 sein Jahrestief von 5.434 Punkten. Ausgehend von einem Niveau, das leicht unter dem des Jahresbeginns lag, gewann er ab Ende August deutlich an Fahrt und erreichte im Dezember 2010 seinen Jahreshöchstwert von 7.078 Punkten; der höchste Stand seit dem Jahr 2008. Seit Jahresanfang stieg er um 16 % und beendete das Jahr 2010 mit 6.914 Punkten.

Im europäischen Vergleich der Bluechip-Indizes schnitt der DAX hervorragend ab. Der **Euro Stoxx 50** verlor im Jahresverlauf 6 % an Wert. Der europäische **Dow Jones Stoxx 600** beendete das Jahr 2010 mit einem Plus von 9 %. In diesem Index entwickelten sich die Aktien von Automobil- (44 %), Industrie- (33 %) und Konsumwerten (27 %) am besten, während Öl und Gas- (0 %), Versorgungs- (-9 %) und Bankenwerte (-12 %) die letzten Plätze belegten. Der Healthcare-Sektor erzielte 6 % an Wertzuwachs. Die Leitindizes in den USA haben gleichfalls deutlich gewonnen: Der **S & P 500** beendete das Jahr 2010 mit einem Plus von 13 %, der **Dow Jones Industrial Average** stieg um 11 %.

## FRESENIUS-AKTIE

Im Jahr 2010 stieg sowohl der Kurs unserer Stammaktie als auch der Kurs unserer Vorzugsaktie deutlich stärker als der Leitindex DAX.

Zu Anfang des Jahres orientierten sich die Fresenius-Aktien noch am Gesamtmarkt und zeigten eine verhaltene Entwicklung. Der Kurs der **Stammaktie** erreichte am 12. Januar 2010 seinen **Jahrestiefststand** von 41,80 €. Die **Vorzugsaktie** verzeichnete ihren **Jahrestiefststand** von 47,96 € am 5. Februar 2010. Danach stiegen die Kurse beider Aktiengattungen kontinuierlich. Am 30. März 2010 gaben wir die geplante Umwandlung der Vorzugsaktien in Stammaktien in Verbindung mit einem Rechtsformwechsel in eine Kommanditgesellschaft auf Aktien (KGaA) bekannt. Nach Bekanntgabe sprang die Stammaktie wertmäßig auf das höhere Niveau der Vorzugsaktie und schloss die Lücke zwischen beiden Aktiengattungen bis auf wenige Eurocent. Anfang Mai lösten Unsicherheiten über die Höhe des EU-Rettungsschirms sowie die Befürchtung, dass weitere Länder unter ihm würden Schutz suchen müssen, eine kurzfristige Kurskorrektur nach unten aus. Auch die Fresenius-Aktien blieben davon nicht verschont.

Mit der Bekanntgabe guter Geschäftszahlen für das 1. Quartal 2010 stabilisierten sie sich jedoch und setzten zu einer Erholung an. Nach Veröffentlichung der sehr guten Halbjahreszahlen und Anhebung des Ausblicks einzelner Unternehmensbereiche Anfang August erfuhren beide Aktiengattungen einen deutlichen Kursanstieg. Dieser verstärkte sich noch dank der hervorragenden Geschäftsentwicklung im 3. Quartal 2010 in Verbindung mit einer weiteren Anhebung des Konzernausblicks. In dem folgenden Anstieg erreichte sowohl der Kurs der Stammaktie als auch der der Vorzugsaktie sein Allzeithoch.

Die **Stammaktie** schloss bei 62,75 €, ihren **Jahreshöchststand** von 67,59 € erreichte sie kurz zuvor am 2. Dezember 2010. Die **Vorzugsaktie** verzeichnete ihren **Jahreshöchststand** von 68,40 € am 26. November 2010 und schloss mit 64,07 €. Die Stammaktie erreichte damit einen Anstieg von 44 % und die Vorzugsaktie von 28 % gegenüber dem Jahresende 2009.

Zum 31. Dezember 2010 lag die **Marktkapitalisierung** von Fresenius um 37 % über dem Niveau des Vorjahres und betrug 10,3 Mrd €.

Das durchschnittliche tägliche **Xetra-Handelsvolumen** der Fresenius-Aktien ist im Berichtsjahr im Vergleich zum Vorjahr um 16 % bzw. 26 % zurückgegangen – wie die Tabelle zeigt. Das Handelsvolumen des DAX ging im gleichen Zeitraum um 2 % zurück.

### XETRA-HANDELSVOLUMEN

|              | Durchschnittliches<br>Handelsvolumen<br>2010<br>Stück | Durchschnittliches<br>Handelsvolumen<br>2009<br>Stück | Veränderung in % |
|--------------|-------------------------------------------------------|-------------------------------------------------------|------------------|
| Stammaktie   | 60.288                                                | 72.012                                                | -16              |
| Vorzugsaktie | 371.172                                               | 500.509                                               | -26              |

Die Fresenius-Aktien sind in Frankfurt am Main sowie an den Börsen in Düsseldorf und München notiert. Fresenius ist im deutschen Leitindex DAX, im Branchenindex Pharma & Healthcare des Prime Standard sowie im Dow Jones Stoxx 600, Industriegruppe Healthcare, vertreten. Darüber hinaus sind wir in den Indizes Dow Jones Euro Stoxx und FTSE Eurofirst 300 gelistet.

## AKTIENUMWANDLUNG UND RECHTSFORMWECHSEL

Im März 2010 haben wir die Vereinfachung der Aktienstruktur durch die Umwandlung der Vorzugsaktien in Stammaktien in Verbindung mit einem Rechtsformwechsel in eine Kommanditgesellschaft auf Aktien (KGaA) angekündigt. Auf der ordentlichen Hauptversammlung am 12. Mai 2010 stimmten sowohl die Stammaktionäre mit einer Mehrheit von 98 % als auch die Vorzugsaktionäre mit einer Mehrheit von 94 % dem Vorhaben zu. Der Rechtsformwechsel in die Fresenius SE & Co. KGaA wurde mit Eintragung in das Handelsregister Bad Homburg v. d. H. am 28. Januar 2011 wirksam. Gemäß Beschluss der Hauptversammlung der Fresenius SE und der Satzung der Fresenius SE & Co. KGaA wurden damit alle Stammaktien der Fresenius SE zu Stammaktien der Fresenius SE & Co. KGaA. Zugleich wurden alle stimmrechtslosen Vorzugsaktien der Fresenius SE obligatorisch im Verhältnis 1:1 in stimmberechtigte Stammaktien der Fresenius SE & Co. KGaA getauscht. Die Höhe des Grundkapitals der Gesellschaft blieb dabei unverändert. Die Notierung der beiden Aktiengattungen der Fresenius SE wurde am 28. Januar 2011 eingestellt. Am 31. Januar 2011 wurde der Handel der Stammaktien der Fresenius SE & Co. KGaA aufgenommen.

Durch die Aktienumwandlung haben wir eine einheitliche Aktiengattung geschaffen. Dies stärkt die Position von Fresenius am Kapitalmarkt und erhöht die Handelsliquidität der Fresenius-Aktie. Eine erhöhte Indexgewichtung wird die Position der Aktie im DAX festigen sowie einen besseren Zugang zum Kapitalmarkt ermöglichen. Dadurch steigern wir die Attraktivität und Transparenz von Fresenius für Investoren maßgeblich.

## KAPITALSTRUKTUR

Im Geschäftsjahr 2010 wurden Optionen auf Stamm- und Vorzugsaktien nach Maßgabe der Aktienoptionspläne 1998 und 2003 ausgeübt. Insgesamt ist dadurch die Anzahl der Aktien um jeweils 567.357 Stück Inhaber-Stamm- und -Vorzugsaktien gestiegen. Informationen zu den Aktienoptionsplänen finden Sie auf den Seiten 191 bis 198 dieses Berichts.

Die Anzahl der Aktien zum Jahresende betrug 81.225.045 Stück Inhaber-Stammaktien und 81.225.045 Stück Inhaber-Vorzugsaktien.

## DIVIDENDENENTWICKLUNG DER STAMMAKTIE IN €

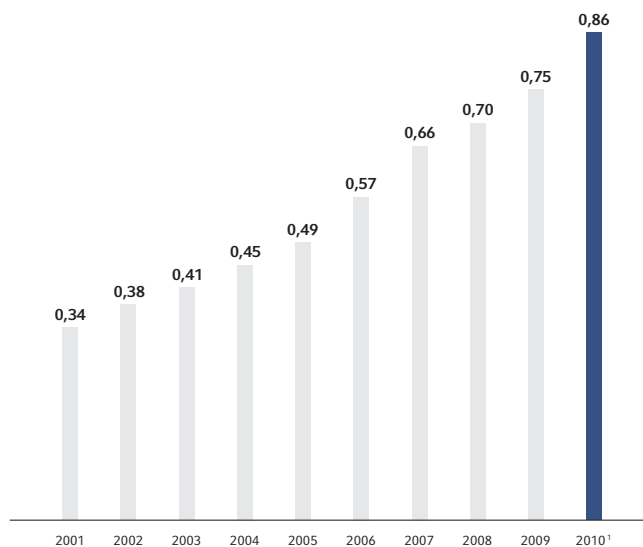

<sup>1</sup> Vorschlag

## DIVIDENDE

Auch für das Geschäftsjahr 2010 wollen wir unsere Dividende als Ergebnis der ausgezeichneten Geschäftsentwicklung im Konzern erhöhen und damit unsere **ertragsorientierte Ausschüttungspolitik** fortsetzen. Unseren Aktionärinnen und Aktionären schlagen wir die 18. Dividendenerhöhung in Folge vor, auf 0,86 € je Stammaktie (2009: 0,75 €). Dies entspricht einer Steigerung von 15 % je Aktie. Die Ausschüttungssumme beläuft sich auf 139,7 Mio €, das sind 21 % des Konzernergebnisses vor Sondereinflüssen. Auf Basis des Dividendenvorschlags und des Schlusskurses unserer Stammaktie Ende des Jahres 2010 beträgt die Dividendenrendite etwa 1,4 %.

Besonders für langfristig orientierte Anleger sind Fresenius-Aktien ein attraktives Investment: Wer vor fünf Jahren rund 1.000 € in Fresenius-Stammaktien investiert und die Dividenden reinvestiert hat, verfügte am 31. Dezember 2010 über ein Vermögen von 1.877 €. Dies entspricht einer durchschnittlichen jährlichen Rendite von 14 %. Als Service finden Sie auf unserer Website [www.fresenius.de](http://www.fresenius.de) unter Investor Relations – Fresenius-Aktien – Aktienkurs einen Gesamtrendite-rechner. Mit diesem Rechner können Sie den Gesamtertrag Ihrer Fresenius-Aktien mitsamt den Dividendenzahlungen ermitteln.

## AKTIONÄRSSTRUKTUR

Die nachfolgende Darstellung zeigt die Aktionärsstruktur zum Ende des Jahres 2010, d. h. vor der Umwandlung der Vorzugsaktien in Stammaktien. Als größter Anteilseigner der Fresenius SE hielt die Else Kröner-Fresenius-Stiftung rund 58 % am stimmberechtigten Kapital. Die Allianz Lebensversicherungs-AG hielt nach eigenen Angaben einen Anteil zwischen 5 und 10 % am stimmberechtigten Kapital. Darüber hinaus lagen uns gemäß Wertpapierhandelsgesetz Stimmrechtsmeldungen von Artio Global Investors und von Fidelity vor. Informationen zu Stimmrechtsmeldungen, die uns nach erfolgter Umwandlung zugegangen sind, finden Sie im Anhang auf den Seiten 173 bis 174.

Zum **31. Dezember 2010** haben wir eine Erhebung unserer **Aktionärsstruktur** durchführen lassen, bei der insgesamt 92 % des Grundkapitals erfasst wurden. Es wurden 99 % der Stammaktien und 85 % der Vorzugsaktien identifiziert. Die Erhebung ergab, dass 306 institutionelle Investoren rund 85,3 Millionen Aktien (52 % des Grundkapitals) hielten. Diese teilten sich auf in 22,2 Millionen Stammaktien (27 % der Stammaktien) und 63,0 Millionen Vorzugsaktien (78 % der Vorzugsaktien). Als Retail-Holdings wurden 4,7 Millionen Stammaktien und 5,5 Millionen Vorzugsaktien festgestellt. Die **Top-10-Investoren** halten 14 % des Stammaktienkapitals bzw. 29 % des Vorzugsaktienkapitals. Beide Aktiengattungen werden überwiegend von Investoren in Deutschland, Großbritannien und den USA gehalten.

Diese Analyse gibt uns wertvolle Informationen über den Stand und die Veränderung unserer Aktionärsstruktur. Die regionale Verteilung unserer institutionellen Investoren ist dabei z. B. eine geeignete Basis für die zielgenaue Planung und Anpassung unsere Roadshow-Aktivitäten. Die zuletzt durchgeführte Erhebung zeigte, dass die Aktionärsbasis solide ist. Damit wird unser Weg bestätigt, den Dialog, insbesondere mit institutionellen Investoren, auszubauen und die Roadshow-Aktivitäten in Europa und den USA zu verstärken.

## ERGEBNIS JE AKTIE

Bereinigt um die Sondereinflüsse aus den Marktwertveränderungen der Pflichtumtauschleihe (MEB) und des Besserungsscheins (CVR) im Zusammenhang mit der Akquisition von APP Pharmaceuticals erzielte der Fresenius-Konzern im Geschäftsjahr 2010 ein Ergebnis je Stamm- und Vorzugsaktie von 4,08 €. Der Anstieg betrug jeweils 28 %. Erläuterungen zur Ergebnisentwicklung sowie Informationen zum Ergebnis je Aktie finden Sie auf Seite 68 im Lagebericht sowie im Anhang zum Konzernabschluss auf Seite 149.

## ANALYSTENEMPFEHLUNGEN

Sowohl für institutionelle Investoren als auch für Privatanleger sind die Empfehlungen der Finanzanalysten eine wichtige Entscheidungsgrundlage für ihre Aktienanlage. Bis zum

AKTIONÄRSSTRUKTUR STAMMAKTIE

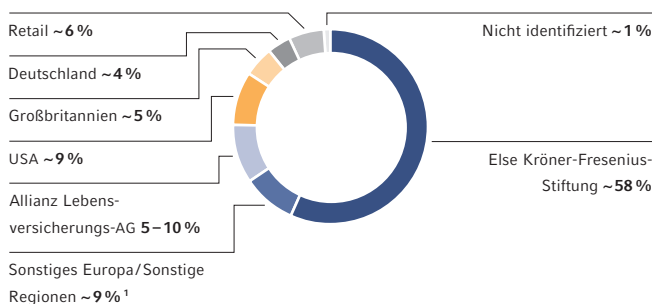

<sup>1</sup> Davon Sonstige Regionen ~1 %

AKTIONÄRSSTRUKTUR VORZUGSAKTIE

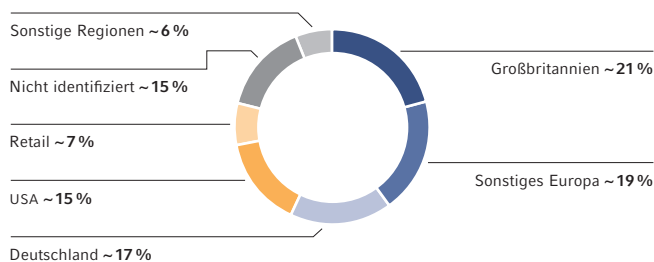

22. Februar 2011 gab es nach unserer Erhebung 24 Kaufempfehlungen, 4 Halteempfehlungen und keine Verkaufsempfehlung. Dies verdeutlicht das Vertrauen in die langfristige Ertragskraft des Fresenius-Konzerns und in das Wachstumspotenzial unseres Geschäfts sowie in unsere Aktien.

Die nachfolgende Tabelle zeigt Banken, die regelmäßig über Fresenius berichten und die Aktien bewerten.

#### ANALYSTENEMPFEHLUNGEN

|                        |                |        |
|------------------------|----------------|--------|
| Bankhaus Lampe         | November 2010  | Kaufen |
| Bankhaus Metzler       | November 2010  | Kaufen |
| BofA/Merrill Lynch     | Januar 2011    | Kaufen |
| Cheuvreux              | Januar 2011    | Kaufen |
| Commerzbank            | Februar 2011   | Kaufen |
| Credit Suisse          | Februar 2011   | Kaufen |
| Deutsche Bank          | Februar 2011   | Kaufen |
| DZ Bank                | Februar 2011   | Kaufen |
| equinet Bank AG        | November 2010  | Halten |
| Evolution Securities   | Februar 2011   | Kaufen |
| Exane BNP Paribas      | November 2010  | Kaufen |
| Jefferies              | Januar 2011    | Kaufen |
| Kepler Capital         | November 2010  | Kaufen |
| LBBW                   | Oktober 2010   | Kaufen |
| Macquarie              | Februar 2011   | Kaufen |
| MainFirst Bank         | November 2010  | Halten |
| M. M. Warburg          | Februar 2011   | Halten |
| Morgan Stanley         | Februar 2011   | Kaufen |
| Nomura                 | November 2010  | Kaufen |
| NordLB                 | November 2010  | Kaufen |
| Piper Jaffray          | September 2010 | Kaufen |
| Royal Bank of Scotland | November 2010  | Kaufen |
| Redburn Partners LLP   | November 2010  | Kaufen |
| Silvia Quandt Research | November 2010  | Kaufen |
| Société Générale       | November 2010  | Halten |
| UBS                    | November 2010  | Kaufen |
| UniCredit              | November 2010  | Kaufen |
| WestLB                 | Februar 2011   | Kaufen |

#### INVESTOR RELATIONS

Unsere Investor-Relations-Arbeit ist den Transparenzrichtlinien des Deutschen Corporate Governance Kodex verpflichtet: Wir verfolgen eine umfassende, zeitnahe und offene Kommunikation sowohl mit privaten und institutionellen Investoren als auch mit Finanzanalysten. Dabei ist uns die Gleichbehandlung aller Marktakteure sehr wichtig.

Um unseren Anlegern eine angemessene Einschätzung der Geschäftslage und des Marktumfelds der Fresenius-Gruppe zu ermöglichen, haben wir im Jahr 2010 den **Dialog mit dem Kapitalmarkt** intensiviert. Insgesamt präsentierte sich Fresenius zusätzlich zu dem jährlichen Analystenmeeting und den vierteljährlichen Telefon-/Webcastkonferenzen auf allen wichtigen Finanzmärkten in Europa und den USA. Weiter ausgebaut werden konnte der regelmäßige Kontakt auf 15 internationalen Investorenkonferenzen und durch 18 Roadshows sowie durch zahlreiche Einzelgespräche mit institutionellen Investoren und Analysten. Daneben führten wir zusammen mit Banken sogenannte Field Trips durch, bei denen wir Investoren und Analysten die Möglichkeit zu Diskussionen mit dem Vorstand bieten.

Darüber hinaus haben wir den Dialog mit unseren **Privatanlegern** fortgeführt. Dabei ist das Internet für uns ein wichtiges Instrument. Auf unserer Website [www.fresenius.de](http://www.fresenius.de) können unsere Privataktionäre Live-Übertragungen der vierteljährlichen Telefonkonferenzen sowie des jährlichen Analystenmeetings verfolgen. Bereits kurz vor und natürlich auch nach den Veranstaltungen stehen die Präsentationen im Bereich „Investor Relations“ unter der Rubrik „Präsentationen“ zum Herunterladen zur Verfügung. Außerdem veröffentlichen wir die Präsentationen zu den Investorenkonferenzen. Es ist unsere Absicht, die Kommunikation mit Privataktionären weiter zu verbessern. Gerne nehmen wir Ihre Anregungen dazu auf. Das Informationsangebot auf unserer Website planen wir auch im Jahr 2011 zu erweitern.

Für unsere Leistungen im Rahmen der Finanzkommunikation erhielten wir im Jahr 2010 wichtige **Auszeichnungen**. Im Wettbewerb des manager magazins für den besten Geschäftsbericht, für den rund 200 Unternehmensberichte deutscher und europäischer Aktiengesellschaften analysiert wurden, belegten wir in der Kategorie DAX den elften Platz. Darüber



hinaus haben wir für unseren Geschäftsbericht den Silver Award in der Kategorie Health Care – Equipment & Supplies von der League of American Communications Professionals (LACP), USA, erhalten. An dieser Analyse haben mehr als 4.000 Unternehmen aus über 25 Ländern teilgenommen.

Unser Online-Geschäftsbericht hat beim LACP 2010 spotlight award mit dem Platinum Award den ersten Platz in der Kategorie EMEA & Asia-Pacific gewonnen. Im Jahr 2010 bewertete die Jury, die sich aus Kommunikationsexperten

verschiedener Branchen und Bereiche zusammensetzt, insgesamt über 1.100 Online-Geschäftsberichte. In der Kategorie Top 100 Communication Materials haben wir den 50. Platz der analysierten Online-Geschäftsberichte belegt.

Wenn Sie Kontakt mit uns aufnehmen oder sich über die geplanten Termine des Finanzkalenders 2011 informieren möchten, schauen Sie bitte auf die letzte Seite dieses Geschäftsberichts oder im Internet auf unsere Website [www.fresenius.de](http://www.fresenius.de) unter „Investor Relations“.

#### KENNDATEN DER FRESENIUS-AKTIE

|                                               | 2010                     | 2009              | 2008              | 2007        | 2006               |
|-----------------------------------------------|--------------------------|-------------------|-------------------|-------------|--------------------|
| Anzahl der Aktien                             | <b>162.450.090</b>       | 161.315.376       | 161.143.734       | 155.164.770 | 51.451.292         |
| Stammaktien                                   | <b>81.225.045</b>        | 80.657.688        | 80.571.867        | 77.582.385  | 25.725.646         |
| Vorzugsaktien                                 | <b>81.225.045</b>        | 80.657.688        | 80.571.867        | 77.582.385  | 25.725.646         |
| Börsenkurs der Stammaktie <sup>1</sup> in €   |                          |                   |                   |             |                    |
| Hoch                                          | <b>67,59</b>             | 43,76             | 60,87             | 63,35       | 51,32 <sup>2</sup> |
| Tief                                          | <b>41,80</b>             | 27,69             | 31,93             | 50,17       | 35,47 <sup>2</sup> |
| Jahresschlusskurs                             | <b>62,75</b>             | 43,45             | 36,23             | 56,00       | 50,57 <sup>2</sup> |
| Börsenkurs der Vorzugsaktie <sup>1</sup> in € |                          |                   |                   |             |                    |
| Hoch                                          | <b>68,40</b>             | 50,01             | 59,25             | 63,12       | 55,32 <sup>2</sup> |
| Tief                                          | <b>47,96</b>             | 31,40             | 37,23             | 50,70       | 37,41 <sup>2</sup> |
| Jahresschlusskurs                             | <b>64,07</b>             | 50,01             | 41,59             | 56,90       | 54,27 <sup>2</sup> |
| Marktkapitalisierung <sup>3</sup> in Mio €    | <b>10.301</b>            | 7.538             | 6.270             | 8.759       | 8.091              |
| Beta-Faktor <sup>4</sup>                      | <b>0,67</b>              | 0,29              | 0,85              | 0,80        | 0,88               |
| Ausschüttungssumme in Mio €                   | <b>139,7<sup>5</sup></b> | 121,8             | 113,6             | 103,2       | 88,8               |
| Je Aktie in €                                 |                          |                   |                   |             |                    |
| Dividende Stammaktie                          | <b>0,86<sup>5</sup></b>  | 0,75              | 0,70              | 0,66        | 0,57               |
| Dividende Vorzugsaktie                        | <b>n. a.</b>             | 0,76              | 0,71              | 0,67        | 0,58               |
| Ergebnis Stammaktie                           | <b>4,08<sup>6</sup></b>  | 3,18 <sup>6</sup> | 2,85 <sup>7</sup> | 2,64        | 2,15 <sup>2</sup>  |
| Ergebnis Vorzugsaktie                         | <b>4,08<sup>6</sup></b>  | 3,19 <sup>6</sup> | 2,86 <sup>7</sup> | 2,65        | 2,16 <sup>2</sup>  |

<sup>1</sup> Xetra-Schlusskurse an der Frankfurter Wertpapierbörse

<sup>2</sup> Adjustiert um Aktiensplit

<sup>3</sup> Gesamtzahl der Stamm- und Vorzugsaktien multipliziert mit dem jeweiligen Xetra-Jahresschlusskurs an der Frankfurter Wertpapierbörse

<sup>4</sup> Fresenius-Vorzugsaktie (Quelle: Bloomberg)

<sup>5</sup> Vorschlag

<sup>6</sup> Bereinigt um die Sondereinflüsse aus den Marktwertveränderungen der Pflichtumtauschleihe (MEB) und des Besserungsscheins (CVR) im Zusammenhang mit der Akquisition von APP Pharmaceuticals

<sup>7</sup> Vor Sondereinflüssen aus der APP-Akquisition

## ERKLÄRUNG ZUR UNTERNEHMENSFÜHRUNG UND CORPORATE-GOVERNANCE-BERICHT.

Der Aufsichtsrat der Fresenius SE & Co. KGaA und der Vorstand der persönlich haftenden Gesellschafterin der Fresenius SE & Co. KGaA bekennen sich zu einer verantwortungsbewussten Unternehmensführung, die auf eine nachhaltige Steigerung des Unternehmenswertes ausgerichtet ist. Wesentliche Faktoren dabei sind langfristige Unternehmensstrategien, eine solide Finanzpolitik, die Einhaltung rechtlicher und ethischer Geschäftsstandards sowie Transparenz in der Unternehmenskommunikation.

Der Aufsichtsrat der Fresenius SE & Co. KGaA und der Vorstand der persönlich haftenden Gesellschafterin der Fresenius SE & Co. KGaA, der Fresenius Management SE (nachfolgend: der Vorstand der persönlich haftenden Gesellschafterin), berichten in dieser Erklärung gemäß § 289a HGB über die Unternehmensführung sowie gemäß Ziffer 3.10 des Deutschen Corporate Governance Kodex über die Corporate Governance des Unternehmens (Corporate-Governance-Bericht). Die Verwaltung hat die Erklärung zur Unternehmensführung und den Corporate-Governance-Bericht auf der Website des Unternehmens, [www.fresenius.de](http://www.fresenius.de), unter Wir über uns – Corporate Governance zugänglich gemacht.

Die Fresenius SE hat das Berichtsjahr in der Rechtsform einer SE (Societas Europaea) abgeschlossen. Am 28. Januar 2011 wurde der Rechtsformwechsel der Gesellschaft in eine Kommanditgesellschaft auf Aktien (KGaA) im Handelsregister

Bad Homburg v. d. H. eingetragen. Die sich daraus ergebenden Auswirkungen auf die Corporate Governance der Fresenius SE & Co. KGaA sind im Anschluss an die Darstellung zum Berichtsjahr 2010 zusammengefasst.

### UMSETZUNG DER EMPFEHLUNGEN DES CORPORATE GOVERNANCE KODEX UND ENTSPRECHENSERKLÄRUNG

Um das Vertrauen in die Unternehmensführung deutscher börsennotierter Gesellschaften zu stärken, wurde der Deutsche Corporate Governance Kodex (nachfolgend: der Kodex) verabschiedet. Dieser soll die in Deutschland geltenden Regeln der Unternehmensleitung und -überwachung für nationale wie internationale Investoren transparenter machen. Die nachhaltige Wertsteigerung sowie der überwiegende Teil der im Kodex enthaltenen Vorgaben, Empfehlungen und Anregungen für eine **verantwortungsbewusste Unternehmensführung** sind bei uns seit Jahren gelebter Bestandteil

des Unternehmensalltags. Umfangreiche Informationen zum Thema Corporate Governance finden Sie auf unserer Website.

Der Aufsichtsrat der Fresenius SE & Co. KGaA und der Vorstand der persönlich haftenden Gesellschafterin haben die folgende nach § 161 AktG vorgeschriebene **Entsprechenserklärung** abgegeben und auf der Website der Gesellschaft zugänglich gemacht:

„Erklärung des Aufsichtsrats der Fresenius SE & Co. KGaA und des Vorstands der persönlich haftenden Gesellschafterin der Fresenius SE & Co. KGaA, der Fresenius Management SE, zum Deutschen Corporate Governance Kodex gemäß § 161 AktG auf der Grundlage der Fassungen des Deutschen Corporate Governance Kodex vom 18. Juni 2009 (nachfolgend: I) und vom 26. Mai 2010 (nachfolgend: II).

I. Der Aufsichtsrat der Fresenius SE & Co. KGaA und der Vorstand der persönlich haftenden Gesellschafterin der Fresenius SE & Co. KGaA (nachfolgend: der Vorstand) erklären, dass den vom Bundesministerium der Justiz im amtlichen Teil des elektronischen Bundesanzeigers bekannt gemachten Empfehlungen der ‚Regierungskommission Deutscher Corporate Governance Kodex‘ (nachfolgend: der Kodex) in der Fassung vom 18. Juni 2009 seit Abgabe der letzten Entsprechenserklärung entsprochen wurde. Lediglich die folgenden Empfehlungen wurden nicht angewendet:

► **Kodex-Ziffer 3.8 Absatz 3: Selbstbehalt für den Aufsichtsrat in einer D & O-Versicherung**

Gemäß Kodex-Ziffer 3.8 Abs. 3 soll in einer D & O-Versicherung für den Aufsichtsrat ein Selbstbehalt vereinbart werden, der dem vom Gesetz zur Angemessenheit der Vorstandsvergütung (VorstAG) eingeführten zwingenden Mindestselbstbehalt für Vorstandsmitglieder entspricht. Dieser beträgt 10 % des Schadens bis zur Höhe des Ein- einhalbfachen der festen jährlichen Vergütung. Bis zum Ende des Monats Juni 2010 handelte es sich bei der D & O-Versicherung von Fresenius um eine Gruppenversicherung für eine Vielzahl von Personen, die keinen Selbstbehalt in der empfohlenen Höhe vorsah. Für den Vorstand der Fresenius SE (nachfolgend ebenfalls: der Vorstand) wurde mit Wirkung ab dem 1. Juli 2010 ein Selbstbehalt vereinbart, der den Vorgaben des VorstAG entspricht. Auch für die Mitglieder des Aufsichtsrats wurde zum 1. Juli 2010 ein entsprechender Selbstbehalt eingeführt.

► **Kodex-Ziffer 4.2.3 Absatz 4: Abfindungs-Cap**

Gemäß Kodex-Ziffer 4.2.3 Abs. 4 soll bei Abschluss von Vorstandsverträgen darauf geachtet werden, dass Zahlungen an ein Vorstandsmitglied bei vorzeitiger Beendigung der Vorstandstätigkeit ohne wichtigen Grund einschließlich Nebenleistungen den Wert von zwei Jahresvergütungen nicht überschreiten (Abfindungs-Cap) und nicht mehr als die Restlaufzeit des Anstellungsvertrags vergüteten. Für die Berechnung des Abfindungs-Caps soll auf die Gesamtvergütung des abgelaufenen Geschäftsjahres und gegebenenfalls auch auf die voraussichtliche Gesamtvergütung für das laufende Geschäftsjahr abgestellt werden.

Die Anstellungsverträge für Mitglieder des Vorstands enthalten keine Abfindungsregelungen für den Fall einer vorzeitigen Beendigung der Vorstandstätigkeit ohne wichtigen Grund. Derartige Abfindungsregelungen widersprechen dem von Fresenius im Einklang mit dem Aktiengesetz praktizierten Konzept, die Anstellungsverträge der Vorstandsmitglieder regelmäßig für die Dauer der Bestellungsperiode abzuschließen. Eine vorzeitige Beendigung des Anstellungsvertrags setzt damit grundsätzlich einen wichtigen Grund voraus.

► **Kodex-Ziffer 5.1.2 Absatz 2 Satz 3 und Kodex-Ziffer 5.4.1 Satz 2: Altersgrenze für Vorstands- und Aufsichtsratsmitglieder**

Gemäß Kodex-Ziffer 5.4.1 Satz 2 soll bei Vorschlägen zur Wahl von Aufsichtsratsmitgliedern auf eine festzulegende Altersgrenze für Aufsichtsratsmitglieder geachtet werden. Ebenso soll gemäß Kodex-Ziffer 5.1.2 Abs. 2 Satz 3 für Vorstandsmitglieder eine Altersgrenze festgelegt werden. Nach Auffassung von Fresenius würde die Festlegung von Altersgrenzen für Aufsichtsratsmitglieder und für Mitglieder des Vorstands die Auswahl qualifizierter Kandidaten pauschal einschränken.

► **Kodex-Ziffer 5.1.2 Absatz 1 Satz 2 und Kodex-Ziffer 5.4.1 Satz 2: Zusammensetzung von Vorstand und Aufsichtsrat**

Sowohl bei der Zusammensetzung des Vorstands als auch bei den Vorschlägen zur Wahl von Aufsichtsratsmitgliedern (Kodex-Ziffern 5.1.2 und 5.4.1) soll der Aufsichtsrat der Gesellschaft auf Vielfalt (Diversity) achten.

Die Zusammensetzung der Gremien der Fresenius SE wurde am Unternehmensinteresse ausgerichtet. Die internationale Tätigkeit des Unternehmens wird bereits aktuell in beiden Gremien berücksichtigt.

► **Kodex-Ziffer 5.3.3: Nominierungsausschuss**

Gemäß Kodex-Ziffer 5.3.3 soll der Aufsichtsrat einen Nominierungsausschuss bilden, der ausschließlich mit Vertretern der Anteilseigner besetzt ist und dem Aufsichtsrat für dessen Wahlvorschläge an die Hauptversammlung geeignete Kandidaten vorschlägt. Dieser Empfehlung wurde in der Vergangenheit grundsätzlich entsprochen, und sie soll auch in Zukunft beachtet werden. Der vom Aufsichtsrat gebildete Nominierungsausschuss hat allerdings vorsorglich darauf verzichtet, für die in der ordentlichen Hauptversammlung 2010 im Zusammenhang mit dem geplanten Formwechsel der Fresenius SE in eine KGaA vorgesehene Wahl der Aufsichtsratsmitglieder des Rechtsträgers neuer Rechtsform Kandidatenvorschläge zu unterbreiten. Die Wahlvorschläge an die Hauptversammlung stammten vom Gesamtaufsichtsrat. Hintergrund ist, dass dem dreiköpfigen Nominierungsausschuss mit den Herren Dr. Dieter Schenk und Dr. Karl Schneider zwei Mitglieder angehörten, die zugleich Mitglieder des Verwaltungsrats der Else Kröner-Fresenius-Stiftung und Testamentsvollstrecker über den Nachlass von Frau Else Kröner sind. Als alleinige Aktionärin der persönlich haftenden Gesellschafterin ist die Else Kröner-Fresenius-Stiftung daran gehindert, an Wahlen zum Aufsichtsrat der KGaA teilzunehmen. Um auch eine anderweitige Einflussnahme auf die Besetzung des Aufsichtsrats zu vermeiden, hat der Aufsichtsrat ausnahmsweise von einer Befassung seines Nominierungsausschusses abgesehen.

II. Im Hinblick auf die vom Bundesministerium der Justiz im amtlichen Teil des elektronischen Bundesanzeigers bekannt gemachten Empfehlungen der ‚Regierungskommission Deutscher Corporate Governance Kodex‘ in der Fassung vom 26. Mai 2010 erklären der Aufsichtsrat der Fresenius SE & Co. KGaA und der Vorstand ferner, dass diesen Empfehlungen entsprochen wird. Neben den bereits vorab dargestellten

Abweichungen von den Empfehlungen gemäß Kodex-Ziffern 4.2.3 Absatz 4, 5.1.2 und 5.4.1 (die auch in der Fassung vom 26. Mai 2010 in entsprechender Weise nicht angewendet werden) werden lediglich die folgenden Empfehlungen nicht angewendet:

► **Kodex-Ziffer 5.4.1 Absatz 2 und Absatz 3: Benennung konkreter Ziele zur Zusammensetzung des Aufsichtsrats und deren Berücksichtigung bei Wahlvorschlägen**

Gemäß Kodex-Ziffer 5.4.1 Abs. 2 und 3 soll der Aufsichtsrat konkrete Ziele für seine Zusammensetzung benennen und bei seinen Wahlvorschlägen berücksichtigen. Die Zielsetzung des Aufsichtsrats und der Stand der Umsetzung sollen im Corporate-Governance-Bericht veröffentlicht werden. Von diesen Empfehlungen wird abgewichen. Die Zusammensetzung des Aufsichtsrats von Fresenius hat sich am Unternehmensinteresse auszurichten und muss die effektive Überwachung und Beratung des Vorstands gewährleisten. Deshalb kommt es bei der Zusammensetzung des Aufsichtsrats vorrangig auf die zur ordnungsgemäßen Wahrnehmung dieser Aufgaben erforderlichen Kenntnisse, Fähigkeiten und fachlichen Erfahrungen des Einzelnen an. Feste Diversity-Quoten und Altersgrenzen würden demgegenüber die Auswahl geeigneter Kandidaten pauschal einschränken.

Bad Homburg v. d. H., im März 2011

Aufsichtsrat der Fresenius SE & Co. KGaA und  
Vorstand der persönlich haftenden Gesellschafterin der  
Fresenius SE & Co. KGaA (der Fresenius Management SE)“

Diese und alle vorangegangenen Entsprechenserklärungen sind gemäß § 161 Abs. 2 AktG bzw. Kodex-Ziffer 3.10 Satz 4 auf unserer Website [www.fresenius.de](http://www.fresenius.de) unter Wir über uns – Corporate Governance abrufbar.

Die Gesellschaft hat das Berichtsjahr in der Rechtsform einer SE (Societas Europaea) abgeschlossen. Die nachstehenden Ausführungen beziehen sich auf die in diesem Zeitraum relevanten Unternehmensführungspraktiken und Arbeitsweisen von Vorstand und Aufsichtsrat der Fresenius SE. Es ist vorgesehen, dass die nachstehend für die Fresenius SE beschriebenen Unternehmensführungspraktiken sowie die Arbeitsweisen von Vorstand und Aufsichtsrat zukünftig in entsprechender Weise auch in der Rechtsform der KGaA angewendet werden. Die Auswirkungen auf die Corporate Governance der Fresenius SE & Co. KGaA, die sich seit dem Rechtsformwechsel ergeben haben, sind im Anschluss an die Darstellung zum Berichtsjahr 2010 zusammengefasst.

## AKTIONÄRE

Die Aktionäre nahmen ihre Rechte in der Hauptversammlung wahr und übten dort ihr **Stimmrecht** aus. Jede Stammaktie der Fresenius SE gewährte eine Stimme. Vorzugsaktien der Fresenius SE gewährten grundsätzlich kein Stimmrecht. Vorzugsaktionäre besaßen dagegen ein Vorrecht bei der Gewinnverteilung und einen höheren **Dividendenanspruch**. Aktien mit Mehr- oder Vorzugsstimmrechten gab es nicht. Wir behandelten alle Aktionäre und wesentlichen Zielgruppen gleich. Informationen zu wichtigen neuen Umständen stellten wir unverzüglich der breiten Öffentlichkeit zur Verfügung. Diese Gleichbehandlung ist Voraussetzung, um Vertrauen im Kapitalmarkt zu schaffen.

Über unsere Kommunikation mit unseren Aktionären berichten wir ausführlich im Kapitel Fresenius-Aktien auf den Seiten 12 und 13.

## HAUPTVERSAMMLUNG

Unsere ordentliche Hauptversammlung fand am 12. Mai 2010 in Frankfurt am Main statt. Dort waren rund 88 % des Stammaktienkapitals und rund 62 % des Vorzugsaktienkapitals vertreten. Alle Aktionäre, die nicht an unserer ordentlichen Hauptversammlung teilnehmen konnten, hatten die Möglichkeit, die Hauptversammlungsrede unseres Vorstandsvorsitzenden in einer Internet-Live-Übertragung auf unserer Website [www.fresenius.de](http://www.fresenius.de) unter Investor Relations – Hauptversammlung zu verfolgen. Darüber hinaus konnten sie ihr Stimmrecht durch Bevollmächtigte oder der Empfehlung des Deutschen Corporate Governance Kodex entsprechend über einen von der Fresenius SE benannten Stimmrechtsvertreter ausüben lassen.

In der ordentlichen Hauptversammlung am 12. Mai 2010 stimmten die Stammaktionäre mit einer Mehrheit von 98 % und die Vorzugsaktionäre mit einer Mehrheit von 94 % für den Rechtsformwechsel der Fresenius SE in eine KGaA in Verbindung mit der Umwandlung der Vorzugsaktien in Stammaktien. Diese Beschlüsse wurden mit Eintragung in das Handelsregister Bad Homburg v. d. H. am 28. Januar 2011 wirksam. Wir verweisen hierzu auch auf die Seite 54 des Geschäftsberichts.

Weiterhin stimmten die Aktionäre mit einer Mehrheit von über 99 % dem Vorschlag von Vorstand und Aufsichtsrat zu, die Dividende für das Geschäftsjahr 2009 um 7 % zu erhöhen. Inhaber von Stammaktien erhielten 0,75 € pro Aktie (2008: 0,70 €), Inhaber von Vorzugsaktien 0,76 € pro Aktie (2008: 0,71 €). Weitere Beschlüsse betrafen u. a. die Billigung des Systems zur Vergütung der Vorstandsmitglieder für das Geschäftsjahr 2010.

Die Dokumente und Informationen zur Hauptversammlung sind auf unserer Website [www.fresenius.de](http://www.fresenius.de) unter Investor Relations – Hauptversammlung verfügbar.

## ARBEITSWEISEN VON VORSTAND UND AUFSICHTSRAT

Die Fresenius SE hatte ein **duales Führungssystem** (Two-Tier-Board-Structure), bestehend aus einem Vorstand und einem Aufsichtsrat. Dabei waren Unternehmensleitung und Kontrolle streng getrennt: Der Vorstand der Fresenius SE leitete das Unternehmen in eigener Verantwortung. Die Mitglieder des Vorstands trugen gemeinsam die Verantwortung für die Unternehmensleitung. Der Aufsichtsrat bestellte, überwachte und beriet den Vorstand und war in Entscheidungen von grundlegender Bedeutung für das Unternehmen unmittelbar eingebunden.

## ARBEITSWEISE DES VORSTANDS

Der Vorstand der Fresenius SE führte die Geschäfte der Gesellschaft. Er entwickelte die strategische Ausrichtung, stimmte diese mit dem Aufsichtsrat ab und sorgte für deren Umsetzung. Sein Handeln und seine Entscheidungen richtete er dabei am Unternehmensinteresse aus. Im Rahmen der Besetzung von Führungspositionen achtete der Vorstand bei der Auswahl auf fachlich qualifizierten Kandidaten auf Vielfalt (Diversity), insbesondere eine angemessene Berücksichtigung von Frauen. 27 % der Teilnehmer an den Aktienoptionsprogrammen im Fresenius-Konzern, die den Führungskräften vorbehalten sind, sind weiblich. Der Vorstand war der nachhaltigen Steigerung des Unternehmenswertes verpflichtet. Die vom Aufsichtsrat erlassene Geschäftsordnung des Vorstands der Fresenius SE bestimmte die nähere Ausgestaltung der Arbeit im Gremium, insbesondere die Ressortzuständigkeiten der Vorstandsmitglieder, dem Gesamtvorstand vorbehaltene Angelegenheiten sowie die vom Gesamtvorstand zu treffenden Beschlüsse. Die **Sitzungen des Vorstands** der Fresenius SE wurden jeweils bei Bedarf, mindestens einmal im Monat, vom Vorstandsvorsitzenden einberufen und von ihm geleitet, oder, wenn er verhindert war, durch den Finanzvorstand, oder, wenn auch dieser verhindert war, von dem an Lebensjahren ältesten anwesenden Vorstandsmitglied. In der Regel fanden Vorstandssitzungen jedoch zweimal im Monat statt. Dem Sitzungsleiter

oblagen die Bestimmung der Reihenfolge, in der die Gegenstände der Tagesordnung behandelt wurden, und die Bestimmung der Art der Abstimmungen. Abgesehen von den Angelegenheiten, in denen zwingende Rechtsvorschriften oder die Satzung Einstimmigkeit oder ein Handeln sämtlicher Vorstandsmitglieder verlangten, beschloss der Vorstand der Fresenius SE in Sitzungen mit einfacher Mehrheit der abgegebenen Stimmen, außerhalb von Sitzungen mit einfacher Mehrheit seiner Mitglieder. Bei Stimmengleichheit gab die Stimme des Vorstandsvorsitzenden den Ausschlag. War der Vorstandsvorsitzende der Fresenius SE verhindert oder enthielt er sich der Stimme, so war bei Stimmengleichheit der Beschlussvorschlag abgelehnt. Die Geschäftsordnung der Fresenius SE regelte zudem den Verkehr zwischen Vorstand und Aufsichtsrat der Gesellschaft und die Zustimmungserfordernisse des Aufsichtsrats. Der Vorstand der Fresenius SE bestand aus sieben Mitgliedern. Diese sind auf Seite 211 des Geschäftsberichts aufgeführt.

Dem Vorstand der Fresenius SE gehörten die Vorstandsvorsitzenden bzw. Vorsitzenden der Geschäftsführung der vier Unternehmensbereiche an. Dadurch war gewährleistet, dass der Gesamtvorstand der Fresenius SE fortlaufend über wichtige Geschäftsvorgänge, Planungen, Entwicklungen und Maßnahmen innerhalb der Unternehmensbereiche informiert war. Aufgrund der Funktion der Fresenius SE als operative Holding waren keine Ausschüsse des Vorstands eingerichtet.

### ARBEITSWEISE DES AUFSICHTSRATS

Der Aufsichtsrat der Fresenius SE bestand aus zwölf Mitgliedern, die von der Hauptversammlung bestellt wurden. Bei den Vorschlägen zur Wahl von Aufsichtsratsmitgliedern der Fresenius SE wurde im Unternehmensinteresse vorrangig auf die erforderlichen Kenntnisse, Fähigkeiten und fachlichen Erfahrungen zur Wahrnehmung der Aufgaben abgestellt. In diesem Rahmen wurde auch auf die Vielfalt in der Zusammensetzung (Diversity) des Aufsichtsrats der Fresenius SE geachtet. Die Benennung fester Quoten und Altersgrenzen für die Zusammensetzung des Aufsichtsrats der Fresenius SE und deren Berücksichtigung bei Wahlvorschlägen, wie sie vom Corporate Governance Kodex empfohlen wird, hätten demgegenüber die Auswahl geeigneter Kandidaten pauschal eingeschränkt. Für die Wahlvorschläge der **Anteilseigner** wurde ein Nominierungsausschuss gebildet, der sich grundsätzlich an den Vorgaben des Gesetzes und des Kodex orientierte. Von

den zwölf Mitgliedern waren sechs Mitglieder auf Vorschlag der **Arbeitnehmer** zu bestellen; die Hauptversammlung war an die Wahlvorschläge gebunden. Die Amtszeit der im Berichtsjahr amtierenden Aufsichtsratsmitglieder endete mit der Eintragung des Rechtsformwechsels in das Handelsregister. Dem Aufsichtsrat der Fresenius SE gehörten eine nach seiner Einschätzung ausreichende Anzahl unabhängiger Mitglieder an, die in keiner geschäftlichen oder persönlichen Beziehung zur Gesellschaft oder zu deren Vorstand standen, die einen Interessenkonflikt begründet hätte. Einzelheiten zur Wahl, Konstituierung und Amtszeit des Aufsichtsrats der Fresenius SE, zu dessen Sitzungen und Beschlussfassungen sowie zu seinen Rechten und Pflichten regelte die **Satzung** der Fresenius SE. Diese ist auf unserer Website [www.fresenius.de](http://www.fresenius.de) unter Wir über uns – Corporate Governance abrufbar.

Der Aufsichtsrat der Fresenius SE hatte sich gemäß Kodex-Ziffer 5.1.3 eine Geschäftsordnung gegeben. Die Koordination der Arbeit, die Leitung der **Aufsichtsratssitzungen** sowie die Wahrnehmung der Aufsichtsratsbelange nach außen übernahm der Aufsichtsratsvorsitzende. Der Aufsichtsrat der Fresenius SE sollte einmal im Kalendervierteljahr und musste zweimal im Kalenderhalbjahr zusammentreten. Die Sitzungen wurden vom Vorsitzenden einberufen und geleitet oder im Falle seiner Verhinderung durch den vom Vorsitzenden benannten Stellvertreter. Er bestimmte die Reihenfolge der Verhandlungsgegenstände und die Art der Abstimmung. Der Aufsichtsrat entschied mit einfacher Mehrheit der an der Beschlussfassung teilnehmenden Stimmen, soweit nicht das Gesetz zwingend andere Mehrheiten vorschrieb. Bei Stimmengleichheit gab die Stimme des Vorsitzenden und bei dessen Nichtteilnahme die Stimme des Stellvertreters den Ausschlag, der ein Vertreter der Anteilseigner war.

Der Aufsichtsrat der Fresenius SE führte seine Geschäfte nach den Vorschriften des Gesetzes, der Satzung und der Geschäftsordnung des Aufsichtsrats. Durch einen regelmäßigen Dialog mit dem Vorstand war der Aufsichtsrat zu jeder Zeit über die Geschäftsentwicklung, die Unternehmensplanung und die Strategie informiert. Er stimmte der Unternehmensplanung zu und billigte den Jahresabschluss des Konzerns unter Berücksichtigung der Berichte des Abschlussprüfers. Ein weiterer wesentlicher Bestandteil der Aufsichtsrats Tätigkeit war die Arbeit in den Ausschüssen, die nach den Anforderungen des Aktiengesetzes sowie den Empfehlungen des Corporate Governance Kodex gebildet wurden.



Die Mitglieder des Aufsichtsrats informierten sich regelmäßig durch unternehmensinterne wie auch durch externe Quellen über den aktuellen Stand der Anforderungen an ihre Überwachungstätigkeit. Der Aufsichtsrat der Fresenius SE stellte sicher und wurde darin von der Gesellschaft unterstützt, dass seine Mitglieder fortlaufend qualifiziert, ihre Fachkenntnisse aktualisiert sowie ihre Urteilsfähigkeit und Erfahrung weiterentwickelt wurden, soweit dies zur ordnungsgemäßen Wahrnehmung seiner Aufgaben einschließlich seiner Ausschüsse erforderlich war. So wurden Informationen von verschiedenen unternehmensexternen Sachkundigen zur Verfügung gestellt. Darüber hinaus informierten Vertreter aus den Fresenius-Fachbereichen über maßgebliche Entwicklungen, z. B. über relevante Neuregelungen in der Rechtsprechung und über Änderungen in der Rechnungslegung und Prüfung nach US-GAAP und IFRS.

Der Bericht des Aufsichtsrats auf den Seiten 202 bis 208 des Geschäftsberichts informiert über die Schwerpunkte der Tätigkeit des Aufsichtsrats und seiner Ausschüsse im Jahr 2010.

#### **ZUSAMMENSETZUNG UND ARBEITSWEISE DER AUSSCHÜSSE DES AUFSICHTSRATS**

Der Aufsichtsrat der Fresenius SE hatte aus dem Kreis seiner Mitglieder drei ständige Ausschüsse gebildet: den Prüfungsausschuss mit fünf Mitgliedern sowie den Personalausschuss und den Nominierungsausschuss mit jeweils drei Mitgliedern. Die Mitglieder der Ausschüsse wurden für die Dauer ihrer Amtszeit im Aufsichtsrat der Fresenius SE mit der Mehrheit der Stimmen der Aufsichtsratsmitglieder gewählt. Die für den Aufsichtsrat der Fresenius SE getroffenen Regelungen galten entsprechend für die Ausschüsse. Die Ausschüsse führten bei Bedarf Sitzungen durch. Die Einberufung erfolgte durch den jeweiligen Ausschussvorsitzenden. Dieser berichtete in der nächsten Aufsichtsratssitzung über die Arbeit der Ausschüsse. Die Geschäftsordnung der Ausschüsse war in der Geschäftsordnung des Aufsichtsrats der Fresenius SE dargelegt. Die Ausschüsse hatten sich keine eigenen Geschäftsordnungen gegeben.

#### **PRÜFUNGSAUSSCHUSS**

Die Besetzung des Ausschussvorsitzes im Prüfungsausschuss der Fresenius SE entsprach den Vorgaben der Ziffer 5.3.2 des Kodex. Prof. Dr. h. c. Roland Berger als Vorsitzender des Prüfungsausschusses erfüllt gemäß § 100 Abs. 5 AktG die Qualifikationsanforderungen des Financial Expert. Der Prüfungsausschuss hatte u. a. die Aufgaben, die Entscheidungen des Aufsichtsrats über die Billigung des Jahresabschlusses und des Konzernabschlusses sowie den Vorschlag des Aufsichtsrats an die Hauptversammlung zur Wahl des Abschlussprüfers vorzubereiten und die Vorprüfung des Vorschlags für die Gewinnverwendung vorzunehmen. Er hatte ferner die Quartalsberichte vor deren Veröffentlichung zu prüfen sowie – nach Beratung mit dem Vorstand – den Abschlussprüfern den Prüfungsauftrag (einschließlich der Honorarvereinbarung) zu erteilen, Prüfungsschwerpunkte festzulegen und die Berichtspflichten des Prüfers gegenüber dem Aufsichtsrat der Fresenius SE zu vereinbaren. Darüber hinaus befasste er sich insbesondere mit der Überprüfung des Risikomanagements, des Kontrollsystems sowie des internen Revisionssystems und mit Fragen der Compliance.

Dem Prüfungsausschuss gehörten im Berichtsjahr die Herren Prof. Dr. h. c. Roland Berger (Vorsitzender), Konrad Kölbl, Dr. Gerd Krick, Dr. Karl Schneider und Rainer Stein an.

#### **PERSONALAUSSCHUSS**

Der Personalausschuss der Fresenius SE unterbreitete dem Aufsichtsrat Vorschläge für das Vergütungssystem für den Vorstand der Fresenius SE sowie für die Vergütung der einzelnen Mitglieder des Vorstands. Er beschloss über die nicht vergütungsrelevanten Bedingungen der Verträge mit den Mitgliedern des Vorstands der Fresenius SE. Der Aufsichtsratsvorsitzende der Fresenius SE hatte den Vorsitz im Personalausschuss inne.

Dem Personalausschuss gehörten im Berichtsjahr die Herren Dr. Gerd Krick (Vorsitzender), Wilhelm Sachs und Dr. Karl Schneider an.

#### **NOMINIERUNGSAUSSCHUSS**

Der Nominierungsausschuss schlug dem Aufsichtsrat geeignete Kandidaten für dessen Wahlvorschläge an die Hauptversammlung zur Besetzung der Vertreter der Anteilseigner im Aufsichtsrat der Gesellschaft vor. Ihm gehörten ausschließlich Vertreter der Anteilseigner an. Der Nominierungsausschuss orientierte sich bei den Wahlvorschlägen an den Vorgaben des

Kodex. Eine Ausnahme bildete die in der ordentlichen Hauptversammlung 2010 im Zusammenhang mit dem Rechtsformwechsel der Fresenius SE in eine KGaA vorgesehene Wahl der Aufsichtsratsmitglieder des Rechtsträgers neuer Rechtsform. Die Wahlvorschläge an die Hauptversammlung stammten unmittelbar vom Gesamtaufsichtsrat. Die Gründe für dieses Vorgehen sind in der Entsprechenserklärung nach § 161 AktG dargestellt, die vorstehend im vollständigen Wortlaut abgedruckt ist. Wir verweisen insoweit auf die dortigen Ausführungen.

Dem Nominierungsausschuss gehörten im Berichtsjahr die Herren Dr. Gerd Krick (Vorsitzender), Dr. Dieter Schenk und Dr. Karl Schneider an.

### VERMITTLUNGSAUSSCHUSS

Ein Vermittlungsausschuss bestand bei der Fresenius SE nicht, da das Mitbestimmungsgesetz in der Rechtsform einer SE nicht galt und der Kodex einen solchen Ausschuss nicht fordert.

Angaben zu Mitgliedschaften der Ausschussmitglieder in anderen gesetzlich zu bildenden Aufsichtsräten und vergleichbaren in- und ausländischen Kontrollgremien von Wirtschaftsunternehmen finden Sie auf den Seiten 209 bis 210 im Geschäftsbericht.

Nach § 14 Abs. 2 der Satzung der Fresenius SE wurde nur die Mitgliedschaft im Prüfungsausschuss sowie im Personalausschuss gesondert vergütet.

### EFFIZIENZPRÜFUNG DES AUFSICHTSRATS

Der Aufsichtsrat der Fresenius SE hat sich in seiner Sitzung im März 2010 mit der Effizienzprüfung gemäß Ziffer 5.6 des Kodex befasst.

Er überprüfte die Effizienz seiner Tätigkeit im Wege einer offenen Diskussion im Plenum. Als Diskussionsgrundlage diente dabei ein **unternehmensspezifischer Fragebogen**, der die für eine Selbsteinschätzung wesentlichen Aspekte abdeckte. Darunter fielen u. a. der Ablauf und die Strukturierung der Sitzungen, der Umfang der Vorlagen sowie der Informationsfluss. Diese Überprüfungen haben ergeben, dass der Aufsichtsrat effizient organisiert war und das Zusammenwirken von Vorstand und Aufsichtsrat sehr gut funktionierte.

### ZUSAMMENWIRKEN VON VORSTAND UND AUFSICHTSRAT

Gute Unternehmensführung setzt eine **vertrauensvolle und effiziente Zusammenarbeit** zwischen Vorstand und Aufsichtsrat voraus. Vorstand und Aufsichtsrat der Fresenius SE arbeiteten zum Wohl des Unternehmens eng zusammen. Dazu ist eine offene Kommunikation von unabdingbarer Bedeutung. Vorstand und Aufsichtsrat der Fresenius SE stimmten sich insbesondere hinsichtlich der strategischen Ausrichtung des Unternehmens ab. Als Kontrollorgan benötigte der Aufsichtsrat der Fresenius SE darüber hinaus umfassende Informationen über die Geschäftsentwicklung und Planung sowie über die Risikolage, das Risikomanagement und die Compliance. Der Vorstand hat dem Aufsichtsrat diese Informationen pflichtgemäß zur Verfügung gestellt. Geschäfte von besonderer Bedeutung benötigten die Zustimmung des Aufsichtsrats. Alle Angelegenheiten, die der Zustimmung des Aufsichtsrats bedurften, wurden ihm rechtzeitig zur Beschlussfassung vorgelegt. In allen Fällen erteilte er seine Zustimmung nach der Prüfung der jeweiligen Beschlussvorlagen sowie nach ausführlicher Beratung mit dem Vorstand.

### VERMEIDUNG VON INTERESSENKONFLIKTEN

Vorstand und Aufsichtsrat der Fresenius SE waren dem Unternehmensinteresse verpflichtet. Sie verfolgten bei der Ausübung ihrer Tätigkeit weder persönliche Interessen noch gewährten sie anderen Personen ungerechtfertigte Vorteile. Nebentätigkeiten oder Geschäfte der Organmitglieder mit dem Unternehmen waren dem Aufsichtsrat unverzüglich offenzulegen und von diesem zu genehmigen. Der Aufsichtsrat der Fresenius SE berichtete der Hauptversammlung über etwaige Interessenkonflikte und deren Behandlung.

Herr Müller ist Aufsichtsratsmitglied unserer Gesellschaft und Aufsichtsratsvorsitzender der Commerzbank AG, mit der der Fresenius-Konzern Geschäftsbeziehungen zu marktüblichen Konditionen unterhält. Das Aufsichtsratsmitglied Herr Dr. Rupprecht war bis zum 31. Dezember 2010 Mitglied des Vorstands der Allianz SE sowie bis zum 30. Juni 2010 Vorstandsvorsitzender und vom 1. Juli bis zum 31. Dezember 2010 Vorsitzender des Aufsichtsrats der Allianz Deutschland AG. Herr Dr. De Meo, Mitglied des Vorstands der Fresenius Management SE (vormals Vorstandsmitglied der Fresenius SE), ist Aufsichtsratsmitglied der Allianz Private Krankenversicherungs-AG. Die vom Fresenius-Konzern an die Allianz gezahlten Versicherungsprämien betrugen im Berichtsjahr 3 Mio € (2009: 7 Mio €). Sie erfolgten zu marktüblichen Konditionen und in der marktüblichen Höhe.



Berater- oder sonstige Dienstleistungsbeziehungen zwischen Aufsichtsratsmitgliedern und der Gesellschaft bestanden bei Herrn Dr. Schenk, der Aufsichtsratsmitglied der Fresenius SE war und zugleich Partner der international agierenden Rechtsanwaltssozietät Noerr LLP ist. Die Sozietät ist im Jahr 2010 für den Fresenius-Konzern rechtsberatend tätig geworden. Der Fresenius-Konzern hat dieser Anwaltssozietät 1 Mio € für erbrachte Dienstleistungen im Jahr 2010 gezahlt (2009: 1 Mio €). Dies entspricht 1,5 % der Rechtsberatungsaufwendungen des Fresenius-Konzerns im Jahr 2010. Berater- oder sonstige Dienstleistungsbeziehungen zwischen Aufsichtsratsmitgliedern und der Gesellschaft bestanden ferner bei Herrn Prof. Dr. h. c. Berger, der Aufsichtsratsmitglied unserer Gesellschaft und zugleich Gesellschafter der Roland Berger Strategy Consultants ist und bis zum 1. August 2010 deren Aufsichtsratsvorsitzender war. Der Fresenius-Konzern hat dieser Gesellschaft 0,2 Mio € für erbrachte Dienstleistungen im Jahr 2010 gezahlt. Im Jahr 2009 wurden keine Dienstleistungen erbracht und keine Honorare gezahlt. Der Prüfungsausschuss des Aufsichtsrats und der Aufsichtsrat der Fresenius SE haben sich mit den beiden vorgenannten Mandatierungen eingehend beschäftigt. Der Aufsichtsrat der

Fresenius SE hat diesen Mandatierungen jeweils bei Stimmenthaltung von Herrn Dr. Schenk bzw. Herrn Prof. Dr. h. c. Berger zugestimmt.

Sonstige Berater-, Dienstleistungs- und Werkverträge zwischen Aufsichtsratsmitgliedern und der Gesellschaft bestehen nicht.

Die Angaben zu den nahe stehenden Personen hat Fresenius in den Quartalsberichten sowie im Geschäftsbericht des Jahres 2010 auf Seite 198 öffentlich gemacht.

## RELEVANTE ANGABEN ZU UNTERNEHMENSFÜHRUNGSPRAKTIKEN

Die Mitglieder des Vorstands der Fresenius SE, denen die Leitung der Gesellschaft oblag, führten die Geschäfte des Unternehmens mit der Sorgfalt eines ordentlichen und gewissenhaften Unternehmensleiters unter Beachtung der gesetzlichen Bestimmungen, der Satzung der Fresenius SE, der Geschäftsordnung des Vorstands der Fresenius SE sowie der Beschlüsse des Gesamtvorstands und der für sie geltenden Dienstverträge. Unternehmensführungspraktiken, die über die gesetzlichen Bestimmungen hinausgehen, finden sich im **Fresenius-Verhaltenskodex**. Dieser enthält die wesentlichen Grundsätze

### DIRECTORS' DEALINGS VORSTAND

| 2010         | Name         | Aktiengattung | Stückzahl | Preis in € <sup>1</sup> | Gesamtvolumen in € | Geschäftsart                 |
|--------------|--------------|---------------|-----------|-------------------------|--------------------|------------------------------|
| 6. August    | R. Baule     | Stammaktie    | 12.900    | 36,10                   | 465.628,52         | Optionsausübung <sup>2</sup> |
| 6. August    | R. Baule     | Vorzugsaktie  | 12.900    | 35,20                   | 454.067,10         | Optionsausübung <sup>2</sup> |
| 3. November  | R. Baule     | Stammaktie    | 10.965    | 49,37                   | 541.329,67         | Optionsausübung <sup>2</sup> |
| 3. November  | R. Baule     | Vorzugsaktie  | 10.965    | 51,34                   | 562.939,62         | Optionsausübung <sup>2</sup> |
| 4. November  | J. Götz      | Stammaktie    | 4.500     | 23,46                   | 105.583,19         | Optionsausübung <sup>2</sup> |
| 4. November  | J. Götz      | Vorzugsaktie  | 4.500     | 23,46                   | 105.583,50         | Optionsausübung <sup>2</sup> |
| 4. November  | J. Götz      | Stammaktie    | 7.305     | 6,58                    | 48.088,31          | Optionsausübung <sup>2</sup> |
| 4. November  | J. Götz      | Vorzugsaktie  | 7.305     | 7,75                    | 56.635,67          | Optionsausübung <sup>2</sup> |
| 4. November  | J. Götz      | Stammaktie    | 3.000     | 34,51                   | 103.538,79         | Optionsausübung <sup>2</sup> |
| 4. November  | J. Götz      | Vorzugsaktie  | 3.000     | 34,53                   | 103.599,00         | Optionsausübung <sup>2</sup> |
| 4. November  | U. Schneider | Stammaktie    | 7.311     | 49,50                   | 361.915,93         | Optionsausübung <sup>2</sup> |
| 4. November  | U. Schneider | Vorzugsaktie  | 7.311     | 52,18                   | 381.509,91         | Optionsausübung <sup>2</sup> |
| 10. November | U. Schneider | Stammaktie    | 7.311     | 48,85                   | 357.177,26         | Optionsausübung <sup>2</sup> |
| 10. November | U. Schneider | Vorzugsaktie  | 7.311     | 51,88                   | 379.272,75         | Optionsausübung <sup>2</sup> |
| 18. November | U. Schneider | Stammaktie    | 7.308     | 51,55                   | 376.749,32         | Optionsausübung <sup>2</sup> |
| 18. November | U. Schneider | Vorzugsaktie  | 7.308     | 53,93                   | 394.113,13         | Optionsausübung <sup>2</sup> |
| 5. Mai       | S. Sturm     | Stammaktie    | 1.000     | 51,41                   | 51.410,00          | Kauf                         |

<sup>1</sup> Preis auf zwei Nachkommastellen gerundet

<sup>2</sup> Ausübung von Aktienoptionen gegen Cash Settlement aus den Aktienoptionsplänen

## DIRECTORS' DEALINGS AUFSICHTSRAT

| 2010          | Name      | Aktiengattung | Stückzahl | Preis in € <sup>1</sup> | Gesamtvolumen in € | Geschäftsart                 |
|---------------|-----------|---------------|-----------|-------------------------|--------------------|------------------------------|
| 3. November   | R. Berger | Stammaktie    | 44        | 64,50                   | 2.838,00           | Verkauf                      |
| 3. November   | R. Berger | Vorzugsaktie  | 1.000     | 65,07                   | 65.065,00          | Verkauf                      |
| 4. November   | R. Berger | Stammaktie    | 2.800     | 64,06                   | 179.378,08         | Verkauf                      |
| 4. November   | R. Berger | Vorzugsaktie  | 27.200    | 64,54                   | 1.755.444,48       | Verkauf                      |
| 5. November   | R. Berger | Vorzugsaktie  | 2.336     | 65,16                   | 152.214,46         | Verkauf                      |
| 8. November   | R. Berger | Vorzugsaktie  | 25.000    | 65,12                   | 1.627.995,00       | Verkauf                      |
| 9. November   | R. Berger | Vorzugsaktie  | 10.000    | 65,37                   | 653.707,00         | Verkauf                      |
| 9. November   | R. Berger | Vorzugsaktie  | 11.500    | 65,19                   | 749.647,05         | Verkauf                      |
| 25. Mai       | G. Krick  | Stammaktie    | 4.998     | 19,29                   | 96.436,41          | Optionsausübung <sup>2</sup> |
| 25. Mai       | G. Krick  | Vorzugsaktie  | 4.998     | 8,30                    | 41.498,39          | Optionsausübung <sup>2</sup> |
| 27. Mai       | G. Krick  | Stammaktie    | 4.998     | 19,95                   | 99.715,10          | Optionsausübung <sup>2</sup> |
| 27. Mai       | G. Krick  | Vorzugsaktie  | 4.998     | 8,43                    | 42.126,14          | Optionsausübung <sup>2</sup> |
| 31. Mai       | G. Krick  | Stammaktie    | 10.002    | 20,76                   | 207.645,52         | Optionsausübung <sup>2</sup> |
| 31. Mai       | G. Krick  | Vorzugsaktie  | 10.002    | 9,38                    | 93.838,76          | Optionsausübung <sup>2</sup> |
| 31. Mai       | G. Krick  | Stammaktie    | 5.802     | 20,78                   | 120.539,38         | Optionsausübung <sup>2</sup> |
| 31. Mai       | G. Krick  | Vorzugsaktie  | 5.802     | 9,36                    | 54.319,18          | Optionsausübung <sup>2</sup> |
| 9. September  | G. Krick  | Stammaktie    | 5.160     | 26,71                   | 137.818,44         | Optionsausübung <sup>2</sup> |
| 9. September  | G. Krick  | Vorzugsaktie  | 5.160     | 23,20                   | 119.706,84         | Optionsausübung <sup>2</sup> |
| 30. September | G. Krick  | Stammaktie    | 7.740     | 28,52                   | 220.760,28         | Optionsausübung <sup>2</sup> |
| 30. September | G. Krick  | Vorzugsaktie  | 7.740     | 25,29                   | 195.775,56         | Optionsausübung <sup>2</sup> |
| 3. November   | G. Krick  | Stammaktie    | 7.740     | 33,05                   | 255.798,26         | Optionsausübung <sup>2</sup> |
| 3. November   | G. Krick  | Vorzugsaktie  | 7.740     | 29,29                   | 226.702,15         | Optionsausübung <sup>2</sup> |
| 2. Dezember   | G. Krick  | Stammaktie    | 5.160     | 36,52                   | 188.460,75         | Optionsausübung <sup>2</sup> |
| 2. Dezember   | G. Krick  | Vorzugsaktie  | 5.160     | 33,21                   | 171.379,08         | Optionsausübung <sup>2</sup> |

<sup>1</sup> Preis auf zwei Nachkommastellen gerundet<sup>2</sup> Ausübung von Aktienoptionen gegen Cash Settlement aus den Aktienoptionsplänen

und Regeln für unser Verhalten im Unternehmen sowie im Verhältnis zu externen Partnern und zur Öffentlichkeit. Die Grundsätze und Regeln dieses Verhaltenskodex sind für alle Mitarbeiter der Gesellschaft verbindlich und bei jeder Form von Geschäftsbeziehung zu befolgen. Der Fresenius-Verhaltenskodex hat Vorbildfunktion für die Verabschiedung und Weiterentwicklung von eigenen Verhaltenskodizes in den Unternehmensbereichen. Er wurde vom Vorstand der Fresenius SE implementiert. Die Einhaltung der Kodexgrundsätze sicherzustellen wird auch als Managementaufgabe unserer Führungskräfte verstanden. Der Verhaltenskodex steht auf unserer Website [www.fresenius.de](http://www.fresenius.de) unter Wir über uns – Corporate Governance zum Herunterladen zur Verfügung.

## INFORMATIONEN ÜBER DIRECTORS' DEALINGS UND AKTIENBESITZ IM GESCHÄFTSJAHR 2010

Mitglieder des Vorstands und Aufsichtsrats, sonstige Personen mit Führungsaufgaben sowie mit diesen in enger Beziehung stehende Personen haben den Erwerb und die Veräußerung von Aktien der Fresenius SE oder sich darauf beziehenden Finanzinstrumenten (Directors' Dealings) nach § 15a des Wertpapierhandelsgesetzes offenzulegen. Über die Directors' Dealings im Jahr 2010 informieren die vorstehenden Tabellen.

Gemäß Kodex-Ziffer 6.6 soll ferner der Besitz von Aktien der Gesellschaft oder sich darauf beziehenden Finanzinstrumenten von Vorstands- und Aufsichtsratsmitgliedern angegeben werden, wenn er direkt oder indirekt 1 % der von der Gesellschaft ausgegebenen Aktien übersteigt. Keines der Vorstands- und Aufsichtsratsmitglieder hält direkt oder indirekt mehr als 1 % der von Fresenius ausgegebenen Aktien.

Die Mitglieder des Vorstands und des Aufsichtsrats der vormaligen Fresenius SE hielten insgesamt Aktien oder sich darauf beziehende Finanzinstrumente bzw. Aktienoptionen aus den Aktienoptionsplänen der Fresenius SE in Höhe von 1,2 % der zum 31. Dezember 2010 ausgegebenen Aktien der Fresenius SE. Davon hielten der Vorstand und der Aufsichtsrat jeweils 0,6 %.

Nach dem am 28. Januar 2011 erfolgten Rechtsformwechsel halten die Mitglieder des Vorstands und des Aufsichtsrats der Fresenius Management SE sowie des Aufsichtsrats der Fresenius SE & Co. KGaA insgesamt Aktien oder sich darauf beziehende Finanzinstrumente bzw. Aktienoptionen aus den Aktienoptionsplänen der Fresenius SE & Co. KGaA in Höhe von 1,2 % der zum 28. Januar 2011 ausgegebenen Aktien der Fresenius SE & Co. KGaA. Davon halten der Vorstand der Fresenius Management SE 0,6 %, der Aufsichtsrat der Fresenius Management SE 0,6 % und der Aufsichtsrat der Fresenius SE & Co. KGaA 0,6 %. Aufgrund der Personenidentität einiger Mitglieder in den jeweiligen Aufsichtsräten ist der tatsächliche Aktienbesitz (oder sich darauf beziehenden Finanzinstrumenten bzw. Besitz von Aktienoptionen) aller Mitglieder der Gremien der Fresenius SE & Co. KGaA und der Fresenius Management SE niedriger als die Summe der berichteten Gesamtwerte dieser drei Gremien.

Es lagen uns keine Mitteilungen vor, denen zufolge der Aktienbesitz von Vorstands- und Aufsichtsratsmitgliedern die jeweiligen im Wertpapierhandelsgesetz vorgesehenen Melde-schwellen erreichte, über- oder unterschritt.

## TRANSPARENZ UND KOMMUNIKATION

Fresenius erfüllt sämtliche Anforderungen, die der Deutsche Corporate Governance Kodex unter Ziffer 6 aufführt. Die Transparenz wird durch eine stetige Kommunikation mit der Öffentlichkeit gewährleistet. Damit wollen wir das uns entgegengebrachte Vertrauen bestätigen und vertiefen. Von besonderer Bedeutung ist für uns die **Gleichbehandlung** aller Adressaten. Damit alle Marktteilnehmer zeitlich und inhaltlich denselben Informationsstand erhalten, stellen wir alle wichtigen Dokumentationen auf unserer Website [www.fresenius.de](http://www.fresenius.de) im Bereich „Investor Relations“ und unter Wir über uns – Corporate Governance zur Verfügung. Dazu gehören u. a. Finanzberichte und meldepflichtige Geschäfte im Sinne des § 15a Wertpapierhandelsgesetz (Directors' Dealings). Über unsere Investor-Relations-Aktivitäten im Jahr 2010 berichten wir ausführlich im Kapitel „Fresenius-Aktien“ auf den Seiten 12 und 13 im Geschäftsbericht.

## RISIKOMANAGEMENT UND KONTROLLSYSTEM

Wir betrachten den verantwortungsbewussten Umgang mit Risiken als ein wesentliches Element guter Corporate Governance. Fresenius verfügt über ein systematisches Risikomanagement und Kontrollsystem, das den Vorstand in die Lage versetzt, Risiken und Markttendenzen frühzeitig zu erkennen und auf relevante Veränderungen des Risikoprofils unverzüglich zu reagieren. Unser Risikomanagement und Kontrollsystem sowie effizient gestaltete Prozesse tragen zum Unternehmenserfolg bei. Das Risikomanagement ist Gegenstand der jährlichen Abschlussprüfung sowie der internen Revision. Das Kontrollsystem wird regelmäßig vom Vorstand und von der Internen Revision überprüft. Einzelheiten finden Sie im Lagebericht auf den Seiten 99 bis 100.

Der Bereich **Interne Revision** unterstützt darüber hinaus den Vorstand als unabhängige Funktion außerhalb des operativen Tagesgeschäfts. Der Bereich beurteilt interne Abläufe aus einem objektiven Blickwinkel und mit der notwendigen Distanz. Ziel ist es, durch verbesserte interne Kontrollen, optimierte Geschäftsprozesse, Reduzierung von Kosten und Effizienzsteigerungen sowie die Prävention von Korruption Mehrwert für Fresenius zu schaffen und dadurch die Organisationsziele zu erreichen. Fresenius Medical Care AG & Co. KGaA verfügt über ein eigenes Risikomanagement und Kontrollsystem.

## COMPLIANCE

Integraler Bestandteil der Unternehmenskultur von Fresenius ist die Beachtung der nationalen und internationalen rechtlichen sowie ethischen Grundsätze im Geschäftsverkehr. Dazu gehören Grundsätze wie Professionalität, Ehrlichkeit und Rechtschaffenheit gegenüber Patienten, Kunden, Lieferanten, Behörden, Mitarbeitern, Aktionären und der Öffentlichkeit. Wir sorgen dafür, dass jeder Mitarbeiter die Einhaltung der relevanten Gesetze und Regeln als Maxime des eigenen Handelns betrachtet.

Der **Fresenius-Verhaltenskodex** enthält die wesentlichen Grundsätze und Regeln für das Verhalten innerhalb des Unternehmens sowie im Verhältnis zu externen Partnern und der Öffentlichkeit. Diese werden durch Unternehmensrichtlinien und Dienstanweisungen konkretisiert. Die Grundsätze dürfen nicht durch Einzelanweisungen unterlaufen werden und sind bei jeder Form der Geschäftsbeziehung zu berücksichtigen. Sie sollen unseren Mitarbeiterinnen und Mitarbeitern helfen,

in ihrer täglichen Arbeit die richtigen Entscheidungen zu treffen. Der Fresenius-Verhaltenskodex hat Vorbildfunktion für die Verabschiedung und Weiterentwicklung eigener Verhaltenskodizes in allen Unternehmensbereichen. Die bereits bestehenden **Compliance-Programme** bleiben grundsätzlich unberührt, solange sie dem Sinn und Zweck der Grundsätze des Fresenius-Verhaltenskodex nicht widersprechen. Die Grundsätze und Regeln des Kodex gelten somit über die Compliance-Programme und die Verhaltenskodizes der Unternehmensbereiche weltweit für alle Mitarbeiter des Fresenius-Konzerns. Unsere Mitarbeiterinnen und Mitarbeiter informieren wir in **Schulungen** über die maßgeblichen gesetzlichen Bestimmungen und internen Unternehmensrichtlinien. Vorgesetzte und Compliance-Beauftragte im Konzern und in den Unternehmensbereichen unterstützen und beraten sie bei Fragen zur Umsetzung und Anwendung dieser Vorgaben. Jeder Mitarbeiter ist aufgerufen, durch die Einhaltung der Gesetze sowie der Prinzipien und Regeln des Fresenius-Verhaltenskodex dazu beizutragen, dass Fresenius als integrierender und verlässlicher Partner im Gesundheitswesen für Patienten, Kunden, Lieferanten, Behörden und die Öffentlichkeit wahrgenommen wird.

Den Fresenius-Verhaltenskodex haben wir auf unserer Website [www.fresenius.de](http://www.fresenius.de) unter Wir über uns – Corporate Governance veröffentlicht.

Grundsätzlich wird bei Fresenius Compliance als Aufgabe des Managements auf allen Entscheidungsebenen angesehen. Als Leitungsaufgabe ist die Stabsstelle Compliance dem **Chief Compliance Officer**, Vorstandsressort Recht, Compliance und Personal, unterstellt. Sie unterstützt den Chief Compliance Officer in der Entwicklung und Umsetzung von Richtlinien und Vorgehensweisen, die die Einhaltung der anwendbaren gesetzlichen Regelungen sowie die Anforderungen des Fresenius-Compliance-Programms sicherstellen sollen.

In jedem Unternehmensbereich wurden Compliance-Aktivitäten und Richtlinien implementiert sowie ein Chief Compliance Officer ernannt. Dieser kümmert sich um die Information sowie Einführung, Weiterentwicklung und Überwachung der Compliance in seinem Unternehmensbereich. Abgestimmt auf die Organisations- und Geschäftsstrukturen werden sie durch weitere Compliance-Beauftragte unterstützt. Die Mitarbeiter der Corporate-Compliance-Abteilungen stehen den Compliance-Beauftragten der Unternehmensbereiche bzw. Regionen

und Länder unterstützend und beratend zur Seite, damit überall im Unternehmen nach den gleichen hohen ethischen Ansprüchen gearbeitet wird, unsere Werte gelebt und die internationalen und lokalen Gesetze und Vorschriften sowie die Unternehmensrichtlinien und Anweisungen eingehalten werden.

Neben Einzelprüfungen durch die Interne Revision überwachen wir mittels eines **internen Reportingsystems**, ob Rechtsvorschriften und die Compliance-Vorgaben eingehalten werden. Die Interne Revision führt Prüfungen in den Gesellschaften und Unternehmensbereichen weltweit durch. Die Prüfer haben, bezogen auf ihren jeweiligen Auftrag, ein uneingeschränktes Informations- und Einsichtsrecht in die Unterlagen der zu prüfenden Gesellschaft.

## RECHNUNGSLEGUNG UND KONZERNABSCHLUSS

Der Fresenius-Konzernabschluss wurde in Übereinstimmung mit den US-amerikanischen Rechnungslegungsgrundsätzen (United States Generally Accepted Accounting Principles – US-GAAP) erstellt. Seit dem Geschäftsjahr 2005 ist Fresenius verpflichtet, als Kapitalgesellschaft mit Sitz in einem Mitgliedstaat der Europäischen Union den Konzernabschluss nach den International Financial Reporting Standards (IFRS) unter Anwendung von § 315a Handelsgesetzbuch (HGB) zu erstellen und zu veröffentlichen. Da unsere größte Tochtergesellschaft Fresenius Medical Care nach US-GAAP bilanziert, veröffentlichen wir neben dem gesetzlich vorgeschriebenen IFRS-Konzernabschluss zusätzlich einen Konzernabschluss nach US-GAAP. Damit stellen wir die wirtschaftliche Lage des Fresenius-Konzerns für alle Anleger vergleichbar und transparent dar.

## CORPORATE GOVERNANCE DER FRESENIUS SE & CO. KGaA

Am 28. Januar 2011 wurde der Rechtsformwechsel der Fresenius SE in eine SE & Co. KGaA in das Handelsregister Bad Homburg v. d. H. eingetragen. Persönlich haftende Gesellschafterin ist die Fresenius Management SE. Über die neue Struktur informiert sie die nebenstehende Grafik.

Seit Wirksamwerden des Rechtsformwechsels ist das Grundkapital der Fresenius SE & Co. KGaA ausschließlich in **Stammaktien** eingeteilt und beträgt 162.450.090 Aktien zum 28. Januar 2011. Jede Stammaktie gewährt eine Stimme. Die Hauptversammlung wird – beginnend mit dem Jahresabschluss für das Geschäftsjahr 2010 – auch über die Feststellung des Jahresabschlusses der Gesellschaft beschließen.

Darüber hinaus bedarf der Beschluss der Zustimmung der persönlich haftenden Gesellschafterin.

Ferner hat sich die **Kompetenzverteilung** geändert: Die Fresenius SE & Co. KGaA hat selbst keinen Vorstand. Die **Geschäftsführung** der SE & Co. KGaA obliegt dem Vorstand der persönlich haftenden Gesellschafterin. Dieser ist personengleich mit dem bisherigen Vorstand der Fresenius SE. Er entwickelt die strategische Ausrichtung, erörtert diese mit dem Aufsichtsrat der Fresenius SE & Co. KGaA und sorgt für deren Umsetzung. Er folgt dabei ausschließlich dem Unternehmensinteresse der Fresenius SE & Co. KGaA.

Die Übersicht über den Vorstand der persönlich haftenden Gesellschafterin – der Fresenius Management SE – finden Sie auf Seite 211 im Geschäftsbericht.

Der **Aufsichtsrat** der Fresenius SE & Co. KGaA überwacht die Geschäftsführung durch die persönlich haftende Gesellschafterin und ihren Vorstand. Gegenstand der Überwachung sind die unternehmerischen Entscheidungen im Hinblick auf deren Ordnungsmäßigkeit, Zweckmäßigkeit und Wirtschaftlichkeit. Die Bestellung der Vorstandsmitglieder der persönlich haftenden Gesellschafterin erfolgt nicht durch den Aufsichtsrat der KGaA, sondern durch den Aufsichtsrat der Fresenius Management SE.

Mit dem Rechtsformwechsel endete die Amtszeit der bisherigen Aufsichtsratsmitglieder am 28. Januar 2011, sodass der Aufsichtsrat neu zu besetzen war. Ein hierzu vorab durchgeführtes Statusverfahren ergab, dass sich der Aufsichtsrat der Fresenius SE & Co. KGaA wie bisher paritätisch aus je sechs Anteilseigner- und Arbeitnehmervertretern zusammensetzt. Zur Anwendung kamen Vorschriften des Gesetzes über die Mitbestimmung der Arbeitnehmer bei einer grenzüberschreitenden Verschmelzung (MgVG).

Der Aufsichtsrat der Fresenius SE & Co. KGaA besteht aus zwölf Mitgliedern. Die Hälfte der Mitglieder wird von der Hauptversammlung gewählt. Für die Wahlvorschläge der **Vertreter der Anteilseigner** wird ein Nominierungsausschuss gebildet, der sich an den Vorgaben des Gesetzes und des Kodex orientiert. Bei den Vorschlägen zur Wahl von Aufsichtsratsmitgliedern wird im Unternehmensinteresse vorrangig auf die erforderlichen Kenntnisse, Fähigkeiten und fachlichen Erfahrungen zur Wahrnehmung der Aufgaben geachtet. Zwar wird daneben auf die Vielfalt (Diversity) bei der Zusammensetzung des Aufsichtsrats geachtet. Feste Quoten für Diversity und Altersgrenzen würden demgegenüber die Auswahl geeigneter Kandidaten bei der Zusammensetzung des Aufsichtsrats und deren Berücksichtigung bei Wahlvorschlägen pauschal einschränken.

#### STRUKTUR FRESENIUS SE & CO. KGAA

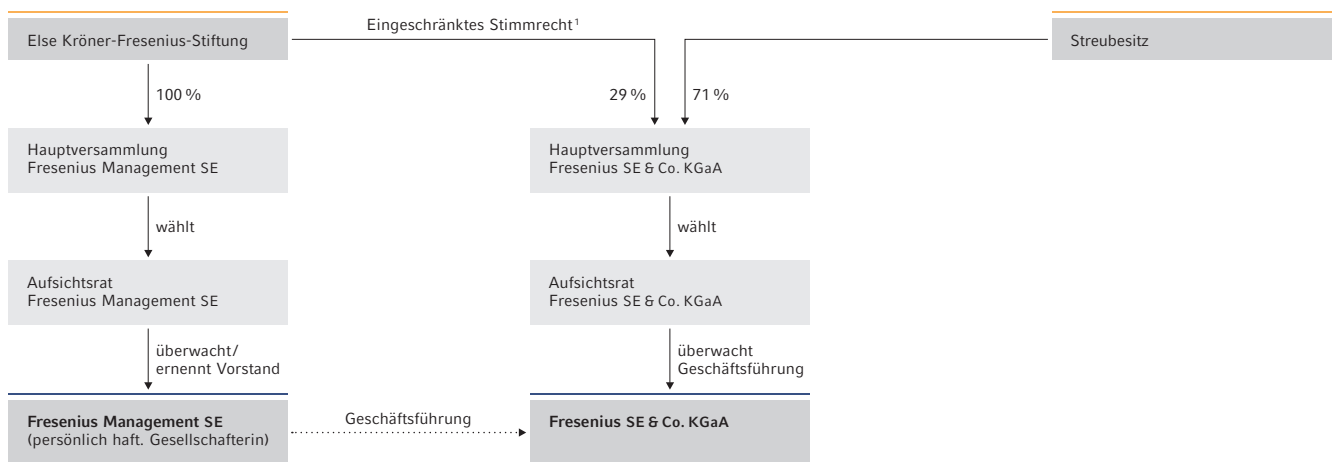

<sup>1</sup> Bei bestimmten Beschlussgegenständen besteht kein Stimmrecht, z. B. Wahl des Aufsichtsrats der SE & Co. KGaA, Entlastung der persönlich haftenden Gesellschafterin und des Aufsichtsrats der SE & Co. KGaA für das Geschäftsjahr, Wahl der Abschlussprüfer.

Von den zwölf Mitgliedern sind sechs Mitglieder von den **Arbeitnehmern** zu wählen. Die Amtszeiten der amtierenden Aufsichtsratsmitglieder enden jeweils mit der Beendigung der ordentlichen Hauptversammlung der Gesellschaft im Jahr 2016. Dem Aufsichtsrat gehörte eine nach seiner Einschätzung ausreichende Anzahl unabhängiger Mitglieder an, die in keiner geschäftlichen oder persönlichen Beziehung zur Gesellschaft oder zu deren Vorstand stehen, die einen Interessenkonflikt begründet. Einzelheiten zur Wahl, Konstituierung und Amtszeit des Aufsichtsrats, zu dessen Sitzungen und Beschlussfassungen sowie zu seinen Rechten und Pflichten regelt die **Satzung** der Fresenius SE & Co. KGaA. Diese ist auf unserer Website [www.fresenius.de](http://www.fresenius.de) unter Wir über uns – Corporate Governance abrufbar.

Die sechs Vertreter der Anteilseigner im Aufsichtsrat der Fresenius SE & Co. KGaA wurden von der Hauptversammlung am 12. Mai 2010 gewählt. Die sechs Vertreter der Arbeitnehmer wurden mit Beschluss des Amtsgerichts Bad Homburg v. d. H. vom 31. Januar 2011 zunächst gerichtlich bestellt.

Die Übersicht über die Aufsichtsratsmitglieder der Fresenius SE & Co. KGaA sowie die Aufsichtsratsmitglieder der persönlich haftenden Gesellschafterin – der Fresenius Management SE – finden Sie auf den Seiten 209 bis 210 und 212 im Geschäftsbericht.

Der Aufsichtsrat der Fresenius SE & Co. KGaA hat sich gemäß Kodex-Ziffer 5.1.3 eine Geschäftsordnung gegeben. Die Koordination der Arbeit, die Leitung der **Aufsichtsratssitzungen** sowie die Wahrnehmung der Aufsichtsratsbelange nach außen übernimmt der Aufsichtsratsvorsitzende. Der Aufsichtsrat soll einmal im Kalendervierteljahr und muss zweimal im Kalenderhalbjahr zusammentreten. Die Sitzungen werden vom Vorsitzenden einberufen und geleitet, im Falle seiner Verhinderung durch den vom Vorsitzenden benannten Sitzungsleiter. Er bestimmt die Reihenfolge der Verhandlungsgegenstände und die Art der Abstimmung. Der Aufsichtsrat entscheidet mit einfacher Mehrheit der an der Beschlussfassung teilnehmenden Stimmen, soweit nicht das Gesetz zwingend andere Mehrheiten vorschreibt. Bei Stimmengleichheit gibt die Stimme des Vorsitzenden und bei dessen Nichtteilnahme die Stimme des Stellvertreters den Ausschlag, der ein Vertreter der Anteilseigner ist.

Der Aufsichtsrat der Fresenius SE & Co. KGaA führt seine Geschäfte nach den Vorschriften des Gesetzes, der Satzung der Fresenius SE & Co. KGaA und der Geschäftsordnung des Aufsichtsrats. Durch einen regelmäßigen Dialog mit dem Vorstand der persönlich haftenden Gesellschafterin – der Fresenius Management SE – ist der Aufsichtsrat zu jeder Zeit über die Geschäftsentwicklung, die Unternehmensplanung und die Strategie informiert. Er überwacht die Geschäftsführung und prüft den Jahresabschluss des Konzerns unter Berücksichtigung der Berichte des Abschlussprüfers. Ein weiterer wesentlicher Bestandteil der Aufsichtsrats Tätigkeit ist die Arbeit in den Ausschüssen, die nach den Bestimmungen des Aktiengesetzes sowie den Empfehlungen des Kodex gebildet werden.

Die Mitglieder des Aufsichtsrats informieren sich regelmäßig durch unternehmensinterne wie auch durch externe Quellen über den aktuellen Stand der Anforderungen an ihre Überwachungstätigkeit. Der Aufsichtsrat stellt sicher und wird darin von der Gesellschaft unterstützt, dass seine Mitglieder fortlaufend qualifiziert, ihre Fachkenntnisse aktualisiert sowie ihre Urteilsfähigkeit und Erfahrung weiterentwickelt werden, die zur ordnungsgemäßen Wahrnehmung seiner Aufgaben einschließlich seiner Ausschüsse erforderlich sind. So werden Informationen von verschiedenen unternehmens-externen Sachkundigen zur Verfügung gestellt, darüber hinaus informieren Vertreter aus den Fresenius-Fachbereichen über maßgebliche Entwicklungen, z. B. über relevante Neuregelungen in der Rechtsprechung und über Änderungen in der Rechnungslegung und Prüfung nach US-GAAP und IFRS.

Der Aufsichtsrat der Fresenius SE & Co. KGaA bildet aus dem Kreis seiner Mitglieder zwei **ständige Ausschüsse**: den Prüfungsausschuss mit fünf Mitgliedern und den Nominierungsausschuss mit drei Mitgliedern. Die Mitglieder der Ausschüsse wurden in der Sitzung am 11. März 2011 gewählt. Nach der Satzung der Fresenius SE & Co. KGaA wird nur die Mitgliedschaft im Prüfungsausschuss gesondert vergütet (§ 13 Abs. 2). Der Personalausschuss entfällt in der KGaA, da der Aufsichtsrat der Fresenius SE & Co. KGaA weder für die Bestellung noch für die Verträge der Vorstandsmitglieder der persönlich haftenden Gesellschafterin zuständig ist. Diese Personalkompetenz liegt vielmehr beim Aufsichtsrat der persönlich haftenden Gesellschafterin.



## VERGÜTUNGSBERICHT

Der Vergütungsbericht fasst die wesentlichen Elemente des Systems zur Vergütung des Vorstands der persönlich haftenden Gesellschafterin der Fresenius SE & Co. KGaA zusammen und erläutert in diesem Zusammenhang vor allem die Höhe und Struktur der Vorstandsvergütung. Darüber hinaus werden die Grundsätze und die Höhe der Vergütung des Aufsichtsrats beschrieben. Der Vergütungsbericht ist Bestandteil des Konzern-Lageberichts. Der Vergütungsbericht wird auf der Basis der Empfehlungen des Deutschen Corporate Governance Kodex erstellt und beinhaltet ferner die Angaben, die nach den maßgeblichen gesetzlichen Vorschriften, vor allem dem Handelsgesetzbuch, erforderlich sind.

### VERGÜTUNG DES VORSTANDS

Für die Festlegung der Vorstandsvergütung ist das Aufsichtsratsplenum der Fresenius Management SE zuständig. Der Aufsichtsrat wird dabei von einem Personalausschuss unterstützt. Der im Berichtsjahr amtierende Personalausschuss der Fresenius SE setzte sich aus den Herren Dr. Gerd Krick, Dr. Karl Schneider und Wilhelm Sachs zusammen.

Die Vergütung der Vorstandsmitglieder der persönlich haftenden Gesellschafterin der Fresenius SE & Co. KGaA berücksichtigte im Berichtsjahr auch bereits die nach Maßgabe des am 5. August 2009 in Kraft getretenen Gesetzes zur Angemessenheit der Vorstandsvergütung (VorstAG) neu formulierten Anforderungen. Das System der Vorstandvergütung wurde zu Beginn des Berichtsjahres von einem unabhängigen externen Vergütungsexperten geprüft und im Weiteren der Hauptversammlung der Fresenius SE (seit 28. Januar 2011: Fresenius SE & Co. KGaA) zur Billigung vorgelegt. Die Hauptversammlung hat das System der Vorstandsvergütung am 12. Mai 2010 mit einer Mehrheit von 99,51 % der abgegebenen Stimmen durch Beschluss gebilligt.

Zielsetzung des Vergütungssystems ist es, die Mitglieder des Vorstands an der Entwicklung des Unternehmens entsprechend ihren Aufgaben und Leistungen sowie den Erfolgen bei der Gestaltung der wirtschaftlichen und finanziellen Lage des Unternehmens unter Berücksichtigung des Vergleichsumfelds angemessen teilhaben zu lassen.

Die Vergütung des Vorstands ist in ihrer Gesamtheit leistungsorientiert und setzte sich im Geschäftsjahr 2010 aus drei Komponenten zusammen:

- ▶ erfolgsunabhängige Vergütung (Grundgehalt)
- ▶ erfolgsbezogene Vergütung (variabler Bonus)
- ▶ Komponente mit langfristiger Anreizwirkung (Aktienoptionen und verschobene Bonuszahlungen)

Des Weiteren hatten im Berichtszeitraum sechs Mitglieder des Vorstands Pensionszusagen.

Die Ausgestaltung der einzelnen Komponenten folgt dabei den nachstehenden Kriterien:

Die erfolgsunabhängige Vergütung wurde im Geschäftsjahr 2010 in zwölf monatlichen Raten als Grundgehalt ausbezahlt. Zusätzlich haben die Mitglieder des Vorstands Nebenleistungen erhalten, die im Wesentlichen aus Versicherungsleistungen, der Privatnutzung der Firmen-Pkw, Sonderzahlungen, wie Wohnkostenzuschüssen und Gebührenerstattungen, sowie Zuschüssen zur Renten- und Krankenversicherung bestehen.

Die erfolgsbezogene Vergütung wird auch für das Geschäftsjahr 2010 als variabler Bonus gewährt. Die Höhe des jeweiligen Bonus ist davon abhängig, dass bestimmte am Konzernergebnis des Fresenius-Konzerns bzw. der relevanten Unternehmensbereiche orientierte Zielparameter erreicht werden. Im Falle der Vorstandsmitglieder mit funktionaler Verantwortlichkeit für den Gesamtkonzern – das sind die Herren Dr. Schneider, Sturm und Dr. Götz – leitet sich die Höhe des variablen Bonus vollständig vom jeweiligen Konzernjahresüberschuss der Fresenius SE & Co. KGaA (nach Abzug von Minderheitsanteilen) ab. Bei den Herren Baule und Dr. De Meo hängt die Höhe des variablen Bonus jeweils hälftig von der Entwicklung des Konzernjahresüberschusses der Fresenius SE & Co. KGaA sowie von der Entwicklung des Jahresüberschusses des Unternehmensbereichs (jeweils nach Abzug von Minderheitsanteilen), für den das jeweilige Vorstandsmitglied zuständig ist, ab. Der variable Bonus von Herrn Dr. Wastler richtet sich jeweils hälftig nach dem Konzernjahresüberschuss der Fresenius SE & Co. KGaA (nach Abzug von Minderheitsanteilen) sowie nach dem Konzernjahresergebnis vor Steuern und außerordentlichen Erträgen/Aufwendungen der VAMED-Gruppe. Herr Dr. Lipps erhält seine Vergütung ausschließlich von der Fresenius Medical Care. Darüber hinaus kann der Aufsichtsrat eine Ermessenstantieme für besondere Leistungen gewähren.

Für die Geschäftsjahre 2010 und 2009 stellte sich die Höhe der Barvergütung des Vorstands der persönlich haftenden Gesellschafterin der Fresenius SE & Co. KGaA wie folgt dar:

| in Tsd €                   | Erfolgsunabhängige Vergütung |              |                        |            | Erfolgsbezogene Vergütung |              | Barvergütung<br>(ohne Komponenten<br>mit langfristiger<br>Anreizwirkung) |              |
|----------------------------|------------------------------|--------------|------------------------|------------|---------------------------|--------------|--------------------------------------------------------------------------|--------------|
|                            | Gehalt                       |              | Sonstiges <sup>2</sup> |            | Bonus                     |              | 2010                                                                     | 2009         |
|                            | 2010                         | 2009         | 2010                   | 2009       | 2010                      | 2009         |                                                                          |              |
| Dr. Ulf M. Schneider       | 900                          | 800          | 47                     | 56         | 908                       | 1.032        | 1.855                                                                    | 1.888        |
| Rainer Baule               | 500                          | 425          | 42                     | 41         | 608                       | 800          | 1.150                                                                    | 1.266        |
| Dr. Francesco De Meo       | 500                          | 425          | 18                     | 18         | 498                       | 543          | 1.016                                                                    | 986          |
| Dr. Jürgen Götz            | 375                          | 325          | 30                     | 28         | 464                       | 424          | 869                                                                      | 777          |
| Dr. Ben Lipps <sup>1</sup> | 905                          | 860          | 354                    | 251        | 1.172                     | 1.200        | 2.431                                                                    | 2.311        |
| Stephan Sturm              | 500                          | 425          | 85                     | 85         | 574                       | 732          | 1.159                                                                    | 1.242        |
| Dr. Ernst Wastler          | 425                          | 375          | 32                     | 27         | 461                       | 473          | 918                                                                      | 875          |
| <b>Summen</b>              | <b>4.105</b>                 | <b>3.635</b> | <b>608</b>             | <b>506</b> | <b>4.685</b>              | <b>5.204</b> | <b>9.398</b>                                                             | <b>9.345</b> |

<sup>1</sup> Herr Dr. Ben Lipps erhält seine Vergütung ausschließlich von der Fresenius Medical Care, an der die Fresenius SE & Co. KGaA einen Anteil von 35 % hält.

Als Mitglied des Vorstands der Fresenius Management SE ist seine Vergütung auch in den Vergütungsbericht des Fresenius-Konzerns aufzunehmen.

<sup>2</sup> Enthalten sind Versicherungsleistungen, die Privatnutzung der Firmen-Pkw, Zuschüsse zur Renten- und Krankenversicherung und sonstige Nebenleistungen.

Der direkt ausgezahlte Bonus, ohne die Auszahlung an Herrn Dr. Ben Lipps, beträgt für das Geschäftsjahr 2010 3.463 Tsd €. Dies entspricht 79 % des gesamten Bonus von 4.360 Tsd €. Der verbleibende Teil in Höhe von 897 Tsd € wurde in eine Komponente mit mehrjähriger Bemessungsgrundlage umgewandelt und die Auszahlung um zwei Jahre verschoben.

Um zu gewährleisten, dass das System zur Vergütung der Vorstandsmitglieder insgesamt auf eine langfristige und nachhaltige Unternehmensentwicklung ausgerichtet ist, sieht das Vergütungssystem vor, dass der Anteil der langfristig orientierten variablen Vergütungsbestandteile betragsmäßig mindestens die Hälfte der dem jeweiligen Vorstandsmitglied insgesamt eingeräumten variablen Vergütungsbestandteile ausmacht. Zur Sicherstellung dieser Mindestrelation zugunsten der langfristig orientierten variablen Vergütungsbestandteile ist ausdrücklich vorgesehen, dass der Aufsichtsrat bestimmen kann, dass der grundsätzlich jährlich zu vergütende variable Bonus (anteilig) in eine auf einer mehrjährigen Bemessungsgrundlage basierende variable Vergütungskomponente, die auch etwaigen negativen Entwicklungen innerhalb des Bemessungszeitraums Rechnung trägt, umgewandelt wird. Dies geschieht in der Weise, dass die Fälligkeit des an sich jährlich erdienten variablen Bonus nach dem Ermessen des Aufsichtsrats anteilig oder vollständig um zwei Jahre verschoben wird. Dabei wird gleichzeitig sichergestellt, dass

eine Auszahlung an das Vorstandsmitglied auch nach Ablauf dieses mehrjährigen Zeitraums nur dann erfolgt, wenn (i) keine nachträgliche Berichtigung des für die Bemessung des variablen Bonus maßgeblichen (um Sondereffekte bereinigten) Konzernjahresüberschusses der Fresenius SE & Co. KGaA (nach Abzug von Minderheitsanteilen) außerhalb einer betragsmäßigen Toleranzbreite von 10 % erfolgt und (ii) der (um Sondereffekte bereinigte) Konzernjahresüberschuss der Fresenius SE & Co. KGaA in den beiden relevanten Folgejahren die (um Sondereffekte bereinigten) Konzernjahresüberschüsse (nach Abzug von Minderheitsanteilen) der jeweiligen vorangegangenen Geschäftsjahre betragsmäßig nicht wesentlich unterschreitet. Im Falle einer lediglich geringfügigen bzw. teilweisen Verfehlung der vorgenannten Auszahlungsvoraussetzungen kann der Aufsichtsrat eine entsprechende anteilige Auszahlung des umgewandelten Teils des variablen Bonus beschließen. Eine Verzinsung des umgewandelten Bonusanspruchs von der erstmaligen Entstehung bis zu dessen effektiver Auszahlung findet nicht statt. Auf diese Weise kann der variable Bonus anteilig oder vollständig in einen echten auf mehrjähriger Bemessungsgrundlage basierenden variablen Vergütungsbestandteil umgewandelt werden, der etwaige negative Entwicklungen während des relevanten Bemessungszeitraums berücksichtigt.

Das Vorstandsvergütungssystem sieht ferner eine vertraglich geregelte betragsmäßige Begrenzung bzw. Begrenzungsmöglichkeit hinsichtlich der durch das Vorstandsmitglied



insgesamt, d. h. unter Einschluss aller variablen Vergütungsbestandteile, zu beanspruchenden jährlichen Vergütung vor. Dadurch kann vor allem solchen außerordentlichen Entwicklungen angemessen Rechnung getragen werden, die in keinem relevanten Zusammenhang mit den Leistungen des Vorstands stehen.

Die Höhe der Grundvergütung und die Gesamtvergütung der Vorstandsmitglieder nach Maßgabe des neuen Vergütungssystems wurde bzw. wird unter besonderer Berücksichtigung relevanter Vergleichswerte anderer DAX-Unternehmen und ähnlicher Gesellschaften vergleichbarer Größe und Leistung aus dem relevanten Industriesektor bemessen.

Als Komponente mit langfristiger Anreizwirkung wurden im Geschäftsjahr 2010 Aktienoptionen auf Basis des Aktienoptionsplans 2008 der Fresenius SE & Co. KGaA und des Aktienoptionsplans 2006 der FMC-AG & Co. KGaA gewährt. Die Anzahl der zuzuteilenden Aktienoptionen wird durch den Aufsichtsrat nach dessen Ermessen jeweils festgelegt, wobei alle Vorstandsmitglieder, mit Ausnahme des Vorsitzenden des Vorstands, der jeweils die doppelte Anzahl von Aktienoptionen erhält, dieselbe Anzahl von Aktienoptionen erhalten.

Die Grundzüge dieser Aktienoptionspläne werden in Anmerkung 34 des Konzern-Anhangs, Aktienoptionen, näher dargestellt.

Für die Geschäftsjahre 2010 und 2009 sind die Anzahl und der Wert der ausgegebenen Aktienoptionen sowie auch der Wert der verschobenen erfolgsbezogenen Vergütung in der unten stehenden Tabelle dargestellt.

Die angegebenen Werte der im Geschäftsjahr 2010 an die Mitglieder des Vorstands gewährten Aktienoptionen entsprechen deren Zeitwert (Fair Value) zum Zeitpunkt ihrer Gewährung, somit einem Wert in Höhe von 12,92 € (2009: 8,24 €) pro Aktienoption der Fresenius SE & Co. KGaA und in Höhe von 8,07 € (2009: 7,64 €) pro Aktienoption der FMC-AG & Co. KGaA. Der Ausübungskurs für die gewährten Aktienoptionen der Fresenius SE & Co. KGaA beträgt 53,44 € (2009: 36,89 €).

Aufgrund der im Geschäftsjahr 2010 erreichten finanziellen Ziele hat Dr. Ben Lipps im Rahmen der Bonusvereinbarung von Fresenius Medical Care einen Anspruch auf eine aktienbasierte Vergütung in Höhe von 391 Tsd € (2009: 341 Tsd €) erworben. Der Anspruch orientiert sich an der Entwicklung der Stammaktie von Fresenius Medical Care und unterliegt einer dreijährigen Wartezeit.

Am Ende des Geschäftsjahres 2010 hielten die Mitglieder des Vorstands 978.960 (2009: 901.500) Aktienoptionen und Wandelschuldverschreibungen der Fresenius SE & Co. KGaA und 598.870 (2009: 703.416) der FMC-AG & Co. KGaA.

#### KOMPONENTEN MIT LANGFRISTIGER ANREIZWIRKUNG

|                      | Aktienoptionen <sup>1</sup> |                |              |              | Verschobene<br>erfolgsbezogene<br>Vergütung <sup>2</sup> |            | Gesamt       |              |
|----------------------|-----------------------------|----------------|--------------|--------------|----------------------------------------------------------|------------|--------------|--------------|
|                      | Anzahl                      |                | Wert Tsd €   |              | Wert Tsd €                                               |            | Wert Tsd €   |              |
|                      | 2010                        | 2009           | 2010         | 2009         | 2010                                                     | 2009       | 2010         | 2009         |
| Dr. Ulf M. Schneider | 56.760                      | 51.600         | 733          | 425          | 174                                                      | 0          | 907          | 425          |
| Rainer Baule         | 28.380                      | 25.800         | 367          | 213          | 241                                                      | 0          | 608          | 213          |
| Dr. Francesco De Meo | 28.380                      | 25.800         | 367          | 213          | 131                                                      | 0          | 498          | 213          |
| Dr. Jürgen Götz      | 28.380                      | 25.800         | 367          | 213          | 98                                                       | 0          | 465          | 213          |
| Dr. Ben Lipps        | 99.600                      | 99.600         | 804          | 761          | 391                                                      | 341        | 1.195        | 1.102        |
| Stephan Sturm        | 28.380                      | 25.800         | 367          | 213          | 208                                                      | 0          | 575          | 213          |
| Dr. Ernst Wastler    | 28.380                      | 25.800         | 367          | 213          | 95                                                       | 0          | 462          | 213          |
| <b>Summen</b>        | <b>298.260</b>              | <b>280.200</b> | <b>3.372</b> | <b>2.251</b> | <b>1.338</b>                                             | <b>341</b> | <b>4.710</b> | <b>2.592</b> |

<sup>1</sup> Aktienoptionen, die in den Jahren 2010 und 2009 aus dem Aktienoptionsprogramm der Fresenius SE & Co. KGaA ausgegeben wurden.

Herr Dr. Ben Lipps erhielt Aktienoptionen aus dem Aktienoptionsprogramm der Fresenius Medical Care.

<sup>2</sup> Die Angabe für Herrn Dr. Ben Lipps bezieht sich auf einen Anspruch auf eine aktienbasierte Vergütung mit Barausgleich der Fresenius Medical Care.

Die Entwicklung und der Stand der Aktienoptionen des Vorstands im Geschäftsjahr 2010 sind in der folgenden Tabelle dargestellt:

|                                                  | Dr. Ulf M. Schneider | Rainer Baule    | Dr. Francesco De Meo | Dr. Jürgen Götz | Dr. Ben Lipps <sup>1</sup> | Stephan Sturm   | Dr. Ernst Wastler | Summen <sup>2</sup> |
|--------------------------------------------------|----------------------|-----------------|----------------------|-----------------|----------------------------|-----------------|-------------------|---------------------|
| Am 1. Januar 2010 ausstehende Optionen           |                      |                 |                      |                 |                            |                 |                   |                     |
| Anzahl                                           | 322.500              | 187.050         | 81.600               | 88.530          | 703.416                    | 139.320         | 82.500            | 901.500             |
| durchschnittlicher Ausübungspreis in €           | 36,65                | 34,42           | 46,66                | 46,74           | 28,44                      | 41,63           | 44,04             | 39,53               |
| Im Geschäftsjahr gewährte Optionen               |                      |                 |                      |                 |                            |                 |                   |                     |
| Anzahl                                           | 56.760               | 28.380          | 28.380               | 28.380          | 99.600                     | 28.380          | 28.380            | 198.660             |
| durchschnittlicher Ausübungspreis in €           | 53,44                | 53,44           | 53,44                | 53,44           | 42,68                      | 53,44           | 53,44             | 53,44               |
| Im Geschäftsjahr ausgeübte Optionen              |                      |                 |                      |                 |                            |                 |                   |                     |
| Anzahl                                           | 43.860               | 47.730          | 0                    | 29.610          | 204.146                    | 0               | 0                 | 121.200             |
| durchschnittlicher Ausübungspreis in €           | 13,59                | 17,31           |                      | 46,77           | 24,49                      |                 |                   | 23,16               |
| durchschnittlicher Aktienkurs in €               | 64,91                | 59,71           |                      | 64,44           | 43,14                      |                 |                   | 62,75               |
| Am 31. Dezember 2010 ausstehende Optionen        |                      |                 |                      |                 |                            |                 |                   |                     |
| Anzahl                                           | 335.400              | 167.700         | 109.980              | 87.300          | 598.870                    | 167.700         | 110.880           | 978.960             |
| durchschnittlicher Ausübungspreis in €           | 42,51                | 42,51           | 48,41                | 48,90           | 32,15                      | 43,63           | 46,44             | 44,38               |
| durchschnittlich verbleibende Laufzeit in Jahren | 5,3                  | 5,3             | 5,7                  | 5,6             | 4,4                        | 5,4             | 5,5               | 5,4                 |
| Bandbreite an Ausübungspreisen in €              | 21,33 bis 57,27      | 21,33 bis 57,27 | 36,89 bis 57,27      | 36,89 bis 57,27 | 14,47 bis 42,68            | 29,92 bis 57,27 | 21,33 bis 57,27   | 21,33 bis 57,27     |
| Am 31. Dezember 2010 ausübbar Optionen           |                      |                 |                      |                 |                            |                 |                   |                     |
| Anzahl                                           | 160.820              | 80.410          | 25.000               | 10              | 300.070                    | 80.410          | 27.400            | 374.050             |
| durchschnittlicher Ausübungspreis in €           | 35,56                | 35,56           | 47,49                | 57,27           | 27,61                      | 37,91           | 40,11             | 37,20               |

<sup>1</sup> Herr Dr. Ben Lipps hält Aktienoptionen aus dem Aktienoptionsplan der Fresenius Medical Care.

<sup>2</sup> Nur Aktienoptionen und Wandelschuldverschreibungen der Fresenius SE & Co. KGaA, ohne Aktienoptionen von Herrn Dr. Ben Lipps

Die Höhe der gesamten Vergütung des Vorstands der persönlich haftenden Gesellschafterin der Fresenius SE & Co. KGaA stellte sich für die Geschäftsjahre 2010 und 2009 damit wie folgt dar:

| in Tsd €             | Barvergütung<br>(ohne Komponenten<br>mit langfristiger<br>Anreizwirkung) |              | Komponenten<br>mit langfristiger<br>Anreizwirkung |              | Gesamtvergütung<br>(einschließlich Kompo-<br>nenten mit langfristiger<br>Anreizwirkung) |               |
|----------------------|--------------------------------------------------------------------------|--------------|---------------------------------------------------|--------------|-----------------------------------------------------------------------------------------|---------------|
|                      | 2010                                                                     | 2009         | 2010                                              | 2009         | 2010                                                                                    | 2009          |
| Dr. Ulf M. Schneider | 1.855                                                                    | 1.888        | 907                                               | 425          | 2.762                                                                                   | 2.313         |
| Rainer Baule         | 1.150                                                                    | 1.266        | 608                                               | 213          | 1.758                                                                                   | 1.479         |
| Dr. Francesco De Meo | 1.016                                                                    | 986          | 498                                               | 213          | 1.514                                                                                   | 1.199         |
| Dr. Jürgen Götz      | 869                                                                      | 777          | 465                                               | 213          | 1.334                                                                                   | 990           |
| Dr. Ben Lipps        | 2.431                                                                    | 2.311        | 1.195                                             | 1.102        | 3.626                                                                                   | 3.413         |
| Stephan Sturm        | 1.159                                                                    | 1.242        | 575                                               | 213          | 1.734                                                                                   | 1.455         |
| Dr. Ernst Wastler    | 918                                                                      | 875          | 462                                               | 213          | 1.380                                                                                   | 1.088         |
| <b>Summen</b>        | <b>9.398</b>                                                             | <b>9.345</b> | <b>4.710</b>                                      | <b>2.592</b> | <b>14.108</b>                                                                           | <b>11.937</b> |

Die Aktienoptionen und der Anspruch auf eine aktienbasierte Vergütung können erst nach Ablauf festgelegter Mindestlaufzeiten (Erdienungszeiträume) ausgeübt werden. Ihr Wert wird

auf die Erdienungszeiträume verteilt und als Aufwand im jeweiligen Geschäftsjahr berücksichtigt. Der auf die Geschäftsjahre 2010 und 2009 entfallende Aufwand ist in der nachfolgenden Tabelle ausgewiesen.

| in Tsd €             | Aufwand für Komponenten mit langfristiger Anreizwirkung |              |
|----------------------|---------------------------------------------------------|--------------|
|                      | 2010                                                    | 2009         |
| Dr. Ulf M. Schneider | 681                                                     | 694          |
| Rainer Baule         | 341                                                     | 347          |
| Dr. Francesco De Meo | 268                                                     | 171          |
| Dr. Jürgen Götz      | 327                                                     | 289          |
| Dr. Ben Lipps        | 1.739                                                   | 1.857        |
| Stephan Sturm        | 341                                                     | 357          |
| Dr. Ernst Wastler    | 268                                                     | 171          |
| <b>Summen</b>        | <b>3.965</b>                                            | <b>3.886</b> |

#### ZUSAGEN AN MITGLIEDER DES VORSTANDS FÜR DEN FALL DER BEENDIGUNG DER TÄTIGKEIT

Für die Vorstandsmitglieder Dr. Ulf M. Schneider, Rainer Baule, Dr. Jürgen Götz und Stephan Sturm bestehen individuelle Pensionszusagen auf der Grundlage ihrer Anstellungsverträge mit der persönlich haftenden Gesellschafterin der Fresenius SE & Co. KGaA. Das Vorstandsmitglied Dr. Ernst Wastler hat eine Pensionszusage der VAMED AG, Wien. Das

Vorstandsmitglied Dr. Ben Lipps hat unverfallbare Ansprüche aus der Teilnahme an Pensionsplänen für Mitarbeiter der Fresenius Medical Care North America erworben. Hinsichtlich dieser Pensionszusagen bestanden im Fresenius-Konzern zum 31. Dezember 2010 Pensionsverpflichtungen in Höhe von 7.870 Tsd € (2009: 5.040 Tsd €). Die Zuführung zur Pensionsrückstellung betrug im Geschäftsjahr 2010 2.830 Tsd € (2009: 924 Tsd €).

Die Pensionsverpflichtungen stellen sich wie folgt dar:

| in Tsd €             | Stand<br>1. Januar 2010 | Zuführung    | Stand<br>31. Dezember 2010 |
|----------------------|-------------------------|--------------|----------------------------|
|                      |                         |              |                            |
| Dr. Ulf M. Schneider | 726                     | 514          | 1.240                      |
| Rainer Baule         | 2.225                   | 1.137        | 3.362                      |
| Dr. Jürgen Götz      | 157                     | 259          | 416                        |
| Dr. Ben Lipps        | 341                     | 60           | 401                        |
| Stephan Sturm        | 365                     | 310          | 675                        |
| Dr. Ernst Wastler    | 1.226                   | 550          | 1.776                      |
| <b>Summen</b>        | <b>5.040</b>            | <b>2.830</b> | <b>7.870</b>               |

Die Pensionszusagen sehen jeweils ab dem endgültigen Ausscheiden aus der aktiven Erwerbstätigkeit, frühestens jedoch ab Vollendung des 63. Lebensjahres oder ab dem Eintritt der Berufs- oder Erwerbsunfähigkeit ein von der Höhe des letzten Grundgehalts abhängiges Ruhegehalt und eine Hinterbliebenenversorgung vor.

Das Ruhegehalt beträgt mindestens 30 % des letzten Grundgehalts und erhöht sich für jedes volle Dienstjahr als Vorstandsmitglied ab Beginn der Pensionszusage um 1,5 %-Punkte, wobei maximal 45 % erreicht werden können.

Laufende Ruhegehälter erhöhen sich nach Maßgabe der gesetzlichen Vorschriften (§ 16 BetrAVG).

Spätere Einkünfte aus einer Erwerbstätigkeit des Vorstandsmitglieds sind mit 30 % ihres Bruttobetrags auf die Pension anzurechnen. Ebenso sind eventuelle Beträge zu 100 % (bzw. bei dem Vorstandsmitglied Rainer Baule zu 70 %) anzurechnen, die den Vorstandsmitgliedern bzw. ihren Hinterbliebenen aus sonstigen betrieblichen Versorgungsanwartschaften des Vorstandsmitglieds, auch aus Anstellungsverhältnissen mit anderen Unternehmen, zustehen.

Im Fall des Todes eines der o. g. Vorstandsmitglieder erhält die Witwe eine Pension in Höhe von 60 % des zu diesem Zeitpunkt sich ergebenden Pensionsanspruchs. Ferner erhalten leibliche eheliche Kinder des verstorbenen Vorstandsmitglieds bis zum Abschluss der Ausbildung, längstens jedoch bis zur Vollendung des 25. Lebensjahres, eine Waisenpension in Höhe von 20 % des zu diesem Zeitpunkt sich ergebenden Pensionsanspruchs. Alle Waisenpensionen und die Witwenpension erreichen zusammen jedoch höchstens 90 % des Pensionsanspruchs des Vorstandsmitglieds.

Scheiden die Vorstandsmitglieder vor Vollendung des 63. Lebensjahres als Mitglieder des Vorstands der Fresenius Management SE auf andere Weise als durch Eintritt der Berufs- oder Erwerbsunfähigkeit aus, bleiben die Anwartschaften auf die vorgenannten Versorgungsleistungen erhalten, jedoch vermindert sich die bei Eintritt eines Versorgungsfalles zu zahlende Pension im Verhältnis der tatsächlichen Dienstzeit als Vorstandsmitglied zur möglichen Dienstzeit bis zur Vollendung des 63. Lebensjahres.

Dem Vorstandsmitglied Rainer Baule ist im Geschäftsjahr 2010 anstelle einer Erhöhung der Versicherungssummen für die von Fresenius zu seinen Gunsten abgeschlossenen Lebensversicherungen die Zahlung eines Betrags in Höhe von 78 Tsd € zugesagt worden, der mit Vollendung des 63. Lebensjahres fällig wird und ab dem 1. Januar 2010 jährlich mit 4,4 % zu verzinsen ist.

Die Pensionszusage von Dr. Ernst Wastler sieht die Gewährung von Normalpension, Vorpension, Berufsunfähigkeitspension sowie Witwen- und Waisenpension vor. Die Normalpension wird frühestens ab Vollendung des 60. Lebensjahres, die Vorpension frühestens ab Vollendung des 55. Lebensjahres gewährt. Die Pensionsleistungen betragen pro Dienstjahr 1,2 % bezogen auf das letzte Grundgehalt, wobei maximal 40 % erreicht werden können. Die Witwenpension (60 %) und die Waisenpensionen (je 20 %) erreichen zusammen maximal den zum Zeitpunkt des Todes bestehenden Pensionsanspruch von Herrn Dr. Ernst Wastler. Von Dritten geleistete Pensionen, Ruhe- oder Versorgungsbezüge werden auf die Pensionsleistung angerechnet.

Mit dem Vorstandsmitglied Dr. Ben Lipps wurde anstelle einer Pensionsregelung einzelvertraglich vereinbart, dass er unter Beachtung eines Wettbewerbsverbots bei Beendigung des zwischen ihm und der Fresenius Medical Care Management AG geschlossenen Anstellungsverhältnisses für einen Zeitraum von zehn Jahren für die Gesellschaft eine beratende Tätigkeit ausüben kann. Die seitens der Fresenius Medical Care Management AG hierfür zu gewährende Gegenleistung

würde sich p. a. wertmäßig auf etwa 33 % der im Geschäftsjahr 2010 an ihn ausbezahlten erfolgsunabhängigen Vergütungskomponente belaufen. Der Barwert dieser Ansprüche betrug zum 31. Dezember 2010 2.153 Tsd €. Das Vorstandsmitglied Dr. Ben Lipps hat ferner unverfallbare Ansprüche aus der Teilnahme an Pensionsplänen für Mitarbeiter der Fresenius Medical Care North America erworben, die die Zahlung eines Ruhegehalts ab Vollendung des 65. Lebensjahres und die Zahlung reduzierter Leistungen ab Vollendung des 55. Lebensjahres vorsehen. Durch Plankürzungen im März 2002 sind die Ansprüche aus den Pensionsplänen auf dem damaligen Stand eingefroren worden.

Für alle Vorstandsmitglieder wurde ein nachvertragliches Wettbewerbsverbot vereinbart. Sofern dieses zur Anwendung kommt, erhalten die Vorstände für die Dauer von maximal zwei Jahren für jedes Jahr der sie jeweils betreffenden Geltung des Wettbewerbsverbots eine Karenzentschädigung in Höhe der halben Jahresgrundvergütung zuzüglich der Hälfte der vertraglich vereinbarten Mindesttantieme bzw. für das Vorstandsmitglied Rainer Baule die Hälfte der zuletzt bezogenen vertragsmäßigen Leistungen.

Die Anstellungsverträge der Vorstandsmitglieder enthalten keine ausdrücklichen Regelungen für den Fall eines „Change of Control“.

Alle Vorstandsmitglieder haben einzelvertragliche Zusagen zur Fortzahlung ihrer Bezüge im Krankheitsfall für maximal zwölf Monate erhalten, wobei ab sechs Monaten krankheitsbedingtem Ausfall gegebenenfalls Versicherungsleistungen zur Anrechnung gebracht werden. Im Falle des Versterbens eines Vorstandsmitglieds werden den Hinterbliebenen nach dem Monat des Versterbens noch drei Monatsbezüge ausbezahlt, längstens jedoch bis zum Ende des jeweiligen Anstellungsvertrags.

## SONSTIGES

Im Geschäftsjahr 2010 wurden an die Mitglieder des Vorstands der Fresenius Management SE keine Darlehen oder Vorschusszahlungen auf zukünftige Vergütungsbestandteile gewährt.

Die Fresenius SE & Co. KGaA hat sich verpflichtet, die Mitglieder des Vorstands von Ansprüchen, die gegen sie aufgrund ihrer Tätigkeit für die Gesellschaft und deren konzernverbundene Unternehmen erhoben werden, soweit solche Ansprüche über ihre Verantwortlichkeit nach deutschem Recht hinausgehen, im Rahmen des gesetzlich Zulässigen freizustellen. Zur Absicherung derartiger Verpflichtungen hat die

Gesellschaft eine Directors & Officers-Versicherung mit einem Selbstbehalt abgeschlossen, der den Vorgaben des Gesetzes zur Angemessenheit der Vorstandsvergütung (VorstAG) entspricht. Die Freistellung gilt für die Zeit, in der das jeweilige Mitglied des Vorstands amtiert sowie für Ansprüche in diesem Zusammenhang nach jeweiliger Beendigung der Vorstandstätigkeit.

Im Geschäftsjahr 2010 sind im Rahmen von Pensionszusagen an ausgeschiedene Vorstandsmitglieder 776 Tsd € (2009: 744 Tsd €) gezahlt worden. Für diesen Personenkreis besteht eine Pensionsverpflichtung von 11.039 Tsd € (2009: 9.878 Tsd €).

### VERGÜTUNG DES AUFSICHTSRATS

Die Vergütung des Aufsichtsrats wird durch die Hauptversammlung festgelegt und ist in § 14 der Satzung der Fresenius SE & Co. KGaA geregelt. Die feste Vergütung pro Aufsichtsratsmitglied beträgt nach der Satzung 13 Tsd €. Die Mitglieder des Prüfungsausschusses der Fresenius SE & Co. KGaA und die Mitglieder des im Berichtsjahr amtierenden Personalausschusses erhalten zusätzlich 10 Tsd €, der

Vorsitzende des Ausschusses weitere 10 Tsd €. Die Vergütung erhöht sich für jedes volle Geschäftsjahr um jeweils 10 %, wenn die Dividende für dieses Geschäftsjahr, die auf eine Stammaktie ausgeschüttet wird (Dividendenbetrag laut Beschluss der Hauptversammlung (Bruttodividende)), um jeweils einen Prozentpunkt höher ist als 3,6 % des auf eine einzelne Stückaktie entfallenden anteiligen Betrags des Grundkapitals; Zwischenbeträge werden interpoliert. Der Vorsitzende erhält das Doppelte und seine Stellvertreter das Ein- einhalbfache der Vergütung eines Aufsichtsratsmitglieds. Allen Aufsichtsratsmitgliedern werden die in Ausübung ihres Amtes entstandenen Auslagen erstattet. Die Fresenius SE & Co. KGaA stellt den Aufsichtsratsmitgliedern Versicherungsschutz in einem für die Ausübung der Aufsichtsrats Tätigkeit angemessenen Umfang mit einem Selbstbehalt zur Verfügung, der dem für den Vorstand vereinbarten entspricht.

Für die Geschäftsjahre 2010 und 2009 stellt sich die Höhe der Vergütung einschließlich der Vergütung für Ausschusstätigkeit für die Mitglieder des Aufsichtsrats der Fresenius SE & Co. KGaA wie folgt dar:

| in Tsd €                      | Festvergütung |            | Vergütung für Ausschusstätigkeit |            | Variable Vergütung |              | Gesamtvergütung |              |
|-------------------------------|---------------|------------|----------------------------------|------------|--------------------|--------------|-----------------|--------------|
|                               | 2010          | 2009       | 2010                             | 2009       | 2010               | 2009         | 2010            | 2009         |
| Dr. Gerd Krick                | 26            | 26         | 30                               | 30         | 214                | 186          | 270             | 242          |
| Dr. Dieter Schenk             | 20            | 20         | 0                                | 0          | 161                | 139          | 181             | 159          |
| Niko Stumpfögger              | 20            | 20         | 0                                | 0          | 161                | 139          | 181             | 159          |
| Prof. Dr. h. c. Roland Berger | 13            | 13         | 20                               | 20         | 107                | 93           | 140             | 126          |
| Dario Ilossi                  | 13            | 13         | 0                                | 0          | 107                | 93           | 120             | 106          |
| Konrad Kölbl                  | 13            | 13         | 10                               | 10         | 107                | 93           | 130             | 116          |
| Klaus-Peter Müller            | 13            | 13         | 0                                | 0          | 107                | 93           | 120             | 106          |
| Dr. Gerhard Rupprecht         | 13            | 13         | 0                                | 0          | 107                | 93           | 120             | 106          |
| Wilhelm Sachs                 | 13            | 13         | 10                               | 10         | 107                | 93           | 130             | 116          |
| Dr. Karl Schneider            | 13            | 13         | 20                               | 20         | 107                | 93           | 140             | 126          |
| Stefan Schubert               | 13            | 13         | 0                                | 0          | 107                | 93           | 120             | 106          |
| Rainer Stein                  | 13            | 13         | 10                               | 10         | 107                | 93           | 130             | 116          |
| <b>Summen</b>                 | <b>183</b>    | <b>183</b> | <b>100</b>                       | <b>100</b> | <b>1.499</b>       | <b>1.301</b> | <b>1.782</b>    | <b>1.584</b> |

### DIRECTORS & OFFICERS-VERSICHERUNG

Die Fresenius SE & Co. KGaA hat eine Vermögensschadenhaftpflichtversicherung für Unternehmensleiter (D & O-Versicherung) mit Selbstbehalt für den Vorstand und den Aufsichtsrat der persönlich haftenden Gesellschafterin der Fresenius SE & Co. KGaA und den Aufsichtsrat der Fresenius SE & Co. KGaA sowie für alle Organe der verbundenen Unternehmen im

In- und Ausland abgeschlossen. Die bestehende D & O-Versicherung ist weltweit gültig und hat eine Laufzeit bis Ende Juni 2011. Die Versicherung deckt die Rechtskosten der Verteidigung eines Organs bei Inanspruchnahme und gegebenenfalls den zu leistenden Schadenersatz im Rahmen der bestehenden Deckungssummen.

**FRESENIUS MEDICAL CARE.** Wir haben Bestwerte bei Umsatz und Ertrag erzielt und unsere Profitabilität steigern können. Unsere weltweit führende Marktposition in der Dialyse haben wir ausgebaut und unser Geschäft vor allem in Europa und der Region Asien-Pazifik verstärkt. Unsere Behandlungsqualität konnten wir weiter erhöhen. Dies ist uns besonders wichtig.

Fresenius Medical Care ist der weltweit führende Anbieter von Dialysedienstleistungen und Dialyseprodukten für Menschen mit chronischem Nierenversagen. Fällt bei Patienten mit chronischer Nierenerkrankung die Nierenfunktion aus, übernimmt die Dialyse die lebensnotwendige Reinigung des Blutes von Schadstoffen und überschüssigem Wasser.

In der Dialyse unterscheidet man grundsätzlich zwischen zwei Behandlungsverfahren: der Hämodialyse (HD) und der Peritonealdialyse (PD). Gesteuert durch ein Hämodialysegerät wird bei der HD das Blut eines Patienten mittels eines Dialysators – auch „künstliche Niere“ genannt – gereinigt. Bei der PD wird das Bauchfell (Peritoneum) eines Patienten als filternde Membran genutzt. Fresenius Medical Care

behandelt chronisch nierenkranke Patienten und stellt auch die dafür notwendigen Dialyseprodukte her. Als vertikal integriertes Unternehmen bietet Fresenius Medical Care Produkte und Dienstleistungen entlang der gesamten Wertschöpfungskette der Dialyse in mehr als 120 Ländern an. Fresenius Medical Care verfügt weltweit über ein Netz von über 40 Produktionsstätten, mit den größten Standorten in den USA, in Deutschland und in Japan.

Im Jahr 2010 haben wir unsere führende Marktposition weiter ausgebaut, wie die Tabelle zeigt: Weltweit versorgten wir 214.648 Patienten in 2.757 Dialysekliniken, und die Zahl der Behandlungen hat erstmals die Marke von 30 Millionen überschritten.

#### FRESENIUS MEDICAL CARE NACH REGIONEN

|                           | Nordamerika | Europa/<br>Nahe Osten/<br>Afrika | Lateinamerika | Asien-Pazifik | Gesamt<br>2010 | Veränderung<br>2010/2009 |
|---------------------------|-------------|----------------------------------|---------------|---------------|----------------|--------------------------|
| Dialysekliniken (31.12.)  | 1.823       | 499                              | 193           | 242           | 2.757          | 8 %                      |
| Dialysepatienten (31.12.) | 137.689     | 38.061                           | 22.471        | 16.427        | 214.648        | 10 %                     |
| Behandlungen (Mio)        | 20,85       | 5,45                             | 3,39          | 1,97          | 31,67          | 8 %                      |

## WIRTSCHAFTLICHE ENTWICKLUNG

Fresenius Medical Care erreichte im Geschäftsjahr 2010 ein deutliches Umsatzplus von 7 % auf 12.053 Mio US\$ (2009: 11.247 Mio US\$). Das organische Wachstum betrug 6 %. Akquisitionen trugen 1 % zum Wachstum bei.

Der Umsatz mit **Dialysedienstleistungen** wuchs um 9 % auf 9.070 Mio US\$ (2009: 8.350 Mio US\$). Diese Steigerung wurde durch ein ausgezeichnetes organisches Wachstum von 7 % getragen. Dialysedienstleistungen lieferten mit 75 % den größten Beitrag zum Gesamtumsatz.

Der Umsatz mit **Dialyseprodukten** stieg um 3 % auf 2.983 Mio US\$ (2009: 2.897 Mio US\$). Rechnet man die Dialyseprodukte hinzu, die wir in unseren eigenen Dialysekliniken einsetzen, ergibt sich ein Plus von 5 % auf 4.098 Mio US\$ (2009: 3.891 Mio US\$). Der Umsatz mit Dialyseprodukten macht 25 % des Gesamtumsatzes aus.

Der **EBIT** stieg um 10 % auf 1.924 Mio US\$ (2009: 1.756 Mio US\$). Die EBIT-Marge konnten wir auf 16,0 % verbessern (2009: 15,6 %). Das Konzernergebnis<sup>1</sup> steigerten wir um 10 % auf 979 Mio US\$ (2009: 891 Mio US\$).

## NORDAMERIKA

In unserer größten Geschäftsregion stieg der Umsatz um 7 % auf 8.130 Mio US\$ (2009: 7.612 Mio US\$). Das organische Wachstum lag bei 6 %.

In Nordamerika erzielten wir den weitaus größten Umsatzanteil mit **Dialysedienstleistungen**, nämlich 90 %. Hier konnten wir ein Wachstum von 7 % auf 7.303 Mio US\$ (2009: 6.794 Mio US\$) erreichen. Die gestiegene Zahl der Dialysebehandlungen und die höhere Vergütung je Behandlung waren die Wachstumstreiber für diese positive Entwicklung. Im Jahr 2010 ist die durchschnittliche Vergütung je Behandlung in den USA um 3 % auf 356 US\$ gestiegen (2009: 347 US\$). Dieser Anstieg ist hauptsächlich der Erhöhung der Erstattungssätze, insbesondere bei privaten Versicherern, zu verdanken.

Bei **Dialyseprodukten** nahm der Umsatz um 1 % auf 827 Mio US\$ zu (2009: 818 Mio US\$). Zu diesem Anstieg trugen Blutschlauchsysteme, Lösungen, Konzentrate und Dialysegeräte bei. Dies wurde teilweise aufgehoben durch niedrigere Umsätze mit Dialysemedikamenten.

Der **EBIT** wuchs um 11 % auf 1.386 Mio US\$ (2009: 1.250 Mio US\$). Die EBIT-Marge stieg auf 17,0 % (2009: 16,4 %). Eine höhere durchschnittliche Vergütung pro Behandlung und Größenvorteile trugen zu diesem Zuwachs bei. Zudem wirkte sich eine günstigere Kostensituation bei Dialysemedikamenten aus.

## UMSATZ NACH SEGMENTEN

| in Mio US\$             | 2010          | 2009          | Veränderung |
|-------------------------|---------------|---------------|-------------|
| <b>Nordamerika</b>      |               |               |             |
| Dialysedienstleistungen | 7.303         | 6.794         | 7 %         |
| Dialyseprodukte         | 827           | 818           | 1 %         |
| <b>Gesamt</b>           | <b>8.130</b>  | <b>7.612</b>  | <b>7 %</b>  |
| <b>International</b>    |               |               |             |
| Dialysedienstleistungen | 1.767         | 1.556         | 14 %        |
| Dialyseprodukte         | 2.156         | 2.079         | 4 %         |
| <b>Gesamt</b>           | <b>3.923</b>  | <b>3.635</b>  | <b>8 %</b>  |
| <b>Weltweit</b>         |               |               |             |
| Dialysedienstleistungen | 9.070         | 8.350         | 9 %         |
| Dialyseprodukte         | 2.983         | 2.897         | 3 %         |
| <b>Gesamt</b>           | <b>12.053</b> | <b>11.247</b> | <b>7 %</b>  |

## INTERNATIONAL

Das Segment International umfasst die Geschäftsregionen **Europa/Naher Osten/Afrika, Asien-Pazifik und Lateinamerika**. Im Jahr 2010 hat Fresenius Medical Care dort 33 % des Gesamtumsatzes erzielt.

Der Umsatz in diesem Segment erhöhte sich um 8 % auf 3.923 Mio US\$ (2009: 3.635 Mio US\$). Dies basiert auf einem organischen Wachstum von 5 % und Netto-Akquisitionen in Höhe von 3 %.

Der Umsatz mit **Dialysedienstleistungen** ist um 14 % auf 1.767 Mio US\$ gestiegen (2009: 1.556 Mio US\$). Dazu trugen Akquisitionen mit 8 % bei, das organische Wachstum belief sich auf 6 %.

Der Umsatz mit **Dialyseprodukten** stieg auf 2.156 Mio US\$ (2009: 2.079 Mio US\$). Höheren Umsätzen u. a. bei Dialysatoren, Lösungen und Konzentraten standen rückläufige Umsätze bei Dialysemedikamenten gegenüber.

Über die Umsatzentwicklung der Geschäftsregionen im Segment International informiert Sie die umseitige Tabelle.

<sup>1</sup> Ergebnis, das auf die Anteilseigner der Fresenius Medical Care AG & Co. KGaA entfällt



Der **EBIT** stieg im Segment International um 6 % auf 678 Mio US\$ (2009: 637 Mio US\$). Die operative Marge betrug 17,3 % (2009: 17,5 %). Positiv wirkten sich u. a. Mengenvorteile aus dem Umsatzwachstum und günstige Währungseffekte aus. Sie wurden kompensiert durch Aufwendungen aus der Abwertung des venezolanischen Bolivars sowie niedrigere Gewinnspannen bei neu erworbenen Dialysekliniken.

### AUSBAU DES INTERNATIONALEN GESCHÄFTS

Fresenius Medical Care hat im Jahr 2010 sowohl das Geschäft mit Dialyseprodukten als auch Dialysedienstleistungen durch Akquisitionen und Kooperationen erheblich verstärkt:

In der russischen Region Krasnodar hat Fresenius Medical Care **KNC**, einen Betreiber von Dialysekliniken, übernommen. KNC versorgt dort als alleiniger Anbieter mehr als 1.000 Patienten in 5 Kliniken. Fresenius Medical Care hat vor dieser Akquisition bereits 5 Dialysekliniken mit rund 570 Patienten betrieben. Mit dieser Übernahme haben wir unsere Präsenz im wachsenden Markt für Dialysedienstleistungen in Russland weiter verstärkt und sind zum führenden Anbieter im Land aufgestiegen. Dort benötigen derzeit über 20.000 Patienten eine Dialysebehandlung.

Im Dezember 2010 hat Fresenius Medical Care das weltweite **Peritonealdialysegeschäft von Gambro** übernommen. Der Ausbau unserer Position in der Heimdialyse ist ein wesentliches Element unserer Wachstumsstrategie. Dabei spielt die Peritonealdialyse eine wichtige Rolle. Gambro war der weltweit drittgrößte Anbieter von Peritonealdialyse und versorgte über 4.000 Patienten in mehr als 25 Ländern. Mit der Akquisition haben wir unsere Aktivitäten, insbesondere in Europa und der Region Asien-Pazifik, ausgeweitet. Die Akquisition soll rund 60 Mio US\$ jährlich zum Umsatz von Fresenius Medical Care beitragen.

Die Region Asien-Pazifik stellt mit einer überdurchschnittlich wachsenden Zahl an Dialysepatienten einen Wachstumsmarkt für Fresenius Medical Care dar. So haben wir im Juli 2010 **Asia Renal Care Ltd.** erworben. Das Unternehmen

behandelt rund 6.200 Patienten in etwa 100 Kliniken in ganz Asien und war nach Fresenius Medical Care der zweitgrößte Dialysedienstleister im asiatisch-pazifischen Raum. Asia Renal Care soll jährlich rund 80 Mio US\$ zum Umsatz von Fresenius Medical Care beitragen. Damit weitet Fresenius Medical Care seine führende Position im Bereich der Dialysedienstleistungen im asiatisch-pazifischen Raum deutlich aus. Dort sind mehr als 680.000 Patienten dauerhaft auf die lebenserhaltende Dialyse angewiesen. Diese Zahl soll dort innerhalb der nächsten fünf Jahre auf über eine Million steigen.

In Japan haben wir mit **Nikkiso Co. Ltd.** einen Vertriebsvertrag für Hämo- und Peritonealdialyseprodukte geschlossen. Durch die Kombination der effizienten Fertigungsverfahren von Fresenius Medical Care und Nikkisos starker Vertriebsorganisation wollen beide Unternehmen ihren Marktanteil in Japan, insbesondere bei Dialysatoren und Produkten für die Peritonealdialyse, weiter erhöhen. Mit der Übernahme von Nikkiso Medical Korea Co. Ltd., einer Tochtergesellschaft von Nikkiso Co. Ltd., baut Fresenius Medical Care zudem seine führende Position im Dialyseproduktgeschäft in der Republik Korea weiter aus. Die Akquisition wird jährlich rund 15 Mio US\$ zum Umsatz von Fresenius Medical Care beitragen.

Im Januar 2011 hat Fresenius Medical Care einen Vertrag abgeschlossen zur Übernahme von **International Dialysis Centers (IDC)**, dem Dialysedienstleistungsgeschäft von Euromedic International. Mit der Akquisition will Fresenius Medical Care die Dialysedienstleistungsaktivitäten insbesondere in Osteuropa ausweiten, wo IDC eine marktführende Position einnimmt. IDC betreibt 70 Dialysekliniken in 9 Ländern und behandelt mehr als 8.200 Hämodialysepatienten, den Großteil davon in Mittel- und Osteuropa. Nach Abschluss der Akquisition wird IDC jährlich rund 180 Mio US\$ zum Umsatz beitragen. Der Kaufpreis von 485 Mio € wurde zunächst aus dem Cashflow und vorhandenen Kreditlinien finanziert. Im Februar 2011 erfolgte die Refinanzierung durch die Ausgabe von Anleihen.

### UMSATZ NACH REGIONEN

| in Mio US\$               | 2010          | 2009          | Veränderung | Währungs-<br>umrechnungs-<br>effekte | Anteil am<br>Konzernumsatz |
|---------------------------|---------------|---------------|-------------|--------------------------------------|----------------------------|
| Nordamerika               | 8.130         | 7.612         | 7 %         | 0 %                                  | 67 %                       |
| Europa/Naher Osten/Afrika | 2.549         | 2.479         | 3 %         | -3 %                                 | 21 %                       |
| Asien-Pazifik             | 777           | 639           | 22 %        | 7 %                                  | 7 %                        |
| Lateinamerika             | 597           | 517           | 16 %        | 7 %                                  | 5 %                        |
| <b>Gesamt</b>             | <b>12.053</b> | <b>11.247</b> | <b>7 %</b>  | <b>0 %</b>                           | <b>100 %</b>               |



## DIALYSEMEDIKAMENTE

Dialysemedikamente tragen zur vertikalen Erweiterung unseres Portfolios bei, über unser Angebot von Dialyseprodukten und -dienstleistungen hinaus. So werden bei der Behandlung von Dialysepatienten üblicherweise Medikamente eingesetzt, um etwa den Mineralhaushalt des Körpers im Gleichgewicht zu halten und das Entstehen einer Blutarmut (Anämie) zu verhindern. Das Spektrum der Dialysemedikamente umfasst blutbildende Substanzen (EPO), Phosphatbinder, Eisenpräparate, Vitamin-D-Präparate und Kalzिमimetika.

Ein fester Bestandteil unserer Wachstumsstrategie ist es, das Angebot mit Dialysemedikamenten auszuweiten. Im Berichtsjahr hat Fresenius Medical Care daher mit dem Unternehmen Galenica Ltd. die Gründung eines gemeinsamen Unternehmens – Vifor-Fresenius Medical Care Renal Pharma Ltd. – bekannt gegeben, um Medikamente für Nierenkranke zu entwickeln und weltweit zu vertreiben. Die Produkte dieses Gemeinschaftsunternehmens dienen der Behandlung von Blutarmut und der Regulierung des Knochenstoffwechsels bei Dialysepatienten und bei Patienten mit chronischem Nierenversagen, die noch keine Dialysebehandlung benötigen. Fresenius Medical Care wird mit 45 % an dem neuen Unternehmen beteiligt sein.

## PARADIGMENWECHSEL IN DER KOSTENERSTATTUNG

Im Jahr 2010 wurden in den **USA** richtungsweisende Änderungen bei der Dialysevergütung staatlich versicherter Dialysepatienten verabschiedet, die ab dem Jahr 2011 in Kraft getreten sind. Produkte und Dienstleistungen, die bislang gemäß dem Erstattungssatz (Composite Rate) vergütet wurden, sowie separat erstattete Leistungen, wie die Verabreichung bestimmter Medikamente und die Durchführung diagnostischer Labortests, werden künftig mit einem **Pauschalsatz** erstattet. Dieser Pauschalsatz wird an individuelle Patientenmerkmale – etwa Alter und Gewicht – angepasst. Anpassungen sind z. B. auch für Patienten vorgesehen, deren medizinisch notwendige

Versorgung außergewöhnlich hoch und damit kostenintensiv ist. Weiteres Merkmal ist neben einem Inflationsausgleich auch das Erreichen bestimmter Qualitätsparameter.

Für Fresenius Medical Care ergeben sich aus dieser veränderten Vergütungsstruktur Vorteile, Chancen und Herausforderungen. Vor allem dank des integrierten Geschäftsmodells ist Fresenius Medical Care nicht nur in der Lage, alle Produkte und Dienstleistungen auf dem geforderten Qualitätsniveau anzubieten, sondern auch gezielter an der Weiterentwicklung der Produkte und Dienstleistungen zu arbeiten.

Weitere Informationen zum Vergütungssystem finden Sie auch auf Seite 105 des Geschäftsberichts.

## BEHANDLUNGSQUALITÄT

Unser wichtigstes Anliegen ist die Gesundheit unserer Patienten. Die Verbesserung ihrer Lebensqualität durch stetige Optimierung der Dialysebehandlung ist unser langfristiges Ziel.

Im Berichtsjahr haben wir die Qualität unserer Behandlung weiter verbessern können, wie verschiedene Qualitätsparameter in unten stehender Tabelle zeigen. Dies betrifft etwa den Hämoglobinwert und ebenso den Kt/V-Wert, der die Reinigungsleistung der Dialysebehandlung angibt; er wird vom Verhältnis der Behandlungsdauer zu den Reinigungsraten von bestimmten giftigen Molekülen abgeleitet. Mit dem Qualitätsindikator Albumin, einem Protein, werden Rückschlüsse auf den allgemeinen Ernährungszustand eines Patienten gezogen.

Weitere Informationen erhalten Sie im Fresenius Medical Care-Geschäftsbericht 2010 oder unter [www.fmc-ag.de](http://www.fmc-ag.de).

Einen Ausblick auf die Geschäftsentwicklung im Jahr 2011 finden Sie im Lagebericht auf den Seiten 113 und 114.

## QUALITÄTSDATEN DER FRESENIUS MEDICAL CARE-PATIENTEN <sup>1</sup>

|                                       | USA         |      | EMEA        |      |
|---------------------------------------|-------------|------|-------------|------|
|                                       | 2010        | 2009 | 2010        | 2009 |
| Kt/V $\geq 1,2$                       | <b>97 %</b> | 96 % | <b>95 %</b> | 95 % |
| Hämoglobin = 10 – 12 g/dl             | <b>71 %</b> | 64 % | <b>54 %</b> | 52 % |
| Albumin $\geq 3,5$ g/dl <sup>2</sup>  | <b>84 %</b> | 83 % | <b>86 %</b> | 86 % |
| Phosphat 3,5 – 5,5 mg/dl <sup>2</sup> | <b>57 %</b> | 55 % | <b>59 %</b> | 61 % |

<sup>1</sup> Jeweils für das letzte Quartal

<sup>2</sup> Internationaler Standard BCR CRM470

**FRESENIUS KABI.** Wir haben Spitzenwerte beim Umsatz und Ertrag erreicht. Unser Geschäft ist in allen Regionen und in allen Produktbereichen gewachsen. Ein außerordentlich starkes Wachstum erzielten wir in Nordamerika bei unserer Gesellschaft APP Pharmaceuticals dank neuer Produkte, zuverlässiger Lieferfähigkeit und Qualität.

Fresenius Kabi ist spezialisiert auf die Therapie und Versorgung von chronisch und kritisch Kranken. Hierfür bieten wir intravenös zu verabreichende generische Arzneimittel (I.V.-Arzneimittel), Infusionstherapien, klinische Ernährung und die dazugehörigen medizintechnischen Produkte zur Applikation an. Unsere Produkte werden im gesamten medizinischen Versorgungsprozess eingesetzt: in der Notfallmedizin, bei Operationen, auf Intensiv- und allgemeinen Krankenhausstationen sowie in der außerklinischen Patientenversorgung.

Unser **Produktportfolio** umfasst im Bereich I.V.-Arzneimittel Anästhetika, Antiinfektiva, Analgetika sowie Arzneimittel zur Behandlung onkologischer und anderer kritischer Erkrankungen. Im Bereich der Infusionstherapien bieten wir Blutvolumenersatzstoffe und Infusionslösungen an. In der klinischen Ernährung zählen wir zu den wenigen Unternehmen der Welt, die parenterale und zugleich enterale Ernährungsprodukte vertreiben. Zur Applikation unserer Produkte bieten wir Infusionspumpen, Infusionsmanagementsysteme, Ernährungspumpen und Einmalartikel an. Unser transfusionstechnologisches Sortiment umfasst Produkte zur Herstellung von Blutprodukten, die von Blutbanken und Blutspendediensten eingesetzt werden.

**WIRTSCHAFTLICHE ENTWICKLUNG**

Fresenius Kabi erzielte im Geschäftsjahr 2010 eine **Umsatzsteigerung** von 19 % auf 3.672 Mio € (2009: 3.086 Mio €). Das organische Wachstum betrug hervorragende 12 %. Akquisitionen hatten einen Einfluss von 1 %. Währungsumrechnungseffekte wirkten sich in Höhe von 6 % aus.

In den **Regionen** zeigte sich folgende Umsatzentwicklung:

| in Mio €              | 2010  | 2009  | Veränderung |
|-----------------------|-------|-------|-------------|
| Europa                | 1.702 | 1.566 | 9 %         |
| Nordamerika           | 975   | 728   | 34 %        |
| Asien-Pazifik         | 593   | 482   | 23 %        |
| Lateinamerika /Afrika | 402   | 310   | 30 %        |
| Gesamt                | 3.672 | 3.086 | 19 %        |

Insbesondere in Nordamerika haben wir mit 26 % organischem Umsatzwachstum eine exzellente Geschäftsentwicklung erzielt: Dazu hat APP Pharmaceuticals in den USA mit einem Umsatzanstieg von 29 % auf 1.143 Mio US\$ maßgeblich beigetragen. Produkteinführungen und eine höhere Nachfrage infolge von Lieferengpässen bei Wettbewerbern wirkten sich dort positiv aus. Auch unser Geschäft in der Region Asien-Pazifik ist mit 13 % und in Lateinamerika mit

18 % organisch erneut sehr gut gewachsen. China ist nach den USA und Deutschland unser drittgrößter Markt, seit Jahren erzielen wir hier zweistellige organische Wachstumsraten.

In den **Produktsegmenten** entwickelte sich der Umsatz wie folgt:

| in Mio €                                           | 2010         | 2009         | Organisches Wachstum |
|----------------------------------------------------|--------------|--------------|----------------------|
| Infusionstherapie                                  | 843          | 712          | 6 %                  |
| I.V.-Arzneimittel                                  | 1.328        | 1.027        | 23 %                 |
| Klinische Ernährung                                | 1.062        | 924          | 9 %                  |
| Medizintechnische Produkte/Transfusionstechnologie | 439          | 423          | 1 %                  |
| <b>Gesamt</b>                                      | <b>3.672</b> | <b>3.086</b> | <b>12 %</b>          |

Die sehr gute **Ergebnisentwicklung** der letzten Jahre haben wir noch übertroffen: Der EBIT stieg um 21 % auf 737 Mio € (2009: 607 Mio €). Im EBIT enthalten sind 20 Mio € für Investitionen in fortgesetzte Effizienzsteigerungen außerhalb Nordamerikas. Die EBIT-Marge erhöhte sich auf 20,1 % (2009: 19,7 %). Insbesondere die ausgezeichnete Geschäftsentwicklung in Nordamerika hat zu dem starken Zuwachs beigetragen. Der EBIT von APP Pharmaceuticals stieg auf 391 Mio US\$ und die EBIT-Marge auf 34,2 %. Der adjustierte EBITDA<sup>1</sup> belief sich auf 464 Mio US\$. APP Pharmaceuticals hat im Jahr 2010 erstmals positiv zum Ergebnis je Aktie von Fresenius beigetragen.

Zur EBIT-Entwicklung trugen die Regionen wie folgt bei:

| in Mio €                                  | 2010          | 2009          | Veränderung |
|-------------------------------------------|---------------|---------------|-------------|
| Europa                                    | 359           | 335           | 7 %         |
| EBIT-Marge                                | 21,1 %        | 21,4 %        |             |
| Nordamerika                               | 335           | 216           | 55 %        |
| EBIT-Marge                                | 34,4 %        | 29,7 %        |             |
| Asien-Pazifik/<br>Lateinamerika/Afrika    | 183           | 151           | 21 %        |
| EBIT-Marge                                | 18,4 %        | 19,1 %        |             |
| Verwaltungs- und<br>zentrale F & E-Kosten | -140          | -95           | -47 %       |
| <b>EBIT</b>                               | <b>737</b>    | <b>607</b>    | <b>21 %</b> |
| <b>EBIT-Marge</b>                         | <b>20,1 %</b> | <b>19,7 %</b> |             |

Das Konzernergebnis<sup>2</sup> der Fresenius Kabi stieg um 47 % auf 294 Mio € (2009: 200 Mio €).

## INFUSIONSTHERAPIEN

Der Einsatz von Infusionslösungen ist fester Bestandteil des medizinischen Alltags. Diese werden u. a. bei Flüssigkeits- und Elektrolytdefiziten und als Trägerlösungen für I.V.-Arzneimittel eingesetzt. Unser Produktportfolio umfasst ein breites Angebot an Infusionslösungen, das wir in Beuteln und Flaschen anbieten. Diese werden den hohen Sicherheitsanforderungen in der Anwendung im Krankenhaus und in der außerklinischen Versorgung optimal gerecht. Unser PVC-freier Infusionsbeutel freeflex® und die Kunststoffflasche KabiPac® tragen z. B. durch ihre Porttechnologie dazu bei, Verwechslungen bei der Nutzung der Infusions- und Injektionsports zu vermeiden.

Für den **Blutvolumenersatz** bieten wir künstliche Kolloide an, die blutgruppenunabhängig infundiert werden können. Unsere Produkte enthalten Hydroxyethylstärke (HES). Seit Jahrzehnten sind wir in diesem Markt aktiv, und wir konnten mit innovativen Produkten Maßstäbe für Volumenersatz und Volumentherapie setzen. So bieten wir ein umfangreiches Portfolio an HES-Produkten an und sind hier weltweit führend. Unser Hauptprodukt Voluven® vertreiben wir in rund 100 Ländern; in mehr als der Hälfte davon sind wir in marktführender Position. Im Berichtsjahr haben wir die Vermarktung dieses Produkts vorangetrieben, vor allem in den Wachstumsmärkten Asien-Pazifik und Lateinamerika. Außerdem haben wir unsere Blutvolumenersatzlösung Volulyte® in weiteren Ländern, z. B. in England, erfolgreich eingeführt. Bereits drei Jahre nach der Einführung verkaufen wir das Produkt in mehr als 20 Ländern.

Auch bei unseren **medizintechnischen Produkten** für die Applikation der Infusionstherapien waren wir erfolgreich und haben unsere Marktpresenz ausgebaut. Insbesondere unser Programm Agilia hat sich sehr gut in unseren Märkten etabliert. In Europa, der Region Asien-Pazifik und Lateinamerika zählen wir mit unseren Produkten zu den führenden Unternehmen. Zudem haben wir unser neues Portkanülsystem Ambix Intrastick Safe u. a. in Deutschland eingeführt. Täglich ereignen sich in medizinischen Einrichtungen zahlreiche ungewollte Verletzungen durch Nadelstiche. Ambix Intrastick Safe enthält einen integrierten Sicherheitsmechanismus, der eine Berührung mit der Spritzenkanüle verhindert und dadurch Stich-, Schnitt- oder Kratzverletzungen vorbeugt.

Im Bereich der **Transfusionstechnologie** sind wir in Europa einer der führenden Anbieter von Blutbeutelssystemen und medizintechnischen Geräten zur Sammlung, Verarbeitung und zum Transport von Blutprodukten. Nach dem

<sup>1</sup> Non-GAAP-Kennzahl – definiert im Zusammenhang mit dem Besserungsschein (CVR) aus der APP-Transaktion

<sup>2</sup> Ergebnis, das auf die Anteilseigner der Fresenius Kabi AG entfällt

Start unseres CompoFlow-Konzepts im Jahr 2009 haben wir dieses inzwischen in zahlreichen europäischen Ländern eingeführt, u. a. in Deutschland und Italien.

## I.V.-ARZNEIMITTEL

Fresenius Kabi ist einer der drei weltweit führenden Anbieter von generischen I.V.-Arzneimitteln. Wir haben ein umfassendes Produktportfolio für die Therapiegebiete Anästhesie, Analgesie, Infektionskrankheiten, Onkologie und kritische Erkrankungen. Wir stellen nicht nur das Arzneimittel, sondern zum Teil auch den Wirkstoff selbst her. So verfügen wir über eine Herstellung von Zytostatika-Wirkstoffen sowie von den Antibiotika-Wirkstoffgruppen Cephalosporine und Penicilline. Dies gibt uns in diesen sehr wichtigen Wachstumsmärkten die Fertigungskompetenz entlang der gesamten pharmazeutischen Wertschöpfungskette. Dies ist im Hinblick auf Qualität und Preisflexibilität von großer Bedeutung.

**APP Pharmaceuticals** ist in den USA der zweitgrößte Anbieter von generischen I.V.-Arzneimitteln. Das Unternehmen bietet ein umfangreiches Sortiment von Anästhetika, Antiinfektiva, Onkologika sowie Produkte für kritische Erkrankungen. Im Berichtsjahr erfolgten erneut Lieferungen des Anästhetikums Propofol aus europäischen Werken der Fresenius Kabi, um Versorgungsengpässe mit Anästhetika zu vermeiden, die durch Produktrückrufe von Mitbewerbern entstanden sind. Zusammen mit dem APP-Anästhetikum Diprivan® konnte so eine weitgehend flächendeckende Versorgung des US-Marktes sichergestellt werden.

Auch bei anderen Arzneimitteln kam es im Berichtsjahr in den USA zu Lieferengpässen bei Wettbewerbern. APP Pharmaceuticals konnte mit seinem breiten Portfolio maßgeblich zur zuverlässigen Versorgung des Marktes beitragen.

Im Bereich der Produkte für kritische Erkrankungen verfügt APP Pharmaceuticals über ein umfangreiches Sortiment und ist der führende Anbieter von hochmolekularem Heparin in Nordamerika. Heparin wird benötigt in der Prophylaxe und Therapie von Blutgerinnseln nach operativen Eingriffen sowie bei extrakorporaler Blutzirkulation, u. a. in der Dialyse. Im Jahr 2010 hat APP Pharmaceuticals seine Informationskampagne „Working Together for Patient Safety“ weiter fortgeführt.

Ferner hat APP Pharmaceuticals neue Produkte erfolgreich im Markt platziert: Indomethacin, das bei Neugeborenen mit angeborenem Herzdefekt eingesetzt wird, das erste Generikum des Antibiotikums Aztreonam, das Virostatikum Ganciclovir sowie die onkologischen Produkte Topotecan

und Anastrozole. Ferner hat APP Pharmaceuticals das auf Fresenius Kabi Oncology zugelassene Zytostatikum Oxaliplatin eingeführt. Aufgrund einer Lizenzvereinbarung mit dem Originalpräparatehersteller Sanofi-Aventis war der Verkauf des Produkts im US-Markt zeitlich bis 30. Juni 2010 befristet und kann erst von August 2012 an fortgeführt werden.

Insgesamt haben APP Pharmaceuticals und Fresenius Kabi Oncology im Berichtsjahr zehn Produktzulassungen von der FDA erhalten, davon entfallen sieben auf APP Pharmaceuticals. Zum Ende des Berichtsjahres sind 28 Zulassungsanträge bei der FDA anhängig.

**Außerhalb Nordamerikas** haben wir unser Sortiment an generischen I.V.-Arzneimitteln ebenfalls ausgebaut. Wir konnten fünf neue Produkte aus den Bereichen Antibiotika und Anästhetika in verschiedenen Konzentrationen und Darreichungsformen in zahlreichen europäischen Ländern einführen. Es ist unser Ziel, unser Produktprogramm auch in weiteren Ländern Europas sowie in den Wachstumsregionen Lateinamerika und Asien-Pazifik anzubieten.

**Fresenius Kabi Oncology** ist spezialisiert auf generische Arzneimittel zur Therapie von Krebserkrankungen. Im Berichtsjahr haben wir die internationale Verbreitung dieser **onkologischen Produkte** vorangetrieben. So haben wir das Zytostatikum Gemcitabin Kabi sehr erfolgreich u. a. in Süd- und Osteuropa eingeführt. Dieses Produkt wird z. B. bei Bauchspeicheldrüsenkrebs und Blasenkarzinomen eingesetzt. Das Zytostatikum Irinotecan Kabi, das zur Behandlung von Darmkrebs eingesetzt wird, konnten wir im Jahr 2010 in zahlreichen europäischen Ländern sehr gut verkaufen. Auch die europäische Markteinführung des Produkts Paclitaxel Kabi haben wir vorangetrieben. Das Produkt wird u. a. zur Behandlung von Ovarial- oder Mammakarzinomen eingesetzt. In der Region Asien-Pazifik vertreiben wir bereits eine Vielzahl an onkologischen Arzneimitteln. Dort konnten wir unsere Marktführerschaft in Indien, Thailand und auf den Philippinen stärken.

Fresenius Kabi versorgt Patienten inzwischen mit einem umfassenden Produktsortiment für die Krebstherapie: Neben unserem Portfolio onkologischer generischer Arzneimittel umfasst unser Angebot auch **klinische Ernährungsprodukte**, die den Ernährungsstatus dieser Patienten verbessern. Zudem bieten wir medizintechnische Produkte zur Applikation der Lösungen sowie patientenindividuell zubereitete Arzneimittel (**Compounding**) an, die auch in der ambulanten Versorgung eingesetzt werden können.

## KLINISCHE ERNÄHRUNG

Klinische Ernährung dient der Versorgung von Patienten, die keine oder nicht ausreichend normale Nahrung zu sich nehmen können. Dies gilt vor allem für Patienten auf Intensivstationen, für schwer und chronisch Kranke sowie Mangelernährte. Der Einsatz klinischer Ernährungsprodukte nimmt kontinuierlich zu. Eine unzureichende Ernährung und ein Mangel an essenziellen Nährstoffen können höhere Komplikationsraten, verlängerte Rehabilitationszeiten, verminderte Lebensqualität und gesteigerte Mortalitätsraten verursachen.

Unsere 3-Kammerbeutel zählen zu den Referenzprodukten in der **parenteralen Ernährungstherapie** im Krankenhaus. Sie decken den vollständigen täglichen Nährstoffbedarf an Aminosäuren, Lipiden, Glukose und Elektrolyten aus einem Behältnis. Auch im Jahr 2010 waren wir damit ausgesprochen erfolgreich: Unser zukunftsweisendes neues Beuteldesign überzeugt durch seine hohe Anwendungssicherheit im klinischen Alltag. Wir haben die regionale Vermarktung dieses Produkts weiter vorangetrieben und vertreiben es nun im neuen Design in mehr als 70 Ländern.

Ein weiterer Wachstumstreiber für unser Geschäft mit 3-Kammerbeuteln ist die Verbreitung von SmofKabiven®. Es enthält als Lipidkomponente unser Produkt SMOFlipid®. Wir bieten damit einen Mehrkammerbeutel zur parenteralen Ernährung mit einem ausgewogenen Fettsäurenmuster und einem optimierten Omega-6 : Omega-3-Fettsäurenverhältnis. Nach erfolgreichen Produkteinführungen in Europa vermarkten wir SmofKabiven® jetzt auch in Chile. Wir vertreiben dieses Produkt bereits in mehr als 20 Ländern weltweit. Auch die Lipid-Einzellösung SMOFlipid® hat sich in unseren Märkten sehr gut etabliert, und wir haben dieses Produkt im Jahr 2010 z. B. in Ländern des asiatisch-pazifischen Raums eingeführt.

Die Ernährung hat auch in der Pädiatrie einen ganz besonderen Stellenwert. Unreife, schwere gastrointestinale Missbildungen bei der Geburt oder akute Erkrankungen sind Indikationen für eine parenterale Ernährung pädiatrischer Patienten. Im Berichtsjahr haben wir die Markteinführung von SMOFlipid® für den Einsatz in der Pädiatrie gestartet. Somit kann SMOFlipid® die Fettkomponente einer parenteralen Ernährungstherapie bilden, mit der alle erforderlichen Nährstoffe bereitgestellt werden, um einer Mangelernährung vorzubeugen sowie Wachstum und Entwicklung der pädiatrischen Patienten zu unterstützen.

Für die **enterale Ernährungstherapie** bieten wir ein umfassendes Sortiment an Trink- und Sondennahrung an. Enterale Produkte werden z. B. in der Geriatrie, Pädiatrie, in

der Intensivmedizin sowie in der ambulanten Versorgung eingesetzt. Darüber hinaus gewinnt die enterale Ernährungstherapie als unterstützender Bestandteil einer Gesamttherapie, beispielsweise bei der Behandlung onkologischer Erkrankungen, zunehmend an Bedeutung.

Im Berichtsjahr haben wir unsere hochkalorischen, eiweißreichen Trinknahrungen Fresubin® 2kcal DRINK, die z. B. für Tumorkranke geeignet sind, in weiteren europäischen Ländern erfolgreich eingeführt. Zudem haben wir unser Produktsortiment um eine weitere innovative Alternative zur Trinknahrung ergänzt: Fresubin® YOcrème, eine hochkalorische, eiweißreiche, vollbilanzierte Nahrung in joghurtartiger, cremiger Konsistenz, ist sowohl für Patienten mit erhöhtem Nährstoffbedarf als auch insbesondere für Patienten mit Schluckstörungen geeignet. Ferner haben wir mit Fresubin® 5kcal SHOT und Fresubin® juky DRINK zwei weitere hochkalorische enterale Trinknahrungen eingeführt: Mit 5 kcal pro Milliliter zeichnet sich Fresubin® 5kcal SHOT durch eine sehr hohe Energiedichte aus. Dadurch können Patienten bereits durch geringe Trinkmengen einen großen Teil ihres Energiebedarfs decken. Das Produkt eignet sich als ergänzende, zusätzliche Trinknahrung u. a. für onkologische Patienten oder auch für Patienten, die an Leber- und Nierenerkrankungen leiden. Fresubin® juky DRINK bietet Patienten hohen Energiegehalt in saftartiger Form.

Speziell für die Ernährung von Dysphagie-Patienten (Schluckstörung) haben wir Fresubin®thickened, eine hochkalorische, proteinreiche, angedickte Trinknahrung, eingeführt. Unsere für diese Patientenzielgruppe entwickelten Produkte können einer Mangelernährung und Austrocknung wirksam begegnen. Je nach Ausprägung der Schluckbeeinträchtigung kann zwischen zwei unterschiedlichen Flüssigkeitsgraden der Trinknahrung gewählt werden.

Wir sind nicht nur in Europa, sondern auch in der Wachstumsregion Asien-Pazifik mit unseren enteralen Ernährungsprodukten stark vertreten und zählen z. B. in China zu den führenden Anbietern.

Im Bereich der Medizintechnik für die Applikation klinischer Ernährung sind wir ein führender Anbieter in Europa. Im Berichtsjahr haben wir unser Produktprogramm regional weiter ausgebaut.

Weitere Informationen finden Sie im Internet unter [www.fresenius-kabi.de](http://www.fresenius-kabi.de). Einen Ausblick auf die Geschäftsentwicklung im Jahr 2011 finden Sie im Lagebericht auf den Seiten 113 und 114.

**FRESENIUS HELIOS.** Wir sind mehr als die Summe unserer Standorte: Das starke Netzwerk unserer Kliniken sowie der fach- und standortübergreifende Wissensaustausch garantieren den Patienten bestmögliche Versorgung. Die gestiegenen Fallzahlen waren im Jahr 2010 erneut Grundlage des erfolgreichen Unternehmenswachstums. Unser Ziel ist es, die hohe Behandlungs- und Betreuungsqualität weiter zu verbessern.

Fresenius Helios ist einer der größten deutschen privaten Krankenhausbetreiber. Zur HELIOS-Kliniken-Gruppe gehören insgesamt 63 eigene Kliniken: 43 Akutkrankenhäuser, darunter die 5 Maximalversorger in Berlin-Buch, Erfurt, Krefeld, Schwerin und Wuppertal, sowie 20 Rehabilitationskliniken. Dem HELIOS-Kliniknetzwerk angeschlossen sind zudem 28 Medizinische Versorgungszentren sowie 4 Seniorenresidenzen. Insgesamt verfügen wir über mehr als 18.500 Betten und versorgen jährlich mehr als 2 Millionen Patienten, davon rund 600.000 Patienten stationär. Ende des Jahres 2010 beschäftigte HELIOS über 33.000 Mitarbeiterinnen und Mitarbeiter.

Grundlage für den medizinischen und wirtschaftlichen Erfolg von HELIOS sind vier **strategische Ziele**:

- ▶ Steigerung des Patientennutzens und Qualitätsführung
- ▶ nachhaltige Sicherung und Entwicklung der Kliniken
- ▶ Ausbau von HELIOS zum Wissenskonzern
- ▶ selektives Wachstum und Stärkung der Marktposition

Wir messen und dokumentieren die Qualität unserer medizinischen Behandlungen, um uns systematisch zu verbessern.

Unser nachhaltiger Erfolg ist sichtbar: In verschiedenen Publikationen und auf der Website stellen wir unsere medizinischen und wirtschaftlichen Ziele den erreichten Ergebnissen gegenüber.

#### WIRTSCHAFTLICHE ENTWICKLUNG

Im Jahr 2010 stieg der **Umsatz** von Fresenius Helios um 4 % auf 2.520 Mio € (2009: 2.416 Mio €). Das sehr gute organische Wachstum von 5 % basiert im Wesentlichen auf höheren Fallzahlen (2009: 7 %). Die Desinvestition einer Akutklinik minderte das Umsatzwachstum um 1 %. Auf den Bereich Akutkliniken entfallen 88 % des Umsatzes (2009: 89 %), während die Rehabilitationskliniken 9 % des Umsatzes erwirtschafteten (2009: 9 %). 3 % entfallen auf sonstige Erlöse (2009: 2 %).

Die ausgezeichnete Geschäftsentwicklung spiegelt das große Vertrauen wider, das wir bei Patienten und niedergelassenen Ärzten genießen; sie ist auch ein Beleg für die erfolgreiche Sanierung und Restrukturierung der akquirierten Kliniken.



Wie die nachfolgende Tabelle zeigt, stieg nicht nur der Umsatz, sondern auch das **Ergebnis** gegenüber dem Vorjahr deutlich:

| in Mio €                      | 2010  | 2009  | Veränderung |
|-------------------------------|-------|-------|-------------|
| Umsatz                        | 2.520 | 2.416 | 4 %         |
| davon Akutkliniken            | 2.229 | 2.142 | 4 %         |
| davon Rehabilitationskliniken | 222   | 211   | 5 %         |
| EBITDA                        | 318   | 286   | 11 %        |
| EBITDA-Marge in %             | 12,6  | 11,8  |             |
| EBIT                          | 235   | 205   | 15 %        |
| EBIT-Marge in %               | 9,3   | 8,5   |             |
| Konzernergebnis <sup>1</sup>  | 131   | 107   | 22 %        |

<sup>1</sup> Ergebnis, das auf die Anteilseigner der HELIOS Kliniken GmbH entfällt

Der EBITDA erhöhte sich um 11 % auf 318 Mio € (2009: 286 Mio €). Die EBITDA-Marge stieg auf 12,6 % (2009: 11,8 %). Fresenius Helios erreichte beim EBIT ein ausgezeichnetes Plus von 15 % auf 235 Mio € (2009: 205 Mio €). Auch die EBIT-Marge verbesserte sich deutlich und kletterte auf 9,3 % (2009: 8,5 %). Das Konzernergebnis<sup>1</sup> betrug 131 Mio € und übertraf den Vorjahreswert um 22 % (2009: 107 Mio €).

Das Geschäft von Fresenius Helios zeichnet sich durch **stabile Cashflows** aus: Der Cashflow in Prozent vom Umsatz lag bei 12,3 % (2009: 9,1 %). Die Forderungslaufzeit betrug im Berichtsjahr 38 Tage (2009: 36 Tage). Dies zeigt sich auch in der sehr geringen Höhe der uneinbringlichen Forderungen in Prozent vom Umsatz von 0,2 % (2009: 0,2 %).

## FÄLLE UND BEHANDLUNGSLEISTUNGEN

Seit der Einführung diagnosebezogener Fallpauschalen (Diagnosis Related Groups – DRGs) mit landesweit einheitlichen Krankenhausentgelten stehen Krankenhäuser in Deutschland in einem unmittelbaren Wettbewerb um Patienten. Die HELIOS-Kliniken haben sich erfolgreich auf die veränderten Kostenerstattungs- und Wettbewerbsbedingungen eingestellt. Dank des ausgeweiteten Leistungsangebots und der hohen Behandlungsqualität konnten wir die Zahl der stationären Fälle in Deutschland um 3 % auf 640.296 steigern (2009: 620.268). Auch ambulant behandelten wir in unseren Kliniken deutlich mehr Patienten als im Vorjahr. Ihre Zahl stieg auf 1.696.919 im Jahr 2010 (2009: 1.634.170), ein Plus von 4 %.

|                                                  | 2010      | 2009      | Veränderung |
|--------------------------------------------------|-----------|-----------|-------------|
| Stationär und teilstationär behandelte Patienten | 640.296   | 620.268   | 3 %         |
| Akutkliniken                                     | 606.880   | 586.123   | 4 %         |
| Rehabilitationskliniken                          | 33.416    | 34.145    | -2 %        |
| Ambulant behandelte Patienten                    | 1.696.919 | 1.634.170 | 4 %         |

Wir verbesserten weitere Strukturdaten und Leistungsindikatoren, wie die nachfolgende Tabelle zeigt: In den Akutkrankenhäusern konnten wir die durchschnittliche Verweildauer leicht auf 6,9 Tage senken (2009: 7,1 Tage). Die Verweildauer in den Rehabilitationskliniken betrug im Berichtsjahr 29,5 Tage (2009: 29,7 Tage). Die Auslastung in den Rehabilitationskliniken lag unter dem Vorjahresniveau und betrug 80,2 % (2009: 82,5 %).

|                                      | 2010   | 2009   | Veränderung |
|--------------------------------------|--------|--------|-------------|
| Akutkliniken                         | 42     | 43     | -2 %        |
| Betten                               | 15.097 | 15.116 | 0 %         |
| Verweildauer (Tage)                  | 6,9    | 7,1    | -3 %        |
| Rehabilitationskliniken <sup>1</sup> | 20     | 19     | 5 %         |
| Betten                               | 3.467  | 3.467  | 0 %         |
| Verweildauer (Tage) <sup>2</sup>     | 29,5   | 29,7   | -1 %        |
| Auslastung <sup>2</sup>              | 80,2 % | 82,5 % |             |

<sup>1</sup> Separate Darstellung einer Klinik, die bis zum Jahr 2009 in eine Akutklinik integriert war

<sup>2</sup> Nur Deutschland

## INVESTITIONEN IN VERSORGUNGS-STRUKTUREN

Fresenius Helios investierte im Berichtsjahr 268 Mio € (2009: 272 Mio €). Der Anteil der **Eigeninvestitionen** betrug 166 Mio € und damit 7 % vom Umsatz (2009: 124 Mio €). Davon entfielen rund 49 Mio € auf Neubauten, die an zwei Klinikstandorten in Krefeld erstellt werden; bis zum Jahr 2014 werden wir hier insgesamt 180 Mio € investieren. Ein weiteres bedeutendes Einzelprojekt und Voraussetzung für den im Dezember 2010 gestarteten Umbau war der Erwerb der Grundstücke und Gebäude am Klinikstandort Siegburg.

| in Mio €                  | 2010 | 2009 | Veränderung |
|---------------------------|------|------|-------------|
| Investitionen             | 268  | 272  | -1 %        |
| Sachanlagen               |      |      |             |
| Eigeninvestitionen        | 166  | 124  | 34 %        |
| Fördermittel <sup>1</sup> | 89   | 69   | 29 %        |
| Akquisitionen             | 13   | 79   | -84 %       |

<sup>1</sup> Summe aus zweckgebundenen, öffentlichen Investitionszuschüssen gemäß § 9 Krankenhausfinanzierungsgesetz (KHG)

<sup>1</sup> Ergebnis, das auf die Anteilseigner der HELIOS Kliniken GmbH entfällt

Unsere Investitionen sichern langfristig den Erhalt der Standorte und das hohe Niveau der medizinischen Versorgung. Die **Fördermittelquote** betrug 43 % (2009: 45 %).

### KONZERNTARIFVERTRAG

HELIOS hat das Ziel, ein attraktiver Arbeitgeber zu sein. Die Klinik-Gruppe verfügt über einen **Konzerntarifvertrag** sowohl mit der Dienstleistungsgewerkschaft ver.di – seit Ende des Jahres 2006 – als auch mit dem Marburger Bund seit Anfang des Jahres 2007.

HELIOS hat die Tarifverhandlungen sowohl mit dem Marburger Bund als auch mit ver.di neu aufgenommen mit dem Ziel, neue Entgelttabellen zu verabschieden. Im 1. Halbjahr 2011 soll eine Vereinbarung mit beiden Gewerkschaften erreicht werden.

### POSITION IM KRANKENHAUSMARKT

Die Wachstumsstrategie von HELIOS beruht zum einen auf **Akquisitionen** und zum anderen auf der **Steigerung der Fallzahlen** und Behandlungsleistungen. Bestandteil der Akquisitionsstrategie ist die regionale Nähe der Kliniken zueinander, um Netzwerke (Cluster) bilden zu können. Dies bietet Einsparpotenziale, vor allem durch die Konzentration von nichtmedizinischen Leistungen (z. B. Wäscherei oder Krankenhausküche) auf nur einen Standort. Zudem profitieren Patienten von der Vernetzung medizinischer Kompetenzen der HELIOS-Kliniken sowohl innerhalb einer Region als auch über deren Grenzen hinaus. Ärzte in Notaufnahmen können z. B. per Videoübertragung mit den Schlaganfallzentren der HELIOS-Kliniken-Gruppe in Kontakt treten. Gemeinsam mit Experten großer Kliniken stellen sie eine gezielte Diagnose und können zügig Entscheidungen treffen.

Nach einer Akquisition führen wir Modernisierungsmaßnahmen durch: Neben Sanierungsmaßnahmen betrifft dies den Umbau, in manchen Fällen sogar den vollständigen Neubau von Gebäuden sowie notwendige Investitionen in medizintechnische Geräte. Zusätzlich reorganisieren wir die internen Prozesse und implementieren unser bewährtes HELIOS-Qualitätsmanagementsystem. Durch diese Ergänzungen und Neustrukturierungen erreichen wir ein zielgerichtetes, ertragsorientiertes Management des betreffenden Krankenhauses. Unser Ziel ist es, die EBITDA-Marge einer einzelnen Akutklinik innerhalb von fünf Jahren nach Erstkonsolidierung auf 15 % zu steigern.

Der **Sanierungsplan der Akutkliniken** zeigt die Krankenhäuser innerhalb der HELIOS-Kliniken-Gruppe, aufgeteilt nach den Jahren der Zugehörigkeit.

Im Berichtsjahr akquirierte HELIOS das Kreiskrankenhaus St. Marienberg in Helmstedt/Niedersachsen. Das Krankenhaus verfügt über 267 Betten. 620 Mitarbeiter versorgen jährlich rund 12.000 Patienten. Das Krankenhaus erwirtschaftete im Jahr 2009 einen Umsatz von rund 32 Mio €. Die Konsolidierung erfolgte zum 1. Januar 2011.

Als erfahrener **Privatisierungspartner** ist HELIOS für weitere Akquisitionen ausgezeichnet gerüstet und konzentriert sich auch künftig auf den Ausbau der Marktposition in Deutschland. In großen Schritten voran kam die Integration der im Jahr 2009 erstmalig konsolidierten Kliniken in Sangerhausen, Lutherstadt Eisleben und Hettstedt sowie Northeim und Bad Gandersheim. Insgesamt stiegen im Berichtsjahr die Fallzahlen an diesen fünf Standorten um 2 %. Grund hierfür sind die bereits erwähnten Maßnahmen, die HELIOS nach der Akquisition einer Klinik zügig durchführt. Diese haben die

### SANIERUNGSPLAN AKUTKLINIKEN 2010

|                            | Jahre nach der Übernahme |     |      |      |      |      |       | Gesamt |
|----------------------------|--------------------------|-----|------|------|------|------|-------|--------|
|                            | <1                       | 1   | 2    | 3    | 4    | 5    | >5    |        |
| Anzahl Akutkliniken        | –                        | –   | 6    | 4    | 7    | –    | 25    | 42     |
| Umsatz in Mio €            | –                        | –   | 186  | 261  | 175  | –    | 1.607 | 2.229  |
| <b>Ziel</b>                |                          |     |      |      |      |      |       |        |
| EBITDA-Marge in %          | –                        | 3,0 | 6,0  | 9,0  | 12,0 | 15,0 | 15,0  |        |
| EBITDA in Mio €            | –                        | –   | 11,2 | 23,5 | 20,9 | –    | 241,1 | 296,7  |
| <b>Erreicht</b>            |                          |     |      |      |      |      |       |        |
| EBITDA-Marge in %          | –                        | –   | 4,0  | 10,8 | 11,9 | –    | 15,8  | 13,9   |
| EBITDA in Mio €            | –                        | –   | 7,5  | 28,2 | 20,8 | –    | 254,2 | 310,7  |
| Anzahl Kliniken im Plan    | –                        | –   | 3    | 3    | 4    | –    | 14    | 24     |
| Anzahl Kliniken unter Plan | –                        | –   | 3    | 1    | 3    | –    | 11    | 18     |

Angaben gemäß IFRS



medizinische Qualität deutlich erhöht. Die HELIOS-Kliniken werden an ihren Standorten als unverzichtbarer, medizinisch sehr gut aufgestellter Versorger wahrgenommen.

## LEISTUNGSSPEKTRUM HELIOS

Die HELIOS-Kliniken-Gruppe bietet ihren Patienten kompetente Leistungen von der Akutmedizin über die ambulante Versorgung bis hin zur Rehabilitation und Seniorenpflege. Unser Ziel ist eine qualitativ hochwertige Medizin in allen Bereichen und auf jeder Versorgungsstufe.

Die **Akutmedizin** bildet den Kern unserer Kliniken-Gruppe. 43 Akutkrankenhäuser decken nahezu das gesamte medizinische Leistungsspektrum ab. Sowohl Krankenhäuser der Grund- und Regelversorgung als auch Krankenhäuser der Maximalversorgung gehören zu unserem breit aufgestellten Portfolio. Den Kliniken angeschlossen sind auch 28 Medizinische Versorgungszentren (MVZ), die über die regionalen Grenzen hinaus einen ausgezeichneten Ruf genießen.

Die vollständige medizinische Versorgung unserer Patienten umfasst auch notwendige **ambulante Weiterbehandlungen** nach einem Klinikaufenthalt. Behandlungsmöglichkeiten im Krankenhaus selbst, unsere MVZ, aber auch zahlreiche Kooperationen mit niedergelassenen Ärzten erlauben eine enge Vernetzung zwischen ambulanter und stationärer Versorgung im HELIOS-Verbund. Die hohe Anzahl ambulant behandelter Patienten im Jahr 2010 belegt erneut den Erfolg unseres Konzepts.

Die **Rehabilitation** ergänzt unser akutes und ambulantes Versorgungskonzept, sowohl hinsichtlich der geografischen Verteilung als auch der medizinischen Ausrichtung unserer Rehabilitationskliniken. Die Zahlen sprechen für sich: Im Berichtsjahr haben wir mehr als 33.000 Patienten in unseren Rehabilitationskliniken betreut.

In unseren **Seniorenresidenzen** ist das zentrale Ziel eine gute und würdevolle Betreuung der Bewohner und Pflegebedürftigen. Sie profitieren zudem von der räumlichen Anbindung an unsere akutmedizinische Versorgung; so garantieren wir eine schnelle und optimale Behandlung.

Die Nutzung des **Web 2.0** ergänzt unser Leistungsspektrum: Als erster deutscher Klinikkonzern hat HELIOS im Jahr 2010 eine eigene, selbst entwickelte Applikation (App) für das iPhone und den BlackBerry gestartet – den **KlinikFinder**. Der KlinikFinder ermöglicht die über GPS gesteuerte Suche nach der nächstgelegenen Akut- oder Rehabilitationsklinik

oder auch nach einem Spezialisten und stellt direkt den Kontakt zur Klinik her. Die App wurde seit der Bereitstellung im Juli 2010 im Internet rund 1.000-mal heruntergeladen. Die Inhalte und Funktionen werden permanent erweitert und sollen zukünftig auch Kliniken außerhalb des HELIOS-Verbunds integrieren.

In einer **Mediathek** stellen wir auf der HELIOS-Website zahlreiche digitale Informationen für die Öffentlichkeit bereit: Informationsfilme für Patienten, Mitarbeiterinterviews und Videos mit Porträts unserer Kliniken. Alle Filme sind auch auf der Internetplattform YouTube in unserem HELIOS-Channel abrufbar.

## MEDIZINISCHE ERGEBNIS- UND BETREUUNGSQUALITÄT

HELIOS hat im Jahr 2010 das Programm zur Weiterentwicklung der medizinischen Ergebnisqualität fortgesetzt. Das einzigartige, eigenentwickelte **Qualitätsmanagementsystem** ermöglicht es, dass die Behandlung von Patienten kontinuierlich und systematisch verbessert wird. Das Qualitätsmanagement sowie die von HELIOS mitbegründete Initiative Qualitätsmedizin (IQ<sup>M</sup>) wird im Lagebericht ab Seite 92 vorgestellt.

Die **Betreuungsqualität** ist neben der medizinischen Ergebnisqualität Bestandteil des Patientennutzens und damit für HELIOS von großer strategischer Bedeutung. Die Zufriedenheit der Patienten und der Angehörigen ist uns wichtig – und unsere Bemühungen tragen Früchte. Auf Seite 93 im Lagebericht führen wir die Ergebnisse unserer Patientenumfrage auf. Sie zeigen, dass wir auf dem richtigen Weg sind.

Es ist unser Ziel, die medizinische Ergebnisqualität bei HELIOS konstant zu verbessern. Wir werden dies auch im Jahr 2011 konsequent verfolgen: In allen wichtigen Bereichen wollen wir eine Behandlungsqualität erreichen, die besser ist als der Bundesdurchschnitt oder andere international übliche Zielwerte. Weitere Informationen zum Unternehmensbereich finden Sie auf der Website [www.helios-kliniken.de](http://www.helios-kliniken.de).

Einen Ausblick auf die Geschäftsentwicklung im Jahr 2011 finden Sie im Lagebericht auf den Seiten 113 und 114.

Informationen zum deutschen Krankenhausmarkt finden Sie auf den Seiten 63 bis 65 und auf den Seiten 111 bis 112 im Lagebericht.

**FRESENIUS VAMED.** Wir haben im Jahr 2010 hervorragende Ergebnisse erzielt: Sowohl beim Umsatz als auch beim EBIT erreichten wir historische Bestwerte. Auftragseingang und Auftragsbestand sind deutlich gestiegen. Sie bieten eine gesunde Basis für zukünftiges Wachstum.

VAMED ist auf internationale Projekte und Dienstleistungen für Krankenhäuser und Gesundheitseinrichtungen spezialisiert. Unser Leistungsspektrum umfasst die gesamte **Wertschöpfungskette** im Gesundheitsbereich: von Beratung und Projektentwicklung sowie Planung und schlüsselfertiger Errichtung über Instandhaltung bis hin zum Management und zur Gesamtbetriebsführung. Diese umfassende Kompetenz ermöglicht es uns, komplexe Gesundheitseinrichtungen über ihren gesamten Lebenszyklus effizient und erfolgreich zu unterstützen. Darüber hinaus ist VAMED ein Pionier im Bereich der Public-Private-Partnership-Modelle (PPP) für Krankenhäuser in Zentraleuropa.

VAMED ist als weltweit tätiger Komplettanbieter für Einrichtungen im Gesundheitswesen mit einem umfassenden

Dienstleistungsportfolio mittlerweile einzigartig positioniert: Wir haben erfolgreich rund 500 Projekte in über 60 Ländern realisiert.

#### WIRTSCHAFTLICHE ENTWICKLUNG

Im Geschäftsjahr 2010 steigerte Fresenius Vamed den **Umsatz** um ausgezeichnete 15 % auf 713 Mio € (2009: 618 Mio €). Das organische Wachstum betrug 15 %.

Der Umsatz nach Geschäftsfeldern entwickelte sich wie folgt:

| in Mio €                | 2010       | 2009 | Veränderung |
|-------------------------|------------|------|-------------|
| Projektgeschäft         | <b>487</b> | 420  | 16 %        |
| Dienstleistungsgeschäft | <b>226</b> | 198  | 14 %        |

#### WERTSCHÖPFUNGSKETTE DER VAMED

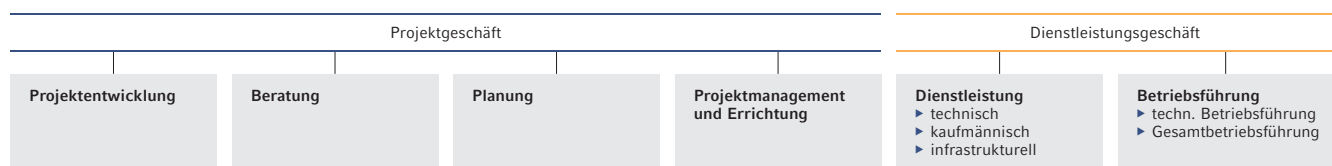

## UMSATZ NACH REGIONEN

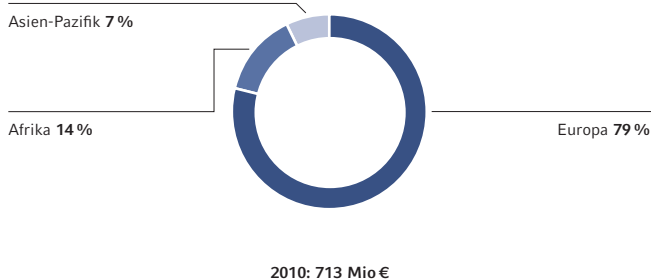

Die stärkste Umsatzregion war Europa mit einem Anteil am Gesamtumsatz von 79 %. Die Regionen Afrika und Asien-Pazifik erwirtschafteten 14 % und 7 % vom Gesamtumsatz.

Außerdem verantwortete VAMED Umsätze in Höhe von 569 Mio € im Rahmen von Managementaufträgen. Die daraus resultierende Vergütung ist im Jahresabschluss der VAMED enthalten.

**Auftragseingang und Auftragsbestand** im Projektgeschäft haben sich erneut hervorragend entwickelt, wie die Tabelle zeigt:

| in Mio €                 | 2010 | 2009 | Veränderung |
|--------------------------|------|------|-------------|
| Auftragseingang          | 625  | 539  | 16 %        |
| Auftragsbestand (31.12.) | 801  | 679  | 18 %        |

Auch die **Ergebnisentwicklung** der Fresenius Vamed war ausgezeichnet. Der EBIT stieg um 14 % auf 41 Mio € (2009: 36 Mio €). Die EBIT-Marge in Höhe von 5,8 % lag auf dem Niveau des Vorjahres (2009: 5,8 %). Im Projektgeschäft erhöhte sich der EBIT um 28 % auf 23 Mio € (2009: 18 Mio €). Im Dienstleistungsgeschäft lag der EBIT in Höhe von 18 Mio € auf Vorjahresniveau. Das Konzernergebnis<sup>1</sup> der Fresenius Vamed betrug 30 Mio € und übertraf den Vorjahreswert um 11 % (2009: 27 Mio €).

Der Anteil des Anlagevermögens in der Bilanz der Fresenius Vamed lag bei 14 %. Aufgrund dieser geringen Kapitalintensität des Geschäfts betrug die Eigenkapitalrentabilität vor Steuern ausgezeichnete 21,9 % (2009: 22,0 %).

## PROJEKTGESCHÄFT

Das Projektgeschäft umfasst die Beratung, die Projektentwicklung, die Planung, die schlüsselfertige Errichtung sowie das Finanzierungsmanagement eines Projekts. Dabei gehen wir flexibel auf unsere lokalen Auftraggeber ein und entwickeln für sie maßgeschneiderte Lösungen aus einer Hand.

Darüber hinaus realisieren wir Projekte im Rahmen von Kooperationsmodellen. Insbesondere öffentliche Auftraggeber zeigen zunehmendes Interesse an **Public-Private-Partnerships** (PPPs). Bei diesen Geschäftsmodellen planen, errichten, finanzieren und betreiben öffentliche und private Partner gemeinsam unter dem Dach einer hierfür gegründeten Projektgesellschaft Krankenhäuser oder andere Gesundheitseinrichtungen.

Das Projektgeschäft hat sich auch im Jahr 2010 erfolgreich entwickelt. Im Folgenden informieren wir über wesentliche Projekte in einzelnen **Zielfmärkten**:

### EUROPA

In **Deutschland** ist uns erneut ein großer Erfolg gelungen: Wir erhielten den Auftrag zur Planung, Finanzierung und schlüsselfertigen Errichtung des neuen Untersuchungs- und Behandlungszentrums der Universitätsklinik Köln (U/B West). Die Errichtungsphase wird im Jahr 2012 abgeschlossen, das Investitionsvolumen beträgt 65 Mio €. Im Rahmen dieses PPP-Projekts wurden wir auch mit der technischen Betriebsführung über einen Zeitraum von 25 Jahren betraut. Bei einem weiteren großen Projekt, dem Klinikum Köln-Merheim, verläuft der im Jahr 2009 begonnene Teilneubau plangemäß. Besonders hervorzuheben ist hier, dass wir den Neubau bei laufendem Klinikbetrieb ausführen. Weitere Beratungs-, Planungs- und Projektsteuerungsaufträge für verschiedene Krankenhäuser runden die erfolgreiche Akquisitionstätigkeit in Deutschland ab.

Im Markt **Österreich** lag der Fokus auf der Entwicklung von weiteren PPP-Projekten und ganzheitlichen Realisierungsmodellen. Für ein allgemeines Krankenhaus in Niederösterreich gewannen wir den Auftrag zur Modernisierung und Erweiterung des 520-Betten-Hauses in Höhe von mehr als 100 Mio €. Die Planung und den Bau der 150-Betten-Rehabilitationsklinik in Schruns/Vorarlberg und des Rehabilitationszentrums Gmundnerberg/Oberösterreich haben wir planmäßig im Sommer 2010 abgeschlossen. Beide Kliniken haben nunmehr den Betrieb erfolgreich aufgenommen. Hier zeichneten wir sowohl für die Projektentwicklung als auch für die Projektrealisierung verantwortlich. Darüber hinaus haben wir die Gesamtbetriebsführung übernommen. Mit dem Auftrag zur Erweiterung und Betriebsführung von zwei Einrichtungen bauen wir die bestehende PPP-Partnerschaft für eine Pflegeeinrichtung im Burgenland aus.

In **Bosnien** gewannen wir einen Großauftrag zur Gesamtrealisierung des Allgemeinen Krankenhauses Bijeljina und haben mit der Errichtung des 220-Betten-Hauses begonnen.

<sup>1</sup> Ergebnis, das auf die Anteilseigner der VAMED AG entfällt

In **Rumänien** schlossen wir Verträge ab, um insgesamt drei Krankenhäuser zu modernisieren und zu erneuern.

In **Russland** setzten wir die schlüsselfertige Errichtung des 300-Betten-Krankenhauses in Krasnodar plangemäß fort. Die Fertigstellung ist für das Jahr 2012 geplant. Nach den Erfolgen im Jahr 2009 arbeiteten wir im Berichtsjahr intensiv daran, Aufträge in **Turkmenistan** zu akquirieren: Wir gewannen erneut drei Lieferaufträge für Medizintechnik in Verbindung mit Installation, Inbetriebnahme und Training. Alle bestehenden Aufträge verlaufen zur vollen Zufriedenheit unserer Kunden. In der **Ukraine** schlossen wir den im Jahr 2009 erhaltenen Medizintechnik-Gesamtauftrag erfolgreich ab.

## AFRIKA

In **Gabun** verlaufen die Arbeiten für den Bau des schlüsselfertigen Schwerpunktkrankenhauses für Krebserkrankungen in Angondje im vorgesehenen Zeit- und Kostenrahmen. Wie geplant, werden wir diesen Großauftrag mit einem Volumen von mehr als 80 Mio € im Jahr 2011 fertigstellen. Die im Jahr 2008 begonnenen Ausbauarbeiten am Großkrankenhaus in Libreville wurden plangemäß fortgesetzt. Im 4. Quartal 2010 haben wir einen Großauftrag in Höhe von 76 Mio € zur schlüsselfertigen Errichtung der Universitätsklinik in Owendo erhalten.

In **Nigeria** wurde die Restfertigstellung der insgesamt 14 dort zu modernisierenden Universitätskrankenhäuser erfolgreich weitergeführt.

In **Ghana** schlossen wir die schlüsselfertige Errichtung der fünf Polikliniken im vorgegebenen Zeit- und Kostenrahmen ab.

Neben unserer intensiven Akquisitionstätigkeit in den bestehenden Zielmärkten Afrikas identifizierten wir auch **Mali** als einen vielversprechenden Markt für VAMED und erzielten im Jahr 2010 einen ersten Auftragseingang.

## ASIEN-PAZIFIK

Bedeutende asiatische Märkte für VAMED sind Malaysia, Vietnam und China, wo VAMED bereits seit vielen Jahren erfolgreich tätig ist. Die hohe Kundenzufriedenheit bei der Abwicklung bestehender Aufträge verhalf uns z. B. in **China** zu neuen Aufträgen. So erhielten wir einen Medizintechnik-Großauftrag am Wu An Peoples Hospital nahe Peking. In der Provinz Henan beauftragte man uns mit der Medizintechnik-Ausrüstung bis hin zur Inbetriebnahme und zum Training an mehreren Klinikstandorten.

## DIENSTLEISTUNGSGESCHÄFT

Das Dienstleistungsgeschäft von VAMED ist modular aufgebaut und umfasst alle Bereiche des technischen, kaufmännischen und infrastrukturellen **Facility-Managements für**

**Objekte im Gesundheitswesen.** Es reicht von der Instandhaltung der Gebäude sowie aller Geräte, der Betreuung medizintechnischer Anlagen, der Abfallbewirtschaftung und dem Energiemanagement sowie der Gebäude- und Außenanlagenreinigung und dem Sicherheitsdienst über technische Betriebsführung bis hin zur **Gesamtbetriebsführung** von Gesundheitseinrichtungen. Mit diesem integrierten Angebot garantieren wir die optimale Bewirtschaftung bzw. Betriebsführung eines Objekts über seinen gesamten Lebenszyklus – von der Errichtung der Gebäude bis zum Ende der primären Nutzung bzw. ihrer Modernisierung oder Erneuerung. Wir übernehmen auch **Logistikaufgaben** im Gesundheitswesen. Durch Optimierung der Prozesse minimieren wir die Logistikkosten und stellen die erforderliche Versorgungsqualität sicher.

Der folgende Überblick beschreibt relevante Veränderungen in den **Zielmärkten** unseres Dienstleistungsgeschäfts:

## EUROPA

Im Jahr 2010 setzte VAMED die mehr als 20-jährige Partnerschaft mit dem Allgemeinen Krankenhaus der Stadt Wien – Medizinischer Universitätscampus (AKH) erfolgreich fort. Bereits seit 1986 sind wir mit der technischen Betriebsführung betraut. Daneben wirkten wir aktiv an den baulichen Maßnahmen zur Restfertigstellung des AKH mit. Das AKH ist eines der größten Krankenhäuser Europas, bestehend aus 31 Kliniken und Instituten mit rund 2.100 Betten.

In Niederösterreich haben wir die technische Betriebsführung von zwei Krankenhäusern mit insgesamt 1.230 Betten erfolgreich weitergeführt. Dabei handelt es sich, nach dem AKH Wien, um den bislang größten technischen Dienstleistungsauftrag in **Österreich**.

Mit der Inbetriebnahme zweier Rehabilitationszentren in Vorarlberg und Oberösterreich konnten wir wichtige Versorgungslücken schließen und gleichzeitig zum größten privaten Anbieter von Rehabilitationsleistungen in Österreich aufsteigen. Anfang des Jahres 2010 wurde ein onkologisches Rehaszentrum im Burgenland eröffnet.

Noch während der Ausbauphase entwickelt sich das PPP-Modell Oberndorf bei Salzburg zu einem Referenzprojekt für die integrierte Gesundheitsversorgung. Wir haben hier den Auftrag, das bestehende Akutkrankenhaus zu betreiben, baulich zu sanieren und zu erweitern. Daneben haben wir ein Rehabilitationszentrum (Inbetriebnahme 2011) errichtet und sind im Begriff, ein Ärztezentrum (Inbetriebnahme 2012) zu bauen.

In **Deutschland** gewannen wir mit dem PPP-Projekt U/B West der Uniklinik Köln nicht nur den Auftrag zur Planung, Errichtung und Ausstattung des neuen Untersuchungs- und Behandlungszentrums. Wir vereinbarten auch eine mindestens 25-jährige technische Betriebsführung für diese Einrichtung. Die Fertigstellung ist für Ende 2012 geplant.

Der Dienstleistungsauftrag für das Universitätsklinikum Charité in Berlin ist um weitere zwei Jahre bis 2012 verlängert worden. Das von VAMED geführte Konsortium Charité CFM Facility Management GmbH ist für den gesamten Dienstleistungsbereich mit Ausnahme der rein medizinischen Leistungen der Charité verantwortlich. Rund 2.600 Mitarbeiter arbeiten daran, einen der größten Dienstleistungsaufträge im europäischen Krankenhausbereich erfolgreich zu erfüllen.

Der Dienstleistungsvertrag mit dem Universitätsklinikum Hamburg-Eppendorf konnte ebenfalls zur Zufriedenheit des Kunden weitergeführt werden. Er wurde bereits zweimal verlängert und läuft aktuell bis zum Jahr 2013.

Eine neue fünfjährige Partnerschaft schlossen wir mit dem Universitätsklinikum Schleswig-Holstein. Ziel ist es, die Qualität der IT-Dienstleistungen und -Ausstattung weiter zu verbessern und den Betrieb der IT-Infrastruktur effizienter zu gestalten.

#### ASIEN-PAZIFIK

Auf internationalem Parkett führte die VAMED alle Gesamtbetriebsführungsaufträge erfolgreich weiter. Das National Research Center for Maternity and Child in Astana/**Kasachstan** mit rund 500 Betten ist nach dem Prince Court Medical Center (PCMC) in Kuala Lumpur/**Malaysia** und dem Al Ain Hospital in Abu Dhabi/**VAE** das dritte Krankenhaus in asiatischen Zielmärkten, dessen Gesamtbetriebsführung wir übernommen haben. Alle drei Projekte werden in Kooperation mit der Medizinischen Universität Wien durchgeführt und dienen als wichtige Referenzen für die VAMED-Gesamtkompetenz.

Dank der konsequenten Marktbearbeitung in **Thailand** entwickelt sich auch dieser Markt positiv für VAMED. Nach ersten Verträgen im Jahr 2009 gewannen wir einen weiteren Dienstleistungsauftrag für die Ramathibodi-Universitätsklinik sowie einen Consultingauftrag für ein Medical Spa in Bangkok.

#### AFRIKA

In **Gabun** verantwortet VAMED die Gesamtbetriebsführung von insgesamt sieben Regionalkrankenhäusern und die technische Betriebsführung des Krankenhauses Omar Bongo Ondimba in Libreville. Bei Letzterem führte die hohe Kundenzufriedenheit zu einer Verlängerung des bestehenden Auftrags um drei Jahre.

In **Libyen** gilt das Medical Center Tripolis als eines der bedeutendsten Referenzprojekte im Bereich technischer Betriebsführung. Auch die Generalsanierung des Gharian-Hospitals in Libyen – bei laufendem Betrieb – verläuft plangemäß und soll im Jahr 2012 abgeschlossen werden.

#### VAMED VITALITY WORLD

Ein neues Gesundheitsbewusstsein und der Wunsch nach Vitalität führen dazu, dass **Thermen und Wellnessresorts** zu immer wichtigeren Gesundheitseinrichtungen werden. Diesem Trend tragen wir mit unseren Thermenresorts der VAMED Vitality World Rechnung und entwickeln, errichten und betreiben seit Jahren erfolgreich solche Projekte.

In Partnerschaft mit der Stadt Wien erweiterten wir die Therme Wien zu einer einzigartigen Gesundheits- und Wellnesslandschaft, der neuen Therme Wien. Im Jahr 2010 hat diese den Betrieb aufgenommen und gilt als die modernste gesundheitstouristische Einrichtung in einer europäischen Metropole.

Daneben starteten wir den Betrieb des 83-Mio-€-Thermenprojekts Tauern SPA Zell am See-Kaprun, Salzburg. VAMED entwickelte und errichtete dieses außergewöhnliche Spa-Projekt, ist aber auch für den gesamten Betrieb verantwortlich. Damit beweist VAMED die volle Leistungsfähigkeit entlang der gesamten Wertschöpfungskette.

Im November 2010 feierte die St. Martins Therme & Lodge im Burgenland ihr einjähriges Bestehen. Sie vereint auf einzigartige Weise die Vorzüge einer gesundheitstouristischen Einrichtung mit dem speziellen Naturerlebnis des angrenzenden Nationalparks Neusiedler See-Seewinkel.

#### AUSBLICK

Die Aufgaben der VAMED im Jahr 2011 werden in Europa weiterhin von ganzheitlichen Realisierungs- und PPP-Projekten bestimmt sein. Da Gesundheitszentren einen hohen Stellenwert in der Prävention einnehmen und der überregionale Gesundheitstourismus immer mehr Anklang findet, sehen wir nach wie vor in diesem Bereich großes Entwicklungspotenzial. Außerhalb Europas wird der Fokus auf maßgeschneiderten Lösungen für Krankenhäuser entlang der VAMED-Wertschöpfungskette liegen.

Weitere Informationen zur VAMED finden Sie auf der Website unter [www.vamed.com](http://www.vamed.com). Einen Ausblick auf die Geschäftsentwicklung im Jahr 2011 finden Sie im Lagebericht auf den Seiten 113 und 114.

# INHALT KONZERN-LAGEBERICHT

## 51 Geschäft und Rahmenbedingungen

### 51 Konzernstruktur und Geschäftstätigkeit

- 52 Leitung und Kontrolle
- 53 Wichtige Produkte und Dienstleistungen
- 53 Wesentliche Absatzmärkte und Wettbewerbsposition
- 53 Rechtliche und wirtschaftliche Einflussfaktoren
- 54 Kapitalien, Aktionäre, Satzungsbestimmungen

### 56 Unternehmenssteuerung, Ziele und Strategie

- 56 Strategie und Ziele

### 58 Überblick über den Geschäftsverlauf

- 58 Gesamtwirtschaftliche Rahmenbedingungen
- 60 Branchenspezifische Rahmenbedingungen
- 65 Einschätzung des Vorstands zur Auswirkung der gesamtwirtschaftlichen und branchenspezifischen Entwicklung auf den Geschäftsverlauf
- 65 Wesentliche Ereignisse für den Geschäftsverlauf
- 65 Beurteilung der Geschäftsentwicklung durch den Vorstand
- 66 Vergleich des tatsächlichen mit dem prognostizierten Geschäftsverlauf

## 66 Ertrags-, Finanz- und Vermögenslage

### 66 Ertragslage

- 66 Umsatz
- 68 Ergebnisstruktur
- 69 Überleitungsrechnung auf das Konzernergebnis
- 69 Entwicklung weiterer, wesentlicher Posten der Gewinn- und Verlustrechnung
- 70 Wertschöpfung

### 70 Finanzlage

- 70 Grundsätze und Ziele des Finanzmanagements
- 71 Finanzierung
- 73 Bedeutung außerbilanzieller Finanzierungsinstrumente für die Finanz- und Vermögenslage
- 73 Liquiditätsanalyse
- 73 Dividende
- 73 Cashflow-Analyse
- 74 Investitionen und Akquisitionen

### 75 Vermögenslage

- 75 Vermögens- und Kapitalstruktur
- 76 Devisen- und Zinsmanagement

## 77 Nichtfinanzielle Leistungsindikatoren und weitere Erfolgsfaktoren

- 77 Mitarbeiterinnen und Mitarbeiter
- 80 Forschung und Entwicklung
- 87 Beschaffung
- 90 Qualitätsmanagement
- 94 Verantwortung, Umweltmanagement, Nachhaltigkeit
- 98 Vertrieb, Marketing und Logistik

## 99 Gesamtaussage zur wirtschaftlichen Lage

## 99 Chancen- und Risikobericht

- 99 Chancenmanagement
- 99 Risikomanagement
- 100 Risikofelder
- 106 Beurteilung der Gesamtrisikosituation
- 106 Rating des Unternehmens

## 107 Nachtragsbericht

## 107 Prognosebericht

- 107 Gesamtaussage und mittelfristiger Ausblick
- 108 Künftige Absatzmärkte
- 109 Gesamtwirtschaftlicher Ausblick
- 110 Gesundheitssektor und Märkte
- 113 Konzernumsatz und Konzernergebnis
- 113 Umsatz und Ergebnis der Unternehmensbereiche
- 114 Finanzierung
- 114 Investitionen
- 115 Beschaffung
- 115 Forschung und Entwicklung
- 116 Unternehmensstruktur und Organisation
- 116 Geplante Änderungen im Personal- und Sozialbereich
- 116 Dividende

**KONZERN-LAGEBERICHT.** Fresenius blickt auf ein ausgezeichnetes Geschäftsjahr 2010 zurück. Wir erreichten erneut Höchstwerte bei Umsatz und Ergebnis – und zwar in allen unseren Unternehmensbereichen und in allen Regionen. Dank der hervorragenden Cashflow-Entwicklung verbesserten wir unsere Verschuldungskennzahlen deutlich.

## GESCHÄFT UND RAHMENBEDINGUNGEN

### KONZERNSTRUKTUR UND GESCHÄFTSTÄTIGKEIT

Fresenius ist ein internationaler Gesundheitskonzern mit Produkten und Dienstleistungen für die Dialyse, das Krankenhaus und die ambulante medizinische Versorgung von Patienten. Weitere Arbeitsfelder sind das Krankenhausträgergeschäft sowie Engineering- und Dienstleistungen für Krankenhäuser und andere Gesundheitseinrichtungen.

Die Hauptversammlung der Fresenius SE vom 12. Mai 2010 hat den Rechtsformwechsel der Gesellschaft in eine SE & Co. KGaA (Kommanditgesellschaft auf Aktien) beschlossen. Dieser wurde am 28. Januar 2011 mit der Eintragung in das Handelsregister wirksam. Die Fresenius SE firmiert seitdem als Fresenius SE & Co. KGaA. Der Rechtsformwechsel

hatte weder die Auflösung der Gesellschaft noch die Gründung einer neuen juristischen Person zur Folge. Die rechtliche und wirtschaftliche Identität der Gesellschaft bleibt erhalten. Im Rahmen dieser Transaktion wurden sämtliche stimmrechtslosen Vorzugsaktien obligatorisch im Verhältnis 1:1 in stimmberechtigte Stammaktien getauscht. Dabei blieb die Höhe des Grundkapitals der Gesellschaft unverändert.

Das operative Geschäft verteilt sich auf rechtlich selbstständige **Unternehmensbereiche** (Segmente), die von der Fresenius SE & Co. KGaA als operativ tätiger Muttergesellschaft geführt werden. Diese Konzernstruktur hat sich im Berichtsjahr nicht verändert.

- ▶ Fresenius Medical Care ist der weltweit führende Anbieter von Dienstleistungen und Produkten für Patienten mit chronischem Nierenversagen. Zum 31. Dezember 2010 behandelte Fresenius Medical Care 214.648 Patienten in 2.757 Dialysekliniken.
- ▶ Fresenius Kabi ist spezialisiert auf Infusionstherapien, intravenös zu verabreichende generische Arzneimittel (I.V.-Arzneimittel) sowie klinische Ernährung für schwer und chronisch kranke Menschen im Krankenhaus und im ambulanten Bereich. Das Unternehmen bietet auch medizintechnische Geräte und Produkte der Transfusionstechnologie an.

#### KONZERNSTRUKTUR

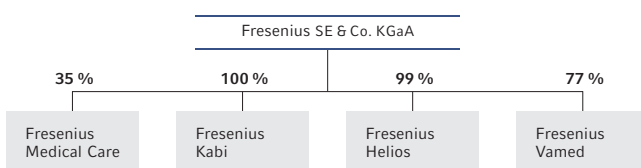



- ▶ Fresenius Helios ist einer der größten deutschen privaten Krankenhausbetreiber. Zur HELIOS-Kliniken-Gruppe gehören 63 eigene Kliniken, davon 62 in Deutschland und eine in der Schweiz. HELIOS verfügt insgesamt über mehr als 18.500 Betten.
- ▶ Fresenius Vamed bietet international Engineering- und Dienstleistungen für Krankenhäuser und andere Gesundheitseinrichtungen an.
- ▶ Das Segment Konzern/Sonstiges umfasst die Holdingfunktionen der Fresenius SE & Co. KGaA, die Fresenius Netcare, die Dienstleistungen im Bereich der Informationstechnologie anbietet, sowie die Fresenius Biotech, die Forschung und Entwicklung auf dem Gebiet der Antikörpertherapien betreibt. Darüber hinaus beinhaltet das Segment Konzern/Sonstiges die Konsolidierungsmaßnahmen, die zwischen den Unternehmensbereichen durchzuführen sind.

Der Fresenius-Konzern ist angesichts seiner starken internationalen Ausrichtung über alle Unternehmensbereiche regional und dezentral organisiert. Im Sinne des Managementprinzips des „Unternehmers im Unternehmen“ bestehen klare Verantwortlichkeiten. Darüber hinaus wird die Verantwortung der Führungskräfte durch ein ergebnisorientiertes und erfolgsdefiniertes Vergütungssystem gestärkt. Fresenius hat ein internationales Vertriebsnetzwerk und betreibt mehr als 80 Produktionsstätten rund um den Globus. Große Produktionsstandorte befinden sich in den USA, in China, Japan, Deutschland und Schweden. Daneben unterhält Fresenius Werke in weiteren Ländern Europas, Lateinamerikas, der Region Asien-Pazifik und in Südafrika. Da wir weltweit produzieren, können wir auch den hohen logistischen und regulatorischen Anforderungen gerecht werden. Die dezentrale Struktur der Produktionsstätten hat darüber hinaus den Vorteil, dass Transportkosten gering sind und Währungsschwankungen größtenteils ausgeglichen werden.

## LEITUNG UND KONTROLLE

Bis zur Wirksamkeit des Rechtsformwechsels waren die Organe der Fresenius SE der Vorstand, der Aufsichtsrat und die Hauptversammlung. Die Fresenius SE hatte ein dualistisches Leitungs- und Überwachungssystem, das aus Vorstand und Aufsichtsrat bestand. Der Vorstand führte die Geschäfte

in eigener Verantwortung. Der Aufsichtsrat bestellte, überwachte und beriet den Vorstand und war in Entscheidungen von grundlegender Bedeutung für das Unternehmen unmittelbar eingebunden.

Seit Wirksamwerden des **Rechtsformwechsels** in eine **KGaA** bilden die Hauptversammlung, der Aufsichtsrat und die persönlich haftende Gesellschafterin, die Fresenius Management SE, die Organe der Gesellschaft. An der Fresenius Management SE ist die Else Kröner-Fresenius-Stiftung zu 100 % beteiligt. Die KGaA hat ebenfalls ein **duales Führungssystem** – Geschäftsleitung und -kontrolle sind, wie in der vormaligen SE, streng voneinander getrennt.

Der **Vorstand der persönlich haftenden Gesellschafterin** führt die Geschäfte der Gesellschaft und vertritt diese gegenüber Dritten. Er besteht aus sieben Mitgliedern und ist in seiner personellen Zusammensetzung identisch mit dem ehemaligen Vorstand der Fresenius SE. Entsprechend der Geschäftsordnung des Vorstands ist jedes Mitglied für seinen Aufgabenbereich verantwortlich. Die Mitglieder haben jedoch eine gemeinschaftliche Verantwortung für die Geschäftsleitung des Konzerns. Neben dem Aufsichtsrat der Fresenius SE & Co. KGaA hat auch die Fresenius Management SE einen eigenen Aufsichtsrat. Der Vorstand hat dem Aufsichtsrat der Fresenius Management SE regelmäßig Bericht zu erstatten, insbesondere über die Geschäftspolitik und die Strategien, die Rentabilität des Geschäfts, den laufenden Geschäftsbetrieb und alle sonstigen Geschäfte, die für die Rentabilität und Liquidität von erheblicher Bedeutung sein können. Der Aufsichtsrat der Fresenius Management SE berät und überwacht zudem den Vorstand bei der Leitung des Unternehmens. Er darf grundsätzlich keine Geschäftsführungsfunktion ausüben. Die Geschäftsordnung des Vorstands sieht jedoch vor, dass der Vorstand bestimmte Geschäfte nicht ohne Zustimmung des Aufsichtsrats der Fresenius Management SE vornehmen darf.

Der **Aufsichtsrat der Fresenius SE & Co. KGaA** berät und überwacht die Geschäftsführung durch die persönlich haftende Gesellschafterin, prüft den Jahresabschluss und den Konzernabschluss und nimmt die ihm sonst durch Gesetz und Satzung zugewiesenen Aufgaben wahr. Er wird in die Strategie und Planung sowie in alle Fragen von grundlegender Bedeutung für das Unternehmen eingebunden.



Dem Aufsichtsrat der Fresenius SE & Co. KGaA gehören – wie auch dem ehemaligen Aufsichtsrat der Fresenius SE – sechs Vertreter der Aktionäre und sechs Vertreter der Arbeitnehmer an. Alle zwölf Mitglieder des Aufsichtsrats werden von der Hauptversammlung bestellt, davon sechs Mitglieder auf Vorschlag der Arbeitnehmer, die auch aus verschiedenen europäischen Ländern kommen können. An diesen Vorschlag ist die Hauptversammlung gebunden.

Der Aufsichtsrat hat mindestens zweimal pro Kalenderhalbjahr zusammenzutreten.

Die Bestellung und Abberufung des Vorstands erfolgt durch den Aufsichtsrat der Fresenius Management SE. Die Bestellung und Abberufung ist in Artikel 39 der SE-Verordnung geregelt. Die Satzung der Fresenius Management SE lässt zu, dass auch stellvertretende Vorstandsmitglieder bestellt werden können.

Die Erklärung zur Unternehmensführung finden Sie auf den Seiten 14 bis 33 dieses Geschäftsberichts sowie auf unserer Website [www.fresenius.de](http://www.fresenius.de) unter Wir über uns – Corporate Governance. Die Beschreibung des Vergütungssystems sowie der individualisierte Ausweis der Vergütung von Vorstand und Aufsichtsrat sind im Vergütungsbericht auf den Seiten 27 bis 33 des Geschäftsberichts enthalten. Der Vergütungsbericht ist Bestandteil des Lageberichts.

## WICHTIGE PRODUKTE UND DIENSTLEISTUNGEN

Fresenius Medical Care bietet ein umfassendes Sortiment an Produkten sowohl für die Hämodialyse als auch für die Peritonealdialyse an und erbringt Dialyседienstleistungen in eigenen Dialysekliniken in mehr als 35 Ländern. Zu den wichtigsten Produktgruppen des Dialyseproduktgeschäfts zählen Dialysatoren, Dialysegeräte und Dialysemedikamente. Die Produkte werden sowohl an eigene Dialysekliniken wie auch an externe Dialyseanbieter in mehr als 120 Ländern vertrieben. In den USA führt die Gesellschaft zusätzlich klinische Labortests durch. Fresenius Kabi ist eines der wenigen Unternehmen, das ein umfangreiches Angebot an enteralen und parenteralen Ernährungstherapien anbietet. Das Unternehmen verfügt außerdem über ein breites Angebot an Produkten für den Flüssigkeits- und Blutvolumenersatz sowie über ein umfassendes Portfolio von I.V.-Arzneimitteln. Das Portfolio der Fresenius Kabi umfasst mehr als 100 Produktfamilien. Das Unternehmen vertreibt seine Produkte in rund 170 Ländern, vorwiegend an Krankenhäuser. Fresenius Helios versorgt in eigenen Krankenhäusern jährlich mehr als 600.000 Patienten stationär und rund 1,7 Millionen Patienten ambulant.

Fresenius Vamed bietet international Engineering- und Dienstleistungen für Krankenhäuser und andere Gesundheitseinrichtungen an.

## WESENTLICHE ABSATZMÄRKTE UND WETTBEWERBSPOSITION

Fresenius ist in mehr als 70 Ländern mit Tochtergesellschaften aktiv. **Hauptabsatzmärkte** sind Europa und Nordamerika. In Nordamerika erwirtschaftet Fresenius 44 %, in Europa 41 % des Umsatzes.

Fresenius Medical Care ist das größte Dialyseunternehmen der Welt. Die Gesellschaft ist im Bereich der Dialyседienstleistungen weltweit führend mit einem Anteil von 18 %, gemessen am Umsatz. Sie versorgt die meisten Dialysepatienten und verfügt über die höchste Zahl von Dialysekliniken. Bei Dialyseprodukten betrug der Marktanteil rund 33 % – damit steht Fresenius Medical Care ebenso an der Spitze. Fresenius Kabi nimmt in Europa führende Marktstellungen ein und hat auch in den Wachstumsmärkten Asien-Pazifik und Lateinamerika bedeutende Positionen inne. In den USA ist Fresenius Kabi der zweitgrößte Anbieter generischer I.V.-Arzneimittel. Fresenius Helios gehört zu den drei größten privaten Krankenhausbetreibern in Deutschland. Fresenius Vamed ist ein weltweit führendes Unternehmen, das auf Engineering- und Dienstleistungen für Krankenhäuser sowie andere Gesundheitseinrichtungen spezialisiert ist.

## RECHTLICHE UND WIRTSCHAFTLICHE EINFLUSSFAKTOREN

Angesichts der Bedeutung, die unsere lebensrettenden und lebenserhaltenden Produkte und Therapien für die Menschen haben, sind die Märkte des Konzerns grundsätzlich stabil und relativ unabhängig von Wirtschaftszyklen. Die Märkte für unsere Produkte und Dienstleistungen wachsen, und zwar hauptsächlich aus drei Gründen:

- ▶ zum Ersten aufgrund der **demografischen Entwicklung**,
- ▶ zum Zweiten aufgrund der **Nachfrage nach innovativen Therapien** in den Industrienationen und
- ▶ zum Dritten aufgrund des zunehmenden **Zugangs zu hochwertiger Gesundheitsfürsorge** in den Entwicklungs- und Schwellenländern.

Zudem schafft die Diversifikation über vier Unternehmensbereiche zusätzliche Stabilität für den Konzern.

Durch sich ändernde Währungsrelationen, vor allem zwischen dem Euro und dem US-Dollar, entstehen in der Gewinn- und Verlustrechnung sowie der Bilanz Währungsumrechnungseffekte. Hier kam es im Berichtsjahr zu positiven Auswirkungen in der Gewinn- und Verlustrechnung aufgrund der im Jahresdurchschnitt veränderten Währungsrelation zwischen US-Dollar und Euro von 1,33 (2010) zu 1,39 (2009). Auch in der Bilanz wirkte sich die veränderte Stichtagsrelation von 1,34 (31. Dezember 2010) zu 1,44 (31. Dezember 2009) deutlich aus.

Rechtliche Aspekte, die die Geschäftsentwicklung wesentlich beeinflusst hätten, gab es im Berichtsjahr nicht.

Insgesamt blieben die rechtlichen und wirtschaftlichen Rahmenbedingungen für den Fresenius-Konzern im Wesentlichen unverändert, sodass das operative Geschäft davon nicht maßgeblich beeinflusst wurde.

### KAPITALIEN, AKTIONÄRE, SATZUNGSBESTIMMUNGEN

Das Grundkapital der Fresenius SE & Co. KGaA (am 31. Dezember 2010 der Fresenius SE) ist in der unten stehenden Übersicht dargestellt. Die Aktien der Fresenius SE & Co. KGaA sind Stückaktien, die auf den Inhaber lauten. Die Rechte der Aktionäre regelt das Aktiengesetz. Mit Eintragung in das Handelsregister am 28. Januar 2011 wurde der Rechtsformwechsel in eine KGaA wirksam. Gemäß Beschluss der Hauptversammlung der Fresenius SE und der Satzung der Fresenius SE & Co. KGaA wurden damit alle Stammaktien der Fresenius SE zu Stammaktien der Fresenius SE & Co. KGaA. Zugleich wurden sämtliche stimmrechtslosen Vorzugsaktien der Fresenius SE obligatorisch im Verhältnis 1:1 in stimmberechtigte Stammaktien der Fresenius SE & Co. KGaA getauscht. Die Höhe des Grundkapitals der Gesellschaft blieb dabei unverändert. Die Notierung der beiden Aktiengattungen der Fresenius SE wurde am 28. Januar 2011 eingestellt. Am 31. Januar wurde der Handel der Stammaktien der Fresenius SE & Co. KGaA aufgenommen.

In der Hauptversammlung am 12. Mai 2010 wurde die Satzung der Fresenius SE & Co. KGaA mit nachfolgenden **Genehmigten Kapitalien** festgestellt. Die Genehmigten Kapitalien I und II entsprechen in ihrem Umfang den Genehmigten Kapitalien der vormaligen Fresenius SE. Die Genehmigten Kapitalien III bis V zur Bedienung der Aktienoptionspläne 1998, 2003 und 2008 sollen nur alternativ zu den Bedingten Kapitalien verwendet werden. Demnach ist die Fresenius Management SE als persönlich haftende Gesellschafterin mit Zustimmung des Aufsichtsrats der Fresenius SE & Co. KGaA ermächtigt:

- ▶ das Grundkapital bis zum 7. Mai 2014 um insgesamt bis zu 12.800.000,00 € zu erhöhen durch ein- oder mehrmalige Ausgabe von Inhaber-Stammaktien gegen Bareinlagen (Genehmigtes Kapital I) sowie
- ▶ das Grundkapital bis zum 7. Mai 2014 um insgesamt bis zu 6.400.000,00 € zu erhöhen durch ein- oder mehrmalige Ausgabe von Inhaber-Stammaktien gegen Bareinlagen und/oder Sacheinlagen (Genehmigtes Kapital II). Das Bezugsrecht der Aktionäre kann ausgeschlossen werden.
- ▶ das Grundkapital bis zum 11. Mai 2015 um insgesamt bis zu 1.313.000,00 € zu erhöhen durch ein- oder mehrmalige Ausgabe von Inhaber-Stammaktien gegen Bareinlagen (Genehmigtes Kapital III). Das Bezugsrecht der Aktionäre ist ausgeschlossen. Von dem Genehmigten Kapital III darf nur insoweit Gebrauch gemacht werden, wie Bezugsrechte auf Inhaber-Stammaktien gemäß dem Aktienoptionsplan 1998 ausgegeben wurden, die Inhaber dieser Bezugsrechte von ihrem Ausübungsrecht Gebrauch machen und soweit die Bedienung der Bezugsrechte nicht aus Bedingtem Kapital erfolgt.
- ▶ das Grundkapital bis zum 11. Mai 2015 um insgesamt bis zu 4.298.442,00 € zu erhöhen durch ein- oder mehrmalige Ausgabe von Inhaber-Stammaktien gegen Bareinlagen und/oder Sacheinlagen (Genehmigtes Kapital IV). Das Bezugsrecht der Aktionäre ist ausgeschlossen. Von dem

|                        | 28. Januar 2011    |                       | 31. Dezember 2010  |                       | 31. Dezember 2009  |                       |
|------------------------|--------------------|-----------------------|--------------------|-----------------------|--------------------|-----------------------|
|                        | Anzahl Aktien      | Grundkapital €        | Anzahl Aktien      | Grundkapital €        | Anzahl Aktien      | Grundkapital €        |
| Stammaktien/-kapital   | 162.450.090        | 162.450.090,00        | 81.225.045         | 81.225.045,00         | 80.657.688         | 80.657.688,00         |
| Vorzugsaktien/-kapital | 0                  | 0                     | 81.225.045         | 81.225.045,00         | 80.657.688         | 80.657.688,00         |
| <b>Gesamt</b>          | <b>162.450.090</b> | <b>162.450.090,00</b> | <b>162.450.090</b> | <b>162.450.090,00</b> | <b>161.315.376</b> | <b>161.315.376,00</b> |

Genehmigten Kapital IV darf nur insoweit Gebrauch gemacht werden, wie Wandelschuldverschreibungen auf Inhaber-Stammaktien gemäß dem Aktienoptionsplan 2003 ausgegeben wurden, die Inhaber dieser Wandelschuldverschreibungen von ihrem Wandlungsrecht Gebrauch machen und soweit die Bedienung der Wandlungsrechte nicht aus Bedingtem Kapital erfolgt.

- das Grundkapital bis zum 11. Mai 2015 um insgesamt bis zu 6.200.000,00 € zu erhöhen durch ein- oder mehrmalige Ausgabe von Inhaber-Stammaktien gegen Bar-einlagen (Genehmigtes Kapital V). Das Bezugsrecht der Aktionäre ist ausgeschlossen. Von dem Genehmigten Kapital V darf nur insoweit Gebrauch gemacht werden, wie Bezugsrechte auf Inhaber-Stammaktien gemäß dem Aktienoptionsplan 2008 ausgegeben wurden oder werden, die Inhaber dieser Bezugsrechte von ihrem Ausübungsrecht Gebrauch machen und die Gesellschaft zur Erfüllung der Bezugsrechte keine eigenen Aktien gewährt bzw. von ihrem Recht auf Barausgleich Gebrauch macht und soweit die Bedienung der Bezugsrechte nicht aus Bedingtem Kapital erfolgt.

Darüber hinaus bestehen nachfolgende **Bedingte Kapitalien**, deren Umfang den Bedingten Kapitalien der vormaligen Fresenius SE – angepasst um zwischenzeitlich erfolgte Aktienoptionsausübungen – entspricht:

- Das Grundkapital ist um bis zu 990.510,00 € durch Ausgabe neuer Inhaber-Stammaktien bedingt erhöht (Bedingtes Kapital I). Die bedingte Kapitalerhöhung wird nur insoweit durchgeführt, wie gemäß dem Aktienoptionsplan 1998 Bezugsrechte ausgegeben wurden und die Inhaber dieser Bezugsrechte von ihrem Ausübungsrecht Gebrauch machen.
- Das Grundkapital ist um bis zu 3.486.318,00 € durch Ausgabe neuer Inhaber-Stammaktien bedingt erhöht (Bedingtes Kapital II). Die bedingte Kapitalerhöhung wird nur insoweit durchgeführt, wie gemäß dem Aktienoptionsplan 2003 Wandelschuldverschreibungen auf Stammaktien ausgegeben wurden und die Inhaber dieser Wandelschuldverschreibungen von ihrem Wandlungsrecht Gebrauch machen.
- Das Grundkapital ist um bis zu 6.200.000,00 € durch Ausgabe neuer Inhaber-Stammaktien bedingt erhöht (Bedingtes Kapital III). Die bedingte Kapitalerhöhung wird nur

insoweit durchgeführt, wie gemäß dem Aktienoptionsplan 2008 Bezugsrechte ausgegeben wurden oder werden und die Inhaber dieser Bezugsrechte von ihrem Ausübungsrecht Gebrauch machen und die Gesellschaft zur Erfüllung der Bezugsrechte keine eigenen Aktien gewährt bzw. von ihrem Recht auf Barausgleich Gebrauch macht, wobei für die Gewährung und Abwicklung von Bezugsrechten an den Vorstand der persönlich haftenden Gesellschafterin ausschließlich deren Aufsichtsrat zuständig ist.

Ein **Aktienrückkaufprogramm** besteht bei der Fresenius SE & Co. KGaA nicht.

**Direkte und indirekte Beteiligungen** an der Fresenius SE & Co. KGaA sind auf der Seite 173 im Anhang aufgeführt. Die Else Kröner-Fresenius-Stiftung als größter Aktionär teilte der Gesellschaft mit, dass sie am 28. Januar 2011 die Anzahl von 46.871.154 Stammaktien der Fresenius SE & Co. KGaA hält. Dies entspricht einem Anteil am Grundkapital von 28,85 %.

**Änderungen der Satzung** erfolgen gemäß § 278 Abs. 3, § 179 Abs. 2 AktG i. V. m. § 17 Abs. 3 der Satzung der Fresenius SE & Co. KGaA. Für Satzungsänderungen bedarf es, soweit nicht zwingende gesetzliche Vorschriften entgegenstehen, der einfachen Mehrheit des bei der Beschlussfassung vertretenen Grundkapitals. Bei Stimmengleichheit gilt ein Antrag als abgelehnt. Satzungsänderungen bedürfen darüber hinaus gemäß § 285 Abs. 2 Satz 1 AktG der Zustimmung der persönlich haftenden Gesellschafterin, der Fresenius Management SE. Die Satzung der Fresenius SE & Co. KGaA befugt den Aufsichtsrat, Änderungen der Satzung, die ihre Fassung betreffen, ohne Beschluss der Hauptversammlung vorzunehmen.

Ein **Kontrollwechsel** infolge eines Übernahmeangebots hätte unter Umständen Auswirkungen auf einige unserer langfristigen Finanzierungsverträge, in denen Vereinbarungen über einen Kontrollwechsel enthalten sind. Dies sind marktübliche Change-of-Control-Klauseln, die den Gläubigern bei einem Kontrollwechsel das Recht einräumen, vorzeitig zu kündigen. Das Kündigungsrecht ist aber in der Regel nur dann wirksam, wenn der Kontrollwechsel mit einer Herabstufung des Ratings der Gesellschaft verbunden ist.

## UNTERNEHMENSSTEUERUNG, ZIELE UND STRATEGIE

Der Vorstand steuert die Bereiche anhand von strategischen und operativen Vorgaben und verschiedenen finanziellen Kenngrößen. So ist im Rahmen unserer **Wachstumsstrategie** das organische Wachstum eine wichtige Steuerungsgröße. Darüber hinaus ist das operative Ergebnis (EBIT) ein geeigneter Parameter, um die Ertragskraft der Bereiche zu messen.

Der Vorstand geht davon aus, dass neben dem operativen Ergebnis auch die Kenngröße Ergebnis vor Zinsen, Steuern und Abschreibungen (EBITDA) ein guter Indikator für die Fähigkeit der Bereiche ist, finanzielle Überschüsse zu erzielen und finanzielle Verpflichtungen zu bedienen. Die Zielgrößen, an denen der Vorstand die Unternehmensbereiche misst, sind im Konzern so gewählt, dass sie alle Erträge und Aufwendungen beinhalten, die im Entscheidungsbereich dieser Segmente liegen. Den Beitrag unserer Bereiche zum operativen Cashflow steuern wir zudem durch die Kenngrößen Forderungslaufzeit und Vorratsreichweite.

Die **Kapitalbeschaffung** ist eine zentrale Konzernaufgabe, die nicht dem Einfluss der Unternehmensbereiche unterliegt. Daher gehen Zinsaufwendungen für die Finanzierung nicht in deren Zielgrößen ein. Das Gleiche gilt für Steueraufwendungen.

Eine weitere wichtige Steuerungsgröße auf Konzernebene ist der **Verschuldungsgrad**, d. h. das Verhältnis der Nettofinanzverbindlichkeiten zum EBITDA. Diese Kennzahl gibt darüber Aufschluss, inwieweit ein Unternehmen in der Lage ist, seinen Zahlungsverpflichtungen nachzukommen. Die Unternehmensbereiche des Konzerns verfügen über bedeutende Marktpositionen und sind in wachsenden und größtenteils nichtzyklischen Märkten aktiv. Sie zeichnen sich durch stabile, planbare und nachhaltige Cashflows aus, da unsere Kunden mehrheitlich über eine hohe Kreditqualität verfügen. Daher kann sich der Konzern über einen relativ höheren Anteil an Fremdkapital finanzieren als Unternehmen in anderen Branchen.

Auf Konzernebene bewerten wir unsere Unternehmensbereiche und ihren Beitrag zur **Wertentwicklung** des Konzerns durch die Rendite auf das betriebsnotwendige Vermögen (ROOA) und auf das investierte Kapital (ROIC). Der ROIC stieg im Konzern auf 8,9 % (2009: 8,2 %), der ROOA auf 11,6 % (2009: 10,5 %). Die deutliche Verbesserung dieser Kennzahlen gegenüber dem Geschäftsjahr 2009 konnte hauptsächlich durch den sehr guten Ergebnisanstieg in allen Unternehmensbereichen erreicht werden. Für unser Geschäft erwarten wir auch zukünftig eine Steigerung von ROIC und ROOA.

Die Übersicht zeigt den ROIC und den ROOA nach Unternehmensbereichen:

| in %                         | ROIC |      | ROOA |      |
|------------------------------|------|------|------|------|
|                              | 2010 | 2009 | 2010 | 2009 |
| Fresenius Medical Care       | 8,8  | 8,5  | 12,5 | 12,2 |
| Fresenius Kabi               | 9,0  | 7,8  | 11,9 | 10,2 |
| Fresenius Helios             | 7,5  | 6,7  | 7,8  | 7,1  |
| Fresenius Vamed <sup>1</sup> | –    | –    | 22,2 | 22,8 |
| Konzern                      | 8,9  | 8,2  | 11,6 | 10,5 |

<sup>1</sup> ROIC: geringes investiertes Kapital aufgrund erhaltener Anzahlungen und Kassenbestand

Unsere **Kapitalkosten** berechnen wir als gewogenes Mittel der Kosten für Eigen- und Fremdkapital. Dieser durchschnittliche Gesamtkapitalkostensatz (WACC – Weighted Average Cost of Capital) betrug im Jahr 2010 für Fresenius Medical Care 6,4 %, für die übrigen Unternehmensbereiche 5,9 %. Die im Jahr 2010 im Fresenius-Konzern erwirtschaftete Rendite auf das eingesetzte Kapital (ROIC) von 8,9 % übersteigt den WACC deutlich.

Unsere **Investitionen** werden grundsätzlich über einen detaillierten Abstimmungs- und Evaluierungsprozess gesteuert. In einem ersten Schritt legt der Vorstand, ausgehend von Investitionsanträgen, das Investitionsbudget für den Konzern und Investitionsschwerpunkte fest. In einem zweiten Schritt ermitteln die entsprechenden Bereiche sowie ein konzerninterner Ausschuss (AIC – Acquisition & Investment Council) die einzelnen Projekte und Maßnahmen unter Berücksichtigung der Gesamtstrategie, des Gesamtbudgets sowie von Renditeanforderungen und Renditepotenzialen. Die Investitionsprojekte werden auf Basis allgemein gängiger Methoden bewertet, wie der internen Zinsfuß- und Kapitalwertmethode. Schließlich wird den Vorstandsorgane bzw. den Geschäftsführungen der Unternehmensbereiche sowie dem Vorstand der Fresenius Management SE oder dessen Aufsichtsrat das jeweilige Investitionsprojekt zur Genehmigung vorgelegt, wenn es eine bestimmte Größenordnung überschreitet.

## STRATEGIE UND ZIELE

Wir haben das Ziel, Fresenius zu einem global führenden Anbieter von Produkten und Therapien für schwer und chronisch kranke Menschen auszubauen. Dabei konzentrieren wir uns mit unseren Unternehmensbereichen auf wenige, ausgewählte Bereiche des Gesundheitswesens. Durch diese klare

Ausrichtung ist es uns gelungen, einzigartige Kompetenzen zu entwickeln. Diese langfristige Strategie werden wir weiterhin konsequent verfolgen und unsere Chancen nutzen. Wir wollen

- ▶ beste Therapien anbieten,
- ▶ mit neuen Produkten und Dienstleistungen wachsen,
- ▶ in Wachstumsmärkten expandieren,
- ▶ nachhaltig die Ertragskraft erhöhen.

Die zentralen Elemente der Strategie und die Ziele des Fresenius-Konzerns stellen sich wie folgt dar:

- ▶ **Ausbau der Marktposition:** Fresenius hat das Ziel, die langfristige Zukunft des Unternehmens als einer der führenden internationalen Anbieter von Produkten und Dienstleistungen für den Gesundheitssektor zu wahren und die Marktposition weiter zu verbessern. Fresenius Medical Care ist das weltweit größte Dialyseunternehmen mit einer starken Marktposition in den USA. Perspektiven in der Dialyse bieten sich künftig sowohl im Bereich der Dialyседienstleistungen und -produkte durch die weitere internationale Expansion als auch durch den Ausbau des Bereichs der Dialysemedikamente. Fresenius Kabi ist führend in der Infusions- und Ernährungstherapie sowohl in Europa als auch in den wichtigsten Ländern in der Region Asien-Pazifik und in Lateinamerika. In den USA ist Fresenius Kabi durch APP Pharmaceuticals eines der führenden Unternehmen im Bereich generischer I.V.-Arzneimittel. Das Unternehmen plant, in den Wachstumsmärkten weitere Produkte seiner Palette einzuführen, um die Position zu stärken. Außerdem will Fresenius Kabi den Marktanteil durch die Einführung neuer Produkte im Bereich I.V.-Arzneimittel und in der Medizintechnik für Infusions- und Ernährungstherapien ausbauen. Ferner sollen auch Produkte aus der existierenden Palette in den USA vermarktet werden. Mit Fresenius Helios eröffnen sich aus einer starken Position heraus weitere Wachstumschancen im Rahmen der fortschreitenden Privatisierung im deutschen Krankenhausmarkt. Dabei bilden die Bestandssicherheit und das langfristige Potenzial der Kliniken die Grundlage für Akquisitionentscheidungen. Fresenius Vamed wird seine Position als weltweit tätiger Spezialist für Engineering- und Dienstleistungen für Krankenhäuser und andere Gesundheitseinrichtungen weiter stärken.
- ▶ **Ausbau der weltweiten Präsenz:** Neben einem nachhaltigen organischen Wachstum in den Märkten, in denen Fresenius bereits etabliert ist, verfolgen wir das Ziel,

weltweit weitere Wachstumsmärkte, vor allem in der Region Asien-Pazifik und in Lateinamerika, zu erschließen. In diesem Zusammenhang wollen wir uns mit unserem Markennamen, dem Produktportfolio und der bestehenden Infrastruktur auf Märkte konzentrieren, die ein attraktives Wachstumsprofil aufweisen. Fresenius plant, neben dem organischen Wachstum kleine und mittlere selektive Akquisitionen zu tätigen, um dadurch die Marktposition des Unternehmens zu verbessern und das Geschäft geografisch zu erweitern.

- ▶ **Stärkung der Innovationskraft:** Fresenius hat das Ziel, die starke Position im Bereich der Technologie, die Kompetenz und Qualität in der Behandlung von Patienten und die kosteneffektiven Herstellungsprozesse weiter auszubauen. Wir wollen unsere Kompetenz in Forschung und Entwicklung nutzen, um solche Produkte und Systeme zu entwickeln, die sich durch eine höhere Sicherheit und Anwenderfreundlichkeit auszeichnen und die den Bedürfnissen der Patienten individuell angepasst werden können. Mit noch wirksameren Produkten und Behandlungsmethoden wollen wir weiterhin dem Anspruch gerecht werden, Spitzenmedizin für schwer und chronisch kranke Menschen zu entwickeln und herzustellen. Das Ziel von Fresenius Helios ist es, die Gesundheitsleistungen und innovativen Therapien als Markenprodukte zu etablieren und den Wiedererkennungswert zu steigern. Ziel von Fresenius Vamed ist es, weitere Projekte zur integrierten Gesundheitsversorgung zu realisieren und somit patientenorientierte Gesundheitssysteme noch wirksamer zu unterstützen.
- ▶ **Steigerung der Ertragskraft:** Es ist unser Ziel, die Ertragskraft des Konzerns weiter zu erhöhen. Auf der Kosten- und Effizienzseite konzentrieren wir uns vor allem darauf, die Effizienz unserer Produktionsstätten zu steigern, Größeneffekte und Vertriebsstrukturen intensiver zu nutzen und grundsätzlich Kostendisziplin zu üben. Die Fokussierung auf den operativen Cashflow mit einem effizienten Working-Capital-Management soll den Spielraum von Fresenius für Investitionen erweitern und die Bilanzrelationen verbessern. Darüber hinaus ist es unser Ziel, die gewichteten Kapitalkosten zu optimieren; dazu setzen wir ganz gezielt einen ausgewogenen Mix aus Eigenkapital- und Fremdkapitalfinanzierungen ein. Unter aktuellen Kapitalmarktverhältnissen erreichen wir eine Optimierung unserer

Kapitalkosten, wenn sich die Kennziffer Netto-Finanzverbindlichkeiten/EBITDA in einer Bandbreite von 2,5 bis 3,0 bewegt. Sie lag am 31. Dezember 2010 bei 2,6. Wir erwarten, dass diese Kennziffer auch im Jahr 2011 in dieser Bandbreite liegen wird.

Über unsere Ziele berichten wir ausführlich im Ausblick auf den Seiten 107 bis 116.

## ÜBERBLICK ÜBER DEN GESCHÄFTSVERLAUF

### GESAMTWIRTSCHAFTLICHE RAHMENBEDINGUNGEN

Die Weltwirtschaft setzte im Jahr 2010 die Erholung von der schwersten konjunkturellen Krise der Nachkriegszeit fort. Die deutliche Konjunkturverbesserung lässt sich vor allem auf folgende Faktoren zurückführen:

- ▶ expansive Geld- und Fiskalpolitik der Industrieländer
- ▶ robuste Nachfrage der Schwellenländer
- ▶ Aufholeffekte auf der Nachfrageseite und durch Lageraufbau

Das globale Bruttoinlandsprodukt (BIP) erhöhte sich im Jahr 2010 um 4,7 % gegenüber einem Minus von 1,2 % im Vorjahr. Dabei fiel die Zuwachsrates des BIPs in den Schwellenländern mit 7,4 % deutlich stärker aus als in den Industrieländern mit 2,6 %. Insgesamt waren im Jahr 2010 etwa zwei Drittel der globalen Konjunkturerholung den Entwicklungs- und Schwellenländern – allen voran China – zuzuschreiben.

### ANTEIL FÜHRENDER WIRTSCHAFTSNATIONEN AM WELTWEITEN BIP

| in %        | 2009 | 2008 |
|-------------|------|------|
| USA         | 20,4 | 20,6 |
| China       | 12,6 | 11,4 |
| Japan       | 6,0  | 6,3  |
| Indien      | 5,1  | 4,8  |
| Deutschland | 4,0  | 4,2  |
| Russland    | 3,0  | 3,3  |

Quellen: IMF, World Economic Outlook 2010, 2009

## Europa

Nach dem starken Konjunkturéinbruch im Jahr 2009 gewann im Jahr 2010 die wirtschaftliche Entwicklung im Euro-Raum wieder an Schwung, und das BIP stieg insgesamt um 1,7 % (2009: -4,1 %). Die Zunahme ist dabei insbesondere auf die Dynamik beim Import mit 10,0 % (2009: -11,9 %) und beim Export mit 9,7 % (2009: -13,2 %) zurückzuführen. Die gute Entwicklung fiel in den einzelnen Ländern des Euro-Raums jedoch sehr unterschiedlich aus: Während sich in Deutschland die Konjunktur besonders stark zeigte, erholte sie sich in Spanien und Italien langsamer als im Durchschnitt. In Griechenland nahm das BIP sogar im Vergleich zum Vorjahr weiter ab, aufgrund der nach wie vor angespannten Haushaltslage.

Die deutlich gestiegene Arbeitslosenquote im Euro-Raum (Schätzung 2010: 10,1 %) verhinderte eine kräftigere Belebung der privaten Konsumnachfrage. Zwei Drittel dieser Zunahme sind allein auf die höhere Anzahl Arbeitsloser in den Ländern Portugal, Spanien, Irland und Griechenland zurückzuführen.

Die Lage der öffentlichen Haushalte hat sich im Jahr 2010 im gesamten Währungsgebiet deutlich verschlechtert: Die Schuldenquote erhöhte sich auf 84,7 %, bezogen auf das nominale BIP. Im Jahr 2007 lag diese noch bei 66,2 %. Somit werden im Jahr 2010 voraussichtlich fast alle Länder des Euro-Raums das Schuldenstandskriterium des Maastricht-Vertrags nicht einhalten können. Ausnahmen sind Finnland, Slowenien und die Slowakei.

Der wirtschaftliche Aufschwung in **Deutschland** übertraf im Jahr 2010 die Erwartungen: Das BIP stieg um 3,6 % (2009: -4,7 %), maßgeblich getrieben durch die positive Entwicklung der Weltwirtschaft. Deutschlands exportorientierte Industrie konnte zeitnah auf die gestiegene Nachfrage reagieren, da sie viele Arbeitskräfte trotz Unterauslastung während der Krise in Kurzarbeit weiterbeschäftigt hatte. Mit einer niedrigen Arbeitslosigkeit, einem vergleichsweise moderaten Preisverfall im Immobiliensektor und einem maßvollen Anstieg der Staatsverschuldung meisterte Deutschland die Krise überdurchschnittlich gut.

In den aufstrebenden Ländern **Osteuropas**, die im Vorfeld der globalen Rezession sowohl hohe Leistungsbilanzdefizite als auch steigende Verschuldungsraten aufgewiesen hatten, konnten nur die besonders wettbewerbsfähigen Länder, u. a. Polen und Tschechien, oder die rohstoffreichen Länder, wie Russland, einen deutlichen Aufschwung verzeichnen.



Dagegen leidet eine Reihe **südosteuropäischer Länder** weiterhin an der abrupten Verschlechterung der Refinanzierungsbedingungen sowie der Kapitalabflüsse und befindet sich aktuell noch in der Rezession.

## USA

Die Wirtschaft in den USA konnte sich im Jahr 2010 spürbar erholen. Der zum Jahresbeginn erfolgte Aufschwung verlor zwar im Sommer an Dynamik, zog aber anschließend wieder an, sodass das BIP im Jahr 2010 um 2,9 % (2009: -2,6 %) wuchs. Getragen wurde das Wachstum vor allem von der Inlandsnachfrage und dem Lageraufbau, während die Nettoexporte weiterhin – wie auch bereits vor der Krise – einen negativen Wachstumsbeitrag leisteten.

Der stark angeschlagene US-amerikanische Immobilienmarkt zeichnete sich im Jahr 2010 immer noch durch ein hohes Überangebot aus. Zwar konnte die Regierung mit verschiedenen Stützungsmaßnahmen, wie Steuererleichterungen und einer flexibleren Anpassung der Tilgungsraten für Hypothekenkredite, einen weiteren Rückgang der Immobilienpreise vermeiden. Gleichwohl lagen die Preise im Sommer 2010 für private Wohnimmobilien rund 20 % und für gewerbliche Immobilien sogar mehr als 40 % unter ihrem jeweiligen Höchststand.

Ein Rückzug des Staates aus der expansiven Geld- und Fiskalpolitik deutet sich nur ansatzweise an. Vor dem Hintergrund der fragilen konjunkturellen Erholung sowie der Probleme am Arbeits- und Immobilienmarkt hat die US-amerikanische Regierung im Jahr 2010 weitere umfangreiche Stimulierungsmaßnahmen verabschiedet. Zudem ist geplant, weitere Staatsanleihen zu kaufen, um damit konjunkturelle Impulse zu setzen.

## Asien

Die Schwellenländer Asiens konnten nach einer kurzen Wachstumsverlangsamung im Jahr 2009 wieder an die positive Entwicklung vor der Finanzkrise anknüpfen und der Weltproduktion deutliche Impulse geben. Asien bleibt die dynamischste Region der Welt. Das BIP in Asien (ohne Japan) ist im Jahr 2010 um 9,2 % gestiegen (2009: 5,7 %). Stärkstes Wachstum im Jahr 2010 zeigte erneut China, das das BIP um 10,0 % (2009: 9,1 %) steigern konnte, gefolgt von Taiwan mit 10,0 % (2009: -2,0 %) und Indien mit 9,8 % (2009: 5,7 %).

Das Wachstum in **China** war zum einen auf die starke Nachfrage aus dem Ausland, zum anderen aber auch auf eine anspringende Inlandsnachfrage zurückzuführen. Angesichts steigender Inflationsraten und um eine Überhitzung zu vermeiden, hat die chinesische Regierung verschiedene Maßnahmen zur Einschränkung der Kreditvergabe ergriffen. Darunter fällt die Erhöhung des Leitzinses. Darüber hinaus signalisierte die chinesische Führung Mitte des Jahres Bereitschaft für größere Flexibilität beim Wechselkurs des Yuan gegenüber dem US-Dollar. Dies führte bis zum Jahresende 2010 zu einer nominalen Aufwertung der chinesischen Währung gegenüber dem US-Dollar um rund 3,0 %.

Die Entwicklung in **Indien** war vor allem durch eine stabile Binnenmarktnachfrage geprägt. Der Impuls des Außenbeitrags war hingegen leicht negativ. Die zunehmenden Kapitalzuflüsse aus dem Ausland üben einen deutlichen Aufwertungsdruck auf die Währung aus und erhöhen das Risiko von Überbewertungen an den Finanz- und Immobilienmärkten.

In **Japan** wurde die konjunkturelle Erholung hauptsächlich durch kräftige Exporte, insbesondere in die asiatischen Nachbarländer, sowie einer günstigen Entwicklung des privaten Verbrauchs gestützt. Die Spuren der Finanzkrise bleiben

## ANTEIL DER GESUNDHEITSAUSGABEN AM BIP

| in %        | 2008 | 2000 | 1990 | 1980 | 1970 |
|-------------|------|------|------|------|------|
| USA         | 16,0 | 13,6 | 12,2 | 9,0  | 7,1  |
| Frankreich  | 11,2 | 10,1 | 8,4  | 7,0  | 5,4  |
| Schweiz     | 10,7 | 10,2 | 8,2  | 7,3  | 5,4  |
| Deutschland | 10,5 | 10,3 | 8,3  | 8,4  | 6,0  |

Quelle: OECD Health Data 2010

jedoch weiterhin sichtbar, insbesondere die hohe Arbeitslosenquote und ein hoher öffentlicher Schuldenstand. Dennoch fiel das BIP-Wachstum in Japan im Jahr 2010 mit 4,2 % (2009: -5,2 %) höher aus als erwartet.

Die übrigen asiatischen Länder waren nur in geringem Umfang von der Finanzkrise betroffen. Die meisten dieser Staaten konnten auch überdurchschnittlich von der Erholung des Welthandels profitieren. Dieses positive Wachstumsumfeld sowie der strukturelle Aufholprozess erklären die teilweise deutlich über denen der entwickelten Industrienationen liegenden Wachstumsraten.

### Lateinamerika

Nachdem die Konjunktur der lateinamerikanischen Schwellenländer bereits Ende des Jahres 2009 wieder das Niveau vor der Krise erreichte, konnten diese im Jahr 2010 die konjunkturelle Dynamik weiter erhöhen. Dank der Erfahrungen aus früheren Rezessionen erholten sich diese Länder relativ schnell: Sie waren ausgestattet mit großen Devisenreserven, um Zahlungsbilanzkrisen zu vermeiden, und hatten ein Bankensystem, das weniger in risikoreiche Geschäfte involviert war. Bedeutendste Antriebskräfte blieben die Rohstoff- und Lebensmittelexporte. Das BIP der Region stieg im Jahr 2010 um 6,0 % (2009: -2,7 %).

Am schwersten von der globalen Finanz- und Wirtschaftskrise getroffen war **Mexiko** aufgrund seiner starken Handelsverflechtungen mit den USA. Nach dem Einbruch des BIPs im Jahr 2009 von -6,5 % verzeichnete das Land im Jahr 2010 ein Wirtschaftswachstum von 5,0 %. Vor allem der starke Import und Export trugen zu dieser positiven Entwicklung bei.

Obwohl **Argentinien** von den Ländern Lateinamerikas nach Mexiko am stärksten von der Krise betroffen war, verzeichnete das Land mit 9,1 % (2009: -3,1 %) den stärksten Zuwachs beim BIP. Vor allem die expansive Geld- und Fiskalpolitik hat zu diesem Wachstum beigetragen. Argentinien profitierte aber auch vom weltweiten Aufschwung. Insbesondere höhere Agrarpreise und der Wirtschaftsboom des Nachbarn Brasilien hatten positive Impulse auf Argentinien's Wirtschaft.

Durch eine robuste Binnenkonjunktur und eine breite regionale und sektorale Diversifikation seiner Exporte hat **Brasilien** die Finanzkrise gut gemeistert. Das brasilianische BIP stieg im Jahr 2010 um 7,7 % (2009: -0,2 %). Zu verdanken war dieses hohe Wachstum vor allem dem niedrigen Zinsumfeld, der umfangreichen Kreditvergabe sowie fiskalischen Impulsen.

### BRANCHENSPEZIFISCHE RAHMENBEDINGUNGEN

Der Gesundheitssektor zählt zu den weltweit bedeutendsten Wirtschaftszweigen. Er ist im Vergleich zu anderen Wirtschaftszweigen weitgehend unabhängig von konjunkturellen Schwankungen und konnte in den vergangenen Jahren überdurchschnittlich wachsen.

Wesentliche **Wachstumsfaktoren** sind

- ▶ zunehmender Bedarf an medizinischer Behandlung, den eine älter werdende Gesellschaft mit sich bringt,
- ▶ steigende Nachfrage nach innovativen Produkten und Therapieformen,
- ▶ medizintechnischer Fortschritt,
- ▶ zunehmendes Gesundheitsbewusstsein, das zu einem steigenden Bedarf an Gesundheitsleistungen und -einrichtungen führt.

In den **Schwellenländern** sind die Triebfedern darüber hinaus

- ▶ stetig zunehmende Zugangsmöglichkeiten und steigende Nachfrage nach medizinischer Basisversorgung sowie
- ▶ steigendes Volkseinkommen und damit auch höhere Ausgaben für Gesundheit.

Gleichzeitig steigen die Kosten der gesundheitlichen Versorgung und bilden einen immer höheren Anteil am Volkseinkommen. Die Gesamtausgaben für Gesundheit der OECD-Länder im Jahr 2008 beliefen sich im Durchschnitt auf 9,0 % des BIPs. Dies entspricht durchschnittlich 3.060 US\$ pro Kopf. Die höchsten Ausgaben pro Kopf verzeichneten wie in den Vorjahren die USA (7.538 US\$), gefolgt von Norwegen (5.003 US\$) und der Schweiz (4.627 US\$). Deutschland belegt mit 3.737 US\$ den neunten Rang im OECD-Ländervergleich.

In den OECD-Ländern betrug die Zuwachsrate der Pro-Kopf-Gesundheitsausgaben in den Jahren 2000 bis 2008 durchschnittlich 4,2 % jährlich. Im gleichen Zeitraum sind in Deutschland die Gesundheitsausgaben pro Kopf um durchschnittlich 1,6 % pro Jahr gestiegen. Verglichen mit allen anderen OECD-Ländern ist dies der geringste Anstieg. Der relativ geringe Zuwachs der Gesundheitsausgaben in Deutschland ist insbesondere durch die Einführung von Maßnahmen zur Senkung der Gesundheitskosten begründet.



Die Gesundheitsausgaben der OECD-Länder wurden im Jahr 2008 durchschnittlich zu 72,8 % aus öffentlichen Mitteln finanziert. Mit weniger als 50 % weisen die USA und Mexiko die geringste Quote öffentlicher Finanzierung auf. In Deutschland lag der staatliche Anteil im Jahr 2008 bei 76,8 % und war damit nahezu unverändert gegenüber dem Vorjahr.

Die Lebenserwartung in den meisten OECD-Staaten hat sich in den letzten Jahrzehnten dank besserer Lebensbedingungen, Gesundheitsvorsorge sowie durch Fortschritte bei der medizinischen Versorgung erhöht. Im Jahr 2008 betrug die Lebenserwartung im Durchschnitt 79,4 Jahre. In Deutschland lag die Lebenserwartung mit 80,2 Jahren um nahezu ein Jahr über diesem Durchschnitt. Von allen OECD-Ländern hat Japan mit 82,7 Jahren die höchste Lebenserwartung.

Um die stetig steigenden Ausgaben im Gesundheitswesen zu begrenzen, werden zunehmend die Versorgungsstrukturen überprüft und mögliche Kostensenkungspotenziale identifiziert. Verstärkt werden marktwirtschaftliche Elemente in das Gesundheitswesen eingeführt, um Anreize für kosten- und qualitätsbewusstes Handeln zu schaffen. Durch eine Erhöhung der Behandlungsqualität und die Optimierung der medizinischen Abläufe sollen die Behandlungskosten insgesamt reduziert werden. Darüber hinaus gewinnen Gesundheitsprogramme zur Vorsorge an Bedeutung ebenso wie innovative Vergütungsmodelle, die an die Behandlungsqualität geknüpft sind.

In unserem größten Einzelmarkt, den **USA**, hat die Regierung im Jahr 2010 eine umfassende Gesundheitsreform beschlossen. Sie soll die bisher rund 45 Millionen Unversicherten schrittweise in die Krankenversicherung bringen. Eine Grundversicherung wird ab dem Jahr 2014 zur Pflicht. Größere Unternehmen müssen ihren Arbeitnehmern eine Krankenversicherung anbieten, während kleine Unternehmen und einkommensschwache Haushalte eine staatliche Beihilfe zum Abschluss einer Krankenversicherung erhalten. Mit diesen Maßnahmen plant die US-amerikanische Regierung, den Anteil der Versicherten von derzeit rund 85 % auf 95 % der Bevölkerung bis zum Jahr 2019 zu erhöhen.

Im Folgenden werden die Entwicklungen in unseren wichtigsten Märkten näher erläutert:

### Der Dialysemarkt

Der Wert des weltweiten Dialysemarktes betrug im Jahr 2010 rund 69 Mrd US\$, was einem währungsbereinigten Wachstum von 4 % entspricht. Etwa 57 Mrd US\$ entfielen auf Dialysedienstleistungen (inklusive Dialysemedikamente), rund 12 Mrd US\$ auf Dialyseprodukte.

Die Zahl der Dialysepatienten stieg weltweit um rund 7 % auf mehr als 2,0 Millionen. Die regionale Aufteilung zeigt folgendes Bild:

DIALYSEPATIENTEN – REGIONALE AUFTEILUNG

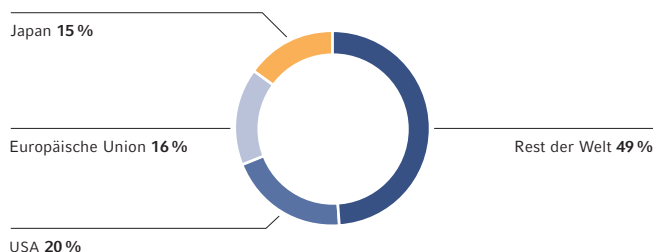

Die Prävalenz, also die relative Zahl der an terminaler Niereninsuffizienz erkrankten und behandelten Menschen pro Million Einwohner, ist regional sehr unterschiedlich und weist eine Schwankungsbreite von weit unter 100 bis deutlich über 2.000 Patienten pro Million Einwohner (PME) auf. Die höchste Prävalenz mit einem Wert von 2.700 PME hat Taiwan, gefolgt von Japan mit 2.490 PME und den USA mit rund 1.890 PME. In den 27 Ländern der Europäischen Union liegt dieser Wert im Durchschnitt bei rund 1.030. Die weitaus geringere durchschnittliche Welt-Prävalenz von rund 380 PME lässt sich zum einen durch Unterschiede in der Altersstruktur und in den Risikofaktoren für Nierenerkrankungen, wie Diabetes und Bluthochdruck, erklären sowie durch genetische Disposition und kulturelle Unterschiede, wie die der Ernährung. Zum anderen ist der Zugang zu Dialysebehandlungen in vielen Ländern so begrenzt, dass viele Menschen mit terminaler Niereninsuffizienz nicht behandelt werden können und deshalb auch nicht in der Prävalenzrechnung erfasst sind. Ein Vergleich der jeweiligen Wirtschaftskraft eines Landes mit seinen Prävalenzwerten zeigt, dass vor allem in Ländern mit einem jährlichen Pro-Kopf-BIP von weniger als 10.000 US\$ nicht jeder Erkrankte Zugang zu einer Behandlung hat. Insgesamt zeigt die steigende weltweite Prävalenz jedoch, dass immer mehr Menschen eine Nierenersatztherapie erhalten.

### Dialysedienstleistungen

Von den 2,0 Millionen Patienten, die im Jahr 2010 eine regelmäßige Behandlung erhielten, unterzogen sich mehr als 89 % der Hämodialyse. Rund 11 % haben sich für eine Peritonealdialyse entschieden. Die überwiegende Mehrheit der

Hämodialysepatienten wurde in einer der weltweit rund 29.000 Dialysekliniken versorgt, die im Durchschnitt jeweils 70 Hämodialysepatienten betreuen.

Je nachdem, ob die Gesundheitssysteme in den einzelnen Ländern eher staatlich oder privatwirtschaftlich organisiert sind, unterscheiden sich die Organisationsstrukturen erheblich: So werden in den USA die meisten der über 5.000 Dialysekliniken privat betrieben und nur etwa 1 % staatlich. In der Europäischen Union hingegen werden rund 60 % der mehr als 5.000 Dialysekliniken von der öffentlichen Hand geführt. In Japan spielen private Nephrologen eine wichtige Rolle, die dort etwa 80 % der Dialysekliniken betreiben.

**In den USA** ist der Markt für Dialysedienstleistungen bereits stark konsolidiert: Fresenius Medical Care und der zweitgrößte Anbieter von Dialysedienstleistungen – DaVita – versorgen zusammen etwa 65 % aller Patienten. Im Jahr 2010 hat Fresenius Medical Care seine marktführende Position von etwa 33 % behauptet.

**Außerhalb der USA** ist der Dialysedienstleistungsmarkt äußerst fragmentiert: Hier konkurriert Fresenius Medical Care insbesondere mit unabhängigen Einzelkliniken und Kliniken, die Krankenhäusern angegliedert sind. Fresenius Medical Care betreibt 934 Dialysekliniken in mehr als 35 Ländern und behandelt mehr als 76.959 Patienten. Damit verfügt das Unternehmen über das mit Abstand größte und internationalste Dialysenetzwerk.

Die Zahl der **Peritonealdialysepatienten** betrug im Jahr 2010 weltweit rund 219.000. Fresenius Medical Care versorgt etwa 39.000 Patienten mit Peritonealdialyseprodukten und hat einen Marktanteil von rund 17 %, gemessen am Umsatz. In den USA belief sich der Anteil auf 26 %. Fresenius Medical Care ist nach Baxter weltweit die Nummer zwei in diesem Markt.

Die **Vergütungssysteme** für die Dialysebehandlung unterscheiden sich von Land zu Land, oft variieren sie sogar innerhalb einzelner Länder. In den USA wird terminales Nierenversagen von den staatlichen Trägern erstattet. Die staatlichen Gesundheitsfürsorgeprogramme **Centers for Medicare & Medicaid Services (CMS)** stellen für mehr als 80 % der Dialysepatienten die medizinische Versorgung im Land sicher. Im Jahr 2010 resultierten 32 % des Umsatzes der Fresenius Medical Care aus Erstattungen des CMS. Änderungen in der Kostenerstattung des CMS haben daher eine besondere Bedeutung für unser Geschäft in Nordamerika.

## Dialyseprodukte

Zu den wichtigsten Produkten im Dialysemarkt zählen Dialysatoren, Hämodialysegeräte, Konzentrate und Dialyselösungen sowie Produkte für die Peritonealdialyse. Fresenius Medical Care ist im Dialyseproduktgeschäft mit einem Marktanteil von rund 33 % weltweit das führende Unternehmen, gefolgt von Baxter mit 19 % und Gambro mit 15 %. Damit versorgen diese drei Hersteller rund zwei Drittel des Marktes. Der Marktanteil der restlichen, mehrheitlich japanischen Anbieter lag jeweils im einstelligen Prozentbereich. **Dialysatoren** bilden die größte Produktgruppe. Das Marktvolumen belief sich im Jahr 2010 auf rund 203 Millionen Stück. Davon hat Fresenius Medical Care rund 92 Millionen Stück, also knapp die Hälfte, produziert. Ein noch besseres Bild ergibt sich bei **Hämodialysegeräten**: Von den etwa 69.000 neu in den Markt gebrachten Geräten stammen rund 55 % von Fresenius Medical Care. In den USA, unserer wichtigsten Geschäftsregion, belief sich unser Marktanteil an diesen beiden Produktgruppen im unabhängigen Markt auf über 80 %. Als unabhängigen Markt definieren wir alle Dialysekliniken, die nicht von einem größeren und USA-weit agierenden Dialysedienstleister wie Fresenius Medical Care oder DaVita betrieben werden. Im Jahr 2010 war China nach den USA unser zweitgrößter Absatzmarkt für neu verkaufte Hämodialysegeräte. Wir haben mehr als 3.800 Geräte verkauft. Mittlerweile stammt mit über 48 % schon fast die Hälfte der Geräte, die in China eingesetzt werden, von Fresenius Medical Care.

## Der Markt für Infusions- und Ernährungstherapien, I.V.-Arzneimittel und medizintechnische Produkte

In den Märkten, in denen Fresenius Kabi aktiv ist, gibt es vier wesentliche Wachstumsfaktoren:

- ▶ den zunehmenden Bedarf an medizinischer Behandlung durch eine älter werdende Gesellschaft,
- ▶ die steigende Nachfrage nach innovativen Therapien,
- ▶ das steigende Volkseinkommen in den Schwellenländern als Triebfeder für höhere Ausgaben im Gesundheitssektor und damit besseren Zugang zu Gesundheitsleistungen sowie
- ▶ den Einsatz generischer Produkte im Zuge der Einsparbestrebungen im Gesundheitswesen.

Insgesamt setzen sich die Bestrebungen zu Kosteneinsparungen im Gesundheitswesen weiter fort. Diese richten sich nach unserer Einschätzung aus heutiger Sicht vor allem auf die Preisbildung für patentgeschützte Arzneimittel und das Segment verschreibungspflichtiger Arzneimittel im Apothekenmarkt. So kommt es für die Zukunft in noch höherem Maße darauf an, beste Produkte und Therapien zu bezahlbaren Preisen bereitzustellen für einen Gesundheitsmarkt, der in zunehmendem Maße von Finanzierungsnöten und steigendem Bedarf geprägt ist.

Im Markt für **Infusionstherapien und klinische Ernährung** gewinnen angesichts des allgemeinen Kostendrucks in Mittel- und Westeuropa solche Therapien an Bedeutung, die eine qualitativ hochwertige Gesundheitsversorgung bieten und gleichzeitig aus ökonomischen Gesichtspunkten vorteilhaft sind. Studien belegen, dass durch die Gabe von Nahrungssupplementen bei krankheits- und altersbedingter Mangelernährung Krankenhauskosten in Höhe von durchschnittlich 1.000 € pro Patient eingespart werden können – durch kürzere Liegezeiten und geringeren Pflegebedarf. Mindestens 25 % aller Patienten in Europa sind bei der Aufnahme in das Krankenhaus mangelernährt oder haben ein erhöhtes Risiko, eine Mangelernährung zu entwickeln. Wesentlich höhere Zahlen um 50 bis 60 % werden für Pflegebedürftige, besonders im Seniorenalter, angegeben. Die Kosten, die durch krankheitsbedingte Mangelernährung verursacht werden, liegen europaweit bei 170 Mrd € jährlich.

Das Wachstum des Marktes für Infusionstherapien und klinische Ernährung liegt in Mittel- und Westeuropa insgesamt im unteren einstelligen Prozentbereich. In den Wachstumsregionen Asien-Pazifik, Lateinamerika und Osteuropa liegen die Wachstumsraten im hohen einstelligen bis zweistelligen Prozentbereich.

Fresenius Kabi geht nach eigenen Erhebungen davon aus, dass sich das für sie relevante Marktvolumen für Infusionstherapien und klinische Ernährung (ohne USA und Japan) in einer Größenordnung von rund 8 Mrd € bewegt.

Darüber hinaus erwarten wir, dass die Nachfrage nach **generischen Arzneimitteln** weiter steigen wird. Generische Arzneimittel sind aufgrund ihres deutlich geringeren Preises unter gesundheitsökonomischen Aspekten vorteilhafter als Originalpräparate und liefern schon heute einen unverzichtbaren Beitrag zur Sicherung der Gesundheitsversorgung.

Der Markt für **generische I.V.-Arzneimittel** ist grundsätzlich charakterisiert durch ein moderates Volumenwachstum, stetigen Preiserückgang und starken Wettbewerb. Zuwächse werden im Wesentlichen durch neue generische Produkte erzielt, die nach Ablauf des Patentschutzes des Originalpräparats in den Markt kommen. Das Wachstum des Marktes für generische I.V.-Arzneimittel bewegt sich in Europa und in den USA im mittleren einstelligen Prozentbereich. Wir erwarten, dass der Markt für I.V.-Arzneimittel, die zwischen den Jahren 2010 und 2020 in den USA ihren Patentschutz verlieren, kumuliert rund 22 Mrd US\$ betragen wird. Diese Werte basieren auf den Umsätzen der Originalpräparate im Jahr 2009 und enthalten nicht die für Generika üblichen Preisabschläge.

Nach eigenen Erhebungen geht Fresenius Kabi davon aus, dass sich das für sie relevante Marktvolumen für intravenös verabreichte generische Arzneimittel (ohne Japan) in einer Größenordnung von rund 14 Mrd € bewegt.

Der Markt für **medizintechnische Produkte** im Bereich der Infusionstherapie, I.V.-Arzneimittel und klinischen Ernährung wächst in Europa im mittleren einstelligen Prozentbereich. Wachstumstreiber sind hier insbesondere technologische Innovationen, die die Sicherheit der Anwendung und die Effizienz der Therapie erhöhen.

### Der deutsche Krankenhausmarkt

Im Jahr 2008 betrug das Gesamtvolumen der Krankenhausleistungen<sup>1</sup> (ohne Forschung und Lehre) in Deutschland rund 70 Mrd € und damit etwa ein Viertel aller Gesamtausgaben im Gesundheitswesen. Rund 61 % der Krankenhauskosten sind Personalaufwendungen, 39 % sind Sachkosten. Die Personalkosten erhöhten sich um 3,4 %, die Sachkosten um 6,3 %.

Die Anzahl der **Krankenhäuser** betrug im Jahr 2009 2.084 (2008: 2.083). Die Zahl der **Betten** verzeichnete nach Jahren des Abbaus einen geringfügigen Rückgang auf 503.341 (2008: 503.360). In den letzten fünf Jahren betrug der Bettenrückgang durchschnittlich 1,0 %. Dennoch liegt Deutschland mit 6,15 Betten je 1.000 Einwohner noch weit über dem OECD-Durchschnitt von 3,6 (2008). Im Jahr 2009

<sup>1</sup> Daten 2009 nicht verfügbar

Quellen: Deutsche Gesellschaft für Ernährungsmedizin e.V. 2009; eigene Erhebung, Marktdaten beziehen sich auf die für Fresenius Kabi relevanten, adressierbaren Märkte. Sie unterliegen zudem jährlichen Schwankungen, u. a. aufgrund von Veränderungen der Währungsrelationen und Patentabläufen der Originalpräparate im Markt der I.V.-Arzneimittel; Statistisches Bundesamt.

## ANTEIL DER KRANKENHAUSBETTEN NACH TRÄGERN

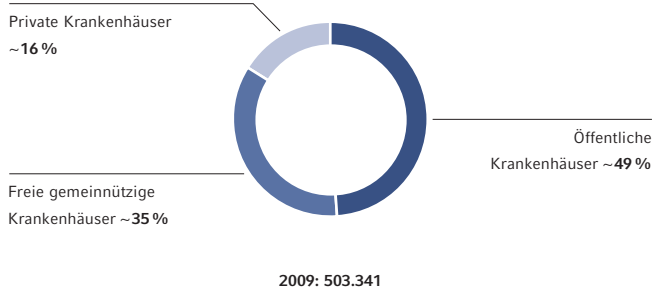

hat bundesweit die **Verweildauer** eines Patienten in einer Akutklinik um insgesamt 0,1 Tage abgenommen und lag bei 8,0 Tagen.

Die **Fallzahl** ist hingegen gestiegen. Nach Einführung der DRG-basierten Vergütung war die Fallzahl in den deutschen Akutkliniken zunächst rückläufig. Obwohl Leistungen in den ambulanten Bereich verlagert wurden, steigen die Fälle seit dem Jahr 2006 aber wieder kontinuierlich an. Eine wesentliche Triebfeder des Wachstums ist der demografische Wandel der Gesellschaft. Im Jahr 2009 lag die Fallzahl bei 17,82 Millionen, dies entspricht einem Zuwachs von rund 300.000 Fällen gegenüber dem Jahr 2008 bzw. 1,7 %. Pro 1.000 Einwohner entspricht das 218 Fällen. Andere Länder liegen deutlich unter diesem Wert. Der EU-Durchschnitt betrug 175 Fälle je 1.000 Einwohner im Jahr 2008. In den Jahren 2005 bis 2009 ist die Fallzahl in Deutschland um durchschnittlich 1,9 % p. a. gestiegen. Die durchschnittlichen Kosten je Fall haben sich bis 2008 um 2,5 % im Fünfjahresdurchschnitt erhöht.

Eine Umfrage des Deutschen Krankenhaus Instituts ergab, dass die **wirtschaftliche Lage** vieler Krankenhäuser in Deutschland weiterhin angespannt ist. 56 % der Einrichtungen erwarten für das Geschäftsjahr 2010 einen Jahresüberschuss

(2009: 44 %), 16 % einen Jahresfehlbetrag (2009: 26 %) und 28 % ein ausgeglichenes Ergebnis (2009: 27 %). Rund 44 % der befragten Krankenhäuser beurteilen ihre wirtschaftliche Lage als eher gut, 19 % sehen sie eher unbefriedigend. Die verbleibenden 37 % bewerten die Lage als gemischt. Die Insolvenzgefahr der Krankenhäuser wird für das Jahr 2010 auf 8 % (2009: 11 %) geschätzt.

Die oft schwierige finanzielle und wirtschaftliche Situation der Kliniken geht einher mit einem enormen **Investitionsbedarf**, der größtenteils auf einen Investitionsstau zurückzuführen ist. Dieser stieg in den vergangenen Jahren kontinuierlich an, da die Bundesländer aufgrund von Haushaltsproblemen ihrer gesetzlichen Verpflichtung zur Finanzierung notwendiger Investitionen und größerer Instandhaltungsmaßnahmen nicht ausreichend nachkommen konnten. Der Fortschritt in der Medizintechnik, erhöhte Qualitätsanforderungen und notwendige Modernisierungen steigern maßgeblich den Investitionsbedarf. Das Bundesministerium für Gesundheit schätzt den jährlichen Investitionsbedarf in deutschen Kliniken auf 5 Mrd €.

Vor diesem Hintergrund hat sich der Privatisierungstrend im deutschen Krankenhausmarkt fortgesetzt, wenn auch sehr verhalten: Die privaten Betreiber konnten ihren Anteil im Jahr 2009 auf 16,6 % (2008: 15,9 %) erhöhen. Mit 48,7 % lag der größte Anteil der Krankenhausbetten jedoch weiterhin in der öffentlichen Hand (2008: 49,0 %), wie die Grafik zeigt.

Nach unseren Erhebungen lag das Umsatzvolumen aus Krankenhaustransaktionen im Jahr 2010 bei rund 230 Mio € und damit noch unter dem Vorjahreswert (2009: 504 Mio €).

Das im März 2009 in Kraft getretene **Krankenhausfinanzierungsreformgesetz** (KHRG) wirkte sich auch im Jahr 2010 grundsätzlich positiv auf die finanzielle Situation der Krankenhäuser aus und führte zu Erlössteigerungen, die Experten mit 4 % p. a. in den Jahren 2009 und 2010 beziffern.

## KENNZAHLEN ZUR STATIONÄREN VERSORGUNG IN DEUTSCHLAND

|                                    | 2009    | 2008    | 2007    | 2006    | 2005    | Veränderung<br>2009/2008 |
|------------------------------------|---------|---------|---------|---------|---------|--------------------------|
| Krankenhäuser                      | 2.084   | 2.083   | 2.087   | 2.104   | 2.139   | 0 %                      |
| Betten                             | 503.341 | 503.360 | 506.954 | 510.767 | 523.824 | 0 %                      |
| Betten je 1.000 Einwohner          | 6,15    | 6,13    | 6,16    | 6,20    | 6,35    | 0,3 %                    |
| Verweildauer (Tage)                | 8,0     | 8,1     | 8,3     | 8,5     | 8,7     | -1,2 %                   |
| Fälle (Mio)                        | 17,82   | 17,52   | 17,18   | 16,83   | 16,54   | 1,7 %                    |
| Ø Kosten je Fall in € <sup>1</sup> | n. a.   | 4.146   | 4.028   | 3.932   | 3.813   | n. a.                    |

<sup>1</sup> Nach Bruttogesamtkosten

Seit Abschluss der Konvergenzphase zum Jahresende 2009 rechnen die Krankenhäuser ausschließlich auf Basis der Landesbasisfallwerte (DRG-System) ab.

Qualität wird immer mehr zum entscheidenden Wettbewerbsfaktor im Krankenhausmarkt. Die Bedeutung von Transparenz und Vergleichbarkeit der Leistungen wird bei Patienten und ihren betreuenden Ärzten weiter zunehmen.

Der **Rehabilitationsklinikmarkt** in Deutschland lag mit insgesamt 1.240 Vorsorge- oder Rehabilitationseinrichtungen im Jahr 2009 etwa auf Vorjahresniveau. Die Bettenzahl betrug 171.489 (2008: 171.060). Private Träger betrieben 55,8 % aller Einrichtungen (2008: 56,3 %). Freigemeinnützige Träger unterhielten nahezu unverändert 26,1 % (2008: 26,0 %), und der Anteil der Einrichtungen der öffentlichen Hand stieg auf 18,1 % (2008: 17,8 %). In privaten Vorsorge- oder Rehabilitationseinrichtungen befanden sich 66,8 % (2008: 66,9 %) aller aufgestellten Betten. Die Anzahl der Betten freigemeinnütziger und öffentlicher Träger lag bei 16,0 % (2008: 16,2 %) bzw. 17,3 % (2008: 16,9 %). Während die bundesweite Fallzahl um rund 4.000 Fälle auf 2,01 Millionen sank, stieg die Verweildauer auf 25,5 Tage (2008: 25,3 Tage).

### **Der Markt für Engineering- und Dienstleistungen für Krankenhäuser und andere Gesundheitseinrichtungen**

Der Markt für Engineering- und Dienstleistungen für Krankenhäuser und andere Gesundheitseinrichtungen ist sehr landesspezifisch und in starkem Maße abhängig von Faktoren wie der staatlichen Gesundheitspolitik, dem Grad der Regulierung und Privatisierung sowie wirtschaftlichen und demografischen Gegebenheiten.

In Märkten mit etablierten Gesundheitssystemen und zunehmendem Kostendruck stehen Krankenhäuser und Gesundheitseinrichtungen vor allem vor der Herausforderung, ihre Effizienz zu steigern. Hier sind insbesondere optimierte Betriebsabläufe in den Gesundheitseinrichtungen sowie die Übernahme medizintechnischer Dienstleistungen durch externe Spezialisten gefragt. Dies ermöglicht es den Krankenhäusern, sich auf ihre Kernkompetenz, der Behandlung

von Patienten, zu konzentrieren. In den Schwellenländern stehen der Aufbau und die Weiterentwicklung der Infrastruktur und die Verbesserung der medizinischen Versorgung im Vordergrund.

### **EINSCHÄTZUNG DES VORSTANDS ZUR AUSWIRKUNG DER GESAMTWIRTSCHAFTLICHEN UND BRANCHENSPEZIFISCHEN ENTWICKLUNG AUF DEN GESCHÄFTSVERLAUF**

Die Entwicklung der Weltwirtschaft hatte nur unwesentliche Auswirkungen auf unsere Branche. Sowohl in den etablierten Märkten als auch in den Wachstumsmärkten hat sich die Branchenentwicklung im Geschäftsjahr 2010 insgesamt positiv für Fresenius ausgewirkt. Wir haben, getragen von der hohen Nachfrage nach unseren Produkten und Dienstleistungen, insgesamt das Wachstum in den jeweiligen Märkten noch übertroffen.

### **WESENTLICHE EREIGNISSE FÜR DEN GESCHÄFTSVERLAUF**

Im Jahr 2010 war die positive Geschäftsentwicklung des Fresenius-Konzerns abermals ganz entscheidend dem sehr guten Wachstum des bestehenden Geschäfts in allen Unternehmensbereichen zu verdanken.

Der Konzernabschluss 2010 enthält **Sondereinflüsse** aus den Marktwertveränderungen der Pflichtumtauschleihe (MEB) und des Besserungsscheins (CVR) im Zusammenhang mit der Akquisition von APP Pharmaceuticals. Dies gilt ebenso für den Jahresabschluss 2009. Die bereinigten Ergebniszahlen zeigen die operative Entwicklung des Konzerns im jeweiligen Zeitraum.

### **BEURTEILUNG DER GESCHÄFTSENTWICKLUNG DURCH DEN VORSTAND**

Die wirtschaftliche Entwicklung des Fresenius-Konzerns war nach Überzeugung des Vorstands im Geschäftsjahr 2010 ausgezeichnet – mit Umsatz- und Ergebnissteigerungen in allen Unternehmensbereichen und allen Regionen. Fresenius Medical Care hat die positive Entwicklung mit einem organischen Umsatzwachstum in Höhe von 6 % und einer deutlichen Ergebnissteigerung fortsetzen können. Fresenius Kabi profitierte von einer weiterhin starken Nachfrage nach Produkten, verstärkt durch ihre Produktneueinführungen und Lieferengpässe bei Wettbewerbern, und konnte sich insgesamt besser als der Markt entwickeln. Dies schlug sich in

einem ausgezeichneten organischen Umsatzwachstum von 12 % und einer starken Ergebnissteigerung nieder. Ebenso erreichte Fresenius Helios ein ausgezeichnetes organisches Wachstum von 5 % und eine weitere deutliche Erhöhung des Ergebnisses. Auch Fresenius Vamed hat das Geschäftsjahr 2010 mit einem sehr guten organischen Umsatzwachstum von 15 % und einer weiteren Ergebnissteigerung abschließen können und einen für das Projektgeschäft wichtigen Anstieg im Auftragseingang und -bestand erzielt.

VERGLEICH DES TATSÄCHLICHEN MIT DEM PROGNOTIZIERTEN GESCHÄFTSVERLAUF

Sämtliche Ziele, die wir uns im Februar bei Veröffentlichung des Konzernabschlusses 2009 für das Jahr 2010 gesetzt hatten, konnten wir erreichen oder übertreffen. Gleiches gilt für den im Jahresverlauf erhöhten Ausblick. Dies zeigt die nachfolgende Übersicht. Unsere Annahme, dass trotz stetiger Bestrebungen zur Kostensenkung im Gesundheitswesen die Nachfrage nach unseren Produkten und Dienstleistungen weiterhin stark bleibt, hat sich bestätigt.

Beim prognostizierten währungsbereinigten Umsatzwachstum von 8 bis 9 % liegt Fresenius mit 8 % im Zielkorridor. Der prognostizierte währungsbereinigte Anstieg des bereinigten Konzernergebnisses<sup>1</sup> von rund 20 % wurde mit 23 % noch übertroffen. Ebenso konnten alle Umsatz- und Ergebnisziele der Unternehmensbereiche vollumfänglich erreicht oder übertroffen werden.

Fresenius hat im Geschäftsjahr 2010 in Sachanlagen 758 Mio € investiert, entsprechend 5 % vom Konzernumsatz. Damit liegt Fresenius auf dem vorgesehenen Wert von rund 5 %.

Beim operativen Cashflow haben wir unseren Ausblick mit einer Cashflow-Rate von 12 % deutlich übertroffen. Hier hatten wir eine hohe einstellige Prozentrage vom Umsatz in Aussicht gestellt.

ZIELERREICHUNG DES KONZERNS 2010

| Konzern                                                    | Ziele 2010<br>publiziert<br>Februar 2010 | Zielerhöhung<br>publiziert<br>August 2010 | Zielerhöhung<br>publiziert<br>November 2010 | Erreicht<br>2010 |
|------------------------------------------------------------|------------------------------------------|-------------------------------------------|---------------------------------------------|------------------|
| Umsatz (Wachstum, währungsbereinigt)                       | 7 – 9 %                                  |                                           | 8 – 9 %                                     | 8 %              |
| Konzernergebnis (Wachstum, währungsbereinigt) <sup>1</sup> | 8 – 10 %                                 | 10 – 15 %                                 | ~ 20 %                                      | 23 %             |
| Investitionen in Sachanlagen (% vom Konzernumsatz)         | ~ 5 %                                    |                                           |                                             | 5 %              |

<sup>1</sup> Ergebnis, das auf die Anteilseigner der Fresenius SE & Co. KGaA entfällt, bereinigt um die Sondereinflüsse aus den Marktwertveränderungen der Pflichtumtauschleihe (MEB) und des Besserungsscheins (CVR) im Zusammenhang mit der Akquisition von APP Pharmaceuticals. Diese sind nicht liquiditätswirksam.

ERTRAGS-, FINANZ- UND VERMÖGENSLAGE

ERTRAGSLAGE

UMSATZ

Im Geschäftsjahr 2010 konnten wir den Konzernumsatz währungsbereinigt um 8 % und zu Ist-Kursen um 13 % auf 15.972 Mio € steigern (2009: 14.164 Mio €).

Die Grafik zeigt die Einflüsse auf das Umsatzwachstum des Fresenius-Konzerns. Das organische Wachstum erreichte sehr gute 7 %, Akquisitionen trugen 1 % zum Umsatzanstieg bei. Währungsumrechnungseffekte hatten einen positiven Einfluss von 5 %. Informationen hierzu finden Sie auch auf Seite 54.

UMSATZEINFLÜSSE

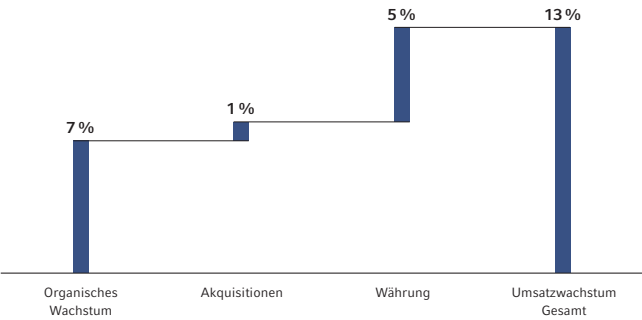

Wesentliche Effekte aus der Veränderung des Sortimentsmix und aus Preiseinflüssen lagen nicht vor. Für die Zukunft sind wesentliche Veränderungen dieser beiden Größen derzeit nicht absehbar.



Das **Umsatzwachstum nach Regionen** stellt sich wie folgt dar:

Nordamerika und Europa mit 44 % bzw. 41 % vom Gesamtumsatz sind die beiden stärksten Umsatzregionen des Konzerns, gefolgt von der Region Asien-Pazifik mit 8 % sowie Lateinamerika und Afrika mit 5 % bzw. 2 %. In Deutschland erzielten wir 21 % unseres Konzernumsatzes.

In Nordamerika erhöhte sich der Umsatz währungsbereinigt um 9 % und organisch um 8 %. In Europa stieg der Umsatz währungsbereinigt um 7 % und organisch um 6 %. Ausgezeichnete organische Wachstumsraten wurden wiederum in der Region Asien-Pazifik mit 7 % und in Lateinamerika mit 11 % erzielt.

Die **Umsätze in unseren Unternehmensbereichen** entwickelten sich wie folgt:

- Fresenius Medical Care erzielte im Geschäftsjahr 2010 einen Umsatz von 9.091 Mio € (2009: 8.064 Mio €). Dies entspricht einem Zuwachs von 13 %. Das organische Wachstum betrug 6 %, Akquisitionen wirkten sich mit 1 % aus. Währungsumrechnungseffekte hatten einen positiven Einfluss in Höhe von 6 %. Deutliche Steigerungen erzielte Fresenius Medical Care auf währungsbereinigter Basis bei Dialysedienstleistungen mit 9 %, das Wachstum bei Dialysepatienten betrug 3 %. Der Anstieg

bei Dialysedienstleistungen ist hauptsächlich zurückzuführen auf das organische Wachstum der Zahl behandelter Patienten und höhere Erlöse je Behandlung.

- Fresenius Kabi steigerte den Umsatz um 19 % auf 3.672 Mio € (2009: 3.086 Mio €). Das Unternehmen erreichte ein organisches Wachstum von 12 %. Dazu haben alle Regionen beigetragen; im Besonderen ist diese Entwicklung dem ausgezeichneten Wachstum in Nordamerika zu verdanken. Dort wirkten sich Produktneueinführungen und eine höhere Nachfrage aufgrund von Lieferengpässen bei Wettbewerbern positiv aus. Akquisitionen schlugen sich mit 1 % nieder. Währungsumrechnungseffekte beeinflussten die Umsatzentwicklung mit 6 %. Sie ergaben sich vor allem aus der Stärkung der Währungen in Nordamerika, Brasilien und China gegenüber dem Euro.
- Fresenius Helios steigerte den Umsatz um 4 % auf 2.520 Mio € (2009: 2.416 Mio €). Das organische Wachstum betrug 5 %. Grund für diese Entwicklung sind vor allem die erhöhten Patientenfallzahlen im Vergleich zum Jahr 2009. Die Desinvestition einer Akutklinik zu Jahresbeginn wirkte sich in Höhe von 1 % aus.
- Fresenius Vamed erzielte einen starken Umsatzanstieg von 15 % auf 713 Mio € (2009: 618 Mio €). Das organische Wachstum betrug 15 %. Im Projektgeschäft erhöhte sich der Umsatz um 16 % auf 487 Mio € (2009: 420 Mio €). Im Dienstleistungsgeschäft verbesserte sich der Umsatz um 14 % auf 226 Mio € (2009: 198 Mio €).

#### UMSATZ NACH REGIONEN

| in Mio €      | 2010          | 2009          | Veränderung | Organisches Wachstum | Währungsumrechnungseffekte | Akquisitionen/Desinvestitionen | Anteil am Konzernumsatz |
|---------------|---------------|---------------|-------------|----------------------|----------------------------|--------------------------------|-------------------------|
| Nordamerika   | 7.020         | 6.113         | 15 %        | 8 %                  | 6 %                        | 1 %                            | 44 %                    |
| Europa        | 6.515         | 6.045         | 8 %         | 6 %                  | 1 %                        | 1 %                            | 41 %                    |
| Asien-Pazifik | 1.307         | 1.088         | 20 %        | 7 %                  | 10 %                       | 3 %                            | 8 %                     |
| Lateinamerika | 814           | 641           | 27 %        | 11 %                 | 13 %                       | 3 %                            | 5 %                     |
| Afrika        | 316           | 277           | 14 %        | 6 %                  | 8 %                        | 0 %                            | 2 %                     |
| <b>Gesamt</b> | <b>15.972</b> | <b>14.164</b> | <b>13 %</b> | <b>7 %</b>           | <b>5 %</b>                 | <b>1 %</b>                     | <b>100 %</b>            |

#### UMSATZ NACH UNTERNEHMENSBEREICHEN

| in Mio €               | 2010  | 2009  | Veränderung | Organisches Wachstum | Währungsumrechnungseffekte | Akquisitionen/Desinvestitionen | Anteil am Konzernumsatz |
|------------------------|-------|-------|-------------|----------------------|----------------------------|--------------------------------|-------------------------|
| Fresenius Medical Care | 9.091 | 8.064 | 13 %        | 6 %                  | 6 %                        | 1 %                            | 57 %                    |
| Fresenius Kabi         | 3.672 | 3.086 | 19 %        | 12 %                 | 6 %                        | 1 %                            | 23 %                    |
| Fresenius Helios       | 2.520 | 2.416 | 4 %         | 5 %                  | 0 %                        | -1 %                           | 16 %                    |
| Fresenius Vamed        | 713   | 618   | 15 %        | 15 %                 | 0 %                        | 0 %                            | 4 %                     |

**Auftragseingang und Auftragsbestand** im Projektgeschäft von Fresenius Vamed haben sich erneut hervorragend entwickelt: Der Auftragseingang erhöhte sich um 16 % auf 625 Mio € (2009: 539 Mio €). Den Auftragsbestand konnte Fresenius Vamed um 18 % auf 801 Mio € steigern (31. Dezember 2009: 679 Mio €). Dies sichert dem Unternehmensbereich eine stabile Auslastung des Geschäfts im laufenden Geschäftsjahr. Fresenius Vamed ist der einzige Unternehmensbereich innerhalb des Fresenius-Konzerns, dessen Geschäft wesentlich vom Auftragseingang und Auftragsbestand bestimmt wird. Getragen durch den weiterhin starken Bedarf nach Gesundheitsversorgung und Krankenhausinfrastruktur konnte Fresenius Vamed bei Auftragseingang und Auftragsbestand erneut eine nachhaltige Entwicklung erreichen, wie die unten stehende Übersicht zeigt.

## ERGEBNISSTRUKTUR

Weiterhin ausgezeichnete Wachstumsraten konnten wir im Berichtsjahr beim Ergebnis erzielen: **Das Konzernergebnis<sup>1</sup>** stieg um 28 % auf 660 Mio €. Währungsumrechnungseffekte wirkten sich deutlich positiv aus, sodass das währungsberichtigte Wachstum 23 % betrug. Das Ergebnis je Stammaktie<sup>1</sup> erhöhte sich auf 4,08 €, das Ergebnis je Vorzugsaktie<sup>1</sup> auf 4,08 € (2009: Stammaktie 3,18 €, Vorzugsaktie 3,19 €). Dies entspricht einem Plus von jeweils 28 %, währungsbereinigt von jeweils 23 %. Inklusive der Sondereinflüsse betrug das Konzernergebnis<sup>2</sup> 622 Mio €, das Ergebnis je Stammaktie 3,85 € und das Ergebnis je Vorzugsaktie 3,85 €. Die Inflationsentwicklung hatte während des Berichtszeitraums keine signifikanten Auswirkungen auf unsere Ertragslage.

Der **Konzern-EBITDA** stieg währungsbereinigt um 12 % und zu Ist-Kursen um 17 % auf 3.057 Mio € (2009: 2.616 Mio €). Der **Konzern-EBIT** erhöhte sich währungsbereinigt um 13 % und zu Ist-Kursen um 18 % auf 2.418 Mio € (2009: 2.054 Mio €).

Der EBIT der einzelnen Unternehmensbereiche entwickelte sich wie folgt:

- ▶ Der EBIT der Fresenius Medical Care stieg um 15 % auf 1.451 Mio € (2009: 1.259 Mio €). Die EBIT-Marge stieg auf 16,0 % (2009: 15,6 %). Die Erhöhung ist weitgehend eine Folge gestiegener Erstattungsätze, der vorteilhaften Entwicklung der Kosten für Arzneimittel und Größenvorteilen. Gegenläufig wirkten sich Aufwendungen aus der Abwertung des venezolanischen Bolivars sowie niedrigere Gewinnspannen bei neu erworbenen Dialysekliniken in Europa und in der Region Asien-Pazifik aus.
- ▶ Fresenius Kabi steigerte den EBIT um 21 % auf 737 Mio € (2009: 607 Mio €). Der ausgezeichnete EBIT-Zuwachs resultierte nicht nur aus einer guten Geschäftsentwicklung in allen Regionen, sondern hauptsächlich aus der ausgezeichneten Entwicklung in Nordamerika. Dort wirkten sich Produkteinführungen und eine höhere Nachfrage aufgrund von Lieferengpässen bei Wettbewerbern positiv aus. Die EBIT-Marge betrug 20,1 % (2009: 19,7 %). Im EBIT enthalten sind 20 Mio € für Investitionen in fortgesetzte Effizienzsteigerungen außerhalb Nordamerikas. Bereinigt um diesen Betrag betrug die EBIT-Marge 20,6 %.
- ▶ Eine ausgezeichnete EBIT-Entwicklung erreichte auch Fresenius Helios. Der Unternehmensbereich schloss das Geschäftsjahr 2010 mit einem EBIT von 235 Mio € ab (2009: 205 Mio €) dank der sehr guten Entwicklung in den etablierten Kliniken und der weiteren Entwicklung der Kliniken im Sanierungsplan. Dies sind die Kliniken, die noch weniger als fünf Jahre zum Klinikportfolio von Fresenius Helios gehören. Der EBIT-Anstieg betrug 15 %. Die EBIT-Marge erhöhte sich auf 9,3 % (2009: 8,5 %).
- ▶ Der EBIT der Fresenius Vamed stieg um sehr gute 14 % auf 41 Mio € (2009: 36 Mio €). Die EBIT-Marge betrug wie im Vorjahr 5,8 %.

## AUFTRAGSEINGANG / -BESTAND FRESENIUS VAMED

| in Mio €                 | 2010 | 2009 | 2008 | 2007 | 2006 |
|--------------------------|------|------|------|------|------|
| Auftragseingang          | 625  | 539  | 425  | 395  | 337  |
| Auftragsbestand (31.12.) | 801  | 679  | 571  | 510  | 387  |

<sup>1</sup> Ergebnis, das auf die Anteilseigner der Fresenius SE & Co. KGaA entfällt, bereinigt um die Sondereinflüsse aus den Marktwertveränderungen der Pflichtumtauschleihe (MEB) und des Besserungsscheins (CVR) im Zusammenhang mit der Akquisition von APP Pharmaceuticals. Diese sind nicht liquiditätswirksam.

<sup>2</sup> Ergebnis, das auf die Anteilseigner der Fresenius SE & Co. KGaA entfällt



## ÜBERLEITUNGSRECHNUNG

| in Mio €                                              | 2010                          |                      | 2009                          |                      |
|-------------------------------------------------------|-------------------------------|----------------------|-------------------------------|----------------------|
|                                                       | Sonstiges Finanz-<br>ergebnis | Konzern-<br>ergebnis | Sonstiges Finanz-<br>ergebnis | Konzern-<br>ergebnis |
| <b>Konzernergebnis<sup>1</sup></b>                    |                               | <b>660</b>           |                               | <b>514</b>           |
| Sonstiges Finanzergebnis: <sup>2</sup>                |                               |                      |                               |                      |
| Marktwertveränderung der Pflichtumtauschanleihe (MEB) | -98                           | -70                  | -37                           | -26                  |
| Marktwertveränderung des Besserungsscheins (CVR)      | 32                            | 32                   | 6                             | 6                    |
| <b>Ergebnis gemäß US-GAAP<sup>3</sup></b>             | <b>-66</b>                    | <b>622</b>           | <b>-31</b>                    | <b>494</b>           |

<sup>1</sup> Ergebnis, das auf die Anteilseigner der Fresenius SE & Co. KGaA entfällt, bereinigt um die Sondereinflüsse aus der Akquisition von APP Pharmaceuticals

<sup>2</sup> Die Sondereinflüsse sind in der Segmentberichterstattung im Segment „Konzern/Sonstiges“ enthalten.

<sup>3</sup> Ergebnis, das auf die Anteilseigner der Fresenius SE & Co. KGaA entfällt

## ÜBERLEITUNGSRECHNUNG AUF DAS KONZERNERGEBNIS

Die oben stehende Tabelle zeigt die Sondereinflüsse aus der Akquisition von APP Pharmaceuticals in der Überleitung vom Konzernergebnis<sup>1</sup> auf das Ergebnis gemäß US-GAAP.

Die Pflichtumtauschanleihe (MEB) und der Besserungsschein (CVR) werden als Verbindlichkeit gebucht. Der Rückzahlungswert des Besserungsscheins sowie die derivativen Ausstattungsmerkmale der Pflichtumtauschanleihe werden zu Marktpreisen bewertet. Die Marktwertveränderung (mark-to-market-accounting) führt über die gesamte Laufzeit der Instrumente zu einem Ertrag oder einem Aufwand. Da die

Bemessungsgrundlage des Besserungsscheins während des maßgebenden Zeitraums die EBITDA-Hürde nicht erreichte, werden keine Zahlungen im Hinblick auf den Besserungsschein fällig und er wird verfallen.

## ENTWICKLUNG WEITERER, WESENTLICHER POSTEN DER GEWINN- UND VERLUSTRECHNUNG

Das **Bruttoergebnis vom Konzernumsatz** stieg auf 5.326 Mio € und übertraf damit um 15 % den Vorjahreswert von 4.636 Mio € (währungsbereinigt: 10 %). Die Bruttoergebnismarge konnten wir auf 33,3 % (2009: 32,7 %) steigern. Die **Umsatzkosten** nahmen im Vergleich zum Vorjahr um 12 %

## GEWINN- UND VERLUSTRECHNUNG (KURZFASSUNG)

| in Mio €                                      | 2010          | 2009          | Veränderung | Veränderung<br>währungsbereinigt |
|-----------------------------------------------|---------------|---------------|-------------|----------------------------------|
| <b>Umsatz</b>                                 | <b>15.972</b> | <b>14.164</b> | <b>13 %</b> | <b>8 %</b>                       |
| Umsatzkosten                                  | -10.646       | -9.528        | -12 %       | -7 %                             |
| <b>Bruttoergebnis vom Umsatz</b>              | <b>5.326</b>  | <b>4.636</b>  | <b>15 %</b> | <b>10 %</b>                      |
| Betriebliche Aufwendungen                     | -2.908        | -2.582        | -13 %       | -8 %                             |
| <b>EBIT (Operatives Ergebnis)</b>             | <b>2.418</b>  | <b>2.054</b>  | <b>18 %</b> | <b>13 %</b>                      |
| Zinsergebnis                                  | -566          | -580          | 2 %         | 6 %                              |
| Sonstiges Finanzergebnis                      | -66           | -31           | -113 %      | -116 %                           |
| Steuern vom Einkommen und vom Ertrag          | -581          | -452          | -29 %       | -23 %                            |
| Auf andere Gesellschafter entfallender Gewinn | -583          | -497          | -17 %       | -12 %                            |
| <b>Konzernergebnis<sup>1</sup></b>            | <b>660</b>    | <b>514</b>    | <b>28 %</b> | <b>23 %</b>                      |
| Konzernergebnis <sup>2</sup>                  | 622           | 494           | 26 %        | 21 %                             |
| Ergebnis je Stammaktie in € <sup>1</sup>      | 4,08          | 3,18          | 28 %        | 23 %                             |
| Ergebnis je Stammaktie in € <sup>2</sup>      | 3,85          | 3,06          | 26 %        | 21 %                             |
| Ergebnis je Vorzugsaktie in € <sup>1</sup>    | 4,08          | 3,19          | 28 %        | 23 %                             |
| Ergebnis je Vorzugsaktie in € <sup>2</sup>    | 3,85          | 3,07          | 25 %        | 20 %                             |
| EBITDA                                        | 3.057         | 2.616         | 17 %        | 12 %                             |
| Abschreibungen                                | 639           | 562           | 14 %        | 9 %                              |

<sup>1</sup> Ergebnis, das auf die Anteilseigner der Fresenius SE & Co. KGaA entfällt, bereinigt um die Sondereinflüsse aus den Marktwertveränderungen der Pflichtumtauschanleihe (MEB) und des Besserungsscheins (CVR) im Zusammenhang mit der Akquisition von APP Pharmaceuticals. Diese sind nicht liquiditätswirksam.

<sup>2</sup> Ergebnis, das auf die Anteilseigner der Fresenius SE & Co. KGaA entfällt

## ERGEBNISSTRUKTUR

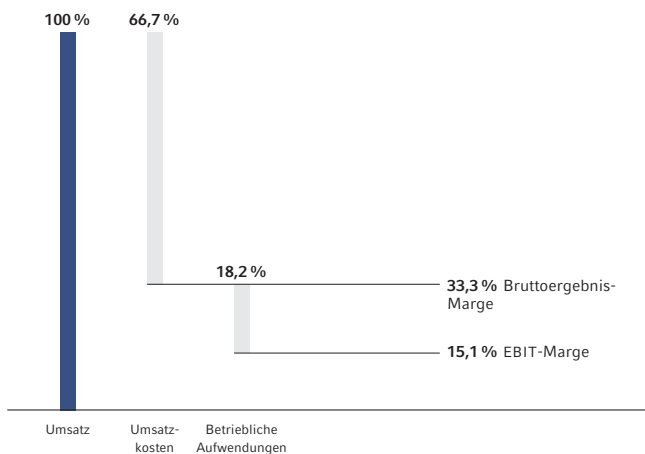

auf 10.646 Mio € zu (2009: 9.528 Mio €). Der Anteil der Umsatzkosten am Konzernumsatz sank von 67,3 % im Jahr 2009 auf 66,7 %. Die **Vertriebs- und allgemeinen Verwaltungskosten** umfassen hauptsächlich Personalkosten, Vertriebskosten und Abschreibungen. Sie erhöhten sich im Berichtsjahr um 14 % auf 2.664 Mio € (2009: 2.342 Mio €). Ihr Anteil am Konzernumsatz betrug 16,7 % (2009: 16,5 %). Die **Abschreibungen** beliefen sich auf 639 Mio € (2009: 562 Mio €). Die Abschreibungsquote lag im Jahr 2010 bei 4,0 % (2009: 4,0 %).

Die oben stehende Grafik verdeutlicht die Ergebnisstruktur des Geschäftsjahres 2010.

Das **Zinsergebnis** des Konzerns betrug -566 Mio € (2009: -580 Mio €). Darauf hatten niedrigere durchschnittliche Zinssätze auf Verbindlichkeiten einen positiven Einfluss. Gegenläufig wirkten sich Währungseffekte aufgrund der Stärke des US-Dollars zum Euro aus.

Das **sonstige Finanzergebnis** in Höhe von -66 Mio € enthält die Marktwertveränderungen aus dem Rückzahlungswert der Pflichtumtauschleihe (MEB) in Höhe von -98 Mio € und des Besserungsscheins (CVR) in Höhe von 32 Mio €. Diese Einflüsse sind nicht liquiditätswirksam.

Die bereinigte **Konzern-Steuerquote** (ohne die Sondereinflüsse aus den Marktwertveränderungen von MEB und CVR) ist auf 32,9 % gestiegen (2009: 31,4 %; hier wirkte sich die Neubewertung einer Steuerforderung im Unternehmensbereich Fresenius Medical Care positiv aus).

Der **auf andere Gesellschafter entfallende Gewinn** stieg hauptsächlich aufgrund der guten Ergebnisentwicklung bei der Fresenius Medical Care auf 583 Mio € nach 497 Mio € im Geschäftsjahr 2009. Davon entfielen 93 % auf Anteile anderer Gesellschafter an der Fresenius Medical Care.

Die Entwicklung der Renditekennzahlen im Verhältnis zum Umsatz zeigt unten stehende Tabelle.

## WERTSCHÖPFUNG

Die Wertschöpfungsrechnung zeigt die von Fresenius im Geschäftsjahr erbrachten wirtschaftlichen Leistungen abzüglich sämtlicher Vorleistungen, d. h. abzüglich des wertmäßigen Verbrauchs bezogener Güter und Leistungen sowie der Abschreibungen. Die Wertschöpfung des Fresenius-Konzerns betrug im Berichtsjahr 7.904 Mio € (2009: 7.041 Mio €). Sie liegt damit um 12 % über dem Wert des Jahres 2009. Die Verwendungsrechnung zeigt, dass den wesentlichen Anteil der Wertschöpfung die Mitarbeiterinnen und Mitarbeiter erhielten; dies waren 5.354 Mio € bzw. 68 %. Danach folgen mit 713 Mio € bzw. 9 % die öffentliche Hand und mit 566 Mio € bzw. 7 % die Darlehensgeber. Den Aktionären fließen 140 Mio € zu, auf andere Gesellschafter entfielen 583 Mio €. Zur inneren Stärkung des Geschäfts verblieben 548 Mio € der Wertschöpfung im Unternehmen.

## FINANZLAGE

## GRUNDSÄTZE UND ZIELE DES FINANZMANAGEMENTS

Finanzielle Flexibilität zu sichern hat höchste Priorität in der Finanzierungsstrategie des Fresenius-Konzerns. Diese Flexibilität erreichen wir durch eine breite Auswahl von Finanzierungsinstrumenten und durch eine hohe Diversifikation der

in %

|                                                        |
|--------------------------------------------------------|
| EBITDA-Marge                                           |
| EBIT-Marge                                             |
| Umsatzrendite (vor Steuern und Gewinnanteilen Dritter) |

| 2010              | 2009              | 2008 <sup>2</sup> | 2007 | 2006 |
|-------------------|-------------------|-------------------|------|------|
| 19,1              | 18,5              | 17,9              | 17,9 | 17,1 |
| 15,1              | 14,5              | 14,0              | 14,2 | 13,4 |
| 11,6 <sup>1</sup> | 10,4 <sup>1</sup> | 10,5              | 10,9 | 9,7  |

<sup>1</sup> Umsatzrendite bereinigt um Sondereinflüsse aus den Marktwertveränderungen der Pflichtumtauschleihe (MEB) und des Besserungsscheins (CVR)

<sup>2</sup> 2008 bereinigt um Sondereinflüsse aus der APP-Akquisition

## WERTSCHÖPFUNGSRECHNUNG

in Mio €

|                                       | 2010         | %          | 2009         | %          |
|---------------------------------------|--------------|------------|--------------|------------|
| <b>Entstehung</b>                     |              |            |              |            |
| Unternehmensleistung                  | 16.046       | 100        | 14.238       | 100        |
| Vorleistungen                         | 7.503        | 47         | 6.635        | 47         |
| Brutto-Wertschöpfung                  | 8.543        | 53         | 7.603        | 53         |
| Abschreibungen                        | 639          | 4          | 562          | 4          |
| <b>Netto-Wertschöpfung</b>            | <b>7.904</b> | <b>49</b>  | <b>7.041</b> | <b>49</b>  |
| <b>Verwendung</b>                     |              |            |              |            |
| Mitarbeiterinnen und Mitarbeiter      | 5.354        | 68         | 4.880        | 69         |
| Öffentliche Hand                      | 713          | 9          | 559          | 8          |
| Darlehensgeber                        | 566          | 7          | 580          | 8          |
| Aktionäre                             | 140          | 2          | 122          | 2          |
| Unternehmen und andere Gesellschafter | 1.131        | 14         | 900          | 13         |
| <b>Netto-Wertschöpfung</b>            | <b>7.904</b> | <b>100</b> | <b>7.041</b> | <b>100</b> |

Investoren. Das Fälligkeitsprofil weist eine breite Streuung auf mit einem hohen Anteil von mittel- und langfristigen Finanzierungen.

Unser Finanzierungsspielraum ist gewährleistet, da wir die revolvingierenden, syndizierten Kreditlinien und bilaterale Linien nur zum Teil genutzt haben. Bei der Auswahl der Finanzierungsinstrumente werden Marktkapazität, Investorendiversifikation, Flexibilität, Kreditauflagen und das bestehende Fälligkeitsprofil berücksichtigt. Gleichzeitig sind wir bestrebt, unsere Finanzierungskosten zu optimieren.

Entsprechend der Konzernstruktur erfolgen die Finanzierungen separat für Fresenius Medical Care und für den übrigen Fresenius-Konzern. Es gibt keine gemeinsamen Finanzierungen und keine gegenseitigen Garantien. Die Unternehmensbereiche Fresenius Kabi, Fresenius Helios und Fresenius Vamed werden hauptsächlich durch die Fresenius SE & Co. KGaA finanziert, um strukturelle Nachrangigkeit zu vermeiden.

## FINANZIERUNG

Fresenius deckt den **Finanzierungsbedarf** durch eine Kombination aus operativen Cashflows, die in den Unternehmensbereichen erwirtschaftet wurden, und durch die Aufnahme von kurz-, mittel- und langfristigen Finanzverbindlichkeiten. Wichtige Instrumente neben Bankfinanzierungen sind Anleihen, Schuldscheindarlehen, ein Commercial-Paper-Programm und ein Forderungsverkaufsprogramm.

Die **Finanzierungsaktivitäten** im Berichtsjahr waren auf die Refinanzierung bestehender bzw. fällig werdender Finanzierungsinstrumente ausgerichtet. Die Konditionen konnten teilweise verbessert werden.

- Im Januar 2010 hat Fresenius Medical Care eine vorrangige, unbesicherte **Anleihe** im Volumen von 250 Mio € platziert. Die Anleihe wird im Jahr 2016 fällig. Der Coupon beträgt 5,5 %. Bei einem Ausgabepreis von 98,6636 % ergab sich eine Rendite von 5,75 %. Der Emissionserlös wurde zur Rückzahlung kurzfristiger Finanzverbindlichkeiten und für allgemeine Geschäftszwecke verwendet.
- Im März 2010 hat die damalige Fresenius SE die Konditionen der syndizierten **Kreditvereinbarung aus dem Jahr 2008** nach Verhandlungen mit den Darlehensgebern deutlich verbessert. Im Rahmen der Vertragsanpassung konnte der Zinssatz der rund 1,2 Mrd US\$ großen Darlehenstranche B (neu: Darlehenstranche C) reduziert werden. Der neue Zinssatz setzt sich zusammen aus dem jeweiligen Geldmarktsatz (LIBOR und EURIBOR), für den eine Untergrenze von 1,50 % (bisher 3,25 %) gilt, und einer Marge von 3,00 % (bisher 3,50 %). Die Neuverhandlung der Konditionen war möglich geworden, da sich seit Abschluss der syndizierten Kreditvereinbarung sowohl die Verschuldungskennziffern von Fresenius als auch die Konditionen am Fremdkapitalmarkt deutlich verbessert hatten.
- Im September 2010 hat Fresenius Medical Care die syndizierte **Kreditvereinbarung aus dem Jahr 2006** verlängert und aufgestockt. Die Laufzeit der revolvingierenden Kreditlinie und der Darlehenstranche A wurde um zwei Jahre

bis 31. März 2013 verlängert. Somit werden diese Fazilitäten am selben Termin zur Rückzahlung fällig wie die Darlehenstranche B (Term Loan B) in Höhe von derzeit rund 1,5 Mrd US\$. Aufgrund der breiten Zustimmung der Darlehensgeber und des großen Interesses im Bankenmarkt konnte der Kreditrahmen der revolving Kreditlinie und der Darlehenstranche A (Term Loan A) zudem um 250 Millionen US\$ auf insgesamt rund 2,565 Mrd US\$ erhöht werden. Der erweiterte Kreditrahmen ist für die Finanzierung allgemeiner Geschäftszwecke und des Nettoumlaufvermögens vorgesehen. Diese Transaktion trug dazu bei, das Fälligkeitsprofil der Finanzverbindlichkeiten zu verlängern.

- Im Februar 2011 hat Fresenius Medical Care über ihre Tochtergesellschaften Fresenius Medical Care US Finance, Inc. eine vorrangige, unbesicherte **Anleihe** über 650 Mio US\$ und über FMC Finance VII S.A. über 300 Mio € ausgegeben. Die US-Dollar-Anleihe wurde zu einem Preis von 99,06 % begeben. Bei einem Coupon von 5,75 % wird die Rendite auf Endfälligkeit bei 5,875 % liegen. Die Euro-Anleihe wurde zum Nennwert ausgegeben und hat einen Coupon von 5,25%. Beide Anleihen haben eine Laufzeit bis 2021. Der Emissionserlös wird zur Rückzahlung von Finanzverbindlichkeiten, für Akquisitionen einschließlich der Übernahme des Dialysedienstleistungsgeschäfts von Euromedic (IDC) und für allgemeine Geschäftszwecke verwendet.

Weitere **Refinanzierungen** in größerem Umfang sind im Fresenius-Konzern erst ab dem Jahr 2012 notwendig, wie die nebenstehende Grafik zeigt.

Die Fresenius SE & Co. KGaA verfügt über ein Commercial-Paper-Programm, in dessen Rahmen kurzfristige Schuldtitel bis zu 250 Mio € ausgegeben werden können. Am 31. Dezember 2010 und 31. Dezember 2009 waren keine Wertpapiere begeben.

#### FÄLLIGKEITSSTRUKTUR DER FINANZIERUNGSTRUMENTE DES FRESENIUS-KONZERNS<sup>1</sup>

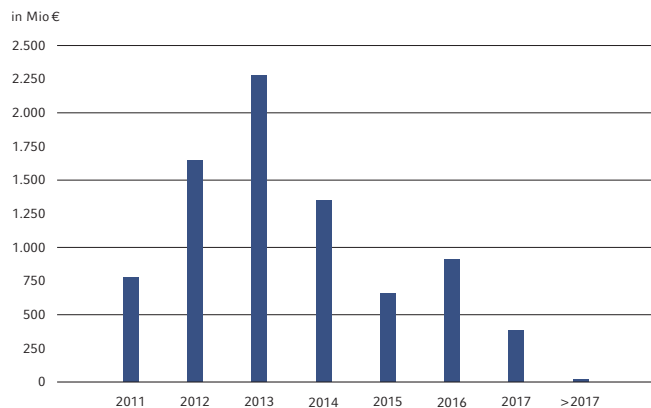

<sup>1</sup> 31. Dezember 2010, wesentliche Instrumente, ohne Forderungsverkaufsprogramm der Fresenius Medical Care

Der Fresenius-Konzern nahm im Rahmen von bilateralen und syndizierten Bankkrediten Mittel in Höhe von rund 4,6 Mrd € in Anspruch. Darüber hinaus bestehen per 31. Dezember 2010 rund 2,0 Mrd € freie Kreditlinien (einschließlich fest zugesagter Kreditlinien in Höhe von 1,4 Mrd €). Die Mittelaufnahme im Rahmen dieser Kreditlinien ist im Allgemeinen zur Finanzierung von Betriebsmitteln vorgesehen und ist in der Regel unbesichert – mit Ausnahme der Kreditvereinbarung aus dem Jahr 2008 der damaligen Fresenius SE und der Fresenius Medical Care-Kreditvereinbarung aus dem Jahr 2006.

Am 31. Dezember 2010 haben sowohl die damalige Fresenius SE als auch die Fresenius Medical Care AG & Co. KGaA einschließlich aller Tochtergesellschaften die Kreditauflagen und Verpflichtungen aus sämtlichen Finanzierungsverträgen erfüllt.

Detaillierte Informationen zur Finanzierung des Fresenius-Konzerns finden Sie auf den Seiten 158 bis 167 im Anhang.

#### FÜNFJAHRESÜBERSICHT FINANZLAGE

| in Mio €                                  | 2010  | 2009  | 2008  | 2007  | 2006  |
|-------------------------------------------|-------|-------|-------|-------|-------|
| Operativer Cashflow                       | 1.911 | 1.553 | 1.074 | 1.296 | 1.052 |
| in % vom Umsatz                           | 12,0  | 11,0  | 8,7   | 11,4  | 9,8   |
| Working Capital <sup>1</sup>              | 3.577 | 3.088 | 2.937 | 2.467 | 2.322 |
| in % vom Umsatz                           | 22,4  | 21,8  | 23,8  | 21,7  | 21,5  |
| Investitionen in Sachanlagen, netto       | 733   | 662   | 736   | 662   | 571   |
| Cashflow vor Akquisitionen und Dividenden | 1.178 | 891   | 338   | 634   | 481   |
| in % vom Umsatz                           | 7,4   | 6,3   | 2,7   | 5,6   | 4,5   |

<sup>1</sup> Forderungen aus Lieferungen und Leistungen und Vorräte abzüglich Verbindlichkeiten aus Lieferungen und Leistungen und erhaltene Anzahlungen

## BEDEUTUNG AUSSERBILANZIELLER FINANZIERUNGSTRUMENTE FÜR DIE FINANZ- UND VERMÖGENSLAGE

Fresenius ist nicht an außerbilanziellen Geschäften beteiligt, die sich gegenwärtig oder zukünftig aller Wahrscheinlichkeit nach in wesentlicher Weise auswirken werden auf die Finanzlage, Aufwendungen oder Erträge, die Ertragslage, Liquidität, Investitionsausgaben, das Vermögen oder die Kapitalausstattung.

## LIQUIDITÄTSANALYSE

Wesentliche Quellen der Liquidität waren im Berichtsjahr **Mittelzuflüsse aus laufender Geschäftstätigkeit** und die Aufnahme von kurz-, mittel- und langfristigen Finanzverbindlichkeiten. Die Mittelzuflüsse aus laufender Geschäftstätigkeit werden beeinflusst durch die Rentabilität des Geschäfts von Fresenius und durch das Nettoumlaufvermögen (Working Capital), insbesondere durch den Forderungsbestand. Mittelzuflüsse aus kurzfristigen Krediten können erzielt werden durch Forderungsverkauf im Rahmen des Forderungsverkaufsprogramms der Fresenius Medical Care, durch die Ausnutzung des Commercial-Paper-Programms sowie durch die Inanspruchnahme von Bankkreditvereinbarungen. Mittel- und langfristige Finanzierungen werden durch die syndizierten Kreditvereinbarungen der Fresenius SE & Co. KGaA und der Fresenius Medical Care und durch Anleihen bereitgestellt sowie durch verschiedene andere Finanzierungsinstrumente. Fresenius ist davon überzeugt, dass die bestehenden Kreditfazilitäten sowie die Mittelzuflüsse aus der laufenden Geschäftstätigkeit und aus sonstigen kurzfristigen Finanzierungsquellen zur Deckung des vorhersehbaren Liquiditätsbedarfs des Konzerns ausreichen werden.

## DIVIDENDE

Vorstand und Aufsichtsrat schlagen der Hauptversammlung vor, die Dividende zu erhöhen: Für das Geschäftsjahr 2010 soll eine Dividende von 0,86 € je Stammaktie an die Aktionäre gezahlt werden. Dies entspricht einer Steigerung von rund 15 %. Die Ausschüttungssumme erhöht sich ebenfalls um 15 % auf 139,7 Mio € (2009: 121,8 Mio €).

## CASHFLOW-DARSTELLUNG IN MIO €

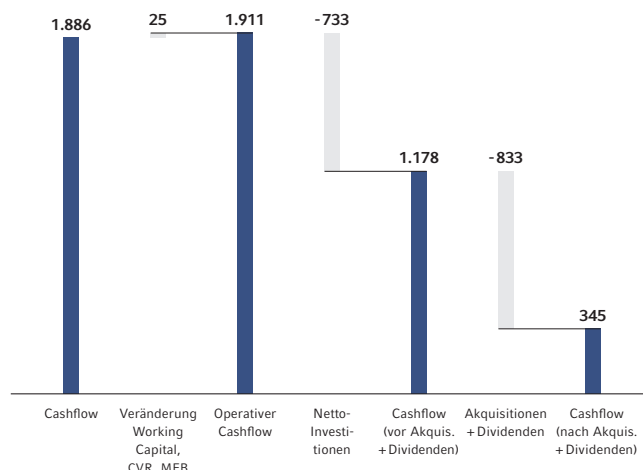

## CASHFLOW-ANALYSE

Die Kapitalflussrechnung des Konzerns zeigt eine sehr positive Entwicklung, wie die Grafik veranschaulicht. Der Cashflow stieg um 19 % auf 1.886 Mio € im Jahr 2010 (2009: 1.579 Mio €). Dies ist vor allem zurückzuführen auf die ausgezeichnete Entwicklung des Konzernergebnisses<sup>1</sup>. Die Veränderung des Working Capitals betrug im Berichtsjahr -13 Mio € (2009: -46 Mio €).

## KAPITALFLUSSRECHNUNG (KURZFASSUNG)

| in Mio €                                                                     | 2010         | 2009         |
|------------------------------------------------------------------------------|--------------|--------------|
| Konzernergebnis <sup>1</sup>                                                 | 1.205        | 991          |
| Abschreibungen                                                               | 639          | 562          |
| Veränderung Pensionsrückstellungen                                           | 42           | 26           |
| <b>Cashflow</b>                                                              | <b>1.886</b> | <b>1.579</b> |
| Veränderung Working Capital                                                  | -13          | -46          |
| Veränderung Marktwert MEB und CVR                                            | 38           | 20           |
| <b>Operativer Cashflow</b>                                                   | <b>1.911</b> | <b>1.553</b> |
| Erwerb von Sachanlagen                                                       | -754         | -677         |
| Erlöse aus dem Verkauf von Sachanlagen                                       | 21           | 15           |
| <b>Cashflow vor Akquisitionen und Dividenden</b>                             | <b>1.178</b> | <b>891</b>   |
| Mittelabfluss für Akquisitionen/Erlöse aus Verkauf                           | -504         | -227         |
| Dividendenzahlungen                                                          | -329         | -275         |
| <b>Cashflow nach Akquisitionen und Dividenden</b>                            | <b>345</b>   | <b>389</b>   |
| Mittelabfluss/-zufluss aus Finanzierungstätigkeit (ohne Dividendenzahlungen) | -23          | -336         |
| Wechselkursbedingte Veränderung der flüssigen Mittel                         | 27           | -3           |
| <b>Veränderung der flüssigen Mittel</b>                                      | <b>349</b>   | <b>50</b>    |

<sup>1</sup> Ergebnis, das auf die Anteilseigner der Fresenius SE & Co. KGaA entfällt, und auf andere Gesellschafter entfallender Gewinn

Die ausführliche Kapitalflussrechnung ist im Konzernabschluss dargestellt.

<sup>1</sup> Ergebnis, das auf die Anteilseigner der Fresenius SE & Co. KGaA entfällt

Der im Jahr 2010 erwirtschaftete Mittelzufluss aus laufender Geschäftstätigkeit (**operativer Cashflow**) stieg um 23 % auf 1.911 Mio € (2009: 1.553 Mio €). Die Cashflow-Marge lag mit 12,0 % über Vorjahresniveau (2009: 11,0 %). Der operative Cashflow überstieg den Finanzierungsbedarf aus Investitionstätigkeit vor Akquisitionen, wobei die Auszahlungen für Investitionen 754 Mio € und die Einzahlungen aus Abgängen von Gegenständen des Anlagevermögens 21 Mio € betrugen (2009: 677 Mio € bzw. 15 Mio €).

Der **Cashflow vor Akquisitionen und Dividenden** stieg um 32 % auf 1.178 Mio € (2009: 891 Mio €). Hieraus konnten wir vollständig die Netto-Akquisitionen in Höhe von 504 Mio € und die Dividenden des Konzerns in Höhe von 329 Mio € finanzieren. Der Dividendenbetrag ermittelt sich wie folgt: Dividende an die Aktionäre der Fresenius SE & Co. KGaA in Höhe von 122 Mio €, Dividende der Fresenius Medical Care an deren Aktionäre in Höhe von 183 Mio € sowie Dividenden an Dritte in Höhe von 89 Mio €. Dagegen steht die Dividende in Höhe von 65 Mio €, die die vormalige Fresenius SE als Aktionärin von Fresenius Medical Care erhalten hat.

Der Mittelabfluss aus Finanzierungstätigkeit (ohne Dividendenzahlungen) betrug 23 Mio € (2009: 336 Mio €). Neben den Akquisitionsausgaben führten die Dividendenzahlungen des Konzerns im Jahr 2010 zu einem Mittelabfluss in Höhe von 329 Mio € (2009: 275 Mio €). Die flüssigen Mittel beliefen sich am 31. Dezember 2010 auf 769 Mio € (31. Dezember 2009: 420 Mio €).

## INVESTITIONEN UND AKQUISITIONEN

Im Jahr 2010 investierte der Fresenius-Konzern 1.402 Mio € (2009: 931 Mio €). Die **Investitionen in Sachanlagen** beliefen sich auf 758 Mio € (2009: 671 Mio €). Sie lagen mit 4,7 % vom Umsatz in der von uns anvisierten Größenordnung (2009: 4,7 % vom Umsatz) und überstiegen deutlich die Abschreibungen in Höhe von 639 Mio €. Damit sichern sie den langfristigen Werterhalt und die Expansion des

## INVESTITIONEN NACH REGIONEN

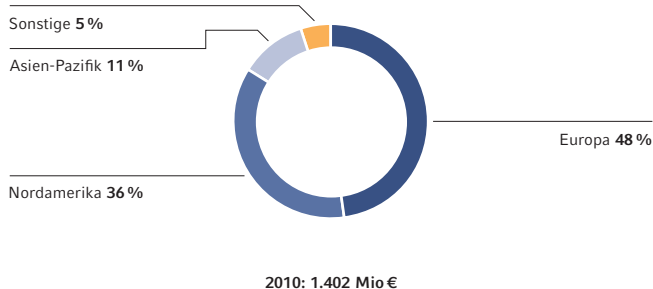

Unternehmens. Die für **Akquisitionen** eingesetzten Mittel betrugen 644 Mio € (2009: 260 Mio €). Von der Gesamtinvestitionssumme entfielen demnach 54 % auf Sachanlagen, 46 % auf Akquisitionen.

## INVESTITIONEN UND AKQUISITIONEN

| in Mio €                                      | 2010         | 2009       | Veränderung |
|-----------------------------------------------|--------------|------------|-------------|
| Investitionen in Sachanlagen                  | 758          | 671        | 13 %        |
| davon Erhaltungsinvestitionen                 | 44 %         | 50 %       |             |
| davon Erweiterungsinvestitionen               | 56 %         | 50 %       |             |
| Investitionen in Sachanlagen in % vom Umsatz  | 4,7 %        | 4,7 %      |             |
| Akquisitionen                                 | 644          | 260        | 148 %       |
| <b>Investitionen und Akquisitionen gesamt</b> | <b>1.402</b> | <b>931</b> | <b>51 %</b> |

Die Tabelle zeigt die Verteilung der Investitionen nach Unternehmensbereichen, die Grafik macht die regionale Aufteilung der Investitionsmittel deutlich.

Die Mittelabflüsse für Akquisitionen betrafen hauptsächlich den Erwerb von Dialysekliniken bei Fresenius Medical Care, und zwar vor allem in Asien und Europa. Fresenius Kabi,

## INVESTITIONEN NACH UNTERNEHMENSBEREICHEN

| in Mio €               | 2010         | 2009       | davon Sachanlagen | davon Akquisitionen | Veränderung | Anteil am Gesamtvolumen |
|------------------------|--------------|------------|-------------------|---------------------|-------------|-------------------------|
| Fresenius Medical Care | 991          | 549        | 395               | 596                 | 81 %        | 71 %                    |
| Fresenius Kabi         | 205          | 157        | 174               | 31                  | 31 %        | 14 %                    |
| Fresenius Helios       | 179          | 203        | 166               | 13                  | -12 %       | 13 %                    |
| Fresenius Vamed        | 14           | 7          | 9                 | 5                   | 100 %       | 1 %                     |
| Konzern/Sonstiges      | 13           | 15         | 14                | -1                  | -13 %       | 1 %                     |
| <b>Gesamt</b>          | <b>1.402</b> | <b>931</b> | <b>758</b>        | <b>644</b>          | <b>51 %</b> | <b>100 %</b>            |

Fresenius Helios und Fresenius Vamed haben keine wesentlichen Akquisitionen getätigt. Größtes Einzelprojekt bei Fresenius Kabi war der Erwerb eines Compounding-Zentrums in Deutschland, bei Fresenius Helios der Erwerb eines Akutkrankenhauses.

Wir haben folgende wesentliche Sachanlageinvestitionen durchgeführt:

- Einrichtung von 90 neuen Dialysekliniken, davon 53 in den USA, sowie Erweiterung und Modernisierung bestehender Kliniken bei Fresenius Medical Care.
- Ausbau und Optimierung von Produktionsanlagen bei Fresenius Medical Care, darunter vor allem die Erweiterung der Herstellungskapazitäten für Dialyseprodukte in Deutschland, und bei Fresenius Kabi, vor allem in Deutschland und in Indien.
- Modernisierung von Krankenhäusern bei Fresenius Helios; bedeutendstes Einzelprojekt war die HELIOS-Klinik in Krefeld. Ferner hat Fresenius Helios die Grundstücke und Gebäude der Klinik in Siegburg erworben.

Für die Fortführung bereits laufender großer **Investitionsvorhaben zum Bilanzstichtag** werden im Jahr 2011 Sachanlageinvestitionen in Höhe von 184 Mio € erfolgen. Hierbei handelt es sich hauptsächlich um Investitionsverpflichtungen für Krankenhäuser bei Fresenius Helios sowie um Investitionsmittel für den Ausbau und die Optimierung von Produktionsanlagen bei Fresenius Medical Care und Fresenius Kabi. Die Finanzierung dieser Projekte soll aus dem operativen Cashflow erfolgen.

#### FÜNFJAHRESÜBERSICHT INVESTITIONEN, OPERATIVER CASHFLOW UND ABSCHREIBUNGEN IN MIO €

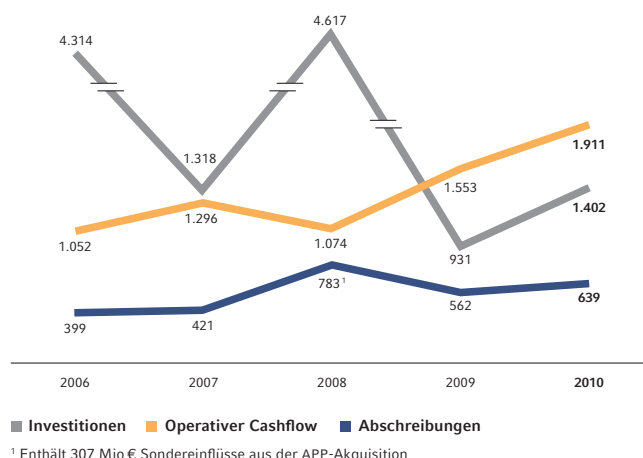

## VERMÖGENSLAGE

### VERMÖGENS- UND KAPITALSTRUKTUR

Die **Bilanzsumme** des Konzerns erhöhte sich um 2.695 Mio € (13 %) auf 23.577 Mio € (31. Dezember 2009: 20.882 Mio €). Währungsbereinigt hätte sich ein Anstieg von 7 % ergeben. Die Zunahme der Bilanzsumme ist hauptsächlich der Ausweitung des bestehenden Geschäfts zuzurechnen. Die Inflationsentwicklung hatte während des Berichtszeitraums keine signifikanten Auswirkungen auf die Vermögenslage von Fresenius.

Auf der Aktivseite betrugen die **langfristigen Vermögenswerte** 17.142 Mio € (2009: 15.519 Mio €). Hier wirkten sich vornehmlich Zugänge im Sachanlagevermögen und bei immateriellen Vermögenswerten aus.

#### FÜNFJAHRESÜBERSICHT VERMÖGENSLAGE

| in Mio €                                                     | 2010   | 2009   | 2008   | 2007   | 2006   |
|--------------------------------------------------------------|--------|--------|--------|--------|--------|
| Bilanzsumme                                                  | 23.577 | 20.882 | 20.544 | 15.324 | 15.024 |
| Eigenkapital <sup>1</sup>                                    | 8.844  | 7.491  | 6.943  | 6.059  | 5.728  |
| Eigenkapitalquote <sup>1</sup>                               | 38     | 36     | 34     | 40     | 38     |
| Eigenkapital <sup>1</sup> /Langfristige Vermögenswerte, in % | 52     | 48     | 45     | 55     | 52     |
| Finanzverbindlichkeiten                                      | 8.784  | 8.299  | 8.787  | 5.699  | 5.872  |
| Finanzverbindlichkeiten in % der Bilanzsumme                 | 37     | 40     | 43     | 37     | 39     |
| Gearing in %                                                 | 91     | 105    | 121    | 88     | 98     |

<sup>1</sup> Einschließlich Anteile anderer Gesellschafter



Die **kurzfristigen Vermögenswerte** stiegen um 20 % auf 6.435 Mio € (2009: 5.363 Mio €). Innerhalb dieser Position nahmen die Forderungen aus Lieferungen und Leistungen um 17 % auf 2.935 Mio € zu (2009: 2.509 Mio €). Die durchschnittliche Forderungslaufzeit liegt mit 67 Tagen leicht über dem Vorjahresniveau von 65 Tagen. Durch ein nachhaltiges Forderungsmanagement konnten wir die Forderungslaufzeiten relativ stabil halten, obwohl die finanzwirtschaftlichen Rahmenbedingungen weiterhin schwierig waren. Die Vorräte sind um 14 % auf 1.411 Mio € gestiegen (2009: 1.235 Mio €). Die Vorratsreichweite betrug 48 Tage, wie auch im Jahr 2009. Der Anteil der Vorräte an der Bilanzsumme hat sich mit 6,0 % gegenüber dem Vorjahresstichtag geringfügig erhöht (31. Dezember 2009: 5,9 %).

Auf der Passivseite der Bilanz ist das **Eigenkapital** einschließlich der **Anteile anderer Gesellschafter am Eigenkapital** um 18 % oder 1.353 Mio €, auf 8.844 Mio € (2009: 7.491 Mio €) gestiegen. Das Konzernergebnis, das auf die Anteilseigner der Fresenius SE & Co. KGaA entfällt, erhöhte das Eigenkapital um 622 Mio €. Die Eigenkapitalquote einschließlich der Anteile anderer Gesellschafter stieg auf 37,5 % am 31. Dezember 2010 (31. Dezember 2009: 35,9 %).

Die Passivseite der Bilanz zeigt eine solide Finanzierungsstruktur: Das Eigenkapital des Konzerns einschließlich der Anteile anderer Gesellschafter deckt die langfristigen Vermögenswerte zu 52 % (2009: 48 %). Eigenkapital, Anteile anderer Gesellschafter und langfristige Verbindlichkeiten decken die gesamten langfristigen Vermögenswerte und 36 % der Vorräte ab.

Die **langfristigen Verbindlichkeiten** sanken zum Bilanzstichtag um 9 % auf 8.813 Mio € (2009: 9.702 Mio €). Die **kurzfristigen Verbindlichkeiten** stiegen um 62 % auf 5.711 Mio € (2009: 3.528 Mio €). Dies ist darauf zurückzuführen, dass die Pflichtumtauschleihe in Höhe von 554 Mio € und genussscheinähnliche Wertpapiere in Höhe von 468 Mio € im Laufe des Jahres 2011 fällig werden.

Im Konzern bestehen keine Rückstellungen, die von wesentlicher Bedeutung sind. Die größte Einzelrückstellung betrifft den Vergleich zur endgültigen Beilegung der Gläubigeranfechtungsforderungen sowie aller weiteren sich aus dem Insolvenzverfahren von W.R. Grace ergebenden Rechtsangelegenheiten im Zusammenhang mit der NMC-Transaktion

im Jahr 1996. Diese beträgt 115 Mio US\$ (86 Mio €). Weitere Informationen hierzu finden Sie auch auf Seite 177 im Anhang.

Die **Finanzverbindlichkeiten** des Konzerns stiegen auf 8.784 Mio € (2009: 8.299 Mio €). Währungsbereinigt betrug der Anstieg 1 %. Ihr Anteil an der Bilanzsumme reduzierte sich auf 37,3 % (2009: 39,7 %). Von den Finanzverbindlichkeiten sind rund 57 % in US-Dollar aufgenommen. Das Volumen mit einer Restlaufzeit bis zu einem Jahr betrug 1.496 Mio € (2009: 550 Mio €); bei den Fälligkeiten von ein bis fünf und über fünf Jahren handelte es sich um einen Betrag von 7.288 Mio € (2009: 7.749 Mio €).

Das Verhältnis der Netto-Finanzverbindlichkeiten zum Eigenkapital einschließlich der Anteile anderer Gesellschafter (Gearing) hat sich verbessert und beträgt 90,6 % (2009: 105,2 %). Die Eigenkapitalrentabilität nach Steuern (Eigenkapital der Anteilseigner der Fresenius SE & Co. KGaA) ist auf 13,3 % gestiegen (2009: 12,1 %), die Gesamtkapitalrentabilität nach Steuern und vor Anteilen anderer Gesellschafter auf 5,3 % (2009: 4,8 %). Die Berechnung dieser Rentabilitätskennziffern erfolgte vor Sondereinflüssen aus den Marktwertveränderungen der Pflichtumtauschleihe (MEB) und des Besserungsscheins (CVR).

Weitere Kennzahlen zur Vermögens- und Kapitalstruktur zeigen sich wie folgt:

| in Mio €                             | 31.12.2010 | 31.12.2009 |
|--------------------------------------|------------|------------|
| Finanzverbindlichkeiten/EBITDA       | 2,9        | 3,2        |
| Netto-Finanzverbindlichkeiten/EBITDA | 2,6        | 3,0        |
| EBITDA/Zinsergebnis                  | 5,4        | 4,5        |

## DEISEN- UND ZINSMANAGEMENT

Zum 31. Dezember 2010 betrug das Nominalvolumen aller Devisenkontrakte 3.323 Mio € mit einem Marktwert von -68 Mio €. Das Nominalvolumen der Zinssicherungskontrakte belief sich auf 3.906 Mio € mit einem Marktwert von -159 Mio €. Weitere Informationen hierzu finden Sie im Risikobericht auf den Seiten 103 und 104 sowie im Anhang auf den Seiten 181 bis 187.

## NICHTFINANZIELLE LEISTUNGS- INDIKATOREN UND WEITERE ERFOLGSFAKTOREN

### MITARBEITERINNEN UND MITARBEITER

Unsere Mitarbeiterinnen und Mitarbeiter sind die Basis unseres Unternehmenserfolgs. Ihre Leistungen, ihre Fähigkeiten und ihr engagierter Einsatz tragen dazu bei, dass wir führende Positionen in unseren Märkten einnehmen. Wir fördern sie durch zahlreiche Maßnahmen und unterstützen aktiv die internationale und interdisziplinäre Zusammenarbeit.

Ende des Jahres 2010 waren im Fresenius-Konzern weltweit 137.552 Mitarbeiterinnen und Mitarbeiter tätig. Damit hat sich deren Zahl um 7.042 Personen bzw. 5 % erhöht (31. Dezember 2009: 130.510). Akquisitionen trugen 2 % zu diesem Anstieg bei.

Die **Zahl der Mitarbeiterinnen und Mitarbeiter** entwickelte sich in den Unternehmensbereichen wie folgt:

| Anzahl Mitarbeiter     | 31.12.2010     | 31.12.2009     | Veränderung |
|------------------------|----------------|----------------|-------------|
| Fresenius Medical Care | 77.442         | 71.617         | 8 %         |
| Fresenius Kabi         | 22.851         | 21.872         | 4 %         |
| Fresenius Helios       | 33.321         | 33.364         | 0 %         |
| Fresenius Vamed        | 3.110          | 2.849          | 9 %         |
| Konzern/Sonstiges      | 828            | 808            | 2 %         |
| <b>Gesamt</b>          | <b>137.552</b> | <b>130.510</b> | <b>5 %</b>  |

Zum Jahresende arbeiteten 40.823 Mitarbeiterinnen und Mitarbeiter (30 %) in Deutschland, eine Zunahme von 1 % (2009: 40.416). 96.729 Mitarbeiterinnen und Mitarbeiter (70 %) sind bei unseren ausländischen Gesellschaften beschäftigt, in welchen Regionen, zeigt das Diagramm: Die Prozentsätze korrespondieren dabei weitestgehend mit den Umsatzanteilen der jeweiligen Kontinente. In Europa hat die Zahl der Beschäftigten um 4 % zugenommen. Hier wirkten sich vor allem die Akquisitionen bei Fresenius Medical Care aus. Auch in der Region Asien-Pazifik ist die Zahl der Beschäftigten deutlich gestiegen, und zwar um 18 %, im Wesentlichen durch die Übernahme des Dialysedienstleisters Asia Renal Care.

### MITARBEITERINNEN UND MITARBEITER NACH REGIONEN

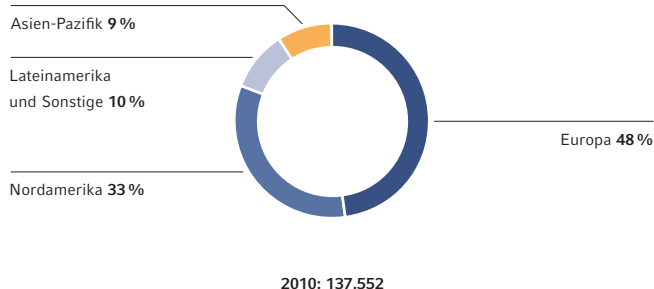

Der **Personalaufwand** im Fresenius-Konzern belief sich im Geschäftsjahr 2010 auf 5.354 Mio € (2009: 4.880 Mio €). Dies entspricht 33,5 % vom Umsatz (2009: 34,5 %). Der Personalaufwand pro Mitarbeiter betrug 39,9 Tsd € (2009: 38,2 Tsd €). Der Anstieg ist vornehmlich auf Tarifsteigerungen und die insgesamt höhere Mitarbeiterzahl zurückzuführen. Wesentliche strukturelle Änderungen der tariflichen und betrieblichen Vereinbarungen erfolgten im Berichtszeitraum nicht.

Fresenius achtet und fördert **Vielfalt** (Diversity). Wir sind überzeugt, dass erst durch verschiedene Sichtweisen, Meinungen, kulturelle Prägungen und Erfahrungswerte die Potenziale ausgeschöpft werden können, die uns erfolgreich machen. Einer der wichtigsten Faktoren dabei ist die internationale Prägung vor allem unserer Führungskräfte. Vielfalt heißt für uns auch, dass wir etwaige Hürden für die Entwicklung und Förderung weiblicher Mitarbeiter identifizieren und weiter abbauen wollen. Die Berücksichtigung von Frauen wird auch bei zukünftigen Besetzungsentscheidungen für Führungspositionen angestrebt und durch konkrete Maßnahmen wie flexible Arbeitszeiten und Teilzeitprogramme gefördert. Dennoch werden wir dazu keine festen Quoten vorsehen, da diese die Auswahl geeigneter Kandidaten pauschal einschränken würde. Wir sind überzeugt, dass eine offene Unternehmenskultur nur dann Bestand hat, wenn alle Mitarbeiterinnen und Mitarbeiter unter gleichen Voraussetzungen eingestellt und gefördert werden. Grundsätzlich richtet sich die Auswahl am Unternehmensinteresse aus, sodass es bei der Besetzung von Positionen vorrangig auf die Qualifikation des Einzelnen ankommt.

Die obere Führungsebene, bezogen auf die weltweiten Teilnehmer an den Aktienoptionsprogrammen, ist im Fresenius-Konzern zu 27 % von Frauen besetzt.

## PERSONALMANAGEMENT

Eine Grundvoraussetzung für nachhaltiges Wachstum sind hoch qualifizierte und motivierte Mitarbeiterinnen und Mitarbeiter. Die fortschreitende Globalisierung unserer Märkte hat die Rahmenbedingungen des Personalmanagements bei Fresenius verändert: Dazu zählen Faktoren wie die demografische Entwicklung, der Wandel zur Dienstleistungsgesellschaft oder die Vereinbarkeit von Familie und Beruf. Der Einfluss dieser Faktoren wird sich in den kommenden Jahren noch verstärken und das Personalmanagement vor neue Herausforderungen stellen.

Wir passen unsere Personalinstrumente ständig den jeweiligen Anforderungen an. Beispielsweise starteten wir neben dem etablierten internen Mentorinnen-Netzwerk bei HELIOS eine Kooperation mit einem Mentorinnen-Netzwerk für Frauen in Naturwissenschaft und Technik der hessischen Hochschulen. Dieses fördert gezielt Studentinnen und Doktorandinnen der naturwissenschaftlich-technischen Fächer und unterstützt so deren persönliche und fachliche Entwicklung. Einen Schlüsselfaktor zur Mitarbeitergewinnung und -bindung sehen wir in der Möglichkeit, die berufliche Karriere mit der persönlichen Familienplanung zu verbinden. So wurden beispielsweise die Kinderbetreuungsangebote bei HELIOS ausgeweitet.

Im Berichtsjahr haben wir Langzeitkonten ergänzend zu unseren Arbeitszeitmodellen in einigen Unternehmensbereichen in Deutschland eingeführt. Unsere Mitarbeiterinnen und Mitarbeiter können neben tariflichen Leistungen auch eigene Beiträge wie Urlaub oder Teile des Entgelts einbringen. Das Langzeitkonto können unsere Mitarbeiterinnen und Mitarbeiter zu einem späteren Zeitpunkt nutzen, etwa um sich durch persönliche Weiterbildung weiterzuqualifizieren, ein Familienmitglied zu pflegen oder auch um eine vorzeitige Überleitung in den Ruhestand zu ermöglichen. Mit diesem zeitgemäßen, modernen Personalinstrument wollen wir unsere Mitarbeiterinnen und Mitarbeiter langfristig an uns binden.

## TALENTMANAGEMENT

Ein modernes Talentmanagement wird vor dem Hintergrund der globalen Marktveränderungen immer wichtiger. Dabei gilt es die Komponenten

- ▶ Personalentwicklung,
- ▶ Arbeitgeberattraktivität,
- ▶ Leistungsbeurteilung und
- ▶ Nachfolgeplanung

so auszugestalten, dass wir künftige Herausforderungen meistern können. Unser Fokus liegt auf der professionellen Entwicklung der Mitarbeiterinnen und Mitarbeiter in einem internationalen, dynamischen Umfeld. Da unsere Unternehmensbereiche – je nach der Kunden- und Marktstruktur – unterschiedliche Bedürfnisse an Personalentwicklungskonzepte und -maßnahmen haben, werden diese bereichsspezifisch abgestimmt, entwickelt und durchgeführt. Beispielsweise verstärkten wir im Jahr 2010 unsere Aktivitäten im Bereich Förderung und Entwicklung von Talenten durch den Aufbau eines zentralen Talentmanagements bei HELIOS für den ärztlichen Dienst und die Pflege. Alle Maßnahmen werden an den übergeordneten Unternehmenszielen einerseits und den individuellen Entwicklungsvorstellungen des Mitarbeiters andererseits ausgerichtet.

Wir unterstützen die **fachliche Entwicklung und Persönlichkeitsbildung** sowohl durch persönliche Beratungsgespräche als auch durch ein breit gefächertes internes Trainingsangebot. Die Stärken des Einzelnen werden hier bewusst gefördert und genutzt. Durch den gezielten Transfer von Wissen im Zuge der Nachfolgeplanung stellen wir sicher, dass wertvolles Know-how nicht verloren geht.

## PERSONALENTWICKLUNG

Das **Fresenius Advanced Management Program** ist ein fester Bestandteil unserer Top-Führungskräfte-Entwicklung. Für das Jahr 2011 planen wir eine grundlegende Neuausrichtung unserer Top-Management-Ausbildung in Kooperation mit der Harvard Business School, einer der führenden Business Schools weltweit. Einen zentralen Baustein bildet die Führungskräfteausbildung. Hier entwickelten wir das Angebot konsequent weiter und implementierten eine zielgruppenspezifische Unterstützung für die verschiedenen Hierarchieebenen. Auch das Mitarbeitergespräch werden wir als Grundlage unseres Performance-Managementprozesses zur Leistungsverfolgung modernisieren.

Im Zuge unserer **Nachwuchskräfteförderung** bieten unsere Trainee-Programme – neben dem klassischen Direkt-einstieg – ambitionierten Hochschulabsolventen die Möglichkeit eines erfolgreichen Berufseinstiegs im Fresenius-Konzern. Die Programme kombinieren anspruchsvolle Arbeitsaufgaben „on the job“ mit internen und externen Trainingsmodulen.

Die HELIOS-Trainee-Programme dienen beispielsweise dazu, Hochschulabsolventen zu künftigen Führungskräften der HELIOS-Kliniken-Gruppe zu entwickeln, um so dem stetigen Wachstum des Konzerns auch beim Führungsnachwuchs

Rechnung zu tragen. Während ihrer zweijährigen Ausbildung durchlaufen die Trainees mehrere Klinikstandorte. In direkter Zusammenarbeit mit dem jeweiligen Verwaltungs- bzw. Abteilungsleiter lernen sie eine Klinik oder einen Fachbereich sowohl strategisch als auch operativ zu leiten.

Bei unserem global aufgestellten Unternehmen spielt die enge Zusammenarbeit zwischen Mitarbeiterinnen und Mitarbeitern unterschiedlicher Nationalitäten und Kulturen eine große Rolle. Daher fördern wir die weltweite Mobilität unserer Mitarbeiter und bieten ihnen die Chance, im Ausland zu arbeiten. Um Bewusstsein und Sensibilität für kulturelle Unterschiede zu stärken, organisieren wir interkulturelle Trainings für die Arbeit im Ausland. Gleiches gilt für Mitarbeiter, die aus unseren internationalen Standorten nach Deutschland kommen. Das Programm „Living + Working in Germany“ beinhaltet beispielsweise Sprachkurse und bietet Hilfe bei der Abwicklung von Formalitäten.

## PERSONALMARKETING

Für Fresenius ist es sehr wichtig, bei hoch qualifizierten Fach- und Führungskräften als attraktiver Arbeitgeber positioniert zu sein, um das Wachstum des Konzerns auch von der Personalseite zu unterstützen. Daher bauten wir im Jahr 2010 unsere Aktivitäten im Personalmarketing weiter aus. So haben wir unsere Hochschulaktivitäten ausgeweitet und ein vollständig neues Fresenius-Karriereportal entwickelt. Hier werden von nun an Vakanzen für den gesamten Konzern an einer zentralen Stelle dargestellt. Auch stellen wir die einzelnen Unternehmensbereiche wesentlich ausführlicher und zielgruppengerecht dar. Interaktive Informationsangebote ergänzen den Auftritt. Gleichzeitig werden die spezifischen Ausrichtungen, Möglichkeiten und Anforderungen für Bewerber deutlicher hervorgehoben.

Mitarbeiterinnen und Mitarbeiter aus den verschiedenen Unternehmensbereichen berichten im Karriereportal über ihre Entwicklung bei Fresenius, ihre tägliche Arbeit und die Gründe, warum sie sich für Fresenius entschieden haben. In Videos und in Textform machen sie Fresenius als Arbeitgeber erfahrbarer und veranschaulichen so die Unternehmenskultur innerhalb der Fresenius-Gruppe.

Das neue Karriereportal des Fresenius-Konzerns finden Sie auf unserer Internetseite [www.fresenius.de](http://www.fresenius.de) unter „Karriere“ oder direkt unter <http://karriere.fresenius.de>.

## IDEENMANAGEMENT

Ziel unseres **team@work-Awards** ist es, den Teamgeist zu stärken und die Zusammenarbeit zu fördern. Außerdem sollen Arbeitsprozesse optimiert sowie Einsparpotenziale erarbeitet und genutzt werden. Auch die vierte Runde unseres Awards im vergangenen Jahr war ein voller Erfolg. Unter dem Motto „Zusammen arbeiten, zusammen gewinnen“ haben 150 Mitarbeiterinnen und Mitarbeiter in 16 Teams aus allen Unternehmensbereichen ihre Projekte eingereicht. Diese spiegeln die vielfältigen Aktivitäten unseres Konzerns wider: von der Zusammenarbeit bei der Behandlung und Betreuung von Patienten über die internationale Kooperation bei der Integration neuer Geschäftsbereiche bis hin zur Nutzung von Synergien im Produktvertrieb. Diesen Teamgeist möchten wir mit einer fünften Runde unseres Awards weiter stärken und fördern. Jede Form der bereichsübergreifenden Zusammenarbeit, die zu mehr Umsatz, geringeren Kosten oder anderen messbaren Verbesserungen führt, hat dabei Aussicht auf Prämierung.

## AUSBILDUNGSMANAGEMENT

Ein wichtiger Baustein, um die Zukunft von Fresenius langfristig zu sichern, ist die Weitergabe von Wissen an Nachwuchskräfte und damit die professionelle Ausbildung junger Menschen. Auch hier sind wir sehr gut aufgestellt: Zum Ende des Jahres 2010 beschäftigten wir in Deutschland rund 1.700 **Auszubildende** in 33 verschiedenen Ausbildungsberufen sowie über 30 Studenten in 9 Studiengängen an dualen Hochschulen.

Die für das Ausbildungsjahr 2010 angebotene Zahl an Ausbildungsplätzen wurde an allen Ausbildungsstandorten im Vergleich zum Vorjahr noch einmal um mehr als 5 % erhöht. Auch das Angebot der Ausbildungsberufe und der dualen Studiengänge wurde erweitert. Die Ausbildung zum Verfahrensmechaniker für Kunststoff- und Kautschuktechnik sowie die dualen Studiengänge „International Business Information Technology“ und „Healthcare Industry“ ermöglichen beispielsweise eine bedarfsgerechte und zeitgemäße Ausbildung, verbunden mit sehr guten Übernahmechancen für die Auszubildenden und Studierenden.

Schon zu Beginn der Ausbildung legen wir großen Wert auf den Ausbau persönlicher Kompetenzen. Schwerpunkte sind die Verbesserung der Kommunikations- und Teamfähigkeit sowie das Management von Projekten.

Im September 2010 fand unter dem Motto „Ausbildung interaktiv“ zum vierten Mal ein Tag der offenen Tür zur Berufsausbildung statt. Auch an Schulen betreiben wir weiterhin

intensives Marketing, um Jugendliche für eine Ausbildung bei Fresenius zu begeistern. Schüler und Lehrer werden gleichermaßen von uns angesprochen: So bieten wir für Schüler Betriebserkundungen und Bewerbungstrainings und für Lehrer Fortbildungen im Rahmen des Arbeitskreises „Schule Wirtschaft“ an.

Um das unternehmerische Denken und die sozialen, kommunikativen und betriebswirtschaftlichen Kompetenzen unserer Auszubildenden zu fördern, wurde in diesem Jahr zum vierten Mal ein standortübergreifendes **Unternehmensplan-spiel** mit großer Resonanz durchgeführt. Insgesamt spielten elf Teams um den Sieg. Die Auszubildenden aller Ausbildungsberufe mussten dabei ein Jahr lang ein fiktives Unternehmen führen. Es galt u. a. Entscheidungen über Investitionen, Aufbau von Lagerkapazitäten, Personaleinstellungen und Marketingmaßnahmen zu treffen.

Fresenius unterstützt Projekte, die Haupt- und Realschüler in einen Ausbildungsplatz bringen. Vom Jahr 2011 an bieten wir in Bad Homburg Praktikumsplätze im Zuge der bundesweiten „Joblinge“-Initiative an. Weiterhin engagieren wir uns im generationsübergreifenden Projekt „JUSTament“ des Vereins für Internationale Jugendarbeit (vij-Frankfurt). Ehrenamtliche SeniorPartnerinnen und SeniorPartner geben ihr Know-how an Haupt- und Realschüler weiter und verbessern damit deren Chancen auf dem Arbeitsmarkt. Fresenius unterstützt das Projekt mit aktuellen Informationen rund um das Auswahlverfahren an unseren Ausbildungsstandorten.

Unsere Maßnahmen im Ausbildungsmanagement tragen Früchte und zeigen, nicht zuletzt durch die steigende Zahl von Bewerbungen mit hoher Qualität, dass wir für Schulabgänger wie für Praktikanten und Studierende ein attraktiver Arbeitgeber sind.

## ERFOLGSBETEILIGUNG UND AKTIONSOPTIONSPLAN

Einer unserer wesentlichen Erfolgsfaktoren ist die große Identifikation unserer Mitarbeiterinnen und Mitarbeiter mit Fresenius. Neben unseren vielfältigen Vergütungsmodellen, die sich je nach landestypischen Regelungen oder Funktionen unterscheiden, wollen wir mit zusätzlichen Leistungen

einen nachhaltigen, wertorientierten Anreiz bieten und unsere Mitarbeiterinnen und Mitarbeiter langfristig für Fresenius begeistern.

Mit unserer aktienbasierten **Erfolgsbeteiligung** und dem Aktienoptionsprogramm partizipieren unsere Mitarbeiterinnen und Mitarbeiter unmittelbar am dynamischen Wachstum von Fresenius. Die Mitarbeiterinnen und Mitarbeiter in Deutschland können den Wert ihrer Erfolgsbeteiligung entweder voll oder zu zwei Dritteln in Aktien investieren. Die Höhe der Erfolgsbeteiligung bemisst sich am jährlichen operativen Ergebnis (EBIT) des Fresenius-Konzerns und beträgt 1.749 € brutto für das Berichtsjahr 2009 (Vollzeitbeschäftigte). Den Anstieg der Erfolgsbeteiligung der letzten Jahre und damit das Wachstum des Fresenius-Konzerns zeigt die Tabelle.

Mit unserem **Aktienoptionsplan** verfügen wir über ein globales Vergütungsinstrument, das unternehmerische Mitverantwortung und zukünftige Chancen und Risiken miteinander vereint. Nach dem Rechtsformwechsel und gemäß der Satzung der Fresenius SE & Co. KGaA ermöglicht der Aktienoptionsplan 2008 die Ausgabe von bis zu 6.200.000 Bezugsrechten auf Stammaktien der Fresenius SE & Co. KGaA an Vorstände und ausgewählte Führungskräfte bis zum Jahr 2012. Die Aktienoptionen unterliegen einer Haltefrist von drei Jahren. Wird in diesem Zeitraum der Jahresüberschuss des Fresenius-Konzerns um mindestens 8 % pro Jahr gesteigert, können die Optionen ausgeübt werden, ansonsten verfallen sie ersatzlos anteilig. Im Berichtsjahr gab Fresenius im Rahmen dieses Plans 1.109.738 Aktienoptionen aus. Weitere Informationen dazu finden Sie auf den Seiten 191 bis 198 dieses Geschäftsberichts.

## FORSCHUNG UND ENTWICKLUNG

Fresenius richtet die Forschungs- und Entwicklungsaktivitäten auf die Kernkompetenzen der folgenden Bereiche aus:

- ▶ Dialyse
- ▶ Infusions- und Ernährungstherapien
- ▶ generische I.V.-Arzneimittel
- ▶ Medizintechnik
- ▶ Antikörpertherapien

## ERFOLGSBETEILIGUNG

|                                      | 2009  | 2008  | 2007  | 2006  | 2005  |
|--------------------------------------|-------|-------|-------|-------|-------|
| Erfolgsbeteiligung <sup>1</sup> in € | 1.749 | 1.586 | 1.526 | 1.444 | 1.000 |
| Bezugsberechtigte                    | 1.710 | 1.630 | 1.690 | 1.830 | 1.780 |

<sup>1</sup> Die Erfolgsbeteiligung gilt für das angegebene Jahr und wird jeweils im nachfolgenden Geschäftsjahr ausgezahlt.

Zusätzlich zur Produktentwicklung konzentrieren wir uns auf optimierte oder völlig neuartige Therapien, Behandlungsverfahren und Dienstleistungen. Im Jahr 2010 haben wir wiederum zahlreiche Projekte erfolgreich vorangetrieben und eine Reihe von Produkten zur Marktreife gebracht.

Die **Aufwendungen** für Forschung und Entwicklung betrugen im Berichtsjahr 244 Mio € (2009: 240 Mio €). Damit haben wir 4 % unseres Produktumsatzes in Forschung und Entwicklung investiert (2009: 5 %). Über die Aufwendungen nach Bereichen informiert Sie die Grafik. Gesteigert wurden die Forschungs- und Entwicklungsaufwendungen im Berichtsjahr bei Fresenius Medical Care um 9 % und bei Fresenius Kabi um 11 %. Im Segment Konzern/Sonstiges wurden 28 Mio € bei der Fresenius Biotech aufgewendet, vorwiegend für die klinische Entwicklung des trifunktionalen Antikörpers. Dieser Wert liegt unter dem Niveau des Vorjahres von 44 Mio €. Detailzahlen finden Sie in der Segmentübersicht auf den Seiten 126 bis 127.

#### FORSCHUNGS- UND ENTWICKLUNGSAUFWAND NACH BEREICHEN

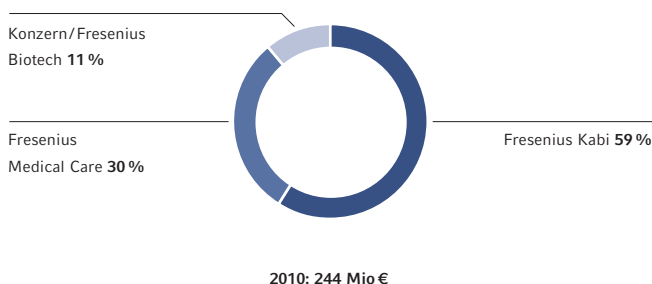

Am 31. Dezember 2010 arbeiteten im Konzern 1.449 Beschäftigte in den Forschungs- und Entwicklungsbereichen (2009: 1.421). 518 Mitarbeiterinnen und Mitarbeiter waren für Fresenius Medical Care tätig (2009: 494), 844 für Fresenius Kabi (2009: 829) und 87 für Fresenius Biotech (2009: 98).

Die Tabelle zeigt die Forschungs- und Entwicklungsaufwendungen und die Zahl der Beschäftigten in den Forschungs- und Entwicklungsbereichen im Mehrjahresvergleich.

|                             | 2010  | 2009  | 2008             | 2007 | 2006 |
|-----------------------------|-------|-------|------------------|------|------|
| F & E-Aufwendungen in Mio € | 244   | 240   | 207 <sup>1</sup> | 184  | 167  |
| in % vom Produktumsatz      | 4,2   | 4,7   | 4,7 <sup>1</sup> | 4,9  | 4,7  |
| F & E-Mitarbeiter           | 1.449 | 1.421 | 1.336            | 999  | 911  |

<sup>1</sup> Ohne Abschreibungen auf erworbene Entwicklungsaktivitäten aus der APP-Akquisition in Höhe von 272 Mio €

Unsere Hauptentwicklungsstandorte befinden sich in Europa, in den USA und in Indien. Produktionsnahe Entwicklungen finden auch in China statt. Die Forschungs- und Entwicklungsprojekte führen wir vornehmlich mit eigenen Mitarbeiterinnen und Mitarbeitern durch. Forschungsleistungen Dritter werden nur in geringem Umfang in Anspruch genommen.

Im Folgenden informieren wir über Forschungs- und Entwicklungsaktivitäten in unseren Unternehmensbereichen:

#### FRESENIUS MEDICAL CARE

Die komplizierten Wechselwirkungen und Begleiterscheinungen, die das Versagen der Niere im Körper zur Folge hat, werden immer besser erforscht. Parallel zu den medizinischen Erkenntnissen wachsen auch die technologischen Möglichkeiten, Patienten zu therapieren. Für die Forschung und Entwicklung von Fresenius Medical Care bedeutet das: Wir wollen neue Erkenntnisse zügig in marktreife Weiter- und Neuentwicklungen umsetzen und so entscheidend dazu beitragen, Patienten immer schonender, sicherer und individueller behandeln zu können.

Mit zunehmendem Alter wächst unter Dialysepatienten auch die Häufigkeit von **Begleiterkrankungen**, z. B. von schweren Herz- und Gefäßeiden. Diese stellen sich typischerweise ein, wenn der Körper als Folge des Nierenversagens dauerhaft durch Überwässerung belastet ist. Daher nehmen die Begleiterscheinungen einen immer breiteren Raum in unserer Entwicklungsarbeit ein – in Form von Diagnose- und Therapiesystemen, die über die eigentliche Dialyse hinausgehen.

Ein weiterer Fokus unserer Forschung und Entwicklung sind **Heimtherapien** – die Peritonealdialyse, die Heimhämodialyse und langfristig auch die tragbare künstliche Niere – sowie die damit verbundenen Technologien und Produkte. Denn eine Behandlung zu Hause gewährt geeigneten Patienten nicht nur größere Freiheiten in der Gestaltung ihres Lebensalltags, sie entlastet auch die begrenzten Kapazitäten der Dialysekliniken und ermöglicht Menschen in Gebieten mit schwacher Gesundheitsinfrastruktur überhaupt erst den Zugang zu einer Behandlung.



Angesichts des steigenden Kostendrucks im Gesundheitswesen müssen **Innovationen** auch bezahlbar sein. Eine hochwertige Behandlung ist zugleich kosteneffizient, wenn sie Risiken und Komplikationen minimiert und dadurch Zusatzkosten, etwa für Krankenhausaufenthalte, vermeidet. Unsere Forschung und Entwicklung arbeitet gezielt an Produkten und Dienstleistungen, die unsere Kunden dabei unterstützen, Patienten in hoher Qualität und zugleich zu bezahlbaren Kosten zu versorgen.

Verschiedene **Schwerpunkte** unserer Arbeit sind nachfolgend näher ausgeführt:

So arbeiten wir im Rahmen eines kontinuierlichen Produktverbesserungsprozesses gezielt daran, das Risiko zu minimieren, dass Patienten durch einen technischen Fehler oder durch menschliches Versagen zu Schaden kommen. Ein seltenes, aber besonders gefährliches Risiko ist der Blutverlust während der Dialyse – etwa durch Leckagen im Blutschlauchsystem oder wenn sich die Fixierung der Nadel löst, die den Gefäßzugang des Patienten mit dem Blutschlauchsystem verbindet. Der Blutverlust kann dann unvermittelt eintreten und innerhalb kurzer Zeit zum Tod führen. Fresenius Medical Care arbeitet derzeit an einem neuem Sicherheitssystem auf der Grundlage einer innovativen Software: dem **Venous Needle Disconnect (VND)**. Dieses ist in der Lage, extrakorporale Drucksignale intelligent auszuwerten: Es kann gewöhnliche Störgrößen als solche erkennen und bei potenziell gefährdenden, feinen Druckunregelmäßigkeiten – zum Beispiel durch das Verrutschen der Nadel, Leckagen oder abgeknickte Blutschlauchsegmente – mit einem Alarm reagieren, der die notwendigen Sicherheitsreaktionen des Dialysegeräts aktiviert. Wir haben den VND im Jahr 2010 intensiv getestet und wollen ihn im laufenden Geschäftsjahr in den Monitor unserer Dialysegeräte der Serien 4008 und 5008 integrieren. Wenngleich sich das Risiko eines Blutverlusts auch durch den VND nicht vollständig vermeiden lassen wird: Wir sind überzeugt, mit dem neuen System eine besonders zuverlässige Technologie entwickelt zu haben, zu der es bislang im Dialysemarkt keine vergleichbare Alternative gibt.

Fresenius Medical Care arbeitet seit einigen Jahren in einem Expertenteam an der Entwicklung einer **tragbaren künstlichen Niere** – einem Dialysegerät, das klein und leicht genug ist, um am Körper des Patienten getragen zu werden, und das der natürlichen Funktion der Niere besonders nahekommt, indem es kontinuierlich in Betrieb ist.

Voraussetzung für ein tragbares System ist, dass dieses mit deutlich weniger Dialyselösung auskommt als die Standardverfahren der Peritoneal- und Hämodialyse: Die Menge an Dialysat muss dazu von derzeit rund 175 bis 360 Litern

pro Woche (je nach Verfahren) auf etwa 150 bis 500 Milliliter Dialyselösung reduziert werden, die im Gerät zirkulieren und wiederholt wiederaufbereitet werden. Diese Wiederaufbereitung ist mit Hilfe von Adsorbern möglich – Substanzen, die Gift- und Abfallstoffe in der Lösung effektiv binden, d. h. absorbieren. Eine entscheidende Ausnahme bildet jedoch der Harnstoff. Um auch Harnstoff aus gebrauchtem Dialysat wirkungsvoll entfernen zu können, hat Fresenius Medical Care deshalb auf Basis ihrer jahrzehntelangen Erfahrung auf dem Gebiet der Polysulfonmembranen eine neuartige zweilagige Hohlfasermembran entwickelt. Sie besteht aus zwei Lagen, die wegen ihrer Struktur und Zusammensetzung den Transport von Stoffen aktiv beeinflussen können: Eine funktionale Beschichtung ermöglicht den Transport des Harnstoffs aus der Dialyselösung heraus, hält jedoch überlebenswichtige Elektrolyte zurück. Im Außenraum der Hohlfaser wird der Harnstoff durch ein Enzym chemisch aufgespalten. Das dabei frei werdende Ammonium wird von Adsorbern gebunden; Reste des giftigen Ammoniaks können nicht erneut in das Dialysat gelangen. Für die neue, mehrlagige Membran bildet eine innovative mikromechanische Technologie auf Siliziumbasis die Grundlage. Diese Technologie dient der Herstellung der mikroskopisch kleinen Spindüsen, die benötigt werden, um in mehreren Ebenen gleichzeitig verschiedene Membranmaterialien, darunter auch Polysulfon, zu verarbeiten. Wir haben für den komplexen Aufbau dieser Spindüsen eine Reihe von Schutzrechten angemeldet. Die zweilagige Harnstoffmembran, die wir für die Anwendung in einer tragbaren künstlichen Niere nun weiter optimieren wollen, ist ein erstes praktisches Ergebnis des neuen Spinnverfahrens. Die Technologie ist jedoch grundsätzlich für Dialysesysteme auf Adsorberbasis von großem Interesse, bei denen es auf eine Wiederaufbereitung von Dialysat ankommt, um mehr Patienten flexibel auch außerhalb von Kliniken therapieren zu können.

Ein weiterer Forschungs- und Entwicklungsansatz ist es, **Therapiesysteme und Softwarelösungen** zu integrieren. Diese sollen zum einen die therapeutische Leistung der Dialyse, zum anderen deren Erfassung und Kontrolle verbessern und so nicht nur zu einer höheren Behandlungsqualität führen, sondern auch zu einem effizienteren Einsatz personeller, medizinischer und finanzieller Ressourcen. Ein Beispiel dafür ist unser neues Hämodialysegerät 2008T für den US-amerikanischen Markt. Nach der Zulassung durch die US-Behörde für Lebensmittel- und Arzneimittelsicherheit FDA (U.S. Food and Drug Administration) haben wir das Gerät im November



2010 im Rahmen der bedeutendsten Branchenkonferenz der USA, der ASN (Konferenz der American Society of Nephrology – Amerikanische Gesellschaft für Nierenheilkunde), auf den Markt gebracht. Es verfügt als erstes zugelassenes Hämodialysegerät auf dem US-amerikanischen Markt über eine integrierte Softwareplattform für die Eingabe und Verwaltung von klinischen Behandlungsdaten direkt an der Liege des Patienten. Angesichts des neuen, seit Januar 2011 geltenden Pauschalvergütungssystems in den USA soll das neue Modul Ärzte und Klinikpersonal dabei unterstützen, die von den Behörden geforderten Daten für die Abrechnung der Leistungen effizient und zeitnah zu erfassen. Es soll zudem dazu beitragen, die Arbeitsabläufe im Klinikalltag zu vereinfachen und das klinische Daten- und Qualitätsmanagement weiter zu verbessern. Zudem testen wir derzeit eine integrierte Infusionspumpe für intravenös zu verabreichende Eisenpräparate, die wir eigens für die 2008T entwickelt haben und die bereits von der FDA zugelassen ist. Diese soll dem Klinikpersonal die Verabreichung des Eisenpräparats sowie eine genaue Dosierung erleichtern und dadurch auch die Sicherheit für den Patienten weiter erhöhen. Mit der Vermarktung dieses neuen Moduls wollen wir noch im laufenden Jahr beginnen.

### FRESENIUS KABI

Fresenius Kabi konzentriert sich in der Forschung und Entwicklung auf Produkte für die Therapie und Versorgung von kritisch und chronisch kranken Patienten. Unsere Schwerpunkte liegen dabei auf Therapiegebieten mit hohem medizinischem Bedarf, z. B. auf der Versorgung onkologischer Patienten. Wir entwickeln Produkte, die dazu beitragen, den medizinischen Therapiefortschritt in der Akut- und Folgeversorgung zu fördern und die Lebensqualität von Patienten zu verbessern. Gleichzeitig wollen wir mit unserem umfassenden Sortiment an Generika hochwertige Behandlungen Patienten weltweit zugänglich machen.

Aus dieser Aufgabenstellung leitet sich unsere **Forschungs- und Entwicklungsstrategie** ab:

- ▶ Entwicklung innovativer Produkte in den Bereichen, in denen wir eine führende Position einnehmen, wie bei den Blutvolumenersatzstoffen und in der klinischen Ernährung
- ▶ Entwicklung neuer Formulierungen von patentfreien Medikamenten
- ▶ Entwicklung von eigenen generischen Arzneimittel-formulierungen zum Patentablaufdatum
- ▶ Kontinuierliche Weiterentwicklung unseres bestehenden Portfolios von Pharmazeutika und medizintechnischen Produkten

Unsere **Entwicklungskompetenz** ist umfassend und beinhaltet alle relevanten Komponenten: den Arzneimittelrohstoff, die pharmazeutische Lösung, das Primärbehältnis, das medizintechnische Produkt zur Applikation sowie die Herstellungstechnologie. Wir sind zudem eines der wenigen Unternehmen weltweit, die den gesamten Herstellungsprozess von I.V.-Arzneimitteln durchführen: von der Verarbeitung der Rohstoffe, der Herstellung des pharmazeutischen Wirkstoffs bis zur Produktion des Arzneimittels. Diese Kompetenz ermöglicht uns, I.V.-Arzneimittel anzubieten, die besondere Herausforderungen an die Entwicklung und vor allem an die Produktion stellen, wie dies z. B. bei onkologischen Produkten der Fall ist. In diesem Bereich entwickeln und produzieren wir u. a. Zytostatika, und zwar sowohl als Fertigprodukt als auch in patientenindividuellen Zusammensetzungen. Dabei entwickeln und produzieren wir – soweit möglich – den pharmazeutischen Wirkstoff in unseren eigenen Forschungseinrichtungen und Produktionsstätten, um beste Qualität zu sichern.

Bedeutend ist für uns auch die **Zulassungsarbeit**, um neue Produkte einführen zu können. So arbeiten wir kontinuierlich an Zulassungsdossiers unserer Produkte für alle großen Märkte der Welt. Dies gilt einerseits für unser etabliertes Portfolio, das wir mit neuen lokalen Zulassungen international breiter verfügbar machen, gleichzeitig arbeiten wir aber auch an Zulassungen von neuen Produkten.

### Infusionstherapien

Im Jahr 2010 haben wir unsere Forschungs- und Entwicklungsarbeit im Bereich der **Blutvolumenersatzstoffe** weiter vorangetrieben. Eines unserer erfolgreichsten Produkte für den Blutvolumenersatz ist Voluven®. Seit der Einführung im Jahr 1999 wurden weltweit rund 30 Millionen<sup>1</sup> Patienten mit diesem Präparat behandelt. Nationale und internationale Arbeitsgruppen haben bislang über 180 Studien zu Voluven® publiziert, die die Wirksamkeit und Sicherheit des Produkts unterstützen. Auch im Berichtsjahr haben wir unser umfangreiches klinisches Forschungsprogramm in diesem Bereich fortgeführt und erweitern damit kontinuierlich die Studienlage in der Therapie mit Blutvolumenersatzstoffen. So haben wir die Unterstützung von randomisierten Doppelblind-Studien

<sup>1</sup> Fresenius Kabi-Marktschätzung

mit Voluven® 6 % bei Sepsis, Trauma und bei Kaiserschnitt-Patientinnen fortgesetzt. Ferner begleiten wir eine Studie mit unserem Produkt Voluven® 6 %, bei der dieses im Vergleich zu kristalloiden Lösungen bei der Behandlung von 7.000 Intensivpatienten untersucht wird. Des Weiteren unterstützen wir mehrere Studien in den Bereichen Anästhesie und Intensivmedizin für unser Produkt Volulyte®, das unseren bewährten HES-Wirkstoff (Hydroxyethylstärke) in einer balancierten Elektrolytlösung enthält.

Fresenius Kabi ist weltweit der größte Hersteller von HES-Produkten für den pharmazeutischen Einsatz und seit Jahrzehnten eines der führenden Unternehmen auf diesem Gebiet. Basierend auf unseren umfangreichen Kenntnissen haben wir die HESylation®-Technologie entwickelt. Sie ermöglicht eine gezielte Modifikation von Arzneimitteln durch deren Kopplung an HES-Moleküle, die an spezifischen Stellen des Wirkstoffmoleküls erfolgt. Dadurch lassen sich wichtige pharmakologische Parameter wie Resorption, Abbau, Halbwertszeit, Wasserlöslichkeit und Sicherheit modifizieren. Die Entwicklung unserer HESylation®-Technologie haben wir im Berichtsjahr in Kooperation mit unseren Pharmapartnern weiter vorangetrieben, mit denen wir projektbezogen zusammenarbeiten. So haben wir gemeinsam mit der Bayer Schering AG sowie der Boehringer Ingelheim RCV, einem österreichischen Unternehmen der Boehringer Ingelheim Gruppe, weitere Meilensteine in der Weiterentwicklung der HESylation®-Technologie erzielt.

### I.V.-Arzneimittel

In der Entwicklung von I.V.-Arzneimitteln konzentrieren wir uns auf qualitativ hochwertige Generika für die Therapiegebiete Anästhesie, Analgesie, Infektionskrankheiten, Onkologie sowie auf Arzneimittel zur Behandlung kritischer Erkrankungen. Unsere langjährige Erfahrung in der Entwicklung und Herstellung von Infusionslösungen ist ein Vorteil für die Entwicklung neuer Generika. Wir arbeiten an gezielten Verbesserungen, z. B. an Arzneimittelformulierungen und Verpackungen bekannter Arzneimittel, und wollen damit einen Beitrag zur optimalen Therapie von chronisch und kritisch kranken Patienten leisten. Zudem steht die Anwendungssicherheit im Mittelpunkt unserer Entwicklungsarbeit. So entwickeln wir Konzepte anwenderfreundlicher Verpackungen, wie das Farbcode-Sicherheitskonzept. Dieses hilft dabei, Produkte und deren unterschiedliche Wirkstoffstärken gut zu unterscheiden und damit ein hohes Maß an Sicherheit für Patient und Anwender zu gewährleisten. Das klare, sichere und leicht verständliche System entspricht nationalen und internationalen Standards.

Unser Entwicklungsportfolio enthält ein umfangreiches Wirkstoffsortiment, das in den kommenden Jahren die Marktreife erlangen wird. So verfügen wir derzeit über rund 135 Produkte in unterschiedlichen Entwicklungsphasen. Unser Ziel ist es hierbei, ein umfangreiches Produktsortiment an hochwertigen Generika global anzubieten. Eine zügige Produkteinführung ist uns wichtig. Daher haben wir im Rahmen unserer Zulassungsarbeit im Berichtsjahr intensiv an den Dossiers zur Marktzulassung neuer Generika gearbeitet.

In den USA hat APP Pharmaceuticals im Berichtsjahr 28 Zulassungsanträge im Genehmigungsverfahren bei der FDA, 6 davon hat die Gesellschaft im Berichtsjahr eingereicht. Je nach der Bearbeitungszeit bei der FDA gehen wir davon aus, diese Produkte innerhalb der nächsten drei Jahre in den Markt einführen zu können.

Auch im Bereich der onkologischen Generika sind Produkteinführungen eine wesentliche Triebfeder für künftiges Wachstum. Weltweit haben wir im Berichtsjahr für 35 Wirkstoffe Zulassungsanträge für Produkte in verschiedenen Konzentrationen und Darreichungsformen gestellt. Wir erwarten, dass wir diese Produkte innerhalb der kommenden zwei Jahre in den Markt einführen werden.

Auch für die Therapiegebiete Anästhesie, Analgesie und Infektionskrankheiten sowie Arzneimittel zur Behandlung kritischer Erkrankungen arbeiten wir außerhalb Nordamerikas intensiv an Zulassungen für hochwertige Generika. Hierfür haben wir im Berichtsjahr für vier Wirkstoffe Zulassungsanträge eingereicht und erwarten die Marktzulassung von 16 Produkten auf der Basis neuer Wirkstoffe in verschiedenen Zubereitungsformen und Ländern innerhalb der nächsten drei Jahre. Im Bereich der Analgesie haben wir im Jahr 2010 die Zulassung für ein intravenös zu verabreichendes Paracetamol erhalten. Auf diese Arzneimittelformulierung haben wir ein Patent eingereicht.

### Klinische Ernährung

Im Bereich der **parenteralen Ernährung** entwickeln wir Produkte, die von großer Bedeutung für die Versorgung kritisch und chronisch kranker Patienten sind. Unsere Schwerpunkte liegen dabei auf:

- ▶ Ernährungsprodukten, die die klinischen Ergebnisse verbessern,
- ▶ innovativen Behältnissen, z. B. Mehrkammerbeuteln, die im medizinischen Alltag höchstmögliche Anwendungssicherheit bieten und einfach zu verabreichen sind.

Die regionale Verbreitung unseres erfolgreichen Produktportfolios ist ebenfalls ein zentrales Thema unserer Entwicklungsarbeit. Hierbei bildet die Einführung unserer parenteralen Produkte in den US-amerikanischen Markt eine wichtige Rolle. Wir haben daher intensiv an der Dokumentation der für die Zulassung vorgesehenen Produkte gearbeitet.

Produkte für die klinische Ernährung von Früh- und Neugeborenen, Säuglingen und Kleinkindern ist ebenfalls einer unserer Entwicklungsschwerpunkte. Im Berichtsjahr haben wir an der Erweiterung unseres Portfolios für den Einsatz in der Pädiatrie gearbeitet. Ferner arbeiten wir an der Entwicklung einer weiteren Variante unseres Produkts SmofKabiven® und planen einen Abschluss dieser Entwicklungsarbeit im Jahr 2011.

Bei der Entwicklung **enteraler Ernährungsprodukte** konzentrieren wir uns auf Trink- und Sondennahrungen für mangelernährte, oftmals geriatrische Patienten, auf Produkte für die Therapiegebiete Dysphagie (Schluckstörung), Diabetes sowie Produkte für onkologisch und kritisch kranke Patienten. Wir verbinden dabei neueste Erkenntnisse aus der Medizin und Ernährungswissenschaft mit aktuellen Entwicklungen aus der Nahrungs- und Verfahrenstechnologie. Dieser Entwicklungsansatz ermöglicht es uns, innovative, auf das spezielle Krankheitsbild abgestimmte Ernährungsprodukte anzubieten. Wir arbeiten darüber hinaus kontinuierlich an neuen und verbesserten Geschmacksrichtungen unserer Trinknahrungen, da in der Langzeittherapie Begleiterscheinungen wie Geschmacksmüdigkeit auftreten. Unser breites Sortiment von Produkten in verschiedenen Geschmacksrichtungen erhöht die Therapietreue der Patienten und trägt gleichzeitig dazu bei, deren Lebensqualität zu verbessern.

In den oben genannten Therapiegebieten haben wir unsere Entwicklungsarbeit für neue Produkte fortgeführt und Produkte zur Marktreife gebracht. So haben wir z. B. für Diabetes-Mellitus-Patienten das Produkt Diben Creme in den Markt eingeführt.

Über die Folgen von Mangelernährung aufzuklären, ist ein Gebiet, mit dem wir uns intensiv befassen. Gründe für einen Mangel an Nährstoffen und Energie sind ein erhöhter Bedarf, z. B. bei Tumorerkrankungen, Verletzungen oder Operationen, eine zu geringe Aufnahme, z. B. wegen Kau- und Schluckstörungen und neurologischer Erkrankungen, oder übermäßige Verluste, z. B. aufgrund von Darmerkrankungen. Wir arbeiten gemeinsam mit der European Society for Clinical Nutrition and Metabolism (ESPEN), der European Nutrition for Health Alliance (ENHA) und der International Medical Nutrition Industry Group (MNI) an Maßnahmen zur Aufklärung über die Folgen von Mangelernährung für den

Patienten sowie an potenziellen Therapieansätzen. So sehen wir z. B. ein in Europa einheitliches Screening als wichtigen Schritt, um Mangelernährung zu bekämpfen.

Bei der Entwicklung von **medizintechnischen Produkten** haben wir uns die Aufgabe gestellt, sichere Applikationsprodukte für effektive Therapien zu entwickeln. Unser Augenmerk liegt dabei auf der Anwendung im medizinischen Alltag. Bei der Infusion von Arzneimitteln und Ernährungskomponenten sowie bei der Transfusion von Blut bzw. Blutkomponenten werden komplexe Applikationstechniken und unterschiedliche Applikationssysteme eingesetzt. Nicht nur die Vielzahl dieser Produkte, sondern auch die Anzahl des in diese Prozesse einbezogenen medizinischen Fachpersonals stellt dabei große Herausforderungen für eine sichere Anwendung dar.

Im Berichtsjahr haben wir die Entwicklung eines innovativen Konnektorsystems für die Applikation von enteralen Ernährungsprodukten fortgeführt. Konnektoren sind im Rahmen einer Infusionstherapie die Verbindungselemente zwischen Kanülen, Spritzen und Infusionsschläuchen. Wir entwickeln ein neuartiges Konnektorsystem, um im medizinischen Alltag das Risiko versehentlicher Fehlkonnektionen mit intravenösen Zugängen möglichst auszuschließen. Eine Patentanmeldung wurde bereits im Jahr 2009 eingereicht. Die Markteinführung ist für Ende des nächsten Jahres geplant.

Die Internationalisierung unseres medizintechnischen Produktportfolios ist ein zentrales Thema der Entwicklungsarbeit. Zum einen planen wir, die Marktpräsenz unseres Portfolios in der Region Asien-Pazifik auszubauen, zum anderen wollen wir mit unseren Produkten in den US-amerikanischen Markt eintreten. So haben wir z. B. die Entwicklungsarbeiten für die Einführung unserer Infusionspumpe Agilia in Japan abgeschlossen. Hierfür haben wir Sprachmodifikationen durchgeführt und die Menüführung des Geräts den lokalen Anforderungen angepasst. Ferner haben wir Vorbereitungen getroffen, um in den USA mittelfristig erste medizintechnische Produkte einführen zu können.

## FRESENIUS BIOTECH

Fresenius Biotech entwickelt und kommerzialisiert innovative Therapien mit immunologisch aktiven Wirkstoffen. Zwei Produkte werden derzeit vermarktet: zum einen ATG-Fresenius S in der Transplantationsmedizin und zum anderen der trifunktionale Antikörper Removab zur Behandlung von Krebspatienten mit malignem Aszites (Bauchwassersucht).

### Trifunktionale Antikörper

Im Jahr 2010 stand insbesondere die Vermarktung von **Removab** (catumaxomab) im Fokus unserer Aktivitäten, nachdem die Zulassung durch die Europäische Kommission im April 2009 für die intraperitoneale Behandlung des malignen Aszites erfolgte. Bei Removab handelt es sich um den weltweit ersten zugelassenen trifunktionalen Antikörper und zudem um das erste zugelassene Medikament gegen **malignen Aszites**. In Deutschland starteten wir mit der Markteinführung im Mai 2009 und erzielten seitdem insgesamt einen Umsatz von 4,5 Mio €, davon rund 3 Mio € im Jahr 2010. Als neue und hochinnovative Therapie muss Removab schrittweise in Kliniken und Fachpraxen eingeführt werden, um dann auch mittelfristig Eingang in die gängigen Behandlungsrichtlinien zu finden. Die Vorbereitungen für den Markteintritt in anderen europäischen Ländern haben wir im Jahr 2010 vorangetrieben. Mit Wirkung zum 8. Oktober 2010 hat das französische Gesundheitsministerium Removab in die Liste der für die Versorgung durch Krankenhäuser zugelassenen Arzneimittel aufgenommen. Dies erlaubt die Kostenerstattung des innovativen Antikörpers zur Behandlung des malignen Aszites in Krankenhäusern. In weiteren, preisregulierten Ländern Europas haben wir die entsprechenden Dokumente zur Preisfestsetzung eingereicht; Entscheidungen der jeweiligen Behörden stehen aber noch aus.

Der hohe Innovationsgrad von Removab wird durch die Verleihung des Galenus-von-Pergamon-Preises im Oktober 2010 in der Kategorie Specialist Care eindrucksvoll unterstrichen. Die Auszeichnung nennt den neuen Wirkmechanismus und die Erhöhung der Lebensqualität für Patienten als ausschlaggebende Gründe für diese Anerkennung. Der Galenus-von-Pergamon-Preis honoriert Spitzenforschung und innovative Arzneimittelentwicklungen in Deutschland.

Um die weitere Vermarktung von Removab zu unterstützen, werden zwei Studien durchgeführt:

Für die **CASIMAS-Studie**, die in europäischen Schlüssel-ländern parallel zur Markteinführung erfolgte, konnte die Rekrutierung von Patienten erfolgreich abgeschlossen werden. Diese randomisierte Phase-IIIb-Studie untersucht die Verträglichkeit, Sicherheit und Effektivität der Behandlung von Aszites-Patienten mit Removab, appliziert als dreistündige Infusion bei gleichzeitiger Prämedikation mit einem Corticosteroid. Bislang ist für Removab eine Infusionsdauer von sechs Stunden zugelassen. Die Nachbeobachtungsphase wird im Jahr 2011 abgeschlossen sein. Die Einreichung bei den europäischen Behörden zur Zulassung der dreistündigen

Infusion ist ebenfalls für das Jahr 2011 geplant. Als Ergänzung zur CASIMAS-Studie wird in der **SECIMAS-Studie** die Sicherheit und Verträglichkeit eines wiederholten Removab-Zyklus untersucht. Diese Studie erlaubt Patienten, die bei einer ersten Gabe im Rahmen der CASIMAS-Studie von Removab profitiert haben, bei Wiederauftreten von malignem Aszites die Therapie erneut zu erhalten.

Im Berichtsjahr wurden die Daten der Zulassungsstudie bei malignem Aszites weiter analysiert und die Ergebnisse auf internationalen Fachtagungen präsentiert. Dabei zeigte sich, dass Patienten, die eine positive Immunantwort aufwiesen, überdurchschnittlich von der Behandlung profitierten. Die veröffentlichten Daten unterstreichen den immunologischen Wirkmechanismus von Removab.

Im Jahr 2010 haben wir weitere klinische Studien vorbereitet. Diese sollen zum einen die Wirksamkeit von intraperitoneal verabreichtem Removab, bezogen auf die Gesamtüberlebenszeit, weiter belegen. Ziel ist es, Removab in früheren Erkrankungsstadien einzusetzen und damit die Vermarktungsbreite zu erhöhen. Zum anderen haben wir eine Studie zur Sicherheit und Durchführbarkeit von wiederholten intravenösen Gaben von Removab vorbereitet. Dieser Applikationsweg ermöglicht den Einsatz von Removab, dem weltweit bisher einzigen zugelassenen Antikörper gegen EpCAM-positive Tumore, auf Indikationen wie Lungenkrebs zu erweitern.

### Immunsuppressivum ATG-Fresenius S

Mit ATG-Fresenius S, einem polyklonalen Antikörper, verfügt Fresenius Biotech über ein seit vielen Jahren erfolgreich eingesetztes Immunsuppressivum, mit dem sich die Abstoßung von transplantierten Organen vermeiden und behandeln lässt. Die Umsätze mit ATG-Fresenius S beliefen sich im Jahr 2010 auf rund 23 Mio €. Die präklinische und klinische Entwicklung für weitere Indikationen und zum Vertrieb in neuen Märkten haben wir vorangetrieben. Wissenschaftliche Daten aus einer europäischen Studie belegen die Wirksamkeit von ATG-Fresenius S in der Prophylaxe von Graft-versus-Host-Disease (GvHD) in der Stammzelltransplantation. Fresenius Biotech erhielt auf Basis dieser Ergebnisse im Januar 2011 die Zustimmung des Paul-Ehrlich-Instituts zur Erweiterung der Zulassung des Arzneimittels ATG-Fresenius S auf dieses Anwendungsgebiet. Deutschland ist damit der erste große Markt mit einer Zulassung im Bereich der Stammzelltransplantation. Fresenius Biotech befindet sich aktuell im Austausch

mit verschiedenen weiteren europäischen Behörden, um für diese Indikation eine Zulassung auf Basis der vorliegenden klinischen Daten zu erreichen. Die vorliegenden Ergebnisse unterstützen nachhaltig die Durchführung einer pivotalen Phase-III-Studie zur Erschließung weiterer internationaler Märkte, die sich zurzeit in der Planung befindet.

## BESCHAFFUNG

Wichtig für die Profitabilität von Fresenius ist eine effiziente Gestaltung der Wertschöpfungskette. Ein zentraler Bestandteil ist das **globale Beschaffungsmanagement**, das die Verfügbarkeit von Gütern und Dienstleistungen und die nachhaltige Qualität der in der Produktion eingesetzten Rohstoffe gewährleistet. Gerade in einem Umfeld, das von andauernden Einsparbemühungen der Kostenträger im Gesundheitswesen und von Preisdruck in den Absatzmärkten gekennzeichnet ist, spielen die Versorgungssicherheit und die Versorgungsqualität eine ausnehmend wichtige Rolle. Aus diesem Grund arbeiten wir beständig daran, Einkaufsprozesse zu optimieren, neue Einkaufsquellen zu erschließen und bestmögliche Preisgestaltungen zu erreichen. Dabei müssen wir unsere hohe Flexibilität erhalten und zugleich unseren strengen Qualitäts- und Sicherheitsstandards gerecht werden.

Im Fresenius-Konzern werden die weltweiten **Beschaffungsprozesse** über zentrale Koordinationsstellen gemanagt. Kompetenzteams bündeln gleichartige Bedarfe und schließen weltweit Rahmenverträge ab. Dazu gehört auch die fortwährende Beobachtung der aktuellen Markt- und Preisentwicklung. Darüber hinaus regeln sie den Einkauf der einzelnen Produktionsstandorte und veranlassen Qualitäts- und Sicherheitskontrollen der Rohstoffe und Beschaffungsgüter.

Im Jahr 2010 betrugen die Aufwendungen für Material und bezogene Leistungen 4.732 Mio € (2009: 4.286 Mio €). Sie stellen sich wie folgt dar:

| in Mio €                                         | 2010         | 2009         |
|--------------------------------------------------|--------------|--------------|
| Aufwendungen für Roh-, Hilfs- und Betriebsstoffe | 4.092        | 3.715        |
| Aufwendungen für bezogene Leistungen             | 640          | 571          |
| <b>Gesamt</b>                                    | <b>4.732</b> | <b>4.286</b> |

Die Aufwendungen für Roh-, Hilfs- und Betriebsstoffe lagen mit 4.092 Mio € um 10 % über dem Vorjahresniveau (2009: 3.715 Mio €). Der Anteil der bezogenen Leistungen am gesamten Materialaufwand im Konzern betrug 14 % (2009: 13 %).

## MATERIALAUFWAND NACH UNTERNEHMENSBEREICHEN <sup>1</sup>

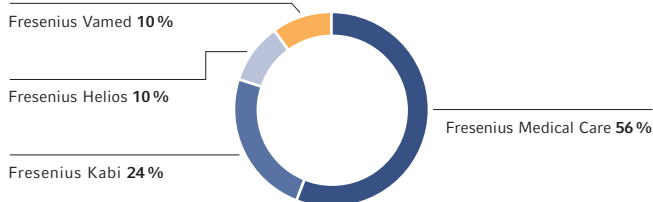

<sup>1</sup> Angaben vor Konsolidierungsbuchungen

## FRESENIUS MEDICAL CARE

Im Berichtsjahr 2010 lag der Fokus auf der Neuorganisation der weltweiten Beschaffungsprozesse innerhalb des neu geschaffenen Geschäftsbereichs **Global Manufacturing Operations (GMO)**. Damit werden die Kompetenzen bei Produktionsverfahren und -prozessen, im Qualitätsmanagement, im strategischen Einkauf und bei der Steuerung der Lieferkette innerhalb von Fresenius Medical Care eng aufeinander abgestimmt. Ziel ist es,

- ▶ die Effizienz der Abläufe weiter zu steigern,
- ▶ Risiken und Kosten besser zu kontrollieren sowie
- ▶ in der Fertigung noch profitabler zu werden.

Im Berichtsjahr haben wir geprüft, inwieweit sich die Produktionsstätten in den Regionen gegenseitig mit Produkten und Teilerzeugnissen versorgen können. Dies bezieht sich auf Produkte, die an lokale Anforderungen anpassbar sind und zugleich auf einheitlichen Kernmaterialien und -technologien basieren. Produktionskapazitäten können so weltweit flexibel und damit effizienter eingesetzt werden.

Der Geschäftsbereich GMO beobachtet weltweit die Entwicklung der **Beschaffungsmärkte** sowie wesentlicher **Währungen**. Es gilt, internationale Preisvorteile auszunutzen, wenn wir Rohstoffe und Komponenten für die Produktion erwerben. Gleichzeitig sollen Risiken besser ausgeglichen werden, z. B. potenzielle Kosten durch Währungsschwankungen oder Abhängigkeiten von einzelnen Lieferanten.

Alle Standorte sollen mit Rohstoffen und Komponenten gleichbleibend hoher Qualität versorgt werden. Deshalb vergeben wir unsere Aufträge zunehmend an Lieferanten, die international agieren und über weltweite Produktionskapazitäten verfügen. GMO hat im Berichtsjahr ergänzend zum

bestehenden Lieferantenmanagement auch ein neues **Risiko-management** integriert. Dieses überwacht die Beziehungen zu strategischen Lieferanten nach einheitlichen Kriterien. Dazu gehören die Solvenz unserer Zulieferer, kurz- und mittelfristige Lieferkapazitäten, Monopolstellungen von Lieferanten und Währungsrisiken sowie Qualitätsrisiken.

#### FRESENIUS KABI

Fresenius Kabi hat im Berichtsjahr die Einkaufskonditionen optimiert und dabei folgende Schwerpunkte gesetzt: Erstens haben wir Maßnahmen – die wir im vergangenen Jahr beschrieben hatten – zur Realisierung der im Jahr 2009 ermittelten Potenziale aus dem Projekt **Global Sourcing Initiative** weiter umgesetzt, und zweitens haben wir akquirierte Gesellschaften stufenweise in die Einkaufsorganisation und in die globalen Beschaffungsaktivitäten integriert.

Im Jahr 2010 konnte sich die Entwicklung der Rohstoffpreise verschiedenen globalen Einflüssen nicht entziehen: Zum einen stiegen die Preise der für Kabi relevanten Basisrohstoffe teilweise erheblich an. Grund war eine gesamtwirtschaftliche Erholung der Nachfrage, insbesondere in China und Indien. Zum anderen beeinflusste die Volatilität handelsstarker Währungen den Welthandel. Einzelne Preise bewegten sich nahe der Höchststände des Jahres 2008.

- ▶ Aufgrund der Basisrohstoffpreisentwicklung erhöhten sich die Preise von **Kunststoffgranulaten** deutlich, z. B. von LDPE (Low Density Polyethylen), Polypropylen und PVC für Primärpackmittel sowie Medizinprodukte, wodurch auch die daraus hergestellten Folien für Primär- und Sekundärpackmittel sowie Schlauchmaterialien für Medizinprodukte entsprechend teurer wurden.
- ▶ Dies gilt auch für **Kartonagen**, wo die Preise für die Mehrzahl der verwendeten Papiersorten deutlich angestiegen sind.
- ▶ Die Preise für **Glasflaschen** sanken im Jahr 2010, u. a. wegen der niedrigeren Energiekosten.
- ▶ Bei Produkten, die auf **Agrarrohstoffen** basieren, ergab sich für Fresenius Kabi ein uneinheitliches Bild: Die Preise für Milchfolgeprodukte erhöhten sich im Durchschnitt des Jahres 2010. Ungeachtet des kräftig nach oben kletternden Preises für Mais im 2. Halbjahr 2010 konnten die Kosten für Maisfolgeprodukte gegenüber dem Jahr 2009 durch frühzeitige Abschlüsse vorteilhaft gestaltet werden.

Für unsere **I.V.-Arzneimittel** verwenden wir eine Vielzahl von Wirkstoffen, die weitgehend unabhängig von der Preisentwicklung der Basisrohstoffe sind. Sie unterliegen einer eigenen Marktdynamik. Dies hängt zusammen mit ihren komplexen Herstellprozessen, den pharmazeutischen Anforderungen, aber auch mit Patenten und der Verfügbarkeit dieser Produkte. Wesentliche Kriterien für die Beschaffungsaktivitäten sind: eine hohe Qualität sowie eine flexible und zeitgerechte Verfügbarkeit zu konkurrenzfähigen Preisen. Für das Jahr 2010 konnten wir eine Reihe attraktiver Abschlüsse mit ein- oder mehrjährigen Laufzeiten zu Festpreisen vereinbaren.

Erwartungsgemäß sind die Beschaffungskosten für **Strom und Erdgas** im Jahr 2010 wieder gesunken. Insbesondere für Erdgas konnten wir die Kosten im Lieferjahr 2010 (31.10.2009 bis 31.10.2010) deutlich senken.

#### FRESENIUS HELIOS

Bei HELIOS sind hohe medizinische Standards untrennbar verbunden mit einem effizienten und ökonomisch sinnvollen Umgang mit Ressourcen. Das Beschaffungsmanagement von HELIOS bündelt klinik- und fachübergreifend sowohl das Wissen der Ärzte und des Pflegepersonals als auch die wirtschaftlichen Kompetenzen im kaufmännischen Bereich. Dieses Wissen und unser Anspruch an medizinische Qualität fließen in alle Beschaffungsentscheidungen zum Wohle des Patienten ein.

Medizinprodukte und Medikamente sind unmittelbar relevant für die **medizinische Qualität**. Die HELIOS-Kliniken setzen daher auf eine enge Zusammenarbeit mit ihren Lieferanten und eine hohe Standardisierung der verwendeten Produkte. Der Risikominimierung durch den Einkauf dient auch die strategische Auswahl der Lieferanten: Nur wer mit einem adäquaten Fehlermanagement, überzeugender Fehlerkommunikation und niedrigen Ausfallrisiken überzeugen kann, ist als Geschäftspartner bei HELIOS gefragt. Seit dem Jahr 2006 führt HELIOS das **HELIOS-Partner-Rating** durch. Ziel ist es, die Zusammenarbeit zwischen HELIOS und den einzelnen Lieferanten aus der Perspektive beider Geschäftspartner zu bewerten. Die Ergebnisse des Ratings 2010 werden in der ersten Jahreshälfte 2011 u. a. auf der Website des Unternehmens veröffentlicht.

Im 1. Halbjahr 2010 wurde der Bereich **Medizintechnik** in den Konzerneinkauf der HELIOS-Kliniken integriert. Er gehört zu den größten Produktgruppen im Beschaffungsmanagement und war bis zum Jahr 2010 ein eigenständiger



Bereich. Durch die Einbettung der Medizintechnik in den Konzerneinkauf steuert HELIOS nun zentral alle wesentlichen Bedarfe im Krankenhaus.

Das Jahr 2010 stand im Zeichen der Überarbeitung von **Datenlieferungs- und Auswertungssystemen**. Die Verbrauchsdaten der HELIOS-Kliniken, die über externe Apotheken beliefert werden, haben wir bislang nicht übergeordnet, sondern nur regional ausgewertet. HELIOS hat aus diesem Grund ein Projekt initiiert, um alle Verbrauchsdaten der HELIOS-Kliniken auf einer einheitlichen Oberfläche analysieren zu können, unabhängig davon, ob sie aus externen oder eigenen Apotheken stammen. Das Projekt lieferte bereits Ende des Berichtsjahres erste Ergebnisse.

Mehr als 85 % des medizinischen Sachmittelbedarfs sind heute konzernweit bei HELIOS standardisiert. Die Umsetzung des **Masterartikelstamms** wurde im Jahr 2010 erfolgreich abgeschlossen. Sieben verschiedene Materialwirtschaftssysteme wurden in ein System mit einheitlichen Abläufen und Stammdaten überführt. Heute bilden mehr als 850 Warengruppen die Basis für Transparenz, Planbarkeit und Wettbewerb. Ziel der **Standardisierung** ist es auch, die Qualität zu optimieren. Medizinische Fachgruppen der Kliniken definieren zusammen mit den Einkäufern Qualitätsanforderungen und legen konzernverbindliche Produktstandards fest. Der Standardisierungsgrad richtet sich dabei nach der jeweiligen Warengruppe. Durch die verbindlichen Produktstandards erreicht HELIOS eine große Mengenbündelung und damit eine sehr gute Verhandlungsposition für exzellente Einkaufskonditionen.

Für das Beschaffungsmanagement sind auch die Qualitätsmerkmale der genutzten Produkte sowie deren **Sicherheit** für Patienten und Mitarbeiter essenziell: Im Jahr 2010 stellten wir die Etikettierung von Spritzen in allen anästhesiologischen und intensivmedizinischen Bereichen um. Weitere Fachbereiche werden im Jahr 2011 folgen. Die Spritzen sind durch Farbcodes gemäß der ISO-Norm 26825:2007 eindeutig gekennzeichnet, um eine Verwechslung zu vermeiden und die Patientensicherheit zu erhöhen.

Der **Energiebedarf in Krankenhäusern** ist ein erheblicher Kostenfaktor. Insgesamt wendete HELIOS im Jahr 2010 rund 55 Mio € (2009: rund 53 Mio €) für Energie, Wasser und Brennstoffe auf. HELIOS hat mit enPortal eine webbasierte Einkaufsplattform etabliert, die für alle Klinikstandorte Transparenz über alle Energieträger schafft. Abweichungen in Verbrauch und Kosten können so zeitnah erkannt und korrigiert werden. HELIOS beobachtet täglich die aktuellen Energiepreisentwicklungen an den Börsen. Neben HELIOS nutzen

auch andere Fresenius-Unternehmensbereiche diese Online-Plattform, an die in Deutschland rund 300 Energieversorger angebunden sind. Für das Jahr 2010 konnten wir den **Strompreis** um mehr als 24 % im Vergleich zum Vorjahr senken. Auch beim **Erdgaseinkauf** erzielten wir sehr gute Ergebnisse und decken den Bedarf nun bis zum 31.10.2012 ab. Die Kosten für Erdgas konnten wir für das Lieferjahr 2010 (31.10.2009 bis 31.10.2010) um 15 % senken.

## FRESENIUS VAMED

Das Beschaffungsmanagement von Fresenius Vamed unterteilt sich in folgende Aktivitäten:

- **Projektgeschäft:** Planungs- und Konstruktionsleistungen, z. B. schlüsselfertige Bauprojekte, sowie gebäudetechnische Ausstattung. VAMED wickelt u. a. Totalunternehmeraufträge ab, die auch Leistungen anderer Unternehmen beinhalten.
- **Servicegeschäft:** Betriebsführung, technisches Gebäudemanagement sowie Ersatzteilbeschaffung für internationale Gesundheitseinrichtungen. Die Vertragslaufzeiten im Servicebereich gehen zumeist über viele Jahre. Wesentliche Beschaffungsmaterialien sind hier z. B. medizintechnische Geräte und Medizinprodukte sowie Dienstleistungen wie Wäscherei, Wartung und Reinigungsdienstleistungen.

Im Rahmen der **VAMED-Einkaufsplattform** werden für Kunden Synergien aus dem Projekt- und Dienstleistungsbe- reich systematisch identifiziert: Erhebliche Einsparpotenziale ergeben sich durch Ausschreibungen und Rahmenvereinbarungen aus mehreren Aufträgen, z. B. Bündelungen hinsichtlich Reinigungsdienstleistungen und Energieversorgung. Wichtig ist, die sogenannten **Life-Cycle-Kosten** zu berücksichtigen. VAMED beurteilt bei Beschaffungsentscheidungen die Gesamtkosten im Lebenszyklus von Materialien und Produkten, d. h. Anschaffungskosten, Service, Wartung sowie Ersatzteile. Strategisches Ziel ist, für den Kunden das optimale Produkt zu attraktivsten Preisen zu beschaffen.

Bei Public-Private-Partnership-Modellen (PPP-Modellen) mit öffentlichen Auftraggebern wird im Beschaffungsmanagement auch die regionale Wertschöpfung berücksichtigt, d. h. der Bezug von Materialien und Leistungen aus der Region.



Im Rahmen des **EFQM-Modells** (European Foundation for Quality Management) legen wir Prozessziele für das Beschaffungsmanagement fest. Diese beinhalten z. B. die Kundenzufriedenheit, den prozentualen Anteil von Rahmenvereinbarungen und die Lieferantenbeurteilungen.

## QUALITÄTSMANAGEMENT

Die Qualität unserer Produkte und Therapien ist Voraussetzung für beste medizinische Versorgung. Alle Prozessabläufe unterliegen höchsten Qualitäts- und Sicherheitsansprüchen zum Wohle der Patienten und zum Schutz unserer Mitarbeiterinnen und Mitarbeiter. Unser Qualitätsmanagement hat die folgenden drei **Schwerpunkte**:

- ▶ wertschöpfende, auf Kundenanforderungen und Effizienz ausgerichtete Prozesse zu erkennen,
- ▶ diese mithilfe von Kennzahlen zu überwachen und zu lenken und
- ▶ Abläufe zu verbessern.

Dies bezieht sich sowohl auf die Qualität unserer Produkte als auch auf alle Dienstleistungen und Therapien, die wir erbringen. Unser Qualitätsmanagement umschließt ferner alle Produktgruppen, wie Arzneimittel, medizintechnische Produkte und Nahrungen, und darüber hinaus unsere Kliniken.

Unser Qualitätsmanagementsystem wird von uns in regelmäßigen internen Audits überprüft und durch externe Organisationen zertifiziert. Bereits während ihrer **Entwicklung** werden alle Produkte intensiven Kontrollen unterzogen. Für Arzneimittel müssen zusätzlich Zulassungsunterlagen auf Basis von nationalen und internationalen Bestimmungen vorbereitet und eingereicht werden. Medizinprodukte durchlaufen z. B. in Europa ein Konformitätsbewertungsverfahren, das die Übereinstimmung mit geltenden Normen belegt. Bei unseren enteralen Nahrungen wird bereits bei deren Entwicklung das sogenannte HACCP-Konzept (Hazard Analysis Critical Control Point) berücksichtigt. Dies ist eine anerkannte Methode, um Risikobereiche in der Produktion von Lebensmitteln zu identifizieren und zu prüfen. In unseren **Produktionsstätten** ist das Qualitätsmanagementsystem gleichfalls etabliert. Neben dem kontrollierten Einsatz von Materialien, validierten Herstellungsverfahren, Umgebungskontrollen sowie Inprozesskontrollen findet eine chargenweise Kontrolle und Freigabe der Produkte statt. Unser Qualitätsmanagement berücksichtigt auch Maßnahmen zum **Schutz der Mitarbeiter**, beispielsweise im Umgang mit gefährlichen Substanzen.

Unsere Produktionsstandorte werden regelmäßig von Überwachungsbehörden oder unabhängigen Institutionen inspiziert. Auch die **Vertriebsbereiche** sind in das Qualitätsmanagementsystem eingebunden. Im Vertriebsprozess können wir z. B. jederzeit nachvollziehen, welche Charge an welchen Kunden geliefert wurde.

HELIOS hat in den vergangenen Jahren ein Kennzahlensystem zur Messung der **medizinischen Ergebnisqualität** im Krankenhaus entwickelt und aufgebaut. Dieses ist als hochinnovatives Verfahren im Krankenhausmarkt anerkannt und wird als Standard auch außerhalb der HELIOS-Kliniken-Gruppe von weit mehr als 400 Kliniken in Deutschland eingesetzt. Darüber hinaus findet das System in der Schweiz ebenso wie in Niederösterreich flächendeckend Anwendung. Ziel ist es, die Ergebnisse medizinischer Behandlungen und Therapien im Krankenhaus auf Basis von Routinedaten nachzuverfolgen, zu bewerten und zu optimieren.

## FRESENIUS MEDICAL CARE

Fresenius Medical Care hat als weltweit führendes Dialyseunternehmen das Ziel, Patienten und Kunden bestmögliche Qualität zu bieten. Um diesen Anspruch und die zahlreichen regulatorischen Auflagen gleichermaßen zu erfüllen, hat Fresenius Medical Care in seinen Regionen umfassende Qualitätsmanagementsysteme implementiert, die lokale Gegebenheiten ebenso widerspiegeln wie die globale Verantwortung des Unternehmens. Diese Systeme regeln und überwachen die Einhaltung von **Qualitäts- und Sicherheitsvorgaben** in Bezug auf sämtliche Produkte und Verfahren, von ihrer Entwicklung und Herstellung über die Marktzulassung und Anwendung in den Kliniken bis hin zur Schulung von Kunden und den Umgang mit Reklamationen.

Das Qualitätsmanagementsystem verbindet interne Regelungen und Abläufe mit den Anforderungen externer Standards – zum Beispiel der ISO-Norm 9001:2000 für Qualitätsmanagementsysteme oder der ISO-Norm 13485:2003 für Medizinprodukte. Darüber hinaus wenden wir u. a. an: die Richtlinien der US-amerikanischen Behörde für Lebensmittel- und Arzneimittelsicherheit, die Medizinprodukte-Richtlinie Medical Device Directive (MDD) der EU oder die Good Manufacturing Practices (GMP) sowie internationale Regelwerke zur sicheren und hochwertigen Fertigung von pharmazeutischen Produkten und medizintechnischen Geräten. Bereits heute

sind Standorte nach mehreren regionalen Qualitätsstandards zertifiziert, damit Produkte flexibel in verschiedene Märkte geliefert und die Versorgungssicherheit erhöht werden kann. Der im Beschaffungsmanagement auf Seite 87 beschriebene Bereich GMO wird innerhalb von Fresenius Medical Care diese mehrfachen Zertifizierungen ausweiten. Darüber hinaus soll das Qualitätsmanagement insgesamt harmonisiert werden, z. B. hinsichtlich überregional vergleichbarer Abläufe und Systeme zur Qualitätssicherung und -verbesserung. Für die Bewertung der Qualität der Dialysebehandlungen nutzt Fresenius Medical Care **medizinische Parameter**, die in der Dialysebranche allgemein anerkannt sind. Ein Beispiel dafür ist der Kt/V-Wert. Dieser setzt die Reinigungsleistung der Dialysebehandlung und Behandlungsdauer in das Verhältnis zur Rate der Reinigung von bestimmten toxischen Molekülen. Auch die Zahl der Tage, die Dialysepatienten im Krankenhaus verbringen müssen, ist ausschlaggebend für die Behandlungsqualität, denn sie gehören zu den besonders kostenintensiven Faktoren und können die Lebensqualität der Dialysepatienten deutlich mindern. Die kontinuierliche Messung dieser und weiterer Parameter hilft uns dabei, unsere Leistungen in der Dialysebehandlung weiter zu verbessern.

Die Umsetzung des Qualitätsmanagements an unseren Standorten und in den Dialysezentren lassen wir regelmäßig prüfen – in Europa etwa durch den TÜV. Die Sachverständigenorganisation kontrolliert in Audits, d. h. standardisierten Inspektionen, jährlich die Unternehmenszentrale sowie die Werke, den Vertrieb und unsere Klinikorganisation. In den **USA** werden unsere Kliniken von den „Centers for Medicare and Medicaid Services“ (CMS) auditert, den Behörden des staatlichen Gesundheitsfürsorgeprogramms. Im Jahr 2010 hat unsere Labordienstleistungsgesellschaft, Spectra Laboratories, als erstes medizinisches Testlabor in den USA eine Zertifizierung nach der ISO-Norm 15189:2007 erhalten; diese Norm legt Qualitätsanforderungen für medizinische Labore fest. Nierenfachärzte sind auf umfangreiche Labortests angewiesen, um die Dialysetherapie individuell auf den Patienten abstimmen zu können.

Im **Segment International** ist unser Geschäft mit Dialyседienstleistungen vom Eintritt in neue Märkte geprägt. Die Rechts- und Gesundheitssysteme variieren zwischen einzelnen Ländern und neu akquirierte Dialysekliniken entsprechen möglicherweise noch nicht unseren Qualitäts- und Managementstandards. Im Jahr 2010 haben wir aus diesem Grund die **Initiative NephroCare Excellence** gestartet. Ziel ist es, unsere Qualitätsstandards effizient und systematisch in neu

akquirierten Kliniken einzuführen und das Risikomanagement bei der Einhaltung von Qualitätsstandards zu verbessern. So wollen wir die Abläufe in unserem Kliniknetz insgesamt harmonisieren und die Qualität unserer Leistungen weiter erhöhen.

Die Leistung unserer Qualitätsmanagementsysteme ermitteln wir regelmäßig auch in unternehmensinternen Audits. Sie werden von Mitarbeitern durchgeführt, die wir dafür gezielt aus- und weiterbilden. Nicht zuletzt erhalten wir durch die Befragung von Patienten und Kunden wichtige Rückmeldungen, etwa zur Akzeptanz des Kunden-, Liefer- und technischen Service.

## FRESENIUS KABI

Das **Qualitätsmanagementsystem** von Fresenius Kabi basiert auf dem international anerkannten Qualitätsmanagementstandard ISO 9001 und einer Vielzahl nationaler und internationaler Richtlinien, die die Herstellung der Produkte von Fresenius Kabi regulieren. Zu diesen Regularien gehören u. a. Good Clinical Practice (GCP), Good Manufacturing Practice (GMP), Good Distribution Practice (GDP) für Arzneimittel sowie der Qualitätsmanagementstandard ISO 13485 für Medizinprodukte. Die Umsetzung und Anwendung dieser Regularien erfolgt auf Basis unternehmensweit geltender Qualitätsmanagementdokumente. Zudem überprüfen wir mittels interner Audits regelmäßig an allen Standorten die Umsetzung unserer Qualitätsstandards sowie die Effizienz des Systems.

Wir passen unser Qualitätsmanagementsystem kontinuierlich an die sich verändernden gesetzlichen Vorgaben an. Im Jahr 2010 traten z. B. erweiterte Vorgaben der europäischen Medizinprodukterichtlinie (MDD) in Kraft.

Im Berichtszeitraum haben wir die Konformität des Qualitätsmanagementsystems mit den relevanten Bestimmungen überprüft und erfolgreich bestätigt. Die gesamte **Wertschöpfungskette** von Fresenius Kabi ist abgedeckt durch Inspektionen von Behörden sowie Audits durch unabhängige Organisationen oder sogar von Kunden. Betroffen ist eine Vielzahl von Standorten: Produktionsstandorte, Compounding-Zentren sowie Vertriebsorganisationen und die Zentralfunktionen des Unternehmens.

Im Jahr 2010 setzten wir planmäßig die **Matrixzertifizierung** nach ISO 9001 fort: Wir integrierten Produktionsstandorte, Compounding-Zentren und Vertriebsorganisationen in Indien, Europa sowie in Nord- und Südamerika. Mit Ausnahme

von Standorten der im Jahr 2008 akquirierten Unternehmen hat Fresenius Kabi damit die weltweite Zertifizierung nahezu vollständig abgeschlossen.

Die notwendige kontinuierliche Verbesserung des Qualitätsmanagementsystems erreichten wir im Jahr 2010 dank optimierter, ergänzter sowie konzernweit harmonisierter Richtlinien. Diese werden von erfahrenen Experten aller Bereiche erarbeitet.

## FRESENIUS HELIOS

Die medizinische Behandlungsqualität ist ein wichtiges strategisches Ziel von HELIOS. Das Qualitätsmanagementsystem soll dazu beitragen, die Behandlung von Patienten kontinuierlich zu verbessern. Mithilfe von mehr als 1.300 Kennzahlen (2009: mehr als 1.200 Kennzahlen) werden alle wichtigen Krankheitsbilder und Operationsverfahren erfasst. So können die Anzahl der erbrachten Leistungen und zum Teil auch Operationstechniken sowie – wo immer möglich – **Indikatoren für die Ergebnisqualität** verfolgt werden. Auffällige medizinische Ergebnisse in einzelnen Kliniken werden in einem Peer-Review-Verfahren kritisch geprüft und besprochen. Fachkollegen untersuchen Behandlungsergebnisse, die nicht dem Qualitätsanspruch von HELIOS genügen. Gemeinsam mit der betroffenen Klinik werden sodann konkrete Verbesserungsmaßnahmen festgelegt. Ziel dieser Analyse ist es, die Abläufe und Strukturen der Behandlungsprozesse zu verbessern. Die Ergebnisse der 30 wichtigsten Krankheitsbilder und Operationsverfahren werden in über 140 Kennzahlen regelmäßig sowohl für die HELIOS-Gruppe als auch für jede Einzelklinik im Internet und in den jeweiligen Klinikführern publiziert. Die Veröffentlichung der Qualitätskennzahlen pro Krankenhaus ist für uns selbstverständlich: Einweisende Ärzte und die Patienten erhalten einen Einblick in die Behandlungsqualität der Kliniken. Diese haben wir in den letzten zehn Jahren kontinuierlich und nachweisbar verbessert.

Aus den 140 Kennzahlen definierten wir für 33 Qualitätsindikatoren **anspruchsvolle Ziele**. Die HELIOS-Kliniken sollen bei diesen Indikatoren mindestens so gut wie der Bundesdurchschnitt sein. Dort, wo entsprechende Vergleichswerte verfügbar sind, erwartet HELIOS von ihren Kliniken, dass sie im Bereich der operativen Medizin internationale Bestwerte erreichen. Bei 28 dieser Indikatoren erreichte der Konzern

diese Zielwerte oder konnte sie übertreffen (2009: 27). Dies zeigt auch die folgende Tabelle:

### HELIOS-QUALITÄTSKENNZAHLEN (AUSZUG)

| Krankheitsbild/Standardisiertes Sterblichkeitsverhältnis (SMR) <sup>1</sup> | 2010 SMR | 2009 SMR <sup>2</sup> |
|-----------------------------------------------------------------------------|----------|-----------------------|
| Herzinfarkt                                                                 | 0,77     | 0,81                  |
| Herzinsuffizienz                                                            | 0,65     | 0,73                  |
| Schlaganfall                                                                | 0,83     | 0,94                  |
| Hirninfarkt                                                                 | 0,84     | 0,92                  |
| Pneumonie                                                                   | 0,72     | 0,79                  |
| Schenkelhalsfraktur                                                         | 0,93     | 0,88                  |

<sup>1</sup> SMR von 1 entspricht dem Bundesdurchschnitt,

SMR < 1 = Sterblichkeit liegt unter dem Bundesdurchschnitt

<sup>2</sup> Adjustiert auf die aktuellen Referenzwerte des Statistischen Bundesamtes

Weitere Informationen: <http://www.helios-kliniken.de/medizin/qualitaetsmanagement>

Im Jahr 2010 erreichte HELIOS einen Wert von 0,65 bei der Herzinsuffizienz. Dies bedeutet, dass die Sterblichkeit in den HELIOS-Kliniken bei diesem Krankheitsbild im Mittel um 35 % unter dem Durchschnittswert aller Krankenhäuser in Deutschland liegt. Bei den Zielen, die nicht erreicht werden konnten, sind die Abweichungen vom Bundesdurchschnitt so gering, dass sie statistisch nicht signifikant sind. Die einzelnen ärztlichen Fachgruppen von HELIOS verfolgen darüber hinaus weitere Zielwerte, die viele Details der Versorgung in den Fachgebieten betreffen.

Die HELIOS-Kliniken arbeiten gemeinsam mit der Technischen Universität Berlin zurzeit an einer umfassenden Weiterentwicklung der Qualitätskennzahlen. Die aktualisierte Version des Systems definiert mehr als 40 Qualitätsindikatoren (2010: 30) als Konzernziele. Sie wird ab dem Jahr 2011 eingesetzt werden. Damit wird es möglich sein, für deutlich mehr Krankheitsbilder bzw. Operationen als bisher ein kontinuierliches Monitoring der Ergebnisqualität sicherzustellen. So werden z. B. die Herz- und Thoraxchirurgie in das Verfahren einbezogen. Sobald die entsprechenden Zahlen verfügbar sind, wird auch das erfolgreiche Peer-Review-Verfahren um weitere Gebiete ergänzt. Dies ermöglicht noch weitreichendere Qualitätsverbesserungen und stärkt die Spitzenposition von HELIOS in der deutschen Medizin.

Im Jahr 2008 hat HELIOS zusammen mit sechs anderen Klinikträgern die **Initiative Qualitätsmedizin (IQM)** in Deutschland gegründet. Ziel der Initiative ist es, das auf Kennzahlen basierende krankenhausinterne Qualitätsmanagement weiterzuentwickeln. Im Jahr 2010 schlossen sich weitere Kliniken IQM an, auch aus der Schweiz und Österreich. Die Initiative umfasst inzwischen etwa 130 Kliniken (Gründungsjahr 2008: etwa 100 Kliniken), darunter auch einige

Universitätskliniken. Der deutliche Zuwachs an teilnehmenden Krankenhäusern bestätigt, dass die Akzeptanz steigt, mehr Transparenz im Gesundheitswesen zu schaffen. Die Mitglieder verpflichten sich, in ihren Kliniken eine einheitliche Qualitätsmessung der Behandlungsergebnisse auf Basis von Routinedaten durchzuführen und diese Ergebnisse zu veröffentlichen. Teil dieser Selbstverpflichtung sind auch hier die Peer-Review-Verfahren. Im Jahr 2010 wurden sie innerhalb dieser Initiative erstmalig trägerübergreifend durchgeführt; entsprechend nahmen auch externe medizinische Experten an Peer-Review-Verfahren bei HELIOS teil. Weitere Informationen finden Sie im Internet auf der Website der Initiative: [www.initiative-qualitaetsmedizin.de](http://www.initiative-qualitaetsmedizin.de).

Das Qualitätsmanagement von HELIOS umfasst jedoch mehr als die medizinische Ergebnisqualität. Unser Qualitätsverständnis beinhaltet auch die **Betreuungsqualität**: Patienten sollen medizinisch und pflegerisch optimal versorgt werden. Denn qualifizierte Pflege ist Voraussetzung für medizinischen und therapeutischen Erfolg. Unser Pflegepersonal – die größte Berufsgruppe in den HELIOS-Kliniken – steht in ständigem Austausch mit den Ärzten und anderen Berufsgruppen, z. B. Therapeuten. Ziel ist es, die physischen, psychischen und sozialen Fähigkeiten der Patienten zu aktivieren und sie durch präventive, kurative und rehabilitierende Maßnahmen zur weitestgehenden Selbstständigkeit zurückzuführen.

HELIOS führte im Geschäftsjahr 2009 eine Patientenbefragung durch, an der sich mehr als 67.000 Patienten beteiligten. Die Detailergebnisse wurden im 2. Quartal 2010 auf der Website [www.helios-kliniken.de](http://www.helios-kliniken.de) veröffentlicht. Die Gesamtzufriedenheit und die Weiterempfehlungsbereitschaft für die HELIOS-Kliniken betragen sehr gute 95 %. Die Auswertung der Befragung bestätigt darüber hinaus die Qualität der HELIOS-Ärzte (95 % positive Bewertungen) sowie der Pflegekräfte (94 % positive Bewertungen).

## FRESENIUS VAMED

Fresenius Vamed hat bei der Planung und Errichtung von Krankenhäusern einen hohen Qualitätsanspruch. Dieser betrifft insbesondere die flexible Gestaltung von **prozess- und strukturübergreifenden Merkmalen**, wie

- ▶ flexible Nutzungsmöglichkeiten der Gebäude, Bereiche und Stationen, falls sich Bedarfsverschiebungen aufgrund von Änderungen in den Vergütungssystemen sowie technologischen Entwicklungen ergeben sollten.
- Ein international erfahrenes Expertenteam von VAMED stellt die Qualität in der Struktur- und Prozessgestaltung beim Kunden sicher: erstens bereits bei der Konzepterstellung für ein Projekt und zweitens bei der Bereitstellung von Dienstleistungen.
- Auch innerhalb von VAMED werden durch **geschäftsfeld-übergreifende Qualitätsstandards** Prozesse effektiv und effizient für nachhaltige und verlässliche Ergebnisse gestaltet. Diese Standards orientieren sich überwiegend sowohl an den ISO-Normen 9001:2000 und ISO 13485:2003 als auch an Standards der European Foundation for Quality Management (EFQM). Im Jahr 2010 wurde die Tochtergesellschaft VAMED-KMB Krankenhausmanagement und Betriebsführungsges. m.b.H. ausgezeichnet im Rahmen des **EFQM Excellence Awards** für die exzellenten Betriebsführungsleistungen im Allgemeinen Krankenhaus der Stadt Wien (AKH) mit dem höchsten europäischen Preis für Qualitätsmanagement in Unternehmen.
- Im **Krankenhausbereich** verwendet VAMED das JCI (Joint Commission International) Zertifizierungsmodell. Für zwei Referenzprojekte erreichten wir bereits die Zertifizierung: für das Neurologische Therapiezentrum Kapfenberg, Österreich, und das Prince Court Medical Center in Kuala Lumpur, Malaysia. Im Jahr 2010 wurde zudem das Al Ain Hospital in Abu Dhabi, Vereinigte Arabische Emirate, gemäß JCI erfolgreich zertifiziert. Darüber hinaus zeichnete die SEHA (Abu Dhabi Health Service Company) dieses Krankenhaus als Hospital of the Year aus. Das Al Ain Hospital wird von VAMED in Kooperation mit der Medical University Vienna International geführt.
- Dem Seniorenzentrum St. Corona, Österreich, wurde die Zertifizierung gemäß dem **E-Qalin-Modell** verliehen. E-Qalin® ist ein für Pflegebereiche entwickeltes europäisches Qualitätsmanagementsystem. Gestartet wurde es im Jahr 2004 gemeinsam von 28 Partnern aus Deutschland, Italien, Luxemburg, Österreich, den Niederlanden, Slowenien und Tschechien als ein von der EU finanziell gefördertes Leonardo-da-Vinci-Pilotprojekt.
- ▶ Prozessoptimierung (z. B. im OP-Bereich, im Aufnahme- und Entlassungszentrum, im interdisziplinären Notfallzentrum, in der interdisziplinären Tagesklinik),
  - ▶ Differenzierung nach modularen Versorgungsstufen (von der Grundversorgung bis zur Intensivpflege) und

## VERANTWORTUNG, UMWELTMANAGEMENT, NACHHALTIGKEIT

Wir orientieren unser Handeln im Fresenius-Konzern an langfristigen Zielen und gewährleisten so, dass unsere Arbeit nachhaltig den Bedürfnissen von Patienten, Mitarbeitern sowie Aktionären und Geschäftspartnern gerecht wird. Unsere **Verantwortung als Gesundheitskonzern** reicht über unser operatives Geschäft hinaus. Beispielhaft dafür steht eine konzernweite Hilfsaktion für die Opfer des Erdbebens in Haiti zu Beginn des Jahres 2010. Fresenius arbeitete mit Behörden und internationalen Hilfsorganisationen in der Region zusammen und stellte Hilfsgüter zur Behandlung von mehr als 185.000 Patienten bereit. Dazu gehörten Infusionslösungen, Narkosemittel, Antiinfektiva und medizintechnische Produkte von Fresenius Kabi sowie Dialyseprodukte von Fresenius Medical Care. Gemeinsam mit dem Hilfswerk Austria International errichtete Fresenius Vamed ein mobiles Ambulanzzentrum, das neben einer ambulanten Operationseinheit auch eine Intensivstation und ein Notfallzentrum umfasst.

Die Natur als Lebensgrundlage zu schützen und mit ihren Ressourcen sorgsam umzugehen, ist ebenso Teil unserer Verantwortung. Es ist daher selbstverständlich für uns, Maßnahmen bei Umwelt- und Gesundheitsschutz, Arbeits- und Anlagensicherheit sowie Produktverantwortung und Logistik stetig zu verbessern und die gesetzlichen Vorgaben einzuhalten. Die internationale ISO-Norm 14001:2004 ist die weltweit bedeutendste Vorgabe dessen, was ein **Umweltmanagement** in einem Unternehmen beinhalten und leisten soll. Sie legt u. a. Wert darauf, dass Standorte hinsichtlich möglicher Umweltbelastungen kontinuierlich überprüft werden, etwa im Hinblick auf Emissionen und Abfälle. Sowohl in unseren verschiedenen Produktionen als auch bei der Mehrheit unserer Dialysekliniken setzen wir diese Normen um. Wichtige Umweltindikatoren sind z. B. der Energie- und Wasserverbrauch, aber auch die Abfallmenge und die Recyclingquote in unseren Standorten.

In Europa unterliegen unsere Produktionsstandorte der **EU-Verordnung REACH** – Registration, Evaluation and Authorization of Chemicals (Registrierung, Bewertung und Zulassung von Chemikalien). Das erklärte Ziel von REACH ist es, Mensch und Umwelt vor Gefahren und Risiken zu schützen, die von Chemikalien ausgehen können. Diese Verordnung haben wir umgesetzt. Fresenius Medical Care ist zudem ein aktives Mitglied der Arbeitsgruppe REACH des Bundesverbandes Medizintechnologie (BVMed). In den wenigen Fällen,

in denen Fresenius Kabi Hersteller in Europa ist oder Importeur für den europäischen Markt, sind in Übereinstimmung mit der REACH-Verordnung alle betroffenen Substanzen vorregistriert.

Wir fördern den Fortschritt im Gesundheitswesen. Dafür investieren wir nicht nur in unsere eigene Forschung und Entwicklung, sondern auch in kluge Köpfe außerhalb des Unternehmens: Auf der 11. **Fresenius-Erfindermesse** präsentierten im Berichtsjahr 23 ausgewählte Forscher und Entwickler ihre Ideen für Innovationen im medizinischen und klinischen Bereich. Fresenius richtet die Erfindermesse alle zwei Jahre im Rahmen der Fachmesse Medica aus. Damit bieten wir Erfindern eine Plattform, den Kontakt zu Partnern aus Wirtschaft und Industrie sowie potenziellen Investoren herzustellen, um die Erfindungen weiterzuentwickeln und zu vermarkten. An der Ausschreibung hatten sich in diesem Jahr rund 40 Ärzte, Naturwissenschaftler, Ingenieure, Techniker und Pflegekräfte beteiligt.

### FRESENIUS MEDICAL CARE

Fresenius Medical Care engagiert sich mit vielfältigen Initiativen und Projekten für mehr Umweltbewusstsein und Umweltschutz. So verbessern wir kontinuierlich unsere Betriebseffizienz, etwa durch Energiesparmaßnahmen oder indem wir den Einsatz von Rohstoffen reduzieren, die wir in der Produktion benötigen. Darüber hinaus prüfen wir, ob umweltfreundliche Produkte und Dienstleistungen Mehrwert für Kunden schaffen.

Unser Umweltmanagement in den **Regionen Europa, Mittlerer Osten und Afrika** ist als integraler Bestandteil des Qualitätsmanagementsystems TÜV-zertifiziert. Es beinhaltet u. a. das Ökocontrolling an Produktionsstandorten und in Dialysekliniken. Darüber hinaus erfasst es umweltbezogene Daten, z. B. Emissionen, Wasser- und Stromverbrauch. Weitere Aufgabengebiete sind:

- ▶ Umweltziele und -strategien zu formulieren,
- ▶ die Koordination interner und externer Umwelt-Audits,
- ▶ die Aus- und Weiterbildung von Umweltverantwortlichen im Unternehmen und
- ▶ das Umweltbewusstsein der Mitarbeiter zu sensibilisieren sowie das Umweltmanagement weiter auszubauen.

Wir haben unser erstes Umweltprogramm in den Jahren 2007 bis 2010 umgesetzt: In zahlreichen Projekten arbeiteten Umweltmanager bereichsübergreifend mit Kollegen zusammen, um u. a. umweltfreundliche Produkte, aber auch Verpackungsmaterialien oder Produktionstechnologien zu entwickeln sowie Ressourcen einzusparen. Wir definieren derzeit neue Ziele, die bis Ende des Jahres 2013 umgesetzt werden sollen. Erneut binden wir Bereiche wie Logistik, Distribution und Vertrieb aktiv ein. Weiterhin soll auch der Arbeitssicherheit unserer Mitarbeiter Rechnung getragen und entsprechende Kriterien in das Umweltmanagementsystem integriert werden.

Fresenius Medical Care hat im Jahr 2010 die Initiative „**Go Green**“ gestartet, gemeinsam mit dem europäischen Verband für Pflegefachkräfte in der Nierenheilkunde (EDTNA/ERCA – European Dialysis and Transplant Nurses Association/European Renal Care Association). Sie soll Dialysefachkräfte in Europa stärker für das Thema Umweltschutz sensibilisieren und sie dabei unterstützen, die Abläufe an ihrem Arbeitsplatz umweltfreundlicher zu gestalten – etwa durch einen effizienteren Wasser-, Strom- und Dialysekonzentratverbrauch sowie durch ein verbessertes Abfallmanagement.

In den USA nutzen wir z. B. ein Mehrwegsystem von Sammelbehältern für medizinische Abfälle. Am Standort Ogden, dem größten Produktionswerk von Fresenius Medical Care in den USA, führen wir Stoffe aus verschiedenen Bereichen der Wiederverwertung zu, z. B. Kunststoffe und Pappe. In den USA prüfen wir derzeit auch eine Zertifizierung von Kliniken und Produktionsstandorten nach der Umweltnorm ISO 14001. Bereits heute durchlaufen alle Produktionswerke, Distributionszentren und Labore jährlich ein zertifiziertes Programm zur Überwachung der Umwelt- und Arbeitssicherheitsstandards. In Audits wird neben der Einhaltung der staatlichen und lokalen Gesetze überprüft, inwieweit wir die Richtlinien der US-amerikanischen Arbeitsschutzbehörde (Occupational Safety and Health Administration), des Verkehrsministeriums (Department of Transportation) sowie der US-Umweltschutzbehörde (Environmental Protection Agency) beachten.

In **Lateinamerika** bauen wir in Kolumbien seit dem Jahr 2010 für die gesamte Länderorganisation ein Umweltmanagementsystem gemäß der ISO-Norm 14001 auf. Unsere Mitarbeiter in Venezuela schulen wir im Rahmen einer Kampagne

zu den Themen Abfallentsorgung, Energie- und Wasserverbrauch. In Argentinien erfassen wir kontinuierlich den Wasser- und Energieverbrauch sowie die Entsorgung des medizinischen Abfalls in allen Dialysekliniken. Übergeordnetes Ziel für diese Maßnahmen ist es, Ressourcen einzusparen sowie Emissionen und das Abfallaufkommen zu vermindern.

Eine eigene Umweltrichtlinie haben wir in der **Region Asien-Pazifik** entwickelt. Diese beinhaltet das Abfallmanagement sowie Richtlinien, um Ressourcen zu schonen und Umweltverschmutzung zu vermeiden. In unseren Werken erfassen wir den Ressourcenverbrauch, z. B. Strom, Gas, Wasser, und ermitteln Verbesserungspotenziale.

### FRESENIUS KABI

Fresenius Kabi hat den Zertifizierungsprozess des **Umweltmanagementsystems** nach dem internationalen Standard ISO 14001 im Berichtsjahr fortgesetzt. Ausgeweitet wurde es z. B. auf die Produktion von onkologischen Wirkstoffen durch Fresenius Kabi Oncology in **Indien**. Der Herstellungsprozess beinhaltet den Umgang mit toxischen Stoffen. Hier kommt dem Schutz der Umwelt und der Arbeitssicherheit unserer Mitarbeiter höchste Bedeutung zu.

In Europa lag an unseren **Produktionsstandorten Friedberg und Bad Homburg**, Deutschland, die Recyclingquote im Jahr 2010 mit rund 97 % über dem Vorjahresniveau von rund 95 %. Die Abfallmenge, die wiederverwertet wird, umfasste rund 5.600 t (2009: rund 5.200 t). Das Abfallvolumen stieg am Produktionsstandort Friedberg um rund 8 % und am Standort Bad Homburg um rund 10 %. Grund hierfür ist ein gegenüber dem Vorjahr erhöhtes Produktionsvolumen.

Im Jahr 2010 wurden Maßnahmen weitergeführt, die den **Energieverbrauch**, den **CO<sub>2</sub>-Ausstoß** sowie den Verbrauch an **Rohstoffen** reduzieren: Am Produktionsstandort Friedberg hatte im Jahr 2009 eine Analyse Energieeinsparpotenziale aufgedeckt, die wir im Berichtsjahr sukzessive umgesetzt haben. Dazu gehörte die Installation einer Solarthermianlage für Brauchwasser und Heizung. In einem weiteren Projekt optimierten wir die Beleuchtung am Standort und reduzierten insgesamt den Energieverbrauch um rund 70.000 KWh pro Jahr. Weiterhin investierten wir in die Modernisierung von Versorgungseinrichtungen, z. B. Druckluftanlagen oder auch Kältemaschinen in der Produktion.



All diese Aktivitäten dienten nicht nur dem vorrangigen Ziel des Umweltschutzes, sie halfen auch, im Jahr 2010 die Energiekosten zu senken.

In Österreich verfügt der **Produktionsstandort Graz** seit dem Jahr 2008 über ein zertifiziertes Umweltmanagement. Darin hat Fresenius Kabi verschiedene Kennzahlen, z. B. die Recyclingquote, als Umweltindikatoren definiert. Ziel ist es, langfristig die Effizienz des Umweltmanagements zu gewährleisten und es kontinuierlich zu verbessern.

Im Jahr 2010 haben wir die **Recyclingquote** bei rund 70 % stabil gehalten. Die verbleibenden 30 % dienen als Energielieferant und werden zu diesem Zweck in thermischen Abfallbehandlungsanlagen eingesetzt. Grundvoraussetzung für eine ordnungsgemäße Wiederverwertung ist die sortenreine Trennung der Abfälle. Weitere Umweltindikatoren sind beispielsweise der Energieverbrauch – unterteilt nach Energiearten – und der Wasserverbrauch, jeweils bezogen auf die Produktionsmenge. Im Jahr 2009 haben wir den **Energie- und Ressourceneinsatz** am Standort analysiert und sodann im Berichtsjahr zahlreiche Projekte umgesetzt. Um den Energieverbrauch zu reduzieren, stellten wir die Kühltemperatur bei der Autoklavierung neu ein. Dampfautoklaven werden am Standort Graz zur Sterilisation von Produkten für die Infusionstherapie eingesetzt. Die Kühltemperaturen der Autoklavenzyklen haben wir produktspezifisch optimiert und so die Durchlaufzeiten verkürzt. Weiterhin stellen wir am Standort die Beleuchtung sukzessive auf LED um. Wesentliche Verbesserungen im Bereich der **Lärmemissionen** erzielten wir dank der Installation von Schalldämpfern sowie lärmabsorbierenden Abschirmungen, z. B. durch Ummantelung von Anlagen.

Im Jahr 2010 wurde das Umweltmanagementsystem des **Produktionsstandorts Linz** gemäß ISO 14001:2004 zertifiziert. Sämtliche Bereiche haben wir intern auditiert, um zu belegen, dass die Norm vollständig umgesetzt ist.

Der Standort Linz zählt weltweit zu den größten Wirkstoffproduzenten von Hydroxethylstärke (HES) sowie Lactulose. Lactulose wird durch chemische Umwandlungsprozesse von Milchzucker (Lactose) gewonnen und hauptsächlich als Laxativa (Abführmittel) verwendet, dank der probiotischen bzw. osmotischen Wirkung. Eine weitere Indikation ist der Einsatz in der Therapie von Lebererkrankungen aufgrund der entgiftenden Eigenschaften. Bereits im Jahr 2009 wurden in der Produktion **Energie- und Ressourceneinsparpotenziale**

realisiert. Im Berichtsjahr setzten wir weitere Maßnahmen um. Dadurch reduzierte sich z. B. der Einsatz des Hilfsstoffs Aktivkohle in der Wirkstoffproduktion um 30 %.

Der Energieverbrauch sank durch den Einsatz eines Abwasserwärmetauscher-Systems um 2.000 MWh/a (Megawattstunden pro Jahr). Dank des Systems wird die Abwärme in den Produktionsprozess zurückgeführt. Weitere langfristig angelegte Maßnahmen werden auch zukünftig zu Einsparungen bei Energie und anderen Ressourcen führen im Sinne eines erfolgreichen Umweltmanagements.

In unseren **schwedischen Produktionsstandorten in Uppsala und Brunna** stieg das Abfallvolumen auf rund 4.073 t im Jahr 2010 (2009: 3.337 t). Dies ist im Wesentlichen auf das höhere Produktionsvolumen zurückzuführen. Im Berichtsjahr konnten wir durch gezielte Maßnahmen sowohl den **Energie-** als auch den **Wasserverbrauch** weiter senken: So haben wir energieintensive Prozesse kombiniert, wie die Kühlung von Kompressoren und das Vorheizen von Speisewasser um Wasser für Injektionszwecke (Water for Injection – WFI) zu gewinnen. Dabei werden in der Produktion eingesetzte Kompressoren mittels Trinkwasser gekühlt. Die Wassertemperatur steigt dadurch auf über 50 Grad Celsius an. Diese Energie wird genutzt, um Wasser für die Produktion von WFI vorzuheizen und aufzubereiten. Durch die Kombination dieser beiden Prozesse reduzierten wir Energiekosten und verringerten den Wasserverbrauch. Gleichzeitig konnten wir die Destillations- und Reinigungsprozesse zur Herstellung von WFI verbessern.

Ziel weiterer Maßnahmen war es, die Kontrolle von **Leistungsparametern** in der Produktion zu verbessern. Dazu gehören die eingesetzten Ressourcen, z. B. Energie und Wasser, aber auch die Verbräuche in der Produktion, z. B. WFI und Stickstoff. Des Weiteren verringerten wir die Emissionen und sparten somit weitere Kosten ein. Im Jahr 2010 konzentrierten wir uns auf den Bereich Kühlung sowie den Stickstoffverbrauch und verbesserten nicht nur diese Leistungsparameter, sondern senkten zudem den Energieverbrauch. Erfasst werden die Leistungsparameter in der Produktion durch ein einheitliches System, um Abweichungen zeitnah erkennen, analysieren und Maßnahmen einleiten zu können. Im Jahr 2011 werden wir uns darauf konzentrieren, die Leistungsparameter beim Wärmeverbrauch, in der Dampferzeugung sowie der WFI-Produktion zu verbessern.



## FRESENIUS HELIOS

Umweltmanagement in Krankenhäusern erfolgt im Spannungsfeld hoher Anforderungen bezüglich der Abfallentsorgung, der Hygiene und des hohen Energiebedarfs.

Im Bereich der **Abfallentsorgung** zielen wir auf eine wirtschaftlich und ökologisch vertretbare Lösung. Unser Entsorgungsmanagement verstehen wir als Prozess, der bereits mit dem Einkauf beginnt und in ein konsequentes Recycling mündet. Alle Abfälle werden standardisiert erfasst und entsprechenden Abfallarten zugeordnet. Diese Daten dienen uns auch als Grundlage für die Entscheidung, ob wir Rahmenverträge mit regionalen Entsorgern oder einen Konzernrahmenvertrag mit einem Entsorger abschließen.

Bei den im Krankenhaus eingesetzten medizinischen Produkten steigt der Anteil von **Einwegartikeln** kontinuierlich. Dies muss aber nicht notwendigerweise zulasten des Umweltschutzes geschehen. So weisen z. B. Einmal-Abdeckungen im Operationsbereich eine bessere Umweltbilanz auf als solche, die wiederverwertet werden. Grund hierfür ist, dass bei wiederverwendbaren Abdeckungen der für die Produktion und die Wiederaufarbeitung notwendige Energieaufwand höher ist als bei der Produktion und Entsorgung von Einmal-Abdeckungen.

In einem Krankenhaus setzen die **Hygieneanforderungen** dem Einsatz von regenerativen Energien Grenzen. Die Warmwasserbereitung durch Solarenergie beispielsweise ist für Krankenhäuser aus unserer Sicht nicht geeignet. Das Temperaturniveau der erzeugten Wärme bietet, anders als das Temperaturniveau konventionell erzeugter Wärme, einen optimalen Nährboden für die Bakterienform der Legionellen. Der Befall von Trinkwasser mit Legionellen kann für immungeschwächte Patienten tödlich sein. Aus diesem Grund verzichtet HELIOS auf den Einsatz von Solarenergie in den Kliniken.

Ein wesentlicher Verursacher des **Energieverbrauchs** in Krankenhäusern ist die notwendige Klimatisierung der Arbeits- und Patientenräume. So müssen Wärme abgebende medizinische Geräte wie Kernspintomografen gekühlt werden. Eine andere wichtige Rolle für den Energieverbrauch spielt auch der bauliche Zustand eines Krankenhauses. HELIOS investiert im Rahmen baulicher Maßnahmen nachhaltig in den Umweltschutz. Alle Neubauten und Gebäudemodernisierungen entsprechen den aktuellen Anforderungen an eine effiziente Wärmedämmung. Im Jahr 2010 betrugen die Kosten für Instandhaltung in Summe 84 Mio € (2009: 82 Mio €).

HELIOS wickelt über eine zentrale Einkaufsplattform den **Energieeinkauf** für alle Kliniken der Gruppe online ab. Diese Plattform liefert neben den Verbrauchsdaten der Standorte auch Anhaltspunkte, um überdurchschnittlich hohe Energieverbräuche zu identifizieren und entsprechend zu reagieren.

Darüber hinaus stellt HELIOS die **Wärmeversorgung** seiner Kliniken schrittweise auf Holzpellets um. Dieser Weg der Wärmeerzeugung ist CO<sub>2</sub>-neutral und damit deutlich umweltschonender als Wärme aus Gas oder Erdöl. Ein Pilotprojekt im HELIOS Klinikum Borna brachte sehr gute Ergebnisse, sodass inzwischen auch die Kliniken Bad Ems und Bergisch Land mit Holzpellets ihre Wärme erzeugen. Im Jahr 2011 folgen die Standorte Bad Saarow und Plauen. Ziel ist es, schrittweise alle HELIOS-Kliniken, bei denen Baumaßnahmen anstehen oder die Erneuerung des Heizkessels vorgesehen ist, auf die Wärmegewinnung durch Pellets umzustellen.

Ein im Jahr 2008 initiiertes **Projekt im Bereich Umweltschutz und Energieeinsparung** wurde auf weitere Standorte ausgeweitet. Im Rahmen des Projekts stellte HELIOS den Mitarbeitern der Kliniken zahlreiche Möglichkeiten vor, Energie zu sparen. Zudem werden sie auf umweltbewusstes Verhalten geschult. Informationsbroschüren bieten praktische Tipps, wie sich umweltschützendes Handeln im Klinikalltag umsetzen lässt. Diese Initiative soll auf den gesamten Konzern ausgeweitet werden.

## FRESENIUS VAMED

Das Gesundheitswesen muss in Zukunft noch stärker dem Prinzip der Nachhaltigkeit gerecht werden. Im **Projektgeschäft** integriert VAMED die jeweiligen nationalen Umweltvorgaben bereits in die Planung von Krankenhäusern und anderen Gesundheitseinrichtungen als aktiven Beitrag für den Umweltschutz. Insbesondere in Wachstumsmärkten in Afrika und Asien ist das umfassende Wissen von VAMED im Bereich Umweltmanagement ein wichtiger Erfolgsfaktor. In Betrieb genommen haben wir beispielsweise eine moderne Abwasserreinigungsanlage und eine Hochtemperatur-Müllverbrennungsanlage nach europäischem Standard in Gabun, Afrika, im Rahmen eines Krankenhausprojekts.

Auch im **Servicegeschäft** hat VAMED wesentliche Erfolge verbucht. So obliegt dem Unternehmensbereich seit mehr als zwei Jahrzehnten die Verantwortung für die technische Betriebsführung des Allgemeinen Krankenhauses (AKH) der

Stadt Wien – Medizinischer Universitätscampus. Das AKH ist einer der größten Betriebe Österreichs mit mehr als 10.000 Beschäftigten. Im Jahr 2010 sank der Schadstoffausstoß des AKH um rund 13 % im Vergleich zum Jahr 1996, dem Ausgangszeitpunkt der gesetzten Ziele. Das internationale Ziel des Kyoto-Protokolls von 5,2 % wurde somit um mehr als das Doppelte übertroffen. Der Erfolg gründet sich auf Verbesserungen in den Bereichen Klimatisierung und Wärmerückgewinnung. Neben CO<sub>2</sub> werden auch weitere Treibhausgase bei der Erfüllung der Kyoto-Ziele berücksichtigt. Das AKH hat sich zusammen mit VAMED zum Ziel gesetzt, bis zum Jahr 2012 den Schadstoffausstoß um das Dreifache der im Kyoto-Protokoll verlangten Menge zu verringern.

In den vergangenen 15 Jahren hat VAMED zudem im Bereich des **Abfallmanagements** des AKH wesentliche Verbesserungen erreicht. Neben kontinuierlichen Optimierungen führten wir Schwerpunktprojekte durch, z. B. hinsichtlich der Abfalltrennung. So reduzierten wir die Menge der als gefährlich deklarierten medizinischen Abfälle um 60 %. Im Berichtsjahr lag der Schwerpunkt bei der Neuorganisation der Sammlung verletzungsgefährlicher medizinischer Abfälle, z. B. Skalpelle, Nadeln sowie spitze und scharfe Gegenstände aus der medizinischen Versorgung. VAMED erarbeitete zusammen mit dem AKH eine separate Entsorgungslogistik und organisierte eine kostengünstigere Entsorgung.

VAMED arbeitet darüber hinaus aktiv in Arbeitskreisen und Gremien, die die für das Krankenhaus geltenden **ÖNORMEN** erstellen. Dies sind österreichische Standards, die vom Austrian Standards Institute verabschiedet werden. Darüber hinaus wurde bereits im Jahr 2009 eine **internationale Arbeitsgruppe** zum Thema Hospital Waste der IWWG (International Waste Working Group) gegründet. IWWG ist eine internationale Arbeitsgruppe von Wissenschaftlern und Unternehmen mit dem Fokus auf nachhaltigem Abfallmanagement. Im Berichtsjahr fand die konstituierende Sitzung der Arbeitsgruppe statt.

## VERTRIEB, MARKETING UND LOGISTIK

Die langfristige und vertrauensvolle Zusammenarbeit mit unseren Kunden ist eine wichtige Basis für unser nachhaltiges Wachstum. Dabei konzentrieren wir uns darauf, unseren Kunden beste Qualität und besten Service, verbunden mit einer zuverlässigen Logistik und Verfügbarkeit unserer Produkte, zu sichern. Dank der umfassenden Produktpalette und der langjährigen Erfahrungen kann Fresenius weltweit enge

Beziehungen zu seinen Kunden aufbauen und aufrechterhalten. Die enge Zusammenarbeit zwischen Vertrieb einerseits sowie Forschung und Entwicklung andererseits ermöglicht Fresenius die Integration von im Vertrieb entwickelten Konzepten und Ideen für neue Produkte. Fresenius verfügt über eigene Vertriebsbereiche mit geschulten Verkaufsmitarbeitern. Überdies setzt das Unternehmen externe Distributoren ein, um auch die Länder abzudecken, in denen keine eigenen Außendienstmitarbeiter tätig sind.

Die Produkte von Fresenius werden von den Produktionsstätten zu zentralen Lagerhäusern geliefert, von dort zu den jeweiligen regionalen Lagerhäusern und anschließend an Kliniken sowie andere Kunden oder direkt nach Hause zu den Patienten. Die Unternehmensbereiche bieten Kundendienst, Schulung und Ausbildung in der jeweiligen Landessprache sowie technischen Support, Instandhaltung und Garantiergelungen für jedes Land an, in dem Fresenius seine Produkte vertreibt. Außerdem werden Produktschulungen angeboten sowie regionale Service-Zentren betrieben, die für den täglichen internationalen Service-Support zuständig sind.

Die Unternehmensbereiche haben folgende **Kundenstruktur**: Die Kunden von Fresenius Medical Care im Produktgeschäft sind hauptsächlich Dialysekliniken und Krankenhäuser. Fresenius Medical Care erzielte rund 32 % ihres Umsatzes durch die Medicare- und Medicaid-Programme der US-Regierung, rund 68 % ihrer Umsätze durch private und andere Kostenträger sowie durch Krankenhäuser.

Fresenius Kabi hat eine breit gestreute Kundenbasis. Dazu gehören Krankenhäuser, Großhändler, Einkaufsorganisationen, medizinische und ähnliche Einrichtungen sowie Krankenhausbetreiber und Patienten zu Hause. Eine wesentliche Abhängigkeit von einer einzelnen Umsatzquelle besteht bei Fresenius Kabi nicht. In den USA werden die Produkte von APP Pharmaceuticals im Wesentlichen über Einkaufskooperationen (GPO – Group Purchasing Organization) vertrieben. Vor allem im internationalen Markt steigt die Tendenz zu Ausschreibungen durch staatliche Stellen, an denen sich Fresenius Kabi in der Regel beteiligt.

Zu den Kunden der Fresenius Helios gehören Sozialversicherungsträger, Krankenkassen sowie Privatpatienten.

Die Kunden der Fresenius Vamed sind öffentliche und private Krankenhäuser sowie andere Gesundheitseinrichtungen.

## GESAMTAUSSAGE ZUR WIRTSCHAFTLICHEN LAGE

Der Vorstand beurteilt die Geschäftsentwicklung des Fresenius-Konzerns zum Zeitpunkt der Erstellung des Lageberichts auch weiterhin als positiv. Nach wie vor sehen wir weltweit eine kräftige Nachfrage nach unseren Produkten und Dienstleistungen. Die Geschäftsentwicklung in den ersten Wochen des Jahres 2011 liegt demgemäß mit weiteren Umsatz- und Ergebnissteigerungen im Rahmen unserer Erwartungen.

## CHANCEN- UND RISIKOBERICHT

Durch die Komplexität und Dynamik seiner Geschäfte ist der Fresenius-Konzern einer Reihe von Risiken ausgesetzt. Diese Risiken sind zwangsläufige Konsequenz aktiven unternehmerischen Handelns. Die Bereitschaft, Risiken einzugehen, ist eine Voraussetzung dafür, Chancen nutzen zu können.

Als Anbieter von lebensrettenden Produkten und Dienstleistungen für schwer und chronisch kranke Menschen sind wir kaum von Konjunkturzyklen betroffen. Die Diversifikation durch vier Unternehmensbereiche, die in unterschiedlichen Segmenten des Gesundheitswesens aktiv sind, vermindert das Risikoprofil des Konzerns weiter. Daneben bilden langjährige Erfahrung sowie unsere regelmäßig führende Marktposition für uns eine solide Basis, Risiken realistisch einschätzen zu können.

Gleichzeitig bietet das Gesundheitswesen dem Fresenius-Konzern vielfältige und nachhaltige Wachstumschancen, die wir auch künftig gezielt nutzen wollen.

### CHANCENMANAGEMENT

Das Management von Chancen ist eine fortwährende Aufgabe unternehmerischer Tätigkeit, um den langfristigen Erfolg des Unternehmens zu sichern. Damit schaffen wir Neues, sichern und verbessern Bestehendes. Durch die dezentrale, regionale Organisations- und Managementstruktur des Fresenius-Konzerns können wir frühzeitig Trends, Anforderungen und die Chancen der oftmals fragmentierten Märkte erkennen, analysieren und gezielt agieren. Darüber hinaus diskutieren wir kontinuierlich mit Forschergruppen und Institutionen und führen intensive Markt- sowie Wettbewerbsbeobachtungen durch, um Potenziale aufzuspüren. Im Konzern identifizieren und nutzen wir zusätzliche Chancen und auch Synergien

durch zielgerichteten Erfahrungsaustausch zwischen den Bereichen. Zukünftige Chancen, die wir derzeit für den Fresenius-Konzern sehen, sind im Prognosebericht ab Seite 107 dargestellt.

### RISIKOMANAGEMENT

Ebenso wie das Chancenmanagement ist das Management von Risiken eine fortwährende Aufgabe. Die Fähigkeit, Risiken zu erfassen, zu kontrollieren und zu steuern, ist ein wichtiges Element solider Unternehmensführung. Das **Fresenius-Risikomanagementsystem** ist eng mit der Unternehmensstrategie verknüpft. Wesentlicher Bestandteil ist unser **Kontrollsystem**, mit dem wir wesentliche Risiken frühzeitig erkennen, um ihnen gegensteuern können.

Innerhalb der Unternehmensbereiche haben wir die Verantwortlichkeiten für den Prozessablauf und die Kontrolle wie folgt festgelegt:

- ▶ Die Risikosituation wird regelmäßig und standardisiert erfasst und mit den bestehenden Vorgaben verglichen. So können wir rechtzeitig Gegenmaßnahmen ergreifen, wenn sich negative Entwicklungen abzeichnen sollten.
- ▶ Die verantwortlichen Führungskräfte sind verpflichtet, dem Vorstand unverzüglich über relevante Veränderungen des Risikoprofils zu berichten.
- ▶ Wir betreiben ständige Marktbeobachtung und halten enge Kontakte zu Kunden, Lieferanten und Behörden, um zeitnah Veränderungen unseres Umfelds erkennen und darauf reagieren zu können.

Das Risikomanagementsystem wird sowohl auf Konzernebene als auch in den Unternehmensbereichen durch das Risikocontrolling sowie ein Managementinformationssystem unterstützt. Auf Basis detaillierter monatlicher und quartalsweiser Berichte werden Abweichungen der tatsächlichen von der geplanten Geschäftsentwicklung identifiziert und analysiert. Darüber hinaus beinhaltet das Risikomanagementsystem ein Kontrollsystem aus organisatorischen Sicherungsmaßnahmen sowie internen Kontrollen und Prüfungen. Unser Risikomanagementsystem wird regelmäßig überprüft und gegebenenfalls angepasst, damit wir Veränderungen in unserem Umfeld frühzeitig begegnen können; dieses System hat sich bislang bewährt.

Die Wirksamkeit des Risikomanagementsystems wird im Rahmen der jährlichen Abschlussprüfung sowie regelmäßig vom Vorstand und von der Internen Revision überprüft. Daraus resultierende Erkenntnisse werden bei der kontinuierlichen Weiterentwicklung des Risikomanagementsystems berücksichtigt. Auch das Kontrollsystem wird regelmäßig vom Vorstand und von der Internen Revision überprüft.

Fresenius hat die Organisation und die Systeme zur Identifikation, Bewertung und Kontrolle von Risiken sowie zur Entwicklung von Gegenmaßnahmen funktionsfähig eingerichtet und angemessen ausgestaltet. Absolute Sicherheit, damit Risiken vollumfänglich identifizieren und steuern zu können, kann es jedoch nicht geben.

### INTERNE KONTROLLEN DER FINANZBERICHT-ERSTATTUNG

Die Verlässlichkeit der Rechnungslegungsprozesse und die Korrektheit der Finanzberichterstattung, einschließlich der Erstellung eines regelkonformen Jahresabschlusses und Konzernabschlusses sowie Lageberichts und Konzern-Lageberichts, werden durch eine Vielzahl von Maßnahmen und internen Kontrollen sichergestellt. Insbesondere unser in der Regel **vierstufiger Berichtsprozess** sichert eine intensive Erörterung und Kontrolle der Finanzergebnisse. Auf jeder Berichtsebene,

- ▶ der lokalen Einheit,
- ▶ der Region,
- ▶ dem Unternehmensbereich und
- ▶ dem Konzern,

werden die Finanzdaten und Kennzahlen berichtet, erörtert und monatlich sowie quartalsweise mit den Vorjahreszahlen, den Budgetwerten und der aktuellen Hochrechnung verglichen. Dabei werden alle Sachverhalte, Annahmen und Schätzungen, die eine relevante Auswirkung auf die extern berichteten Konzern- und Segmentzahlen haben, intensiv mit der für die Erstellung der Konzernabschlüsse zuständigen Abteilung besprochen. Quartalsweise werden diese Vorgänge im Prüfungsausschuss des Aufsichtsrats erörtert.

Um eine zuverlässige Finanzberichterstattung und die zutreffende Erfassung von Transaktionen in der Buchhaltung sicherzustellen, bestehen Kontrollmechanismen, z. B. systemtechnische und manuelle Abstimmungen. Zur Vermeidung von Missbrauch achten wir auf eine systematische Trennung

von Funktionen. Zusätzlich tragen die vom Management durchgeführten Überwachungen und Bewertungen dazu bei, dass Risiken mit direktem Einfluss auf die Finanzberichterstattung identifiziert werden und Kontrollen zur Risikominimierung eingerichtet sind. Darüber hinaus werden Änderungen der Rechnungslegungsvorschriften eng verfolgt und die mit der Finanzberichterstattung betrauten Mitarbeiter regelmäßig und umfassend geschult.

Mit Fresenius Medical Care unterliegt eine wichtige Konzerngesellschaft zudem dem Kontrollumfeld des Abschnitts 404 des Sarbanes-Oxley Act.

### RISIKOFELDER

Die für die Geschäftstätigkeit des Fresenius-Konzerns maßgeblichen Risikofelder stellen sich wie folgt dar:

#### GESAMTWIRTSCHAFTLICHES RISIKO

Aus heutiger Sicht besteht für den Fresenius-Konzern hinsichtlich der globalen Wirtschaftsentwicklung kein wesentliches Risiko, wenn auch das gesamtwirtschaftliche Wachstum im Jahr 2011 etwas geringer als im Jahr 2010 ausfallen dürfte. Zudem ist Fresenius von allgemeinen Konjunkturschwankungen nur in geringem Maße betroffen. Wir erwarten auch weiterhin eine wachsende Nachfrage nach unseren lebensrettenden und lebenserhaltenden Produkten und Dienstleistungen.

#### RISIKEN AUFGRUND WIRTSCHAFTLICHER RAHMENBEDINGUNGEN

Die Risikosituation der einzelnen Unternehmensbereiche ist insbesondere von der Entwicklung der jeweils relevanten Absatzmärkte abhängig. Daher beobachten und bewerten wir auch die politischen, rechtlichen und finanzwirtschaftlichen Rahmenbedingungen sorgfältig. Dies gilt vor allem für Länder mit Haushaltsproblemen aufgrund ihrer Staatsschulden. Darüber hinaus erfordert die fortschreitende Internationalisierung unserer Absatzmärkte, dass wir uns mit länderspezifischen Risiken auseinandersetzen.

#### BRANCHENRISIKO

Von wesentlicher Bedeutung für den Fresenius-Konzern sind Risiken, die im Zusammenhang mit **Veränderungen im Gesundheitsmarkt** stehen. Dabei handelt es sich vor allem um die Entwicklung neuer Produkte und Therapien durch Wettbewerber, die Finanzierung der Gesundheitssysteme sowie die Kostenerstattung im Gesundheitssektor. In unserem zum großen Teil reglementierten Geschäftsumfeld können

Gesetzesänderungen, auch in Bezug auf Kostenerstattungen, einschneidende Auswirkungen auf unseren Geschäftserfolg haben. Aufgrund des hohen Anteils am Konzernumsatz trifft dies in besonderem Maße auf den Absatzmarkt USA zu, wo z. B. Änderungen im Erstattungssystem unser Geschäft erheblich beeinflussen könnten. Ferner wird ein Teil der Dialysebehandlung in den USA durch private Krankenversicherungen und sogenannte Managed-Care-Organisationen erstattet. Falls es diesen Versicherungsträgern in den USA gelingt, eine Senkung der Erstattungssätze durchzusetzen, könnte dies die Umsatzerlöse für die Produkte und Dienstleistungen von Fresenius Medical Care wesentlich verringern. Ähnliches gilt für den Krankenhausmarkt in Deutschland. Das DRG-System (Diagnosis Related Groups) soll die Effizienz in den Krankenhäusern steigern und die Aufwendungen im Gesundheitssystem reduzieren. Die gesetzlichen Weiterentwicklungen des DRG-Systems werden durch das Unternehmen sorgfältig verfolgt, ebenso wie die Diskussionen um die Beendigung der dualen Finanzierung im Krankenhausbereich. Ein erheblicher Teil der Belegungen in den Kliniken wird durch gesetzliche Krankenkassen und Rentenversicherungsträger vorgenommen. Der Erfolg des Konzerns wird daher davon beeinflusst, dass mit diesen Institutionen geschlossene Verträge fortbestehen. Neben der intensiven Beobachtung gesetzgeberischer Aktivitäten arbeiten wir auch mit den staatlichen Gesundheitsorganisationen zusammen. Insgesamt wollen wir über Leistungssteigerungen und Kostenreduktionen möglichen regulatorischen Risiken entgegenwirken.

In den USA werden nahezu alle injizierbaren pharmazeutischen Produkte mittels Vereinbarungen mit **Einkaufskooperationen (GPO – Group Purchasing Organization)** und Distributoren verkauft. Die meisten Krankenhäuser haben mit den GPOs ihrer Wahl Verträge abgeschlossen, um ihren Bedarf zu decken. Derzeit kontrollieren weniger als zehn GPOs den größten Anteil der Verkäufe an Krankenhauskunden. Entsprechend erzielt APP Pharmaceuticals einen großen Umsatzanteil mit einer kleinen Anzahl GPOs. APP Pharmaceuticals hat mit den wichtigsten Vereinbarungen abgeschlossen. Um diese Geschäftsbeziehungen aufrechtzuerhalten, muss APP Pharmaceuticals qualitativ hochwertige Produkte zuverlässig liefern, eine umfassende Produktpalette offerieren, den Preis konkurrenzfähig halten und die Bestimmungen der U.S. Food and Drug Administration (FDA) einhalten. Die GPOs

haben auch mit anderen Herstellern Verträge abgeschlossen. Der Bieterprozess ist sehr wettbewerbsintensiv. Die meisten Verträge von APP Pharmaceuticals können kurzfristig gekündigt werden.

Darüber hinaus sind wir durch **Kooperationen mit Ärzten und Wissenschaftlern** in der Lage, wichtige technologische Innovationen aufzugreifen und zu fördern. Auch diese Kooperationen führen dazu, dass wir stets über aktuelle Entwicklungen alternativer Behandlungsmethoden informiert sind und auf dieser Basis unsere unternehmerische Strategie bewerten und gegebenenfalls anpassen können.

## RISIKEN DES OPERATIVEN GESCHÄFTS

### Produktion, Produkte und Dienstleistungen

Die Einhaltung von **Produktspezifikationen und Produktionsvorschriften** wird durch unsere Qualitätsmanagementsysteme gemäß den international anerkannten Qualitätsnormen ISO 9001 und den entsprechenden internen Richtlinien sichergestellt. Diese sind in Qualitätshandbüchern und Verfahrensanweisungen festgelegt. Auditoren führen an Produktionsstandorten und in Dialysekliniken regelmäßig Audits durch. Diese umfassen die Einhaltung aller Anforderungen und Vorschriften von der Leitung und Verwaltung über die Produktherstellung und die klinischen Dienstleistungen bis hin zur Patientenzufriedenheit. Unsere Produktionsstätten entsprechen grundsätzlich den internationalen „Good Manufacturing Practice“- sowie den „Current Good Manufacturing Practice“-US-Richtlinien und anderen anerkannten Standards. Möglichen Risiken bei der Inbetriebnahme neuer Produktionsstätten oder neuer Technologien begegnen wir durch sorgfältige Projektplanung und durch regelmäßige Analyse und Überprüfung der Projektfortschritte. Dem Risiko mangelnder Güte von fremdbezogenen Rohstoffen, Halbfertigprodukten und Bauteilen begegnen wir im Wesentlichen durch präzise Qualitätsanforderungen an die Lieferanten. Hierzu gehören neben der Zertifizierung durch externe Institute und der Auditierung der Lieferanten eine umfangreiche Prüfung von Vorabmustern sowie regelmäßige Qualitätskontrollen. Es werden nur qualitativ hochwertige Produkte von höchster Sicherheit und erwiesener Eignung von qualifizierten Lieferanten bezogen, die unseren Spezifikationen und Anforderungen entsprechen.

In unseren Krankenhäusern, Fachkliniken und Dialysekliniken erbringen wir **medizinische Leistungen**, die grundsätzlich Risiken unterliegen. Daneben bestehen Betriebsrisiken, z. B. infolge der hohen Anforderungen an die Hygiene.

Diesen Risiken begegnen wir durch eine strukturierte Ablauforganisation, kontinuierliche Mitarbeiterschulungen und eine an den Bedürfnissen der Patienten ausgerichtete Arbeitsweise. Darüber hinaus arbeiten wir im Rahmen von Qualitätsmanagementsystemen kontinuierlich daran, die Behandlung der Patienten zu verbessern.

Weitere Risiken bestehen sowohl durch zunehmenden **Preisdruck** auf unsere Produkte als auch auf der Beschaffungsseite durch mögliche Preiserhöhungen. So könnten z. B. in den USA Änderungen in den Richtlinien zur Erstattung oder eine geänderte Verabreichung, eine Lieferunterbrechung oder schlechtere Einkaufsbedingungen von Erythropoietin (EPO) die Umsatzerlöse und das Ergebnis von Fresenius erheblich beeinträchtigen. EPO ist ein Hormon, das die Produktion roter Blutkörperchen anregt und in der Dialyse eingesetzt wird. Vor allem die ab 1. Januar 2011 vorgeschriebene Umstellung auf ein ausgeweitetes gebündeltes Medicare-Erstattungssystem für Dialyседienstleistungen, wonach die Erstattung für EPO im Basis-Erstattungssatz enthalten ist, könnte bei höheren Basiskosten für EPO Umsatzerlöse und das Ergebnis erheblich beeinträchtigen. Erstattungen und Umsatzerlöse aus der Verabreichung von EPO trugen im Geschäftsjahr 2010 rund 7 % zum Umsatz des Fresenius-Konzerns bei.

Ein steigender **Wettbewerb** könnte sich nachteilig auf die Preisgestaltung und Verkäufe unserer Produkte und Dienstleistungen auswirken. Durch die Einführung neuer Produkte und Dienstleistungen von Wettbewerbern könnten Produkte und Dienstleistungen von Fresenius weniger wettbewerbsfähig oder sogar überflüssig werden oder Auswirkungen auf Dialysemedikamente der Fresenius Medical Care haben, für die zum Teil Mindestlizenzen zu leisten sind. Risiken im **Beschaffungssektor**, die sich hauptsächlich auf mögliche Preissteigerungen und Verfügbarkeiten der Rohstoffe und Güter beziehen, begegnen wir durch eine entsprechende Auswahl und Kooperation mit unseren Lieferanten, durch längerfristige Rahmenverträge in bestimmten Einkaufssegmenten sowie durch Bündelung der zu beschaffenden Mengen im Konzern. Insgesamt sind die Märkte, in denen wir arbeiten, durch Preisdruck, Wettbewerb und **Kosteneinsparungen im Gesundheitssektor** gekennzeichnet. Dies könnte zu geringeren Umsätzen führen und sich nachteilig auf unser Geschäft, unsere Finanzlage und unsere Betriebsergebnisse auswirken.

Den mit dem **Engineering- und Krankenhaus-Dienstleistungsgeschäft** verbundenen Risiken begegnen wir mit professioneller Projektsteuerung, kompetentem Projektmanagement und mit einem ausgereiften und der jeweiligen Geschäftstätigkeit angepassten System zur Erkennung, Bewertung und Minimierung dieser Risiken. Dies besteht aus organisatorischen Maßnahmen (u. a. Standards für Risikokalkulation in der Angebotserstellung, Risikoeinschätzung vor Auftragsannahme, laufendem Projektcontrolling und laufend aktualisierter Risikobewertung), Qualitätssicherungsmaßnahmen und finanztechnischen Maßnahmen (u. a. Bonitätsprüfungen, Sicherung der Zahlungen durch Vorauszahlungen, Akkreditive und abgesicherten Krediten).

Besonderen Wert legen wir auf die Einhaltung unserer **Compliance-Programme** und Richtlinien. Mit diesen wollen wir unseren eigenen Erwartungen wie auch denen unserer Partner entsprechen und unsere Geschäftsaktivitäten an anerkannten Standards sowie lokalen Gesetzen und Verordnungen ausrichten. Wir setzen damit verbindliche Vorgaben für unsere Mitarbeiterinnen und Mitarbeiter. Wir gehen davon aus, dass wir ausreichend Vorsorge getroffen haben, dass die nationalen und internationalen Regeln beachtet werden.

### Forschung und Entwicklung

Die Entwicklung neuer Produkte und Therapien ist grundsätzlich mit dem Risiko verbunden, angestrebte Entwicklungsziele nicht oder deutlich später als geplant zu erreichen. Bis zur Zulassung eines Produkts sind kostenintensive und umfangreiche präklinische Prüfungen und klinische Studien notwendig. Da unsere Entwicklungsaktivitäten unterschiedliche Produktsegmente betreffen, sind diese Risiken im Fresenius-Konzern breit gestreut. Zudem begegnen wir etwaigen Risiken aus Forschungs- und Entwicklungsprojekten dadurch, dass wir die Entwicklungstrends kontinuierlich analysieren und evaluieren sowie die Projektfortschritte überprüfen. Daneben wird die strikte Einhaltung gesetzlicher Vorgaben in der klinischen und chemisch-pharmazeutischen Forschung und Entwicklung überwacht. Im Bereich der I.V.-Arzneimittel ist ferner die rechtzeitige und stetige Einführung neuer Produkte entscheidend. Anhand detaillierter Projektpläne und einer strikten Orientierung an Erfolgsfristen kann die Entwicklung von Produkten jederzeit überwacht werden, mit der Möglichkeit, Gegenmaßnahmen zu ergreifen, falls die geplanten Ziele nicht erreicht werden.



## Risiken aus Akquisitionen

Mit der **Übernahme** und der **Integration** anderer Unternehmen ist Fresenius Risiken ausgesetzt, die sich nachteilig auf die Vermögens-, Finanz- und Ertragslage von Fresenius auswirken können. Nach einer Akquisition müssen die Infrastrukturen des erworbenen Unternehmens integriert, rechtliche und vertragliche Fragen gelöst, Marketing, Service für Patienten sowie logistische Abläufe vereinheitlicht werden. Im Laufe der Integration könnte es zum Verlust wesentlicher Führungskräfte kommen, und der Geschäftsablauf sowie die Geschäftsbeziehungen zu Kunden und Mitarbeitern könnten in Mitleidenschaft gezogen werden. Ferner könnten Change-of-Control-Klauseln in Anspruch genommen werden. Der Integrationsprozess könnte sich als schwieriger bzw. zeitlich aufwändiger und kostenintensiver erweisen als erwartet. Bei der Geschäftstätigkeit der neu erworbenen Gesellschaften könnten Risiken auftreten, die von Fresenius nicht erkannt oder als nicht wesentlich erachtet wurden. Vorteile, die Fresenius sich von dem Erwerb verspricht, könnten nicht oder nicht im geplanten Maße eintreten. **Künftige Akquisitionen** könnten eine Herausforderung für die Finanzierung und das Management unseres Geschäfts darstellen. Ferner kann der Erwerb von Unternehmen zur Folge haben, dass Fresenius direkt oder mittelbar in die Haftung gegenüber Dritten genommen wird oder Ansprüche gegenüber Dritten sich als nicht durchsetzbar erweisen.

Die im Jahr 2008 von Fresenius übernommene Gesellschaft APP Pharmaceuticals haftet gegenüber der von ihr im Jahr 2007 abgespalteten Gesellschaft Abraxis BioScience, Inc. für Geschäftsvorfälle vor der Abspaltung, die sich im Rahmen des bei der heutigen APP Pharmaceuticals verbliebenen Geschäfts ereignet haben. Im Gegenzug stellt Abraxis BioScience die APP Pharmaceuticals frei von Ansprüchen, die sich auf Sachverhalte im Geschäftsfeld der heutigen Abraxis BioScience vor der Abspaltung beziehen. Inwieweit Abraxis BioScience solche potenziellen Ansprüche zukünftig wird befriedigen können, lässt sich nicht vorhersehen.

Aufgrund der Übernahme von APP Pharmaceuticals durch Fresenius könnte die Steuerfreiheit der im Jahr 2007 durchgeführten Abspaltung infrage gestellt werden. Ein im Rahmen der Übernahme eingeholtes Steuerrechtsgutachten bestätigt, dass die Akquisition von APP Pharmaceuticals die Steuerfreiheit der Abspaltung im Jahr 2007 nicht beeinträchtigen sollte. Da das eingeholte Gutachten sowie der darin zugrunde gelegte Sachverhalt für die US-Steuerbehörde jedoch nicht

bindend ist, könnte sie zu einer anderen Einschätzung kommen. Dies könnte zu substanziellen Steuernachzahlungen führen.

Risiken aus Akquisitionen begegnen wir durch detaillierte Integrationspläne sowie durch ein dezidiertes Integrations- und Projektmanagement, um bei Abweichungen von der erwarteten Entwicklung frühzeitig Gegenmaßnahmen ergreifen zu können.

## Personalrisiken

Dem Risiko des Mangels an qualifiziertem Personal wirkt die Gesellschaft vorsorglich durch geeignete Rekrutierungsmaßnahmen und Personalentwicklungsprogramme entgegen. Auch durch die Einrichtung von Langzeitkonten in verschiedenen Bereichen wollen wir die Bindung an unser Unternehmen sichern. Darüber hinaus profitieren unsere Mitarbeiterinnen und Mitarbeiter u. a. von attraktiven Sozialleistungen sowie zum Teil von Erfolgszahlungen. Dem generellen Mangel an Klinikfachpersonal begegnet Fresenius durch gezieltes Personalmarketing. Auf diesem Weg gewinnen wir qualifiziertes und motiviertes Fachpersonal und sichern so den hohen Standard der Behandlungsqualität. Gleichzeitig sollen junge Mitarbeiter qualifiziert und an das Unternehmen gebunden werden. So bindet z. B. HELIOS Nachwuchsarzte durch eine intensive Betreuung schon zu Studienzeiten und während des praktischen Jahres. Risiken im Bereich Personalmarketing werden aufgrund all dieser Maßnahmen als nicht wesentlich eingestuft.

## Finanzrisiken

Aus der internationalen Ausrichtung der Geschäftstätigkeit ergeben sich für den Fresenius-Konzern vielfältige Fremdwährungsrisiken. Die Finanzierung der Geschäftstätigkeit setzt den Konzern darüber hinaus verschiedenen Zinsänderungsrisiken aus. Um mögliche nachteilige Auswirkungen dieser Risiken zu begrenzen, setzen wir im Rahmen unseres Risikomanagements u. a. auch derivative Finanzinstrumente ein. Wir beschränken uns dabei auf marktgängige, außerbörslich gehandelte Instrumente, die wir ausschließlich zur Sicherung von Grundgeschäften nutzen, nicht aber zu Handels- oder Spekulationszwecken. Alle Transaktionen erfolgen mit Banken mit einem hohen Rating.



Der Fresenius-Konzern betreibt das **Währungsmanagement** auf der Grundlage einer vom Vorstand verabschiedeten Richtlinie, in der Ziele, Organisation und Ablauf der Risikomanagementprozesse festgelegt sind. Sie definiert insbesondere die Verantwortlichkeiten für die Ermittlung der Risiken, für den Abschluss von Sicherungsgeschäften und für die regelmäßige Berichterstattung über das Risikomanagement. Diese Verantwortlichkeiten sind auf die Entscheidungsstrukturen in den übrigen Geschäftsprozessen des Konzerns abgestimmt. Entscheidungen über den Einsatz derivativer Finanzinstrumente im **Zinsmanagement** werden grundsätzlich in enger Abstimmung mit dem Vorstand getroffen. Die Geschäfte mit derivativen Finanzinstrumenten werden, bis auf vereinzelte devisenrechtlich bedingte Ausnahmen, unter Kontrolle der zentralen Treasury-Abteilung des Fresenius-Konzerns getätigt und unterliegen strenger interner Aufsicht. So ist sichergestellt, dass der Vorstand über alle wesentlichen Risiken und über die bestehenden Sicherungsgeschäfte stets umfassend informiert ist.

Grundsätzlich ist der Fresenius-Konzern sowohl im Hinblick auf **Währungs- als auch Zinsrisiken** in hohem Maße gesichert: Von den Finanzverbindlichkeiten des Fresenius-Konzerns zum 31. Dezember 2010 sind rund 74 % durch Festzinsfinanzierungen bzw. durch Zinssicherungen gegen einen Zinsanstieg geschützt, sodass lediglich 26 % bzw. 2.284 Mio € einem Zinsänderungsrisiko unterliegen. Eine Sensitivitätsanalyse zeigt, dass ein Anstieg der für Fresenius relevanten Referenzzinsen um 0,5 % einen Einfluss auf das Konzernergebnis von weniger als 1 % hätte.

Fresenius unterliegt als international tätiger Konzern in hohem Maße **Translationseffekten** aufgrund sich ändernder Währungsrelationen; hierbei spielt angesichts des starken US-Geschäfts besonders das Verhältnis von US-Dollar zu Euro eine Rolle. Translationsrisiken werden nicht gesichert. Eine Sensitivitätsanalyse zeigt, dass eine US-Dollar-Euro-Veränderung von 1 Cent einen jährlichen Effekt von etwa 59 Mio € auf den Konzernumsatz und von rund 1,5 Mio € auf das Konzernergebnis hätte.

Als weltweit tätiger Konzern verfügen wir in allen wesentlichen Währungsräumen über Produktionskapazitäten. In den Servicegeschäften decken sich unsere Umsatz- und Kostenbasis in hohem Maße. Die Währungsrisiken aus unserer

Geschäftstätigkeit (**Transaktionsrisiken**) nehmen tendenziell in geringerem Maße zu als das Umsatzwachstum. Für die Abschätzung und Quantifizierung der Transaktionsrisiken in fremder Währung betrachten wir die mit hinreichender Wahrscheinlichkeit eintretenden Zahlungsströme der nächsten drei Monate als relevante Bemessungsgrundlage für eine Sensitivitätsanalyse. Diese unterstellt, dass sich alle Wechselkurse, in denen wir zum Stichtag offene Währungspositionen hatten, um 10 % negativ verändern. Durch Multiplikation der ermittelten ungesicherten Währungspositionen mit diesem Faktor ergibt sich ein maximal möglicher negativer Einfluss aus Transaktionsrisiken auf die Ertragslage des Konzerns in Höhe von 18 Mio €. Informationen hierzu finden Sie auch auf den Seiten 185 bis 187 im Anhang.

Finanzwirtschaftliche Risiken, die aus Akquisitionen und Investitionen in Sachanlagen und immaterielle Vermögensgegenwerte resultieren könnten, sind Gegenstand sorgfältiger und detaillierter Prüfungen unter Einbeziehung externer Beratung. Ferner wird die Werthaltigkeit der in der Konzernbilanz enthaltenen Firmenwerte und der sonstigen immateriellen Vermögenswerte mit unbestimmbarer Nutzungsdauer im Rahmen des jährlichen **Impairment-Tests** festgestellt. Weitere Informationen hierzu finden Sie auf Seite 137 im Anhang.

Das Risiko von **Zahlungsverzögerungen bzw. -ausfällen** von Kunden begrenzen wir, indem wir in der Regel die Kreditwürdigkeit von Neukunden bewerten, ferner führen wir kontinuierlich Nachfolgebewertungen und Prüfungen der Kreditlimits durch. Wir überwachen Außenstände bestehender Kunden und bewerten das Ausfallrisiko der Forderungen.

Die **Verschuldung** von Fresenius hat sich durch die Finanzierung der Akquisition von APP Pharmaceuticals im Jahr 2008 deutlich erhöht. Die Finanzverbindlichkeiten betrugen 8.784 Mio € zum 31. Dezember 2010. Die Verschuldung könnte die Fähigkeit zur Zahlung von Dividenden, die Refinanzierung und die Einhaltung von Kreditklauseln oder die Umsetzung der Geschäftsstrategie beeinträchtigen. Vor dem Hintergrund einer anhaltenden schwierigen allgemeinen Finanzmarktsituation könnten sich mögliche Finanzierungsrisiken für Fresenius ergeben. Diese Risiken reduzieren wir durch einen hohen Anteil an mittel- und langfristigen Finanzierungen mit einem ausgewogenen Fälligkeitsprofil. Darüber hinaus besteht nur ein begrenzter kurzfristiger Finanzierungsbedarf im Konzern.

## Staatliche Erstattungszahlungen

Die Geschäftstätigkeit von Fresenius unterliegt in nahezu allen Ländern umfassenden staatlichen **Regulierungen**. Davon sind wir insbesondere in den USA und in Deutschland betroffen. Darüber hinaus hat Fresenius weitere allgemein anwendbare Rechtsvorschriften zu beachten, die sich von Land zu Land unterscheiden. Sollte Fresenius gegen diese Gesetze oder Vorschriften verstoßen, kann dies vielfältige Rechtsfolgen nach sich ziehen.

Fresenius erzielt einen wesentlichen Teil des Konzernumsatzes aus staatlichen Erstattungen, z. B. aus Erstattungen für Dialyседienstleistungen aus den US-Bundesgesundheitsversorgungsprogrammen. Zum 1. Januar 2011 wurde ein neues **Pauschalvergütungssystem** für die Dialyse für staatlich versicherte Patienten (Medicare) eingeführt. Alle Produkte und Dienstleistungen, die bislang gemäß dem Erstattungssatz (Composite Rate) vergütet wurden, sowie separat erstattete Leistungen, wie die Verabreichung bestimmter Medikamente und die Durchführung von diagnostischen Labortests, werden künftig mit einem Pauschalsatz erstattet. Dieser anfängliche Basis-Erstattungssatz wird auf 229,63 US\$ je Dialysebehandlung festgesetzt und entspricht damit 98 % der geschätzten nach dem derzeitigen Erstattungssystem berechneten Kosten des Medicare-Programms für Dialyседienstleistungen.

Dieser Basis-Erstattungssatz wird Anpassungen aufgrund der Fallzusammensetzung unterworfen sein. Die Merkmale der einzelnen Patienten wie z. B. Alter, Größe der Körperoberfläche, Körpermassenzahl, Länge der Dialysebehandlung sowie Sterblichkeitszusammenhänge sollen die patientenspezifischen Gegebenheiten widerspiegeln. Basierend auf der gesetzlichen Annahme, dass lediglich ca. 43 % der Dialysekliniken in den USA unter dem neuen Vergütungssystem vergütet werden, wurde ein Übergangsfaktor berechnet, der den Basis-Erstattungssatz für 2011 um zusätzlich 3,1 % (der sogenannte Übergangsfaktor) vermindert, um eine budgetneutrale Einführung zu gewährleisten. Ab 2012 wird der Erstattungsbetrag erstmalig jährlichen Anpassungen unterliegen, die auf dem Anstieg der Kosten eines „Warenkorbs“ aus bestimmten Produkten und Dienstleistungen des Gesundheitswesens abzüglich einer Produktivitätsanpassung beruhen. Sollte es Fresenius Medical Care in Zusammenarbeit mit anderen Dialyседienstleistern nicht gelingen, den Übergangsfaktor zu überarbeiten, Abläufe bei der Behandlung der Patienten zu ändern und Kosteneinsparungen beim Arzneimittelkauf zu verhandeln als auch Effizienzsteigerungen und

verbesserte Patientenbehandlungserfolge durch Initiativen zur Verbesserung der Patientenversorgung zu erreichen, könnte das neue Pauschalvergütungssystem zu niedrigeren Umsatzerlösen und einem niedrigeren Ergebnis führen.

Änderungen der Gesetzgebung bzw. der Erstattungspraxis könnten den Umfang der Erstattungen für Dienstleistungen als auch den Umfang des Versicherungsschutzes beeinflussen. Dies könnte erhebliche nachteilige Auswirkungen auf die Geschäftstätigkeit und die Vermögens-, Finanz- und Ertragslage von Fresenius haben.

## Rechtsrisiken

Risiken, die sich im Zusammenhang mit **Rechtsstreitigkeiten** ergeben, werden innerhalb des Unternehmens fortlaufend identifiziert, bewertet und kommuniziert. Unternehmen in der Gesundheitsbranche sind regelmäßig Klagen wegen Sorgfaltspflichtverletzungen, Produkthaftung, Verletzung ihrer Gewährleistungspflichten, Behandlungsfehlern und anderen Ansprüchen ausgesetzt. Diese können Schadenersatzforderungen und Kosten für die Rechtsverteidigung mit sich bringen, unabhängig davon, ob letztlich ein Schadenersatzanspruch besteht. Klageverfahren können ferner dazu führen, dass Risiken dieser Art zukünftig nicht mehr zu angemessenen Bedingungen versichert werden können. Produkte aus der Gesundheitsbranche können zudem Rückrufaktionen und Patentverletzungsklagen unterliegen.

Im Jahr 2003 wurde ein abschließender Vergleich geschlossen zur endgültigen Beilegung der Gläubigeranfechtungsforderungen sowie aller weiteren sich aus dem Insolvenzverfahren von W.R. Grace ergebenden Rechtsangelegenheiten im Zusammenhang mit der NMC-Transaktion des Jahres 1996. Nachdem der W.R. Grace & Co. Reorganisations- und Sanierungsplan bestätigt worden ist, wird Fresenius Medical Care gemäß der Vergleichsvereinbarung insgesamt 115 Mio US\$ ohne Zinsen an die W.R. Grace & Co.-Konkursmasse bzw. an eine andere, vom Gericht festgelegte Stelle zahlen. Die Vergleichsvereinbarung wurde vom US-Konkursgericht genehmigt. Vorbehaltlich der noch ausstehenden Bestätigung des W.R. Grace & Co. Reorganisations- und Sanierungsplans sind damit alle aus der Zeit der NMC-Transaktion stammenden Rechtsangelegenheiten endgültig abgeschlossen.

Im Juli 2007 hat die US-Staatsanwaltschaft eine Zivilklage gegen RCG und FMCH in ihrer Eigenschaft als aktuelle Muttergesellschaft der RCG vor dem US-Bezirksgericht für das Eastern District von Missouri erhoben. Mit der Klage werden Schadenersatzansprüche und Strafmaßnahmen im Hinblick auf die Geschäftstätigkeit der Method-II-Zulieferungsgesellschaft von RCG im Jahr 2005 vor dem Erwerb von RCG durch FMCH geltend gemacht. Fresenius Medical Care ist der Ansicht, dass RCG die Leitung der Method-II-Zulieferungsgesellschaft im Einklang mit geltendem Recht durchgeführt hat, dass eine Stattgabe der von den Vereinigten Staaten geltend gemachten Klagebegehrens nicht zu erwarten ist und dass sie ihre Position im Verfahren am Ende durchsetzen wird.

RCG könnte möglichen Freistellungsansprüchen früherer Mitglieder des Board of Directors ausgesetzt sein. Diese sind Beklagte in einem Sammelklageverfahren, in dem ehemalige Aktionäre dieser Gesellschaft Schadenersatz verlangen.

Fresenius Medical Care ist der Auffassung, dass die ehemaligen Board-Mitglieder in dem Rechtsstreit obsiegen werden und sich deshalb ein möglicher Anspruch erledigen wird.

Weitere Angaben zu rechtlichen Verfahren, insbesondere zu wesentlichen Patentstreitigkeiten, finden Sie auf den Seiten 177 bis 181 im Anhang.

Darüber hinaus ist der Fresenius-Konzern in verschiedene Rechtsstreitigkeiten involviert, die sich aus der Geschäftstätigkeit ergeben. Auch wenn es nicht möglich ist, den Ausgang dieser Streitigkeiten vorherzusagen, erwarten wir aus den heute anhängigen Verfahren keine wesentlichen negativen Auswirkungen auf die Vermögens-, Finanz- und Ertragslage.

## Sonstige Risiken

Risiken sonstiger Art, z. B. **Umweltrisiken, Risiken aus Steuerungs- und Controllingsystemen** oder im Bereich unserer Informationstechnologiesysteme, wurden als nicht wesentlich eingestuft. So tritt Fresenius Risiken im Bereich der **Informationstechnologie** durch Sicherungsmaßnahmen, Kontrollen und Prüfungen entgegen. Darüber hinaus begegnen wir diesen Risiken durch kontinuierliche Investitionen in Hard- und Software; gleichzeitig verbessern wir stetig unser System-Know-how. Solche Risiken decken wir im Rahmen eines detaillierten Notfallplans ab, den wir kontinuierlich verbessern und testen. Wichtige Systeme, wie internationale IT-Systeme oder Kommunikationsinfrastruktur, halten wir redundant vor. Um organisatorische Risiken, wie Manipulationen oder unzulässige Zugriffe, zu minimieren, haben wir

einen Zugriffsschutz durch Passwörter eingerichtet; außerdem sind Unternehmensrichtlinien zu beachten, die auch die Berechtigungsvergabe regeln und deren Einhaltung durch Kontrollen überprüft wird. Daneben führen wir operative und sicherheitsbezogene Prüfungen durch.

## BEURTEILUNG DER GESAMTRISIKOSITUATION

Grundlage der Einschätzung des Gesamtrisikos ist das von Fresenius eingesetzte Risikomanagement, das seinerseits vom Management regelmäßig überprüft wird. Zu den Risiken von Fresenius gehören zum einen die nicht von der Gesellschaft unmittelbar beeinflussbaren Faktoren, wie die allgemeine Entwicklung der nationalen und globalen Wirtschaftslage, die wir regelmäßig analysieren. Zum anderen gehören dazu von Fresenius unmittelbar beeinflussbare, zumeist operative Risiken, die wir frühzeitig antizipieren und gegen die wir, falls notwendig, Maßnahmen einleiten. Zum jetzigen Zeitpunkt sind keine dieser Risiken für die zukünftige Entwicklung erkennbar, die zu einer dauerhaften und wesentlich negativen Beeinträchtigung der Vermögens-, Finanz- und Ertragslage des Fresenius-Konzerns führen könnten. Organisatorisch haben wir alle Voraussetzungen geschaffen, um frühzeitig über mögliche Risikosituationen informiert zu sein und um entsprechende Steuerungsmaßnahmen ergreifen zu können.

## RATING DES UNTERNEHMENS

Die Kreditwürdigkeit von Fresenius wird von den führenden Rating-Agenturen Moody's, Standard & Poor's und Fitch bewertet und regelmäßig überprüft. Standard & Poor's stuft die Fresenius SE & Co. KGaA mit BB, Moody's mit Ba1 und Fitch mit BB ein. Im Jahr 2010 haben alle drei Rating-Agenturen den Ausblick angehoben: Im April erhöhte Standard & Poor's den Ausblick von stabil auf positiv. Im Mai hat Moody's den Ausblick von negativ auf stabil angehoben. Schließlich hob Fitch im August den Ausblick von stabil auf positiv an.

### RATING DER FRESENIUS SE & CO. KGAA

|                    | Standard<br>& Poor's | Moody's | Fitch   |
|--------------------|----------------------|---------|---------|
| Unternehmensrating | BB                   | Ba1     | BB      |
| Ausblick           | positiv              | stabil  | positiv |

## NACHTRAGSBERICHT

Im Jahr 2010 hat Fresenius einen Rechtsformwechsel in eine Kommanditgesellschaft auf Aktien (KGaA) in Verbindung mit der Umwandlung der Vorzugsaktien in Stammaktien in die Wege geleitet. Die Änderung der Rechtsform der Fresenius SE und die Aktienumwandlung wurden am 28. Januar 2011 durch Eintragung des Rechtsformwechsels in das Handelsregister wirksam. Die Eintragung war endgültig möglich geworden, nachdem sich das Unternehmen im Wege eines Prozessvergleichs mit Aktionären geeinigt hat, die Klagen gegen dieses Vorhaben erhoben hatten.

Die Gesellschaft firmiert nunmehr als Fresenius SE & Co. KGaA. Damit sind alle Aktionäre der vormaligen Fresenius SE nun Aktionäre der Fresenius SE & Co. KGaA. Im Rahmen der Transaktion wurden sämtliche stimmrechtslosen Vorzugsaktien obligatorisch im Verhältnis 1:1 in stimmberechtigte Stammaktien getauscht. Dadurch wird die Aktienstruktur vereinfacht, die Handelsliquidität der Fresenius-Aktie erhöht, die Position von Fresenius am Kapitalmarkt weiter gestärkt und der Zugang zum Eigenkapitalmarkt verbessert.

Im Januar 2011 hat Fresenius Medical Care einen Vertrag zur Übernahme von International Dialysis Centers (IDC), dem Dialyседienstleistungsgeschäft von Euromedic International, abgeschlossen. Mit der Akquisition will Fresenius Medical Care seine Aktivitäten im Bereich der Dialyседienstleistungen insbesondere in Osteuropa ausweiten, wo IDC eine marktführende Position einnimmt. IDC betreibt 70 Dialysekliniken in neun Ländern und behandelt derzeit mehr als 8.200 Hämodialysepatienten, den Großteil davon in Mittel- und Osteuropa. Nach Abschluss der Akquisition wird IDC jährlich rund 180 Mio US\$ zum Umsatz von Fresenius Medical Care beitragen. Der Kaufpreis betrug 485 Mio €. Die Übernahme bedarf noch der Zustimmung der zuständigen Kartellbehörden und wird voraussichtlich in der ersten Jahreshälfte 2011 abgeschlossen.

Im Februar 2011 hat Fresenius Medical Care vorrangige, unbesicherte Anleihen über 650 Mio US\$ sowie 300 Mio € begeben, die u. a. zur Finanzierung der Akquisition von IDC verwendet wurden. Weitere Informationen hierzu finden Sie auf Seite 72 im Lagebericht.

Nach Schluss des Geschäftsjahres 2010 haben sich keine wesentlichen Änderungen im Branchenumfeld ergeben. Sonstige Vorgänge mit wesentlicher Auswirkung auf die Vermögens-, Finanz- und Ertragslage sind nach Schluss des Geschäftsjahres ebenfalls nicht eingetreten.

## PROGNOSEBERICHT

Einige der im Lagebericht enthaltenen Angaben, einschließlich der Aussagen zu künftigen Umsätzen, Kosten und Investitionsausgaben sowie zu möglichen Veränderungen in der Branche oder zu Wettbewerbsbedingungen und zur Finanzlage, enthalten zukunftsbezogene Aussagen. Diese wurden auf der Grundlage von Erwartungen und Einschätzungen des Vorstands über künftige, den Konzern möglicherweise betreffende Ereignisse und auf Basis unserer Mittelfristplanung formuliert. Solche in die Zukunft gerichteten Aussagen unterliegen naturgemäß Risiken, Ungewissheiten, Annahmen und anderen Faktoren, die dazu führen können, dass die tatsächlichen Ergebnisse einschließlich der Finanzlage und der Profitabilität von Fresenius wesentlich von denjenigen abweichen – in positiver wie in negativer Hinsicht –, die in diesen Aussagen ausdrücklich oder implizit angenommen oder beschrieben werden. Informationen hierzu finden Sie auch in unserem Chancen- und Risikobericht auf den Seiten 99 ff.

### GESAMTAUSSAGE UND MITTELFRISTIGER AUSBLICK

Die Aussichten des Fresenius-Konzerns für die kommenden Jahre schätzen wir weiterhin als positiv ein. Wir arbeiten fortwährend daran, unsere Kosten zu optimieren, unsere Kapazitäten anzupassen, um unsere Patienten und Kunden verlässlich versorgen und beliefern zu können, sowie unseren Produktmix zu verbessern. Wir erwarten, dass diese Aktivitäten zu Ergebnisverbesserungen führen. Ferner ergeben sich gute Wachstumschancen für Fresenius vor allem aus folgenden Faktoren:

- Das stetige **Wachstum der Märkte**, in denen wir tätig sind: Hier sieht Fresenius sehr gute Chancen, von dem hohen Bedarf an Gesundheitsversorgung zu profitieren. Dieser resultiert aus der älter werdenden Bevölkerung und dem technischen Fortschritt, wird aber auch getrieben durch die noch unzureichende Versorgung in den Entwicklungs- und Schwellenländern. So bieten sich für uns in Ländern Asiens und Lateinamerikas, aber auch in Osteuropa überdurchschnittliche und nachhaltige Wachstumschancen. Mit der Verbesserung der wirtschaftlichen Rahmenbedingungen werden sich mit der Zeit auch entsprechende Vergütungsstrukturen und funktionierende

Gesundheitssysteme etablieren. Wir werden unsere lokalen Geschäftsaktivitäten in diesen Regionen stärken und sukzessive weitere Produkte aus unserem Portfolio in diesen Märkten einführen.

- Die **Entwicklung innovativer Produkte und Therapien:** Diese bietet uns Chancen, unsere Marktposition in den Regionen weiter auszubauen. Dabei spielen neben der Innovationskraft unsere marktführende Qualität, Verlässlichkeit und die einfache Handhabung unserer Produkte und Therapien eine entscheidende Rolle. So wäre bei Fresenius Medical Care langfristig z. B. die Entwicklung von tragbaren künstlichen Nieren denkbar, auch wenn die Forschungsvorhaben dazu noch am Anfang stehen. Bei Fresenius Kabi arbeiten wir an der Entwicklung neuer generischer Produkte, um diese nach Auslauf der Patente der Originalpräparate auf den Markt bringen zu können.
- Die **Ausweitung der regionalen Präsenz:** Vor allem in den stark wachsenden Märkten in der Region Asien-Pazifik, in Lateinamerika und in Osteuropa sehen wir weiteres Potenzial, unsere Marktanteile zu erhöhen. So bieten sich u. a. in China, dem bevölkerungsreichsten Land der Erde, langfristig ausgezeichnete Wachstumschancen, zum einen im Bereich der Ernährungs- und Infusionstherapie bei Fresenius Kabi, die bereits eine führende Marktposition in diesem Land erreicht hat, aber auch bei Fresenius Medical Care auf dem Gebiet der Dialyse.

Wir setzen ebenso darauf, sukzessive Produkte und Therapien aus unserem bestehenden Portfolio in Ländern einzuführen, in denen wir noch nicht über ein umfassendes Sortiment verfügen. So bietet uns APP Pharmaceuticals im Unternehmensbereich Fresenius Kabi eine Plattform, Produkte aus den Bereichen Infusions- und Ernährungstherapie in den USA einzuführen.

- Der **Ausbau des Dienstleistungsgeschäfts:** Hier ergeben sich für Fresenius Helios Chancen im deutschen Krankenhausmarkt durch die weitere Privatisierung öffentlicher Kliniken. Grundlegend neue Chancen könnten sich u. a. für Fresenius Medical Care aus veränderten rechtlichen Vorschriften ergeben. Sollten sich z. B. in Japan die Rahmenbedingungen für den Betrieb von Dialysekliniken für privatwirtschaftlich tätige Unternehmen ändern, ergäben sich für Fresenius Medical Care hieraus neue Absatzmöglichkeiten, da Japan einer der größten Dialysemärkte der Welt ist. Deutschland ist – gemessen an der Zahl

der Dialysepatienten – der viertgrößte Markt der Welt für Fresenius Medical Care. Hier ist es der Gesellschaft inzwischen möglich, Dialyседienstleistungen im Rahmen von Medizinischen Versorgungszentren (MVZ) anzubieten. Fresenius Medical Care versteht sich als Partner der Kunden beim Aufbau von neuen Versorgungsstrukturen im deutschen Gesundheitswesen und wird sich bietende Gelegenheiten wahrnehmen, um das Geschäft durch ein solches Engagement langfristig zu stärken. Ende 2010 war Fresenius Medical Care an acht MVZ beteiligt (2009: vier).

- **Selektive Akquisitionen:** Neben gutem organischem Wachstum als Basis unseres Geschäfts werden wir auch künftig die Chancen nutzen, über kleine und mittlere Akquisitionen zu wachsen, um unsere Produktpalette zu erweitern und die regionale Präsenz zu stärken.

Darüber hinaus nehmen wir **leistungswirtschaftliche Chancen** wahr, die sich aus dem operativen Geschäft durch Kostenmanagement und Effizienzsteigerungen ergeben. Dazu zählen u. a. ein weiter optimierter Beschaffungsprozess und eine kosteneffiziente Produktion. Unsere Beschaffungsprozesse richten wir immer stärker global aus, um von zusätzlichen Synergien zu profitieren.

Akquisitionen, im Wesentlichen der Erwerb von APP Pharmaceuticals, haben im Jahr 2008 zu deutlich höheren Finanzverbindlichkeiten des Konzerns mit entsprechenden Effekten auf das Zinsergebnis geführt. Inzwischen haben wir die **Verschuldungskennziffern** des Konzerns deutlich verbessert. Die Kennziffer Netto-Finanzverbindlichkeiten/EBITDA (Verschuldungsgrad) betrug 2,6 per 31. Dezember 2010 und lag damit in der von uns anvisierten Bandbreite von 2,5 bis 3,0. In dieser Bandbreite soll sich die Kennziffer Netto-Finanzverbindlichkeiten/EBITDA auch im Jahr 2011 bewegen.

Die Prognose berücksichtigt alle zum Zeitpunkt der Bilanz aufstellung bekannten Ereignisse, die unsere Geschäftsentwicklung im Jahr 2011 und darüber hinaus beeinflussen könnten. Wesentliche Risiken werden im Risikobericht erläutert. Wie in der Vergangenheit setzen wir alles daran, unsere Ziele zu erreichen und – wenn möglich – zu übertreffen.

## KÜNFTIGE ABSATZMÄRKTE

Als international operierendes Unternehmen bieten wir unsere Produkte und Dienstleistungen in über 170 Ländern an. Wir erwarten, dass sich in unseren Märkten, insbesondere in Europa, Asien-Pazifik und Lateinamerika, die Konsolidierung

weiter fortsetzt. Wir gehen daher insgesamt davon aus, dass sich für Fresenius Möglichkeiten eröffnen, sich sowohl über die Erhöhung der regionalen Präsenz als auch über die Arrondierung des Produktprogramms neue Absatzmärkte zu erschließen. In den USA verfügen Fresenius Medical Care und der Wettbewerber DaVita bereits über einen Marktanteil von rund zwei Dritteln. Daher sind dort – auch aufgrund potenzieller kartellrechtlicher Restriktionen – eher nur kleinere Akquisitionen zu erwarten. Darüber hinaus erschließen sich für Fresenius neue Absatzmärkte durch die sukzessive regionale Ausdehnung des bestehenden Produkt- und Dienstleistungsprogramms. So agiert Fresenius Medical Care aufgrund unterschiedlicher regionaler und rechtlicher Rahmenbedingungen in einigen Ländern ausschließlich als Anbieter von Dialyseprodukten. Sollten sich in diesen Ländern die Rahmenbedingungen ändern, könnte das Unternehmen möglicherweise zusätzlich Dialyседienstleistungen anbieten.

## GESAMTWIRTSCHAFTLICHER AUSBLICK

Die Entwicklung der Weltwirtschaft wird auch im Jahr 2011 mit Risiken behaftet bleiben. Zum einen wird erwartet, dass die nach wie vor angespannte Situation auf den Finanz- und Immobilienmärkten die wirtschaftliche Dynamik in den Industrieländern bremsen wird. Zum anderen gehen Experten von einer leichten Eintrübung der Konjunkturperspektiven in den Schwellenländern aus, die sich bislang als Konjunkturmotor erwiesen hatten. Dies ist u. a. auf die wachsende Sorge vor einem abrupten Ende der möglicherweise blasenhaften Entwicklung der Immobilienpreise in China zurückzuführen. Darüber hinaus sehen sich viele Industrieländer mit der Aufgabe konfrontiert, ihre zuletzt stark gestiegene Verschuldung im öffentlichen als auch im privaten Sektor zurückzuführen. Der daraus resultierende Nachfragerückgang erhöht zusammen mit noch immer unterausgelasteten Kapazitäten und einer hohen Arbeitslosigkeit das Deflationsrisiko in den betroffenen Ländern. Die bereits sehr expansiv ausgerichtete Geldpolitik vieler Volkswirtschaften schränkt den Spielraum zur Begrenzung eines solchen Risikos weiter ein.

Vor diesem Hintergrund wird erwartet, dass im Jahr 2011 der weltwirtschaftliche Aufschwung an Tempo verlieren dürfte. Insgesamt soll sich das globale BIP um rund 3,9 % erhöhen.

## EUROPA

Für das Jahr 2011 wird erwartet, dass sich die positive Entwicklung der meisten Länder im Euro-Raum weiter fortsetzen wird. Für die Peripherieländer des Währungsgebiets wird hingegen von einer bestenfalls schleppenden Konjunktur ausgegangen. Hier wiegen die realwirtschaftlichen Probleme im Finanz- und Immobilienmarkt bzw. auf dem Arbeitsmarkt noch zu schwer. Angesichts der weiterhin unterausgelasteten Kapazitäten wird eine vergleichsweise moderate Ausweitung der Investitionen erwartet. Zudem werden die in den Krisenländern erforderlichen – und teilweise bereits angegangenen – Sparanstrengungen, wie Lohnanpassungen, Steuererhöhungen und der Abbau von Sozialleistungen, die inländische Konsum- und Investitionsnachfrage hemmen. Darüber hinaus wachsen Befürchtungen, dass weitere Länder wie Portugal und eventuell Spanien Hilfe aus dem EU-Rettungsschirm annehmen müssen.

Die Wirtschaftsleistung des Euro-Raums dürfte im Jahr 2011 um 1,2 % zunehmen, trotz des voraussichtlichen Rückgangs des BIPs in Griechenland und Portugal. Vor allem die starke Konjunktur in **Deutschland** sollte wesentlich zu diesem Wachstum beitragen, allerdings mit vermindertem Schwung, da aus den anderen Industrieländern nur noch eine abgeschwächte Nachfrage zu erwarten ist. An die Stelle außenwirtschaftlicher Impulse werden voraussichtlich zunehmend Impulse von der Binnennachfrage treten. Für das Jahr 2011 wird mit einem BIP-Wachstum von 2,0 % gerechnet.

## USA

Die Konjunktur in den USA wird sich im Jahr 2011 voraussichtlich weiter beleben. Es ist zwar zu erwarten, dass die Investitionsausgaben, gestützt durch ein weiterhin sehr günstiges Zinsniveau und eine expansive Geldpolitik, etwas stärker anziehen werden. Allerdings dürften der Schuldenabbau bei den privaten Haushalten und im Finanzsektor sowie die hohe Arbeitslosigkeit den privaten Konsum weiterhin drosseln. Die gestiegene Sparquote der privaten Haushalte dürfte jedoch einen plötzlichen Einbruch des Konsums unwahrscheinlich machen. Insbesondere die träge Entwicklung am Arbeitsmarkt mit einer weiterhin hohen Arbeitslosenrate von 9,8 % dämpft die Wachstumserwartungen. Jedoch wird für das Jahr 2011 eine leichte Verbesserung der Arbeitslosenrate erwartet.

Insgesamt ist davon auszugehen, dass sich die Zuwachsrates des BIPs im Jahr 2011 auf etwa 3,1 % erhöhen wird.



## ASIEN

Für die asiatischen Schwellenländer wird erwartet, dass sich das Wirtschaftswachstum im Jahr 2011 auf 7,4 % abschwächen wird. Die private Nachfrage sollte weiterhin zunehmen. Die niedrigere Wachstumsrate dürfte vor allem auf einem Rückgang der Exportwachstumsrate und dem nachlassenden Wachstum in den Industrieländern beruhen. Die Schwellenländer werden auch weiterhin von den Industrieländern abhängig bleiben, für die ein Großteil der Exporte bestimmt ist.

Für **China** wird im Jahr 2011 ein BIP-Wachstum von 8,7 % erwartet. Diese moderate Abschwächung gegenüber dem Vorjahr lässt sich auf drei Gründe zurückführen: erstens geringere Basiseffekte, zweitens eine erwartete Abschwächung bei der externen Nachfrage und drittens Chinas geldpolitische Straffung, die im ersten Quartal 2010 begann. Weiterhin bleibt abzuwarten, ob die chinesische Regierung zu einer weiteren Flexibilisierung der immer noch unterbewerteten Währung bereit ist.

Für **Japan** könnten ein Nachfragerückgang bei Konsumgütern nach dem Auslaufen der fiskalpolitischen Subventionen sowie die weltweite Konjunkturschwäche belastend wirken. Die Zuwachsraten des BIPs wird voraussichtlich 0,6 % betragen.

Die asiatischen Schwellenländer werden auch im Jahr 2011 hohe Wachstumsraten erzielen. Strukturelle Faktoren, wie der Aufholprozess gegenüber den Industrienationen, die junge und weiter wachsende Bevölkerung sowie die Verbesserungen der Infrastruktur, werden hier weiterhin Wachstumsmotor für die Volkswirtschaften sein. Im Zuge des hohen Wachstums ist mit steigender Inflation und insbesondere weiterhin steigenden Lebensmittelpreisen zu rechnen.

## LATEINAMERIKA

Für Lateinamerika wird trotz einiger Anzeichen für eine Verlangsamung ein anhaltend robustes Wachstum prognostiziert. Dieses gründet vor allem auf einer weiteren erwarteten Dynamik der Binnennachfrage und positiven Effekten aus den gestiegenen Rohstoffpreisen. Weiterhin dürfte Lateinamerika von den Vorteilen eines stabilen finanziellen und wirtschaftlichen Umfelds profitieren. Die Verschuldung der Unternehmen und privaten Haushalte ist relativ gering.

**Argentinien** ist zwar jüngst wieder auf den Wachstumspfad zurückgekehrt, die Risikolage bleibt aber aufgrund der politischen Instabilität weiter negativ. Im Jahr 2011 dürfte das

argentinische BIP um 5,5 % wachsen. Für **Brasilien** erwarten Experten ein Wachstum von rund 4,5 %. Die schwächere Wachstumsprognose beruht auf der Erwartung einer etwas restriktiveren Fiskalpolitik. Auch in **Mexiko** sollte das Wachstum etwas nachlassen: Erwartet werden 4,0 %, da Mexikos Wirtschaft weiterhin stark von der US-Wirtschaft abhängt.

## GESUNDHEITSEKTOR UND MÄRKTE

Der Gesundheitssektor zählt nach wie vor zu den weltweit bedeutendsten Wirtschaftszweigen und gilt als weitestgehend konjunkturunabhängig. Die Nachfrage insbesondere nach lebensrettenden und lebenserhaltenden Produkten und Dienstleistungen wird aufgrund ihrer medizinischen Notwendigkeit und der Alterung der Gesellschaft weiter steigen.

Experten schätzen jedoch, dass weitere staatliche Finanzierungsengpässe zu größerem Preisdruck und langsamerem Umsatzwachstum führen könnten, da die Regierungen die Ausgaben im Gesundheitswesen zu senken versuchen.

Bei allen Herausforderungen erwarten Branchenbeobachter für den Sektor auch in nächster Zeit eine vergleichsweise solide finanzielle Entwicklung. Demografische Entwicklungen sowie der wissenschaftliche Fortschritt und die große Zahl der noch schwer oder überhaupt nicht heilbaren Erkrankungen dürften das Wachstum vorantreiben. Darüber hinaus sollten der Bedarf nach einer breiteren medizinischen Basisversorgung und die zunehmende Nachfrage nach hochwertigen Therapien in den Schwellenländern auch weiterhin zu stetigen Zuwachsraten führen.

## DER DIALYSEMARKT

Wir erwarten, dass auch in den kommenden Jahren die Zahl der Dialysepatienten weltweit um etwa 6 % p. a. zunehmen wird. Dabei sollten die zum Teil erheblichen regionalen Unterschiede unverändert bestehen bleiben: Für die USA, Japan sowie Mittel- und Westeuropa rechnen wir angesichts der bereits relativ hohen Prävalenz mit einem Wachstum der Patientenzahlen in der Größenordnung von 3 bis 5 % p. a. In vielen Entwicklungsländern jedoch ist der Bedarf längst noch nicht gedeckt. Hier erwarten wir eine Zunahme der Patientenzahlen von bis zu 10 %, in einzelnen Ländern sogar noch darüber. Dieses Wachstum wird getrieben durch die sich stetig entwickelnden Gesundheitssysteme, die eine zunehmende



Versorgung der Patienten gewährleisten. Die Tatsache, dass mehr als 80 % der Weltbevölkerung in vergleichsweise wirtschaftlich wachstumsstarken Ländern leben, macht deutlich, wie groß das Potenzial für das gesamte Spektrum der Dialysebehandlung und -produkte ist.

Nicht zuletzt tragen demografische Faktoren zu weiter wachsenden Dialysemärkten bei, u. a. die älter werdende Bevölkerung und die steigende Zahl von Menschen, die an Diabetes und Bluthochdruck leiden. Dies sind Erkrankungen, die dem terminalen Nierenversagen oft vorausgehen. Zudem steigt die Lebenserwartung von Dialysepatienten dank der sich stetig verbessernden Behandlungsqualität und des auch in den Entwicklungsländern steigenden Lebensstandards.

Wir gehen davon aus, dass der globale Dialysemarkt – unveränderte Wechselkursrelationen vorausgesetzt – im Jahr 2011 um etwa 4 % wachsen wird (2010: rund 69 Mrd €).

Im Januar 2011 wurde in unserem größten Absatzmarkt – den USA – ein neues Pauschalvergütungssystem für staatlich versicherte Dialysepatienten eingeführt. Alle Produkte und Dienstleistungen, die bislang gemäß dem Erstattungssatz (Composite Rate) vergütet wurden, sowie separat erstattete Leistungen, wie die Verabreichung bestimmter Medikamente und die Durchführung von diagnostischen Labortests, werden künftig mit einem Pauschalsatz erstattet.

Weitere Informationen hierzu finden Sie auf Seite 105 des Lageberichts.

## **DER MARKT FÜR INFUSIONS- UND ERNÄHRUNGSTHERAPIEN, GENERISCHE I.V.-ARZNEIMITTEL UND MEDIZINTECHNISCHE PRODUKTE**

Der Markt für **Infusionstherapien und klinische Ernährung** in Mittel- und Westeuropa wird in den kommenden Jahren voraussichtlich auch weiterhin im niedrigen einstelligen Prozentbereich wachsen. Allerdings setzen sich Bestrebungen zur Kosteneinsparung im Gesundheitswesen vor dem Hintergrund der Finanzsituation der Länder unvermindert fort. Hohes Wachstumspotenzial bieten uns nach wie vor die Regionen Asien-Pazifik – hier vor allem China – sowie Lateinamerika und Osteuropa. Dort erwarten wir, dass sich das Marktwachstum im hohen einstelligen bis zweistelligen Prozentbereich fortsetzen wird.

Bei **generischen I.V.-Arzneimitteln** wird die Wachstumsdynamik auch weiterhin durch den Ablauf des Patentschutzes von Originalpräparaten getrieben. Gegenläufig wirkt der Preisrückgang der bereits im Markt befindlichen Produkte.

Wir gehen davon aus, dass das Marktwachstum bei generischen I.V.-Arzneimitteln im Jahr 2011 in Mittel- und Westeuropa und den USA im mittleren einstelligen Prozentbereich liegen wird.

Auch auf dem Markt für medizintechnische Produkte sehen wir in den nächsten Jahren eine steigende Nachfrage.

## **DER DEUTSCHE KRANKENHAUSMARKT**

Der Deutsche Bundestag hat zum Ende des Jahres 2010 das Gesetz zur nachhaltigen und sozial ausgewogenen Finanzierung der Gesetzlichen Krankenkassen (GKV-FinG) verabschiedet, das auch den Krankenhausmarkt beeinflussen wird. Um das prognostizierte Defizit von 9 Mrd € bei den Gesetzlichen Krankenkassen auszugleichen, werden durch das GKV-FinG alle wesentlichen Akteure im Gesundheitsmarkt beteiligt. Der geschätzte Beitrag der Krankenhäuser zur Deckung der Finanzierungslücke liegt bei rund 0,5 Mrd € im Jahr 2011.

Die aktuellen Reformen beschäftigen sich schwerpunktmäßig mit der Einnahmeseite der gesetzlichen Krankenkassen und den Kostendämpfungsmaßnahmen; sie begründen bisher keine wesentlichen Veränderungen in Hinblick auf die gesetzlichen Rahmenbedingungen für den Akut- und Rehabilitationsklinikenmarkt.

Im Hinblick auf die Finanzierung können die Krankenhäuser auch im Jahr 2011 grundsätzlich mit steigenden Budgets rechnen. Der Preiszuwachs für Krankenhausleistungen jedoch wird durch das GKV-FinG auf 0,9 % reduziert. Dies entspricht einer Kürzung der Grundlohnrate um 0,25 Prozentpunkte. Für das Jahr 2012 wird eine Kürzung der Grundlohnrate um maximal 0,5 Prozentpunkte erwartet. Darüber hinaus werden im Jahr 2011 gegenüber dem Jahr 2010 vereinbarte Mehrleistungen grundsätzlich nur noch zu 70 % erstattet.

Durch die reduzierten Erlössteigerungen können voraussichtlich nicht alle erwarteten Kostensteigerungen in den Krankenhäusern – insbesondere im Personalbereich aufgrund von Tarifsteigerungen – abgedeckt werden. Der Kostendruck und die Notwendigkeit weiterer Einsparungen im Krankenhausbetrieb bleiben erhalten.

In Deutschland werden seit Beginn des Jahres 2010 akutstationäre Krankenhausleistungen ausschließlich auf Basis der Landesbasisfallwerte (DRG-System) abgerechnet. In einem

Zeitraum von fünf Jahren, beginnend im Jahr 2010, sollen die unterschiedlichen Landesbasisfallwerte dann schrittweise auf einen einheitlichen bundesweiten Basisfallwertkorridor angenähert werden. Die ursprünglich geplante Angleichung an einen einheitlichen Bundesbasisfallwert ab dem Jahr 2015 wurde aufgehoben.

Aufgrund der bisherigen Erfahrungen mit dem DRG-System, der guten Fallzahlentwicklung sowie der nunmehr abgeschlossenen Konvergenzphase erwartet HELIOS jedoch keine grundlegenden Veränderungen in der Finanzierung ihrer Leistungen.

Im Rahmen des **Krankenhausfinanzierungsreformgesetzes** (KHRG) sollen die Kriterien für eine Umstellung auf eine pauschalisierende Investitionsfinanzierung durch die Kostenträger bis zum Jahresende 2012 erarbeitet werden. Anstelle der bislang antragsbasierten Investitionsfinanzierung der Krankenhäuser soll den Ländern eine leistungsorientierte Verteilung von Investitionsmitteln ermöglicht werden. Im Einklang mit dem DRG-System ist geplant, Investitionspauschalen aus einem jeweils auf der Landesebene festzulegenden Investitionsfallwert und bundeseinheitlichen Investitionsbewertungsrelationen zu ermitteln.

Der steigende **Bedarf an Investitionsmitteln** bei gleichzeitiger Reduzierung der Fördermittel erhöht den Druck auf die Krankenhäuser, Rationalisierungspotenziale konsequent auszuschöpfen. Laut einer Analyse des Deutschen Krankenhaus Instituts wird mittlerweile weniger als die Hälfte der Krankenhausinvestitionen aus den öffentlichen Fördermitteln der Bundesländer bestritten. Die Finanzierung der Investitionen stellt sich insbesondere für Einrichtungen der öffentlichen Hand als Herausforderung dar, denn die Finanzlage der Kommunen, die in der Vergangenheit häufig für Fehlbeträge aus dem laufenden Geschäftsbetrieb ihrer Krankenhäuser aufkamen und deren Investitionen mitgetragen haben, wird weiter angespannt bleiben. Dies wird die finanziellen Möglichkeiten zur Unterstützung von defizitären Krankenhäusern und zu Investitionen in öffentliche Gesundheitseinrichtungen weiter einschränken und Privatisierungen fördern.

Eine Zunahme des Anteils privater Krankenhäuser zulasten öffentlicher Einrichtungen ist daher grundsätzlich zu erwarten. Private Krankenhausketten und große Klinikverbünde können dem Druck zu mehr Wirtschaftlichkeit tendenziell besser begegnen als öffentliche Einrichtungen. Sie verfügen oft über mehr Erfahrung hinsichtlich wirtschaftlich orientierten Handelns, über effiziente Strukturen und die Möglichkeit,

Kostenvorteile im Einkauf zu erzielen. Auch haben private Träger meist mehr Erfahrung im Prozess-Know-how bei der Akquisition und Integration neuer Kliniken sowie einer raschen Anpassung ihrer Kostenstrukturen. Für das Jahr 2011 erwarten Experten angesichts der schwierigeren Lage der Kliniken vermehrt Privatisierungen.

Eine weitere Herausforderung für Krankenhäuser wird auch zukünftig die **Personalknappheit** sein, die u. a. auf eine restriktive Arbeitszeitgesetzgebung sowie einen erhöhten Fachkräftebedarf in ausgewählten Bereichen zurückzuführen ist. Allein im ärztlichen Bereich gehen Experten von rund 6.000 unbesetzten Stellen aus. Die langfristige Bindung qualifizierter Fachkräfte und deren Weiterbildung gelten als wesentliche Erfolgsfaktoren im Krankenhaus.

Neben effizienten Betriebsabläufen, einem attraktiven Behandlungsspektrum und qualifizierten Mitarbeitern ist vor allem die hervorragende medizinische Qualität wesentliches Kriterium für ein erfolgreiches Krankenhaus. HELIOS ist davon überzeugt, dass ein systematisches Qualitätsmanagement und eine Dokumentation der medizinischen Ergebnisqualität nicht nur als Marketinginstrumente dienen, sondern Teil des Krankenhausmanagements und somit auch der Vergütung werden sollten. Langfristig werden Initiativen erwartet, die die Einführung einer qualitätsabhängigen Vergütung (Pay-for-Performance) vorsehen bzw. Krankenhäusern die Option eröffnen, Selektivverträge mit Krankenversicherungen zu schließen. Auf eine solche Entwicklung wäre die HELIOS-Kliniken-Gruppe dank ihrer konsequenten Ausrichtung auf Qualität und Transparenz bestens vorbereitet.

Für den Rehabilitationsbereich sind derzeit keine Konsequenzen aus gesetzlichen Änderungen absehbar. Gleichwohl wird der Preis- und Steuerungseinfluss durch die Kostenträger weiter zunehmen. Angesichts des demografischen Wandels, steigender Lebensarbeitszeit und der wachsenden Zahl chronischer Krankheiten gehen Experten von einer zunehmenden Bedeutung der medizinischen Rehabilitation aus. Wir erwarten zudem, dass wir durch die steigenden Fallzahlen im Akutbereich und durch eine kontinuierliche Optimierung unseres Überleitungsmanagements unsere Potenziale aus der Verbindung zwischen Akut- und Reha-Versorgung besser nutzen und somit die Zahl der Fälle in unseren Rehabilitationskliniken steigern können.

## DER MARKT FÜR ENGINEERING- UND DIENSTLEISTUNGEN FÜR KRANKENHÄUSER UND ANDERE GESUNDHEITSEINRICHTUNGEN

In den Industrieländern ist aufgrund der demografischen Entwicklung weiterhin mit einer zunehmenden Nachfrage nach hochwertiger und effizienter medizinischer Versorgung und damit auch nach Engineering- und Dienstleistungen für Krankenhäuser und andere Gesundheitseinrichtungen zu rechnen. Im Vordergrund stehen die Dienstleistungen, d. h. Wartung und Instandhaltung der Medizin- und Krankenhaus-technik, Facility-Management, Technische Betriebsführung bis hin zur Gesamtbetriebsführung sowie infrastrukturelle Prozessoptimierungen – insbesondere im Rahmen von Public-Private-Partnership-Modellen. Zusätzliche Wachstumschancen ergeben sich durch die fortschreitende Privatisierung des Gesundheitswesens.

In den Schwellenmärkten steigt die Nachfrage, vor allem im Bereich Aufbau und Weiterentwicklung der Infrastruktur, aber auch nach effizienter und bedarfsgerechter medizinischer Versorgung. Der Aufbau der primären Versorgung ist weitestgehend abgeschlossen. In vielen Märkten gilt es, den Ausbau der sekundären Versorgung voranzutreiben bzw. im Rahmen von „Centers of Excellence“ tertiäre Versorgungsstrukturen sowie Lehr- und Forschungsstrukturen zu schaffen. Insgesamt erwarten wir, dass der Markt für Engineering- und Dienstleistungen für Krankenhäuser und andere Gesundheitseinrichtungen auch im Jahr 2011 wachsen wird.

## KONZERNUMSATZ UND KONZERNERGEBNIS

Dank seiner internationalen Produktions- und Vertriebsplattform ist der Fresenius-Konzern sehr gut aufgestellt, um mit seinen marktgerechten Produkten und Dienstleistungen auch in den nächsten Jahren weiter zu wachsen. Gleichzeitig bieten die im Kapitel „Gesundheitssektor und Märkte“ beschriebenen Entwicklungen Chancen für profitables Wachstum. Für das Geschäftsjahr 2011 planen wir daher, den **Konzernumsatz** auf Basis der Währungsrelationen des Jahres 2010 um  $\geq 7\%$  zu steigern.

Während die Märkte in unseren angestammten Regionen Europa und Nordamerika im Durchschnitt mit niedrigen bis mittleren einstelligen Prozentraten wachsen, sehen wir auch für die Zukunft stärkere Wachstumschancen in der Region Asien-Pazifik und in Lateinamerika, da hier der Bedarf an unseren lebenserhaltenden und lebensrettenden Produkten aufgrund der medizinischen Unterversorgung weiterhin hoch ist. Dies wird sich so auch in unserer Umsatzentwicklung widerspiegeln.

Für das Geschäftsjahr 2011 planen wir erneut einen Anstieg des **Konzernergebnisses**. Dies wollen wir erreichen durch die angesprochene Umsatzentwicklung sowie durch Maßnahmen zur Kostenoptimierung. Wenngleich das Marktumfeld nachhaltig von Kosteneinsparungen und Preisdruck gekennzeichnet ist, erwarten wir, das Konzernergebnis<sup>1</sup> währungsbereinigt um 8 bis 12 % zu erhöhen.

## ZIELE DES KONZERNS

|                                                             | Ziele 2011                                         | Geschäftsjahr 2010             |
|-------------------------------------------------------------|----------------------------------------------------|--------------------------------|
| Umsatz, Wachstum (währungsbereinigt)                        | $\geq 7\%$                                         | 15.972 Mio €                   |
| Konzernergebnis <sup>1</sup> , Wachstum (währungsbereinigt) | 8 – 12 %                                           | 660 Mio €                      |
| Investitionen in Sachanlagen                                | ~5 % v. Umsatz                                     | 758 Mio €                      |
| Dividende                                                   | Ertragsorientierte Ausschüttungspolitik fortsetzen | Vorschlag: +15 % je Stammaktie |

<sup>1</sup> Ergebnis, das auf die Anteilseigner der Fresenius SE & Co. KGaA entfällt, bereinigt um die Sondereinflüsse aus den Marktwertveränderungen der Pflichtumtauschleihe (MEB) und des Besserungsscheins (CVR) im Zusammenhang mit der Akquisition von APP Pharmaceuticals. Diese sind nicht liquiditätswirksam.

## UMSATZ UND ERGEBNIS DER UNTERNEHMENSBEREICHE

Für das laufende Geschäftsjahr 2011 erwarten wir in allen Unternehmensbereichen weitere Umsatz- und Ergebnissteigerungen. Dies zeigt die Tabelle im Überblick.

## ZIELE DER UNTERNEHMENSBEREICHE

|                               | Ziele 2011             | Geschäftsjahr 2010       |
|-------------------------------|------------------------|--------------------------|
| <b>Fresenius Medical Care</b> |                        |                          |
| Umsatz                        | 12,8–13,0 Mrd US\$     | 12.053 Mio US\$          |
| Konzernergebnis <sup>1</sup>  | 1.035 – 1.055 Mio US\$ | 979 Mio US\$             |
| <b>Fresenius Kabi</b>         |                        |                          |
| Umsatzwachstum (organisch)    | ~5 %                   | 3.672 Mio € <sup>2</sup> |
| EBIT-Marge                    | > 19 %                 | 20,1 %                   |
| <b>Fresenius Helios</b>       |                        |                          |
| Umsatzwachstum (organisch)    | 3 – 5 %                | 2.520 Mio € <sup>2</sup> |
| EBIT                          | 250 – 260 Mio €        | 235 Mio €                |
| <b>Fresenius Vamed</b>        |                        |                          |
| Umsatzwachstum                | 5 – 10 %               | 713 Mio € <sup>2</sup>   |
| EBIT-Wachstum                 | 5 – 10 %               | 41 Mio € <sup>3</sup>    |
| <b>Fresenius Biotech</b>      |                        |                          |
| EBIT                          | ~ - 30 Mio €           | - 32 Mio €               |

<sup>1</sup> Ergebnis, das auf die Anteilseigner der Fresenius Medical Care AG & Co. KGaA entfällt

<sup>2</sup> Umsatz

<sup>3</sup> EBIT

Die Zahl der Dialysepatienten wird voraussichtlich auch im Jahr 2011 weltweit um etwa 6 % zunehmen. Daraus werden der Bedarf an Dialyseprodukten und die Zahl von Behandlungen steigen. Für das Geschäftsjahr 2011 erwartet **Fresenius Medical Care** in ihrer Berichtswährung US-Dollar einen Umsatzanstieg auf 12,8 bis 13,0 Mrd US\$. Das Konzernergebnis soll auf 1.035 bis 1.055 Mio US\$ steigen.

**Fresenius Kabi** erwartet weiterhin eine positive Entwicklung. Aufgrund der hohen Basis, die im Jahr 2010 dank des außerordentlichen Wachstums in Nordamerika erreicht wurde, werden die Zuwachsraten im Jahr 2011 moderater ausfallen. Der Umsatz soll dennoch organisch um rund 5 % steigen. Gute Wachstumschancen werden erneut in der Region Asien-Pazifik und in Lateinamerika erwartet. Angesichts der zuversichtlichen Umsatzprognose und weiterer Kostenoptimierungen, vor allem in der Produktion, sowie einer Verbesserung des Produktmix, rechnet Fresenius Kabi im Geschäftsjahr 2011 mit einem weiteren Ergebnisanstieg. Die EBIT-Marge soll bei > 19 % liegen. Damit erreichen wir weiterhin ein ausgezeichnetes Margenniveau.

**Fresenius Helios** geht im Krankenhausbetreiber-Geschäft von einer weiterhin guten Entwicklung aus. Für das Geschäftsjahr 2011 rechnet das Unternehmen mit einem organischen Umsatzwachstum von 3 bis 5 %. Der EBIT von Fresenius Helios soll auf 250 bis 260 Mio € steigen.

Der Unternehmensbereich **Fresenius Vamed** verfügt angesichts des ausgezeichneten Auftragsbestands im Projektgeschäft in Höhe von 801 Mio € und langfristiger Verträge im Servicegeschäft über eine ausgezeichnete Basis für weiteres Wachstum. Sowohl der Umsatz als auch der EBIT sollen im Geschäftsjahr 2011 um 5 bis 10 % steigen.

Für **Fresenius Biotech** erwarten wir eine weitere Reduzierung des negativen EBIT auf eine Größenordnung von rund - 30 Mio €.

## FINANZIERUNG

Im Geschäftsjahr 2010 haben wir vornehmlich durch die gute Ergebnisentwicklung und ein konsequentes Management des Nettoumlaufvermögens einen hohen operativen Cashflow von 1.911 Mio € erreicht. Die Cashflow-Rate beträgt hervorragende 12,0 %. Aus heutiger Sicht gehen wir davon aus, dass wir im Geschäftsjahr 2011 eine **Cashflow-Rate** in der Größenordnung einer hohen einstelligen Prozentrage vom Umsatz werden erzielen können.

Als eine zentrale finanzwirtschaftliche Zielgröße für den Fresenius-Konzern verwenden wir die Kennzahl **Netto-Finanzverbindlichkeiten/EBITDA** (Verschuldungsgrad). Dieser

Wert war nach der Akquisition von APP Pharmaceuticals im Jahr 2008 auf 3,6 angestiegen, konnte aber bereits im Jahr 2009 wieder deutlich verbessert werden auf einen Wert von 3,0. Die positive Entwicklung setzte sich im Jahr 2010 mit 2,6 weiter fort. Damit bewegt sich diese Kennzahl in der von uns anvisierten Bandbreite von 2,5 bis 3,0. Auch für das Jahr 2011 erwarten wir, dass unser Verschuldungsgrad in dieser Bandbreite liegen wird. Dies soll primär durch Ergebnissteigerungen bzw. eine weiterhin positive Cashflow-Entwicklung erreicht werden.

Insgesamt verfügen wir über einen angemessenen **Finanzierungsspielraum** mit freien Kreditlinien aus syndizierten oder bilateral mit Banken vereinbarten Krediten. Das Commercial-Paper-Programm der Fresenius SE & Co. KGaA in Höhe von 250 Mio € war am Bilanzstichtag nicht genutzt. Informationen hierzu finden Sie auch auf Seite 164.

Im Jahr 2011 besteht nur ein begrenzter **Refinanzierungsbedarf**, der sich im Wesentlichen aus der Fälligkeit der genussscheinähnlichen Wertpapiere (Trust Preferred Securities) der Fresenius Medical Care in Höhe von 300 Mio € und 225 Mio US\$ ergibt.

## INVESTITIONEN

Auch künftig werden wir weiter in unser Wachstum investieren. Für das Geschäftsjahr 2011 erwarten wir, Investitionen in Sachanlagen in Höhe von rund 5 % vom Umsatz zu tätigen, was auf dem prozentualen Wert des Jahres 2010 liegt.

Rund 60 % der vorgesehenen Investitionsmittel entfallen auf Fresenius Medical Care, jeweils etwa 20 % auf die Unternehmensbereiche Fresenius Kabi und Fresenius Helios. Bei Fresenius Medical Care werden die Investitionsschwerpunkte darin bestehen, Dialysekliniken zu errichten sowie Produktionskapazitäten auszubauen und Kosten zu optimieren. Fresenius Kabi wird zum einen in den Ausbau und Erhalt der Produktionsanlagen, zum anderen in die Einführung neuer Fertigungstechnologien investieren. Dies eröffnet weitere Chancen, die Produktionseffizienz zu steigern. Ein wichtiges Projekt ist die Erweiterung unseres Produktions- und Logistikzentrums in Friedberg, Deutschland. Bei Fresenius Helios investieren wir primär in die Modernisierung sowie Ausstattung von Krankenhäusern.

Regionale Schwerpunkte im Konzern sind Europa und Nordamerika mit rund 50 % bzw. 35 %, die restlichen Mittel werden wir in Asien, Lateinamerika und Afrika investieren. Rund 30 % der gesamten Mittel sind für Investitionen in Deutschland vorgesehen.

## BESCHAFFUNG

Auch im Jahr 2011 werden wir unser Beschaffungsmanagement nachhaltig optimieren: Preise, Konditionen und insbesondere die Qualität sind zentrale Bausteine, um unseren Ertrag weiter zu steigern.

Die Rohstoffnachfrage ist weltweit gestiegen. Um dieser Entwicklung zu begegnen, baut **Fresenius Medical Care** das **Lieferantenmanagement** sowohl regional als auch überregional weiter aus. Es gilt, die Versorgung mit hochwertigen Rohmaterialien und Halbfertigprodukten zu günstigen Konditionen sicherzustellen. Auch die Fertigungskette soll insgesamt profitabler gestaltet werden: Bereits bei der Entwicklung von Produkten und Produktionsverfahren wollen wir vom Know-how wichtiger Zulieferer profitieren. Wir binden Partner ein, die für Fresenius Medical Care komplette Produktmodule oder Baugruppen entwickeln und liefern. Nachdem im Jahr 2010 die Regionen ihre Einkaufsstrategie insbesondere bei Produktionsmaterialien harmonisiert haben, wollen wir nunmehr auch beim **indirekten Bedarf** Synergien erzielen. Dazu gehören alle Güter und Dienstleistungen, die nicht direkt in die Fertigung eingehen, z. B. Informationstechnologie, Energie, Fracht- oder Beratungsleistungen.

Die Beschaffungsaktivitäten von **Fresenius Kabi** werden im Jahr 2011 vor allem durch folgende Faktoren beeinflusst: erstens durch die erhebliche Volatilität sowohl der Preise für Basisrohstoffe als auch der Wechselkurse handelsstarker Währungen, zweitens durch die Auswirkungen der anhaltenden Finanzkrise in einigen europäischen Ländern und drittens durch die schwer einschätzbaren finanz- bzw. wirtschaftspolitischen Maßnahmen großer Volkswirtschaften. Diese Einflüsse erschweren eine Vorhersage der Preisentwicklung der für Fresenius Kabi relevanten **Basisrohstoffe** und deren Folgeprodukte. Im Jahr 2010 bewegten sich die Preise einer Reihe von Basisrohstoffen bereits nahe ihrer jeweiligen Höchstwerte des Jahres 2008. Es bleibt abzuwarten, ob sich dieser Trend weiter fortsetzen wird. Für Produkte, deren Preise an die relevanten Basisrohstoffpreise gebunden sind, wird der Preis im Jahresverlauf zu fest vereinbarten Terminen neu fixiert.

Bei Wirkstoffen für **I.V.-Arzneimittel** konnten wir bereits wichtige Abschlüsse für das Jahr 2011 tätigen.

Die **Energiemärkte** sind extrem volatil und spekulationsgetrieben. Bereits in der Talsohle der Wirtschaftskrise haben wir für Strom einen Abschluss für das Jahr 2011 getroffen und so gegenüber dem Vorjahr eine positive Entwicklung unserer Kostenposition gesichert. Dies wird jedoch praktisch neutralisiert, da sich der Zuschlag für erneuerbare Energien im Jahr 2011 um 72 % erhöht und zudem Steuerermäßigungen wegfallen. Außerdem rechnen wir mit Preissteigerungen für Gas.

Das auf drei Jahre ausgelegte Projekt **Global Sourcing Initiative** wird auch im Jahr 2011 einer unserer Schwerpunkte in den Beschaffungsaktivitäten sein. Die im Rahmen des Projekts definierten Maßnahmen beziehen sich sowohl auf den Preis als auch auf den Verbrauch und die Substitution von Einsatz- bzw. Verbrauchsmaterialien.

Der **HELIOS-Konzerneinkauf** plant, im Jahr 2011 das Projekt zur einheitlichen Darstellung der Verbrauchsdaten abzuschließen: Nach einer Validierungsphase soll das System allen Kliniken im HELIOS-Verbund zur Verfügung stehen. In weiteren strategischen Projekten legen wir unseren Fokus auf die **Medizintechnik**. In einem ersten Schritt werden mit den Anwendern im Klinikverbund Produktstrategien entwickelt, die sich sowohl auf die medizinische Verwendung als auch auf die Qualitätsanforderungen konzentrieren. Konzernweit sollen in einem zweiten Schritt Einkaufsmengen gebündelt werden, um Kostenpotenziale zu heben.

Der **Stromeinkauf** für das Jahr 2011 wurde bereits im 1. Quartal 2009 getätigt. Gegenüber dem Jahr 2010 konnten wir den Strompreis für das Jahr 2011 um 15 % senken. Die Einsparung kompensiert teilweise den erhöhten Zuschlag für erneuerbare Energien. Auch den **Erdgasbedarf** haben wir bereits frühzeitig gedeckt. Für das Lieferjahr 2011 (31.10.2010 bis 31.10.2011) sank der Erdgaspreis um rund 15 % im Vergleich zum Lieferjahr 2010.

Langfristig will HELIOS alle Klinikstandorte auf eine teilweise Wärmegewinnung durch erneuerbare Energien umrüsten. Bereits drei Standorte beziehen Energie über einen Biomassekessel (Pellets). Im Jahr 2011 wird deren Einsatz an weiteren Standorten untersucht und vorbereitet.

## FORSCHUNG UND ENTWICKLUNG

Unseren Forschungs- und Entwicklungsaktivitäten werden wir auch in Zukunft einen hohen Stellenwert beimessen, um das Wachstum des Unternehmens langfristig durch **Innovationen und neuartige Therapien** sichern zu können.

Als vertikal integriertes Unternehmen, das sowohl Dialyseprodukte fertigt als auch eigene Dialysekliniken betreibt, will **Fresenius Medical Care** ein komplettes Portfolio an hochwertigen Produkten und Dienstleistungen für die Behandlung des chronischen Nierenversagens anbieten, das sich flexibel an lokale Marktbedingungen und an die sich zum Teil dynamisch verändernden Gesundheitssysteme und Vergütungsstrukturen anpassen lässt. Angesichts der wachsenden

Herausforderung im Gesundheitswesen, immer mehr Patienten umfassend, hochwertig und zugleich kosteneffizient zu versorgen, wollen wir dieses umfangreiche Portfolio zunehmend nutzen, um unseren Partnern im Gesundheitswesen ganzheitliche oder integrierte Versorgungskonzepte (Disease Management) anzubieten.

Demzufolge wird ein Fokus unserer Arbeit Innovationen sein, die zusätzliche Behandlungselemente in unsere Angebote integrieren oder diese besser aufeinander abstimmen, um die Qualität, Sicherheit und Kosteneffizienz der Therapie gleichermaßen zu verbessern. Zum Beispiel werden wir an Vorrichtungen für unsere Hämodialysegeräte arbeiten, die die Handhabung des Blutschlauchsystems sowie seiner Anschlüsse auf wenige Arbeitsschritte reduzieren und dadurch das Klinikpersonal entlasten sollen. Auch mit der Integration der Dosierung und der Verabreichung bestimmter Medikamente in den Ablauf des Dialysegeräts werden wir uns weiter beschäftigen ebenso wie mit neuen Zusatzfunktionen, um die Behandlungsqualität und -sicherheit zu erhöhen.

Weiterhin wird uns allgemein die Frage beschäftigen, wie wir neue wissenschaftliche und technologische Erkenntnisse nutzen können, um die Lebensqualität einer wachsenden Zahl von Patienten mit chronischem Nierenversagen weiter zu verbessern – etwa durch Innovationen in den Heimtherapien. Die Sicherheit der Behandlung wird ein Schwerpunkt der kontinuierlichen Verbesserung unserer Produkte und Dienstleistungen bleiben und auch mit den Begleiterkrankungen des chronischen Nierenversagens werden wir uns weiter auseinandersetzen.

Einen weiteren Schwerpunkt der Entwicklungsarbeit bilden die Infusions- und Ernährungstherapien sowie die Entwicklung von generischen I.V.-Arzneimitteln bei **Fresenius Kabi**.

In der **Biotechnologie** konzentrieren wir uns auf die weitere klinische Entwicklung des Antikörpers catumaxomab, um das Produkt Removab kommerziell erfolgreicher zu machen. Informationen hierzu finden Sie auch auf Seite 86.

Für das Geschäftsjahr 2011 haben wir geplant, unsere **Aufwendungen** für Forschung und Entwicklung im Konzern zu erhöhen. Wir planen, rund 4 bis 5 % unseres Produktumsatzes für Forschung und Entwicklung zu investieren. Die Zahl der in der Forschung und Entwicklung tätigen Mitarbeiterinnen und Mitarbeiter soll weiter steigen.

Für den Erfolg neuer Produkte ist es von zentraler Bedeutung, dass Forschungs- und Entwicklungsprojekte marktorientiert und unter strengem zeitlichem Management vorangetrieben werden. Dabei überprüfen wir kontinuierlich unsere

Forschungsergebnisse auf der Grundlage klar definierter Zwischenziele. Innovative Ideen, Produktentwicklung und Therapien mit hohem Qualitätsniveau werden auch in Zukunft die Basis für weitere marktführende Produkte sein. Vor dem Hintergrund fortgesetzter Sparmaßnahmen im Gesundheitswesen gewinnt bei der Entwicklung von Produkten und der Verbesserung von Behandlungskonzepten Kosteneffizienz in Verbindung mit einer starken Qualitätsorientierung immer mehr an Bedeutung.

## UNTERNEHMENSSTRUKTUR UND ORGANISATION

Der Fresenius-Konzern präsentiert sich mit vier Unternehmensbereichen, die jeweils rechtlich selbstständig sind. Sie sind regional und dezentral aufgestellt, um so mit größtmöglicher Flexibilität die Anforderungen ihrer Märkte erfüllen zu können. Das Prinzip des „Unternehmers im Unternehmen“ mit klar definierten Verantwortlichkeiten hat sich seit vielen Jahren erfolgreich bewährt. Daran halten wir fest.

## GEPLANTE ÄNDERUNGEN IM PERSONAL- UND SOZIALBEREICH

Die Zahl der Mitarbeiterinnen und Mitarbeiter im Konzern wird angesichts des erwarteten Wachstums auch in Zukunft steigen. Wir gehen davon aus, dass die Zahl der Beschäftigten im Jahr 2011 in der Größenordnung einer mittleren einstelligen Zuwachsrate ansteigen sollte. In allen Unternehmensbereichen ist ein Anstieg geplant. Die regionale Verteilung der Beschäftigten wird sich nicht wesentlich ändern – etwa 50 % werden in Europa, rund ein Drittel in Nordamerika und die restliche Zahl der Mitarbeiter in Asien-Pazifik, Lateinamerika und Afrika beschäftigt sein.

## DIVIDENDE

Bei unserer Dividendenpolitik wollen wir die **Kontinuität** bewahren, die wir mit stetigen Dividendenerhöhungen in den letzten 17 Jahren eindrucksvoll bewiesen haben. Dabei haben wir im Durchschnitt etwa die Hälfte der prozentualen Steigerung des Konzernergebnisses als prozentuale Dividenden-erhöhung an unsere Aktionärinnen und Aktionäre weitergegeben. Auch für das Geschäftsjahr 2011 wollen wir unseren Aktionärinnen und Aktionären, basierend auf unserer positiven Ergebniserwartung, wieder eine **ertragsorientierte Ausschüttung** in Aussicht stellen.

---

# INHALT KONZERNABSCHLUSS

|                                         |                                              |
|-----------------------------------------|----------------------------------------------|
| 118 Konzern-Gewinn- und Verlustrechnung | 124 Konzern-Eigenkapitalveränderungsrechnung |
| 119 Konzern-Gesamtergebnisrechnung      | 126 Konzern-Segmentberichterstattung         |
| 120 Konzern-Bilanz                      | 130 Konzern-Anhang                           |
| 122 Konzern-Kapitalflussrechnung        |                                              |



# **FRESENIUS SE & CO. KGAA (BIS 28. JANUAR 2011: FRESENIUS SE)** **KONZERN-GEWINN- UND VERLUSTRECHNUNG**

| in Mio €                                                                                                  | Anhang (Anmerkung) | 2010         | 2009         |
|-----------------------------------------------------------------------------------------------------------|--------------------|--------------|--------------|
| Umsatz                                                                                                    | 4                  | 15.972       | 14.164       |
| Umsatzkosten                                                                                              | 5                  | -10.646      | -9.528       |
| <b>Bruttoergebnis vom Umsatz</b>                                                                          |                    | <b>5.326</b> | <b>4.636</b> |
| Vertriebs- und allgemeine Verwaltungskosten                                                               | 8                  | -2.664       | -2.342       |
| Forschungs- und Entwicklungsaufwendungen                                                                  |                    | -244         | -240         |
| <b>Operatives Ergebnis (EBIT)</b>                                                                         |                    | <b>2.418</b> | <b>2.054</b> |
| Zinserträge                                                                                               | 9                  | 30           | 22           |
| Zinsaufwendungen                                                                                          | 9                  | -596         | -602         |
| Sonstiges Finanzergebnis                                                                                  | 10                 | -66          | -31          |
| <b>Finanzergebnis</b>                                                                                     |                    | <b>-632</b>  | <b>-611</b>  |
| <b>Ergebnis vor Ertragsteuern</b>                                                                         |                    | <b>1.786</b> | <b>1.443</b> |
| Ertragsteuern                                                                                             | 11                 | -581         | -452         |
| <b>Ergebnis nach Ertragsteuern</b>                                                                        |                    | <b>1.205</b> | <b>991</b>   |
| Abzüglich Anteile anderer Gesellschafter                                                                  | 26                 | 583          | 497          |
| <b>Konzernergebnis<br/>(Ergebnis, das auf die Anteilseigner der Fresenius SE &amp; Co. KGaA entfällt)</b> |                    | <b>622</b>   | <b>494</b>   |
| <b>Ergebnis je Stammaktie in €</b>                                                                        | 12                 | <b>3,85</b>  | <b>3,06</b>  |
| Ergebnis je Stammaktie bei voller Verwässerung in €                                                       | 12                 | 3,79         | 3,04         |
| <b>Ergebnis je Vorzugsaktie in €</b>                                                                      | 12                 | <b>3,85</b>  | <b>3,07</b>  |
| Ergebnis je Vorzugsaktie bei voller Verwässerung in €                                                     | 12                 | 3,79         | 3,05         |

Der nachfolgende Anhang ist integraler Bestandteil des Konzernabschlusses.

## FRESENIUS SE & CO. KGAA (BIS 28. JANUAR 2011: FRESENIUS SE) KONZERN-GESAMTERGEBNISRECHNUNG

| in Mio €                                                                                 | Anhang (Anmerkung) | 2010         | 2009        |
|------------------------------------------------------------------------------------------|--------------------|--------------|-------------|
| <b>Ergebnis nach Ertragsteuern</b>                                                       |                    | <b>1.205</b> | <b>991</b>  |
| <b>Other Comprehensive Income (Loss)</b>                                                 |                    |              |             |
| Währungsumrechnungsdifferenzen                                                           | 28, 30             | 377          | -125        |
| Cashflow Hedges                                                                          | 28, 30             | -15          | 2           |
| Versicherungsmathematische Verluste aus leistungsorientierten Pensionsplänen             | 25, 28             | -54          | -5          |
| Ertragsteuern auf Komponenten des Other Comprehensive Income (Loss)                      | 28                 | 11           | -5          |
| <b>Other Comprehensive Income (Loss)</b>                                                 |                    | <b>319</b>   | <b>-133</b> |
| <b>Gesamtergebnis</b>                                                                    |                    | <b>1.524</b> | <b>858</b>  |
| <b>Auf andere Gesellschafter mit Put-Optionen entfallendes Gesamtergebnis</b>            |                    | <b>33</b>    | <b>16</b>   |
| <b>Auf andere Gesellschafter ohne Put-Optionen entfallendes Gesamtergebnis</b>           |                    | <b>689</b>   | <b>391</b>  |
| <b>Auf die Anteilseigner der Fresenius SE &amp; Co. KGaA entfallendes Gesamtergebnis</b> |                    | <b>802</b>   | <b>451</b>  |

Der nachfolgende Anhang ist integraler Bestandteil des Konzernabschlusses.

**FRESENIUS SE & CO. KGAA (BIS 28. JANUAR 2011: FRESENIUS SE)**  
**KONZERN-BILANZ**  
**AKTIVA**

| zum 31. Dezember, in Mio €                                                                               | Anhang (Anmerkung) | 2010          | 2009          |
|----------------------------------------------------------------------------------------------------------|--------------------|---------------|---------------|
| Flüssige Mittel                                                                                          | 13                 | 769           | 420           |
| Forderungen aus Lieferungen und Leistungen,<br>abzüglich Wertberichtigungen auf zweifelhafte Forderungen | 14                 | 2.935         | 2.509         |
| Forderungen gegen und Darlehen an verbundene Unternehmen                                                 |                    | 15            | 26            |
| Vorräte                                                                                                  | 15                 | 1.411         | 1.235         |
| Sonstige kurzfristige Vermögenswerte                                                                     | 16                 | 925           | 893           |
| Latente Steuern                                                                                          | 11                 | 380           | 280           |
| <b>I. Summe kurzfristige Vermögenswerte</b>                                                              |                    | <b>6.435</b>  | <b>5.363</b>  |
| Sachanlagen                                                                                              | 17                 | 3.954         | 3.559         |
| Firmenwerte                                                                                              | 18                 | 11.464        | 10.356        |
| Sonstige immaterielle Vermögenswerte                                                                     | 18                 | 984           | 1.053         |
| Sonstige langfristige Vermögenswerte                                                                     | 16                 | 628           | 436           |
| Latente Steuern                                                                                          | 11                 | 112           | 115           |
| <b>II. Summe langfristige Vermögenswerte</b>                                                             |                    | <b>17.142</b> | <b>15.519</b> |
| <b>Summe Aktiva</b>                                                                                      |                    | <b>23.577</b> | <b>20.882</b> |

## PASSIVA

zum 31. Dezember, in Mio €

|                                                                                                | Anhang (Anmerkung) | 2010          | 2009          |
|------------------------------------------------------------------------------------------------|--------------------|---------------|---------------|
| Verbindlichkeiten aus Lieferungen und Leistungen                                               |                    | 691           | 601           |
| Kurzfristige Verbindlichkeiten gegenüber verbundenen Unternehmen                               |                    | 2             | 7             |
| Kurzfristige Rückstellungen und sonstige kurzfristige Verbindlichkeiten                        | 19, 20             | 2.731         | 2.197         |
| Kurzfristige Finanzverbindlichkeiten                                                           | 21                 | 606           | 287           |
| Kurzfristige Darlehen von verbundenen Unternehmen                                              |                    | 2             | 2             |
| Kurzfristig fälliger Teil der langfristigen Darlehen und aktivierten Leasingverträge           | 21                 | 420           | 261           |
| Pflichtumtauschsanleihe                                                                        | 23                 | 554           | 0             |
| Genussscheinähnliche Wertpapiere der Fresenius Medical Care Capital Trusts                     | 24                 | 468           | 0             |
| Kurzfristige Rückstellungen für Ertragsteuern                                                  |                    | 163           | 122           |
| Latente Steuern                                                                                | 11                 | 74            | 51            |
| <b>A. Summe kurzfristige Verbindlichkeiten</b>                                                 |                    | <b>5.711</b>  | <b>3.528</b>  |
| Langfristige Darlehen und aktivierte Leasingverträge, abzüglich des kurzfristig fälligen Teils | 21                 | 4.919         | 5.228         |
| Anleihen                                                                                       | 22                 | 2.369         | 2.066         |
| Pflichtumtauschsanleihe                                                                        | 23                 | 0             | 554           |
| Langfristige Rückstellungen und sonstige langfristige Verbindlichkeiten                        | 19, 20             | 458           | 481           |
| Genussscheinähnliche Wertpapiere der Fresenius Medical Care Capital Trusts                     | 24                 | 0             | 455           |
| Pensionsrückstellungen                                                                         | 25                 | 383           | 309           |
| Langfristige Rückstellungen für Ertragsteuern                                                  |                    | 196           | 194           |
| Latente Steuern                                                                                | 11                 | 488           | 415           |
| <b>B. Summe langfristige Verbindlichkeiten</b>                                                 |                    | <b>8.813</b>  | <b>9.702</b>  |
| <b>I. Summe Verbindlichkeiten</b>                                                              |                    | <b>14.524</b> | <b>13.230</b> |
| <b>II. Anteile anderer Gesellschafter mit Put-Optionen</b>                                     | 26                 | <b>209</b>    | <b>161</b>    |
| <b>A. Anteile anderer Gesellschafter ohne Put-Optionen</b>                                     | 26                 | <b>3.879</b>  | <b>3.257</b>  |
| Gezeichnetes Kapital                                                                           | 27                 | 162           | 161           |
| Kapitalrücklage                                                                                | 27                 | 2.085         | 2.035         |
| Gewinnrücklage                                                                                 | 27                 | 2.683         | 2.183         |
| Kumuliertes Other Comprehensive Income (Loss)                                                  | 28                 | 35            | -145          |
| <b>B. Eigenkapital der Anteilseigner der Fresenius SE &amp; Co. KGaA</b>                       |                    | <b>4.965</b>  | <b>4.234</b>  |
| <b>III. Summe Eigenkapital</b>                                                                 |                    | <b>8.844</b>  | <b>7.491</b>  |
| <b>Summe Passiva</b>                                                                           |                    | <b>23.577</b> | <b>20.882</b> |

Der nachfolgende Anhang ist integraler Bestandteil des Konzernabschlusses.

# **FRESENIUS SE & CO. KGAA (BIS 28. JANUAR 2011: FRESENIUS SE)** **KONZERN-KAPITALFLUSSRECHNUNG**

1. Januar bis 31. Dezember in Mio €

Anhang (Anmerkung)

2010

2009

**Laufende Geschäftstätigkeit**

|                                                                                                                        |            |        |       |
|------------------------------------------------------------------------------------------------------------------------|------------|--------|-------|
| Ergebnis nach Ertragsteuern                                                                                            |            | 1.205  | 991   |
| <b>Überleitung vom Ergebnis nach Ertragsteuern auf den Mittelzufluss aus laufender Geschäftstätigkeit</b>              |            |        |       |
| Abschreibungen                                                                                                         | 16, 17, 18 | 639    | 562   |
| Veränderung der latenten Steuern                                                                                       | 11         | 11     | 11    |
| Gewinn/Verlust aus Anlagenabgängen                                                                                     |            | 1      | –     |
| <b>Veränderungen bei Aktiva und Passiva, ohne Auswirkungen aus Veränderungen des Konsolidierungskreises</b>            |            |        |       |
| Forderungen aus Lieferungen und Leistungen, netto                                                                      | 14         | -275   | -7    |
| Vorräte                                                                                                                | 15         | -81    | -92   |
| Sonstige kurz- und langfristige Vermögenswerte                                                                         | 16         | 57     | -96   |
| Forderungen an/Verbindlichkeiten gegenüber verbundenen Unternehmen                                                     |            | 6      | -4    |
| Verbindlichkeiten aus Lieferungen und Leistungen, Rückstellungen und sonstige kurz- und langfristige Verbindlichkeiten |            | 346    | 122   |
| Steuerrückstellungen                                                                                                   |            | 2      | 66    |
| <b>Mittelzufluss aus laufender Geschäftstätigkeit</b>                                                                  |            | 1.911  | 1.553 |
| <b>Investitionstätigkeit</b>                                                                                           |            |        |       |
| Erwerb von Sachanlagen                                                                                                 |            | -754   | -677  |
| Erlöse aus dem Verkauf von Sachanlagen                                                                                 |            | 21     | 15    |
| Erwerb von Anteilen an verbundenen Unternehmen, Beteiligungen, Finanzanlagen und immateriellen Vermögenswerten, netto  | 2, 32      | -615   | -236  |
| Erlöse aus dem Verkauf von Finanzanlagen und verbundenen Unternehmen                                                   |            | 111    | 9     |
| <b>Mittelabfluss aus Investitionstätigkeit</b>                                                                         |            | -1.237 | -889  |

1. Januar bis 31. Dezember in Mio €

|                                                                          | Anhang (Anmerkung) | 2010        | 2009        |
|--------------------------------------------------------------------------|--------------------|-------------|-------------|
| <b>Finanzierungstätigkeit</b>                                            |                    |             |             |
| Einzahlungen aus kurzfristigen Darlehen                                  | 21                 | 233         | 73          |
| Tilgung kurzfristiger Darlehen                                           | 21                 | -196        | -296        |
| Einzahlungen aus kurzfristigen Darlehen von verbundenen Unternehmen      |                    | –           | –           |
| Tilgung von kurzfristigen Darlehen von verbundenen Unternehmen           |                    | –           | –           |
| Einzahlungen aus langfristigen Darlehen und aktivierten Leasingverträgen | 21                 | 541         | 700         |
| Tilgung von langfristigen Darlehen und aktivierten Leasingverträgen      | 21                 | -1.185      | -1.288      |
| Einzahlungen aus der Begebung von Anleihen                               | 22                 | 242         | 753         |
| Tilgung von Verbindlichkeiten aus Anleihen                               | 22                 | 0           | -100        |
| Veränderung des Forderungsverkaufsprogramms                              | 21                 | 223         | -233        |
| Einzahlungen aus der Ausübung von Aktienoptionen                         | 34                 | 121         | 56          |
| Dividendenzahlungen                                                      |                    | -329        | -275        |
| Veränderung sonstiger Anteile anderer Gesellschafter                     | 26                 | -3          | -2          |
| Einzahlungen aus der Kurssicherung von Konzerndarlehen in Fremdwährung   |                    | 1           | 1           |
| <b>Mittelabfluss aus Finanzierungstätigkeit</b>                          |                    | <b>-352</b> | <b>-611</b> |
| <b>Wechselkursbedingte Veränderung der flüssigen Mittel</b>              |                    | <b>27</b>   | <b>-3</b>   |
| <b>Nettozunahme der flüssigen Mittel</b>                                 |                    | <b>349</b>  | <b>50</b>   |
| <b>Flüssige Mittel am Anfang der Berichtsperiode</b>                     | 13                 | <b>420</b>  | <b>370</b>  |
| <b>Flüssige Mittel am Ende der Berichtsperiode</b>                       | 13                 | <b>769</b>  | <b>420</b>  |

Der nachfolgende Anhang ist integraler Bestandteil des Konzernabschlusses.

# FRESENIUS SE & CO. KGAA (BIS 28. JANUAR 2011: FRESENIUS SE)

## KONZERN-EIGENKAPITALVERÄNDERUNGSRECHNUNG

|                                                                              |                       | Stammaktien                    |                    | Vorzugsaktien                  |                    | Gezeichnetes Kapital |                    |
|------------------------------------------------------------------------------|-----------------------|--------------------------------|--------------------|--------------------------------|--------------------|----------------------|--------------------|
|                                                                              | Anhang<br>(Anmerkung) | Anzahl<br>der Aktien<br>in Tsd | Betrag<br>in Tsd € | Anzahl<br>der Aktien<br>in Tsd | Betrag<br>in Tsd € | Betrag<br>in Tsd €   | Betrag<br>in Mio € |
| <b>Stand am 31. Dezember 2008</b>                                            |                       | 80.572                         | 80.572             | 80.572                         | 80.572             | 161.144              | 161                |
| Erlöse aus der Ausübung<br>von Aktienoptionen                                | 34                    | 86                             | 86                 | 86                             | 86                 | 172                  | –                  |
| Personalaufwand aus Aktienoptionen                                           | 34                    |                                |                    |                                |                    |                      |                    |
| Dividendenzahlungen                                                          | 27                    |                                |                    |                                |                    |                      |                    |
| Zugang von Anteilen anderer<br>Gesellschafter ohne Put-Optionen              | 26                    |                                |                    |                                |                    |                      |                    |
| Marktwertveränderung von Anteilen anderer<br>Gesellschafter mit Put-Optionen | 26                    |                                |                    |                                |                    |                      |                    |
| Gesamtergebnis                                                               |                       |                                |                    |                                |                    |                      |                    |
| Ergebnis nach Ertragsteuern                                                  |                       |                                |                    |                                |                    |                      |                    |
| Other Comprehensive Income (Loss)                                            |                       |                                |                    |                                |                    |                      |                    |
| Cashflow Hedges                                                              | 28, 30                |                                |                    |                                |                    |                      |                    |
| Währungsumrechnungsdifferenzen                                               | 28, 30                |                                |                    |                                |                    |                      |                    |
| Anpassung aus<br>Pensionsverpflichtungen                                     | 25, 28                |                                |                    |                                |                    |                      |                    |
| Gesamtergebnis                                                               |                       |                                |                    |                                |                    |                      |                    |
| <b>Stand am 31. Dezember 2009</b>                                            |                       | 80.658                         | 80.658             | 80.658                         | 80.658             | 161.316              | 161                |
| Erlöse aus der Ausübung<br>von Aktienoptionen                                | 34                    | 567                            | 567                | 567                            | 567                | 1.134                | 1                  |
| Personalaufwand aus Aktienoptionen                                           | 34                    |                                |                    |                                |                    |                      |                    |
| Dividendenzahlungen                                                          | 27                    |                                |                    |                                |                    |                      |                    |
| Zugang von Anteilen anderer<br>Gesellschafter ohne Put-Optionen              | 26                    |                                |                    |                                |                    |                      |                    |
| Marktwertveränderung von Anteilen anderer<br>Gesellschafter mit Put-Optionen | 26                    |                                |                    |                                |                    |                      |                    |
| Gesamtergebnis                                                               |                       |                                |                    |                                |                    |                      |                    |
| Ergebnis nach Ertragsteuern                                                  |                       |                                |                    |                                |                    |                      |                    |
| Other Comprehensive Income (Loss)                                            |                       |                                |                    |                                |                    |                      |                    |
| Cashflow Hedges                                                              | 28, 30                |                                |                    |                                |                    |                      |                    |
| Währungsumrechnungsdifferenzen                                               | 28, 30                |                                |                    |                                |                    |                      |                    |
| Anpassung aus<br>Pensionsverpflichtungen                                     | 25, 28                |                                |                    |                                |                    |                      |                    |
| Gesamtergebnis                                                               |                       |                                |                    |                                |                    |                      |                    |
| <b>Stand am 31. Dezember 2010</b>                                            |                       | 81.225                         | 81.225             | 81.225                         | 81.225             | 162.450              | 162                |



|                                                                              | Rücklagen             |                                  |                                 |                                                                      |                                                                                      |                                                                          |                                   |
|------------------------------------------------------------------------------|-----------------------|----------------------------------|---------------------------------|----------------------------------------------------------------------|--------------------------------------------------------------------------------------|--------------------------------------------------------------------------|-----------------------------------|
|                                                                              | Anhang<br>(Anmerkung) | Kapital-<br>rücklage<br>in Mio € | Gewinn-<br>rücklage<br>in Mio € | Kumuliertes<br>Other Com-<br>prehensive<br>Income (Loss)<br>in Mio € | Eigenkapital<br>der Anteils-<br>eigner der<br>Fresenius<br>SE & Co. KGaA<br>in Mio € | Anteile<br>anderer<br>Gesellschafter<br>ohne<br>Put-Optionen<br>in Mio € | Summe<br>Eigenkapital<br>in Mio € |
| Stand am 31. Dezember 2008                                                   |                       | 2.020                            | 1.803                           | -102                                                                 | 3.882                                                                                | 2.944                                                                    | 6.826                             |
| Erlöse aus der Ausübung<br>von Aktienoptionen                                | 34                    | 4                                |                                 |                                                                      | 4                                                                                    | 52                                                                       | 56                                |
| Personalaufwand aus Aktienoptionen                                           | 34                    | 21                               |                                 |                                                                      | 21                                                                                   | 15                                                                       | 36                                |
| Dividendenzahlungen                                                          | 27                    |                                  | -114                            |                                                                      | -114                                                                                 | -154                                                                     | -268                              |
| Zugang von Anteilen anderer<br>Gesellschafter ohne Put-Optionen              | 26                    |                                  |                                 |                                                                      | 0                                                                                    | 27                                                                       | 27                                |
| Marktwertveränderung von Anteilen anderer<br>Gesellschafter mit Put-Optionen | 26                    | -10                              |                                 |                                                                      | -10                                                                                  | -18                                                                      | -28                               |
| Gesamtergebnis                                                               |                       |                                  |                                 |                                                                      |                                                                                      |                                                                          |                                   |
| Ergebnis nach Ertragsteuern                                                  |                       |                                  | 494                             |                                                                      | 494                                                                                  | 477                                                                      | 971                               |
| Other Comprehensive Income (Loss)                                            |                       |                                  |                                 |                                                                      |                                                                                      |                                                                          |                                   |
| Cashflow Hedges                                                              | 28, 30                |                                  |                                 | -8                                                                   | -8                                                                                   | 0                                                                        | -8                                |
| Währungsumrechnungsdifferenzen                                               | 28, 30                |                                  |                                 | -29                                                                  | -29                                                                                  | -86                                                                      | -115                              |
| Anpassung aus<br>Pensionsverpflichtungen                                     | 25, 28                |                                  |                                 | -6                                                                   | -6                                                                                   | 0                                                                        | -6                                |
| Gesamtergebnis                                                               |                       |                                  | 494                             | -43                                                                  | 451                                                                                  | 391                                                                      | 842                               |
| Stand am 31. Dezember 2009                                                   |                       | 2.035                            | 2.183                           | -145                                                                 | 4.234                                                                                | 3.257                                                                    | 7.491                             |
| Erlöse aus der Ausübung<br>von Aktienoptionen                                | 34                    | 37                               |                                 |                                                                      | 38                                                                                   | 83                                                                       | 121                               |
| Personalaufwand aus Aktienoptionen                                           | 34                    | 19                               |                                 |                                                                      | 19                                                                                   | 14                                                                       | 33                                |
| Dividendenzahlungen                                                          | 27                    |                                  | -122                            |                                                                      | -122                                                                                 | -172                                                                     | -294                              |
| Zugang von Anteilen anderer<br>Gesellschafter ohne Put-Optionen              | 26                    |                                  |                                 |                                                                      | 0                                                                                    | 35                                                                       | 35                                |
| Marktwertveränderung von Anteilen anderer<br>Gesellschafter mit Put-Optionen | 26                    | -6                               |                                 |                                                                      | -6                                                                                   | -27                                                                      | -33                               |
| Gesamtergebnis                                                               |                       |                                  |                                 |                                                                      |                                                                                      |                                                                          |                                   |
| Ergebnis nach Ertragsteuern                                                  |                       |                                  | 622                             |                                                                      | 622                                                                                  | 561                                                                      | 1.183                             |
| Other Comprehensive Income (Loss)                                            |                       |                                  |                                 |                                                                      |                                                                                      |                                                                          |                                   |
| Cashflow Hedges                                                              | 28, 30                |                                  |                                 | -12                                                                  | -12                                                                                  | 0                                                                        | -12                               |
| Währungsumrechnungsdifferenzen                                               | 28, 30                |                                  |                                 | 230                                                                  | 230                                                                                  | 128                                                                      | 358                               |
| Anpassung aus<br>Pensionsverpflichtungen                                     | 25, 28                |                                  |                                 | -38                                                                  | -38                                                                                  | 0                                                                        | -38                               |
| Gesamtergebnis                                                               |                       |                                  | 622                             | 180                                                                  | 802                                                                                  | 689                                                                      | 1.491                             |
| Stand am 31. Dezember 2010                                                   |                       | 2.085                            | 2.683                           | 35                                                                   | 4.965                                                                                | 3.879                                                                    | 8.844                             |

Der nachfolgende Anhang ist integraler Bestandteil des Konzernabschlusses.

# FRESENIUS SE & CO. KGAA (BIS 28. JANUAR 2011: FRESENIUS SE)

## KONZERN-SEGMENTBERICHTERSTATTUNG

nach Unternehmensbereichen

| in Mio €                                                                                   | Fresenius Medical Care |        |         | Fresenius Kabi |        |         |
|--------------------------------------------------------------------------------------------|------------------------|--------|---------|----------------|--------|---------|
|                                                                                            | 2010                   | 2009   | Veränd. | 2010           | 2009   | Veränd. |
| Umsatz                                                                                     | <b>9.091</b>           | 8.064  | 13 %    | <b>3.672</b>   | 3.086  | 19 %    |
| davon Beitrag zum Konzernumsatz                                                            | <b>9.088</b>           | 8.061  | 13 %    | <b>3.629</b>   | 3.046  | 19 %    |
| davon Innenumsatz                                                                          | <b>3</b>               | 3      | 0 %     | <b>43</b>      | 40     | 8 %     |
| Beitrag zum Konzernumsatz                                                                  | <b>57 %</b>            | 57 %   |         | <b>23 %</b>    | 22 %   |         |
| EBITDA                                                                                     | <b>1.830</b>           | 1.586  | 15 %    | <b>893</b>     | 742    | 20 %    |
| Abschreibungen                                                                             | <b>379</b>             | 327    | 16 %    | <b>156</b>     | 135    | 16 %    |
| EBIT                                                                                       | <b>1.451</b>           | 1.259  | 15 %    | <b>737</b>     | 607    | 21 %    |
| Zinsergebnis                                                                               | <b>-211</b>            | -215   | 2 %     | <b>-279</b>    | -302   | 8 %     |
| Ertragsteuern                                                                              | <b>-436</b>            | -352   | -24 %   | <b>-142</b>    | -89    | -60 %   |
| Konzernergebnis (Ergebnis, das auf die Anteilseigner der Fresenius SE & Co. KGaA entfällt) | <b>738</b>             | 639    | 15 %    | <b>294</b>     | 200    | 47 %    |
| Operativer Cashflow                                                                        | <b>1.032</b>           | 960    | 8 %     | <b>567</b>     | 397    | 43 %    |
| Cashflow vor Akquisitionen und Dividenden                                                  | <b>649</b>             | 557    | 17 %    | <b>401</b>     | 272    | 47 %    |
| Bilanzsumme                                                                                | <b>12.793</b>          | 10.982 | 16 %    | <b>6.860</b>   | 6.335  | 8 %     |
| Finanzverbindlichkeiten                                                                    | <b>4.400</b>           | 3.865  | 14 %    | <b>4.298</b>   | 4.184  | 3 %     |
| Investitionen, brutto                                                                      | <b>395</b>             | 411    | -4 %    | <b>174</b>     | 125    | 39 %    |
| Akquisitionen, brutto                                                                      | <b>596</b>             | 138    | --      | <b>31</b>      | 32     | -3 %    |
| Forschungs- und Entwicklungsaufwand                                                        | <b>73</b>              | 67     | 9 %     | <b>143</b>     | 129    | 11 %    |
| Mitarbeiter (Köpfe zum Stichtag)                                                           | <b>77.442</b>          | 71.617 | 8 %     | <b>22.851</b>  | 21.872 | 4 %     |
| Kennzahlen                                                                                 |                        |        |         |                |        |         |
| EBITDA-Marge                                                                               | <b>20,1 %</b>          | 19,7 % |         | <b>24,3 %</b>  | 24,0 % |         |
| EBIT-Marge                                                                                 | <b>16,0 %</b>          | 15,6 % |         | <b>20,1 %</b>  | 19,7 % |         |
| Abschreibungen in % vom Umsatz                                                             | <b>4,2 %</b>           | 4,1 %  |         | <b>4,2 %</b>   | 4,4 %  |         |
| Operativer Cashflow in % vom Umsatz                                                        | <b>11,4 %</b>          | 11,9 % |         | <b>15,4 %</b>  | 12,9 % |         |
| ROOA                                                                                       | <b>12,5 %</b>          | 12,2 % |         | <b>11,9 %</b>  | 10,2 % |         |

<sup>1</sup> Inkl. Sondereinflüsse aus der Akquisition von APP Pharmaceuticals, Inc.

| Fresenius Helios |        |         | Fresenius Vamed |        |         | Konzern/Sonstiges <sup>1</sup> |      |         | Fresenius-Konzern |         |         |
|------------------|--------|---------|-----------------|--------|---------|--------------------------------|------|---------|-------------------|---------|---------|
| 2010             | 2009   | Veränd. | 2010            | 2009   | Veränd. | 2010                           | 2009 | Veränd. | 2010              | 2009    | Veränd. |
| <b>2.520</b>     | 2.416  | 4 %     | <b>713</b>      | 618    | 15 %    | <b>-24</b>                     | -20  | -20 %   | <b>15.972</b>     | 14.164  | 13 %    |
| <b>2.520</b>     | 2.416  | 4 %     | <b>713</b>      | 618    | 15 %    | <b>22</b>                      | 23   | -4 %    | <b>15.972</b>     | 14.164  | 13 %    |
| <b>0</b>         | 0      |         | <b>-</b>        | -      | --      | <b>-46</b>                     | -43  | -7 %    | <b>0</b>          | 0       |         |
| <b>16 %</b>      | 17 %   |         | <b>4 %</b>      | 4 %    |         | <b>0 %</b>                     | 0 %  |         | <b>100 %</b>      | 100 %   |         |
| <b>318</b>       | 286    | 11 %    | <b>49</b>       | 42     | 17 %    | <b>-33</b>                     | -40  | 18 %    | <b>3.057</b>      | 2.616   | 17 %    |
| <b>83</b>        | 81     | 2 %     | <b>8</b>        | 6      | 33 %    | <b>13</b>                      | 13   | 0 %     | <b>639</b>        | 562     | 14 %    |
| <b>235</b>       | 205    | 15 %    | <b>41</b>       | 36     | 14 %    | <b>-46</b>                     | -53  | 13 %    | <b>2.418</b>      | 2.054   | 18 %    |
| <b>-55</b>       | -55    | 0 %     | <b>2</b>        | 3      | -33 %   | <b>-23</b>                     | -11  | -109 %  | <b>-566</b>       | -580    | 2 %     |
| <b>-37</b>       | -32    | -16 %   | <b>-12</b>      | -12    | 0 %     | <b>46</b>                      | 33   | 39 %    | <b>-581</b>       | -452    | -29 %   |
| <b>131</b>       | 107    | 22 %    | <b>30</b>       | 27     | 11 %    | <b>-571</b>                    | -479 | -19 %   | <b>622</b>        | 494     | 26 %    |
| <b>311</b>       | 219    | 42 %    | <b>47</b>       | 29     | 62 %    | <b>-46</b>                     | -52  | 12 %    | <b>1.911</b>      | 1.553   | 23 %    |
| <b>150</b>       | 95     | 58 %    | <b>38</b>       | 24     | 58 %    | <b>-60</b>                     | -57  | -5 %    | <b>1.178</b>      | 891     | 32 %    |
| <b>3.270</b>     | 3.199  | 2 %     | <b>549</b>      | 456    | 20 %    | <b>105</b>                     | -90  | --      | <b>23.577</b>     | 20.882  | 13 %    |
| <b>1.096</b>     | 1.099  | 0 %     | <b>16</b>       | 2      | --      | <b>-1.026</b>                  | -851 | -21 %   | <b>8.784</b>      | 8.299   | 6 %     |
| <b>166</b>       | 124    | 34 %    | <b>9</b>        | 5      | 80 %    | <b>14</b>                      | 6    | 133 %   | <b>758</b>        | 671     | 13 %    |
| <b>13</b>        | 79     | -84 %   | <b>5</b>        | 2      | 150 %   | <b>-1</b>                      | 9    | -111 %  | <b>644</b>        | 260     | 148 %   |
| <b>-</b>         | -      | --      | <b>0</b>        | 0      |         | <b>28</b>                      | 44   | -36 %   | <b>244</b>        | 240     | 2 %     |
| <b>33.321</b>    | 33.364 | 0 %     | <b>3.110</b>    | 2.849  | 9 %     | <b>828</b>                     | 808  | 2 %     | <b>137.552</b>    | 130.510 | 5 %     |
| <b>12,6 %</b>    | 11,8 % |         | <b>6,9 %</b>    | 6,8 %  |         |                                |      |         | <b>19,1 %</b>     | 18,5 %  |         |
| <b>9,3 %</b>     | 8,5 %  |         | <b>5,8 %</b>    | 5,8 %  |         |                                |      |         | <b>15,1 %</b>     | 14,5 %  |         |
| <b>3,3 %</b>     | 3,4 %  |         | <b>1,1 %</b>    | 1,0 %  |         |                                |      |         | <b>4,0 %</b>      | 4,0 %   |         |
| <b>12,3 %</b>    | 9,1 %  |         | <b>6,6 %</b>    | 4,7 %  |         |                                |      |         | <b>12,0 %</b>     | 11,0 %  |         |
| <b>7,8 %</b>     | 7,1 %  |         | <b>22,2 %</b>   | 22,8 % |         |                                |      |         | <b>11,6 %</b>     | 10,5 %  |         |

Die Konzern-Segmentberichterstattung nach Unternehmensbereichen ist integraler Bestandteil des Anhangs.  
Der nachfolgende Anhang ist integraler Bestandteil des Konzernabschlusses.

## FRESENIUS SE & CO. KGAA (BIS 28. JANUAR 2011: FRESENIUS SE)

### KONZERN-SEGMENTBERICHTERSTATTUNG

nach Regionen

| in Mio €                         | Europa        |        |         | Nordamerika   |        |         |
|----------------------------------|---------------|--------|---------|---------------|--------|---------|
|                                  | 2010          | 2009   | Veränd. | 2010          | 2009   | Veränd. |
| Umsatz                           | <b>6.515</b>  | 6.045  | 8 %     | <b>7.020</b>  | 6.113  | 15 %    |
| in % vom Gesamtumsatz            | <b>41 %</b>   | 42 %   |         | <b>44 %</b>   | 43 %   |         |
| EBIT                             | <b>723</b>    | 673    | 7 %     | <b>1.347</b>  | 1.092  | 23 %    |
| Abschreibungen                   | <b>294</b>    | 271    | 8 %     | <b>265</b>    | 232    | 14 %    |
| Bilanzsumme                      | <b>8.935</b>  | 7.763  | 15 %    | <b>12.152</b> | 11.176 | 9 %     |
| Investitionen, brutto            | <b>400</b>    | 350    | 14 %    | <b>223</b>    | 229    | -3 %    |
| Akquisitionen, brutto            | <b>267</b>    | 136    | 96 %    | <b>277</b>    | 98     | 183 %   |
| Mitarbeiter (Köpfe zum Stichtag) | <b>66.179</b> | 63.602 | 4 %     | <b>46.082</b> | 44.590 | 3 %     |

| Asien-Pazifik |        |         | Lateinamerika |        |         | Afrika       |       |         | Fresenius-Konzern |         |         |
|---------------|--------|---------|---------------|--------|---------|--------------|-------|---------|-------------------|---------|---------|
| 2010          | 2009   | Veränd. | 2010          | 2009   | Veränd. | 2010         | 2009  | Veränd. | 2010              | 2009    | Veränd. |
| <b>1.307</b>  | 1.088  | 20 %    | <b>814</b>    | 641    | 27 %    | <b>316</b>   | 277   | 14 %    | <b>15.972</b>     | 14.164  | 13 %    |
| <b>8 %</b>    | 8 %    |         | <b>5 %</b>    | 5 %    |         | <b>2 %</b>   | 2 %   |         | <b>100 %</b>      | 100 %   |         |
| <b>205</b>    | 173    | 18 %    | <b>107</b>    | 87     | 23 %    | <b>36</b>    | 29    | 24 %    | <b>2.418</b>      | 2.054   | 18 %    |
| <b>47</b>     | 36     | 31 %    | <b>27</b>     | 19     | 42 %    | <b>6</b>     | 4     | 50 %    | <b>639</b>        | 562     | 14 %    |
|               |        |         |               |        |         |              |       |         |                   |         |         |
| <b>1.610</b>  | 1.233  | 31 %    | <b>755</b>    | 616    | 23 %    | <b>125</b>   | 94    | 33 %    | <b>23.577</b>     | 20.882  | 13 %    |
| <b>73</b>     | 50     | 46 %    | <b>52</b>     | 37     | 41 %    | <b>10</b>    | 5     | 100 %   | <b>758</b>        | 671     | 13 %    |
| <b>89</b>     | 12     | --      | <b>11</b>     | 13     | -15 %   | <b>–</b>     | 1     | -100 %  | <b>644</b>        | 260     | 148 %   |
|               |        |         |               |        |         |              |       |         |                   |         |         |
| <b>12.258</b> | 10.356 | 18 %    | <b>11.726</b> | 10.804 | 9 %     | <b>1.307</b> | 1.158 | 13 %    | <b>137.552</b>    | 130.510 | 5 %     |

Die Konzern-Segmentberichterstattung nach Regionen ist integraler Bestandteil des Anhangs.  
Der nachfolgende Anhang ist integraler Bestandteil des Konzernabschlusses.

# INHALT KONZERN-ANHANG

## 131 Allgemeine Erläuterungen

- 131 1. Grundlagen
  - 131 I. Konzernstruktur
  - 131 II. Rechtsformwechsel der Fresenius SE in eine Kommanditgesellschaft auf Aktien und Umwandlung der Vorzugsaktien in Stammaktien
  - 132 III. Grundlage der Darstellung
  - 132 IV. Zusammenfassung der wesentlichen Bilanzierungs- und Bewertungsgrundsätze
  - 142 V. Kritische Rechnungslegungsgrundsätze
- 144 2. Akquisitionen und Desinvestitionen

## 145 Erläuterungen zur Konzern-Gewinn- und Verlustrechnung

- 145 3. Sondereinflüsse
- 145 4. Umsatz
- 145 5. Umsatzkosten
- 145 6. Materialaufwand
- 145 7. Personalaufwand
- 146 8. Vertriebs- und allgemeine Verwaltungskosten
- 146 9. Zinsergebnis
- 146 10. Sonstiges Finanzergebnis
- 146 11. Steuern
- 149 12. Ergebnis je Aktie

## 150 Erläuterungen zur Konzern-Bilanz

- 150 13. Flüssige Mittel
- 150 14. Forderungen aus Lieferungen und Leistungen
- 150 15. Vorräte
- 151 16. Sonstige kurz- und langfristige Vermögenswerte
- 151 17. Sachanlagen
- 153 18. Firmenwerte und sonstige immaterielle Vermögenswerte
- 156 19. Sonstige Rückstellungen
- 157 20. Sonstige Verbindlichkeiten
- 158 21. Darlehen und aktivierte Leasingverträge

- 165 22. Anleihen
- 166 23. Pflichtumtauschanleihe
- 167 24. Genussscheinähnliche Wertpapiere
- 168 25. Pensionen und ähnliche Verpflichtungen
- 173 26. Anteile anderer Gesellschafter
- 173 27. Eigenkapital der Anteilseigner der Fresenius SE & Co. KGaA (bis 28. Januar 2011: Fresenius SE)
- 176 28. Other Comprehensive Income (Loss)

## 177 Sonstige Erläuterungen

- 177 29. Haftungsverhältnisse und Eventualverbindlichkeiten
- 181 30. Finanzinstrumente
- 188 31. Zusätzliche Informationen zum Kapitalmanagement
- 189 32. Zusätzliche Informationen zur Konzern-Kapitalflussrechnung
- 189 33. Erläuterungen zur Konzern-Segmentberichterstattung
- 191 34. Aktienoptionen
- 198 35. Geschäftsbeziehungen mit nahe stehenden Personen
- 198 36. Wesentliche Ereignisse seit Ende des Geschäftsjahres

## 199 Erläuterungen nach dem Handelsgesetzbuch

- 199 37. Vergütung von Vorstand und Aufsichtsrat
- 199 38. Honorar des Abschlussprüfers
- 199 39. Corporate Governance
- 199 40. Gewinnverwendungsvorschlag
- 200 41. Versicherung der gesetzlichen Vertreter

## ALLGEMEINE ERLÄUTERUNGEN

### 1. GRUNDLAGEN

#### I. KONZERNSTRUKTUR

Fresenius ist ein weltweit tätiger Gesundheitskonzern mit Produkten und Dienstleistungen für die Dialyse, das Krankenhaus und die ambulante medizinische Versorgung von Patienten. Weitere Arbeitsfelder sind der Betrieb von Krankenhäusern sowie Engineering- und Dienstleistungen für Krankenhäuser und andere Gesundheitseinrichtungen. Neben den Tätigkeiten der Muttergesellschaft Fresenius SE & Co. KGaA, Bad Homburg v. d. Höhe, verteilen sich die operativen Aktivitäten im Geschäftsjahr 2010 auf folgende rechtlich eigenständige Unternehmensbereiche (Teilkonzerne):

- ▶ Fresenius Medical Care
- ▶ Fresenius Kabi
- ▶ Fresenius Helios
- ▶ Fresenius Vamed

Fresenius Medical Care ist der weltweit führende Anbieter von Dialyseprodukten und Dialyседienstleistungen zur lebensnotwendigen medizinischen Versorgung von Patienten mit chronischem Nierenversagen. In 2.757 eigenen Dialysekliniken betreut Fresenius Medical Care 214.648 Patienten.

Fresenius Kabi ist ein weltweit tätiger Anbieter von Infusionstherapien, intravenös verabreichten generischen Arzneimitteln, klinischer Ernährung sowie den dazugehörigen medizintechnischen Produkten zur Applikation. Die Produkte werden im Krankenhaus sowie bei der ambulanten medizinischen Versorgung von chronisch und kritisch Kranken eingesetzt. In Europa ist Fresenius Kabi Marktführer in Infusionstherapien und klinischer Ernährung, in den USA zählt das Unternehmen im Bereich der intravenös verabreichten generischen Arzneimittel zu den führenden Anbietern.

Fresenius Helios ist einer der größten deutschen privaten Krankenhausbetreiber.

Fresenius Vamed ist auf Engineering- und Dienstleistungen für Krankenhäuser und andere Gesundheitseinrichtungen ausgerichtet.

Zum Ende des Geschäftsjahres 2010 betrug der Anteil der Fresenius SE & Co. KGaA am stimmberechtigten Kapital der Fresenius Medical Care AG & Co. KGaA (FMC-AG & Co. KGaA) 35,74 % und am gesamten gezeichneten Kapital der

FMC-AG & Co. KGaA 35,27 %. Die persönlich haftende Gesellschafterin der FMC-AG & Co. KGaA, die Fresenius Medical Care Management AG, ist eine hundertprozentige Tochtergesellschaft der Fresenius SE & Co. KGaA. Daher wird die FMC-AG & Co. KGaA zu 100 % im Fresenius-Konzernabschluss konsolidiert. Die Beteiligungen an den Leitungsgesellschaften der Unternehmensbereiche Fresenius Kabi (Fresenius Kabi AG) sowie Fresenius Helios und Fresenius Vamed (gehalten über die Fresenius ProServe GmbH) betrugen zum 31. Dezember 2010 unverändert 100 %. Über die Fresenius ProServe GmbH ist die Fresenius SE & Co. KGaA zu 99 % an der HELIOS Kliniken GmbH sowie zu 77 % an der VAMED AG beteiligt. Daneben hält die Fresenius SE & Co. KGaA Beteiligungen an Gesellschaften, die die Holdingfunktionen hinsichtlich Immobilien, Finanzierung und Versicherung wahrnehmen, sowie an der Fresenius Netcare GmbH, die Dienstleistungen im Bereich der Informationstechnik anbietet, und der Fresenius Biotech Beteiligungs GmbH.

Die Berichtswährung im Fresenius-Konzern ist der Euro. Aus Gründen der Übersichtlichkeit erfolgt die Darstellung der Beträge überwiegend in Millionen Euro. Beträge, die aufgrund der vorzunehmenden Rundungen unter 1 Mio € fallen, wurden mit „–“ gekennzeichnet.

#### II. RECHTSFORMWECHSEL DER FRESENIUS SE IN EINE KOMMANDITGESELLSCHAFT AUF AKTIEN UND UMWANDLUNG DER VORZUGSAKTIEN IN STAMMAKTIEN

Die Hauptversammlung der Fresenius SE hat am 12. Mai 2010 den Beschluss gefasst, die Fresenius SE in eine Kommanditgesellschaft auf Aktien (KGaA) mit dem Namen Fresenius SE & Co. KGaA formwechselnd umzuwandeln. Damit verbunden ist die Umwandlung sämtlicher stimmrechtsloser Vorzugsaktien in stimmberechtigte Stammaktien. Dem Rechtsformwechsel sowie der Aktienumwandlung haben die Vorzugsaktionäre im Wege eines Sonderbeschlusses zugestimmt.

Mit Eintragung im Handelsregister des Amtsgerichts Bad Homburg v. d. Höhe am 28. Januar 2011 wurde der Rechtsformwechsel in die Fresenius SE & Co. KGaA wirksam. Gemäß dem Hauptversammlungsbeschluss haben die Vorzugsaktionäre für jede Vorzugsaktie an der Fresenius SE eine Stammaktie an der Fresenius SE & Co. KGaA erhalten; die Stammaktionäre haben für jede Stammaktie an der Fresenius SE eine Stammaktie an der Fresenius SE & Co. KGaA erhalten. Der



rechnerische Anteil jeder Stückaktie am Grundkapital sowie die Höhe des Grundkapitals blieben unverändert. Der Rechtsformwechsel der Fresenius SE in eine KGaA hatte weder die Auflösung der Gesellschaft noch die Gründung einer neuen juristischen Person zur Folge. Die rechtliche und wirtschaftliche Identität der Gesellschaft blieben erhalten.

Die Rechtsform der KGaA ermöglicht es Fresenius, die Vorteile einer einheitlichen Aktienstruktur zu verwirklichen, ohne dass der Einfluss der Else Kröner-Fresenius-Stiftung, die vor dem Rechtsformwechsel rund 58 % der Stammaktien der Fresenius SE hielt, verloren geht. Komplementärin der Fresenius SE & Co. KGaA ist die Fresenius Management SE, eine Europäische Gesellschaft, an der die Else Kröner-Fresenius-Stiftung zu 100 % beteiligt ist. Der Vorstand der Fresenius Management SE ist in seiner personellen Zusammensetzung identisch mit dem vorherigen Vorstand der Fresenius SE und hat die Geschäftsführung und Vertretung der Fresenius SE & Co. KGaA übernommen. Das Recht der Else Kröner-Fresenius-Stiftung zur Stellung der Komplementärin ist an einen Anteil am Grundkapital der Fresenius SE & Co. KGaA von mehr als 10 % geknüpft.

Zusätzlich zu den bestehenden Bedingten Kapitalien wurden mit der durch die Hauptversammlung festgestellten Satzung der Fresenius SE & Co. KGaA drei Genehmigte Kapitalien geschaffen, aus denen alternativ die drei bestehenden Aktienoptionspläne bedient werden können.

Die einzelnen Auswirkungen des Rechtsformwechsels werden im Detail in den jeweiligen Anmerkungen erläutert.

Die Eintragung des Rechtsformwechsels im Handelsregister war endgültig möglich geworden, nachdem sich das Unternehmen im Wege eines Prozessvergleichs mit Aktionären geeinigt hat, die Klagen gegen dieses Vorhaben erhoben hatten.

In diesem Bericht wird zur besseren Lesbarkeit, sofern sinnvoll, stets die seit 28. Januar 2011 gültige neue Rechtsformbezeichnung Fresenius SE & Co. KGaA verwendet.

### III. GRUNDLAGE DER DARSTELLUNG

Der beigefügte Konzernabschluss wurde in Übereinstimmung mit den US-amerikanischen Rechnungslegungsgrundsätzen, den „United States Generally Accepted Accounting Principles“ (US-GAAP), aufgestellt.

Die Fresenius SE & Co. KGaA erfüllt als kapitalmarktorientiertes Mutterunternehmen mit Sitz in einem Mitgliedsstaat der Europäischen Union ihre Pflicht, den Konzernabschluss nach den „International Financial Reporting Standards“ (IFRS) unter Anwendung von § 315a Handelsgesetzbuch (HGB) aufzustellen und zu veröffentlichen. Gleichzeitig veröffentlicht der Fresenius-Konzern den auf freiwilliger Basis nach US-GAAP aufgestellten Konzernabschluss.

Zur Verbesserung der Lesbarkeit sind verschiedene Positionen der Konzern-Bilanz und der Konzern-Gewinn- und Verlustrechnung zusammengefasst. Diese sind im Anhang gesondert angegeben, um den Adressaten des Konzernabschlusses weitere Informationen zur Verfügung zu stellen.

Die Konzern-Bilanz ist nach der Liquidität der Vermögenswerte und Verbindlichkeiten gegliedert. Die Konzern-Gewinn- und Verlustrechnung wird nach dem Umsatzkostenverfahren aufgestellt.

### IV. ZUSAMMENFASSUNG DER WESENTLICHEN BILANZIERUNGS- UND BEWERTUNGSGRUNDSÄTZE

#### a) Konsolidierungsgrundsätze

Die Abschlüsse der in den Konzernabschluss einbezogenen Unternehmen sind nach einheitlichen Bilanzierungs- und Bewertungsgrundsätzen aufgestellt.

Die Kapitalkonsolidierung erfolgt durch die Verrechnung der Beteiligungsbuchwerte mit dem anteiligen, neu bewerteten Eigenkapital der Tochterunternehmen zum Zeitpunkt des Erwerbs. Dabei werden die Vermögenswerte und Schulden sowie Anteile anderer Gesellschafter mit ihren Zeitwerten angesetzt. Ein verbleibender aktiver Unterschiedsbetrag wird als Firmenwert aktiviert und mindestens einmal jährlich einer Prüfung auf Werthaltigkeit unterzogen.

Die Konsolidierung von assoziierten Unternehmen (Stimmrechtsanteil üblicherweise zwischen 20 % und 50 %) erfolgt nach der Equity-Methode. Nicht als assoziierte Unternehmen eingestufte Beteiligungen werden zu Anschaffungskosten bilanziert.

Alle wesentlichen konzerninternen Umsätze, Aufwendungen und Erträge sowie konzerninterne Forderungen und Verbindlichkeiten werden gegenseitig aufgerechnet. Zwischenergebnisse aus konzerninternen Lieferungen in das

Anlage- und Vorratsvermögen werden im Rahmen der Konsolidierung eliminiert. Auf konsolidierungsbedingte temporäre Unterschiede werden latente Steuern gebildet.

Anteile anderer Gesellschafter mit Put-Optionen werden in der Konzern-Bilanz als Position zwischen den Verbindlichkeiten und dem Eigenkapital ausgewiesen. Anteile anderer Gesellschafter ohne Put-Optionen werden als Ausgleichsposten für Anteile konzernfremder Gesellschafter am konsolidierungspflichtigen Kapital angesetzt. In der Konzern-Gewinn- und Verlustrechnung werden die den konzernfremden Gesellschaftern zustehenden Gewinne und Verluste separat ausgewiesen.

## b) Konsolidierungskreis

Der Konzernabschluss umfasst alle wesentlichen Unternehmen, die unter der rechtlichen oder tatsächlichen Kontrolle der Fresenius SE & Co. KGaA stehen. Darüber hinaus bezieht der Fresenius-Konzern Zweckgesellschaften (Variable Interest Entities – VIEs) in den Konzernabschluss ein, wenn der Fresenius-Konzern als Meistbegünstigter betrachtet wird.

Fresenius Medical Care geht verschiedene Vereinbarungen mit bestimmten Dialysekliniken und einer Distributionsgesellschaft ein, die Management-Dienstleistungen, Finanzierungen und die Lieferung von Produkten umfassen. Da die Kliniken und die Distributionsgesellschaft ein negatives Eigenkapital aufweisen bzw. nicht in der Lage sind, sich selbst zu finanzieren, unterstützt Fresenius Medical Care ihre Geschäftstätigkeit finanziell durch die Vergabe von Darlehen.

Als Ausgleich für die Finanzierung kann Fresenius Medical Care Zinsen, Exklusivverträge für die Lieferung von Produkten, einen Anspruch auf einen Anteil am Gewinn, sofern einer erwirtschaftet wird, sowie ein Vorkaufsrecht, sollten die Eigentümer das Geschäft oder die Vermögenswerte verkaufen, erhalten. Diese Kliniken und die Distributionsgesellschaft sind VIEs, bei denen Fresenius Medical Care als Meistbegünstigte bestimmt wurde, und müssen daher voll konsolidiert werden. Sie erwirtschafteten im Jahr 2010 bzw. 2009 einen Umsatz von rund 100 Mio € (133 Mio US\$) bzw. 81 Mio € (113 Mio US\$). Fresenius Medical Care gewährte diesen VIEs Darlehen und Kredite in Höhe von 83 Mio € (111 Mio US\$) im Jahr 2010 bzw. 29 Mio € (42 Mio US\$) im Jahr 2009. Im Zusammenhang mit diesen VIEs hat Fresenius Medical Care

im Jahr 2010 Vermögenswerte in Höhe von 130 Mio € (174 Mio US\$), Verbindlichkeiten in Höhe von 89 Mio € (119 Mio US\$) und Eigenkapital in Höhe von 41 Mio € (55 Mio US\$) konsolidiert. Im Jahr 2009 wurden 74 Mio € (106 Mio US\$) Vermögenswerte, 42 Mio € (60 Mio US\$) Verbindlichkeiten und 32 Mio € (46 Mio US\$) Eigenkapital konsolidiert. Der Anteil anderer Gesellschafter an den konsolidierten VIEs wird zum 31. Dezember 2010 unter den Anteilen anderer Gesellschafter in der Bilanz ausgewiesen.

Fresenius Vamed engagiert sich für einen begrenzten längerfristigen Zeitraum in eigens für diesen Zweck gegründeten Projektgesellschaften zur Errichtung und Betreibung von Thermen, von denen einige als VIEs zu qualifizieren sind. Basierend auf Cashflow-Analysen aller beteiligten Parteien ist Fresenius Vamed dabei jedoch nicht die Meistbegünstigte. Die Projektgesellschaften erwirtschafteten im Jahr 2010 rund 54 Mio € Umsatz (2009: 32 Mio €). Die VIEs finanzieren sich im Wesentlichen durch Fremdkapital, Genussrechte und Investitionszuschüsse. Der Wert der Vermögenswerte und Verbindlichkeiten in Verbindung mit den VIEs ist unwesentlich. Fresenius Vamed leistete an die VIEs neben den vertraglich vereinbarten keine weiteren Zahlungen. Aufgrund bestehender vertraglicher Regelungen ist aus heutiger Sicht aus diesen VIEs kein nennenswertes Verlustrisiko erkennbar.

Der Konzernabschluss umfasste im Jahr 2010 neben der Fresenius SE & Co. KGaA 144 (2009: 136) deutsche und 972 (2009: 912) ausländische Unternehmen.

Der Konsolidierungskreis hat sich wie folgt verändert:

|                          | Deutschland | Ausland    | Gesamt       |
|--------------------------|-------------|------------|--------------|
| <b>31. Dezember 2009</b> | <b>136</b>  | <b>912</b> | <b>1.048</b> |
| Zugänge                  | 12          | 122        | 134          |
| davon gegründet          | 2           | 48         | 50           |
| davon erworben           | 9           | 65         | 74           |
| Abgänge                  | 4           | 62         | 66           |
| davon ausgeschieden      | 2           | 36         | 38           |
| davon verschmolzen       | 2           | 26         | 28           |
| <b>31. Dezember 2010</b> | <b>144</b>  | <b>972</b> | <b>1.116</b> |

Nach der Equity-Methode wurden 17 Gesellschaften (2009: 10) bilanziert.

Die vollständige Aufstellung des Anteilsbesitzes der Fresenius SE & Co. KGaA mit Sitz in Bad Homburg v. d. H. wird beim elektronischen Bundesanzeiger eingereicht und beim Unternehmensregister hinterlegt.

Folgende vollkonsolidierte deutsche Konzerngesellschaften machten im Geschäftsjahr 2010 von der Befreiungsvorschrift der §§ 264 Abs. 3 bzw. 264b HGB Gebrauch:

| Name der Gesellschaft                                             | Sitz                 |
|-------------------------------------------------------------------|----------------------|
| <b>Konzern/Sonstiges</b>                                          |                      |
| Fresenius Biotech GmbH                                            | Gräfelfing           |
| Fresenius Biotech Beteiligungs GmbH                               | Bad Homburg v. d. H. |
| Fresenius Immobilien-Verwaltungs-GmbH & Co. Objekt Friedberg KG   | Bad Homburg v. d. H. |
| Fresenius Immobilien-Verwaltungs-GmbH & Co. Objekt St. Wendel KG  | Bad Homburg v. d. H. |
| Fresenius Immobilien-Verwaltungs-GmbH & Co. Objekt Schweinfurt KG | Bad Homburg v. d. H. |
| Fresenius Netcare GmbH                                            | Bad Homburg v. d. H. |
| Fresenius ProServe GmbH                                           | Bad Homburg v. d. H. |
| FPS Immobilien Verwaltungs GmbH & Co. Reichenbach KG              | Bad Homburg v. d. H. |
| ProServe Krankenhaus Beteiligungs-gesellschaft mbH & Co. KG       | München              |
| <b>Fresenius Kabi</b>                                             |                      |
| Fresenius HemoCare GmbH                                           | Bad Homburg v. d. H. |
| Fresenius HemoCare Beteiligungs GmbH                              | Bad Homburg v. d. H. |
| Fresenius Kabi AG                                                 | Bad Homburg v. d. H. |
| Fresenius Kabi Deutschland GmbH                                   | Bad Homburg v. d. H. |
| Hosped GmbH                                                       | Friedberg            |
| MC Medizintechnik GmbH                                            | Alzenau              |
| V. Krütten Medizinische Einmalgeräte GmbH                         | Idstein              |

| Name der Gesellschaft                         | Sitz                 |
|-----------------------------------------------|----------------------|
| <b>Fresenius Helios</b>                       |                      |
| HELIOS Agnes Karll Krankenhaus GmbH           | Bochum               |
| HELIOS Care GmbH                              | Berlin               |
| HELIOS Catering GmbH                          | Berlin               |
| HELIOS Kids in Pflege GmbH                    | Geesthacht           |
| HELIOS Klinik Dresden-Wachwitz GmbH           | Dresden              |
| HELIOS Klinik Geesthacht GmbH                 | Geesthacht           |
| HELIOS Klinik Lengerich GmbH                  | Lengerich            |
| HELIOS Kliniken GmbH                          | Berlin               |
| HELIOS Kliniken Breisgau-Hochschwarzwald GmbH | Müllheim             |
| HELIOS Kliniken Leipziger Land GmbH           | Borna                |
| HELIOS Klinikum Bad Saarow GmbH               | Bad Saarow           |
| HELIOS Klinikum Erfurt GmbH                   | Erfurt               |
| HELIOS Klinikum Wuppertal GmbH                | Wuppertal            |
| HELIOS Privatkliniken GmbH                    | Bad Homburg v. d. H. |
| HELIOS Schlossbergklinik Oberstaufen GmbH     | Oberstaufen          |
| HELIOS Service GmbH                           | Berlin               |
| HELIOS Versorgungszentren GmbH                | Berlin               |
| HELIOS Versorgungszentrum Bad Saarow GmbH     | Bad Saarow           |
| HELIOS Vogtland-Klinikum Plauen GmbH          | Plauen               |
| HUMAINE Kliniken GmbH                         | Berlin               |
| Poliklinik am HELIOS Klinikum Buch GmbH       | Berlin               |
| Senioren- und Pflegeheim Erfurt GmbH          | Erfurt               |
| St. Josefs-Hospital GmbH                      | Bochum               |

### c) Ausweis

Der Fresenius-Konzern hat Anteile anderer Gesellschafter mit Put-Optionen in der Konzern-Bilanz umgebucht und neu bewertet. Demzufolge wurden zum 31. Dezember 2009 von der Position Anteile anderer Gesellschafter 125 Mio €, von der Position Kapitalrücklage 38 Mio € sowie von der Position Kumuliertes Other Comprehensive Loss -2 Mio € in die Position Anteile anderer Gesellschafter mit Put-Optionen umgebucht. Des Weiteren benannte der Fresenius-Konzern die Position mit den verbleibenden Anteilen anderer Gesellschafter in Anteile anderer Gesellschafter ohne Put-Optionen um. Die Konzern-Eigenkapitalveränderungsrechnung wurde entsprechend angepasst. Die vorgenommenen Änderungen hatten keinen Einfluss auf die Konzern-Gewinn- und Verlustrechnung.

Der Ausweis bestimmter sonstiger Positionen des Konzernabschlusses 2009 wurde dem Ausweis im Jahr 2010 angepasst.

**d) Rechnungslegung in Hochinflationländern**

Aufgrund der Inflationsentwicklung in Venezuela wenden die dort operierenden Tochtergesellschaften der Fresenius Medical Care seit dem 1. Januar 2010 die „Financial Accounting Standards Board Accounting Standards Codification“ (FASB ASC) Topic 830, Foreign Currency Matters, an. Alle sich aus der Neubewertung der Vermögenswerte und Schulden ergebenden Gewinne und Verluste wurden ergebniswirksam erfasst.

**e) Grundsätze der Umsatzrealisierung**

Umsätze aus Dienstleistungen werden in Höhe derjenigen Beträge realisiert, mit deren Erzielung aufgrund bestehender Erstattungsvereinbarungen mit Dritten gerechnet werden kann. Die Realisierung erfolgt zu dem Zeitpunkt, zu dem die Dienstleistung erbracht und die damit zusammenhängenden Produkte geliefert wurden. Zu diesem Zeitpunkt ist der Kunde zur Zahlung verpflichtet.

Umsätze aus Produktlieferungen werden zu dem Zeitpunkt realisiert, in dem das wirtschaftliche Eigentum auf den Käufer übergeht; entweder zum Zeitpunkt der Lieferung, bei Annahme durch den Kunden oder zu einem anderen Zeitpunkt, der den Eigentumsübergang eindeutig definiert. Da die Rücksendung von Produkten untypisch ist, werden dafür keine Wertberichtigungen gebildet. Falls eine Rücksendung von Waren erfolgt, werden die Umsätze, die Umsatzkosten und die Forderungen entsprechend vermindert. Die Umsatzerlöse sind abzüglich Skonti, Preisnachlässen und Rabatten ausgewiesen.

Im Unternehmensbereich Fresenius Vamed erfolgt die Umsatzrealisierung für die langfristigen Fertigungsaufträge bei Erfüllung der Anwendungsvoraussetzungen entsprechend dem Projektfortschritt (Percentage-of-Completion-Method – PoC-Methode). Der Fertigstellungsgrad wird dabei entweder auf Basis des Verhältnisses der bereits angefallenen Kosten zum geschätzten gesamten Kostenvolumen des Vertrags, der vertraglich vereinbarten Meilensteine oder des Leistungsfortschritts bestimmt. Gewinne aus der PoC-Methode werden nur dann realisiert, wenn das Ergebnis eines Fertigungsauftrags verlässlich ermittelt werden kann.

Jede Umsatzsteuer, die von einer staatlichen Behörde erhoben wird, wird netto ausgewiesen; ebenso wird der Umsatz abzüglich der Steuer dargestellt.

**f) Zuwendungen der öffentlichen Hand**

Zuwendungen der öffentlichen Hand werden nur bilanziell erfasst, wenn eine angemessene Sicherheit dafür besteht, dass die damit verbundenen Bedingungen erfüllt und die Zuwendungen gewährt werden. Die Zuwendung wird bei Gewährung zunächst passiviert und im Zeitpunkt der tatsächlichen Verwendung (Anschaffung eines Anlagegutes) mit den Anschaffungskosten des Gutes verrechnet. Aufwandsbezogene Zuwendungen werden erfolgswirksam behandelt und grundsätzlich in den Perioden verrechnet, in denen die Aufwendungen anfallen, die durch die Zuwendungen kompensiert werden sollen.

**g) Forschungs- und Entwicklungsaufwendungen**

Forschung ist die eigenständige und planmäßige Suche mit der Aussicht, zu neuen wissenschaftlichen oder technischen Erkenntnissen zu gelangen. Entwicklung ist die technische und kommerzielle Umsetzung von Forschungsergebnissen. Forschungs- und Entwicklungsaufwendungen werden bei ihrer Entstehung als Aufwand erfasst.

**h) Außerplanmäßige Abschreibungen**

Der Fresenius-Konzern prüft die Buchwerte seines Sachanlagevermögens und seiner immateriellen Vermögenswerte sowie seiner sonstigen langfristigen Vermögenswerte auf außerplanmäßigen Abschreibungsbedarf, wenn Ereignisse oder Veränderungen darauf hindeuten, dass der Buchwert dieser Vermögenswerte nicht werthaltig ist. Die Werthaltigkeit dieser Vermögenswerte wird durch einen Vergleich zwischen dem Buchwert und den diesen Vermögenswerten direkt zurechenbaren undiskontierten zukünftigen Zahlungsströmen überprüft. Falls für die Vermögenswerte Abwertungsbedarf besteht, wird eine Abwertung auf den niedrigeren Marktwert vorgenommen. Der Fresenius-Konzern nutzt zur Ermittlung des Marktwerts das Discounted-Cashflow-Verfahren oder – sofern angemessen – andere Bewertungsverfahren. Vermögenswerte, die zum Verkauf bestimmt sind, werden mit dem Buchwert oder dem niedrigeren Zeitwert abzüglich der Kosten der Veräußerung bilanziert. Für diese Vermögenswerte werden keine weiteren planmäßigen Abschreibungen vorgenommen.

**i) Aktivierter Zinsen**

Der Fresenius-Konzern aktiviert Zinsen, sofern sie dem Erwerb, dem Bau oder der Herstellung von qualifizierten Vermögenswerten zuzuordnen sind. In den Geschäftsjahren

2010 bzw. 2009 wurden Zinsen in Höhe von 4 Mio € bzw. 8 Mio €, basierend auf einem durchschnittlichen Zinssatz von 4,90 % bzw. 5,56 %, aktiviert.

#### j) Latente Steuern

Aktive und passive latente Steuern werden für zukünftige Auswirkungen ermittelt, die sich aus den temporären Differenzen zwischen den im Konzernabschluss zugrunde gelegten Werten für die Aktiva und Passiva und den steuerlich angesetzten Werten ergeben. Außerdem werden latente Steuern auf ergebniswirksame Konsolidierungsmaßnahmen gebildet. Die aktiven latenten Steuern enthalten auch Forderungen auf Steuererminderungen, die sich aus der mit hinreichender Sicherheit erwarteten Nutzung bestehender Verlustvorträge ergeben. Die Werthaltigkeit latenter Steueransprüche aus steuerlichen Verlustvorträgen bzw. deren Nutzbarkeit wird aufgrund der Ergebnisplanung des Fresenius-Konzerns sowie konkret umsetzbarer Steuerstrategien beurteilt.

Die latenten Steuern werden auf Basis der Steuersätze ermittelt, die nach der derzeitigen Rechtslage in den einzelnen Ländern zum Realisationszeitpunkt gelten bzw. verabschiedet sind. Zukünftig geltende Steuersätze, die zum Abschlussstichtag noch nicht verabschiedet wurden, werden folglich nicht berücksichtigt.

Die Werthaltigkeit des Buchwerts eines latenten Steueranspruchs wird an jedem Bilanzstichtag überprüft. Grundlage für die Beurteilung der Werthaltigkeit latenter Steuern ist die Einschätzung der Wahrscheinlichkeit, dass eine aktive latente Steuer in Zukunft tatsächlich realisierbar ist bzw. sich passive latente Steuern in Zukunft umkehren. Die Realisierung aktiver latenter Steuern hängt von der Erzielung eines steuerpflichtigen Gewinns in den Perioden ab, in denen sich die zeitlichen Unterschiede zwischen Handels- und Steuerbilanz umkehren. Hierbei werden die Umkehrung bestehender passiver latenter Steuern und der erwartete zukünftige steuerpflichtige Gewinn berücksichtigt.

Ist die Wahrscheinlichkeit, dass ein ausreichend zu versteuernder Gewinn zur Verfügung stehen wird, um den latenten Steueranspruch entweder zum Teil oder insgesamt zu nutzen, nicht mehr gegeben, wird der Buchwert des latenten Steueranspruchs in diesem Umfang wertberichtigt. Wertberichtigungen werden zu dem Zeitpunkt und in dem Umfang wieder aufgehoben, in dem es wahrscheinlich wird, dass ein ausreichend zu versteuerndes Ergebnis zur Verfügung stehen wird.

#### k) Unsichere Steuervorteile

Für den Ansatz und die Bewertung von Steuervorteilen, die im Rahmen von Steuererklärungen angesetzt worden sind oder angesetzt werden sollen, ist eine Zwei-Stufen-Prüfung vorgesehen. Der Fresenius-Konzern muss überprüfen, ob eine Eintrittswahrscheinlichkeit von über 50 % gegeben ist. Diese Entscheidung berücksichtigt die sachlichen Gegebenheiten des Steuervorteils und erfolgt unter Beachtung sämtlicher damit verbundener Berufungs- und Gerichtsverfahren. Wenn das Eintrittswahrscheinlichkeitskriterium erfüllt ist, erfolgt die Bewertung des unsicheren Steuervorteils in der größtmöglichen Höhe, die eine Eintrittswahrscheinlichkeit von mehr als 50 % aufweist.

#### l) Ergebnis je Stammaktie und je Vorzugsaktie

Das Ergebnis je Stammaktie ergibt sich aus dem Konzernergebnis abzüglich des Vorzugsbetrags der Vorzugsaktien, geteilt durch den gewichteten Durchschnitt der während des Geschäftsjahres im Umlauf befindlichen Anzahl von Stammaktien und Vorzugsaktien. Zur Ermittlung des Ergebnisses je Vorzugsaktie wird der Vorzugsbetrag zum Ergebnis je Stammaktie hinzugerechnet. Das verwässerte Ergebnis je Aktie enthält die Auswirkung aller Optionsrechte, indem sie behandelt werden, als hätten sich die entsprechenden Aktien während des Geschäftsjahres im Umlauf befunden. Die Ansprüche im Rahmen der Fresenius- bzw. Fresenius Medical Care-Aktionsoptionspläne können zu einem Verwässerungseffekt führen.

#### m) Flüssige Mittel

Die flüssigen Mittel enthalten Barmittel und kurzfristige liquide Anlagen mit einer Fälligkeit von ursprünglich bis zu drei Monaten (Termingelder und Wertpapiere).

#### n) Forderungen aus Lieferungen und Leistungen

Die Forderungen aus Lieferungen und Leistungen werden zu Nominalwerten abzüglich Wertberichtigungen auf zweifelhafte Forderungen angesetzt. Die Schätzung der Wertberichtigungen auf zweifelhafte Forderungen basiert hauptsächlich auf dem Zahlungsverhalten in der Vergangenheit sowie der Berücksichtigung der Altersstruktur und der Vertragspartner. In gewissen zeitlichen Abständen werden Veränderungen im Zahlungsverhalten überprüft, um die Angemessenheit der Wertberichtigungen sicherzustellen.

### o) Vorräte

In den Vorräten sind diejenigen Vermögenswerte ausgewiesen, die zum Verkauf im normalen Geschäftsgang gehalten werden (fertige Erzeugnisse), die sich in der Herstellung für den Verkauf befinden (unfertige Erzeugnisse) oder die im Rahmen der Herstellung oder Erbringung von Dienstleistungen verbraucht werden (Roh-, Hilfs- und Betriebsstoffe).

Die Vorräte werden entweder zu Anschaffungs- bzw. Herstellungskosten (ermittelt nach der Durchschnittskosten- bzw. Fifo-Methode) oder zum niedrigeren Marktpreis angesetzt. In die Herstellungskosten werden neben den direkt zurechenbaren Kosten auch Fertigungs- und Materialgemeinkosten sowie Abschreibungen einbezogen.

### p) Sachanlagevermögen

Die Gegenstände des Sachanlagevermögens werden zu Anschaffungs- und Herstellungskosten abzüglich kumulierter Abschreibungen bewertet. Wesentliche Verbesserungen der Vermögenswerte über ihren ursprünglichen Zustand hinaus werden aktiviert. Reparatur- und Instandhaltungsaufwendungen, die nicht zu einer Verlängerung der Nutzungsdauer führen, werden aufwandswirksam behandelt. Abschreibungen werden nach der linearen Methode über die geschätzte Nutzungsdauer der Vermögenswerte vorgenommen, die für Gebäude und Einbauten zwischen 4 und 50 Jahren (im gewogenen Durchschnitt 16 Jahre) und für technische Anlagen und Maschinen zwischen 3 und 15 Jahren (im gewogenen Durchschnitt 10 Jahre) liegt.

### q) Immaterielle Vermögenswerte mit bestimmter Nutzungsdauer

Im Fresenius-Konzern werden immaterielle Vermögenswerte mit bestimmter Nutzungsdauer, wie z. B. Patente, Produkt- und Vertriebsrechte, Verträge über Wettbewerbsverzicht, Technologie sowie Lizenzen zur Fertigung, Distribution und zum Verkauf von Arzneimitteln, über die jeweilige Restnutzungsdauer linear auf ihren Restwert abgeschrieben und auf außerplanmäßigen Abschreibungsbedarf hin überprüft (siehe Anmerkung 1. IV h, Außerplanmäßige Abschreibungen). Die Nutzungsdauer für Patente, Produkt- und Vertriebsrechte liegt zwischen 5 und 20 Jahren. Verträge über Wettbewerbsverzicht mit einer bestimmten Nutzungsdauer haben eine Nutzungsdauer zwischen 2 und 25 Jahren und eine durchschnittliche Nutzungsdauer von 8 Jahren. Managementverträge

mit einer bestimmten Nutzungsdauer haben eine Nutzungsdauer zwischen 5 und 40 Jahren. Für Technologie liegt die bestimmte Nutzungsdauer bei 15 Jahren. Lizenzen zur Fertigung, Distribution und zum Verkauf von Arzneimitteln werden abgeschrieben anhand des vertraglich festgelegten Lizenzzeitraums und der jährlich geschätzten Absatzmenge des Lizenzproduktes. Alle anderen immateriellen Vermögenswerte werden über ihre jeweilige geschätzte Nutzungsdauer zwischen 3 und 15 Jahren abgeschrieben.

Dauerhafte Wertminderungen werden durch außerplanmäßige Abschreibungen berücksichtigt.

### r) Firmenwerte sowie immaterielle Vermögenswerte mit unbestimmter Nutzungsdauer

Der Fresenius-Konzern identifizierte immaterielle Vermögenswerte mit unbestimmter Nutzungsdauer, weil es aufgrund einer Analyse aller relevanten Faktoren keine vorhersehbare Begrenzung der Periode gibt, in der die Vermögenswerte voraussichtlich Netto-Cashflows für den Konzern erzeugen werden. Die Bilanzierung von immateriellen Vermögenswerten mit unbestimmter Nutzungsdauer, die im Rahmen von Unternehmenszusammenschlüssen erworben wurden, wie z. B. Markennamen und bestimmte Managementverträge, erfolgt getrennt vom Firmenwert. Der Ansatz erfolgt zu Anschaffungskosten. Firmenwerte und immaterielle Vermögenswerte mit unbestimmter Nutzungsdauer werden nicht planmäßig abgeschrieben, sondern jährlich und unterjährig bei Eintritt bestimmter Ereignisse auf außerplanmäßigen Abschreibungsbedarf hin überprüft (Impairment Test).

Zur jährlichen Durchführung des Impairment Tests von Firmenwerten hat der Fresenius-Konzern einzelne sogenannte Berichtseinheiten (Reporting Units) festgelegt und deren Buchwerte durch Zuordnung der Vermögenswerte und Verbindlichkeiten, einschließlich vorhandener Firmenwerte und immaterieller Vermögenswerte, bestimmt. Eine Berichtseinheit wird in der Regel eine Ebene unter der Segmentebene nach Regionen oder rechtlichen Einheiten festgelegt. Im Segment Fresenius Medical Care wurden fünf Berichtseinheiten ermittelt (Europa, Lateinamerika, Asien-Pazifik, Nordamerika Renal Therapy Group, Nordamerika Fresenius Medical Services). Im Segment Fresenius Kabi gibt es eine



Berichtseinheit für die Region Nordamerika und eine Berichtseinheit für das Geschäft außerhalb Nordamerikas. Das Segment Fresenius Helios besteht entsprechend der regionalen Organisationsstruktur aus sieben Berichtseinheiten, die durch einen Zentralbereich gesteuert werden. Das Segment Fresenius Vamed setzt sich aus zwei Berichtseinheiten zusammen (Projekt- und Servicegeschäft). Mindestens einmal jährlich wird der Zeitwert jeder Berichtseinheit mit deren Buchwert verglichen. Der Zeitwert einer Berichtseinheit wird unter Anwendung eines Discounted-Cashflow-Verfahrens, basierend auf den erwarteten Zahlungsmittelzuflüssen (Cashflows) der Berichtseinheiten, ermittelt. Falls der Zeitwert der Berichtseinheit niedriger ist als der Buchwert, wird die Differenz zuerst beim Firmenwert der Berichtseinheit als außerplanmäßige Abschreibung berücksichtigt.

Um die Werthaltigkeit von einzeln abgrenzbaren immateriellen Vermögenswerten mit unbestimmter Nutzungsdauer zu beurteilen, vergleicht der Fresenius-Konzern die Zeitwerte dieser immateriellen Vermögenswerte mit ihren Buchwerten. Der beizulegende Zeitwert eines immateriellen Vermögenswerts wird unter Anwendung eines Discounted-Cashflow-Verfahrens oder – sofern angemessen – anderer Methoden ermittelt.

Die Werthaltigkeit der in der Konzern-Bilanz enthaltenen Firmenwerte und der sonstigen einzeln abgrenzbaren immateriellen Vermögenswerte mit unbestimmter Nutzungsdauer war gegeben. Außerplanmäßige Abschreibungen auf Firmenwerte waren daher in den Geschäftsjahren 2010 und 2009 nicht erforderlich.

### s) Leasing

Gemietete Sachanlagen, die wirtschaftlich auf Basis von Chancen und Risiken dem Fresenius-Konzern zuzurechnen sind (Finanzierungsleasing), werden zum Zeitpunkt des Zugangs zu Barwerten der Leasingzahlungen bilanziert, soweit die Marktwerte nicht niedriger sind. Die Abschreibungen erfolgen planmäßig linear über die wirtschaftliche Nutzungsdauer. Ist ein späterer Eigentumsübergang des Leasinggegenstandes unsicher und liegt keine günstige Kaufoption vor, wird die Laufzeit des Leasingvertrags zugrunde gelegt, sofern diese kürzer ist. Liegt der erzielbare Betrag unter den fortgeführten Anschaffungs- oder Herstellungskosten, werden die Sachanlagen außerplanmäßig abgeschrieben.

Verbindlichkeiten aus Finanzierungsleasingverträgen werden in Höhe des Barwerts der zukünftigen Leasingraten passiviert und als Finanzverbindlichkeit ausgewiesen.

Vermietete Sachanlagen, die der Fresenius-Konzern bilanziert, werden zu Anschaffungskosten aktiviert und über die Leasingdauer linear auf den erwarteten Restwert abgeschrieben.

### t) Finanzinstrumente

Finanzinstrumente sind alle Verträge, die einen finanziellen Vermögenswert bei der einen Gesellschaft und eine finanzielle Verbindlichkeit oder ein Eigenkapitalinstrument bei einer anderen Gesellschaft begründen. Folgende Kategorien (abgeleitet aus International Accounting Standard 39, Financial Instruments: Recognition and Measurement) sind für den Fresenius-Konzern relevant: Kredite und Forderungen, zum Restbuchwert bewertete finanzielle Verbindlichkeiten sowie zum beizulegenden Zeitwert bewertete finanzielle Verbindlichkeiten/Vermögenswerte. Weitere Kategorien sind im Fresenius-Konzern in unwesentlichem Umfang oder gar nicht vorhanden. Der Fresenius-Konzern teilt die Finanzinstrumente ihrem Charakter nach in folgende Klassen ein: flüssige Mittel, zum Buchwert bilanzierte Vermögenswerte, zum Buchwert bilanzierte Verbindlichkeiten, Derivate zu Sicherungszwecken sowie zum Marktwert bilanzierte Verbindlichkeiten und zum Marktwert bilanzierte Anteile anderer Gesellschafter mit Put-Optionen.

Der Zusammenhang zwischen den Klassen und den Kategorien sowie die Überleitung zur Konzern-Bilanz ist in Anmerkung 30, Finanzinstrumente, in tabellarischer Form dargestellt.

Der Fresenius-Konzern kann dazu verpflichtet werden, die Anteile, die andere Gesellschafter an einigen seiner Tochtergesellschaften halten, zu erwerben. Diese Verpflichtung basiert auf Put-Optionen und kann im Ermessen der anderen Gesellschafter innerhalb eines festgelegten Zeitraums ausgeübt werden. Bei Ausübung dieser Put-Optionen wäre der Fresenius-Konzern dazu verpflichtet, sämtliche oder Teile der Anteile der anderen Gesellschafter zum geschätzten Marktwert zu erwerben. Zur Ermittlung dieser Marktwerte setzt der Fresenius-Konzern den höheren Wert aus Netto-Buchwert und Gewinnmultiplikatoren an, wobei die Gewinnmultiplikatoren auf historischen Gewinnen, dem Entwicklungsstadium des zugrunde liegenden Geschäftes und anderen Faktoren



beruhen. In Abhängigkeit von den Marktgegebenheiten können die geschätzten Marktwerte der Anteile anderer Gesellschafter schwanken und die in den finalen Verpflichtungen implizierten Gewinnmultiplikatoren für die Anteile anderer Gesellschafter mit Put-Optionen erheblich von den derzeitigen Schätzungen abweichen.

Derivative Finanzinstrumente, im Wesentlichen Devisenterminkontrakte und Zinsswaps, werden als Vermögenswerte und Verbindlichkeiten zum Marktwert in der Konzernbilanz ausgewiesen. Die Marktwertänderungen der derivativen Finanzinstrumente, die als Fair Value Hedges klassifiziert werden, und der dazugehörigen gesicherten Grundgeschäfte werden periodengerecht ergebniswirksam erfasst. Der effektive Teil der Marktwertänderungen der als Cashflow Hedges klassifizierten Finanzinstrumente wird bis zum Realisationszeitpunkt des gesicherten Grundgeschäfts erfolgsneutral im Eigenkapital (kumuliertes Other Comprehensive Income (Loss)) ausgewiesen (siehe Anmerkung 30, Finanzinstrumente). Der ineffektive Teil von Cashflow Hedges wird in der laufenden Periode ergebniswirksam gebucht. Die Marktwertveränderungen der Derivate ohne bilanzielle Sicherungsbeziehung, also Derivate für die kein Hedge-Accounting angewendet wird, werden periodengerecht ergebniswirksam erfasst.

#### u) Verbindlichkeiten

Verbindlichkeiten werden grundsätzlich zum Barwert bzw. zum Wert der Güter und Dienstleistungen, die für die Verpflichtung erbracht werden, bewertet. Bei kurzfristigen Verbindlichkeiten erfolgt die Passivierung in der Regel in Höhe des Rückzahlungsbetrags.

#### v) Rechtskosten

Der Fresenius-Konzern ist im normalen Geschäftsablauf in Rechtsstreitigkeiten, Gerichtsverfahren, Verwaltungsverfahren und Ermittlungen hinsichtlich verschiedenster Aspekte seiner Geschäftstätigkeit involviert. Der Fresenius-Konzern analysiert regelmäßig entsprechende Informationen und bildet die erforderlichen Rückstellungen für möglicherweise aus solchen Verfahren resultierende Verbindlichkeiten einschließlich der geschätzten Rechtsberatungskosten. Für diese Analysen

nutzt der Fresenius-Konzern sowohl seine interne Rechtsabteilung als auch externe Ressourcen. Die Bildung einer Rückstellung für Rechtsstreitigkeiten richtet sich nach der Wahrscheinlichkeit eines für den Fresenius-Konzern nachteiligen Ausgangs und der Möglichkeit, einen Verlustbetrag sinnvoll schätzen zu können.

Die Erhebung einer Klage oder die formelle Geltendmachung eines Anspruchs bzw. die Bekanntgabe einer solchen Klage oder der Geltendmachung eines Anspruchs bedeutet nicht zwangsläufig, dass eine Rückstellung zu bilden ist.

#### w) Sonstige Rückstellungen

Die Rückstellungen für Steuern und sonstige Verpflichtungen werden gebildet, wenn eine gegenwärtige Verpflichtung resultierend aus einem Ereignis der Vergangenheit gegenüber Dritten besteht, die künftige Zahlung wahrscheinlich ist und der Betrag zuverlässig geschätzt werden kann.

Die Steuerrückstellungen enthalten neben der Berechnung für das laufende Jahr auch Verpflichtungen für frühere Jahre.

#### x) Rückstellungen für Pensionen und ähnliche Verpflichtungen

Der Fresenius-Konzern bilanziert die Unterdeckung seiner leistungsorientierten Pensionspläne, die sich aus der Differenz zwischen den Pensionsverpflichtungen und dem beizulegenden Zeitwert des Planvermögens ergibt, als eine Rückstellung. Änderungen des Finanzierungsstatus nach Steuern werden in dem Jahr, in dem sie entstehen, im kumulierten Other Comprehensive Income (Loss) erfasst. Diese Änderungen setzen sich zusammen aus ungetilgten versicherungsmathematischen Gewinnen oder Verlusten, ungetilgtem früherem Dienstzeitaufwand oder anderen Kosten, die nicht als Bestandteile der Veränderung des Pensionsaufwands berücksichtigt wurden. In den Folgejahren werden die versicherungsmathematischen Gewinne und Verluste und der Dienstzeitaufwand früherer Jahre bei Realisierung im Pensionsaufwand berücksichtigt.

#### y) Kosten der Fremdkapitalaufnahme

Aufwendungen, die im Zusammenhang mit der Aufnahme von Fremdkapital anfallen, werden separat von den Finanzverbindlichkeiten ausgewiesen und über die Laufzeit der zugrunde liegenden Schulden ergebniswirksam verteilt.

## z) Aktienoptionspläne

Der Fresenius-Konzern wendet im Rahmen des Standards zur aktienbasierten Vergütung die modifizierte prospektive Überleitungsmethode an. Entsprechend dieser Überleitungsmethode sind in den Jahren 2009 und 2010 Personalaufwendungen entstanden, die sich aus den nachfolgenden Beträgen zusammensetzen: (a) Personalaufwendungen für alle aktienbasierten Vergütungen, die zum 1. Januar 2006 bereits gewährt waren, deren Wartezeit jedoch noch nicht abgelaufen war; (b) Personalaufwendungen für aktienbasierte Vergütungen, die nach dem 1. Januar 2006 gewährt wurden; diese basieren auf dem Marktwert am Tag der Gewährung.

## aa) Selbstversicherungsprogramme

Über das Versicherungsprogramm für Berufs-, Produkt- und allgemeine Haftpflichtrisiken sowie für Pkw-Schäden und Arbeitnehmer-Entschädigungsansprüche ist die in Nordamerika ansässige größte Tochtergesellschaft der Fresenius Medical Care AG & Co. KGaA hinsichtlich Berufshaftpflichtrisiken teilweise selbstversichert. Die Absicherung aller anderen eingetretenen Schadensfälle übernimmt die Fresenius Medical Care AG & Co. KGaA bis zu einer festgesetzten Schadenshöhe selbst. Wird diese überschritten, treten andere externe Versicherungen ein. Die im Geschäftsjahr bilanzierten Verbindlichkeiten stellen Schätzungen von zukünftigen Zahlungen für die gemeldeten sowie für die bereits entstandenen,

aber noch nicht gemeldeten Schadensfälle dar. Die Schätzungen basieren auf historischen Erfahrungen und gegenwärtigem Anspruchsverhalten. Diese Erfahrungen beziehen sowohl die Anspruchshäufigkeit (Anzahl) als auch die Anspruchshöhe (Kosten) ein und werden zur Schätzung der bilanzierten Beträge mit Erwartungen hinsichtlich einzelner Ansprüche kombiniert.

## bb) Fremdwährungsumrechnung

Die Berichtswährung ist der Euro. Grundsätzlich werden die Vermögenswerte und Verbindlichkeiten der ausländischen Tochtergesellschaften zum Mittelkurs am Bilanzstichtag umgerechnet. Erträge und Aufwendungen werden mit dem Durchschnittskurs umgerechnet. Währungsumrechnungsdifferenzen werden erfolgsneutral im Eigenkapital (kumuliertes Other Comprehensive Income (Loss)) erfasst. Außerdem werden Umrechnungsdifferenzen von bestimmten konzerninternen Fremdwährungsdarlehen, die als Anlage mit Eigenkapitalcharakter betrachtet werden, ebenfalls als Währungsumrechnungsdifferenz im Eigenkapital erfasst.

Gewinne und Verluste aus der Umrechnung von Fremdwährungspositionen und anderen konzerninternen Fremdwährungsdarlehen, sofern sie nicht Eigenkapitalcharakter haben, werden als allgemeine Verwaltungsaufwendungen ausgewiesen. Im Geschäftsjahr 2010 resultierten aus dieser Umrechnung nur unwesentliche Verluste.

Die für die Währungsumrechnung zugrunde gelegten Wechselkurse wesentlicher Währungen haben sich wie folgt entwickelt:

|                                | Stichtagskurs <sup>1</sup> |               | Durchschnittskurs |         |
|--------------------------------|----------------------------|---------------|-------------------|---------|
|                                | 31. Dez. 2010              | 31. Dez. 2009 | 2010              | 2009    |
| US-Dollar je €                 | 1,3362                     | 1,4406        | 1,3259            | 1,3948  |
| Pfund Sterling je €            | 0,86075                    | 0,8881        | 0,85805           | 0,8909  |
| Schwedische Kronen je €        | 8,9655                     | 10,2520       | 9,5387            | 10,6191 |
| Chinesische Renminbi Yuan je € | 8,8220                     | 9,8350        | 8,9729            | 9,5277  |
| Japanische Yen je €            | 108,65                     | 133,16        | 116,32            | 130,34  |

<sup>1</sup> Mittelkurs am Bilanzstichtag

## cc) Fair-Value-Hierarchie

Die dreistufige Fair-Value-Hierarchie nach „Financial Accounting Standards Board Accounting Standards Codification“ (FASB ASC) Topic 820, Fair Value Measurements and Disclosures, gliedert die zum Marktwert bilanzierten Vermögenswerte

und Verbindlichkeiten basierend auf den Daten, die für die Marktwertermittlung herangezogen werden. Level 1 umfasst demnach beobachtbare Daten, wie quotierte Marktpreise auf aktiven Märkten. Level 2 werden alle am Markt direkt oder indirekt beobachtbaren Preisdaten zugeordnet, die nicht

quotierte Marktpreise in aktiven Märkten darstellen. Level 3 stellen alle nicht-beobachtbaren Werte dar, für die keine oder nur wenige Marktdaten zur Verfügung stehen und die deshalb die Entwicklung von unternehmenseigenen Annahmen erforderlich machen. Die Fair-Value-Hierarchie findet Anwendung in Anmerkung 25, Pensionen und ähnliche Verpflichtungen sowie in Anmerkung 30, Finanzinstrumente.

#### dd) Verwendung von Schätzungen

Die Erstellung eines Konzernabschlusses nach US-GAAP macht Schätzungen und Annahmen durch die Unternehmensleitung erforderlich, die die Höhe der Aktiva und Passiva, die Angabe von Eventualforderungen und -verbindlichkeiten zum Bilanzstichtag sowie die Höhe der Erträge und Aufwendungen während des Geschäftsjahres beeinflussen. Die tatsächlichen Ergebnisse können von diesen Schätzungen abweichen.

#### ee) Forderungsmanagement

Die Gesellschaften des Fresenius-Konzerns führen laufend Überprüfungen der finanziellen Lage ihrer Kunden durch und verlangen von diesen bei der Lieferung von Produkten und der Erbringung von Serviceleistungen üblicherweise keine Sicherheiten. Etwa 18 % bzw. 19 % der erwirtschafteten Umsätze des Fresenius-Konzerns im Jahr 2010 bzw. 2009 unterlagen den Regularien der staatlichen Gesundheitsprogramme in den USA, Medicare und Medicaid und werden von US-Regierungsbehörden verwaltet.

#### ff) Neu angewendete Verlautbarungen

Im Geschäftsjahr 2010 wurden die US-GAAP zugrunde gelegt, die verpflichtend bzw. freiwillig vorzeitig auf Geschäftsjahre anzuwenden sind, die am 1. Januar 2010 beginnen.

Von diesen Standards wurden – soweit für die Geschäftstätigkeit des Fresenius-Konzerns von Bedeutung – im Geschäftsjahr 2010 erstmals angewendet:

Im Juli 2010 verabschiedete das „Financial Accounting Standards Board“ (FASB) **Accounting Standards Update 2010-20** (ASU 2010-20), Disclosures about the Credit Quality of Financing Receivables and the Allowance for Credit Losses. ASU 2010-20 ist eine Aktualisierung von FASB ASC Topic 310,

Receivables, und erfordert erweiterte Angabepflichten auf disaggregierter Basis über:

- ▶ die Art des dem Portfolio von Finanzforderungen inhärenten Kreditrisikos,
- ▶ die Art und Weise, wie dieses Risiko im Rahmen der Ermittlung der Wertberichtigungen auf Kreditverluste analysiert und bewertet wird,
- ▶ die Veränderungen der Wertberichtigungen auf Kreditverluste unter Angabe der Gründe für die Veränderungen.

Die von ASU 2010-20 erforderten Angaben zum Ende der Berichtsperiode sind für Perioden und Geschäftsjahre anzugeben, die am oder nach dem 15. Dezember 2010 enden. Angaben zu Aktivitäten während der Berichtsperiode sind für Perioden und Geschäftsjahre anzugeben, die am oder nach dem 15. Dezember 2010 beginnen. Eine frühere Anwendung ist erlaubt. Der Fresenius-Konzern wendet die von ASU 2010-20 vorgeschriebenen Änderungen seit dem 1. Januar 2010 an.

Im Juni 2009 verabschiedete das FASB **Accounting Standards Update 2009-17** (ASU 2009-17), FASB ASC Topic 810, Consolidations – Improvements to Financial Reporting by Enterprises Involved with Variable Interest Entities. ASU 2009-17 verpflichtet berichtende Unternehmen, ehemalige „Qualifying Special Purposes Entities“ (QSPE) für die Konsolidierung zu bewerten. ASU 2009-17 ersetzt eine quantitative Bewertungsmethode zur Bestimmung des Hauptbegünstigten einer „Variable Interest Entity“ (VIE) durch eine qualitative Bewertungsmethode mit dem Ziel, eine Mehrheitsbeteiligung zu identifizieren. Des Weiteren verlangt ASU 2009-17 häufigere Bewertungen, um sicherzustellen, dass es sich bei dem identifizierten Unternehmen weiterhin um den Hauptbegünstigten der VIE handelt. Darüber hinaus klärt ASU 2009-17 die Charakteristika von VIEs, ohne diese signifikant zu ändern.

Im Juni 2009 verabschiedete das FASB **Accounting Standards Update 2009-16** (ASU 2009-16), FASB ASC Topic 860, Transfers and Servicing – Accounting for Transfers of Financial Assets. ASU 2009-16 streicht das Konzept der QSPEs und erhöht die Anforderungen an den Ausweis von Übertragungen von Teilen finanzieller Vermögenswerte als Verkäufe. ASU 2009-16 klärt die Ausbuchungskriterien für finanzielle Vermögenswerte, ändert die Bewertung von Ansprüchen, die der Veräußerer bei erstmaligem Ansatz zurück behält

(Retained Interests), und hebt die Vorschriften für die Umklassifizierung von Verbriefungen garantierter Hypotheken auf. ASU 2009-16 erweitert für Jahres- und Zwischenabschlüsse die Angabepflichten zu Risiken in Zusammenhang mit VIEs.

Seit dem 1. Januar 2010 wendet der Fresenius-Konzern die von ASU 2009-16 und ASU 2009-17 vorgeschriebenen Änderungen an. Sie hatten keine wesentlichen Auswirkungen auf das Ergebnis des Fresenius-Konzerns im Geschäftsjahr 2010.

#### **gg) Noch nicht angewendete neue Verlautbarungen**

Das FASB hat keine für den Fresenius-Konzern relevanten neuen Rechnungslegungsvorschriften herausgegeben, die frühestens für Geschäftsjahre beginnend am oder nach dem 1. Januar 2011 anzuwenden sind.

In der Regel übernimmt der Fresenius-Konzern neue Rechnungslegungsvorschriften nicht vor dem Zeitpunkt der verpflichtenden Anwendung.

### **V. KRITISCHE RECHNUNGSLEGUNGSGRUNDSÄTZE**

Die folgenden Rechnungslegungsgrundsätze und -themen sind nach Meinung des Managements des Fresenius-Konzerns kritisch für den Konzernabschluss im gegenwärtigen ökonomischen Umfeld. Die Einflüsse und Beurteilungen sowie die Ungewissheiten, die auf sie einwirken, sind ebenfalls wesentlich für das Verständnis der jetzigen und künftigen operativen Ergebnisse des Fresenius-Konzerns.

#### **a) Werthaltigkeit von Firmenwerten und immateriellen Vermögenswerten mit unbestimmter Nutzungsdauer**

Die immateriellen Vermögenswerte einschließlich der Firmenwerte, Produktrechte, Markennamen und Managementverträge tragen einen wesentlichen Teil zu der Bilanzsumme des Fresenius-Konzerns bei. Zum 31. Dezember 2010 bzw. 31. Dezember 2009 belief sich der Buchwert der Firmenwerte und der immateriellen Vermögenswerte mit unbestimmter Nutzungsdauer, die nicht der planmäßigen Abschreibung unterliegen, auf 11.641 Mio € bzw. 10.670 Mio €. Dies entsprach 49 % bzw. 51 % der Bilanzsumme.

Firmenwerte und immaterielle Vermögenswerte mit unbestimmter Nutzungsdauer werden mindestens einmal jährlich auf einen erforderlichen Abschreibungsbedarf hin untersucht (Impairment Test) oder wenn Ereignisse eintreten oder Veränderungen darauf hindeuten, dass die Buchwerte dieser Vermögenswerte nicht mehr realisiert werden können.

Um eventuelle Wertminderungen dieser Vermögenswerte zu ermitteln, werden die Zeitwerte der Berichtseinheiten (Reporting Units) mit deren Buchwerten verglichen. Der Zeitwert der Berichtseinheiten wird durch Anwendung eines Discounted-Cashflow-Verfahrens unter Einbeziehung der spezifischen gewichteten Gesamtkapitalkosten (Weighted-average cost of capital – WACC) bestimmt. Zur Ermittlung der diskontierten zukünftigen Zahlungsmittelzuflüsse wird eine Vielzahl von Annahmen getroffen. Diese betreffen insbesondere zukünftige Erstattungsätze und Verkaufspreise, die Anzahl der Behandlungen, Absatzmengen und Kosten. Zur Bestimmung der Zahlungsmittelzuflüsse werden in allen Berichtseinheiten das Budget der nächsten drei Jahre sowie Projektionen für die Jahre vier bis zehn und entsprechende Wachstumsraten für alle nachfolgenden Jahre zugrunde gelegt. Diese Wachstumsraten liegen bei Fresenius Medical Care zwischen 0 % und 4 %, bei Fresenius Kabi bei 3 % sowie bei Fresenius Helios und Fresenius Vamed bei 1 %. Projektionen von bis zu zehn Jahren sind durch den weitgehend gleichförmigen und konjunkturunabhängigen Verlauf des Geschäfts des Fresenius-Konzerns möglich. Der Abzinsungsfaktor ermittelt sich aus dem WACC der jeweiligen Berichtseinheit. Im Jahr 2010 basierte der WACC der Fresenius Medical Care auf einer Basisrate von 6,38 %. Diese Basisrate wird für jede Berichtseinheit um die jeweiligen länderspezifischen Risikoraten angepasst. Im Jahr 2010 lagen die WACCs (nach Steuern) für die Berichtseinheiten der Fresenius Medical Care zwischen 6,38 % und 13,56 %. In den Segmenten Fresenius Kabi, Fresenius Helios und Fresenius Vamed lag der WACC (nach Steuern) bei 5,88 %, länderspezifische Anpassungen waren nicht erforderlich. Falls der beizulegende Zeitwert der Berichtseinheit niedriger ist als der Buchwert, wird die Differenz zuerst beim Firmenwert der Berichtseinheit als außerplanmäßige Abschreibung berücksichtigt. Ein Anstieg des WACC (nach Steuern) um 0,5 % hätte im Geschäftsjahr 2010 nicht zu einem Abschreibungsbedarf geführt.

Ein länger anhaltender Abschwung im Gesundheitswesen mit einem niedrigeren als erwarteten Anstieg der Erstattungs-raten und/oder mit höheren als erwarteten Kosten für die Erbringung der Gesundheitsdienstleistungen könnte die Schätzungen des Fresenius-Konzerns der zukünftigen Cashflows bestimmter Länder oder Segmente negativ beeinflussen. Weiterhin könnten Veränderungen im makroökonomischen Umfeld den Abzinsungssatz beeinflussen. Die mögliche Folge wäre, dass die künftigen operativen Ergebnisse des Fresenius-Konzerns in wesentlichem Umfang negativ durch zusätzliche außerplanmäßige Abschreibungen auf Firmenwerte und immaterielle Vermögenswerte mit unbestimmter Nutzungsdauer beeinflusst werden.

#### b) Rechtliche Eventualverbindlichkeiten

Der Fresenius-Konzern ist in verschiedene Rechtsstreitigkeiten involviert, die sich aus der Geschäftstätigkeit ergeben. Der Ausgang dieser Rechtsangelegenheiten könnte einen wesentlichen Einfluss auf die Vermögens-, Finanz- und Ertragslage des Fresenius-Konzerns haben. Zu Einzelheiten wird auf Anmerkung 29, Haftungsverhältnisse und Eventualverbindlichkeiten, verwiesen.

Der Fresenius-Konzern analysiert regelmäßig entsprechenden Informationen und bildet die erforderlichen Rückstellungen für möglicherweise aus solchen Verfahren resultierende Verbindlichkeiten einschließlich der geschätzten Rechtsberatungskosten. Für diese Analysen nutzt der Fresenius-Konzern sowohl seine interne Rechtsabteilung als auch externe Ressourcen. Die Bildung einer Rückstellung für Rechtsstreitigkeiten richtet sich nach der Wahrscheinlichkeit eines für den Fresenius-Konzern nachteiligen Ausgangs und der Möglichkeit, einen Verlustbetrag sinnvoll schätzen zu können.

Die Erhebung einer Klage oder die formelle Geltendmachung eines Anspruchs bzw. die Bekanntgabe einer solchen Klage oder der Geltendmachung eines Anspruchs bedeutet nicht zwangsläufig, dass eine Rückstellung zu bilden ist.

#### c) Wertberichtigungen auf zweifelhafte Forderungen

Forderungen aus Lieferungen und Leistungen sind eine wesentliche Bilanzposition, und die Wertberichtigungen auf zweifelhafte Forderungen bedürfen einer umfangreichen Schätzung und Beurteilung durch das Management. Die Forderungen aus Lieferungen und Leistungen nach Wertberichtigungen betrugen 2.935 Mio € bzw. 2.509 Mio € im Jahr 2010 bzw. 2009. Rund zwei Drittel der Forderungen stammen aus dem Unternehmensbereich Fresenius Medical Care und hier im Wesentlichen aus dem Bereich der Dialyседienstleistungen in Nordamerika.

Die größten Schuldner oder Schuldnergruppen an den Forderungen aus Lieferungen und Leistungen entfielen zum 31. Dezember 2010 mit jeweils 14 % auf die US Medicare und Medicaid Gesundheitsprogramme sowie auf private Versicherungen in den USA. Darüber hinaus existieren aufgrund der internationalen und heterogenen Kundenstruktur im Fresenius-Konzern keinerlei Risikokonzentrationen in nennenswertem Ausmaß.

Die Wertberichtigungen auf zweifelhafte Forderungen betrugen 317 Mio € bzw. 285 Mio € zum 31. Dezember 2010 bzw. zum 31. Dezember 2009.

Die Umsätze werden in Höhe der erwarteten Erstattungsbeträge in Übereinstimmung mit den vertraglichen Vereinbarungen mit Dritten fakturiert. Die Bestimmung der Wertberichtigungen auf zweifelhafte Forderungen basiert hauptsächlich auf dem Zahlungsverhalten in der Vergangenheit sowie der Berücksichtigung der Altersstruktur und der Vertragspartner. Der Fresenius-Konzern glaubt, dass diese Analysen zu einer sachlich begründeten Schätzung der Wertberichtigungen auf zweifelhafte Forderungen führen. In gewissen Zeitabständen überprüft der Fresenius-Konzern Veränderungen im Zahlungsverhalten, um die Angemessenheit der Wertberichtigungen sicherzustellen.

Das Entstehen eines Forderungsrückstandes und Schwierigkeiten beim Einzug von Forderungen könnten eine Anhebung der Schätzung des Wertberichtigungsbedarfs auf zweifelhafte Forderungen erfordern. Solche zusätzlichen Aufwendungen für uneinbringliche Forderungen könnten die künftigen operativen Ergebnisse in wesentlichem Umfang negativ beeinflussen.

#### d) Selbstversicherungsprogramme

Über das Versicherungsprogramm für Berufs-, Produkt- und allgemeine Haftpflichtrisiken sowie für Pkw-Schäden und Arbeitnehmer-Entschädigungsansprüche ist die in Nordamerika ansässige größte Tochtergesellschaft der Fresenius Medical Care AG & Co. KGaA hinsichtlich Berufshaftpflichtrisiken teilweise selbstversichert. Zu weiteren Details über die Rechnungslegungsgrundsätze für Selbstversicherungsprogramme siehe Anmerkung 1. IV aa, Selbstversicherungsprogramme.

## 2. AKQUISITIONEN UND DESINVESTITIONEN

### AKQUISITIONEN UND DESINVESTITIONEN

Der Fresenius-Konzern hat Akquisitionen in Höhe von 644 Mio € im Jahr 2010 bzw. 260 Mio € im Jahr 2009 getätigt. Hiervon wurden im Jahr 2010 Kaufpreiszahlungen in Höhe von 516 Mio € in bar geleistet und Verpflichtungen in Höhe von 128 Mio € übernommen.

#### Fresenius Medical Care

Die Akquisitionsausgaben der Fresenius Medical Care betrugen im Geschäftsjahr 2010 596 Mio € und entfielen im Wesentlichen auf den Erwerb von Dialysekliniken, die Gründung eines neuen Unternehmens für Medikamente zur Nierentherapie mit Galenica Ltd., den Erwerb von Lizenzen und die Übernahme des Peritonealdialyse-Geschäfts außerhalb der USA von Gambro.

Die Akquisitionsausgaben der Fresenius Medical Care im Jahr 2009 in Höhe von 138 Mio € entfielen im Wesentlichen auf den Erwerb von Dialysekliniken.

#### Fresenius Kabi

Fresenius Kabi tätigte im Jahr 2010 Akquisitionen in Höhe von 31 Mio €, die im Wesentlichen auf den Erwerb der cas central compounding baden-württemberg GmbH, Deutschland und der Fortuna Herstellung GmbH, Deutschland entfielen.

Die Akquisitionsausgaben von Fresenius Kabi beliefen sich im Geschäftsjahr 2009 auf 32 Mio €. Größtes Einzelprojekt war der Erwerb eines Lactulose-Geschäftsbereichs in Italien.

#### Fresenius Helios

Fresenius Helios tätigte im Jahr 2010 Akquisitionsausgaben in Höhe von 13 Mio €, die im Wesentlichen auf den Erwerb des Kreiskrankenhauses St. Marienberg in Helmstedt, Deutschland und den Erwerb von medizinischen Versorgungszentren entfielen.

Fresenius Helios tätigte im Jahr 2009 Akquisitionen in Höhe von 79 Mio €, die im Wesentlichen auf den Erwerb von fünf Akutkliniken entfielen. Die Vereinbarungen zum Erwerb dieser Kliniken traf Fresenius Helios bereits im Dezember 2008 und schloss die Transaktionen im Februar 2009 ab.

#### Fresenius Vamed

In den Jahren 2010 und 2009 tätigte Fresenius Vamed keine wesentlichen Akquisitionen.

### Konzern/Sonstiges

Im Jahr 2009 wurde im Segment Konzern/Sonstiges ein Teil der Meilensteinzahlungen im Zusammenhang mit dem im Jahr 2007 getätigten Erwerb weiterer Anteile an der Trion Pharma GmbH, Deutschland, in Höhe von 9 Mio € geleistet.

### AUSWIRKUNGEN VON AKQUISITIONEN AUF DEN ABSCHLUSS DES FRESENIUS-KONZERNS

Die Akquisitionen des Geschäftsjahres 2010 wurden gemäß der Erwerbsmethode bilanziert und infolgedessen ab dem Erwerbszeitpunkt konsolidiert. Sie sind jede für sich nicht wesentlich. Der Unterschiedsbetrag zwischen den Akquisitionskosten und dem Marktwert des Nettovermögens betrug 480 Mio € bzw. 310 Mio € im Jahr 2010 bzw. 2009.

Die Kaufpreisaufteilung wurde noch nicht für alle Akquisitionen abgeschlossen. Auf Basis der vorläufigen Kaufpreisaufteilung wurden 359 Mio € als Firmenwerte und 121 Mio € als sonstige immaterielle Vermögenswerte ausgewiesen. Von diesen Firmenwerten entfallen 324 Mio € auf die Akquisitionen von Fresenius Medical Care, 30 Mio € auf die von Fresenius Kabi, 1 Mio € auf die von Fresenius Helios und 4 Mio € auf die von Fresenius Vamed.

Die im Geschäftsjahr 2010 durchgeführten bzw. erstmalig für ein volles Geschäftsjahr einbezogenen Akquisitionen leisteten zur Umsatz- und Ergebnisentwicklung den folgenden Beitrag:

| in Mio €        | 2010 |
|-----------------|------|
| Umsatz          | 159  |
| EBITDA          | 21   |
| EBIT            | 13   |
| Zinsergebnis    | -5   |
| Konzernergebnis | 3    |

Die Akquisitionen haben die Bilanzsumme des Fresenius-Konzerns um 496 Mio € erhöht.



## ERLÄUTERUNGEN ZUR KONZERN-GEWINN- UND VERLUSTRECHNUNG

### 3. SONDEREINFLÜSSE

Die Gewinn- und Verlustrechnung der Jahre 2010 und 2009 enthält Sondereinflüsse aus der Akquisition von APP Pharmaceuticals, Inc. (APP) in 2008. Die folgenden Tabellen zeigen die Sondereinflüsse aus der Akquisition von APP in der Überleitung vom bereinigten Ergebnis auf das Ergebnis gemäß US-GAAP.

| in Mio €                                         | Sonstiges<br>Finanz-<br>ergebnis | Konzern-<br>ergebnis |
|--------------------------------------------------|----------------------------------|----------------------|
| <b>Bereinigtes Ergebnis 2010</b>                 |                                  | 660                  |
| Marktwertänderung der<br>Pflichtumtauschleihe    | -98                              | -70                  |
| Marktwertänderung des<br>Besserungsscheins (CVR) | 32                               | 32                   |
| <b>Ergebnis gemäß US-GAAP 2010</b>               |                                  | <b>622</b>           |

| in Mio €                                         | Sonstiges<br>Finanz-<br>ergebnis | Konzern-<br>ergebnis |
|--------------------------------------------------|----------------------------------|----------------------|
| <b>Bereinigtes Ergebnis 2009</b>                 |                                  | 514                  |
| Marktwertänderung der<br>Pflichtumtauschleihe    | -37                              | -26                  |
| Marktwertänderung des<br>Besserungsscheins (CVR) | 6                                | 6                    |
| <b>Ergebnis gemäß US-GAAP 2009</b>               |                                  | <b>494</b>           |

Für weitere Informationen zu der Pflichtumtauschleihe und dem Besserungsschein (CVR) wird auf Anmerkung 10, Sonstiges Finanzergebnis, verwiesen.

### 4. UMSATZ

Der Umsatz ergab sich aus folgenden Tätigkeiten:

| in Mio €                                                    | 2010          | 2009          |
|-------------------------------------------------------------|---------------|---------------|
| Umsätze aus Dienstleistungen                                | 9.631         | 8.643         |
| Verkauf von Produkten und damit<br>verbundenen Erzeugnissen | 5.850         | 5.097         |
| Umsätze aus langfristigen<br>Fertigungsaufträgen            | 490           | 423           |
| Sonstige Umsätze                                            | 1             | 1             |
| <b>Umsatz</b>                                               | <b>15.972</b> | <b>14.164</b> |

Die Gliederung des Umsatzes nach Segmenten und Regionen ist aus der Segmentberichterstattung auf den Seiten 126 bis 129 ersichtlich.

### 5. UMSATZKOSTEN

Die Umsatzkosten setzten sich wie folgt zusammen:

| in Mio €                                                               | 2010          | 2009         |
|------------------------------------------------------------------------|---------------|--------------|
| Kosten aus Dienstleistungen                                            | 7.144         | 6.519        |
| Herstellungskosten von Produkten und damit<br>verbundenen Erzeugnissen | 3.098         | 2.655        |
| Kosten aus langfristigen Fertigungsaufträgen                           | 404           | 354          |
| Sonstige Umsatzkosten                                                  | –             | –            |
| <b>Umsatzkosten</b>                                                    | <b>10.646</b> | <b>9.528</b> |

### 6. MATERIALAUFWAND

Der Materialaufwand gliederte sich in Aufwendungen für Roh-, Hilfs- und Betriebsstoffe und für bezogene Waren sowie in Aufwendungen für bezogene Leistungen:

| in Mio €                                                                | 2010         | 2009         |
|-------------------------------------------------------------------------|--------------|--------------|
| Aufwendungen für Roh-, Hilfs-, Betriebsstoffe<br>und für bezogene Waren | 4.092        | 3.715        |
| Aufwendungen für bezogene Leistungen                                    | 640          | 571          |
| <b>Materialaufwand</b>                                                  | <b>4.732</b> | <b>4.286</b> |

### 7. PERSONALAUFWAND

In den Umsatzkosten, den Vertriebs- und allgemeinen Verwaltungskosten sowie den Forschungs- und Entwicklungsaufwendungen war im Jahr 2010 bzw. 2009 Personalaufwand in Höhe von 5.354 Mio € bzw. 4.880 Mio € enthalten.

Der Personalaufwand gliederte sich wie folgt:

| in Mio €                                                                       | 2010         | 2009         |
|--------------------------------------------------------------------------------|--------------|--------------|
| Löhne und Gehälter                                                             | 4.221        | 3.882        |
| Soziale Abgaben und Aufwendungen für<br>Altersversorgung und für Unterstützung | 1.133        | 998          |
| davon für Altersversorgung                                                     | 132          | 120          |
| <b>Personalaufwand</b>                                                         | <b>5.354</b> | <b>4.880</b> |

Im Jahresdurchschnitt verteilten sich die Mitarbeiter im Fresenius-Konzern auf die folgenden Funktionsbereiche:

|                               | 2010           | 2009           |
|-------------------------------|----------------|----------------|
| Produktion und Dienstleistung | 106.803        | 102.003        |
| Allgemeine Verwaltung         | 17.594         | 16.131         |
| Vertrieb und Marketing        | 8.321          | 8.397          |
| Forschung und Entwicklung     | 1.445          | 1.372          |
| <b>Gesamt (Köpfe)</b>         | <b>134.163</b> | <b>127.903</b> |



## 8. VERTRIEBS- UND ALLGEMEINE VERWALTUNGSKOSTEN

Die Vertriebskosten betrugen 615 Mio € (2009: 561 Mio €). Sie enthielten vor allem Aufwendungen für Vertriebspersonal in Höhe von 304 Mio € (2009: 270 Mio €).

Die allgemeinen Verwaltungskosten in Höhe von 2.049 Mio € (2009: 1.781 Mio €) betreffen Aufwendungen der Verwaltung, die weder der Forschung und Entwicklung noch der Produktion oder dem Vertrieb zugeordnet werden können.

## 9. ZINSERGEBNIS

Das Zinsergebnis in Höhe von -566 Mio € setzte sich aus Zinsaufwendungen in Höhe von 596 Mio € und Zinserträgen in Höhe von 30 Mio € zusammen. Die Zinsaufwendungen resultierten aus den Finanzverbindlichkeiten des Fresenius-Konzerns (siehe Anmerkung 30, Finanzinstrumente).

## 10. SONSTIGES FINANZERGEBNIS

Unter der Position Sonstiges Finanzergebnis werden die folgenden Sonderaufwendungen und -erträge im Zusammenhang mit der Akquisition von APP Pharmaceuticals, Inc. (APP) und deren Finanzierung gezeigt:

Die den APP-Aktionären gewährten Besserungsscheine (CVR) werden an der US-Börse NASDAQ gehandelt. Die entsprechende Verbindlichkeit wird daher zum Stichtag mit dem aktuellen Börsenkurs bewertet. Aus dieser Bewertung ergab sich im Jahr 2010 ein Ertrag in Höhe von 32 Mio € (2009: 6 Mio € Ertrag).

Die ausgegebene Pflichtumtauschanleihe enthält aufgrund ihrer vertraglichen Ausgestaltung derivative Finanzinstrumente, die mit Marktpreisen zu bewerten sind. Aus dieser Bewertung ergab sich im Jahr 2010 ein Aufwand (vor Steuern) in Höhe von 98 Mio € (2009: 37 Mio € Aufwand vor Steuern). Diese Bewertung bedingt jedoch keine Veränderung des am Ende der Laufzeit in Stammaktien der Fresenius Medical Care AG & Co. KGaA zu begleichenden Nominalwerts der Pflichtumtauschanleihe von 554,4 Mio €, sondern spiegelt im Wesentlichen die Kursentwicklung dieser Aktien wider (siehe Anmerkung 23, Pflichtumtauschanleihe).

## 11. STEUERN

### ERTRAGSTEUERN

Das Ergebnis vor Ertragsteuern war den folgenden geographischen Regionen zuzuordnen:

| in Mio €      | 2010         | 2009         |
|---------------|--------------|--------------|
| Deutschland   | 338          | 342          |
| Ausland       | 1.448        | 1.101        |
| <b>Gesamt</b> | <b>1.786</b> | <b>1.443</b> |

Die Steueraufwendungen bzw. -erträge für die Jahre 2010 und 2009 setzten sich wie folgt zusammen:

| in Mio €      | Laufende Steuern | Latente Steuern | Ertragsteuern |
|---------------|------------------|-----------------|---------------|
| <b>2009</b>   |                  |                 |               |
| Deutschland   | 83               | –               | 83            |
| Ausland       | 358              | 11              | 369           |
| <b>Gesamt</b> | <b>441</b>       | <b>11</b>       | <b>452</b>    |
| <b>2010</b>   |                  |                 |               |
| Deutschland   | 97               | -10             | 87            |
| Ausland       | 472              | 22              | 494           |
| <b>Gesamt</b> | <b>569</b>       | <b>12</b>       | <b>581</b>    |

In den Geschäftsjahren 2010 und 2009 betrug der Körperschaftsteuersatz in Deutschland 15 % zuzüglich des Solidaritätszuschlags in Höhe von 5,5 % der Körperschaftsteuerbelastung.

Nachfolgend wird die Überleitung vom erwarteten Steueraufwand zum ausgewiesenen Steueraufwand gezeigt. Die Berechnung des erwarteten Steueraufwands erfolgt durch Anwendung des deutschen Körperschaftsteuersatzes (einschließlich Solidaritätszuschlag) zuzüglich des effektiven Gewerbesteuersatzes auf das Ergebnis vor Ertragsteuern. Der daraus resultierende kombinierte Ertragsteuersatz betrug 29,0 % für die Geschäftsjahre 2010 und 2009.



### UNSICHERE STEUERVORTEILE

Die Fresenius SE & Co. KGaA und ihre Tochtergesellschaften sind Gegenstand regelmäßiger steuerlicher Betriebsprüfungen.

In Deutschland ist die Betriebsprüfung für die Jahre 1998 bis 2001 abgeschlossen. Alle Ergebnisse der abgeschlossenen Prüfungen wurden bereits im Konzernabschluss zum 31. Dezember 2008 ausreichend berücksichtigt. Derzeit findet die steuerliche Betriebsprüfung für die Jahre 2002 bis 2005 statt. Zum 31. Dezember 2010 wurden alle vorgeschlagenen Anpassungen im Konzernabschluss berücksichtigt. Alle nachfolgenden Geschäftsjahre sind hinsichtlich der Betriebsprüfung offen. Für das Steuerjahr 1997 hat Fresenius Medical Care eine Wertberichtigung auf eine Beteiligung vorgenommen, deren steuerliche Anerkennung als Aufwand im Jahr 2003 im Abschluss der für die Jahre 1996 und 1997 durchgeführten Betriebsprüfung versagt wurde. Fresenius Medical Care hat vor dem zuständigen deutschen Finanzgericht Klage erhoben, um die Entscheidung der Finanzbehörde anzufechten. Im Januar 2011 wurde ein Vergleich mit den Steuerbehörden erzielt, welcher Schätzungen zur Folge etwas günstiger ausfällt als der bisher berücksichtigte Steuervorteil. Der voraussichtlich zusätzliche Steuerertrag aus diesem Sachverhalt wird in 2011 erfasst.

In den USA hat Fresenius Medical Care Anträge auf Erstattung eingereicht, gegen die Versagung der Abzugsfähigkeit der von Fresenius Medical Care Holdings, Inc. (FMCH) in den Steuererklärungen der Vorjahre geltend gemachten zivilrechtlichen Vergleichszahlungen durch den Internal Revenue Service (IRS). Aufgrund der von Fresenius Medical Care mit dem IRS geschlossenen Vergleichsvereinbarung hat Fresenius Medical Care im September 2008 eine Teilerstattung in Höhe von 37 Mio US\$, einschließlich Zinsen, erhalten und sich das

Recht bewahrt, die Erstattung aller anderen nicht anerkannten Abzüge auf dem Klagewege vor den US-Gerichten weiter zu verfolgen. Am 22. Dezember 2008 hat Fresenius Medical Care in dem Verfahren *Fresenius Medical Care Holdings, Inc. v. United States* bei dem US-Bezirksgericht für den Bezirk von Massachusetts eine Klage auf vollständige Erstattung eingereicht. Am 24. Juni 2010 lehnte das Gericht den Antrag von FMCH auf ein Urteil im beschleunigten Verfahren ab und der Rechtsstreit wird vor Gericht weitergeführt. Die unsicheren Steuervorteile aus diesen Sachverhalten sind im nachfolgend angegebenen Gesamtbetrag der unsicheren Steuervorteile enthalten. Die steuerlichen Betriebsprüfungen in den USA für die Jahre 2002 bis 2006 sind abgeschlossen. Der IRS hat die Abzugsfähigkeit für konzerninternes genussrechtsähnliches Kapital in diesen Prüfungszeiträumen nicht anerkannt. Zusätzlich schlug der IRS weitere Anpassungen vor, welche im Konzernabschluss Berücksichtigung fanden. Fresenius Medical Care hat gegen die Nichtanerkennung der Abzüge Einspruch eingelegt und wird alle Rechtsmittel nutzen. Ein nachteiliger Ausgang hinsichtlich der Abzugsfähigkeit des konzerninternen genussrechtsähnlichen Kapitals könnte erhebliche negative Auswirkungen auf das operative Ergebnis sowie die Finanzlage der Fresenius Medical Care haben. Die steuerliche Betriebsprüfung für die Jahre 2007 und 2008 findet derzeit statt, für die Jahre 2009 und 2010 steht die steuerliche Betriebsprüfung noch aus. Außerdem werden in einigen US-Bundesstaaten steuerliche Betriebsprüfungen durchgeführt, während in anderen US-Bundesstaaten die steuerliche Betriebsprüfung für verschiedene Jahre noch aussteht. Alle erwarteten Ergebnisse wurden im Konzernabschluss berücksichtigt.

Neben Deutschland und den USA finden weltweit länderspezifische steuerliche Betriebsprüfungen von Tochtergesellschaften der Fresenius SE & Co. KGaA statt. Der Fresenius-Konzern schätzt die Auswirkungen dieser steuerlichen Betriebsprüfungen auf den Konzernabschluss als nicht wesentlich ein.

Die unsicheren Steuervorteile haben sich während des Geschäftsjahres 2010 wie folgt verändert:

| in Mio €                                             | 2010       |
|------------------------------------------------------|------------|
| <b>Stand 1. Januar 2010</b>                          | <b>355</b> |
| Anstieg unsicherer Steuervorteile Vorjahre           | 10         |
| Rückgang unsicherer Steuervorteile Vorjahre          | -15        |
| Anstieg unsicherer Steuervorteile laufendes Jahr     | 18         |
| Veränderung aufgrund von Einigung mit Finanzbehörden | -26        |
| Währungsumrechnungsdifferenzen                       | 12         |
| <b>Stand 31. Dezember 2010</b>                       | <b>354</b> |

Zum 31. Dezember 2010 bestehende unsichere Steuervorteile in Höhe von 354 Mio € würden bei ihrem Ansatz den effektiven Steuersatz beeinflussen. Als Ergebnis des oben genannten Vergleichs für 1997 erwartet der Fresenius-Konzern, dass sich der Betrag der unsicheren Steuervorteile vom 31. Dezember 2010 um ungefähr 196 Mio US\$ verringern wird, ein geringer Anteil dieser Reduzierung wird als zusätzlicher Steuerertrag in 2011 zu erfassen sein. Der Fresenius-Konzern ist zum jetzigen Zeitpunkt nicht in der Lage, den Zeitpunkt oder die Größenordnung von Veränderungen der anderen Positionen der unsicheren Steuervorteile zu prognostizieren.

Der Fresenius-Konzern erfasst Zinsen und sonstige Zuschläge im Zusammenhang mit den Steuervorteilen als Ertragsteueraufwand. Im Geschäftsjahr 2010 erfasste der Fresenius-Konzern Aufwendungen in Höhe von 8 Mio € für Zinsen und sonstige Zuschläge. Zum 31. Dezember 2010 hatte der Fresenius-Konzern Rückstellungen in Höhe von 43 Mio € für derartige Zinsen und sonstige Zuschläge gebildet.

## 12. ERGEBNIS JE AKTIE

Das Ergebnis je Stamm- und je Vorzugsaktie mit und ohne Verwässerungseffekt durch ausgegebene Aktienoptionen und die Pflichtumtauschanleihe stellte sich wie folgt dar:

|                                                                                            | 2010        | 2009        |
|--------------------------------------------------------------------------------------------|-------------|-------------|
| <b>Zähler in Mio €</b>                                                                     |             |             |
| Konzernergebnis (Ergebnis, das auf die Anteilseigner der Fresenius SE Co. KGaA entfällt)   | 622         | 494         |
| abzüglich Mehrdividenden auf Vorzugsaktien                                                 | 0           | 1           |
| abzüglich Effekt aus Anteilsverwässerung Fresenius Medical Care und Pflichtumtauschanleihe | 6           | 1           |
| Ergebnis, das für alle Aktientypen zur Verfügung steht                                     | 616         | 492         |
| <b>Nenner in Stück</b>                                                                     |             |             |
| Gewichteter Durchschnitt ausstehender Stammaktien                                          | 80.870.695  | 80.595.319  |
| Gewichteter Durchschnitt ausstehender Vorzugsaktien                                        | 80.870.695  | 80.595.319  |
| Gewichteter Durchschnitt ausstehender Aktien aller Gattungen                               | 161.741.390 | 161.190.638 |
| Potenziell verwässernde Stammaktien                                                        | 541.580     | 268.447     |
| Potenziell verwässernde Vorzugsaktien                                                      | 541.580     | 268.447     |
| Gewichteter Durchschnitt ausstehender Stammaktien bei voller Verwässerung                  | 81.412.275  | 80.863.766  |
| Gewichteter Durchschnitt ausstehender Vorzugsaktien bei voller Verwässerung                | 81.412.275  | 80.863.766  |
| Gewichteter Durchschnitt ausstehender Aktien aller Gattungen bei voller Verwässerung       | 162.824.550 | 161.727.532 |
| <b>Ergebnis je Stammaktie in €</b>                                                         | <b>3,85</b> | <b>3,06</b> |
| Mehrdividende je Vorzugsaktie in €                                                         | 0,00        | 0,01        |
| <b>Ergebnis je Vorzugsaktie in €</b>                                                       | <b>3,85</b> | <b>3,07</b> |
| <b>Ergebnis je Stammaktie bei voller Verwässerung in €</b>                                 | <b>3,79</b> | <b>3,04</b> |
| Mehrdividende je Vorzugsaktie in €                                                         | 0,00        | 0,01        |
| <b>Ergebnis je Vorzugsaktie bei voller Verwässerung in €</b>                               | <b>3,79</b> | <b>3,05</b> |

Den Inhabern von Vorzugsaktien stand eine Mehrdividende von 0,01 € je Inhaber-Vorzugsaktie pro Geschäftsjahr zu.

Die in Verbindung mit dem Rechtsformwechsel vorgenommene Umwandlung von Vorzugsaktien in Stammaktien hat zur Folge, dass ab dem Geschäftsjahr 2011 die Verwässerungseffekte nur noch auf Stammaktien berechnet werden.

## ERLÄUTERUNGEN ZUR KONZERN-BILANZ

### 13. FLÜSSIGE MITTEL

Zum 31. Dezember setzten sich die flüssigen Mittel wie folgt zusammen:

| in Mio €                                                                   | 2010       | 2009       |
|----------------------------------------------------------------------------|------------|------------|
| Zahlungsmittel                                                             | 650        | 411        |
| Termingelder und Wertpapiere<br>(mit einer Fälligkeit von bis zu 90 Tagen) | 119        | 9          |
| <b>Flüssige Mittel</b>                                                     | <b>769</b> | <b>420</b> |

Zum 31. Dezember 2010 bzw. 2009 waren in den flüssigen Mitteln zweckgebundene Mittel in Höhe von 65 Mio € bzw. 17 Mio € enthalten.

### 14. FORDERUNGEN AUS LIEFERUNGEN UND LEISTUNGEN

Zum 31. Dezember setzten sich die Forderungen aus Lieferungen und Leistungen wie folgt zusammen:

| in Mio €                                                  | 2010         | 2009         |
|-----------------------------------------------------------|--------------|--------------|
| Forderungen aus Lieferungen und Leistungen                | 3.252        | 2.794        |
| abzüglich Wertberichtigungen auf zweifelhafte Forderungen | 317          | 285          |
| <b>Forderungen aus Lieferungen und Leistungen, netto</b>  | <b>2.935</b> | <b>2.509</b> |

Sämtliche Forderungen aus Lieferungen und Leistungen haben eine Fristigkeit von unter einem Jahr.

Die folgende Tabelle zeigt die Entwicklung der Wertberichtigungen im Geschäftsjahr:

| in Mio €                                                | 2010       | 2009       |
|---------------------------------------------------------|------------|------------|
| <b>Wertberichtigungen zu Beginn des Geschäftsjahres</b> | <b>285</b> | <b>257</b> |
| Erfolgswirksame Abschreibungen/Wertaufholungen          | 175        | 174        |
| Erfolgsneutrale Abgänge/Zugänge                         | -158       | -141       |
| Währungsumrechnungsdifferenz                            | 15         | -5         |
| <b>Wertberichtigungen am Ende des Geschäftsjahres</b>   | <b>317</b> | <b>285</b> |

Im Folgenden werden die Altersstruktur der Forderungen aus Lieferungen und Leistungen sowie deren Wertberichtigungen dargestellt:

| in Mio €                                                  | nicht<br>überfällig | bis zu 3<br>Monate<br>überfällig | 3 bis 6<br>Monate<br>überfällig | 6 bis 12<br>Monate<br>überfällig | über 12<br>Monate<br>überfällig | Summe        |
|-----------------------------------------------------------|---------------------|----------------------------------|---------------------------------|----------------------------------|---------------------------------|--------------|
| Forderungen aus Lieferungen und Leistungen                | 1.894               | 527                              | 254                             | 237                              | 340                             | 3.252        |
| abzüglich Wertberichtigungen auf zweifelhafte Forderungen | 16                  | 43                               | 33                              | 53                               | 172                             | 317          |
| <b>Forderungen aus Lieferungen und Leistungen, netto</b>  | <b>1.878</b>        | <b>484</b>                       | <b>221</b>                      | <b>184</b>                       | <b>168</b>                      | <b>2.935</b> |

### 15. VORRÄTE

Zum 31. Dezember setzten sich die Vorräte wie folgt zusammen:

| in Mio €                               | 2010         | 2009         |
|----------------------------------------|--------------|--------------|
| Roh-, Hilfs-, Betriebsstoffe und Waren | 350          | 311          |
| Unfertige Erzeugnisse                  | 255          | 188          |
| Fertige Erzeugnisse                    | 874          | 794          |
| abzüglich Wertberichtigungen           | 68           | 58           |
| <b>Vorräte, netto</b>                  | <b>1.411</b> | <b>1.235</b> |

Die Gesellschaften des Fresenius-Konzerns haben sich verpflichtet, zu festgelegten Bedingungen Roh-, Hilfs-, Betriebsstoffe und Waren im Wert von etwa 1.720 Mio € zu kaufen, von denen zum 31. Dezember 2010 für Käufe im Geschäftsjahr 2011 363 Mio € vorgesehen waren. Die Laufzeit dieser Vereinbarungen beträgt ein bis acht Jahre. Erhaltene Anzahlungen in Höhe von 170 Mio € (2009: 186 Mio €) wurden von den Vorräten abgesetzt.

Die Vorräte beinhalteten zum 31. Dezember 2010 bzw. 31. Dezember 2009 einen Wert von etwa 25 Mio € bzw. 24 Mio € für das Produkt Erythropoietin (EPO), das in den USA von einem einzigen Anbieter bezogen wird. Verzögerungen,

Lieferunterbrechungen oder die Beendigung der Belieferung mit EPO können die Ertragslage von Fresenius Medical Care negativ beeinflussen. Im Oktober 2006 hat Fresenius Medical Care einen fünfjährigen Exklusivvertrag bezüglich Beschaffung

und Lieferung mit ihrem EPO-Lieferanten abgeschlossen. Mit der Verabreichung von EPO wurden in den Jahren 2010 und 2009 jeweils rund 7 % des Gesamtumsatzes des Fresenius-Konzerns erzielt.

## 16. SONSTIGE KURZ- UND LANGFRISTIGE VERMÖGENSWERTE

Zum 31. Dezember setzten sich die sonstigen kurz- und langfristigen Vermögenswerte wie folgt zusammen:

| in Mio €                                            | 2010         |                   | 2009         |                   |
|-----------------------------------------------------|--------------|-------------------|--------------|-------------------|
|                                                     |              | davon kurzfristig |              | davon kurzfristig |
| Beteiligungen und langfristige Darlehen             | 254          | 6                 | 74           | 5                 |
| Steuererstattungsansprüche                          | 240          | 224               | 253          | 242               |
| Rabatte                                             | 124          | 124               | 129          | 129               |
| Forderungen nach dem Krankenhausfinanzierungsgesetz | 111          | 79                | 145          | 89                |
| Aktivierte Fremdfinanzierungskosten                 | 108          | 10                | 107          | 10                |
| Leasingforderungen                                  | 73           | 29                | 55           | 22                |
| Geleistete Anzahlungen                              | 53           | 52                | 41           | 39                |
| Rechnungsabgrenzungsposten                          | 45           | 15                | 32           | 16                |
| Derivative Finanzinstrumente                        | 25           | 18                | 49           | 29                |
| Rückdeckungsforderungen                             | 25           | 0                 | 23           | 0                 |
| Forderungen aus Managementverträgen in Kliniken     | 7            | 7                 | 6            | 6                 |
| Übrige sonstige Vermögenswerte                      | 496          | 367               | 428          | 318               |
| <b>Sonstige Vermögenswerte, brutto</b>              | <b>1.561</b> | <b>931</b>        | <b>1.342</b> | <b>905</b>        |
| abzüglich Wertberichtigungen                        | 8            | 6                 | 13           | 12                |
| <b>Sonstige Vermögenswerte, netto</b>               | <b>1.553</b> | <b>925</b>        | <b>1.329</b> | <b>893</b>        |

In den Beteiligungen und langfristigen Darlehen sind Beteiligungen in Höhe von 190 Mio € (2009: 9 Mio €) enthalten, die nach der Equity-Methode konsolidiert wurden.

Die Forderungen nach dem Krankenhausfinanzierungsgesetz umfassen im Wesentlichen Ansprüche der Fresenius Helios auf Auszahlung von zweckgebundenen Fördermitteln,

die durch bereits vorliegende Bescheide der entsprechenden Förderinstitutionen fest zugesagt sind.

Auf sonstige langfristige Vermögenswerte wurden Abschreibungen in Höhe von jeweils 2 Mio € im Geschäftsjahr 2010 bzw. 2009 vorgenommen.

## 17. SACHANLAGEN

Zum 31. Dezember setzten sich die Anschaffungs- und Herstellungskosten sowie die kumulierten Abschreibungen des Sachanlagevermögens wie folgt zusammen:

### ANSCHAFFUNGS- UND HERSTELLUNGSKOSTEN

| in Mio €                                                  | Stand 1. Januar 2010 | Währungs-umrechnungs-differenzen | Veränderungen im Konsolidierungskreis | Zugänge    | Umbuchungen | Abgänge    | Stand 31. Dezember 2010 |
|-----------------------------------------------------------|----------------------|----------------------------------|---------------------------------------|------------|-------------|------------|-------------------------|
| Grundstücke und Grundstückseinrichtungen                  | 206                  | 7                                | 1                                     | 8          | –           | 1          | 221                     |
| Gebäude und Einbauten                                     | 2.628                | 111                              | 16                                    | 86         | 193         | 58         | 2.976                   |
| Technische Anlagen und Maschinen                          | 3.355                | 178                              | 42                                    | 326        | 110         | 215        | 3.796                   |
| Andere Anlagen und Mietanlagen aus Finanzierungsverträgen | 146                  | 3                                | 7                                     | 20         | -65         | 13         | 98                      |
| Anlagen im Bau                                            | 340                  | 18                               | 12                                    | 304        | -250        | 5          | 419                     |
| <b>Sachanlagen</b>                                        | <b>6.675</b>         | <b>317</b>                       | <b>78</b>                             | <b>744</b> | <b>-12</b>  | <b>292</b> | <b>7.510</b>            |

## ABSCHREIBUNGEN

| in Mio €                                                     | Stand<br>1. Januar<br>2010 | Währungs-<br>umrechnungs-<br>differenzen | Veränderungen<br>im Konsoli-<br>dierungskreis | Zugänge    | Umbuchungen | Abgänge    | Stand<br>31. Dezember<br>2010 |
|--------------------------------------------------------------|----------------------------|------------------------------------------|-----------------------------------------------|------------|-------------|------------|-------------------------------|
| Grundstücke und Grundstückseinrichtungen                     | 2                          | 2                                        | 0                                             | –          | –           | –          | 4                             |
| Gebäude und Einbauten                                        | 1.038                      | 48                                       | 1                                             | 173        | 37          | 51         | 1.246                         |
| Technische Anlagen und Maschinen                             | 2.001                      | 97                                       | 16                                            | 351        | –           | 196        | 2.269                         |
| Andere Anlagen und Mietanlagen<br>aus Finanzierungsverträgen | 74                         | 1                                        | –                                             | 8          | -39         | 8          | 36                            |
| Anlagen im Bau                                               | 1                          | –                                        | 0                                             | –          | 0           | –          | 1                             |
| <b>Sachanlagen</b>                                           | <b>3.116</b>               | <b>148</b>                               | <b>17</b>                                     | <b>532</b> | <b>-2</b>   | <b>255</b> | <b>3.556</b>                  |

## ANSCHAFFUNGS- UND HERSTELLUNGSKOSTEN

| in Mio €                                                     | Stand<br>1. Januar<br>2009 | Währungs-<br>umrechnungs-<br>differenzen | Veränderungen<br>im Konsoli-<br>dierungskreis | Zugänge    | Umbuchungen | Abgänge    | Stand<br>31. Dezember<br>2009 |
|--------------------------------------------------------------|----------------------------|------------------------------------------|-----------------------------------------------|------------|-------------|------------|-------------------------------|
| Grundstücke und Grundstückseinrichtungen                     | 199                        | 1                                        | 4                                             | 3          | 1           | 2          | 206                           |
| Gebäude und Einbauten                                        | 2.424                      | -20                                      | 11                                            | 85         | 144         | 16         | 2.628                         |
| Technische Anlagen und Maschinen                             | 3.023                      | 8                                        | 29                                            | 283        | 96          | 84         | 3.355                         |
| Andere Anlagen und Mietanlagen<br>aus Finanzierungsverträgen | 138                        | –                                        | 1                                             | 9          | -1          | 1          | 146                           |
| Anlagen im Bau                                               | 346                        | –                                        | 3                                             | 252        | -254        | 7          | 340                           |
| <b>Sachanlagen</b>                                           | <b>6.130</b>               | <b>-11</b>                               | <b>48</b>                                     | <b>632</b> | <b>-14</b>  | <b>110</b> | <b>6.675</b>                  |

## ABSCHREIBUNGEN

| in Mio €                                                     | Stand<br>1. Januar<br>2009 | Währungs-<br>umrechnungs-<br>differenzen | Veränderungen<br>im Konsoli-<br>dierungskreis | Zugänge    | Umbuchungen | Abgänge   | Stand<br>31. Dezember<br>2009 |
|--------------------------------------------------------------|----------------------------|------------------------------------------|-----------------------------------------------|------------|-------------|-----------|-------------------------------|
| Grundstücke und Grundstückseinrichtungen                     | 2                          | –                                        | –                                             | –          | –           | –         | 2                             |
| Gebäude und Einbauten                                        | 898                        | -10                                      | 2                                             | 158        | 1           | 11        | 1.038                         |
| Technische Anlagen und Maschinen                             | 1.744                      | 5                                        | 12                                            | 305        | -1          | 64        | 2.001                         |
| Andere Anlagen und Mietanlagen<br>aus Finanzierungsverträgen | 65                         | –                                        | –                                             | 10         | –           | 1         | 74                            |
| Anlagen im Bau                                               | 1                          | 0                                        | 0                                             | –          | 0           | 0         | 1                             |
| <b>Sachanlagen</b>                                           | <b>2.710</b>               | <b>-5</b>                                | <b>14</b>                                     | <b>473</b> | <b>–</b>    | <b>76</b> | <b>3.116</b>                  |

## BUCHWERTE

| in Mio €                                                  | 31. Dezember<br>2010 | 31. Dezember<br>2009 |
|-----------------------------------------------------------|----------------------|----------------------|
| Grundstücke und Grundstückseinrichtungen                  | 217                  | 204                  |
| Gebäude und Einbauten                                     | 1.730                | 1.590                |
| Technische Anlagen und Maschinen                          | 1.527                | 1.354                |
| Andere Anlagen und Mietanlagen aus Finanzierungsverträgen | 62                   | 72                   |
| Anlagen im Bau                                            | 418                  | 339                  |
| <b>Sachanlagen</b>                                        | <b>3.954</b>         | <b>3.559</b>         |

Die Abschreibungen auf Sachanlagen betrugen 532 Mio € bzw. 473 Mio € im Geschäftsjahr 2010 bzw. 2009. Sie sind in den Umsatzkosten, den Vertriebs- und allgemeinen

Verwaltungskosten und in den Forschungs- und Entwicklungsaufwendungen entsprechend der Nutzung des Vermögenswerts enthalten.



**LEASING**

In der Position technische Anlagen und Maschinen waren zum 31. Dezember 2010 bzw. 2009 Beträge in Höhe von 312 Mio € bzw. 253 Mio € für Peritonealdialyse-Cycler enthalten, die Fresenius Medical Care auf monatlicher Basis an Kunden mit terminaler Niereninsuffizienz vermietet, sowie für Hämodialysegeräte, die Fresenius Medical Care im Rahmen von Operate-Leasingverträgen an Ärzte vermietet.

In geringem Umfang wird Sachanlagevermögen zur Behandlung von Patienten auch in den anderen Unternehmensbereichen vermietet.

Zu Details der Mindestleasingzahlungen aus Finanzierungsleasingverträgen siehe Anmerkung 21, Darlehen und aktivierte Leasingverträge.

**18. FIRMENWERTE UND SONSTIGE IMMATERIELLE VERMÖGENSWERTE**

Zum 31. Dezember setzten sich die Anschaffungskosten und die kumulierten Abschreibungen der immateriellen Vermögenswerte wie folgt zusammen:

**ANSCHAFFUNGSKOSTEN**

| in Mio €                                                        | Stand<br>1. Januar<br>2010 | Währungs-<br>umrechnungs-<br>differenzen | Veränderungen<br>im Konsoli-<br>dierungskreis | Zugänge   | Umbuchungen | Abgänge   | Stand<br>31. Dezember<br>2010 |
|-----------------------------------------------------------------|----------------------------|------------------------------------------|-----------------------------------------------|-----------|-------------|-----------|-------------------------------|
| Firmenwerte                                                     | 10.356                     | 587                                      | 355                                           | 4         | 162         | 0         | 11.464                        |
| Patente, Produkt- und Vertriebsrechte                           | 538                        | 35                                       | 4                                             | 39        | 2           | 1         | 617                           |
| Markennamen                                                     | 161                        | 12                                       | –                                             | –         | –           | 0         | 173                           |
| Technologie                                                     | 69                         | 6                                        | 8                                             | 0         | 0           | 0         | 83                            |
| Verträge über Wettbewerbsverzicht                               | 157                        | 12                                       | 20                                            | –         | –           | 5         | 184                           |
| Managementverträge                                              | 153                        | 13                                       | 0                                             | 0         | -162        | 0         | 4                             |
| Sonstige                                                        | 423                        | 32                                       | 15                                            | 35        | –           | 21        | 484                           |
| <b>Firmenwerte und sonstige<br/>immaterielle Vermögenswerte</b> | <b>11.857</b>              | <b>697</b>                               | <b>402</b>                                    | <b>78</b> | <b>2</b>    | <b>27</b> | <b>13.009</b>                 |

**ABSCHREIBUNGEN**

| in Mio €                                                        | Stand<br>1. Januar<br>2010 | Währungs-<br>umrechnungs-<br>differenzen | Veränderungen<br>im Konsoli-<br>dierungskreis | Zugänge    | Umbuchungen | Abgänge   | Stand<br>31. Dezember<br>2010 |
|-----------------------------------------------------------------|----------------------------|------------------------------------------|-----------------------------------------------|------------|-------------|-----------|-------------------------------|
| Firmenwerte                                                     | 0                          | 0                                        | 0                                             | 0          | 0           | 0         | 0                             |
| Patente, Produkt- und Vertriebsrechte                           | 93                         | 4                                        | –                                             | 43         | –           | 1         | 139                           |
| Markennamen                                                     | 0                          | 0                                        | 0                                             | 0          | 0           | 0         | 0                             |
| Technologie                                                     | 12                         | 1                                        | 0                                             | 6          | 0           | 0         | 19                            |
| Verträge über Wettbewerbsverzicht                               | 109                        | 8                                        | 0                                             | 13         | –           | 5         | 125                           |
| Managementverträge                                              | 0                          | 0                                        | 0                                             | 0          | 0           | 0         | 0                             |
| Sonstige                                                        | 234                        | 22                                       | –                                             | 43         | –           | 21        | 278                           |
| <b>Firmenwerte und sonstige<br/>immaterielle Vermögenswerte</b> | <b>448</b>                 | <b>35</b>                                | <b>–</b>                                      | <b>105</b> | <b>–</b>    | <b>27</b> | <b>561</b>                    |

## ANSCHAFFUNGSKOSTEN

| in Mio €                                                    | Stand<br>1. Januar<br>2009 | Währungs-<br>umrechnungs-<br>differenzen | Veränderungen<br>im Konsoli-<br>dierungskreis | Zugänge   | Umbuchungen | Abgänge  | Stand<br>31. Dezember<br>2009 |
|-------------------------------------------------------------|----------------------------|------------------------------------------|-----------------------------------------------|-----------|-------------|----------|-------------------------------|
| Firmenwerte                                                 | 10.383                     | -252                                     | 220                                           | 5         | –           | 0        | 10.356                        |
| Patente, Produkt- und Vertriebsrechte                       | 540                        | -14                                      | –                                             | 12        | 1           | 1        | 538                           |
| Markennamen                                                 | 166                        | -5                                       | 0                                             | –         | –           | –        | 161                           |
| Technologie                                                 | 71                         | -2                                       | 0                                             | 0         | 0           | 0        | 69                            |
| Verträge über Wettbewerbsverzicht                           | 158                        | -5                                       | 3                                             | 1         | 0           | 0        | 157                           |
| Managementverträge                                          | 158                        | -5                                       | 0                                             | 0         | –           | 0        | 153                           |
| Sonstige                                                    | 361                        | -4                                       | 11                                            | 54        | 6           | 5        | 423                           |
| <b>Firmenwerte und sonstige immaterielle Vermögenswerte</b> | <b>11.837</b>              | <b>-287</b>                              | <b>234</b>                                    | <b>72</b> | <b>7</b>    | <b>6</b> | <b>11.857</b>                 |

## ABSCHREIBUNGEN

| in Mio €                                                    | Stand<br>1. Januar<br>2009 | Währungs-<br>umrechnungs-<br>differenzen | Veränderungen<br>im Konsoli-<br>dierungskreis | Zugänge   | Umbuchungen | Abgänge  | Stand<br>31. Dezember<br>2009 |
|-------------------------------------------------------------|----------------------------|------------------------------------------|-----------------------------------------------|-----------|-------------|----------|-------------------------------|
| Firmenwerte                                                 | 4                          | 0                                        | -4                                            | 0         | 0           | 0        | 0                             |
| Patente, Produkt- und Vertriebsrechte                       | 54                         | -1                                       | –                                             | 41        | –           | 1        | 93                            |
| Markennamen                                                 | 0                          | 0                                        | 0                                             | 0         | 0           | 0        | 0                             |
| Technologie                                                 | 8                          | 0                                        | 0                                             | 4         | 0           | 0        | 12                            |
| Verträge über Wettbewerbsverzicht                           | 102                        | -4                                       | 0                                             | 11        | –           | 0        | 109                           |
| Managementverträge                                          | 0                          | 0                                        | 0                                             | 0         | 0           | 0        | 0                             |
| Sonstige                                                    | 212                        | -2                                       | –                                             | 31        | –           | 7        | 234                           |
| <b>Firmenwerte und sonstige immaterielle Vermögenswerte</b> | <b>380</b>                 | <b>-7</b>                                | <b>-4</b>                                     | <b>87</b> | <b>–</b>    | <b>8</b> | <b>448</b>                    |

## BUCHWERTE

| in Mio €                                                    | 31. Dezember<br>2010 | 31. Dezember<br>2009 |
|-------------------------------------------------------------|----------------------|----------------------|
| Firmenwerte                                                 | 11.464               | 10.356               |
| Patente, Produkt- und Vertriebsrechte                       | 478                  | 445                  |
| Markennamen                                                 | 173                  | 161                  |
| Technologie                                                 | 64                   | 57                   |
| Verträge über Wettbewerbsverzicht                           | 59                   | 48                   |
| Managementverträge                                          | 4                    | 153                  |
| Sonstige                                                    | 206                  | 189                  |
| <b>Firmenwerte und sonstige immaterielle Vermögenswerte</b> | <b>12.448</b>        | <b>11.409</b>        |

Die Unterscheidung in planmäßig abzuschreibende und nicht planmäßig abzuschreibende immaterielle Vermögenswerte ergibt folgende Darstellung:

#### PLANMÄSSIG ABZUSCHREIBENDE IMMATERIELLE VERMÖGENSWERTE

| in Mio €                              | 31. Dezember 2010   |                            |            | 31. Dezember 2009   |                            |            |
|---------------------------------------|---------------------|----------------------------|------------|---------------------|----------------------------|------------|
|                                       | Anschaffungs-kosten | kumulierte Abschrei-bungen | Buchwert   | Anschaffungs-kosten | kumulierte Abschrei-bungen | Buchwert   |
| Patente, Produkt- und Vertriebsrechte | 617                 | 139                        | 478        | 538                 | 93                         | 445        |
| Technologie                           | 83                  | 19                         | 64         | 69                  | 12                         | 57         |
| Verträge über Wettbewerbsverzichte    | 184                 | 125                        | 59         | 157                 | 109                        | 48         |
| Sonstige                              | 484                 | 278                        | 206        | 423                 | 234                        | 189        |
| <b>Gesamt</b>                         | <b>1.368</b>        | <b>561</b>                 | <b>807</b> | <b>1.187</b>        | <b>448</b>                 | <b>739</b> |

#### NICHT PLANMÄSSIG ABZUSCHREIBENDE IMMATERIELLE VERMÖGENSWERTE

| in Mio €           | 31. Dezember 2010   |                            |               | 31. Dezember 2009   |                            |               |
|--------------------|---------------------|----------------------------|---------------|---------------------|----------------------------|---------------|
|                    | Anschaffungs-kosten | kumulierte Abschrei-bungen | Buchwert      | Anschaffungs-kosten | kumulierte Abschrei-bungen | Buchwert      |
| Markennamen        | 173                 | 0                          | 173           | 161                 | 0                          | 161           |
| Managementverträge | 4                   | 0                          | 4             | 153                 | 0                          | 153           |
| Firmenwerte        | 11.464              | 0                          | 11.464        | 10.356              | 0                          | 10.356        |
| <b>Gesamt</b>      | <b>11.641</b>       | <b>0</b>                   | <b>11.641</b> | <b>10.670</b>       | <b>0</b>                   | <b>10.670</b> |

Im 2. Quartal 2010 wurden Verwaltungsdienstleistungsverträge der Fresenius Medical Care in Höhe von 215 Mio US\$ (162 Mio €) von der Position Managementverträge in die Position Firmenwerte umgebucht, nachdem Fresenius Medical Care durch eine Änderung der Bestimmungen des Bundesstaates New York ab April 2010 sämtliche Anteile an den dort betriebenen Kliniken erlangte.

Die Abschreibungen auf immaterielle Vermögenswerte beliefen sich auf 105 Mio € im Geschäftsjahr 2010 bzw. auf 87 Mio € im Geschäftsjahr 2009. Sie sind in den Umsatzkosten, den Vertriebs- und allgemeinen Verwaltungskosten und in den Forschungs- und Entwicklungsaufwendungen entsprechend der Nutzung des Vermögenswerts enthalten.

Die erwarteten planmäßigen Abschreibungen auf immaterielle Vermögenswerte für die nächsten fünf Jahre zeigt die folgende Tabelle:

| in Mio €                        | 2011 | 2012 | 2013 | 2014 | 2015 |
|---------------------------------|------|------|------|------|------|
| Erwarteter Abschreibungsaufwand | 97   | 90   | 85   | 80   | 71   |

Der Buchwert der Firmenwerte hat sich wie folgt entwickelt:

| in Mio €                              | Fresenius Medical Care | Fresenius Kabi | Fresenius Helios | Fresenius Vamed | Konzern/ Sonstiges | Fresenius-Konzern |
|---------------------------------------|------------------------|----------------|------------------|-----------------|--------------------|-------------------|
| <b>Buchwert zum 1. Januar 2009</b>    | <b>5.253</b>           | <b>3.511</b>   | <b>1.565</b>     | <b>44</b>       | <b>6</b>           | <b>10.379</b>     |
| Zugänge                               | 125                    | 43             | 61               | 0               | 0                  | 229               |
| Währungsumrechnungsdifferenzen        | -164                   | -88            | 0                | 0               | 0                  | -252              |
| <b>Buchwert zum 31. Dezember 2009</b> | <b>5.214</b>           | <b>3.466</b>   | <b>1.626</b>     | <b>44</b>       | <b>6</b>           | <b>10.356</b>     |
| Zugänge                               | 324                    | 30             | 1                | 4               | 0                  | 359               |
| Umbuchungen                           | 162                    | 0              | 0                | 0               | 0                  | 162               |
| Währungsumrechnungsdifferenzen        | 392                    | 195            | 0                | 0               | 0                  | 587               |
| <b>Buchwert zum 31. Dezember 2010</b> | <b>6.092</b>           | <b>3.691</b>   | <b>1.627</b>     | <b>48</b>       | <b>6</b>           | <b>11.464</b>     |

Zum 31. Dezember 2010 bzw. 31. Dezember 2009 betrugen die Buchwerte der sonstigen nicht planmäßig abzuschreibenden immateriellen Vermögenswerte 161 Mio € bzw. 299 Mio €

für Fresenius Medical Care und 16 Mio € bzw. 15 Mio € für Fresenius Kabi.

## 19. SONSTIGE RÜCKSTELLUNGEN

Die sonstigen Rückstellungen setzten sich zum 31. Dezember wie folgt zusammen:

| in Mio €                                    | 2010         |                   | 2009         |                   |
|---------------------------------------------|--------------|-------------------|--------------|-------------------|
|                                             |              | davon kurzfristig |              | davon kurzfristig |
| Personalaufwand                             | 482          | 423               | 379          | 331               |
| Ausstehende Rechnungen                      | 188          | 188               | 147          | 147               |
| Selbstversicherungsprogramme                | 123          | 123               | 119          | 119               |
| Boni und Rabatte                            | 89           | 89                | 78           | 78                |
| Sonderaufwendungen für Rechtsstreitigkeiten | 86           | 86                | 80           | 80                |
| Rechts-, Beratungs-, Prüfungskosten         | 66           | 66                | 42           | 42                |
| Garantien und Reklamationen                 | 36           | 34                | 28           | 24                |
| Kommissionen                                | 21           | 21                | 18           | 18                |
| Abrechnungen von Ärzten                     | 4            | 4                 | 5            | 5                 |
| Übrige sonstige Rückstellungen              | 387          | 339               | 316          | 278               |
| <b>Sonstige Rückstellungen</b>              | <b>1.482</b> | <b>1.373</b>      | <b>1.212</b> | <b>1.122</b>      |

Die sonstigen Rückstellungen haben sich im Geschäftsjahr wie folgt entwickelt:

| in Mio €                                    | Stand 1. Januar 2010 | Währungs-umrechnungs-differenzen | Veränderungen im Konsolidierungskreis | Zuführung    | Umbuchung | Verbrauch     | Auflösung  | Stand 31. Dezember 2010 |
|---------------------------------------------|----------------------|----------------------------------|---------------------------------------|--------------|-----------|---------------|------------|-------------------------|
| Personalaufwand                             | 379                  | 16                               | 3                                     | 342          | 13        | -251          | -20        | 482                     |
| Ausstehende Rechnungen                      | 147                  | 3                                | 1                                     | 245          | -7        | -186          | -15        | 188                     |
| Selbstversicherungsprogramme                | 119                  | 9                                | -                                     | 7            | -         | -12           | -          | 123                     |
| Boni und Rabatte                            | 78                   | 4                                | 1                                     | 149          | -6        | -133          | -4         | 89                      |
| Sonderaufwendungen für Rechtsstreitigkeiten | 80                   | 6                                | 0                                     | 0            | 0         | 0             | 0          | 86                      |
| Rechts-, Beratungs-, Prüfungskosten         | 42                   | 2                                | -                                     | 50           | -2        | -25           | -1         | 66                      |
| Garantien und Reklamationen                 | 28                   | -                                | 0                                     | 18           | 1         | -6            | -5         | 36                      |
| Kommissionen                                | 18                   | -                                | -                                     | 20           | -         | -15           | -2         | 21                      |
| Abrechnungen von Ärzten                     | 5                    | 1                                | 0                                     | 0            | 0         | -2            | 0          | 4                       |
| Übrige sonstige Rückstellungen              | 316                  | 9                                | 5                                     | 484          | 15        | -405          | -37        | 387                     |
| <b>Gesamt</b>                               | <b>1.212</b>         | <b>50</b>                        | <b>10</b>                             | <b>1.315</b> | <b>14</b> | <b>-1.035</b> | <b>-84</b> | <b>1.482</b>            |

Die Rückstellungen für Personalaufwand umfassen im Wesentlichen Rückstellungen für Prämien, Abfindungen, Altersteilzeit und Resturlaub.

Im Jahr 2001 hat Fresenius Medical Care Sonderaufwendungen in Höhe von 258 Mio US\$ gebucht. Dies geschah im Hinblick auf Rechtsangelegenheiten, die aus Transaktionen im Zusammenhang mit der Fusionsvereinbarung und dem Reorganisationsplan vom 4. Februar 1996 zwischen der W.R. Grace & Co. und der Fresenius AG resultieren sowie im Hinblick auf geschätzte Verpflichtungen und Rechtskosten, die sich im Zusammenhang mit dem Insolvenzverfahren der W.R. Grace & Co. nach Chapter 11 des US-amerikanischen Konkursrechts (Grace Chapter 11-Insolvenzverfahren) ergeben und im Hinblick auf Kosten für die Regulierung schwebender

Rechtsstreitigkeiten mit bestimmten privaten Versicherungen. Im 2. Quartal 2003 bestätigte das für das Grace Chapter 11-Insolvenzverfahren zuständige Gericht einen endgültigen Vergleichsvertrag zwischen Fresenius Medical Care, den Asbest-Gläubigerausschüssen und W.R. Grace & Co. Gemäß der Vergleichsvereinbarung wird Fresenius Medical Care nach Bestätigung des Reorganisations- und Sanierungsplans 115 Mio US\$ (86 Mio €), ohne Zinsen, zahlen (siehe Anmerkung 29, Haftungsverhältnisse und Eventualverbindlichkeiten). Mit Ausnahme der vorgeschlagenen Vergleichszahlung in Höhe von 115 Mio US\$ sind alle in der Rückstellung für Sonderaufwendungen für Rechtsangelegenheiten enthaltenen Sachverhalte reguliert.

## 20. SONSTIGE VERBINDLICHKEITEN

Die sonstigen Verbindlichkeiten setzten sich zum 31. Dezember wie folgt zusammen:

| in Mio €                                                  | 2010         |                   | 2009         |                   |
|-----------------------------------------------------------|--------------|-------------------|--------------|-------------------|
|                                                           |              | davon kurzfristig |              | davon kurzfristig |
| Derivative Finanzinstrumente                              | 363          | 239               | 185          | 28                |
| Verbindlichkeiten nach dem Krankenhausfinanzierungsgesetz | 183          | 177               | 215          | 203               |
| Zinsverbindlichkeiten                                     | 126          | 126               | 117          | 117               |
| Steuerverbindlichkeiten                                   | 117          | 114               | 117          | 114               |
| Passive Rechnungsabgrenzungsposten                        | 104          | 22                | 97           | 22                |
| Personalverbindlichkeiten                                 | 102          | 97                | 90           | 86                |
| Erhaltene Anzahlungen                                     | 79           | 72                | 55           | 49                |
| Leasingverbindlichkeiten                                  | 54           | 54                | 46           | 46                |
| Übrige sonstige Verbindlichkeiten                         | 579          | 457               | 544          | 410               |
| <b>Sonstige Verbindlichkeiten</b>                         | <b>1.707</b> | <b>1.358</b>      | <b>1.466</b> | <b>1.075</b>      |

Die Verbindlichkeiten nach dem Krankenhausfinanzierungsgesetz umfassen im Wesentlichen bereits erhaltene zweckgebundene Fördermittel der Fresenius Helios, die noch nicht entsprechend verwendet wurden und daher als Verbindlichkeit gegenüber den Förderinstitutionen auszuweisen sind.

Von den langfristigen sonstigen Verbindlichkeiten in Höhe von 349 Mio € zum 31. Dezember 2010 waren 290 Mio € in ein bis fünf Jahren und 59 Mio € nach fünf Jahren fällig. Die Bilanzposition langfristige Rückstellungen und sonstige langfristige Verbindlichkeiten in Höhe von 458 Mio € beinhaltete des Weiteren sonstige langfristige Rückstellungen in Höhe von 109 Mio € zum 31. Dezember 2010.

## 21. DARLEHEN UND AKTIVIERTE LEASINGVERTRÄGE

### KURZFRISTIGE FINANZVERBINDLICHKEITEN

Der Fresenius-Konzern wies kurzfristige Finanzverbindlichkeiten in Höhe von 606 Mio € bzw. 287 Mio € zum 31. Dezember 2010 bzw. 31. Dezember 2009 aus. Diese betrafen zum 31. Dezember 2010 einerseits Darlehen in Höhe von 224 Mio €, die einzelne Konzerngesellschaften im Rahmen von Kreditvereinbarungen bei Geschäftsbanken aufgenommen haben, zum anderen bestanden 382 Mio € kurzfristige Verbindlichkeiten aus dem nachfolgend beschriebenen Forderungsverkaufsprogramm. Im Durchschnitt wurden die Darlehen (mit Ausnahme des Forderungsverkaufsprogramms) zum 31. Dezember 2010 bzw. 2009 mit 5,14 % bzw. 5,03 % verzinst.

Die von der Fresenius Medical Care abgeschlossene Rahmenvereinbarung über Forderungsverkäufe (das Forderungsverkaufsprogramm) wurde im September 2010 auf den 27. September 2011 verlängert und um 50 Mio US\$ auf 700 Mio US\$ erhöht. Im Rahmen dieses Programms werden zunächst bestimmte Forderungen an die NMC Funding Corp.

(NMC Funding), eine hundertprozentige Tochtergesellschaft der Fresenius Medical Care, verkauft. NMC Funding tritt anschließend Eigentumsrechte aus diesen Forderungen anteilig an bestimmte Bankinvestoren ab. Gemäß den vertraglichen Bestimmungen des Forderungsverkaufsprogramms behält sich NMC Funding das Recht vor, jederzeit an die Banken übertragene Eigentumsrechte zurückzufordern. Folglich verbleiben die Forderungen in der Konzern-Bilanz und die Erlöse aus der Abtretung werden als kurzfristige Finanzverbindlichkeiten ausgewiesen.

Zum 31. Dezember 2010 betrugen die ausstehenden kurzfristigen Verbindlichkeiten aus dem Forderungsverkaufsprogramm 510 Mio US\$ (382 Mio €). Die NMC Funding zahlt den Bankinvestoren Zinsen, die auf der Grundlage des Zinses für Geldmarktpapiere (commercial paper rate) für die jeweils gewählten Tranchen ermittelt werden. Im Jahr 2010 lag der durchschnittliche Zinssatz bei 1,86 %. Jährliche Refinanzierungskosten einschließlich Rechtskosten und Bankgebühren werden über die Laufzeit des Forderungsverkaufsprogramms abgeschrieben.

### LANGFRISTIGE DARLEHEN UND AKTIVIERTE LEASINGVERTRÄGE

Zum 31. Dezember setzten sich die langfristigen Darlehen und aktivierten Leasingverträge wie folgt zusammen:

| in Mio €                                                                                              | 2010         | 2009         |
|-------------------------------------------------------------------------------------------------------|--------------|--------------|
| Fresenius Medical Care-Kreditvereinbarung 2006                                                        | 2.211        | 2.445        |
| Kreditvereinbarung 2008                                                                               | 1.484        | 1.602        |
| Euro-Schuldscheindarlehen                                                                             | 800          | 800          |
| Kredite von der Europäischen Investitionsbank                                                         | 531          | 424          |
| Finanzierungsleasing-Verbindlichkeiten                                                                | 54           | 45           |
| Sonstige                                                                                              | 259          | 173          |
| Zwischensumme                                                                                         | 5.339        | 5.489        |
| abzüglich kurzfristig fälliger Teil                                                                   | 420          | 261          |
| <b>Langfristige Darlehen und aktivierte Leasingverträge, abzüglich des kurzfristig fälligen Teils</b> | <b>4.919</b> | <b>5.228</b> |

Die langfristigen Darlehen und aktivierten Leasingverträge haben folgende Fälligkeiten:

| in Mio €                                                    | bis 1 Jahr | 1 bis 5 Jahre | länger als 5 Jahre |
|-------------------------------------------------------------|------------|---------------|--------------------|
| Fresenius Medical Care-Kreditvereinbarung 2006              | 102        | 2.109         | 0                  |
| Kreditvereinbarung 2008                                     | 194        | 1.290         | 0                  |
| Euro-Schuldscheindarlehen                                   | 0          | 800           | 0                  |
| Kredite von der Europäischen Investitionsbank               | 8          | 491           | 32                 |
| Finanzierungsleasing-Verbindlichkeiten                      | 10         | 26            | 18                 |
| Sonstige                                                    | 106        | 91            | 62                 |
| <b>Langfristige Darlehen und aktivierte Leasingverträge</b> | <b>420</b> | <b>4.807</b>  | <b>112</b>         |

Die Gesamtsummen der jährlichen Rückzahlungen im Rahmen der oben aufgeführten langfristigen Darlehen und aktivierten Leasingverträge betragen für die folgenden Geschäftsjahre:

| Geschäftsjahr | in Mio €     |
|---------------|--------------|
| 2011          | 420          |
| 2012          | 1.708        |
| 2013          | 1.709        |
| 2014          | 1.366        |
| 2015          | 24           |
| Nachfolgende  | 112          |
| <b>Gesamt</b> | <b>5.339</b> |

### Fresenius Medical Care-Kreditvereinbarung 2006

Am 31. März 2006 wurden die Fresenius Medical Care AG & Co. KGaA (FMC-AG & Co. KGaA), Fresenius Medical Care Holdings, Inc. (FMCH) und bestimmte weitere Tochterunternehmen der FMC-AG & Co. KGaA, inklusive Fresenius Medical Care Deutschland GmbH (FMC D-GmbH), als Kreditnehmer und/oder Garantiegeber Vertragspartner in einer syndizierten Kreditvereinbarung (Fresenius Medical Care-Kreditvereinbarung 2006) in Höhe von 4,6 Mrd US\$ mit verschiedenen Banken und institutionellen Investoren. Diese Vereinbarung ersetzte eine frühere Kreditvereinbarung.

Seit Abschluss dieser Kreditvereinbarung wurden sowohl Vertragsanpassungen als auch freiwillige vorzeitige Tilgungen vorgenommen, die zu einer Veränderung des Kreditrahmens

führten. Entsprechend einer Anpassung in Verbindung mit einer Verlängerung der Fresenius Medical Care-Kreditvereinbarung 2006, die am 29. September 2010 erfolgte, wurden die revolvingende Kreditfazilität von 1.000 Mio US\$ auf 1.200 Mio US\$ und das Darlehen A um 50 Mio US\$ auf 1.365 Mio US\$ erhöht. Die Laufzeit beider Fazilitäten wurde außerdem vom 31. März 2011 auf den 31. März 2013 verlängert. Des Weiteren wurde die Verpflichtung zur vorzeitigen Tilgung des Darlehens B aufgehoben. Diese sah vor, dass das Darlehen B bereits am 1. März 2011 zurückzuzahlen ist, falls die Trust Preferred Securities, die am 15. Juni 2011 fällig sind, bis zu diesem Zeitpunkt weder zurückgezahlt noch refinanziert sind oder falls deren Laufzeit nicht verlängert worden ist. Die Definition des Verschuldungsgrades wurde dahingehend angepasst, dass zukünftig flüssige Mittel von bis zu 250 Mio US\$ statt 30 Mio US\$ von den Finanzverbindlichkeiten abgezogen werden dürfen. Außerdem wurden Höchstbeträge für bestimmte außerhalb der Kreditvereinbarung erlaubte Kreditaufnahmen angehoben und zusätzliche Flexibilität für bestimmte Arten von Finanzanlagen eingeräumt. Die Vertragsparteien einigten sich weiterhin auf eine Anhebung der in der Fresenius Medical Care-Kreditvereinbarung 2006 enthaltenen Beschränkungen in Bezug auf Dividendenausschüttungen und andere eingeschränkte Zahlungen von 300 Mio US\$ für das Jahr 2010 auf 330 Mio US\$ für das Jahr 2011. Danach erhöhen sie sich jährlich um 30 Mio US\$ bis zum Jahr 2013.

Die folgenden Tabellen zeigen die zur Verfügung stehenden Fazilitäten und die Inanspruchnahmen aus der Fresenius Medical Care-Kreditvereinbarung 2006 zum 31. Dezember:

|                       | 2010              |              |                  |              |
|-----------------------|-------------------|--------------|------------------|--------------|
|                       | Kreditfazilitäten |              | Inanspruchnahmen |              |
|                       | in Mio US\$       | in Mio €     | in Mio US\$      | in Mio €     |
| Revolvierender Kredit | 1.200             | 898          | 81               | 61           |
| Darlehen A            | 1.335             | 999          | 1.335            | 999          |
| Darlehen B            | 1.538             | 1.151        | 1.538            | 1.151        |
| <b>Gesamt</b>         | <b>4.073</b>      | <b>3.048</b> | <b>2.954</b>     | <b>2.211</b> |

  

|                       | 2009              |              |                  |              |
|-----------------------|-------------------|--------------|------------------|--------------|
|                       | Kreditfazilitäten |              | Inanspruchnahmen |              |
|                       | in Mio US\$       | in Mio €     | in Mio US\$      | in Mio €     |
| Revolvierender Kredit | 1.000             | 694          | 595              | 413          |
| Darlehen A            | 1.373             | 953          | 1.373            | 953          |
| Darlehen B            | 1.554             | 1.079        | 1.554            | 1.079        |
| <b>Gesamt</b>         | <b>3.927</b>      | <b>2.726</b> | <b>3.522</b>     | <b>2.445</b> |



Am 31. Dezember 2010 bzw. am 31. Dezember 2009 nutzte Fresenius Medical Care zusätzlich 122 Mio US\$ bzw. 97 Mio US\$ durch Letters of Credit, die nicht in den genannten Inanspruchnahmen zu diesen Zeitpunkten enthalten waren.

Die angepasste und verlängerte Fresenius Medical Care-Kreditvereinbarung 2006 bestand zum 31. Dezember 2010 aus:

- ▶ Einer revolvingierenden Kreditfazilität in Höhe von 1.200 Mio US\$, die am 31. März 2013 zur Rückzahlung fällig wird. Von dieser Fazilität sind bis zu 400 Mio US\$ für Letters of Credit, bis zu 400 Mio US\$ für Kreditaufnahmen in bestimmten anderen Währungen als US-Dollar, bis zu 150 Mio US\$ als Kurzfristlinie (Swingline) in US-Dollar, bis zu 250 Mio US\$ als „Competitive Loan Facility“ und bis zu 50 Mio US\$ als Kurzfristlinie (Swingline) in bestimmten Nicht-US-Dollar-Währungen verfügbar. Die Gesamtnutzung des revolvingierenden Kredites darf 1.200 Mio US\$ nicht überschreiten.
- ▶ Einem Darlehen (Darlehen A) in Höhe von 1.335 Mio US\$, dessen Laufzeit am 31. März 2013 endet. Die Tilgung erfolgt vierteljährlich in Höhe von 30 Mio US\$ und reduziert das Darlehen A am Ende jedes Quartals schrittweise bis zum 31. Dezember 2012. Der Restbetrag ist am 31. März 2013 fällig.
- ▶ Einem Darlehen (Darlehen B) in Höhe von 1.538 Mio US\$, dessen Laufzeit am 31. März 2013 endet. Die Tilgung erfolgt ebenfalls vierteljährlich, wobei die nächsten fünf Tilgungszahlungen in Höhe von jeweils 4 Mio US\$ vorzunehmen sind und die letzten vier Tilgungen in Höhe von jeweils 379,4 Mio US\$ jeweils am Ende des Quartals zu leisten sind.

In Abhängigkeit von der gewählten Zinsperiode kann Fresenius Medical Care zwischen folgenden Zinsvarianten entscheiden: Entweder sie zahlt Zinsen auf Basis LIBOR zuzüglich einer bestimmten Marge oder auf Basis des höheren Werts aus (a) der Prime Rate der Bank of America oder (b) der um 0,5 % erhöhten Federal Funds Rate zuzüglich einer bestimmten Marge.

Die jeweilige Marge ist variabel und hängt vom Verschuldungsgrad der Fresenius Medical Care ab. Dieser wird gemäß den Festlegungen in der Fresenius Medical Care-Kreditvereinbarung 2006 als Quotient aus Finanzverbindlichkeiten (abzüglich bis zu 250 Mio US\$ flüssige Mittel) und EBITDA ermittelt.

Für einen Großteil der variabel verzinslichen Darlehen der Fresenius Medical Care-Kreditvereinbarung 2006 wurden Zinssicherungen abgeschlossen (vgl. zu Zinssicherungen Anmerkung 30, Finanzinstrumente).

Zusätzlich zu den verbindlich festgelegten Tilgungsraten muss die ausstehende Verbindlichkeit aus der Fresenius Medical Care-Kreditvereinbarung 2006 entsprechend vorgeschriebener Rückzahlungsklauseln getilgt werden. Dies erfolgt durch Teile der Netto-Erlöse aus der Veräußerung von bestimmten Vermögenswerten, aus Mittelzuflüssen von Finanzierungen, die durch Vermögenswerte besichert sind (außer aus dem bestehenden Forderungsverkaufsprogramm der Fresenius Medical Care), aus der Emission von nachrangigen Schuldverschreibungen mit Ausnahme bestimmter Transaktionen zwischen Konzerngesellschaften sowie aus bestimmten Eigenkapitalmaßnahmen und dem überschüssigen Cashflow.

Zur Besicherung der gesamten Verbindlichkeiten aus der Fresenius Medical Care-Kreditvereinbarung 2006 sind die Anteile am Stammkapital wesentlicher Tochtergesellschaften an die Gläubiger verpfändet worden.

Die Fresenius Medical Care-Kreditvereinbarung 2006 enthält Unterlassungs- und Leistungsverpflichtungen der FMC-AG & Co. KGaA und ihrer Tochterunternehmen und sonstige Zahlungsbeschränkungen. Die Beschränkungen durch diese Vertragsklauseln betreffen u. a. die Verschuldung und verpflichten die Fresenius Medical Care, bestimmte in der Vereinbarung festgelegte Finanzkennzahlen einzuhalten. Zusätzlich enthält die Fresenius Medical Care-Kreditvereinbarung 2006 Beschränkungen in Bezug auf Dividendenausschüttungen und andere eingeschränkte Zahlungen. Diese liegen bei 330 Mio US\$ für das Jahr 2011 und erhöhen sich danach jährlich um 30 Mio US\$ bis zum Jahr 2013. In Übereinstimmung mit den Beschränkungen aus der Fresenius Medical

Care-Kreditvereinbarung 2006 wurden im Mai 2010 Dividenden in Höhe von 232 Mio US\$ gezahlt. Bei Nichteinhaltung der Kreditbedingungen ist die ausstehende Verbindlichkeit aus der Fresenius Medical Care-Kreditvereinbarung 2006 sofort fällig und auf Verlangen der Gläubiger zu zahlen. Zum 31. Dezember 2010 haben die FMC-AG & Co. KGaA und ihre Tochterunternehmen alle in der Fresenius Medical Care-Kreditvereinbarung 2006 festgelegten Verpflichtungen erfüllt.

Fresenius Medical Care zahlte im Zusammenhang mit der Fresenius Medical Care-Kreditvereinbarung 2006 etwa 86 Mio US\$ und im Zusammenhang mit der Anpassung und Verlängerung dieser Vereinbarung etwa 21 Mio US\$ an Gebühren, die über die Laufzeit der Kreditvereinbarung verteilt werden.

Zum 31. Dezember 2010 wurden aufgrund der Verlängerung der Fresenius Medical Care-Kreditvereinbarung 2006 der im 1. Halbjahr 2010 in den kurzfristigen Verbindlichkeiten ausgewiesene Revolvierende Kredit und das Darlehen A in der Position langfristige Darlehen und aktivierte Leasingverträge ausgewiesen.

Die folgenden Tabellen zeigen die zur Verfügung stehenden Fazilitäten und die Inanspruchnahmen aus der Kreditvereinbarung 2008 zum 31. Dezember:

|                           |  | 2010              |       |                  |       |
|---------------------------|--|-------------------|-------|------------------|-------|
|                           |  | Kreditfazilitäten |       | Inanspruchnahmen |       |
|                           |  | in Mio €          |       | in Mio €         |       |
| Revolvierende Kreditlinie |  | 550 Mio US\$      | 411   | 0 Mio US\$       | 0     |
| Darlehen A                |  | 782 Mio US\$      | 586   | 782 Mio US\$     | 586   |
| Darlehen C (in US\$)      |  | 984 Mio US\$      | 736   | 984 Mio US\$     | 736   |
| Darlehen C (in €)         |  | 162 Mio €         | 162   | 162 Mio €        | 162   |
| <b>Gesamt</b>             |  |                   | 1.895 |                  | 1.484 |

  

|                           |  | 2009              |       |                  |       |
|---------------------------|--|-------------------|-------|------------------|-------|
|                           |  | Kreditfazilitäten |       | Inanspruchnahmen |       |
|                           |  | in Mio €          |       | in Mio €         |       |
| Revolvierende Kreditlinie |  | 550 Mio US\$      | 382   | 0 Mio US\$       | 0     |
| Darlehen A                |  | 925 Mio US\$      | 642   | 925 Mio US\$     | 642   |
| Darlehen B (in US\$)      |  | 1.117 Mio US\$    | 775   | 1.117 Mio US\$   | 775   |
| Darlehen B (in €)         |  | 185 Mio €         | 185   | 185 Mio €        | 185   |
| <b>Gesamt</b>             |  |                   | 1.984 |                  | 1.602 |

Die Kreditvereinbarung 2008 bestand zum 31. Dezember 2010 aus:

- ▶ Revolvierenden Kreditfazilitäten im Gesamtvolumen von 550 Mio US\$, die am 10. September 2013 fällig werden. Diese Fazilitäten stehen in Höhe von 150 Mio US\$ der APP Pharmaceuticals, LLC und in Höhe von 400 Mio US\$ der Fresenius Finance I S.A., einer hundertprozentigen Tochtergesellschaft der Fresenius SE & Co. KGaA, zur Verfügung. Die durch die Fresenius Finance I S.A. nutzbare Kreditlinie kann in verschiedenen Währungen gezogen werden.
- ▶ Darlehensfazilitäten (Darlehen A) im Gesamtvolumen von 782 Mio US\$. Diese Darlehen stehen zu gleichen Teilen der Fresenius US Finance I, Inc., einer hundertprozentigen Tochtergesellschaft der Fresenius SE & Co. KGaA, und der APP Pharmaceuticals, LLC zur Verfügung. Darlehen A wird schrittweise in ungleichen halbjährlichen Tilgungszahlungen zurückgeführt, die am 10. September 2013 enden.
- ▶ Darlehensfazilitäten (Darlehen C) im Gesamtvolumen von 983,5 Mio US\$ und 162,5 Mio €. Diese Darlehen stehen in Höhe von 579,3 Mio US\$ und 162,5 Mio € der Fresenius US Finance I, Inc. und in Höhe von 404,2 Mio US\$ der APP Pharmaceuticals, LLC zur Verfügung. Darlehen C wird schrittweise in gleichgroßen halbjährlichen Tilgungszahlungen zurückgeführt. Die letzte Tilgungszahlung ist am 10. September 2014 fällig.

Der Zinssatz für die im Rahmen der Kreditvereinbarung 2008 in Anspruch genommenen Mittel setzt sich zusammen aus (a) der anwendbaren Marge (wie nachfolgend beschrieben) und (b) dem jeweiligen LIBOR oder für Ziehungen in Euro dem jeweiligen EURIBOR für die entsprechenden Zinsperioden. Die anwendbare Marge ist variabel und verändert sich in Abhängigkeit vom Verschuldungsgrad gemäß den Definitionen der Kreditvereinbarung 2008. Im Fall des Darlehens C wurde eine Untergrenze für LIBOR und EURIBOR von 1,50 % festgesetzt.

Für einen Großteil der variabel verzinslichen Darlehen der Kreditvereinbarung 2008 wurden Zinssicherungen abgeschlossen.

Zusätzlich zu den verbindlich festgelegten Tilgungsraten müssen die Verbindlichkeiten aus der Kreditvereinbarung 2008 entsprechend vorgeschriebener Rückzahlungsklauseln bei bestimmten Vorgängen (z. B. bei Veräußerung von bestimmten Vermögenswerten, Erhöhung von Verbindlichkeiten, Eigenkapitalmaßnahmen und Rückzahlung von bestimmten Konzerndarlehen) getilgt werden. Dabei hängt die Höhe der vorzeitigen Tilgung von den durch diese Vorgänge erzielten Erlösen ab.

Die Kreditvereinbarung 2008 wird von der Fresenius SE & Co. KGaA, der Fresenius ProServe GmbH und der Fresenius Kabi AG garantiert. Die von APP Pharmaceuticals, LLC im Rahmen der Kreditvereinbarung 2008 aufgenommenen Verbindlichkeiten, die zur Refinanzierung der Verbindlichkeiten unter APP's früherer Kreditvereinbarung verwendet wurden, sind im selben Maße wie die frühere Kreditvereinbarung mit Vermögenswerten von APP und deren Tochtergesellschaften besichert und werden von APP's Tochtergesellschaften garantiert. Alle Darlehensgeber profitieren außerdem von indirekten Sicherheiten durch die Verpfändung von Anteilen an bestimmten Tochtergesellschaften der Fresenius Kabi AG und durch Verpfändung von gewissen Konzerndarlehen.

Die Kreditvereinbarung 2008 enthält eine Reihe üblicher Leistungs- und Unterlassungsverpflichtungen und sonstiger Zahlungsbeschränkungen. Zu diesen Verpflichtungen gehören Beschränkungen im Hinblick auf die Gewährung von Sicherungsrechten, die Veräußerung von Vermögenswerten, die Aufnahme weiterer Verbindlichkeiten, Investitionen und Akquisitionen sowie Begrenzungen bei der Zahlung von Dividenden. Die Kreditvereinbarung 2008 verpflichtet die Fresenius SE & Co. KGaA und ihre Tochtergesellschaften (außer Fresenius Medical Care und deren Tochtergesellschaften) außerdem zur Einhaltung im Vertrag definierter Finanzkennzahlen wie Verschuldungsgrad, Fixkostendeckungsgrad und Zinsdeckungsgrad und setzt Grenzen für Investitionsausgaben fest. Zum 31. Dezember 2010 hat der Fresenius-Konzern alle in der Kreditvereinbarung 2008 festgelegten Verpflichtungen erfüllt.

## Euro-Schuldscheindarlehen

Zum 31. Dezember setzten sich die Schuldscheindarlehen des Fresenius-Konzerns wie folgt zusammen:

|                                                | Fälligkeit    | Nominalzins | Buchwert/Nominalbetrag<br>in Mio € |            |
|------------------------------------------------|---------------|-------------|------------------------------------|------------|
|                                                |               |             | 2010                               | 2009       |
| Fresenius Finance B.V. 2008/2012               | 2. April 2012 | 5,59 %      | 62                                 | 62         |
| Fresenius Finance B.V. 2008/2012               | 2. April 2012 | variabel    | 138                                | 138        |
| Fresenius Finance B.V. 2007/2012               | 2. Juli 2012  | 5,51 %      | 26                                 | 26         |
| Fresenius Finance B.V. 2007/2012               | 2. Juli 2012  | variabel    | 74                                 | 74         |
| Fresenius Finance B.V. 2008/2014               | 2. April 2014 | 5,98 %      | 112                                | 112        |
| Fresenius Finance B.V. 2008/2014               | 2. April 2014 | variabel    | 88                                 | 88         |
| Fresenius Finance B.V. 2007/2014               | 2. Juli 2014  | 5,75 %      | 38                                 | 38         |
| Fresenius Finance B.V. 2007/2014               | 2. Juli 2014  | variabel    | 62                                 | 62         |
| Fresenius Medical Care AG & Co. KGaA 2009/2012 | 27. Okt. 2012 | 7,41 %      | 36                                 | 36         |
| Fresenius Medical Care AG & Co. KGaA 2009/2012 | 27. Okt. 2012 | variabel    | 119                                | 119        |
| Fresenius Medical Care AG & Co. KGaA 2009/2014 | 27. Okt. 2014 | 8,38 %      | 15                                 | 15         |
| Fresenius Medical Care AG & Co. KGaA 2009/2014 | 27. Okt. 2014 | variabel    | 30                                 | 30         |
| <b>Schuldscheindarlehen</b>                    |               |             | <b>800</b>                         | <b>800</b> |

Am 27. April 2009 wurden von Fresenius Medical Care vorrangige und unbesicherte Schuldscheindarlehen in Höhe von 200 Mio € begeben. Die Schuldscheindarlehen bestehen aus vier Tranchen mit Laufzeiten von 3,5 und 5,5 Jahren sowie fest- und variabelverzinslichen Tranchen. Die Erlöse aus der Begebung wurden zur Tilgung der im Juli 2009 fällig gewordenen Schuldscheindarlehen aus dem Jahr 2005 verwendet.

Die Schuldscheindarlehen der Fresenius Finance B.V. werden von der Fresenius SE & Co. KGaA garantiert. Die

Schuldscheindarlehen der FMC-AG & Co. KGaA werden von der FMCH und der FMC D-GmbH garantiert.

Für den größten Teil der variabel verzinslichen Schuldscheindarlehen, deren Verzinsung auf EURIBOR zuzüglich vertraglich vereinbarter Marge basiert, wurden Zinsswaps abgeschlossen (siehe Anmerkung 30, Finanzinstrumente). Lediglich die variablen Tranchen des Schuldscheindarlehens der FMC-AG & Co. KGaA in Höhe von 149 Mio € unterliegen dem Zinsänderungsrisiko.

## Kreditvereinbarungen mit der Europäischen Investitionsbank

Verschiedene Gesellschaften des Fresenius-Konzerns verfügen über Kreditvereinbarungen mit der Europäischen Investitionsbank (EIB). Die folgende Tabelle zeigt den Stand dieser Verbindlichkeiten zum 31. Dezember:

|                                      | Fälligkeit | Kreditfazilitäten<br>in Mio € |            | Buchwert<br>in Mio € |            |
|--------------------------------------|------------|-------------------------------|------------|----------------------|------------|
|                                      |            | 2010                          | 2009       | 2010                 | 2009       |
| Fresenius SE & Co. KGaA              | 2013       | 196                           | 196        | 196                  | 196        |
| Fresenius Medical Care AG & Co. KGaA | 2013/2014  | 271 <sup>1</sup>              | 271        | 263 <sup>1</sup>     | 148        |
| HELIOS Kliniken GmbH                 | 2019       | 72                            | 80         | 72                   | 80         |
| <b>Kredite von der EIB</b>           |            | <b>539</b>                    | <b>547</b> | <b>531</b>           | <b>424</b> |

<sup>1</sup> Abweichung aufgrund von Währungsumrechnungsdifferenzen

Die Kredite wurden überwiegend in Euro ausgezahlt. Die FMC-AG & Co. KGaA hat in US-Dollar denominierte Verbindlichkeiten gegenüber der EIB in Höhe von 165 Mio US\$ (123 Mio €).

Die EIB ist die nicht-gewinnorientierte Finanzierungsinstitution der Europäischen Union, die langfristige Finanzierungen

für spezifische Investitions- und Forschungsprojekte zu günstigen Konditionen bereitstellt. Die Kredite wurden zur Finanzierung bestimmter Forschungs- und Entwicklungsprojekte, zur Erweiterung und Optimierung von bestehenden Produktionsstätten in Deutschland sowie für den Aufbau und die Errichtung eines Krankenhauses gewährt.

Im Februar 2010 erfolgte die Auszahlung eines Kredites in Höhe von 50 Mio €, den die FMC-AG & Co. KGaA mit der EIB im Dezember 2009 abgeschlossen hatte. Der Kredit hat eine Laufzeit von vier Jahren und wird durch die FMCH und die FMC D-GmbH garantiert. Des Weiteren nahm die FMC-AG & Co. KGaA im März 2010 die verbleibende Summe von 81 Mio US\$ in Anspruch, die noch aus einer mit der EIB abgeschlossenen revolving Kreditvereinbarung zur Verfügung stand.

Im September 2009 nahm die Fresenius SE (seit 28. Januar 2011: Fresenius SE & Co. KGaA) ein Darlehen in Höhe von 100 Mio € und einer Laufzeit von vier Jahren bei der EIB auf. Der Kredit wird von der Fresenius Kabi AG und der Fresenius ProServe GmbH garantiert.

Die Tilgung des Darlehens der HELIOS Kliniken GmbH begann bereits im Dezember 2007. Die Rückzahlung erfolgt in gleichbleibenden halbjährlichen Beträgen bis Dezember 2019.

Die Kredite der EIB werden zu variablen Zinssätzen verzinst, die auf Basis von EURIBOR bzw. LIBOR zuzüglich einer vertraglich vereinbarten Marge ermittelt werden. Diese Zinssätze werden quartalsch angepasst. Die Inanspruchnahmen unter den Kreditvereinbarungen, die vor dem Jahr 2009 abgeschlossen wurden, werden durch Bankgarantien besichert. Alle Kreditvereinbarungen mit der EIB enthalten übliche Auflagen und Verpflichtungen.

### Finanzierungsleasing-Verbindlichkeiten

Die Details zu den Verbindlichkeiten aus Finanzierungsleasing sind wie folgt:

| in Mio €                                                                            | 2010      | 2009      |
|-------------------------------------------------------------------------------------|-----------|-----------|
| <b>Verbindlichkeiten aus Finanzierungsleasing (Mindestleasingzahlungen)</b>         | <b>68</b> | <b>50</b> |
| fällig innerhalb eines Jahres                                                       | 12        | 13        |
| fällig zwischen einem und fünf Jahren                                               | 32        | 25        |
| fällig nach mehr als fünf Jahren                                                    | 24        | 12        |
| <b>In den zukünftigen Mindestleasingzahlungen enthaltener Zinsanteil</b>            | <b>14</b> | <b>5</b>  |
| fällig innerhalb eines Jahres                                                       | 2         | 1         |
| fällig zwischen einem und fünf Jahren                                               | 6         | 3         |
| fällig nach mehr als fünf Jahren                                                    | 6         | 1         |
| <b>Barwert der Finanzierungsleasing-Verbindlichkeiten (Mindestleasingzahlungen)</b> | <b>54</b> | <b>45</b> |
| fällig innerhalb eines Jahres                                                       | 10        | 12        |
| fällig zwischen einem und fünf Jahren                                               | 26        | 22        |
| fällig nach mehr als fünf Jahren                                                    | 18        | 11        |

### KREDITLINIEN

Neben den zuvor beschriebenen Verbindlichkeiten stehen dem Fresenius-Konzern weitere Kreditfazilitäten zur Verfügung, die zum Stichtag nicht oder nur teilweise genutzt waren. Der zusätzlich verfügbare Finanzierungsspielraum aus freien Kreditlinien betrug am 31. Dezember 2010 rund 2,0 Mrd €.

Dabei entfielen auf syndizierte Kreditlinien 1,1 Mrd €. Dieser Betrag umfasst die ungenutzten Mittel der Fresenius Medical Care-Kreditvereinbarung 2006 in Höhe von 997 Mio US\$ (746 Mio €) und die ungenutzten Mittel aus der Kreditvereinbarung 2008 in Höhe von 550 Mio US\$ (411 Mio €). Des Weiteren bestanden bilaterale Kreditlinien in Höhe von rund 835 Mio €, die einzelne Konzerngesellschaften mit

Geschäftsbanken vereinbart haben. Sie werden für allgemeine Geschäftszwecke verwendet und sind in der Regel unbesichert.

Neben diesen Kreditfazilitäten verfügt die Fresenius SE & Co. KGaA außerdem über ein Commercial-Paper-Programm, in dessen Rahmen kurzfristige Schuldtitel von bis zu 250 Mio € ausgegeben werden können. Am 31. Dezember 2010 waren keine Wertpapiere begeben.

Darüber hinaus bestehen weitere Finanzierungsmöglichkeiten im Rahmen des Fresenius Medical Care Forderungsverkaufsprogramms mit einem maximalen Volumen von 700 Mio US\$, das zum 31. Dezember 2010 mit 510 Mio US\$ in Anspruch genommen war.

## 22. ANLEIHEN

Zum 31. Dezember setzten sich die Anleihen des Fresenius-Konzerns wie folgt zusammen:

|                                         | Nominalbetrag | Fälligkeit    | Nominalzins | Buchwert in Mio € |              |
|-----------------------------------------|---------------|---------------|-------------|-------------------|--------------|
|                                         |               |               |             | 2010              | 2009         |
| Fresenius Finance B.V. 2006/2013        | 500 Mio €     | 31. Jan. 2013 | 5,00 %      | 500               | 500          |
| Fresenius Finance B.V. 2006/2016        | 650 Mio €     | 31. Jan. 2016 | 5,50 %      | 635               | 639          |
| Fresenius US Finance II, Inc. 2009/2015 | 275 Mio €     | 15. Juli 2015 | 8 ¾ %       | 261               | 259          |
| Fresenius US Finance II, Inc. 2009/2015 | 500 Mio US\$  | 15. Juli 2015 | 9,00 %      | 356               | 326          |
| FMC Finance III S.A. 2007/2017          | 500 Mio US\$  | 15. Juli 2017 | 6 ⅞ %       | 370               | 342          |
| FMC Finance VI S.A. 2010/2016           | 250 Mio €     | 15. Juli 2016 | 5,50 %      | 247               | 0            |
| <b>Anleihen</b>                         |               |               |             | <b>2.369</b>      | <b>2.066</b> |

Die Fresenius Finance B.V. hat im Juni 2009 die im Jahr 2016 fällige Anleihe um 150 Mio € aufgestockt. Mit dem Erlös wurden kurzfristige Finanzverbindlichkeiten zurückgeführt.

Die Anleihe der Fresenius Finance B.V. in Höhe von 100 Mio €, die am 30. April 2009 fällig war, wurde planmäßig zurückgezahlt.

Die Fresenius US Finance II, Inc., eine hundertprozentige Tochtergesellschaft der Fresenius SE & Co. KGaA, hat im Januar 2009 eine vorrangige unbesicherte Anleihe begeben. Diese Anleihe besteht aus einer US-Dollar-Tranche mit einem Nominalvolumen von 500 Mio US\$ und einer Euro-Tranche mit einem Nominalvolumen von 275 Mio €. Beide Tranchen werden im Jahr 2015 fällig. Dem Fresenius-Konzern ist aus der Begebung der Anleihe ein Netto-Erlös von rund 800 Mio US\$ zugeflossen, der für die Rückführung der im Zusammenhang mit der Akquisition von APP Pharmaceuticals, Inc. abgeschlossenen Zwischenfinanzierung sowie für die Rückzahlung sonstiger Finanzverbindlichkeiten und für allgemeine Unternehmenszwecke verwendet wurde.

Alle Anleihen der Fresenius Finance B.V. und der Fresenius US Finance II, Inc. werden von der Fresenius SE & Co. KGaA, der Fresenius Kabi AG und der Fresenius ProServe GmbH garantiert. Die Gläubiger dieser Anleihen haben das Recht, einen Rückkauf der Anleihe durch die Emittenten zu 101 % des Nennwerts zuzüglich aufgelaufener Zinsen zu fordern, wenn es nach einem Kontrollwechsel zu einer Herabstufung des Ratings der jeweiligen Anleihe kommt. Für die im Jahr 2016 fällig werdende Anleihe der Fresenius Finance B.V. besteht seit dem 31. Januar 2011 die Möglichkeit des vorzeitigen Rückkaufs dieser Anleihe durch die Emittentin zu Kursen, die bereits bei Emission in den Anleihebedingungen festgelegt wurden. Die anderen Anleihen der Fresenius

Finance B.V. und der Fresenius US Finance II, Inc. können vor ihrer Fälligkeit zu einem Rückzahlungskurs von 100 % zuzüglich aufgelaufener Zinsen und einer in den Anleihebedingungen festgelegten Prämie vollständig, jedoch nicht anteilig, und unter Einhaltung bestimmter Fristen von den Emittenten zurückgekauft werden.

Die Fresenius SE & Co. KGaA ist zum Schutz der Anleihegläubiger verschiedene Verpflichtungen eingegangen, die den Handlungsspielraum der Fresenius SE & Co. KGaA und ihrer Tochtergesellschaften (außer Fresenius Medical Care AG & Co. KGaA (FMC-AG & Co. KGaA) und deren Tochtergesellschaften) unter bestimmten Voraussetzungen in gewissem Umfang einschränken. Dazu zählen u. a. Begrenzungen bei der Aufnahme weiterer Fremdmittel, bei der Zahlung von Dividenden, bei der Durchführung von Investitionen, bei der Rückzahlung nachrangiger Verbindlichkeiten sowie bei der Belastung oder Veräußerung von Vermögenswerten. Einige dieser Auflagen werden automatisch aufgehoben, wenn das Rating der jeweiligen Anleihe einen sogenannten Investment Grade Status erreicht. Bei bestimmten Verstößen gegen die Anleihebedingungen steht den Anleihegläubigern, sofern sie in ihrer Gesamtheit mindestens 25 % des ausstehenden Anleihebetrags besitzen, das Recht zu, die Anleihe fällig zu stellen und die sofortige Rückzahlung des Anleihebetrags plus Zinsen zu verlangen. Der Fresenius-Konzern befand sich zum 31. Dezember 2010 in Übereinstimmung mit seinen diesbezüglichen Verpflichtungen.

Am 20. Januar 2010 hat die FMC Finance VI S.A. eine vorrangige, unbesicherte Anleihe in Höhe von 250 Mio € platziert. Die Anleihe wird am 15. Juli 2016 fällig und hat einen Coupon von 5,50 %. Bei einem Ausgabekurs von 98,66 % lag die Rückzahlungsrendite bei 5,75 %. Der Nettoemissionserlös wurde zur Rückzahlung kurzfristiger Finanzverbindlichkeiten und für allgemeine Geschäftszwecke verwendet.

Am 3. Februar 2011 haben die Fresenius Medical Care US Finance, Inc. und die FMC Finance VII S.A. vorrangige, unbesicherte Anleihen in Höhe von 650 Mio US\$ und 300 Mio € platziert. Die Anleihen werden am 15. Februar 2021 fällig. Der Coupon der von der Fresenius Medical Care US Finance, Inc. begebenen Anleihe beträgt 5,75 %. Bei einem Ausgabekurs von 99,06 % liegt die Rückzahlungsrendite bei 5,875 %. Die Anleihe der FMC Finance VII S.A. hat einen Coupon von 5,25 % und wurde zum Nennwert ausgegeben. Der Nettoemissionserlös wurde oder wird zur Rückzahlung von Finanzverbindlichkeiten, für Akquisitionen und für allgemeine Geschäftszwecke verwendet.

Die Anleihen der FMC Finance III S.A., der FMC Finance VI S.A., der Fresenius Medical Care US Finance, Inc. und der FMC Finance VII S.A. (hundertprozentige Tochtergesellschaften der FMC-AG & Co. KGaA) werden durch die Gesellschaften FMC-AG & Co. KGaA, Fresenius Medical Care Holdings, Inc. und Fresenius Medical Care Deutschland GmbH gesamtschuldnerisch garantiert. Die Anleihegläubiger haben das Recht, einen Rückkauf der Anleihe durch die Emittenten zu 101 % des Nennwerts zuzüglich aufgelaufener Zinsen zu fordern, wenn es nach einem Kontrollwechsel zu einer Herabstufung des Ratings der jeweiligen Anleihen kommt. Die Emittenten haben jederzeit das Recht, die Anleihen zu 100 % des Nennwerts zuzüglich aufgelaufener Zinsen und bestimmten in den Anleihebedingungen festgelegten Aufschlägen zurückzukaufen.

Die FMC-AG & Co. KGaA ist zum Schutz der Anleihegläubiger verschiedene Verpflichtungen eingegangen, die unter bestimmten Umständen den Spielraum der FMC-AG & Co. KGaA und ihrer Tochtergesellschaften im Hinblick auf die Aufnahme von Verbindlichkeiten, die Belastung oder Veräußerung von Vermögenswerten, das Eingehen von Sale and Leaseback-Transaktionen sowie Zusammenschlüsse oder Verschmelzungen mit anderen Gesellschaften einschränken. Zum 31. Dezember 2010 haben die FMC-AG & Co. KGaA und ihre Tochterunternehmen alle Verpflichtungen aus den zu diesem Zeitpunkt bestehenden Anleihebedingungen erfüllt.

## 23. PFLICHTUMTAUSCHANLEIHE

Zur Finanzierung der Akquisition von APP Pharmaceuticals, Inc. wurde im Juli 2008 über die Fresenius Finance (Jersey) Ltd. eine Pflichtumtauschanleihe (Mandatory Exchangeable Bonds) über einen Gesamtnennbetrag von 554,4 Mio € begeben. Die Fresenius Finance B.V. hat diese Anleihe zu 100 % ihres Nennwerts von der Fresenius Finance (Jersey) Ltd. gezeichnet. Anschließend wurde die Anleihe im Rahmen eines

Wertpapierdarlehens an die Fresenius SE (seit 28. Januar 2011: Fresenius SE & Co. KGaA) übertragen und von dieser am Markt platziert. Die Anleihe ist mit einem jährlichen Zinskupon von 5 % ausgestattet und wird am 14. August 2011 fällig. Bei Fälligkeit ist die Anleihe zwingend in Stammaktien der Fresenius Medical Care AG & Co. KGaA (FMC-AG & Co. KGaA) umzutauschen, wobei auf Basis der aktuellen Umtauschpreise mindestens 14,76 Millionen und maximal 17,42 Millionen Aktien zu liefern sind. Hinsichtlich der endgültigen Anzahl der zu liefernden Aktien können sich in Abhängigkeit von verwässernden Ereignissen (etwa Kapitalmaßnahmen) bei der FMC-AG & Co. KGaA noch Änderungen ergeben. Die Anleihe ist nicht in bar zurückzuzahlen.

Der anfängliche Mindest-Umtauschpreis wurde auf 33,00 € festgesetzt und der anfängliche Höchst-Umtauschpreis auf 38,94 € (118 % des anfänglichen Mindest-Umtauschpreises). Aufgrund der im Mai 2010 und 2009 erfolgten Dividendenzahlungen der FMC-AG & Co. KGaA haben sich der Mindest-Umtauschpreis und der Höchst-Umtauschpreis auf 31,83 € bzw. 37,56 € reduziert. Nach den Anleihebedingungen haben sowohl die Emittentin als auch die Anleihegläubiger die Möglichkeit eines vorzeitigen Umtauschs. Die Emittentin, Fresenius Finance (Jersey) Ltd., ist grundsätzlich zum Umtausch aller ausstehenden Teilschuldverschreibungen in Aktien der FMC-AG & Co. KGaA zu einem am jeweiligen Umtauschtag zu berechnenden Höchst-Umtauschverhältnis zuzüglich Zahlung aufgelaufener Zinsen und eines Vorfälligkeitsaufschlags berechtigt. Darüber hinaus ist die Anleihe zwingend zum Höchst-Umtauschverhältnis zuzüglich dieser Zahlungen umzutauschen, wenn das Rating der Fresenius SE & Co. KGaA ein bestimmtes Niveau unterschreitet und dieses Niveau nicht wieder hergestellt wird. Im Falle eines Kontrollwechsels bei der Fresenius SE & Co. KGaA oder der FMC-AG & Co. KGaA hat zudem jeder Anleihegläubiger das Recht, seine Anleihen zum Höchst-Umtauschverhältnis zuzüglich dieser Zahlungen umzutauschen. Darüber hinaus ist jeder Gläubiger berechtigt, sämtliche von ihm gehaltenen Anleihen zu einem am jeweiligen Umtauschtag bestimmten Mindest-Umtauschverhältnis ohne Zahlung aufgelaufener Zinsen oder Aufschläge umzutauschen.

Die Fresenius SE & Co. KGaA garantiert zugunsten der Fresenius Finance (Jersey) Ltd. die Zahlung bestimmter Zinsverpflichtungen der Fresenius Finance B.V. Ferner stellt sie über einen Verpfändungsvertrag die Lieferung der dem



Umtausch zugrunde liegenden Aktien der FMC-AG & Co. KGaA sicher. Zudem hat die Fresenius SE & Co. KGaA die Verpflichtung gegenüber den Gläubigern übernommen, dass weder sie selbst noch eine ihrer wesentlichen Tochtergesellschaften für bestimmte Kapitalmarktverbindlichkeiten Sicherheiten an ihrem Vermögen bestellen wird, ohne die Gläubiger zur gleichen Zeit und in gleichem Rang an solchen Sicherheiten teilnehmen zu lassen.

Aufgrund der Fälligkeit der Pflichtumtauschanleihe am 14. August 2011 erfolgt der Ausweis zum 31. Dezember 2010 in der Bilanz unter den kurzfristigen Verbindlichkeiten in Höhe von 554 Mio €.

Die in die Pflichtumtauschanleihe eingebetteten derivativen Finanzinstrumente werden zu Marktpreisen bewertet und separat von der Anleihe unter der Bilanzposition kurzfristige Rückstellungen und sonstige kurzfristige Verbindlichkeiten ausgewiesen (2009 unter: langfristige Rückstellungen und sonstige langfristige Verbindlichkeiten).

## 24. GENUSSSCHEINÄHNLICHE WERTPAPIERE

Fresenius Medical Care hat über Fresenius Medical Care Capital Trusts genussscheinähnliche Wertpapiere (Trust Preferred Securities) ausgegeben. Bei diesen Gesellschaften handelt es sich um entsprechend den Gesetzen des Staates Delaware, USA, geregelte Trusts. Die Fresenius Medical Care AG & Co. KGaA (FMC-AG & Co. KGaA) hält 100 % am Stammkapital dieser Trusts. Das Vermögen jedes Trusts besteht ausschließlich aus einer Forderung aus nachrangigen Schuldverschreibungen (Senior Subordinated Note), die die FMC-AG & Co. KGaA oder eine ihrer hundertprozentigen Tochtergesellschaften begeben haben. FMC-AG & Co. KGaA, Fresenius

Medical Care Deutschland GmbH (FMC D-GmbH) und Fresenius Medical Care Holdings, Inc. (FMCH) haben den jeweiligen Fresenius Medical Care Capital Trusts Zahlungen und Leistungen für diese nachrangige Forderung garantiert. Die Trust Preferred Securities werden von FMC-AG & Co. KGaA, FMC D-GmbH und FMCH durch eine Reihe von Verpflichtungen garantiert.

Die Trust Preferred Securities gewähren den Inhabern das Recht auf Ausschüttung in Höhe eines festen jährlichen Prozentsatzes auf den Nominalbetrag der Wertpapiere. Sie sind nach zehn Jahren abzulösen. Auf Verlangen der Inhaber können vorzeitige Ablösungen im Falle eines Kontrollwechsels in Verbindung mit einer Herabsetzung des Ratings oder aufgrund weiterer festgelegter Tatbestände einschließlich nicht erfolgter Zinszahlungen erforderlich werden. Die Inhaber der Trust Preferred Securities haben bei Liquidation des Trusts Anspruch auf Rückzahlung des Nominalbetrags der Trust Preferred Securities. Sie haben bis auf wenige, genau bestimmte Ausnahmen kein Stimmrecht im Trust.

Die nachrangigen Schuldverschreibungen, die von den Fresenius Medical Care Capital Trusts gehalten werden, enthalten Unterlassungs- und Leistungsverpflichtungen für FMC-AG & Co. KGaA und ihre Tochterunternehmen sowie sonstige Zahlungsbeschränkungen. Die Beschränkungen durch diese Vertragsklauseln betreffen u. a. die Verschuldung sowie die Investitionen der FMC-AG & Co. KGaA und ihrer Tochterunternehmen und verpflichten zur Einhaltung bestimmter in der Vereinbarung festgelegter Kennzahlen. Zum 31. Dezember 2010 haben die FMC-AG & Co. KGaA und ihre Tochterunternehmen alle in der Vereinbarung über die Trust Preferred Securities festgelegten Verpflichtungen erfüllt.

Die zum 31. Dezember 2010 bzw. 31. Dezember 2009 im Fresenius-Konzern ausstehenden genussscheinähnlichen Wertpapiere zeigt die folgende Tabelle:

|                                         | Jahr der Ausgabe | Nominalbetrag | Zinssatz                        | Verbindliche Tilgungstermine | 2010<br>in Mio € | 2009<br>in Mio € |
|-----------------------------------------|------------------|---------------|---------------------------------|------------------------------|------------------|------------------|
| Fresenius Medical Care Capital Trust IV | 2001             | 225 Mio US\$  | 7 <sup>7</sup> / <sub>8</sub> % | 15. Jun. 2011                | 168              | 156              |
| Fresenius Medical Care Capital Trust V  | 2001             | 300 Mio €     | 7 <sup>3</sup> / <sub>8</sub> % | 15. Jun. 2011                | 300              | 299              |
| <b>Genussscheinähnliche Wertpapiere</b> |                  |               |                                 |                              | <b>468</b>       | <b>455</b>       |

Die genussscheinähnlichen Wertpapiere des Fresenius Medical Care Capital Trust IV und V sind am 15. Juni 2011 fällig und zum 31. Dezember 2010 folglich unter den kurzfristigen Verbindlichkeiten in Höhe von 468 Mio € ausgewiesen (2009 unter: langfristige Verbindlichkeiten).

## 25. PENSIONEN UND ÄHNLICHE VERPFLICHTUNGEN

### GRUNDLAGEN

Der Fresenius-Konzern hat Pensionsaufwendungen und bildet Pensionsrückstellungen für laufende und zukünftige Leistungen an berechnete aktive und ehemalige Mitarbeiter des Fresenius-Konzerns. Je nach rechtlicher, wirtschaftlicher und steuerlicher Gegebenheit eines Landes bestehen dabei unterschiedliche Systeme der Alterssicherung. Der Fresenius-Konzern hat zwei Arten von Versorgungssystemen. Dies sind zum einen leistungs- und zum anderen beitragsorientierte Versorgungspläne. Die Höhe der Pensionsleistungen hängt bei leistungsorientierten Versorgungsplänen grundsätzlich von der gesamten bzw. einem Teil der Beschäftigungsdauer sowie dem letzten Gehalt der Mitarbeiter ab. In beitragsorientierten Versorgungsplänen werden die Pensionsleistungen durch die Höhe der Beiträge der Mitarbeiter und der Arbeitgeber sowie der Erträge aus dem Planvermögen festgelegt. Die Beiträge können durch gesetzliche Höchstbeträge begrenzt sein.

Im Falle des Ausscheidens eines Mitarbeiters ist der Fresenius-Konzern bei leistungsorientierten Pensionsplänen verpflichtet, die zugesagten Leistungen an den ehemaligen Mitarbeiter zu zahlen, wenn diese fällig werden. Leistungsorientierte Versorgungspläne können rückerstattungs- oder fondsfinanziert sein. Fondsfinanzierte Versorgungspläne bestehen im Fresenius-Konzern im Wesentlichen in den USA, in Norwegen, in Großbritannien, in den Niederlanden und in Österreich. Rückerstattungsfinanzierte Versorgungspläne bestehen in Deutschland und Frankreich.

Die Höhe der Pensionsverpflichtungen aus leistungsorientierten Versorgungsplänen wird auf Basis versicherungsmathematischer Annahmen berechnet, wodurch Schätzungen erforderlich werden. Die Annahmen zur Lebenserwartung, der Abzinsungsfaktor sowie die künftigen Gehalts- und Leistungsniveaus beeinflussen als wesentliche Parameter die Höhe der Pensionsverpflichtung. Im Rahmen der fondsfinanzierten Pläne des Fresenius-Konzerns werden Vermögenswerte für die Erbringung der zukünftigen Zahlungsverpflichtungen reserviert. Der erwartete Ertrag aus diesem Planvermögen wird in

der entsprechenden Periode als Ertrag erfasst. Versicherungsmathematische Gewinne und Verluste entstehen, wenn sich die tatsächlichen Werte der Parameter eines Jahres von den versicherungsmathematischen Annahmen für dieses Jahr unterscheiden sowie bei Abweichungen des tatsächlichen vom erwarteten Ertrag auf das Planvermögen. Die Pensionsrückstellungen einer Gesellschaft werden durch diese versicherungsmathematischen Gewinne oder Verluste beeinflusst.

Die Pensionsverpflichtungen des Fresenius-Konzerns werden bei einem fondsfinanzierten Versorgungsplan mit dem zum beizulegenden Zeitwert bewerteten Planvermögen saldiert. Übersteigt die Pensionsverpflichtung den beizulegenden Zeitwert des Planvermögens, so wird eine Pensionsrückstellung in der Konzern-Bilanz ausgewiesen. Übersteigt das Planvermögen die Verpflichtung aus der Pensionszusage und hat das Unternehmen einen Anspruch auf Rückerstattung oder Minderung künftiger Beitragszahlungen an den Fonds, so wird in der Konzern-Bilanz ein Aktivposten unter den sonstigen Vermögenswerten ausgewiesen.

Bei beitragsorientierten Versorgungsplänen zahlt der Fresenius-Konzern festgelegte Beiträge während der Dienstzeit eines Mitarbeiters. Durch diese Beiträge sind alle Verpflichtungen des Fresenius-Konzerns abgegolten. Der Fresenius-Konzern hat einen wesentlichen beitragsorientierten Versorgungsplan in Nordamerika.

### LEISTUNGSORIENTIERTE PENSIONSPLÄNE

Die Pensionsverpflichtungen (Projected benefit obligation – PBO) des Fresenius-Konzerns zum 31. Dezember 2010 in Höhe von 655 Mio € (2009: 556 Mio €) waren mit 261 Mio € (2009: 237 Mio €) durch Fondsvermögen gedeckt und mit 394 Mio € (2009: 319 Mio €) rückerstattungsfinanziert. Der kurzfristige Teil der Pensionsrückstellungen in Höhe von 11 Mio € wird in der Konzern-Bilanz unter den kurzfristigen Rückstellungen und sonstigen kurzfristigen Verbindlichkeiten ausgewiesen. Der langfristige Teil der Rückstellungen in Höhe von 383 Mio € wird als Pensionsrückstellung ausgewiesen.

Die Pensionsrückstellungen in Höhe von 394 Mio € beruhen zu 70 % auf der „Versorgungsordnung der Fresenius-Unternehmen“ von 1988 (Pensionsplan 1988), die, mit Ausnahme von Fresenius Helios, für die meisten deutschen Gesellschaften gilt. Der Rest der Pensionsrückstellungen entfällt auf individuelle Versorgungspläne von deutschen Gesellschaften des Unternehmensbereichs Fresenius Helios und von ausländischen Gesellschaften des Fresenius-Konzerns.

Die Pensionszahlungen hängen generell von der Beschäftigungsdauer und der Vergütung des Mitarbeiters bei Eintritt des Versorgungsfalles ab. Wie in Deutschland üblich, sind die dortigen Pensionszusagen der Gesellschaften des Fresenius-Konzerns unmittelbare Versorgungszusagen. Für den deutschen Pensionsplan 1988 besteht kein gesonderter Pensionsfonds.

Für die Mitarbeiter der Fresenius Medical Care Holdings, Inc. (FMCH), einer Tochtergesellschaft der Fresenius Medical Care AG & Co. KGaA, in den USA bestehen ein leistungsorientierter Pensionsplan sowie ergänzende Pensionspläne für leitende Mitarbeiter, die im 1. Quartal 2002 gekürzt wurden. Durch diese Plankürzung werden im Wesentlichen alle gemäß den Plänen anspruchsberechtigten Mitarbeiter keine zusätzlichen Versorgungsansprüche für zukünftige Leistungen mehr erhalten. Die FMCH hat alle Pensionsverpflichtungen der Gesellschaft aus den unverfallbaren und eingefrorenen Pensionsansprüchen der Mitarbeiter zum Zeitpunkt der Plankürzung beibehalten. Jedes Jahr führt FMCH dem Pensionsplan mindestens den Betrag zu, der sich aufgrund gesetzlicher Vorschriften (Employee Retirement Income Security Act of 1974) ergibt. Für das Jahr 2010 sahen die gesetzlichen Vorschriften keine Mindestzuführung für den leistungsorientierten Pensionsplan vor. Im Jahr 2010 wurden freiwillige Zuführungen in Höhe von 0,6 Mio US\$ (0,5 Mio €) getätigt. Die erwarteten Zuführungen für das Jahr 2011 betragen 0,7 Mio US\$ (0,5 Mio €).

Der Fresenius-Konzern hat Pensionsverpflichtungen in Höhe von 310 Mio € aus Pensionsplänen, die entweder vollständig oder teilweise durch einen Pensionsfonds gedeckt werden. Pensionsverpflichtungen aus Pensionsplänen ohne Fondsvermögen belaufen sich auf 345 Mio €.

Im Folgenden werden die Veränderung der Pensionsverpflichtung, die Veränderung des Planvermögens und der Finanzierungsstatus der Versorgungspläne dargestellt. Die Rentenzahlungen in der Veränderung der Pensionsverpflichtung beinhalten Zahlungen sowohl aus den fondsfinanzierten als auch aus den rückstellungsfinanzierten Versorgungsplänen. Dagegen beinhalten die Rentenzahlungen in der Veränderung des Planvermögens lediglich die Zahlungen, die über Pensionsfonds geleistet werden.

Der Finanzierungsstatus stellte sich wie folgt dar:

| in Mio €                                                | 2010       | 2009       |
|---------------------------------------------------------|------------|------------|
| <b>Pensionsverpflichtungen zu Beginn des Jahres</b>     | <b>556</b> | <b>505</b> |
| Veränderungen im Konsolidierungskreis                   | 0          | 6          |
| Währungsumrechnungsdifferenzen                          | 16         | -4         |
| Laufender Dienstzeitaufwand                             | 16         | 14         |
| Früherer Dienstzeitaufwand                              | 2          | 1          |
| Zinsaufwand                                             | 33         | 31         |
| Mitarbeiterbeiträge                                     | 1          | 1          |
| Übertragungen                                           | -          | -          |
| Änderung der Versorgungszusage / Planabgeltungen        | -2         | -5         |
| Versicherungsmathematische Verluste                     | 50         | 23         |
| Rentenzahlungen                                         | -18        | -16        |
| Plananpassungen                                         | 1          | -          |
| <b>Pensionsverpflichtungen am Ende des Jahres</b>       | <b>655</b> | <b>556</b> |
| davon unverfallbar                                      | 558        | 463        |
| <b>Marktwert des Planvermögens zu Beginn des Jahres</b> | <b>237</b> | <b>213</b> |
| Veränderungen im Konsolidierungskreis                   | 0          | 4          |
| Währungsumrechnungsdifferenzen                          | 14         | -4         |
| Tatsächliche Erträge des Planvermögens                  | 13         | 27         |
| Arbeitgeberbeiträge                                     | 4          | 4          |
| Mitarbeiterbeiträge                                     | 1          | 1          |
| Abgeltung von Planvermögen                              | -          | -2         |
| Rentenzahlungen                                         | -8         | -6         |
| <b>Marktwert des Planvermögens am Ende des Jahres</b>   | <b>261</b> | <b>237</b> |
| <b>Finanzierungsstatus zum 31. Dezember</b>             | <b>394</b> | <b>319</b> |

Die Zinssätze der einzelnen Pläne werden abgeleitet aus den Renditen von Portfolios aus Eigenkapitalinstrumenten und Fremdkapitalinstrumenten mit hohem Rating und Laufzeiten, die den Zeithorizont der Pensionsverpflichtung widerspiegeln. Der Zinssatz des Fresenius-Konzerns ergibt sich aus dem mit den Pensionsverpflichtungen der einzelnen Pläne gewichteten Durchschnitt dieser Zinssätze.

Den errechneten Pensionsverpflichtungen liegen folgende gewichtete durchschnittliche Annahmen zum 31. Dezember zugrunde:

| in %           | 2010 | 2009 |
|----------------|------|------|
| Zinssatz       | 5,43 | 5,86 |
| Gehaltsdynamik | 3,32 | 3,30 |
| Rententrend    | 1,73 | 1,81 |

Der Anwartschaftsbarwert (Accumulated benefit obligation – ABO) für alle leistungsorientierten Pensionspläne betrug zum 31. Dezember 2010 567 Mio € (2009: 515 Mio €).

Die folgende Übersicht bezieht sich auf Pensionspläne, in denen die Pensionsverpflichtungen und der Anwartschaftsbarwert den beizulegenden Zeitwert des Pensionsvermögens überstieg:

| in Mio €                    | 2010 | 2009 |
|-----------------------------|------|------|
| Pensionsverpflichtung (PBO) | 655  | 556  |
| Anwartschaftsbarwert (ABO)  | 567  | 515  |
| Marktwert des Planvermögens | 261  | 237  |

Die pensionsbedingten Änderungen im Eigenkapital in den Jahren 2010 und 2009 stellten sich vor Steuereffekten wie folgt dar:

| in Mio €                                        | 1. Januar 2010 | Umbuchungen <sup>1</sup> | Zugänge    | Währungs-<br>umrechnungs-<br>differenzen | 31. Dezember<br>2010 |
|-------------------------------------------------|----------------|--------------------------|------------|------------------------------------------|----------------------|
| Versicherungsmathematische Gewinne und Verluste | -54            | 5                        | -54        | -4                                       | -107                 |
| Dienstzeitaufwand früherer Jahre                | 4              | 1                        | -2         | –                                        | 3                    |
| Übergangsfehlbetrag                             | -1             | –                        | –          | –                                        | -1                   |
| <b>Summe der pensionsbedingten Änderungen</b>   | <b>-51</b>     | <b>6</b>                 | <b>-56</b> | <b>-4</b>                                | <b>-105</b>          |

<sup>1</sup> In der Konzern-Gewinn- und Verlustrechnung erfolgswirksam erfasst

| in Mio €                                        | 1. Januar 2009 | Umbuchungen <sup>1</sup> | Zugänge    | Währungs-<br>umrechnungs-<br>differenzen | 31. Dezember<br>2009 |
|-------------------------------------------------|----------------|--------------------------|------------|------------------------------------------|----------------------|
| Versicherungsmathematische Gewinne und Verluste | -49            | 4                        | -10        | 1                                        | -54                  |
| Dienstzeitaufwand früherer Jahre                | 4              | –                        | –          | –                                        | 4                    |
| Übergangsfehlbetrag                             | -1             | 1                        | -1         | –                                        | -1                   |
| <b>Summe der pensionsbedingten Änderungen</b>   | <b>-46</b>     | <b>5</b>                 | <b>-11</b> | <b>1</b>                                 | <b>-51</b>           |

<sup>1</sup> In der Konzern-Gewinn- und Verlustrechnung erfolgswirksam erfasst

Zu den Steuereffekten durch die pensionsbedingten Änderungen auf das kumulierte Other Comprehensive Income zum 31. Dezember 2010 wird auf Anmerkung 28, Other Comprehensive Income (Loss), verwiesen.

Im Jahr 2011 erwartet der Fresenius-Konzern aus der erfolgswirksamen Auflösung der pensionsbedingten Änderungen im Eigenkapital folgende Auswirkungen:

| in Mio €                                        | 2011 |
|-------------------------------------------------|------|
| Versicherungsmathematische Gewinne und Verluste | 8    |
| Dienstzeitaufwand früherer Jahre                | 1    |
| Übergangsfehlbetrag                             | –    |

Der Pensionsaufwand aus den leistungsorientierten Versorgungsplänen in Höhe von 36 Mio € (2009: 35 Mio €) setzte sich aus folgenden Komponenten zusammen:

| in Mio €                                                 | 2010      | 2009      |
|----------------------------------------------------------|-----------|-----------|
| Laufender Dienstzeitaufwand                              | 16        | 14        |
| Zinsaufwand                                              | 33        | 31        |
| Erwartete Erträge des Planvermögens                      | -17       | -15       |
| Tilgung von versicherungsmathematischen Verlusten, netto | 5         | 3         |
| Tilgung von früherem Dienstzeitaufwand                   | 1         | –         |
| Tilgung des Übergangsfehlbetrags                         | –         | 1         |
| Aufwand aus der Abgeltung eines Plans                    | -2        | 1         |
| <b>Pensionsaufwand</b>                                   | <b>36</b> | <b>35</b> |

Der Pensionsaufwand wird den Umsatzkosten, den Vertriebs- und allgemeinen Verwaltungskosten oder den Forschungs- und Entwicklungsaufwendungen als Personalaufwand zugeordnet. Dies ist davon abhängig, in welchem Bereich der Bezugsberechtigte beschäftigt ist.

Dem errechneten Pensionsaufwand liegen folgende gewichtete durchschnittliche Annahmen zum 31. Dezember zugrunde:

| in %                                | 2010 | 2009 |
|-------------------------------------|------|------|
| Zinssatz                            | 5,86 | 6,21 |
| Erwartete Erträge des Planvermögens | 5,58 | 5,74 |
| Gehaltsdynamik                      | 3,30 | 3,56 |

Die versicherungsmathematischen Verluste, die im Geschäftsjahr zu einer Erhöhung des Anwartschaftsbarwerts der Versorgungszusagen führten, ergeben sich aus den der versicherungsmathematischen Berechnung zugrunde liegenden Änderungen der Abzinsungssätze sowie der Änderung der Annahmen zu Inflation und Mortalitäten. Versicherungsmathematische Verluste bestanden in Höhe von insgesamt 107 Mio € (2009: 54 Mio €).

Die Marktwerte des Planvermögens, gegliedert nach Kategorien, beliefen sich auf:

Die folgende Tabelle zeigt die in den nächsten zehn Jahren erwarteten Rentenzahlungen:

| Geschäftsjahr                               | in Mio €   |
|---------------------------------------------|------------|
| 2011                                        | 20         |
| 2012                                        | 22         |
| 2013                                        | 23         |
| 2014                                        | 24         |
| 2015                                        | 26         |
| 2016 bis 2020                               | 167        |
| <b>Summe der erwarteten Rentenzahlungen</b> | <b>282</b> |

Der Bewertungsstichtag des Planvermögens des Fresenius-Konzerns zur Bestimmung des Finanzierungsstatus ist für alle Pläne der 31. Dezember 2010.

Der größte Teil der Pensionsrückstellungen entfällt auf Deutschland. Zum 31. Dezember wurden 79 % der Pensionsrückstellungen in Deutschland gebildet, weitere 21 % verteilten sich auf das übrige Europa und Nordamerika.

Von den Bezugsberechtigten waren knapp zwei Drittel in Nordamerika, rund ein Viertel in Deutschland und der Rest im übrigen Europa bzw. auf anderen Kontinenten beschäftigt.

| in Mio €                                           | 31. Dezember 2010                                                               |                                                                           |            | 31. Dezember 2009                                                               |                                                                           |            |
|----------------------------------------------------|---------------------------------------------------------------------------------|---------------------------------------------------------------------------|------------|---------------------------------------------------------------------------------|---------------------------------------------------------------------------|------------|
|                                                    | Quotierte Marktpreise auf aktiven Märkten für identische Vermögenswerte Level 1 | Direkt oder indirekt beobachtbare Marktpreise auf aktiven Märkten Level 2 | Summe      | Quotierte Marktpreise auf aktiven Märkten für identische Vermögenswerte Level 1 | Direkt oder indirekt beobachtbare Marktpreise auf aktiven Märkten Level 2 | Summe      |
| <b>Kategorien der Planvermögen</b>                 |                                                                                 |                                                                           |            |                                                                                 |                                                                           |            |
| Eigenkapitalpapiere                                | 32                                                                              | 49                                                                        | 81         | 78                                                                              | 0                                                                         | 78         |
| Index-Fonds <sup>1</sup>                           | 23                                                                              | 49                                                                        | 72         | 72                                                                              | 0                                                                         | 72         |
| Sonstige Eigenkapitalpapiere                       | 9                                                                               | 0                                                                         | 9          | 6                                                                               | 0                                                                         | 6          |
| Festverzinsliche Wertpapiere                       | 41                                                                              | 118                                                                       | 159        | 37                                                                              | 106                                                                       | 143        |
| Staatsanleihen <sup>2</sup>                        | 20                                                                              | 2                                                                         | 22         | 18                                                                              | 2                                                                         | 20         |
| Unternehmensanleihen <sup>3</sup>                  | 13                                                                              | 114                                                                       | 127        | 13                                                                              | 104                                                                       | 117        |
| Sonstige festverzinsliche Wertpapiere <sup>4</sup> | 8                                                                               | 2                                                                         | 10         | 6                                                                               | –                                                                         | 6          |
| Sonstige <sup>5</sup>                              | 18                                                                              | 3                                                                         | 21         | 13                                                                              | 3                                                                         | 16         |
| <b>Gesamt</b>                                      | <b>91</b>                                                                       | <b>170</b>                                                                | <b>261</b> | <b>128</b>                                                                      | <b>109</b>                                                                | <b>237</b> |

<sup>1</sup> Diese Kategorie beinhaltet hauptsächlich kostengünstige, nicht aktiv gemanagte eigenkapitalbasierte Index-Fonds, die den S & P 500, S & P 400, Russell 2000, MSCI EAFE Index und MSCI Emerging Markets Index für 2010 und 2009 sowie zusätzlich in 2009 den Barclays Capital Long Corporate Index nachbilden.

<sup>2</sup> Diese Kategorie beinhaltet hauptsächlich festverzinsliche Wertpapiere der US-Regierung und von der Regierung geförderten Instanzen.

<sup>3</sup> Diese Kategorie beinhaltet hauptsächlich Investment-Grade Anleihen von US-Emittenten diverser Industrien.

<sup>4</sup> Diese Kategorie beinhaltet hauptsächlich privat platzierte Anleihen sowie hypothekarisch besicherte Anleihen und Fonds, die in US Treasury Schatzanweisungen sowie in US Treasury besicherte Instrumente investieren.

<sup>5</sup> Diese Kategorie beinhaltet hauptsächlich flüssige Mittel, Geldmarktfonds sowie Investmentfonds, die in Unternehmensanleihen höchster Bonität investieren.

Im Folgenden werden die wesentlichen Methoden und Werte, die zur Ermittlung der Marktwerte des Planvermögens zugrunde lagen, erläutert:

Die Marktwerte der Index-Fonds basieren auf Marktpreisen.

Sonstige Eigenkapitalpapiere werden zu ihrem Marktpreis am Bilanzstichtag bewertet.

Der Marktwert für einen Großteil der Staatsanleihen basiert auf Marktpreisen. Die verbleibenden Staatsanleihen werden zum Marktpreis bewertet.

Die Marktwerte der Unternehmensanleihen und der sonstigen Anleihen basieren auf Marktpreisen zum Bilanzstichtag.

Flüssige Mittel werden zu ihrem Nominalwert angesetzt, der dem Marktwert entspricht.

US Treasury Geldmarktfonds sowie andere Geldmarkt- und Investmentfonds werden zu ihrem Marktpreis bewertet.

### Investmentpolitik und Strategie für das Planvermögen

Der Fresenius-Konzern überprüft regelmäßig die Annahme über die erwartete langfristige Rendite des Planvermögens des nordamerikanischen, fondsfinanzierten Versorgungsplans. Im Rahmen dieser Überprüfung wird eine Bandbreite für die erwartete langfristige Rendite des gesamten Planvermögens ermittelt, indem erwartete zukünftige Renditen für jede Klasse von Vermögenswerten mit dem Anteil der jeweiligen Klasse am gesamten Planvermögen gewichtet werden. Die ermittelte Renditebandbreite basiert sowohl auf aktuelle ökonomische Rahmendaten berücksichtigenden Prognosen langfristiger Renditen als auch auf historischen Marktdaten über vergangene Renditen, Korrelationen und Volatilitäten der einzelnen Klassen von Vermögenswerten. Im Geschäftsjahr 2010 betrug die erwartete langfristige Rendite auf das Planvermögen des nordamerikanischen Pensionsplans 7,5 %.

Die globale Investitionsstrategie des nordamerikanischen Pensionsplans zielt, bei einer breiten Diversifikation der Vermögenswerte, der Anlagestrategien und des Anlagemanagements, auf das Erreichen eines Verhältnisses von 98 % der Investitionen in langfristiges Wachstum zu 2 % für kurzfristige Rentenzahlungen ab.

Die Investmentpolitik des nordamerikanischen Pensionsplans strebt eine Verteilung der Vermögenswerte von 35 % auf Aktien und 65 % auf langfristige US-Anleihen an und berücksichtigt, dass es einen zeitlichen Horizont für investierte Fonds

von mehr als fünf Jahren geben wird. Das gesamte Portfolio wird an einem Index gemessen, der die Benchmark der jeweiligen Anlagekategorien sowie die angestrebte Verteilung der Vermögenswerte widerspiegelt. Entsprechend der Richtlinie darf nicht in Aktien der Fresenius Medical Care AG & Co. KGaA oder anderer nahe stehender Unternehmen investiert werden. Die Maßstäbe für die Entwicklung der separaten Anlagekategorien beinhalten: S & P 500 Index, S & P 400 Index, Russell 2000 Growth Index, MSCI EAFE Index, MSCI Emerging Markets Index, Barclays Capital Long Term Government Index sowie Barclays Capital 20 Year US Treasury Strip Index.

Die folgende Tabelle beschreibt die Aufteilung für die fondsfinanzierten Pläne des Fresenius-Konzerns:

| in %                         | Anteil 2010   | Anteil 2009 | Angestrebter Anteil |
|------------------------------|---------------|-------------|---------------------|
| Eigenkapitalinstrumente      | <b>31,12</b>  | 33,15       | 35,74               |
| Festverzinsliche Wertpapiere | <b>60,73</b>  | 60,35       | 59,57               |
| Sonstiges, inkl. Immobilien  | <b>8,15</b>   | 6,50        | 4,69                |
| <b>Gesamt</b>                | <b>100,00</b> | 100,00      | 100,00              |

Die langfristig erwartete Gesamtverzinsung des Planvermögens des Fresenius-Konzerns beträgt jährlich 6,77 %. Die erwarteten Zuführungen zum Planvermögen für das Geschäftsjahr 2011 belaufen sich auf 5 Mio €.

### BEITRAGSORIENTIERTE PENSIONSPLÄNE

Der Gesamtaufwand aus beitragsorientierten Plänen im Fresenius-Konzern betrug im Jahr 2010 31 Mio € (2009: 27 Mio €), wobei der größte Anteil auf den nordamerikanischen Plan entfällt, an dem die Mitarbeiter der FMCH teilnehmen können. Die Mitarbeiter der FMCH können bis zu 75 % ihres Gehalts im Rahmen dieses Plans anlegen. Dabei gilt für Mitarbeiter im Alter von unter 50 Jahren ein jährlicher Maximalbetrag von 16.500 US\$ und für Mitarbeiter ab einem Alter von 50 Jahren ein jährlicher Maximalbetrag von 22.000 US\$. Fresenius Medical Care zahlt 50 % des Mitarbeiterbeitrags ein, allerdings maximal 3 % des Gehalts des betreffenden Mitarbeiters. Im Geschäftsjahr 2010 betrug der Gesamtaufwand aus diesem beitragsorientierten Plan der Fresenius Medical Care 24 Mio € (2009: 20 Mio €).

## 26. ANTEILE ANDERER GESELLSCHAFTER

### ANTEILE ANDERER GESELLSCHAFTER MIT PUT-OPTIONEN

Der Fresenius-Konzern kann dazu verpflichtet werden, die Anteile, die andere Gesellschafter an einigen seiner Tochtergesellschaften halten, zu erwerben. Diese Verpflichtung basiert auf Put-Optionen und kann im Ermessen der anderen Gesellschafter innerhalb eines festgelegten Zeitraums ausgeübt werden. Bei Ausübung dieser Put-Optionen wäre der Fresenius-Konzern dazu verpflichtet, sämtliche oder Teile der Anteile der anderen Gesellschafter zum geschätzten Marktwert zu erwerben.

Zum 31. Dezember 2010 bzw. 2009 betrugen diese Verpflichtungen im Rahmen der Put-Optionen 209 Mio € bzw. 161 Mio €, wovon zum 31. Dezember 2010 71 Mio € ausübbar waren.

### ANTEILE ANDERER GESELLSCHAFTER OHNE PUT-OPTIONEN

Die Anteile anderer Gesellschafter ohne Put-Optionen im Konzern zum 31. Dezember stellten sich wie folgt dar:

| in Mio €                                                                                     | 2010         | 2009         |
|----------------------------------------------------------------------------------------------|--------------|--------------|
| Anteile anderer Gesellschafter ohne Put-Optionen an der Fresenius Medical Care AG & Co. KGaA | 3.574        | 2.985        |
| Anteile anderer Gesellschafter ohne Put-Optionen an der HELIOS Kliniken GmbH                 | 4            | 4            |
| Anteile anderer Gesellschafter ohne Put-Optionen an der VAMED AG                             | 23           | 33           |
| Anteile anderer Gesellschafter ohne Put-Optionen in den Unternehmensbereichen                |              |              |
| Fresenius Medical Care                                                                       | 110          | 85           |
| Fresenius Kabi                                                                               | 46           | 37           |
| Fresenius Helios                                                                             | 119          | 110          |
| Fresenius Vamed                                                                              | 3            | 3            |
| <b>Gesamt</b>                                                                                | <b>3.879</b> | <b>3.257</b> |

Die Anteile anderer Gesellschafter ohne Put-Optionen erhöhten sich im Geschäftsjahr 2010 um 622 Mio € auf 3.879 Mio €. Die Veränderung resultiert aus der Zurechnung des Anteils am Gewinn in Höhe von 561 Mio €, verringert um anteilige Dividendenausschüttungen in Höhe von 172 Mio € sowie Zurechnungen aus Aktienoptionen, Währungseffekten und Erstkonsolidierungen in Höhe von zusammen 233 Mio €.

## 27. EIGENKAPITAL DER ANTEILSEIGNER DER FRESENIUS SE & CO. KGAA (BIS 28. JANUAR 2011: FRESENIUS SE)

### GEZEICHNETES KAPITAL

#### Entwicklung des gezeichneten Kapitals

Im Geschäftsjahr 2010 wurden 1.134.714 Aktienoptionen ausgeübt. Das Grundkapital der Fresenius SE war danach zum 31. Dezember 2010 eingeteilt in 81.225.045 Inhaber-Stammaktien und 81.225.045 stimmrechtslose Inhaber-Vorzugsaktien. Die Aktien sind als Stückaktien ohne Nennwert ausgegeben. Der anteilige Betrag am Grundkapital beträgt 1,00 € je Aktie.

In Verbindung mit dem Rechtsformwechsel der Fresenius SE in die Fresenius SE & Co. KGaA und dessen Wirksamwerden mit Eintragung im Handelsregister am 28. Januar 2011 wurden sämtliche Inhaber-Vorzugsaktien in Inhaber-Stammaktien umgewandelt. Danach ist das Grundkapital der Fresenius SE & Co. KGaA ausschließlich in Inhaber-Stammaktien eingeteilt.

#### Mitteilungen von Aktionären

Nach dem erfolgreichen Rechtsformwechsel am 28. Januar 2011 hat die Fresenius SE & Co. KGaA (vormals Fresenius SE) Stimmrechtsmitteilungen gemäß § 26 Abs. 1 Wertpapierhandelsgesetz (WpHG) veröffentlicht. Diese beziehen sich auf das Grundkapital zum 28. Januar 2011 in Höhe von 162.450.090 €, eingeteilt in 162.450.090 stimmberechtigte Stammaktien, und spiegeln den Beteiligungsstand wider:

Die Else Kröner-Fresenius-Stiftung mit Sitz in Bad Homburg, Deutschland, hat der Fresenius SE & Co. KGaA gemäß § 21 Abs. 1 WpHG mitgeteilt, dass ihr Stimmrechtsanteil an der Fresenius SE & Co. KGaA, Else-Kröner-Straße 1, 61352 Bad Homburg v. d. H., am 28. Januar 2011 die Schwellen von 50 % und 30 % unterschritten hat und zu diesem Tag 28,85 % (46.871.154 Stimmrechte) beträgt.

Die Allianz SE mit Sitz in München, Deutschland, hat der Fresenius SE & Co. KGaA gemäß § 21 Abs. 1 WpHG mitgeteilt, dass ihr Stimmrechtsanteil an der Fresenius SE & Co. KGaA, Else-Kröner-Straße 1, 61352 Bad Homburg v. d. H., am 28. Januar 2011 die Schwelle von 5 % unterschritten hat und 4,26 % (6.920.552 Stimmrechte von insgesamt 162.450.090 Stimmrechten) betrug. Davon wurden ihr gemäß § 22 Abs. 1 Satz 1 Nr. 1 WpHG 4,26 % (6.919.271 Stimmrechte) und 0,0008 % (1.281 Stimmrechte) nach § 22 Abs. 1 Satz 1 Nr. 6 WpHG zugerechnet.



Der Allianz SE zugerechnete Stimmrechte wurden dabei über folgende von ihr kontrollierte Unternehmen, deren Stimmrechtsanteil an der Fresenius SE & Co. KGaA jeweils 3 % oder mehr betrug, gehalten:

- ▶ Allianz Deutschland AG
- ▶ Jota Vermögensverwaltungsgesellschaft mbH
- ▶ Allianz Lebensversicherungs-AG

Die Artio Global Investors, Inc. mit Sitz in New York, USA, hat der Fresenius SE & Co. KGaA gemäß § 21 Abs. 1 WpHG mitgeteilt, dass ihr Stimmrechtsanteil an der Fresenius SE & Co. KGaA, Else-Kröner-Str. 1, 61352 Bad Homburg v. d. H., Deutschland, am 28. Januar 2011 die Schwelle von 3 % unterschritten hat und zu diesem Tag 2,36 % betrug (entspricht 3.840.708 Stimmrechten) sowohl in Bezug auf die Gesamtmenge der Stimmrechte des Emittenten als auch in Bezug auf alle mit Stimmrechten versehenen Aktien ein und derselben Gattung.

Die Stimmrechte sind der Artio Global Investors, Inc. vollständig im Umfang von 2,36 % (entspricht 3.840.708 Stimmrechten) nach § 22 Abs. 1 Satz 1 Nr. 6 WpHG i. V. m. § 22 Abs. 1 Satz 2 WpHG zuzurechnen.

Die FMR LLC, Boston, Massachusetts, USA, hat der Fresenius SE & Co. KGaA gemäß § 21 Abs. 1 WpHG mitgeteilt, dass ihr Stimmrechtsanteil an der Fresenius SE & Co. KGaA, Else-Kröner-Str. 1, 61352 Bad Homburg v. d. H., Deutschland, am 28. Januar 2011 die Schwelle von 3 % unterschritten hat und zu diesem Tag 1,69 % betrug (entspricht 2.740.382 Stimmrechten).

Die Stimmrechte sind der FMR LLC vollständig nach § 22 Abs. 1 Satz 1 Nr. 6 WpHG i. V. m. § 22 Abs. 1 Satz 2 WpHG zuzurechnen.

Darüber hinaus hat die Fresenius SE (seit 28. Januar 2011 Fresenius SE & Co. KGaA) im Jahr 2010 nach § 26 Abs. 1 WpHG die folgende Stimmrechtsmitteilung veröffentlicht:

Die Fidelity Investment Trust, Boston, Massachusetts, USA, hat der Fresenius SE (seit 28. Januar 2011: Fresenius SE & Co. KGaA) am 13. Juli 2010 mitgeteilt, dass der Stimmrechtsanteil der Fidelity Investment Trust an der Fresenius SE, Else-Kröner-Straße 1, 61352 Bad Homburg v. d. H., Deutschland, am 9. Juli 2010 die Schwelle von 3 % unterschritten hat. Zu diesem Datum hielt Fidelity Investment Trust 2,95 % der Stimmrechte an der Fresenius SE entsprechend 2.387.886 Stammaktien.

Alle Mitteilungen von Aktionären im Geschäftsjahr 2010 wurden auf der Website der Gesellschaft [www.fresenius.de](http://www.fresenius.de) im Bereich Investor Relations/Fresenius-Aktien/Aktionärsstruktur veröffentlicht.

## GENEHMIGTES KAPITAL

In der Hauptversammlung am 12. Mai 2010 wurde die Satzung der Fresenius SE & Co. KGaA mit nachfolgenden Genehmigten Kapitalien festgestellt. Die Genehmigten Kapitalien I und II entsprechen in ihrem Umfang den Genehmigten Kapitalien der vormaligen Fresenius SE. Inhaltlich bleiben die Genehmigten Kapitalien I und II unverändert, jedoch werden zukünftig lediglich Stammaktien ausgegeben. Die Genehmigten Kapitalien III, IV und V dienen ausschließlich zur alternativen Bedienung der Aktienoptionspläne von 1998, 2003 und 2008 (siehe Anmerkung 34, Aktienoptionen) mit Stammaktien, soweit die Aktienoptionspläne nicht aus den vorrangig dafür vorgesehenen Bedingten Kapitalien I, II und III, die gleichfalls auf die Ausgabe von Stammaktien umgestellt wurden, bedient werden.

Im Einzelnen ist die Fresenius Management SE als persönlich haftende Gesellschafterin gemäß Satzung der Fresenius SE & Co. KGaA ermächtigt, mit Zustimmung des Aufsichtsrats bis zum 7. Mai 2014,

- ▶ das Grundkapital der Fresenius SE & Co. KGaA um insgesamt bis zu 12.800.000 € durch ein- oder mehrmalige Ausgabe neuer Inhaber-Stammaktien gegen Bareinlagen zu erhöhen (Genehmigtes Kapital I). Den Aktionären ist ein Bezugsrecht einzuräumen. Die persönlich haftende Gesellschafterin ist ermächtigt, Spitzenbeträge von dem Bezugsrecht der Aktionäre auszunehmen.
- ▶ das Grundkapital der Fresenius SE & Co. KGaA um insgesamt bis zu 6.400.000 € durch ein- oder mehrmalige Ausgabe neuer Inhaber-Stammaktien gegen Bareinlagen und/oder Sacheinlagen zu erhöhen (Genehmigtes Kapital II). Die persönlich haftende Gesellschafterin ist ermächtigt, jeweils mit Zustimmung des Aufsichtsrats über den Ausschluss des Bezugsrechts der Aktionäre zu entscheiden. Bei Bareinlagen ist dies nur zulässig, wenn der Ausgabebetrag den Börsenpreis nicht wesentlich unterschreitet. Bei Sacheinlagen kann das Bezugsrecht beim Erwerb eines Unternehmens oder einer Beteiligung an einem Unternehmen ausgeschlossen werden. Ebenfalls können Spitzenbeträge von dem Bezugsrecht der Aktionäre ausgenommen werden.

Weiterhin ist die persönlich haftende Gesellschafterin gemäß Satzung der Fresenius SE & Co. KGaA ermächtigt, mit Zustimmung des Aufsichtsrats bis zum 11. Mai 2015,

- ▶ das Grundkapital der Fresenius SE & Co. KGaA um insgesamt bis zu 1.313.000 € durch ein- oder mehrmalige Ausgabe neuer Inhaber-Stammaktien gegen Bareinlagen zu erhöhen (Genehmigtes Kapital III). Die persönlich haftende Gesellschafterin darf von dem Genehmigten Kapital III nur insoweit Gebrauch machen, wie Bezugsrechte auf Inhaber-Stammaktien gemäß dem Aktienoptionsplan 1998 ausgegeben wurden, die Inhaber dieser Bezugsrechte von ihrem Ausübungsrecht Gebrauch machen und soweit die Bedienung der Bezugsrechte nicht aus dem Bedingten Kapital erfolgt.
- ▶ das Grundkapital der Fresenius SE & Co. KGaA um insgesamt bis zu 4.298.442 € durch ein- oder mehrmalige Ausgabe neuer Inhaber-Stammaktien gegen Bareinlagen und/oder Sacheinlagen zu erhöhen (Genehmigtes Kapital IV). Die persönlich haftende Gesellschafterin darf von dem Genehmigten Kapital IV nur insoweit Gebrauch machen, wie Wandelschuldverschreibungen auf Inhaber-Stammaktien gemäß dem Aktienoptionsplan 2003 ausgegeben wurden, die Inhaber dieser Wandelschuldverschreibungen von ihrem Wandlungsrecht Gebrauch machen und soweit die Bedienung der Wandlungsrechte nicht aus dem Bedingten Kapital erfolgt.
- ▶ das Grundkapital der Fresenius SE & Co. KGaA um insgesamt bis zu 6.200.000 € durch ein- oder mehrmalige Ausgabe neuer Inhaber-Stammaktien gegen Bareinlagen zu erhöhen (Genehmigtes Kapital V). Die persönlich haftende Gesellschafterin darf von dem Genehmigten Kapital V nur insoweit Gebrauch machen, wie Bezugsrechte auf Inhaber-Stammaktien gemäß dem Aktienoptionsplan 2008 ausgegeben wurden oder werden und die Inhaber dieser Bezugsrechte von ihrem Ausübungsrecht Gebrauch machen, die Fresenius SE & Co. KGaA zur Erfüllung der Bezugsrechte keine eigenen Aktien gewährt bzw. von ihrem Recht auf Barausgleich Gebrauch macht und soweit die Bedienung der Bezugsrechte nicht aus dem Bedingten Kapital erfolgt.

Das Bezugsrecht der Aktionäre ist bei dem Genehmigten Kapital III, IV und V jeweils ausgeschlossen.

Die beschlossenen Änderungen des Genehmigten Kapitals wurden mit Eintragung der neuen Satzung im Handelsregister am 28. Januar 2011 wirksam.

Gegen die Beschlüsse der Hauptversammlung vom 8. Mai 2009 zur Schaffung des Genehmigten Kapitals I und II wurden zwei Anfechtungsklagen erhoben. Das Landgericht Frankfurt am Main hat einer der beiden Anfechtungsklagen mit Urteil vom 2. Februar 2010 stattgegeben, die andere Anfechtungsklage wurde abgewiesen. Mit Urteil vom 15. Februar 2011 hat das Oberlandesgericht Frankfurt am Main die Wirksamkeit der Beschlüsse zur Schaffung des Genehmigten Kapitals I und II bestätigt.

Das von der Fresenius SE eingeleitete Freigabeverfahren nach § 246a Aktiengesetz (AktG) zur Absicherung des bereits im Handelsregister eingetragenen Genehmigten Kapitals I und II wurde von dem Oberlandesgericht Frankfurt am Main am 30. März 2010 zugunsten der Fresenius SE entschieden. Damit war die Handelsregistereintragung des Genehmigten Kapitals I und II bereits bestandskräftig geworden.

## **BEDINGTES KAPITAL**

Das Bedingte Kapital der Fresenius SE (seit 28. Januar 2011: Fresenius SE & Co. KGaA) ist entsprechend der Aktienoptionspläne in das Bedingte Kapital I, das Bedingte Kapital II und das Bedingte Kapital III eingeteilt. Diese bestehen zur Bedienung der Bezugsrechte aus den bisher ausgegebenen Aktienoptionen bzw. Wandelschuldverschreibungen auf Inhaber-Stammaktien der Aktienoptionspläne von 1998, 2003 und 2008 (siehe Anmerkung 34, Aktienoptionen).

Die Bedingten Kapitalien in der Satzung der Fresenius SE & Co. KGaA entsprechen in ihrem Umfang den Bedingten Kapitalien der vormaligen Fresenius SE, angepasst um zwischenzeitlich erfolgte Aktienoptionsausübungen. Der Rechtsformwechsel wurde am 28. Januar 2011 mit der Eintragung im Handelsregister wirksam.

Im Zuge der Umwandlung von Vorzugsaktien in Stammaktien wurde das Bedingte Kapital dahingehend angepasst, dass ausschließlich Bezugsrechte auf Inhaber-Stammaktien gewährt werden.

Das Bedingte Kapital hat sich wie folgt entwickelt:

| in €                                                      | Stammaktien      | Vorzugsaktien    | Gesamt            |
|-----------------------------------------------------------|------------------|------------------|-------------------|
| Bedingtes Kapital I Fresenius AG Aktienoptionsplan 1998   | 656.550          | 656.550          | 1.313.100         |
| Bedingtes Kapital II Fresenius AG Aktienoptionsplan 2003  | 2.149.221        | 2.149.221        | 4.298.442         |
| Bedingtes Kapital III Fresenius SE Aktienoptionsplan 2008 | 3.100.000        | 3.100.000        | 6.200.000         |
| <b>Gesamtes Bedingtes Kapital per 1. Januar 2010</b>      | <b>5.905.771</b> | <b>5.905.771</b> | <b>11.811.542</b> |
| Ausübungen aus dem Fresenius AG Aktienoptionsplan 1998    | -161.295         | -161.295         | -322.590          |
| Ausübungen aus dem Fresenius AG Aktienoptionsplan 2003    | -406.062         | -406.062         | -812.124          |
| <b>Gesamtes Bedingtes Kapital per 31. Dezember 2010</b>   | <b>5.338.414</b> | <b>5.338.414</b> | <b>10.676.828</b> |

## KAPITALRÜCKLAGE

Die Kapitalrücklage enthält die Aufgelder aus der Ausgabe von Aktien und der Ausübung von Aktienoptionen.

## GEWINNRÜCKLAGE

In der Gewinnrücklage sind die in der Vergangenheit erzielten Ergebnisse der in den Konzernabschluss einbezogenen Unternehmen enthalten, soweit sie nicht ausgeschüttet wurden.

## DIVIDENDEN

Nach deutschem Aktienrecht (AktG) ist der Bilanzgewinn, wie er sich aus dem nach deutschen handelsrechtlichen Vorschriften (HGB) aufgestellten Jahresabschluss der Fresenius SE

(seit 28. Januar 2011: Fresenius SE & Co. KGaA) ergibt, Grundlage für die Ausschüttung von Dividenden an die Aktionäre.

Im Mai 2010 wurde auf der Hauptversammlung eine Dividende von 0,75 € je Inhaber-Stammaktie und 0,76 € je Inhaber-Vorzugsaktie, entsprechend einer Gesamtausschüttung von 122 Mio €, beschlossen und ausgezahlt.

## 28. OTHER COMPREHENSIVE INCOME (LOSS)

Im Other Comprehensive Income (Loss) sind die Differenzen aus der erfolgsneutralen Währungsumrechnung von Abschlüssen ausländischer Tochtergesellschaften sowie die Effekte aus der erfolgsneutralen Bewertung von Finanzinstrumenten und die erfolgsneutrale Veränderung aus der Pensionsbewertung nach Steuern ausgewiesen.

Folgende Änderungen ergaben sich im Other Comprehensive Income (Loss) für das Jahr 2010 bzw. 2009:

| in Mio €                                                    | 2010               |              |                     | 2009               |              |                     |
|-------------------------------------------------------------|--------------------|--------------|---------------------|--------------------|--------------|---------------------|
|                                                             | Betrag vor Steuern | Steuereffekt | Betrag nach Steuern | Betrag vor Steuern | Steuereffekt | Betrag nach Steuern |
| Veränderung aus derivativen Finanzinstrumenten              | -15                | 3            | -12                 | 2                  | -10          | -8                  |
| Veränderung der unrealisierten Gewinne/Verluste             | -32                | 7            | -25                 | -1                 | -9           | -10                 |
| Realisierte Gewinne/Verluste aufgrund von Reklassifizierung | 17                 | -4           | 13                  | 3                  | -1           | 2                   |
| Unterschied aus der Pensionsbewertung                       | -54                | 16           | -38                 | -5                 | -1           | -6                  |
| Unterschied aus der Währungsumrechnung                      | 238                | -8           | 230                 | -35                | 6            | -29                 |
| <b>Other Comprehensive Income (Loss)</b>                    | <b>169</b>         | <b>11</b>    | <b>180</b>          | <b>-38</b>         | <b>-5</b>    | <b>-43</b>          |

## SONSTIGE ERLÄUTERUNGEN

### 29. HAFTUNGSVERHÄLTNISSE UND EVENTUALVERBINDLICHKEITEN

#### OPERATE LEASING UND MIETZAHLUNGEN

Die Gesellschaften des Fresenius-Konzerns mieten Verwaltungsgebäude, Betriebsstätten sowie Maschinen, Anlagen und Einrichtungen im Rahmen verschiedener Miet- und Leasingverträge, die zu unterschiedlichen Terminen bis zum Jahr 2101 auslaufen. Im Jahr 2010 bzw. 2009 betrugen die Aufwendungen hierfür 480 Mio € bzw. 430 Mio €.

Die zukünftigen Mindestmietzahlungen aus den nicht kündbaren Miet- und Leasingverträgen für die folgenden Geschäftsjahre betragen:

| Geschäftsjahr | in Mio €     |
|---------------|--------------|
| 2011          | 405          |
| 2012          | 345          |
| 2013          | 298          |
| 2014          | 250          |
| 2015          | 210          |
| Nachfolgende  | 766          |
| <b>Gesamt</b> | <b>2.274</b> |

Zum 31. Dezember 2010 bestanden Restinvestitionsverpflichtungen aus Kaufverträgen für Krankenhäuser in projektiierter Höhe von bis zu 137 Mio € bis zum Jahr 2014, wovon 71 Mio € auf das Jahr 2011 entfallen.

Über die oben genannten Eventualverbindlichkeiten hinaus ist der Umfang der sonstigen Haftungsverhältnisse unbedeutend.

#### RECHTLICHE VERFAHREN

Der Fresenius-Konzern ist regelmäßig in zahlreiche Klagen, Rechtsstreitigkeiten, behördliche und steuerbehördliche Prüfungen, Ermittlungen und sonstige Rechtsangelegenheiten involviert, die sich größtenteils aus der gewöhnlichen Geschäftstätigkeit der Erbringung von Dienstleistungen und Lieferung von Produkten im Gesundheitswesen ergeben. Der genaue Ausgang von Rechtsstreitigkeiten und anderen Rechtsangelegenheiten kann stets nur schwer vorhergesagt werden, und es können sich Resultate ergeben, die von der Einschätzung des Fresenius-Konzerns abweichen. Der Fresenius-Konzern ist überzeugt, stichhaltige Einwände gegen die in

anhängigen Rechtsangelegenheiten geltend gemachten Ansprüche oder Vorwürfe zu besitzen und wird sich vehement verteidigen. Dennoch ist es möglich, dass die Entscheidung einer oder mehrerer derzeit anhängiger oder drohender rechtlicher Angelegenheiten erhebliche nachteilige Auswirkungen auf die Geschäftstätigkeit des Fresenius-Konzerns sowie auf dessen Finanz- und Ertragslage haben könnten.

#### Zivilrechtsstreitigkeiten

##### W.R. Grace & Co. Rechtsstreitigkeit

Fresenius Medical Care wurde ursprünglich als Ergebnis einer Reihe von Transaktionen in Übereinstimmung mit der Fusionsvereinbarung und dem Reorganisationsplan vom 4. Februar 1996 zwischen W.R. Grace & Co. und Fresenius SE (vormals: Fresenius AG) gegründet (der Zusammenschluss). Zum Zeitpunkt des Zusammenschlusses hatte und hat noch heute eine Tochtergesellschaft der W.R. Grace & Co., die W.R. Grace & Co.-Conn., erhebliche Verbindlichkeiten aus Rechtsverfahren im Zusammenhang mit Produzentenhaftung (einschließlich Asbestansprüchen), Steuerverbindlichkeiten für die Zeit vor dem Zusammenschluss und weitere Verbindlichkeiten, die nicht mit der National Medical Care, Inc. (NMC) in Verbindung stehen, welche vor dem Zusammenschluss das Dialysegeschäft von W.R. Grace & Co. betrieb. Im Zusammenhang mit dem Zusammenschluss hatte sich W.R. Grace & Co.-Conn. verpflichtet, Fresenius Medical Care, Fresenius Medical Care Holdings, Inc. (FMCH) und NMC von allen Verpflichtungen der W.R. Grace & Co. freizustellen, die sich auf Ereignisse vor oder nach dem Zusammenschluss beziehen mit Ausnahme von Verpflichtungen, die im Zusammenhang mit dem Geschäftsbetrieb der NMC stehen. Am 2. April 2001 beantragten W.R. Grace & Co. und einige ihrer Tochtergesellschaften die Reorganisation nach „Chapter 11 des US-amerikanischen Konkursrechts“ (das Grace Chapter 11-Insolvenzverfahren).

Vor und nach Beginn des Grace Chapter 11-Insolvenzverfahrens wurde gegen W.R. Grace & Co. und FMCH Sammelklage erhoben, sowohl von Klägern, die sich als Gläubiger von W.R. Grace & Co.-Conn. ausgeben, als auch von Asbest-Gläubigerausschüssen des Grace Chapter 11-Insolvenzverfahrens. Dabei wird im Wesentlichen behauptet, dass der Zusammenschluss eine betrügerische Übertragung gewesen sei, gegen das Gesetz gegen betrügerische Transfers verstoße und eine Verschwörung darstelle. Alle Verfahren dieser Art wurden entweder zunächst ausgesetzt und an das US-Bezirksgericht überwiesen oder sind beim US-Bezirksgericht als Teil des Grace Chapter 11-Insolvenzverfahrens anhängig.

Im Jahr 2003 hat Fresenius Medical Care eine Vereinbarung in Bezug auf die im Rahmen des Grace Chapter 11-Insolvenzverfahrens anhängigen Angelegenheiten geschlossen. Die Vereinbarung regelt alle Ansprüche gegen Fresenius Medical Care im Hinblick auf den Vorwurf der betrügerischen Übertragung sowie steuerliche und andere Ansprüche gegen Fresenius Medical Care. Gemäß den ergänzten Regelungen der Vergleichsvereinbarung werden die Behauptung der betrügerischen Übertragung und andere von den Asbestklägern erhobene Behauptungen öffentlich fallen gelassen, und Fresenius Medical Care wird Schutz vor allen vorhandenen und allen potenziellen künftigen Ansprüchen im Zusammenhang mit W.R. Grace & Co. erhalten, einschließlich solcher aus betrügerischer Übertragung und aus Asbestansprüchen sowie Freistellungen von Einkommensteuerforderungen, die sich auf die bei der Bestätigung des W.R. Grace & Co. Reorganisations- und Sanierungsplans nicht zur NMC gehörenden Mitglieder der steuerlichen Organschaft W.R. Grace & Co. beziehen. Nachdem der W.R. Grace & Co. Reorganisations- und Sanierungsplan bestätigt worden ist, wird Fresenius Medical Care gemäß der Vergleichsvereinbarung insgesamt 115 Mio US\$ ohne Zinsen an die W.R. Grace & Co.-Konkursmasse bzw. an eine andere vom Gericht festgelegte Stelle zahlen. Es wurden keine Schuldanerkenntnisse erklärt, und es werden keine Schuldanerkenntnisse erklärt werden. Die Vergleichsvereinbarung wurde vom US-Bezirksgericht genehmigt. Am 31. Januar 2011 genehmigte das US-Konkursgericht den Sanierungsplan von W.R. Grace & Co. einschließlich der Vergleichsvereinbarung und empfahl dem US-Bezirksgericht die Genehmigung des Plans. Nach dem Zusammenschluss war W.R. Grace & Co. in einer mehrstufigen Transaktion im Zusammenhang mit der Sealed Air Corporation (Sealed Air, früher bekannt als Grace Holding, Inc.) involviert. Fresenius Medical Care befindet sich in einem Rechtsstreit mit Sealed Air, um ihren Anspruch auf Entschädigung durch Sealed Air für alle Verluste und Aufwendungen von Fresenius Medical Care in Verbindung mit Steuerverbindlichkeiten vor dem Zusammenschluss und im Zusammenhang mit anderen Ansprüchen aus dem Zusammenschluss geltend zu machen. Gemäß der Vergleichsvereinbarung wird dieser Rechtsstreit bei endgültiger Bestätigung eines Sanierungsplans, der den Bedingungen der Zahlungsverpflichtungen von Fresenius Medical Care in Verbindung mit dem Rechtsstreit gerecht wird, öffentlich fallen gelassen.

#### **Baxter-Patentstreit „Touchscreen-Schnittstellen“ (1)**

Am 4. April 2003 hat FMCH eine Feststellungsklage (Fresenius USA, Inc., et al., v. Baxter International, Inc., et al.) mit der Geschäftsnr. C 03-1431 beim US-Bundesbezirksgericht für Nordkalifornien eingereicht, mit der gerichtlich festgestellt werden soll, dass FMCH keine Patente der Firma Baxter International, Inc., ihrer Tochtergesellschaften oder ihrer verbundenen Unternehmen (Baxter) verletzt, dass die Patente ungültig sind und dass Baxter kein Recht und keine Befugnis hat, FMCH wegen der angeblichen Verletzung von Patenten der Firma Baxter eine Klage anzudrohen oder einen Prozess gegen FMCH zu führen. Allgemein betreffen die geltend gemachten Patente die Verwendung von Touchscreen-Schnittstellen für Hämodialysegeräte. Baxter hat Widerklage gegen FMCH auf Schadensersatz in Höhe von über 140 Mio US\$ und auf Erlass einer einstweiligen Verfügung erhoben und behauptet, dass FMCH vorsätzlich die Baxter-Patente verletzte. Am 17. Juli 2006 hatte das Gericht der Klage von FMCH durch Geschworenenurteil stattgegeben und festgestellt, dass die fraglichen Baxter-Patente offensichtlich ungültig und/oder angesichts des Stands der Technik dispositiv sind.

Am 13. Februar 2007 hat das Gericht dem Antrag von Baxter, das zugunsten von FMCH ergangene Urteil aufzuheben, stattgegeben, die Patente wieder in Kraft gesetzt und deren Verletzung festgestellt. In Folge einer im Rahmen des Verfahrens im Hinblick auf Schadensersatz erfolgten Verhandlung hat das Gericht am 6. November 2007 Baxter durch Geschworenenurteil 14,3 Mio US\$ zuerkannt. Am 4. April 2008 hat das Gericht Baxters Antrag auf ein neues Verfahren abgelehnt. Für den seit dem 7. November 2007 fortgesetzten Verkauf der mit Touchscreens ausgerüsteten FMCH-Hämodialysegeräte 2008K setzte das Gericht die Zahlung einer Lizenzgebühr an Baxter in Höhe von 10 % des Verkaufspreises sowie für zugehörige Einwegartikel, Ersatzteile und Wartung in Höhe von 7 % des Verkaufspreises fest und untersagte den Verkauf des Geräts 2008K ab dem 1. Januar 2009. Fresenius Medical Care hat gegen die Entscheidung des Gerichts bei dem US-Bundesberufungsgericht Rechtsmittel eingelegt. Fresenius Medical Care hat im Oktober 2008 die Durchführung konstruktiver Veränderungen an dem Gerät 2008K abgeschlossen, die das Risiko weiterer, auf der ursprünglichen bezirksgerichtlichen Entscheidung basierender Ansprüche auf Lizenzzahlungen beseitigen. Am 10. September 2009 hob das Berufungsgericht die Entscheidung des Bezirksgerichts auf und stellte die Unwirksamkeit der behaupteten Ansprüche hinsichtlich zwei der drei strittigen Patente fest. Hinsichtlich des dritten Patents bestätigte das Berufungsgericht die Entscheidung des Bezirksgerichts, jedoch

hob es die Untersagung des Verkaufs und die Zubilligung von Schadensersatz auf. Diese Streitpunkte wurden zur nochmaligen Überprüfung im Lichte der Entscheidung über die Unwirksamkeit der meisten Ansprüche an das Bezirksgericht zurückverwiesen. Demzufolge besteht für FMCH kein Erfordernis mehr, Zahlungen auf das gerichtlich anerkannte Treuhandkonto zu leisten, das zur Hinterlegung der durch das Bezirksgericht angeordneten Lizenzgebühren eingerichtet worden war. Bereits einbezahlte Beträge bleiben jedoch bis zur abschließenden Entscheidung über den Fall hinterlegt. Am 18. März 2010 haben das US Patent- und Markenamt (USPTO) und das US Board of Patent Appeals and Interferences (Beschwerdekammer) in einem separaten Prüfungsverfahren (Re-examination) das verbliebene Baxter-Patent für unwirksam erklärt. Am 5. Oktober 2010 legte Baxter beim US-Bundesberufungsgericht Berufung gegen die Entscheidung des Boards ein.

#### **Baxter-Patentstreit „Touchscreen-Schnittstellen“ (2)**

Am 28. April 2008 hat Baxter bei dem US-Bundesbezirksgericht für Nord-Illinois, Eastern Division (Chicago), eine Klage (Baxter International, Inc. and Baxter Healthcare Corporation v. Fresenius Medical Care Holdings, Inc. and Fresenius USA, Inc., Geschäftsnr. CV 2389) eingereicht, in der die Verletzung von vier 2007 und 2008 erteilten Patenten durch Hämodialysemaschinen von FMCH behauptet wird. Sämtliche dieser Patente basieren auf einem der Patente, das bereits durch den vorab beschriebenen Rechtsstreit mit Baxter vom April 2003 streitgegenständlich ist. Die neuen Patente laufen im April 2011 aus und beziehen sich auf Trendkurven, deren Anzeige auf Touchscreen-Schnittstellen erfolgt, sowie auf der Erfassung von Ultrafiltrations-Profilen (Ultrafiltration meint die Entziehung von Flüssigkeiten aus dem Körper eines Patienten durch osmotischen Druck). Das Gericht hat das Verfahren zurzeit ausgesetzt. Fresenius Medical Care geht davon aus, dass ihre Hämodialysemaschinen keine gültigen Patentansprüche dieser Patente von Baxter verletzen. Alle geltend gemachten Patente sind nun in dem anhängigen separaten Überprüfungsverfahren (Re-examination) vor dem USPTO abgewiesen.

#### **Baxter-Patentstreit „Liberty Cyclor“**

Am 17. Oktober 2006 haben Baxter und die DEKA Products Limited Partnership (DEKA) bei dem US-Bundesbezirksgericht für Ost-Texas eine Klage mit der Bezeichnung Baxter Healthcare Corporation and DEKA Products Limited Partnership v. Fresenius Medical Care Holdings, Inc. d/b/a

Fresenius Medical Care North America and Fresenius USA, Inc., Geschäftsnr. CV 438 TJW eingereicht, die im weiteren Verlauf an den Gerichtsbezirk Nordkalifornien übertragen wurde. In der Klageschrift wurde behauptet, der Liberty™ Cyclor der FMCH verletze neun von Baxter gehaltene oder an Baxter lizenzierte Patente. Während und nach dem Beweisverfahren (Discovery) wurden sieben der geltend gemachten Patente als Klagegegenstand fallengelassen. Zum Abschluss der Verhandlung am 28. Juli 2010 hat die Jury in einem Urteil zugunsten von FMCH befunden, dass der Liberty™ Cyclor keine der geltend gemachten Ansprüche aus den Baxter Patenten verletzt. Baxter hat beim Bezirksgericht die Aufhebung des Juryurteils beantragt.

#### **Gambro-Patentstreit**

In Deutschland war eine Patentrechtsstreitigkeit zwischen Gambro Industries (Gambro) auf der einen Seite und der Fresenius Medical Care Deutschland GmbH sowie der Fresenius Medical Care AG & Co. KGaA (nachfolgend insgesamt Fresenius Medical Care) auf der anderen Seite anhängig. Fresenius Medical Care und Gambro haben dieses und weitere laufende Patentrechtsverfahren zwischen den Parteien durch entsprechende Vergleichsvereinbarungen sowie durch die Vereinbarung einer Reihe von Patentlizenzen beigelegt.

### **Sonstige Rechtsstreitigkeiten und potenzielle Risiken**

#### **Renal Care Group – Sammelklage „Akquisition“**

Renal Care Group, Inc. (RCG) ist als Beklagte in einer Klage mit der Bezeichnung Indiana State District Council of Laborers and Hod Carriers Pension Fund v. Gary Brukardt et al. benannt, die ursprünglich am 13. September 2006 beim Chancery Court für den Bundesstaat Tennessee, Zwanzigster Gerichtsbezirk in Nashville eingereicht wurde. In Folge der Klageabweisung durch das erstinstanzliche Gericht, der Einlegung der teilweisen Berufung durch den Kläger sowie der teilweisen Aufhebung durch das Berufungsgericht, hat der Klagegegenstand den Anspruch einer Sammelklage im Namen der ehemaligen Aktionäre von RCG und ist auf Schadensersatz ausschließlich gegen einzelne frühere Mitglieder des Board of Directors von RCG gerichtet. Die jeweiligen Beklagten könnten jedoch Ansprüche auf Freistellung und Aufwandsentschädigung gegenüber Fresenius Medical Care haben. Fresenius Medical Care rechnet damit, dass sie das Verfahren, welches zur Verhandlung bei dem Chancery Court fortgeführt wird, als Beklagte fortsetzen wird, und geht davon aus, dass die Beklagten obsiegen werden.



### Renal Care Group – Klage „Method II“

Am 17. Juli 2007 hat die US-Staatsanwaltschaft, resultierend aus einem im Jahr 2005 begonnenen Ermittlungsverfahren, eine Zivilklage gegen Renal Care Group, Inc., ihre Tochtergesellschaft RCG Supply Company und FMCH in ihrer Eigenschaft als aktuelle Muttergesellschaft von RCG vor dem United States Bezirksgericht für das Eastern District von Missouri erhoben. Mit der Klage werden Schadensersatzansprüche und Strafmaßnahmen im Hinblick auf die Geschäftstätigkeit der Method II Zulieferungsgesellschaft von RCG im Jahr 2005 vor dem Erwerb von RCG durch FMCH im Jahr 2006 geltend gemacht. Die Klage läuft unter United States of America ex. rel. Julie Williams et al. vs. Renal Care Group, Renal Care Group Supply Company und FMCH. Am 11. August 2009 hat das Bezirksgericht in Missouri dem Antrag der RCG stattgegeben, gemäß dem der Verhandlungsort an das US-Berufsgericht für den „Middle District“ von Tennessee (Nashville) verlegt wird. Am 22. März 2010 hat das Bezirksgericht Tennessee ein Urteil über ca. 23 Mio US\$ Schadensersatz und Zinsen bezüglich des Klagepunktes der ungerechtfertigten Bereicherung gegen die Beklagten erlassen, aber alle sechs in der Klageschrift geltend gemachten Klagebegehren nach dem False Claims Act abgelehnt. Fresenius Medical Care legte beim US-Berufungsgericht für den Sechsten Bezirk Rechtsmittel gegen die Entscheidung des Bezirksgerichts Tennessee ein und erwirkte einen Aufschub der Vollstreckung der Entscheidung für die Dauer des Berufungsverfahrens. Die US-Staatsanwaltschaft hat Anschlussberufung eingelegt, jedoch das Gericht zusätzlich um eine vorläufige oder ergänzende Entscheidung ersucht. Am 23. Juni 2010 erließ das Bezirksgericht Tennessee die vorläufige Entscheidung, dass es damit rechne, ein Urteil gegen Fresenius Medical Care in Höhe von 104 Mio US\$ auf Grundlage des False Claims Act zu erlassen, sofern das Verfahren an das Bezirksgericht zurückverwiesen wird. Am 23. September 2010 verwies das Berufungsgericht das Verfahren zurück an das Bezirksgericht Tennessee, um diesem die Änderung oder Ergänzung des ursprünglichen Urteils zu ermöglichen. Im Anschluss daran kann Fresenius Medical Care Berufung bei dem Berufungsgericht einlegen. Fresenius Medical Care ist der Ansicht, dass RCG die Leitung der Method II Zulieferungsgesellschaft im Einklang mit geltendem Recht durchgeführt hat, dass eine Stattgabe der von den Vereinigten Staaten geltend gemachten Klagebegehren nicht zu erwarten ist und dass sie ihre Position im Verfahren am Ende durchsetzen wird.

### Fresenius Medical Care Holdings – „qui tam“ Klage

Am 27. November 2007 hat das Bundesbezirksgericht für den „Western District“ von Texas (El Paso) zwei Anzeigen, die zuvor versiegelt durch eine sogenannte qui tam-Anzeigeerstatlerin, eine frühere Angestellte einer dortigen Klinik der FMCH, eingereicht worden waren, entsiegelt und deren Zustellung zugelassen. Im Rahmen des ersten Verfahrens wurde behauptet, ein Nephrologe habe in seiner Praxis zum Zwecke der Behandlung von Patienten unrechtmäßigerweise einen Assistenten beschäftigt, der hierfür nicht approbiert gewesen sei. Abrechnungen des Nephrologen und der FMCH gegenüber Medicare hätten daher gegen das Gesetz betreffend unberechtigte Forderungen (False Claims Act) verstoßen. Im Rahmen des zweiten Verfahrens wurde behauptet, FMCH habe sich gegenüber der Anzeigeerstatlerin unrechtmäßig verhalten, indem ihr Arbeitsverhältnis durch eine vom Arbeitgeber durch dessen Verhalten herbeigeführte arbeitnehmerseitige Kündigung beendet worden sei. Die Staatsanwaltschaft des „Western District“ of Texas lehnte es ab, sich in das Verfahren einzuschalten und den Vorgang im Namen der Vereinigten Staaten zu verfolgen. Am 30. März 2010 hat das Bezirksgericht auf Grundlage einer Juryentscheidung vom 25. Februar 2010 und Entscheidungen des Gerichts von Rechts wegen während der Verhandlung ein endgültiges Urteil zu Gunsten der Beklagten in allen Klagepunkten erlassen. Die Klägerin hat beim Bezirksgericht Berufung gegen das Urteil eingelegt.

Der Fresenius-Konzern ist im normalen Geschäftsverlauf Gegenstand von Rechtsstreitigkeiten, Gerichtsverfahren und Ermittlungen hinsichtlich verschiedenster Aspekte seiner Geschäftstätigkeit. Der Fresenius-Konzern analysiert regelmäßig entsprechende Informationen und bildet die erforderlichen Rückstellungen für möglicherweise aus solchen Verfahren resultierende Verbindlichkeiten einschließlich der geschätzten Rechtsberatungskosten.

### Rückstellung für Sonderaufwendungen der Fresenius Medical Care für Rechtsangelegenheiten

Zum 31. Dezember 2001 hat Fresenius Medical Care eine Rückstellung für Sonderaufwendungen für Rechtsangelegenheiten in Höhe von 258 Mio US\$ (vor Steuern) gebildet, die ihre Einschätzung der Ausgaben widerspiegelt, die im Zusammenhang mit der Verteidigung und Regelung von Steuerforderungen aus der Zeit vor dem Zusammenschluss, von Ansprüchen im Zusammenhang mit dem Zusammenschluss sowie von Ansprüchen privater Versicherungen auftreten können. Die Aufwendungen aus der Vergleichsvereinbarung



und den Vergleichen mit den Versicherungen wurden zulasten dieser Rückstellung gebucht. Mit Ausnahme der vorgeschlagenen Zahlung in Höhe von 115 Mio US\$ (86 Mio €) gemäß der Vergleichsvereinbarung in dem Grace Chapter 11-Insolvenzverfahren sind alle in der Rückstellung für Sonderaufwendungen für Rechtsangelegenheiten enthaltenen Sachverhalte beglichen. Fresenius Medical Care ist der Auffassung, dass

ihre verbleibende Rückstellung die geschätzten künftigen Aufwendungen im Zusammenhang mit der fortgesetzten Verteidigung und Regelung dieser verbleibenden Angelegenheit angemessen widerspiegelt. Es kann aber keine Gewähr dafür gegeben werden, dass die tatsächlichen Kosten, die Fresenius Medical Care entstehen, den Rückstellungsbetrag nicht überschreiten werden.

### 30. FINANZINSTRUMENTE

Der Zusammenhang zwischen Klassen und Kategorien sowie die Zuordnung der Bilanzpositionen zu den Klassen wird in der folgenden Übersicht dargestellt:

|                                                                           | Kategorien                                                                                                    |                                                                                                                                                                                                                                                                                                                                                                                                                                                                                                                           |                                                                                                                                                                                                                                                |                                                                                                                                                                                                                                                |
|---------------------------------------------------------------------------|---------------------------------------------------------------------------------------------------------------|---------------------------------------------------------------------------------------------------------------------------------------------------------------------------------------------------------------------------------------------------------------------------------------------------------------------------------------------------------------------------------------------------------------------------------------------------------------------------------------------------------------------------|------------------------------------------------------------------------------------------------------------------------------------------------------------------------------------------------------------------------------------------------|------------------------------------------------------------------------------------------------------------------------------------------------------------------------------------------------------------------------------------------------|
|                                                                           | Kredite und Forderungen                                                                                       | Zum Restbuchwert bewertete finanzielle Verbindlichkeiten                                                                                                                                                                                                                                                                                                                                                                                                                                                                  | Zum beizulegenden Zeitwert bewertete finanzielle Verbindlichkeiten/ Vermögenswerte                                                                                                                                                             | Keiner Kategorie zugeordnet                                                                                                                                                                                                                    |
| <b>Klassen</b>                                                            |                                                                                                               |                                                                                                                                                                                                                                                                                                                                                                                                                                                                                                                           |                                                                                                                                                                                                                                                |                                                                                                                                                                                                                                                |
| Flüssige Mittel                                                           |                                                                                                               |                                                                                                                                                                                                                                                                                                                                                                                                                                                                                                                           |                                                                                                                                                                                                                                                | ► Flüssige Mittel                                                                                                                                                                                                                              |
| Zum Buchwert bilanzierte Vermögenswerte                                   | ► Forderungen aus Lieferungen und Leistungen (inkl. Forderungen gegen und Darlehen an verbundene Unternehmen) |                                                                                                                                                                                                                                                                                                                                                                                                                                                                                                                           |                                                                                                                                                                                                                                                |                                                                                                                                                                                                                                                |
| Zum Buchwert bilanzierte Verbindlichkeiten                                |                                                                                                               | <ul style="list-style-type: none"> <li>► Verbindlichkeiten aus Lieferungen und Leistungen</li> <li>► Kurzfristige Verbindlichkeiten gegenüber verbundenen Unternehmen</li> <li>► Kurzfristige Finanzverbindlichkeiten (inkl. kurzfristige Darlehen von verbundenen Unternehmen)</li> <li>► Langfristige Darlehen, ohne Verbindlichkeiten aus aktivierten Leasingverträgen</li> <li>► Anleihen</li> <li>► Genussscheinähnliche Wertpapiere</li> <li>► Pflichtumtauschanleihe (exklusive eingebetteter Derivate)</li> </ul> |                                                                                                                                                                                                                                                | ► Langfristige Verbindlichkeiten aus aktivierten Leasingverträgen                                                                                                                                                                              |
| Zum Marktwert bilanzierte Verbindlichkeiten                               |                                                                                                               |                                                                                                                                                                                                                                                                                                                                                                                                                                                                                                                           | ► Sonstige kurzfristige Verbindlichkeiten (ausschließlich Besserungsschein (CVR) und in die Pflichtumtauschanleihe eingebettete Derivate) (2009: sonstige langfristige Verbindlichkeiten)                                                      |                                                                                                                                                                                                                                                |
| Zum Marktwert bilanzierte Anteile anderer Gesellschafter mit Put-Optionen |                                                                                                               |                                                                                                                                                                                                                                                                                                                                                                                                                                                                                                                           |                                                                                                                                                                                                                                                | ► Anteile anderer Gesellschafter mit Put-Optionen                                                                                                                                                                                              |
| Derivate zu Sicherungszwecken                                             |                                                                                                               |                                                                                                                                                                                                                                                                                                                                                                                                                                                                                                                           | <ul style="list-style-type: none"> <li>► Sonstige kurzfristige Vermögenswerte</li> <li>► Sonstige langfristige Vermögenswerte</li> <li>► Sonstige kurzfristige Verbindlichkeiten</li> <li>► Sonstige langfristige Verbindlichkeiten</li> </ul> | <ul style="list-style-type: none"> <li>► Sonstige kurzfristige Vermögenswerte</li> <li>► Sonstige langfristige Vermögenswerte</li> <li>► Sonstige kurzfristige Verbindlichkeiten</li> <li>► Sonstige langfristige Verbindlichkeiten</li> </ul> |

Die in die Pflichtumtauschsanleihe eingebetteten Derivate sind in der Konzern-Bilanz in der Position kurzfristige Rückstellungen und sonstige kurzfristige Verbindlichkeiten (in 2009: langfristige Rückstellungen und sonstige langfristige Verbindlichkeiten) enthalten (zu Details im Zusammenhang mit der Pflichtumtauschsanleihe siehe Anmerkung 23,

Pflichtumtauschsanleihe). Aufgrund ihres besonderen Charakters und der unterschiedlichen Bewertung werden die eingebetteten Derivate separat einer eigenen Klasse zugeordnet. Der Besserungsschein (CVR) wird ebenfalls aufgrund seines Charakters und der unterschiedlichen Bewertung getrennt von seiner Bilanzposition einer eigenen Klasse zugeordnet.

## BEWERTUNG VON FINANZINSTRUMENTEN

Die Buchwerte der Finanzinstrumente, gegliedert nach Kategorien, betrugen zum 31. Dezember:

| in Mio €                                                            | 2010  | 2009  |
|---------------------------------------------------------------------|-------|-------|
| Kredite und Forderungen                                             | 2.950 | 2.535 |
| Zum Restbuchwert bewertete finanzielle Verbindlichkeiten            | 9.977 | 9.416 |
| Zum beizulegenden Zeitwert bewertete Vermögenswerte <sup>1</sup>    | 11    | 11    |
| Zum beizulegenden Zeitwert bewertete Verbindlichkeiten <sup>1</sup> | 174   | 73    |
| Keiner Kategorie zugeordnet                                         | 311   | 106   |

<sup>1</sup> Es bestehen keine Finanzinstrumente, die beim erstmaligen Ansatz als zum beizulegenden Zeitwert zu bewerten eingestuft wurden.

### Ermittlung der Marktwerte von Finanzinstrumenten

Im Folgenden werden die wesentlichen Methoden und Annahmen erläutert, die bei der Ermittlung der Marktwerte von Finanzinstrumenten angewendet werden:

Flüssige Mittel werden zu ihrem Nominalwert angesetzt, der dem Marktwert entspricht.

Für die kurzfristigen Finanzinstrumente, wie Forderungen und Verbindlichkeiten aus Lieferungen und Leistungen sowie kurzfristige Finanzverbindlichkeiten, stellt der Nominalwert den Buchwert dar, der aufgrund der kurzen Laufzeiten dieser Instrumente eine angemessene Schätzung des Marktwerts ist.

Die Marktwerte der wesentlichen langfristigen Finanzinstrumente werden anhand vorhandener Marktinformationen ermittelt. Finanzinstrumente, für die Kursnotierungen verfügbar sind, werden mit den zum Bilanzstichtag aktuellen Kursnotierungen bewertet. Der Marktwert der anderen langfristigen Finanzinstrumente ergibt sich als Barwert der entsprechenden zukünftigen Zahlungsströme. Für die Ermittlung dieser Barwerte werden die am Bilanzstichtag gültigen Zinssätze und Kreditmargen des Fresenius-Konzerns berücksichtigt. Die Marktwerte der Anteile anderer Gesellschafter mit Put-Optionen werden auf Basis von signifikanten nicht-beobachtbaren Werten berechnet.

Das Kreditrisiko aus Finanzforderungen des Fresenius-Konzerns ist unwesentlich und die Auswirkungen aus Wertberichtigungen auf Kreditausfälle von Finanzforderungen

auf das Ergebnis des Fresenius-Konzerns können als immateriell erachtet werden.

Die Buchwerte der in die Pflichtumtauschsanleihe eingebetteten Derivate und des Besserungsscheins (CVR) entsprechen deren Marktwerten. Die eingebetteten Derivate sind mit Marktwerten zu bewerten, die auf Grundlage eines Black-Scholes Modells ermittelt werden. Der Besserungsschein (CVR) wird an der US-Börse gehandelt und ist daher zum Stichtag mit dem aktuellen Börsenkurs zu bewerten.

Die im Wesentlichen aus Zinsswaps und Devisentermingeschäften bestehenden Derivate werden wie folgt bewertet: Bei Zinsswaps erfolgt die Bewertung durch Abzinsung der zukünftigen Zahlungsströme auf Basis der am Bilanzstichtag für die Restlaufzeit der Kontrakte geltenden Marktzinssätze. Für die Ermittlung der Marktwerte von Devisentermingeschäften wird der kontrahierte Terminkurs mit dem Terminkurs des Bilanzstichtags für die Restlaufzeit des jeweiligen Kontraktes verglichen. Der daraus resultierende Wert wird unter Berücksichtigung aktueller Marktzinssätze der entsprechenden Währung auf den Bilanzstichtag diskontiert.

In die Ermittlung der Marktwerte der als Verbindlichkeiten bilanzierten Derivate wird das eigene Kreditrisiko einbezogen. Für die Bewertung der als Vermögenswerte bilanzierten Derivate wird das Kreditrisiko der Vertragspartner berücksichtigt.

## Marktwerte der Finanzinstrumente

In der folgenden Tabelle sind die Buchwerte sowie die Marktwerte der Finanzinstrumente des Fresenius-Konzerns zum 31. Dezember dargestellt:

| in Mio €                                                                  | 2010     |           | 2009     |           |
|---------------------------------------------------------------------------|----------|-----------|----------|-----------|
|                                                                           | Buchwert | Marktwert | Buchwert | Marktwert |
| Flüssige Mittel                                                           | 769      | 769       | 420      | 420       |
| Zum Buchwert bilanzierte Vermögenswerte                                   | 2.950    | 2.950     | 2.535    | 2.535     |
| Zum Buchwert bilanzierte Verbindlichkeiten                                | 10.031   | 10.259    | 9.461    | 9.611     |
| Zum Marktwert bilanzierte Verbindlichkeiten                               | 133      | 133       | 55       | 55        |
| Zum Marktwert bilanzierte Anteile anderer Gesellschafter mit Put-Optionen | 209      | 209       | 161      | 161       |
| Derivate zu Sicherungszwecken                                             | -225     | -225      | -115     | -115      |

Die zum Marktwert bilanzierten derivativen und nicht-derivativen Finanzinstrumente werden entsprechend der dreistufigen Fair-Value-Hierarchie aufgeteilt. Die Marktwert-Berechnung von Derivaten zu Sicherungszwecken basiert auf signifikanten sonstigen beobachtbaren Werten, sie sind daher entsprechend der definierten Fair-Value-Hierarchiestufen als Level 2 klassifiziert. Die in die Pflichtumtauschleihe eingebetteten Derivate werden ebenfalls als Level 2 klassifiziert. Die Bewertung

des Besserungsscheins (CVR) basiert auf den aktuellen Börsenkursen, daher wird er als Level 1 klassifiziert. Die Klasse der zum Marktwert bilanzierten Verbindlichkeiten besteht aus den eingebetteten Derivaten und dem Besserungsschein (CVR) und wird daher in ihrer Gesamtheit der niedrigeren Hierarchiestufe Level 2 zugeordnet. Die Bewertung der Anteile anderer Gesellschafter mit Put-Optionen erfolgt zu signifikanten nicht-beobachtbaren Werten, sie sind daher als Level 3 klassifiziert.

### MARKTWERTE DER DERIVATIVEN FINANZINSTRUMENTE

| in Mio €                                                          | 31. Dezember 2010 |                   | 31. Dezember 2009 |                   |
|-------------------------------------------------------------------|-------------------|-------------------|-------------------|-------------------|
|                                                                   | Vermögenswerte    | Verbindlichkeiten | Vermögenswerte    | Verbindlichkeiten |
| Zinssicherungsgeschäfte (kurzfristig)                             | –                 | 43                | –                 | –                 |
| Zinssicherungsgeschäfte (langfristig)                             | 1                 | 115               | –                 | 134               |
| Devisenkontrakte (kurzfristig)                                    | 8                 | 49                | 18                | 11                |
| Devisenkontrakte (langfristig)                                    | 5                 | 2                 | 20                | 1                 |
| <b>Als Sicherungsinstrumente designierte Derivate<sup>1</sup></b> | <b>14</b>         | <b>209</b>        | <b>38</b>         | <b>146</b>        |
| Zinssicherungsgeschäfte (kurzfristig)                             | 0                 | 2                 | 0                 | 0                 |
| Devisenkontrakte (kurzfristig) <sup>1</sup>                       | 10                | 34                | 11                | 17                |
| Devisenkontrakte (langfristig) <sup>1</sup>                       | 1                 | 7                 | –                 | 1                 |
| In die Pflichtumtauschleihe eingebettete Derivate (kurzfristig)   | 0                 | 111               | 0                 | 0                 |
| In die Pflichtumtauschleihe eingebettete Derivate (langfristig)   | 0                 | 0                 | 0                 | 21                |
| <b>Derivate ohne bilanzielle Sicherungsbeziehung</b>              | <b>11</b>         | <b>154</b>        | <b>11</b>         | <b>39</b>         |

<sup>1</sup> Als Sicherungsinstrumente designierte Derivate und Devisenkontrakte aus Derivaten ohne bilanzielle Sicherungsbeziehung bilden die Klasse Derivate zu Sicherungszwecken.

Derivative Finanzinstrumente werden in jeder Berichtsperiode zum Marktwert bewertet, demzufolge entsprechen die Buchwerte zum Bilanzstichtag den Marktwerten.

Auch Derivate ohne bilanzielle Sicherungsbeziehung, also Derivate, für die kein Hedge-Accounting angewendet wird, werden ausschließlich zur Absicherung von wirtschaftlichen Risiken eingesetzt und nicht für Spekulationszwecke abgeschlossen.

Die Derivate zu Sicherungszwecken sowie die in die Pflichtumtauschleihe eingebetteten Derivate wurden in der Konzern-Bilanz unsaldiert unter den sonstigen Vermögenswerten in Höhe von 25 Mio € und den sonstigen Verbindlichkeiten in Höhe von 363 Mio € ausgewiesen.

Der kurzfristig fällige Teil der Zinssicherungsgeschäfte und der Devisenkontrakte, der in der vorhergehenden Tabelle als Vermögenswert bzw. Verbindlichkeit gezeigt ist, wird in der Konzern-Bilanz unter den sonstigen kurzfristigen Vermögenswerten bzw. unter den kurzfristigen Rückstellungen und sonstigen kurzfristigen Verbindlichkeiten ausgewiesen. Der als Vermögenswert bzw. als Verbindlichkeit ausgewiesene langfristig fällige Teil ist in den sonstigen langfristigen Vermögenswerten bzw. in den langfristigen Rückstellungen und sonstigen langfristigen Verbindlichkeiten enthalten. Die in die Pflichtumtauschleihe eingebetteten Derivate sind

in der Konzern-Bilanz in den sonstigen kurzfristigen Verbindlichkeiten (2009: sonstige langfristige Verbindlichkeiten) ausgewiesen.

### Erfolgswirksame Effekte der Finanzinstrumente

Die Nettogewinne und -verluste aus Finanzinstrumenten betrafen Wertberichtigungen auf Forderungen in Höhe von 175 Mio € sowie Transaktionen in Fremdwährung in Höhe von -25 Mio €. Des Weiteren bestanden Erträge aus der Marktbewertung des Besserungsscheins (CVR) in Höhe von 32 Mio € und Aufwendungen aus der Marktbewertung der in die Pflichtumtauschleihe eingebetteten Derivate in Höhe von 90 Mio €. Die Zinserträge in Höhe von 30 Mio € resultieren im Wesentlichen aus Forderungen aus Lieferungen und Leistungen sowie Darlehen an verbundene Unternehmen. Die Zinsaufwendungen in Höhe von 596 Mio € resultieren im Wesentlichen aus Finanzverbindlichkeiten.

#### EFFEKT DER ALS SICHERUNGSTRUMENTE DESIGNIERTEN DERIVATE AUF DIE GESAMTERGEBNISRECHNUNG

| in Mio €                                                       | 2010                                                                                   |                                                                                     |                                                                  |
|----------------------------------------------------------------|----------------------------------------------------------------------------------------|-------------------------------------------------------------------------------------|------------------------------------------------------------------|
|                                                                | im Other Comprehensive Income (Loss) angesetzte Erträge/Aufwendungen (effektiver Teil) | Umbuchungen aus dem kumulierten Other Comprehensive Income (Loss) (effektiver Teil) | in der Gewinn- und Verlustrechnung erfasste Erträge/Aufwendungen |
| Zinssicherungsgeschäfte                                        | -25                                                                                    | -8                                                                                  | 1                                                                |
| Devisenkontrakte                                               | -7                                                                                     | -9                                                                                  | -1                                                               |
| <b>Als Cashflow Hedges klassifizierte Derivate<sup>1</sup></b> | <b>-32</b>                                                                             | <b>-17</b>                                                                          | <b>0</b>                                                         |
| Devisenkontrakte                                               |                                                                                        |                                                                                     | -24                                                              |
| <b>Als Fair Value Hedges klassifizierte Derivate</b>           |                                                                                        |                                                                                     | <b>-24</b>                                                       |
| <b>Als Sicherungsinstrumente designierte Derivate</b>          | <b>-32</b>                                                                             | <b>-17</b>                                                                          | <b>-24</b>                                                       |

<sup>1</sup> Die in der Gewinn- und Verlustrechnung erfassten Erträge/Aufwendungen bestehen ausschließlich aus dem ineffektiven Anteil.

| in Mio €                                                       | 2009                                                                                   |                                                                                     |                                                                  |
|----------------------------------------------------------------|----------------------------------------------------------------------------------------|-------------------------------------------------------------------------------------|------------------------------------------------------------------|
|                                                                | im Other Comprehensive Income (Loss) angesetzte Erträge/Aufwendungen (effektiver Teil) | Umbuchungen aus dem kumulierten Other Comprehensive Income (Loss) (effektiver Teil) | in der Gewinn- und Verlustrechnung erfasste Erträge/Aufwendungen |
| Zinssicherungsgeschäfte                                        | 5                                                                                      | -5                                                                                  | -                                                                |
| Devisenkontrakte                                               | -6                                                                                     | 2                                                                                   | -                                                                |
| <b>Als Cashflow Hedges klassifizierte Derivate<sup>1</sup></b> | <b>-1</b>                                                                              | <b>-3</b>                                                                           | <b>-</b>                                                         |
| Devisenkontrakte                                               |                                                                                        |                                                                                     | 21                                                               |
| <b>Als Fair Value Hedges klassifizierte Derivate</b>           |                                                                                        |                                                                                     | <b>21</b>                                                        |
| <b>Als Sicherungsinstrumente designierte Derivate</b>          | <b>-1</b>                                                                              | <b>-3</b>                                                                           | <b>21</b>                                                        |

<sup>1</sup> Die in der Gewinn- und Verlustrechnung erfassten Erträge/Aufwendungen bestehen ausschließlich aus dem ineffektiven Anteil.

## EFFEKT DER DERIVATE OHNE BILANZIELLE SICHERUNGSBEZIEHUNG AUF DIE GESAMTERGEBNISRECHNUNG

| in Mio €                                             | in der Gewinn- und Verlustrechnung<br>erfasste Erträge/Aufwendungen |            |
|------------------------------------------------------|---------------------------------------------------------------------|------------|
|                                                      | 2010                                                                | 2009       |
| Zinssicherungsgeschäfte                              | -                                                                   | 0          |
| Devisenkontrakte                                     | -97                                                                 | -22        |
| In die Pflichtumtauschanleihe eingebettete Derivate  | -90                                                                 | -29        |
| <b>Derivate ohne bilanzielle Sicherungsbeziehung</b> | <b>-187</b>                                                         | <b>-51</b> |

Den in der Gewinn- und Verlustrechnung erfassten Aufwendungen aus als Fair Value Hedges klassifizierten Derivaten und aus Devisenkontrakten ohne bilanzielle Sicherungsbeziehung stehen in entsprechender Höhe in der Gewinn- und Verlustrechnung erfasste Erträge aus den zugehörigen Grundgeschäften gegenüber.

Der Fresenius-Konzern erwartet innerhalb der nächsten zwölf Monate die erfolgswirksame Erfassung von Aufwendungen aus Devisenkontrakten aus dem kumulierten Other Comprehensive Income (Loss) in Höhe von insgesamt 4 Mio € (netto). Aus Zinssicherungsgeschäften erwartet der Fresenius-Konzern innerhalb der nächsten zwölf Monate die erfolgswirksame Erfassung von Zinsaufwendungen in Höhe von 95 Mio €, die im Rahmen der gewöhnlichen Geschäftstätigkeit anfallen.

Die Erträge und Aufwendungen aus Devisenkontrakten und den jeweiligen Grundgeschäften verteilen sich in der Gewinn- und Verlustrechnung auf die Positionen Umsatzkosten, Vertriebs- und allgemeine Verwaltungskosten und Zinsergebnis. Die erfolgswirksam erfassten Erträge und Aufwendungen aus Zinssicherungsgeschäften werden in der Gewinn- und Verlustrechnung im Zinsergebnis ausgewiesen. Das sonstige Finanzergebnis umfasst die Erträge und Aufwendungen aus der Bewertung der in die Pflichtumtauschanleihe eingebetteten Derivate (siehe Anmerkung 10, Sonstiges Finanzergebnis).

## MARKTRISIKO

### Allgemeines

Aus der internationalen Geschäftstätigkeit in zahlreichen Währungen ergeben sich für den Fresenius-Konzern Risiken aus Wechselkursschwankungen. Zur Finanzierung seiner Geschäftstätigkeit emittiert der Fresenius-Konzern Anleihen,

genussscheinähnliche Wertpapiere und Geldmarktpapiere und vereinbart mit Banken im Wesentlichen langfristige Darlehen und Schuldscheindarlehen. Daraus können sich für den Fresenius-Konzern Zinsrisiken aus variabler Verzinsung und Kursrisiken für Bilanzpositionen mit fixer Verzinsung ergeben.

Zur Steuerung der Zins- und Währungsrisiken tritt der Fresenius-Konzern im Rahmen der vom Vorstand festgelegten Limite in bestimmte Sicherungsgeschäfte mit Banken ein, die ein hohes Rating aufweisen. Der Fresenius-Konzern schließt derivative Finanzinstrumente nicht für spekulative Zwecke ab.

Der Fresenius-Konzern führt seine Aktivitäten auf dem Gebiet der derivativen Finanzinstrumente grundsätzlich unter Kontrolle einer zentralen Abteilung durch. Der Fresenius-Konzern hat dazu in Anlehnung an einschlägige Normen aus dem Bankenbereich Richtlinien für die Risikobeurteilung und die Kontrolle über den Einsatz von derivativen Finanzinstrumenten festgelegt. Diese Richtlinien regeln insbesondere eine klare Trennung der Verantwortlichkeiten in Bezug auf Handel, Abwicklung, Buchhaltung und Kontrolle.

Zur Quantifizierung der Zins- und Währungsrisiken definiert der Fresenius-Konzern für die einzelnen Risikopositionen jeweils einen Richtwert (Benchmark) auf Basis erzielbarer bzw. tragfähiger Sicherungskurse. In Abhängigkeit von den jeweiligen Richtwerten werden dann Sicherungsstrategien vereinbart und umgesetzt.

Das Jahresergebnis des Konzerns wurde nur unwesentlich durch die Ineffektivität von Sicherungsgeschäften beeinflusst, da die Kontraktspezifikationen der Zins- und Devisenkontrakte weitgehend mit den Parametern der entsprechenden Risikopositionen übereinstimmen.

## Derivative Finanzinstrumente

### Management des Währungsrisikos

Für die Finanzberichterstattung ist der Euro Berichtswährung. Daher beeinflussen Translationsrisiken aus der Änderung von Wechselkursen zwischen dem Euro und den lokalen Währungen, in denen die Jahresabschlüsse der ausländischen Tochtergesellschaften erstellt werden, das im Konzernabschluss ausgewiesene Jahresergebnis und die Darstellung der finanziellen Lage.

Daneben gibt es Transaktionsrisiken einzelner Konzerngesellschaften, die sich vor allem aus in fremder Währung fakturierten Einkäufen, Verkäufen, Engineering- und Dienstleistungen ergeben. Insbesondere werden die in den in- und ausländischen Werken des Fresenius-Konzerns hergestellten Produkte an die Tochtergesellschaften in den verschiedenen Ländern geliefert und grundsätzlich in der Währung der Produktionsstätte fakturiert. Aus diesen Transaktionen resultiert der wesentliche Teil der Transaktionsrisiken. Für diese konzerninternen Lieferungen und Leistungen sind vor allem der Euro, der US-Dollar und der Yen die jeweilige Fakturierungswährung. Dadurch sind die Tochtergesellschaften von Wechselkursänderungen zwischen den Fakturierungswährungen und den Währungen betroffen, in denen sie ihre lokalen Geschäftstätigkeiten durchführen. Ausschließlich zur Sicherung der bestehenden oder zu erwartenden Transaktionsrisiken setzt der Fresenius-Konzern Devisentermingeschäfte und in unwesentlichem Umfang Devisenoptionen ein. Im Zusammenhang mit Darlehen in Fremdwährung tätigt der Fresenius-Konzern in der Regel Devisenswapgeschäfte. Dadurch wird sichergestellt, dass aus diesen Darlehen keine Wechselkursrisiken entstehen.

Zum 31. Dezember 2010 betrug das Nominalvolumen aller Devisengeschäfte 3.323 Mio €. Der Abschluss dieser Devisenkontrakte erfolgte zur Absicherung von Transaktionsrisiken aus dem operativen Geschäft und im Zusammenhang mit Darlehen in fremder Währung. Der überwiegende Teil der Devisentermingeschäfte zur Absicherung von Transaktionsrisiken aus dem operativen Geschäft wurde als Cashflow Hedge bilanziert, während Devisengeschäfte im Zusammenhang mit Darlehen in Fremdwährung teilweise als Fair Value Hedge bilanziert werden. Die Marktwerte der Cashflow Hedges und der Fair Value Hedges betrugen -39 Mio € bzw. 1 Mio €.

Der effektive Teil der Marktwertänderungen von Devisenterminkontrakten, die als Cashflow Hedges für geplante Wareneinkäufe und -verkäufe bestimmt und geeignet sind,

wird erfolgsneutral im Eigenkapital (kumuliertes Other Comprehensive Income (Loss)) abgegrenzt. Diese Beträge werden in der Folgezeit zeitgleich mit den Ergebniswirkungen der entsprechenden Transaktion in der Gewinn- und Verlustrechnung als Umsatzkosten oder als Teil der Vertriebs- und Verwaltungskosten erfasst.

Der Fresenius-Konzern hatte zum 31. Dezember 2010 Devisenkontrakte mit einer maximalen Laufzeit von 59 Monaten im Bestand.

Für die Abschätzung und Quantifizierung der Transaktionsrisiken in fremder Währung betrachtet der Fresenius-Konzern die mit hinreichender Wahrscheinlichkeit eintretenden Zahlungsströme der nächsten drei Monate als relevante Bemessungsgrundlage für die Durchführung einer Sensitivitätsanalyse. Für diese Analyse wird unterstellt, dass sich alle Wechselkurse, in denen der Konzern zum Stichtag offene Währungspositionen hatte, um 10 % negativ ändern. Durch Multiplikation der ermittelten ungesicherten Risikopositionen mit diesem Faktor ergibt sich ein maximal möglicher negativer Einfluss der Transaktionsrisiken auf die Ertragslage des Konzerns in Höhe von 18 Mio €.

### Management des Zinsrisikos

Die Zinsrisiken des Konzerns erwachsen im Wesentlichen aus den Geld- und Kapitalmarkttransaktionen des Fresenius-Konzerns zur Finanzierung der Geschäftstätigkeit.

Der Fresenius-Konzern setzt Zinsswaps und in geringem Umfang Zinsoptionen ein, um sich durch den Tausch von variablen Zinsen in Festzinssätze gegen Zinsänderungsrisiken aus variabel verzinsten langfristigen Krediten abzusichern.

Zur Analyse der Auswirkungen von Änderungen der für Fresenius relevanten Referenzzinsen auf die Ertragslage des Konzerns wird der Anteil der Finanzverbindlichkeiten ermittelt, der originär zu variablen Sätzen verzinst wird und nicht durch den Einsatz von Zinsswaps oder Zinsoptionen gegen einen Anstieg der Referenzzinsen gesichert ist. Für den auf diese Weise ermittelten Teil der Finanzverbindlichkeiten wird unterstellt, dass die Referenzzinssätze am Berichtsstichtag jeweils einheitlich um 0,5 % höher gewesen wären als sie tatsächlich waren. Der daraus folgende zusätzliche jährliche Zinsaufwand wird zu dem Konzernergebnis ins Verhältnis gesetzt. Diese Analyse ergibt, dass ein Anstieg der für den Fresenius-Konzern relevanten Referenzzinssätze um 0,5 %

einen Einfluss auf das Konzernergebnis und das Eigenkapital der Anteilseigner der Fresenius SE & Co. KGaA von weniger als 1 % hätte.

Der Fresenius-Konzern nutzt als Cashflow Hedges klassifizierte Zinsswaps, um bestimmte, in US-Dollar und Euro zu leistende Zinszahlungen aus bestehenden Kreditvereinbarungen und Schuldscheindarlehen in fixe Zinszahlungen zu konvertieren. Außerdem wurden Zinsswaps auch im Hinblick auf die Aufnahme zukünftiger Verbindlichkeiten abgeschlossen. Die entsprechenden US-Dollar Zinsswaps mit einem Nominalvolumen von 4.675 Mio US\$ (3.499 Mio €) und einem Marktwert von - 184 Mio US\$ (- 138 Mio €) laufen zu verschiedenen Terminen in den Jahren 2011 bis 2014 aus. Die entsprechenden Euro Zinsswaps mit einem Nominalvolumen von 407 Mio € und einem Marktwert von - 21 Mio € werden zwischen den Jahren 2011 und 2016 fällig. Der durchschnittliche Zinssatz für die US-Dollar Zinsswaps beträgt 3,94 % und für die Euro Zinsswaps 4,34 %.

Die aus den Swap-Vereinbarungen resultierenden Zinsverbindlichkeiten und Zinsforderungen werden abgegrenzt und als Anpassung des Zinsaufwands zum jeweiligen Bilanzstichtag erfasst.

## KREDITRISIKO

Der Fresenius-Konzern ist in Bezug auf Finanzinstrumente dem Risiko ausgesetzt, dass Vertragspartner ihre Leistungsverpflichtungen nicht erfüllen. Im Hinblick auf derivative Finanzinstrumente wird jedoch erwartet, dass die Vertragspartner ihren Verpflichtungen nachkommen, da es sich bei diesen um Banken handelt, die ein hohes Rating aufweisen. Das maximale Kreditrisiko aus Derivaten ergibt sich aus der

Summe der Derivate mit einem zum Bilanzstichtag positiven Marktwert. Am 31. Dezember 2010 bestand kein Kreditrisiko aus Zinsderivaten. Das maximale Kreditrisiko der Währungsderivate betrug 24 Mio €. Das maximale Kreditrisiko aus nicht-derivativen Finanzinstrumenten entspricht dem Gesamtwert aller Forderungen. Das Management des Fresenius-Konzerns analysiert zur Kontrolle dieses Kreditrisikos die Altersstruktur der Forderungen. Zu Details im Zusammenhang mit Forderungen aus Lieferungen und Leistungen sowie Wertberichtigungen wird auf Anmerkung 14, Forderungen aus Lieferungen und Leistungen verwiesen.

## LIQUIDITÄTSRISIKO

Das Liquiditätsrisiko ist definiert als das Risiko, dass eine Gesellschaft möglicherweise ihren finanziellen Verpflichtungen nicht nachkommen kann. Mittels eines effektiven Working-Capital- und Cash-Managements sowie einer vorausschauenden Evaluierung von Refinanzierungsalternativen steuert das Management des Fresenius-Konzerns die Liquidität des Konzerns. Das Management des Fresenius-Konzerns ist davon überzeugt, dass die bestehenden Kreditfazilitäten sowie die Mittelzuflüsse aus der laufenden Geschäftstätigkeit und aus sonstigen kurzfristigen Finanzierungsquellen zur Deckung des vorhersehbaren Liquiditätsbedarfs der Gesellschaft ausreichen (siehe Anmerkung 21, Darlehen und aktivierte Leasingverträge).

Die folgende Tabelle zeigt die künftigen nicht-diskontierten vertraglich vereinbarten Zahlungen (inklusive Zinsen) aus finanziellen Verbindlichkeiten sowie die Marktwerte der Anteile anderer Gesellschafter mit Put-Optionen und die Marktwerte der derivativen Finanzinstrumente:

| in Mio €                                                                | bis 1 Jahr   | 1 bis 5 Jahre | länger als 5 Jahre |
|-------------------------------------------------------------------------|--------------|---------------|--------------------|
| Langfristige Darlehen und aktivierte Leasingverträge <sup>1</sup>       | 557          | 5.054         | 110                |
| Kurzfristige Finanzverbindlichkeiten (inkl. Forderungsverkaufsprogramm) | 637          | 0             | 0                  |
| Anleihen                                                                | 158          | 1.719         | 1.357              |
| Pflichtumtauschanleihe <sup>2</sup>                                     | 31           | 0             | 0                  |
| Verbindlichkeiten aus Lieferungen und Leistungen                        | 691          | –             | –                  |
| Genussscheinähnliche Wertpapiere                                        | 486          | –             | –                  |
| Anteile anderer Gesellschafter mit Put-Optionen                         | 69           | 78            | 62                 |
| Derivative Finanzinstrumente                                            | 128          | 124           | 0                  |
| <b>Gesamt</b>                                                           | <b>2.757</b> | <b>6.975</b>  | <b>1.529</b>       |

<sup>1</sup> Zukünftige Zinszahlungen für variabel verzinsliche Finanzverbindlichkeiten wurden auf Basis der zuletzt vor dem 31. Dezember 2010 fixierten Zinssätze ermittelt.

<sup>2</sup> Für die Pflichtumtauschanleihe wurden nur Zinszahlungen berücksichtigt, da bei Fälligkeit keine Tilgungszahlung sondern ein Umtausch in Aktien der Fresenius Medical Care AG & Co. KGaA erfolgt.



### 31. ZUSÄTZLICHE INFORMATIONEN ZUM KAPITALMANAGEMENT

Der Fresenius-Konzern verfügt über ein solides Finanzprofil. Das Kapitalmanagement schließt sowohl Eigenkapital als auch Finanzverbindlichkeiten ein. Ein wesentliches Ziel des Kapitalmanagements des Fresenius-Konzerns ist es, die gewichteten durchschnittlichen Kapitalkosten zu optimieren. Ferner wird ein ausgewogener Mix aus Eigen- und Fremdkapital angestrebt. Zur langfristigen Sicherung des Wachstums wird in Ausnahmefällen, etwa zur Finanzierung einer großen Akquisition, auch eine Kapitalerhöhung in Erwägung gezogen.

Aufgrund der Diversifikation des Unternehmens innerhalb des Gesundheitssektors und der starken Marktpositionen der Unternehmensbereiche in globalen, wachsenden und nicht zyklischen Märkten werden planbare und nachhaltige Cashflows erwirtschaftet. Diese erlauben einen angemessenen Anteil an Fremdkapital, d. h. den Einsatz eines umfangreichen Mix aus Finanzverbindlichkeiten. Zudem verfügen die Kunden des Fresenius-Konzerns im Allgemeinen über eine hohe Kreditqualität.

Das Eigen- und Fremdkapital hat sich wie folgt entwickelt:

#### EIGENKAPITAL

| in Mio €          | 31. Dezember<br>2010 | 31. Dezember<br>2009 |
|-------------------|----------------------|----------------------|
| Eigenkapital      | <b>8.844</b>         | 7.491                |
| Bilanzsumme       | <b>23.577</b>        | 20.882               |
| Eigenkapitalquote | <b>37,5 %</b>        | 35,9 %               |

Die Fresenius SE & Co. KGaA unterliegt keinen satzungsmäßigen Kapitalerfordernissen. Sie hat Verpflichtungen zur Ausgabe von Aktien aus dem Bedingten Kapital im Zusammenhang mit Ausübungen von Aktienoptionen und Wandelschuldverschreibungen auf Basis der bestehenden Aktienoptionspläne 1998, 2003 und 2008 (siehe Anmerkung 34, Aktienoptionen).

#### FINANZVERBINDLICHKEITEN

| in Mio €                | 31. Dezember<br>2010 | 31. Dezember<br>2009 |
|-------------------------|----------------------|----------------------|
| Finanzverbindlichkeiten | <b>8.784</b>         | 8.299                |
| Bilanzsumme             | <b>23.577</b>        | 20.882               |
| Fremdkapitalquote       | <b>37,3 %</b>        | 39,7 %               |

Entsprechend der in den zugrunde liegenden Vereinbarungen enthaltenen Definitionen werden die Pflichtumtauschanleihe und der Besserungsschein (CVR) nicht den Finanzverbindlichkeiten zugeordnet.

Die finanzielle Flexibilität zu sichern, hat höchste Priorität in der Finanzierungsstrategie des Konzerns. Diese Flexibilität wird erreicht durch eine breite Auswahl von Finanzierungsinstrumenten und durch eine hohe Diversifikation der Investoren. Das Fälligkeitsprofil des Fresenius-Konzerns weist eine breite Streuung der Fälligkeiten mit einem hohen Anteil von mittel- und langfristigen Finanzierungen auf. Bei der Auswahl der Finanzierungsinstrumente werden Marktkapazität, Investorendiversifikation, Flexibilität, Kreditaufgaben und das bestehende Fälligkeitsprofil berücksichtigt.

Als eine zentrale finanzwirtschaftliche Zielgröße verwendet der Fresenius-Konzern die Kennzahl Netto-Finanzverbindlichkeiten/EBITDA (Verschuldungsgrad). Zum 31. Dezember 2010 betrug der Verschuldungsgrad 2,6. Damit lag diese Kennzahl in der von dem Fresenius-Konzern anvisierten Bandbreite von 2,5 bis 3,0. In dieser Bandbreite soll sich die Kennziffer Netto-Finanzverbindlichkeiten/EBITDA auch im Jahr 2011 bewegen.

Die Finanzierungsstrategie des Fresenius-Konzerns spiegelt sich im Kreditrating wider. Der Fresenius-Konzern wird von den Rating-Agenturen Moody's, Standard & Poor's und Fitch bewertet.

Die folgende Tabelle zeigt das Unternehmensrating der Fresenius SE & Co. KGaA:

|                    | Standard & Poor's | Moody's | Fitch   |
|--------------------|-------------------|---------|---------|
| Unternehmensrating | BB                | Ba1     | BB      |
| Ausblick           | positiv           | stabil  | positiv |

Im Jahr 2010 haben alle drei Rating-Agenturen den Ausblick angehoben:

Im April 2010 erhöhte Standard & Poor's den Ausblick von stabil auf positiv. Im Mai 2010 hat Moody's den Ausblick von negativ auf stabil angehoben. Schließlich hob Fitch im August 2010 den Ausblick von stabil auf positiv an.

### 32. ZUSÄTZLICHE INFORMATIONEN ZUR KONZERN-KAPITALFLUSSRECHNUNG

Die Konzern-Kapitalflussrechnungen der Geschäftsjahre 2010 und 2009 des Fresenius-Konzerns sind auf den Seiten 122 bis 123 dargestellt.

Die in der Konzern-Kapitalflussrechnung und in der Konzern-Bilanz ausgewiesenen flüssigen Mittel umfassen alle Kassenbestände, Schecks, Wertpapiere und Guthaben bei Kreditinstituten, soweit sie innerhalb von drei Monaten ohne nennenswerte Wertschwankungen verfügbar sind.

Die folgende Übersicht liefert zusätzliche Informationen in Bezug auf die Konzern-Kapitalflussrechnung:

| in Mio €               | 2010 | 2009 |
|------------------------|------|------|
| Gezahlte Zinsen        | 534  | 554  |
| Gezahlte Ertragsteuern | 504  | 393  |

Die Auszahlungen für Akquisitionen (ohne den Erwerb von Lizenzen) setzten sich wie folgt zusammen:

| in Mio €                                                  | 2010       | 2009       |
|-----------------------------------------------------------|------------|------------|
| Erworbene Vermögenswerte                                  | 562        | 348        |
| Übernommene Verbindlichkeiten                             | -85        | -48        |
| Anteile anderer Gesellschafter                            | -29        | -31        |
| Als Teil des Kaufpreises über- bzw. aufgenommene Schulden | -32        | -19        |
| Barzahlungen                                              | 416        | 250        |
| Erworbene Barmittel                                       | -14        | -24        |
| <b>Auszahlungen für Akquisitionen, netto</b>              | <b>402</b> | <b>226</b> |

### 33. ERLÄUTERUNGEN ZUR KONZERN-SEGMENTBERICHTERSTATTUNG

#### ALLGEMEINE ERLÄUTERUNGEN

Die Tabellen zur Konzern-Segmentberichterstattung als integraler Bestandteil des Konzern-Anhangs befinden sich auf den Seiten 126 bis 129.

Die Segmentierung im Fresenius-Konzern mit den Unternehmensbereichen Fresenius Medical Care, Fresenius Kabi, Fresenius Helios und Fresenius Vamed folgt den internen Organisations- und Berichtsstrukturen (Management Approach) zum 31. Dezember 2010.

Die Kennzahlen, die im Rahmen der Segmentberichterstattung dargestellt werden, entsprechen den Kennzahlen der internen Berichterstattung des Fresenius-Konzerns. Interne und externe Berichterstattung und Unternehmensrechnung korrespondieren; es werden die gleichen Kennzahlen und Definitionen verwendet.

Verkäufe und Erlöse zwischen den Segmenten werden grundsätzlich zu Preisen erbracht, die auch mit Konzernfremden vereinbart würden. Verwaltungsleistungen werden über Dienstleistungsvereinbarungen abgerechnet.

Grundlage für die Segmentierung ist die Rechnungslegungsvorschrift FASB ASC Topic 280, Segment Reporting, in der die Segmentberichterstattung in den Jahres- und Quartalsabschlüssen zu den operativen Geschäfts-, Produkt- und Dienstleistungsbereichen und Regionen geregelt ist. Die Segmentierung stellt sich somit wie folgt dar:

- ▶ Fresenius Medical Care
- ▶ Fresenius Kabi
- ▶ Fresenius Helios
- ▶ Fresenius Vamed
- ▶ Konzern/Sonstiges

Das Segment Konzern/Sonstiges umfasst im Wesentlichen die Holdingfunktionen der Fresenius SE & Co. KGaA und die Fresenius Netcare GmbH, die Dienstleistungen im Bereich der Informationstechnologie anbietet, sowie die Fresenius Biotech, die nicht die Größenmerkmale zur separaten Darstellung als zu berichtendes Segment aufweist. Des Weiteren enthält das Segment Konzern/Sonstiges die zwischen den Segmenten durchzuführenden Konsolidierungsmaßnahmen sowie Sondereinflüsse aus der Marktwertbewertung der Pflichtumtauschleihe und des Besserungsscheins (CVR).

Eine Erläuterung zu den einzelnen Unternehmensbereichen befindet sich auf der Seite 131 des Konzern-Anhangs.

Die regionale Segmentierung berücksichtigt neben der kontinentalen Aufteilung auch die Homogenität der Märkte bezüglich Chancen und Risiken. Die Zuordnung zu den einzelnen Segmenten richtet sich nach dem Sitz der Kunden.

## ERLÄUTERUNG ZU DEN SEGMENTDATEN

Die Zielgrößen, an denen die Segmente vom Vorstand gemessen werden, sind so gewählt, dass diese alle Erträge und Aufwendungen beinhalten, die im Entscheidungsbereich der Segmente liegen. Der Vorstand ist davon überzeugt, dass der dafür am besten geeignete Maßstab das operative Ergebnis (EBIT) ist. Der Vorstand geht davon aus, dass neben dem operativen Ergebnis auch die Kenngröße Ergebnis vor Zinsen, Ertragsteuern und Abschreibungen (EBITDA) für Investoren hilfreich sein kann, um die Fähigkeit des Fresenius-Konzerns in Bezug auf die Erzielung von finanziellen Überschüssen und die Bedienung seiner finanziellen Verpflichtungen zu beurteilen. Die Kennzahl EBITDA ist außerdem die Basis für die Beurteilung der Einhaltung von vorgegebenen Kennzahlen im Rahmen der Kreditvereinbarungen des Fresenius-Konzerns (z. B. Fresenius Medical Care-Kreditvereinbarung 2006 oder Kreditvereinbarung 2008).

Die Abschreibungen beziehen sich auf die in dem jeweiligen Unternehmensbereich gebundenen Sachanlagen und immateriellen Vermögenswerte mit bestimmter Nutzungsdauer.

Das Zinsergebnis umfasst Zinsaufwendungen und Zinserträge.

Das Konzernergebnis ist definiert als das Ergebnis nach Ertragsteuern und nach Anteilen anderer Gesellschafter.

Der operative Cashflow ist der durch die gewöhnliche Geschäftstätigkeit erwirtschaftete Mittelzufluss/-abfluss.

Der Cashflow vor Akquisitionen und Dividenden errechnet sich aus dem operativen Cashflow abzüglich der Netto-Investitionen.

Die Finanzverbindlichkeiten umfassen Verbindlichkeiten gegenüber Kreditinstituten, Anleihen, genussscheinähnliche Wertpapiere (Trust Preferred Securities), Verbindlichkeiten aus Finanzierungsleasing, Verbindlichkeiten aus ausstehenden Zahlungen für Akquisitionen sowie Konzernverbindlichkeiten. Nicht enthalten sind die Pflichtumtauschanleihe und der Besserungsschein (CVR) (siehe Anmerkung 31, Zusätzliche Informationen zum Kapitalmanagement).

Die Investitionen beinhalten im Wesentlichen die Zugänge von Sachanlagen.

Bei den Akquisitionen handelt es sich sowohl um den Erwerb von Anteilen an rechtlich selbstständigen Unternehmen als auch um den Kauf von Unternehmensteilen und immateriellen Vermögenswerten (z. B. Lizenzen). Die hier dargestellten Kennzahlen geben die vertraglichen Kaufpreise wieder, die sich aus bar bezahlten Beträgen (abzüglich erworbener flüssiger Mittel), übernommenen Schulden sowie der Ausgabe von Aktienanteilen zusammensetzen. In die Kapitalflussrechnung hingegen fließen die in bar gezahlten Kaufpreisbestandteile abzüglich der erworbenen flüssigen Mittel ein.

Die EBITDA-Marge errechnet sich aus dem EBITDA im Verhältnis zum Umsatz.

Die EBIT-Marge ermittelt sich aus dem EBIT im Verhältnis zum Umsatz.

Die Rentabilität des betriebsnotwendigen Vermögens (ROOA) ist definiert als Quotient aus dem EBIT und dem durchschnittlichen betriebsnotwendigen Vermögen. Das betriebsnotwendige Vermögen ermittelt sich aus der Bilanzsumme abzüglich der aktiven latenten Steuern, der Lieferantenverbindlichkeiten sowie der erhaltenen Anzahlungen und zugesagten Fördermittel.

Des Weiteren werden die Kenngrößen „Abschreibungen in % vom Umsatz“ und „Operativer Cashflow in % vom Umsatz“ ausgewiesen.

## ABSTIMMUNG DER KENNZAHLEN ZUM KONSOLIDIERTEN ERGEBNIS

| in Mio €                                                     | 2010         | 2009  |
|--------------------------------------------------------------|--------------|-------|
| Gesamt-EBIT der berichtserstattenden Segmente                | <b>2.464</b> | 2.107 |
| Allgemeine Unternehmensaufwendungen Konzern/Sonstiges (EBIT) | <b>-46</b>   | -53   |
| <b>Konzern-EBIT</b>                                          | <b>2.418</b> | 2.054 |
| Zinsaufwand                                                  | <b>-596</b>  | -602  |
| Zinsertrag                                                   | <b>30</b>    | 22    |
| Sonstiges Finanzergebnis                                     | <b>-66</b>   | -31   |
| <b>Ergebnis vor Ertragsteuern</b>                            | <b>1.786</b> | 1.443 |

## HERLEITUNG DER NETTO-FINANZVERBINDLICHKEITEN AUS DER KONZERN-BILANZ

| in Mio €                                                                                             | 31. Dezember<br>2010 | 31. Dezember<br>2009 |
|------------------------------------------------------------------------------------------------------|----------------------|----------------------|
| Kurzfristige Finanzverbindlichkeiten                                                                 | 606                  | 287                  |
| Kurzfristige Darlehen von<br>verbundenen Unternehmen                                                 | 2                    | 2                    |
| Kurzfristig fälliger Teil der<br>langfristigen Darlehen und<br>aktivierten Leasingverträge           | 420                  | 261                  |
| Genussscheinähnliche Wertpapiere<br>der Fresenius Medical Care Capital<br>Trusts (kurzfristig)       | 468                  | 0                    |
| Langfristige Darlehen und<br>aktivierte Leasingverträge,<br>abzüglich des kurzfristig fälligen Teils | 4.919                | 5.228                |
| Anleihen                                                                                             | 2.369                | 2.066                |
| Genussscheinähnliche Wertpapiere<br>der Fresenius Medical Care Capital<br>Trusts (langfristig)       | 0                    | 455                  |
| <b>Finanzverbindlichkeiten</b>                                                                       | <b>8.784</b>         | <b>8.299</b>         |
| abzüglich flüssige Mittel                                                                            | 769                  | 420                  |
| <b>Netto-Finanzverbindlichkeiten</b>                                                                 | <b>8.015</b>         | <b>7.879</b>         |

Die regionale Aufteilung der langfristigen Aktiva stellt sich wie folgt dar:

| in Mio €                                       | 31. Dezember<br>2010 | 31. Dezember<br>2009 |
|------------------------------------------------|----------------------|----------------------|
| Deutschland                                    | 3.574                | 3.205                |
| Übriges Europa (ohne Deutschland)              | 1.984                | 1.938                |
| Nordamerika                                    | 10.182               | 9.241                |
| Asien-Pazifik                                  | 882                  | 681                  |
| Lateinamerika                                  | 354                  | 282                  |
| Afrika                                         | 47                   | 37                   |
| <b>Gesamte langfristige Aktiva<sup>1</sup></b> | <b>17.023</b>        | <b>15.384</b>        |

<sup>1</sup> Die Summe der langfristigen Aktiva ergibt sich aus den langfristigen Vermögenswerten abzüglich der latenten Steuern sowie der derivativen Finanzinstrumente.

In Deutschland wurde im Geschäftsjahr 2010 ein Umsatz in Höhe von 3.355 Mio € erwirtschaftet (2009: 3.152 Mio €). In den USA betrug der Umsatz 2010 6.849 Mio € (2009: 5.976 Mio €).

## 34. AKTIONSOPTIONEN

### PERSONALAUFWAND AUS DEN AKTIONSOPTIONS- PLÄNEN DES FRESENIUS-KONZERNS

Im Geschäftsjahr 2010 weist der Fresenius-Konzern für die seit 2006 ausgegebenen Wandelschuldverschreibungen und Aktienoptionen 33 Mio € an Personalaufwand aus. Für die leistungsorientierten Pläne berücksichtigt der Fresenius-Konzern Personalaufwand in den Perioden bis zur Unverfallbarkeit der Optionen. Dabei wird von den Marktwerten der zugrunde liegenden Aktienoptionen zum Zeitpunkt der Gewährung ausgegangen.

### MARKTWERT DER AKTIONSOPTIONEN

Der Fresenius-Konzern hat sich entschieden, FAS 123(R), Share-Based Payment, zukunftsbezogen anzuwenden.

Für die Schätzung der Marktwerte der nach den Aktienoptionsplänen der Fresenius SE & Co. KGaA und der Fresenius Medical Care AG & Co. KGaA gewährten Aktienoptionen wendet der Fresenius-Konzern ein Binomialmodell an. Optionspreismodelle verlangen die Berücksichtigung von sehr subjektiven Annahmen einschließlich der erwarteten Volatilität des Aktienkurses. Die Annahmen des Fresenius-Konzerns beruhen auf Erfahrungen der Vergangenheit sowie auf Marktentwicklungen und Erfahrungen anderer Gesellschaften ähnlicher Größe und vergleichbarer Industriezweige. Zur Berücksichtigung einer erwarteten frühzeitigen Ausübung wurde eine frühzeitige Ausübung der Optionen mit erfüllter Wartezeit angenommen, sobald der Aktienkurs eine Kursschwelle von 150 % des Ausübungspreises erreicht. Die Aktienoptionen des Fresenius-Konzerns haben Eigenschaften, die wesentlich von den Eigenschaften gehandelter Optionen abweichen. Änderungen subjektiver Annahmen können einen wesentlichen Effekt auf den Marktwert der Option haben.

Die gewichteten durchschnittlichen Annahmen zur Bewertung der Marktwerte für Zusagen, die in den Jahren 2010 und 2009 aus dem Fresenius SE Aktienoptionsplan 2008 gewährt wurden, sind wie folgt:

| in Mio €                       | 2010               |                | 2009               |                |
|--------------------------------|--------------------|----------------|--------------------|----------------|
|                                | Dezember-Zuteilung | Juli-Zuteilung | Dezember-Zuteilung | Juli-Zuteilung |
| Erwartete Dividendenrendite    | 1,58 %             | 1,92 %         | 2,33 %             | 2,90 %         |
| Risikoloser Zinssatz           | 2,38 %             | 2,12 %         | 2,73 %             | 3,04 %         |
| Erwartete Volatilität          | 28,44 %            | 28,94 %        | 28,83 %            | 29,01 %        |
| Laufzeit der Option            | 7 Jahre            | 7 Jahre        | 7 Jahre            | 7 Jahre        |
| Ausübungspreis pro Option in € | 63,94              | 53,49          | 39,61              | 36,89          |

Die erwartete Volatilität ergibt sich aus der historischen Volatilität über die erwartete Laufzeit der Aktienoptionen. Die Volatilität wurde bei erstmaliger Berechnung des Fair Values der Aktienoptionen ermittelt und anschließend jährlich mit der Ausgabe einer neuen Tranche überprüft.

#### **FRESENIUS SE & CO. KGAA AKTIONSOPTIONSPLÄNE** **Beschreibung der gültigen Fresenius SE & Co. KGaA Aktienoptionspläne**

Zum 31. Dezember 2010 bestanden in der Fresenius SE (seit 28. Januar 2011: Fresenius SE & Co. KGaA) drei Aktienoptionspläne; der auf die Ausgabe von Aktienoptionen gerichtete Fresenius AG Aktienoptionsplan 1998 (Aktienoptionsplan 1998), der auf Wandelschuldverschreibungen basierende Fresenius AG Aktienoptionsplan 2003 (Aktienoptionsplan 2003) und der auf Aktienoptionen basierende Fresenius SE Aktienoptionsplan 2008 (Aktienoptionsplan 2008). Aktienoptionen wurden im Jahr 2010 ausschließlich aus dem Aktienoptionsplan 2008 gewährt.

Die folgenden Erläuterungen der einzelnen Aktienoptionspläne zeigen den Stand zum 31. Dezember 2010. Die Änderungen, die sich aufgrund der mit dem Rechtsformwechsel verbundenen Umstellung des gesamten Grundkapitals auf Inhaber-Stammaktien für die Aktienoptionspläne ergeben, werden im Anschluss in einem gesonderten Absatz beschrieben.

#### **Aktienoptionsplan 2008**

Im Jahr 2008 führte die Fresenius SE den Aktienoptionsplan 2008 zur Gewährung von Bezugsrechten an Mitglieder des Vorstands und leitende Mitarbeiter der Gesellschaft und verbundener Unternehmen ein.

Es können bis zu 6,2 Millionen Optionen ausgegeben werden, die zum Bezug von insgesamt 3,1 Millionen Stammaktien und 3,1 Millionen Vorzugsaktien berechtigen. Auf die Mitglieder des Vorstands der Fresenius SE entfallen bis zu 1,2 Millionen Aktienoptionen; bis zu 3,2 Millionen Optionen sind für die Mitglieder der Geschäftsführung direkt oder indirekt verbundener Unternehmen (mit Ausnahme der Fresenius Medical Care) bestimmt; bis zu 1,8 Millionen Aktienoptionen sind für Führungskräfte der Fresenius SE und ihrer verbundenen Unternehmen (mit Ausnahme der Fresenius Medical Care) bestimmt. Für die bezugsberechtigten Mitglieder des Vorstands der Fresenius SE legt der Aufsichtsrat die Zuteilung der Aktienoptionen fest und sorgt insoweit für die Abwicklung des Aktienoptionsplans 2008; für alle weiteren Bezugsberechtigten übernimmt dies der Vorstand der Fresenius SE. Die Optionen können in fünf jährlichen Tranchen jeweils mit Wirkung zum ersten Bankarbeitstag im Juli und/oder ersten Bankarbeitstag im Dezember zugeteilt werden. Der Ausübungspreis der Optionen entspricht dem durchschnittlichen Schlusskurs, der für die Stammaktien bzw. Vorzugsaktien der Fresenius SE an der Frankfurter Wertpapierbörse während der 30 Börsentage unmittelbar vor dem jeweiligen Zuteilungszeitpunkt notiert wurde. Für Bezugsberechtigte in den USA kann der Ausübungspreis den jeweiligen Durchschnittskursen der beiden Aktiegattungen während der 30 Kalendertage unmittelbar vor dem Zuteilungszeitpunkt entsprechen, wenn diese höher sind. Die gewährten Optionen haben eine Laufzeit von sieben Jahren, können jedoch erst nach einer dreijährigen Wartezeit ausgeübt werden. Zwingende Voraussetzung für die Ausübung von Optionen ist das Erreichen des jährlichen Erfolgsziels innerhalb der dreijährigen Wartezeit. Das Erfolgsziel ist jeweils erreicht, wenn das um außerordentliche Effekte bereinigte konsolidierte Konzernergebnis des Fresenius-Konzerns jeweils im Vergleich zum bereinigten Konzernergebnis des vorherigen Geschäftsjahres um mindestens 8 % gestiegen ist. Für jedes Jahr, in dem das Ziel nicht erreicht wird, verfallen die Optionen anteilig um jeweils ein Drittel. Das bereinigte Konzernergebnis ist auf der Grundlage der Berechnungsmethode der Bilanzierungsgrundsätze

nach US-GAAP zu ermitteln und wird für Zwecke des Aktienoptionsplans 2008 festgelegt und vom Abschlussprüfer der Gesellschaft auf der Grundlage des geprüften Konzernabschlusses verbindlich verifiziert. In den Jahren 2009 und 2010 wurde das Erfolgsziel erreicht. Bei der Ausübung von Optionen, die die Wartezeit erfüllt haben, hat die Fresenius SE das Recht, die Aktienoptionen durch eigene Aktien oder durch eine Barzahlung zu bedienen, anstatt durch Ausgabe von neuen Aktien das Kapital zu erhöhen. Bei Erfüllung aller Voraussetzungen können die Optionen ganzjährig mit Ausnahme festgelegter Ausübungssperrfristen ausgeübt werden.

### **Aktienoptionsplan 2003**

Im Jahr 2003 führte die Fresenius AG den Aktienoptionsplan 2003 zur Ausgabe von Aktien an Vorstand und leitende Mitarbeiter ein. Dieses auf Wandelschuldverschreibungen basierende Vergütungsprogramm wurde durch den Aktienoptionsplan 2008 ersetzt. Seit dem Jahr 2008 wurden aus diesem Plan keine weiteren Aktienoptionen mehr ausgegeben. Der Aktienoptionsplan 2003 gewährt den Bezugsberechtigten das Recht, Stammaktien und Vorzugsaktien der Fresenius SE zu erwerben. Die aus diesem Plan gewährten Wandelschuldverschreibungen haben eine Laufzeit von zehn Jahren. Sie können jeweils zu einem Drittel frühestens nach zwei, drei oder vier Jahren nach dem Ausgabedatum gewandelt werden. Nach Gewährung des Bezugsrechts haben die begünstigten Personen das Recht, zwischen Wandelschuldverschreibungen mit einem Kursziel (Stock Price Target) oder solchen ohne Kursziel zu wählen. Der Wandlungspreis für Wandelschuldverschreibungen, die einem Kursziel unterliegen, entspricht dem Kurs der Stammaktien bzw. Vorzugsaktien zum Zeitpunkt, zu dem die Kurssteigerung des Aktienkurses gegenüber dem Basispreis (nach dem Aktiensplit im Jahr 2007:  $\frac{1}{3}$  des Basispreises) erstmalig mindestens 25 % beträgt. Bei einer Wandlung nach dem Aktiensplit beträgt der Wandlungspreis zum Bezug von drei Stamm- bzw. Vorzugsaktien je Wandelschuldverschreibung das Dreifache des gedrittelten Basispreises. Der Basispreis wird aus dem Durchschnittskurs der Stammaktien bzw. Vorzugsaktien während der letzten 30 Handelstage vor dem Ausgabedatum bestimmt. Der Wandlungspreis für Wandelschuldverschreibungen ohne Kursziel

entspricht dem Basispreis. Im Falle der Wahl von Wandelschuldverschreibungen ohne Kursziel erhalten die bezugsberechtigten Personen 15 % weniger Wandelschuldverschreibungen als bei der Wahl von Wandelschuldverschreibungen mit Kursziel. Jede nach dem Aktiensplit gewährte Wandelschuldverschreibung berechtigt den Inhaber, nach Zahlung des entsprechenden Wandlungspreises je eine Stammaktie bzw. eine Vorzugsaktie zu erwerben. Die vorher gewährten Wandelschuldverschreibungen berechtigten den Inhaber bei Wandlung vor Wirksamwerden des Aktiensplits zum Erwerb je einer Stammaktie bzw. einer Vorzugsaktie; bei Wandlung nach dem Aktiensplit zum Erwerb von je drei Stammaktien bzw. Vorzugsaktien.

### **Aktienoptionsplan 1998**

Im Jahr 1998 führte die Fresenius AG den Aktienoptionsplan 1998 zur Ausgabe von Aktien an Vorstand und leitende Mitarbeiter ein. Dieses auf Aktienoptionen basierende Vergütungsprogramm wurde durch den Aktienoptionsplan 2003 ersetzt, und seit dem Jahr 2003 wurden aus diesem Plan keine weiteren Aktienoptionen mehr ausgegeben. Der Aktienoptionsplan 1998 gewährt den Bezugsberechtigten das Recht, Stammaktien und Vorzugsaktien der Fresenius SE zu erwerben. Die aus diesem Plan gewährten Aktienoptionen haben eine Laufzeit von zehn Jahren. Zum 31. Dezember 2010 waren alle ausübbar. Für jedes Bezugsrecht konnte vor dem Aktiensplit eine Stammaktie bzw. Vorzugsaktie erworben werden. Nach dem Aktiensplit im Jahr 2007 berechtigt jedes Bezugsrecht zum Erwerb von drei Stammaktien bzw. Vorzugsaktien. Entsprechend erhöht sich die Anzahl der an die Mitglieder des Vorstands bzw. an die leitenden Mitarbeiter höchstens auszugebenden Aktien.

### **Anpassungen der Aktienoptionspläne aufgrund des Rechtsformwechsels**

Mit dem durch Eintragung im Handelsregister am 28. Januar 2011 wirksam gewordenen Rechtsformwechsel der Fresenius SE in die Fresenius SE & Co. KGaA wurden Anpassungen der drei Aktienoptionspläne erforderlich. Die in Verbindung mit dem Rechtsformwechsel vorgenommene Umwandlung der Vorzugsaktien in Stammaktien hat zur Folge, dass sämtliche unter dem jeweiligen Aktienoptionsplan bereits ausgegebenen Bezugsrechte im Fall der Ausübung ausschließlich mit Stammaktien bedient werden. Des



Weiteren werden den Berechtigten unter dem Aktienoptionsplan 2008 ausschließlich Bezugsrechte auf Stammaktien gewährt. In diesen Kreis der Berechtigten treten für zukünftige Gewährungen von Aktienoptionen anstelle der Mitglieder des ehemaligen Vorstands der Fresenius SE die Mitglieder des Vorstands der Fresenius Management SE. Im Hinblick auf den Aktienoptionsplan 2008 legt der Aufsichtsrat der Fresenius Management SE die Zuteilung für die Mitglieder des Vorstands der Fresenius Management SE fest. Für alle weiteren Bezugsberechtigten übernimmt dies der Vorstand der Fresenius Management SE. Die Umwandlung erforderte wegen des Wegfalls der Vorzugsaktien weiterhin eine Anpassung des Erfolgsziels des Aktienoptionsplans 2003 dahingehend, dass dieses als erreicht gilt, wenn die Summe der folgenden Kurssteigerungen mindestens 25 % beträgt:

- ▶ Steigerung des gemeinsamen durchschnittlichen Börsenkurses von Stammaktien und Vorzugsaktien vom Tag der Gewährung bis zum Wirksamwerden des Rechtsformwechsels
- ▶ Steigerung des Börsenkurses der Stammaktien seit dem Wirksamwerden des Rechtsformwechsels

Während die Anzahl der Aktienoptionen unverändert bleibt, richtet sich der Ausübungspreis der Aktienoptionen zukünftig allein nach dem relevanten Börsenkurs der Stammaktie ohne Berücksichtigung des Börsenkurses der Vorzugsaktie.

Die beschlossenen Änderungen der Aktienoptionspläne wurden mit Beschluss des Vorstands vom 27. September 2010 und Zustimmung des Aufsichtsrats vom 12. Oktober 2010 wirksam.

### Transaktionen im Geschäftsjahr 2010

Im Geschäftsjahr 2010 gab die Fresenius SE (seit 28. Januar 2011: Fresenius SE & Co. KGaA) 1.109.738 Aktienoptionen mit einem gewichteten durchschnittlichen Ausübungspreis von 53,57 € und einem gewichteten durchschnittlichen Marktwert von 12,95 € pro Aktienoption aus. Hiervon wurden 198.660 an den Vorstand der Fresenius SE (seit 28. Januar 2011: Fresenius SE & Co. KGaA) ausgegeben. Der Marktwert aller ausgegebenen Aktienoptionen beträgt 14 Mio € und wird über die dreijährige Wartezeit amortisiert.

Im Geschäftsjahr 2010 wurden 1.134.714 Aktienoptionen ausgeübt. Der durchschnittliche Aktienkurs zum Ausübungszeitpunkt betrug bei den Stammaktien 57,56 € und bei den

Vorzugsaktien 58,61 €. Durch diese Ausübungen flossen der Fresenius SE (seit 28. Januar 2011: Fresenius SE & Co. KGaA) flüssige Mittel in Höhe von 38 Mio € zu. Der innere Wert der ausgeübten Aktienoptionen im Geschäftsjahr 2010 betrug 27 Mio €.

Zum 31. Dezember 2010 betrug der Bestand an Aktienoptionen aus dem Aktienoptionsplan 1998 134.452 Stück, die alle ausübbar waren. Es entfielen keine Aktienoptionen auf die Mitglieder des Vorstands der Fresenius SE (seit 28. Januar 2011: Fresenius SE & Co. KGaA). Der Bestand an Wandelschuldverschreibungen aus dem Aktienoptionsplan 2003 betrug zum 31. Dezember 2010 1.958.284 Stück, wovon 1.679.338 ausübbar waren und 419.100 auf die Mitglieder des Vorstands der Fresenius SE (seit 28. Januar 2011: Fresenius SE & Co. KGaA) entfielen. Der Bestand an Aktienoptionen aus dem Aktienoptionsplan 2008 betrug zum 31. Dezember 2010 3.196.586 Stück, wovon 559.860 auf die Mitglieder des Vorstands der Fresenius SE (seit 28. Januar 2011: Fresenius SE & Co. KGaA) entfielen.

Die Transaktionen hinsichtlich der Aktienoptionen sind wie folgt zusammengefasst:

| Stammaktien<br>31. Dezember | Anzahl Optionen  | Gewichteter<br>durchschnittl.<br>Ausübungspreis<br>in € | Anzahl<br>Optionen<br>ausübbar |
|-----------------------------|------------------|---------------------------------------------------------|--------------------------------|
| <b>Saldo 2008</b>           | <b>2.370.299</b> | <b>40,05</b>                                            | <b>951.484</b>                 |
| gewährt                     | 533.624          | 33,82                                                   |                                |
| ausgeübt                    | 85.821           | 24,55                                                   |                                |
| verfallen                   | 121.376          | 36,14                                                   |                                |
| <b>Saldo 2009</b>           | <b>2.696.726</b> | <b>39,49</b>                                            | <b>1.205.185</b>               |
| gewährt                     | 554.869          | 53,61                                                   |                                |
| ausgeübt                    | 567.357          | 32,90                                                   |                                |
| verfallen                   | 39.577           | 47,82                                                   |                                |
| <b>Saldo 2010</b>           | <b>2.644.661</b> | <b>43,87</b>                                            | <b>906.895</b>                 |

| Vorzugsaktien<br>31. Dezember | Anzahl Optionen  | Gewichteter<br>durchschnittl.<br>Ausübungspreis<br>in € | Anzahl<br>Optionen<br>ausübbar |
|-------------------------------|------------------|---------------------------------------------------------|--------------------------------|
| <b>Saldo 2008</b>             | <b>2.370.299</b> | <b>40,21</b>                                            | <b>951.484</b>                 |
| gewährt                       | 533.624          | 39,97                                                   |                                |
| ausgeübt                      | 85.821           | 25,24                                                   |                                |
| verfallen                     | 121.376          | 38,10                                                   |                                |
| <b>Saldo 2009</b>             | <b>2.696.726</b> | <b>40,73</b>                                            | <b>1.205.185</b>               |
| gewährt                       | 554.869          | 53,54                                                   |                                |
| ausgeübt                      | 567.357          | 34,63                                                   |                                |
| verfallen                     | 39.577           | 48,95                                                   |                                |
| <b>Saldo 2010</b>             | <b>2.644.661</b> | <b>44,74</b>                                            | <b>906.895</b>                 |



Die folgenden Tabellen zeigen Angaben bezüglich der ausstehenden und ausübaren Aktienoptionen zum 31. Dezember 2010:

#### OPTIONEN AUF STAMMAKTIEN

| Bandbreite<br>der Ausübungspreise<br>in € | Ausstehende Optionen |                                                                    |                                                             | Ausübare Optionen |                                                                    |                                                             |
|-------------------------------------------|----------------------|--------------------------------------------------------------------|-------------------------------------------------------------|-------------------|--------------------------------------------------------------------|-------------------------------------------------------------|
|                                           | Anzahl Optionen      | Gewichtete<br>durchschnittliche<br>erwartete Laufzeit<br>in Jahren | Gewichteter<br>durchschnittlicher<br>Ausübungspreis<br>in € | Anzahl Optionen   | Gewichtete<br>durchschnittliche<br>erwartete Laufzeit<br>in Jahren | Gewichteter<br>durchschnittlicher<br>Ausübungspreis<br>in € |
| 10,01 – 15,00                             | 58.101               | 2,50                                                               | 13,65                                                       | 58.101            | 2,50                                                               | 13,65                                                       |
| 15,01 – 20,00                             | 62.394               | 1,62                                                               | 19,59                                                       | 62.394            | 1,62                                                               | 19,59                                                       |
| 20,01 – 25,00                             | 107.710              | 3,50                                                               | 21,96                                                       | 107.710           | 3,50                                                               | 21,96                                                       |
| 25,01 – 30,00                             | 180.695              | 4,46                                                               | 28,57                                                       | 180.695           | 4,46                                                               | 28,57                                                       |
| 30,01 – 35,00                             | 534.638              | 5,38                                                               | 33,74                                                       | 12.530            | 0,58                                                               | 30,83                                                       |
| 35,01 – 40,00                             | 266.800              | 5,39                                                               | 39,23                                                       | 265.050           | 5,39                                                               | 39,24                                                       |
| 40,01 – 45,00                             | 46.205               | 4,92                                                               | 41,62                                                       | 0                 |                                                                    |                                                             |
| 45,01 – 50,00                             | 8.484                | 5,50                                                               | 48,81                                                       | 8.484             | 5,50                                                               | 48,81                                                       |
| 50,01 – 55,00                             | 1.023.730            | 5,61                                                               | 54,07                                                       | 0                 |                                                                    |                                                             |
| 55,01 – 60,00                             | 339.441              | 6,50                                                               | 56,43                                                       | 203.959           | 6,50                                                               | 56,43                                                       |
| 60,01 – 65,00                             | 4.500                | 6,92                                                               | 63,53                                                       | 0                 |                                                                    |                                                             |
| 70,01 – 75,00                             | 11.963               | 6,50                                                               | 70,54                                                       | 7.972             | 6,50                                                               | 70,54                                                       |
|                                           | <b>2.644.661</b>     | <b>5,32</b>                                                        | <b>43,87</b>                                                | <b>906.895</b>    | <b>4,73</b>                                                        | <b>36,19</b>                                                |

#### OPTIONEN AUF VORZUGSAKTIEN

| Bandbreite<br>der Ausübungspreise<br>in € | Ausstehende Optionen |                                                                    |                                                             | Ausübare Optionen |                                                                    |                                                             |
|-------------------------------------------|----------------------|--------------------------------------------------------------------|-------------------------------------------------------------|-------------------|--------------------------------------------------------------------|-------------------------------------------------------------|
|                                           | Anzahl Optionen      | Gewichtete<br>durchschnittliche<br>erwartete Laufzeit<br>in Jahren | Gewichteter<br>durchschnittlicher<br>Ausübungspreis<br>in € | Anzahl Optionen   | Gewichtete<br>durchschnittliche<br>erwartete Laufzeit<br>in Jahren | Gewichteter<br>durchschnittlicher<br>Ausübungspreis<br>in € |
| 10,01 – 15,00                             | 65.799               | 2,50                                                               | 12,14                                                       | 65.799            | 2,50                                                               | 12,14                                                       |
| 15,01 – 20,00                             | 107.710              | 3,50                                                               | 19,00                                                       | 107.710           | 3,50                                                               | 19,00                                                       |
| 20,01 – 25,00                             | 54.696               | 1,50                                                               | 21,13                                                       | 54.696            | 1,50                                                               | 21,13                                                       |
| 25,01 – 30,00                             | 180.695              | 4,46                                                               | 29,33                                                       | 180.695           | 4,46                                                               | 29,33                                                       |
| 30,01 – 35,00                             | 12.530               | 0,58                                                               | 34,73                                                       | 12.530            | 0,58                                                               | 34,73                                                       |
| 35,01 – 40,00                             | 550.896              | 5,45                                                               | 39,88                                                       | 28.788            | 4,50                                                               | 38,52                                                       |
| 40,01 – 45,00                             | 238.012              | 5,50                                                               | 40,57                                                       | 236.262           | 5,50                                                               | 40,55                                                       |
| 45,01 – 50,00                             | 46.205               | 4,92                                                               | 45,40                                                       | 0                 |                                                                    |                                                             |
| 50,01 – 55,00                             | 1.032.214            | 5,61                                                               | 52,98                                                       | 8.484             | 5,50                                                               | 53,01                                                       |
| 55,01 – 60,00                             | 339.441              | 6,50                                                               | 56,11                                                       | 203.959           | 6,50                                                               | 56,11                                                       |
| 60,01 – 65,00                             | 4.500                | 6,92                                                               | 64,34                                                       | 0                 |                                                                    |                                                             |
| 70,01 – 75,00                             | 11.963               | 6,50                                                               | 70,14                                                       | 7.972             | 6,50                                                               | 70,14                                                       |
|                                           | <b>2.644.661</b>     | <b>5,32</b>                                                        | <b>44,74</b>                                                | <b>906.895</b>    | <b>4,73</b>                                                        | <b>36,25</b>                                                |

Zum 31. Dezember 2010 betrug der kumulierte innere Wert der ausübzbaren Optionen auf Stammaktien 24 Mio €. Der kumulierte innere Wert der ausübzbaren Optionen auf Vorzugsaktien betrug 25 Mio €.

Am 31. Dezember 2010 bestand nach den Aktienoptionsplänen 2003 und 2008 der Fresenius SE & Co. KGaA ein unrealisierter Personalaufwand in Höhe von 18 Mio € für Aktienoptionen, die die Wartezeit noch nicht erfüllt haben. Es wird erwartet, dass dieser Aufwand über einen durchschnittlichen Zeitraum von 1,9 Jahren anfällt.

## **FRESENIUS MEDICAL CARE AG & CO. KGAA**

### **AKTIENOPTIONSPLÄNE**

#### **Aktienoptionsplan 2006**

Durch Zustimmung der ordentlichen Hauptversammlung der Fresenius Medical Care AG & Co. KGaA (FMC-AG & Co. KGaA) wurde am 9. Mai 2006 der Fresenius Medical Care AG & Co. KGaA Aktienoptionsplan 2006 geschaffen. Dieser Plan wurde am 15. Mai 2007 geändert (angepasster Plan 2006). Zur Erfüllung der aus dem Aktienoptionsplan entstehenden Bezugsrechte wurde das Grundkapital der FMC-AG & Co. KGaA um bis zu 15 Mio € durch die Ausgabe von bis zu 15 Millionen Stück nennwertloser Inhaber-Stammaktien mit einem Nominalwert von je 1,00 € bedingt erhöht. Gemäß dem angepassten Plan 2006 können bis zu 15 Millionen Optionen ausgegeben werden, wovon jede zum Bezug einer Stammaktie berechtigt. Auf die Mitglieder des Vorstands der Fresenius Medical Care Management AG (FMC Management AG), die persönlich haftende Gesellschafterin der FMC-AG & Co. KGaA, entfallen bis zu 3 Millionen Aktienoptionen; bis zu 3 Millionen Optionen sind für die Mitglieder der Geschäftsführung direkt oder indirekt verbundener Unternehmen bestimmt; bis zu 9 Millionen Aktienoptionen sind für Führungskräfte der FMC-AG & Co. KGaA und ihrer verbundenen Unternehmen bestimmt. Für die bezugsberechtigten Mitglieder des Vorstands der FMC Management AG legt deren Aufsichtsrat die Zuteilung der Aktienoptionen fest und sorgt insoweit für die Abwicklung des angepassten Plans 2006; für alle weiteren Bezugsberechtigten übernimmt dies der Vorstand der FMC Management AG.

Unter dem angepassten Plan 2006 können die Optionen am letzten Montag im Juli und/oder am ersten Montag im Dezember gewährt werden. Der Ausübungskurs der unter dem angepassten Plan 2006 gewährten Optionen entspricht

dem durchschnittlichen Schlusskurs, der für die Stammaktien der FMC-AG & Co. KGaA an der Frankfurter Wertpapierbörse während der 30 Kalendertage unmittelbar vor dem jeweiligen Zuteilungszeitpunkt notiert wurde. Die unter dem angepassten Plan 2006 gewährten Optionen haben eine Laufzeit von sieben Jahren, können jedoch erst nach einer dreijährigen Wartezeit ausgeübt werden. Die Optionen werden ausübbar, wenn die Erfolgsziele über einen Zeitraum von drei Jahren ab dem Tag der Zuteilung erreicht werden. In jedem dieser Jahre gilt das Erfolgsziel als erreicht, wenn sich das bereinigte Ergebnis je Stammaktie (EPS) der FMC-AG & Co. KGaA, wie es unter dem angepassten Plan 2006 errechnet wird, während der Wartezeit jährlich um mindestens 8 % erhöht; Ausgangswert ist das EPS im Jahr der Zuteilung gegenüber dem EPS vor dem Jahr der Zuteilung. Bei der Kalkulation der EPS unter dem angepassten Plan 2006 wurden u. a. die Kosten des Rechtsformwechsels und die Kosten der Umwandlung von Vorzugsaktien in Stammaktien ausgeschlossen. Für jede Zuteilung gilt, dass ein Drittel der zugeteilten Optionen für jedes Jahr, in dem das Ziel von 8 % für das EPS nicht erreicht oder übertroffen wird, verfällt. In den Jahren 2010 und 2009 wurden die Erfolgsziele erreicht. Die Ausübung eines oder mehrerer Anteile einer Zuteilung für ein oder mehrere Jahre, in denen das Erfolgsziel erreicht wurde, kann erst nach Ablauf der gesamten dreijährigen Wartezeit erfolgen.

Bei den unter dem angepassten Plan 2006 gewährten Optionen für bezugsberechtigte Mitglieder aus den USA handelt es sich um nicht qualifizierte Aktienoptionen gemäß dem United States Internal Revenue Code (dem amerikanischen Bundessteuergesetz) in der Fassung von 1986. Bezugsberechtigte oder deren Erben können die unter dem angepassten Plan 2006 gewährten Optionen nicht übertragen, verpfänden, abtreten oder anderweitig veräußern.

Ab Dezember 2010 werden keine weiteren Aktienoptionen unter dem angepassten Plan 2006 ausgegeben.

#### **Aktienoptionsplan 2001**

Unter dem Fresenius Medical Care Aktienoptionsplan 2001 (Plan 2001) wurden Aktienoptionen in Form von Wandelschuldverschreibungen im Gesamtnennbetrag von bis zu 12 Mio € an die Mitglieder des Vorstands und Mitarbeiter der FMC-AG & Co. KGaA ausgegeben, die zu einer Zeichnung

von bis zu 12 Millionen stimmrechtslosen Vorzugsaktien berechtigen. Die Wandelschuldverschreibungen haben einen Nennwert von 1,00 € und werden mit 5,5 % verzinst. Mit Ausnahme der Vorstandsmitglieder können bezugsberechtigte Mitarbeiter den Kauf dieser Wertpapiere durch ein Darlehen finanzieren, das dieselben Konditionen wie die Wandelschuldverschreibungen aufweist und durch diese gesichert wird. Die FMC-AG & Co. KGaA hat das Recht, ihre Verpflichtung in Bezug auf die Wandelschuldverschreibung gegen die Verpflichtung der Mitarbeiter aus dem zugehörigen Darlehen aufzurechnen. Die Verpflichtungen aus den Wandelschuldverschreibungen und die Darlehensforderungen an die Mitarbeiter werden wie Aktienoptionen betrachtet und schlagen sich daher nicht im Konzernabschluss nieder. Die Aktienoptionen haben eine Laufzeit von zehn Jahren und können frühestens nach Ablauf von zwei, drei oder vier Jahren nach Ausgabedatum ausgeübt werden. Der Personalaufwand aus den unter diesem Plan gewährten Optionen wird linear über die jeweilige Wartezeit verteilt. Die an Vorstandsmitglieder gewährten Wandelschuldverschreibungen, die nicht durch ein Darlehen der FMC-AG & Co. KGaA finanziert wurden, werden in der Konzern-Bilanz als Verbindlichkeit ausgewiesen.

Nach Gewährung des Bezugsrechts hatten die begünstigten Personen das Recht, zwischen Aktienoptionen mit einem Kursziel oder Aktienoptionen ohne Kursziel auszuwählen. Der Wandlungspreis für die Aktienoptionen, die einem Kursziel unterliegen, entspricht dem Kurs der Vorzugsaktien zum Zeitpunkt, zu dem die Kurssteigerung des Aktienkurses gegenüber dem Basispreis erstmalig mindestens 25 % beträgt. Der Basispreis wird durch den Durchschnittskurs der Vorzugsaktien während der 30 Handelstage vor dem Ausgabetag

bestimmt. Im Falle der Wahl von Aktienoptionen ohne Kursziel erhalten die bezugsberechtigten Personen 15 % weniger Wandelschuldverschreibungen als bei der Wahl von Aktienoptionen mit einem Kursziel. Der Wandlungspreis von Aktienoptionen ohne Kursziel entspricht dem Basispreis. Jede Aktienoption berechtigt den Inhaber, nach Zahlung des entsprechenden Wandlungspreises eine Vorzugsaktie zu erwerben. Seit Mai 2006 können aus dem Plan 2001 keine Aktienoptionen mehr ausgegeben werden. Nach dem Jahr 2005 wurden keine Aktienoptionen unter dem Plan 2001 gewährt.

### Transaktionen im Geschäftsjahr 2010

Im Jahr 2010 gewährte die FMC-AG & Co. KGaA 2.817.879 Aktienoptionen mit einem gewichteten durchschnittlichen Ausübungspreis von 42,71 € und einem gewichteten durchschnittlichen Marktwert von 8,10 € pro Option. Davon wurden 423.300 an den Vorstand der FMC Management AG ausgegeben. Der Marktwert aller ausgegebenen Optionen beträgt 23 Mio € und wird über die dreijährige Wartezeit der Aktienoptionen amortisiert.

Im Jahr 2010 flossen der FMC-AG & Co. KGaA 73 Mio € flüssige Mittel aus der Ausübung von Aktienoptionen sowie 10 Mio € aus einer im Zusammenhang mit den Aktienoptionen stehenden Steuerforderung zu. Der innere Wert der ausgeübten Optionen im Jahr 2010 betrug 38 Mio €.

Zum 31. Dezember 2010 hielten die Mitglieder des Vorstands der FMC Management AG 2.178.699 Aktienoptionen für Stammaktien und Mitarbeiter der FMC-AG & Co. KGaA 9.973.409 Aktienoptionen für Stamm- und 58.663 Aktienoptionen für Vorzugsaktien aus den verschiedenen aktienbasierten Vergütungsplänen der Fresenius Medical Care.

Die folgende Tabelle zeigt die Überleitung der ausstehenden Aktienoptionen am 31. Dezember 2010 im Vergleich zum 31. Dezember 2009:

|                                                                        | Anzahl Optionen<br>in Tsd | Gewichteter<br>durchschnittl.<br>Ausübungspreis<br>in € |
|------------------------------------------------------------------------|---------------------------|---------------------------------------------------------|
| <b>Stand der Aktienoptionen auf Stammaktien am 31. Dezember 2009</b>   | <b>11.894</b>             | <b>30,50</b>                                            |
| ausgegeben                                                             | 2.818                     | 42,71                                                   |
| ausgeübt                                                               | 2.532                     | 28,38                                                   |
| verfallen                                                              | 28                        | 30,35                                                   |
| <b>Stand der Aktienoptionen auf Stammaktien am 31. Dezember 2010</b>   | <b>12.152</b>             | <b>33,78</b>                                            |
| <b>Stand der Aktienoptionen auf Vorzugsaktien am 31. Dezember 2009</b> | <b>147</b>                | <b>18,35</b>                                            |
| ausgeübt                                                               | 73                        | 18,57                                                   |
| verfallen                                                              | 15                        | 13,95                                                   |
| <b>Stand der Aktienoptionen auf Vorzugsaktien am 31. Dezember 2010</b> | <b>59</b>                 | <b>19,19</b>                                            |

Die folgende Tabelle zeigt Angaben bezüglich der ausübbaren Aktienoptionen für Stamm- und Vorzugsaktien, die die Wartezeit zum 31. Dezember 2010 erfüllt haben:

|                                  | Anzahl Optionen<br>in Tsd | Gewichtete<br>durchschnittliche<br>erwartete Laufzeit<br>in Jahren | Gewichteter<br>durchschnittlicher<br>Ausübungspreis<br>in € | Kumulierter<br>innerer Wert<br>in Mio € |
|----------------------------------|---------------------------|--------------------------------------------------------------------|-------------------------------------------------------------|-----------------------------------------|
| Aktienoptionen für Stammaktien   | 4.316                     | 3                                                                  | 27,99                                                       | 66                                      |
| Aktienoptionen für Vorzugsaktien | 59                        | 3                                                                  | 19,19                                                       | 1                                       |

Am 31. Dezember 2010 bestand nach allen Plänen ein unrealisierter Personalaufwand in Höhe von 33 Mio € für Aktienoptionen, die die Wartezeit noch nicht erfüllt haben. Es wird erwartet, dass dieser Aufwand über einen durchschnittlichen Zeitraum von 1,6 Jahren anfällt.

### 35. GESCHÄFTSBEZIEHUNGEN MIT NAHE STEHENDEN PERSONEN

Herr Prof. Dr. h. c. Roland Berger, Mitglied des Aufsichtsrats der Fresenius SE & Co. KGaA, ist Gesellschafter und war bis zum 1. August 2010 Aufsichtsratsvorsitzender der Roland Berger Strategy Consultants. Der Fresenius-Konzern hat dieser Gesellschaft im Jahr 2010 0,2 Mio € für erbrachte Beratungsleistungen gezahlt. Im Jahr 2009 hat der Fresenius-Konzern keine Dienstleistungen von dieser Gesellschaft in Anspruch genommen.

Herr Klaus-Peter Müller, Mitglied des Aufsichtsrats der Fresenius SE & Co. KGaA, ist Aufsichtsratsvorsitzender der Commerzbank AG. Der Fresenius-Konzern unterhält mit der Commerzbank Geschäftsbeziehungen zu marktüblichen Konditionen.

Herr Dr. Gerhard Rupprecht, Mitglied des Aufsichtsrats der Fresenius SE & Co. KGaA, war bis zum 31. Dezember 2010 Mitglied des Vorstands der Allianz SE und bis zum 30. Juni 2010 Vorstandsvorsitzender der Allianz Deutschland AG. Herr Dr. Francesco De Meo, Mitglied des Vorstands der persönlich haftenden Gesellschafterin der Fresenius SE & Co. KGaA, ist Aufsichtsratsmitglied der Allianz Private Krankenversicherungs-AG. Im Geschäftsjahr 2010 zahlte der Fresenius-Konzern an die Allianz Versicherungsprämien in Höhe von 3 Mio € (2009: 7 Mio €).

Herr Dr. Dieter Schenk, stellvertretender Aufsichtsratsvorsitzender der Fresenius SE bis zum 28. Januar 2011, Mitglied des Aufsichtsrats der Fresenius Management SE seit 11. März 2010 und stellvertretender Aufsichtsratsvorsitzender derselben seit 12. Mai 2010, ist Partner der Noerr LLP (vormals: Anwaltssozietät Nörr Stiefenhofer Lutz), die für den Konzern tätig ist. Der Fresenius-Konzern hat dieser Anwaltssozietät 1 Mio € für erbrachte Dienstleistungen im Jahr 2010 gezahlt (2009: 1 Mio €).

### 36. WESENTLICHE EREIGNISSE SEIT ENDE DES GESCHÄFTSJAHRES

Im Jahr 2010 hat Fresenius einen Rechtsformwechsel in eine Kommanditgesellschaft auf Aktien (KGaA) in Verbindung mit der Umwandlung der Vorzugsaktien in Stammaktien in die Wege geleitet. Die Änderung der Rechtsform der Fresenius SE und die Aktienumwandlung wurden am 28. Januar 2011 durch Eintragung des Rechtsformwechsels im Handelsregister wirksam. Die Eintragung war endgültig möglich geworden, nachdem sich das Unternehmen im Wege eines Prozessvergleichs mit Aktionären geeinigt hat, die Klagen gegen dieses Vorhaben erhoben hatten.

Die Gesellschaft firmiert nunmehr als Fresenius SE & Co. KGaA. Damit sind alle Aktionäre der vormaligen Fresenius SE nun Aktionäre der Fresenius SE & Co. KGaA. Im Rahmen der Transaktion wurden sämtliche stimmrechtslosen Vorzugsaktien obligatorisch im Verhältnis 1:1 in stimmberechtigte Stammaktien getauscht. Dadurch wird die Aktienstruktur vereinfacht, die Handelsliquidität der Fresenius-Aktie erhöht, die Position von Fresenius am Kapitalmarkt weiter gestärkt und der Zugang zum Eigenkapitalmarkt verbessert.

Im Januar 2011 hat Fresenius Medical Care einen Vertrag zur Übernahme von International Dialysis Centers (IDC), dem Dialysedienstleistungsgeschäft von Euromedic International, abgeschlossen. Mit der Akquisition will Fresenius Medical Care seine Aktivitäten im Bereich der Dialysedienstleistungen insbesondere in Osteuropa ausweiten, wo IDC eine marktführende Position einnimmt. IDC betreibt 70 Dialysekliniken in 9 Ländern und behandelt derzeit mehr als 8.200 Hämodialysepatienten, den Großteil davon in Mittel- und Osteuropa. Nach Abschluss der Akquisition wird IDC jährlich rund 180 Mio US\$ zum Umsatz von Fresenius Medical Care beitragen. Der Kaufpreis betrug 485 Mio €. Die Übernahme bedarf noch der Zustimmung der zuständigen Kartellbehörden und wird voraussichtlich in der ersten Jahreshälfte 2011 abgeschlossen.

Seit Ende des Geschäftsjahres 2010 haben sich keine wesentlichen Änderungen im Branchenumfeld ergeben. Sonstige Vorgänge mit wesentlicher Auswirkung auf die Vermögens-, Finanz- und Ertragslage sind seit Ende des Geschäftsjahres ebenfalls nicht eingetreten.

## ERLÄUTERUNGEN NACH DEM HANDELSGESETZBUCH

### 37. VERGÜTUNG VON VORSTAND UND AUFSICHTSRAT

Individualisierte Angaben zur Vergütung des Vorstands und des Aufsichtsrats sind im geprüften Vergütungsbericht (siehe Seite 27 ff.), der Bestandteil des Konzern-Lageberichts ist, dargestellt.

Die Vergütung des Vorstands ist in ihrer Gesamtheit leistungsorientiert und bestand im Geschäftsjahr 2010 aus drei Komponenten: erfolgsunabhängige Vergütung (Grundgehalt), erfolgsbezogene Vergütung (variabler Bonus), Komponente mit langfristiger Anreizwirkung (Aktienoptionen).

Die Barvergütung des Vorstands belief sich für die Wahrnehmung seiner Aufgaben auf 9.398 Tsd € (2009: 9.345 Tsd €). Davon entfielen 4.105 Tsd € (2009: 3.635 Tsd €) auf eine erfolgsunabhängige Vergütung und 4.685 Tsd € (2009: 5.204 Tsd €) auf eine erfolgsbezogene Vergütung. Die Höhe der erfolgsbezogenen Vergütung ist abhängig von der Erreichung von Zielen im Hinblick auf das Konzernergebnis des Fresenius-Konzerns und der Unternehmensbereiche. Als Komponente mit langfristiger Anreizwirkung erhielten die Mitglieder des

Vorstands 198.660 Aktienoptionen aus dem Fresenius SE Aktienoptionsplan 2008 bzw. 99.600 Aktienoptionen aus dem Fresenius Medical Care AG & Co. KGaA Aktienoptionsplan 2006.

Die Auszahlung eines Teils der erfolgsbezogenen Vergütung in Höhe von 897 Tsd € wurde als Komponente mit langfristiger Anreizwirkung um zwei Jahre verschoben. Die Auszahlung ist an die Erreichung von Zielen für den Konzern-Jahresüberschuss der Jahre 2011 und 2012 gebunden.

Die Vergütung des Aufsichtsrats und seiner Ausschüsse belief sich im Geschäftsjahr 2010 auf 1.782 Tsd € (2009: 1.584 Tsd €). Davon entfielen 183 Tsd € (2009: 183 Tsd €) auf Festvergütung, 100 Tsd € (2009: 100 Tsd €) auf Vergütung für Ausschusstätigkeit und 1.499 Tsd € (2009: 1.301 Tsd €) auf variable Vergütung.

Im Geschäftsjahr 2010 wurden an ausgeschiedene Vorstandsmitglieder Bezüge in Höhe von 776 Tsd € (2009: 744 Tsd €) gezahlt. Für diesen Personenkreis besteht eine Pensionsverpflichtung von 11.039 Tsd € (2009: 9.878 Tsd €).

In den Geschäftsjahren 2010 und 2009 wurden an die Mitglieder des Vorstands der vormaligen Fresenius SE keine Darlehen oder Vorschusszahlungen auf zukünftige Vergütungsbestandteile gewährt.

### 38. HONORAR DES ABSCHLUSSPRÜFERS

In den Geschäftsjahren 2010 bzw. 2009 wurden folgende Honorare für den Abschlussprüfer KPMG AG Wirtschaftsprüfungsgesellschaft im Aufwand erfasst:

| in Mio €                               | 2010      |             | 2009      |             |
|----------------------------------------|-----------|-------------|-----------|-------------|
|                                        | Gesamt    | Deutschland | Gesamt    | Deutschland |
| Abschlussprüfung                       | 15        | 5           | 14        | 5           |
| Bestätigungs- und Bewertungsleistungen | 1         | –           | –         | –           |
| Steuerberatungsleistungen              | 1         | –           | 1         | 0           |
| Sonstige Leistungen                    | –         | –           | –         | –           |
| <b>Honorar des Abschlussprüfers</b>    | <b>17</b> | <b>5</b>    | <b>15</b> | <b>5</b>    |

### 39. CORPORATE GOVERNANCE

Für jedes in den Konzernabschluss einbezogene börsennotierte Unternehmen ist die nach § 161 AktG vorgeschriebene Erklärung abgegeben und den Aktionären über die Internetseite der Fresenius SE & Co. KGaA [www.fresenius.de](http://www.fresenius.de) im Bereich Wir über uns/Corporate Governance/Entsprechenserklärung bzw. der Fresenius Medical Care AG & Co. KGaA [www.fmc-ag.de](http://www.fmc-ag.de) im Bereich Investor Relations/Corporate Governance/Entsprechenserklärung zugänglich gemacht worden.

### 40. GEWINNVERWENDUNGSVORSCHLAG

Die persönlich haftende Gesellschafterin und der Aufsichtsrat der Fresenius SE & Co. KGaA schlagen der Hauptversammlung vor, den Bilanzgewinn des Jahres 2010 der Fresenius SE (seit 28. Januar 2011: Fresenius SE & Co. KGaA) wie folgt zu verwenden:

| in €                                                                                                             |                       |
|------------------------------------------------------------------------------------------------------------------|-----------------------|
| Zahlung einer Dividende von 0,86 € je Inhaber-Stammaktie auf 162.450.090 Stück dividendenberechtigte Stammaktien | 139.707.077,40        |
| Vortrag auf neue Rechnung                                                                                        | 50.880,80             |
| <b>Bilanzgewinn</b>                                                                                              | <b>139.757.958,20</b> |

#### 41. VERSICHERUNG DER GESETZLICHEN VERTRETER

„Wir versichern nach bestem Wissen, dass gemäß den anzuwendenden Rechnungslegungsgrundsätzen der Konzernabschluss ein den tatsächlichen Verhältnissen entsprechendes Bild der Vermögens-, Finanz- und Ertragslage des Konzerns

vermittelt und im Konzern-Lagebericht der Geschäftsverlauf einschließlich des Geschäftsergebnisses und die Lage des Konzerns so dargestellt sind, dass ein den tatsächlichen Verhältnissen entsprechendes Bild vermittelt wird, sowie die wesentlichen Chancen und Risiken der voraussichtlichen Entwicklung des Konzerns beschrieben sind.“

Bad Homburg v. d. H., den 23. Februar 2011

Fresenius SE & Co. KGaA,

vertreten durch:

Fresenius Management SE, die persönlich haftende Gesellschafterin

Der Vorstand



Dr. U. M. Schneider



R. Baule



Dr. F. De Meo



Dr. J. Götz



Dr. B. Lipps



S. Sturm



Dr. E. Wastler

## BESTÄTIGUNGSVERMERK DES ABSCHLUSSPRÜFERS

An die Fresenius SE & Co. KGaA

Wir haben den von der Fresenius SE & Co. KGaA (bis zum 28. Januar 2011: Fresenius SE), Bad Homburg v. d. Höhe, aufgestellten Konzernabschluss – bestehend aus Konzern-Gewinn- und Verlustrechnung, Konzern-Gesamtergebnisrechnung, Konzern-Bilanz, Konzern-Kapitalflussrechnung, Eigenkapitalveränderungsrechnung und Konzern-Anhang – für das Geschäftsjahr vom 1. Januar bis 31. Dezember 2010 geprüft. Die Aufstellung des Konzernabschlusses nach den Accounting Principles Generally Accepted in the United States of America (US-GAAP) liegt in der Verantwortung des gesetzlichen Vertreters der Gesellschaft. Unsere Aufgabe ist es, auf der Grundlage der von uns durchgeführten Prüfung eine Beurteilung über den Konzernabschluss abzugeben. Ergänzend wurden wir beauftragt zu beurteilen, ob der zu dem Konzernabschluss nach US-GAAP freiwillig erstellte Konzern-Lagebericht, abgesehen von der zutreffenden Verwendung von US-GAAP-Finanzdaten, mit dem von der Fresenius SE & Co. KGaA gemäß § 290 und § 315 HGB aufgestellten Konzern-Lagebericht übereinstimmt.

Wir haben unsere Konzernabschlussprüfung nach § 317 HGB unter Beachtung der vom Institut der Wirtschaftsprüfer (IDW) festgestellten deutschen Grundsätze ordnungsmäßiger Abschlussprüfung vorgenommen. Danach ist die Prüfung so zu planen und durchzuführen, dass Unrichtigkeiten und Verstöße, die sich auf die Darstellung des durch den Konzernabschluss unter Beachtung der US-GAAP vermittelten Bildes der Vermögens-, Finanz- und Ertragslage wesentlich auswirken, mit hinreichender Sicherheit erkannt werden. Bei

der Festlegung der Prüfungshandlungen werden die Kenntnisse über die Geschäftstätigkeit und über das wirtschaftliche und rechtliche Umfeld des Konzerns sowie die Erwartungen über mögliche Fehler berücksichtigt. Im Rahmen der Prüfung werden die Wirksamkeit des rechnungslegungsbezogenen internen Kontrollsystems sowie Nachweise für die Angaben im Konzernabschluss überwiegend auf der Basis von Stichproben beurteilt. Die Prüfung umfasst die Beurteilung der Jahresabschlüsse der in den Konzernabschluss einbezogenen Unternehmen, der Abgrenzung des Konsolidierungskreises, der angewandten Bilanzierungs- und Konsolidierungsgrundsätze und der wesentlichen Einschätzungen des gesetzlichen Vertreters sowie die Würdigung der Gesamtdarstellung des Konzernabschlusses. Wir sind der Auffassung, dass unsere Prüfung eine hinreichend sichere Grundlage für unsere Beurteilung bildet.

Unsere Prüfung hat zu keinen Einwendungen geführt.

Nach unserer Beurteilung auf Grund der bei der Prüfung gewonnenen Erkenntnisse vermittelt der Konzernabschluss unter Beachtung der US-GAAP ein den tatsächlichen Verhältnissen entsprechendes Bild der Vermögens-, Finanz- und Ertragslage des Konzerns. Der zu dem Konzernabschluss nach den US-GAAP freiwillig erstellte Konzern-Lagebericht steht in Einklang mit dem nach den US-GAAP aufgestellten Konzernabschluss und stimmt, abgesehen von der zutreffenden Verwendung von US-GAAP-Finanzdaten, mit dem von der Fresenius SE & Co. KGaA gemäß § 290 und § 315 HGB aufgestellten Konzern-Lagebericht überein, zu dem wir einen uneingeschränkten gesetzlichen Bestätigungsvermerk erteilt haben. Danach vermittelt der Konzern-Lagebericht insgesamt ein zutreffendes Bild von der Lage des Konzerns und stellt die Chancen und Risiken der zukünftigen Entwicklung zutreffend dar.

Frankfurt am Main, den 23. Februar 2011

KPMG AG

Wirtschaftsprüfungsgesellschaft



Hölzl  
Wirtschaftsprüfer



Hommel  
Wirtschaftsprüferin



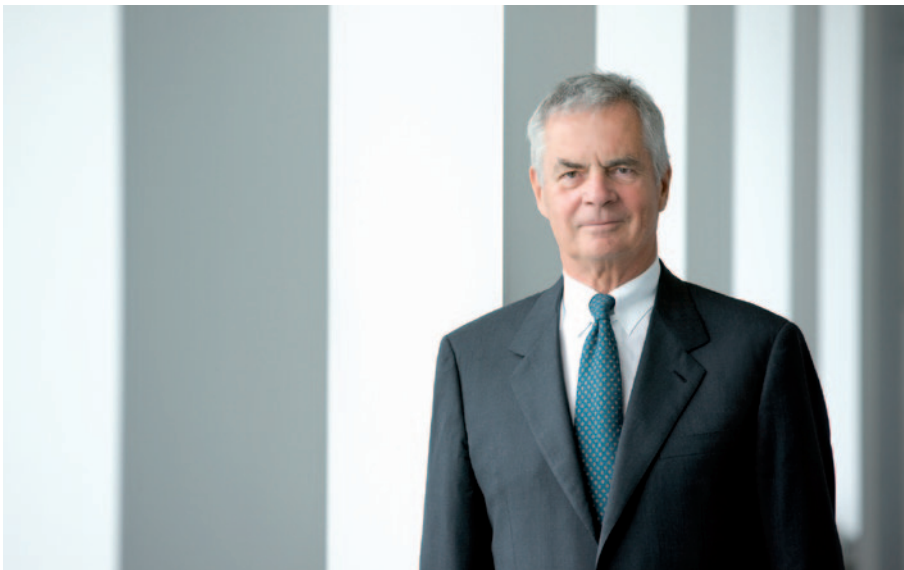

## BERICHT DES AUFSICHTSRATS

Im Geschäftsjahr 2010 wurden wichtige strukturelle Schritte eingeleitet – der Rechtsformwechsel der Gesellschaft in eine Kommanditgesellschaft auf Aktien (KGaA) und damit verbunden die Umwandlung der Vorzugsaktien in Stammaktien. Das Berichtsjahr hat die Gesellschaft noch in der Rechtsform einer SE (Societas Europaea) abgeschlossen.

Der Aufsichtsrat hat im Berichtsjahr die ihm nach Gesetz und Satzung übertragenen Aufgaben wahrgenommen. Er hat den Vorstand bei der Leitung des Unternehmens regelmäßig beraten und die Geschäftsführung überwacht. In alle Entscheidungen, die für die Gesellschaft oder für den Konzern von wesentlicher Bedeutung sind, war er unmittelbar eingebunden.

### ZUSAMMENWIRKEN VON VORSTAND UND AUFSICHTSRAT

Im Rahmen seiner Überwachungs- und Beratungstätigkeit ließ sich der Aufsichtsrat vom Vorstand regelmäßig, zeitnah und umfassend sowohl schriftlich als auch mündlich berichten, und zwar über den Geschäftsverlauf, die wirtschaftliche und finanzielle Lage sowie die Rentabilität der Gesellschaft und des Konzerns, die Strategie und Planung des Unternehmens, die Risikosituation, das Risikomanagement und die Compliance sowie über wichtige Geschäftsvorfälle.

Der Aufsichtsrat der Fresenius SE trat im Geschäftsjahr 2010 zu vier ordentlichen Sitzungen im März, Mai, Oktober und Dezember zusammen sowie zu einer außerordentlichen Sitzung am 30. März. Gegenstand der außerordentlichen Sitzung des Aufsichtsrats war insbesondere die Beschlussfassung über den Rechtsformwechsel der Gesellschaft in eine SE & Co. KGaA und über die grenzüberschreitende Verschmelzung mit der Calea Nederland N.V. Vor allen Aufsichtsratssitzungen hatte der Vorstand ausführliche Berichte und

umfassende Beschlussvorlagen an die Mitglieder des Aufsichtsrats versandt. In jeder der Sitzungen hat der Aufsichtsrat auf der Grundlage der Berichterstattungen des Vorstands die Geschäftsentwicklung und für das Unternehmen bedeutsame Entscheidungen eingehend erörtert.

Alle Angelegenheiten, die der Zustimmung des Aufsichtsrats bedurften, wurden dem Aufsichtsrat rechtzeitig zur Beschlussfassung vorgelegt. Er erteilte in allen Fällen nach der Prüfung der jeweiligen Beschlussvorlagen sowie nach ausführlicher Beratung mit dem Vorstand seine Zustimmung.

Über wichtige Geschäftsvorfälle wurde der Aufsichtsrat auch zwischen den Sitzungen unterrichtet. In dringenden Fällen nahm er Beschlussfassungen im schriftlichen Verfahren vor. Ferner setzte der Vorstandsvorsitzende den Aufsichtsratsvorsitzenden in Einzelgesprächen regelmäßig über die aktuelle Entwicklung der Geschäftslage und anstehende Entscheidungen in Kenntnis.

Mit einer Ausnahme hat jedes Mitglied des Aufsichtsrats an wenigstens der Hälfte der Aufsichtsratsitzungen im Geschäftsjahr 2010 teilgenommen. Herr Dr. Rupprecht hat an drei Sitzungen des Aufsichtsrats nicht teilnehmen können. An den Beschlussfassungen dieser Sitzungen hat er jedoch durch Übermittlung schriftlicher Stimmabgaben teilgenommen.

## SCHWERPUNKTE DER AUFSICHTSRATSARBEIT

Im Jahr 2010 war einer der Schwerpunkte, mit dem sich der Aufsichtsrat befasst hat, die Änderung der Rechtsform der Gesellschaft in eine KGaA und die damit verbundene Umwandlung der Vorzugsaktien in Stammaktien. Der Aufsichtsrat hat die einzelnen Aspekte dieser Transaktion, die vor allem die Aktienstruktur vereinfachen, die Handelsliquidität der Aktie erhöhen und den Zugang zum Eigenkapitalmarkt verbessern soll, mit dem Vorstand ausführlich erörtert. Der Aufsichtsrat hat die Auswirkungen auf die Gesellschaft und die Aktionäre abgewogen. Er ist zu der Überzeugung gekommen, dass in der gewählten Rechtsform die Interessen der Gesellschaft und ihrer Aktionäre am besten und mit einer langfristigen Perspektive gewahrt werden können. Er hat die gesamte Transaktion bis zu ihrem Abschluss begleitet und sämtliche Schritte gebilligt.

Weitere Schwerpunkte der Überwachungs- und Beratungstätigkeit des Aufsichtsrats waren das operative Geschäft sowie Investitionen und Akquisitionen der Unternehmensbereiche. Ferner hat er alle weiteren für das Unternehmen bedeutenden Geschäftsvorgänge ausführlich beraten und mit dem Vorstand besprochen. Das Budget 2011 und die mittelfristige Planung des Fresenius-Konzerns wurden geprüft und nach Besprechung mit dem Vorstand genehmigt. Der Aufsichtsrat informierte sich außerdem sowohl im Prüfungsausschuss als auch im Plenum regelmäßig über die Risikolage und das Risikomanagement des Konzerns sowie über die Compliance.

## CORPORATE GOVERNANCE

Der Aufsichtsrat und der Vorstand haben gemeinsam am 12. März 2010 die Entsprechenserklärung zum Deutschen Corporate Governance Kodex gemäß § 161 AktG abgegeben und am 1. April 2010 aktualisiert.

Vorstand und Aufsichtsrat der Fresenius SE sind dem Unternehmensinteresse verpflichtet. Sie verfolgen bei der Ausübung ihrer Tätigkeit weder persönliche Interessen, noch gewähren sie anderen Personen ungerechtfertigte Vorteile. Nebentätigkeiten oder Geschäfte der Organe mit dem Unternehmen sind dem Aufsichtsrat unverzüglich offenzulegen und bedürfen dessen Genehmigung.

Herr Müller ist Aufsichtsratsmitglied unserer Gesellschaft und Aufsichtsratsvorsitzender der Commerzbank AG, mit der der Fresenius-Konzern Geschäftsbeziehungen zu marktüblichen Konditionen unterhält. Das Aufsichtsratsmitglied Herr Dr. Rupprecht war bis zum 31. Dezember 2010 Mitglied des Vorstands der Allianz SE und bis zum 30. Juni 2010 Vorstandsvorsitzender sowie vom 1. Juli bis zum 31. Dezember Vorsitzender des Aufsichtsrats der Allianz Deutschland AG. Herr Dr. De Meo, Vorstandsmitglied der Fresenius Management SE (vormals Vorstandsmitglied der Fresenius SE), ist Aufsichtsratsmitglied der Allianz Private Krankenversicherungs-AG. Die vom Fresenius-Konzern an die Allianz gezahlten Versicherungsprämien betrugen 3 Mio € im Berichtsjahr (2009: 7 Mio €). Sie erfolgten zu marktüblichen Konditionen und in der marktüblichen Höhe.

Es bestehen keine unmittelbaren Beratungs- oder sonstigen Dienstleistungsbeziehungen zwischen der Gesellschaft und einem Aufsichtsratsmitglied. Im Geschäftsjahr 2010 bestanden jedoch Beratungsverträge mit einer Rechtsanwaltssozietät und einer Unternehmensberatung, denen jeweils ein Aufsichtsratsmitglied als Partner bzw. Gesellschafter angehört: Fresenius wurde durch die international agierende Rechtsanwaltssozietät Noerr LLP beraten. Herr Dr. Schenk, der bis zum 28. Januar 2011 Aufsichtsratsmitglied der Fresenius SE war, ist zugleich Partner dieser Sozietät. Der Fresenius-Konzern hat der Anwaltssozietät 1 Mio € für erbrachte Dienstleistungen im Jahr 2010 gezahlt (2009: 1 Mio €). Dies entspricht 1,5 % der Rechtsberatungsaufwendungen des Fresenius-Konzerns im Jahr 2010 (2009: 1,6 %). Ferner wurde Fresenius von der Unternehmensberatung Roland Berger Strategy Consultants beraten. Herr Prof. Dr. h. c. Berger ist Aufsichtsratsmitglied unserer Gesellschaft und zugleich Gesellschafter der Roland Berger Strategy Consultants. Bis zum 1. August 2010 war er auch deren Aufsichtsratsvorsitzender. Der Fresenius-Konzern hat dieser Gesellschaft 0,2 Mio € für erbrachte Dienstleistungen im Jahr 2010 gezahlt. Im Jahr 2009 wurden keine Dienstleistungen erbracht und keine Honorare gezahlt.

Der Prüfungsausschuss des Aufsichtsrats und der Aufsichtsrat der Fresenius SE haben sich mit den beiden vorgenannten Mandatierungen eingehend beschäftigt. Der Aufsichtsrat hat diesen Mandatierungen jeweils bei Stimmenthaltung von Herrn Dr. Schenk bzw. Herrn Prof. Dr. h. c. Berger zugestimmt.

In der ordentlichen Hauptversammlung 2010 wurden die Anteilseignervertreter gewählt, die dem Aufsichtsrat seit dem Wirksamwerden des Rechtsformwechsels am 28. Januar 2011 angehören. Entgegen dem sonst üblichen Verfahren hatte der Nominierungsausschuss in diesem Zusammenhang vorsorglich darauf verzichtet, dem Aufsichtsrat der Fresenius SE Kandidaten für dessen Wahlvorschläge an die ordentliche Hauptversammlung 2010 vorzuschlagen. Die Wahlvorschläge an die Hauptversammlung stammen also unmittelbar vom Gesamtaufichtsrat. Hintergrund ist, dass dem dreiköpfigen Nominierungsausschuss die Herren Dr. Dieter Schenk und Dr. Karl Schneider angehörten. Diese sind auch Mitglieder des Verwaltungsrats der Else Kröner-Fresenius-Stiftung und Testamentsvollstrecker über den Nachlass von Frau Else Kröner. Die Else Kröner-Fresenius-Stiftung ist alleinige Aktionärin der persönlich haftenden Gesellschafterin der Fresenius SE & Co. KGaA. Um einen Einfluss auf die Besetzung des Aufsichtsrats der KGaA zu vermeiden, ist sie kraft Gesetzes gehindert, an der Wahl des Aufsichtsrats der KGaA teilzunehmen. Diesem gesetzlichen Anliegen trug der Aufsichtsrat Rechnung, indem er ausnahmsweise von einer Befassung seines Nominierungsausschusses absah. An der Beschlussfassung des Aufsichtsratsplenums über die Wahlvorschläge an die Hauptversammlung haben die Herren Dr. Schenk und Dr. Schneider allerdings teilgenommen. Die Wahlen zum Aufsichtsrat der KGaA standen in engem Sachzusammenhang mit dem Rechtsformwechsel in die KGaA und der mit ihm verbundenen Umwandlung der Vorzugsaktien in Stammaktien. Daher hat der Aufsichtsrat diese Vorgänge und die notwendigen Beschluss- und Wahlvorschläge an die Hauptversammlung auch zusammenhängend beraten und entschieden. Angesichts der besonderen Bedeutung dieser Maßnahmen wäre es nach Überzeugung des Aufsichtsrats nicht sachgerecht gewesen, wenn die Herren Dr. Schenk und Dr. Schneider an den Beratungen und Beschlussfassungen des Aufsichtsratsplenums nicht teilgenommen hätten.

Weitergehende Erläuterungen zur Corporate Governance bei Fresenius sind der Erklärung zur Unternehmensführung und dem Corporate-Governance-Bericht auf den Seiten 14 bis 33 des Geschäftsberichts zu entnehmen. Die Angaben zu den nahe stehenden Personen hat Fresenius in den Quartalsberichten sowie im Geschäftsbericht auf Seite 198 öffentlich gemacht.

## ARBEIT DER AUSSCHÜSSE

Der Personalausschuss des Aufsichtsrats der Fresenius SE, der zuständig war für die Unterbreitung von Vorschlägen für das Vergütungssystem für den Vorstand der Fresenius SE und für die Vergütung der einzelnen Vorstandsmitglieder sowie für die Beschlussfassung über die nicht vergütungsrelevanten Bedingungen der Verträge mit den Vorstandsmitgliedern, traf sich im Berichtsjahr zu zwei Sitzungen und hielt eine Telefonkonferenz ab. Der Personalausschuss hat u. a. die Umsetzung des Gesetzes zur Angemessenheit der

Vorstandsvergütung (VorstAG) vorbereitet, darunter die Anpassung des Vergütungssystems des Vorstands an die Anforderungen des VorstAG. Ferner hat er sich mit einer Vereinbarung eines Selbstbehalts für Vorstand und Aufsichtsrat im Rahmen der D & O-Versicherung befasst.

Der Prüfungsausschuss trat im Berichtsjahr zu drei Sitzungen zusammen und hielt darüber hinaus vier Telefonkonferenzen ab. Im Blickpunkt seiner Überwachungstätigkeit standen dabei die Vorprüfung des Jahresabschlusses und der Konzernabschlüsse für das Geschäftsjahr 2009 sowie die Erörterung der Prüfungsberichte und der Prüfungsschwerpunkte mit dem Wirtschaftsprüfer. Außerdem hat sich der Prüfungsausschuss mit der Empfehlung an den Aufsichtsrat für den Vorschlag zur Wahl des Abschlussprüfers für den Jahresabschluss und die Konzernabschlüsse für das Geschäftsjahr 2010 befasst. Der Vorschlag des Aufsichtsrats an die ordentliche Hauptversammlung 2010, die KPMG AG Wirtschaftsprüfungsgesellschaft, Berlin, zu wählen, ging auf eine entsprechende Empfehlung des Prüfungsausschusses zurück. Schließlich beschäftigte sich der Prüfungsausschuss eingehend mit den Quartalsberichten des Jahres 2010, der Kontrollrechnung zur Entwicklung der Unternehmenskäufe sowie der Überprüfung des Risikomanagementsystems, des internen Kontrollsystems und des internen Revisionssystems.

Der Nominierungsausschuss hielt im Berichtsjahr zwei Telefonkonferenzen ab.

Über die Arbeit der Ausschüsse haben die Ausschussvorsitzenden dem Aufsichtsrat regelmäßig in den jeweils folgenden Sitzungen berichtet.

Einen Vermittlungsausschuss gibt es nicht, da das Mitbestimmungsgesetz, das einen solchen Ausschuss vorsieht, für die Gesellschaft in der Rechtsform der Societas Europaea nicht galt.

Weitere Informationen zu den Ausschüssen, zu deren Zusammensetzung und zu deren Arbeitsweise finden Sie in der Erklärung zur Unternehmensführung und im Corporate-Governance-Bericht auf Seite 19 und 20 des Geschäftsberichts sowie auf Seite 210 des Geschäftsberichts.

## **PERSONALIEN – BESETZUNG VON VORSTAND UND AUFSICHTSRAT**

Im Geschäftsjahr 2010 fanden keine Veränderungen in der Besetzung von Vorstand und Aufsichtsrat der Fresenius SE statt.

Am 28. Januar 2011 wurden der Rechtsformwechsel und die grenzüberschreitende Verschmelzung wirksam. Dadurch endete die Amtszeit der bisherigen Aufsichtsratsmitglieder, sodass der Aufsichtsrat neu zu besetzen war. Ein hierzu durchgeführtes Statusverfahren hat ergeben, dass sich der Aufsichtsrat der Fresenius SE & Co. KGaA nach den Vorschriften des Gesetzes über die Mitbestimmung der Arbeitnehmer bei einer grenzüberschreitenden Verschmelzung (MgVG) wie bisher paritätisch aus je sechs Anteilseigner- und Arbeitnehmervertretern zusammensetzt.

In Vorbereitung auf das Wirksamwerden des Rechtsformwechsels der Fresenius SE in eine Kommanditgesellschaft auf Aktien (KGaA) hatte die Hauptversammlung bereits die Anteilseignervertreter im Aufsichtsrat der Fresenius SE & Co. KGaA gewählt. Dabei handelt es sich um die Herren Dr. Gerd Krick, Prof. Dr. h. c. Roland Berger, Klaus-Peter Müller und Dr. Gerhard Rupprecht, die alle bereits Aufsichtsratsmitglieder der Fresenius SE waren. Zusätzlich wurden die Herren Prof. Dr. D. Michael Albrecht und Gerhard Roggemann gewählt. Die Herren Dr. Dieter Schenk und Dr. Karl Schneider, die bislang Aufsichtsratsmitglieder der Fresenius SE waren, gehören dem Aufsichtsrat der Fresenius SE & Co. KGaA nicht an, sondern ausschließlich dem Aufsichtsrat der Fresenius Management SE. Der Aufsichtsrat dankt Herrn Dr. Schenk und Herrn Dr. Schneider für ihre über ein Jahrzehnt dauernde, langjährige wertvolle Mitarbeit im Aufsichtsrat der Fresenius AG, der Fresenius SE und in den Ausschüssen sowie für ihren Einsatz zum Wohle des Unternehmens, seiner Mitarbeiterinnen und Mitarbeiter.

Die sechs Arbeitnehmervertreter im Aufsichtsrat wurden mit Beschluss des Amtsgerichts Bad Homburg v. d. H. vom 31. Januar 2011 zunächst gerichtlich bestellt. Dabei handelt es sich um die Herren Dario Ilossi, Konrad Kölbl, Wilhelm Sachs, Stefan Schubert, Rainer Stein und Niko Stumpfögger. Alle Herren gehörten bereits dem Aufsichtsrat der Fresenius SE an.

Durch den Rechtsformwechsel der Gesellschaft in eine KGaA endeten auch die Mandate der Vorstandsmitglieder der Fresenius SE. Die Fresenius SE & Co. KGaA selbst hat keinen Vorstand. Die Geschäftsführung der Gesellschaft wird vielmehr von der persönlich haftenden Gesellschafterin, der Fresenius Management SE, wahrgenommen. Der Vorstand der Fresenius Management SE ist in seiner personellen Zusammensetzung identisch mit dem bisherigen Vorstand der Fresenius SE.

## **JAHRES- UND KONZERNABSCHLUSS**

Die Buchführung, der nach den Rechnungslegungsvorschriften des HGB aufgestellte Jahresabschluss und der Lagebericht der Gesellschaft für das Geschäftsjahr 2010 wurden geprüft von der KPMG AG Wirtschaftsprüfungsgesellschaft, Berlin. Dies erfolgte gemäß Beschluss der ordentlichen Hauptversammlung der Fresenius SE vom 12. Mai 2010 und dem anschließenden Auftrag durch den Aufsichtsrat. Jahresabschluss und Lagebericht sind mit dem uneingeschränkten Bestätigungsvermerk des Abschlussprüfers versehen. Gleiches gilt für die Konzernabschlüsse der Gesellschaft, die nach IFRS sowie auf freiwilliger Basis nach US-GAAP aufgestellt wurden.

Jahresabschluss, Konzernabschlüsse, die Lageberichte sowie die Prüfungsberichte des Abschlussprüfers lagen jedem Aufsichtsratsmitglied der Gesellschaft rechtzeitig vor. In ihren Sitzungen am 10. und 11. März 2011 erörterten zunächst der Prüfungsausschuss und sodann der Aufsichtsrat alle Unterlagen eingehend.

Der Abschlussprüfer berichtete jeweils in beiden Sitzungen über die wesentlichen Ergebnisse seiner Prüfungen. Schwächen des Risikomanagementsystems und des internen Kontrollsystems bezogen auf den Rechnungslegungsprozess hat der Abschlussprüfer nicht festgestellt. Der Abschlussprüfer nahm an allen Sitzungen des Aufsichtsrats und des Prüfungsausschusses teil.

Von den Prüfungsergebnissen des Abschlussprüfers nahmen der Prüfungsausschuss und der Aufsichtsrat zustimmend Kenntnis. Auch nach dem abschließenden Ergebnis der eigenen Prüfung hatte der Aufsichtsrat keine Einwendungen gegen den Jahresabschluss und den Lagebericht der Gesellschaft sowie gegen die Konzernabschlüsse und die Konzern-Lageberichte. Der Aufsichtsrat billigte in seiner Sitzung am 11. März 2011 die von der persönlich haftenden Gesellschafterin vorgelegten Abschlüsse und Lageberichte und die darin enthaltenen Aussagen zur weiteren Unternehmensentwicklung.

Dem Vorschlag der persönlich haftenden Gesellschafterin über die Verwendung des Bilanzgewinns für das Geschäftsjahr 2010 schließt sich der Aufsichtsrat an.

Der Aufsichtsrat dankt den Mitgliedern des Vorstands der persönlich haftenden Gesellschafterin und allen Mitarbeiterinnen und Mitarbeitern für ihre herausragenden Leistungen in einem nach wie vor wirtschaftlich schwierigen Umfeld.

Bad Homburg v. d. H., 11. März 2011

Der Aufsichtsrat



Dr. Gerd Krick  
Vorsitzender



# GREMIEN

## AUFSICHTSRAT FRESENIUS SE & CO. KGAA

### Dr. Gerd Krick

Königstein

Ehemaliger Vorstandsvorsitzender

Fresenius AG

Vorsitzender

#### Mandate

##### Aufsichtsrat

Fresenius Management SE  
(seit 11. März 2010; Vorsitzender seit 12. Mai 2010)  
Fresenius Medical Care AG & Co. KGaA (Vorsitzender)  
Fresenius Medical Care Management AG  
Fresenius SE (bis 28. Januar 2011; Vorsitzender)  
VAMED AG, Österreich (Vorsitzender)

### Prof. Dr. med. D. Michael Albrecht

Dresden

Medizinischer Vorstand und Sprecher

des Vorstands des Universitätsklinikums

Carl Gustav Carus Dresden

#### Mandate

##### Aufsichtsrat

GÖK Consulting AG  
HELIOS Kliniken GmbH (bis 31. Mai 2010)  
Universitätsklinikum Aachen  
Universitätsklinikum Rostock  
Universitätsklinikum Magdeburg

### Prof. Dr. h. c. Roland Berger

München

Unternehmensberater

#### Mandate

##### Aufsichtsrat

Fresenius Management SE (seit 12. Mai 2010)  
Fresenius SE (bis 28. Januar 2011)  
Live Holding AG (bis 31. August 2010; Vorsitzender)  
Prime Office AG (Vorsitzender)  
Roland Berger Strategy Consultants Holding GmbH  
(Vorsitzender bis 1. August 2010;  
Ehrenvorsitzender seit 1. August 2010)  
Schuler AG  
Senator Entertainment AG (bis 16. April 2010)  
Wilhelm von Finck AG (stellvertretender Vorsitzender)  
WMP EuroCom AG (Vorsitzender)

#### Board of Directors

3W Power Holdings S.A., Luxemburg (Vorsitzender)  
(früher SPAC Germany 1 Acquisition Limited, Guernsey)  
Fiat S.p.A., Italien  
Italy 1 Investment S.A., Luxemburg (seit 26. August 2010;  
stellvertretender Vorsitzender)  
Loyalty Partner Holdings S.A., Luxemburg  
RCS Mediagroup S.p.A., Italien (seit 17. Dezember 2010)  
Telecom Italia S.p.A., Italien

#### Verwaltungsrat

Wittelsbacher Ausgleichsfonds

### Dario Anselmo Ilossi

(seit 31. Januar 2011)

Rom, Italien

Gewerkschaftsführer FEMCA Cisl –

Energie, Mode und Chemie

#### Mandate

##### Aufsichtsrat

Fresenius SE (bis 28. Januar 2011)

### Konrad Kölbl

(seit 31. Januar 2011)

Hof am Laithagebirge, Österreich

Freigestellter Betriebsrat

Arbeiterbetriebsrat der VAMED-KMB

Krankenhausmanagement

und Betriebsführungsges. m.b.H.

Konzernbetriebsratsvorsitzender der

VAMED AG

#### Konzernmandate

##### Aufsichtsrat

Fresenius SE (bis 28. Januar 2011)  
VAMED-KMB Krankenhausmanagement und  
Betriebsführungsges. m.b.H., Österreich

### Klaus-Peter Müller

Bad Homburg v. d. H.

Vorsitzender des Aufsichtsrats

der Commerzbank AG

#### Mandate

##### Aufsichtsrat

Commerzbank AG (Vorsitzender)  
Fraport AG (bis 31. Dezember 2010)  
Fresenius Management SE (seit 12. Mai 2010)  
Fresenius SE (bis 28. Januar 2011)  
Linde AG

#### Board of Directors

Parker Hannifin Corporation, USA

#### Verwaltungsrat

Assicurazioni Generali S.p.A., Italien (bis 24. April 2010)  
Landwirtschaftliche Rentenbank

### Gerhard Roggemann

Hannover

Vice Chairman (Mitglied der

Geschäftsleitung) von Hawkpoint

Partners Ltd., Großbritannien

#### Mandate

##### Aufsichtsrat

Deutsche Beteiligungs AG (seit 24. März 2010)  
Deutsche Börse AG (stellvertretender Vorsitzender)  
GP Günter Papenburg AG (Vorsitzender)

#### Board of Directors

F & C Asset Management plc, Großbritannien  
Friends Provident Holdings (UK) plc, Großbritannien  
Resolution Ltd., Guernsey

### Dr. Gerhard Rupprecht

Gerlingen

Mitglied des Vorstands der Allianz SE

(bis 31. Dezember 2010)

Vorsitzender des Vorstands der Allianz

Deutschland AG (bis 30. Juni 2010)

Stellvertretender Vorsitzender

#### Mandate

##### Aufsichtsrat

Allianz Beratungs- und Vertriebs-AG  
(bis 30. Juni 2010; Vorsitzender)  
Allianz Deutschland AG (vom 1. Juli 2010 bis  
31. Dezember 2010; Vorsitzender)  
Allianz Elementar Lebensversicherungs-AG  
(bis 31. Dezember 2010; Vorsitzender)  
Allianz Elementar Versicherungs-AG  
(bis 31. Dezember 2010; Vorsitzender)  
Allianz Investmentbank AG  
(bis 31. Dezember 2010; stellvertretender Vorsitzender)  
Allianz Lebensversicherungs-AG  
(bis 30. Juni 2010; Vorsitzender)  
Allianz Private Krankenversicherungs-AG  
(bis 30. Juni 2010; Vorsitzender)  
Allianz Suisse Lebensversicherungs-AG, Schweiz  
(bis 31. Dezember 2010)  
Allianz Suisse Versicherungs-AG, Schweiz  
(bis 31. Dezember 2010)  
Allianz Versicherungs-AG  
(bis 30. Juni 2010; Vorsitzender)  
Fresenius Management SE (seit 12. Mai 2010)  
Fresenius SE (bis 28. Januar 2011)  
Heidelberger Druckmaschinen AG

## AUFSICHTSRAT FRESENIUS SE & CO. KGAA

### Wilhelm Sachs

(seit 31. Januar 2011)

Friedrichsdorf

Freigestellter Betriebsrat

Stellvertretender Vorsitzender des Betriebsrats Werk Friedberg

Mitglied des Gemeinschaftsbetriebsrats der Fresenius SE & Co. KGaA/Standort Friedberg

Vorsitzender des Gesamtbetriebsrats der Fresenius SE & Co. KGaA

#### Konzernmandate Aufsichtsrat

Fresenius SE (bis 28. Januar 2011)

### Stefan Schubert

(seit 31. Januar 2011)

Limburg-Staffel

Krankenpfleger und freigestellter Betriebsrat

Betriebsratsvorsitzender der HELIOS Klinik Bad Schwalbach und der HELIOS Klinik Idstein

Konzernbetriebsratsvorsitzender der Wittgensteiner Kliniken GmbH

#### Konzernmandate Aufsichtsrat

Fresenius SE (bis 28. Januar 2011)  
Wittgensteiner Kliniken GmbH

### Rainer Stein

(seit 31. Januar 2011)

Berlin

Freigestellter Betriebsrat

Vorsitzender des Konzernbetriebsrats der HELIOS Kliniken GmbH

#### Konzernmandate Aufsichtsrat

Fresenius SE (bis 28. Januar 2011)  
HELIOS Kliniken GmbH

### Niko Stumpfögger

(seit 31. Januar 2011)

Zeuthen

Gewerkschaftssekretär ver.di,  
Betriebs- und Branchenpolitik im  
Bereich Gesundheit und Soziales  
Stellvertretender Vorsitzender

#### Mandate Aufsichtsrat

Fresenius SE (bis 28. Januar 2011;  
stellvertretender Vorsitzender)  
HELIOS Kliniken GmbH (stellvertretender Vorsitzender)

## AUSSCHÜSSE DES AUFSICHTSRATS

### Personalausschuss (bis 28. Januar 2011)

Dr. Gerd Krick (Vorsitzender)<sup>1</sup>

Wilhelm Sachs<sup>1</sup>

Dr. Karl Schneider<sup>1,2</sup>

Der Personalausschuss entfällt in der Rechtsform der KGaA.

### Nominierungsausschuss

Dr. Gerd Krick (Vorsitzender)<sup>1,3</sup>

Prof. Dr. h. c. Roland Berger<sup>3</sup>

Dr. Gerhard Rupprecht<sup>3</sup>

Dr. Dieter Schenk<sup>1,2</sup>

Dr. Karl Schneider<sup>1,2</sup>

### Prüfungsausschuss

Prof. Dr. h. c. Roland Berger

(Vorsitzender)<sup>1,3</sup>

Konrad Kölbl<sup>1,3</sup>

Dr. Gerd Krick<sup>1,3</sup>

Gerhard Roggemann<sup>3</sup>

Rainer Stein<sup>1,3</sup>

Dr. Karl Schneider<sup>1,2</sup>

<sup>1</sup> Ausschussmitglied im Aufsichtsrat der Rechtsvorgängerin Fresenius SE bis 28. Januar 2011

<sup>2</sup> Aufsichtsratsmitglied der Rechtsvorgängerin Fresenius SE bis 28. Januar 2011

<sup>3</sup> Ausschussmitglied im Aufsichtsrat der Fresenius SE & Co. KGaA seit 11. März 2011

## VORSTAND FRESENIUS MANAGEMENT SE

(persönlich haftende Gesellschafterin der Fresenius SE & Co. KGaA)

### Dr. Ulf M. Schneider<sup>1</sup>

Frankfurt am Main

Vorsitzender

#### Konzernmandate

##### Aufsichtsrat

Fresenius HemoCare Netherlands B.V., Niederlande  
Fresenius Kabi AG (Vorsitzender)  
Fresenius Kabi Austria GmbH, Österreich  
(bis 30. Juni 2010)  
Fresenius Kabi España S.A., Spanien  
Fresenius Medical Care Groupe France S.A.S., Frankreich  
(Vorsitzender)  
Fresenius Medical Care Management AG (Vorsitzender)  
HELIOS Kliniken GmbH (Vorsitzender)

##### Board of Directors

APP Pharmaceuticals, Inc., USA  
FHC (Holdings), Ltd., Großbritannien  
Fresenius Kabi Pharmaceuticals Holding, Inc., USA

### Rainer Baule<sup>1</sup>

Ettlingen

Unternehmensbereich Fresenius Kabi

#### Konzernmandate

##### Aufsichtsrat

Fresenius HemoCare Netherlands B.V., Niederlande  
(Vorsitzender)  
Fresenius Kabi Austria GmbH, Österreich (Vorsitzender)  
Fresenius Kabi España S.A., Spanien  
Labesfal – Laboratórios Almiro, S.A., Portugal

##### Board of Directors

APP Pharmaceuticals, Inc., USA  
Dabur Pharma (Thailand) Co. Ltd., Thailand  
FHC (Holdings) Ltd., Großbritannien  
Fresenius Kabi Asia Pacific Ltd., Hongkong  
Fresenius Kabi Oncology Inc., USA (bis 24. März 2010)  
Fresenius Kabi Oncology Plc., Großbritannien  
Fresenius Kabi Pharmaceuticals Holding, Inc., USA  
Fresenius Kabi (Singapore) Pte Ltd., Singapur

##### Verwaltungsrat

Fresenius Kabi Groupe France S.A., Frankreich  
(Vorsitzender)  
Fresenius Kabi Italia S.p.A., Italien

### Dr. Francesco De Meo<sup>1</sup>

Petersberg

Unternehmensbereich Fresenius Helios

#### Konzernmandate

##### Aufsichtsrat

HELIOS Klinikum Bad Saarow GmbH (Vorsitzender)  
HELIOS Klinikum Emil von Behring GmbH (Vorsitzender)  
HELIOS Klinikum Erfurt GmbH  
(Vorsitzender seit 12. Januar 2010)  
HELIOS Klinikum Krefeld GmbH (bis 31. Oktober 2010)  
HELIOS Kliniken Leipziger Land GmbH  
(Vorsitzender seit 15. Januar 2010)  
HELIOS Kliniken Mansfeld-Südharz GmbH  
(seit 12. Januar 2010; Vorsitzender seit 4. März 2010)  
HELIOS Kliniken Schwerin GmbH (Vorsitzender)  
HELIOS Spital Überlingen GmbH (Vorsitzender)

##### Mandate

##### Aufsichtsrat

Allianz Private Krankenversicherungs-AG

### Dr. Jürgen Götz<sup>1</sup>

Bad Soden am Taunus

Recht, Compliance, Personal

#### Konzernmandate

##### Aufsichtsrat

HELIOS Kliniken GmbH  
Wittgensteiner Kliniken GmbH (Vorsitzender)

### Dr. Ben Lipps<sup>1</sup>

Boston, Massachusetts (USA)

Unternehmensbereich

Fresenius Medical Care

#### Konzernmandate

##### Vorstand

Fresenius Medical Care Management AG (Vorsitzender)

### Stephan Sturm<sup>1</sup>

Hofheim am Taunus

Finanzen

#### Konzernmandate

##### Aufsichtsrat

Fresenius HemoCare Netherlands B.V., Niederlande  
Fresenius Kabi AG (stellvertretender Vorsitzender)  
Fresenius Kabi España S.A., Spanien  
HELIOS Kliniken GmbH  
Labesfal – Laboratórios Almiro, S.A., Portugal  
VAMED AG, Österreich (stellvertretender Vorsitzender)  
Wittgensteiner Kliniken GmbH

##### Board of Directors

FHC (Holdings) Ltd., Großbritannien

##### Verwaltungsrat

Fresenius Kabi Groupe France S.A., Frankreich

### Dr. Ernst Wastler<sup>1</sup>

Linz, Österreich

Unternehmensbereich

Fresenius Vamed

#### Konzernmandate

##### Aufsichtsrat

Charité CFM Facility Management GmbH  
(stellvertretender Vorsitzender)  
VAMED-KMB Krankenhausmanagement und  
Betriebsführungsges. m.b.H., Österreich (Vorsitzender)

<sup>1</sup> Mitglied des Vorstands der Fresenius SE bis 28. Januar 2011

AUFSICHTSRAT FRESENIUS MANAGEMENT SE

(persönlich haftende Gesellschafterin der Fresenius SE & Co. KGaA)

**Dr. Gerd Krick**  
Königstein  
Vorsitzender

**Prof. Dr. h. c. Roland Berger**  
München

**Klaus-Peter Müller**  
Bad Homburg v. d. H.

**Dr. Gerhard Rupprecht**  
Gerlingen

**Dr. Dieter Schenk**  
München  
Rechtsanwalt und Steuerberater  
Stellvertretender Vorsitzender

**Mandate**  
**Aufsichtsrat**  
Fresenius Medical Care AG & Co. KGaA  
(stellvertretender Vorsitzender)  
Fresenius Medical Care Management AG  
(stellvertretender Vorsitzender)  
Fresenius SE (bis 28. Januar 2011;  
stellvertretender Vorsitzender)  
Gabor Shoes AG (Vorsitzender)  
Greiffenberger AG (stellvertretender Vorsitzender)  
TOPTICA Photonics AG (Vorsitzender)

**Verwaltungsrat**  
Else Kröner-Fresenius-Stiftung (Vorsitzender)

**Dr. Karl Schneider**  
Mannheim  
Ehemaliger Vorstandssprecher  
Südzucker AG

**Mandate**  
**Aufsichtsrat**  
Fresenius SE (bis 28. Januar 2011)

**Verwaltungsrat**  
Else Kröner-Fresenius-Stiftung  
(stellvertretender Vorsitzender)

# GLOSSAR

## Begriffe aus dem Gesundheitswesen/Produkte und Dienstleistungen

### 3-Kammerbeutel

Der 3-Kammerbeutel enthält alle Makronährstoffe wie Aminosäuren, Glukose und Lipide sowie Elektrolyte in drei separaten Kammern. Erst unmittelbar vor der Infusion werden durch einfaches Öffnen der einzelnen Kammern alle Nährstoffe im Beutel vermischt. Dies verringert das Kontaminationsrisiko und führt zu Zeitersparnis bei der Vorbereitung von Infusionen.

### Antikörper

Zu den Gammaglobulinen gehörende Gruppe von Immunglobulinen (Eiweißkörper), die von B-Lymphozyten und Plasmazellen als Antwort des Immunsystems nach Kontakt des Organismus mit Antigenen gebildet und in die Körperflüssigkeiten abgegeben werden. Antikörper reagieren gezielt mit speziellen Antigenen.

### Aszites

Krankhafte Flüssigkeitsansammlung in der freien Bauchhöhle, umgangssprachlich auch Bauchwassersucht. Von malignem Aszites spricht man, wenn die Ursache der Bauchwassersucht auf eine Tumorerkrankung zurückzuführen ist.

### ATG-Fresenius S (Anti-T-Lymphozytenglobulin)

Polyklonaler Antikörper, der spezifisch an die T-Lymphozyten bindet und so dazu beiträgt, die immunologische Abwehrreaktion zu unterdrücken. Der Antikörper wird bei der Transplantation von Organen und in einigen Ländern auch bei Stammzelltransplantationen angewendet.

### CompoFlow-Konzept

Das CompoFlow-Konzept besteht aus drei Komponenten: dem Blutkomponentenseparator CompoMat G5, dem CompoFlow Blutbeutelssystem und einem tragbaren Gerät zur Öffnung der CompoFlow Blutbeutelventile. Durch dieses Konzept werden mögliche Anwendungsfehler beim manuellen Öffnen der Standardventile reduziert.

### Compounding

Mischen von unterschiedlichen Lösungen oder Komponenten zur I.V.- oder parenteralen Ernährungstherapie.

### Dialysator

Spezieller Filter, der in der Hämodialyse zur Entfernung von Schadstoffen und Endprodukten des Stoffwechsels sowie zur Abscheidung überschüssigen Wassers aus dem Blut verwendet wird. Häufig als „künstliche Niere“ bezeichnet.

### Dialyse

Form der Nierenersatztherapie, bei der eine halbdurchlässige Membran – in der Peritonealdialyse das Peritoneum (Bauchfell), in der Hämodialyse die Membran des Dialysators – zur Reinigung des Blutes eines Patienten genutzt wird.

### Dialysegerät

Der Hämodialyseprozess wird durch ein Dialysegerät gesteuert, das Blut pumpt, gerinnungshemmende Mittel zusetzt, den Reinigungsprozess reguliert sowie die Mischung der Dialysierlösung und ihre Fließgeschwindigkeit durch das System steuert.

### Dialyselösung

Bei der Dialyse verwendete Flüssigkeit, um die während der Behandlung herausgefilterten Stoffe und überschüssiges Wasser aus dem Blut abzutransportieren.

### Enterale Ernährung

Zufuhr von Nährstoffen als Trink- und Sondennahrung unter Einbeziehung des Magen-Darm-Traktes.

### EPO (Erythropoietin)

Hormon, das die Produktion roter Blutkörperchen anregt. Rekombinantes, also künstlich hergestelltes, Human-EPO wird üblicherweise Dialysepatienten verschrieben, die an Anämie leiden.

### FDA (U.S. Food and Drug Administration)

Die behördliche Lebensmittelüberwachung und die Arzneimittelzulassungsbehörde der USA.

### Graft-versus-Host-Disease (GvHD)

Abstoßungsreaktion nach Transplantation, verursacht durch T-Zellen in dem Spendertransplantat, die den Empfängerorganismus angreifen.

### Grundlohnrate

Die Grundlohnrate (=Veränderungsrate) wird vom Bundesministerium für Gesundheit einmal jährlich auf Basis der Entwicklung der beitragspflichtigen Einnahmen aller Mitglieder der gesetzlichen Krankenversicherung festgelegt und dient als Grundlage für die jährlich zu verhandelnden Preissteigerungen der Krankenhausleistungen.

### Hämodiafiltration (HDF)

Spezielle Form der Behandlung von Patienten mit chronischem Nierenversagen (ESRD), in der die Vorteile der Hämodialyse und der Hämofiltration kombiniert genutzt werden, d. h. es werden hohe Eliminationsraten für Substanzen mit niedrigem und hohem Molekulargewicht mittels Diffusion bzw. Konvektion erzielt.

## Begriffe aus dem Gesundheitswesen/Produkte und Dienstleistungen

### Hämodialyse (HD)

Behandlungsmethode für Dialysepatienten, bei der das Blut des Patienten durch einen Dialysator gereinigt wird. Der Austausch löslicher Substanzen zwischen Blut und Dialysierflüssigkeit wird durch Diffusionsprozesse geregelt.

### Intraperitoneal

Gabe eines Medikamentes in die Bauchhöhle (Peritoneum).

### Kalzimimetika

Erweiterung der Therapieoptionen zur wirkungsvollen Beeinflussung des Knochen- und Mineralstoffwechsels bei chronisch Nierenkranken. Kalzimimetika werden bei einer Schilddrüsenüberfunktion verabreicht, die bei Dialysepatienten häufig auftritt.

### Kristalloide

Lösungen, die Elektrolyte, wie Natrium oder Chlorid, enthalten. Kristalloide Lösungen werden eingesetzt, um Flüssigkeitsverluste bei Patienten auszugleichen. Des Weiteren können Kristalloide für den Ausgleich von kurzzeitigen Blutverlusten verwendet werden. Ferner dienen Kristalloide als Trägerlösungen für intravenös verabreichte Arzneimittel.

### Medizinisches Versorgungszentrum (MVZ)

Fachübergreifende Einrichtung zur ambulanten Krankenversorgung, die unter ärztlicher Leitung steht. Träger eines MVZ können alle Leistungserbringer (z. B. Ärzte, Apotheker, Gesundheitseinrichtungen) sein, die zur medizinischen Versorgung gesetzlich versicherter Patienten ermächtigt sind.

### Parenterale Ernährungstherapie

Zufuhr lebenswichtiger Nährstoffe direkt in die Blutbahn (intravenös). Diese wird notwendig, wenn der Zustand des Patienten es nicht zulässt, dass Nährstoffe in ausreichender Menge oral oder als Trink- und Sondernahrung aufgenommen und verstoffwechselt werden.

### Peritonealdialyse (PD)

Behandlungsmethode in der Dialyse, bei der das Peritoneum (Bauchfell) des Patienten als „Filter“ für die Blutreinigung genutzt wird.

### Polyklonale Antikörper

Antikörper, die eine bestimmte Struktur erkennen, jedoch von verschiedenen Zellklonen produziert werden.

### Prävalenz

Kennzahl, die aussagt, wie viele Menschen einer bestimmten Gruppe (Population) definierter Größe – üblicherweise 10.000 oder eine Million – an einer bestimmten Krankheit erkrankt sind.

### Public-Private-Partnership (PPP)

Als Public-Private-Partnership wird die Mobilisierung privaten Kapitals und Fachwissens zur Erfüllung staatlicher Aufgaben bezeichnet. Im weiteren Sinn steht der Begriff auch für andere Arten des kooperativen Zusammenwirkens von Hoheitsträgern mit privaten Wirtschaftssubjekten. PPP geht in vielen Fällen mit einer Teilprivatisierung von öffentlichen Aufgaben einher.

### Routinedaten

Daten aus dem Behandlungsprozess, die im Rahmen der gesetzlichen Abrechnungsvorschriften standardmäßig erfasst und an die Krankenversicherungen sowie zum Teil auch an das Statistische Bundesamt und andere amtliche Stellen gemeldet werden müssen. Dazu gehören u. a. auch die kodierten Diagnosen und Operationen.

### Speisewasser

Wasser mit Trinkwasserqualität, das zur Speisung von Aufbereitungsanlagen zur Herstellung von Reinstwasser (Gereinigtes Wasser, Wasser für Injektionszwecke) verwendet wird.

### Trifunktionale Antikörper

Antikörper, die an drei verschiedene Zelltypen binden (z. B. Tumorzelle, T-Zelle und akzessorische Zelle) und damit eine Tumor-spezifische Immunreaktion auslösen.

### Versorgungsstruktur (primär, sekundär, tertiär)

Primäre Versorgung bezieht sich auf Märkte, die über Basis-Infrastruktur, Gesundheitsposten und Regionalkrankenhäuser verfügen. Sekundäre Versorgung bezieht sich auf Märkte, die über Allgemeine Krankenhäuser, Spezialkliniken und Rehabilitation verfügen. Tertiäre Versorgung bezieht sich auf Märkte, die über Krankenhäuser der Maximalversorgung, Lehrkrankenhäuser, Universitätskrankenhäuser und Medizinische Kompetenz-Center verfügen.

## Begriffe aus dem Finanzwesen

### Beta-Faktor

Der Beta-Faktor zeigt die Korrelation einer Aktie zu einem bestimmten Index.

$\beta > 1$  bedeutet: das Wertpapier bewegt sich in größeren Schwankungen als der Index.

$\beta = 1$  bedeutet: das Wertpapier bewegt sich gleich mit dem Index.

$\beta < 1$  bedeutet: das Wertpapier bewegt sich weniger stark als der Index.

### Cashflow

Wirtschaftliche Messgröße, die den Nettozufluss liquider Mittel während einer Periode darstellt.

### Commercial-Paper-Programm

Schuldverschreibungen mit einer Laufzeit von wenigen Tagen bis unter zwei Jahren. Sie werden von großen Unternehmen zur flexiblen Deckung ihres kurzfristigen Kreditbedarfs emittiert.

### Compliance

Oberbegriff für Maßnahmen zur Einhaltung von Recht, Gesetz und unternehmensinternen Richtlinien.

### Corporate Governance

Bezeichnung für verantwortliche, auf langfristige Wertschöpfung ausgerichtete Unternehmensleitung und Unternehmenskontrolle.

### EBIT (Earnings before Interest and Taxes)

Ergebnis vor Zinsen und Ertragsteuern.

### EBITDA (Earnings before Interest, Taxes, Depreciation and Amortization)

Ergebnis vor Zinsen, Ertragsteuern und Abschreibungen.

### Forderungslaufzeit

#### (Days Sales Outstanding, DSO)

Kennzahl, die angibt, nach wie vielen Tagen eine Forderung im Durchschnitt beglichen wird. Je kürzer die Forderungslaufzeit, desto niedriger ist die Zinsbelastung für den Kreditgeber und umso geringer das Risiko des Forderungsausfalls.

### Kommanditgesellschaft auf Aktien (KGaA)

Gesellschaftsform mit eigener Rechtspersönlichkeit (juristische Person), bei der mindestens ein Gesellschafter (der persönlich haftende Gesellschafter oder Komplementäraktionär) den Gesellschaftsgläubigern unbeschränkt haftet und die übrigen (Kommanditaktionäre) an dem in Aktien zerlegten Grundkapital beteiligt sind, ohne persönlich für die Verbindlichkeiten der Gesellschaft zu haften.

### Organisches Wachstum

Bezeichnet den Teil des Wachstums eines Unternehmens, der aus eigener Kraft heraus erfolgt und nicht aus Akquisitionen, Desinvestitionen oder Währung.

### Rating

Eine auf den internationalen Kapitalmärkten anerkannte Einstufung der Kreditwürdigkeit eines Unternehmens. Es wird von unabhängigen Ratingagenturen wie z. B. Standard & Poor's, Moody's oder Fitch auf Basis einer Unternehmensanalyse publiziert.

### ROE (Return on Equity)

Rentabilität des Eigenkapitals. Zeigt die Verzinsung des eingesetzten Eigenkapitals an. Errechnet aus: Gewinn/Eigenkapital x 100.

### ROIC (Return on Invested Capital)

Rentabilität des investierten Kapitals. Errechnet aus: (EBIT - Steuern) : Investiertes Kapital  
Investiertes Kapital = Bilanzsumme + Goodwill - Abschreibung (kumuliert) - aktive latente Steuern - flüssige Mittel - Lieferantenverbindlichkeiten - Rückstellungen (ohne Pensionsrückstellungen) - sonstige nicht verzinsliche Verbindlichkeiten.

### ROOA (Return on Operating Assets)

Rentabilität des betriebsnotwendigen Vermögens. Errechnet aus: EBIT x 100 : Betriebsnotwendiges Vermögen (Durchschnitt); Betriebsnotwendiges Vermögen = Bilanzsumme - aktive latente Steuern - Lieferantenverbindlichkeiten - erhaltene Anzahlungen - zugesagte Fördermittel.

### SE (Societas Europea)

Handelsgesellschaft in der Form einer europäischen Aktiengesellschaft. Sie ist eine supranationale Rechtsform, die durch europäisches Gemeinschaftsrecht geschaffen wurde. Vorbehaltlich europarechtlicher Bestimmungen wird die SE in jedem Mitgliedsstaat wie eine Aktiengesellschaft behandelt, die nach dem Recht des Sitzstaats der SE gegründet wurde.

### Working Capital

Umlaufvermögen (inklusive Aktiver Rechnungsabgrenzungsposten) - Rückstellungen - Lieferantenverbindlichkeiten - Übrige Verbindlichkeiten - Passiver Rechnungsabgrenzungsposten.

### Xetra (Exchange Electronic Trading)

Elektronisches Handelssystem der Deutsche Börse AG für den Kauf oder Verkauf von Wertpapieren, Devisen oder anderen Finanzinstrumenten.



# STICHWORTVERZEICHNIS

## A

|                                |                                |
|--------------------------------|--------------------------------|
| Akquisitionen                  | 35 f., 44, 74, 107 ff., 144 f. |
| Aktie                          | 8 ff.                          |
| Aktionsoptionsplan             | 80, 191 ff.                    |
| Aktionärsstruktur              | 11                             |
| Analystenempfehlungen          | 11 f.                          |
| Anteile anderer Gesellschafter | 121, 173                       |
| Antikörpertherapien            | 80 f., 85 ff.                  |
| Aufsichtsrat                   | 17 ff., 202 ff., 209 ff.       |
| Ausbildung                     | 79                             |
| Ausblick                       | 107 ff.                        |
| Ausschüsse des Aufsichtsrats   | 19 f., 205 f., 210             |

## B

|                      |             |
|----------------------|-------------|
| Bedingtes Kapital    | 55, 175 f.  |
| Beschäftigte         | 77 ff.      |
| Beschaffung          | 87 ff., 115 |
| Bilanzierungs- und   |             |
| Bewertungsgrundsätze | 132 ff.     |
| Bilanzstruktur       | 7, 75 f.    |
| Branchenspezifische  |             |
| Rahmenbedingungen    | 60 ff.      |

## C

|                      |                          |
|----------------------|--------------------------|
| Cashflow             | 7, 73 f., 122 f., 189    |
| Chancenmanagement    | 99                       |
| Compliance           | 23 f., 215               |
| Corporate Governance | 14 ff., 199, 204 f., 215 |

## D

|                             |                  |
|-----------------------------|------------------|
| Devisen- und Zinsmanagement | 76, 181 ff.      |
| Dialysedienstleistungen     | 34 ff., 61 f.    |
| Dialysemedikamente          | 37               |
| Dialyseprodukte             | 34 ff., 62       |
| Dividende                   | 10, 73, 116, 176 |

## E

|                                   |             |
|-----------------------------------|-------------|
| Eigenkapitalquote                 | 7, 75, 188  |
| Enterale Ernährung                | 41, 85, 213 |
| Entsprechenserklärung             | 14 ff.      |
| Erfolgsbeteiligung                | 80          |
| Ergebnis                          | 6, 68 ff.   |
| Ergebnis je Aktie                 | 11, 149     |
| Erklärung zur Unternehmensführung | 14 ff.      |
| Ertragslage                       | 66 ff.      |

## F

|                           |                      |
|---------------------------|----------------------|
| Finanzierung              | 71 ff., 158 ff., 188 |
| Finanzlage                | 70 ff.               |
| Flüssige Mittel           | 120, 150             |
| Forschung und Entwicklung | 80 ff., 115 f.       |
| Fresenius Biotech         | 85 ff.               |

## G

|                            |            |
|----------------------------|------------|
| Genehmigtes Kapital        | 54 f., 174 |
| Geschäftsverlauf           | 58 ff.     |
| Gewinnverwendungsvorschlag | 199        |

## H

|                  |                    |
|------------------|--------------------|
| Hämodialyse      | 34 ff., 61 f., 214 |
| Hauptversammlung | 17                 |

## I

|                    |                       |
|--------------------|-----------------------|
| Infusionstherapie  | 39, 62 f., 83 f., 111 |
| Investitionen      | 74 f., 114            |
| Investor Relations | 12 f.                 |
| I.V.-Arzneimittel  | 40, 62 f., 84, 111    |

## K

|                             |                         |
|-----------------------------|-------------------------|
| Kapitalflussrechnung        | 73, 122 f.              |
| Kapitalien                  | 54 f.                   |
| Klinische Ernährung         | 40 f., 63, 84 f., 111   |
| Konsolidierungskreis        | 133 f.                  |
| Konzernergebnis             | 6, 68 f., 113, 136, 149 |
| Konzernstruktur             | 51 ff., 131             |
| Krebs                       | 40, 85 f.               |
| Kursentwicklung             | 8 f.                    |
| Kurzfristige Vermögenswerte | 76, 120                 |

## L

|                             |         |
|-----------------------------|---------|
| Langfristige Vermögenswerte | 75, 120 |
|-----------------------------|---------|

## M

|                                  |             |
|----------------------------------|-------------|
| Marktkapitalisierung             | 9, 13       |
| Mitarbeiterinnen und Mitarbeiter | 77 ff., 116 |

## N

|                  |     |
|------------------|-----|
| Nachtragsbericht | 107 |
|------------------|-----|

## O

|                     |               |
|---------------------|---------------|
| Operativer Cashflow | 7, 73 f., 122 |
|---------------------|---------------|

## P

|                       |                |
|-----------------------|----------------|
| Parenterale Ernährung | 41, 84 f., 214 |
| Pensionen             | 121, 168 ff.   |
| Peritonealdialyse     | 34, 61 f., 214 |
| Personalaufwand       | 77, 145        |
| Prognosebericht       | 107 ff.        |

## Q

|                     |        |
|---------------------|--------|
| Qualitätsmanagement | 90 ff. |
|---------------------|--------|

## R

|                                 |                              |
|---------------------------------|------------------------------|
| Rating                          | 106, 215                     |
| Rechtsformwechsel               | 131 f.                       |
| Risikomanagement / Risikofelder | 99 ff.                       |
| ROE                             | Umschlag innen, 215          |
| ROIC                            | Umschlag innen, 56, 215      |
| ROOA                            | Umschlag innen, 56, 126, 215 |

## S

|                          |                  |
|--------------------------|------------------|
| Satzungsbestimmungen     | 54 f.            |
| Segmentberichterstattung | 126 ff., 189 ff. |
| Strategie                | 56 ff.           |

## T

|                         |       |
|-------------------------|-------|
| Transfusionstechnologie | 39 f. |
| Transplantation         | 85 f. |

## U

|                       |                       |
|-----------------------|-----------------------|
| Umsatz                | 6, 66 f., 113 f., 145 |
| Umweltmanagement      | 94 ff.                |
| Unternehmenssteuerung | 56 ff.                |

## V

|                                         |               |
|-----------------------------------------|---------------|
| Vergütung von Vorstand und Aufsichtsrat | 27 ff.        |
| Vermögens- und Kapitalstruktur          | 75 f.         |
| Vermögenslage                           | 75 f.         |
| Vorräte                                 | 150 f.        |
| Vorstand                                | 17 f., 211 f. |

## W

|                    |         |
|--------------------|---------|
| Währungsumrechnung | 54, 140 |
| Weiterbildung      | 78 f.   |
| Wertschöpfung      | 70 f.   |
| Working Capital    | 72, 215 |

## Z

|              |            |
|--------------|------------|
| Zinsergebnis | 6, 70, 146 |
|--------------|------------|

# FRESENIUS WELTWEIT

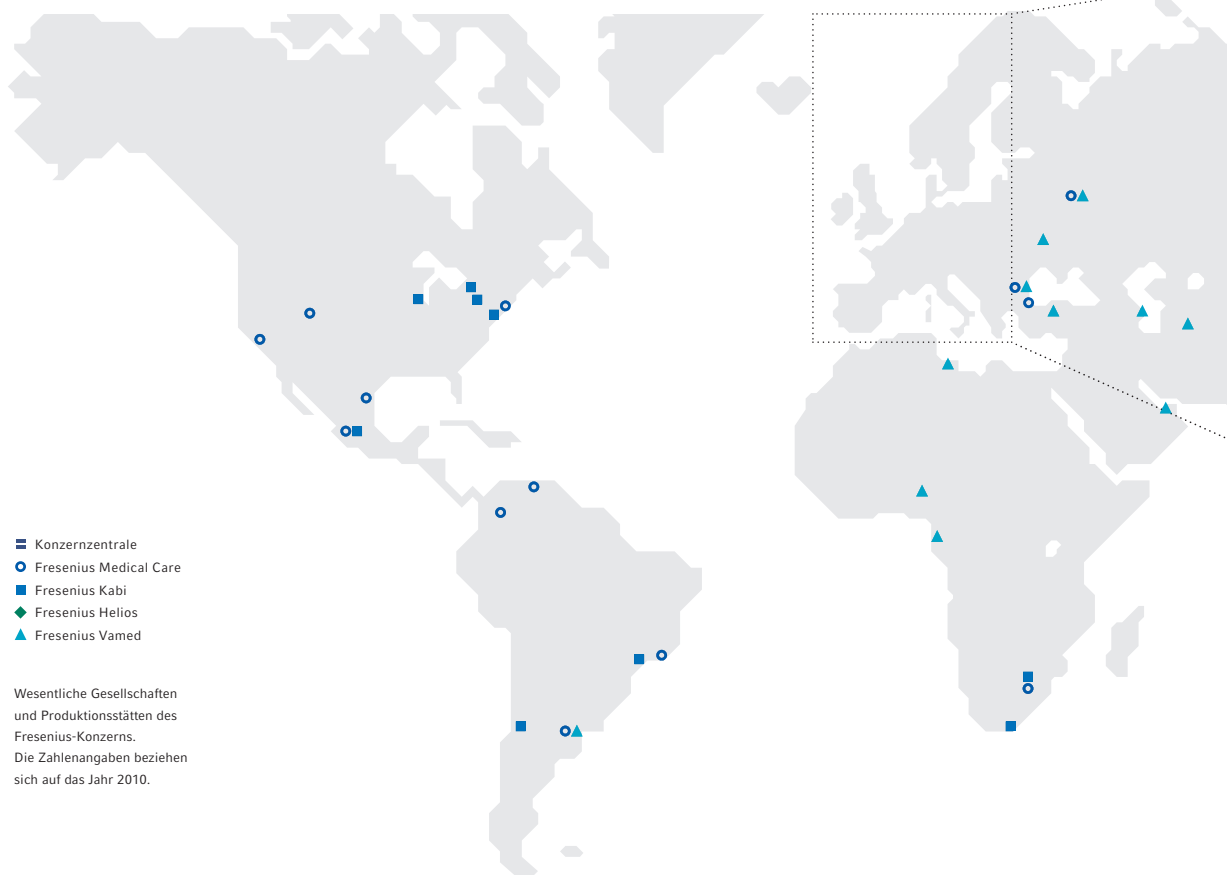

- Konzernzentrale
- Fresenius Medical Care
- Fresenius Kabi
- ◆ Fresenius Helios
- ▲ Fresenius Vamed

Wesentliche Gesellschaften  
und Produktionsstätten des  
Fresenius-Konzerns.  
Die Zahlenangaben beziehen  
sich auf das Jahr 2010.

## FRESENIUS MEDICAL CARE

**Umsatz: 12.053 Mio US\$**  
**Mitarbeiter: 77.442**

Informationen zu den Gesellschaften und Produktionsstätten der Fresenius Medical Care AG & Co. KGaA finden Sie im Geschäftsbericht der Gesellschaft.

## FRESENIUS KABI

**Umsatz: 3.672 Mio €**  
**Mitarbeiter: 22.851**

**Fresenius HemoCare GmbH**  
Bad Homburg v. d. H., Deutschland  
**Fresenius Kabi Deutschland GmbH**  
Bad Homburg v. d. H., Deutschland  
**Fresenius Vial S.A.S.**  
Brézins, Frankreich  
**Fresenius Kabi France S.A.S.**  
Sèvres, Frankreich  
**Fresenius Kabi Italia S.p.A.**  
Verona, Italien  
**Fresenius Kabi Anti-Infectives S.r.l.**  
Cernusco sul Naviglio, Italien  
**Fresenius Kabi Ltd.**  
Runcorn/Cheshire, Großbritannien  
**Fresenius Kabi Nederland B.V.**  
's-Hertogenbosch, Niederlande  
**Fresenius HemoCare Netherlands B.V.**  
Emmen, Niederlande  
**Fresenius Kabi N.V.**  
Schelle, Belgien  
**Fresenius Kabi (Schweiz) AG**  
Stans, Schweiz  
**Fresenius Kabi Austria GmbH**  
Graz, Österreich

**Fresenius Kabi España S.A.**  
Barcelona, Spanien  
**Labesfal - Laboratórios Almiro, S.A.**  
Campo de Besteiros, Portugal  
**Fresenius Kabi Polska Sp. z o.o.**  
Warschau, Polen  
**Fresenius Kabi AB**  
Stockholm, Schweden  
**Fresenius Kabi Norge A/S**  
Halden, Norwegen  
**Fresenius Kabi Pharmaceuticals Holding, Inc.**  
Wilmington/Delaware, USA  
**Calea Ltd.**  
Toronto/Ontario, Kanada  
**Fresenius Kabi Brasil Ltda.**  
São Paulo, Brasilien  
**Fresenius HemoCare Brasil Ltda.**  
São Paulo, Brasilien  
**Laboratorio Sanderson S.A.**  
Santiago de Chile, Chile  
**Fresenius Kabi Mexico S.A. de C.V.**  
Guadalajara, Mexiko

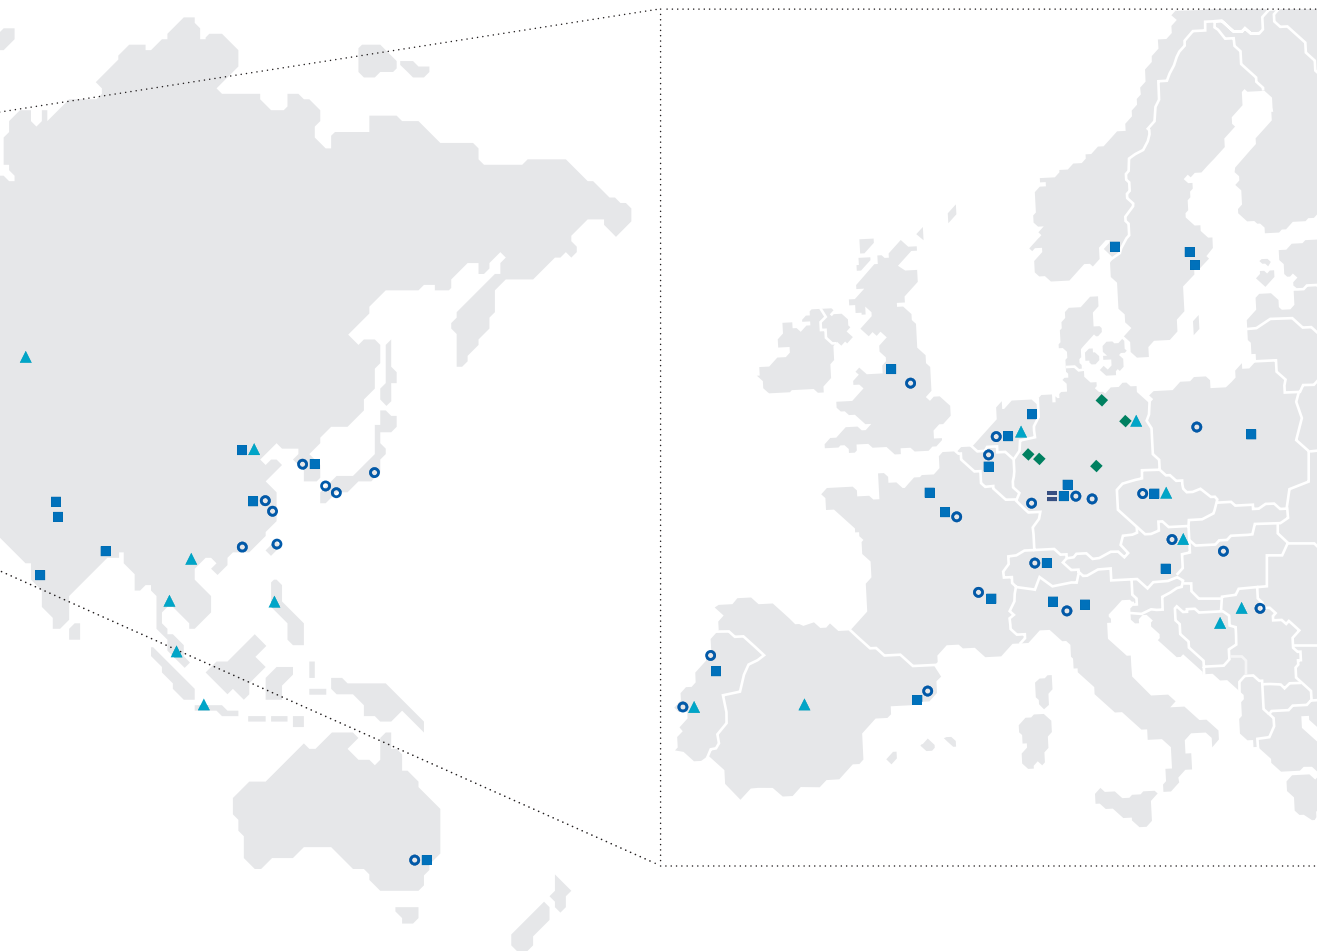

#### FRESENIUS HELIOS

**Umsatz: 2.520 Mio €**  
**Mitarbeiter: 33.321**

**Zur HELIOS-Gruppe gehören  
 63 Kliniken, darunter Krankenhäuser  
 der Maximalversorgung in:**

Berlin, Deutschland  
 Erfurt, Deutschland  
 Krefeld, Deutschland  
 Schwerin, Deutschland  
 Wuppertal, Deutschland

#### FRESENIUS VAMED

**Umsatz: 713 Mio €**  
**Mitarbeiter: 3.110**

**Die VAMED-Gruppe hat  
 Gesellschaften/Niederlassungen in:**

Wien, Österreich  
 Berlin, Deutschland  
 Madrid, Spanien  
 Lissabon, Portugal  
 Arnheim, Niederlande  
 Prag, Tschechische Republik  
 Novi Sad, Serbien  
 Tuzla, Bosnien-Herzegowina  
 Bukarest, Rumänien  
 Moskau, Russland  
 Kiew, Donetsk, Ukraine  
 Astana, Kasachstan  
 Ashgabat, Turkmenistan  
 Baku, Aserbaidshan  
 Ankara, Türkei  
 Buenos Aires, Argentinien  
 Peking, China  
 Kuala Lumpur, Malaysia  
 Bangkok, Thailand  
 Hanoi, Vietnam  
 Jakarta, Indonesien  
 Manila, Philippinen  
 Abuja, Nigerien  
 Libreville, Gabun  
 Tripolis, Libyen  
 Abu Dhabi, UAE

**Beijing Fresenius Kabi  
 Pharmaceutical Co., Ltd.**  
 Peking, China  
**Sino-Swed Pharmaceutical Corp. Ltd.**  
 Wuxi, China  
**Fresenius Kabi Oncology Ltd.**  
 Neu Delhi, Indien  
**Fresenius Kabi Korea Ltd.**  
 Seoul, Korea  
**Fresenius Kabi Australia Pty Ltd.**  
 Sydney, Australien  
**Fresenius Kabi South Africa (Pty) Ltd.**  
 Midrand, Südafrika

---

# FINANZKALENDER

|                                       |                  |
|---------------------------------------|------------------|
| Veröffentlichung 1. Quartal 2011      |                  |
| Analysten-Telefonkonferenz            |                  |
| Live-Übertragung im Internet          | 4. Mai 2011      |
| Hauptversammlung, Frankfurt am Main   | 13. Mai 2011     |
| Auszahlung der Dividende <sup>1</sup> | 16. Mai 2011     |
| Veröffentlichung 1. Halbjahr 2011     |                  |
| Analysten-Telefonkonferenz            |                  |
| Live-Übertragung im Internet          | 2. August 2011   |
| Veröffentlichung 1. – 3. Quartal 2011 |                  |
| Analysten-Telefonkonferenz            |                  |
| Live-Übertragung im Internet          | 2. November 2011 |

<sup>1</sup> Vorbehaltlich der Zustimmung durch die Hauptversammlung

---

# FRESENIUS-AKTIE

|                   |                 |
|-------------------|-----------------|
|                   | Stammaktie      |
| WKN               | 578 560         |
| Börsenkürzel      | FRE             |
| ISIN              | DE0005785604    |
| Bloomberg-Symbol  | FRE GR          |
| Reuters-Symbol    | FREG.de         |
| Haupthandelsplatz | Frankfurt/Xetra |

## Konzernzentrale

Else-Kröner-Straße 1  
Bad Homburg v. d. H.

## Postanschrift

Fresenius SE & Co. KGaA  
61346 Bad Homburg v. d. H.

## Kontakt für Aktionäre

Investor Relations  
Telefon: (0 61 72) 6 08-26 37  
Telefax: (0 61 72) 6 08-24 88  
E-mail: [ir-fre@fresenius.com](mailto:ir-fre@fresenius.com)

## Kontakt für Presse

Konzern-Kommunikation  
Telefon: (0 61 72) 6 08-23 02  
Telefax: (0 61 72) 6 08-22 94  
E-mail: [pr-fre@fresenius.com](mailto:pr-fre@fresenius.com)

Sitz und Handelsregister: Bad Homburg v. d. H.; HRB 11852  
Vorsitzender des Aufsichtsrats: Dr. Gerd Krick

Persönlich haftende Gesellschafterin: Fresenius Management SE

Sitz und Handelsregister: Bad Homburg v. d. H.; HRB 11673

Vorstand: Dr. Ulf M. Schneider (Vorsitzender), Rainer Baule, Dr. Francesco De Meo, Dr. Jürgen Götz, Dr. Ben Lipps, Stephan Sturm, Dr. Ernst Wastler

Vorsitzender des Aufsichtsrats: Dr. Gerd Krick

Dieser Geschäftsbericht erscheint auch in englischer Sprache.  
This Annual Report is also available in English.

Der Geschäftsbericht, der Jahresabschluss der Fresenius SE & Co. KGaA und der Konzernabschluss nach IFRS-Rechnungslegungsgrundsätzen sind auf unserer Website verfügbar und können bei Investor Relations angefordert werden.

Weitere Informationen und aktuelle Unternehmensnachrichten können Sie abrufen auf unserer Website unter: <http://www.fresenius.de>.

## Zukunftsbezogene Aussagen:

Dieser Geschäftsbericht enthält Angaben, die sich auf die zukünftige Entwicklung beziehen. Diese Aussagen stellen Einschätzungen dar, die wir auf Basis der uns derzeit zur Verfügung stehenden Informationen getroffen haben. Sollten die den Aussagen zugrunde gelegten Annahmen nicht eintreffen oder Risiken – wie im Risikobericht und in den bei der SEC eingereichten Unterlagen der Fresenius Medical Care AG & Co. KGaA und der Fresenius Kabi Pharmaceuticals Holding, Inc. angesprochen – eintreten, so können die tatsächlichen Ergebnisse von den zurzeit erwarteten Ergebnissen abweichen.

**Designkonzept/Realisation:** Hilger & Boie Design, Wiesbaden  
**Druck:** Druckerei Ziegler GmbH & Co. KG, Neckarbischofsheim

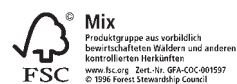

Supplement: Supplementary file 54 [file Fresenius GB 2010.pdf › Korpustexte/Korpustexte pdf/Fresenius/Fresenius GB 2010.pdf]
