# Supplementary material
Source: publisher site journal article supplement (https://www.degruyterbrill.com/publication/isbn/9783110432879/downloadAsset/9783110432879_Elektronischer_Anhang_2.zip)

FIT FOR THE  
FUTURE »»

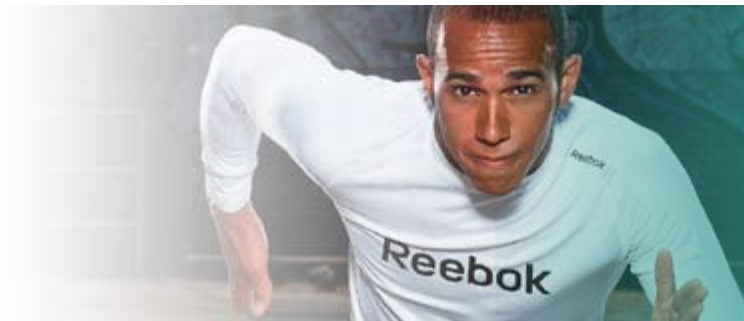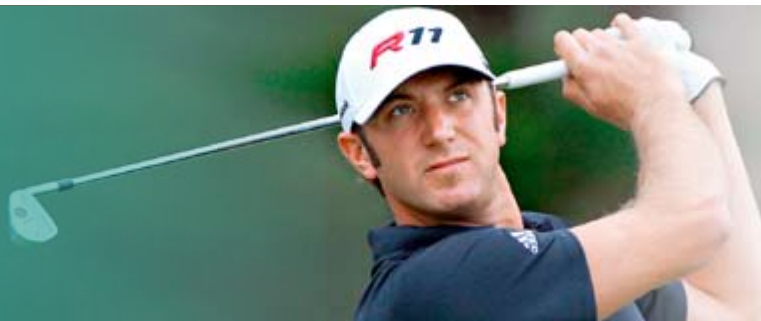

## Ziele » 2010

Währungsbereinigter Umsatzanstieg im niedrigen bis mittleren einstelligen Bereich

Einführung neuer und innovativer Konzepte sowie technologischer Weiterentwicklungen, zum Beispiel:

**adidas:**

- adiZero F50 Fußballschuh
- miCoach Trainingssystem

**Reebok:**

- ZigTech Trainingsschuh

**TaylorMade-adidas Golf:**

- R9 SuperTri Driver

**Rockport:**

- TruWalk Schuhkollektion

**Reebok-CCM Hockey:**

- 11K Schlittschuh

Auf währungsbereinigter Basis:

- Umsatzsteigerung im niedrigen bis mittleren einstelligen Bereich im Großhandelssegment
- Umsatzsteigerung im hohen einstelligen Bereich im Einzelhandelssegment
- Umsatzsteigerung im niedrigen einstelligen Bereich in den Anderen Geschäftssegmenten

Steigerung der Bruttomarge auf ein Niveau zwischen 46 % und 47 %

Steigerung der operativen Marge auf ein Niveau von etwa 6,5 %

Weitere Reduzierung des operativen kurzfristigen Betriebskapitals im Verhältnis zum Umsatz

Investitionsniveau zwischen 300 Mio. € und 400 Mio. €

Weitere Reduzierung der Nettofinanzverbindlichkeiten; Beibehaltung eines Verhältnisses von Nettofinanzverbindlichkeiten zu EBITDA von unter 2

Anstieg des verwässerten Ergebnisses je Aktie auf ein Niveau zwischen 1,90 € und 2,15 €

Weiterer Ausbau des Shareholder Values

## Ergebnisse » 2010

Konzernumsatz erreicht 11,990 Mrd. €  
Währungsbereinigter Anstieg um 9 %

Wichtige Produkteinführungen 2010:

**adidas:**

- adiStar Salvation Laufschuh
- adiZero F50 Fußballschuh
- miCoach Trainingssystem

**Reebok:**

- ZigTech Trainingsschuh
- RunTone Laufschuh

**TaylorMade-adidas Golf:**

- R9 SuperTri Driver
- Burner SuperFast Driver und Fairwayhölzer

**Rockport:**

- TruWalk Herren- und Damenschuhe

**Reebok-CCM Hockey:**

- Reebok 11K und CCM U+ Crazy Light Schlittschuh

Auf währungsbereinigter Basis:

- Umsatz im Großhandelssegment steigt um 8 %
- Umsatz im Einzelhandelssegment steigt um 18 %
- Umsatz der Marke adidas steigt um 9 %
- Umsatz der Marke Reebok steigt um 12 %
- Umsatz in den Anderen Geschäftssegmenten steigt um 2 %
- Umsatz bei TaylorMade-adidas Golf steigt um 1 %

Bruttomarge: 47,8 %

Operative Marge: 7,5 %

Operatives kurzfristiges Betriebskapital im Verhältnis zum Umsatz auf 20,8 % verbessert

Investitionen: 269 Mio. €

Nettofinanzverbindlichkeiten wesentlich auf 221 Mio. € reduziert; Verschuldungsgrad am Jahresende: 4,8 %

Anstieg des auf Anteilseigner entfallenden Gewinns um 131 % auf 567 Mio. €; verwässertes Ergebnis je Aktie steigt um 122 % auf 2,71 €

Aktienkurs der adidas AG steigt um 29 %;  
Dividende von 0,80 € pro Aktie  
(vorbehaltlich der Zustimmung durch die Hauptversammlung)

## Ausblick » 2011

Währungsbereinigter Umsatzanstieg im mittleren bis hohen einstelligen Bereich

Einführung neuer und innovativer Konzepte sowie technologischer Weiterentwicklungen, zum Beispiel:

**adidas:**

- adiZero F50 Runner Laufschuh
- adiPower Predator Fußballschuh

**Reebok:**

- RealFlex Schuh
- EasyTone Plus Schuh
- ClassicLite Schuh- und Bekleidungskollektion

**TaylorMade-adidas Golf:**

- R11 und R11 TP Driver

**Rockport:**

- Naomi Damen-Schuhkollektion

**Reebok-CCM Hockey:**

- CCM U+ Crazy Light II Schläger

Auf währungsbereinigter Basis:

- Umsatzsteigerung im mittleren einstelligen Bereich im Großhandelssegment
- Umsatzsteigerung im niedrigen zweistelligen Bereich im Einzelhandelssegment
- Umsatzsteigerung im mittleren einstelligen Bereich in den Anderen Geschäftssegmenten

Steigerung der Bruttomarge auf ein Niveau zwischen 47,5 % und 48,0 %

Steigerung der operativen Marge auf ein Niveau von zwischen 7,5 % und 8,0 %

Anstieg des operativen kurzfristigen Betriebskapitals im Verhältnis zum Umsatz

Investitionsniveau zwischen 350 Mio. € und 400 Mio. €

Weitere Reduzierung der Nettofinanzverbindlichkeiten; Beibehaltung eines Verhältnisses von Nettofinanzverbindlichkeiten zu EBITDA von unter 2

Anstieg des verwässerten Ergebnisses je Aktie auf ein Niveau zwischen 2,98 € und 3,12 €

Weiterer Ausbau des Shareholder Values

## Finanz-Highlights (IFRS)

01

|                                                                              | 2010               | 2009        | Veränderung |
|------------------------------------------------------------------------------|--------------------|-------------|-------------|
| <b>Operative Highlights (in Mio. €)</b>                                      |                    |             |             |
| Umsatzerlöse                                                                 | 11.990             | 10.381      | 15,5 %      |
| EBITDA                                                                       | 1.159              | 780         | 48,6 %      |
| Betriebsergebnis                                                             | 894                | 508         | 76,0 %      |
| Auf Anteilseigner entfallender Gewinn                                        | 567                | 245         | 131,1 %     |
| <b>Wichtige Kennzahlen (%)</b>                                               |                    |             |             |
| Bruttomarge                                                                  | 47,8 %             | 45,4 %      | 2,4 PP      |
| Betriebliche Aufwendungen in % der Umsatzerlöse                              | 42,1 %             | 42,3 %      | - 0,2 PP    |
| Operative Marge                                                              | 7,5 %              | 4,9 %       | 2,6 PP      |
| Steuerquote                                                                  | 29,5 %             | 31,5 %      | - 2,0 PP    |
| Auf Anteilseigner entfallender Gewinn in % der Umsatzerlöse                  | 4,7 %              | 2,4 %       | 2,4 PP      |
| Operatives kurzfristiges Betriebskapital in % der Umsatzerlöse <sup>1)</sup> | 20,8 %             | 24,3 %      | - 3,5 PP    |
| Eigenkapitalquote                                                            | 43,5 %             | 42,5 %      | 1,0 PP      |
| Nettofinanzverbindlichkeiten/EBITDA                                          | 0,2                | 1,2         |             |
| Verschuldungsgrad                                                            | 4,8 %              | 24,3 %      | - 19,5 PP   |
| Eigenkapitalrendite                                                          | 12,3 %             | 6,5 %       | 5,8 PP      |
| <b>Bilanz- und Cashflow-Daten (in Mio. €)</b>                                |                    |             |             |
| Bilanzsumme                                                                  | 10.618             | 8.875       | 19,6 %      |
| Vorräte                                                                      | 2.119              | 1.471       | 44,1 %      |
| Forderungen und sonstige kurzfristige Vermögenswerte                         | 2.324              | 2.038       | 14,0 %      |
| Kurzfristiges Betriebskapital                                                | 1.972              | 1.649       | 19,6 %      |
| Nettofinanzverbindlichkeiten                                                 | 221                | 917         | - 75,9 %    |
| Auf Anteilseigner entfallendes Kapital                                       | 4.616              | 3.771       | 22,4 %      |
| Investitionen                                                                | 269                | 240         | 11,8 %      |
| Mittelzufluss aus betrieblicher Tätigkeit                                    | 894                | 1.198       | - 25,3 %    |
| <b>Kennzahlen je Aktie (in €)</b>                                            |                    |             |             |
| Unverwässertes Ergebnis                                                      | 2,71               | 1,25        | 116,8 %     |
| Verwässertes Ergebnis                                                        | 2,71               | 1,22        | 121,8 %     |
| Operativer Cashflow                                                          | 4,28               | 6,11        | - 30,0 %    |
| Dividende                                                                    | 0,80 <sup>2)</sup> | 0,35        | 128,6 %     |
| Aktienkurs am Ende des Jahres                                                | 48,89              | 37,77       | 29,4 %      |
| <b>Sonstiges (am Ende des Jahres)</b>                                        |                    |             |             |
| Anzahl der Mitarbeiter                                                       | 42.541             | 39.596      | 7,4 %       |
| Anzahl der Aktien                                                            | 209.216.186        | 209.216.186 | 0,0 %       |
| Durchschnittliche Anzahl der Aktien                                          | 209.216.186        | 196.220.166 | 6,6 %       |

## Umsatzerlöse

in Mio. €

02

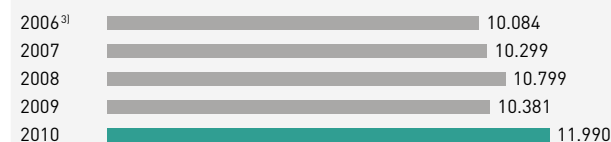

## Auf Anteilseigner entfallender Gewinn

in Mio. €

03

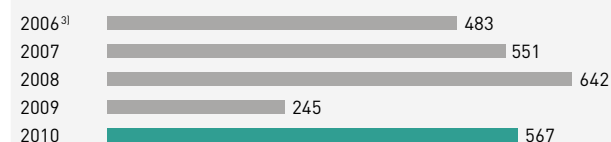

1) Laufender Zwölf-Monatsdurchschnitt.

2) Vorbehaltlich der Zustimmung durch die Hauptversammlung.

3) Beinhaltet Reebok, Rockport und Reebok-CCM Hockey seit 1. Februar 2006.

» ROCKPORT

» Reebok CCM

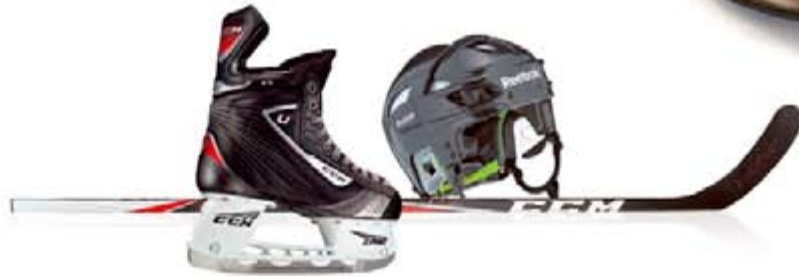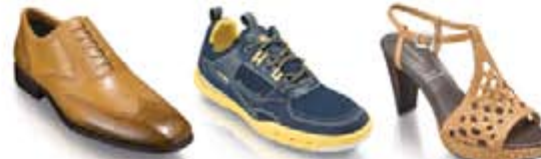

» TaylorMade

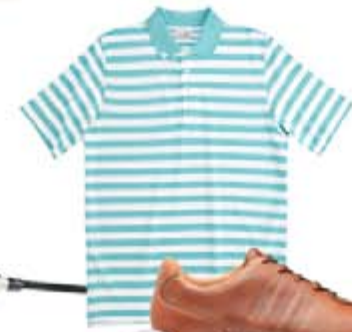

» TaylorMade  
» adidas  
» ASHWORTH

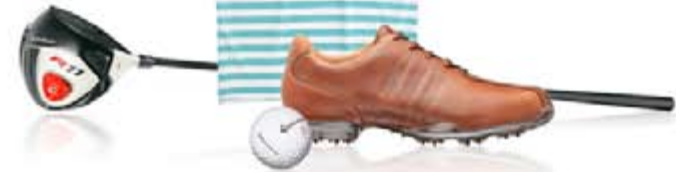

» adidas

» adidas  
» adidas  
» adidas

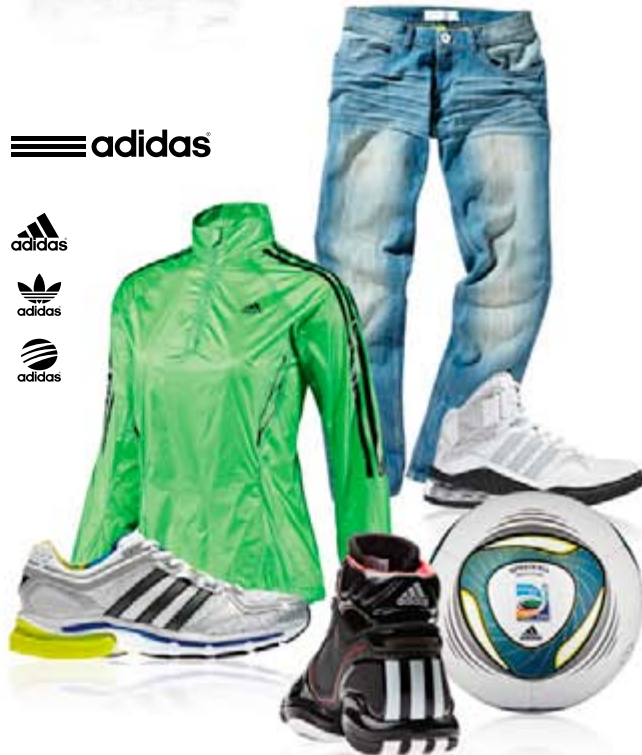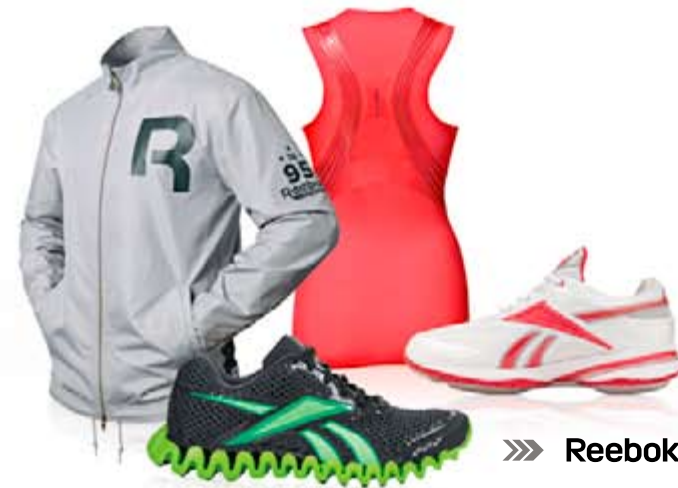

» Reebok



Wir wissen, wie viel Einsatz es braucht, um erfolgreich zu sein – sei es bei den größten Sportereignissen der Welt oder bei den kleinsten Details unserer neuesten Innovationen. Wir wissen, dass alles zusammenpassen muss. Unsere Mitarbeiter, Sportler und Produkte. Unsere Marken und Erfahrung, unsere Talente und Ziele. Unsere Stärken. Unsere Leidenschaft. All das passt. Wir sind ein Team. Smarter. Ehrgeiziger. Die bessere Mannschaft. Unser Konzern ist fit. Fit für die Route 2015. Fit, um zu wachsen. Fit, um zu siegen. Wir sind ...

FIT FOR THE FUTURE »»»

01

An unsere Aktionäre

|                                                                             |      |
|-----------------------------------------------------------------------------|------|
| Operative und Sport-Highlights 2010 .....                                   | » 6  |
| Interview mit dem Vorstandsvorsitzenden .....                               | » 10 |
| Vorstand .....                                                              | » 16 |
| Aufsichtsrat .....                                                          | » 18 |
| Bericht des Aufsichtsrats .....                                             | » 20 |
| Corporate Governance Bericht mit<br>Erklärung zur Unternehmensführung ..... | » 25 |
| Vergütungsbericht .....                                                     | » 30 |
| Unsere Aktie .....                                                          | » 34 |

»»» 02

Fit for the Future

|                                |      |
|--------------------------------|------|
| adidas .....                   | » 40 |
| Reebok .....                   | » 58 |
| TaylorMade-adidas Golf .....   | » 66 |
| Reebok-CCM Hockey Hockey ..... | » 70 |
| Rockport .....                 | » 72 |

03

Konzernlagebericht – Unser Konzern

|                                                           |       |
|-----------------------------------------------------------|-------|
| Corporate Mission Statement .....                         | » 76  |
| Unsere Marken .....                                       | » 77  |
| Wichtige Standorte und<br>Promotion-Partnerschaften ..... | » 78  |
| Konzernstrategie .....                                    | » 80  |
| Strategie Global Sales .....                              | » 82  |
| Großhandel .....                                          | » 83  |
| Einzelhandel .....                                        | » 84  |
| E-Commerce .....                                          | » 86  |
| Strategie Global Brands .....                             | » 87  |
| adidas .....                                              | » 91  |
| Reebok .....                                              | » 96  |
| Strategie Andere Geschäftssegmente .....                  | » 98  |
| TaylorMade-adidas Golf .....                              | » 98  |
| Rockport .....                                            | » 102 |
| Reebok-CCM Hockey .....                                   | » 104 |
| Global Operations .....                                   | » 106 |
| Forschung und Entwicklung .....                           | » 110 |
| Mitarbeiter .....                                         | » 115 |
| Nachhaltigkeit .....                                      | » 120 |

# 04

## Konzernlagebericht – Unser Finanzjahr

|                                                        |       |
|--------------------------------------------------------|-------|
| Internes Konzernmanagementsystem .....                 | » 126 |
| Geschäftsentwicklung des Konzerns .....                | » 130 |
| Entwicklung Gesamtwirtschaft<br>und Branche .....      | » 130 |
| Gewinn- und Verlustrechnung .....                      | » 133 |
| Bilanz und Kapitalflussrechnung .....                  | » 140 |
| Angaben nach § 315 Abs. 4 HGB .....                    | » 143 |
| Treasury .....                                         | » 146 |
| Geschäftsentwicklung nach Segmenten .....              | » 150 |
| Geschäftsentwicklung Großhandel .....                  | » 150 |
| Geschäftsentwicklung Einzelhandel .....                | » 153 |
| Geschäftsentwicklung<br>Andere Geschäftssegmente ..... | » 156 |
| Risiko- und Chancenbericht .....                       | » 158 |
| Nachtrag und Ausblick .....                            | » 174 |

# 05

## Konzernabschluss

|                                                                       |       |
|-----------------------------------------------------------------------|-------|
| Versicherung der gesetzlichen Vertreter .....                         | » 182 |
| Bestätigungsvermerk des Abschlussprüfers ...                          | » 183 |
| Konzernbilanz .....                                                   | » 184 |
| Konzerngewinn- und Verlustrechnung .....                              | » 185 |
| Konzerngesamtergebnisrechnung .....                                   | » 186 |
| Konzerneigenkapitalveränderungsrechnung ...                           | » 186 |
| Konzernkapitalflussrechnung .....                                     | » 187 |
| Konzernanhang .....                                                   | » 188 |
| Entwicklung der immateriellen<br>und materiellen Vermögenswerte ..... | » 224 |
| Anteilsbesitz .....                                                   | » 226 |

# 06

## Zusätzliche Informationen

|                               |       |
|-------------------------------|-------|
| Zehn-Jahresübersicht .....    | » 234 |
| Glossar .....                 | » 236 |
| Index .....                   | » 241 |
| Unterstützungserklärung ..... | » 242 |
| Impressum .....               | » 242 |
| Finanzkalender 2011 .....     | » 243 |

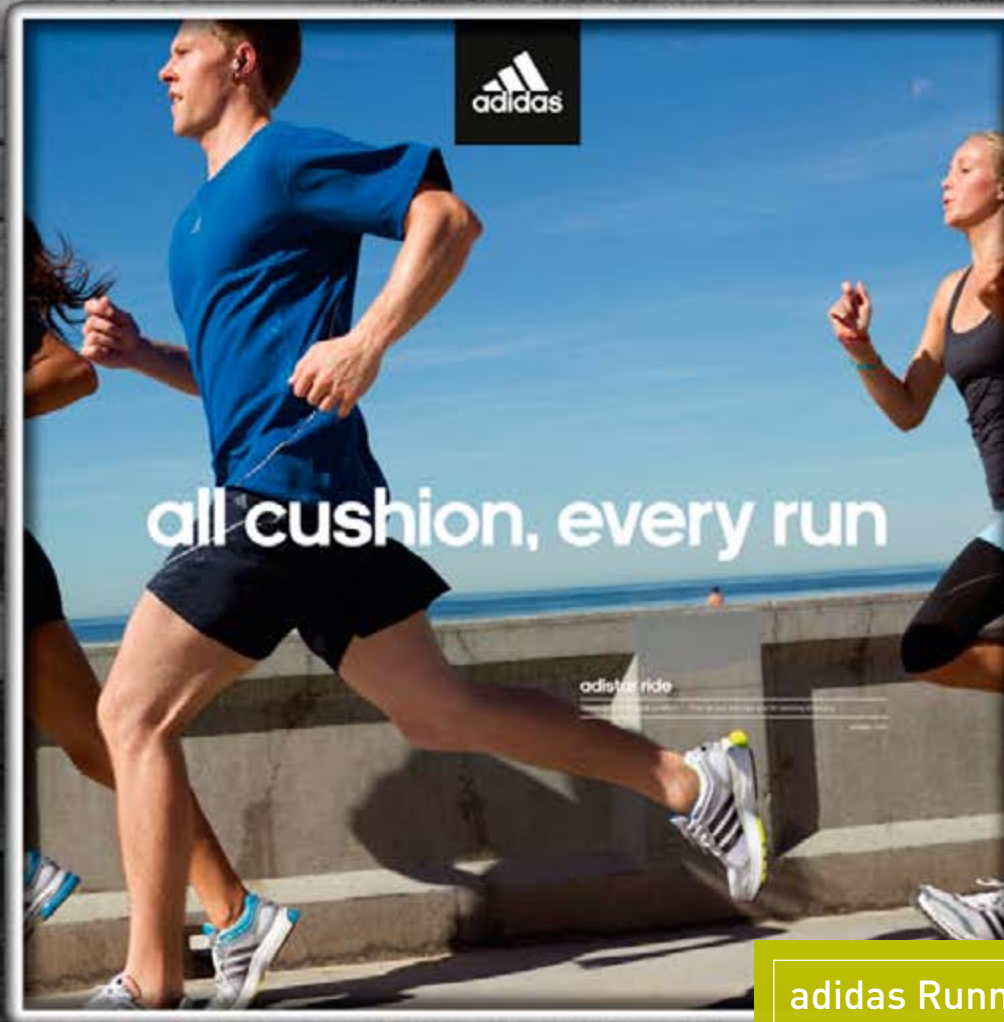

## adidas Running Kampagne

Laufen ist die Seele des Sports. 2011 werden Konsumenten adidas Running auf eine neue Art erleben: jugendlich, gesellig, frisch und spaßig. Damit will adidas Sportler „der nächsten Generation“ ansprechen. Alle Sportler laufen entweder, um ihre sportspezifische Leistung zu verbessern oder einfach aus purer Freude am Laufen. Mit authentischen Laufprodukten unterstützt adidas Läufer dabei, ihre Leistungen zu verbessern.



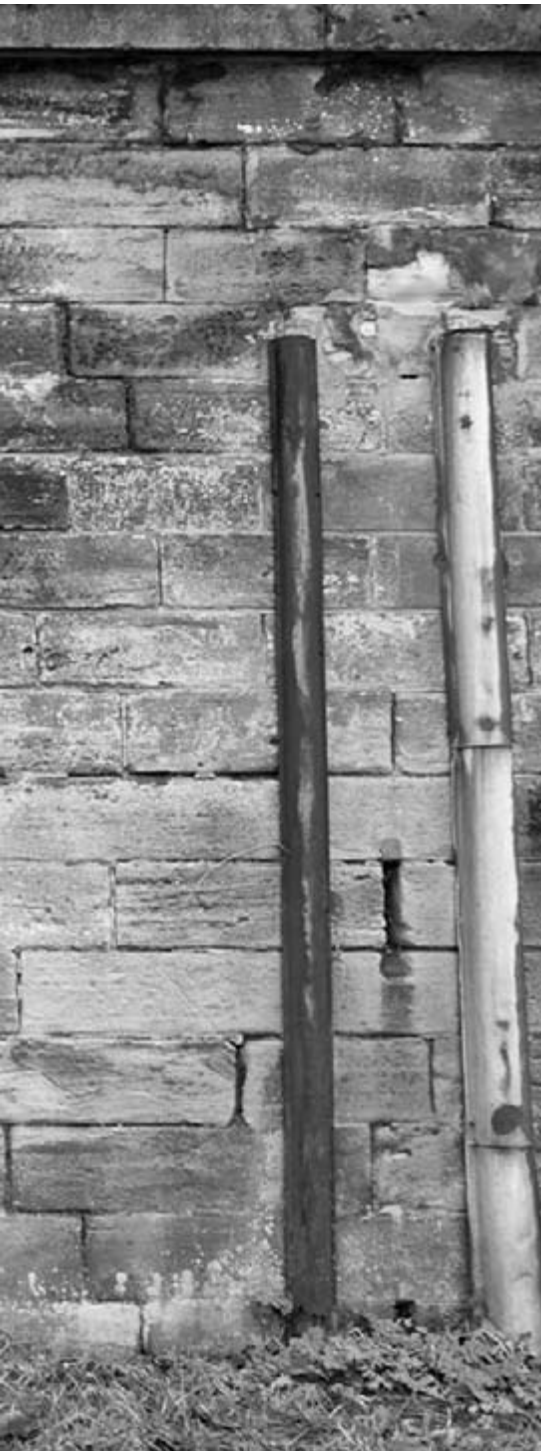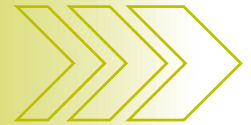

# 01

## An unsere Aktionäre

|                                                                             |      |
|-----------------------------------------------------------------------------|------|
| Operative und Sport-Highlights 2010 .....                                   | » 6  |
| Interview mit dem Vorstandsvorsitzenden .....                               | » 10 |
| Vorstand .....                                                              | » 16 |
| Aufsichtsrat .....                                                          | » 18 |
| Bericht des Aufsichtsrats .....                                             | » 20 |
| Corporate Governance Bericht mit<br>Erklärung zur Unternehmensführung ..... | » 25 |
| Vergütungsbericht .....                                                     | » 30 |
| Unsere Aktie .....                                                          | » 34 |



# Operative und Sport-Highlights 2010

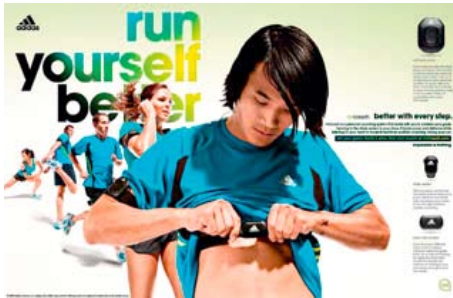

»» 01

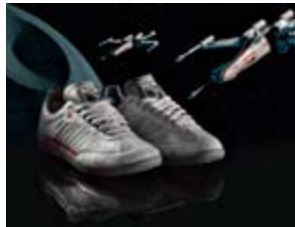

»» 02

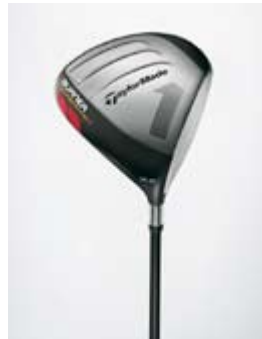

»» 03

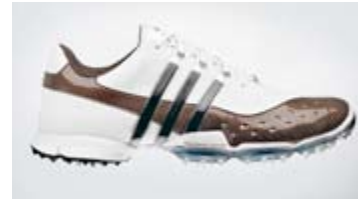

»» 05

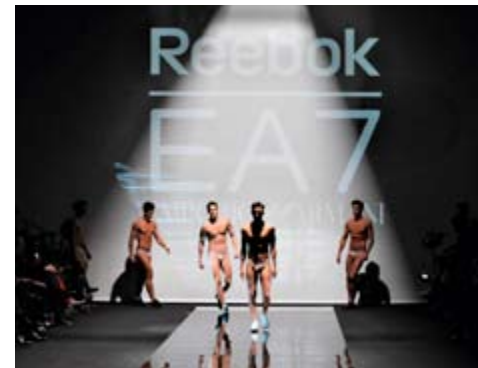

»» 04

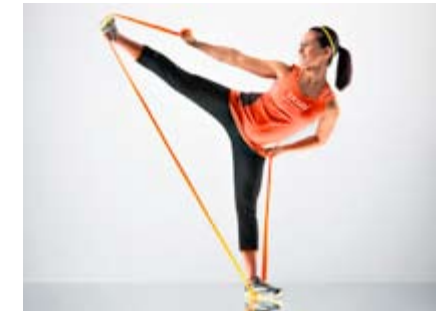

»» 06

## Erstes Quartal

### Januar

**07.01.** adidas präsentiert den neuen miCoach, ein digitales und interaktives Trainingssystem, das Läufer dabei unterstützt, ihre individuellen Trainingsziele zu erreichen »» Bild 01.

**12.01.** adidas Originals bringt eine Star Wars Kollektion auf den Markt. Sie umfasst Schuhe, Bekleidung und Accessoires für Männer, Frauen und Kinder »» Bild 02.

**12.01.** Reebok gibt seine Zusammenarbeit mit der erfolgreichen Fernsehshow „Germany's next Topmodel“ bekannt, in der Reebok den bahnbrechenden EasyTone Schuh in Szene setzt.

**14.01.** TaylorMade stellt die Burner SuperFast Driver und Fairwayhölzer vor. Der erstaunlich leichte 284 Gramm Driver ist darauf ausgelegt, höhere Abschwinggeschwindigkeiten und weitere Distanzen zu erzielen »» Bild 03.

**15.01.** Giorgio Armani S.p.A. und Reebok kündigen ihre globale Kooperation an »» Bild 04.

**28.01.** Reinhold Messner und adidas Outdoor erneuern ihre Zusammenarbeit und präsentieren die neueste Version des legendären Super Trekking Schuhs.

### Februar

**05.02.** Reeboks Markenbotschafter Thierry Henry und Lewis Hamilton präsentieren den revolutionären ZigTech Trainingsschuh.

**06.02.** Reebok stellt seine neu gestaltete Webseite [www.reebok.com](http://www.reebok.com) vor und startet die neue „Ree“-Marketingkampagne mit TV-Spots zum EasyTone und ZigTech.

**12.02.** Cassie Campbell, Gewinnerin von olympischem und WM-Gold sowie Ex-Kapitän der kanadischen Frauen-Eishockeynationalmannschaft, wird in Zukunft als Rockport Markenbotschafterin fungieren.

**22.02.** adidas Golf präsentiert Powerband 3.0, den ersten personalisierten mi adidas Golfschuh »» Bild 05.

**25.02.** Reebok und Cirque du Soleil bringen Jukari Fit to Flex auf den Markt – das zweite innovative Trainingsprogramm, das im Rahmen der Partnerschaft erarbeitet wurde »» Bild 06.

**28.02.** Die Olympischen Winterspiele 2010 in Vancouver sind ein großartiger Erfolg: 42 Medaillen (16 x Gold, 14 x Silber, 12 x Bronze) gehen an Athleten der adidas Gruppe.

### März

**09.03.** adidas präsentiert den „Finale Madrid“, den offiziellen Spielball für das UEFA Champions League Finale in Madrid.

**10.03.** Lewis Hamilton und Reebok stellen das Alternate Reality Game „Lewis Hamilton: Secret Life“ vor, in dem Lewis Hamilton die Hauptfigur spielt.

**18.03.** adidas Originals präsentiert die TV-Kampagne „The street where Originality lives“ mit Ikonen wie David Beckham und Snoop Dogg.

**24.03.** adidas und die National Basketball Association (NBA) geben die Erweiterung ihrer globalen Partnerschaft bekannt. Demnach hält adidas ab der NBA-Saison 2010/11 die Exklusivrechte für den Vertrieb der gesamten NBA-Bekleidungskollektion in Europa.

**26.03.** TaylorMade-adidas Golf saht bei den GolfMagazin Awards 2010 ab – mit Auszeichnungen für den besten Driver, den besten Hybrid-Driver und das beste Golfschuhmodell.

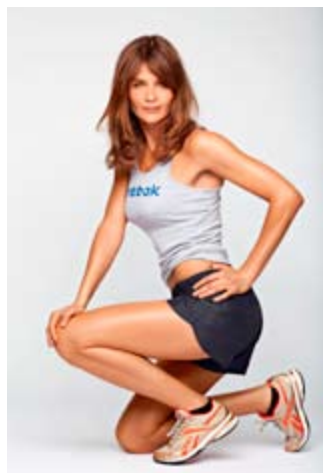

» 07

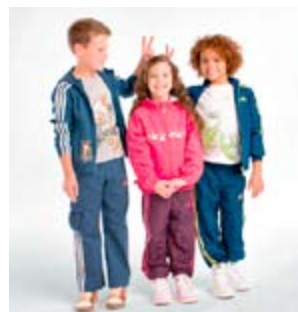

» 09

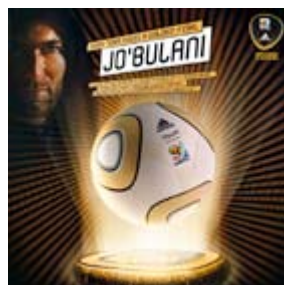

» 08

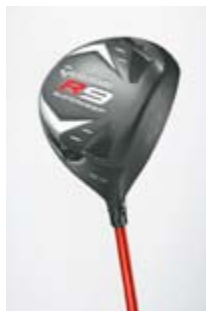

» 10

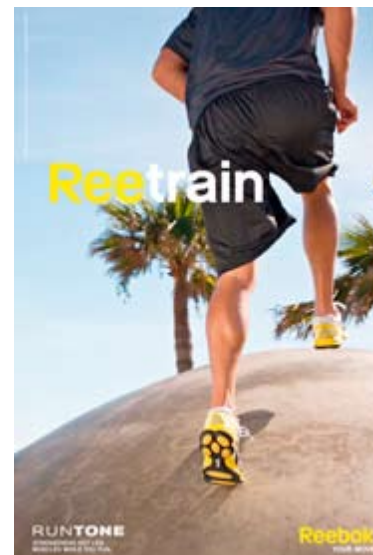

» 11

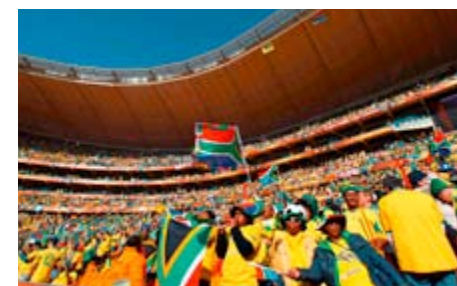

» 12

## Zweites Quartal

### April

**09.04.** Supermodel Helena Christensen wirbt in London für das neue Jukari Fit To Flex Trainingsprogramm von Reebok und Cirque du Soleil » Bild 07.

**15.04.** TaylorMade ist zum zehnten Mal in Folge die meistgespielte Driver-Marke bei den US-Masters.

**20.04.** adidas präsentiert den offiziellen Spielball für das Finale der FIFA Fußball-Weltmeisterschaft 2010 in Südafrika. Der Jobulani ist eine goldfarbene Version des Jabulanis » Bild 08.

**27.04.** adidas Originals und Burton Snowboards geben bekannt, dass sie eine gemeinsame, limitierte adidas Originals x Burton Lifestyle-Kollektion herausbringen werden.

### Mai

**11.05.** Die adidas Fußball-Superstars Lionel Messi und David Villa stellen den adiZero F50 vor. Mit gerade einmal 165 Gramm (bei UK-Größe 8,5) ist er der leichteste adidas Fußballschuh aller Zeiten.

**13.05.** adidas und Volkswagen enthüllen das Sondermodell Golf GTI adidas.

**17.05.** adidas und Disney Consumer Products präsentieren zur Premiere des Disney-Pixar Toy Story 3 die neue Herbst/Winter 2010 Kinder- und Babykollektion » Bild 09.

**19.05.** TaylorMade-adidas Golf stellt den neuen R9 SuperDeep TP für Tour Pros und erfahrene Golfspieler vor » Bild 10.

**19.05.** Die adidas Gruppe eröffnet ihr bis dahin größtes Vertriebszentrum in Spartanburg/South Carolina, USA.

**26.05.** Reebok startet die „Get Stronger With Every Step“-Kampagne, begleitend zur Markteinführung der Toning-Schuhe für Männer in den USA » Bild 11.

### Juni

**11.06.** Die FIFA Fußball-Weltmeisterschaft 2010 in Südafrika beginnt. adidas ist offizieller Sponsor, Ausrüster und Lizenznehmer des Turniers und rüstet zudem über 200 Spieler sowie 12 Teams aus » Bild 12.

**22.06.** adidas miCoach, das persönliche Coaching- und Trainingssystem, gewinnt einen begehrten Stevie Award der 2010 American Business Awards.

**23.06.** Reebok gibt seine Partnerschaft mit dem Basketball-Ass und diesjährigen Nummer-Eins-Pick der NBA John Wall bekannt.

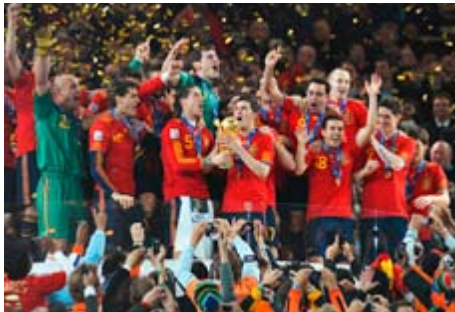

» 01

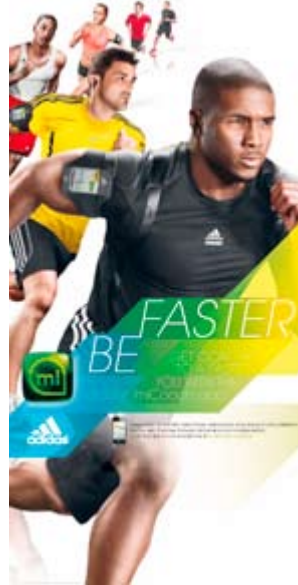

» 02

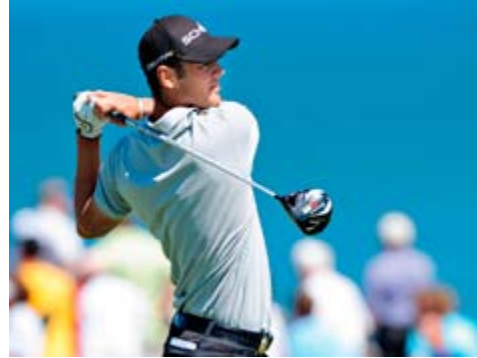

» 03

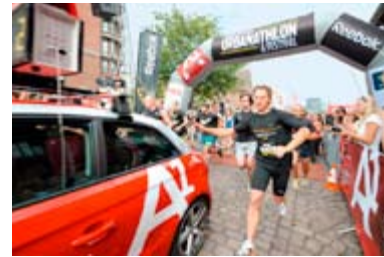

» 04

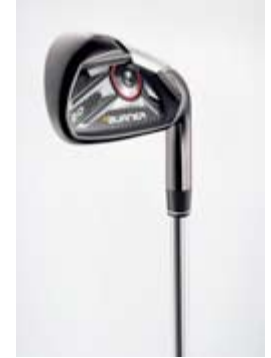

» 05

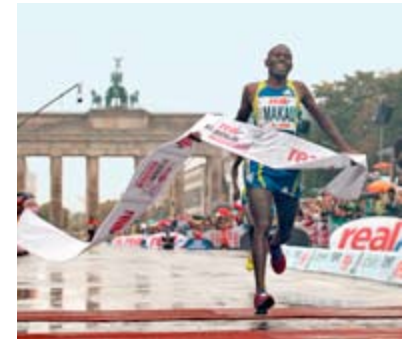

» 06

## Drittes Quartal

### Juli

**11.07.** Die von adidas gesponserte spanische Nationalmannschaft sichert sich ihren ersten Weltmeistertitel. Als Ausrüster des WM-Siegers und ausgezeichneten Einzelspieler sowie mit aufregenden Produktinnovationen und einem Rekordumsatz geht adidas als klarer Gewinner der FIFA Fußball-Weltmeisterschaft 2010 hervor » Bild 01.

**18.07.** Reebok Tennisprofi Nicolas Almagro gewinnt seinen sechsten ATP-Titel beim Turnier im schwedischen Bastad. Zwei Wochen später siegt er beim Suisse Open in Gstaad.

**19.07.** adidas Outdoor gewinnt mit dem Terrex Solo Schuh den OutDoor Industry Award.

**22.07.** adidas bringt den Fluid Trainer auf den Markt – einen neuen, vielseitigen Trainingsschuh für Männer und Frauen.

### August

**02.08.** adidas präsentiert die neue miCoach Personal Training App » Bild 02.

**10.08.** adidas und der mexikanische Fußballverband verlängern ihre Partnerschaft bis 2018.

**15.08.** TaylorMade-adidas Golf stellt das Burner SuperLaunch Eisen und Rescue Set vor, das insbesondere für Golfer mit langsamerer Schwunggeschwindigkeit sowie für Frauen und ältere Spieler geeignet ist.

**16.08.** TaylorMade Tour Staff Professional Martin Kaymer gewinnt die PGA Championship » Bild 03.

**20.08.** Nur wenige Tage bevor adidas die offiziellen Spielbälle für die UEFA Klubwettbewerbe enthüllt, kommt der offizielle adidas Spielball Torfabrik in der Bundesliga erstmals zum Einsatz.

**21.08.** Reebok Deutschland präsentiert den ZigTech Schuh beim Urbanathlon in Hamburg » Bild 04.

**30.08.** adidas und Major League Soccer, die amerikanische Fußballliga, geben die Verlängerung ihrer Partnerschaft bis 2018 bekannt.

### September

**08.09.** TaylorMade-adidas Golf stellt die Burner 2.0 Eisen vor, die die legendäre Burner Flugweite mit mehr Ballgefühl und besserer Spielbarkeit kombinieren » Bild 05.

**10.09.** Die adidas AG wird zum elften Mal in Folge in den Dow Jones Sustainability Index aufgenommen.

**14.09.** Y-3 präsentiert seine Frühjahr/Sommer 2011 Kollektion in New York.

**16.09.** Reebok und Fitness First geben ihre langfristige Partnerschaft in Deutschland bekannt.

**22.09.** adidas Basketball stellt die NBA Revolution 30-Kollektion mit der leichten und technologisch fortschrittlichen NBA-Bekleidung im NBA Store in New York vor.

**26.09.** adidas Athlet Patrick Makau gewinnt den Berlin Marathon. adidas Athletin Aberu Kebede ist die schnellste Läuferin » Bild 06.



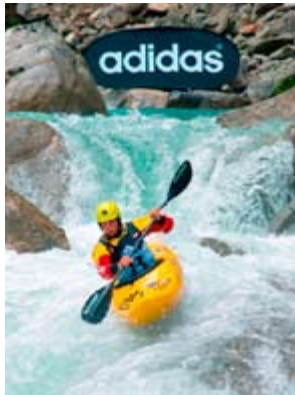

» 07

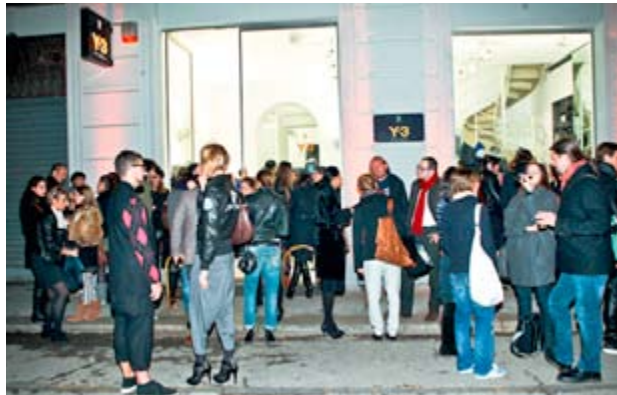

» 08

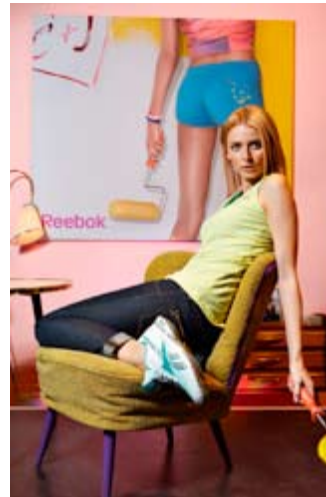

» 09

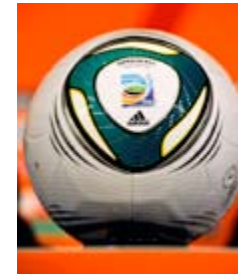

» 10

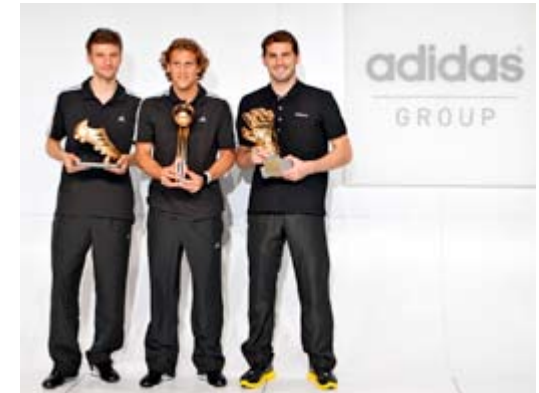

» 11

## Viertes Quartal

### Oktober

**08.10.** Bei der adidas Sickline Extreme Kayak Weltmeisterschaft in Tirol gewinnt adidas Athlet Sam Sutton » Bild 07.

**11.10.** Die adidas AG vollzieht die Umstellung der auf den Inhaber lautenden Stückaktien in auf den Namen lautende Stückaktien (Namensaktien).

**11.10.** PGA Champion und TaylorMade Tour Staff Professional Martin Kaymer gewinnt die Alfred Dunhill Links Championship in St. Andrews, Schottland.

**25.10.** adidas gibt die Verlängerung des Vertrags mit dem FC Chelsea als offizieller Sponsor und Ausrüster bis 2018 bekannt.

### November

**08.11.** Die adidas Gruppe gibt im Rahmen eines Investorentags ihren strategischen Geschäftsplan „Route 2015“ bekannt.

**11.11.** adidas eröffnet den ersten Y-3 Flagship-Store in Mailand » Bild 08.

**17.11.** Im neuen EasyTone Werbespot zeigt Reebok die innovative Toning-Bekleidungskollektion, die bei jeder Bewegung einen Widerstand erzeugt und somit hilft, zentrale Muskeln zu straffen.

**18.11.** Herbert Hainer, Vorstandsvorsitzender der adidas Gruppe, wird vom manager magazin zum „Manager des Jahres“ gewählt.

**26.11.** Topmodel Eva Padberg wird als neue Reebok Markenbotschafterin für 2011 vorgestellt » Bild 09.

**29.11.** Der Sieg beim 2010 Race to Dubai macht Martin Kaymer zur Nummer Eins im europäischen Golfsport.

**30.11.** adidas und die FIFA präsentieren den Speedcell, den offiziellen Spielball der FIFA Frauen-Weltmeisterschaft 2011 in Deutschland » Bild 10.

### Dezember

**01.12.** Footwear News krönt Reebok zum „Unternehmen des Jahres“.

**09.12.** Mit der Einführung von drei neuen Modellen definiert TaylorMade das Forged Eisen neu. Die Modelle heißen: TPMB (Tour Preferred Muscleback), TPMC (Tour Preferred Muscle Cavity) und TPCB (Tour Preferred Cavityback).

**14.12.** Herbert Hainer übergibt die adidas Golden Awards der FIFA Fußball-Weltmeisterschaft 2010 in Herzogenaurach an die adidas Spieler Diego Forlán und Thomas Müller sowie an den Reebok Spieler Iker Casillas » Bild 11.

## Interview mit dem Vorstandsvorsitzenden

Im Jahr 2010 nutzte der adidas Konzern seine Chancen in vollem Umfang. Er erzielte einen Rekordumsatz und verbesserte seine Profitabilität erheblich. Durch die starken operativen und finanziellen Ergebnisse konnten 2010 die Nettofinanzverbindlichkeiten erneut deutlich reduziert werden. Infolgedessen wird das Management den Aktionären eine Dividende von 0,80 € vorschlagen – mehr als doppelt so viel wie im Vorjahr. Darüber hinaus hat der adidas Konzern im Jahr 2010 die „Route 2015“ vorgestellt, seinen bisher umfassendsten und stimmigsten strategischen Geschäftsplan. Basierend auf seinen Premium-Marken, seiner Innovationsstärke und seiner gesunden finanziellen Position erwartet der Konzern im Jahr 2011 ein Umsatzwachstum im mittleren bis hohen einstelligen Bereich sowie eine Gewinnsteigerung von 10 % bis 15 %.

Im folgenden Interview blickt Herbert Hainer, Vorstandsvorsitzender des adidas Konzerns, auf das Jahr 2010 zurück. Er spricht zum einen über die strategischen und finanziellen Aussichten und zum anderen erläutert er, warum der Konzern fit für die Zukunft ist.

**Herr Hainer, wie hat sich der adidas Konzern im Jahr 2010 entwickelt?  
Haben Sie Ihre Ziele erreicht?**

Nach der Finanzkrise und den schwierigen wirtschaftlichen Rahmenbedingungen im Jahr 2009 erlebte der Konzern in 2010 einen deutlichen Aufschwung. Wir blicken auf ein hervorragendes Jahr zurück. Der Konzernumsatz stieg währungsbereinigt um 9 % und erreichte mit 12 Mrd. € ein Rekordniveau. Damit sind wir schneller gewachsen als unsere wichtigsten Wettbewerber. Die Bruttomarge verbesserte sich um 2,4 Prozentpunkte – dank einem niedrigeren Anteil von Lagerräumungsverkäufen und einem höheren Anteil von Umsätzen im Einzelhandelssegment, die eine höhere Marge erzielen. Zwar sind unsere Marketinginvestitionen deutlich gestiegen, aber wir konnten die betrieblichen Aufwendungen im Verhältnis zum Umsatz trotzdem senken. Dies führte zu einem signifikanten Anstieg der operativen Marge auf 7,5 %. Infolgedessen kletterte der Konzerngewinn um 131 % auf 567 Mio. €, das Ergebnis je Aktie lag bei 2,71 €. Das ist am oberen Ende der Prognose, die wir im November bekannt gegeben hatten. Was unsere Bilanz und den Cashflow betrifft, hätte die Entwicklung im Jahr 2010 nicht besser sein können. Wir konnten unser operatives kurzfristiges Betriebskapital im Verhältnis zum Umsatz um 3,5 Prozentpunkte auf 20,8 % senken. Dies entspricht dem niedrigsten Wert in der Unternehmensgeschichte. Wir haben in 2010 erneut einen hervorragenden Cashflow aus der betrieblichen Tätigkeit, dem wichtigsten Treiber für die Steigerung des Shareholder Values, in Höhe von 1,2 Mrd. € generiert. Dadurch konnten wir unsere Nettofinanzverbindlichkeiten weiter reduzieren. Diese belaufen sich nun auf 221 Mio. €. Das ist gerade einmal ein Zehntel des Werts von vor 24 Monaten. 2010 war also unter finanziellen Gesichtspunkten zweifelsohne ein erstklassiges Jahr. Wir haben unsere ursprünglichen Erwartungen für 2010 nicht nur erfüllt, sondern deutlich übertroffen. Dies ist nicht zuletzt dem Engagement, der Zielstrebigkeit und dem Einsatz all unserer Mitarbeiter zu verdanken.

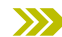

**Gibt es ein Geschäftssegment, das mit seinen Ergebnissen besonders herausragt?**

Auch wenn alle unsere Segmente in 2010 ihre Ziele erreichen konnten, so denke ich doch, dass die Leistung unseres Einzelhandelssegments hervorzuheben ist. Die Umsätze erhöhten sich währungsbereinigt um 18 % – vor allem dank des beeindruckenden Anstiegs der Umsatzerlöse in bereits bestehenden Shops, die um 11 % zulegten. Besonders erfreulich war dabei die Entwicklung unserer Concept Stores, deren Umsatzerlöse, wenn man die gleiche Store-Basis zugrunde legt, sogar um 14 % gewachsen sind. Dies unterstreicht die Stärke und Attraktivität unserer Produktkollektionen. Zudem zeigt es, dass wir mehr und mehr an Einzelhandelsexpertise hinzugewinnen. Mit einem Anstieg der operativen Marge um 5,3 Prozentpunkte auf 18,9 % trug das Einzelhandelssegment mehr als die Hälfte zur Verbesserung der Konzernprofitabilität bei. Damit wird deutlich, wie wichtig das Einzelhandelssegment für unseren Konzern ist. Diese Ergebnisse sollten Sie zuversichtlich stimmen, dass unsere künftigen Investitionen auf diesem Gebiet einen deutlichen Beitrag zur Wertschöpfung des adidas Konzerns in den kommenden Jahren liefern werden.

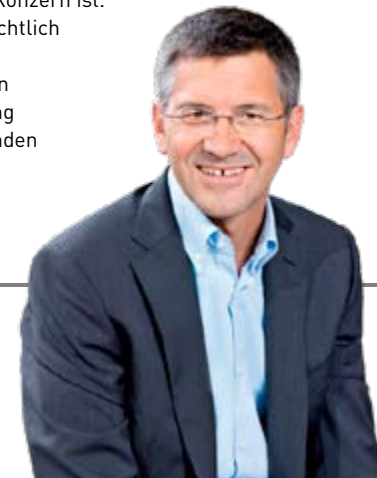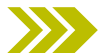



Da wir gerade über Investitionen sprechen – 2010 haben Sie Ihre Marketingaufwendungen deutlich erhöht. Glauben Sie, diese Investitionen haben sich gelohnt?

Absolut. Zunächst freut es mich, dass Sie nicht vergessen haben, dass ich Marketing als Investition betrachte und nicht als Kosten. Wir haben unsere gesamten Marketingaufwendungen 2010 auf 13,3% des Umsatzes erhöht und diese somit wieder auf das gleiche Niveau gebracht wie vor der Krise. Bei all unseren Marketinginvestitionen bewerte ich immer sorgfältig ihren Nutzen. Zudem vergleiche ich auch immer die Ergebnisse mit unseren Erwartungen und dem Abschneiden unserer Wettbewerber. Egal welche unserer Marken ich mir aber ansehe, die Ergebnisse sprechen für sich. Wir haben die immensen Chancen, die sich uns geboten haben, genutzt und sind stärker aus der Rezession gekommen als unsere Wettbewerber.

Bei adidas zum Beispiel stieg der währungsbereinigte Umsatz um 9% auf 8,7 Mrd. €, mit hervorragenden Ergebnissen insbesondere in der Kategorie Fußball. Wir haben in Südafrika die erfolgreichste WM aller Zeiten erlebt und mit deutlich mehr als 1,5 Mrd. € einen Rekordumsatz in dieser Kategorie erzielt. Durch unser erstklassiges Sponsoring-Portfolio war adidas auf jedem Siegerpodest präsent – nicht zuletzt auch als langjähriger Partner des Weltmeisters Spanien. Der adiZero F50 war der Fußballschuh, mit dem die meisten Tore in diesem Turnier geschossen wurden und ist einer der meistverkauften Fußballschuhe der Branche. Ein weiteres Beispiel für unser erfolgreiches Marketing war der starke Auftrieb, den unsere Basketballkategorie erlebte. Die TV-Spots mit Derrick Rose und Dwight Howard zur Unterstützung unserer Positionierung als schnellste und leichteste Marke im Basketball führten zu den höchsten Durchverkaufsraten seit Jahren in dieser Kategorie. Im Bereich Streetwear konnten wir durch mutige Kollaborationen, wie z.B. mit Jeremy Scott, und unerwartete Kampagnen, wie den außerordentlich erfolgreichen Star Wars Cantina Spot, punkten. Die Umsätze unserer adidas Sport Style Submarken gingen um 23% nach oben – auf die Rekordmarke von 2,2 Mrd. €. Alleine adidas Originals hat inzwischen mehr als 7 Millionen Anhänger auf seiner Facebook-Seite und ist damit die beliebteste Lifestyle-Marke unserer Branche.

Auch bei Reebok haben sich die Investitionen in unsere neuen Initiativen ausgezahlt. Reeboks Umsatz erhöhte sich währungsbereinigt um 12% auf 1,9 Mrd. €. Der EasyTone wurde von Kunden und Konsumenten rund um den Globus begeistert aufgenommen. Mit spannenden Kampagnen und der Unterstützung von Prominenten wie Helena Christensen und Kelly Brook standen wir am Jahresende in der Toning-Kategorie ganz oben. Noch erfreulicher war die erfolgreiche Markteinführung des ZigTech Konzepts, mit dem wir 2010 einen zweiten Wachstumsmotor schufen. Unterstützt wurde dieser durchschlagende Erfolg durch unsere bisher größte Online-Marketingkampagne vor der offiziellen Markteinführung. Der kommerzielle Erfolg war phänomenal. All diese Initiativen zusammen führten dazu, dass Reebok im Weihnachtsgeschäft in den USA eine der drei meistverkauften Schuhmarken war.

Auch bei den Marken in unseren Anderen Geschäftssegmenten stellten wir sicher, dass sie die Unterstützung erhielten, um ihre Ziele zu erreichen. Bestes Beispiel hierfür ist TaylorMade-adidas Golf, wo der Umsatz im Jahr 2010 auf 909 Mio. € stieg. Zudem wurde TaylorMade-adidas Golf 2010 der weltweit führende Anbieter auf dem Golfmarkt.

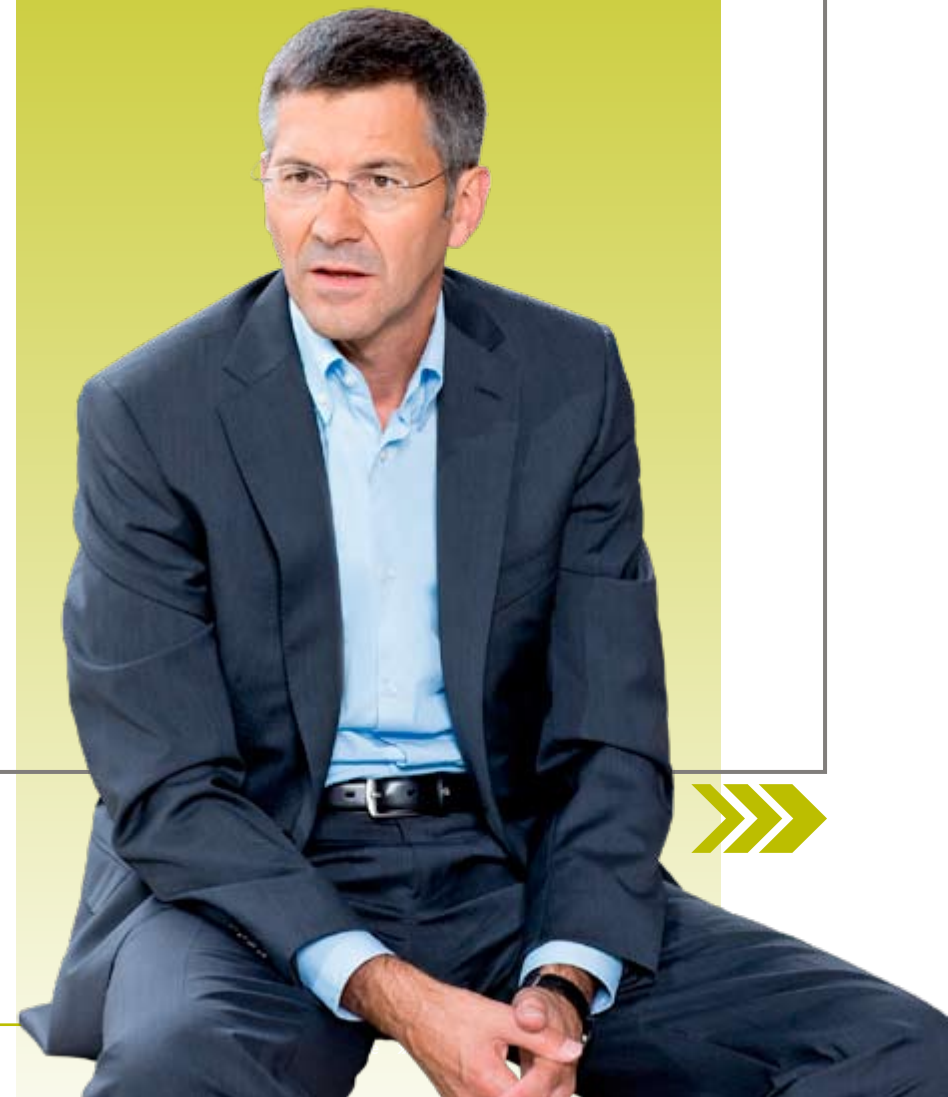

**Nordamerika und China waren 2010 wichtige Prioritäten für Sie. Wie haben sich diese und auch Ihre anderen Regionen im vergangenen Jahr entwickelt?**

Unser Wachstum und unser Erfolg waren 2010 erfreulich breit gestreut und stark in den meisten unserer wichtigsten Märkte. In Nordamerika übertrafen wir unsere Ziele deutlich. Der Umsatz von adidas stieg währungsneutral um 14 %, der Umsatz von Reebok um 22 %. Das gesamte Konsumentenspektrum reagierte sehr positiv auf unsere wichtigsten Produktinitiativen in den Bereichen „Lightweight“ und Originals bei adidas oder Toning und ZigTech bei Reebok. Zudem machten wir Fortschritte bei unserer Mission, eine starke Verbindung zu den Sportlern der nächsten Generation aufzubauen und unsere Präsenz im wichtigen Vertriebskanal Einkaufszentren deutlich zu steigern. In China sind die Umsatzzahlen im Gesamtjahr leicht gefallen, allerdings verzeichneten wir im zweiten Halbjahr wieder ein Wachstum von 10 %. Wir haben 2010 unsere Lagerbestände radikal bereinigt und die Anzahl unserer Geschäfte rationalisiert. Ich bin sicher, dass wir heute durch die Verbesserung unseres Merchandisings, unseres Produktangebots und unserer operativen Abläufe gut aufgestellt sind. So können wir diesen Wachstumstrend fortsetzen, während manche unserer Wettbewerber erste Schwächen zeigen.

Was die anderen Märkte angeht, so haben wir 2010 unseren Marktanteil in Europa deutlich gesteigert. Die Kategorie Fußball war extrem erfolgreich, zudem konnten wir unsere starke Stellung in den Schwellenländern der Region ausbauen. Die Umsätze in Westeuropa stiegen währungsbereinigt um 7 %, primär aufgrund zweistelliger Umsatzzuwächse in Großbritannien, Deutschland und Spanien. In den Europäischen Schwellenländern legte der währungsbereinigte Umsatz um 16 % zu. Hier glänzte insbesondere Russland/GUS. Denn in diesem Markt, mit hauptsächlich eigenem Einzelhandel, nahmen die Umsätze bei bereits bestehenden Geschäften um 25 % zu. Wir haben unsere deutliche Marktführerschaft in Russland weiter ausgebaut und Reebok belegt nun nach adidas Platz zwei unter den Sportartikelmarken. In den Anderen Asiatischen Märkten stieg der Umsatz 2010 um 6 %, in Lateinamerika um 14 %. Selbst in Japan sind wir trotz eines schwierigen Konsumumfelds gewachsen und haben so unsere Marktführung weiter ausgebaut. Eines der größten Highlights in diesem Markt war der währungsbereinigte Umsatzanstieg bei Reebok um beachtliche 45 %.

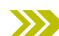

**Bei Ihren Finanzergebnissen für das Jahr 2010 fällt vor allem die deutliche Reduzierung der Nettofinanzverbindlichkeiten auf. Wie haben Sie dies erreicht? Können Sie uns kurz etwas zu Ihrem Kapitalmanagement und Ihrer Dividendenpolitik sagen?**

Angesichts der schwierigen Bedingungen an den Finanzmärkten haben wir uns in den letzten zwei Jahren darauf konzentriert, unsere Finanzverbindlichkeiten zu reduzieren. Das haben wir durch unseren Fokus auf die Steigerung des Cashflows aus der betrieblichen Tätigkeit erreicht, der sich in den letzten 24 Monaten auf 2,8 Mrd. € belief. Zum Jahresende betrugen unsere Nettofinanzverbindlichkeiten 221 Mio. €, das Verhältnis von Nettofinanzverbindlichkeiten zu EBITDA liegt nun bei 0,2 – also deutlich innerhalb unserer langfristigen Vorgabe von unter zwei. Was Kapitaleinsatz und -management angeht, werden wir bei Fremdkapital einen konservativen Ansatz verfolgen, zumindest solange keine nachhaltige Erholung des gesamtwirtschaftlichen Umfelds zu spüren ist. Kurzfristig gesehen beabsichtigen wir, die überschüssigen Finanzmittel weitgehend zur Investition in unsere „Route 2015“-Wachstumsinitiativen und zur weiteren Reduzierung der Nettofinanzverbindlichkeiten zu verwenden.

Zudem sind wir fest entschlossen, unsere Dividendenpolitik, die 2010 nach oben angepasst wurde, beizubehalten. Diese sieht vor, zwischen 20 % und 40 % des auf Anteilseigner entfallenden Gewinns auszuschütten. Dieses Jahr beabsichtigen wir, 167 Mio. € auszuschütten, im Vorjahr waren es 73 Mio. €. Das entspricht einer Dividende von 0,80 € je Aktie – mehr als doppelt so viel wie die 0,35 € des Vorjahres. Mit der richtigen Balance zwischen Investitionen und Gewinnausschüttungen bin ich überzeugt, dass wir langfristig einen beachtlichen Mehrwert für unsere Aktionäre schaffen werden.

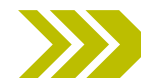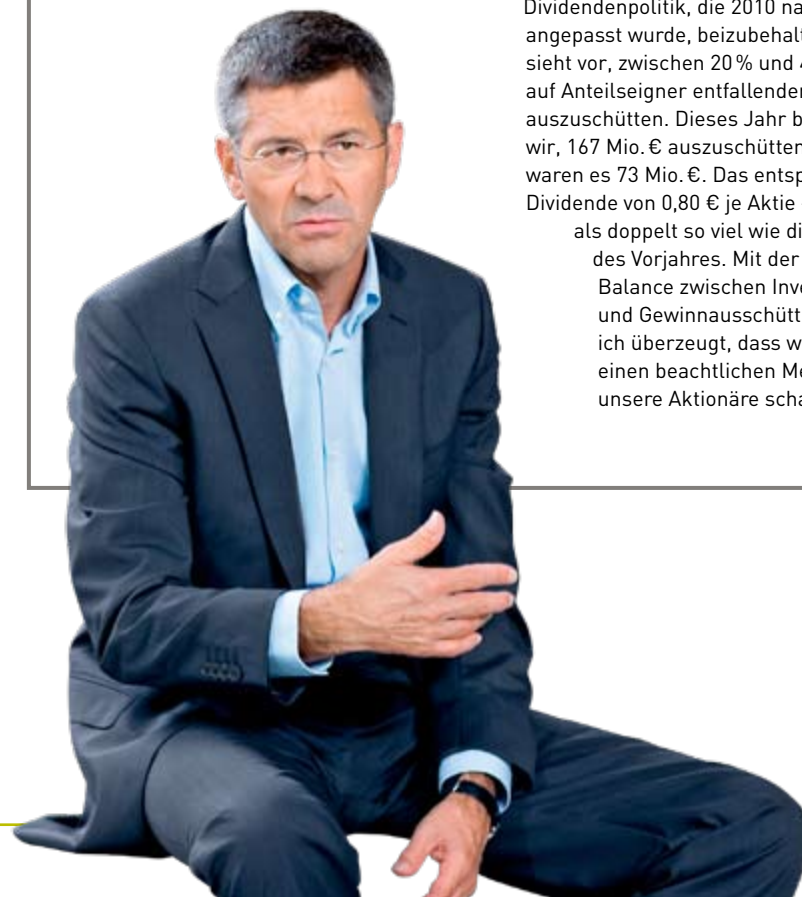

Im November 2010 stellten Sie Ihren strategischen Geschäftsplan für die nächsten fünf Jahre vor – genannt Route 2015. Was sind die Hintergründe dieses Plans? Können Sie uns kurz die wichtigsten Ziele erläutern?

Wenn wir fokussiert sind, ein klares Ziel vor Augen haben, sind wir stark und bereit, es mit jedem Wettbewerber aufzunehmen, der uns herausfordert. Mit dieser Einstellung vor Augen erstellten wir unseren Strategieplan Route 2015. Dabei handelt es sich um den umfassendsten und stimmigsten strategischen Geschäftsplan, den der Konzern jemals aufgestellt hat. Er gründet auf unserer langfristigen Mission: Wir wollen der weltweit führende Anbieter der Sportartikelindustrie sein. Alles in unserer Strategie dreht sich um den Konsumenten.

Dieser Strategieplan hat das Ziel, dass unser Konzern schneller wächst als der Gesamtmarkt, das Bruttoinlandsprodukt und der Sportartikelmarkt. Zudem wollen wir schneller wachsen als unsere Hauptwettbewerber. Denn nur durch langfristiges, qualitativ hochwertiges Wachstum können wir unser volles Potenzial ausschöpfen und zu dem Unternehmenswert gelangen, den wir unserem eigenen Anspruch nach schaffen können. Unser Ziel ist, über den Fünfjahreszeitraum jährlich ein währungs-bereinigtes Umsatzwachstum im hohen einstelligen Bereich zu erreichen. Das bedeutet einen Umsatzanstieg um 45 % bis 50 % gegenüber 2010. Aus Markenperspektive werden adidas und Reebok mehr als 90 % zu diesem Wachstum beitragen. Der restliche Anteil wird aus den Anderen Geschäftssegmenten stammen. Unsere drei so genannten „Angriffsmärkte“ – Nordamerika, China und Russland/GUS – sollen 50 % der Umsatzzuwächse beisteuern. Was das Ergebnis je Aktie angeht – den Gradmesser für unsere Fähigkeit, Unternehmenswert zu schaffen – so streben wir eine durchschnittliche jährliche Wachstumsrate von 15 % in diesem Zeitraum an. Dies wollen wir erreichen, indem wir die erforderlichen Investitionen zur Sicherung des Umsatzwachstums sorgfältig abstimmen und dieses auch im Gewinn sichtbar machen. Dabei sind wir fest entschlossen, spätestens bis 2015 eine operative Marge von 11 % nachhaltig zu erreichen.

Wir gehen davon aus, dass die anvisierte Steigerung von Umsatz und Gewinn in den nächsten fünf Jahren zu bisher unerreichtem Cashflow für unseren Konzern führen wird. Und Sie werden mir sicherlich zustimmen: Das ist der richtige Weg, um Unternehmenswert zu schaffen.

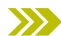

Steigende Beschaffungskosten und Preisinflation sind derzeit zwei viel diskutierte Themen in der Finanzwelt. Erwarten Sie in diesem Zusammenhang größere Auswirkungen auf die Bruttomarge?

Diese Marktkräfte sind nicht nur aktuell ein Thema, sondern stellen für das gesamte kommende Jahr einen starken Gegenwind dar. Allerdings sind davon auch alle anderen Anbieter der Branche betroffen. Schauen wir uns die Fakten an: Rohstoff-, Lohn- und Transportkosten sind allesamt gestiegen – zum Teil sogar ganz erheblich. Die Preise für Baumwolle zum Beispiel haben sich im vergangenen Jahr fast verdoppelt. Sie steigen auch weiterhin kräftig an und liegen jetzt bereits um mehr als 20 % über dem Niveau zum Jahresende 2010. Deshalb arbeiten unsere Bereiche Global Brands und Global Operations an der Optimierung unserer Produktentwicklungs-, Herstellungs- und Vertriebsprozesse, um unsere Produkte kosteneffizienter auf den Markt zu bringen und so den Entwicklungen entgegenzuwirken. Diese Maßnahmen werden die für uns negativen Effekte etwas abfedern. Aber bedingt durch den extremen Anstieg der Rohstoffpreise gegen Ende des letzten Jahres werden sie nicht ausreichen, um den Kostendruck vollständig auszugleichen. Preisanpassungen und Inflation gehören daher zur wirtschaftlichen Realität unserer Branche. Allerdings können wir, was die Möglichkeiten zur Preisgestaltung angeht, sehr zuversichtlich sein. Selbst inmitten der schlimmsten weltweiten Rezession, die ich erlebt habe, hat sich gezeigt, dass Konsumenten bereit sind, für Markenprodukte mit dem Gütesiegel Qualität, Innovation und Service etwas mehr auszugeben. Genau solche Marken und Produkte haben wir. Und wir haben auch die Marketingstärke, um sie entsprechend zu unterstützen und noch attraktiver zu machen.

Am Ende des Tages liegt die Entscheidung jedoch beim Konsumenten, und wir werden wachsam beobachten, wie sich Preise und Volumen im Lauf des Jahres entwickeln. Was unsere Finanzergebnisse angeht, so wird sich dies bei unserer Bruttomarge am meisten bemerkbar machen. Die genannten Faktoren können sich negativ auswirken, aber es gibt auch Faktoren, die uns 2011 zu Gute kommen werden. Dazu zählt unsere regionale Umsatzverteilung, da wir in den Schwellenländern ein schnelleres Wachstum erwarten.

Auch der zunehmende Anteil der Umsätze aus unserem eigenen Einzelhandel, die höhere Margen erzielen, wird sich positiv bemerkbar machen. Infolgedessen gehen wir davon aus, dass die Bruttomarge des Konzerns 2011 weitgehend unverändert bleiben wird – bei einem Wert zwischen 47,5 % und 48,0 % gegenüber 47,8 % im Jahr 2010. Sollten die Beschaffungskosten weiterhin so ansteigen, wird sich die Situation jedoch verschärfen und der Druck auf die Margen in unserer Branche wird über 2011 hinaus weiter zunehmen.

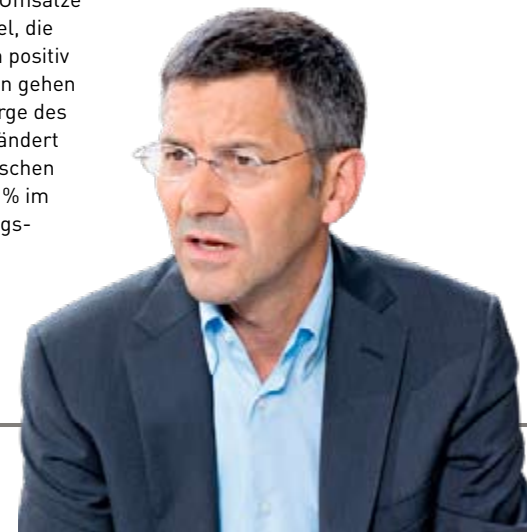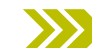

**2011 finden keine großen Sportereignisse statt. Wird adidas trotzdem wachsen können? Welche wichtigen Initiativen und Produkteinführungen sind in diesem Jahr bei den Marken zu erwarten?**

Der Unterschied zwischen Jahren mit und Jahren ohne große Sportereignisse wird oft überschätzt. Aufgrund der Vielfalt der Marke adidas ist der Unterschied heutzutage minimal, abgesehen von der unterschiedlichen Verteilung unseres Geschäfts über die Quartale. Das haben wir letztes Jahr eindeutig gesehen. Fußball und adidas Sport Style habe ich bereits erwähnt, aber wir hatten auch bei Running und Outdoor hervorragendes Wachstum von 8 % bzw. 21 %. In Running sind Kollektionen wie adiZero, Supernova und Response allesamt mit zweistelligen Wachstumsraten gestiegen.

Außerdem würde ich nicht sagen, dass es 2011 keine Events gibt. Der Sportkalender bietet eine breite Palette von Veranstaltungen in den verschiedenen Regionen. Das kann für eine globale Marke wie adidas nur positiv sein. Zu den Veranstaltungen, von denen wir in diesem Jahr profitieren werden, zählen die Cricket-Weltmeisterschaft in Indien, der Rugby World Cup in Neuseeland, die Copa América in Argentinien, die FIFA Frauen-Weltmeisterschaft in Deutschland und die Leichtathletik-WM in Korea, um nur einige zu nennen. In Lateinamerika wird die Copa América allein eine halbe Milliarde Zuschauer anziehen. Gegen Jahresende werden wir uns bereits auf die mit großer Spannung erwarteten Olympischen Spiele 2012 in London und die UEFA Europameisterschaft 2012 vorbereiten.

Aber letztendlich basiert unser Erfolg, unabhängig davon, welches Jahr wir schreiben, immer darauf, wie gut unsere Initiativen den Nerv der Konsumenten treffen. Und in dieser Hinsicht bin ich äußerst zuversichtlich, denn wir haben für 2011 große Kampagnen und Produkteinführungen geplant. Mitte März startet unsere globale Markenkampagne „all adidas“. Sie wird die unverwechselbare Präsenz von adidas in unterschiedlichen Sportarten, Kulturen und Lifestyles hervorheben und Sport, Musik und Mode miteinander verbinden. Wir werden auch in diesem Jahr wieder zahlreiche neue Produkte auf den Markt bringen. In Running, einer der wichtigsten Kategorien für unsere Route 2015, erwarte ich durch Produkte wie den adiZero F50 Runner und den Clima CC Ride ein beschleunigtes Wachstum im zweistelligen Bereich. Bei Fußball wird der neu designte Predator sowohl technisch als auch optisch großen Eindruck machen. Er ist dann auch vollständig in das adidas miCoach Konzept integriert. Auf dem Fußballplatz wird der Predator von jungen Nachwuchsstars getragen, wie beispielsweise von Nani, dem jüngsten Mitglied der adidas Familie. Mit der Einführung des adiZero Crazylight Schuhs stärken wir zudem unsere Glaubwürdigkeit als Marke mit den leichtesten Produkten im Basketball. Auch adidas Sport Style wird wieder eine Reihe interessanter Kollektionen herausbringen. Dazu gehört auch unsere erste eigene Originals Denim Kollektion.

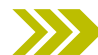

**Bei Reebok haben Sie 2010 eine deutliche Wende geschafft. Es gibt allerdings Anzeichen einer Verlangsamung im Toning-Markt – kann Reebok in nächster Zeit seine Dynamik fortsetzen?**

Auf jeden Fall. Ich kann nur wiederholen, was ich bereits im November gesagt habe. Wir haben es richtig angepackt – unsere Präsenz sorgfältig aufgebaut, uns Zeit gelassen sowie mit Bedacht ausgewählt, wie und mit wem wir unsere Produkte vertreiben wollen. Zudem haben wir Angebot und Nachfrage überlegt aufeinander abgestimmt. Dabei hatten wir unsere Vision immer fest im Blick. Wir haben sichergestellt, dass wir unseren Partnern die richtige Unterstützung bieten und dass wir den Durchverkauf an den Konsumenten fördern.

Was jedoch noch wichtiger ist – die Umsatztreiber sind von Quartal zu Quartal breiter und internationaler aufgestellt. Wir sind immer stärker im Einzelhandel vertreten und unsere Partner zeigen großes Vertrauen in die Marke. Bestes Beispiel hierfür ist unsere Präsenz bei Finish Line in den USA. Im Februar wurden alle 680 Finish Line Stores im Rahmen der ReeZig-Kampagne vier Wochen lang mit ZigTech Bildmaterial dekoriert. 2011 bereiten wir uns nun auf die Einführung des dritten wichtigen Technologiekonzepts vor: RealFlex. RealFlex unterstützt die natürliche Bewegung und ist in Sachen Design und Funktionalität genauso überzeugend wie Toning und Zig. Zudem werden wir Reebok Classics neu auflegen. Um Classics zu unterstützen, kündigte Reebok vor Kurzem eine vielseitige Partnerschaft mit dem Produzenten, Künstler und Designer Swizz Beatz an. Er wird anfangs an den kreativen Inhalten arbeiten,

um die neue Positionierung von Classics mit Leben zu füllen. Die Resonanz auf RealFlex und Reebok Classics war und ist sehr positiv und hat der dynamischen Marke noch mehr Schwung verliehen.

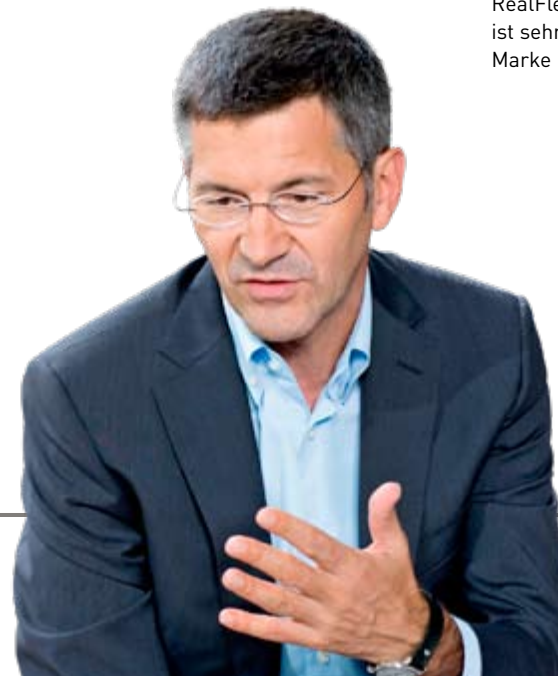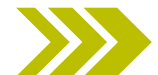



Können Sie uns Informationen zu Ihrer Strategie für die Anderen Geschäftssegmente geben? Welchen Beitrag erwarten Sie mittelfristig von TaylorMade-adidas Golf, Rockport und Reebok-CCM Hockey?

Ich sehe großes Wachstumspotenzial und viel Unternehmenswert in den Anderen Geschäftssegmenten des Konzerns. Wie wir bereits bei unserem Investorentag bekannt gegeben haben, erwarten wir, dass diese Segmente zusammen ihren Umsatz von heute 1,4 Mrd. € auf 1,8 Mrd. € bis 2015 steigern werden. TaylorMade-adidas Golf als das größte Segment wird hier Hauptwachstumstreiber sein. Dabei werden wir nicht nur unsere Marktführung im Bereich Metallhölzer ausbauen, sondern wir wollen auch weitere Marktanteile bei Eisen, Golfbällen und Schuhen hinzugewinnen. Mit der Einführung des R11 Drivers im Jahr 2011 verleiht TaylorMade dem Golfsport eine ganz neue Farbe. Das außergewöhnliche Weiß des Schlägerkopfs begeistert die Medien, Tourprofis und Einzelhändler und konnte sich in der Branche schnell durchsetzen. Der R11 ist ein hervorragendes Beispiel für die Initiativen von TaylorMade-adidas Golf. Er verkörpert perfekt unsere Energie und Leidenschaft. Genauso ist es bei Rockport. Dort haben wir eine überzeugende Strategie rund um das Motto „Walkability“ (auf Deutsch etwa „Gehbarkeit“) entwickelt und uns so im stark fragmentierten Lederschuhmarkt ganz klar von der Masse abgehoben. Dies wird in den kommenden Monaten deutlich sichtbar sein, z. B. mit neuen „leichten“ Technologien in unserer DresSport Kollektion. Bei Reebok-CCM Hockey verbinden wir weiterhin zwei wichtige Grundsätze des Konzerns auf starke und wirkungsvolle Weise: Innovation und Unterstützung durch Profisportler.

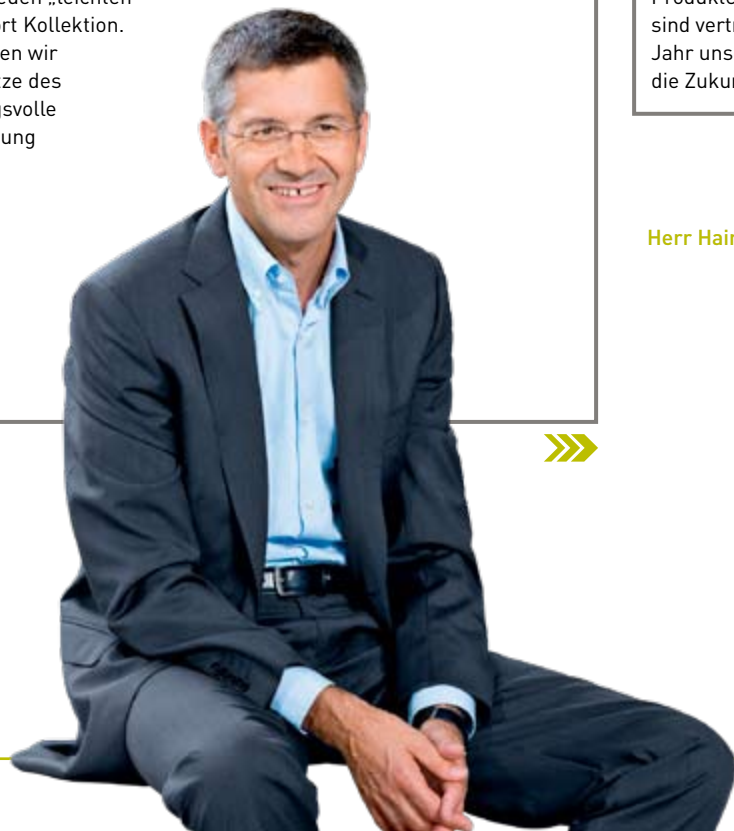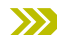

Wenn wir uns das nun alles vor Augen führen, was erwarten Sie für den Konzern im Jahr 2011 aus finanzieller Sicht?

Wir können mit Recht behaupten, dass unser Unternehmen sich noch nie in einer so starken finanziellen Position befand wie heute. Außerdem sind wir sehr gut aufgestellt, um zukünftige Chancen zu nutzen und Herausforderungen zu meistern, insbesondere die steigenden Beschaffungskosten, über die wir bereits gesprochen haben. Das Feedback von unseren Einzelhandelspartnern zu unseren Produkten und Kampagnen stimmt uns sehr zuversichtlich, dass wir – zumal sich das Konsumumfeld weiterhin verbessert – Marktanteile hinzugewinnen können. Wir erwarten, dass der Konzernumsatz 2011 währungsbereinigt im mittleren bis hohen einstelligen Bereich steigen und eine neue Rekordmarke erreichen wird. Alle Segmente und Marken sowie all unsere Regionen werden zu diesem Wachstum beitragen. Wir werden unsere Marken weiterhin unterstützen, indem wir in Marketing und selbst kontrollierte Verkaufsflächen investieren. Nur so können wir die Markenpräsenz bei unseren Konsumenten und wichtigen Vertriebspartnern sicherstellen. Die betrieblichen Aufwendungen im Verhältnis zum Umsatz werden nichtsdestotrotz zurückgehen. Wir erwarten deshalb, dass sich die operative Marge 2011 auf ein Niveau zwischen 7,5% und 8,0% verbessern wird. Infolgedessen wird das Ergebnis je Aktie um 10% bis 15% auf einen Wert zwischen 2,98 € und 3,12 € steigen. Wir haben alles, was sich ein Unternehmen nur wünschen kann – starke Marken, Premium-Produkte, hervorragende Promotion-Partner. Wir haben eine immense globale Reichweite und sind vertriebsstark. Unsere Bilanzstruktur ist sehr gesund. Ich freue mich auf 2011, das erste Jahr unseres strategischen Geschäftsplans Route 2015. Denn wir sind in jeder Hinsicht fit für die Zukunft.

Herr Hainer, vielen Dank für das Gespräch.



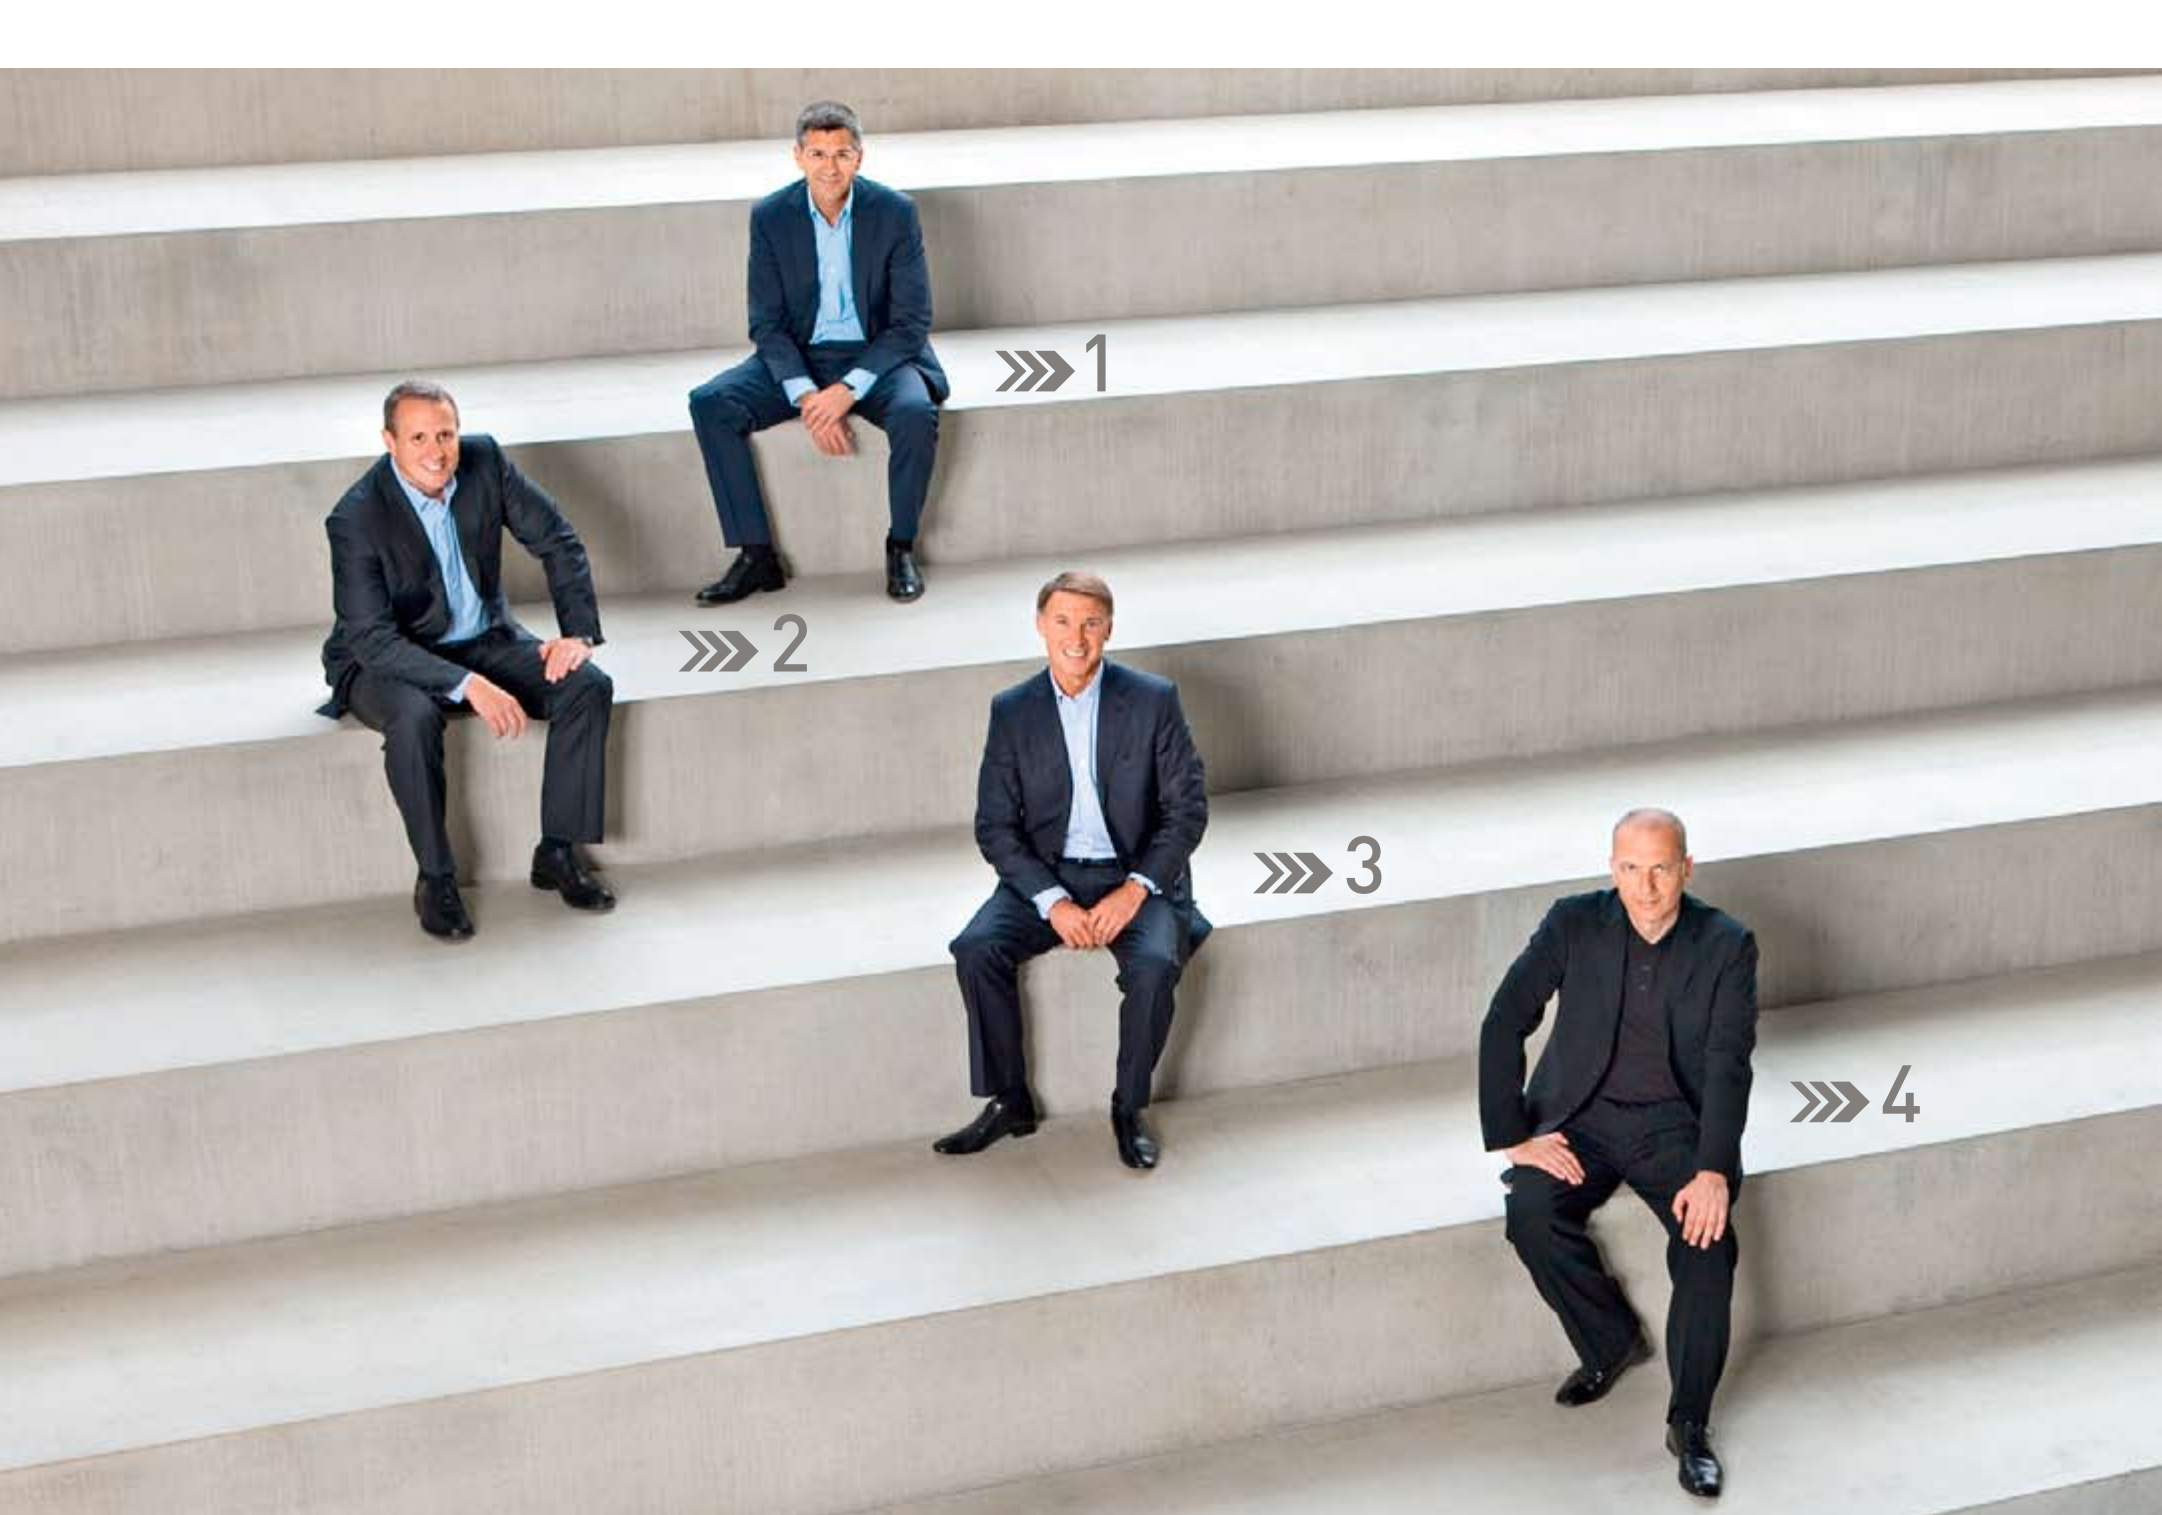

»»» 1

»»» 2

»»» 3

»»» 4

# Vorstand

Unser Vorstand setzt sich aus vier Mitgliedern zusammen, die die internationale Struktur unseres Konzerns reflektieren. Jedes Vorstandsmitglied ist für mindestens einen wichtigen Funktionsbereich innerhalb des Konzerns verantwortlich.

## Herbert Hainer

»» 1

wurde 1954 in Dingolfing geboren. Nach dem Studium zum Diplom-Betriebswirt war Herbert Hainer acht Jahre in verschiedenen Vertriebs- und Marketingpositionen bei Procter & Gamble tätig. Er kam 1987 zu adidas Deutschland. Dort hatte er mehrere Managementpositionen innerhalb des Konzerns inne, u. a. Geschäftsführer Deutschland und Senior Vice President für Vertrieb und Logistik in Europa, Afrika und dem Nahen Osten. Herbert Hainer kam 1997 in den Vorstand und wurde 2001 Vorstandsvorsitzender der adidas AG<sup>1)</sup>. Er ist verheiratet, hat zwei Töchter und lebt in Herzogenaurach.

Herbert Hainer ist auch:

- »» Stellvertretender Vorsitzender des Aufsichtsrats, FC Bayern München AG, München
- »» Mitglied des Aufsichtsrats, Allianz Deutschland AG, München
- »» Mitglied des Aufsichtsrats, Deutsche Lufthansa AG, Frankfurt (seit 29. April 2010)
- »» Mitglied des Aufsichtsrats, Engelhorn KGaA, Mannheim

## Glenn Bennett

»» 2

wurde 1963 in New Hampshire, USA, geboren. Als Diplom-Informatiker begann er seine berufliche Laufbahn 1983 bei Reebok International Ltd., wo er zehn Jahre in verschiedenen Positionen im operativen Bereich und im Produktbereich tätig war, zuletzt als Director of Footwear Development. 1993 kam Glenn Bennett zur adidas AG und begann als Head of Worldwide Footwear Development. Dort wurde er wenige Monate später zum Senior Vice President of Footwear Operations ernannt. Er wurde 1997 in den Vorstand berufen und übernahm kurz darauf die Verantwortung für alle Aktivitäten in den Bereichen Schuhe, Bekleidung und Sportzubehör bei Global Operations. Glenn Bennett lebt in Boston/Massachusetts, USA.

## Robin J. Stalker

»» 3

wurde 1958 in Palmerston North, Neuseeland, geboren. Nach seinem Betriebswirtschaftsstudium startete er 1982 seine berufliche Laufbahn und erhielt seine Qualifikation als Chartered Accountant. Er war bei Arthur Young in Neuseeland und London tätig und hatte danach verschiedene Positionen im Finanz- und Controllingbereich in der Unterhaltungsindustrie inne, darunter United International Pictures und Warner Bros. International. Des Weiteren arbeitete er als selbständiger Berater. Robin J. Stalker kam 1996 zur adidas AG. Seit Februar 2000 ist er Chief Financial Officer der adidas AG<sup>1)</sup>. Er wurde 2001 für den Bereich Finanzen in den Vorstand berufen. Im Jahr 2005 übernahm er zusätzlich Verantwortung als Arbeitsdirektor. Robin J. Stalker ist verheiratet und lebt in der Nähe von Herzogenaurach.

Robin J. Stalker ist auch:

- »» Mitglied des Aufsichtsrats der Schaeffler GmbH, Herzogenaurach (seit 13. August 2010)

## Erich Stamminger

»» 4

wurde 1957 in Rosenberg geboren. Nach dem Studium zum Diplom-Betriebswirt begann er seine Karriere bei dem Marktforschungsinstitut GfK. 1983 kam Erich Stamminger zu adidas Deutschland. Er war in mehreren Marketingpositionen tätig, bevor er Geschäftsführer für Deutschland und später für Europa und Asien/Pazifik wurde. Erich Stamminger ist seit 1997 Mitglied des Vorstands und wurde im Jahr 2000 zum Head of Global Marketing ernannt. Vier Jahre später wurde er President von adidas Nordamerika und war gleichzeitig weiterhin für den Bereich Marketing weltweit verantwortlich. Im Jahr 2006 wurde er President der Marke adidas und ist seit 2009 für Global Brands verantwortlich. Erich Stamminger ist verheiratet und lebt in Nürnberg.

1) adidas-Salomon AG vom 19. Dezember 1997 bis zum 29. Mai 2006.

# Aufsichtsrat

## Mitglieder des Aufsichtsrats

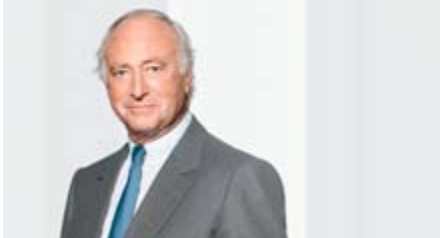

**Igor Landau**

**Vorsitzender**

Ehemaliger Vorstandsvorsitzender der Aventis S.A., Paris, Frankreich  
» Mitglied des Aufsichtsrats, Allianz SE, München  
» Mitglied des Verwaltungsrats, Sanofi-Aventis S.A., Paris, Frankreich  
» Mitglied des Verwaltungsrats, HSBC France S.A., Paris, Frankreich

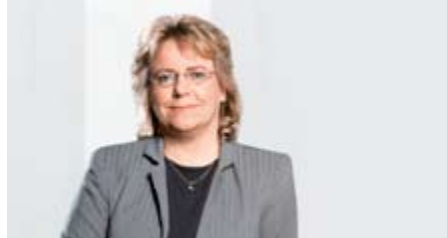

**Sabine Bauer<sup>1)</sup>**

**Stellvertretende Vorsitzende**

Vorsitzende des Gesamtbetriebsrats<sup>2)</sup>, adidas AG

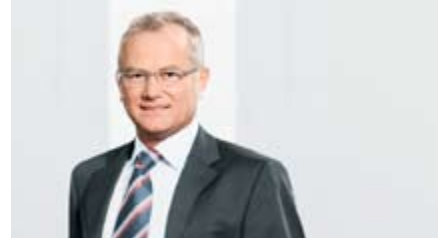

**Willi Schwerdtle**

**Stellvertretender Vorsitzender**

Geschäftsführer, Procter & Gamble GmbH, Schwalbach am Taunus

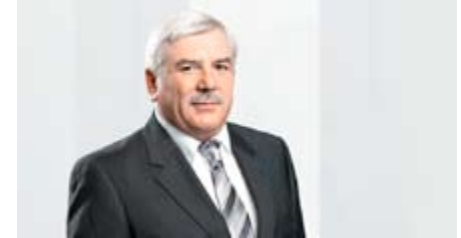

**Dieter Hauenstein<sup>1)</sup>**

Vorsitzender des Betriebsrats Herzogenaurach, adidas AG

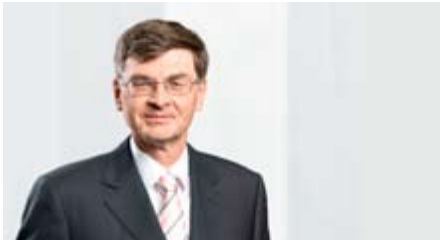

**Herbert Kauffmann**

Unternehmensberater, Stuttgart

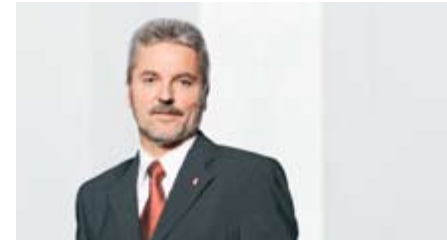

**Roland Nosko<sup>1)</sup>**

Bezirksleiter, IG BCE, Bezirk Nürnberg, Nürnberg

» Stellvertretender Vorsitzender des Aufsichtsrats<sup>3)</sup>, CeramTec AG, Plochingen

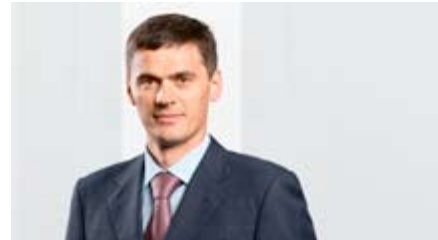

**Alexander Popow**

Vorsitzender, RFSO „Lokomotiv“, Moskau, Russland

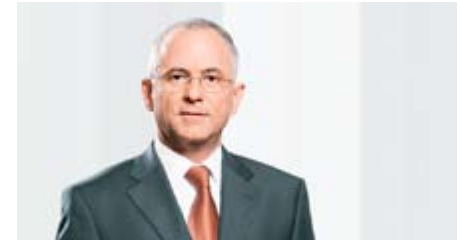

**Hans Ruprecht<sup>1)</sup>**

Vertriebsdirektor Customer Service, Market Central, adidas AG

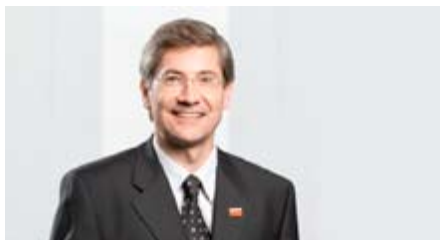

**Dr. Wolfgang Jäger<sup>1)</sup>**  
Geschäftsführer, Hans-Böckler-Stiftung,  
Düsseldorf

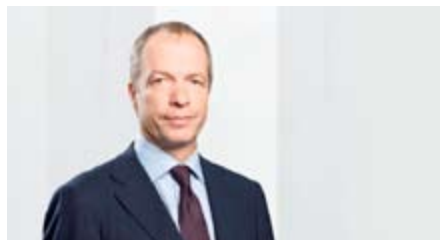

**Dr. Stefan Jentzsch**  
Partner, Perella Weinberg Partners UK LLP,  
London, Großbritannien  
» Mitglied des Aufsichtsrats, Sky Deutschland AG,  
Unterföhring

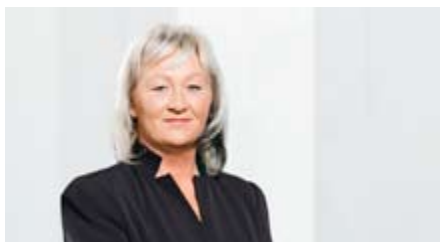

**Heidi Thaler-Veh<sup>1)</sup>**  
Mitglied des Gesamtbetriebsrats, adidas AG

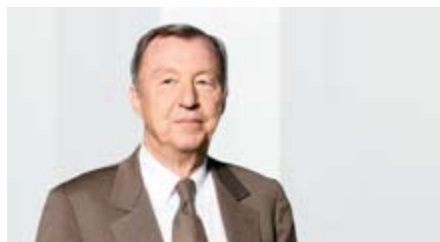

**Christian Tourres**  
Ehemaliges Vorstandsmitglied der adidas AG  
» Mitglied des Board of Directors, Beleta Worldwide  
Ltd., Guernsey, Kanalinseln<sup>4)</sup>

### Ständige Ausschüsse

**Präsidium:** Igor Landau (Vorsitzender), Sabine Bauer,  
Willi Schwerdtle

**Präsidialausschuss:** Igor Landau (Vorsitzender), Sabine Bauer,  
Roland Nosko, Willi Schwerdtle

**Prüfungsausschuss:** Herbert Kauffmann (Vorsitzender),  
Dr. Wolfgang Jäger, Dr. Stefan Jentzsch, Hans Ruprecht

**Vermittlungsausschuss:** Igor Landau, Sabine Bauer,  
Willi Schwerdtle, Heidi Thaler-Veh

**Nominierungsausschuss:** Igor Landau (Vorsitzender),  
Willi Schwerdtle, Christian Tourres

### Sonstige Ausschüsse

**Ausschuss für Grundstücksprojekte:** Herbert Kauffmann  
(Vorsitzender), Dr. Wolfgang Jäger, Dr. Stefan Jentzsch

1) Arbeitnehmervertreter/Arbeitnehmervertreterin.

2) Seit 1. Januar 2010; zuvor Qualitätsreferentin, Global Operations, adidas AG.

3) Seit 18. Mai 2010; zuvor Mitglied des Aufsichtsrats, CeramTech AG, Plochingen.

4) Bis 1. November 2010.

---

## Bericht des Aufsichtsrats

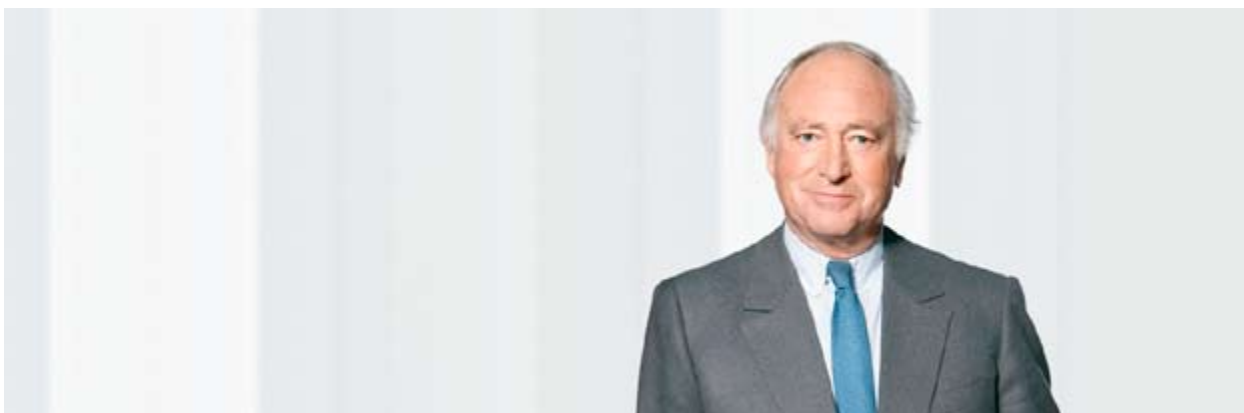

**Igor Landau**  
Vorsitzender des Aufsichtsrats

### Sehr geehrte Aktionärinnen und Aktionäre,

startete der adidas Konzern noch mit vorsichtigem Optimismus in das Geschäftsjahr 2010, so blickt er nun auf ein Jahr zurück, das von Aufschwung und Erfolg geprägt war. Für den adidas Konzern war 2010 ein Jahr großer Sportereignisse wie die FIFA Fußball-Weltmeisterschaft und die Olympischen Winterspiele. Zudem fanden alle unsere Marken dank innovativer Produkte und Marketingkampagnen begeisterten Anklang bei den Konsumenten. Der Konzern ist in fast allen Regionen gewachsen. Auch aufgrund der positiven Effekte der neuen Organisationsstruktur konnte der Konzern sein Ergebnis deutlich steigern.

#### Überwachung und Beratung im Dialog mit dem Vorstand

Im abgelaufenen Geschäftsjahr haben wir den Vorstand bei der Leitung des Unternehmens regelmäßig beraten und seine Tätigkeit sorgfältig und regelmäßig überwacht. Insbesondere haben wir die Rechtmäßigkeit, Zweckmäßigkeit und Ordnungsmäßigkeit der Geschäftsführung geprüft.

Der Vorstand hat uns in den Aufsichtsratssitzungen und zwischen den Sitzungen durch schriftliche und mündliche Berichte über die Geschäftspolitik, alle relevanten Aspekte der Unternehmensplanung einschließlich der Finanz-, Investitions- und Personalplanung, den Gang der Geschäfte, die wirtschaftliche Lage der Gesellschaft und des Konzerns (einschließlich der Risikolage und des Risikomanagements), die Finanzlage und die Rentabilität des Konzerns sowie über alle für den Konzern wichtigen Entscheidungen und Geschäftsvorgänge regelmäßig, zeitnah und umfassend informiert.

In sämtliche Entscheidungen, die für das Unternehmen von wesentlicher Bedeutung waren, wurden wir unmittelbar eingebunden. Zustimmungspflichtigen Geschäften oder solchen, bei denen aus unserer Sicht eine Behandlung im Aufsichtsrat im Unternehmensinteresse erforderlich war, haben wir nach eingehender Beratung und Prüfung der uns vom Vorstand übergebenen ausführlichen Unterlagen zugestimmt.



---

Im Berichtsjahr 2010 haben wir fünf Sitzungen abgehalten, von denen eine in Form einer Telefonkonferenz stattfand. In Einzelfällen haben wir Beschlüsse im schriftlichen Verfahren gefasst. Zusätzlich tagten wir im Februar 2011 zu Themen, die das Geschäftsjahr 2010 betrafen. Die Mitglieder des Aufsichtsrats waren in allen Sitzungen des Berichtsjahres bis auf einer, an der ein Aufsichtsratsmitglied aufgrund anderer, nicht aufschiebbarer dienstlicher Termine nicht teilnehmen konnte, vollständig anwesend. Gleiches gilt für die Ausschusssitzungen. Der externe Abschlussprüfer, die KPMG AG Wirtschaftsprüfungsgesellschaft (KPMG), hat an vier Sitzungen des Aufsichtsrats sowie an allen des Prüfungsausschusses teilgenommen. Der Aufsichtsratsvorsitzende und der Prüfungsausschussvorsitzende, der als unabhängiger Finanzexperte im Sinne des Aktiengesetzes gilt, standen auch zwischen den Sitzungsterminen mit dem Vorstandsvorsitzenden und dem Finanzvorstand in regelmäßigem Kontakt und haben sich über die aktuelle Entwicklung der Geschäftslage und die wesentlichen Geschäftsvorfälle informiert. Zur Vorbereitung unserer Sitzungen erhielten wir vom Vorstand regelmäßig ausführliche Berichte. Nach sorgfältiger Prüfung und Beratung fassten wir Beschlüsse zu den Vorstandsvorlagen.

### **Schwerpunkte der Beratungen und Prüfungen im Aufsichtsratsplenum**

Gegenstand regelmäßiger Erörterungen im Plenum waren die Umsatz-, Ergebnis- und Beschäftigungsentwicklung, die Finanzlage des Konzerns sowie die Geschäftsentwicklung einzelner Märkte, die uns vom Vorstand in allen Sitzungen bis auf eine detailliert erläutert und anschließend jeweils gemeinsam diskutiert wurden. Ferner standen in den Aufsichtsratssitzungen zahlreiche Einzelthemen auf der Tagesordnung, die wir mit dem Vorstand intensiv erörterten. Dabei ergaben sich keine Zweifel an der Rechtmäßigkeit, Zweckmäßigkeit und Ordnungsmäßigkeit der Geschäftsführung des Vorstands.

In unserer Sitzung am 10. Februar 2010, an der der Vorstand nicht teilgenommen hat, haben wir nach ausführlicher Diskussion unter anderem den vom Präsidialausschuss vorgeschlagenen Performance-Bonus-Plan 2010 für den Vorstand mit den maßgeblichen Kriterien und Zielen beschlossen. Ferner haben wir die Geschäftsordnung des Vorstands sprachlich dem Deutschen Corporate Governance Kodex angepasst und die Geschäftsverteilung entsprechend der neuen Segmentberichterstattung geregelt. Sodann beschlossen wir die Entsprechenserklärung, deren Inhalt vom Prüfungsausschuss in einer vorangegangenen Sitzung intensiv vorbereitet worden war.

Themenschwerpunkt der Bilanzsitzung am 2. März 2010 waren der von der KPMG jeweils mit einem uneingeschränkten Bestätigungsvermerk versehene Jahres- und Konzernabschluss der adidas AG mit den entsprechenden Lageberichten zum 31. Dezember 2009 sowie der Vorschlag des Vorstands für die Verwendung des Bilanzgewinns. Auf der Grundlage der Vorprüfungen und Beratungen des Prüfungsausschusses haben wir mit dem Vorstand und der KPMG wesentliche Aspekte des Jahres- und Konzernabschlusses erörtert. Sowohl der Vorstand als auch die KPMG haben uns sämtliche Fragen umfassend beantwortet. Nach Abwägung der Finanzlage der Gesellschaft und der Erwartungen von Aktionären und Kapitalmarkt stimmten wir dem Gewinnverwendungsvorschlag des Vorstands zu. Im Anschluss an die Beratung und Beschlussfassung zu den Gegenständen der Tagesordnung der Hauptversammlung 2010 widmeten wir uns ausführlich dem von uns sodann verabschiedeten Budget- und Investitionsplan 2010.

In unserer Sitzung am 5. Mai 2010 berichtete der Vorstand ausführlich über die aktuelle Geschäftsentwicklung und Finanzlage des Konzerns nach Abschluss des ersten Quartals 2010. Zudem erörterten wir Form und Umfang der durchzuführenden Effizienzprüfung des Aufsichtsrats. Darüber hinaus befassten wir uns mit der wirtschaftlichen Lage und dem Entwicklungspotenzial des Einzelhandelssegments und des E-Commerce-Vertriebskanals. Der Übertragung der von der adidas International B. V. an der FC Bayern München AG gehaltenen Anteile an die adidas AG stimmten wir nach ausführlicher Präsentation seitens des Vorstands und anschließender Diskussion zu.

---

In unserer Sitzung am 3. August 2010 standen die Ergebnisse des ersten Halbjahres, die deutlich über den Markterwartungen lagen, sowie der für das Jahr 2010 zu erwartende Geschäftsverlauf im Mittelpunkt. Darüber hinaus gab uns der Vorstand einen ausführlichen Bericht über die IT-Strategie des Konzerns. Ferner befassten wir uns detailliert mit den im Juli 2010 in Kraft getretenen Änderungen des Deutschen Corporate Governance Kodex. Zudem verlängerten wir das Vorstandsmandat von Herrn Stamminger und stimmten dem Abschluss des vom Präsidialausschuss vorbereiteten neuen Dienstvertrags zu.

In der Aufsichtsratssitzung am 3. November 2010 standen der Neunmonatsbericht und der Ausblick auf die verbleibenden Monate des Geschäftsjahres 2010 im Mittelpunkt. Im Anschluss an die detaillierte Präsentation des Vorstands über den strategischen Geschäftsplan „Route 2015“ für die Jahre 2011 bis 2015 befassten wir uns mit der mittelfristigen Geschäftsentwicklung des Konzerns. Zudem informierte uns der Vorstand über das Wachstumspotenzial der Marke adidas in der Kategorie Outdoor. Großes Augenmerk widmeten wir dem Bericht des Prüfungsausschussvorsitzenden über die wesentlichen Inhalte der Prüfungsausschusssitzungen vom 29. September und vom 2. November 2010, die die Überprüfung der Wirksamkeit des weiterentwickelten Risikomanagement-, internen Kontroll- sowie Compliance-Systems durch den Prüfungsausschuss zum Gegenstand hatten. Der Prüfungsausschuss, auf den wir die Überwachung der Wirksamkeit der Systeme abschließend delegiert haben, legte dar, dass die Systeme den gesetzlichen Anforderungen entsprechen.

In unserer Sitzung am 9. Februar 2011, an der der Vorstand nur zeitweise teilnahm, erörterten wir die Budget- und Investitionsplanung für das Geschäftsjahr 2011 auf Basis ausführlicher Präsentationsunterlagen des Vorstands und stimmten dieser zu. Ferner genehmigten wir nach einem umfassenden Bericht des Vorstands den Verkauf von Grundstücken auf der Herzo-Base. Im Anschluss diskutierten wir die Ziele für die künftige Zusammensetzung des Aufsichtsrats und beschlossen diese neben dem Inhalt der Entsprechenserklärung 2011. Zudem fassten wir Beschluss über den Vorschlag des Präsidialausschusses zur Höhe des jedem Vorstandsmitglied zu gewährenden Performance-Bonus 2010.

#### **Bericht aus den Ausschüssen**

Zur effizienten Wahrnehmung unserer Aufgaben haben wir neben dem projektbezogenen, im Jahr 2009 ad hoc gebildeten Ausschuss für Grundstücksprojekte insgesamt fünf ständige Aufsichtsratsausschüsse eingerichtet »» siehe Aufsichtsrat, S. 18. Ihre Aufgabe ist es nicht nur, Themen und Beschlüsse des Aufsichtsrats vorzubereiten, sondern zum Teil auch an Stelle des Aufsichtsrats Entscheidungen zu treffen.

Die Arbeit der Ausschüsse im Berichtsjahr kann wie folgt zusammengefasst werden:

- Das **Präsidium**, das in besonders eilbedürftigen Fällen Beschlüsse anstelle des Gesamtaufichtsrats fassen kann, tagte im Berichtsjahr nicht. Vielmehr konnten alle Aufsichtsratsbeschlüsse vom Plenum gefasst werden.
- Der **Präsidialausschuss**, der die Personalentscheidungen des Aufsichtsrats vorbereitet und ihm Beschlussempfehlungen hinsichtlich der Vergütung des Vorstands sowie zu Inhalt, Gestaltung und Abschluss der VorstandsDienstverträge unterbreitet, hielt zwei Sitzungen im Geschäftsjahr 2010 ab. Eine weitere Sitzung, die Themen des Berichtsjahres betraf, fand im Februar 2011 statt. In den Sitzungen des Präsidialausschusses wurden nach eingehender Erörterung unter anderem die dem Aufsichtsrat zu unterbreitenden Beschlussvorschläge für die Kriterien und Ziele für den Performance-Bonus-Plan 2010 erarbeitet. Ferner befasste sich der Ausschuss ausführlich mit dem anlässlich der Wiederbestellung von Erich Stamminger als Mitglied des Vorstands abzuschließenden Dienstvertrag. Zudem beriet er die den einzelnen Vorstandsmitgliedern für das Geschäftsjahr 2010 zu gewährenden Performance-Bonus-Zahlungen.

- 
- Der **Prüfungsausschuss** hielt im Geschäftsjahr 2010 fünf Sitzungen ab sowie eine weitere Sitzung im Februar 2011, die Themen des Berichtsjahres betraf. An den Sitzungen nahmen der Abschlussprüfer und der Finanzvorstand teil. Schwerpunkt der Tätigkeit des Ausschusses waren die Prüfung des Jahres- und Konzernabschlusses 2009 und der Lageberichte, die Erörterung der Prüfungsberichte mit dem Abschlussprüfer sowie die detaillierte Behandlung des Halbjahresfinanzberichts und der Quartalsfinanzberichte vor der jeweiligen Veröffentlichung. Der Abschlussprüfer berichtete den Ausschussmitgliedern ausführlich über die Prüfungstätigkeit und deren Ergebnisse. Des Weiteren holte der Prüfungsausschuss die erforderliche Unabhängigkeitserklärung des Abschlussprüfers ein und bereitete den Vorschlag des Aufsichtsrats an die Hauptversammlung für die Wahl des Abschlussprüfers für das Geschäftsjahr 2010 vor. Er legte gemeinsam mit dem Abschlussprüfer die Prüfungsschwerpunkte für die Prüfung des Jahres- und Konzernabschlusses 2010 fest und beschloss die Erteilung des Prüfungsauftrags an den Abschlussprüfer. Weiter befasste er sich mit der Überwachung der Unabhängigkeit, der Qualifikation des Abschlussprüfers und den von ihm erbrachten anderen Beratungsleistungen sowie der Festlegung des Honorars des Abschlussprüfers. Im Rahmen der vom Ausschuss vorgenommenen Prüfung der Wirksamkeit des weiterentwickelten Risikomanagement- und internen Kontrollsystems sowie des internen Revisionssystems und der Compliance-Organisation haben sich die Ausschussmitglieder ausführlich über angewandte Methoden und Systeme sowie deren Effizienz schriftlich und mündlich unterrichten lassen. In den anschließenden kritischen Diskussionen unter anderem mit dem Abschlussprüfer haben sie sich so von der Wirksamkeit der Systeme überzeugt. Darüber hinaus setzte sich der Ausschuss, der nach der Geschäftsordnung des Aufsichtsrats auch für Fragen der Corporate Governance zuständig ist, mit den Neuregelungen des Deutschen Corporate Governance Kodex in der Fassung vom 26. Mai 2010 auseinander und beriet den Inhalt der vom Aufsichtsrat abzugebenden Entsprechenserklärung. Ferner diskutierte der Ausschuss in der letzten Sitzung des Berichtsjahres den vom Finanzvorstand erläuterten Entwurf der Budget- und Investitionsplanung 2011. Der Prüfungsausschussvorsitzende berichtete mündlich in der jeweils folgenden Aufsichtsratssitzung über die Ergebnisse jeder Sitzung und leitete dem Aufsichtsrat darüber hinaus regelmäßig schriftliche Berichte zu.
  - Der **Vermittlungsausschuss** musste auch im Jahr 2010 nicht einberufen werden.
  - Auch der **Nominierungsausschuss** tagte im Berichtsjahr nicht, da keine Aufsichtsratswahlen anstehen.
  - Der im Jahr 2009 für Grundstücksprojekte gebildete **Ad-hoc-Ausschuss** ist ebenfalls nicht einberufen worden.

#### **Corporate Governance und Entsprechenserklärung**

Im abgelaufenen Geschäftsjahr haben wir uns ausführlich mit den Neuerungen des Deutschen Corporate Governance Kodex und deren Anwendung auf das Unternehmen befasst. Im zweiten Halbjahr hat der Aufsichtsrat die Effizienz seiner Tätigkeit einschließlich der Zusammenarbeit mit dem Vorstand auf der Grundlage von detaillierten Fragebögen überprüft. Nach entsprechenden Selbstbeurteilungen durch die Aufsichtsratsmitglieder hat ein externer Berater die Ergebnisse kritisch analysiert und dem Plenum präsentiert. Bedenken hinsichtlich der Effizienz der Tätigkeit des Aufsichtsrats ergaben sich nicht. Interessenkonflikte, wie durch den Deutschen Corporate Governance Kodex definiert, sind bei den Aufsichtsratsmitgliedern auch im Berichtsjahr nicht aufgetreten. Nach ausführlicher Beratung der Corporate Governance Themen im Prüfungsausschuss haben wir auf dessen Empfehlung am 11. Februar 2011 die aktualisierte Entsprechenserklärung nach § 161 Aktiengesetz (AktG) abgegeben und den Aktionären auf der Internetseite unter »» [www.adidas-Group.de/corporate\\_governance](http://www.adidas-Group.de/corporate_governance) dauerhaft zugänglich gemacht. Weitere Informationen zur Corporate Governance im Unternehmen einschließlich der Vergütung von Vorstand und Aufsichtsrat enthält der Corporate Governance Bericht mit Erklärung zur Unternehmensführung »» siehe S. 25.

### Jahres- und Konzernabschlussprüfung

Die KPMG hat den vom Vorstand gemäß § 315a HGB nach IFRS aufgestellten und um einen Konzernlagebericht ergänzten Konzernabschluss 2010 geprüft und mit einem uneingeschränkten Bestätigungsvermerk versehen. Dies gilt auch für den nach den Vorschriften des HGB aufgestellten Jahresabschluss 2010 der adidas AG und den Lagebericht. Die Abschlussunterlagen und der Gewinnverwendungsvorschlag des Vorstands sowie die Prüfungsberichte des Abschlussprüfers hat der Vorstand an alle Mitglieder des Aufsichtsrats rechtzeitig verteilt. Sie wurden von uns in der Sitzung des Prüfungsausschusses am 25. Februar 2011 und in der Bilanzsitzung des Aufsichtsrats am 1. März 2011, in der uns der Vorstand die Abschlüsse umfassend erläuterte, in Gegenwart des Abschlussprüfers eingehend geprüft. Der Abschlussprüfer berichtete uns in beiden Sitzungen über die wesentlichen Ergebnisse seiner Prüfung mit den vom Prüfungsausschuss für das Berichtsjahr festgelegten Prüfungsschwerpunkten. Er hat uns keine wesentlichen Schwachstellen hinsichtlich des Risikofrüherkennungs- und internen Kontrollsystems mitgeteilt. Für ergänzende Fragen und Auskünfte stand der Abschlussprüfer den Prüfungsausschuss- bzw. Aufsichtsratsmitgliedern zur Verfügung. Nach unseren eigenen Prüfungen sind wir zu dem abschließenden Ergebnis gekommen, dass keine Einwendungen zu erheben sind. Wir haben daher in Übereinstimmung mit der Empfehlung des Prüfungsausschusses dem Ergebnis der Prüfung durch den Abschlussprüfer zugestimmt und die vom Vorstand aufgestellten Abschlüsse in unserer Bilanzsitzung gebilligt. Der Jahresabschluss der adidas AG ist damit festgestellt. Wir haben mit dem Vorstand auch den Gewinnverwendungsvorschlag im Hinblick auf die Dividendenpolitik erörtert und diesem nach Abwägung der Finanzlage des Unternehmens sowie der Erwartungen der Aktionäre und des Kapitalmarkts zugestimmt.

### Nachruf

In ehrendem Andenken möchten wir unseren langjährigen Aufsichtsratsvorsitzenden, Herrn Henri Filho, bewahren. Er verstarb am 25. Dezember 2010 im Alter von 79 Jahren. Herr Filho stand seit April 1993 als Mitglied des Aufsichtsrats und seit April 1994 als Vorsitzender des Aufsichtsrats dem Vorstand der adidas AG bis November 2007 in herausragender Art und Weise zum Wohle des adidas Konzerns überwachend und beratend zur Seite. Während seiner Amtszeit gelang es dem adidas Konzern, zu einem der weltweit führenden Unternehmen in der Sportartikelindustrie aufzusteigen.

### Dank

Der Aufsichtsrat dankt dem Vorstand, den Unternehmensleitungen der Konzerngesellschaften, dem Betriebsrat sowie allen Mitarbeiterinnen und Mitarbeitern für ihren hohen persönlichen Einsatz, ihre Leistungen und das fortwährende Engagement, die für die Erreichung der ausgezeichneten Ergebnisse maßgeblich waren.

Für den Aufsichtsrat

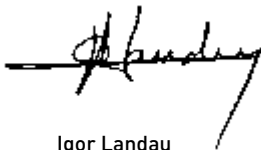

Igor Landau  
Vorsitzender des Aufsichtsrats  
März 2011

# Corporate Governance Bericht mit Erklärung zur Unternehmensführung

Verantwortungsbewusste und transparente, auf nachhaltige Wertschöpfung ausgerichtete Unternehmensführung und -kontrolle sind die Grundsätze unseres Handelns. Wir sind davon überzeugt, dass gute Corporate Governance die nachhaltige Steigerung des Unternehmenswerts unterstützt und das Vertrauen unserer Aktionäre, Geschäftspartner, Mitarbeiter und der Finanzmärkte in unser Unternehmen stärkt.

Der nachfolgende Bericht enthält den Corporate Governance Bericht und die Erklärung zur Unternehmensführung von Vorstand und Aufsichtsrat.

## Duales Führungssystem

Entsprechend den gesetzlichen Vorgaben besteht bei der adidas AG ein duales Führungssystem, das dem Vorstand die Leitung des Unternehmens und dem Aufsichtsrat die Beratung und Überwachung des Vorstands zuweist. Diese beiden Gremien sind sowohl hinsichtlich Mitgliedschaft als auch in ihren Kompetenzen streng voneinander getrennt.

## Zusammensetzung und Arbeitsweise des Vorstands

Unserem Vorstand gehören vier Mitglieder an »» siehe Vorstand, S. 16. Vorstandsausschüsse bestehen nicht. Der Vorstand leitet das Unternehmen in eigener Verantwortung, entwickelt die strategische Ausrichtung des Unternehmens, stimmt diese mit dem Aufsichtsrat ab und sorgt für deren Umsetzung. Dabei ist er an das Unternehmensinteresse gebunden und der nachhaltigen Steigerung des Unternehmenswerts verpflichtet.

Unbeschadet der Gesamtverantwortung des Vorstands führen die einzelnen Mitglieder die ihnen zugeordneten Geschäftsbereiche in eigener Verantwortung. Dem Vorstandsvorsitzenden obliegt insbesondere die Leitung des Gesamtvorstands sowie die Federführung in der Geschäftspolitik des Konzerns. Darüber hinaus trägt er die Verantwortung für verschiedene Bereiche, wie z. B. Global Sales, die Interne Revision, Soziales und Umwelt sowie Compliance. Die Bereiche Finanzen, Global Brands und Global Operations sind jeweils einem weiteren Vorstandsmitglied zugewiesen. Die Geschäftsordnung des Vorstands und der Geschäftsverteilungsplan regeln die Aufgaben und Zuständigkeiten des Vorstands. Insbesondere sind ihnen auch Regelungen zu Sitzungen und Beschlussfassungen sowie zur Zusammenarbeit mit dem Aufsichtsrat zu entnehmen.

In den Aufsichtsratssitzungen berichtet der Vorstand schriftlich und mündlich zu den Tagesordnungspunkten und Beschlussvorlagen und beantwortet die Fragen der einzelnen Aufsichtsratsmitglieder. Des Weiteren berät der Vorstandsvorsitzende zusammen mit dem Aufsichtsratsvorsitzenden regelmäßig über die Strategie und die Geschäftsentwicklung des Konzerns.

## Zusammensetzung und Arbeitsweise des Aufsichtsrats

Unser Aufsichtsrat besteht in Übereinstimmung mit dem deutschen Mitbestimmungsgesetz (MitbestG) aus jeweils sechs Vertretern der Anteilseigner und Arbeitnehmer »» siehe Aufsichtsrat, S. 18. Ihm gehören gegenwärtig zwei Frauen an. Fünf Mitglieder des Aufsichtsrats verfügen über langjährige internationale Erfahrung. Auf Grund der unterschiedlichen Werdegänge der Mitglieder zeichnet sich die Zusammensetzung des Aufsichtsrats durch eine hohe Vielfalt und umfassende Branchenkenntnisse aus. Die Mitglieder unseres Aufsichtsrats üben weder Organfunktionen oder Beratungsaufgaben bei wesentlichen Wettbewerbern des Unternehmens aus, noch stehen sie in einer geschäftlichen oder persönlichen Beziehung zur adidas AG oder deren Vorstand.

## Weiterführende Informationen zum Thema Corporate Governance

Mehr Informationen zu den nachfolgenden Themen sind auf unserer Internetseite unter »» [www.adidas-Group.de/corporate\\_governance](http://www.adidas-Group.de/corporate_governance) nachzulesen:

- Satzung
- Geschäftsordnung des Vorstands
- Geschäftsverteilungsplan (Auszug)
- Geschäftsordnung des Aufsichtsrats
- Geschäftsordnung des Prüfungsausschusses



Den Empfehlungen des Deutschen Corporate Governance Kodex („Kodex“) entsprechend hat der Aufsichtsrat in seiner Sitzung am 9. Februar 2011 folgende konkrete Ziele für seine Zusammensetzung beschlossen:

- Beibehaltung der Besetzung des Aufsichtsrats mit Mitgliedern mit internationalem Hintergrund im bisherigen Umfang
- Beibehaltung der Anzahl von zwei Frauen im Aufsichtsrat bis zur Neuwahl des Aufsichtsrats im Jahr 2014
- Erhöhung der Beteiligung von Frauen im Aufsichtsrat ab der Neuwahl der Anteilseigner- und der Arbeitnehmervertreter im Jahr 2014; der Aufsichtsrat strebt die Mitgliedschaft von mindestens drei Frauen an, davon mindestens eine auf der Seite der Anteilseigner
- Beibehaltung der Unabhängigkeit sämtlicher Aufsichtsratsmitglieder unter Berücksichtigung der Arbeitsverhältnisse der Arbeitnehmervertreter
- Berücksichtigung der Altersgrenze von in der Regel 72 Jahren zum Zeitpunkt der Wahl.

Daneben werden bei den Wahlvorschlägen auch weitere Kriterien herangezogen, die für die Qualifikation der Aufsichtsratsmitglieder von Bedeutung sind, z. B. die Berücksichtigung von Fach- und Branchenkenntnissen sowie besonderen Kenntnissen und Erfahrungen in der Anwendung von Rechnungslegungsgrundsätzen und internen Kontrollsystemen.

Ungeachtet der Berücksichtigung der vorgenannten Ziele und Kriterien werden sich die Wahlvorschläge des Aufsichtsrats weiterhin am Wohl des Unternehmens orientieren. Dem Nominierungsausschuss wurden die oben genannten Ziele zur Berücksichtigung bei von ihm zu unterbreitenden Wahlvorschlägen vorgegeben. Auch den Arbeitnehmervertretern empfiehlt der Aufsichtsrat, sich im Rahmen ihrer Möglichkeiten im Hinblick auf die Wahlvorschläge der Arbeitnehmer um eine Berücksichtigung der beschlossenen Ziele zu bemühen, obwohl der Aufsichtsrat auf die Auswahl der Aufsichtsratskandidaten der Arbeitnehmer keinen Einfluss nehmen kann.

Der Aufsichtsrat überwacht und berät den Vorstand bei der Geschäftsführung. Der Vorstand berichtet dem Aufsichtsrat regelmäßig, zeitnah und umfassend über die Geschäftsentwicklung, die Planung sowie die Risikolage des Unternehmens und stimmt mit dem Aufsichtsrat die Strategie und deren Umsetzung ab. Ebenso legt er dem Aufsichtsrat die Jahresabschlüsse der adidas AG und des adidas Konzerns unter Berücksichtigung der Berichte des Abschlussprüfers zur Billigung vor. Bestimmte Geschäfte und Maßnahmen des Vorstands bedürfen der vorherigen Zustimmung des Aufsichtsrats.

Der Aufsichtsrat hat zur Steigerung der Effizienz seiner Arbeit aus dem Kreis seiner Mitglieder fünf ständige Ausschüsse gebildet, die unter anderem seine Beschlüsse vorbereiten bzw. zum Teil an seiner Stelle beschließen. Dabei handelt es sich um das Präsidium, den Präsidialausschuss, den Prüfungsausschuss, den Vermittlungsausschuss gemäß § 27 Absatz 3 MitbestG sowie den Nominierungsausschuss. Ferner besteht der 2009 ad hoc für die Behandlung von Grundstücksangelegenheiten gebildete Ausschuss für Grundstücksprojekte. Die Ausschussvorsitzenden berichten regelmäßig an den Gesamtaufseher über die Arbeitsergebnisse der Ausschüsse.

Die Zusammensetzung der Ausschüsse und ihre Aufgaben können unserer Internetseite entnommen werden.

Die Geschäftsordnungen für den Aufsichtsrat und den Prüfungsausschuss regeln neben den Aufgaben und Zuständigkeiten die persönlichen Anforderungen an die Mitglieder sowie das Prozedere der Sitzungen und Beschlussfassungen. Sie sind auf unserer Internetseite öffentlich zugänglich. Die Tätigkeiten des Aufsichtsrats und seiner Ausschüsse im Geschäftsjahr werden im Bericht des Aufsichtsrats

» siehe S. 20 erläutert.

Die Mitglieder des Aufsichtsrats nehmen die für ihre Aufgaben erforderlichen Aus- und Fortbildungsmaßnahmen eigenverantwortlich wahr. Die Gesellschaft unterstützt den Aufsichtsrat durch ein auf ihn zugeschnittenes Fortbildungsprogramm, informiert ihn regelmäßig über aktuelle Gesetzesänderungen und stellt einschlägige Fachliteratur zur Verfügung.

Alle zwei Jahre überprüft der Aufsichtsrat die Effizienz seiner Tätigkeit. Im Berichtsjahr haben sich der Aufsichtsratsvorsitzende und seine Stellvertreter intensiv mit der Effizienzprüfung befasst. Diese wurde mittels detaillierter Fragebögen durchgeführt. Die Auswertung erfolgte durch einen externen Berater, der die Ergebnisse in der Aufsichtsratsitzung im November 2010 präsentierte und die sich daraus ergebende Diskussion leitete. Auf Grundlage der Diskussion wurden Verbesserungsmöglichkeiten erörtert, die jedoch keinen Zweifel an der Effizienz der Aufsichtsrats-tätigkeit ließen.

#### Vermeidung von Interessenkonflikten

Interessenkonflikte von Vorstands- und Aufsichtsratsmitgliedern sind dem dafür zuständigen Präsidialausschuss im Berichtsjahr nicht mitgeteilt worden.

## Erklärung von Vorstand und Aufsichtsrat der adidas AG gemäß § 161 Aktiengesetz (AktG) zum Deutschen Corporate Governance Kodex

Vorstand und Aufsichtsrat der adidas AG haben die letzte Entsprechenserklärung gemäß § 161 AktG am 11. Februar 2010 abgegeben. Die nachfolgende Erklärung bezieht sich für den Zeitraum ab Veröffentlichung der letzten Entsprechenserklärung bis 2. Juli 2010 auf den Deutschen Corporate Governance Kodex (im Folgenden „Kodex“) in der Fassung vom 18. Juni 2009. Für den Zeitraum ab dem 3. Juli 2010 bezieht sich die nachfolgende Erklärung auf die Empfehlungen des Kodex in seiner Fassung vom 26. Mai 2010, die am 2. Juli 2010 im elektronischen Bundesanzeiger veröffentlicht wurde.

Vorstand und Aufsichtsrat der adidas AG erklären, dass den Empfehlungen der „Regierungskommission Deutscher Corporate Governance Kodex“ mit den folgenden Abweichungen entsprochen wurde und wird:

### **Selbstbehalt bei der D&O-Versicherung (Ziffer 3.8)**

Die D&O-Versicherung für unsere Vorstands- und Aufsichtsratsmitglieder, eine Gruppenversicherung für eine Vielzahl von Führungskräften, sah bis zum 30. Juni 2010 keinen Selbstbehalt vor. Für den Vorstand der adidas AG wurde mit Wirkung zum 1. Juli 2010 ein Selbstbehalt vereinbart, der den Vorgaben des Gesetzes zur Angemessenheit der Vorstandsvergütung entspricht. Auch für die Mitglieder des Aufsichtsrats wurde zum 1. Juli 2010 ein entsprechender Selbstbehalt eingeführt.

### **Vereinbarung von Abfindungs-Caps bei Abschluss von Vorstandsverträgen (Ziffer 4.2.3 Absatz 4)**

Für Verträge mit einer Laufzeit von über drei Jahren ist ein Abfindungs-Cap gemäß den Kodexempfehlungen vorgesehen. Für Verträge mit einer Laufzeit von bis zu drei Jahren sind wir der Auffassung, dass bereits die vereinbarte kurze Vertragsdauer im Zusammenhang mit weiteren Vertragsbestimmungen ausreichenden Schutz vor unangemessenen Abfindungszahlungen bietet. Es ist deshalb kein förmliches Abfindungs-Cap vorgesehen.

### **Altersgrenze für Aufsichtsratsmitglieder (Ziffer 5.4.1 Satz 2 alte Fassung)**

### **Zusammensetzung des Aufsichtsrats (Ziffer 5.4.1 Absatz 2 und 3 neue Fassung)**

Eine Altersgrenze für Aufsichtsratsmitglieder war bislang nicht vorgesehen. Der Prüfungsausschuss und das Plenum haben die Neuregelungen des Kodex hinsichtlich der Zielsetzung für die Zusammensetzung des Aufsichtsrats zunächst beraten. In der Sitzung am 9. Februar 2011 beschloss der Aufsichtsrat die Ziele und legte im Rahmen dieser Beschlussfassung auch eine Altersgrenze für Aufsichtsratsmitglieder fest. Den neuen Empfehlungen des Kodex wird demnach bei zukünftigen Besetzungen des Aufsichtsrats entsprochen.

### **Anzahl der Mandate für ein Vorstandsmitglied (Ziffer 5.4.5 Satz 2 neue Fassung)**

Das Vorstandsmitglied Herbert Hainer hält derzeit zwei Aufsichtsratsmandate in konzernexternen börsennotierten Gesellschaften und zwei Mandate in Aufsichtsgremien von Gesellschaften mit vergleichbaren Anforderungen, so dass es seit Inkrafttreten der Ziffer 5.4.5 Satz 2 n.F. zu einer Abweichung von der Empfehlung kommt. Mit Wirkung zum 28. Februar 2011 wird Herbert Hainer sein Mandat bei der Engelhorn KGaA niederlegen. Auf Grund der langjährigen Mitgliedschaft im genannten Aufsichtsgremium kann der geänderten Empfehlung des Kodex nicht ohne einen gewissen zeitlichen Vorlauf entsprochen werden. Diese temporäre Abweichung halten wir für angemessen. Ab 1. März 2011 werden alle Vorstandsmitglieder der Empfehlung des Kodex entsprechen.

### **Vergütung des Aufsichtsrats (Ziffer 5.4.6 Absatz 2)**

Die Mitglieder unseres Aufsichtsrats erhalten keine erfolgsorientierte Vergütung, um potenzielle Interessenkonflikte bei Entscheidungen des Aufsichtsrats, die Einfluss auf Erfolgskriterien haben könnten, auszuschließen.

### **Angabe des von einzelnen Vorstands- und Aufsichtsratsmitgliedern gehaltenen Besitzes von Aktien oder sich darauf beziehender Finanzinstrumente (Ziffer 6.6 Satz 1)**

Soweit nicht weitergehende gesetzliche Verpflichtungen bestehen, geben wir den Aktienbesitz, wenn er 1 % der von der adidas AG ausgegebenen Aktien übersteigt, nicht für die einzelnen Organmitglieder an. Stattdessen veröffentlichen wir den Gesamtbesitz aller Vorstands- und Aufsichtsratsmitglieder lediglich getrennt nach Gruppen, um die schutzwürdigen Interessen der Organmitglieder zu wahren.

Herzogenaurach, 11. Februar 2011

Für den Aufsichtsrat

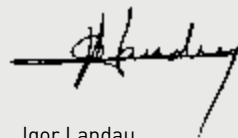

Igor Landau  
Aufsichtsratsvorsitzender

Für den Vorstand

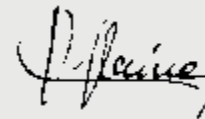

Herbert Hainer  
Vorstandsvorsitzender

### Anregungen des Deutschen Corporate Governance Kodex weitestgehend erfüllt

Die adidas AG erfüllt die Anregungen des Kodex bis auf eine Ausnahme: Gemäß Ziffer 3.6 des Kodex sollte eine gesonderte Vorbereitung von Aufsichtsratssitzungen durch Vertreter der Aktionäre und Arbeitnehmer erfolgen. Die Mitglieder unseres Aufsichtsrats treffen sich zu solchen Vorbereitungssitzungen nach Bedarf.

### Relevante Unternehmensführungspraktiken

Unser unternehmerisches Handeln orientiert sich an den Rechtsordnungen der verschiedenen Länder und Märkte, in denen wir tätig sind. Darüber hinaus tragen wir eine große Verantwortung für die Umwelt und die Menschen in diesen Regionen. Leistung, Leidenschaft, Integrität und Vielfalt sind die Werte unseres Konzerns, die von Vorstand, Aufsichtsrat und den Mitarbeitern in allen Bereichen des Unternehmens aktiv gelebt werden.

### Compliance im adidas Konzern

Unser Compliance-System schafft die organisatorischen Voraussetzungen dafür, dass das jeweils geltende Recht sowie unsere internen Regelungen und Richtlinien konzernweit bekannt sind und ihre Einhaltung sichergestellt wird. Der adidas Konzern betrachtet Compliance umfassend und orientiert am Produktzyklus von der Lieferantenkette bis zum Endverbraucher.

Der Bereich Soziales und Umwelt nimmt sich der Arbeitnehmerrechte in der Beschaffungskette an und koordiniert die Produktsicherheitsnormen. Bevor unsere Produkte auf dem Markt angeboten werden, überprüft der Marken- und Patentbereich die verwendeten Technologien, Marken, Logos und Geschmacksmuster hinsichtlich etwaiger Verletzungen der Rechte Dritter.

Um ein einheitliches vorbildliches Handeln und Verhalten zu gewährleisten, existiert in unserem Unternehmen ein Verhaltenskodex (Code of Conduct), der seit 2006 in allen Regionen und Unternehmensbereichen gilt. Darin sind Leitlinien für das tägliche Verhalten im Arbeitsalltag festgeschrieben. Der Code of Conduct steht auf unserer Internetseite zur Verfügung.

Das interne Compliance-Programm beinhaltet unter anderem ein konsequent implementiertes, webbasiertes Training, das allen Mitarbeitern weltweit in zehn Sprachen zur Verfügung steht. Außerdem haben wir weltweit lokale Compliance-Beauftragte als Ansprechpartner eingesetzt, denen Beschwerden und Hinweise auf mögliche Compliance-Verstöße gemeldet werden können und die direkt an den Chief Compliance Officer des Konzerns berichten. Im Bereich Datenschutz haben wir ebenfalls ein webbasiertes Training für alle Mitarbeiter in zehn Sprachen eingeführt. Zusätzlich existiert ein „Marketing Guide“, um unsere Mitarbeiter für datenschutzrechtliche Themen im Umgang mit unseren Kunden zu sensibilisieren. Als nächste Maßnahme sind zusätzliche Online-Trainings zu den Bereichen Kartell- und Vertragsrecht in Vorbereitung.

### Einhaltung von Arbeits- und Sozialstandards

Die Entwicklung von Unternehmensleitlinien bezüglich sozialer Mindeststandards, der Arbeitssicherheit sowie des Gesundheits- und Umweltschutzes und deren Überwachung in den Produktionsstätten des adidas Konzerns und seiner Geschäftspartner ist fester Bestandteil unserer Unternehmenspolitik. Unser Konzern verfügt über einen eigenen Verhaltenskodex für die Beschaffungskette, die Workplace Standards („Arbeitsplatzstandards“). Diese Standards

» siehe [www.adidas-Group.com/Nachhaltigkeit](http://www.adidas-Group.com/Nachhaltigkeit) orientieren sich an den Konventionen der Internationalen Arbeitsorganisation (ILO) und folgen dem Verhaltenskodex des Weltverbands der Sportartikelindustrie (WFSGI). Sie helfen uns, nur solche Geschäftspartner auszuwählen, die mit unseren Werten übereinstimmende Arbeitsplatzstandards und Geschäftspraktiken erfüllen. Für die Koordinierung der Einhaltung und Überwachung der Arbeitsplatzstandards haben wir eigens ein Expertenteam bestellt. Wir berichten in diesem Geschäftsbericht über unser Nachhaltigkeitsprogramm » siehe Nachhaltigkeit S. 120 und veröffentlichen regelmäßig Nachhaltigkeitsberichte.

### Weiterführende Informationen zu den Prinzipien unserer Unternehmensführung

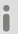

Mehr Informationen zu den nachfolgenden Themen sind auf unserer Internetseite unter » [www.adidas-Group.de](http://www.adidas-Group.de) nachzulesen:

- Code of Conduct
- Nachhaltigkeit
- Gesellschaftliches Engagement
- Informationen und Unterlagen zur Hauptversammlung
- Directors' Dealings
- Rechnungslegung und Abschlussprüfung

## Umweltverantwortung und gesellschaftliches Engagement

Nachhaltiges Handeln ist für den adidas Konzern eine maßgebliche Voraussetzung für eine langfristig erfolgreiche Unternehmensführung, die insbesondere soziale und ökologische Verantwortung für gegenwärtige und zukünftige Generationen umfasst.

Mit unserer „Green Company“-Initiative als Teil unserer konzernweiten Umweltstrategie vereinen wir alle Ansätze zu Klimaschutz und Ressourcenschonung an unseren Standorten unter einem Dach, um so das langfristige Ziel eines emissionsneutralen Unternehmens auf globaler Ebene zu verwirklichen.

Wir fördern die positive Entwicklung der Regionen, in denen unser Konzern tätig ist, indem wir mit Wohltätigkeitsorganisationen kooperieren, um mit Hilfe des Sports das Leben von Menschen zu verbessern. Darüber hinaus engagieren wir uns für Bildung, Wissenschaft und humanitäre Initiativen in verschiedenen Projekten in Afrika, Lateinamerika und Asien.

Mit dem Ziel, bezahlbare Schuhe für die Ärmsten der Armen zu produzieren und zu verkaufen, haben wir im Rahmen unserer Kooperation mit dem Friedensnobelpreisträger Professor Muhammad Yunus ein erfolgreiches Pilotprojekt in Bangladesch durchgeführt. Das Projekt basiert auf den Kernkompetenzen des adidas Konzerns und ist unter der Marke Reebok positioniert. Im Rahmen einer Machbarkeitsstudie wird aktuell geprüft, inwieweit die Umsetzung des Projekts in ein funktionierendes „Social Business“ nach den wissenschaftlichen Prinzipien von Professor Yunus realisierbar ist.

## Transparenz und Wahrung der Aktionärsinteressen

Unser Ziel ist es, institutionelle Investoren, Privataktionäre, Finanzanalysten, Mitarbeiter sowie die interessierte Öffentlichkeit durch regelmäßige, offene und aktuelle Kommunikation gleichzeitig und gleichberechtigt über die Lage des Unternehmens zu informieren. Alle wesentlichen Informationen, wie z. B. Presse-, Ad-hoc- und Stimmrechtsmitteilungen, sowie sämtliche Finanzberichte veröffentlichen wir im Internet. Darüber hinaus stehen dort auch sämtliche Dokumente und Informationen zu unserer Hauptversammlung zur Verfügung. Bei unserer nächsten Hauptversammlung, die am 12. Mai 2011 in Fürth (Bayern) stattfinden wird, werden wir unseren Aktionären erneut einen bestmöglichen Service bieten. So haben alle Aktionäre die Möglichkeit, die Hauptversammlung live und in vollem Umfang im Internet zu verfolgen. Über unsere aktive Investor Relations-Tätigkeit stehen wir in enger Verbindung mit unseren Aktionären »» siehe Unsere Aktie, S. 34.

## Angemessenes Risikomanagement

Der adidas Konzern verfügt über ein unternehmensweites Risikomanagementsystem, das im Jahr 2010 einer umfassenden Analyse unterzogen wurde. Im Rahmen dieses Systems werden sowohl strategische und operative Risiken, Risiken im Zusammenhang mit der Nicht-Einhaltung von Standards als auch finanzielle Risiken unternehmensweit und bereichsübergreifend von den wichtigsten Entscheidungsträgern erfasst, bewertet und gemeldet. Diese Vorgehensweise soll sicherstellen, dass wesentliche Risiken rechtzeitig zur Kenntnis der Unternehmensleitung gebracht und entsprechende Maßnahmen zur Risikominimierung entwickelt und eingeleitet werden

»» siehe Risiken- und Chancenbericht, S. 158.

## Aktienbesitz von Vorstand und Aufsichtsrat

Der Gesamtbesitz aller Vorstandsmitglieder an Aktien der adidas AG betrug am Ende des Geschäftsjahres 2010 weniger als 1 % der von der Gesellschaft ausgegebenen Aktien.

Die Mitglieder des Aufsichtsrats hielten zum selben Zeitpunkt insgesamt 1,96 % der von der Gesellschaft ausgegebenen Aktien.

Eine Darstellung der im Jahr 2010 getätigten Directors' Dealings ist auf unserer Internetseite unter »» [www.adidas-group.de/directors\\_dealings](http://www.adidas-group.de/directors_dealings) veröffentlicht.

## Rechnungslegung und Abschlussprüfung

Die adidas AG erstellt den Jahresabschluss nach den Vorschriften des Handelsgesetzbuches (HGB) und des AktG. Der Konzernabschluss wird nach den Grundsätzen der International Financial Reporting Standards (IFRS), wie sie in der EU anzuwenden sind, aufgestellt.

Als Abschlussprüfer für den Jahresabschluss und den Konzernabschluss 2010 wurde die KPMG AG Wirtschaftsprüfungsgesellschaft von der Hauptversammlung gewählt. Der Aufsichtsrat hatte sich zuvor von der Unabhängigkeit des Prüfers überzeugt.

# Vergütungsbericht<sup>1)</sup>

Die transparente und verständliche Berichterstattung über die Vergütung von Vorstand und Aufsichtsrat stellt für den adidas Konzern ein wesentliches Element guter Corporate Governance dar. Im Folgenden fassen wir die Grundsätze des Vergütungssystems zusammen und erläutern die Struktur und Höhe der Vorstands- und Aufsichtsratsvergütung. Ebenso beschreiben wir die Leistungen, die den Mitgliedern unseres Vorstands für den Fall der Beendigung ihrer Tätigkeit bzw. für ihren Ruhestand zugesagt wurden.

## Vergütungssystem für den Vorstand

Das Vergütungssystem für unseren Vorstand und die Gesamtvergütung der einzelnen Vorstandsmitglieder werden vom Aufsichtsratsplenum nach entsprechender Vorbereitung durch den Präsidialausschuss festgelegt und regelmäßig überprüft. Sie sollen einen Anreiz für eine langfristige, auf Nachhaltigkeit angelegte Unternehmensführung setzen.

Die Vergütung der Mitglieder des Vorstands soll der Größe und globalen Ausrichtung des Unternehmens, seiner wirtschaftlichen Lage und den Zukunftsaussichten Rechnung tragen und sich an der üblichen Struktur und Höhe der Vorstandsvergütung bei vergleichbaren Unternehmen orientieren. Die Aufgaben und der Beitrag des jeweiligen Vorstandsmitglieds zum Unternehmenserfolg, seine individuelle Leistung sowie die Leistung des Gesamtvorstands werden bei der Vorstandsvergütung unter Heranziehung der Vergütungsstruktur des adidas Konzerns berücksichtigt. Hierdurch soll die Angemessenheit der Vergütung gewährleistet werden.

## Bestandteile des Vergütungssystems

Das Zieljahreseinkommen unserer Vorstandsmitglieder soll sich bei einem Zielerreichungsgrad von 100 % aus einer fixen Vergütung in Höhe von etwa 35 % und einer variablen, d. h. erfolgsbezogenen, Vergütung in Höhe von etwa 65 % zusammensetzen.

- Die fixe Vergütung besteht aus einem vertraglich vereinbarten, erfolgsunabhängigen Jahresgehalt, das in zwölf gleichen monatlichen Teilbeträgen ausgezahlt wird.
- Die variable Vergütung besteht aus einem Performance-Bonus und einer Vergütungskomponente mit langfristiger Anreizwirkung, dem über einen Dreijahreszeitraum bemessenen Long-Term Incentive Plan 2009/2011 (LTIP 2009/2011). Die variablen Vergütungskomponenten sind so ausgestaltet, dass der Anreiz, die mit dem LTIP 2009/2011 gesetzten nachhaltigen Ziele zu erreichen, deutlich höher ist, als die für die Gewährung des Performance-Bonus zu erfüllenden Ziele zu erreichen. Entsprechende vertragliche Regelungen stellen sicher, dass diese Gewichtung auch künftig erhalten bleibt.

– Der Performance-Bonus vergütet im Einklang mit der kurzfristigen Unternehmensentwicklung die Leistungen des Vorstands für das abgelaufene Geschäftsjahr. Er wird vom Aufsichtsrat in einem zweistufigen Verfahren festgesetzt: Zu Beginn des Geschäftsjahres 2010 hat der Aufsichtsrat als Performance-Kriterien sowohl die unternehmensbezogenen Kriterien (die Steigerung des Gewinns vor Steuern und der Einzelhandelsmarge) als auch die individuelle Leistung des Vorstandsmitglieds festgelegt und eindeutige Ziele definiert. Die Zielerreichung der unternehmensbezogenen Kriterien kann mit max. 150 % bewertet werden. Nach Ablauf des Geschäftsjahres legt der Aufsichtsrat für jedes Vorstandsmitglied den konkreten Bonusbetrag in Abhängigkeit des jeweiligen Zielerreichungsgrads fest.

– Der aus dem LTIP 2009/2011 resultierende Bonus (LTIP-Bonus) vergütet im Einklang mit der Unternehmensplanung die langfristige Leistung des Vorstands.

Bei der Ausgabe des LTIP 2009/2011 an die Mitglieder des Vorstands hat der Aufsichtsrat nachfolgende unterschiedlich gewichtete Performance-Kriterien bestimmt:

- die Steigerung des Konzerngewinns
- die Reduzierung der Nettoverschuldung (bereinigt um nicht-operative Effekte)
- das Umsatzwachstum der Marken Reebok, Rockport und Reebok-CCM Hockey
- die absolute und relative Entwicklung des Aktienkurses

Für die Berechnung des nach Ablauf des Dreijahreszeitraums zu zahlenden LTIP-Bonus werden die Zielerreichungsgrade der Performance-Kriterien akkumuliert und mit dem individuellen Zielbetrag multipliziert. Die Auszahlung aus dem LTIP 2009/2011, die auf maximal 150 % des individuellen Zielbetrags begrenzt ist (Cap), erfolgt nach Feststellung des Jahresabschlusses zum 31. Dezember 2011. Sollte der Zielerreichungsgrad für den Dreijahreszeitraum unter dem Schwellenwert von 50 % liegen, so steht dem Mitglied des Vorstands kein LTIP-Bonus zu.

Eine aus einem Aktienoptionsprogramm resultierende Vergütungskomponente besteht nicht und ist nicht geplant.

<sup>1)</sup> Dieser Vergütungsbericht ist Bestandteil des geprüften Konzernlageberichts und bildet zugleich einen Teil des Corporate Governance Berichts mit Erklärung zur Unternehmensführung.



## Die Vorstandsvergütung im Einzelnen

Die Gesamtvergütung unseres Vorstands im Geschäftsjahr 2010 belief sich auf 11,494 Mio. € (2009: 10,494 Mio. €).

## Leistungen für den Fall der Beendigung der Vorstandstätigkeit

Alle Mitglieder des Vorstands haben einzelvertragliche Pensionszusagen erhalten, die im Wesentlichen folgende Regelungen beinhalten:

### Pensionszusagen

Die Altersrente beginnt mit Beendigung der Vorstandstätigkeit nach Vollendung des 65. Lebensjahres, es sei denn, es handelt sich um einen Berufs- oder Erwerbsunfähigkeitsfall oder um Hinterbliebenenversorgung im Todesfall.

- Die Altersrente bestimmt sich nach einem Bausteinsystem, d. h. ausgehend von einem Grundbetrag in Höhe von 10 % der rentenfähigen Bezüge wird für jedes volle Jahr der Vorstandstätigkeit ein Pensionsbaustein in Höhe von 2 % der rentenfähigen Bezüge, die derzeit dem in der Tabelle angegebenen Jahresfestgehalt entsprechen, gebildet.<sup>2)</sup> Die Altersrente kann sich auf maximal 40 % der rentenfähigen Bezüge belaufen.
- Im Falle der Berufs- oder Erwerbsunfähigkeit eines Vorstandsmitglieds vor Erreichen des Renteneintrittsalters erhält dieser eine Invalidenrente in Höhe des bis zu jenem Zeitpunkt erreichten Pensionsanspruchs.

– Im Falle des Todes eines Vorstandsmitglieds während der Vorstandstätigkeit oder nach Eintritt des Rentenfalls steht dem Ehepartner eine Hinterbliebenenrente in Höhe von 50 %, den unterhaltsberechtigten Kindern eine Halbwaisenrente in Höhe von jeweils 15 % bzw. eine Vollwaisenrente in Höhe von jeweils 30 % der Pensionsansprüche zu. Die Höchstgrenze für die Hinterbliebenenversorgung liegt bei 100 % der Pensionsansprüche. Im Todesfall während der Vorstandstätigkeit erhält der Ehepartner, ersatzweise erhalten die unterhaltsberechtigten Kinder, zusätzlich das zeitanteilige Jahresfestgehalt für den Sterbemonat sowie für die drei folgenden Monate weiter, längstens bis zum im Dienstvertrag vereinbarten Vertragsende.

Im Falle des Ausscheidens eines Vorstandsmitglieds vor Erreichen des Renteneintrittsalters richtet sich die Unverfallbarkeit der Pensionsanschaften nach den gesetzlichen Bestimmungen. Die laufenden Rentenzahlungen erhöhen sich ab dem zweiten Rentenbezugsjahr um mindestens 1 % des Betrags der Vorjahresrente und zusätzlich um etwaige dem jeweiligen Vorstandsmitglied zurechenbare Erträge aus der Unterstützungskasse.

## Gesamtvergütung des Vorstands im Geschäftsjahr 2010

in Tsd. €

01

|                                        | Erfolgsunabhängige Vergütungskomponenten |                  | Erfolgsbezogene Vergütungskomponente | Vergütungskomponente mit langfristiger Anreizwirkung <sup>1)</sup> | Gesamt        |
|----------------------------------------|------------------------------------------|------------------|--------------------------------------|--------------------------------------------------------------------|---------------|
|                                        | Jahresfestgehalt                         | Nebenleistungen  | Performance-Bonus                    | LTIP-Bonus 2009/2011                                               |               |
| Herbert Hainer (Vorstandsvorsitzender) | 1.373                                    | 28 <sup>2)</sup> | 1.752                                | 1.680                                                              | 4.833         |
| Glenn Bennett <sup>3)</sup>            | 497                                      | 14               | 510                                  | 840                                                                | 1.861         |
| Robin J. Stalker                       | 550                                      | 16 <sup>2)</sup> | 555                                  | 840                                                                | 1.961         |
| Erich Stamminger                       | 700                                      | 37 <sup>2)</sup> | 1.022                                | 1.080                                                              | 2.839         |
| <b>Gesamt</b>                          | <b>3.120</b>                             | <b>95</b>        | <b>3.839</b>                         | <b>4.440</b>                                                       | <b>11.494</b> |

- 1) Der angegebene Betrag entspricht der für das Geschäftsjahr 2010 neu gebildeten Rückstellung aufgrund der Prognose der Zielerreichung zum Bilanzstichtag. Die Höhe einer etwaigen Auszahlung ist damit nicht vorgegeben. Die Auszahlung erfolgt erst bei Erreichen der Ziele nach der Billigung des Konzernabschlusses zum 31. Dezember 2011.
- 2) Nebenleistungen sind Bewirtungen, Zuschüsse zur Rentenversicherung und geldwerte Vorteile aus der Bereitstellung von Dienstwagen.
- 3) Die folgenden Bestandteile der Vergütung von Glenn Bennett wurden vertragsgemäß in US-Dollar gewährt: Jahresfestgehalt \$ 660.000, Zuschuss Pkw-Nutzung \$ 18.000, Performance-Bonus \$ 677.000. Es wurde ein Kurs von 1,3279 \$/€ [Jahresdurchschnittskurs 2010] zugrunde gelegt.

## Gesamtvergütung des Vorstands im Geschäftsjahr 2009

in Tsd. €

02

|                                        | Erfolgsunabhängige Vergütungskomponenten |                  | Erfolgsbezogene Vergütungskomponente | Vergütungskomponente mit langfristiger Anreizwirkung <sup>1)</sup> | Gesamt        |
|----------------------------------------|------------------------------------------|------------------|--------------------------------------|--------------------------------------------------------------------|---------------|
|                                        | Jahresfestgehalt                         | Nebenleistungen  | Performance-Bonus                    | LTIP-Bonus 2009/2011                                               |               |
| Herbert Hainer (Vorstandsvorsitzender) | 1.250                                    | 27 <sup>2)</sup> | 1.512                                | 1.400                                                              | 4.189         |
| Glenn Bennett <sup>3)</sup>            | 431                                      | 25               | 581                                  | 700                                                                | 1.737         |
| Robin J. Stalker                       | 500                                      | 13 <sup>2)</sup> | 612                                  | 700                                                                | 1.825         |
| Erich Stamminger                       | 700                                      | 36 <sup>2)</sup> | 1.107                                | 900                                                                | 2.743         |
| <b>Gesamt</b>                          | <b>2.881</b>                             | <b>101</b>       | <b>3.812</b>                         | <b>3.700</b>                                                       | <b>10.494</b> |

- 1) Der angegebene Betrag entspricht der für das Geschäftsjahr 2009 gebildeten Rückstellung aufgrund der Prognose der Zielerreichung zum Bilanzstichtag. Die Höhe einer etwaigen Auszahlung ist damit nicht vorgegeben. Die Auszahlung erfolgt erst bei Erreichen der Ziele nach der Billigung des Konzernabschlusses zum 31. Dezember 2011.
- 2) Nebenleistungen sind Zuschüsse zur Rentenversicherung und geldwerte Vorteile aus der Bereitstellung von Dienstwagen.
- 3) Die folgenden Bestandteile der Vergütung von Glenn Bennett wurden vertragsgemäß in US-Dollar gewährt: Jahresfestgehalt \$ 600.000, Zuschuss zur Pkw-Nutzung und andere Nebenleistungen \$ 34.190, Performance-Bonus \$ 810.000. Es wurde ein Kurs von 1,3932 \$/€ [Jahresdurchschnittskurs 2009] zugrunde gelegt.

2) Erstbestellung von Herbert Hainer und Erich Stamminger: 1. April 1997; Erstbestellung von Robin J. Stalker: 1. Januar 2001; abweichende Regelung für Glenn Bennett: Statt dem Zeitpunkt der Erstbestellung (1. April 1997) gilt der 1. Januar 2000 als maßgeblicher Zeitpunkt für die Berechnung der Pensionsansprüche. Ferner beträgt der Grundbetrag 20 % der rentenfähigen Bezüge.

#### **Zusagen für den Fall der vorzeitigen Beendigung der Vorstandstätigkeit**

In den Dienstverträgen mit den Vorstandsmitgliedern Glenn Bennett, Robin J. Stalker und Erich Stamminger ist für den Fall der vorzeitigen Beendigung des Dienstverhältnisses, ohne dass ein zur Kündigung berechtigender wichtiger Grund vorliegt, angesichts der relativ kurzen Vertragsdauer von bis zu drei Jahren kein Abfindungscap vorgesehen. Der Dienstvertrag mit Herbert Hainer hingegen, der eine Laufzeit von mehr als drei Jahren aufweist, sieht für diesen Fall der Vertragsbeendigung eine Abfindung in Höhe der Zahlungsansprüche für die Restlaufzeit des Dienstvertrags vor. Diese ist jedoch auf höchstens zwei Gesamtjahresvergütungen begrenzt (Abfindungscap). Als Gesamtjahresvergütung gilt in diesem Zusammenhang die ihm für das letzte volle Geschäftsjahr vor dem Ausscheiden aus dem Vorstand ausgezahlte Gesamtvergütung unter Berücksichtigung der voraussichtlichen Gesamtvergütung für das laufende Geschäftsjahr. Erfolgt die Beendigung des Dienstvertrags von Herbert Hainer anlässlich eines Kontrollwechsels, so ist eine etwaige Abfindung auf 150 % des Abfindungscaps begrenzt.

#### **Zusagen für den Fall der regulären Beendigung der Tätigkeit**

Im Falle der regulären Beendigung des Dienstvertrags, d. h. bei Nichtverlängerung eines Dienstvertrags oder bei Beendigung aufgrund des Erreichens der Altersgrenze, steht dem jeweiligen Vorstandsmitglied ein einzelvertraglich festgelegter Nachlaufbonus zu. Dieser beträgt für Glenn Bennett 75 %, für Robin J. Stalker 100 % und für Herbert Hainer 125 % des dem jeweiligen Vorstandsmitglied für das letzte volle Geschäftsjahr gewährten Performance-Bonus. Der Nachlaufbonus wird in zwei Tranchen 12 bzw. 24 Monate nach Vertragsende ausgezahlt.

Der Dienstvertrag von Erich Stamminger sieht für den Fall, dass die adidas AG den Dienstvertrag nach Ablauf der Bestelldauer nicht verlängert, obwohl er seine Bereitschaft zur Fortsetzung der Vorstandstätigkeit zu den bestehenden Konditionen erklärt hat, eine Abfindung in Höhe von 100 % des vereinbarten Jahresfestgehalts vor. Hierbei wird das Jahresfestgehalt des Geschäftsjahres im Zeitpunkt des Ausscheidens zugrunde gelegt. Die Abfindung wird anstelle des Nachlaufbonus gewährt. Diese Vertragsregelung hat der Aufsichtsrat ab dem Geschäftsjahr 2011 an das für die übrigen Vorstandsmitglieder geltende System angepasst und einen Nachlaufbonus in Höhe von 125 % festgesetzt.

#### **Nebenleistungen und sonstige Zusagen**

- Abgesehen von den in der Tabelle aufgeführten Nebenleistungen erhielten die Vorstandsmitglieder keine Leistungen.
- Für die Übernahme von Mandaten in Konzerngesellschaften erhielten sie keine zusätzliche Vergütung.
- Die Mitglieder unseres Vorstands erhielten vom Unternehmen keine Darlehen oder Vorschusszahlungen.
- Das Unternehmen unterhält eine Vermögensschadenhaftpflichtversicherung für Organmitglieder des adidas Konzerns (D&O-Versicherung). Sie deckt das persönliche Haftungsrisiko für den Fall ab, dass Vorstandsmitglieder bei Ausübung ihrer Tätigkeit für Vermögensschäden in Anspruch genommen werden. Für Schadensfälle, die ab dem 1. Juli 2010 eintreten, besteht entsprechend den gesetzlichen Bestimmungen und den Empfehlungen des Deutschen Corporate Governance Kodex ein Selbstbehalt. Dieser beträgt 10 % des Schadens bis zum Eineinhalbfachen des Jahresfestgehalts für sämtliche Schadensfälle innerhalb eines Geschäftsjahres.

#### **Zahlungen an ehemalige Mitglieder des Vorstands und deren Hinterbliebene**

Die Pensionszahlungen an ehemalige Vorstandsmitglieder bzw. deren Hinterbliebene beliefen sich im Geschäftsjahr 2010 auf 3,235 Mio. € (2009: 2,607 Mio. €). Die Rückstellungen für Pensionsansprüche dieses Personenkreises betrugen zum 31. Dezember 2010 insgesamt 45,884 Mio. € (2009: 45,658 Mio. €). Die Dynamisierung der Renten erfolgt nach den gesetzlichen oder tarifvertraglichen Regelungen, es sei denn etwaige Überschussanteile aus dem Pensionsfonds werden nach Rentenbeginn für eine Erhöhung der Rentenleistungen verwendet.

### Vergütung des Aufsichtsrats

Die Vergütung unserer Aufsichtsratsmitglieder wird von der Hauptversammlung festgelegt und ist in § 18 der Satzung der adidas AG geregelt. Sie orientiert sich an der Unternehmensgröße sowie an der Verantwortung und dem Tätigkeitsumfang der Aufsichtsratsmitglieder. Die Mitglieder erhalten nach Ablauf des jeweiligen Geschäftsjahres für ihre Tätigkeit eine Festvergütung sowie eine Vergütung für Vorsitz- bzw. Ausschusstätigkeiten. Eine variable Vergütung wird nicht zusätzlich gewährt » siehe Corporate Governance Bericht mit Erklärung zur Unternehmensführung, S. 25. Mitglieder des Aufsichtsrats, die nicht während des gesamten Geschäftsjahres dem Aufsichtsrat angehören, erhalten eine zeitanteilige Vergütung.

Die jährliche Festvergütung jedes einzelnen Aufsichtsratsmitglieds beträgt 40.000 €. Der Aufsichtsratsvorsitzende erhält das Dreifache und die beiden Stellvertreter jeweils das Doppelte. Die Mitglieder des Präsidialausschusses bzw. des Prüfungsausschusses erhalten einen Zuschlag in Höhe von 20.000 € bzw. 40.000 €. Der Vorsitzende des Präsidialausschusses erhält jährlich einen Zuschlag in Höhe von 40.000 € bzw. der Vorsitzende des Prüfungsausschusses einen Zuschlag in Höhe von 60.000 €. Mit der für einen Ausschussvorsitz gezahlten Vergütung ist auch die Mitgliedschaft in diesem Ausschuss abgegolten. Die Mitglieder des Präsidiums, des Vermittlungsausschusses, des Nominierungsausschusses und der ad hoc gebildeten Ausschüsse erhalten keine zusätzliche Vergütung. Gehört ein Aufsichtsratsmitglied mehreren Ausschüssen an, so wird nur die Tätigkeit in dem Ausschuss vergütet, für die betragsmäßig die höchste Vergütung bezahlt wird. Den Mitgliedern des Aufsichtsrats werden zudem sämtliche Auslagen, die im Zusammenhang mit der Ausübung ihres Mandats stehen, sowie die auf ihre Vergütung entfallende Umsatzsteuer, soweit sie diese gesondert in Rechnung stellen, ersetzt.

Mit der Neuverteilung der Mitgliedschaften in den Ausschüssen bzw. der Vorsitzverteilung am 7. Mai 2009 im Anschluss an die Neuwahl des Aufsichtsrats erhöhte sich die Gesamtvergütung des Aufsichtsrats im Geschäftsjahr 2010 auf 920.000 € (2009: 898.871 €).

### Nebenleistungen und sonstige Zusagen

- Die Mitglieder des Aufsichtsrats haben vom Unternehmen keine Darlehen oder Vorschusszahlungen erhalten.
- Das Unternehmen unterhält eine Vermögensschadenhaftpflichtversicherung für Organmitglieder des adidas Konzerns (D&O-Versicherung). Sie deckt das persönliche Haftungsrisiko für den Fall ab, dass Aufsichtsratsmitglieder bei Ausübung ihrer Tätigkeit für Vermögensschäden in Anspruch genommen werden. Für ab dem 1. Juli 2010 eintretende Schadensfälle besteht entsprechend den Empfehlungen des Deutschen Corporate Governance Kodex ein Selbstbehalt in Höhe von 10 % des Schadens bis zu einer Höhe des Eineinhalbfachen der festen jährlichen Vergütung des Aufsichtsratsmitglieds für sämtliche Schadensfälle innerhalb eines Geschäftsjahres.

### Vergütung des Aufsichtsrats in €

03

|                                                                                                           | 2010           | 2009                        |
|-----------------------------------------------------------------------------------------------------------|----------------|-----------------------------|
| Mitglieder des Aufsichtsrats zum 31. Dezember 2010                                                        |                |                             |
| Igor Landau<br>(Vorsitzender des Aufsichtsrats, Vorsitzender des Präsidialausschusses)                    | 160.000        | 138.871                     |
| Sabine Bauer<br>(Stellvertretende Vorsitzende des Aufsichtsrats, Mitglied des Präsidialausschusses)       | 100.000        | 78.871                      |
| Willi Schwerdtle<br>(Stellvertretender Vorsitzender des Aufsichtsrats, Mitglied des Präsidialausschusses) | 100.000        | 78.871                      |
| Dieter Hauenstein                                                                                         | 40.000         | 25.914                      |
| Dr. Wolfgang Jäger<br>(Mitglied des Prüfungsausschusses)                                                  | 80.000         | 51.828                      |
| Dr. Stefan Jentzsch<br>(Mitglied des Prüfungsausschusses)                                                 | 80.000         | 65.914                      |
| Herbert Kauffmann<br>(Vorsitzender des Prüfungsausschusses)                                               | 100.000        | 64.785                      |
| Roland Nosko<br>(Mitglied des Präsidialausschusses)                                                       | 60.000         | 52.957                      |
| Alexander Popow                                                                                           | 40.000         | 25.914                      |
| Hans Ruprecht<br>(Mitglied des Prüfungsausschusses)                                                       | 80.000         | 80.000                      |
| Heidi Thaler-Veh                                                                                          | 40.000         | 40.000                      |
| Christian Tourres                                                                                         | 40.000         | 40.000                      |
| <b>Gesamt</b>                                                                                             | <b>920.000</b> | <b>898.871<sup>1)</sup></b> |

1) Dieser Betrag beinhaltet die Vergütung der mit Beendigung der Hauptversammlung am 7. Mai 2009 ausgeschiedenen Aufsichtsratsmitglieder Dr. Hans Friderichs, Fritz Kammerer, Dr. iur. Manfred Gentz und Klaus Weiß in Höhe von insgesamt € 154.946.

# Unsere Aktie

Im Jahr 2010 zogen sowohl die weltweiten Aktienmärkte als auch die Aktie der adidas AG deutlich an. Ein sich verbesserndes gesamtwirtschaftliches Umfeld, starke Unternehmensgewinne und steigendes Verbrauchervertrauen unterstützten das Wachstum an den Wertpapierbörsen. Diese Faktoren glichen die negativen Auswirkungen der Krise aufgrund der Staatsverschuldung in den peripheren Ländern der Eurozone mehr als aus. Die deutliche Erholung des Konzernumsatzes und -gewinns sowie die Bekanntgabe des strategischen Geschäftsplans „Route 2015“ beeinflussten die Aktie der adidas AG positiv. Unser Aktienkurs legte 2010 um 29 % zu und entwickelte sich somit besser als der DAX, der im gleichen Zeitraum um lediglich 16 % zulegte. Aufgrund des Anstiegs des auf Anteilseigner entfallenden Gewinns im Geschäftsjahr 2010 beabsichtigen wir der Hauptversammlung im Jahr 2011 eine im Vergleich zum Vorjahr höhere Dividende von 0,80 € je Aktie vorzuschlagen (2009: 0,35 €).

## Aktienmärkte weltweit setzen Dynamik des Vorjahres fort

Die weltweiten Aktienmärkte, der DAX und die Aktie der adidas AG behielten im Jahr 2010 die positive Dynamik des Vorjahres bei und setzten ihren Aufwärtstrend fort. Investoren zeigten trotz relativ niedriger Bewertungen wieder Vertrauen in die Aktienmärkte. Der Kurs unserer Aktie stieg im Jahresverlauf um 29 % und übertraf somit den DAX (16 %), blieb aber hinter der Entwicklung des MSCI World Textiles, Apparel & Luxury Goods Index (44 %) zurück » siehe 02. Die starke Entwicklung des MSCI war vor allem auf den hohen Anteil von Luxusgüterunternehmen in diesem Index zurückzuführen, die sich im Durchschnitt besser als Unternehmen im Sportartikelsektor entwickelten.

Die weiterhin lockere Geldpolitik der Zentralbanken, sich verbessernde Konjunkturdaten sowie positive Unternehmensnachrichten im Rahmen der Berichterstattung zum Geschäftsjahr 2009 gaben den Aktienmärkten weltweit zu Beginn des Jahres positive Impulse.

Allerdings verstärkten sich während des gesamten zweiten Quartals die Anzeichen, die auf eine Verlangsamung der weltweiten Konjunkturerholung deuteten. In Verbindung mit der Krise aufgrund der Staatsverschuldung in den peripheren Ländern der Eurozone führte dies zu einem Rückgang der wichtigen Indizes weltweit.

Im dritten Quartal drehte sich die Stimmung auf den Aktienmärkten und die meisten Indizes weltweit meldeten deutliche Gewinne. Grund hierfür waren die Veröffentlichung guter Unternehmensergebnisse für das erste Halbjahr 2010 und die Resultate der Stress-tests bei den europäischen Banken, die besser als erwartet ausfielen. Anzeichen einer weiterhin expansiven Geldpolitik der US-Notenbank trugen ebenfalls zu dieser positiven Entwicklung bei. Auch im vierten Quartal setzte sich der Aufschwung an den weltweiten Aktienmärkten fort. Angesichts der Konjunkturdaten, die auf eine anhaltende Verbesserung der Weltwirtschaft und der Unternehmensgewinne im Jahr 2011 hindeuteten, herrschte trotz des beginnenden Inflationsdrucks in China eine nach wie vor positive Stimmung unter den Anlegern.

## Aktienkurs der adidas AG spiegelt deutliche operative Verbesserungen wider

Der Aktienkurs der adidas AG legte zu Beginn des Jahres, insbesondere aufgrund des steigenden Vertrauens der Investoren in den erfolgreichen Turn-around der Marke Reebok, deutlich zu und übertraf somit die Kursentwicklung unserer Mitbewerber und des Markts insgesamt. Unsere Ergebnisse für das Jahr 2009 stießen sowohl bei Investoren als auch bei Analysten auf eine positive Resonanz, allerdings fiel die Reaktion des Markts auf unseren Ausblick für das Jahr 2010 verhalten aus. Einhergehend mit den höher tendierenden Aktienmärkten und der sich verbessernden allgemeinen Stimmung aufgrund positiver Analystenkommentare konnte die Aktie der adidas AG dennoch gegen Ende des ersten Quartals ihren Abwärtstrend umkehren.

| Die adidas AG Aktie                 |                                                                      | 01 |
|-------------------------------------|----------------------------------------------------------------------|----|
| Anzahl Aktien                       |                                                                      |    |
| Durchschnitt im Jahr 2010           | 209.216.186                                                          |    |
| zum Jahresende 2010 <sup>1)</sup>   | 209.216.186                                                          |    |
| Aktienart                           | Auf den Namen lautende<br>nennwertlose Stückaktien<br>(Namensaktien) |    |
| Free Float                          | 100 %                                                                |    |
| Börsengang                          | 17. November 1995                                                    |    |
| Aktiensplit                         | 6. Juni 2006 (im Verhältnis 1:4)                                     |    |
| Börsenplatz                         | Alle deutschen Börsen                                                |    |
| Wertpapiercode (ISIN) <sup>2)</sup> | DE000A1EWWW0                                                         |    |
| Börsenkürzel                        | ADS, ADSGn.DE                                                        |    |
| Wichtige Indizes                    | DAX-30                                                               |    |
|                                     | MSCI World Textiles,<br>Apparel & Luxury Goods                       |    |
|                                     | Deutsche Börse Prime Consumer                                        |    |
|                                     | Dow Jones STOXX                                                      |    |
|                                     | Dow Jones EURO STOXX                                                 |    |
|                                     | Dow Jones Sustainability                                             |    |
|                                     | FTSE4Good Europe                                                     |    |
|                                     | Ethibel Index Excellence Europe                                      |    |
| ASPI Eurozone Index                 |                                                                      |    |
| ECPI Ethical Index EMU              |                                                                      |    |

1) Alle Aktien sind voll dividendenberechtigt.  
2) Am 11. Oktober 2010 wurden die auf den Inhaber lautenden Stückaktien der adidas AG in auf den Namen lautende Stückaktien (Namensaktien) umgestellt. Die Namensaktien der adidas AG werden seitdem unter der neuen ISIN DE000A1EWWW0 (bisherige ISIN: DE0005003404) an den Börsen gehandelt.

Die vorläufigen Ergebnisse für das erste Quartal, die Ende April 2010 veröffentlicht wurden, übertrafen die Markterwartungen. Dies trug dazu bei, dass unser Aktienkurs während des gesamten zweiten Quartals der insgesamt rückläufigen Entwicklung des Markts trotzen und leichte Gewinne verbuchen konnte. Auch positives Feedback zu einer Reebok Investorenveranstaltung in London sowie unsere Mitte Mai erhöhte Umsatzprognose für die Kategorie Fußball unterstützten diese Entwicklung.

Nach der Veröffentlichung besser als erwarteter vorläufiger Ergebnisse für das erste Halbjahr legte der Aktienkurs der adidas AG gegen Ende Juli deutlich zu. Die positive Dynamik setzte sich im August nach Veröffentlichung der endgültigen Ergebnisse fort und im dritten Quartal entwickelte sich unser Aktienkurs – nicht zuletzt dank der erhöhten Prognose für das Gesamtjahr – besser als die Indizes weltweit.

Die Anfang November veröffentlichten, sehr guten Ergebnisse für das dritte Quartal sowie der Umsatz- und Gewinnausblick für das Jahr 2011 konnten trotz überwiegend guter Resonanz seitens Investoren und Analysten der Kursentwicklung keine zusätzlichen Impulse geben. Nach der Ankündigung des strategischen Geschäftsplans des Konzerns „Route 2015“ am 8. November 2010 brachten die Marktteilnehmer aber ihr Vertrauen in unsere mittel- bis langfristigen strategischen Ziele deutlich zum Ausdruck.

Dies zeigte sich in weiteren Kursgewinnen während der letzten Wochen des Jahres. Infolgedessen beendete die Aktie der adidas AG das Jahr 2010 mit 48,89 € und verzeichnete somit im Laufe des Jahres ein Plus von 29 %. Aufgrund dieser Entwicklung lag unsere Marktkapitalisierung am Jahresende bei 10,2 Mrd. € (2009: 7,9 Mrd. €) » siehe 04.

### Umstellung von Inhaberauf Namensaktien

Auf Grundlage des Beschlusses Nr. 13 der Hauptversammlung am 6. Mai 2010 wurden die auf den Inhaber lautende Stückaktien der adidas AG am 11. Oktober 2010 in auf den Namen lautende Stückaktien (Namensaktien) umgestellt. Die Namensaktien der adidas AG werden seitdem unter der neuen ISIN DE000A1EWWW0 (bisherige ISIN: DE0005003404) bzw. WKN A1EWWW (bisherige WKN: 500340) an den Börsen gehandelt. Das Börsenkürzel ADS bleibt unverändert. Die Rechtsstellung der im Aktienregister eingetragenen Aktionäre der adidas AG wurde durch die Umstellung auf Namensaktien nicht beeinträchtigt. Auch das Recht der Aktionäre zur Veräußerung oder zum Kauf von Aktien wird nicht eingeschränkt oder erschwert.

### Aktie der adidas AG in wichtigen Indizes vertreten

Die Aktie der adidas AG ist in verschiedenen angesehenen Indizes weltweit vertreten, beispielsweise im DAX und dem MSCI World Textiles, Apparel & Luxury Goods Index.

Der deutsche Spitzenindex DAX enthält die Aktien der 30 wichtigsten Unternehmen, die an der Frankfurter Wertpapierbörse gehandelt werden.

Im MSCI World Textiles, Apparel & Luxury Goods Index sind die Hauptwettbewerber unseres Konzerns vertreten. Am 31. Dezember 2010 betrug unsere Gewichtung im DAX, die auf Basis der Marktkapitalisierung nach Streubesitz und des Handelsvolumens der letzten zwölf Monate berechnet wird, 1,69 % (2009: 1,49 %). Verantwortlich für die höhere Gewichtung im Vorjahresvergleich war hauptsächlich der Anstieg unserer Marktkapitalisierung, der einen im Vergleich zum restlichen Markt ausgeprägteren Rückgang des Handelsvolumens mehr als ausglich. Das tägliche durchschnittliche Handelsvolumen der adidas AG Aktie an allen deutschen Börsenplätzen (ohne Bankumsätze) verringerte sich von 1,4 Millionen im Jahr 2009 auf 1,2 Millionen Aktien im Jahr 2010. Im DAX lagen wir zum Jahresende gemessen an der Marktkapitalisierung auf Platz 16 (2009: 17) und gemessen am Umsatz auf Platz 23 (2009: 22). Das durchschnittliche tägliche Handelsvolumen der adidas AG Aktie über alternative Handelssysteme nahm hingegen um über 40 % auf 0,7 Millionen Aktien zu (2009: 0,5 Millionen Aktien).

### Historische Performance der adidas AG Aktie und wichtiger Indizes zum 31. Dezember 2010<sup>1)</sup> in %

02

|                                             | 1 Jahr | 3 Jahre | 5 Jahre | 10 Jahre | Seit Börsengang |
|---------------------------------------------|--------|---------|---------|----------|-----------------|
| adidas AG                                   | 29     | -5      | 22      | 196      | 406             |
| DAX                                         | 16     | -14     | 28      | 7        | 215             |
| MSCI World Textiles, Apparel & Luxury Goods | 44     | 28      | 71      | 154      | 243             |

1) Quelle: Bloomberg.

### adidas AG monatliche Höchst- und Tiefsturse<sup>1)</sup> in €

03

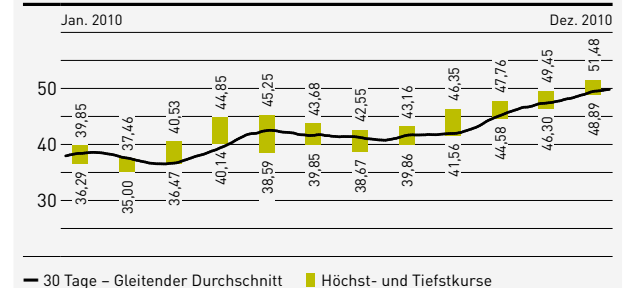

1) Basierend auf Tagesschlusskursen.  
Quelle: Bloomberg.

### adidas AG Marktkapitalisierung zum Jahresende in Mio. €

04

|      |        |
|------|--------|
| 2006 | 7.679  |
| 2007 | 10.438 |
| 2008 | 5.252  |
| 2009 | 7.902  |
| 2010 | 10.229 |



## Index-Notierungen unterstreichen gute Nachhaltigkeitsarbeit

In Anerkennung unserer Leistungen im Sozial- und Umweltbereich ist die adidas AG in mehreren Nachhaltigkeitsindizes gelistet. Zum elften Mal in Folge wurde die adidas AG in die Dow Jones Sustainability Indices (DJSI) aufgenommen. Diese Indizes analysieren und bewerten weltweit die Performance von mehr als 300 Unternehmen in den Bereichen Soziales, Umwelt und Finanzen.

Zudem ist die adidas AG zum wiederholten Mal im FTSE4Good Europe Index vertreten. Die erneut positive Bewertung unterstreicht das soziale, ökologische und ethische Engagement des Konzerns und bestärkt uns darin, unser Nachhaltigkeitsmanagement weiter voranzutreiben und zu intensivieren. Darüber hinaus wurde die adidas AG erneut in den Ethibel Excellence Sustainability Index Europe sowie in den ASPI Eurozone Index der Vigeo Group aufgenommen. Die Vigeo Group ist ein führender europäischer Anbieter von Analysen im nicht-finanziellen Bereich, die Unternehmen in Bezug auf nachhaltige Entwicklung und soziale Verantwortung bewerten. Unser Konzern wurde zudem zum sechsten Mal in Folge in die Liste der „Global 100 Most Sustainable Corporations in the World“ (100 nachhaltigste Unternehmen der Welt) aufgenommen. Dieses Projekt wurde von Corporate Knights Inc. zusammen mit Innovest Strategic Value Advisors Inc. initiiert, einem Forschungsunternehmen, das sich auf die Analyse nicht-finanzieller Indikatoren für Unternehmensrisiken und Shareholder Value spezialisiert hat. Die jährliche Liste der „Global 100 Most Sustainable Corporations in the World“ wurde 2005 erstmals zusammengestellt und wird jedes Jahr im Rahmen des Weltwirtschaftsforums in Davos veröffentlicht.

## Historische Entwicklung der Aktie der adidas AG überflügelt Benchmark-Indizes

Der adidas Konzern ist der kontinuierlichen Verbesserung des Shareholder Values verpflichtet. Die langfristige Entwicklung unseres Aktienkurses zeigt das Vertrauen der Anleger in unser Unternehmen und in das Wachstumspotenzial unseres Konzerns. Unsere Aktie hat in den letzten zehn Jahren 196 % zugelegt. Sie hat damit sowohl den DAX, der im gleichen Zeitraum um 7 % stieg, als auch den MSCI Index, der einen Zuwachs von 154 % verzeichnete, deutlich übertroffen.

## ADR entwickelt sich in etwa wie die Aktie

Seit der Einführung am 30. Dezember 2004 erfreut sich unser Level 1 American Depositary Receipt (ADR) Programm unter US-amerikanischen Anlegern großer Beliebtheit. Im Januar 2010 beauftragten wir anstelle von The Bank of New York Mellon die Deutsche Bank Trust Company Americas als Depotbank für unser Level 1 ADR Programm. Das Level 1 ADR schloss das Jahr bei 32,60 US-Dollar. Dies bedeutet einen Anstieg um 20 % gegenüber dem Vorjahr (2009: 27,15 US-Dollar). Der geringere Kursanstieg des Level 1 ADR gegenüber dem Kursanstieg der Aktie ist auf die Aufwertung des US-Dollars im Jahr 2010 zurückzuführen.

Die Anzahl der ausstehenden Level 1 ADRs stieg von 5,4 Millionen Ende 2009 auf 6,4 Millionen zum Jahresende 2010. Das durchschnittliche tägliche Handelsvolumen verringerte sich im Vorjahresvergleich um 60 %. Seit November 2007 wird das ADR der adidas AG am OTCQX International Premier Markt notiert, dem Premium-Sektor des US-amerikanischen Over-the-Counter-Markts. Dieses elektronische Handelsforum umfasst führende internationale Unternehmen mit einem entsprechend umfangreichen operativen Geschäft sowie glaubwürdigen Veröffentlichungsgrundsätzen. Weitere Informationen zu unserem ADR-Programm sind auf unserer Internetseite zu finden

» www.adidas-Group.de/adr.

## Dividendenvorschlag von 0,80 € je Aktie

Der Vorstand und der Aufsichtsrat der adidas AG werden der Hauptversammlung am 12. Mai 2011 für das Geschäftsjahr 2010 eine Dividende in Höhe von 0,80 € je Aktie vorschlagen (2009: 0,35 €). Sofern die Hauptversammlung ihre Zustimmung erteilt, wird die Dividende am 13. Mai 2011 ausgezahlt. Dies bedeutet eine Erhöhung von 129 % und spiegelt die deutliche Verbesserung unserer Profitabilität im Jahr 2010 wider. Die Gesamtausschüttung von 167 Mio. € (2009: 73 Mio. €) entspricht einem Ausschüttungssatz von 30 % des Konzerngewinns (2009: 30 %). Dieser Vorschlag steht im Einklang mit der Dividendenpolitik des Konzerns, die einen Ausschüttungssatz zwischen 20 % und 40 % des auf Anteilseigner entfallenden Gewinns vorsieht.

## Fünf-Jahres-Aktienkursentwicklung<sup>1)</sup>

05

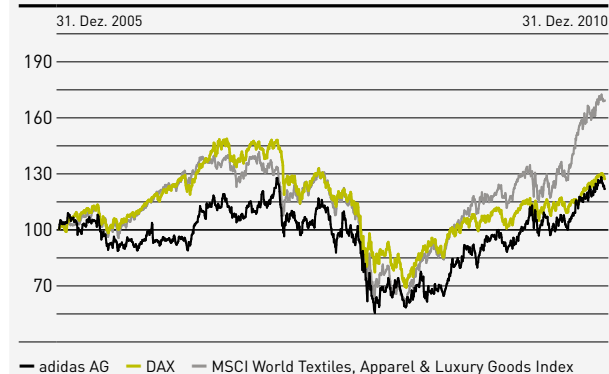

1) Index: 31. Dezember 2005 = 100 %.

## Aktionärsstruktur<sup>1)</sup>

06

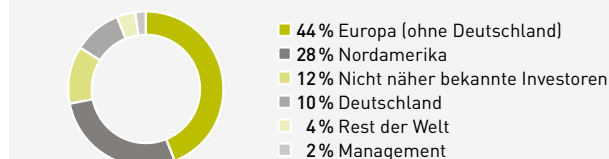

1) Stand: Februar 2011.

## Empfehlungen von Analysten<sup>1)</sup>

07

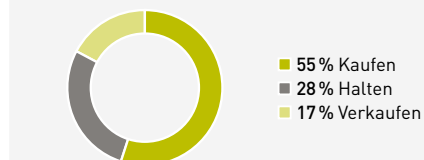

1) Am Jahresende 2010.  
Quelle: Bloomberg.

### Ausgeprägt internationale Investorenbasis

Basierend auf unserem Aktienregister schätzen wir die Gesamtzahl der Aktionäre der adidas AG auf derzeit rund 60.000. Gemäß unserer letzten Aktienbesitzanalyse vom Februar 2011 konnten wir 88 % unserer ausstehenden Aktien zuordnen. In Nordamerika ansässige Investoren halten 28 % unserer gesamten ausstehenden Aktien. Auf deutsche, institutionelle Investoren entfallen 10 %. Der Anteilsbesitz von Investoren aus anderen europäischen Ländern ohne Deutschland beläuft sich auf 44 %. Institutionelle Investoren in anderen Regionen der Welt halten 4 %. Das Management des adidas Konzerns, d. h. die derzeitigen Mitglieder von Vorstand und Aufsichtsrat, hält insgesamt 2 % » siehe Corporate Governance Bericht, S. 25. Der Anteil der Aktien, die sich im Besitz von uns nicht näher bekannten Investoren befinden, beträgt demnach 12 %. In dieser Gruppe sind auch Privatanleger enthalten » siehe 06.

### Stimmrechtsmitteilungen erhalten

Im Jahr 2010 erhielt die adidas AG zwölf Stimmrechtsmitteilungen gemäß § 21 Abs. 1 Wertpapierhandelsgesetz (WpHG). Alle Stimmrechtsmitteilungen, die im Jahr 2010 und danach erhalten wurden, sind auf der Internetseite des Unternehmens » [www.adidas-Group.de/stimmrechtsmitteilungen](http://www.adidas-Group.de/stimmrechtsmitteilungen) zu finden. Informationen zu Stimmrechtsanteilen, die eine bestimmte Schwelle über- oder unterschritten haben, sind zudem dem Konzernanhang in diesem Bericht zu entnehmen » siehe Erläuterung 25, S. 204.

### Erneut starke Analystenunterstützung für den adidas Konzern

Die Unterstützung der Analysten für den adidas Konzern war im Jahr 2010 weiterhin stark. Rund 35 Analysten von Investmentbanken und Brokerfirmen veröffentlichten regelmäßig Studien über unseren Konzern. Die Mehrheit der Analysten ist in Bezug auf das mittel- und langfristige Potenzial unseres Konzerns zuversichtlich. Dies zeigt die Aufteilung der Analystenempfehlungen hinsichtlich unserer Aktie zum 31. Dezember 2010. 55 % der Analysten sprachen in ihrem letzten Bericht im Zwölf-Monatszeitraum eine „Kauf“-Empfehlung für unsere Aktie aus (2009: 54 %). 28 % empfahlen das „Halten“ unserer Aktie (2009: 22 %). 17 % der Analysten stuften unsere Aktie zum „Verkauf“ ein (2009: 24 %) » siehe 07.

### Auszeichnungen für Investor Relations Aktivitäten

Die adidas AG strebt einen kontinuierlichen Dialog mit institutionellen und privaten Anlegern sowie Analysten an. Das Management und das Investor Relations Team verbrachten im Jahr 2010 mehr als 35 Tage auf Roadshows und präsentierten auf 19 nationalen und internationalen Konferenzen. Zur Vorstellung des neuen strategischen Geschäftsplans des Konzerns „Route 2015“ veranstalteten wir am 8. November einen Investor Day in Herzogenaurach, an dem mehr als 70 Investoren und weitere Vertreter der Finanzmärkte teilnahmen.

Wir arbeiten kontinuierlich daran, unseren Investoren und Analysten einen hervorragenden Service zu bieten. Dies wurde in einer Investor Relations Umfrage, die von Thomson Reuters durchgeführt wurde, bestätigt. In dieser Umfrage wurde der adidas Konzern im Bereich Consumer/Luxury Goods von den Buy-Side-Analysten auf Platz zwei gewählt.

Die Printversion unseres Geschäftsberichts 2009 erhielt ebenfalls hohe Anerkennung: Dieser erreichte den fünften Platz unter den DAX-Unternehmen im Manager Magazin Ranking „Die besten Geschäftsberichte“.

### Ausführliche Finanzinformationen online erhältlich

Unter » [www.adidas-Group.de/investoren](http://www.adidas-Group.de/investoren) stellen wir ausführliche Informationen rund um unsere Aktie sowie die Strategie und Ergebnisse des Konzerns zur Verfügung. Unser Veranstaltungskalender zeigt alle Konferenzen und Roadshows, an denen wir teilnehmen, und ermöglicht den Download aller Präsentationen. Zusätzlich zu den Live-Webcasts aller wichtigen Veranstaltungen, wie zum Beispiel unserer Analystenkonferenzen, der Hauptversammlung und unserer Investor Days, bieten wir auch Podcasts unserer Telefonkonferenzen zu den Quartalsergebnissen an. Darüber hinaus erhalten unsere Aktionäre und sonstige Vertreter der Finanzwelt auf Wunsch einen vierteljährlichen Investor Relations Newsletter, in dem wir sie über Neuigkeiten zum adidas Konzern sowie zur Aktie der adidas AG aktuell informieren.

### Kennzahlen zur Aktie auf einen Blick

08

|                                                               | 2010                     | 2009      |
|---------------------------------------------------------------|--------------------------|-----------|
| Unverwässertes Ergebnis je Aktie                              | € 2,71                   | 1,25      |
| Verwässertes Ergebnis je Aktie                                | € 2,71                   | 1,22      |
| Operativer Cashflow je Aktie                                  | € 4,28                   | 6,11      |
| Jahresendkurs                                                 | € 48,89                  | 37,77     |
| Jahreshoch                                                    | € 51,48                  | 38,76     |
| Jahrestief                                                    | € 35,01                  | 22,73     |
| Dividende                                                     | € 0,80 <sup>1)</sup>     | 0,35      |
| Dividendensumme                                               | Mio. € 167 <sup>2)</sup> | 73        |
| Ausschüttungsquote                                            | % 29,5                   | 29,8      |
| Dividendenrendite                                             | % 1,6                    | 0,9       |
| Eigenkapitel pro Aktie                                        | € 22,06                  | 18,02     |
| Kurs-Gewinn-Verhältnis am Jahresende                          | 18,0                     | 31,0      |
| Durchschnittliches Handelsvolumen je Handelstag <sup>3)</sup> | Aktien 1.170.523         | 1.392.613 |
| Rang im DAX <sup>4)</sup> am Jahresende                       |                          |           |
| nach Marktkapitalisierung                                     | 16                       | 17        |
| nach Handelsvolumen                                           | 23                       | 22        |

1) Vorbehaltlich der Zustimmung durch die Hauptversammlung.

2) Basierend auf der Anzahl der ausstehenden Aktien zum Jahresende.

3) Basierend auf der Anzahl der an allen deutschen Börsen gehandelten Aktien.

4) Wie von der Deutschen Börse veröffentlicht.

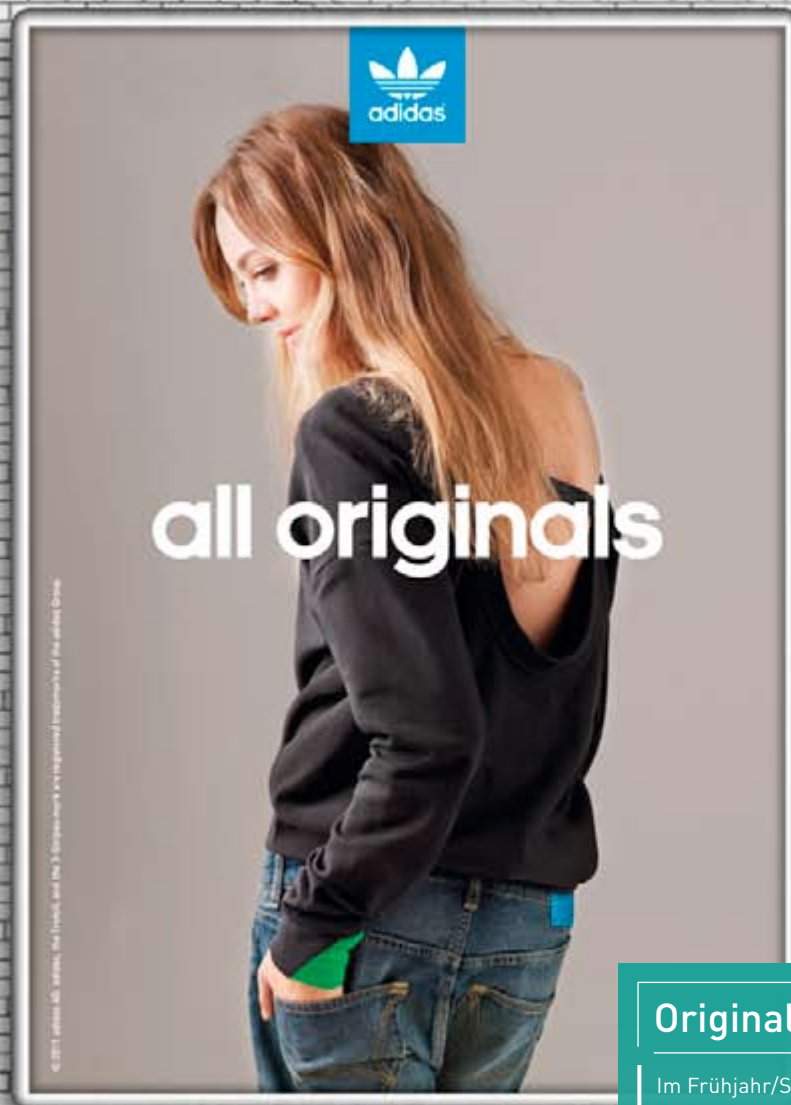

## Originals Denim Kampagne

Im Frühjahr/Sommer 2011 präsentiert adidas Originals Blue eine moderne Streetwear-Kollektion in angesagten Looks für Männer und Frauen. Mit ihrer ersten eigenen Jeanslinie (Originals Denim) und einer Kollektion von Premium-Accessoires – die allen voran eine Reihe weicher, exquisiter Ledertaschen beinhaltet – rundet adidas Originals Blue das holistische Angebot von Kopf-bis-Fuß-Outfits ab. Der Name der Kollektion ist eine Hommage an die ikonische blaue adidas Originals Farbe „bluebird“, die Fans rund um den Globus gut bekannt ist.

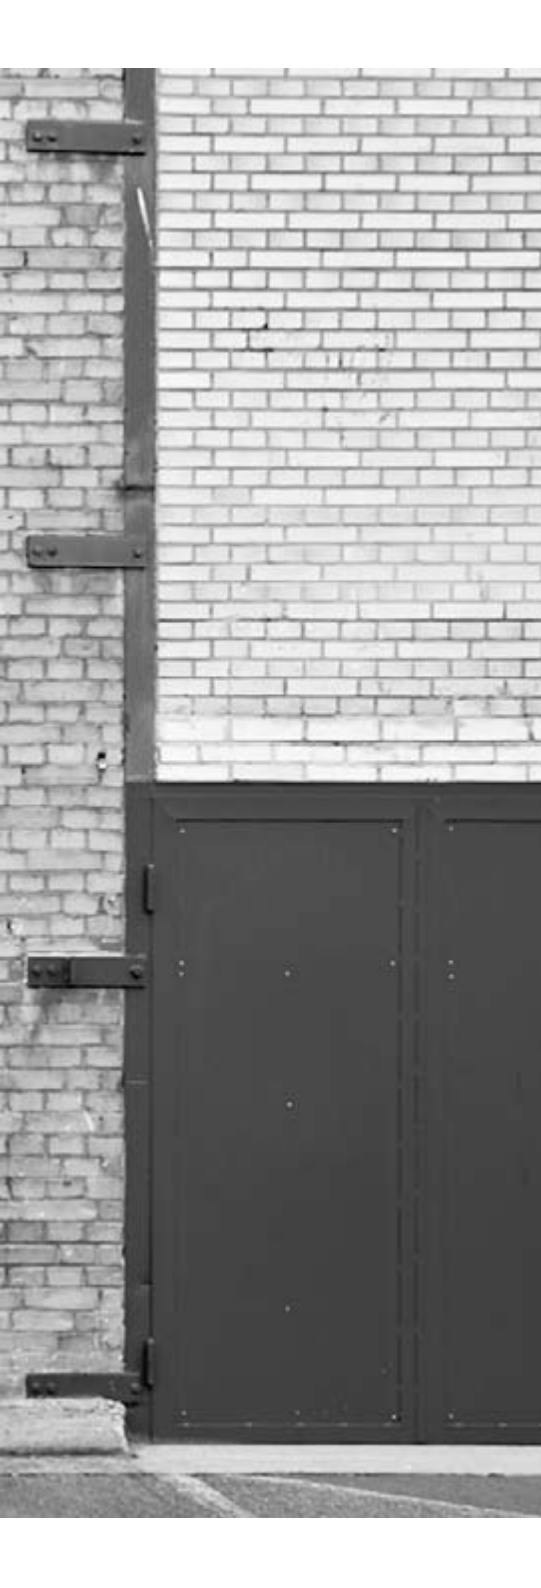

# 02

| Fit for the Future           |       |
|------------------------------|-------|
| adidas .....                 | »» 40 |
| Reebok .....                 | »» 58 |
| TaylorMade-adidas Golf ..... | »» 66 |
| Reebok-CCM Hockey .....      | »» 70 |
| Rockport .....               | »» 72 |

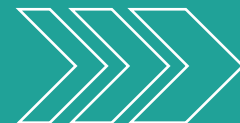





adidas

Sport Performance » Running

# »» UND DAS BESTE KOMMT ZUM SCHLUSS - LAUFEN.

Silvia Felt, Deutsche,  
Category Managerin Outdoor,  
adidas

**Vier Zahlen begleiten meinen Weg: 3,86; 180,2; 42,195 und 10. Genauer: Schwimmen, Fahrrad fahren und Laufen, alles unter 10 Stunden und am Ende steht ein Satz: „You are an Ironman!“** Mit diesen Worten wird jeder Athlet über die Ziellinie getragen, der den Ironman in Hawaii erfolgreich meistert, so wie ich erstmals im Jahr 2009. Alles begann, als ich 2004 aus Spaß an meinem ersten Triathlon teilnahm. Fünf Jahre später stand ich als drittschnellste Frau in meiner Altersklasse bei der Siegerehrung des härtesten Triathlonrennens der Welt. Dazwischen lag eine lange Phase harten Trainings, in der mich adidas als mein Arbeitgeber unterstützt hat. Beruflich bin ich bereits da angekommen, wo ich immer hinwollte, und auch sportlich konnte ich schon einige Erfolge feiern, dennoch gibt es ein großes Ziel das ich erreichen möchte: in der Kategorie der Profis auf Hawaii zu laufen. Um einen Triathlon erfolgreich zu absolvieren musst du sehr viel trainieren, jede einzelne Disziplin. Wenn du in einer versagst, wirst du verlieren. Ein detailliertes Zeitmanagement und Disziplin sind dabei extrem wichtig. Denn am Ende des Tages musst du in drei verschiedenen Disziplinen jeweils Bestleistungen erbringen. Oft werde ich gefragt, wie ich Sport und Vollzeitjob unter einen Hut bringe: Ich stehe hinter beidem mit Herz und Leidenschaft und gebe immer mein Bestes. Ich bin stolz darauf, Teil einer Marke zu sein, die die Geschichten der Top-Athleten schreibt. Denn Sport ist meine absolute Leidenschaft.



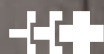

Mehr Informationen zu adidas Running und Training:  
[www.adidas.de/running](http://www.adidas.de/running)  
[www.adidas.de/training](http://www.adidas.de/training)

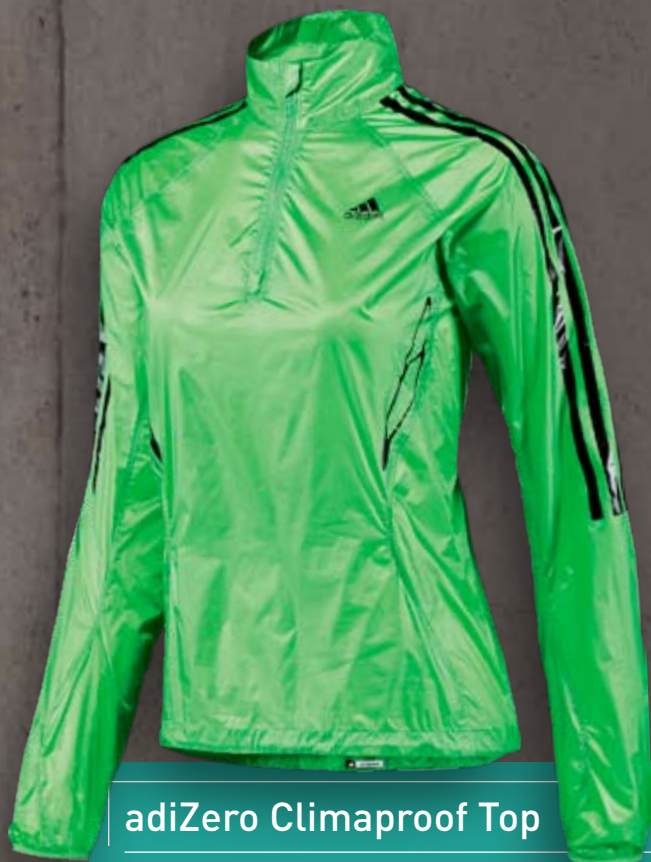

### adiZero Climaproof Top

Mit dem adiZero Climaproof Top kann Regen die Laufbegeisterung ganz sicher nicht trüben. Dieses leichte und atmungsaktive Top bietet den Schutz, den Läufer brauchen, um auch an regnerischen Tagen mit widrigsten Laufbedingungen angenehm trocken zu bleiben. Dreistufiger Climaproof Schutz sorgt für ein angenehmes Klima beim Laufen, da warme Luft in Hautnähe „gefangen“ und Schweiß nach außen transportiert wird. Die Jacke ist wind- und wasserdicht und bietet maximalen Schutz, auch über einen längeren Zeitraum.

### adiStar Ride 3

adidas stellt die neueste Version des hochwertigen adiStar Laufschuhs vor – den adiStar Ride 3. Er verbindet neueste Technologien mit hochwertiger Verarbeitung. Mit seiner Mittelfußunterstützung für Stabilität und Bewegungskontrolle und dem intelligenten Dämpfungssystem adiPrene im Vor- und Rückfuß ist er der ideale Schuh für Athleten, die ihre maximale Leistungsfähigkeit erreichen wollen. Das miCoach Trainingssystem begleitet den Läufer auf diesem Weg, denn der adiStar Ride 3 ist mit miCoach kompatibel.

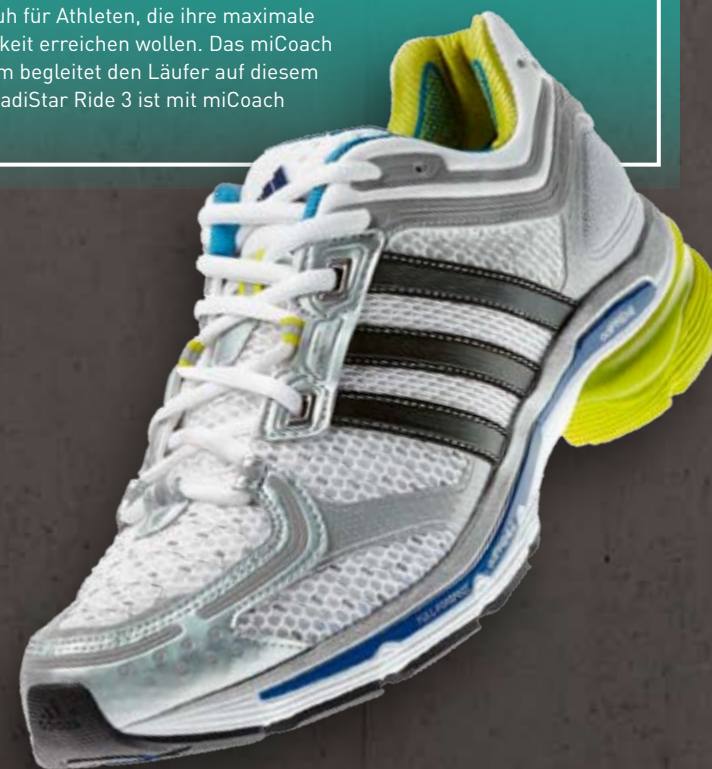

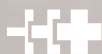

Mehr Informationen zu adidas miCoach:  
[www.miCoach.com](http://www.miCoach.com)

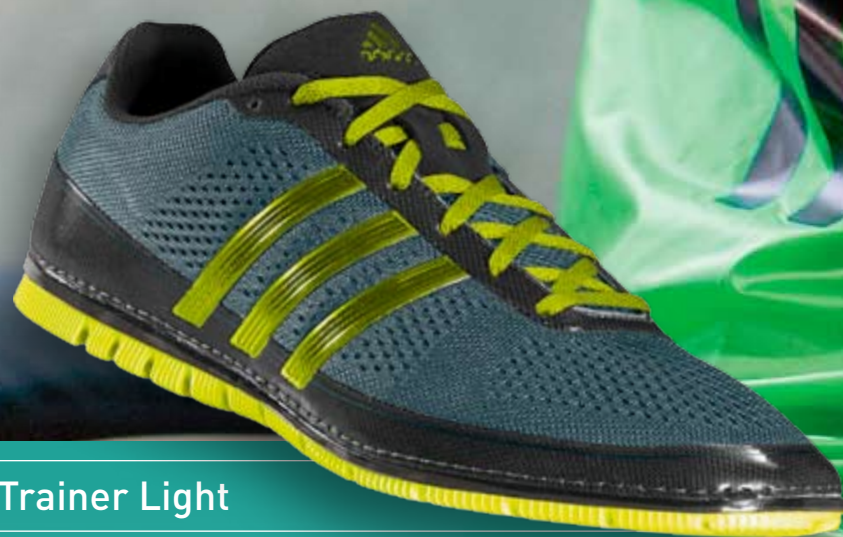

## Fluid Trainer Light

adidas hat 2010 erfolgreich den komfortablen und vielseitigen Fluid Trainer auf den Markt gebracht – ein neues Produktkonzept, dessen ergonomisches Design sich den natürlichen Bewegungen des Fußes perfekt anpasst. Nahtloses Obermaterial aus Mesh ermöglicht maximale Flexibilität, Komfort und Bewegungsfreiheit. Die sockenähnliche Passform und die lückenlose Mesh-Atmungsaktivität sorgen für ein angenehmes Tragegefühl. 2011 wird adidas eine neue Kollektion des Fluid Trainers präsentieren – erneut in großer Farbauswahl, darunter den abgebildeten Fluid Trainer Light.

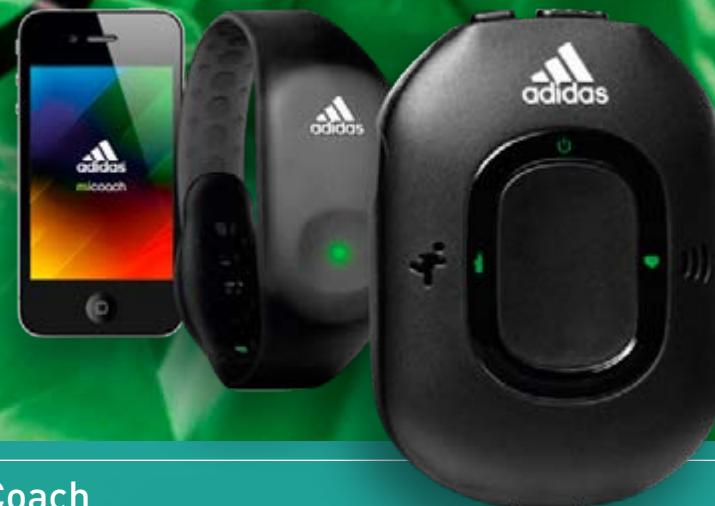

## miCoach

miCoach gibt Sportlern akustische und visuelle Trainingsanleitungen in Echtzeit und unterstützt sie dabei, besser zu werden und ihre optimale Leistung zu erreichen. miCoach misst die Herzfrequenz und erstellt darauf basierend Pläne für all diejenigen, die für eine bestimmte Sportart trainieren wollen. 2011 wird adidas mit der Einführung von miCoach Kraft- und Flexibilitätsprogrammen das persönliche Coaching-System weiter ausbauen und verbessern. Anwender können Ziele für Geschwindigkeit und Kraft festlegen und mit Hilfe von miCoach noch besser werden. Sportbegeisterte können sich unter » [www.miCoach.com](http://www.miCoach.com) registrieren, ihre Ausrüstung und Trainingspläne auswählen und sich auf ein erfolgreiches Coaching-Programm freuen.





# »» SCHNELLER, HÖHER, WEITER – EINFACH BESSER.

**Jessica Ennis, Engländerin, Siebenkämpferin:** Du bist voller Konzentration, kämpfst alleine – nicht gegen andere, sondern gegen dich selbst. Du musst schneller, höher, weiter sein – einfach besser. Das Equipment ist perfekt. Du bist fokussiert, suchst den perfekten Ablauf. Sechs Mal erfolgreich zu sein bringt nichts, wenn du in der siebten Disziplin versagst. Ein letztes Mal die Zähne zusammenbeißen, sich noch einmal selbst übertreffen. Nur noch 800 Meter bis aufs obere Treppchen.



adidas

Sport Performance » Fußball

# » ICH LEBE MEINEN TRAUM, NUR AUF ANDERE ART.

Aubrey Dolan, Ire,  
Senior Product Manager Football,  
adidas

**Mein Sport: Fußball. Meine Leidenschaft: Gewinnen. Meine Faszination: Egal in welchem Land man ist, Fußball ist eine Sprache, die auf der ganzen Welt gesprochen wird. Mein Motto: Sei heute besser als gestern.** Im Alter von sechs Jahren begann ich in einem Verein Fußball zu spielen und von Beginn an hatte ich nur einen Traum – Profi werden. Ich spielte von Sonnenauf- bis Sonnenuntergang, zwölf Trainingseinheiten pro Woche in vier verschiedenen Teams. Das Gefühl als Mannschaftskapitän zweimal den Football Association of Ireland Challenge Cup zu gewinnen werde ich nie vergessen. Noch heute habe ich Kontakt zu meinen Trainern, Mitspielern und ehemaligen Gegnern. In Deutschland bekam ich die Chance, als Profi zu arbeiten – allerdings nicht auf dem Fußballplatz, sondern auf der Produktseite. Seitdem Sorge ich dafür, dass die Profis auf dem Spielfeld mit den besten Produkten ausgestattet werden. In meinem Job als Senior Product Manager in der Business Unit Football bei adidas bin ich den Fußballstars näher, als ich es mir je erträumt hätte. Im Team entwickeln wir Fußballschuhe von der ersten Idee bis zum fertigen Schuh. Die enge Zusammenarbeit mit den Athleten steht dabei im Vordergrund und ließ meinen größten Traum Wirklichkeit werden: Im Sommer 2008 durfte ich zum ersten Mal mit meinem großen Vorbild Lionel Messi zusammenarbeiten. Damals hatte ich lediglich den Prototyp des neuen adiZero F50 Schuhs im Gepäck und wollte seine Meinung dazu hören. Messi wurde Teil des Teams und wir entwickelten gemeinsam den erfolgreichsten Fußballschuh der FIFA Weltmeisterschaft 2010 in Südafrika. Heute trainiere ich noch drei bis vier Mal in der Woche. Mein Training gibt mir das Gefühl, auf alles vorbereitet zu sein. Und es ermöglicht mir, unsere Produkte zu testen. So lebe ich meinen Traum – nur auf andere Art.



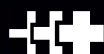

Mehr Informationen zu adidas Fußball:  
[www.adidas.de/football](http://www.adidas.de/football)

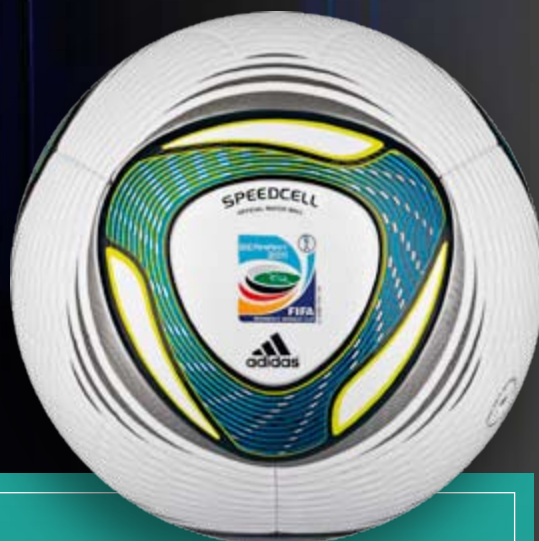

## Speedcell

Speedcell, der offizielle Spielball für die FIFA Frauen-Weltmeisterschaft 2011, steht für Geschwindigkeit, Stärke und Teamgeist. Die futuristische Außenhaut sorgt für optimale Griffbarkeit bei allen klimatischen Bedingungen und das aerodynamisch gestaltete Profil sichert ein außergewöhnlich stabiles Flugverhalten. Zudem garantieren die sphärisch geformten 3-D-Panels perfekte Rundheit und einen stets optimalen Kontakt zwischen Schuh und Ball. Das Design ist von den rotierenden, schnellen und dynamischen Bewegungen im Fußball inspiriert.

## » MEIN HEIMSPIEL.

Martina Mirschberger, Deutsche,  
Manager Product Testing,  
adidas

Ich spiele Fußball seit ich laufen kann und habe immer davon geträumt, selbst einmal bei der FIFA Frauen-Weltmeisterschaft dabei sein zu können. 2011 findet das Turnier in Deutschland statt und für mich als Mitarbeiterin von adidas, dem offiziellen Sponsor und Ausrüster dieses Events, geht damit ein Traum in Erfüllung: live vor Ort in den Stadien zu sein und dabei die Produkte zu sehen, die ich selbst getestet habe – in meinem Job und auf dem Platz.

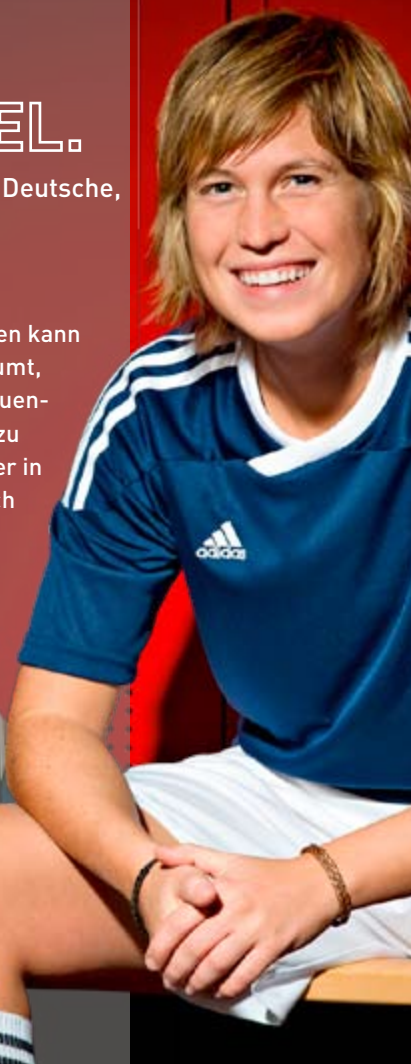



## adiZero F50 Prime

Nach dem großen Erfolg des adiZero F50 bei der FIFA Fußball-Weltmeisterschaft 2010 in Südafrika, wo mit diesem Schuh die meisten Tore geschossen wurden, stellt adidas nun den adiZero F50 Prime vor – den leichtesten adidas Fußballschuh aller Zeiten. Der adiZero F50 Prime wiegt gerade einmal 150 Gramm – ist somit um 15 Gramm leichter als sein Vorgängermodell – und präsentiert sich in leuchtenden Neonfarben.

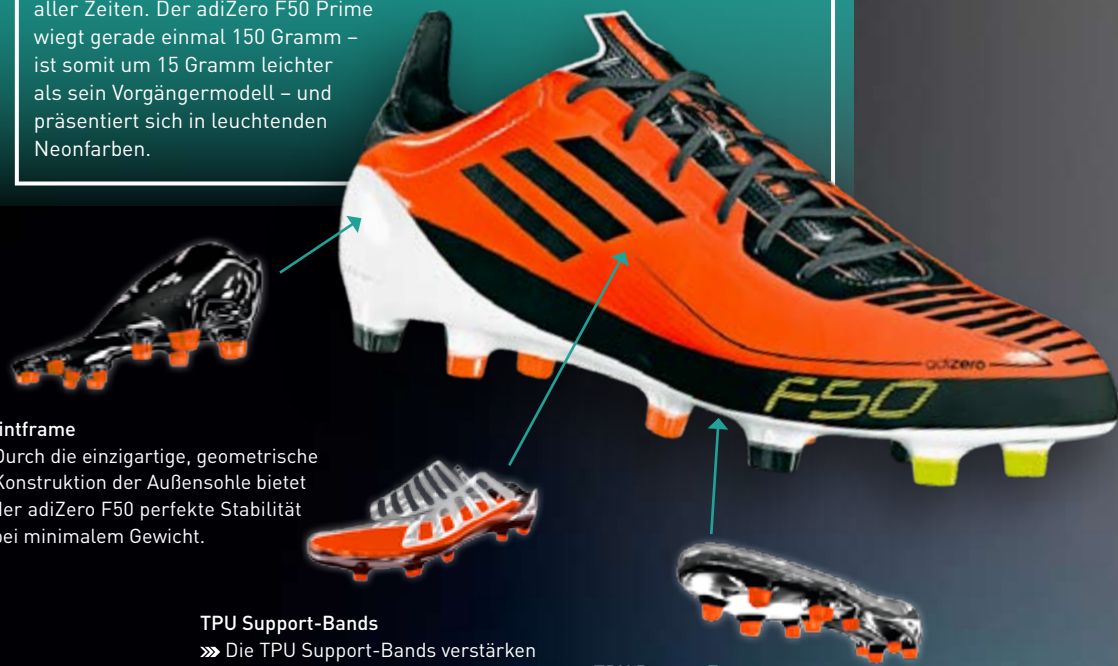

### Sprintframe

» Durch die einzigartige, geometrische Konstruktion der Außensohle bietet der adiZero F50 perfekte Stabilität bei minimalem Gewicht.

### TPU Support-Bands

» Die TPU Support-Bands verstärken das einlagige Sprintskein Schaftmaterial des Schuhs und sorgen für optimale Stabilität und Halt bei jeder Bewegung.

### TPU Bottom Frame

» Der TPU Bottom Frame schützt das Obermaterial vor erhöhtem Abrieb, verbindet Obermaterial und Außensohle optimal und sorgt durch die Verteilung der Kräfte von der Außensohle auf das Obermaterial für hervorragende Stabilität und Standfestigkeit.

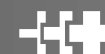

Mehr Informationen zu adidas Fußball:  
[www.adidas.de/football](http://www.adidas.de/football)

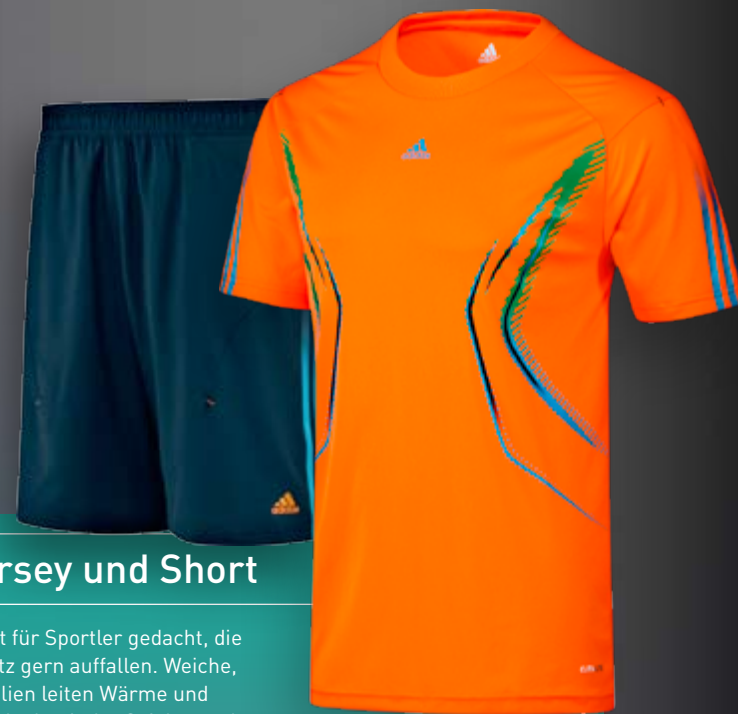

## Climalite Jersey und Short

Das Climalite Jersey ist für Sportler gedacht, die auch auf dem Sportplatz gern auffallen. Weiche, atmungsaktive Materialien leiten Wärme und Schweiß von der Haut ab, damit der Spieler auch bei warmen Temperaturen kühl und trocken bleibt. Die körperbetonte Slim Fit Form und der sportive Rundhalsschnitt sorgen für ein angenehmes Tragegefühl. Das Design von Jersey und Short ist von der UEFA Champions League inspiriert.

# »» AUF DEM PLATZ KANN ICH DEN FANS ALLES ZURÜCKGEBEN.

**Lionel Messi, Argentinier, Fußballspieler:** In dem Moment im Spielertunnel, kurz bevor du den Platz betrittst, hörst du die Fans jubeln: Das Adrenalin schießt dir in die Adern – Gänsehaut. Die Fangesänge tragen dich auf den Platz – die Luft brennt. Ein letzter Blick auf die Schuhe – mein F50 sitzt. Es kann losgehen. Du bist bereit, alles zu geben und hast nur eine Mission: als Sieger vom Platz gehen. Du lebst den Traum von Millionen Kindern. Sie glauben an dich. Immer wenn du auf den Platz gehst, ist es deine Zeit, ihnen und den Fans etwas zurückzugeben.

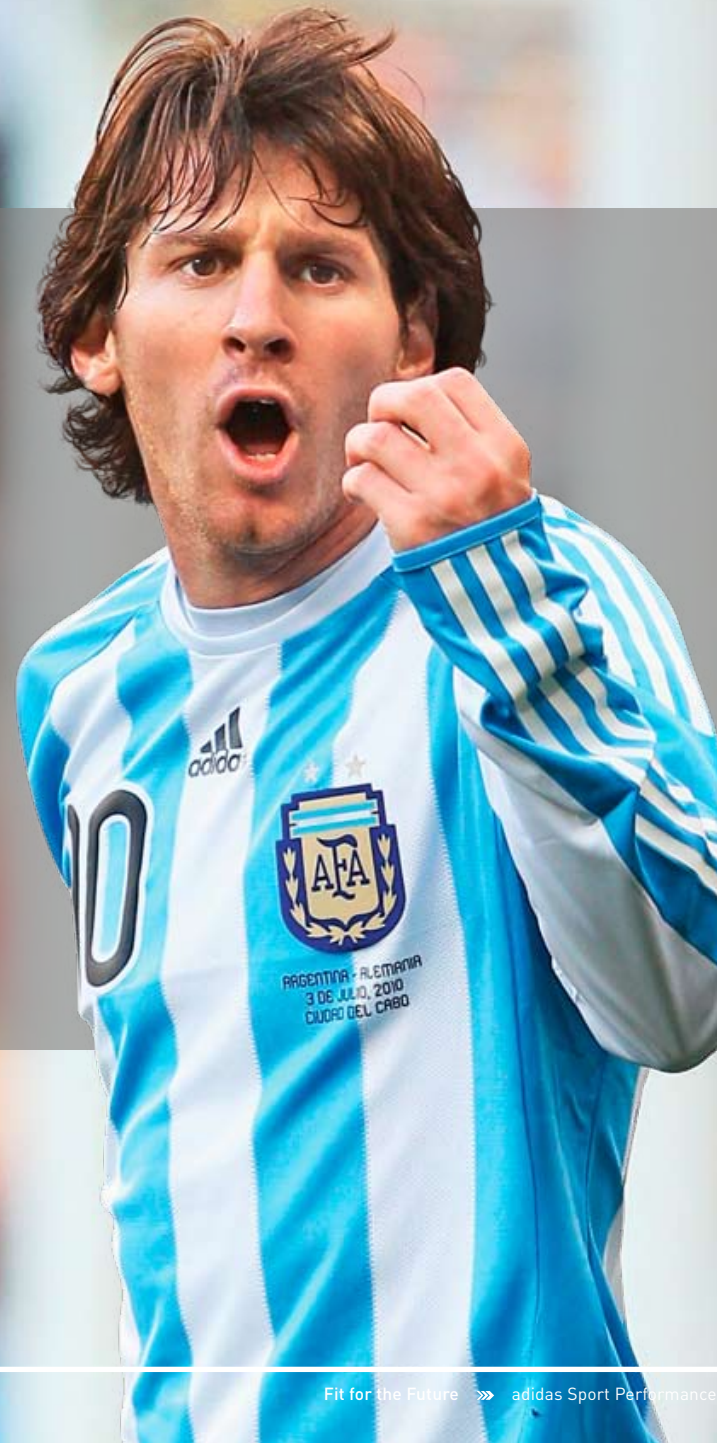





adidas

Sport Performance » Basketball

# »» ES GEHT UMS TEAM UND UM VERTRAUEN.

Robert Zimmermann, Deutscher,  
Marketing and License Manager  
for Olympic and Regional Sports,  
adidas

Vince Jackson, Amerikaner,  
Global PR Manager Basketball,  
adidas

**Robert: Im Basketball dreht sich alles um Team und Vertrauen.**

**Und natürlich darum, zu spielen!** Deshalb gefällt es mir so, neben meinem Job auch Open Run-Veranstaltungen, Freundschaftsspiele und Turniere für unsere adidas Basketballer zu organisieren. Uns verbindet im Spiel die gemeinsame Leidenschaft für den Sport, ungeachtet unserer Herkunft und Sprache. Durch Basketball habe ich bei der Arbeit viele Freundschaften geschlossen, und ich freue mich, für ein Unternehmen zu arbeiten, das uns dabei unterstützt unseren Sport auszuleben.

**Vince: Ich bin von klein auf begeisterter Basketballer und das bin ich auch heute noch.** Wenn du in Brooklyn, New York, aufwächst, musst du das Spiel einfach lieben. Als Kind spielte ich in meinem Zimmer mit einem Soft-Basketball und saß immer vorm Fernseher, wenn die Knicks spielten. Später sah ich dann die älteren Jungs im Park spielen und dachte mir: „Das möchte ich auch.“ Mit neun Jahren trat ich einer Mannschaft bei. Schließlich kam ich durch meinen Sport zu einem Sportstipendium für das College. Das war der Grundstein für meine zukünftige Karriere. Basketball begeistert mich nach wie vor: Heute arbeite ich als Global PR Manager für adidas Basketball und spiele auch im Basketballteam des Unternehmens mit. Dort bin ich von Kollegen umgeben, die diesen Sport genauso lieben wie ich. So fühle ich mich wie zu Hause, auch wenn ich Tausende von Kilometern davon entfernt bin.



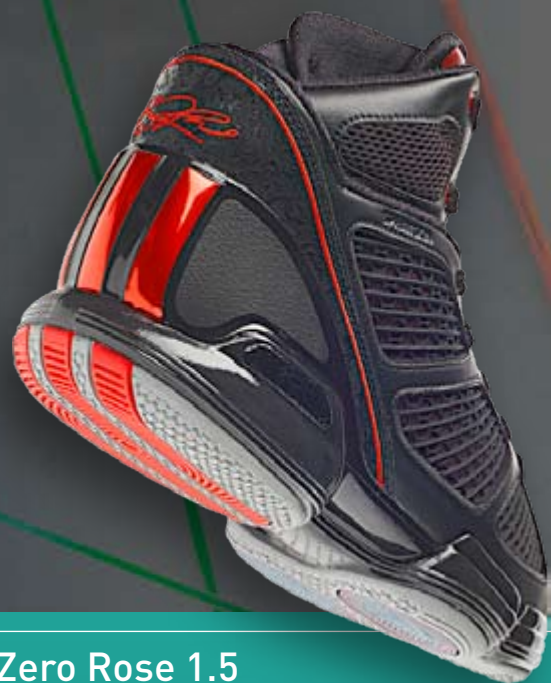

## adiZero Rose 1.5

adidas startete in die neue NBA-Saison mit Signature-Schuhen für zwei der herausragendsten Spieler der NBA: Derrick Rose and Dwight Howard. Der abgebildete adiZero Rose 1.5 ist ein Top-Basketballschuh und die optimale Kombination aus festem Halt und geringem Gewicht. Mit diesem Schuh kann Derrick Rose das Unmögliche möglich machen. Mit nur 368 Gramm ist der zweite nach Rose benannte Schuh einer der leichtesten adidas Basketballschuhe überhaupt.

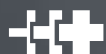

Mehr Informationen zu adidas Basketball:  
[www.adidas.de/basketball](http://www.adidas.de/basketball)

» EINFACH  
ALLES GEBEN –  
BIS ZUR LETZTEN  
SEKUNDE.

**Derrick Rose, Amerikaner, Basketballspieler:** Du siehst auf die Spieluhr, es sind nur noch wenige Sekunden zu spielen. Du hast nur noch ein Ziel: den entscheidenden Punkt des Spiels machen und siegen. Du fühlst dich bereit. Dein Stand ist sicher, denn deine Schuhe sind nur für dich gemacht und tragen sogar deinen Namen. Du fixierst den Korb. Dein Umfeld wird unscharf. Noch 3 Sekunden. Noch 2. Noch 1. Du hebst ab und wirfst. Treffer.



A woman with blonde hair, wearing a light blue knit hat with a pom-pom, a bright pink and blue jacket, and a backpack, is smiling in a snowy forest. She is wearing blue gloves and has a grey strap across her chest.

adidas

Sport Performance » Outdoor

# » EINE NEUE ROUTE IST WIE EIN WEISSES BLATT PAPIER.

Zuzanna Asztemborska, Polin,  
Senior Product Managerin Outdoor,  
adidas

**Für mich gibt es kein besseres Gefühl, als einen Berg zu besteigen – und das so schnell wie möglich.** Wenn ich nach allen Vorbereitungen und Planungen am Fuß des Berges stehe, zählt für mich in erster Linie die Zeit. Ich will sportlich unterwegs sein, nach dem Motto: schnell und leicht. Meine Schnelligkeit am Berg ist gleichzeitig ein Sicherheitsfaktor, gerade im hochalpinen Bereich. Ich gehe in die Berge, um mich körperlich und mental herauszufordern. Vor einer Tour weiß man nicht, wie es am Ende ausgeht, ob man den Gipfel erreichen wird oder nicht. Du weißt nie, wie das Wetter sich entwickelt. Deswegen sind Leistungen in den Bergen so schwer vergleichbar. Was zählt ist deine Leistung an einem bestimmten Tag, an einem bestimmten Ort, zu einer bestimmten Zeit. Alles ist im Grunde eine Momentaufnahme – und diese Momente einzufangen, darin liegt für mich die Spannung. Dabei ist Risiko dein ständiger Begleiter, es gehört mit dazu. Du musst immer voll konzentriert sein, um deine persönlichen Grenzen identifizieren und beachten zu können. Ich war einmal auf einer Expedition auf dem Ojos del Salado in Chile, dem höchsten Vulkan der Erde. Ich war alleine unterwegs, extreme Wetterverhältnisse machten es mir unmöglich, die letzten drei Meter nach oben zu kommen. Ich habe mich entschieden umzukehren – und dennoch war es einer meiner größten Erfolge. Dass ich heute bei adidas als Senior Produktmanagerin für die Outdoor-Kategorie arbeite, ist kein Zufall. Ich kann so unsere Produkte testen und durch meine Erfahrung weiß ich, was ein Bergsportler wirklich braucht.

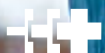

Mehr Informationen zu adidas Outdoor:  
[www.adidas.de/outdoor](http://www.adidas.de/outdoor)



## Terrex Hybrid Jacke

adidas hat mit der Terrex Hybrid Jacke einen echten Allrounder für Wind und Regen und damit die perfekte Ausrüstung für sportliche Outdoor-Aktivitäten entwickelt. Die ultraleichte und strapazierfähige Softshell-Jacke ist kälte-, wind- und feuchtigkeitsabweisend und kann als äußere oder mittlere Jackenschicht getragen werden.

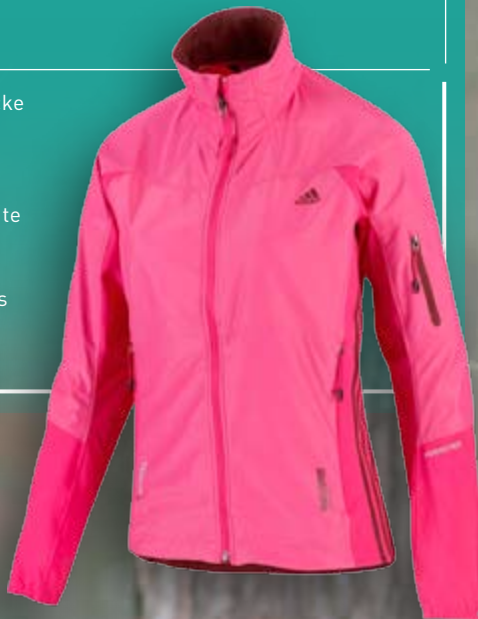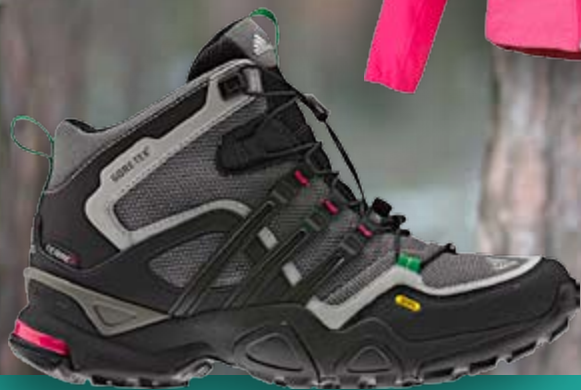

## Terrex Fast X FM Mid GTX

Leicht, schnell und vielseitig – das sind die Attribute, die den Terrex Fast X FM Mid GTX am besten beschreiben. Hinzu kommt seine sportliche Konstruktion: eher enganliegend im Mittelfußbereich und zugleich viel Platz für die Zehen. Der Schuh gibt Outdoor-Sportlern Halt und Dämpfung, wenn sie draußen schnell unterwegs sein wollen. Zudem verbessert die Formotion Technologie die Bewegungskontrolle auf unebenem Terrain und bietet beim Bergablaufen sicheren Komfort.

»» NATUR. WILDNIS.  
WASSER. –  
MEIN LEBEN.

### Sam Sutton, Neuseeländer,

**Kajaker:** Kajaken – das ist mein Leben.

Natur. Wildnis. Wasser. In reißenden Flüssen zu fahren, erfordert absolute Konzentration. Nur der kleinste Fehler könnte verheerende Konsequenzen haben. Wenn du gewinnen willst, musst du sicher und perfekt durchs Wasser gleiten. Als Outdoor-Sportler kannst du noch so gut sein – ohne das richtige Equipment wirst du die Naturgesetze nicht bezwingen.

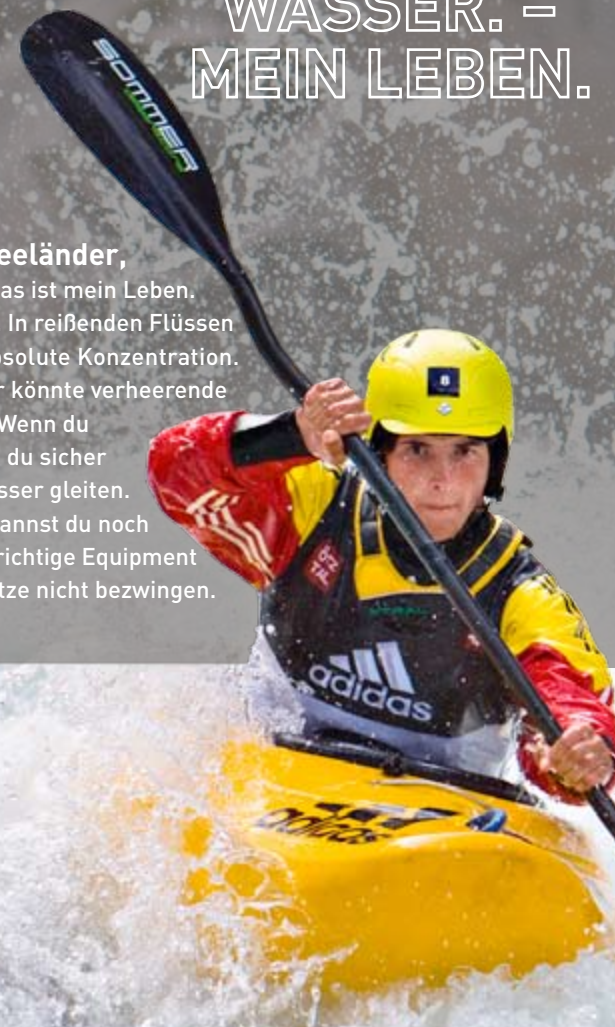





adidas

Sport Style »» Originals

# »»» MEIN ERFOLGS- GEHEIMNIS ORIGINALITÄT.

**B.O.B., Amerikaner, Rapper und Produzent:** Im Hip-Hop dreht sich alles ums Image. Du musst authentisch sein, deinen eigenen Stil haben. Du musst wissen, wo deine Wurzeln sind, wo du herkommst. Originalität ist meine Lebenseinstellung und der Schlüssel zu meinem Erfolg. Das alles versuche ich in meinen Songs zusammenzubringen. Musik ist mein Leben. Durch Musik kann ich den Menschen zeigen, dass es unendlich viele Möglichkeiten gibt, was man machen und auch erreichen kann.



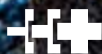

Mehr Informationen zu adidas Originals:  
[www.adidas.de/originals](http://www.adidas.de/originals)

## Originals Denim

Im Frühjahr/Sommer 2011 bringt adidas Originals ihre erste eigene Jeanskollektion auf den Markt. Originals Denim soll langfristig als fester Bestandteil des ganzheitlichen Streetwear-Angebots etabliert werden. Die Jeanskollektion besteht aus je zwei Modellen für Männer und Frauen, jeweils in einer Vielzahl von Waschungen. Und ganz im Sinne des renommierten Sportschuhanbieters verfügen die Jeans als besonderes Merkmal über einen so genannten „Sneaker Protector“, der das Abfärben auf die Schuhe verhindert.

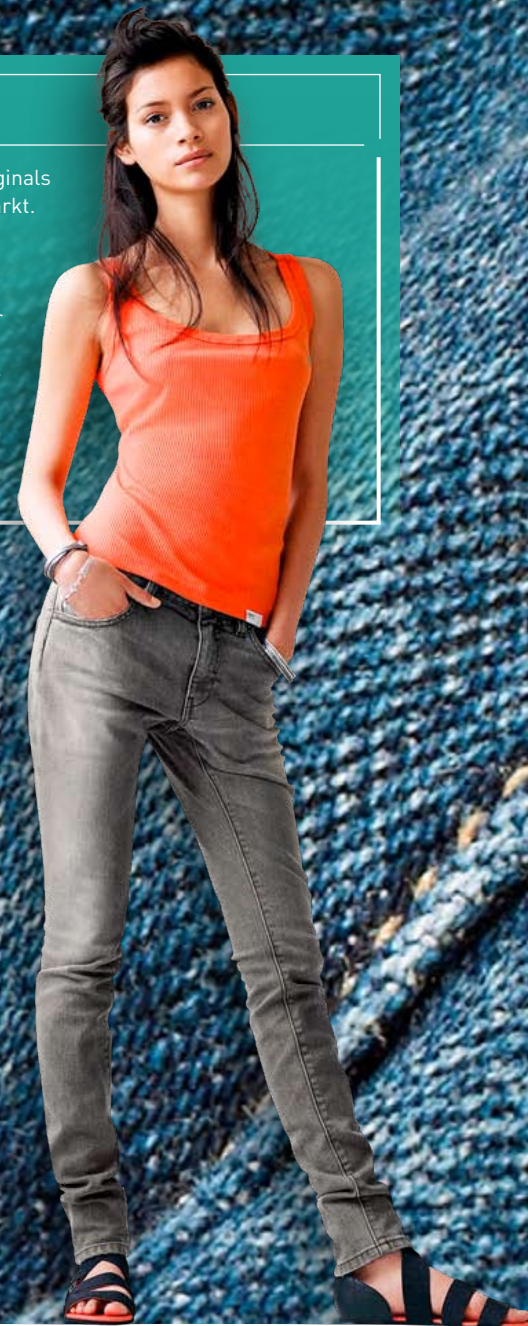

## Originals Mega Soft Cell BHM

Das Schuhkonzept Mega von adidas Originals umfasst neuartige Sneakermodele mit Torsion und Soft Cell Technologie – zwei der erfolgreichsten adidas Technologien, die nun auch im modernen Streetstyle zum Einsatz kommen. Der abgebildete Mega Soft Cell BHM bietet mehr Style und Komfort bei jedem Schritt. Der Schuh im Streetbasketball-Look ist hoch und robust geschnitten und hat eine Oberflächenprägung, einen kompakten Schaft, eine breite Zunge sowie Soft Cell Dämpfung in der Ferse.

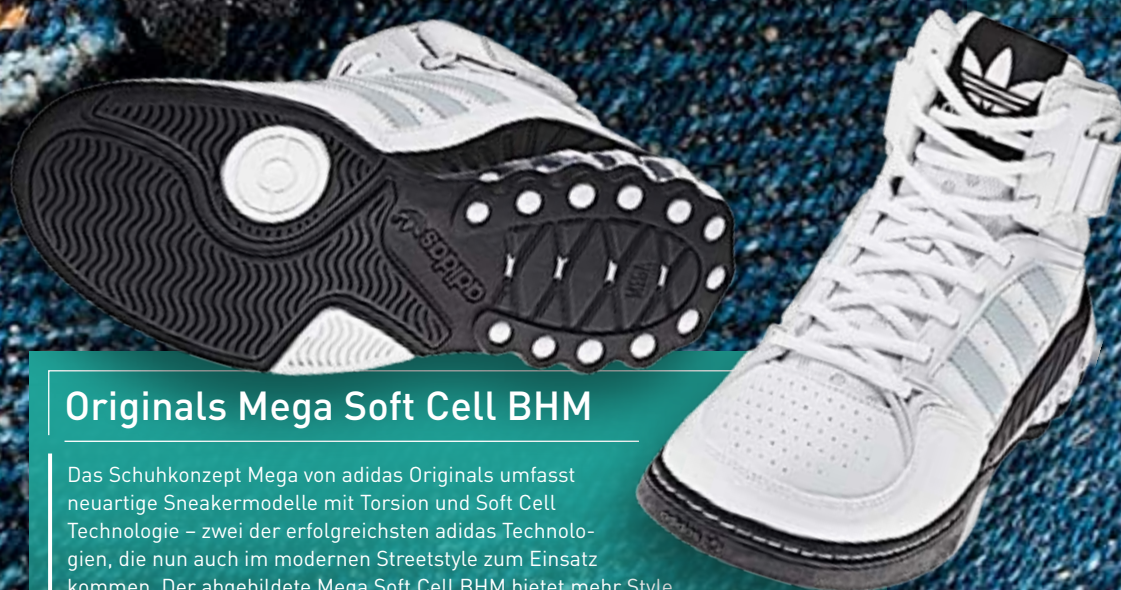





**adidas**

Sport Style »» NEO

# »»» DAS LEBEN VOLL AUSLEBEN.

**Mit dem NEO Label erweitert adidas Sport Style sein Angebot im Fast-Fashion Geschäft, das junge, trendbewusste Konsumenten anspricht.**

Im Frühjahr/Sommer 2011 präsentiert das adidas NEO Label „Go Squad“: eine Gruppe von aufstrebenden Jugendlichen, die die Eigenschaften des NEO Labels verkörpern und ihre individuellen Leidenschaften ausleben. Eine Vielzahl von Nachwuchsmusikern, -models, -schauspielern und -modeikonen kommt im Squad zusammen: Trace Cyrus (USA), Jessica Brando (Italien), Tal (Frankreich), Chau Pak Ho (Hongkong), Angela Yang „Angelababy“ (Hongkong), Anita Bhounmik (Russland) und Kylee Saunders (Japan).

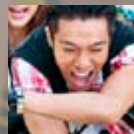

Pak Ho

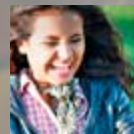

Anita

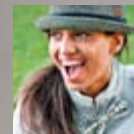

Tal

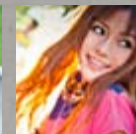

Angelababy

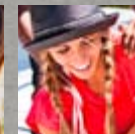

Jessica

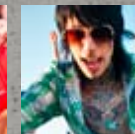

Trace

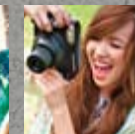

Kylee

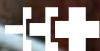

Lebe stylisch mit adidas NEO.  
Mehr Informationen gibt es auf:  
[www.adidas.de/neo](http://www.adidas.de/neo)



## adidas NEO Frühjahr/Sommer 2011 Kollektion

Im Frühjahr/Sommer 2011 bringt adidas NEO neue Must-haves auf den Markt. Die Kollektion lässt Sport und Style verschmelzen und präsentiert legere Kopf-bis-Fuß-Looks für junge, trendbewusste Konsumenten. Das Mönnersortiment umfasst T-Shirts mit Aufdrucken, Cargohosen und Kapuzenpullis in lebhaften Farben. Inspiriert wurde ein Teil der Kollektion von Fußballstar und Stilikone David Beckham.

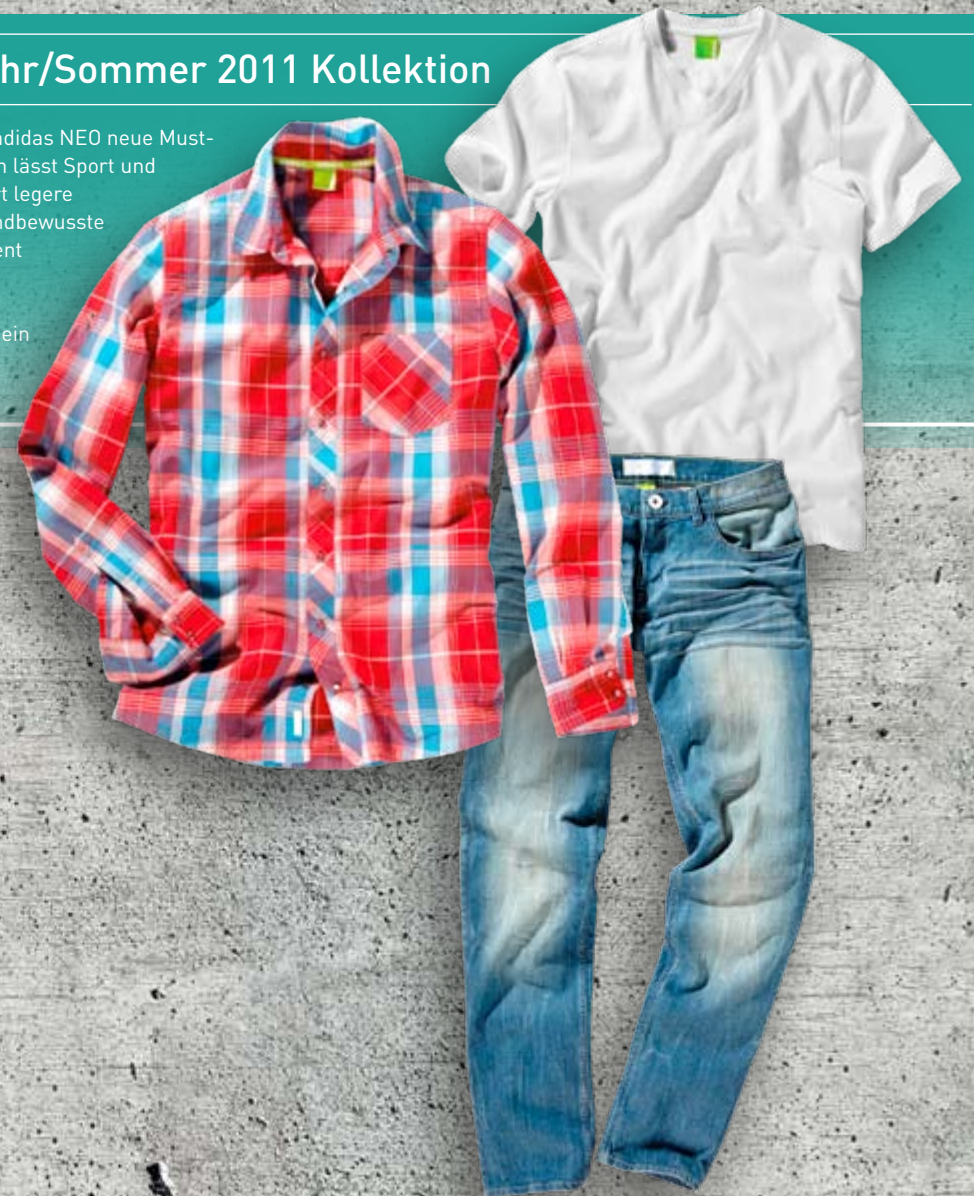

## NEO Cup

Der adidas NEO Cup im Tennisschuh-Stil mit Schaft aus Leder und Veloursleder sorgt auch auf der Straße für einen großen Auftritt. Das integrierte Vibe Complete garantiert exzellenten Komfort bei jedem Schritt.

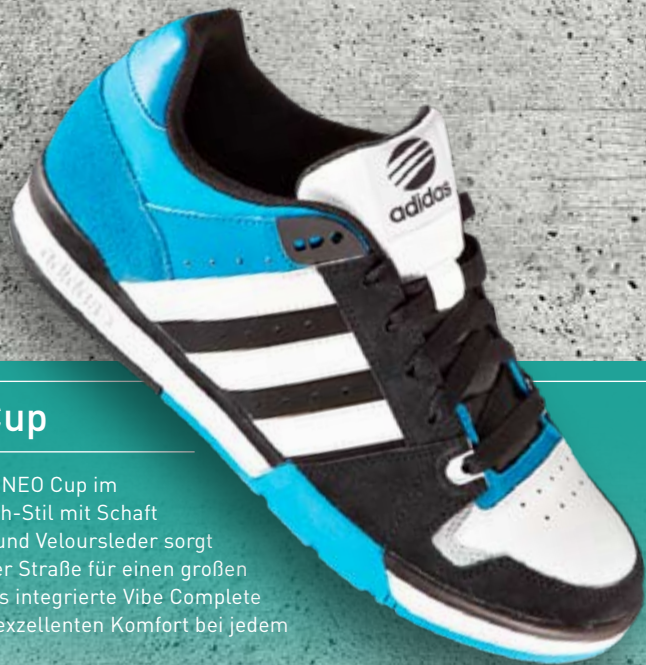





# adidas

Sport Style »» Fashion Group

## »» FUSSBALL TRIFFT MODE.

**Zinédine Zidane, Franzose, Fußballspieler:** Meine Leidenschaft Nr. 1 ist wohl jedem bekannt: Sport. Meine Leidenschaft Nr. 2 kennt nicht jeder: Mode. Ich möchte mich wohlfühlen in meiner Haut. Dafür sorgt zum einen mein Training, zum anderen aber auch mein Style. Ob auf dem Spielfeld oder im Alltag – ich schätze Leidenschaft, Weitblick und eine klare Vision. Die Symbiose aus Mode und Sport ist in keinem anderen Label der Modewelt so präsent wie bei Y-3. adidas steht für Sport, Yohji Yamamoto für Design. Deswegen bin ich so ein großer Fan von Y-3.

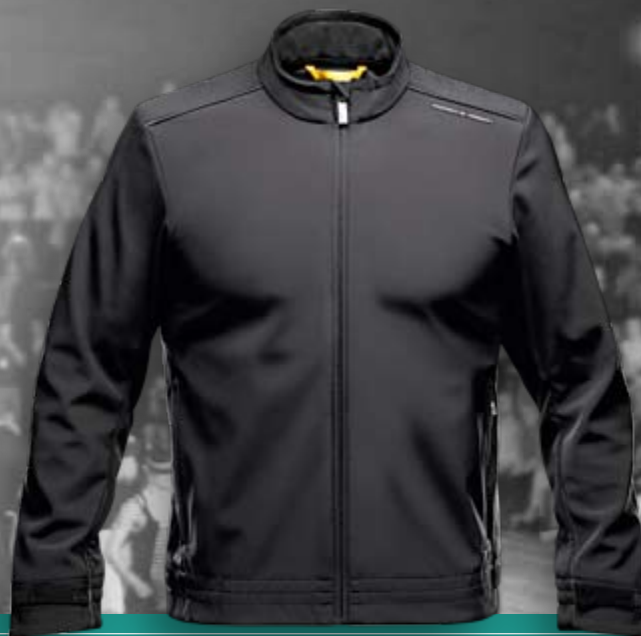

## Porsche Design Sport Driver's Jacke

Inspiziert von den technischen Ansprüchen von Straßenrennen besitzt die Porsche Design Sport Race Edition – die im Frühjahr/Sommer 2011 vorgestellt wurde – leistungsverstärkende Details, wie Klimaregulierung und Schutz vor Wind oder Regen. Die Driver's Jacke zum Beispiel wurde aus zwei hochfunktionalen Stoffen gefertigt: vorne und an den Ärmeln eine 3-lagige wasserabweisende Mischung mit 4-Wege Stretch, am Rücken ein 2-lagiges Strickmaterial.

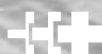

Mehr Informationen zu adidas Sport Style:  
[www.adidas.de](http://www.adidas.de)

## SLVR Clima Wedge

Die adidas SLVR Kollektion, die sich in erster Linie an Konsumenten im Alter von 24 bis 36 richtet, steht für raffinierte, klassische, selbstbewusste und sportliche Bekleidung, die länger als eine Saison aktuell bleibt. In ihrer ständigen Weiterentwicklung spiegelt adidas SLVR die Einstellung und das Tempo der heutigen Welt wider. Mit dieser Kollektion lässt es sich smarter und effizienter leben, arbeiten und kreativ sein. Zu den Schuhneuheiten von adidas SLVR für Frühjahr/Sommer 2011 gehört ein Wedge-Schuh für Damen in Sorbetfarben mit grafisch gestaltetem Mesh am Schaft.

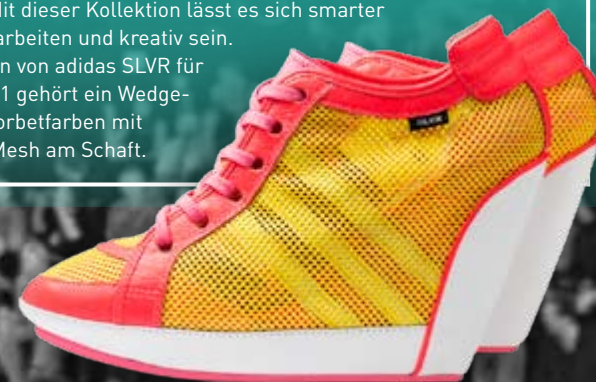

## Y-3 Kubo

Der Y-3 Kubo mit wahlweise mittelhohem oder hohem Schaft setzt neue Akzente in Sachen Style. Jedes Modell ist aufgrund der expandierbaren Sohle nur in den Größen Small, Medium oder Large erhältlich. Der leichte Kubo für Männer und Frauen ist der erste Schuh der Y-3 Kollektion, der über eine komplett zusammenfaltbare Sohle verfügt – für alle, die wie auf Wolken gehen wollen.

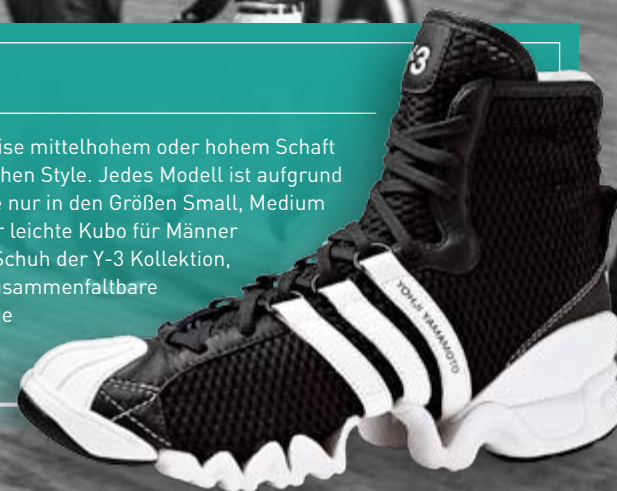





# Reebok

Women's Sport » Toning

## » FITNESS IST MEINE WELT.

Sharon Wright, Engländerin,  
Marketing Managerin Women's,  
Reebok

**Abwechslung, Spaß und ein durchtrainierter Körper – das sind die Gründe, warum ich so eine Fitness-Fanatikerin bin.** Ich finde es toll, meinen Körper durch gute und abwechslungsreiche Workouts zu definieren und in Form zu bringen – und eines kann ich dabei nicht gebrauchen: Eintönigkeit. Ich mache nun schon seit meiner Schulzeit Fitness-Training und es ist zu einem wichtigen Teil meines Lebens geworden. Ich liebe es, mich nach einem Workout so gut zu fühlen: Es ist ein großartiges Erfolgserlebnis, wenn ich mein Tagesziel erreicht habe. Es erstaunt mich immer wieder, wie ich an meine Grenzen gehen und alles geben kann, um ein Workout erfolgreich abzuschließen. Das kommt mir auch im Alltag zu Gute. Meine Workouts in der Mittagszeit sind Teil meiner täglichen To-do-Liste und ich finde es toll, dass Reebok als mein Arbeitgeber dies möglich macht. Meine Workout-Outfits nehmen sicher die Hälfte meines Kleiderschranks ein, aber mein Lieblingsprodukt ist der EasyTone. Meine Rolle als Marketing Manager Women's passt perfekt zu mir, weil sich auch hier alles um meine Leidenschaft dreht: Fitness. Oft muss ich Trainer von verschiedenen Studios in Jukari, CrossFit oder Toning einweisen und die Vorteile der jeweiligen Workouts erklären. Ich stelle neue Fitnesskurse für die Marke zusammen und kann all meine Erfahrung in diesen kreativen Prozess einbringen. Wie cool ist das?

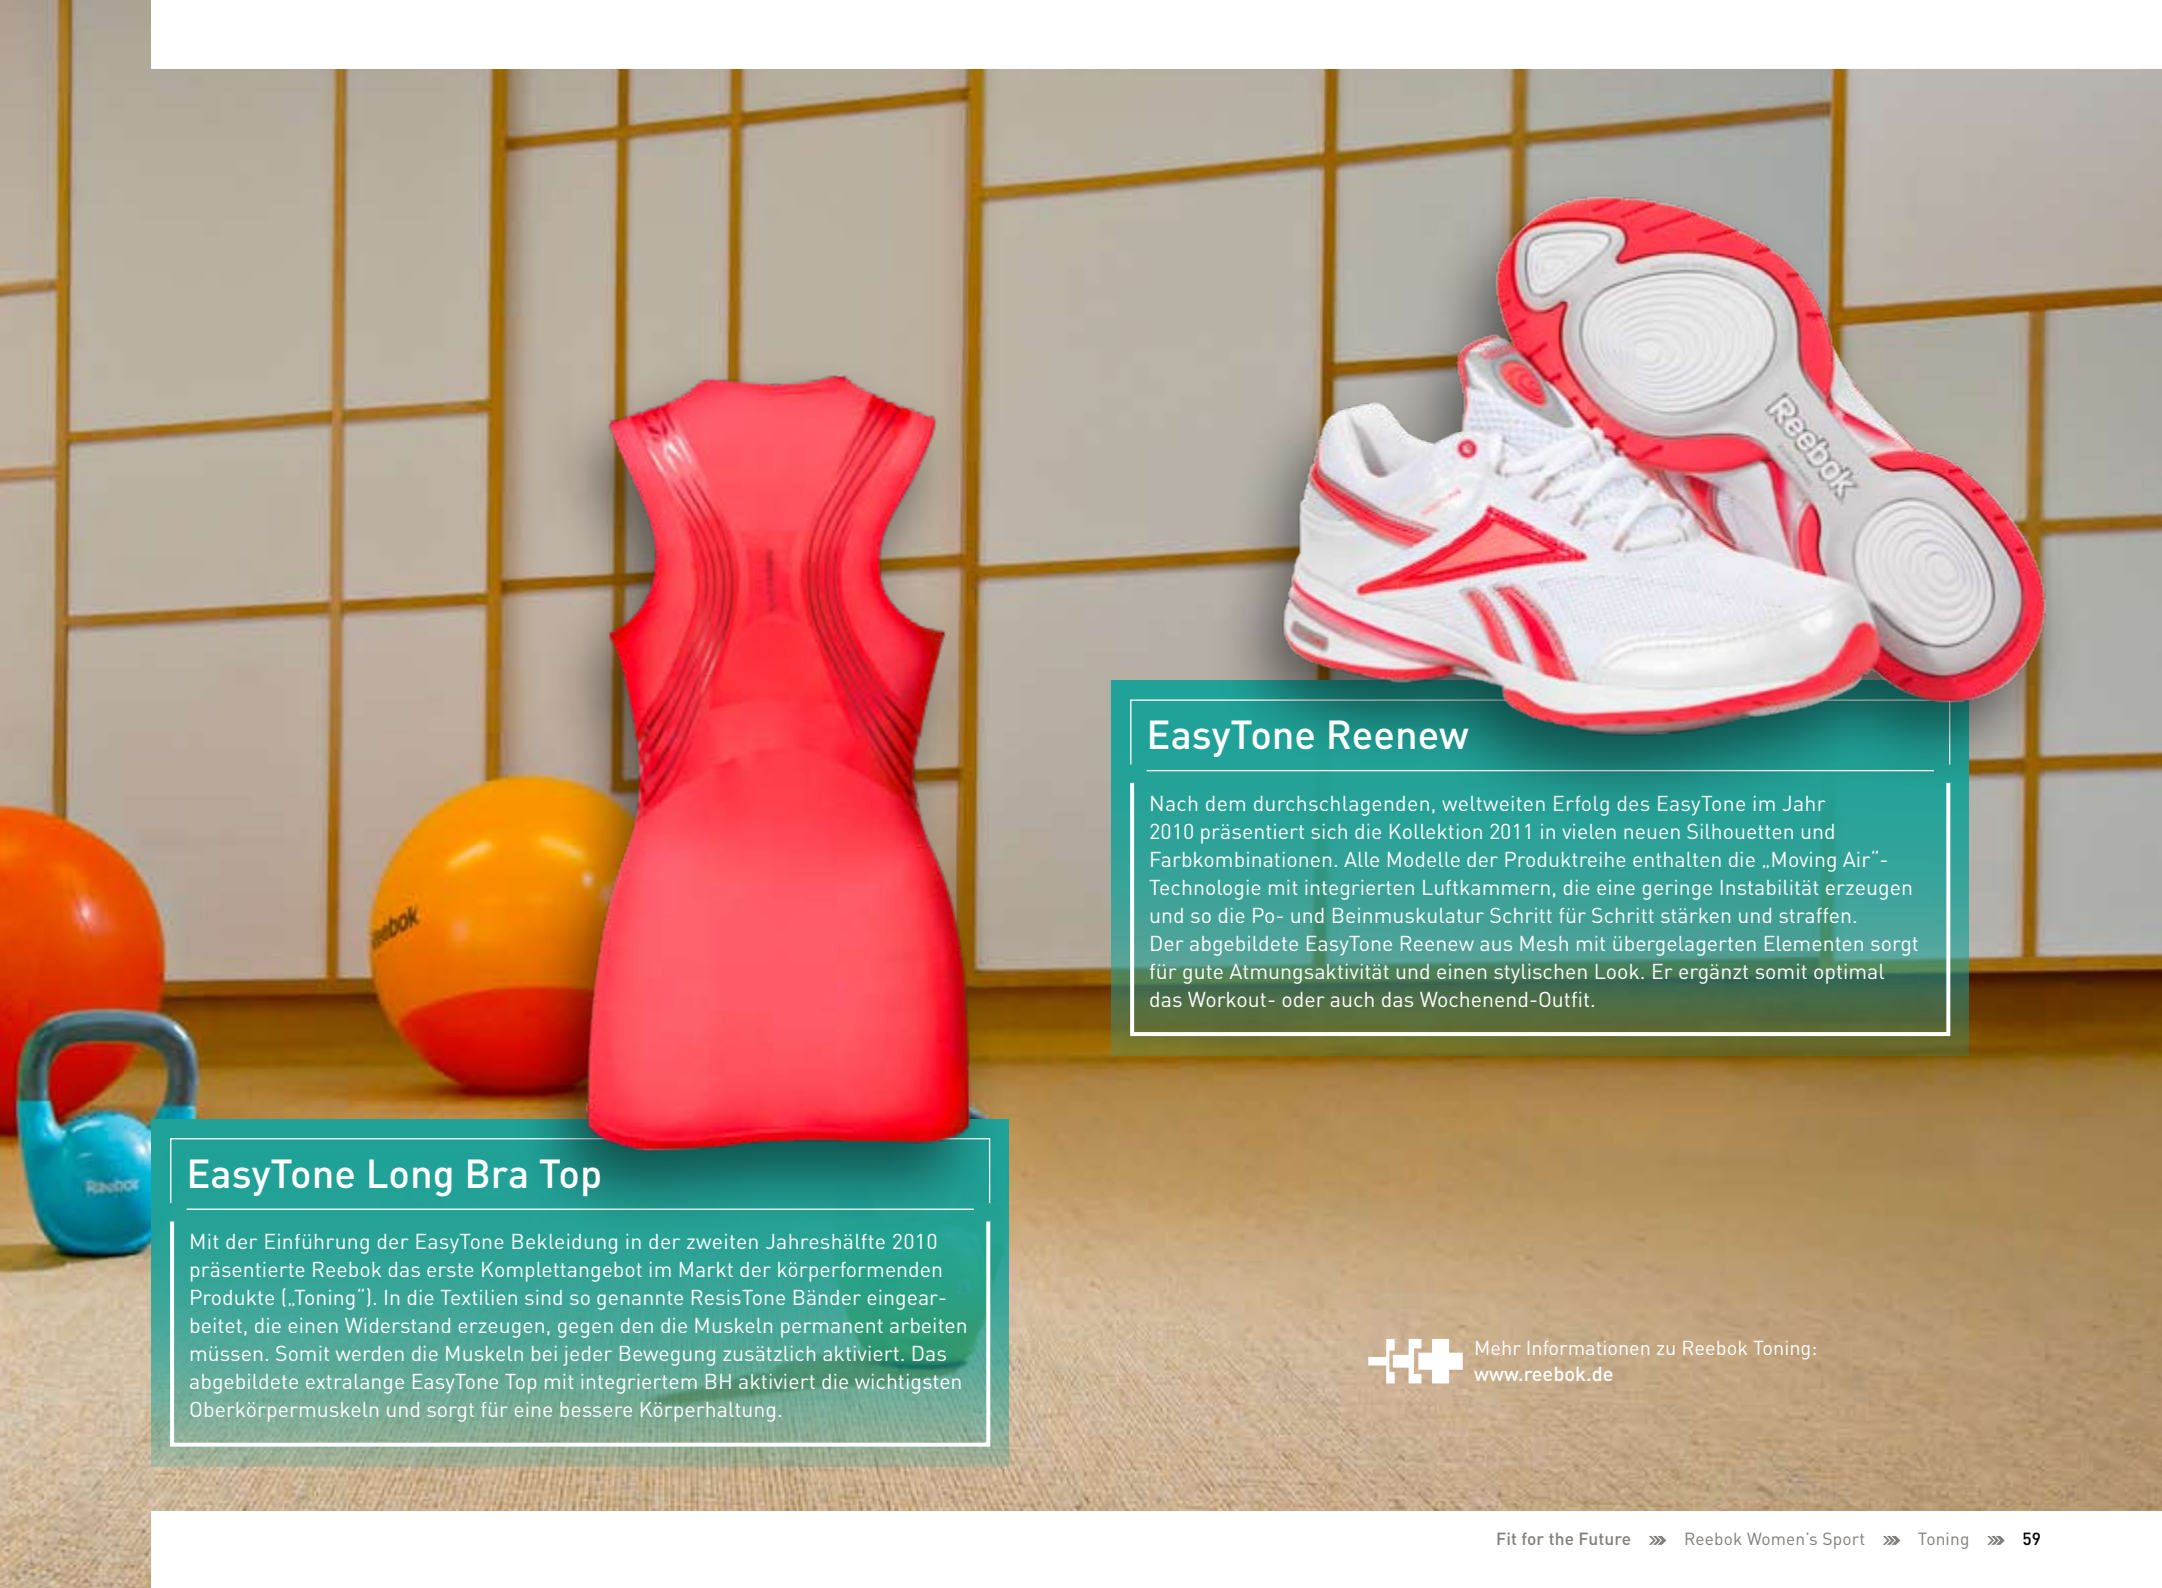

## EasyTone Long Bra Top

Mit der Einführung der EasyTone Bekleidung in der zweiten Jahreshälfte 2010 präsentierte Reebok das erste Komplettangebot im Markt der körperformenden Produkte („Toning“). In die Textilien sind so genannte ResisTone Bänder eingearbeitet, die einen Widerstand erzeugen, gegen den die Muskeln permanent arbeiten müssen. Somit werden die Muskeln bei jeder Bewegung zusätzlich aktiviert. Das abgebildete extralange EasyTone Top mit integriertem BH aktiviert die wichtigsten Oberkörpermuskeln und sorgt für eine bessere Körperhaltung.

## EasyTone Reenew

Nach dem durchschlagenden, weltweiten Erfolg des EasyTone im Jahr 2010 präsentiert sich die Kollektion 2011 in vielen neuen Silhouetten und Farbkombinationen. Alle Modelle der Produktreihe enthalten die „Moving Air“-Technologie mit integrierten Luftkammern, die eine geringe Instabilität erzeugen und so die Po- und Beinmuskulatur Schritt für Schritt stärken und straffen. Der abgebildete EasyTone Reenew aus Mesh mit überlagerten Elementen sorgt für gute Atmungsaktivität und einen stylischen Look. Er ergänzt somit optimal das Workout- oder auch das Wochenend-Outfit.

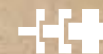

Mehr Informationen zu Reebok Toning:  
[www.reebok.de](http://www.reebok.de)



## EasyTone Capri Hose

Die abgebildete EasyTone Caprihose stärkt die Bein- und Pomuskulatur mit jedem Schritt. Die eingearbeiteten ResisTone Bänder erzeugen einen Widerstand, gegen den die Muskeln permanent arbeiten müssen. Körperbetont, mit Gesäßtasche und mit viel Liebe zum Detail designt, eignet sich die Caprihose hervorragend für den Alltag oder das Workout im Fitnessstudio.

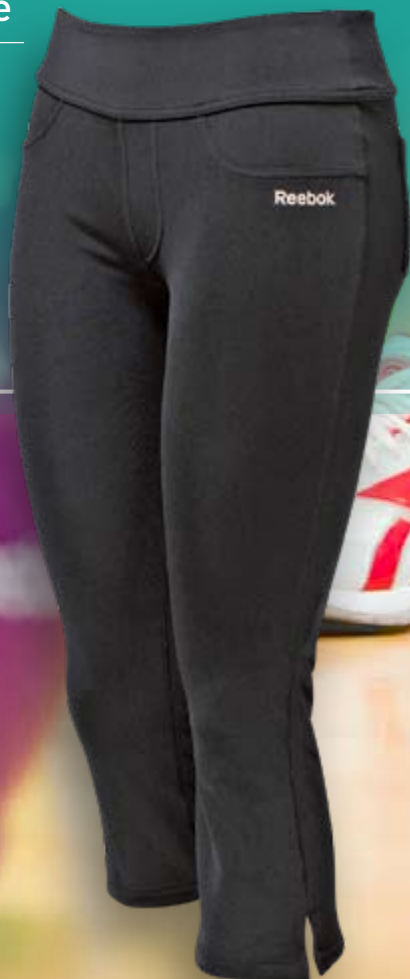

## RunTone Ready

Der RunTone Ready ist ein Laufschuh für Damen, der durch seine leichte Instabilität und weiche Konstruktion wichtige Po- und Beinmuskeln beim Laufen trainiert. Der RunTone Ready ist in einer Vielzahl von attraktiven Farbkombinationen erhältlich.

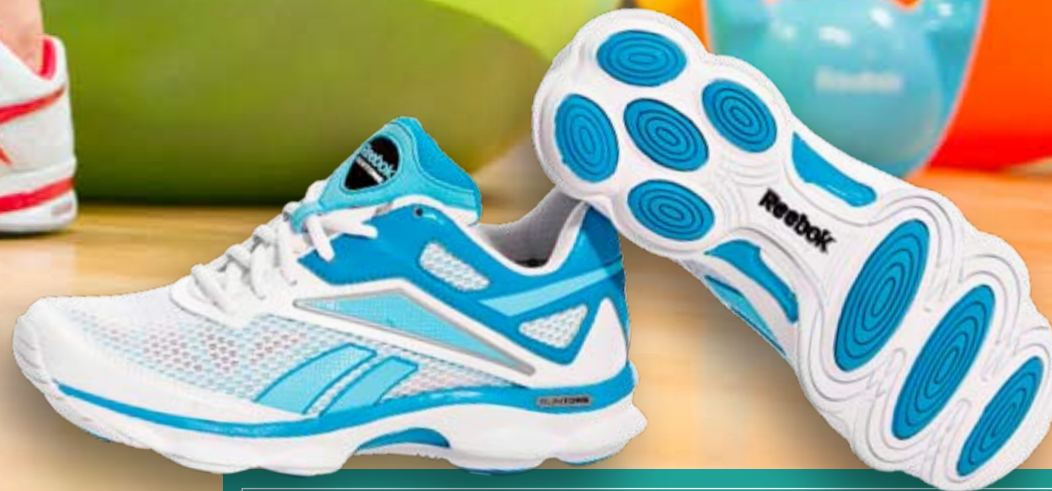





## »» MEIN GEHEIMNIS: REEBOK TONING.

**Kelly Brook, Engländerin, Schauspielerin und Model:** Mein Markenzeichen: meine Persönlichkeit und meine Figur. Mein Geheimnis: neben regelmäßigem Sport Reeboks EasyTone. Als Schauspielerin und Model bin ich viel unterwegs. Mir fehlt die Zeit für ein ausgiebiges Fitness-Training. Mit den Toning-Produkten beanspruche ich meine Muskeln nicht nur beim Sport, sondern auch in der Freizeit. Ob auf dem Catwalk oder vor der Kamera – Fitness ist die Basis für meinen Erfolg.



# Reebok

Men's Sport » ZigTech

# »» MEIN TRAINING – SCHNELL, INTENSIV UND ABWECHSLUNGS- REICH.

Jeremy Bauer, Franzose,  
Marketing Director Market Central,  
Reebok

**Mein Job als Marketing Director ist genau wie mein Fitnesstraining – schnell, intensiv und abwechslungsreich.** Und das passt perfekt zu mir, denn was ich nicht leiden kann ist Langeweile. Natürlich steht die Arbeit an erster Stelle, aber wenn ich die Zeit zum Trainieren finde, brauche ich neue Herausforderungen, Spaß und Energie. In meinem Sport möchte ich mich auspowern, Stress abbauen und gefordert sein. Reebok ZigTechs spielen in meinem Training die Hauptrolle. Sie liegen bei mir immer griffbereit und geben mir für mein Training sozusagen den Extra-Energiekick. So auch beim Urbanathlon, dem ersten urbanen Hindernislauf in Deutschland, der im August in Hamburg stattfand. Es galt, 10 Kilometer Laufstrecke, 891 Treppenstufen, 12 Hindernisse und 200 Höhenmeter zu überwinden. Egal ob Profilaufers oder Anfänger, alle 2.000 Teilnehmer hatten einen spürbaren Respekt vor dem Lauf. Ich musste über Container klettern, einen Autostau überwinden und eine fünf Meter hohe Halfpipe meistern. Es war ein Gefühl wie in einem Actionfilm – und dabei haben mir 15.000 Zuschauer zugejubelt. Im nächsten Jahr werden wir mit unserem gesamten Reebok Market Central Marketing Team an den Start gehen. Was könnte ein Team mehr zusammenschweißen als zusammen zu trainieren und ein gemeinsames Ziel zu haben? Ich glaube, es gibt keinen Job, in dem Leistung, Spaß und die Begeisterung für eine Marke und ihre Produkte näher beieinanderliegen.

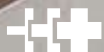

Mehr Informationen zu Reebok ZigTech:  
[www.reebok.de](http://www.reebok.de)



## ZigTech Nano

Die Reebok ZigTech Schuhe zeichnen sich durch ein auffälliges Zickzack-Design aus, das mehr Energie auf den tatsächlichen Laufschrift überträgt und so Ermüdungserscheinungen der Muskulatur im Schienbein vermindert. Im Frühjahr 2011 präsentierte Reebok die nächste Kategorie spezifische Weiterentwicklung von ZigTech: Der ZigTech Nano hat ein niedrigeres Profil als die ersten ZigTech Modelle und bietet dem effizienten Läufer noch mehr Leichtigkeit beim Laufen.

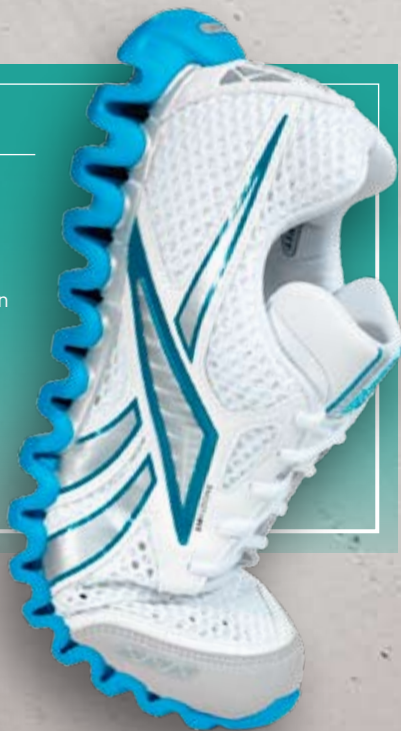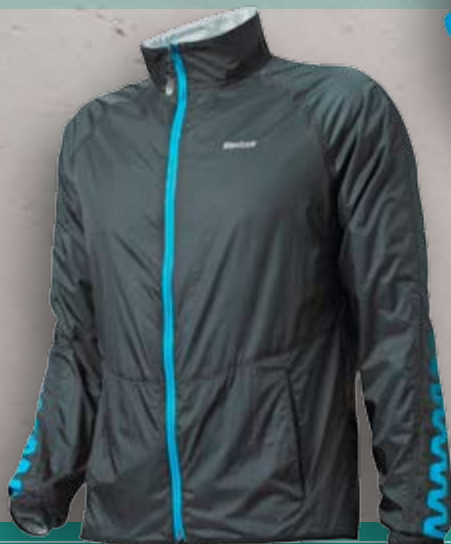

## ZigTech Track Jacke

Wie bei den ZigTech Schuhmodellen dreht sich auch bei der ZigTech Bekleidung alles um Energie. Die ZigTech Bekleidungsprodukte besitzen Spezialfasern, die in den jeweiligen Stoff eingewirkt oder gewebt sind. Diese Fasern bestehen aus unterschiedlichen natürlichen Mineralien, die die abgegebene Energie aufnehmen und dem Körper durch die Haut wieder zurückführen. Diese recycelte Energie trägt zu einem besseren Sauerstoffgehalt im Körper bei.

## » BASKETBALL – EIN SPIEL? ES IST VIEL MEHR ALS DAS.

**John Wall, Amerikaner, Basketballspieler:** Basketball – ein Spiel? Es ist viel mehr als das. Es ist eine Lebenseinstellung, verkörpert einen Lifestyle. Basketball ist der Traum vieler Kids. Es ist Intensität. Sprinten. Springen. Schneller Richtungswechsel. Dafür brauchst du viel Kraft und Energie – je mehr desto besser. Ich bin Point Guard in der NBA, da ist man viel auf dem Spielfeld unterwegs. Passt. Dribbelt. Wirft. Ich bin ständig in Bewegung. Meine ZigSlash Basketballschuhe geben mir für das Spiel den Extrakick Energie.

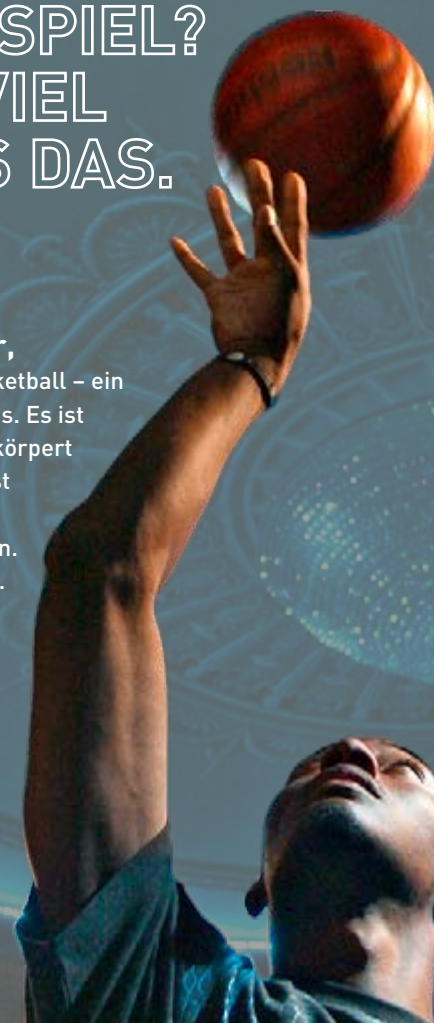



# »» IMMER ZEHN SCHRITTE VORAUSS.

**Swizz Beatz, Amerikaner, Künstler, Designer und Produzent:**

Ich mag es, der Szene immer zehn Schritte voraus zu sein. Ich bin immer gleichzeitig in unterschiedlichen Welten unterwegs – in Mode, Musik und Kunst. Ich will kein typischer Künstler sein. Reebok Classics passt perfekt zu meinem Chamäleoncharakter. Mein Sound und mein Style sind die Quelle der Inspiration für meine Kunst. Mit meiner Arbeit und meinem Style will ich andere dazu inspirieren, auch kreativ und innovativ zu sein. Ich möchte meinen kreativen Einfluss nutzen, um Jugendliche zu berühren.



## Classic Heritage Sport Bekleidungskollektion

Die Classic Heritage Sport Woven Coach-Jacke ist Teil der Frühjahr/Sommer 2011 Heritage Sport Woven Label Kollektion, die im Januar 2011 auf den Markt gebracht wurde. Als auffälliges Merkmal zeigt die Jacke das „Dropped R“ Logo auf der linken Brust, das ausschließlich in Reeboks Classics Bereich zu finden ist. Reebok Classics wird im Frühjahr/Sommer 2011 auf den Retro-Look im American College Sport Stil setzen.

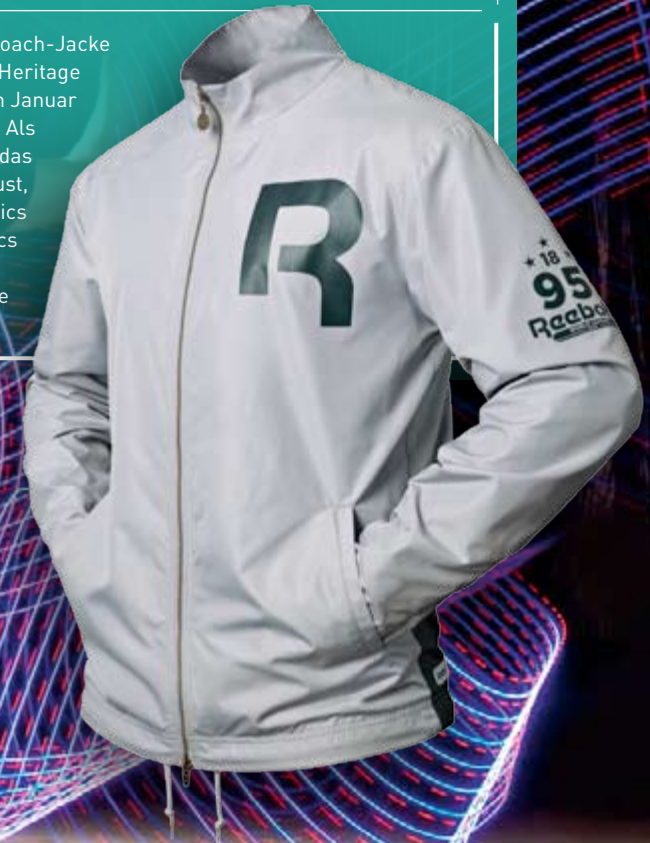

## Classic Lite Schuhkollektion

Die neue Classic Lite Kollektion überzeugt durch kultige Reebok Modelle aus leichten Materialien und bietet so die perfekte Verbindung von Form und Funktion. Die traditionellen EVA-Gummi-Außensohlen wurden durch federleichte 3-D Ultralite-Sohlen ersetzt. Zugleich überzeugen die Classic Lite Schuhe durch ihre gute Dämpfung. Besonders ins Auge stechen die Farben: Knallige Farbtöne wie „fearless purple“ oder die Trendfarbe „malibu blue“ machen die Schuhe zum Hingucker – auf der Straße oder im Club.

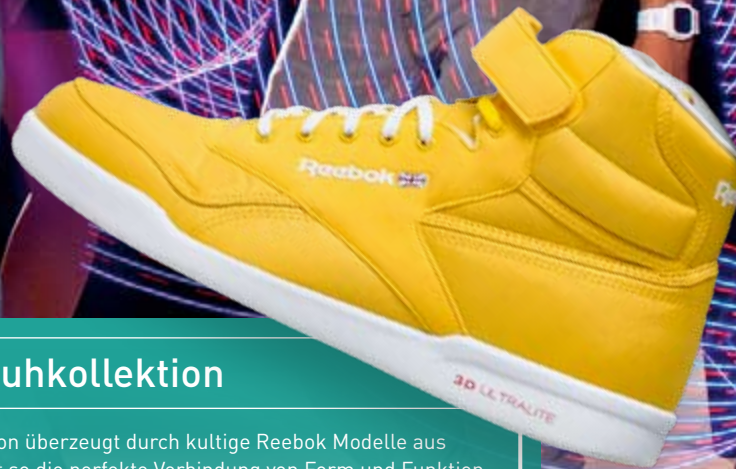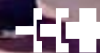

Mehr Informationen zu Reebok Classics:  
[www.reebok.com/de/classics](http://www.reebok.com/de/classics)



## »» MANCHMAL GENÜGT EIN EINZIGER SCHLAG.

Steve Olsen, Amerikaner,  
Social Media and eMarketing Coordinator,  
TaylorMade-adidas Golf

**Mein Job-Interview bestand aus einem 50-tägigen Golfabenteuer in neun Ländern, auf drei Kontinenten, mit über 20 Runden Golf.** Ich habe mich dem Wear in the World Golfabenteuer gestellt. Im Juni 2010 traten ich und ein weiterer Bewerber diese Herausforderung an, bei der der Sieger eine Stelle in der Marketing Abteilung bei TaylorMade-adidas Golf übernehmen sollte. Seit meinem zweiten Lebensjahr spiele ich Golf und habe immer davon geträumt, in der Golfbranche zu arbeiten. Deshalb wollte ich diese einmalige Chance ergreifen. Für mich war das Wear in the World Abenteuer nicht nur eine sportliche Herausforderung, sondern auch ein persönlicher Reifeprozess. Ich musste an meine Grenzen gehen – sowohl mental als auch körperlich. Die vielen Übungsstunden auf der Driving Range und jahrelanges Golfen – das war der Weg zum Ziel. Eines der schönsten Erlebnisse war die Teilnahme an Herbert Hainers Pro-Am Golfturnier zusammen mit den PGA Tour Profis von TaylorMade-adidas Golf. Ich wusste, wenn ich fokussiert bleibe, werde ich es schaffen – und so war es auch. Teil des Wear in the World Abenteuers zu sein und am Ende als Sieger hervorzugehen, ist mein bisher größter Erfolg. Ich bin erst 25 Jahre alt und habe bereits meinen Traumjob: Ich arbeite für das führende Golfunternehmen der Welt.



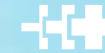

Mehr Informationen zu TaylorMade-adidas Golf:  
[www.taylormadegolf.com](http://www.taylormadegolf.com)  
[www.adidasgolf.com](http://www.adidasgolf.com)

## R11 Driver

Beim R11 wird Anpassungsmöglichkeit großgeschrieben: Er enthält die Adjustable Sole Plate Technologie, Flight Control Technologie und Movable Weight Technologie in einem. Dadurch können Golfspieler den Driver noch genauer an ihren individuellen Schwung anpassen und die Flugbahn um bis zu 100 Yards verlängern.

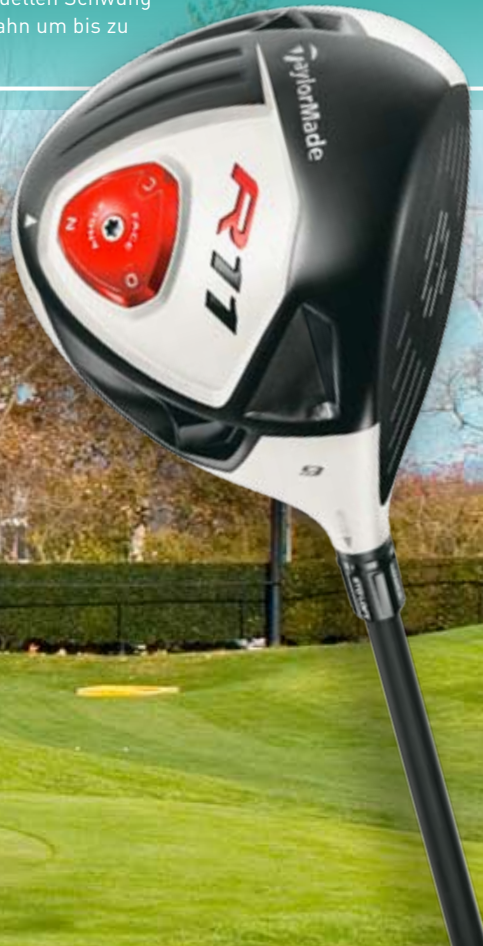

## adiComfort Golfschuh

adiComfort Schuhe sind sowohl in verschiedenen Weiten als auch in Übergrößen erhältlich. Sie bestechen durch eine ideale Passform und maximalen Komfort. Golfer genießen mit diesem Schuh ein äußerst angenehmes Laufgefühl und bestmögliche Performance in einem sportiven, klassischen Look.

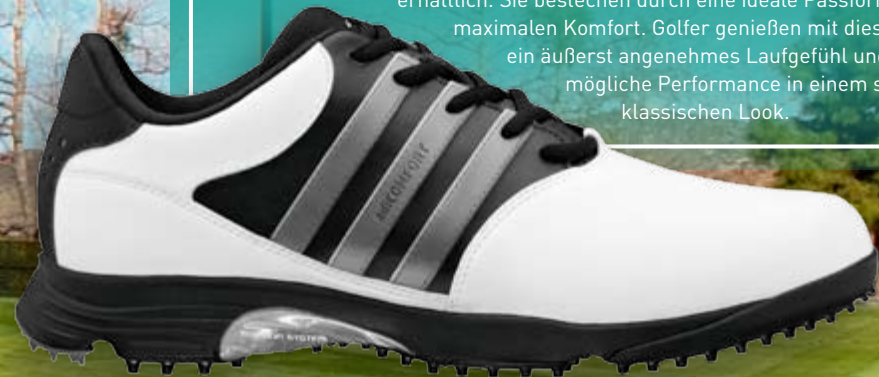



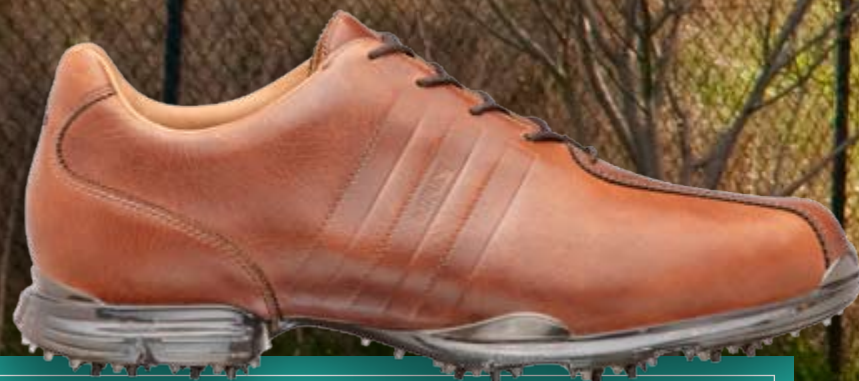

## adiPure Z Golfschuh

adiPure Z Golfschuhe wurden für den wettbewerbsorientierten Puristen entwickelt. Der Schuh besticht durch sein klassisch modernes Design mit eleganten Linien, edlen Details und hochwertigen Materialien. Das von Hand bearbeitete Narbenleder und ein neu designter Schaft sorgen für eine hochwertige Optik und sind angenehm zu tragen. Das adiPrene Dämpfungssystem gewährleistet dank einer optimierten Stoßdämpfung im Fersenbereich anhaltenden Tragekomfort.

## Burner SuperFast 2.0 Driver

Die verbesserte SuperFast Technologie und der aerodynamischere Schlägerkopf machen den Burner SuperFast 2.0 Driver länger, leichter und schneller als alle Driver, die TaylorMade je zuvor entwickelt hat. Die ultralange Schlagfläche sorgt für einen höheren Abschlagwinkel, weniger Spin und dadurch mehr Distanz.

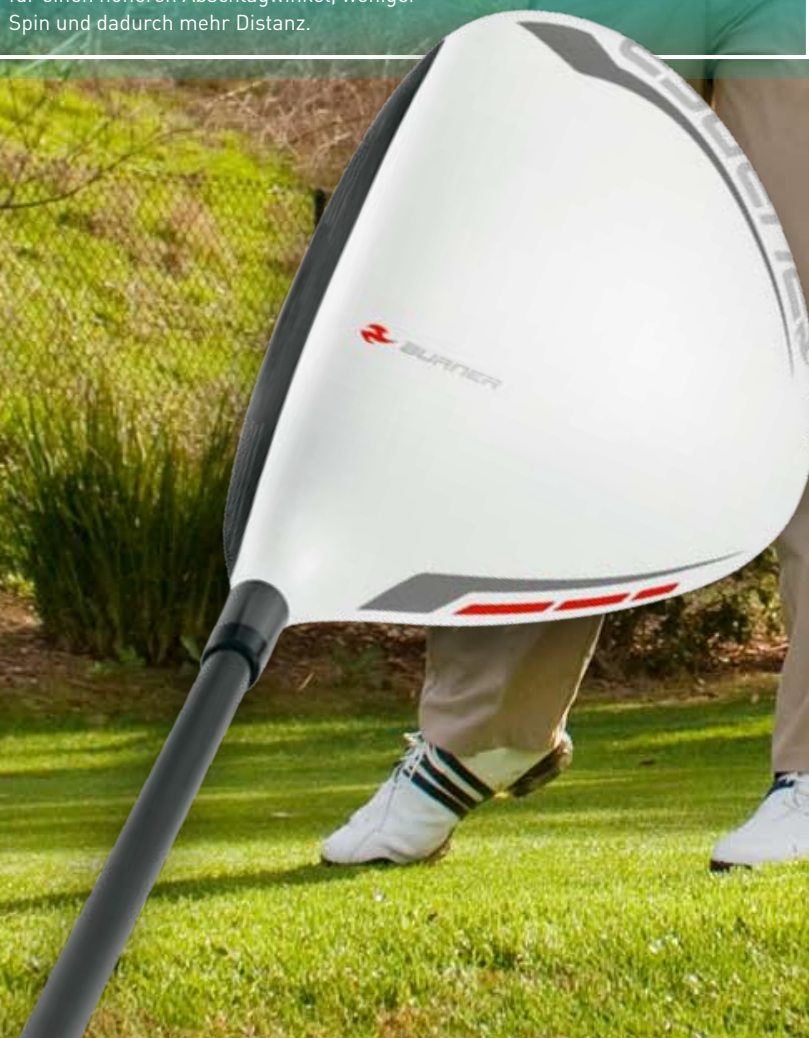





# »» DAS GERÄUSCH BEIM ABSCHLAG – MUSIK IN MEINEN OHREN.

**Martin Kaymer, Deutscher, Golfer:** Der Probeschwung fühlte sich gut an. Du gehst zum Abschlag und teest den Ball auf – volle Konzentration. Der Driver liegt perfekt in den Händen. Seine Leichtigkeit macht ihn einzigartig. Du holst zum Schwung aus. Getrieben von Akribie und Perfektion willst du der Beste sein. Der Schläger trifft den Ball – das Geräusch ist Musik in deinen Ohren. Erst auf dem Grün kommt der Ball zum Liegen.



## »» EIN LEBEN OHNE HOCKEY? FÜR MICH UNDENKBAR.

Jean-Claude Bergeron, Kanadier,  
Pro Product Director, Reebok-CCM Hockey

**Eishockey ist ein Teil von mir und hat mich zu dem gemacht, der ich heute bin.** Es fing als Lebenstraum an und wurde Wirklichkeit. Als ich mit vier Jahren begann, Eishockey zu spielen, träumte ich davon, Profi zu werden. Es war nicht einfach, es bis zur NHL zu bringen; viele versuchen es und scheitern. Als ich dann für die Montreal Canadiens spielte, war das auf jeden Fall mein größter sportlicher Erfolg. Am Ende meiner Profi-Karriere konnte ich mir ein Leben ohne Eishockey nicht mehr vorstellen. Ich musste deshalb eine Möglichkeit finden, wie ich auch außerhalb des Spielfelds beruflich erfolgreich sein konnte. Die Stelle bei Reebok-CCM Hockey ist perfekt, um meine Leidenschaft für Eishockey mit meiner Arbeit zu verbinden. Als Pro Product Director arbeite ich eng mit dem F&E-Team zusammen, um für unsere Profispieler die besten Produkte zu entwickeln. Das Großartige dabei ist, dass ich so viele neue Produkte wie ich möchte testen darf und Feedback dazu geben kann. Momentan spiele ich mit dem U+ Crazy Light Stick. Da ich bereits in der höchsten Liga gespielt habe, weiß ich, worauf es ankommt. Und ich kann den weltweit besten Spielern die Ausrüstung bieten, die sie benötigen, um ihre bestmögliche Leistung zu erzielen.

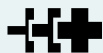

Mehr Informationen zu Reebok-CCM Hockey:  
[www.ccmhockey.com](http://www.ccmhockey.com)  
[www.reebokhockey.com](http://www.reebokhockey.com)

## CCM U+ Crazy Light Schläger

Der neue U+ Crazy Light Stick ist der leichteste Schläger seiner Kategorie und ermöglicht schnellere Reaktionszeiten, eine höhere Schlaggeschwindigkeit und einen kräftigeren Schuss. Entlang der Kelle verlaufen zwei vertikale, parallele Karbonstreben, die den Sweet Spot des Schlägers von der Ferse bis hin zur Schlägerspitze erweitern.

## CCM U+ Crazy Light Skate

Der neue U+ Crazy Light ist an die Bedürfnisse der besten Spieler der Welt angepasst und setzt in Sachen Passform neue Maßstäbe. Das einzigartige FluidFit System des Schlittschuhs sorgt bereits vor dem Thermoformen für ein komfortables Einstiegsgefühl. Dank UForm-3-D Technologie und dem ultrareaktiven U Foam Material lässt sich der CCM U+ Crazy Light an die dreidimensionalen Formen des Fußes anpassen, was zu einer erstklassigen Passform und höchstem Tragekomfort führt.

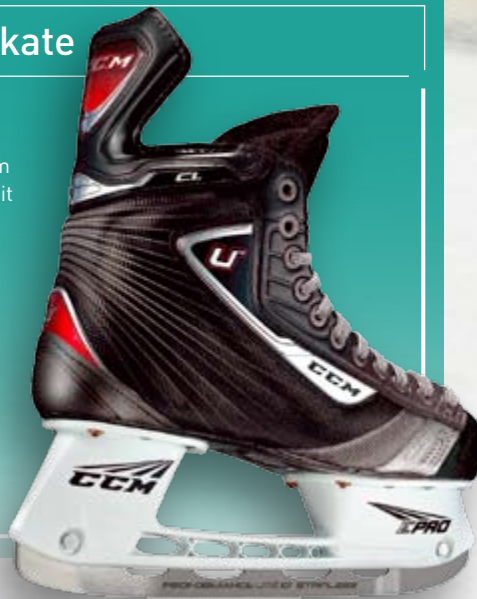

»» AUF DEM EIS  
GEHT ES UM  
ALLES.

**Sidney Crosby, Kanadier, Eishockey-Spieler:** Der Schiri pfeift – die Overtime ist vorbei. Sieg. Als du vom Eis läufst, realisierst du erst die Schmerzen. Alles tut dir weh. Aber die Freude über den Erfolg überwiegt. Der Moment des Sieges – alles passt. Du fühlst dich stark. Du und dein Team. Ihr funktioniert nur gemeinsam, aber trotzdem kannst du derjenige sein, der den Weg an die Spitze ebnet. Ein gutes Gefühl. So kann es weitergehen.



# Rockport

## »»» STYLE MIT KOMFORT.

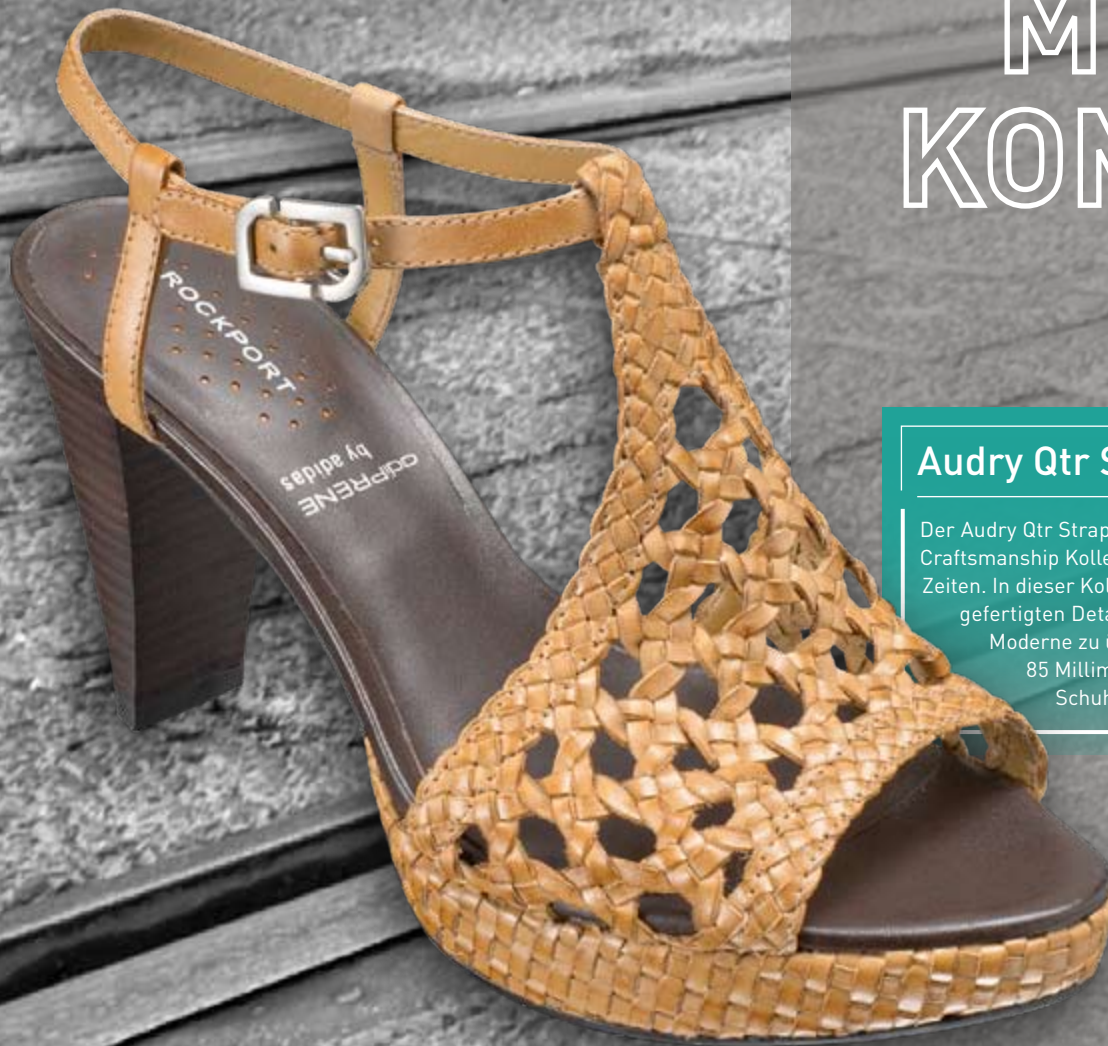

### Audry Qtr Strap Woven

Der Audry Qtr Strap Woven steht für individuelle Passform. Er gehört zur Craftsmanship Kollektion von Rockport, inspiriert von der Kunstfertigkeit früherer Zeiten. In dieser Kollektion gelingt es Rockport, die Tradition von in Handarbeit gefertigten Details, behandeltem Leder und gewebten Akzenten in die Moderne zu übertragen. Mit adiPrene von adidas, einer Absatzhöhe von 85 Millimetern und einem Plateau von 20 Millimetern sorgt dieser Schuh garantiert für glanzvolle Auftritte.





## Fairwood Hillandale

Der Fairwood Hillandale Schuh mit seinem glänzenden, von Hand polierten Leder ist ein echter Hingucker im Vintage-Look. Das Modell ist Teil der Craftsmanship Kollektion. Diese wurde von der traditionellen Handwerkskunst inspiriert, die das Designteam von Rockport auf seinen Reisen in Märkten und Handwerksbetrieben rund um die ganze Welt entdeckte.

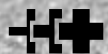

Mehr Informationen zu Rockport:  
[www.rockport.com](http://www.rockport.com)

## Hydromotion 2 Hydro-Sail

Der sportlich-komfortable Stil dieses Segelschuhs steht ganz im Zeichen der „In Motion“ Kollektion, in der Rockport seine Interpretation von „Form trifft auf Funktionalität“ zur Geltung bringt. Rockport hat dabei klassische Muster und Stile als Grundlage genommen, mit fortschrittlichen Technologien und Materialien verfeinert und daraus einen technologisch hochentwickelten Schuh im aktuellen Look geschaffen. Das Mascalzone Latino Audi Team trug diesen Schuh bei der Louis Vuitton Trophy 2010.



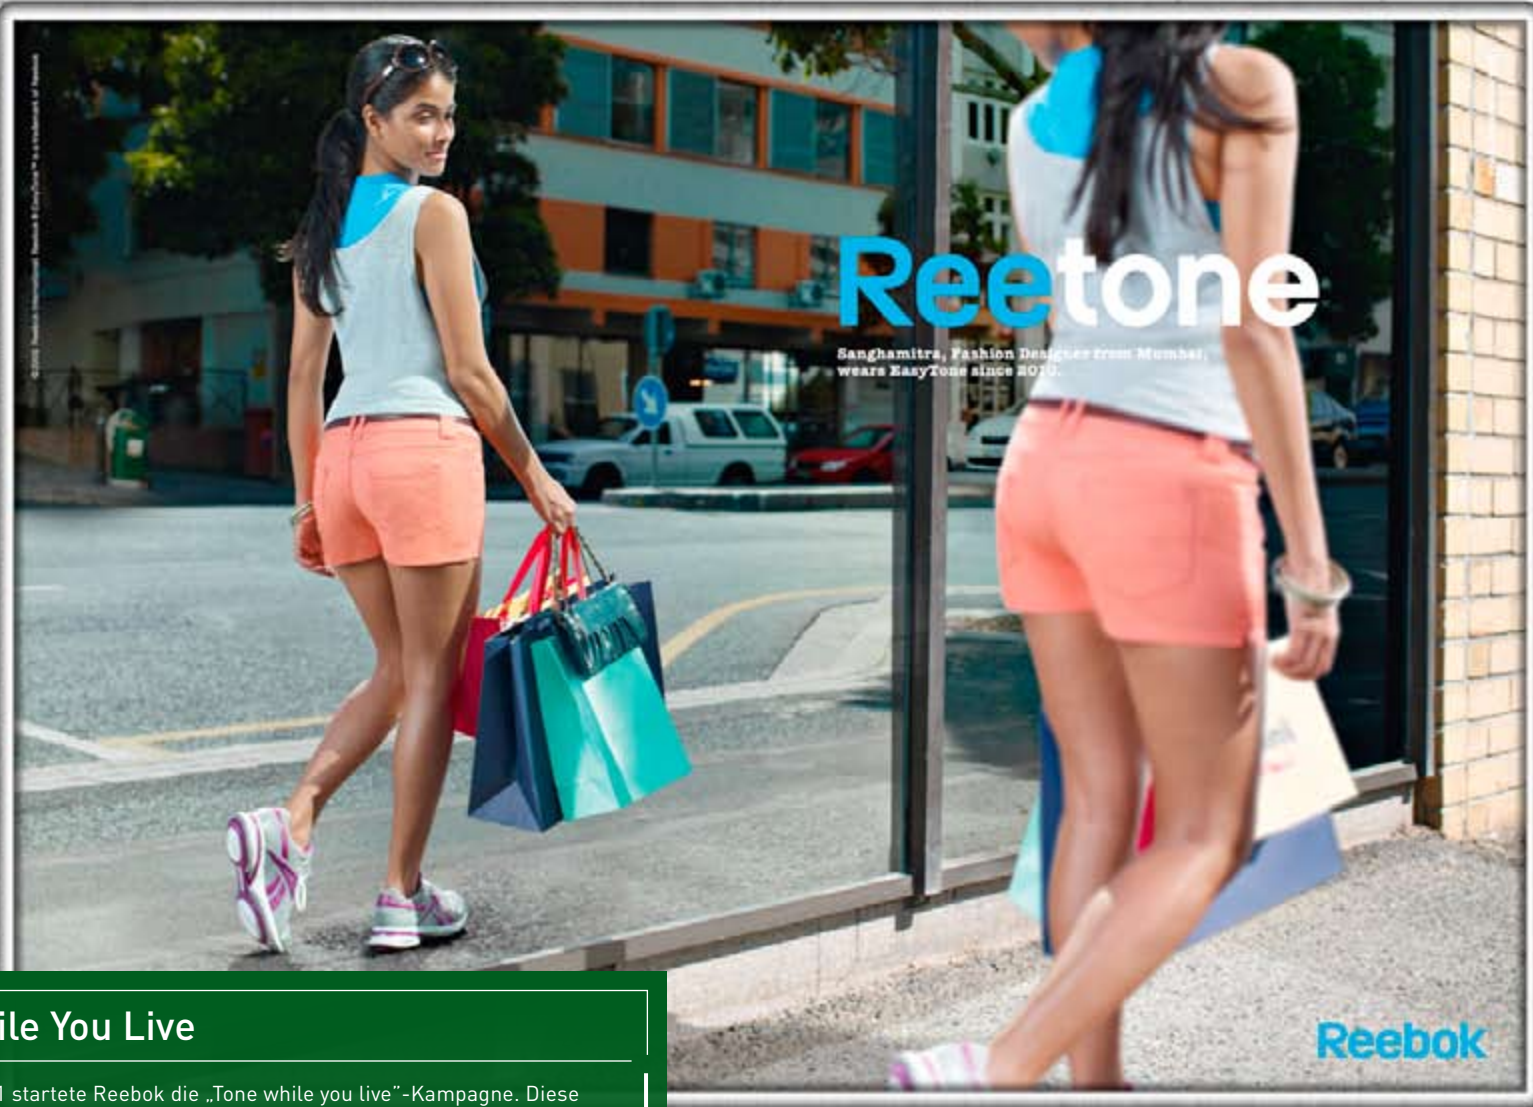

## Tone While You Live

Im Februar 2011 startete Reebok die „Tone while you live“-Kampagne. Diese richtet sich an weibliche Konsumenten und zeigt sechs inspirierende EasyTone Botschafter, die sich „ReeToners“ nennen. Diese repräsentieren Frauen rund um den Globus, die dank EasyTone auch in ihrem stressigen Alltag nicht auf Fitness verzichten müssen. Die Schauspielerin und Stil-Ikone Eva Mendes unterstützt die ReeToners als prominente Markenbotschafterin. Die Kampagne begleitet die offizielle Markteinführung der EasyTone Bekleidungskollektion.

# 03

## Konzernlagebericht – Unser Konzern

|                                                           |       |
|-----------------------------------------------------------|-------|
| Corporate Mission Statement .....                         | » 76  |
| Unsere Marken .....                                       | » 77  |
| Wichtige Standorte und<br>Promotion-Partnerschaften ..... | » 78  |
| Konzernstrategie .....                                    | » 80  |
| Strategie Global Sales .....                              | » 82  |
| Großhandel .....                                          | » 83  |
| Einzelhandel .....                                        | » 84  |
| E-Commerce .....                                          | » 86  |
| Strategie Global Brands .....                             | » 87  |
| adidas .....                                              | » 91  |
| Reebok .....                                              | » 96  |
| Strategie Andere Geschäftssegmente .....                  | » 98  |
| TaylorMade-adidas Golf .....                              | » 98  |
| Rockport .....                                            | » 102 |
| Reebok-CCM Hockey .....                                   | » 104 |
| Global Operations .....                                   | » 106 |
| Forschung und Entwicklung .....                           | » 110 |
| Mitarbeiter .....                                         | » 115 |
| Nachhaltigkeit .....                                      | » 120 |

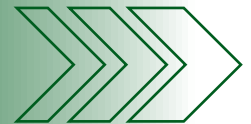



## Unsere Mission

DER ADIDAS KONZERN STREBT DANACH,  
DER WELTWEIT FÜHRENDE ANBIETER DER  
SPORTARTIKELINDUSTRIE ZU SEIN – MIT  
MARKEN, DIE AUF LEIDENSCHAFT FÜR DEN  
SPORT SOWIE SPORTLICHEM LIFESTYLE  
BASIEREN.

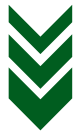

### Wir sind der fortwährenden Stärkung

unserer Marken und Produkte verpflichtet, um unsere Wettbewerbsposition zu verbessern.

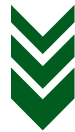

### Wir sind führend in Innovation und Design

und wollen mit jedem Produkt, das wir auf den Markt bringen, Sportlern auf jedem Niveau zu Spitzenleistungen verhelfen.

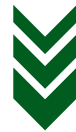

### Wir orientieren uns an unseren Konsumenten

daher verbessern wir kontinuierlich die Qualität, das Design und das Image unserer Produkte sowie unsere organisatorischen Strukturen. Wir wollen die Erwartungen der Konsumenten nicht nur erfüllen, sondern übertreffen und ihnen damit höchsten Nutzen bieten.

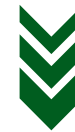

### Wir sind ein globales Unternehmen

das sozial und ökologisch verantwortungsbewusst handelt, kreativ ist, Vielfalt wertschätzt und seinen Mitarbeitern und Aktionären finanzielle Attraktivität sichert.

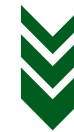

### Wir sind voll und ganz darauf ausgerichtet

kontinuierlich hervorragende Ergebnisse zu erzielen.

# Unsere Marken

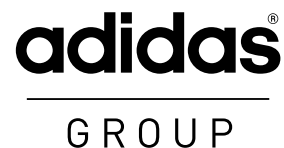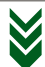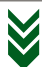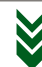

## Großhandel

68 % der Konzernumsatzerlöse

## Einzelhandel

20 % der Konzernumsatzerlöse

## Andere Geschäftssegmente

12 % der Konzernumsatzerlöse

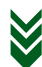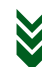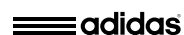

**adidas** (72 % der Konzernumsatzerlöse)

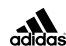

### adidas Sport Performance (75 % der adidas Umsatzerlöse)

Das Leitprinzip von adidas Sport Performance lautet „Play to Win“. Inspiriert von der Motivation des Gründers Adi Dassler entwickelt Sport Performance mit Leidenschaft Spitzenprodukte für Sportler aller Sportarten, damit sie schneller, stärker, smarter, cooler und natürlicher werden. Der Fokus von adidas Sport Performance liegt auf fünf Kernkategorien: Fußball, Basketball, Running, Training und Outdoor.

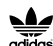

### adidas Sport Style (25 % der adidas Umsatzerlöse)

adidas Sport Style umfasst zwei Geschäftseinheiten. Die Originals Group ist das authentische, kultige Sportswear-Label für den Street-Look und baut auf die Kernaussage „Celebrate Originality“. Die Fashion Group wird als Zukunft von Sportswear definiert und umfasst die Labels Y-3<sup>1)</sup>, Porsche Design Sport, adidas SLVR und adidas NEO. Mit diesen vier Labels präsentiert adidas authentische, vom Sport inspirierte Bekleidung für alle Lifestyle-Konsumenten.

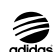

## Reebok

**Reebok** (16 % der Konzernumsatzerlöse)

Reeboks Erfolg basiert seit jeher auf dem Mut, mit Konventionen zu brechen. Die Marke entwickelt kontinuierlich innovative Produkte, schafft neue Märkte und kreiert den neuesten sportlichen Style. Reebok ist eine globale Sportmarke, inspiriert von ihrer Tradition im Fitnessbereich, die ihre Konsumenten fit fürs Leben machen will.

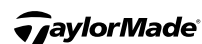

**TaylorMade-adidas Golf** (8 % der Konzernumsatzerlöse)

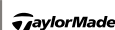

### TaylorMade (66 % der TaylorMade-adidas Golf Umsatzerlöse)

TaylorMade ist die führende Marke bei Metallhölzern und die meist gespielte Driver-Marke bei den wichtigsten Profi-Golfturnieren der Welt. Die Marke ist weltweit dafür bekannt, innovative und leistungsstarke Technologien für Driver, Fairwayhölzer, Hybrid-Schläger, Eisen, Putter und Bälle zu entwickeln.

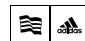

### adidas Golf (31 % der TaylorMade-adidas Golf Umsatzerlöse)

adidas Golf richtet sich an aktive, ambitionierte Golfspieler, die wissen, dass moderne Technologien in Schuhen und Bekleidung ihr Spiel erheblich verbessern können.

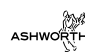

### Ashworth (3 % der TaylorMade-adidas Golf Umsatzerlöse)

Ashworth ist eine authentische Golfbekleidungsmarke, die weltweit für ihre Qualität, ihren Komfort und ihr unverkennbares Design bekannt ist und nicht nur auf Golfplätzen und in Clubhäusern getragen werden kann.

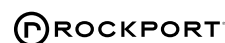

**Rockport** (2 % der Konzernumsatzerlöse)

Die Marke Rockport blickt auf vier Jahrzehnte Erfahrung in der Schuhentwicklung zurück und fühlt sich heute wie damals der Innovation verpflichtet. Rockport entwirft und vermarktet Schuhe in den Bereichen Dress, Casual und Street sowie Bekleidung und Accessoires, die Style mit Komfort für den urbanen, berufstätigen Konsumenten verbinden.

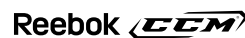

**Reebok-CCM Hockey** (2 % der Konzernumsatzerlöse)

Reebok-CCM Hockey ist einer der weltgrößten Designer, Hersteller und Vermarkter von Eishockey-Ausrüstung und -Bekleidung mit zwei der weltweit bekanntesten Eishockey-Marken: Reebok Hockey und CCM Hockey.

1) In der Segmentberichterstattung wird Y-3 in den Anderen Geschäftssegmenten konsolidiert.



## Wichtige Standorte und Promotion-Partnerschaften

Der adidas Konzern vermarktet Produkte in fast jedem Land der Welt. Zum 31. Dezember 2010 gehörten weltweit 169 Tochtergesellschaften zum Konzern. Der Hauptsitz befindet sich in Herzogenaurach, Deutschland. Unser Konzern verfügt außerdem über ein einzigartiges globales Portfolio an Promotion-Partnerschaften. Dazu zählen Sportverbände, Veranstaltungen, Mannschaften und Einzelsportler. Die wichtigsten Standorte des Konzerns sowie bevorstehende Sportveranstaltungen sind auf unserer Weltkarte aufgeführt.

### Wichtige Standorte

|                                                                     |    |
|---------------------------------------------------------------------|----|
| <b>Europa</b>                                                       |    |
| adidas Konzernzentrale, Herzogenaurach, Deutschland .....           | 01 |
| adidas International Trading, Amsterdam, Niederlande .....          | 02 |
| adidas Group Russland, Moskau, Russland .....                       | 03 |
| <b>Nordamerika</b>                                                  |    |
| adidas Nordamerika, Portland/Oregon, USA .....                      | 04 |
| Reebok International Headquarter, Canton/Massachusetts, USA .....   | 05 |
| The Rockport Company Headquarter, Canton/Massachusetts, USA .....   | 06 |
| Reebok-CCM Hockey Headquarter, Montreal/Quebec, Kanada .....        | 07 |
| TaylorMade-adidas Golf Headquarter, Carlsbad/Kalifornien, USA ..... | 08 |
| <b>Asien</b>                                                        |    |
| adidas Global Sourcing, Hongkong, China .....                       | 09 |
| adidas Group China, Shanghai, China .....                           | 10 |
| adidas Group Japan, Tokio, Japan .....                              | 11 |
| <b>Lateinamerika</b>                                                |    |
| adidas Group Lateinamerika, Panama-Stadt, Panama .....              | 12 |

### Wichtige Promotion-Partnerschaften in 2011

|                                                                                                                                                |          |
|------------------------------------------------------------------------------------------------------------------------------------------------|----------|
| <b>IHF Handballweltmeisterschaft der Männer, Schweden 13. – 30. Januar 2011 .....</b>                                                          | <b>A</b> |
| adidas Offizieller Partner des Internationalen Handballverbands IHF                                                                            |          |
| <b>NHL All-Star Game, Raleigh/North Carolina, USA 30. Januar 2011 .....</b>                                                                    | <b>B</b> |
| Reebok Offizieller Ausrüster der National Hockey League                                                                                        |          |
| <b>NFL Super Bowl, Arlington/Texas, USA 6. Februar 2011 .....</b>                                                                              | <b>C</b> |
| Reebok Offizieller Ausrüster der National Football League                                                                                      |          |
| <b>NBA All-Star Game, Los Angeles/Kalifornien, USA 20. Februar 2011 .....</b>                                                                  | <b>D</b> |
| adidas Offizieller Ausrüster der National Basketball Association                                                                               |          |
| <b>Flora London Marathon, London, Großbritannien 17. April 2011 .....</b>                                                                      | <b>E</b> |
| adidas Offizieller Sponsor                                                                                                                     |          |
| <b>Boston Marathon, Boston/Massachusetts, USA 18. April 2011 .....</b>                                                                         | <b>F</b> |
| adidas Offizieller Ausrüster für Bekleidung und Schuhe                                                                                         |          |
| <b>UEFA Europa League Finale, Dublin, Irland 18. Mai 2011 .....</b>                                                                            | <b>G</b> |
| adidas Offizieller Ball-Ausrüster der UEFA Europa League                                                                                       |          |
| <b>French Open, Paris, Frankreich 22. Mai – 5. Juni 2011 .....</b>                                                                             | <b>H</b> |
| adidas Offizieller Partner von Roland Garros                                                                                                   |          |
| <b>UEFA Champions League Finale, London, Großbritannien 28. Mai 2011 .....</b>                                                                 | <b>I</b> |
| adidas Offizieller Ball-Ausrüster der UEFA Champions League                                                                                    |          |
| <b>FIFA Frauen-Weltmeisterschaft, Deutschland 26. Juni – 17. Juli 2011 .....</b>                                                               | <b>J</b> |
| adidas Offizieller Sponsor                                                                                                                     |          |
| <b>MLB All-Star Game, Phoenix/Arizona, USA 12. Juli 2011 .....</b>                                                                             | <b>K</b> |
| Reebok Offizieller Lizenznehmer von Major League Baseball Fan- und Lifestyle-Bekleidung und Offizieller Authentic Collection Footwear Supplier |          |
| <b>UEFA Super Cup, Monaco 26. August 2011 .....</b>                                                                                            | <b>L</b> |
| adidas Offizieller Ball-Ausrüster                                                                                                              |          |
| <b>IAAF Leichtathletikweltmeisterschaft, Daegu, Südkorea 27. August – 4. September 2011 .....</b>                                              | <b>M</b> |
| adidas Offizieller Partner                                                                                                                     |          |
| <b>FIFA Beach Soccer Weltmeisterschaft, Italien 1. – 11. September 2011 .....</b>                                                              | <b>N</b> |
| adidas Offizieller Sponsor                                                                                                                     |          |
| <b>BMW Berlin Marathon, Berlin, Deutschland 25. September 2011 .....</b>                                                                       | <b>O</b> |
| adidas Offizieller Partner                                                                                                                     |          |

## Europa

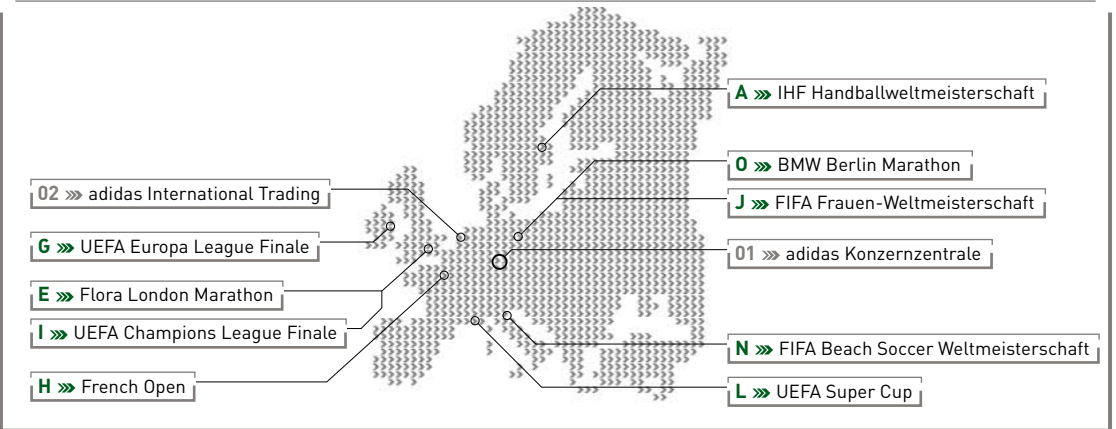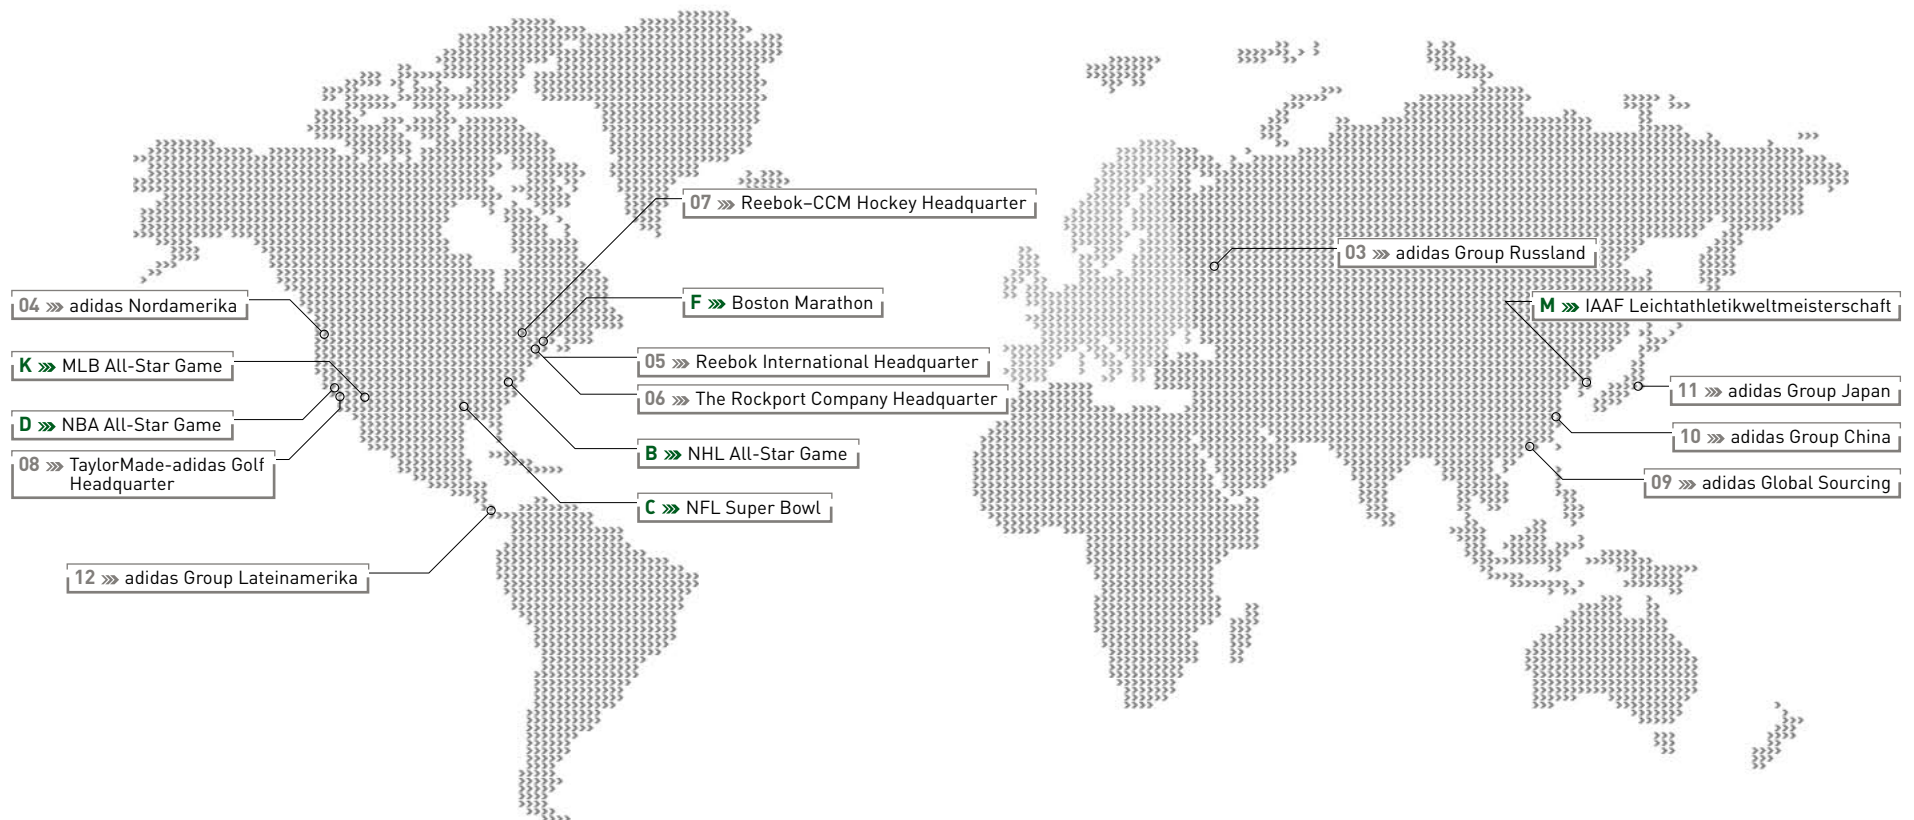



# Konzernstrategie

Unser Ziel ist es, Marktführer in der Sportartikelbranche zu werden. Wir wollen dies durch Marken erreichen, die auf Leidenschaft für den Sport sowie auf sportlichem Lifestyle basieren. Durch unsere langjährige Tradition konnten wir ein umfassendes Wissen über unsere Kunden und Konsumenten aufbauen. Dieses ist für die Erreichung unseres Ziels unabdingbar. Um Kunden- und Konsumentenbedürfnisse zu antizipieren und zu befriedigen, ist Innovation integraler Bestandteil unserer Unternehmenskultur. Dabei brechen wir mit Konventionen und sind offen für Veränderungen. Unser Streben nach Innovation lässt uns neue Maßstäbe bei Produkten, beim Service und bei Prozessen setzen. So stärken wir unsere Wettbewerbsfähigkeit und maximieren die operative und finanzielle Stärke des Konzerns, was der langfristigen Wertschöpfung für unsere Aktionäre dient.

## Schaffen von Shareholder Value

Im Mittelpunkt unserer unternehmerischen Entscheidungen steht das Schaffen von Wertzuwächsen für unsere Aktionäre durch das Erzielen eines starken Cashflows »» siehe Internes Konzern-Managementsystem, S. 126. Daher konzentrieren wir uns darauf, Faktoren, die wir steuern können, strikt zu managen und strategische Entscheidungen zu treffen, die nachhaltiges Wachstum von Umsatz und Gewinn ermöglichen und letztendlich auch die Steigerung des Cashflows fördern. In all unseren Segmenten treiben wir diejenigen Projekte voran, von denen wir erwarten, dass sie am meisten zur Wertsteigerung beitragen. Dabei hat die Verbesserung der Profitabilität höchste Priorität. Weitere Schwerpunkte sind die strikte Kontrolle des kurzfristigen Betriebskapitals und die Optimierung unserer Kapitalstruktur. Gleichzeitig streben wir danach, die Rendite für unsere Aktionäre durch eine in der Branche überdurchschnittliche Aktienkurs- und Dividendenentwicklung zu steigern.

## Präsentation von Route 2015

Im November 2010 stellte der Konzern seinen strategischen Geschäftsplan bis 2015 der Öffentlichkeit vor: Route 2015. Es ist der umfassendste Strategieplan, den der Konzern je erstellt hat und umfasst alle Marken, Vertriebskanäle und

Konzernfunktionen weltweit. Basierend auf unseren starken Marken, unseren Premiumprodukten, unserer umfassenden globalen Präsenz sowie unserem Bekenntnis zu Innovation und den Konsumenten, streben wir danach, schneller zu wachsen als der Markt insgesamt (sowohl BIP als auch Sportartikelmarkt) und den Gewinn schneller zu steigern als den Umsatz. Zudem will der Konzern das Fundament für die Führungsposition in der Sportartikelindustrie legen, indem wir in den nächsten fünf Jahren schneller wachsen als unser Hauptmitbewerber. Der Plan sieht vor, den Umsatz des adidas Konzerns zwischen 2010 und 2015 währungsbereinigt um 45 % bis 50 % zu steigern. Außerdem soll sich dabei der Gewinn jährlich um durchschnittlich 15 % erhöhen, und die operative Marge soll bis spätestens 2015 nachhaltig auf 11 % verbessert werden »» siehe Nachtrag und Ausblick, S. 174. Um diese Ziele zu erreichen, haben wir strategische Entscheidungen getroffen und die Prioritäten für unsere Investitionen unter sechs strategischen Säulen zusammengefasst »» siehe 01.

## Vielfältiges Markenportfolio

Konsumenten erwarten individuelle Auswahl. Vom Spitzensportler, der die bestmögliche Ausrüstung sucht, bis zum Konsumenten von Freizeitbekleidung, der dem neuesten Modetrend folgt: Wir wollen

Erlebnisse schaffen, um so eine langjährige Bindung zwischen den Konsumenten und unseren Marken aufzubauen. Um unsere Reichweite unter Konsumenten zu maximieren, verfolgen wir eine Mehrmarken-Strategie. So haben wir die Möglichkeit, als Massen- oder Nischenanbieter aufzutreten und eine große Palette genau abgestimmter Produkte für ein breites Konsumentenspektrum bereitzustellen. Auf diese Weise kann jede Marke ihre eigene Identität bewahren und sich auf ihre Kernkompetenzen konzentrieren, während dem Konzern ein breiteres Produktangebot zur Verfügung steht, um den Einfluss im Markt zu steigern »» siehe Strategie Global Brands, S. 87.

## Investitionen in Märkte und Vertriebskanäle mit größtem Potenzial

Unser Ziel ist es, in allen Märkten, in denen wir weltweit vertreten sind, mit unseren Marken führende Positionen einzunehmen. Allerdings konzentrieren wir unsere Investitionen auf Märkte, die mittel- und langfristig die besten Wachstums- und Profitabilitätschancen bieten. Dabei sind der Ausbau unserer Aktivitäten in den Schwellenländern, insbesondere in China und Russland, sowie die Hinzugewinnung von Marktanteilen in Märkten wie den USA, in denen wir weniger stark vertreten sind, weiterhin Schwerpunkte »» siehe Nachtrag und Ausblick, S. 174.

Wir wissen, dass das Kaufverhalten und das Einzelhandelsumfeld in den Märkten, in denen wir tätig sind, sehr individuell sind. Um die Marktchancen in vollem Umfang auszuschöpfen, zielt unsere Vertriebsstrategie darauf ab, unsere Marken in optimaler Art und Weise zu präsentieren. Hierbei verfolgen wir einen differenzierten aber koordinierten Ansatz in puncto Vertriebskanäle. Wir sind bestrebt, unseren Kunden einen hervorragenden Service zu bieten, um so die besten Regalflächen für unsere Marken zu sichern. Gleichzeitig wollen wir unsere strategische Kompetenz im eigenen Einzelhandel und E-Commerce weiter stärken »» siehe Strategie Global Sales, S. 82.

## Aufbau einer flexiblen Beschaffungskette

Schnelligkeit und Beweglichkeit sind entscheidend für unseren Wettbewerbsvorteil. Wir wollen die gesamte Bandbreite an Kunden- und Konsumentenwünschen erfüllen. Hierfür stellen wir sicher, dass unsere Produkte in den richtigen Größen und Farben verfügbar sind. Zudem liefern wir wegweisende technologische Innovationen und bieten die neuesten hochwertigen Modeprodukte mit den höchsten Qualitätsstandards an.

Als wichtige strategische Priorität wollen wir die Vorlaufzeiten für Entwicklung und Produktion verkürzen, indem wir unsere Infrastruktur, Prozesse und Systeme kontinuierlich verbessern. Durch den gegenseitigen Informationsaustausch zwischen dem Point-of-Sale und dem Ausgangspunkt werden wir die einzelnen Elemente unserer Beschaffungskette miteinander verbinden und enger integrieren, so dass wir schneller auf sich wandelnde Konsumententrends reagieren können. Die Schaffung maximaler Flexibilität hat daher für uns hohe Priorität. Der Konzern wird einerseits die Effizienzvorteile gemeinsamer Infrastrukturen und Prozesse ausschöpfen, andererseits aber auch maßgeschneiderte Lösungen für alle Geschäftsmodelle anbieten, ob im Großhandel oder Einzelhandel, ob in den Performance- oder Lifestyle-orientierten Geschäftsbereichen » siehe Global Operations, S. 106.

### Führend durch Innovation

Jeder Einzelne im adidas Konzern ist dafür verantwortlich, Innovation zu fördern. Daher unterstützen wir eine Unternehmenskultur, die mit Konventionen bricht und offen für Veränderungen ist. Wir erwarten von allen Konzernbereichen mindestens eine bedeutende Innovation pro Jahr. Insbesondere sind wir überzeugt, dass technologische Weiterentwicklungen und wegweisende Designs unserer Produkte von grundlegender Bedeutung sind, um eine langfristige Führungsposition in unserer Branche einzunehmen » siehe Forschung und Entwicklung, S. 110. Zu den weiteren Bereichen, in denen wir nach Innovation streben, zählen die Optimierung von Dienstleistungen für unsere Geschäftspartner » siehe Strategie Global Sales, S. 82 und die Implementierung effizienterer und effektiverer interner Abläufe.

### Förderung eines Teams, das auf unsere Tradition setzt

Unsere Unternehmenskultur ist von Einflüssen aus Vergangenheit und Gegenwart sowie von unseren Zielen für die Zukunft geprägt. Wir leben die Hingabe unserer Gründer gegenüber Sportlern und Konsumenten fort, wir sind stolz auf unsere Arbeit, schätzen Qualität und lieben Sport. Teamgeist wird bei uns großgeschrieben, ebenso wie offene Kommunikation, gute Zusammenarbeit und unsere gemeinsamen Werte aus der Welt des Sports » siehe i „Gemeinsame Werte“. Daher pflegen wir eine Unternehmenskultur, die die Werte Leistung, Leidenschaft, Integrität und Vielfalt in den Mittelpunkt rückt. Wir wollen ein Arbeitsumfeld schaffen, das – basierend auf starken Führungsqualitäten und Mitarbeiterengagement – Innovation, Teamgeist und Leistung fördert » siehe Mitarbeiter, S. 115.

### Nachhaltigkeit als wichtiges Ziel des Unternehmens

Wie jedes weltweit tätige Unternehmen muss der adidas Konzern einen vielfältigen Geschäfts- und Wettbewerbsdruck bewältigen, um höhere Finanzerträge und Wachstum zu erreichen. Gleichzeitig tragen wir eine Verantwortung für unsere Mitarbeiter, für die Arbeiter in den Fabriken unserer Zulieferer und auch für die Umwelt. Wir wollen ein nachhaltiges Unternehmen werden, indem wir gezielt eine Balance zwischen den Interessen unserer Aktionäre, den Bedürfnissen und Belangen unserer Mitarbeiter, der Arbeitnehmer sowie der Umwelt schaffen » siehe Nachhaltigkeit, S. 120. Wir berichten stets öffentlich über Maßnahmen, die wir ergreifen, um einen positiveren Einfluss auf Gesellschaft und Umwelt zu haben » siehe Online-Sozial- und Umweltbericht 2010 sowie auf » www.adidas-group.com/nachhaltigkeit.

### Strategische Säulen des adidas Konzerns

01

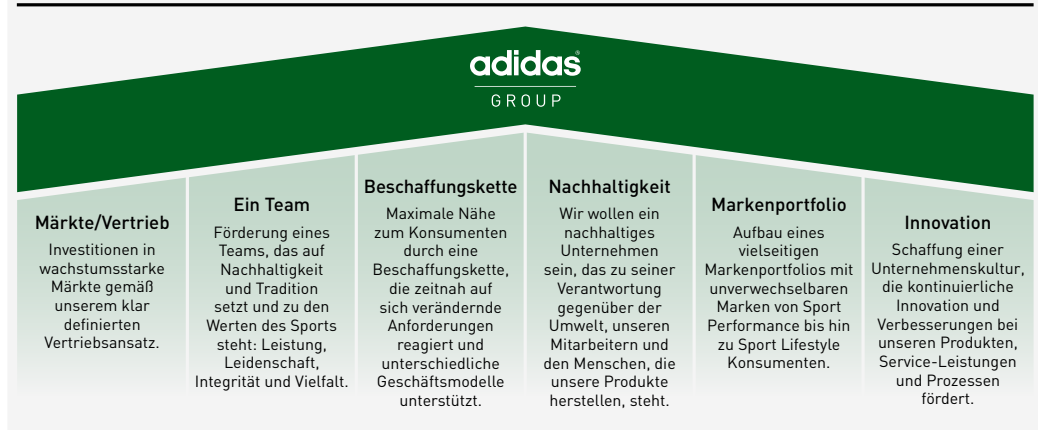

### Gemeinsame Werte

Mit unseren Werten schaffen wir glaubwürdige Marken für unsere Konsumenten und verpflichten uns, uns so zu verhalten wie es die Gesellschaft von einem verantwortungsbewussten Unternehmen erwartet.

- Leistung
- Leidenschaft
- Integrität
- Vielfalt

» siehe Corporate Mission Statement, S. 76.



# Strategie Global Sales

Die Vertriebsaktivitäten der Marken adidas und Reebok sind im Bereich Global Sales gebündelt. Der Bereich ist in drei Vertriebskanäle gegliedert: Großhandel, Einzelhandel und E-Commerce. Diese Aufteilung ermöglicht es uns, vielfältige Kunden- und Konsumenten Anforderungen zu erfüllen, um das Potenzial unserer Marken optimal auszuschöpfen, sich schneller auf Marktentwicklungen einzustellen und durch die weltweite Implementierung von „Best Practice“-Methoden Synergien in den Vertriebskanälen zu nutzen.

## Global Sales definiert strategische Prioritäten bis 2015

Der Bereich Global Sales steuert alle lokalen Organisationen in unseren Märkten, die für den Vertrieb der Marken adidas und Reebok verantwortlich sind. Der Fokus in diesem Bereich liegt darauf, zeitgemäße Vertriebsstrategien zu entwickeln und umzusetzen, die am Point-of-Sale lohnende Einkaufserlebnisse bieten.

Im Rahmen unseres konzernweiten strategischen Geschäftsplans (Route 2015), in dem Strategien und Ziele für den Zeitraum bis 2015 festgelegt sind, hat der Bereich Global Sales drei strategische Prioritäten definiert:

- Erhöhung des Anteils selbst kontrollierter Verkaufsflächen auf 45 % des Konzernumsatzes bis zum Jahr 2015
- Implementierung einer integrierten Vertriebsstrategie, um in wichtigen Regionen weiteres Wachstum sicherzustellen und das maximale Potenzial der Marken auszuschöpfen
- Unterstützung von Wachstumsinitiativen in den drei Schlüsselmärkten des Konzerns (Nordamerika, China und Russland/GUS).

## Fokus auf selbst kontrollierte Verkaufsflächen

Unsere Marken müssen am Point-of-Sale wettbewerbsfähig sein – also dort, wo Konsumenten ihre Kaufentscheidungen aufgrund von Verfügbarkeit, Komfort und Breite des Produktangebots treffen. Aus diesem Grund verfeinern wir kontinuierlich unsere Vertriebsstrategien. Von besonderer Bedeutung sind dabei insbesondere unsere selbst kontrollierten Verkaufsflächen. Zu diesen zählen:

- Eigener Einzelhandel
- E-Commerce
- Markenspezifische Geschäfte auf Franchise-Ebene (so genannte Mono-Branded Franchise Stores)
- Shop-in-Shops
- Joint Ventures mit Einzelhandelspartnern
- Co-Branded Stores mit Sportorganisationen und anderen Marken, d. h. Geschäfte, die zusätzlich zu unserer Marke noch mindestens eine weitere im Angebot haben.

Diese Formate bieten uns ein hohes Maß an Kontrolle über unsere Marken, da wir die Geschäfte entweder selbst führen (eigener Einzelhandel und E-Commerce, verwaltet durch unser Einzelhandelssegment) oder eng mit unseren Partnern zusammenarbeiten (Mono-Branded Franchise Stores, Shop-in-Shops, Joint Ventures und Co-Branded Stores, verwaltet durch unser Großhandelssegment).

Damit stellen wir sicher, dass am Point-of-Sale das passende Produktangebot adäquat präsentiert wird. Wir beabsichtigen, bis zum Jahr 2015 den Umsatzanteil selbst kontrollierter Verkaufsflächen auf 45 % des Konzernumsatzes zu steigern. Wir möchten dabei vor allem in unserem Einzelhandelssegment wachsen und den Ausbau unserer eigenen Stores weiter vorantreiben. Daneben setzen wir auf Wachstumsinitiativen in unserem Großhandelssegment, zum Beispiel die Ausweitung unseres Franchise-Geschäfts.

## Ausbau von Markenpräsenz und Marktanteil durch integrierten Vertriebsplan

Um unsere globale Markenpräsenz zu erhöhen und das zukünftige Wachstum unseres Geschäfts sicherzustellen, hat der Bereich Global Sales eine breit angelegte Initiative ins Leben gerufen, die so genannte „Integrated Distribution Roadmap“. Im Rahmen dieses Projekts identifizieren unsere drei Vertriebskanäle gemeinsam, wo und in welchen Vertriebsformaten unsere Marken in Schlüsselmärkten präsent sein sollen.

Auf diese Weise können wir ermitteln, wie wir die Konsumenten in den größten und attraktivsten Städten der Welt am besten ansprechen, ohne unserem Marken- und Vertriebsmix durch Kannibalisierungseffekte zu schaden. Darüber hinaus soll uns die Initiative dabei helfen, weitere Marktanteile in wohlhabenden Städten mit geringer Marktdurchdringung hinzuzugewinnen.

## Drei „Angriffsmärkte“ stehen im Mittelpunkt

Im Rahmen unseres strategischen Geschäftsplans Route 2015 hat der Bereich Global Sales folgende wichtige Wachstumsmärkte ermittelt: Nordamerika, China, Russland/GUS, Lateinamerika, Japan, Großbritannien und Indien » siehe Nachtrag und Ausblick, S. 174. Von diesen Märkten sollen die „Angriffsmärkte“ Nordamerika, China und Russland/GUS mehr als 50% der Umsatzzuwächse ausmachen, die wir für die nächsten fünf Jahre erwarten. Die Management-Verantwortlichen dieser drei Märkte berichten direkt an den Vorstandsvorsitzenden des adidas Konzerns, Herbert Hainer. Damit stellen wir sicher, dass diese Märkte die notwendige Aufmerksamkeit und die erforderlichen Ressourcen zum Erreichen ihrer Ziele erhalten.

## Großhandelsstrategie

Das Hauptziel des Großhandelssegments ist es, die effektivste und effizienteste Vertriebsorganisation der Sportartikelbranche zu werden, um so eine profitable Steigerung der Marktanteile zu gewährleisten » siehe 01. Dazu setzt das Großhandelssegment die vom Bereich Global Brands vorgegebenen „Go-to-Market“-Strategien innerhalb eines definierten Rahmens mit unseren wichtigsten Vertriebspartnern um.

Unsere wichtigsten Vertriebspartner sind Sporthandelsketten, Kaufhäuser, unabhängige Sportartikeleinkaufsgruppen, Lifestyle-Einzelhandelsketten und Online-Händler. Hier strebt das Großhandelssegment nach starken Partnerschaften mit den jeweils dynamischsten Händlern. Ziel ist es, diesen Partnern einen erstklassigen, individuell zugeschnittenen Service zu bieten. Dies soll unter anderem durch die Umsetzung folgender Prinzipien erreicht werden:

- Die Differenzierung und Segmentierung des Produktangebots in Abhängigkeit von den Stärken des jeweiligen Vertriebspartners.
- Die Harmonisierung und Standardisierung von Verkaufsmodellen und -prozessen, um Effizienz- und Kostenvorteile zu nutzen und den Bedarf an kurzfristigem Betriebskapital zu reduzieren.

### Ausschöpfen des Marktpotenzials durch Segmentierung von Kundengruppen und Produktangebot

Die Einführung weltweit standardisierter Sortimentspakete ist ein wichtiges Element unserer Großhandelsstrategie. Dies wurde zuerst in Europa umgesetzt.

Dabei werden vergleichbare Kunden in Gruppen eingeteilt, denen jeweils differenzierte Produktpakete angeboten werden. Bei weltweit 40.000 verschiedenen Partnern mit insgesamt mehr als 100.000 Points-of-Sale basiert die Segmentierung auf einer Unterscheidung zwischen Sport- und Lifestyle-Händlern, die entweder eine imagegetriebene, hochwertige Positionierung anstreben oder eine eher preisorientierte, kommerzielle Ausrichtung haben. Die optimale Abstimmung auf die jeweiligen Kundenanforderungen macht es möglich, das Marktpotenzial besser auszuschöpfen und zugleich die Komplexität und die Kosten zu reduzieren. Darüber hinaus kann unser Großhandelssegment in Zusammenarbeit mit seinen Einzelhandelspartnern den Umfang der regelmäßig bereitgestellten Durchverkaufsinformationen optimieren und deren Qualität verbessern. Die so gewonnenen Erkenntnisse über ihre spezifischen Bedürfnisse sind für beide Parteien von Vorteil. Unser Konzern wird dadurch zu einem noch attraktiveren und zuverlässigeren Geschäftspartner für den Einzelhandel. Gleichzeitig können wir hierdurch Umsatzwachstum erzielen und Geschäftschancen nutzen.

### Effizienzsteigerung durch das Management von Verkaufsflächen

Das Management von Verkaufsflächen (Retail Space Management, RSM) umfasst alle Geschäftsmodelle, die der Bereich Global Sales beim Ausbau selbst kontrollierter Verkaufsflächen im Einzelhandel anwendet. Unter der Prämisse, dass der Verkaufsprozess erst dann abgeschlossen ist, wenn ein Artikel vom Konsument gekauft wurde, arbeitet das Großhandelssegment entlang der gesamten Beschaffungskette eng mit den Einzelhändlern zusammen, um einen erstklassigen Service bis hin zum Point-of-Sale zu bieten.

Indem wir versuchen, die Profitabilität pro Quadratmeter zu steigern und zugleich die Produktverfügbarkeit für unsere Einzelhandelspartner zu verbessern, können wir eine höhere Zufriedenheit unserer Geschäftspartner erreichen und dadurch unseren Anteil an Regalflächen im Einzelhandel ausbauen. Die zwei wichtigsten Modelle des adidas Konzerns für ein erfolgreiches Management von Verkaufsflächen sind Franchising und „Never-out-of-Stock“ („Niemals Ausverkauft“).

– **Franchising:** Markenspezifische Geschäfte auf Franchise-Ebene (so genannte Mono-Branded Stores) sind eine der wichtigsten Wachstumschancen für den Konzern, da sie eine optimale Präsentation der Marke ermöglichen. Franchise-Stores werden von Franchise-Partnern finanziert und betrieben. Der adidas Konzern beteiligt sich normalerweise an den Kosten für die markenspezifische Ausstattung der Geschäfte. Zudem unterstützen wir unsere Franchise-Partner durch ein umfassendes Franchise-Konzept, darunter Sortimentsangebot, IT-Systeme, Schulungskonzepte sowie Leitlinien für Ladenbau und -betrieb. Auf diese Weise wird sichergestellt, dass sowohl die Präsentation der Marke als auch der Service jederzeit höchsten Qualitätsansprüchen genügen und mit unseren eigenen Einzelhandelsgeschäften vergleichbar sind.

– **Never-out-of-Stock (NOOS):** Das NOOS-Nachschubprogramm umfasst ein Kernsortiment an Hauptartikeln, zumeist mit einem Lebenszyklus von 18–24 Monaten, die in allen Vertriebskanälen und Märkten angeboten werden.

## Strategische Säulen Großhandel

01

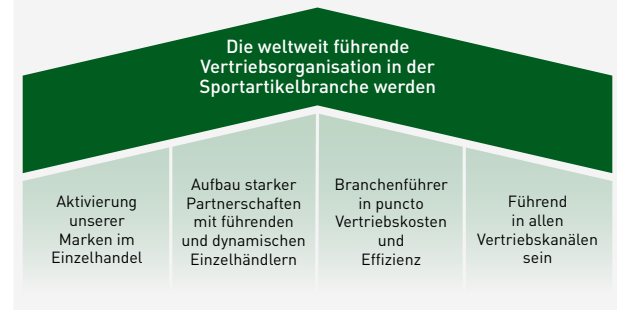



Dieses Nachschubprogramm sorgt für eine ausgezeichnete Produktverfügbarkeit während einer Saison und ermöglicht eine schnelle Anpassung an das Nachfrageverhalten der Konsumenten. Um an diesem Programm teilnehmen zu können, müssen Einzelhändler spezielle Verkaufsflächen bereitstellen, Kosten für die Ladenausstattung mittragen und sich zur Abnahme einer Erstlieferung verpflichten, die etwa 25 % der erwarteten Gesamtnachfrage für eine Saison entspricht. Im Gegenzug profitieren Kunden von einem deutlich reduzierten Lagerbestandsrisiko bei diesen Produkten. Die meisten NOOS-Artikel sind Teil einer durchgehenden („End-to-End“) Beschaffungskette, was auch das Lagerbestandsrisiko für den adidas Konzern begrenzt, da wir Nachschubprodukte nur auf Kundennachfrage produzieren.

### Harmonisierung und Standardisierung von Prozessen zur Realisierung von Skaleneffekten

Unser Großhandelssegment ist ständig bestrebt, operative „Best Practice“-Methoden übergreifend für die gesamten Großhandelsaktivitäten zu implementieren. Dabei wollen wir die Größe des Konzerns ausnutzen und die Komplexität reduzieren. Insbesondere die Harmonisierung und Standardisierung von nachgelagerten Prozessen ermöglicht zusätzliche Kostensenkungen durch vereinfachte IT-Systeme und -Anwendungen. Zudem führen wir (wie bereits in Europa begonnen) eine Richtlinie für Handelskonditionen ein, bei der Kunden für Effizienzsteigerungen (z. B. in der Logistik) oder durch vermehrte Verkaufsunterstützung (z. B. durch Mittel zur verbesserten Produktpräsentation) belohnt werden.

In diesem Zusammenhang haben wir bereits eine regelmäßige Berichterstattung, die uns aussagefähige Richtwerte („Benchmarks“) liefert, mit denen wir unsere Maßnahmen zur Unterstützung des Durchverkaufs bei unseren Geschäftspartnern präziser steuern können.

### Innovation als Schlüssel zu kürzeren Markteinführungszeiten

Wenn wir unseren Wettbewerbsvorsprung sichern und letztendlich mehr Regalfläche bei unseren Kunden gewinnen möchten, ist es von entscheidender Bedeutung, unseren Produktentwicklungsprozess zu beschleunigen und gleichzeitig die Komplexität zu reduzieren. Aus diesem Grund haben wir eine virtuelle Applikation für den Hineinverkauf unserer Produkte in den Einzelhandel entwickelt, mit der wir unseren Einzelhandelspartnern ständig ein komplettes Sortiment an Mustern zur Verfügung stellen können. Dabei profitieren unsere Kunden dahingehend, dass sie jederzeit und überall Zugriff auf das gesamte Sortiment haben. Da mit der Applikation weniger Muster während des Hineinverkaufsprozesses erforderlich sind und zugleich der Bilderstellungsprozess rationalisiert wird, können wir einerseits die Markteinführungszeiten verkürzen und andererseits Kosten senken. Die neue Applikation wurde bereits in mehreren Märkten vorab eingeführt und soll bis zum Jahr 2013 60 % aller Vorbestellungen im Großhandelssegment abdecken.

## Einzelhandelsstrategie

Unsere strategische Vision für unser Einzelhandelssegment besteht darin, durch gesundes und nachhaltiges Wachstum mit gesteigerter Kapitalrendite einer der weltweit führenden Einzelhändler zu werden » siehe 02. Unser eigener Einzelhandel hat für das Wachstum unseres Konzerns und unserer Marken eine große Bedeutung. Die Gründe hierfür sind vielfältig:

- Möglichkeit zur erstklassigen Präsentation unserer Marken und ihrer Vielfalt (z. B. in Concept Stores)
- Aufbau von Vertriebsaktivitäten in Märkten, die keine traditionellen Großhandelsstrukturen besitzen
- Abnehmender Anteil an Verkaufsflächen über den Großhandel aufgrund der Branchenkonsolidierung
- Nutzen der Erfahrungen aus dem eigenen Einzelhandel für die restliche Organisation
- Bedarf, Lagerräumungsverkäufe über einen eigenen Vertriebskanal zu steuern (d. h. Factory Outlets)

Reebok  
Core Store in Warschau

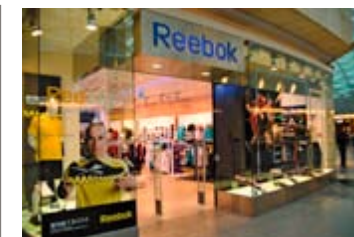

Im Laufe der letzten fünf Jahre hat sich der adidas Konzern mit weltweit 2.270 Läden der Marken adidas und Reebok zu einem bedeutenden Einzelhandelsunternehmen entwickelt » siehe Geschäftsentwicklung Einzelhandel, S. 153.

Für die Zukunft haben wir die Struktur unserer Ladenkette vereinfacht und in drei Formate zusammengefasst: Brand Center, Core Stores und Factory Outlets.

- Brand Center, d. h. groß angelegte Geschäfte, die das komplette Spektrum der jeweiligen Marke unter einem Dach vereinen, repräsentieren auf eindrucksvolle Art deren Stärke, Vielfalt und Tiefe. Dieses Format wird es nur in begrenzter Anzahl und an exklusiven Standorten geben.
- Core Stores sind der wirtschaftliche Motor für Umsatz und Gewinn innerhalb unserer Einzelhandelsorganisation und maßgeblich dafür verantwortlich, der Stärke der einzelnen Marken Nachdruck zu verleihen. Es wird Core Stores der Marke adidas, Originals Core Stores sowie Reebok Core Stores geben. Entsprechend ihrer Größe werden diese in die Kategorien A, B oder C eingeteilt.
- Unsere Factory Outlets ermöglichen den kontrollierten Verkauf von Überbeständen unserer verschiedenen Großhandelskunden und Franchise-Partner, aus dem Bereich E-Commerce sowie von unseren eigenen Einzelhandelsgeschäften. Durch das verbesserte Management regionaler Lagerbestände und eine begrenzte Produktion nach Plan möchten wir unser Produktangebot verbessern und ausgewogener gestalten, um so unsere Profitabilität weiter zu steigern.

Angesichts der gestiegenen Bedeutung des Einzelhandels für die Konzern-ergebnisse wurde im Jahr 2009 ein neues zentrales Führungsteam für diesen Bereich gebildet. Das Team hat den Auftrag, einen globalen strategischen Rahmen mit entsprechenden Leitlinien zu erstellen, die Bedürfnisse der Einzelhandelsgeschäfte und des Markts auf globaler Ebene zu vertreten sowie die wirtschaftliche Stärke des weltweiten Einzelhandels von adidas und Reebok zu steigern.

Um die Entwicklung zu einem erstklassigen Einzelhändler voranzutreiben, wurden vier strategische Grundpfeiler definiert:

- Fokussierung auf den Konsumenten
- Festigung der operativen Stärke
- Ausschöpfung des Markenportfolios
- Nutzung unserer globalen Präsenz und Größe.

adidas Sport Performance  
Core Store in Berlin

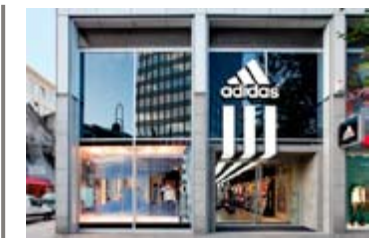

Durch eine klare Ausrichtung auf diese vier strategischen Grundpfeiler sind wir auf dem besten Weg, zu einem der weltweit führenden Einzelhändler zu werden. Im Rahmen unseres strategischen Geschäftsplans (Route 2015) werden wir weiter in unsere eigenen Einzelhandelsaktivitäten investieren und bis zum Jahr 2015 mehr als 500 Geschäfte in den bestehenden Einzelhandelsformaten eröffnen.

Wir planen, die meisten dieser neuen Geschäfte in Schwellenländern zu eröffnen, insbesondere in Russland. Zudem rücken wir die weitere Ausdehnung der Originals Core Stores in den Mittelpunkt, um damit die Anzahl der Vertriebsstellen für unsere Bekleidungskollektionen zu erhöhen. Darüber hinaus planen wir die Implementierung des neuen vertikalen Geschäftsmodells für das adidas NEO Label » siehe Strategie Global Brands, S. 87. Für die praktische Umsetzung unserer strategischen Prioritäten streben wir an, das Management der so genannten „5 Ps“ (People, Products, Premises, Processes und Profit) zu verbessern.

### Menschen („People“)

Der Konsument und unsere Einzelhandelsmitarbeiter sind die primären Bezugspunkte für unseren Erfolg. Wir sind fortlaufend bestrebt, Konsumentenwünsche zu interpretieren und uns auf sie einzustellen, um so eine Mischung aus neuen und treuen Konsumenten – ob sportlich aktiv, vom Sport inspiriert oder freizeitorientiert – anzusprechen. Um die Wünsche der Konsumenten zuverlässig zu erfüllen, wird unser Einzelhandelssegment eine Belegschaft zusammenstellen, die besonders engagiert sowie wirtschaftlich- und kundenorientiert ist. Für unseren Einzelhandel möchten wir im Backoffice-Bereich sowie in den Geschäften einen Stab von Mitarbeitern aufbauen, die im Sinne eines vertikalen Einzelhändlers denken und handeln und die den Konsumenten stets in den Vordergrund stellen. Um dieses Ziel zu erreichen, hat das Einzelhandelssegment im Jahr 2010 die neue Personalstrategie SHINE eingeführt. Diese Strategie zielt darauf ab, bestehende „Best Practice“-Methoden zu nutzen und im Personalbereich einen globalen Standard für die Einzelhandelsgeschäfte zu schaffen.

Damit sollen vielfältige und umfassende wirtschaftliche Kompetenzen sowie Expertise im vertikalen Einzelhandel sichergestellt werden, mit denen sich unsere weltweite Belegschaft weiterentwickeln kann.

### Produkte („Products“)

Die Produktstrategie unseres Einzelhandelssegments soll in erster Linie sicherstellen, dass in den diversen Einzelhandelsformaten des Konzerns die für das jeweils angesprochene Konsumentenprofil relevanten Produkte präsentiert werden. Das Produktangebot muss preislich wettbewerbsfähig, klar verständlich, leicht zu finden und vor allem zur richtigen Zeit am richtigen Ort verfügbar sein. Um dieses Ziel zu erreichen, werden wir die Produktsortimente, Konzepte und Point-of-Sale-Materialien im Einklang mit aktuellen Konsumtrends bestmöglich einsetzen. Darüber hinaus sind wir durch die Analyse täglicher Handelsinformationen in der Lage, unsere Produkte im richtigen Verhältnis zu präsentieren und dadurch unseren Durchverkauf zum vollen Preis zu erhöhen. Dies gilt insbesondere für unsere „Bestseller“, bei denen wir den Absatz noch weiter steigern möchten.

### Verkaufsflächen („Premises“)

Ein angenehmes Einkaufserlebnis beginnt im Laden – hier begegnen sich Konsument und Marke. Daher ist es von höchster Wichtigkeit, dass unsere Einzelhandelsgeschäfte nicht nur ansprechend, sportlich, unterhaltsam und interaktiv sind, sondern auch übersichtlich und logisch gestaltet sind, so dass sie den Einkauf leicht machen. Um den Absatz pro Quadratmeter zu steigern, hat das Einzelhandelssegment die Optimierung des eigenen Immobilienmanagements in den Mittelpunkt gerückt.

## Strategische Säulen Einzelhandel

02

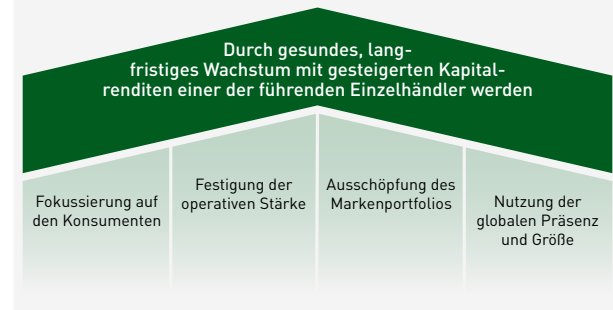



Dabei wurden spezielle Immobilienteams aufgebaut, die Folgendes sicherstellen sollen:

- Standort und Größe eines Geschäfts sind auf die Anforderungen des lokalen Markts abgestimmt.
- Der Laden ermöglicht einen hohen Absatz pro Quadratmeter.
- Die Steigerung der Marktanteile und die verstärkte Präsenz am Markt stehen im Einklang mit unserem integrierten Vertriebsplan, nach dem sich das Einzelhandelssegment auf die weltweit 100 wichtigsten Städte konzentrieren wird.

adidas Originals  
Core Store in München

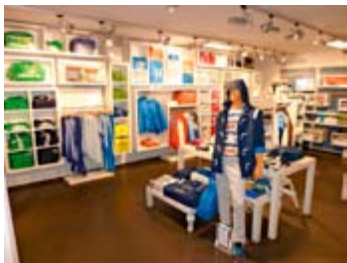

### Prozesse („Processes“)

Auch im Jahr 2011 wird die Straffung und Harmonisierung unserer Einzelhandelsgeschäfte und Beschaffungsprozesse für das Einzelhandelssegment klare Priorität haben, um möglichst schnell auf Kundenwünsche reagieren zu können. In Bezug auf die Läden zielt eine groß angelegte Initiative darauf ab, branchenweit führende operative Richtlinien und Verfahren zu identifizieren und umzusetzen sowie die einheitliche Anwendung der neuen Standards für den Einzelhandel sicherzustellen.

Weltweit einheitliche Handbücher liefern klare Leitlinien für den Aufbau der Läden, die Warenpräsentation und die geschäftsinternen Kommunikationsabläufe, wodurch wir eine reibungslose Umsetzung und operative Stärke sicherstellen möchten.

Zudem werden wir weiter daran arbeiten, die Beschaffungskette, die Systemlandschaft sowie Einkaufs- und Bedarfsplanungsprozesse anzupassen – eine wesentliche Voraussetzung, um unsere Flexibilität während der Saison zu verbessern, um schneller auf sich wandelnde Trends reagieren zu können und Größenvorteile für die Einzelhandelsaktivitäten des Konzerns zu realisieren. Schließlich bedeutet die strikte Fokussierung unseres Einzelhandels auf die Konsumenten auch einen Perspektivwechsel vom Hineinverkauf (Push-Modell) zum Durchverkauf (Pull-Modell).

### Gewinn („Profit“)

Für alle Einzelhandelsteams, egal ob sie in der Logistik, direkt in den Läden, im Marketing oder in einer anderen Einzelhandelsfunktion tätig sind, besteht das Hauptziel darin, die Wirtschaftlichkeit und Profitabilität der vorhandenen eigenen Einzelhandelsgeschäfte zu steigern. Wir werden daher Läden aufgeben, die ihr Potenzial nicht erfüllen. Außerdem werden wir neu eröffnete bzw. umgestaltete Läden genau überwachen und bewerten, um sicherzustellen, dass die Vorgaben hinsichtlich Profitabilität und Kapitalrendite erreicht werden. Im Rahmen unserer Route 2015 liegt ein Schwerpunkt darauf, die Profitabilität der bestehenden Brand Center und Core Stores der einzelnen Marken zu steigern. Um diese Strategie zu unterstützen, führte das Einzelhandelssegment im Jahr 2010 neue operative Leistungsindikatoren ein, die einen Vergleich mit branchenweit führenden Einzelhändlern ermöglichen.

## E-Commerce-Strategie

Anfang 2010 wurde ein Führungsteam aufgebaut, um die strategische Ausrichtung der E-Commerce-Aktivitäten des Konzerns für die Marken adidas und Reebok zu erarbeiten und festzulegen. Beide Marken haben in den letzten Jahren mit ihren jeweiligen Plattformen Fortschritte erzielt. Dennoch glauben wir, dass dieser Vertriebsweg dem Konzern noch beträchtliches Potenzial bietet.

Im Rahmen unseres konzernweiten strategischen Geschäftsplans (Route 2015) haben wir die strategischen Prioritäten von E-Commerce definiert. Diese umfassen unter anderem Folgendes:

- Etablieren von E-Commerce als dritte Vertriebsäule
- Abstimmung von Großhandels- und E-Commerce-Aktivitäten durch Umsetzen einer neuen Distributionspolitik
- Schaffung einer einzigen Anlaufstelle für Konsumenten durch Verknüpfung von Marken-, Shop- und Individualisierungs-Internetseiten
- Aufbau einer branchenweit führenden Technologieplattform
- Aufbau verbesserter E-Marketing-Kompetenzen, um Konsumenten anzuziehen, zu gewinnen und zu binden.

Der Erfolg unserer E-Commerce-Strategie ist eng mit unserer Fähigkeit verknüpft, in einem umkämpften Markt neue Konsumenten anzuziehen, für uns zu gewinnen und schließlich an uns zu binden. Um Konsumenten anzuziehen, müssen wir die Sichtbarkeit unserer Internetseite sowie deren Ranking in den verschiedenen Suchmaschinen verbessern. Darüber hinaus müssen wir unser Management von bezahlten Internetplatzierungen optimieren, unsere Internetseite mit sozialen Medien verlinken sowie Affiliate Marketing einsetzen, um für eine größere Anzahl geeigneter Konsumententypen attraktiv zu werden. Um die Kaufraten zu erhöhen, wollen wir unsere E-Commerce-Plattformen verbessern und vereinfachen und zu „Best-in-class“-Einkaufserlebnissen weiterentwickeln. Um die neu gewonnenen Konsumenten nachhaltig an uns zu binden, wollen wir sie gezielt ansprechen. Dabei setzen wir auf CRM-Lösungen, die eine klare Segmentierung ermöglichen. In diesem Zusammenhang spielen soziale Medien eine wesentliche Rolle, da sie die Vertiefung des Dialogs mit unseren Konsumenten erleichtern und eine intensivere Beziehung mit ihnen unterstützen.

Mit diesen Maßnahmen strebt unser Konzern an, bis 2015 einen Umsatz von 500 Mio. € im Bereich E-Commerce zu erzielen.

# Strategie Global Brands

Der Bereich Global Brands ist für alle Marketingfunktionen sowie für die langfristige Entwicklung der Marken adidas und Reebok verantwortlich. Zu den Hauptzielen des Bereichs gehört es sicherzustellen, dass unsere Marken die sich bietenden Chancen in einzelnen Märkten und Kategorien über gut strukturierte und koordinierte Marketingstrategien ergreifen. Jede Marke ist für die Umsetzung ihrer eigenen Strategie verantwortlich. Dazu entwickeln sie ständig innovative, ansprechende Produkte und entwerfen Kommunikationsstrategien, die den Konsumenten unsere Marken auf überzeugende und authentische Art präsentieren.

## Unterstützung der langfristigen Entwicklung von adidas und Reebok

Um das langfristige, nachhaltige Wachstum des Konzerns zu sichern, konzentriert sich der Bereich Global Brands darauf, die Entwicklung der Marken adidas und Reebok voranzutreiben. Strategisches Ziel ist es, ein qualitatives, nachhaltiges Wachstum zu erreichen, indem wir Marken aufbauen, die von Kunden und Konsumenten als begehrenswert erachtet werden. Im Jahr 2010 spielte Global Brands eine wesentliche Rolle bei der Erarbeitung der Route 2015, dem strategischen Geschäftsplan des Konzerns für die nächsten fünf Jahre. Die Marken adidas und Reebok werden innerhalb dieser fünf Jahre schätzungsweise 90 % des geplanten Konzernwachstums beisteuern.

Die nachfolgenden Ziele von adidas und Reebok wurden als entscheidende Erfolgsfaktoren für den adidas Konzern identifiziert:

- Steigerung von Umsatz und Marktanteilen bei adidas Sport Performance in den weltweit wichtigsten Kategorien Running und Basketball
- Ausbau von adidas Sport Style im Fast-Fashion-Bereich durch adidas NEO
- Etablierung von Reebok als führende Marke für Fitness und Training
- Kategorieübergreifende, branchenweite Führungsrolle in den Bereichen Personalisierung und Interaktivität

## Fokussierung auf den Konsumenten

Der Konsument steht im Mittelpunkt unseres unternehmerischen Handelns. Dies ist unsere oberste Maxime für unseren langfristigen Erfolg. Im Rahmen seiner Tätigkeit hat der Bereich Global Brands eine Übersicht über unsere Zielkonsumenten erarbeitet. Diese erstreckt sich ausgehend von unserer Verwurzelung im Sport – und damit vom rein leistungsorientierten Konsumenten – hin zu den heutigen Trendsettern in Sachen Mode, die die Sportartikelmarken für sich entdeckt haben >>> siehe 01.

## Markenarchitektur – Portfoliostrategie

01

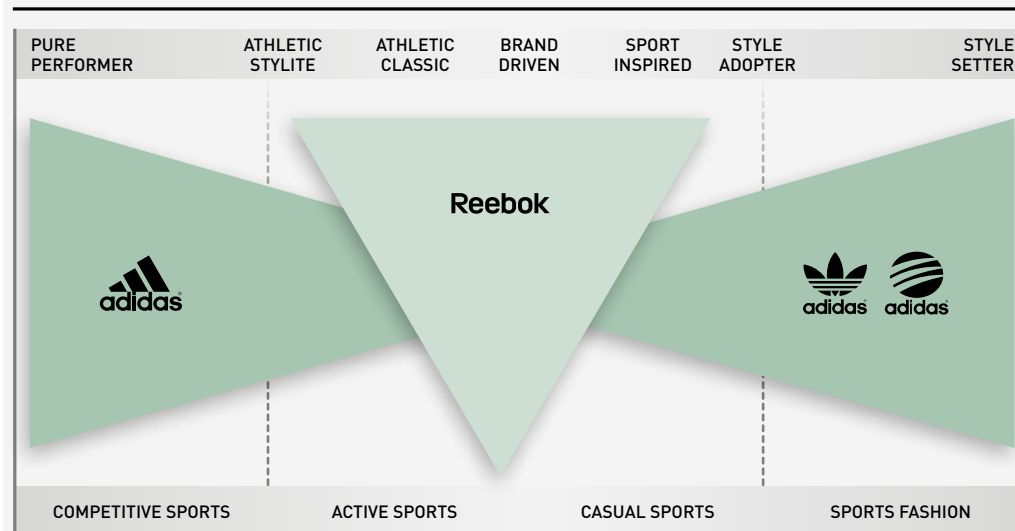



Wir sind uns bewusst, dass es heutzutage nicht mehr um Massenprodukte und Massenmarketing geht, sondern vielmehr darum, Beziehungen individuell aufzubauen. Wenn wir die Kaufgewohnheiten, die Fitness, die Motivation und die Ziele für den Sport oder den Lifestyle kennen, können wir relevantere Produkte, Dienstleistungen und Erlebnisse anbieten, die einen bleibenden Eindruck beim Konsumenten hinterlassen. In diesem Zusammenhang haben wir fünf wesentliche globale Trends identifiziert, die über den Zeitraum der Route 2015 hinweg für unsere Marken und Submarken von großer Bedeutung sind:

– **Fit fürs Leben:** Beim Sport geht es mittlerweile um weit mehr, als im Wettkampf gegeneinander anzutreten und zu gewinnen. Sport ist immer stärker im Alltag und Leben der Konsumenten verankert. Motivation und Ziele sind nicht mehr nur auf die sportliche Leistung beschränkt, sondern schließen Spaß, Kontaktfreudigkeit und Lebensqualität mit ein.

– **Du bist, was du weißt und was du tust:** Der Gedanke des lebenslangen Lernens gewinnt an Popularität. Der Fokus verschiebt sich zusehends von dem, was wir haben und woher wir kommen, zu dem, was wir wissen und was wir tun.

– **Individualität wird großgeschrieben:**

Die Konsumenten möchten sich zunehmend von anderen abheben. Sie wollen ihrer Kreativität freien Lauf lassen – einerseits durch die individuelle Kombination der Produkte und Services, die sie brauchen, andererseits durch die Wahl personalisierter Angebote, die auf ihre Bedürfnisse zugeschnitten sind.

– **Lieber gemeinsam:** Das Bedürfnis nach sozialer Interaktion, sowohl online als auch offline, wird stärker. Dies liegt daran, dass von den Konsumenten immer mehr Mobilität gefordert wird und der Aufstieg digitaler Technologien es ihnen ermöglicht, leichter mit Gleichgesinnten in Kontakt zu treten.

– **Back to the Basics:** Produkte und Services für den Alltag sollen schlicht und authentisch sein und das Leben der Konsumenten vereinfachen, statt es komplizierter zu machen. Das Interesse an Aktivitäten im Freien steigt. Es wird der zunehmende Wunsch deutlich, sich auf die Natur einzulassen und im Einklang mit ihr zu leben.

Um diesen Trends nachzukommen und die entsprechende Nachfrage der Konsumenten erfüllen zu können, müssen die Teams von Global Brands die nachfolgenden Prinzipien einhalten:

- Schaffung unerwarteter Produkt- und Markenerlebnisse
- Schaffung einer möglichst starken emotionalen Verbindung zwischen unseren Marken und dem Konsumenten
- Bereit sein für die nächste Generation – Veränderungen vorhersehen
- Reduzierung auf das Wesentliche
- Umsetzungsstärke zeigen, d. h. sicherstellen, dass unser gesamtes Handeln einheitlich ist – von der Idee bis zur Kommunikation am Point-of-Sale und im Internet.

**Markenarchitektur und Differenzierung**

Wir sind davon überzeugt, dass uns unsere Mehrmarken-Struktur einen entscheidenden Wettbewerbsvorteil sichert. Über unsere Markenarchitektur decken wir nahtlos die von uns definierten Konsumentensegmente ab. Wir erfüllen dadurch nicht nur mehr Konsumentenbedürfnisse, sondern vermitteln gleichzeitig klare Markenbotschaften und Werte. Die Positionierung von adidas, Reebok und deren jeweiligen Submarken basiert stets auf ihrer einzigartigen DNA – ihrer Tradition und ihren Werten.

Als durch und durch globale Marke mit deutschen Wurzeln konzentriert sich adidas über seine Submarken auf den Wettkampfsport.

Der Fokus von adidas Sport Performance richtet sich dabei auf Innovation und Technologie: Die Submarke präsentiert sich als Multisport-Spezialist. Ziel ist es zunächst, die besten Produkte für einzelne Sportarten wie z. B. Fußball, Basketball oder Running sowie regionspezifische Sportarten anzubieten. Anschließend möchten wir die Markentreue und Innovationskraft in weitere Kategorien übertragen. adidas Originals und adidas Sport Style schöpfen das Potenzial in den Sport-Lifestyle- und Fashion-Märkten aus.

Im Gegensatz dazu präsentiert sich Reebok als eine globale Marke mit amerikanischem Touch. Rückgrat der Marke bilden die Kategorien Fitness und Training, speziell in den Bereichen Active und Casual Sports. Konsumenten, die sich mit den Werten und der Positionierung von Reebok identifizieren, werden die Marke auch dann attraktiv finden, wenn sie laufen gehen oder Basketball spielen. So schöpft Reebok die Möglichkeit aus, seine Technologiekonzepte und Designs in andere Sportkategorien zu übertragen. Damit schlägt Reebok eine Brücke zwischen den beiden Polen des Konsumentenspektrums von Leistungssportlern bis hin zu Konsumenten mit einer Affinität für Sportmode  
» siehe 02.

Durch diese unterschiedlichen Positionierungen stehen unsere Marken nicht im direkten Konkurrenzkampf miteinander. Vielmehr fordern und unterstützen wir uns als „freundschaftliche“ Wettbewerber mit unterschiedlichen Zielgruppen gegenseitig.

Jede Marke und Submarke ist selbst dafür verantwortlich, ihre jeweilige Positionierung mit Leben zu erfüllen. Dazu entwickelt sie Produkte und Kommunikationsinstrumente, die den Vertrieb in seinem Tagesgeschäft unterstützen. Diese bilden auch die Plattform und das Gerüst für langfristige Steigerungen von Marktanteil und Profitabilität. adidas und Reebok verfügen jeweils über eine eigene Identität und Tradition, über eigene Technologien und Designs sowie ein eigenes Image. Die strategischen Prinzipien und Methoden, über die Umsatzwachstum und Profitabilität künftig gesteigert werden sollen, sind für beide Marken jedoch gleich und umfassen unter anderem:

- Führungsrolle bei Produktinnovationen, die den Konsumenten begeistern und inspirieren
- Vorreiterrolle in Marketing und Kommunikation
- Aktivierung und Akzeptanzbildung über relevante Promotion-Partnerschaften
- Steigerung von Stellenwert und Attraktivität der Marken durch strategische Partnerschaften

#### **Führungsrolle bei Produktinnovationen, die den Konsumenten begeistern und inspirieren**

Durch Global Brands streben wir danach, jeden Konsumenten individuell und auf besondere Art anzusprechen. Dazu setzt der Bereich Produktinitiativen ein, die sowohl im Handel als auch beim Konsumenten Interesse wecken.

Wir sind davon überzeugt, dass technologische Innovationen die Grundvoraussetzung für eine langfristige Führungsposition in unserer Branche sind. adidas und Reebok setzen bei ihren Produkten in puncto Funktionalität und Leistungsfähigkeit immer wieder neue Maßstäbe, indem sie die umfangreichen Kompetenzen und Erfahrungen in Forschung und Entwicklung innerhalb des Konzerns optimal zum Einsatz bringen. Darüber hinaus ist Innovation ein wichtiger Faktor, durch den sich die Produkte von adidas und Reebok für den Konsumenten sichtbar von denjenigen der Wettbewerber abheben.

Bei adidas ist beispielsweise das Thema Personalisierung eines der Kernthemen in puncto Innovation. Die Marke hat sich das Ziel gesetzt, bis zum Jahr 2015 die Sportmarke mit dem individuellsten Angebot zu sein. Bei Reebok liegt der Innovationsfokus auf Fitness und Training. Hier liegt der Schwerpunkt auf der Entwicklung von Produkten, die den Konsumenten wesentliche Vorteile in den Bereichen Krafttraining, Muskelaktivierung und Beweglichkeit bieten » siehe Forschung und Entwicklung, S. 110.

Durch die Schaffung von inspirierenden Produkt- und Markenerlebnissen versuchen adidas und Reebok, ihre Positionen als Premium-Marken auszubauen. Dies wiederum leistet einen bedeutenden Beitrag zur nachhaltigen Steigerung der Bruttomargen. Aus diesem Grund ist das kontinuierliche Hervorbringen von Innovationen ein wichtiger Weichensteller für zukünftige Profitabilitätssteigerungen des Konzerns.

#### **Differenzierung der Marken adidas und Reebok**

02

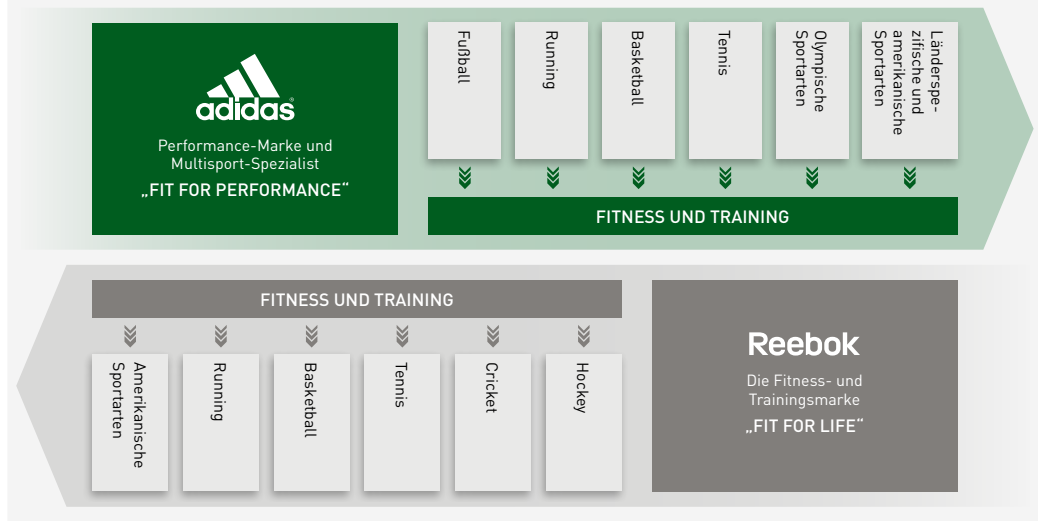

### Vorreiterrolle in Marketing und Kommunikation

Um in der Sportartikelbranche wettbewerbsfähig zu sein, müssen Marken über ein klares Profil bei ihren Zielkonsumenten verfügen. Aus diesem Grund konzentrieren sich adidas und Reebok auf die Entwicklung inspirierender und innovativer Marketingkampagnen und Kommunikationsinstrumente, um so Markenwert zu schaffen und die wirtschaftlichen Ziele des Konzerns zu unterstützen.

Ein wichtiger Grundsatz der Marketing- und Kommunikationsstrategie ist es, die Emotionen des Sports sowie die Vorteile eines sportlichen Lebensstils über alle Kommunikationskanäle hinweg auszunutzen. Sowohl adidas als auch Reebok stellen regelmäßig neue globale Marketingkonzepte vor, die einfache und überzeugende Markenbotschaften formulieren und ein breites Produktsortiment bewerben. So wird adidas zum Beispiel die Kampagne „One Brand Anthem“ („Eine gemeinsame Markenhymne“) nutzen, um alle seine wichtigsten Kategorien und Submarken im Jahr 2011 gezielt zu präsentieren. Reebok wird weiterhin auf seine globale Kampagne setzen, bei der das Motto „Ree“ („wieder“) als Leitmotiv für die Markenkommunikation mit den Konsumenten dient. Die Schlüsselbotschaft der Kampagne ist „ReeDefine“ – Reebok definiert Sport und Lifestyle neu und füllt damit das Leben der Konsumenten wieder mit Spaß und Freude.

Darüber hinaus möchte der Bereich Global Brands sicherstellen, dass alle seine Marken eine Vorreiterrolle bei der Markenkommunikation spielen – ein besonders wichtiger Aspekt, denn der Informationsfluss wird heute immer schneller. Mithilfe von Investitionen in digitales Marketing und digitale Technologien regen adidas und Reebok die Konsumenten an, in einen persönlichen Dialog mit den Marken zu treten. Ob Personalisierungsplattformen in den Geschäften oder online, ob soziale Netzwerke oder digitale Übertragungsmedien – diese kostengünstigen Methoden schaffen neuartige Konsumentenlebnisse mit Echtzeit-Charakter.

### Aktivierung und Akzeptanzbildung über relevante Promotion-Partnerschaften

Die Zusammenarbeit mit verschiedenen Promotion-Partnern wie Verbänden, Mannschaften, Ligen, Sportveranstaltungen und Einzelpersonen ist ein wichtiges Mittel zur Unterstützung der Markenpositionierung. Der adidas Konzern widmet diesen Kooperationen erhebliche Ressourcen. Mit Hilfe dieser Partnerschaften können adidas und Reebok die Vorteile ihrer Produkte im Leistungssport demonstrieren und die Marken auf den von Sport inspirierten Lifestyle-Markt ausweiten. Sowohl adidas als auch Reebok verfolgen eine Partnerschaftsstrategie, die darauf ausgerichtet ist, ihre jeweilige Positionierung im Markt optimal widerzuspiegeln.

Eines der Leitprinzipien von adidas ist es, alle Athleten auf dem Weg zum Erreichen ihres eigenen „Impossible“ zu unterstützen.

Dabei präsentiert adidas seine hervorragenden Produkte auf den größten Bühnen dieser Welt – durch Sponsorenverträge für die FIFA Fußball-Weltmeisterschaft, die NBA, den European Rugby Cup sowie die Olympischen Spiele 2012 in London. Darüber hinaus hat adidas Partnerschaften mit unzähligen herausragenden Sportmannschaften, darunter AC Mailand, Liverpool FC, FC Bayern München und Real Madrid im Fußball, die neuseeländische Rugby-Nationalmannschaft (All Blacks), verschiedene amerikanische Universitäten wie z. B. die UCLA und Notre Dame sowie bedeutende Sportpersönlichkeiten wie der FIFA Weltfußballer des Jahres Lionel Messi, Fußballidol David Beckham, die Basketball-Größen Derrick Rose und Dwight Howard, Langstreckenlegende Haile Gebrselassie, die Leichtathletikstars Tyson Gay und Jeremy Wariner sowie die Tennisstars Justine Henin, Caroline Wozniacki und Andy Murray.

Um seine zentralen Konzepte nachhaltig voranzutreiben, hat Reebok ebenfalls Partnerschaften mit Top-Sportlern vorzuweisen. Im Bereich Women's arbeitet Reebok mit einigen der weltbesten Fitnesstrainerinnen zusammen, die für ihren mitreißenden und motivierenden Trainingsansatz bekannt sind. Im Bereich Men's Sport wird Reebok von einigen der bekanntesten Sportler unterstützt, darunter Peyton Manning, John Wall sowie Lewis Hamilton. Vor diesem Hintergrund hat die Marke unter anderem auch exklusive, langfristige Lizenzvereinbarungen mit der National Lacrosse League in Nordamerika. Dadurch hält Reebok Exklusivrechte zur Herstellung und Vermarktung von authentischen und Replika-Trikots sowie Bekleidung für Trainerstab und Auswechselspieler.

### Steigerung von Stellenwert und Attraktivität der Marken durch strategische Partnerschaften

adidas und Reebok verfolgen erfolgreiche Design- und Co-Branding-Strategien mit geeigneten Partnern. So kann adidas mit Partnerschaften wie beispielsweise mit Yohji Yamamoto, Stella McCartney und Porsche Design aufwarten, die vom Sport inspirierte Mode, hochwertige funktionale Sortimente oder auch Luxus-Sportbekleidung entwerfen. adidas Originals setzt weiterhin auf wertvolle Kooperationen mit bekannten Marken wie Burton, Vespa und Star Wars, über die adidas bei stilbewussten Streetwear-Konsumenten verstärkt wahrgenommen wird.

Im Bereich Women's Fitness setzen Reebok und Cirque du Soleil ihre strategische Partnerschaft fort, die inspirierende, neue Trainingserlebnisse und Produktkollektionen hervorgebracht hat. Im Herbst/Winter 2010 stellte Reebok seine erste Kollektion in Zusammenarbeit mit Giorgio Armani S.p.A. vor. Diese Kombination aus der weltweit erfolgreichen Mode der Label EA7 und Emporio Armani sowie der Geschichte, Tradition und Technologie von Reebok in Sachen Fitness und Training eröffnet eine völlig neue Perspektive und schafft ein einzigartiges Konzept auf dem weltweiten Sport- und Lifestyle-Markt.



## adidas Strategie

### adidas: Performance-Märke und Multisport-Spezialist

adidas hat eine klare Mission: Die Marke möchte die weltweit führende Sportartikelmarke werden. Einer der wichtigsten Faktoren auf dem Weg dorthin ist die breit gefächerte, einzigartige Produktpalette – von Bekleidung und Schuhen für Profisportler bis hin zu hochwertiger Mode. Dadurch kann adidas unterschiedlichste Konsumentenbedürfnisse erfüllen und Marktchancen in verschiedenen Bereichen nutzen. Gleichzeitig ist adidas dadurch Marktrisiken weniger ausgesetzt. adidas hat sich der Produktinnovation verschrieben und ist stolz auf ihre Tradition, wodurch sich die Marke von anderen Wettbewerbern abhebt und auf einer soliden Grundlage für künftiges Wachstum steht.

### adidas Sport Performance: „Play to Win“ (Spielen, um zu siegen)

Keine andere Marke ist stärker im Sport verwurzelt als adidas. adidas ist nicht nur dort präsent, wo sich – wie bei der FIFA Fußball-Weltmeisterschaft oder beim NBA All-Star-Game – die weltbesten Athleten versammeln, sondern überall auf der Welt, wo Sport getrieben, gesehen, gelebt und zelebriert wird. Der Geist unseres Unternehmensgründers Adi Dassler ist bei adidas Sport Performance immerzu präsent. Das oberste Ziel ist klar: Wir möchten Athleten besser machen. Daher steht Innovation im Mittelpunkt aller adidas Sport Performance Produkte. Zu den Zielkonsumenten der Submarke zählen jene, die sich selbst als Sportler sehen, die aktiv Sport treiben und die Sport einfach mögen bzw. sich von Sport inspirieren lassen.

Bei den 20- bis 29-Jährigen sind wir dabei bereits stark vertreten.

In Zukunft richten wir den Fokus aber auch verstärkt auf den Schulsport („High School Kids“) und die Gruppe der 14- bis 19-Jährigen.

adidas Sport Performance bietet Produkte für fast jede Sportart an. Das Hauptaugenmerk liegt jedoch auf folgenden Kategorien:

- Fußball
- Basketball
- Running
- Training
- Outdoor

Darüber hinaus setzt adidas Sport Performance in Zukunft auf Interaktivität, Individualisierung und Personalisierung als kategorieübergreifende Hauptwachstumstreiber. Ein gutes Beispiel dafür ist adidas miCoach, das weltweit erste webbasierte individuelle Trainingsprogramm. adidas miCoach kombiniert neueste Trainingswissenschaftliche Erkenntnisse mit einer interaktiven Internetplattform sowie akustischen Trainingsanweisungen in Echtzeit.

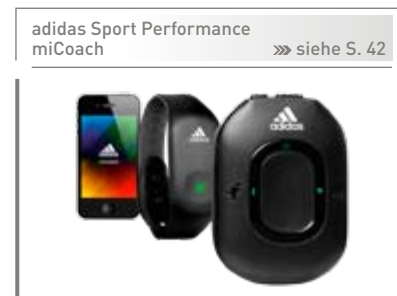

adidas miCoach ist mit allen MP3-Playern kompatibel und lässt sich zudem als Anwendung auf Smartphones wie iPhone und Blackberry als mobile Anwendung nutzen.

miCoach ist ein leuchtendes Beispiel für unseren Fokus auf Produktinnovation, wodurch wir Sportlern dabei helfen möchten, ihre Leistung zu verbessern und für Höchstleistungen vorbereitet zu sein.

### Fünf Performance-Nutzen

Um uns als Performance-Märke bei unseren Zielkonsumenten zu positionieren, haben wir fünf Konsumentenprofile identifiziert, die in den nächsten fünf Jahren das Fundament unserer Innovationspipeline bilden sollen. Wir sind überzeugt, dass wir unsere führende Marktposition durch Ausrichtung auf diese fünf Nutzen sichern können. Gleichzeitig werden wir dadurch das Markenimage verbessern und unsere Technologien und Positionierung in allen Kategorien optimal nutzen.

- **Schneller:** Wir möchten Sportlern helfen, schneller zu sein. Daher konzentrieren wir uns darauf, das Gewicht der Produkte zu verringern und die leichtesten Produkte auf den Markt zu bringen. Das Angebot wird auf Grundlage der adiZero Plattform aufgebaut. Dieser bereits 2010 gestarteten Initiative kommt 2011 eine Schlüsselrolle zu: Wir werden noch leichtere Produkte in den Kategorien Fußball, Basketball und American Football einführen.
- **Stärker:** Über adiPower möchten wir ein Angebot aufbauen, das Athleten mehr sportliche Leistung ermöglicht. Zu dieser Plattform zählen unter anderem Produkte wie der Predator in der Kategorie Fußball, der Barricade im Bereich Tennis oder auch Techfit Bekleidung.

## adidas auf einen Blick

03

### Über adidas

**adidas Sport Performance:**  
Das Leitprinzip von adidas Sport Performance ist, Sportler besser zu machen: schneller, stärker, smarter, cooler und natürlicher. Der Fokus liegt hierbei auf fünf Kernkategorien: Fußball, Basketball, Running, Training und Outdoor.

**adidas Originals:**  
adidas Originals ist das authentische, kultige Sportswear-Label für den Street-Look und baut auf die Philosophie „Celebrate Originality“.

**adidas Sport Style:**  
adidas Sport Style wird als Zukunft von Sportswear definiert und umfasst die Label Y-3, Porsche Design Sport, adidas SLVR und adidas NEO. Das Credo von adidas Sport Style lautet „Style your Life“.

|                                  |                                                                                                                                                                                                                                                                                                                                                                                                                           |
|----------------------------------|---------------------------------------------------------------------------------------------------------------------------------------------------------------------------------------------------------------------------------------------------------------------------------------------------------------------------------------------------------------------------------------------------------------------------|
| <b>Mission</b>                   | Die Marke möchte die weltweit führende Sportartikelmarke werden.                                                                                                                                                                                                                                                                                                                                                          |
| <b>Markenwerte</b>               | Authentisch, leidenschaftlich, innovativ, inspirierend, engagiert, aufrichtig                                                                                                                                                                                                                                                                                                                                             |
| <b>Motto</b>                     | Impossible Is Nothing                                                                                                                                                                                                                                                                                                                                                                                                     |
| <b>Weltweite Präsenz</b>         | Eine durch und durch globale Marke mit deutschen Wurzeln.                                                                                                                                                                                                                                                                                                                                                                 |
| <b>Schwerpunktbereiche</b>       | Fußball, Basketball, Running, Outdoor, Training, Originals, NEO, Personalisierung, Interaktivität                                                                                                                                                                                                                                                                                                                         |
| <b>Strategische Grundpfeiler</b> | <ul style="list-style-type: none"> <li>– Steigerung von Umsatz und Marktanteilen bei adidas Sport Performance in den wichtigsten globalen Wachstumskategorien wie z. B. Running und Basketball</li> <li>– Kategorieübergreifende, branchenweite Führungsrolle in den Bereichen Personalisierung und Interaktivität</li> <li>– Ausbau von adidas Sport Style im Fast-Fashion-Bereich durch das Label adidas NEO</li> </ul> |
| <b>Umsatzerlöse 2010</b>         | 8,714 Mrd. €                                                                                                                                                                                                                                                                                                                                                                                                              |

- **Smarter:** Durch interaktive Produkte möchten wir Sportlern und Konsumenten aller Fitness Ebenen dabei helfen, smarter zu trainieren und Bestleistungen zu erzielen. Dabei arbeiten wir mit den besten Athleten und Trainern auf der ganzen Welt zusammen. Über Plattformen wie miCoach machen wir das dabei gewonnene Wissen den jeweiligen Konsumenten zugänglich, so dass diese ihre persönlichen Ziele besser erreichen können.
- **Cooler:** Diese Produkte sollen für die richtige Klimatisierung der Sportler sorgen. Dabei gibt es Produkte, die den Körper kühlen, wärmen, vor Wind und Regen schützen usw. Erreicht wird dieses Ziel über die Clima Reihe, die sich bereits zu einer unserer bekanntesten Technologien weltweit entwickelt hat.
- **Natürlich:** Die Orientierung an natürlichen Bewegungen ist ein wesentlicher Trend in unserer Branche. Basierend auf unserer Geschichte, unseren Erfahrungswerten und Erkenntnissen hinsichtlich Fußform und Körperbewegungen werden wir in den nächsten fünf Jahren ein neues Produktkonzept kreieren, in dessen Mittelpunkt natürliche Bewegungen stehen.

### Fußball: Ausbau der starken Marktposition

Als populärster Sport der Welt spielt Fußball für die Marke adidas eindeutig eine strategische Schlüsselrolle. Seit mehr als 50 Jahren hat adidas alle wichtigen technologischen Entwicklungen bei Schuhen, Fußbällen und Bekleidung entscheidend geprägt. Aufbauend auf dem Erfolg im Zusammenhang mit wichtigen Sportereignissen wie der FIFA Fußball-Weltmeisterschaft strebt die Marke an, ihre starke Marktposition weiter auszubauen.

Dies soll über die kontinuierliche Entwicklung branchenführender Produkte und mit Hilfe eines hervorragenden Portfolios an Sport-Marketing-Partnern erreicht werden.

Das Partnerschaftsportfolio umfasst im Fußball führende Dachverbände (z. B. die FIFA und die UEFA), Sportereignisse (FIFA Fußball-Weltmeisterschaft, UEFA Fußball-Europameisterschaft, UEFA Champions League), nationale Verbände (z. B. den amtierenden Welt- und Europameister Spanien, Deutschland, China, Russland, Griechenland, Argentinien, Mexiko, Japan), Ligen (z. B. Major League Soccer in den USA), Vereine (z. B. Real Madrid, AC Mailand, FC Chelsea, FC Liverpool, FC Bayern München, River Plate Buenos Aires) und Spieler (z. B. den besten Spieler der FIFA Fußball-Weltmeisterschaft 2010 Diego Forlán, den Torschützenkönig der WM-Endrunde 2010 Thomas Müller sowie Lionel Messi, Kaká, Steven Gerrard, David Beckham, Michael Ballack).

2010 war mit einem historischen Umsatzrekord von mehr als 1,5 Mrd. € das erfolgreichste Jahr in der Geschichte von adidas Fußball. Der unumstrittene Höhepunkt des Jahres war die FIFA Fußball-Weltmeisterschaft 2010. adidas war Sponsor der Siegermannschaft Spanien.

Zudem war der adiZero F50 der Fußballschuh, mit dem die meisten Tore bei dem Turnier erzielt wurden.

adidas Sport Performance  
adiZero F50 Prime FG » siehe S. 46

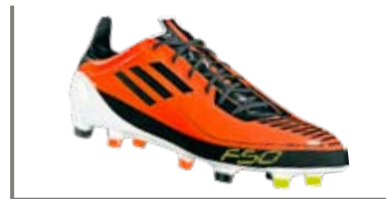

Auf Facebook konnte adidas Fußball schließlich eine förmliche Mitgliederexplosion von 100.000 auf über 3 Millionen kurz vor Ende 2010 verzeichnen.

Im Jahr 2011 stehen die UEFA Champions League, die Copa America, die FIFA Frauen-Weltmeisterschaft 2011 und die UEFA Euro 2012 im Mittelpunkt der Aktivitäten von adidas Fußball.

adidas Sport Performance  
Speedcell » siehe S. 45

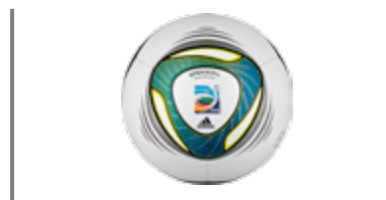

Dazu zählen bedeutende neue Versionen aller drei Hauptproduktmodelle im Bereich Fußballschuhe (adiPower Predator, adiZero F50 und adiPure), die Einführung neuer Nationalmannschaftstriks und der offizielle Spielball der UEFA EURO 2012.

### Basketball: Ausweitung der weltweiten Präsenz

adidas verfolgt das Ziel, seine Position im Basketball zu stärken, die Präsenz im wichtigen nordamerikanischen Markt auszubauen sowie von der wachsenden Popularität der Sportart in Schwellenländern zu profitieren. Um dieses Ziel zu erreichen und den Markenwert zu steigern, wird adidas Basketball seinen Status als offizieller Ausrüster der NBA und seine Partnerschaften mit einigen der talentiertesten NBA-Stars wie Derrick Rose und Dwight Howard nutzen. Darüber hinaus möchte adidas Basketball die besten Produkte in dieser Kategorie anbieten.

In der aktuellen Saison richtet adidas Basketball seinen Fokus insbesondere auf das Angebot an „schnelleren“ Produkten. Mit der Einführung der NBA Revolution 30 Bekleidung – der leichtesten adidas Basketballbekleidung aller Zeiten – und dem adiZero Rose Schuh hat sich adidas als Basketball-Marke positioniert, die die leichtesten Produkte in dieser Kategorie herstellt.

adidas Sport Performance  
adiZero Rose 1.5 » siehe S. 49

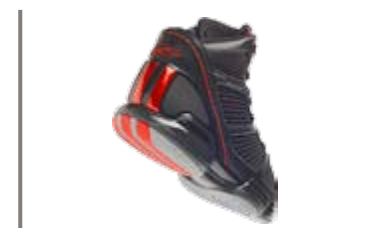

Im Jahr 2011 ist das NBA All-Star-Game in Los Angeles die wichtigste Bühne zur Präsentation der neuesten innovativen Technologien.

### Running: Stärkung der Glaubwürdigkeit bei Leistungssportlern

Running hat bei adidas weiterhin eine hohe Priorität und spielt auch für den zukünftigen Erfolg der Marke eine wichtige Rolle. adidas folgt der Philosophie, Läufer aller Leistungsniveaus anzusprechen, mit dem Ziel, weltweit die vertrauenswürdigste und begehrteste Marke im Bereich Running zu sein. In den letzten Jahren lag der Fokus der Marke darauf, die Glaubwürdigkeit bei Leistungssportlern und aktiven Fitnessläufern zu erhöhen.

adidas Sport Performance  
Running Kampagne » siehe S. 4

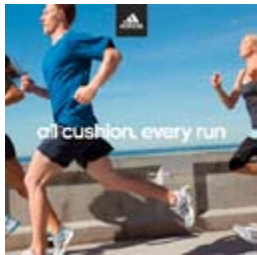

Diese Glaubwürdigkeit bildet nun die Grundlage, auf der adidas Freizeitläufer und junge Multisport-Läufer ansprechen möchte. Bei diesen Zielgruppen sieht adidas entscheidende Chancen, seinen Marktanteil in Zukunft deutlich zu steigern. Um im Jahr 2011 Wachstums- und Marktanteilssteigerungen in dieser Kategorie zu erreichen, wird adidas Running Produkte für junge Multisport-Läufer fördern. Im Mittelpunkt stehen dabei die Reihen adiZero und Climacool, mit denen Läufer „schneller“ und „cooler“ ihren Sport ausüben können.

Die Produktfamilien adiStar und Supernova werden weiterhin die adidas Angebote für ambitionierte Läufer anführen. miCoach ist im Rahmen unserer „smarteren“ Angebote ein integraler Bestandteil aller Produkte im Bereich Running.

adidas Sport Performance  
adiStar Ride » siehe S. 41

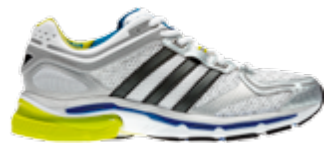

Darüber hinaus bieten wir über die Neuerungen bei der miCoach Plattform (Stichwort miCoach Apps) sowie durch neue Online-Trainingsprogramme wie Finish Faster und Coaching Circles allen Läufern optimale Lösungen im Bereich individuelles Training an.

### Training: Neue Konsumenten-erlebnisse schaffen

Bei adidas ist Training die größte Sportkategorie für Männer und Frauen gleichermaßen. Training ist die größte Bekleidungskategorie der Branche und umfasst Produkte, die Sportler bei ihren Trainingsvorbereitungen in allen Sportdisziplinen unterstützen. adidas möchte sich in dieser Kategorie als Marke positionieren, die Athleten fit für den Erfolg macht. Um dieses Ziel zu erreichen, entwickelt adidas Training eigene Technologien und setzt sie in verschiedenen Sportkategorien ein, um den Anforderungen von Alltagssportlern gerecht zu werden.

adidas Sport Performance  
Fluid Trainer Light » siehe S. 42

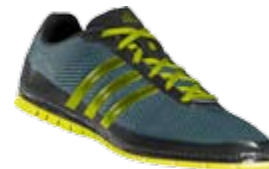

Beispielsweise konnte die Kategorie Training im Jahr 2010 die Verbreitung ihres branchenführenden Techfit PowerWeb Konzepts bei Sportlern weiter ausbauen und das Angebot auf andere Sportkategorien (z. B. Women's) übertragen.

Ein wichtiger strategischer Schwerpunkt für zukünftiges Wachstum in der Kategorie Training ist die Verknüpfung des aktuellen Produktangebots mit revolutionären neuen Konsumentenerlebnissen, über die adidas seine Vision realisieren möchte, die weltweit führende Marke bei personalisierten Produkten zu sein. Im Laufe des Jahres 2010 hat adidas Training seine Aktivitäten mit Sportlern und führenden Experten intensiviert und als Ergebnis dieser Bemühungen sein erstes 360°-Konzept eingeführt – adidas Core Performance. Hierbei handelt es sich um ein Gesamttrainingsangebot, das Sportlern dabei hilft, maximalen Nutzen aus ihrem Training zu ziehen. Über eine digitale Training-Internetseite steht adidas Core Performance in direkter Verbindung mit seinen Konsumenten und bietet ihnen Trainingstipps und Ratschläge zu vier entscheidenden Eckpfeilern eines erfolgreichen Trainings: Einstellung, Ernährung, Bewegung und Erholung.

Im Jahr 2011 wird adidas Training sein Augenmerk weiterhin auf seine Performance Essentials Kollektion richten. Dabei spielen voll integrierte Geschäftsmodelle wie „Never-out-of-Stock“ („Niemals Ausverkauft“) sowie andere Initiativen zu selbst kontrollierten Verkaufsflächen eine wichtige Rolle » siehe Strategie Global Sales, S. 82. Der Fokus für die Kollektion wird sich zudem auf Qualitätsverbesserungen, ein umfangreicheres Farbangebot sowie eine verstärkte Marketingpräsenz in den Läden richten. Angeführt von dem Konzept „adidas by Stella McCartney“ für Frauen, das Performance und Style in sich vereint, genießt der Bereich Women's Training weiterhin eine strategische Priorität.



### Outdoor: adidas als die Sportmarke für Outdoor-Sportarten

adidas hat eine lange Tradition im Outdoor-Bereich, die bis ins Jahr 1978 zurückreicht. Damals entwickelten adidas und Reinhold Messner eine neue Generation von Schuhen, die der Alpinist auf seinem Weg zum Basislager des Mount Everest trug, bevor er den Gipfel als erster Mensch ohne Verwendung von zusätzlichem Sauerstoff bestieg. Vor dem Hintergrund dieser Tradition und aufgrund der wachsenden Beliebtheit des Outdoor-Sektors hat adidas mit Produktkollektionen wie Terrex und Super Trekking in den Aufbau einer authentischen und Performance-orientierten Position im Outdoor-Markt investiert.

Neben Schuhen bietet adidas inzwischen eine Produktpalette von Kopf bis Fuß. Die Produkte umfassen Bekleidung, Rucksäcke und Brillen, in denen die neuesten adidas Technologien sowie anerkannte Technologien zahlreicher Partner (z. B. Gore-Tex, Windstopper und Nano-Tex) integriert sind.

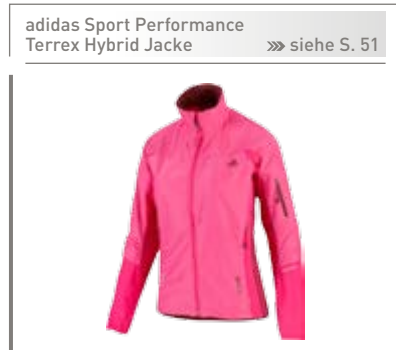

Wie in anderen Kategorien genießt auch hier die Schaffung von Aufmerksamkeit, Glaubwürdigkeit und Präsenz über Partnerschaften und Idole einen hohen Stellenwert, um die eigenen Marktanteile weiter auszubauen.

Zu den Botschaftern und Athleten von adidas Outdoor zählen mit Thomas und Alexander Huber (auch bekannt als die „Huberbuam“) zwei der weltbesten Extremkletterer sowie andere Topathleten verschiedener Outdoor-Sportarten, wie z. B. Kajak, Slacklining, Hanggliding und Speedflying.

adidas Outdoor wird 2011 auf der zunehmenden Dynamik des Bereichs aufbauen und sich dabei insbesondere auf die Terrex Produktreihe konzentrieren, zu der Produkthighlights wie die Terrex Feather Jacke oder die Terrex Fast X FM Outdoor Schuhe zählen.

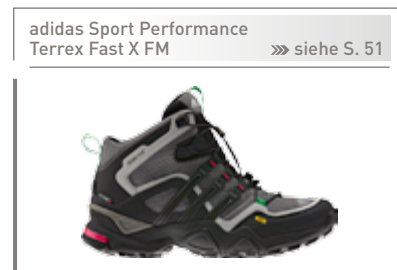

Diese Produkte sowie die Authentizität der Marke werden über eine voll integrierte Marketingkampagne mit Bildern von Expeditionen der „Huberbuam“ beworben. Gleichzeitig finden Kooperationen mit wichtigen Einzelhändlern im Sportartikelhandel und Outdoor-Sportfachhandel statt. Darüber hinaus wird adidas Outdoor im Herbst/Winter 2011 auf den US-Markt expandieren.

### adidas Originals: „Celebrate Originality“ (Originalität großschreiben)

Da der Markt für Streetwear und Lifestyle-Mode größer und vielschichtiger ist als der für reine Sportprodukte, bietet er Sportartikelherstellern eine einzigartige Chance. Hinzu kommt, dass die Profitabilität im Sport-Lifestyle-Markt wegen geringerer Produktkomplexität üblicherweise höher ist. adidas schaffte es als erste Marke, auf glaubwürdige Weise die Erfolge aus dem Sport- in den Lifestyle-Bereich zu übertragen, und gilt damit zu Recht als echte Sport-Lifestyle-Marke. adidas Originals mit seinem Dreiblatt-Logo spielt eine relevante Rolle im Leben vieler Menschen – ganz egal, welchen Lebensstil sie pflegen: Skater, Rocker, Künstler, Musiker, Sportschuhfans, Sportbegeisterte usw.

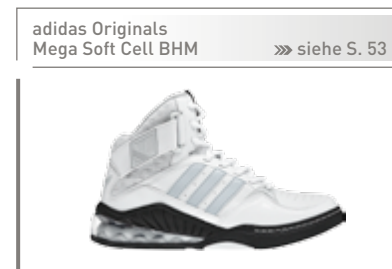

Mit einem ganzheitlichen Produktangebot und Kommunikationsmaßnahmen konzentriert sich adidas Originals auf die Konsumentengruppe der 16- bis 24-jährigen Schüler und Studenten.

Um die Bedürfnisse verschiedener Konsumentengruppen zu erfüllen und Geschäftschancen bestmöglich zu nutzen, verfolgt adidas Originals eine dreistufige Strategie in puncto Marken- und Produktmarketing:

- **Erstens** investiert die Marke in neue Konzepte und strebt nach Innovation – ob bei Street-Fashion-Kollektionen wie der von Jeremy Scott oder durch die Zusammenarbeit mit Burton, einer der führenden Marken im Bereich Snowboard, über die wir den Einstieg in ein neues Marktsegment geschafft haben.
- **Zweitens** können wir durch diese ständigen Neuheiten Begeisterung rund um die Marke adidas Originals erzeugen, was uns hilft, unsere Botschaften auszudehnen und in weitere Geschäftssegmente wie z. B. Denim, Skate oder Sleek im Bereich Women's vorzudringen.
- **Drittens** vermarkten wir die Submarke an ein möglichst breites Publikum und arbeiten dabei mit Konzepten wie adicolor, bei dem wir unseren Konsumenten die beliebtesten Schuh- und Bekleidungsmodelle in einer Vielzahl verschiedener Farben und Materialien anbieten, oder mit speziellen Kollektionen wie Star Wars oder Mega.

Um mit seinen jugendlichen Konsumenten in Verbindung zu bleiben, setzt adidas Originals auf einen kontinuierlichen digitalen Dialog, der 365 Tage im Jahr den Nerv der jugendlichen Konsumenten treffen soll. Auf diese Weise hat adidas Originals bei digitalen Medien wie z. B. Facebook inzwischen über sieben Millionen Fans gewonnen. adidas Originals nimmt damit im digitalen Markt gegenwärtig eine führende Position ein.

### adidas Sport Style: „Style your Life“ (Style dein Leben)

Was einst als Nischengeschäft begann, macht mittlerweile einen beachtlichen Anteil des Gesamtumsatzes des Konzerns aus. Um die Chancen im Sport-Fashion-Markt bestmöglich auszunutzen, setzt adidas Sport Style hier auf eine Mehrmarkenstrategie.

#### Y-3: zukunftsweisend

Das „Y“ steht für Yohji Yamamoto, die „3“ für das adidas Logo mit den drei Streifen und der Bindestrich „-“ für die Verbindung zwischen den beiden Akteuren. Y-3 zielt auf den anspruchsvollen, trendbewussten Konsumenten ab. Das Label ermöglichte adidas, im gehobenen Sport-Fashion-Marktsegment Fuß zu fassen und feiert im Jahr 2011 seinen zehnten Geburtstag. Y-3 bleibt auch in Zukunft das wegweisende Sportswear-Label, bei dem Sport und avantgardistisches Design miteinander verschmelzen. Der für Yohji Yamamoto charakteristische Stil wird bei jeder Kollektion mit traditionellen japanischen Schnittmustern kombiniert.

adidas Sport Style  
Y-3 Kubo » siehe S. 57

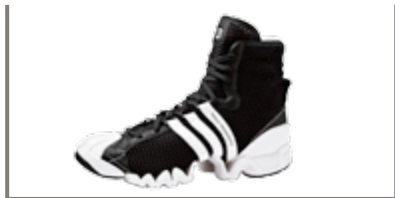

Angesichts der steigenden Konsumentennachfrage hat Y-3 eigene Mono-Branded Stores eröffnet, die heute in zahlreichen Metropolen wie New York, Los Angeles, Miami, Las Vegas, Paris, Mailand, Dubai, Singapur, Shanghai und Peking zu finden sind. Im Jahr 2011 werden weitere Y-3 Läden in anderen bedeutenden Städten in den USA, Asien und Europa eröffnet. Darüber hinaus wird Y-3 sein Geschäft durch den Start der globalen E-Commerce-Plattform y-3store.com ausbauen.

#### adidas SLVR: smartes Design

Im Februar 2009 führte adidas das Label adidas SLVR ein, um seine Präsenz im mittleren Preissegment auszuweiten. adidas SLVR ist das smarte Fashion-Sportswear-Label von adidas Sport Style. Wir sind überzeugt, dass ein Markt für anspruchsvolle und klassische Sportswear besteht, die zugleich Aktualität und Selbstbewusstsein verkörpert und dabei länger als eine Saison getragen werden kann. Das adidas SLVR Label erfüllt dieses Bedürfnis. Seit der Einführung von adidas SLVR hat adidas Mono-Branded Stores in New York und Bangkok eröffnet. adidas SLVR ist außerdem in den größeren adidas Brand Centers in Berlin, Paris, Moskau und Peking sowie in den adidas Online-Shops in den USA und in Europa erhältlich. In Bezug auf den Vertrieb über Fremdunternehmen verfolgen wir einen konservativen Ansatz. Dabei arbeiten wir seit zwölf Monaten in einer Pilotphase mit einigen der führenden Kaufhäuser wie z. B. Harrods, Selfridges und Bloomingdales zusammen. Ab dem zweiten Halbjahr 2011 werden wir unseren Vertrieb erweitern und Franchise-Stores in China eröffnen.

adidas Sport Style  
SLVR Clima Wedge » siehe S. 57

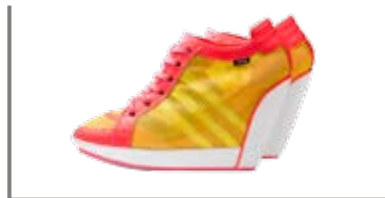

#### adidas NEO: schnell und frisch

Das adidas NEO Label soll modebewusste Teenager zwischen 12 und 16 Jahren ansprechen, die über soziale Netzwerke, Freunde und Familie, über ihre Freizeit oder ihre sportlichen Aktivitäten einen aktiven Lebensstil pflegen. Das adidas NEO Label bietet stylische Produkte für den preisbewussten Konsumenten, die im Sports-Casual-Bereich nach den Modetrends der Saison suchen, nicht auf Neues verzichten möchten und ihre Persönlichkeit so zum Ausdruck bringen, dass ihr Lebensstil und ihre Werte repräsentiert werden.

adidas Sport Style  
NEO Bekleidung » siehe S. 55

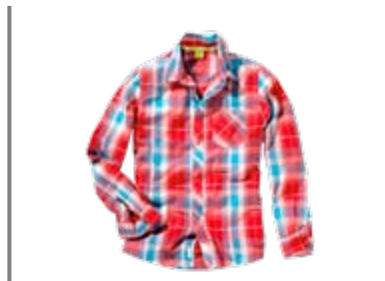

Das adidas NEO Produktangebot umfasst Schuhe, Bekleidung und Accessoires. Diese Produkte werden zu erschwinglicheren Preisen angeboten, sind aber dennoch preislich höher angesetzt als bei Wettbewerbern. Dabei zielen wir vornehmlich auf Mädchen als Konsumenten ab, die im Laufe der Zeit etwa zwei Drittel des Umsatzes mit diesem Label ausmachen sollen. Beim weiteren Ausbau des Labels betrachten wir ein vertikales Geschäftsmodell als effektivste Lösung, um die Zielgruppe zu erreichen. Wir berücksichtigen dabei das Wettbewerbsumfeld und die zukünftigen Anforderungen erfolgreicher Modemarken und Einzelhändler. Aus diesem Grund müssen wir unseren Fokus darauf richten, sowohl in unserem eigenen Einzelhandel als auch bei selbst kontrollierten Verkaufsflächen mit Großhandelspartnern geeignete Einzelhandelslösungen zu schaffen.

adidas Sport Style  
NEO Bekleidung » siehe S. 55

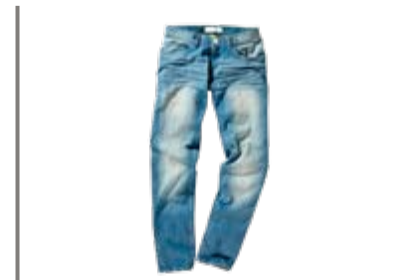

## Reebok Strategie

Die Marke Reebok hat im Jahr 2010 die Umsetzung ihrer Strategie, sich als Premium-Marke in den Bereichen Sport und Lifestyle zu positionieren, weiter vorangetrieben. Klarer Fokus liegt dabei auf den Bereichen Fitness und Training. Aufbauend auf den Wurzeln und der langen Tradition der Marke im Bereich Fitness hat Reebok einen Aktionsplan für seine wichtigsten Geschäftsfelder aufgestellt: die Kategorie Women's Sport dominieren, in der Kategorie Men's Sport angreifen und die Kategorie Classics wieder beleben » siehe 05.

### Die Kategorie Women's Sport dominieren und in der Kategorie Men's Sport angreifen

Im Gegensatz zu einigen anderen Marken möchte Reebok erreichen, dass bei Fitness der Spaßfaktor wieder in den Vordergrund rückt. Reebok möchte dieses Ziel erreichen, indem die Marke Konsumenten inspiriert sowie Erlebnisse und Produkte schafft, die Konsumenten fit fürs Leben machen.

Mit einem ganzheitlichen Fitnessansatz bietet Reebok seinen Konsumenten eigene Technologien, die auf den drei Kernelementen des gesamten Fitnessspektrums aufbauen: Kraft, Ausdauer und Beweglichkeit. Mit Fokus auf diesen Elementen hat Reebok drei Produktkonzepte entwickelt:

- Toning (Markteinführung: 2009),
- ZigTech (Markteinführung: 2010) und
- RealFlex (Markteinführung: für 2011 geplant) » siehe 06.

Diese drei Produktkonzepte wurden sowohl für Frauen als auch für Männer konzipiert und werden entsprechend geschlechtsspezifisch angeboten.

### Kraft: Führungsposition im Bereich Toning nutzen

Im Jahr 2009 stellte Reebok die EasyTone Schuhkollektion vor, die wichtige Beinmuskeln bei jedem Schritt unterstützend aktivieren soll. Grundlage für EasyTone bildet Reeboks „Moving Air“ Technologie. Durch zwei Balance-Elemente unter Ferse und Vorfuß entsteht bei jedem Schritt eine natürliche Instabilität, die eine ausgleichende Reaktion der Muskeln erfordert. Aufbauend auf dem Erfolg von EasyTone erweiterte Reebok im Jahr 2010 das Angebot an Schuhen und dehnte es auf die Bereiche Running (RunTone) und Training (TrainTone) aus.

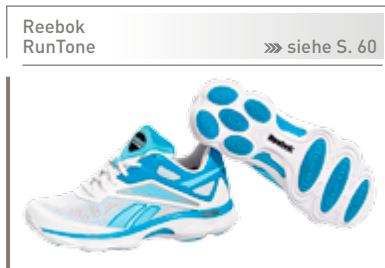

Zudem baute die Marke ihr Toning-Angebot mit neuen Schuhmodellen für die Bereiche Lifestyle, Athletic und Dress Shoe aus, um zusätzliche Konsumentengruppen anzusprechen und weitere Vertriebskanäle zu nutzen.

Um ihre Führungsposition in der Kategorie Toning weiter zu stärken, führte Reebok in der zweiten Jahreshälfte 2010 EasyTone Bekleidung ein und stellte so als erster Anbieter Toning-Outfits von Kopf bis Fuß vor. Die EasyTone Bekleidung umfasst stylische Oberteile und Hosen, die die wichtigsten Muskelgruppen kräftigen und einen gesunden und sportlichen Lebensstil unterstützen. Zudem sind Reebok ResiTone Bänder, die einen gewissen Widerstand bei jeder Bewegung erzeugen, in die EasyTone Bekleidung integriert.

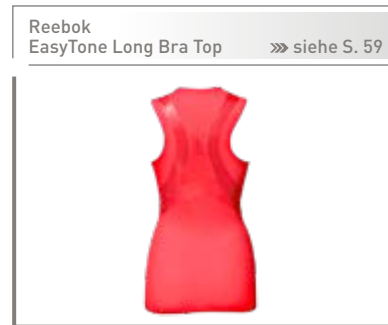

Mit der Vorstellung der „Tone while you live“-Kampagne wird Reebok die Toning-Plattform im Jahr 2011 weiter ausbauen. Die Kampagne zeigt inspirierende EasyTone Fans aus der ganzen Welt, die trotz ihres stressigen Alltags dank EasyTone Schuhe und Bekleidung nicht auf Fitness verzichten müssen.

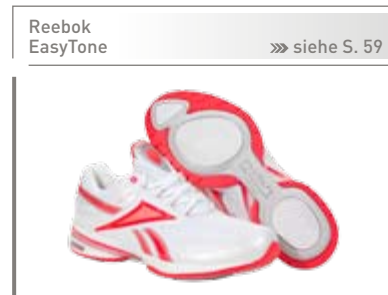

### Ausdauer: erfolgreiche Markteinführung von ZigTech

Im Frühjahr 2010 stellte Reebok seine zweite fortschrittliche Produkttechnologie vor: ZigTech – ein innovatives Lauf- und Trainingsschuhkonzept, das auf Ausdauertraining zugeschnitten ist. Die ZigTech Modelle für Männer, Frauen und Kinder sorgten für enorme Begeisterung bei Konsumenten und führten bei großen Kunden in wichtigen Märkten, wie den USA, Russland und Korea, zu sehr guten Durchverkaufserfolgen.

## Reebok auf einen Blick

04

|                                  |                                                                                                                                                                                                                                                                                                                                             |
|----------------------------------|---------------------------------------------------------------------------------------------------------------------------------------------------------------------------------------------------------------------------------------------------------------------------------------------------------------------------------------------|
| <b>Über Reebok</b>               | Reeboks Erfolg basiert seit jeher auf dem Mut, mit Konventionen zu brechen: Die Marke entwickelt kontinuierlich innovative Produkte, schafft neue Märkte und kreiert den neuesten sportlichen Style. Reebok ist eine globale Sportmarke, inspiriert von ihrer Tradition im Fitnessbereich, die ihre Konsumenten fit fürs Leben machen will. |
| <b>Mission</b>                   | Durch Kreativität die Fitnesswelt herausfordern und führen.                                                                                                                                                                                                                                                                                 |
| <b>Markenwerte</b>               | Authentisch, stark, individuell, innovativ, mutig und greifbar                                                                                                                                                                                                                                                                              |
| <b>Motto</b>                     | Fit fürs Leben. Mit Spaß fit bleiben.                                                                                                                                                                                                                                                                                                       |
| <b>Weltweite Präsenz</b>         | Eine amerikanisch geprägte globale Marke                                                                                                                                                                                                                                                                                                    |
| <b>Schwerpunktbereiche</b>       | Training, Running, Walking, Basketball, American Sports, Cricket und Hockey                                                                                                                                                                                                                                                                 |
| <b>Strategische Grundpfeiler</b> | Basierend auf den Elementen des gesamten Fitnessspektrums (Kraft, Ausdauer, Beweglichkeit) liegt Reeboks Fokus auf drei ganzheitlichen Schuh- und Bekleidungskonzepten: Toning, ZigTech und RealFlex.                                                                                                                                       |
| <b>Umsatzerlöse 2010</b>         | 1,913 Mrd. €                                                                                                                                                                                                                                                                                                                                |



Reeboks ZigTech Schuhe zeichnen sich durch ein auffälliges Zickzack-Design aus, das Energie auf den tatsächlichen Laufschrift überträgt. Die ungewöhnliche Sohlenkonstruktion beschleunigt die Vorwärtsbewegung und hilft, die Muskelermüdung in den Schienbeinen zu reduzieren.

Reebok beabsichtigt, das ZigTech Konzept auf weitere Kategorien auszuweiten und mit den einzigartigen Zickzack-Produkten Marktanteile hinzuzugewinnen. Im Oktober 2010 beispielsweise präsentierte Reebok zusammen mit John Wall von den Washington Wizards den ZigTech Basketballsuh und konnte damit seine Konsumenten wieder für Reebok Basketball begeistern. Daneben weitete die Marke ihr ZigTech Angebot auch auf Kinderschuhmodelle aus, um diese wichtigen jungen und einflussreichen Konsumenten gezielt anzusprechen. Die Markteinführung von ZigTech Schuhen für Kinder im vierten Quartal 2010 wurde in den USA durch eine integrierte „ReeZig“-Marketingkampagne unterstützt.

Im Frühjahr 2011 kommt die nächste categoriespezifische ZigTech Weiterentwicklung für Frauen und Männer auf den Markt: der ZigTech Nano mit einem niedrigeren Profil als beim Original-ZigTech.

Reebok ZigTech Nano » siehe S. 63

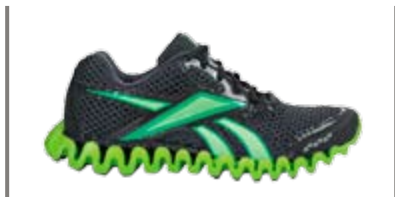

Reebok nutzt die mit ZigTech Schuhen erzeugte Dynamik und verleiht mit der Erweiterung des Angebots um ZigTech

Bekleidung für Frauen und Männer im Jahr 2011 nicht nur Füßen, sondern dem gesamten Körper einen zusätzlichen Energieschub. ZigTech Bekleidung enthält spezielle Celliant-Fasern, die durch ihre natürlichen Mineralien den Sauerstoffgehalt an der Haut erhöhen.

Das ZigTech Konzept wird 2011 durch eine integrierte globale „ReeZig – More Energy“-Marketingkampagne unterstützt. In der Kampagne sind wichtige Reebok Vertragsspieler wie John Wall, Lewis Hamilton, Alexander Ovechkin und Peyton Manning beim Training zu sehen. Dabei heben sie visuell das einzigartige Zickzack-Design hervor.

#### Beweglichkeit: Markteinführung von RealFlex

Auch für die dritte Fitness-Säule „Beweglichkeit“ wird Reebok im Jahr 2011 ein Produktkonzept vorstellen, in dessen Mittelpunkt die Flexibilität und Unterstützung der natürlichen Bewegung steht. RealFlex Schuhe besitzen 76 einzelne „Sensoren“, die die natürliche Bewegung des Fußes unterstützen. Diese Sensoren sind so platziert, dass sie sich während des Laufschriffs flexibel biegen und bewegen. Gleichzeitig schützen sie die Unterseite des Fußes beim Laufen oder Trainieren. RealFlex ist Reeboks Antwort auf die schnell wachsende „Light“ Running und Training Kategorie. Wie auch ZigTech und Toning besticht RealFlex mit einem visuell markanten Design und einem zeitgemäßen, funktionellen Angebot für Konsumenten.

Auch innovative Workout-Erlebnisse, wie beispielsweise die Zusammenarbeit mit Cirque du Soleil und die Präsentation der Jukari Trainingsprogramme, unterstreichen Reeboks Positionierung in den Bereichen Fitness und Training. Im Jahr 2011 wird Reebok sein Fitnessangebot mit innovativen „Back-to-the-Basics“-Initiativen global weiter ausbauen.

#### Die Kategorie Classics wieder beleben

Reebok Classics überträgt die Wurzeln und die Tradition der Marke im Bereich Fitness auf den Bereich Lifestyle. Reebok Classics spricht Konsumenten an, die „fit für die Straße“ sein wollen und modische Produkte schätzen, die zu ihrem mobilen Lebensstil passen. Die Grundlagen und die strategische Ausrichtung des Classics Geschäfts wurden 2010 detaillierter spezifiziert, um so eine solide Basis für die Wiederbelebung von Reebok Classics im Jahr 2011 zu schaffen.

Reebok Lite wird dabei das wichtigste Produktkonzept im Jahr 2011 sein. Die Kollektion modernisiert Reebok Classics, indem es leichte, modische Materialien mit Reebok Technologien kombiniert.

Reebok Classic Lite » siehe S. 65

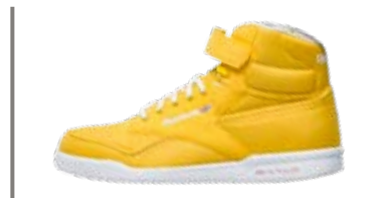

Daraus entsteht eine Produktkollektion, die höchsten Komfort, technische Details und einzigartige Ästhetik miteinander vereint. Eine integrierte globale Marketingkampagne wird diese neue Produktkollektion unterstützen. Swizz Beatz, renommierter Musikproduzent und neuestes Mitglied der Reebok Familie, wird als Creative Director der Kampagne agieren, die Musik- und Tanzeinlagen sowie die Reebok Lite Produktkollektion zeigt. Die Botschaft der Kampagne lautet: Reebok Classics ist zurück.

#### Reebok Strategie und Geschäftsfelder

05

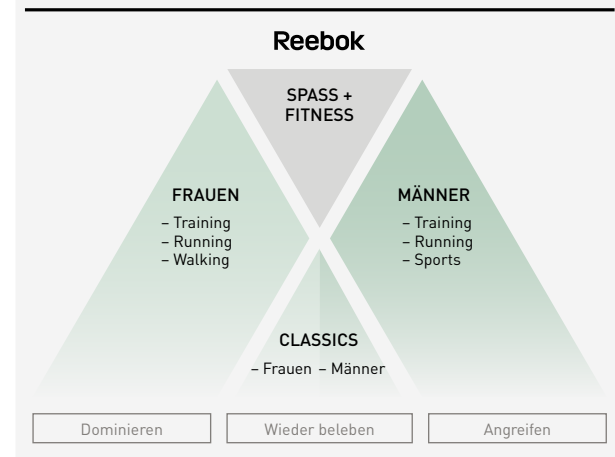

#### Strategische Produktkonzepte

06

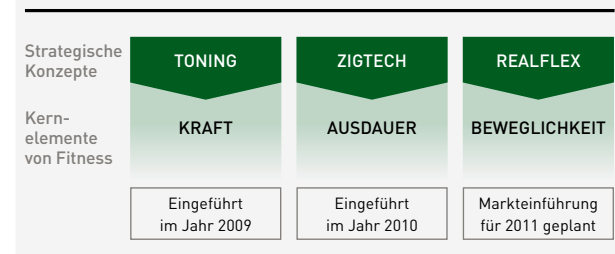

# Strategie Andere Geschäftssegmente

Die Anderen Geschäftssegmente umfassen in erster Linie die Segmente TaylorMade-adidas Golf, Rockport und Reebok-CCM Hockey. Jedes dieser Segmente hat eine eigene Strategie implementiert, um seine jeweiligen Zielgruppen gezielt anzusprechen und seine Marktanteile entsprechend weiter auszubauen. So tragen sie gemeinsam dazu bei, das übergeordnete Ziel des Konzerns zu erreichen: der weltweit führende Anbieter der Sportartikelindustrie zu werden.

## TaylorMade-adidas Golf Strategie

TaylorMade-adidas Golf verfolgt das Ziel, das weltweit führende Unternehmen für Performance-Golfprodukte hinsichtlich Umsatz und Profitabilität zu sein. Es vereint drei der bekanntesten und angesehensten Golfmarken unter einem Dach: TaylorMade, adidas Golf und Ashworth. Zu den wichtigsten strategischen Säulen in diesem Segment zählen einerseits die konsequente Weiterentwicklung und Vermarktung höchst innovativer und technologisch hochwertiger Produkte. Andererseits ist der Fokus darauf gerichtet, die Glaubwürdigkeit der Marken durch eine hohe Präsenz und Sichtbarkeit bei Profi-Golftouren zu unterstreichen. Darüber hinaus sind neue Initiativen im Marketing- und Einzelhandelsbereich zur Unterstützung der eigenen Markenwerte sowie die Optimierung des globalen Vertriebs entscheidende Prioritäten. Hierdurch soll langfristiges Wachstum sichergestellt werden.

### Drei etablierte Marken mit starken Marktpositionen

TaylorMade-adidas Golf setzt auf eine Mehrmarkenstrategie und vereint drei Golfmarken mit klarem Profil unter einem Dach. TaylorMade ist Marktführer in der Kategorie Metallhölzer und gehört zu den führenden Marken bei Eisen. Darüber hinaus entwickelt sich TaylorMade kontinuierlich zu einem bedeutenden Anbieter in den Kategorien Putter und Golfbälle. adidas Golf entwickelt Performance-Schuhe und Bekleidung für Golfer, die ihr Potenzial voll ausschöpfen möchten, um Leistungen auf höchstem Niveau zu erreichen. Ashworth ist eine authentische, vom Golfsport inspirierte Lifestyle-Marke, die das Produktportfolio von adidas Golf ideal ergänzt. Durch den Zusammenschluss mit adidas Golf und Ashworth hat sich TaylorMade-adidas Golf zu einem der weltweit führenden Unternehmen für Golfbekleidung und zur Nummer zwei bei Schuhen entwickelt.

### Fokus auf Innovation und Technologie

Das wichtigste Ziel von TaylorMade-adidas Golf ist es, die besten Performance-Golfprodukte auf dem Markt zu entwickeln » siehe Forschung und Entwicklung, S. 110. Dies beginnt mit einem klaren Bekenntnis zu Innovation und Technologie. Das Segment strebt deshalb fortlaufend danach, seine Führungsposition durch Innovation und herausragendes Design weiter auszubauen und dabei alle 12 bis 18 Monate mindestens zwei bedeutende Produktinnovationen oder -weiterentwicklungen auf den Markt zu bringen. Im Jahr 2010 hat TaylorMade beispielsweise seine neuen xFT Wedges mit Exchangeable Face Technologie eingeführt. Damit können Golfspieler die Schlagfläche austauschen und erhalten so neue Grooves für viel Spin, ohne dass ein komplett neuer Schlägerkopf gekauft werden muss. Darüber hinaus hat TaylorMade die Corza Ghost Putter auf den Markt gebracht. Charakteristisch für diese Putter ist der weiße Putterkopf mit drei schwarzen Linien auf der Krone und einer kreisrunden Öffnung, wodurch die Ausrichtung beim Putt deutlich vereinfacht wird.

## TaylorMade-adidas Golf auf einen Blick

01

### Über TaylorMade-adidas Golf

TaylorMade-adidas Golf setzt auf eine Mehrmarkenstrategie und vereint drei Golfmarken mit klarem Profil unter einem Dach: TaylorMade, adidas Golf und Ashworth. Die Strategie dieses Segments ist einerseits die konsequente Weiterentwicklung und Vermarktung innovativer, technologisch hochwertiger Produkte. Andererseits ist der Fokus darauf gerichtet, die Glaubwürdigkeit der Marken durch eine hohe Präsenz und Sichtbarkeit bei Profi-Golftouren zu unterstreichen.

### Mission

Das weltweit führende Unternehmen für Performance-Golfprodukte hinsichtlich Umsatz und Profitabilität zu sein.

### Motto

TaylorMade, adidas Golf und Ashworth sind allesamt bestrebt, authentisch, leidenschaftlich, wettbewerbsfähig und innovativ zu bleiben, um somit stets bessere Produkte für unsere Golfkunden zu entwickeln.

### Wichtige Märkte

Nordamerika, Großbritannien, Japan

### Schwerpunktbereiche

Golfausrüstung, Schuhe, Bekleidung

### Strategische Grundpfeiler

- Die Stellung von TaylorMade als die Nummer Eins Driver-Marke auf den wichtigsten Profi-Golfturnieren der Welt sichern.
- Auch zukünftig technologisch hochwertige Metallhölzer, Eisen, Putter, Bälle, Schuhe und Bekleidung entwickeln und vermarkten, um Golfern aller Leistungsstufen einen Wettbewerbsvorteil bieten.
- Eine hohe Präsenz der Marke adidas Golf bei den wichtigsten Profi-Golfturnieren der Welt sichern.
- Ashworth als authentische Golf-Lifestyle-Marke entwickeln.

### Umsatzerlöse 2010

909 Mio. €

### Tourpräsenz als wichtige strategische Säule

Golfer aller Leistungsstufen lassen sich oft davon beeinflussen, mit welcher Ausrüstung die besten Golfprofis der Welt spielen und welche Bekleidung sie tragen. Deshalb ist eine führende Stellung und eine hohe Präsenz von TaylorMade-adidas Golf bei den wichtigsten Profi-Golftouren der Welt unerlässlich, um TaylorMade-adidas Golf für Konsumenten sichtbar und attraktiv zu machen.

Im Rahmen seiner Bemühungen, die talentiertesten Spieler für sich zu gewinnen, stellt TaylorMade-adidas Golf Spitzengolfern einen umfassenden Service bereit. Beispielsweise sind die Einsatzwagen von TaylorMade bei jedem Event der PGA und European Tour dabei und bieten eine voll ausgestattete, hochmoderne Servicewerkstatt, um Driver, Fairwayhölzer, Hybrid-Schläger, Eisen, Wedges und Putter direkt vor Ort zu bauen und zu warten. Heute zählen zu den TaylorMade-adidas Golf Tour Staff Professionals Größen wie Sergio Garcia, Sean O'Hair, Yong-Eun Yang, Dustin Johnson, Fred Funk, Justin Rose, Paula Creamer, Camilo Villegas, Retief Goosen, Greg Norman, Nick Faldo, Mike Weir, Andrés Romero, Darren Clarke, Natalie Gulbis und auch Deutschlands Martin Kaymer, einer der Top-Golfer weltweit, der im Jahr 2010 mit der US PGA Championship nicht nur sein erstes Major-Turnier gewann, sondern zudem auch die European Tour als Nummer Eins beendete. In China, einem noch unterentwickelten Golfmarkt, hat TaylorMade-adidas Golf eine neue Vereinbarung mit der China Golf Association geschlossen, die das Unternehmen zum exklusiven Ausrüster der chinesischen Golf-Nationalmannschaft ernannt hat.

### Erstklassiges Marketing als zentraler Erfolgsfaktor

Ein gut koordiniertes, konsumentenorientiertes Marketing ist Voraussetzung, um Marktführerschaft nachhaltig zu sichern. Daher hat TaylorMade-adidas Golf das Produktmarketing, die Markenkommunikation und das Einzelhandelsmarketing in einem vernetzten, globalen Marketingteam zusammengefasst, das eine breite Palette von Marketinginstrumenten einsetzt. Um den Durchverkauf zu fördern, werden Produkteinführungen durch umfangreiche PR- und Marketingkampagnen mit Beteiligung von wichtigen Vertragsspielern und durch hervorragenden Kundenservice unterstützt. Genauso beschreitet TaylorMade-adidas Golf neue und innovative Wege, um Produkte über soziale Medien (Facebook und Twitter) oder auch über Product Seeding – wie das Burner Projekt mit kostenlosen Burner 6er Eisen als Werbegeschenk sowie das Penta TP Programm mit Gratis-Schlägerhaube – zu vermarkten.

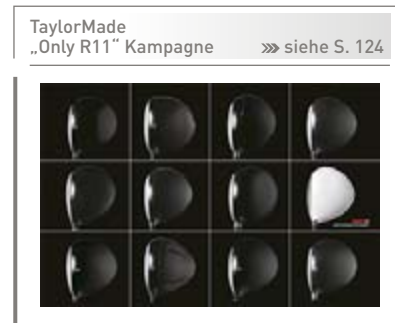

Ein weiteres Beispiel einer besonderen verkaufsfördernden Maßnahme ist die „Unstoppable 8 Tour“. Im Rahmen dieser Aktion fanden acht exklusive Events in acht verschiedenen Städten der USA statt, bei denen die Konsumenten die neuen Burner 2.0 Eisen hautnah erleben und selbst testen konnten. Deshalb TaylorMade, im November und Dezember 2010 die Marktführerschaft in den USA in der Kategorie Eisen zu übernehmen. Daneben startete TaylorMade-adidas Golf im Jahr 2010 die zweite Runde des „Wear in the World“-Golfabenteuers. Im Rahmen dieser Aktion wurde Performance-Bekleidung an Orten mit extremen klimatischen Bedingungen getestet, unter anderem an Golfplätzen im Geburtsort des Golfsports, St. Andrews in Schottland, in den Sanddünen Dubais und am Berg Rokko in Japan. Ziel war es, den Vorteil von Technologien wie Climacool, Climalite und Climaproof unter extremen Bedingungen zu zeigen. Das Golfabenteuer zog große Aufmerksamkeit seitens der Konsumenten und Medien auf sich.

### Intelligente Marketing- und Vertriebsansätze im Einzelhandel

TaylorMade-adidas Golf arbeitet mit Einzelhandelspartnern, die in der Lage sind, die Vorteile und modernen Designmerkmale der Produkte von TaylorMade, adidas Golf und Ashworth effektiv zu vermitteln. Zu den wichtigsten Vertriebskanälen zählen dabei Golfshops auf Golfplätzen („Pro-Shops“), reguläre Golffachgeschäfte sowie Sportfachhändler mit eigener Golfabteilung. TaylorMade-adidas Golf legt auf die Entwicklung modernster Merchandising-Konzepte für seine wichtigsten Einzelhandelspartner Wert, damit diese die Produkte angemessen präsentieren und gleichzeitig Kernbotschaften möglichst deutlich vermitteln können.

Dadurch kann TaylorMade-adidas Golf seine Schläger, Bälle, Schuhe und Bekleidung unter den meistverkauften Golfprodukten in diesen Einzelhandelskanälen positionieren. TaylorMade-adidas Golf wird auch 2011 eng mit seinen Key Accounts zusammenarbeiten und sich darüber hinaus bemühen, seine Präsenz bei kleineren Einzelhändlern und Golfshops auf Golfplätzen auszubauen. In Schwellenländern setzt das Unternehmen weltweit auf die vorhandene Infrastruktur des adidas Konzerns, um den Vertrieb der Produkte zu unterstützen, das Bewusstsein für die Produkte zu schärfen und das dortige Wachstum zu fördern.

### Preispolitik unterstreicht Markenpositionierung

Die Preispolitik von TaylorMade-adidas Golf spiegelt die Positionierung der drei Marken wider. Die Preisstrategie von TaylorMade zielt darauf ab, im Hochpreissegment eine marktbeherrschende Stellung zu erlangen und im hochvolumigen mittleren Preissegment offensiv im Wettbewerb zu agieren. adidas Golf bietet Produkte vor allem im hochpreisigen Segment an und unterstreicht so das Markenimage als Innovationsführer. Ashworth positioniert seine Produkte im mittleren und hohen Preissegment. Marktanteilssteigerungen können im Golfmarkt vor allem durch Spitzenprodukte in unterschiedlichen Preiskategorien erzielt werden. Beispiele für den Erfolg, den TaylorMade-adidas Golf mit der Umsetzung dieser Strategie 2010 verzeichnete, sind die Schuhe adiPure (Hochpreissegment) und Traxion Lite (mittleres Preissegment).



### TaylorMade: Ausbau der Führung bei Metallhölzern und Eisen

Zu den Prioritäten von TaylorMade gehören der Ausbau seiner weltweiten Marktführerschaft bei Metallhölzern und das weitere Wachstum seines weltweiten Marktanteils bei Eisen. Daneben möchte TaylorMade seine Präsenz in allen anderen Bereichen der Golfausrüstung – darunter bei Wedges, Puttern und Bällen – stärken und seinen Ruf weiter verbessern.

– **Metallhölzer:** TaylorMade ist heute klarer Marktführer bei Metallhölzern (Driver, Fairwayhölzer und Hybrid-Schläger). Besonders stark ist die Marke in den USA, wo sie mit einem Marktanteil von über 30 % deutlich vor ihrem nächsten Wettbewerber liegt. In Zukunft wird sich die Marke vor allem auf zwei Schwerpunkte konzentrieren: die Festigung ihrer Marktstellung als Innovationsführer und den Ausbau des Geschäfts mit Metallhölzern außerhalb der USA. Dazu sollen auch verstärkt regionale Promotion-Partnerschaften beitragen.

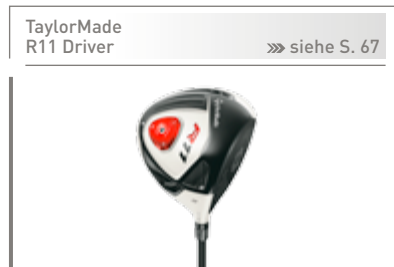

Aus Produktperspektive wird die Marke im Jahr 2011 ihre erfolgreiche Produktfamilie R9 mit der Einführung der neuen R11 Serie von Drivern ergänzen sowie die Burner Serie von Metallhölzern durch den Burner SuperFast 2.0 fortsetzen. Die neuen R11 Schläger besitzen neben den bedeutenden TaylorMade Driver-Technologien (Movable Weight Technologie und Flight Control Technologie) die neue Adjustable Sole Plate Technologie, die eine Einstellung des Schlagflächenwinkels unabhängig von der Schlägerblattneigung ermöglicht.

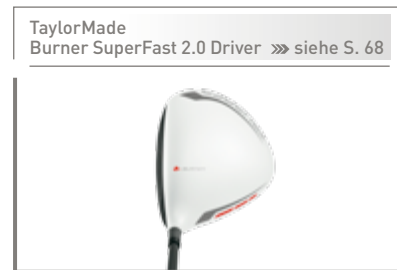

Mit gerade einmal 279 Gramm ist der Burner SuperFast 2.0 der leichteste TaylorMade Driver, der jemals auf den Markt gebracht wurde. Durch das geringe Gewicht sowie seinen neuen glatten, aerodynamischen Schlägerkopf erzielt dieser Schläger deutlich mehr Schlägerkopf-Geschwindigkeit und weitere Distanzen als jedes Burner Driver Vorgängermodell.

– **Eisen:** Mit den Burner Eisen konnte TaylorMade beträchtliche Marktanteile in dieser Kategorie dazugewinnen. Im Gegensatz zu früheren Eisen von TaylorMade wurden die langen, mittleren und kurzen Eisenmodelle der Burner Serie unabhängig voneinander entwickelt. Die Einführung des Burner 2.0 im vierten Quartal 2010 und die Premiere der Tour Preferred Eisen im März 2011 werden eine entscheidende Rolle für das zukünftige Wachstum in dieser Kategorie spielen.

– **Wedges:** TaylorMade ist bestrebt, seinen Erfolg bei Metallhölzern und Eisen auch auf andere Kategorien wie z. B. Wedges auszuweiten. Dies bleibt eine strategische Priorität der Marke. In diesem Zusammenhang ist Innovation von entscheidender Bedeutung, wobei TaylorMade durch den Erfolg des TP Wedge mit Exchangeable Face Technologie (xFT) im Jahr 2010 sein Ziel untermauern konnte, seine Präsenz und seinen Marktanteil in anderen Golfausrüstungskategorien zu steigern. Mit xFT können Golfspieler ganz einfach eine abgenutzte Schlagfläche durch eine neue ersetzen und so ihren Spin bewahren, ohne dass ein komplett neuer Schlägerkopf gekauft werden muss. Für den Konsumenten ergeben sich dadurch erhebliche Einsparungen.

– **Putter:** Sowohl bei unseren Konsumenten als auch bei Tour-Profispielern war der Corza Ghost Putter von TaylorMade 2010 ein großer Erfolg. Der weiße Putterkopf dieser Serie erleichtert die Ausrichtung und verhindert Blendeffekte auf der Krone. Das einzigartige Design dieser Putter war für die Zuschauer unverkennbar, als Justin Rose zwei Turniersiege auf der PGA Tour verzeichnen konnte. 2011 wird es weitere Ergänzungen zur Ghost Serie geben, bei der Anregungen verschiedener Tour-Profispielers berücksichtigt wurden.

– **Golfbälle:** Erfolg hängt in der Kategorie Golfbälle vor allem von drei Faktoren ab, nämlich der Entwicklung von Golfbällen höchster Qualität, der richtigen Markteinführung und dem Ansehen bei den Tour-Profispielern. TaylorMade konnte 2010 seinen Status als Hersteller von Premium-Golfbällen mit dem Penta TP Ball weiter ausbauen. Der Penta TP ist der erste Golfball aus fünf Schichten, der optimale Ergebnisse bei fünf entscheidenden Abschlüssen gewährleisten soll: Driver, langes Eisen, mittleres Eisen, kurzes Eisen sowie Wedges. Der technologische Vorsprung des Penta TP wurde durch 18 Major-Turniersiege im Jahr 2010, darunter die PGA Championship, eindrucksvoll unterstrichen. Für 2011 wird TaylorMade an die positive Entwicklung bei Golfbällen auf Grundlage des Penta TP Balls anknüpfen. Dabei soll auch die Anzahl der Tour-Profispielers, die mit Bällen von TaylorMade spielen (wie z. B. der 2010 PGA Tour Player of the Year Jim Furyk), erhöht werden.

### adidas Golf: Neue Maßstäbe bei Performance-Schuhen und -Bekleidung

adidas Golf entwickelt Performance-Golfschuhe und -bekleidung für Golfer, die ihr Potenzial voll ausschöpfen möchten, um Leistungen auf höchstem Niveau zu erreichen.

adidas Golf  
adiPure Z

» siehe S. 68

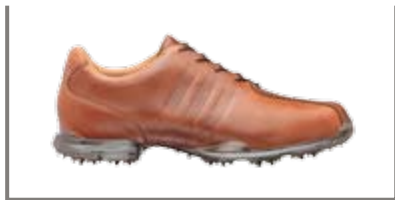

Bei den Schuhen bietet der Einsatz proprietärer Technologien aus anderen adidas Kategorien wie z. B. adiPrene+ zusammen mit golfspezifischen Technologien einen entscheidenden Wettbewerbsvorteil gegenüber Marken, die sich allein auf Golfschuhe spezialisiert haben. Im Jahr 2010 konnte adidas Golf bedeutende neue Innovationen auf den Markt bringen, darunter den adiPure Z, dessen revolutionäre ThinTech Technologie mit flachem Profil für einen besseren Bodenkontakt des Golfspielers und dadurch mehr Stabilität sorgt. Dies wiederum ermöglicht eine verbesserte Beinarbeit und eine präzisere Ballführung.

Bei Golfbekleidung positioniert sich adidas Golf als innovativste Performance-Marke im Markt. Eine wichtige Rolle spielt hierbei die Verwendung der adidas Technologien Formotion, Climacool und Climaproof in Golfbekleidung. adidas Golf war die erste große Marke, die solche Technologien in der Golfbekleidung einführte. So brachte adidas Golf im Jahr 2010 die neue Climacool Bekleidungskollektion mit Coolmax Energy Gewebe auf den Markt. Hierbei werden spezielle Mikrofasern eingesetzt, die die Luftzirkulation an der Haut verbessern.

Für 2011 sind zahlreiche neue Produkteinführungen geplant, darunter mit dem Tour360 5.0 die nächste Generation der Tour360 Schuhe. Dieser Schuh ist leichter, flacher und stabiler als sein Vorgänger und wird die einzigartige Verschmelzung von Design, Technologie und Funktionalität fortsetzen, die adidas Golf ausmacht. Darüber hinaus wird die Marke im Jahr 2011 ihre Marketingaktivitäten durch eine integrierte Kampagne für Schuhe und Bekleidung – „Be Greater“ – intensivieren. Mit dieser Kampagne sollen Golfer darauf aufmerksam gemacht werden, wie sie mit Ausrüstung von adidas Golf ihr Spiel verbessern, ihr Potenzial besser ausschöpfen und ein höheres Niveau erreichen können.

### Ashworth: Eine authentische Golf-Lifestyle-Marke

Ashworth, im Jahr 1987 gegründet, bietet TaylorMade-adidas Golf die einzigartige Chance zum Aufbau eines Golf-Lifestyle-Geschäfts. Die starke Verwurzelung im Golfsport und die Authentizität als Golfmarke sind ein zentrales Unterscheidungsmerkmal, durch das sich Ashworth von anderen Golf-Lifestyle-Marken abhebt. Nach der Übernahme im Jahr 2008 wurde die Marke neu ausgerichtet. Es wurde eine klar definierte Produktpalette festgelegt, der Vertrieb gestrafft sowie das Portfolio an Partnerschaften neu gestaltet. Hierdurch wurde das Fundament für zukünftiges profitables Wachstum gelegt. Im Jahr 2010 führte Ashworth neue Produktkollektionen ein. Besondere Merkmale dieser Produkte sind proprietäre Stoffe, die pflegeleicht und angenehm zu tragen sind. Der Schwerpunkt wird 2011 darauf liegen, die Positionierung von Ashworth als Golf-Lifestyle-Marke für passionierte Golfspieler mit der Überzeugung „Du bist auf dem Platz, wo immer du bist“ weiter zu stärken. Zudem wird Ashworth versuchen, auf der Tour verstärkt präsent zu sein und die Glaubwürdigkeit der Marke durch die Zusammenarbeit mit den Tour-Profispielern Fred Couples, Sean O’Hair und Ryan Palmer unter Beweis zu stellen.

adidas Golf  
adiComfort

» siehe S. 67

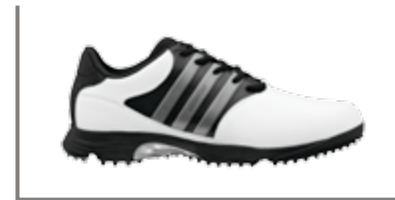

## Rockport Strategie

Rockport ist ein Hersteller von Lederschuhen mit Sitz in den USA. Die Marke wurde 1971 gegründet. Seitdem verkauft Rockport erfolgreich komfortable Walking- und Straßenschuhe aus Leder für Männer und Frauen. Rockport verfolgt das Ziel, durch die Kombination aus modernem Stil und ausgereiftem Tragekomfort zu einer der weltweit führenden Lederschuhmarken zu avancieren. Der Markt für Lederschuhe ist ein großer, höchst attraktiver Markt, in dem bisher nur wenige Akteure bedeutende Marktanteile erobern konnten. Die Tradition von Rockport sowie seine Markenpositionierung in ausgewählten Märkten bilden ein starkes Fundament für zukünftiges Wachstum.

### Bedeutende Chancen im Markt für Lederschuhe

Die Lederschuhbranche ist in Bezug auf Volumen, Wachstum und Gewinnpotenzial höchst attraktiv. Der globale Markt ist gegenwärtig stark fragmentiert und seine Größe wird auf über 70 Mrd. US-Dollar geschätzt. Rockport hat hier eine starke Markentradition und genießt, vor allem im Heimatmarkt USA, einen hohen Wiedererkennungswert. Durch die Sicherung kontinuierlichen, profitablen Wachstums hat Rockport die Möglichkeit, in dieser Branche nachhaltig erfolgreich zu sein.

### Globale Ausrichtung der Marke Rockport auf Zielkunden

Die Markenpositionierung von Rockport ist auf „Walkability“ (auf Deutsch „Gehbarkeit“) ausgerichtet und setzt dabei auf das Prinzip „Fortschrittliche Technologien für Stil mit Komfort“. Diese Ausrichtung baut auf dem vorhandenen Markenwert in Bezug auf Komfort und technologische Innovation auf, beinhaltet aber zugleich die Schaffung einer modischen und modernen Marke. Dazu setzt Rockport seine internationale Designkompetenz ein, die einen breiten Konsumentenkreis anspricht.

Rockport  
Audry Qtr Strap Woven » siehe S. 72

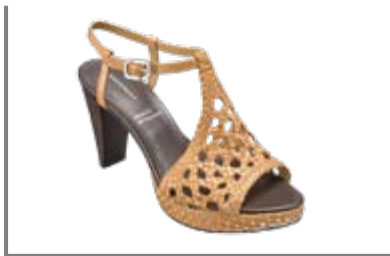

Die Kombination dieser Markenelemente soll Rockport für seine globale Hauptzielgruppe attraktiv machen – die berufstätigen Konsumenten in Großstädten. Rockport fokussiert sich derzeit nahezu ausschließlich auf den Bereich Schuhe.

### Internationale Expansion

Im Jahr 2010 hat Rockport den Vertrieb auf internationaler Ebene weiter ausgebaut. Die Marke ist nun in mehr als 54 Märkten der Welt aktiv. Umsätze außerhalb der USA machen inzwischen nahezu 50% des Gesamtumsatzes von Rockport aus. Die strategischen Prioritäten von Rockport sind:

- Stärkung seiner Position in den USA als Basis für eine globale Ausdehnung
- Schaffung einer Organisation auf Regionenebene als Fundament für Wachstumssteigerungen in Europa und Asien.

### Rockport auf einen Blick

02

|                           |                                                                                                                                                                                                                                                                                                                                                                                 |
|---------------------------|---------------------------------------------------------------------------------------------------------------------------------------------------------------------------------------------------------------------------------------------------------------------------------------------------------------------------------------------------------------------------------|
| Über Rockport             | Die Marke Rockport blickt zurück auf vier Jahrzehnte Erfahrung in der Schuhentwicklung und fühlt sich heute wie damals der Innovation verpflichtet. Rockport entwirft und vermarktet Schuhe in den Bereichen Dress, Casual und Outdoor, bei denen Performance-Technologien eingesetzt werden, um urbanen Konsumenten einen modischen Schuh mit höchstem Tragekomfort zu bieten. |
| Mission                   | Durch die innovative Kombination aus modernem Stil und ausgereiftem Tragekomfort zu einer der weltweit führenden Lederschuhmarken avancieren.                                                                                                                                                                                                                                   |
| Motto                     | Sexy, clever, modern, amerikanisch, urban                                                                                                                                                                                                                                                                                                                                       |
| Wichtige Märkte           | USA, Russland, Großbritannien, Kanada, Japan, Südkorea                                                                                                                                                                                                                                                                                                                          |
| Schwerpunktbereiche       | Dress, Dress Casual, Relaxed Casual, Active Casual                                                                                                                                                                                                                                                                                                                              |
| Strategische Grundpfeiler | Globalisierung, Women's, Einzelhandel, operative Fähigkeiten                                                                                                                                                                                                                                                                                                                    |
| Umsatzerlöse 2010         | 252 Mio. €                                                                                                                                                                                                                                                                                                                                                                      |



Rockport  
"It's nice to win" Kampagne» siehe S. 180

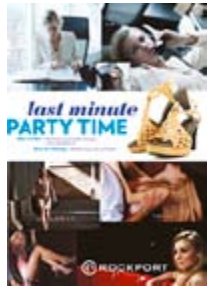

### Produktangebot für Männer und Frauen

Im Jahr 2010 hat Rockport mit der Einführung eines ausgewogenen, ganzheitlichen Markensortiments für Frauen bedeutende Fortschritte im Bereich Women's gemacht. Dieses Sortiment bietet der Konsumentin ein Wertversprechen, das Mode mit Komfort verbindet und ihr dadurch den Kauf von Lederschuhen ohne Kompromisse ermöglicht. Aufgrund der Investitionen und der Ausrichtung der Marke wird 2011 ein zweistelliger Umsatzanstieg im Bereich Women's erwartet.

### Ausweitung des profitablen Einzelhandelskonzepts für Rockport Exklusiv-Shops

Rockport treibt die globale Erweiterung seines neuen Einzelhandelskonzepts für Rockport Exklusiv-Shops auf den weltweit wichtigsten Märkten weiter voran. Angesichts vielversprechender Ergebnisse wird Rockport die Erweiterung dieses Konzepts in Russland, Japan und Südkorea sowie in anderen Präsenzmärkten weltweit forcieren.

Rockport  
Hydromotion 2 Hydro-Sail » siehe S. 73

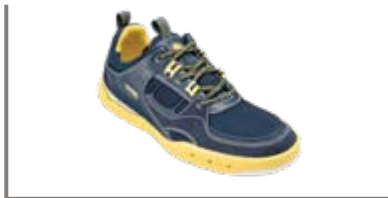

Eigene Einzelhandelsgeschäfte, die Produkte zum vollen Verkaufspreis anbieten, werden bis 2014 voraussichtlich mehr als 20 % des Gesamtumsatzes ausmachen und sollen in diesem Zeitraum als wichtigster Wachstums-treiber für die Marke dienen.

### Wichtige strategische Produktinitiativen und Innovationen

Die Marke Rockport plant für 2011 die Einführung von Produkten, die modisch und außergewöhnlich komfortabel sind, höchste „Walkability“ bieten und schnell am Markt sind – insbesondere bei der DresSports Kollektion und bei High-Heels. Hierfür soll der Produkteinführungsprozess noch weiter beschleunigt werden.

Rockport  
Fairwood Hillandale » siehe S. 73

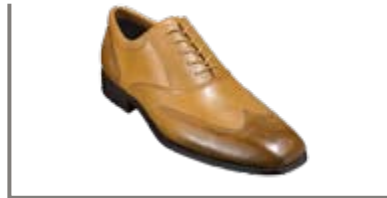

Neben den gegenwärtigen Fortschritten beim Produktdesign wird die Marke fortlaufend innovative Konzepte und führende Technologien in seine Produkte integrieren. Im Mittelpunkt stehen dabei nach wie vor stylische Komfort-schuhe für berufstätige Konsumenten in Großstädten.

## Reebok-CCM Hockey Strategie

Reebok-CCM Hockey ist einer der weltgrößten Designer, Hersteller und Vermarkter von Eishockey-Ausrüstung und -Bekleidung mit zwei der bekanntesten Marken im Eishockeysport: Reebok Hockey und CCM Hockey. Reebok-CCM Hockey rüstet mehr Eishockey-Profis als jeder andere Anbieter aus, darunter NHL-Superstars wie Sidney Crosby und Alexander Owetschkin. Reebok-CCM Hockey ist zudem offizieller Ausrüster namhafter Ligen wie der National Hockey League sowie mehrerer NCAA-Teams und Nationalmannschaften. Die Strategie von Reebok-CCM Hockey zielt darauf ab, durch seinen Mehrmarkenansatz unterschiedliche Konsumentengruppen anzusprechen und so seinen Marktanteil weiter auszubauen. Zudem hat Reebok-CCM Hockey den Anspruch, Spitzensportler stets mit innovativen Produkten auszurüsten.

### Fokus auf Spitzenleistung

Reebok-CCM Hockey umfasst zwei Marken: Reebok Hockey und CCM Hockey. Reebok Hockey ist eine globale Eishockey-Marke. Bei den Produkten stehen innovative, auffällige Technologien im Vordergrund, die einen markenaffinen Konsumenten ansprechen. CCM Hockey existiert seit 1899 und ist damit eine der traditionsreichsten Marken im Eishockey. Sie verkörpert den Leistungsgedanken des Sports und spricht Konsumenten an, die Wert auf Performance und Qualität legen.

Die Vision von Reebok-CCM Hockey ist es, Marktführer im Segment für hochwertige Performance-Produkte im Eishockey zu werden. Um diese Vision zu verwirklichen, wird der Fokus konsequent auf Produktinnovation gerichtet. Dabei nutzt Reebok-CCM Hockey Partnerschaften mit Top-Profispielern, um seine Spitzenprodukte im sportlichen Wettbewerb einem breiten Publikum zu präsentieren. Zudem sind differenzierte Marketing- und Markenkampagnen jeweils auf klare Konsumentensegmente zugeschnitten, z. B. Spieler oder Fans.

CCM Hockey Kampagne

» siehe S. 232

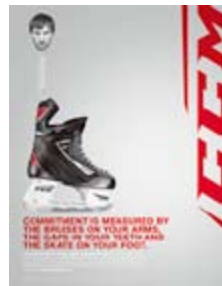

Marketinginitiativen in den Arenen und mit Partnern, Werbekampagnen und internetbasierte Initiativen zielen darauf ab, die Markenpräsenz zu stärken und dadurch die Nachfrage nach den Produkten von Reebok-CCM Hockey zu steigern.

### Produktinnovation passend zur Markenpositionierung

Reebok-CCM Hockey hat den Anspruch Produkte zu entwerfen und zu vermarkten, die sich von der Konkurrenz abheben und besser sind. Vorrangiges Ziel ist es, Spitzensportler mit Hochleistungsprodukten auszurüsten. Mit dem Fokus auf Produktinnovation werden kontinuierlich neue Produkte mit patentierten fortschrittlichen Technologien auf den Markt gebracht » siehe Forschung und Entwicklung, S. 110. Der Eishockey-Schlittschuh Pump, KFS Schutzausrüstung, der Eishockey-Schläger O-Stick, der 11K Helm und das Edge Uniform System von Reebok Hockey sind gute Beispiele für die innovativen Technologien der Marke. Ein Beispiel für Produktinnovationen bei CCM Hockey ist die High-Performance-Ausrüstung der U+ Serie, darunter der CCM U+ Crazy Light Skate (ein Schlittschuh, der sich der Fußform anpasst) und der CCM U+ Stick (der leichteste Hochleistungsschläger der Welt).

### Unterstützung durch Profispieler

Reebok-CCM Hockey weiß, dass der Erfolg beim Konsumenten stark von der Sichtbarkeit der Marke in den Profiligen beeinflusst wird. Die Verwendung der Produkte von den besten Spielern untermauert die Leistungsansprüche der Produkte von Reebok-CCM Hockey – und beide Marken haben in den Eishockey-Profiligen rund um den Globus eine hohe Präsenz.

## Reebok-CCM Hockey auf einen Blick

03

|                           |                                                                                                                                                                                                             |
|---------------------------|-------------------------------------------------------------------------------------------------------------------------------------------------------------------------------------------------------------|
| Über Reebok-CCM Hockey    | Reebok-CCM Hockey ist einer der weltgrößten Designer, Hersteller und Vermarkter von Eishockey-Ausrüstung und -Bekleidung mit zwei der weltweit bekanntesten Eishockey-Marken: Reebok Hockey und CCM Hockey. |
| Mission                   | Marktführer im Segment für hochwertige Performance-Produkte im Eishockey werden.                                                                                                                            |
| Motto                     | CCM Hockey: Performance Within<br>Reebok Hockey: Your Move                                                                                                                                                  |
| Wichtige Märkte           | Kanada, USA, Skandinavien, Russland                                                                                                                                                                         |
| Schwerpunktbereiche       | Schlittschuhe, Schläger, NHL-Lizenzbekleidung                                                                                                                                                               |
| Strategische Grundpfeiler | – Produktinnovationen<br>– Partnerschaften mit Profispielern<br>– Zwei-Markenstrategie                                                                                                                      |
| Umsatzerlöse 2010         | 200 Mio. €                                                                                                                                                                                                  |

– Reebok-CCM Hockey unterhält die wertvollsten Liga-Partnerschaften der gesamten Branche – als exklusiver Lizenznehmer für Trikots der National Hockey League (NHL), der American Hockey League (AHL), der Canadian Hockey League (CHL) sowie vieler europäischer Nationalmannschaften (8) und Teams der Elite League (60). Reebok-CCM Hockey ist zudem offizieller Ausrüster der AHL, der CHL und der ECHL. Jeder Spieler der NHL trägt Reebok Edge Bekleidung, da Reebok-CCM Hockey alle 30 Teams dieser Liga mit Trikots und Stutzen in den Heim-, Auswärts- und Alternativfarben ausstattet.

– Reebok-CCM Hockey hat Sponsoringverträge mit vielen der weltweit besten Eishockey-Spieler abgeschlossen. Dank ihrer Fertigungseinrichtungen in der Nähe der größten Ligen können beide Marken schnell maßgeschneiderte Lösungen liefern und genießen dadurch einen bedeutenden Wettbewerbsvorteil, wenn es darum geht, Spitzenprofis unter Vertrag zu nehmen. NHL-Spieler wie Sidney Crosby, Pawel Dazjuk, Patrice Bergeron, Roberto Luongo und Marc-André Fleury sind Markenbotschafter für Reebok Hockey. CCM Hockey hat zudem Spieler wie Alexander Owetschkin, Joe Thornton, Vincent Lecavalier und John Tavares unter Vertrag.

#### Wichtigste strategische Kategorien für mehr Wachstum

Reebok-CCM Hockey beabsichtigt, sein Wachstum durch kontinuierliche Produkteinführungen in seinen drei Hauptkategorien voranzutreiben: Schlittschuhe, Schläger und Bekleidung.

– **Schlittschuhe:** Das Ziel in der Kategorie Schlittschuhe ist es, mithilfe von erstklassigen Produkten in puncto Passform, Gewicht und Strapazierfähigkeit den Marktanteil zu steigern. So wurde 2010 beispielsweise eine neue, durch den 11K Pump angeführte Serie an Schlittschuhen der Marke Reebok Hockey auf den Markt gebracht, die den Konsumenten eine optimierte Passform bietet. Bei der Entwicklung wurde zudem besonders auf die Einbeziehung leichter, haltbarer Materialien geachtet. Im vierten Quartal 2010 hat CCM Hockey die nächste Generation der Produktplattform U+ vorgestellt. Dazu gehört auch der CCM U+ Crazy Light – der beste thermoflexible und an die Fußform anpassbare Schlittschuh in der Geschichte der Marke. Die übrigen Produkte der Serie werden bis April 2011 auf den Markt gebracht.

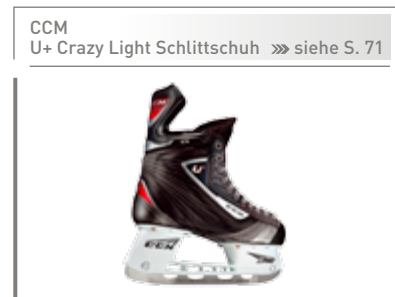

– **Schläger:** Um das Wachstum in der Kategorie Eishockey-Schläger fortzusetzen, konzentriert sich Reebok-CCM Hockey auf die Entwicklung neuer Technologien, die Schlagkraft, Handhabung, Flexibilität und Gewicht der Schläger verbessern.

Der von Reebok Hockey im vierten Quartal 2010 eingeführte Schläger 11K Sickick III ermöglicht Spielern dank Dual Matrix und Guided Blade Technologien eine schnellere Abgabe und eine verbesserte Puck-Kontrolle. Im Jahr 2011 wird CCM den neuen CCM U+ Crazy Light Schläger, den leichtesten Hochleistungsschläger auf dem Markt, weltweit einführen. Außerdem wird 2011 mit dem Schläger U+ Crazy Strong ein neuer und höchst robuster High-Performance-Schläger seine Premiere feiern.

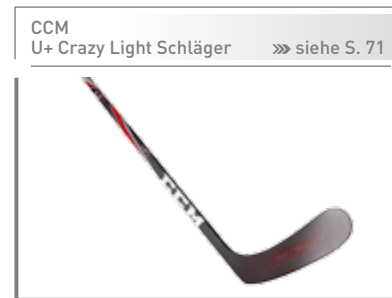

– **Bekleidung:** Reebok-CCM Hockey wird weiterhin versuchen, seine Liga-Partnerschaften und seinen Status als exklusiver Ausrüster zu nutzen, um das Wachstum voranzutreiben. Das Reebok Edge NHL Trikot mit Quattro-Stretch-Mesh gewährleistet maximale Ventilation und Bewegungsfreiheit für den Spieler. Neben der Bereitstellung der offiziellen Ausrüstung wird Reebok-CCM Hockey seinen Status als offizieller Ausrüster für NHL Locker Room Performance-Bekleidung sowie die Exklusivrechte der NHL Players' Association für Bekleidung und Kopfbedeckungen mit Spielernamen und -nummern voll ausschöpfen. NHL Locker Room Performance-Bekleidung umfasst Produkte, die von Profispielern während des Spiels unter den Trikots bzw. beim Training oder im Fitness-Studio getragen werden.

Eine bedeutende Produktinitiative ist hierbei die Reebok Speedwick Bekleidung. Die verwendeten Gewebe fühlen sich wie Baumwolle an, sind atmungsaktiv und verfügen über antimikrobielle Fasern, die das Bakterienwachstum hemmen. Darüber hinaus wird Reebok Hockey im Jahr 2011 die ZigTech Technologie in Trainings- und Performance-Bekleidung für den Eishockey-Sport einführen. ZigTech Bekleidung enthält Celliant-Fasern, die laut Testergebnissen einen höheren Sauerstoffgehalt in den betroffenen Hautpartien erzeugen als bei herkömmlicher Polyesterbekleidung. Dies ermöglicht es Spielern sowohl beim Spielen als auch beim Training abseits des Eises, ihren Energiehaushalt schneller wieder herzustellen.

#### Gesteigerte Profitabilität durch effizientere Beschaffungskette

Eine weitere strategische Priorität für Reebok-CCM Hockey besteht darin, die Umstellung von der eigenen Fertigung auf die Beschaffung von Produkten durch Dritte weiterzuverfolgen. Fertigungsaktivitäten werden jedoch in Bereichen beibehalten, in denen sich dadurch deutliche Wettbewerbsvorteile ergeben, wie z. B. bei Produkten für Sportler auf Profiniveau.

#### Preisstrategie unterstreicht Produktpositionierung

Die Preisstrategie von Reebok-CCM Hockey entspricht der Positionierung als Premium-Marke. Im Einklang mit der Verpflichtung zur Produktinnovation ist die Preisstrategie von Reebok-CCM Hockey darauf ausgelegt, zum einen in den Hochpreissegmenten eine dominante Marktposition zu erlangen und zum anderen im mittleren Preissegment als starker Wettbewerber aufzutreten.



# Global Operations

Global Operations, das internationale Beschaffungsteam des adidas Konzerns, steuert die Entwicklung, Fertigungsplanung, Beschaffung und Logistik für den Großteil unserer Produkte. Der Bereich Global Operations arbeitet kontinuierlich daran, sowohl die Effizienz innerhalb unserer Beschaffungskette zu optimieren als auch eine gleichbleibend hohe Produktqualität und Liefertreue bei wettbewerbsfähigen Kosten zu gewährleisten.

## Unsere Vision bleibt unverändert: maximale Nähe zum Konsumenten

Die Vision von Global Operations lautet, maximale Nähe zum Konsumenten zu erreichen. Durch Umsetzung der fünf strategischen Säulen » siehe 02 strebt Global Operations an, den Konsumenten die richtigen Produkte (hinsichtlich Größe, Farbe und Ausführung) zur richtigen Zeit und am richtigen Ort sowie in allen Vertriebskanälen und für alle Marken des Konzerns bereitzustellen. Global Operations kann viele Erfolge bei der Einführung hochmoderner Infrastruktur, Prozesse und Systeme vorweisen. In den letzten vier Jahren konnte der Bereich bestehende Strukturen erfolgreich konsolidieren und optimieren, wodurch Komplexität und Betriebskosten für den Konzern reduziert werden konnten. Mit unserem Fokus auf Qualität, Kosten und Produktverfügbarkeit haben wir bewiesen, dass wir den sich schnell ändernden Anforderungen unserer Konsumenten und Kunden gewachsen sind.

Mit dem strategischen Geschäftsplan Route 2015 werden Änderungen in der Arbeitsweise von Global Operations innerhalb des Konzerns erforderlich. Aufgrund dessen hat Global Operations einen strategischen Plan in enger Abstimmung mit den Anforderungen von Global Brands und Global Sales erstellt. Hierbei wurden auch einige externe Faktoren, die sich heute auf das Geschäft auswirken, berücksichtigt.

Dazu zählen voraussichtlich steigende Rohstoffpreise, Lohn- und Transportkosten sowie soziale und regulatorische Anforderungen, eine steigende Nachfrage und eine größere Nachfragesvolatilität. In den nächsten fünf Jahren wird sich Global Operations auf fünf strategische Prioritäten konzentrieren, unterstützt durch 15 auf den Konzern ausgerichtete Initiativen:

- Sicherung von wettbewerbsfähigen Kostenstrukturen
- Branchenweit führende Produktverfügbarkeit
- Ermöglichung kurzfristiger Bestellungen
- Unterstützung der Wachstumsprojekte des Konzerns
- Modernisierung der Infrastruktur des Konzerns

Durch die Realisierung dieser Initiativen wird Global Operations dazu beitragen, dass die Konzernziele der Route 2015 erreicht werden können. Gleichzeitig werden wir dadurch den Wettbewerbsvorteil unserer Beschaffungskette sicherstellen, um so der präferierte Partner für unsere Konsumenten und Kunden zu sein.

Die ersten beiden Prioritäten im strategischen Plan 2015 von Global Operations stellen sicher, dass der Bereich die grundlegenden Anforderungen des Konzerns weiterhin erfüllt. Mit den verbleibenden drei Prioritäten zielen wir darauf ab, Global Operations einen Vorsprung gegenüber den Wettbewerbern der Branche zu verschaffen.

## Global Operations im Prozess der Produktentstehung bis zur Markteinführung

01

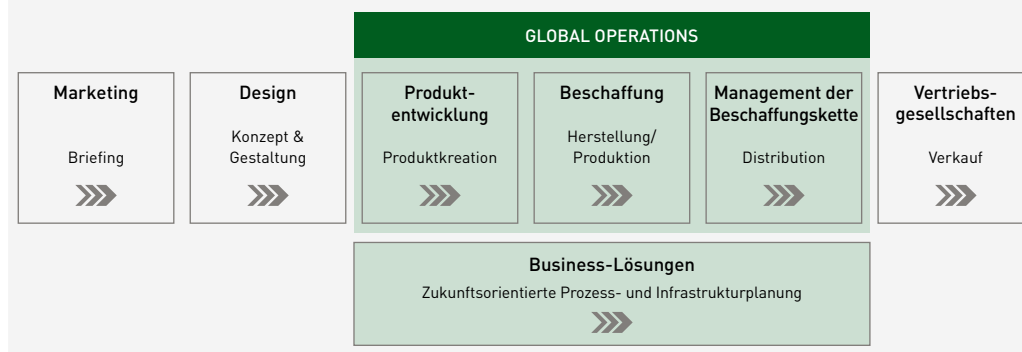

## Sicherung von wettbewerbsfähigen

**Kostenstrukturen:** Im Rahmen dieser Priorität konzentriert sich Global Operations darauf, unsere Produktentwicklung durch einen effizienteren Auswahlprozess für Materialien und Farben weiter zu optimieren. Zudem werden wir den Automatisierungsgrad bei unseren Fertigungsprozessen erhöhen. Dadurch werden wir die Produktivität steigern, Vorlaufzeiten verkürzen und die Qualität insgesamt verbessern. Diese Maßnahmen sollen die Profitabilität des Konzerns erhöhen und sicherstellen, dass wir unseren Konsumenten das beste Wertversprechen in unserer Branche bieten. Die Abteilung für Profitabilitätsmanagement von Global Operations spielt eine zentrale Rolle bei der Realisierung unserer Wettbewerbsfähigkeit, da sie unsere strategischen Kostenkalkulationsmaßnahmen vorantreibt und unsere Einkaufsstrategien optimiert. Dazu überwacht die Abteilung unter anderem gesamtwirtschaftliche Entwicklungen, um deren künftige Auswirkungen auf Produktkosten prognostizieren zu können. Darüber hinaus führt sie eine kontinuierliche finanzielle Bewertung unseres Zuliefernetzes durch.

**Branchenweit führende Produktverfügbarkeit:** Global Operations hat eine solide Plattform etabliert, um die Produktverfügbarkeit sicherzustellen. Darauf aufbauend wird dieser Bereich unsere Vorlaufzeiten von der Bestellung bis zur Auslieferung weiter verkürzen. Hierzu wird Global Operations durchdachte, maßgeschneiderte Lieferfähigkeitsprogramme für unsere Kunden durch verbesserte Planungssysteme und -prozesse für den Konzern aufstellen und anbieten. Um diese Initiative erfolgreich umsetzen zu können, müssen wir einerseits risikoorientierte Planungs- und Fertigungsmodelle für ausgewählte Produktbereiche

entwickeln und andererseits unsere Logistikzentren von Einkauf auf Lagerbestandsplanung umstellen.

## Ermöglichung kurzfristiger Bestellungen:

Die Ermöglichung kurzfristiger Bestellungen gehört zu den funktionsübergreifenden Prioritäten von Global Operations. Wir wollen unseren Kunden die Möglichkeit bieten, Produkte näher am Verkaufszeitpunkt bestellen zu können. Dadurch können sie ihre Einkaufsentscheidungen basierend auf besseren Marktkennntnissen treffen. Dies unterstützt das Ziel der Route 2015, die Vorlaufzeiten des gesamten Produktportfolios des Konzerns auf höchstens 60 Tage zu reduzieren. Insbesondere möchten wir die Produktionsvorlaufzeiten für den Großteil der Reebok Schuhe von 90 Tagen auf 60 Tage reduzieren. Für adidas Schuhe liegen die Vorlaufzeiten bereits größtenteils bei 60 Tagen. Durch diese Reduzierung können wir die Vertriebsabläufe der beiden Marken besser aufeinander abstimmen und unsere Effizienz steigern. Zudem planen wir, im Laufe der Zeit auch die Vorlaufzeiten für Bekleidung auf 60 Tage oder weniger zu verkürzen. Um diese Verbesserungen zu verwirklichen, wollen wir ein größeres regionales Beschaffungsnetz für Bekleidung aufbauen. Dadurch werden wir näher an unseren Schlüsselmärkten produzieren und Produkte schneller nachliefern können.

## Unterstützung der Wachstumsprojekte des Konzerns:

Global Operations unterstützt die Wachstumsprojekte, die im Geschäftsplan Route 2015 des Konzerns dargelegt sind. Dazu zählen insbesondere das adidas NEO Label, wichtige Marktinitiativen, Einzelhandel und E-Commerce sowie weitere wichtige Markenprogramme wie z. B. die Individualisierung » siehe Strategie Global Brands, S. 87

und Strategie Global Sales, S. 82. So unterstützt Global Operations beispielsweise beim adidas NEO Label das Geschäft in Sachen Fast Fashion-Produktentwicklung, Beschaffung und Management der Beschaffungskette. Im Bereich Einzelhandel stellt Global Operations weiterhin die Prozesse und Systeme bereit. Das Ziel besteht letztendlich darin, eine nachfrageorientierte Beschaffungskette zu haben, die bestehende Produktionsmodelle mit kurzer Vorlaufzeit besser nutzt, um die Produktverfügbarkeit ohne Überbestände zu optimieren » siehe Einzelhandelsstrategie, S. 84. Daneben wird sich Global Operations auf die Weiterentwicklung bestehender Individualisierungsmodelle konzentrieren, um die Geschäftsexpansion des Konzerns vor allem im Vertriebskanal E-Commerce zu unterstützen.

**Modernisierung der Infrastruktur des Konzerns:** Zur Unterstützung der Wachstumspläne des Konzerns wird sich Global Operations weiterhin auf den Aufbau der erforderlichen Infrastruktur, Prozesse und Systeme konzentrieren. Hierzu zählen die weitere Vereinfachung von Prozessen, die Konsolidierung bestehender Systeme und Vertriebsstrukturen sowie die Entwicklung modernster Systeme zur Unterstützung der neuen Geschäftsbedürfnisse. Ein Beispiel hierfür ist die Eröffnung unseres neuen Vertriebszentrums in Spartanburg, um das Wachstum in den USA zu unterstützen. Global Operations wird zudem weiterhin an seinen langfristigen Verbesserungsprogrammen wie „Fast and Lean Creation“ für Bekleidung, die Einführung der Global-Procurement-Solution-Plattform sowie die Erweiterung der Virtualisierung auf neue Produktkategorien und den Bereich Design festhalten » siehe Forschung und Entwicklung, S. 110.

## Strategische Säulen von Global Operations

02

### Lieferfähigkeit

Sicherung hoher Produktverfügbarkeit sowie rechtzeitige und schnelle Lieferung an unsere Kunden aus dem Groß- und Einzelhandel bei gleichzeitiger Minimierung unseres Vorratsbestands an Fertigprodukten. Dies soll dazu beitragen, die Initiativen in Bezug auf von uns selbst kontrollierte Verkaufsflächen zu unterstützen.

### Durchgehende („End-to-End“) Profitabilität

Ermittlung unserer wichtigsten Kosten- und Profitabilitätsstreiber und deren Wechselwirkungen, um die Entscheidungsfindung innerhalb der Beschaffungskette zu optimieren. Dadurch können wir finanzielle Risiken minimieren und die langfristige Profitabilität des Konzerns und des Zuliefernetzes sicherstellen.

### Flexible Lieferkette

Verbesserung der Flexibilität und Reaktionsgeschwindigkeit bei den für die Beschaffung und das Supply Chain Management verantwortlichen Abteilungen von Global Operations, um auf kurzfristige Änderungen der Marktanforderungen zeitnah reagieren zu können.

### Durchgehende („End-to-End“) Planung

Optimierung unserer Systeme für die Bedarfs- und Beschaffungsplanung, um effizientere, transparentere und funktionsübergreifend besser vernetzte Prozesse in den Segmenten Großhandel und Einzelhandel sowie in den Anderen Geschäftssegmenten zu entwickeln.

### Verkürzung der Entwicklungszeiten („Creation-to-Shelf“)

Aufbau von Kompetenzen, Prozessen und Technologien, die eine schnellere, intelligentere und effizientere Produktentwicklung zur Generierung von Wachstum und zur Verbesserung der Profitabilität ermöglichen.

## Mehrere Programme erreichen 2010 wichtige Meilensteine

Im Jahr 2010 konnte Global Operations entscheidende Fortschritte bei wichtigen Projekten erzielen. Im Mai wurde das Logistikzentrum des Konzerns in Spartanburg, South Carolina (USA), offiziell eröffnet. Über diese hochmoderne Einrichtung bedienen wir nun unsere Großhandelskunden und eigenen Einzelhandelsgeschäfte sowie unseren E-Commerce Bereich in den USA mit Produkten der Marken adidas, Reebok, TaylorMade-adidas Golf sowie Rockport. Dabei erhalten 80 % unserer Kunden ihre Bestellungen innerhalb von drei Tagen. Des Weiteren haben wir verschiedene wichtige Projekte zur Systemvereinfachung erfolgreich abgeschlossen. Die langfristige Einführung der Global Procurement Solution (GPS) von adidas wurde auf die Marken Reebok und Ashworth ausgeweitet. Bestellungen von adidas, Reebok und Ashworth werden von nun an über eine gemeinsame Plattform abgewickelt, die den gesamten Prozess von der Marktnachfrage über die Fabrikplanung bis hin zur Rechnungslegung der Zulieferer und der Abrechnung mit den Tochtergesellschaften abdeckt. Das GPS der Version 2.0 ersetzt insgesamt fünf große IT-Anwendungen. Darüber hinaus konnten wir mit der Entwicklung einer gemeinsamen Planungs-, Berichterstattungs- und Kommunikationsplattform die Anzahl der Systeme zur Beschaffungsplanung innerhalb des adidas Konzerns von drei auf eins reduzieren. Eine weitere große Errungenschaft im Jahr 2010 war die offizielle Einführung des „Fast and Lean Creation“-Prozesses für Schuhe.

Die Produktentwicklungsteams entwickeln jetzt etwa 75 % aller Schuhe in direkter Zusammenarbeit mit den Fabriken und legen damit den Grundstein für zukünftige Entwicklungszeiten von 12 Monaten oder weniger. In Sachen „Fast and Lean Creation“ für Bekleidung haben wir mit der Einführung des neuen Produktlebenszyklus-Managementsystems FlexPLM nur acht Monate nach Projektstart ebenfalls einen wichtigen Meilenstein erreicht. Daneben trugen die Teams von Global Operations im Jahr 2010 zu unserem Virtualisierungsprogramm bei: Mehr als 18.000 Artikel wurden in Form von 3-D-Dateien erstellt. Auch das „Fit & Size“-Programm, bei dem mehr als 500 Grundmuster überarbeitet wurden, um sie den heutigen Körpergrößen anzupassen und so für eine verbesserte Passform der Bekleidung zu sorgen, wurde von den Teams von Global Operations vorangetrieben.

## Großteil der Produktion erfolgt durch unabhängige Zulieferer

Um unsere Herstellungskosten möglichst gering zu halten, werden mehr als 95 % unserer Produkte von unabhängigen Vertragslieferanten hergestellt, die vorrangig in Asien angesiedelt sind. Unsere Zulieferer erhalten detaillierte Spezifikationen hinsichtlich der Produktion und Lieferung und verfügen zudem über fundierte Kenntnisse in der kosteneffizienten Massenproduktion von Schuhen, Bekleidung und Sportzubehör. Eine regelmäßig aktualisierte Liste unserer Zulieferbetriebe ist unserer Internetseite » [www.adidas-Group.com/de/sustainability/suppliers\\_and\\_workers](http://www.adidas-Group.com/de/sustainability/suppliers_and_workers) zu entnehmen.

Wir betreiben jedoch auch einige wenige eigene Produktions- und Montagestätten in Deutschland (1), Schweden (1), Finnland (1), den USA (4), Kanada (4), China (1) und Japan (1). Um die hohen Qualitätserwartungen der Konsumenten an unsere Produkte zu erfüllen, führen wir strenge Betriebs- und Qualitätskontrollen bei unseren Zulieferern und in unseren eigenen Werken durch. Darüber hinaus setzen wir uns in unserer kompletten Beschaffungskette sehr stark für die Einhaltung von Sozial- und Umweltstandards ein » siehe Nachhaltigkeit, S. 120.

## Anzahl der Zulieferpartner insgesamt stabil

Im Jahr 2010 arbeitete Global Operations mit 270 unabhängigen Herstellern zusammen. Die Anzahl der Zulieferer im Bereich Bekleidung ging aufgrund der weiteren Rationalisierung der Zulieferbasis zurück. In den Bereichen Schuhe und Sportzubehör war hingegen ein Anstieg bei der Anzahl der Zulieferer zu verzeichnen. Bei Schuhen ist dies auf erhebliche Volumensteigerungen und die Ausweitung in neue Beschaffungsländer (z. B. Kambodscha) zurückzuführen. 75 % unserer unabhängigen Zulieferer waren in Asien, 16 % auf dem amerikanischen Kontinent und 9 % in Europa ansässig » siehe 03. 32 % aller Zulieferbetriebe befanden sich in China.

Der Bereich Global Operations koordiniert die Entwicklung, Kommerzialisierung und Logistik für unsere Produkte und verantwortet den Beschaffungsprozess für unsere Groß- und Einzelhandelssegmente sowie für adidas Golf » siehe 01.

## Zulieferer nach Regionen<sup>1)</sup>

03

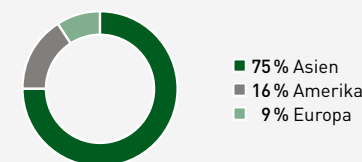

1) Angaben beinhalten Zulieferer der Marken adidas, Reebok und adidas Golf, ohne lokale Zulieferer, Handelsmakler, Subunternehmer, Materiallieferanten und Zulieferbetriebe der Lizenznehmer.

## Schuhproduktion nach Regionen<sup>1)</sup>

04

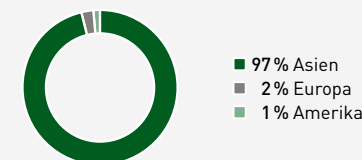

1) Angaben beinhalten adidas, Reebok und adidas Golf.

## Schuhproduktion<sup>1)</sup> in Millionen Paar

05

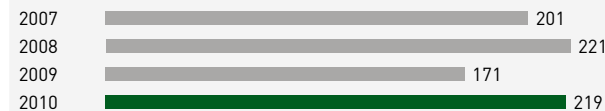

1) Angaben beinhalten adidas, Reebok und adidas Golf.



Aufgrund der unterschiedlichen Beschaffungsanforderungen in ihren jeweiligen Geschäftsbereichen fallen Taylor-Made, Rockport, Reebok-CCM Hockey sowie die Sports Licensed Division nicht in den Zuständigkeitsbereich von Global Operations, sondern arbeiten mit eigenen Beschaffungsteams. Außerdem beziehen einzelne Konzerngesellschaften ohne Beteiligung von Global Operations Produkte von Zulieferern vor Ort, um kurzfristige Chancen in ihrem Heimatmarkt zu nutzen oder bestimmte Handelsbestimmungen zu erfüllen – allerdings erfolgt dies nur mit der Zustimmung des Sozial- und Umweltteams. Solche lokalen Einkäufe machen jedoch nur einen geringen Teil unseres gesamten Beschaffungsvolumens aus.

#### Geringerer Anteil Chinas an der Schuhproduktion

Im Jahr 2010 wurden 97 % der Schuhe unserer Marken adidas, Reebok und adidas Golf in Asien produziert (2009: 97 %). Auf Europa und den amerikanischen Kontinent entfielen insgesamt 3 % des Beschaffungsvolumens (2009: 3 %) » siehe 04. Das wichtigste Beschaffungsland war China mit einem Anteil von ca. 39 % am Gesamtvolumen, gefolgt von Vietnam (31 %) und Indonesien (22 %). Im Zuge unserer Strategie, die regionale Vielfalt unserer Zulieferbasis zu erweitern und so die künftigen Erfordernisse unseres Geschäfts zu erfüllen, ging der Anteil Chinas in unserem Beschaffungsmix um 2 Prozentpunkte zurück. Gleichzeitig hat sich 2010 der Anteil Kambodschas an unserer Schuhproduktion von einer niedrigen Vergleichsbasis nahezu verdreifacht.

Im Jahr 2010 stellten unsere Zulieferer rund 219 Millionen Paar Schuhe her (2009: ca. 171 Millionen Paar) » siehe 05. Dieser Anstieg im Vorjahresvergleich erklärt sich durch das starke Umsatzwachstum 2010 und die niedrige Vergleichsbasis 2009 aufgrund von Aktivitäten zur Bestandsbereinigung. Unser größter Zulieferbetrieb produzierte etwa 9 % unseres Gesamtvolumens an Schuhen (2009: 11 %). Rockport kaufte 2010 etwa 8 Millionen Paar Schuhe ein, was einer Steigerung um 27 % gegenüber dem Vorjahr entspricht. Die Produkte stammten zum Großteil aus Fabriken in China (67 %), Vietnam (25 %), Indonesien (5 %) und Indien (3 %). Der größte Zulieferbetrieb trug 37 % zum gesamten Beschaffungsvolumen von Rockport bei.

#### Steigerung der Bekleidungsproduktion

Im Jahr 2010 stammten 82 % unserer Gesamteinkäufe an Bekleidung für die Marken adidas, Reebok und adidas Golf aus Asien (2009: 83 %). Europa ist mit 12 % des Gesamtvolumens nach wie vor die zweitgrößte Einkaufsregion für Bekleidung (2009: 11 %), während 6 % auf den amerikanischen Kontinent entfielen (2009: 6 %) » siehe 06. China war mit 36 % der Gesamtproduktion das wichtigste Zulieferland, gefolgt von Thailand mit 13 % und Indonesien mit ebenfalls 13 %. Insgesamt stellten unsere Zulieferer im Jahr 2010 rund 301 Millionen Textilien her (2009: ca. 239 Millionen Textilien) » siehe 07. Der größte Zulieferbetrieb produzierte im Jahr 2010 etwa 9 % dieser Bekleidungsstücke (2009: 11 %). Darüber hinaus kaufte Reebok-CCM Hockey im Jahr 2010 ca. 2 Millionen Textilien (2009: ca. 2 Millionen Textilien) ein.

Der Großteil davon stammte aus asiatischer Produktion, während kleine Anteile in Amerika (insbesondere Kanada) und Europa hergestellt wurden. Die Sports Licensed Division kaufte ca. 23 Millionen Textilien und 15 Millionen Kopfbekleidungsprodukte ein (2009: 20 Millionen bzw. 14 Millionen). Die Textilien (meist halbfertige Erzeugnisse, die anschließend in unseren eigenen Siebdruck-Einrichtungen in den USA fertiggestellt wurden) stammten vor allem aus Lateinamerika (85 %) und Asien (15 %). Die Mehrzahl der Kopfbekleidungsprodukte wurde bereits fertig eingekauft, vor allem in Asien (97 %) und den USA (3 %).

**67 % der Zubehöartikel der Marken adidas und Reebok kommen aus China**  
Mit 98 % wurde im Jahr 2010 der Großteil von Sportzubehör, wie Bälle und Taschen der Marken adidas und Reebok, in Asien hergestellt (2009: 98 %). China blieb mit 67 % des Beschaffungsvolumens unser wichtigstes Einkaufsland, gefolgt von Vietnam mit 20 % und Pakistan mit 11 %. Die verbleibenden 2 % stammten aus europäischen Ländern » siehe 08. Das gesamte Beschaffungsvolumen belief sich im Jahr 2010 auf rund 48 Millionen Stück (2009: ca. 34 Millionen Stück), wovon 21 % auf den größten Zulieferbetrieb entfielen » siehe 09.

Bei TaylorMade und Reebok-CCM Hockey stammten 98 % bzw. 72 % der Zubehörprodukte aus Asien (2009: 92 % bzw. 78 %). Beide Marken bezogen zudem einen Anteil der Produkte aus Amerika. Die Mehrzahl der Komponenten von TaylorMade Golfschlägern wurde von Zulieferern in China hergestellt und dann von TaylorMade in den USA, China und Japan zusammengesetzt.

#### Bekleidungsproduktion nach Regionen<sup>1)</sup>

06

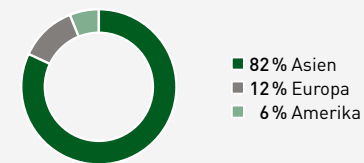

1) Angaben beinhalten adidas, Reebok und adidas Golf.

#### Bekleidungsproduktion<sup>1)</sup> in Millionen Stück

07

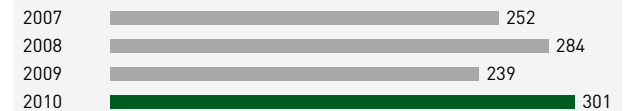

1) Angaben beinhalten adidas, Reebok und adidas Golf.

#### Produktion von Sportzubehör nach Regionen<sup>1)</sup>

08

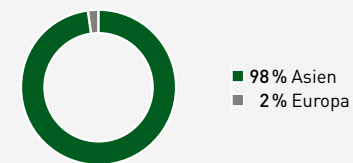

1) Angaben beinhalten adidas, Reebok und adidas Golf.

#### Produktion von Sportzubehör<sup>1)</sup> in Millionen Stück

09

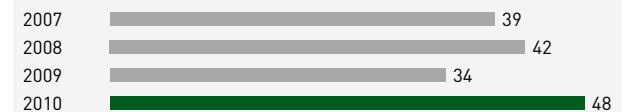

1) Angaben beinhalten adidas, Reebok und adidas Golf.

# Forschung und Entwicklung

Die Schaffung innovativer Produkte, die den sich verändernden Bedürfnissen von Sportlern und Konsumenten entsprechen, ist für eine positive Markenwahrnehmung von zentraler Bedeutung. Deshalb spielt Forschung und Entwicklung (F&E) eine entscheidende Rolle für den dauerhaften Erfolg unseres Unternehmens. Wir investieren erhebliche Ressourcen in die Weiterentwicklung und Vermarktung technologischer Innovationen und neuartiger Designideen, um so die Wünsche unserer Konsumenten optimal zu erfüllen. Vorangetrieben wird der Forschungs- und Entwicklungsprozess durch Teams von Mitarbeitern mit unterschiedlichen beruflichen Hintergründen. Im Jahr 2011 wird der Fokus unserer F&E-Aktivitäten auf Individualisierung und digitalen Sportprodukten liegen.

## F&E als integraler Bestandteil der Produktentwicklung

Forschung und Entwicklung sind innerhalb des adidas Konzerns dezentral organisiert. Grundlegende und bio-mechanische Forschungsergebnisse werden jedoch konzernweit allen Beteiligten zugänglich gemacht. Jede Marke investiert entsprechend ihrer jeweiligen Positionierung in Forschung, Design und Entwicklung. Der Schwerpunkt der Teams liegt in der Regel entweder auf einer bestimmten Kategorie oder einer Technologie. Innerhalb der einzelnen Segmente bildet die Forschung und Entwicklung keine eigenständige Organisationseinheit, sondern ist eng in die Bereiche Beschaffung, Design und Produktmarketing integriert. Hierdurch lassen sich alle F&E-Ergebnisse direkt auf ein bestimmtes Produkt anwenden. Zu Beginn der Produktentwicklung legt die Marketing-Abteilung den Entwicklungsschwerpunkt fest. Dieser ergibt sich fallweise aus einer Kombination von Konsumentenstudien und -feedback, Wettbewerbsanalysen und eigenen Produkttests. Darüber hinaus sind unsere Innovationsteams stets auf der Suche nach Ideen für potenzielle Produktinnovationen. Sie analysieren unabhängig von speziellen Entwicklungsaufträgen neue Materialien, Herstellungsprozesse und wissenschaftliche Untersuchungen, oft sogar aus anderen Branchen.

Die sich hieraus ergebenden Ideen werden bereits in einem frühen Stadium dem Produktmarketing präsentiert, um den Vermarktungswert des Konzepts zu bewerten. Nach der Konzepterstellung werden neue Technologien unter Einsatz von modernsten CAD- und Finite-Elemente-Analyse-Systemen entwickelt. Bei der Produktentwicklung arbeiten Beschaffungs- und Materialteams eng mit unseren Zulieferern zusammen, um innovative Materialien zu identifizieren und Kostenaspekte und Produktionsprozesse bereits in der Entwicklungsphase abzuwägen. Sobald die neue Technologie umsetzbar erscheint, werden Muster produziert. Diese Muster werden dann durch die Mitarbeiter unserer Innovationsteams sowie durch Spitzensportler eingehenden Tests unterzogen. Nur wenn diese Tests erfolgreich verlaufen, werden die neuen Technologien an das Produktmarketing übergeben, wo die Technologien dann im Endprodukt kommerzialisiert werden.

## adidas Innovation Team treibt F&E-Aktivitäten der Marke voran

Die F&E-Aktivitäten bei der Marke adidas konzentrieren sich auf die Entwicklung innovativer Technologien für den Leistungssport. Das adidas Innovation Team (ait) hat zum Ziel, die führende Stellung von adidas bei Technologie und Innovation zu stärken. Dazu entwickelt es ständig neue Technologien und Konzepte in allen wichtigen Produktkategorien. Das Team

ist in Gruppen aufgeteilt; diese spezialisieren sich jeweils auf Bekleidung, Schuhe und Sportzubehör, widmen sich darin wiederum spezifischen Produktkategorien wie Basketball, Fußball oder American Football oder beschäftigen sich mit kategorieübergreifenden Projekten wie intelligenten Produkten oder Energiemanagement-Systemen (Dämpfungs-technologien). Die Mehrheit dieser Teams agiert von den Standorten Herzogenaurach und Portland/Oregon, USA, aus. Der Produktentwicklungsprozess wird von speziellen Innovationsentwicklungszentren in Asien unterstützt, die sich auf die Umsetzung von Konzepten durch die Herstellung von Prototypen konzentrieren. Diese Zentren leisten einen wichtigen Beitrag zur Entwicklungseffizienz, da die Produktentwicklung in realen Produktionsumgebungen stattfindet.

## Fitness und Training im Mittelpunkt der F&E-Aktivitäten bei Reebok

Das Hauptaugenmerk der F&E-Teams bei Reebok liegt auf der Entwicklung von Schuhen, Bekleidung und Sportzubehör für die Bereiche Fitness und Training, ohne dabei Kompromisse hinsichtlich Komfort und Passform einzugehen. Die Organisationsstruktur der Teams richtet sich nach den jeweiligen Prioritäten der Marke in den einzelnen Kategorien: Muskelkraft und Muskelaktivierung, Muskeltraining und Flexibilität. Daneben gibt es bestimmte kategorieübergreifende Teams wie z. B. das

Reebok Advanced Concepts Team, das spezielle Konzepte von der ursprünglichen Idee bis hin zur Produktionsphase begleitet. Der Tätigkeitsschwerpunkt der F&E-Teams von Reebok liegt vorwiegend in Canton/Massachusetts, USA. Zusätzlich sind Kooperationspartner in fortgeschrittenen Entwicklungszentren in China und Vietnam tätig, die sich in erster Linie mit neuen technologischen Entwicklungen, innovativen Materialien und Beschichtungen sowie Fertigungslösungen beschäftigen.

## Branchenführende Forschung und Entwicklung bei TaylorMade-adidas Golf

Das F&E-Team von TaylorMade-adidas Golf konzentriert sich auf das Konzipieren und Entwickeln branchenführender Golfprodukte. Die Organisationsstruktur des Teams richtet sich nach den verschiedenen Produktkategorien im Golfbereich. Das Team hat seinen Sitz in Carlsbad/Kalifornien, USA.

## Vertikal integrierte F&E-Aktivitäten bei Rockport

Die F&E-Einrichtung von Rockport mit Sitz in Canton/Massachusetts, USA, ist eine vertikal integrierte Organisation, die sämtliche Aspekte hinsichtlich Strategie, Forschung, Design, Entwicklung und Produkttests umfasst. Hierbei kommen modernste, firmeneigene Sportschuh-technologien in den Schuhkollektionen zum Einsatz.

### Reebok-CCM Hockey F&E-Aktivitäten in Kanada angesiedelt

Das F&E-Team von Reebok-CCM Hockey hat seinen Sitz in Montreal/Quebec, Kanada, und konzentriert sich auf die fortlaufende Entwicklung von technisch ausgereifter Eishockey-Ausrüstung für Profis und Hobbyspieler. Die Organisationsstruktur der Teams richtet sich nach den Kategorien unter den beiden Marken Reebok und CCM.

### Ausgewählter Zukauf externer F&E-Expertise

Neben den internen F&E-Aktivitäten kauft der adidas Konzern in begrenztem Umfang auch F&E-Expertise etablierter Forschungspartner ein. Diese Strategie ermöglicht uns eine höhere Flexibilität und schnelleren Zugriff auf Know-how, dessen Aufbau innerhalb unseres Konzerns sehr viel Zeit und Ressourcen in Anspruch nehmen würde. Um effizient zu arbeiten und die Forschungsergebnisse zu schützen, sind diese Kooperationen in der Regel langfristig und exklusiv angelegt. Alle Projekte, die gemeinsam mit externen Partnern durchgeführt werden, beruhen auf einem klar definierten Auftrag, der den Projektumfang vorgibt. So wird die Übereinstimmung mit den F&E-Schwerpunkten des Konzerns gewährleistet. adidas unterhält etablierte Beziehungen zur University of Loughborough in England, zur University of Calgary in Kanada, zu den Universitäten Erlangen-Nürnberg und Freiburg. Die Universität Freiburg war beispielsweise an Studien zur Griffigkeit beteiligt, die maßgeblich für die Entwicklung des ultraleichten adidas adiZero F50 Fußballschuhs waren. Darüber hinaus wurden 2010 technologische Weiterentwicklungen bei Techfit Bekleidung in Zusammenarbeit mit der University of Calgary (Kanada) durchgeführt.

Reebok setzte für seine Produkte, die im Jahr 2010 auf den Markt kamen, seine Forschungsaktivitäten mit F&E-Einrichtungen weltweit fort. Dazu gehörten elektromyografische Untersuchungen am Utica College (USA) und an der Universität Erlangen-Nürnberg. Für die ZigTech Plattform führte Reebok gemeinsam mit der University of Wisconsin (USA) Druckmessungen unter dem Fuß durch. TaylorMade-adidas Golf führte 2010 seine langjährige Kooperation mit Forschern der University of Calgary (Kanada) fort. So wurden umfassende gemeinsame Studien zur Schwungdynamik durchgeführt, um den Einfluss verschiedener Schäfte auf die Leistung und Wahrnehmung des Golfers zu untersuchen.

### Strategie zum aktiven Schutz von Markenzeichen und Patenten

Um von der Leistung des Konzernbereichs Forschung und Entwicklung angemessen profitieren zu können, streben wir stets an, unsere Innovationen patentrechtlich zu schützen. Es gehört zu unseren wichtigsten Prinzipien, für den bestmöglichen patentrechtlichen Schutz unserer Innovationen zu sorgen. Da wir ein breites Spektrum an unterschiedlichen Technologien in unseren Produkten einsetzen, sind wir nicht von einzelnen Technologien oder damit verbundenen Patentrechten abhängig. Wir besitzen ein umfassendes Portfolio an eingetragenen Markenzeichen für die Marken des Konzerns und die dazugehörigen Markennamen. Als Teil unserer Geschäftspolitik setzen wir die Marken- und Patentrechte des Konzerns mit Nachdruck durch, indem wir Patentrechtsverletzungen aufspüren und Maßnahmen ergreifen, um solche Verletzungen zu verhindern.

Dazu gehört ein rigoroses Programm gegen Fälschungen. Zudem haben wir umfassende Prozesse eingeführt und unternehmen umfangreiche Ermittlungen, um eine Verletzung der Schutzrechte von Dritten zu vermeiden » siehe Risiko- und Chancenbericht, S. 158.

### Hoch qualifiziertes Fachpersonal

Unsere F&E-Abteilungen beschäftigen erfahrene und qualifizierte Mitarbeiter unterschiedlicher Kompetenzbereiche und vielfältiger kultureller Hintergründe. Unsere Spezialisten für Maschinenbau und Biomechanik befassen sich in erster Linie mit der Entwicklung von Performance-Schuhen, wobei vorrangig die Belastungen für Knie- und andere Gelenke reduziert werden sollen. Unsere Experten für Werkstofftechnik beschäftigen sich hauptsächlich mit der Entwicklung von Bekleidung und Schuhen, die robuster und flexibler sind und sich durch eine verbesserte Temperatur- und Feuchtigkeitsregelung auszeichnen. Daneben tragen auch unsere Prozess- und Produktionsspezialisten entscheidend zu unseren starken Produktentwicklungen bei. Außerdem beschäftigen wir Spezialisten für Softwareentwicklung, Industrie- und Grafikdesign, Elektrotechnik, Finite-Elemente-Analyse, fortschrittliches CAD-Design und Kinesiologie. Für das Jahr 2011 erwarten wir einen leichten Anstieg bei der Mitarbeiterzahl im Bereich Forschung und Entwicklung. Zum 31. Dezember 2010 waren 1.002 Mitarbeiter im F&E-Bereich des Konzerns beschäftigt (2009: 999). Damit arbeiten 2 % der Konzernmitarbeiter im Bereich Forschung und Entwicklung; dies bedeutet einen leichten Rückgang im Vergleich zum Vorjahr (2009: 3 %).

### Wichtige Standorte und Aktivitäten im Bereich F&E

01

|                        | Hauptaktivitäten                           | Standort                  |
|------------------------|--------------------------------------------|---------------------------|
| adidas                 | Globales Entwicklungszentrum (ait)         | Herzogenaurach            |
|                        | Globales Entwicklungszentrum (ait)         | Portland/Oregon, USA      |
|                        | Globales Forschungs- und Testzentrum (ait) | Scheinfeld                |
| Reebok                 | Produktentwicklungszentrum                 | Schanghai, China          |
|                        | Produktentwicklungszentrum                 | Tokio, Japan              |
|                        | Globales Entwicklungs- und Testzentrum     | Canton/Massachusetts, USA |
|                        | Vorentwicklungszentrum                     | Fuzhou, China             |
| TaylorMade-adidas Golf | Entwicklungs- und Testzentrum              | Ho Chi Minh, Vietnam      |
|                        | Globales Entwicklungs- und Testzentrum     | Carlsbad/Kalifornien, USA |
| Rockport               | Globales Entwicklungs- und Testzentrum     | Canton/Massachusetts, USA |
| Reebok-CCM Hockey      | Entwicklungs- und Testzentrum              | Montreal/Quebec, Kanada   |



### Initiativen zur weiteren Straffung des Produktentwicklungsprozesses

Wir zielen darauf ab, auf Veränderungen von Konsumentenbedürfnissen noch schneller, flexibler und effizienter zu reagieren. Dazu erleichtern wir die direkte Interaktion und Beteiligung unserer Zulieferer in Sachen Produktentwicklung, Qualitätskontrolle, Produkttests und Vermarktung. Im Jahr 2010 haben wir unser Programm „Fast and Lean Creation“ für Schuhe vollständig umgesetzt und es für Bekleidung eingeführt » siehe Global Operations, S. 106. Im gleichen Jahr haben wir zudem weitere Fortschritte dabei gemacht, die Marketing- und Designteams noch früher in den Produktentwicklungsprozess einzubinden. Dadurch werden kostspielige Produktänderungen in späteren Phasen des Entwicklungsprozesses auf ein Minimum beschränkt.

### F&E-Kosten steigen um 18%

Die F&E-Aufwendungen umfassen Ausgaben für Personal und Verwaltung, jedoch keine sonstigen Aufwendungen wie zum Beispiel die Designkosten während der Produktentwicklung. Wie in den Vorjahren wurden auch 2010 sämtliche Kosten für Forschung und Entwicklung zum Zeitpunkt der Entstehung als Aufwand erfasst. Die F&E-Ausgaben des adidas Konzerns stiegen 2010 um 18% auf 102 Mio. € (2009: 86 Mio. €). Grund hierfür waren die höheren Aufwendungen der Marke adidas für Initiativen rund um die Entwicklung von intelligenten Produkten. Die Personalkosten machen den größten Teil der F&E-Aufwendungen aus und entsprachen mehr als 69% der Gesamtausgaben für Forschung und Entwicklung im Jahr 2010.

Der Anteil der Aufwendungen für Forschung und Entwicklung an den gesamten betrieblichen Aufwendungen betrug im Jahr 2010 2,0% (2009: 2,0%). Im Verhältnis zum Umsatz blieben die Aufwendungen für F&E mit 0,8% stabil (2009: 0,8%) » siehe Erläuterung 2, S. 189.

### Erfolgreiche Vermarktung technologischer Innovationen

Um Innovationsführer zu sein, genügt es nicht, branchenführende Technologien zu entwickeln. Während die Auszeichnungen, die wir im Jahr 2010 erhielten, erneut unsere Technologieführerschaft in der Sportartikelbranche untermauern » siehe 06, ist die erfolgreiche Vermarktung dieser technologischen Innovationen von noch größerer Bedeutung. Der adidas Konzern erzielte 2010 den Großteil seines Umsatzes mit Produkten, die im Laufe des Jahres auf den Markt kamen. Da neue Produkte in der Regel eine höhere Bruttomarge aufweisen als Artikel, die bereits länger als eine Saison auf dem Markt sind, trugen neu eingeführte Produkte im Jahr 2010 überproportional zum Konzerngewinn bei. Wir gehen davon aus, dass sich diese Entwicklung auch im Jahr 2011 fortsetzt, da unser Produkteinführungsplan eine Fülle innovativer Produkte vorsieht » siehe Nachtrag und Ausblick, S. 174.

### Erfolgreiche Produkteinführungen in allen wichtigen adidas Kategorien

Der Großteil des Umsatzes im Jahr 2010 entfiel erneut auf Produkte aus dem aktuellen Produktsortiment. Im Jahr 2010 neu eingeführte Produkte machten 75% des Markenumsatzes aus (2009: 80%). Nur 2% des Gesamtumsatzes wurden mit Produkten erzielt, deren Markteinführung drei Jahre oder länger zurückliegt (2009: 3%).

In der Kategorie Running brachte adidas im Jahr 2010 eine neue Version des ultraleichten Laufschuhs adiZero adios auf den Markt, der durch modernste Verbundmaterialien, innovative Konstruktion und sein Design besticht. Athleten mit diesem Schuh konnten im Jahr 2010 mehr als 60 große Rennen für sich entscheiden. In der Kategorie Fußball zählte die Einführung des adidas adiZero F50 bei der FIFA Fußball-Weltmeisterschaft 2010 zu den Highlights. Sein neuer SprintSkin Schaff besteht aus einem innovativen, einlagigen Mikrofaser-Polyurethan-Synthetikmaterial, das den Schuh nicht nur extrem leicht macht, sondern ihm gleichzeitig eine einmalige Passform verleiht. Darüber hinaus führte adidas im Jahr 2010 die Clima365 Reihe ein, die neue Maßstäbe in Sachen Bekleidungstechnologie zur Regulierung der Körpertemperatur setzt. Mit Hilfe von BodyMapping wurden verschiedene Schweiß- und Wärmezonen des Körpers ermittelt. Ausgehend von diesen Informationen befinden sich bei Clima365 die speziellen Fasern genau dort, wo sie am meisten gebraucht werden. Ferner erweiterte adidas im Jahr 2010 sein interaktives Trainingssystem miCoach mit der Einführung des miCoach Pacer und der miCoach App. miCoach Pacer ist eine Art digitaler Personal Trainer, der in Verbindung mit sportartspezifischen Trainingsprogrammen den Athleten durch akustische Trainingsanweisungen in Echtzeit beim Training unterstützt. Mit der neuen miCoach App bringt adidas das individuelle Coaching auf verschiedene Smartphone-Plattformen wie iPhone oder Blackberry. Dieser Service dehnt das Trainingsangebot weiter auf Kategorien wie Fußball, Tennis, American Football und Basketball aus.

### Aufwendungen für Forschung und Entwicklung

in Mio. €

02

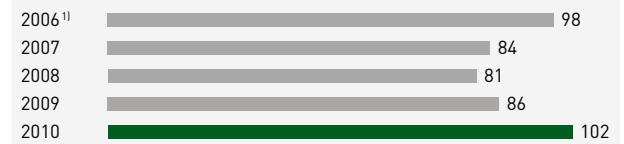

1) Beinhaltet Reebok, Rockport und Reebok-CCM Hockey ab 1. Februar 2006.

### Aufwendungen für Forschung und Entwicklung

in % der Umsatzerlöse

03

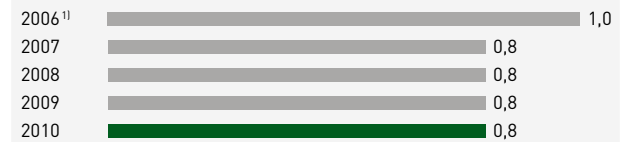

1) Beinhaltet Reebok, Rockport und Reebok-CCM Hockey ab 1. Februar 2006.

### Aufwendungen für Forschung und Entwicklung

in % der sonstigen betrieblichen Aufwendungen

04

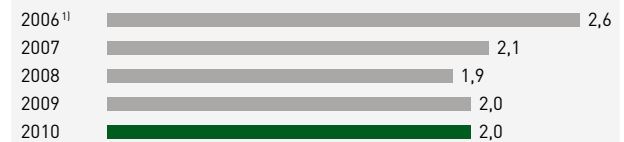

1) Beinhaltet Reebok, Rockport und Reebok-CCM Hockey ab 1. Februar 2006.

## Reebok baut Muskelaktivierung aus und führt ZigTech Technologieplattform ein

Im Jahr 2010 erzielte Reebok mit neu eingeführten Produkten den Großteil seiner Umsätze. Geschätzte 63 % der 2010 verkauften Schuhe waren Produkte, die im gleichen Jahr eingeführt wurden (2009: 64 %), während 15 % der Schuhverkäufe auf Produkte entfielen, die vor drei oder mehr Jahren auf den Markt kamen (2009: 14 %). Im Jahr 2010 erweiterte Reebok mit der Einführung von RunTone, TrainTone und JumpTone sein Angebot zur Muskelaktivierung. Während bei all diesen Konzepten wichtige Beinmuskeln aktiviert werden, sind sie jeweils für eine spezielle Sportart konzipiert (RunTone für den Laufbereich, TrainTone für den Trainingsbereich und JumpTone für den Bereich Basketball). Die technologischen Innovationen bei diesen Produkten unterstützen zudem das Wachstum in der Kategorie Men's, da eine gesteigerte Muskelaktivierung auch diese Zielgruppe anspricht, insbesondere beim Krafttraining. Im Jahr 2010 wurden Produkte zur Muskelaktivierung auch im Bereich Bekleidung eingeführt. Die EasyTone Bekleidungskollektion soll die Oberkörpermuskulatur aktivieren und stärken und damit Körperhaltung und Ausrichtung verbessern. Bei dieser innovativen Serie an Performance-Bekleidung werden ResisTone Bänder eingesetzt, die bei jeder Bewegung einen Widerstand erzeugen. Daneben hat Reebok 2010 die ZigTech Technologieplattform eingeführt. Diese konzentriert sich darauf, die Effizienz von Athleten zu erhöhen, damit sie länger laufen können und Ermüdungserscheinungen in wichtigen Beinmuskeln reduziert werden. Die Sohle des ZigTech Schuhs besteht aus leichtem Schaummaterial in einem geometrischen Zickzack-Design.

Die unverwechselbare Zickzack-Konstruktion absorbiert die Aufprallkräfte der Ferse und gibt die Energie an die vorderen Partien des Fußes ab, um die Vorwärtsbewegung des Athleten zu beschleunigen.

## Innovation ein wichtiger Erfolgsfaktor für TaylorMade-adidas Golf

Bei TaylorMade-adidas Golf wurden im Jahr 2010 58 % der Umsätze im Bereich Zubehör mit Produkten erwirtschaftet, die in den letzten 18 Monaten (die typische Produktlebensdauer im Golf) eingeführt wurden (2009: 69 %). Mit Produkten, deren Markteinführung drei Jahre oder länger zurücklag, erzielte TaylorMade-adidas Golf 2010 5 % des Umsatzes (2009: 15 %). Zu den Highlights bei den Produkteinführungen im Jahr 2010 zählte der R9 SuperTri Driver, der die Movable Weight Technologie und die Flight Control Technologie miteinander verbindet. Die Hölzer der R9 Produktfamilie machten 2010 etwa 37 % des TaylorMade Umsatzes in der Kategorie Metallhölzer aus. Weiterhin führte TaylorMade im Jahr 2010 den Burner SuperFast Driver ein. Dieser extrem leichte (<285 g) und aerodynamische Driver ermöglicht eine sehr hohe Schlägerkopf-Geschwindigkeit. Die neuen Burner 2.0 Eisen wurden in Sachen Distanz, Genauigkeit und Spielbarkeit individuell weiterentwickelt und optimiert.

Die Burner 2.0 Eisen konnten Ende 2010 entscheidende Marktanteile gewinnen und trugen maßgeblich dazu bei, dass TaylorMade im Jahr 2010 zum US-Marktführer bei Eisen aufsteigen konnte (bezogen auf den Umsatz in US-Dollar im November und Dezember 2010). Der TaylorMade Penta Ball wurde im Jahr 2010 weltweit in großen Stückzahlen lieferbar und machte 35 % der Umsätze von TaylorMade bei Golfbällen auf dem US-Markt aus. Schließlich konnte der Corza Ghost Putter – der erste Putter mit weißem Kopf – in den USA Platz Drei bei den Putter-Verkaufszahlen erobern und katapultierte den Marktanteil bei Puttern dadurch auf deutlich über 10 %.

## Rockport erweitert truWalk Architektur

Da die Marke Rockport auf Lederschuhe ausgerichtet ist, verfolgt sie ein anderes Geschäftsmodell, in dem der Einfluss neuer Produkte im Vergleich zu unseren anderen Marken weniger hoch ist. 52 % aller Produktverkäufe im Jahr 2010 bezogen sich auf Produkte, die im gleichen Jahr eingeführt wurden (2009: 55 %). Im Jahr 2010 konzentrierten sich die F&E-Aktivitäten darauf, die Schuhe noch komfortabler zu machen. Dazu wurde die innovative truWalk Architektur von Rockport auch auf Schuhe der Bereiche Dress, Casual und Rugged Casual erweitert. Die truWalk Architektur passt sich an die natürliche Fußbewegung an und sorgt für einen bequemeren Schritt. Dank adiPrene Technologie von adidas ermöglicht truWalk einen weichen Fersenauftritt, dem ein sanftes Abrollen über die Fußwölbung und mit Hilfe eines flexiblen Vorfußes ein aktives Abstoßen folgt.

## Wichtige Produkteinführungen 2010

05

| Produkt                                                    | Marke         |
|------------------------------------------------------------|---------------|
| adidas Team Signature Basketball-Kollektion                | adidas        |
| adiPure Fußballschuh                                       | adidas        |
| UEFA Champions League Finale Spielball und Schuhkollektion | adidas        |
| FIFA Fussball-Weltmeisterschaft 2010 Kollektion            | adidas        |
| adiZero F50 Fußballschuh                                   | adidas        |
| Terrex Outdoor Bekleidungs- und Schuhkollektion            | adidas        |
| Supernova Glide Laufschuh                                  | adidas        |
| adiStar Salvation Laufschuh                                | adidas        |
| Supernova Sequence und Supernova Riot Laufschuhe           | adidas        |
| miCoach Trainingssystem                                    | adidas        |
| adidas by Stella McCartney Performance Radkollektion       | adidas        |
| Techfit PowerWeb Herren Trainingsbekleidung                | adidas        |
| Damen und Herren Fluid Trainingsschuhe                     | adidas        |
| Star Wars Originals Kollektion                             | adidas        |
| JumpTone Herrenschuhe                                      | Reebok        |
| ZigSlash und ZigReenergize Basketballschuhe                | Reebok        |
| U-Form 4-Speed Footballschuh                               | Reebok        |
| Cirque du Soleil Kollektion                                | Reebok        |
| Jukari Fit to Flex Damenschuhe                             | Reebok        |
| RunTone Herren Schuhkollektion                             | Reebok        |
| ZigEnergy und ZigFuel Herren Schuhkollektion               | Reebok        |
| Emporio Armani Schuhe und EA7 Kollektion                   | Reebok        |
| TrainTone Damen Schuhkollektion                            | Reebok        |
| Burner SuperFast Driver und Fairwayhölzer                  | TaylorMade    |
| R9 SuperTri Driver                                         | TaylorMade    |
| Monza Spider Vicino Putter                                 | TaylorMade    |
| Burner SuperLaunch Eisen                                   | TaylorMade    |
| Herren Formotion Bekleidung                                | adidas Golf   |
| Damen/Herren Climacool Bekleidung mit Soft-Touch Coolmax   | adidas Golf   |
| Damen/Herren adiPure Bekleidung                            | adidas Golf   |
| Damen/Herren EZ-Tech Bekleidung                            | Ashworth      |
| Damen/Herren Doeskin Outerwear                             | Ashworth      |
| Reebok 11K Schlittschuh                                    | Reebok Hockey |
| Reebok 11K Sickick III Stick                               | Reebok Hockey |
| CCM U+ Octolight Schläger                                  | CCM Hockey    |
| CCM U+ Pro Schutzbekleidung                                | CCM Hockey    |
| CCM U+ Crazy Light Skate                                   | CCM Hockey    |
| TruWalk Herren- und Damenschuhe                            | Rockport      |

### Reebok-CCM Hockey präsentiert innovative Schläger und Schlittschuhe

Bei Reebok-CCM Hockey entfielen 53% des Umsatzes in Nordamerika auf Produkte, die im Jahr 2010 eingeführt wurden. Lediglich 12% des Umsatzes wurden mit Produkten generiert, die vor drei oder mehr Jahren auf den Markt kamen. Reebok-CCM Hockey brachte 2010 neue Schlittschuh- und Schlägerkollektionen auf den Markt. Der Reebok 11K Schlittschuh vereint die bewährte Pump Technologie mit der neuen Pro Armour Technologie und bietet dadurch noch mehr Stabilität, eine noch höhere Strapazierfähigkeit und eine noch bessere Energieübertragung. Der CCM U+ Crazy Light Skate mit UForm-3-D Technologie und FluidFit System ist der Schlittschuh auf dem Markt, der sich am besten an die Fußform anpassen lässt. Der Reebok Sickick III Schläger mit Dual Matrix Technologie bietet ein präziseres Gefühl, eine bessere Balance, schnellere Reaktionszeiten und höhere Schlaggeschwindigkeiten. Zu den weiteren technologiegetriebenen Produkteinführungen 2010 zählen die Revoke Goalie Ausrüstung, der Smooth Air Mundschutz und die CCM Schutzausrüstung.

### Ehrgeizige F&E-Ziele für 2011

Unser Konzern wird auch weiterhin jedes Jahr mindestens eine neue und revolutionäre Technologie beziehungsweise wegweisende Weiterentwicklung auf den Markt bringen » siehe Konzernstrategie, S. 80.

Im Jahr 2011 werden Individualisierung und digitale Sportprodukte im Vordergrund der F&E-Aktivitäten von adidas stehen, denn wir wollen die Marke als Technologieführer in dieser schnell wachsenden Kategorie etablieren. Reebok's F&E-Aktivitäten werden sich im Jahr 2011 durch Innovationen in den Kategorien Muskelkraft, Muskeltraining und Flexibilität gezielt auf den Bereich Fitness und Training konzentrieren. Einerseits sollen die ZigTech bzw. Muskelaktivierungs-Plattformen ausgeweitet werden und andererseits mit RealFlex eine Technologie eingeführt werden, in deren Mittelpunkt niedriges Gewicht und natürliche Bewegungsabläufe stehen. Die Entwicklungsaktivitäten bei TaylorMade-adidas Golf richten sich weiterhin auf die Verbesserung der Performance von Golfern durch neue Möglichkeiten zur Individualisierung und Anpassung bei Hölzern und geschmiedeten Eisen, um damit die Spitzenposition der Marke im Golf zu festigen. Rockport legt den Fokus bei Produktentwicklungen auf geringes Gewicht, Komfort und das Konzept „Walkability“. Dies gilt insbesondere für die DresSports Kollektion und die High-Heels in der Kategorie Women's. Bei Reebok-CCM Hockey wird der Fokus auf neue Technologien in allen Kategorien gerichtet sein. Dabei stehen Schlittschuhe im Mittelpunkt, die bei geringstmöglichem Gewicht mehr Anpassungsmöglichkeiten für eine optimale Passform bieten, sowie Schläger, die maximale Schlagkraft mit optimaler Genauigkeit und Handhabung verbinden.

### Produktauszeichnungen 2010

06

| Produkt                                  | Auszeichnung                                                                  | Kategorie                           | Marke/Segment          |
|------------------------------------------|-------------------------------------------------------------------------------|-------------------------------------|------------------------|
| adidas miCoach                           | Stevie Award für bestes Konsumgut / The American Business Awards              | Konsumgüter                         | adidas                 |
| adidas miCoach App                       | Handy App des Jahres / The Stuff Gadget Awards 2010                           | Handy App                           | adidas                 |
| Terrex Solo                              | OutDoor Award / OutDoor – die führende Outdoormesse                           | Schneller Allround-/ Approach-Schuh | adidas                 |
| adidas Authentic Trikot – Sammleredition | Red Dot Award: Communication Design 2010 / Design Zentrum Nordrhein-Westfalen | Verpackungsdesign                   | adidas                 |
| ZigTech Laufschuh                        | Best Sole Mate Award / Wallpaper Magazine Design Award                        | Schuhe / Best Sole Mate             | Reebok                 |
| EasyTone Schuh                           | Produkt des Jahres 2010 / Sportsfack – Schwedisches Sportmagazin              | Sportprodukt                        | Reebok                 |
| EasyTone Schuh                           | Innovativstes Sportprodukt / Oscar de l'Innovation 2010 / LSA Magazin         | Innovatives Sportprodukt            | Reebok                 |
| Penta TP Ball                            | Ingenuity Honors / International Network of Golf Industry Honors              | Produktinnovation                   | TaylorMade-adidas Golf |



# Mitarbeiter

Um in der Sportartikelindustrie weltweit führend zu sein, sind wir auf das Potenzial, das Engagement, die Fähigkeiten und die Leistung unserer Mitarbeiter sowie auf die Kompetenz unserer Führungskräfte angewiesen. Aus diesem Grund möchten wir eine Unternehmenskultur fördern, die auf den Werten Leistung, Leidenschaft, Integrität und Vielfalt basiert. Diese Werte schaffen den Rahmen für Innovation, Teamgeist und Engagement.

## Leistungssteigerung durch Engagement

Wir sind davon überzeugt, dass die Zufriedenheit unserer Mitarbeiter zu einer höheren Mitarbeiterbindung, eine höhere Mitarbeiterbindung zu mehr Engagement und mehr Engagement zu mehr Leistung führt. Deshalb haben wir Engagement zu einem unserer Leistungsindikatoren gemacht. Hierdurch können wir unser Vorankommen bei der Weiterentwicklung unserer Leistungskultur messen. Seit 2008 führen wir breit angelegte Mitarbeiterumfragen durch, um die Ansichten unserer Mitarbeiter zu erfassen. Dadurch können wir unsere Stellung als „Wunscharbeitgeber“ für unsere Mitarbeiter beurteilen und uns so mit anderen messen. Im Jahr 2010 fand die erste konzernweite Mitarbeiterumfrage statt. Dabei verzeichneten wir eine überragende Teilnehmerquote von 90 %. Zudem können wir uns durch die Ergebnisse in Bezug auf das Mitarbeiterengagement zu den führenden Unternehmen der Konsumgüterindustrie einreihen. Verglichen mit 2008, als wir Mitarbeiterbefragungen nur in einzelnen Regionen durchführten, konnten wir unsere Engagementwerte erheblich steigern. Das Ergebnis bestätigt ein hohes Maß an Vertrauen seitens der Mitarbeiter in die obere Führungsebene, ein klares Verständnis der strategischen Ausrichtung unseres Konzerns sowie ein offenes und konstruktives Arbeitsklima.

Als verbesserungswürdige Bereiche wurden u. a. Karriereentwicklung und Transparenz für berufliche Möglichkeiten, Verfügbarkeit von IT-Tools sowie Anerkennung für gute Leistungen identifiziert. Unsere leitenden Führungskräfte sind sich ihrer Verantwortung bewusst und fest entschlossen, die Engagementwerte noch weiter zu steigern. Wie bereits in den vergangenen Jahren werden auf Grundlage der Umfrageergebnisse spezielle Teams ins Leben gerufen, um die jeweiligen Initiativen zur weiteren Verbesserung des Engagements voranzutreiben.

## Förderung persönlicher Bestleistungen

Damit alle unsere Mitarbeiter ihre persönliche Bestleistung erreichen können, bieten wir eine Reihe von Fortbildungsmaßnahmen an, um Stärken weiter auszubauen, notwendige Fähigkeiten zu verfeinern und individuelle Herausforderungen zu meistern. Dabei kommt es vor allem darauf an, die persönlichen Ziele mit den Anforderungen unseres Konzerns in Einklang zu bringen.

In unserem „Kompetenzmodell“ sind die Kompetenzbereiche klar definiert, um das Leistungs-, Talent- und Nachfolge-management einheitlich und transparent zu gestalten.

Dabei stützen sich unsere Bemühungen auf drei Erfolgsfaktoren:

- Leistungsmanagement,
- Talentmanagement und
- Nachfolgemanagement

» siehe 01.

**Leistungsmanagement:** Mit Hilfe unseres globalen Instruments zur Mitarbeiterbeurteilung (Performance Evaluation and Planning, PEP) messen wir nicht nur die Arbeitsleistung unserer Mitarbeiter in Bezug auf die erforderlichen Fähigkeiten in ihrer Position, sondern legen auch individuelle Geschäftsziele fest und planen nach Bedarf geeignete Trainingsmaßnahmen. Wir bieten Mitarbeitern aller Ebenen gezielte Unterstützung an (Verhaltens- und Managementtraining). PEP wird in allen Geschäftseinheiten des adidas Konzerns eingesetzt. Die Online-Variante von PEP hat eine Reichweite von 71 %. Das Ziel für 2011 besteht darin, die Online-Reichweite konzernweit auf 97 % zu steigern.

## Die drei Säulen unserer Personalstrategie

Unsere Aktivitäten im Personalbereich (Human Resources) konzentrieren sich auf die Implementierung und Umsetzung unserer Personalstrategie, die auf den folgenden drei Säulen beruht:

- Schaffung eines Arbeitsumfelds, das Teamgeist, Leidenschaft, Engagement und Leistung fördert

» siehe „Leistungssteigerung durch Engagement“, S. 115

» siehe „Bedeutung der internen Kommunikation für das Mitarbeiterengagement“, S. 117

- Ausbau einer Leistungskultur, die auf starken Führungsqualitäten basiert

» siehe „Förderung persönlicher Bestleistungen“, S. 115

» siehe „Leistungsorientiertes Vergütungssystem“, S. 116

» siehe „Schaffung eines attraktiven Arbeitsumfelds“, S. 117

- Ein „Wunscharbeitgeber“ sein

In den oben genannten Abschnitten werden die Maßnahmen erklärt, die wir zur Umsetzung unserer Personalstrategie ergreifen.

**Talentmanagement:** Speziell entwickelte Instrumente helfen uns auf allen Konzernebenen, Mitarbeiter mit Potenzial für Führungsaufgaben zu identifizieren. Zur Vorbereitung auf komplexere zukünftige Aufgaben bieten wir ausgewählten Mitarbeitern gezielte Weiterbildungsprogramme:

- Executive Development Programm (EDP): Ein globales Programm des adidas Konzerns (marken- und funktionsübergreifend) für Mitarbeiter in Führungspositionen. Das Programm wird zentral organisiert und umgesetzt.
- Management Development Programm (MDP): Ein globales Programm des adidas Konzerns, das auf regionaler Ebene umgesetzt wird. Dieses Programm richtet sich an Mitarbeiter verschiedener Funktionsbereiche und Marken, die Potenzial für Führungsfunktionen aufweisen.
- People Manager Development Programm (PDP): Ein globales Programm des adidas Konzerns, das auf lokaler Ebene umgesetzt wird. Das Programm richtet sich an Teamleiter, die Potenzial für den nächsten Schritt ihrer beruflichen Laufbahn aufweisen.
- Business Management Programm (BMP): Ein 24-monatiges internationales, funktions- und markenübergreifendes Programm, das junge Berufstätige mit einem MBA-Abschluss und drei bis fünf Jahren Berufserfahrung auf eine zukünftige Führungstätigkeit in unserem Konzern vorbereitet. Am Jahresende 2010 betrug die Teilnehmerzahl am BMP sechs Mitarbeiter weltweit (2009: 5).

– Functional Trainee Programm (FTP): Studenten mit internationalem Hintergrund und ausgezeichneten akademischen Referenzen bieten wir die Chance, ihre Karriere bei uns im Rahmen eines 12- bis 18-monatigen Programms zu starten. Es umfasst sechs dreimonatige Stationen in verschiedenen Abteilungen, mindestens eine davon im Ausland. Am Jahresende 2010 betrug die Teilnehmerzahl am FTP 36 Mitarbeiter weltweit (2009: 39).

Unsere Programme zur beruflichen Weiterentwicklung werden durch Ausbildungsangebote und Praktika ergänzt. Die Ausbildungsprogramme des adidas Konzerns geben jungen Menschen in Deutschland die Möglichkeit, direkt nach ihrem Schulabschluss in einem dreijährigen Rotationsprogramm praktische Erfahrungen zu sammeln. Zu diesen Programmen gehören neben den Ausbildungen für Einzelhandelskaufleute, Industriekaufleute und Fachinformatiker auch duale Studienprogramme in Zusammenarbeit mit Berufsakademien. Ende 2010 beschäftigten wir in Deutschland 55 Auszubildende (2009: 58).

Im Rahmen unseres weltweiten Praktikumsangebots bieten wir Studenten die Chance, für einen Zeitraum von drei bis sechs Monaten Berufserfahrung zu sammeln. Für unsere besten Praktikanten haben wir das „ReBound“-Programm weitergeführt, um mit ihnen in Kontakt zu bleiben. Ende 2010 beschäftigten wir in Deutschland 320 Praktikanten (2009: 331).

**Nachfolgemanagement:** Wir haben einen konzernweiten Nachfolgemanagementprozess eingeführt, über den wir Nachfolgerisiken identifizieren sowie designierte bzw. potenzielle Nachfolger an zukünftige Managementpositionen heranführen können. Die Nachfolgesituation für alle Positionen ab der mittleren Führungsebene wird regelmäßig analysiert. Der Nachfolgemanagementprozess läuft in erster Linie über ein Online-System ab, das Daten zu Positionen und Mitarbeitern enthält, wobei insbesondere die Eigenschaften Leistung, Potenzial, Karrierevorstellungen, Mobilität usw. erfasst werden. 71 % der Geschäftseinheiten des adidas Konzerns werden derzeit auf diese Weise analysiert. Das Ziel für 2011 besteht darin, die Online-Reichweite konzernweit auf 94 % zu steigern.

### Leistungsorientiertes Vergütungssystem

Wir sind stets bestrebt, zur Entlohnung unserer Mitarbeiter am Markt orientierte, wettbewerbsfähige Vergütungs- und Leistungssysteme heranzuziehen. Das Vergütungskonzept umfasst im gesamten Konzern feste und flexible Gehaltskomponenten, Sachbezüge und andere immaterielle Leistungen. Grundlage unseres Vergütungsprogramms ist unser globales Vergütungsmanagementsystem (Global Salary Management System). Es dient als Basis, um den Wert der Position eines Mitarbeiters und damit sein Einkommen auf marktübliche und leistungsorientierte Weise zu bestimmen.

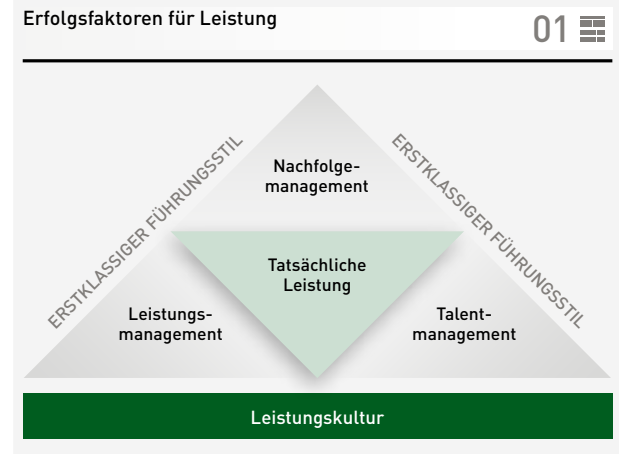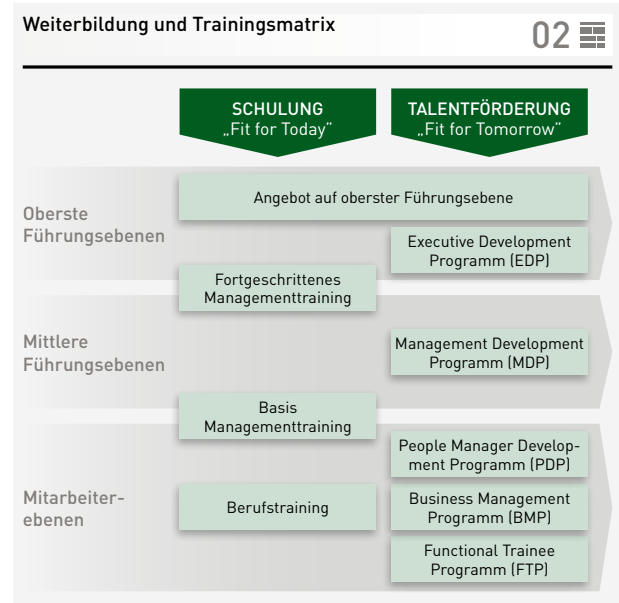

Neben einem festen Grundgehalt bieten wir unseren Mitarbeitern verschiedene flexible Vergütungskomponenten:

**Bonusprogramm:** Um unsere Mitarbeiter am Erfolg unseres Unternehmens zu beteiligen und um sie für die Erreichung ihrer Ziele zu entlohnen, haben wir ein weltweites Bonusprogramm eingeführt. Das Programm kombiniert die individuelle Leistung mit der des Unternehmens (die Geschäftsergebnisse gemessen im Vergleich zu den jeweiligen Konzern-, Marken-, Vertriebskanal-, Divisions- bzw. Geschäftseinheitszielen).

**Gewinnbeteiligung:** In unserer Firmenzentrale und am Standort Deutschland haben wir für Mitarbeiter, die nicht am Bonusprogramm teilnehmen, ein Gewinnbeteiligungsprogramm, den „Champions-Bonus“, eingeführt.

**Weitere Gehaltskomponenten:** Für Mitglieder der obersten Führungsebene und des Vorstands bieten wir langfristige Anreizprogramme (Long-Term Incentive Programmes, LTIP). Weitere Leistungen sind unsere 401-K Pensionspläne in den USA und das Altersvorsorgeprogramm des adidas Konzerns für Mitarbeiter in Deutschland. Im Jahr 2010 nahmen 2.060 Mitarbeiter an letzterem Programm teil, was 58 % der teilnahmeberechtigten Mitarbeiter entspricht.

Auch unsere Tochtergesellschaften bieten ihren Mitarbeitern eine Reihe von Zusatzleistungen. Diese sind von den örtlichen Gepflogenheiten und landesspezifischen Richtlinien abhängig.

### Bedeutung der internen Kommunikation für das Mitarbeiterengagement

Wir sind davon überzeugt, dass eine robuste interne Kommunikationsplattform für die Förderung des Mitarbeiterengagements und für eine offene Zusammenarbeit innerhalb unseres Unternehmens von entscheidender Bedeutung ist. So wurde beispielsweise unser Intranet im Verlauf der letzten beiden Jahre auf Blogs umgestellt, die Abteilungen und Teams die Möglichkeit geben, schnell ihre eigenen internen Kommunikationsplattformen zu erstellen und zu pflegen. Mitarbeiter können nun auch Nachrichten kommentieren, Wissen schneller austauschen, zusammenarbeiten und aktuelle Themen diskutieren. Im Jahr 2010 haben wir außerdem ein konzernweites Ideenforum eingerichtet. Hierüber erhalten unsere Mitarbeiter Anerkennung für ihre Ideen und nehmen aktiv am Umsetzungsprozess teil. Für das Jahr 2011 richten wir unseren Fokus auf Wissensmanagement und planen die Einführung einer Microsoft SharePoint-Plattform als zentrales, global integriertes Tool. Dies ist Teil eines längerfristigen Projekts zur Schaffung einer modernen, kontinuierlichen Lernorganisation.

### Mitarbertervielfalt zur Unterstützung weltweiter Ziele

Als globales Unternehmen sind wir uns bewusst, dass wir zum Erreichen unserer Ziele Mitarbeiter benötigen, die verschiedene Ideen, Stärken, Interessen und kulturelle Hintergründe haben. Unsere Mannschaft ist bereits ein Spiegelbild der Vielfalt in unserem Konzern. So beschäftigen wir in unserer Konzernzentrale Mitarbeiter aus über 50 Ländern. Wir möchten ein Umfeld bieten, in dem Vielfalt eine wichtige Rolle spielt. Dazu setzen wir auf verschiedene Initiativen, wie z. B. Networking-Events, interkulturelles Training und unsere auf „Work-Life-Integration“ spezialisierte Abteilung.

### Schaffung eines attraktiven Arbeitsumfelds

Es ist unser erklärtes Ziel, die geschäftlichen Interessen des adidas Konzerns mit den privaten und familiären Bedürfnissen unserer Mitarbeiter in Einklang zu bringen. Unser Programm zur „Work-Life-Balance“ umfasst familienorientierte Dienstleistungen, flexible Arbeitszeiten und Arbeitsplatzwahl sowie Mitarbeiterentwicklung und Vermittlung von Führungskompetenzen im Bereich „Work-Life-Balance“.

#### Mitarbeiterstatistik

03

|                                                              | 2010   |
|--------------------------------------------------------------|--------|
| Mitarbeiterzahl insgesamt                                    | 42.541 |
| Mitarbeiter gesamt (in %)                                    |        |
| Männlich                                                     | 52 %   |
| Weiblich                                                     | 48 %   |
| Managementpositionen (in %)                                  |        |
| Männlich                                                     | 72 %   |
| Weiblich                                                     | 28 %   |
| Durchschnittsalter je Mitarbeiter (in Jahren) <sup>1)</sup>  | 33     |
| Durchschnittliche Unternehmenszugehörigkeit (in Jahren)      | 4      |
| Durchschnittliche Schulungszeit pro Mitarbeiter (in Stunden) | 13     |

1) Zum Jahresende.

#### Anzahl der Mitarbeiter<sup>1)</sup>

04

|                    |        |
|--------------------|--------|
| 2006 <sup>2)</sup> | 26.376 |
| 2007               | 31.344 |
| 2008               | 38.982 |
| 2009               | 39.596 |
| 2010               | 42.541 |

1) Zum Jahresende.

2) Beinhaltet Reebok, Reebok-CCM Hockey und Rockport seit dem 1. Februar 2006.



Wir bieten unseren Mitarbeitern an unseren Hauptstandorten ein breites Spektrum an sportlichen Aktivitäten an. Den Mitarbeitern in Herzogenaurach, Portland und Canton sowie an weiteren Standorten stehen firmeneigene Fitness-Studios zur Verfügung.

Darüber hinaus organisiert die Abteilung Company Sports in Herzogenaurach verschiedene sportliche Aktivitäten wie z. B. Mountainbike-, Kajak- oder Ski-Touren. Zusätzlich stehen Sonderveranstaltungen wie einwöchige Sportcamps für die Kinder der Mitarbeiter, transalpine Mountainbike-Touren und das jährliche Berlin-Marathon-Wochenende (mit entsprechendem Trainingsprogramm vor der Veranstaltung) auf dem Programm. Im Jahr 2010 hat die Company Sports Abteilung in Deutschland etwa 225 Sportkurse und über 40 Veranstaltungen angeboten, an denen mehr als 3.600 Personen teilnahmen (2009: >3.000).

#### Weltweite Mitarbeiterzahl wächst weiter

Zum 31. Dezember 2010 beschäftigte der Konzern 42.541 Mitarbeiter. Dies bedeutet einen Zuwachs von 7 % im Vergleich zum Vorjahresstand von 39.596 Beschäftigten. Diese Steigerung ist in erster Linie auf Neueinstellungen im Einzelhandelssegment zurückzuführen, die hauptsächlich auf Teilzeitbeschäftigungsverhältnissen basieren. Gemessen in Vollzeitäquivalenten beschäftigte der adidas Konzern zum 31. Dezember 2010 36.444 Mitarbeiter (2009: 34.437). Aufgrund des hohen Anteils an teilzeitbeschäftigten Mitarbeitern im Einzelhandelssegment liegt dieser Wert unter der angegebenen absoluten Anzahl an Mitarbeitern » siehe 08. Die Personalaufwendungen stiegen 2010 um 12 % auf 1,521 Mrd. € gegenüber 1,352 Mrd. € im Jahr 2009 » siehe Erläuterung 31, S. 215. Dies entspricht einem Anteil von 30 % an den gesamten betrieblichen Aufwendungen des Konzerns (2009: 31 %) sowie 13 % am Konzernumsatz (2009: 13 %).

#### Mitarbeiteranstieg durch den Ausbau eigener Einzelhandelsaktivitäten in Schwellenländern

Die Anzahl der Mitarbeiter im Segment Großhandel verringerte sich um 8 % und lag Ende 2010 bei 4.329 (2009: 4.723). Grund für diese Entwicklung waren vor allem Reorganisationsmaßnahmen im Zusammenhang mit der Implementierung des gemeinsamen Geschäftsmodells im Jahr 2009. Im Einzelhandelssegment stieg die Zahl der Mitarbeiter um 14 %. Der Hauptgrund hierfür war der Ausbau unserer eigenen Einzelhandelsaktivitäten in Schwellenländern. Zum Jahresende waren 22.286 Mitarbeiter im Einzelhandelssegment beschäftigt (2009: 19.576). Im Bereich Andere Geschäftssegmente sank die Anzahl der Mitarbeiter um 4 % auf 1.676 (2009: 1.750). Grund für diese Entwicklung waren vor allem Reorganisationsmaßnahmen bei TaylorMade-adidas Golf und Reebok-CCM Hockey. Zum Jahresende waren 14.250 Mitarbeiter in Headquarter Funktionen tätig, was im Vorjahresvergleich einem Anstieg um 5 % entspricht (2009: 13.547). Diese Entwicklung spiegelt die Veränderungen in der Organisationsstruktur wider.

#### Mitarbeiter nach Segment<sup>1)</sup>

05

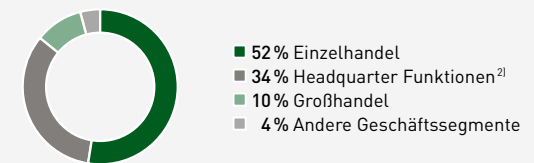

1) Zum Jahresende.

2) Beinhaltet beispielsweise Global Marketing, Global Operations, Global Corporate Services (z. B. Legal, Finance, HR).

#### Mitarbeiter nach Regionen<sup>1)</sup>

06

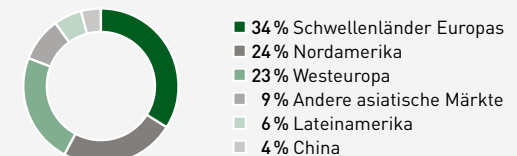

1) Zum Jahresende.

Zum Jahresende 2010 beschäftigten wir 23 % unserer Belegschaft in Westeuropa (2009: 23 %), 34 % in Europäischen Schwellenländern (2009: 31 %), 24 % in Nordamerika (2009: 25 %), 4 % in China (2009: 8 %), 9 % in Anderen Asiatischen Ländern (2009: 6 %) und 6 % in Lateinamerika (2009: 7 %). Weniger als 9 % unserer Mitarbeiter sind in Deutschland tätig. Als globales Unternehmen fördern wir ausdrücklich die weltweite Mobilität unserer Mitarbeiter und bieten ihnen die Chance, im Ausland zu arbeiten. Um Mitarbeitern und ihren Familien die Anpassung an ihre neue Lebens- und Arbeitsumgebung zu erleichtern, bieten wir beispielsweise Sprachkurse und Kulturschulungen an.

### Herausforderungen im Personalmanagement

Im Zuge der wirtschaftlichen Erholung verschärft sich auch wieder der Wettbewerb um die besten Talente » siehe Risiko- und Chancenbericht, S. 158. Mehr denn je stellen wir uns der großen Herausforderung, ein interessanter und attraktiver Arbeitgeber für die von uns benötigten Talente zu sein und zu bleiben. Im Jahr 2010 konnten wir in verschiedenen Arbeitgeberarranglisten führende Positionen einnehmen und damit beweisen, dass der adidas Konzern bei Schulabgängern und Hochschulabsolventen als ein sehr beliebter Arbeitgeber gilt. Um unsere Position in diesem Bereich weiter auszubauen, haben wir unsere Aktivitäten an Schulen und Universitäten im Berichtsjahr intensiviert.

Durch Partnerschaften mit ausgewählten Universitäten auf der ganzen Welt möchten wir unseren guten Ruf als Arbeitgeber durch den direkten Kontakt mit den besten Absolventen weiter festigen. So entsandten wir 2010 wieder Vorstandsmitglieder und andere leitende Führungskräfte unseres Konzerns an ausgewählte Top-Universitäten (darunter die London Business School, die IESE in Barcelona und die Universitäten Mannheim und Nürnberg), die Einblicke in unser Unternehmen gaben. Auch der adidas Konzern spürt einen zunehmenden Wettbewerb um hoch qualifizierte potenzielle Mitarbeiter auf dem internationalen Arbeitsmarkt. Diesem Wettbewerb werden wir uns auch in Zukunft stellen, mit innovativen Programmen wie z. B. dem 2010 eingeführten „Mitarbeiterwerben-Mitarbeiter“-Programm. In unserem konzernweiten strategischen Geschäftsplan (Route 2015), der Ziele und Strategien bis 2015 festlegt, werden wir im Personalbereich die bestehenden Programme und Konzepte weiterentwickeln. Ein spezieller Fokus liegt zudem auf Initiativen, die unsere Leistungs-, Lern- und Führungskultur weiter stärken.

### Mitarbeiter nach Funktionsbereichen<sup>1)</sup>

07

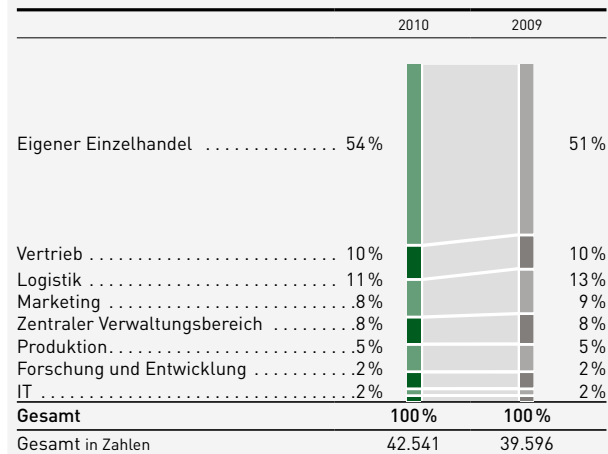

1) Zum Jahresende.

### Anzahl der Mitarbeiter<sup>1)</sup>

08

|                                      | 2010                      |                                           | 2009 <sup>5)</sup>        |                                           |
|--------------------------------------|---------------------------|-------------------------------------------|---------------------------|-------------------------------------------|
|                                      | Mitarbeiter <sup>3)</sup> | Vollzeit-Äquivalente (FTEs) <sup>4)</sup> | Mitarbeiter <sup>3)</sup> | Vollzeit-Äquivalente (FTEs) <sup>4)</sup> |
| Großhandel                           | 4.329                     | 4.158                                     | 4.723                     | 4.511                                     |
| Einzelhandel                         | 22.286                    | 17.017                                    | 19.576                    | 15.229                                    |
| Andere Geschäftssegmente             | 1.676                     | 1.599                                     | 1.750                     | 1.676                                     |
| Headquarter Funktionen <sup>2)</sup> | 14.250                    | 13.670                                    | 13.547                    | 13.022                                    |
| <b>Gesamt</b>                        | <b>42.541</b>             | <b>36.444</b>                             | <b>39.596</b>             | <b>34.437</b>                             |

1) Zum Jahresende.

2) Beinhaltet beispielsweise Global Marketing, Global Operations, Global Corporate Services (z.B. Legal, Finance, HR).

3) Anzahl der Mitarbeiter auf Basis des tatsächlichen Personalbestands.

4) Anzahl der Mitarbeiter auf Basis von Vollzeit-Äquivalenten. Bedingt durch den hohen Anteil an Teilzeit-Beschäftigungskräften im Einzelhandelssegment ist die Anzahl der Mitarbeiter auf Basis von Vollzeit-Äquivalenten niedriger als auf Basis des tatsächlichen Personalbestands.

5) Bedingt durch geringfügige Veränderungen in der Konzernstruktur im ersten Quartal 2010 wurden die Zahlen für 2009 nachträglich angepasst, um die Vergleichbarkeit der Zahlen zu gewährleisten. Die Gesamtzahl hat sich dabei nicht geändert.

# Nachhaltigkeit

Wir tragen Verantwortung dafür, nachhaltige Geschäftspraktiken zu entwickeln und umzusetzen, die sowohl unseren operativen Anforderungen als auch unserer Verpflichtung gegenüber Gesellschaft und Umwelt gerecht werden. Aus diesem Grund arbeiten wir aktiv mit unseren verschiedenen Stakeholdern zusammen, um unsere Bilanz in den Bereichen Soziales und Umwelt zu verbessern. Wir sind überzeugt, dass wir durch soziales und umweltbewusstes Engagement sowohl unseren Ruf weiter verbessern als auch den Unternehmenswert zusätzlich steigern.

## Zusammenarbeit mit unseren Stakeholdern

Wir führen einen offenen Dialog mit unseren zahlreichen Stakeholdern und beteiligen sie gezielt an wichtigen gesellschaftlichen und ökologischen Entscheidungen, die unsere täglichen Geschäftsaktivitäten beeinflussen. Durch die intensive Zusammenarbeit u. a. mit der Better Cotton Initiative, der Leather Working Group und der AFIRM-Arbeitsgruppe stehen wir in engem Kontakt mit führenden Unternehmen verschiedener Branchen. Dies ermöglicht uns, nachhaltige Geschäftsstrategien zu entwickeln und gesellschaftliche und ökologische Themen auf globaler Ebene zu diskutieren. Auch unsere Mitgliedschaft in Organisationen wie dem World Business Council for Sustainable Development, dem Weltverband der Sportartikelindustrie, dem Fair Factories Clearinghouse und der Fair Labor Association unterstreicht dies. Wir bemühen uns um eine offene und ehrliche Kommunikation, um unsere Geschäftspraktiken transparent zu machen, und zeigen damit, dass wir unsere Verantwortung ernst nehmen.

## Arbeitsplatzstandards definieren Regeln in der Beschaffungskette

Wir tragen Verantwortung für unsere Mitarbeiter, die Arbeitnehmer in den Zulieferbetrieben und die Umwelt. Missstände in diesen Bereichen – insbesondere Verstöße gegen die Menschenrechte

und zweifelhafte Beschäftigungspraktiken – können Ansehen und Effizienz des Konzerns und seiner Zulieferer stark beeinträchtigen. Die Sicherheit und Gesundheit am Arbeitsplatz, die Einhaltung des Arbeitsrechts und der Umweltschutz an unseren eigenen Standorten sowie in den Zulieferbetrieben haben für uns daher höchste Priorität. Aus diesem Grund haben wir Regeln und Standards definiert, die sich an unseren Unternehmenswerten sowie an den Maßstäben orientieren, die die Gesellschaft von global agierenden Unternehmen erwartet. Unsere Standards stehen im Einklang mit den Menschen- und Arbeitnehmerrechtskonventionen der Internationalen Arbeitsorganisation (IAO) und der UNO sowie dem Verhaltenskodex des Weltverbands der Sportartikelindustrie (WFSGI). Wir haben diese Regeln in einem Verhaltenskodex für Zulieferer zusammengefasst – unseren „Workplace Standards“ (Arbeitsplatzstandards). Diese helfen uns bei der Auswahl von Geschäftspartnern für die Herstellung unserer Produkte und dienen zudem als Leitprinzipien, um mögliche Probleme in Zulieferbetrieben frühzeitig zu erkennen und zu lösen. Damit unsere Zulieferer die Standards in der Praxis implementieren können, haben wir detaillierte ergänzende Richtlinien für Fabriken zusammengestellt.

Unser Team für Sozial- und Umweltangelegenheiten (Social and Environmental Affairs – SEA) aktualisiert diese Richtlinien regelmäßig und zieht sie heran, um die Einhaltung der Standards in den Zulieferbetrieben zu prüfen. Anhand der Richtlinien schulen und beraten wir unsere Zulieferer, so dass sie ihre Sozial- und Umweltbilanz verbessern können. Unsere Arbeitsplatzstandards enthalten klare Vorgaben

- zu umweltbewussten, sicheren und gesunden Arbeitsbedingungen,
- zu angemessenen Löhnen und Sozialleistungen,
- zur Koalitionsfreiheit,
- zum Verbot von übermäßigen Überstunden sowie von Zwangs- und Kinderarbeit
- und zum Schutz vor Belästigung und Diskriminierung.

## Sorgfältige Auswahl von Zulieferern

Um die Arbeitsbedingungen in der gesamten Beschaffungskette zu verbessern, arbeitet der Bereich Global Operations bei der Auswahl von Zulieferern eng mit dem SEA-Team zusammen. Das SEA-Team bewertet alle potenziellen neuen Hersteller. Aufträge an neue Zulieferer können nur mit seiner Zustimmung vergeben werden.

## Weiterführende Informationen online

Mehr Informationen zu den nachfolgenden Themen sind in unserem Online-Sozial- und Umweltbericht 2010 sowie auf unserer Internetseite unter » [www.adidas-group.com/nachhaltigkeit](http://www.adidas-group.com/nachhaltigkeit) nachzulesen:

- Unser Nachhaltigkeitsprogramm
- Nachhaltigkeitsziele und Fortschritt
- Zusammenarbeit mit Stakeholdern
- Das „Better Place“-Programm
- Leistungsindikatoren
- Unsere Umweltstrategie



### Förderung der Eigenverantwortung

Wir unterstützen unsere Hauptgeschäftspartner dabei, Managementsysteme gemäß international anerkannten Standards, wie beispielsweise dem ISO Standard 14001 für Umweltmanagement, aufzubauen. Diese können den Fabriken helfen, ihre täglichen Abläufe zu verbessern und Eigenverantwortung zu fördern. Durch die Einrichtung eines zertifizierten Managementsystems demonstrieren unsere Zulieferer ihre Entschlossenheit zur kontinuierlichen Verbesserung ihrer Sozial- und Umweltbilanz. Wir unterstützen unsere Hersteller zudem bei der Einführung von Personalmanagementsystemen in ihren Produktionsstätten, um die Arbeitsbedingungen zu verbessern. Dazu zählen z. B. betriebseigene Beschwerdesysteme, die dabei helfen, Probleme in den Fabriken zu erkennen und zu beheben. Im Rahmen unserer Aktivitäten zur Durchsetzung von Beschäftigungsstandards in den Zulieferbetrieben ermutigen wir Arbeitnehmer dazu, ihre Rechte zu wahren und sich aktiv an Entscheidungen zu beteiligen.

### Schulungen fördern Einhaltung der Standards

Unser SEA-Team bietet spezielle Schulungen und Workshops für Vorgesetzte und Manager in den Zulieferbetrieben an, um sie bei der Einhaltung unserer Standards und der Umsetzung von Best Practice-Maßnahmen zu unterstützen. Zu diesen Workshops gehören beispielsweise Einführungsschulungen über die Arbeitsplatzstandards und die SEA-Richtlinien für das operative Geschäft oder detaillierte Schulungen über wirksame Maßnahmen in den Bereichen Sicherheit, Gesundheit und Umweltschutz am Arbeitsplatz. Darüber hinaus fördern wir die Entwicklung von

Strukturen, die die Arbeitnehmer und die Geschäftsleitung unserer Zulieferer ebenso aktiv mit einbeziehen wie örtliche Arbeitnehmerorganisationen und Nicht-Regierungsorganisationen. Außerdem organisiert unser SEA-Team Workshops für Lizenznehmer, Agenten und Geschäftseinheiten des adidas Konzerns, um die Personalkompetenz in puncto Nachhaltigkeit zu stärken. So wird die Berücksichtigung angemessener Arbeitsbedingungen zu einem festen Bestandteil der Geschäftsaktivitäten. Im Jahr 2010 hat das SEA-Team 193 Schulungen und Workshops durchgeführt (2009: 216).

### Überwachung durch Inspektion von Produktionsstätten

Das SEA-Team bewertet die Einhaltung der Arbeitsplatzstandards durch Inspektionen der Produktionsstätten. Anhand einer speziell auf den jeweiligen Betrieb zugeschnittenen Kriterienliste stufen unsere Prüfer dessen Leistung ein. Zugleich wird die Effektivität der Maßnahmen zur Einhaltung der Standards bewertet und die Arbeit der Personen, die für deren Umsetzung verantwortlich sind, beurteilt. So können wir den Schulungsbedarf in den Herstellerbetrieben akkurat ermitteln. Im Verlauf des Jahres 2010 wurden insgesamt 1.451 Betriebsbegehungen auf verschiedenen Ebenen unserer Beschaffungskette durchgeführt (2009: 1.592 Besuche) » siehe 01. Dabei sprachen die Mitglieder des SEA-Teams mit der Betriebsleitung und den Beschäftigten, überprüften Unterlagen sowie Fabrikanlagen und führten Schulungen durch.

Zusätzlich zu unseren eigenen Kontrollen setzen wir auf die unabhängige Bewertung durch Dritte. Dadurch können wir die Glaubwürdigkeit unseres Programms nachweisen und unseren

Stakeholdern verifizierte Informationen vorlegen. Als Mitglied der Fair Labor Association (FLA) unterliegt der adidas Konzern der Prüfung durch unabhängige Kontrolleure und ist dem Beschwerdesystem und der öffentlichen Berichterstattung der FLA verpflichtet. Im Jahr 2008 wurde das Kontrollsystem des adidas Konzerns erneut von der FLA akkreditiert. Diese Entscheidung basierte auf der unabhängigen Überwachung von Fabriken sowie auf Verifizierungsberichten der Zuliefererstandorte. Zusätzlich dienen auch sorgfältige Prüfungen der relevanten Protokolle, der Schulungsprogramme und der Prüfungssysteme als Grundlage. Seit unserem Beitritt zur FLA wurden mehr als 250 unabhängige externe Kontrollen und Nachprüfungen bei unseren Zulieferbetrieben durchgeführt.

### Verwarnungssystem zur Durchsetzung der Standards

Sollte ein Hersteller im Hinblick auf die Einhaltung der Arbeitsplatzstandards schlechte Ergebnisse aufweisen, werden wir in enger Zusammenarbeit mit ihm nach Lösungen suchen. Sollten jedoch weiterhin ernsthafte Verstöße auftreten und die Produktionsleitung mangelnde Bereitschaft zur Beseitigung der Verstöße zeigen, sprechen wir eine offizielle Verwarnung aus. Dieses Schreiben informiert die Betriebsleitung darüber, dass die Geschäftsbeziehung mit dem adidas Konzern gefährdet ist. Nach dreimaliger Verwarnung wird die Aufkündigung des Geschäftsverhältnisses ausgesprochen. Im Jahr 2010 haben wir unsere Geschäftsbeziehungen mit keinem Hersteller aufgrund der Nichteinhaltung unserer Standards beenden müssen (2009: 9).

### Anzahl der Fabrikbesuche

01

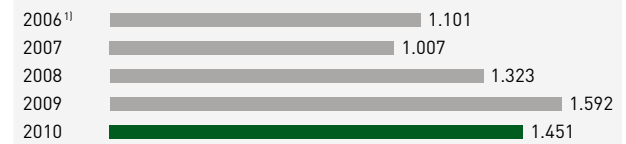

1) Beinhaltet das Reebok Geschäftssegment ab 1. Februar 2006.

### Strategischer Ansatz zur Begrenzung der Umweltauswirkungen und zur Bekämpfung des Klimawandels

Die Bekämpfung des Klimawandels stellt unser Unternehmen und unsere Produktionspartner vor zahlreiche Herausforderungen. Nach Analyse der Umweltauswirkungen unserer Geschäftstätigkeiten und aufbauend auf bestehenden Umweltinitiativen haben wir im Jahr 2010 eine Umweltstrategie mit präzise definierten Zielvorgaben erarbeitet, die bis zum Jahr 2015 umgesetzt werden sollen. Damit werden wir die Umweltauswirkungen unseres Unternehmens kontinuierlich senken, indem wir bei unserer täglichen Arbeit sowie in unserer Beschaffungskette vorbildliche Umweltmaßnahmen anwenden. Wir analysieren systematisch alle wichtigen Bereiche des Unternehmens und der Wertschöpfungskette, damit wir unsere Ressourcen bewusster und effizienter einsetzen und gleichzeitig die Betriebskosten senken. Dies erstreckt sich von Produktdesign und -entwicklung bis hin zu Beschaffung und Produktion. Dabei nehmen wir unsere eigenen Standorte, Einzelhandelsgeschäfte und alle anderen Verkaufsstellen nicht aus. Der Fokus liegt auf den Bereichen Energie, Wasser (Senkung des Wasserverbrauchs und des Abwasseraufkommens), Abfall sowie Chemikalien. Nähere Informationen zu unserer Umweltstrategie sind in unserem Online-Sozial- und Umweltbericht 2010 sowie auf unserer Internetseite unter » [www.adidas-Group.com/nachhaltigkeit](http://www.adidas-Group.com/nachhaltigkeit) erhältlich.

### Reduzierung der Umweltauswirkungen an unseren eigenen Standorten

Einen Kernpunkt unserer Umweltstrategie bildet die Initiative „Green Company“, die wir ins Leben gerufen haben, um die Umweltauswirkungen an unseren eigenen Standorten zu reduzieren. Die Initiative bietet eine Plattform, die alle Konzerneinheiten dazu anhält, die Umweltauswirkungen ihrer Geschäftstätigkeiten zu verringern.

Im Rahmen der Initiative haben wir sowohl konzernweite als auch standortspezifische Zielvorgaben für das Jahr 2015 aufgestellt, die vor allem reduzierte Kohlendioxidemissionen, Einsparungen beim Energie-, Wasser- und Papierverbrauch sowie die Nutzung umweltfreundlicherer Energiequellen betreffen. Dabei möchten wir den relativen Energieverbrauch um 20 %, die relativen Kohlendioxidemissionen um 30 % und den Papierverbrauch um 50 % pro Mitarbeiter reduzieren. Darüber hinaus wurden Ziele hinsichtlich des Abfallaufkommens, der Einkaufspraktiken sowie des Mobilitätsmanagements festgelegt. Neben den übergreifenden Konzernzielen haben einzelne Standorte ihre eigenen Vorgaben aufgestellt. Eines der wichtigsten Ziele der „Green Company“-Initiative bestand darin, für die Umweltmanagementsysteme an sechs großen Hauptverwaltungsstandorten des adidas Konzerns die Zertifizierung nach ISO 14001 zu erhalten. Dies konnte im Jahr 2010 für die fünf Hauptstandorte in Nordamerika (Portland, Carlsbad, Canton, Montreal und Spartanburg) erreicht werden. Die Zertifizierung für die adidas Konzernzentrale „World of Sports“ in Herzogenaurach ist für das Jahr 2011 geplant.

### Verbesserung der Umweltbilanz unserer Beschaffungskette

Innerhalb unserer Beschaffungskette unterstützen wir unsere Zulieferer bei der Einrichtung solider Umweltmanagementsysteme an ihren Produktionsstätten, um so ihre negativen Umweltauswirkungen nach Möglichkeit zu reduzieren. Außerdem haben wir geeignete Richtlinien und Schulungsprogramme für unsere Zulieferer erstellt, wobei die Umweltpraktiken unserer eigenen Produktionsstätten als Vorbild dienen.

Im Jahr 2010 waren 24 Betriebe von Sportschuhherstellern des adidas Konzerns nach OHSAS 18000 und/oder ISO 14001 zertifiziert. Diese Fabriken produzierten rund 83 % unseres Beschaffungsvolumens bei Schuhen. Das restliche Volumen wird in Fabriken produziert, die Managementsysteme implementiert haben, jedoch nicht zertifiziert sind. Sämtliche Schuhproduktionsstätten werden regelmäßig anhand der Standards des adidas Konzerns hinsichtlich Umweltauswirkungen sowie Gesundheit und Sicherheit am Arbeitsplatz geprüft.

Daneben wurden zahlreiche andere Maßnahmen umgesetzt, um die CO<sub>2</sub>-Bilanz der Beschaffungs- und Vertriebskette zu verbessern, z. B. in den Bereichen Transport und Energieverbrauch. Beim Transport unserer Produkte sind wir bestrebt, die Auswirkungen, insbesondere von Luftfrachtsendungen, durch bessere Instrumente bei der Auftrags- und Produktionsplanung zu minimieren.

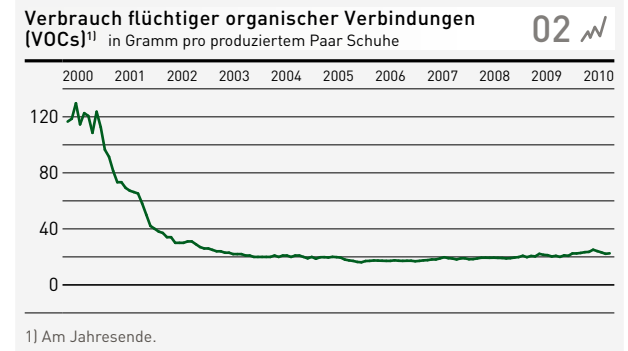

### Kontrolle und Überwachung von Gefahrstoffen

Unsere Zulieferer sind dazu angehalten, auf die Verwendung von Gefahrstoffen, d. h. potenziell schädlichen Substanzen für Mensch oder Umwelt, zu verzichten. Zu diesem Zweck haben wir eindeutige, verbindliche Standards festgelegt. Diese entsprechen den strengsten örtlichen Bestimmungen sowie den höchsten Anforderungen für den Schutz und die Sicherheit von Konsumenten. Anhand unseres ständigen Dialogs mit wissenschaftlichen Organisationen aktualisieren wir unseren Richtlinienkatalog regelmäßig. Unsere Standards erfüllen die allgemeinen Anforderungen für Umweltzeichen und -siegel für Schuhe, Bekleidung und Sportzubehör (z. B. ÖKO-TEX Standard 100, Tox Proof TÜV Rheinland). Externe Prüfstellen sowie unsere eigenen Qualitätssicherungslabore kontrollieren fortlaufend Materialproben, um sicherzustellen, dass sich die Lieferanten an unsere Anforderungen halten. Wir lehnen alle Materialien ab, die unseren Standards und Spezifikationen nicht entsprechen.

### Reduzierung der VOC-Emissionen

In unseren Herstellungsprozessen eingesetzte Lösungsmittel enthalten üblicherweise flüchtige organische Verbindungen (VOCs). Diese können in hoher Konzentration Atembeschwerden und andere gesundheitliche Probleme für Arbeitnehmer in der Produktion verursachen. Aus diesem Grund haben wir uns verpflichtet, die VOC-Emissionen in den Schuhfabriken unserer Zulieferer auf einen durchschnittlichen VOC-Ausstoß von 20 Gramm pro Paar Schuhe zu reduzieren.

Es geht uns dabei vor allem darum, durch die gemeinsame Verwendung von Informationen, Daten und Quellen zu produktionsrelevanten Aspekten (z. B. wasserbasierte Klebstoffe) technische Synergien zu nutzen. Bei unseren wichtigsten Sportschuhherstellern messen wir die VOC-Emissionen. Dabei belegen unsere Aufzeichnungen, dass die Beschäftigten keinen gefährlichen VOC-Mengen ausgesetzt sind. Unsere Zulieferer in Asien und Europa haben ihre VOC-Emissionen von 130 Gramm pro Paar Schuhe im Jahr 1999 auf 24,8 Gramm pro Paar Schuhe im Jahr 2010 reduziert (2009: 22,6) » siehe » 02. Zum Vergleich: Der Grenzwert gemäß der europäischen VOC-Richtlinie sowie der 31. Verordnung des Bundes-Immissionsschutzgesetzes liegt bei 25 Gramm pro Paar Schuhe. Beide Verordnungen traten 2007 in Kraft.

### Ökologisch optimierte Produktkonzepte

adidas Sport Performance hat mit dem Programm „Better Place“ eine Initiative für nachhaltige Produkte eingeführt, die sich auf die effiziente Nutzung von Ressourcen beim Produktdesign und in der Materialauswahl konzentriert. Die ersten Produkte der adidas Initiative „Better Place“ wurden weltweit im Frühjahr/Sommer 2009 eingeführt, da wir eine gestiegene Nachfrage der Konsumenten nach nachhaltiger Sportbekleidung und nachhaltigen Schuhen feststellen konnten. Durch ihr Design, ihren Aufbau, ihre Materialzusammensetzung und ihre Verpackung qualifizieren sie sich als ökologisch nachhaltige Produkte. Sämtliche im Rahmen von „Better Place“ eingesetzten Materialien werden einer gründlichen Analyse unterzogen.

adidas verzeichnete im Jahr 2010 einen starken Anstieg beim Verkauf von „Better Place“-Produkten. Damit wurde eine solide Grundlage geschaffen, um den Anteil nachhaltiger Produkte in den folgenden Saisons weiter zu steigern. Wir sehen für unseren Konzern erhebliche Geschäftschancen im Bereich nachhaltiger Produktkonzepte » siehe Risiko- und Chancenbericht, S. 158. Aus diesem Grund haben wir uns zum Ziel gesetzt, dass bis zum Jahr 2012 100 % der Schuhe von adidas Sport Performance nachhaltige Materialien enthalten sollen.

### Index-Notierungen unterstreichen gute Nachhaltigkeitsarbeit

Das Interesse seitens der Finanzwelt an nachhaltiger Unternehmensführung nimmt stetig zu. Wir schätzen die positive Resonanz, die uns durch internationale Institutionen und Ratingagenturen sowie durch Nicht-Regierungsorganisationen und SRI-Analysten (Socially Responsible Investment – Sozialverantwortliches Investment) zuteil wird. Jedes Jahr beantworten wir eine Vielzahl von Anfragen von Investoren, Fondsmanagern und Finanzanalysten, die sich gezielt dem Thema der Unternehmensverantwortung widmen. Diese bewerten unsere Nachhaltigkeitsaktivitäten durch eine eingehende Analyse unseres Sozial- und Umweltprogramms, welche auch eine Überprüfung der Geschäftsdokumente sowie Gespräche mit Beschäftigten und Führungskräften umfasst. Als Anerkennung für unsere Leistungen im Nachhaltigkeitsmanagement wird die adidas AG in zahlreichen angesehenen Nachhaltigkeitsindizes geführt » siehe i „Die adidas AG in Nachhaltigkeitsindizes“.

#### Die adidas AG in Nachhaltigkeitsindizes

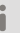

- DJSI World (DJSI = Dow Jones Sustainability Index)
- DJSI STOXX
- DJSI EURO STOXX
- FTSE4Good Europa Index
- ASPI Eurozone Index
- Ethibel Index Excellence Europa
- ECPI Ethibel Index EMU

Für weiterführende Informationen » siehe Unsere Aktie, S. 34.



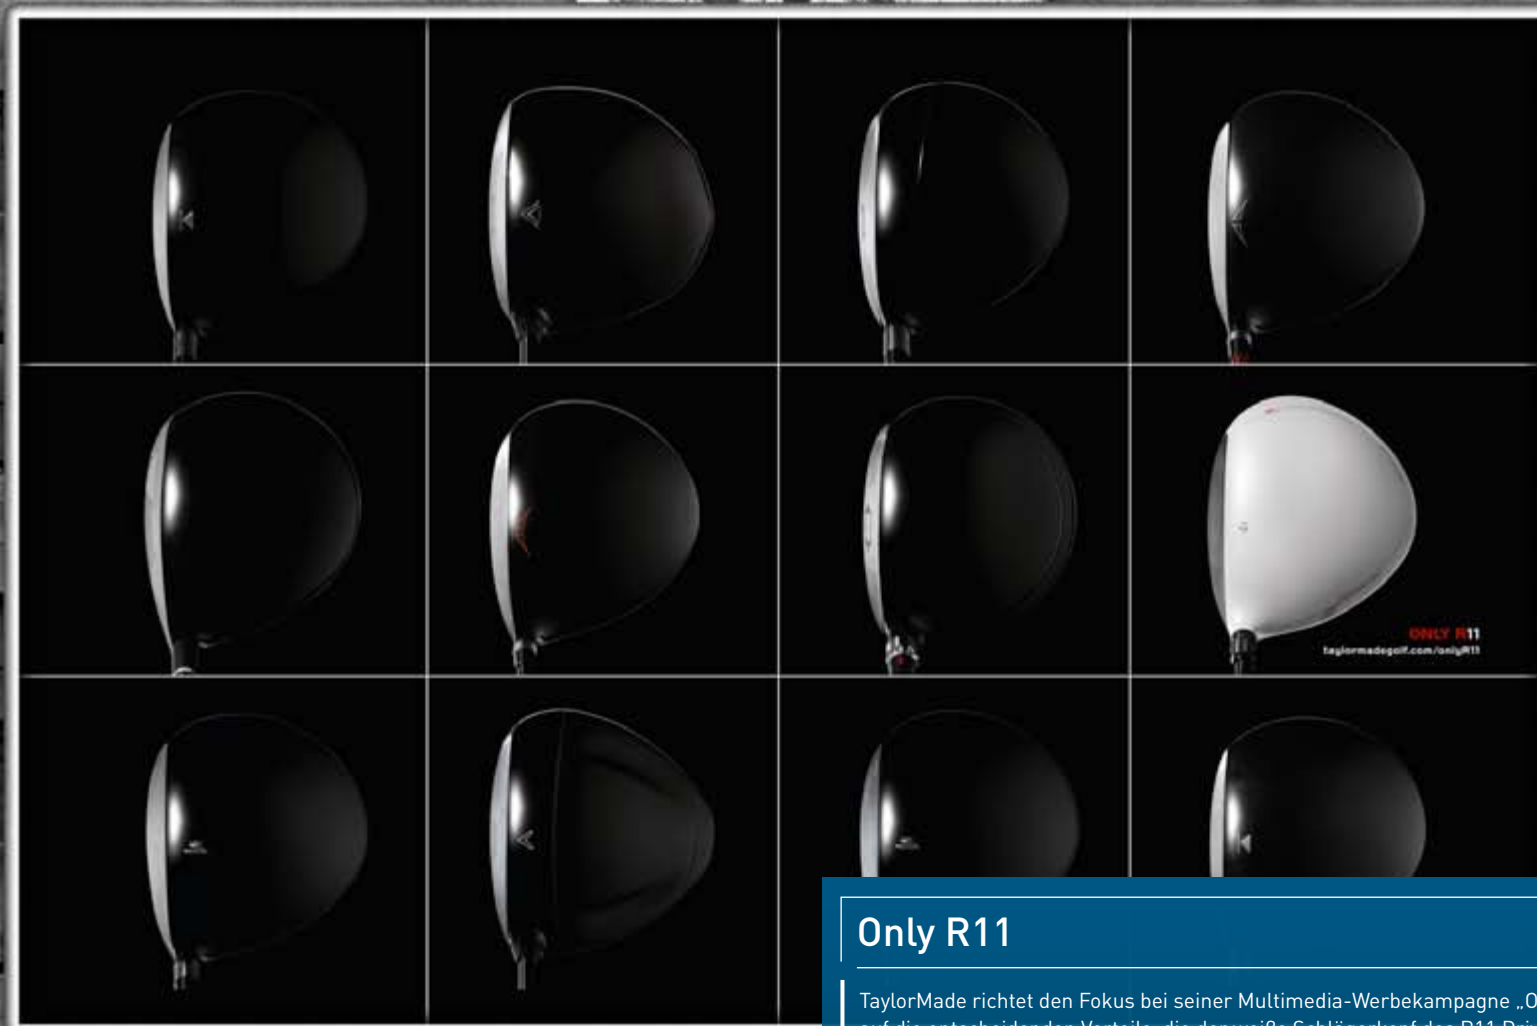

## Only R11

TaylorMade richtet den Fokus bei seiner Multimedia-Werbekampagne „Only R11“ auf die entscheidenden Vorteile, die der weiße Schlägerkopf des R11 Drivers im Vergleich zu herkömmlichen schwarzen Schlägerköpfen anderer Marken bietet. Der TV-Werbespot erzeugte viel Aufmerksamkeit, vor allem durch die Verwendung des beliebten Kinderlieds One of These Things is Not Like the Other. In der Kampagne werden das auffällige Design, die innovative Technologie und die herausragende Performance des Schlägers im Vergleich zu Produkten der Wettbewerber in Szene gesetzt.

# 04

## Konzernlagebericht – Unser Finanzjahr

|                                                        |       |
|--------------------------------------------------------|-------|
| Internes Konzernmanagementsystem .....                 | » 126 |
| Geschäftsentwicklung des Konzerns .....                | » 130 |
| Entwicklung Gesamtwirtschaft<br>und Branche .....      | » 130 |
| Gewinn- und Verlustrechnung .....                      | » 133 |
| Bilanz und Kapitalflussrechnung .....                  | » 140 |
| Angaben nach § 315 Abs. 4 HGB .....                    | » 143 |
| Treasury .....                                         | » 146 |
| Geschäftsentwicklung nach Segmenten .....              | » 150 |
| Geschäftsentwicklung Großhandel .....                  | » 150 |
| Geschäftsentwicklung Einzelhandel .....                | » 153 |
| Geschäftsentwicklung<br>Andere Geschäftssegmente ..... | » 156 |
| Risiko- und Chancenbericht .....                       | » 158 |
| Nachtrag und Ausblick .....                            | » 174 |

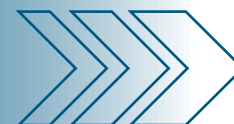

# Internes Konzern-Managementsystem

Zur Steigerung des Shareholder Values steht beim adidas Konzern die Maximierung des Cashflows aus der betrieblichen Tätigkeit im Mittelpunkt. Wir beabsichtigen, dieses Ziel zu erreichen, indem wir Umsatz und Gewinn kontinuierlich verbessern und gleichzeitig den Kapitaleinsatz optimieren. Das Planungs- und Steuerungssystem unseres Konzerns ist darauf ausgelegt, eine Vielzahl von Instrumenten bereitzustellen, um die aktuelle Geschäftsentwicklung zu bewerten und daraus zukünftige Strategie- und Investitionsentscheidungen abzuleiten. Ziel ist die optimale Ausschöpfung wirtschaftlicher und unternehmerischer Erfolgspotenziale.

## Cashflow aus der betrieblichen Tätigkeit im Mittelpunkt des internen Konzern-Managementsystems

Wir sind überzeugt, dass der Cashflow aus der betrieblichen Tätigkeit unser wichtigstes Instrument ist, um Wertzuwächse für unsere Aktionäre zu schaffen. Der Cashflow aus der betrieblichen Tätigkeit setzt sich aus folgenden Bestandteilen zusammen: Betriebsergebnis, Veränderung des operativen kurzfristigen Betriebskapitals und Netto-Reinvestitionen (Investitionen abzüglich Abschreibungen) » siehe 01. Damit wir den Cashflow aus der betrieblichen Tätigkeit in unserem Unternehmen maximieren können, tragen die Geschäftsführung unserer operativen Segmente und das Management auf Marktebene die direkte Verantwortung für die Verbesserung des Betriebsergebnisses sowie für die Optimierung von operativem kurzfristigem Betriebskapital und Investitionen. Um den Fokus der obersten Führungsebene voll auf die Erzielung langfristiger operativer Verbesserungen zu richten, setzen wir ein modifiziertes Modell auf Basis des Economic Value Added (EVA) ein.

Dabei werden die Kapitalkosten eines Markts oder einer operativen Einheit innerhalb des Konzerns, anhand des Vermögensbestands und des jeweiligen Kapitalkostensatzes, ermittelt und vom Betriebsergebnis der jeweiligen Geschäftseinheit abgezogen. Der Vermögensbestand beinhaltet das kurzfristige Betriebskapital sowie sonstige Vermögenswerte, die für die täglichen Geschäftsaktivitäten eines Markts oder einer operativen Einheit erforderlich sind. Der sich daraus ergebende interne Leistungsindikator (KPI) wird als Beitrag nach Kapitalkosten (Contribution After Capital Charge – CACC) bezeichnet. Diese Kennzahl dient als eines der wichtigsten Ziele für die Berechnung des variablen Bestands der Gesamtvergütung der zuständigen Führungskräfte. Dieses Konzept wurde im Jahr 2010 konzernweit eingeführt.

### Operative Marge als Maßstab der operativen Fortschritte

Die operative Marge (definiert als Betriebsergebnis im Verhältnis zum Umsatz) ist die wichtigste Kennzahl unseres Konzerns, um den operativen Erfolg zu messen. Sie misst die Qualität unserer Umsatzentwicklung und zeigt, wie effizient wir unser operatives Geschäft steuern.

Verbesserungen der operativen Marge erzielen wir vor allem durch:

- **Umsatzsteigerung und Verbesserung der Bruttomarge:** Das Management versucht solche Chancen zu erkennen und auszunutzen, die nicht nur zukünftiges Wachstum fördern, sondern auch zur Verbesserung der Bruttomarge (definiert als Bruttoergebnis im Verhältnis zum Umsatz) führen können. Um den Konzernumsatz und die Bruttomarge zu steigern, bedienen wir uns folgender Maßnahmen:
  - Optimierung des Produktmixes,
  - Verbesserung unserer Vertriebsqualität (besonderes Augenmerk liegt hierbei auf selbst kontrollierten Verkaufsflächen),
  - Umsetzung effizienzsteigernder Initiativen in der Beschaffungskette und
  - Minimierung von Lagerräumungsaktivitäten.

## Bestandteile des Cashflows aus der betrieblichen Tätigkeit

01

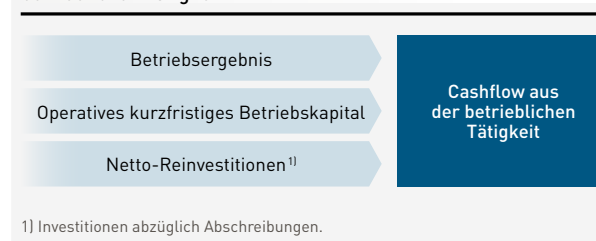



– **Kontrolle und Steuerung der betrieblichen Aufwendungen:** Strikte Kontrolle der betrieblichen Aufwendungen spielt eine zentrale Rolle in unserem Bestreben, aus dem Wachstum des Konzernumsatzes Kapital zu schlagen und den Gewinn zu steigern. Besonderes Augenmerk legen wir hierbei auf die Flexibilität der Kostenbasis. Unser größter betrieblicher Aufwandsposten ist das Marketing Working Budget. Marketing ist eines unserer wichtigsten Instrumente zur Umsatzsteigerung. Unser Fokus liegt daher auf dem optimalen Einsatz unserer Marketingaufwendungen. Dazu konzentrieren sich unsere Kommunikationsaktivitäten (Werbung, Präsentation im Einzelhandel, PR) auf die wichtigsten globalen Initiativen unserer Marken. Außerdem fokussieren wir unsere Promotionaufwendungen auf sorgfältig ausgewählte Partnerschaften mit Veranstaltern wichtiger Sportereignisse, Ligen, Vereinen oder Einzelsportlern. Des Weiteren verfolgen wir die Ziele, die Effizienz unseres operativen Geschäfts zu steigern und die Betriebsgemeinkosten im Verhältnis zum Umsatz zu senken. In diesem Zusammenhang prüfen wir kontinuierlich unsere operativen Strukturen. Dabei sind für uns die Straffung unserer Geschäftsprozesse, die Vermeidung von Redundanzen im Konzern und die Realisierung von Größenvorteilen wichtige Maßnahmen. Diese Maßnahmen ergänzen wir gegebenenfalls um kurzfristige Initiativen wie die vorübergehende Kürzung betrieblicher Aufwendungen, z. B. im Bereich Personaleinstellungen.

Wir setzen uns zur Umsatzmaximierung und Kostenminimierung monatlich detaillierte Ziele und überwachen Abweichungen auf Basis rollierender Prognosen » siehe III 03. Wenn notwendig, erarbeiten wir Aktionspläne und setzen diese so um, dass sich unser operatives Geschäft bestmöglich entwickeln kann.

#### Optimierung nicht-operativer Größen

Für den Konzern hat die Optimierung nicht-operativer Größen wie Finanzaufwendungen und Steuern ebenfalls hohe Priorität, da diese den Mittelabfluss und damit den Free Cashflow des Konzerns deutlich beeinflussen. Die zentrale Konzern-Treasury-Abteilung ist für das Management der Finanzaufwendungen zuständig » siehe Treasury, S. 146., während die zentrale Konzern-Steuerabteilung aktuelle und zukünftige Steuerbelastungen optimiert.

#### Straffes Management des operativen kurzfristigen Betriebskapitals

Da unser Geschäft vergleichsweise wenig anlagenintensiv ist, nimmt das Management des operativen kurzfristigen Betriebskapitals eine zentrale Rolle im Hinblick auf die Optimierung der Bilanzeffizienz ein. Für uns ist hier das Verhältnis des operativen kurzfristigen Betriebskapitals zum Umsatz die zentrale Kennzahl. Anhand der Entwicklung dieser Kennzahl können wir Fortschritte hinsichtlich Effizienzsteigerungen in unserem Geschäftszyklus verfolgen.

Wir haben in den letzten Jahren das Management unseres operativen kurzfristigen Betriebskapitals erheblich verbessert, indem wir uns fortlaufend auf die Optimierung der Vorräte sowie der Forderungen und der Verbindlichkeiten aus Lieferungen und Leistungen konzentriert haben.

Wir managen unsere Lagerbestände so, dass wir die Marktnachfrage erfüllen und schnellen Nachschub sicherstellen können. Darüber hinaus überwachen und steuern wir die Altersstruktur unserer Vorräte, um einer Überalterung vorzubeugen und Lagerräumungsaktivitäten zu optimieren. Die Lagerumschlagshäufigkeit ist unsere wichtigste Kenngröße für das Lagerbestandsmanagement. Sie misst, wie häufig der durchschnittliche Lagerbestand während eines Jahres abverkauft wird, und verdeutlicht damit die Effizienz des in Produkten gebundenen Kapitals im Verhältnis zum Konzerngeschäft. Um die Kapitalbindung in Forderungen aus Lieferungen und Leistungen zu minimieren, verbessern wir unsere Maßnahmen zum Forderungseinzug. So lässt sich die Außenstandsdauer (Days of Sales Outstanding – DSO) reduzieren und die Altersstruktur der Forderungen aus Lieferungen und Leistungen optimieren. Im gleichen Maß arbeiten wir daran, optimale Zahlungsbedingungen bei unseren Lieferanten auszuhandeln, um damit unsere Verbindlichkeiten aus Lieferungen und Leistungen bestmöglich zu steuern.

#### Wichtige Finanzkennzahlen

02

|                                                                |   |                                                                                                |
|----------------------------------------------------------------|---|------------------------------------------------------------------------------------------------|
| Bruttomarge                                                    | = | $\frac{\text{Bruttoergebnis}}{\text{Umsatzerlöse}} \times 100$                                 |
| Operative Marge                                                | = | $\frac{\text{Betriebsergebnis}}{\text{Umsatzerlöse}} \times 100$                               |
| Ø operatives kurzfristiges Betriebskapital                     | = | $\frac{\text{Summe der Quartalsendbestände des operativen kurzfristigen Betriebskapitals}}{4}$ |
| Operatives kurzfristiges Betriebskapital in % der Umsatzerlöse | = | $\frac{\text{Ø operatives kurzfristiges Betriebskapital}}{\text{Umsatzerlöse}} \times 100$     |
| Investitionen <sup>1)</sup>                                    | = | $\frac{\text{Zugänge von Sachanlagen und immateriellen Vermögenswerten}}{\text{Umsatzerlöse}}$ |

1) Ohne Akquisitionen und Finanzierungsleasing.

### Investitionen zielen auf maximale zukünftige Rendite ab

Ein weiterer Stellhebel zur Maximierung des Cashflows aus der betrieblichen Tätigkeit ist effektives Investitionsmanagement. Wir steuern unsere Investitionen über einen Top-down-/Bottom-up-Ansatz. Im ersten Schritt legt die Konzernleitung, ausgehend von Investitionsanträgen von unterschiedlichen Stellen im Unternehmen, die Investitionsschwerpunkte fest und bestimmt daraufhin das komplette Investitionsbudget für den Konzern. Anschließend stimmen unsere operativen Einheiten ihre Initiativen anhand der Vorgaben hinsichtlich Investitionsschwerpunkt und verfügbarem Budget miteinander ab. Wir ermitteln das Renditepotenzial unserer geplanten Investitionsprojekte über die Kapitalwertmethode. Risiken berücksichtigen wir, indem wir gegebenenfalls einen Risikoaufschlag auf die Kapitalkosten vornehmen und unsere Schätzungen hinsichtlich künftiger Erlöse reduzieren. Im Rahmen von Szenarienplanungen wird anhand von Veränderungen gegenüber den ursprünglichen Annahmen die Sensitivität der Investitionsrendite geprüft. Bei besonders aufwendigen Investitionsprojekten überwachen wir während der kompletten Projektdauer monatlich die Einhaltung von Zeitplänen und Budgetvorgaben.

### M&A-Aktivitäten konzentrieren sich auf langfristiges Wertsteigerungspotenzial

Der Großteil unserer Wachstumschancen liegt in unserem organischen Geschäft. Da wir langfristige und nachhaltige Profitabilitätsverbesserungen anstreben, überprüfen wir jedoch auch regelmäßig die Möglichkeit von Zukäufen, die uns zusätzliche wirtschaftliche und strukturelle Erfolgspotenziale bieten könnten. Dabei konzentrieren wir uns in erster Linie auf Akquisitionsmöglichkeiten, die die Position unseres Konzerns innerhalb einzelner Sportkategorien verbessern würden, unser Technologie-Portfolio stärken würden oder uns dabei helfen könnten, neue Konsumentengruppen anzusprechen.

Die Strategie eines möglichen Akquisitionsobjekts muss zu der langfristigen Ausrichtung des Konzerns passen. Eine Schlüsselrolle in unserem Entscheidungsprozess spielt dabei die Maximierung der langfristigen Überschussrendite (d. h. Kapitalrendite abzüglich Kapitalkosten). Besonders wichtig ist darüber hinaus die Einschätzung des möglichen Einflusses auf den Free Cashflow des Konzerns. Deshalb bewerten wir anhand von Ist- und Planwerten diverser Finanzkennzahlen den potenziellen Ergebnisbeitrag eines Akquisitionsobjekts. Zudem analysieren wir sorgfältig mögliche Finanzierungserfordernisse sowie deren Auswirkung auf den Verschuldungsgrad des Konzerns.

### Ziele und Ergebnisse des adidas Konzerns

03

|                                                                                        | 2009<br>Ergebnisse | 2010<br>Ursprünglicher Ausblick <sup>1)</sup>            | 2010<br>Ergebnisse | 2011<br>Ziele                                        |
|----------------------------------------------------------------------------------------|--------------------|----------------------------------------------------------|--------------------|------------------------------------------------------|
| Umsatzerlöse<br>(Entwicklung gegenüber Vorjahr, währungsneutral)                       | - 6 %              | Wachstum im niedrigen bis mittleren einstelligen Bereich | 9 %                | Wachstum im mittleren bis hohen einstelligen Bereich |
| Bruttomarge                                                                            | 45,4 %             | 46 % bis 47 %                                            | 47,8 %             | 47,5 % bis 48,0 %                                    |
| Sonstige betriebliche Aufwendungen<br>(in % der Umsatzerlöse)                          | 42,3 %             | moderater Rückgang                                       | 42,1 %             | moderater Rückgang                                   |
| Operative Marge                                                                        | 4,9 %              | ca. 6,5 %                                                | 7,5 %              | 7,5 % bis 8,0 %                                      |
| (Verwässertes) Ergebnis je Aktie (in €)                                                | 1,22               | 1,90 bis 2,15                                            | 2,71               | 2,98 bis 3,12                                        |
| Durchschnittliches operatives kurzfristiges Betriebskapital<br>(in % der Umsatzerlöse) | 24,3 %             | weitere Reduzierung                                      | 20,8 %             | Anstieg                                              |
| Investitionen (in Mio. €) <sup>2)</sup>                                                | 240                | 300 bis 400                                              | 269                | 350 bis 400                                          |
| Nettoverschuldung (in Mio. €)                                                          | 917                | weitere Reduzierung                                      | 221                | weitere Reduzierung                                  |

1) Wie am 3. März 2010 veröffentlicht; der Ausblick wurde im Jahresverlauf aktualisiert.

2) Ohne Akquisitionen und Finanzierungsleasing.

### Kapitalkosten als Grundlage für Wertbestimmung einer potenziellen Investition

Unsere Konzernstrategie ist auf die Schaffung von Shareholder Value ausgerichtet, der durch die Erzielung von Überschussrenditen erreicht wird. Wir beschaffen uns finanzielle Mittel am Eigen- und Fremdkapitalmarkt und haben deshalb die Verpflichtung, eine den Ansprüchen unserer Kapitalgeber entsprechende Kapitalverzinsung zu erzielen. Unser Konzern bestimmt die Kapitalkosten anhand der Berechnung des gewichteten, durchschnittlichen Kapitalkostensatzes (Weighted Average Cost of Capital – WACC). Dieser Kapitalkostensatz ermöglicht uns die Ermittlung der Mindestrendite von geplanten Investitionsprojekten. Zur Berechnung der Eigenkapitalkosten verwenden wir den risikolosen Zinssatz, eine dem Markt angemessene Risikoprämie und den Beta-Wert. Die Fremdkapitalkosten ermitteln wir mit Hilfe des risikolosen Zinssatzes, des Credit Spreads und des durchschnittlichen Steuersatzes.

### Strukturiertes System zur Performance-Messung

Wir haben ein umfangreiches System zur Messung der wirtschaftlichen Entwicklung des Konzerns aufgebaut, welches eine Vielzahl verschiedener Instrumente umfasst. Die wichtigsten Finanzkennzahlen des Konzerns werden kontinuierlich überwacht und monatlich mit den Budgetzielen verglichen. Dabei liegt unser Augenmerk auf der Generierung von Cashflow aus der betrieblichen Tätigkeit, CACC, Umsatz, der operativen Marge, dem operativen kurzfristigen Betriebskapital und Nettofinanzverbindlichkeiten » siehe 02.

Sollten negative Abweichungen von unseren Zielen auftreten, führen wir detaillierte Analysen durch und ergreifen entsprechende Gegenmaßnahmen. Des Weiteren vergleichen wir die Ergebnisse des Konzerns quartalsweise mit den Ergebnissen unserer wichtigsten Wettbewerber. Um die aktuelle Entwicklung von Umsatz und Profitabilität zu beurteilen, analysiert die Konzernleitung Durchverkaufdaten aus unserem eigenen Einzelhandel sowie kurzfristige Auffüllaufträge unserer Großhandelskunden. Anhand der jeweils bis dato erzielten Ergebnisse sowie der Chancen und Risiken werden die Geschäftsergebnisse des Konzerns für das Gesamtjahr vierteljährlich hochgerechnet.

In diesem Zusammenhang dient u. a. der Auftragsbestand als Indikator für die künftige Entwicklung. Dieser beinhaltet die in einem Zeitraum von bis zu neun Monaten vor dem eigentlichen Verkauf eingegangenen Kundenbestellungen. Im Vergleich zu vergangenen Jahren sind die Auftragsbücher allerdings ein weniger verlässlicher Indikator für unsere zu erwartenden Erlöse. Grund hierfür ist der zunehmende Anteil unseres eigenen Einzelhandels in unserem Geschäftsmix sowie das schwankende Bestellverhalten unserer Großhandelspartner. Aufgrund des wachsenden Anteils des Sofortgeschäfts wird das qualitative Feedback unserer Handelspartner zum Erfolg unserer Kollektionen am Point-of-Sale noch wichtiger. Als Frühindikator für die künftige Geschäftsentwicklung führen wir zudem Marktforschung durch, um Markenattraktivität und -bewusstsein sowie die daraus resultierenden Kaufabsichten einschätzen zu können.

### Beurteilung von Geschäftsentwicklung und Zielen durch das Management

Wir geben jährlich unsere Finanzziele für den Konzern bekannt und aktualisieren diese bei Bedarf im Laufe des Geschäftsjahres. Im Jahr 2010 stiegen sowohl Umsatz als auch Gewinn des Konzerns deutlich. Im Einzelhandelssegment legte der Umsatz mit zweistelligen Wachstumsraten zu. Das Großhandelssegment sowie die Anderen Geschäftssegmente erzielten Umsatzzuwächse im einstelligen Bereich. Aufgrund gestiegener Einzelhandelsumsätze in den Schwellenländern lag der Konzernumsatz über unserer ursprünglichen Prognose eines Umsatzanstiegs im niedrigen bis mittleren einstelligen Bereich. Das Wachstum des Konzernumsatzes übertraf die Entwicklung der Gesamtwirtschaft und der weltweiten Sportartikelbranche » siehe Entwicklung Gesamtwirtschaft und Branche, S. 130. Verantwortlich hierfür waren in erster Linie deutliche Umsatzzuwächse in den meisten Regionen. Unsere Profitabilität stieg infolge höherer Bruttomargen deutlicher als ursprünglich erwartet. Grund hierfür war u. a. die starke Entwicklung unseres Einzelhandelssegments. Durch unseren kontinuierlichen Fokus auf das operative kurzfristige Betriebskapital und das Cash-Management haben wir im Geschäftsjahr 2010 all unsere Ziele in Bezug auf Verbesserungen der Bilanz erreicht.

Unsere Prognosen für die Geschäftsentwicklung des Konzerns im Jahr 2011 basieren auf der Erwartung einer Erholung der Weltwirtschaft und einer Stärkung unseres Geschäfts in den Schwellenländern. Zudem haben wir eine starke Produktpipeline, für die wir aus dem Einzelhandel positives Feedback erhalten haben. Angesichts dieser erwarteten Entwicklungen in Verbindung mit einer verbesserten Bilanz rechnen wir mit einer Steigerung von Umsatz und Ergebnis je Aktie im Geschäftsjahr 2011. Allerdings werden steigende Rohmaterial- und Lohnkosten in der Sportartikelbranche Profitabilitätsverbesserungen mindern. Unter der Annahme einer sich weiter verbessernden Weltwirtschaft sind wir überzeugt, dass wir im Jahr 2012 und darüber hinaus Umsatz und Ergebnis je Aktie – wie in unserem strategischen Geschäftsplan Route 2015 dargestellt – weiter steigern können. Wir sind zuversichtlich, dass unsere Ziele im derzeitigen Geschäftsumfeld realistisch sind. Da es zwischen dem Ende des Geschäftsjahres 2010 und der Veröffentlichung dieses Geschäftsberichts keine für unseren Geschäftsverlauf wesentlichen Ereignisse gegeben hat, die uns zu einer Änderung der Prognose veranlassen würden, sehen wir uns in unseren Annahmen bestätigt » siehe Nachtrag und Ausblick, S. 174.



# Geschäftsentwicklung des Konzerns

Im Geschäftsjahr 2010 konnte der adidas Konzern seine Geschäftsergebnisse gegenüber dem Vorjahr deutlich verbessern. Der Konzernumsatz stieg aufgrund von Wachstum in den Segmenten Großhandel und Einzelhandel sowie in den Anderen Geschäftssegmenten währungsbereinigt um 9 %. In Euro erhöhte sich der Konzernumsatz um 15 % auf 11,990 Mrd. € (2009: 10,381 Mrd. €). Die Bruttomarge des Konzerns verbesserte sich um 2,4 Prozentpunkte auf 47,8 % (2009: 45,4 %). Ein geringerer Anteil von Lagerräumungsverkäufen und ein größerer Anteil von Einzelhandelsumsätzen, die höhere Margen erzielen, unterstützten diese Entwicklung. Infolgedessen stieg das Bruttoergebnis des Konzerns im Geschäftsjahr 2010 um 22 % auf 5,730 Mrd. € (2009: 4,712 Mrd. €). Die operative Marge lag mit 7,5 % um 2,6 Prozentpunkte über dem Vorjahreswert (2009: 4,9 %). Diese Verbesserung ist insbesondere auf die höhere Bruttomarge sowie auf niedrigere sonstige betriebliche Aufwendungen im Verhältnis zum Umsatz zurückzuführen. Das Betriebsergebnis des Konzerns nahm um 76 % auf 894 Mio. € zu (2009: 508 Mio. €). Der auf Anteilseigner entfallende Konzerngewinn stieg um 131 % auf 567 Mio. € (2009: 245 Mio. €). Das verwässerte Ergebnis je Aktie erhöhte sich im Geschäftsjahr 2010 um 122 % auf 2,71 € (2009: 1,22 €).

## Entwicklung Gesamtwirtschaft und Branche

### Weltwirtschaft erholt sich im Jahr 2010

Nach der weltweiten Rezession im Jahr 2009 erholte sich das gesamtwirtschaftliche Umfeld im Verlauf des Jahres 2010 deutlich. Das weltweite Bruttoinlandsprodukt (BIP) stieg um 3,9 %, während es im Vorjahr noch einen Rückgang um 2,2 % zu verzeichnen hatte. Verantwortlich für diese Erholung war vor allem das rapide Wachstum in den Schwellenländern verbunden mit zusätzlichem, weltweitem Auftrieb durch das Exportgeschäft und die Industrieproduktion. Trotz der positiven BIP-Entwicklungen belasteten Befürchtungen hinsichtlich Staatsverschuldung sowie hohe Arbeitslosigkeit in den meisten wichtigen westlichen Ländern das Wirtschaftswachstum.

In Westeuropa stieg das BIP um 1,8 % (2009: Rückgang um 4,1 %), vor allem aufgrund des hohen Exportvolumens. Die Krise infolge der hohen Staatsverschuldung in einigen peripheren Ländern der Region in Verbindung mit hoher Arbeitslosigkeit und strikten Sparmaßnahmen bremsten jedoch das Wachstum und trübten das Vertrauen in vielen westeuropäischen Ländern. Trotz ähnlicher Herausforderungen setzte sich in den europäischen Schwellenländern hingegen die Erholung der Wirtschaft im Jahr 2010 fort. Dort stieg das BIP um ca. 3,9 % (2009: Rückgang um 3,4 %). Steigende Anlageinvestitionen sowie eine sich verbessernde Inlandsnachfrage im Vergleich zum Vorjahr wirkten sich hier positiv aus.

In den USA nahm das BIP 2010 um 2,9 % zu (2009: Rückgang um 2,6 %). Insbesondere wieder steigende Investitionen sowohl aus dem privaten als auch aus dem öffentlichen Sektor trugen zu dieser positiven Entwicklung bei. Ein Großteil dieser Tätigkeit wurde durch steuer- und geldpolitische Anreize seitens der Regierung unterstützt. Darüber hinaus hatte der schwache US-Dollar einen positiven Einfluss auf die Exporte aus dieser Region. Trotz des allgemeinen wirtschaftlichen Aufschwungs belasteten hohe Arbeitslosigkeit und relativ niedrige Hauspreise weiterhin die Konsumausgaben; diese stiegen im Jahr 2010 nur moderat an.

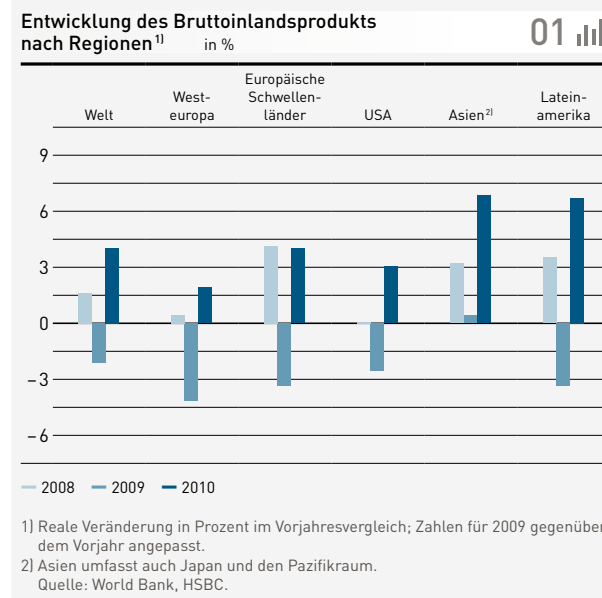

Die Volkswirtschaften Asiens führten 2010 die weltweite Konjunkturerholung an. In dieser Region stieg das BIP um 6,7 % (2009: 0,3 %). Hauptmotoren dieses Wachstums waren die Industrieproduktion sowie die Robustheit von Binnennachfrage und Einzelhandelsumsätzen. In China stieg das BIP 2010 vor allem aufgrund des Wachstums in den Bereichen Industrieproduktion und Export um 10,0 % (2009: 9,1 %). Die gesamtwirtschaftliche Entwicklung unterstützte einen weiteren Anstieg der Löhne; die Konsumausgaben nahmen um 9,5 % zu. Die meisten anderen Volkswirtschaften der Region verzeichneten ähnliche Trends, darunter auch Indien, wo das BIP-Wachstum auf 9,2 % geschätzt wird. Die Steigerung des BIPs in Japan lag mit 4,3 % hingegen unter dem Durchschnitt der Region (2009: Rückgang um 6,3 %). Verantwortlich für die wirtschaftliche Belebung Japans war die Exportnachfrage aus anderen asiatischen Ländern. Die Stärkung des Yen belastete jedoch den internationalen Handel und führte in Verbindung mit einem trägen Arbeitsmarkt gegen Ende des Jahres zu einer abschwächenden BIP-Tendenz.

In Lateinamerika stieg das BIP im Gesamtjahr um 6,6 % (2009: Rückgang um 3,4 %). Die deutliche Erholung war vor allem auf steigende Rohstoffpreise und eine starke Inlandsnachfrage zurückzuführen. Zudem belebten steigende Beschäftigungszahlen und Löhne den Konsum in dieser Region.

#### Sportartikelbranche wächst weltweit

Die Sportartikelbranche profitierte im Jahr 2010 von gestiegenem Verbrauchervertrauen und höheren Konsumausgaben in den meisten Regionen und Märkten der Welt. Hierzu trug in Westeuropa und Lateinamerika vor allem die FIFA Fußball-Weltmeisterschaft 2010 bei. Die Trendwende im Lagerbestandszyklus in der ersten Jahreshälfte unterstützte die Branche in vielen wichtigen Märkten. Infolge einer starken Back-to-School-Saison in Nordamerika und Europa setzte sich diese positive Entwicklung auch im zweiten Halbjahr fort. In den Schwellenländern, vor allem in Asien und Lateinamerika, gaben steigende Konsumausgaben der Expansion der Sportartikelbranche zusätzliche Impulse. Niedrigere Beschaffungskosten sowie weniger Lagerräumungsaktivitäten wirkten sich positiv auf die Profitabilität in der Branche aus.

#### FIFA Fußball-Weltmeisterschaft verleiht Europas Sportartikelbranche zusätzlichen Auftrieb

Die europäische Sportartikelindustrie verzeichnete im Jahr 2010 moderates Wachstum. Die Region profitierte nachhaltig von der FIFA Fußball-Weltmeisterschaft 2010, da drei der vier Halbfinalteilnehmer aus dieser Region stammten. Dennoch fiel die Entwicklung auf Länderebene sehr unterschiedlich aus. Hohe Arbeitslosigkeit bremste die Konsumausgaben, insbesondere in den peripheren Ländern der Region. Sowohl bei Schuhen als auch bei Bekleidung wurden Umsatzzuwächse in Europa verzeichnet, wobei sich der Bereich Schuhe schneller erholte als der Bereich Bekleidung. Gegen Ende des Jahres profitierte der Bekleidungsbereich jedoch von den kalten Witterungsbedingungen.

#### Arbeitslosenquote nach Quartalen und Regionen

02

|                         | Q4 2009 | Q1 2010 | Q2 2010 | Q3 2010 | Q4 2010 |
|-------------------------|---------|---------|---------|---------|---------|
| USA <sup>1)</sup>       | 10,0    | 9,7     | 9,6     | 9,6     | 9,6     |
| Euro-Zone <sup>2)</sup> | 9,9     | 9,9     | 10,0    | 10,0    | 10,0    |
| Japan <sup>3)</sup>     | 5,2     | 5,0     | 5,3     | 5,0     | 4,9     |
| China <sup>4)</sup>     | 4,3     | 4,2     | 4,2     | 4,1     | 4,1     |
| Russland <sup>5)</sup>  | 8,2     | 8,6     | 6,8     | 6,6     | 7,2     |

1) Quelle: US-Amt für Arbeitsstatistik.

2) Quelle: Eurostat.

3) Quelle: Japanisches Ministerium für Inneres und Kommunikation.

4) Quelle: Chinesisches Statistikamt.

5) Quelle: Russisches Statistikamt.

#### Quartalsweise Entwicklung des Konsumentenpreisindex<sup>1) 2)</sup>

03

|           | Q4 2009 | Q1 2010 | Q2 2010 | Q3 2010 | Q4 2010 |
|-----------|---------|---------|---------|---------|---------|
| USA       | 2,7     | 2,3     | 1,1     | 1,1     | 1,5     |
| Euro-Zone | 0,9     | 1,4     | 1,4     | 1,8     | 2,2     |
| Japan     | -1,7    | -1,1    | -0,7    | -0,6    | 0,0     |
| China     | 1,9     | 2,4     | 2,9     | 3,6     | 4,6     |
| Russland  | 8,8     | 6,5     | 5,8     | 7,0     | 8,8     |

1) Quelle: Bloomberg.

2) Zum Quartalsende.

#### Quartalsweise Entwicklung des Konsumentenvertrauens

04

|                         | Q4 2009 | Q1 2010 | Q2 2010 | Q3 2010 | Q4 2010 |
|-------------------------|---------|---------|---------|---------|---------|
| USA <sup>1)</sup>       | 53,6    | 52,3    | 54,3    | 48,6    | 53,3    |
| Euro-Zone <sup>2)</sup> | -16     | -17     | -17     | -11     | -11     |
| Japan <sup>3)</sup>     | 37,9    | 41,0    | 43,6    | 41,4    | 40,2    |
| China <sup>4)</sup>     | 103,9   | 107,9   | 108,5   | 104,1   | 102,9   |
| Russland <sup>5)</sup>  | -20     | -10     | -7      | -11     | -10     |

1) Quelle: Conference Board.

2) Quelle: Europäische Kommission.

3) Quelle: Volks- und Sozialwirtschaftliches Institut der japanischen Regierung.

4) Quelle: Chinesisches Statistikamt.

5) Quelle: Russisches Statistikamt.

### Steigende Volumina und höhere durchschnittliche Preise beflügeln nordamerikanische Sportartikelbranche

Unseren Schätzungen zufolge stiegen die Umsatzerlöse mit Sportartikeln in den USA im Jahr 2010 im mittleren einstelligen Bereich – vor allem durch höhere Verkaufspreise und steigende Volumina. Niedrige Lagerbestände in der ersten Jahreshälfte halfen den Händlern Sonderpreis- und Rabattinitiativen zu minimieren und so die durchschnittlichen Verkaufspreise von Sportartikeln anzuheben. Die positive Dynamik wurde zudem durch steigende Konsumausgaben unterstützt; in der zweiten Jahreshälfte wurden sowohl in der Back-to-School-Saison als auch im Weihnachtsgeschäft starke Ergebnisse erzielt. Schätzungen zufolge ist der Umsatz im Bereich Schuhe im Jahr 2010 – insbesondere aufgrund von Wachstum in den Kategorien Muskelaktivierung, Running, Basketball und Outdoor – im hohen einstelligen Bereich gestiegen. Eine steigende Nachfrage nach Funktionsbekleidung konnte Rückgänge im Lizenzbekleidungsgeschäft zum Teil ausgleichen. Der Markt für Sportzubehör blieb 2010 in dieser Region schwach, der Golfmarkt erlitt weitere Umsatzrückgänge.

### Wachstum der Sportartikelbranche in Asien

Asiens Sportartikelindustrie verzeichnete im Jahr 2010 hohe einstellige Umsatzsteigerungen. Verantwortlich hierfür waren in erster Linie die Schwellenländer der Region. In China sorgten eine höhere Binnennachfrage und steigende Löhne sowie der weitere Ausbau im Bereich Einzelhandel für Wachstumsraten von etwa 20 %. In Japan hingegen gingen die Umsätze der Sportartikelbranche im Jahr 2010 analog zu den allgemein schwachen Konsumausgaben zurück. Der Bereich Schuhe erhielt zwar positive Impulse von der Kategorie Muskelaktivierung, aber insgesamt blieben die Einzelhandelsumsätze in Japan sowohl bei Schuhen als auch bei Bekleidung von hohem Preisdruck gekennzeichnet.

### Lateinamerikanischer Sportartikelmarkt setzt positive Entwicklung fort

In Lateinamerika entwickelte sich die Sportartikelbranche im Jahr 2010 sehr positiv und erzielte im Vorjahresvergleich Wachstum im zweistelligen Bereich. Das solide Wirtschaftswachstum der Region in Verbindung mit den positiven Effekten aus der FIFA Fußball-Weltmeisterschaft 2010 führte zu relativ hohen Ausgaben für Sportartikel, vor allem in der Kategorie Fußball.

### adidas Konzern und Wettbewerber entwickeln sich besser als Gesamtwirtschaft

Ebenso wie bei vielen Wettbewerbern und Einzelhändlern stiegen Umsatz und Profitabilität des adidas Konzerns im Jahr 2010. In den meisten Regionen war der Umsatzanstieg des adidas Konzerns und anderer bedeutender Sportartikelanbieter erheblich stärker als das Wachstum des BIPs und der allgemeinen Konsumausgaben.

### Wechselkursentwicklung<sup>1)</sup>

1 € entspricht

05

|     | Durchschnittskurs 2009 | Q1 2010 | Q2 2010 | Q3 2010 | Q4 2010 | Durchschnittskurs 2010 |
|-----|------------------------|---------|---------|---------|---------|------------------------|
| USD | 1,3932                 | 1,3479  | 1,2271  | 1,3648  | 1,3362  | 1,3279                 |
| GBP | 0,8912                 | 0,8898  | 0,8175  | 0,8600  | 0,8608  | 0,8584                 |
| JPY | 130,23                 | 125,93  | 108,79  | 113,68  | 108,65  | 116,56                 |
| RUB | 44,144                 | 39,695  | 38,282  | 41,692  | 40,820  | 40,303                 |
| CNY | 9,5148                 | 9,2006  | 8,3269  | 9,1457  | 8,8493  | 8,9885                 |

1) Kassakurs am Quartalsende.

### Ölpreisentwicklung<sup>1)</sup>

in USD

06

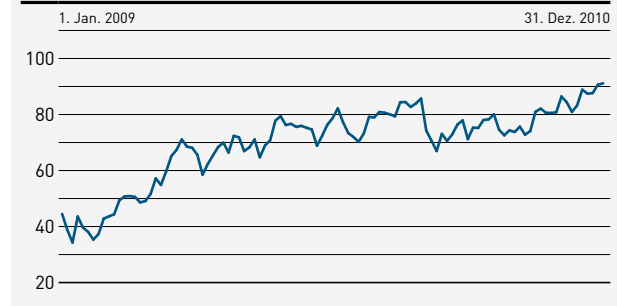

1) West Texas Intermediate Cushing Rohöl.  
Quelle: Bloomberg.



## Gewinn- und Verlustrechnung

### Vorjahreszahlen in der Segmentberichterstattung angepasst

Bedingt durch geringfügige Veränderungen in der Konzernstruktur im ersten Quartal 2010 wurden einige Funktionen im Vergleich zum Konzernjahresabschluss 2009 neu zugeordnet. Dies wirkt sich in geringem Maß auf die Struktur der Konzernsegmente aus. Um die vollständige Vergleichbarkeit der Geschäftsergebnisse im Jahr 2010 zu gewährleisten, hat sich der Konzern entschieden, die Segmentberichterstattung für das Jahr 2009 nachträglich anzupassen. Diese Anpassungen wirken sich nicht auf die Gesamtergebnisse des Konzerns aus. Einzelheiten zu den Anpassungen sind den Erläuterungen zu entnehmen » siehe Erläuterung 35, S. 218.

### Währungsbereinigter Konzernumsatz steigt 2010 um 9 %

Im Geschäftsjahr 2010 legte der Konzernumsatz aufgrund von Umsatzzuwächsen in den Segmenten Großhandel und Einzelhandel sowie in den Anderen Geschäftssegmenten währungsbereinigt um 9 % zu. Diese Entwicklung übertraf die ursprüngliche Erwartung des Managements von einem Umsatzanstieg im niedrigen bis mittleren einstelligen Bereich. Währungseffekte wirkten sich positiv auf die Umsatzerlöse in Euro aus. Der Konzernumsatz nahm um 15 % zu und erreichte 11,990 Mrd. € (2009: 10,381 Mrd. €) » siehe 07.

### Deutliche Umsatzzuwächse auf Groß- und Einzelhandelssegmente zurückzuführen

Im Geschäftsjahr 2010 stieg der Umsatz währungsbereinigt in allen Segmenten. Im Großhandelssegment erhöhte sich der währungsbereinigte Umsatz aufgrund von Umsatzzuwächsen sowohl bei adidas als auch bei Reebok um 8 %. Der währungsbereinigte Umsatz im Einzelhandelssegment legte im Vorjahresvergleich aufgrund von Umsatzwachstum bei adidas und Reebok um 18 % zu. Der Umsatz in den Anderen Geschäftssegmenten stieg auf währungsbereinigter Basis um 2 %. TaylorMade-adidas Golf, Rockport und Reebok-CCM Hockey verzeichneten jeweils ein Umsatzplus. Währungseffekte wirkten sich positiv auf die Segmentumsatzerlöse in Euro aus. Im Großhandelssegment stieg der Umsatz im Jahr 2010 um 14 % auf 8,181 Mrd. € (2009: 7,164 Mrd. €). Der Umsatz im Einzelhandelssegment legte 25 % zu und erreichte 2,389 Mrd. € (2009: 1,906 Mrd. €). In den Anderen Geschäftssegmenten lag der Umsatz 2010 mit 1,420 Mrd. € um 10 % über dem Vorjahresniveau (2009: 1,293 Mrd. €).

### Währungsbereinigter Umsatzanstieg in fast allen Regionen

Der währungsbereinigte Konzernumsatz lag im Geschäftsjahr 2010 in allen Regionen mit Ausnahme von China über dem Vorjahresniveau. In Westeuropa stieg der Umsatz vor allem aufgrund zweistelliger Umsatzzuwächse in Großbritannien, Deutschland und Spanien währungsbereinigt um 7 %. Der Umsatz in den Europäischen Schwellenländern lag aufgrund von Umsatzwachstum in den meisten Ländern der Region, insbesondere in Russland, währungsbereinigt um 16 % über dem Vorjahresniveau. In Nordamerika legte der Konzernumsatz aufgrund deutlicher Umsatzzuwächse sowohl in den USA als auch in Kanada währungsbereinigt um 12 % zu. In China verringerten sich die Umsatzerlöse währungsbereinigt um 2 %. In den Anderen Asiatischen Märkten stieg der Umsatz infolge von Wachstum in den meisten Märkten währungsbereinigt um 6 %. In Lateinamerika legte der Umsatz währungsbereinigt mit zweistelligen Zuwächsen in den meisten wichtigen Märkten der Region um 14 % zu. Währungseffekte wirkten sich positiv auf die Umsatzerlöse der Regionen in Euro aus » siehe 11.

### Umsatzerlöse

in Mio. €

07

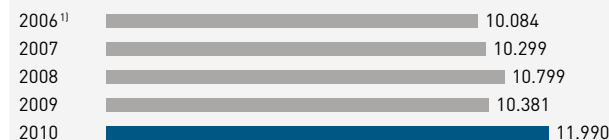

1) Beinhaltet Reebok, Rockport und Reebok-CCM Hockey ab 1. Februar 2006.

### Umsatzerlöse nach Quartalen

in Mio. €

08

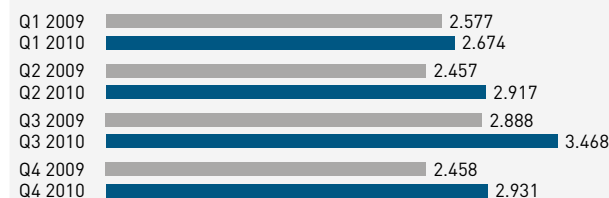

### 2010 Umsatzerlöse nach Segmenten

09

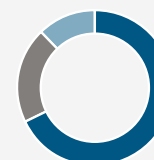

- 68 % Großhandel
- 20 % Einzelhandel
- 12 % Andere Geschäftssegmente

### 2010 Umsatzerlöse nach Regionen

10

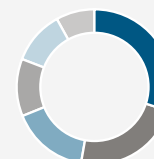

- 30 % Westeuropa
- 23 % Nordamerika
- 16 % Andere Asiatische Märkte
- 12 % Europäische Schwellenländer
- 11 % Lateinamerika
- 8 % China

## Umsatzzuwächse in allen Produktbereichen

Im Geschäftsjahr 2010 stieg der Konzernumsatz auf währungsbereinigter Basis in sämtlichen Produktbereichen. Der währungsbereinigte Umsatz im Bereich Schuhe wuchs in diesem Zeitraum um 9 %. Grund für diese Entwicklung war ein Umsatzzuwachs in den Kategorien Fußball, Running und Outdoor. Der Umsatz im Bereich Bekleidung erhöhte sich aufgrund von Umsatzzuwächsen in den Kategorien Fußball, Running und Basketball auf währungsbereinigter Basis um 9 %. Die Umsatzerlöse im Bereich Zubehör legten auf währungsbereinigter Basis im Vorjahresvergleich um 5 % zu. Verantwortlich hierfür waren in erster Linie deutliche Umsatzzuwächse in der Kategorie Fußball. Währungseffekte wirkten sich positiv auf die Umsatzerlöse in Euro aus » siehe 13.

## Umsatzkosten steigen

Umsatzkosten werden als der Betrag definiert, den wir Dritten für Aufwendungen im Zusammenhang mit der Herstellung und Lieferung unserer Produkte zahlen. Eigene Produktionsaufwendungen sind ebenfalls in den Umsatzkosten des Konzerns enthalten. Diese Aufwendungen machen allerdings nur einen sehr geringen Anteil der Gesamtumsatzkosten aus. Im Jahr 2010 lagen die Umsatzkosten mit 6,260 Mrd. € um 10 % über dem Vorjahresniveau (2009: 5,669 Mrd. €). Diese Entwicklung war hauptsächlich auf höhere Beschaffungsvolumina bei Schuhen, Bekleidung und Zubehör zurückzuführen. Optimierte Beschaffungsprozesse sowie reduzierte Beschaffungskosten infolge niedrigerer Rohstoffpreise zum Zeitpunkt der Produktbeschaffung wirkten sich positiv auf die Umsatzkosten aus.

## Umsatzerlöse nach Regionen

in Mio. €

11

|                             | 2010          | 2009          | Veränderung | Veränderung<br>(währungsneutral) |
|-----------------------------|---------------|---------------|-------------|----------------------------------|
| Westeuropa                  | 3.543         | 3.261         | 9 %         | 7 %                              |
| Europäische Schwellenländer | 1.385         | 1.122         | 23 %        | 16 %                             |
| Nordamerika                 | 2.805         | 2.362         | 19 %        | 12 %                             |
| China                       | 1.000         | 967           | 3 %         | -2 %                             |
| Andere Asiatische Märkte    | 1.972         | 1.647         | 20 %        | 6 %                              |
| Lateinamerika               | 1.285         | 1.006         | 28 %        | 14 %                             |
| <b>Gesamt<sup>1)</sup></b>  | <b>11.990</b> | <b>10.381</b> | <b>15 %</b> | <b>9 %</b>                       |

1) Beinhaltet Zentralbereiche/Konsolidierung.

## 2010 Umsatzerlöse nach Produktbereichen

12

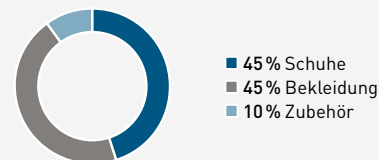

## Umsatzerlöse nach Produktbereichen

in Mio. €

13

|                            | 2010          | 2009          | Veränderung | Veränderung<br>(währungsneutral) |
|----------------------------|---------------|---------------|-------------|----------------------------------|
| Schuhe                     | 5.389         | 4.642         | 16 %        | 9 %                              |
| Bekleidung                 | 5.380         | 4.663         | 15 %        | 9 %                              |
| Zubehör                    | 1.221         | 1.076         | 13 %        | 5 %                              |
| <b>Gesamt<sup>1)</sup></b> | <b>11.990</b> | <b>10.381</b> | <b>15 %</b> | <b>9 %</b>                       |

1) Bei Zahlen können Rundungsdifferenzen auftreten.

### Bruttomarge des Konzerns verbessert sich um 2,4 Prozentpunkte

Die Bruttomarge des Konzerns verbesserte sich im Geschäftsjahr 2010 um 2,4 Prozentpunkte auf 47,8 % (2009: 45,4 %) » siehe 15. Verantwortlich für diese Entwicklung waren in erster Linie reduzierte Beschaffungskosten, ein geringerer Anteil von Lagerräumungsverkäufen und ein höherer Anteil von Umsätzen im Einzelhandelsegment, die eine höhere Marge erzielen. Infolgedessen stieg das Bruttoergebnis des Konzerns im Jahr 2010 um 22 % auf 5,730 Mrd. € (2009: 4,712 Mrd. €)

» siehe 14.

### Höhere Lizenz- und Provisionserträge

Die Lizenz- und Provisionserträge des adidas Konzerns nahmen 2010 um 16 % auf 100 Mio. € zu (2009: 86 Mio. €). Auf währungsbereinigter Basis stiegen die Lizenz- und Provisionserträge um 12 %. Grund hierfür waren vor allem höhere Lizenzumsätze. Neue Lizenzpartnerschaften wirkten sich ebenfalls positiv auf die Lizenz- und Provisionserträge des Konzerns aus.

### Anstieg der sonstigen betrieblichen Erträge um 10 %

Die sonstigen betrieblichen Erträge beinhalten Posten wie Erlöse aus Abgängen des Anlagevermögens sowie aus der Auflösung von Rückstellungen. Die sonstigen betrieblichen Erträge stiegen im Geschäftsjahr 2010 um 10 % auf 110 Mio. € (2009: 100 Mio. €). Hauptgründe hierfür waren die Beilegung eines Rechtsstreits und die Veräußerung eines Markenzeichens.

### Sonstige betriebliche Aufwendungen im Verhältnis zum Umsatz um 0,2 Prozentpunkte gesunken

Die sonstigen betrieblichen Aufwendungen einschließlich Abschreibungen beinhalten Posten wie das Sales Working Budget, das Marketing Working Budget und die Betriebsgemeinkosten. In Euro stiegen die sonstigen betrieblichen Aufwendungen im Jahr 2010 um 15 % auf 5,046 Mrd. € (2009: 4,390 Mrd. €). Verantwortlich hierfür waren der Ausbau der eigenen Einzelhandelsaktivitäten des Konzerns sowie höhere Marketingaufwendungen » siehe 17. Allerdings verringerten sich die sonstigen betrieblichen Aufwendungen im Verhältnis zum Umsatz im Jahr 2010 um 0,2 Prozentpunkte auf 42,1 % (2009: 42,3 %) » siehe 18.

### Anstieg des Sales Working Budgets im Verhältnis zum Umsatz

Das Sales Working Budget beinhaltet Aufwendungen zur Unterstützung des Durchverkaufs. Die Aufwendungen stehen im Zusammenhang mit Marketing- und Promotion-Initiativen am Point-of-Sale sowie mit Geschäftsausstattungen und -einrichtungen. Da die Aufwendungen des Sales Working Budgets jeweils bestimmte Vertriebskanäle betreffen, werden sie den operativen Segmenten des Konzerns zugeordnet. Absolut gesehen nahmen die Aufwendungen des Sales Working Budgets im Jahr 2010 um 28 % auf 308 Mio. € zu (2009: 241 Mio. €). Im Verhältnis zum Umsatz erhöhte sich das Sales Working Budget im Jahr 2010 um 0,3 Prozentpunkte auf 2,6 % (2009: 2,3 %) » siehe 19. Hauptgrund hierfür war die Eröffnung neuer Stores im Zusammenhang mit dem Ausbau der eigenen Einzelhandelsaktivitäten. Ferner trugen höhere Aufwendungen am Point-of-Sale im Zusammenhang mit der FIFA Fußball-Weltmeisterschaft 2010 sowie neue Produkteinführungen bei der Marke Reebok zu dieser Entwicklung bei.

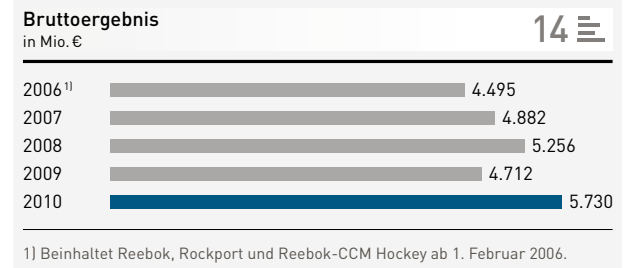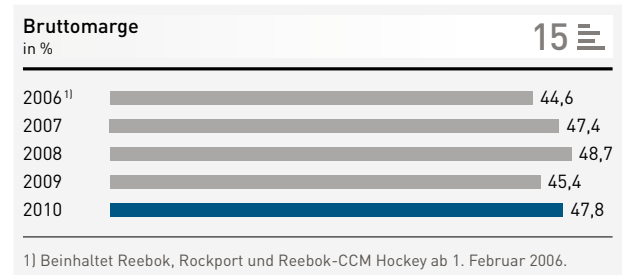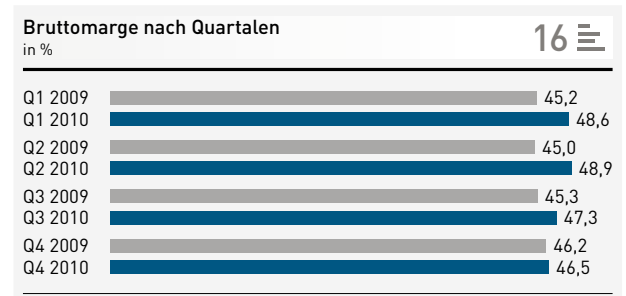



### Marketing Working Budget im Verhältnis zum Umsatz gestiegen

Das Marketing Working Budget beinhaltet Posten wie Aufwendungen für Promotion-Partnerschaften, Werbung und Öffentlichkeitsarbeit. Diese Maßnahmen tragen dazu bei, unsere Markenstärke zu unterstützen. Da die Aufwendungen des Marketing Working Budgets keine bestimmten Vertriebskanäle betreffen, werden sie den Segmenten nicht zugeordnet. Absolut gesehen stiegen die Aufwendungen des Marketing Working Budgets im Jahr 2010 um 25 % auf 1,288 Mrd. € (2009: 1,028 Mrd. €). Im Verhältnis zum Umsatz lag das Marketing Working Budget mit 10,7 % um 0,8 Prozentpunkte über dem Vorjahresniveau (2009: 9,9 %) » siehe 20. Dieser Anstieg stand in erster Linie im Zusammenhang mit höheren Aufwendungen zur Unterstützung der Präsenz von adidas als offizieller Sponsor bei der FIFA Fußball-Weltmeisterschaft 2010. Darüber hinaus trugen verstärkte Promotion- und Marketinginitiativen für neue Produktkonzepte der Marke Reebok zu dieser Entwicklung bei.

### Betriebsgemeinkosten im Verhältnis zum Umsatz gehen zurück

Die Betriebsgemeinkosten des Konzerns enthalten Gemeinkosten im Zusammenhang mit Marketing, Vertrieb, Logistik, Forschung und Entwicklung sowie mit zentralen Verwaltungsfunktionen. Personalaufwendungen machen fast die Hälfte der Gemeinkosten aus. Absolut gesehen stiegen die Betriebsgemeinkosten im Geschäftsjahr 2010 um 11 % auf 3,450 Mrd. € (2009: 3,121 Mrd. €). Dies war eine Folge von verstärkten eigenen Einzelhandelsaktivitäten des Konzerns sowie von höheren Logistik- und Lagerhaltungskosten. Aufgrund der zunehmenden Expertise im Einzelhandelsbereich sowie der Verbesserungen im operativen Geschäft verringerten sich jedoch die Betriebsgemeinkosten im Verhältnis zum Umsatz um 1,3 Prozentpunkte auf 28,8 % (2009: 30,1 %).

### Anzahl der Mitarbeiter im Konzern steigt um 7 %

Ende Dezember 2010 beschäftigte der Konzern 42.541 Mitarbeiter. Das entspricht einem Anstieg um 7 % gegenüber dem Vorjahresstand von 39.596. Verantwortlich für diese Entwicklung war vor allem die gestiegene Anzahl eigener Einzelhandelsgeschäfte des Konzerns, die zu Neueinstellungen führte. Gemessen in Vollzeit-Äquivalenten stieg die Mitarbeiteranzahl zum Ende des Jahres 2010 um 6 % auf 36.444 (2009: 34.437).

### Sonstige betriebliche Aufwendungen

in Mio. €

17

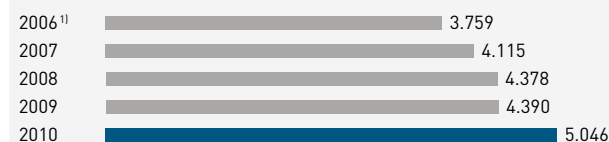

1) Beinhaltet Reebok, Rockport und Reebok-CCM Hockey ab 1. Februar 2006.

### Sonstige betriebliche Aufwendungen

in % der Umsatzerlöse

18

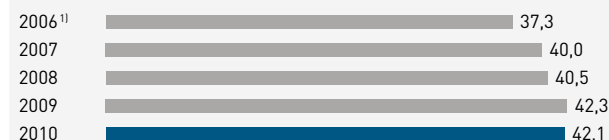

1) Beinhaltet Reebok, Rockport und Reebok-CCM Hockey ab 1. Februar 2006.

### Sales Working Budget

in % der Umsatzerlöse

19

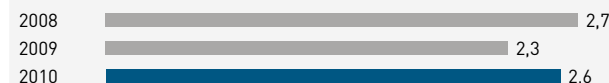

### Marketing Working Budget

in % der Umsatzerlöse

20

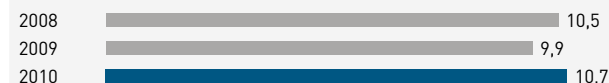

## EBITDA verbessert sich um 49 %

Der Konzerngewinn vor Zinsen, Steuern und Abschreibungen, sowie Wertminderungen/-aufholungen auf Sachanlagen und immaterielle Vermögenswerte (EBITDA) stieg im Geschäftsjahr 2010 um 49 % auf 1,159 Mrd. € (2009: 780 Mio. €) » siehe 22. Abschreibungen auf materielle und immaterielle Vermögenswerte mit bestimmter Nutzungsdauer gingen um 12 % auf 263 Mio. € zurück (2009: 299 Mio. €). Diese Entwicklung war vor allem auf niedrigere Wertminderungskosten im Jahr 2010 im Vergleich zum Vorjahr sowie auf den Rückgang der Investitionen im Jahr 2009 zurückzuführen. Gemäß den IFRS werden immaterielle Vermögenswerte mit unbestimmter Nutzungsdauer (Geschäfts- oder Firmenwerte sowie Markenrechte) einmal jährlich sowie zusätzlich bei Anzeichen einer potenziellen Wertminderung auf Wertberichtigungsbedarf überprüft. Im Jahr 2010, wie auch im Jahr 2009, war diesbezüglich keine Wertminderung vorzunehmen.

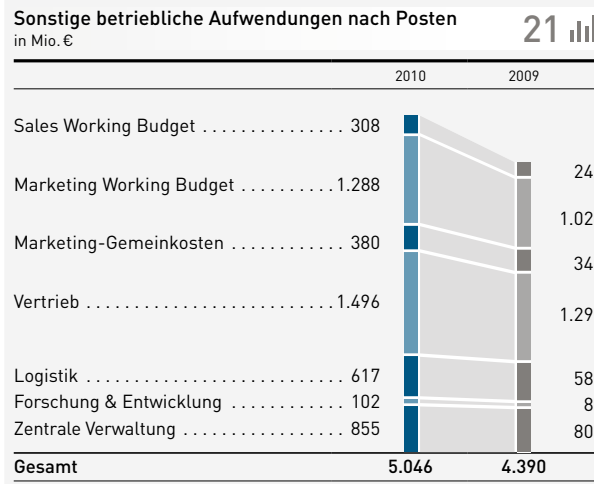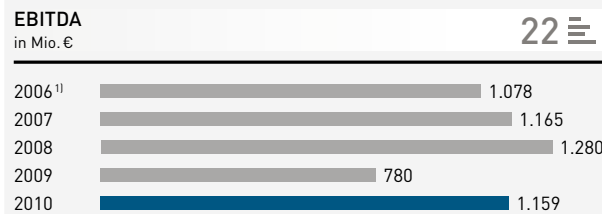

1) Beinhaltet Reebok, Rockport und Reebok-CCM Hockey ab 1. Februar 2006.

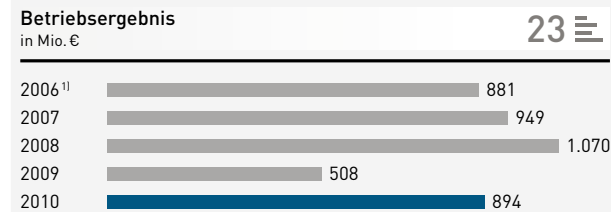

1) Beinhaltet Reebok, Rockport und Reebok-CCM Hockey ab 1. Februar 2006.

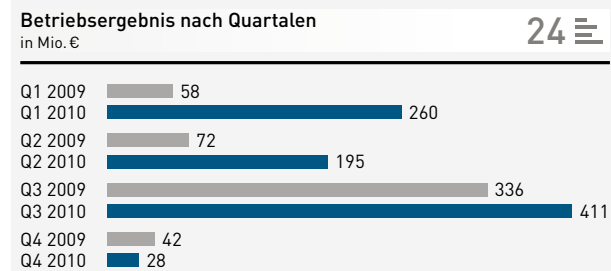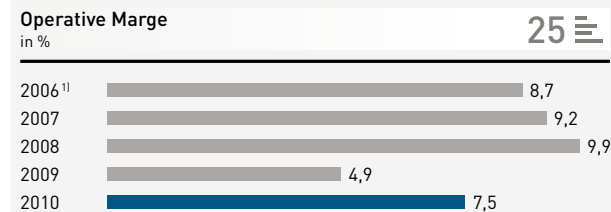

1) Beinhaltet Reebok, Rockport und Reebok-CCM Hockey ab 1. Februar 2006.

### Operative Marge um 2,6 Prozentpunkte über Vorjahr

Das Betriebsergebnis des Konzerns stieg im Jahr 2010 um 76 % auf 894 Mio. € (2009: 508 Mio. €) » siehe 23. Infolgedessen verbesserte sich die operative Marge des Konzerns 2010 um 2,6 Prozentpunkte auf 7,5 % (2009: 4,9 %) » siehe 25. Die Verbesserung der operativen Marge war in erster Linie auf die höhere Bruttomarge sowie auf niedrigere sonstige betriebliche Aufwendungen im Verhältnis zum Umsatz zurückzuführen.

### Finanzerträge um 28 % gestiegen

Die Finanzerträge stiegen 2010 um 28 % auf 25 Mio. € (2009: 19 Mio. €). Hauptgründe hierfür waren höhere Zinserträge sowie positive Währungseffekte.

### Finanzaufwendungen gehen um 34 % zurück

Die Finanzaufwendungen verringerten sich im Geschäftsjahr 2010 um 34 % auf 113 Mio. € (2009: 169 Mio. €) » siehe 26. Zu diesem Rückgang trugen der Wegfall negativer Währungseffekte aus dem Vorjahr sowie niedrigere Zinsaufwendungen bei.

### Gewinn vor Steuern im Verhältnis zum Umsatz steigt um 3,3 Prozentpunkte

Der Konzerngewinn vor Steuern erhöhte sich um 125 % auf 806 Mio. € (2009: 358 Mio. €) » siehe 27. Der Gewinn vor Steuern im Verhältnis zum Umsatz verbesserte sich im Geschäftsjahr 2010 um 3,3 Prozentpunkte auf 6,7 % (2009: 3,5 %). Diese Entwicklung war vor allem auf die Verbesserung der operativen Marge sowie auf niedrigere Finanzaufwendungen zurückzuführen.

### Auf Anteilseigner entfallender Gewinn mehr als verdoppelt

Der auf Anteilseigner entfallende Konzerngewinn stieg im Geschäftsjahr 2010 auf 567 Mio. € (2009: 245 Mio. €) » siehe 29. Dies bedeutet einen Anstieg um 131 % gegenüber dem Vorjahreswert. Hauptgrund für diese Entwicklung war der höhere Gewinn vor Steuern. Die Steuerquote des Konzerns verringerte sich 2010 – vor allem aufgrund nicht wiederkehrender Aufwendungen des Vorjahres im Zusammenhang mit Wertberichtigungen auf latente Steueransprüche – um 2,0 Prozentpunkte auf 29,5 % (2009: 31,5 %).

### Finanzaufwendungen

in Mio. €

26

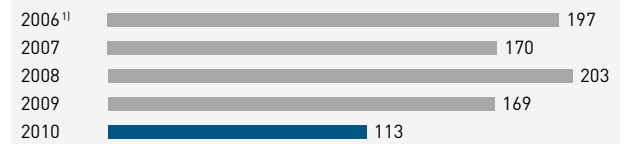

1) Beinhaltet Reebok, Rockport und Reebok-CCM Hockey ab 1. Februar 2006.

### Gewinn vor Steuern

in Mio. €

27

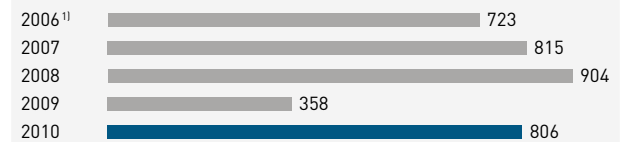

1) Beinhaltet Reebok, Rockport und Reebok-CCM Hockey ab 1. Februar 2006.

### Gewinn vor Steuern nach Quartalen

in Mio. €

28

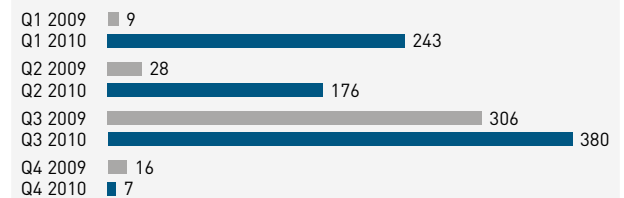



### Auf nicht beherrschende Anteile entfallender Gewinn steigt

Der auf nicht beherrschende Anteile entfallende Gewinn erhöhte sich auf 1 Mio. € (2009: 0 Mio. €). Der Anstieg beruht hauptsächlich auf dem höheren Gewinn bei unserem Joint Venture in Israel.

### Ergebnis je Aktie erreicht 2,71 €

Infolge der vollständigen Wandlung der Wandelanleihe des Konzerns im vierten Quartal 2009 bestehen für den Konzern keine verwässernden potenziellen Aktien mehr. Deshalb ist das verwässerte Ergebnis je Aktie identisch mit dem unverwässerten Ergebnis je Aktie. Im Geschäftsjahr 2010 betrug das unverwässerte und verwässerte Ergebnis je Aktie 2,71 € » siehe 31. Im Vorjahreszeitraum betrug das unverwässerte Ergebnis je Aktie 1,25 €, das verwässerte Ergebnis je Aktie 1,22 €. Die gewichtete durchschnittliche Anzahl der Aktien für die Berechnung des Ergebnisses je Aktie belief sich 2010 auf 209.216.186. Im Vergleichszeitraum 2009 belief sich die Anzahl der Aktien für die Berechnung des unverwässerten Ergebnisses je Aktie auf 196.220.166 und für die Berechnung des verwässerten Ergebnisses je Aktie auf 209.238.099.

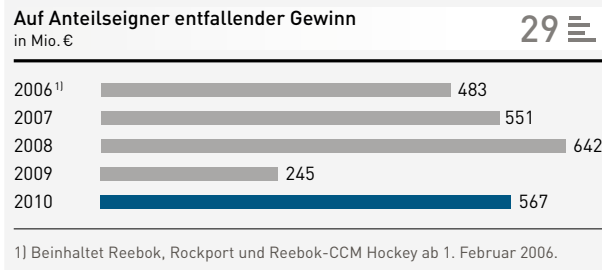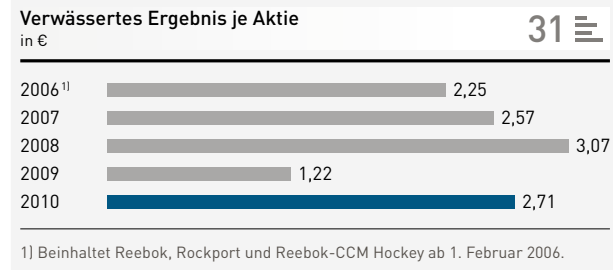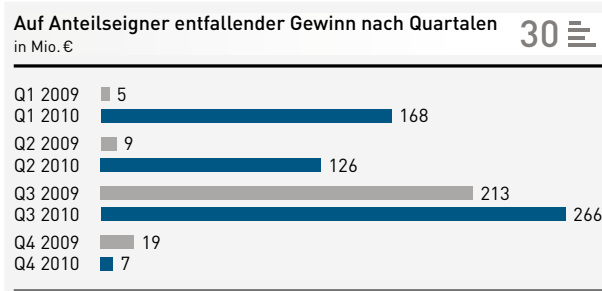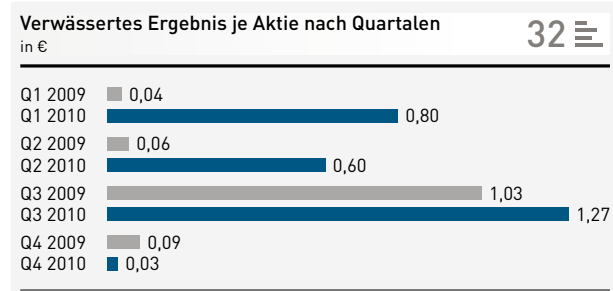

## Bilanz und Kapitalflussrechnung

### Veränderungen der Rechnungslegungsgrundsätze

Der Konzernabschluss wird gemäß den International Financial Reporting Standards (IFRS), wie sie in der EU anzuwenden sind, erstellt. Im Jahr 2010 gab es Änderungen in den IFRS-Vorschriften mit entsprechenden Änderungen in den Konsolidierungs- und Rechnungslegungsgrundsätzen des Konzerns » siehe Erläuterung 1, S. 188. Allerdings hatten diese Veränderungen keine wesentlichen Auswirkungen auf den Konzernabschluss im Berichtszeitraum.

### Bilanzsumme steigt um 20 %

Zum Ende des Geschäftsjahres 2010 stieg die Bilanzsumme gegenüber dem Vorjahr um 20 % auf 10,618 Mrd. € (2009: 8,875 Mrd. €) » siehe 35. Dies lag in erster Linie an einem Anstieg der kurzfristigen Vermögenswerte. Höhere langfristige Vermögenswerte trugen ebenfalls zu dieser Entwicklung bei.

### Vorräte des Konzerns nehmen um 44 % zu

Die Vorräte des Konzerns lagen zum Ende des Jahres 2010 mit 2,119 Mrd. € um 44 % über dem Vorjahresniveau (2009: 1,471 Mrd. €) » siehe Erläuterung 8, S. 197. Auf währungsbereinigter Basis stiegen die Vorräte um 34 %. Dies spiegelt unsere Erwartung eines fortgesetzten Wachstums für die kommenden Quartale wider » siehe 36.

### Forderungen aus Lieferungen und Leistungen um 17 % über Vorjahr

Die Forderungen aus Lieferungen und Leistungen des Konzerns stiegen zum Ende des Geschäftsjahres 2010 infolge des Umsatzwachstums um 17 % auf 1,667 Mrd. € (2009: 1,429 Mrd. €) » siehe Erläuterung 6, S. 196. Währungsbereinigt nahmen die Forderungen aus Lieferungen und Leistungen um 7 % zu. Diese Entwicklung liegt unter dem währungsbereinigten Umsatzwachstum des Konzerns von 9 % im vierten Quartal 2010. Darin spiegelt sich die konsequente Durchsetzung der Zahlungsmodalitäten im Konzern und die gezielten Maßnahmen zum Forderungseinzug in allen Segmenten wider » siehe 37.

### Anstieg der sonstigen kurzfristigen finanziellen Vermögenswerte um 23 %

Die sonstigen kurzfristigen finanziellen Vermögenswerte erhöhten sich zum Ende des Geschäftsjahres 2010 um 23 % auf 197 Mio. € (2009: 160 Mio. €) » siehe Erläuterung 7, S. 196. Diese Entwicklung war hauptsächlich auf gestiegene beizulegende Zeitwerte von Finanzinstrumenten zurückzuführen.

### Sonstige kurzfristige Vermögenswerte steigen um 8 %

Die sonstigen kurzfristigen Vermögenswerte lagen zum Ende des Geschäftsjahres 2010 mit 390 Mio. € um 8 % über dem Vorjahresniveau (2009: 360 Mio. €). Hauptgrund hierfür waren höhere Steuererstattungsansprüche ohne Ertragsteuern » siehe Erläuterung 9, S. 197.

### Zur Veräußerung gehaltene Vermögenswerte verringern sich um 63 %

Zum Ende Dezember 2010 gingen die zur Veräußerung gehaltenen Vermögenswerte um 63 % auf 47 Mio. € zurück (2009: 126 Mio. €), da einige Vermögenswerte, deren Verkauf in absehbarer Zeit als nicht wahrscheinlich erachtet wird, wieder in das Anlagevermögen umgegliedert wurden » siehe Erläuterung 10, S. 197. Die zur Veräußerung gehaltenen Vermögenswerte stehen vor allem im Zusammenhang mit dem geplanten Verkauf von Grundstücken und Gebäuden in Herzogenaurach sowie eines Lagerhauses in den Niederlanden.

### Anlagevermögen wächst um 7 %

Das Anlagevermögen stieg zum Ende des Jahres 2010 um 7 % auf 4,076 Mrd. € (2009: 3,794 Mrd. €). Das Anlagevermögen beinhaltet Sachanlagen, Geschäfts- oder Firmenwerte, Markenrechte und sonstige immaterielle Vermögenswerte sowie langfristige finanzielle Vermögenswerte. Zugänge in Höhe von 271 Mio. € waren größtenteils auf den weiteren Ausbau unserer eigenen Einzelhandelsaktivitäten, Investitionen in die IT-Infrastruktur des Konzerns sowie die Weiterentwicklung unserer Konzernzentrale in Herzogenaurach zurückzuführen. Außerdem wurde Anlagevermögen in Höhe von 76 Mio. € netto von zur Veräußerung gehaltenen Vermögenswerten umgebucht. Währungseffekte in Höhe von 216 Mio. € auf Anlagevermögen in Nicht-Euro-Währungen wirkten sich ebenfalls positiv auf diese Entwicklung aus. Den Zugängen standen Abschreibungen in Höhe von 263 Mio. € und Abgänge in Höhe von 17 Mio. € gegenüber.

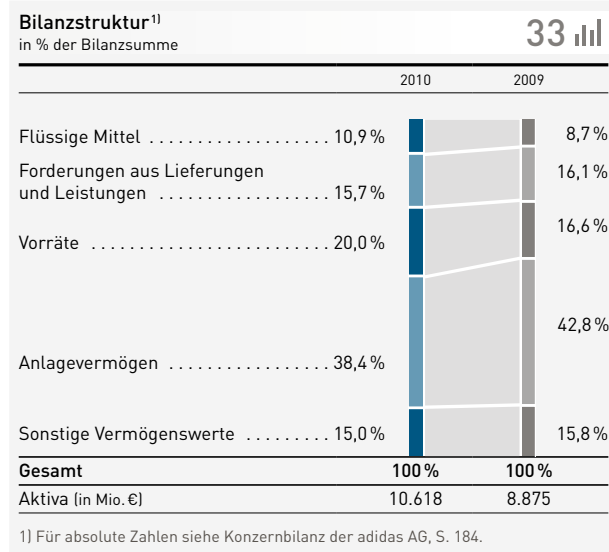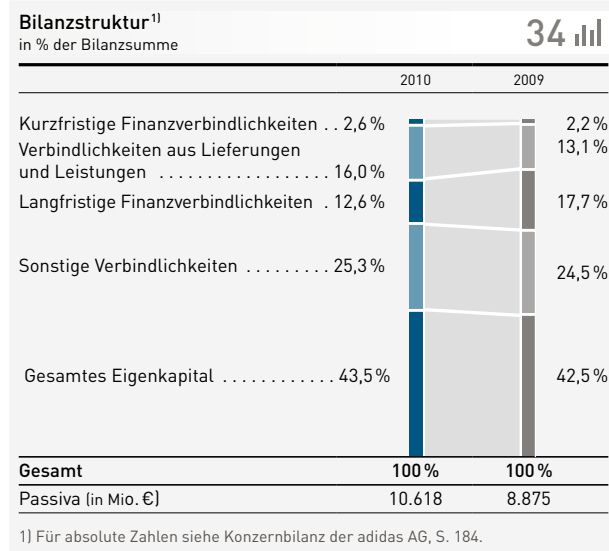

### Sonstige langfristige Vermögenswerte gehen um 20 % zurück

Die sonstigen langfristigen Vermögenswerte lagen zum Ende des Geschäftsjahres 2010 mit 100 Mio. € um 20 % unter dem Vorjahresniveau (2009: 126 Mio. €). Hauptgrund hierfür waren niedrigere Vorauszahlungen für Promotion-Verträge

» siehe Erläuterung 16, S. 200.

### Verbindlichkeiten aus Lieferungen und Leistungen nehmen um 45 % zu

Zum Ende des Jahres 2010 stiegen die Verbindlichkeiten aus Lieferungen und Leistungen um 45 % auf 1,694 Mrd. € (2009: 1,166 Mrd. €) » siehe 38. Auf währungsbereinigter Basis erhöhten sich die Verbindlichkeiten aus Lieferungen und Leistungen infolge gestiegener Vorräte im vierten Quartal um 36 %.

### Anstieg der sonstigen kurzfristigen finanziellen Verbindlichkeiten um 21 %

Die sonstigen kurzfristigen finanziellen Verbindlichkeiten lagen mit 123 Mio. € um 21 % über dem Vorjahresniveau (2009: 101 Mio. €). Dieser Anstieg resultierte in erster Linie aus höheren negativen beizulegenden Zeitwerten von Finanzinstrumenten » siehe Erläuterung 18, S. 200.

### Sonstige kurzfristige Rückstellungen steigen um 47 %

Die sonstigen kurzfristigen Rückstellungen erhöhten sich zum Ende des Jahres 2010 um 47 % auf 470 Mio. € (2009: 320 Mio. €). Dies war vor allem auf einen Anstieg der Rückstellungen für Rücklieferungen, Gutschriften und Gewährleistungsverpflichtungen zurückzuführen » siehe Erläuterung 19, S. 201.

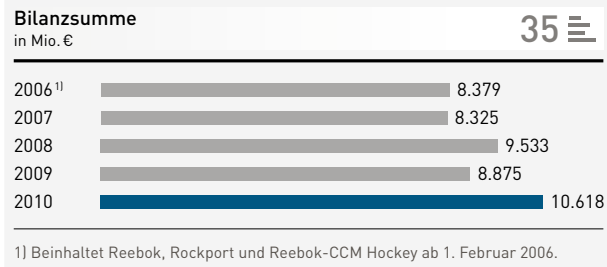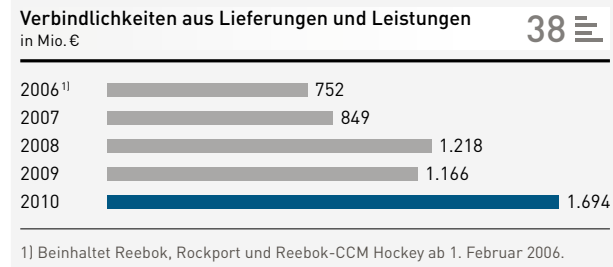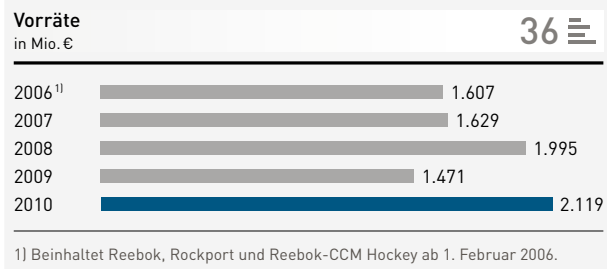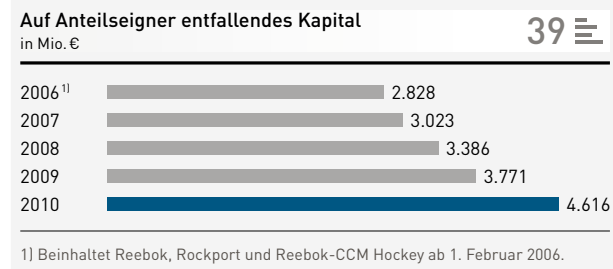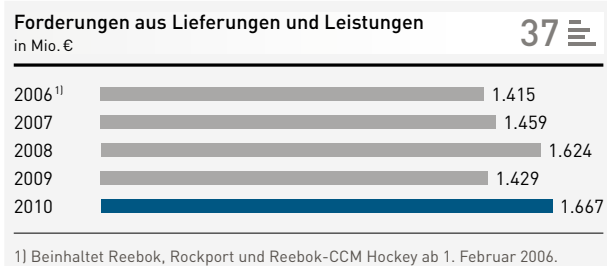



### Kurzfristige abgegrenzte Schulden steigen um 35 %

Die kurzfristigen abgegrenzten Schulden erhöhten sich zum Ende des Geschäftsjahres 2010 um 35 % auf 842 Mio. € (2009: 625 Mio. €). Dies war vor allem auf einen Anstieg der Rückstellungen für noch nicht fakturierte Lieferungen und Leistungen zurückzuführen » siehe Erläuterung 20, S. 201.

### Sonstige kurzfristige Verbindlichkeiten um 4 % über Vorjahresniveau

Die sonstigen kurzfristigen Verbindlichkeiten stiegen zum Ende des Geschäftsjahres 2010 um 4 % auf 241 Mio. € (2009: 232 Mio. €). Verantwortlich hierfür war in erster Linie ein Anstieg von Kundenguthaben » siehe Erläuterung 21, S. 202.

### Auf Anteilseigner entfallendes Kapital wächst infolge der Gewinnsteigerung

Das auf Anteilseigner entfallende Kapital erhöhte sich zum Ende Dezember 2010 um 22 % auf 4,616 Mrd. € (2009: 3,771 Mrd. €) » siehe 39. Hauptgrund hierfür war der im Berichtszeitraum erwirtschaftete Gewinn. Währungseffekte in Höhe von 330 Mio. € wirkten sich positiv auf diese Entwicklung aus. Der positive Effekt wurde jedoch teilweise durch die im Berichtszeitraum ausgezahlte Dividende in Höhe von 73 Mio. € aufgehoben » siehe Erläuterung 25, S. 204.

### Aufwendungen im Zusammenhang mit außerbilanziellen Posten

Die bedeutendsten außerbilanziellen Verpflichtungen des Konzerns sind operative Leasingverträge, die sich auf Einzelhandelsgeschäfte, Büroräumlichkeiten, Lagerhäuser und Einrichtungen beziehen.

Der Konzern hat verschiedene operative Leasingverträge abgeschlossen anstatt Immobilien zu erwerben, um das Risiko aus Wertschwankungen von Immobilien zu reduzieren. Die Mietausgaben stiegen im Jahr 2010 vor allem aufgrund des weiteren Ausbaus der eigenen Einzelhandelsaktivitäten des Konzerns um 13 % auf 544 Mio. € (2009: 480 Mio. €) » siehe Erläuterung 27, S. 207.

### Cashflow spiegelt verbesserte Profitabilität des Konzerns wider

Im Geschäftsjahr 2010 betrug der Nettomittelzufluss aus der betrieblichen Tätigkeit 894 Mio. € (2009: 1,198 Mrd. €). Der niedrigere Mittelzufluss aus der operativen Geschäftstätigkeit im Vergleich zum Vorjahr stand vor allem im Zusammenhang mit dem höheren Bedarf an kurzfristigem Betriebskapital. Dieser Effekt wurde zum Teil durch die verbesserte Profitabilität des Konzerns kompensiert. Der Nettomittelabfluss aus der Investitionstätigkeit in Höhe von 330 Mio. € (2009: 162 Mio. €) bezog sich vor allem auf Ausgaben für Sachanlagen wie z. B. Investitionen in die Einrichtung und Ausstattung von Geschäften in unserem Einzelhandelssegment, neue Bürogebäude und IT-Systeme sowie den Erwerb von kurzfristigen Finanzanlagen. Der Nettomittelabfluss aus der Finanzierungstätigkeit belief sich auf insgesamt 238 Mio. € (2009: 512 Mio. €).

Der Mittelabfluss aus der Finanzierungstätigkeit stand im Zusammenhang mit der Rückzahlung kurzfristiger Finanzverbindlichkeiten in Höhe von insgesamt 198 Mio. € und Dividendenzahlungen in Höhe von 73 Mio. €. Diese Entwicklung wurde durch einen Anstieg der langfristigen Finanzverbindlichkeiten um 33 Mio. € zum Teil ausgeglichen. Währungseffekte in Höhe von 55 Mio. € wirkten sich positiv auf die Liquidität des Konzerns im Jahr 2010 aus (2009: 7 Mio. €). Infolgedessen stiegen die flüssigen Mittel des Konzerns zum Ende des Geschäftsjahres 2010 um 381 Mio. € auf 1,156 Mrd. € (31. Dezember 2009: 775 Mio. €) » siehe 40.

### Anstieg der Investitionen um 12 %

Investitionen sind die gesamten finanziellen Mittel, die für die Anschaffung von materiellen und immateriellen Vermögenswerten verwendet werden. Die Investitionen des Konzerns stiegen im Geschäftsjahr 2010 um 12 % auf 269 Mio. € (2009: 240 Mio. €). Auf das Einzelhandelssegment entfielen 23 % der Investitionen des Konzerns (2009: 30 %). Investitionen standen vor allem im Zusammenhang mit der Eröffnung weiterer Geschäfte der Marken adidas und Reebok. Investitionen im Großhandelssegment machten 12 % der Gesamtinvestitionen aus (2009: 10 %). Auf die Anderen Geschäftssegmente entfielen 10 % der gesamten Investitionen (2009: 6 %). Die verbleibenden 55 % der gesamten Investitionen des Konzerns wurden im Bereich Zentralbereiche/Konsolidierung erfasst (2009: 54 %). Diese standen hauptsächlich im Zusammenhang mit Investitionen in neue Bürogebäude sowie in IT-Infrastrukturmaßnahmen » siehe 41 und Global Operations, S. 106.

### Veränderung der flüssigen Mittel

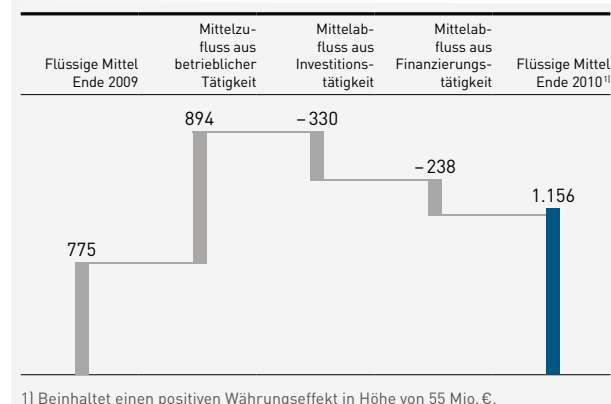

### 2010 Investitionen nach Segmenten

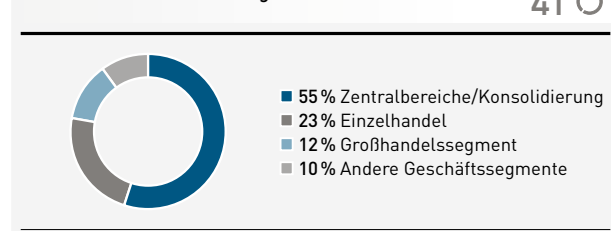

### 2010 Investitionen nach Bereichen

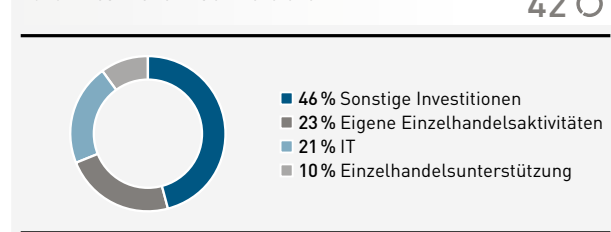

## Angaben nach § 315 Abs. 4 HGB

### Zusammensetzung des gezeichneten Kapitals

Das Grundkapital der adidas AG beläuft sich auf 209.216.186 € (Stand: 31. Dezember 2010), eingeteilt in ebenso viele nennwertlose, auf den Namen lautende Stückaktien, die jeweils mit einem Euro am Grundkapital beteiligt sind („Aktien“) » siehe Erläuterung 25, S. 204. Ein Anspruch der Aktionäre auf Verbrie- fung ist gemäß § 4 Abs. 8 der Satzung grundsätzlich ausgeschlossen. Jede Aktie gewährt in der Hauptversammlung eine Stimme. Mit allen Aktien sind die gleichen Rechte und Pflichten verbunden.

In den USA haben wir American Depositary Receipts (ADRs) begeben. ADRs sind Hinterlegungsscheine nicht-amerikanischer Aktien, die an den US-Börsen anstelle der Originalaktien gehandelt werden. Zwei ADRs entsprechen jeweils einer Aktie.

### Beschränkungen, die die Stimmrechte oder Übertragung von Aktien betreffen

Vertragliche Vereinbarungen mit der Gesellschaft oder sonstige Vereinbarungen, die die Stimmrechte oder die Übertragung von Aktien beschränken, sind uns nicht bekannt. Aufgrund des Code of Conduct der adidas AG bestehen jedoch für Vorstände beim Kauf und Verkauf von adidas AG Aktien gewisse Sperrfristen im Zusammenhang mit der Veröffentlichung unserer Quartals- und Jahresergebnisse. Entsprechende Sperrfristen gelten auch für Mitarbeiter, die Zugang zu noch nicht veröffentlichten Geschäftsergebnissen haben.

Beschränkungen des Stimmrechts können ferner aufgrund von Vorschriften des Aktiengesetzes, etwa gemäß § 136 AktG oder für eigene Aktien gemäß § 71b AktG, bestehen.

### Beteiligungen am Grundkapital, die 10 % der Stimmrechte überschreiten

Beteiligungen am Grundkapital der adidas AG, die 10 % der Stimmrechte überschreiten, sind der adidas AG nicht mitgeteilt worden und auch ansonsten nicht bekannt.

### Aktien mit Sonderrechten

Aktien mit Sonderrechten, insbesondere mit solchen, die Kontrollbefugnisse verleihen, bestehen nicht.

### Stimmrechtskontrolle bei Beteiligungen von Arbeitnehmern am Kapital

Arbeitnehmer, die adidas AG Aktien halten, üben ihre Kontrollrechte wie andere Aktionäre unmittelbar nach Maßgabe der gesetzlichen Vorschriften und der Satzung aus.

### Ernennung und Abberufung des Vorstands

Die Bestimmung der Anzahl der Vorstandsmitglieder, ihre Bestellung und Abberufung sowie die Bestellung des Vorstandsvorsitzenden erfolgen durch den Aufsichtsrat gemäß § 6 der Satzung und § 84 AktG. Der Vorstand der adidas AG besteht derzeit aus dem Vorstandsvorsitzenden sowie weiteren drei Mitgliedern » siehe Vorstand, S. 16. Vorstandsmitglieder dürfen für einen Zeitraum von höchstens fünf Jahren bestellt werden. Eine wiederholte Bestellung oder Verlängerung der Amtszeit für jeweils höchstens fünf Jahre ist zulässig.

Der Aufsichtsrat kann die Bestellung zum Vorstandsmitglied beziehungsweise zum Vorstandsvorsitzenden widerrufen, wenn ein wichtiger Grund, zum Beispiel eine grobe Pflichtverletzung oder ein Vertrauensentzug durch die Hauptversammlung, vorliegt. Da die adidas AG den Regelungen des Mitbestimmungsgesetzes (MitbestG) unterliegt, ist für die Bestellung von Mitgliedern des Vorstands, aber auch für deren Abberufung eine Mehrheit von mindestens zwei Dritteln der Aufsichtsratsmitglieder erforderlich (§ 31 MitbestG). Kommt eine solche Mehrheit bei der ersten Abstimmung im Aufsichtsrat nicht zustande, so kann auf Vorschlag des Vermittlungsausschusses die Bestellung beziehungsweise Abberufung in einer zweiten Abstimmung mit einfacher Mehrheit der Stimmen der Aufsichtsratsmitglieder erfolgen. Wird auch hierbei die erforderliche Mehrheit nicht erreicht, erfolgt eine dritte Abstimmung, die erneut einer einfachen Mehrheit bedarf, bei der dem Aufsichtsratsvorsitzenden jedoch zwei Stimmen zustehen. Fehlt ein erforderliches Vorstandsmitglied, hat darüber hinaus in dringenden Fällen das Amtsgericht Fürth gemäß § 85 Abs. 1 AktG auf Antrag eines Beteiligten ein Vorstandsmitglied zu bestellen.

### Satzungsänderungen

Die Satzung der adidas AG kann gemäß § 179 Abs. 1 Satz 1 AktG grundsätzlich nur durch einen Beschluss der Hauptversammlung geändert werden. Gemäß § 21 Abs. 3 der Satzung in Verbindung mit § 179 Abs. 2 Satz 2 AktG beschließt die Hauptversammlung der adidas AG über Satzungsänderungen grundsätzlich mit einfacher Mehrheit der abgegebenen Stimmen und mit einfacher Mehrheit des bei der Beschlussfassung vertretenen Grundkapitals. Soweit das Gesetz zwingend eine größere Stimm- oder Kapitalmehrheit vorschreibt, ist diese maßgeblich. Änderungen der Satzung, die lediglich die Fassung betreffen, kann jedoch der Aufsichtsrat gemäß § 179 Abs. 1 Satz 2 AktG in Verbindung mit § 10 Abs. 1 der Satzung beschließen.

### **Befugnisse des Vorstands hinsichtlich Aktienausgabe**

Die Befugnisse unseres Vorstands sind in §§ 76 ff. AktG in Verbindung mit § 7 der Satzung geregelt. So hat er insbesondere die Aufgabe, die adidas AG unter eigener Verantwortung zu leiten und die Gesellschaft gerichtlich und außergerichtlich zu vertreten.

Seine Befugnisse zur Ausgabe von Aktien ergeben sich aus § 4 der Satzung und den gesetzlichen Bestimmungen.

– Bis zum 21. Juni 2012 ist der Vorstand ermächtigt, das Grundkapital mit Zustimmung des Aufsichtsrats durch Ausgabe neuer Aktien gegen Sacheinlagen einmalig oder in Teilbeträgen mehrmalig um insgesamt bis zu 25.000.000 € zu erhöhen (Genehmigtes Kapital 2009/II).

– Bis zum 21. Juni 2014 ist der Vorstand ermächtigt, das Grundkapital mit Zustimmung des Aufsichtsrats durch Ausgabe neuer Aktien gegen Bareinlagen einmalig oder in Teilbeträgen mehrmalig um insgesamt bis zu 50.000.000 € zu erhöhen (Genehmigtes Kapital 2009/I).

– Bis zum 12. Juli 2015 ist der Vorstand ermächtigt, das Grundkapital mit Zustimmung des Aufsichtsrats durch Ausgabe neuer Aktien gegen Bareinlagen einmalig oder in Teilbeträgen mehrmalig um insgesamt bis zu 20.000.000 € zu erhöhen (Genehmigtes Kapital 2010).

Das Bezugsrecht unserer Aktionäre kann mit Zustimmung des Aufsichtsrats jeweils in bestimmten Fällen ausgeschlossen werden » siehe Erläuterung 25, S. 204.

– Der Vorstand ist gemäß Beschluss der Hauptversammlung vom 6. Mai 2010 ermächtigt, mit Zustimmung des Aufsichtsrats bis zum 5. Mai 2015 durch die Gesellschaft oder nachgeordnete Konzernunternehmen einmalig oder mehrmalig Options- und/oder Wandelanleihen im Gesamtnennbetrag von bis zu 1,5 Mrd. € mit oder ohne Laufzeitbeschränkung gegen Bareinlagen zu begeben und für solche, von nachgeordneten Konzernunternehmen der Gesellschaft begebene Schuldverschreibungen die Garantie zu übernehmen. Der Vorstand ist ferner ermächtigt, mit Zustimmung des Aufsichtsrats den Inhabern bzw. Gläubigern von Schuldverschreibungen Options- bzw. Wandlungsrechte auf insgesamt 36.000.000 Aktien nach näherer Maßgabe der jeweiligen Bedingungen der Schuldverschreibungen zu gewähren.

Hierzu ist das Grundkapital um bis zu 36.000.000 € bedingt erhöht worden (Bedingtes Kapital 2010). Der Vorstand ist ermächtigt, mit Zustimmung des Aufsichtsrats das Bezugsrecht der Aktionäre auf die Schuldverschreibungen für Spitzenbeträge und ferner soweit auszuschließen, wie dies zur Einräumung von Bezugsrechten, die Inhaber bzw. Gläubiger von bereits zuvor begebenen Schuldverschreibungen zustehen, erforderlich ist. Schließlich ist der Vorstand ermächtigt, mit Zustimmung des Aufsichtsrats das Bezugsrecht der Aktionäre auch dann auszuschließen, wenn der Ausgabepreis der Schuldverschreibungen ihren Marktwert nicht wesentlich unterschreitet und die Anzahl der auszugebenden Aktien 10 % des Grundkapitals nicht überschreitet. Auf die 10 %-Grenze ist in bestimmten weiteren Fällen die Ausgabe von neuen oder die Verwendung eigener Aktien anzurechnen. Von dieser Ermächtigung ist bislang kein Gebrauch gemacht worden.

### **Befugnisse des Vorstands hinsichtlich Aktienrückkauf**

Die Befugnisse zum Erwerb eigener Aktien ergeben sich aus §§ 71 ff. AktG sowie zum Bilanzstichtag aus der Ermächtigung durch die Hauptversammlung vom 6. Mai 2010.

– Der Vorstand ist bis zum 5. Mai 2015 befugt, eigene Aktien in Höhe von insgesamt bis zu 10 % des zum Zeitpunkt der Beschlussfassung bestehenden (oder ggf. des zum Zeitpunkt der Inanspruchnahme der Ermächtigung niedrigeren) Grundkapitals zu jedem zulässigen Zweck im Rahmen der gesetzlichen Beschränkungen zu erwerben. Die Ermächtigung kann durch die Gesellschaft, aber auch durch ihre Tochtergesellschaften oder für ihre oder deren Rechnung durch von der Gesellschaft oder von einer Tochtergesellschaft beauftragte Dritte ausgenutzt werden.

Der Rückkauf erfolgt über die Börse, mittels eines öffentlichen Kaufangebots, mittels einer öffentlichen Einladung zur Abgabe von Verkaufsangeboten oder durch die Einräumung von Andienungsrechten an die Aktionäre. Die Ermächtigung enthält auch Festlegungen über den höchsten und niedrigsten Gegenwert, der jeweils gewährt werden darf.



Die aufgrund dieser Ermächtigung erworbenen eigenen Aktien können insbesondere wie folgt verwendet werden:

- Sie können über die Börse, durch ein Angebot an alle Aktionäre oder gegen Barzahlung (begrenzt auf 10 % des Grundkapitals unter Berücksichtigung bestimmter Anrechnungen) durch anderweitigen Verkauf zu einem Preis, der den Börsenpreis von Aktien gleicher Ausstattung nicht wesentlich unterschreitet, veräußert werden.
- Sie können zum Zwecke des unmittelbaren oder mittelbaren Erwerbs von Unternehmen, Unternehmensteilen oder Beteiligungen an Unternehmen oder im Rahmen von Unternehmenszusammenschlüssen angeboten und übertragen werden.
- Sie können als Gegenleistung für den Erwerb von gewerblichen Schutzrechten oder Immaterialgüterrechten oder für den Erwerb daran bestehender Lizenzen, auch durch Tochtergesellschaften, angeboten und veräußert werden.
- Sie können zur Erfüllung von Options- bzw. Wandlungsrechten oder Options- bzw. Wandlungspflichten oder einem Aktienlieferungsrecht der Gesellschaft aus Options- und/oder Wandelanleihen, die die Gesellschaft oder eine unmittelbare oder mittelbare Tochtergesellschaft der Gesellschaft aufgrund einer Ermächtigung der Hauptversammlung begibt, verwendet werden.
- Sie können eingezogen werden, ohne dass die Einziehung oder deren Durchführung eines weiteren Hauptversammlungsbeschlusses bedarf.

Die Aktien können ferner als Vergütung in Form einer Aktientantieme an Mitglieder des Vorstands mit der Maßgabe übertragen werden, dass die Veräußerung durch den Vorstand erst nach einer Sperrfrist von mindestens drei Jahren ab Übertragung zulässig ist. Die Zuständigkeit hierfür liegt beim Aufsichtsrat.

Im Falle der Verwendung von Aktien zu den oben genannten Zwecken, mit Ausnahme der Einziehung von Aktien, ist das Bezugsrecht der Aktionäre ausgeschlossen.

Der Aufsichtsrat kann bestimmen, dass Maßnahmen aufgrund dieser Ermächtigung nur mit seiner Zustimmung oder der Zustimmung eines Aufsichtsratsausschusses vorgenommen werden dürfen.

– Der Vorstand ist unter der von der Hauptversammlung am 6. Mai 2010 beschlossenen Ermächtigung ferner befugt, den Aktienerwerb auch unter Einsatz von Eigenkapitalderivaten durchzuführen, die mit einem Finanzinstitut zu marktnahen Konditionen abgeschlossen werden. Die adidas AG kann auf physische Belieferung gerichtete Call-Optionen erwerben und/oder Put-Optionen verkaufen bzw. eine Kombination aus Call- und Put-Optionen oder andere Eigenkapitalderivate verwenden, wenn durch die Optionsbedingungen sichergestellt ist, dass diese nur mit Aktien beliefert werden, die ihrerseits unter Wahrung des Gleichbehandlungsgrundsatzes erworben wurden. Alle Aktienerwerbe unter Einsatz der wie oben ausgeführten Eigenkapitalderivate sind dabei auf Aktien im Umfang von höchstens 5 % des zum Zeitpunkt der Beschlussfassung der Hauptversammlung über diese Ermächtigung bestehenden (oder ggf. des zum Zeitpunkt der Inanspruchnahme der Ermächtigung niedrigeren) Grundkapitals beschränkt. Die Laufzeit der Optionen darf jeweils 18 Monate nicht überschreiten und muss ferner so gewählt sein, dass der Erwerb der Aktien in Ausübung der Optionen nicht nach dem 5. Mai 2015 erfolgt. Die Ermächtigung enthält auch Festlegungen über den höchsten und niedrigsten Gegenwert, der jeweils gewährt werden darf.

Für die Verwendung, den Bezugsrechtsausschluss und die Einziehung von Aktien, die unter Einsatz von Eigenkapitalderivaten erworben wurden, gelten die von der Hauptversammlung festgesetzten (oben dargestellten) allgemeinen Regeln entsprechend.

Die adidas AG besitzt zum 31. Dezember 2010 keine eigenen Aktien.

#### **Change of Control/Entschädigungsvereinbarungen**

Die wesentlichen Vereinbarungen der adidas AG, die unter der Bedingung eines Kontrollwechsels (Change of Control) stehen, betreffen Finanzierungsvereinbarungen. Für den Fall eines Kontrollwechsels sehen diese wie üblich für den Kreditgeber das Recht zur Kündigung und vorzeitigen Fälligstellung der Rückzahlung vor.

Mit den Mitgliedern des Vorstands sowie Arbeitnehmern bestehen keine Vereinbarungen über Entschädigungsleistungen für den Fall eines Übernahmeangebots.

## Treasury

### Finanzierungsgrundsätze des Konzerns

Das Hauptziel unserer Finanzierungsgrundsätze ist die Minimierung der Finanzaufwendungen des Konzerns bei gleichzeitiger Sicherstellung ausreichender Liquiditätsreserven, um jederzeit den Zahlungsverpflichtungen des Konzerns nachkommen zu können. Die betriebliche Geschäftstätigkeit unserer Konzernsegmente und der daraus resultierende Mittelzufluss stellen die Hauptliquiditätsquelle für unseren Konzern dar. Die Liquiditätsprognose erfolgt anhand eines mehrjährigen Finanz- und Liquiditätsplans auf rollierender monatlicher Basis. Alle Konzerngesellschaften im Konsolidierungskreis werden darin einbezogen. Unser „In-House Bank“-Konzept nutzt die überschüssigen Mittel der einzelnen Konzerngesellschaften, um den Finanzierungsbedarf anderer Gesellschaften abzudecken. Dadurch reduzieren wir den externen Finanzierungsbedarf und optimieren unsere Nettozinsaufwendungen. Durch den Ausgleich konzerninterner Transaktionen über konzerninterne Finanzkonten können wir externe Banktransaktionen und Bankgebühren reduzieren. Ein weiteres Ziel unserer Konzern-Treasury-Abteilung ist das effektive Management unserer Währungs- und Zinsrisiken.

### Treasury-System und Verantwortlichkeiten

Die Treasury-Grundsätze des Konzerns regeln die Vorgehensweise bei sämtlichen Treasury-relevanten Themen. Hierzu zählen die Bankpolitik und die Genehmigung von Bankbeziehungen, Finanzierungsvereinbarungen und Liquiditäts-/Anlagen-Management weltweit, das Management von Währungs- und Zinsrisiken sowie das Management konzerninterner Cashflows. Die Verantwortlichkeiten hierfür sind nach einem dreistufigen Ansatz strukturiert:

- Das Treasury-Komitee, das sich aus Mitgliedern des Vorstands und anderen Führungskräften zusammensetzt, entscheidet über die Treasury-Grundsätze des Konzerns und gibt die strategische Ausrichtung für das Management von Treasury-relevanten Themen vor. Alle wesentlichen Änderungen der Treasury-Grundsätze bedürfen der Zustimmung des Treasury-Komitees.
- Die Konzern-Treasury-Abteilung ist für spezifische zentralisierte Treasury-Transaktionen sowie für die Umsetzung unserer Treasury-Grundsätze weltweit verantwortlich.
- Auf Ebene der Tochtergesellschaften sind die Geschäftsführer sowie die Finanz-Controller vor Ort für das Management der Treasury-Angelegenheiten bei den jeweiligen Gesellschaften verantwortlich. Controlling-Funktionen auf Konzernebene stellen sicher, dass die Transaktionen der einzelnen Geschäftseinheiten den Treasury-Grundsätzen des Konzerns folgen.

### Zentralisierte Treasury-Funktion

Gemäß den Treasury-Grundsätzen des Konzerns werden alle weltweiten Kreditlinien direkt oder indirekt von unserer Konzern-Treasury-Abteilung verwaltet. Diese Linien werden zum Teil an Tochtergesellschaften weitergegeben und durch Garantien des Mutterunternehmens abgesichert. Aufgrund des zentralisierten Liquiditätsmanagements ist der Konzern in der Lage, die Mittel innerhalb der Organisation effizient zuzuteilen. Die Finanzverbindlichkeiten des Konzerns sind in der Regel unbesichert und gegebenenfalls mit marktüblichen Kreditverpflichtungen verbunden, die auf Quartalsbasis überprüft werden. Der Konzern unterhält gute Geschäftsbeziehungen zu verschiedenen Partnerbanken und vermeidet dadurch eine zu starke Abhängigkeit von einzelnen Instituten. Partnerbanken auf Konzern- und Tochtergesellschaftsebene müssen ein langfristiges Investment Grade Rating von Standard & Poor's oder ein vergleichbares Rating einer anderen führenden Ratingagentur von mindestens BBB+ vorweisen. Nur in Ausnahmefällen dürfen Konzerngesellschaften mit Banken zusammenarbeiten, die ein niedrigeres Rating haben  
» siehe Risiko- und Chancenbericht, S. 158.  
Soweit gesetzlich zulässig und wirtschaftlich vertretbar, müssen die Tochtergesellschaften überschüssige Liquidität an die Konzernzentrale weiterleiten, um eine optimale Zuteilung der flüssigen Finanzmittel innerhalb des Konzerns sicherzustellen.

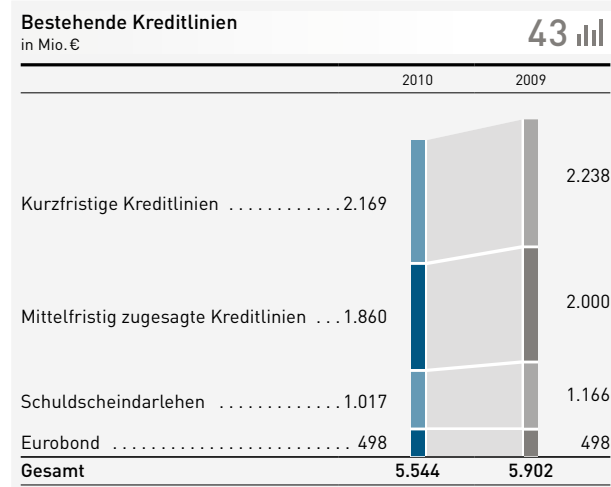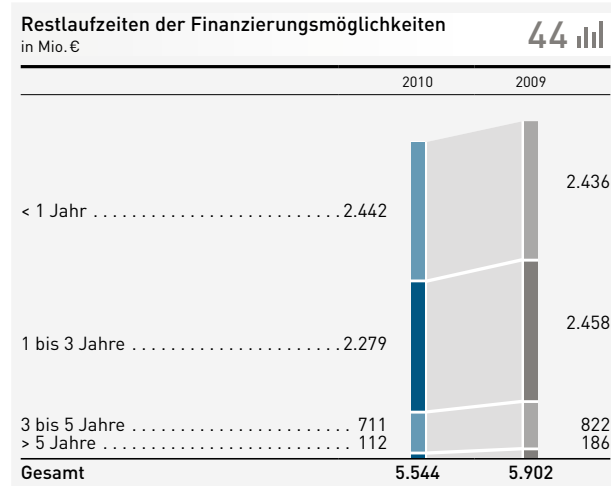

### Finanzielle Flexibilität sichergestellt

Die finanzielle Flexibilität des Konzerns ist durch ungenutzte Kreditlinien in Höhe von 3,934 Mrd. € zum Ende des Geschäftsjahres 2010 sichergestellt (2009: 4,135 Mrd. €). Diese umfassen eine fest zugesagte mehrjährige Konsortialkreditlinie in Höhe von 1,860 Mrd. €, die zum Jahresende 2010 ungenutzt war (2009: 2,000 Mrd. € ungenutzt), sowie bilaterale Kreditlinien bei verschiedenen Banken in Höhe von insgesamt 2,074 Mrd. € (2009: 2,135 Mrd. €). Wir überwachen kontinuierlich den Bedarf an verfügbaren Kreditlinien, basierend auf dem jeweiligen Volumen der Finanzverbindlichkeiten sowie dem künftigen Finanzierungsbedarf.

### Rückgang der kurzfristigen Kreditlinien

Die kurzfristigen Kreditlinien gingen zum Ende des Geschäftsjahres 2010 um 3 % auf 2,169 Mrd. € zurück (2009: 2,238 Mrd. €). Der Rückgang der Kreditlinien entspricht dem niedrigeren Finanzierungsbedarf und steigenden Liquiditätsüberschüssen. Fest zugesagte und nicht fest zugesagte Kreditlinien machen rund 30 % bzw. 70 % der gesamten kurzfristigen Kreditlinien aus (2009: 37 % bzw. 63 %) » siehe [IIL 45](#).

### Marktübliche Kreditverpflichtungen

Im Falle unserer fest zugesagten Kreditlinien sind wir verschiedenen Kreditverpflichtungen eingegangen. Diese Kreditverpflichtungen können eine Limitierung der Veräußerung von Anlagevermögen, Höchstgrenzen für dinglich abgesicherte Verbindlichkeiten sowie Cross-Default- und Change-of-Control-Klauseln vorsehen. Des Weiteren enthalten bestimmte Finanzierungsvereinbarungen Klauseln zu Eigenkapitalquote, Mindesteigenkapital und Nettoverlust. Sollten wir eine Klausel nicht einhalten können und von der Mehrheit der Partnerbanken keine Verzichtserklärung („Waiver“) erhalten, würden die Finanzverbindlichkeiten sofort fällig und zahlbar werden. Zum 31. Dezember 2010 haben wir alle Bedingungen vollständig erfüllt und lagen ausreichend über sämtlichen vorgesehenen Mindestanforderungen. Aufgrund unserer Cashflow-Erwartungen sind wir zuversichtlich, diese Bedingungen auch in Zukunft erfüllen zu können » siehe Nachtrag und Ausblick, S. 174. Wir sind derzeit überzeugt, dass die Mittelzuflüsse aus der Geschäftstätigkeit zusammen mit der Verfügbarkeit externer Mittel ausreichen werden, um unseren künftigen Bedarf an operativen Mitteln und Kapital zu decken.

### Rückgang der Bruttofinanzverbindlichkeiten

Die Bruttofinanzverbindlichkeiten verringerten sich zum Ende des Jahres 2010 um 9 % auf 1,610 Mrd. € (2009: 1,767 Mrd. €). Die Bankverbindlichkeiten sanken um 8 % auf 95 Mio. € (2009: 103 Mio. €). Unsere Schuldscheindarlehen bzw. Privatplatzierungen in den USA, Europa und Asien verringerten sich im Geschäftsjahr 2010 um 13 % auf 1,017 Mrd. € (2009: 1,166 Mrd. €). Das Volumen der ausstehenden Anleihen blieb stabil und belief sich auf 498 Mio. € (2009: 498 Mio. €) » siehe [IIL 43](#). Am Ende des Jahres 2010 waren keine Commercial Paper ausstehend (2009: 0 Mio. €).

### Euro dominiert Währungsmix

Der Großteil der Bruttofinanzverbindlichkeiten des Konzerns wird in Euro und US-Dollar gehalten. Zum Ende des Geschäftsjahres 2010 machten die Bruttofinanzverbindlichkeiten in Euro 55 % der gesamten Bruttofinanzverbindlichkeiten aus (2009: 61 %). Der Anteil der in US-Dollar gehaltenen Bruttofinanzverbindlichkeiten stieg auf 40 % (2009: 33 %) » siehe [IIL 46](#).

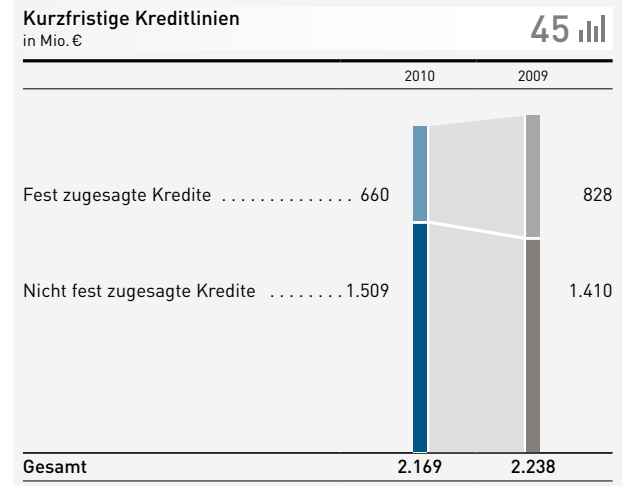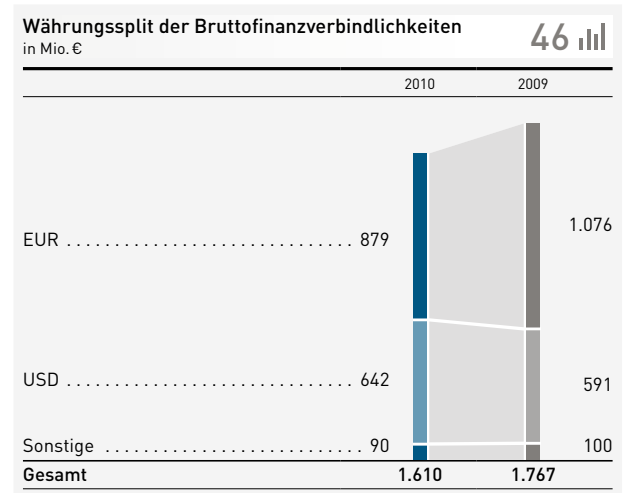



### Fälligkeitsprofil der Finanzverbindlichkeiten stabil

Das Fälligkeitsprofil der Finanzverbindlichkeiten des Konzerns blieb im Verlauf des Jahres 2010 stabil und wies eine gleichmäßig verteilte Laufzeitstruktur auf » siehe III 53. Zum Ende des Geschäftsjahres 2010 belief sich der gesamte Refinanzierungsbedarf innerhalb der nächsten 12 Monate auf insgesamt 273 Mio. € (2009: 198 Mio. €).

### Zinssatz leicht verbessert

Im gewichteten Mittel verbesserte sich der Zinssatz für die Bruttofinanzverbindlichkeiten des Konzerns im Jahr 2010 leicht auf 5,1 % (2009: 5,2 %) » siehe III 49. Positive Effekte niedrigerer Zinssätze bei kurzfristigen Finanzverbindlichkeiten wurden teilweise durch den höheren Anteil längerfristiger Finanzverbindlichkeiten in der Finanzierungsstruktur des Konzerns aufgehoben, da letztere einen höheren durchschnittlichen Zinssatz aufweisen. Langfristige festverzinsliche Finanzierungen machten zum Ende des Geschäftsjahres 2010 76 % des gesamten Finanzierungsvolumens aus (2009: 68 %). 24 % des gesamten Finanzierungsvolumens des Konzerns am Ende des Jahres waren variabel verzinslich (2009: 32 %).

### Nettofinanzverbindlichkeiten um 696 Mio. € gesunken

Am 31. Dezember 2010 beliefen sich die Nettofinanzverbindlichkeiten auf 221 Mio. € (2009: 917 Mio. €). Das bedeutet einen Rückgang um 696 Mio. € bzw. 76 % gegenüber dem Vorjahresniveau » siehe III 47. Damit haben wir unser zu Beginn des Jahres 2010 kommuniziertes Ziel, die Nettofinanzverbindlichkeiten unter das Vorjahresniveau zu senken, vollständig erreicht. Ein starker operativer Cashflow sowie niedrigere Investitionen als ursprünglich geplant wirkten sich positiv auf diese Entwicklung aus. Darüber hinaus trugen positive Währungseffekte in Höhe von 43 Mio. € zur Verringerung der Nettofinanzverbindlichkeiten bei. Auf Basis der Inanspruchnahme der zugesagten Kreditlinien Ende 2010 bei 4 % (2009: 16 %). Der Verschuldungsgrad des Konzerns sank am Ende des Jahres 2010 auf 4,8 % (2009: 24,3 %) » siehe III 51. Ende 2010 belief sich das Verhältnis von Nettofinanzverbindlichkeiten zu EBITDA auf 0,2 (Verhältnis 2009: 1,2) und lag damit deutlich innerhalb der mittelfristigen Vorgaben von unter 2. Ein effizientes Management unserer Kapitalstruktur hat für unser Management nach wie vor hohe Priorität » siehe Nachtrag und Ausblick, S. 174.

### Nettofinanzverbindlichkeiten

in Mio. €

47

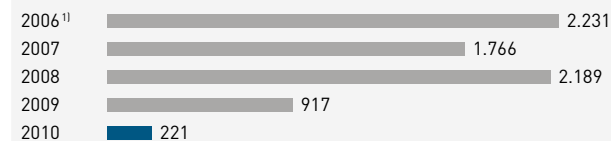

1) Beinhaltet Reebok, Rockport und Reebok-CCM Hockey ab 1. Februar 2006.

### Nettofinanzverbindlichkeiten nach Quartalen<sup>1)</sup>

in Mio. €

48

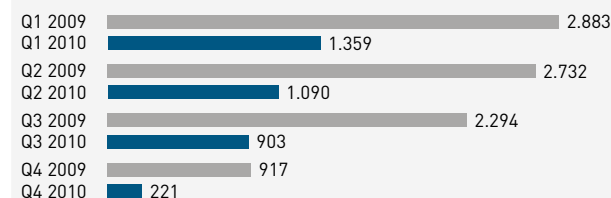

1) Am Ende der Periode.

### Zinssatzentwicklung<sup>1)</sup>

in %

49

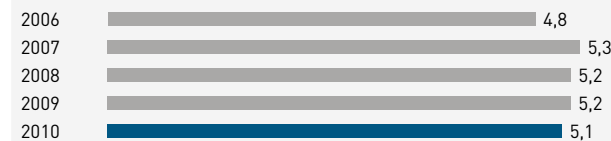

1) Gewichteter durchschnittlicher Zinssatz der Bruttofinanzverbindlichkeiten.

## Währungsmanagement von hoher Priorität

Da der adidas Konzern weltweit tätig ist, ist das Währungsmanagement ein wichtiger Fokus der Konzern-Treasury-Abteilung. Dabei ist das US-Dollar-Hedging von zentraler Bedeutung, da unsere Beschaffung überwiegend in Asien stattfindet und größtenteils in Dollar abgerechnet wird » siehe Global Operations, S. 106. Im Geschäftsjahr 2010 verwaltete die Konzern-Treasury-Abteilung ein Nettodefizit gegenüber dem Euro in Höhe von ca. 2,1 Mrd. US-Dollar (2009: 1,9 Mrd. US-Dollar). Gemäß den Treasury-Grundsätzen des Konzerns haben wir ein rollierendes Hedging-System mit einem Zeitfenster von 12 bis 24 Monaten, wobei wir einen Großteil unseres erwarteten saisonalen Hedging-Bedarfs sechs Monate vor Saisonbeginn absichern. Das bedeutet, dass wir unser Hedging für das Jahr 2011 bereits beinahe vollständig abgeschlossen haben. Außerdem haben wir schon begonnen, uns für 2012 abzusichern. Das Hedging für das Jahr 2011 ist zu geringfügig ungünstigeren Kursen wie im Vorjahr abgeschlossen worden. Wir nutzen verschiedene Hedging-Instrumente, wie z. B. Devisentermingeschäfte, Währungsoptionen und Währungsswaps oder Kombinationen von unterschiedlichen Instrumenten, um uns gegen ungünstige Kursentwicklungen zu schützen. Dabei bleiben wir weiterhin in der Lage, von künftigen positiven Kursentwicklungen zu profitieren » siehe Risiko- und Chancenbericht, S. 158.

| Finanzierungsstruktur <sup>1)</sup>                   |              |              | 50 |
|-------------------------------------------------------|--------------|--------------|----|
| in Mio. €                                             |              |              |    |
|                                                       | 2010         | 2009         |    |
| <b>Flüssige Mittel und kurzfristige Finanzanlagen</b> | <b>1.389</b> | <b>850</b>   |    |
| Bankkredite                                           | 95           | 103          |    |
| Commercial Paper                                      | 0            | 0            |    |
| Schuldscheindarlehen                                  | 1.017        | 1.166        |    |
| Eurobond                                              | 498          | 498          |    |
| <b>Bruttofinanzverbindlichkeiten</b>                  | <b>1.610</b> | <b>1.767</b> |    |
| <b>Nettofinanzverbindlichkeiten</b>                   | <b>221</b>   | <b>917</b>   |    |

1) Bei Zahlen können Rundungsdifferenzen auftreten.

| Verschuldungsgrad  |      | 51 |
|--------------------|------|----|
| in %               |      |    |
| 2006 <sup>1)</sup> | 78,9 |    |
| 2007               | 58,4 |    |
| 2008               | 64,6 |    |
| 2009               | 24,3 |    |
| 2010               | 4,8  |    |

1) Beinhaltet Reebok, Rockport und Reebok-CCM Hockey ab 1. Februar 2006.

| Emittierte Privatplatzierungen und Anleihen auf einen Blick |         |              |             | 52 |
|-------------------------------------------------------------|---------|--------------|-------------|----|
| in Mio.                                                     |         |              |             |    |
| Emittierte Anleihen                                         | Volumen | Kupon        | Fälligkeit  |    |
| US Schuldscheindarlehen                                     | USD 288 | fix          | 2011        |    |
| Französisches Schuldscheindarlehen                          | EUR 150 | variabel     | 2011 – 2012 |    |
| Deutsches Schuldscheindarlehen                              | EUR 78  | fix/variabel | 2012        |    |
| US Schuldscheindarlehen                                     | USD 292 | fix          | 2013        |    |
| Eurobond                                                    | EUR 498 | fix          | 2014        |    |
| Deutsches Schuldscheindarlehen                              | EUR 122 | fix/variabel | 2014        |    |
| US Schuldscheindarlehen                                     | USD 115 | fix          | 2015        |    |
| US Schuldscheindarlehen                                     | USD 150 | fix          | 2016        |    |
| Sonstige Schuldscheindarlehen                               | EUR 30  | variabel     | 2010 – 2012 |    |

| Restlaufzeit der Bruttofinanzverbindlichkeiten |              |              | 53 |
|------------------------------------------------|--------------|--------------|----|
| in Mio. €                                      |              |              |    |
|                                                | 2010         | 2009         |    |
| < 1 Jahr                                       | 273          | 198          |    |
| 1 bis 3 Jahre                                  | 514          | 561          |    |
| 3 bis 5 Jahre                                  | 711          | 822          |    |
| > 5 Jahre                                      | 112          | 186          |    |
| <b>Gesamt</b>                                  | <b>1.610</b> | <b>1.767</b> |    |

# Geschäftsentwicklung nach Segmenten

Der adidas Konzern hat seine betriebliche Tätigkeit in drei Berichtssegmente gegliedert: Großhandel, Einzelhandel und Andere Geschäftssegmente. Das Großhandelssegment umfasst die Geschäftstätigkeit der Marken adidas und Reebok mit Einzelhändlern, das Einzelhandelssegment die eigenen Einzelhandelsaktivitäten der Marken adidas und Reebok. Die Ergebnisse von TaylorMade-adidas Golf, Rockport, Reebok-CCM Hockey sowie der Anderen Zentral Geführten Marken werden im Segment Andere Geschäftssegmente zusammengefasst. Im Geschäftsjahr 2010 stiegen Umsatz und Gewinn des adidas Konzerns in allen Segmenten.

## Geschäftsentwicklung Großhandel

### Ergebnisse des Großhandels-segments im Überblick

Das Großhandelssegment umfasst die Geschäftstätigkeit von adidas und Reebok mit Einzelhändlern. Im Geschäftsjahr 2010 stieg der Umsatz im Großhandelssegment auf währungsbereinigter Basis um 8%. In Euro nahm der Großhandelsumsatz um 14% auf 8,181 Mrd. € zu (2009: 7,164 Mrd. €). Die Bruttomarge verringerte sich hauptsächlich infolge einer ungünstigen regionalen Umsatzverteilung um 0,3 Prozentpunkte auf 41,3% (2009: 41,6%). Das Bruttoergebnis stieg 2010 um 13% auf 3,379 Mrd. € (2009: 2,978 Mrd. €). Die Segmentaufwendungen aus der betrieblichen Tätigkeit im Verhältnis zum Umsatz nahmen um 1,0 Prozentpunkte auf 9,9% zu (2009: 8,9%). Infolge der niedrigeren Bruttomarge verringerte sich die operative Marge des Segments um 1,2 Prozentpunkte auf 31,4% (2009: 32,7%). Absolut gesehen lag das Segmentbetriebsergebnis 2010 mit 2,572 Mrd. € um 10% über dem Vorjahreswert (2009: 2,342 Mrd. €).

### Segmentumsatz wächst währungsbereinigt um 8%

Im Geschäftsjahr 2010 stieg der Umsatz im Großhandelssegment auf währungsbereinigter Basis um 8%. Hauptgrund hierfür waren Umsatzzuwächse in allen drei Markendivisionen: adidas Sport Performance, adidas Sport Style und Reebok. Währungseffekte wirkten sich positiv auf die Segmentumsatzerlöse in Euro aus. Der Umsatz im Großhandelssegment wuchs 2010 um 14% auf 8,181 Mrd. € (2009: 7,164 Mrd. €)

» siehe 01.

### Großhandelsumsatz steigt währungsbereinigt in fast allen Regionen

Die Umsatzerlöse im Großhandelssegment nahmen im Geschäftsjahr 2010 auf währungsbereinigter Basis in allen Regionen außer China und den Europäischen Schwellenländern zu. In Westeuropa stiegen die Umsätze auf währungsbereinigter Basis um 8%. Hauptgrund hierfür waren Umsatzzuwächse in Großbritannien, Deutschland und Spanien. In den Europäischen Schwellenländern ging der Umsatz auf währungsbereinigter Basis um 2% zurück. In Nordamerika wuchs der Umsatz im Großhandelssegment infolge zweistelliger Zuwächse, sowohl in den USA als auch in Kanada, währungsbereinigt um 17%. In China lagen die Umsatzerlöse währungsbereinigt um 7% unter dem Vorjahresniveau.

Der währungsbereinigte Umsatz in den Anderen Asiatischen Märkten nahm aufgrund von Umsatzsteigerungen in den meisten Märkten um 8% zu. In Lateinamerika stieg der Umsatz dank zweistelliger Steigerungen in den meisten wichtigen Märkten währungsbereinigt um 11%. Währungseffekte wirkten sich positiv auf die Umsatzerlöse der Regionen in Euro aus » siehe 03.

### Währungsbereinigter Umsatz von adidas Sport Performance um 2% über Vorjahr

Im Jahr 2010 stieg der Großhandelsumsatz von adidas Sport Performance auf währungsbereinigter Basis um 2%. Dieser Anstieg resultierte in erster Linie aus Umsatzzuwächsen in den Kategorien Fußball, hervorgerufen durch die FIFA Fußball-Weltmeisterschaft 2010, und Running. Umsatzwachstum in der Kategorie Outdoor trug ebenfalls zu der positiven Entwicklung bei. Währungseffekte wirkten sich positiv auf die Umsatzerlöse in Euro aus. In Euro stieg der Umsatz von adidas Sport Performance um 9% auf 5,101 Mrd. € (2009: 4,696 Mrd. €).

### Großhandel im Überblick

in Mio. €

01

|                                                  | 2010   | 2009   | Veränderung |
|--------------------------------------------------|--------|--------|-------------|
| Umsatzerlöse                                     | 8.181  | 7.164  | 14 %        |
| Bruttoergebnis                                   | 3.379  | 2.978  | 13 %        |
| Bruttomarge                                      | 41,3 % | 41,6 % | -0,3 PP     |
| Segmentbetriebsergebnis                          | 2.572  | 2.342  | 10 %        |
| Segmentbetriebsergebnis im Verhältnis zum Umsatz | 31,4 % | 32,7 % | -1,2 PP     |

### Großhandel Umsatzerlöse nach Quartalen

in Mio. €

02

|         |       |
|---------|-------|
| Q1 2009 | 1.874 |
| Q1 2010 | 1.898 |
| Q2 2009 | 1.605 |
| Q2 2010 | 1.928 |
| Q3 2009 | 2.036 |
| Q3 2010 | 2.421 |
| Q4 2009 | 1.648 |
| Q4 2010 | 1.934 |



### Umsatz von adidas Sport Style steigt währungsbereinigt um 21 %

Der Großhandelsumsatz von adidas Sport Style nahm im Geschäftsjahr 2010 währungsbereinigt um 21 % zu. Verantwortlich für diese Umsatzsteigerung war eine positive Entwicklung in allen Kategorien, insbesondere bei adidas Originals und dem adidas Neo Label. Währungseffekte wirkten sich positiv auf die Umsatzerlöse in Euro aus. In Euro stieg der Umsatz von adidas Sport Style im Jahr 2010 um 27 % auf 1,559 Mrd. € (2009: 1,225 Mrd. €).

### Reebok Umsatz währungsbereinigt um 12 % gestiegen

Im Geschäftsjahr 2010 legte der Großhandelsumsatz von Reebok auf währungsbereinigter Basis um 12 % zu. Verantwortlich hierfür war ein deutliches Umsatzwachstum in den Kategorien Walking und Running, das durch Produkte im Bereich der Muskelaktivierung (Toning) und mit dem ZigTech Konzept erzielt werden konnte. Auch die Kategorie Training verzeichnete einen Umsatzanstieg. Diese Umsatzzuwächse gleichen Rückgänge in anderen Kategorien mehr als aus. In Euro stieg der Umsatz von Reebok im Geschäftsjahr 2010 um 19 % auf 1,505 Mrd. € (2009: 1,265 Mrd. €).

### Bruttomarge durch ungünstige regionale Umsatzverteilung negativ beeinflusst

Die Bruttomarge im Großhandelssegment lag im Geschäftsjahr 2010 mit 41,3 % um 0,3 Prozentpunkte unter dem Vorjahreswert (2009: 41,6 %) » siehe 01. Niedrigere Beschaffungskosten sowie ein geringerer Anteil von Lagerräumungsverkäufen wurden durch eine ungünstige regionale Umsatzverteilung, bedingt durch einen höheren Umsatzanteil der Länder mit geringeren Margen, mehr als aufgehoben. Die Bruttomarge von adidas aus der Großhandelstätigkeit verringerte sich um 0,7 Prozentpunkte auf 43,7 % (2009: 44,4 %). Die Bruttomarge der Marke Reebok aus der Großhandelstätigkeit lag mit 30,8 % um 2,4 Prozentpunkte über dem Vorjahreswert (2009: 28,4 %). Das Bruttoergebnis im Großhandelssegment verbesserte sich 2010 um 13 % auf 3,379 Mrd. € (2009: 2,978 Mrd. €)

» siehe 01.

### Großhandel Umsatzerlöse nach Regionen

|                             | 2010         | 2009         | Veränderung | Währungsbereinigte Veränderung |
|-----------------------------|--------------|--------------|-------------|--------------------------------|
| Westeuropa                  | 2.882        | 2.633        | 9 %         | 8 %                            |
| Europäische Schwellenländer | 503          | 475          | 6 %         | - 2 %                          |
| Nordamerika                 | 1.609        | 1.295        | 24 %        | 17 %                           |
| China                       | 840          | 855          | - 2 %       | - 7 %                          |
| Andere Asiatische Märkte    | 1.270        | 1.041        | 22 %        | 8 %                            |
| Lateinamerika               | 1.077        | 865          | 24 %        | 11 %                           |
| <b>Gesamt<sup>1)</sup></b>  | <b>8.181</b> | <b>7.164</b> | <b>14 %</b> | <b>8 %</b>                     |

1) Bei Zahlen können Rundungsdifferenzen auftreten.

### 2010 Großhandel Umsatzerlöse nach Regionen

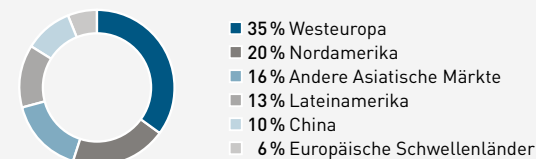

### 2010 Großhandel Umsatzerlöse nach Divisionen

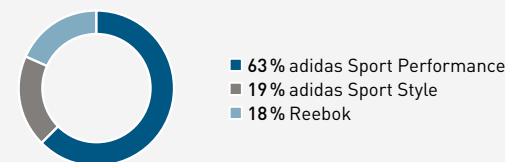

### Segmentaufwendungen aus der betrieblichen Tätigkeit im Verhältnis zum Umsatz um 1,0 Prozentpunkte gestiegen

Die Segmentaufwendungen aus der betrieblichen Tätigkeit im Großhandelssegment beinhalten in erster Linie Aufwendungen des Sales Working Budgets sowie Aufwendungen für Vertriebspersonal, Verwaltung und Logistik. In Euro stiegen die Segmentaufwendungen aus der betrieblichen Tätigkeit im Jahr 2010 um 27 % auf 807 Mio. € (2009: 636 Mio. €). Die Segmentaufwendungen aus der betrieblichen Tätigkeit im Verhältnis zum Umsatz nahmen um 1,0 Prozentpunkte auf 9,9 % zu (2009: 8,9 %). Hauptgründe hierfür waren höhere Lagerhaltungs- und Vertriebskosten. Aufwendungen im Zusammenhang mit der FIFA Fußball-Weltmeisterschaft 2010 sowie mit Reeboks Wachstumsstrategie wirkten sich ebenfalls geringfügig auf diese Entwicklung aus.

### Segmentbetriebsergebnis um 10 % über Vorjahr

Das Segmentbetriebsergebnis verbesserte sich im Geschäftsjahr 2010 um 10 % auf 2,572 Mrd. € (2009: 2,342 Mrd. €). Die operative Marge des Segments verringerte sich 2010 um 1,2 Prozentpunkte auf 31,4 % (2009: 32,7 %) » siehe 01. Verantwortlich für diese Entwicklung waren die niedrigere Bruttomarge und höhere Segmentaufwendungen aus der betrieblichen Tätigkeit im Verhältnis zum Umsatz.

### Anzahl der Mitarbeiter im Großhandelssegment geht zurück

Zum Jahresende 2010 beschäftigte der Konzern 4.329 Mitarbeiter im Großhandelssegment. Das bedeutet einen Rückgang um 8 % gegenüber 4.723 Mitarbeitern im Vorjahr. Diese Entwicklung ist vor allem auf Reorganisationsmaßnahmen im Zusammenhang mit der Implementierung des gemeinsamen Geschäftsmodells im Jahr 2009 zurückzuführen. Gemessen in Vollzeit-Äquivalenten waren am Jahresende 4.158 Mitarbeiter im Großhandelssegment beschäftigt. Dies entspricht einem Rückgang um 8 % gegenüber der Mitarbeiterzahl von 4.511 am Ende des Vorjahres.

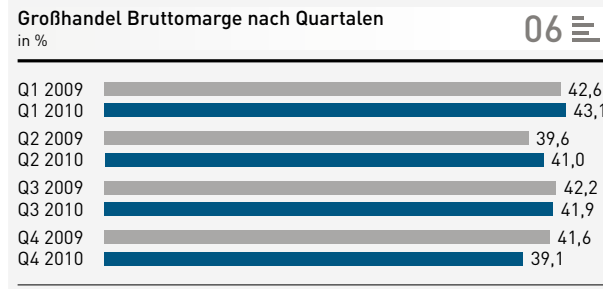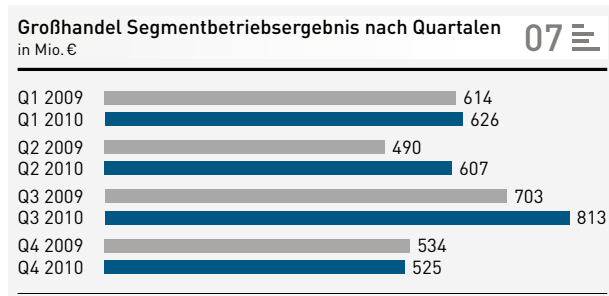

## Geschäftsentwicklung Einzelhandel

### Ergebnisse des Einzelhandels-segments im Überblick

Das Einzelhandelssegment umfasst die eigenen Einzelhandelsaktivitäten der Marken adidas und Reebok. Im Geschäftsjahr 2010 stieg der Umsatz im Einzelhandelssegment währungsbereinigt um 18 %. In Euro legte der Umsatz im Einzelhandelssegment um 25 % auf 2,389 Mrd. € zu (2009: 1,906 Mrd. €). Der Umsatz bestehender Geschäfte lag währungsbereinigt um 11 % über dem Vorjahresniveau. Die Bruttomarge verbesserte sich um 3,2 Prozentpunkte auf 61,8 % (2009: 58,6 %). Hauptgründe hierfür waren der gestiegene Umsatzanteil von Concept Stores mit höheren Margen sowie positive Währungseffekte im Zusammenhang mit dem russischen Rubel. Das Bruttoergebnis stieg 2010 um 32 % auf 1,476 Mrd. € (2009: 1,116 Mrd. €). Aufgrund der verbesserten Bruttomarge sowie der niedrigeren Segmentaufwendungen aus der betrieblichen Tätigkeit im Verhältnis zum Umsatz stieg die operative Marge des Segments um 5,3 Prozentpunkte auf 18,9 % (2009: 13,6 %). Absolut gesehen lag das Segmentbetriebsergebnis mit 452 Mio. € im Geschäftsjahr 2010 um 74 % über dem Vorjahreswert (2009: 259 Mio. €).

### Segmentumsatz wächst währungsbereinigt um 18 %

Im Geschäftsjahr 2010 stieg der Umsatz im Einzelhandelssegment währungsbereinigt um 18 %. Die Umsatzerlöse von Concept Stores, Factory Outlets und sonstigen Einzelhandelsgeschäften lagen allesamt über dem Vorjahresniveau. Währungseffekte wirkten sich positiv auf die Umsatzerlöse des Einzelhandelssegments in Euro aus. Der Umsatz legte um 25 % auf 2,389 Mrd. € zu (2009: 1,906 Mrd. €) » siehe 08. Bei bestehenden Shops erhöhte sich der Umsatz im Vorjahresvergleich währungsbereinigt um 11 %. Dabei verzeichneten sämtliche Einzelhandelsformate Umsatzzuwächse.

### Höhere Anzahl eigener Einzelhandelsgeschäfte

Zum 31. Dezember 2010 betrieb das Einzelhandelssegment des adidas Konzerns 2.270 Geschäfte. Dies bedeutet einen Nettoanstieg um 58 Geschäfte bzw. 3 % gegenüber 2.212 Geschäften zum Ende des Vorjahres. Die Gesamtzahl der Geschäfte setzte sich aus 1.712 adidas Geschäften und 558 Reebok Geschäften zusammen (31. Dezember 2009: 1.626 adidas Geschäfte, 586 Reebok Geschäfte). Im Verlauf des Jahres eröffnete der Konzern 234 neue Geschäfte, 127 Geschäfte wurden geschlossen und 51 umgestaltet. 49 Geschäfte wurden neu klassifiziert. Grund hierfür war eine geänderte Zuordnungsmethode für Geschäfte, in denen unterschiedliche Marken des Konzerns gemeinsam vertrieben werden.

### Einzelhandelsumsatz legt währungsbereinigt in allen Regionen zu

Der Umsatz im Einzelhandelssegment stieg auf währungsbereinigter Basis in allen Regionen. In Westeuropa nahm der Einzelhandelsumsatz vor allem infolge von Umsatzzuwächsen in Spanien, Deutschland und Italien währungsbereinigt um 4 % zu. In den Europäischen Schwellenländern stieg der Umsatz währungsbereinigt um 30 %. Ausschlaggebend hierfür war das Umsatzwachstum in Russland, wo sowohl die Marke adidas als auch die Marke Reebok deutliche Umsatzzuwächse im zweistelligen Bereich verzeichneten. In Nordamerika legte der Umsatz im Einzelhandelssegment infolge zweistelliger Zuwächse in den USA währungsbereinigt um 14 % zu. In China lagen die Umsatzerlöse währungsbereinigt um 41 % über dem Vorjahresniveau. In den Anderen Asiatischen Märkten stieg der Umsatz währungsbereinigt um 1 %. In dieser Region wurden Umsatzzuwächse in Südkorea zum Teil durch Umsatzrückgänge in Japan aufgehoben. Die Marke Reebok konnte ihren Umsatz in Japan jedoch im zweistelligen Bereich ausbauen. In Lateinamerika legte der währungsbereinigte Einzelhandelsumsatz um 34 % zu. Insbesondere Argentinien und Mexiko verzeichneten ein deutliches Umsatzwachstum. Währungseffekte wirkten sich positiv auf die Umsatzerlöse der Regionen in Euro aus » siehe 11.

### Einzelhandel im Überblick

in Mio. €

08

|                                                  | 2010   | 2009   | Veränderung |
|--------------------------------------------------|--------|--------|-------------|
| Umsatzerlöse                                     | 2.389  | 1.906  | 25 %        |
| Bruttoergebnis                                   | 1.476  | 1.116  | 32 %        |
| Bruttomarge                                      | 61,8 % | 58,6 % | 3,2 PP      |
| Segmentbetriebsergebnis                          | 452    | 259    | 74 %        |
| Segmentbetriebsergebnis im Verhältnis zum Umsatz | 18,9 % | 13,6 % | 5,3 PP      |

### Einzelhandel Anzahl der Shops

09

|                 | 2010         | 2009         |
|-----------------|--------------|--------------|
| Concept Stores  | 1.352        | 1.203        |
| Factory Outlets | 725          | 755          |
| Andere          | 193          | 254          |
| <b>Gesamt</b>   | <b>2.270</b> | <b>2.212</b> |

### Einzelhandel Umsatzerlöse nach Quartalen

in Mio. €

10

|         |     |
|---------|-----|
| Q1 2009 | 400 |
| Q1 2010 | 459 |
| Q2 2009 | 486 |
| Q2 2010 | 602 |
| Q3 2009 | 524 |
| Q3 2010 | 665 |
| Q4 2009 | 497 |
| Q4 2010 | 664 |



### Währungsbereinigter Umsatz der Concept Stores wächst um 23 %

Der Umsatz der Concept Stores beinhaltet die Umsatzerlöse von adidas Sport Performance, adidas Sport Style und Reebok Concept Stores. Im Geschäftsjahr 2010 stieg der Umsatz der Concept Stores währungsbereinigt um 23 %. Dabei verzeichneten sowohl adidas als auch Reebok zweistellige Wachstumsraten. Der Umsatz der bestehenden Concept Stores erhöhte sich währungsbereinigt um 14 %. Die Anzahl der Concept Stores stieg zum Ende des Jahres um 149 auf 1.352 (31. Dezember 2009: 1.203). Währungseffekte wirkten sich positiv auf die Umsatzerlöse in Euro aus. Der Umsatz der Concept Stores legte 2010 um 31 % auf 1,094 Mrd. € zu (2009: 833 Mio. €).

### Umsatz der Factory Outlets steigt währungsbereinigt um 13 %

Der Umsatz der Factory Outlets beinhaltet die Umsatzerlöse der adidas und Reebok Factory Outlets. Im Geschäftsjahr 2010 stieg der Umsatz der Factory Outlets währungsbereinigt um 13 %. Der Umsatz bestehender Factory Outlets lag währungsbereinigt um 5 % über dem Vorjahresniveau. Die Anzahl der Factory Outlets ging zum Ende des Jahres um 30 auf 725 zurück (31. Dezember 2009: 755). adidas verzeichnete einen zweistelligen Umsatzanstieg. Bei Reebok lag der Umsatz ebenfalls über dem Vorjahresniveau. Währungseffekte wirkten sich positiv auf die Umsatzerlöse in Euro aus. Die Umsatzerlöse der Factory Outlets stiegen im Geschäftsjahr 2010 um 20 % auf 1,203 Mrd. € (2009: 1,005 Mrd. €).

### Währungsbereinigter Umsatzanstieg um 28 % bei anderen Einzelhandelsformaten

Der Umsatz der anderen Einzelhandelsformate beinhaltet die Umsatzerlöse der Concession Corners und die E-Commerce-Umsätze bei adidas und Reebok. Im Jahr 2010 nahm der Umsatz der anderen Einzelhandelsformate währungsbereinigt um 28 % zu. Auf vergleichbarer Basis stieg der Umsatz anderer Einzelhandelsformate währungsbereinigt um 63 %. Die E-Commerce-Umsätze bei adidas und Reebok lagen währungsbereinigt um 83 % über dem Vorjahresniveau. Währungseffekte wirkten sich positiv auf die Umsatzerlöse der anderen Einzelhandelsformate in Euro aus. Der Umsatz der anderen Einzelhandelsformate stieg um 35 % auf 92 Mio. € (2009: 68 Mio. €).

### Einzelhandel Umsatzerlöse nach Regionen

in Mio. €

11

|                             | 2010         | 2009         | Veränderung | Währungsbereinigte Veränderung |
|-----------------------------|--------------|--------------|-------------|--------------------------------|
| Westeuropa                  | 426          | 405          | 5 %         | 4 %                            |
| Europäische Schwellenländer | 846          | 617          | 37 %        | 30 %                           |
| Nordamerika                 | 461          | 380          | 21 %        | 14 %                           |
| China                       | 131          | 88           | 49 %        | 41 %                           |
| Andere Asiatische Märkte    | 330          | 286          | 15 %        | 1 %                            |
| Lateinamerika               | 195          | 129          | 50 %        | 34 %                           |
| <b>Gesamt<sup>1)</sup></b>  | <b>2.389</b> | <b>1.906</b> | <b>25 %</b> | <b>18 %</b>                    |

1) Bei Zahlen können Rundungsdifferenzen auftreten.

### 2010 Einzelhandel Umsatzerlöse nach Regionen

12

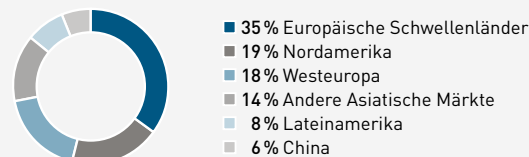

### 2010 Einzelhandel Umsatzerlöse nach Vertriebsformaten

13

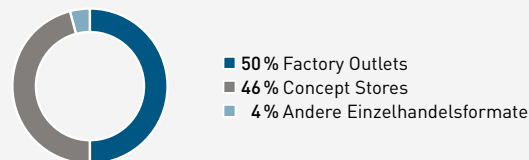

### Einzelhandelsumsatz wächst bei adidas und bei Reebok

Im Geschäftsjahr 2010 verzeichneten sowohl adidas als auch Reebok zweistellige Wachstumsraten im Einzelhandelssegment. Der währungsbereinigte Umsatz von adidas Sport Performance legte in diesem Zeitraum um 15 % zu. Die Umsätze von adidas Sport Style verzeichneten auf währungsbereinigter Basis im Vorjahresvergleich ein Umsatzplus von 29 %. Der Umsatz von Reebok legte im Vorjahresvergleich währungsbereinigt um 14 % zu. Der Umsatz bestehender Geschäfte der Marke adidas stieg währungsbereinigt um 11 %. Verantwortlich hierfür waren vor allem zweistellige Umsatzzuwächse in den Kategorien Training, Fußball und Running. Der Umsatz bestehender Geschäfte der Marke Reebok stieg, insbesondere aufgrund deutlicher Umsatzzuwächse in den Kategorien Training und Running, um 11 %. Währungseffekte wirkten sich positiv auf die Umsatzerlöse in Euro aus. Die Umsatzerlöse der eigenen Einzelhandelsgeschäfte von adidas Sport Performance stiegen im Jahr 2010 um 23 % auf 1,404 Mrd. € (2009: 1,142 Mrd. €), der Umsatz der eigenen Einzelhandelsgeschäfte von adidas Sport Style nahm 2010 um 37 % auf 575 Mio. € zu (2009: 420 Mio. €). Der Umsatz der eigenen Einzelhandelsgeschäfte von Reebok stieg 2010 um 20 % auf 408 Mio. € (2009: 339 Mio. €).

### Bruttomarge im Einzelhandelssegment verbessert sich um 3,2 Prozentpunkte

Die Bruttomarge im Einzelhandelssegment stieg im Geschäftsjahr 2010 um 3,2 Prozentpunkte auf 61,8 % (2009: 58,6 %). Dabei erzielten alle Einzelhandelsformate Umsatzwachstum. Hauptgrund hierfür war der gestiegene Umsatzanteil von Concept Stores, die höhere Margen erzielen. Die Bruttomarge wurde ebenfalls durch die Stärkung des russischen Rubels positiv beeinflusst. Nach Marken betrachtet verbesserte sich die Bruttomarge bei adidas um 2,4 Prozentpunkte auf 63,2 % (2009: 60,9 %). Bei Reebok lag die Bruttomarge mit 54,8 % um 6,7 Prozentpunkte über dem Vorjahreswert (2009: 48,1 %). Das Bruttoergebnis im Einzelhandelssegment verbesserte sich 2010 um 32 % auf 1,476 Mrd. € (2009: 1,116 Mrd. €)

» siehe 08.

### Segmentaufwendungen aus der betrieblichen Tätigkeit im Verhältnis zum Umsatz um 2,1 Prozentpunkte gesunken

Die Segmentaufwendungen aus der betrieblichen Tätigkeit im Einzelhandel beinhalten in erster Linie Personal- und Mietaufwendungen sowie Sales Working Budget-Aufwendungen. Die Segmentaufwendungen aus der betrieblichen Tätigkeit nahmen 2010 um 19 % auf 1,024 Mrd. € zu (2009: 857 Mio. €). Diese Entwicklung resultierte aus höheren Sales Working Budget-Aufwendungen und aus höheren Aufwendungen durch die gestiegene Anzahl der eigenen Einzelhandelsgeschäfte, insbesondere in den Schwellenländern. Die Segmentaufwendungen aus der betrieblichen Tätigkeit im Verhältnis zum Umsatz verringerten sich 2010 aufgrund der Verbesserungen im operativen Geschäft um 2,1 Prozentpunkte auf 42,9 % (2009: 45,0 %).

### Segmentbetriebsergebnis um 74 % über Vorjahr

Das Segmentbetriebsergebnis stieg im Geschäftsjahr 2010 um 74 % auf 452 Mio. € (2009: 259 Mio. €). Die operative Marge des Segments verbesserte sich 2010 um 5,3 Prozentpunkte auf 18,9 % (2009: 13,6 %) » siehe 08. Verantwortlich für diese Entwicklung waren die höhere Bruttomarge und niedrigere Segmentaufwendungen aus der betrieblichen Tätigkeit im Verhältnis zum Umsatz.

### Anzahl der Mitarbeiter im Einzelhandelssegment gestiegen

Zum 31. Dezember 2010 beschäftigte der Konzern 22.286 Mitarbeiter im Einzelhandelssegment. Dies bedeutet einen Anstieg um 14 % gegenüber 19.576 Beschäftigten zum Ende des Vorjahres. Der Mitarbeiterzuwachs steht im Zusammenhang mit der höheren Anzahl von Einzelhandelsgeschäften des Konzerns. Der Großteil der Mitarbeiter im Einzelhandelssegment ist in Teilzeitverhältnissen beschäftigt. Gemessen in Vollzeit-Äquivalenten stieg die Anzahl der Mitarbeiter im Einzelhandelssegment zum Jahresende 2010 um 12 % auf 17.017 (2009: 15.229).

Einzelhandel Bruttomarge nach Quartalen  
in %

14

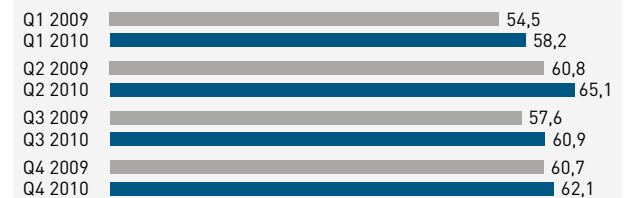

Einzelhandel Segmentbetriebsergebnis nach Quartalen  
in Mio. €

15

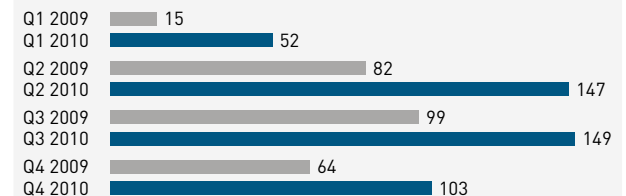

## Geschäftsentwicklung Andere Geschäftssegmente

### Ergebnisse der Anderen Geschäftssegmente im Überblick

Andere Geschäftssegmente umfassen in erster Linie die Segmente TaylorMade-adidas Golf, Rockport und Reebok-CCM Hockey. Hierin enthalten ist auch das Segment Andere Zentral Geführte Marken, das Marken wie Y-3 umfasst. Im Geschäftsjahr 2010 stieg der Umsatz in den Anderen Geschäftssegmenten auf währungsbereinigter Basis um 2%. In Euro legte der Umsatz um 10% auf 1,420 Mrd. € zu (2009: 1,293 Mrd. €). Die Bruttomarge verbesserte sich um 4,2 Prozentpunkte auf 43,5% (2009: 39,3%). Verantwortlich hierfür waren vor allem verbesserte Produktmargen und ein geringerer Anteil von Lagerräumungsverkäufen im Rockport Segment. Das Bruttoergebnis erhöhte sich 2010 um 21% auf 618 Mio. € (2009: 509 Mio. €). Aufgrund der verbesserten Bruttomarge sowie der stabilen Segmentaufwendungen aus der betrieblichen Tätigkeit im Verhältnis zum Umsatz stieg die operative Marge des Segments um 4,1 Prozentpunkte auf 26,0% (2009: 21,9%). Absolut gesehen lag das Segmentbetriebsergebnis mit 369 Mio. € im Geschäftsjahr 2010 um 30% über dem Vorjahreswert (2009: 283 Mio. €).

### Umsatz in Anderen Geschäftssegmenten steigt währungsbereinigt um 2%

Im Jahr 2010 erhöhte sich der Umsatz in den Anderen Geschäftssegmenten auf währungsbereinigter Basis um 2%. Alle Segmente erzielten eine Umsatzsteigerung. Währungseffekte wirkten sich positiv auf die Umsatzerlöse in Euro aus. Der Umsatz in den Anderen Geschäftssegmenten lag 2010 mit 1,420 Mrd. € um 10% über dem Vorjahresniveau (2009: 1,293 Mrd. €) » siehe 16.

### Umsatz in Anderen Geschäftssegmenten wächst währungsbereinigt in allen Regionen

Der Umsatz in den Anderen Geschäftssegmenten legte währungsbereinigt in allen Regionen zu. In Westeuropa erhöhte sich der währungsbereinigte Umsatz aufgrund von Zuwächsen bei TaylorMade-adidas Golf und Reebok-CCM Hockey um 1%. Dieser Anstieg wurde teilweise durch einen Umsatzrückgang bei Rockport aufgehoben. In den Europäischen Schwellenländern stieg der Umsatz hauptsächlich aufgrund von höheren Umsatzerlösen bei Rockport und Reebok-CCM Hockey währungsbereinigt um 8%. In Nordamerika blieb der Umsatz auf währungsbereinigter Basis stabil. Der Umsatz in China wuchs auf währungsbereinigter Basis infolge höherer Umsatzerlöse bei TaylorMade-adidas Golf um 12%. In den Anderen Asiatischen Märkten lag der Umsatz währungsbereinigt um 3% über dem Vorjahresniveau. Dieser Anstieg resultierte hauptsächlich aus Umsatzzuwächsen bei Rockport. Lateinamerika verzeichnete aufgrund von Umsatzwachstum bei TaylorMade-adidas Golf und Rockport einen währungsbereinigten Umsatzanstieg um 10%. Währungseffekte wirkten sich positiv auf die Umsatzerlöse der Regionen in Euro aus

» siehe 20.

### Währungsbereinigter Umsatzanstieg um 1% bei TaylorMade-adidas Golf

Im Geschäftsjahr 2010 nahm der Umsatz bei TaylorMade-adidas Golf währungsbereinigt um 1% zu. Das Umsatzwachstum war hauptsächlich eine Folge von höheren Umsätzen in den Kategorien Bälle und Eisen, wobei Produkte wie der Penta TP Ball und die Burner Eisen zu diesem Anstieg beitrugen. Auch adidas Golf verzeichnete infolge höherer Umsatzerlöse mit Schuhen und Bekleidung einen Umsatzanstieg. Bei Ashworth verringerte sich der Umsatz aufgrund des Wegfalls von Umsatzerlösen aus dem Vorjahr im Zusammenhang mit einer Lizenzvereinbarung, die nicht verlängert wurde. Zudem trugen Sonderlagerräumungsverkäufe, die 2009 zur Ausrichtung der Marke auf ihre neue Positionierung erfolgten, zu dieser Entwicklung bei. Währungseffekte wirkten sich positiv auf die Umsatzerlöse in Euro aus. Im Geschäftsjahr 2010 stieg der Umsatz von TaylorMade-adidas Golf um 9% auf 909 Mio. € (2009: 831 Mio. €).

### Währungsbereinigter Umsatz von Rockport wächst um 2%

Im Jahr 2010 legte der Umsatz von Rockport auf währungsbereinigter Basis um 2% zu. Das Umsatzwachstum im Bereich Schuhe glich einen Rückgang bei Accessoires und Bekleidung mehr als aus. Nach Regionen betrachtet konnte Rockport eine deutliche Umsatzsteigerung in den Anderen Asiatischen Märkten, insbesondere in Japan und Südkorea, verzeichnen. Dieser Umsatzanstieg konnte niedrigere Umsatzerlöse in Nordamerika mehr als ausgleichen. Währungseffekte wirkten sich positiv auf die Umsatzerlöse in Euro aus. Der Umsatz von Rockport stieg im Jahr 2010 um 9% auf 252 Mio. € (2009: 232 Mio. €).

### Andere Geschäftssegmente im Überblick

in Mio. €

16

|                                                  | 2010  | 2009  | Veränderung |
|--------------------------------------------------|-------|-------|-------------|
| Umsatzerlöse                                     | 1.420 | 1.293 | 10%         |
| Bruttoergebnis                                   | 618   | 509   | 21%         |
| Bruttomarge                                      | 43,5% | 39,3% | 4,2 PP      |
| Segmentbetriebsergebnis                          | 369   | 283   | 30%         |
| Segmentbetriebsergebnis im Verhältnis zum Umsatz | 26,0% | 21,9% | 4,1 PP      |

### Andere Geschäftssegmente Umsatzerlöse nach Quartalen

in Mio. €

17

|         |     |
|---------|-----|
| Q1 2009 | 295 |
| Q1 2010 | 316 |
| Q2 2009 | 362 |
| Q2 2010 | 387 |
| Q3 2009 | 326 |
| Q3 2010 | 382 |
| Q4 2009 | 310 |
| Q4 2010 | 333 |

### Andere Geschäftssegmente Bruttomarge nach Quartalen

in %

18

|         |      |
|---------|------|
| Q1 2009 | 39,4 |
| Q1 2010 | 45,0 |
| Q2 2009 | 38,3 |
| Q2 2010 | 44,2 |
| Q3 2009 | 37,8 |
| Q3 2010 | 45,3 |
| Q4 2009 | 42,0 |
| Q4 2010 | 39,4 |

### Andere Geschäftssegmente Betriebsergebnis nach Quartalen

in Mio. €

19

|         |     |
|---------|-----|
| Q1 2009 | 43  |
| Q1 2010 | 92  |
| Q2 2009 | 85  |
| Q2 2010 | 105 |
| Q3 2009 | 76  |
| Q3 2010 | 110 |
| Q4 2009 | 78  |
| Q4 2010 | 62  |



### Währungsbereinigter Umsatz von Reebok-CCM Hockey um 3 % über Vorjahresniveau

Der währungsbereinigte Umsatz von Reebok-CCM Hockey stieg im Geschäftsjahr 2010 vor allem aufgrund von höheren Umsatzerlösen im Bereich Zubehör um 3 %. Diese Entwicklung wurde durch neu eingeführte Produkte wie die Reebok 11K und CCM U+ Crazy Light Schlittschuhe unterstützt. Nach Regionen betrachtet verzeichnete Reebok-CCM Hockey ein Umsatzwachstum im mittleren einstelligen Bereich in Skandinavien und im niedrigen einstelligen Bereich in Nordamerika. Währungseffekte wirkten sich positiv auf die Umsatzerlöse in Euro aus. Der Umsatz von Reebok-CCM Hockey legte 2010 um 13 % auf 200 Mio. € zu (2009: 177 Mio. €).

### Bruttomarge in Anderen Geschäftssegmenten um 4,2 Prozentpunkte verbessert

Die Bruttomarge in den Anderen Geschäftssegmenten lag 2010 mit 43,5 % um 4,2 Prozentpunkte über dem Vorjahreswert (2009: 39,3 %). Verantwortlich hierfür war vor allem eine deutliche Verbesserung der Bruttomarge bei TaylorMade-adidas Golf infolge höherer Produktmargen. Zudem verbesserte sich die Bruttomarge von Rockport deutlich gegenüber dem Vorjahreswert aufgrund eines niedrigeren Anteils von Lageräumungsverkäufen. Absolut gesehen stieg das Bruttoergebnis in den Anderen Geschäftssegmenten im Jahr 2010 um 21 % auf 618 Mio. € (2009: 509 Mio. €)

» siehe 16.

### Segmentaufwendungen aus der betrieblichen Tätigkeit im Verhältnis zum Umsatz um 0,1 Prozentpunkte gestiegen

Die Segmentaufwendungen aus der betrieblichen Tätigkeit nahmen 2010 um 11 % auf 249 Mio. € zu (2009: 225 Mio. €). Hauptgrund hierfür war insbesondere der Ausbau des eigenen Einzelhandels bei Rockport. Die Segmentaufwendungen aus der betrieblichen Tätigkeit im Verhältnis zum Umsatz nahmen um 0,1 Prozentpunkte auf 17,6 % zu (2009: 17,4 %).

### Segmentbetriebsergebnis steigt um 30 %

Das Segmentbetriebsergebnis verbesserte sich im Geschäftsjahr 2010 um 30 % auf 369 Mio. € (2009: 283 Mio. €). Die operative Marge des Segments stieg aufgrund von Verbesserungen bei TaylorMade-adidas Golf und Rockport um 4,1 Prozentpunkte auf 26,0 % (2009: 21,9 %) » siehe 16. Diese Verbesserungen waren hauptsächlich auf höhere Bruttomargen zurückzuführen.

### Anzahl der Mitarbeiter geht zurück

Zum Jahresende 2010 waren 1.676 Mitarbeiter in den Anderen Geschäftssegmenten beschäftigt. Das bedeutet einen Rückgang um 4 % gegenüber 1.750 Mitarbeitern im Vorjahr. Verantwortlich für diese Entwicklung waren in erster Linie Reorganisationsmaßnahmen bei TaylorMade-adidas Golf und Reebok-CCM Hockey. Gemessen in Vollzeit-Äquivalenten ging die Mitarbeiteranzahl in den Anderen Geschäftssegmenten um 5 % zurück und belief sich zum Jahresende 2010 auf 1.599 (2009: 1.676).

### Andere Geschäftssegmente Umsatzerlöse nach Regionen

in Mio. €

20

|                             | 2010         | 2009         | Veränderung | Währungsbereinigte Veränderung |
|-----------------------------|--------------|--------------|-------------|--------------------------------|
| Westeuropa                  | 235          | 224          | 5 %         | 1 %                            |
| Europäische Schwellenländer | 35           | 30           | 17 %        | 8 %                            |
| Nordamerika                 | 735          | 685          | 7 %         | 0 %                            |
| China                       | 29           | 24           | 18 %        | 12 %                           |
| Andere Asiatische Märkte    | 372          | 319          | 17 %        | 3 %                            |
| Lateinamerika               | 14           | 12           | 16 %        | 10 %                           |
| <b>Gesamt<sup>1)</sup></b>  | <b>1.420</b> | <b>1.293</b> | <b>10 %</b> | <b>2 %</b>                     |

1) Bei Zahlen können Rundungsdifferenzen auftreten.

### 2010 Andere Geschäftssegmente Umsatzerlöse nach Regionen

21

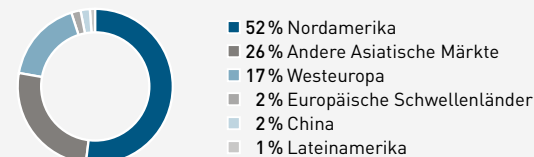

### 2010 Andere Geschäftssegmente Umsatzerlöse nach Marken

22

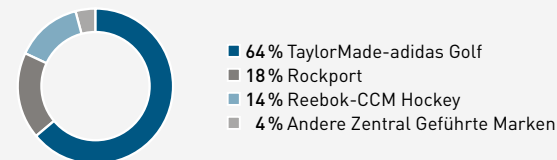

# Risiko- und Chancenbericht

Der adidas Konzern versucht jederzeit systematisch, Chancen frühzeitig zu erkennen und zu ergreifen, um den Gewinn zu sichern und gleichzeitig den Shareholder Value langfristig zu steigern. Dabei ist uns bewusst, dass wir gewisse Risiken eingehen müssen, um Chancen bestmöglich nutzen zu können. Unsere Grundsätze und unser System für das Risiko- und Chancenmanagement stellen sicher, dass wir unsere Geschäftstätigkeit in einem gut kontrollierten Unternehmensumfeld ausüben können.

## Analyse des Risiko- und Chancenmanagements 2010

Im Zuge der jüngsten weltweiten Wirtschaftskrise sind die Erwartungen von Investoren und Finanzmärkten im Hinblick auf eine transparente und umfassende Risiko- und Chancenkommunikation deutlich gestiegen. Aus diesem Grund haben wir 2010 unsere Risiko- und -systeme genau analysiert. Ziel war dabei, unseren konzernweiten Ansatz zum Risiko- und Chancenmanagement zu stärken, das Bewusstsein innerhalb des Konzerns zu schärfen sowie gegebenenfalls die interne und externe Berichterstattung zu verbessern. Die Umsetzung und Weiterentwicklung des Systems wurde der Konzernrisikomanagementfunktion übertragen, die für den zentral gesteuerten Risiko- und Chancenmanagementprozess verantwortlich ist. Die zentrale Konzernrisikomanagementfunktion hat einen Kreis von Vertretern der obersten Führungsebene (so genannte Risikoverantwortliche) bestimmt, dem sämtliche, direkt an den Vorstand der adidas AG berichtende Manager sowie die Geschäftsführer aller unserer Märkte angehören. Zu den regelmäßigen Aufgaben dieser Risikoverantwortlichen zählen das Management und die Überwachung von Risiken und Chancen in ihren jeweiligen Verantwortungsbereichen.

Im Zuge dieses Prozesses haben wir eine überarbeitete Konzernrichtlinie zum Risikomanagement (Group Risk Management Policy) erarbeitet und umgesetzt.

In dieser Richtlinie, die allen Mitarbeitern online zur Verfügung steht, sind die Grundsätze, Verfahren, Instrumente, Risikobereiche und Kompetenzen innerhalb des Konzerns niedergelegt. Ferner sind darin auch die Anforderungen an die Berichterstattung und Kommunikationspflichten festgelegt.

## Grundlagen des Risiko- und Chancenmanagements

Der adidas Konzern wird regelmäßig mit Risiken und Chancen konfrontiert, die sich sowohl positiv als auch negativ auf die Vermögenswerte des Konzerns, den Gewinn, den Cashflow, aber auch auf immaterielle Werte wie das Markenimage auswirken können.

Wir verstehen Risiken als potenzielle finanzielle Auswirkungen durch das Eintreten eines internen oder externen Ereignisses (bzw. einer Folge von Ereignissen), welches das Erreichen unserer Geschäftsziele negativ beeinflussen kann. Chancen definieren wir als potenzielle finanzielle Auswirkungen durch das Eintreten eines internen oder externen Ereignisses (bzw. einer Folge von Ereignissen), welches das Erreichen unserer Geschäftsziele positiv beeinflussen kann.

Wir haben die wichtigsten Punkte in diesem Risiko- und Chancenbericht in drei Hauptteile gegliedert: strategische und operative, auf die Einhaltung von Standards bezogene und finanzielle Risiken und Chancen.

## Risiko- und Chancenmanagementsystem

Der Vorstand der adidas AG trägt die Gesamtverantwortung für ein effektives Risiko- und Chancenmanagementsystem, durch das ein umfassendes und einheitliches Management sämtlicher wesentlicher Risiken und Chancen sichergestellt wird. Der Aufsichtsrat der adidas AG ist dafür zuständig, die Effektivität des Konzernrisikomanagementsystems zu überwachen, wobei diese Zuständigkeit vom Prüfungsausschuss des Aufsichtsrats wahrgenommen wird.

Sofern relevant, schließt die interne Revision (Global Internal Audit) im Rahmen ihrer regulären Prüfungstätigkeit die Einhaltung der Vorschriften der Konzernrichtlinie zum Risikomanagement durch die Risikoverantwortlichen in den Prüfungsumfang mit ein.

Für ein möglichst effektives Risiko- und Chancenmanagement haben wir ein integriertes Risiko- und Chancenmanagementsystem eingeführt, in dem Risiken und Chancen identifiziert, bewertet, gesteuert, überwacht und systematisch berichtet werden. Hauptziel dieses Systems ist es, den Shareholder Value zu sichern und weiter zu steigern. Dazu setzen wir bei der Entscheidungsfindung auf einen Ansatz, der chancenorientiert ist, ohne dabei die Risiken außer Acht zu lassen.

## adidas Konzern Risiko- und Chancenmanagementsystem

01

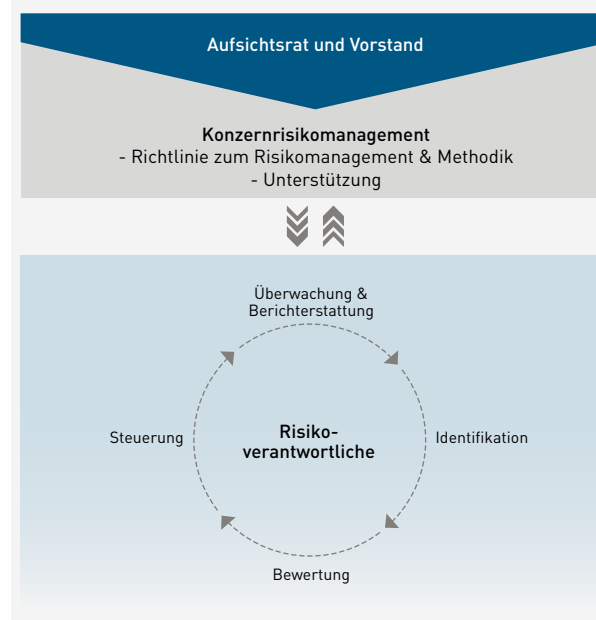

Ein wesentlicher Bestandteil eines optimalen Risiko- und Chancenmanagementsystems ist für uns die Identifikation und Bewertung von Risiken sowie risikomindernden Maßnahmen und Chancen an der Stelle, an der sie auftreten. Daneben ist ein aufeinander abgestimmter Ansatz der Steuerung, Überwachung und Berichterstattung von besonderer Bedeutung. Somit ist das Risiko- und Chancenmanagement eine konzernweite Aufgabe, die bei den Erkenntnissen des Managements unserer Geschäftseinheiten auf lokaler Ebene ansetzt.

Die wichtigsten Elemente unseres Risiko- und Chancenmanagementprozesses sind:

#### **Risiko- und Chancenidentifikation:**

Wir überwachen fortlaufend sowohl das gesamtwirtschaftliche Umfeld und die Entwicklungen in der Sportartikelindustrie als auch interne Prozesse, um Risiken und Chancen so früh wie möglich zu identifizieren. Die Risikoverantwortlichen sind hauptverantwortlich für die Identifikation der Risiken und Chancen. Um die Risikoverantwortlichen bei der Identifikation und Kategorisierung von Risiken und Chancen zu unterstützen, hat die zentrale Konzernrisikomanagementfunktion einen Katalog potenzieller Risiken („Risk Universe“) erstellt. Zu den Aufgaben der jeweiligen Risikoverantwortlichen zählt einerseits die aktive Beobachtung der möglichen finanziellen Auswirkungen von Veränderungen der gesamtwirtschaftlichen, politischen und gesellschaftlichen Lage. Andererseits verfolgen die Risikoverantwortlichen genau die Entwicklung von Marken, Vertriebskanälen und Preisen.

Ein Schlüsselement im Identifikationsprozess ist die primäre qualitative und quantitative Marktforschung. Dazu zählen beispielsweise Trendscouting, Konsumentenbefragungen sowie Erfahrungswerte unserer Geschäftspartner und aus den von uns kontrollierten Verkaufsflächen. Unterstützt wird dies durch weltweite Marktforschung und Wettbewerbsanalyse. Mit diesem Prozess versuchen wir, die Märkte, Kategorien, Zielgruppen und Produkte zu ermitteln, die auf lokaler und globaler Ebene in der Zukunft die größten Wachstumschancen bieten. Unsere Analysen konzentrieren sich gleichermaßen auf die Bereiche, in denen Risiken durch Marktsättigung, zunehmenden Wettbewerb oder durch sich wandelnde Vorlieben der Konsumenten bestehen.

**Risiko- und Chancenbewertung:** Damit wir ein effektives Risiko- und Chancenmanagement sicherstellen können, bewerten wir die identifizierten Risiken und Chancen einzeln anhand einer systematischen Bewertungsmethode. Diese wird konsequent angewandt und ermöglicht neben einer angemessenen Prioritätensetzung auch eine angemessene Zuweisung von Ressourcen. Nach unserer Risikomanagementmethode wird für jedes Risiko und jede Chance ein bestimmter Wert berechnet, und zwar durch Multiplikation der möglichen finanziellen Auswirkung mit der Eintrittswahrscheinlichkeit. Unter finanzieller Auswirkung verstehen wir hierbei den größtmöglichen potenziellen Einfluss auf das Betriebsergebnis vor konzerninternen Lizenzgebühren. Die finanzielle Auswirkung wird anhand von fünf Kategorien bewertet: unwesentlich, gering, moderat, wesentlich und groß.

Wahrscheinlichkeit bezeichnet die Möglichkeit, dass ein bestimmtes Risiko bzw. eine bestimmte Chance eintritt. Die Eintrittswahrscheinlichkeit für einzelne Risiken und Chancen wird auf einer Skala von 0 % bis 100 % bewertet und in fünf Kategorien zusammengefasst, um für verschiedene Risiko- und Chancenkategorien eine aggregierte Wahrscheinlichkeit darzustellen. Diese fünf Kategorien lauten unwahrscheinlich, möglich, wahrscheinlich, sehr wahrscheinlich und höchstwahrscheinlich.

Da Risiken und Chancen unterschiedliche Merkmale aufweisen, haben wir verschiedene Methoden für die Beurteilung der potenziellen finanziellen Folgen festgelegt. Für jedes Einzelrisiko müssen der Brutorisikowert und der Nettorisikowert ermittelt werden. Der Brutorisikowert stellt dabei die größtmögliche negative finanzielle Auswirkung vor eventuellen risikomindernden Maßnahmen dar. Der Nettorisikowert stellt die erwartete finanzielle Auswirkung nach Umsetzung sämtlicher risikomindernder Maßnahmen dar. Dieser Ansatz ermöglicht einerseits ein umfassendes Verständnis darüber, welchen Einfluss einzelne risikomindernde Maßnahmen haben und bildet andererseits die Grundlage für Szenarioanalysen und -simulationen. Darüber hinaus müssen die jeweiligen Risikoverantwortlichen jedes Risiko unter zeitlichen Gesichtspunkten betrachten, um zu ermitteln, wann es eintreten könnte. Zur Bewertung ihres potenziellen Einflusses auf den Ergebnisbeitrag werden alle Chancen auf ihre Umsetzbarkeit, mögliche Risiken und den erwarteten Ergebnisbeitrag hin untersucht.

Diesen Ansatz verfolgen wir auf Konzern- sowie in stärkerem Maße auf Marken- und Marktebene sowohl bei langfristigen strategischen Chancen als auch bei eher kurzfristigen taktischen und opportunistischen Maßnahmen.

**Risiko- und Chancensteuerung:** Risiken und Chancen werden gemäß den Grundsätzen des Risiko- und Chancenmanagements gesteuert, die in der Konzernrichtlinie zum Risikomanagement dargelegt sind. Die Risikoverantwortlichen haben die Aufgabe, geeignete risikomindernde Maßnahmen zu erarbeiten und umzusetzen sowie Chancen in ihren jeweiligen Verantwortungsbereichen zu nutzen. Darüber hinaus müssen die Risikoverantwortlichen eine allgemeine Strategie zum Umgang mit den identifizierten Risiken erarbeiten. Zu diesen Strategien zählen Risikovermeidung, Risikoverringung mit dem Ziel, die finanzielle Auswirkung bzw. die Eintrittswahrscheinlichkeit zu minimieren, Risikotransfer auf Dritte oder Risikoakzeptanz. Die Entscheidung über die Umsetzung der entsprechenden Strategie berücksichtigt auch die Kosten in Verbindung mit der Effektivität etwaiger geplanter risikomindernder Maßnahmen.



**Risiko- und Chancenüberwachung und -berichterstattung:** Durch unser integriertes Risiko- und Chancenmanagementsystem soll die Transparenz von Konzernrisiken und -chancen erhöht werden. Da sowohl Risiken als auch Chancen ständigen Änderungen unterliegen, wird deren Entwicklung sowie Angemessenheit und Effektivität der aktuellen Strategie zum Umgang mit Risiken und Chancen von den Risikoverantwortlichen kontinuierlich beobachtet. Die Risikoberichterstattung umfasst zwei separate, regelmäßige Elemente:

Auf der einen Seite müssen Risikoverantwortliche Brutto Risiken mit einer potenziellen Auswirkung auf den Ergebnisbeitrag von mehr als 50 Mio. € dem Konzernrisikomanagement melden, und zwar unabhängig davon, wie hoch die Eintrittswahrscheinlichkeit eines solchen Risikos ist. Ebenso müssen Netto Risiken mit einer potenziellen Auswirkung auf den Ergebnisbeitrag von mehr als 1 Mio. € und die entsprechende Eintrittswahrscheinlichkeit berichtet werden. Wesentliche Veränderungen bei zuvor gemeldeten Risiken bzw. neu identifizierte Risiken mit einer potenziellen Nettoauswirkung auf den Ergebnisbeitrag von mehr als 5 Mio. € werden ad hoc dem Konzernrisikomanagement angezeigt. Chancen werden separat aggregiert, wobei die Risikoverantwortlichen sämtliche Chancen mit einer Nettoauswirkung auf den Ergebnisbeitrag von mehr als 1 Mio. € berichten.

Auf der anderen Seite stellt das Konzernrisikomanagement dem Vorstand der adidas AG einen vierteljährlich aktualisierten Bericht auf Basis der übermittelten Daten zur Verfügung. Sofern Sachverhalte identifiziert werden, die aufgrund ihrer Wesentlichkeit einer umgehenden Information an den Vorstand bedürfen, erfolgt die Berichterstattung außerhalb der vorgesehenen Berichtswege als ad hoc-Berichterstattung.

#### **Beschreibung der wesentlichen Merkmale des internen Kontroll- und Risikomanagementsystems im Hinblick auf den Konzernrechnungslegungsprozess gemäß § 315 Abs. 2 Nr. 5 HGB**

Wir verstehen das interne Kontroll- und Risikomanagementsystem im Hinblick auf den Rechnungslegungsprozess des adidas Konzerns als System, das in das konzernweit geltende Risikomanagementsystem eingebettet ist. Das Risikomanagementsystem im Hinblick auf den Konzernrechnungslegungsprozess zielt darauf ab, das Risiko der Falschaussage in der Konzernrechnungslegung sowie in der externen Berichterstattung zu minimieren. Die unternehmensweite Einhaltung gesetzlicher und unternehmensinterner Vorschriften muss dafür gewährleistet sein. Wir verstehen das Risikomanagementsystem als Prozess, der nach dem Prinzip der Funktionstrennung verschiedene Teilprozesse in den Bereichen Accounting, Controlling, Taxes, Treasury, Planning, Reporting und Legal zur Identifikation, Bewertung, Steuerung, Überwachung und Kommunikation von Risiken hinsichtlich der Finanzberichterstattung umfasst. Den eindeutig definierten Teilprozessen in den Bereichen sind jeweils klare Verantwortlichkeiten zugeordnet. Das Risikomanagementsystem dient im ersten Schritt der Identifikation und Bewertung, weiterhin der Begrenzung und Überprüfung erkannter Risiken im Konzernrechnungslegungsprozess, die dem Ziel der Regelungskonformität des Konzernabschlusses entgegenstehen könnten.

Das interne Kontrollsystem des Rechnungslegungsprozesses soll gewährleisten, dass trotz identifizierter Risiken in der Finanzberichterstattung ein mit hinreichender Sicherheit regelungskonformer Konzernabschluss erstellt wird.

Zur Sicherstellung der Wirksamkeit des internen Kontroll- und Risikomanagementsystems erfolgen regelmäßige Überprüfungen rechnungslegungsrelevanter Prozesse durch die Interne Revision. Im Rahmen der Abschlussprüfung zum Jahresende untersucht zudem der externe Abschlussprüfer ausgewählte interne Kontrollen und beurteilt deren Effektivität. Darüber hinaus werden ausgewählte Aspekte der eingesetzten IT-Systeme geprüft. Eine absolute Sicherheit kann jedoch auch mit angemessenen und funktionsfähigen Systemen nicht gewährleistet werden.

Die adidas AG legt Konzernbilanzierungsrichtlinien einheitlich fest und aktualisiert diese regelmäßig in Abhängigkeit von regulatorischen Änderungen und unternehmensinternen Entwicklungen. Durch eindeutige Vorgaben soll der Ermessensspielraum der Mitarbeiter bei Ansatz, Bewertung und Ausweis von Vermögenswerten und Schulden eingeschränkt und somit das Risiko konzernuneinheitlicher Rechnungslegungspraktiken verringert werden. Über das konzernweite Intranet sind diese Richtlinien allen in den Rechnungslegungsprozess eingebundenen Mitarbeitern zugänglich. Wesentliche Änderungen werden quartalsweise an alle Tochtergesellschaften kommuniziert. Die Einhaltung der Rechnungslegungsvorschriften soll durch die durchgängige Einhaltung des Vier-Augen-Prinzips in den rechnungslegungsrelevanten Prozessen gewährleistet werden. Den Tochtergesellschaften sind bestimmte Berichtspflichten und -umfänge zwingend vorgegeben. Die Einhaltung der Berichtspflichten und -fristen wird zentral durch das Konzernrechnungswesen überwacht.

Die Buchhaltung der Tochtergesellschaften wird entweder lokal durch die Gesellschaft oder durch ein Shared Service Center durchgeführt, das diese Leistung für mehrere Tochtergesellschaften erbringt. Die eingesetzten EDV-Systeme basieren größtenteils auf SAP AFS. Bei bestimmten Konzerngesellschaften kommt eine selbst entwickelte ERP-Software auf Navision-Basis zum Einsatz. Die Einzelabschlüsse werden schließlich in ein zentrales Konsolidierungssystem, basierend auf SAP SEM-BCS, überführt. Auf Konzernebene wird innerhalb des Konzernrechnungswesens und des Controllings die Ordnungsmäßigkeit und Verlässlichkeit der von den Tochtergesellschaften vorgelegten Einzelabschlüsse überprüft. Für die Darstellung selten auftretender und nicht routinemäßig verarbeitbarer Geschäftsvorfälle werden im Bedarfsfall unabhängige Expertenmeinungen eingeholt. Kontrollen im Rahmen des Konsolidierungsprozesses, wie der Schulden- oder Aufwands- und Ertragskonsolidierung, erfolgen sowohl automatisch (systemseitig) als auch manuell. Eventuelle Mängel werden korrigiert und an die Tochtergesellschaften zurückberichtet.

Alle eingesetzten Finanzsysteme sind durch entsprechende Berechtigungskonzepte und Zugangsbeschränkungen vor Missbrauch geschützt. Zugriffsberechtigungen werden regelmäßig überprüft und gegebenenfalls aktualisiert. Durch die zentrale Steuerung und Überwachung nahezu sämtlicher IT-Systeme, durch das zentrale Management von Veränderungsprozessen und mit Hilfe regelmäßiger Systemsicherungen wird seitens der Konzern-IT sowohl das Risiko eines Datenverlusts als auch eines Ausfalls rechnungslegungsrelevanter IT-Systeme minimiert.

## Strategische und operative Risiken

### Gesamtwirtschaftliche Risiken

Das Wachstum der Sportartikelindustrie ist in hohem Umfang von Konsumausgaben und Konsumentenvertrauen abhängig. Plötzliche konjunkturelle Rückgänge oder gesellschaftspolitische Faktoren wie z. B. Bürgerunruhen, Verstaatlichung oder Enteignung, besonders in Regionen, in denen der Konzern stark vertreten ist, stellen daher ein bedeutendes kurzfristiges Risiko für die Umsatzentwicklung dar. Um dieses Risiko zu vermindern, strebt der Konzern eine gleichmäßige Verteilung des Umsatzes zwischen den wichtigsten Regionen der Welt, aber auch zwischen reifen Märkten und Schwellenländern, an. Zu den Kernelementen unserer Positionierung im Leistungssport zählt außerdem die Nutzung eines umfassenden Veranstaltungs- und Partnerschaftsportfolios, bei dem die Nachfrage vorhersehbarer ist und weniger von gesamtwirtschaftlichen Entwicklungen beeinflusst wird. Für das Jahr 2011 geht der Konzern von einem Wachstum der weltweiten Wirtschaft aus, das unseren Erwartungen zufolge jedoch regional unterschiedlich ausfallen wird » siehe Nachtrag und Ausblick, S. 174. Deshalb schätzen wir die Wahrscheinlichkeit, dass sich ungünstige gesamtwirtschaftliche Entwicklungen auf unser Geschäft auswirken könnten, als wahrscheinlich ein. Damit hat sich das Risiko gegenüber dem Vorjahr verringert. Die potenzielle finanzielle Auswirkung derartiger Ereignisse stufen wir jedoch nach wie vor als wesentlich ein.

### Risiken aus der Konsumentennachfrage

Das Versäumnis, Veränderungen in der Konsumentennachfrage nach Sportartikeln vorausszusehen und entsprechend zu reagieren, stellt eine der ernsthaftesten Bedrohungen für unsere Branche dar. Die Konsumentennachfrage kann sich schnell und unerwartet ändern, insbesondere in den Modebereichen unseres Geschäfts. Da die durchschnittlichen Produktentwicklungszyklen in unserer Branche bei 12 bis 18 Monaten liegen, besteht für den adidas Konzern das Risiko eines kurzfristigen Umsatzverlusts, wenn wir nicht in der Lage sind, schnell auf solche Veränderungen zu reagieren. Noch kritischer allerdings ist das Risiko, einen neuen Konsumtrend auf Dauer zu übersehen oder das potenzielle Ausmaß des Trends über einen längeren Zeitraum nicht zu erkennen.

Um dieses Risiko zu vermindern, ist es deshalb eine zentrale Aufgabe all unserer Marken und speziell der jeweiligen Risikoverantwortlichen, etwaige Veränderungen in der Konsumentennachfrage zu identifizieren und so frühzeitig wie möglich darauf zu reagieren. Zu diesem Zweck nutzen wir umfassende primäre und sekundäre Marktforschungsinstrumente, wie in den Erläuterungen zu unserem Risiko- und Chancenidentifikationsprozess dargestellt wird.

Als eines der branchenführenden Unternehmen sind unsere Markenstrategien allerdings darauf ausgerichtet, das sich verändernde Konsumenten-umfeld zu beeinflussen, anstatt darauf zu reagieren. Wir investieren beträchtliche Ressourcen in Forschung und Entwicklung, um innovativ zu bleiben und neue Technologien und Designs auf den Markt zu bringen » siehe Forschung und Entwicklung, S. 110.

## Übersicht Unternehmensrisiken

02

|                                                                                    | Eintrittswahrscheinlichkeit | Mögliche finanzielle Auswirkung |
|------------------------------------------------------------------------------------|-----------------------------|---------------------------------|
| <b>Strategische und operative Risiken</b>                                          |                             |                                 |
| Gesamtwirtschaftliche Risiken                                                      | Wahrscheinlich              | Wesentlich                      |
| Risiken aus der Konsumentennachfrage                                               | Wahrscheinlich              | Moderat                         |
| Risiken aus der Branchenkonsolidierung                                             | Sehr wahrscheinlich         | Wesentlich                      |
| Risiken durch außergewöhnliche externe Störfälle                                   | Unwahrscheinlich            | Groß                            |
| Risiken durch Verlust von Markenimage                                              | Möglich                     | Wesentlich                      |
| Risiken aufgrund des eigenen Einzelhandels                                         | Wahrscheinlich              | Moderat                         |
| Risiken durch steigende Einstandskosten                                            | Höchstwahrscheinlich        | Groß                            |
| Lieferantenausfallrisiken                                                          | Möglich                     | Moderat                         |
| Lagerbestandsrisiken                                                               | Möglich                     | Moderat                         |
| Kundenrisiken                                                                      | Höchstwahrscheinlich        | Groß                            |
| Regulatorische Risiken                                                             | Wahrscheinlich              | Wesentlich                      |
| Risiken durch den Verlust wichtiger Veranstaltungs- oder Promotion-Partnerschaften | Wahrscheinlich              | Moderat                         |
| Risiken in Produktdesign und -entwicklung                                          | Möglich                     | Gering                          |
| Personalrisiken                                                                    | Wahrscheinlich              | Moderat                         |
| IT-Risiken                                                                         | Unwahrscheinlich            | Wesentlich                      |
| <b>Risiken in Verbindung mit der Einhaltung von Standards</b>                      |                             |                                 |
| Rechtliche Risiken                                                                 | Möglich                     | Moderat                         |
| Sozial- und Umweltrisiken                                                          | Sehr wahrscheinlich         | Moderat                         |
| Risiken aus Produktfälschungen und -nachahmungen                                   | Höchstwahrscheinlich        | Moderat                         |
| Produktqualitätsrisiken                                                            | Möglich                     | Moderat                         |
| Risiken aufgrund der Nichteinhaltung von Standards                                 | Unwahrscheinlich            | Gering                          |
| <b>Finanzrisiken</b>                                                               |                             |                                 |
| Ausfallrisiken                                                                     | Möglich                     | Moderat                         |
| Finanzierungs- und Liquiditätsrisiken                                              | Unwahrscheinlich            | Gering                          |
| Währungsrisiken                                                                    | Höchstwahrscheinlich        | Groß                            |
| Zinsrisiken                                                                        | Höchstwahrscheinlich        | Moderat                         |

## Bewertungskategorien der Unternehmensrisiken

In aufsteigender Reihenfolge

03

| Eintrittswahrscheinlichkeit | Mögliche finanzielle Auswirkung |
|-----------------------------|---------------------------------|
| Unwahrscheinlich            | Unwesentlich                    |
| Möglich                     | Gering                          |
| Wahrscheinlich              | Moderat                         |
| Sehr wahrscheinlich         | Wesentlich                      |
| Höchstwahrscheinlich        | Groß                            |

Darüber hinaus sind wir stets bestrebt, durch unsere umfangreichen Programme für Marketing, Produkt- und Markenkommunikation die Nachfrage von Konsumenten nach unseren Marken zu verstärken. Wir konzentrieren uns außerdem auf Verbesserungen in unserer Beschaffungskette, um die Zeitspanne zwischen Produktkonzipierung und Markteinführung („Creation-to-Shelf“) zu verkürzen » siehe Global Operations, S. 106.

Angesichts des breiten Spektrums unseres Produktangebots, des Feedbacks aus dem Einzelhandel und weiterer Frühindikatoren » siehe Internes Konzernmanagementsystem, S. 126, bleibt unsere Einschätzung des Risikos aus Veränderungen der Konsumentennachfrage gegenüber dem Vorjahr unverändert. Aus diesem Grund schätzen wir Veränderungen der Konsumentennachfrage als wahrscheinlich und die potenziellen finanziellen Auswirkungen als moderat ein.

#### Risiken aus der Branchenkonsolidierung

Der adidas Konzern ist Risiken aus der Konsolidierung von Märkten sowie aus strategischen Allianzen zwischen Wettbewerbern und/oder Einzelhändlern ausgesetzt. Diese können zu einer Reduzierung unserer Verhandlungsmacht und zu schädlichem Wettbewerbsverhalten wie z. B. Preisschlächten führen. Ungewöhnliche Preisreduzierungen und weniger zugewiesene Regalfläche bei Einzelhändlern sind typische potenzielle Auswirkungen dieser Risiken. So kann ein anhaltend wettbewerbsintensives Umfeld in einem für den Konzern wichtigen Markt die Entwicklung von Umsatz und Profitabilität gefährden.

Um dieses Risiko zu mindern, sind wir stets bestrebt, für eine regional ausgeglichene Umsatzverteilung zu sorgen, und passen die Vertriebsstrategie des Konzerns entsprechend kontinuierlich an. Dabei stehen insbesondere Initiativen in Bezug auf von uns selbst kontrollierte Verkaufsflächen im Mittelpunkt » siehe Strategie Global Sales, S. 82. Obwohl die Marktkapitalisierung vieler Unternehmen in der Sportartikelbranche im Jahr 2010 erheblich gestiegen ist, gehen wir davon aus, dass sich angesichts der guten Rahmenbedingungen auf dem Kreditmarkt sowie verbesserter Unternehmensbilanzen und Geschäftsaussichten die Aktivitäten im Bereich Fusionen und Übernahmen intensivieren werden. Infolgedessen betrachten wir die Eintrittswahrscheinlichkeit von Risiken aufgrund von Marktkonsolidierung weiterhin als sehr wahrscheinlich. Die potenziellen finanziellen Auswirkungen beurteilen wir als wesentlich.

#### Risiken durch außergewöhnliche externe Störfälle

Der adidas Konzern ist externen Risiken wie Naturkatastrophen, Epidemien, Feuer und Unfällen ausgesetzt. Schäden an Gebäuden, Produktionsanlagen und Lagerhäusern des Konzerns oder seiner Zulieferer und an unterwegs befindlicher Ware können zu Sachschäden oder Unterbrechungen der Geschäftsaktivitäten führen. Dem wirken wir auf verschiedene Weise entgegen. Beispielsweise setzen wir zuverlässige Zulieferer und Logistikanbieter ein, die hohe Sicherheitsstandards garantieren. Zusätzlich zu unserem Versicherungsschutz haben wir auch Notfallpläne implementiert, um potenzielle negative Auswirkungen zu minimieren.

Wir schätzen die Eintrittswahrscheinlichkeit von Risiken durch außergewöhnliche externe Störfälle als unwahrscheinlich ein. Im Zusammenhang mit der in 2010 überarbeiteten Methodik zur Risikobeurteilung haben wir jedoch unsere Einschätzung der potenziellen finanziellen Auswirkungen korrigiert. Sollten Risiken durch außergewöhnliche externe Störfälle eintreten, erwarten wir nun große finanzielle Auswirkungen. Damit berücksichtigen wir die weitreichenden und verheerenden Folgen, die Naturkatastrophen oder terroristische Handlungen theoretisch für unser Geschäft haben könnten.

#### Risiken durch Verlust von Markenimage

Der adidas Konzern ist einem beträchtlichen Risiko ausgesetzt, falls es uns nicht gelingen sollte, die Aufmerksamkeit, Verbundenheit und Kaufabsicht der Konsumenten in Bezug auf unsere Marken auf einem konstant hohen Niveau zu halten. Wenn die Marken des adidas Konzerns nicht genügend Marketingressourcen bereitstellen, um unsere Promotion-Partnerschaften und Markenkampagnen nachhaltig zu nutzen, besteht darüber hinaus das Risiko, dass wir Aufmerksamkeit und Attraktivität einbüßen. Wir mindern diese Risiken durch klar definierte Mission Statements, Werte und Ziele für all unsere Marken. Diese Aspekte bilden die Grundlage der Kommunikationsstrategien für unsere Produkte und Marken. Darüber hinaus optimieren wir laufend unser Produktangebot, um auf Veränderungen bei der Konsumentennachfrage zu reagieren und unser Angebot auf die neuesten Trends abzustimmen. Im Mittelpunkt aller Markenkampagnen steht die Vermittlung einer klaren und in sich stimmigen Botschaft an unsere Zielkonsumenten.

Aufgrund der hinzugewonnenen Marktanteile bei TaylorMade und des Erfolgs von adidas bei der FIFA Fußball-Weltmeisterschaft 2010 sind wir zuversichtlich, dass das Risiko von Imageverlust für diese Marken unwahrscheinlich ist. Durch die erfolgreiche Einführung neuer Produktinitiativen bei Reebok, wie z. B. in der Kategorie Muskelaktivierung und ZigTech, konnten wir zudem das Interesse der Konsumenten für die Marke sowie das Markenimage von Reebok steigern.

In einer Gesamtbetrachtung dieser Faktoren gehen wir davon aus, dass die Eintrittswahrscheinlichkeit des Risikos durch Verlust von Markenimage nur als möglich anzusehen ist. Dennoch könnte eine deutliche Beeinträchtigung des Markenimages eine wesentliche finanzielle Auswirkung auf unseren Konzern haben.

#### Risiken aufgrund des eigenen Einzelhandels

Im Rahmen der eigenen Einzelhandelsaktivitäten eröffnen adidas, Reebok und Rockport neue Geschäfte. Dabei sind beträchtliche Investitionen sowohl vorab in Geschäftsausstattung und -einrichtung als auch in die laufende Instandhaltung erforderlich. Darüber hinaus erfordern eigene Einzelhandelsgeschäfte oftmals längerfristige Mietverpflichtungen und einen deutlich höheren Personalaufwand im Verhältnis zum Umsatz als in unserem Großhandelssegment. Dieser höhere Anteil von Fixkosten gegenüber unserem Großhandelsgeschäft bedingt im Falle deutlicher Umsatzeinbußen eine größere Auswirkung auf den Gewinn.

Wir reduzieren dieses Risiko, indem wir nur Mietverträge mit einer Dauer von weniger als zehn Jahren abschließen. Die Leistung der Geschäfte wird anhand einer Einzelhandels-Scorecard mit neun quantitativen Leistungsindikatoren gemessen.



Geschäfte, die unsere Erwartungen nicht erfüllen, werden fallweise umorganisiert, umgestaltet oder geschlossen.

Einer der Schwerpunkte wird im Jahr 2011 weiterhin darauf liegen, unsere Kompetenz als Einzelhändler durch Investitionen in Fachkompetenz sowie IT-Systeme weiter zu steigern » siehe Strategie Global Sales, S. 82. Trotz des für 2011 prognostizierten Aufschwungs des weltweiten gesamtwirtschaftlichen Umfelds sind die Risiken in Bezug auf Konsumausgaben aufgrund steigender Inflation hoch » siehe Entwicklung Gesamtwirtschaft und Branche, S. 130. Daher schätzen wir das Risiko, dass einige unserer eigenen Einzelhandelsgeschäfte die Erwartungen nicht erfüllen können, als wahrscheinlich ein. Das Ausmaß des potenziellen finanziellen Verlusts durch eine etwaige schwache Performance im eigenen Einzelhandel, die auch Wertminderungskosten und Schließungen von Geschäften beinhalten könnte, schätzen wir als moderat ein.

#### Risiken durch steigende Einstandskosten

Rohstoff- und Lohnkosten machen etwa 70 % der Umsatzkosten des Konzerns aus. Vor allem Materialien wie Gummi, Baumwolle, Polyester sowie Rohstoffe, deren Preis eng mit dem Ölpreis korreliert, unterliegen dem Risiko von Preisschwankungen. Da unsere Bestellungen und Preisverhandlungen gewöhnlich rund sechs Monate vor der Produktion stattfinden, hat unser Beschaffungsbereich genügend Transparenz und Reaktionszeit, um starke Steigerungen der Einstandskosten einzuplanen.

Wir reduzieren die finanziellen Auswirkungen höherer Beschaffungskosten auf unsere Produktmargen, indem wir in unseren Partnerbetrieben weitere Maßnahmen zur Verschlinkung von Produktionsprozessen einführen, Zeit- und Kosteneinsparungen bei der Beschaffung realisieren sowie – wo möglich – unsere Produkte überarbeiten und die Preise selektiv erhöhen. Darüber hinaus haben wir durch unsere Initiativen in Sachen durchgehende („End-to-End“) Profitabilität ein spezielles Team aufgebaut, das die Aufgabe hat, Maßnahmen zur Bewältigung steigender Einstandskosten innerhalb der Beschaffungskette zu erarbeiten » siehe Global Operations, S. 106. Mittelfristig haben wir auch die Möglichkeit, unsere Beschaffungsstruktur anzupassen, um konkurrenzfähigere Kosten an anderen Standorten auszunutzen.

Aufgrund des deutlichen weltweiten Konjunkturaufschwungs sind die Rohstoffkosten im Vorjahresvergleich erheblich gestiegen. Hierdurch erwarten wir eine negative Auswirkung auf unsere Beschaffungskosten im Jahr 2011. Bei den beginnenden Planungen für 2012 können wir weitere Preissteigerungen nicht ausschließen. Aus diesem Grund sind die Risiken durch steigende Einstandskosten gegenüber dem Jahresende 2009 beträchtlich gestiegen. Wir schätzen die Eintrittswahrscheinlichkeit derartiger Risiken als höchstwahrscheinlich und die potenziellen finanziellen Folgen als groß ein.

#### Lieferantenausfallrisiken

Wir beziehen mehr als 95 % unseres Produktangebots von unabhängigen Zulieferern, die vorrangig in Asien ansässig sind » siehe Global Operations, S. 106.

Um das Risiko von Geschäftsunterbrechungen aufgrund eines Lieferantenausfalls zu senken, arbeiten wir mit Zulieferern zusammen, die für Zuverlässigkeit, Qualität, Innovationsstärke und ständige Verbesserung stehen. Darüber hinaus haben wir uns gegen das Risiko von Geschäftsausfällen durch materielle Schädigungen von Betriebsgeländen und Gebäuden unserer Lieferanten versichert. Infolgedessen schätzen wir die Eintrittswahrscheinlichkeit der Risiken durch Lieferantenausfall als möglich und das Ausmaß des potenziellen finanziellen Verlusts als moderat ein.

#### Lagerbestandsrisiken

Da wir unsere ersten Produktionsaufträge etwa sechs Monate vor der Auslieferung platzieren, ist der adidas Konzern Lagerbestandsrisiken ausgesetzt. Diese stehen im Zusammenhang mit einer möglichen Fehleinschätzung der Verbrauchernachfrage zum Zeitpunkt der Produktionsplanung. Ein plötzlicher Nachfragerückgang kann eventuell zu Überbeständen führen. Daraus ergeben sich, durch einen höheren Anteil an Lagerräumungsverkäufen und überalteten Vorräten sowie durch eine geringere Liquidität aufgrund des höheren Bedarfs an operativem kurzfristigem Betriebskapital, möglicherweise negative Auswirkungen auf unsere Ergebnisse.

Auf der anderen Seite kann ein plötzlicher Anstieg der Nachfrage zu Produktmangel am Point-of-Sale führen. In einer solchen Situation sieht sich der Konzern dem Risiko verpasster Umsatzchancen bzw. Enttäuschung seitens Kunden und Konsumenten ausgesetzt. Dies könnte die Loyalität zu unseren Marken sowie unseren Ruf als termin- und mengengetreuer Lieferant beeinträchtigen.

Darüber hinaus ergeben sich potenzielle Auswirkungen auf unsere Profitabilität resultierend aus Kosten, z. B. Luftfrachtkosten, die im Zusammenhang mit unseren Maßnahmen zum beschleunigten Produktnachschub entstehen.

Um diese Risiken zu mindern, arbeiten wir kontinuierlich an der Verbesserung unserer Prognose- und Materialplanungsprozesse. Unsere Lieferfähigkeitsprogramme sind ein weiteres Beispiel für die Verkürzung der Produktionsvorlaufzeiten. Hiermit sichern wir Produktverfügbarkeit bei gleichzeitiger Vermeidung von Überbeständen » siehe Global Operations, S. 106.

Das erwartete überproportionale Wachstum des Einzelhandelssegments wird die Anfälligkeit gegenüber Schwankungen bei der Konsumentennachfrage erhöhen. Jedoch wird unsere Planungsgenauigkeit in Bezug auf Nachfrage und Lagerbestand im Jahr 2011 von der verbesserten gesamtwirtschaftlichen Lage verglichen mit dem Vorjahr profitieren. Daher schätzen wir die Eintrittswahrscheinlichkeit von Risiken in Bezug auf den Lagerbestand etwas niedriger ein. Wir gehen nun davon aus, dass die Eintrittswahrscheinlichkeit von Lagerbestandsrisiken möglich und die potenziellen finanziellen Auswirkungen für unseren Konzern moderat sind.

#### Kundenrisiken

Kundenrisiken entstehen aufgrund unserer Abhängigkeit von wichtigen Kunden (Key Accounts), die in der Lage sind, ihre Verhandlungsmacht auszunutzen. Dies könnte beträchtlichen Druck auf unsere Margen ausüben oder zur Stornierung von Kundenaufträgen führen.

Diese Risiken ergeben sich nicht nur aufgrund der relativen Größe einiger unserer wichtigsten Kunden, sondern auch aus unseren begrenzten Möglichkeiten, auf ihr Geschäft einzuwirken. Zudem haben einige Großkunden ihre Geschäftsaktivitäten mit eigenen Marken und eigenen Labels erweitert. Dies kann sich negativ auf unsere Bemühungen um mehr Regalfläche auswirken.

Um diese Risiken zu verringern, haben wir eine breit angelegte Vertriebsstrategie, die auch den Ausbau der von uns kontrollierten Verkaufsflächen umfasst. Dadurch können wir die negativen Folgen möglicher Umsatzausfälle bei Key Accounts reduzieren. Im Einzelnen war kein Kunde unseres Konzerns im Jahr 2010 für mehr als 10 % der Konzernumsätze verantwortlich.

Im Bedarfsfall beschränken oder limitieren wir auch den Vertrieb unserer Produkte, um das Markenimage bzw. die Produktmargen zu schützen. Durch die Differenzierung des Produktangebots gegenüber den Kunden begrenzen wir das Risiko einer Wettbewerbsverschärfung bei den Preisen bestimmter Produkte, die zu Margenerosion führen kann. Darüber hinaus sind unsere groß angelegten Marketingaktivitäten darauf gerichtet, begehrten Marken aufzubauen, die den Geschmack unserer Konsumenten treffen und letztendlich zu hohen Durchverkaufsraten bei unseren Kunden führen, so dass unsere Kunden weniger Anreiz haben, mit eigenen Labels aktiv zu werden.

Angesichts positiver Entwicklungen im Einzelhandel schätzen wir das Risiko, dass das Geschäft mit einem einzelnen, größeren Kunden deutlich zurückgehen könnte, als unwahrscheinlich ein.

Dennoch gehen wir aufgrund der steigenden Kundenaktivität bezüglich eigener Marken und Labels nun davon aus, dass sich die Kundenrisiken in ihrer Gesamtheit erhöht haben und die Eintrittswahrscheinlichkeit permanent höchstwahrscheinlich ist. Die potenziellen finanziellen Auswirkungen für unseren Konzern schätzen wir als groß ein.

#### Regulatorische Risiken

Regulatorische Risiken umfassen vor allem potenzielle Verluste durch starke Veränderungen der Handelspolitik. Der adidas Konzern ist insbesondere Risiken im Zusammenhang mit plötzlich verschärften Einfuhrbeschränkungen sowie Einfuhrzöllen und -abgaben ausgesetzt. Diese Risiken könnten den freien Warenverkehr innerhalb des Konzerns und von Zulieferbetrieben zum Konzern beeinträchtigen. So haben beispielsweise einige lateinamerikanische Länder hohe Importzölle für aus China importierte Schuhe eingeführt, was unsere Profitabilität in diesen Märkten negativ beeinflusst.

Um diese Risiken zu minimieren, bedienen wir uns einer breiten Zulieferbasis, die einen gewissen Schutz gegen unvorhersehbare regulatorische Änderungen bietet und uns zudem erlaubt, wenn notwendig, die Produktion bereits frühzeitig in andere Länder zu verlagern » siehe Global Operations, S. 106.

Infolge der Wahrscheinlichkeit erhöhter Schutzmaßnahmen seitens der Regierungen stufen wir die Eintrittswahrscheinlichkeit weiterer politischer und regulatorischer Maßnahmen nach wie vor als wahrscheinlich ein. Die finanzielle Auswirkung einer unerwarteten, wesentlichen Veränderung des politischen und regulatorischen Umfelds schätzen wir als wesentlich ein.

#### Risiken durch den Verlust wichtiger Veranstaltungs- oder Promotion-Partnerschaften

Veranstaltungs- und Promotion-Partnerschaften spielen eine wesentliche Rolle für das Markenimage und die Authentizität unserer Produkte bei unseren Konsumenten und damit letztendlich auch für den Umsatz mit Lizenzprodukten. Für den adidas Konzern besteht das Risiko, wichtige Partnerschaften zu verlieren oder aufgrund des stärkeren Wettbewerbs um attraktive Verträge unvorteilhafte Bedingungen akzeptieren zu müssen. Um die damit verbundenen Risiken zu minimieren, bemühen wir uns einerseits um die Verlängerung unserer wichtigsten Partnerschaftsvereinbarungen schon vor Vertragsabschluss. Andererseits verfolgen wir die Strategie, das Portfolio von Premium-Partnerschaften des Konzerns zu erweitern, um die Konsumentenreichweite unserer Marken zu steigern und um die Abhängigkeit von einzelnen Partnerschaften zu reduzieren. Zwei Beispiele hierfür waren im Jahr 2010 die Verlängerung der Partnerschaft zwischen adidas und dem mexikanischen Fußballverband sowie die globale Partnerschaft von Reebok mit Giorgio Armani zur Schaffung gemeinsamer Kollektionen.

Darüber hinaus umfassen unsere Verträge in der Regel „Change-of-Control“-Klauseln und nicht-monetäre Vergütungsbestandteile. So vermeiden wir das Risiko, dass sich die Verhandlungen allein um den Preis drehen.

Wir erwarten kurz- und mittelfristig weiterhin einen scharfen Wettbewerb um Top-Promotion-Partnerschaften, da kleinere Wettbewerber ihre Ausgaben in diesem Bereich wahrscheinlich erhöhen werden. Aufgrund der Laufzeit unserer wichtigsten Verträge sehen wir das Risiko des Verlusts wichtiger Promotion-Verträge nur als wahrscheinlich an. Wir gehen davon aus, dass dieses Risiko mittelfristig potenziell moderate finanzielle Auswirkungen hat.

#### Risiken in Produktdesign und -entwicklung

Innovative und attraktive Produkte generieren hohe Umsätze und strahlen zudem durch den so genannten Halo-Effekt auf andere Produkte ab. Zudem ist es für unseren nachhaltigen kommerziellen Erfolg essenziell, höchste Standards in Sachen Produktqualität und Sicherheit zu erfüllen. Diese Vorgabe ist ein zentraler Bestandteil bei Produktdesign und -entwicklung. Um Wettbewerbsvorteile zu wahren, ist es entscheidend, neue Produkttechnologien und frische Designideen schnell auf den Markt zu bringen. Im Jahr 2010 haben alle Marken den Großteil ihres Umsatzes mit Produkten erwirtschaftet, die in den letzten 12 bis 18 Monaten auf den Markt kamen » siehe Forschung und Entwicklung, S. 110. Falls wir es über einen längeren Zeitraum versäumen sollten, kontinuierlich innovative Produkte zu entwickeln, wäre der Konzern dem Risiko eines beträchtlichen Umsatzrückgangs ausgesetzt. Wir konzentrieren uns auf die weitere Stärkung unserer Innovationsfähigkeit und Designkompetenz. Damit wir schnell auf sich verändernde Konsumentenpräferenzen reagieren und Produkte rascher auf den Markt bringen können, richten wir unser Augenmerk auf die Straffung unserer Forschungs- und Entwicklungsabläufe.

Daher schätzen wir die Eintrittswahrscheinlichkeit von Risiken in Produktdesign und -entwicklung weiterhin als möglich ein. Angesichts des breit aufgestellten Produktangebots des adidas Konzerns haben sich jedoch unserer Ansicht nach die potenziellen finanziellen Auswirkungen insgesamt verringert und werden nun als gering eingestuft.

### Personalrisiken

Unsere Mitarbeiter und ihre Fähigkeiten sind für das Erreichen unseres Ziels, der weltweit führende Anbieter der Sportartikelindustrie zu werden, von grundlegender Bedeutung. Der Verlust wichtiger Mitarbeiter in strategischen Positionen ist daher ein offensichtliches Risiko für uns. Es besteht ebenso das Risiko, dass wir es versäumen, die talentiertesten und für die speziellen Bedürfnisse unseres Konzerns am besten geeigneten Mitarbeiter zu identifizieren, sie einzustellen und an uns zu binden. Zudem könnten unzureichende Weiterbildungsmaßnahmen zu Lücken bei geschäftsrelevantem Wissen führen, insbesondere im Bereich Produktdesign und -entwicklung.

Um dieses Risiko zu mindern, tun wir unser Bestes, um unseren Mitarbeitern ein motivierendes Arbeitsumfeld zu bieten. Dies soll dazu beitragen, den adidas Konzern als Wunscharbeitgeber unserer Branche zu etablieren. Durch attraktive Bonus- und Anreizprogramme sollen langfristige Karrieremöglichkeiten und -planung ergänzt werden » siehe Mitarbeiter, S. 115.

Aufgrund des Ausbaus unserer eigenen Einzelhandelsaktivitäten und der steigenden Mitarbeiterzahl in den Schwellenländern gehen wir davon aus, dass die Mitarbeiterfluktuation in Zukunft leicht höher ausfallen wird. Darüber hinaus ist der Personalmarkt immer härter umkämpft und der Wettbewerb um die talentiertesten Mitarbeiter steigt stetig an.

Aus diesem Grund hat sich die Eintrittswahrscheinlichkeit von Personalrisiken erhöht und wird nun als wahrscheinlich angesehen. Diese Risiken könnten moderate finanzielle Auswirkungen für unseren Konzern nach sich ziehen.

### IT-Risiken

Wichtige Geschäftsabläufe beruhen auf IT-Systemen – vom Produktmarketing über die Bestell- und Lagerverwaltung bis hin zu Rechnungsbearbeitung, Kundensupport und Finanzberichterstattung. Ein bedeutender Ausfall der Systeme oder ein wesentlicher Datenverlust könnte zu gravierenden Geschäftsunterbrechungen führen. Projekte von wesentlicher Bedeutung für den Konzern könnten sich durch unzureichendes Projektmanagement verzögern oder teurer werden als geplant.

Um diese Risiken zu mindern, führt unsere IT-Organisation proaktiv vorbeugende Systemwartungen und Service-Kontinuitätsplanungen durch und stellt die Einhaltung von maßgeblichen IT-Grundsätzen sicher. Die Datensicherheit wird durch eingeschränkte Zugriffsrechte für die Nutzer, basierend auf der jeweiligen Stellenbeschreibung, gewährleistet.

Darüber hinaus wird die Einhaltung datenschutzrechtlicher Regelungen sichergestellt. Für das zentrale ERP (Enterprise-Resource-Planning)-System nehmen wir mehrmals täglich Datensicherungen vor – wechselweise in verschiedenen Datenzentren. Darüber hinaus ermöglicht uns unsere Notfalllösung für das ERP-System im Bedarfsfall schnell und ohne Datenverlust auf einen Remote-Standort zu wechseln. Sicherheit, Kontrollmechanismen und Verlässlichkeit der Systeme werden durch die Interne Revision kontrolliert.

IT-Projektrisiken werden weiter gemindert, indem wir für alle IT-Projekte eine bewährte Projektmethode anwenden. Dazu gehören strikte Kostenkontrolle und regelmäßige Risikoprüfungen bei allen wichtigen Projekten. Neben diesen grundlegenden Kontrollen hat sich der adidas Konzern im Jahr 2010 weiterhin auf zusätzliche IT-Kontrollmaßnahmen konzentriert. Die strategische Ausrichtung und der Fünf-Jahres-Plan der IT-Organisation sind mit dem strategischen Geschäftsplan Route 2015 des adidas Konzerns abgestimmt. Wir haben neue Qualitätsbewertungen für Großprojekte implementiert, um sicherzustellen, dass die Mitglieder der oberen Führungsebene Fortschritt, Qualität und Kosten dieser Projekte regelmäßig bewerten können. Schließlich bildeten IT-bezogene Prozesse und Systeme einen Schwerpunkt der Analyse des konzernweiten Risiko- und Chancenmanagements 2010.

Basierend auf diesen Faktoren gehen wir weiterhin davon aus, dass die Eintrittswahrscheinlichkeit eines schwerwiegenden IT-Ausfalls unwahrscheinlich ist. Die potenziellen finanziellen Auswirkungen eines solchen Ausfalls wären jedoch wesentlich.

## Risiken in Verbindung mit der Einhaltung von Standards

### Rechtliche Risiken

Der adidas Konzern ist dem Risiko ausgesetzt, dass Dritte Forderungen oder Klagen wegen Verletzung ihrer Schutzrechte, Patentrechte oder anderer Rechte geltend machen. Um dieses Risiko zu mindern, werden neue Produkttechnologien, -designs und -namen sorgfältig geprüft, um eventuelle Konflikte mit den Rechten Dritter zu identifizieren und zu vermeiden. Wir haben die Ressourcen unserer Abteilung für gewerbliche Schutzrechte weiter verstärkt, um Verbesserungen unseres Patentportfolios sowie die Prüfung und Analyse von Patentrechten Dritter voranzutreiben.

Aufgrund der Schutzmaßnahmen und angesichts der Tatsache, dass wir nicht von einzelnen Produkten oder Produktgruppen abhängig sind, gehen wir davon aus, dass die Eintrittswahrscheinlichkeit einer schwerwiegenden Verletzung der Schutz- oder Patentrechte Dritter durch den Konzern lediglich möglich ist. Dennoch schätzen wir die finanzielle Auswirkung von Rechtsstreitigkeiten auf unseren Konzern im Eintrittsfall als moderat ein.

### Sozial- und Umweltrisiken

Wir sind uns unserer ständigen Verantwortung für Arbeitnehmer, Zulieferer und Umwelt bewusst. Verfehlungen in diesen Bereichen – insbesondere Verstöße gegen die Menschenrechte, zweifelhafte Beschäftigungspraktiken und umweltschädliche Produktionsverfahren – können Ansehen und Effizienz des Konzerns und seiner Zulieferer stark beeinträchtigen.



Zur Begrenzung dieses Risikos haben wir Arbeitsplatzstandards erstellt, welche Zulieferer einhalten müssen, um Geschäftspartner des adidas Konzerns zu werden und zu bleiben » siehe Nachhaltigkeit, S. 120. Es werden regelmäßig interne Kontrollen von Zulieferbetrieben durchgeführt, die von umfangreichen unabhängigen Prüfungen bestätigt werden. Bei Verstößen gegen unsere Standards entwickeln wir gemeinsam Maßnahmenpläne und Zeitrahmen, um die zukünftige Einhaltung und weitere Verbesserungen zu gewährleisten. Werden diese Zeitrahmen nicht eingehalten, beenden wir die Geschäftsbeziehung mit dem betroffenen Zulieferer » siehe Nachhaltigkeit, S. 120 und [www.adidas-Group.com/nachhaltigkeit](http://www.adidas-Group.com/nachhaltigkeit).

Um die Auswirkungen der Produktion und des Vertriebs unserer Produkte auf die Umwelt zu minimieren, hat der adidas Konzern im Jahr 2010 seine erste allumfassende Umweltstrategie erarbeitet (Umweltstrategie 2015). Diese Strategie setzt auf einen ganzheitlichen Ansatz in Bezug auf ökologische Fragen wie z. B. den nachhaltigen Einsatz von Ressourcen, Klimaschutz, Emissionen in Gewässer und Luft, Abfallbehandlung sowie gefährliche Substanzen. Im Rahmen dieser Strategie werden wir unsere „Better Place“-Initiative auf weitere Sportschuh- und Bekleidungsprodukte der Marke adidas ausweiten » siehe Nachhaltigkeit, S. 120.

Wir sehen derzeit nur in Einzelfällen konkrete Risiken von Verfehlungen im Sozial- und Umweltbereich, und schätzen daher deren Eintrittswahrscheinlichkeit als unwahrscheinlich ein. Nichtsdestotrotz sind wir überzeugt, dass sowohl die gesetzlichen Regelungen als auch die Erwartungen der Konsumenten hinsichtlich sozial- und umweltverträglicher Geschäftspraktiken und -verhalten künftig anspruchsvoller werden. Dadurch

steigen auch unsere Verpflichtungen als verantwortungsvoll handelndes Unternehmen. Aufgrund dieser Entwicklung werden wir beispielsweise höhere Kosten im Zusammenhang mit der Erfüllung zunehmender Umweltauflagen bewältigen müssen. Die Eintrittswahrscheinlichkeit und die potenziellen finanziellen Auswirkungen von Sozial- und Umwelt Risiken sind folglich gestiegen und werden nun als sehr wahrscheinlich bzw. moderat eingeschätzt.

#### Risiken aus Produktfälschungen und -nachahmungen

Als populäre Konsumgütermarken, die sich über Technologie- und Designinnovationen definieren, sind die Marken des adidas Konzerns häufig von Fälschungen und Nachahmungen durch Dritte betroffen. Wir sind bemüht, Umsatzeinbußen und die potenzielle Schädigung des Markenimages zu mindern, die aus dem Verkauf von gefälschten Produkten entstehen. Zu diesem Zweck sichert sich der Konzern umfassend rechtlich ab (in der Regel durch Eintragung) und arbeitet mit Vollstreckungsbehörden, Fahndern und unternehmensexternen Juristen eng zusammen. Obwohl wir Maßnahmen wie z. B. die Verwendung von Sicherheitsetiketten bei autorisierten Zulieferern verstärkt haben, bleibt die Entwicklung dieser Maßnahmen weiterhin ein sehr wichtiges Anliegen. Weltweit wurden im Jahr 2010 mehr als 12 Millionen gefälschte Produkte des adidas Konzerns sichergestellt.

Wir schätzen die Wahrscheinlichkeit von Produktfälschungen und -nachahmungen weiterhin als höchstwahrscheinlich ein. Wir gehen jedoch davon aus, dass wir ausreichende Mittel budgetiert haben, um unsere Bemühungen im Kampf gegen Produktfälschungen und Nachahmungen erfolgreich fortzusetzen, wie beispielsweise die Anzahl

der Markenschutzbeauftragten vor Ort zu erhöhen. Wir stufen die potenzielle negative Auswirkung von hieraus resultierenden Risiken auf unseren erwarteten Ergebnisbeitrag daher als moderat ein.

#### Produktqualitätsrisiken

Der adidas Konzern ist dem Risiko möglicher Produktmängel ausgesetzt, die zu Verletzungen bei Konsumenten führen bzw. dem Ansehen unserer Produkte auf dem Markt schaden können. Zur Verringerung solcher Risiken haben wir spezielle Teams gegründet, die sich um die Überwachung der Produktqualität auf allen Ebenen unserer Beschaffungskette kümmern. Dazu führen die Teams intensive Qualitätskontrollen vor der Produktion durch, arbeiten während des Produktionsvorgangs eng mit den Zulieferern zusammen, nehmen Zufallskontrollen nach der Lieferung an den Einzelhändler vor, kommunizieren Produktmängel offen und sorgen, wenn notwendig, für eine zügige Regulierung bei Produkthaftungsansprüchen. Im Jahr 2010 haben wir keine Produkte zurückrufen müssen.

Unsere Einschätzung der Produktqualitätsrisiken bleibt gegenüber dem Vorjahr unverändert. Wir stufen die Eintrittswahrscheinlichkeit bedeutender Produkthaftungsfälle oder weitreichender Rückrufaktionen als möglich ein. Da wir gegen bedeutende Produkthaftungsfälle versichert sind, schätzen wir die potenziellen finanziellen Auswirkungen als moderat ein.

#### Risiken aufgrund der Nichteinhaltung von Standards

Es besteht die Gefahr, dass unsere Mitarbeiter gegen Richtlinien und Standards für ein angemessenes und verantwortliches Geschäftsgebahren verstoßen. Um diesem Risiko effektiv zu begegnen, wurde Ende 2006 ein weltweit geltender

Richtlinienkatalog (Group Policy Manual) eingeführt. Darin enthalten sind grundlegende Arbeitsabläufe und -prozesse sowie ein Verhaltenskodex. Dieser schreibt vor, dass jeder Mitarbeiter in seiner Tätigkeit für den Konzern ethisch handeln und die Gesetze und Bestimmungen des jeweiligen Rechtssystems einhalten muss. Im Rahmen unseres weltweiten Programms zur Sicherstellung der Einhaltung von Standards (Global Compliance Programme) müssen alle neuen Mitarbeiter an einem speziellen Kurs zu unserem Verhaltenskodex teilnehmen.

Wir stufen das Risiko schwerwiegender Verstöße weiterhin als unwahrscheinlich ein. Im Zusammenhang mit der aktualisierten Risikomanagementmethodik schätzen wir die potenziellen finanziellen Auswirkungen dieses Risikos niedriger ein und gehen nun davon aus, dass diese als gering anzusehen sind.

## Finanzrisiken

#### Ausfallrisiken

Ein Ausfallrisiko entsteht, wenn ein Kunde oder eine andere Gegenpartei eines Finanzinstruments nicht den vertraglichen Verpflichtungen nachkommt. Der adidas Konzern ist diesem Risiko infolge seiner laufenden Geschäftstätigkeit und bestimmter Finanzierungsaktivitäten ausgesetzt. Ausfallrisiken ergeben sich hauptsächlich aufgrund von Forderungen aus Lieferungen und Leistungen sowie in geringerem Umfang auch aus anderen vertraglichen finanziellen Verpflichtungen der Gegenpartei, wie z. B. sonstigen Finanzanlagen, kurzfristig hinterlegten Bankguthaben und derivativen Finanzinstrumenten » siehe Erläuterung 28, S. 208. Ohne Berücksichtigung

etwaiger zusätzlicher Sicherheiten entspricht der Buchwert der Finanzanlagen sowie der Forderungen aus Lieferungen und Leistungen dem maximalen Ausfallrisiko.

Ende 2010 gab es keine relevante Anhäufung des Ausfallrisikos nach Kundentyp oder Region. Unser Ausfallrisiko wird vielmehr durch individuelle Kundenmerkmale beeinflusst. Gemäß den Kreditrichtlinien des Konzerns werden neue Kunden auf ihre Bonität geprüft, bevor wir ihnen unsere regulären Zahlungs- und Lieferbedingungen anbieten. Außerdem definieren wir Forderungsobergrenzen, die wir gegenüber einzelnen Kunden zugestehen. Bonität und Forderungsobergrenzen werden ständig überwacht. Kunden, deren Bonität den Mindestanforderungen des Konzerns nicht genügt, dürfen Produkte in der Regel nur gegen Vorauszahlung erwerben. Andere Aktivitäten zur Senkung des Ausfallrisikos beinhalten Eigentumsvorbehaltsklauseln sowie, selektiv eingesetzt, Kreditversicherungen, Verkauf von Forderungen aus Lieferungen und Leistungen ohne Regress und Bankgarantien.

Objektive Hinweise für Wertminderungen von finanziellen Vermögenswerten umfassen unter anderem erhebliche finanzielle Schwierigkeiten des Emittenten oder des Schuldners, Hinweise einer möglichen Insolvenz des Kreditnehmers sowie das durch finanzielle Schwierigkeiten bedingte Verschwinden eines aktiven Marktes für einen finanziellen Vermögenswert.

Der Konzern verwendet Wertberichtigungskonten zum Verbuchen von Wertminderungen, die den geschätzten Kreditverlusten im Zusammenhang mit Forderungen aus Lieferungen und Leistungen entsprechen. Die Wertberichtigungskonten werden verwendet, solange der Konzern der Annahme ist,

dass der Eingang des geschuldeten Betrags möglich ist. Trifft diese Annahme nicht mehr zu, werden die Beträge als uneinbringlich angesehen und direkt gegen den finanziellen Vermögenswert ausgebucht.

Die Wertberichtigung setzt sich aus zwei Komponenten zusammen:

(1) einer Wertberichtigung abhängig von der Altersstruktur überfälliger Forderungen und

(2) einer spezifischen Wertberichtigung für einzeln bewertete Risiken einzelner Kunden, unabhängig von der Altersstruktur.

Zum Ende des Jahres 2010 entfielen auf keinen einzelnen Konzernkunden mehr als 10 % der Forderungen aus Lieferungen und Leistungen. Daher gehen wir davon aus, dass die potenziellen finanziellen Auswirkungen unseres Ausfallrisikos durch Kunden, insbesondere bei kleineren Händlern, moderat sind und wir schätzen die Eintrittswahrscheinlichkeit als möglich ein » siehe Entwicklung Gesamtwirtschaft und Branche, S. 130.

Währungs- und Zinssicherungsgeschäfte sowie Investitionen flüssiger Mittel werden von der Konzern-Treasury-Abteilung weltweit mit großen Banken hoher Kreditwürdigkeit getätigt. adidas Konzerngesellschaften ist es ausschließlich erlaubt, mit Banken, die ein Rating von BBB+ oder höher haben, zusammenzuarbeiten.

Nur in Ausnahmefällen dürfen Tochtergesellschaften mit Banken, die ein schlechteres Rating als BBB+ haben, zusammenarbeiten. Um das Risiko in solchen Fällen zu begrenzen, werden Restriktionen, wie z. B. Höchstanlagebeträge, klar vorgeschrieben. Zusätzlich werden die Credit Default Swap-Prämien unserer Partnerbanken wöchentlich überprüft. Wird eine definierte Schwelle überschritten, werden die Kreditsummen

auf Banken übertragen, die innerhalb des Limits liegen.

Im Verlauf des Jahres 2010 wurden die Credit Default Swap-Prämien bei zahlreichen Banken weiter gesenkt, nachdem sie als Folge der Börsenturbulenzen 2008 ihren Höchststand erreicht hatten. Diese Entwicklung deutet auf einen leichten Rückgang bei den damit verbundenen Risiken hin.

Auch wenn sich die Lage an den Finanzmärkten im Jahr 2010 verbessert hat, sind wir weiterhin der Meinung, dass die potenziellen finanziellen Auswirkungen von Ausfallrisiken aus diesen Posten als moderat einzuschätzen sind und die Eintrittswahrscheinlichkeit möglich ist. Dennoch gehen wir davon aus, dass die Risikokonzentration gering ist, da wir unsere Investmentgeschäfte auf mehr als 24 Banken verteilen. Zum 31. Dezember 2010 war keine Bank für mehr als 8 % unseres Investmentgeschäfts verantwortlich, wobei die durchschnittliche Konzentration, einschließlich der kurzfristigen Bankeinlagen von Tochtergesellschaften bei lokalen Banken, bei 1 % lag. Daraus resultiert ein maximales Risiko von 105 Mio. € bei Ausfall einer einzelnen Bank. Zudem hielten wir derivative Finanzinstrumente mit einem positiven Marktwert von 86 Mio. €. Das maximale Risiko gegenüber einer einzelnen Bank aus solchen Vermögenswerten belief sich auf 8 Mio. € und die durchschnittliche Konzentration lag bei 1 %.

#### Finanzierungs- und Liquiditätsrisiken

Liquiditätsrisiken ergeben sich aus einem eventuellen Mangel an Mitteln, um fällige Verbindlichkeiten in Bezug auf Fristigkeit, Volumen und Währungsstruktur bedienen zu können. Der adidas Konzern sieht sich außerdem dem Risiko ausgesetzt, aufgrund von Liquiditätsengpässen ungünstige Finanzierungsbedingungen

#### Zukünftige Mittelabflüsse<sup>1)</sup> in Mio. €

04

|                                                        | Bis zu<br>1 Jahr | Zwischen<br>1 und<br>3 Jahren | Zwischen<br>3 und<br>5 Jahren | Nach<br>5 Jahren | Gesamt       |
|--------------------------------------------------------|------------------|-------------------------------|-------------------------------|------------------|--------------|
| <b>zum 31. Dezember 2010</b>                           |                  |                               |                               |                  |              |
| Bankkredite <sup>2)</sup>                              | 95               | —                             | —                             | —                | 95           |
| Schuldscheindarlehen <sup>3)</sup>                     | 320              | 482                           | 237                           | 118              | 1.157        |
| Eurobond <sup>3)</sup>                                 | 24               | 48                            | 514                           | —                | 586          |
| Verbindlichkeiten<br>aus Lieferungen und<br>Leistungen | 1.694            | —                             | —                             | —                | 1.694        |
| Andere finanzielle<br>Verbindlichkeiten                | 27               | 2                             | 1                             | —                | 30           |
| Derivative<br>Finanzverbindlichkeiten                  | 96               | 12                            | 0                             | 0                | 108          |
| <b>Gesamt</b>                                          | <b>2.256</b>     | <b>544</b>                    | <b>752</b>                    | <b>118</b>       | <b>3.670</b> |
| <b>zum 31. Dezember 2009</b>                           |                  |                               |                               |                  |              |
| Bankkredite <sup>2)</sup>                              | 103              | —                             | —                             | —                | 103          |
| Schuldscheindarlehen <sup>3)</sup>                     | 245              | 537                           | 370                           | 201              | 1.353        |
| Eurobond <sup>3)</sup>                                 | 24               | 48                            | 538                           | —                | 610          |
| Verbindlichkeiten<br>aus Lieferungen und<br>Leistungen | 1.166            | —                             | —                             | —                | 1.166        |
| Andere finanzielle<br>Verbindlichkeiten                | 21               | 0                             | 1                             | 1                | 23           |
| Derivative<br>Finanzverbindlichkeiten                  | 81               | 23                            | 1                             | 1                | 106          |
| <b>Gesamt</b>                                          | <b>1.640</b>     | <b>609</b>                    | <b>909</b>                    | <b>203</b>       | <b>3.361</b> |

1) Bei Zahlen können Rundungsdifferenzen auftreten.

2) Im Konzernabschluss als langfristig (zwischen 1 und 3 Jahren) ausgewiesen, da diese durch den fest zugesagten mittelfristigen Konsortialkredit gedeckt sind.

3) Beinhaltet Zinszahlungen.

akzeptieren zu müssen. Das Management des Liquiditätsrisikos ist Aufgabe der Konzern-Treasury-Abteilung, die dafür ein effizientes Cash-Managementsystem einsetzt. Zum 31. Dezember 2010 beliefen sich die flüssigen Mittel des Konzerns auf 1,16 Mrd. € (2009: 775 Mio. €). Darüber hinaus unterhält der Konzern kurzfristige bilaterale Kreditlinien in Höhe von 2,17 Mrd. € und einen fest zugesagten mittelfristigen Konsortialkredit in Höhe von 1,86 Mrd. € bei internationalen Banken, der keine Marktstörungsklausel (Market Disruption Clause) enthält. Die 4,03 Mrd. € Kreditlinien wurden vereinbart, um jederzeit ausreichende Liquidität zu gewährleisten » siehe Treasury, S. 146.

Künftige Mittelabflüsse infolge finanzieller Verbindlichkeiten, die in der Konzernbilanz passiviert wurden, sind tabellarisch dargestellt » siehe 04. Dazu gehören Zahlungen zur Begleichung von Finanzverbindlichkeiten sowie Mittelabflüsse infolge von bar beglichenen Derivaten mit negativem Marktwert. Finanzielle Verbindlichkeiten, die ohne Strafgebühren vorzeitig abgelöst werden können, werden zu ihrem frühestmöglichen Rückzahlungstermin berücksichtigt. Cashflows für variabel verzinsliche Verbindlichkeiten werden anhand der Marktkonditionen zum Bilanzstichtag ermittelt.

Im Jahr 2010 haben wir unsere Netto-Finanzverbindlichkeiten auf 221 Mio. € (2009: 917 Mio. €) verringert. Das Verhältnis von Nettofinanzverbindlichkeiten zum rollierenden Zwölf-Monats-EBITDA belief sich zum Jahresende auf 0,2. Damit liegen wir innerhalb des mittelfristigen Ziels unseres Konzerns von unter 2. Aufgrund der uns zur Verfügung stehenden Kreditlinien, unserer Finanzierungsstruktur sowie unseres Geschäftsmodells halten wir das Auftreten von Finanzierungs- bzw.

Liquiditätsrisiken für unwahrscheinlich und erwarten deshalb geringe finanzielle Auswirkungen für den Konzern.

### Währungsrisiken

Der adidas Konzern ist Währungsrisiken ausgesetzt, da Cashflows in vielen verschiedenen Währungen anfallen. Risiken entstehen insbesondere aus der Tatsache, dass Beschaffung und Verkauf unserer Produkte in unterschiedlichen Währungen in ungleicher Höhe erfolgen. Der überwiegende Anteil unserer Beschaffungskosten fällt in US-Dollar an, während der Großteil des Konzernumsatzes in anderen Währungen, vor allem dem Euro, entsteht. Unsere größten Exposures sind in der nebenstehenden Tabelle aufgeführt » siehe 05. Das Risiko aus festen Zusagen und prognostizierten Transaktionen wurde auf einjähriger Basis kalkuliert.

Gemäß den Anforderungen des IFRS 7 haben wir die Auswirkungen von Veränderungen unserer wichtigsten Wechselkurse auf Gewinn und Eigenkapital geschätzt. Die errechneten Effekte ergeben sich vor allem aus Veränderungen der beizulegenden Zeitwerte unserer Hedging-Instrumente. Die Analyse berücksichtigt keine Effekte aus der Umrechnung der Abschlüsse unserer ausländischen Tochtergesellschaften in die Berichtswährung des Konzerns. Die Sensitivitätsanalyse basiert auf dem Netto-Bilanzrisiko einschließlich konzerninterner Salden aus monetären Vermögenswerten und Verbindlichkeiten, die auf Fremdwährungen lauten. Überdies werden alle ausstehenden Währungsderivate anhand hypothetischer Wechselkurse neu bewertet, um die Effekte auf Gewinn und Eigenkapital zu bestimmen. Die Analyse wurde für die Jahre 2009 und 2010 auf der gleichen Basis durchgeführt.

Dieser Analyse zufolge hätte eine zehnprozentige Aufwertung des Euro gegenüber dem US-Dollar zum 31. Dezember 2010 zu einer Steigerung des Gewinns um 3 Mio. € geführt. Der negativere Marktwert der US-Dollar-Sicherungsgeschäfte hätte das Eigenkapital um 157 Mio. € verringert. Ein um 10% schwächerer Euro zum 31. Dezember 2010 hätte zu einer Reduzierung des Konzerngewinns um 4 Mio. € geführt. Das Eigenkapital wäre um 193 Mio. € gestiegen » siehe 06. Zur besseren Darstellung der gegenwärtigen Struktur unserer Währungsrisiken haben wir eine Sensitivitätsanalyse für EUR/JPY erstellt. Im Zusammenhang mit der Veränderung des Geschäftsmodells im Jahr 2010 wurde das Exposure des Währungspaares USD/JPY in EUR/JPY und EUR/USD aufgesplittet. Die Auswirkungen von Kursschwankungen des US-Dollar gegenüber dem russischen Rubel und des Euro gegenüber dem britischen Pfund und dem japanischen Yen auf Gewinn und Eigenkapital sind gemäß den IFRS-Anforderungen ebenfalls dargestellt.

Viele andere finanzielle und operative Variablen, welche die Auswirkung von Währungsfluktuationen potenziell verringern könnten, werden jedoch von der Analyse ausgeschlossen:

- Es wird angenommen, dass Zinssätze, Rohstoffpreise und alle anderen Wechselkurse konstant bleiben.
- Es werden Jahresendkurse anstelle umsatzgewichteter Durchschnittskurse herangezogen. Letztere hätten eine höhere Relevanz und werden intern verwendet, um sowohl die Saisonalität unseres Geschäfts als auch Währungsschwankungen während des Jahres besser abzubilden.
- Das Exposure aus den prognostizierten operativen Cashflows, auf die sich die Sicherungsgeschäfte mehrheitlich

| Wechselkursrisiko-Exposure <sup>1)</sup>                                   |               |            |            |            |
|----------------------------------------------------------------------------|---------------|------------|------------|------------|
| basierend auf Nominalbeträgen, in Mio. €                                   |               |            |            |            |
|                                                                            | USD           | RUB        | GBP        | JPY        |
| <b>zum 31. Dezember 2010</b>                                               |               |            |            |            |
| Risiko aus festen Zusagen und prognostizierten Transaktionen               | -3.313        | 380        | 332        | 325        |
| Bilanzrisiko, einschließlich konzerninternem Risiko                        | -194          | 13         | -10        | 25         |
| <b>Bruttorisiko gesamt</b>                                                 | <b>-3.507</b> | <b>393</b> | <b>322</b> | <b>350</b> |
| Mit anderen Cashflows abgesichert                                          | 166           | —          | —          | —          |
| Mit Währungsoptionen abgesichert                                           | 576           | —          | -41        | —          |
| Mit Devisentermingeschäften abgesichert                                    | 1.733         | —          | -222       | -266       |
| <b>Nettorisiko</b>                                                         | <b>-1.032</b> | <b>393</b> | <b>59</b>  | <b>84</b>  |
| <b>zum 31. Dezember 2009</b>                                               |               |            |            |            |
| Risiko aus festen Zusagen und prognostizierten Transaktionen <sup>2)</sup> | -2.642        | 343        | 237        | 199        |
| Bilanzrisiko, einschließlich konzerninternem Risiko                        | -74           | -1         | 7          | 0          |
| <b>Bruttorisiko gesamt</b>                                                 | <b>-2.716</b> | <b>342</b> | <b>245</b> | <b>200</b> |
| Mit anderen Cashflows abgesichert                                          | 150           | —          | —          | —          |
| Mit Währungsoptionen abgesichert                                           | 532           | —          | —          | -6         |
| Mit Devisentermingeschäften abgesichert                                    | 1.659         | —          | -260       | -120       |
| <b>Nettorisiko</b>                                                         | <b>-375</b>   | <b>342</b> | <b>-15</b> | <b>73</b>  |

1) Bei Zahlen können Rundungsdifferenzen auftreten.

2) Für USD/RUB prognostizierte Transaktionen angepasst.



beziehen, wird in dieser Analyse nicht umbewertet.

- Operative Aspekte, beispielsweise potenzielle Rabatte für Key Accounts, die mit den Auswirkungen von Währungseffekten auf unsere Beschaffungsaktivitäten vertraut sind (da sie bei ihrer Beschaffung für Eigenmarken ähnliche Währungseffekte spüren), werden von dieser Darstellung ebenfalls ausgeschlossen.

Der Konzern unterhält ein zentralisiertes System für das Management von Währungsrisiken. Damit sichern wir den Währungsbedarf für das geplante Beschaffungsvolumen auf rollierender Basis 12 bis 24 Monate im Voraus ab » siehe Treasury, S. 146. Unser Ziel ist dabei die Sicherung eines Großteils unseres Hedging-Volumens jeweils sechs Monate vor Beginn einer Saison. In seltenen Fällen werden Hedges auch über einen Zeitraum von 24 Monaten hinaus abgeschlossen. Darüber hinaus schützt sich der Konzern weitgehend auch gegen Risiken in der Bilanz. Dank unserer starken globalen Position können wir das Währungsrisiko weitgehend durch natürliche Absicherungen minimieren. Dennoch lag das verbleibende Netto-Cashflow-Exposure (US-Dollar) nach natürlichen Hedges, das wir für das nächste Jahr ermittelt haben, zum Jahresende 2010 bei rund 3,3 Mrd. €. Das Exposure wurde mit Devisentermingeschäften, Währungsoptionen und Währungs-Swaps abgesichert » siehe

■ 05. Gemäß den Treasury-Grundsätzen des Konzerns können wir Hedging-Instrumente wie Währungsoptionen oder Kombinationen von Optionen einsetzen, die Schutz und gleichzeitig das Potenzial bieten, von künftigen günstigen Wechselkursentwicklungen an den Finanzmärkten zu profitieren.

Da das Hedging für das Jahr 2011 bereits beinahe vollständig abgeschlossen wurde, steht fest, dass die Umrechnungskurse für die wichtigen Währungen etwas ungünstiger sind als 2010. Abweichungen in den Volumina-Erwartungen, höhere Wechselkursvolatilität und ein größerer Anteil unseres Geschäfts in Schwellenländern bedeuten für den adidas Konzern im Jahr 2011 zusätzliche Risiken in puncto Währungen. Darüber hinaus könnten Währungseffekte aus der Umrechnung von Ergebnissen, die nicht auf Euro lauten, in die funktionale Währung des Konzerns, den Euro, zu einer wesentlichen negativen Auswirkung auf die Finanzergebnisse des Konzerns führen. Infolgedessen hat sich das Währungsrisiko unserer Einschätzung nach erhöht. Wir sind nun der Meinung, dass die Eintrittswahrscheinlichkeit von Währungsrisiken als höchstwahrscheinlich einzuschätzen ist und stufen die potenziellen finanziellen Auswirkungen von Währungsrisiken als groß ein.

### Zinsrisiken

Veränderungen der Marktzinsen weltweit wirken sich auf zukünftige Zinszahlungen für variabel verzinsliche Verbindlichkeiten aus. Wesentliche Zinssatzsteigerungen können daher Profitabilität, Liquidität und die Finanzlage des Konzerns beeinträchtigen. Gemäß den Anforderungen des IFRS 7 haben wir die Auswirkung von Veränderungen der für uns wichtigsten Zinssätze auf Gewinn und Eigenkapital analysiert. Die Auswirkung von Zinssatzänderungen auf künftige Cashflows ist von dieser Analyse ausgeschlossen. Dennoch haben wir aufgelaufene Zinsen, die als Verbindlichkeiten ausgewiesen werden, anhand der hypothetischen Marktzinssätze zum 31. Dezember 2010 neu berechnet.

Anschließend wurden beizulegende Zeitwerte für als Cashflow-Hedges verbuchte derivative Zinsinstrumente anhand der hypothetischen Marktzinsen neu berechnet und die daraus resultierenden Auswirkungen auf Gewinn und Eigenkapital in die Sensitivitätsanalyse einbezogen. Zinsrisiken aus den beizulegenden Zeitwerten von Schuldscheindarlehen, die mit Fair-Value-Hedges abgesichert sind, wurden ebenfalls berücksichtigt. Die Veränderungen der beizulegenden Zeitwerte der abgesicherten Positionen und der Zinssicherungsinstrumente führten aber zu keinen wesentlichen Effekten in der Gewinn- und Verlustrechnung. Folgende Instrumente wurden von dieser Analyse ausgeschlossen:

- Einige festverzinsliche Finanzinstrumente, wie z. B. Geldmarktzertifikate, die vom Konzern aufgrund ihrer kurzfristigen Fälligkeit als ergebniswirksam zum beizulegenden Zeitwert („at Fair Value through Profit or Loss“) erfasst werden, werden nicht berücksichtigt. Etwaige Auswirkungen veränderter Zinssätze werden als unwesentlich betrachtet und in der Sensitivitätsanalyse nicht berücksichtigt.
- Andere festverzinsliche Finanzinstrumente werden nach der Effektivzinismethode bewertet. Da ein veränderter Zinssatz bei dieser Art von Instrumenten keinen Einfluss auf den Buchwert hätte, würde der Gewinn nicht beeinflusst werden. Sie sind daher von dieser Analyse ausgeschlossen.

Die Zinssensitivitätsanalyse nimmt eine Parallelverschiebung der Zinsstrukturkurve um 100 Basispunkte für alle Währungen an und wurde für die Jahre 2009 und 2010 auf der gleichen Basis durchgeführt. Bei einem Anstieg des Zinssatzes um 100 Basispunkte zum 31. Dezember 2010 wäre das

| Sensitivitätsanalyse für Wechselkursveränderungen von Fremdwährungen in Mio. € |           |           |           |           | 06 |
|--------------------------------------------------------------------------------|-----------|-----------|-----------|-----------|----|
|                                                                                | USD       | RUB       | GBP       | JPY       |    |
| <b>zum 31. Dezember 2010</b>                                                   |           |           |           |           |    |
|                                                                                | EUR +10 % | USD +10 % | EUR +10 % | EUR +10 % |    |
| Eigenkapital                                                                   | -157      | —         | 21        | 20        |    |
| Gewinn                                                                         | 3         | -1        | 1         | -3        |    |
|                                                                                | EUR -10 % | USD -10 % | EUR -10 % | EUR -10 % |    |
| Eigenkapital                                                                   | 193       | —         | -25       | -24       |    |
| Gewinn                                                                         | -4        | 1         | -1        | 4         |    |
| <b>zum 31. Dezember 2009</b>                                                   |           |           |           |           |    |
|                                                                                | EUR +10 % | USD +10 % | EUR +10 % | USD +10 % |    |
| Eigenkapital                                                                   | -144      | —         | 21        | 13        |    |
| Gewinn                                                                         | 1         | 0         | -1        | 0         |    |
|                                                                                | EUR -10 % | USD -10 % | EUR -10 % | USD -10 % |    |
| Eigenkapital                                                                   | 176       | —         | -25       | -13       |    |
| Gewinn                                                                         | -1        | 0         | 1         | -1        |    |

Eigenkapital um 0,04 Mio. € gestiegen (2009: 0,50 Mio. €) und der Gewinn um 0,22 Mio. € gefallen (2009: 0,65 Mio. €). Eine Verringerung des Zinssatzes um 100 Basispunkte zum 31. Dezember 2010 hätte einen Rückgang des Eigenkapitals um 0,04 Mio. € zur Folge gehabt (2009: 0,05 Mio. €). Der Gewinn wäre um 0,22 Mio. € gestiegen (2009: 0,63 Mio. €).

Wir sind der Meinung, dass die Zinsatzanalyse gemäß IFRS 7 eine realistische, wenn auch grobe Schätzung unseres derzeitigen Zinsrisikos darstellt.

Zur Senkung der Zinsrisiken und Sicherung seiner finanziellen Flexibilität verfolgt der Konzern im Rahmen seiner Finanzstrategie das zentrale Ziel, den überschüssigen Cashflow aus der betrieblichen Tätigkeit weiterhin zur Reduzierung der Nettofinanzverbindlichkeiten einzusetzen » siehe Treasury, S. 146. Darüber hinaus ist der adidas Konzern stets bestrebt, adäquate Hedging-Strategien mittels derivativer Zinsinstrumente zur Minderung des Zinsrisikos zu identifizieren.

Im Verlauf des Jahres 2010 erreichte das Zinsniveau in Nordamerika und Europa einen neuen Tiefstand. Das Risiko von Zinsanhebungen ist angesichts der niedrigen Zinsen, nachlassender fiskalpolitischer Maßnahmen seitens der Regierungen zur Ankurbelung des Wirtschaftswachstums sowie steigender Inflationsraten im Vergleich zum Vorjahr gestiegen. Deshalb kommen wir nun zu dem Schluss, dass die Wahrscheinlichkeit einer konzernweiten Erhöhung des Zinssatzes höchstwahrscheinlich ist. Trotzdem schätzen wir, angesichts des im Jahr 2010 gestiegenen Anteils von längerfristigen festverzinslichen Finanzierungen in der Finanzierungsstruktur des Konzerns, die finanziellen Auswirkungen potenzieller Zinssteigerungen als moderat ein.

## Strategische und operative Chancen

### Günstige gesamtwirtschaftliche Entwicklungen

Als Unternehmen der Konsumgüterbranche können Verbrauchervertrauen und Konsumausgaben Auswirkungen auf unsere Umsatzentwicklung haben. Gesamtwirtschaftliche Entwicklungen, die besser als ursprünglich prognostiziert ausfallen und die Konsumenten-nachfrage und -kaufkraft unterstützen, können sich somit positiv auf Umsatz und Profitabilität unseres Konzerns auswirken. Zudem können Veränderungen in der Gesetzgebung, zum Beispiel hinsichtlich der Besteuerung von Unternehmensgewinnen, die Profitabilität des Konzerns positiv beeinflussen.

### Zunehmender Stellenwert von Sport im Kampf gegen Fettleibigkeit

In immer mehr Ländern wird ein aktiver Lebensstil im Kampf gegen Fettleibigkeit und Herz-Kreislauf-Erkrankungen vom Staat gefördert. Laut der International Obesity Task Force (IOTF) galten im Jahr 2010 mehr als 600 Millionen Erwachsene als fettleibig und weitere 1,0 Milliarden als übergewichtig. Zudem wurden bis zu 200 Millionen Kinder im Schulalter als fettleibig oder übergewichtig eingeschätzt. Einst nur als Problem der wohlhabenden Nationen betrachtet, wird die Fettleibigkeit jetzt auch in Ländern mit geringerem Pro-Kopf-Einkommen zu einem ernststen Problem.

Diese Entwicklung hat gravierende Folgen für die Gesundheit und dramatische Auswirkungen auf die Kosten im Gesundheitswesen. Infolgedessen regen Regierungen und Nicht-Regierungsorganisationen die Gesellschaft vermehrt dazu an, gesund zu leben und mehr Sport zu treiben. So stellte das U.S. Department of Education Schulen und Organisationen des Gemeinwesens über das Carol M. White Physical Education Programm 80 Mio. US-Dollar für den Sportunterricht zur Verfügung. Da wir insbesondere in für Gewichtsreduktion geeigneten Disziplinen wie Ausdauertraining, Laufen und Schwimmen über eine starke Marktposition verfügen, gehen wir davon aus, dass wir von diesem Trend profitieren werden.

### Verschmelzung von Sport und Lifestyle setzt sich fort

Sport ist aus dem Leben von immer mehr Menschen nicht mehr wegzudenken. Dabei verschwimmen die Grenzen zwischen Sport und Lifestyle zunehmend. Die Menschen wollen auch bei ihrer sportlichen Betätigung modisch aussehen, ohne auf Qualität und neuesten technologischen Fortschritt zu verzichten. Gleichzeitig finden Performance-Funktionen und -Designs zunehmend Anwendung in eher freizeitorientierten Produkten. Wir schätzen den weltweiten Sport-Lifestyle-Markt als mindestens dreimal so groß ein wie den Performance-Markt. Damit eröffnen sich unserem Konzern und unseren Marken, die in diesem Markt bereits sehr gut positioniert sind, zusätzliche Chancen. Ein Beispiel hierfür ist unser Vorhaben, das adidas NEO Label im Rahmen unseres Geschäftsplans Route 2015 zu erweitern » siehe Strategie Global Brands, S. 87.

## Übersicht Unternehmenschancen

07

### Strategische und operative Chancen

|                                                                        |
|------------------------------------------------------------------------|
| Günstige gesamtwirtschaftliche Entwicklungen                           |
| Zunehmender Stellenwert von Sport im Kampf gegen Fettleibigkeit        |
| Verschmelzung von Sport und Lifestyle setzt sich fort                  |
| Schwellenländer als langfristige Wachstumsmotoren                      |
| Kategorie Women's bietet langfristiges Potenzial                       |
| Steigende Nachfrage nach Funktionsbekleidung                           |
| Wachsende Beliebtheit von „grünen“ Produkten                           |
| Neue Möglichkeiten zur Einbindung von Konsumenten durch soziale Medien |
| Starke Marktpositionen weltweit                                        |
| Mehrmarken-Ansatz                                                      |
| Personalisierung und Individualisierung auf dem Vormarsch              |
| Chancen in neuen, schnell wachsenden Sportkategorien nutzen            |
| Reichweite des Vertriebs weiter ausbauen                               |
| Verbesserung der Profitabilität durch Kostenoptimierung                |

### Finanzwirtschaftliche Chancen

|                                              |
|----------------------------------------------|
| Günstige Veränderungen auf den Finanzmärkten |
|----------------------------------------------|

### Schwellenländer als langfristige Wachstumsmotoren

Laut Schätzungen der Vereinten Nationen wird die Weltbevölkerung bis Ende 2015 von derzeit 6,9 auf 7,3 Milliarden anwachsen. Bis zum Jahr 2050 sollen es sogar mehr als 9 Milliarden Menschen sein. Ein Großteil des Bevölkerungszuwachses entfällt dabei auf die Schwellenländer. Der Anstieg der Beschäftigung und der realen Einkommen sowie eine wachsende Mittelklasse geben diesen Volkswirtschaften und damit auch unserer Branche neue Impulse. Die sportliche Betätigung in Ländern wie China und Indien war in der Vergangenheit niedriger als in den Industrienationen, wird aber unseren Erwartungen zufolge in Zukunft steigen. Bestimmt wird dieser Trend vor allem durch die zunehmende Freizeit und die verstärkten Infrastrukturinvestitionen. Außerdem werden sich die Menschen immer mehr der positiven Auswirkungen sportlicher Betätigung bewusst. Eine weitere Wachstumschance ergibt sich für uns daraus, dass europäische und nordamerikanische Sportartikelmarken in Schwellenländern einen hohen Stellenwert genießen und häufig als leicht zugängliche, erschwingliche Luxusgüter betrachtet werden.

### Kategorie Women's bietet langfristiges Potenzial

Unseres Erachtens ist der Sportartikelmarkt für Frauen eines der attraktivsten Segmente unserer Branche. Schuhe für Frauen machen mehr als ein Drittel des Umsatzes bei Sportschuhen aus. Die meisten Umsatzerlöse des Konzerns werden jedoch noch immer in den männerspezifischen und Unisex-Kategorien erzielt. Der adidas Konzern wird auch in Zukunft in die Entwicklung von speziellen Performance- und Lifestyle-Produkten für Frauen investieren, die weibliche Individualität, Authentizität und Stilsicherheit unterstreichen. Aktuelle Beispiele für dieses Engagement sind die Women's Techfit Bekleidungskollektion bei adidas, die in Zusammenarbeit mit dem Berliner Staatsballett entwickelt wurde, die Toning Schuhe und Bekleidung bei Reebok sowie eine spezifisch für Frauen entwickelte Serie von Burner Schlägern und Eisen bei TaylorMade.

### Steigende Nachfrage nach Funktionsbekleidung

Die Nachfrage nach Funktionsbekleidung hat sich in den letzten Jahren verstärkt, weil die Konsumenten die Vorteile dieser Bekleidung gegenüber traditioneller Sportbekleidung aus Baumwolle erkannt haben. Verbessertes Feuchtigkeitsmanagement sowie mehr Bewegungsfreiheit und Komfort veranlassen Konsumenten dazu, auf High-Performance-Bekleidung umzusteigen.

Design und Entwicklung von Funktionsbekleidung erfordern wesentlich mehr Know-how, Produkt- und Materialforschung sowie Produktionsexpertise im Vergleich zu technisch anspruchsloserer Bekleidung. Daher sind nur wenige Unternehmen in der Lage, hochwertige Funktionsbekleidung anzubieten. Unsere Ressourcen und unsere Führungsposition im Bereich Sport Performance ermöglichen es uns, kontinuierlich innovative Produkte zu entwickeln und daraus Nutzen zu ziehen. Im Jahr 2010 brachte adidas zum Beispiel die Terrex Softshell Jacke auf den Markt. Diese Jacke vereint exzellente Atmungsaktivität und Schutz vor Wind mit einer optimalen Passform, die sich den Bewegungen des Körpers anpasst und somit höchsten Komfort gewährleistet.

### Wachsende Beliebtheit von „grünen“ Produkten

Konsumenten machen sich heute zunehmend Gedanken über die Auswirkung ihres Konsumverhaltens auf die Umwelt. Daher wächst die Nachfrage nach umweltfreundlichen Produkten. Im Jahr 2010 haben wir uns verstärkt um die Schaffung geeigneter Produktplattformen bemüht, um das Wachstum in diesem Bereich zu fördern. Insbesondere konzentrierten wir uns auf den weiteren Ausbau des adidas „Better Place“-Programms, dessen erste Produkte 2009 weltweit eingeführt wurden. Bei diesem Programm achten wir bei der Produkt- und Verpackungsgestaltung ganz besonders auf die Einhaltung von Nachhaltigkeitsprinzipien. Beispielsweise verwenden wir verstärkt recycelte Materialien und überwachen den Energieverbrauch bei der Aufbereitung von Materialien und Produkten.

Alle Sport Performance Kategorien von adidas beteiligen sich an diesem Programm und im Vorfeld der Olympischen Spiele 2012 in London verfolgt der Konzern diesbezüglich ehrgeizige Pläne » siehe Nachhaltigkeit, S. 120. Wir haben es uns zum Ziel gesetzt, dass bis zum Jahr 2012 bei 100 % der adidas Sport Performance Sportschuhe und bei 20 % der Bekleidungsprodukte ein gewisser Anteil an nachhaltigen Materialien verwendet wird. Auch Reebok setzt immer mehr auf umweltfreundliche Produkte. Im Januar 2010 beispielsweise brachte Reebok die Kids' Green Easy Schuhkollektion für Kleinkinder und Babys auf den Markt. Durch die Verwendung von recycelten Rohstoffen in dieser Kollektion werden Umweltaspekte berücksichtigt. Selbstverständlich beschränken sich unsere Bemühungen, für unsere Produkte umweltfreundliche Materialien einzusetzen, nicht ausschließlich auf diese speziellen Programme. Auch in anderen Kategorien verfolgen wir dieses Prinzip, wenn auch in geringerem Maße.

### Neue Möglichkeiten zur Einbindung von Konsumenten durch soziale Medien

Die Fortschritte im Bereich der digitalen Kommunikation bieten wesentliche Chancen für unsere Marken. So können wir öfter mit Konsumenten in Kontakt treten und einfacher dauerhafte Beziehungen und Markentreue aufbauen. Der adidas Konzern verfolgt aufmerksam die neuesten Entwicklungen und Trends auf dem Gebiet der Kommunikationstechnologie. Ein Beispiel hierfür sind die neuen sozialen Medien und Netzwerke, durch die unsere Marken bereits jetzt mehr Konsumenten erreichen können. Der entscheidende Vorteil dabei ist, dass unsere Marken in einen unmittelbaren Dialog mit unseren Konsumenten treten können. Konsumenten können beispielsweise aktiv an Markenkampagnen teilnehmen oder sich am Design und der Entwicklung von neuen Produkten beteiligen. Dadurch schaffen wir ein weitaus intensiveres Markenerlebnis, das vor allem die junge Generation anspricht. Der Großteil unserer Divisionen investiert daher beträchtliche Ressourcen, um die Marken des adidas Konzerns auf den unterschiedlichen Plattformen der sozialen Medien, wie Facebook und Twitter, zu präsentieren. Die Facebook-Seite von adidas Originals zum Beispiel hat bereits mehr als 7 Millionen Anhänger.

### Starke Marktpositionen weltweit

Der adidas Konzern ist in zahlreichen Ländern Marktführer. Diese starke Wettbewerbsposition bietet uns viele Vorteile hinsichtlich weltweiter Markenpräsenz, Marktstellung und der Fähigkeit, unsere Position in Schwellenländern effektiv weiter auszubauen. Aufgrund unseres starken Portfolios an Partnerschaften und unserer Marketingaktivitäten genießen unsere Marken weltweit einen hohen Bekanntheitsgrad, wodurch die Konsumenten offen für unsere Markenbotschaften sind. Somit erfreuen sich unsere Produkte einer beständigen Nachfrage als die kleinerer Wettbewerber, weshalb viele Händler unsere Produkte als Kernelement ihres Angebots betrachten. Dies versetzt den adidas Konzern in eine starke Position im Wettstreit um Regalfläche.

### Mehrmarken-Ansatz

Wir glauben, dass einer einzelnen Marke aufgrund der unterschiedlichen Vorlieben und Erwartungen eines stark fragmentierten Markts bei der Zielgruppengröße natürliche Grenzen gesetzt sind. Durch unseren Mehrmarken-Ansatz können wir die Stärke unserer Marken präziser und sinnvoller nutzen »» siehe Konzernstrategie, S. 80. Dabei können wir die kombinierte Kraft aller Marken einsetzen, um Marktanteile hinzuzugewinnen und ein breiteres Spektrum von Käuferschichten, Konsumentenbedürfnissen und Preissegmenten abzudecken.

### Personalisierung und Individualisierung auf dem Vormarsch

Konsumenten erwarten heute mehr als nur ein breites Produktangebot. Sie suchen individuelle Auswahl und Vielfalt. Wir entwickeln einzigartige, relevante Produkte, die spezifischen funktionalen und ästhetischen Anforderungen entsprechen »» siehe Konzernstrategie, S. 80. Die Marken adidas, Reebok und TaylorMade bieten beispielsweise allesamt verschiedene Plattformen zur personalisierten und individualisierten Produktgestaltung an, die die Strategie der jeweiligen Marke verdeutlichen. Zu den wichtigen Konzepten bei adidas zählen mi adidas, miTeam und miCoach. miCoach zum Beispiel ist ein Personalisierungskonzept, das Produkttechnologien mit einer intelligenten Web-Plattform verbindet. Es bietet Konsumenten ein persönliches Trainingssystem mit Audio-Feedback in Echtzeit. Im August 2010 präsentierte adidas die miCoach App, mit der Smartphone-Nutzer ihr Mobiltelefon in einen persönlichen Trainer verwandeln können. Mit der Your Reebok iPhone-App können Konsumenten ihre ganz persönlichen Schuhe online entwerfen und bestellen. Über die myTPball Online-Plattform von TaylorMade-adidas Golf können Golfspieler ihre eigenen Golfbälle entwerfen und bestellen, während die Centers of Excellence zur individuellen Anpassung der Ausrüstung mit Hilfe von Experten und Technikern einladen. Wir erwarten, dass der Markt für personalisierte und kundenindividuelle Schuhe, Bekleidung und Sportzubehör in den kommenden Jahren stark wachsen und sich entwickeln wird, weshalb wir weiter in diesen Bereich investieren.

### Chancen in neuen, schnell wachsenden Sportkategorien nutzen

Die Nutzung des Potenzials, das aufstrebende, schnell wachsende Sportkategorien bieten, stellt eine weitere Chance für unsere Marken dar. Unsere Markenteams führen Marktforschung und Trendmarketing-Studien durch, um so früh wie möglich Veränderungen im Lebensstil und in den Bedürfnissen ihrer Zielkonsumenten zu identifizieren. Veränderungen hinsichtlich Lebensgewohnheiten und Einstellungen können zu neuen Konsumentenbedürfnissen führen, die vom aktuellen Produktangebot nicht erfüllt werden. So hat sich zum Beispiel Muskelaktivierung in weniger als zwei Jahren zu einer bedeutenden Kategorie entwickelt. Nach der erfolgreichen Markteinführung des Reebok EasyTone Walking-Schuhs im Jahr 2009 stellte die Marke 2010 zusätzliche Modelle vor und weitete das Muskelaktivierungskonzept auf andere Sportkategorien sowie auf den Bekleidungsbereich aus. Zudem erleben wir den Trend, dass immer mehr Athleten und Sportbegeisterte eher minimalistische Produkte bevorzugen, die den natürlichen Bewegungsablauf des Körpers unterstützen. Die Nachfrage nach solchen Produkten gilt potenziell als wichtiger Zukunftstrend. Um diese Chance zu nutzen, wollen wir mehr leichte und flexible Produkte auf den Markt bringen, die die natürlichen Bewegungen des Sportlers unterstützen.



### Reichweite des Vertriebs weiter ausbauen

Das Einzelhandelsumfeld in der Sportartikelbranche befindet sich in stetigem Wandel. Konsumenten wollen sich zunehmend mit Marken identifizieren. Wir passen unseren Vertrieb deshalb fortlaufend weiter an und haben Initiativen in Bezug auf von uns selbst kontrollierte Verkaufsflächen zur strategischen Priorität gemacht. Hierzu gehören auch das Management von Verkaufsflächen bei wichtigen Einzelhandelspartnern sowie die Einführung neuer Formate für eigene Einzelhandelsgeschäfte. Im November 2010 wurde in München beispielsweise die Reebok Reetone World eröffnet. Zusammen mit wichtigen Händlern bietet Reebok neben den beliebten Toning-Schuhen auch exklusive Teile aus der „On the Move“-Kollektion an. Kunden können außerdem bei der Your-Reebok Station ihre eigenen Reebok Schuhe entwerfen und personalisieren. Zudem eröffnete adidas im Vorfeld der US-Basketballsaison 2010/2011 in einigen Hundert Champs Sports Läden landesweit exklusive NBA Shop-in-Shops. Wir sind überzeugt, dass wir durch Initiativen wie diese Konsumenten effektiver ansprechen und sie emotional an unsere Produkte binden können.

### Verbesserung der Profitabilität durch Kostenoptimierung

Für hohe Profitabilität und Kapitalrendite sind kontinuierliche Optimierung wichtiger Geschäftsprozesse sowie strikte Kostenkontrolle von essenzieller Bedeutung.

Wir sind der Meinung, dass wir die Möglichkeiten für eine weitere Optimierung der Kostenstrukturen innerhalb unseres Konzerns bei Weitem noch nicht voll ausgeschöpft haben. Unserer Überzeugung nach sind durch die weitere Integration der Funktionen von adidas und Reebok mittelfristig Größenvorteile realisierbar. Darüber hinaus sind wir weiterhin bestrebt, unsere Beschaffungskette effizienter und nachfrageorientierter zu gestalten. Durch die Einführung von durchgehenden („End-to-End“) Planungsprozessen und verbesserter Lieferfähigkeit sehen wir zudem Chancen, unsere Kunden besser bedienen zu können und unseren Bedarf an operativem kurzfristigem Betriebskapital weiter zu senken » siehe Global Operations, S. 106. Ein weiteres Beispiel ist die Reduzierung der Artikelanzahl. Dadurch reduziert sich der Aufwand für Produktentwicklung, die Lagerhaltungskosten werden geringer und wir erhalten die Möglichkeit, unseren Einzelhandelspartnern gezieltere Kollektionen anzubieten.

## Finanzwirtschaftliche Chancen

### Günstige Veränderungen auf den Finanzmärkten

Günstige Wechselkurs- und Zinsentwicklungen können sich positiv auf die Finanzergebnisse des Konzerns auswirken. Unsere Konzern-Treasury-Abteilung verfolgt daher die Entwicklungen auf den Finanzmärkten genau, um Chancen zu identifizieren und zu nutzen » siehe Treasury, S. 146.

## Einschätzung des Managements zu Gesamtrisiken und Chancen

### Gesamtrisikoprofil des Konzerns im Vergleich zum Vorjahr unverändert

Das Management aggregiert alle Risiken, die von verschiedenen Geschäftseinheiten und Funktionen angezeigt werden. Hinsichtlich der in diesem Bericht erläuterten Risiken – unter Berücksichtigung der Eintrittswahrscheinlichkeit und der potenziellen finanziellen Auswirkung sowie der gegenwärtigen Geschäftsaussichten – erwartet das Konzern-Management keine einzelnen oder aggregierten Risiken, welche die Unternehmensfortführung wesentlich gefährden könnten. Diese Einschätzung wird durch die bisherige Resonanz auf unseren Finanzierungsbedarf bestätigt » siehe Treasury, S. 146. Der adidas Konzern hat sich deshalb nicht um ein offizielles Rating einer führenden Ratingagentur bemüht.

Das Management ist nach wie vor zuversichtlich, dass die Ertragskraft des Konzerns eine solide Grundlage für unsere künftige Geschäftsentwicklung bildet und die notwendigen Ressourcen zur Verfügung stellt, um die Chancen, die unserem Konzern geboten werden, zu nutzen.

Verglichen mit der letztjährigen Einschätzung haben sich folgende Risiken erhöht: Risiken durch außergewöhnliche externe Störfälle, Risiken durch steigende Einstandskosten, Kundenrisiken, Personalrisiken, Sozial- und Umweltrisiken, Währungsrisiken sowie Zinsrisiken. Folgende Risiken werden jetzt niedriger eingestuft: gesamtwirtschaftliche Risiken, Lagerbestandsrisiken, Risiken in Produktdesign und -entwicklung, Risiken aufgrund der Nichteinhaltung von Standards sowie Finanzierungs- und Liquiditätsrisiken. Nichtsdestotrotz haben die Veränderungen der individuellen Risiken keine wesentliche Auswirkung auf das Gesamtrisikoprofil des Konzerns, das unserer Überzeugung nach im Vergleich zum Vorjahr unverändert bleibt.

# Nachtrag und Ausblick

Im Jahr 2011 wird für die meisten wichtigen Volkswirtschaften mit Wachstum gerechnet. Wir erwarten, dass sowohl die Sportartikelindustrie als auch der adidas Konzern von steigendem Verbrauchervertrauen und höheren Konsumausgaben profitieren werden. Angesichts unserer Innovationsstärke sowie unseres umfangreichen Angebots an neuen Produkten und Marketinginitiativen prognostizieren wir für 2011 eine Verbesserung von Umsatz und Gewinn. Wir erwarten auf währungsbereinigter Basis einen Anstieg des Konzernumsatzes im mittleren bis hohen einstelligen Bereich aufgrund von Wachstum in den Segmenten Großhandel und Einzelhandel sowie in den Anderen Geschäftssegmenten. Wir gehen davon aus, dass die Bruttomarge des Konzerns zwischen 47,5 % und 48,0 % liegen wird. Höhere Beschaffungskosten werden die positiven Effekte, die aus unserer regionalen Umsatzverteilung und unserem Produktmix erwartet werden, abschwächen. Die operative Marge wird sich voraussichtlich infolge niedrigerer sonstiger betrieblicher Aufwendungen im Verhältnis zum Umsatz auf einen Wert zwischen 7,5 % und 8,0 % verbessern. Infolgedessen gehen wir davon aus, dass das Ergebnis je Aktie um 10 % bis 15 % auf einen Wert zwischen 2,98 € und 3,12 € steigen wird.

## Nachtrag

### Keine Veränderungen seit Ende des Geschäftsjahres

Seit Ende 2010 gab es keine signifikanten organisatorischen, gesamtwirtschaftlichen, sozialpolitischen, gesellschaftsrechtlichen oder finanzierungstechnischen Änderungen sowie keine sonstigen Veränderungen im Management, die sich nach unseren Erwartungen maßgeblich auf unser Geschäft auswirken könnten.

## Ausblick

### Zukunftsbezogene Aussagen

Dieser Lagebericht enthält zukunftsbezogene Aussagen, die auf der aktuellen Prognose des Managements hinsichtlich der zukünftigen Entwicklung des adidas Konzerns beruhen. Der Ausblick basiert auf Einschätzungen, die wir anhand aller uns zum jetzigen Zeitpunkt verfügbaren Informationen getroffen haben. Diese Aussagen unterliegen außerdem Risiken und Unsicherheiten – wie im Risiko- und Chancenbericht beschrieben –, die außerhalb der Kontrollmöglichkeiten des adidas Konzerns liegen » siehe Risiko- und Chancenbericht, S. 158. Sollten die dem Ausblick zugrunde liegenden Annahmen nicht zutreffend sein oder die beschriebenen Risiken eintreten, können die tatsächlichen Ergebnisse und Entwicklungen deutlich von den in diesen Aussagen genannten Ergebnissen und Entwicklungen abweichen.

Der adidas Konzern übernimmt außerhalb der gesetzlich vorgeschriebenen Veröffentlichungsvorschriften keine Verpflichtung, die in diesem Lagebericht enthaltenen Aussagen zu aktualisieren.

### Weltweiter Wirtschaftsaufschwung begünstigt Konzernwachstum 2011

Das Tempo des wirtschaftlichen Aufschwungs im Jahr 2010 hat bei Wirtschaftsanalysten und Marktforschungsinstituten zu zuversichtlicheren Prognosen für 2011 geführt. Nach Schätzung der Weltbank wird die globale Wirtschaft im Jahr 2011 um etwa 3,3 % wachsen. Generell sagen die Prognosen ein starkes Wachstum in Schwellenländern und eine Fortsetzung der moderaten Erholung in den entwickelten Volkswirtschaften voraus.

Gleichwohl gehen von strukturellen Problemen wie der hohen Staatsverschuldung und der hohen Arbeitslosigkeit in zahlreichen Industrieländern Risiken für das weltweite Wirtschaftswachstum aus. Darüber hinaus besteht die Sorge einer Überhitzung der Märkte in einigen Schwellenländern mit steigenden Preisen für Vermögenswerte und zunehmendem Inflationsdruck, obwohl versucht wird, durch die aktuelle Geldpolitik und quantitative Maßnahmen derartigen Entwicklungen entgegenzusteuern.

Ungeachtet der erwarteten Inflation gehen die Ökonomen davon aus, dass die weltweiten Konsumausgaben 2011 ansteigen werden. Aus diesem Grund glauben wir, dass das wirtschaftliche Umfeld unsere Wachstumsziele für 2011 unterstützen wird. Es ist jedoch wahrscheinlich, dass das Wirtschaftswachstum zu weiteren Anstiegen der Rohstoffpreise führt. Dies wiederum wird unserer Ansicht nach ab der zweiten Jahreshälfte 2011 zu weiter steigenden Beschaffungskosten führen.

In Westeuropa wird das BIP im Jahr 2011 voraussichtlich langsam um rund 1,5 % wachsen, wobei vor allem Deutschland und Frankreich als Motor fungieren. Investitionen im verarbeitenden Gewerbe, Exportaktivität und ein stetiger Anstieg der Konsumausgaben dürften die Hauptwachstumstreiber sein. Jedoch gehen wir davon aus, dass Sparmaßnahmen aufgrund der Staatsverschuldung sowie hohe Arbeitslosenzahlen in zahlreichen peripheren Wirtschaften der Region weiter anhalten und das Wachstum bremsen werden.

Für die europäischen Schwellenländer wird 2011 ein Wachstum von etwa 4,1 % vorausgesagt. Die meisten Volkswirtschaften dieser Region werden den Prognosen nach von zunehmenden Exporten und den stetig ansteigenden Konsumausgaben profitieren. Vor allem Russland wird aus den erwarteten höheren Rohstoffpreisen positiven Nutzen ziehen.

Für Nordamerika wird 2011 ein BIP-Wachstum von etwa 3,3 % vorhergesagt. Der Aufschwung in den USA dürfte durch weitere Konjunkturprogramme wie z. B. quantitative Lockerung, Steuer-senkungen und staatliche Leistungszahlungen gefördert werden. Niedrige Zinsen, steigende Konsum- und Unternehmensausgaben sowie starke Exporte, die von einem schwachen Dollar profitieren, werden voraussichtlich ebenfalls zum Wachstum beitragen. Nichtsdestotrotz sind die erhebliche Schuldenlast, die hohen Arbeitslosenzahlen sowie die nur langsam steigenden Gehälter und Privateinkommen in den USA potenzielle Wachstumsbremsen für die Region.

In Asien geht man 2011 von einem weiterhin starken, jedoch leicht verlangsamten Wachstum in Höhe von 4,8 % aus. Hauptwachstumstreiber hierbei sind die Schwellenländer der Region. Dabei sind vor allem China und Indien zu nennen, deren BIP-Wachstum voraussichtlich 8,9 % bzw. 8,0 % betragen wird, insbesondere aufgrund hoher Inlandsnachfrage. In Japan hingegen werden sich die Wachstumsraten 2011 den Prognosen zufolge auf etwa 1,0 % verlangsamen. Mit dem Ende der staatlichen Konjunkturprogramme dürften die geringe Inlandsnachfrage und zurückgehende Konsumausgaben die Wirtschaft dämpfen.

In Lateinamerika werden sich die Wachstumsraten 2011 voraussichtlich leicht verlangsamen und bei etwa 4,8 % einpendeln. Steigende Rohstoffpreise sowie starke Exporte dürften sich positiv auf zahlreiche Volkswirtschaften der Region auswirken. Diese Entwicklung dürfte zudem durch weiter steigende Löhne und Konsumausgaben unterstützt werden.

### Steigende Konsumausgaben unterstützen Wachstum der Sportartikelindustrie

Ohne wesentliche wirtschaftliche Rückschläge gehen wir von einem Wachstum der globalen Sportartikelindustrie im Jahr 2011 aus. In entwickelten Volkswirtschaften werden die Konsumausgaben Prognosen zufolge trotz hoher Arbeitslosenzahlen und moderater Lohnerhöhungen stärker zunehmen als im Vorjahr. Der Privatkonsum in den Schwellenländern wird voraussichtlich weiter kräftig steigen, wobei insbesondere bei den Konsumausgaben für nicht essenzielle Artikel mit einem Plus zu rechnen ist. Diese Entwicklungen begünstigen zwar das Wachstum der Sportartikelindustrie im Jahr 2011, die Preisinflation bei Schuhen und Bekleidung aufgrund höherer Beschaffungskosten könnte jedoch das Wachstum dämpfen.

In Westeuropa wird die Sportartikelbranche im Jahr 2011 voraussichtlich moderat wachsen, obwohl die FIFA Fußball-Weltmeisterschaft 2010 eine hohe Messlatte angelegt hat. Speziell im Bereich Bekleidung wird es jedoch schwer, infolge zunehmenden Preisdrucks aufgrund steigender Beschaffungskosten, Wachstum zu erzielen. Die positiven Entwicklungen in den europäischen Schwellenländern sollten sich im Jahr 2011 fortsetzen. Das Wachstum wird voraussichtlich von Russland angeführt, wo steigende verfügbare Einkommen und Konsumausgaben den Aufschwung im Einzelhandel und in der Sportartikelbranche unterstützen.

In Nordamerika dürften Konjunkturprogramme und Steuervergünstigungen die Konsumausgaben im Jahr 2011 unterstützen, was durch das steigende Konsumentenvertrauen untermauert wird.

Innerhalb der Sportartikelindustrie gehen wir 2011 von höheren Umsätzen bei Schuhen und Bekleidung aus. Aus Categoriesicht sehen wir in diesem Jahr insbesondere die Bereiche Basketball, Lightweight Running und Outdoor-Bekleidung als Wachstumstreiber an.

In China wird der zunehmende Inlandskonsum den Umsatz in der Sportartikelbranche im Jahr 2011 voraussichtlich fördern. Steigende Einkommen auch außerhalb der wichtigsten Großstädte dürften den Vorstoß der Branche in diese Märkte unterstützen, da die Konsumenten hier mehr für nicht essenzielle Konsumartikel ausgeben können.

In den anderen asiatischen Märkten wird die Sportartikelbranche voraussichtlich weiter wachsen, wobei es jedoch regionale Unterschiede geben wird. Schnell wachsende Märkte wie z. B. Indien, Indonesien und Vietnam dürften weiteres Potenzial für die Sportartikelmarken bieten. Indien sollte zusätzlichen Rückenwind durch die Ausrichtung der ICC Cricket-Weltmeisterschaft 2011 erhalten. In Japan werden den Prognosen zufolge Konsumentenvertrauen und Konsumausgaben jedoch auch 2011 zurückgehen. Aufgrund der schwachen Nachfrage wird die Sportartikelbranche in diesem Markt weiterhin zu kämpfen haben.

Die Sportartikelbranche in Lateinamerika wird 2011 voraussichtlich wachsen. Sinkende Arbeitslosenzahlen und steigende Einkommen fördern dabei die Konsumausgaben für nicht essenzielle Produkte in dieser Region, was sich positiv auf den Sportartikelsektor auswirken sollte. Das Wachstum könnte jedoch durch den Inflationsdruck, insbesondere bei Bekleidung, gebremst werden.

### Währungsbereinigter Konzernumsatz steigt 2011 voraussichtlich im mittleren bis hohen einstelligen Bereich

Wir erwarten, dass der Konzernumsatz im Jahr 2011 währungsbereinigt im mittleren bis hohen einstelligen Bereich wachsen wird. Vor allem steigendes Verbrauchervertrauen infolge der anhaltenden Konjunkturerholung wird die Umsatzentwicklung positiv beeinflussen. Die positiven Effekte unserer starken Präsenz in schnell wachsenden Schwellenländern, der weitere Ausbau unseres Einzelhandelssegments sowie die anhaltende Dynamik bei der Marke Reebok werden den Wegfall von Umsätzen im Zusammenhang mit der FIFA Fußball-Weltmeisterschaft 2010 mehr als ausgleichen. Infolgedessen gehen wir davon aus, dass das Wachstum des adidas Konzerns im Jahr 2011 die Entwicklung der Weltwirtschaft über-treffen wird.

### Währungsbereinigter Umsatzanstieg im Großhandelssegment im mittleren einstelligen Bereich erwartet

Im Segment Großhandel rechnen wir im Vorjahresvergleich mit einem währungsbereinigten Umsatzanstieg im mittleren einstelligen Bereich. Die Auftragsentwicklung und positives Feedback aus dem Einzelhandel und auf Messen unterstützen unsere Wachstumserwartungen für das Jahr 2011. Bei adidas Sport Performance erwarten wir einen Umsatzanstieg auf währungsbereinigter Basis im niedrigen bis mittleren einstelligen Bereich. Verantwortlich hierfür werden Umsatzzuwächse in wichtigen Kategorien wie Running und Training sein.

Der Umsatz von adidas Sport Style wird auf währungsbereinigter Basis voraussichtlich im hohen einstelligen bis niedrigen zweistelligen Bereich steigen. Dies wird auf den Ausbau der Vertriebsreichweite und die anhaltende Dynamik unserer Produktlinien, insbesondere beim adidas NEO Label, zurückzuführen sein. Bei Reebok rechnen wir mit einem währungsbereinigten Umsatzanstieg aufgrund von Wachstum in den Kategorien Women's Fitness und Men's Training sowie im Classics Geschäft.

### Währungsbereinigtes Umsatzwachstum im niedrigen zweistelligen Bereich für das Einzelhandelssegment prognostiziert

Wir erwarten für das Einzelhandelssegment im Jahr 2011 einen währungsbereinigten Umsatzzuwachs im niedrigen zweistelligen Bereich. Eine höhere Anzahl eigener Einzelhandelsgeschäfte sowie Umsatzsteigerungen bei bestehenden Shops dürften in gleichem Maße hierzu beitragen.

Der Konzern rechnet im Jahr 2011 mit einem Nettoanstieg der eigenen adidas und Reebok Shops um rund 100 Geschäfte. Abhängig von der Verfügbarkeit der gewünschten Standorte prognostizieren wir etwa 200 Eröffnungen neuer Geschäfte, die in erster Linie in Schwellenländern Osteuropas angesiedelt sein werden. Rund 100 Geschäfte werden im Verlauf des Jahres schließen und etwa 220 Geschäfte sollen umgestaltet werden. Der Umsatz in bereits bestehenden Shops wird im Vorjahresvergleich unseren Prognosen zufolge im mittleren einstelligen Bereich steigen. Wir rechnen damit, dass sich Concept Stores angesichts der prognostizierten Verbesserungen im Konsumumfeld etwas besser entwickeln werden als Factory Outlets.

### Währungsbereinigter Umsatzanstieg in Anderen Geschäftssegmenten im mittleren einstelligen Bereich

Für das Jahr 2011 erwarten wir, dass der Umsatz in den Anderen Geschäftssegmenten auf währungsbereinigter Basis im mittleren einstelligen Bereich ansteigen wird. Bei TaylorMade-adidas Golf rechnen wir damit, dass der Umsatz währungsbereinigt im Vorjahresvergleich im niedrigen bis mittleren einstelligen Bereich zunehmen wird. Neue Produkteinführungen in Kernkategorien wie Metallhölzer, Eisen und Putter dürften das Umsatzwachstum in diesem Segment unterstützen, auch wenn sich der Golfmarkt weltweit nur langsam erholt. Für Rockport wird mit einem Umsatzanstieg im hohen einstelligen bis niedrigen zweistelligen Bereich gerechnet, wofür Verbesserungen im Produktportfolio sowie die verstärkten Einzelhandelsaktivitäten dieser Marke verantwortlich sein werden.

Bei Reebok-CCM Hockey erwarten wir vor allem infolge neuer Produkteinführungen einen Umsatzanstieg im niedrigen einstelligen Bereich im Jahr 2011.

## adidas Konzern Ausblick für 2011

01

| Währungsbereinigte Umsatzentwicklung (in %):                                         |                                                                    |
|--------------------------------------------------------------------------------------|--------------------------------------------------------------------|
| adidas Konzern                                                                       | Wachstum im mittleren bis hohen einstelligen Bereich               |
| Großhandel                                                                           | Wachstum im mittleren einstelligen Bereich                         |
| Einzelhandel                                                                         | Wachstum im niedrigen zweistelligen Bereich                        |
| Bereits bestehende Shops                                                             | Wachstum im mittleren einstelligen Bereich                         |
| Anderere Geschäftssegmente                                                           | Wachstum im mittleren einstelligen Bereich                         |
| TaylorMade-adidas Golf                                                               | Wachstum im niedrigen bis mittleren einstelligen Bereich           |
| Rockport                                                                             | Wachstum im hohen einstelligen bis niedrigen zweistelligen Bereich |
| Reebok-CCM Hockey                                                                    | Wachstum im niedrigen einstelligen Bereich                         |
| Bruttomarge                                                                          | 47,5% bis 48,0%                                                    |
| Operative Marge                                                                      | 7,5% bis 8,0%                                                      |
| Ergebnis je Aktie                                                                    | 2,98 € bis 3,12 €                                                  |
| Durchschnittliches operatives kurzfristiges Betriebskapital im Verhältnis zum Umsatz | Anstieg                                                            |
| Investitionen <sup>1)</sup>                                                          | 350 Mio. € bis 400 Mio. €                                          |
| Anzahl der Shops                                                                     | Nettoanstieg um rund 100 Shops                                     |
| Nettofinanzverbindlichkeiten                                                         | Rückgang                                                           |

1) Ohne Akquisitionen und Finanzierungsleasing.



## Konzernumsatz wächst voraussichtlich in allen Regionen

Wir erwarten, dass der währungsbereinigte Umsatz des Konzerns 2011 in all unseren Regionen, wenn auch in unterschiedlichem Ausmaß, steigen wird. In Westeuropa wird, trotz des Wegfalls der positiven Impulse im Zusammenhang mit der FIFA Fußball-Weltmeisterschaft 2010, die allmähliche Erholung des gesamtwirtschaftlichen Umfelds die Umsatzentwicklung in dieser Region, wenn auch nur moderat, positiv beeinflussen. Das Wachstum in den mitteleuropäischen Ländern dürfte schwierige Rahmenbedingungen in den peripheren Märkten der Region ausgleichen. Wir erwarten, dass sich in den europäischen Schwellenländern der weitere Ausbau und die zunehmende Expertise im Bereich unserer eigenen Einzelhandelsaktivitäten sowie die sich verbessernden Bedingungen im Großhandelsbereich in einigen Ländern dieser Region positiv auf die Umsatzerlöse des Konzerns auswirken. Für Nordamerika gehen wir davon aus, dass wir von der anhaltenden Dynamik, insbesondere bei den Marken adidas und Reebok, profitieren werden. Neue Produkte sowie Produktweiterungen werden diese Entwicklung maßgeblich unterstützen. Für China prognostizieren wir nach einem Umsatzrückgang im Vorjahr eine Rückkehr zu starkem Wachstum im Jahr 2011. Der Rückgang alter Lagerbestände, die Stärkung unserer Präsenz im Einzelhandel und weitere neue Produktlinien, unter anderem bei adidas Originals und adidas NEO, werden sich hier positiv auswirken.

In den Anderen Asiatischen Märkten wird die schwache Konsumnachfrage in Japan durch eine positive Entwicklung in anderen Ländern der Region, wie zum Beispiel Südkorea und Indien, mehr als ausgeglichen werden. In Lateinamerika dürfte die starke Positionierung unserer Marken den Wegfall des positiven Effekts der FIFA Fußball-Weltmeisterschaft 2010 auf den Umsatz mehr als ausgleichen.

## Bruttomarge des Konzerns zwischen 47,5% und 48,0%

Wir erwarten, dass die Bruttomarge des Konzerns 2011 in etwa auf dem Vorjahresniveau liegen wird und einen Wert zwischen 47,5% und 48,0% erreichen wird (2010: 47,8%). Unseren Prognosen zufolge wird die Bruttomarge in unserem Einzelhandelssegment sowie in den Anderen Geschäftssegmenten ansteigen, wohingegen sie im Großhandelssegment voraussichtlich zurückgehen wird. Im Jahr 2011 wird die Bruttomarge des Konzerns von positiven Effekten aus der regionalen Umsatzverteilung profitieren: Den Prognosen zufolge werden die Wachstumsraten in den Schwellenländern über den Wachstumsraten in den reiferen Märkten liegen. Zudem werden Verbesserungen im Einzelhandelssegment sowie bei der Marke Reebok die Entwicklung der Bruttomarge positiv beeinflussen. Allerdings werden diese positiven Effekte durch einige Faktoren aufgehoben werden: Insbesondere werden die Beschaffungskosten im Vergleich zum Vorjahr infolge steigender Rohstoffpreise und Kapazitätsengpässe deutlich ansteigen. Außerdem werden die Hedging-Konditionen im Jahr 2011 im Vorjahresvergleich etwas ungünstiger ausfallen.

## Wichtige Produkteinführungen 2011

02

| Produkt                                                            | Marke         |
|--------------------------------------------------------------------|---------------|
| adilibria und Techfit Trainingsbekleidung für Frauen               | adidas        |
| adidas by Stella McCartney Performance Tenniskollektion            | adidas        |
| adiZero F50 Runner Laufschuh                                       | adidas        |
| CC Ride Laufschuh                                                  | adidas        |
| Supernova Sequence 4 Laufschuh                                     | adidas        |
| adiZero Trainer Trainingsschuh                                     | adidas        |
| adiZero Crazy Light Basketballsuh                                  | adidas        |
| adiPower Predator Fußballschuh                                     | adidas        |
| adiZero Feather Tennisschuh                                        | adidas        |
| Techfit PowerWeb Trainingsbekleidung für Herren                    | adidas        |
| Terrex Faster Outdoor-Kollektion                                   | adidas        |
| adiPower Howard Basketballsuh                                      | adidas        |
| Climawarm Herren-Trainingsbekleidung                               | adidas        |
| Reebok Armani ZigTech Schuhe                                       | Reebok        |
| EasyTone Bekleidung mit ResisTone Technologie                      | Reebok        |
| ZigTech Bekleidung                                                 | Reebok        |
| Premier ZigFly Laufschuh                                           | Reebok        |
| ClassicLite Schuh- und Bekleidungskollektion                       | Reebok        |
| RealFlex Schuhe                                                    | Reebok        |
| Classic ModernLite Schuhe                                          | Reebok        |
| Kamikaze Classic Schuhe                                            | Reebok        |
| Rockeasy Classic Schuhe mit Moving Air Technologie                 | Reebok        |
| EasyTone Plus Schuhe                                               | Reebok        |
| ZigTech Trainingsschuh für Frauen                                  | Reebok        |
| R11 und R11 TP Driver                                              | TaylorMade    |
| Burner SuperFast 2.0 und Burner SuperFast 2.0 TP Driver            | TaylorMade    |
| Tour Preferred MB Eisen und MC Eisen                               | TaylorMade    |
| Ghost Putter Serie                                                 | TaylorMade    |
| Climacool Bekleidung mit Coolmax Energy Fasertechnologie           | adidas Golf   |
| Climacool Bekleidung mit Soft Touch Fasertechnologie               | adidas Golf   |
| Tour360 5.0 Schuhe                                                 | adidas Golf   |
| Golf Lifestyle Bekleidungskollektion für Herren                    | Ashworth      |
| Leucadia spikeloser Golfschuh                                      | Ashworth      |
| DresSports Schuhkollektion für Herren mit truWalk                  | Rockport      |
| Naomi Schuhkollektion für Frauen                                   | Rockport      |
| 11K KFS Schutzbekleidung                                           | Reebok Hockey |
| Larceny Torwartbekleidung                                          | Reebok Hockey |
| CCM U+ Crazy Light Alexander Ovechkin Limited Edition Schlittschuh | CCM Hockey    |
| CCM U+ Crazy Light II Schläger                                     | CCM Hockey    |

### Rückgang der sonstigen betrieblichen Aufwendungen im Verhältnis zum Umsatz

Der Konzern geht davon aus, dass sich die sonstigen betrieblichen Aufwendungen im Verhältnis zum Umsatz im Jahr 2011 leicht verringern werden (2010: 42,1%). Aufwendungen des Sales Working Budgets und des Marketing Working Budgets im Verhältnis zum Umsatz werden im Vergleich zum Vorjahr voraussichtlich leicht zurückgehen. Marketinginvestitionen zur Unterstützung von Reeboks Wachstumsstrategie in den Kategorien Men's und Women's Fitness sowie Investitionen für weiteres Wachstum in unseren wichtigen „Angriffsmärkten“ Nordamerika, China und Russland/GUS werden durch den Wegfall von Aufwendungen im Zusammenhang mit der Präsenz von adidas bei der FIFA Fußball-Weltmeisterschaft 2010 kompensiert werden. Wir erwarten, dass die Betriebsgemeinkosten im Verhältnis zum Umsatz 2011 geringfügig unter dem Vorjahresniveau liegen werden. Höhere Verwaltungs- und Personalaufwendungen im Einzelhandelssegment aufgrund der geplanten Eröffnung weiterer Einzelhandelsgeschäfte werden durch Verbesserungen und Effizienzsteigerungen bei den nicht zugeordneten Kosten in Zentralbereichen/Konsolidierung ausgeglichen werden.

Wir gehen davon aus, dass die Mitarbeiteranzahl des adidas Konzerns gegenüber dem Vorjahr zunehmen wird. Neueinstellungen werden hauptsächlich im Zusammenhang mit dem Ausbau des eigenen Einzelhandels stehen und in erster Linie in Schwellenländern erfolgen. Sie werden hauptsächlich auf Teilzeitbeschäftigungsverhältnissen basieren.

Im Jahr 2011 wird der adidas Konzern erneut ca. 1 % des Konzernumsatzes in Forschung und Entwicklung investieren. Im Vordergrund stehen dabei Personalisierung und digitale Sportprodukte bei adidas sowie die Stärkung von Reeboks Position in den Bereichen Fitness und Training »» siehe Forschung und Entwicklung, S. 110.

### Weitere Verbesserungen der operativen Marge

Die operative Marge des adidas Konzerns wird im Jahr 2011 voraussichtlich auf einen Wert zwischen 7,5 % und 8,0 % ansteigen (2010: 7,5 %). Wir erwarten, dass hauptsächlich niedrigere sonstige betriebliche Aufwendungen im Verhältnis zum Umsatz zu dieser positiven Entwicklung beitragen werden.

### Ergebnis je Aktie steigt voraussichtlich auf 2,98 € bis 3,12 €

Das Ergebnis je Aktie wird unseren Prognosen zufolge um 10 % bis 15 % steigen und zwischen 2,98 € und 3,12 € liegen (verwässertes Ergebnis je Aktie 2010: 2,71 €). Umsatzwachstum und eine höhere operative Marge werden maßgeblich zu dieser positiven Entwicklung beitragen. Infolge niedrigerer durchschnittlicher Nettofinanzverbindlichkeiten rechnen wir im Jahr 2011 mit niedrigeren Zinsaufwendungen. Die Steuerquote des Konzerns dürfte in etwa auf dem Vorjahresniveau liegen (2010: 29,5 %).

### Anstieg des operativen kurzfristigen Betriebskapitals im Verhältnis zum Umsatz

Wir gehen davon aus, dass das durchschnittliche operative kurzfristige Betriebskapital im Verhältnis zum Umsatz im Jahr 2011 im Vorjahresvergleich steigen wird (2010: 20,8 %). Dieser Anstieg steht vor allem im Zusammenhang mit einem höheren Bedarf an kurzfristigem Betriebskapital, um das Wachstum unseres Geschäfts zu unterstützen.

### Investitionsausgaben voraussichtlich zwischen 350 Mio. € und 400 Mio. €

Im Jahr 2011 plant der adidas Konzern 350 Mio. € bis 400 Mio. € in materielle und immaterielle Vermögenswerte zu investieren (2010: 269 Mio. €). Investitionen sind vor allem auf Initiativen im Zusammenhang mit selbst kontrollierten Verkaufsflächen bei adidas und Reebok, insbesondere in Schwellenländern, gerichtet. Diese Investitionen werden im Jahr 2011 fast ein Drittel der Gesamtinvestitionssumme ausmachen.

Zu den sonstigen Investitionsbereichen gehören die Weiterentwicklung der Konzernzentrale in Herzogenaurach sowie die Ausweitung von SAP- und anderen IT-Systemen bei wichtigen Tochtergesellschaften des Konzerns. Wir gehen davon aus, dass wir im Jahr 2011 sämtliche Investitionen vollständig aus dem aus der betrieblichen Tätigkeit generierten Cashflow finanzieren werden.

### Mittelüberschuss wird zur Unterstützung von Wachstumsmaßnahmen eingesetzt

Im Jahr 2011 erwarten wir einen weiterhin positiven Mittelzufluss aus der betrieblichen Tätigkeit. Der Mittelzufluss wird dazu verwendet werden, den Bedarf an kurzfristigem Betriebskapital sowie Investitionen und Dividendenzahlungen zu finanzieren. Wir beabsichtigen, die überschüssigen Mittel größtenteils zur Investition in die Wachstumsmaßnahmen unseres strategischen Geschäftsplans Route 2015 sowie zur weiteren Reduzierung unserer Nettofinanzverbindlichkeiten einzusetzen. Langfristig beabsichtigen wir, zum Jahresende ein Verhältnis von Nettofinanzverbindlichkeiten zu EBITDA von unter zwei beizubehalten (2010: Verhältnis 0,2).

### Effizientes Liquiditätsmanagement für 2011 und darüber hinaus

Im Geschäftsjahr 2011 hat effizientes Liquiditätsmanagement weiterhin eine hohe Priorität für den adidas Konzern. Wir konzentrieren uns darauf, den Mittelzufluss aus der betrieblichen Tätigkeit unserer Konzernsegmente kontinuierlich zu prognostizieren, da dieser die Hauptquelle für liquide Mittel im Konzern darstellt. Die Liquiditätsprognose erfolgt vierteljährlich anhand eines mehrjährigen Finanz- und Liquiditätsplans. Die langfristige Liquidität wird durch kontinuierlich positiven Free Cashflow und ein ausreichendes Volumen zugesagter und nicht fest zugesagter ungenutzter Kreditlinien sichergestellt. Wir planen für das Jahr 2011 keine Finanzierungsaktivitäten zum Ersetzen von fälligen Kreditlinien

»» siehe Treasury, S. 146.

### Management beabsichtigt Dividende von 0,80 € vorzuschlagen

Angesichts der starken Cashflow-Generierung im Jahr 2010 und der deutlich reduzierten Nettofinanzverbindlichkeiten beabsichtigt das Management der Hauptversammlung am 12. Mai 2011 für das Geschäftsjahr 2010 eine Dividende von 0,80 € vorzuschlagen (2009: 0,35 €). Dieser Vorschlag bedeutet eine Erhöhung um 129 % gegenüber dem Vorjahr. Sofern die Aktionäre ihre Zustimmung erteilen, wird die Dividende am 13. Mai 2011 ausbezahlt. Dieser Vorschlag entspricht, wie auch im Vorjahr, einem Ausschüttungssatz von 30 % und steht im Einklang mit unserer Dividendenpolitik, die einen Ausschüttungssatz zwischen 20 % und 40 % des auf Anteilseigner entfallenden Gewinns vorsieht. Basierend auf der Anzahl der im Umlauf befindlichen Aktien zum Ende des Geschäftsjahres 2010 wird die Ausschüttungssumme auf 167 Mio. € steigen (2009: 73 Mio. €).

### adidas Konzern legt langfristige strategische Ziele fest

Aufbauend auf starken Marken und Premium-Produkten, der umfassenden globalen Präsenz sowie dem Fokus auf Innovation und Konsumenten möchte der adidas Konzern die Größe seiner Geschäftsaktivitäten bis zum Jahr 2015 deutlich steigern. Der strategische Geschäftsplan bis 2015 „Route 2015“, der im November 2010 vorgestellt wurde, sieht vor, dass der Konzernumsatz in diesem Fünfjahreszeitraum auf währungsbereinigter Basis um 45 % bis 50 % steigen und somit das Wachstum des Markts insgesamt (sowohl BIP als auch Sportartikelindustrie) übertreffen soll.

Zudem wollen wir den Gewinn schneller steigern als den Umsatz: Ziel ist es, den Gewinn jährlich um durchschnittlich 15 % und die operative Marge spätestens bis zum Jahr 2015 nachhaltig auf 11 % zu steigern. Für das Jahr 2012 erwarten wir gemäß unseren mittelfristigen Prognosen einen Anstieg von Umsatz und Gewinn gegenüber dem Jahr 2011.

Um unsere strategischen Ziele zu erreichen und langfristigen, nachhaltigen Shareholder Value zu schaffen, haben wir klare strategische Grundpfeiler festgelegt. Hierzu zählen:

#### – Klare Marktpositionierung und Prioritätensetzung bei den Marken:

Wir sind davon überzeugt, dass unser Markenportfolio beträchtliches Wachstumspotenzial bietet. Der überwiegende Anteil des anvisierten Wachstums soll aus dem Bereich Global Brands stammen, der unseren Prognosen zufolge 90 % zum erwarteten Umsatzanstieg in diesem Zeitraum beitragen wird »» siehe Strategie Global Brands, S. 87. Innerhalb von adidas und Reebok sollten unter anderem folgende Initiativen maßgeblich zum nachhaltigen Wachstum des Konzerns beitragen:

- Umsatz- und Marktanteile in den Kategorien Running und Basketball innerhalb adidas Sport Performance hinzugewinnen;
- adidas Sport Style durch das NEO Label im Fast-Fashion-Bereich weiter ausbauen;
- Reebok als die führende Fitness- und Training-Marke etablieren;
- in den Bereichen Personalisierung und Interaktivität die Branche anführen.

Auf Markenebene rechnen wir bei adidas Sport Performance mit einem durchschnittlichen jährlichen Wachstum im mittleren bis hohen einstelligen Bereich. Bei adidas Sport Style und Reebok streben wir bis 2015 eine durchschnittliche jährliche Umsatzsteigerung im zweistelligen Bereich an.

#### – Ausbau der Präsenz in wichtigen Wachstumsmärkten:

Wir haben Nordamerika, China, Russland/GUS, Lateinamerika, Japan, Großbritannien und Indien als wichtige Wachstumsmärkte für die nächsten fünf Jahre identifiziert. Wir erwarten, dass von diesen Märkten die drei „Angriffsmärkte“ Nordamerika, China und Russland/GUS bis 2015 rund 50 % des gesamten Umsatzwachstums des Konzerns beisteuern werden. Ziel ist es, in jedem dieser Märkte eine durchschnittliche jährliche Wachstumsrate im zweistelligen Bereich zu erzielen. In den USA haben die Marken des Konzerns ein beträchtliches Potenzial, Marktanteile hinzuzugewinnen. Um dieses Potenzial auszuschöpfen, wird der Fokus auf dem verbesserten Vertrieb und einem höheren Anteil an speziell für diesen Markt entwickelten Produkten liegen. In Schwellenländern wie China und Russland dürften ein steigender Lebensstandard, höhere verfügbare Einkommen, positive demografische Trends sowie eine zunehmende sportliche Betätigung den Anstieg der Nachfrage nach Sportartikeln unterstützen.

– **Intensivierter Fokus auf selbst kontrollierte Verkaufsflächen:** Wir beabsichtigen, in den kommenden Jahren den Anteil des Konzernumsatzes von selbst kontrollierten Verkaufsflächen auf mindestens 45 % auszuweiten.

Dazu gehören die Eröffnung von neuen Einzelhandelsläden von adidas und Reebok, der weitere Ausbau unserer Mono-Branded Stores in Märkten wie China sowie neue Shop-in-Shop-Initiativen mit Einzelhandelspartnern rund um die Welt. Im Bereich des eigenen Einzelhandels haben wir vor, in den nächsten fünf Jahren mindestens 500 adidas und Reebok Geschäfte zu eröffnen. Zudem wollen wir unser E-Commerce-Geschäft deutlich steigern, das unseren Prognosen zufolge in diesem Zeitraum auf 500 Mio. € wachsen wird »» siehe Strategie Global Sales, S. 82.

#### – Gewinnsteigerung durch Wachstum und operative Stärke:

Die Expansion in den Schwellenländern sowie der Ausbau selbst kontrollierter Verkaufsflächen sind wichtige Stellhebel für mehr Markenpräsenz, die Verbesserung des Durchverkaufs und die Steigerung der Profitabilität des Konzerns. Darüber hinaus werden wir weiterhin an der Straffung unserer internen Abläufe arbeiten, um Entscheidungsprozesse zu beschleunigen, Komplexität zu reduzieren und unser Unternehmen schlanker und effizienter zu machen. Wir sind davon überzeugt, dass uns die Fokussierung auf die eben genannten Maßnahmen erhebliches Potenzial bietet, um unsere operative Marge bis 2015 nachhaltig auf 11 % zu steigern.

– **Beibehaltung der finanziellen Flexibilität:** Wir beabsichtigen, langfristig ein Verhältnis von Nettofinanzverbindlichkeiten zu EBITDA von unter zwei beizubehalten. Eine gesunde Bilanzstruktur steigert unsere Flexibilität hinsichtlich der Realisierung wertschaffender mittel- und langfristiger Chancen im Interesse unserer Aktionäre.

## It's nice to win

Hinter Rockports „It's nice to win“-Kampagne steht die Idee, dass berufstätige Konsumenten in Großstädten trotz Zeitmangels die Freiheit haben sollen, das zu erleben, was es für sie zu erleben gibt – ohne sich durch die Wahl ihrer Schuhe eingeschränkt zu fühlen. Das abgebildete Kampagnenmotiv nennt sich „Last Minute Party Time“. Es zeigt eine junge Frau, die bei der Arbeit spontan zu einer Party eingeladen wird. Sie will nun direkt vom Büro zur Party gehen, ohne sich zu Hause noch einmal umziehen zu müssen. Kein Problem mit den Schuhen von Rockport, die sie bereits den ganzen Tag bei der Arbeit getragen hat – denn durch ihre Eleganz eignen sie sich sowohl für das Büro als auch für eine lange Partynacht.

The advertisement is a vertical poster for Rockport shoes. It features a collage of images: a woman in a white blazer working at a desk, a woman on a phone, a woman in a pink dress, and a woman in a red dress. The text 'last minute PARTY TIME' is prominently displayed in the center. Below it, the tagline 'How to Play - Win all day and go straight to the party without changing shoes.' is written. To the right of the text, a pair of yellow high-heeled shoes is shown. At the bottom, the Rockport logo is visible, along with the text 'ROCKPORT' and 'It's nice to win'.

**last minute  
PARTY TIME**

*How to Play - Win all day and go straight to the party without changing shoes.*

*Keys to Winning - Versatility. Style made comfortable.*

**ROCKPORT**

It's nice to win



# 05

## Konzernabschluss

|                                                                       |       |
|-----------------------------------------------------------------------|-------|
| Versicherung der gesetzlichen Vertreter .....                         | » 182 |
| Bestätigungsvermerk des Abschlussprüfers .....                        | » 183 |
| Konzernbilanz .....                                                   | » 184 |
| Konzerngewinn- und Verlustrechnung .....                              | » 185 |
| Konzerngesamtergebnisrechnung .....                                   | » 186 |
| Konzerneigenkapitalveränderungsrechnung .....                         | » 186 |
| Konzernkapitalflussrechnung .....                                     | » 187 |
| Konzernanhang .....                                                   | » 188 |
| Entwicklung der immateriellen<br>und materiellen Vermögenswerte ..... | » 224 |
| Anteilsbesitz .....                                                   | » 226 |

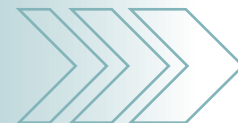

---

## Versicherung der gesetzlichen Vertreter

Wir versichern nach bestem Wissen, dass gemäß den anzuwendenden Rechnungslegungsgrundsätzen der Konzernabschluss ein den tatsächlichen Verhältnissen entsprechendes Bild der Vermögens-, Finanz- und Ertragslage des Konzerns vermittelt und im Konzernlagebericht der Geschäftsverlauf einschließlich des Geschäftsergebnisses und die Lage des Konzerns so dargestellt sind, dass ein den tatsächlichen Verhältnissen entsprechendes Bild vermittelt wird, sowie die wesentlichen Chancen und Risiken der voraussichtlichen Entwicklung des Konzerns beschrieben sind.

Herzogenaurach, den 15. Februar 2011

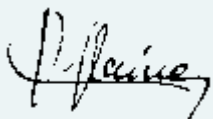

Herbert Hainer  
Vorstandsvorsitzender

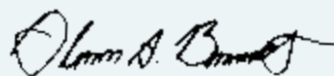

Glenn Bennett  
Global Operations



Robin J. Stalker  
Finanzvorstand

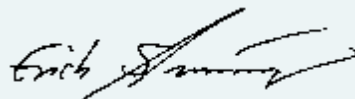

Erich Stamminger  
Global Brands

# Bestätigungsvermerk des Abschlussprüfers

Wir haben den von der adidas AG, Herzogenaurach, aufgestellten Konzernabschluss – bestehend aus Bilanz, Gewinn- und Verlustrechnung, Gesamtergebnisrechnung, Eigenkapitalveränderungsrechnung, Kapitalflussrechnung und Anhang – sowie den Konzernlagebericht für das Geschäftsjahr vom 1. Januar bis 31. Dezember 2010 geprüft. Die Aufstellung von Konzernabschluss und Konzernlagebericht nach den IFRS, wie sie in der EU anzuwenden sind, und den ergänzend nach § 315a Abs. 1 HGB anzuwendenden handelsrechtlichen Vorschriften liegt in der Verantwortung des Vorstands der Gesellschaft. Unsere Aufgabe ist es, auf der Grundlage der von uns durchgeführten Prüfung eine Beurteilung über den Konzernabschluss und den Konzernlagebericht abzugeben.

Wir haben unsere Konzernabschlussprüfung nach § 317 HGB unter Beachtung der vom Institut der Wirtschaftsprüfer (IDW) festgestellten deutschen Grundsätze ordnungsmäßiger Abschlussprüfung vorgenommen. Danach ist die Prüfung so zu planen und durchzuführen, dass Unrichtigkeiten und Verstöße, die sich auf die Darstellung des durch den Konzernabschluss unter Beachtung der anzuwendenden Rechnungslegungsvorschriften und durch den Konzernlagebericht vermittelten Bildes der Vermögens-, Finanz- und Ertragslage wesentlich auswirken, mit hinreichender Sicherheit erkannt werden. Bei der Festlegung der Prüfungshandlungen werden die Kenntnisse über die Geschäftstätigkeit und über das wirtschaftliche und rechtliche Umfeld des Konzerns sowie die Erwartungen über mögliche Fehler berücksichtigt. Im Rahmen der Prüfung werden die Wirksamkeit des rechnungslegungsbezogenen internen Kontrollsystems sowie Nachweise für die Angaben im Konzernabschluss und Konzernlagebericht überwiegend auf der Basis von Stichproben beurteilt. Die Prüfung umfasst die Beurteilung der Jahresabschlüsse der in den Konzernabschluss einbezogenen Unternehmen, der Abgrenzung des Konsolidierungskreises, der angewandten Bilanzierungs- und Konsolidierungsgrundsätze und der wesentlichen Einschätzungen des Vorstands sowie die Würdigung der Gesamtdarstellung des Konzernabschlusses und des Konzernlageberichts. Wir sind der Auffassung, dass unsere Prüfung eine hinreichend sichere Grundlage für unsere Beurteilung bildet.

Unsere Prüfung hat zu keinen Einwendungen geführt.

Nach unserer Beurteilung auf Grund der bei der Prüfung gewonnenen Erkenntnisse entspricht der Konzernabschluss den IFRS, wie sie in der EU anzuwenden sind, und den ergänzend nach § 315a Abs. 1 HGB anzuwendenden handelsrechtlichen Vorschriften und vermittelt unter Beachtung dieser Vorschriften ein den tatsächlichen Verhältnissen entsprechendes Bild der Vermögens-, Finanz- und Ertragslage des Konzerns. Der Konzernlagebericht steht in Einklang mit dem Konzernabschluss, vermittelt insgesamt ein zutreffendes Bild von der Lage des Konzerns und stellt die Chancen und Risiken der zukünftigen Entwicklung zutreffend dar.

Frankfurt am Main, den 15. Februar 2011

KPMG AG  
Wirtschaftsprüfungsgesellschaft

Michael Kozikowski  
Wirtschaftsprüfer

Achim Wolper  
Wirtschaftsprüfer

**Konzernbilanz (IFRS) der adidas AG**

in Mio. €

01

|                                                              | Erläuterung | 31. Dezember 2010 | 31. Dezember 2009 | Veränderung in % |
|--------------------------------------------------------------|-------------|-------------------|-------------------|------------------|
| Flüssige Mittel                                              | 4           | 1.156             | 775               | 49,2             |
| Kurzfristige Finanzanlagen                                   | 5           | 233               | 75                | 209,5            |
| Forderungen aus Lieferungen und Leistungen                   | 6           | 1.667             | 1.429             | 16,6             |
| Sonstige kurzfristige finanzielle Vermögenswerte             | 7           | 197               | 160               | 22,9             |
| Vorräte                                                      | 8           | 2.119             | 1.471             | 44,1             |
| Forderungen aus Ertragsteuern                                | 33          | 71                | 89                | -20,3            |
| Sonstige kurzfristige Vermögenswerte                         | 9           | 390               | 360               | 8,2              |
| Vermögenswerte klassifiziert als zur Veräußerung gehalten    | 10          | 47                | 126               | -62,6            |
| <b>Kurzfristige Aktiva</b>                                   |             | <b>5.880</b>      | <b>4.485</b>      | <b>31,1</b>      |
| Sachanlagen                                                  | 11          | 855               | 723               | 18,3             |
| Geschäfts- oder Firmenwerte                                  | 12          | 1.539             | 1.478             | 4,1              |
| Markenrechte                                                 | 13          | 1.447             | 1.342             | 7,8              |
| Sonstige immaterielle Vermögenswerte                         | 13          | 142               | 160               | -11,2            |
| Langfristige Finanzanlagen                                   | 14          | 93                | 91                | 2,4              |
| Sonstige langfristige finanzielle Vermögenswerte             | 15          | 54                | 58                | -6,5             |
| Latente Steueransprüche                                      | 33          | 508               | 412               | 23,2             |
| Sonstige langfristige Vermögenswerte                         | 16          | 100               | 126               | -20,3            |
| <b>Langfristige Aktiva</b>                                   |             | <b>4.738</b>      | <b>4.390</b>      | <b>7,9</b>       |
| <b>Aktiva</b>                                                |             | <b>10.618</b>     | <b>8.875</b>      | <b>19,6</b>      |
| Kurzfristige Finanzverbindlichkeiten                         | 17          | 273               | 198               | 37,8             |
| Verbindlichkeiten aus Lieferungen und Leistungen             |             | 1.694             | 1.166             | 45,3             |
| Sonstige kurzfristige finanzielle Verbindlichkeiten          | 18          | 123               | 101               | 21,2             |
| Ertragsteuern                                                | 33          | 265               | 194               | 36,1             |
| Sonstige kurzfristige Rückstellungen                         | 19          | 470               | 320               | 46,8             |
| Kurzfristige abgegrenzte Schulden                            | 20          | 842               | 625               | 34,7             |
| Sonstige kurzfristige Verbindlichkeiten                      | 21          | 241               | 232               | 4,2              |
| Verbindlichkeiten klassifiziert als zur Veräußerung gehalten | 10          | 0                 | 0                 | n.a.             |
| <b>Kurzfristige Passiva</b>                                  |             | <b>3.908</b>      | <b>2.836</b>      | <b>37,8</b>      |
| Langfristige Finanzverbindlichkeiten                         | 17          | 1.337             | 1.569             | -14,8            |
| Sonstige langfristige finanzielle Verbindlichkeiten          | 22          | 15                | 25                | -41,1            |
| Pensionen und ähnliche Verpflichtungen                       | 23          | 180               | 157               | 14,9             |
| Latente Steuerschulden                                       | 33          | 451               | 433               | 4,0              |
| Sonstige langfristige Rückstellungen                         | 19          | 29                | 29                | -0,3             |
| Langfristige abgegrenzte Schulden                            | 20          | 39                | 22                | 79,8             |
| Sonstige langfristige Verbindlichkeiten                      | 24          | 36                | 28                | 31,8             |
| <b>Langfristige Passiva</b>                                  |             | <b>2.087</b>      | <b>2.263</b>      | <b>-7,7</b>      |
| Grundkapital                                                 |             | 209               | 209               | —                |
| Sonstige Rücklagen                                           |             | 563               | 212               | 167,1            |
| Gewinnrücklagen                                              |             | 3.844             | 3.350             | 14,7             |
| <b>Auf Anteilseigner entfallendes Kapital</b>                | 25          | <b>4.616</b>      | <b>3.771</b>      | <b>22,4</b>      |
| Nicht beherrschende Anteile                                  | 26          | 7                 | 5                 | 29,9             |
| <b>Gesamtes Eigenkapital</b>                                 |             | <b>4.623</b>      | <b>3.776</b>      | <b>22,4</b>      |
| <b>Passiva</b>                                               |             | <b>10.618</b>     | <b>8.875</b>      | <b>19,6</b>      |

Bei Prozentangaben und Zahlen können Rundungsdifferenzen auftreten.  
Der Konzernanhang ist integraler Bestandteil des Konzernabschlusses.



**Konzerngewinn- und Verlustrechnung (IFRS) der adidas AG**

in Mio. €

02

|                                                            | Erläuterung | 1. Jan. bis 31. Dez. 2010 | 1. Jan. bis 31. Dez. 2009 | Veränderung    |
|------------------------------------------------------------|-------------|---------------------------|---------------------------|----------------|
| Umsatzerlöse                                               | 35          | 11.990                    | 10.381                    | 15,5 %         |
| Umsatzkosten                                               |             | 6.260                     | 5.669                     | 10,4 %         |
| <b>Bruttoergebnis</b>                                      |             | <b>5.730</b>              | <b>4.712</b>              | <b>21,6 %</b>  |
| (in % der Umsatzerlöse)                                    |             | 47,8 %                    | 45,4 %                    | 2,4 PP         |
| Lizenz- und Provisionserträge                              |             | 100                       | 86                        | 16,1 %         |
| Sonstige betriebliche Erträge                              | 29          | 110                       | 100                       | 9,7 %          |
| Sonstige betriebliche Aufwendungen                         | 11, 13, 30  | 5.046                     | 4.390                     | 14,9 %         |
| (in % der Umsatzerlöse)                                    |             | 42,1 %                    | 42,3 %                    | -0,2 PP        |
| <b>Betriebsergebnis</b>                                    |             | <b>894</b>                | <b>508</b>                | <b>76,0 %</b>  |
| (in % der Umsatzerlöse)                                    |             | 7,5 %                     | 4,9 %                     | 2,6 PP         |
| Finanzerträge                                              | 32          | 25                        | 19                        | 28,3 %         |
| Finanzaufwendungen                                         | 32          | 113                       | 169                       | -33,5 %        |
| <b>Gewinn vor Steuern</b>                                  |             | <b>806</b>                | <b>358</b>                | <b>125,0 %</b> |
| (in % der Umsatzerlöse)                                    |             | 6,7 %                     | 3,5 %                     | 3,3 PP         |
| Ertragsteuern                                              | 33          | 238                       | 113                       | 111,0 %        |
| (in % des Gewinns vor Steuern)                             |             | 29,5 %                    | 31,5 %                    | -2,0 PP        |
| <b>Gewinn</b>                                              |             | <b>568</b>                | <b>245</b>                | <b>131,4 %</b> |
| (in % der Umsatzerlöse)                                    |             | 4,7 %                     | 2,4 %                     | 2,4 PP         |
| <b>Auf Anteilseigner entfallender Gewinn</b>               |             | <b>567</b>                | <b>245</b>                | <b>131,1 %</b> |
| (in % der Umsatzerlöse)                                    |             | 4,7 %                     | 2,4 %                     | 2,4 PP         |
| <b>Auf nicht beherrschende Anteile entfallender Gewinn</b> |             | <b>1</b>                  | <b>0</b>                  | <b>794,7 %</b> |
| Unverwässertes Ergebnis je Aktie (in €)                    | 34          | 2,71                      | 1,25                      | 116,8 %        |
| Verwässertes Ergebnis je Aktie (in €)                      | 34          | 2,71                      | 1,22                      | 121,8 %        |

Bei Prozentangaben und Zahlen können Rundungsdifferenzen auftreten.  
Der Konzernanhang ist integraler Bestandteil des Konzernabschlusses.

**Konzerngesamtergebnisrechnung (IFRS) der adidas AG**

in Mio. €

03

|                                                                                                            | Erläuterung | 1. Jan. bis 31. Dez. 2010 | 1. Jan. bis 31. Dez. 2009 |
|------------------------------------------------------------------------------------------------------------|-------------|---------------------------|---------------------------|
| <b>Gewinn nach Steuern</b>                                                                                 |             | <b>568</b>                | <b>245</b>                |
| Nettogewinn/-verlust aus der Absicherung von Cashflow, netto nach Steuern                                  | 28          | 31                        | - 132                     |
| Versicherungsmathematische Verluste aus leistungsorientierten Pensionszusagen (IAS 19), netto nach Steuern | 23          | - 10                      | - 11                      |
| Effekt aus Vermögenswertlimitierung (IAS 19), netto nach Steuern                                           | 23          | - 0                       | - 1                       |
| Währungsänderung                                                                                           |             | 331                       | - 19                      |
| <b>Sonstiges Ergebnis</b>                                                                                  |             | <b>352</b>                | <b>- 163</b>              |
| <b>Gesamtergebnis</b>                                                                                      |             | <b>920</b>                | <b>82</b>                 |
| Auf Anteilseigner der adidas AG entfallend                                                                 |             | 918                       | 82                        |
| Auf nicht beherrschende Anteile entfallend                                                                 |             | 2                         | 0                         |

Bei Prozentangaben und Zahlen können Rundungsdifferenzen auftreten.  
Der Konzernanhang ist integraler Bestandteil des Konzernabschlusses.

**Konzerneigenkapitalveränderungsrechnung (IFRS) der adidas AG**

in Mio. €

04

|                                                                              | Erläuterung | Grund-<br>kapital | Kapital-<br>rücklage | Kumulierte<br>Währungs-<br>umrechnung | Hedging-<br>Rücklage | Sonstige<br>Rücklagen <sup>1)</sup> | Gewinn-<br>rücklagen | Eigenkapital<br>der Anteils-<br>eigner | Ausgleichs-<br>posten für nicht<br>beherrschende<br>Anteile | Gesamt       |
|------------------------------------------------------------------------------|-------------|-------------------|----------------------|---------------------------------------|----------------------|-------------------------------------|----------------------|----------------------------------------|-------------------------------------------------------------|--------------|
| <b>31. Dezember 2008</b>                                                     |             | <b>194</b>        | <b>338</b>           | <b>- 432</b>                          | <b>91</b>            | <b>- 6</b>                          | <b>3.202</b>         | <b>3.386</b>                           | <b>14</b>                                                   | <b>3.400</b> |
| <b>Gesamtergebnis</b>                                                        |             |                   |                      | - 19                                  | - 132                | - 12                                | 245                  | 82                                     | 0                                                           | 82           |
| Dividendenzahlung                                                            | 25          |                   |                      |                                       |                      |                                     | - 97                 | - 97                                   |                                                             | - 97         |
| Ausgeübte Aktienoptionen                                                     | 38          | 0                 | 0                    |                                       |                      |                                     |                      | 0                                      |                                                             | 0            |
| Wandlung der Wandelanleihe                                                   |             | 16                | 384                  |                                       |                      |                                     |                      | 400                                    |                                                             | 400          |
| Erwerb von Anteilen von Minderheitsaktionären                                | 26          |                   |                      |                                       |                      |                                     |                      |                                        | - 12                                                        | - 12         |
| Neu gegründete Joint Ventures                                                | 26          |                   |                      |                                       |                      |                                     |                      |                                        | 3                                                           | 3            |
| Umgliederung von nicht beherrschenden Anteilen in Übereinstimmung mit IAS 32 | 26          |                   |                      |                                       |                      |                                     | 0                    | 0                                      |                                                             | 0            |
| <b>31. Dezember 2009</b>                                                     |             | <b>209</b>        | <b>722</b>           | <b>- 451</b>                          | <b>- 41</b>          | <b>- 18</b>                         | <b>3.350</b>         | <b>3.771</b>                           | <b>5</b>                                                    | <b>3.776</b> |
| <b>Gesamtergebnis</b>                                                        |             |                   |                      | 330                                   | 31                   | - 10                                | 567                  | 918                                    | 2                                                           | 920          |
| Dividendenzahlung                                                            | 25          |                   |                      |                                       |                      |                                     | - 73                 | - 73                                   | - 0                                                         | - 73         |
| Umgliederung von nicht beherrschenden Anteilen in Übereinstimmung mit IAS 32 | 26          |                   |                      |                                       |                      |                                     | 0                    | 0                                      |                                                             | 0            |
| <b>31. Dezember 2010</b>                                                     |             | <b>209</b>        | <b>722</b>           | <b>- 121</b>                          | <b>- 10</b>          | <b>- 28</b>                         | <b>3.844</b>         | <b>4.616</b>                           | <b>7</b>                                                    | <b>4.623</b> |

1) Rücklagen für versicherungsmathematische Gewinne/Verluste und Aktienoptionspläne.  
Bei Prozentangaben und Zahlen können Rundungsdifferenzen auftreten.  
Der Konzernanhang ist integraler Bestandteil des Konzernabschlusses.

|                                                                                                          | Erläuterung    | 1. Jan. bis 31. Dez. 2010 | 1. Jan. bis 31. Dez. 2009 |
|----------------------------------------------------------------------------------------------------------|----------------|---------------------------|---------------------------|
| <b>Betriebliche Tätigkeit:</b>                                                                           |                |                           |                           |
| Gewinn vor Steuern                                                                                       |                | 806                       | 358                       |
| <b>Anpassungen für:</b>                                                                                  |                |                           |                           |
| Abschreibungen und Wertminderungsaufwendungen                                                            | 11, 13, 14, 30 | 270                       | 299                       |
| Wertaufholungen                                                                                          |                | -7                        | 0                         |
| Unrealisierte Währungsgewinne/-verluste, netto                                                           |                | -19                       | 15                        |
| Zinserträge                                                                                              | 32             | -23                       | -16                       |
| Zinsaufwendungen                                                                                         | 32             | 112                       | 138                       |
| Verlust aus Sachanlagenabgang, netto                                                                     |                | 5                         | 23                        |
| Sonstige nicht zahlungswirksame Erträge/Aufwendungen                                                     | 29, 30         | -0                        | 5                         |
| <b>Betriebliches Ergebnis vor Änderungen im Nettoumlaufvermögen</b>                                      |                | <b>1.144</b>              | <b>822</b>                |
| Zunahme/Abnahme der Forderungen und der sonstigen Vermögenswerte                                         |                | -100                      | 464                       |
| Zunahme/Abnahme der Vorräte                                                                              |                | -561                      | 617                       |
| Zunahme/Abnahme der Verbindlichkeiten aus Lieferungen und Leistungen und der sonstigen Verbindlichkeiten |                | 757                       | -312                      |
| <b>Mittelzufluss aus betrieblicher Tätigkeit vor Zinsen und Steuern</b>                                  |                | <b>1.240</b>              | <b>1.591</b>              |
| Zinszahlungen                                                                                            |                | -111                      | -131                      |
| Zahlungen für Ertragsteuern                                                                              |                | -235                      | -262                      |
| <b>Mittelzufluss aus betrieblicher Tätigkeit</b>                                                         |                | <b>894</b>                | <b>1.198</b>              |
| <b>Investitionstätigkeit:</b>                                                                            |                |                           |                           |
| Erwerb von Markenrechten und sonstigen immateriellen Vermögenswerten                                     |                | -42                       | -46                       |
| Erlöse aus dem Abgang von Markenrechten und sonstigen immateriellen Vermögenswerten                      |                | 17                        | 10                        |
| Erwerb von Sachanlagen                                                                                   |                | -227                      | -195                      |
| Erlöse aus dem Abgang von Sachanlagen                                                                    |                | 1                         | 16                        |
| Erwerb von weiteren Anteilen an Tochtergesellschaften                                                    | 3              | —                         | -14                       |
| Erwerb von Tochtergesellschaften und sonstigen Geschäftseinheiten abzüglich erworbener flüssiger Mittel  | 3, 36          | —                         | -8                        |
| Erwerb von/Erlöse aus dem Abgang von kurzfristigen Finanzanlagen                                         |                | -146                      | 60                        |
| Erlöse aus dem Abgang von/Erwerb von Finanzanlagen und sonstigen langfristigen Vermögenswerten           |                | 44                        | -1                        |
| Erhaltene Zinsen                                                                                         |                | 23                        | 16                        |
| <b>Mittelabfluss aus Investitionstätigkeit</b>                                                           |                | <b>-330</b>               | <b>-162</b>               |
| <b>Finanzierungstätigkeit:</b>                                                                           |                |                           |                           |
| Erlöse aus/Rückzahlung von langfristigen Finanzverbindlichkeiten                                         |                | 33                        | -508                      |
| Einzahlungen aus der Emission eines Eurobonds                                                            |                | —                         | 497                       |
| Gezahlte Dividende an Anteilseigner der adidas AG                                                        | 25             | -73                       | -97                       |
| Gezahlte Dividende an nicht beherrschende Aktionäre                                                      |                | -0                        | —                         |
| Ausgeübte Aktienoptionen                                                                                 |                | —                         | 0                         |
| Auszahlungen für die Rückzahlung von kurzfristigen Finanzverbindlichkeiten                               |                | -198                      | -404                      |
| <b>Mittelabfluss aus der Finanzierungstätigkeit</b>                                                      |                | <b>-238</b>               | <b>-512</b>               |
| <b>Wechselkursbedingte Veränderungen des Finanzmittelbestands</b>                                        |                |                           |                           |
|                                                                                                          |                | <b>55</b>                 | <b>7</b>                  |
| Zunahme des Finanzmittelbestands                                                                         |                | 381                       | 531                       |
| Finanzmittelbestand am Anfang des Jahres                                                                 | 4              | 775                       | 244                       |
| <b>Finanzmittelbestand am Ende des Jahres</b>                                                            | <b>4</b>       | <b>1.156</b>              | <b>775</b>                |

Bei Prozentangaben und Zahlen können Rundungsdifferenzen auftreten.  
Der Konzernanhang ist integraler Bestandteil des Konzernabschlusses.

# Konzernanhang

Die adidas AG (im Weiteren auch „die Gesellschaft“) ist eine börsennotierte Aktiengesellschaft nach deutschem Recht und oberstes Mutterunternehmen des adidas Konzerns. Die adidas AG und ihre Tochtergesellschaften (zusammen der „adidas Konzern“ oder der „Konzern“) entwerfen, entwickeln, produzieren und vertreiben – zunehmend auch durch eigene Einzelhandelsaktivitäten – ein breites Angebot von Sport- und Freizeitartikeln. Der adidas Konzern hat seinen Sitz in der Adi-Dassler-Str. 1, 91074 Herzogenaurach, Deutschland. Die Geschäftstätigkeit des adidas Konzerns ist in sechs Geschäftssegmente gegliedert: Großhandel, Einzelhandel, TaylorMade-adidas Golf, Rockport, Reebok-CCM Hockey und Andere Zentral Geführte Marken.

Im Großhandelssegment werden alle Geschäftsaktivitäten berichtet, die sich auf den Vertrieb von adidas und Reebok Produkten an Einzelhändler beziehen.

Im Einzelhandelssegment werden alle Geschäftsaktivitäten berichtet, die sich auf den Verkauf von adidas und Reebok Produkten an den Endkonsumenten im eigenen Einzelhandel beziehen.

Produkte der Marken adidas und Reebok umfassen Schuhe, Bekleidung und Sportzubehör wie Taschen und Bälle.

TaylorMade-adidas Golf umfasst die drei Marken TaylorMade, adidas Golf und Ashworth. TaylorMade entwirft, entwickelt und montiert bzw. produziert hochwertige Golfschläger, Bälle und Accessoires. Produkte der Marke adidas Golf umfassen Schuhe, Bekleidung und Sportzubehör. Unter der Marke Ashworth wird Lifestyle-Sportbekleidung für Männer und Frauen entworfen und vertrieben.

Rockport entwirft und vermarktet hauptsächlich Lederschuhe für Männer und Frauen.

Reebok-CCM Hockey entwirft, produziert und vermarktet Hockeyausrüstung wie Schläger und Schlittschuhe sowie Bekleidung hauptsächlich unter den Markennamen Reebok Hockey und CCM Hockey.

Das Segment Andere Zentral Geführte Marken umfasst vor allem die Geschäftsaktivitäten des Y-3 Labels, unter dem hochwertige Schuhe und Bekleidung entwickelt und vertrieben werden.

## Grundsätzliches

» 01

Der Konzernabschluss der adidas AG zum 31. Dezember 2010 umfasst die adidas AG und ihre Tochtergesellschaften und wird in Übereinstimmung mit den International Financial Reporting Standards (IFRS), wie sie in der Europäischen Union (EU) zum 31. Dezember 2010 anzuwenden sind, und den ergänzend nach § 315a Abs. 1 HGB anzuwendenden handelsrechtlichen Vorschriften erstellt.

Folgende neue Standards und Interpretationen bzw. Änderungen von bestehenden Standards und Interpretationen sind für Geschäftsjahre, die am 1. Januar 2010 beginnen, erstmalig anzuwenden:

– **IFRS 2 Amendment – Group Cash-settled Share-based Payment Transactions** (Zeitpunkt des Inkrafttretens: 1. Januar 2010): diese Änderung hatte keine Auswirkungen auf den Konzernabschluss.

– **IFRS 3 Business Combinations – Revised** (Zeitpunkt des Inkrafttretens: 1. Juli 2009): diese Änderung hatte keine Auswirkungen auf den Konzernabschluss.

– **IAS 27 Amendment – Consolidated and Separate Financial Statements** (Zeitpunkt des Inkrafttretens: 1. Juli 2009): diese Änderung hatte keine materiellen Auswirkungen auf den Konzernabschluss.

– **IAS 39 Amendment – Financial Instruments: Recognition and Measurement – Eligible hedged items** (Zeitpunkt des Inkrafttretens: 1. Juli 2009): diese Änderung hatte keine materiellen Auswirkungen auf den Konzernabschluss.

– **IFRIC 12 Service Concession Arrangements** (Zeitpunkt des Inkrafttretens: 29. März 2009): diese Interpretation hatte keine Auswirkungen auf den Konzernabschluss.



- **IFRIC 15 Agreements for the Construction of Real Estate** (Zeitpunkt des Inkrafttretens: 1. Januar 2010): diese Interpretation hatte keine Auswirkungen auf den Konzernabschluss.
  - **IFRIC 16 Hedges of a Net Investment in a Foreign Operation** (Zeitpunkt des Inkrafttretens: 1. Juli 2009): diese Interpretation hatte keine Auswirkungen auf den Konzernabschluss.
  - **IFRIC 17 Distributions on Non-cash Assets to Owners** (Zeitpunkt des Inkrafttretens: 1. November 2009): diese Interpretation hatte keine Auswirkungen auf den Konzernabschluss.
  - **IFRIC 18 Transfers of Assets from Customers** (Zeitpunkt des Inkrafttretens: 1. November 2009): diese Interpretation hatte keine Auswirkungen auf den Konzernabschluss.
  - **Improvements to IFRSs (2008) > IFRS 5** (Zeitpunkt des Inkrafttretens: 1. Juli 2009): diese Neuerungen hatten keine materiellen Auswirkungen auf den Konzernabschluss.
  - **Improvements to IFRSs (2009)** (Zeitpunkt des Inkrafttretens: 1. Januar 2010): diese Neuerungen hatten keine materiellen Auswirkungen auf den Konzernabschluss.
- Neue Standards und Interpretationen bzw. Änderungen von bestehenden Standards und Interpretationen, die für nach dem 1. Januar 2010 beginnende Geschäftsjahre gültig sind und die beim Erstellen dieses Konzernabschlusses nicht angewandt wurden, sind:
- **IAS 24 Related Party Disclosures – Revised** (Zeitpunkt des Inkrafttretens: 1. Januar 2011): diese Änderung wird voraussichtlich keine Auswirkungen auf den Konzernabschluss haben.
  - **IAS 32 Amendment – Financial Instruments: Presentation – Classification of Rights Issues** (Zeitpunkt des Inkrafttretens: 1. Februar 2010): diese Änderung wird voraussichtlich keine Auswirkungen auf den Konzernabschluss haben.
  - **IFRIC 14 Amendment – Prepayments of a Minimum Funding Requirement** (Zeitpunkt des Inkrafttretens: 1. Januar 2011): diese Änderung wird voraussichtlich keine Auswirkungen auf den Konzernabschluss haben.
  - **IFRIC 19 Extinguishing Financial Liabilities with Equity Instruments** (Zeitpunkt des Inkrafttretens: 1. Juli 2010): diese Interpretation wird voraussichtlich keine Auswirkungen auf den Konzernabschluss haben.

Die neuen Standards und Interpretationen bzw. Änderungen von bestehenden Standards und Interpretationen sind für Berichtsperioden anzuwenden, die am oder nach dem Zeitpunkt des Inkrafttretens beginnen.

Neue Standards und Interpretationen bzw. Änderungen von bestehenden Standards und Interpretationen werden vom Konzern für gewöhnlich nicht vor dem Zeitpunkt des Inkrafttretens angewendet.

Der Konzernabschluss wurde auf Basis der historischen Anschaffungs- und Herstellungskosten erstellt, mit Ausnahme gewisser Positionen wie Finanzinstrumente, die erfolgswirksam zum beizulegenden Zeitwert bewertet werden, zur Veräußerung verfügbare finanzielle Vermögenswerte, derivative Finanzinstrumente, Planvermögen und Forderungen, die mit ihrem beizulegenden Zeitwert erfasst werden.

Der Konzernabschluss wird in Euro (€) aufgestellt. Die Werte werden auf Millionen Euro (Mio. €) gerundet.

## Zusammenfassung wesentlicher Rechnungslegungsgrundsätze

» 02

Der Konzernabschluss wird in Übereinstimmung mit den nachfolgenden Konsolidierungs-, Bilanzierungs- und Bewertungsgrundsätzen erstellt.

### Konsolidierungsgrundsätze

In den Konzernabschluss werden die adidas AG und ihre direkten und indirekten Tochterunternehmen einbezogen. Die Abschlüsse dieser Unternehmen werden nach einheitlichen Rechnungslegungsgrundsätzen erstellt.

Als Tochterunternehmen gilt ein Unternehmen, das von der adidas AG beherrscht wird, beispielsweise durch direkte oder indirekte Bestimmung der Finanz- und Geschäftspolitik.

Die Entwicklung der Anzahl der konsolidierten Tochtergesellschaften zum 31. Dezember 2010 bzw. 2009 stellt sich wie folgt dar:

#### Anzahl der konsolidierten Tochtergesellschaften

|                                         | 2010       | 2009       |
|-----------------------------------------|------------|------------|
| <b>1. Januar</b>                        | <b>177</b> | <b>190</b> |
| Erstkonsolidierte Unternehmen           | 1          | 6          |
| davon neu gegründet                     | 1          | 5          |
| davon erworben                          | —          | 1          |
| Entkonsolidierte/veräußerte Unternehmen | – 1        | – 9        |
| Unternehmenszusammenschlüsse            | – 8        | – 10       |
| <b>31. Dezember</b>                     | <b>169</b> | <b>177</b> |

Eine Aufstellung des Anteilsbesitzes der adidas AG ist diesen Erläuterungen als Anlage II beigelegt. Zudem wird eine Aufstellung des Anteilsbesitzes der adidas AG im elektronischen Bundesanzeiger bekannt gemacht.

Im Rahmen der Erstkonsolidierung werden die erworbenen Vermögenswerte und Schulden mit dem beizulegenden Zeitwert zum Erwerbszeitpunkt angesetzt. Ein Unterschiedsbetrag zwischen den Anschaffungskosten des Unternehmenserwerbs und dem anteiligen beizulegenden Zeitwert der Vermögenswerte, Schulden und Eventualverbindlichkeiten wird, falls aktivisch, als Geschäfts- oder Firmenwert ausgewiesen oder, falls passivisch, erfolgswirksam vereinnahmt.

Erwerbe von weiteren Anteilen an Konzerngesellschaften, bei denen Kontrolle bereits vorhanden ist, werden als Eigenkapitaltransaktionen verbucht. Somit werden weder Anpassungen auf den beizulegenden Zeitwert der Vermögenswerte und Schulden angesetzt noch Gewinne oder Verluste vereinnahmt. Ein Unterschiedsbetrag zwischen den Kosten des zusätzlichen Anteils und dem Buchwert des Nettovermögens zum Zugangszeitpunkt wird direkt mit dem auf die Anteils-eigner entfallenden Kapital verrechnet.

Die bilanziellen Effekte konzerninterner Transaktionen sowie unrealisierte Gewinne und Verluste aus konzerninternen Geschäftsbeziehungen werden im Rahmen der Konsolidierung eliminiert.

## Bewertungsgrundsätze

Der folgenden Tabelle können die wichtigsten Bewertungsgrundsätze im Rahmen der Erstellung des Konzernabschlusses entnommen werden.

### Übersicht ausgewählter Bewertungsgrundsätze

| Bilanzposten                                                           | Bewertungsgrundsatz                                                                   |
|------------------------------------------------------------------------|---------------------------------------------------------------------------------------|
| <b>Aktiva</b>                                                          |                                                                                       |
| Flüssige Mittel                                                        | Nennwert                                                                              |
| Kurzfristige Finanzanlagen                                             | Erfolgswirksam zum beizulegenden Zeitwert                                             |
| Forderungen aus Lieferungen und Leistungen                             | Fortgeführte Anschaffungskosten                                                       |
| Vorräte                                                                | Niedrigerer Wert aus Anschaffungs- oder Herstellungskosten und Nettoveräußerungswert  |
| Vermögenswerte klassifiziert als zur Veräußerung gehalten              | Niedrigerer Wert aus Buchwert und beizulegendem Zeitwert abzüglich Veräußerungskosten |
| Sachanlagen                                                            | Fortgeführte Anschaffungs- oder Herstellungskosten                                    |
| Geschäfts- oder Firmenwerte                                            | Impairment-only-Ansatz                                                                |
| <b>Immaterielle Vermögenswerte (außer Geschäfts- oder Firmenwerte)</b> |                                                                                       |
| Mit bestimmter Nutzungsdauer                                           | Fortgeführte Anschaffungs- oder Herstellungskosten                                    |
| Mit unbestimmter Nutzungsdauer                                         | Impairment-only-Ansatz                                                                |
| <b>Sonstige finanzielle Vermögenswerte (Kategorien nach IAS 39):</b>   |                                                                                       |
| Erfolgswirksam zum beizulegenden Zeitwert bewertet                     | Erfolgswirksam zum beizulegenden Zeitwert                                             |
| Bis zur Endfälligkeit zu halten                                        | Fortgeführte Anschaffungskosten                                                       |
| Kredite und Forderungen                                                | Fortgeführte Anschaffungskosten                                                       |
| Zur Veräußerung verfügbar                                              | Erfolgsneutral zum beizulegenden Zeitwert                                             |
| <b>Passiva</b>                                                         |                                                                                       |
| Verbindlichkeiten aus Lieferungen und Leistungen                       | Fortgeführte Anschaffungskosten                                                       |
| Finanzverbindlichkeiten                                                | Fortgeführte Anschaffungskosten                                                       |
| <b>Rückstellungen</b>                                                  |                                                                                       |
| Pensionen                                                              | Methode der laufenden Einmalprämien                                                   |
| Sonstige Rückstellungen                                                | Erfüllungsbetrag                                                                      |
| Abgegrenzte Schulden                                                   | Fortgeführte Anschaffungskosten                                                       |

## Währungsumrechnung

Transaktionen von Vermögenswerten und Schulden in Fremdwährungen werden in die jeweilige funktionale Währung mit dem Kassakurs am Tag der Transaktion umgerechnet.

In den Abschlüssen der einzelnen Tochtergesellschaften werden monetäre Posten, die nicht in den jeweiligen funktionalen Währungen nominiert sind, grundsätzlich zum Jahresendkurs am Bilanzstichtag umgerechnet. Daraus resultierende Währungsgewinne und -verluste werden unmittelbar ergebniswirksam erfasst.

Die Aktiva und Passiva von Tochtergesellschaften, deren funktionale Währung nicht der Euro ist, werden zum Bilanzstichtagskurs in die Berichtswährung Euro umgerechnet, welche auch die funktionale Währung der adidas AG ist. Aufwendungen und Erträge werden zum Transaktionskurs umgerechnet. Sämtliche kumulierten Unterschiedsbeträge aus der Währungsumrechnung des Eigenkapitals von ausländischen Tochtergesellschaften, die aus Änderungen der Umrechnungskurse resultieren, werden erfolgsneutral verrechnet und im Eigenkapital separat ausgewiesen.

Eine Aufstellung der für den Konzern wichtigsten Wechselkurse zum Euro ist nachfolgend dargestellt:

### Wechselkurse

€ 1 entspricht

|     | Durchschnittskurse für das Geschäftsjahr |        | Jahresendkurse zum 31. Dezember |        |
|-----|------------------------------------------|--------|---------------------------------|--------|
|     | 2010                                     | 2009   | 2010                            | 2009   |
| USD | 1,3279                                   | 1,3932 | 1,3362                          | 1,4406 |
| GBP | 0,8584                                   | 0,8912 | 0,8608                          | 0,8881 |
| JPY | 116,56                                   | 130,23 | 108,65                          | 133,16 |
| CNY | 8,9885                                   | 9,5148 | 8,8493                          | 9,8350 |
| RUB | 40,303                                   | 44,144 | 40,820                          | 43,154 |

## Derivative Finanzinstrumente

Der Konzern setzt derivative Finanzinstrumente wie Fremdwährungsoptionen, Devisentermingeschäfte sowie Zins-Swaps und kombinierte Zins- und Währungs-Swaps zur Absicherung seiner Wechselkurs- und Zinsrisiken ein. Gemäß seinen Treasury-Grundsätzen schließt der Konzern keine derivativen Finanzinstrumente zu Handelszwecken mit Banken ab.

Derivative Finanzinstrumente werden in der Bilanz bei Zugang mit ihrem beizulegenden Zeitwert und in der Folge ebenfalls mit ihrem beizulegenden Zeitwert erfasst. Die Erfassung von Gewinnen oder Verlusten hängt von der Art der zu sichernden Position ab. Zum Zeitpunkt des Abschlusses eines Sicherungsgeschäfts klassifiziert der Konzern bestimmte Derivate entweder als Sicherung einer geplanten Transaktion (Cashflow-Hedge), als Sicherung des beizulegenden Zeitwerts eines ausgewiesenen Vermögenswerts oder einer Verbindlichkeit (Fair-Value-Hedge) oder als Absicherung einer Nettoinvestition in einer wirtschaftlich selbständigen ausländischen Tochtergesellschaft.

Änderungen des beizulegenden Zeitwerts von Derivaten, die zur Absicherung des Cashflows bestimmt und geeignet sind und die sich nach Maßgabe von IAS 39 „Finanzinstrumente: Ansatz und Bewertung“ als effektiv erweisen, werden im Eigenkapital ausgewiesen. Soweit keine 100%ige Effektivität gegeben ist, wird der ineffektive Teil des beizulegenden Zeitwerts ergebniswirksam erfasst. Die im Eigenkapital kumulierten Gewinne und Verluste werden im gleichen Zeitraum ergebniswirksam ausgewiesen, in dem sich die abgesicherte geplante Transaktion auf die Gewinn- und Verlustrechnung auswirkt.

Für derivative Instrumente, die zur Absicherung eines beizulegenden Zeitwerts eingesetzt werden, werden die Gewinne bzw. Verluste aus dem Derivat sowie die entsprechenden Gewinne oder Verluste aus der abgesicherten Position sofort ergebniswirksam erfasst.

Obwohl manche Sicherungsgeschäfte im Einklang mit den Risikomanagementgrundsätzen des Konzerns aus wirtschaftlicher Sicht durchaus eine geeignete Absicherung darstellen, erfüllen sie nicht die Voraussetzungen für eine Bilanzierung als Sicherungsgeschäft gemäß

den Vorschriften des IAS 39 (Hedge-Accounting). Änderungen des beizulegenden Zeitwerts von Derivaten, die nicht für die Bilanzierung als Hedge-Accounting gemäß IAS 39 geeignet sind, werden sofort ergebniswirksam erfasst.

Die Absicherung ausländischer Nettoinvestitionen wird analog zur Cashflow-Absicherung ausgewiesen. Ist das Sicherungsinstrument ein Derivat (z. B. ein Devisentermingeschäft) oder z. B. ein Fremdwährungskredit, werden tatsächliche Währungsgewinne und -verluste aus dem Derivat beziehungsweise aus der Umrechnung des Kredits im Eigenkapital ausgewiesen.

Bei Abschluss der Transaktion dokumentiert der Konzern die Beziehung zwischen den Sicherungsinstrumenten und den abgesicherten Positionen sowie die Risikomanagementziele und -strategien der Sicherungsgeschäfte. Bei diesem Verfahren werden alle als Sicherungsinstrument klassifizierten Derivate mit spezifischen, fest zugesagten und geplanten Transaktionen verknüpft. Des Weiteren prüft der Konzern die Effektivität der als Sicherungsinstrumente eingesetzten Derivate durch den Einsatz anerkannter Methoden, wie der „Dollar Offset Method“ oder der „Hypothetical Derivative Method“.

Die beizulegenden Zeitwerte von Devisentermingeschäften und Fremdwährungsoptionen werden auf Basis der Marktbedingungen zum Bilanzstichtag ermittelt. Für die Bestimmung des beizulegenden Zeitwerts von Fremdwährungsoptionen werden anerkannte Bewertungsmodelle angewandt. Der beizulegende Zeitwert einer Option wird neben der Restlaufzeit der Option zusätzlich durch weitere Faktoren, wie z. B. die aktuelle Höhe und Volatilität des zu Grunde liegenden Wechselkurses, beeinflusst.

### Flüssige Mittel

Die flüssigen Mittel beinhalten Kasse und kurzfristige Bankeinlagen mit Restlaufzeiten von nicht mehr als drei Monaten gerechnet vom Erwerbszeitpunkt.

Die in den flüssigen Mitteln enthaltenen Zahlungsmitteläquivalente sind kurzfristige hochliquide Finanzinvestitionen, die jederzeit in festgelegte Zahlungsmittelbeträge umgewandelt werden können und nur unwesentlichen Wertschwankungen unterliegen.

### Forderungen und sonstige finanzielle Vermögenswerte

Forderungen und sonstige finanzielle Vermögenswerte werden mit ihrem beizulegenden Zeitwert erfasst, der als Barwert der künftigen Zahlungsströme diskontiert mit dem Marktzins am Bilanzstichtag berechnet wird. Die Folgebewertung erfolgt unter Anwendung der „Effektivzinismethode“ zu fortgeführten Anschaffungskosten. Gegebenenfalls notwendige Wertberichtigungen werden basierend auf individueller Risikoeinschätzung sowie abhängig von der Altersstruktur überfälliger Forderungen ermittelt.

### Vorräte

Fertige Erzeugnisse und Handelswaren werden mit dem niedrigeren Wert aus Anschaffungs- oder Herstellungskosten und Nettoveräußerungswert angesetzt. Letzterer entspricht dem geschätzten, im normalen Geschäftsgang erzielbaren Verkaufserlös abzüglich der geschätzten Kosten bis zur Fertigstellung und der geschätzten notwendigen Vertriebskosten. Die Anschaffungskosten werden durch eine Standardbewertungsmethode ermittelt, die der „Durchschnittsmethode“ entspricht. Die Herstellungskosten fertiger Erzeugnisse beinhalten Materialkosten, Fertigungslöhne und angemessene Teile der zurechenbaren Gemeinkosten. Die Berechnung der Gemeinkostenzuschläge erfolgt auf Basis geplanter durchschnittlicher Auslastungen. Die Wertberichtigungen auf den Nettoveräußerungswert werden konzerneinheitlich, basierend auf dem Alter bzw. der voraussichtlichen Umsatzerlöse der Artikel, ermittelt.

### Vermögenswerte/Verbindlichkeiten klassifiziert als zur Veräußerung gehalten

Vermögenswerte und Verbindlichkeiten (primär langfristig), von denen erwartet wird, dass sie überwiegend durch eine Veräußerung und nicht durch fortgesetzte Nutzung realisiert werden, sind als zur Veräußerung gehalten klassifiziert. Diese werden mit dem niedrigeren Wert aus Buchwert und beizulegendem Zeitwert abzüglich Veräußerungskosten angesetzt. Ein eventueller Verlust oder Gewinn ist mit dem Buchwert der zur Veräußerung gehaltenen Vermögenswerte und Verbindlichkeiten zu verrechnen.

### Sachanlagen

Die Bewertung von Sachanlagen erfolgt zu fortgeführten Anschaffungs- bzw. Herstellungskosten. Diese umfassen alle direkt zurechenbaren Kosten, um den Vermögenswert in den erforderlichen, vom Management beabsichtigten betriebsbereiten Zustand zu bringen, abzüglich kumulierter Abschreibungen (mit Ausnahme von Grundstücken und in Erstellung befindlichen Vermögenswerten) und kumulierter Wertminderungsaufwendungen. Abschreibungen auf Sachanlagen werden nach der „linearen Methode“ vorgenommen, sofern nicht aufgrund der tatsächlichen Nutzung ein degressiver Abschreibungsverlauf geboten ist. Die voraussichtlichen wirtschaftlichen Nutzungsdauern sind wie folgt:

#### Voraussichtliche wirtschaftliche Nutzungsdauern von Sachanlagen

|                                                                                              | Jahre  |
|----------------------------------------------------------------------------------------------|--------|
| Bauten/Einbauten                                                                             | 5 – 50 |
| Technische Anlagen und Maschinen sowie andere Anlagen und Betriebs- und Geschäftsausstattung | 2 – 10 |

Reparatur- und Instandhaltungsaufwendungen werden zum Zeitpunkt der Entstehung als Aufwand erfasst. Erneuerungen und Verbesserungen werden aktiviert und separat abgeschrieben, wenn die Ansatzkriterien erfüllt sind.

### Wertminderungsaufwendungen

Ergeben sich aufgrund von Tatsachen oder Umständen Anhaltspunkte für eine Wertminderung von langfristigen Vermögenswerten (z.B. Sachanlagevermögen, Immaterielle Vermögenswerte einschließlich Geschäfts- oder Firmenwerte und bestimmte finanzielle Vermögenswerte), wird der erzielbare Betrag ermittelt. Dieser bemisst sich als der höhere Wert aus beizulegendem Zeitwert abzüglich der Verkaufskosten (Nettoveräußerungspreis) und Nutzungswert. Sofern der erzielbare Betrag unter dem Buchwert liegt, wird ein Wertminderungsaufwand in den sonstigen betrieblichen Aufwendungen erfasst. Bei Vorliegen eines Wertminderungsaufwands in einer zahlungsmittelgenerierenden Einheit muss zuerst der Buchwert jeglichen Geschäfts- oder Firmenwerts, der der zahlungsmittelgenerierenden Einheit zugeordnet ist, vermindert werden und dann anteilig die anderen langfristigen Vermögenswerte der Einheit auf Basis der Buchwerte jedes einzelnen Vermögenswerts der Einheit.

Unabhängig davon, ob ein Anhaltspunkt für eine Wertminderung vorliegt, werden immaterielle Vermögenswerte mit einer unbestimmten Nutzungsdauer und bei einem Unternehmenszusammenschluss erworbene Geschäfts- oder Firmenwerte jährlich auf Wertminderung überprüft.

Ein für Geschäfts- oder Firmenwerte erfasster Wertminderungsaufwand wird nicht aufgeholt. Für alle weiteren wertgeminderten Vermögenswerte wird ein in früheren Berichtsperioden erfasster Wertminderungsaufwand nur erfolgswirksam aufgeholt, wenn sich eine Änderung in den Schätzungen ergeben hat, die bei der Bestimmung des erzielbaren Betrags herangezogen wurden. Die Wertaufholungsobergrenze bildet hierbei der Buchwert abzüglich Abschreibungen oder Amortisationen, der zu Buche stünde, wenn ursprünglich kein Wertminderungsaufwand erfasst worden wäre.

### Leasing

Bei Finanzierungsleasingverträgen werden im Wesentlichen alle Risiken und Chancen im Zusammenhang mit einem Vermögenswert auf den Konzern als Leasingnehmer übertragen. Zu Beginn eines Finanzierungsleasingverhältnisses wird der jeweilige Vermögenswert sowie eine entsprechende Verbindlichkeit in Höhe des beizulegenden Zeitwerts des Vermögenswerts oder, sofern niedriger, in Höhe des Barwerts der Mindestleasingzahlungen angesetzt. Für die Folgebewertung werden die Mindestleasingzahlungen in die Finanzierungskosten und den Tilgungsanteil der Restschuld aufgeteilt. Die Finanzierungskosten werden in jeder Berichtsperiode während der Laufzeit des Leasingverhältnisses so verteilt, dass eine konstante periodische Verzinsung der verbleibenden Restschuld erzielt wird. Zudem werden Abschreibungen und eventuelle Wertminderungsaufwendungen für den Vermögenswert berücksichtigt.

Bei Operating-Leasingverträgen werden die Mietaufwendungen linear über die Laufzeit des Leasingverhältnisses verteilt.

### Immaterielle Vermögenswerte (außer Geschäfts- oder Firmenwerte)

Die immateriellen Vermögenswerte werden zu fortgeführten Anschaffungs- oder Herstellungskosten, vermindert um kumulierte Abschreibungen (außer bei Vermögenswerten mit unbestimmter wirtschaftlicher Nutzungsdauer) und Wertminderungsaufwendungen, angesetzt. Die Abschreibungen werden nach der „linearen Methode“ über die voraussichtliche wirtschaftliche Nutzungsdauer verteilt. Es werden nachfolgende voraussichtliche wirtschaftliche Nutzungsdauern zugrunde gelegt:

#### Voraussichtliche wirtschaftliche Nutzungsdauern von immateriellen Vermögenswerten

|                                    | Jahre      |
|------------------------------------|------------|
| Markenrechte                       | unbestimmt |
| Software                           | 3 – 5      |
| Patente, Markenrechte und Lizenzen | 5 – 15     |

In den Geschäftsjahren 2010 und 2009 stellte der adidas Konzern fest, dass es bei den Markenrechten mit unbestimmter wirtschaftlicher Nutzungsdauer keine Wertminderung gab.

Der erzielbare Betrag wird auf Basis des Nettoveräußerungspreises, d. h. des beizulegenden Zeitwerts abzüglich der Veräußerungskosten, die mit 1 % des beizulegenden Zeitwerts angesetzt werden, ermittelt. Dabei wird der jeweilige beizulegende Zeitwert durch die Diskontierung von ersparten fiktiven Lizenzentgelten nach Steuern und zuzüglich eines Steuervorteils ermittelt, der sich aus der Abschreibung des erworbenen Vermögenswerts ergibt („Methode der Lizenzpreis-analogie“). Bei dieser Berechnung wird die Prognose der ersparten Lizenzentgelte, deren Bemessungsgrundlage die Umsatzerlöse sind, basierend auf der Finanzplanung über einen Zeitraum von insgesamt fünf Jahren herangezogen. Die Höhe der angesetzten Lizenzrate zur Bemessung der ersparten Lizenzentgelte orientiert sich sowohl an Lizenzvereinbarungen des adidas Konzerns mit

externen Lizenznehmern als auch an öffentlich verfügbaren Lizenzvereinbarungen für vergleichbare Vermögenswerte. Ersparte fiktive Lizenzentgelte über diesen Zeitraum hinaus werden mit stetigen Wachstumsraten von 1,7 % (2009: 1,7 %) hochgerechnet. Die Wachstumsraten übersteigen nicht die langfristigen durchschnittlichen Wachstumsraten des Geschäftsfelds, dem die Markenrechte zugeordnet sind.

Der Diskontierungssatz basiert auf einer gewichteten durchschnittlichen Kapitalkostenberechnung unter Heranziehung einer marktgewichteten „Fünf-Jahres-Durchschnitts“-Fremd-/Eigenkapitalstruktur und auf den Finanzierungskosten jeweils unter Einbeziehung der wichtigsten Wettbewerber. Der angewandte Diskontierungssatz ist ein Nachsteuersatz und spiegelt das spezifische Eigenkapital- und Länderrisiko wider. Der angewandte Diskontierungssatz beträgt in Abhängigkeit vom zu bewertenden immateriellen Vermögenswert zwischen 6,4 % und 8,3 % (2009: 9,3 %).

Sobald die Aktivierungsvoraussetzungen gemäß IAS 38 „Immaterielle Vermögenswerte“ kumuliert erfüllt sind, werden Aufwendungen der Entwicklungsphase für selbst erstellte immaterielle Vermögenswerte zum Zeitpunkt ihrer Entstehung aktiviert.

### Geschäfts- oder Firmenwerte

Ein Geschäfts- oder Firmenwert stellt einen Vermögenswert dar, der künftigen wirtschaftlichen Nutzen aus anderen bei einem Unternehmenszusammenschluss erworbenen Vermögenswerten darstellt, die nicht einzeln identifiziert und separat angesetzt werden. Er ergibt sich, wenn die Anschaffungskosten des Unternehmenserwerbs die beizulegenden Zeitwerte der erworbenen identifizierbaren Vermögenswerte, Schulden und Eventualverbindlichkeiten übersteigen. Die Geschäfts- oder Firmenwerte, die im Zusammenhang mit dem Erwerb eines ausländischen Unternehmens stehen, und alle Anpassungen an den beizulegenden Zeitwert der übernommenen Vermögenswerte, Schulden und Eventualverbindlichkeiten werden als Vermögenswerte, Schulden und Eventualverbindlichkeiten des berichtenden Unternehmens behandelt und mit den Umrechnungskursen zum Zeitpunkt der Erstkonsolidierung umgerechnet. Der Geschäfts- oder Firmenwert wird in der funktionalen Währung der erworbenen ausländischen Einheit geführt.

Die erworbenen Geschäfts- oder Firmenwerte werden zu Anschaffungskosten angesetzt und jährlich, sowie zusätzlich bei Anzeichen einer potenziellen Wertminderung, auf Wertberichtigungsbedarf überprüft.

Infolge der Reorganisation des Konzerns in der zweiten Jahreshälfte 2009 erfolgte auf Basis von relativen Wertansätzen eine Reallokation der Geschäfts- oder Firmenwerte auf die entsprechenden zahlungsmittelgenerierenden Einheiten.

Die entsprechenden zahlungsmittelgenerierenden Einheiten umfassen 17 regionale Märkte, die für den gemeinsamen Vertrieb von adidas und Reebok verantwortlich sind, sowie TaylorMade-adidas Golf, Rockport und Reebok-CCM Hockey.

Die zahlungsmittelgenerierenden Einheiten (bzw. Gruppen von Einheiten) entsprechen der niedrigsten Ebene innerhalb des Unternehmens, auf der die Geschäfts- oder Firmenwerte für interne Managementzwecke nach der Reorganisation des Konzerns überwacht werden.

Der Werthaltigkeitstest für Geschäfts- oder Firmenwerte wurde auf Basis der zahlungsmittelgenerierenden Einheiten (bzw. Gruppen von Einheiten) durchgeführt.

Insgesamt ergab sich für die Geschäfts- oder Firmenwerte keine Wertminderung.

Der erzielbare Betrag einer zahlungsmittelgenerierenden Einheit wird auf Basis des Nutzungswerts ermittelt. Bei dieser Berechnung wird die Cashflow-Prognose, basierend auf der Finanzplanung über einen Zeitraum von insgesamt fünf Jahren, herangezogen. Die Planung basiert auf dem am 8. November 2010 veröffentlichten strategischen Business Plan des adidas



Konzerns „Route 2015“ » siehe Nachtrag und Ausblick, S. 174 und reflektiert ein voraussichtliches prozentuales Umsatzwachstum im mittleren bis hohen einstelligen Bereich für den Großteil der zahlungsmittelgenerierenden Einheiten (bzw. Gruppe von Einheiten). In einigen Schwellenländern gehen wir durchschnittlich von einem höheren Umsatzwachstum im niedrigen zweistelligen Bereich aus. Darüber hinaus erwarten wir eine Verbesserung der operativen Marge, die im Wesentlichen durch leichte Verbesserungen der Bruttomarge sowie niedrigeren betrieblichen Aufwendungen im Verhältnis zum Umsatz getragen wird. Die Planung der Investitionen und des kurzfristigen Betriebskapitals basiert im Wesentlichen auf historischen Erfahrungswerten. Die zukünftigen Steuerzahlungen basieren auf aktuell gesetzlich festgelegten Unternehmenssteuerraten der einzelnen zahlungsmittelgenerierenden Einheiten (bzw. Gruppe von Einheiten). Cashflows über diesen Zeitraum hinaus werden mit stetigen Wachstumsraten von 1,7 % (2009: 1,7 %) hochgerechnet. Die Wachstumsraten übersteigen nach unseren Annahmen nicht die langfristigen durchschnittlichen Wachstumsraten des Geschäftsfelds, in dem die jeweilige zahlungsmittelgenerierende Einheit tätig ist.

Die Diskontierungssätze basieren auf einer gewichteten durchschnittlichen Kapitalkostenberechnung unter Heranziehung einer marktgewichteten „Fünf-Jahres-Durchschnitts“-Fremd-/Eigenkapitalstruktur und auf den Finanzierungskosten, jeweils unter Einbeziehung der wichtigsten Wettbewerber der jeweiligen zahlungsmittelgenerierenden Einheit (bzw. Gruppe von Einheiten). Die angewandten Diskontierungssätze sind Nachsteuersätze und spiegeln das spezifische Eigenkapital- und Länderrisiko der jeweiligen zahlungsmittelgenerierenden Einheit wider.

Die der jeweiligen zahlungsmittelgenerierenden Einheit (bzw. Gruppe von Einheiten) zugeordneten Buchwerte der Geschäfts- oder Firmenwerte sowie der immateriellen Vermögenswerte und die jeweiligen auf die Cashflow-Prognosen angewendeten Diskontierungssätze sind wie folgt:

#### Zuordnung der Geschäfts- oder Firmenwerte

|                                               | Geschäfts-<br>oder Firmenwerte<br>(in Mio. €) | Immaterielle<br>Vermögenswerte<br>mit unbestimmter<br>Nutzungsdauer<br>(in Mio. €) | Diskontierungssatz |
|-----------------------------------------------|-----------------------------------------------|------------------------------------------------------------------------------------|--------------------|
| TaylorMade-adidas Golf                        | 284                                           | 27                                                                                 | 7,6 %              |
| China                                         | 221                                           | 247                                                                                | 8,3 %              |
| Andere Asiatische Märkte                      | 167                                           | 169                                                                                | 7,9 – 11,0 %       |
| Westeuropa                                    | 538                                           | 323                                                                                | 7,1 – 10,2 %       |
| Sonstige zahlungsmittelgenerierende Einheiten | 329                                           | 681                                                                                | 6,4 – 11,0 %       |
| <b>Gesamt</b>                                 | <b>1.539</b>                                  | <b>1.447</b>                                                                       |                    |

Die in der Tabelle unter Andere Asiatische Märkte, Westeuropa und Sonstige zahlungsmittelgenerierende Einheiten dargestellten Geschäfts- oder Firmenwerte sind eine Zusammenfassung mehrerer zahlungsmittelgenerierender Einheiten, da der Geschäfts- oder Firmenwert jeder einzelnen zahlungsmittelgenerierenden Einheit im Vergleich zum Gesamtbuchwert der Geschäfts- oder Firmenwerte nicht signifikant ist. Die Ermittlung der erzielbaren Beträge der unter Andere Asiatische Märkte und Westeuropa zu Gruppen zusammengefassten zahlungsmittelgenerierenden Einheiten beruht jeweils auf denselben wesentlichen Annahmen.

#### Forschung und Entwicklung

Forschungskosten werden zum Zeitpunkt der Entstehung in voller Höhe als Aufwand erfasst. Entwicklungskosten werden ebenfalls zum Zeitpunkt der Entstehung als Aufwand erfasst, sofern sie die Ansatzkriterien des IAS 38 „Immaterielle Vermögenswerte“ nicht erfüllen.

Die vom Konzern getätigten Aufwendungen für Produktforschung und Entwicklung beliefen sich auf 102 Mio. € bzw. 86 Mio. € für die Geschäftsjahre 2010 und 2009.

#### Finanzanlagen

Alle Ankäufe und Veräußerungen von Finanzanlagen werden zum Handelstag erfasst. Die Anschaffungskosten beinhalten die Transaktionskosten. Wenn der beizulegende Zeitwert von Finanzanlagen, die zur Veräußerung verfügbar sind (dies sind nicht-derivative finanzielle Vermögenswerte, die keiner anderen Kategorie des IAS 39 zugeordnet werden können), zuverlässig ermittelt werden kann, werden diese Finanzanlagen nachfolgend zu ihrem beizulegenden Zeitwert ausgewiesen. Die realisierten und unrealisierten Gewinne und Verluste aus den Veränderungen des beizulegenden Zeitwerts der Finanzanlagen werden zum Zeitpunkt ihrer Entstehung in der Gewinn- und Verlustrechnung ausgewiesen, mit Ausnahme der zur Veräußerung verfügbaren Finanzanlagen, bei denen die unrealisierten Gewinne und Verluste, sofern keine Wertminderungen vorliegen, im Eigenkapital erfasst werden.

#### Finanzverbindlichkeiten und sonstige Verbindlichkeiten

Finanzverbindlichkeiten und sonstige Verbindlichkeiten werden mit dem beizulegenden Zeitwert unter Anwendung der „Effektivzinsmethode“ abzüglich der Transaktionskosten erfasst. In den Folgeperioden werden langfristige Finanzverbindlichkeiten mit den fortgeführten Anschaffungskosten nach der „Effektivzinsmethode“ bewertet. Jede Differenz zwischen dem Nettodarlehensbetrag und dem Tilgungswert wird verteilt über die Laufzeit der Finanzverbindlichkeiten in der Gewinn- und Verlustrechnung ausgewiesen.

#### Sonstige Rückstellungen und abgegrenzte Schulden

Eine sonstige Rückstellung wird gebildet, wenn aus einem Ereignis der Vergangenheit eine gegenwärtige – rechtliche oder faktische – Verpflichtung gegenüber Dritten entstanden ist, die zu einem wahrscheinlichen Abfluss von Ressourcen führt und die Höhe der Verpflichtung zuverlässig zu schätzen ist, wobei der Zeitpunkt oder die Höhe noch ungewiss ist. Langfristige sonstige Rückstellungen werden dann abgezinst, wenn die Auswirkung der Abzinsung wesentlich ist.

Abgegrenzte Schulden sind Schulden zur Zahlung von erhaltenen oder gelieferten Gütern oder Dienstleistungen, die weder bezahlt wurden, noch vom Lieferanten in Rechnung gestellt oder formal vereinbart wurden. Hierzu gehören auch an Mitarbeiter geschuldete Beträge. Hierbei sind jedoch der Zeitpunkt und die Höhe des wahrscheinlichen Abflusses von Ressourcen nicht mehr ungewiss.

### Pensionen und ähnliche Verpflichtungen

Rückstellungen und Aufwendungen für Pensionen und ähnliche Verpflichtungen beziehen sich auf die Verpflichtungen des Konzerns für leistungsorientierte und beitragsorientierte Pläne. Die Verpflichtungen für leistungsorientierte Pläne werden separat für jeden Plan durch Schätzung der in der laufenden Periode und in früheren Perioden – im Austausch für die erbrachten Arbeitsleistungen der Arbeitnehmer – erdienten Leistungen ermittelt. Diese Leistungsansprüche werden zur Bestimmung ihres Barwerts abgezinst und die beizulegenden Zeitwerte für jedes Planvermögen werden zur Ermittlung der Nettoverbindlichkeit mit dem Barwert saldiert. Der Abzinsungssatz basiert auf Renditen für erstrangige, festverzinsliche Industrieanleihen am Bilanzstichtag. Die Berechnungen werden von qualifizierten Versicherungsmathematikern nach der Methode der laufenden Einmalprämien („Projected Unit Credit method“) in Übereinstimmung mit IAS 19 „Leistungen an Arbeitnehmer“ durchgeführt. Die Beiträge zu beitragsorientierten Plänen werden bei ihrer Fälligkeit als Aufwand in der Gewinn- und Verlustrechnung erfasst.

Die im Dezember 2004 veröffentlichte Ergänzung zu IAS 19 gewährt neben einer erfolgswirksamen Erfassung versicherungsmathematischer Gewinne und Verluste nach der „Korridor-methode“ deren sofortige erfolgsneutrale Vereinnahmung. Der Konzern macht von dieser Option zur Vermeidung von Ergebnisvolatilitäten Gebrauch und erfasst mit Wirkung zum 1. Januar 2005 versicherungsmathematische Gewinne oder Verluste aus leistungsorientierten Plänen sofort in dem Posten „Sonstige Rücklagen“ innerhalb des Eigenkapitals, wie in der Konzerngesamt-ergebnisrechnung angegeben.

### Berücksichtigung von Erträgen

Erträge aus dem Verkauf von Gütern (Umsatzerlöse) werden zum Zeitpunkt der Übertragung der maßgeblichen mit dem Eigentum der verkauften Waren und Erzeugnisse verbundenen Risiken und Chancen auf den Käufer erfasst, wenn es hinreichend wahrscheinlich ist, dass dem Konzern der wirtschaftliche Nutzen aus dem Verkauf zufließen wird. Die Höhe der erfassten Umsatzerlöse basiert auf den beizulegenden Zeitwerten der erhaltenen oder zu beanspruchenden Gegenleistung unter Berücksichtigung von Rücklieferungen, Skonti und Boni.

Lizenz- und Provisionserträge werden gemäß den Vertragsbedingungen periodengerecht erfasst.

### Werbe- und Promotion-Aufwendungen

Die Produktionskosten für Medienkampagnen werden bis zum Erhalt der Dienstleistung als Abgrenzungsposten unter den sonstigen kurz- und langfristigen Vermögenswerten ausgewiesen und dann vollständig aufwandswirksam erfasst. Wesentliche Aufwendungen für Medienkampagnen werden linear über die vorgesehene Dauer der Ausstrahlung als Aufwand verteilt.

Promotion-Aufwendungen, die mit Zahlungen einhergehen, einschließlich der bei Unterzeichnung zu zahlenden einmaligen Prämien für Promotion-Verträge, werden planmäßig über die Laufzeit des Vertrags als Aufwand verteilt.

### Zinsen

Zinsen werden zum Zeitpunkt der Entstehung als Ertrag bzw. Aufwand gebucht (unter Berücksichtigung der „Effektivzinsmethode“).

Eine Ausnahme von der erfolgswirksamen Erfassung bilden Zinsen, die direkt dem Erwerb, dem Bau oder der Herstellung eines qualifizierten Vermögenswerts zugeordnet werden können.

Diese werden als Teil der Anschaffungs- oder Herstellungskosten des qualifizierten Vermögenswerts aktiviert.

### Ertragsteuern

Ertragsteuern werden gemäß den steuerrechtlichen Bestimmungen der Länder, in denen der Konzern tätig ist, ermittelt.

Der Konzern ermittelt latente Steuern für sämtliche temporären Differenzen zwischen den Buchwerten und den steuerlichen Wertansätzen der Vermögenswerte und Schulden sowie für steuerliche Verlustvorträge. Da es nicht zulässig ist, eine latente Steuerschuld für Geschäfts- oder Firmenwerte zu erfassen, berechnet der Konzern keine latenten Steuern auf diese.

Aktive latente Steuern aus abzugsfähigen temporären Unterschieden und steuerlichen Verlustvorträgen, die zu versteuernde temporäre Unterschiede übersteigen, werden nur in dem Umfang ausgewiesen, in dem mit hinreichender Wahrscheinlichkeit angenommen werden kann, dass das jeweilige Unternehmen ausreichend steuerpflichtiges Einkommen zur Realisierung des entsprechenden Vorteils erzielen wird.

Ertragsteuern werden in der Gewinn- und Verlustrechnung erfasst, mit Ausnahme von denen, die sich auf Sachverhalte beziehen, die direkt im Eigenkapital verrechnet worden sind.

### Kapitalbeteiligungspläne

Im Rahmen des Aktienoptionsplans (MSOP) der adidas AG wurden Bezugsrechte an Mitglieder des Vorstands, an Mitglieder der Geschäftsleitungsorgane verbundener Unternehmen sowie an weitere Führungskräfte des Konzerns gewährt » siehe auch Erläuterung 38. Zur Bedienung der entstehenden Verpflichtung hatte die Gesellschaft im Geschäftsjahr 2009 letztmalig die Wahl zwischen der Ausgabe neuer Aktien und einem Barausgleich. Die Gesellschaft entschloss sich zur Ausgabe neuer Aktien, wobei der Mittelzufluss abzüglich der Transaktionskosten im Grundkapital und in der Kapitalrücklage erfasst wurde.

Gemäß IFRS 2 „Anteilsbasierte Vergütung“ wird ein Aufwand und eine entsprechende Buchung im Eigenkapital für Aktienoptionen mit Ausgleich durch Eigenkapitalinstrumente erfasst.

### Schätzungsunsicherheiten und Ermessensentscheidungen

Die Erstellung von Abschlüssen in Übereinstimmung mit IFRS erfordert vom Management Annahmen und Schätzungen, die Auswirkungen auf ausgewiesene Beträge und damit im Zusammenhang stehende Angaben haben. Obwohl diese Schätzungen nach bestem Wissen des Managements basierend, auf den gegenwärtigen Ereignissen und Maßnahmen, erfolgen, kann es bei den tatsächlichen Ergebnissen zu Abweichungen von diesen Schätzungen kommen.

Die wichtigsten zukunftsbezogenen Annahmen sowie sonstige am Bilanzstichtag bestehende wesentliche Quellen von Schätzungsunsicherheiten, aufgrund derer ein beträchtliches Risiko besteht, dass innerhalb des nächsten Geschäftsjahres eine wesentliche Anpassung der Buchwerte von Vermögenswerten und Schulden erforderlich sein wird, werden in der entsprechenden Erläuterung aufgeführt. Hierunter fallen insbesondere Geschäfts- oder Firmenwerte » siehe Erläuterung 12, Markenrechte » siehe Erläuterung 13, sonstige Rückstellungen » siehe Erläuterung 19, Pensionen » siehe Erläuterung 23, Derivate » siehe Erläuterung 28 sowie latente Steuern » siehe Erläuterung 33.

Ermessensentscheidungen sind z. B. im Zusammenhang mit der Einordnung von Leasingvereinbarungen sowie bei der Auswahl von Bewertungsmethoden immaterieller Vermögenswerte zum Tragen gekommen.

## Akquisitionen/Abgänge von Tochtergesellschaften sowie Vermögenswerten und Schulden

» 03

Die adidas International B.V. erwarb mit Wirkung zum 1. Januar 2009 für einen Betrag von 12 Mio. € die ausstehenden 25 % der Anteile an der Reebok Tochtergesellschaft in Spanien, adidas Finance Spain S.A. (vormals Reebok Spain S.A.), Alicante. Der aus dieser Transaktion entstandene Geschäfts- oder Firmenwert belief sich auf 1 Mio. €.

Mit Wirkung zum 1. Januar 2009 erwarb adidas International B.V. für einen Kaufpreis in Höhe von 25,6 Mio. ILS 51 % der Anteile an Life Sport Ltd., einem Unternehmen mit Sitz in Holon (Israel), das adidas und Reebok Produkte in Israel vermarktet.

Die Übernahme hatte die folgenden Auswirkungen auf die Vermögenswerte und Schulden des Konzerns:

### Nettovermögen von Life Sport Ltd. am Zugangsdatum

in Mio. €

|                                                               | Buchwerte vor dem Erwerb | Zeitwert-anpassungen | Zum Erwerb angesetzte Beträge |
|---------------------------------------------------------------|--------------------------|----------------------|-------------------------------|
| Flüssige Mittel                                               | 0                        | —                    | 0                             |
| Forderungen aus Lieferungen und Leistungen                    | 5                        | —                    | 5                             |
| Vorräte                                                       | 7                        | —                    | 7                             |
| Sonstige kurzfristige Vermögenswerte                          | 2                        | —                    | 2                             |
| Sachanlagen                                                   | 6                        | —                    | 6                             |
| Sonstige immaterielle Vermögenswerte                          | 0                        | 1                    | 1                             |
| Langfristige Finanzanlagen                                    | 0                        | —                    | 0                             |
| Latente Steueransprüche                                       | 0                        | —                    | 0                             |
| Kurzfristige Finanzverbindlichkeiten                          | -9                       | —                    | -9                            |
| Verbindlichkeiten aus Lieferungen und Leistungen              | -7                       | —                    | -7                            |
| Sonstige kurzfristige Verbindlichkeiten                       | -3                       | —                    | -3                            |
| Langfristige Finanzverbindlichkeiten                          | -1                       | —                    | -1                            |
| Pensionen und ähnliche Verpflichtungen                        | -0                       | —                    | -0                            |
| <b>Nettovermögen</b>                                          | <b>0</b>                 | <b>1</b>             | <b>1</b>                      |
| Geschäfts- oder Firmenwert aus dem Unternehmenserwerb         |                          |                      | 4                             |
| <b>Kaufpreis in bar</b>                                       |                          |                      | <b>5</b>                      |
| Erworbene flüssige Mittel                                     |                          |                      | 0                             |
| <b>Zahlungsmittelabfluss aufgrund des Unternehmenserwerbs</b> |                          |                      | <b>5</b>                      |

Die Buchwerte vor dem Erwerb basierten auf den anzuwendenden IFRS.

Der Geschäfts- oder Firmenwert ergab sich aus dem Überschuss des gezahlten Kaufpreises über den Saldo der beizulegenden Zeitwerte der erworbenen Vermögenswerte und Schulden. Jeder erworbene Vermögenswert, der die Identifikations- und Ansatzkriterien für Vermögenswerte nicht erfüllt hat, wurde im Geschäfts- oder Firmenwert berücksichtigt.

Der aus diesem Erwerb entstehende Geschäfts- oder Firmenwert ist der zahlungsmittelgenerierenden Einheit adidas im Erwerbszeitpunkt zugeordnet worden und wurde im Rahmen der Reorganisation des Konzerns in der zweiten Jahreshälfte 2009 neu zugeordnet. Der Geschäfts- oder Firmenwert wird in der lokalen funktionalen Währung der erworbenen Einheit geführt » siehe auch Erläuterung 2.

Für den Zeitraum von Januar bis Dezember 2009 erzielte die erworbene Tochtergesellschaft einen Verlust für den Konzern in Höhe von 0 Mio. €.

Die adidas AG erwarb mit Wirkung zum 23. Januar 2009 für einen Betrag von 1 Mio. € die restlichen 5 % der Anteile an der Tochtergesellschaft in Griechenland, adidas Hellas A.E., Thessaloniki.

Am 16. Februar 2009 hat adidas International, Inc. für einen Kaufpreis in Höhe von 5 Mio. USD Vermögenswerte von Bones in Motion, Inc., einem Unternehmen mit Sitz in Austin/Texas (USA), das sport- und fitnessspezifische, positionserkennende („location-aware“) Softwareanwendungen und webbasierte Dienstleistungen entwickelt, produziert und vertreibt, im Rahmen eines Asset Deals erworben.

Die Übernahme hatte die folgenden Auswirkungen auf die Vermögenswerte und Schulden des Konzerns:

### Nettovermögen von Bones in Motion, Inc. am Zugangsdatum

in Mio. €

|                                                               | Buchwerte vor dem Erwerb | Zeitwert-anpassungen | Zum Erwerb angesetzte Beträge |
|---------------------------------------------------------------|--------------------------|----------------------|-------------------------------|
| Forderungen aus Lieferungen und Leistungen                    | 0                        | —                    | 0                             |
| Markenrechte und sonstige immaterielle Vermögenswerte         | —                        | 3                    | 3                             |
| <b>Nettovermögen</b>                                          | <b>—</b>                 | <b>3</b>             | <b>3</b>                      |
| Geschäfts- oder Firmenwert aus dem Unternehmenserwerb         |                          |                      | 1                             |
| <b>Kaufpreis in bar</b>                                       |                          |                      | <b>4</b>                      |
| Erworbene flüssige Mittel                                     |                          |                      | —                             |
| <b>Zahlungsmittelabfluss aufgrund des Unternehmenserwerbs</b> |                          |                      | <b>4</b>                      |

Die Buchwerte vor dem Erwerb basierten auf den anzuwendenden IFRS.

Folgende Bewertungsmethoden wurden für die erworbenen Vermögenswerte angewandt:

– Markenrechte und sonstige immaterielle Vermögenswerte: Bei der Bewertung der Patente wurde die „Residualwertmethode“ („Multi-Period-Excess-Earnings Method“) angewendet. Dabei wurden die jeweiligen zukünftigen Zahlungsströme über die gesamte Vertragslaufzeit identifiziert und von Einflüssen, die nichts mit diesen Vermögenswerten zu tun haben, bereinigt. Die Zahlungsströme wurden auf der Basis der erwarteten Umsätze ermittelt, abzüglich variabler und umsatzabhängiger kalkulatorischer Kosten für die Nutzung dafür benötigter Vermögenswerte. Anschließend wurden die Ergebnisse mit einem spezifischen Zinssatz diskontiert und ein abschreibungsbedingter Steuervorteil hinzugerechnet.

Der Geschäfts- oder Firmenwert ergab sich aus dem Überschuss des gezahlten Kaufpreises über den Saldo der beizulegenden Zeitwerte der erworbenen Vermögenswerte und Schulden. Jeder erworbene Vermögenswert, der die Identifikations- und Ansatzkriterien für Vermögenswerte nicht erfüllt hat, wurde im Geschäfts- oder Firmenwert berücksichtigt.

Der aus diesem Erwerb entstehende Geschäfts- oder Firmenwert ist der zahlungsmittelgenerierenden Einheit adidas im Erwerbszeitpunkt zugeordnet worden und wurde im Rahmen der Reorganisation des Konzerns in der zweiten Jahreshälfte 2009 neu zugeordnet. Der Geschäfts- oder Firmenwert wird in der lokalen funktionalen Währung der erworbenen Einheit geführt » siehe auch Erläuterung 2.

Hätte diese Übernahme zum 1. Januar 2009 stattgefunden, hätten für 2009 der gesamte Konzernumsatz 10,4 Mrd. € und der Gewinn 245 Mio. € betragen.

## Erläuterungen zur Konzernbilanz

### Flüssige Mittel

» 04

Die flüssigen Mittel setzen sich aus Bankguthaben und Kassenbeständen sowie kurzfristigen Bankeinlagen zusammen. Kurzfristige Finanzanlagen werden nur dann als flüssige Mittel erfasst, wenn sie unmittelbar in einen festgelegten Zahlungsmittelbetrag umgewandelt werden können und nur unwesentlichen Wertschwankungsrisiken unterliegen.

### Kurzfristige Finanzanlagen

» 05

Die kurzfristigen Finanzanlagen werden als erfolgswirksam zum beizulegenden Zeitwert bewertete finanzielle Vermögenswerte („at Fair Value through Profit or Loss“) klassifiziert. Veränderungen des beizulegenden Zeitwerts werden zum Zeitpunkt ihrer Entstehung in der Gewinn- und Verlustrechnung ausgewiesen.

Die kurzfristigen Finanzanlagen beinhalten im Wesentlichen Geldmarktfonds und strukturierte Anlagen.

### Forderungen aus Lieferungen und Leistungen

» 06

Die Forderungen aus Lieferungen und Leistungen bestehen vor allem in den Währungen Euro, US-Dollar und japanischer Yen und setzen sich wie folgt zusammen:

#### Forderungen aus Lieferungen und Leistungen

in Mio. €

|                                                                                         | 31. Dez. 2010 | 31. Dez. 2009 |
|-----------------------------------------------------------------------------------------|---------------|---------------|
| Forderungen aus Lieferungen und Leistungen, brutto                                      | 1.794         | 1.553         |
| abzüglich: kumulierte Wertberichtigungen auf Forderungen aus Lieferungen und Leistungen | 127           | 124           |
| <b>Forderungen aus Lieferungen und Leistungen, netto</b>                                | <b>1.667</b>  | <b>1.429</b>  |

#### Entwicklung der Wertberichtigungen auf Forderungen aus Lieferungen und Leistungen

in Mio. €

|                                                              | 2010       | 2009       |
|--------------------------------------------------------------|------------|------------|
| <b>Wertberichtigungen am 1. Januar</b>                       | <b>124</b> | <b>119</b> |
| Zuführungen                                                  | 50         | 68         |
| Auflösungen                                                  | -31        | -29        |
| Ausbuchung von Forderungen gegen die Wertberichtigungskonten | -23        | -34        |
| Währungsumrechnungseffekte                                   | 7          | 0          |
| <b>Wertberichtigungen am 31. Dezember</b>                    | <b>127</b> | <b>124</b> |

#### Forderungen aus Lieferungen und Leistungen, die überfällig, aber nicht wertgemindert sind

in Mio. €

|                      | überfällig<br>1 – 30 Tage | überfällig<br>31 – 60 Tage | überfällig<br>61 – 90 Tage | überfällig<br>91 – 180 Tage | überfällig<br>> 180 Tage |
|----------------------|---------------------------|----------------------------|----------------------------|-----------------------------|--------------------------|
| <b>31. Dez. 2010</b> | <b>118</b>                | <b>53</b>                  | <b>11</b>                  | <b>9</b>                    | <b>1</b>                 |
| <b>31. Dez. 2009</b> | <b>115</b>                | <b>57</b>                  | <b>10</b>                  | <b>6</b>                    | <b>5</b>                 |

Bezüglich der Forderungen aus Lieferungen und Leistungen, die am Bilanzstichtag überfällig, aber nicht wertgemindert sind, gibt es keine Hinweise, dass die Kunden, basierend auf der Kredithistorie und den aktuellen Bonitätseinstufungen, nicht imstande sind, ihren Verpflichtungen nachzukommen.

Ferner sind keine Hinweise auf Zahlungsverzug bei Forderungen aus Lieferungen und Leistungen, die weder überfällig noch wertgemindert sind, erkennbar.

Für weitere Informationen zu Kreditrisiken » siehe Risiko- und Chancenbericht, S. 158.

### Sonstige kurzfristige finanzielle Vermögenswerte

» 07

Die sonstigen kurzfristigen finanziellen Vermögenswerte setzen sich wie folgt zusammen:

#### Sonstige kurzfristige finanzielle Vermögenswerte

in Mio. €

|                                                         | 31. Dez. 2010 | 31. Dez. 2009 |
|---------------------------------------------------------|---------------|---------------|
| Zinsderivate                                            | —             | 0             |
| Währungsoptionen                                        | 34            | 22            |
| Devisentermingeschäfte                                  | 30            | 20            |
| Kautionen                                               | 69            | 60            |
| Übrige finanzielle Vermögenswerte                       | 64            | 58            |
| <b>Sonstige kurzfristige finanzielle Vermögenswerte</b> | <b>197</b>    | <b>160</b>    |

Für Informationen zu Devisentermingeschäften sowie Zinsderivaten und Währungsoptionen

» siehe Erläuterung 28.



## Vorräte

» 08

Die Vorräte gliedern sich in folgende Hauptgruppen:

### Vorräte

in Mio. €

|                                      | 31. Dez. 2010   |                                           |                | 31. Dez. 2009   |                                           |                |
|--------------------------------------|-----------------|-------------------------------------------|----------------|-----------------|-------------------------------------------|----------------|
|                                      | Brutto-<br>wert | Abzüglich<br>Wert-<br>berich-<br>tigungen | Netto-<br>wert | Brutto-<br>wert | Abzüglich<br>Wert-<br>berich-<br>tigungen | Netto-<br>wert |
| Fertige Erzeugnisse und Handelswaren | 1.538           | 96                                        | 1.442          | 1.197           | 73                                        | 1.124          |
| Unterwegs befindliche Ware           | 641             | —                                         | 641            | 317             | —                                         | 317            |
| Roh-, Hilfs- und Betriebsstoffe      | 23              | 1                                         | 22             | 26              | 2                                         | 24             |
| Unfertige Erzeugnisse                | 14              | —                                         | 14             | 6               | —                                         | 6              |
| <b>Vorräte</b>                       | <b>2.216</b>    | <b>97</b>                                 | <b>2.119</b>   | <b>1.546</b>    | <b>75</b>                                 | <b>1.471</b>   |

Die unterwegs befindlichen Waren stammen im Wesentlichen aus Lieferungen von fertigen Erzeugnissen und Handelswaren von Lieferanten in Asien an Tochtergesellschaften in Europa, Asien sowie Nord- und Lateinamerika. Der Buchwert der zum beizulegenden Zeitwert abzüglich Veräußerungskosten angesetzten Vorräte beträgt 195 Mio. € zum 31. Dezember 2010 bzw. 355 Mio. € zum 31. Dezember 2009 » siehe auch Erläuterung 2.

## Sonstige kurzfristige Vermögenswerte

» 09

Die sonstigen kurzfristigen Vermögenswerte setzen sich wie folgt zusammen:

### Sonstige kurzfristige Vermögenswerte

in Mio. €

|                                                     | 31. Dez. 2010 | 31. Dez. 2009 |
|-----------------------------------------------------|---------------|---------------|
| Abgrenzungsposten                                   | 200           | 208           |
| Steuererstattungsansprüche ohne Ertragsteuern       | 122           | 84            |
| Sonstige                                            | 70            | 72            |
| <b>Sonstige kurzfristige Vermögenswerte, brutto</b> | <b>392</b>    | <b>364</b>    |
| abzüglich: kumulierte Wertberichtigungen            | 2             | 4             |
| <b>Sonstige kurzfristige Vermögenswerte, netto</b>  | <b>390</b>    | <b>360</b>    |

Die Abgrenzungsposten enthalten im Wesentlichen Vorauszahlungen für Promotion- und Dienstleistungsverträge sowie Mieten.

## Vermögenswerte/Verbindlichkeiten klassifiziert als zur Veräußerung gehalten

» 10

Ein Teil der Vermögenswerte der GEV Grundstücksgesellschaft Herzogenaurach mbH & Co. KG und der Immobilieninvest und Betriebsgesellschaft Herzo-Base GmbH & Co. KG werden infolge eines in 2010 abgeschlossenen Vertrags als zur Veräußerung gehalten gezeigt. Zum 31. Dezember 2010 umfassen die Veräußerungsgruppen Vermögenswerte in Höhe von 30 Mio. € (2009: 53 Mio. €). Ein Teil der im Vorjahreswert enthaltenen Vermögenswerte wurde aufgrund veränderter Rahmenbedingungen wieder in die Sachanlagen umgegliedert. Für das Geschäftsjahr 2009 wurden Abschreibungen in Höhe von 0 Mio. € für die in die Sachanlagen umgegliederten Vermögenswerte nachgeholt.

Des Weiteren wird ein Lagerhaus in den Niederlanden in Höhe von 17 Mio. € aufgrund einer neuen Absichtserklärung weiterhin als zur Veräußerung gehalten gezeigt. Zudem sind in 2010 Wertminderungsaufwendungen in Höhe von 6 Mio. € in Zusammenhang mit dem Lagerhaus erfasst worden, welche in den sonstigen betrieblichen Aufwendungen enthalten sind.

Aufgrund einer in 2009 geschlossenen Absichtserklärung wurden zum 31. Dezember 2009 Vermögenswerte in den USA in Höhe von 51 Mio. € als zur Veräußerung gehalten klassifiziert. Diese wurden im Geschäftsjahr 2010 aufgrund veränderter Rahmenbedingungen in die Sachanlagen zurückgegliedert. Für das Geschäftsjahr 2009 wurden Abschreibungen in Höhe von 0 Mio. € für die in die Sachanlagen umgegliederten Vermögenswerte nachgeholt.

Zum 31. Dezember 2009 wurde das ehemalige Lagerhaus von Reebok in Großbritannien aufgrund der Veräußerungsabsicht und dem Vorliegen von Kaufangeboten als zur Veräußerung gehalten klassifiziert (2 Mio. €). Das Lagerhaus ist im dritten Quartal 2010 veräußert worden.

### Vermögenswerte klassifiziert als zur Veräußerung gehalten

in Mio. €

|                                                                                     | 31. Dez. 2010 | 31. Dez. 2009 |
|-------------------------------------------------------------------------------------|---------------|---------------|
| Forderungen aus Lieferungen und Leistungen und sonstige kurzfristige Vermögenswerte | 0             | 18            |
| Sachanlagen                                                                         | 47            | 108           |
| <b>Gesamt</b>                                                                       | <b>47</b>     | <b>126</b>    |

In den Geschäftsjahren 2010 und 2009 gab es keine wesentlichen Verbindlichkeiten klassifiziert als zur Veräußerung gehalten.

## Sachanlagen

» 11

Die Sachanlagen setzen sich wie folgt zusammen:

### Sachanlagen

in Mio. €

|                                                                     | 31. Dez. 2010 | 31. Dez. 2009 |
|---------------------------------------------------------------------|---------------|---------------|
| Grundstücke und Bauten/Einbauten                                    | 510           | 380           |
| Technische Anlagen und Maschinen                                    | 161           | 156           |
| Andere Anlagen, Betriebs- und Geschäftsausstattung                  | 987           | 876           |
|                                                                     | <b>1.658</b>  | <b>1.412</b>  |
| abzüglich: kumulierte Abschreibungen und Wertminderungsaufwendungen | 943           | 757           |
|                                                                     | <b>715</b>    | <b>655</b>    |
| In Erstellung befindliche Vermögenswerte, netto                     | 140           | 68            |
| <b>Sachanlagen, netto</b>                                           | <b>855</b>    | <b>723</b>    |

Die Abschreibungen für die Geschäftsjahre 2010 und 2009 betrugen 194 Mio. € bzw. 198 Mio. € » siehe Erläuterung 30. Die in den Geschäftsjahren 2010 und 2009 vorgenommenen Wertminderungsaufwendungen beliefen sich auf 10 Mio. € bzw. 16 Mio. € und betrafen Vermögenswerte der Betriebs- und Geschäftsausstattung (vor allem im Bereich der eigenen Einzelhandelsaktivitäten), bei denen im Gegensatz zu den Erwartungen kein ausreichender künftiger wirtschaftlicher Nutzen zufließen wird » siehe Erläuterung 30. Im Geschäftsjahr 2010 sind Zuschreibungen in Höhe von 7 Mio. € vorgenommen worden.

In 2010 sind im Zusammenhang mit der nicht realisierten Veräußerung von Vermögenswerten » siehe Erläuterung 10 Vermögenswerte in Höhe von 80 Mio. € aus den „Vermögenswerten klassifiziert als zur Veräußerung gehalten“ in „Grundstücke und Bauten“ innerhalb der Sachanlagen umgegliedert worden.

Die zurückgegliederten Abschreibungen setzen sich zusammen aus nachgeholter Abschreibung » siehe Erläuterung 10 und der zum damaligen Zeitpunkt ausgegliederten Abschreibung.

Die vertraglichen Verpflichtungen für den Erwerb von Sachanlagen betreffen größtenteils Bauvorhaben in Herzogenaurach in Höhe von 33 Mio. €.

Siehe auch Entwicklung der immateriellen und materiellen Vermögenswerte » Anlage I dieses Anhangs.

## Geschäfts- oder Firmenwerte

» 12

Die Geschäfts- oder Firmenwerte beruhen hauptsächlich auf dem Erwerb des Geschäfts von Reebok und TaylorMade sowie auf Erwerben von Tochtergesellschaften, hauptsächlich in den USA, Australien/Neuseeland, den Niederlanden, Dänemark und Italien.

### Geschäfts- oder Firmenwerte

in Mio. €

|                                                  | 31. Dez. 2010 | 31. Dez. 2009 |
|--------------------------------------------------|---------------|---------------|
| Geschäfts- oder Firmenwerte, brutto              | 1.539         | 1.478         |
| abzüglich: kumulierte Wertminderungsaufwendungen | —             | —             |
| <b>Geschäfts- oder Firmenwerte, netto</b>        | <b>1.539</b>  | <b>1.478</b>  |

Der größte Teil dieses Geschäfts- oder Firmenwerts, welcher hauptsächlich auf den Erwerb des Geschäfts von Reebok in 2006 zurückzuführen ist, wird in US-Dollar geführt. Der Effekt aus der Währungsumrechnung betrug für die Geschäftsjahre 2010 und 2009 61 Mio. € bzw. -27 Mio. €.

Der Konzern überprüft mindestens einmal jährlich, ob der Geschäfts- oder Firmenwert wertgemindert ist. Dies erfordert eine Schätzung des Nutzungswerts der zahlungsmittelgenerierenden Einheiten, denen der Geschäfts- oder Firmenwert zugeordnet ist. Zur Schätzung des Nutzungswerts muss der Konzern die voraussichtlichen künftigen Cashflows aus der zahlungsmittelgenerierenden Einheit schätzen und darüber hinaus einen angemessenen Abzinsungssatz wählen, um den Barwert dieser Cashflows zu ermitteln. Für die Geschäftsjahre 2010 und 2009 entstand kein Wertminderungsaufwand.

Künftige Veränderungen der erwarteten Zahlungsströme und Diskontierungssätze können in der Zukunft zu Wertminderungen der ausgewiesenen Geschäfts- oder Firmenwerte führen.

Siehe auch Entwicklung der immateriellen und materiellen Vermögenswerte » Anlage I dieses Anhangs.

Die Entwicklung der Geschäfts- oder Firmenwerte stellt sich wie folgt dar:

### Entwicklung der Geschäfts- oder Firmenwerte

in Mio. €

|                          | Westeuropa | China      | Andere Asiatische Märkte | TaylorMade-adidas Golf | Sonstige   | Gesamt       |
|--------------------------|------------|------------|--------------------------|------------------------|------------|--------------|
| <b>1. Januar 2010</b>    | <b>513</b> | <b>210</b> | <b>159</b>               | <b>283</b>             | <b>313</b> | <b>1.478</b> |
| Währungseffekte          | 25         | 11         | 8                        | 1                      | 16         | 61           |
| <b>31. Dezember 2010</b> | <b>538</b> | <b>221</b> | <b>167</b>               | <b>284</b>             | <b>329</b> | <b>1.539</b> |

## Markenrechte und sonstige immaterielle Vermögenswerte » 13

Die Markenrechte und sonstigen immateriellen Vermögenswerte setzen sich wie folgt zusammen:

### Markenrechte und sonstige immaterielle Vermögenswerte

in Mio. €

|                                                                     | 31. Dez. 2010 | 31. Dez. 2009 |
|---------------------------------------------------------------------|---------------|---------------|
| Reebok                                                              | 1.159         | 1.075         |
| Rockport                                                            | 163           | 152           |
| Reebok-CCM Hockey                                                   | 98            | 90            |
| TaylorMade-adidas Golf                                              | 27            | 25            |
| <b>Markenrechte, brutto</b>                                         | <b>1.447</b>  | <b>1.342</b>  |
| abzüglich: kumulierte Abschreibungen und Wertminderungsaufwendungen | 0             | 0             |
| <b>Markenrechte, netto</b>                                          | <b>1.447</b>  | <b>1.342</b>  |
| Software, Patente und Lizenzen, brutto                              | 600           | 538           |
| abzüglich: kumulierte Abschreibungen und Wertminderungsaufwendungen | 458           | 378           |
| <b>Sonstige immaterielle Vermögenswerte, netto</b>                  | <b>142</b>    | <b>160</b>    |
| <b>Markenrechte und sonstige immaterielle Vermögenswerte, netto</b> | <b>1.589</b>  | <b>1.502</b>  |

Zum 31. Dezember 2010 besitzen die Markenrechte, die größtenteils aus der Akquisition von Reebok International Ltd. (USA) in 2006 und Ashworth, Inc. in 2008 resultieren, eine unbestimmte Nutzungsdauer. Dies beruht auf der Einschätzung einer dauerhaften Nutzung der erworbenen Markennamen.

Der Konzern überprüft mindestens einmal jährlich, ob die Markenrechte mit unbestimmter Nutzungsdauer wertgemindert sind. Dies erfordert eine Schätzung des beizulegenden Zeitwerts abzüglich der Veräußerungskosten der Markenrechte. Zur Schätzung des beizulegenden Zeitwerts abzüglich der Veräußerungskosten muss der Konzern die voraussichtlichen künftigen Markenumsätze und fiktiven Lizenzraten zu Marktbedingungen schätzen und darüber hinaus einen angemessenen Abzinsungssatz wählen, um den Barwert zu ermitteln. Für die Geschäftsjahre 2010 und 2009 entstand kein Wertminderungsaufwand.

Künftige Veränderungen der erwarteten Zahlungsströme und Diskontierungssätze können in der Zukunft zu Wertminderungen der ausgewiesenen Markenrechte führen.

Die Abschreibungen für immaterielle Vermögenswerte mit bestimmter Nutzungsdauer für die Geschäftsjahre 2010 und 2009 beliefen sich auf 55 Mio. € bzw. 66 Mio. € » siehe auch Erläuterung 30. Die Wertminderungsaufwendungen betrugen für die Geschäftsjahre 2010 und 2009 11 Mio. € bzw. 19 Mio. € und betreffen Distributions- und Lizenzrechte, bei denen kein künftiger wirtschaftlicher Nutzen mehr vorliegt » siehe auch Erläuterung 30.

Siehe auch Entwicklung der immateriellen und materiellen Vermögenswerte » Anlage I dieses Anhangs.

## Langfristige Finanzanlagen » 14

Die langfristigen Finanzanlagen enthalten eine 9,7%ige Kapitalbeteiligung an der FC Bayern München AG (2009: 10%) in Höhe von 79 Mio. € (2009: 79 Mio. €). Der Prozentsatz der Beteiligung ist aufgrund der Neuausgabe von Aktien, die durch einen weiteren Aktionär gezeichnet worden sind, gesunken. Diese Kapitalbeteiligung ist als „erfolgswirksam zum beizulegenden Zeitwert bewertet“ klassifiziert und wird zum beizulegenden Zeitwert ausgewiesen. Diese Finanzanlage verfügt über keinen auf einem aktiven Markt notierten Marktpreis, somit wurden bestehende vertragliche Regelungen zur Ermittlung des beizulegenden Zeitwerts zum 31. Dezember 2010 berücksichtigt. Anstatt einer regulären Verzinsung werden von der FC Bayern München AG Dividenden ausgeschüttet.

Des Weiteren enthalten die langfristigen Finanzanlagen Wertpapiere, die zum größten Teil in Versicherungsprodukte investiert und zum beizulegenden Zeitwert ausgewiesen sind, sowie sonstige Finanzanlagen.

### Langfristige Finanzanlagen

in Mio. €

|                                         | 31. Dez. 2010 | 31. Dez. 2009 |
|-----------------------------------------|---------------|---------------|
| Kapitalbeteiligung FC Bayern München AG | 79            | 79            |
| Wertpapiere                             | 14            | 12            |
| Sonstige Finanzanlagen                  | 0             | 0             |
| <b>Langfristige Finanzanlagen</b>       | <b>93</b>     | <b>91</b>     |

Wertminderungsaufwendungen auf den beizulegenden Zeitwert betrugen 0 Mio. € (2009: 5 Mio. €). Dabei handelt es sich um Wertberichtigungen auf sonstige Finanzanlagen zur Abdeckung des drohenden Ausfallrisikos » siehe auch Erläuterung 32.

## Sonstige langfristige finanzielle Vermögenswerte » 15

Die sonstigen langfristigen finanziellen Vermögenswerte setzen sich wie folgt zusammen:

### Sonstige langfristige finanzielle Vermögenswerte

in Mio. €

|                                                         | 31. Dez. 2010 | 31. Dez. 2009 |
|---------------------------------------------------------|---------------|---------------|
| Zinsderivate                                            | 8             | 4             |
| Währungsoptionen                                        | 12            | 19            |
| Devisentermingeschäfte                                  | 10            | 2             |
| Kautionen                                               | 24            | 21            |
| Übrige finanzielle Vermögenswerte                       | —             | 12            |
| <b>Sonstige langfristige finanzielle Vermögenswerte</b> | <b>54</b>     | <b>58</b>     |

Für Informationen zu Devisentermingeschäften sowie Zinsderivaten und Währungsoptionen » siehe Erläuterung 28.

## Sonstige langfristige Vermögenswerte

» 16

Die sonstigen langfristigen Vermögenswerte setzen sich wie folgt zusammen:

### Sonstige langfristige Vermögenswerte

in Mio. €

|                                             | 31. Dez. 2010 | 31. Dez. 2009 |
|---------------------------------------------|---------------|---------------|
| Abgrenzungsposten                           | 98            | 117           |
| Sonstige                                    | 2             | 9             |
| <b>Sonstige langfristige Vermögenswerte</b> | <b>100</b>    | <b>126</b>    |

Die Abgrenzungsposten enthalten im Wesentlichen Vorauszahlungen für langfristige Promotion- und Dienstleistungsverträge » siehe auch Erläuterung 37 bzw. Erläuterung 27.

## Finanzverbindlichkeiten und Kreditlinien

» 17

Der Konzern hat entsprechend seiner operativen Tätigkeit Kredite in einer Vielzahl von Währungen aufgenommen. Zum 31. Dezember 2010 lauteten die effektiven Bruttofinanzverbindlichkeiten (vor Liquiditätsswaps zu Zwecken des Cash-Managements) im Wesentlichen auf Euro (2010: 55%; 2009: 61%) und US-Dollar (2010: 40%; 2009: 33%).

Im gewichteten Mittel blieb der Zinssatz für die Bruttofinanzverbindlichkeiten des Konzerns im Jahr 2010 mit 5,1 % stabil (2009: 5,2 %).

Zum 31. Dezember 2010 verfügte der Konzern über Kreditlinien und sonstige langfristige Finanzierungsvereinbarungen von insgesamt 5,5 Mrd. € (2009: 5,9 Mrd. €). Die ungenutzten Kreditlinien beliefen sich auf 3,9 Mrd. € (2009: 4,1 Mrd. €). Des Weiteren hatte der Konzern separate Kreditlinien für die Ausstellung von Akkreditiven und Avalen in Höhe von etwa 0,3 Mrd. € (2009: 0,4 Mrd. €).

Die Finanzverbindlichkeiten des Konzerns sind unbesichert und gegebenenfalls mit marktüblichen Kreditvereinbarungen verbunden, die auf Quartalsbasis überprüft werden. Diese Kreditvereinbarungen können eine Limitierung der Veräußerung von Anlagevermögen, Höchstgrenzen für dinglich abgesicherte Verbindlichkeiten sowie Cross-Default- und Change-of-Control-Klauseln vorsehen. Des Weiteren enthalten bestimmte Finanzierungsvereinbarungen Klauseln zu Eigenkapitalquote, Mindesteigenkapital und Nettoverlust.

Zum 31. Dezember 2010 und 31. Dezember 2009 lag das Eigenkapital des Konzerns deutlich über der vereinbarten Mindestkapitalisierung. Gleichmaßen lag das maßgebliche Nettoergebnis deutlich über den Nettoverlustklauseln.

Bei den langfristigen Finanzverbindlichkeiten handelt es sich um Kreditaufnahmen unter den folgenden Vereinbarungen mit Fälligkeiten wie folgt:

### Bruttofinanzverbindlichkeiten zum 31. Dezember 2010

in Mio. €

|                       | Bis zu<br>1 Jahr | Zwischen 1<br>und 3 Jahren | Zwischen 3<br>und 5 Jahren | Über<br>5 Jahre | Gesamt       |
|-----------------------|------------------|----------------------------|----------------------------|-----------------|--------------|
| Bankverbindlichkeiten | —                | 95                         | —                          | —               | <b>95</b>    |
| Schuldscheindarlehen  | 273              | 419                        | 213                        | 112             | <b>1.017</b> |
| Eurobond              | —                | —                          | 498                        | —               | <b>498</b>   |
| <b>Gesamt</b>         | <b>273</b>       | <b>514</b>                 | <b>711</b>                 | <b>112</b>      | <b>1.610</b> |

Die den langfristigen Finanzverbindlichkeiten zugeordneten Bankverbindlichkeiten enthalten auch kurzfristig rückzahlbare Beträge, die einen revolving Bestand im Rahmen des fest zugesagten mittelfristigen Konsortialkredits bzw. der dauerhaft verfolgten Finanzierungsstrategie darstellen.

### Bruttofinanzverbindlichkeiten zum 31. Dezember 2009

in Mio. €

|                       | Bis zu<br>1 Jahr | Zwischen 1<br>und 3 Jahren | Zwischen 3<br>und 5 Jahren | Über<br>5 Jahre | Gesamt       |
|-----------------------|------------------|----------------------------|----------------------------|-----------------|--------------|
| Bankverbindlichkeiten | —                | 103                        | —                          | —               | <b>103</b>   |
| Schuldscheindarlehen  | 198              | 458                        | 324                        | 186             | <b>1.166</b> |
| Eurobond              | —                | —                          | 498                        | —               | <b>498</b>   |
| <b>Gesamt</b>         | <b>198</b>       | <b>561</b>                 | <b>822</b>                 | <b>186</b>      | <b>1.767</b> |

Für weitere Informationen zu künftigen Mittelabflüssen » siehe Risiko- und Chancenbericht, S. 158.

## Sonstige kurzfristige finanzielle Verbindlichkeiten

» 18

Die sonstigen kurzfristigen finanziellen Verbindlichkeiten setzen sich wie folgt zusammen:

### Sonstige kurzfristige finanzielle Verbindlichkeiten

in Mio. €

|                                                            | 31. Dez. 2010 | 31. Dez. 2009 |
|------------------------------------------------------------|---------------|---------------|
| Zinsderivate                                               | 1             | 2             |
| Währungsoptionen                                           | 10            | 10            |
| Devisentermingeschäfte                                     | 85            | 69            |
| Verpflichtungen aus Finanzierungsleasing <sup>1)</sup>     | 2             | —             |
| Übrige finanzielle Verbindlichkeiten                       | 25            | 20            |
| <b>Sonstige kurzfristige finanzielle Verbindlichkeiten</b> | <b>123</b>    | <b>101</b>    |

1) Kurzfristige Verpflichtungen aus Finanzierungsleasing werden ab 2010 unter den sonstigen kurzfristigen finanziellen Verbindlichkeiten ausgewiesen. Für das Geschäftsjahr 2009 » siehe Erläuterung 21.

Für Informationen zu Devisentermingeschäften sowie Zinsderivaten und Währungsoptionen

» siehe Erläuterung 28. Für weitere Informationen zu Verpflichtungen aus Finanzierungsleasing

» siehe Erläuterung 27.



## Sonstige Rückstellungen

» 19

Die sonstigen Rückstellungen setzen sich wie folgt zusammen:

### Sonstige Rückstellungen

in Mio. €

|                                                                  | 1. Jan. 2010 | Währungs-<br>umrechnungs-<br>effekte | Verbrauch  | Auflösungen | Zuführungen | Umbuchungen | 31. Dez. 2010 | davon<br>langfristig |
|------------------------------------------------------------------|--------------|--------------------------------------|------------|-------------|-------------|-------------|---------------|----------------------|
| Marketing                                                        | 45           | 0                                    | 17         | 1           | 36          | —           | 63            | 0                    |
| Personal                                                         | 55           | 2                                    | 34         | 1           | 26          | 1           | 49            | 11                   |
| Rücklieferungen, Gutschriften und Gewährleistungsverpflichtungen | 105          | 13                                   | 68         | 2           | 123         | —           | 171           | —                    |
| Sonstige Steuern                                                 | 12           | 0                                    | 8          | 0           | 14          | —           | 18            | 0                    |
| Übrige                                                           | 132          | 5                                    | 24         | 1           | 84          | 2           | 198           | 18                   |
| <b>Sonstige Rückstellungen</b>                                   | <b>349</b>   | <b>20</b>                            | <b>151</b> | <b>5</b>    | <b>283</b>  | <b>3</b>    | <b>499</b>    | <b>29</b>            |

Rückstellungen für Marketing bestehen hauptsächlich aus Rückstellungen für Promotion-Verträge.

Rückstellungen für Personal beinhalten hauptsächlich Rückstellungen für Gewinnbeteiligungspläne. Bezüglich der Rückstellungen für Altersteilzeit werden unter den sonstigen langfristigen Vermögenswerten Erstattungsansprüche in Höhe von 2 Mio. € (31. Dezember 2009: 3 Mio. €) ausgewiesen.

Rückstellungen für Rücklieferungen, Gutschriften und Gewährleistungsverpflichtungen ergeben sich primär aus Bonusvereinbarungen mit Händlern und der Erfüllung von Kundenansprüchen hinsichtlich der Rücklieferung von durch den Konzern verkauften Produkten mit mangelhafter Beschaffenheit. Die Höhe der Rückstellung orientiert sich an der historischen

Entwicklung von Rücklieferungen, Gutschriften und Gewährleistungsverpflichtungen sowie aktuellen Vereinbarungen.

Rückstellungen für sonstige Steuern beziehen sich insbesondere auf die Umsatzsteuer, Grundsteuer und Kraftfahrzeugsteuer.

Die übrigen Rückstellungen enthalten hauptsächlich Rückstellungen für Zollrisiken sowie Rückstellungen für drohende Verluste aus schwebenden Geschäften und Rückstellungen für Prozessrisiken.

Bei der Schätzung der Rückstellungsbeträge orientiert sich das Management an den Erfahrungswerten aus ähnlichen Transaktionen und berücksichtigt dabei alle Hinweise aus Ereignissen bis zur Erstellung des Konzernabschlusses.

## Abgegrenzte Schulden

» 20

Die abgegrenzten Schulden setzen sich wie folgt zusammen:

### Abgegrenzte Schulden

in Mio. €

|                             | 1. Jan. 2010 | Währungs-<br>umrechnungs-<br>effekte | Verbrauch  | Auflösungen | Zuführungen | Umbuchungen | 31. Dez. 2010 | davon<br>langfristig |
|-----------------------------|--------------|--------------------------------------|------------|-------------|-------------|-------------|---------------|----------------------|
| Ausstehende Rechnungen      | 252          | 16                                   | 197        | 6           | 297         | 1           | 363           | 0                    |
| Marketing und Vertrieb      | 154          | 10                                   | 101        | 3           | 135         | 0           | 195           | 10                   |
| Personal                    | 162          | 11                                   | 97         | 9           | 189         | – 1         | 255           | 25                   |
| Übrige                      | 79           | 1                                    | 31         | 0           | 22          | – 3         | 68            | 4                    |
| <b>Abgegrenzte Schulden</b> | <b>647</b>   | <b>38</b>                            | <b>426</b> | <b>18</b>   | <b>643</b>  | <b>– 3</b>  | <b>881</b>    | <b>39</b>            |

Die abgegrenzten Schulden für Marketing setzen sich hauptsächlich aus abgegrenzten Schulden für den Vertrieb, z. B. für Skonti, Rabatte und Provisionen, zusammen.

Die abgegrenzten Schulden für Personal enthalten hauptsächlich abgegrenzte Schulden für ausstehende Gehaltszahlungen, wie z. B. Boni und Überstunden, sowie für ausstehende Urlaubsansprüche. Die übrigen abgegrenzten Schulden enthalten unter anderem abgegrenzte Schulden für Zinsen.

## Sonstige kurzfristige Verbindlichkeiten

» 21

Die sonstigen kurzfristigen Verbindlichkeiten setzen sich wie folgt zusammen:

### Sonstige kurzfristige Verbindlichkeiten

in Mio. €

|                                                        | 31. Dez. 2010 | 31. Dez. 2009 |
|--------------------------------------------------------|---------------|---------------|
| Verpflichtungen aus Finanzierungsleasing <sup>1)</sup> | —             | 1             |
| Verbindlichkeiten gegenüber Arbeitnehmern              | 34            | 31            |
| Sonstige Steuerverbindlichkeiten ohne Ertragsteuern    | 99            | 108           |
| Verbindlichkeiten im Rahmen der sozialen Sicherheit    | 16            | 13            |
| Abgrenzungsposten                                      | 16            | 27            |
| Sonstige                                               | 76            | 52            |
| <b>Sonstige kurzfristige Verbindlichkeiten</b>         | <b>241</b>    | <b>232</b>    |

1) Kurzfristige Verpflichtungen aus Finanzierungsleasing werden ab 2010 unter den sonstigen kurzfristigen finanziellen Verbindlichkeiten ausgewiesen » siehe Erläuterung 18.

## Sonstige langfristige finanzielle Verbindlichkeiten

» 22

Die sonstigen langfristigen finanziellen Verbindlichkeiten setzen sich wie folgt zusammen:

### Sonstige langfristige finanzielle Verbindlichkeiten

in Mio. €

|                                                            | 31. Dez. 2010 | 31. Dez. 2009 |
|------------------------------------------------------------|---------------|---------------|
| Zinsderivate                                               | 5             | 10            |
| Währungsoptionen                                           | 6             | 10            |
| Devisentermingeschäfte                                     | 1             | 5             |
| Verpflichtungen aus Finanzierungsleasing <sup>1)</sup>     | 3             | —             |
| Übrige finanzielle Verbindlichkeiten                       | 0             | 0             |
| <b>Sonstige langfristige finanzielle Verbindlichkeiten</b> | <b>15</b>     | <b>25</b>     |

1) Langfristige Verpflichtungen aus Finanzierungsleasing werden ab 2010 unter den sonstigen langfristigen finanziellen Verbindlichkeiten ausgewiesen. Für das Geschäftsjahr 2009 » siehe Erläuterung 24.

Für Informationen zu Verpflichtungen aus Devisentermingeschäften sowie Zinsderivaten und Währungsoptionen » siehe Erläuterung 28. Für weitere Informationen zu Verpflichtungen aus Finanzierungsleasing » siehe Erläuterung 27.

Verbindlichkeiten mit Fälligkeiten von mehr als fünf Jahren beliefen sich auf 0 Mio. € bzw. 1 Mio. € zum 31. Dezember 2010 und 2009.

## Pensionen und ähnliche Verpflichtungen

» 23

Der Konzern hat Verpflichtungen für Leistungen nach Beendigung des Arbeitsverhältnisses, die sich aus leistungsorientierten Plänen ergeben, bilanziert. Die Leistungen werden gemäß den gesetzlichen, finanziellen und wirtschaftlichen Rahmenbedingungen des jeweiligen Landes gewährt.

### Pensionen und ähnliche Verpflichtungen

in Mio. €

|                                               | 31. Dez. 2010 | 31. Dez. 2009 |
|-----------------------------------------------|---------------|---------------|
| Leistungsorientierte Verpflichtung            | 172           | 150           |
| Ähnliche Verpflichtungen                      | 8             | 7             |
| <b>Pensionen und ähnliche Verpflichtungen</b> | <b>180</b>    | <b>157</b>    |

### Beitragsorientierte Pläne

Der Gesamtaufwand für beitragsorientierte Pläne belief sich im Geschäftsjahr 2010 auf 34 Mio. € (2009: 35 Mio. €).

### Leistungsorientierte Pläne

Im Konzern existieren in diversen Konzerngesellschaften unterschiedliche leistungsorientierte Pläne, die verschiedenste Regelungen für Leistungen nach Beendigung des Arbeitsverhältnisses umfassen. Die leistungsorientierten Pläne leisten im Allgemeinen Zahlungen im Todesfall, bei Erwerbsunfähigkeit oder im Ruhestand an ehemalige Mitarbeiter bzw. deren Hinterbliebene. Die Verpflichtungen aus leistungsorientierten Plänen sind teilweise durch Planvermögen gedeckt.

### In der Konzernbilanz erfasste Beträge für leistungsorientierte Pläne

in Mio. €

|                                                                                 | 31. Dez. 2010 | 31. Dez. 2009 |
|---------------------------------------------------------------------------------|---------------|---------------|
| Barwert der Verpflichtung für fondsfinanzierte leistungsorientierte Pläne       | 74            | 63            |
| Beizulegender Zeitwert des Planvermögens                                        | - 67          | - 61          |
| <b>Finanzierungsstand</b>                                                       | <b>7</b>      | <b>2</b>      |
| Barwert der Verpflichtung für nicht fondsfinanzierte leistungsorientierte Pläne | 163           | 144           |
| Effekt aus Vermögenswertlimitierung                                             | 1             | 2             |
| <b>Nettoverbindlichkeit für leistungsorientierte Pläne</b>                      | <b>171</b>    | <b>148</b>    |
| <b>davon leistungsorientierte Verpflichtung</b>                                 | <b>172</b>    | <b>150</b>    |
| davon adidas AG                                                                 | 138           | 123           |
| <b>davon leistungsorientierter Vermögenswert</b>                                | <b>- 1</b>    | <b>- 2</b>    |
| davon adidas AG                                                                 | - 1           | - 2           |

Der Effekt aus Vermögenswertlimitierung ergibt sich aus dem deutschen fondsfinanzierten leistungsorientierten Plan und wird in der Konzerngesamtergebnisrechnung reflektiert.

Die Ermittlung der bilanzierten Vermögenswerte und Verbindlichkeiten in Bezug auf die leistungsorientierten Pensionspläne basiert auf versicherungsmathematischen Berechnungen. Dabei ist insbesondere der Barwert der leistungsorientierten Verpflichtungen abhängig von finanziellen Variablen (wie Diskontierungssatz oder künftige Gehaltssteigerungen) und demografischen Variablen (wie Arbeitnehmerfluktuation und Sterbewahrscheinlichkeit). Die versicherungsmathematischen Annahmen können substantiell von den tatsächlichen Ergebnissen abweichen, d. h., der Barwert der tatsächlichen zukünftigen Leistungen kann von dem ausgewiesenen Barwert abweichen.

#### Versicherungsmathematische Annahmen

in %

|                                          | 31. Dez. 2010 | 31. Dez. 2009 |
|------------------------------------------|---------------|---------------|
| Diskontierungssatz                       | 4,6           | 5,0           |
| Erwartete Lohn- oder Gehaltssteigerungen | 3,3           | 3,3           |
| Erwartete Rentenerhöhungen               | 2,0           | 2,0           |
| Erwarteter Ertrag aus dem Planvermögen   | 5,3           | 5,4           |

Die versicherungsmathematischen Annahmen zum Bilanzstichtag werden verwendet, um die leistungsorientierte Verpflichtung zu diesem Zeitpunkt sowie die Pensionsaufwendungen für das kommende Jahr zu ermitteln.

Die versicherungsmathematischen Annahmen in Bezug auf Austrittswahrscheinlichkeit und Sterbewahrscheinlichkeit basieren auf in den jeweiligen Ländern verfügbaren statistischen Informationen, letztere für Deutschland auf den Heubeck 2005 G Sterbetafel.

Der Konzern erfasst versicherungsmathematische Gewinne oder Verluste aus leistungsorientierten Plänen sofort außerhalb der Gewinn- und Verlustrechnung in der Konzerngesamtergebnisrechnung. Die in dieser Aufstellung für 2010 erfassten Verluste beliefen sich auf 13 Mio. € (2009: 16 Mio. €). Die kumulierten erfassten Verluste betrugen 38 Mio. € (2009: 25 Mio. €) » siehe auch Erläuterung 25.

Der erwartete Ertrag aus Planvermögen wird für jeden leistungsorientierten Plan separat festgelegt. Rund 90 % des Planvermögens bezieht sich auf Planvermögen in Großbritannien, Deutschland und der Schweiz. Der erwartete Ertrag aus dem Planvermögen wird auf Basis der erwarteten Erträge pro Assetkategorie entsprechend der zu Grunde liegenden Assetallokation bestimmt. Bei der Bestimmung werden historische Marktentwicklungen und Renditeprognosen im Einklang mit anerkannten Kapitalmarktprinzipien zu Grunde gelegt.

In Großbritannien orientiert sich der erwartete Ertrag pro Assetkategorie an den Renditen langfristiger Staatsanleihen, zuzüglich eines Ertrags von 3,5 % für Eigenkapitalinstrumente und 1,0 % für Unternehmensanleihen.

In Deutschland ist das Planvermögen in Versicherungsverträge und einen Pensionsfonds investiert. Der erwartete Ertrag des Planvermögens entspricht der erwarteten Rendite der zugrunde liegenden Versicherungsverträge.

Das Planvermögen in der Schweiz wird von einer Sammelstiftung gehalten und der erwartete Ertrag des Planvermögens bestimmt sich als gewichteter Durchschnitt der Erträge pro Assetkategorie unter Berücksichtigung der zu Grunde liegenden Investmentstrategie.

In den übrigen Ländern ist das Planvermögen hauptsächlich in Versicherungsverträgen investiert und der erwartete Ertrag des Planvermögens entspricht im Wesentlichen der erwarteten Rendite des jeweiligen Versicherungsvertrags.

#### Pensionsaufwendungen für leistungsorientierte Pläne

in Mio. €

|                                                            | 1. Jan. bis<br>31. Dez. 2010 | 1. Jan. bis<br>31. Dez. 2009 |
|------------------------------------------------------------|------------------------------|------------------------------|
| Laufender Dienstzeitaufwand                                | 11                           | 11                           |
| Zinsaufwand                                                | 10                           | 10                           |
| Erwarteter Ertrag aus dem Planvermögen                     | -4                           | -3                           |
| <b>Pensionsaufwendungen für leistungsorientierte Pläne</b> | <b>17</b>                    | <b>18</b>                    |

Von dem Gesamtpensionsaufwand entfällt ein Betrag in Höhe von 13 Mio. € (2009: 13 Mio. €) auf Arbeitnehmer der adidas AG. Die Pensionsaufwendungen wurden unter den sonstigen betrieblichen Aufwendungen bzw., soweit produktionsbezogen, in den Umsatzkosten ausgewiesen.

#### Barwert der leistungsorientierten Verpflichtung

in Mio. €

|                                                                         | 2010       | 2009       |
|-------------------------------------------------------------------------|------------|------------|
| <b>Barwert der leistungsorientierten Verpflichtung zum 1. Januar</b>    | <b>207</b> | <b>172</b> |
| Währungseffekt                                                          | 7          | 3          |
| Laufender Dienstzeitaufwand                                             | 11         | 11         |
| Zinsaufwand                                                             | 10         | 10         |
| Beiträge der Teilnehmer des Plans                                       | 0          | 0          |
| Pensionszahlungen                                                       | -12        | -8         |
| Versicherungsmathematischer Verlust                                     | 14         | 19         |
| <b>Barwert der leistungsorientierten Verpflichtung zum 31. Dezember</b> | <b>237</b> | <b>207</b> |

#### Beizulegender Zeitwert des Planvermögens

in Mio. €

|                                                                  | 2010      | 2009      |
|------------------------------------------------------------------|-----------|-----------|
| <b>Beizulegender Zeitwert des Planvermögens zum 1. Januar</b>    | <b>61</b> | <b>53</b> |
| Währungseffekt                                                   | 3         | 2         |
| Pensionszahlungen                                                | -5        | -3        |
| Gezahlte Beiträge des Arbeitgebers                               | 3         | 3         |
| Gezahlte Beiträge der Teilnehmer des Plans                       | 0         | 0         |
| Versicherungsmathematischer Gewinn                               | 1         | 3         |
| Erwarteter Ertrag aus dem Planvermögen                           | 4         | 3         |
| <b>Beizulegender Zeitwert des Planvermögens zum 31. Dezember</b> | <b>67</b> | <b>61</b> |

Für das Jahr 2011 werden Einzahlungen in Höhe von 10 Mio. € erwartet. Davon entfallen 7 Mio. € auf Leistungen, die direkt von den Konzerngesellschaften gezahlt werden, sowie Beitragszahlungen durch die Konzerngesellschaften in das Planvermögen in Höhe von 3 Mio. €. Im Jahr 2010 betrug der tatsächliche Ertrag aus dem Planvermögen 5 Mio. € (2009: 6 Mio. €).

## Zusammensetzung des Planvermögens

in Mio. €

|                                                 | 31. Dez. 2010 | 31. Dez. 2009 |
|-------------------------------------------------|---------------|---------------|
| Eigenkapitalinstrumente                         | 21            | 19            |
| Anleihen                                        | 14            | 13            |
| Immobilien                                      | 1             | 1             |
| Rückdeckungsversicherung                        | 21            | 19            |
| Andere Vermögenswerte                           | 10            | 9             |
| <b>Beizulegender Zeitwert des Planvermögens</b> | <b>67</b>     | <b>61</b>     |

## Historische Entwicklung

in Mio. €

|                                                                | 31. Dez. 2010 | 31. Dez. 2009 | 31. Dez. 2008 | 31. Dez. 2007 | 31. Dez. 2006 |
|----------------------------------------------------------------|---------------|---------------|---------------|---------------|---------------|
| Barwert der Verpflichtung für leistungsorientierte Pläne       | 237           | 207           | 172           | 171           | 170           |
| Beizulegender Zeitwert des Planvermögens                       | 67            | 61            | 53            | 60            | 46            |
| Davon: Leistungsorientiertes Vermögen                          | - 1           | - 2           | - 5           | - 4           | - 2           |
| <b>Fehlbetrag der Pläne</b>                                    | <b>171</b>    | <b>148</b>    | <b>124</b>    | <b>115</b>    | <b>126</b>    |
| Erfahrungsbedingte Berichtigungen der Schulden der Pläne       | - 1           | - 3           | 2             | - 1           | 4             |
| Erfahrungsbedingte Berichtigungen der Vermögenswerte der Pläne | 1             | 3             | - 8           | 4             | —             |

## Sonstige langfristige Verbindlichkeiten

» 24

Die sonstigen langfristigen Verbindlichkeiten setzen sich wie folgt zusammen:

### Sonstige langfristige Verbindlichkeiten

in Mio. €

|                                                        | 31. Dez. 2010 | 31. Dez. 2009 |
|--------------------------------------------------------|---------------|---------------|
| Verpflichtungen aus Finanzierungsleasing <sup>1)</sup> | —             | 2             |
| Verbindlichkeiten gegenüber Arbeitnehmern              | 16            | 7             |
| Abgrenzungsposten                                      | 19            | 17            |
| Sonstige                                               | 1             | 2             |
| <b>Sonstige langfristige Verbindlichkeiten</b>         | <b>36</b>     | <b>28</b>     |

1) Langfristige Verpflichtungen aus Finanzierungsleasing werden ab 2010 unter den sonstigen langfristigen finanziellen Verbindlichkeiten ausgewiesen » siehe Erläuterung 22.

Verbindlichkeiten mit Fälligkeiten von mehr als fünf Jahren beliefen sich auf 12 Mio. € bzw. 10 Mio. € zum 31. Dezember 2010 und 2009.

## Eigenkapital

» 25

Das Grundkapital der adidas AG („die Gesellschaft“) belief sich am 31. Dezember 2009 auf 209.216.186 €, eingeteilt in 209.216.186 auf den Inhaber lautende nennwertlose Stückaktien, und war voll eingezahlt.

Am 6. Mai 2010 hat die ordentliche Hauptversammlung der Gesellschaft die Umstellung der auf den Inhaber lautenden Stückaktien in auf den Namen lautende Stückaktien beschlossen. Die entsprechenden Satzungsänderungen wurden am 13. Juli 2010 in das Handelsregister eingetragen und damit wirksam. Am 11. Oktober 2010 wurden die auf den Inhaber lautenden Stückaktien der Gesellschaft in auf den Namen lautende Stückaktien („Namensaktien“) umgestellt

» siehe auch Unsere Aktie, S. 34.

Das Grundkapital der Gesellschaft belief sich zum Bilanzstichtag auf insgesamt 209.216.186 €, eingeteilt in 209.216.186 Namensaktien. Es ist vollständig eingezahlt.

Eine Änderung des Grundkapitals erfolgte nicht. Am 15. Februar 2011 beträgt danach das Grundkapital der adidas AG 209.216.186 €, eingeteilt in 209.216.186 Namensaktien.

Jede Aktie gewährt eine Stimme und ist seit dem Beginn des Jahres, in dem sie entstanden ist, dividendenberechtigt. Unmittelbar oder mittelbar gehaltene eigene Aktien sind nach § 71b Aktiengesetz (AktG) nicht dividendenberechtigt. Am 15. Februar 2011 hält die Gesellschaft keine eigenen Aktien.

### Genehmigtes Kapital

Von den bestehenden genehmigten Kapitalia von insgesamt bis zu 95.000.000 € hat der Vorstand der adidas AG im Geschäftsjahr 2010 und über den Bilanzstichtag hinaus bis zum 15. Februar 2011 keinen Gebrauch gemacht. Die folgende Darstellung des bestehenden genehmigten Kapitals beinhaltet nicht die von der Hauptversammlung am 6. Mai 2010 beschlossene Aufhebung des Genehmigten Kapitals 2006, von dem bis zum 6. Mai 2010 ebenfalls kein Gebrauch gemacht wurde.

Das genehmigte Kapital der Gesellschaft, das zum Bilanzstichtag in § 4 Abs. 2, 3 und 4 der Satzung geregelt ist, ermächtigt den Vorstand, mit Zustimmung des Aufsichtsrats, das Grundkapital

bis zum 21. Juni 2014

– durch Ausgabe neuer Aktien gegen Bareinlagen einmal oder mehrmals um insgesamt bis zu 50.000.000 € zu erhöhen und, mit Zustimmung des Aufsichtsrats, Spitzenbeträge vom Bezugsrecht der Aktionäre auszunehmen (Genehmigtes Kapital 2009/I);

bis zum 21. Juni 2012

– durch Ausgabe neuer Aktien gegen Sacheinlagen einmal oder mehrmals um insgesamt bis zu 25.000.000 € zu erhöhen und, mit Zustimmung des Aufsichtsrats, das Bezugsrecht der Aktionäre auszuschließen (Genehmigtes Kapital 2009/II);



bis zum 12. Juli 2015

– durch Ausgabe neuer Aktien gegen Bareinlagen einmal oder mehrmals um insgesamt bis zu 20.000.000 € zu erhöhen und, mit Zustimmung des Aufsichtsrats, Spitzenbeträge vom Bezugsrecht der Aktionäre auszunehmen sowie das Bezugsrecht der Aktionäre auszuschließen, wenn die neuen Aktien zu einem Ausgabebetrag ausgegeben werden, der den Börsenpreis von Aktien gleicher Ausstattung nicht wesentlich unterschreitet (Genehmigtes Kapital 2010). Von der Ermächtigung zum Ausschluss des Bezugsrechts gemäß dem vorhergehenden Satz kann jedoch nur soweit Gebrauch gemacht werden, wie der anteilige Betrag der neuen Aktien am Grundkapital zusammen mit dem anteiligen Betrag am Grundkapital sonstiger Aktien, die von der Gesellschaft seit dem 6. Mai 2010 unter Ausschluss des Bezugsrechts gemäß oder entsprechend § 186 Abs. 3 Satz 4 AktG auf der Grundlage eines genehmigten Kapitals oder nach Rückerwerb ausgegeben worden sind oder auf die seit dem 6. Mai 2010 unter Ausschluss des Bezugsrechts entsprechend § 186 Abs. 3 Satz 4 AktG ein Umtausch- bzw. Bezugsrecht oder eine Umtausch- bzw. Bezugspflicht durch Options- und/oder Wandelanleihen eingeräumt worden ist, zehn vom Hundert (10 %) des Grundkapitals zum Zeitpunkt der Eintragung dieser Ermächtigung in das Handelsregister oder – falls geringer – zum jeweiligen Zeitpunkt der Ausübung der Ermächtigung nicht übersteigt.

#### Bedingtes Kapital

Die folgende Darstellung des bedingten Kapitals bezieht sich auf § 4 Abs. 5 der Satzung der Gesellschaft und die zugrunde liegenden Hauptversammlungsbeschlüsse vom 6. Mai 2010. Sonstiges bedingtes Kapital besteht nicht.

#### Bedingtes Kapital 2010

Das Grundkapital ist zum Bilanzstichtag um bis zu 36.000.000 €, eingeteilt in bis zu 36.000.000 Namensaktien, bedingt erhöht (Bedingtes Kapital 2010). Die bedingte Kapitalerhöhung wird nur insoweit durchgeführt, wie die Inhaber bzw. Gläubiger von Options- bzw. Wandlungsrechten oder die zur Optionsausübung bzw. Wandlung Verpflichteten aus Schuldverschreibungen, die von der Gesellschaft oder einem nachgeordneten Konzernunternehmen der Gesellschaft aufgrund der Ermächtigung des Vorstands durch Hauptversammlungsbeschluss vom 6. Mai 2010 bis zum 5. Mai 2015 begeben bzw. von der Gesellschaft garantiert werden, von ihren Options- bzw. Wandlungsrechten Gebrauch machen oder, soweit sie zur Optionsausübung bzw. Wandlung verpflichtet sind, ihre Verpflichtung zur Optionsausübung bzw. Wandlung erfüllen oder, soweit die Gesellschaft ein Wahlrecht ausübt, ganz oder teilweise anstelle der Zahlung des fälligen Geldbetrags Aktien der Gesellschaft zu liefern, soweit nicht ein Barausgleich gewährt oder eigene Aktien oder Aktien einer börsennotierten anderen Gesellschaft zur Bedienung eingesetzt werden. Die Ausgabe der neuen Aktien erfolgt zu dem nach Maßgabe des vorstehend bezeichneten Ermächtigungsbeschlusses jeweils zu bestimmenden Options- bzw. Wandlungspreis. Die neuen Aktien nehmen vom Beginn des Geschäftsjahres an, in dem sie entstehen, am Gewinn teil. Der Vorstand ist ermächtigt, mit Zustimmung des Aufsichtsrats, die weiteren Einzelheiten der Durchführung der bedingten Kapitalerhöhung festzusetzen.

Aus dem Bedingten Kapital 2010 hat der Vorstand der adidas AG im Geschäftsjahr 2010 und über den Bilanzstichtag hinaus bis zum 15. Februar 2011 weder Options- oder Wandlungsrechte noch Aktien ausgegeben.

#### Rückerwerb eigener Aktien

Die Aktionäre der Gesellschaft haben die am 7. Mai 2009 beschlossene Ermächtigung zum Erwerb eigener Aktien, von der kein Gebrauch gemacht wurde, in der Hauptversammlung am 6. Mai 2010 aufgehoben. Zugleich hat die Hauptversammlung eine neue Ermächtigung des Vorstands beschlossen, eigene Aktien von bis zu 10 % des Grundkapitals bis zum 5. Mai 2015 zu erwerben. Die Ermächtigung kann durch die Gesellschaft, aber auch durch ihre Tochtergesellschaften oder für ihre oder deren Rechnung durch von der Gesellschaft oder von einer Tochtergesellschaft beauftragte Dritte ausgenutzt werden. Einzelheiten dazu bei »» Angaben nach § 315 Abs. 4 HGB, S. 143.

Von der Ermächtigung ist im Berichtsjahr und bis zum 15. Februar 2011 kein Gebrauch gemacht worden.

## Stimmrechtsmitteilungen

Gemäß § 160 Abs. 1 Nr. 8 AktG sind Angaben über das Bestehen von Beteiligungen zu machen, die nach § 21 Abs. 1 oder Abs. 1a des Wertpapierhandelsgesetzes (WpHG) dem Unternehmen mitgeteilt worden sind.

Der folgenden Tabelle können die zum 15. Februar 2011 bestehenden Beteiligungen entnommen werden, die der Gesellschaft mitgeteilt wurden. Die Angaben wurden jeweils der zeitlich letzten Mitteilung eines Meldepflichtigen an die Gesellschaft entnommen. Es wird darauf hingewiesen, dass die Angaben zu der Beteiligung in Prozent und in Stimmrechten zwischenzeitlich überholt sein können.

### Bestehende Beteiligungen zum 15. Februar 2011

| Meldepflichtiger                                                           | Datum des Erreichens, Über- oder Unterschreitens | Meldeschwelle       | Zurechnung gemäß § 22 WpHG                     | Beteiligung in % | Beteiligung in Stimmrechten |
|----------------------------------------------------------------------------|--------------------------------------------------|---------------------|------------------------------------------------|------------------|-----------------------------|
| Walter Scott & Partners Limited, Edinburgh, Schottland <sup>1)</sup>       | 25. Juni 2010                                    | 3 % Überschreitung  | § 22 Abs. 1 S. 1 Nr. 6                         | 3,0096           | 6.296.653                   |
| Neptune LLC, Pittsburgh, USA <sup>1)</sup>                                 | 25. Juni 2010                                    | 3 % Überschreitung  | § 22 Abs. 1 S. 1 Nr. 6 i.V.m. § 22 Abs. 1 S. 2 | 3,0096           | 6.296.653                   |
| Mellon International Holdings S.A.R.L., Luxemburg, Luxemburg <sup>1)</sup> | 25. Juni 2010                                    | 3 % Überschreitung  | § 22 Abs. 1 S. 1 Nr. 6 i.V.m. § 22 Abs. 1 S. 2 | 3,0096           | 6.296.653                   |
| BNY Mellon International Limited, London, Großbritannien <sup>1)</sup>     | 25. Juni 2010                                    | 3 % Überschreitung  | § 22 Abs. 1 S. 1 Nr. 6 i.V.m. § 22 Abs. 1 S. 2 | 3,0096           | 6.296.653                   |
| MBC Investments Corp., Greenville, USA <sup>1)</sup>                       | 25. Juni 2010                                    | 3 % Überschreitung  | § 22 Abs. 1 S. 1 Nr. 6 i.V.m. § 22 Abs. 1 S. 2 | 3,1682           | 6.628.400                   |
| Euro Pacific Growth Fund, Los Angeles, USA <sup>2)</sup>                   | 21. Juni 2010                                    | 3 % Unterschreitung | —                                              | 2,95             | 6.178.394                   |
| BlackRock Financial Management, Inc., New York, USA <sup>3)</sup>          | 12. März 2010                                    | 5 % Überschreitung  | § 22 Abs. 1 S. 1 Nr. 6 i.V.m. § 22 Abs. 1 S. 2 | 5,03             | 10.533.558                  |
| BlackRock Holdco 2, Inc., Wilmington, Delaware, USA <sup>3)</sup>          | 12. März 2010                                    | 5 % Überschreitung  | § 22 Abs. 1 S. 1 Nr. 6 i.V.m. § 22 Abs. 1 S. 2 | 5,03             | 10.533.558                  |
| BlackRock, Inc., New York, USA <sup>3)</sup>                               | 12. März 2010                                    | 5 % Überschreitung  | § 22 Abs. 1 S. 1 Nr. 6 i.V.m. § 22 Abs. 1 S. 2 | 5,21             | 10.904.232                  |
| The Bank of New York Mellon Corporation, New York, USA <sup>4)</sup>       | 12. März 2010                                    | 3 % Überschreitung  | § 22 Abs. 1 S. 1 Nr. 6 i.V.m. § 22 Abs. 1 S. 2 | 3,0745           | 6.432.398                   |
| Capital Research and Management Company, Los Angeles, USA <sup>5)</sup>    | 19. Dezember 2008                                | 5 % Überschreitung  | § 22 Abs. 1 S. 1 Nr. 6                         | 5,01             | 9.695.127                   |

1) Übermittlung der Mitteilung durch The Bank of New York Mellon Corporation, Pittsburgh, USA; vgl. Veröffentlichung durch die Gesellschaft vom 23.07.2010.

2) Vgl. Veröffentlichung durch die Gesellschaft vom 28.06.2010.

3) Übermittlung der Mitteilung durch BlackRock Investment Management (UK) Limited, London, Großbritannien; vgl. Veröffentlichung durch die Gesellschaft vom 18.03.2010.

4) Vgl. Veröffentlichung durch die Gesellschaft vom 17.03.2010.

5) Vgl. Veröffentlichung durch die Gesellschaft vom 07.01.2009.

Sämtliche Veröffentlichungen durch die Gesellschaft über Mitteilungen von Beteiligungen im Berichtsjahr und darüber hinaus bis zum 15. Februar 2011 stehen auf der Internetseite des adidas Konzerns ([www.adidas-Group.de/stimmrechtsmitteilungen](http://www.adidas-Group.de/stimmrechtsmitteilungen)) zur Verfügung.

## Kapitalmanagement

Die Zielsetzung des Konzerns liegt in der Beibehaltung einer starken Eigenkapitalbasis, um das Vertrauen der Investoren, der Kreditgeber und des Markts zu erhalten und um die zukünftige Geschäftsentwicklung zu stärken.

Der Konzern strebt eine Ausgewogenheit zwischen einer höheren Eigenkapitalrendite, die aufgrund eines höheren Fremdfinanzierungsniveaus möglich wäre, und den Vorteilen sowie der Sicherheit, die eine solide Eigenkapitalposition bietet, an. Nach dem Erreichen des mittelfristigen Ziels eines Verschuldungsgrads von unter 50 % Nettoverschuldung im Verhältnis zum Eigenkapital im Jahr 2009 beabsichtigt der Konzern nun langfristig ein Verhältnis von Nettofinanzverbindlichkeiten zu EBITDA von unter zwei beizubehalten.

Der Verschuldungsgrad ergibt sich aus der Division der Nettofinanzverbindlichkeiten (kurz- und langfristige Finanzverbindlichkeiten abzüglich flüssige Mittel und kurzfristige Finanzanlagen) in Höhe von 221 Mio. € (2009: 917 Mio. €) durch das Eigenkapital in Höhe von 4,616 Mrd. € (2009:

3,771 Mrd. €). Das EBITDA beträgt für das Geschäftsjahr 2010 1,159 Mrd. € (2009: 780 Mio. €). Das Verhältnis von Nettofinanzverbindlichkeiten zu EBITDA beträgt im Geschäftsjahr 2010 0,2 (2009: 1,2).

## Rücklagen

Rücklagen im Eigenkapital sind wie folgt:

- **Kapitalrücklage:** beinhaltet das im Rahmen von Aktienemissionen gezahlte Agio.
- **Kumulierte Währungsumrechnung:** Diese Rücklage beinhaltet alle Fremdwährungsunterschiede, die aus der Umrechnung der Abschlüsse ausländischer Geschäftsbetriebe entstehen.
- **Hedging-Rücklage:** beinhaltet den effektiven Anteil der kumulierten Nettoveränderungen im beizulegenden Zeitwert der Absicherung von Cashflows in Bezug auf abgesicherte Transaktionen, die noch nicht eingetreten sind, sowie der Absicherung von Nettoinvestitionen in ausländischen Tochtergesellschaften.
- **Übrige Rücklagen:** beinhalten die kumulierten Nettoveränderungen von versicherungsmathematischen Gewinnen oder Verlusten und den Effekt aus Vermögenswertlimitierung im Rahmen von leistungsorientierten Pensionszusagen, Aufwendungen für Aktienoptionspläne sowie beizulegenden Zeitwerten von zur Veräußerung verfügbaren finanziellen Vermögenswerten.

– **Gewinnrücklagen:** beinhalten die kumulierten Gewinnvorräte abzüglich der ausgezahlten Dividenden.

#### Ausschüttungsfähige Gewinne und Dividenden

Die ausschüttungsfähigen Beträge beziehen sich auf den Bilanzgewinn der adidas AG, der gemäß deutschem Handelsrecht ermittelt wird.

Für das Jahr 2009 wurde eine Dividende von 0,35 € je Aktie (Gesamtbetrag: 73 Mio. €) nach der Zustimmung durch die Hauptversammlung 2010 ausgeschüttet. Der Vorstand der adidas AG schlägt den Aktionären vor, aus dem zum 31. Dezember 2010 ausgewiesenen Bilanzgewinn in Höhe von 368 Mio. € eine Ausschüttung einer Dividende von 0,80 € pro für das Geschäftsjahr 2010 dividendenberechtigter Aktie vorzunehmen und den Restbetrag auf neue Rechnung vorzutragen.

Zum 31. Dezember 2010 bestehen 209.216.186 dividendenberechtigte Aktien. Dies würde zu einer Dividendenzahlung in Höhe von 167 Mio. € führen.

### Nicht beherrschende Anteile

» 26

Dieser Posten enthält nicht beherrschende Anteile am Eigenkapital einer Reihe von Tochtergesellschaften, welche der adidas AG weder unmittelbar noch mittelbar zugeordnet werden.

Die nicht beherrschenden Anteile sind zum 31. Dezember 2010 und zum 31. Dezember 2009 jeweils sieben Tochtergesellschaften zuzuordnen » siehe auch Aufstellung des Anteilsbesitzes der adidas AG (Anlage II dieses Anhangs). Diese Tochtergesellschaften wurden teilweise im Rahmen der Akquisition von Reebok und teilweise in den letzten Jahren erworben bzw. gegründet.

Entsprechend IAS 32 „Finanzinstrumente: Darstellung“ werden bestimmte nicht beherrschende Anteile außerhalb des Postens „Nicht beherrschende Anteile“ berichtet. Hierunter fallen die nicht beherrschenden Anteile an der GEV Grundstücksgesellschaft Herzogenaurach mbH & Co. KG (Deutschland) aufgrund der vorliegenden Rechtsform einer Kommanditgesellschaft. Der beizulegende Zeitwert dieser nicht beherrschenden Anteile wird in den sonstigen Verbindlichkeiten ausgewiesen und die entsprechenden Ergebnisanteile werden in den Finanzaufwendungen berichtet » siehe auch Erläuterung 32.

### Leasing- und Dienstleistungsverträge

» 27

#### Operating-Leasing

Der Konzern mietet, pachtet und least vor allem Einzelhandelsgeschäfte sowie Büros, Lager- räume und Einrichtungen. Die Verträge haben Restlaufzeiten zwischen einem und vierzehn Jahren und beinhalten teilweise Verlängerungsoptionen und Preisanpassungsklauseln. Die Gesamtaufwendungen aus diesen Verträgen, welche zum Teil umsatzabhängig sind, beliefen sich auf 544 Mio. € bzw. 480 Mio. € für die Geschäftsjahre 2010 und 2009.

Die künftigen Mindestleasingzahlungen für die Mindestmietzeiten stellen sich nominal wie folgt dar:

#### Mindestleasingzahlungen aus Operating-Leasing

in Mio. €

|                                | 31. Dez. 2010 | 31. Dez. 2009 |
|--------------------------------|---------------|---------------|
| Innerhalb eines Jahres         | 404           | 360           |
| Zwischen einem und fünf Jahren | 659           | 619           |
| Über fünf Jahre                | 331           | 320           |
| <b>Gesamt</b>                  | <b>1.394</b>  | <b>1.299</b>  |

#### Finanzierungsleasing

Des Weiteren mietet, pachtet und least der Konzern verschiedene Objekte für Verwaltung, Lager, Forschung und Entwicklung sowie Produktion, die als Finanzierungsleasing behandelt werden.

Der Nettobuchwert dieser Vermögenswerte in Höhe von 7 Mio. € bzw. 7 Mio. € wird in den Sachanlagen zum 31. Dezember 2010 und 2009 ausgewiesen. Der Zinsaufwand und die Abschreibungen für das Geschäftsjahr 2010 beliefen sich auf 1 Mio. € (2009: 1 Mio. €) bzw. 3 Mio. € (2009: 1 Mio. €).

Die künftigen Mindestleasingzahlungen für die Restlaufzeiten dieser Verträge, die bis zum Jahr 2016 laufen, sowie deren Barwerte stellen sich wie folgt dar:

#### Mindestleasingzahlungen aus Finanzierungsleasing

in Mio. €

|                                                         | 31. Dez. 2010 | 31. Dez. 2009 |
|---------------------------------------------------------|---------------|---------------|
| <b>Fälligkeitsstruktur der Mindestleasingzahlungen:</b> |               |               |
| Innerhalb eines Jahres                                  | 2             | 1             |
| Zwischen einem und fünf Jahren                          | 3             | 1             |
| Über fünf Jahre                                         | 0             | 1             |
| <b>Mindestleasingzahlungen gesamt</b>                   | <b>5</b>      | <b>3</b>      |
| abzüglich: erwartete zukünftige Zinszahlungen           | 0             | 0             |
| <b>Barwert der Mindestleasingzahlungen</b>              | <b>5</b>      | <b>3</b>      |
| davon:                                                  |               |               |
| Innerhalb eines Jahres                                  | 2             | 1             |
| Zwischen einem und fünf Jahren                          | 3             | 1             |
| Über fünf Jahre                                         | 0             | 1             |

#### Dienstleistungsverträge

Der Konzern hat bestimmte Logistik- und EDV-Funktionen ausgelagert. In diesem Zusammenhang hat der Konzern langfristige Verträge abgeschlossen. Die finanziellen Verpflichtungen aus diesen Verträgen haben die folgenden Fälligkeiten:

#### Finanzielle Verpflichtungen aus Dienstleistungsverträgen

in Mio. €

|                                | 31. Dez. 2010 | 31. Dez. 2009 |
|--------------------------------|---------------|---------------|
| Innerhalb eines Jahres         | 40            | 42            |
| Zwischen einem und fünf Jahren | 65            | 59            |
| Über fünf Jahre                | 44            | —             |
| <b>Gesamt</b>                  | <b>149</b>    | <b>101</b>    |

## Ergänzende Angaben zu Finanzinstrumenten

## Buchwerte der Finanzinstrumente zum 31. Dezember 2010 gemäß den Kategorien des IAS 39 und ihre beizulegenden Zeitwerte

in Mio. €

|                                                           | Kategorie<br>gemäß IAS 39 | Buchwert<br>31. Dez. 2010 | Bewertung gemäß IAS 39             |                                           |                                           | Bewertung<br>gemäß IAS 17 | Beizulegender Zeitwert<br>31. Dez. 2010 |
|-----------------------------------------------------------|---------------------------|---------------------------|------------------------------------|-------------------------------------------|-------------------------------------------|---------------------------|-----------------------------------------|
|                                                           |                           |                           | Fortgeführte<br>Anschaffungskosten | Beizulegender Zeitwert<br>ergebnisneutral | Beizulegender Zeitwert<br>ergebniswirksam |                           |                                         |
| Finanzielle Vermögenswerte                                |                           |                           |                                    |                                           |                                           |                           |                                         |
| Flüssige Mittel                                           | n.a.                      | 1.156                     | 1.156                              |                                           |                                           |                           | 1.156                                   |
| Kurzfristige Finanzanlagen                                | FAHfT                     | 233                       |                                    |                                           | 233                                       |                           | 233                                     |
| Forderungen aus Lieferungen und Leistungen                | LaR                       | 1.667                     | 1.667                              |                                           |                                           |                           | 1.667                                   |
| Sonstige kurzfristige finanzielle Vermögenswerte          |                           |                           |                                    |                                           |                                           |                           |                                         |
| Derivate mit Sicherungsbeziehung                          | n.a.                      | 46                        |                                    | 46                                        |                                           |                           | 46                                      |
| Derivate ohne Sicherungsbeziehung                         | FAHfT                     | 18                        |                                    |                                           | 18                                        |                           | 18                                      |
| Sonstige finanzielle Vermögenswerte                       | LaR                       | 133                       | 133                                |                                           |                                           |                           | 133                                     |
| Langfristige Finanzanlagen                                |                           |                           |                                    |                                           |                                           |                           |                                         |
| Sonstige Kapitalanlage                                    | FAHfT                     | 79                        |                                    |                                           | 79                                        |                           | 79                                      |
| Zur Veräußerung verfügbare finanzielle Vermögenswerte     | AfS                       | 14                        |                                    | 14                                        |                                           |                           | 14                                      |
| Kredite                                                   | LaR                       | 0                         | 0                                  |                                           |                                           |                           | 0                                       |
| Sonstige langfristige finanzielle Vermögenswerte          |                           |                           |                                    |                                           |                                           |                           |                                         |
| Derivate mit Sicherungsbeziehung                          | n.a.                      | 24                        |                                    | 16                                        | 8                                         |                           | 24                                      |
| Derivate ohne Sicherungsbeziehung                         | FAHfT                     | 6                         |                                    |                                           | 6                                         |                           | 6                                       |
| Sonstige finanzielle Vermögenswerte                       | LaR                       | 24                        | 24                                 |                                           |                                           |                           | 24                                      |
| Vermögenswerte klassifiziert als zur Veräußerung gehalten | LaR                       | —                         | —                                  |                                           |                                           |                           | —                                       |
|                                                           |                           |                           |                                    |                                           |                                           |                           |                                         |
| Finanzielle Verbindlichkeiten                             |                           |                           |                                    |                                           |                                           |                           |                                         |
| Kurzfristige Finanzverbindlichkeiten                      |                           |                           |                                    |                                           |                                           |                           |                                         |
| Schuldscheindarlehen                                      | FLAC                      | 273                       | 273                                |                                           |                                           |                           | 286                                     |
| Eurobond                                                  | FLAC                      | —                         | —                                  |                                           |                                           |                           | —                                       |
| Verbindlichkeiten aus Lieferungen und Leistungen          | FLAC                      | 1.694                     | 1.694                              |                                           |                                           |                           | 1.694                                   |
| Abgegrenzte Schulden                                      | FLAC                      | 394                       | 394                                |                                           |                                           |                           | 394                                     |
| Sonstige kurzfristige finanzielle Verbindlichkeiten       |                           |                           |                                    |                                           |                                           |                           |                                         |
| Derivate mit Sicherungsbeziehung                          | n.a.                      | 74                        |                                    | 74                                        |                                           |                           | 74                                      |
| Derivate ohne Sicherungsbeziehung                         | FLHfT                     | 22                        |                                    |                                           | 22                                        |                           | 22                                      |
| Sonstige finanzielle Verbindlichkeiten                    | FLAC                      | 25                        | 25                                 |                                           |                                           |                           | 25                                      |
| Verpflichtungen aus Finanzierungsleasing                  | n.a.                      | 2                         |                                    |                                           |                                           | 2                         | 2                                       |
| Langfristige Finanzverbindlichkeiten                      |                           |                           |                                    |                                           |                                           |                           |                                         |
| Bankverbindlichkeiten                                     | FLAC                      | 95                        | 95                                 |                                           |                                           |                           | 95                                      |
| Schuldscheindarlehen                                      | FLAC                      | 744                       | 744                                |                                           |                                           |                           | 773                                     |
| Eurobond                                                  | FLAC                      | 498                       | 498                                |                                           |                                           |                           | 529                                     |



# Buchwerte der Finanzinstrumente zum 31. Dezember 2010 gemäß den Kategorien des IAS 39 und ihre beizulegenden Zeitwerte

in Mio. €

|                                                                                                                                                            | Kategorie<br>gemäß IAS 39 | Buchwert<br>31. Dez. 2010 | Bewertung gemäß IAS 39             |                                           |                                           | Bewertung<br>gemäß IAS 17 | Beizulegender Zeitwert<br>31. Dez. 2010 |
|------------------------------------------------------------------------------------------------------------------------------------------------------------|---------------------------|---------------------------|------------------------------------|-------------------------------------------|-------------------------------------------|---------------------------|-----------------------------------------|
|                                                                                                                                                            |                           |                           | Fortgeführte<br>Anschaffungskosten | Beizulegender Zeitwert<br>ergebnisneutral | Beizulegender Zeitwert<br>ergebniswirksam |                           |                                         |
| Sonstige langfristige finanzielle Verbindlichkeiten                                                                                                        |                           |                           |                                    |                                           |                                           |                           |                                         |
| Derivate mit Sicherungsbeziehung                                                                                                                           | n.a.                      | 6                         |                                    | 6                                         |                                           |                           | 6                                       |
| Derivate ohne Sicherungsbeziehung                                                                                                                          | FLHfT                     | 6                         |                                    |                                           | 6                                         |                           | 6                                       |
| Sonstige finanzielle Verbindlichkeiten                                                                                                                     | FLAC                      | —                         | —                                  |                                           |                                           |                           | —                                       |
| Verpflichtungen aus Finanzierungsleasing                                                                                                                   | n.a.                      | 3                         |                                    |                                           |                                           | 3                         | 3                                       |
| Verbindlichkeiten klassifiziert als zur Veräußerung gehalten                                                                                               | FLAC                      | —                         | —                                  |                                           |                                           |                           | —                                       |
| Davon: aggregiert nach Kategorien gemäß IAS 39                                                                                                             |                           |                           |                                    |                                           |                                           |                           |                                         |
| Erfolgswirksam zum beizulegenden Zeitwert bewertete<br>finanzielle Vermögenswerte                                                                          |                           | 336                       |                                    |                                           |                                           |                           |                                         |
| davon: beim erstmaligen Ansatz als solche eingestuft<br>(Fair Value Option – FVO)                                                                          |                           | —                         |                                    |                                           |                                           |                           |                                         |
| davon: zu Handelszwecken gehalten<br>(Financial Assets Held for Trading – FAHfT)                                                                           |                           | 336                       |                                    |                                           |                                           |                           |                                         |
| Kredite und Forderungen (Loans and Receivables – LaR)                                                                                                      |                           | 1.824                     |                                    |                                           |                                           |                           |                                         |
| Zur Veräußerung verfügbare finanzielle Vermögenswerte<br>(Available-for-Sale Financial Assets – AfS)                                                       |                           | 14                        |                                    |                                           |                                           |                           |                                         |
| Finanzielle Verbindlichkeiten, die zu fortgeführten<br>Anschaffungskosten bewertet werden<br>(Financial Liabilities Measured at Amortised Cost – FLAC)     |                           | 3.723                     |                                    |                                           |                                           |                           |                                         |
| Erfolgswirksam zum beizulegenden Zeitwert bewertete<br>finanzielle Verbindlichkeiten zu Handelszwecken<br>(Financial Liabilities Held for Trading – FLHfT) |                           | 28                        |                                    |                                           |                                           |                           |                                         |

**Buchwerte der Finanzinstrumente zum 31. Dezember 2009 gemäß den Kategorien des IAS 39 und ihre beizulegenden Zeitwerte**

in Mio. €

|                                                           | Kategorie<br>gemäß IAS 39 | Buchwert<br>31. Dez. 2009 | Bewertung gemäß IAS 39             |                                           |                                           | Bewertung<br>gemäß IAS 17 | Beizulegender Zeitwert<br>31. Dez. 2009 |
|-----------------------------------------------------------|---------------------------|---------------------------|------------------------------------|-------------------------------------------|-------------------------------------------|---------------------------|-----------------------------------------|
|                                                           |                           |                           | Fortgeführte<br>Anschaffungskosten | Beizulegender Zeitwert<br>ergebnisneutral | Beizulegender Zeitwert<br>ergebniswirksam |                           |                                         |
| Finanzielle Vermögenswerte                                |                           |                           |                                    |                                           |                                           |                           |                                         |
| Flüssige Mittel                                           | n.a.                      | 775                       | 775                                |                                           |                                           |                           | 775                                     |
| Kurzfristige Finanzanlagen                                | FAHfT                     | 75                        |                                    |                                           | 75                                        |                           | 75                                      |
| Forderungen aus Lieferungen und Leistungen                | LaR                       | 1.429                     | 1.429                              |                                           |                                           |                           | 1.429                                   |
| Sonstige kurzfristige finanzielle Vermögenswerte          |                           |                           |                                    |                                           |                                           |                           |                                         |
| Derivate mit Sicherungsbeziehung                          | n.a.                      | 17                        |                                    | 17                                        | 0                                         |                           | 17                                      |
| Derivate ohne Sicherungsbeziehung                         | FAHfT                     | 25                        |                                    |                                           | 25                                        |                           | 25                                      |
| Sonstige finanzielle Vermögenswerte                       | LaR                       | 118                       | 118                                |                                           |                                           |                           | 118                                     |
| Langfristige Finanzanlagen                                |                           |                           |                                    |                                           |                                           |                           |                                         |
| Sonstige Kapitalanlage                                    | FAHfT                     | 79                        |                                    |                                           | 79                                        |                           | 79                                      |
| Zur Veräußerung verfügbare finanzielle Vermögenswerte     | AfS                       | 12                        |                                    | 12                                        |                                           |                           | 12                                      |
| Kredite                                                   | LaR                       | 0                         | 0                                  |                                           |                                           |                           | 0                                       |
| Sonstige langfristige finanzielle Vermögenswerte          |                           |                           |                                    |                                           |                                           |                           |                                         |
| Derivate mit Sicherungsbeziehung                          | n.a.                      | 11                        |                                    | 7                                         | 4                                         |                           | 11                                      |
| Derivate ohne Sicherungsbeziehung                         | FAHfT                     | 14                        |                                    |                                           | 14                                        |                           | 14                                      |
| Sonstige finanzielle Vermögenswerte                       | LaR                       | 33                        | 33                                 |                                           |                                           |                           | 33                                      |
| Vermögenswerte klassifiziert als zur Veräußerung gehalten | LaR                       | —                         | —                                  |                                           |                                           |                           | —                                       |
|                                                           |                           |                           |                                    |                                           |                                           |                           |                                         |
| Finanzielle Verbindlichkeiten                             |                           |                           |                                    |                                           |                                           |                           |                                         |
| Kurzfristige Finanzverbindlichkeiten                      |                           |                           |                                    |                                           |                                           |                           |                                         |
| Schuldscheindarlehen                                      | FLAC                      | 198                       | 198                                |                                           |                                           |                           | 199                                     |
| Eurobond                                                  | FLAC                      | —                         | —                                  |                                           |                                           |                           | —                                       |
| Verbindlichkeiten aus Lieferungen und Leistungen          | FLAC                      | 1.166                     | 1.166                              |                                           |                                           |                           | 1.166                                   |
| Abgegrenzte Schulden                                      | FLAC                      | 282                       | 282                                |                                           |                                           |                           | 282                                     |
| Sonstige kurzfristige finanzielle Verbindlichkeiten       |                           |                           |                                    |                                           |                                           |                           |                                         |
| Derivate mit Sicherungsbeziehung                          | n.a.                      | 72                        |                                    | 72                                        |                                           |                           | 72                                      |
| Derivate ohne Sicherungsbeziehung                         | FLHfT                     | 9                         |                                    |                                           | 9                                         |                           | 9                                       |
| Sonstige finanzielle Verbindlichkeiten                    | FLAC                      | 20                        | 20                                 |                                           |                                           |                           | 20                                      |
| Verpflichtungen aus Finanzierungsleasing                  | n.a.                      | 1                         |                                    |                                           |                                           | 1                         | 1                                       |
| Langfristige Finanzverbindlichkeiten                      |                           |                           |                                    |                                           |                                           |                           |                                         |
| Bankverbindlichkeiten                                     | FLAC                      | 103                       | 103                                |                                           |                                           |                           | 103                                     |
| Schuldscheindarlehen                                      | FLAC                      | 968                       | 968                                |                                           |                                           |                           | 1.010                                   |
| Eurobond                                                  | FLAC                      | 498                       | 498                                |                                           |                                           |                           | 518                                     |

# Buchwerte der Finanzinstrumente zum 31. Dezember 2009 gemäß den Kategorien des IAS 39 und ihre beizulegenden Zeitwerte

in Mio. €

|                                                                                                                                                            | Kategorie<br>gemäß IAS 39 | Buchwert<br>31. Dez. 2009 | Bewertung gemäß IAS 39             |                                           |                                           | Bewertung<br>gemäß IAS 17 | Beizulegender Zeitwert<br>31. Dez. 2009 |
|------------------------------------------------------------------------------------------------------------------------------------------------------------|---------------------------|---------------------------|------------------------------------|-------------------------------------------|-------------------------------------------|---------------------------|-----------------------------------------|
|                                                                                                                                                            |                           |                           | Fortgeführte<br>Anschaffungskosten | Beizulegender Zeitwert<br>ergebnisneutral | Beizulegender Zeitwert<br>ergebniswirksam |                           |                                         |
| Sonstige langfristige finanzielle Verbindlichkeiten                                                                                                        |                           |                           |                                    |                                           |                                           |                           |                                         |
| Derivate mit Sicherungsbeziehung                                                                                                                           | n.a.                      | 13                        |                                    | 13                                        |                                           |                           | 13                                      |
| Derivate ohne Sicherungsbeziehung                                                                                                                          | FLHfT                     | 12                        |                                    |                                           | 12                                        |                           | 12                                      |
| Sonstige finanzielle Verbindlichkeiten                                                                                                                     | FLAC                      | —                         | —                                  |                                           |                                           |                           | —                                       |
| Verpflichtungen aus Finanzierungsleasing                                                                                                                   | n.a.                      | 2                         |                                    |                                           |                                           | 2                         | 2                                       |
| Verbindlichkeiten klassifiziert als zur Veräußerung gehalten                                                                                               | FLAC                      | —                         | —                                  |                                           |                                           |                           | —                                       |
| Davon: aggregiert nach Kategorien gemäß IAS 39                                                                                                             |                           |                           |                                    |                                           |                                           |                           |                                         |
| Erfolgswirksam zum beizulegenden Zeitwert bewertete<br>finanzielle Vermögenswerte                                                                          |                           | 193                       |                                    |                                           |                                           |                           |                                         |
| davon: beim erstmaligen Ansatz als solche eingestuft<br>(Fair Value Option – FVO)                                                                          |                           | —                         |                                    |                                           |                                           |                           |                                         |
| davon: zu Handelszwecken gehalten<br>(Financial Assets Held for Trading – FAHfT)                                                                           |                           | 193                       |                                    |                                           |                                           |                           |                                         |
| Kredite und Forderungen (Loans and Receivables – LaR)                                                                                                      |                           | 1.580                     |                                    |                                           |                                           |                           |                                         |
| Zur Veräußerung verfügbare finanzielle Vermögenswerte<br>(Available-for-Sale Financial Assets – AfS)                                                       |                           | 12                        |                                    |                                           |                                           |                           |                                         |
| Finanzielle Verbindlichkeiten, die zu fortgeführten<br>Anschaffungskosten bewertet werden<br>(Financial Liabilities Measured at Amortised Cost – FLAC)     |                           | 3.235                     |                                    |                                           |                                           |                           |                                         |
| Erfolgswirksam zum beizulegenden Zeitwert bewertete<br>finanzielle Verbindlichkeiten zu Handelszwecken<br>(Financial Liabilities Held for Trading – FLHfT) |                           | 21                        |                                    |                                           |                                           |                           |                                         |

## Hierarchische Einstufung der beizulegenden Zeitwerte von Finanzinstrumenten gemäß IFRS 7 zum 31. Dezember 2010 in Mio. €

| Hierarchische Einstufung der beizulegenden Zeitwerte, aggregiert nach Kategorien                                                                                                                               | Beizulegender Zeitwert<br>31. Dez. 2010 | Stufe 1 | Stufe 2    | Stufe 3                                 |
|----------------------------------------------------------------------------------------------------------------------------------------------------------------------------------------------------------------|-----------------------------------------|---------|------------|-----------------------------------------|
| Erfolgswirksam zum beizulegenden Zeitwert bewertete finanzielle Vermögenswerte                                                                                                                                 |                                         |         |            |                                         |
| davon: beim erstmaligen Ansatz als solche eingestuft (Fair Value Option – FVO)                                                                                                                                 | —                                       |         |            |                                         |
| davon: zu Handelszwecken gehalten (Financial Assets Held for Trading – FAHfT)                                                                                                                                  | 336                                     |         | 257        | 79 <sup>1)</sup>                        |
| Zur Veräußerung verfügbare finanzielle Vermögenswerte (Available-for-Sale Financial Assets – AfS)                                                                                                              | 14                                      |         | 14         |                                         |
| Sonstige finanzielle Vermögenswerte                                                                                                                                                                            |                                         |         |            |                                         |
| Derivate mit Sicherungsbeziehung                                                                                                                                                                               | 70                                      |         | 70         |                                         |
| <b>Finanzielle Vermögenswerte</b>                                                                                                                                                                              | <b>420</b>                              |         | <b>341</b> | <b>79</b>                               |
| Erfolgswirksam zum beizulegenden Zeitwert bewertete finanzielle Verbindlichkeiten zu Handelszwecken (Financial Liabilities Held for Trading – FLHfT)                                                           | 28                                      |         | 28         |                                         |
| Sonstige finanzielle Verbindlichkeiten                                                                                                                                                                         |                                         |         |            |                                         |
| Derivate mit Sicherungsbeziehung                                                                                                                                                                               | 80                                      |         | 80         |                                         |
| <b>Finanzielle Verbindlichkeiten</b>                                                                                                                                                                           | <b>108</b>                              |         | <b>108</b> |                                         |
|                                                                                                                                                                                                                | Beizulegender Zeitwert<br>1. Jan. 2010  | Gewinne | Verluste   | Beizulegender Zeitwert<br>31. Dez. 2010 |
| 1) Diese Kategorie enthält eine 9,7%ige Kapitalbeteiligung an der FC Bayern München AG in Höhe von 79 Mio. €. Anstatt einer regulären Verzinsung werden von der FC Bayern München AG Dividenden ausgeschüttet. | 79                                      | 0       | —          | 79                                      |

- Stufe 1 basiert auf quotierten Preisen auf aktiven Märkten für identische Vermögenswerte und Verbindlichkeiten.
- Stufe 2 basiert auf Inputfaktoren, die direkte (d. h. Preise) oder indirekte (d. h. hergeleitete Preise) beobachtbare Marktdaten für die Vermögenswerte und Verbindlichkeiten darstellen und nicht quotierte Preise aus Stufe 1 sind.
- Stufe 3 basiert auf Inputfaktoren für die Vermögenswerte und Verbindlichkeiten, die nicht an einem Markt beobachtbar sind (unbeobachtbare Inputfaktoren).

Aufgrund der kurzen Laufzeiten der flüssigen Mittel, kurzfristigen Finanzanlagen, Forderungen und Verbindlichkeiten aus Lieferungen und Leistungen sowie der übrigen kurzfristigen finanziellen Forderungen und Verbindlichkeiten wird angenommen, dass die beizulegenden Zeitwerte den Buchwerten entsprechen.

Die beizulegenden Zeitwerte der langfristigen finanziellen Vermögenswerte und Verbindlichkeiten werden als Barwerte der zukünftig erwarteten Cashflows ermittelt. Zur Diskontierung werden auf die entsprechenden Fristigkeiten bezogene, marktübliche Zinssätze, angepasst um eine konzernspezifische Kreditrisikoprämie, verwendet.

Für die zum beizulegenden Zeitwert bewerteten als „zur Veräußerung verfügbar“-klassifizierten langfristigen Finanzanlagen basieren die Zeitwerte auf dem an einem aktiven Markt notierten Marktpreis oder werden als Barwerte der zukünftig erwarteten Cashflows ermittelt.

Die beizulegenden Zeitwerte von Devisentermingeschäften und Fremdwährungsoptionen werden auf Basis der Marktbedingungen zum Bilanzstichtag ermittelt. Für die Bestimmung des beizulegenden Zeitwerts von Fremdwährungsoptionen werden anerkannte Bewertungsmodelle, wie z. B. das „Garman-Kohlhagen-Modell“, angewandt. Der beizulegende Zeitwert einer Option wird neben der Restlaufzeit der Option zusätzlich durch weitere Faktoren, wie z. B. die aktuelle Höhe und Volatilität des zu Grunde liegenden Wechselkurses, beeinflusst.

## Nettogewinne oder -verluste aus Finanzinstrumenten, die ergebniswirksam erfasst wurden

in Mio. €

|                                                                                                                   | 1. Jan. bis<br>31. Dez. 2010 | 1. Jan. bis<br>31. Dez. 2009 |
|-------------------------------------------------------------------------------------------------------------------|------------------------------|------------------------------|
| Erfolgswirksam zum beizulegenden Zeitwert bewertete finanzielle Vermögenswerte oder finanzielle Verbindlichkeiten | – 6                          | 4                            |
| davon: beim erstmaligen Ansatz als solche eingestuft                                                              | —                            | —                            |
| davon: zu Handelszwecken gehalten                                                                                 | – 6                          | 4                            |
| Kredite und Forderungen                                                                                           | – 81                         | – 44                         |
| Zur Veräußerung verfügbare finanzielle Vermögenswerte                                                             | —                            | —                            |
| Finanzielle Verbindlichkeiten, die zu fortgeführten Anschaffungskosten bewertet werden                            | 6                            | 5                            |

Nettogewinne oder -verluste aus finanziellen Vermögenswerten oder finanziellen Verbindlichkeiten, die zu Handelszwecken gehalten werden, beinhalten Effekte aus der Bewertung zum beizulegenden Zeitwert von Derivaten, die nicht Teil einer Sicherungsbeziehung sind, und Veränderungen des beizulegenden Zeitwerts weiterer Finanzinstrumente sowie Zinszahlungen, die hauptsächlich von Investmentfonds stammen.

Nettogewinne oder -verluste aus Krediten und Forderungen beinhalten hauptsächlich Wertminderungsaufwendungen und Wertaufholungen.

Nettogewinne oder -verluste aus finanziellen Verbindlichkeiten, die zu fortgeführten Anschaffungskosten bewertet werden, beinhalten Effekte aus vorzeitiger Tilgung und Auflösungen von abgegrenzten Schulden.

Die nach IFRS 7 „Finanzinstrumente: Angaben“, Paragraphen 31–42 („Art und Ausmaß der sich aus Finanzinstrumenten ergebenden Risiken“), erforderlichen Angaben sind der » Erläuterung 6 und dem Konzernlagebericht zu entnehmen » siehe Risiko- und Chancenbericht, S. 158.



### Finanzinstrumente zur Absicherung des Währungsrisikos

Der adidas Konzern nutzt Möglichkeiten zum natürlichen Ausgleich von Währungsrisiken sowie Devisentermingeschäfte, Währungsoptionen und Währungsswaps. Zum 31. Dezember 2010 hatte der Konzern ausstehende Währungsoptionskontrakte mit gezahlten Optionsprämien in einem Gesamtbetrag von 7 Mio. € (31. Dezember 2009: 6 Mio. €) abgeschlossen. Marktwertveränderungen des effektiven Teils von Währungssicherungsgeschäften werden ergebnisneutral in die Hedging-Rücklage bzw. bei den Anschaffungskosten gesicherter Vorräte gebucht und zum gleichen Zeitpunkt wie die zugrunde liegenden gesicherten Transaktionen ergebniswirksam erfasst. Ein Betrag von 16 Mio. € (2009: 4 Mio. €) für Währungsoptionen und ein Betrag von – 25 Mio. € (2009: –41 Mio. €) für Devisentermingeschäfte wurden ergebnisneutral in der Hedging-Rücklage erfasst. Währungsoptionsprämien wirkten sich 2010 in Höhe von 4 Mio. € ergebniswirksam aus (2009: 4 Mio. €).

Die gesamten Zeitwerte der Fremdwährungsoptionen, die nicht Teil einer Absicherung waren, in Höhe von 1 Mio. € (2009: 3 Mio. €) wurden in 2010 ergebniswirksam erfasst. Aufgrund einer Veränderung des Exposures wurden einige Währungssicherungsgeschäfte geschlossen, was zu einer ergebniswirksamen Umklassifizierung von –3 Mio. € aus der Hedging-Rücklage geführt hat.

Insgesamt wurde für die Produktbeschaffung in den Geschäftsjahren 2010 und 2009 ein Nettobetrag von 3,7 Mrd. US-Dollar bzw. 3,7 Mrd. US-Dollar gegen andere Währungen gekauft.

Die Nominalbeträge aller offenen Kurssicherungsgeschäfte, die sich im Wesentlichen auf Cashflow-Hedges beziehen, lassen sich wie folgt zusammenfassen:

#### Nominalbeträge aller ausstehenden Kurssicherungsgeschäfte

in Mio. €

|                        | 31. Dez. 2010 | 31. Dez. 2009 |
|------------------------|---------------|---------------|
| Devisentermingeschäfte | 3.100         | 3.118         |
| Währungsoptionen       | 617           | 532           |
| <b>Gesamt</b>          | <b>3.717</b>  | <b>3.650</b>  |

Der relativ hohe Anteil an Devisentermingeschäften beruht hauptsächlich auf dem Einsatz von Währungsswaps zu Zwecken des Liquiditätsmanagements und Sicherungsgeschäften.

Von den gesamten offenen Sicherungsgeschäften dienen nachfolgende Kontrakte der Absicherung gegen das größte Einzelwährungsrisiko der Produktbeschaffung, den US-Dollar:

#### Nominalbeträge der ausstehenden US-Dollar-Sicherungsgeschäfte

in Mio. €

|                        | 31. Dez. 2010 | 31. Dez. 2009 |
|------------------------|---------------|---------------|
| Devisentermingeschäfte | 2.248         | 2.252         |
| Währungsoptionen       | 576           | 532           |
| <b>Gesamt</b>          | <b>2.824</b>  | <b>2.784</b>  |

Der beizulegende Zeitwert sämtlicher ausstehender Kurssicherungsinstrumente stellt sich wie folgt dar:

#### Beizulegende Zeitwerte

in Mio. €

|                        | 31. Dez. 2010                    |                                  | 31. Dez. 2009                    |                                  |
|------------------------|----------------------------------|----------------------------------|----------------------------------|----------------------------------|
|                        | Positiver beizulegender Zeitwert | Negativer beizulegender Zeitwert | Positiver beizulegender Zeitwert | Negativer beizulegender Zeitwert |
| Devisentermingeschäfte | 40                               | – 86                             | 22                               | – 74                             |
| Währungsoptionen       | 38                               | – 15                             | 28                               | – 18                             |
| <b>Gesamt</b>          | <b>78</b>                        | <b>– 101</b>                     | <b>50</b>                        | <b>– 92</b>                      |

Vom saldierten beizulegenden Zeitwert für Devisentermingeschäfte entfallen – 35 Mio. € (2009: – 57 Mio. €) auf Hedging-Instrumente, die für die Bilanzierung nach Hedge Accounting gemäß IAS 39 „Finanzinstrumente: Ansatz und Bewertung“ geeignet sind und in der Hedging-Rücklage erfasst wurden. Der verbleibende saldierte beizulegende Zeitwert von – 11 Mio. € (2009: 5 Mio. €) entfällt mehrheitlich auf Währungsswaps zu Zwecken des Liquiditätsmanagements und auf Devisentermingeschäfte zur Absicherung von konzerninternen Dividendenforderungen und wurde ergebniswirksam in der Gewinn- und Verlustrechnung erfasst. Der gesamte beizulegende Zeitwert der offenen Währungsoptionen in Höhe von 23 Mio. € (2009: 10 Mio. €) entfällt auf Cashflow-Hedges.

Anpassungen des beizulegenden Zeitwerts aus offenen Cashflow-Hedges, die der Absicherung künftiger Verkaufstransaktionen dienen, werden zu dem Zeitpunkt, an dem das geplante Warengeschäft stattfindet, ergebniswirksam in der Gewinn- und Verlustrechnung berücksichtigt. Diese Geschäfte sind zum größten Teil für 2011 geplant. Zum Bilanzstichtag wurden 6 Mio. € (2009: 4 Mio. €) in den Vorräten erfasst, die in 2011 ergebniswirksam in der Gewinn- und Verlustrechnung berücksichtigt werden.

Für die Absicherung von Nettoinvestitionen in ausländischen Tochtergesellschaften wird eine negative Hedging-Rücklage in Höhe von 3 Mio. € (2009: – 3 Mio. €) ausgewiesen. Diese bleibt solange bestehen bis die ausländische Tochtergesellschaft veräußert bzw. das Darlehen getilgt wird.

Der adidas Konzern setzt anerkannte, finanzmathematische Berechnungsmodelle basierend, auf den herrschenden Marktbedingungen zum Bilanzstichtag, ein, um die beizulegenden Zeitwerte der nicht börsengehandelten derivativen Finanzinstrumente festzustellen.

Für die Berechnung der beizulegenden Zeitwerte der Derivate wurde die „Zero-Methode“ herangezogen. Die „Zero-Methode“ ist ein theoretisches Modell, das Forward-Kurse auf der Basis von Einlagen- und Swap-Zinssätzen kalkuliert. Eine alternative Methode ist die „Par-Methode“, die auf tatsächlich im Markt gehandelte Forward-Kurse abstellt. Ein Vergleich der Bewertungsergebnisse auf Basis der alternativen Methoden ergab keine materiellen Abweichungen.

### Finanzinstrumente zur Absicherung des Zinsrisikos

Die Fälligkeiten der offenen Zinssicherungsgeschäfte zum 31. Dezember 2010 und 2009 stellen sich wie folgt dar:

#### Fälligkeiten von Zinssicherungsgeschäften

in Mio. €

|                                | 31. Dez. 2010 | 31. Dez. 2009 |
|--------------------------------|---------------|---------------|
| Innerhalb eines Jahres         | 60            | 139           |
| Zwischen einem und drei Jahren | 105           | 150           |
| Zwischen drei und fünf Jahren  | 75            | —             |
| Über fünf Jahre                | —             | 81            |
| <b>Gesamt</b>                  | <b>240</b>    | <b>370</b>    |

Die oben dargestellte Zusammenfassung für das Geschäftsjahr 2010 enthält einen als Fair-Value-Hedge gemäß den Vorschriften des IAS 39 designierten Zinsswap mit einem Nominalvolumen in Höhe von 75 Mio. € (2009: 79 Mio. €). Dabei handelt es sich um einen US-Dollar-Zinsswap mit dem Sicherungsziel, für ein Schuldscheindarlehen in US-Dollar eine variabel verzinsliche Finanzierung zu erhalten. Der ergebniswirksam gebuchte, gesamte positive beizulegende Zeitwert in Höhe von 8 Mio. € (2009: 4 Mio. €) wurde kompensiert von einer gesamten negativen Veränderung des beizulegenden Zeitwerts der gesicherten Schuldscheindarlehen in Höhe von 8 Mio. € (2009: – 4 Mio. €).

Daneben enthält die oben dargestellte Zusammenfassung als Cashflow-Hedge gemäß den Vorschriften des IAS 39 designierte Zinsswaps mit einem Nominalvolumen in Höhe von 150 Mio. € (2009: 279 Mio. €). Der Einsatz der Zinsswaps dient der Absicherung zukünftiger Zahlungsströme aus variabel verzinslichen Schuldscheindarlehen durch Generierung einer synthetischen festverzinslichen Finanzierung. Auf die als Cashflow-Hedge designierten Zinsswaps entfallen positive beizulegende Zeitwerte in Höhe von 0 Mio. € (2009: 0 Mio. €) und negative beizulegende Zeitwerte in Höhe von 6 Mio. € (2009: – 10 Mio. €). Im Geschäftsjahr 2010 wurde für die als Cashflow-Hedges designierten Zinsswaps eine negative Wertänderung von 2 Mio. € (2009: – 7 Mio. €) ergebnisneutral in der Hedging-Rücklage im Eigenkapital erfasst. Im Jahr 2010 wurden – 4 Mio. € (2009: – 4 Mio. €) aus der Hedging-Rücklage in das Ergebnis gebucht. Die als Cashflow-Hedge designierten Zinsswaps im Nominalvolumen von 45 Mio. € bzw. 105 Mio. € sichern variable Zinszahlungen aus Schuldscheindarlehen ab, welche in 2011 bzw. 2012 fällig werden.

### Erläuterungen zur Konzerngewinn- und Verlustrechnung

#### Sonstige betriebliche Erträge

» 29

Die sonstigen betrieblichen Erträge setzen sich wie folgt zusammen:

#### Sonstige betriebliche Erträge

in Mio. €

|                                                                        | 1. Jan. bis<br>31. Dez. 2010 | 1. Jan. bis<br>31. Dez. 2009 |
|------------------------------------------------------------------------|------------------------------|------------------------------|
| Einzahlungen auf ausgebuchte Forderungen                               | 2                            | 2                            |
| Erträge aus der Auflösung von abgegrenzten Schulden und Rückstellungen | 19                           | 31                           |
| Erträge aus dem Abgang von Anlagevermögen                              | 16                           | 3                            |
| Übrige Erträge                                                         | 66                           | 64                           |
| Wertaufholungen für immaterielle und materielle Vermögenswerte         | 7                            | 0                            |
| <b>Sonstige betriebliche Erträge</b>                                   | <b>110</b>                   | <b>100</b>                   |

Die Erträge aus dem Abgang von Anlagevermögen enthalten im Geschäftsjahr 2010 insbesondere Erträge aus der Veräußerung eines Markenzeichens. Die übrigen Erträge resultierten im Geschäftsjahr 2010 unter anderem aus der positiven Beilegung eines Rechtsstreits.

#### Sonstige betriebliche Aufwendungen

» 30

Die betrieblichen Aufwendungen umfassen die Aufwendungen für Vertrieb, Marketing, Forschung und Entwicklung sowie Logistik und zentrale Verwaltung. Des Weiteren werden darin die Abschreibungen und Wertminderungsaufwendungen auf Sachanlagen und immaterielle Vermögenswerte ausgewiesen, mit Ausnahme der in den Umsatzkosten enthaltenen Abschreibungen.

Das Marketing Working Budget stellt den wesentlichen Teil der sonstigen betrieblichen Aufwendungen dar. Es enthält die Aufwendungen für Promotion und Kommunikation, wie z. B. Promotion-Verträge, Werbung, Veranstaltungen und sonstige Kommunikationsaktivitäten, jedoch nicht die Personal- und Verwaltungskosten im Marketingbereich, welche in den Marketinggemeinkosten ausgewiesen werden. Im Jahr 2010 entfielen etwa 26 % (2009: 23 %) der gesamten sonstigen betrieblichen Aufwendungen auf das Marketing Working Budget.

Die Aufwendungen der zentralen Verwaltung umfassen die Funktionen IT, Finanzen, Recht, Personalwesen, allgemeine Verwaltung und Geschäftsleitung.

Abschreibungen und Wertminderungsaufwendungen auf Sachanlagen und immaterielle Vermögenswerte (ohne Geschäfts- oder Firmenwerte) beliefen sich auf 263 Mio. € bzw. 299 Mio. € in den Geschäftsjahren 2010 und 2009. Davon wurden 3 Mio. € bzw. 5 Mio. € in den Umsatzkosten ausgewiesen, weil diese Beträge direkt in die Herstellungskosten der verkauften Waren eingehen.

## Sonstige betriebliche Aufwendungen

in Mio. €

|                                               | 1. Jan. bis<br>31. Dez. 2010 | 1. Jan. bis<br>31. Dez. 2009 |
|-----------------------------------------------|------------------------------|------------------------------|
| Marketing Working Budget                      | 1.288                        | 1.028                        |
| Sales Working Budget                          | 308                          | 241                          |
| Marketinggemeinkosten <sup>1)</sup>           | 380                          | 348                          |
| Vertrieb <sup>1)</sup>                        | 1.496                        | 1.296                        |
| Logistik <sup>1)</sup>                        | 617                          | 582                          |
| Forschung und Entwicklung <sup>1)</sup>       | 102                          | 86                           |
| Zentrale Verwaltung <sup>1)</sup>             | 855                          | 809                          |
| <b>Sonstige betriebliche Aufwendungen</b>     | <b>5.046</b>                 | <b>4.390</b>                 |
| davon:                                        |                              |                              |
| Abschreibungen und Wertminderungsaufwendungen | 260                          | 294                          |

1) Enthält hauptsächlich Personal- und Verwaltungsaufwand.

## Kostenarten

» 31

In der Gewinn- und Verlustrechnung werden die Aufwendungen nach Funktionen unter Anwendung des Umsatzkostenverfahrens dargestellt. Zusätzliche Informationen über die Herkunft dieser Aufwendungen nach Kostenarten werden im Folgenden gegeben.

### Materialaufwand

Der Materialaufwand entspricht dem Betrag der Vorräte, welcher als Aufwand in der Berichtsperiode erfasst worden ist. Für die Geschäftsjahre 2010 und 2009 belief sich dieser auf 6,165 Mrd. € bzw. 5,546 Mrd. €.

### Personalaufwand

Der Personalaufwand setzt sich wie folgt zusammen:

#### Personalaufwand

in Mio. €

|                        | 1. Jan. bis<br>31. Dez. 2010 | 1. Jan. bis<br>31. Dez. 2009 |
|------------------------|------------------------------|------------------------------|
| Löhne und Gehälter     | 1.338                        | 1.185                        |
| Sozialabgaben          | 132                          | 114                          |
| Pensionsaufwand        | 51                           | 53                           |
| <b>Personalaufwand</b> | <b>1.521</b>                 | <b>1.352</b>                 |

Der wesentliche Teil des Personalaufwands ist in den sonstigen betrieblichen Aufwendungen enthalten. Personalaufwand, der den Herstellungskosten direkt zugeordnet werden kann, ist in den Umsatzkosten enthalten.

## Finanzerträge/Finanzaufwendungen

» 32

Das Finanzergebnis setzt sich wie folgt zusammen:

### Finanzerträge

in Mio. €

|                                                                                                   | 1. Jan. bis<br>31. Dez. 2010 | 1. Jan. bis<br>31. Dez. 2009 |
|---------------------------------------------------------------------------------------------------|------------------------------|------------------------------|
| Zinserträge aus Finanzinstrumenten, die zu fortgeführten Anschaffungskosten bewertet werden       | 16                           | 11                           |
| Zinserträge aus Finanzinstrumenten, die erfolgswirksam zum beizulegenden Zeitwert bewertet werden | 7                            | 5                            |
| Zinserträge aus nicht-finanziellen Vermögenswerten                                                | 0                            | —                            |
| Wechselkursgewinne, netto                                                                         | 2                            | —                            |
| Sonstige                                                                                          | 0                            | 3                            |
| <b>Finanzerträge</b>                                                                              | <b>25</b>                    | <b>19</b>                    |

### Finanzaufwendungen

in Mio. €

|                                                                                                        | 1. Jan. bis<br>31. Dez. 2010 | 1. Jan. bis<br>31. Dez. 2009 |
|--------------------------------------------------------------------------------------------------------|------------------------------|------------------------------|
| Zinsaufwendungen aus Finanzinstrumenten, die zu fortgeführten Anschaffungskosten bewertet werden       | 112                          | 138                          |
| Zinsaufwendungen aus Finanzinstrumenten, die erfolgswirksam zum beizulegenden Zeitwert bewertet werden | 0                            | —                            |
| Zinsaufwendungen aus sonstigen Rückstellungen und nicht-finanziellen Verbindlichkeiten                 | 0                            | —                            |
| Wechselkursverluste, netto                                                                             | —                            | 25                           |
| Sonstige                                                                                               | 1                            | 6                            |
| <b>Finanzaufwendungen</b>                                                                              | <b>113</b>                   | <b>169</b>                   |

Zinserträge aus Finanzinstrumenten, die zu fortgeführten Anschaffungskosten bewertet werden, setzen sich hauptsächlich aus Zinserträgen aus Bankguthaben und Darlehen zusammen.

Zinserträge/Zinsaufwendungen aus Finanzinstrumenten, die erfolgswirksam zum beizulegenden Zeitwert bewertet werden, beinhalten hauptsächlich Zinszahlungen aus Investmentfonds sowie Nettozinszahlungen aus Zinsderivaten, die nicht Teil einer Sicherungsbeziehung sind. Unrealisierte Gewinne/Verluste aus der Bewertung zum beizulegenden Zeitwert von solchen finanziellen Vermögenswerten werden in den sonstigen Finanzerträgen oder -aufwendungen ausgewiesen.

Zinsaufwendungen aus Finanzinstrumenten, die zu fortgeführten Anschaffungskosten bewertet werden, beinhalten hauptsächlich Zinsen auf Finanzverbindlichkeiten und die Effekte aus der Anwendung der „Effektivzinsmethode“.

Zinsaufwendungen aus sonstigen Rückstellungen und nicht-finanziellen Verbindlichkeiten beinhalten vor allem die Effekte aus der Bewertung zum Barwert bei sonstigen Rückstellungen und Zinsen auf nicht-finanzielle Verbindlichkeiten wie zum Beispiel Steuerschulden.

Die sonstigen Finanzaufwendungen enthalten Wertberichtigungen auf sonstige Finanzanlagen in Höhe von 0 Mio. € für das Geschäftsjahr 2010 (2009: 5 Mio. €).

In den sonstigen Finanzaufwendungen sind auch Ergebnisanteile der nicht beherrschenden Anteile, die nach IAS 32 „Finanzinstrumente: Darstellung“ kein Eigenkapital darstellen, enthalten » siehe auch Erläuterung 26.

Für Informationen bezüglich zur Veräußerung verfügbarer Wertpapiere, Finanzverbindlichkeiten und Finanzinstrumenten » siehe auch Erläuterungen 5, 14, 17 und 28.

## Ertragsteuern

» 33

Die adidas AG und ihre deutschen Tochtergesellschaften unterliegen der inländischen Körperschaftsteuer und der Gewerbesteuer. Der für das Geschäftsjahr 2010 und 2009 anzuwendende Körperschaftsteuersatz beträgt 15 %. Zusätzlich wird ein Solidaritätszuschlag von 5,5 % erhoben. Die Gewerbeertragsteuer beträgt ca. 11,6 % des steuerpflichtigen Einkommens.

Bei den ausländischen Tochtergesellschaften werden für die Berechnung der latenten Steuern die am Bilanzstichtag gültigen oder bereits rechtskräftig beschlossenen Steuersätze verwendet.

### Latente Steueransprüche/-schulden

Die latenten Steueransprüche und -schulden werden saldiert, wenn sie sich auf die gleiche Steuerbehörde beziehen. Dementsprechend werden sie in der Konzernbilanz wie folgt ausgewiesen:

#### Latente Steueransprüche/-schulden

in Mio. €

|                                       | 31. Dez. 2010 | 31. Dez. 2009 |
|---------------------------------------|---------------|---------------|
| Latente Steueransprüche               | 508           | 412           |
| Latente Steuerschulden                | -451          | -433          |
| <b>Latente Steueransprüche, netto</b> | <b>57</b>     | <b>-21</b>    |

Die Entwicklung der latenten Steueransprüche stellt sich wie folgt dar:

#### Entwicklung der latenten Steueransprüche

in Mio. €

|                                                                                                                                                                                | 2010       | 2009        |
|--------------------------------------------------------------------------------------------------------------------------------------------------------------------------------|------------|-------------|
| <b>Latente Steueransprüche, netto zum 1. Januar</b>                                                                                                                            | <b>-21</b> | <b>-119</b> |
| Latente Steuererträge                                                                                                                                                          | 76         | 43          |
| Veränderung der latenten Steuern auf als zur Veräußerung gehaltene Vermögenswerte » siehe Erläuterung 10                                                                       | —          | -3          |
| Veränderung der latenten Steuern, die sich auf die Veränderung des beizulegenden Zeitwerts von Sicherungsinstrumenten beziehen, gebucht im Eigenkapital » siehe Erläuterung 28 | -12        | 46          |
| Währungseffekte                                                                                                                                                                | 11         | 6           |
| Veränderung der latenten Steuern aufgrund von versicherungsmathematischen Gewinnen und Verlusten, gebucht im Eigenkapital » siehe Erläuterung 23                               | 3          | 6           |
| <b>Latente Steueransprüche, netto zum 31. Dezember</b>                                                                                                                         | <b>57</b>  | <b>-21</b>  |

Die latenten Bruttosteueransprüche und -steuerschulden des Konzerns nach Wertberichtigung und vor entsprechender Verrechnung beziehen sich auf die nachfolgend dargestellten Positionen:

#### Latente Steuern

in Mio. €

|                                         | 31. Dez. 2010 | 31. Dez. 2009 |
|-----------------------------------------|---------------|---------------|
| Langfristige Vermögenswerte             | 127           | 129           |
| Kurzfristige Vermögenswerte             | 111           | 87            |
| Abgegrenzte Schulden und Rückstellungen | 203           | 132           |
| Kumulierte steuerliche Verlustvorträge  | 101           | 78            |
| <b>Latente Steueransprüche</b>          | <b>542</b>    | <b>426</b>    |
| Langfristige Vermögenswerte             | 443           | 420           |
| Kurzfristige Vermögenswerte             | 19            | 25            |
| Abgegrenzte Schulden und Rückstellungen | 23            | 2             |
| <b>Latente Steuerschulden</b>           | <b>485</b>    | <b>447</b>    |
| <b>Latente Steueransprüche, netto</b>   | <b>57</b>     | <b>-21</b>    |

Latente Steueransprüche werden nur in dem Umfang angesetzt, in dem die Realisierung des entsprechenden Steuervorteils wahrscheinlich ist. Für die Beurteilung der Wahrscheinlichkeit werden neben der Ertragslage der Vergangenheit und den jeweiligen Geschäftserwartungen für die absehbare Zukunft auch geeignete steuerliche Strukturmaßnahmen berücksichtigt.

Die latenten Steueransprüche, deren Realisierung nicht wahrscheinlich ist, sind im Geschäftsjahr 2010 währungsbereinigt von 297 Mio. € auf 325 Mio. € angestiegen. Sie entfallen zu einem großen Teil auf steuerliche Verlustvorträge und ungenutzte Steuergutschriften für ausländische Steuern der Steuergruppe USA. Die verbleibenden nicht aktivierten latenten Steueransprüche betreffen Tochtergesellschaften in Ländern, in denen nicht mit hinreichender Wahrscheinlichkeit angenommen werden kann, dass die entsprechenden Steuervorteile realisiert werden.



Der Konzern berücksichtigt keine latenten Steuerschulden für einbehaltene Gewinne ausländischer Tochtergesellschaften, falls diese Gewinne als voraussichtlich permanent investiert betrachtet werden. Wenn diese Gewinne, deren wertmäßige Ermittlung nicht praktikabel ist, als Dividenden ausgeschüttet werden würden oder der Konzern seine Beteiligung an dem jeweiligen Tochterunternehmen veräußern würde, könnte eine zusätzliche Steuerschuld entstehen.

### Steueraufwand

Der Steueraufwand stellt sich wie folgt dar:

#### Ertragsteueraufwand

in Mio. €

|                            | 1. Jan. bis<br>31. Dez. 2010 | 1. Jan. bis<br>31. Dez. 2009 |
|----------------------------|------------------------------|------------------------------|
| Laufender Steueraufwand    | 314                          | 156                          |
| Latente Steuererträge      | -76                          | -43                          |
| <b>Ertragsteueraufwand</b> | <b>238</b>                   | <b>113</b>                   |

Der effektive Steuersatz des Konzerns weicht von einem erwarteten Steuersatz in Höhe von 30 % für das Geschäftsjahr 2010 wie folgt ab:

#### Überleitung des Steuersatzes

in Mio. €

|                                                                                                             | 1. Jan. bis 31. Dez. 2010 |             | 1. Jan. bis 31. Dez. 2009 |             |
|-------------------------------------------------------------------------------------------------------------|---------------------------|-------------|---------------------------|-------------|
|                                                                                                             | in Mio. €                 | in %        | in Mio. €                 | in %        |
| Erwarteter Ertragsteueraufwand                                                                              | 242                       | 30,0        | 108                       | 30,0        |
| Steuersatzunterschiede                                                                                      | -89                       | -11,0       | -94                       | -26,1       |
| Nicht abzugsfähige Aufwendungen                                                                             | 43                        | 5,3         | -36                       | -10,1       |
| Verluste, für die keine Steueransprüche bilanziert werden konnten, und Veränderungen der Wertberichtigungen | 8                         | 1,0         | 119                       | 33,2        |
| Änderung von Steuersätzen                                                                                   | -11                       | -1,4        | 4                         | 1,1         |
| Sonstige, netto                                                                                             | 1                         | 0,1         | 1                         | 0,3         |
|                                                                                                             | <b>194</b>                | <b>24,0</b> | <b>102</b>                | <b>28,3</b> |
| Quellensteueraufwand                                                                                        | 44                        | 5,5         | 11                        | 3,1         |
| <b>Ertragsteueraufwand</b>                                                                                  | <b>238</b>                | <b>29,5</b> | <b>113</b>                | <b>31,5</b> |

Die Zeile „Änderung von Steuersätzen“ reflektiert im Geschäftsjahr 2010 im Wesentlichen die Steuersatzreduzierung in Großbritannien in 2011.

Die Zeile „Nicht abzugsfähige Aufwendungen“ enthält im Geschäftsjahr 2010 einen Steuerertrag in Höhe von insgesamt 14 Mio. € (2009: 57 Mio. €). Hierbei handelt es sich um für den Konzern positive Verhandlungsergebnisse aus Steuerverständigungen für Vorjahre mit ausländischen Finanzbehörden.

Die Zeile „Verluste, für die keine Steueransprüche bilanziert werden konnten, und Veränderungen der Wertberichtigungen“ beinhaltet im Geschäftsjahr 2009 im Wesentlichen Veränderungen der Wertberichtigungen der Steuergruppe USA.

### Ergebnis je Aktie

» 34

Das unverwässerte Ergebnis je Aktie wird durch Division des auf die Aktionäre entfallenden Gewinns durch die gewichtete durchschnittliche Anzahl der im Umlauf befindlichen Aktien im entsprechenden Geschäftsjahr ermittelt.

Aufgrund des Aktienoptionsplans (MSOP) der adidas AG, der 1999 eingeführt wurde, sind in 2009 verwässernde potenzielle Aktien entstanden. Da die vorgegebenen Erfolgsziele für die Ausübung der Bezugsrechte in sämtlichen Tranchen des Aktienoptionsplans in 2009 erfüllt wurden, wirkten sich verwässernde potenzielle Aktien auf die Ermittlung des verwässerten Ergebnisses je Aktie für das Geschäftsjahr 2009 aus » siehe Erläuterung 38.

Es war ebenso erforderlich verwässernde potenzielle Aktien aufgrund der Ausgabe der Wandelanleihe im Oktober 2003 bei der Berechnung des verwässerten Ergebnisses je Aktie des Geschäftsjahres 2009 bis zur Wandlung zu berücksichtigen, da am Bilanzstichtag 2009 die vorgegebenen Bedingungen für die Wandlung erfüllt waren » siehe Erläuterung 17. Während des Geschäftsjahres 2009 wurde angenommen, dass die Wandelanleihe in Aktien gewandelt wird. Aufgrund dessen wurde der Jahresüberschuss zur Eliminierung des Zinsaufwands abzüglich des Steuereffekts angepasst.

Infolge der vollständigen Wandlung der Wandelanleihe des Konzerns im vierten Quartal 2009 und des nicht mehr Vorhandenseins ausstehender Aktienoptionen aus dem MSOP, bestanden für den Konzern keine verwässernden potenziellen Aktien im Geschäftsjahr 2010.

#### Ergebnis je Aktie

|                                                                           | 1. Jan. bis<br>31. Dez. 2010 | 1. Jan. bis<br>31. Dez. 2009 |
|---------------------------------------------------------------------------|------------------------------|------------------------------|
| Auf Anteilseigner entfallender Gewinn (in Mio. €)                         | 567                          | 245                          |
| Durchschnittlich im Umlauf befindliche Aktien                             | 209.216.186                  | 196.220.166                  |
| <b>Unverwässertes Ergebnis je Aktie (in €)</b>                            | <b>2,71</b>                  | <b>1,25</b>                  |
| Auf Anteilseigner entfallender Gewinn (in Mio. €)                         | 567                          | 245                          |
| Zinsaufwand auf Wandelanleihe, abzüglich Steuern (in Mio. €)              | —                            | 10                           |
| <b>Gewinn zur Berechnung des verwässerten Ergebnisses je Aktie (in €)</b> | <b>567</b>                   | <b>255</b>                   |
| Durchschnittlich im Umlauf befindliche Aktien                             | 209.216.186                  | 196.220.166                  |
| Gewichtete Aktienoptionen                                                 | —                            | 34.369                       |
| Gewichtete angenommene Wandlung der Wandelanleihe                         | —                            | 12.983.564                   |
| <b>Gewichtete Anzahl der Aktien für verwässertes Ergebnis je Aktie</b>    | <b>209.216.186</b>           | <b>209.238.099</b>           |
| <b>Verwässertes Ergebnis je Aktie (in €)</b>                              | <b>2,71</b>                  | <b>1,22</b>                  |

Der Konzern ist primär in einem Wirtschaftszweig tätig, und zwar in der Entwicklung sowie dem Vertrieb und der Vermarktung von Sport- und Freizeitartikeln.

Die Berichterstattungsstruktur des Konzerns für Managementzwecke hat sich durch die Reorganisation des Konzerns in 2009 geändert. Hierbei wurde die Konzernorganisationsstruktur auf die beiden Vertriebskanäle Großhandel und Einzelhandel ausgerichtet und ein gemeinsames Geschäftsmodell für die Marken adidas und Reebok eingeführt. Gründe hierfür sind die gewünschte Erzielung von Synergien in den Vertriebskanälen durch „Best Practice“-Methoden und eine verbesserte Abstimmung zwischen den Marken, um das Markenmanagement für ein langfristiges und nachhaltiges Wachstum zu stärken. Vor diesem Hintergrund wurden gemäß der Definition des IFRS 8 „Geschäftssegmente“ sechs Geschäftssegmente identifiziert: Großhandel, Einzelhandel, TaylorMade-adidas Golf, Rockport, Reebok-CCM Hockey und Andere Zentral Geführte Marken. Entsprechend den Kriterien des IFRS 8 für berichtspflichtige Segmente werden die Geschäftssegmente Großhandel und Einzelhandel separat gemeldet, während die restlichen aus Wesentlichkeitsgründen unter Andere Geschäftssegmente zusammengefasst werden. Die berichtspflichtigen Segmente Großhandel und Einzelhandel entsprechen der Darstellung im internen Berichtswesen.

Die Marken adidas und Reebok werden in den Segmenten Großhandel, Einzelhandel und Andere Zentral Geführte Marken berichtet.

Das Geschäftssegment TaylorMade-adidas Golf beinhaltet die Marken TaylorMade, adidas Golf und Ashworth.

Rockport und Reebok-CCM Hockey waren früher im Reebok Segment enthalten.

Bestimmte zentralisierte Funktionen des Konzerns erfüllen nicht die Definition von IFRS 8 zu berichtspflichtigen Segmenten. Dies gilt vor allem für die Funktionen des zentralen Treasury und der weltweiten Beschaffung sowie für andere Abteilungen der Konzernzentrale. Vermögenswerte, Schulden, Erträge und Aufwendungen, die auf diese Zentralfunktionen entfallen, werden zusammen mit anderen nicht zuzuordnenden Positionen und den Eliminierungen zwischen den Segmenten in den Überleitungsrechnungen ausgewiesen.

Der Hauptentscheidungsträger des adidas Konzerns ist definiert als der gemeinsame Vorstand der adidas AG.

Informationen zu den nach der internen Berichterstattung des Managements gegliederten Segmenten werden im Folgenden dargestellt.

Zwischen den berichtspflichtigen Geschäftssegmenten fallen keine Umsätze an. Transaktionen zwischen den einzelnen Segmenten werden nach dem Prinzip des Fremdvergleichs durchgeführt. Die in den Segmentinformationen angewendeten Bilanzierungsregeln stimmen mit denen des adidas Konzerns, wie in » Erläuterung 2 beschrieben, überein.

Das Ergebnis der berichtspflichtigen Segmente wird in der Position „Segmentbetriebs-ergebnis“ berichtet. Dies ist definiert als Bruttoergebnis abzüglich dem Segment oder der Gruppe von Segmenten direkt zurechenbaren Kosten (im Wesentlichen Vertriebs- und Logistikkosten), vor Marketing Working Budget Aufwendungen und nicht direkt zuordenbaren Betriebsgemeinkosten.

Die Segmentvermögenswerte enthalten Forderungen und Vorräte. Nur diese Posten werden regelmäßig dem Hauptentscheidungsträger gemeldet. Abschreibungen, Wertminderungsaufwendungen und Wertaufholungen sowie Investitionen in langfristige Vermögenswerte sind Teil der Segmentberichterstattung, obwohl Sachanlagen und immaterielle Vermögenswerte nicht Bestandteil der Segmentvermögenswerte sind. Einem Segment oder einer Gruppe von Segmenten nicht direkt zurechenbare Abschreibungen, Wertminderungsaufwendungen und Wertaufholungen werden in den Überleitungen unter Zentralbereiche/Konsolidierung ausgewiesen.

Segmentschulden enthalten Verbindlichkeiten aus Lieferungen und Leistungen aus dem operativen Geschäft. Es werden keine weiteren Verbindlichkeitspositionen regelmäßig dem Hauptentscheidungsträger zur Verfügung gestellt.

Zinserträge und Zinsaufwendungen sowie Ertragsteuern sind nicht den berichtspflichtigen Segmenten zugeordnet und werden auch nicht separat an den Vorstand der adidas AG berichtet.

Bedingt durch geringfügige Veränderungen in der Konzernstruktur im ersten Quartal 2010, wurden einige Funktionen im Vergleich zum Konzernabschluss 2009 neu zugeordnet. Dies wirkt sich in geringem Maß auf die Struktur der Konzernsegmente aus. Um die vollständige Vergleichbarkeit der Geschäftsergebnisse des Konzerns im Jahr 2010 zu gewährleisten, hat sich der Konzern entschieden, die Segmentberichterstattung für das Jahr 2009 nachträglich anzupassen. Diese Anpassungen wirken sich nicht auf die Gesamtergebnisse des Konzerns aus, lediglich auf die Ergebnisse der einzelnen Segmente. So beläuft sich der Umsatz im Großhandelssegment für das Geschäftsjahr 2009 auf 7,164 Mrd. € (anstatt der berichteten 7,174 Mrd. €). Der Einzelhandelsumsatz für das Geschäftsjahr 2009 beläuft sich weiterhin auf 1,906 Mrd. €. Der Umsatz in den Anderen Geschäftssegmenten beträgt 1,293 Mrd. € (anstatt der berichteten 1,283 Mrd. €). Das Betriebsergebnis für das Geschäftsjahr 2009 beträgt im Großhandelssegment nun 2,342 Mrd. € (anstatt der berichteten 2,346 Mrd. €) bzw. im Einzelhandelssegment 259 Mio. € (anstatt der berichteten 267 Mio. €). Das Betriebsergebnis in den Anderen Geschäftssegmenten beläuft sich auf 283 Mio. € (anstatt der berichteten 281 Mio. €). Die Segmentvermögenswerte für das Geschäftsjahr 2009 belaufen sich im Großhandelssegment auf 1,938 Mrd. € (anstatt der berichteten 1,943 Mrd. €) und für Andere Geschäftssegmente auf 420 Mio. € (anstatt der berichteten 415 Mio. €). Die Schulden in den Anderen Geschäftssegmenten betragen im Geschäftsjahr 2009 nun 78 Mio. € (anstatt der berichteten 74 Mio. €). Die Investitionen in den Anderen Geschäftssegmenten belaufen sich auf 23 Mio. € (anstatt der berichteten 14 Mio. €). Im Konzernabschluss für das Geschäftsjahr 2010 sind diese Anpassungen in den Vergleichszahlen für das Jahr 2009 bereits berücksichtigt.

## Segmentinformation

in Mio. €

|                                                | Großhandel |       | Einzelhandel |       | Andere Geschäftssegmente |       | Gesamt Segmente |        |
|------------------------------------------------|------------|-------|--------------|-------|--------------------------|-------|-----------------|--------|
|                                                | 2010       | 2009  | 2010         | 2009  | 2010                     | 2009  | 2010            | 2009   |
| Umsatzerlöse (mit Dritten)                     | 8.181      | 7.164 | 2.389        | 1.906 | 1.420                    | 1.293 | 11.990          | 10.363 |
| Segmentbetriebsergebnis                        | 2.572      | 2.342 | 452          | 259   | 369                      | 283   | 3.393           | 2.884  |
| Segmentvermögenswerte                          | 2.690      | 1.938 | 541          | 429   | 514                      | 420   | 3.745           | 2.787  |
| Segmentsschulden                               | 537        | 470   | 76           | 37    | 110                      | 78    | 723             | 585    |
| Investitionen                                  | 33         | 24    | 61           | 71    | 26                       | 23    | 120             | 118    |
| Abschreibungen                                 | 22         | 24    | 88           | 88    | 8                        | 6     | 118             | 118    |
| Wertminderungsaufwendungen und Wertaufholungen | - 1        | 0     | 4            | 14    | 0                        | 0     | 3               | 14     |

## Überleitungsrechnungen

Die folgenden Tabellen enthalten Überleitungen der Segmentinformation zu den aggregierten Konzernabschlussgrößen unter Berücksichtigung von Posten, die nicht einem Segment oder einer Gruppe von Segmenten direkt zugerechnet werden können.

### Umsatzerlöse (mit Dritten)

in Mio. €

|                                | 1. Jan. bis<br>31. Dez. 2010 | 1. Jan. bis<br>31. Dez. 2009 |
|--------------------------------|------------------------------|------------------------------|
| Berichtspflichtige Segmente    | 10.570                       | 9.070                        |
| Andere Geschäftssegmente       | 1.420                        | 1.293                        |
| Zentralbereiche/Konsolidierung | 0                            | 18                           |
| <b>Gesamt</b>                  | <b>11.990</b>                | <b>10.381</b>                |

### Betriebsergebnis

in Mio. €

|                                                   | 1. Jan. bis<br>31. Dez. 2010 | 1. Jan. bis<br>31. Dez. 2009 |
|---------------------------------------------------|------------------------------|------------------------------|
| Betriebsergebnis der berichtspflichtigen Segmente | 3.024                        | 2.601                        |
| Betriebsergebnis in Anderen Geschäftssegmenten    | 369                          | 283                          |
| Zentralbereiche/Konsolidierung                    | 212                          | 51                           |
| Marketing Working Budget                          | 1.288                        | 1.028                        |
| Sonstige betriebliche Aufwendungen                | 1.523                        | 1.485                        |
| Lizenz- und Provisionserträge                     | 100                          | 86                           |
| <b>Betriebsergebnis</b>                           | <b>894</b>                   | <b>508</b>                   |
| Finanzerträge                                     | 25                           | 19                           |
| Finanzaufwendungen                                | 113                          | 169                          |
| <b>Gewinn vor Steuern</b>                         | <b>806</b>                   | <b>358</b>                   |

Das Betriebsergebnis von zentralisierten Funktionen, die kein Segment darstellen, wird unter Zentralbereiche/Konsolidierung ausgewiesen.

## Investitionen

in Mio. €

|                                | 1. Jan. bis<br>31. Dez. 2010 | 1. Jan. bis<br>31. Dez. 2009 |
|--------------------------------|------------------------------|------------------------------|
| Berichtspflichtige Segmente    | 94                           | 95                           |
| Andere Geschäftssegmente       | 26                           | 23                           |
| Zentralbereiche/Konsolidierung | 149                          | 122                          |
| <b>Gesamt</b>                  | <b>269</b>                   | <b>240</b>                   |

## Abschreibungen

in Mio. €

|                                | 1. Jan. bis<br>31. Dez. 2010 | 1. Jan. bis<br>31. Dez. 2009 |
|--------------------------------|------------------------------|------------------------------|
| Berichtspflichtige Segmente    | 110                          | 112                          |
| Andere Geschäftssegmente       | 8                            | 6                            |
| Zentralbereiche/Konsolidierung | 128                          | 141                          |
| <b>Gesamt</b>                  | <b>246</b>                   | <b>259</b>                   |

## Wertminderungsaufwendungen und Wertaufholungen

in Mio. €

|                                | 1. Jan. bis<br>31. Dez. 2010 | 1. Jan. bis<br>31. Dez. 2009 |
|--------------------------------|------------------------------|------------------------------|
| Berichtspflichtige Segmente    | 3                            | 14                           |
| Andere Geschäftssegmente       | 0                            | 0                            |
| Zentralbereiche/Konsolidierung | 11                           | 21                           |
| <b>Gesamt</b>                  | <b>14</b>                    | <b>35</b>                    |

## Vermögenswerte

in Mio. €

|                                                                                                 | 31. Dez. 2010 | 31. Dez. 2009 |
|-------------------------------------------------------------------------------------------------|---------------|---------------|
| Vermögenswerte der berichtspflichtigen Segmente                                                 | 3.231         | 2.367         |
| Vermögenswerte der Anderen Geschäftssegmente                                                    | 514           | 420           |
| Forderungen aus Lieferungen und Leistungen sowie Vorräte,<br>die keinem Segment zugeordnet sind | 41            | 113           |
| Kurzfristige finanzielle Vermögenswerte                                                         | 1.586         | 1.010         |
| Sonstige kurzfristige Aktiva                                                                    | 508           | 575           |
| Langfristige Aktiva                                                                             | 4.738         | 4.390         |
| <b>Aktiva</b>                                                                                   | <b>10.618</b> | <b>8.875</b>  |

## Schulden

in Mio. €

|                                                                                         | 31. Dez. 2010 | 31. Dez. 2009 |
|-----------------------------------------------------------------------------------------|---------------|---------------|
| Schulden der berichtspflichtigen Segmente                                               | 613           | 507           |
| Schulden der Anderen Geschäftssegmente                                                  | 110           | 78            |
| Verbindlichkeiten aus Lieferungen und Leistungen,<br>die keinem Segment zugeordnet sind | 971           | 581           |
| Kurzfristige finanzielle Verbindlichkeiten                                              | 396           | 299           |
| Sonstige kurzfristige Passiva                                                           | 1.818         | 1.371         |
| Langfristige Passiva                                                                    | 2.087         | 2.263         |
| <b>Gesamte Schulden</b>                                                                 | <b>5.995</b>  | <b>5.099</b>  |

## Informationen über Produkte

### Umsatzerlöse (mit Dritten)

in Mio. €

|                 | 1. Jan. bis<br>31. Dez. 2010 | 1. Jan. bis<br>31. Dez. 2009 |
|-----------------|------------------------------|------------------------------|
| Sportschuhe     | 5.389                        | 4.642                        |
| Sportbekleidung | 5.380                        | 4.663                        |
| Sportzubehör    | 1.221                        | 1.076                        |
| <b>Gesamt</b>   | <b>11.990</b>                | <b>10.381</b>                |

## Geografische Informationen

Die Umsatzerlöse mit Dritten werden in dem geografischen Markt ausgewiesen, in dem die Umsatzerlöse realisiert werden. Langfristige Vermögenswerte werden unabhängig von der Segmentstruktur dem geografischen Markt nach dem Sitz der Gesellschaft zugeordnet. Diese bestehen aus Sachanlagen, Geschäfts- oder Firmenwerten, Markenrechten sowie sonstigen immateriellen Vermögenswerten und sonstigen langfristigen Vermögenswerten.

### Geografische Informationen

in Mio. €

|                                | Umsatzerlöse (mit Dritten)   |                              | Langfristige Vermögenswerte  |                              |
|--------------------------------|------------------------------|------------------------------|------------------------------|------------------------------|
|                                | 1. Jan. bis<br>31. Dez. 2010 | 1. Jan. bis<br>31. Dez. 2009 | 1. Jan. bis<br>31. Dez. 2010 | 1. Jan. bis<br>31. Dez. 2009 |
| Westeuropa                     | 3.543                        | 3.261                        | 1.515                        | 1.505                        |
| Europäische Schwellenländer    | 1.385                        | 1.122                        | 592                          | 437                          |
| Nordamerika                    | 2.805                        | 2.362                        | 683                          | 666                          |
| China                          | 1.000                        | 967                          | 520                          | 474                          |
| Andere Asiatische Märkte       | 1.972                        | 1.647                        | 557                          | 521                          |
| Lateinamerika                  | 1.285                        | 1.006                        | 216                          | 225                          |
| Zentralbereiche/Konsolidierung | 0                            | 16                           | 0                            | 0                            |
| <b>Gesamt</b>                  | <b>11.990</b>                | <b>10.381</b>                | <b>4.083</b>                 | <b>3.828</b>                 |

Westeuropa enthält für Deutschland Umsatzerlöse mit Dritten in Höhe von 655 Mio. € bzw. 587 Mio. € sowie langfristige Vermögenswerte in Höhe von 363 Mio. € bzw. 281 Mio. € für die Geschäftsjahre 2010 und 2009. Auf die USA entfallen in Nordamerika Umsatzerlöse mit Dritten in Höhe von 2,427 Mrd. € bzw. 2,068 Mrd. € sowie langfristige Vermögenswerte in Höhe von 546 Mio. € bzw. 547 Mio. € für die Geschäftsjahre 2010 und 2009.



## Zusätzliche Informationen zur Kapitalflussrechnung

» 36

Der niedrigere Mittelzufluss aus der betrieblichen Tätigkeit im Vergleich zum Vorjahr resultierte vor allem aus einem Anstieg der Forderungen und Vorräte.

Der Nettomittelabfluss aus der Investitionstätigkeit in 2010 bezog sich vor allem auf Ausgaben für Sachanlagen wie zum Beispiel Investitionen in die Einrichtung und Ausstattung von Geschäften in unserem Einzelhandelssegment, neue Bürogebäude und in IT-Systeme sowie auf den Kauf von kurzfristigen Finanzanlagen.

Der Nettomittelabfluss aus der Finanzierungstätigkeit stand in erster Linie im Zusammenhang mit der Rückzahlung von kurzfristigen Finanzverbindlichkeiten in Höhe von 198 Mio. € und Dividendenzahlungen in Höhe von 73 Mio. €.

Die Zeile „Erwerb von Tochtergesellschaften und sonstigen Geschäftseinheiten abzüglich erworbener flüssiger Mittel“ der Konzernkapitalflussrechnung beinhaltet im Jahr 2009 den Erwerb von Life Sport Ltd. und Bones in Motion, Inc. » siehe Erläuterung 3.

Kurzfristige revolvingende Finanzierungstransaktionen werden innerhalb der Finanzierungstätigkeit saldiert dargestellt.

## Haftungsverhältnisse und sonstige finanzielle Verpflichtungen

» 37

### Sonstige finanzielle Verpflichtungen

Der Konzern hat sonstige finanzielle Verpflichtungen im Zusammenhang mit Promotion- und Werbeverträgen. Die Restlaufzeiten dieser Verträge stellen sich wie folgt dar:

#### Finanzielle Verpflichtungen aus Promotion- und Werbeverträgen

in Mio. €

|                                | 31. Dez. 2010 | 31. Dez. 2009 |
|--------------------------------|---------------|---------------|
| Innerhalb eines Jahres         | 613           | 554           |
| Zwischen einem und fünf Jahren | 1.474         | 1.403         |
| Über fünf Jahre                | 695           | 594           |
| <b>Gesamt</b>                  | <b>2.782</b>  | <b>2.551</b>  |

Verpflichtungen im Zusammenhang mit Promotion- und Werbeverträgen mit Laufzeiten über fünf Jahre haben zum 31. Dezember 2010 Restlaufzeiten von bis zu zwölf Jahren.

Zu den Verpflichtungen im Zusammenhang mit Leasing- und Dienstleistungsverträgen » siehe Erläuterung 27.

### Prozessrisiken

Der Konzern ist gegenwärtig in verschiedene Rechtsstreitigkeiten verwickelt, die sich aus der normalen Geschäftstätigkeit, hauptsächlich im Zusammenhang mit Lizenznehmer- und Distributionsverträgen sowie Wettbewerbsstreitigkeiten ergeben. Sofern die Höhe der Verpflichtung zuverlässig geschätzt werden kann, sind die Risiken aus diesen Rechtsstreitigkeiten in den sonstigen Rückstellungen berücksichtigt » siehe Erläuterung 19. Das Management vertritt die Ansicht, dass eventuelle Verpflichtungen aus diesen Rechtsstreitigkeiten keine wesentlichen Auswirkungen auf die Vermögenslage des Konzerns haben werden.

**Aktienoptionsplan (MSOP) der adidas AG**

Im Rahmen des von den Aktionären der adidas AG am 20. Mai 1999 beschlossenen und gemäß Hauptversammlungsbeschluss vom 8. Mai 2002 und vom 13. Mai 2004 geänderten Aktienoptionsplans wurde der Vorstand ermächtigt, bis zum 27. August 2004 an Mitglieder des Vorstands der adidas AG, an Mitglieder der Geschäftsleitungsorgane verbundener Unternehmen sowie an weitere Führungskräfte der adidas AG und verbundener Unternehmen nicht übertragbare Bezugsrechte für bis zu 1.373.350 auf den Inhaber lautende Stückaktien auszugeben. Die Ausgabe konnte in Tranchen je Geschäftsjahr von nicht mehr als 25 % des Gesamtvolumens erfolgen.

Für die Bezugsrechte galt eine Wartezeit von zwei Jahren und eine Laufzeit von rund sieben Jahren nach ihrer jeweiligen Ausgabe.

**Aktienoptionsplan (MSOP)**

|                                         | Tranche I (1999)   |          |                          | Tranche II (2000) |                          | Tranche III (2001) |                          | Tranche IV (2002) |                          | Tranche V (2003) |                          |
|-----------------------------------------|--------------------|----------|--------------------------|-------------------|--------------------------|--------------------|--------------------------|-------------------|--------------------------|------------------|--------------------------|
|                                         | Aktienkurs<br>in € | Anzahl   | Ausübungs-<br>preis in € | Anzahl            | Ausübungs-<br>preis in € | Anzahl             | Ausübungs-<br>preis in € | Anzahl            | Ausübungs-<br>preis in € | Anzahl           | Ausübungs-<br>preis in € |
| Ursprünglich ausgegeben                 |                    | 266.550  |                          | 335.100           |                          | 342.850            |                          | 340.850           |                          | 88.000           |                          |
| <b>Ausstehend zum 1. Januar 2009</b>    |                    | <b>0</b> | —                        | <b>0</b>          | —                        | <b>0</b>           | —                        | <b>11.200</b>     | <b>6,40</b>              | <b>4.600</b>     | <b>4,00</b>              |
| Verwirkte Optionen                      |                    | 0        | —                        | 0                 | —                        | 0                  | —                        | 300               | 0,00                     | 500              | 82,60                    |
| Ausgeübte Optionen                      |                    |          |                          |                   |                          |                    |                          |                   |                          |                  |                          |
| Mai 2009 <sup>1)</sup>                  | 0,00               | 0        | —                        | 0                 | —                        | 0                  | —                        | 0                 | —                        | 0                | —                        |
| Aug. 2009 <sup>1)</sup>                 | 136,48             | 0        | —                        | 0                 | —                        | 0                  | —                        | 0                 | —                        | 4.100            | 82,60                    |
| Nov. 2009 <sup>1)</sup>                 | 0,00               | 0        | —                        | 0                 | —                        | 0                  | —                        | 0                 | —                        | 0                | —                        |
| Verfallene Optionen                     |                    | 0        | —                        | 0                 | —                        | 0                  | —                        | 10.900            | 0,00                     | 0                | —                        |
| <b>Ausstehend zum 31. Dezember 2009</b> |                    | <b>0</b> | —                        | <b>0</b>          | —                        | <b>0</b>           | —                        | <b>0</b>          | —                        | <b>0</b>         | —                        |
| Ausübbar zum 31. Dezember 2009          |                    | 0        | —                        | 0                 | —                        | 0                  | —                        | 0                 | —                        | 0                | —                        |
| <b>Ausstehend zum 1. Januar 2010</b>    |                    | <b>0</b> | —                        | <b>0</b>          | —                        | <b>0</b>           | —                        | <b>0</b>          | —                        | <b>0</b>         | —                        |

1) Aufgrund des im Mai 2006 wirksam gewordenen Aktiensplits gewährt eine Option das Recht auf den Bezug von vier Aktien. Dementsprechend beziehen sich die Angaben bezüglich des Aktienkurses auf jeweils vier Aktien.

Am Ende der Geschäftsjahre 2010 und 2009 existierten keine ausstehenden Optionen mehr. Im Geschäftsjahr 2010 wurden keine weiteren Bezugsrechte ausgegeben.

Die Bezugsrechte konnten nur ausgeübt werden, wenn mindestens eines der folgenden Erfolgsziele erreicht wurde:

**(1) Absolute Performance:** In dem Zeitraum zwischen Ausgabe und Ausübung der Bezugsrechte muss der Börsenkurs der Aktie der adidas AG – errechnet auf der Grundlage des „Total-Shareholder-Return-Ansatzes“ – um jährlich durchschnittlich mindestens 8 % gestiegen sein.

**(2) Relative Performance:** Im selben Zeitraum muss sich der Börsenkurs der Aktie der adidas AG um jährlich durchschnittlich 1 % besser entwickelt haben als die Börsenkurse einer Auswahl von Wettbewerbern des adidas Konzerns weltweit und darf absolut gesehen nicht gefallen sein.

Die Bezugsrechte konnten nur gegen Zahlung des Ausübungspreises ausgeübt werden. Der Ausübungspreis entsprach dem durchschnittlichen Schlusskurs der Aktie der adidas AG an den letzten 20 Börsentagen des jeweiligen Ausübungszeitraums, abzüglich eines Abschlags, der sich danach bemisst, inwieweit der Aktienkurs bei Ausübung die zuvor beschriebenen absoluten und relativen Performance-Hürden überschritten hatte. Der Ausübungspreis entsprach in jedem Fall mindestens dem geringsten Ausgabepreis gemäß § 9 Abs. 1 Aktiengesetz, derzeit 1,00 € (d. h. 4,00 € pro Option).

Die Ausübungsbedingungen sahen vor, dass die Bezugsrechte statt mit neuen Aktien aus dem bedingten Kapital mit bereits bestehenden Stückaktien bedient werden konnten oder anstelle von Stückaktien der Abschlag in bar geleistet wurde.

Die neuen Aktien nahmen vom Beginn des Geschäftsjahrs, in dem die Ausgabe erfolgt war, am Gewinn teil.

## Beziehungen zu nahe stehenden Unternehmen und Personen

» 39

Gemäß den Definitionen des IAS 24 „Angaben über Beziehungen zu nahe stehenden Unternehmen und Personen“ wurden der Aufsichtsrat und der Vorstand der adidas AG als nahe stehende Personen identifiziert. Die Mitglieder dieser Geschäftsführungs- und Aufsichtsorgane erhalten lediglich Bezüge im Rahmen ihrer Funktion als Personen in Schlüsselpositionen. Für Informationen über die Bezüge von Aufsichtsrat und Vorstand der adidas AG » siehe Erläuterung 40 und Vergütungsbericht, S. 30.

## Sonstige Angaben

» 40

### Mitarbeiter

Die Mitarbeiterzahlen stellen sich im Jahresdurchschnitt wie folgt dar:

#### Mitarbeiter

|                           | 1. Jan. bis<br>31. Dez. 2010 | 1. Jan. bis<br>31. Dez. 2009 |
|---------------------------|------------------------------|------------------------------|
| Eigener Einzelhandel      | 21.883                       | 19.460                       |
| Vertrieb                  | 4.064                        | 3.905                        |
| Logistik                  | 4.749                        | 5.484                        |
| Marketing                 | 3.527                        | 3.375                        |
| Zentrale Verwaltung       | 3.260                        | 3.075                        |
| Produktion                | 1.886                        | 1.892                        |
| Forschung und Entwicklung | 991                          | 1.005                        |
| Informationstechnologie   | 927                          | 875                          |
| <b>Gesamt</b>             | <b>41.287</b>                | <b>39.071</b>                |

### Honorar für Dienstleistungen des Abschlussprüfers des Konzernabschlusses

Das als Aufwand erfasste Honorar für Abschlussprüfungen des Prüfers KPMG Europe LLP betrug im Geschäftsjahr 2010 1,6 Mio. € (2009: 1,8 Mio. €).

Für Steuerberatungsleistungen durch den Abschlussprüfer wurden 0,2 Mio. € (2009: 0,3 Mio. €), für sonstige Bestätigungs- oder Bewertungsleistungen des Abschlussprüfers wurden 0,0 Mio. € (2009: 0,1 Mio. €) und für sonstige Leistungen des Abschlussprüfers wurden 0,0 Mio. € (2009: 0,0 Mio. €) aufgewendet.

### Bezüge von Aufsichtsrat und Vorstand der adidas AG

#### Aufsichtsrat

Die gemäß Satzung an die Aufsichtsratsmitglieder zu zahlende feste jährliche Vergütung belief sich auf insgesamt 0,9 Mio. € (2009: 0,9 Mio. €).

Mitglieder des Aufsichtsrats erhielten im Geschäftsjahr 2010 vom Unternehmen keine Kredite.

### Vorstand

Die Gesamtbezüge der Mitglieder des Vorstands betrugen im Geschäftsjahr 2010 11,5 Mio. € (2009: 10,5 Mio. €), davon entfielen auf kurzfristig fällige Leistungen 7,1 Mio. € (2009: 6,8 Mio. €) und auf langfristig fällige Leistungen 4,4 Mio. € (2009: 3,7 Mio. €). Der Aufwand für Leistungen nach Beendigung des Arbeitsverhältnisses (Dienstzeitaufwand der Pensionszusage für Vorstandsmitglieder) betrug im Geschäftsjahr 2010 0,5 Mio. € (2009: 0,4 Mio. €).

Im Geschäftsjahr 2010 erhielten frühere Mitglieder des Vorstands und deren Hinterbliebene Pensionszahlungen in Höhe von insgesamt 3,2 Mio. € (2009: 2,6 Mio. €).

Für Pensionszusagen gegenüber früheren Vorstandsmitgliedern und deren Hinterbliebenen bestehen Pensionsrückstellungen in Höhe von insgesamt 45,9 Mio. € (2009: 45,7 Mio. €).

Mitglieder des Vorstands erhielten im Geschäftsjahr 2010 keine Kredite vom Unternehmen.

Ab dem Geschäftsjahr 2004 wurden Mitgliedern des Vorstands keine Aktienoptionen mehr gewährt. In den Geschäftsjahren 2010 und 2009 übten Mitglieder des Vorstands keine Optionen aus. Für weitere Informationen zum Aktienoptionsplan » siehe auch Erläuterung 38.

Die weiteren Angaben nach § 314 Abs. 1 Nr. 6a HGB sind dem Vergütungsbericht zu entnehmen » siehe Vergütungsbericht, S. 30.

## Informationen zum Deutschen Corporate Governance Kodex

» 41

### Informationen nach § 161 Aktiengesetz

Vorstand und Aufsichtsrat der adidas AG haben eine aktualisierte Entsprechenserklärung gemäß § 161 AktG am 11. Februar 2011 abgegeben und den Aktionären dauerhaft zugänglich gemacht. Der Wortlaut der Entsprechenserklärung ist auf der Internetseite des Konzerns einzusehen.

## Ereignisse nach dem Bilanzstichtag

» 42

### Konzernspezifische Ereignisse nach dem Bilanzstichtag

Es sind keine konzernspezifischen Ereignisse nach dem Bilanzstichtag bekannt, die einen wesentlichen Einfluss auf die Vermögens-, Finanz- und Ertragslage des Konzerns haben könnten.

### Tag der Aufstellung

Der Vorstand der adidas AG hat den Konzernabschluss am 15. Februar 2011 aufgestellt und zur Weitergabe an den Aufsichtsrat freigegeben. Der Aufsichtsrat hat die Aufgabe, den Konzernabschluss zu prüfen und zu erklären, ob er den Konzernabschluss billigt.

Herzogenaurach, den 15. Februar 2011

**Der Vorstand der adidas AG**

Entwicklung der immateriellen und materiellen Vermögenswerte  
in Mio. €

Anlage I

|                                                                                   | Geschäfts- oder<br>Firmenwerte | Markenrechte | Software,<br>Patente und<br>Lizenzen | Selbst<br>geschaffene<br>Software | Immaterielle<br>Vermögenswerte | Grundstücke und<br>Bauten/Einbauten | Technische<br>Anlagen und<br>Maschinen | Andere Anlagen,<br>Betriebs- und<br>Geschäfts-<br>ausstattung | In Erstellung<br>befindliche<br>Vermögenswerte | Sachanlage-<br>vermögen |
|-----------------------------------------------------------------------------------|--------------------------------|--------------|--------------------------------------|-----------------------------------|--------------------------------|-------------------------------------|----------------------------------------|---------------------------------------------------------------|------------------------------------------------|-------------------------|
| <b>Anschaffungs- und Herstellungskosten</b>                                       |                                |              |                                      |                                   |                                |                                     |                                        |                                                               |                                                |                         |
| <b>1. Januar 2009</b>                                                             | <b>1.499</b>                   | <b>1.390</b> | <b>516</b>                           | <b>1</b>                          | <b>3.406</b>                   | <b>489</b>                          | <b>140</b>                             | <b>847</b>                                                    | <b>66</b>                                      | <b>1.542</b>            |
| Effekt aus Währungsumrechnung                                                     | -26                            | -48          | -7                                   | —                                 | -81                            | -7                                  | -1                                     | -3                                                            | -1                                             | -13                     |
| Zugänge                                                                           | 1                              | 0            | 48                                   | 0                                 | 50                             | 17                                  | 4                                      | 101                                                           | 72                                             | 195                     |
| Zugang Konsolidierungskreis                                                       | 4                              | —            | 0                                    | —                                 | 4                              | —                                   | 0                                      | 6                                                             | —                                              | 6                       |
| Zurückgegliedert aus Vermögenswerte klassifiziert als zur<br>Veräußerung gehalten | —                              | —            | —                                    | —                                 | —                              | 4                                   | 2                                      | 1                                                             | —                                              | 7                       |
| Vermögenswerte klassifiziert als zur Veräußerung gehalten                         | —                              | —            | —                                    | —                                 | —                              | -126                                | —                                      | —                                                             | —                                              | -126                    |
| Abgang Konsolidierungskreis                                                       | 0                              | —            | —                                    | —                                 | 0                              | —                                   | —                                      | —                                                             | —                                              | —                       |
| Umbuchungen                                                                       | —                              | —            | 2                                    | 1                                 | 3                              | 28                                  | 28                                     | 6                                                             | -65                                            | -3                      |
| Abgänge                                                                           | —                              | —            | -24                                  | -0                                | -25                            | -25                                 | -19                                    | -82                                                           | -2                                             | -128                    |
| <b>31. Dezember 2009/1. Januar 2010</b>                                           | <b>1.478</b>                   | <b>1.342</b> | <b>535</b>                           | <b>3</b>                          | <b>3.358</b>                   | <b>380</b>                          | <b>156</b>                             | <b>876</b>                                                    | <b>69</b>                                      | <b>1.480</b>            |
| Effekt aus Währungsumrechnung                                                     | 61                             | 105          | 28                                   | —                                 | 194                            | 18                                  | 12                                     | 75                                                            | 1                                              | 106                     |
| Zugänge                                                                           | 0                              | —            | 41                                   | 0                                 | 42                             | 20                                  | 5                                      | 103                                                           | 100                                            | 227                     |
| Zugang Konsolidierungskreis                                                       | —                              | —            | —                                    | —                                 | —                              | —                                   | —                                      | —                                                             | —                                              | —                       |
| Zurückgegliedert aus Vermögenswerte klassifiziert als zur<br>Veräußerung gehalten | —                              | —            | —                                    | —                                 | —                              | 95                                  | —                                      | —                                                             | —                                              | 95                      |
| Vermögenswerte klassifiziert als zur Veräußerung gehalten                         | —                              | —            | -1                                   | —                                 | -1                             | -2                                  | —                                      | -4                                                            | —                                              | -6                      |
| Abgänge Konsolidierungskreis                                                      | —                              | —            | —                                    | —                                 | —                              | —                                   | —                                      | —                                                             | —                                              | —                       |
| Umbuchungen                                                                       | —                              | —            | -2                                   | 2                                 | 0                              | 6                                   | 4                                      | 18                                                            | -28                                            | -0                      |
| Abgänge                                                                           | —                              | -0           | -5                                   | -0                                | -6                             | -6                                  | -16                                    | -82                                                           | -2                                             | -105                    |
| <b>31. Dezember 2010</b>                                                          | <b>1.539</b>                   | <b>1.447</b> | <b>595</b>                           | <b>5</b>                          | <b>3.586</b>                   | <b>511</b>                          | <b>161</b>                             | <b>987</b>                                                    | <b>140</b>                                     | <b>1.798</b>            |



**Entwicklung der immateriellen und materiellen Vermögenswerte**

in Mio. €

**Anlage I**

|                                                                                  | Geschäfts- oder<br>Firmenwerte | Markenrechte | Software,<br>Patente und<br>Lizenzen | Selbst<br>geschaffene<br>Software | Immaterielle<br>Vermögenswerte | Grundstücke und<br>Bauten/Einbauten | Technische<br>Anlagen und<br>Maschinen | Andere Anlagen,<br>Betriebs- und<br>Geschäfts-<br>ausstattung | In Erstellung<br>befindliche<br>Vermögenswerte | Sachanlage-<br>vermögen |
|----------------------------------------------------------------------------------|--------------------------------|--------------|--------------------------------------|-----------------------------------|--------------------------------|-------------------------------------|----------------------------------------|---------------------------------------------------------------|------------------------------------------------|-------------------------|
| <b>Kumulierte Abschreibungen, Wertminderungsaufwendungen und Wertaufholungen</b> |                                |              |                                      |                                   |                                |                                     |                                        |                                                               |                                                |                         |
| <b>1. Januar 2009</b>                                                            | —                              | —            | 313                                  | 0                                 | 313                            | 116                                 | 50                                     | 490                                                           | —                                              | 656                     |
| Effekt aus Währungsumrechnung                                                    | —                              | —            | -6                                   | —                                 | -6                             | -2                                  | -1                                     | -6                                                            | —                                              | -9                      |
| Zugänge                                                                          | —                              | 0            | 65                                   | 1                                 | 66                             | 32                                  | 20                                     | 147                                                           | —                                              | 198                     |
| Wertminderungsaufwendungen                                                       | —                              | —            | 19                                   | —                                 | 19                             | 6                                   | 0                                      | 10                                                            | —                                              | 16                      |
| Wertaufholungen                                                                  | —                              | —            | 0                                    | —                                 | 0                              | —                                   | —                                      | -0                                                            | —                                              | -0                      |
| Zugang Konsolidierungskreis                                                      | —                              | —            | —                                    | —                                 | —                              | —                                   | —                                      | 1                                                             | —                                              | 1                       |
| Zurückgegliedert aus Vermögenswerte klassifiziert als zur Veräußerung gehalten   | —                              | —            | —                                    | —                                 | —                              | 2                                   | 2                                      | 1                                                             | —                                              | 5                       |
| Vermögenswerte klassifiziert als zur Veräußerung gehalten                        | —                              | —            | —                                    | —                                 | —                              | -20                                 | —                                      | —                                                             | —                                              | -20                     |
| Abgang Konsolidierungskreis                                                      | —                              | —            | —                                    | —                                 | —                              | —                                   | —                                      | —                                                             | —                                              | —                       |
| Umbuchungen                                                                      | —                              | —            | 0                                    | —                                 | 0                              | -1                                  | -0                                     | 1                                                             | —                                              | -0                      |
| Abgänge                                                                          | —                              | —            | -16                                  | -0                                | -16                            | -9                                  | -16                                    | -65                                                           | —                                              | -89                     |
| <b>31. Dezember 2009/1. Januar 2010</b>                                          | —                              | 0            | 377                                  | 0                                 | 377                            | 123                                 | 55                                     | 579                                                           | —                                              | 757                     |
| Effekt aus Währungsumrechnung                                                    | -0                             | 0            | 19                                   | —                                 | 19                             | 7                                   | 6                                      | 53                                                            | —                                              | 66                      |
| Zugänge                                                                          | —                              | 0            | 54                                   | 1                                 | 55                             | 28                                  | 21                                     | 145                                                           | —                                              | 194                     |
| Wertminderungsaufwendungen                                                       | —                              | —            | 11                                   | —                                 | 11                             | 5                                   | 0                                      | 5                                                             | —                                              | 10                      |
| Wertaufholungen                                                                  | —                              | —            | —                                    | —                                 | —                              | -0                                  | -0                                     | -7                                                            | —                                              | -7                      |
| Zugang Konsolidierungskreis                                                      | —                              | —            | —                                    | —                                 | —                              | —                                   | —                                      | —                                                             | —                                              | —                       |
| Zurückgegliedert aus Vermögenswerte klassifiziert als zur Veräußerung gehalten   | —                              | —            | —                                    | —                                 | —                              | 15                                  | —                                      | —                                                             | —                                              | 15                      |
| Vermögenswerte klassifiziert als zur Veräußerung gehalten                        | —                              | —            | -1                                   | —                                 | -1                             | -0                                  | —                                      | -2                                                            | —                                              | -2                      |
| Abgang Konsolidierungskreis                                                      | —                              | —            | —                                    | —                                 | —                              | —                                   | —                                      | —                                                             | —                                              | —                       |
| Umbuchungen                                                                      | —                              | —            | 0                                    | —                                 | 0                              | -0                                  | -1                                     | 1                                                             | —                                              | -0                      |
| Abgänge                                                                          | —                              | —            | -3                                   | -0                                | -3                             | -5                                  | -14                                    | -71                                                           | —                                              | -91                     |
| <b>31. Dezember 2010</b>                                                         | -0                             | 0            | 456                                  | 1                                 | 458                            | 173                                 | 68                                     | 703                                                           | —                                              | 943                     |
| <b>Nettowerte</b>                                                                |                                |              |                                      |                                   |                                |                                     |                                        |                                                               |                                                |                         |
| 31. Dezember 2008                                                                | 1.499                          | 1.390        | 202                                  | 2                                 | 3.093                          | 373                                 | 90                                     | 357                                                           | 66                                             | 886                     |
| 31. Dezember 2009                                                                | 1.478                          | 1.342        | 158                                  | 2                                 | 2.980                          | 257                                 | 101                                    | 297                                                           | 69                                             | 724                     |
| <b>31. Dezember 2010</b>                                                         | <b>1.539</b>                   | <b>1.447</b> | <b>139</b>                           | <b>4</b>                          | <b>3.128</b>                   | <b>338</b>                          | <b>93</b>                              | <b>284</b>                                                    | <b>140</b>                                     | <b>855</b>              |

Bei Prozentangaben und Zahlen können Rundungsdifferenzen auftreten.

# Aufstellung des Anteilsbesitzes der adidas AG, Herzogenaurach

zum 31. Dezember 2010

## Anlage II

| Firma und Sitz der Gesellschaft                                                                             |                                     | Währung | Eigenkapital (in Tausend<br>Währungseinheiten) | Anteil am Kapital<br>gehalten von <sup>7)</sup> | in %  |
|-------------------------------------------------------------------------------------------------------------|-------------------------------------|---------|------------------------------------------------|-------------------------------------------------|-------|
| <b>Deutschland</b>                                                                                          |                                     |         |                                                |                                                 |       |
| 1 GEV Grundstücksgesellschaft Herzogenaurach mbH & Co. KG                                                   | Herzogenaurach (Deutschland)        | EUR     | 972                                            | direkt                                          | 90    |
| 2 GEV Grundstücks-Beteiligungsgesellschaft Herzogenaurach mbH                                               | Herzogenaurach (Deutschland)        | EUR     | 37                                             | direkt                                          | 100   |
| 3 adidas Insurance & Risk Consultants GmbH <sup>12)</sup> (vormals: adidas Versicherungs-Vermittlungs GmbH) | Herzogenaurach (Deutschland)        | EUR     | 26                                             | direkt                                          | 100   |
| 4 adidas Beteiligungsgesellschaft mbH <sup>12)</sup>                                                        | Herzogenaurach (Deutschland)        | EUR     | 354.103                                        | direkt                                          | 100   |
| 5 Immobilieninvest und Betriebsgesellschaft Herzo-Base Verwaltungs GmbH                                     | Herzogenaurach (Deutschland)        | EUR     | 33                                             | direkt                                          | 100   |
| 6 Immobilieninvest und Betriebsgesellschaft Herzo-Base GmbH & Co. KG                                        | Herzogenaurach (Deutschland)        | EUR     | 2.395                                          | direkt                                          | 100   |
| 7 World of Commerce Management GmbH <sup>4)</sup>                                                           | Herzogenaurach (Deutschland)        | EUR     | —                                              | direkt                                          | 100   |
| 8 World of Commerce GmbH & Co. KG <sup>4)</sup>                                                             | Herzogenaurach (Deutschland)        | EUR     | —                                              | direkt                                          | 100   |
| 9 Hotel Herzo-Base GmbH & Co. KG <sup>4)</sup>                                                              | Herzogenaurach (Deutschland)        | EUR     | —                                              | direkt                                          | 100   |
| 10 Herzo-Base Management GmbH <sup>4)</sup>                                                                 | Herzogenaurach (Deutschland)        | EUR     | —                                              | direkt                                          | 100   |
| 11 Factory Outlet Herzo-Base GmbH & Co. KG <sup>4)</sup>                                                    | Herzogenaurach (Deutschland)        | EUR     | —                                              | direkt                                          | 100   |
| 12 Reebok-CCM Hockey GmbH <sup>10)</sup>                                                                    | Kirchheim-Heimstetten (Deutschland) | EUR     | 4.043                                          | 94                                              | 100   |
| <b>Europa (inkl. Mittlerer Osten und Afrika)</b>                                                            |                                     |         |                                                |                                                 |       |
| 13 adidas sport gmbh                                                                                        | Cham (Schweiz)                      | CHF     | 9.133                                          | direkt                                          | 100   |
| 14 Sarragan AG                                                                                              | Cham (Schweiz)                      | CHF     | – 3.057                                        | direkt                                          | 100   |
| 15 adidas Austria GmbH                                                                                      | Klagenfurt (Österreich)             | EUR     | 6.997                                          | direkt                                          | 95,89 |
|                                                                                                             |                                     |         |                                                | 13                                              | 4,11  |
| 16 adidas France S.a.r.l.                                                                                   | Landersheim (Frankreich)            | EUR     | 93.151                                         | 30                                              | 100   |
| 17 adidas International B.V.                                                                                | Amsterdam (Niederlande)             | EUR     | 5.680.662                                      | direkt                                          | 93,97 |
|                                                                                                             |                                     |         |                                                | 16                                              | 6,03  |
| 18 adidas International Trading B.V.                                                                        | Amsterdam (Niederlande)             | EUR     | 762.088                                        | 17                                              | 100   |
| 19 adidas International Marketing B.V.                                                                      | Amsterdam (Niederlande)             | EUR     | 36.967                                         | 17                                              | 100   |
| 20 adidas International Finance B.V.                                                                        | Amsterdam (Niederlande)             | EUR     | 11.056                                         | 17                                              | 100   |
| 21 adidas Benelux B.V.                                                                                      | Amsterdam (Niederlande)             | EUR     | 4.623                                          | direkt                                          | 100   |
| 22 Reebok International Finance B.V.                                                                        | Amsterdam (Niederlande)             | USD     | 562                                            | 110                                             | 100   |
| 23 Rockport (Europe) B.V.                                                                                   | Amsterdam (Niederlande)             | USD     | 3.510                                          | 97                                              | 100   |
| 24 adidas (UK) Limited <sup>1)</sup>                                                                        | Stockport (Großbritannien)          | GBP     | 48.698                                         | 30                                              | 100   |
| 25 adidas (ILKLEY) Limited <sup>1) 4)</sup>                                                                 | Stockport (Großbritannien)          | GBP     | —                                              | 24                                              | 100   |
| 26 LARA SPORT (UK) Limited <sup>1) 4)</sup>                                                                 | Stockport (Großbritannien)          | GBP     | —                                              | 24                                              | 100   |
| 27 Sarragan (UK) Limited <sup>1) 4)</sup>                                                                   | Stockport (Großbritannien)          | GBP     | —                                              | 24                                              | 100   |
| 28 adidas Trefoil Trading (U.K.) Limited <sup>1) 4)</sup>                                                   | Stockport (Großbritannien)          | GBP     | —                                              | 27                                              | 100   |
| 29 Three Stripes Limited <sup>1) 4)</sup>                                                                   | Stockport (Großbritannien)          | GBP     | —                                              | 24                                              | 50    |
|                                                                                                             |                                     |         |                                                | 25                                              | 50    |
| 30 Reebok International Limited <sup>11)</sup>                                                              | London (Großbritannien)             | GBP     | 1.036.627                                      | 17                                              | 65,1  |
|                                                                                                             |                                     |         |                                                | 110                                             | 34,9  |

1) Teilkonzern adidas UK 2) Teilkonzern Reebok International Ltd. 3) Teilkonzern Indien 4) Teilkonzern Mexiko (adidas) 5) Teilkonzern Taylor Made UK 6) Gesellschaft ohne aktive Geschäftstätigkeit

7) Die Zahl bezieht sich auf die Nummerierung der Gesellschaft. 8) Teilkonzern Onfield 9) Teilkonzern Reebok-CCM Hockey, Inc. 10) Teilkonzern Sports Holdings Corp. 11) Teilkonzern Reebok International Limited

12) Ergebnisabführungsvertrag 13) Teilkonzern Taylor Made Golf Co., Inc. 14) Teilkonzern adidas Kanada 15) Teilkonzern adidas Brasilien

**Aufstellung des Anteilsbesitzes der adidas AG, Herzogenaurach**

zum 31. Dezember 2010

**Anlage II**

| Firma und Sitz der Gesellschaft                                  |                              | Währung | Eigenkapital (in Tausend Währungseinheiten) | Anteil am Kapital gehalten von <sup>7)</sup> | in % |
|------------------------------------------------------------------|------------------------------|---------|---------------------------------------------|----------------------------------------------|------|
| 31 Reebok Finance Limited <sup>6) 11)</sup>                      | London (Großbritannien)      | GBP     | —                                           | 110                                          | 100  |
| 32 RBK Holdings Limited <sup>11)</sup>                           | London (Großbritannien)      | GBP     | —                                           | 110                                          | 89   |
|                                                                  |                              |         |                                             | 96                                           | 11   |
| 33 Reebok Sports Limited                                         | London (Großbritannien)      | USD     | 1.608                                       | 30                                           | 100  |
| 34 J.W. Foster & Sons (Athletic Shoes) Limited <sup>6) 11)</sup> | London (Großbritannien)      | GBP     | —                                           | 30                                           | 100  |
| 35 The Rockport Company Limited <sup>6) 11)</sup>                | London (Großbritannien)      | GBP     | —                                           | 30                                           | 100  |
| 36 Reebok Eastern Trading Limited <sup>6)</sup>                  | London (Großbritannien)      | USD     | 3.112                                       | 30                                           | 100  |
| 37 Reebok Pensions Management Limited <sup>11)</sup>             | London (Großbritannien)      | GBP     | —                                           | 30                                           | 100  |
| 38 Reebok Europe Holdings                                        | London (Großbritannien)      | GBP     | 86.877                                      | 30                                           | 100  |
| 39 Taylor Made Golf Limited <sup>5)</sup>                        | Basingstoke (Großbritannien) | GBP     | – 6.791                                     | 17                                           | 100  |
| 40 Ashworth U.K. Ltd. <sup>5)</sup>                              | Basingstoke (Großbritannien) | GBP     | —                                           | 39                                           | 100  |
| 41 adidas (Ireland) Limited                                      | Dublin (Irland)              | EUR     | 3.610                                       | 17                                           | 100  |
| 42 adidas International Re Limited                               | Dublin (Irland)              | EUR     | 8.838                                       | 17                                           | 100  |
| 43 Reebok Ireland Limited                                        | Dublin (Irland)              | EUR     | 56                                          | 41                                           | 100  |
| 44 adidas Belgium N.V.                                           | Brüssel (Belgien)            | EUR     | 3.228                                       | 21                                           | 100  |
| 45 adidas Espana S.A.                                            | Saragossa (Spanien)          | EUR     | 25.482                                      | 4                                            | 100  |
| 46 adidas Finance Spain S.A.                                     | Saragossa (Spanien)          | EUR     | 34.308                                      | 110                                          | 75   |
|                                                                  |                              |         |                                             | 46                                           | 25   |
| 47 adidas Italy S.p.A                                            | Monza (Italien)              | EUR     | 43.602                                      | 17                                           | 100  |
| 48 adidas Portugal – Artigos de Desporto, S.A.                   | Lissabon (Portugal)          | EUR     | 28.971                                      | 17                                           | 100  |
| 49 adidas Business Services Lda.                                 | Maia (Portugal)              | EUR     | 59                                          | 17                                           | 98   |
|                                                                  |                              |         |                                             | direkt                                       | 2    |
| 50 adidas Norge AS                                               | Lillestrom (Norwegen)        | NOK     | 28.107                                      | direkt                                       | 100  |
| 51 Reebok Jofa AS                                                | Gressvik (Norwegen)          | NOK     | 14.865                                      | 50                                           | 100  |
| 52 adidas Sverige AB                                             | Stockholm (Schweden)         | SEK     | 70.750                                      | direkt                                       | 100  |
| 53 Nordic Hockey Company AB <sup>10)</sup>                       | Malung (Schweden)            | SEK     | 539.015                                     | 94                                           | 100  |
| 54 Reebok Jofa AB                                                | Malung (Schweden)            | SEK     | 105.077                                     | 52                                           | 100  |
| 55 adidas Suomi Oy                                               | Helsinki (Finnland)          | EUR     | 1.750                                       | 17                                           | 100  |
| 56 Reebok-CCM Hockey Oy                                          | Forssa (Finnland)            | EUR     | 9.229                                       | 17                                           | 100  |
| 57 adidas Danmark A/S                                            | Århus (Dänemark)             | DKK     | 18.381                                      | 17                                           | 100  |
| 58 adidas CR s.r.o.                                              | Prag (Tschechische Republik) | CZK     | 141.127                                     | direkt                                       | 100  |
| 59 adidas Budapest Kft.                                          | Budapest (Ungarn)            | HUF     | 1.320.477                                   | direkt                                       | 85   |
| 60 adidas Bulgaria EAD                                           | Sofia (Bulgarien)            | BGN     | 9.707                                       | direkt                                       | 100  |
| 61 LLC „adidas, Ltd.“                                            | Moskau (Russland)            | RUB     | 15.955.659                                  | 15                                           | 100  |
| 62 adidas Poland Sp.z.o.o.                                       | Warschau (Polen)             | PLN     | 39.349                                      | direkt                                       | 100  |
| 63 adidas Finance Poland S.A.                                    | Warschau (Polen)             | PLN     | 86.675                                      | 110                                          | 100  |
| 64 adidas Romania S.R.L.                                         | Bukarest (Rumänien)          | RON     | 15.212                                      | 17                                           | 100  |

1) Teilkonzern adidas UK 2) Teilkonzern Reebok International Ltd. 3) Teilkonzern Indien 4) Teilkonzern Mexiko (adidas) 5) Teilkonzern Taylor Made UK 6) Gesellschaft ohne aktive Geschäftstätigkeit

7) Die Zahl bezieht sich auf die Nummerierung der Gesellschaft. 8) Teilkonzern Onfield 9) Teilkonzern Reebok-CCM Hockey, Inc. 10) Teilkonzern Sports Holdings Corp. 11) Teilkonzern Reebok International Limited

12) Ergebnisabführungsvertrag 13) Teilkonzern Taylor Made Golf Co., Inc. 14) Teilkonzern adidas Kanada 15) Teilkonzern adidas Brasilien

**Aufstellung des Anteilsbesitzes der adidas AG, Herzogenaurach**
**Anlage II**

zum 31. Dezember 2010

| Firma und Sitz der Gesellschaft                      |                                      | Währung | Eigenkapital (in Tausend Währungseinheiten) | Anteil am Kapital gehalten von <sup>7)</sup> | in % |
|------------------------------------------------------|--------------------------------------|---------|---------------------------------------------|----------------------------------------------|------|
| 65 adidas Baltics SIA                                | Riga (Lettland)                      | EUR     | 428                                         | 17                                           | 100  |
| 66 adidas Slovakia s.r.o.                            | Bratislava (Slowakische Republik)    | SKK     | 2.614                                       | direkt                                       | 100  |
| 67 adidas Trgovina d.o.o.                            | Ljubljana (Slowenien)                | EUR     | 1.265                                       | direkt                                       | 100  |
| 68 SC „adidas-Ukraine“                               | Kiew (Ukraine)                       | UAH     | 388.478                                     | direkt                                       | 100  |
| 69 adidas LLP                                        | Almaty (Republik Kasachstan)         | KZT     | 1.829.756                                   | direkt                                       | 100  |
| 70 adidas Serbia d.o.o.                              | Neu-Belgrad (Serbien)                | RSD     | 373.940                                     | 17                                           | 100  |
| 71 adidas Croatia d.o.o.                             | Zagreb (Kroatien)                    | HRK     | 16.771                                      | 17                                           | 100  |
| 72 adidas Hellas A.E.                                | Thessaloniki (Griechenland)          | EUR     | 1.123                                       | direkt                                       | 100  |
| 73 adidas (Cyprus) Limited                           | Nikosia (Zypern)                     | EUR     | 1.240                                       | direkt                                       | 100  |
| 74 adidas Spor Malzemeleri Satış ve Pazarlama A.Ş.   | Istanbul (Türkei)                    | TRY     | 142.773                                     | 17                                           | 100  |
| 75 a-RET Tekstil ve Deri Ürünleri Ticaret A.Ş.       | Istanbul (Türkei)                    | TRY     | 1.499                                       | 18                                           | 100  |
| 76 adidas Emerging Market L.L.C.                     | Dubai (Vereinigte Arabische Emirate) | USD     | 31.755                                      | indirekt                                     | 51   |
|                                                      |                                      |         |                                             | 16                                           | 49   |
| 77 adidas Emerging Markets FZE                       | Dubai (Vereinigte Arabische Emirate) | USD     | 12.514                                      | 17                                           | 100  |
| 78 adidas Levant Limited                             | Dubai (Vereinigte Arabische Emirate) | JOD     | 2.352                                       | 77                                           | 55   |
| 79 adidas Levant Limited – Jordan                    | Amman (Jordanien)                    | JOD     | 1.533                                       | 78                                           | 100  |
| 80 adidas Imports & Exports Ltd.                     | Kairo (Ägypten)                      | EGP     | 3.400                                       | 81                                           | 100  |
| 81 adidas Sporting Goods Ltd.                        | Kairo (Ägypten)                      | EGP     | 23.842                                      | 17                                           | 90   |
|                                                      |                                      |         |                                             | 18                                           | 10   |
| 82 adidas Egypt Ltd. <sup>6)</sup>                   | Kairo (Ägypten)                      | USD     | – 1.831                                     | direkt                                       | 100  |
| 83 adidas Israel Ltd.                                | Holon (Israel)                       | ILS     | 7.948                                       | direkt                                       | 100  |
| 84 Life Sport Ltd.                                   | Holon (Israel)                       | ILS     | 40.608                                      | 17                                           | 51   |
| 85 adidas (South Africa) (Pty) Ltd.                  | Kapstadt (Südafrika)                 | ZAR     | 176.401                                     | direkt                                       | 100  |
| <b>Nordamerika</b>                                   |                                      |         |                                             |                                              |      |
| 86 adidas North America, Inc.                        | Portland, Oregon (USA)               | USD     | 4.939.208                                   | 17                                           | 100  |
| 87 adidas America, Inc. (vormals adidas Sales, Inc.) | Portland, Oregon (USA)               | USD     | 40.011                                      | 86                                           | 100  |
| 88 adidas International, Inc.                        | Portland, Oregon (USA)               | USD     | 47.078                                      | 86                                           | 100  |
| 89 adidas Team, Inc.                                 | Portland, Oregon (USA)               | USD     | – 155                                       | 86                                           | 100  |
| 90 Taylor Made Golf Co., Inc. <sup>13)</sup>         | Carlsbad, Kalifornien (USA)          | USD     | 49.600                                      | 86                                           | 100  |
| 91 Ashworth, LLC. <sup>13)</sup>                     | Carlsbad, Kalifornien (USA)          | USD     | –                                           | 90                                           | 100  |
| 92 The Reebok Worldwide Trading Company, LLC         | Wilmington, Delaware (USA)           | USD     | 12.281                                      | 110                                          | 100  |
| 93 Reebok-CCM Hockey, Inc. <sup>9)</sup>             | Wilmington, Delaware (USA)           | USD     | 156.648                                     | 110                                          | 100  |
| 94 Sports Holdings Corp. <sup>10)</sup>              | Wilmington, Delaware (USA)           | USD     | – 18.339                                    | 93                                           | 100  |
| 95 RFC, Inc.                                         | Wilmington, Delaware (USA)           | USD     | – 1                                         | 110                                          | 100  |
| 96 Reebok Securities Holdings LLC <sup>2)</sup>      | Wilmington, Delaware (USA)           | USD     | –                                           | 110                                          | 100  |
| 97 The Rockport Company, LLC                         | Wilmington, Delaware (USA)           | USD     | 226.761                                     | 110                                          | 100  |

1) Teilkonzern adidas UK 2) Teilkonzern Reebok International Ltd. 3) Teilkonzern Indien 4) Teilkonzern Mexiko (adidas) 5) Teilkonzern Taylor Made UK 6) Gesellschaft ohne aktive Geschäftstätigkeit

7) Die Zahl bezieht sich auf die Nummerierung der Gesellschaft. 8) Teilkonzern Onfield 9) Teilkonzern Reebok-CCM Hockey, Inc. 10) Teilkonzern Sports Holdings Corp. 11) Teilkonzern Reebok International Limited

12) Ergebnisabführungsvertrag 13) Teilkonzern Taylor Made Golf Co., Inc. 14) Teilkonzern adidas Kanada 15) Teilkonzern adidas Brasilien



**Aufstellung des Anteilsbesitzes der adidas AG, Herzogenaurach**

zum 31. Dezember 2010

**Anlage II**

| Firma und Sitz der Gesellschaft                                   |                                | Währung | Eigenkapital (in Tausend<br>Währungseinheiten) | Anteil am Kapital<br>gehalten von <sup>7)</sup> | in % |
|-------------------------------------------------------------------|--------------------------------|---------|------------------------------------------------|-------------------------------------------------|------|
| 98 Textronics, Inc.                                               | Wilmington, Delaware (USA)     | USD     | 12.764                                         | 88                                              | 100  |
| 99 Ashworth Acquisition Corp. <sup>13)</sup>                      | Wilmington, Delaware (USA)     | USD     | —                                              | 91                                              | 100  |
| 100 Ashworth Store I, Inc. <sup>13)</sup>                         | Wilmington, Delaware (USA)     | USD     | —                                              | 91                                              | 100  |
| 101 Ashworth Store II, Inc. <sup>13)</sup>                        | Wilmington, Delaware (USA)     | USD     | —                                              | 91                                              | 100  |
| 102 Ashworth EDC, LLC <sup>13)</sup>                              | Wilmington, Delaware (USA)     | USD     | —                                              | 91                                              | 100  |
| 103 Putter, LLC (vormals Gekko Brands, LLC) <sup>4) 13)</sup>     | Montgomery, Alabama (USA)      | USD     | —                                              | 99                                              | 100  |
| 104 Bunker Shot, LLC (vormals Kudzu, LLC) <sup>4) 13)</sup>       | Montgomery, Alabama (USA)      | USD     | —                                              | 103                                             | 100  |
| 105 Tee Off, LLC (vormals The Game, LLC) <sup>4) 13)</sup>        | Montgomery, Alabama (USA)      | USD     | —                                              | 103                                             | 100  |
| 106 Sunice Holdings, Inc. <sup>13)</sup>                          | Wilmington, Delaware (USA)     | USD     | —                                              | 91                                              | 100  |
| 107 SLM Trademark Acquisition Corp. <sup>4) 9)</sup>              | Dover, Delaware (USA)          | USD     | —                                              | 93                                              | 100  |
| 108 Onfield Apparel Group, LLC <sup>8)</sup>                      | Dover, Delaware (USA)          | USD     | —                                              | 110                                             | 99   |
|                                                                   |                                |         |                                                | 109                                             | 1    |
| 109 Reebok Onfield, LLC <sup>8)</sup>                             | Dover, Delaware (USA)          | USD     | —                                              | 110                                             | 100  |
| 110 Reebok International Ltd. <sup>2)</sup>                       | Canton, Massachusetts (USA)    | USD     | – 1.192.508                                    | 86                                              | 100  |
| 111 Reebok CHC, Inc. <sup>2) 4)</sup>                             | Stoughton, Massachusetts (USA) | USD     | —                                              | 110                                             | 100  |
| 112 Sports Licensed Division of the adidas Group, LLC             | Boston, Massachusetts (USA)    | USD     | 109.699                                        | 110                                             | 99   |
|                                                                   |                                |         |                                                | 96                                              | 1    |
| 113 RBK Thailand, Inc. <sup>2)</sup>                              | Boston, Massachusetts (USA)    | USD     | 369                                            | 110                                             | 100  |
| 114 Reebok-CCM Hockey U.S., Inc.                                  | Montpelier, Vermont (USA)      | USD     | 10.402                                         | 93                                              | 64   |
|                                                                   |                                |         |                                                | 94                                              | 36   |
| 115 adidas Canada Ltd. <sup>14)</sup>                             | Concord, Ontario (Kanada)      | CAD     | 81.525                                         | direkt                                          | 100  |
| 116 adidas Style Retail Canada Limited <sup>14)</sup>             | Concord, Ontario (Kanada)      | CAD     | —                                              | 115                                             | 100  |
| 117 R.C. Investments Ltd.                                         | Montreal (Kanada)              | CAD     | 2.218                                          | 110                                             | 100  |
| 118 Reebok Canada Inc.                                            | Montreal (Kanada)              | CAD     | 6.879                                          | 115                                             | 100  |
| 119 CCM Holdings (1983) Inc.                                      | Montreal (Kanada)              | CAD     | 6.317                                          | 121                                             | 100  |
| 120 Sport Maska Inc.                                              | New Brunswick (Kanada)         | CAD     | 45.870                                         | 93                                              | 100  |
| 121 SLM Trademark Acquisition Canada Corporation <sup>4) 9)</sup> | New Brunswick (Kanada)         | CAD     | —                                              | 107                                             | 100  |
| <b>Asien</b>                                                      |                                |         |                                                |                                                 |      |
| 122 adidas Sourcing Limited                                       | Hongkong (China)               | USD     | 258.447                                        | 18                                              | 100  |
| 123 adidas Services Limited                                       | Hongkong (China)               | USD     | 5.616                                          | 17                                              | 100  |
| 124 adidas Hong Kong Ltd.                                         | Hongkong (China)               | HKD     | 184.288                                        | direkt                                          | 100  |
| 125 Smedley Industries (Hong Kong) Limited <sup>4) 9)</sup>       | Hongkong (China)               | HKD     | —                                              | 93                                              | 100  |
| 126 Reebok Trading (Far East) Limited                             | Hongkong (China)               | USD     | 33.569                                         | 110                                             | 100  |
| 127 Reebok (China) Services Limited                               | Hongkong (China)               | USD     | 7.416                                          | 126                                             | 100  |
| 128 RIL Indonesia Services Limited                                | Hongkong (China)               | USD     | 1.876                                          | 126                                             | 100  |
| 129 adidas (Suzhou) Co. Ltd.                                      | Suzhou (China)                 | CNY     | 137.218                                        | 4                                               | 100  |

1) Teilkonzern adidas UK 2) Teilkonzern Reebok International Ltd. 3) Teilkonzern Indien 4) Teilkonzern Mexiko (adidas) 5) Teilkonzern Taylor Made UK 6) Gesellschaft ohne aktive Geschäftstätigkeit

7) Die Zahl bezieht sich auf die Nummerierung der Gesellschaft. 8) Teilkonzern Onfield 9) Teilkonzern Reebok-CCM Hockey, Inc. 10) Teilkonzern Sports Holdings Corp. 11) Teilkonzern Reebok International Limited

12) Ergebnisabführungsvertrag 13) Teilkonzern Taylor Made Golf Co., Inc. 14) Teilkonzern adidas Kanada 15) Teilkonzern adidas Brasilien

**Aufstellung des Anteilsbesitzes der adidas AG, Herzogenaurach**
**Anlage II**

zum 31. Dezember 2010

| Firma und Sitz der Gesellschaft                    |                             | Währung | Eigenkapital (in Tausend<br>Währungseinheiten) | Anteil am Kapital<br>gehalten von <sup>7)</sup> | in %  |
|----------------------------------------------------|-----------------------------|---------|------------------------------------------------|-------------------------------------------------|-------|
| 130 adidas Sports (China) Co. Ltd.                 | Suzhou (China)              | CNY     | 2.794.820                                      | 4                                               | 100   |
| 131 adidas (China) Ltd.                            | Shanghai (China)            | CNY     | 24.578                                         | 17                                              | 100   |
| 132 Zhuhai adidas Technical Services Limited       | Zhuhai (China)              | USD     | 1.600                                          | 122                                             | 100   |
| 133 adidas Japan K.K.                              | Tokio (Japan)               | JPY     | 4.111.657                                      | 30                                              | 100   |
| 134 Taylor Made Golf Co., Ltd.                     | Tokio (Japan)               | JPY     | 5.350.911                                      | 30                                              | 100   |
| 135 adidas Korea Ltd.                              | Seoul (Korea)               | KRW     | 110.986.329                                    | direkt                                          | 100   |
| 136 Taylor Made Korea Ltd.                         | Seoul (Korea)               | KRW     | 20.593.684                                     | direkt                                          | 100   |
| 137 adidas Korea Technical Services Ltd.           | Pusan (Korea)               | KRW     | - 5.802.755                                    | 122                                             | 100   |
| 138 adidas India Private Ltd. <sup>3)</sup>        | Neu-Delhi (Indien)          | INR     | - 81.589                                       | direkt                                          | 99    |
|                                                    |                             |         |                                                | 17                                              | 1     |
| 139 adidas India Marketing Pvt. Ltd. <sup>3)</sup> | Neu-Delhi (Indien)          | INR     | —                                              | 138                                             | 91,4  |
|                                                    |                             |         |                                                | 17                                              | 8,6   |
| 140 adidas Technical Services Pvt. Ltd.            | Neu-Delhi (Indien)          | USD     | 883                                            | 122                                             | 100   |
| 141 Reebok India Company                           | Neu-Delhi (Indien)          | INR     | 859.995                                        | 152                                             | 93,15 |
| 142 P.T. adidas Indonesia Ltd.                     | Jakarta (Indonesien)        | IDR     | 22.245.799                                     | 17                                              | 99    |
|                                                    |                             |         |                                                | direkt                                          | 1     |
| 143 adidas (Malaysia) Sdn. Bhd.                    | Kuala Lumpur (Malaysia)     | MYR     | 32.501                                         | direkt                                          | 60    |
|                                                    |                             |         |                                                | 17                                              | 40    |
| 144 adidas Philippines Inc.                        | Manila (Philippinen)        | PHP     | 251.568                                        | direkt                                          | 100   |
| 145 adidas Singapore Pte. Ltd.                     | Singapur (Singapur)         | SGD     | 18.411                                         | direkt                                          | 100   |
| 146 adidas Taiwan Limited                          | Taipei (Taiwan)             | TWD     | 602.334                                        | 17                                              | 100   |
| 147 adidas Holding (Thailand) Co., Ltd.            | Bangkok (Thailand)          | THB     | - 25.481                                       | indirekt                                        | 51    |
|                                                    |                             |         |                                                | direkt                                          | 49    |
| 148 adidas (Thailand) Co., Ltd.                    | Bangkok (Thailand)          | THB     | 682.277                                        | 147                                             | 50,01 |
|                                                    |                             |         |                                                | direkt                                          | 49,99 |
| 149 adidas Australia Pty. Limited                  | Mulgrave (Australien)       | AUD     | 48.754                                         | 17                                              | 100   |
| 150 adidas New Zealand Limited                     | Auckland (Neuseeland)       | NZD     | 3.375                                          | direkt                                          | 100   |
| 151 adidas Vietnam Company Limited                 | Ho-Chi-Minh-Stadt (Vietnam) | VND     | - 22.794.881                                   | 17                                              | 100   |
| 152 Reebok (Mauritius) Company Limited             | Port Louis (Mauritius)      | USD     | 2.194                                          | 110                                             | 99    |
|                                                    |                             |         |                                                | 92                                              | 1     |
| <b>Lateinamerika</b>                               |                             |         |                                                |                                                 |       |
| 153 adidas Argentina S.A.                          | Buenos Aires (Argentinien)  | ARS     | 179.155                                        | 17                                              | 95    |
|                                                    |                             |         |                                                | 4                                               | 5     |
| 154 Reebok Argentina S.A.                          | Buenos Aires (Argentinien)  | ARS     | 5.461                                          | 17                                              | 89,99 |
|                                                    |                             |         |                                                | 18                                              | 10    |
| 155 adidas do Brasil Ltda. <sup>15)</sup>          | Sao Paulo (Brasilien)       | BRL     | 411.297                                        | 4                                               | 100   |

1) Teilkonzern adidas UK 2) Teilkonzern Reebok International Ltd. 3) Teilkonzern Indien 4) Teilkonzern Mexiko (adidas) 5) Teilkonzern Taylor Made UK 6) Gesellschaft ohne aktive Geschäftstätigkeit

7) Die Zahl bezieht sich auf die Nummerierung der Gesellschaft. 8) Teilkonzern Onfield 9) Teilkonzern Reebok-CCM Hockey, Inc. 10) Teilkonzern Sports Holdings Corp. 11) Teilkonzern Reebok International Limited

12) Ergebnisabführungsvertrag 13) Teilkonzern Taylor Made Golf Co., Inc. 14) Teilkonzern adidas Kanada 15) Teilkonzern adidas Brasilien

**Aufstellung des Anteilsbesitzes der adidas AG, Herzogenaurach**

zum 31. Dezember 2010

**Anlage II**

| Firma und Sitz der Gesellschaft                         |                              | Währung | Eigenkapital (in Tausend Währungseinheiten) | Anteil am Kapital gehalten von <sup>7)</sup> | in %  |
|---------------------------------------------------------|------------------------------|---------|---------------------------------------------|----------------------------------------------|-------|
| 156 ASPA do Brasil Ltda.                                | Sao Paulo (Brasilien)        | BRL     | - 11.065                                    | 122                                          | 100   |
| 157 adidas Trading Paraná Ltda. <sup>15)</sup>          | Pinhais (Brasilien)          | BRL     | —                                           | 155                                          | 99,99 |
| 158 Reebok Produtos Esportivos Brasil Ltda.             | Jundiai (Brasilien)          | BRL     | 44.484                                      | 17                                           | 99,99 |
| 159 adidas Chile Ltda.                                  | Santiago de Chile (Chile)    | CLP     | 41.427.037                                  | direkt                                       | 99    |
|                                                         |                              |         |                                             | 3                                            | 1     |
| 160 adidas Colombia Ltda.                               | Bogota (Kolumbien)           | COP     | 51.182.945                                  | direkt                                       | 100   |
| 161 adidas de Mexico, S.A. de C.V. <sup>4)</sup>        | Mexiko-Stadt (Mexiko)        | MXN     | 230.556                                     | direkt                                       | 100   |
| 162 adidas Industrial, S.A. de C.V. <sup>4)</sup>       | Mexiko-Stadt (Mexiko)        | MXN     | —                                           | direkt                                       | 100   |
| 163 Reebok de Mexico, S.A. de C.V.                      | Neucalpan de Juarez (Mexiko) | MXN     | - 307.643                                   | direkt                                       | 100   |
| 164 adidas Latin America, S.A.                          | Panama-Stadt (Panama)        | USD     | - 23.523                                    | direkt                                       | 100   |
| 165 Concept Sport, S.A.                                 | Panama-Stadt (Panama)        | USD     | 1.306                                       | 17                                           | 100   |
| 166 adidas Market LAM, S.A.                             | Panama-Stadt (Panama)        | USD     | —                                           | 17                                           | 100   |
| 167 3 Stripes S.A. (adidas Uruguay) <sup>4)</sup>       | Montevideo (Uruguay)         | UYU     | - 436                                       | direkt                                       | 100   |
| 168 adidas Corporation de Venezuela, S.A. <sup>6)</sup> | Caracas (Venezuela)          | VEF     | - 17                                        | direkt                                       | 100   |
| 169 adisport Corporation                                | San Juan (Puerto Rico)       | USD     | - 2.477                                     | 17                                           | 100   |

1) Teilkonzern adidas UK 2) Teilkonzern Reebok International Ltd. 3) Teilkonzern Indien 4) Teilkonzern Mexiko (adidas) 5) Teilkonzern Taylor Made UK 6) Gesellschaft ohne aktive Geschäftstätigkeit

7) Die Zahl bezieht sich auf die Nummerierung der Gesellschaft. 8) Teilkonzern Onfield 9) Teilkonzern Reebok-CCM Hockey, Inc. 10) Teilkonzern Sports Holdings Corp. 11) Teilkonzern Reebok International Limited

12) Ergebnisabführungsvertrag 13) Teilkonzern Taylor Made Golf Co., Inc. 14) Teilkonzern adidas Kanada 15) Teilkonzern adidas Brasilien

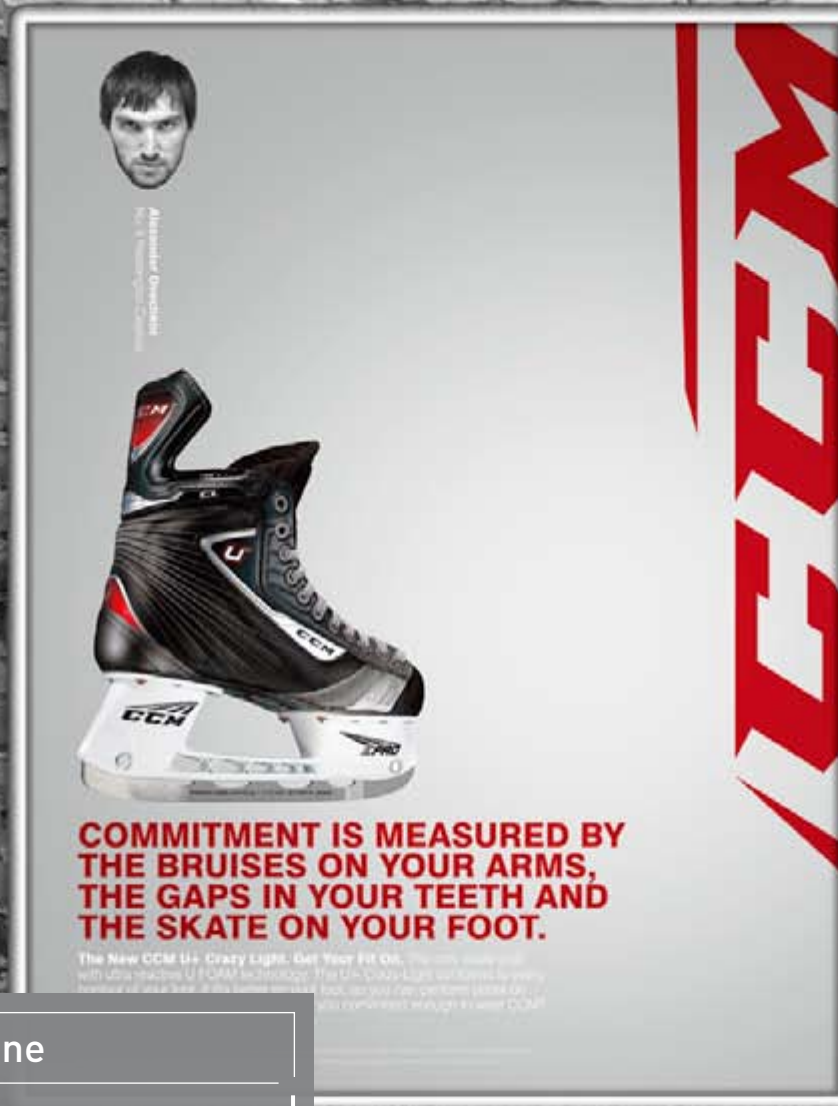

## CCM U+ Crazy Light Kampagne

Um die Markteinführung des neuen U+ Crazy Light Schlittschuhs zu unterstützen, wurde eine facettenreiche Kampagne mit Alex Ovechkin, Stürmer bei den Washington Capitals, gestartet. Charakteristisch für die Kampagne ist der „schwebende“ Kopf von Ovechkin, der auf komisch-scurrile Art frischen Wind in die Eishockey-Medienlandschaft bringt. Die Kampagne wurde im Oktober 2010 eingeführt und soll bis Ende 2011 laufen.



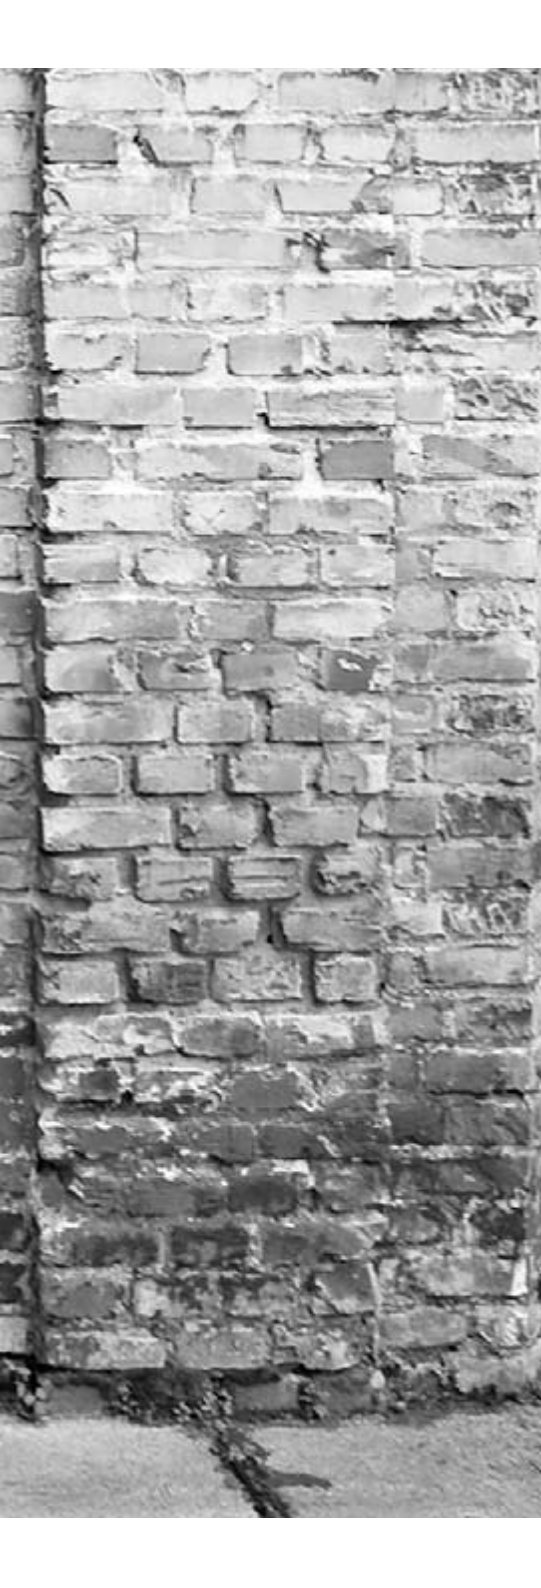

# 06

## Zusätzliche Informationen

|                               |       |
|-------------------------------|-------|
| Zehn-Jahresübersicht .....    | » 234 |
| Glossar .....                 | » 236 |
| Index .....                   | » 241 |
| Unterstützungserklärung ..... | » 242 |
| Impressum .....               | » 242 |
| Finanzkalender 2011 .....     | » 243 |

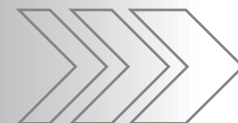

## Zehn-Jahresübersicht

|                                                                           | 2010   | 2009   | 2008   | 2007   | 2006 <sup>1)</sup> | 2005   | 2004   | 2003   | 2002   | 2001   |
|---------------------------------------------------------------------------|--------|--------|--------|--------|--------------------|--------|--------|--------|--------|--------|
| <b>Informationen zur Gewinn- und Verlustrechnung (in Mio. €)</b>          |        |        |        |        |                    |        |        |        |        |        |
| Umsatzerlöse <sup>2)</sup>                                                | 11.990 | 10.381 | 10.799 | 10.299 | 10.084             | 6.636  | 5.860  | 6.267  | 6.523  | 6.112  |
| Bruttoergebnis <sup>2)</sup>                                              | 5.730  | 4.712  | 5.256  | 4.882  | 4.495              | 3.197  | 2.813  | 2.814  | 2.819  | 2.601  |
| Lizenz- und Provisionserträge <sup>2)</sup>                               | 100    | 86     | 89     | 102    | 90                 | 47     | 42     | 42     | 46     | 42     |
| Sonstige betriebliche Erträge <sup>2)</sup>                               | 110    | 100    | 103    | 80     | 55                 | 36     | n/a    | n/a    | n/a    | n/a    |
| Sonstige betriebliche Aufwendungen <sup>2)</sup>                          | 5.046  | 4.390  | 4.378  | 4.115  | 3.759              | 2.573  | n/a    | n/a    | n/a    | n/a    |
| EBITDA <sup>2)</sup>                                                      | 1.159  | 780    | 1.280  | 1.165  | 1.078              | 806    | 716    | 652    | 622    | 620    |
| Betriebsergebnis <sup>2), 3)</sup>                                        | 894    | 508    | 1.070  | 949    | 881                | 707    | 584    | 490    | 477    | 475    |
| Finanzergebnis, netto <sup>2), 4)</sup>                                   | -88    | -150   | -166   | -135   | -158               | -52    | -59    | -49    | -87    | -102   |
| Gewinn vor Steuern <sup>2), 4)</sup>                                      | 806    | 358    | 904    | 815    | 723                | 655    | 526    | 438    | 390    | 376    |
| Ertragsteuern <sup>2)</sup>                                               | 238    | 113    | 260    | 260    | 227                | 221    | 193    | 167    | 148    | 147    |
| Auf nicht beherrschende Anteile entfallender Gewinn <sup>2), 4)</sup>     | -1     | 0      | -2     | -4     | -13                | -8     | -7     | -11    | -14    | -21    |
| Auf Anteilseigner entfallender Gewinn <sup>5)</sup>                       | 567    | 245    | 642    | 551    | 483                | 383    | 314    | 260    | 229    | 208    |
| <b>Kennzahlen zur Gewinn- und Verlustrechnung</b>                         |        |        |        |        |                    |        |        |        |        |        |
| Bruttomarge <sup>2)</sup>                                                 | 47,8 % | 45,4 % | 48,7 % | 47,4 % | 44,6 %             | 48,2 % | 48,0 % | 44,9 % | 43,2 % | 42,6 % |
| Operative Marge <sup>2), 3)</sup>                                         | 7,5 %  | 4,9 %  | 9,9 %  | 9,2 %  | 8,7 %              | 10,7 % | 10,0 % | 7,8 %  | 7,3 %  | 7,8 %  |
| Zinsdeckungsgrad <sup>2)</sup>                                            | 10,1   | 3,9    | 7,4    | 6,8    | 5,9                | 18,4   | 10,2   | 8,4    | 6,4    | 4,9    |
| Steuerquote <sup>2)</sup>                                                 | 29,5 % | 31,5 % | 28,8 % | 31,8 % | 31,4 %             | 33,7 % | 36,7 % | 38,0 % | 37,9 % | 39,0 % |
| Auf Anteilseigner entfallender Gewinn in % der Umsatzerlöse <sup>5)</sup> | 4,7 %  | 2,4 %  | 5,9 %  | 5,4 %  | 4,8 %              | 5,8 %  | 5,4 %  | 4,2 %  | 3,5 %  | 3,4 %  |
| <b>Umsatzerlöse nach Marken (in Mio. €)</b>                               |        |        |        |        |                    |        |        |        |        |        |
| adidas                                                                    | 8.714  | 7.520  | 7.821  | 7.113  | 6.626              | 5.861  | 5.174  | 4.950  | 5.105  | 4.825  |
| Reebok                                                                    | 1.913  | 1.603  | 1.717  | 1.831  | 1.979              | —      | —      | —      | —      | —      |
| TaylorMade-adidas Golf                                                    | 909    | 831    | 812    | 804    | 856                | 709    | 633    | 637    | 707    | 545    |
| Rockport                                                                  | 252    | 232    | 243    | 291    | 293                | —      | —      | —      | —      | —      |
| Reebok-CCM Hockey                                                         | 200    | 177    | 188    | 210    | 202                | —      | —      | —      | —      | —      |
| <b>Umsatzerlöse nach Produktbereichen (in Mio. €)</b>                     |        |        |        |        |                    |        |        |        |        |        |
| Schuhe <sup>2)</sup>                                                      | 5.389  | 4.642  | 4.919  | 4.751  | 4.733              | 2.978  | 2.620  | 2.767  | 2.851  | 2.650  |
| Bekleidung <sup>2)</sup>                                                  | 5.380  | 4.663  | 4.775  | 4.426  | 4.105              | 2.798  | 2.462  | 2.222  | 2.288  | 2.212  |
| Zubehör <sup>2)</sup>                                                     | 1.221  | 1.076  | 1.105  | 1.121  | 1.246              | 860    | 778    | 1.278  | 1.385  | 1.250  |

Bei Prozentangaben und Zahlen können Rundungsdifferenzen auftreten.

1) Beinhaltet Reebok, Reebok-CCM Hockey und Rockport ab 1. Februar 2006. 2) Die Zahlen für 2004 und 2005 spiegeln aufgrund der Veräußerung des Salomon Geschäftssegments das fortgeführte Geschäft wider.

3) Lizenz- und Provisionserträge sowie Wertminderungsaufwendungen für Geschäfts- oder Firmenwerte sind vor 2004 nicht im Betriebsergebnis enthalten.

4) Die Zahlen für 2003 und 2004 wurden aufgrund der Anwendung von IAS 32/IAS 39 und der Änderung zu IAS 19 angepasst. 5) Enthält Gewinn aus fortgeführtem und nicht fortgeführtem Geschäft.

6) Angepasst aufgrund des am 6. Juni 2006 im Verhältnis 1:4 durchgeführten Aktiensplits. 7) Vorbehaltlich der Zustimmung durch die Hauptversammlung.

## Zehn-Jahresübersicht

|                                                                      | 2010               | 2009    | 2008    | 2007    | 2006 <sup>1)</sup> | 2005    | 2004    | 2003    | 2002    | 2001    |
|----------------------------------------------------------------------|--------------------|---------|---------|---------|--------------------|---------|---------|---------|---------|---------|
| <b>Bilanzdaten (in Mio. €)</b>                                       |                    |         |         |         |                    |         |         |         |         |         |
| Bilanzsumme <sup>4)</sup>                                            | 10.618             | 8.875   | 9.533   | 8.325   | 8.379              | 5.750   | 4.434   | 4.188   | 4.261   | 4.183   |
| Vorräte                                                              | 2.119              | 1.471   | 1.995   | 1.629   | 1.607              | 1.230   | 1.155   | 1.164   | 1.190   | 1.273   |
| Forderungen und sonstige kurzfristige Vermögenswerte                 | 2.324              | 2.038   | 2.523   | 2.048   | 1.913              | 1.551   | 1.425   | 1.335   | 1.560   | 1.520   |
| Kurzfristiges Betriebskapital <sup>4)</sup>                          | 1.972              | 1.649   | 1.290   | 1.522   | 1.733              | 2.644   | 1.336   | 1.433   | 1.445   | 1.485   |
| Nettofinanzverbindlichkeiten                                         | 221                | 917     | 2.189   | 1.766   | 2.231              | -551    | 665     | 1.018   | 1.498   | 1.679   |
| Eigenkapital <sup>4)</sup>                                           | 4.616              | 3.771   | 3.386   | 3.023   | 2.828              | 2.684   | 1.544   | 1.285   | 1.081   | 1.015   |
| <b>Bilanzkennzahlen</b>                                              |                    |         |         |         |                    |         |         |         |         |         |
| Nettofinanzverbindlichkeiten/EBITDA <sup>2)</sup>                    | 0,2                | 1,2     | 1,7     | 1,5     | 2,1                | -0,7    | 0,9     | 1,6     | 2,4     | 2,7     |
| Verschuldungsgrad <sup>4)</sup>                                      | 4,8%               | 24,3%   | 64,6%   | 58,4%   | 78,9%              | -20,5%  | 43,1%   | 79,2%   | 138,5%  | 165,5%  |
| Eigenkapitalquote <sup>4)</sup>                                      | 43,5%              | 42,5%   | 35,5%   | 36,3%   | 33,8%              | 46,7%   | 34,8%   | 30,7%   | 25,4%   | 24,3%   |
| Anlagendeckungsgrad <sup>4)</sup>                                    | 97,4%              | 85,9%   | 73,6%   | 72,2%   | 63,5%              | 194,0%  | 110,4%  | 91,1%   | 75,4%   | 77,8%   |
| Vermögensdeckung I <sup>4)</sup>                                     | 141,5%             | 137,4%  | 127,7%  | 136,1%  | 138,7%             | 284,1%  | 194,1%  | 197,6%  | 196,9%  | 209,3%  |
| Vermögensdeckung II <sup>4)</sup>                                    | 97,7%              | 102,9%  | 89,1%   | 98,0%   | 102,0%             | 150,4%  | 106,3%  | 108,3%  | 107,6%  | 105,9%  |
| Anlagenintensität                                                    | 44,6%              | 49,5%   | 48,2%   | 50,3%   | 53,2%              | 24,1%   | 31,6%   | 33,7%   | 33,7%   | 31,2%   |
| Umlaufintensität                                                     | 55,4%              | 50,5%   | 51,8%   | 49,7%   | 46,8%              | 75,9%   | 68,4%   | 66,3%   | 66,3%   | 68,8%   |
| Liquidität ersten Grades <sup>4)</sup>                               | 35,5%              | 30,0%   | 10,5%   | 14,5%   | 15,8%              | 92,0%   | 26,8%   | 20,8%   | 5,5%    | 6,1%    |
| Liquidität zweiten Grades <sup>4)</sup>                              | 78,2%              | 80,4%   | 55,1%   | 70,3%   | 80,4%              | 148,0%  | 88,4%   | 100,8%  | 99,1%   | 96,0%   |
| Liquidität dritten Grades <sup>4)</sup>                              | 132,4%             | 132,2%  | 109,8%  | 132,6%  | 153,7%             | 219,4%  | 156,4%  | 187,4%  | 185,3%  | 187,4%  |
| Umschlagshäufigkeit des kurzfristigen Betriebskapitals <sup>4)</sup> | 6,1                | 6,3     | 8,4     | 6,8     | 5,8                | 2,6     | 4,4     | 4,4     | 4,5     | 4,1     |
| Eigenkapitalrendite <sup>4) 5)</sup>                                 | 12,3%              | 6,5%    | 18,9%   | 18,2%   | 17,1%              | 14,3%   | 20,4%   | 20,2%   | 21,1%   | 20,5%   |
| Verzinsung des eingesetzten Kapitals <sup>4) 5)</sup>                | 20,2%              | 11,3%   | 19,8%   | 20,2%   | 17,6%              | 49,3%   | 27,5%   | 22,1%   | 16,8%   | 16,7%   |
| <b>Kennzahlen je Aktie<sup>4)</sup></b>                              |                    |         |         |         |                    |         |         |         |         |         |
| Aktienkurs am Jahresende (in €)                                      | 48,89              | 37,77   | 27,14   | 51,26   | 37,73              | 40,00   | 29,69   | 22,58   | 20,58   | 21,08   |
| Unverwässertes Ergebnis <sup>5)</sup> (in €)                         | 2,71               | 1,25    | 3,25    | 2,71    | 2,37               | 2,05    | 1,72    | 1,43    | 1,26    | 1,15    |
| Verwässertes Ergebnis <sup>5)</sup> (in €)                           | 2,71               | 1,22    | 3,07    | 2,57    | 2,25               | 1,93    | 1,64    | 1,43    | 1,26    | 1,15    |
| Kurs/Gewinn-Verhältnis am Jahresende                                 | 18,0               | 31,0    | 8,8     | 19,9    | 16,8               | 20,7    | 18,1    | 15,8    | 16,3    | 18,3    |
| Marktkapitalisierung am Jahresende (in Mio. €)                       | 10.229             | 7.902   | 5.252   | 10.438  | 7.679              | 8.122   | 5.446   | 4.104   | 3.738   | 3.823   |
| Operativer Cashflow (in €)                                           | 4,28               | 6,11    | 2,52    | 3,83    | 3,74               | 1,88    | 3,17    | 3,58    | 2,94    | 2,12    |
| Dividende (in €)                                                     | 0,80 <sup>7)</sup> | 0,35    | 0,50    | 0,50    | 0,42               | 0,33    | 0,33    | 0,25    | 0,25    | 0,23    |
| Gewinnausschüttungsquote (in %)                                      | 29,5               | 29,8    | 15,1    | 18,0    | 17,7               | 17,2    | 18,9    | 17,5    | 19,8    | 20,0    |
| Anzahl der Aktien am Jahresende (in Tausend)                         | 209.216            | 209.216 | 193.516 | 203.629 | 203.537            | 203.047 | 183.436 | 181.816 | 181.692 | 181.396 |
| <b>Mitarbeiter</b>                                                   |                    |         |         |         |                    |         |         |         |         |         |
| Anzahl der Mitarbeiter am Jahresende <sup>2)</sup>                   | 42.541             | 39.596  | 38.982  | 31.344  | 26.376             | 15.935  | 14.254  | 15.686  | 14.716  | 13.941  |
| Personalaufwand <sup>2)</sup> (in Mio. €)                            | 1.521              | 1.352   | 1.283   | 1.186   | 1.087              | 706     | 637     | 709     | 758     | 695     |

Bei Prozentangaben und Zahlen können Rundungsdifferenzen auftreten.

1) Beinhaltet Reebok, Reebok-CCM Hockey und Rockport ab 1. Februar 2006. 2) Die Zahlen für 2004 und 2005 spiegeln aufgrund der Veräußerung des Salomon Geschäftssegments das fortgeführte Geschäft wider.

3) Lizenz- und Provisionserträge sowie Wertminderungsaufwendungen für Geschäfts- oder Firmenwerte sind vor 2004 nicht im Betriebsergebnis enthalten.

4) Die Zahlen für 2003 und 2004 wurden aufgrund der Anwendung von IAS 32/IAS 39 und der Änderung zu IAS 19 angepasst. 5) Enthält Gewinn aus fortgeführtem und nicht fortgeführtem Geschäft.

6) Angepasst aufgrund des am 6. Juni 2006 im Verhältnis 1:4 durchgeführten Aktiensplits. 7) Vorbehaltlich der Zustimmung durch die Hauptversammlung.

# Glossar

## A

**AFIRM** [Apparel and Footwear International Restricted Substances List Management Working Group]

Expertenarbeitsgruppe, deren Ziel es ist, die Verwendung und die Auswirkungen schädlicher Stoffe in der Beschaffungskette von Kleidung und Schuhen zu reduzieren » siehe auch [www.afirm-group.com](http://www.afirm-group.com).

**American Depositary Receipt (ADR)**

Hinterlegungsscheine für ausländische Aktien, die von amerikanischen Banken ausgegeben werden und dem Inhaber Dividendenansprüche und sonstige Rechte, die im Zusammenhang mit der zugrunde liegenden Aktie stehen, einräumen. ADRs werden wie Aktien an amerikanischen Börsen gehandelt. Dadurch haben amerikanische Investoren die Möglichkeit, Anteile an ausländischen Unternehmen in den USA zu erwerben, ohne an eine ausländische Börse gehen zu müssen.

**Anlagendeckung**

Gibt den durch Eigenkapital finanzierten Anteil der langfristigen Vermögenswerte an.  
*Anlagendeckung = Eigenkapital / Anlagevermögen.*

**Auftragsbestand**

Wert der erhaltenen Aufträge für zukünftige Lieferungen. Die meisten Bestellungen der Einzelhändler werden sechs bis neun Monate im Voraus in Auftrag gegeben.

## B

**Beta Faktor**

Maß für das relative Risiko einer einzelnen Aktie im Vergleich zum Gesamtmarkt. Ein Beta Faktor von größer eins bedeutet, dass die Aktie risikobehafteter ist als der Gesamtmarkt. Für einen Beta Faktor von kleiner eins gilt der umgekehrte Fall.

**Betriebsergebnis**

Ergebnis des operativen Geschäfts des Konzerns nach Umsatzkosten und sonstigen betrieblichen Aufwendungen.

*Betriebsergebnis = Bruttoergebnis + Lizenz- und Provisionserträge + sonstige betriebliche Erträge – Sales Working Budget – Marketing Working Budget – Betriebsgemeinkosten.*

**Betriebsgemeinkosten**

In Verbindung mit dem Geschäftsbetrieb anfallende Kosten, die nicht direkt auf die verkauften Produkte und Dienstleistungen umzulegen sind. Dies sind Kosten für Vertrieb, Marketinggemeinkosten, Logistik, Forschung und Entwicklung sowie allgemeine Verwaltungskosten, nicht aber die Kosten für Promotion, Werbung und Kommunikation.

**Better Cotton Initiative**

Die „Better Cotton Initiative“ wurde im Rahmen einer Zusammenarbeit zwischen dem World Wildlife Fund (WWF) und einer Vielzahl von Anspruchsgruppen gegründet, die in die Beschaffung von Baumwolle involviert sind. Die Initiative zielt darauf ab, messbare Verbesserungen der Auswirkungen auf Umwelt und Gesellschaft durch die Baumwollanpflanzung und -beschaffung zu erzielen und diese umweltfreundlicher und sozial nachhaltiger zu gestalten » siehe auch [www.bettercotton.org](http://www.bettercotton.org).

**Bruttoergebnis**

Differenz zwischen Umsatz und Umsatzkosten.  
*Bruttoergebnis = Umsatz – Umsatzkosten.*

**Bruttoinlandsprodukt (BIP)**

Die zu Marktpreisen bewertete Summe aller fertigen Erzeugnisse und Dienstleistungen, die in einem bestimmten Zeitraum in einem Land produziert wurden.

*BIP = Konsumausgaben + Investitionen + Staatsausgaben + (Exporte – Importe)*

**Bruttomarge**

Bruttoergebnis im Verhältnis zum Umsatz.  
*Bruttomarge = (Bruttoergebnis / Umsatz) × 100.*

## C

**CAD**

Computer-Aided Design (CAD) ist die Verwendung von Computer-Technologie für den Design-Prozess und die Design-Dokumentation.

**Celliant-Fasern**

Celliant ist eine Komponente für den Einsatz in der Textilindustrie. Es ist ein Stoffmaterial, das sichtbares Infrarotlicht umwandelt und die dabei frei werdende Energie dem Körper zurückführt. Dadurch werden Blutfluss und Sauerstoffgehalt im Blut erhöht.

**China**

Im Kontext dieses Berichts ist China als der geografische Großraum China, inklusive Hongkong und Taiwan, definiert.

**Commercial Paper**

Handelbare, unbesicherte Inhaberschuldverschreibungen, die zur kurzfristigen Fremdkapitalaufnahme emittiert werden. Commercial Paper werden als Daueremission revolving mit einer Laufzeit von sieben Tagen bis zu zwölf Monaten oder länger ausgegeben.

**Concession Corners**

Verkaufsbereich, der von einer der Marken des adidas Konzerns betrieben wird. Der Bereich ist Teil eines größeren Verkaufsbereichs, der von einem Handelspartner betrieben wird.

**Corporate Governance**

Verteilung von Rechten und Pflichten unter den wichtigsten Interessensgruppen des Unternehmens, insbesondere den Aktionären, dem Vorstand und dem Aufsichtsrat.

**Credit Default Swap**

Ein Credit Default Swap (CDS) ist ein Derivat, bei dem der Käufer des CDS eine Gebühr (Ausfallprämie) an den Verkäufer zahlt und im Gegenzug im Falle eines definierten „Kreditereignisses“ (z. B. Zahlungsausfall des Anleihenemitters oder Kreditgebers) eine Ausgleichszahlung erhält.

**Customer Relationship Management (CRM)**

Möglichkeiten und Methoden, die ein Unternehmen einsetzt, um sich auf ihre Kunden und die systematische Gestaltung der Kundenbeziehungs-Prozesse auszurichten.

## D

**D&O-Versicherung**

Directors-and-Officers-Versicherung, auch Organ- oder Manager-Haftpflichtversicherung. Vermögensschadenhaftpflichtversicherung, die ein Unternehmen für seine Organe und leitenden Angestellten zum Schutz vor Kosten aufgrund von Rechtsstreitigkeiten in Verbindung mit einem möglichen fehlerhaften Geschäftsverhalten abschließt.

**DAX**

Der DAX (Deutscher Aktienindex) ist ein Aktienindex, bestehend aus den 30 größten deutschen Unternehmen, die an der Frankfurter Wertpapierbörse gehandelt werden.

**Days of Sales Outstanding (DSO)**

Durchschnittlicher Zeitraum der Forderungsbegleichung durch unsere Kunden.

**Devisentermingeschäft**

Vertrag über den Austausch zweier Währungen zu einem im Voraus festgelegten Wechselkurs und Zeitpunkt.



#### Dow Jones Sustainability Index

Der Dow Jones Sustainability Index (DJSI) misst die Nachhaltigkeit von Unternehmensinitiativen. Der Fokus liegt dabei auf der Art und Weise, wie ein Unternehmen mit den Risiken und Chancen in seiner Geschäftsstrategie umgeht, die aus Nachhaltigkeitsthemen entstehen.

#### Durchverkauf

Zeitraum, in dem Produkte über den Einzelhandel an den Konsumenten weiterverkauft werden.

#### E

##### EBITDA

Ergebnis vor Zinsen, Steuern, Abschreibungen und Wertminderungsaufwendungen sowie Wertaufholungen für Sachanlagen und immaterielle Vermögenswerte.

#### Eigenkapitalderivate

Klasse von Derivaten, deren Wert sich zumindest teilweise aus einem oder mehreren zu Grunde liegenden Eigenkapitalwerten ableitet. Optionen und Termingeschäfte sind mit Abstand die häufigsten Eigenkapitalderivate. Zusätzlich existieren viele weitere Arten, die aktiv gehandelt werden.

#### Eigenkapitalquote

Gibt den Prozentsatz an, zu dem das Anlagevermögen durch Eigenkapital finanziert ist.  
 $\text{Eigenkapitalquote} = (\text{Eigenkapital} / \text{Anlagevermögen}) \times 100$ .

#### Eigenkapitalrendite (ROE)

Die Eigenkapitalrendite zeigt den Ertrag eines Unternehmens im Verhältnis zum Eigenkapital.  
 $\text{ROE} = (\text{Jahresüberschuss} / \text{auf Anteilseigner entfallendes Kapital}) \times 100$ .

#### Enterprise Resource Planning (ERP)

Enterprise Resource Planning bezeichnet eine Systemlösung, die alle Aspekte des jeweiligen Geschäftsmodells berücksichtigt, inklusive Planung, Herstellung, Verkauf und Marketing.

#### F

##### Fair Factories Clearinghouse

Das Fair Factories Clearinghouse (FFC) wurde im Jahr 2004 zur Verbesserung von Sozial-, Umwelt- und Sicherheitsstandards gegründet und soll dabei helfen, faire Arbeitsbedingungen für Arbeiter zu schaffen, die weltweit in der Konsumgüterindustrie beschäftigt sind. Zu den Mitgliedern zählen viele Unternehmen der Sportartikel- und Konsumgüterindustrie, sowie deren Zuliefererbetriebe » siehe auch [www.fairfactories.org](http://www.fairfactories.org).

##### Fair Labor Association (FLA)

Die Fair Labor Association (FLA) ist eine gemeinnützige Arbeitsrechtsorganisation, die Firmen, Colleges, Universitäten und andere gesellschaftliche Organisationen vereint. Sie hat sich zum Ziel gesetzt, Arbeitsbedingungen weltweit zu verbessern, indem sie sich für die Einhaltung von nationalem und internationalem Arbeitsrecht einsetzt » siehe auch [www.fairlabor.org](http://www.fairlabor.org).

#### Fair Value

Beizulegender Zeitwert. Betrag, zu dem Vermögenswerte zwischen Geschäftspartnern fairer Weise gehandelt würden. Der Fair Value ist häufig identisch mit dem Marktpreis.

#### Finanzierungsleasing

Art des Leasings, bei dem die Vermietung des Objekts durch eine spezielle Leasinggesellschaft für eine bestimmte, unkündbare Grundmietzeit erfolgt. Das Investitionsrisiko geht dabei auf den Leasingnehmer über.

#### Franchising

Ein Franchisegeber stellt einem Franchisenehmer die Nutzung eines Produkts, einer Dienstleistung oder Geschäftskonzepts zur Verfügung. In der Regel unterstützt der Franchisegeber den Franchisenehmer z. B. in organisatorischen Dingen und bei Schulungen im Bereich Marketing und Management.

#### Free Cashflow

Finanzielle Mittel, die einem Unternehmen nach Abzug von Investitionen und anderen Auszahlungen wie beispielsweise Steuern und Zinsen vom Betriebsergebnis für zukünftige Aktivitäten zur Verfügung stehen.

$\text{Free Cashflow} = \text{Betriebsergebnis} + \text{Abschreibungen (inkl. Geschäfts- oder Firmenwerte)} \pm \text{Veränderungen im operativen kurzfristigen Betriebskapital} - \text{Investitionen} \pm \text{betriebsfremde Auszahlungen}$ .

#### G

##### Geschäfts- oder Firmenwerte (Goodwill)

Immaterieller Vermögenswert, der den Betrag quantifiziert, der für das Image, das Know-how und die Marktposition eines übernommenen Unternehmens bezahlt wurde. Der Geschäfts- oder Firmenwert ergibt sich aus der Differenz zwischen dem Kaufpreis und dem Zeitwert des erworbenen Nettovermögens zum Zeitpunkt der Übernahme.

#### Gewichteter Kapitalkostensatz (WACC)

Bestimmung der Kapitalkosten anhand der Berechnung des gewichteten Kapitalkostensatzes (WACC), basierend auf dem Verhältnis von Fremdkapital und Eigenkapital. Die Eigenkapitalkosten werden mit dem risikolosen Zinssatz, einer Risikoprämie für das Marktrisiko und dem Beta Faktor berechnet. Die Grundlage zur Bestimmung der Fremdkapitalkosten sind der risikolose Zinssatz, der Credit Spread und die durchschnittliche Steuerquote.

#### Go-to-Market

Alle Maßnahmen, Hilfsmittel sowie Kommunikations- und Vertriebskanäle, die dafür genutzt werden, mit dem Konsumenten in Verbindung zu treten und seine Bedürfnisse bestmöglich zu befriedigen.

#### H

##### Halo-Effekt

Der Halo-Effekt bezeichnet einen Wahrnehmungseffekt, nach welchem Menschen von einzelnen Eigenschaften auf andere, nicht mit den ursprünglich bewerteten in Zusammenhang stehenden Eigenschaften schließen, die sie dann entweder auch positiv (oder auch negativ) einschätzen.

#### Hedging

Hedging ist eine Strategie zur Absicherung von Zins-, Währungs- oder Kursrisiken durch derivative Finanzinstrumente (Optionen, Swaps, Termingeschäfte usw.) » siehe auch [Natürliche Absicherungsmaßnahmen](#).

#### I

##### Institutionelle Investoren

Gesellschaften wie z. B. Investmentgesellschaften, Investmentfonds, Makler, Versicherungsgesellschaften, Pensionsfonds, Investmentbanken und Stiftungen. Diese haben in der Regel umfassende Kenntnisse hinsichtlich Anlageformen und -risiken und sind in der Lage, große Investitionen zu tätigen.

#### Interessenvertreter

Alle Gruppen, die ein direktes oder indirektes Interesse an den Leistungen und Ergebnissen eines Unternehmens haben. Dazu zählen Kreditgeber, Aktionäre, Konsumenten, Fachhändler, Lieferanten, Lizenznehmer, Geschäftspartner in der Beschaffungskette, Mitarbeiter, internationale Sportverbände, Nicht-Regierungsorganisationen, Medien usw.

### International Financial Reporting Standards (IFRS)

Die IFRS (vormals IAS) werden vom IASB (International Accounting Standards Board) mit dem Ziel herausgegeben, transparente und vergleichbare Rechnungslegungsprinzipien zu schaffen, die von Unternehmen und Organisationen weltweit zur Finanzberichterstattung angewendet werden.

### International Labour Organization (ILO)

Die ILO, auch Internationale Arbeitsorganisation genannt, ist eine Sonderorganisation der Vereinten Nationen, die sich für die Formulierung und Durchsetzung internationaler Sozial- und Arbeitsnormen einsetzt

» siehe auch: [www.ilo.org](http://www.ilo.org).

### Investitionen

Gesamte finanzielle Mittel, die für die Anschaffung von materiellen und immateriellen Vermögenswerten verwendet werden, ausgenommen Akquisitionen und Finanzierungsleasing.

### ISO 14001

Der ISO 14001 Standard der Internationalen Organisation für Normung (ISO) definiert die Anforderungen an Umweltmanagementsysteme von Unternehmen/Organisationen. Er betrifft vor allem Aspekte, die Unternehmen/Organisationen selbst in ihrer Umweltbilanz beeinflussen/kontrollieren können (z. B. Energie- und Wasserverbrauch).

## J

### Joint Venture

Eine Kooperation von Gesellschaften durch die Gründung einer neuen, rechtlich selbstständigen Geschäftseinheit, an der die Gründungsgesellschaften (zwei oder mehrere Gesellschaften) mit ihrem Kapital und wesentlichen Ressourcen beteiligt sind.

## K

### Key Accounts

Groß- oder Einzelhändler, die als wichtige Kunden des Konzerns einen beträchtlichen Anteil des Umsatzes generieren.

### Kinesiologie

Bewegungswissenschaft.

### Konsortialkredit

Ein Konsortialkredit wird von einer Gruppe von Kreditgebern vergeben und von einer oder mehreren Geschäftsbanken oder Investmentbanken strukturiert, gestaltet und verwaltet.

### Konsumentenpreisindex

Zeigt die durchschnittliche Preisentwicklung eines definierten, für Großstadtkonsumenten typischen Korbs an Waren und Dienstleistungen. Die prozentuale Veränderung des Index wird als Maßstab für die Inflationsberechnung verwendet.

### Kurs-Gewinn-Verhältnis (KGV)

Verhältnis zwischen Aktienkurs und verwäsertem (aktuellem oder zukünftigem) Gewinn je Aktie. Kennzahl zur Beurteilung der Ertragskraft und -entwicklung eines Unternehmens im Vergleich zu einem oder mehreren anderen im Gesamtmarkt. Meist ist es sinnvoller, das KGV eines Unternehmens mit anderen Unternehmen in einer ähnlichen Branche zu vergleichen. In der Regel deutet ein hohes KGV darauf hin, dass Investoren künftig eine höhere Gewinnsteigerung im Vergleich zu Unternehmen mit niedrigerem KGV erwarten.

### Kurzfristiges Betriebskapital

Kurzfristig verfügbares Kapital eines Unternehmens zur Finanzierung der laufenden Geschäftsaktivitäten.

*Kurzfristiges Betriebskapital = Umlaufvermögen – kurzfristige Verbindlichkeiten*

» siehe auch Operatives kurzfristiges Betriebskapital.

## L

### Leather Working Group

Die Leather Working Group (LWG) wurde im April 2005 gegründet, um nachhaltige und angemessene Umweltverantwortlichkeitspraktiken innerhalb der Lederindustrie zu fördern » siehe auch [www.leatherworkinggroup.com](http://www.leatherworkinggroup.com).

### Lifestyle-Markt

Markt für Sport-inspirierte modische Schuh- und Bekleidungskollektionen. Innerhalb des adidas Konzerns wird dieses Segment von den Submarken adidas Sport Style und Reebok Classics abgedeckt.

### Liquidität ersten, zweiten, dritten Grades

Der Liquiditätsgrad gibt an, wie schnell ein Unternehmen Vermögenswerte liquidieren kann, um kurzfristige Verbindlichkeiten zu bedienen.

Liquidität ersten Grades:

$$[(\text{Flüssige Mittel} + \text{kurzfristige Finanzanlagen}) / \text{kurzfristige Verbindlichkeiten}] \times 100.$$

Liquidität zweiten Grades:

$$[(\text{Flüssige Mittel} + \text{kurzfristige Finanzanlagen} + \text{Forderungen aus Lieferungen und Leistungen}) / \text{kurzfristige Verbindlichkeiten}] \times 100.$$

Liquidität dritten Grades:

$$[(\text{Flüssige Mittel} + \text{kurzfristige Finanzanlagen} + \text{Forderungen aus Lieferungen und Leistungen} + \text{Vorräte}) / \text{kurzfristige Verbindlichkeiten}] \times 100.$$

### Lizenzbekleidung

Bekleidungsprodukte, welche unter einer Lizenzvereinbarung hergestellt und vermarktet werden. Der adidas Konzern hat Lizenzgeschäfte mit Sportverbänden (z. B. FIFA, UEFA, IOC), Sportligen (z. B. NFL, NBA), professionellen Sportteams (z. B. Real Madrid, AC Mailand) und Universitäten (z. B. UCLA, Notre Dame).

## M

### Marketing Working Budget (MWB)

Enthält Aufwendungen für Promotion und Kommunikation, darunter Sponsoring-Verträge mit Mannschaften und einzelnen Sportlern sowie Werbung, Einzelhandelsunterstützung, Veranstaltungen und andere Kommunikationsaktivitäten, jedoch ohne Personal- und Verwaltungskosten im Marketing. Da die Aufwendungen des MWB keine bestimmten Vertriebskanäle betreffen, werden sie nicht den Segmenten zugeordnet.

### Marktkapitalisierung

Der Gesamtmarktwert aller im Umlauf befindlichen Aktien einer Gesellschaft.

*Marktkapitalisierung = Anzahl der im Umlauf befindlichen Aktien × aktueller Börsenkurs.*

### Mitbestimmungsgesetz (MitbestG)

Das Mitbestimmungsgesetz regelt die Form der Mitbestimmung von Arbeitnehmern bei Kapitalgesellschaften mit mehr als 2.000 Mitarbeitern. Es bestimmt unter anderem, dass der Aufsichtsrat einer solchen Gesellschaft zu gleichen Teilen aus Vertretern der Arbeitnehmer und der Anteilseigner zu besetzen ist.

### Mono-Branded Stores

adidas, Reebok oder Rockport Geschäfte, die nicht im Besitz des adidas Konzerns sind, sondern von Franchise-Partnern betrieben werden. Der adidas Konzern nutzt dieses Konzept in erster Linie in Wachstumsländern wie China, um von der lokalen Marktexpertise des jeweiligen Partners zu profitieren » siehe auch Franchising.

## N

### Natürliche Absicherungsmaßnahmen

Ausgleich von Währungsrisiken, der ohne die Nutzung von Derivaten auf natürliche Weise als Ergebnis der normalen Geschäftstätigkeit eines Unternehmens zustande kommt. Ein Beispiel sind in Fremdwährung erzielte Umsatzerlöse, die zur Tilgung von Verbindlichkeiten in der gleichen Fremdwährung eingesetzt werden.

### Nettofinanzverbindlichkeiten

Der Teil der Gesamtf Finanzverbindlichkeiten, der nicht durch flüssige Mittel und kurzfristige Finanzanlagen abgedeckt ist. Im Fall von Nettoliquidität ist diese Zahl negativ.

*Nettofinanzverbindlichkeiten = Kurzfristige Verbindlichkeiten + Langfristige Verbindlichkeiten – Flüssige Mittel – Kurzfristige Finanzanlagen.*

### Nicht beherrschende Anteile

Anteil am Jahresergebnis, der nicht dem Konzern, sondern Konzernfremden, die Anteile an verbundenen Unternehmen halten, die zu Finanzberichterstattungszwecken innerhalb des Mutterunternehmens konsolidiert sind, zuzurechnen ist.

## O

### OHSAS 18000

Das OHSAS 18000 ist ein internationaler Standard, der die Anforderungen an ein Gesundheits- und Sicherheitsmanagementsystem definiert.

### ÖKO-Tex Standard 100

Der Öko-Tex Standard 100 ist ein internationales Test- und Zertifizierungssystem für Textilien, das den Gebrauch von bestimmten Chemikalien definiert bzw. limitiert.

### Operatives kurzfristiges Betriebskapital

Betriebsvermögen, das ein Unternehmen aufbringen muss, um seine laufende Geschäftstätigkeit zu finanzieren. Im Gegensatz zu kurzfristigem Betriebskapital enthält das operative kurzfristige Betriebskapital keine nicht-operativen Bilanzpositionen wie flüssige Mittel, kurzfristige Finanzanlagen und Steuern.

*Operatives kurzfristiges Betriebskapital = Forderungen aus Lieferungen und Leistungen + Vorräte – Verbindlichkeiten aus Lieferungen und Leistungen*  
» siehe auch Kurzfristiges Betriebskapital.

### Operatives Leasing

Methode, Anlagen über einen bestimmten Zeitraum zu mieten, der kürzer ist als die erwartete Lebensdauer der Anlage. Bei einem operativen Leasing erscheinen weder die Anlage noch die Verbindlichkeit in der Bilanz des Leasingnehmers. Die periodischen Zahlungen werden beim Leasingnehmer als operative Aufwendungen verbucht.

### Option

Finanzinstrument, das das Recht verbrieft, einen bestimmten Vermögenswert (z. B. Aktien oder Devisen) zu einem bestimmten Preis (Strike Price) bis zu einem bestimmten Datum zu kaufen (Call Option) oder zu verkaufen (Put Option).

## P

### Performance-Markt

Markt für leistungsorientierte Schuh- und Bekleidungsprodukte, die primär beim Sport zum Einsatz kommen.

### Pfandrecht

Das Recht, einen Vermögenswert eines Schuldners als Sicherheit oder Bezahlung für eine Schuld in Besitz zu nehmen und zu behalten oder ihn zu verkaufen.

### Point-of-Sale

Verkaufsort/-stelle.

### Preispunkte

Spezifischer Verkaufspreis. Gewöhnlich werden dabei psychologische Preisobergrenzen, wie z. B. 99,99 € anstelle von 100 €, verwendet.

### Privatanleger

Einzelperson, die am Kapitalmarkt eigenes Geld anlegt, im Gegensatz zu einem institutionellen Investor.

### Produktlizenznehmer

Unternehmen, die die Genehmigung haben, den Namen einer Marke oder eines Unternehmens bei der Herstellung und dem Vertrieb von Produkten zu verwenden. Bei adidas umfassen Lizenzprodukte zum Beispiel Kosmetika, Uhren und Brillen, bei Reebok Fitness-Equipment und bei TaylorMade-adidas Golf Taschen und Handschuhe.

### Promotion-Partnerschaften

Partnerschaften mit Sportveranstaltungen, Verbänden, Ligen, Vereinen und Sportlern, wobei diese für eine Marke und deren Produkte werben. Die Vergütung erfolgt in Form von Geldzahlungen und / oder Sachleistungen.

### Push-Pull-Modell

Das Push-Pull-System des Einzelhandels beschreibt die Beschaffungs- und Nachfragedynamik zwischen Einzelhändlern und Konsumenten. Unter dem Push-Modell versteht man die Bereitstellung von Produkten, basierend auf geschätzten (spekulativen) Kundenbestellungen. Beim Pull-Modell hingegen werden die Waren basierend auf der Konsumenten-nachfrage am Point-of-Sale und den aktuellen Verkaufstrends auf dem Markt bereitgestellt.

## R

### Regionen

Der adidas Konzern unterscheidet 17 Märkte, die in sechs geografischen Regionen zusammengefasst werden: Westeuropa, Europäische Schwellenländer, Nordamerika, China, Andere Asiatische Märkte sowie Lateinamerika.

### Risikoloser Zins

Die Verzinsung, die ein Anleger von einem risikofreien Investment, beispielsweise einer Staatsanleihe, erwarten kann.

### Risikoprämie

Mehrertrag, den der Markt insgesamt oder eine bestimmte Aktie über dem risikolosen Zinssatz bieten muss, um Anleger für das höhere Risiko von Aktien zu entschädigen.  
*Risikoprämie = Differenz zwischen der erwarteten Rendite aus dem Marktportfolio aus Aktien und der Verzinsung risikoloser Anlagen.*

## S

### Sales Working Budget

Die Aufwendungen des Sales Working Budgets stehen im Zusammenhang mit Marketing- und Promotion-Initiativen am Point-of-Sale sowie mit Geschäftsausstattungen und –einrichtungen. Da die Aufwendungen des Sales Working Budgets vertriebskanalspezifisch sind, werden sie den jeweiligen operativen Geschäftssegmenten des Konzerns zugeordnet.

### Schuldscheindarlehen

Auch Privatplatzierung. Platzierung von festverzinslichen Wertpapieren direkt bei institutionellen Investoren wie Banken, Fonds, Versicherungsunternehmen, Pensionskassen und Stiftungen.

### Schwellenländer

In der Entwicklung begriffene Volkswirtschaften mit großem Wachstumspotenzial in Bezug auf Wirtschaftskraft und privatem Wohlstand. Als Schwellenländer versteht der adidas Konzern die Länder Asiens, Osteuropas, Lateinamerikas und Afrikas.

## Segment

Auch Geschäftssegment. Einheiten innerhalb eines Unternehmens, die Gewinn- und Verlustverantwortung besitzen. Der adidas Konzern ist zur Zeit in sechs Geschäftssegmente unterteilt: Großhandel, Einzelhandel, TaylorMade-adidas Golf, Rockport, Reebok-CCM Hockey und Andere Zentral Geführte Marken.

## Selbst kontrollierte Verkaufsflächen

Beinhalten den eigenen Einzelhandel, Mono-Branded Stores, Shop-in-Shops, Joint Ventures mit Einzelhändlern und Co-Branded Stores. Selbst kontrollierte Verkaufsflächen bieten ein hohes Maß an Markenkontrolle und ermöglichen die bestmögliche Präsentation der Produkte entsprechend den Vorgaben der jeweiligen Marke.

## Shop-in-Shop

adidas, Reebok oder Rockport Verkaufsreich innerhalb eines Einzelhandelsgeschäfts. Je nach Vereinbarung wird der Bereich vom adidas Konzern oder dem Betreiber des Einzelhandelsgeschäfts betrieben. Ziel ist es, dem Kunden auf kleinerer Fläche ein ähnliches Käuferlebnis zu vermitteln, wie er es in einem unserer eigenen Einzelhandelsgeschäfte haben würde.

## Signature Collection

Kollektion, die mit dem Namen oder dem Markenzeichen von Top-Athleten versehen ist.

## Swap

Derivat, mit dem zwei Unternehmen vereinbaren, in der Zukunft Zahlungsströme (Cash-flows) auszutauschen.

## T

### Top-down, Bottom-up

Spezielles Konzept der Informations- und Wissensverarbeitung, bei dem Informationen und Managemententscheidungen von oben nach unten delegiert werden, um dann im zweiten Schritt mit dem Ergebnis wieder von unten nach oben berichtet und abgeschlossen zu werden.

## Toxproof / TÜV Rheinland

Das Toxproof Zeichen ist ein Sicherheitszeichen, das vom TÜV Rheinland ausgestellt wird, vor allem für die Prüfung der Mengen von Giftstoffen in Produkten.

## Trendscouting

Identifikation und Kommerzialisierung von künftigen Trends, vor allem Lifestyle-Trends.

## U

### Umsatzkosten

Der Betrag, den der Konzern Dritten für Aufwendungen im Zusammenhang mit der Herstellung und Lieferung unserer Produkte zahlt. Eigene Produktionsaufwendungen sind ebenfalls in den Umsatzkosten des Konzerns enthalten.

### Umschlagshäufigkeit des kurzfristigen Betriebskapitals

Gibt an, wie oft das kurzfristige Betriebskapital in der betrachteten Periode umgeschlagen wurde. Die Umschlagshäufigkeit zeigt die Bindungsdauer des kurzfristigen Betriebskapitals und lässt so Rückschlüsse auf die Höhe des Kapitalbedarfs zu. Je höher diese Kennzahl ist, desto positiver ist sie zu beurteilen.

*Umschlagshäufigkeit des kurzfristigen Betriebskapitals = Umsatz / kurzfristiges Betriebskapital.*

### Unverwässertes Ergebnis je Aktie

Leistungsindikator zur Beurteilung des Ergebnisses je Aktie, basierend auf der Anzahl ausstehender Aktien (ohne Aktienoptionen, zugewiesene Aktienrechte und Wandelschuldverschreibungen).  
*Unverwässertes Ergebnis je Aktie = Jahresüberschuss / Gewichtete durchschnittliche Anzahl der im Umlauf befindlichen Aktien im Geschäftsjahr*

» siehe auch verwässertes Ergebnis je Aktie.

## V

### Verschuldungsgrad

Zeigt den Anteil des Fremdkapitals innerhalb der Finanzstruktur eines Unternehmens.

*Verschuldungsgrad = (Nettofinanzverbindlichkeiten / Eigenkapital) × 100.*

### Vertikaler Einzelhändler

Ein Handelsunternehmen, das den gesamten Design-, Produktions- und Distributionsprozess seiner Produkte (vertikal) selbst kontrolliert.

### Verwässertes Ergebnis je Aktie

Leistungsindikator zur Beurteilung des Ergebnisses je Aktie unter Annahme der Ausübung und Wandlung ausstehender Aktienoptionen und Wandelschuldverschreibungen, durch die sich die Zahl der im Umlauf befindlichen Aktien erhöhen kann.

*Verwässertes Ergebnis je Aktie = (Jahresüberschuss + Zinsaufwand auf Wandelanleihe) / (Gewichtete durchschnittliche Anzahl der im Umlauf befindlichen Aktien im Geschäftsjahr + Gewichtete Aktienoptionen + Aktien aus angenommener Wandlung der Wandelanleihe).*

### Verzinsung des eingesetzten Kapitals (ROCE)

Misst die Effektivität und Profitabilität eines Unternehmens hinsichtlich des eingesetzten Kapitals.

*ROCE = (Gewinn vor Steuern + Finanzergebnis) / (Jahresdurchschnitt des auf Anteilseigner entfallenden Kapitals + nicht beherrschende Anteile + Nettofinanzverbindlichkeiten) × 100.*

### Visuelles Merchandising

Maßnahmen, die der Verkaufsförderung, vor allem durch die Präsentation im Einzelhandel, dienlich sind. Die Produkte werden so platziert, dass der Kunde zum Kauf animiert wird.

### VOC (Flüchtige organische Verbindungen)

Flüchtige, organische Verbindungen, die Atembeschwerden und andere Gesundheitsprobleme verursachen können. VOCs sind Nebenprodukte, die in der Schuhproduktion anfallen.

## W

### Währungsbereinigt / Währungsneutral

Finanzdaten werden zu Vorjahreswechselkursen angegeben. Dies bereinigt das Ergebnis um die Wechselkursveränderung und zeigt eine direkte unverfälschte Geschäftsentwicklung.

### World Business Council for Sustainable Development (WBCSD)

Das WBCSD ist ein globaler Verband mit rund 200 internationalen Unternehmen, der sich ausschließlich mit nachhaltiger Wertschöpfung befasst » siehe auch: [www.wbcd.org](http://www.wbcd.org).

### World Federation of the Sporting Goods Industry (WFSGI)

Die WFSGI ist ein unabhängiger, gemeinnütziger Verband, der von Unternehmen der Sportartikelbranche und deren Zulieferer und Herstellerunternehmen sowie Einzelhandelsunternehmen und anderen Geschäften der Sportbranche gegründet wurde. Als solcher wird der WFSGI vom Internationalen Olympischen Komitee als offizieller Verband der Sportbranche anerkannt.

## Z

### Zinsdeckungsgrad

Zeigt die Fähigkeit des Unternehmens, die Nettozinsaufwendungen mit dem Ergebnis vor Steuern und Nettozinsaufwendungen abzudecken.

*Zinsdeckungsgrad = (Ergebnis vor Steuern und Nettozinsaufwendungen / Nettozinsaufwendungen) × 100.*

### Zubehör

Dieser Produktbereich umfasst alle Arten von Sportzubehör wie Taschen, Bälle, Fitnessgeräte und Golf- oder Hockeyschläger.



# Index

## A

Akquisition 128, 195  
Aktienkursentwicklung 34 ff.  
Aktionsoptionsplan (MSOP) 222 f.  
Aktionärsstruktur 36  
American Depositary Receipts (ADRs) 36, 143  
Anlagevermögen 140 ff., 184 ff.  
Anleihen 149, 203 ff.  
Anteilsbesitz 206 f., 226 ff.  
Auf Anteilseigner entfallender Gewinn *Innenseite Umschlag vorne*, 138 f.  
Auf Anteilseigner entfallendes Kapital 141 f., 204 ff.  
Aufsichtsrat:  
– Ausschüsse 19  
– Bericht 20 ff.  
– Mitglieder 18 f.  
Außerbilanzielle Positionen 142

## B

Beschaffung 106 ff., 163  
Beschaffungskette 80 f., 105 ff., 122  
Bestätigungsvermerk des Abschlussprüfers 183  
Betriebliche Aufwendungen 135 ff., 214 f.  
Betriebsergebnis 135, 214  
Bilanz 140 ff., 184 f., 196 ff.,  
Bruttomarge 126 ff., 135, 151 f., 155, 156 f., 177

## C

Corporate Governance Bericht 25 ff.

## D

Derivate Finanzinstrumente 190  
Dividende *Innenseite Umschlag hinten*, 36 f., 179, 207

## E

Eigenkapital:  
– Konzerneigenkapitalveränderungsrechnung 186  
Einzelhandelsaktivitäten 118, 135, 142, 153  
Entsprechenserklärung 23  
Entwicklung Gesamtwirtschaft und Branche 130 ff.  
Ergebnis je Aktie 139, 178, 217

## F

Finanzaufwendungen 138, 215 f.  
Finanz-Highlights *Innenseite Umschlag vorne*  
Finanzierungsstruktur 149  
Finanzinstrumente 208 ff.  
Finanzkalender 2011 *Innenseite Umschlag hinten*  
Finanzverbindlichkeiten 146 ff., 193, 200  
Flüssige Mittel 126 ff., 140 ff.  
Forschung und Entwicklung 110 ff., 193  
Free Cashflow 126 ff.

## G

Geschäfts- oder Firmenwerte  
[Goodwill] 192 f., 198  
Geschäftsentwicklung:  
– Andere Geschäftssegmente 156 ff.  
– Einzelhandel 153 ff.  
– Großhandel 150 ff.  
Gewinn- und Verlustrechnung 133 ff., 185, 214 ff.  
Gewinn vor Steuern 138  
Global Operations 106 ff.  
Glossar 236 ff.

## H

Hauptversammlung *Innenseite Umschlag hinten*  
Hedging 149, 168 ff., 213 ff.

## I

Internes Konzern-Managementsystem 126 ff.  
Interview mit dem Vorstandsvorsitzenden 10 ff.  
Investitionen 128, 142, 219  
Investor Relations 37, 242

## K

Kampagnen 4, 38, 74, 124, 180, 232  
Kapitalflussrechnung 140 ff., 187  
Kapitalkosten (WACC) 129  
Kontrollierte Verkaufsflächen 82, 179  
Konzernabschluss 181 ff.  
Konzernanhang 188 ff.  
Konzernlagebericht 75 ff.

## L

Leasing 192, 207  
Liquidität 146, 167 f., 178  
Lizenz- und Provisionserträge 135

## M

Markenportfolio *Innenseite Umschlag vorne*, 80 f.  
Marketing Working Budget 136  
Marktkapitalisierung 35  
Mission Statement 76  
Mitarbeiter 115 ff.

## N

Nachhaltigkeit 28, 120 ff.  
Nachtrag und Ausblick 174 ff.

## O

Operative Marge 126 f., 137 f., 152, 155, 157, 178  
Operative und Sport-Highlights 2010 6 ff.  
Operatives kurzfristiges Betriebskapital 126 ff., 178

## P

Pensionen 194, 202  
Personal 115 ff.  
Produkteinführungen 112 f., 177  
Promotion-Partnerschaften 78 f., 164

## R

Risiko- und Chancenbericht 158 ff.  
Rückstellungen 141, 190, 201

## S

Sachanlagevermögen 140  
Segmentberichterstattung 133, 150 ff., 218  
Standorte 78 f., 111  
Steuern 194, 216 f.  
Struktur und Strategie:  
– adidas Konzern 77 ff.  
– Markensegmente 87 ff.

## T

Treasury 146 ff., 167 f.

## U

Umsatzkosten 134, 163  
Unterstützungserklärung 242

## V

Vergütung:  
– Aufsichtsrat 33  
– Bericht 30 ff.  
– Mitarbeiter 116 f.  
– Vorstand 31  
Verschuldungsgrad 149  
Versicherung der gesetzlichen Vertreter 182  
Verwässertes Ergebnis je Aktie 139, 178, 217  
Vorräte 140 f., 163, 191  
Vorstand 16 f.

## W

Währung 146 ff., 167 ff.  
Wandelanleihe 139, 217  
Wechselkurs 132, 168, 187, 190  
Wichtige Standorte und Promotion-Partnerschaften 78 f.

## Z

Zehn-Jahresübersicht 234 f.  
Ziele *Innenseite Umschlag vorne*, 114, 128  
Zinssatz 148, 169 f., 214

# Unterstützungserklärung

Die adidas AG erklärt ihre Unterstützung, abgesehen vom Fall des politischen Risikos, dass folgende Gesellschaften ihren Verbindlichkeiten gegenüber Gläubigern in vereinbarter Weise nachkommen:

adidas (Malaysia) Sdn. Bhd., Kuala Lumpur, Malaysia  
adidas (South Africa) (Pty) Ltd., Kapstadt, Südafrika  
adidas (UK) Limited, Stockport, Großbritannien  
adidas Argentina S.A., Buenos Aires, Argentinien  
adidas Austria GmbH, Klagenfurt, Österreich  
adidas Benelux B.V., Amsterdam, Niederlande  
adidas Chile Ltda., Santiago de Chile, Chile  
adidas Colombia Ltda., Bogota, Kolumbien  
adidas Croatia d.o.o., Zagreb, Kroatien  
adidas do Brasil Ltda., Sao Paulo, Brasilien  
adidas Espana S.A., Saragossa, Spanien  
adidas France S.a.r.l., Landersheim, Frankreich  
adidas India Marketing Pvt. Ltd., Neu Delhi, Indien  
adidas Industrial S.A. de C.V., Mexiko-Stadt, Mexiko  
adidas International B.V., Amsterdam, Niederlande  
adidas International Finance B.V., Amsterdam, Niederlande  
adidas International Trading B.V., Amsterdam, Niederlande  
adidas Italy S.p.A, Monza, Italien  
adidas Japan K.K., Tokio, Japan  
adidas Korea Ltd., Seoul, Korea  
adidas LLP, Almaty, Republik Kasachstan  
adidas Philippines Inc., Manila, Philippinen  
adidas Portugal – Artigos de Desporto, S.A., Lissabon, Portugal  
adidas Serbia d.o.o., Neu-Belgrad, Serbien  
adidas Spor Malzemeleri Satis ve Pazarlama A.S., Istanbul, Türkei  
adidas sport gmbh, Cham, Schweiz  
adidas Sports (China) Co. Ltd., Suzhou, China  
adidas Sverige AB, Stockholm, Schweden  
adidas Taiwan Limited, Taipei, Taiwan  
adidas Vietnam Company Limited, Ho Chi Minh City, Vietnam  
LLC „adidas, Ltd.“, Moskau, Russland  
P.T. adidas Indonesia Ltd., Jakarta, Indonesien  
Sarragan AG, Cham, Schweiz  
SC „adidas-Ukraine“, Kiew, Ukraine  
Taylor Made Korea Ltd., Seoul, Korea

# Impressum

adidas AG  
Adi-Dassler-Str. 1  
91074 Herzogenaurach  
Deutschland

Tel: + 49 (0) 91 32 84 - 0  
Fax: + 49 (0) 91 32 84 - 22 41  
»» [www.adidas-Group.de](http://www.adidas-Group.de)

Investor Relations  
Tel: + 49 (0) 91 32 84 - 21 87  
Fax: + 49 (0) 91 32 84 - 31 27  
Email: [investor.relations@adidas-Group.com](mailto:investor.relations@adidas-Group.com)  
»» [www.adidas-Group.de/investoren](http://www.adidas-Group.de/investoren)

Der adidas Konzern ist Mitglied im DIRK (Deutscher Investor Relations Kreis) und NIRI (National Investor Relations Institute, USA).

Dieser Bericht ist auch in englischer Sprache erhältlich.  
Weitere Berichte des adidas Konzerns finden Sie auf der Website des Unternehmens.

Aus Gründen der besseren Lesbarkeit verzichten wir in diesem Geschäftsbericht auf die Darstellung von eingetragenen Markenzeichen.

Konzept und Design  
Strichpunkt, Stuttgart

Druck  
Eberl Print, Immenstadt

**Veröffentlichung der Jahresergebnisse 2010 .....» 2. März 2011**

Analysten- und Bilanzpressekonferenzen in Herzogenaurach  
Pressemitteilung, Telefonkonferenz mit Analysten und Webcast  
Veröffentlichung des Geschäftsberichts 2010

**Veröffentlichung der Ergebnisse des ersten Quartals 2011 .....» 5. Mai 2011**

Pressemitteilung, Telefonkonferenz mit Analysten und Webcast

**Hauptversammlung .....» 12. Mai 2011**

Fürth, Bayern, Webcast

**Dividendenzahlung .....» 13. Mai 2011**

(vorbehaltlich der Zustimmung durch die Hauptversammlung)

**Veröffentlichung der Halbjahresergebnisse 2011 .....» 4. August 2011**

Pressemitteilung, Telefonkonferenz mit Analysten und Webcast

**Veröffentlichung der Neunmonatsergebnisse 2011 .....» 3. November 2011**

Pressemitteilung, Telefonkonferenz mit Analysten und Webcast

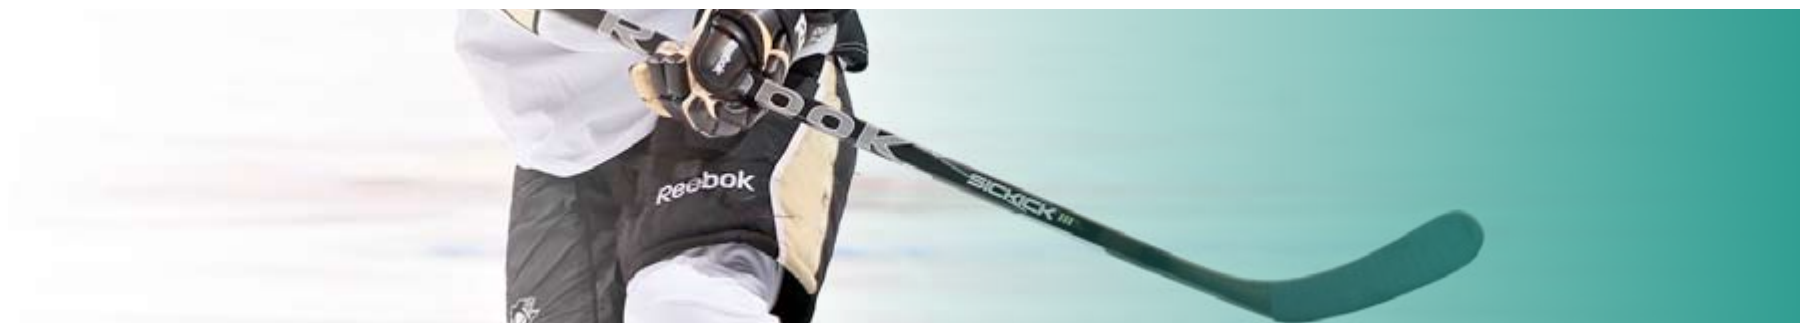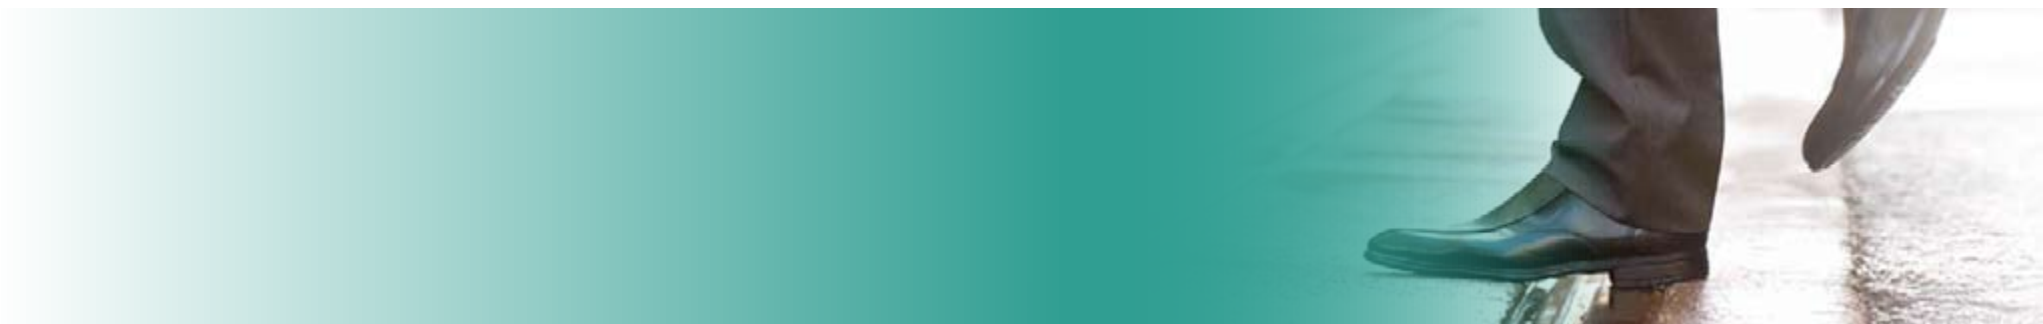

adidas AG  
Adi-Dassler-Str. 1  
91074 Herzogenaurach  
Deutschland

©2011 adidas AG. adidas, Reebok, TaylorMade, adidas Golf, Ashworth, Rockport  
und CCM sind eingetragene Markenzeichen des adidas Konzerns.

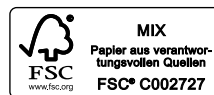

Supplement: Supplementary file 1 [file Adidas GB 2010.pdf › Korpustexte/Korpustexte pdf/Adidas/Adidas GB 2010.pdf]
