# Supplementary material
Source: publisher site journal article supplement (https://www.degruyterbrill.com/publication/isbn/9783110432879/downloadAsset/9783110432879_Elektronischer_Anhang_2.zip)

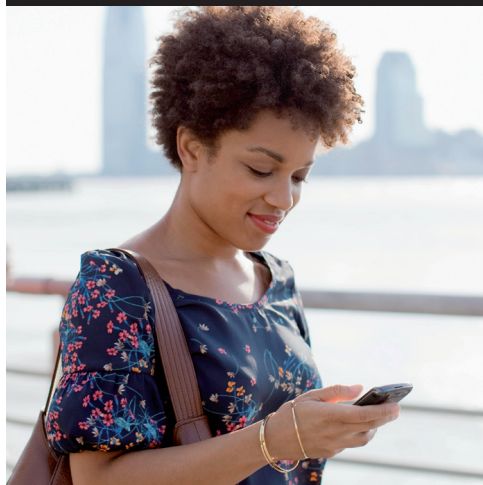

# SAP auf einen Blick

## Weltgrößter Anbieter von Unternehmenssoftware<sup>1)</sup>

Als weltweit führender Anbieter von Unternehmenssoftware<sup>1)</sup> stellt SAP Produkte und Services bereit, mit denen unsere mehr als 183.000 Kunden in über 120 Ländern Innovationen in ihren Unternehmen beschleunigen können. SAP unterhält derzeit in über 75 Ländern Vertriebs- und Entwicklungsstandorte und ist unter dem Kürzel „SAP“ an mehreren Börsen notiert, unter anderem an der Frankfurter sowie der New Yorker Börse.

### Fakten im Überblick

#### Finanzkennzahlen - GJ 2011 (IFRS)

|                                    |              |
|------------------------------------|--------------|
| SSRS-Erlöse <sup>2)</sup>          | 11,32 Mrd. € |
| Umsatzerlöse                       | 14,23 Mrd. € |
| Betriebsergebnis <sup>3)</sup>     | 4,88 Mrd. €  |
| Gewinn nach Steuern <sup>3)</sup>  | 3,44 Mrd. €  |
| Steuerquote <sup>3)</sup>          | 27,9 %       |
| Free Cashflow                      | 3,33 Mrd. €  |
| Mitarbeiter (Vollzeitbeschäftigte) | 55.765       |

#### SAP-Aktie (15. März 2012)

|                                 |                             |
|---------------------------------|-----------------------------|
| Tickersymbol                    | SAP                         |
| Heimatsbörse                    | Frankfurter Wertpapierbörse |
| US-Börse                        | NYSE (ADR)                  |
| ADR : Stammaktie                | 1 : 1                       |
| Aktienanzahl in Mio.            | 1.228                       |
| Streubesitz                     | 73,32 %                     |
| 52 Wochen Hoch/Tief             | 34,26 € - 54,54 €           |
| Marktkapitalisierung            | 67 Mrd. €                   |
| Ergebnis je Aktie <sup>3)</sup> | 2,89 €                      |

#### Die fünf Marktkategorien der SAP

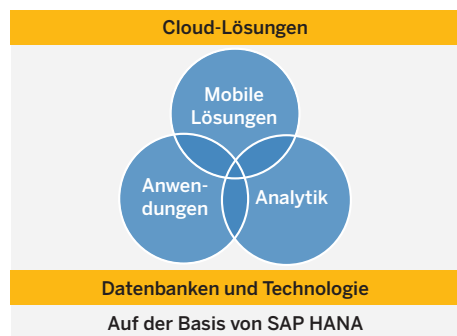

#### Leitziel der SAP

Unsere Vision ist es, die Abläufe in der weltweiten Wirtschaft zu verbessern und die Lebensqualität von Menschen zu erhöhen. Wir möchten jeden unserer Kunden zu einem leistungsfähigen und effizienten Unternehmen - einem „Best-run Business“ machen. Innovationen in verschiedenen Bereichen helfen uns dabei: Mobiltechnologie wird die Art und Weise verändern, wie Menschen in Unternehmen mit Software arbeiten. In-Memory- Technologie wird IT-Architekturen vereinfachen und den Mehrwert von Anwendungen deutlich erhöhen. Und die Datenwolke, die „Cloud“, wird sich als Software-Bezugsmodell allgemein durchsetzen. Diese Innovationen, gepaart mit unserer traditionellen Stärke bei Anwendungen und Analytik, fließen in Softwarelösungen ein, die die Geschäftsabläufe unserer Kunden verbessern. Damit SAP-Kunden ihre IT-Investitionen optimal nutzen und so bestmögliche Geschäftsergebnisse erzielen können, liefern ihnen die Fachleute von SAP professionellen Service und Support.

1) Unternehmenssoftware (Enterprise Application Software) wird von SAP definiert als Anwendungen für ERP (Enterprise Resource Planning) und angrenzende Bereiche.

2) SSRS = Software und softwarebezogene Services

3) beeinflusst durch TomorrowNow Rechtsstreit

#### Umsatz nach Regionen (nach Sitz des Kunden) in Mio. €

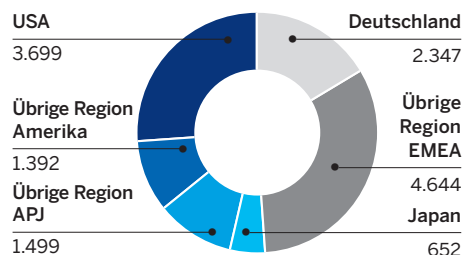

#### Profitabilität (IFRS)

in Mrd. € (Marge in %)

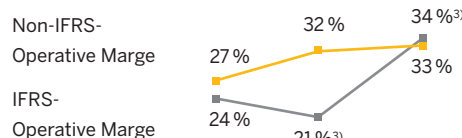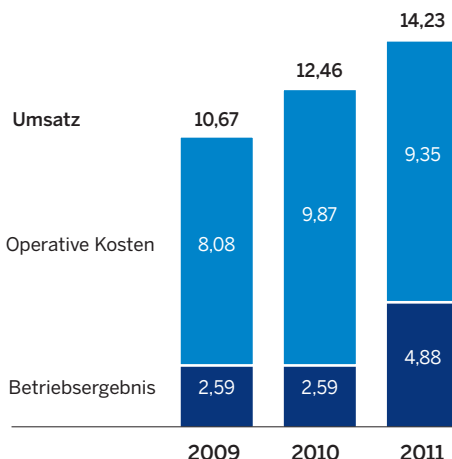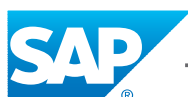

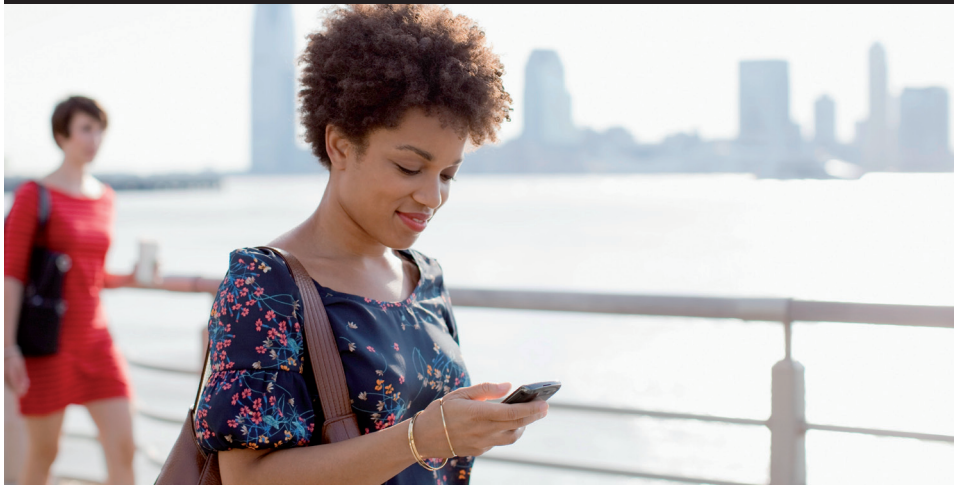

PartnerEdge, ByDesign, SAP BusinessObjects Explorer, StreamWork und weitere im Text erwähnte SAP-Produkte und -Dienstleistungen sowie die entsprechenden Logos sind Marken oder eingetragene Marken der SAP AG in Deutschland und anderen Ländern. Business Objects und das Business-Objects-Logo, BusinessObjects, Crystal Reports, Crystal Decisions, Web Intelligence, Xcelsius und andere im Text erwähnte Business-Objects-Produkte und Dienstleistungen sowie die entsprechenden Logos sind Marken oder eingetragene Marken der Business Objects Software Ltd. Business Objects ist ein Unternehmen der SAP AG. Sybase und Adaptive Server, iAnywhere, Sybase 365, SQL Anywhere und weitere im Text erwähnte Sybase-Produkte und -Dienstleistungen sowie die entsprechenden Logos sind Marken oder eingetragene Marken der Sybase Inc.

Sybase ist ein Unternehmen der SAP AG. Alle anderen Namen von Produkten und Dienstleistungen sind Marken der jeweiligen Firmen. Die Angaben im Text sind unverbindlich und dienen lediglich zu Informationszwecken.

Produkte können länderspezifische Unterschiede aufweisen.

### Wachstumsstrategie

Durch die Konzentration auf fünf Marktkategorien wollen wir unseren Zielmarkt bis 2015 gegenüber 2010 verdoppeln. In allen Marktkategorien profitieren Unternehmen von der In-Memory-Technologie mit unserer bahnbrechenden SAP-HANA-Plattform. Ziel unserer Wachstumsstrategie ist es, unsere Führungsposition in den bestehenden Marktkategorien Anwendungen, Analytik und Mobile Lösungen auszubauen und uns in neuen Kategorien wie Cloud-Lösungen sowie Datenbanken und Technologie als Marktführer zu positionieren. Dieses Wachstumspotenzial soll erschlossen werden durch:

#### 1. Organisches Wachstum

Auch in Zukunft möchte die SAP das Unternehmenswachstum in erster Linie durch die organische Entwicklung ihres Produktportfolios sichern. Zu diesem Zweck wurden 2011 rund 1,9 Mrd. € in Forschung und Entwicklung investiert.

#### 2. Gemeinsame Innovationen

Durch den Ausbau des Partnernetzwerkes bieten sich nicht nur zusätzliche Möglichkeiten innovative Produkte zu entwickeln, auch werden die Vertriebsmöglichkeiten deutlich erweitert. Mit Hilfe der Vertriebspartner können unterschiedliche Markt- und Kundensegmente erschlossen werden.

#### 3. Strategische Akquisitionen

Die Wachstumsstrategie wird ferner durch Unternehmensübernahmen unterstützt. Erworbene Technologien und Anwendungen ergänzen das breit gefächerte Angebot der SAP-Lösungen und bieten damit Kunden zusätzlichen Nutzen.

### Warum SAP?

Durch Ihre Investition in die SAP-Aktie werden Sie Anteilseigner eines der führenden Anbieter von Unternehmenssoftware:

- 40 Jahre Erfahrung als Softwareanbieter für die erfolgreichsten Unternehmen der Welt
- Tausende von Kunden weltweit, die täglich auf SAP-Software bauen – darunter viele Unternehmen aus Ihrem Anlageportfolio
- Solide Wachstumsbilanz und Anlegerrendite
- Beste Wachstumschancen auf Basis eines nachhaltigen, fundierten und langfristigen Geschäftsmodells
- Mit einer Marktkapitalisierung von über 65 Mrd. € sind wir nicht nur an der Frankfurter Wertpapierbörse gelistet, sondern wir gehören auch zu den umsatzstärksten ADRs an der NYSE.

### Dividende

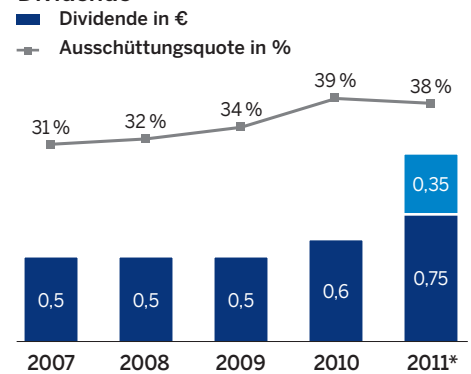

\*Vorschlag 1,10 € inkl. Sonderdividende von 0,35 €

### Finanzkalender 2012

- 25. April Q1-Zahlen
- 23. Mai Hauptversammlung
- 24. Juli Q2-Zahlen
- 24. Oktober Q3-Zahlen

### SAP Investor Relations

- E-Mail: investor@sap.com
- Aktionärstelefon: +49 6227 7-67336
- Telefax: +49 6227 7-40805
- Internet: www.sap.de/investor
- Twitter: @SAPinvestor

SAP Investor Relations  
Dietmar-Hopp-Allee 16  
69190 Walldorf

**VISION**  
DIE ABLÄUFE IN DER  
WELTWIRTSCHAFT VERBESSERN

**LEITZIEL**  
JEDEN KUNDEN AUF SEINEM WEG  
ZUM BEST-RUN BUSINESS UNTER-  
STÜTZEN

**BIS MITTE DES JAHRZEHNTS**

- 20 MRD. € UMSATZ
- 35 % NON-IFRS OPERATIVE MARGE
- 1 MRD. ANWENDER

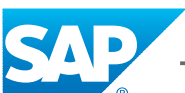

Supplement: Supplementary file 87 [file SAP SAP Auf einen Blick.pdf › Korpustexte/Korpustexte pdf/SAP/SAP SAP Auf einen Blick.pdf]
