# Supplementary material
Source: publisher site journal article supplement (https://www.degruyterbrill.com/publication/isbn/9783110432879/downloadAsset/9783110432879_Elektronischer_Anhang_2.zip)

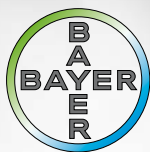

Science For A Better Life

NAMEN | ZAHLEN | FAKTEN

2011 | 2012

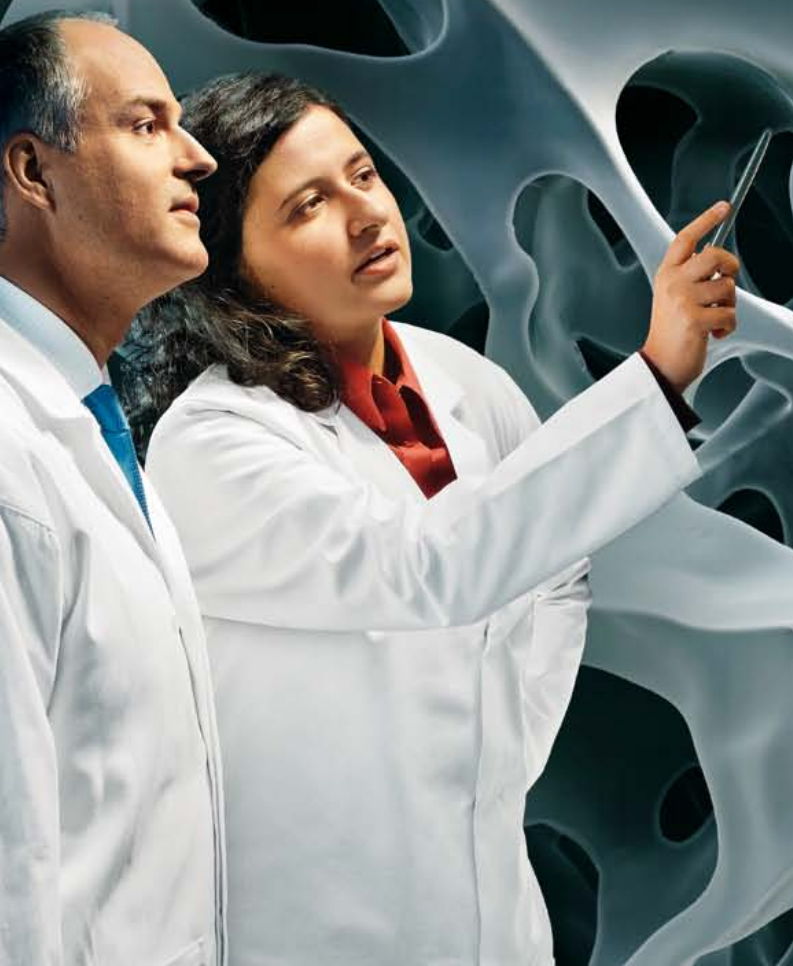



#### ZUM TITELBILD

Der Klimasünder Kohlendioxid kann als wertvoller Rohstoff für nachhaltiges Wirtschaften in der Industrie genutzt werden. Das ist das Ziel des Projekts „Dream Production“ von Bayer mit Partnern aus Wissenschaft und Unternehmen. Dabei soll  $\text{CO}_2$  chemisch gebunden werden, als Rohstoff Verwendung bei der Herstellung von Polymer-Materialien finden und damit einen Teil der herkömmlichen fossilen Rohstoffe ersetzen. Das Foto zeigt den Chemiker Dr. Christoph Gürtler, Projektleiter bei Bayer MaterialScience, mit der Wissenschaftlerin Daniela d’Elia von der RWTH Aachen University vor der Rasterelektronenmikroskop-Aufnahme einer Polyurethan-Schaumstruktur.

# Inhalt

## KONZERN

---

|                                       |    |
|---------------------------------------|----|
| Mission                               | 2  |
| Organisation                          | 4  |
| Vorstand                              | 6  |
| Aufsichtsrat und Corporate Governance | 8  |
| Standorte und Regionen                | 10 |
| Geschäftsentwicklung                  | 12 |
| Die Bayer-Aktie                       | 14 |

## TEILKONZERNE UND SERVICEGESELLSCHAFTEN

---

|                       |    |
|-----------------------|----|
| Bayer HealthCare      | 16 |
| Bayer CropScience     | 20 |
| Bayer MaterialScience | 24 |
| Servicegesellschaften | 28 |

## WEITERE THEMEN

---

|                           |    |
|---------------------------|----|
| Forschung und Entwicklung | 30 |
| Mitarbeiter               | 32 |
| Nachhaltigkeit            | 34 |
| Historie                  | 38 |
| Dialog                    | 42 |
| Impressum                 | 45 |

# Bayer: Science For A Better Life

---

Bayer ist ein weltweit tätiges Unternehmen mit Kernkompetenzen auf den Gebieten Gesundheit, Ernährung und hochwertige Materialien. Als Erfinder-Unternehmen setzen wir Zeichen in forschungsintensiven Bereichen. Mit unseren Produkten und Dienstleistungen möchten wir den Menschen nützen und zur Verbesserung der Lebensqualität beitragen. Gleichzeitig wollen wir Werte schaffen durch Innovation, Wachstum und eine hohe Ertragskraft. Wir bekennen uns zu den Prinzipien der Nachhaltigkeit und handeln als „Corporate Citizen“ sozial und ethisch verantwortlich.

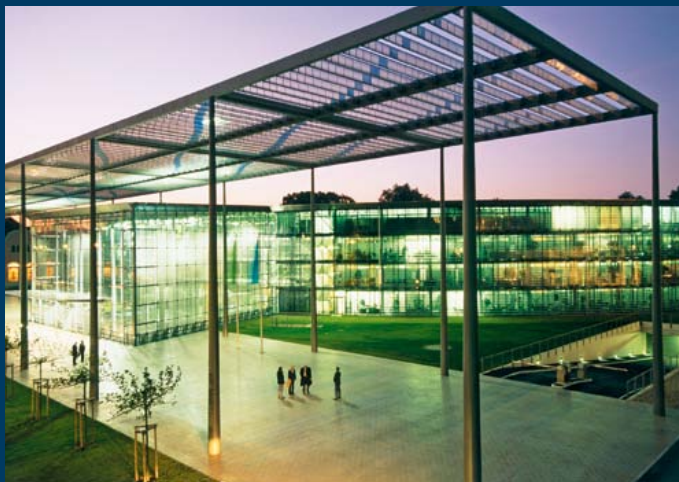

Die Konzernzentrale der Bayer AG in Leverkusen

# Unsere Werte.

Die Unternehmenskultur ist eine wichtige Voraussetzung für den Erfolg von Bayer. Eine zentrale Rolle spielen dabei unsere Werte Leadership (Führung), Integrität, Flexibilität und Effizienz. Wir haben sie unter dem Begriff **LIFE** zusammengefasst.

## L

### LEADERSHIP

- Sich für Mitarbeiter engagieren und Leistung fördern
- Eigeninitiative zeigen, andere inspirieren und motivieren
- Verantwortung übernehmen für Aufgaben und Ergebnisse, Erfolge und Misserfolge
- Andere fair und mit Respekt behandeln
- Klar, ehrlich und zügig Feedback geben
- Konflikte konstruktiv lösen
- Werte schaffen für unsere Aktionäre, Kunden, Mitarbeiter und die Gesellschaft

## I

### INTEGRITY

- Vorbild sein
- Gesetze, Richtlinien und Regeln einhalten
- Anderen vertrauen und vertrauensvolle Beziehungen aufbauen
- Ehrlich und zuverlässig sein
- Aufmerksam zuhören und angemessen kommunizieren
- Nachhaltig handeln: kurzfristige Ergebnisse mit langfristigen Anforderungen in Einklang bringen
- Menschen und Umwelt schützen, Sicherheit gewährleisten

## F

### FLEXIBILITY

- Veränderungen aktiv vorantreiben
- Trends frühzeitig aufgreifen und sich auf Anforderungen der Zukunft einstellen
- Den Ist-Zustand hinterfragen
- Kundenorientiert denken und handeln
- Chancen erkennen und kalkulierte Risiken eingehen
- Offen für Neues sein
- Bereit sein, das ganze Leben lang zu lernen

## E

### EFFICIENCY

- Ressourcen optimal einsetzen
- Sich auf Aktivitäten konzentrieren, die Wert schaffen
- Aufgaben einfach und effektiv erledigen
- Die erforderliche Qualität rechtzeitig und zu angemessenen Kosten bereitstellen
- Schneller zu überlegten Entscheidungen kommen
- Entscheidungen konsequent umsetzen
- Gemeinsam bessere Lösungen finden

# Organisation

Die Bayer AG definiert die gemeinsamen Werte, Ziele und Strategien des gesamten Konzerns. Drei Teilkonzerne und drei Servicegesellschaften arbeiten eigenverantwortlich unter der Führung der Management-Holding. Der Konzernvorstand wird bei der strategischen Führung des Unternehmens vom Corporate Center unterstützt.

## BAYER AG (HOLDING)

### Konzernvorstand

**Marijn Dekkers**

Vorsitzender

**Werner Baumann**

Finanzen

**Wolfgang Plischke**

Technologie, Innovation & Umwelt

**Richard Pott \***

Strategie & Personal

### Corporate-Center-Bereiche

Corporate Office

**Jörg Krell**

Communications

**Michael Schade**

Investor Relations

**Alexander Rosar**

Corporate Auditing

**Rainer Meyer**

Corporate Human  
Resources & Organization

**Horst-Uwe Groh**

Finance

**Johannes Dietsch**

Corporate Development

**Alexander Moscho**

Law & Patents, Insurance

**Roland Hartwig**

Environment & Sustainability

**Wolfgang Große Entrup**

Group Accounting & Controlling

**Ulrich Hauck**

Regional Coordination

**Ian Paterson**

\* Arbeitsdirektor

\*\* ab 01.06.2011 Michael A. Schulz  
Stand 01.04.2011

## ARBEITSGBIETE

## Bayer HealthCare

|                                  |                     |
|----------------------------------|---------------------|
| Vorsitzender                     | Jörg Reinhardt      |
| Animal Health                    | Jean-Luc Lowinski   |
| Consumer Care                    | Erica L. Mann       |
| Medical Care                     | Alain Main          |
| Pharmaceuticals                  | Andreas Fibig       |
| Global Drug Discovery            | Andreas Busch       |
| Global Development               | Kemal Malik         |
| Chief Administration Officer     | Manfred Vehreschild |
| Product Supply                   | Hartmut Klusik *    |
| General Counsel                  | Alexander Bey       |
| Human Resources                  | Andreas Günther     |
| Communications                   | Markus Pickel       |
| Business Development & Licensing | N. N.               |

## Bayer CropScience

|                                    |                      |
|------------------------------------|----------------------|
| Vorsitzende                        | Sandra E. Peterson   |
| Chief Operating Officer            | Lykele van der Broek |
| Human Resources                    | Michael Haug         |
| Research                           | Alexander Klausener  |
| Communications                     | Steffen Kurzawa      |
| General Counsel                    | Gerhart Marchand     |
| Industrial Operations              | Achim Noack          |
| Development                        | Franz-Josef Placke   |
| Environmental Science              | Gunnar Riemann       |
| Strategy & Business Management     | Rüdiger Scheitza *   |
| Business Planning & Administration | Dirk Suwelack **     |

## Bayer MaterialScience

|                                  |                     |
|----------------------------------|---------------------|
| Vorsitzender                     | Patrick Thomas      |
| Administration                   | Axel Steiger-Bagel  |
| Industrial Operations            | Tony Van Osselaer * |
| Polycarbonates                   | Günter Hilken       |
| Polyurethanes                    | Peter Vanacker      |
| Coatings, Adhesives, Specialties | Joachim Wolff       |

## SERVICEGBIETE

Bayer Business  
Services

**Daniel Hartert**  
Vorsitzender  
**Norbert Fieseler \***  
Geschäftsführer

Bayer Technology  
Services

**Dirk Van Meirvenne**  
Geschäftsführer

## Currenta

**Klaus Schäfer**  
Vorsitzender  
**Joachim Waldi \***  
Geschäftsführer

# Vorstand der Bayer AG

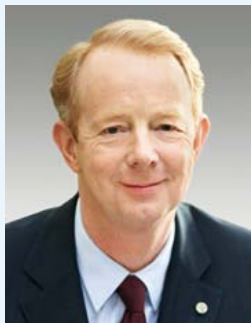

**DR. MARIJN DEKKERS**  
Vorstandsvorsitzender

1957 in Tilburg, Niederlande, geboren, studierte Marijn Dekkers Chemie und Chemieingenieurwesen in Nijmegen und Eindhoven. Nach seiner Promotion begann er eine Laufbahn als Forscher bei General Electric in den USA. 1995 wechselte er zu Honeywell. 2000 wurde er Chief Operating Officer von Thermo Electron Corporation und zwei Jahre später CEO und President. Nach dem Erwerb von Fisher Scientific erhielt das Unternehmen den Namen Thermo Fisher Scientific Inc. Zum 1. Oktober 2010 trat Dekkers die Nachfolge von Werner Wenning an. Marijn Dekkers ist verheiratet und hat drei Töchter.

---

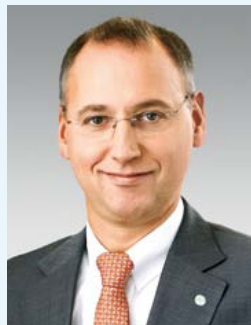

**WERNER BAUMANN**  
Finanzen · Region Europa

1962 in Krefeld geboren, studierte Werner Baumann Wirtschaftswissenschaften in Aachen und Köln. Er trat 1988 in die Bayer AG ein und übernahm erste Aufgaben im Ressort Konzernfinanzen. Nach Stationen in Spanien und den USA kehrte Baumann 2002 nach Deutschland zurück und wurde Mitglied des Executive Committee von Bayer HealthCare und ein Jahr später Vorstandsmitglied und Arbeitsdirektor im neu gegründeten Teilkonzern. Am 1. Mai 2010 trat er die Nachfolge von Klaus Kühn an. Werner Baumann ist verheiratet und hat vier Kinder.



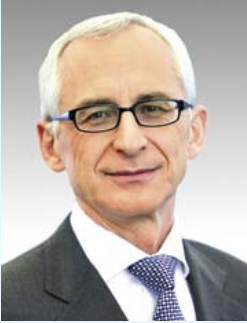
**DR. WOLFGANG PLISCHKE**

Technologie · Innovation · Umwelt ·  
Region Asien/Pazifik

1951 in Stuttgart geboren, studierte Wolfgang Plischke Biologie an der Universität Hohenheim. Nach seiner Promotion begann er seine Laufbahn im Konzern 1980 bei der Bayer-Tochtergesellschaft Miles. Nach verschiedenen Stationen im In- und Ausland leitete Plischke ab 2000 den Geschäftsbereich Pharma in Nordamerika, zwei Jahre später übernahm er die Leitung des Geschäftsbereichs Pharma der Bayer AG. Im März 2006 wurde er in den Vorstand berufen. Seit Dezember 2007 ist Plischke Vorsitzender des Verbandes Forschender Arzneimittelhersteller in Deutschland. Wolfgang Plischke ist verheiratet und hat zwei Söhne.

---

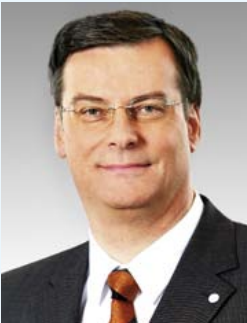
**DR. RICHARD POTT**

Strategie · Personal · Arbeitsdirektor ·  
Region Amerika, Afrika und Naher Osten

1953 in Leverkusen geboren, studierte Richard Pott Physik an der Universität Köln, wo er auch promovierte. 1984 trat Pott in die Zentrale Forschung der Bayer AG ein. Nach verschiedenen Stationen in der Konzernverwaltung wurde er 1997 zum Leiter des Konzernbereichs Konzernplanung und Controlling ernannt, bevor ihm 1999 die Leitung des Geschäftsbereichs Spezialprodukte übertragen wurde. Im Mai 2002 wurde er in den Vorstand berufen. Richard Pott ist verheiratet und hat drei Kinder.

# Aufsichtsrat und Corporate Governance

Der Aufsichtsrat der Bayer AG hat die Aufgabe, den Vorstand zu überwachen und ihn zu beraten. Er besteht aus 20 Mitgliedern, die gemäß dem deutschen Mitbestimmungsgesetz jeweils zur Hälfte aus Kreisen der Aktionäre und der Arbeitnehmer stammen. In Entscheidungen von grundlegender Bedeutung für das Unternehmen ist der Aufsichtsrat unmittelbar eingebunden. Er stimmt mit dem Vorstand auch die strategische Ausrichtung der Gesellschaft ab und erörtert mit ihm regelmäßig den Stand der Umsetzung dieser Geschäftsstrategie.

Der Aufsichtsrat hat vier Ausschüsse gebildet – Präsidium, Prüfungsausschuss, Personalausschuss und Nominierungsausschuss – und hat sie im Einklang mit den Anforderungen des Aktiengesetzes und des Deutschen Corporate Governance Kodex mit der Wahrnehmung bestimmter Aufgaben betraut.

## CORPORATE GOVERNANCE

Die verantwortungsvolle Unternehmensführung (Corporate Governance) hat bei Bayer seit jeher einen hohen Stellenwert. So hat das Unternehmen im Jahr 2010 die Erklärung abgeben können, mit einer vorübergehenden Ausnahme, den Empfehlungen des Deutschen Corporate Governance Kodex in der Vergangenheit entsprochen zu haben und ihnen, vorbehaltlich einer vorübergehenden Ausnahme, in Zukunft wieder voll entsprechen zu wollen.

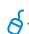

[WWW.BAYER.DE](http://WWW.BAYER.DE) > KONZERN > CORPORATE GOVERNANCE  
[WWW.BAYER.DE](http://WWW.BAYER.DE) > KONZERN > AUFSICHTSRAT

### ORGANE DER GESELLSCHAFT

#### Vorsitzender des Aufsichtsrats

**Dr. Manfred Schneider**

#### Stellvertretender Vorsitzender des Aufsichtsrats

**Thomas de Win**

Vorsitzender des Gesamt- und Konzernbetriebsrats Bayer

## Weitere Aufsichtsratsmitglieder

---

### **Dr. Paul Achleitner**

Mitglied des Vorstands der Allianz SE

### **André Aich**

Mitglied des Betriebsrats der Bayer Schering Pharma AG \*

### **Willy Beumann**

Vorsitzender des Betriebsrats Bayer, Standort Wuppertal

### **Dr. Clemens Börsig**

Vorsitzender des Aufsichtsrats der Deutsche Bank AG

### **Dr.-Ing. Thomas Fischer**

Vorsitzender des Konzernsprecherausschusses Bayer

### **Peter Hausmann**

Mitglied des geschäftsführenden Hauptvorstands der IG Bergbau, Chemie, Energie

### **Prof. Dr.-Ing. e.h. Hans-Olaf Henkel**

Honorarprofessor an der Universität Mannheim

### **Reiner Hoffmann**

Landesbezirksleiter der IG Bergbau, Chemie, Energie Nordrhein

### **Dr. rer. pol. Klaus Kleinfeld**

Chairman und Chief Executive Officer der ALCOA Inc.

### **Petra Kronen**

Vorsitzende des Betriebsrats Bayer, Standort Uerdingen

### **Dr. rer. nat. Helmut Panke**

Mitglied verschiedener Aufsichtsräte

### **Hubertus Schmoldt**

Mitglied verschiedener Aufsichtsräte

### **Dr.-Ing. Ekkehard D. Schulz**

Mitglied verschiedener Aufsichtsräte

### **Dr. Klaus Sturany \*\***

Mitglied verschiedener Aufsichtsräte

### **Roswitha Süßelbeck**

Stellv. Vorsitzende des Betriebsrats Bayer, Standort Leverkusen

### **Dipl.-Ing. Dr.-Ing. e. h. Jürgen Weber**

Vorsitzender des Aufsichtsrats Deutsche Lufthansa AG

### **Prof. Dr. Dr. h. c. Ernst-Ludwig Winnacker**

Generalsekretär des Human Frontier Science Program

### **Oliver Zühlke**

Vorsitzender des Betriebsrats Bayer, Standort Leverkusen

## Ehrenvorsitzender

---

### **Hermann Josef Strenger**

\* Umfirmierung in Bayer Pharma AG beschlossen.

\*\* Unabhängiges und sachverständiges Mitglied im Sinne von § 100 Abs. 5 AktG.

# Standorte und Regionen

## NORDAMERIKA

|                       |                                  |
|-----------------------|----------------------------------|
| Umsatz                | 8.228 Millionen Euro, (+6,8 %) * |
| Mitarbeiter           | 16.400                           |
| F+E-Ausgaben          | 612 Millionen Euro               |
| Anzahl Gesellschaften | 42 **                            |

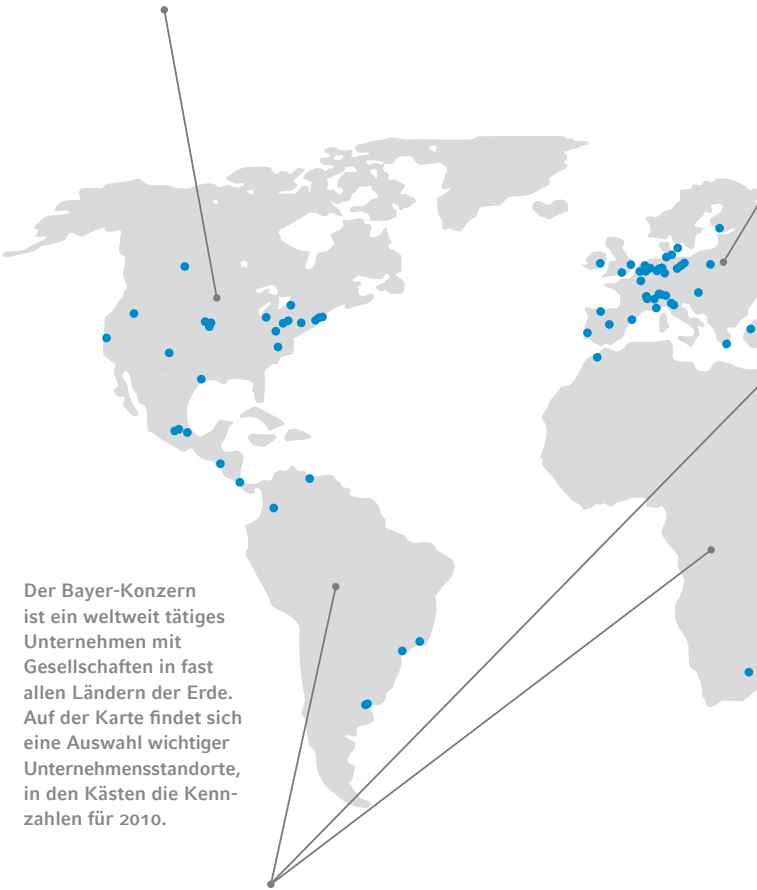

Der Bayer-Konzern ist ein weltweit tätiges Unternehmen mit Gesellschaften in fast allen Ländern der Erde. Auf der Karte findet sich eine Auswahl wichtiger Unternehmensstandorte, in den Kästen die Kennzahlen für 2010.

## LATEINAMERIKA/AFRIKA/NAHOST

|                       |                                   |
|-----------------------|-----------------------------------|
| Umsatz                | 5.628 Millionen Euro, (+17,7 %) * |
| Mitarbeiter           | 16.100                            |
| F+E-Ausgaben          | 35 Millionen Euro                 |
| Anzahl Gesellschaften | 43 **                             |

**EUROPA**

|                       |                                   |
|-----------------------|-----------------------------------|
| Umsatz                | 13.751 Millionen Euro, (+6,0 %) * |
| Mitarbeiter           | 54.300                            |
| F+E-Ausgaben          | 2.246 Millionen Euro              |
| Anzahl Gesellschaften | 150 **                            |

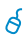
[www.bayer.de](http://www.bayer.de) > KONZERN > BAYER IN ALLER WELT
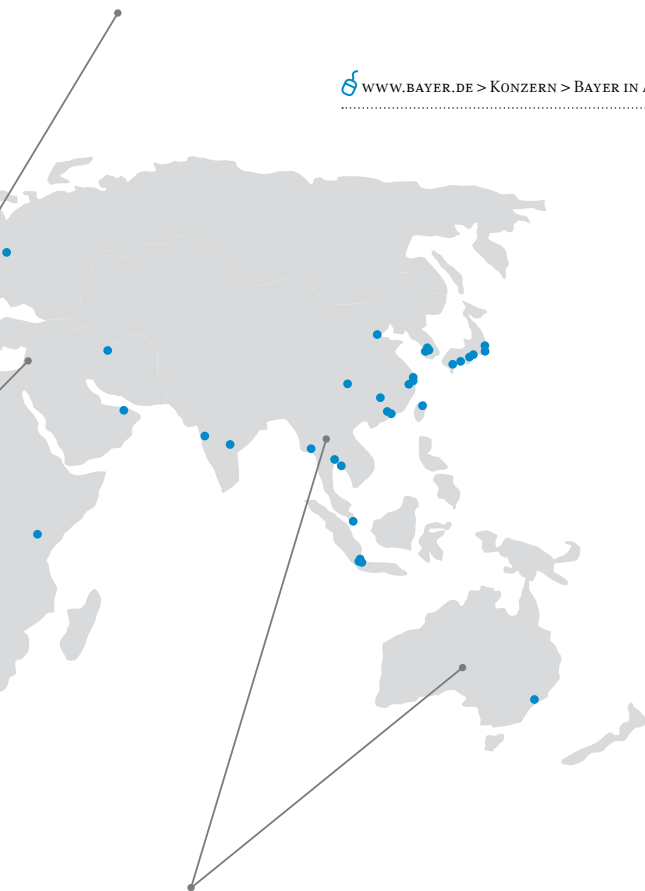**ASIEN/PAZIFIK**

|                       |                                   |
|-----------------------|-----------------------------------|
| Umsatz                | 7.481 Millionen Euro, (+31,0 %) * |
| Mitarbeiter           | 24.600                            |
| F+E-Ausgaben          | 160 Millionen Euro                |
| Anzahl Gesellschaften | 53 **                             |

\* Umsatzveränderung gegenüber dem Vorjahr in Prozent und nach Verbleib (Stand 31.12.2010)

\*\* vollkonsolidierte Beteiligungsgesellschaften (Stand 31.12.2010)

# Geschäftsentwicklung

Der Bayer-Konzern konnte im Jahr 2010 den Umsatz deutlich steigern. Diese Steigerungen sind auf die starke Erholung des MaterialScience-Geschäfts sowie positive Währungseffekte zurückzuführen. Hingegen blieb HealthCare insgesamt leicht hinter den Erwartungen zurück, das CropScience-Geschäft – vor allem im 1. Halbjahr – sogar deutlich. Im Jahr 2010 hat Bayer die Forschungs- und Entwicklungsaufwendungen signifikant auf 3,1 Milliarden Euro gesteigert.

## KONZERNUMSATZ

Der Konzernumsatz wuchs um 12,6 Prozent auf 35.088 Millionen Euro (Vorjahr: 31.168 Millionen Euro). Währungs- und portfolio-bereinigt bedeutet dies ein Plus von 8,0 Prozent. Der Umsatz von HealthCare erhöhte sich um 5,8 Prozent auf 16.913 Millionen Euro. Im CropScience-Geschäft wuchs er um 4,9 Prozent auf 6.830 Millionen Euro. Der Umsatz von MaterialScience stieg deutlich um 35,0 Prozent auf 10.154 Millionen Euro.

## ERGEBNIS

Das EBIT des Bayer-Konzerns sank trotz der positiven Geschäftsentwicklung bei MaterialScience um 9,2 Prozent auf 2.730 Millionen Euro (Vorjahr: 3.006 Millionen Euro). Ergebnisbelastend wirkten sich Sonderaufwendungen in Höhe von 1.722 Millionen Euro (Vorjahr: 766 Millionen Euro) aus. Das EBITDA vor Sondereinflüssen stieg um 9,7 Prozent auf 7.101 Millionen Euro (Vorjahr: 6.472 Millionen Euro). Dabei profitierte Bayer auch von positiven Währungseffekten in Höhe von rund 0,4 Milliarden Euro. MaterialScience konnte das EBITDA vor Sondereinflüssen insbesondere aufgrund der deutlichen Mengen- und Preissteigerungen auf 1.356 Millionen Euro verdreifachen. Hingegen verzeichnete CropScience in einem schwachen Marktumfeld mit aggressivem Wettbewerb einen Rückgang des EBITDA vor Sondereinflüssen um 14,3 Prozent auf 1.293 Millionen Euro (Vorjahr: 1.508 Millionen Euro). Bei HealthCare sank das EBITDA vor Sondereinflüssen leicht auf 4.405 Millionen Euro (Vorjahr: 4.468 Millionen Euro). Dies beruhte vor allem auf höheren Aufwendungen für Vertrieb, Forschung und Entwicklung sowie Belastungen aus Gesundheitsreformen verschiedener Länder. Bayer erzielte ein Konzernergebnis von 1.301 Millionen Euro (Vorjahr: 1.359 Millionen Euro). Das Ergebnis je Aktie betrug 1,57 Euro (Vorjahr: 1,70 Euro).

## Kennzahlen

|                                                   | 2009     | 2010     | Veränderung |
|---------------------------------------------------|----------|----------|-------------|
|                                                   | in Mio € | in Mio € | in %        |
| Umsatzerlöse                                      | 31.168   | 35.088   | 12,6        |
| EBIT <sup>1</sup>                                 | 3.006    | 2.730    | -9,2        |
| EBIT vor Sondereinflüssen <sup>2</sup>            | 3.772    | 4.452    | 18,0        |
| EBITDA <sup>3</sup>                               | 5.815    | 6.286    | 8,1         |
| EBITDA vor Sondereinflüssen <sup>2</sup>          | 6.472    | 7.101    | 9,7         |
| EBITDA-Marge vor Sondereinflüssen <sup>4</sup>    | 20,8 %   | 20,2 %   |             |
| Ergebnis vor Ertragsteuern                        | 1.870    | 1.721    | -8,0        |
| Konzernergebnis                                   | 1.359    | 1.301    | -4,3        |
| Ergebnis je Aktie (in €) <sup>5</sup>             | 1,70     | 1,57     | -7,6        |
| Bereinigtes Ergebnis je Aktie (in €) <sup>6</sup> | 3,64     | 4,19     | 15,1        |
| Brutto-Cashflow <sup>7</sup>                      | 4.658    | 4.771    | 2,4         |
| Netto-Cashflow <sup>8</sup>                       | 5.375    | 5.773    | 7,4         |
| Nettofinanzverschuldung                           | 9.691    | 7.917    | -18,3       |
| Investitionen <sup>*</sup>                        | 1.669    | 1.621    | -2,9        |
| Forschungs- und Entwicklungskosten                | 2.746    | 3.053    | 11,2        |
| Dividende pro Aktie der Bayer AG (in €)           | 1,40     | 1,50     | 7,1         |

\* Ausgaben für Sachanlagen und immaterielle Vermögenswerte laut Kapitalflussrechnung im Geschäftsbericht 2010

Erläuterung der Fußnoten siehe Seite 44

## Umsatzanteil der Segmente 2010 (Vorjahreswerte in Klammern)

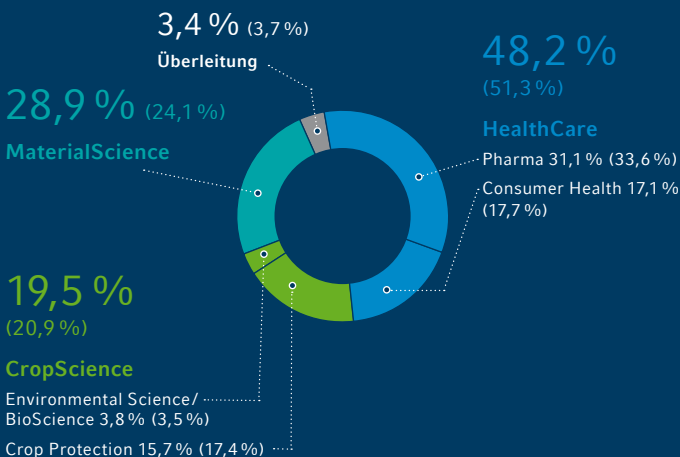

# Die Bayer-Aktie

Die Diskussion über die Verschuldungskrise einiger europäischer Mitgliedsstaaten bestimmte seit dem Frühjahr das Marktgeschehen. Unter dem Eindruck einer robusten Konjunkturerholung konnte der DAX jedoch im Jahresverlauf 2010 seinen Aufwärtstrend von 2009 weiter fortsetzen und bis zum Jahresende um 16 Prozent zulegen. Nach einer schwankungsintensiven Seitwärtsbewegung im ersten Dreivierteljahr legte der DAX im letzten Quartal deutlich zu, überschritt Anfang Dezember die 7.000er Punkte-Marke und schloss am Jahresende bei 6.914 Punkten. Der europäische Aktienindex EURO STOXX 50 (Performance Index) verlor – auch vor dem Hintergrund der Probleme einiger Mitgliedsstaaten in Europa – rund 3 Prozent. Die Aktienkurse in den USA und Japan entwickelten sich unterschiedlich. So stieg der S & P 500 um rund 13 Prozent, während der Nikkei 225 rund 3 Prozent verlor.

## LEICHTES PLUS DER BAYER-AKTIE

Die Bayer-Aktie gewann im Jahresverlauf – unter Einbeziehung der im Mai 2010 gezahlten Dividende von 1,40 Euro pro Aktie – knapp 2 Prozent. Am Jahresende schloss die Bayer-Aktie mit 55,30 Euro, nach einem kurz zuvor erreichten Jahreshoch von 58,62 Euro. Damit lag die Rendite der Bayer-Aktie im vierten Jahr in Folge über der des EURO STOXX 50 (Performance Index).

## NACHHALTIGES INVESTMENT

Die Bayer-Aktie ist in zahlreichen Aktienindizes und -fonds vertreten, die Unternehmen mit nachhaltiger und verantwortungsbewusster Unternehmenspolitik auszeichnen – unter anderem in den „Dow Jones Sustainability Indizes World and Europe“, in den „FTSE4Good Global and Europe Indizes“, dem „Advanced Sustainable Performance Indices“-Eurozone-Index oder dem „NYSE Euronext Low Carbon Europe Index“. Von Storebrand, einem norwegischen Finanzdienstleister mit Fokus auf nachhaltigem Investment, wird Bayer als sogenanntes „Best-in-Class-Unternehmen“ im Sektor Pharma geführt.

## DIVIDENDE ERHÖHT AUF 1,50 EURO PRO AKTIE

Vorstand und Aufsichtsrat schlagen der Hauptversammlung in diesem Jahr eine Dividende in Höhe von 1,50 Euro pro Aktie vor. Legt man den Jahresschlusskurs von 2010 (55,30 Euro) zugrunde, so errechnet sich eine Dividendenrendite von 2,7 Prozent. Die Ausschüttungssumme beträgt 1.240 Millionen Euro.

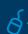



## Performance der Bayer-Aktie 2010

indiziert; 100 = Schlusskurs am 31.12.2009

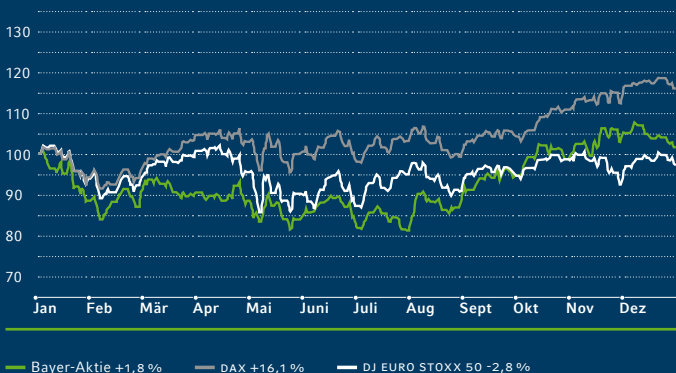

## Dividende pro Aktie (Euro)

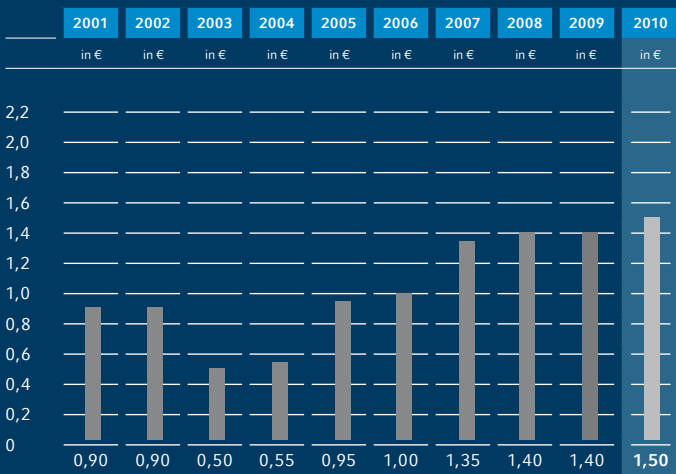

## Ausschüttungssumme

| 2001     | 2002     | 2003     | 2004     | 2005     | 2006     | 2007     | 2008     | 2009     | 2010     |
|----------|----------|----------|----------|----------|----------|----------|----------|----------|----------|
| in Mio € |
| 657      | 657      | 365      | 402      | 694      | 764      | 1.032    | 1.070    | 1.158    | 1.240    |

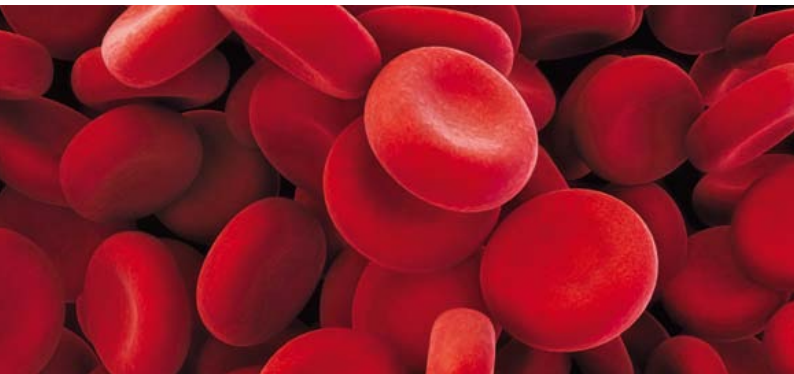

# Bayer HealthCare

## Unternehmensdaten

|                              |                                                                   |
|------------------------------|-------------------------------------------------------------------|
| Unternehmen                  | Bayer HealthCare                                                  |
| Sitz                         | Leverkusen, Deutschland                                           |
| Leitung                      | Dr. Jörg Reinhardt                                                |
| Divisionen                   | Animal Health<br>Consumer Care<br>Medical Care<br>Pharmaceuticals |
| Umsatz                       | 16.913 Millionen Euro                                             |
| EBITDA vor Sondereinflüssen* | 4.405 Millionen Euro                                              |
| F+E-Investitionen            | 2.066 Millionen Euro                                              |
| Mitarbeiter                  | 55.700                                                            |

Stand 31.12.2010

\* Erläuterung siehe Seite 44

 [WWW.BAYERHEALTHCARE.COM](http://WWW.BAYERHEALTHCARE.COM)

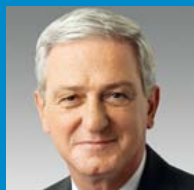

**Dr. Jörg Reinhardt**  
Leitung

Das Bild oben zeigt eine  
Illustration von Blutzellen.

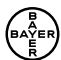

Bayer HealthCare gehört zu den weltweit führenden innovativen Unternehmen in der Gesundheitsversorgung mit Arzneimitteln und medizinischen Produkten. Ziel des Teilkonzerns ist es, innovative Produkte zu erforschen, zu entwickeln, zu produzieren und zu vertreiben, um die Gesundheit von Mensch und Tier weltweit zu verbessern.

Das operative Geschäft des Teilkonzerns ist in vier Divisionen aufgeteilt:

- **Animal Health** (Tierarzneimittel und -pflegeprodukte);
- **Consumer Care** (verschreibungsfreie Arznei- und Nahrungsergänzungsmittel);
- **Medical Care** (Blutzucker-Messgeräte sowie Geräte für die diagnostische Bildgebung und medizinische Therapie);
- **Pharmaceuticals** (verschreibungspflichtige Arzneimittel).

## WIRTSCHAFTLICHE ENTWICKLUNG

Bayer HealthCare steigerte 2010 seinen Umsatz um 5,8 Prozent auf rund 17 Milliarden Euro. Das um Sondereinflüsse bereinigte EBITDA sank um 1,4 Prozent auf 4,4 Milliarden Euro. In der Division Pharmaceuticals erhöhten sich die Umsätze um 4,2 Prozent auf rund 11,0 Milliarden Euro. Die Division Consumer Care verzeichnete 2010 einen Zuwachs von 9,4 Prozent und steigerte ihren Umsatz auf knapp 3,4 Milliarden Euro. Ein Plus von 3,4 Prozent gelang auch der Division Medical Care, die 2010 einen Umsatz von 1,5 Milliarden Euro erwirtschaftete. Die Erlöse der Division Animal Health erhöhten sich um 14,6 Prozent auf 1,1 Milliarden Euro.

### Zahlen | Fakten

| Umsatzentwicklung                  |                                                                                     | in Mio €    |
|------------------------------------|-------------------------------------------------------------------------------------|-------------|
| 2009                               |  | 15.988      |
| 2010                               |  | 16.913      |
| Mitarbeiterzahlen                  |                                                                                     | Mitarbeiter |
| 2009                               |  | 55.800      |
| 2010                               |  | 55.700      |
| Forschungs- und Entwicklungskosten |                                                                                     | in Mio €    |
| 2009                               |  | 1.847       |
| 2010                               |  | 2.066       |

## FORSCHUNGSAKTIVITÄTEN

Mit rund 2,1 Milliarden Euro entfielen 2010 allein rund 68 Prozent der gesamten Forschungsaufwendungen des Bayer-Konzerns auf Bayer HealthCare. Der Fokus der Forschung und Entwicklung bei Bayer HealthCare liegt auf der Identifizierung und Entwicklung neuer Wirkstoffe für Erkrankungen mit einem hohen medizinischen Bedarf.

Die Division Pharmaceuticals forscht und entwickelt schwerpunktmäßig in den Gebieten Kardiologie und Hämatologie, Onkologie, Frauengesundheit und Diagnostische Bildgebung. Aktuelle Beispiele für Wirkstoffe aus der Pharmaforschung sind:

- **Xarelto™**: Medikament zur Prävention und Therapie thromboembolischer Erkrankungen (Venenthrombosen);
- **Nexavar™**: Antikrebs-Medikament, das das Tumorwachstum durch die Kombination zweier spezieller Wirkmechanismen verhindert;
- **VEGF Trap-Eye**: zur Behandlung der feuchten altersbedingten Makula-Degeneration;
- **Riociguat**: oraler Wirkstoff zur Therapie verschiedener Formen des Lungenhochdrucks.

Die Division Consumer Care konzentriert ihre Forschung und Entwicklung auf den Ausbau bestehender Marken durch Erweiterung von Indikationen und optimierten Darreichungsformen.

Die Forschungs- und Entwicklungsschwerpunkte der Division Medical Care liegen auf den Gebieten der Blutzuckermessung sowie in der Weiterentwicklung medizinischer Geräte, die in der Diagnose und Therapie verschiedener Erkrankungen eingesetzt werden. Des Weiteren wird auch in die Ausweitung medizinischer Datenmanagementsysteme investiert.

Parasitizide und Antibiotika sowie Produkte zur Behandlung altersbedingter Erkrankungen bei Haus- und Hobbytieren und innovative Leistungen für Lebensmittel produzierende Tiere stehen im Mittelpunkt der Forschungs- und Entwicklungsaktivitäten der Division Animal Health.

## Schutz vor Thrombosen

Eine Thrombose kann ohne Vorwarnung eintreten – und ist lebensgefährlich. Schlaganfall, Herzinfarkt oder Lungenembolie können die Folge sein, wenn ein Blutgerinnsel ein Gefäß im Gehirn, im Herzen oder in der Lunge blockiert. Deshalb forschen Bayer-Wissenschaftler an neuen Substanzen, um Thrombosen vorzubeugen und zu behandeln.

## Umsatzstärkste Produkte\*

**Adalat™** (Medikament zur Behandlung des Bluthochdrucks)

**Advantage™** (Produktlinie für Antiflohmittel für Hunde und Katzen)

**Aspirin™** (Schmerzmittel auf Basis des Wirkstoffs Acetylsalicylsäure)

**Avalox™/Avelox™** (Medikament zur Behandlung von Infektionen der Atemwege)

**Betaferon™/Betaseron™** (Spezialtherapeutikum zur Behandlung der Multiplen Sklerose)

**Contour™** (Dachmarke für Systeme und Serviceleistungen im Bereich der Blutzuckermessung)

**Glucobay™** (Medikament zur Behandlung der Zuckerkrankheit)

**Kogenate™** (Medikament zur Behandlung der Bluterkrankheit)

**Levitra™** (Medikament zur Behandlung der erektilen Dysfunktion)

**Mirena™** (hormonelles Verhütungsmittel)

**Nexavar™** (Medikament gegen Nieren- und Leberkrebs)

**YAZ™/Yasmin™/Yasminelle™** (hormonelle Verhütungsmittel)

Stand 31.12.2010

\* in alphabetischer Reihenfolge

Prof. Dr. Robert M. Califf (l.), Vice Chancellor für klinische Forschung an der Duke University in North Carolina, USA, und Dr. Scott D. Berkowitz, Leiter der Thrombose-Gruppe bei Bayer HealthCare in den USA

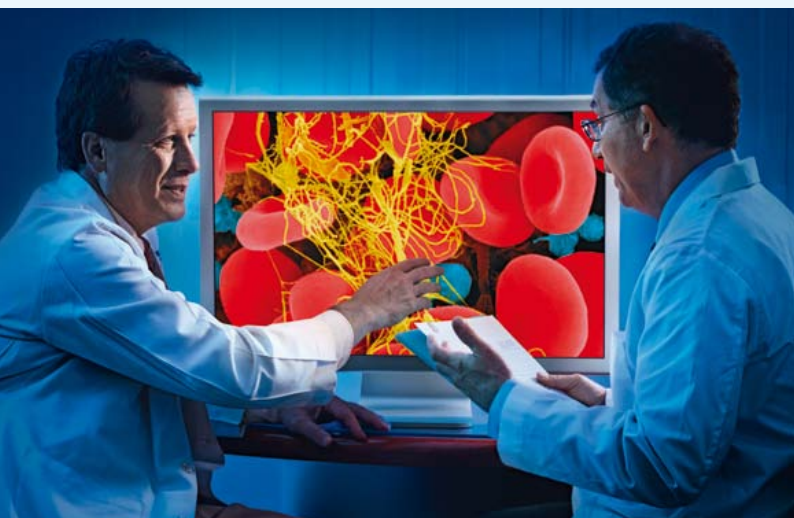

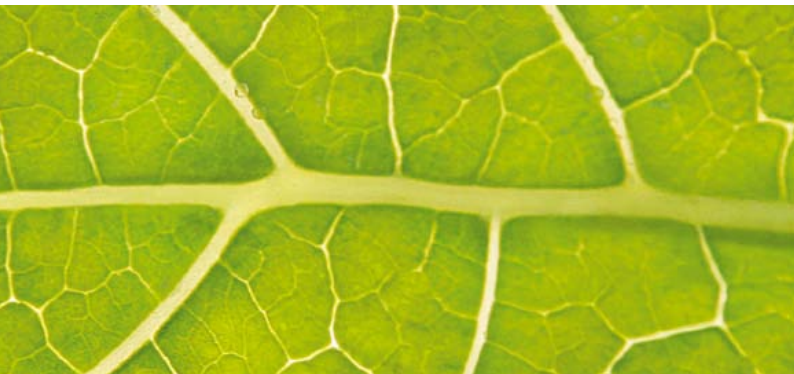

# Bayer CropScience

## Unternehmensdaten

|                               |                                                        |
|-------------------------------|--------------------------------------------------------|
| Unternehmen                   | Bayer CropScience                                      |
| Sitz                          | Monheim, Deutschland                                   |
| Leitung                       | Sandra E. Peterson                                     |
| Geschäftsbereiche             | Crop Protection<br>Environmental Science<br>BioScience |
| Umsatz                        | 6.830 Millionen Euro                                   |
| EBITDA vor Sondereinflüssen * | 1.293 Millionen Euro                                   |
| F+E-Investitionen             | 722 Millionen Euro                                     |
| Mitarbeiter                   | 20.700                                                 |

Stand 31.12.2010

\* Erläuterung siehe Seite 44

 [WWW.BAYERCROPSCIENCE.COM](http://WWW.BAYERCROPSCIENCE.COM)

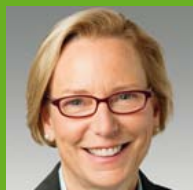

**Sandra E. Peterson**  
Leitung

Das Bild oben zeigt die Detailaufnahme eines Rapsblattes.

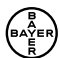

Bayer CropScience nimmt mit leistungsfähigen Produkten, zukunftsweisenden Innovationen und starker Kundenorientierung weltweit Spitzenpositionen im Pflanzenschutz und bei der Schädlingsbekämpfung im nicht-landwirtschaftlichen Bereich ein. Ein weiterer Schwerpunkt liegt beim Geschäft mit Saatgut und Pflanzeigenschaften.

Das Unternehmen ist auf dem Gebiet des chemischen Pflanzenschutzes, der Schädlings- und Unkrautbekämpfung außerhalb der Landwirtschaft sowie im Bereich Saatgut und verbesserte Pflanzeigenschaften (Traits) tätig. Das CropScience-Geschäft besteht aus den Segmenten Crop Protection und Environmental Science/BioScience. Dabei umfasst das Segment Crop Protection entsprechend seinem Produktangebot die Geschäftsfelder Herbizide, Fungizide, Insektizide sowie Saatgutbehandlungsmittel. Das Segment Environmental Science/BioScience beinhaltet im Geschäftsbereich Environmental Science Produkte zur Schädlings- und Unkrautbekämpfung in nicht-landwirtschaftlichen Anwendungen und im Geschäftsbereich BioScience Aktivitäten auf den Gebieten Saatgut und Pflanzeigenschaften (Traits).

## WIRTSCHAFTLICHE ENTWICKLUNG

Bayer CropScience konnte trotz eines sich abschwächenden Marktumfelds den Umsatz im Geschäftsjahr 2010 um 4,9 Prozent auf 6,8 Milliarden Euro steigern. Das EBITDA vor Sondereinflüssen verringerte sich um 14,3 Prozent auf rund 1,3 Milliarden Euro. Der Umsatz im Segment Crop Protection stieg 2010 um 1,3 Prozent auf rund 5,5 Milliarden Euro. Das EBITDA vor Sondereinflüssen sank um 21,2 Prozent auf eine Milliarde Euro. Die niedrigeren Absatzmengen sowie die damit einhergehende geringere Auslastung unserer Produktionsanlagen im 1. Halbjahr wirkten sich ergebnisbelastend aus. Zudem waren Preiserückgänge in Nordamerika zu

### Zahlen | Fakten

| Umsatzentwicklung                  |  | in Mio €    |
|------------------------------------|--|-------------|
| 2009                               |  | 6.510       |
| 2010                               |  | 6.830       |
| Mitarbeiterzahlen                  |  | Mitarbeiter |
| 2009                               |  | 20.500      |
| 2010                               |  | 20.700      |
| Forschungs- und Entwicklungskosten |  | in Mio €    |
| 2009                               |  | 653         |
| 2010                               |  | 722         |

verkräften. Im Segment Environmental Science/BioScience stieg der Umsatz um 23,1 Prozent auf 1,3 Milliarden Euro. Das EBITDA vor Sondereinflüssen lag mit 268 Millionen Euro um 29,5 Prozent über dem Vorjahreswert.

## FORSCHUNGSAKTIVITÄTEN

Im Jahr 2010 entfielen mit 722 Millionen Euro rund 24 Prozent der Aufwendungen des Bayer-Konzerns für Forschung und Entwicklung auf Bayer CropScience.

Wichtige Schwerpunkte liegen neben der klassischen Pflanzenschutzforschung auch im Bereich Saatgut und Pflanzeigenschaften. Hier sind Forschung und Entwicklung auf die Verbesserung der agronomischen und qualitativen Eigenschaften von Nutzpflanzen ausgerichtet. Die dazu verwendeten Technologien umfassen von der Identifizierung des gesuchten Gens bis zur Entwicklung der fertigen Pflanzen alle relevanten Werkzeuge, um wichtige Nutzpflanzen wie Baumwolle, Raps und Reis für Erzeuger und Partner in der Industrie zu verbessern. Aktuelle Beispiele aus der Wirkstoffforschung bei Bayer CropScience sind:

- **Isotianil** (Hauptmarke: Routine™): schützt Reis gegen Pilzerreger, der die Reisbräune verursacht, indem es die natürlichen Abwehrmechanismen der Pflanzen stimuliert;
- **Indaziflam** (Hauptmarke: Specticle™/Alion™): Wirkstoff, der sich durch seine langanhaltende Wirkungsdauer auszeichnet;
- **Bacillus firmus** (Hauptmarke: Votivo™): Mittel zur biologischen Schädlingsbekämpfung in der Saatgutbehandlung;
- **Fluopyram** (Hauptmarke: Luna™): Mittel zur effektiven Behandlung verschiedener durch Pilzerreger hervorgerufener Pflanzenkrankheiten.

Um die Innovationskraft von Bayer CropScience weiter zu stärken, wird das Unternehmen die Forschungs- und Entwicklungsaktivitäten vor allem in den Bereichen Saatgut und Pflanzenmerkmale sukzessive erhöhen.

## Von der Saat bis zum Verzehr

Die Nachfrage nach hochwertigem Obst und Gemüse steigt weltweit. Immer mehr Menschen auch in Schwellenländern wollen Tomaten, Melonen und Paprika frisch kaufen. Mit innovativen Lösungen von der Züchtung über den Anbau bis hin zum Handel trägt Bayer CropScience dazu bei, dass einer wachsenden Weltbevölkerung auch in Zukunft vitaminreiches und hochwertiges Obst und Gemüse für eine gesunde Ernährung zur Verfügung stehen.



## Umsatzstärkste Produkte\*

**Atlantis™** (Mittel gegen Unkräuter)

**Basta™/Liberty™/Rely™/Ignite™** (Mittel gegen Unkräuter)

**Confidor™/Gaucho™/Admire™/Merit™** (Mittel gegen Insekten)

**Decis™/K-Othrine™** (Mittel gegen Insekten)

**Fandango™** (Mittel gegen pilzliche Krankheiten)

**Flint™/Stratego™/Sphere™/Nativo™** (Mittel gegen pilzliche Krankheiten)

**Folicur™/Raxil™** (Mittel gegen pilzliche Krankheiten)

**Poncho™** (Mittel zur Behandlung des Saatguts)

**Proline™/Input™/Prosaro™** (Mittel gegen pilzliche Krankheiten)

**Puma™** (Mittel gegen Unkräuter)

Stand 31.12.2010

\* in alphabetischer Reihenfolge

Bayer-Tomatenzüchter Coert Engels begutachtet gemeinsam mit Produktentwicklerin Nikola Richter vom Salatproduzenten Bauer Funken im Gewächshaus von Nunhems in den Niederlanden eine Intense™-Tomate.

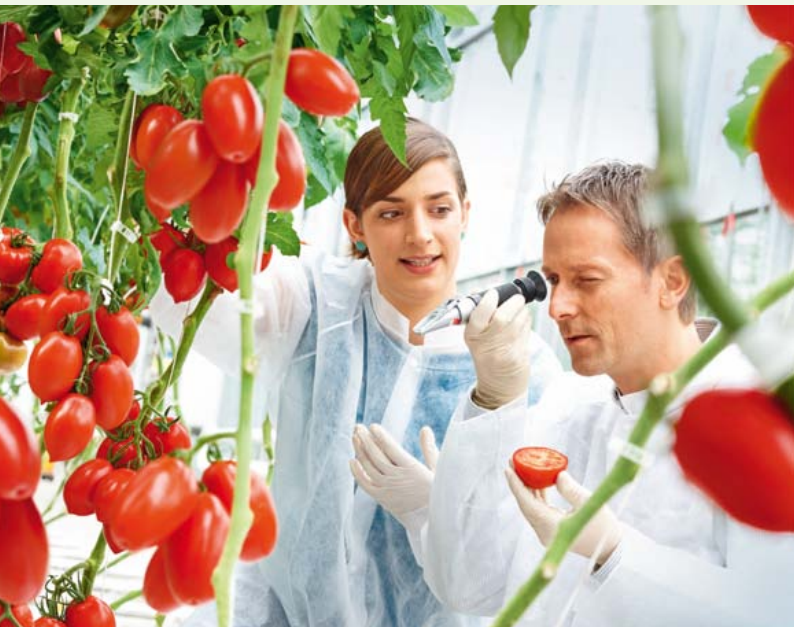

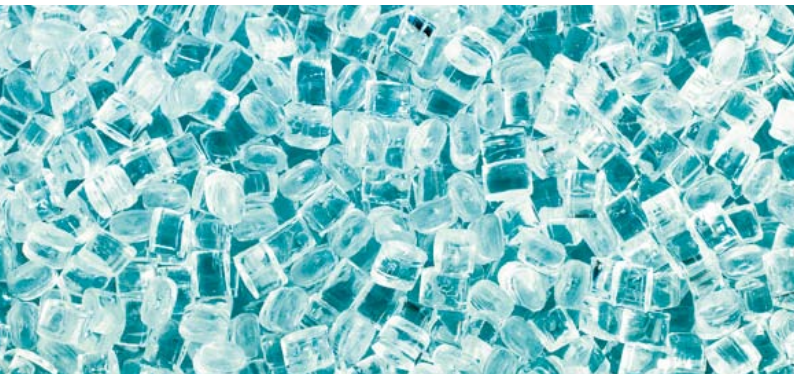

# Bayer MaterialScience

## Unternehmensdaten

|                               |                                                                     |
|-------------------------------|---------------------------------------------------------------------|
| Unternehmen                   | Bayer MaterialScience                                               |
| Sitz                          | Leverkusen, Deutschland                                             |
| Leitung                       | Patrick Thomas                                                      |
| Business Units                | Polyurethanes<br>Polycarbonates<br>Coatings, Adhesives, Specialties |
| Umsatz                        | 10.154 Millionen Euro                                               |
| EBITDA vor Sondereinflüssen * | 1.356 Millionen Euro                                                |
| F+E-Investitionen             | 231 Millionen Euro                                                  |
| Mitarbeiter                   | 14.700                                                              |

Stand 31.12.2010

\* Erläuterung siehe Seite 44

 [WWW.BAYERMATERIALSCIENCE.DE](http://WWW.BAYERMATERIALSCIENCE.DE)

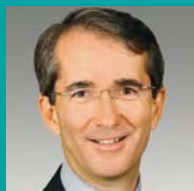

**Patrick Thomas**  
Leitung

Das Bild oben zeigt Granulat  
des Hochleistungskunststoffs  
Makrolon™.

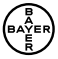

Bayer MaterialScience ist ein führender Hersteller von hochwertigen Werkstoffen, zum Beispiel Polycarbonat und Polyurethan sowie innovativen Systemlösungen, die in zahlreichen Produkten des täglichen Lebens Anwendung finden. Einen Großteil des Umsatzes erwirtschaftet das Unternehmen mit Produkten, die auf dem Weltmarkt Spitzenpositionen einnehmen.

Das Portfolio des Teilkonzerns besteht aus den drei Business Units

- **Polyurethanes;**
  - **Polycarbonates;**
  - **Coatings, Adhesives, Specialties**
- sowie dem Bereich **Industrial Operations.**

## WIRTSCHAFTLICHE ENTWICKLUNG

Die positive Geschäftsentwicklung von MaterialScience war 2010 durch die deutliche konjunkturelle Erholung von der globalen Finanz- und Wirtschaftskrise geprägt. Während das Geschäft zu Jahresbeginn noch beeinträchtigt war, erreichten die Umsätze der vergangenen drei Quartale wieder das Vorkrisenniveau. Der Umsatz stieg auf 10,1 Milliarden Euro und lag damit um 35,0 Prozent über dem Vorjahreswert. Dieser erhebliche Zuwachs resultierte aus der signifikant gestiegenen Nachfrage in allen Hauptabnehmerbranchen, die in sämtlichen Business Units und Regionen zu Mengenausweitungen im zweistelligen Prozentbereich führte. Dadurch stiegen die Absatzmengen wieder auf das Vorkrisenniveau. Darüber hinaus erzielte der Teilkonzern im Vergleich zum Vorjahr insgesamt höhere Absatzpreise. Das EBITDA vor Sondereinflüssen lag mit rund 1,4 Milliarden Euro erheblich über dem Vorjahr. Der Umsatz bei Polyurethanes erhöhte sich 2010 um 32,8 Prozent auf 5,0 Milliarden Euro. Bei Polycarbonates stieg der Umsatz um 49,0 Prozent auf rund 2,8 Milliarden Euro.

### Zahlen | Fakten

| Umsatzentwicklung                  |                                                                                     | in Mio €    |
|------------------------------------|-------------------------------------------------------------------------------------|-------------|
| 2009                               |  | 7.520       |
| 2010                               |  | 10.154      |
| Mitarbeiterzahlen                  |                                                                                     | Mitarbeiter |
| 2009                               |  | 14.600      |
| 2010                               |  | 14.700      |
| Forschungs- und Entwicklungskosten |                                                                                     | in Mio €    |
| 2009                               |  | 207         |
| 2010                               |  | 231         |

Die Business Unit Coatings, Adhesives, Specialties erzielte einen Umsatz von rund 1,8 Milliarden Euro (+ 31,3 Prozent). Der Bereich Industrial Operations wuchs um 9,6 Prozent auf 548 Millionen Euro.

## FORSCHUNGSAKTIVITÄTEN

Bayer MaterialScience wendete im Jahr 2010 231 Millionen Euro für Forschung und Entwicklung (ohne Einbeziehung von gemeinsamen Entwicklungsprojekten mit Kunden) auf. Dies entspricht rund acht Prozent der gesamten Forschungs- und Entwicklungsinvestitionen des Bayer-Konzerns. Der Teilkonzern will damit als globaler Anbieter von hochwertigen, maßgeschneiderten Material- und Systemlösungen seine führende Position im Markt und in der Prozesstechnik weiter ausbauen. In den Business Units Polycarbonates; Polyurethanes und Coatings, Adhesives, Specialties werden modernste Technologien und Produktionsverfahren eingesetzt, um in Kooperation mit den Kunden und anderen externen Partnern neue Produkte und neue Anwendungen zu realisieren.

In der Business Unit Polyurethanes richten sich die Aktivitäten in der Produktentwicklung auf die Erweiterung der Anwendungsgebiete sowie die Eigenschaftsoptimierung der Polyurethan-Systeme. Ein wichtiges Einsatzgebiet ist die Bauindustrie, wo Hartschaum auf Basis von Polyurethanen (PU) als hocheffizienter Dämmstoff dient und damit einen aktiven Beitrag zur Senkung des Energieverbrauchs und zum Schutz des Klimas leistet. Weitere Beispiele aus der Forschung sind:

- **gewichtsreduzierte Materialien** für den Transportbereich (wie etwa Autoscheiben aus Polycarbonat);
- **Dream Production:** gemeinsam mit Partnern (z. B. RWTH Aachen) wird in dem Projekt erstmals die katalytische Umsetzung von Kohlendioxid im Technikumsmaßstab ausgeführt. CO<sub>2</sub> soll als Rohstoff für hochwertige Materialien künftig herkömmliche fossile Rohstoffe ersetzen;
- **Baymedix™:** maßgeschneiderte Anwendungen in der Medizintechnik.

## Hightech für den Klimaschutz

Das vergangene Jahr war global gesehen das wärmste seit Beginn der Wetteraufzeichnungen. Die Welt braucht Klimaschutz. Mit innovativen Technologien und hochwertigen Materialien leistet Bayer einen nachhaltigen Beitrag zur Bewältigung der globalen Herausforderungen – für mehr Energieeffizienz, Klimaschutz und zur Schonung der Ressourcen.

## Wichtige Produkte\*

**Bayblend™** (Markenname für Polymerblends auf der Basis von Polycarbonat und Acrylnitril-Butadien-Styrol)

**Baycusan™ C** (Markenname für Polyurethan-Dispersionen für kosmetische Formulierungen)

**Baydur™** (Polyurethan-System für technische Gehäuse, Medizin, Sport, Sanitär, Möbel)

**Bayflex™** (Familie elastischer Polyurethan-Systeme mit maßgeschneidert einstellbaren Eigenschaften für verschiedene Anwendungen)

**Baytubes™** (Produktname für mehrwandige Kohlenstoff-Nanoröhrchen)

**Desmodur™/Desmophen™** (Lackrohstoffe für Fahrzeug- und Industrielackierung, Korrosionsschutz)

**Desmopan™** (thermoplastische Polyurethane für eine Vielzahl von Hightech-Anwendungen)

**Makrolon™** (Polycarbonat (transparenter, schlagzäher Kunststoff) u. a. für CD, DVD, Automobilanwendungen, Gebäudeverschiebung, Elektrik-/Elektronikanwendungen)

**Multitec™** (innovatives Polyurethan-Sprühsystem für die Herstellung großformatiger Formteile)

Stand 31.12.2010

\* in alphabetischer Reihenfolge

Bayer-Forscher Dr. Thomas Ernst Müller (l.) und Prof. Dr. Walter Leitner von der RWTH Aachen University diskutieren über die nachhaltige Verwendung von Kohlendioxid.

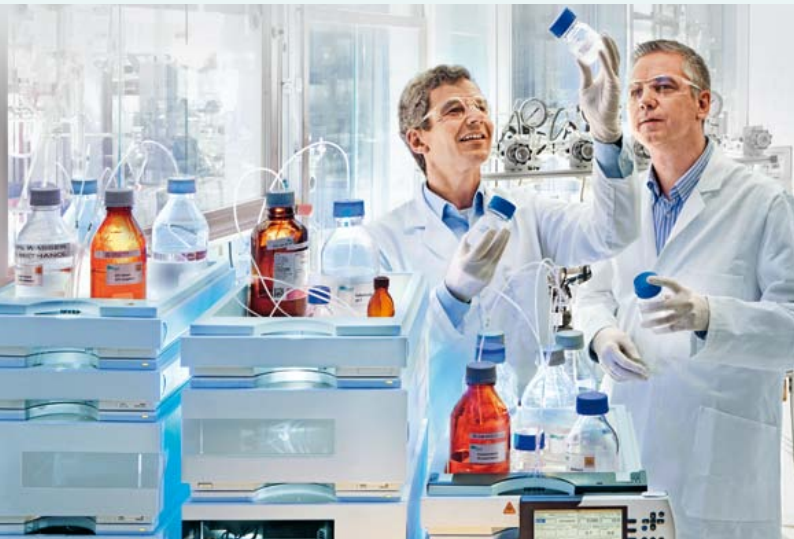

# Servicegesellschaften

Die zentralen Servicefunktionen für das operative Geschäft der Bayer-Teilkonzerne sind in drei Dienstleistungsgesellschaften zusammengefasst:

## **BAYER BUSINESS SERVICES**

Bayer Business Services ist das globale Kompetenz-Zentrum des Bayer-Konzerns für IT- und Business Services. Das Angebot konzentriert sich auf Dienstleistungen in den Kernbereichen IT-Infrastruktur und -Anwendungen, Einkauf und Logistik, Personal- und Managementdienste sowie Finanz- und Rechnungswesen.

 [WWW.BAYERBBS.DE](http://WWW.BAYERBBS.DE)  
.....

## **BAYER TECHNOLOGY SERVICES**

Bayer Technology Services ist das weltweite technologische Rückgrat und ein wichtiger Innovationsmotor des Bayer-Konzerns, wenn es um die Entwicklung und die Planung sowie den Bau und die Optimierung von Prozessen und Anlagen geht. Hier bietet die Servicegesellschaft ganzheitliche Lösungen entlang des gesamten Lebenszyklus von Prozessen und Produkten.

 [WWW.BAYERTECHNOLOGY.COM](http://WWW.BAYERTECHNOLOGY.COM)  
.....

## **CURRENTA**

Currenta bietet Dienstleistungen im chemisch-technischen Bereich an. Dazu zählen unter anderem Energieversorgung, Entsorgung, Infrastruktur, Sicherheit, Analytik sowie Ausbildung. Die Servicegesellschaft – ein gemeinsames Unternehmen von Bayer und Lanxess – betreibt den CHEMPARK an den Standorten Leverkusen, Dormagen und Krefeld-Uerdingen.

 [WWW.CURRENTA.DE](http://WWW.CURRENTA.DE)  
.....

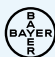

## Bayer Business Services

### Unternehmensdaten

|                     |                              |
|---------------------|------------------------------|
| <b>Unternehmen</b>  | Bayer Business Services GmbH |
| <b>Sitz</b>         | Leverkusen, Deutschland      |
| <b>Vorsitzender</b> | Daniel Hartert               |
| <b>Mitarbeiter</b>  | 5.800*                       |
| <b>Services</b>     | IT- und Business-Services    |

(Stand 31.12.2010)

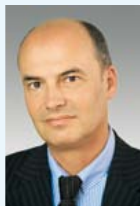

**Daniel Hartert**  
Vorsitzender

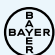

## Bayer Technology Services

### Unternehmensdaten

|                        |                                                                       |
|------------------------|-----------------------------------------------------------------------|
| <b>Unternehmen</b>     | Bayer Technology Services GmbH                                        |
| <b>Sitz</b>            | Leverkusen, Deutschland                                               |
| <b>Geschäftsführer</b> | Dr. Dirk Van Meirvenne                                                |
| <b>Mitarbeiter</b>     | 2.700                                                                 |
| <b>Services</b>        | technologische Lösungen im Bereich<br>Verfahren, Anlagen und Produkte |

(Stand 31.12.2010)

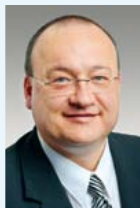

**Dr. Dirk Van Meirvenne**  
Geschäftsführer

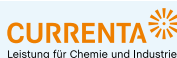

### Unternehmensdaten

|                     |                                                                                                  |
|---------------------|--------------------------------------------------------------------------------------------------|
| <b>Unternehmen</b>  | Currenta GmbH & Co. OHG                                                                          |
| <b>Sitz</b>         | Leverkusen, Deutschland                                                                          |
| <b>Vorsitzender</b> | Dr. Klaus Schäfer                                                                                |
| <b>Mitarbeiter</b>  | 5.300**                                                                                          |
| <b>Services</b>     | Dienstleistungen im chemisch-<br>technischen Bereich sowie Manager<br>und Betreiber des CHEMPARK |

(Stand 31.12.2010)

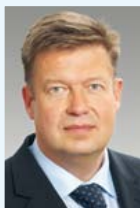

**Dr. Klaus Schäfer**  
Vorsitzender

\* permanente Mitarbeiter ohne Auszubildendenpool

\*\* permanente Mitarbeiter ohne Auszubildende

# Forschung und Entwicklung

Innovationen leisten wichtige Beiträge, um die globalen Herausforderungen in den Bereichen Gesundheit, Ernährung der wachsenden Weltbevölkerung sowie Schonung knapper werdender Ressourcen zu bewältigen, und sie sind wesentlicher Treiber für das künftige Wachstum von Bayer.

Im Jahr 2010 wurden 3.053 Millionen Euro für Forschung und Entwicklung aufgewendet. Dies entspricht einer Forschungskostenquote von 8,7 Prozent bezogen auf den Umsatz. Eine besondere Bedeutung hat die fokussierte Entwicklung von neuen, das Kerngeschäft stärkenden Produkten. Um das angestrebte Wachstum zu ermöglichen, arbeitet das Unternehmen an einer stetigen Erneuerung und Erweiterung des Produktportfolios sowie an einer Optimierung der Produktionsprozesse. Die Forschungs- und Entwicklungsaktivitäten orientieren sich eng an den Marktbedürfnissen und unterliegen dementsprechend einem kontinuierlichen Anpassungsprozess. Die Aktivitäten des Konzerns werden durch ein internationales Netzwerk von führenden Hochschulen, öffentlichen Forschungseinrichtungen und Partnerfirmen ergänzt, das entlang der Forschungs- und Entwicklungsschwerpunkte kontinuierlich ausgebaut wird. Bayer will durch Bündelung von Know-how neue Geschäftsideen zügig in Produktfolge umsetzen. Die gezielte Förderung von Mitarbeitern in den Forschungs- und Entwicklungsbereichen ist ein weiteres Kernelement zur Unterstützung dieser Aktivitäten.

## **FORSCHUNG IN DEN DREI TEILKONZERNEN**

Von den gesamten Forschungsaufwendungen des Konzerns entfielen 67,7 Prozent auf Bayer HealthCare, 23,6 Prozent auf Bayer CropScience und 7,6 Prozent auf Bayer MaterialScience. Weitere Informationen zu den Forschungsaktivitäten der Teilkonzerne finden sich in den jeweiligen Kapiteln dieser Broschüre.

## **BAYER TECHNOLOGY SERVICES**

Bei technologischen Lösungen, insbesondere in den Bereichen der Prozesstechnologie, dem Anlagenbau, der Automatisierung und der Produktentwicklung, arbeiten alle Bayer-Teilkonzerne weltweit eng mit Bayer Technology Services zusammen. Die Servicegesellschaft entwickelt zum Beispiel zusammen mit Bayer MaterialScience neue, energie- und rohstoffeffiziente Produktionsverfahren und unterstützt somit den Teilkonzern, seine Technologie- und Kostenführerschaft zu sichern. Die zentrale Weiterentwicklung von teilkonzernübergreifenden Querschnittstechnologien – wie zum Beispiel der



Nano- und Biotechnologie oder des Know-hows auf dem Gebiet der mathematischen Simulation und der statistischen Datenanalyse – hilft Bayer HealthCare und Bayer CropScience, die Entwicklungszeiten für neue Produkte zu verkürzen. Dazu gehören auch völlig neue Produktionskonzepte, die zukünftig etwa in dem in Bau befindlichen Forschungszentrum INVITE, einer Kooperation von Bayer Technology Services und der Technischen Universität Dortmund, entwickelt werden. Ein weiteres strategisches Kernelement ist dabei die internationale Beschaffung von Know-how. Es reicht von landesspezifischem Wissen bei der Abwicklung von Investitionsprojekten bis zur weltweiten Erschließung von Innovationen.

## BAYER INNOVATION

Innovationsthemen, die am Rande der Kernaktivitäten der Teilkonzerne liegen, werden von der Bayer Innovation erarbeitet, bewertet und zu tragfähigen neuen Geschäften für den Konzern weiterentwickelt. Ein Arbeitsgebiet ist die Herstellung von Medikamenten in Pflanzen. Im Jahr 2010 wurde mit der klinischen Studie (Phase I) eines personalisierten Krebsimpfstoffs zur Therapie des Non-Hodgkin-Lymphoms begonnen. Im Gebiet Landwirtschaft sind neuartige Hybrid-Konzepte basierend auf Polymertechnologien und Pflanzenschutzmitteln in der Entwicklung. Das volle Potenzial dieser Technologien wird in enger Kooperation mit den Teilkonzernen sowie mit externen Partnern evaluiert.

### Forschungs- und Entwicklungskosten nach Teilkonzernen

(Vorjahreswerte in Klammern)

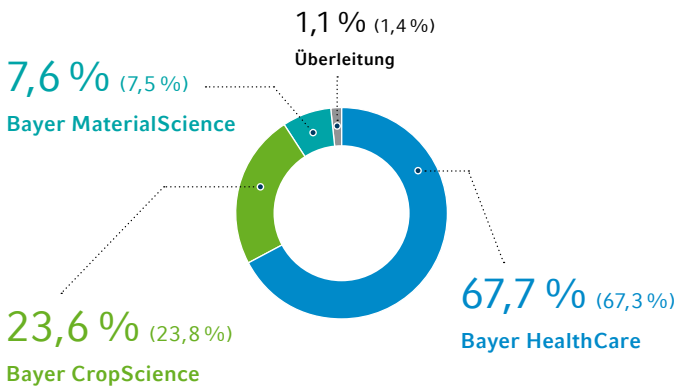

Stand 31.12.2010

# Mitarbeiter

Der Bayer-Konzern beschäftigte am 31.12.2010 weltweit 111.400 Mitarbeiterinnen und Mitarbeiter (Vorjahr: 111.000). In Deutschland hatte das Unternehmen 36.200 Mitarbeiterinnen und Mitarbeiter (Vorjahr: 36.000), dies entspricht einem Anteil von 32,5 Prozent am Gesamtkonzern. Der Personalaufwand erhöhte sich um 4,2 Prozent auf rund 8,1 Milliarden Euro.

## AUSBILDUNG UND NACHWUCHSGEWINNUNG

Vielfalt, internationale Karrierechancen, ein modernes Arbeitsumfeld sowie soziales Engagement machen Bayer weltweit zu einem attraktiven Arbeitgeber. Das Unternehmen konnte 2010 konzernweit mehr als 4.000 akademisch qualifizierte Fach- und Führungskräfte als Mitarbeiter gewinnen. Allein in Indien rekrutierte der Konzern mehr als 750 Hochschulabsolventen, in Deutschland waren es rund 700 und in den USA über 350. Um Schulabgänger und Studenten schon früh von den beruflichen Möglichkeiten im Unternehmen zu überzeugen, hat Bayer die Aktivitäten seines Hochschulmarketings 2010 um Unternehmensauftritte in sozialen Netzwerken erweitert. Ergänzt werden diese Kommunikationsmaßnahmen durch mehr als 2.700 Berufspraktika, die der Konzern weltweit an Studierende unterschiedlicher Fachrichtungen vergeben hat.

Neben der Einstellung von Hochschulabsolventen gehört die eigene Ausbildung von jungen Menschen zu den wichtigsten Maßnahmen, um einem möglichen Fachkräftemangel aufgrund des demographischen Wandels zu begegnen. Auch im Jahr 2010 begannen allein in Deutschland wieder mehr als 900 Jugendliche bei Bayer eine Ausbildung in einem von über 20 Berufen.

## WEITERBILDUNG UND WISSENSERHALT

Auf den demographischen Wandel – eine Herausforderung in vielen Industrienationen – reagiert Bayer mit einer Vielzahl von Maßnahmen. Mit umfangreichen Weiterbildungsangeboten fördert der Konzern das Wissen seiner Mitarbeiter und passt es an veränderte Anforderungen an. Mit dem 2010 gestarteten „Bayer Senior Experts Network“ (BaySEN) will das Unternehmen die langjährige Erfahrung pensionierter Führungskräfte für das Unternehmen erhalten.

## VERGÜTUNG UND MITARBEITERBETEILIGUNG

Die Vergütung im Bayer-Konzern folgt einer weltweit einheitlichen Systematik, die konzernweit eine transparente und leistungsgerechte Bezahlung und Incentivierung der Beschäftigten gewährleistet.

Auf der Grundlage regelmäßiger Wettbewerbsanalysen bietet der Konzern seinen Mitarbeiterinnen und Mitarbeitern ein leistungs- und verantwortungsbezogenes Grundgehalt, das durch attraktive erfolgsabhängige Vergütungsbestandteile sowie umfangreiche Nebenleistungen ergänzt wird. So sind 2010 allein im Rahmen des konzernweiten Short-Term-Incentive-Programms über 500 Millionen Euro an variablen Einmalzahlungen an die Beschäftigten vorgesehen. Verschiedene Aktienbeteiligungsprogramme ermöglichen den Mitarbeitern zudem den vergünstigten Erwerb von Unternehmensanteilen. Sie sind in zahlreichen Ländern Bestandteil der umfangreichen Zusatzleistungen des Unternehmens.

#### Mitarbeiter-Kennzahlen

|                                                                                                                                         | 31.12.2009     | 31.12.2010     |
|-----------------------------------------------------------------------------------------------------------------------------------------|----------------|----------------|
|                                                                                                                                         | in FTE         | in FTE         |
| <b>Mitarbeiter pro Region</b>                                                                                                           |                |                |
| Europa                                                                                                                                  | 54.600         | 54.300         |
| Nordamerika                                                                                                                             | 16.600         | 16.400         |
| Asien/Pazifik                                                                                                                           | 23.000         | 24.600         |
| Lateinamerika/Nahost/Afrika                                                                                                             | 16.800         | 16.100         |
| <b>Mitarbeiter nach Funktion</b>                                                                                                        |                |                |
| Produktion                                                                                                                              | 48.400         | 47.200         |
| Vertrieb                                                                                                                                | 40.200         | 41.100         |
| Forschung und Entwicklung                                                                                                               | 12.800         | 13.200         |
| Verwaltung                                                                                                                              | 9.600          | 9.900          |
| <b>Gesamt</b>                                                                                                                           | <b>111.000</b> | <b>111.400</b> |
| Auszubildende                                                                                                                           | 2.700          | 2.600          |
|                                                                                                                                         | in %           | in %           |
| Prozentsatz an Frauen im Konzernführungskreis                                                                                           | 5,5            | 6,5            |
| Anzahl der Nationalitäten im Konzernführungskreis                                                                                       | 22             | 21             |
| Anteil Vollzeitmitarbeiter mit vertraglich festgelegter Arbeitszeit von maximal 48 h/Woche                                              | 100            | 100            |
| Anteil Mitarbeiter mit Krankenversicherung                                                                                              | 95             | 94             |
| Anteil Mitarbeiter mit Zugangsberechtigung zu einer betrieblichen Altersversorgung oder einer unternehmensfinanzierten Altersversorgung | 74             | 73             |
| Anteil Mitarbeiter, die durch Kollektivvereinbarungen erfasst werden, insbesondere hinsichtlich Löhnen und Arbeitsbedingungen           | 56             | 55             |

Die Anzahl der Mitarbeiter (Festanstellungen und befristete Arbeitsverhältnisse) wird in Vollzeitbeschäftigte (FTE) umgerechnet dargestellt. Teilzeitbeschäftigte werden dabei gemäß ihrer vertraglichen Arbeitszeit proportional berücksichtigt. (Stand 31.12.2010)

# Nachhaltigkeit

Nachhaltigkeit ist ein wesentlicher Bestandteil der Mission und Werte des Bayer-Konzerns. Entsprechend unserer Mission „Bayer: Science For A Better Life“ sind wir davon überzeugt, dass wir unternehmerisch auf Dauer nur erfolgreich sein können, wenn wir wirtschaftliches Wachstum in Einklang bringen mit ökologischer und gesellschaftlicher Verantwortung. Dies unterstreicht unser Bekenntnis zu den zehn Prinzipien des UN Global Compact und zur „Responsible Care®“-Initiative der Chemischen Industrie. Die Umsetzung erfolgt auf drei Ebenen: mithilfe unserer Produkte und Innovationen, die den Menschen nützen und zur Verbesserung der Lebensqualität beitragen sollen, im verantwortungsvollen Umgang mit unseren Stakeholdern im Rahmen unserer Geschäftsaktivitäten sowie durch unser gesellschaftliches Engagement.

## NACHHALTIGKEITSPROGRAMM

Nachhaltigkeit bedeutet für Bayer im Kern Zukunftsfähigkeit und ist deshalb integraler Teil unserer Geschäftsstrategie. Mit innovativen Lösungen adressieren wir Marktchancen und wollen zur Lösung globaler Herausforderungen beitragen. Dies steht im Fokus unserer Nachhaltigkeitsstrategie. Auf deren Basis haben wir 2009 ein Nachhaltigkeitsprogramm entwickelt. Schwerpunkte bilden die Allianzen für nachhaltige Gesundheitsversorgung, innovative Partnerschaften für mehr hochwertige Nahrungsmittel sowie neue Lösungen für Klimaschutz und Ressourcennutzung. Zur Verdeutlichung unserer Nachhaltigkeitsstrategie wurden exemplarisch acht Leuchtturm-Projekte ausgewählt, die den Kern unserer Strategie besonders gut verdeutlichen.

## LEISTUNGEN UND KENNZAHLEN

Ein zentrales Element des Bayer-Nachhaltigkeitsmanagements ist die Steuerung durch Leistungskennzahlen, die transparent und überprüfbar Rechenschaft über Nachhaltigkeitsleistungen, aber auch Herausforderungen des Unternehmens ablegen. Im Jahr 2010 konnten wir fast alle Nachhaltigkeitskennzahlen verbessern, obwohl wir unsere produzierte Verkaufsmenge um rund 20 Prozent gesteigert haben. Als Folge erhöhte sich im Berichtsjahr der Wasser- und Energieeinsatz, aber auch die Menge des organisch gebundenen Kohlenstoffs (TOC). Die Arbeitsunfallquote reduzierte sich erneut. Damit haben wir unser Ziel einer Quote von < 2,0 deutlich unterschritten. Wir konnten 2010 auch einen Rückgang der Umwelt- und Transportereignisse verzeichnen. Alle Ereignisse und Unfälle werden stets detailliert analysiert und bewertet, um adäquate Maßnahmen zu ihrer künftigen Vermeidung einleiten zu können.

## Bayer-Nachhaltigkeitsprogramm

|                 |                                                                                                              |                                                                                                                       |                                                                                                                                                            |
|-----------------|--------------------------------------------------------------------------------------------------------------|-----------------------------------------------------------------------------------------------------------------------|------------------------------------------------------------------------------------------------------------------------------------------------------------|
| Herausforderung | › Globaler Zugang zu Gesundheitsversorgung                                                                   | Ernährung für eine wachsende Weltbevölkerung                                                                          | Klima- und Umweltschutz                                                                                                                                    |
| Fokus           | › Allianzen für nachhaltige Gesundheitsversorgung                                                            | Mehr hochwertige Nahrungsmittel                                                                                       | Lösungen für Klimaschutz und Ressourcennutzung                                                                                                             |
| Projekte        | › <ul style="list-style-type: none"> <li>• Familienplanung</li> <li>• Vernachlässigte Krankheiten</li> </ul> | <ul style="list-style-type: none"> <li>• „Food Chain Partnership“ Gemüse</li> <li>• Direktaussaat von Reis</li> </ul> | <ul style="list-style-type: none"> <li>• EcoCommercial Building Program</li> <li>• Energieeffizienz (2 Projekte)</li> <li>• Ressourceneffizienz</li> </ul> |

## Leistungskennzahlen

| Kategorie                 | Leistungskennzahlen                                                         | 2009  | 2010  |
|---------------------------|-----------------------------------------------------------------------------|-------|-------|
| Gesundheit und Sicherheit | Arbeitsunfälle von Bayer-Mitarbeitern mit Ausfalltagen (MAQ*-Wert)          | 2,0   | 1,7   |
|                           | Berichtspflichtige Arbeitsunfälle von Bayer-Mitarbeitern (MAQ*-Wert)        | 3,1   | 3,1   |
|                           | Umweltereignisse                                                            | 13    | 7     |
|                           | Transportunfälle                                                            | 10    | 8     |
| Emissionen                | Direkte Treibhausgas-Emissionen (CO <sub>2</sub> -Äquivalente in Mio t)**   | 4,57  | 4,80  |
|                           | Indirekte Treibhausgas-Emissionen (CO <sub>2</sub> -Äquivalente in Mio t)** | 3,53  | 3,70  |
|                           | Flüchtige organische Verbindungen in 1.000 t/a                              | 2,59  | 2,54  |
|                           | Gesamt-Phosphor im Abwasser in 1.000 t/a                                    | 0,74  | 0,09  |
|                           | Gesamt-Stickstoff im Abwasser in 1.000 t/a                                  | 0,64  | 0,49  |
|                           | Gesamter organisch gebundener Kohlenstoff in 1.000 t/a                      | 1,35  | 1,42  |
| Abfälle                   | Erzeugter gefährlicher Abfall in Mio t/a                                    | 0,38  | 0,35  |
|                           | Deponierter gefährlicher Abfall in Mio t/a                                  | 0,09  | 0,06  |
| Ressourceneinsatz         | Wassereinsatz in Mio m <sup>3</sup> /a                                      | 407   | 474   |
|                           | Energieeinsatz in Petajoule (10 <sup>15</sup> Joule)/a                      | 77,33 | 85,71 |

Vorjahreswerte angepasst, a = Jahr

\* MAQ = Millionen-Arbeitsstunden-Quote, d. h. Anzahl der Unfälle pro einer Million Arbeitsstunden

\*\* Nach Greenhouse Gas Protocol

## NACHHALTIGES INVESTMENT

Die Bayer-Aktie ist seit Jahren in zahlreichen Aktienindizes und -fonds vertreten, die Unternehmen mit nachhaltiger und verantwortungsbewusster Unternehmenspolitik auszeichnen (siehe auch Seite 14). Auch 2010 wurden wir aufgrund unserer transparenten Berichterstattung über Klimastrategie und Treibhausgas-Emissionen im sechsten Jahr in Folge in den Carbon Disclosure Leadership Index aufgenommen, Bayer ist vom „Carbon Disclosure Project“ außerdem in den neu eingeführten „Carbon Performance Leadership Index“ (CPLI) mit dem Prädikat „A“ aufgenommen worden.

## GESELLSCHAFTLICHES ENGAGEMENT

Gesellschaftliches Engagement ist ein fester Bestandteil der Nachhaltigkeitsstrategie von Bayer. Das Unternehmen versteht sich als Teil der Gesellschaft und begreift sein Engagement im Sinne eines „Good Corporate Citizen“ als langfristige Investition in die Zukunftsfähigkeit der Gesellschaft und als nachhaltigen Beitrag für positive unternehmerische Rahmenbedingungen. Wir fokussieren dabei auf Themen, die von globaler oder besonderer gesellschaftlicher Relevanz in den Ländern sind, in denen Bayer vertreten ist. Unser Engagement dokumentiert sich in zahlreichen Projekten, die das Unternehmen zum Teil seit Jahren in vielen Regionen der Welt organisiert oder unterstützt. Dafür stellte Bayer 2010 rund 57 Millionen Euro (Vorjahr: 44 Millionen Euro) in den vier Schwerpunktbereichen (Bildung und Forschung/Umwelt und Natur/Gesundheit und Soziales/Sport und Kultur) zur Verfügung. Das „Humboldt Bayer Mobil“, ein Forschungslabor auf Rädern, macht seit 2010 Station an Schulen. Die Bayer-Stiftung unterstützt dieses gemeinsam mit der Humboldt-Universität zu Berlin gestartete und zunächst auf drei Jahre angelegte naturwissenschaftliche Bildungsprojekt mit 300.000 Euro.

Im Rahmen unseres Engagements gegen Kinderarbeit in unserer Lieferkette in Indien setzen wir mit dem Programm „Learning for Life“ ein integriertes Maßnahmenpaket um. Es ermöglicht Kindern beziehungsweise Jugendlichen den Zugang zu Schulbildung und Ausbildung und soll verhindern, dass Baumwollsaatgut-Zulieferer sie als Arbeitskräfte einsetzen. Für die Erdbebenopfer in Haiti finanzierte die „Bayer Cares Foundation“ gemeinsam mit „Caritas international“ ein Gesundheitszentrum, das 30.000 Menschen medizinisch versorgen wird. Ermöglicht wurde dies durch die Bayer-Mitarbeiter, die in 34 Ländern einem weltweiten Spendenaufruf des Unternehmens gefolgt sind und 250.000 Euro spendeten. Bayer stockte diesen Betrag auf insgesamt 350.000 Euro auf.

## Ausgewählte Mitgliedschaften

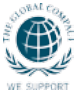

### Global-Compact

Gründungsmitglied der UN-Unternehmensinitiative für eine nachhaltige Welt

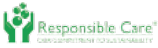

### Responsible Care Global Charter

Erstunterzeichner der weltweiten Charter für Entwicklung und verantwortliches Handeln in der chemischen Industrie

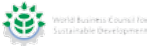

### World Business Council for Sustainable Development

aktive Mitgliedschaft seit 1997

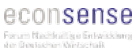

### econsense Forum Nachhaltige Entwicklung der Deutschen Wirtschaft

Gründungsmitglied der branchenübergreifenden Initiative für Nachhaltige Entwicklung

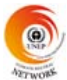

### UNEP „Climate Neutral Network“

Förderung von Wirtschaftsstrukturen und Gesellschaften mit niedrigen CO<sub>2</sub>-Emissionen

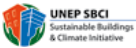

### UNEP SBCI

Unterstützung von SBCI im Rahmen des „EcoCommercial Building Program“

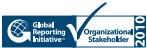

### Global Reporting Initiative

aktive Unterstützung als Organizational Stakeholder

## Ausgewählte Projekte

### UNEP

Die Zusammenarbeit mit dem Umweltprogramm der Vereinten Nationen (UNEP) hat mittlerweile exemplarischen Charakter für Kooperationen zwischen Politik und Privatwirtschaft, sogenannten „Public Private Partnerships“. Eine der langjährigen gemeinsamen Aktivitäten ist das Programm „Bayer Young Environmental Envoy in Partnership with UNEP“ mit 18 Teilnehmerländern aus drei Kontinenten.

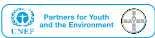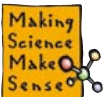

### Making Science Make Sense

Das Bildungsprogramm „Making Science Make Sense“ wurde auch im Jahr 2010 wieder in zwölf Ländern umgesetzt. Schüler profitieren vom freiwilligen Einsatz der Bayer-Mitarbeiter, die in Schulen den Sinn und Nutzen der Naturwissenschaften in anschaulichen Experimenten demonstrieren.

### TB Alliance

Im Kampf gegen Tuberkulose kooperiert Bayer mit der „Global Alliance for TB Drug Development“, einer us-amerikanischen Non-Profit-Organisation, bei der Entwicklung eines Medikaments, das die Behandlungszeit reduzieren soll.

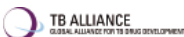

# Historie

## 19. JAHRHUNDERT

**1863**

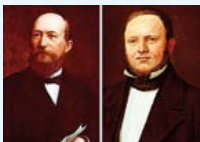

Am 1. August gründen der Kaufmann Friedrich Bayer und der Färbermeister Johann Friedrich Weskott einen Farbstoffbetrieb in Barmen (heute ein Stadtteil von Wuppertal).

**1881**

Am 1. Juli gründen die Nachkommen Bayers und Weskotts die Aktiengesellschaft Farbenfabriken vorm. Friedr. Bayer & Co.

**1891**

Das Gelände in Leverkusen wird angekauft.

**1897**

Dem Bayer-Forscher Dr. Felix Hoffmann gelingt die Synthese des Wirkstoffs von Aspirin™, Acetylsalicylsäure, in chemisch reiner und haltbarer Form.

**1884**

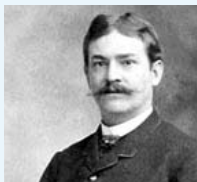

Der Chemiker Carl Duisberg beginnt seine Arbeit bei Bayer. Unter seiner Leitung gelingen den Wissenschaftlern bahnbrechende Erfindungen.

**1865**

Die Firmengründer beteiligen sich an einer Teerfarbenfabrik in den USA und liefern Zwischenprodukte nach Übersee.

**1899**

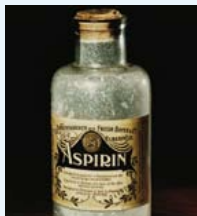

Aspirin™ wird als Warenzeichen eingetragen und erobert als Schmerzmittel die Welt.

**1876**

Eine Fabrikfiliale wird in Moskau eröffnet.

**1888**

Der Aufbau einer pharmazeutischen Abteilung beginnt.

## 20. JAHRHUNDERT

**1912**

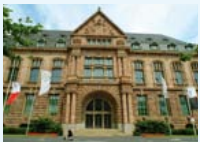

Der Firmensitz wird nach Leverkusen verlegt.

**1925**

Die Farbenfabriken vorm. Friedr. Bayer & Co. gehen in der I.G. Farbenindustrie AG auf. Leverkusen wird Hauptwerk der Betriebsgemeinschaft Niederrhein der I.G. Als das bedeutendste Chemieunternehmen Deutschlands wird die I.G. Farben auch in die Entwicklung des Dritten Reichs verstrickt. Nach dem Zweiten Weltkrieg wird die I.G. Farben auf alliierten Befehl beschlagnahmt und später entflochten.



**1939**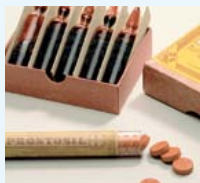

Dem Bayer-Forscher Gerhard Domagk wird der Medizinnobelpreis für die Entdeckung der antibakteriellen Wirkung der Sulfonamide (Prontosil) zugesprochen.

Unternehmenszentrale von Bayer CropScience) in Monheim.

**1986**

In Pittsburgh wird die Bayer USA Inc. als Management- und Holdinggesellschaft der Bayer-Firmen in den USA gegründet.

amerikanische Selbst-medikationsgeschäft von Sterling Winthrop und erhält damit endgültig seine vollen – nach dem Ersten Weltkrieg beschlagnahmten – Namensrechte für alle Produkte und das Firmenzeichen in den USA und Kanada zurück.

**1951**

Die Farbenfabriken Bayer AG wird neu gegründet und firmiert ab 1972 als Bayer AG.

**1991**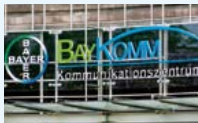

In Leverkusen wird das Bayer-Kommunikationszentrum (BayKomm) eingeweiht.

**1999**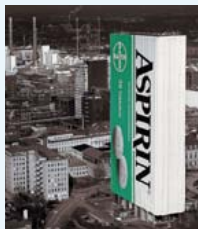

Anlässlich des 100. Geburtstags von Aspirin™ am 6. März wird das Bayer-Verwaltungshochhaus in Leverkusen in die größte Aspirin™-Schachtel der Welt verwandelt – eine Leistung, die drei Einträge ins Guinness-Buch der Rekorde erhält.

**1973**

In diesem Jahr erfolgt die Grundsteinlegung für das Bayer-Werk in Brunsbüttel, sechs Jahre später, 1979, für das Pflanzenschutzzentrum (heute ...)

**1994**

Der erste Betrieb der Bayer Bitterfeld GmbH nimmt die Produktion auf. Im selben Jahr erwirbt Bayer das nord- ...)

## 21. JAHRHUNDERT

**2000**

Mit der Übernahme des Polyol-Geschäfts des us-Unternehmens Lyondell Chemical Company avanciert Bayer zum weltgrößten Hersteller von Polyurethan-Rohstoffen.

**2001**

Am 6. Dezember beschließt die Konzernleitung die Gründung eigenständiger Geschäftseinheiten, die unter dem Dach einer strategischen Holding strukturell verbunden bleiben.

**2002**

Bayer erwirbt im Juni Aventis CropScience und schließt damit im Pflanzenschutz zur Weltspitze auf.

## 21. JAHRHUNDERT

**2002**

Im Oktober startet die Bayer CropScience AG als erster rechtlich selbstständiger Teilkonzern.

**2004**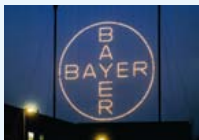

100 Jahre Bayer-Kreuz: Im Januar feiert das weltweit bekannte Markenzeichen des Bayer-Konzerns Geburtstag.

führt die Chemieaktivitäten und Teile des Polymergeschäfts von Bayer weiter.

**2003**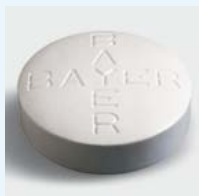

Im Februar nimmt die Weltgesundheitsorganisation WHO den Aspirin<sup>TM</sup>-Wirkstoff Acetylsalicylsäure in die „Liste der unentbehrlichen Arzneimittel“ auf.

**2004**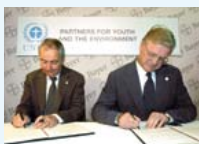

Bayer wird im Juni als erstes Wirtschaftsunternehmen Partner des Umweltprogramms der Vereinten Nationen im Bereich Jugend und Umwelt.

**2005**

Im Dezember erfolgt die us-Zulassung für den gemeinsam von Bayer HealthCare und Onyx Pharmaceuticals Inc. entwickelten Wirkstoff Sorafenib (Handelsname Nexavar<sup>TM</sup>) für die Therapie des fortgeschrittenen Nierenzellkarzinoms.

**2006**

Im März kündigt Bayer ein Übernahmeangebot für die Schering AG an. Im Juli erlangt der Konzern die Kontrolle über 92,4 Prozent der rund 191 Millionen ausstehenden Schering-Aktien. Im Dezember wird die Schering AG offiziell in Bayer Schering Pharma AG umbenannt. Sitz der Gesellschaft ist Berlin.

**2003**

Im Oktober werden im Rahmen der Neustrukturierung die Teilkonzerne Bayer Chemicals AG und Bayer HealthCare AG sowie die Servicegesellschaft Bayer Technology Services GmbH zu rechtlich selbstständigen Unternehmen. Der Teilkonzern Bayer MaterialScience AG und die Servicegesellschaften Bayer Business Services GmbH und Bayer Industry Services GmbH & Co. OHG (heute Currenta GmbH & Co. OHG) folgen im Dezember.

**2005**

Im Januar schließt Bayer die Übernahme des Consumer-Health-Geschäfts von Roche ab und steigt damit in die Gruppe der drei weltweit führenden Anbieter für verschreibungsfreie Arzneimittel auf.

**2005**

Die Trennung der Lanxess AG vom Bayer-Konzern wird am 28. Januar vollzogen. Das Unternehmen

**2007**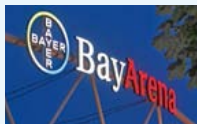

Im März gibt der Konzern bekannt, dass die BayArena, das Stadion des Fußball-Bundesligisten Bayer 04 Leverkusen, modernisiert,

ausgebaut und auf eine Zuschauerkapazität von über 30.000 Besuchern erweitert wird.

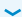

## 2007

100 Jahre Bayer-Archiv: Seit März 1907 ist das Archiv das Gedächtnis des Unternehmens.

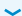

## 2007

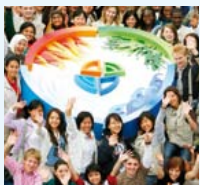

Bayer ist im August Gastgeber der internationalen „Tunza-Jugend-Umweltkonferenz“ in Leverkusen. Der Jugend-Umweltgipfel findet erstmals in Mitteleuropa statt. 180 junge Menschen aus 85 Ländern diskutieren über globale Umweltthemen.

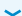

## 2007

100 Jahre Bayer-Kultur: Im September findet die Eröffnung der 100. Spielzeit der Bayer-Kulturabteilung statt.



## 2007

Im November wird das integrierte konzernweite „Bayer Climate Program“ gestartet, mit dem das Unternehmen u. a. die  $\text{CO}_2$ -Emissionen reduziert.

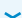

## 2008

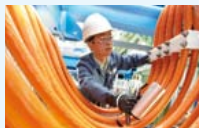

Im Juni erhält Bayer den BDI-Umweltpreis in der Kategorie „Umweltfreundliche Technologien“. Der Einsatz der neuen Sauerstoffverzehrkathode spart Energie und reduziert  $\text{CO}_2$ -Emissionen.

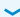

## 2008

Im September erfolgt das Squeeze-out der Minderheitsaktionäre der Bayer Schering Pharma AG. Die Pharma-Geschäfte von Bayer und Bayer Schering Pharma werden zur Jahreswende 2008/2009 in Deutschland zusammengeführt.

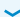

## 2008

Im Oktober wird die weltweit größte Anlage zur Herstellung von MDI in Shanghai in Betrieb genommen.

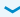

## 2009

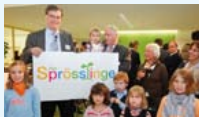

Im November setzt Bayer mit der Eröffnung der Kindertagesstätte in Monheim erstmals sein Konzept für Null-Emissionsgebäude weltweit um.

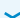

## 2009

Bayer CropScience hat die Akquisition der Athenix Corp., eines nicht börsennotierten us-Biotech-Unternehmens, im November abgeschlossen.

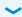

## 2009

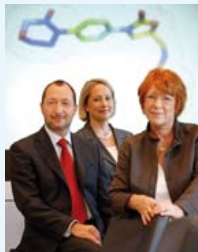

Im Dezember gewinnt das Bayer-Team den Deutschen Zukunftspreis für die Entwicklung des neuen Blutgerinnungshemmers Rivaroxaban (Handelsname Xarelto™).

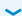

## 2010

Am 1. Oktober löst Dr. Marijn Dekkers Werner Wenning als Vorsitzenden des Vorstands der Bayer AG ab.

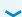

## 2011

In Leverkusen startet Bayer im Februar die Pilotanlage „Dream Production“ zur Herstellung hochwertiger Kunststoffe mit Kohlendioxid.

# Dialog

Für Bayer hat die Kommunikation einen hohen Stellenwert. Sie ist Anliegen und Verpflichtung gleichermaßen, denn sie prägt das Bild des Unternehmens in der Öffentlichkeit. Bayer möchte im offenen Dialog auf die Fragen und Probleme der Menschen eingehen. Das Unternehmen bemüht sich dabei um Glaubwürdigkeit, Vertrauen und Akzeptanz.

## PUBLIKATIONEN UND INTERNET

Die Bayer AG gibt verschiedene Publikationen für die breite Öffentlichkeit sowie zur regelmäßigen Information von Mitarbeitern und Aktionären heraus:

- **Geschäftsbericht**
- **Aktionärsbrief**
- **Nachhaltigkeitsbericht**
- **research** (Forschungsmagazin)
- **report** (Unternehmensmagazin)
- **direkt** (Zeitung für die Mitarbeiter/Nachbarn)

Einen Überblick über den Konzern und seine globalen Aktivitäten bietet darüber hinaus das Internetportal [www.BAYER.DE](http://www.BAYER.DE), auf dem auch ein innovatives Podcast Center mit zahlreichen Audio- und Videobeiträgen zu finden ist. Weitere Informationen geben die Teilkonzerne und Servicegesellschaften auf ihren jeweiligen Internetseiten.

## DAS BAYKOMM

Einen weiteren Schwerpunkt des Informationsangebots bildet das 1991 eröffnete Bayer-Kommunikationszentrum in Leverkusen, kurz BayKomm. Hier können Besucher in verschiedenen Themenräumen und Veranstaltungen Hintergründe zu den Aktivitäten des Unternehmens erfahren und naturwissenschaftliche Phänomene kennenlernen – von der Entwicklung neuer Arzneimittel über die Sicherung der Welternährung bis zu modernen Werkstoffen für den Klimaschutz. Zum Angebot zählen unter anderem Führungen zu den rund 300 Ausstellungsexponaten, Experimentvorträge sowie Schülerprojekte.

Im Februar 2010 wurde im BayKomm ein weiteres Schülerlabor – Baylab – eröffnet. Es ist das vierte Baylab des Konzerns und soll Kinder und Jugendliche für die Welt der Naturwissenschaften begeistern. Die jungen Besucher werden dabei für einen Tag selbst zu Forschern.

## Ansprechpartner Communications

---

### Bayer AG

|                |                          |
|----------------|--------------------------|
| Michael Schade | michael.schade@bayer.com |
|----------------|--------------------------|

### Bayer HealthCare

|                   |                         |
|-------------------|-------------------------|
| Dr. Markus Pickel | markus.pickel@bayer.com |
|-------------------|-------------------------|

### Bayer CropScience

|                 |                           |
|-----------------|---------------------------|
| Steffen Kurzawa | steffen.kurzawa@bayer.com |
|-----------------|---------------------------|

### Bayer MaterialScience

|                |                          |
|----------------|--------------------------|
| Harald Liedtke | harald.liedtke@bayer.com |
|----------------|--------------------------|

### Bayer Business Services

|                |                           |
|----------------|---------------------------|
| Oliver Günther | oliver.guenther@bayer.com |
|----------------|---------------------------|

### Bayer Technology Services

|                       |                             |
|-----------------------|-----------------------------|
| Dr. Arnold Rajathurai | arnold.rajathurai@bayer.com |
|-----------------------|-----------------------------|

### Currenta

|              |                           |
|--------------|---------------------------|
| Jürgen Gemke | juergen.gemke@currenta.de |
|--------------|---------------------------|

## Wichtige Internet-Adressen

---

|                            |                                                                                    |
|----------------------------|------------------------------------------------------------------------------------|
| Homepage                   | <a href="http://www.bayer.de">www.bayer.de</a>                                     |
| BayKomm                    | <a href="http://www.baykomm.bayer.de">www.baykomm.bayer.de</a>                     |
| Geschäftsbericht           | <a href="http://www.geschaeftsbericht.bayer.de">www.geschaeftsbericht.bayer.de</a> |
| Aktionärsbrief             | <a href="http://www.aktionuersbrief.bayer.de">www.aktionuersbrief.bayer.de</a>     |
| Nachhaltigkeitsbericht     | <a href="http://www.nb.bayer.de">www.nb.bayer.de</a>                               |
| Forschungsmagazin research | <a href="http://www.research.bayer.de">www.research.bayer.de</a>                   |
| Publikationen              | <a href="http://www.publikationen.bayer.de">www.publikationen.bayer.de</a>         |
| Presse-Informationen       | <a href="http://www.presse.bayer.de">www.presse.bayer.de</a>                       |
| Podcast Center             | <a href="http://www.podcast.bayer.de">www.podcast.bayer.de</a>                     |

## Publikationen bestellen

---

|        |                                                                  |
|--------|------------------------------------------------------------------|
| E-Mail | <a href="mailto:serviceline@bayer.com">serviceline@bayer.com</a> |
| Post   | Nutzen Sie die Bestellkarte in dieser Broschüre.                 |

## Kommunikationszentrum BayKomm

---

Kaiser-Wilhelm-Allee 16, 51373 Leverkusen

Öffnungszeiten ohne Voranmeldung:

Montag bis Freitag von 12.00 bis 18.00 Uhr, Sonntag von 12.00 bis 17.00 Uhr  
(zusätzliche Termine auf Anfrage)

BayKomm Service Infoline:

Tel. +49/214/30-50100

- 1 **EBIT:** operatives Ergebnis gemäß Gewinn- und Verlustrechnung.
- 2 **EBIT(DA)** vor Sondereinflüssen stellen Kennzahlen dar, die nach den internationalen Rechnungslegungsvorschriften nicht definiert sind. Daher sollten sie nur als ergänzende Information angesehen werden. Das Unternehmen geht davon aus, dass das EBITDA vor Sondereinflüssen eine geeignetere Kennzahl für die Beurteilung der operativen Geschäftstätigkeit darstellt, da es weder durch Abschreibungen auf immaterielle Vermögenswerte und Sachanlagen noch durch Sondereinflüsse belastet ist. Das Unternehmen möchte dem Leser mit dieser Kennzahl ein Bild der Ertragslage vermitteln, das im Zeitablauf vergleichbarer und zutreffender informiert.
- 3 **EBITDA:** EBIT zuzüglich Abschreibungen auf immaterielle Vermögenswerte und Sachanlagen.
- 4 Die EBITDA-Marge vor Sondereinflüssen berechnet sich aus der Division von EBITDA vor Sondereinflüssen und den Umsatzerlösen.
- 5 Ergebnis je Aktie: Berechnung nach IAS 33 (Earnings per Share): Division angepasstes Konzernergebnis durch durchschnittliche Anzahl der Aktien.
- 6 Das bereinigte Ergebnis je Aktie stellt eine Kennzahl dar, die nach den internationalen Rechnungslegungsvorschriften nicht definiert ist. Das Unternehmen geht davon aus, dem Leser mit dieser Kennzahl ein Bild der Ertragslage zu vermitteln, das im Zeitablauf vergleichbarer und zutreffender informiert.
- 7 **Brutto-Cashflow:** Ergebnis nach Steuern zuzüglich Ertragsteueraufwand zuzüglich Finanzergebnis abzüglich gezahlter bzw. geschuldeter Ertragsteuern zuzüglich Abschreibungen zuzüglich bzw. abzüglich Veränderungen der Pensionsrückstellungen abzüglich Gewinne bzw. zuzüglich Verluste aus dem Abgang von langfristigen Vermögenswerten abzüglich Gewinne aus der Neubewertung bisheriger Vermögenswerte bei stufenweisem Unternehmenserwerb. Die Position Veränderung der Pensionsrückstellungen umfasst sowohl die Korrektur nicht zahlungswirksamer Effekte im operativen Ergebnis (EBIT) als auch Auszahlungen aufgrund unserer Pensionsverpflichtungen.
- 8 **Netto-Cashflow:** Entspricht dem Cashflow aus der betrieblichen Tätigkeit nach IAS 7.

## IMPRESSUM

### Herausgeber

Bayer AG, Konzernkommunikation, 51368 Leverkusen

### Redaktion

Dr. Katrin Schneider, Tel. +49 (0)2 14/30-4 88 25

E-Mail: [katrin.schneider@bayer.com](mailto:katrin.schneider@bayer.com)

### Bayer im Internet

[WWW.BAYER.DE](http://WWW.BAYER.DE)

April 2011

---

### Zukunftsgerichtete Aussagen:

Diese Publikation enthält in die Zukunft gerichtete Aussagen, die auf den gegenwärtigen Annahmen und Prognosen der Unternehmensleitung des Bayer-Konzerns bzw. seiner Teilkonzerne beruhen. Verschiedene bekannte wie auch unbekannte Risiken, Ungewissheiten und andere Faktoren können dazu führen, dass die tatsächlichen Ergebnisse, die Finanzlage, die Entwicklung oder die Performance der Gesellschaft wesentlich von den hier gegebenen Einschätzungen abweichen. Diese Faktoren schließen diejenigen ein, die Bayer in veröffentlichten Berichten beschrieben hat. Diese Berichte stehen auf der Bayer-Website [www.bayer.de](http://www.bayer.de) zur Verfügung. Die Gesellschaft übernimmt keinerlei Verpflichtung, solche zukunftsgerichteten Aussagen fortzuschreiben und an zukünftige Ereignisse oder Entwicklungen anzupassen.

### Wichtige Information:

Die Namen „Bayer Schering Pharma“ oder „Schering“ stehen in dieser Publikation immer gleichbedeutend für die Bayer Schering Pharma AG, Berlin, Deutschland, oder für deren Vorgängerin, die Schering AG, Berlin, Deutschland.

### Markenrechtshinweis:

Bei den mit <sup>TM</sup> gekennzeichneten Produktnamen handelt es sich um Marken des Bayer-Konzerns bzw. seiner Vertriebspartner, die in vielen Ländern als eingetragene Marken geschützt sind.

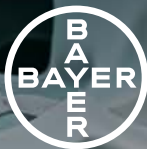

Supplement: Supplementary file 18 [file Bayer Namen Zahlen Fakten 2011_2012.pdf › Korpustexte/Korpustexte pdf/Bayer/Bayer Namen Zahlen Fakten 2011_2012.pdf]
