# Supplementary material
Source: publisher site journal article supplement (https://www.degruyterbrill.com/publication/isbn/9783110432879/downloadAsset/9783110432879_Elektronischer_Anhang_2.zip)

# VOLKSWAGEN

AKTIENGESELLSCHAFT

Vielfalt erfahren.

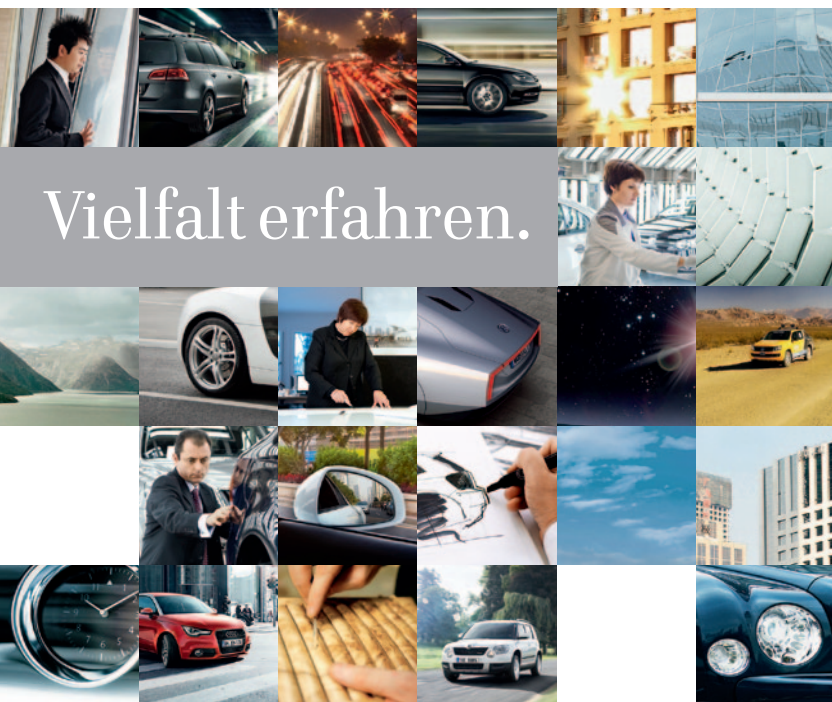

**ZAHLENDATENFAKTEN**

**NAVIGATOR2011**



|                                                        |           |
|--------------------------------------------------------|-----------|
| <b>INHALTSÜBERSICHT</b>                                | <b>1</b>  |
| <b>Inhaltsübersicht</b>                                | <b>1</b>  |
| <b>Der Volkswagen Konzern</b>                          | <b>2</b>  |
| <b>Vorstand der Volkswagen Aktiengesellschaft</b>      | <b>4</b>  |
| <b>Aufsichtsrat</b>                                    | <b>5</b>  |
| <b>Wesentliche Zahlen</b>                              | <b>6</b>  |
| <b>Fünf-Jahres-Übersicht des Volkswagen Konzerns</b>   | <b>8</b>  |
| <b>Kennzahlen zur Volkswagen Aktie</b>                 | <b>10</b> |
| <b>Aktienentwicklung von 31.12.2005 bis 31.12.2010</b> | <b>12</b> |
| <b>Wesentliche Konzerngesellschaften</b>               | <b>14</b> |
| <b>Fertigungsverbund</b>                               | <b>16</b> |
| Deutschland                                            | 16        |
| Europa                                                 | 18        |
| Nord-/Südamerika und Südafrika                         | 22        |
| Asien/Pazifik                                          | 23        |
| <b>Umwelt und Verkehr</b>                              | <b>25</b> |
| <b>Auslieferungen an Kunden</b>                        | <b>26</b> |
| <b>Konkurrenzsituation</b>                             | <b>33</b> |
| Marktanteile Pkw-Neuzulassungen nach Ländern           | 33        |
| Pkw-Neuzulassungen nach Märkten                        | 34        |
| <b>Belegschaftsentwicklung</b>                         | <b>36</b> |
| <b>Mitarbeiter in der Technischen Entwicklung</b>      | <b>40</b> |
| <b>Beschaffung allgemein</b>                           | <b>42</b> |
| Beschaffungsvolumen nach Marken und Gesellschaften     | 42        |
| <b>Organigramme</b>                                    | <b>43</b> |
| Volkswagen Pkw                                         | 43        |
| Audi                                                   | 44        |
| SEAT                                                   | 45        |
| Škoda                                                  | 46        |
| Volkswagen Nutzfahrzeuge                               | 47        |
| Bentley                                                | 48        |
| Bugatti                                                | 49        |
| Lamborghini                                            | 50        |
| Scania                                                 | 51        |
| Volkswagen Financial Services AG                       | 52        |
| <b>Chronik</b>                                         | <b>54</b> |
| <b>Die Modellpalette des Volkswagen Konzerns</b>       | <b>76</b> |
| Volkswagen Pkw                                         | 76        |
| Audi                                                   | 84        |
| SEAT                                                   | 89        |
| Škoda                                                  | 92        |
| Volkswagen Nutzfahrzeuge                               | 96        |
| Bentley                                                | 100       |
| Bugatti                                                | 101       |
| Lamborghini                                            | 102       |
| Scania                                                 | 103       |

Der Volkswagen Konzern mit Sitz in Wolfsburg ist einer der führenden Automobilhersteller weltweit und der größte Automobilproduzent Europas. Im Jahr 2010 steigerte der Konzern die Auslieferungen von Fahrzeugen an Kunden auf 7,203 Millionen (2009: 6,336 Millionen), das entspricht einem Pkw-Weltmarktanteil von 11,4 Prozent.

In Westeuropa stammt mehr als ein Fünftel aller neuen Pkw (21,0 Prozent) aus dem Volkswagen Konzern. Der Umsatz des Konzerns belief sich im Jahr 2010 auf 126,9 Milliarden Euro (2009: 105,2 Milliarden). Das Ergebnis nach Steuern betrug im abgelaufenen Geschäftsjahr 7,2 Milliarden Euro (2009: 0,9 Milliarden).

Neun Marken aus sieben europäischen Ländern gehören zum Konzern: Volkswagen, Audi, SEAT, Škoda, Volkswagen Nutzfahrzeuge, Bentley, Bugatti, Lamborghini und Scania.

Jede Marke hat ihren eigenständigen Charakter und operiert selbstständig im Markt. Dabei reicht das Angebot von verbrauchsoptimalen Kleinwagen bis hin zu Fahrzeugen der Luxusklasse. Im Bereich der Nutzfahrzeuge beginnt das Angebot bei Pick-up-Fahrzeugen und reicht bis zu Bussen und schweren Lastkraftwagen.

Ab dem ersten Quartal 2011 betreibt der Konzern in 15 Ländern Europas und in sieben Ländern Amerikas, Asiens und Afrikas 62 Fertigungsstätten\*. Fast 400.000 Beschäftigte produzieren an jedem Arbeitstag rund um den Globus rund 30.000 Fahrzeuge oder sind mit fahrzeugbezogenen Dienstleistungen befasst. Seine Fahrzeuge bietet der Volkswagen Konzern in 153 Ländern an.

Ziel des Konzerns ist es, attraktive, sichere und umweltschonende Fahrzeuge anzubieten, die im zunehmend scharfen Wettbewerb auf dem Markt konkurrenzfähig und jeweils Weltmaßstab in ihrer Klasse sind.

\* Die hier bereits mitgezählten Standorte Chattanooga und Osnabrück nehmen die Produktion im Frühjahr 2011 auf und werden daher als aktive Standorte gerechnet.

# VOLKSWAGEN

AKTIENGESELLSCHAFT

## **Vorstand der Volkswagen Aktiengesellschaft**

### **Prof. Dr. rer. nat. Martin Winterkorn**

Vorsitzender,  
Forschung und Entwicklung

### **Dr. rer. pol. h.c. Francisco Javier Garcia Sanz**

Beschaffung

### **Prof. Dr. rer. pol. Jochem Heizmann**

Nutzfahrzeuge

### **Christian Klingler**

Vertrieb und Marketing

### **Dr.-Ing. E. h. Michael Macht**

Produktion

### **Prof. Dr. rer. pol. Horst Neumann**

Personal und Organisation

### **Hans Dieter Pötsch**

Finanzen und Controlling

### **Rupert Stadler**

Vorsitzender des Vorstands der AUDI AG

**Hon.-Prof. Dr. techn. h.c.**

**Dipl.-Ing. ETH**

**Ferdinand K. Piëch**

Vorsitzender

**Berthold Huber**

Stv. Vorsitzender,

1. Vorsitzender der Industrie-  
gewerkschaft Metall

**Dr. Hussain Ali Al-Abdulla**

Vice Chairman of Qatar Holding

**Jörg Bode**

Niedersächsischer Minister  
für Wirtschaft, Arbeit und Verkehr

**Dr. jur. Michael Frenzel**

Vorsitzender des Vorstands  
der TUI AG

**Babette Fröhlich**

Industriegewerkschaft Metall,  
Ressortleiterin Strategische Planung

**Dr. jur. Hans Michael Gaul**

**Dr. Ing. Jürgen Großmann**

Vorsitzender des Vorstands der RWE  
AG; Gesellschafter der Georgs-  
marienhütte Holding GmbH

**Peter Jacobs**

Vorsitzender des Betriebsrats  
Werk Emden der Volkswagen AG

**David McAllister**

Niedersächsischer Ministerpräsident

**Hartmut Meine**

Bezirksleiter des IG Metall Bezirks  
Niedersachsen und Sachsen-Anhalt

**Peter Mosch**

Vorsitzender des Gesamt-  
betriebsrats der AUDI AG

**Bernd Osterloh**

Vorsitzender des Gesamt-  
und Konzernbetriebsrats der  
Volkswagen AG

**Dr. jur. Hans Michel Piëch**

Selbstständiger Rechtsanwalt

**Dr. jur. Ferdinand Oliver Porsche**

Vorstand der Familie Porsche AG  
Beteiligungsgesellschaft

**Dr. rer. comm. Wolfgang Porsche**

Vorsitzender des Aufsichtsrats der  
Porsche Automobil Holding SE;  
Vorsitzender des Aufsichtsrats der  
Dr. Ing. h.c. F. Porsche AG

**Wolfgang Ritmeier**

Vorsitzender des Vorstands der  
Volkswagen Management  
Association (VMA)

**Jürgen Stumpf**

Vorsitzender des Betriebsrats  
Werk Kassel der Volkswagen AG

**Bernd Wehlauer**

Stv. Vorsitzender des Gesamt-  
und Konzernbetriebsrats der  
Volkswagen AG

**Thomas Zwiebler**

Vorsitzender des Betriebsrats  
Volkswagen Nutzfahrzeuge

## VOLKSWAGEN KONZERN

| Mengendaten <sup>1</sup>                                                       | 2010      | 2009      | %      |
|--------------------------------------------------------------------------------|-----------|-----------|--------|
| Absatz (Automobile)                                                            | 7.278.440 | 6.309.743 | + 15,4 |
| Produktion (Automobile)                                                        | 7.357.505 | 6.054.829 | + 21,5 |
| Belegschaft am 31.12.                                                          | 399.381   | 368.500   | + 8,4  |
| Finanzdaten nach IFRS in Mio. €                                                | 2010      | 2009      | %      |
| Umsatzerlöse                                                                   | 126.875   | 105.187   | + 20,6 |
| Operatives Ergebnis                                                            | 7.141     | 1.855     | x      |
| Ergebnis vor Steuern                                                           | 8.994     | 1.261     | x      |
| Ergebnis nach Steuern                                                          | 7.226     | 911       | x      |
| Ergebnisanteil der Aktionäre<br>der Volkswagen AG                              | 6.835     | 960       | x      |
| Cash-flow laufendes Geschäft                                                   | 11.455    | 12.741    | - 10,1 |
| Investitionstätigkeit laufendes Geschäft                                       | 9.278     | 10.428    | - 11,0 |
| Konzernbereich Automobile <sup>2</sup>                                         |           |           |        |
| EBITDA <sup>3</sup>                                                            | 13.940    | 8.005     | + 74,1 |
| Cash-flow laufendes Geschäft                                                   | 13.930    | 12.815    | + 8,7  |
| Investitionstätigkeit<br>laufendes Geschäft <sup>4</sup>                       | 9.095     | 10.252    | - 11,3 |
| davon: Sachinvestitionen                                                       | 5.656     | 5.783     | - 2,2  |
| in % der Umsatzerlöse                                                          | 5,0       | 6,2       |        |
| Entwicklungskosten (aktiviert)                                                 | 1.667     | 1.948     | - 14,4 |
| in % der Umsatzerlöse                                                          | 1,5       | 2,1       |        |
| Netto-Cash-flow                                                                | 4.835     | 2.563     | + 88,6 |
| Netto-Liquidität am 31.12.                                                     | 18.639    | 10.636    | + 75,2 |
| Renditen in %                                                                  | 2010      | 2009      |        |
| Umsatzrendite vor Steuern                                                      | 7,1       | 1,2       |        |
| Kapitalrendite nach Steuern<br>(Automobilbereich)                              | 13,5      | 3,8       |        |
| Eigenkapitalrendite vor Steuern<br>(Finanzdienstleistungsbereich) <sup>5</sup> | 12,9      | 7,9       |        |



## VOLKSWAGEN AG

| <b>Mengendaten</b>                    | <b>2010</b>      | <b>2009</b> | <b>%</b> |
|---------------------------------------|------------------|-------------|----------|
| Absatz (Automobile)                   | <b>2.309.648</b> | 2.053.427   | + 12,5   |
| Produktion (Automobile)               | <b>1.100.186</b> | 1.038.344   | + 6,0    |
| Belegschaft am 31.12.                 | <b>94.787</b>    | 95.164      | - 0,4    |
|                                       |                  |             |          |
| <b>Finanzdaten nach HGB in Mio. €</b> | <b>2010</b>      | <b>2009</b> | <b>%</b> |
| Umsatzerlöse                          | <b>57.243</b>    | 47.864      | + 19,6   |
| Jahresüberschuss                      | <b>1.550</b>     | 1.082       | + 43,3   |
|                                       |                  |             |          |

- 1) Mengendaten inklusive der nicht vollkonsolidierten chinesischen Gemeinschaftsunternehmen. Belegschaft 2009 ohne chinesische Komponentenwerke.
- 2) Inklusive Zuordnung der Konsolidierung zwischen den Konzernbereichen Automobile und Finanzdienstleistungen.
- 3) Operatives Ergebnis zuzüglich des Saldos aus Zu-/Abschreibungen auf Sachanlagen, aktivierte Entwicklungskosten, Vermietvermögen, Goodwill und Finanzanlagen gemäß Kapitalflussrechnung.
- 4) Ohne Erwerb und Verkauf von Beteiligungen: 7.034 (7.585) Mio. €.
- 5) Ergebnis vor Steuern in Prozent des durchschnittlichen Eigenkapitals.

**Mengendaten (in Tsd.)****Absatz** (Automobile)

im Inland

im Ausland

**Produktion** (Automobile)

im Inland

im Ausland

**Belegschaft** (im Jahresdurchschnitt)

im Inland

im Ausland

**Finanzdaten (in Mio. €)****Umsatzerlöse****Ergebnis vor Steuern****Ergebnis nach Steuern****Cash-flow laufendes Geschäft\*****Investitionstätigkeit laufendes Geschäft\***

\* 2008 und 2007 angepasst.

|  | 2010           | 2009           | 2008           | 2007           | 2006           |
|--|----------------|----------------|----------------|----------------|----------------|
|  | <b>7.278</b>   | <b>6.310</b>   | <b>6.272</b>   | <b>6.192</b>   | <b>5.720</b>   |
|  | 1.059          | 1.288          | 1.013          | 1.030          | 1.093          |
|  | 6.219          | 5.022          | 5.259          | 5.162          | 4.627          |
|  | <b>7.358</b>   | <b>6.055</b>   | <b>6.347</b>   | <b>6.213</b>   | <b>5.660</b>   |
|  | 2.115          | 1.938          | 2.146          | 2.086          | 1.935          |
|  | 5.243          | 4.117          | 4.201          | 4.127          | 3.725          |
|  | <b>389</b>     | <b>367</b>     | <b>357</b>     | <b>329</b>     | <b>329</b>     |
|  | 178            | 173            | 178            | 175            | 174            |
|  | 210            | 194            | 179            | 154            | 155            |
|  |                |                |                |                |                |
|  | 2010           | 2009           | 2008           | 2007           | 2006           |
|  | <b>126.875</b> | <b>105.187</b> | <b>113.808</b> | <b>108.897</b> | <b>104.875</b> |
|  |                |                |                |                |                |
|  | <b>8.994</b>   | <b>1.261</b>   | <b>6.608</b>   | <b>6.543</b>   | <b>1.793</b>   |
|  | <b>7.226</b>   | <b>911</b>     | <b>4.688</b>   | <b>4.122</b>   | <b>1.955</b>   |
|  |                |                |                |                |                |
|  | <b>11.455</b>  | <b>12.741</b>  | <b>2.702</b>   | <b>9.308</b>   | <b>14.470</b>  |
|  | <b>9.278</b>   | <b>10.428</b>  | <b>11.613</b>  | <b>7.120</b>   | <b>11.911</b>  |
|  |                |                |                |                |                |

**Dividendenentwicklung**

|                                  |            |
|----------------------------------|------------|
| Anzahl der Stückaktien am 31.12. |            |
| Stammaktien                      | Tsd. Stück |
| Vorzugsaktien                    | Tsd. Stück |
| Dividende                        |            |
| je Stammaktie                    | €          |
| je Vorzugsaktie                  | €          |

**Wertentwicklung der Aktie <sup>1</sup>**

|                            |        |
|----------------------------|--------|
| Stammaktie                 |        |
| Jahresendkurs              | €      |
| Jahreshöchstwert           | €      |
| Jahrestiefstwert           | €      |
| Vorzugsaktie               |        |
| Jahresendkurs              | €      |
| Jahreshöchstwert           | €      |
| Jahrestiefstwert           | €      |
| Börsenwert am 31.12.       | Mrd. € |
| Eigenkapital am 31.12.     | Mrd. € |
| Börsenwert zu Eigenkapital | Faktor |

**Kennzahlen je Aktie**

|                                           |        |
|-------------------------------------------|--------|
| Ergebnis je Stammaktie                    |        |
| unverwässert                              | €      |
| verwässert                                | €      |
| Operatives Ergebnis <sup>3</sup>          | €      |
| Cash-flow laufendes Geschäft <sup>3</sup> | €      |
| Eigenkapital <sup>4</sup>                 | €      |
| Kurs-Gewinn-Verhältnis <sup>5</sup>       | Faktor |
| Kurs-Cash-flow-Verhältnis <sup>5</sup>    | Faktor |
| Dividendenrendite                         |        |
| Stammaktie                                | %      |
| Vorzugsaktie                              | %      |
| Kursentwicklung (ohne Dividende)          |        |
| Stammaktie                                | %      |
| Vorzugsaktie                              | %      |

**Umsätze an deutschen Börsen <sup>6</sup>**

|                                 |            |
|---------------------------------|------------|
| Umsatz Volkswagen Stammaktien   | Mrd. €     |
|                                 | Mio. Stück |
| Anteil Volkswagen am DAX-Umsatz | %          |

1) Xetra-Kurse.

2) Für 2006 aus fortgeführten und nicht fortgeführten Aktivitäten.

3) Auf Basis der gewichteten durchschnittlichen Anzahl ausstehender Stamm- und Vorzugsaktien (unverwässert).

|  | 2010             | 2009             | 2008    | 2007    | 2006              |
|--|------------------|------------------|---------|---------|-------------------|
|  | 295.046          | 295.005          | 294.920 | 291.337 | 286.980           |
|  | 170.143          | 105.238          | 105.238 | 105.238 | 105.238           |
|  | 2,20             | 1,60             | 1,93    | 1,80    | 1,25              |
|  | 2,26             | 1,66             | 1,99    | 1,86    | 1,31              |
|  | 2010             | 2009             | 2008    | 2007    | 2006              |
|  | 105,90           | 77,00            | 250,00  | 156,10  | 85,89             |
|  | 118,50           | 298,85           | 945,00  | 197,90  | 85,89             |
|  | 62,30            | 72,41            | 148,43  | 82,60   | 45,10             |
|  | 121,40           | 65,74            | 38,02   | 100,00  | 56,55             |
|  | 136,90           | 81,72            | 108,30  | 131,00  | 56,55             |
|  | 55,83            | 30,24            | 29,30   | 54,14   | 32,85             |
|  | 51,9             | 29,6             | 77,7    | 56,0    | 30,6              |
|  | 46,0             | 35,3             | 35,0    | 31,9    | 26,9              |
|  | 1,13             | 0,84             | 2,22    | 1,75    | 1,14              |
|  | 2010             | 2009             | 2008    | 2007    | 2006              |
|  | 15,17            | 2,37             | 11,92   | 10,43   | 7,07 <sup>2</sup> |
|  | 15,17            | 2,37             | 11,88   | 10,34   | 7,04 <sup>2</sup> |
|  | 15,87            | 4,64             | 15,91   | 15,60   | 5,18              |
|  | 25,46            | 31,84            | 27,13   | 39,72   | 37,32             |
|  | 98,84            | 88,15            | 87,49   | 80,38   | 68,59             |
|  | 7,0              | 32,5             | 21,0    | 15,0    | 12,1              |
|  | 4,2              | 2,4              | 9,2     | 3,9     | 2,3               |
|  | 2,1              | 2,1              | 0,8     | 1,2     | 1,5               |
|  | 1,9              | 2,5              | 5,2     | 1,9     | 2,3               |
|  | + 37,5           | - 69,2           | + 60,2  | + 81,7  | + 92,5            |
|  | + 84,7           | + 72,9           | - 62,0  | + 76,8  | + 74,0            |
|  | 2010             | 2009             | 2008    | 2007    | 2006              |
|  | 6,3              | 23,5             | 136,5   | 103,1   | 50,5              |
|  | 81,4             | 129,6            | 562,8   | 877,3   | 770,4             |
|  | 3,2 <sup>7</sup> | 3,2 <sup>7</sup> | 8,0     | 5,3     | 3,9               |

4) Auf Basis der gesamten Stamm- und Vorzugsaktien am 31.12.

5) Zur Ermittlung wurden die Jahresendkurse der Stammaktien verwendet.

6) Orderbuch-Umsätze an deutschen Börsen.

7) Zum 23. Dezember 2009 wurde die Stammaktie im DAX durch die Vorzugsaktie ersetzt.

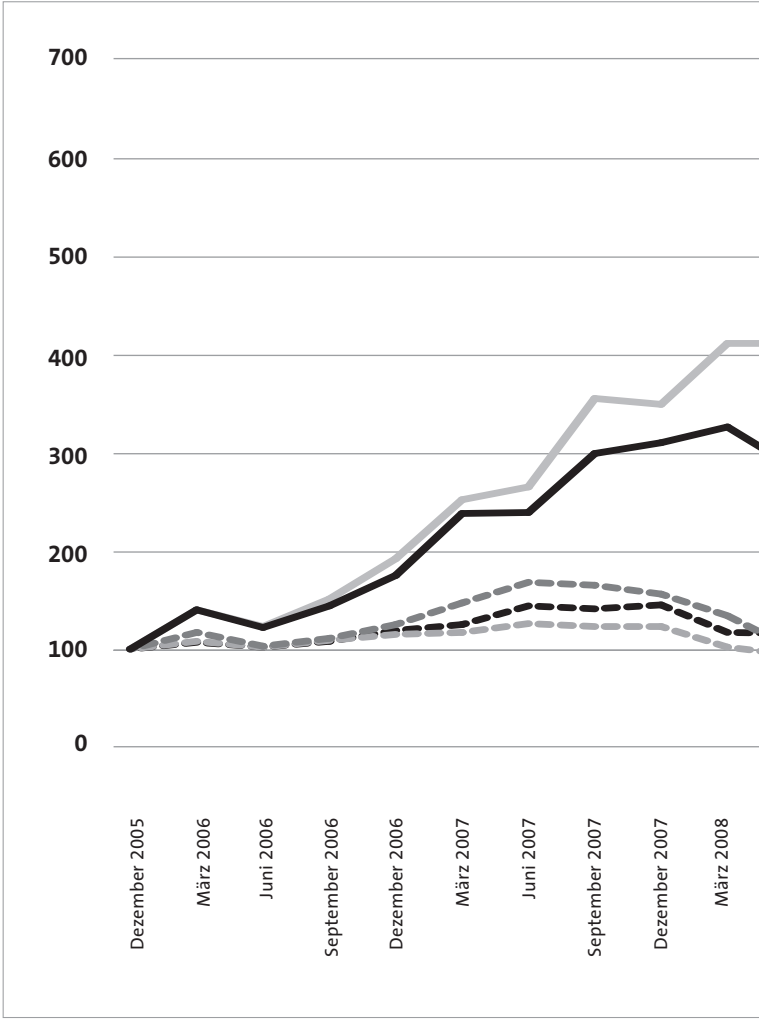

Index auf Basis der Monatsendkurse

31.12.2005 = 100

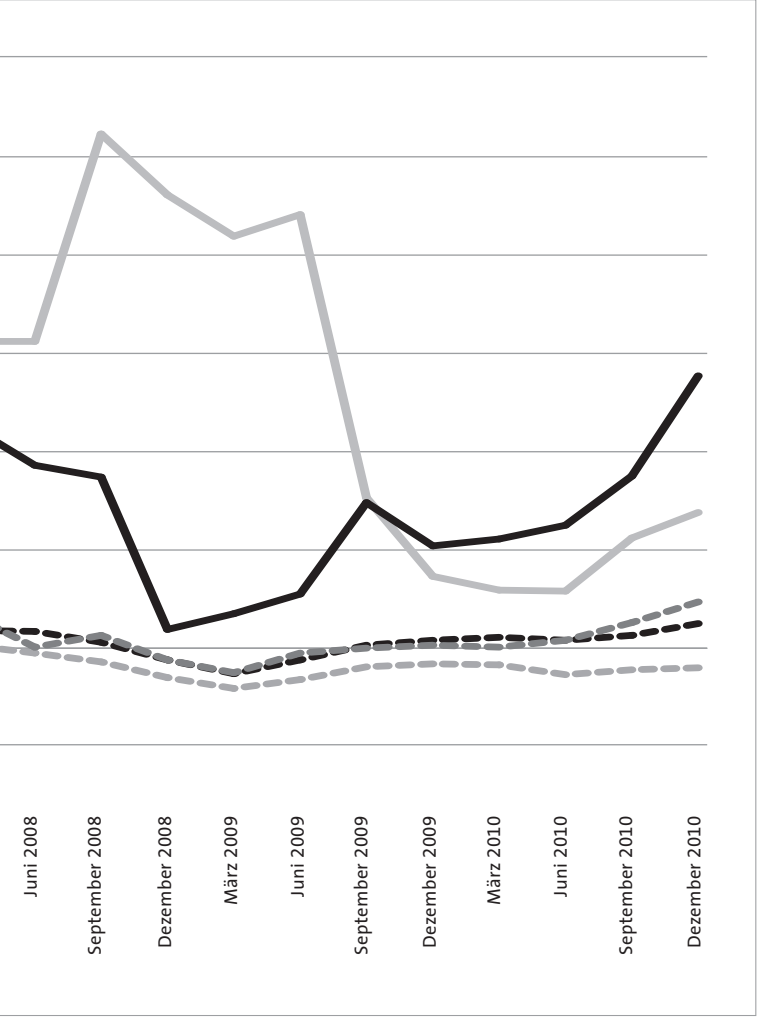

**Volkswagen-Vorzugsaktie**

— — — — —

**DJ Euro STOXX 50**

• • • • •

**Deutscher Aktien-Index (DAX)**

**Volkswagen-Stammaktie**

— — — — —

**DJ Euro STOXX Automobile**

| Name, Sitz                                                                                       | Kapitalanteil in % |
|--------------------------------------------------------------------------------------------------|--------------------|
| VOLKSWAGEN AG, Wolfsburg                                                                         |                    |
| Volkswagen Sachsen GmbH, Zwickau                                                                 | 100,00             |
| VOLKSWAGEN SLOVAKIA, a.s., Bratislava/Slowakische Republik                                       | 100,00             |
| SITECH Sitztechnik GmbH, Wolfsburg                                                               | 100,00             |
| Volkswagen Navarra, S.A., Polígono de Landaben, s/n,<br>Arazurí (Navarra)/Spanien                | 100,00             |
| Volkswagen Autoeuropa, Lda., Quinta do Anjo/Portugal                                             | 100,00             |
| Volkswagen Motor Polska Sp.z o.o., Polkowice/Polen                                               | 100,00             |
| Volkswagen-Audi España, S.A., El Prat de Llobregat<br>(Barcelona)/Spanien                        | 100,00             |
| Volkswagen Original Teile Logistik GmbH & Co. KG, Baunatal                                       | 53,37              |
| VOLKSWAGEN Group United Kingdom Ltd.,<br>Milton Keynes/Großbritannien                            | 100,00             |
| Groupe VOLKSWAGEN France s.a., Villers-Cotterêts/Frankreich                                      | 100,00             |
| Automobilmanufaktur Dresden GmbH, Dresden                                                        | 100,00             |
| Volkswagen Poznań Sp.z o.o., Poznań/Polen                                                        | 100,00             |
| Volkswagen Group Sverige Aktiebolag, Södertälje/Schweden                                         | 100,00             |
| Volkswagen Group of America, Inc., Herndon, Virginia/USA                                         | 100,00             |
| Volkswagen Group Canada, Inc., Ajax, Ontario/Kanada                                              | 100,00             |
| VOLKSWAGEN Group Japan K.K., Toyohashi/Japan                                                     | 100,00             |
| LLC Volkswagen Group Rus, Kaluga/Russische Föderation                                            | 93,78              |
| Volkswagen India Private Ltd., Pune/Indien                                                       | 100,00             |
| AUDI AG, Ingolstadt                                                                              | 99,55              |
| AUDI BRUSSELS S.A./N.V., Brüssel/Belgien                                                         | 100,00             |
| AUDI HUNGARIA MOTOR Kft., Győr/Ungarn                                                            | 100,00             |
| Audi of America, LLC, Herndon, Virginia/USA                                                      | 100,00             |
| Audi Volkswagen Korea Ltd., Seoul/Korea                                                          | 100,00             |
| Audi Volkswagen Middle East FZE,<br>Dubai/Vereinte Arabische Emirate                             | 100,00             |
| Automobili Lamborghini Holding S.p.A., Sant' Agata Bolognese/Italien                             | 100,00             |
| VOLKSWAGEN GROUP ITALIA S.P.A., Verona/Italien                                                   | 100,00             |
| quattro GmbH, Neckarsulm                                                                         | 100,00             |
| SEAT, S.A., Martorell, Barcelona/Spanien                                                         | 100,00             |
| SEAT Deutschland GmbH, Mörfelden-Walldorf                                                        | 100,00             |
| Gearbox del Prat, S.A., El Prat de Llobregat (Barcelona)/Spanien                                 | 100,00             |
| ŠKODA AUTO a.s., Mladá Boleslav/Tschechische Republik                                            | 100,00             |
| ŠkodaAuto Deutschland GmbH, Weiterstadt                                                          | 100,00             |
| ŠKODA AUTO Slovensko, s.r.o., Bratislava/Slowakische Republik                                    | 100,00             |
| ŠKODA AUTO POLSKA, S.A., Poznań/Polen                                                            | 51,00              |
| Bentley Motors Ltd., Crewe/Großbritannien                                                        | 100,00             |
| Volkswagen de México, S.A. de C.V., Puebla/Pue./Mexiko                                           | 100,00             |
| Volkswagen do Brasil Indústria de Veículos Automotores Ltda.,<br>São Bernardo do Campo/Brasilien | 100,00             |
| Volkswagen Argentina S.A., Buenos Aires/Argentinien                                              | 100,00             |
| Volkswagen of South Africa (Pty) Ltd., Uitenhage/Südafrika                                       | 100,00             |



| Name, Sitz                                                                     | Kapitalanteil in % |
|--------------------------------------------------------------------------------|--------------------|
| Scania AB, Södertälje/Schweden <sup>1</sup>                                    | 49,29              |
| Scania CV AB, Södertälje/Schweden                                              | 100,00             |
| Scania Latin America Ltda., São Bernardo do Campo/Brasilien                    | 100,00             |
| Scania Great Britain Ltd., Milton Keynes/Großbritannien                        | 100,00             |
| Scania Deutschland Holding GmbH, Koblenz                                       | 100,00             |
| Shanghai-Volkswagen Automotive Company Ltd., Shanghai/VR China <sup>2</sup>    | 50,00              |
| FAW-Volkswagen Automotive Company, Ltd., Changchun/VR China <sup>2</sup>       | 40,00              |
| Volkswagen (China) Investment Company Ltd., Peking/VR China                    | 100,00             |
| Volkswagen Group Services S.A., Brüssel/Belgien                                | 100,00             |
| Volkswagen International Finance N.V., Amsterdam/Niederlande                   | 100,00             |
| Porsche Zwischenholding GmbH, Stuttgart <sup>2, 4</sup>                        | 49,90              |
| Dr. Ing. h.c. F. Porsche AG, Stuttgart                                         | –                  |
| MAN SE, München <sup>3</sup>                                                   | 28,67              |
| Suzuki Motor Corporation, Hamamatsu, Shizuoka/Japan                            | 19,89              |
| VOLKSWAGEN FINANCIAL SERVICES AG, Braunschweig                                 | 100,00             |
| Volkswagen Leasing GmbH, Braunschweig                                          | 100,00             |
| Volkswagen Bank GmbH, Braunschweig                                             | 100,00             |
| Volkswagen Versicherung Aktiengesellschaft, Braunschweig                       | 100,00             |
| Volkswagen-Versicherungsdienst GmbH, Wolfsburg                                 | 100,00             |
| VOLKSWAGEN FINANCE, S.A.                                                       |                    |
| - ESTABLECIMIENTO FINANCIERO DE CRÉDITO -, Madrid/Spanien                      | 100,00             |
| Volkswagen Financial Services (UK) Ltd., Milton Keynes/Großbritannien          | 100,00             |
| Volkswagen Financial Services N.V., Amsterdam/Niederlande                      | 100,00             |
| Volkswagen Financial Services Japan Ltd., Tokio/Japan                          | 100,00             |
| ŠkoFIN s.r.o., Prag/Tschechische Republik                                      | 100,00             |
| Global Mobility Holding B.V., Amsterdam/Niederlande <sup>2, 5</sup>            | 50,00              |
| LeasePlan Corporation N.V., Amsterdam/Niederlande                              | –                  |
| Volkswagen Pon Financial Services B.V., Amersfoort/Niederlande <sup>2, 6</sup> | 60,00              |
| VW CREDIT, INC., Wilmington, Delaware/USA                                      | 100,00             |
| VOLKSWAGEN LEASING SA DE CV, Puebla/Mexiko                                     | 100,00             |
| VOLKSWAGEN BANK SA INSTITUCION DE BANCA MULTIPLE, Puebla/Mexiko                | 100,00             |
| Finanzdienstleistungsgesellschaften Brasilien, São Paulo/Brasilien             | 100,00             |
| Finanzdienstleistungsgesellschaften Argentinien, Buenos Aires/Argentinien      | 100,00             |

- 1) Der Stimmrechtsanteil beträgt abweichend vom Kapitalanteil bei Scania 71,81 %.
- 2) Gemeinschaftsunternehmen sind At Equity bewertet.
- 3) Der Stimmrechtsanteil beträgt abweichend vom Kapitalanteil bei MAN 29,9 %.  
Die Gesellschaft wird als At Equity bewertet.
- 4) Die Porsche Zwischenholding GmbH, Stuttgart, hält 100 % der Anteile an der Dr. Ing. h.c. F. Porsche AG, Stuttgart.  
Das Geschäftsjahr der Gesellschaft endete zum 30. Juni 2010.  
Im laufenden Geschäftsjahr wurde der Abschlussstichtag auf den 31.12.2010 verlängert.
- 5) Die Global Mobility Holding B.V., Amsterdam, hält 100 % der Anteile an der LeasePlan Corporation N.V., Amsterdam.
- 6) Der Volkswagen Konzern teilt sich die Beherrschung über die Volkswagen Pon Financial Services B.V. auf Basis vertraglicher Regelungen.

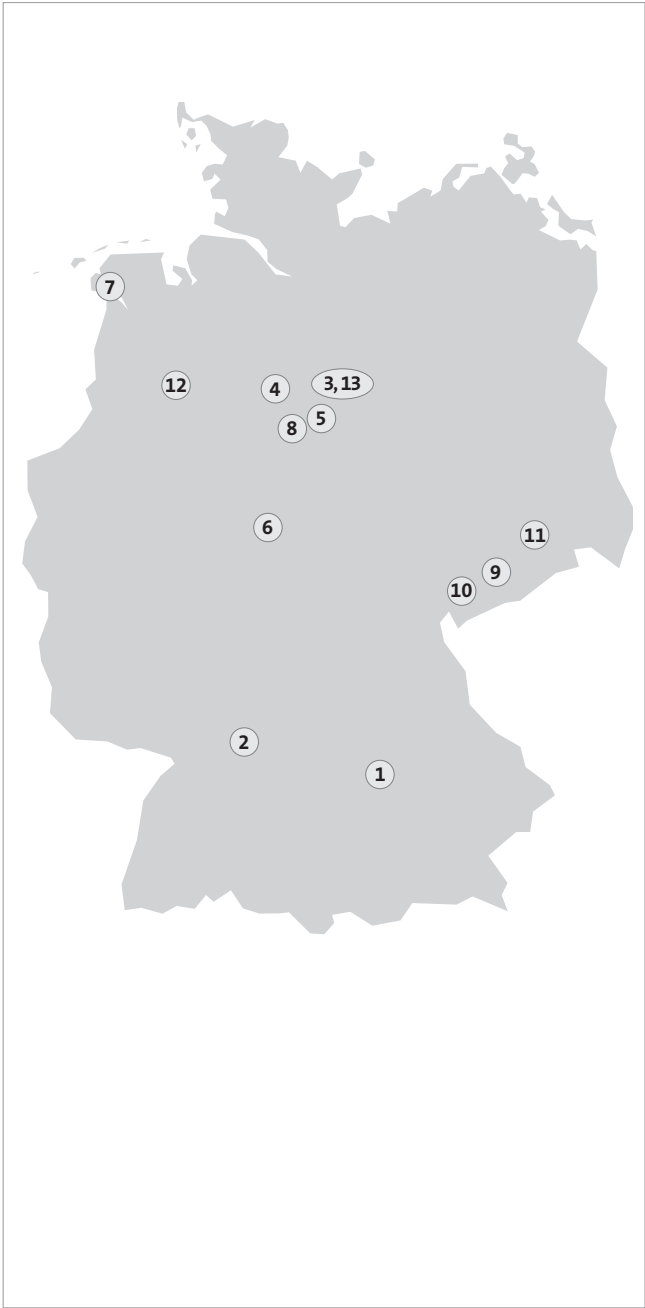

## DEUTSCHLAND

**AUDI AG** (46.620 Beschäftigte;  
Gründung 1909, 1965 Erwerb von  
50 % des Stammkapitals der ehe-  
maligen Auto-Union GmbH; heute  
über 99 % bei der VOLKSWAGEN  
AG)

**1 Werk Ingolstadt**

AUDI A3, AUDI A3 SPORTBACK, AUDI A4,  
AUDI A4 AVANT, AUDI A4 ALLROAD,  
AUDI A5 COUPÉ, AUDI A5 SPORT-  
BACK, AUDI Q5,  
Komponenten: Motorkomponenten

**2 Werk Neckarsulm**

AUDI A4, AUDI A5 CABRIOLET,  
AUDI A6, AUDI A6 AVANT, AUDI A6  
ALLROAD, AUDI A7 SPORTBACK, AUDI  
A8, AUDI R8 COUPÉ, AUDI R8 SPYDER

**VOLKSWAGEN AG**

(94.787 Beschäftigte; Gründung  
1938 als Volkswagenwerk GmbH)

**3 Werk Wolfsburg**

(49.857 Beschäftigte)  
GOLF, GOLF PLUS, TIGUAN, TOURAN,  
Komponenten: Presswerk, Fahr-  
werk, Kunststofftechnik

**4 Werk Hannover**

(12.530 Beschäftigte)  
T5, Komponenten: Gießerei,  
Wärmetauscher

**5 Werk Braunschweig**

(5.548 Beschäftigte)  
Fahrwerkskomponenten

**6 Werk Kassel**

(13.366 Beschäftigte)  
Getriebe, Komponenten: Gießerei,  
Presswerk, Abgasanlagen

**7 Werk Emden**

(7.536 Beschäftigte)  
PASSAT, PASSAT VARIANT, PASSAT CC

**8 Werk Salzgitter**

(5.950 Beschäftigte)  
Motoren

**Volkswagen Sachsen GmbH**

(7.846 Beschäftigte;  
Gründung 1990;  
100 % VOLKSWAGEN AG)

**9 Werk Chemnitz**

Motoren

**10 Werk Zwickau**

GOLF, PASSAT

**Automobilmanufaktur  
Dresden GmbH**

(421 Beschäftigte;  
Gründung 1998;  
100 % VOLKSWAGEN AG)

**11 Gläserne Manufaktur  
Dresden**

PHAETON

**Volkswagen Osnabrück  
GmbH**

(840 Beschäftigte; Gründung 2009;  
100 % VOLKSWAGEN AG)

**12 Werk Osnabrück**

GOLF CABRIOLET (ab II. Quartal  
2011)

**SITECH Sitztechnik GmbH**

(1.755 Beschäftigte; Gründung  
2001; 100 % SITECH Sp. z o.o.)

**13 Werk Wolfsburg**

Komponenten: Sitztechnik

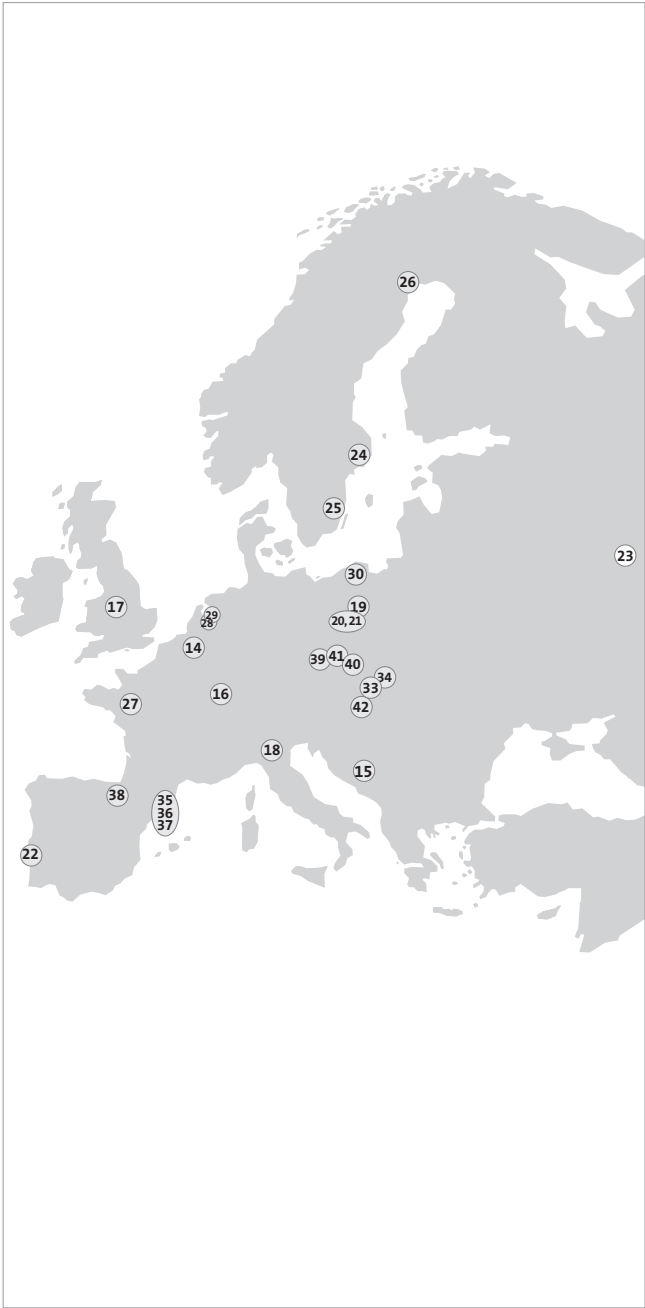

## BELGIEN

**AUDI BRUSSELS S.A.**

(2.143 Beschäftigte; Gründung 1971; 100 % AUDI AG)

**14 Werk Brüssel**

AUDI A1

## BOSNIEN-HERZEGOWINA

**VOLKSWAGEN SARAJEVO, d.o.o.**

(Gründung 1998;  
58 % VOLKSWAGEN AG,  
42 % Prevent Sarajevo d.o.o.)

**15 Werk Sarajevo**

ECO CARRIER, Komponenten:  
Zahnkränze, Achszapfen

## FRANKREICH

**Bugatti Automobiles SAS**

(62 Beschäftigte; Gründung 1910;  
seit 1998 zum Volkswagen Konzern  
gehörend; 100 % Groupe  
VOLKSWAGEN France s.a.)

**16 Werk Molsheim**

VEYRON 16.4, VYRON GRAND SPORT,  
VEYRON SUPER SPORT

## GROSSBRITANNIEN

**Bentley Motors Ltd.**

(3.467 Beschäftigte; Gründung 1919; 100 % Volkswagen International Finance N.V.)

**17 Werk Crewe**

MULSANN, CONTINENTAL FLYING  
SPUR, CONTINENTAL GT,  
CONTINENTAL GTC, Motoren

## ITALIEN

**Automobili Lamborghini S.p.A.**

(826 Beschäftigte;  
Gründung 1963,  
100 % Automobili Lamborghini  
Holding S.p.A., diese ist seit 1998  
100 % AUDI AG)

**18 Werk Sant' Agata Bolognese**

GALLARDO COUPÉ, GALLARDO  
SPYDER, MURCIÉLAGO COUPÉ,  
MURCIÉLAGO ROADSTER, Motoren

## POLEN

**Volkswagen Poznań Sp. z o.o.**

(4.985 Beschäftigte;  
Gründung 1993; 100 % Volkswagen  
International Finance N.V.)

**19 Werk Poznań**

CADDY 3, T5,  
Komponenten: Gießerei

**Volkswagen Motor Polska Sp. z o.o.**

(1.147 Beschäftigte;  
Gründung 1998; 100 % Volkswagen  
International Finance N.V.)

**20 Werk Polkowice**

Motoren

**SITECH Sp. z o.o.**

(1.393 Beschäftigte; Gründung 1998; 100 % Volkswagen International Finance N.V.)

**21 Werk Polkowice**

Komponenten: Sitztechnik

## PORTUGAL

### **Volkswagen Autoeuropa, Lda.**

(3.221 Beschäftigte;  
Gründung 1991; 74 % Volkswagen  
International Finance N.V.;  
26 % Global VW Automotive B.V.)

### **22 Werk Palmela**

EOS, SCIROCCO, SHARAN,  
SEAT ALHAMBRA

## RUSSLAND

### **LLC Volkswagen Group Rus**

(3.097 Beschäftigte; Gründung  
1999; 28,06 % VOLKSWAGEN AG,  
16,80 % ŠKODA AUTO a.s., 48,92 %  
Volkswagen International Finance  
N.V., 6,22 % European Bank for  
Reconstruction and Development)

### **23 Werk Kaluga**

TIGUAN, POLO, ŠKODA FABIA,  
ŠKODA OCTAVIA

## SCHWEDEN

### **Scania AB**

(35.514 Beschäftigte\*;  
Gründung 1891,  
VOLKSWAGEN AG 49,29 % Kapital-  
anteil und 71,81 % Stimmrechte)

### **24 Werk Södertälje (Schweden)**

Lkw- und Busfahrgestelle (Ferti-  
gung), Komponenten: Motoren-,  
Getriebe- und Achsproduktion

### **25 Werk Oskarshamn (Schweden)**

Komponenten: Fahrerhausproduktion

### **26 Werk Luleå (Schweden)**

Komponenten: Rahmenproduktion

### **27 Werk Angers (Frankreich)**

Lkw (Fertigung)

### **28 Werk Zwolle (Niederlande)**

Lkw (Fertigung)

### **29 Werk Meppel (Niederlande)**

Komponenten, Lackierung von Teilen

### **30 Werk Slupsk (Polen)**

Busaufbau

### **31 Werk São Paulo (Brasilien)**

Produktion von Motoren, Achsen,  
Fahrerhäusern, Lkw- und Bus-  
fahrgestellen

### **32 Werk Tucumán (Argentinien)**

Komponenten des Antriebsstrangs  
(Produktion)

**SLOWAKISCHE REPUBLIK****VOLKSWAGEN SLOVAKIA, a.s.**

(6.964 Beschäftigte;  
Gründung 1991; 100 % Volkswagen  
International Finance N.V.)

**33 Werk Bratislava**

TOUAREG, AUDI Q7,  
PORSCHE CAYENNE,  
Getriebe (nur Montage)

**34 Werk Martin**

Komponenten: Getriebe-/Fahrwerk-  
komponenten

**SPANIEN****SEAT, S.A.**

(10.726 Beschäftigte;  
Gründung 1950, 100 % Volkswagen  
International Finance N.V.)

**35 Werk Barcelona**

Komponenten: Presswerk

**36 Werk Martorell**

IBIZA, IBIZA SC, IBIZA SPORTTOURER,  
LEÓN, ALTEA, ALTEA XL, ALTEA FREE-  
TRACK, EXEO, EXEO ST,  
Motoren (nur Montage)

**Gearbox del Prat, S.A.**

(1.085 Beschäftigte; Gründung  
1989, 100 % SEAT, S.A.)

**37 Werk Prat**

Getriebe, Komponenten: Gießerei

**Volkswagen Navarra, S.A.**

(4.795 Beschäftigte;  
1993 Gründung durch Ausgliederung  
des Werks Pamplona unter  
der Firma „Fabrica Navarra de  
Automoviles S.A.“ aus der SEAT, S.A.,  
100 % SEAT, S.A.)

**38 Werk Pamplona**

POLO, Motoren (nur Montage)

**TSCHECHISCHE REPUBLIK****ŠKODA AUTO a.s.**

(23.308 Beschäftigte;  
Gründung 1895;  
100 % Volkswagen International  
Finance N.V.)

**39 Werk Mladá Boleslav**

FABIA, FABIA COMBI, OCTAVIA,  
OCTAVIA COMBI, Motoren, Getriebe,  
Komponenten: Gießerei

**40 Werk Kvasiny**

ROOMSTER, PRAKTIK, YETI, SUPERB,  
SUPERB COMBI

**41 Werk Vrchlabí**

OCTAVIA, OCTAVIA COMBI

**UNGARN****AUDI HUNGARIA MOTOR  
Kft.**

(6.138 Beschäftigte;  
Gründung 1993; 100 % AUDI AG)

**42 Werk Győr**

AUDI A3 CABRIOLET, AUDI TT COUPÉ,  
AUDI TT ROADSTER, Motoren

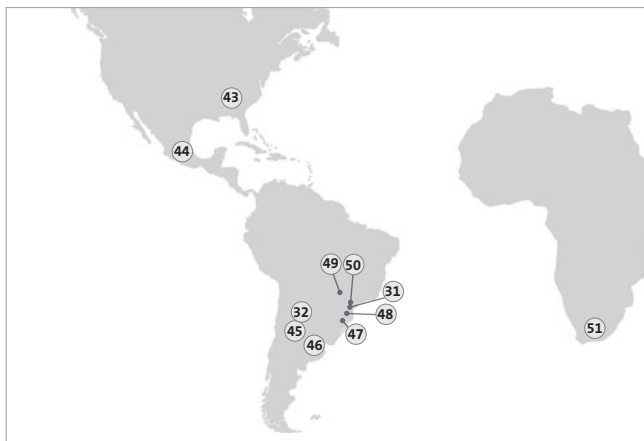

## USA

### Volkswagen Group of America Chattanooga Operations, LLC.

(1.265 Beschäftigte; Gründung 2008; 100 % Volkswagen Group of America Inc.)

#### 43 Werk Chattanooga PASSAT (ab II. Quartal 2011)

## MEXIKO

### Volkswagen de México, S.A. de C.V. (15.290 Beschäftigte; Gründung 1964; 100 % VOLKSWAGEN AG)

#### 44 Werk Puebla JETTA, NEW BEETLE, NEW BEETLE CABRIOLET, GOLF VARIANT, Motoren, Komponenten: Gießerei

## ARGENTINIEN

### Volkswagen Argentina S.A. (6.500 Beschäftigte; Gründung 1980; 100 % SEAT, S.A.)

#### 45 Werk Cordoba Getriebe

#### 46 Werk Pacheco SURAN GP, AMAROK, Motoren (nur Montage)

## BRASILIEN

### Volkswagen do Brasil Indústria de Veículos Automotores Ltda. (23.189 Beschäftigte; Gründung 1953; 100 % Volkswagen International Finance N.V.)

#### 47 Werk Anchieta GOL, NEW SAVEIRO, POLO, POLO CLASSIC, PARATI, T2, Motoren, Getriebe, Komponenten: Gießerei

#### 48 Werk Curitiba FOX, GOLF

#### 49 Werk São Carlos Motoren

#### 50 Werk Taubaté GOL, VOYAGE

## SÜDAFRIKA

### Volkswagen of South Africa (Pty) Ltd. (5.634 Beschäftigte; Gründung 1956; 100 % VOLKSWAGEN AG)

#### 51 Werk Uitenhage POLO, POLO VIVO, Motoren



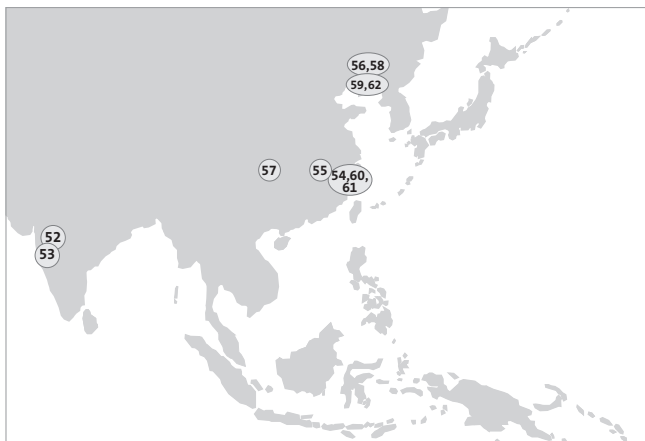

## INDIEN

### ŠKODA AUTO India Private

**Ltd.** (954 Beschäftigte; Gründung 1999; 100 % ŠKODA AUTO a.s.)

#### 52 Werk Aurangabad

JETTA, PASSAT, ŠKODA FABIA, ŠKODA OCTAVIA, ŠKODA SUPERB, ŠKODA YETI, AUDI A4, AUDI A6, AUDI Q5

### Volkswagen India Private Ltd.

(3.505 Beschäftigte; Gründung 2007; VOLKSWAGEN AG 90,99 % Kapitalanteil und 0,0001 % Stimmrechte, Volkswagen International Finance N.V. 9,01 % Kapitalanteil und 99,9999 % Stimmrechte)

#### 53 Werk Pune

ŠKODA FABIA, POLO, VENTO

## VOLKSREPUBLIK CHINA

### Shanghai-Volkswagen Automotive Company Ltd.

(22.104 Beschäftigte; Gründung 1985; 40 % VOLKSWAGEN AG, 10 % Volkswagen (China) Investment Company Ltd., 50 % Shanghai Automotive Group Company Ltd./SAGCL)

#### 54 Werk Shanghai (Anting)

ŠKODA FABIA JINGRUI, ŠKODA OCTAVIA MINGRUI, ŠKODA SUPERB HAORUI, POLO, POLO JINQING, POLO JINQU, LAVIDA, SANTANA, PASSAT LINGYU, TIGUAN, TOURAN, Motoren

#### 55 Werk Nanjing

SANTANA, SANTANA VISTA

### FAW-Volkswagen Automotive Company Ltd.

(15.596 Beschäftigte; Gründung 1991; 20 % VOLKSWAGEN AG, 10 % Volkswagen (China) Investment Company Ltd., 10 % AUDI AG, 60 % First Automobile Works Corp./FAW)

#### 56 Werk Changchun

JETTA, NEW BORA, GOLF, SAGITAR, MAGOTAN, MAGOTAN CC, AUDI A4, AUDI A6, AUDI Q5, Motoren, Getriebe

#### 57 Werk Chengdu

JETTA

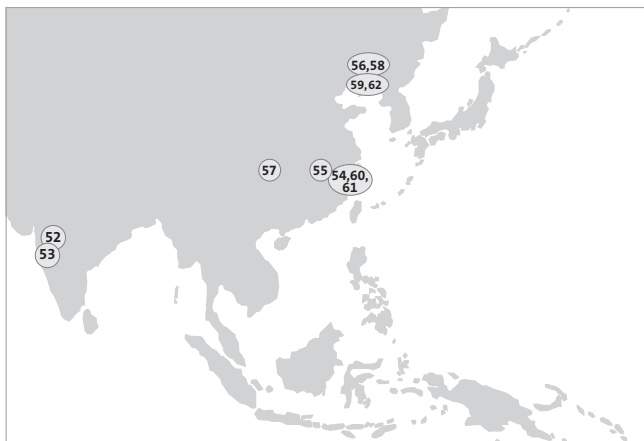

### Volkswagen FAW Platform Company Ltd.

(354 Beschäftigte; Gründung 2005; 60 % Volkswagen (China) Investment Company Ltd., 40 % FAWER Automobile Parts Co. Ltd.)

### 58 Werk Changchun

Komponenten: Fahrwerk/Achsen

### VOLKSWAGEN FAW Engine (Dalian) Co., Ltd.

(559 Beschäftigte; Gründung 2005; 60 % Volkswagen (China) Investment Company Ltd., 40 % First Automobile Works Corp./FAW)

### 59 Werk Dalian

Motoren

### VOLKSWAGEN Transmission (Shanghai) Company Ltd.

(262 Beschäftigte; Gründung 2001; 60 % Volkswagen (China) Investment Company Ltd., 20 % FAW-Car Company, 20 % SAIC Motor Co., Ltd.)

### 60 Werk Shanghai (Jiading)

Getriebe

### Shanghai Volkswagen Powertrain Company Ltd.

(525 Beschäftigte; Gründung 2005; 60 % Volkswagen (China) Investment Company Ltd., 40 % Shanghai Automotive Group Company Ltd./SAGCL)

### 61 Werk Shanghai (Loutang)

Motoren

### VOLKSWAGEN Automatic Transmission Co., Ltd.

(580 Beschäftigte; Gründung 2010; 100 % Volkswagen (China) Investment Company Ltd.)

### 62 Werk Dalian

Getriebe

**Volkswagen-Konzern-Modelle mit CO<sub>2</sub>-Emissionen von ≤ 130 CO<sub>2</sub>/km  
für Markt Deutschland**

**20 Modelle ≤ 100 CO<sub>2</sub>/km**

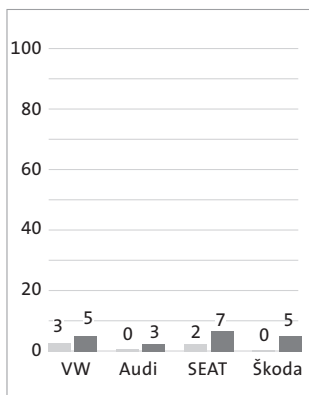

**116 Modelle ≤ 120 CO<sub>2</sub>/km**

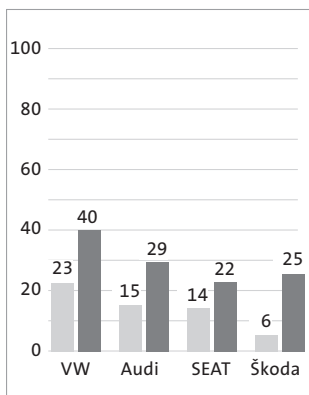

**220 Modelle ≤ 130 CO<sub>2</sub>/km**

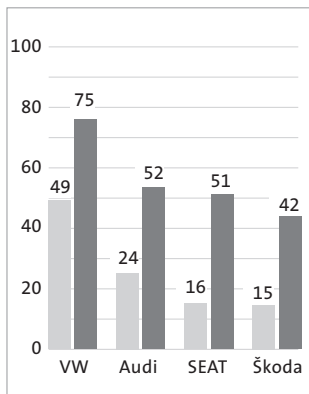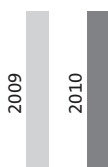

## 26 AUSLIEFERUNGEN AN KUNDEN

| Welt                      | Stand 31.12.2010 | 2009                               |
|---------------------------|------------------|------------------------------------|
|                           |                  | 2010                               |
| Konzern                   |                  | 6.336.319<br>7.203.094 (= +13,7 %) |
| Volkswagen Pkw            |                  | 3.954.551<br>4.502.827 (= +13,9 %) |
| Audi                      |                  | 949.729<br>1.092.411 (= +15,0 %)   |
| SEAT                      |                  | 336.683<br>339.501 (= +0,8 %)      |
| Škoda                     |                  | 684.226<br>762.600 (= +11,5 %)     |
| Volkswagen Nutzfahrzeuge* |                  | 361.506<br>435.584 (= +20,5 %)     |
| Bentley                   |                  | 4.616<br>5.117 (= +10,9 %)         |
| Bugatti                   |                  | 50<br>40 (= -20,0 %)               |
| Lamborghini               |                  | 1.515<br>1.302 (= -14,1 %)         |
| Scania                    |                  | 43.443<br>63.712 (= +46,7 %)       |

| Europa                   | Stand 31.12.2010 | 2009                              |
|--------------------------|------------------|-----------------------------------|
|                          |                  | 2010                              |
| Konzern**                |                  | 3.281.216<br>3.304.907 (= +0,7 %) |
| Volkswagen Pkw           |                  | 1.564.083<br>1.545.374 (= -1,2 %) |
| Audi                     |                  | 618.854<br>647.631 (= +4,7 %)     |
| SEAT                     |                  | 312.222<br>309.416 (= -0,9 %)     |
| Škoda                    |                  | 525.572<br>528.071 (= +0,5 %)     |
| Volkswagen Nutzfahrzeuge |                  | 258.057<br>272.210 (= +5,5 %)     |
| Bentley                  |                  | 1.739<br>1.751 (= +0,7 %)         |
| Bugatti                  |                  | 22<br>18 (= -18,2 %)              |
| Lamborghini              |                  | 667<br>436 (= -34,6 %)            |

\* inkl. Trucks und Busse Januar - Februar 2009

\*\* ohne Scania

**Westeuropa ohne Deutschland**

Stand 31.12.2010

2009

2010

**Konzern\***

|  |                       |
|--|-----------------------|
|  | 1.655.259             |
|  | 1.846.870 (= +11,6 %) |

**Volkswagen Pkw**

|  |                     |
|--|---------------------|
|  | 766.396             |
|  | 863.496 (= +12,7 %) |

**Audi**

|  |                    |
|--|--------------------|
|  | 359.465            |
|  | 382.748 (= +6,5 %) |

**SEAT**

|  |                    |
|--|--------------------|
|  | 236.852            |
|  | 248.499 (= +4,9 %) |

**Škoda**

|  |                     |
|--|---------------------|
|  | 182.857             |
|  | 219.938 (= +20,3 %) |

**Volkswagen Nutzfahrzeuge**

|  |                     |
|--|---------------------|
|  | 107.776             |
|  | 130.426 (= +21,0 %) |

**Bentley**

|  |                  |
|--|------------------|
|  | 1.363            |
|  | 1.408 (= +3,3 %) |

**Bugatti**

|  |                |
|--|----------------|
|  | 18             |
|  | 14 (= -22,2 %) |

**Lamborghini**

|  |                 |
|--|-----------------|
|  | 532             |
|  | 341 (= -35,9 %) |

**Zentral- und Osteuropa**

Stand 31.12.2010

2009

2010

**Konzern\***

|  |                     |
|--|---------------------|
|  | 381.932             |
|  | 423.187 (= +10,8 %) |

**Volkswagen Pkw**

|  |                     |
|--|---------------------|
|  | 125.070             |
|  | 147.913 (= +18,3 %) |

**Audi**

|  |                    |
|--|--------------------|
|  | 30.545             |
|  | 35.726 (= +17,0 %) |

**SEAT**

|  |                   |
|--|-------------------|
|  | 19.188            |
|  | 17.897 (= -6,7 %) |

**Škoda**

|  |                    |
|--|--------------------|
|  | 180.387            |
|  | 194.810 (= +8,0 %) |

**Volkswagen Nutzfahrzeuge**

|  |                   |
|--|-------------------|
|  | 26.605            |
|  | 26.712 (= +0,4 %) |

**Bentley**

|  |                |
|--|----------------|
|  | 103            |
|  | 113 (= +9,7 %) |

**Lamborghini**

|  |                |
|--|----------------|
|  | 34             |
|  | 16 (= -52,9 %) |

\* ohne Scania

**Deutschland**

Stand 31.12.2010

2009

2010

**Konzern\***

|  |                       |
|--|-----------------------|
|  | 1.244.025             |
|  | 1.034.850 (= -16,8 %) |

**Volkswagen Pkw**

|  |                     |
|--|---------------------|
|  | 672.617             |
|  | 533.965 (= -20,6 %) |

**Audi**

|  |                    |
|--|--------------------|
|  | 228.844            |
|  | 229.157 (= +0,1 %) |

**SEAT**

|  |                    |
|--|--------------------|
|  | 56.182             |
|  | 43.020 (= -23,4 %) |

**Škoda**

|  |                     |
|--|---------------------|
|  | 162.328             |
|  | 113.323 (= -30,2 %) |

**Volkswagen Nutzfahrzeuge**

|  |                    |
|--|--------------------|
|  | 123.676            |
|  | 115.072 (= -7,0 %) |

**Bentley**

|  |                 |
|--|-----------------|
|  | 273             |
|  | 230 (= -15,8 %) |

**Bugatti**

|  |   |
|--|---|
|  | 4 |
|  | 4 |

**Lamborghini**

|  |                |
|--|----------------|
|  | 101            |
|  | 79 (= -21,8 %) |

**Großbritannien**

Stand 31.12.2010

2009

2010

**Konzern\***

|  |                     |
|--|---------------------|
|  | 338.744             |
|  | 377.496 (= +11,4 %) |

**Volkswagen Pkw**

|  |                    |
|--|--------------------|
|  | 157.535            |
|  | 172.944 (= +9,8 %) |

**Audi**

|  |                    |
|--|--------------------|
|  | 90.513             |
|  | 99.705 (= +10,2 %) |

**SEAT**

|  |                   |
|--|-------------------|
|  | 29.987            |
|  | 32.936 (= +9,8 %) |

**Škoda**

|  |                    |
|--|--------------------|
|  | 36.012             |
|  | 41.632 (= +15,6 %) |

**Volkswagen Nutzfahrzeuge**

|  |                    |
|--|--------------------|
|  | 23.681             |
|  | 29.197 (= +23,3 %) |

**Bentley**

|  |                |
|--|----------------|
|  | 891            |
|  | 976 (= +9,5 %) |

**Bugatti**

|  |               |
|--|---------------|
|  | 5             |
|  | 4 (= -20,0 %) |

**Lamborghini**

|  |                 |
|--|-----------------|
|  | 120             |
|  | 102 (= -15,0 %) |

\* ohne Scania

| Italien                  |                                                                                   | 2009                          |
|--------------------------|-----------------------------------------------------------------------------------|-------------------------------|
|                          | Stand 31.12.2010                                                                  | 2010                          |
| Konzern*                 |  | 236.458<br>241.121 (= +2,0 %) |
| Volkswagen Pkw           |  | 130.649<br>137.018 (= +4,9 %) |
| Audi                     |  | 57.204<br>60.337 (= +5,5 %)   |
| SEAT                     |  | 22.235<br>17.013 (= -23,5 %)  |
| Škoda                    |  | 18.215<br>18.276 (= +0,3 %)   |
| Volkswagen Nutzfahrzeuge |  | 7.900<br>8.355 (= +5,8 %)     |
| Bentley                  |  | 44<br>33 (= -25,0 %)          |
| Lamborghini              |  | 211<br>89 (= -57,8 %)         |

| Spanien                  |                                                                                     | 2009                          |
|--------------------------|-------------------------------------------------------------------------------------|-------------------------------|
|                          | Stand 31.12.2010                                                                    | 2010                          |
| Konzern*                 |  | 223.779<br>244.811 (= +9,4 %) |
| Volkswagen Pkw           |  | 77.773<br>85.916 (= +10,5 %)  |
| Audi                     |  | 38.788<br>39.557 (= +2,0 %)   |
| SEAT                     |  | 83.008<br>91.331 (= +10,0 %)  |
| Škoda                    |  | 17.598<br>19.871 (= +12,9 %)  |
| Volkswagen Nutzfahrzeuge |  | 6.568<br>8.100 (= +23,3 %)    |
| Bentley                  |  | 38<br>29 (= -23,7 %)          |
| Bugatti                  |  | 0<br>2                        |
| Lamborghini              |  | 6<br>5 (= -16,7 %)            |

**Nordamerika**

Stand 31.12.2010

| 2009 | 2010 |
|------|------|
|------|------|

|                          |         |                     |
|--------------------------|---------|---------------------|
| Konzern*                 | 467.344 | 549.238 (= +17,5 %) |
| Volkswagen Pkw           | 344.776 | 406.367 (= +17,9 %) |
| Audi                     | 98.896  | 121.452 (= +22,8 %) |
| SEAT                     | 15.588  | 13.380 (= -14,2 %)  |
| Volkswagen Nutzfahrzeuge | 6.245   | 6.186 (= -0,9 %)    |
| Bentley                  | 1.443   | 1.531 (= +6,1 %)    |
| Bugatti                  | 7       | 6 (= -14,3 %)       |
| Lamborghini              | 389     | 316 (= -18,8 %)     |

**USA**

Stand 31.12.2010

| 2009 | 2010 |
|------|------|
|------|------|

|                          |         |                     |
|--------------------------|---------|---------------------|
| Konzern                  | 297.973 | 360.287 (= +20,9 %) |
| Volkswagen Pkw           | 213.454 | 256.830 (= +20,3 %) |
| Audi                     | 82.716  | 101.629 (= +22,9 %) |
| Volkswagen Nutzfahrzeuge | 0       | 1                   |
| Bentley                  | 1.443   | 1.531 (= +6,1 %)    |
| Bugatti                  | 7       | 6 (= -14,3 %)       |
| Lamborghini              | 353     | 290 (= -17,8 %)     |



**Südamerika**

Stand 31.12.2010

| 2009 | 2010 |
|------|------|
|------|------|

**Konzern\***

|         |                    |
|---------|--------------------|
| 808.817 | 887.958 (= +9,8 %) |
|---------|--------------------|

**Volkswagen Pkw**

|         |                    |
|---------|--------------------|
| 735.142 | 756.451 (= +2,9 %) |
|---------|--------------------|

**Audi**

|       |                    |
|-------|--------------------|
| 8.716 | 13.390 (= +53,6 %) |
|-------|--------------------|

**SEAT**

|       |                   |
|-------|-------------------|
| 1.491 | 2.483 (= +66,5 %) |
|-------|-------------------|

**Škoda**

|       |                  |
|-------|------------------|
| 1.819 | 1.915 (= +5,3 %) |
|-------|------------------|

**Volkswagen Nutzfahrzeuge**

|        |                     |
|--------|---------------------|
| 61.644 | 113.707 (= +84,5 %) |
|--------|---------------------|

**Lamborghini**

|   |                 |
|---|-----------------|
| 5 | 12 (= +140,0 %) |
|---|-----------------|

**Brasilien**

Stand 31.12.2010

| 2009 | 2010 |
|------|------|
|------|------|

**Konzern\***

|         |                    |
|---------|--------------------|
| 682.520 | 711.523 (= +4,2 %) |
|---------|--------------------|

**Volkswagen Pkw**

|         |                    |
|---------|--------------------|
| 623.056 | 614.498 (= -1,4 %) |
|---------|--------------------|

**Audi**

|       |                   |
|-------|-------------------|
| 2.010 | 3.276 (= +63,0 %) |
|-------|-------------------|

**Volkswagen Nutzfahrzeuge**

|        |                    |
|--------|--------------------|
| 57.449 | 93.737 (= +63,2 %) |
|--------|--------------------|

**Lamborghini**

|   |                 |
|---|-----------------|
| 5 | 12 (= +140,0 %) |
|---|-----------------|

**Südafrika**

Stand 31.12.2010

| 2009 | 2010 |
|------|------|
|------|------|

**Konzern\***

|        |                    |
|--------|--------------------|
| 51.935 | 71.299 (= +37,3 %) |
|--------|--------------------|

**Volkswagen Pkw**

|        |                    |
|--------|--------------------|
| 39.379 | 54.173 (= +37,6 %) |
|--------|--------------------|

**Audi**

|       |                    |
|-------|--------------------|
| 8.710 | 12.060 (= +38,5 %) |
|-------|--------------------|

**Volkswagen Nutzfahrzeuge**

|       |                   |
|-------|-------------------|
| 3.838 | 5.058 (= +31,8 %) |
|-------|-------------------|

**Lamborghini**

|   |   |
|---|---|
| 8 | 8 |
|---|---|

## Asien-Pazifik

Stand 31.12.2010

| 2009 | 2010 |
|------|------|
|------|------|

## Konzern\*

|  |                       |
|--|-----------------------|
|  | 1.546.121             |
|  | 2.140.698 (= +38,5 %) |

## Volkswagen Pkw

|  |                       |
|--|-----------------------|
|  | 1.200.505             |
|  | 1.651.469 (= +37,6 %) |

## Audi

|  |                     |
|--|---------------------|
|  | 199.003             |
|  | 276.241 (= +38,8 %) |

## Škoda

|  |                     |
|--|---------------------|
|  | 138.782             |
|  | 203.313 (= +46,5 %) |

## Volkswagen Nutzfahrzeuge

|  |                   |
|--|-------------------|
|  | 6.646             |
|  | 7.907 (= +19,0 %) |

## Bentley

|  |                   |
|--|-------------------|
|  | 869               |
|  | 1.283 (= +47,6 %) |

## Bugatti

|  |               |
|--|---------------|
|  | 6             |
|  | 5 (= -16,7 %) |

## Lamborghini

|  |                 |
|--|-----------------|
|  | 310             |
|  | 480 (= +54,8 %) |

## China

Stand 31.12.2010

| 2009 | 2010 |
|------|------|
|------|------|

## Konzern\*

|  |                       |
|--|-----------------------|
|  | 1.400.013             |
|  | 1.923.454 (= +37,4 %) |

## Volkswagen Pkw

|  |                       |
|--|-----------------------|
|  | 1.117.303             |
|  | 1.513.570 (= +35,5 %) |

## Audi

|  |                     |
|--|---------------------|
|  | 158.941             |
|  | 227.938 (= +43,4 %) |

## Škoda

|  |                     |
|--|---------------------|
|  | 122.556             |
|  | 180.515 (= +47,3 %) |

## Volkswagen Nutzfahrzeuge

|  |                 |
|--|-----------------|
|  | 612             |
|  | 283 (= -53,8 %) |

## Bentley

|  |                 |
|--|-----------------|
|  | 484             |
|  | 901 (= +86,2 %) |

## Lamborghini

|  |                  |
|--|------------------|
|  | 117              |
|  | 247 (= +111,1 %) |

# MARKTANTEILE PKW-NEUZULASSUNGEN NACH LÄNDERN (VOLKSWAGEN KONZERN)

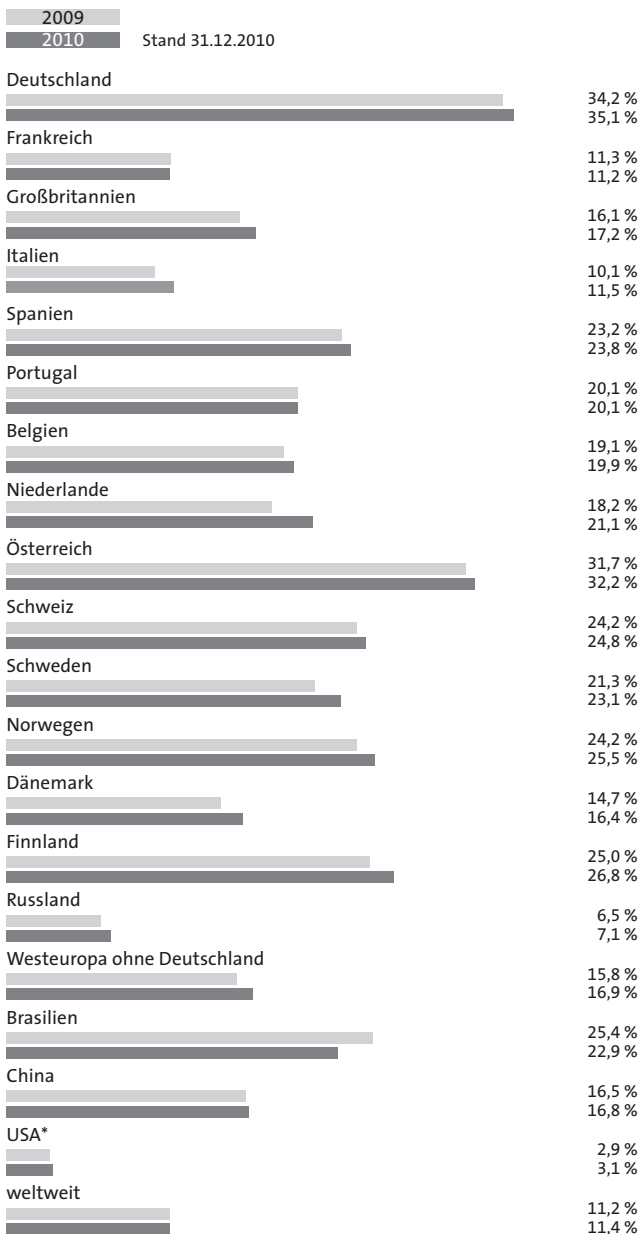

\* Gesamtmarkt enthält Pkw und leichte Nutzfahrzeuge

## PKW-NEUZULASSUNGEN NACH MÄRKTEN (Stand 31.12.2010)

**Deutschland**

|                        |         |
|------------------------|---------|
| Volkswagen Konzern     | 35,10 % |
| PSA Konzern            | 5,24 %  |
| Renault Nissan Allia   | 7,37 %  |
| General Motors Konzern | 8,89 %  |
| Ford                   | 6,80 %  |
| Fiat Konzern           | 3,09 %  |
| BMW Konzern            | 9,14 %  |
| Daimler AG             | 10,64 % |
| Toyota Konzern         | 2,88 %  |
| Hyundai Konzern        | 3,80 %  |

**USA (Pkw und Light Truck)**

|                              |               |
|------------------------------|---------------|
| Volkswagen                   | 2,2 %         |
| Audi                         | 0,9 %         |
| <b>Volkswagen Konzern</b>    | <b>3,1 %</b>  |
| Toyota                       | 15,2 %        |
| Nissan                       | 7,8 %         |
| Honda                        | 10,6 %        |
| <b>Japaner gesamt</b>        | <b>38,6 %</b> |
| <b>Koreaner gesamt</b>       | <b>7,7 %</b>  |
| <b>BMW</b>                   | <b>1,9 %</b>  |
| <b>Daimler AG</b>            | <b>2,0 %</b>  |
| <b>Sonstige Importmarken</b> | <b>1,5 %</b>  |
| <b>Importmarken gesamt*</b>  | <b>54,9 %</b> |
| GM Konzern                   | 19,1 %        |
| Ford Konzern                 | 16,7 %        |
| Chrysler                     | 9,4 %         |
| <b>Domestics</b>             | <b>45,1 %</b> |

\* Die Zahlen sind jeweils für sich gerundet; das kann bei der Addition zu geringfügigen Abweichungen führen.

**Westeuropa ohne Deutschland**

|                        |         |
|------------------------|---------|
| Volkswagen Konzern     | 16,92 % |
| PSA Konzern            | 15,95 % |
| Renault Nissan Allia   | 14,56 % |
| General Motors Konzern | 8,57 %  |
| Ford                   | 8,63 %  |
| Fiat Konzern           | 9,07 %  |
| BMW Konzern            | 4,66 %  |
| Daimler AG             | 3,50 %  |
| Toyota Konzern         | 4,97 %  |
| Hyundai Konzern        | 4,28 %  |

**China (ohne Hong Kong)\***

|                                       |               |
|---------------------------------------|---------------|
| Volkswagen Konzern (lokal)            | 16,1 %        |
| Volkswagen Konzern (Importe)          | 0,6 %         |
| <b>Volkswagen Konzern (Total)**</b>   | <b>16,8 %</b> |
| <b>GM Konzern</b>                     | <b>9,4 %</b>  |
| <b>Toyota</b>                         | <b>6,6 %</b>  |
| <b>Ford</b>                           | <b>2,7 %</b>  |
| <b>Nissan</b>                         | <b>5,8 %</b>  |
| <b>PSA Konzern</b>                    | <b>3,3 %</b>  |
| <b>Honda</b>                          | <b>5,7 %</b>  |
| <b>Hyundai</b>                        | <b>5,9 %</b>  |
| <b>Kia</b>                            | <b>2,8 %</b>  |
| <b>Chery</b>                          | <b>4,5 %</b>  |
| <b>Geely</b>                          | <b>3,1 %</b>  |
| <b>BYD</b>                            | <b>4,2 %</b>  |
| <b>Sonstige chinesische Marken</b>    | <b>17,9 %</b> |
| <b>Sonstige internationale Marken</b> | <b>7,0 %</b>  |

\* Quelle: Volkswagen Group China

\*\* Die Zahlen sind jeweils für sich gerundet; das kann bei der Addition zu geringfügigen Abweichungen führen.

## VOLKSWAGEN KONZERN

## Belegsgesellschaftsentwicklung Welt

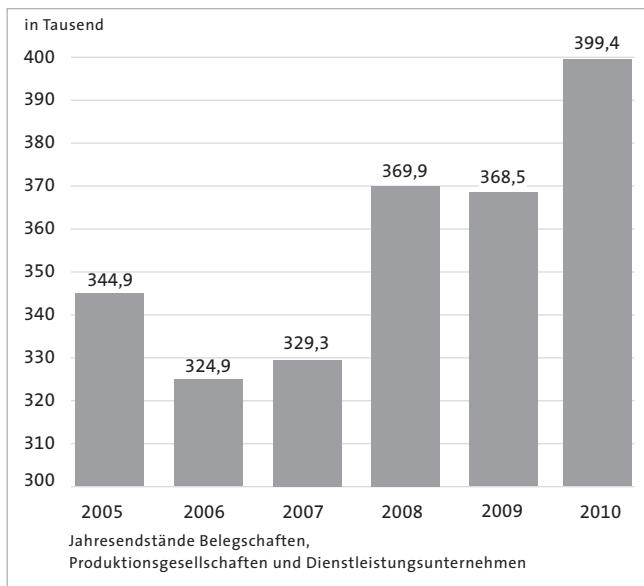

Stand 31.12.2010

## VOLKSWAGEN KONZERN

## Beschäftigte Inland/Ausland absolut

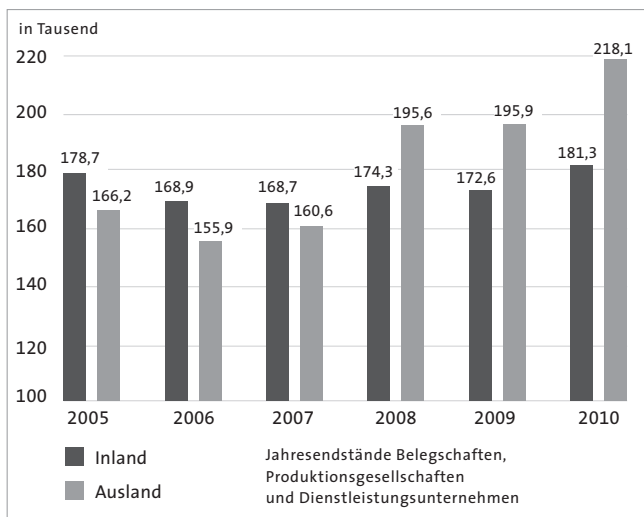

Stand 31.12.2010

## VOLKSWAGEN KONZERN

## Belegschaft Produktionsgesellschaften nach Ländern (ohne Scania)

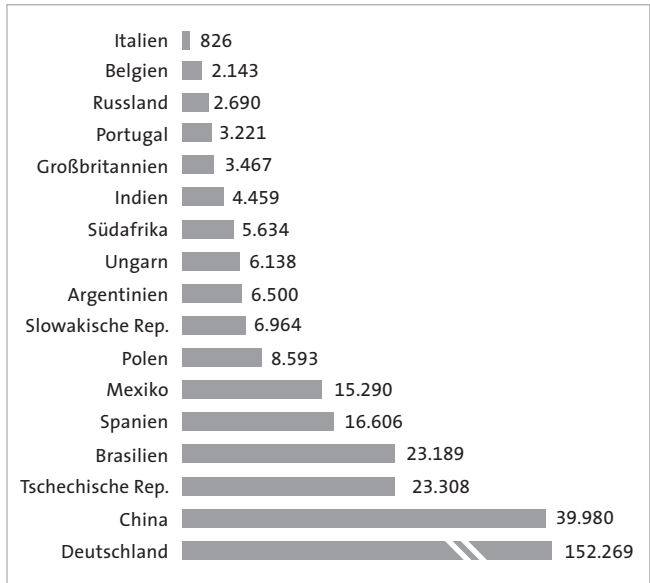

Stand 31.12.2010

## VOLKSWAGEN KONZERN

## Belegschaft nach Beschäftigungsgruppen

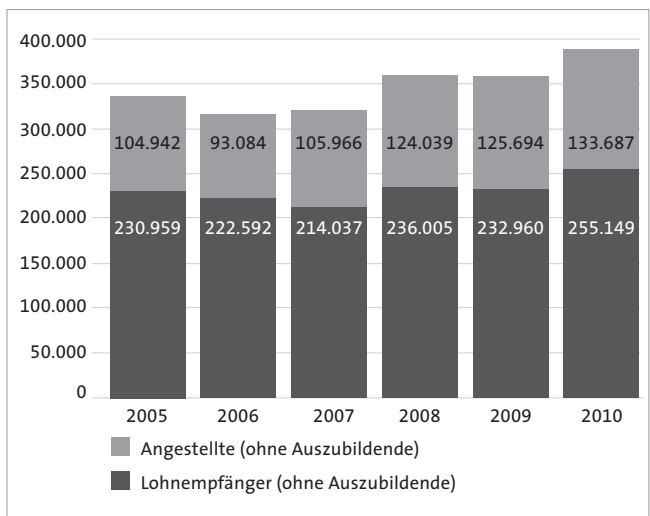

Stand 31.12.2010

## VOLKSWAGEN AG

## Entwicklung Teilzeitbeschäftigte

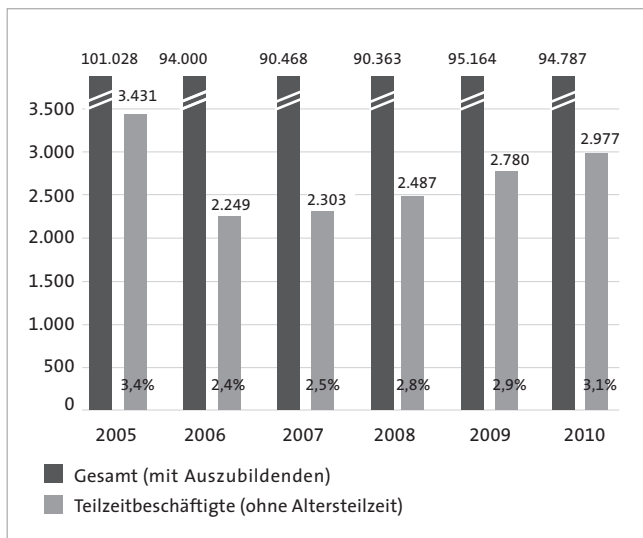

Stand 31.12.2010

## VOLKSWAGEN AG

## Entwicklung Frauenanteil

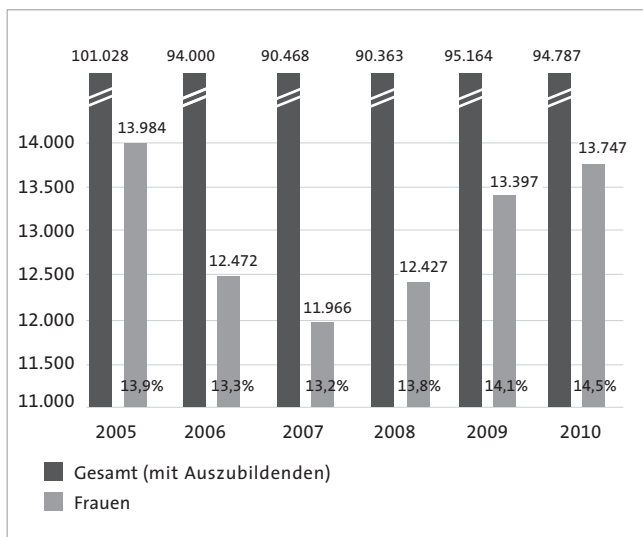

Stand 31.12.2010



VOLKSWAGEN AG

Altersstruktur gesamt

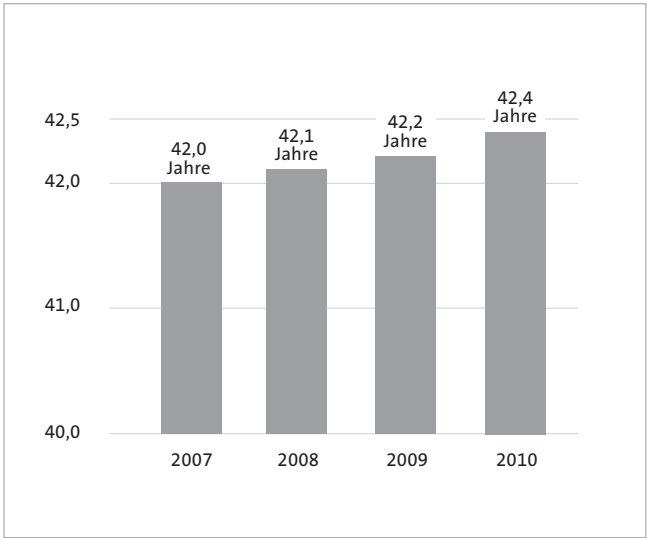

Stand 31.12.2010

VOLKSWAGEN AG

Gesundheitsstand

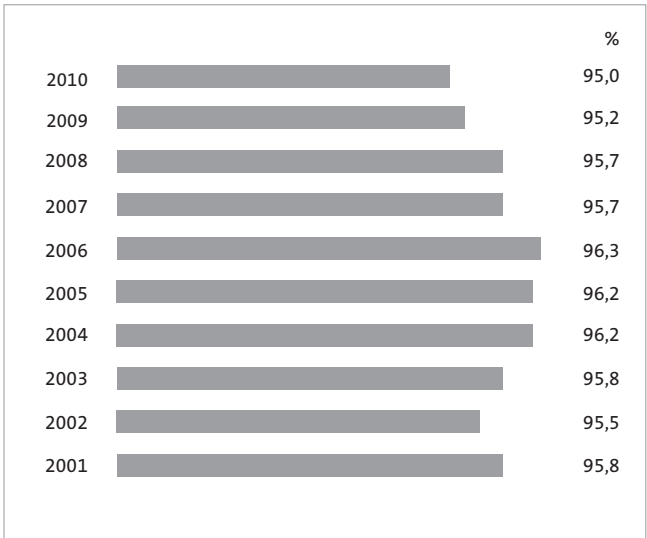

Stand 31.12.2010

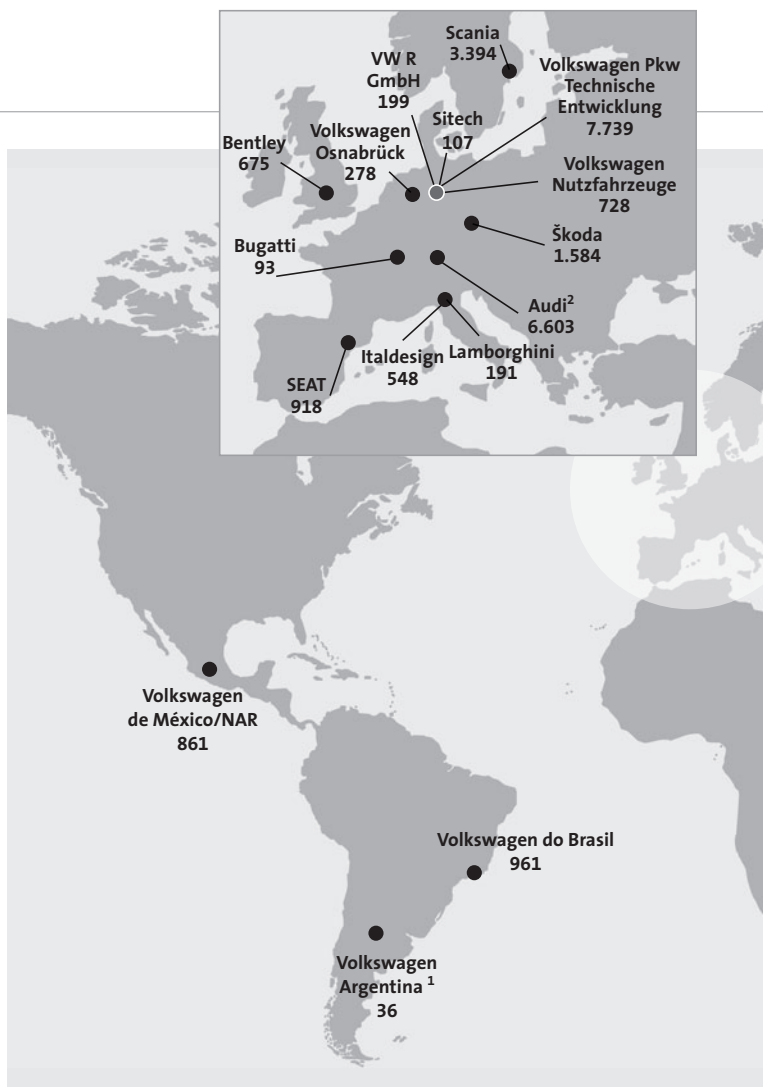

1) mit Robust Pick-Up/  
Volkswagen Nutzfahrzeuge

2) mit Audi Hungari Motor

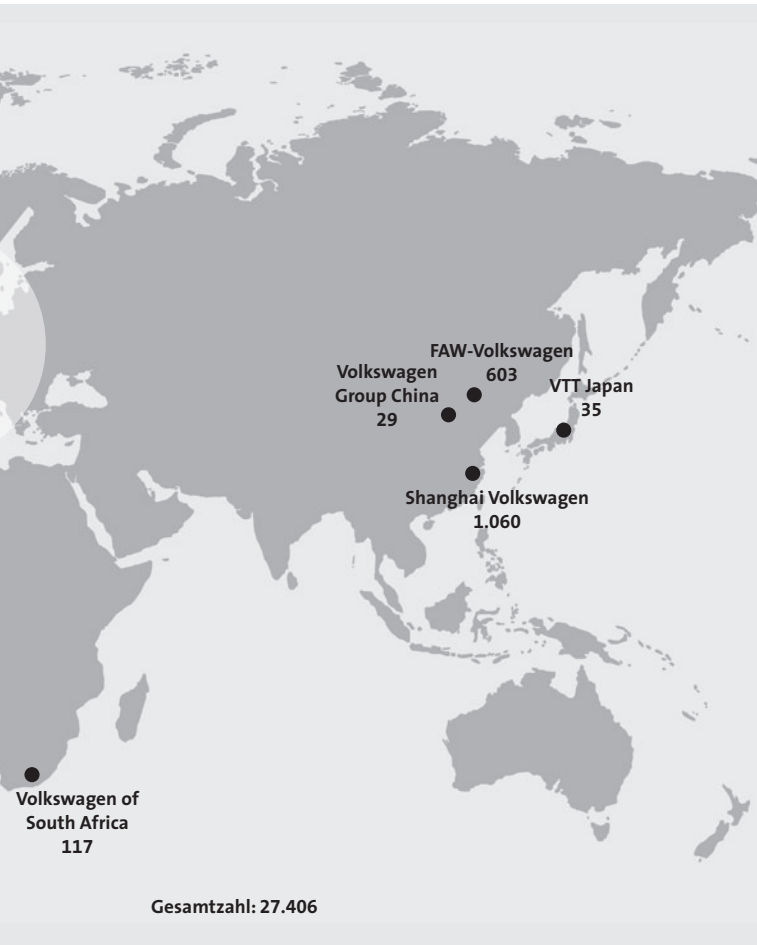

647 zusätzliche Mitarbeiter in der Konzernforschung

**Einkaufsvolumen (Volkswagen Konzern)**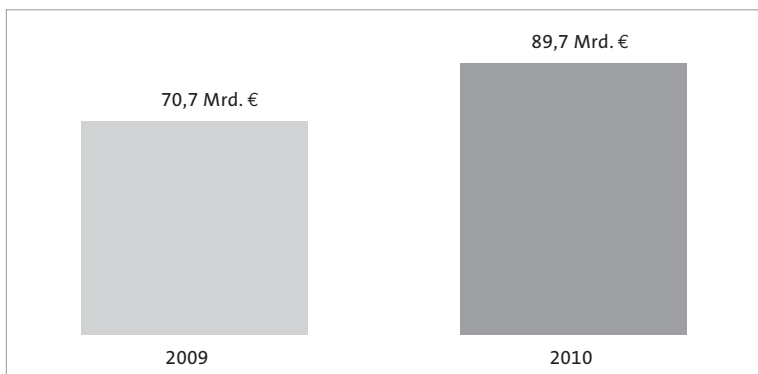**Beschaffungsvolumen Marken/Gesellschaften\***

|                            |                  |              |
|----------------------------|------------------|--------------|
| Volkswagen AG              | 20.693,61        | 23,1 %       |
| Audi                       | 13.493,86        | 15,0 %       |
| Volkswagen Shanghai        | 10.634,87        | 11,9 %       |
| FAW Volkswagen             | 8.586,52         | 9,6 %        |
| Volkswagen do Brasil       | 5.595,36         | 6,2 %        |
| Škoda Auto                 | 5.074,55         | 5,7 %        |
| Scania                     | 4.140,17         | 4,6 %        |
| Volkswagen de México       | 3.794,69         | 4,2 %        |
| Audi Hungaria Motor        | 3.277,33         | 3,7 %        |
| SEAT                       | 2.893,98         | 3,2 %        |
| Volkswagen Slovakia        | 2.773,90         | 3,1 %        |
| Volkswagen Sachsen         | 2.372,07         | 2,6 %        |
| Volkswagen Argentina       | 1.304,17         | 1,5 %        |
| Volkswagen Autoeuropa      | 1.248,97         | 1,4 %        |
| Audi Brüssel               | 754,62           | 0,8 %        |
| Volkswagen of South Africa | 701,74           | 0,8 %        |
| Volkswagen USA             | 675,48           | 0,8 %        |
| Volkswagen Motor Polska    | 658,88           | 0,7 %        |
| Bentley                    | 329,51           | 0,4 %        |
| Volkswagen Group RUS       | 272,72           | 0,3 %        |
| Lamborghini                | 214,29           | 0,2 %        |
| Volkswagen India           | 179,01           | 0,2 %        |
| <b>Gesamt</b>              | <b>89.670,30</b> | <b>100 %</b> |

**VOLKSWAGEN**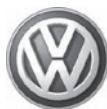

**Firmensitz:** Wolfsburg, Deutschland

**Beteiligungsverhältnis:** 100 %

---

**Vorstand der Marke Volkswagen:**

**Prof. Dr. rer. nat. Martin Winterkorn**

Vorsitzender

**Dr. rer. pol. Arno Antlitz**

Controlling und Rechnungswesen

**Dr. rer. pol. h.c. Francisco Javier Garcia Sanz**

Beschaffung

**Dr.-Ing. Ulrich Hackenberg**

Technische Entwicklung

**Christian Klingler**

Vertrieb und Marketing

**Prof. Dr. Ing. Werner Neubauer**

Komponente

**Prof. Dr. rer. pol. Horst Neumann**

Personal und Organisation

**Hubert Walzl**

Produktion, Logistik

---

**Adresse:**

Volkswagen Aktiengesellschaft

38436 Wolfsburg

Deutschland

**Internet:** [www.volkswagen.com](http://www.volkswagen.com)

**AUDI AG**

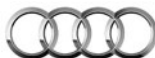

**Firmensitz:** Ingolstadt, Deutschland

**Beteiligungsverhältnis:** 99,55 %

---

**Vorstand der Marke Audi:**

**Rupert Stadler**

Vorsitzender

**Ulf Berkenhagen**

Beschaffung

**Michael Dick**

Technische Entwicklung

**Frank Dreves**

Produktion

**Peter Schwarzenbauer**

Marketing und Vertrieb

**Thomas Sigi**

Personal- und Sozialwesen

**Axel Strotbek**

Finanz und Organisation

---

**Adresse:**

AUDI AG

85045 Ingolstadt

Deutschland

**Internet:** [www.audi.de](http://www.audi.de)

**SEAT, S.A.**

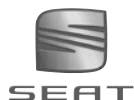

**Firmensitz:** Martorell, Spanien

**Beteiligungsverhältnis:** 100 %

---

**Vorstand der Marke SEAT:**

**James Muir**

Präsident

**Dr. Ing. Matthias Rabe**

Forschung und Entwicklung

**Holger Kintscher**

Finanz und Organisation

**James Muir**

Vertrieb und Marketing

**Ramón Paredes**

Regierungsbeziehungen

**Josef Schelchshorn**

Personal

**Dieter Seemann**

Beschaffung

**Wolfram Thomas**

Produktion

---

**Adresse:**

SEAT, S.A.

Autovía A-2, Km. 585

08760 Martorell

Spanien

**Internet:** [www.seat.com](http://www.seat.com)

**ŠKODA AUTO a.s.**

**ŠKODA**

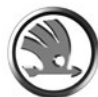

**Firmensitz:** Mladá Boleslav, Tschechische Republik

**Beteiligungsverhältnis:** 100 %

---

**Vorstand der Marke Škoda:**

**Prof. Dr. h.c. Winfried Vahland**

Vorsitzender

**Karlheinz Hell**

Beschaffung

**Winfried Krause**

Kaufmännischer Bereich

**Michael Oeljeklaus**

Produktion und Logistik

**Dr. Ing. Eckhard Scholz**

Technische Entwicklung

**Jürgen Stackmann**

Vertrieb und Marketing

**Bohdan Wojnar**

Personal

---

**Adresse:**

ŠKODA AUTO a.s.

Václava Klementa 869

293 60 Mladá Boleslav

Tschechische Republik

**Internet:** [www.skoda-auto.com](http://www.skoda-auto.com)



**VOLKSWAGEN NUTZFAHRZEUGE**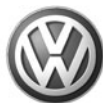**Nutzfahrzeuge****Firmensitz:** Hannover, Deutschland**Beteiligungsverhältnis:** 100 %

---

**Vorstand der Marke Volkswagen Nutzfahrzeuge:****Dr.-Ing. Wolfgang Schreiber**

Sprecher des Markenvorstands

Entwicklung

**Dirk Große-Loheide**

Beschaffung und Logistik

**Harald Schomburg**

Vertrieb und Marketing

**Klaus-Dieter Schürmann**

Finanz und Integrationstechnologie

**Jochen Schumm**

Personal

---

**Adresse:**

Volkswagen Nutzfahrzeuge

Postfach 21 05 80

30405 Hannover

Deutschland

**Internet:** [www.vwn.de](http://www.vwn.de)

**BENTLEY MOTORS LIMITED**

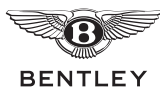

**Firmensitz:** Crewe, Großbritannien

**Beteiligungsverhältnis:** 100 %

---

**Vorstand der Marke Bentley:**

**Wolfgang Dürheimer**

Vorsitzender

**Doug Dickson**

Sonderprojekte

**Dr.-Ing. Ulrich Eichhorn**

Technische Entwicklung

**Christine Gaskell**

Personal

**Jan-Henrik Lafrentz**

Finanz und Informationssysteme

**Alasdair Stewart**

Vertrieb und Marketing

**Michael Straughan**

Produktion

---

**Adresse:**

Bentley Motors Limited

Pyms Lane

Crewe

Cheshire, CW1 3PL

Großbritannien

**Internet:** [www.bentleymotors.com](http://www.bentleymotors.com)

**BUGATTI**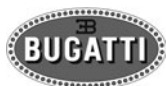**Bugatti Automobiles S.A.S.:**

**Firmensitz:** Molsheim, France

**Beteiligungsverhältnis:** 100 %

**Wolfgang Dürheimer**

Präsident

**Dr. rer. pol. Stefan Brungs**, Marketing, Sales und After Sales

**Hans-Georg Melching**, Finanzen und Human Resources

**Fred Schulemann**, Produktion

Geschäftsführer

---

**Bugatti International S.A.** (Firmensitz Luxemburg)**Wolfgang Dürheimer**

Präsident

**Bugatti Engineering GmbH** (Firmensitz Wolfsburg)**Dirk Isgen****Hans-Georg Melching**

Geschäftsführer

---

**Adresse:**

Bugatti Automobiles S.A.S.

1, Château St. Jean

67120 Molsheim

Frankreich

Bugatti Engineering GmbH

Nordsteimker Str. 7-9

38446 Wolfsburg

Deutschland

**Internet:** [www.bugatti.com](http://www.bugatti.com)

## **AUTOMOBILI LAMBORGHINI S.p.A.**

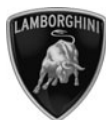

**Firmensitz:** Sant' Agata Bolognese, Italien

**Beteiligungsverhältnis:** 100 %

---

### **Verwaltungsrat der Marke Lamborghini:**

#### **Stephan Winkelmann**

Präsident Verwaltungsrat Automobili Lamborghini S.p.A.,  
Sant' Agata Bolognese, Italien

#### **Ranieri Niccoli**

Mitglied des Verwaltungsrats

#### **Maurizio Reggiani**

Mitglied des Verwaltungsrats

---

### **Adresse:**

Automobili Lamborghini S.p.A.  
via Modena, 12  
40019 Sant' Agata Bolognese  
Italien

**Internet:** [www.lamborghini.com](http://www.lamborghini.com)

**SCANIA**

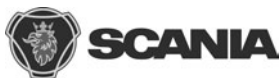

**Firmensitz:** Södertälje, Schweden

**Beteiligungsverhältnis:** 49,29 %

---

**Vorstand der Marke Scania:**

**Leif Östling**

Präsident und Vorsitzender

**Per Hallberg**

Forschung und Entwicklung,  
Beschaffung

**Christian Levin**

Vertrieb und Service

**Martin Lundstedt**

Franchise und Werksvertrieb

**Anders Nielsen**

Produktion und Logistik

**Jan Ytterberg**

Chief Financial Officer  
Finanzen und Controlling

---

**Adresse:**

Scania

SE-151 87 Södertälje

Schweden

**Internet:** [www.scania.com](http://www.scania.com)

## **VOLKSWAGEN FINANCIAL SERVICES**

AKTIENGESELLSCHAFT

**Firmensitz:** Braunschweig, Deutschland

**Beteiligungsverhältnis:** 100 %

---

### **Vorstand Volkswagen Financial Services AG:**

**Frank Witter**

Vorsitzender des Vorstands

**Frank Fiedler**

Finanzen

**Christiane Hesse**

Personal und Organisation

**Dr. rer. pol. Michael Reinhart**

Risikomanagement

**Lars-Henner Santelmann**

Vertrieb und Marketing

---

### **Adresse:**

Volkswagen Financial Services AG

Gifhorner Straße 57

38112 Braunschweig

Deutschland

**Internet:** [www.vwfs.de](http://www.vwfs.de)



Aus dem Traum der Automobilität für viele wurde durch die Konstruktion von Ferdinand Porsche ein „Volkswagen“. Auf der Basis dieses Produkts entstand ein Unternehmen, das nach dem Zweiten Weltkrieg rasch zu internationaler Bedeutung heranwuchs.

Der Motor des „Wirtschaftswunders“ war luftgekühlt und lag im Heck des Wagens, dessen einprägsame Silhouette Volkswagen in aller Welt ebenso bekannt machte wie der 1950 eingeführte Transporter zum allseits beliebten Lastesel und Fernreisemobil wurde.

Um den Kunden näher sein zu können, entstanden bereits in den 1950er Jahren etliche Fabrikationsstätten außerhalb Europas.

Durch die Übernahme der „Auto Union GmbH“ und der „NSU Motorenwerke AG“ in den 1960er Jahren zum deutschen Automobilkonzern herangewachsen, machten der dynamische Markterfolg von Passat, Golf und Polo

nach 1973 das weitere Unternehmenswachstum zur Multi-Brand-Group möglich: 1985 und 1991 kamen SEAT und Škoda, 1998 Bentley, Lamborghini und Bugatti.

Die Marke „Volkswagen Nutzfahrzeuge“ sowie die 2008 übernommene Marke „Scania“ mit Fabriken in Europa, Afrika und Südamerika bieten für die unterschiedlichsten Mobilitätswünsche eine differenzierte Produktpalette vom Stadtlieferwagen bis zum Lastkraftwagen und Bus.

Zum automobilen Erfolg des Volkswagen Konzerns tragen auch die Finanzdienstleistungen unter dem Dach der Volkswagen Financial Services AG bei, deren Wurzeln bis in das Jahr 1949 zurückreichen.

Auf der Basis starker Marken setzt der Volkswagen Konzern mit faszinierenden Produkten seinen automobilen Erfolgsweg fort. Gestärkt durch ein erneutes Absatzplus auf 7,1 Millionen Fahrzeuge, setzt der Volkswagen Konzern seinen Kurs fort, bis 2018 das ökonomisch und ökologisch weltweit führende Automobilunternehmen zu werden.



1937 — 1945

### **28. Mai 1937**

Die „Gesellschaft zur Vorbereitung des Deutschen Volkswagens mbH“ wird in Berlin gegründet.

### **Anfang 1938**

Der Bau des Volkswagenwerks beginnt östlich von Fallersleben.

### **16. September 1938**

Umbenennung des Unternehmens in „Volkswagenwerk GmbH“.

Anstelle der Serienproduktion von zivilen Fahrzeugen werden zwischen 1939 und 1945 im Volkswagenwerk Rüstungsgüter gefertigt. Das Volkswagenwerk deckt den Arbeitskräftebedarf seiner expandierenden Rüstungsproduktion von Sommer 1940 an vor allem mit ausländischen Zwangsarbeitern. Diese stellen im Spätsommer 1944 fast zwei Drittel der 18.000 Personen umfassenden Belegschaft.

### **11. April 1945**

Der Einmarsch der amerikanischen Truppen beendet die Rüstungsproduktion und die Zwangsarbeit im Volkswagenwerk.

## 1945

| Fahrzeugproduktion  |              |
|---------------------|--------------|
| VOLKSWAGENWERK GMBH |              |
|                     | <b>1.785</b> |

| Belegschaft (im Jahresdurchschnitt) |              |
|-------------------------------------|--------------|
| VOLKSWAGENWERK GMBH                 |              |
| Arbeiter                            | 5.459        |
| Angestellte                         | 574          |
| <b>Gesamt</b>                       | <b>6.033</b> |

| Finanzdaten (in Mio. RM) |             |
|--------------------------|-------------|
| VOLKSWAGENWERK GMBH      |             |
| Umsatz                   | <b>11,7</b> |

## 1945 — 1949

**Juni 1945**

Die Treuhänderschaft für das von den Alliierten beschlagnahmte Unternehmen geht auf die britische Militärregierung über.

**Dezember 1945**

Die Serienproduktion des Volkswagen Typ 1 beginnt mit der Montage von 55 Limousinen.

**Oktober 1947**

Mit der Überführung von fünf Limousinen in die Niederlande beginnt der Export.

**1. Januar 1948**

Heinrich Nordhoff wird Generaldirektor des Volkswagenwerks.

**29. Juli 1948**

Der Unternehmenssitz wird durch Eintragung ins Handelsregister von Berlin nach Wolfsburg verlegt.

**30. Juni 1949**

Die „Volkswagen-Finanzierungs-Gesellschaft mbH“ wird ins Leben gerufen, um durch Darlehensgewährung an inländische Endabnehmer und Händler den Verkauf von Volkswagen zu unterstützen.

**8. Oktober 1949**

Die britische Militärregierung überträgt der Bundesregierung die Treuhänderschaft über das Volkswagenwerk. Die Verwaltung übernimmt das Land Niedersachsen.

## 1950 — 1954

**8. März 1950**

In Wolfsburg beginnt die Serienproduktion des Volkswagen Transporters.

**11. September 1952**

Mit der Gründung der „Volkswagen Canada Ltd.“ in Toronto beginnt die Internationalisierung des Volkswagen Vertriebsnetzes.

**23. März 1953**

In São Paulo entsteht mit der „Volkswagen do Brasil Ltda.“ die erste Volkswagen Produktionsgesellschaft im Ausland. 1957 geht die Volkswagen do Brasil von der Montage zur lokalen Fertigung des Transporters über, 1959 läuft der erste Käfer aus brasilianischer Produktion vom Band.

**Oktober 1953**

Die Volkswagenwerk GmbH verfügt über 82 Generalvertretungen im Ausland. Der Exportanteil liegt bei 44 Prozent der Fahrzeugproduktion. Volkswagen vereint mit 68.754 Fahrzeugen, die 1953 im Ausland abgesetzt werden, mehr als 40 Prozent aller bundesdeutschen Pkw-Exporte auf sich.

**1. Januar 1954**

Die deutsche Händler-Organisation umfasst 66 Großhändler, 239 Händler und 531 Vertragswerkstätten.

## 1950

**Fahrzeugproduktion**

VOLKSWAGENWERK GMBH

**90.038****Belegschaft** (im Jahresdurchschnitt)

VOLKSWAGENWERK GMBH

Arbeiter 13.322

Angestellte 1.644

**Gesamt 14.966****Finanzdaten (in Mio. DM)**

VOLKSWAGENWERK GMBH

Umsatz 411

Gewinn 3,8

## 1955

| Fahrzeugproduktion  |                |
|---------------------|----------------|
| VOLKSWAGENWERK GMBH |                |
|                     | <b>329.893</b> |

| Fahrzeugabsatz      |                |
|---------------------|----------------|
| VOLKSWAGENWERK GMBH |                |
| Inland              | 150.397        |
| Ausland             | 177.657        |
| <b>Gesamt</b>       | <b>328.054</b> |

| Belegschaft (im Jahresdurchschnitt) |               |
|-------------------------------------|---------------|
| VOLKSWAGENWERK GMBH                 |               |
| Arbeiter                            | 28.606        |
| Angestellte                         | 2.964         |
| <b>Gesamt</b>                       | <b>31.570</b> |

| Finanzdaten (in Mio. DM) |              |
|--------------------------|--------------|
| VOLKSWAGEN KONZERN       |              |
| <b>Umsatz</b>            | <b>1.444</b> |

## 1955 — 1959

**5. August 1955**

Die Werksangehörigen und Händler aus dem In- und Ausland feiern in Wolfsburg den einmillionsten Volkswagen.

**August 1955**

Das Karmann Ghia Coupé geht in Produktion.

**27. Oktober 1955**

Gründung der „Volkswagen of America Inc.“ mit Sitz in Newark, New Jersey.

**8. März 1956**

Nach einjähriger Bauzeit nimmt das neue Werk in Hannover-Stöcken die Fertigung des Transporters auf.

**8. Juni 1956**

Die Volkswagenwerk GmbH erwirbt Aktienanteile des bisherigen Generalimporteurs „South African Motor Assemblers and Distributors Ltd. (SAMAD)“.

**Juli 1958**

Das Volkswagenwerk verlegt die Aggregate-Aufbereitung von Wolfsburg nach Altenbauna bei Kassel. Die Belegschaft steigt im neuen Werk Kassel bis 1959 auf 1.124 Mitarbeiter, die täglich 430 Motoren und 130 Achsen aufbereiten.

## 1960 — 1964

**11. März 1960**

Gründung der „Volkswagen France S.A.“ in Paris.

**22. August 1960**

Auf Grundlage des „VW-Gesetzes“ wird die Volkswagenwerk GmbH in eine Aktiengesellschaft überführt. Bis zum 15. März 1961 gibt das Unternehmen Aktien im Nennwert von 360 Millionen DM zu einem Kurs von 350 DM pro Aktie aus.

**September 1961**

Auf der Internationalen Automobilausstellung in Frankfurt präsentiert Volkswagen den VW 1500.

**2. Oktober 1962**

Im Werk Hannover läuft der einmillionste Transporter vom Band.

**17. Januar 1964**

Gründung der „Volkswagen de México, S.A. de C.V.“ in Mexiko City.

**8. Dezember 1964**

Im Volkswagenwerk Emden läuft die Käfer-Produktion an. Täglich werden 500 Fahrzeuge hergestellt, die über die werkeigene Verschiffungsanlage verladen und vor allem nach Nordamerika exportiert werden.

## 1960

**Fahrzeugproduktion**

VOLKSWAGEN KONZERN

**890.673****Fahrzeugabsatz**

VOLKSWAGEN KONZERN

Inland 374.478

Ausland 514.029

**Gesamt 888.507****Belegschaft** (im Jahresdurchschnitt)

VOLKSWAGEN KONZERN

**Gesamt 75.528****Finanzdaten (in Mio. DM)**

VOLKSWAGEN KONZERN

**Umsatz 4.607**

## 1965

| <b>Fahrzeugproduktion</b> |                  |
|---------------------------|------------------|
| VOLKSWAGEN KONZERN        |                  |
|                           | <b>1.594.861</b> |

| <b>Fahrzeugabsatz</b> |                  |
|-----------------------|------------------|
| VOLKSWAGEN KONZERN    |                  |
| Inland                | 632.671          |
| Ausland               | 963.693          |
| <b>Gesamt</b>         | <b>1.596.364</b> |

| <b>Belegschaft</b> (im Jahresdurchschnitt)      |                |
|-------------------------------------------------|----------------|
| VOLKSWAGEN KONZERN                              |                |
| Beschäftigte in den Auslands-<br>gesellschaften | 18.625         |
| <b>Gesamt</b>                                   | <b>125.157</b> |

| <b>Finanzdaten (in Mio. DM)</b> |       |
|---------------------------------|-------|
| VOLKSWAGEN KONZERN              |       |
| Umsatz                          | 9.268 |
| Investitionen                   | 702   |

## 1965 — 1969

**1. Januar 1965**

Die Volkswagenwerk AG erwirbt die „Auto-Union GmbH“ mit Sitz in Ingolstadt, die als selbstständige Marke die Modellpalette des entstehenden Konzerns ergänzt.

**Oktober 1966**

Gründung der „Volkswagen Leasing GmbH“.

**August 1967**

Im Werk Hannover beginnt die Serienproduktion der zweiten Transporter-Generation.

**1. Mai 1968**

Kurt Lotz übernimmt den Vorsitz im Vorstand.

**19. September 1968**

Eröffnung des Testgeländes in Ehra-Lessien, das im Endausbau über 100 Kilometer Versuchsstrecken verfügt.

**November 1968**

Mit der Präsentation des Audi 100 stößt der Volkswagen Konzern in das Segment der gehobenen Mittelklasse vor.

**21. August 1969**

Die „Auto Union GmbH“ wird mit der „NSU Motorenwerke AG“ zur „Audi NSU Auto Union AG“ verschmolzen, an der die Volkswagenwerk AG anfänglich 59,5 Prozent der Anteile hält.

**November 1969**

Der VW Porsche 914 geht in Serie.

## 1970 — 1974

**Juli 1970**

Im neuen Werk Salzgitter läuft der K 70 vom Band.

**1. Oktober 1971**

Rudolf Leiding tritt im Vorstand den Vorsitz an.

**Mai 1973**

Der Passat geht als erstes Modell der neuen Volkswagen Generation in Produktion – mit Frontantrieb, wassergekühltem 4-Zylinder-Motor und Ganzstahl-Karosserie.

**Februar 1974**

Der sportliche Volkswagen Scirocco geht in Serie.

**29. März 1974**

In Wolfsburg beginnt die Serienfertigung des Golf.

**1. Juli 1974**

Um 11.19 Uhr läuft nach fast 12 Millionen gebauten Fahrzeugen im Werk Wolfsburg der letzte Käfer vom Band.

## 1970

**Fahrzeugproduktion**

## VOLKSWAGEN KONZERN

2.214.937

**Fahrzeugabsatz**

## VOLKSWAGEN KONZERN

Inland 725.055

Ausland 1.481.866

**Gesamt 2.206.921****Belegschaft** (im Jahresdurchschnitt)

## VOLKSWAGEN KONZERN

Beschäftigte in den Auslands-  
gesellschaften 35.421**Gesamt 190.306****Finanzdaten (in Mio. DM)**

## VOLKSWAGEN KONZERN

Umsatz 15.791

Investitionen 1.536

Gewinn 407

## 1975

| <b>Fahrzeugproduktion</b> |                  |
|---------------------------|------------------|
| VOLKSWAGEN KONZERN        |                  |
|                           | <b>1.948.939</b> |

| <b>Fahrzeugabsatz</b> |                  |
|-----------------------|------------------|
| VOLKSWAGEN KONZERN    |                  |
| Inland                | 625.555          |
| Ausland               | 1.412.302        |
| <b>Gesamt</b>         | <b>2.037.857</b> |

| <b>Belegschaft</b> (im Jahresdurchschnitt)      |                |
|-------------------------------------------------|----------------|
| VOLKSWAGEN KONZERN                              |                |
| Beschäftigte in den Auslands-<br>gesellschaften | 59.157         |
| <b>Gesamt</b>                                   | <b>176.824</b> |

| <b>Finanzdaten (in Mio. DM)</b> |        |
|---------------------------------|--------|
| VOLKSWAGEN KONZERN              |        |
| Umsatz                          | 18.857 |
| Investitionen                   | 941    |
| Verlust                         | -157   |

## 1975 — 1979

**10. Februar 1975**

Toni Schmücker wird Vorsitzender des Vorstands.

**März 1975**

In Wolfsburg beginnt die Serienfertigung des Polo, der im Segment der Kleinwagen als preiswerte Variante zum baugleichen Audi 50 positioniert wird.

**27. Oktober 1976**

Der einmillionste Golf rollt vom Band.

**Januar 1977**

Als Polovariante mit Stufenheck geht der Derby in Produktion.

**November 1977**

Vertrag mit der DDR über die Lieferung von 10.000 Golf.

**19. Januar 1978**

Im Werk Emden läuft der letzte in Deutschland gefertigte Käfer vom Band.

**Mai 1978**

Gründung der „V.A.G Transportgesellschaft mbH“ in Wolfsburg.

**Februar 1979**

Beginn der Serienfertigung des Golf Cabriolet bei Karmann in Osnabrück.



## 1980 — 1984

**März 1980**

Auf dem Genfer Automobilsalon sorgt der allradgetriebene Audi quattro für Aufsehen.

**8. Mai 1980**

Auf dem Energie-Symposium in Wolfsburg präsentiert Volkswagen die Formel E.

**Dezember 1980**

Gründung der „VW Kraftwerk GmbH“ in Wolfsburg.

**August 1981**

Der Santana geht in Produktion. In Wolfsburg beginnt die Produktion der zweiten Polo-Generation.

**1. Januar 1982**

Carl H. Hahn tritt den Vorstandsvorsitz an.

**30. September 1982**

Lizenzvertrag mit der „Soci dad Espa ola de Autom viles de Turismo“ (SEAT) zur Fertigung der Volkswagen Modelle Passat, Santana und Polo.

**November 1982**

Der Stadtlieferwagen Volkswagen Caddy geht in Serie.

**Juni 1983**

Beginn der Produktion der zweiten Generation des Golf.

**3. Februar 1984**

Einweihung des neuen Forschungszentrums im Werk Wolfsburg.

**Dezember 1984**

Volkswagen  bernimmt die Aktienmehrheit des italienischen Generalimporteurs „Autogerma S.p.A.“.

## 1980

**Fahrzeugproduktion**

## VOLKSWAGEN KONZERN

**2.573.871****Fahrzeugabsatz**

## VOLKSWAGEN KONZERN

Inland 787.591

Ausland 1.707.156

**Gesamt 2.494.747****Belegschaft** (im Jahresdurchschnitt)

## VOLKSWAGEN KONZERN

Besch ftigte in den Auslands-  
gesellschaften 99.060**Gesamt 257.930****Finanzdaten (in Mio. DM)**

## VOLKSWAGEN KONZERN

Umsatz 33.288

Investitionen 4.279

Gewinn 321

## 1985

| <b>Fahrzeugproduktion</b> |                  |
|---------------------------|------------------|
| VOLKSWAGEN KONZERN        |                  |
|                           | <b>2.398.196</b> |

| <b>Fahrzeugabsatz</b> |                  |
|-----------------------|------------------|
| VOLKSWAGEN KONZERN    |                  |
| Inland                | 721.812          |
| Ausland               | 1.676.192        |
| <b>Gesamt</b>         | <b>2.398.004</b> |

| <b>Belegschaft</b> (im Jahresdurchschnitt)      |                |
|-------------------------------------------------|----------------|
| VOLKSWAGEN KONZERN                              |                |
| Beschäftigte in den Auslands-<br>gesellschaften | 88.703         |
| <b>Gesamt</b>                                   | <b>259.047</b> |

| <b>Finanzdaten (in Mio. DM)</b> |        |
|---------------------------------|--------|
| VOLKSWAGEN KONZERN              |        |
| Umsatz                          | 52.502 |
| Investitionen                   | 3.388  |
| Gewinn                          | 596    |

## 1985 — 1989

**1. Januar 1985**

Die „Audi NSU Auto Union AG“ wird in „AUDI AG“ umbenannt. Der Firmensitz wechselt von Neckarsulm nach Ingolstadt.

**20. April 1985**

Gründung der „Shanghai-Volkswagen Automotive Company Ltd.“ Die Volkswagenwerk AG hält 50 Prozent der Anteile an dem deutsch-chinesischen Joint-Venture.

**4. Juli 1985**

Umbenennung des Unternehmens in „Volkswagen AG“.

**1. September 1985**

Beginn der Serienfertigung des Santana in China.

**18. Juni 1986**

Die Volkswagen AG übernimmt 51 Prozent des Aktienkapitals von SEAT und erhöht ihre Beteiligung bis Ende des Jahres auf 75 Prozent.

**Januar 1988**

Das Sportcoupé Corrado geht in Serienproduktion.

**24. August 1988**

Lizenzvertrag mit „First Automobile Works“ in Changchun zur Fertigung des Audi 100 in China.

**Herbst 1989**

Markteinführung des Audi 100 TDI, des ersten Konzernfahrzeugs mit Turbodiesel-Direkteinspritzer.

## 1990 — 1994

**6. Februar 1991**

Gründung der „FAW-Volkswagen Automotive Company Ltd.“ in Changchun.

**16. April 1991**

Die Volkswagen AG übernimmt die „ŠKODA, automobilová a.s.“, die als vierte Marke in den Volkswagen Konzern eingegliedert wird. Das tschechische Traditionsunternehmen mit gutem Namen hat bereits 1905 die ersten Automobile auf den Markt gebracht.

**24. Juni 1991**

Zur Produktion einer Großraumlimousine wird im portugiesischen Setúbal die „AutoEuropa Automóveis Lda.“ gegründet.

**1. Januar 1993**

Ferdinand Piëch übernimmt den Vorstandsvorsitz.

**18. Februar 1993**

Gründung der „AUDI HUNGARIA MOTOR Kft.“ mit Sitz im ungarischen Győr zur Produktion von Motoren.

**1. Januar 1994**

Die drei Jahre zuvor gegründete „Volkswagen Finanz GmbH“ firmiert fortan als „Volkswagen Financial Services AG“.

**März 1994**

Audi präsentiert mit dem A8 seine neue, sportliche Oberklasselimousine, die durch konsequenten Leichtbau brilliert.

## 1990

**Fahrzeugproduktion**

## VOLKSWAGEN KONZERN

**3.057.598****Fahrzeugabsatz**

## VOLKSWAGEN KONZERN

Inland 945.384

Ausland 2.084.795

**Gesamt 3.030.179****Belegschaft** (im Jahresdurchschnitt)

## VOLKSWAGEN KONZERN

Beschäftigte in den Auslands-  
gesellschaften 95.934**Gesamt 268.744****Finanzdaten (in Mio. DM)**

## VOLKSWAGEN KONZERN

Umsatz 68.061

Investitionen 5.372

Gewinn 1.086

## 1995

| Fahrzeugproduktion |           |
|--------------------|-----------|
| VOLKSWAGEN KONZERN |           |
|                    | 3.408.422 |

| Fahrzeugabsatz     |                  |
|--------------------|------------------|
| VOLKSWAGEN KONZERN |                  |
| Inland             | 937.323          |
| Ausland            | 2.504.623        |
| <b>Gesamt</b>      | <b>3.441.946</b> |

| Belegschaft (im Jahresdurchschnitt)             |                |
|-------------------------------------------------|----------------|
| VOLKSWAGEN KONZERN                              |                |
| Beschäftigte in den Auslands-<br>gesellschaften | 117.147        |
| <b>Gesamt</b>                                   | <b>259.342</b> |

| Finanzdaten (in Mio. DM) |        |
|--------------------------|--------|
| VOLKSWAGEN KONZERN       |        |
| Umsatz                   | 88.119 |
| Investitionen            | 6.863  |
| Gewinn                   | 336    |

## 1995 — 1999

**4. Juli 1995**

Einführung der Marke „Volkswagen Nutzfahrzeuge“.

**17. November 1995**

In Pacheco bei Buenos Aires nimmt die Volkswagen Argentina S.A. ihr neues Automobilwerk in Betrieb.

**August 1997**

Im Werk Wolfsburg läuft die Produktion der vierten Golf-Generation an.

**Dezember 1997**

Die „Volkswagen de México“ nimmt die Produktion des New Beetle auf.

**Juli 1998**

Übernahme der „Bugatti International S.A. Holding“ und der „Bentley Motor Cars Ltd.“, deren automobile Tradition bis in das Jahr 1919 zurückreicht.

**September 1998**

Die „Audi AG“ übernimmt den italienischen Sportwagenhersteller „Lamborghini S.p.A.“.

**Juli 1999**

Mit dem Lupo 3L TDI, dem ersten in Serie gebauten 3-Liter-Auto, schreibt Volkswagen Automobilgeschichte.

**23. Dezember 1999**

Gründung der Montagegesellschaft „ŠKODA Auto India Private Ltd.“ in Aurangabad.

## 2000 — 2004

**1. Juni 2000**

Eröffnung der AutoStadt in Wolfsburg.

**11. Dezember 2001**

Eröffnung der „Gläsernen Manufaktur“ in Dresden und Produktionsanlauf des Phaeton.

**16. April 2002**

Bernd Pieschetsrieder übernimmt den Vorstandsvorsitz bei der Volkswagen AG.

**August 2002**

Bei der Volkswagen Slovakia, a.s. in Bratislava läuft die Serienfertigung des Touareg an.

**Dezember 2002**

In Wolfsburg beginnt die Fertigung des Touran. Der variable und wertige Kompakt-Van überfährt bereits nach sechs Jahren die Millionen-Grenze.

**August 2003**

Die Produktion der fünften Generation des Golf beginnt.

## 2000

**Fahrzeugproduktion**

## VOLKSWAGEN KONZERN

|           |              |
|-----------|--------------|
| (in Tsd.) | <b>5.156</b> |
|-----------|--------------|

**Fahrzeugabsatz**

## VOLKSWAGEN KONZERN

|                  |       |
|------------------|-------|
| Inland (in Tsd.) | 1.019 |
|------------------|-------|

|                   |       |
|-------------------|-------|
| Ausland (in Tsd.) | 4.146 |
|-------------------|-------|

|                         |              |
|-------------------------|--------------|
| <b>Gesamt (in Tsd.)</b> | <b>5.165</b> |
|-------------------------|--------------|

**Belegschaft** (im Jahresdurchschnitt)

## VOLKSWAGEN KONZERN

|                                                           |       |
|-----------------------------------------------------------|-------|
| Beschäftigte in den Auslands-<br>gesellschaften (in Tsd.) | 160,3 |
|-----------------------------------------------------------|-------|

|                         |              |
|-------------------------|--------------|
| <b>Gesamt (in Tsd.)</b> | <b>324,4</b> |
|-------------------------|--------------|

**Finanzdaten (in Mio. €)**

## VOLKSWAGEN KONZERN

|        |        |
|--------|--------|
| Umsatz | 81.835 |
|--------|--------|

|               |        |
|---------------|--------|
| Investitionen | 14.563 |
|---------------|--------|

|        |       |
|--------|-------|
| Gewinn | 2.614 |
|--------|-------|

## 2005

**Fahrzeugproduktion**

## VOLKSWAGEN KONZERN

(in Tsd.) **5.219****Fahrzeugabsatz**

## VOLKSWAGEN KONZERN

Inland (in Tsd.) 1.019

Ausland (in Tsd.) 4.174

**Gesamt (in Tsd.) 5.193****Belegschaft** (im Jahresdurchschnitt)

## VOLKSWAGEN KONZERN

Beschäftigte in den Auslands-  
gesellschaften (in Tsd.) 166**Gesamt (in Tsd.) 345****Finanzdaten (in Mio. €)**

## VOLKSWAGEN KONZERN

Umsatz 93.996

Investitionen 10.365

Gewinn 1.050

## 2005

**11. März 2005**

Die sechste Generation der Passat Limousine kommt auf den Markt; das Erfolgsmodell Passat Variant folgt am 19. August 2005.

**24. Mai 2005**

Im Werk Wolfsburg läuft der 100-millionste Volkswagen, ein Touran, vom Band.

**15. September 2005**

Der Bugatti Veyron kommt auf die Straße. Das technische Wunder aus der 1001-PS-Welt im elsässischen Molsheim, übersetzt die ingenieösen Meisterleistungen des automobilen Visionärs Ettore Bugatti für die automobilbegeisterte Gegenwart.

**21. September 2005**

Im brasilianischen Resende wird die neue „Constellation“-Lkw-Familie von Volkswagen Nutzfahrzeuge gefertigt. Die Sieben- bis 40-Tonner erzielen in Brasilien einen Marktanteil von 33 Prozent.

## 2006

**3. März 2006**

Start der Serienproduktion des für sein cleveres Raumkonzept gelobten Roomster im Škoda-Werk in Kvasiny.

**10. März 2006**

Markteinführung des Audi Q7, des luxuriösen SUV dritter Generation, der bis Jahresende schon 52.750 Abnehmer fand.

**19. Mai 2006**

Der Volkswagen Eos, das neue Cabrio-Coupé, wird im deutschen Markt eingeführt.

**3. Oktober 2006**

Volkswagen erwirbt eine Beteiligung von anfänglich 15,06 Prozent an der MAN Aktiengesellschaft.

**1. November 2006**

Der zwischen der Volkswagen AG und der IG Metall vereinbarte Tarifabschluss, der einen Arbeitszeitkorridor mit einer Obergrenze von 34 Stunden festlegt, tritt in Kraft. Zugleich werden zur besseren Auslastung und zur Arbeitsplatzsicherung für jeden Standort Fertigungsumfänge festgelegt.

**1. Dezember 2006**

Die Volkswagen Financial Services übernimmt die Kundenbetreuung in der Kfz-Haftpflicht-Schadenabwicklung, um die Reparaturqualität durch die Einbindung der Konzern-Vertragswerkstätten zu steigern und kundenfreundliche Bearbeitungsprozesse sicherzustellen.

## 2006

**Fahrzeugproduktion****VOLKSWAGEN KONZERN**

|           |              |
|-----------|--------------|
| (in Tsd.) | <b>5.660</b> |
|-----------|--------------|

**Fahrzeugabsatz****VOLKSWAGEN KONZERN**

|                  |       |
|------------------|-------|
| Inland (in Tsd.) | 1.093 |
|------------------|-------|

|                   |       |
|-------------------|-------|
| Ausland (in Tsd.) | 4.627 |
|-------------------|-------|

|                         |              |
|-------------------------|--------------|
| <b>Gesamt (in Tsd.)</b> | <b>5.720</b> |
|-------------------------|--------------|

**Belegschaft** (im Jahresdurchschnitt)**VOLKSWAGEN KONZERN**

|                                                           |     |
|-----------------------------------------------------------|-----|
| Beschäftigte in den Auslands-<br>gesellschaften (in Tsd.) | 155 |
|-----------------------------------------------------------|-----|

|                         |            |
|-------------------------|------------|
| <b>Gesamt (in Tsd.)</b> | <b>329</b> |
|-------------------------|------------|

**Finanzdaten (in Mio. €)****VOLKSWAGEN KONZERN**

|        |         |
|--------|---------|
| Umsatz | 104.875 |
|--------|---------|

|               |        |
|---------------|--------|
| Investitionen | 11.911 |
|---------------|--------|

|        |       |
|--------|-------|
| Gewinn | 1.955 |
|--------|-------|

## 2007

| <b>Fahrzeugproduktion</b> |              |
|---------------------------|--------------|
| VOLKSWAGEN KONZERN        |              |
| (in Tsd.)                 | <b>6.213</b> |

| <b>Fahrzeugabsatz</b>   |              |
|-------------------------|--------------|
| VOLKSWAGEN KONZERN      |              |
| Inland (in Tsd.)        | 1.030        |
| Ausland (in Tsd.)       | 5.162        |
| <b>Gesamt (in Tsd.)</b> | <b>6.192</b> |

| <b>Belegschaft</b> (im Jahresdurchschnitt)                |            |
|-----------------------------------------------------------|------------|
| VOLKSWAGEN KONZERN                                        |            |
| Beschäftigte in den Auslands-<br>gesellschaften (in Tsd.) | 154        |
| <b>Gesamt (in Tsd.)</b>                                   | <b>329</b> |

| <b>Finanzdaten (in Mio. €)</b> |         |
|--------------------------------|---------|
| VOLKSWAGEN KONZERN             |         |
| Umsatz                         | 108.897 |
| Investitionen                  | 13.497  |
| Gewinn                         | 4.122   |

## 2007

**1. Januar 2007**

Dr. Martin Winterkorn übernimmt den Vorstandsvorsitz der Volkswagen Aktiengesellschaft.

**23. März 2007**

Im Werk Wolfsburg läuft der 25-millionste Golf vom Band, ein Golf Sportline 1,4 l TSI.

**9. Juli 2007**

Die Autostadt in Wolfsburg liefert den einmillionsten Volkswagen aus.

**August 2007**

Start der Serienproduktion des Kompakt-SUV Tiguan in Wolfsburg, der sich durch Variabilität, Wertigkeit und technische Innovationen, darunter das elektro-mechanische Lenkungssystem, auszeichnet.

**5. bis 7. Oktober 2007**

Internationales VW-Bus-Treffen in Hannover zu „60 Jahre Bulli“.

**9. November 2007**

Im Werk Emden läuft der weltweit 15-millionste Passat vom Band.

**5. Dezember 2007**

Volkswagen präsentiert auf der Bologna Motorshow mit drei Versionen der Studie up! erstmals die „New Small Family“.



## 2008

**3. März 2008**

Volkswagen baut seine Kapitalbeteiligung an Scania auf 37,73 Prozent und seinen Stimmrechtsanteil auf 68,60 Prozent aus. Der 1891 gegründete schwedische Nutzfahrzeughersteller wird als neunte Marke in den Konzern integriert.

**18. April 2008**

Die Shanghai Volkswagen eröffnet in Nanjing ihr viertes Automobilwerk mit einer Kapazität von 60.000 Fahrzeugen pro Jahr.

**16. August 2008**

Bugatti präsentiert mit dem Veyron 16.4 Grand Sport einen offenen Supersportwagen.

**September 2008**

Volkswagen stellt die sechste Generation des Golf vor.

**30. Oktober 2008**

Mit der Gründung einer Tochtergesellschaft in China verstärkt Lamborghini sein Engagement bei der Erschließung strategischer Wachstumsmärkte.

**15. Dezember 2008**

Volkswagen veräußert sein brasilianisches Geschäft mit schweren Nutzfahrzeugen an die MAN Aktiengesellschaft.

**16. Dezember 2008**

Škoda eröffnet in Mladá Boleslav ein neues Technologiezentrum und baut damit seine Kompetenz in der PKW-Entwicklung aus.

## 2008

**Fahrzeugproduktion****VOLKSWAGEN KONZERN**

|           |              |
|-----------|--------------|
| (in Tsd.) | <b>6.347</b> |
|-----------|--------------|

**Fahrzeugabsatz****VOLKSWAGEN KONZERN**

|                  |       |
|------------------|-------|
| Inland (in Tsd.) | 1.013 |
|------------------|-------|

|                   |       |
|-------------------|-------|
| Ausland (in Tsd.) | 5.259 |
|-------------------|-------|

|                         |              |
|-------------------------|--------------|
| <b>Gesamt (in Tsd.)</b> | <b>6.272</b> |
|-------------------------|--------------|

**Belegschaft** (im Jahresdurchschnitt)**VOLKSWAGEN KONZERN**

|                                                           |     |
|-----------------------------------------------------------|-----|
| Beschäftigte in den Auslands-<br>gesellschaften (in Tsd.) | 179 |
|-----------------------------------------------------------|-----|

|                         |            |
|-------------------------|------------|
| <b>Gesamt (in Tsd.)</b> | <b>370</b> |
|-------------------------|------------|

**Finanzdaten (in Mio. €)****VOLKSWAGEN KONZERN**

|        |         |
|--------|---------|
| Umsatz | 113.808 |
|--------|---------|

|               |        |
|---------------|--------|
| Investitionen | 19.710 |
|---------------|--------|

|        |       |
|--------|-------|
| Gewinn | 4.688 |
|--------|-------|

## 2009

| <b>Fahrzeugproduktion</b> |              |
|---------------------------|--------------|
| VOLKSWAGEN KONZERN        |              |
| (in Tsd.)                 | <b>6.055</b> |

| <b>Fahrzeugabsatz</b>   |              |
|-------------------------|--------------|
| VOLKSWAGEN KONZERN      |              |
| Inland (in Tsd.)        | 1.288        |
| Ausland (in Tsd.)       | 5.022        |
| <b>Gesamt (in Tsd.)</b> | <b>6.310</b> |

| <b>Belegschaft</b> (im Jahresdurchschnitt)                |            |
|-----------------------------------------------------------|------------|
| VOLKSWAGEN KONZERN                                        |            |
| Beschäftigte in den Auslands-<br>gesellschaften (in Tsd.) | 194        |
| <b>Gesamt (in Tsd.)</b>                                   | <b>367</b> |

| <b>Finanzdaten (in Mio. €)</b> |         |
|--------------------------------|---------|
| VOLKSWAGEN KONZERN             |         |
| Umsatz                         | 105.187 |
| Investitionen                  | 10.428  |
| Gewinn                         | 911     |

## 2009

**18. Januar 2009**

Volkswagen schreibt mit dem Race Touareg Motorsportgeschichte: Markendoppelsieg und erster Sieg eines Dieselfahrzeugs in der Automobilwertung der Rallye Dakar in Argentinien und Chile.

**31. März 2009**

Eröffnung des neuen Werks im indischen Pune mit einer maximalen Jahresproduktionskapazität von bis zu 110.000 Fahrzeugen.

**11. Mai 2009**

Pressepräsentation des neuen Polo: in Qualität, Wertigkeit, Sicherheit und Effizienz eine eigene Klasse. Die Folge sind viele Auszeichnungen, darunter „Car of the Year 2010“.

**23. Mai 2009**

Der VfL Wolfsburg wird erstmalig Deutscher Fußball Meister: Der Erfolg des Markenbotschafters begeistert die Zuschauer weit über die Grenzen Wolfsburgs hinaus.

**15. September 2009**

Extrem windschlüpfzig, ultra leicht und mächtig sicher: Mit der als Vorgeschmack der Serienversion geltenden Studie L 1 zeigt Volkswagen auf der IAA als Update der Zukunft sein 1-Liter-Auto.

**20. Oktober 2009**

Das auf eine Jahresfertigung von bis zu 150.000 Fahrzeugen ausgelegte russische Werk Kaluga, das die Fahrzeugmontage im November 2007 aufgenommen hatte, geht in Anwesenheit des russischen Ministerpräsidenten Putin auf die Vollproduktion mit eigenem Karosseriebau und eigener Lackiererei sowie Montage über.

**29. Oktober 2009**

Verabschiedung verbindlicher Mindeststandards in den Beteiligungsrechten der Arbeitnehmervertretungen auf betrieblicher Ebene durch die zwischen Konzernvorstand, dem Internationalen Metallgewerkschaftsbund und der Arbeitnehmervertretung von Volkswagen geschlossenen „Charta der Arbeitsbeziehungen“.

**7. Dezember 2009**

Übernahme von 49,9 Prozent der Aktienanteile an der Dr.-Ing. h.c. F. Porsche AG als Meilenstein auf dem Weg zum integrierten Automobilkonzern.

**9. Dezember 2009**

Verabredung der gegenseitigen Anteilsverflechtung und einer langfristigen strategischen Partnerschaft mit der Suzuki Motor Corporation.

## 2010

| <b>Fahrzeugproduktion</b> |              |
|---------------------------|--------------|
| VOLKSWAGEN KONZERN        |              |
| (in Tsd.)                 | <b>7.358</b> |

| <b>Fahrzeugabsatz</b>   |              |
|-------------------------|--------------|
| VOLKSWAGEN KONZERN      |              |
| Inland (in Tsd.)        | 1.059        |
| Ausland (in Tsd.)       | 6.219        |
| <b>Gesamt (in Tsd.)</b> | <b>7.278</b> |

| <b>Belegschaft</b> (im Jahresdurchschnitt)                |            |
|-----------------------------------------------------------|------------|
| VOLKSWAGEN KONZERN                                        |            |
| Beschäftigte in den Auslands-<br>gesellschaften (in Tsd.) | 210        |
| <b>Gesamt (in Tsd.)</b>                                   | <b>389</b> |

| <b>Finanzdaten (in Mio. €)</b> |         |
|--------------------------------|---------|
| VOLKSWAGEN KONZERN             |         |
| Umsatz                         | 126.875 |
| Investitionen                  | 9.278   |
| Gewinn                         | 7.226   |

## 2010

**27. Februar 2010**

Start der Image- und Marketing-Kampagne „Think Blue.“, die als Ausdruck verantwortungsvollen Unternehmenshandelns darauf abzielt, effiziente und nachhaltige Mobilität für alle zu ermöglichen.

**2. März 2010**

Mit der Präsentation der Euro-paversion des Amarok auf dem Genfer Automobilsalon betritt Volkswagen das Pickup-Segment. Die im Vormonat in Argentinien vorgestellte Amerika-Version will in den klassischen Pickup-Regionen auch mit vergleichsweise geringen Emissionen punkten.

**14. April 2010**

65 Mio. neue Vorzugsaktien erhöhen das Grundkapital der Volkswagen Aktiengesellschaft um nominal 166,2 Mio. € . Die weltweit größte öffentlich platzierte Kapitalerhöhung im Automobilsektor ergibt einen Nettoemissionserlös von insgesamt rund 4,1 Mrd. €.

**3. Mai 2010**

Die Studie des Golf blue-e-motion, eine rein elektrisch betriebene Version des erfolgreichsten Volkswagen, nimmt an der von Bundeskanzlerin Angela Merkel einberufenen „Nationalen Plattform Elektromobilität“ teil.

**11. Mai 2010**

Bei der Volkswagen Automatic Transmission Co. im chinesischen Dalian beginnt die Produktion von 7-Gang-Doppelkupplungsgetrieben. Zunächst entsteht eine Jahreskapazität von 300.000 Einheiten, die mittelfristig verdoppelt werden kann. Investitionen in einer Größenordnung von rund 6 Milliarden Euro fließen bis 2012 in die chinesischen Produktionsstandorte, etwa die neuen Werke im südchinesischen Foshan und ostchinesischen Yizheng.

**20. Juli 2010**

Die internationale Fahrpräsentation in San Francisco zeigt den neuen, in seinen Dimensionen deutlich gewachsenen Jetta als sportlich-avantgardistische und zugleich verbrauchs-effiziente Limousine – German Engineering at its best.

**9. August 2010**

Der Erwerb eines Anteils von 90,1 Prozent an der Turiner Italdesign Giugiaro S.p.A. durch den Volkswagen Konzern erfolgt, nachdem die Konzernintegration des berühmten Designunternehmens am 25. Mai 2010 angekündigt worden war. Das dortige Entwicklungszentrum, dessen Auftragsbücher prall gefüllt sind, übernimmt zahlreiche Aufgaben bei der anhaltenden Modelloffensive des Volkswagen Konzerns.

**30. September 2010**

Die siebte Passat Generation erlebt ihre Weltpremiere in Paris. Limousine und der Variant unterstreichen mit geraden Linien, klar strukturierten Flächen und dynamischen Proportionen auf markante Weise Qualität und Präzision der mit Oberklasse-Features ausgestatteten Volkswagen Baureihe.

**21. Dezember 2010**

Im Rahmen seiner Wachstumsstrategie 2018 vereinbart Volkswagen in Kuala Lumpur mit DRB Hicom eine lokale Fahrzeugmontage zur Erschließung des malaysischen Automobilmarktes. In Pekan soll ab Ende 2011 der Passat montiert werden; für Ende 2012 ist eine zweite Ausbaustufe geplant, um Volkswagen Jetta und Passat in einer lokalen Vollfertigung zu produzieren.

VOLKSWAGEN ([www.volkswagen.com](http://www.volkswagen.com))

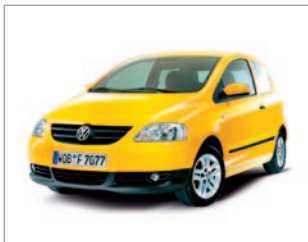

**Fox**

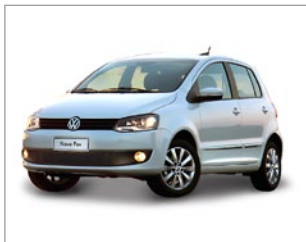

**New Fox (Südamerika)**

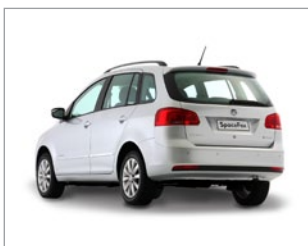

**Spacefox (Südamerika)**

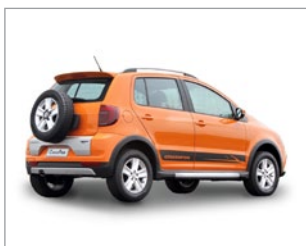

**Crossfox (Südamerika)**

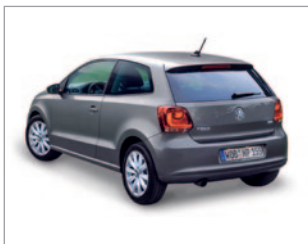

**Polo**

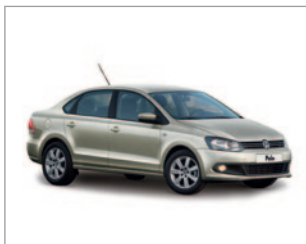

**Polo Sedan (Russland)**

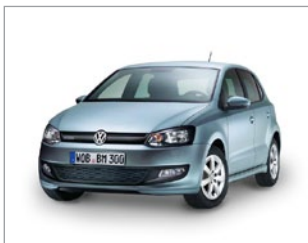

**Polo BlueMotion**

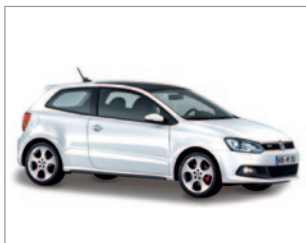

**Polo GTI**

**VOLKSWAGEN** ([www.volkswagen.com](http://www.volkswagen.com))

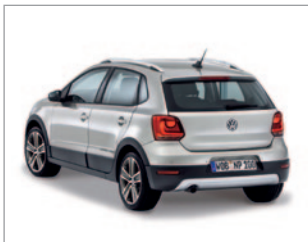

**CrossPolo**

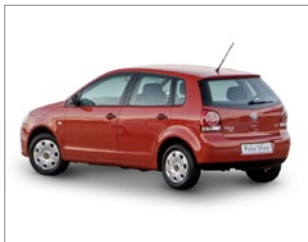

**Polo Vivo (Südafrika)**

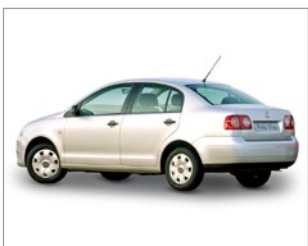

**Polo Vivo Sedan (Südafrika)**

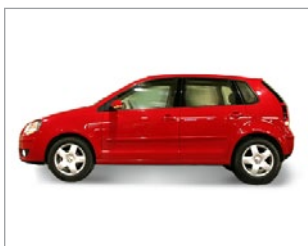

**Polo Jinqing (China)**

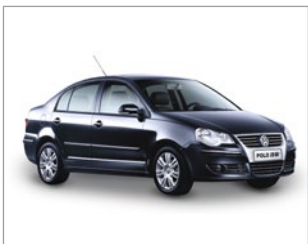

**Polo Jinqu (China)**

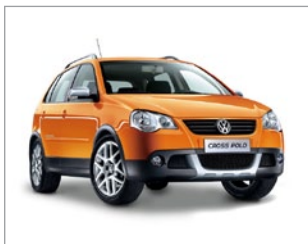

**Polo Cross (China)**

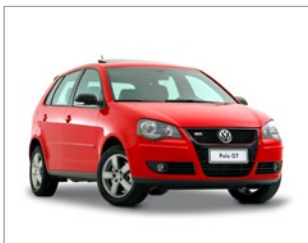

**Polo GT (Südamerika)**

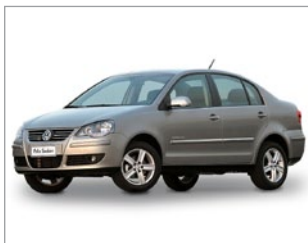

**Polo Sedan (Südamerika)**

VOLKSWAGEN ([www.volkswagen.com](http://www.volkswagen.com))

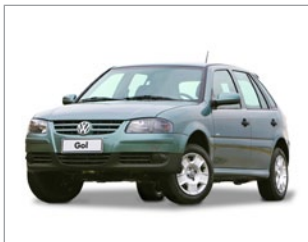

**Gol G4 (Südamerika)**

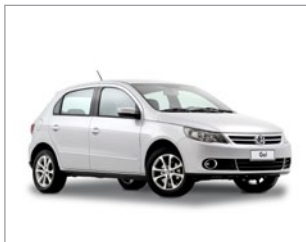

**Gol (Südamerika)**

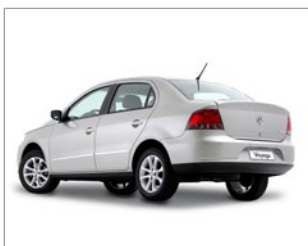

**Voyage (Südamerika)**

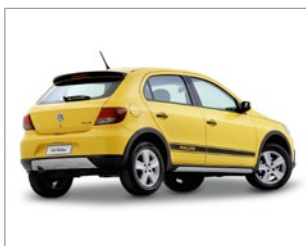

**Gol Rallye (Südamerika)**

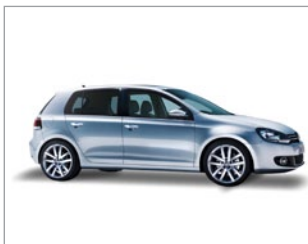

**Golf**

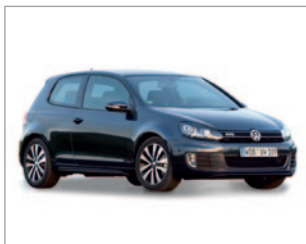

**Golf GTD**

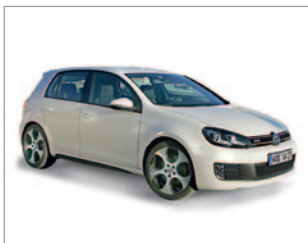

**Golf GTI**

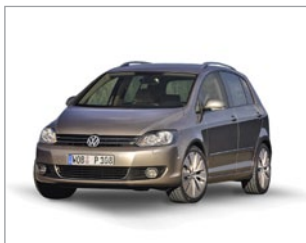

**Golf Plus**



**VOLKSWAGEN** ([www.volkswagen.com](http://www.volkswagen.com))

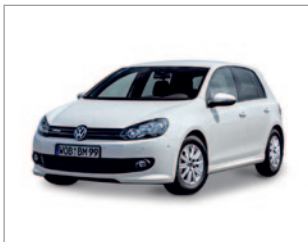

**Golf BlueMotion**

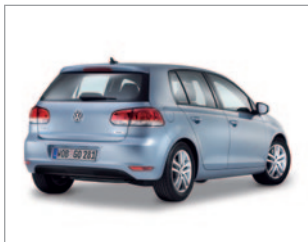

**Golf BiFuel (LPG)**

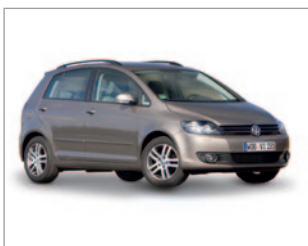

**Golf Plus BiFuel (LPG)**

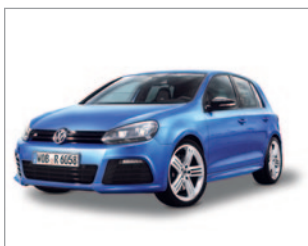

**Golf R**

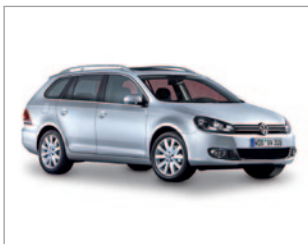

**Golf Variant**

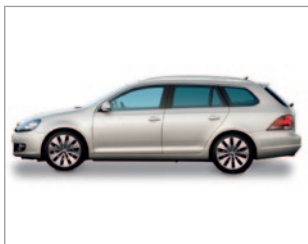

**Golf Variant BlueMotion**

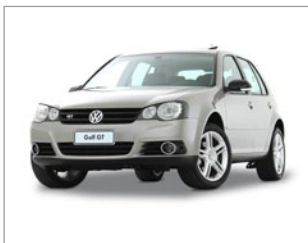

**Golf A4 (Südamerika)**

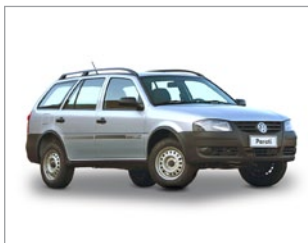

**Parati (Südamerika)**

VOLKSWAGEN ([www.volkswagen.com](http://www.volkswagen.com))

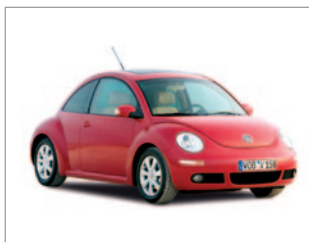

**New Beetle**

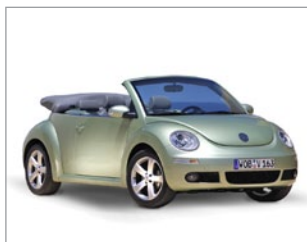

**New Beetle Cabriolet**

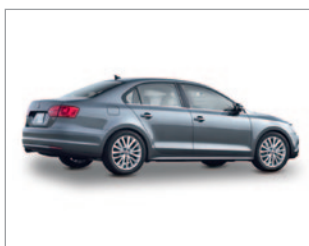

**Jetta (Nordamerika)**

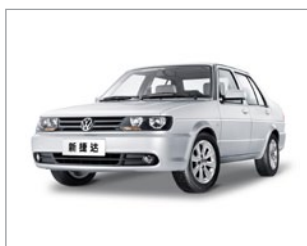

**Jetta A2 (China)**

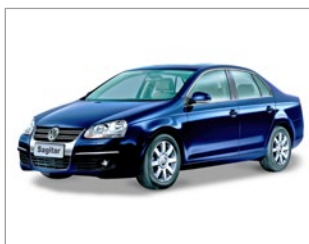

**Sagitar (China)**

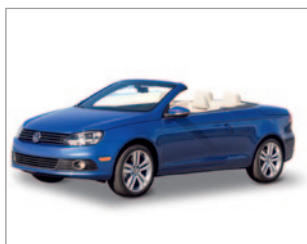

**Eos**

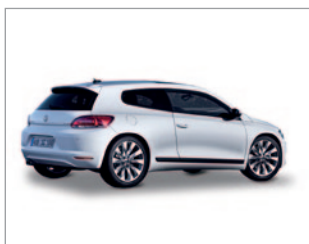

**Scirocco**

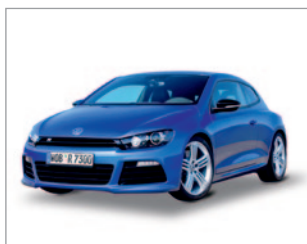

**Scirocco R**

**VOLKSWAGEN** ([www.volkswagen.com](http://www.volkswagen.com))

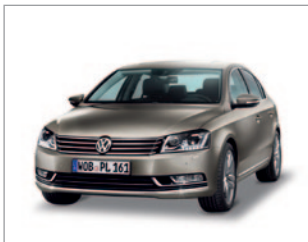

**Passat**

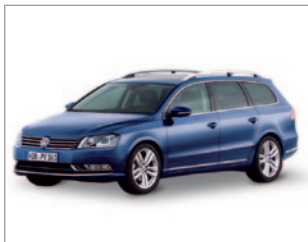

**Passat Variant**

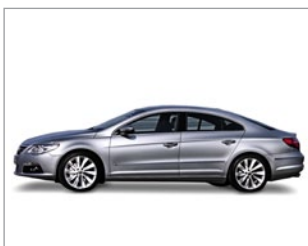

**Passat CC**

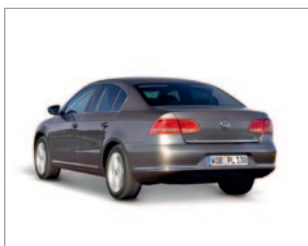

**Passat EcoFuel**

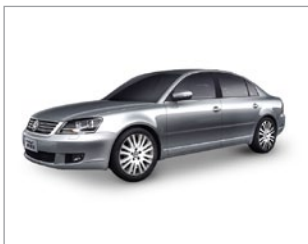

**Passat Lingyu (China)**

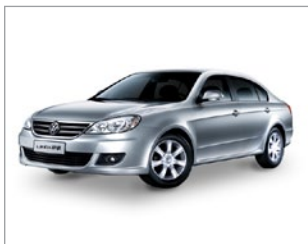

**Lavida (China)**

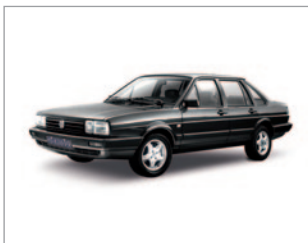

**Santana (China)**

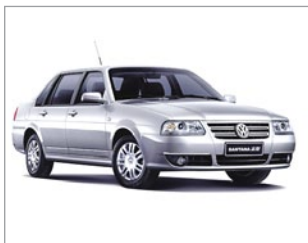

**Santana 3000 Vista (China)**

VOLKSWAGEN ([www.volkswagen.com](http://www.volkswagen.com))

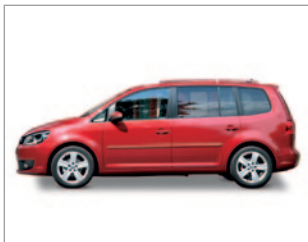

**Touran**

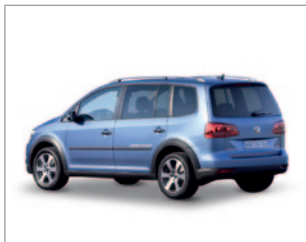

**CrossTouran**

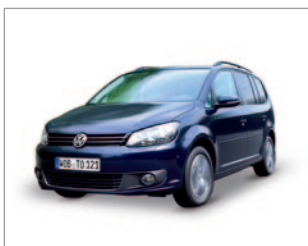

**Touran EcoFuel**

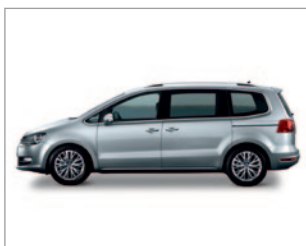

**Sharan**

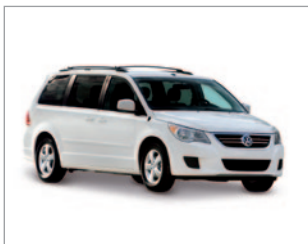

**Routan (Nordamerika)**

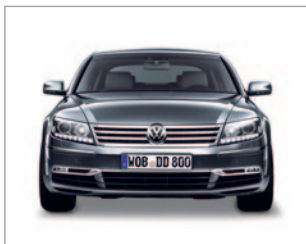

**Phaeton**

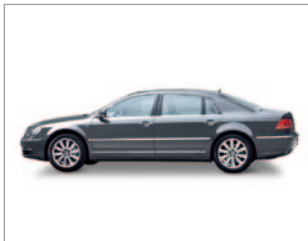

**Phaeton LWB**

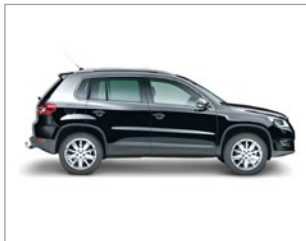

**Tiguan**

**VOLKSWAGEN** ([www.volkswagen.com](http://www.volkswagen.com))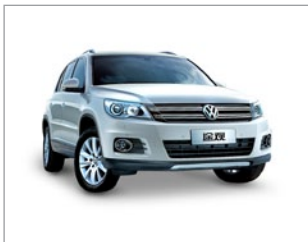**Tiguan LWB (China)**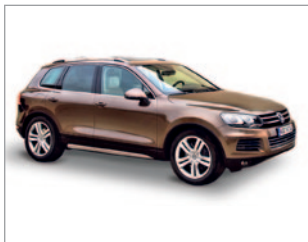**Touareg**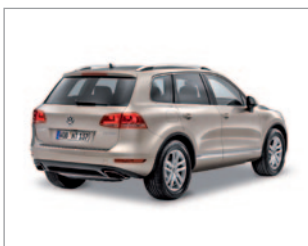**Touareg Hybrid**

AUDI ([www.audi.de](http://www.audi.de))

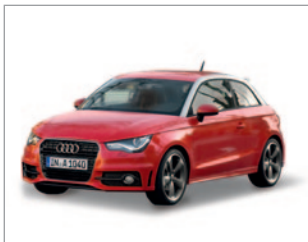

A1

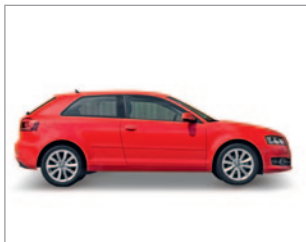

A3

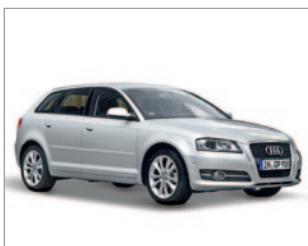

A3 Sportback

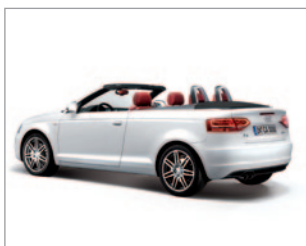

A3 Cabriolet

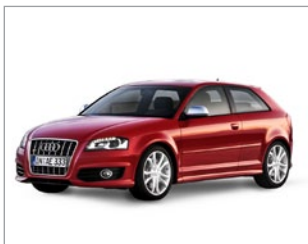

S3

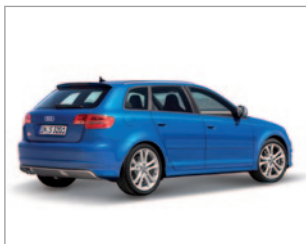

S3 Sportback

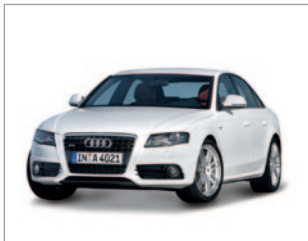

A4

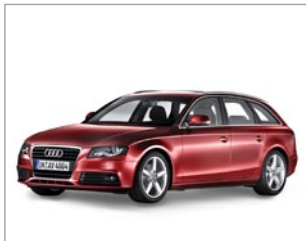

A4 Avant

AUDI ([www.audi.de](http://www.audi.de))

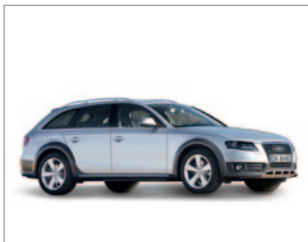

**A4 allroad quattro**

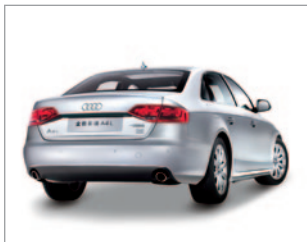

**A4 L (China)**

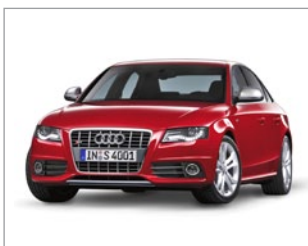

**S4**

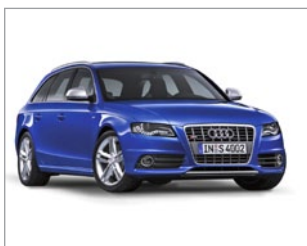

**S4 Avant**

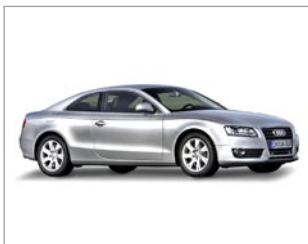

**A5 Coupé**

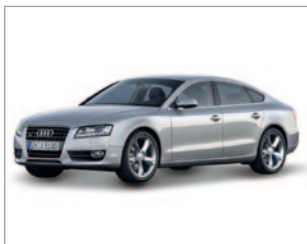

**A5 Sportback**

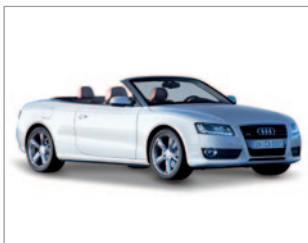

**A5 Cabriolet**

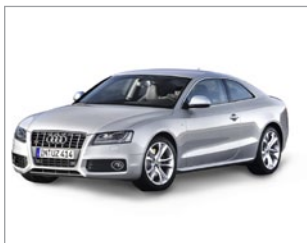

**S5 Coupé**

AUDI ([www.audi.de](http://www.audi.de))

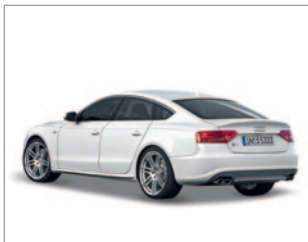

S5 Sportback

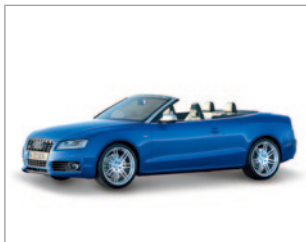

S5 Cabriolet

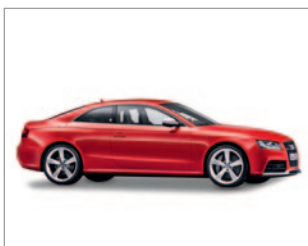

R55 Coupé

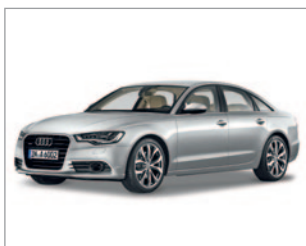

A6

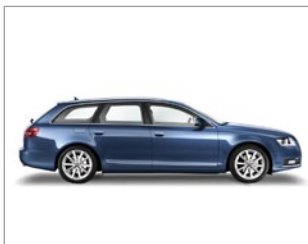

A6 Avant

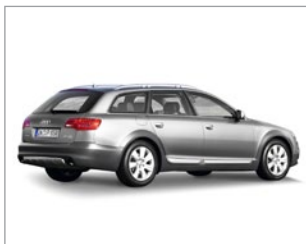

A6 allroad quattro

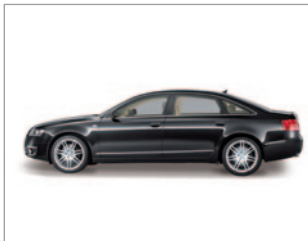

A6 L (China)

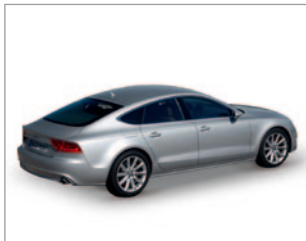

A7 Sportback



AUDI ([www.audi.de](http://www.audi.de))

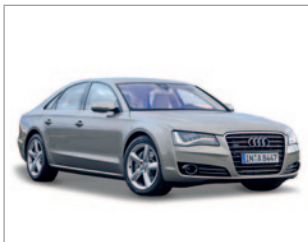

**A8**

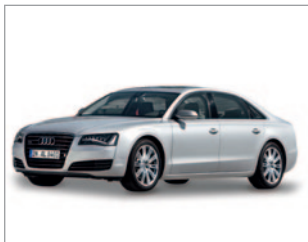

**A8 L**

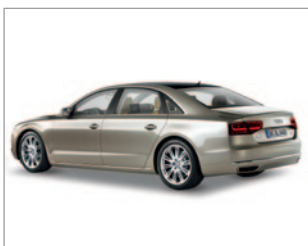

**A8 L W12**

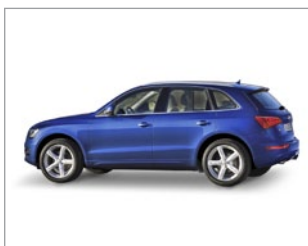

**Q5**

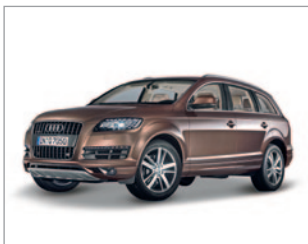

**Q7**

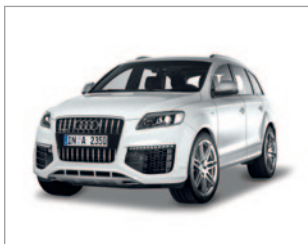

**Q7 V12 TDI**

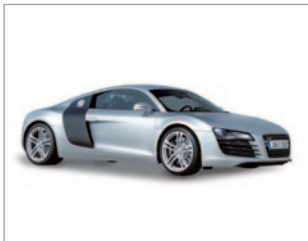

**R8 4.2 FSI quattro**

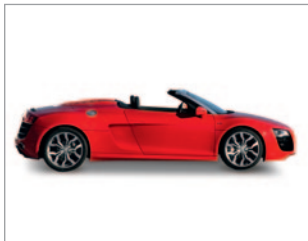

**R8 Spyder 4.2 FSI quattro**

AUDI ([www.audi.de](http://www.audi.de))

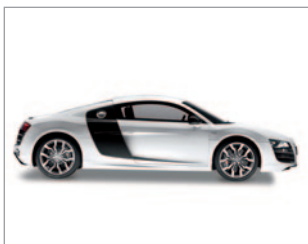

R8 5.2 FSI quattro

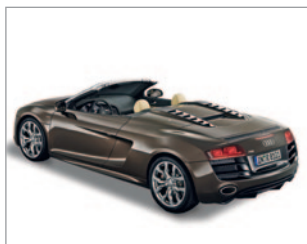

R8 Spyder 5.2 FSI quattro

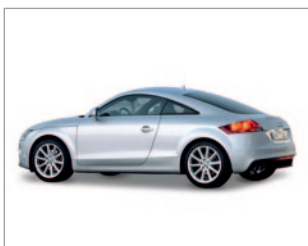

TT Coupé

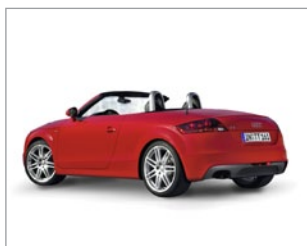

TT Roadster

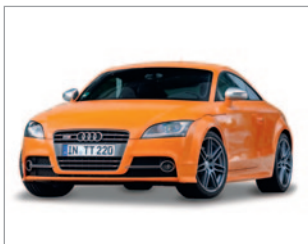

TTS Coupé

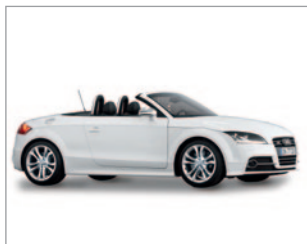

TTS Roadster

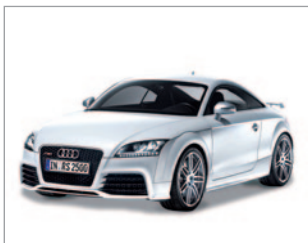

TT RS Coupé

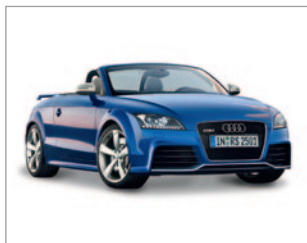

TT RS Roadster

SEAT ([www.seat.com](http://www.seat.com))

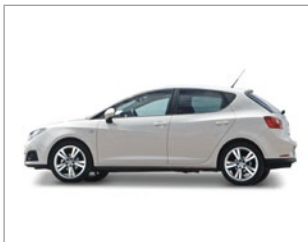

**Ibiza**

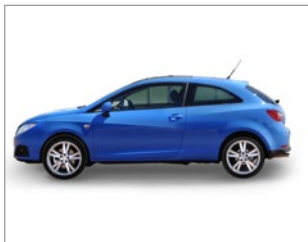

**Ibiza SC**

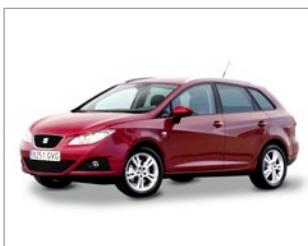

**Ibiza ST**

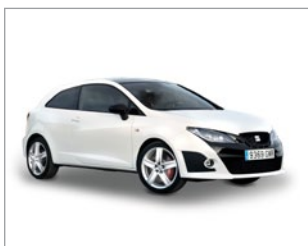

**Ibiza SC Bocanegra**

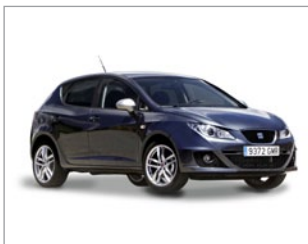

**Ibiza FR**

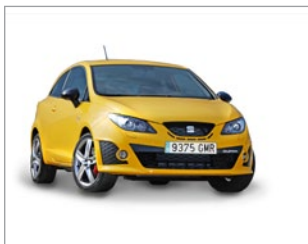

**Ibiza Cupra**

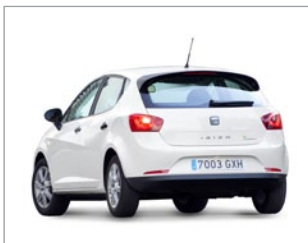

**Ibiza ECOMOTIVE**

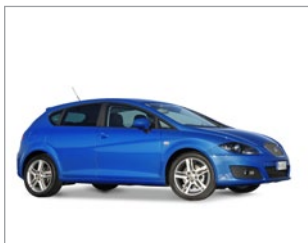

**León**

SEAT ([www.seat.com](http://www.seat.com))

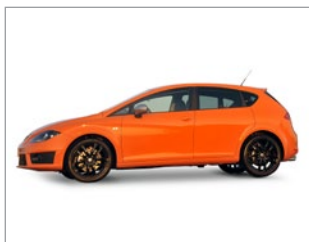

León FR

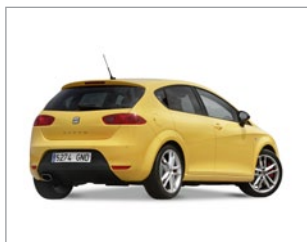

León Cupra

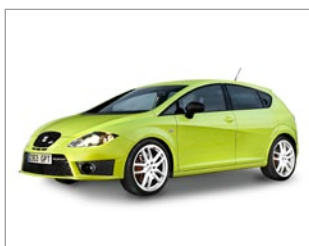

León Cupra R

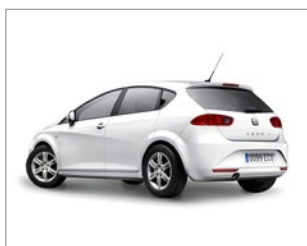

León ECOMOTIVE

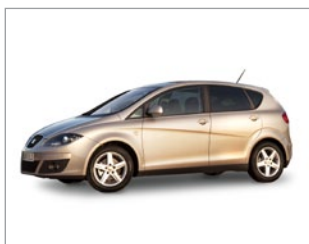

Altea

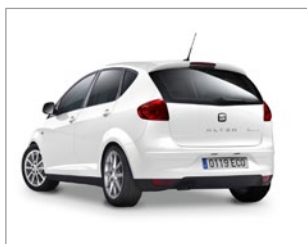

Altea ECOMOTIVE

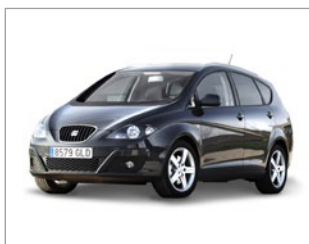

Altea XL

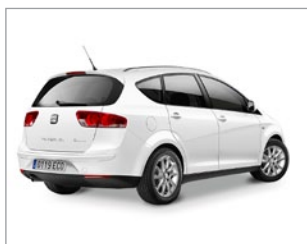

Altea XL ECOMOTIVE

SEAT ([www.seat.com](http://www.seat.com))

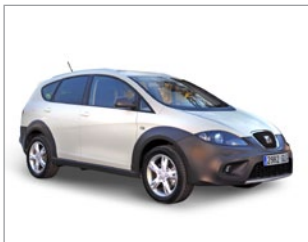

**Altea Freetrack**

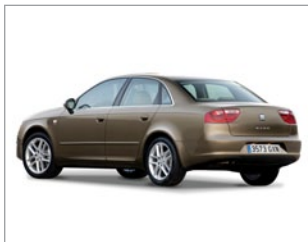

**Exeo**

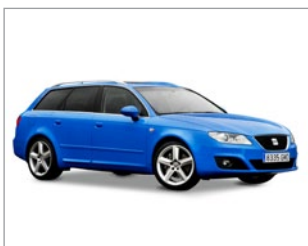

**Exeo ST**

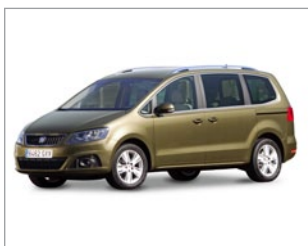

**Alhambra**

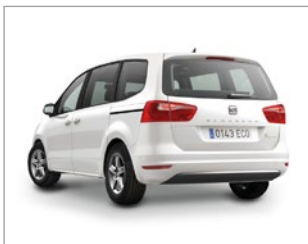

**Alhambra ECOMOTIVE**

ŠKODA ([www.skoda-auto.com](http://www.skoda-auto.com))

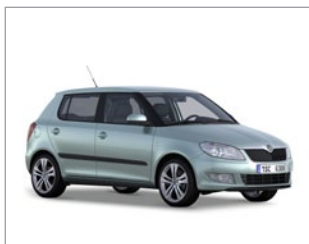

**Fabia**

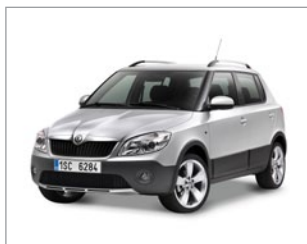

**Fabia Scout**

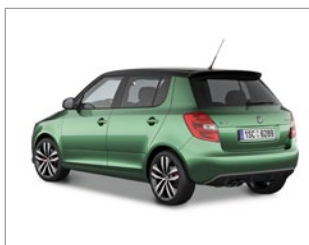

**Fabia RS**

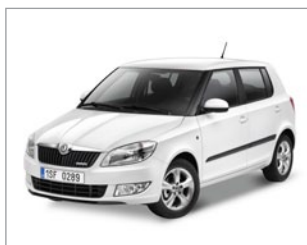

**Fabia GreenLine**

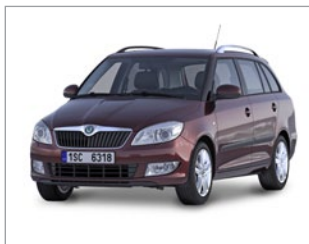

**Fabia Combi**

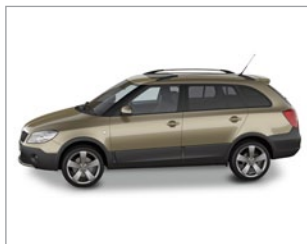

**Fabia Combi Scout**

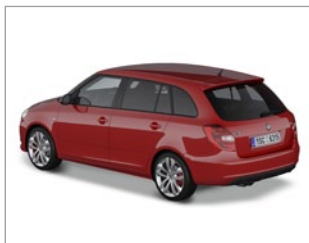

**Fabia Combi RS**

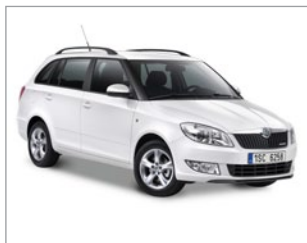

**Fabia Combi GreenLine**

ŠKODA ([www.skoda-auto.com](http://www.skoda-auto.com))

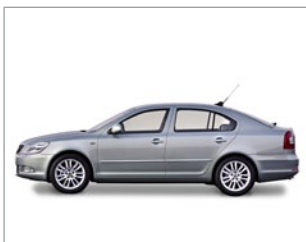

**Octavia**

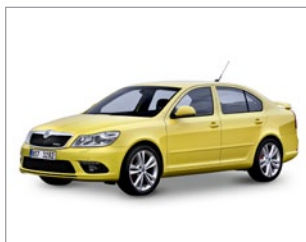

**Octavia RS**

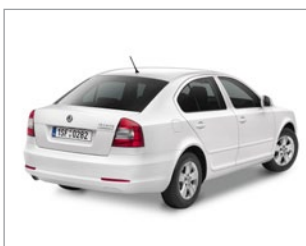

**Octavia GreenLine**

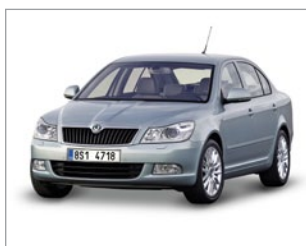

**Octavia LPG**

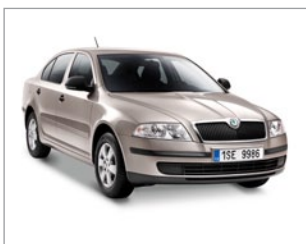

**Octavia Tour**

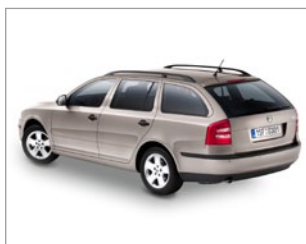

**Octavia Combi Tour**

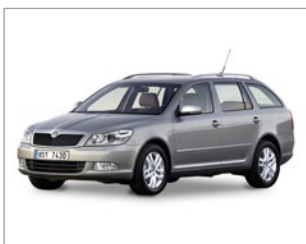

**Octavia Combi**

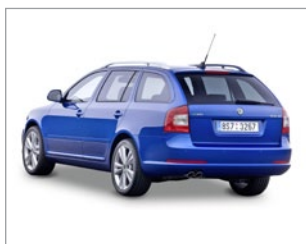

**Octavia Combi RS**

ŠKODA ([www.skoda-auto.com](http://www.skoda-auto.com))

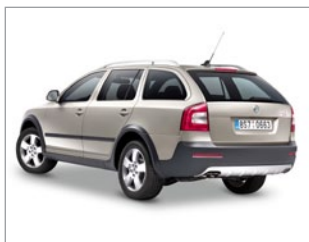

**Octavia Scout**

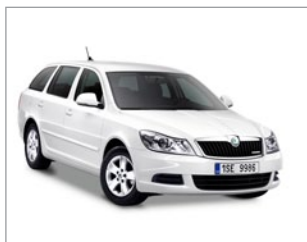

**Octavia Combi GreenLine**

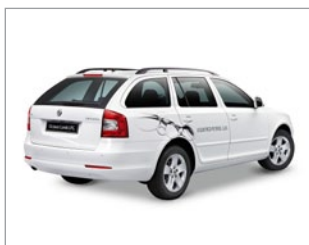

**Octavia Combi LPG**

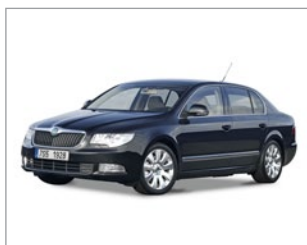

**Superb**

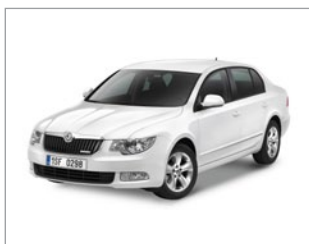

**Superb GreenLine**

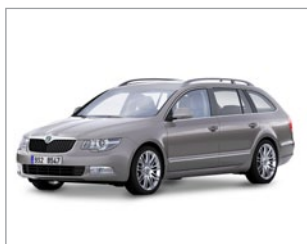

**Superb Combi**

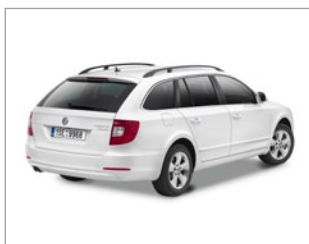

**Superb Combi GreenLine**

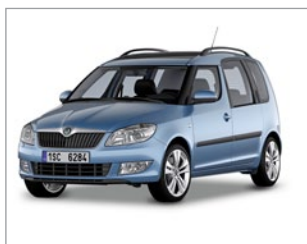

**Roomster**



ŠKODA ([www.skoda-auto.com](http://www.skoda-auto.com))

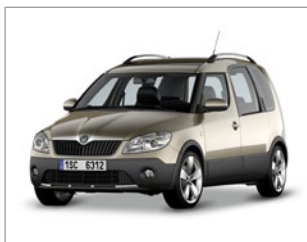

**Roomster Scout**

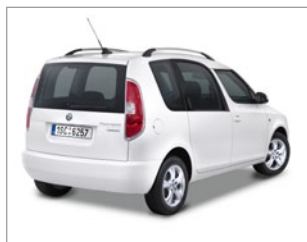

**Roomster GreenLine**

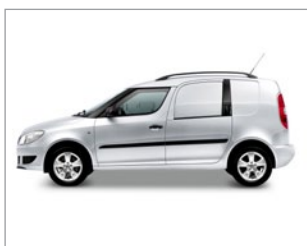

**Praktik**

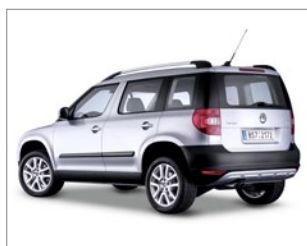

**Yeti**

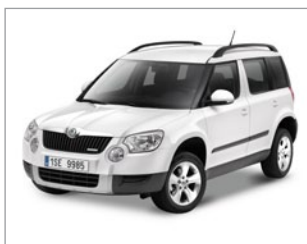

**Yeti GreenLine**

VOLKSWAGEN NUTZFAHRZEUGE ([www.vwn.de](http://www.vwn.de))

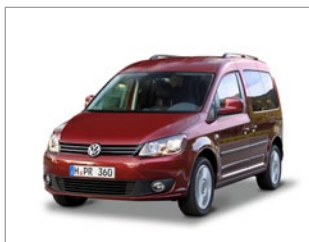

Caddy

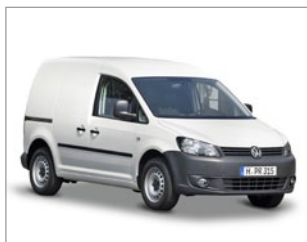

Caddy Kasten

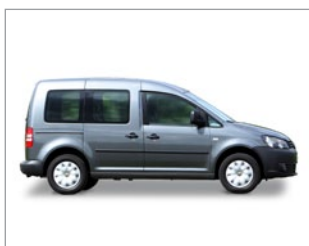

Caddy Kombi

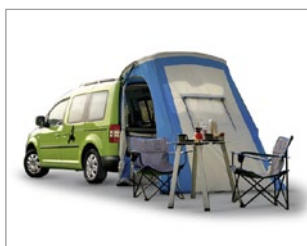

Caddy Tramper

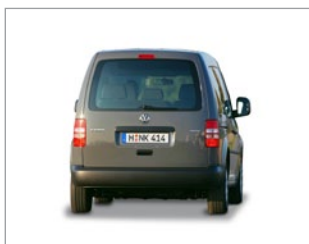

Caddy EcoFuel

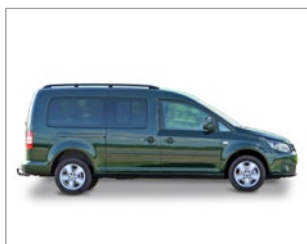

Caddy Maxi

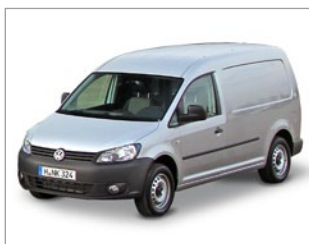

Caddy Maxi Kasten

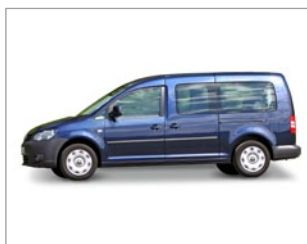

Caddy Maxi Kombi

**VOLKSWAGEN NUTZFAHRZEUGE** ([www.vwn.de](http://www.vwn.de))

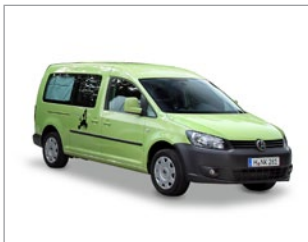

**Caddy Maxi Tramper**

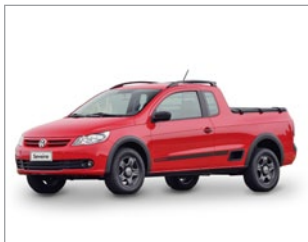

**Saveiro (Südamerika)**

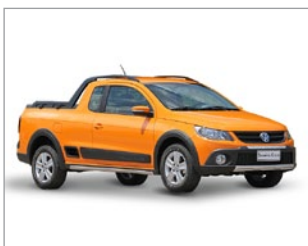

**Saveiro Cross (Südamerika)**

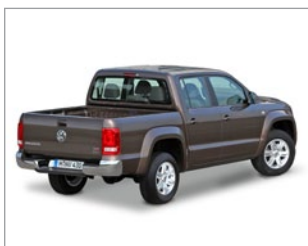

**Amarok Doppelkabine**

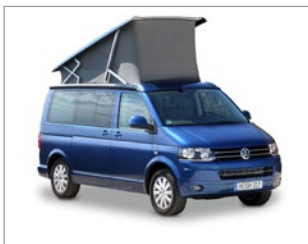

**California**

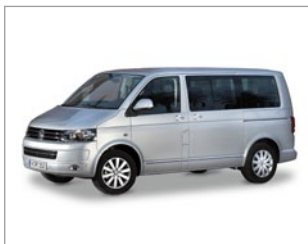

**Multivan**

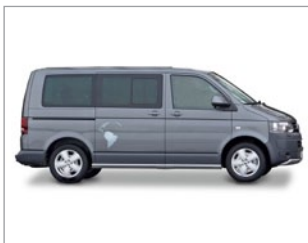

**Multivan PanAmericana**

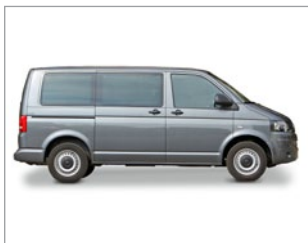

**Caravelle**

VOLKSWAGEN NUTZFAHRZEUGE ([www.vwn.de](http://www.vwn.de))

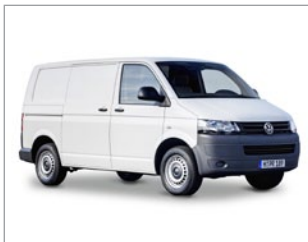

**Transporter Kasten**

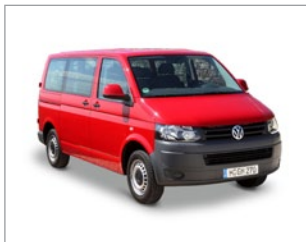

**Transporter Kombi**

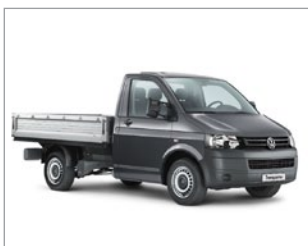

**Transporter Einzelkabine**

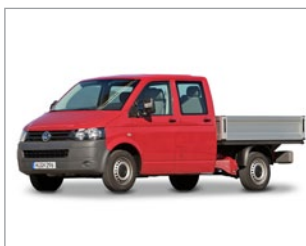

**Transporter Doppelkabine**

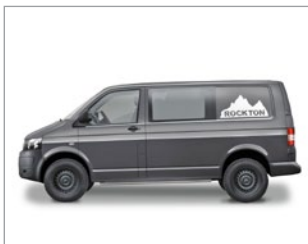

**Rockton**

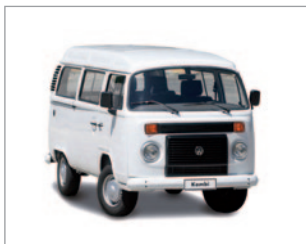

**T2 Kombi (Südamerika)**

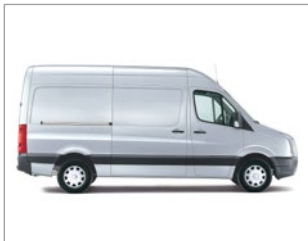

**Crafter Kasten**

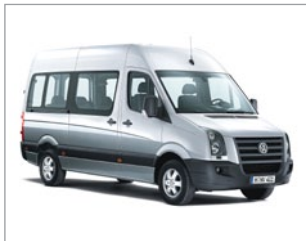

**Crafter Kombi**

**VOLKSWAGEN NUTZFAHRZEUGE** ([www.vwn.de](http://www.vwn.de))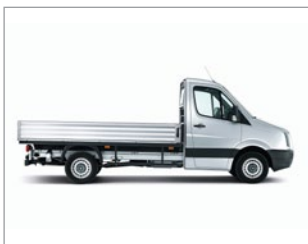**Crafter Pritsche Einzelkabine**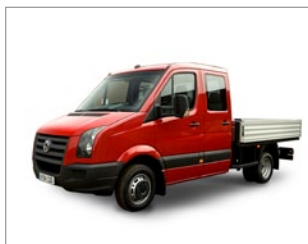**Crafter Pritsche Doppelkabine**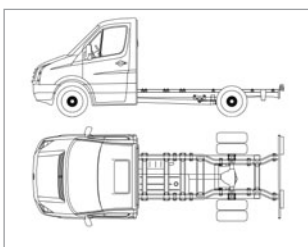**Crafter Einzelkabine Fahrgestell**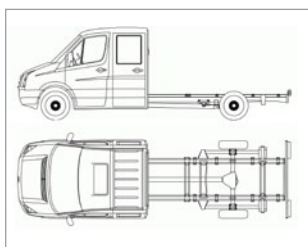**Crafter Doppelkabine Fahrgestell**

**BENTLEY** ([www.bentleymotors.com](http://www.bentleymotors.com))

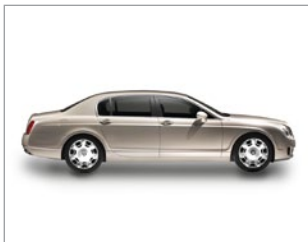

**Bentley Continental Flying Spur**

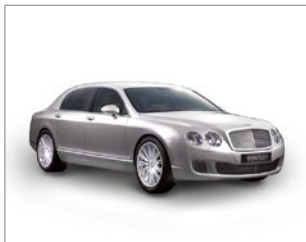

**Bentley Continental Flying Spur Speed**

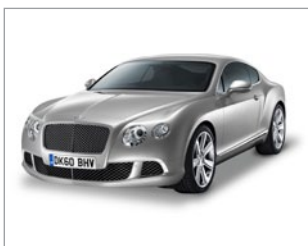

**Bentley Continental GT**

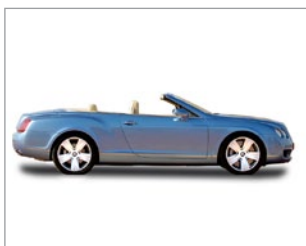

**Bentley Continental GTC**

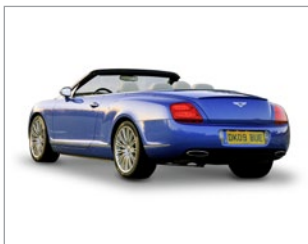

**Bentley Continental GTC Speed**

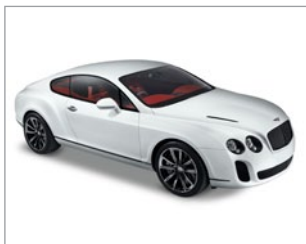

**Bentley Continental SuperSports**

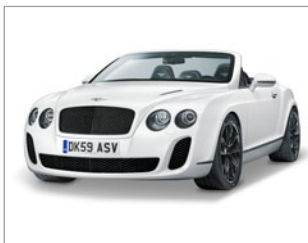

**Bentley Continental SuperSports Convertible**

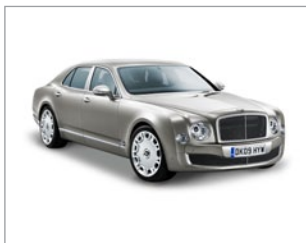

**Bentley Mulsanne**

**BUGATTI** ([www.bugatti.com](http://www.bugatti.com))

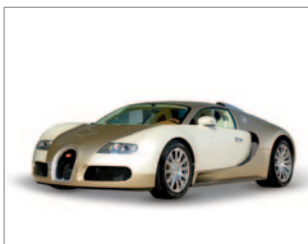

**Bugatti Veyron 16.4**

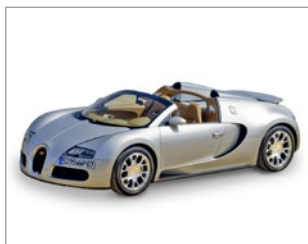

**Bugatti Veyron 16.4 Grand Sport**

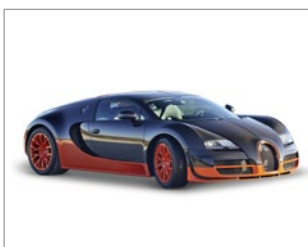

**Bugatti Veyron 16.4 Super Sport**

LAMBORGHINI ([www.lamborghini.com](http://www.lamborghini.com))

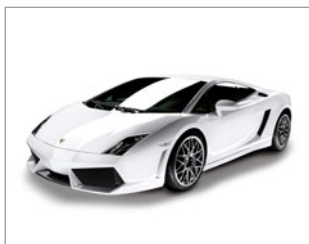

**Gallardo LP 560-4 Coupé W2**

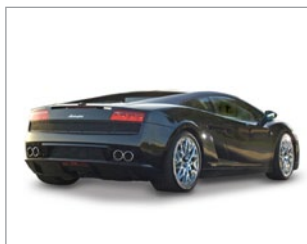

**Gallardo LP 560-4 Coupé W4**

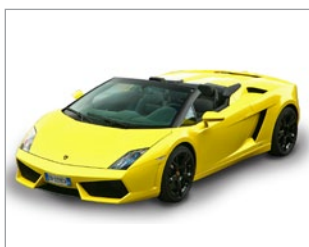

**Gallardo LP 560-4 Spyder**

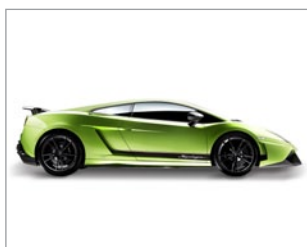

**Gallardo LP 560-4 Superleggera**

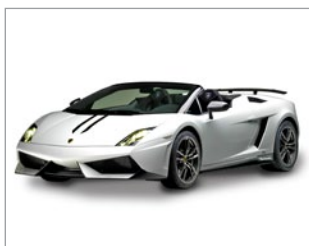

**Gallardo LP 570-4  
Spyder Performante**

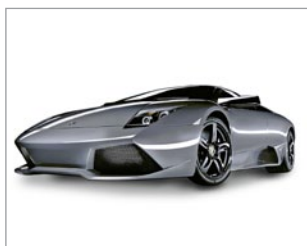

**Murciélago LP 640 Coupé**

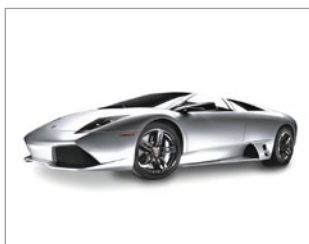

**Murciélago LP 640 Roadster**



SCANIA\* ([www.scania.com](http://www.scania.com))

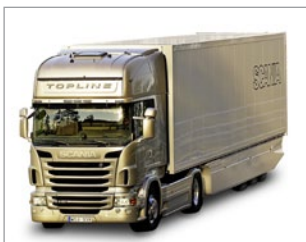

**Fernverkehr**

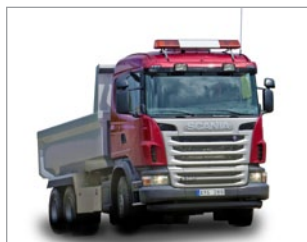

**Baufahrzeuge**

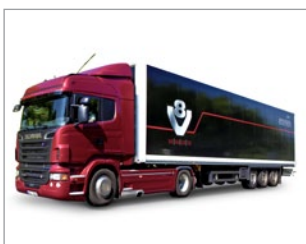

**V8 Baureihe**

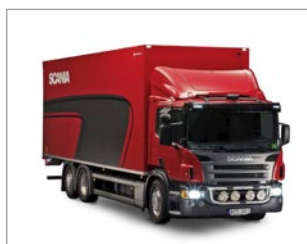

**Verteilerverkehr**

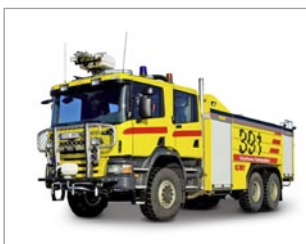

**Spezialfahrzeuge**

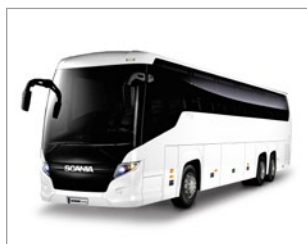

**Reisebusse**

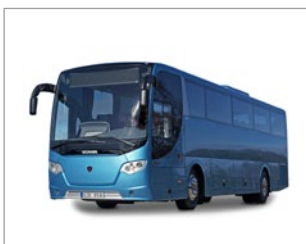

**Überlandbusse**

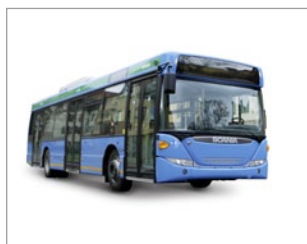

**Stadtbusse**

\* Die Scania Produkte auf dieser Seite repräsentieren verschiedene Segmente. Für diese Segmente gibt es jeweils eine Vielzahl von Kundenspezifikationen.

## 38436 Wolfsburg

Printed in Germany

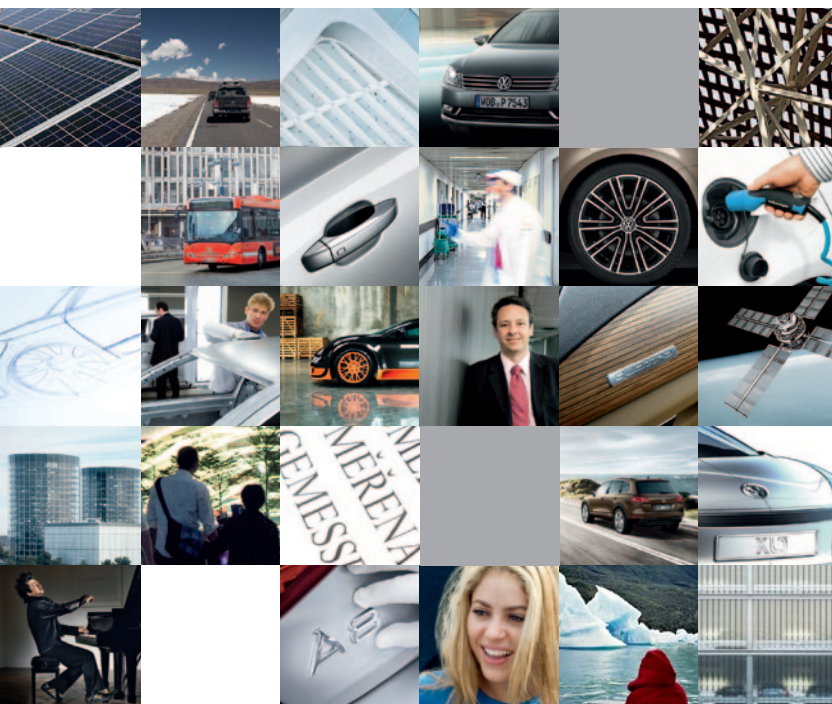

Supplement: Supplementary file 97 [file VW Zahlen.Daten.Fakten.pdf › Korpustexte/Korpustexte pdf/VW/VW Zahlen.Daten.Fakten.pdf]
