# Supplementary material
Source: publisher site journal article supplement (https://www.degruyterbrill.com/publication/isbn/9783110432879/downloadAsset/9783110432879_Elektronischer_Anhang_2.zip)

# Compliance. Verantwortungsvolles und rechtmäßiges Handeln.

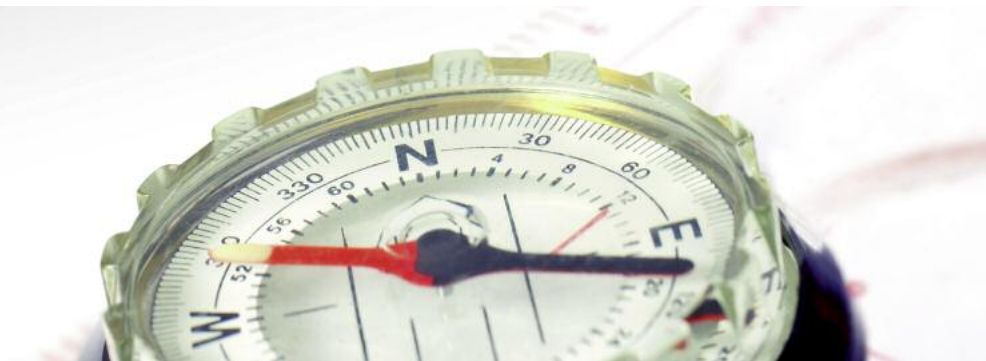

Verhaltenskodex –  
Grundsätze für rechtmäßiges Handeln.

## Compliance Contact

Telefon: +49 89 382-60000  
E-Mail: [compliance@bmwgroup.com](mailto:compliance@bmwgroup.com)

## Herausgeber

Bayerische Motoren Werke Aktiengesellschaft  
Petuelring 130  
80788 München  
AJ-C, Compliance Committee Office

© BMW AG, Stand: September 2008

42-10-30 E4114140 PM-740 Agenturdienste

**BMW Group**

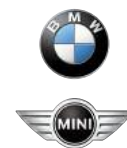

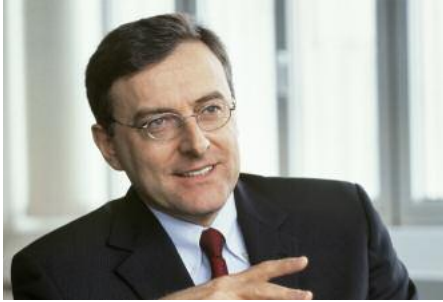

## **Liebe Mitarbeiterinnen und Mitarbeiter,**

verantwortungsvolles und rechtmäßiges Handeln ist eine der Grundvoraussetzungen für unseren unternehmerischen Erfolg. Der gesamte Vorstand stellt dabei an sich selbst und an jeden einzelnen Mitarbeiter hohe Ansprüche. Dies ist fester Bestandteil unserer Unternehmenskultur und bildet die Basis für das Vertrauen, das uns Kunden, Aktionäre, Geschäftspartner und auch die Öffentlichkeit entgegen bringen. Die hohe Reputation der BMW Group, die wir uns täglich mit viel Engagement erarbeiten, kann schon durch einzelne Rechtsverstöße Schaden nehmen. Deshalb ist jeder Einzelne von Ihnen zu verantwortungsbewusstem Verhalten und zur Einhaltung geltenden Rechts verpflichtet.

Wir sind uns bewusst, dass durch die Internationalisierung des Wirtschaftsgeschehens und aufgrund der Vielzahl und Komplexität rechtlicher Vorschriften die Gefahr von Rechtsverstößen steigt. Deshalb haben wir im Vorstand gemeinsam den nachstehenden Verhaltenskodex – Grundsätze für rechtmäßiges Handeln (Legal Compliance Code) verabschiedet. Dieser Kodex gilt an allen Standorten der BMW Group weltweit. Er soll Ihnen helfen, Rechtsrisiken zu erkennen und Rechtsverstöße zu vermeiden. Meine Vorstandskollegen und ich erwarten, dass Sie diesen Verhaltenskodex sorgfältig durchlesen und zum verbindlichen Maßstab für Ihr Handeln machen. Sie leisten damit einen unverzichtbaren Beitrag für den Erfolg der BMW Group – heute und in Zukunft.

Dr. Norbert Reithofer für den Vorstand der BMW AG

Verantwortung

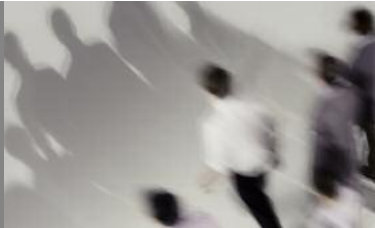

Höchstleistung

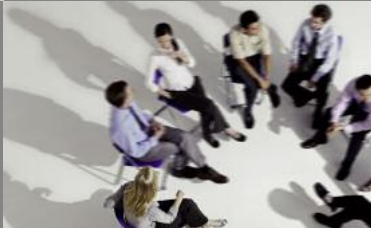

Respekt, Vertrauen,  
Fairness

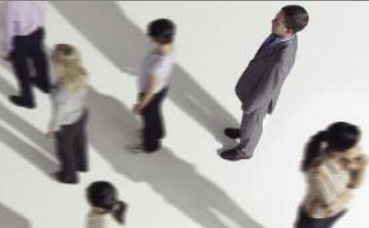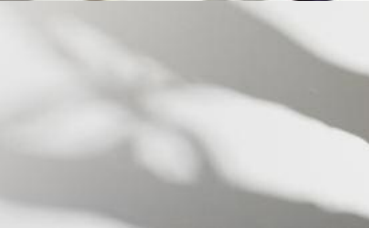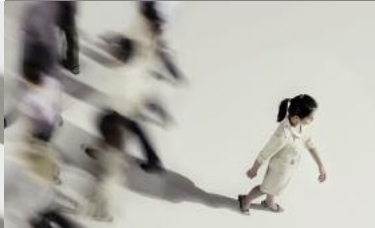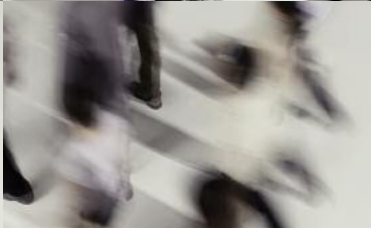

Gesellschaft

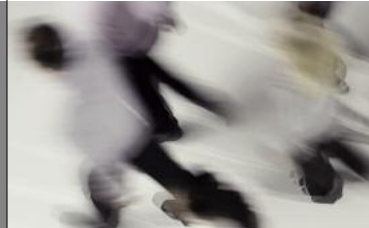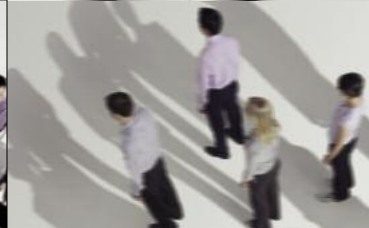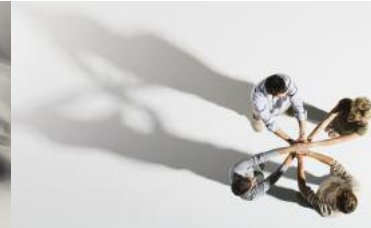

Mitarbeiter

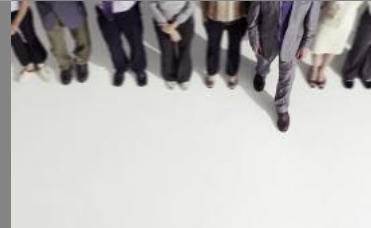

Kundenorientierung

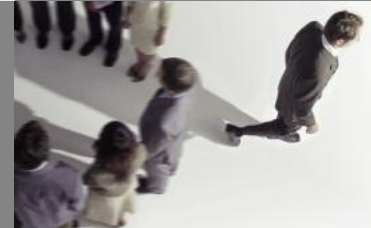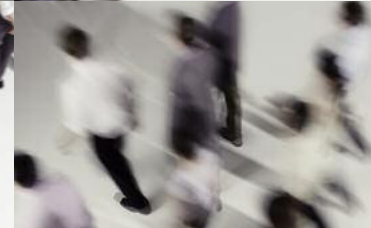

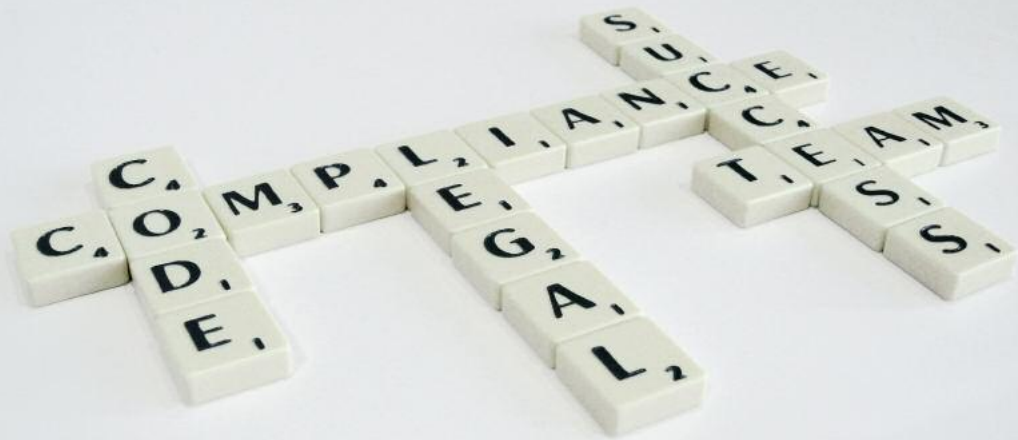

## 1. Verantwortungsvolles und rechtmäßiges Handeln.

Verantwortungsvolles und rechtmäßiges Handeln ist in unserem Unternehmen fest verankert und Grundlage für unseren langfristigen Unternehmenserfolg.

Die BMW Group nimmt ihre ökologische und soziale Verantwortung wahr: Sie bekennt sich zu den zehn Prinzipien des Global Compact der Vereinten Nationen und hat zusammen mit nationalen und internationalen Arbeitnehmervertretungen eine gemeinsame Erklärung über Menschenrechte und Arbeitsbedingungen unterzeichnet. Mit ihren Werten und Grundüberzeugungen hat die BMW Group ihre Unternehmenskultur auf ein Fundament des Vertrauens, gegenseitiger Wertschätzung und Toleranz gestellt.

Der hier vorliegende Verhaltenskodex befasst sich ausschließlich mit der Beachtung der geltenden Rechtsvorschriften. Die BMW Group ergreift alle erforderlichen Maßnahmen, um rechtmäßiges Handeln ihrer Organe, ihrer Führungskräfte und Mitarbeiter sicherzustellen. Die Gesamtheit dieser Maßnahmen wird mit dem Begriff Legal Compliance bezeichnet.

Das geltende Recht bildet den verbindlichen Rahmen für die vielfältigen unternehmerischen Aktivitäten der BMW Group weltweit. Für alle Mitarbeiter ist es deshalb notwendig, die für sie relevanten Rechtspflichten zu kennen und einzuhalten. Dies prägt das Bild der BMW Group in der Öffentlichkeit und schafft Vertrauen in ihre Produkte und Marken. Dieses Vertrauen ist die Basis für unseren Unternehmenserfolg.

Rechtsverstöße führen hingegen zu gravierenden Nachteilen für das Unternehmen, etwa in Form von Bußgeldern oder Schadensersatzforderungen. Hinzu kommen mögliche Reputationsschäden, die die BMW Group als Anbieter von Premiumprodukten und Premiumdienstleistungen erheblich schwächen würden. In vielen Fällen kann auch schon der bloße Anschein einer Rechtsverletzung die Einstellung der Öffentlichkeit und die Haltung von Kunden, Anteilseignern oder Geschäftspartnern ungünstig beeinflussen.

Die BMW Group bietet ihre Produkte und Dienstleistungen weltweit an und ist mit ihren Standorten in über 130 Ländern vertreten. Ihre globalen Aktivitäten unterliegen verschiedensten länderspezifischen und internationalen Rechtsvorschriften.

Mit der Beachtung geltender Rechtsvorschriften handelt jeder Mitarbeiter im Unternehmensinteresse der BMW Group. Rechtliche Verbote und Pflichten sind zu beachten, auch wenn sich dies aus Sicht des Einzelnen oder des Unternehmens als unzweckmäßig oder wirtschaftlich ungünstig darstellen mag. Rechtmäßiges Handeln hat im Zweifel immer Vorrang. Auf dieses Prinzip kann sich jeder Mitarbeiter verlassen. Es gilt selbst bei entgegenstehenden Anweisungen einer Führungskraft.

Dieser Verhaltenskodex zeigt jedem Mitarbeiter das Spektrum der für die BMW Group relevanten rechtlichen Rahmenbedingungen auf und verdeutlicht deren unbedingte Verbindlichkeit. Die in diesem Dokument erläuterten Prinzipien gelten im Umgang mit allen Kollegen, Kunden, Lieferanten, Geschäftspartnern und öffentlichen Stellen.

Der Verhaltenskodex gilt weltweit an allen Standorten und für alle Geschäftsbereiche der BMW Group. Bei zusätzlichen geschäfts- oder landesspezifischen Anforderungen kann er durch lokale Compliance Programme ergänzt werden.

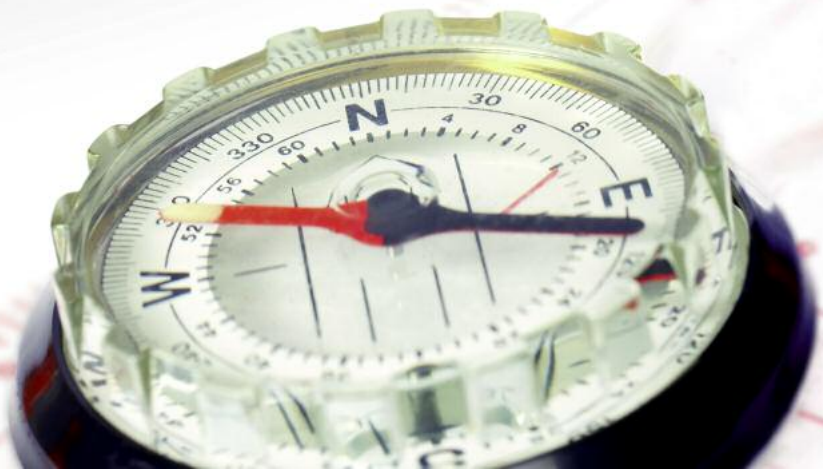

## 2. Der rechtliche Rahmen – ein Überblick.

### 2.1. Produkte, Dienstleistungen, Kunden und Märkte der BMW Group.

#### Die Produktsicherheit ist Grundlage unserer umfassenden Produktverantwortung.

Die Produkte der BMW Group werden unter strenger Anwendung unserer Qualitätsmanagementsysteme entwickelt und hergestellt. Wir beobachten unsere Produkte im Markt und überprüfen alle Hinweise zum Thema Sicherheit. Falls erforderlich, informieren wir umgehend die zuständigen Behörden und leiten alle notwendigen Maßnahmen zum Schutz unserer Kunden ein.

#### Im Wettbewerb um die Gunst der Kunden überzeugen wir durch unsere Produkte und Leistungen.

Mit unseren Produkten und Dienstleistungen wecken wir Emotionen – auch in der Werbung. Dabei beachten wir stets die geltenden Anforderungen des Verbraucherschutz- und Wettbewerbsrechts an Transparenz und Richtigkeit. Wir stellen unseren Kunden alle notwendigen Informationen für eine umsichtige und bewusste Entscheidung zur Verfügung.

#### Genauso erfolgsentscheidend wie die Faszination unserer Produkte und Dienstleistungen ist die Qualität unserer Vertriebsorganisation.

Um den Premiumanspruch in Vertrieb und Service zu erfüllen, hat sich die BMW Group für ein selektives Vertriebssystem entschieden. Damit sind ausschließlich unsere autorisierten Vertragshändler und Niederlassungen berechtigt, Neufahrzeuge zu verkaufen. Die Vertriebs- und Servicestrukturen in der

Automobilbranche unterliegen in nahezu allen Märkten besonderen rechtlichen Regeln. Im Zusammenspiel mit den Händlerverträgen bilden diese Regelungen den Maßstab für die vertraglichen Beziehungen zwischen der BMW Group und ihren Vertriebspartnern und sichern die Erhaltung des Wettbewerbs. Unzulässig sind insbesondere Maßnahmen, die geeignet sind, den Handel an Preise zu binden oder solche Preisbindungen zu fördern.

#### Die internationalen Aktivitäten der BMW Group unterliegen dem Außenwirtschafts-, Steuer- und Zollrecht.

Bei unseren weltweiten Aktivitäten und bei der Erschließung neuer Märkte müssen verschiedenste Regeln des Außenwirtschafts-, Steuer- und Zollrechts beachtet werden. Die hierfür zuständigen Stellen tragen dafür Sorge, dass es nicht zur unerlaubten Verkürzung von Abgaben und Steuern oder der Verletzung unserer Mitwirkungspflichten kommt. Dabei sind sie auf korrekte Informationen aus dem Unternehmen angewiesen.

#### Finanzdienstleistungen und Versicherungen – bedarfs- und kundengerechte Beratung schafft Vertrauen.

Viele Menschen vertrauen auf die Leistungen des Geschäftsbereichs Financial Services der BMW Group – nicht nur, wenn es um die Fahrzeugfinanzierung geht. Zu ihrem Schutz gibt es besondere gesetzliche und aufsichtsrechtliche Anforderungen. Die gesamte Geschäftsorganisation der BMW Group im Bereich Financial Services ist darauf ausgerichtet. Die hierzu etablierten internen Richtlinien und Regelungen gehen häufig sogar über die Erfüllung der rechtlichen Anforderungen hinaus. Deren Umsetzung wird laufend intern überwacht und unterliegt der Kontrolle von Wirtschaftsprüfungsgesellschaften und der jeweils zuständigen Banken- und Finanzaufsichtsbehörden.

Grundlegend für eine vertrauensvolle Kundenbeziehung ist der sorgfältige Umgang mit den Informationen und Daten unserer Kunden in Übereinstimmung mit den gesetzlichen und vertraglichen Vorgaben, beispielsweise Datenschutzrecht und Bankgeheimnis. Gemäß den geltenden Vorschriften informieren wir unsere Kunden in klarer und gut verständlicher Weise über die von uns angebotenen Produkte. Dies gilt sowohl für eigene Produkte wie auch für die Vermittlung von Fremdprodukten wie Wertpapieren und Versicherungen. In vielen Ländern muss dies besonders dokumentiert werden. Teilweise besteht die Pflicht, die persönlichen Verhältnisse und Vorkenntnisse beim Umgang mit Finanzprodukten der Kunden zu klären.

Nicht nur zur Bekämpfung von Geldwäsche, sondern auch im eigenen Interesse vergewissern wir uns über die Identität und Seriosität unserer Kunden (Know-Your-Customer Principle).



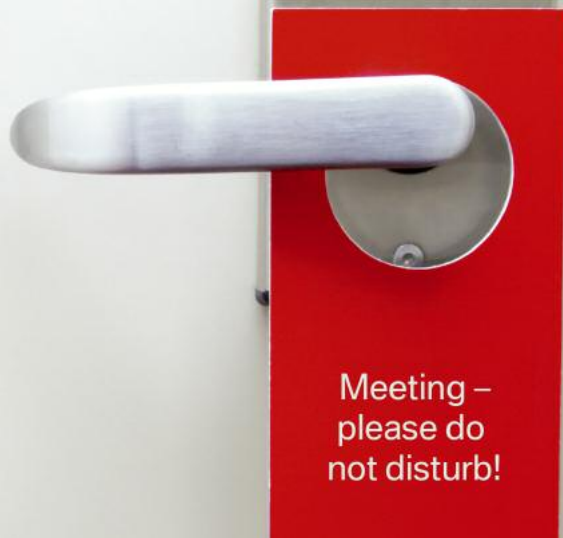

## 2.2. Die BMW Group im Wettbewerb.

### Unternehmerischer Erfolg durch Leistung setzt fairen Wettbewerb voraus.

Die BMW Group bekennt sich ohne Einschränkung zu den Prinzipien der Marktwirtschaft und des fairen Wettbewerbs. Wir verfolgen unsere Unternehmensziele ausschließlich nach dem Leistungsprinzip und unter Beachtung der geltenden Wettbewerbsregeln. Dies erwarten wir auch von unseren Wettbewerbern und Geschäftspartnern.

### Wettbewerbsbeschränkende Absprachen sind tabu.

Nicht nur beim Vertrieb von Fahrzeugen oder bei der Erbringung von Finanzdienstleistungen, sondern auch in der Fahrzeugentwicklung sowie bei der Beschaffung von Vormaterialien steht die BMW Group mit anderen Automobilherstellern und Anbietern im Wettbewerb. In allen Fällen ist die wichtigste kartellrechtliche Grundregel: keine marktrelevanten Absprachen mit Wettbewerbern, insbesondere über Preise, Angebote, Geschäftsbedingungen, Produktionsprogramme, Absatzquoten oder Marktanteile.

Gleichgültig ist dabei, ob es sich um eine Vereinbarung handelt oder um informelle Gespräche – auch außerhalb offizieller Anlässe. Verboten ist jede Art der bewussten Verhaltensabstimmung, wenn diese zu einer Wettbewerbsbeschränkung führt. Dabei ist schon der bloße Anschein eines Verstoßes zu vermeiden.

Besondere Vorsicht ist auf Tagungen von Verbänden und bei anderen Branchentreffen geboten. Die sich dort bietenden Gelegenheiten zur Begegnung und Diskussion dürfen nicht dazu genutzt werden, vertrauliche Markt- und Unternehmensinformationen auszutauschen, um das Marktgeschehen zu beeinflussen. Das Gleiche gilt beim Informationsaustausch im Rahmen von Marktforschungs- und Benchmark-Projekten.

### In Lieferantennetzwerken muss die wirtschaftliche Handlungsfreiheit aller Partner gewährleistet sein.

Die Entwicklung und Herstellung von Fahrzeugen erfolgt in hochkomplexen, arbeitsteiligen Prozessen, die es erforderlich machen, mit Lieferanten und Entwicklungspartnern in Netzwerken zusammen zu arbeiten. Beim Management dieser Netzwerke darf die Freiheit der Beteiligten bei der Auswahl von Geschäftspartnern oder bei der Gestaltung von Konditionen nicht unzulässig eingeschränkt werden.

### Durch den Erwerb und die Veräußerung von Unternehmen stärkt die BMW Group ihre Position im Wettbewerb.

Transaktionen wie der Erwerb und die Veräußerung von Unternehmen unterliegen der Fusionskontrolle der Kartellbehörden, beispielsweise der EU Kommission, der US-amerikanischen Federal Trade Commission oder anderer nationaler Kartellbehörden. Zusammenschlüsse und andere Transaktionen dürfen in der Regel erst vollzogen werden, wenn sie bei sämtlichen zuständigen Kartellbehörden angemeldet und von diesen freigegeben worden sind.

### Die Folgen von Kartellverstößen sind gravierend.

Verstöße gegen wettbewerbs- und kartellrechtliche Verbote können weit reichende Konsequenzen haben, z.B. Geld- oder Freiheitsstrafen, hohe Bußgelder, Abschöpfung von erwirtschafteten Gewinnen und zivilrechtliche Haftungsansprüche. Gleichzeitig bestehen gerade in diesen Bereichen schwierige Auslegungs- und Beurteilungsfragen, die eine genaue Kenntnis der Behördenpraxis und der Rechtsprechung erfordern. In Zweifelsfällen sowie bei der Durchführung fusionsrechtlicher Anmeldeverfahren ist stets die Rechtsabteilung der BMW Group in wettbewerbsrechtlichen Fragen zu konsultieren.

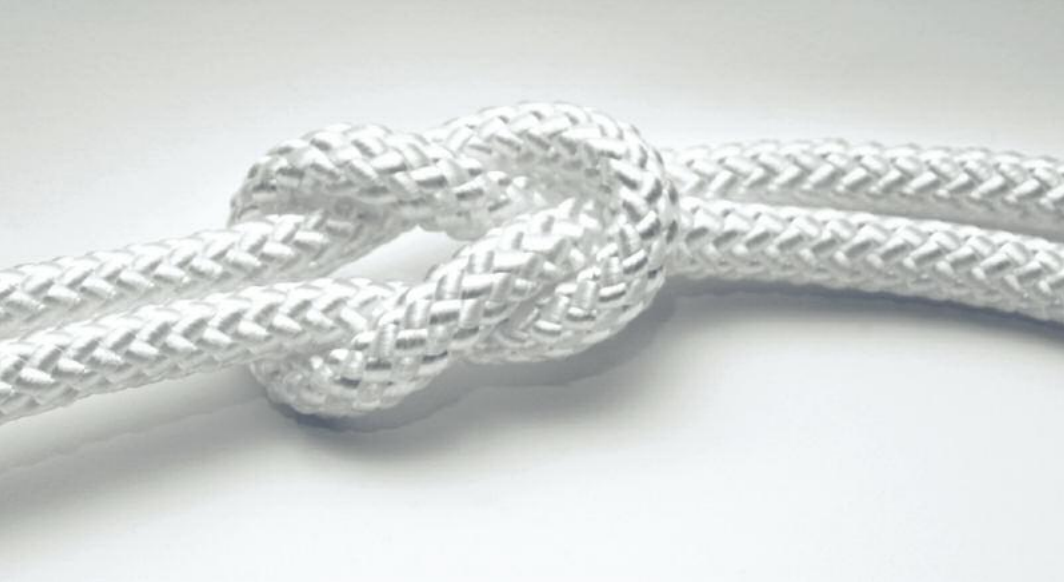

## 2.3. Sicherheit am Arbeitsplatz.

### **Arbeitssicherheit und Gesundheitsmanagement haben bei der BMW Group höchste Priorität.**

Um Gesundheitsgefährdungen zu vermeiden, sind Arbeitsschutz- und Arbeitssicherheitsvorschriften unbedingt zu beachten. Arbeitsschutz ist keine Nebensache, sondern verpflichtende Aufgabe jedes Einzelnen. Den Führungskräften kommt dabei eine wichtige Vorbildfunktion zu.

Wir planen und betreiben unsere Anlagen unter strenger Beachtung der Sicherheitsvorschriften. So verringern wir das Risiko von Unfällen und sichern den störungsfreien Anlagenbetrieb. Die zuständigen Führungskräfte nehmen ihre Betreiberverantwortung und Unternehmerpflichten wahr. Sie stellen sicher, dass die an einer Anlage tätigen Mitarbeiter sorgfältig ausgewählt und unterwiesen sind.

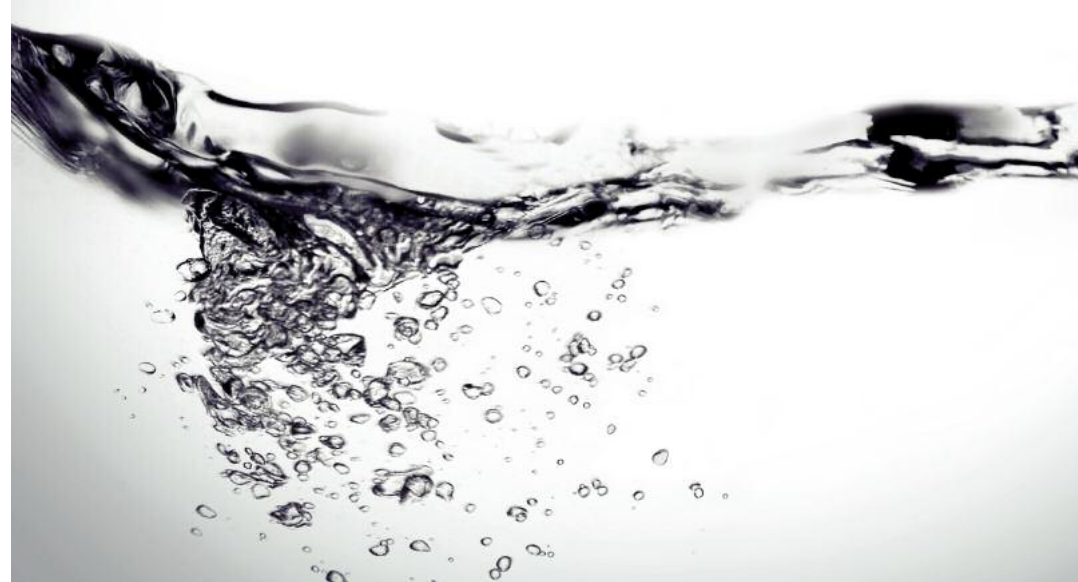

## 2.4. Umweltschutz.

### **Die BMW Group übernimmt Verantwortung für die Umwelt.**

Nur wer nachhaltig wirtschaftet, kann auf Dauer erfolgreich sein. Das Umweltrecht gibt der BMW Group hierzu verbindliche Standards vor. Die für umweltrelevante Anlagen und Tätigkeiten zuständigen Mitarbeiter sind sich ihrer besonderen Verantwortung bei der Einhaltung des Umweltrechts bewusst. Unterstützt werden sie dabei vom Konzernbeauftragten Umweltschutz und seinem Netzwerk.

Umweltrechtliche Vorschriften sind während des gesamten Lebenszyklus' unserer Fahrzeuge von Bedeutung. Dies beginnt bei der Entwicklung z. B. emissionsarmer und alternativer Antriebssysteme, reicht über die Auswahl von Materialien und Lieferanten unter ökologischen Aspekten und endet beim umweltverträglichen und verantwortungsvollen Umgang mit Altfahrzeugen.

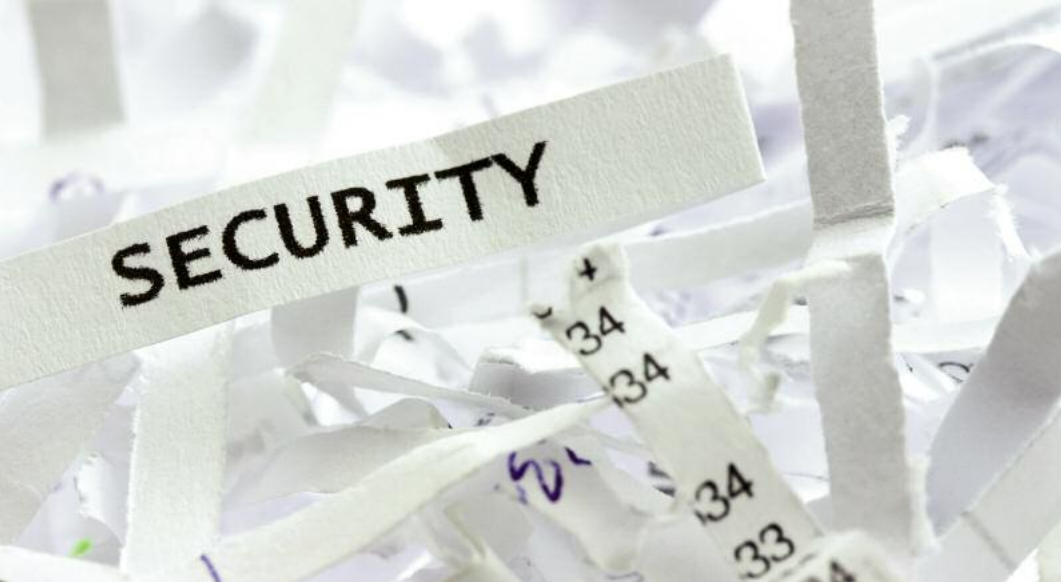

## 2.5. Datenschutz.

### **Wir halten uns konsequent an die Datenschutzbestimmungen.**

Die Nutzung innovativer Informationstechnologien wirft in vielen Bereichen Fragen der informationellen Selbstbestimmung auf, die wir als hohes Gut ansehen. Dem Datenschutz trägt die BMW Group im Umgang mit persönlichen Daten ihrer Kunden, Mitarbeiter und Geschäftspartner umfassend Rechnung. Der Datenschutzbeauftragte der BMW Group unterstützt hierbei die Fachstellen. Personenbezogene Angaben werden nur erhoben, verarbeitet oder genutzt, wenn dies rechtlich gestattet oder der Betroffene damit einverstanden ist. Wir bekennen uns zu den Grundsätzen der sparsamen Speicherung von personenbezogenen Daten sowie zur Transparenz der Datenverarbeitung.

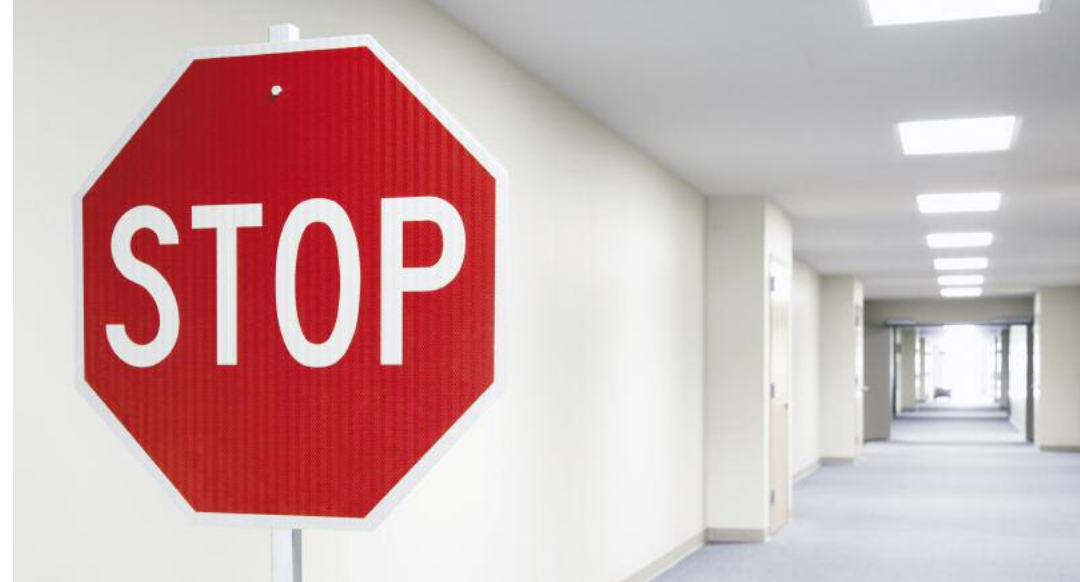

## 2.6. Gegenseitige Wertschätzung und Diskriminierungsverbot.

### **Die Mitarbeiter der BMW Group sind zentraler Erfolgsfaktor des Unternehmens.**

Leistungsbereite und kompetente Mitarbeiter zeichnen die BMW Group aus. Dabei wird jeder Einzelne als Individuum respektiert. Dementsprechend ist der Umgang miteinander von Wertschätzung, gegenseitigem Verständnis sowie von Offenheit und Fairness geprägt.

### **Diskriminierungen und Belästigungen werden nicht toleriert.**

Niemand darf wegen seiner Rasse, seiner ethnischen Herkunft, seiner Hautfarbe, seiner Nationalität, seines Geschlechts, seiner Religion oder Weltanschauung, einer Behinderung, seines Alters, seinem Veteranenstatus, seiner sexuellen Orientierung oder sonstiger gesetzlich geschützter Merkmale benachteiligt, begünstigt oder belästigt werden. Aus diesem Grund befürwortet die BMW Group staatliche Programme, die dazu dienen, die Folgewirkungen von diskriminierenden Praktiken aus der Vergangenheit zu überwinden.

Sexuelle Belästigungen sind, ebenso wie alle anderen Formen der Belästigung am Arbeitsplatz, generell verboten. Jeder hat ein Recht darauf, dagegen geschützt zu werden. Es spielt keine Rolle, ob ein Täter sein eigenes Verhalten für akzeptabel hält oder ob der Betroffene die Möglichkeit hat, sich der Belästigung zu entziehen.

Jede Führungskraft ist mit ihrem eigenem Verhalten Vorbild und hat für ein diskriminierungs- und belästigungsfreies Arbeitsumfeld zu sorgen.



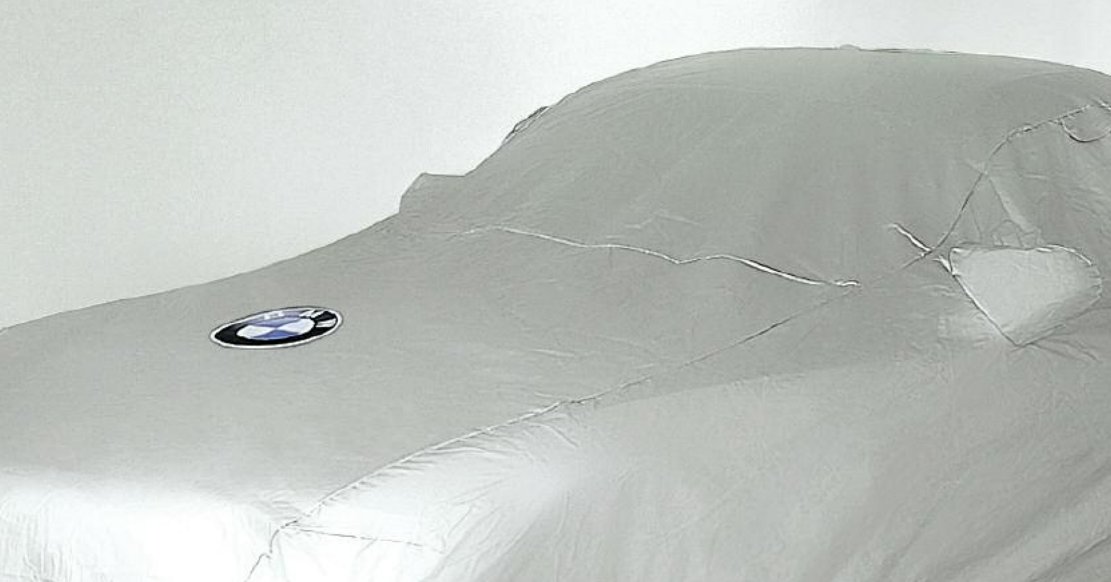

## 2.7. Schutz von Unternehmenswerten.

### Innovationen und Marken müssen geschützt werden.

Innovationen sowie die Gesamtheit unseres Wissens und unserer Erfahrungen bilden die Grundlage für die Entwicklung und Herstellung attraktiver Produkte und Dienstleistungen der BMW Group. Um unseren Vorsprung im Wettbewerb zu sichern, sind diese Innovationen und Fähigkeiten bestmöglich vor Nachahmung zu schützen.

Auf dem Gebiet der Technik und des Designs nutzt die BMW Group die rechtlichen Möglichkeiten des Innovationsschutzes durch gewerbliche Schutzrechte (Patente, Geschmacksmuster, Marken). Dabei ist die Rechtsabteilung auf die Hinweise der Mitarbeiter auf Innovationen in den unterschiedlichsten Bereichen angewiesen. Das gleiche gilt für den Schutz der Marken der BMW Group, die zu den wertvollsten der Welt gehören.

Vor allem bei unserer Produktentwicklung und vor Einführung neuer Bezeichnungen sind wir verpflichtet, sorgfältig nach bestehenden Schutzrechten zu recherchieren und diese nur mit Zustimmung ihres Inhabers zu verwenden.

### Persönliche Verantwortung beim Umgang mit vertraulichen Informationen.

Bei der Zusammenarbeit mit Lieferanten, Entwicklungspartnern, anderen Fahrzeugherstellern, Händlern oder sonstigen Geschäftspartnern ist der Schutz von vertraulichen Informationen, Know-how und Betriebsgeheimnissen besonders wichtig.

Jeder Mitarbeiter ist verpflichtet, Daten und Informationen, die ihm im betrieblichen Umfang zur Kenntnis gelangen, ausschließlich in dem zugelassenen Rahmen zu verwenden und bei einer Weitergabe innerhalb und außerhalb des Unternehmens zu prüfen, ob der Empfänger berechtigt ist. In Abhängigkeit von der Bedeutung der Informationen sind zusätzliche Sicherheitsmaßnahmen wie Geheimhaltungsverpflichtungen oder Audits zu vereinbaren.

Genauso achten und schützen wir vertrauliche Informationen Anderer. Fremdes Wissen nutzen wir nur, soweit es uns rechtmäßig oder aus allgemein zugänglichen Quellen bekannt ist.

### Betriebliches Eigentum muss respektiert und geschützt werden.

Jeder Mitarbeiter ist für den Schutz und die sachgerechte Verwendung betrieblichen Eigentums und sonstiger Unternehmenswerte der BMW Group verantwortlich. Arbeitsmittel und sonstige Gegenstände des Unternehmens (z. B. Fahrzeuge, Werkzeuge, Ersatzteile, Büromaterial, Dokumente, Computer, Datenträger) dürfen grundsätzlich nur für betriebliche Zwecke genutzt werden. Sie sind vor Verlust, Diebstahl, Beschädigung oder Missbrauch zu schützen. Kein Mitarbeiter darf Eigentum des Unternehmens ohne Zustimmung aus dem räumlichen Bereich des Unternehmens entfernen.

### Informationstechnologien erfordern ein besonderes Sicherheitsbewusstsein.

Die elektronische Datenverarbeitung ist ein unerlässlicher Bestandteil unserer Infrastruktur. Eingriffe in diese Systeme können Produktionsanlagen und Vertriebsprozesse stilllegen. Alle Mitarbeiter sind verpflichtet, die durch die IT Fachstellen erlassenen Schutzvorschriften zu beachten und sich aktiv für deren Einhaltung einzusetzen. So dürfen beispielsweise Anhänge von E-Mails, Downloads aus dem Internet oder auf Speichermedien eingebrachte Dateien nicht ungeprüft geöffnet bzw. installiert werden.

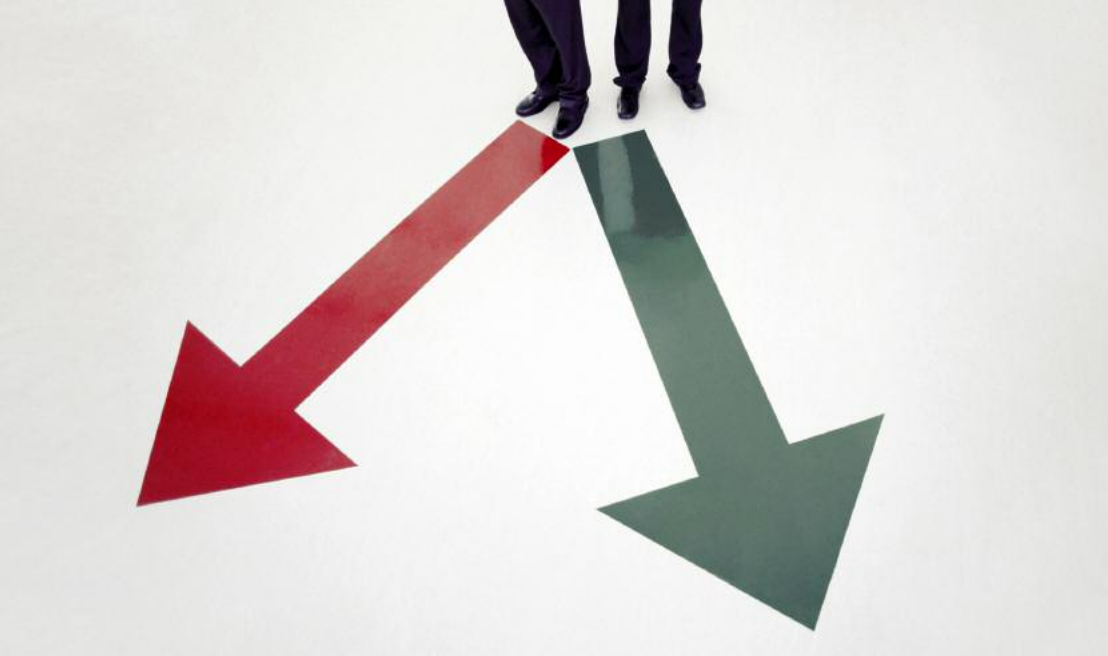

## 2.8. Interessenkonflikte.

**Pflichtgemäßes Verhalten bedeutet für jeden Mitarbeiter, private und Unternehmensinteressen sorgfältig zu trennen.**

Die BMW Group fordert von ihren Mitarbeitern, Situationen zu vermeiden, die zu persönlichen Interessenkonflikten führen können. Sollte die Möglichkeit eines Interessenkonflikts bestehen, ist die jeweilige Führungskraft, die Konzernrevision oder die Rechtsabteilung anzusprechen.

**Der Beste erhält den Zuschlag – die Anbahnung von Geschäftsbeziehung erfolgt ausschließlich nach sachlichen Kriterien.**

Geschäftsbeziehungen dürfen nur nach sachlichen Kriterien angebahnt oder unterhalten werden, z. B. nach Qualität, Preis, technologischem Standard und Zuverlässigkeit des Geschäftspartners. Kaufmännische und personelle Entscheidungen, Beratungsleistungen oder Empfehlungen von BMW Group Mitarbeitern dürfen nicht von privaten Interessen und Beziehungen geprägt oder durch materielle oder immaterielle Vorteile motiviert sein. Bereits der Anschein sachfremder Erwägungen ist zu vermeiden.

**Mitarbeiter der BMW Group dürfen im Zusammenhang mit dienstlichen Tätigkeiten keine persönlichen Vorteile annehmen oder fordern, anbieten oder gewähren.**

Das Verbot der Vorteilsannahme oder -gewährung betrifft nicht nur direkte finanzielle Zuwendungen, sondern auch sonstige Vergünstigungen, die die dienstliche Unabhängigkeit in Frage stellen könnten, wie zum Beispiel Einladungen und Geschenke. Abzulehnen sind daher finanzielle und sonstige Zuwendungen, die den Rahmen üblicher und angemessener Geschäftspraxis überschreiten.

Üblich und akzeptabel sind lediglich symbolhafte Gelegenheits- oder Werbebeschenke von geringem Wert. Das Gleiche gilt für Geschäftsessen im üblichen und angemessenen Rahmen, die einem berechtigten beruflichen Zweck dienen, beispielsweise Mittagessen während oder im Anschluss an eine dienstliche Besprechung. Sowohl bei der Annahme als auch bei der Gewährung von Zuwendungen haben alle Mitarbeiter stets die Grenzen der Üblichkeit und Angemessenheit zu beachten. Wenn es um höherwertige Zuwendungen geht muss vorher eine Genehmigung der zuständigen Führungskraft eingeholt werden.

Ein Verstoß gegen diese Prinzipien kann auch nicht mit dem Verhalten anderer gerechtfertigt werden, nach dem Motto: „Das machen doch alle.“

**Wir überzeugen unsere Geschäftspartner durch unsere Produkte und Leistungen – nicht durch unberechtigte Vorteile.**

Vor diesem Hintergrund werden Geschenke und Einladungen an Geschäftspartner nur in einem angemessenen Rahmen und unter Einhaltung der steuerrechtlichen Vorschriften gemacht. Um eine unredliche Beeinflussung zu vermeiden, dürfen beispielsweise Vermittlungsprovisionen im Vertrieb nur nach vorheriger Vereinbarung und bei nachweislichem Vermittlungserfolg ausgezahlt werden. Die Höhe der Provisionen muss angemessen und marktüblich sein.

Besondere Zurückhaltung ist bei Amtsträgern geboten: Beamte, Richter, Politiker oder andere Vertreter öffentlicher Institutionen dürfen keinerlei Geschenke, Zuwendungen oder Einladungen erhalten, die ihre Unabhängigkeit in Frage stellen könnten und rechtswidrig sind.

Weitere Einzelheiten zum Thema Interessenkonflikte finden Sie in den BMW Group Grundsätzen zu persönlichem Verhalten, die für alle Einheiten der BMW Group gelten.

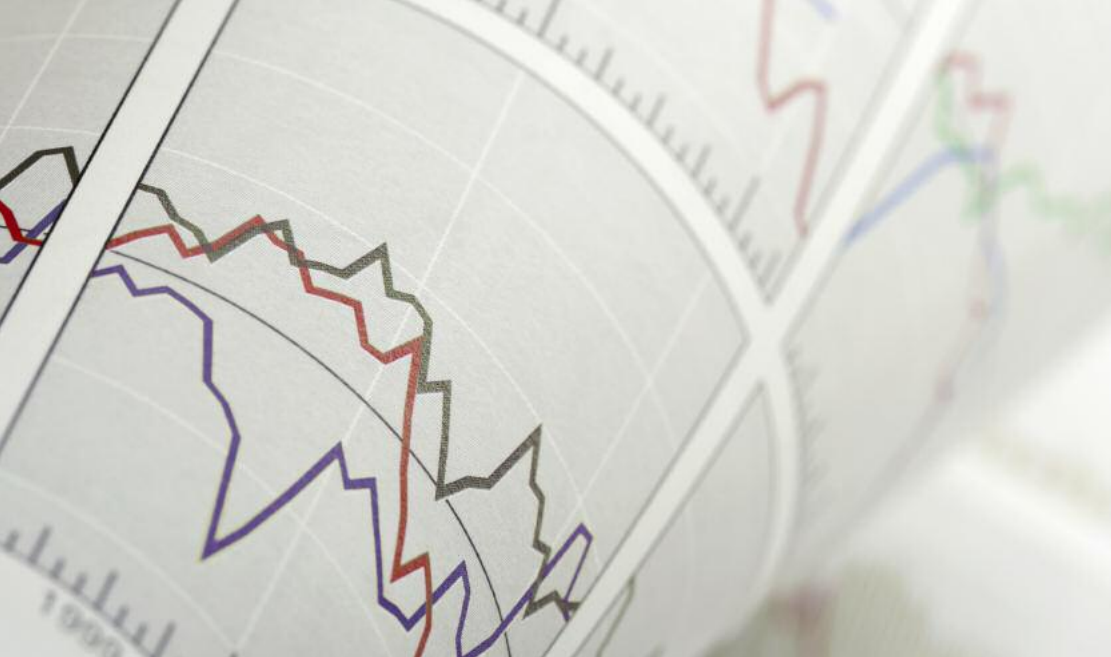

## 2.9. Transparenz für Kapitalanleger.

### Transparenz schafft Vertrauen auf den Kapitalmärkten.

Die BMW Group genießt bei der Finanzierung ihrer weltweiten Aktivitäten das Vertrauen der Investoren. Grundvoraussetzung hierfür ist eine transparente Finanzberichterstattung und die Gleichbehandlung aller Kapitalanleger.

Die Börsennotierung der BMW AG und die Ausgabe von Unternehmensanleihen führen zu einer Vielzahl von Pflichten bei der Finanzberichterstattung. Dementsprechend informiert die BMW Group in ihren Geschäftsberichten und Analystenveranstaltungen klar und verlässlich über kapitalmarktrelevante Unternehmensdaten und -fakten. Veröffentlicht wird beispielsweise auch, wenn Personen mit Führungsaufgaben Geschäfte mit Wertpapieren des eigenen Unternehmens tätigen, so genannte Director's Dealings.

Die Vorstandsmitglieder müssen die Richtigkeit der Finanzberichterstattung versichern. Diese beruht auf einer Vielzahl von Informationen aus allen Unternehmensbereichen. Alle beteiligten Mitarbeiter müssen daher die Richtigkeit und Vollständigkeit ihrer Beiträge sicherstellen.

### **Verbot von Insidergeschäften: Insiderwissen verpflichtet zu besonderer Verschwiegenheit und Zurückhaltung.**

Wer vertrauliche Informationen kennt, die geeignet sind, den Kurs der BMW Aktien oder Anleihen erheblich zu beeinflussen, ist Insider. Er darf seine so genannten Insiderinformationen nicht an Kollegen oder Dritte weitergeben. Ausnahmen bestehen nur, wenn Kollegen diese Informationen für ein konkretes Projekt benötigen. Keinesfalls dürfen Insider ihren Wissensvorsprung für eigene Geschäfte ausnutzen, sei es unmittelbar oder über Dritte. Dies bedeutet, dass ein Mitarbeiter für die Dauer seines Insiderwissens z.B. auf ein privates Aktiengeschäft verzichten muss.

### **Kursrelevante Unternehmensinformationen sind unverzüglich zu veröffentlichen.**

Zur Erfüllung der so genannten Ad-hoc-Mitteilungspflicht hat die BMW AG ein Ad-hoc-Gremium eingesetzt, das den jeweiligen Sachverhalt auf seine Kursrelevanz prüft und den Vorstand in Fragen der Ad-hoc-Publizität berät. Alle Mitarbeiter der BMW Group sind verpflichtet, dieses Gremium über ihre Führungskräfte zu informieren, falls Anzeichen bestehen, dass ein Sachverhalt den Kurs erheblich beeinflussen könnte.

### **Bei der Ausgabe neuer Wertpapiere ist Transparenz ein Muss.**

Alle Veröffentlichungen zu Neuemissionen von Aktien und Anleihen müssen richtig und vollständig sein. In den Prospekten und Unternehmensberichten dürfen keine Informationen fehlen, die zur Beurteilung des Emittenten und der ausgegebenen Wertpapiere erforderlich sind.

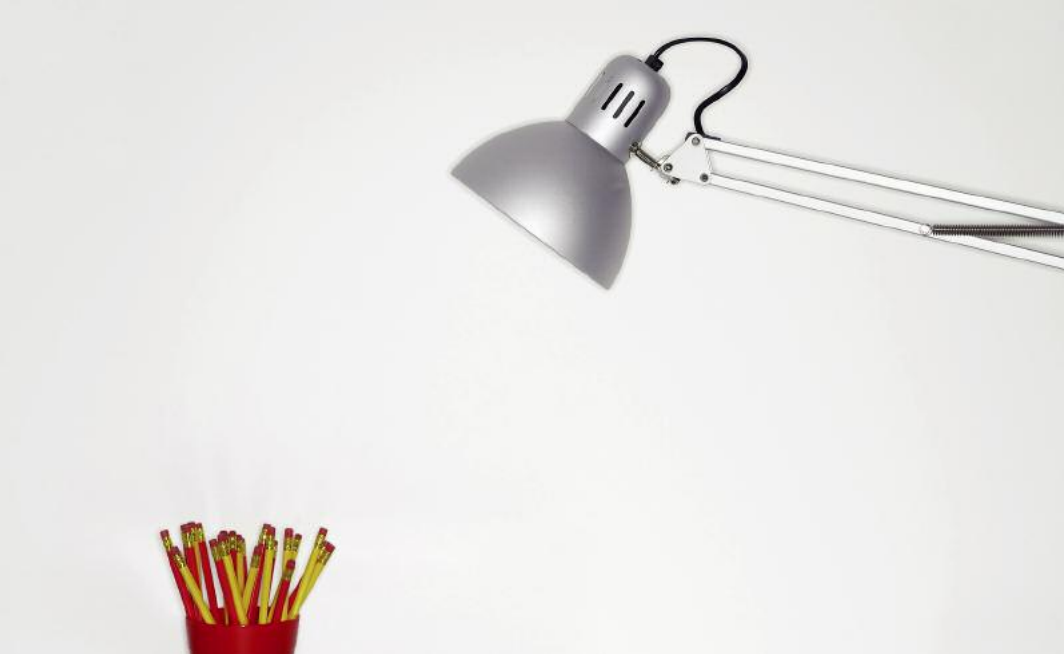

## 2.10. Umgang mit Behörden.

**Die Zusammenarbeit mit Behörden ist geprägt von gegenseitigem Vertrauen und Wertschätzung auf der Grundlage geltender Verfahrensregeln.**

Die BMW Group strebt ein kooperatives und von Transparenz geprägtes Verhältnis zu allen zuständigen Behörden und anderen hoheitlichen Stellen an. Gleichwohl legen wir Wert auf die Einhaltung der rechtlich vorgesehenen Verfahren bei Ermittlungen und anderen behördlichen Aktivitäten. Die Wahrnehmung von Verfahrensrechten ist ein wesentlicher und legitimer Bestandteil im Umgang der BMW Group mit Behörden. Zur Wahrung dieser Rechte und zur Begleitung des Dialogs etwa mit Aufsichts- und Ermittlungsbehörden sind die Mitarbeiter der BMW Group verpflichtet, die rechtsberatenden Unternehmensfunktionen einzubeziehen.

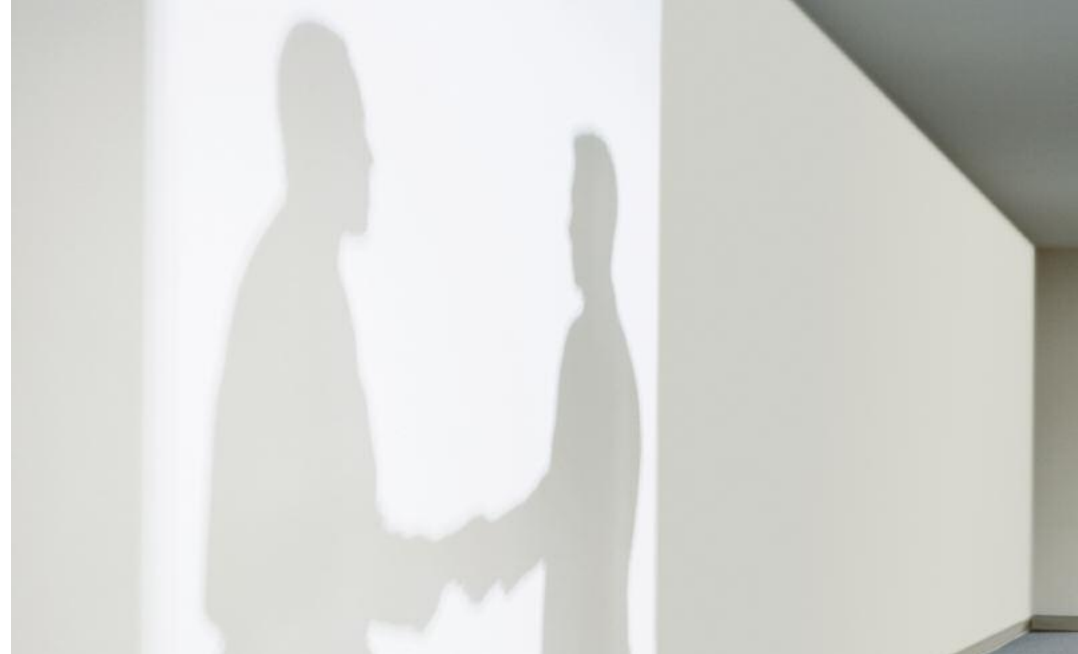

## 3. Umsetzung des Verhaltenskodexes.

**Alle Mitarbeiter müssen geltendes Recht einhalten.**

Jeder Mitarbeiter der BMW Group ist verpflichtet, diesen Verhaltenskodex einzuhalten. Es reicht nicht aus, ihn bloß zur Kenntnis zu nehmen. Vielmehr muss jeder Mitarbeiter sein Handeln anhand der vorstehenden Grundsätze überprüfen und danach ausrichten.

**Alle Führungskräfte haben die Beachtung dieses Kodexes in ihrem Verantwortungsbereich sicherzustellen.**

Jede Führungskraft ist verpflichtet, ihre Mitarbeiter über Inhalt und Bedeutung dieses Verhaltenskodexes zu informieren und zu sensibilisieren. Sie unterstützt ihre Mitarbeiter nach besten Kräften, rechtmäßig zu handeln. Falls es Anhaltspunkte für Rechtsverstöße gibt, ist diesen konsequent nachzugehen. Führungskräfte haben aus eigener Initiative regelmäßig die Beachtung des geltenden Rechts zu überprüfen und suchen hierzu das Gespräch mit ihren Mitarbeitern. Nur so ist gewährleistet, dass die in diesem Kodex niedergelegten Grundsätze täglich gelebt werden und fest in unserer Unternehmenskultur verankert bleiben.

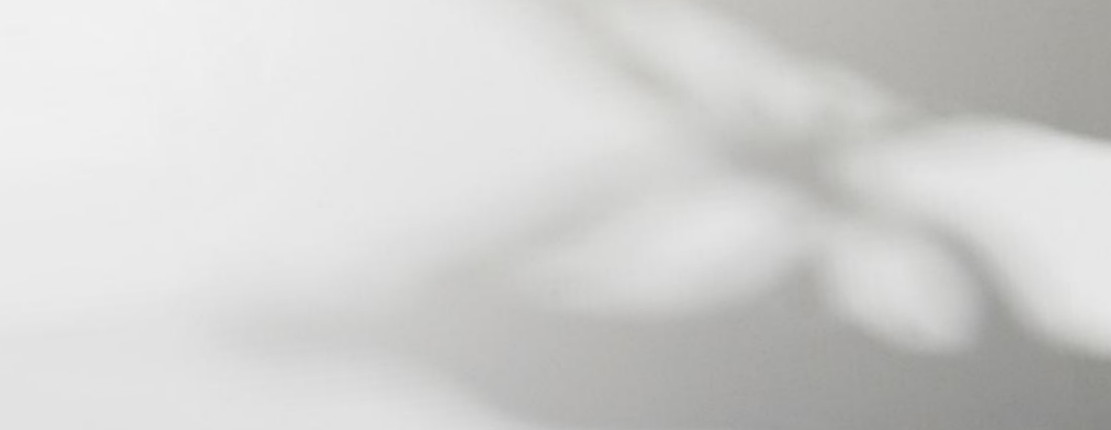

### **Mitarbeiter und Führungskräfte müssen die BMW Group Richtlinien kennen und beachten.**

Vielfach konkretisieren die Richtlinien der BMW Group das geltende Recht. Darüber hinaus stellen sie ergänzende, unternehmensinterne Regeln auf. Die Richtlinien der BMW Group sind für alle Mitarbeiter und Führungskräfte verbindlich. Jeder ist verpflichtet, sich über die für seinen Aufgabenbereich geltenden Richtlinien zu informieren.

### **Die BMW Group nimmt Rechtsverstöße ihrer Mitarbeiter nicht hin.**

Schuldhaftige Rechtsverletzungen von Mitarbeitern können arbeitsrechtliche Sanktionen, bis hin zur Beendigung des Arbeitsverhältnisses nach sich ziehen. Wenn durch Rechtsverstöße Schäden entstehen, kann dies zusätzlich eine persönliche Haftung des Mitarbeiters zur Folge haben. Ebenso können Strafen oder Geldbußen verhängt werden.

### **Das BMW Group Compliance Committee berichtet an den Vorstand.**

Das BMW Group Compliance Committee steuert und überwacht die erforderlichen Aktivitäten zur Einhaltung dieses Kodexes. Zu diesen Aktivitäten gehören: Trainings-, Informations- und Kommunikationsmaßnahmen, die Verfolgung von Rechtsverstößen und die Umsetzung von Compliance Anforderungen. Das Compliance Committee berichtet dem Vorstand regelmäßig über durchgeführte Untersuchungen, bekannt gewordene Verstöße und deren Sanktion sowie über Präventionsmaßnahmen der Fachstellen und sonstige Compliance Aspekte.

Alle Unternehmensbereiche berichten regelmäßig dem Compliance Committee. Die Mitarbeiter der BMW Group sind verpflichtet, an der Compliance Berichterstattung aktiv mitzuwirken.

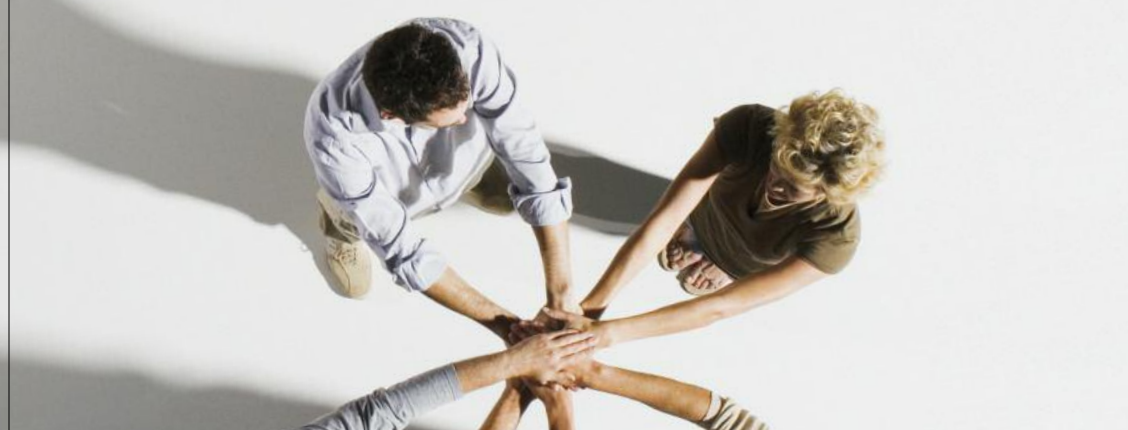

### **Fragen und Hinweise rund um den Verhaltenskodex beantwortet der Compliance Contact.**

Um Rechtsverstöße zu vermeiden, können sich alle Mitarbeiter mit ihren Fragen an ihre Führungskräfte und an die zuständigen Fachstellen der BMW Group wenden, insbesondere an die Rechtsabteilung, die Konzernrevision und die Konzernsicherheit. Daneben steht jedem Mitarbeiter der folgende Compliance Contact für weitere Informationen zur Verfügung.

**Telefon: +49 89 382-60000**

**E-Mail: [compliance@bmwgroup.com](mailto:compliance@bmwgroup.com)**

Hinweise auf Rechtsverstöße oder auf Risiken von Rechtsverstößen können an jede Führungskraft, die Konzernrevision, die Rechtsabteilung, die Konzernsicherheit oder den Compliance Contact gegeben werden. Das gleiche gilt, wenn Schwachstellen oder sonstige Umstände bemerkt werden, die zu Rechtsverstößen führen können.

### **Die Einhaltung und Umsetzung dieses Kodexes wird regelmäßig in der gesamten BMW Group überprüft.**

Die Beachtung und Umsetzung dieses Kodexes ist Gegenstand regelmäßiger Prüfungen der Konzernrevision. Hierzu wird die Konzernrevision auch vor Ort Unterlagen einsehen, Mitarbeiter befragen und Standortbesichtigungen durchführen.

Aus Gründen der einfacheren Lesbarkeit wird auf die geschlechtsneutrale Differenzierung, z. B. Mitarbeiter/Mitarbeiterinnen, verzichtet. Entsprechende Begriffe gelten im Sinne der Gleichbehandlung grundsätzlich für beide Geschlechter.



**Wandlungsfähigkeit**



**Wirksamkeit**

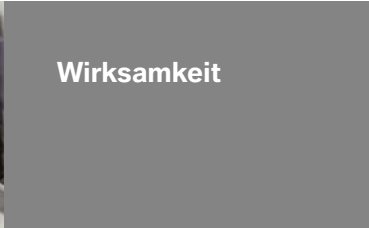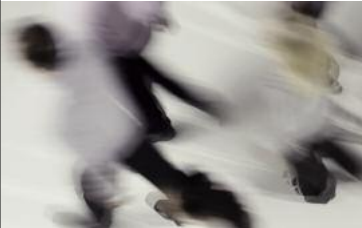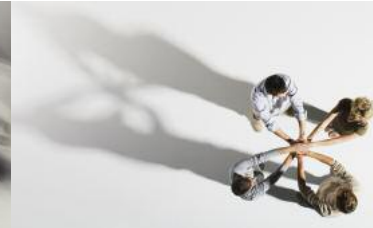

**Nachhaltigkeit**

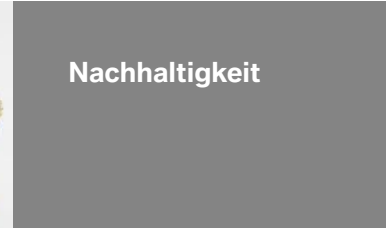

**Dissens**

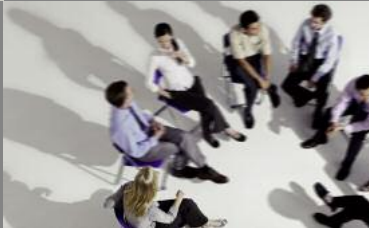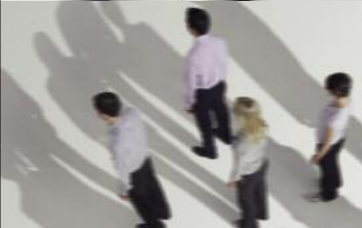

**Unabhängigkeit**

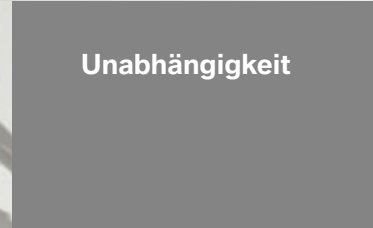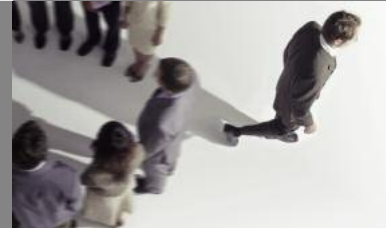

**Vorbildfunktion**

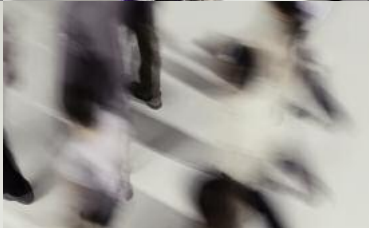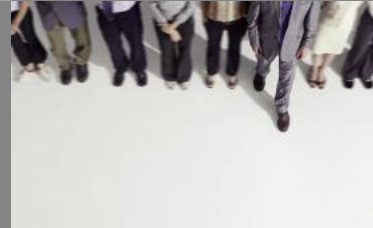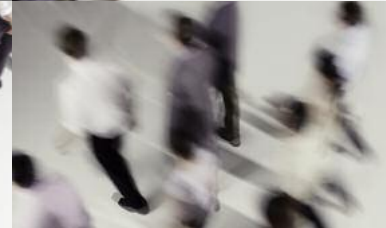

Supplement: Supplementary file 13 [file BMW Verhaltenskodex.pdf › Korpustexte/Korpustexte pdf/BMW/BMW Verhaltenskodex.pdf]
