# Supplementary material
Source: publisher site journal article supplement (https://www.degruyterbrill.com/publication/isbn/9783110432879/downloadAsset/9783110432879_Elektronischer_Anhang_2.zip)
Supplement: Supplementary file 2 [file Adidas Leitbild und Werte.pdf › Korpustexte/Korpustexte pdf/Adidas/Adidas Leitbild und Werte.pdf]

## VISION UND GOVERNANCE

Sozial- und Umweltbericht • 11

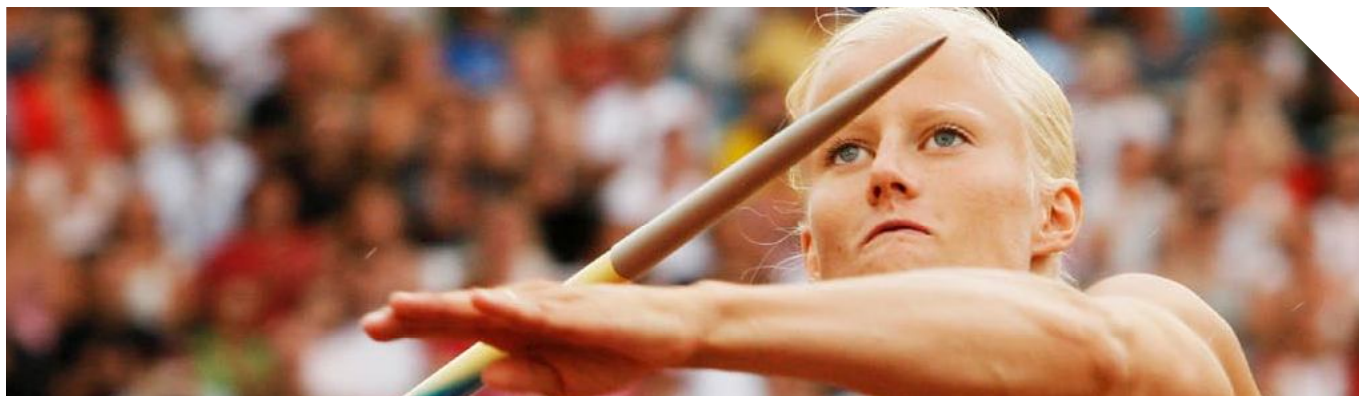

Bei dem Ziel, zum weltweit führenden Unternehmen der Sportartikelbranche zu werden, geht es nicht nur um Ergebnisse, sondern auch darum, wie diese Ergebnisse erreicht werden.

Wir zielen darauf ab, dass alle Bereiche unseres Konzerns – einschließlich unserer Beschaffungskette – einheitliche Wertvorstellungen vertreten und diese auch in die Praxis umsetzen. Ein entsprechender Rahmen hinsichtlich einer verantwortungsvollen Unternehmensführung (Corporate Governance) soll uns dabei helfen, diese Vision umzusetzen.

### LEITBILD UND WERTE

Unternehmensverantwortung ist fest in unseren Werten verankert:

**Leistung. Leidenschaft. Integrität. Vielfalt**

Diese Werte kommen aus der Welt des Sports und Sport ist die Seele des adidas Konzerns. Er ist die Verbindung zwischen unserer Vergangenheit und unserer Gegenwart – und er weist uns den Weg in die Zukunft.

Da alle Mitarbeiter des adidas Konzerns diese Werte verinnerlicht haben, können wir:

- Für Innovation sorgen und weltweit führende Produkte entwickeln;
- Gut zusammenarbeiten – über ethnische und regionale Unterschiede hinweg;
- Leistung erbringen und eine Führungsposition einnehmen, d.h. überragende Finanzergebnisse und Renditen erzielen und
- Die höchsten Standards der Unternehmensverantwortung in den Gemeinden, in denen wir tätig sind, einhalten.

Die Werte helfen uns, Marken zu entwickeln, die unsere Kunden überzeugen, und ein Unternehmen zu schaffen, dem unsere Stakeholder vertrauen können. Unternehmensverantwortung hat viele Facetten und durchdringt alle Bereiche und Aktivitäten des Unternehmens. Für den adidas Konzern bedeutet verantwortliches Handeln:

- Die Arbeitsbedingungen in den Fabriken unserer Zulieferer zu verbessern;
- Die Umweltauswirkungen sowohl durch unsere eigenen operativen Tätigkeiten als auch in unserer Beschaffungskette zu reduzieren;

- Uns um das Wohlergehen und die Entwicklung unserer Mitarbeiter zu kümmern;
- Für die Menschen in unseren Standortgemeinden positive Veränderungen herbeizuführen.

Um diese Aspekte der Verantwortung zu einem integralen Bestandteil unserer täglichen Arbeit zu machen, müssen sie in den Aufgaben und Zielen unserer zentralen Konzernfunktionen verankert werden.

Unsere Prinzipien der Nachhaltigkeit bilden den operativen Rahmen für unsere Entwicklung zu einem nachhaltigeren Unternehmen und die Grundlage für unsere Mission in den Bereichen Sozial- und Umweltangelegenheiten, Human Resources und gesellschaftliches Engagement.

### NACHHALTIGKEITSPRINZIPIEN

#### Rechtliche Vorschriften

Wir tragen Sozial- und Umweltgesetzen, -direktiven und -richtlinien Rechnung und sind fortlaufend um die Verbesserung unseres Beitrags zu einer Gesellschaft bemüht, die sich an den Prinzipien einer nachhaltigen Entwicklung orientiert.

#### Management

Wir haben es uns zum Ziel gesetzt:

- Die sozialen und ökologischen Auswirkungen unserer Produkte, Technologien und Verfahren bereits im Design- und Entwicklungsstadium zu analysieren und zu bewerten;
- Eindeutige Ziele festzulegen, Aktionspläne zu formulieren und unsere Fortschritte zu überwachen;
- Die jeweiligen Ergebnisse zu veröffentlichen.

#### Beziehung zu Zulieferern und Kunden

Wir erwarten, dass die Aktivitäten unserer Zulieferer mit unseren ‚Workplace Standards‘ übereinstimmen. Wir arbeiten partnerschaftlich mit ihnen zusammen, um ihre wie auch unsere Leistung zu verbessern. Unsere Geschäftspartner regen wir dazu an, aktiv auf die sozialen und umweltrelevanten Auswirkungen ihrer Aktivitäten Einfluss zu nehmen.

#### Unterstützung

Wir unterstützen soziale und Umweltschutzprojekte und gehen Partnerschaften mit Unternehmen und Organisationen ein, die direkt oder indirekt zu einer nachhaltigen Entwicklung beitragen.
