# Supplementary material
Source: publisher site journal article supplement (https://www.degruyterbrill.com/publication/isbn/9783110432879/downloadAsset/9783110432879_Elektronischer_Anhang_2.zip)
Supplement: Supplementary file 3 [file Allianz GB 2010 Zusatzinformationen.pdf › Korpustexte/Korpustexte pdf/Allianz/Allianz GB 2010/Allianz GB 2010 Zusatzinformationen.pdf]

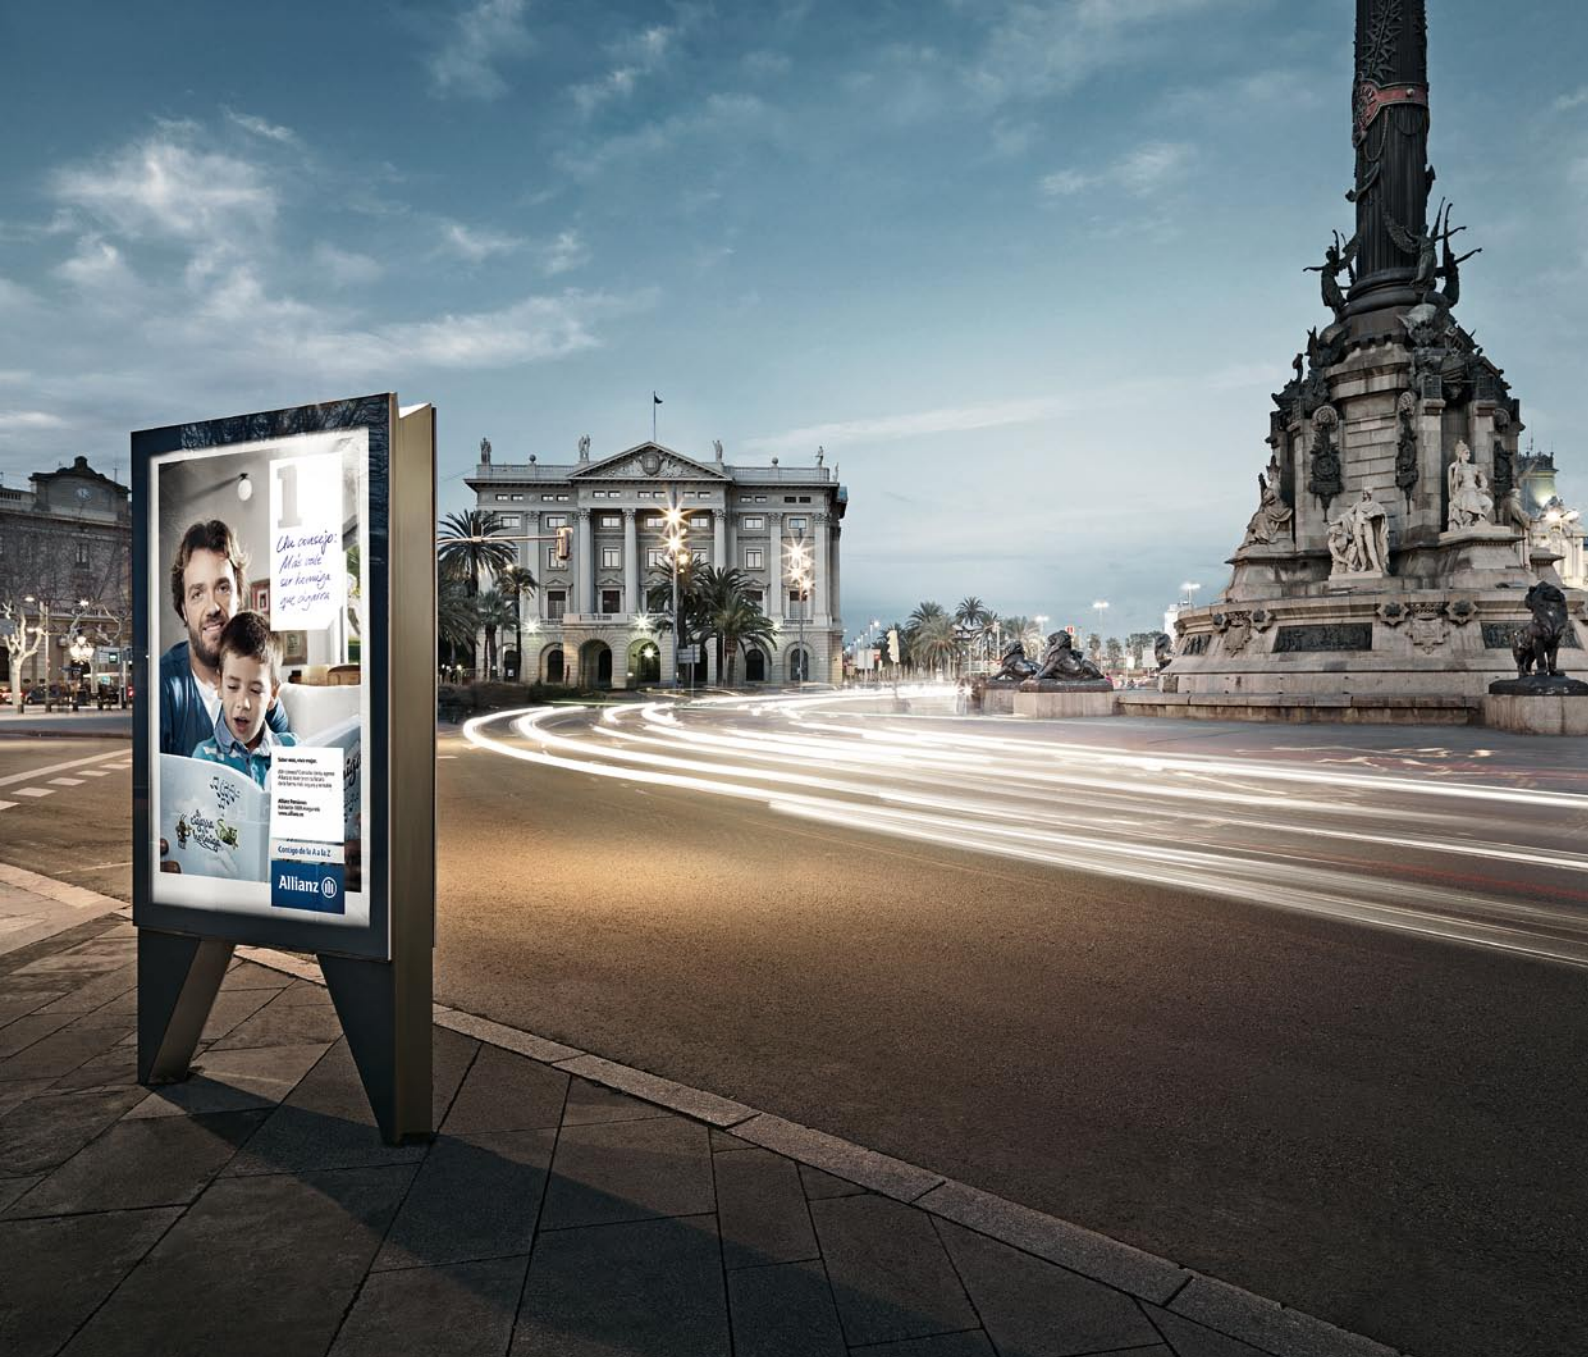

# Allianz Gruppe

## **Geschäftsbericht 2010**

### Zusatzinformationen

Ungeprüft

**Allianz** 

# Inhalt

- 1    Geschäftsbereiche und Märkte**
- 18   Unsere Strategie**
- 21   Die Marke Allianz**
- 25   Unsere Mitarbeiter**
- 29   Nachhaltige Entwicklung**

# Geschäftsbereiche und Märkte

Die Allianz ist in etwa 70 Ländern tätig und bietet mehr als 76 Millionen Kunden eine Vielfalt von Versicherungs- und Vermögensverwaltungsprodukten an. Als ein weltweit führender, globaler Finanzdienstleister zählen wir in 32 Märkten zu den Top-5-Anbietern.

## Unser Geschäft

Wir bedienen unsere Kunden vornehmlich in drei Geschäftssegmenten: Schaden- und Unfallversicherung, Lebens- und Krankenversicherung sowie Asset Management. Darüber hinaus weisen wir unter dem Segment Corporate und Sonstiges unser Bankgeschäft und sonstige ergänzende Tätigkeiten aus. Unsere sechs Geschäftsbereiche und ihre jeweiligen

Vorstände verwalten unsere globalen und regionalen Geschäftssparten und Gesellschaften, während die anderen vier Vorstände, unter ihnen der Vorstandsvorsitzende, konzernweite Funktionen wie Finanzen, Controlling und Operations leiten.

### Vorstandsmitglieder und ihre Aufgabenbereiche 2010 und 2011<sup>1</sup>

| Aufgaben/Geschäftsbereiche                                        | Vorstandsmitglied                                                                          |
|-------------------------------------------------------------------|--------------------------------------------------------------------------------------------|
| <b>Funktional</b>                                                 |                                                                                            |
| Chairman of the Board of Management                               | Michael Diekmann                                                                           |
| Finance                                                           | Dr. Paul Achleitner                                                                        |
| Controlling, Reporting, Risk                                      | Oliver Bäte                                                                                |
| <b>Geschäftsbereiche</b>                                          |                                                                                            |
| Insurance Growth Markets                                          | Dr. Werner Zedelius (bis 31. Dezember 2010)<br>Manuel Bauer (seit 1. Januar 2011)          |
| Global Insurance Lines & Anglo Markets                            | Clement B. Booth                                                                           |
| Insurance Europe, South America, Africa                           | Enrico Cucchiani                                                                           |
| Asset Management Worldwide                                        | Dr. Joachim Faber                                                                          |
| Operations, Assistance Service                                    | Dr. Christof Mascher                                                                       |
| Insurance NAFTA Markets                                           | Jay Ralph                                                                                  |
| Insurance German Speaking Countries, Human Resources <sup>2</sup> | Dr. Gerhard Rupprecht (bis 31. Dezember 2010)<br>Dr. Werner Zedelius (seit 1. Januar 2011) |

## Versicherungsgeschäft

Für unsere Privat- und Firmenkunden halten wir eine große Auswahl von Schaden- und Unfall- sowie Lebens- und Krankenversicherungsprodukten bereit. Wir sind der weltweit führende Anbieter in der Schaden- und Unfallversicherung und zählen zu den Top 5 im Lebens- und Krankenversicherungsgeschäft. Die meisten Versicherungsmärkte werden über örtliche Allianz Gesellschaften bedient, während ausgewählte

<sup>1</sup> Weitere Informationen zur Vergütungsstruktur einschließlich Zielen und Leistungsbeurteilung finden sich im Vergütungsbericht des Geschäftsberichtes 2010.

<sup>2</sup> Seit dem 1. Januar 2011 überwacht Dr. Werner Zedelius die internationale Personalstrategie und sämtliche Personalfunktionen.

Geschäftsbereiche (Global Corporate Customers, Kreditversicherung, Assistance-Leistungen, Worldwide Care, Rückversicherung) global agieren.

Weitere Informationen über unsere größten Versicherungsmärkte finden sich ab Seite 5.

#### Auswahl des Produktportfolios

|                 | Schaden- und Unfallversicherung                                                                                                                                                                                                                                      | Lebens- und Krankenversicherung                                                                                                                                                                                                                 |
|-----------------|----------------------------------------------------------------------------------------------------------------------------------------------------------------------------------------------------------------------------------------------------------------------|-------------------------------------------------------------------------------------------------------------------------------------------------------------------------------------------------------------------------------------------------|
| Privatkunden    | <ul style="list-style-type: none"> <li>– Kraftfahrzeug (Haftpflicht und Kasko)</li> <li>– Haftpflicht</li> <li>– Bauen und Wohnen</li> <li>– Unfall</li> <li>– Reise und Assistance</li> </ul>                                                                       | <ul style="list-style-type: none"> <li>– Kapitallebensversicherung</li> <li>– Rentenprodukte</li> <li>– Risikolebensversicherung</li> <li>– Invalidität</li> <li>– Anlageorientierte Produkte</li> <li>– Private Krankenversicherung</li> </ul> |
| Geschäftskunden | <ul style="list-style-type: none"> <li>– Schadenversicherung</li> <li>– Haftpflicht</li> <li>– Fahrzeugflotten</li> <li>– Directors-and-Officers-Versicherung</li> <li>– Kreditversicherung</li> <li>– Schifffahrt-, Luftfahrt- und Transportversicherung</li> </ul> | <ul style="list-style-type: none"> <li>– Gruppen-Lebensversicherungen</li> <li>– Rentenprodukte für Mitarbeiter</li> </ul>                                                                                                                      |

#### Asset Management

Wir gehören weltweit zu den größten aktiven Vermögensverwaltern. Das gesamte von unserem Asset Management verwaltete Vermögen belief sich zum 31. Dezember 2010 auf mehr als 1 500 Milliarden Euro. Unsere diesbezüglichen Geschäftsaktivitäten umfassen Produkt- und Serviceangebote für Drittinvestoren sowie für die Versicherungsgesellschaften der Allianz Gruppe.

Wir betreuen eine Vielfalt privater und institutioneller Investoren. Zu unseren institutionellen Kunden gehören Pensionsfonds, Versicherungsunternehmen und andere Finanzdienstleister, Regierungen, Stiftungen und Finanzberater. Unsere Vermögensverwaltung für Privatkunden wird von unseren weltweit tätigen operativen Gesellschaften fast durchgängig unter der Marke Allianz Global Investors (AGI) betrieben. Im Asset Management für institutionelle Investoren tritt

AGI unter der jeweiligen Marke unserer Vermögensverwaltungsgesellschaften auf (PIMCO, RCM, AGI Capital).

Zum 31. Dezember 2010 verwaltete AGI Kapitalanlagen für Dritte von 1,1 Billionen Euro, und zwar sowohl von privaten als auch von institutionellen Kunden. Der Anteil von AGI stellt damit 98,4 (2009: 97,4) Prozent unserer gesamten verwalteten Drittgelder in aller Welt dar. AGI ist global mit Investment- und Vertriebskapazitäten in sämtlichen Hauptmärkten mit besonderem Augenmerk auf die USA, Deutschland sowie Frankreich, Italien, Großbritannien und den asiatisch-pazifischen Raum vertreten. Durch unsere Beteiligung am Joint Venture Guotai Allianz Finance Management sind wir auch in China tätig. In Indien sind wir über Bajaj Allianz Global Investors, ein Joint Venture mit Bajaj, vertreten.

#### Auswahl des Produktangebots

|                                    | Aktien                                                                                                                                                                                                           | Festverzinslich                                                                                                                                                                                                                                                                   |
|------------------------------------|------------------------------------------------------------------------------------------------------------------------------------------------------------------------------------------------------------------|-----------------------------------------------------------------------------------------------------------------------------------------------------------------------------------------------------------------------------------------------------------------------------------|
| Private und institutionelle Kunden | <ul style="list-style-type: none"> <li>– systematisch</li> <li>– Sektorenfonds</li> <li>– Länderfonds</li> <li>– Stocks Plus</li> </ul>                                                                          | <ul style="list-style-type: none"> <li>– Geldmarkt</li> <li>– kurze Duration</li> <li>– reale Rendite</li> <li>– global</li> <li>– Investment Grade</li> <li>– diversifizierte Erträge</li> <li>– hochrentierlich</li> <li>– Schwellenmärkte</li> <li>– Wandelanleihen</li> </ul> |
|                                    | <b>Alternative Anlagen</b> <ul style="list-style-type: none"> <li>– Hedgefonds-Dachfonds</li> <li>– Rohstofffonds</li> <li>– Zertifikatefonds</li> <li>– Immobilien</li> <li>– strukturierte Produkte</li> </ul> | <b>Lösungen</b> <ul style="list-style-type: none"> <li>– Lebenszyklus-Konzepte</li> <li>– Multi-Asset-Lösung</li> <li>– variable Rentenprodukte</li> <li>– Asset Liability Management</li> <li>– Risikomanagement-Konzepte</li> </ul>                                             |

## Corporate und Sonstiges

Die folgenden vier Funktionsbereiche gehören zum Segment Corporate und Sonstiges: der des Vorstandsvorsitzenden, die Bereiche Controlling/Reporting/Risk und Finanzen sowie jener des Chief Operating Officer. Folgende Tätigkeiten sind innerhalb von Corporate und Sonstiges gebündelt: Geschäftssteuerung und -unterstützung der Allianz Gruppe durch die Bereiche Strategie, Risikomanagement, Corporate Finance und Treasury, Finanzcontrolling, Kommunikation, Recht, Personal sowie IT ebenso wie das Bankgeschäft und der Bereich Alternative Investments.

### Bankgeschäft

Unser Bankgeschäft unterstützt unser Versicherungsgeschäft und rundet unser Produktangebot in Deutschland, Italien, Frankreich sowie Mittel- und Osteuropa ab. Im Bankgeschäft konzentrieren wir uns auf unseren Kernmarkt Deutschland unter dem Markennamen Allianz Bank. Allianz Banking Germany ist ein Geschäftsbereich der Allianz Deutschland AG und umfasst die Oldenburgische Landesbank AG sowie jene Bankkunden, die ursprünglich von Allianz Vertretern für die Dresdner Bank geworben worden waren. Die Oldenburgische Landesbank AG ist unser Hauptanbieter von Bankprodukten in Deutschland. Die Bank konzentriert sich zwar im Wesentlichen auf Privatkunden, bietet jedoch auch eine Vielzahl von Produkten für Firmen- wie Privatkunden an. Neben unseren Bankaktivitäten ist auch der Vertrieb von Bankprodukten über unser deutsches Vertreternetz wichtig. Die Anzahl der Zweigniederlassungen und der Bankagenturen der Allianz Bank, die integrierte Finanzdienstleistungen und -produkte anbieten, hat sich von 130 auf 694 erhöht. Weitere Bankagenturen sollen im Lauf des Jahres 2011 zertifiziert werden. Wegen seiner geringen Größe wird unser Bankgeschäft als Teil des Segments Corporate und Sonstiges geführt.

Im Rahmen unseres laufenden Portfoliomanagements haben wir unser Bankgeschäft in Ungarn und Polen untersucht und beschlossen, Allianz Bank Zrt., Budapest (2010 abgeschlossen) und Allianz Bank Polska SA (für 2011 erwartet) zu verkaufen.

## Weltweite Präsenz und Geschäftsbereiche

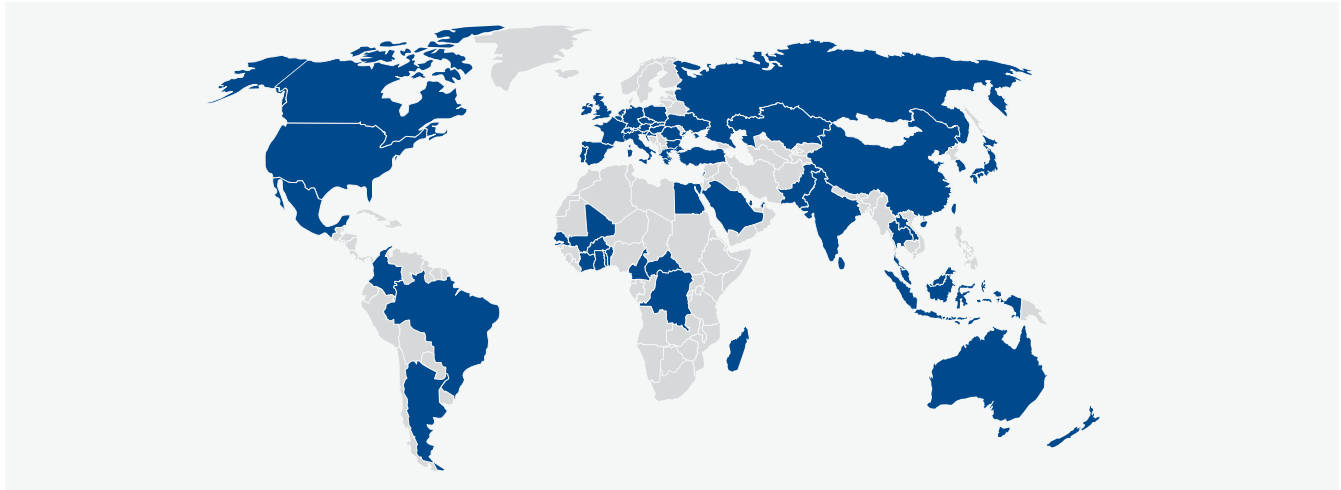

### Versicherung German Speaking Countries

|       |        |   |             |
|-------|--------|---|-------------|
| ● I.  | ● I.   | ● | Deutschland |
| ● II. | ● II.  |   | Schweiz     |
| ● II. | ● III. |   | Österreich  |

### Versicherung Europe, South America, Africa

|        |        |   |              |
|--------|--------|---|--------------|
| ● II.  | ● II.  | ● | Italien      |
| ● II.  | ● IV.  |   | Spanien      |
| ● III. | ● III. |   | Portugal     |
| ● III. | ● III. |   | Griechenland |
| ● II.  | ● III. |   | Türkei       |
| ● II.  | ● III. | ● | Frankreich   |
| ● III. | ● III. |   | Belgien      |
| ● II.  | ● III. |   | Niederlande  |
| ● IV.  | ● IV.  |   | Luxemburg    |

#### Südamerika

|        |        |  |             |
|--------|--------|--|-------------|
| ● IV.  |        |  | Argentinien |
| ● III. | ● III. |  | Brasilien   |
| ● II.  | ● III. |  | Kolumbien   |

#### Afrika

|       |       |  |                              |
|-------|-------|--|------------------------------|
| ● II. |       |  | Benin                        |
| ● II. | ● II. |  | Burkina Faso                 |
| ● II. | ● I.  |  | Kamerun                      |
| ● II. |       |  | Zentralafrikanische Republik |
| ● —   |       |  | Ghana                        |
| ● II. | ● II. |  | Elfenbeinküste               |
| ● II. | ● —   |  | Madagaskar                   |
| ● II. |       |  | Mali                         |
| ● I.  | ● II. |  | Senegal                      |
| ● II. |       |  | Togo                         |

### Versicherung NAFTA Markets

|       |        |  |        |
|-------|--------|--|--------|
| ● IV. | ● III. |  | USA    |
| ● IV. | ● IV.  |  | Mexiko |

### Global Insurance Lines & Anglo Markets

|        |       |   |                                        |
|--------|-------|---|----------------------------------------|
| ● III. |       |   | Großbritannien                         |
| ● II.  | ● IV. | ● | Australien                             |
| ● II.  |       |   | Irland                                 |
| ● II.  |       |   | Allianz Global Corporate and Specialty |
| ● I.   |       |   | Kreditversicherung                     |
| ● —    | ● —   |   | Rückversicherung                       |
| ● —    | ● —   |   | Allianz Worldwide Care                 |

### Versicherung Growth Markets

#### Asien

|        |        |  |            |
|--------|--------|--|------------|
| ● I.   |        |  | Brunei     |
| ● IV.  | ● IV.  |  | China      |
| ● IV.  |        |  | Hongkong   |
| ● II.  | ● II.  |  | Indien     |
| ● III. | ● II.  |  | Indonesien |
| ● IV.  | ● IV.  |  | Japan      |
| ● I.   | ● I.   |  | Laos       |
| ● I.   | ● III. |  | Malaysia   |
| ● —    | ● —    |  | Pakistan   |
| ● IV.  |        |  | Singapur   |
| ● III. | ● III. |  | Sri Lanka  |
|        | ● III. |  | Südkorea   |
|        | ● III. |  | Taiwan     |
| ● IV.  | ● III. |  | Thailand   |

#### Zentral- und Osteuropa

|       |        |   |                       |
|-------|--------|---|-----------------------|
| ● II. | ● I.   | ● | Bulgarien             |
| ● II. | ● I.   |   | Kroatien              |
| ● II. | ● III. |   | Tschechische Republik |
| ● I.  | ● II.  | ● | Ungarn                |
| ● II. |        |   | Kasachstan            |
| ● II. | ● II.  | ● | Polen                 |
| ● II. | ● III. |   | Rumänien              |
| ● II. | ● III. |   | Russland              |
| ● I.  | ● I.   |   | Slowakei              |
| ● IV. |        |   | Ukraine               |

### Versicherung Growth Markets

#### Mittlerer Osten und Nordafrika

|        |        |  |               |
|--------|--------|--|---------------|
| ● IV.  | ● III. |  | Bahrain       |
| ● III. | ● II.  |  | Ägypten       |
| ● II.  | ● II.  |  | Libanon       |
|        | ● —    |  | Qatar         |
| ● III. | ● III. |  | Saudi-Arabien |

### Asset Management

#### Amerika

|   |   |  |        |
|---|---|--|--------|
| ● | ● |  | USA    |
| ● |   |  | Kanada |

#### Europa/Mittlerer Osten

|   |   |  |                       |
|---|---|--|-----------------------|
| ● | ● |  | Deutschland           |
| ● | ● |  | Frankreich            |
| ● | ● |  | Italien               |
| ● | ● |  | Portugal              |
| ● | ● |  | Spanien               |
| ● | ● |  | Schweiz               |
| ● | ● |  | Österreich            |
| ● | ● |  | Niederlande           |
| ● | ● |  | Großbritannien        |
| ● | ● |  | Skandinavische Länder |
| ● | ● |  | Mittlerer Osten       |

#### Asien-Pazifik

|   |   |  |            |
|---|---|--|------------|
| ● | ● |  | Japan      |
| ● | ● |  | Hongkong   |
| ● | ● |  | Taiwan     |
| ● | ● |  | Singapur   |
| ● | ● |  | Südkorea   |
| ● | ● |  | China      |
| ● | ● |  | Indien     |
| ● | ● |  | Australien |

● Schaden- und Unfallversicherung ● Lebens- und Krankenversicherung ● Bankgeschäft ● Private Kunden Asset Management ● Institutionelle Kunden Asset Management  
Marktposition im Versicherungsgeschäft nach Bruttobeiträgen: <sup>1</sup> I. Position 1 II. Position 2 bis 5 III. Position 6 bis 10 IV. nicht unter den Top 10

### Reiseversicherung und Assistance-Leistungen

Mit der Mondial Assistance Gruppe sind wir nach Umsätzen<sup>1</sup> der weltweit größte Anbieter von Reiseversicherungen und Assistance-Leistungen. Mondial Assistance ist eine unserer schnell wachsenden Einheiten, die neue Märkte erobert und erfolgreich neue, äußerst differenzierte Produkte entwickelt. Die von Mondial Assistance bereitgestellten Dienstleistungen werden teilweise zusammen mit unseren Versicherungsprodukten angeboten und bereichern so unser globales Portfolio.

<sup>1</sup> Quelle: nach eigenen lokalen Schätzungen. Stand: 2009



## Unsere größten Versicherungsmärkte

Die folgenden Abschnitte bieten einen Überblick über unser Geschäft in unseren größten Versicherungsmärkten nach Geschäftsbereichen.

### Versicherung German Speaking Countries

| Ausgewählte Märkte |      | Kfz/Nicht-Kfz als % der ges. Bruttobeiträge Schaden- und Unfallversicherung |      | traditionell/nichttraditionell als % der ges. Bruttobeiträge Leben <sup>1</sup> |  | Bruttobeitrags-einnahmen | Operatives Ergebnis | Anzahl Kunden <sup>2</sup> (Mio) | Eigene Netzwerke <sup>3</sup> (Tsd) | Anzahl Makler (Tsd) | Anzahl Mitarbeiter (Tsd) |
|--------------------|------|-----------------------------------------------------------------------------|------|---------------------------------------------------------------------------------|--|--------------------------|---------------------|----------------------------------|-------------------------------------|---------------------|--------------------------|
| Deutschland        | I.   | 35% 65%                                                                     | I.   | 79% 21%                                                                         |  | 28 183 Mio €             | 1 771 Mio €         | 19,3                             | 15,2                                | 10,4                | 28,3                     |
| Schweiz            | II.  | 49% 51%                                                                     | II.  | 39% 61%                                                                         |  | 2 891 Mio €              | 229 Mio €           | 1,0                              | 1,0                                 | 0,7                 | 2,0                      |
| Österreich         | III. | 44% 56%                                                                     | III. | 80% 20%                                                                         |  | 1 288 Mio €              | 99 Mio €            | 1,1                              | 1,4                                 | 0,8                 | 2,9                      |

● Schaden- und Unfallversicherung ● Lebens- und Krankenversicherung

Marktposition nach Bruttobeiträgen:<sup>4</sup> I. Position 1 II. Position 2 bis 5 III. Position 6 bis 10 IV. nicht unter den Top 10

#### Deutschland

Wir bieten unseren Kunden in Deutschland eine breite Palette an Versicherungs- und Finanzprodukten über die Allianz Deutschland AG an. Produkte werden von unseren operativen Einheiten Allianz Versicherungs-AG (Allianz Sach), Allianz Lebensversicherungs-AG (Allianz Leben) und Allianz Private Krankenversicherungs-AG (Allianz Private Kranken) bereitgestellt. Seit 2009 bietet die Allianz in Deutschland (unter anderem über die Oldenburgische Landesbank AG und die Allianz Bank) ein breites Sortiment von Bankprodukten an. Unsere Produkte werden hauptsächlich über ein Netz hauptberuflicher, ausschließlich in unserem Namen arbeitender Agenten verkauft. Seit September 2010 vertreiben alle Niederlassungen der Commerzbank Produkte der Allianz, was die Bedeutung des Bankenvertriebskanals steigern wird. Die Allianz Beratungs- und Vertriebs-AG fungiert als Vertriebsgesellschaft.

Als führender Anbieter im deutschen Markt für **Schaden- und Unfallversicherung** bieten wir ein breit gefächertes Sortiment von Versicherungsprodukten für Privat- und Gewerbekunden an. Der deutsche Markt für Schaden- und Unfallversicherung ist bereits stark gesättigt und zeichnet sich durch einen hohen Wettbewerbsdruck aus. 2010 litt unser Autoversicherungsgeschäft darunter, dass wir das Flottengeschäft von unrentablen Risiken befreien und weniger Fuhrparks von Gewerbekunden versicherten. Außerdem gab es im Firmenkundengeschäft ohne die Autoversicherung einen erheblichen Preisdruck.

In der **Lebensversicherung** sind wir sowohl im Privatkunden- als auch im Firmenkundengeschäft tätig und bieten dort eine breite Palette von Lebensversicherungen und lebensversicherungsnahen Produkten an. Die wichtigsten Produktgruppen sind Rentenprodukte sowie Kapital- und Risikolebensversicherungen. Ferner bieten wir unseren Firmenkunden Gruppenversicherungen sowie Lösungen für Betriebsrenten und die beitragsorientierte Altersvorsorge an. 2010 konnten wir unseren Marktanteil bei traditionellen Lebensversicherungsprodukten erhöhen, und zwar sowohl mit Einzel- als auch mit Gruppenverträgen. Unsere selektive Absatzpolitik führte zu Marktanteilverlusten bei kurzfristigen Kapitalisierungsprodukten.

<sup>1</sup> Wir definieren IFRS-Prämien als „traditionell“ und Einlagen aus Versicherungs- und Investmentverträgen als „nichttraditionell“. Dies gilt auch für die folgenden Seiten.  
<sup>2</sup> Kundenzahlen sind nicht direkt mit nebenstehenden Finanzkennzahlen vergleichbar. Auch Länderspezifika sind nicht enthalten (z. B. Mikroversicherung, Pensionsfonds und Tierversicherung). Dies gilt auch für die folgenden Seiten.  
<sup>3</sup> Einschließlich Agenten und Finanzberater. Dies gilt auch für die folgenden Seiten.  
<sup>4</sup> Quelle: nach eigenen lokalen Schätzungen. Stand: 2009. Dies gilt auch für die folgenden Seiten.

Über Allianz Private Kranken bieten wir eine umfassende Auswahl von **Krankenversicherungsprodukten** an, darunter private Krankenvoll-, Krankenzusatz- und Pflegeversicherungen sowie Auslandsreisekrankenversicherungen. Für unser Krankenversicherungsgeschäft mit seinen beiden Basisprodukten – Krankenvollversicherung und Krankenzusatzversicherung – haben sich die politischen Rahmenbedingungen für das Gesundheitswesen in letzter Zeit verbessert. So wurde beispielsweise die Wartezeit für einen Wechsel von einer gesetzlichen Krankenkasse in eine private Krankenversicherung zum 1. Januar 2011 von drei Jahren auf nur mehr ein Jahr verkürzt. Wir erwarten eine zunehmende Nachfrage bei beiden Produkten. Dank der strategischen Partnerschaft der Allianz Private Krankenversicherungs-AG mit der KKH-Allianz verfügen wir über einen großen Vertriebskanal für Zusatzprodukte.

In der Schaden- und Unfallversicherung erwarten wir ein unverändert schwieriges Marktumfeld mit leicht ansteigenden Beiträgen, vor allem in der Autoversicherung. Gleichwohl besteht unsere größte Herausforderung darin, unsere Rentabilität zu wahren, indem wir unsere disziplinierte Zeichnungspolitik verstärken und ein effektives Schadenmanagement betreiben. Des Weiteren werden wir unsere Zusammenarbeit mit Automobilherstellern verstärken und unsere Position im Direktmarkt unter der Marke AllSecur weiter ausbauen. In der Lebensversicherung erwarten wir Wachstumschancen, die sich aus dem steigenden Bedarf an Altersvorsorgelösungen für Privatkunden sowie allgemein an Rentenprodukten ergeben. Um unsere Position im deutschen Markt zu verstärken, bauen wir unsere auf den Kunden ausgerichtete Organisation weiter aus und zielen darauf ab, unseren Kunden für alle Lebensphasen spartenübergreifende Produkte aus sämtlichen Segmenten anzubieten.

## Österreich

Unsere österreichischen Gesellschaften Allianz Elementar Versicherungs-AG und Allianz Elementar Lebensversicherungs-AG bieten Privat- und Geschäftskunden in den Segmenten Schaden- und Unfallversicherung sowie Lebens- und Krankenversicherung ein breites Produktsortiment an. Den Vertrieb übernehmen vorwiegend fest angestellte Außendienstmitarbeiter, Ausschließlichkeitsvertreter und Makler.

Der Wettbewerbsdruck im österreichischen Markt für **Schaden- und Unfallversicherung** ist sehr hoch, insbesondere in der Autoversicherung, in der ein hoher Preisdruck herrscht. Dennoch – und obwohl die Inflationsanpassung im Bestandgeschäft marginal war – gelang es der Allianz, 2010 das Beitragsniveau des Vorjahres zu halten und die gute Rentabilität zu wahren.

In Österreich bieten wir neben traditionellen **Lebens- und Krankenversicherungen** auch staatlich geförderte sowie fondsgebundene anlageorientierte Produkte an. 2010 verzeichnete der österreichische Lebensversicherungsmarkt die stärksten Impulse im Einmalprämiengeschäft des Bankassurance-Vertriebs. Da die Allianz keine Produkte über den Bankassurance-Kanal vertreibt, konnten wir an diesem Trend nicht teilhaben und mussten daher einen Beitragsrückgang hinnehmen. Dennoch hält die Allianz nach wie vor eine gute Wettbewerbsposition sowohl im traditionellen Markt als auch im Firmenkundengeschäft. In den letzten Jahren hat die Allianz den Markt in Bezug auf Rentabilität übertreffen können.

Für die nächsten Jahre erwarten wir eine leichte Verbesserung der Marktpreise im Autoversicherungsgeschäft. Kurzfristig werden wir uns darauf konzentrieren, unser gutes Rentabilitätsniveau zu bewahren und von unserem erstklassigen fachlichen Know-how zu profitieren. Die Allianz wird auch weiterhin in erster Linie auf die Rentabilität der Gesellschaft achten. Wir sind davon überzeugt, dass der österreichische Markt erhebliches mittelfristiges Wachstumspotenzial bietet, sobald sich die Bedingungen in den Finanzmärkten weiter verbessern.



## Schweiz

Im Schweizer Markt für Schaden- und Unfallversicherung sind wir durch die Allianz Suisse Versicherungs-Gesellschaft AG sowie über CAP Rechtsschutz AG und Quality 1 vertreten. Die Tochtergesellschaften Alba Allgemeine Versicherungs-Gesellschaft AG, Phenix Versicherungsgesellschaft AG und Phenix Lebensversicherungsgesellschaft AG wurden 2010 an die Helvetia Gruppe verkauft.

Die größte und bedeutendste Sparte in der **Schaden- und Unfallversicherung** ist die Autoversicherung, in der wir nach Umsätzen einen Marktanteil von rund 16 Prozent halten.<sup>1</sup> Neben der Autoversicherung bieten wir Privat- und Firmenkunden ein breites Sortiment von Sach-, Haftpflicht-, Unfall- und Krankenversicherungsleistungen an. Im Jahr 2010 erlebten wir einen starken Preisdruck, vor allem in der Autoversicherung, und allgemein einen verschärften Wettbewerb im Schaden- und Unfallgeschäft. In der Gewerbe- und Unfallversicherung wuchsen wir kräftig. Mit der Einführung des „FIT for the future“-Programms im Jahr 2009 – unsere Initiative zur Kostenreduktion, Re-Organisation und Steigerung der Kundenorientierung – haben wir unsere Kundenorientierung verstärkt und eine neue, kosteneffiziente Struktur eingeführt, die dem Zielbetriebsmodell des Konzerns entspricht.

Über die Allianz Suisse Lebensversicherungs-Gesellschaft AG bieten wir zahlreiche **Lebensversicherungsprodukte** für das Individual- und Gruppengeschäft an, darunter Altersvorsorge- und Risikolebens- sowie Berufsunfähigkeitsversicherungen. Der Verkauf fondsgebundener Produkte litt immer noch unter den Auswirkungen der Finanzkrise. Es kam marktweit zu einer Verlagerung hin zu traditionellen Angeboten mit Mindestgarantien. Das Berichtsjahr war geprägt durch das Wachstum des Gruppenlebensversicherungsgeschäfts, das dynamischer war als im Marktdurchschnitt. Andererseits ging das Geschäftsvolumen bei traditionellen Einzellebensversicherungen infolge des niedrigen Zinsumfelds zurück, was zu einem Rückgang des gesamten Geschäftsvolumens führte. In Anbetracht der zunehmenden Notwendigkeit einer privaten finanziellen Vorsorge für das Rentenalter sowie des hohen verfügbaren Einkommens und Pro-Kopf-Vermögens in der Schweiz sind wir der Meinung, dass der Markt zusätzliches Wachstumspotenzial für unsere Pensions- und Anlageprodukte bietet.

Allianz Suisse wird das FIT-Programm in 2011 verstärkt nutzen und erwartet für die kommenden Jahre deutlich sichtbare Ergebnisse. Diese dürften der Gesellschaft helfen, sich trotz zunehmenden Wettbewerbs- und Preisdrucks gut zu behaupten. Starke Kundenorientierung, hohe Servicestandards und eine günstige Kostenstruktur sind eine solide Grundlage für unseren künftigen Erfolg.

## Versicherung Europe, South America, Africa

| Ausgewählte Märkte |     | Kfz/Nicht-Kfz als % der ges. Bruttobeiträge Schaden- und Unfallversicherung         |      | traditionell/nichttraditionell als % der ges. Bruttobeiträge Leben                  |  | Bruttobeitrags-einnahmen | Operatives Ergebnis | Anzahl Kunden (Mio) | Eigene Netzwerke (Tsd) | Anzahl Makler (Tsd) | Anzahl Mitarbeiter (Tsd) |
|--------------------|-----|-------------------------------------------------------------------------------------|------|-------------------------------------------------------------------------------------|--|--------------------------|---------------------|---------------------|------------------------|---------------------|--------------------------|
| Italien            | II. | 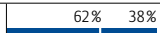 | II.  |  |  | 12 827 Mio €             | 662 Mio €           | 5,9                 | 18,8                   | 0,5                 | 5,5                      |
| Spanien            | II. |  | IV.  |  |  | 2 937 Mio €              | 395 Mio €           | 3,4                 | 7,1                    | 4,3                 | 2,4                      |
| Frankreich         | II. |  | III. |  |  | 11 314 Mio €             | 613 Mio €           | 5,1                 | 5,6                    | 1,2                 | 12,1                     |
| Niederlande        | II. |  | III. |  |  | 1 225 Mio €              | 102 Mio €           | 1,5                 | —                      | 5,1                 | 1,3                      |

● Schaden- und Unfallversicherung ● Lebens- und Krankenversicherung

Marktposition nach Bruttobeiträgen: I. Position 1 II. Position 2 bis 5 III. Position 6 bis 10 IV. nicht unter den Top 10

<sup>1</sup> Quelle: eigene lokale Schätzung

## Italien

Den italienischen Markt bedienen wir größtenteils über die Allianz S.p.A., in der vor allem unsere Vertreter und Broker organisiert sind. Darüber hinaus vertreiben wir unsere Produkte über Genialloyd (einen Marktführer im Direktvertrieb), die Allianz Bank mit ihrem Netz verbundener Finanzberater (unter den fünf Marktführern)<sup>1</sup> sowie über den Bankassurance-Kanal (Hauptpartner ist hier Unicredit).

Das wichtigste Produkt in der **Schaden- und Unfallversicherung** ist die Autoversicherung. Aber auch die Feuer-, die private Unfall- und die allgemeine Haftpflichtversicherung spielen eine große Rolle. Nachdem sich aufgrund der Einführung der Bersani-Gesetze im Jahr 2010 die technische Rentabilität über mehrere Jahre hinweg erheblich verschlechtert hatte, konnten wir erste Anzeichen für eine Rückkehr eines positiven Preistrends feststellen. Im übrigen Versicherungsgeschäft sind die Bedingungen nach wie vor äußerst schwierig. Zudem verstärkte sich die Unsicherheit am Markt durch rechtliche Änderungen, beispielsweise die Einführung der Mailänder Tabellen für Entschädigungsleistungen, welche die Schadenabwicklungskosten erhöhten.

Allianz Italien konzentrierte sich auch weiterhin auf Profitabilität, wobei dem Unternehmen sein Effizienzvorteil, sein technisches Know-how, seine selektive Zeichnungspolitik und seine starken Vertriebsnetze zugute kamen. Besonders hervorzuheben ist das von Genialloyd, unserem Direktversicherer, erzielte Umsatzplus von über 22 Prozent in einem schwierigen Umfeld und das mit einer Combined Ratio von 86 Prozent.

Nach einem besonders starken Wachstum im Jahr 2009 zeichnete sich der italienische **Lebensversicherungsmarkt** durch hohe und beständige Umsatzvolumina aus, was vor allem im ersten Halbjahr 2010 zu beobachten war. Wegen des Aufschwungs an den Finanzmärkten schwenkte die Nachfrage im zweiten Halbjahr 2010 von traditionellen zu fondsgebundenen Produkten. Das gesamte Vertriebsnetz von Allianz Italien erzielte gute Ergebnisse.

Auch wenn das Rentabilitätsniveau im Markt akzeptabel bleibt, was wir annehmen, rechnen wir mit einem unverändert schwierigen italienischen Versicherungsmarkt. Dennoch dürften wir von unserem technischen Know-how, unserer IT-Infrastruktur und unserer starken Marke profitieren. Nach wie vor achten wir auf erstklassigen Kundendienst, Effizienzsteigerungen und ein diszipliniertes, profitables Neugeschäft in der Schaden- und Unfallversicherung. Wir werden unseren Kunden künftig neue Produktinnovationen anbieten, und zwar sowohl in der Lebens- und Kranken- als auch in der Schaden- und Unfallversicherung.

## Spanien und Portugal

Den spanischen Markt für **Schaden- und Unfallversicherungen** bedient die Allianz über die operativen Einheiten Allianz Compañía de Seguros y Reaseguros S.A. und Fénix Directo S.A. **Lebensversicherungsprodukte** werden über Allianz Compañía de Seguros y Reaseguros S.A. und Eurovida, unser Joint Venture mit der Banco Popular, vermarktet. Unsere portugiesische Gesellschaft ist die Allianz Companhia de Seguros.

Neben Autoversicherungen, die unseren größten Geschäftsbereich ausmachen, bieten wir sowohl in Spanien als auch in Portugal Sach- und Haftpflichtprodukte sowie Lebens- und Krankenversicherungen an. In Portugal umfasst unser Angebot außerdem die Arbeiterunfallversicherung.

Wir vertreiben unsere Produkte durch Vertreter und Broker, rund 11 400 in Spanien und mehr als 3 600 in Portugal. In beiden Ländern verfügen wir über starke Bankassurance-Partnerschaften: Banco Popular in Spanien und BPI in Portugal.

2010 wurden die Volkswirtschaften Spaniens und Portugals durch die globale Krise stark in Mitleidenenschaft gezogen. Der Schaden- und Unfallversicherungsmarkt in beiden Ländern stagnierte, unter anderem weil staatliche Anreize zum Automobilkauf 2010 ausliefen. Dennoch waren unsere dortigen Gesellschaften erfolgreicher als der Markt; sie wuchsen stärker (sowohl bei den Beiträgen als auch bei der Kundenzahl) und waren auch profitabler. Der portugiesische Lebensversicherungsmarkt expandierte, der spanische hingegen schrumpfte; unser Lebens-

<sup>1</sup> Quelle: eigene Schätzung

versicherungsgeschäft entwickelte sich jedoch in beiden Ländern positiv, hauptsächlich über den Verkauf traditioneller Produkte.

Wir erwarten, dass sich die iberische Region langsamer von der Wirtschaftskrise erholen wird als andere EU-Staaten. Die Arbeitslosigkeit ist nach wie vor sehr hoch, vor allem in Spanien. Wir sind jedoch zuversichtlich, dass unsere effiziente Betriebsplattform und unser starker Vertrieb uns in die Lage versetzen werden, in Spanien und Portugal besser abzuschneiden als der Markt.

### Frankreich

Den französischen Finanzdienstleistungs- und Versicherungsmarkt bearbeiten wir über Allianz Frankreich, einen der wichtigsten Anbieter in diesem Markt. Wir verfügen dort über ein umfangreiches Schaden- und Unfall- sowie Lebens- und Krankenversicherungssortiment für Privat- und Firmenkunden. Es umfasst neben Sach-, Personen- und Haftpflichtversicherungen auch Instrumente für kurzfristige Anlagen und Sparprodukte. Unser Vertrieb besteht aus mehr als 2 000 Vertretern, 2 500 Lebens- und 350 Krankenversicherungsberatern, mehr als 1 200 Brokern und über 500 unabhängigen Finanzberatern sowie zahlreichen Partnerschaften; zusammen bedient er über 5 Millionen Kunden.

Zusätzlich zum traditionellen Verkauf bieten wir unsere Produkte auch über den Direktvertrieb AllSecur an. Seit 2010 sind unsere Vertriebswege über die eAllianz Plattform miteinander verbunden, so dass Kunden und Vertriebspartner flexibel und ohne Mehraufwand ihren bevorzugten Vertriebskanal auswählen können.

Der wettbewerbsintensive französische **Schaden- und Unfallversicherungsmarkt** wuchs in den letzten Jahren nur schwach; 2010 litt er, wie schon im Vorjahr, unter den gravierenden Folgen von Naturkatastrophen. In diesem Umfeld setzen wir stark auf Effizienzsteigerungen durch Prozess- und Strukturverbesserungen. Der strategische Plan, nach dem wir uns in Frankreich ausrichten, hat vier Ziele: finanz- und versicherungstechnische Wertbeiträge, profitables Wachstum, operative Exzellenz und Leistungskultur.

Den Verkauf von **Lebens- und Krankenversicherungen** in Frankreich betrachten wir als einen Wachstumsmarkt. Er ist sehr wettbewerbsintensiv, und die Kundschaft stellt hohe Ansprüche, die wir mit einem attraktiven Sortiment traditioneller und fondsgebundener Produkte im Gruppen- und Einzelgeschäft bedienen. Dank unserer Innovationskraft verfügen wir über Produkte, die auch dann noch attraktiv sind, wenn das Zinsumfeld niedrig bleibt. Wie in der Schaden- und Unfallversicherung steht die Rentabilität an oberster Stelle.

Allianz Frankreich ist auch im dynamischen Krankenversicherungsmarkt für private und institutionelle Kunden stark. In diesem Segment sind wir dank Spezial-Know-how bei französischen und internationalen Kunden erfolgreich, gerade auch mit individuell zu rechtgeschnittenen Lösungen, in die Lebens-, Kranken- und Unfallversicherungselemente einfließen.

Die Allianz Banque ergänzt unser Versicherungsgeschäft und ermöglicht es uns, Lösungen aus einer Hand anzubieten, etwa durch die Kombination von Lebensversicherungen mit Einlagen auf Hypothekendarlehen.

Wir erwarten einen unverändert harten Wettbewerb in der französischen Schaden- und Unfallversicherung. Allerdings dürften unsere Gesellschaft und der Markt insgesamt von Preiserhöhungen profitieren. Wie sich die französische Lebensversicherung weiterentwickelt, hängt auch davon ab, welche Richtung die anhaltende Diskussion über aufsichtsrechtliche oder fiskalpolitische Veränderungen nimmt. Wir sind in Frankreich gut aufgestellt, um dort auch unter schwierigen Bedingungen Wert zu schaffen, nämlich durch unsere Maßnahmen in der Tarifierung und unserer Zeichnungspolitik sowie unsere Effizienz intern und im Vertrieb.

## Niederlande

Auto- und Feuerepolen sind nach wie vor Hauptumsatzträger unserer niederländischen **Schaden- und Unfallversicherung**. Außer über Broker verkauft die Allianz Nederland Group N.V. ihre Schaden- und Unfallversicherungsprodukte über einen schnell wachsenden Direktvertrieb. Auch unser dortiges **Lebensversicherungsangebot** ist stattlich.

Wir konzentrieren uns in diesem wettbewerbsintensiven Markt auf unsere Profitabilität. Die Kostentransparenz fondsgebundener Lebensversicherungen ist dort in die öffentliche Diskussion geraten. Wir griffen sie als einer der ersten Marktteilnehmer mit einer neuen Produktgeneration auf, die mit modernster Technik und Prozessen geschaffen wurde und deren Kosten transparent sind.

Auch für 2011 rechnen wir mit einem starken Wettbewerb. Allerdings dürften die Marktpreise sich erhöhen und es dadurch ermöglichen, dass sich die Margen erholen, jedenfalls ein Stück weit.

## Belgien

Allianz Belgium S.A. vermarktet eine beträchtliche Anzahl von **Lebens-** sowie **Schaden- und Unfallversicherungen**, wobei der wichtigste Geschäftsbereich nach wie vor die Lebensversicherung ist. Das Wachstum 2010 war dynamisch, hauptsächlich dank des prämierten Produkts „Invest for Life“.

Trotz des hohen Wettbewerbsdrucks wuchs Allianz Belgium auch in der Schaden- und Unfallversicherung. Die Profitabilität war 2010 beeinträchtigt durch mehrere Naturkatastrophen, die Belgien 2010 heimsuchten (Sturm „Xynthia“, Sommerstürme und Überflutungen im November). Dennoch war unsere Combined Ratio besser als im Marktdurchschnitt.<sup>1</sup>

Unsere Produkte und Dienstleistungen werden ausschließlich über Broker verkauft. Um diesen Ansatz weiter zu stärken, haben wir eine neue Broker-Strategie umgesetzt, das Angebot erweitert und es individuell an die Bedürfnisse unserer Partner angepasst.

2011 dürfte der Wettbewerb im Versicherungssektor stark bleiben, doch erwarten wir steigende Marktpreise, was eine leichte Erholung der Margen erlauben könnte.

## Türkei

Im türkischen Markt sind wir über unsere Einheiten Allianz Sigorta A.S. und Allianz Hayat ve Emeklilik A.S. tätig. Wir bieten ein breites Produktsortiment in der **Schaden- und Unfallversicherung** an, und zwar sowohl für Privatkunden (überwiegend Vertretervertrieb) als auch für Firmenkunden (größtenteils Brokervertrieb). Ferner bieten wir unseren Kunden **Lebensversicherungen** und Lösungen für die Altersvorsorge an.

In der Schaden- und Unfallversicherung sind die Marktbedingungen nach wie vor äußerst schwierig; zahlreiche Versicherer müssen erhebliche Verluste hinnehmen. Durch eine Konzentration auf profitable Produkte konnte Allianz Türkei jedoch eine deutlich über dem Marktdurchschnitt liegende Profitabilität erzielen. Wir sind für die Zukunft zuversichtlich und meinen, dass neue Reserveanforderungen das Preisniveau erhöhen werden. Das dürfte uns zugute kommen, weil unsere Kapitalbasis bereits solide ist.

## Südamerika

Kern unserer südamerikanischen Aktivitäten sind drei Gesellschaften: Allianz Brazil Seguros S.A. in Brasilien, Aseguradora Colseguros S.A. in Kolumbien und Allianz Argentina Compañía de Seguros S.A. in Argentinien.

In allen drei Märkten verkaufen wir hauptsächlich **Schaden- und Unfallversicherungen**; Hauptumsatzträger ist die Autoversicherung, gefolgt von Industrieversicherungen. Außerdem bieten wir in Kolumbien **Lebensversicherungen** an und gehören dort und in Brasilien zu den führenden Anbietern von **Krankenversicherungen**. Unser wichtigster Vertriebsweg läuft über Broker.

Besonders erfreulich ist die Entwicklung im brasilianischen Versicherungsmarkt; dieser profitiert vom dortigen Wachstum und vom Aufschwung des Landes zu einer Wirtschaftsmacht. War schon die Expansion des brasilianischen Versicherungssektors ausgesprochen stark, so schnitt Allianz Brazil sogar merklich besser ab,

<sup>1</sup> Quelle: eigene Schätzungen

und dies mit einer soliden Marge.

Das Wachstumspotenzial in den südamerikanischen Märkten mit unserer Präsenz ist nach unserer Überzeugung erheblich; deshalb verstärken wir unsere dortige Position, namentlich durch Ausbau unseres Produktangebots für Privatkunden.

### Afrika

Diesen Markt bedienen wir über Allianz Afrika, unseren Spezialisten für die afrikanischen Länder südlich der Sahara. In zehn Ländern südlich der Sahara sind wir durch örtliche Tochtergesellschaften mit insgesamt 450 Mitarbeitern vertreten; in angrenzenden Ländern

verfügen wir über weitere Partner. Unser Vertriebsnetz, das sowohl Erst- wie Rückversicherungen anbietet, besteht vornehmlich aus Vertretern, lokalen und internationalen Brokern sowie Direktvertriebs- und Bankassurance-Partnern. In allen afrikanischen Ländern, in denen wir tätig sind, bieten wir **Schaden- und Unfallversicherungen** an. In Burkina Faso, der Elfenbeinküste, Kamerun, Madagaskar und in Senegal verkaufen wir auch **Lebensversicherungen**.

Wenn sich in Afrika weitere Geschäftschancen bieten, werden wir diese prüfen, jedoch liegt unser Schwerpunkt auf organischem Wachstum.

## Versicherung NAFTA Markets

| Ausgewählte Märkte |     | Kfz/Nicht-Kfz als % der ges. Bruttobeiträge Schaden- und Unfallversicherung |      | traditionell/nichttraditionell als % der ges. Bruttobeiträge Leben |  | Bruttobeiträge-einnahmen | Operatives Ergebnis | Anzahl Kunden (Mio) | Eigene Netzwerke (Tsd) | Anzahl Makler (Tsd) | Anzahl Mitarbeiter (Tsd) |
|--------------------|-----|-----------------------------------------------------------------------------|------|--------------------------------------------------------------------|--|--------------------------|---------------------|---------------------|------------------------|---------------------|--------------------------|
| USA                | IV. | 6% 94%                                                                      | III. | 9% 91%                                                             |  | 11 505 Mio €             | 627 Mio €           | 1,3                 | —                      | —                   | 5,3                      |

● Schaden- und Unfallversicherung ● Lebens- und Krankenversicherung

Marktposition nach Bruttobeiträgen: I. Position 1 II. Position 2 bis 5 III. Position 6 bis 10 IV. nicht unter den Top 10

### USA

Unser Schaden- und Unfallgeschäft in den USA wird über die Fireman's Fund Insurance Company (Fireman's Fund) sowie die US-amerikanischen Geschäftsbereiche der Allianz Global Corporate & Specialty (AGCS) abgewickelt. Für unser Lebensversicherungs- und Rentengeschäft ist die Allianz Life Insurance Company of North America (Allianz Life U.S.) zuständig.

Fireman's Fund ist sowohl im Privat- als auch im Firmenkundengeschäft tätig und hält zudem Spezialversicherungen für die Agrarindustrie bereit. Unsere Produkte werden durch unabhängige Vertreter und Broker verkauft. Unsere Privatkundensparte bedient vermögende Privatkunden, unser Firmenkundengeschäft spricht kleine und mittelgroße Unternehmen mit auf sie zugeschnittenen **Schaden- und Unfallver-**

**sicherungen** an. Unsere Agrarsparte vermittelt Ernteausfall- sowie Farm- und Bauernhofversicherungen.

2010 erlebten die USA eine gemäßigte Wirbelsturm-saison, doch gab es mehr Winterstürme als im Vorjahr. Der dortige Markt für Schaden- und Unfallversicherungen blieb jedoch schwach, zusätzlich gebremst durch die Wirtschaftslage. Allerdings profitierten wir 2010 geschäftlich von starken Ernten und robusten Agrarpreisen. Fireman's Fund ist einer der wenigen US-Versicherer mit nationaler Präsenz im Privat- und Firmenkundengeschäft. Unsere Strategie fußt dabei auf zwei Säulen: Zum einen investieren wir fortlaufend in unsere Infrastruktur, um unser Bestandsgeschäfts zu stärken, zum anderen forcieren wir regional breit gestreutes Wachstum im Privat- und Firmenkundengeschäft, neuerdings mit neuen Sach- und Autoversicherungen, die erstmals unter der Marke Allianz US-weit angeboten werden. Dies und die Stärke unserer Nischenstrategie befähigen

uns, einen deutlich größeren Teil des Marktes anzusprechen als bisher und weitere attraktive Wachstumspotenziale auszuschöpfen. Außerdem stärken wir das Versicherungsgeschäft durch gezielte Verbesserung unserer Kosteneffizienz angesichts eines schwachen Marktes.

In der **Lebensversicherung** und im **Rentengeschäft** bieten wir in erster Linie aktienindexierte Produkte und Rentenprodukte mit festgelegten oder variablen Zahlungen an. Diese werden durch unabhängige Vertriebsnetze sowie über große Finanzinstitute wie Banken und Wirehouse-Firmen verkauft. 2010 erholte sich der Markt, doch der Wettbewerb blieb unverändert stark. Sämtliche Anbieter reagierten auf die Wirtschaftskrise mit Angebotsanpassungen, insbesondere in Bezug auf Variable-Annuity-Produkte. Wir haben unser Lebensversicherungsportfolio in den vergangenen zwei Jahren erheblich verändert mit dem Ziel, dem Kunden Produkte mit einer attraktiven Rendite anzubieten, die sich namentlich für das Altersvorsorgesparsen eignen. Die Ergebnisse unseres US-Lebensversicherungs- und US-Rentengeschäfts waren gut; wir konnten Produktportfolio und Vertriebspartnerschaften ausbauen.

Für 2011 rechnen wir in der Schaden- und Unfallversicherung mit keinem erheblichen Prämienwachstum, auch wegen der fortdauernden wirtschaftlichen Unsicherheiten in den USA. Die Preise gaben unerwartet lang nach und stehen noch immer unter Druck; auch wenn das Preisniveau inzwischen langsamer sinkt, werden die Ergebnisse des Versicherungsgeschäfts durch Schadeninflation weiterhin belastet.

Zwar sind die schlimmsten Krisenturbulenzen vorbei; die Lebensversicherungsumsätze dürften sich jedoch erst allmählich erholen, was vor allem für Rentenprodukte gilt. Wir erwarten ein unsicheres Wirtschaftswachstum, volatile Aktienmärkte und ein Niedrigzinsumfeld; die Unwägbarkeiten bei aufsichtsrechtlichen Vorschriften, besonders in Bezug auf den Vertrieb, haben allerdings nachgelassen. Unverändert sind wir davon überzeugt, dass der US-Altersvorsorgemarkt wegen der dortigen demografischen Entwicklung erstklassige Geschäftschancen bietet. Um dafür bestmöglich vorbereitet zu sein, verbessern wir unser

Vertriebsnetz und stellen unser Wertversprechen für die Versicherungskunden deutlicher heraus.

### **Mexiko**

Den mexikanischen Markt bedienen wir über die Allianz México, S.A. Compañía de Seguros, die **Schaden- und Unfall-** sowie **Lebens- und Krankenversicherungen** anbietet. Über Broker läuft ihr wichtigster Vertriebsweg. Die Gesellschaft ist in den letzten Jahren kräftig gewachsen, vornehmlich durch den Verkauf von Lebens- und Krankenversicherungen.

Der mexikanische Markt ist wegen seiner wirtschaftlichen Bedeutung, seines dynamischen Wachstums und seines zukünftigen Expansionspotenzials sowie wegen seines effektiven Aufsichtsrechts für uns attraktiv.



## Global Insurance Lines & Anglo Markets

| Ausgewählte Märkte |      | Kfz/Nicht-Kfz als % der ges. Bruttobeiträge Schaden- und Unfallversicherung |     | traditionell/nichttraditionell als % der ges. Bruttobeiträge Leben | Bruttobeitrags-einnahmen | Operatives Ergebnis | Anzahl Kunden (Mio) | Eigene Netzwerke (Tsd) | Anzahl Makler (Tsd) | Anzahl Mitarbeiter (Tsd) |
|--------------------|------|-----------------------------------------------------------------------------|-----|--------------------------------------------------------------------|--------------------------|---------------------|---------------------|------------------------|---------------------|--------------------------|
| Australien         | II.  | 46% 54%                                                                     | IV. | 100%                                                               | 2 161 Mio €              | 302 Mio €           | 2,7                 | —                      | 2,0                 | 3,5                      |
| Großbritannien     | III. | 26% 74%                                                                     | —   | —                                                                  | 1 939 Mio €              | 185 Mio €           | 0,9                 | —                      | 5,2                 | 4,2                      |

● Schaden- und Unfallversicherung ● Lebens- und Krankenversicherung

Marktposition nach Bruttobeiträgen: I. Position 1 II. Position 2 bis 5 III. Position 6 bis 10 IV. nicht unter den Top 10

### Australien

Mit der Geschäftseinheit Allianz Australia Insurance Ltd. bedienen wir die [Schaden- und Unfallversicherungsmärkte](#) in Australien und Neuseeland. Seit 2006 vertreibt die Allianz unter dem Namen Allianz Australia Life Insurance Ltd. [Lebensversicherungsprodukte](#).

Das von der Allianz in Australien angebotene Service- und Produktsortiment ist breit gefächert. Besonders stark sind wir in der Arbeitslosenversicherung, der Arbeiterunfall- und der Unfallnachsorgeversicherung sowie bei Sicherheits- und Umweltdienstleistungen. Außerdem sind wir in bestimmten Nischenmärkten aktiv, etwa bei der Vorfinanzierung von Versicherungsprämien und im Markt für Freizeitfahrzeugversicherungen. Der Vertrieb erfolgt über Broker, freie Vertreter und Direktabsatz. Außerdem haben wir das Vorfinanzierungsgeschäft mit Versicherungsprämien um eine Forderungsfinanzierung erweitert.

Der Wettbewerbsdruck im australischen Markt ist unverändert hoch. Im oberen Marktsegment geben die Prämien nach, im unteren steigen die Preise entsprechend der Geldentwertung. Dieser Trend dürfte sich 2011 fortsetzen.

### Irland

Die Allianz steht im irischen Versicherungsgeschäft nach Umsätzen an dritter Stelle. Wir halten ein umfangreiches Angebot von [Schaden- und Unfallversicherungsprodukten](#) für Firmen- und Privatkunden bereit. Die Produkte werden über Broker und Banken sowie über einen Direktvertrieb angeboten. Das schwierige Konjunkturmilieu 2010 schwächte das

Firmenkundengeschäft, in dem nach wie vor Kapazitätsüberhänge und ein strenger Wettbewerb herrschen. Das Privatkundengeschäft erlebte Tarifierhöhungen; eine weitere Kältewelle am Jahresende 2010 wird nochmals Preisanpassungen erzwingen. 2009 hatten wir ein Restrukturierungsprogramm eingeleitet, dessen Kosteneinsparungen uns 2010 halfen, unsere Wettbewerbsposition in einem schwierigen Umfeld zu verteidigen.

Das Marktumfeld dürfte auch 2011 schwierig bleiben, vor allem dann, wenn keine wirtschaftliche Erholung einsetzt.

### Großbritannien

Den britischen Markt bearbeiten wir vor allem über unsere Tochtergesellschaft Allianz Insurance plc. Unser Produktangebot in der [Schaden- und Unfallversicherung](#) für Privat- und Firmenkunden, darunter Spezialversicherungen, ist vielfältig, und wir vertreiben es über verschiedene Vertriebskanäle, auch über zielgruppenaffine Programme.

Wir machten bei der Einrichtung eines rentablen und expandierenden Privatkundengeschäfts 2010 gute Fortschritte, erzielten wieder wichtige Geschäftsabschlüsse mit großen Firmenkunden, verbesserten unsere Preiskompetenz und waren im Firmenkundengeschäft unverändert wachstumsstärker und rentabler als unsere wichtigsten Konkurrenten.

Um die operative Profitabilität im wettbewerbsintensiven Markt zu halten, setzen wir weiterhin auf aktives Zyklusmanagement, das heißt, wir suchen das

Wachstum nur dort, wo Prämien in einem angemessenen Verhältnis zum gezeichneten Risiko stehen und die Gewinnmarge stimmt; in Bereichen, in denen kein angemessenes Risiko-Ertrags-Profil besteht, werden wir auf Wachstum verzichten.

### **Allianz Global Corporate & Specialty**

Allianz Global Corporate & Specialty (AGCS) bietet individuelle Leistungen für **Firmen- und Spezialversicherungskunden** weltweit in zahlreichen Branchen an. AGCS kann ihre Kunden in rund 150 Ländern begleiten, und zwar über eigene Teams und Niederlassungen in fast 30 Ländern, über das Allianz Netz und über örtliche Kooperationspartner. Das AGCS-Produktspektrum umfasst Schaden-, Haftpflicht- und Maschinenbruchversicherungen für Firmenkunden (mit besonderem Schwerpunkt auf größeren Unternehmen oder Unternehmen mit multinationalen Risiken), ferner Schifffahrt-, Luftfahrt- und Energie- und Finanzspezialversicherungen. Überdies arbeitet AGCS eng mit Allianz Risk Transfer zusammen, um maßgeschneiderte, nichtherkömmliche Risikotransferlösungen für komplexe Risiken zu entwickeln und anzubieten.

AGCS bündelt sein Geschäft einschließlich umfassender Risikomanagementlösungen und -leistungen auch weiterhin unter einem Dach, so dass globale Synergien noch besser ausgeschöpft und die Effizienz gesteigert werden können. 2010 eröffnete AGCS Niederlassungen in Belgien, den Niederlanden, Spanien, Dubai und Südafrika. Außerdem übernahm die Einheit die Leitung des Schaden- und Unfallversicherungsgeschäfts der Allianz in Singapur, Hongkong und Japan.

Trotz großer Naturkatastrophen und deren Auswirkungen (insbesondere des Erdbebens in Chile) war AGCS 2010 profitabel. Das zeigt, was für ein Wertpotenzial in der Globalität dieser Einheit steckt, und zwar im Hinblick sowohl auf seine Produktlinien als auch auf seine geografische Präsenz. Unser Ausblick auf das laufende Jahr bleibt positiv. Wir erweitern unsere globale Reichweite und rechnen bei Firmen- und Spezialversicherungen mit einem alles in allem stabilen Preisniveau.

### **Kreditversicherung**

Das **Kreditversicherungsgeschäft** betreiben wir in den wichtigsten Märkten über Euler Hermes, den globalen Marktführer.<sup>1</sup> Wir versichern Unternehmen gegen Forderungsausfälle und bieten Schutz vor Insolvenz eines Geschäftspartners. Außerdem ist Euler Hermes bei Bürgschaften, Garantien, Forderungsinkasso und in der Kautionsversicherung stark vertreten, verfügt also mit Produkten rund um das Forderungsmanagement über umfassende Kompetenz. Unternehmen jeder Größe und Branchenzugehörigkeit benötigen diese Dienstleistungen, um entsprechende Geschäftsrisiken im In- und Ausland abzudecken.

Mit dem Ziel, in den kommenden drei Jahren noch effizienter zu werden, die Marktführerschaft zu sichern und seinen Wettbewerbsvorteil besser auszuspielen, führte Euler Hermes 2010 das „Excellence-Projekt“ ein. Dieses Programm will über eine neue Kundensegmentierung, die höhere Kundenzufriedenheit schafft und in spezifischen Regionen und Branchen Expansionsimpulse setzt, zusätzlich wachsen. Um die Kosten noch strikter in den Griff zu bekommen und Produktivitätssteigerungen zu erzielen, setzt unser Kreditversicherer auf eine effiziente globale Geschäftsplattform, die Betriebsmittel und -prozesse vereinheitlicht.

Seit Juni 2009 hat Euler Hermes den Versicherungsschutz schrittweise ausgebaut, damit seine Kunden am wirtschaftlichen Aufschwung partizipieren können. Gleichzeitig sorgten steigende Umsätze und geringere Schadenaufwendungen für günstigere Geschäftsergebnisse; der Schadentiefpunkt war im August 2010 erreicht. Auch die proaktive Kundenkommunikation verbesserte nachweislich die Zufriedenheit und die Bindung der Klienten.

Wegen all dieser Maßnahmen und eines umsichtigen Asset-Managements bestätigte Standard & Poor's im Juli 2010 sein AA-Rating samt stabilem Ausblick für Euler Hermes. Damit verfügt das Unternehmen über das solideste Rating in seiner Branche.

1 Quelle: eigene Schätzung, beruhend auf Informationen der International Credit Insurance and Surety Association (ICISA)

Für 2011 rechnen wir damit, dass sich das Wachstum der Weltwirtschaft fortsetzt, wenn auch nicht so rasant wie 2010. Die Insolvenzen in aller Welt dürften weiter nur moderat abnehmen, weil ihre Anzahl immer noch höher ist als vor der Krise.

Wir haben uns unverändert zum Ziel gesetzt, die Kundenzufriedenheit und unsere Marktstellung bei Bürgschaften, Garantien und Forderungsinkasso zu steigern und damit unsere Führungsrolle zu festigen und auszubauen. Bezogen auf die Kreditversicherungen, das Kerngeschäft von Euler Hermes, haben wir für Schwellenmärkte, etwa in Lateinamerika und Asien-Pazifik, eine Wachstumsstrategie entwickelt.

### Allianz Worldwide Care

Allianz Worldwide Care (AWC) ist unsere spezialisierte **Krankenversicherung** mit Sitz in Dublin. Sie bietet internationale Krankenversicherungen an, und zwar für Kunden, die außerhalb ihres Heimatlandes leben (Expatriates), sowie für vermögende Privatkunden in Schwellenmärkten. Der Verkauf erfolgt über Broker, Vertreter und im Direktvertrieb über Internet und ein Callcenter. Die Rentabilität ist gut, weil wir die Kosten streng kontrollieren, die Prozesse verbessert haben und bei der Risikoübernahme auf rigorose Disziplin achten. Diese Rentabilität dürfte in den nächsten Jahren bei steigenden Umsätzen andauern.

## Versicherung Growth Markets

| Ausgewählte Märkte | Kfz/Nicht-Kfz als % der ges. Bruttobeiträge Schaden- und Unfallversicherung              | traditionell/nichttraditionell als % der ges. Bruttobeiträge Leben                       | Bruttobeitrags-einnahmen | Operatives Ergebnis | Anzahl Kunden (Mio) | Eigene Netzwerke (Tsd) | Anzahl Makler (Tsd) | Anzahl Mitarbeiter (Tsd) |
|--------------------|------------------------------------------------------------------------------------------|------------------------------------------------------------------------------------------|--------------------------|---------------------|---------------------|------------------------|---------------------|--------------------------|
| Südkorea           | —                                                                                        | III. 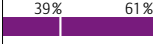 | 1 836 Mio €              | 87 Mio €            | 1,2                 | 5,7                    | —                   | 1,6                      |
| Taiwan             | —                                                                                        | III.  | 2 170 Mio €              | 51 Mio €            | 0,3                 | 1,9                    | —                   | 0,5                      |
| Malaysia           | I.    | III.  | 552 Mio €                | 55 Mio €            | 2,6                 | 10,2                   | —                   | 1,5                      |
| Indonesien         | III.  | II.   | 494 Mio €                | 39 Mio €            | 0,7                 | 14,2                   | —                   | 1,0                      |
| Ungarn             | I.    | II.   | 602 Mio €                | 17 Mio €            | 1,5                 | 2,0                    | —                   | 1,6                      |
| Polen              | II.   | II.   | 811 Mio €                | 13 Mio €            | 1,6                 | 3,7                    | —                   | 1,2                      |
| Russland           | II.   | III.  | 723 Mio €                | - 38 Mio €          | 0,9                 | 34,1                   | 1,0                 | 8,3                      |

● Schaden- und Unfallversicherung ● Lebens- und Krankenversicherung

Marktposition nach Bruttobeiträgen: I. Position 1 II. Position 2 bis 5 III. Position 6 bis 10 IV. nicht unter den Top 10

### Asien

Wir erzielten in Asien in den vergangenen fünf Jahren ein erhebliches Umsatzwachstum, und damit ist dies einer unserer größten Wachstumsmärkte. Wir sind dort einer der führenden internationalen Versicherer; in den wichtigsten dortigen Märkten präsent, bieten wir Produkte aus unseren Kerngeschäften Schaden- und Unfall-, Lebens- und Krankenversicherungen sowie Asset-Management-Dienstleistungen an. Unser Kundenstamm umfasst mehr als 20 Millionen Menschen; über 33.000 Mitarbeiter in den verschiedenen Allianz Landesgesellschaften betreuen sie. Das Allianz Vertriebsnetz umfasst rund 218.000 Vertreter, die eine breite Produktpalette vertreiben.

In Asien betreiben wir das **Schaden- und Unfallversicherungsgeschäft** in Malaysia, Indonesien, China, Hongkong Indien, Japan, Singapur, Sri Lanka, Thailand, Brunei und Laos. In Indonesien sind wir der führende Anbieter von Mikroversicherungen mit rund 460.000 versicherten Personen. Hauptumsatzträger in der **Lebens- und Krankenversicherung** sind Allianz Life Insurance Co. Ltd. (Allianz Life Korea) in Südkorea und Allianz Taiwan Life Insurance Company in Taiwan. In Südkorea sind wir in den letzten Jahren zu einem wichtigen Anbieter aktienindexierter Produkte herangewachsen. Die Allianz Taiwan Life ist der führende Anbieter fondsgebundener Versicherungsprodukte. Wir haben diesen Rang durch Produktinnovationen

und einen erstklassigen Kundendienst erreicht. Außerdem sind wir im Markt für Lebens- und Krankenversicherungen in Malaysia, Indonesien, China, Indien, Thailand und Japan stark vertreten.

Über innovative Produkte, ständige Anpassungen unseres Angebots an die geänderten Kundenwünsche und einen ausdifferenzierten Vertriebskanalmix wachsen wir in dieser sehr expansiven Region unverändert kräftig und verbessern unsere Marktstellung.

- Allianz Life Insurance Japan schloss 2010 Vertriebspartnerschaften mit mehreren bedeutenden Banken und baute so ihr Geschäft merklich aus.
- Indonesien ist für die Allianz einer der am stärksten wachsenden Märkte; das dürfte auch so bleiben, weil die dortige Mittelschicht immer breiter wird. Besonders kräftig expandiert unsere Lebensversicherung; der Verkauf erfolgt über unser Vertreternetz und unsere Bankassurance-Vertriebspartner.
- Thailand ist wegen unserer Spezialisierung auf Sparprodukte mit Erfolgsbeteiligung und dank unserem starken Vertreternetz mit über 10 000 Vermittlern einer unserer profitabelsten Märkte.
- In Malaysia ist die Allianz eine Marke mit hohem Wiedererkennungswert. Unsere beiden Versicherungseinheiten wachsen dort stetig und robust.
- Im Januar 2010 genehmigte die chinesische Versicherungsaufsicht CIRC der Allianz die Umwandlung der Niederlassung Allianz Insurance Company Guangzhou in eine Tochtergesellschaft unter dem Namen Allianz China General Insurance Company Ltd. Diese nahm am 1. Juli 2010 ihre Geschäftstätigkeit auf.

Unser Ziel ist es, in allen unseren Märkten in Asien organisch und über ausgewählte Akquisitionen zu wachsen. Wir beabsichtigen, unseren Vertrieb weiter auszubauen und unsere operative Effektivität zu steigern. Die Schwellenmärkte Asiens haben die Finanz- und Wirtschaftskrise wesentlich besser überstanden als erwartet. Zudem weist die Region vorteilhafte demografische Verhältnisse auf: Nur 9 Prozent der

Bevölkerung sind älter als 65 Jahre, verglichen mit 18 Prozent in Europa. Am dynamischsten dürften sich die Pensionsvermögen in den Schwellenmärkten Asiens entwickeln. In Anbetracht des zunehmenden Wohlstands in den Ländern Asiens und der niedrigen Durchdringung im Versicherungsgeschäft ist weiteres Wachstum möglich. Wir haben vor, dieses Potenzial durch verstärkte Vertriebsanstrengungen und attraktive Produktangebote für uns zu nutzen.

### **Zentral- und Osteuropa (CEE) Commonwealth of Independent States (CIS)**

In dieser Region ist die Allianz in elf Ländern aktiv, bedient 7,4 Millionen Kunden und zählt in den sechs größten Märkten von CEE zu den drei führenden Anbietern. Wir bieten Lebens-, Kranken-, Schaden- und Unfallversicherungen sowie Altersvorsorgeprodukte an. Unsere operativen Tochtergesellschaften befinden sich in Bulgarien, Kroatien, Tschechien, Ungarn, Kasachstan, Polen, Russland, Rumänien, der Slowakei, Slowenien und der Ukraine. Innerhalb von zwei Jahrzehnten haben wir uns zum führenden internationalen Versicherer der Region entwickelt, mit einem Marktanteil nach Umsätzen von über 9 Prozent. CEE stellt eine unserer wichtigsten Wachstumsregionen dar.

Bei den **Schaden- und Unfallversicherungen** ist die Allianz in der CEE-Region der führende Anbieter. Zu unseren Hauptprodukten zählen Auto- und Autohaftpflichtversicherungen sowie Schaden- und Haftpflichtversicherungen für Privat-, Geschäfts- und Industriekunden. Die Finanzkrise hat unserer Autoversicherung in der ganzen Region stark zugesetzt, hauptsächlich weil der Neuwagenkauf zurückging. Um dennoch unsere Rentabilität zu sichern, passten wir Produkte und Preise an, führten neue Angebote ein und starteten eine Reihe von Effizienzinitiativen.

Unser **Lebens- und Krankenversicherungsgeschäft** erlebte 2010 einen starken Aufschwung, angetrieben durch eine erfolgreiche Kampagne für Produkte mit Einmalprämie in Ungarn und in Tschechien sowie das Bankassurance-Geschäft in Polen und Russland – Letzteres erzielte hohe Umsätze bei Firmenkunden und dank innovativer Produkte ein gutes Ergebnis. Wir wollen auch künftig von den Wachstumschancen

in der CEE-Region profitieren und unsere dortige Marktposition ausbauen. Ein ausgeglichenes Produktportfolio und solide Vertriebskapazitäten werden den anhaltenden geschäftlichen Erfolg in all unseren dortigen Märkten sicherstellen. Unser mehrgleisiges Vertriebsnetz hat sich bislang für unser Geschäft als erfolgreiche Strategie erwiesen. Wir werden dieses Modell auf der Grundlage bestehender und neuer Vertriebskanäle unvermindert vorantreiben und die Professionalität unserer Ausschließlichkeitsvertreter noch stärker nutzen. Des Weiteren beabsichtigen wir, uns in allen CEE-Märkten auch künftig stark auf die Prozessoptimierung und die Kostenkontrolle zu konzentrieren.

Nachdem wir unsere Schaden- und Unfallversicherung wetterfester gemacht haben, rechnen wir damit, dass wir in der CEE-Region trotz eingetrübter Geschäftsbedingungen weiter auf Erfolgskurs bleiben werden.

In der Lebensversicherung planen wir das Bankassurance-Geschäft zu verstärken, und zwar sowohl über diversifizierte Bankpartner als auch über Lebensversicherungsbroker. Wir sind zuversichtlich, trotz schwieriger Marktumstände in dieser Region weiter nachhaltig zu wachsen und unsere Rentabilität langfristig zu halten.

### **Mittlerer Osten und Nordafrika (MENA)**

2010 übertrugen wir das wachsende Geschäft im Mittleren Osten und in Nordafrika auf die damalige Allianz New Europe Business Division, die seither als Allianz CEEMA (Central and Eastern Europe, Middle East and North Africa) firmiert. Unsere MENA-Einheiten sind in Ägypten, dem Libanon, Saudi-Arabien und Bahrain tätig; sie betreuen insgesamt über 200 000 Kunden.

Über Allianz Egypt, Allianz Saudi Fransi und Allianz SNA (Libanon) bieten wir sowohl [Schaden- und Unfallversicherungen](#) als auch [Lebens- und Krankenversicherungen](#) an. Unsere Produkte werden über Vertreter und Banken angeboten. Schaden- und Unfallversicherungen werden zusätzlich auch über Broker und Händler verkauft; das ist ein wichtiger Vertriebsweg für uns. In Bahrain bieten wir Lebens- und Kranken- sowie Schaden- und Unfallversicherungen über Allianz Takaful an, unsere Gesellschaft für innovative, schariakonforme Versicherungen. Unser Wachstum in den vergangenen Jahren in der MENA-Region war kräftig. Unsere dortigen Gesellschaften zählen in ihren jeweiligen Märkten, gemessen am Umsatz, zu den führenden Anbietern. Unser Bankassurance-Geschäft ist in Ägypten und dem Libanon besonders wichtig; die Bankpartnerschaften von Allianz Egypt, über die ein breites Lebensversicherungsportfolio angeboten wird, sind in diesem Geschäftszweig der örtliche Marktführer.

Unsere Tochter Allianz Egypt, die 2010 gezeigt hat, wie wettbewerbsfähig sie im Lebensversicherungsgeschäft ist, wird ihre Marktposition weiter ausbauen und dabei ihre Rentabilität wahren.

Über unser Unternehmen NEXtCARE bieten wir Krankenversicherungsmanagement- und -administrationsdienste für Drittkunden an. Mit mehr als 750 000 versicherten Personen ist das Unternehmen in diesem Geschäftszweig in den Vereinigten Arabischen Emiraten führend und verfügt in der MENA-Region über eine gute Präsenz.

# Unsere Strategie

2010 war ein schwieriges Jahr. Unsere starken Ergebnisse zeigen jedoch unsere führende Position in unseren Märkten und wie konsequent wir unseren Geschäftsplan in die Tat umgesetzt haben. Mit unserer nachweislich erfolgreichen Strategie, unserem robusten Geschäftsmodell und unserer starken Marke sind wir auf dem besten Weg, die vertrauenswürdigste Finanzgemeinschaft weltweit zu bilden.

## Fünf Ziele unserer Strategie

Fundamental betrachtet, bleibt unser Geschäftsumfeld schwierig. Wahrscheinlich ist in überschaubarer Zeit lediglich mit einem moderaten Wirtschaftswachstum zu rechnen, insbesondere in Westeuropa und den USA. Gleichzeitig dürfte bei anhaltendem Niedrigzins die Volatilität an den Finanzmärkten auf hohem Niveau verharren; auch die Forderungen nach einem strengeren Aufsichtsrecht und nach höheren Steuern werden vermutlich anhalten.

Wir wollen für unsere Investoren Wert schaffen und Erträge erzielen; deshalb behalten wir die Markterwartungen scharf im Auge. Es macht uns stolz, dass unsere Gewinne und Ausschüttungen für das Jahr 2010 diese Erwartungen übertrafen.

Eine solche Performance lässt sich nur erreichen, wenn es gelingt, den Anliegen unserer anderen Interessengruppen gerecht zu werden: unserer äußerst anspruchsvollen Kundenbasis, unseren talentierten und motivierten Mitarbeitern, unseren flexiblen Geschäfts- und Vertriebspartnern und der Öffentlichkeit, in der wir tätig sind. Wir tun das über eine nachhaltige und solide Wertschöpfung; unsere Strategie verfolgt entsprechend fünf Ziele.

1. Wir streben nach profitablen und nachhaltigem Wachstum. 2. Unser Geschäftsportfolio ist ausgeglichen und weist Synergien auf. 3. Wir steuern eine solide Kapitalausstattung ohne Übertreibungen an. 4. Wir werden durch eine weltweit erstklassige Vermögensverwaltung unterstützt. 5. Unsere Aktivitäten sind durch einen zukunftsweisenden Risikorahmen abgesichert.

## 1. Profitables und nachhaltiges Wachstum

Wir streben in unseren drei Geschäftssegmenten Schaden- und Unfallversicherung, Lebens- und Krankenversicherung sowie Asset Management profitables und nachhaltiges Wachstum an.

Im Geschäftsjahr 2010 gelang es uns, den Umsatz deutlich über die beeindruckende Schwelle von 100 Milliarden Euro zu heben. Unser Umsatzwachstum betrug mehr als 9 Prozent, der Reinerlös aus fortzuführenden Geschäftsbereichen stieg um 12 Prozent auf über 5 Milliarden Euro, und das operative Ergebnis verbesserte sich sogar noch deutlicher auf über 8 Milliarden Euro.

## 2. Ausgeglichenes Geschäftsportfolio mit Synergien

Die Veränderungen im Wirtschaftsumfeld und an den Kapitalmärkten wirken sich auf unsere drei Geschäftsbereiche unterschiedlich aus. Wie im Verlauf der Finanzkrise und danach gezeigt, sind wir in der Lage, im Vergleich zum Wirtschaftsumfeld, zum Markt und zur Konkurrenz eine starke Performance zu erbringen, dies dank der Geschäftsentwicklung in jedem unserer Segmente und der Leistung des Gruppenverbunds.

Wir werden weltweit unsere ehrgeizigen und zugleich vorsichtigen Expansionspläne durch regionale ebenso wie produktbezogene Vorhaben vorantreiben. Wir suchen dabei nach profitablen und nachhaltigen Wachstumschancen, und zwar über unsere flexiblen örtlichen Gesellschaften sowie in unseren globalen



Geschäftszweigen. Ein willkommener Nebeneffekt unserer weltweiten Präsenz ist es, dass wir in den globalen Leitwährungen unsere Erträge erwirtschaften.

Die Allianz ist jedoch wesentlich mehr als eine diversifizierte Finanzgruppe. Unsere Geschäftssegmente und unsere operativen Einheiten ergänzen und bereichern einander, vor allem indem sie den vielschichtigen Bedürfnissen unserer Kunden dienen. Darüber hinaus sorgt die Geschäftsleitung dafür, dass wertschöpfende Synergien gehoben werden. Nachfolgend einige Beispiele:

- Die Allianz verfügt über eine der stärksten Finanzdienstleistungsmarken weltweit, deren Wert und Stellung wir stetig ausbauen.
- Wir sind zuversichtlich, dass wir als Gruppenverbund viel besser als jede unserer Einheiten für sich imstande sind, eine nach den Solvency-II-Regeln solide Kapitalausstattung zu bieten, nicht zuletzt wegen unserer Risikopolitik, unseres Risikomanagements und unseres globalen Rückversicherungsgeschäfts.
- Umfang und Reichweite unserer Aktivitäten versetzen uns in die Lage, sorgfältig Kapital für attraktive Geschäftschancen einzusetzen, ohne dabei die langfristige Erzielung von Cashflows aufs Spiel zu setzen.
- Wir stellen uns flexibel auf verändertes Kundenverhalten und neue Kundenbedürfnisse ein. Dies zeigt die Zusammenfassung unserer Dienstleistungen für globale Firmenkunden in einer eigenen Geschäftseinheit.
- Fortlaufend wird unser überall vorhandenes erstklassiges Praxiswissen in Bezug auf Kundendienst, Vertrieb, Produkte, Versicherungstechniken und weiteren funktionalen Aspekten von unseren hochspezialisierten und ergebnisorientierten Kompetenzzentren und -initiativen gesammelt, ergänzt, angereichert und unseren Tochtergesellschaften und anderen Geschäftseinheiten zur Verfügung gestellt.

- Die Allianz nutzt über gemeinsame Abwicklungszentren unvermindert Größen- und Verbundvorteile und schafft durch gezielte Technologieinvestitionen ein dynamisches Umfeld.

### 3. Solide Kapitalausstattung

Unsere diesbezüglichen Hauptziele sind:

- Schutz des Kapitals unserer Investoren vor Schocks an den Anlagemärkten,
- Unterstützung unserer Geschäftstätigkeit mit einer ausreichenden Kapitalausstattung für qualitatives Wachstum sowie
- Definition und Angebot eines angemessenen Risikokapitalrahmens auf Gruppenebene in Anbetracht neuer bilanztechnischer und aufsichtsrechtlicher Risikovorschriften gemäß IFRS und Solvency II sowie im Einklang mit besten branchenspezifischen Verfahrensweisen wie der Berechnungsmethode zum MCEV (Market Consistent Embedded Value).

Außerdem sind wir es unseren Anlegern und unseren anderen Interessengruppen schuldig, unseren Ruf, unsere Marktposition und unsere globale Reichweite dafür einzusetzen, dass sich aufsichtsrechtliche und bonitätsspezifische Entwicklungen, die Gegenstand der öffentlichen Diskussion sind, nicht nachteilig auf unsere starke Kapitalausstattung auswirken.

#### 4. Weltweit erstklassiges Vermögensverwaltungsgeschäft

Eine solide Anlagestrategie ist das Fundament eines qualitativ starken Wachstums und einer guten Kapitalausstattung. Unabdingbar ist dabei ein solides und konservativ geführtes Anlageportfolio, mit dem sich stabile Renditen erzielen und, sofern notwendig, niedrige Zinsen oder eine drohende Inflation ausgleichen lassen. Berücksichtigt man den Kapitalbedarf, die Bonitätsanforderungen und die Notwendigkeit eines soliden Portfolios, dann sind Anlagen in riskanteren Anlageklassen kaum angebracht.

Solange das gegenwärtige Marktumfeld vorherrscht, streben wir daher nach

- einem Ausgleich für niedrigere Anlageerträge über ein höheres versicherungstechnisches Ergebnis,
- Optionen zur Schaffung von Spielraum mit kurzfristigem Schwerpunkt auf dem Durationsmanagement und
- einer stetigen Anpassung unserer Kapazitäten für bessere Renditen an adäquate Anlageinstrumente und nach erstklassigen Kompetenzen für alternative Investments.

#### 5. Zukunftweisender Risikorahmen

Wir wollen unseren Investoren und Interessengruppen mit unserem umfassenden Risikokonzept und unseren Strategien ein attraktives Risiko-Ertrags-Profil bieten. Mit unseren Ansätzen, Standards, Richtlinien und Systemen für das Risikomanagement stellen wir sicher, dass unsere Geschäfts- und Anlageentscheidungen auf örtlicher und globaler Ebene im Rahmen einer umsichtig definierten Toleranz für vorhersehbare Risiken getroffen werden.

Unsere „3+One“-Strategie verfolgt die Erreichung dieser Ziele durch wohl definierte Maßnahmen innerhalb der Allianz Gruppe, um unsere Kapitalbasis zu schützen, unsere operative Profitabilität zu stärken, die Komplexität unserer Struktur und unseres Betriebsmodells zu reduzieren und unsere nachhaltige Wettbewerbsfähigkeit und unseren Wert zu steigern.

# Die Marke Allianz

Eine starke Marke sorgt für Vertrauen und fördert bei Kunden und Anteilseignern die Identifikation mit dem Unternehmen. Die historisch erfolgreich gewachsene Marke Allianz baut im Wesentlichen auf zwei Säulen auf: einem herausragenden Produkt-, Dienstleistungs- und Vertriebsangebot sowie einem nachhaltigen Markenmanagement, welches sich innerhalb eines globalen Gesamtkontexts bewegt. Unsere Marke unterstützt Konsumenten im Kaufentscheidungsprozess, indem sie Sicherheit und Vertrauen vermittelt.

Dass wir ein „vertrauenswürdiger Partner“ sind, ist Kern unserer Marke und wird von uns tagtäglich unter Beweis gestellt. Dies differenziert uns nicht nur von der Konkurrenz, sondern schafft uns einen nachhaltigen und langfristigen Wettbewerbsvorteil. Unsere Marke ist ein wichtiger und wertvoller Vermögenswert und somit ein zentrales Element unserer Gesamtunternehmensstrategie. Wir wollen die globale Entwicklung und den einheitlichen Auftritt der Marke Allianz weiter gezielt vorantreiben. Kürzlich erfolgreich umgesetzte Markenmigrationen in Italien und Frankreich belegen dies.

## Kerninformationen zu unserer Marke

- Die Allianz Gruppe ist in etwa 70 Ländern tätig; 79 Prozent ihrer Umsätze werden derzeit unter dem Markennamen Allianz erzielt. Mit dem für 2011/2012 geplanten Rebranding für Mondial wird sich der Anteil der unter der Marke Allianz erzielten Umsätze am Gesamtumsatz auf über 80 Prozent erhöhen.
- Unser einheitlicher Markenauftritt bietet auch Spielraum für renommierte Spezialmarken wie PIMCO, den größten US-Verwalter festverzinslicher Anlagen, und Euler Hermes, den Weltmarktführer im Bereich Kreditversicherungen.

- Allianz ist eine weltweit eingetragene und geschützte Marke, was auch für unsere Webdomains gilt.
- Booz & Co verlieh der Allianz Gruppe 2010 den Chief Marketing Officer Award in Anerkennung der außerordentlichen und konsequenten Verwirklichung einer klaren, globalen Markenarchitektur.
- 2010 verbesserte sich die Allianz im Top-100-Interbrand-Markenwert-Ranking um 14 Plätze und zählt damit zu den größten Gewinnern weltweit. Gemessen am Interbrand-Ranking stieg der Wert der Marke Allianz von rund 3,8 Milliarden US-Dollar im Vorjahr auf 4,9 Milliarden US-Dollar im Jahr 2010.

## Markensteuerung

Unsere Markenführung ist integraler Bestandteil unserer Gesamtunternehmensstrategie. Um den Markenwert weiter zu erhöhen und unsere Markeninvestitionen zu optimieren, verwenden wir einen strukturierten Markensteuerungsprozess, in dem die meisten lokalen Märkte durch eine globale standardisierte Marktforschung abgedeckt werden. Unser Markensteuerungsprozess umfasst folgende Elemente: Strategie, Positionierung, Aufbau und Monitoring.

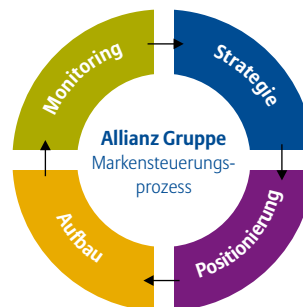

## Holistisches Management der Marke

Unsere langfristige Markenstrategie und -architektur verfolgen einen einheitlichen Markenauftritt (Mono-Marken-Ansatz), der durch unsere Markenkommunikation und unsere Kampagnen mit Leben gefüllt wird. Kunden lernen aus Erfahrung, insbesondere in Krisenzeiten, ob die Marke hält, was sie verspricht. Sie wünschen sich einen starken Partner, der sie in jeder Phase Ihres Lebens begleitet und unterstützt, daher ist unsere Rolle als vertrauenswürdiger Partner Kernbestandteil unserer Marke. Dies ist auch eine unserer Kernbotschaften und ein Orientierungspunkt für unsere mehr als 150 000 Mitarbeiter und mehrere Hunderttausend Vertriebspartner.

Die Finanzkrise hat zahlreiche Stärken der Allianz hervorgehoben, die uns bei unseren Anteilseignern gegenüber den Wettbewerbern klar differenzieren. Unser neuer Kommunikationsansatz greift diese Stärken und die Notwendigkeit der Verjüngung unserer Marke auf und unterstützt uns dadurch auf unserem Weg, die weltweit stärkste Finanzgemeinschaft aufzubauen. Unsere neue Kommunikationsstrategie schafft eine verbesserte Form des Kundendialogs und ist offener und transparenter als je zuvor.

Die neue Kommunikationsstrategie beruht auf fundierten Analysen des Verbraucherverhaltens und unserem Verständnis der Funktionsweise vertrauensvoller Beziehungen. 120 Jahre gesammelte Erfahrung im Umgang mit aktuell mehr als 76 Millionen Kunden weltweit versetzen uns in die Lage, private, berufliche und businessrelevante Herausforderungen im Leben unserer Kunden genau zu verstehen. Das Herzstück unserer Strategie ist es, Dialoge zu ermutigen, um unser enormes Wissen und unsere Expertise mit Mitarbeitern und Kunden zu teilen. Dieser Ansatz unterstützt uns bei dem Ausbau von langfristigen und nachhaltigen Kundenbeziehungen.

Das „One“-Konzept: Unserer Strategie folgend haben wir in den letzten Jahren die Organisationsstruktur der Allianz in stärker kunden- und marktorientierte Einheiten adaptiert. Als nächsten Schritt stellen wir den Kunden in den Mittelpunkt unserer Kommunikation, indem wir uns mit tatsächlichen Kunden – nicht mit Werbefiguren – auseinandersetzen und ihre Erfahrungen, Ratschläge und Erkenntnisse an andere weitergeben.

Mit dem „One“-Konzept hat die Allianz die Gelegenheit ergriffen, den jetzigen und potenziellen Kunden weltweit unsere starke und konsistente Position aufzuzeigen. Es geht dabei um ein einheitliches globales Konzept, das aber lokale Interpretationen zulässt.

Innerhalb dieses Konzepts spielen digitale Medien eine stärkere Rolle. Dies spiegelt die zunehmende Bedeutung digitaler Technologie sowie die neuen Bedürfnisse und das veränderte Verhalten von Verbrauchern wider.

### Berichtete Mediaausgaben für die „One“-Kampagne

|             | 2010<br>Mio € |
|-------------|---------------|
| Deutschland | 26,1          |
| Österreich  | 4,1           |
| Ungarn      | 5,9           |
| Portugal    | 1,8           |

Quelle: Focus Media Research, Infoadex, Marktest, Kantar, TNS Media Intelligence

Ein weiterer Aspekt unseres Kommunikationsansatzes ist unser Engagement im Sport, etwa bei der Formel Eins™, beim Golf, bei den Paralympics, beim FC Bayern München und bei der Allianz Arena. Mittels dieser globalen Plattformen ist es uns möglich, dass wir weltweit und in den mehr als 70 lokalen Märkten unsere Marke stärken, indem wir eine Verbindung zwischen Sport und unseren Geschäftsfeldern herstellen. Das geschieht beispielsweise durch unsere Beteiligung am Safety Car in der Formel Eins™. Damit demonstrieren wir als einer der global führenden Autoversicherer unser Engagement für die Verkehrssicherheit.

Unsere Kommunikationsstrategie wird von unserem neuen Corporate-Identity-Konzept und -Design unterstützt, welches speziell nach den digitalen Bedürfnissen unserer Konsumenten entwickelt wurde. Verbraucher können ihre Erfahrungen und ihr Wissen jetzt mühelos mit uns sowie mit bestehenden Kunden und Interessenten austauschen.

Für ein optimales Monitoring der Leistungsfähigkeit unserer Marke im Rahmen der neuen strategischen Ausrichtung ist es notwendig, die wichtigsten Werttreiber in den lokalen Märkten zu verstehen. Die fortlaufend gesammelten Verbrauchererfahrungen und -feedbacks sind in diesen Prozess integriert. Darüber hinaus ist das Marken-Monitoring äußerst wichtig, um unsere Marketingaktivitäten erfolgreich zu steuern und unsere Ressourcen optimal einzusetzen.

Um den neuen Anforderungen der Markenkommunikation gerecht zu werden und ein enges Zusammenspiel zwischen operativem Geschäft und Marke unter Nutzung potentieller Synergien zu gewährleisten, wurden 2009/2010 globale Agentur-Partner bewertet und gleichzeitig Geschäftsbeziehungen mit lokalen Agenturen reduziert.

## Der Kunde im Mittelpunkt

Unser Ziel ist es, weiterhin profitabel zu wachsen und langjährige Kundenbeziehungen aufzubauen. Hierfür fördern wir die Marktmanagementfunktion in allen Landesgesellschaften, um die Maßnahmen unserer Geschäftsbereiche zur Verstärkung ihrer Kunden- und Marktorientierung zu unterstützen.

Aufbauend auf Markt- und Kundenerkenntnissen versetzt unsere Marktmanagementfunktion uns in die Lage:

- ein ganzheitliches Bild unserer Kunden über alle relevanten Kundeninteraktionen zu gewinnen,
- strategische Kundensegmente zu identifizieren,
- Produkt-, Dienstleistungs- und Vertriebsangebote zu entwickeln,
- die Kundenloyalität zu fördern und
- die Markenführung nach Geschäftszielen auszurichten.

Wir betrachten Kundenorientierung als einen entscheidenden Erfolgsfaktor für ein nachhaltig profitables Wachstum. Als ein Teil unserer Kundenorientierung setzen wir neben dem weltweit in unseren Unternehmenseinheiten etablierten Net Promoter Score (NPS) auch auf ein umfassendes Beschwerdemanagement. Über diese Instrumente sind wir immer für unsere Kunden da, identifizieren deren Bedürfnisse, lernen von ihnen und können entsprechend handeln.

Der NPS misst die Kundenloyalität und zeigt auf, wie hoch die Weiterempfehlungsbereitschaft für die Allianz ist. Wir nutzen ihn in doppelter Hinsicht:

Zum einen messen wir jährlich, wie hoch die Loyalität unserer Kunden im Vergleich zu denen der Wettbewerber ist. 2010 haben wir dies in 57 Märkten durchgeführt. Für unser Management steht die Erhöhung unserer Kundenloyalität an vorrangiger Stelle. Daher sind relative Verbesserungen des NPS Teil der Zielvereinbarungen und Managementvergütungen.

Zum anderen haben wir in 2010 systematisch in 40 Tochtergesellschaften (die rund 90 Prozent der Bruttoprämie erwirtschaften) den NPS als ein global übergreifendes Kunden-Feedback-Instrument etabliert. Auf diese Weise konnten wir bei unseren Kunden über eine Million Rückmeldungen aus den persönlichen Erfahrungen mit uns bei Verkaufsgesprächen oder Schadenregulierungen einholen. Diese Rückmeldungen werden mittels Anrufen bei den Kunden durch unsere Servicemitarbeiter erhoben. Der NPS dient als ein Instrument, um neue Bedürfnisse aufzuzeigen, notwendige Veränderungen zu initiieren, und ermöglicht dadurch laufend übergreifende Verbesserungen.

Wir nehmen die Meinungen und Beschwerden unserer Kunden sehr ernst und legen bei der Bearbeitung besonderen Wert auf die Einhaltung der global gültigen Qualitätsstandards. Zu diesem Zweck mussten die Allianz Gesellschaften einen internen Zertifizierungsprozess durchlaufen, der sicherstellt, dass die erfolgreichsten Praktiken überall als Standard etabliert werden. Aufbauend auf diesen Erkenntnissen sind wir nun in der Lage, unsere Dienstleistungen, Prozesse und Produkte gemäß den Kundenanforderungen stetig zu verbessern.

Für die Sicherstellung der Zufriedenheit unserer Vertriebspartner setzen wir ebenfalls den NPS ein. Um ein besseres Bild von unseren Stärken und möglichen Schwächen im Verkaufsprozess zu erhalten, führen wir regelmäßig Testkäufe durch (Mystery Shopping durch geschulte Testpersonen).

Die Entwicklung und immer stärkere Nutzung des NPS zeigen, dass unsere Maßnahmen erfolgreich sind: Seit Beginn unserer NPS-Messungen 2006 ist die Anzahl unserer Tochtergesellschaften mit höherer Kundenloyalität gegenüber dem Branchendurchschnitt deutlich gestiegen.

#### Kunden nach Regionen/Ländern zum 31. Dezember 2010 (31. Dezember 2009)

in %

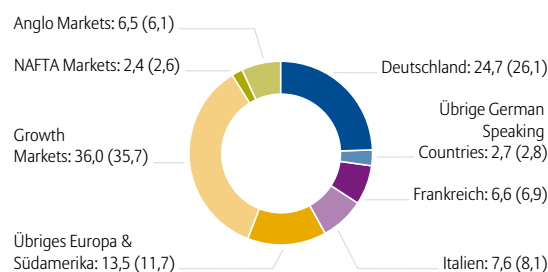



# Unsere Mitarbeiter

Unser Erfolg hängt maßgeblich davon ab, dass sich unsere Mitarbeiter mit außergewöhnlichem Engagement und einem hohen Anspruch an die eigene Leistung für unsere Kunden einsetzen. Um unsere Leistung konstant weiter zu steigern, setzen wir auf exzellente Führung, fortlaufende Talentförderung und persönliche Weiterentwicklung unserer Mitarbeiterschaft. Denn nur wenn wir das Potenzial unserer Mitarbeiter beständig fördern, können wir unser wichtigstes Ziel erreichen: unseren Kunden ein zuverlässiger Partner zu sein.

## Mitarbeiter in Zahlen

Zum 31. Dezember 2010 beschäftigte die Allianz Gruppe 151 338 Mitarbeiter, 1,2 Prozent weniger als im Vorjahr. 2010 wurden weltweit 24 261 Mitarbeiter eingestellt.

### Mitarbeiter nach Ländern

| Stand 31. Dezember              | 2010           | 2009           |
|---------------------------------|----------------|----------------|
| Deutschland                     | 47 889         | 49 051         |
| Frankreich                      | 18 127         | 18 489         |
| USA                             | 9 808          | 9 908          |
| Russland                        | 8 434          | 8 311          |
| Großbritannien                  | 7 253          | 7 043          |
| Italien                         | 6 914          | 6 961          |
| Australien                      | 4 043          | 3 866          |
| Schweiz                         | 3 633          | 3 984          |
| Spanien                         | 3 448          | 3 426          |
| Österreich                      | 3 258          | 3 194          |
| Brasilien                       | 2 876          | 2 963          |
| Polen                           | 2 560          | 2 589          |
| Slowakei                        | 2 432          | 2 487          |
| China (einschließlich Hongkong) | 2 143          | 2 225          |
| Rumänien                        | 2 121          | 2 152          |
| Niederlande                     | 2 041          | 2 102          |
| Übrige                          | 24 358         | 24 452         |
| <b>Total</b>                    | <b>151 338</b> | <b>153 203</b> |

### Mitarbeiter nach Regionen/Ländern

zum 31. Dezember 2010

in %

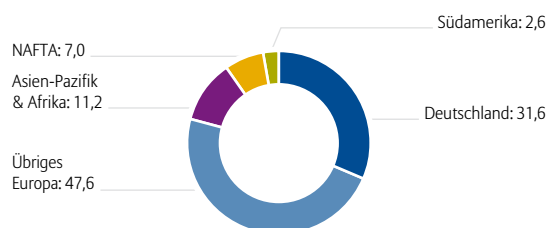

## Neuausrichtung der Personalfunktion

Wir richteten im Berichtsjahr das Personalwesen neu aus mit dem Ziel, die Entwicklung unserer Mitarbeiter weiter zu verbessern und die strategische Beratungsaufgabe dieses Bereichs auszubauen. Die Zuständigkeit im Vorstand wurde neu geordnet, die zentralen Personalabteilungen wurden zusammengeführt, und es wurde ein Chief HR Officer mit gruppenübergreifender Zuständigkeit bestimmt.

Der Fokus unserer Personalarbeit liegt auf:

- Mitarbeiterengagement,
- Vielfalt,
- Talentmanagement,
- Vergütung.

## Mitarbeiterengagement

Das Engagement unserer Mitarbeiter ist ein entscheidender Wettbewerbsvorteil und soll kontinuierlich verbessert werden. Auf diesem Weg erreichten wir 2010 ein wichtiges Zwischenergebnis: Erstmals wurde eine gruppenweit einheitliche Mitarbeiterbefragung durchgeführt, die es erlaubte, die Ergebnisse einzelner Tochtergesellschaften miteinander zu vergleichen. Das war bisher nicht möglich gewesen, weil jede Einheit ihre Mitarbeiterbefragung eigenständig durchgeführt hatte. Nunmehr wurden weltweit rund 106 000 Mitarbeiter aus 66 Gesellschaften eingeladen, die gleichen Fragen zu beantworten. Die Zustimmung

zur Erhebung war mit einer Beteiligungsquote von 69 Prozent hoch. Der Index für das Mitarbeiterengagement<sup>1</sup> lag bei 31 Gesellschaften wieder über 70 Prozent.

Die Mitarbeitermotivation geht – wie schon die Bewertungen von Kunden und Aktionären – in die Vorstandsvergütung ein und beeinflusst den variablen Gehaltsbestandteil des Topmanagements. Weitere Informationen finden sich im Vergütungsbericht auf den Seiten 35 bis 46 des Geschäftsberichts 2010.

### Beschäftigungsdauer nach Regionen zum 31. Dezember, 2010

in Anzahl von Jahren

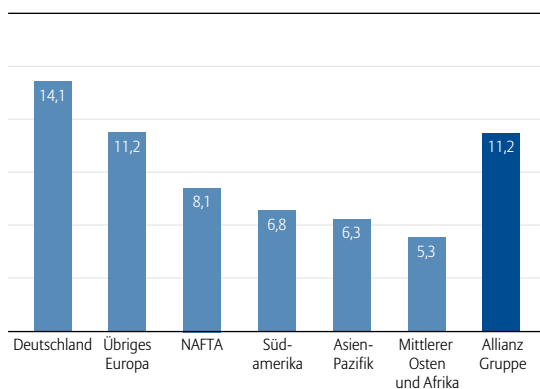

## Vielfalt

Wir sind davon überzeugt, dass Vielfalt und Offenheit für unterschiedliche Meinungen und Einstellungen die Grundlage für unternehmerische Innovation und Kundennähe sind. Außerdem machen es die gesellschaftliche Alterung und der absehbare Fachkräftemangel erforderlich, das Mitarbeiterpotenzial insgesamt zu fördern und zu nutzen.

Dabei setzen wir auf unsere Internationalität und unsere grenzüberschreitende Zusammenarbeit: In den zwei Management-Topebenen arbeiten 43 Prozent Nichtdeutsche; betrachtet man das Topmanagement insgesamt, sind dort 39 Nationalitäten vertreten. 2010 koordinierten wir gruppenweit 531 längerfristige Entsendungen von Mitarbeitern.

Vielfalt zu stärken bedeutet für uns auch Frauenförderung. Unser Ziel, dass unser Talentpool für die Besetzung von Führungspositionen bis 2015 zu 30 Prozent aus Frauen besteht, hatten wir bereits 2008 formuliert. Im Berichtsjahr waren 15 Prozent der Führungspositionen unmittelbar unter dem Vorstand von Frauen besetzt; der Anteil der Frauen im mittleren Management belief sich auf 20 Prozent. Fasst man sämtliche Führungsebenen<sup>2</sup> der Allianz Gruppe zusammen, sind dort 32 Prozent der Positionen von Frauen besetzt. 2010 boten Allianz SE, Allianz Global Corporate Specialty, Allianz Global Investors, Euler Hermes und Allianz Frankreich Mentoring-Programme für Frauen an.

## Talent Management

Unsere Unternehmenskultur steht für Leistung und soll exzellente Mitarbeiter anziehen, die immer bereit sind, Höchstleistungen zu erbringen und sich weiterzuentwickeln. Unser weltumspannendes Talent-Management-System verschafft uns einen Überblick darüber, welche Mitarbeiter mit Entwicklungspotenzial es in den Ländergesellschaften gibt, sodass wir die Nachfolgeplanung gruppenweit und international steuern können.

2010 führten wir in 58 Ländern Career Development Conferences (CDC) durch, einen Kernbestandteil unseres Talent Management Prozesses. Auf diesen CDCs bewerteten wir anhand eines vorgegebenen Kompetenzkatalogs mehr als 3 000 Kandidaten aus 70 Allianz Gesellschaften. Zusätzlich zu den CDCs für den Managementnachwuchs gab es 8 weitere CDCs, auf denen die Kandidaten für die wichtigsten Fachfunktionen bewertet wurden.

<sup>1</sup> Der Index für das Mitarbeiterengagement dient als wichtige Kennzahl der Mitarbeiterbefragung sowie als Indikator für die Verhaltensänderungen der Menschen. Diese Verhaltensänderungen beeinflussen weitere Faktoren wie Kundenzufriedenheit, Produktivität, Effizienz, Sicherheit, die wiederum Auswirkungen auf die Rentabilität haben.

<sup>2</sup> Bezieht sich auf Frauen in Führungspositionen im Vorstand sowie die drei Ebenen darunter (Bereichs-, Abteilungs- und Referatsleiter).

Wir verfügen auch über ein „Strategic Workforce Planning“, das sich mit der Mitarbeiterplanung für die nächsten zehn Jahre befasst und den Expertennachwuchs für Stellen mit strategischer Relevanz sicherstellen soll. Nach einer ersten 2009 durchgeführten umfassenden Analyse der künftigen Personalentwicklung in Deutschland werteten wir im Berichtsjahr die entsprechenden Daten für unsere Gesellschaften in Frankreich und Italien aus, ferner die Daten der global tätigen AGCS und jene unserer deutschen und französischen Vertretervertriebsnetze. In der Folge setzten wir spezielle, global ausgerichtete Entwicklungsprogramme für Aktuarien, Revisoren und Kommunikationsexperten in Gang, unsere ersten Fort- und Weiterbildungsmaßnahmen für Fachkräfte dieser Art.

Insgesamt investierte die Allianz Gruppe im Berichtsjahr 130 (147) Millionen Euro in Trainings- und Bildungsmaßnahmen; das sind im Schnitt 980 (1 100) Euro je Mitarbeiter weltweit. Der Rückgang der Investitionen in individuelle Fortbildungen ist darauf zurückzuführen, dass verstärkt e-Learning-Möglichkeiten angeboten wurden und insgesamt mehr Trainings intern abgehalten wurden. Unsere Führungskräfte und Potenzialkandidaten fördern und schulen wir durch das Allianz Management Institute (AMI); 6 692 von ihnen nahmen 2010 an einem AMI-Programm teil, 21 Prozent mehr als im Vorjahr. Im AMI sind seit 2010 auch die Programme der AMI OPEX Academy integriert, an denen 1 363 Mitarbeiter teilnahmen.

## Vergütung

Die Vergütung für Vorstände der Allianz SE und Führungskräfte der Allianz Versicherungsgesellschaften wurde im Berichtsjahr noch konsequenter auf Nachhaltigkeit und Langfristigkeit ausgerichtet und dabei vereinheitlicht. Das neue, gruppenweit gültige Vergütungssystem 2010 ist so angelegt, dass ein ausgewogenes Verhältnis zwischen den kurz-, mittel- und langfristigen Elementen der variablen Vergütung besteht. Dementsprechend wurde der Drei-Jahre-Bonus für Topmanager mit operativer Verantwortung weiter ausgebaut, sodass dessen Anteil bei Vorständen

der Allianz SE von 11 auf 25 Prozent der Gesamtzielvergütung anstieg. Weitere Informationen dazu finden sich im Vergütungsbericht auf den Seiten 35 bis 46 des Geschäftsberichts 2010.

Auch unterhalb des Vorstands legt die Allianz Gruppe Wert auf eine leistungsorientierte, ausgewogene Vergütung. Durch eine regelmäßige Überprüfung sowohl der einzelnen Vergütungskomponenten als auch der Gesamtvergütung stellen wir eine attraktive und wettbewerbsgerechte Entlohnung sicher. Leistungsanreize werden über diverse, je nach Geschäftsfeld und Markt unterschiedliche Komponenten der variablen Vergütung gesetzt. Für die meisten Führungskräfte besteht die Vergütung im Wesentlichen aus drei Komponenten: der Grundvergütung, dem jährlichen Bonus und einer Zuteilung von virtuellen Aktien, sogenannten Restricted Stock Units (RSU) im Rahmen des Plans Allianz Equity Incentive (AEI). Am AEI, der Langfristvergütungskomponente, nehmen rund 800 Führungskräfte und besondere Leistungsträger teil. Je nach Rolle, Verantwortung und Marktgewohnheiten nehmen Mitarbeiter in aller Welt ebenfalls an jährlichen Bonus-Programmen teil; der Jahresbonus macht dabei typischerweise zwischen 10 und 40 Prozent der Barvergütung aus.

Auch 2010 bot die Allianz Gruppe wieder in vielen Märkten ein attraktives Aktienkaufprogramm für Mitarbeiter an, um die Belegschaft auch als Aktionäre stärker an das Unternehmen zu binden und das Bewusstsein für Unternehmensstrategie und Geschäftsergebnisse zu stärken. Etwa 94 000 Mitarbeiter in 21 Ländern waren zur Teilnahme an diesem Programm berechtigt. Rund 14 500 von ihnen nahmen die Kaufgelegenheit wahr. Insgesamt halten Mitarbeiter 1,1 Prozent der Allianz Aktien und stellen 7,9 Prozent der Aktionäre.

Viele Mitarbeiter nehmen darüber hinaus an Programmen der betrieblichen Altersversorgung, anderen Vorsorge- oder Versicherungsleistungen, flexiblen Entgeltlösungen und Arbeitszeitregelungen, sowie weiteren Sozialleistungsprogrammen teil, die in verschiedenen Ländern und Märkten unterschiedlich ausfallen, aber mit den üblichen Marktpraktiken ähnlicher Unternehmen vergleichbar sind.

Die Summe aller Leistungen, welche die Allianz Gruppe 2010 weltweit an ihre Mitarbeiter auszahlte, betrug 8,3 (7,7) Milliarden Euro. Davon entfielen 2,0 Milliarden Euro oder etwa 24 Prozent auf leistungsbezogene (variable) Vergütungsanteile. Für Sozialabgaben, Altersversorgung und sonstige Sozialleistungen wurden 2,2 (2,2) Milliarden Euro aufgewandt.

## Auszeichnungen unserer Personalpolitik

2010 wurden verschiedene Personalprojekte und -initiativen der Allianz Gruppe ausgezeichnet:

### Auszeichnungen 2010

Die Unternehmensberatung Potentialpark kürte unser Internetportal [Allianz.com/careers](http://Allianz.com/careers) zur „Besten Unternehmenskarriere-Website 2010“.

Das Berufsbildungswerk der Deutschen Versicherungswirtschaft verlieh der Allianz Deutschland den „InnoWard“.

Mondial Assistance UK wurde von Best Companies und der „Sunday Times“ in die Spitzengruppe der „Besten Arbeitgeber“ erhoben.

Izabela Jarosz, Personaldirektorin von Mondial Assistance Polen, wurde von der polnischen Tageszeitung „Rzeczpospolita“ als „Top HR Manager“ ausgezeichnet.

In einem von der Tageszeitung Akzia organisierten Ranking wählte die russische Karriereplattform Superjob unser Unternehmen ROSNO als „Attraktivsten Arbeitgeber“ und einen der „50 Traum-Arbeitgeber für Hochschulabsolventen“ aus.

Das Personalmagazin „51job“ versammelte Allianz China Life unter die „100 besten Personalmanagement-Unternehmen“ und die „100 besten Fortbildungs-Unternehmen“.

Mediacorp Canada Inc. ernannte Mondial Assistance Canada zu einem der „Top 15 Arbeitgeber in der Waterloo-Region“.

# Nachhaltige Entwicklung

Während der letzten 120 Jahre hat die Allianz ein solides Fundament geschaffen, das uns in die Lage versetzt, effektiv auf veränderte Markt- und Rahmenbedingungen einzugehen. Indem wir weiterhin Nachhaltigkeit in unserem Geschäft verankern, sichern wir unseren langfristigen Erfolg, auch und gerade dann, wenn der Wandel sich beschleunigt.

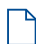

Die Allianz konzentriert sich auf fünf globale Themenbereiche:

1. Klimawandel
2. Demografischer Wandel
3. Digitalisierung
4. Stabilität der Finanzmärkte
5. Zugang zu Finanzdienstleistungen

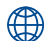

Eine vollständige Liste unserer umweltfreundlichen Lösungen findet sich im Internet unter [Green Solutions Factsheet](#)

Die Allianz hat es sich zum Ziel gesetzt, gemäß den Grundsätzen ökologischer und sozialer Verantwortung sowie guter Corporate Governance langfristig Mehrwert zu schaffen. Indem wir konsequent globale, langfristige Themen vorantreiben, die maßgeblich für unser Geschäft sind, tragen wir zur Nachhaltigkeit unseres Erfolgs bei. Diese Themen sind: Klimawandel, demografischer Wandel, Digitalisierung, Finanzmarktstabilität und Zugang zu grundlegenden Finanzdienstleistungen.

Unsere Einheit Allianz4Good trägt die Verantwortung dafür, dass in allen Geschäftsbereichen Nachhaltigkeit gefördert und verstärkt berücksichtigt wird. Dafür arbeitet sie eng mit zentralen Abteilungen und unseren Tochtergesellschaften zusammen. Diese Vorgehensweise findet Eingang in unsere strategischen Grundsätze einer nachhaltigen Entwicklung. Nachfolgend finden Sie unsere Erfolge im Berichtsjahr 2010.

## 1. Verstärkter Schutz natürlicher Ressourcen in den internen Prozessen

Wir erwarten von allen Mitarbeitern, dass sie die Umwelt so gut wie möglich schützen. Wir überwachen und kontrollieren die Umweltauswirkungen der Allianz über ein konzernweites Umweltmanagementsystem, das mehr als 80 Prozent unserer Mitarbeiter weltweit umfasst.

### CO<sub>2</sub>-Emissionen der Allianz Gruppe

in Kilogramm pro Mitarbeiter

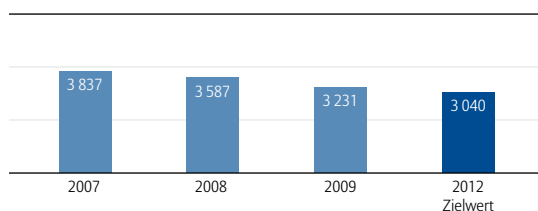

Seit 2010 gibt es einen Group Environmental Officer. Seine Aufgabe ist es, die Strategie zur Verringerung des Kohlendioxidausstoßes für die gesamte Gruppe weiter zu entwickeln und die Maßnahmen zur Reduzierung der CO<sub>2</sub>-Emissionen der Tochterunternehmen zu lenken. Außerdem haben wir neue Gruppenrichtlinien für Geschäftsreisen und das Drucken von Dokumenten eingeführt, die unsere Umweltschutzziele zusätzlich unterstützen.

## 2. Zunehmend nachhaltiges Geschäft durch ein wachsendes Produkt- und Dienstleistungsportfolio

Wir entwickeln neue Produkte und Dienstleistungen, die unseren Kunden dabei helfen, die Auswirkungen des Klimawandels zu mindern oder ihre eigene Umwelteinwirkung einzudämmen. 2010 erhöhte sich die Anzahl der von der Allianz angebotenen umweltbezogenen Produkte und Dienstleistungen von 50 auf über 70. Außerdem nutzen inzwischen mehr als 4 (3,8) Millionen Kunden in acht Ländern Asiens, Afrikas und Südamerikas eine Vielzahl unserer Mikrofinanzprodukte. Die Produktpalette stellt jedoch nur eine Komponente unserer Strategie dar. Ebenso wichtig ist uns die Förderung finanzieller Allgemeinbildung und Unabhängigkeit.

Darüber hinaus erweiterten wir unser Portfolio erneuerbarer Energien durch zusätzliche Investitionen in europäische Solarenergieprojekte. Bis Ende 2010 hatte die Allianz mehr als 1 Milliarde Euro in 30 Wind- und Solarparks investiert. Unser Ziel ist es, diesen Investitionswert um weitere 0,5 Milliarden Euro bis Ende 2012 zu erhöhen. Über Allianz Global Investors, unsere Asset-Management-Einheit, verwalten wir zusätzlich zahlreiche nachhaltige und sozial verantwortliche Anlagen (Sustainable and Responsible

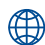

Weitere Informationen über unsere Mitarbeiter-Kennzahlen finden Sie unter [www.allianz.com/geschaeftsbericht](http://www.allianz.com/geschaeftsbericht)

Investments, SRI), und zwar in sämtlichen wesentlichen Anlageklassen. Das verwaltete Vermögen, das auf SRI-Investitionen entfällt, belief sich zum Jahresresultimo 2010 auf 3,1 Milliarden Euro im Vergleich zu 4,8 Milliarden Euro im Vorjahr. Dieser Rückgang war auf Mittelabflüsse Dritter im Rentengeschäft zurückzuführen, insbesondere Geldmarktfonds, bedingt durch das niedrige Zinsniveau.

### 3. Festigung der langfristigen und wechselseitig förderlichen Partnerschaft mit unseren Stakeholdern

Wir wollen dazu beitragen, dass soziale Herausforderungen in den Gemeinden, in denen wir arbeiten, effektiv gemeistert werden, und tun dies durch systematische Zusammenarbeit mit strategischen Partnern. 2010 kooperierten die Allianz und ihre Partner mit dem Bildungssektor und der Politik, um eine unabhängige Initiative zu gründen, die Schüler an Finanzthemen heranführt. Gegenwärtig wird das Projekt „My Finance Coach“ in Deutschland erprobt; 670 unserer Mitarbeiter erklärten sich 2010 dazu bereit mitzuwirken. Insgesamt erreichten sie bundesweit 7 770 Schüler an 90 Schulen.

#### My Finance Coach Kennzahlen

|                                                                | 2010    |         | 2011     |
|----------------------------------------------------------------|---------|---------|----------|
|                                                                | Geplant | Istwert | Planwert |
| Sozial engagierte Mitarbeiter (mindestens 1 Unterrichtsbesuch) | 300     | 670     | 800      |
| Teilnehmende Schüler                                           | 3 750   | 7 770   | 53 000   |
| im Unterricht                                                  | 3 750   | 7 770   | 15 000   |
| Lehrtraining und außerschulische Aktivitäten <sup>1</sup>      | —       | —       | 38 000   |

Darüber hinaus unterstützen und fördern wir das soziale Engagement unserer Mitarbeiter ebenso wie die Nutzung der Expertise und der Kompetenzen des Unternehmens zum Vorteil der Gesellschaft. Eine der entsprechenden Initiativen ist „Social OPEX“. Dabei wenden geschulte Allianz Mitarbeiter Geschäftsoptimierungsinstrumente in sozialen Organisationen an, um ihnen dabei zu helfen, ihre Auswirkung auf die Gesellschaft zu verstärken. 2010 unterstützten unsere Mitarbeiter über „Social OPEX“ 11 soziale Organisationen.

#### Social OPEX Kennzahlen

|                                       | 2009 <sup>2</sup> | 2010    | 2011     |
|---------------------------------------|-------------------|---------|----------|
|                                       | Istwert           | Istwert | Planwert |
| Sozial engagierte Mitarbeiter         | 8                 | 21      | 40       |
| Teilnehmende soziale Organisationen   | 3                 | 11      | 18       |
| Sozial engagierte operative Einheiten | 5                 | 10      | 13       |

### 4. Streben nach Transparenz unserer Nachhaltigkeitsperformance erneut ausgezeichnet

2010 wurde unser Bemühen, eine transparente Allianz Nachhaltigkeitsleistung vorzulegen, erneut mehrfach ausgezeichnet.

- Dow Jones Sustainability Index: Wir sind in diesem Index seit 2000 vertreten und wurden 2010 zum fünften Mal in Folge als bester Erstversicherer ausgezeichnet.
- Carbon Disclosure Project: Die Allianz ist Gründungsmitglied und Teil des Carbon Disclosure Leadership Index Deutschland 2010.
- FTSE4Good: Wir gehören zu den Unternehmen, die am längsten in diesem Index geführt werden, nämlich seit 2001.
- Goldman Sachs GS Sustain: Die Allianz zählt zu den drei als führend in Bezug auf Nachhaltigkeit gewürdigten Versicherungsunternehmen, eine ganz besondere Auszeichnung insofern, als hier sowohl finanzielle als auch nichtfinanzielle Gesichtspunkte bewertet wurden.

Ein detaillierter Bericht über unsere Leistungen 2010 in Bezug auf nachhaltige Entwicklung ist ab Mai 2011 im Internet unter [www.allianz.com/nachhaltigkeit](http://www.allianz.com/nachhaltigkeit) verfügbar.

<sup>1</sup> Weitere Module werden 2011 eingeführt.

<sup>2</sup> Vorführjahr
