# Supplementary material
Source: publisher site journal article supplement (https://www.degruyterbrill.com/publication/isbn/9783110432879/downloadAsset/9783110432879_Elektronischer_Anhang_2.zip)
Supplement: Supplementary file 4 [file Allianz GB 2010.pdf › Korpustexte/Korpustexte pdf/Allianz/Allianz GB 2010/Allianz GB 2010.pdf]

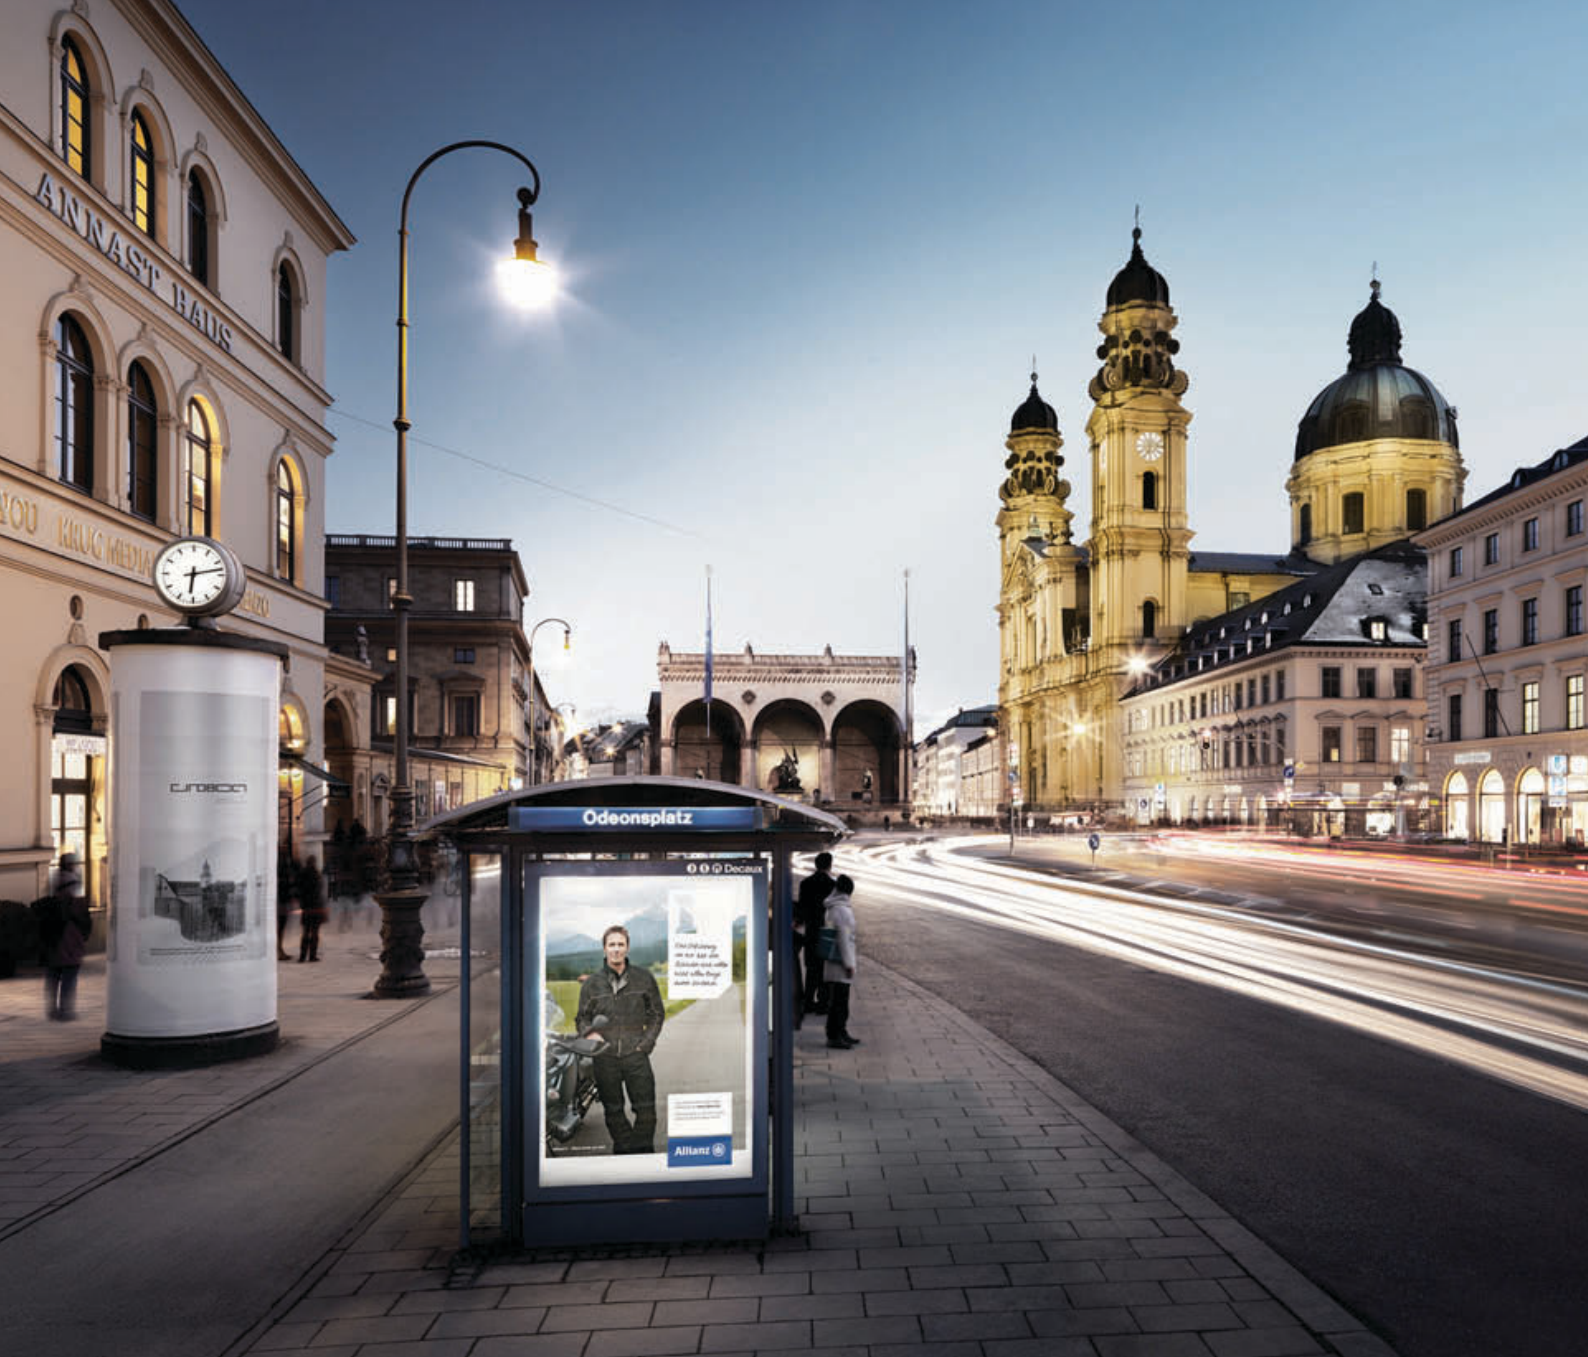

# Allianz Gruppe Geschäftsbericht 2010

**Allianz** 

# Inhalt

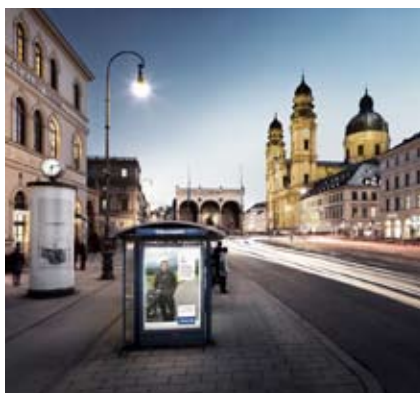

München, Odeonsplatz

Im Herbst 2010 starteten wir die „One“-Kampagne, in deren Mittelpunkt der Wissens- und Erfahrungsaustausch realer Personen in Alltagssituationen steht. Die Kampagne wird bis Ende dieses Jahres weltweit in über zwanzig Ländern zu sehen sein. Eine Auswahl bereits erschienener Motive zeigen wir in diesem Bericht.

## Weitere Informationen zu den Kapiteln

Unser Geschäft  
Unsere Strategie  
Die Marke Allianz  
Der Kunde im Mittelpunkt  
Unsere Mitarbeiter  
Nachhaltige Entwicklung

**finden Sie auf unseren Internetseiten unter:**  
**[www.allianz.com/geschaeftsbericht](http://www.allianz.com/geschaeftsbericht)**

## 1

### An unsere Aktionäre

- 2 Aktionärsbrief
- 6 Bericht des Aufsichtsrats
- 12 Mitglieder des Vorstands
- 13 International Executive Committee
- 15 Mitglieder des Aufsichtsrats
- 16 Allianz Aktie
- 20 Services für den Allianz Aktionär

## 2

### Corporate Governance

- 22 Corporate-Governance-Bericht und Erklärung zur Unternehmensführung
- 31 Übernahmerelevante Angaben und Erläuterungen
- 35 Vergütungsbericht

## 3

### Konzernlagebericht

- 57 Detailliertes Inhaltsverzeichnis

#### Ihre Allianz

- 58 Weltweite Präsenz und Geschäftsbereiche
- 59 Unser Geschäft
- 60 Unsere Strategie
- 61 Die Marke Allianz
- 62 Der Kunde im Mittelpunkt
- 63 Unsere Mitarbeiter
- 64 Nachhaltige Entwicklung

#### Analyse und Diskussion der Ergebnisse

- 65 Geschäftsumfeld
- 68 Überblick über den Geschäftsverlauf 2010
- 75 Schaden- und Unfallversicherung
- 84 Lebens- und Krankenversicherung
- 90 Asset Management
- 94 Corporate und Sonstiges
- 96 Ausblick 2011 und 2012
- 106 Vermögenslage und Eigenkapital
- 114 Liquidität und Finanzierung
- 120 Überleitungen

#### Risikobericht, Kontrollen und Verfahren

- 122 Risikobericht
- 158 Kontrolle der Finanzberichterstattung und des Risikokapitals

## 4

### Konzernabschluss

- 161 Detailliertes Inhaltsverzeichnis
- 162 Konzernabschluss
- 170 Konzernanhang
- 224 Angaben zur Konzernbilanz
- 260 Angaben zur Konzern-Gewinn- und Verlustrechnung
- 275 Sonstige Angaben

## 5

### Weitere Informationen

- 320 Gemeinsamer Beirat und Internationaler Beraterkreis
- 321 Mandate
- 324 Fachbegriffe
- 328 Register

# Auf einen Blick

|                                                                                                     |       | 2010               | Ver-<br>änderung<br>zum<br>Vorjahr | 2009      | 2008    | 2007      | 2006                | 2005                 | Mehr<br>dazu auf<br>Seite |
|-----------------------------------------------------------------------------------------------------|-------|--------------------|------------------------------------|-----------|---------|-----------|---------------------|----------------------|---------------------------|
| <b>Ergebniszahlen<sup>1</sup></b>                                                                   |       |                    |                                    |           |         |           |                     |                      |                           |
| Gesamter Umsatz <sup>2</sup>                                                                        | Mio € | 106 451            | 9,3%                               | 97 385    | 92 568  | 97 689    | 94 873 <sup>3</sup> | 100 967 <sup>3</sup> | 69                        |
| Operatives Ergebnis <sup>4</sup>                                                                    | Mio € | 8 243              | 17,0%                              | 7 044     | 7 455   | 10 320    | 9 219 <sup>3</sup>  | 8 003 <sup>3</sup>   | 69                        |
| Jahresüberschuss aus fortzuführenden Geschäftsbereichen <sup>5</sup>                                | Mio € | 5 209              | 12,0%                              | 4 650     | 4 268   | 7 991     | 7 843               | —                    | 71                        |
| Jahresüberschuss (-fehlbetrag) aus aufgegebenen Geschäftsbereichen, nach Ertragsteuern <sup>5</sup> | Mio € | —                  | n. a.                              | – 395     | – 6 373 | 723       | 467                 | —                    | —                         |
| Jahresüberschuss (-fehlbetrag)                                                                      | Mio € | 5 209              | 22,4%                              | 4 255     | – 2 105 | 8 714     | 8 310               | 5 766                | 71                        |
| <b>Bilanzzahlen zum 31. Dezember</b>                                                                |       |                    |                                    |           |         |           |                     |                      |                           |
| Bilanzsumme                                                                                         | Mio € | 624 945            | 7,1%                               | 583 717   | 954 999 | 1 061 149 | 1 110 081           | 1 054 656            | 107                       |
| Eigenkapital                                                                                        | Mio € | 44 491             | 10,9%                              | 40 108    | 33 720  | 47 753    | 49 650              | 38 656               | 106                       |
| Anteile anderer Gesellschafter                                                                      | Mio € | 2 071              | – 2,4%                             | 2 121     | 3 564   | 3 628     | 7 180               | 8 386                | 258                       |
| <b>Angaben zur Aktie</b>                                                                            |       |                    |                                    |           |         |           |                     |                      |                           |
| Ergebnis je Aktie <sup>1</sup>                                                                      | €     | 11,20              | 20,0%                              | 9,33      | – 5,25  | 18,00     | 17,09               | 11,24                | 306                       |
| Verwässertes Ergebnis je Aktie <sup>1</sup>                                                         | €     | 11,12              | 19,6%                              | 9,30      | – 5,29  | 17,71     | 16,78               | 11,14                | 306                       |
| Dividende je Aktie                                                                                  | €     | 4,50 <sup>6</sup>  | 9,8%                               | 4,10      | 3,50    | 5,50      | 3,80                | 2,00                 | 17                        |
| Dividendensumme                                                                                     | Mio € | 2 045 <sup>6</sup> | 10,5%                              | 1 850     | 1 580   | 2 472     | 1 642               | 811                  | 17                        |
| Aktienkurs zum 31. Dezember                                                                         | €     | 88,93              | 2,0%                               | 87,15     | 75,00   | 147,95    | 154,76              | 127,94               | 16                        |
| Marktkapitalisierung zum 31. Dezember                                                               | Mio € | 40 419             | 2,2%                               | 39 557    | 33 979  | 66 600    | 66 880              | 51 949               | 17                        |
| <b>Sonstiges</b>                                                                                    |       |                    |                                    |           |         |           |                     |                      |                           |
| Eigenkapitalrendite nach Steuern <sup>1,7,8</sup>                                                   | %     | 11,9               | – 0,6 Pkt                          | 12,5      | 9,9     | 15,0      | 15,0                | 12,9                 | 17                        |
| Gesamtes verwaltetes Vermögen zum 31. Dezember                                                      | Mio € | 1 517 538          | 26,2%                              | 1 202 122 | 950 548 | 1 009 586 | 1 011 802           | 977 957              | 91                        |
| davon: Vermögensverwaltung für Dritte zum 31. Dezember                                              | Mio € | 1 163 982          | 25,7%                              | 925 699   | 703 478 | 764 621   | 763 855             | 742 937              | 91                        |
| Mitarbeiter                                                                                         |       | 151 338            | – 1,2%                             | 153 203   | 182 865 | 181 207   | 166 505             | 177 625              | 63                        |

1 Beträge vor 2008 wurden nicht angepasst, um eine Änderung der Bilanzierungs- und Bewertungsmethode der Allianz Gruppe zu berücksichtigen wirksam zum 1. Juli 2010. Weitere Informationen finden sich unter Anmerkung 4 im Konzernanhang.

2 Der gesamte Umsatz umfasst die gesamten Bruttobeitrageinnahmen im Schaden- und Unfall- sowie im Lebens- und Krankenversicherungsgeschäft, die operativen Erträge aus dem Asset-Management-Geschäft und den gesamten Umsatz aus Corporate und Sonstiges (Bankgeschäft).

3 Die Zahlen spiegeln die von uns in 2009 eingeführten Änderungen in der Berichterstattung nicht wider.

4 Die Allianz Gruppe verwendet das operative Ergebnis, um die Leistung ihrer Segmente und die der Gruppe als Ganzes zu beurteilen.

5 Mit Bekanntgabe des Verkaufs am 31. August 2008 wurde der verkaufte Teil der Dresdner Bank als „zu Veräußerungszwecken gehalten“ (Held for Sale) und als „aufgegebener Geschäftsbereich“ klassifiziert. Aus diesem Grund werden die Ergebnisse der Teile der Dresdner Bank, die am 12. Januar 2009 an die Commerzbank veräußert wurden, in all unseren operativen Erträgen und Ergebniszahlen für fortzuführende Geschäftsbereiche nicht mehr berücksichtigt. Für die Geschäftsjahre ab 2006 werden diese Ergebnisse separat in der Position „Jahresüberschuss (-fehlbetrag) aus aufgegebenen Geschäftsbereichen, nach Ertragsteuern“ ausgewiesen.

6 Vorschlag

7 Berechnet auf Basis des durchschnittlichen Eigenkapitals; dieses ist der Durchschnitt aus dem Eigenkapital am 31. Dezember zweier aufeinanderfolgender Geschäftsjahre.

8 Berechnet auf den Jahresüberschuss aus fortzuführenden Geschäftsbereichen nach Anteilen anderer Gesellschafter.

Weitere Vergleichsperioden können aufgrund von nachträglichen Änderungen in der Präsentation nicht zur Verfügung gestellt werden.

# Allianz Gruppe

**44,5 Mrd €**

**AA** Standard & Poor's Rating  
seit 2007

Eigenkapital | ► Seite 106

**4,50 €**

Dividende je Aktie (Vorschlag) | ► Seite 17

**88,93 €**

Aktienkurs zum 31. Dezember 2010 | ► Seite 16

**+9,3 %**

Anstieg des gesamten Umsatzes | ► Seite 69

**+12,0 %**

Zunahme beim Jahresüberschuss  
aus fortzuführenden Geschäftsbereichen | ► Seite 71

**8 243 Mio €**

Operatives Ergebnis | ► Seite 69

# Unsere Geschäftssegmente

## Schaden- und Unfallversicherung

Robustes Ergebnis in einem schwierigen Umfeld:

- Bruttobeiträge stiegen um 3,2 Prozent auf 43,9 Milliarden Euro.
- Das operative Ergebnis verbesserte sich um 5,9 Prozent auf 4,3 Milliarden Euro.

# 97,2%

Combined Ratio ▶ Seiten 75 – 83

### Bruttobeiträge nach Regionen/Ländern

zum 31. Dezember 2010 (31. Dezember 2009)<sup>1,2</sup> in %

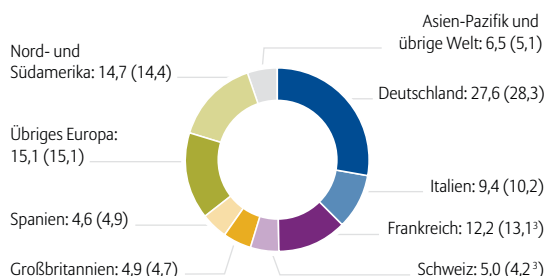

## Lebens- und Krankenversicherung

Sehr gute Entwicklung trotz Niedrigzinsumfeld:

- Umsatz stieg um 12,5 Prozent auf 57,1 Milliarden Euro.
- Operatives Investmentergebnis stieg um 14,6 Prozent auf 16,0 Milliarden Euro.

# 2 868 Mio €

Operatives Ergebnis ▶ Seiten 84 – 89

### Gesamte Beitragseinnahmen nach Regionen/Ländern

zum 31. Dezember 2010 (31. Dezember 2009)<sup>1</sup> in %

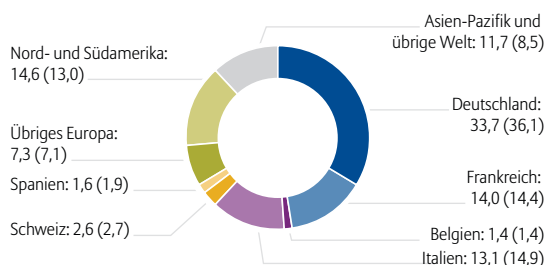

## Asset Management

Unser Asset-Management-Geschäft erzielte ein weiteres Rekordjahr:

- Nettomittelzuflüsse Dritter betrugen 113 Milliarden Euro.
- Hervorragendes operatives Ergebnis von 2,1 Milliarden Euro.

# 1 518 Mrd €

Gesamtes verwaltetes Vermögen ▶ Seiten 90 – 93

### Kapitalanlagen für Dritte nach Regionen/Ländern

zum 31. Dezember 2010 (31. Dezember 2009)<sup>4</sup> in %

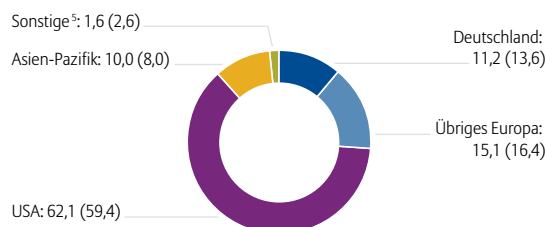

<sup>1</sup> nach Bereinigung länder- und segmentübergreifender Transaktionen zwischen Gesellschaften der Allianz Gruppe

<sup>2</sup> Die Bruttobeiträge aus unserem Spezialversicherungsgeschäft sind in dieser Darstellung den Regionen zugeordnet worden.

<sup>3</sup> Die Bruttobeiträge aus unserem Spezialversicherungsgeschäft Travel und Assistance (Mondial) sind nun Frankreich zugeordnet, da der Hauptsitz aus der Schweiz nach Frankreich 2010 wechselte. 2010 betrug Mondials Anteil an Bruttobeiträgen 3,5 (3,2) Prozent. 2009 Zahlen wurden rückwirkend angepasst.

<sup>4</sup> Ausschlaggebend ist die Herkunft der Kapitalanlagen.

<sup>5</sup> Enthalten sind Kapitalanlagen, die von anderen Gesellschaften der Allianz Gruppe (rund 19 Mrd € zum 31. Dezember 2010 beziehungsweise 24 Mrd € zum 31. Dezember 2009) verwaltet wurden.



## An unsere Aktionäre

- 2 Aktionärsbrief
- 6 Bericht des Aufsichtsrats
- 12 Mitglieder des Vorstands
- 13 International Executive Committee
- 15 Mitglieder des Aufsichtsrats
- 16 Allianz Aktie
- 20 Services für den Allianz Aktionär

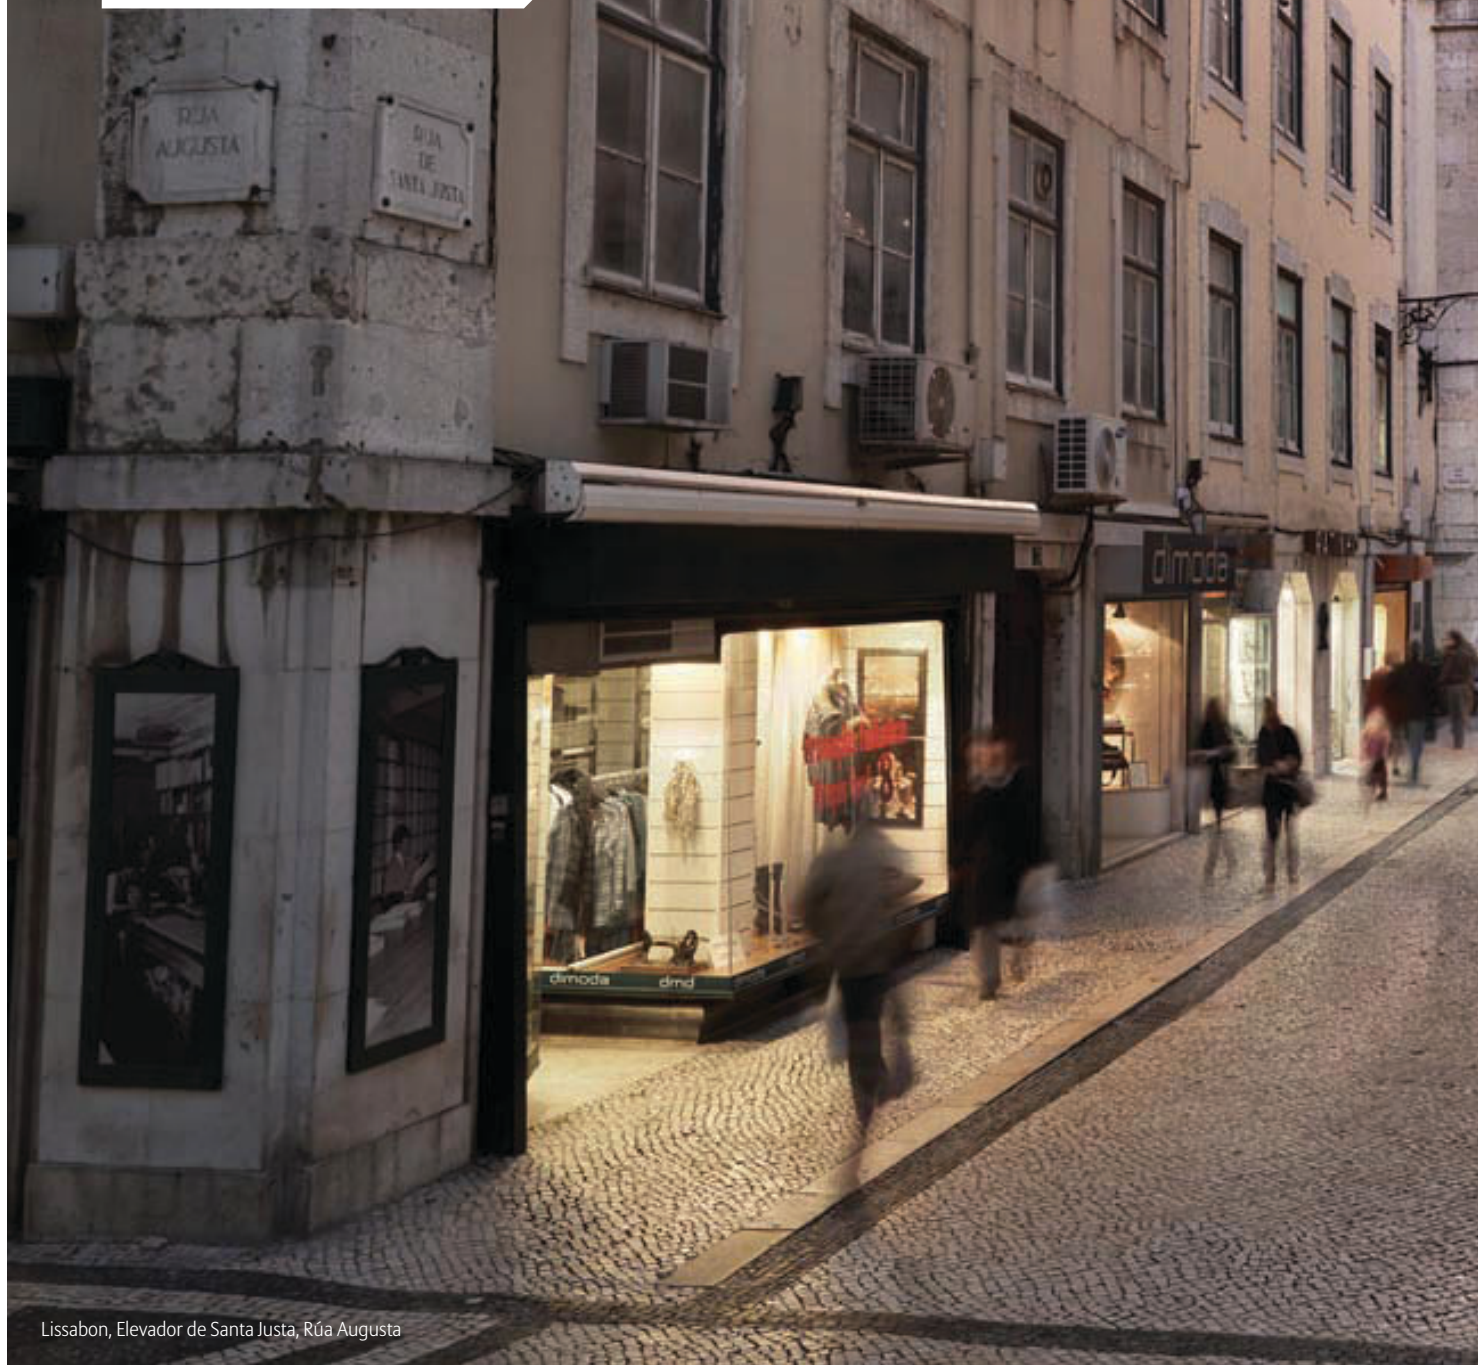

Lissabon, Elevador de Santa Justa, Rua Augusta



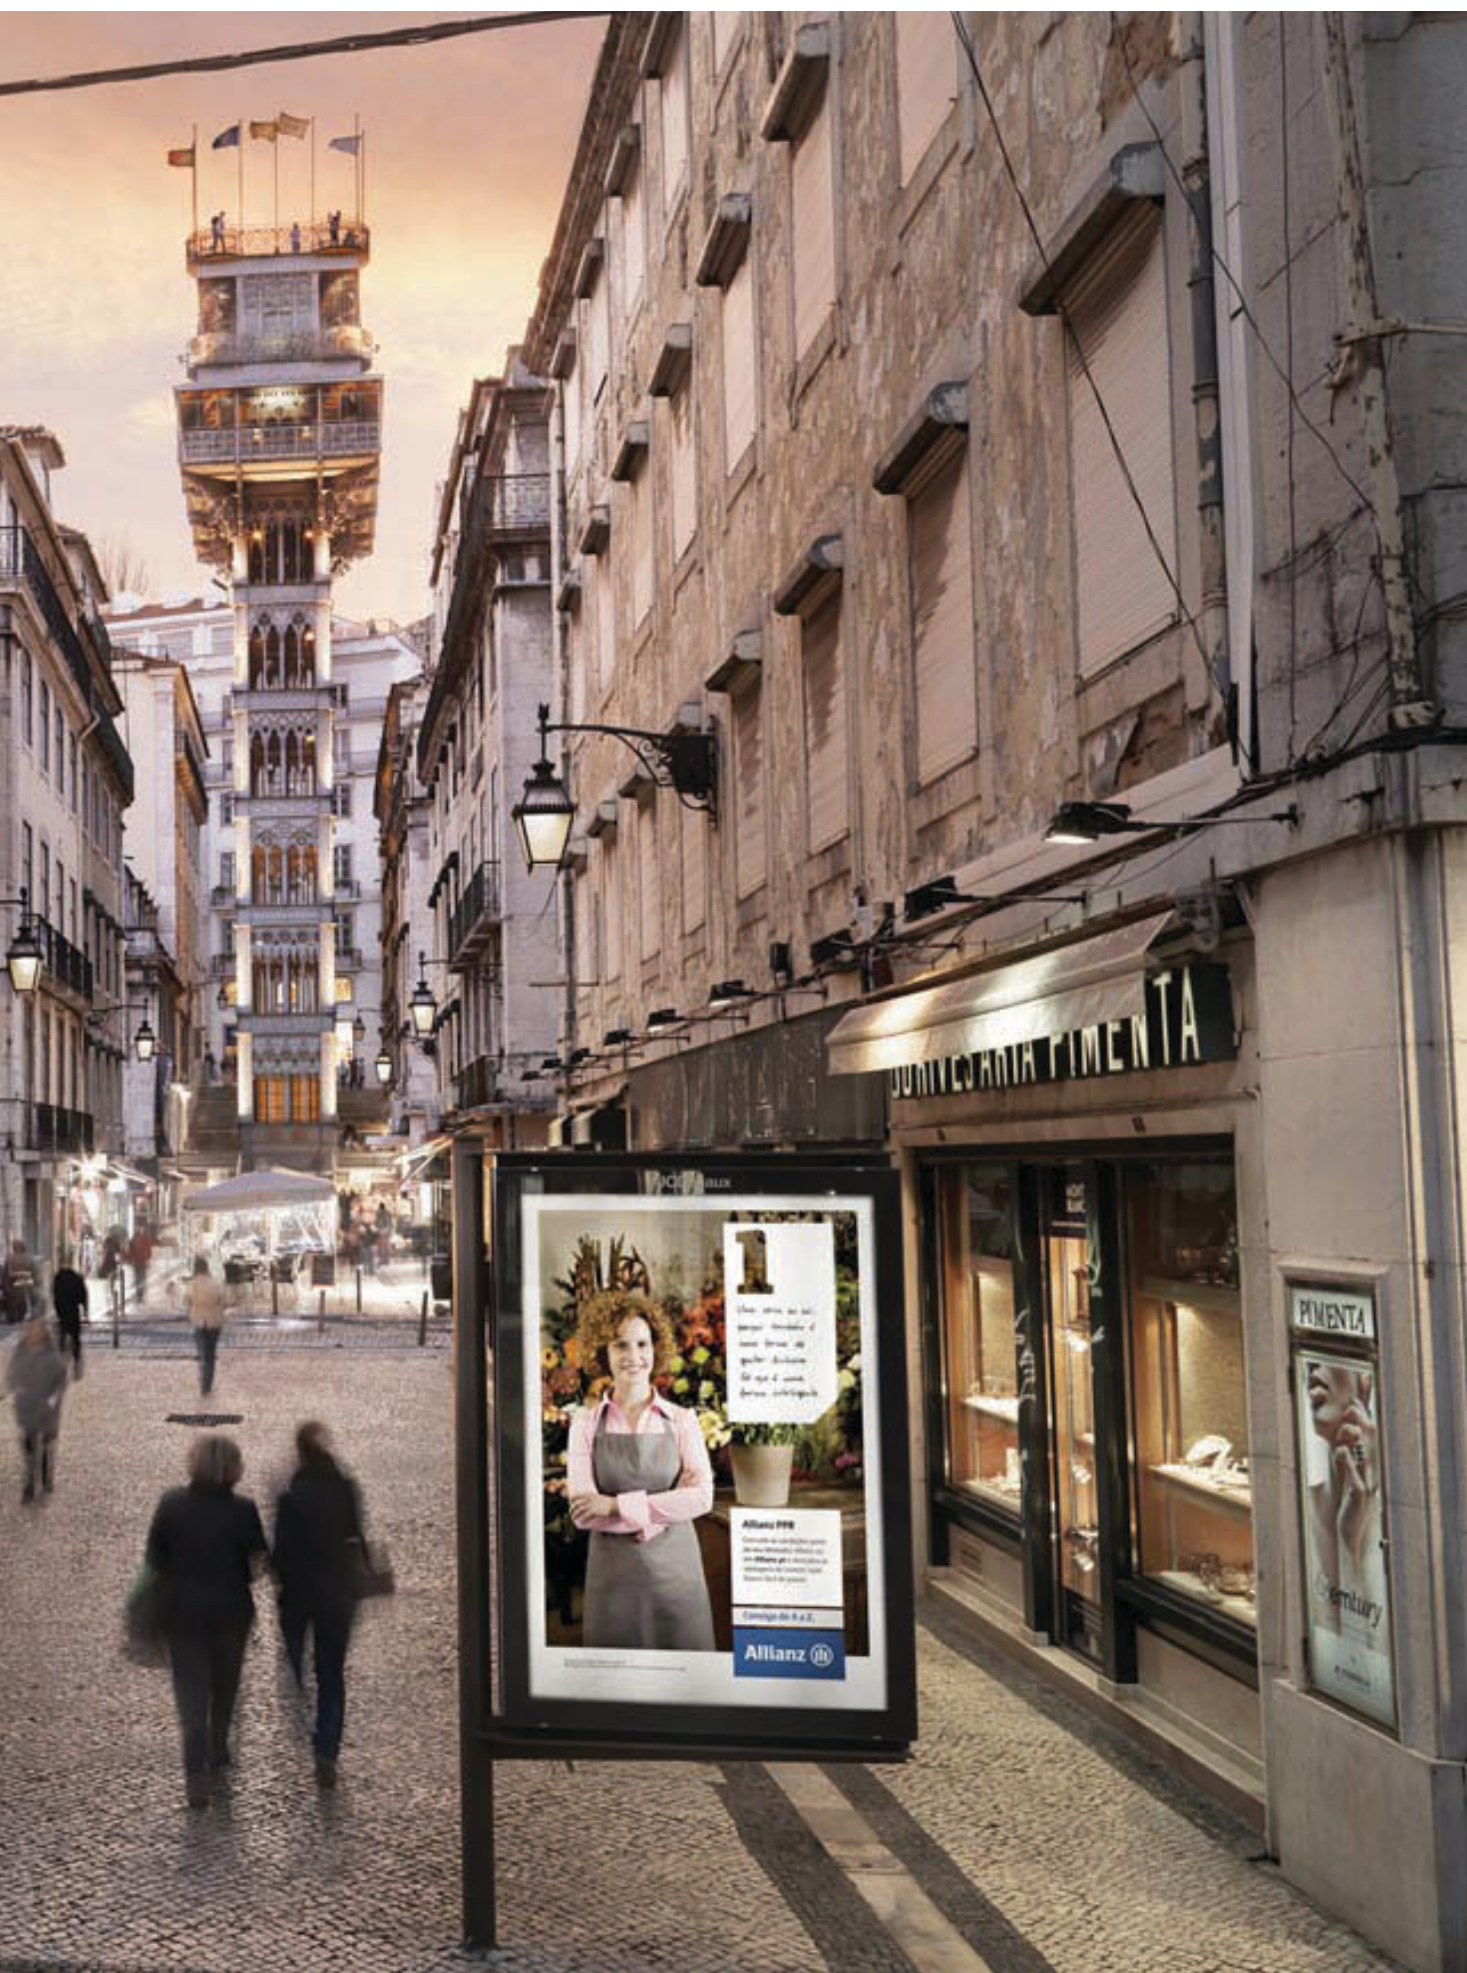



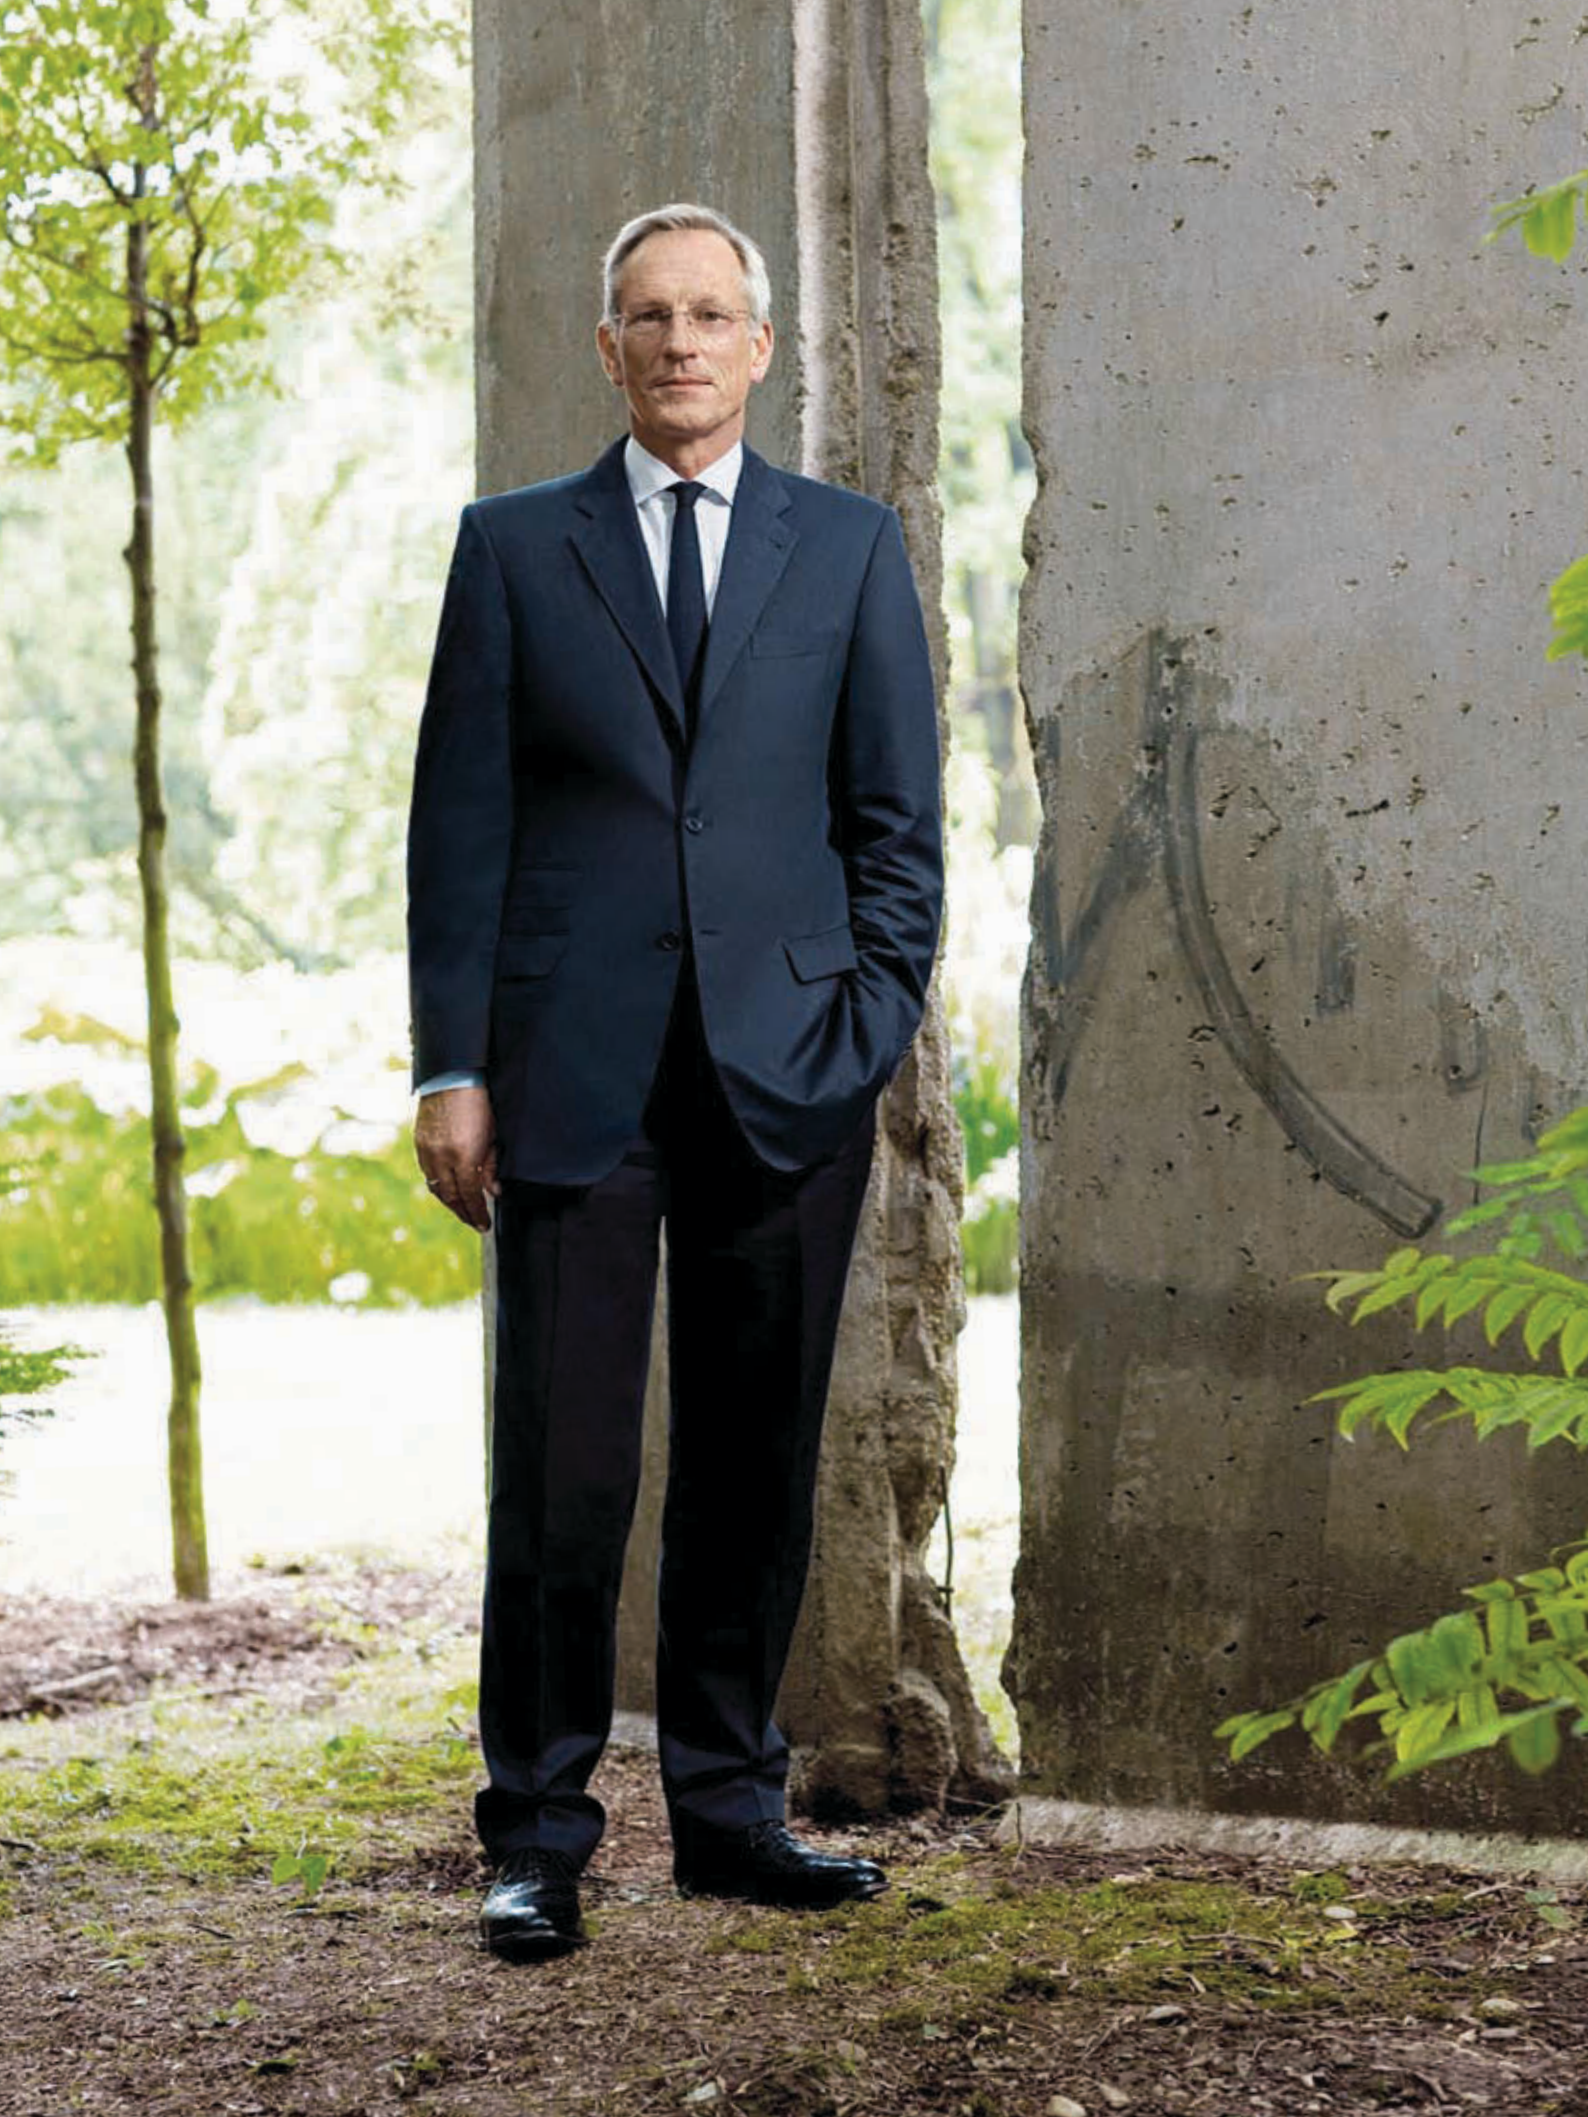



## Sehr geehrte Investoren

In meinem letzten Aktionärsbrief hatte ich Ihnen geschrieben, Ihre Allianz sei gut aufgestellt, um Risiken abzufedern und Chancen zu nutzen. Heute kann ich bestätigen: Die Finanzdaten im Berichtsjahr sind mit wenigen länderspezifischen Ausnahmen ausgezeichnet. Unser strategisches Programm „3+Eins“ greift unverändert und hält Ihr Unternehmen auf dem Spitzenplatz in der internationalen Versicherungs- und Asset-Management-Branche.

Wir erzielten 2010 ein starkes Wachstum. Das Gesamtumsatzplus betrug 9,3 Prozent auf mehr als 106 Milliarden Euro – der höchste je erreichte Umsatz. Die operative Profitabilität hat sich nach den zwei Krisenjahren 2008 und 2009 wieder kräftig verbessert, nämlich um stolze 17,0 Prozent auf 8,2 Milliarden Euro. Der Jahresüberschuss aus fortzuführenden Geschäftsbereichen stieg um 12,0 Prozent auf 5,2 Milliarden Euro. Insgesamt legen wir ein Zahlenwerk vor, das zu den besten in der mehr als 120-jährigen Allianz Geschichte zählt.

Dies zeigt: Unser auf Nachhaltigkeit, Risikoausgleich und Langfristigkeit fußendes Geschäftsmodell hat auch in der Krise seine Werthaltigkeit bewiesen und profitables Wachstum ermöglicht.

- Die Schaden- und Unfallversicherung weist trotz widriger Marktumstände eine Schaden-Kostenquote von 97,2 Prozent aus und erzielte ein Umsatzplus von 3,2 Prozent. Unser globales Portfolio ist so gut diversifiziert und ertragsstark, dass wir Schwächen unserer Einheiten in Deutschland, Frankreich, Italien und den USA ausgleichen konnten. Die Ertragswende in den besagten Landesgesellschaften wurde energisch eingeleitet und soll 2011 deutlich sichtbare Ergebnisse zeigen. In Italien beispielsweise sind wir seit der Integration unserer dortigen Gesellschaften ununterbrochen operativ stärker als der Gesamtmarkt.
- Trotz Niedrigzinsphase übertraf der Lebensversicherungsabsatz unsere Erwartungen. Die sehr wettbewerbsfähige Kundenrendite unserer Produkte verlieh dem Verkauf einen kräftigen Schub, weil die Kunden wissen: Wir können selbst dann, wenn die Niedrigzinsphase dauerhaft anhält, unsere Versprechen halten, und zwar seriös, aus einer starken Bilanz bezahlt. Übrigens: Die Marge unseres Lebensversicherungsgeschäfts, die wir Ihnen als Investor gutschreiben, wurde im Vergleich zu den Vorjahren nochmals verbessert.
- Unser Asset-Management-Geschäft erzielte ein weiteres Rekordjahr. Das gesamte verwaltete Vermögen betrug über 1 500 Milliarden Euro, die Nettomittelzuflüsse Dritter summierten sich auf 113 Milliarden Euro. Beim Management von festverzinslichen Wertpapieren erreichten wir bereits jene Exzellenz, die wir in sämtlichen Geschäftssegmenten anstreben.
- Mit einer Solvabilitätsquote von 173 Prozent ist die Allianz sehr gut kapitalisiert und erfreut sich einer starken Bonität.

Ich hoffe, dieser Überblick vermittelt auch Ihnen Zuversicht. Die Geschäftszahlen zeigen, mit welcher Konsequenz Ihre Allianz selbst unter widrigen Umständen für Sie, unsere Eigentümer, ein solides und zuverlässiges Ergebnis erwirtschaftet. Das ist auch eine gute Nachricht für alle weiteren Interessengruppen: mehr als 76 Millionen Kunden, 151 338 Mitarbeiter, unsere mehrere Hunderttausend Vertriebspartner und die Gesellschaften in etwa 70 Ländern, in denen wir operativ tätig sind.

Das Einkommen je Aktie, also Kursperformance plus Dividendenausschüttung, belief sich auf 7,4 Prozent. Das ist deutlich besser als die entsprechenden Werte vieler Wettbewerber und zeigt einen ansehnlichen Renditeabstand zu zehnjährigen Bundesanleihen von rund 4 Prozentpunkten. Die guten Geschäftszahlen 2010 veranlassen uns, Ihnen eine kräftige Anhebung der Dividende auf 4,50 Euro je Aktie vorzuschlagen. Auch diese Ausschüttung ist ein Zeichen für die Gesundheit Ihrer Allianz. Sie soll Ihnen als langfristig orientierten, im besten Sinne „konservativen“ Investoren Zuverlässigkeit signalisieren.

Ihre Gesellschaft steht auf der bewahrend-vorsichtigen Seite und sucht unter allen Umständen Stabilität – heute mehr denn je angesichts hoher Marktvolatilitäten, fortdauernder Unsicherheiten über zukünftige Regulierungs- und Rechnungslegungsvorschriften sowie sich schnell ändernden Kundenverhaltens. Unsere Entscheidungen orientieren sich nicht an Moden und schnellen, vergänglichen Effekten. Wir haben uns einer Kultur des Wandels verschrieben, dessen Ziel es ist, die Kernwerte unseres Geschäfts zu bestätigen und zu verbessern sowie dauerhaft im internationalen Wettbewerb ganz vorn mitzuspielen. Gleichzeitig stärken wir das Geschäft mit dem bewährten Instrumentarium, das uns in über 120 Jahren Unternehmensgeschichte immer gute Dienste erwiesen hat.

- Deshalb haben wir der Allianz eine fundamentale Transformation ihres Betriebsmodells verordnet, obwohl dies kein einfacher Weg ist. Er wird aber dazu führen, dass Ihr Unternehmen dem Kunden besser zuhört, der wahre Markt den Schreibtisch der Mitarbeiter erreicht und wir deutlich effektiver und kundenorientierter arbeiten.
- Deshalb haben wir im Jahr 2000 den Asset-Manager PIMCO erworben. Obwohl es zwischenzeitlich Kritik am Kaufpreis gab, der Jahresausweis 2010 zeigt Ihnen, wie wertschaffend und strategisch richtig diese Entscheidung war und weiterhin sein wird.
- Deshalb achten wir strikt auf die Einhaltung unserer risiko- und ertragsorientierten Zeichnungs- und Investmentpolitik. Versicherungstechnische Verluste akzeptieren wir nicht. Wir investierten konservativ in sichere Anlagen mit attraktiven Renditen und in solche, die bilanziell weniger sensitiv auf die Kursentwicklung an den Kapitalmärkten reagieren. Nicht zuletzt dieser Umstand versetzte uns in die Lage, während der gesamten jüngsten Bank- und Weltwirtschaftskrise als einer der ganz wenigen globalen Versicherer unser „AA-Rating“ (mit stabilem Ausblick) von Standard & Poor's beizubehalten, eines der besten Ratings in der internationalen Versicherungswirtschaft.
- Deshalb verbessern wir fortlaufend unsere Produktivität und das Vertriebssystem. Wir beseitigen Komplexität, die Feindin von Effizienz und Wachstum, und gründeten eine Managementgesellschaft, die IT, Services und Betriebsprozesse vereinfacht, standardisiert und weltweit durchsetzt. Dadurch erzielen wir künftig Skaleneffekte und heben alle Tochtergesellschaften auf den erforderlichen technologischen Stand.

Diese und weitere Initiativen werden fort dauern. Sie verleihen unserer Zukunft ebenso Stabilität wie den Erträgen unserer Kunden. Tatsächlich werden die meisten von ihnen nie enden, weil der Markt nicht aufhört, sich zu ändern. Dass sie greifen und unser Geschäft so gut läuft, verdanken wir unseren fabelhaften Mitarbeitern und Vertriebspartnern, die mit Talent, Einsatz und Herz bei der Sache sind. Sie sind tüchtig, sie sind motiviert, sie sind stolz auf die Allianz und haben ihr 2010 einen kräftigen Profitabilitätsschub verschafft. Ich glaube, es ist auch in Ihrem Sinne, wenn ich ihnen für ihr außergewöhnliches Engagement herzlich danke.

Unterdessen wachsen neue Herausforderungen heran. Während die Weltwirtschaftskrise langsam abklingt, dämmert eine neue Realität heran, welche die Art und Weise, wie wir global zusammenarbeiten und unser Geschäft betreiben, fundamental ändern wird. Zeitsprünge werden immer kürzer, Kunden sind vernetzt und gut informiert, die Digitalisierung macht Riesenschritte. Aufsicht und Regulierung sind im Fluss und werden sich bald zu neuen Regelwerken verfestigen. Finanzielle Sicherheit im Alter erfährt ungeahnte Aufmerksamkeit.

Was bedeutet das für die Allianz? Wie berührt das Sie als Investor? Das sind wichtige Fragen. Sie beschäftigen uns, weil sie für Sie relevant sind.

Die Digitalisierung verändert unsere Gesellschaften rasend schnell. Neue Massenmedien entstehen. Es hat 40 Jahre gedauert, bis in den USA 50 Millionen Menschen das Radio nutzten. Beim Fernsehen wurde diese Marke nach 13, beim Internet nach 5 Jahren erreicht. Jetzt ist Web 2.0 dran, die interaktiven Dienste. Der größte Anbieter erreichte binnen 3,5 Jahren weltweit 50 Millionen Nutzer. Während ich diesen Brief schreibe, dürften es mehr als 600 Millionen sein. Viele Menschen sind völlig eingenommen von den neuen Kommunikationsmöglichkeiten. Inzwischen haben weltweit mehr Menschen ein Konto bei einer Social-Media-Plattform als bei einem E-Mail-Betreiber. 2019 sollen 40 Prozent der Weltbevölkerung online sein.



Unsere Aufgabe als Allianz ist es, die Chancen der neuen Technik auszuschöpfen, um Kunden, Vertretern und Maklern einen realen Mehrwert zu verschaffen und unsere Produktivität sowie Servicequalität zu steigern. Ich spreche von digital optimierten Vertriebswegen, Betriebsabläufen, neuen Produkten und Dienstleistungen sowie Analyseinstrumenten, die uns eine vertiefte Einsicht in Kundenwünsche verschaffen und unsere Reaktion auf neue Entwicklungen beschleunigen.

Ein weiteres großes Thema ist Solvency II, also die neuen Regeln zur Kapitalausstattung von Versicherern. Sie sollen 2013 wirksam werden, die Branche krisenfester machen und Kunden schützen. Doch das Versicherungsgeschäft, anders als Banken und weitere Finanzdienstleister, ist in der Krise stabil geblieben. Wenn wir jetzt wegen übertriebener Vorsicht unnötig zusätzliches Kapital bereitstellen müssen, was viel Geld kostet, dann schadet das allen. Kunden werden gezwungen, höhere Preise zu akzeptieren. Besitzer von Lebensversicherungen erhalten im Alter geringere Auszahlungen. Gehaltssteigerungen für Mitarbeiter, Steuerzahlungen für den Staat und Dividendenzahlungen an Sie als Aktionäre könnten bescheidener ausfallen. Wir wissen noch nicht, wie die unterschiedlichen Regulierungsvorschläge am Ende aussehen werden. Doch wir versuchen mit Nachdruck, Aufseher und Regulierer davon zu überzeugen, dass es keinen Grund gibt, unsere Branche und ihre Nutznießer ökonomisch zu beschneiden.

Die voranschreitende Alterung der Gesellschaft eröffnet uns weiterhin ausgezeichnete Geschäftsmöglichkeiten. Wir zielen darauf ab, das Altersvorsorge-, Assistance- und Vermögensgeschäft kräftig auszubauen und insbesondere ins Pensionssegment zu investieren. Dieses Wachstumsfeld bietet uns die Chance, unser Risikomodell sowie unser anerkanntes Asset-Management- und Lebensversicherungs-Know-how noch gewinnbringender einzusetzen.

Ich bin guter Dinge, dass sich 2011 die Realwirtschaft weltweit stabilisieren wird, nicht zuletzt gestützt auf eine gute Nachfrage einer ebenfalls wieder zuversichtlicheren Kundschaft. Allerdings bleiben erhebliche Unsicherheitsfaktoren weiter bestehen – beispielsweise Volatilität der Finanzmärkte, Verschuldung der öffentlichen Haushalte, Inflations-sorgen. Unabhängig davon, ob Sie als Investor optimistisch in die Zukunft blicken oder nicht – eines ist gewiss: Ihre Allianz ist robuster denn je aufgestellt. Sie wird auch in der laufenden Geschäftsperiode in der Lage sein, für ihre Kunden die finanziellen Auswirkungen des Unvorhersehbaren zu dämpfen, und hat eine innere Ertragssicherheit erreicht, die von keiner der üblichen Marktwidrigkeiten angegriffen werden kann. Ich erwarte für das Geschäftsjahr ein ähnlich gutes Resultat wie 2010, auch dann, wenn der Versicherungsmarkt kurzfristig noch nicht kräftig Fahrt aufnehmen sollte.

Sehr geehrte Investoren, während wir uns auf eine neue weltwirtschaftliche Realität einstellen, bleiben unsere Fundamentalwerte unverändert. Wir sind ein Finanzdienstleister, der um Vertrauen wirbt, indem er seinen Kunden unter allen Umständen Sicherheit und Ertrag gewährleistet. Erst heute – nach Abklingen einer globalen Weltwirtschaftskrise säkularen Ausmaßes – erkennen Kundschaft und Öffentlichkeit den wahren Wert solcherart eingehaltener Versprechen. Unsere Ziele bleiben anspruchsvoll. Gleichzeitig sind wir noch nicht zufrieden mit dem bisher Erreichten. Dieser doppelte Ansatz – ambitionierte Ziele und der Wille, es Monat für Monat, Quartal für Quartal, Jahr für Jahr besser zu machen – hat uns bisher gute Dienste geleistet, um für Sie, die Eigentümer, eine nachhaltig stabile Rendite zu erwirtschaften. Bitte schenken Sie uns weiterhin Ihr Vertrauen und bleiben in die Allianz investiert.

mit freundlichen Grüßen,  
h  
M. Diekmann

Michael Diekmann  
Vorsitzender des Vorstands

# Bericht des Aufsichtsrats

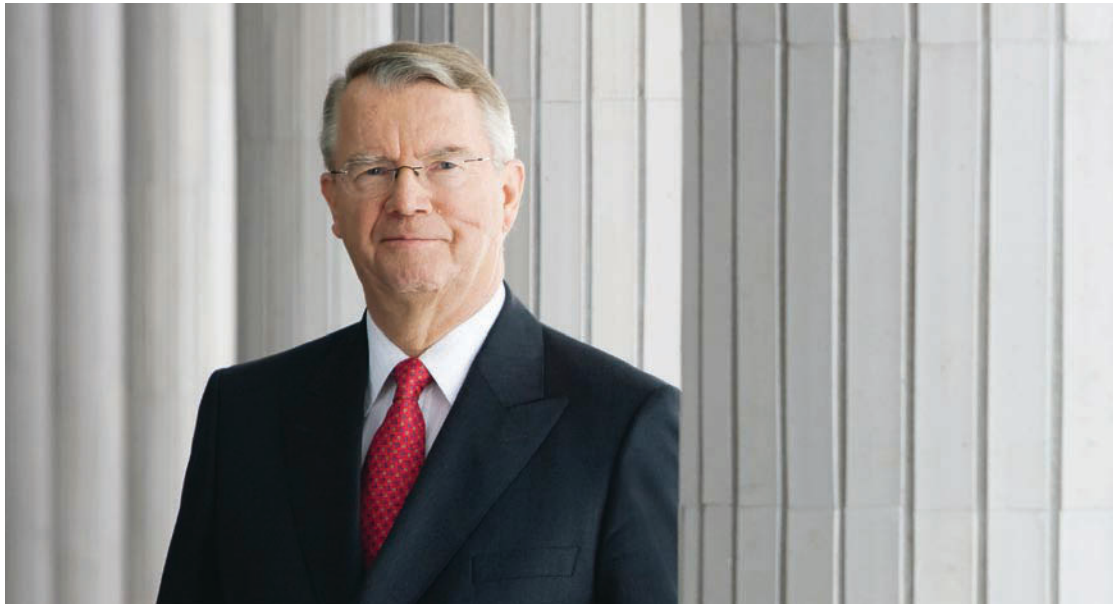

## Sehr geehrte Damen und Herren,

der Aufsichtsrat nahm im Geschäftsjahr 2010 die ihm nach Gesetz und Satzung obliegenden Aufgaben wahr. Wir überwachten die Geschäftsführung der Gesellschaft und berieten den Vorstand bei der Leitung des Unternehmens. In alle Entscheidungen, die für das Unternehmen von grundlegender Bedeutung waren, wurden wir eingebunden.

Im Rahmen unserer Überwachungs- und Beratungstätigkeit ließen wir uns vom Vorstand regelmäßig, zeitnah und umfassend berichten, und zwar sowohl schriftlich als auch mündlich. Der Vorstand informierte uns über den Gang der Geschäfte, die wirtschaftliche und die finanzielle Entwicklung sowohl der Allianz Gruppe als auch der Allianz SE. Weitere Hauptpunkte der Berichterstattung waren grundsätzliche Fragen der Unternehmensstrategie, Compliance-Themen, die Auswirkungen der Finanzkrise und der hohen Verschuldung einzelner EU-Staaten, die Vergütungsstrukturen in der Allianz Gruppe vor dem Hintergrund neuer rechtlicher Anforderungen sowie der Stand der

Umsetzung der Solvency-II-Richtlinie. Auf der Grundlage der Berichterstattung des Vorstands erörterten wir in den Aufsichtsratssitzungen die Geschäftsentwicklung sowie für das Unternehmen wichtige Entscheidungen und Vorgänge. Wir befassten uns mit der Planung des Vorstands für das Geschäftsjahr 2011, der Mittelfristplanung und mit den Abweichungen des tatsächlichen Geschäftsverlaufs von den Planungen. Außerdem berieten wir eingehend über die Vergütung des Aufsichtsrats und entschieden uns schließlich dafür, der ordentlichen Hauptversammlung 2011 eine Umstellung auf eine reine Festvergütung vorzuschlagen.

Im Geschäftsjahr 2010 trat der Aufsichtsrat zu fünf Sitzungen zusammen. Die regulären Sitzungen fanden im März, im Mai, im September und im Dezember statt. Im Februar 2010 hielt der Aufsichtsrat eine außerordentliche Sitzung im Zusammenhang mit der Feststellung der Zielerreichung für die variable Vorstandsvergütung und dem Dividendenvorschlag des Vorstands ab. Die Vorsitzenden von Aufsichtsrat und Vorstand tauschten sich regelmäßig über wesentliche Entwicklungen und Entscheidungen aus.



Die Vorstandsberichte zur Geschäftslage und die Referate zu besonderen Themen waren von schriftlichen Präsentationen und Unterlagen begleitet, die jeweils vor der Sitzung zur Vorbereitung an jedes Aufsichtsratsmitglied geschickt wurden. Gleiches galt für alle Abschlussunterlagen und Prüfungsberichte des Abschlussprüfers. Soweit die in diesem Bericht näher dargestellten Geschäftsführungsmaßnahmen der Zustimmung des Aufsichtsrats oder eines seiner Ausschüsse bedurften, wurde hierüber Beschluss gefasst. Über die satzungs- oder geschäftsordnungsmäßigen Anforderungen hinaus legte der Aufsichtsrat keine weiteren Zustimmungsvorbehalte fest.

## Die Themen im Aufsichtsratsplenum

In allen Aufsichtsratssitzungen des Berichtsjahres 2010 mit Ausnahme der außerordentlichen Sitzung im Februar 2010 erläuterte uns der Vorstand, wie sich Umsatz und Ergebnis im Konzern entwickelt hatten; ferner ging er auf den Verlauf in den einzelnen Geschäftssegmenten näher ein und berichtete über die Finanzlage. Kontinuierlich wurden wir vom Vorstand über den Stand wesentlicher Rechtsstreitigkeiten informiert.

Einen wichtigen Schwerpunkt unserer Arbeit im Aufsichtsrat bildeten die Auswirkungen der Finanz- und Kapitalmarktkrise sowie der hohen Verschuldung einiger EU-Staaten, insbesondere Griechenlands. Besonderes Augenmerk richteten wir dabei auf die möglichen Konsequenzen für die Risikosituation und die Liquiditätsausstattung. Wir erörterten mit dem Vorstand auch die Bewertungsfragen und den Handlungsbedarf, der aus den Marktstörungen abzuleiten war. Eingehend setzten wir uns mit dem Thema Diversity, insbesondere mit einer angemessenen Berücksichtigung von Frauen, auf der Ebene von Vorstand und Aufsichtsrat auseinander und ließen uns vom Vorstand zudem über den Stand und die Maßnahmen auf der Ebene der Führungskräfte unterhalb des Vorstands berichten.

In der außerordentlichen Sitzung am 24. Februar 2010 beschloss der Aufsichtsrat vor dem Hintergrund des altersbedingten Ausscheidens von Herrn Dr. Rupprecht aus dem Vorstand der Allianz SE zum 31. Dezember 2010 die Bestellung von Herrn Manuel Bauer in den Vorstand zum 1. Januar 2011. Im weiteren Verlauf der Sitzung behandelten wir die Zielerreichung der einzelnen Vorstandsmitglieder und setzten deren variable Vergütung entsprechend fest. Schließlich erfolgte eine Aussprache über den Dividendenvorschlag des Vorstands.

In der Sitzung am 17. März 2010 fasste der Aufsichtsrat Beschluss über die Verlängerung des Vorstandsmandats von Herrn Booth bis zum 31. Dezember 2014. Die Mandate der Herren Cucchiani und Dr. Faber wurden mit Blick auf die jeweilige Vollendung des 60. Lebensjahres bis zum 31. Dezember 2011 verlängert. Im weiteren Sitzungsverlauf befassten wir uns vor allem mit dem Jahres- und dem Konzernabschluss sowie dem Gewinnverwendungsvorschlag des Vorstands für das Geschäftsjahr 2009. KPMG berichtete über die wesentlichen Feststellungen der Abschlussprüfung. Den Beherrschungs- und Gewinnabführungsverträgen der Allianz SE mit der Allianz Common Applications and Services GmbH und der AZ Argos 45 Vermögensverwaltungsgesellschaft mbH erteilte der Aufsichtsrat aufgrund der schriftlichen und mündlichen Erläuterungen des Vorstands die erforderliche Zustimmung. Darüber hinaus befasste er sich mit der Tagesordnung für die Hauptversammlung 2010 der Allianz SE und verabschiedete die Beschlussvorschläge des Aufsichtsrats an die Hauptversammlung. Außerdem machten wir uns anhand eines schriftlichen und mündlichen Berichts des Vorstands im Einzelnen ein Bild über den Status zur Umsetzung der EU-Solvency-II-Richtlinie.

Am 5. Mai 2010, unmittelbar vor der Hauptversammlung, informierte uns der Vorstand kurz über den Geschäftsverlauf im ersten Quartal und die aktuelle Lage der Allianz Gruppe. Auch in dieser Sitzung wurden wir über die Auswirkungen der Griechenlandkrise informiert und ließen uns über laufende Beteiligungsprojekte in Kenntnis setzen. Weiter nutzten wir die Sitzung, um die anschließende Hauptversammlung vorzubereiten.

In der Sitzung am 9. September 2010 setzten wir uns in einer Executive Session eingehend mit den aktuellen Änderungen des Deutschen Corporate Governance Kodex auseinander, insbesondere zum Thema Diversity auf der Ebene von Aufsichtsrat und Vorstand, und beschlossen entsprechende Anpassungen in der Geschäftsordnung des Aufsichtsrats. Wir erörterten mögliche Grundzüge einer Zielsetzung zur Zusammensetzung des Aufsichtsrats. Im weiteren Sitzungsverlauf befassten wir uns mit der Struktur der Aufsichtsratsvergütung. Eine Anregung aus der letzten Effizienzprüfung aufgreifend, hatte der Personalausschuss die Unternehmensberatung Kienbaum Management Consultants damit beauftragt, eine Studie zur Überprüfung der geltenden Aufsichtsratsvergütung zu erstellen. Anhand der Ergebnisse dieser Studie berieten wir mögliche Änderungen der aktuellen Vergütungsstruktur. Nach Abschluss der Executive Session berichtete der Vorstand eingehend über den Geschäftsverlauf und die Finanzlage der Allianz Gruppe sowie die Entwicklung in den einzelnen Segmenten. Wie im Vorjahr widmeten wir unsere besondere Aufmerksamkeit der Strategie der Allianz Gruppe. Der Beschluss des Vorstands, Mitarbeitern der Allianz Gruppe in 21 Ländern Allianz Aktien zu vergünstigten Bedingungen zum Kauf anzubieten, wurde vom Aufsichtsrat begrüßt. Der Ständige Ausschuss stimmte der Ausnutzung des Genehmigten Kapitals 2010/II zur Ausgabe der Mitarbeiteraktien zu.

In der Sitzung am 15. Dezember 2010 beschlossen wir zunächst in einer Executive Session über den Dienstvertrag für Herrn Bauer. Anschließend überprüfte der Aufsichtsrat anhand eines vertikalen und horizontalen Vergleichs die Angemessenheit der Vorstandsvergütung. Der Aufsichtsrat folgte dem Vorschlag des Personalausschusses zur Anpassung der Festvergütung einzelner Vorstandsmitglieder sowie zur Festsetzung der Pensions- und Risikobeiträge für das Jahr 2011. Unter Berücksichtigung dieser Anpassungen stellten wir die Angemessenheit der Vorstandsvergütung fest. Zudem beschäftigten wir uns mit Fragestellungen im Zusammenhang mit der Pensionierung von Vorstandsmitgliedern und den Rahmenbedingungen für die Wahrnehmung von Mandaten und für Beratungstätigkeiten pensionierter

Vorstandsmitglieder. Im weiteren Verlauf der Executive Session setzten wir die Beratungen über eine Änderung des Vergütungssystems für den Aufsichtsrat fort und beschlossen, der ordentlichen Hauptversammlung 2011 insbesondere eine Umstellung auf eine reine Festvergütung vorzuschlagen. Im Anschluss verabschiedeten wir auf der Grundlage der Vorbereitungen durch den Nominierungs- und den Personalausschuss eine Zielsetzung zur Zusammensetzung des Aufsichtsrats sowie Eckpunkte für das Auswahlverfahren zur Bestellung von Vorstandsmitgliedern. Weiter nutzten wir die Sitzung für die regelmäßige Effizienzprüfung des Aufsichtsrats. Zuvor waren alle Aufsichtsratsmitglieder schriftlich zu wichtigen Aspekten der Aufsichtsratsarbeit befragt worden. In der Sitzung diskutierten wir die wesentlichen Aussagen, die sich aus der Auswertung der Befragung ergaben, und die daraus abzuleitenden Verbesserungsmöglichkeiten. Schließlich war wegen des Ausscheidens von Herrn Grimm aus dem Aufsichtsrat der Allianz SE zum Jahresende 2010 eine Nachwahl in den Ausschüssen erforderlich. In den Ständigen Ausschuss wurde auf Vorschlag der Arbeitnehmervertreter Herr Kossubek gewählt. Herr Franz Heiß, der vom Konzernbetriebsrat als Nachfolger von Herrn Grimm im Aufsichtsrat der Allianz SE vorgeschlagen worden war, wurde in den Risikoausschuss gewählt. Nach Abschluss der Executive Session informierte uns der Vorstand über den Geschäftsverlauf und die Lage der Allianz Gruppe sowie über die rechtlichen Anforderungen an Vergütungssysteme im Versicherungsbereich und über die Vergütungsstrukturen innerhalb der Allianz Gruppe. Weiter behandelten wir die Planung für das Geschäftsjahr 2011 sowie die Mittelfristplanung. In diesem Zusammenhang verabschiedete der Aufsichtsrat auch die Ziele für die variable Vergütung der Vorstandsmitglieder für das Jahr 2011. Anschließend gaben wir die Entsprechenserklärung zum Deutschen Corporate Governance Kodex ab.



|    |                                   |
|----|-----------------------------------|
| 2  | Aktionärsbrief                    |
| 6  | Bericht des Aufsichtsrats         |
| 12 | Mitglieder des Vorstands          |
| 13 | International Executive Committee |
| 15 | Mitglieder des Aufsichtsrats      |
| 16 | Allianz Aktie                     |
| 20 | Services für den Allianz Aktionär |

**Vorsitz und Ausschüsse  
des Aufsichtsrats**  
Stand:  
31. Dezember 2010  
(und nachfolgende  
Veränderungen)

**Vorsitzender des  
Aufsichtsrats**  
Dr. Henning Schulte-  
Noelle

**Stellvertretende Vor-  
sitzende des Aufsichtsrats**  
Dr. Gerhard Cromme  
Rolf Zimmermann

**Prüfungsausschuss**  
Dr. Wulf H. Bernotat  
(Vorsitzender)  
Igor Landau  
Dr. Henning Schulte-  
Noelle  
Jean-Jacques Cetté  
Jörg Reinbrecht

**Nominierungsausschuss**  
Dr. Henning Schulte-  
Noelle (Vorsitzender)  
Dr. Gerhard Cromme  
Prof. Dr. Renate Köcher

**Personalausschuss**  
Dr. Henning Schulte-  
Noelle (Vorsitzender)  
Dr. Gerhard Cromme  
Rolf Zimmermann

**Risikoausschuss**  
Dr. Henning Schulte-  
Noelle (Vorsitzender)  
Prof. Dr. Renate Köcher  
Peter D. Sutherland  
Godfrey Robert Hayward  
Franz Heiß  
(seit 1. Januar 2011)  
Peter Kossubek  
(bis 31. Dezember 2010)

**Ständiger Ausschuss**  
Dr. Henning Schulte-  
Noelle (Vorsitzender)  
Dr. Wulf H. Bernotat  
Dr. Gerhard Cromme  
Karl Grimm  
(bis 31. Dezember 2010)  
Peter Kossubek  
(seit 1. Januar 2011)  
Rolf Zimmermann

## Corporate Governance und Entsprechenserklärung

Vorstand und Aufsichtsrat haben am 15. Dezember 2010 die Entsprechenserklärung nach § 161 Aktien-  
gesetz abgegeben und diese den Aktionären auf der  
Website der Gesellschaft dauerhaft zugänglich ge-  
macht. Die Allianz SE hat seit der letzten Entsprechens-  
erklärung sämtliche Empfehlungen der Regierungs-  
kommission Deutscher Corporate Governance Kodex  
befolgt. Sie wird sämtlichen Empfehlungen der aktu-  
ellen Fassung des Kodex vom 26. Mai 2010 mit Aus-  
nahme von Ziffer 5.4.6 Absatz 2 Satz 1 entsprechen,  
weil die Gesellschaft beabsichtigt, der Hauptver-  
sammlung eine Umstellung der Vergütungsstruktur  
für den Aufsichtsrat auf eine reine Festvergütung  
vorzuschlagen.

Weitergehende Erläuterungen zur Corporate Gover-  
nance in der Allianz Gruppe sind dem Corporate-  
Governance-Bericht und der Erklärung zur Unter-  
nehmensführung ab Seite 22 zu entnehmen. Auch  
der Internetauftritt der Allianz hält unter  
[www.allianz.com/cg](http://www.allianz.com/cg) vertiefende Informationen zur  
Corporate Governance bereit.

## Arbeit der Ausschüsse

Zur effizienten Wahrnehmung seiner Aufgaben hat  
der Aufsichtsrat den Prüfungsausschuss, den Ständi-  
gen Ausschuss, den Personalausschuss, den Risiko-  
ausschuss und den Nominierungsausschuss gebildet.  
Die Ausschüsse bereiten die Beratung und die Be-  
schlussfassung im Plenum vor. Darüber hinaus sind  
den Ausschüssen für geeignete Fälle auch eigene  
Beschlusszuständigkeiten übertragen worden. Einen  
Vermittlungsausschuss gibt es nicht, weil das Mitbe-  
stimmungsgesetz, das diesen Ausschuss vorsieht, für  
die Allianz SE nicht gilt. Die nebenstehende Aufstel-  
lung gibt die derzeitige Zusammensetzung der Aus-  
schüsse wieder.

Im Berichtsjahr 2010 befasste sich der **Ständige Aus-  
schuss** in drei turnusmäßigen Sitzungen vor allem  
mit Corporate-Governance-Fragen, der Vorbereitung  
der ordentlichen Hauptversammlung, dem Mitarbei-  
teraktienkaufprogramm und der Effizienzprüfung des  
Aufsichtsrats. In einer zusätzlichen Sitzung während  
der Hauptversammlung im Mai 2010 behandelte der  
Ausschuss einen Geschäftsordnungsantrag eines  
Aktionärs auf Abwahl des Versammlungsleiters. Wäh-  
rend des Geschäftsjahres waren durch den Ausschuss  
Zustimmungsbeschlüsse zu fassen, und zwar zur  
Ausnutzung des Genehmigten Kapitals 2010/II für die  
Ausgabe von Mitarbeiteraktien und zur Gewährung  
von Krediten an leitende Angestellte und Organmit-  
glieder.

Der **Personalausschuss** tagte siebenmal. Behandelt  
wurden Personalangelegenheiten sowie Struktur und  
Höhe der Vorstandsvergütung. Der Personalaus-  
schuss bereitete die Überprüfung des Vergütungs-  
systems für den Vorstand vor, einschließlich der we-  
sentlichen Vertragselemente und der Festsetzung der  
Ziele für die variable Vergütung. Zudem befasste er  
sich mit der Zielerreichung der Vorstandsmitglieder  
für den Jahresbonus 2009, die aktienbasierte Vergü-  
tung und den Mid Term Bonus für die Jahre 2007 bis  
2009. In mehreren Sitzungen beriet der Ausschuss  
eingehend über Struktur und Höhe der Aufsichtsrats-  
vergütung und unterbreitete schließlich dem Auf-  
sichtsratsplenum den Vorschlag zur Umstellung auf  
eine reine Festvergütung. Der Ausschuss beschäftigte  
sich ferner mit der Umsetzung der Empfehlung des  
Deutschen Corporate Governance Kodex zu Diversity  
auf der Ebene des Vorstands und bereitete einen Vor-  
schlag für Eckpunkte zum Auswahlverfahren für die  
Bestellung von Vorstandsmitgliedern vor.

Der **Prüfungsausschuss** hielt im Geschäftsjahr 2010  
fünf Sitzungen ab, die im Februar, im März, im Mai,  
im August und im November stattfanden. Der Aus-  
schuss erörterte in Gegenwart des Abschlussprüfers  
die Jahresabschlüsse der Allianz SE und des Konzerns,  
die Lageberichte und die Prüfungsberichte. Ferner  
prüfte der Ausschuss den Halbjahresfinanzbericht  
sowie die übrigen Quartalsabschlüsse und besprach  
im Beisein des Abschlussprüfers deren prüferische  
Durchsicht. Der Prüfungsausschuss sah im Rahmen

seiner Prüfungen keinen Anlass für Beanstandungen. Weiterhin befasste sich der Ausschuss mit der Erteilung der Prüfungsaufträge und der Festlegung der Prüfungsschwerpunkte. Zudem wurde die Vergabe von Aufträgen für nicht prüfungsbezogene Dienstleistungen an den Abschlussprüfer besprochen. Des Weiteren beschäftigte sich der Ausschuss mit dem Risikomanagement- und Risikoüberwachungssystem, dem Compliance-System und dem Internal-Audit-System. Fortlaufend ließ der Ausschuss sich von den Leitern der Fachbereiche Group Audit und Group Compliance über Revisions- und Compliance-Themen berichten. Durch die Leiterin des Fachbereichs Group Audit ließ sich das Gremium außerdem einen Bericht zu wesentlichen Revisionsergebnissen des letzten Geschäftsjahres erstatten. Der Chefsyndikus informierte den Ausschuss regelmäßig über den Stand wesentlicher Rechtsstreitigkeiten. In der Sitzung im November 2010 ließ der Ausschuss sich den Prüfungsplan von Group Audit für das Jahr 2011 vorstellen.

Der **Risikoausschuss** hielt im Jahr 2010 zwei Sitzungen ab. In beiden Sitzungen ließen wir uns vom Vorstand zunächst die aktuelle Risikosituation der Allianz Gruppe darlegen und berieten mit dem Vorstand darüber. Weitere Punkte der Ausschussarbeit waren die Folgen der Kreditkrise, die Behandlung von Risiken aus Naturkatastrophen sowie von Inflationsrisiken und die vom Group Capital Committee beschlossene Strategic Asset Allocation, die als Grundlage für Kapitalanlageentscheidungen dient. Zudem befassten wir uns eingehend mit den Auswirkungen der auf europäischer Ebene beschlossenen risikoorientierten Weiterentwicklung der gesetzlichen Solvabilitätsvorschriften (Eigenmittelanforderungen) für Versicherungsunternehmen (Solvency II). Die speziell risikobezogenen Aussagen im Jahres- und im Konzernabschluss sowie im Lagebericht und im Konzernlagebericht unterzogen wir einer Vorprüfung und informierten den Prüfungsausschuss über das Ergebnis.

Der **Nominierungsausschuss** tagte im Geschäftsjahr einmal. Im September 2010 beriet der Ausschuss über die Formulierung einer Zielsetzung für die

Zusammensetzung des Aufsichtsrats. Eine solche Zielsetzung wurde anschließend im Umlaufverfahren verabschiedet und im Dezember dem Aufsichtsratsplenium zum Beschluss vorgeschlagen.

Über die Arbeit der Ausschüsse ist der Aufsichtsrat regelmäßig umfassend unterrichtet worden.

## Jahres- und Konzernabschlussprüfung

Aufgrund einer gesetzlichen Sonderregelung für Versicherungsunternehmen werden der Abschlussprüfer und der Prüfer für die prüferische Durchsicht des Halbjahresfinanzberichts durch den Aufsichtsrat der Allianz SE und nicht durch die Hauptversammlung bestellt. Zum Abschlussprüfer für den Jahres- und den Konzernabschluss sowie für die prüferische Durchsicht des Halbjahresfinanzberichts hat der Aufsichtsrat die KPMG AG Wirtschaftsprüfungsgesellschaft, München, bestellt. Die KPMG hat die Jahresabschlüsse der Allianz SE und des Konzerns sowie die entsprechenden Lageberichte geprüft und mit dem uneingeschränkten Bestätigungsvermerk versehen. Der Konzernabschluss wurde auf der Grundlage der internationalen Rechnungslegungsstandards IFRS, wie sie in der Europäischen Union anzuwenden sind, aufgestellt. Ebenfalls wurden der Halbjahresfinanzbericht und die übrigen Quartalsabschlüsse durch die KPMG einer prüferischen Durchsicht unterzogen.

Die Abschlussunterlagen und die Prüfungsberichte der KPMG für das Geschäftsjahr 2010 wurden allen Aufsichtsratsmitgliedern rechtzeitig zugeleitet. Im Prüfungsausschuss wurden am 23. Februar 2011 auf vorläufiger Grundlage die Abschlüsse und die Prüfungsergebnisse der KPMG erörtert. Im Anschluss daran hatten alle Aufsichtsratsmitglieder die Möglichkeit, telefonisch an einer Aussprache über den Dividendenvorschlag des Vorstands teilzunehmen. Über die fertiggestellten Abschlussunterlagen und die Prüfungsberichte der KPMG wurde am 16. März 2011 im Prüfungsausschuss und im Aufsichtsratsplenium beraten. An diesen Erörterungen nahmen die Abschlussprüfer jeweils teil. Sie legten die wesentlichen Ergebnisse der Prüfungen dar und standen für Fragen und ergänzende Auskünfte zur Verfügung.

Aufgrund eigener Prüfung des Jahres- und des Konzernabschlusses, des Lageberichts und des Konzernlageberichts sowie des Gewinnverwendungsvorschlags haben wir keine Einwendungen erhoben und dem Ergebnis der KPMG-Abschlussprüfung zugestimmt. Den vom Vorstand aufgestellten Jahres- und den Konzernabschluss haben wir gebilligt; der Jahresabschluss ist damit festgestellt. Dem Gewinnverwendungsvorschlag des Vorstands schließen wir uns an.

## Besetzung von Aufsichtsrat und Vorstand

Herr Sutherland wurde als Nachfolger des zum 31. Dezember 2009 aus dem Aufsichtsrat ausgeschiedenen Herrn Dr. Humer zunächst gerichtlich mit Wirkung zum 1. Januar 2010 in den Aufsichtsrat bestellt. Am 5. Mai 2010 wählte die Hauptversammlung Herrn Sutherland in den Aufsichtsrat.

Herr Grimm ist aufgrund seines Wechsels in die passive Altersteilzeit zum 31. Dezember 2010 aus dem Aufsichtsrat der Allianz SE ausgeschieden. Für seinen Einsatz hat der Aufsichtsrat ihm Dank und Anerkennung ausgesprochen. Mit Beschluss vom 20. Dezember 2010 hat das Amtsgericht München Herrn Heiß als Nachfolger von Herrn Grimm mit Wirkung zum 1. Januar 2011 bis zur nächsten Hauptversammlung in den Aufsichtsrat bestellt. Die laufende Amtszeit des Aufsichtsrats endet mit Ablauf der ordentlichen Hauptversammlung 2012.

Zum 31. Dezember 2010 ist Herr Dr. Rupprecht in den Ruhestand getreten und aus dem Vorstand der Allianz SE ausgeschieden. Der Aufsichtsrat hat Herrn Dr. Rupprecht für seine erfolgreiche Arbeit gedankt. Während der über 30 Jahre, in denen Herr Dr. Rupprecht für die Allianz Gruppe tätig gewesen sei, habe er die Geschicke der Allianz wesentlich mitgeprägt. Die von Herrn Dr. Rupprecht wahrgenommenen Zuständigkeiten wurden zum 1. Januar 2011 von Herrn Dr. Zedelius übernommen, der nunmehr das Versicherungsgeschäft in Deutschland, der Schweiz und Österreich sowie den Bereich „Arbeit und Soziales“ betreut.

Mit Wirkung zum 1. Januar 2011 hat der Aufsichtsrat Herrn Bauer in den Vorstand der Allianz SE bestellt. Herr Bauer hat von Herrn Dr. Zedelius das Ressort Wachstumsmärkte übernommen. Er ist bereits seit vielen Jahren in der Allianz Gruppe beschäftigt und war zuletzt verantwortlicher Leiter der Allianz in Zentral- und Osteuropa, im Mittleren Osten und in Nordafrika.

Herr Dr. Faber wird zum Jahresende 2011 in den Ruhestand gehen. Herr Ralph, derzeit im Vorstand der Allianz SE für das Versicherungsgeschäft in Nordamerika und Mexiko verantwortlich, soll zum 1. Januar 2012 zusätzlich die Ressortverantwortung von Herrn Dr. Faber für das globale Asset Management übernehmen. Zunächst übernimmt er zum 1. April 2011 die Rolle des Chief Operating Officer bei der Allianz Global Investors AG.

Der Aufsichtsrat hat sich vom Vorstand jeweils über die Aufgabenverteilung im Vorstand informieren lassen und darüber beraten.

Der Aufsichtsrat dankt allen Mitarbeiterinnen und Mitarbeitern der Allianz Gruppengesellschaften für ihren großen persönlichen Einsatz im abgelaufenen Geschäftsjahr.

München, den 16. März 2011

Für den Aufsichtsrat:



Dr. Henning Schulte-Noelle  
Vorsitzender



# Mitglieder des Vorstands

**Michael Diekmann**

Chairman of the Board of Management

**Dr. Paul Achleitner**

Finance

**Oliver Bäte**

Controlling, Reporting, Risk

**Manuel Bauer** seit 1. Januar 2011

Insurance Growth Markets

**Clement B. Booth**

Global Insurance Lines & Anglo Markets

**Enrico Cucchiani**

Insurance Europe (& South America)

**Dr. Joachim Faber**

Asset Management (Worldwide)

**Dr. Christof Mascher**

Operations

**Jay Ralph**

Insurance NAFTA Markets

**Dr. Gerhard Rupprecht** bis 31. Dezember 2010

Insurance German Speaking Countries

Director responsible for Work and Social Welfare

**Dr. Werner Zedelius**

Insurance Growth Markets bis 31. Dezember 2010

Insurance German Speaking Countries

Director responsible for Work and Social Welfare

seit 1. Januar 2011

# International Executive Committee

Dem International Executive Committee (IEC) gehören die Vorstandsmitglieder der Allianz SE und die Chefs der größten Tochtergesellschaften der Allianz Gruppe an. Unter dem Vorsitz von Michael Diekmann diskutiert dieses Gremium gruppenübergreifende strategische Themen.

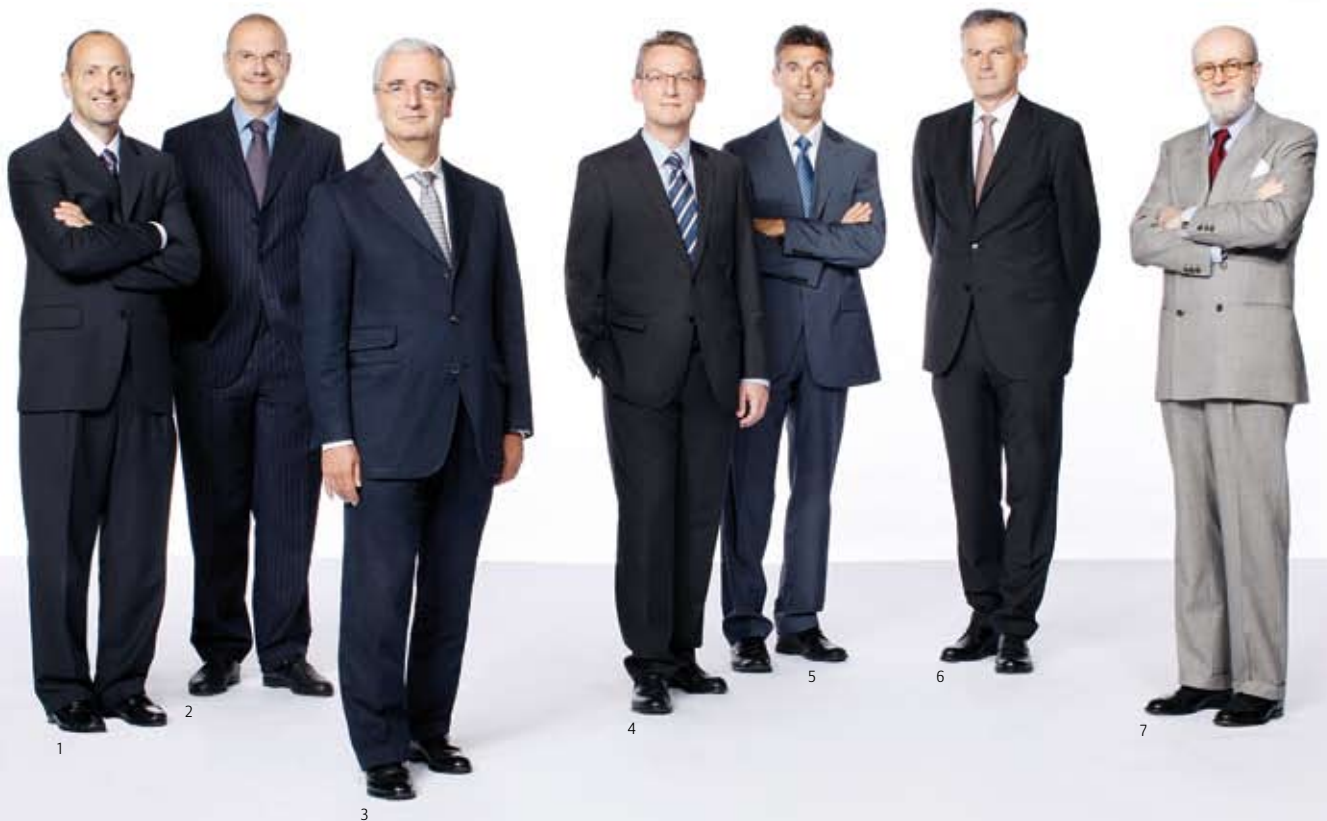

- 1 **Michael E. LaRocco**, Fireman's Fund Insurance Company, Novato
- 2 **Wolfram Littich**, Allianz Elementar, Wien
- 3 **Paul Achleitner**, Allianz SE, München

- 4 **Axel Theis**, Allianz Global Corporate & Specialty, München
- 5 **Severin Moser**, Allianz Deutschland AG/ Allianz Versicherungs-AG

- 6 **Christof Mascher**, Allianz SE, München
- 7 **Enrico Cucchiani**, Allianz SE, München

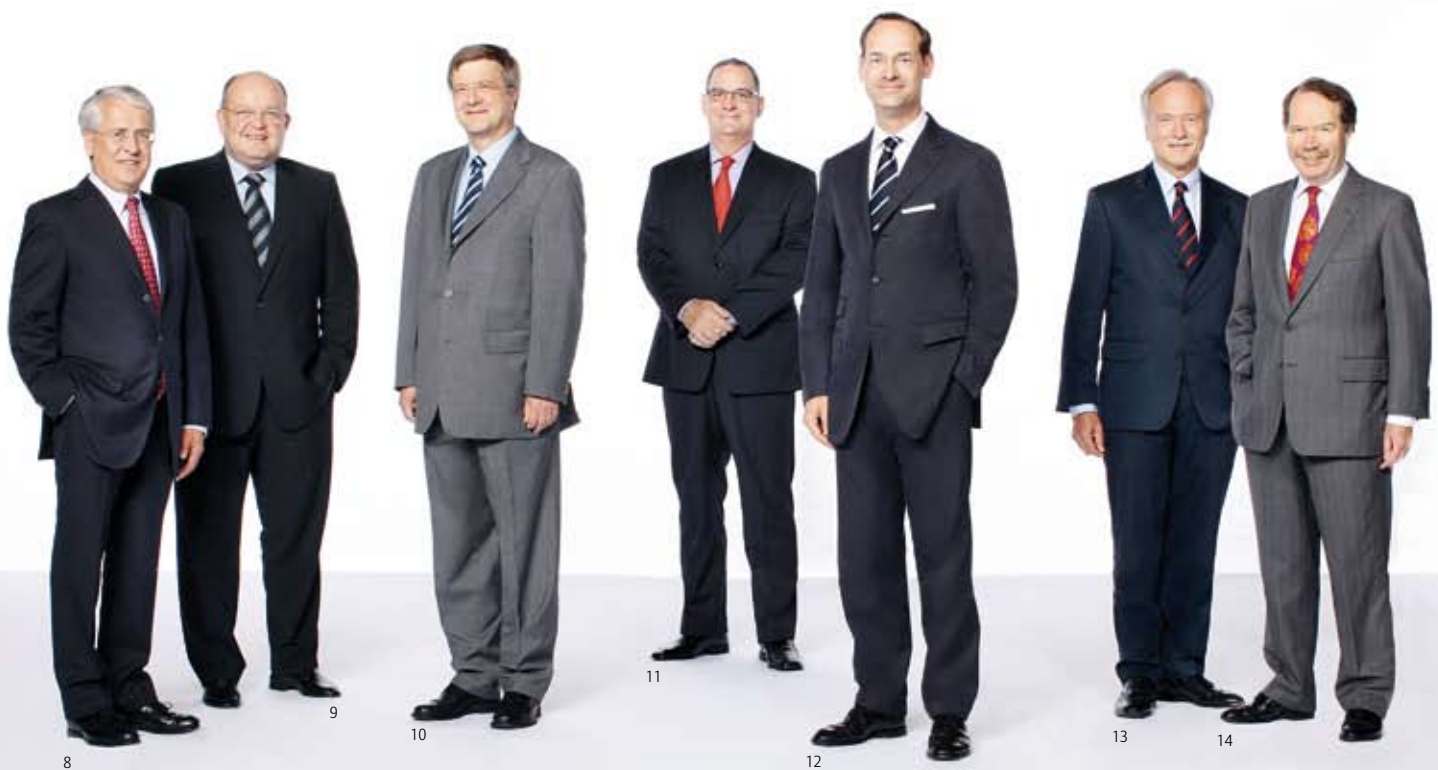

8 Clemens von Weichs, Allianz Re, München  
9 Manuel Bauer, Allianz Central and Eastern Europe, Middle East and North Africa (CEEMA)  
10 Karl-Hermann Lowe, Allianz Investment Management SE

11 Bruce Bowers, Allianz Asia Pacific  
12 Oliver Bäte, Allianz SE, München

13 Joachim Faber, Allianz SE, München  
14 Andrew Torrance, Allianz Insurance PLC



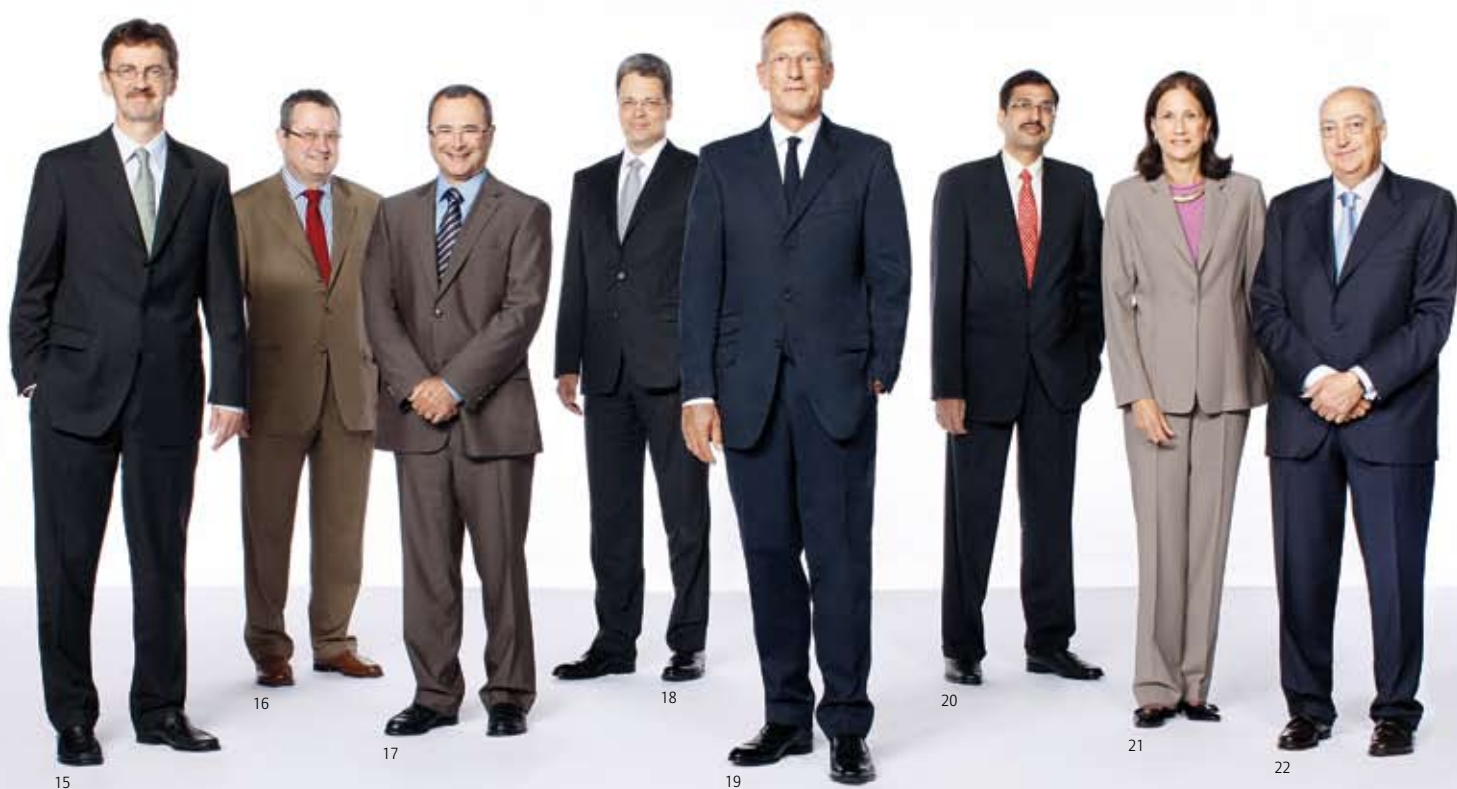

15 **Maximilian Zimmerer**, Allianz Deutschland AG/Allianz  
Lebensversicherungs-AG, Allianz Private Krankenver-  
sicherungs-AG  
16 **Clement B. Booth**, Allianz SE, München

17 **Jacques Richier**, Allianz France, Paris  
18 **Manfred Knof**, Allianz Suisse, Zürich  
19 **Michael Diekmann**, Allianz SE, München

20 **Kamesh Goyal**, Bajaj Allianz Life, Pune  
21 **Marna Whittington**, Allianz Global Investors, München  
22 **Vicente Tardío Barutel**, Allianz Compañía de Seguros y  
Reaseguros, Barcelona

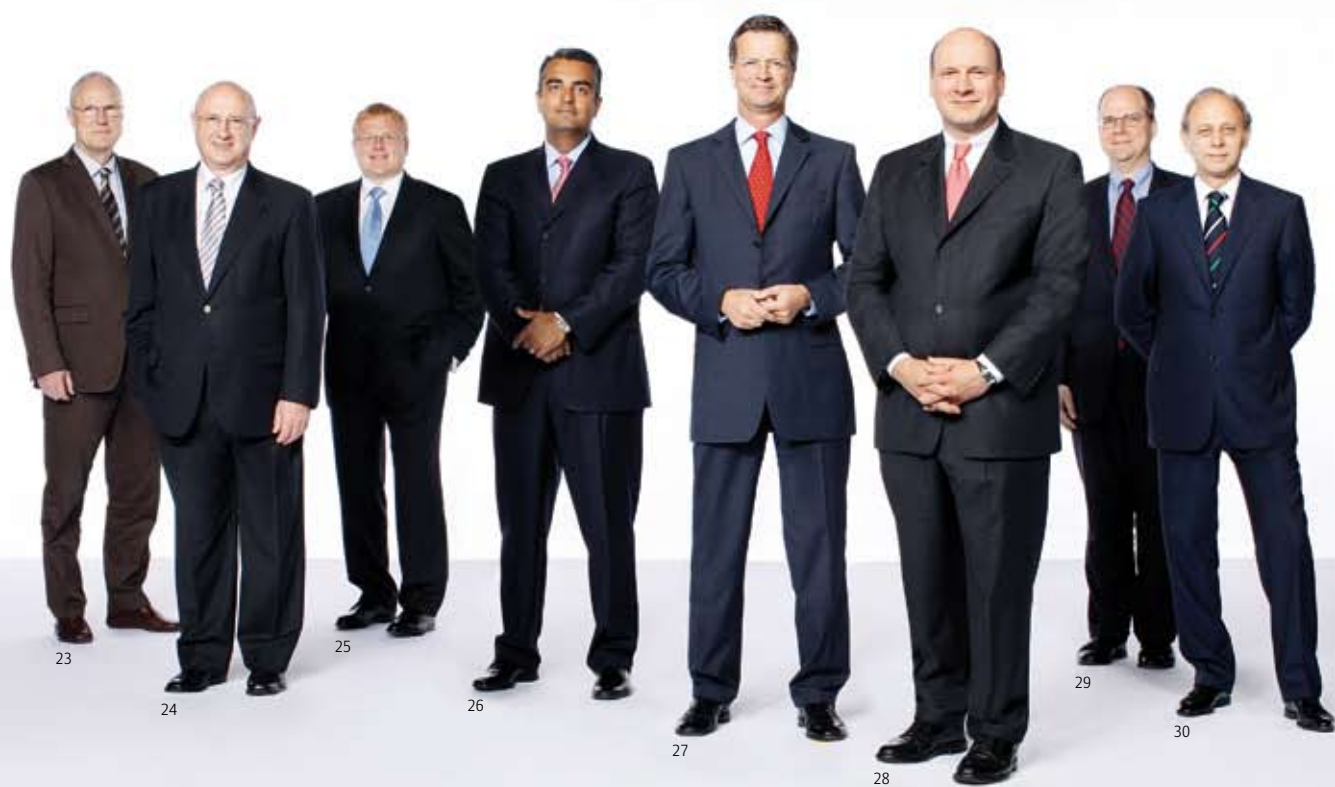

23 Gerhard Rupprecht, Allianz SE, München  
 24 Terry Towell, Allianz Australia, Sydney  
 25 Andree Moschner, Allianz Deutschland AG/  
 Allianz Beratungs- und Vertriebs-AG

26 Gary C. Bhojwani, Allianz Life Insurance Company  
 of North America  
 27 Werner Zedelius, Allianz SE, München

28 Markus Rieß, Allianz Deutschland AG, München  
 29 Jay Ralph, Allianz SE, München  
 30 George Sartorel, Allianz S.p.A., Mailand

# Mitglieder des Aufsichtsrats

## **Dr. Henning Schulte-Noelle**

Vorsitzender

Ehem. Vorsitzender des Vorstands, Allianz AG

## **Dr. Gerhard Cromme**

Stv. Vorsitzender

Vorsitzender des Aufsichtsrats, ThyssenKrupp AG

## **Rolf Zimmermann**

Stv. Vorsitzender

Angestellter, Allianz Deutschland AG

## **Dr. Wulf H. Bernotat**

Ehem. Vorsitzender des Vorstands, E.ON AG

## **Jean-Jacques Cette**

Vorsitzender des Konzernbetriebsrates,  
Allianz France S.A.

**Karl Grimm** bis 31. Dezember 2010

Angestellter, Allianz Deutschland AG

## **Godfrey Robert Hayward**

Angestellter, Allianz Insurance plc

**Franz HeiB** seit 1. Januar 2011

Angestellter, Allianz Beratungs- und Vertriebs-AG

## **Prof. Dr. Renate Köcher**

Geschäftsführerin,  
Institut für Demoskopie Allensbach

## **Peter Kossubek**

Angestellter, Allianz Deutschland AG

## **Igor Landau**

Mitglied des Verwaltungsrats, Sanofi-Aventis S.A.

## **Jörg Reinbrecht**

Gewerkschaftssekretär, ver.di Bundesverwaltung

## **Peter D. Sutherland**

Vorsitzender, Goldman Sachs International

# International Executive Committee



# Allianz Aktie

- Die Allianz Aktie hat sich in schwierigem Umfeld für Finanzwerte gut behauptet.
- Wir schlagen der Hauptversammlung vor, die Dividende je Aktie um 0,40 Euro auf 4,50 Euro zu erhöhen.

## Druck auf Finanzwerte

Die europäischen Aktienmärkte bewegten sich im Jahr 2010 uneinheitlich, bedingt durch gegenläufige Einflüsse: zum einen die Nachrichten über eine sich zuspitzende Schuldenkrise, zum anderen die Anzeichen einer auflebenden Konjunktur. Letztere verliehen konjunkturabhängigen Titeln einen deutlichen Aufschwung; dagegen mussten Finanzwerte zum Teil empfindliche Kurseinbußen hinnehmen. Hin- und hergerissen in diesem Spannungsfeld, schloss der EURO STOXX 50 das Jahr mit einem Minus von 5,8 Prozent. Das Jahresplus des DAX von 16,1 Prozent ist darauf zurückzuführen, dass dieser Index besonders viele konjunkturabhängige Werte enthält. Diese erlebten einen kräftigen Aufschwung, weil Güter und Dienstleistungen insbesondere in Asien wieder stark nachgefragt waren. Innerhalb des Euroraums schnitt einzig der finnische Aktienmarkt besser als der DAX ab.

## Allianz Aktie gut behauptet

Nachdem der Kurs im Vorjahr einen Anstieg um 16,2 Prozent auf 87,15 Euro verzeichnet hatte, schloss unser Papier in einem schwierigen Börsenumfeld für Finanzwerte 2010 zum Jahresultimo mit 88,93 Euro gut behauptet ab. Vornehmlich im Sommer belasteten sehr niedrige Zinsen den Kursverlauf, doch als im Schlussquartal die Zinsen wieder anzogen, machte auch die Allianz Aktie Boden gut. Die Jahresperformance 2010 betrug 2,0 Prozent, und die Gesamtrendite, also Wertentwicklung plus Dividendenaus-schüttung, belief sich auf 7,4 Prozent. Im Branchenvergleich lag die Kursentwicklung des STOXX Europe 600 Insurance bei 1,6 Prozent und seine Gesamtrendite bei 5,5 Prozent. Somit schnitt die Allianz Aktie, wie schon im Vorjahr, besser ab als der Branchendurchschnitt. Nach Veröffentlichung der Geschäftsjahres-ergebnisse 2010 haben 63 Prozent der Analysten die

Allianz Aktie zum Kauf empfohlen, mit einem durchschnittlichen Kursziel von 114,83 Euro. Die aktuellen Analystenempfehlungen zur Allianz Aktie finden Sie im Internet unter [www.allianz.com/analystenempfehlungen](http://www.allianz.com/analystenempfehlungen).

### Kursentwicklung der Allianz Aktie versus EURO STOXX 50 und STOXX Europe 600 Insurance

bezogen auf den Allianz Kurs in €

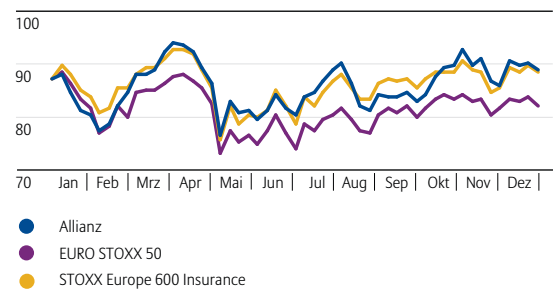

Quelle: Thomson Reuters Datastream  
Aktuelle Informationen zum Kursverlauf finden Sie im Internet unter [www.allianz.com/aktie](http://www.allianz.com/aktie).

### Analystenempfehlungen

zum 7. März 2011 in %

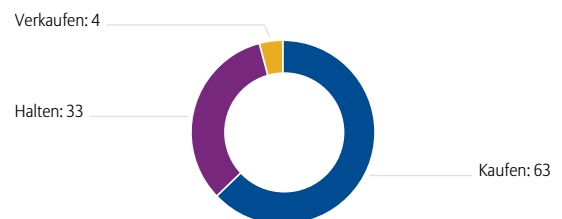

Quelle: Bloomberg

Der Kursaufschwung unserer Aktie 2009 und 2010 konnte ihren Wertverlust aus 2008 jedoch nicht auf-fangen. Dadurch ist die längerfristige Performance im Fünf- und im Zehnjahresvergleich noch negativ. Dies entspricht ungefähr der Wertentwicklung des Versicherungssektors. Unter der Internetadresse [www.allianz.com/aktie](http://www.allianz.com/aktie) bieten wir einen Aktienrechner an, mit dem die Wertentwicklung eines Investments in Allianz Aktien berechnet werden kann.

## Performance der Allianz Aktie im Vergleich

durchschnittliche Jahresperformance in %

|                            | 1 Jahr<br>2010 | 5 Jahre<br>2006 – 2010 | 10 Jahre<br>2001 – 2010 |
|----------------------------|----------------|------------------------|-------------------------|
| Allianz (ohne Dividende)   | 2,0            | – 7,0                  | – 12,9                  |
| Allianz (mit Dividende)    | 7,4            | – 3,6                  | – 10,7                  |
| STOXX Europe 600 Insurance | 1,6            | – 8,8                  | – 10,4                  |
| EURO STOXX 50              | – 5,8          | – 4,8                  | – 5,2                   |
| DAX                        | 16,1           | 5,0                    | 0,7                     |

Quelle: Thomson Reuters Datastream

## Basisinformationen zur Aktie

|                 |                                      |
|-----------------|--------------------------------------|
| Aktienart       | Vinkulierte Namensaktie              |
| Wertpapiercodes | WKN 840 400<br>ISIN DE 000 840 400 5 |
| Bloomberg       | ALV GY                               |
| Reuters         | ALVG.DE                              |

## Dividende

Wir wollen unsere Aktionäre an der sehr guten Geschäftsentwicklung teilhaben lassen und schlagen deshalb der Hauptversammlung vor, die Dividende je Aktie von 4,10 Euro auf 4,50 Euro zu erhöhen. Dies entspricht einer Dividendenrendite von 5,1 Prozent. Gemessen am Jahresüberschuss 2010 beträgt die Ausschüttungsquote 40 Prozent.<sup>3</sup>

## Dividendensumme und Dividende je Aktie

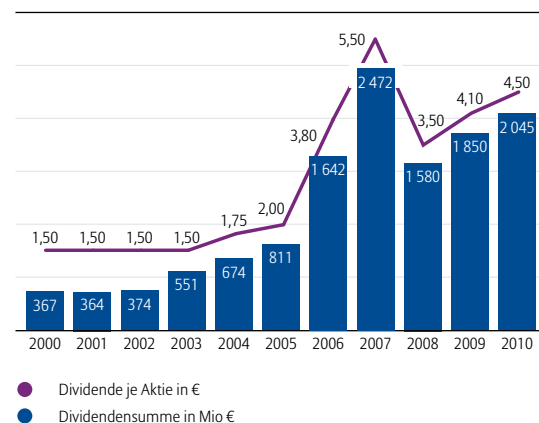

## Kennzahlen zur Allianz Aktie auf einen Blick

|                                                         |           | 2010              | 2009        | 2008        |
|---------------------------------------------------------|-----------|-------------------|-------------|-------------|
| Anzahl ausgegebener Aktien am 31.12.                    |           | 454 500 000       | 453 900 000 | 453 050 000 |
| Gewichteter Durchschnitt der Anzahl ausstehender Aktien |           | 451 280 092       | 450 845 024 | 450 161 145 |
| Aktienkurs am 31.12.                                    | €         | 88,93             | 87,15       | 75,00       |
| Jahreshoch                                              | €         | 95,43             | 88,36       | 145,92      |
| Jahrestief                                              | €         | 76,67             | 48,68       | 46,64       |
| Jahresperformance                                       | %         | 2,0               | 16,2        | – 49,3      |
| Marktkapitalisierung am 31.12.                          | Mrd €     | 40,4              | 39,6        | 34,0        |
| Durchschnittlicher Umsatz je Handelstag (Xetra)         | Mio Stück | 2,5               | 3,0         | 4,9         |
| Beta-Faktor <sup>1</sup>                                |           | 0,9               | 1,4         | 1,3         |
| Ergebnis je Aktie                                       | €         | 11,20             | 9,33        | – 5,25      |
| Kurs-Gewinn-Verhältnis (KGV)                            |           | 7,9               | 9,3         | —           |
| Dividende je Aktie                                      | €         | 4,50 <sup>2</sup> | 4,10        | 3,50        |
| Dividendenrendite, bezogen auf den Jahresendkurs        | %         | 5,1               | 4,7         | 4,7         |
| Ausschüttungsquote <sup>3</sup>                         | %         | 40                | 40          | 40          |
| Eigenkapitalrendite nach Steuern <sup>3,4</sup>         | %         | 11,9              | 12,5        | 9,9         |

<sup>1</sup> im Vergleich zum EURO STOXX 50, Quelle: Bloomberg

<sup>2</sup> Vorschlag

<sup>3</sup> berechnet auf den Jahresüberschuss aus fortzuführenden Geschäftsbereichen nach Anteilen anderer Gesellschafter

<sup>4</sup> Berechnet auf Basis des durchschnittlichen Eigenkapitals; dieses ist der Durchschnitt aus dem Eigenkapital am 31. Dezember zweier aufeinanderfolgender Geschäftsjahre.

## Handelsumsätze der Allianz Aktie

Im Jahr 2010 wurden an den deutschen Börsen (einschließlich Xetra) noch rund 73 Prozent des gesamten Handels der Allianz Aktie abgewickelt. Unter- dessen werden außerbörsliche Handelsplattformen immer wichtiger.

### Handelsumsätze der Allianz Aktie 2010 (2009)

in %

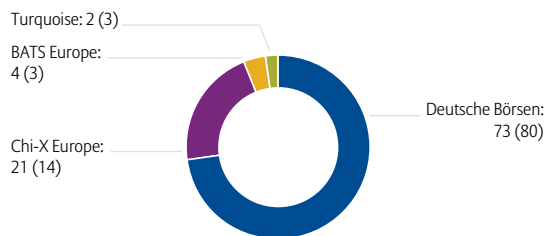

Quelle: Bloomberg

## In wichtigen Indizes stark vertreten

Zum Jahresultimo 2010 betrug die Marktkapitalisierung der Allianz SE 40,4 Milliarden Euro. Damit zählt die Allianz zu den am höchsten bewerteten Finanzdienstleistern weltweit. Ihre Stärke zeigt sich in dem Gewicht, das der Allianz Aktie in wichtigen deutschen, europäischen und Weltmarktindizes eingeräumt wird. Bei der Berechnung des STOXX Europe 600 Insurance, in den 33 Versicherungstitel eingehen, besitzt unser Papier das größte Gewicht. Auch im MSCI World Financials Index ist die Allianz führend vertreten.

### Gewichtung der Allianz Aktie in wichtigen Indizes

am 31. Dezember 2010

|                            | Gewichtung in % | Rang | Werte im Index |
|----------------------------|-----------------|------|----------------|
| DAX                        | 6,7             | 6    | 30             |
| EURO STOXX 50              | 2,6             | 11   | 50             |
| STOXX Europe 600 Insurance | 14,2            | 1    | 33             |
| MSCI World Financials      | 1,1             | 19   | 341            |
| MSCI World                 | 0,2             | 82   | 1 660          |

Quelle: Deutsche Börse, STOXX Ltd., MSCI

## Allianz Aktie als nachhaltiges Investment

Unser ganzheitlicher unternehmerischer Ansatz wird seit geraumer Zeit anerkannt und hat dazu geführt, dass unsere Aktie seit Langem in wichtigen Nachhaltigkeitsindizes vertreten ist, beispielsweise im Dow Jones Sustainability Index und im FTSE4Good. Indizes und Research-Agenturen stufen die Allianz in ihren Berichten regelmäßig auf Top-Positionen ein und bewerten uns damit als eine der Versicherungsgruppen mit der stärksten Nachhaltigkeitsorientierung. Dies dokumentiert die Attraktivität der Allianz Aktie für Anleger mit einem nachhaltig ausgerichteten Investmentansatz. Mehr zum Thema Nachhaltigkeit in der Allianz Gruppe finden sich im Konzernlagebericht auf Seite 64 und im Internet unter [www.allianz.com/verantwortung](http://www.allianz.com/verantwortung).

## Aktionärsstruktur

Mit rund 484 000 Aktionären gehört die Allianz zu den großen Publikumsgesellschaften Europas. Unsere Aktien befinden sich zu 100 Prozent im Streubesitz; zum Jahresende wurden 84 Prozent von institutionellen Investoren und 16 Prozent von privaten Anlegern gehalten. Nach Regionen aufgeschlüsselt, befanden sich 79 Prozent der Allianz Aktien im Besitz von europäischen Investoren, 21 Prozent wurden von Aktionären außerhalb Europas gehalten. Im Vergleich zum Vorjahr blieb die Anzahl der Aktionäre stabil. Aktuelle Informationen zur Aktionärsstruktur können im Internet unter [www.allianz.com/aktionaeere](http://www.allianz.com/aktionaeere) abgerufen werden.



## Aktionärsstruktur

zum 31. Dezember 2010 (31. Dezember 2009) in % des Grundkapitals

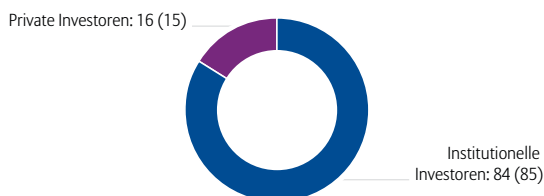

Quelle: Aktienregister Allianz SE

## Regionale Verteilung

zum 31. Dezember 2010 (31. Dezember 2009) in % des Grundkapitals

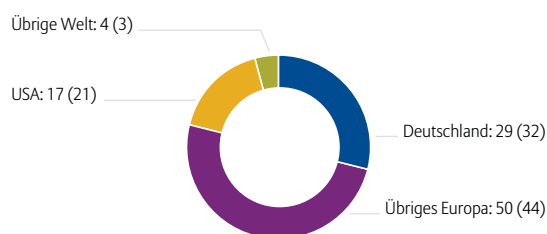

Quelle: Aktienregister Allianz SE

## Kommunikation mit dem Kapitalmarkt

Die Kommunikation mit Investoren ist uns sehr wichtig. Auf zahlreichen „Roadshows“ in Europa, den USA, Asien und Kanada erläuterten Vorstandsmitglieder und unser Investor-Relations-Team (IR-Team) Geschäftsentwicklung und strategische Ausrichtung der Allianz im Jahr 2010. Insgesamt, also einschließlich der Treffen am Münchner Firmensitz, führten wir 364 Gespräche mit institutionellen Anlegern und Analysten. Unsere Analystenkonferenz zu den Vorjahresergebnissen und die Telefonkonferenzen zu den Quartalszahlen fanden reges Interesse; unser Münchner „Capital Markets Day“ war ebenfalls gut besucht. Dort präsentierten Top-Manager die globalen Geschäftsfelder der Allianz. Auf neun internationalen Investorenkonferenzen beantwortete das Management die Fragen von institutionellen Investoren und Analysten. Ein weiterer wichtiger Teil unserer IR-Arbeit ist der Dialog mit privaten Aktionären. Wie im Vorjahr bearbeiteten wir 2010 rund 8 500 Anfragen.

## Auszeichnungen

Die Arbeit unseres IR-Teams wurde 2010 erneut von Analysten und Portfolio-Managern ausgezeichnet.

### Auszeichnungen 2010

Zum vierten Mal in Folge erlangten wir im renommierten „Extel Pan European Survey“ von Thomson Reuters den ersten Rang im europäischen Versicherungssektor; dort wird die Arbeit von 45 europäischen Versicherungs-IR-Teams bewertet.

Das Finanzmagazin „Institutional Investor“ 2010 kürte unser Team zur Nummer 2 im europäischen Versicherungssektor.

Eine branchenübergreifende Studie des Deutschen Investor Relations Verbandes DIRK zur IR-Arbeit der DAX-30-Unternehmen platzierte uns auf Platz 3.

## Hauptversammlung 2010

Rund 4 500 Aktionäre und Aktionärsvertreter besuchten am 5. Mai 2010 unsere Hauptversammlung in der Münchner Olympiahalle. Mehr als 37 Prozent des Grundkapitals stimmten ab. Erstmals boten wir unseren Aktionären an, ihr Stimmrecht per Briefwahl oder Online-Briefwahl auszuüben. 4,5 Prozent des Grundkapitals gelangten so zur Abstimmung. Dies war möglich geworden, nachdem das Gesetz zur Umsetzung der EU-Richtlinie betreffend Aktionärsrechte im September 2009 in Kraft getreten war.

# Services für den Allianz Aktionär

## Online-Services

- Unser Online-Geschäftsbericht 2010 steht Ihnen im Internet unter [www.allianz.com/geschaeftsbericht](http://www.allianz.com/geschaeftsbericht) zur Verfügung. Nutzen Sie die Vorteile des Internets: Laden Sie einzelne Kapitel und Tabellen (im PDF- und Excelformat) herunter und gelangen Sie über eine Suchfunktion und Verlinkungen innerhalb des Berichts leichter zu den gewünschten Information.
- Besuchen Sie uns auf [www.allianz.com/ir](http://www.allianz.com/ir), um sich über aktuelle Entwicklungen der Allianz Gruppe und der Allianz Aktie online zu informieren. Wir übertragen sämtliche Analystenkonferenzen live und stellen sie im Anschluss als Aufzeichnung und als Podcast zur Verfügung.
- Wichtige IR-Informationen, die wir im Internet veröffentlichen, stellen wir durch unsere „Investor App“ nun auch Aktionären mit iPhone und iPod touch über den Apple App Store zur Verfügung. So haben Sie den Kurs der Allianz Aktie, IR-Mitteilungen, Analystenpräsentationen, die Podcasts unserer Analystenkonferenzen sowie den Finanzkalender immer griffbereit. Einen ähnlichen Service bieten wir über [m.allianz.com](http://m.allianz.com) auch Handy- und Blackberry-Nutzern an.

## Online-Services zur Hauptversammlung

Unsere Online-Services unter [www.allianz.com/hv](http://www.allianz.com/hv) sollen unseren Aktionären die Teilnahme und die Stimmrechtsausübung bei der Hauptversammlung erleichtern. Für den E-Mail-Versand der Hauptversammlungsunterlagen können Sie sich online registrieren lassen. Auch Ihre Eintrittskarte zur Hauptversammlung können Sie online bestellen und ausdrucken. Weiter bieten wir Ihnen an, Ihre Stimmen per Online-Briefwahl abzugeben, wenn Sie an der Hauptversammlung nicht persönlich teilnehmen können.

## Investor Relations Kontakt

Allianz SE, Investor Relations  
Königinstraße 28, 80802 München  
Telefon: +49 1802 2554269  
(Allianz Investor Line, Mo – Fr, 8 – 20 Uhr für 6 Cent je Anruf aus dem deutschen Festnetz, max. 42 Cent je Minute aus deutschen Mobilfunknetzen)  
Fax: +49 89 3800 3899  
E-Mail: [investor.relations@allianz.com](mailto:investor.relations@allianz.com)  
Internet: [www.allianz.com/ir](http://www.allianz.com/ir)

## Finanzkalender

### Wichtige Termine für Aktionäre und Analysten<sup>1</sup>

|            |                                              |
|------------|----------------------------------------------|
| 04.05.2011 | Hauptversammlung                             |
| 12.05.2011 | Zwischenbericht 1. Quartal 2011              |
| 05.08.2011 | Zwischenbericht 2. Quartal 2011              |
| 11.11.2011 | Zwischenbericht 3. Quartal 2011              |
| 23.02.2012 | Bilanzpressekonferenz zum Geschäftsjahr 2011 |
| 24.02.2012 | Analystenkonferenz zum Geschäftsjahr 2011    |
| 23.03.2012 | Geschäftsbericht 2011                        |
| 09.05.2012 | Hauptversammlung                             |

<sup>1</sup> Das deutsche Wertpapierhandelsgesetz verpflichtet Emittenten, Informationen mit erheblichem Kursbeeinflussungspotenzial unverzüglich zu veröffentlichen. Aufgrund dessen ist es möglich, dass wir Eckdaten unserer Quartals- und Geschäftsjahresergebnisse vor den oben genannten Terminen publizieren. Da wir Terminverschiebungen grundsätzlich nicht ausschließen können, empfehlen wir, die Termine kurzfristig im Internet unter [www.allianz.com/finanzkalender](http://www.allianz.com/finanzkalender) zu überprüfen.

|    |                                   |
|----|-----------------------------------|
| 2  | Aktionärsbrief                    |
| 6  | Bericht des Aufsichtsrats         |
| 12 | Mitglieder des Vorstands          |
| 13 | International Executive Committee |
| 15 | Mitglieder des Aufsichtsrats      |
| 16 | Allianz Aktie                     |
| 20 | Services für den Allianz Aktionär |



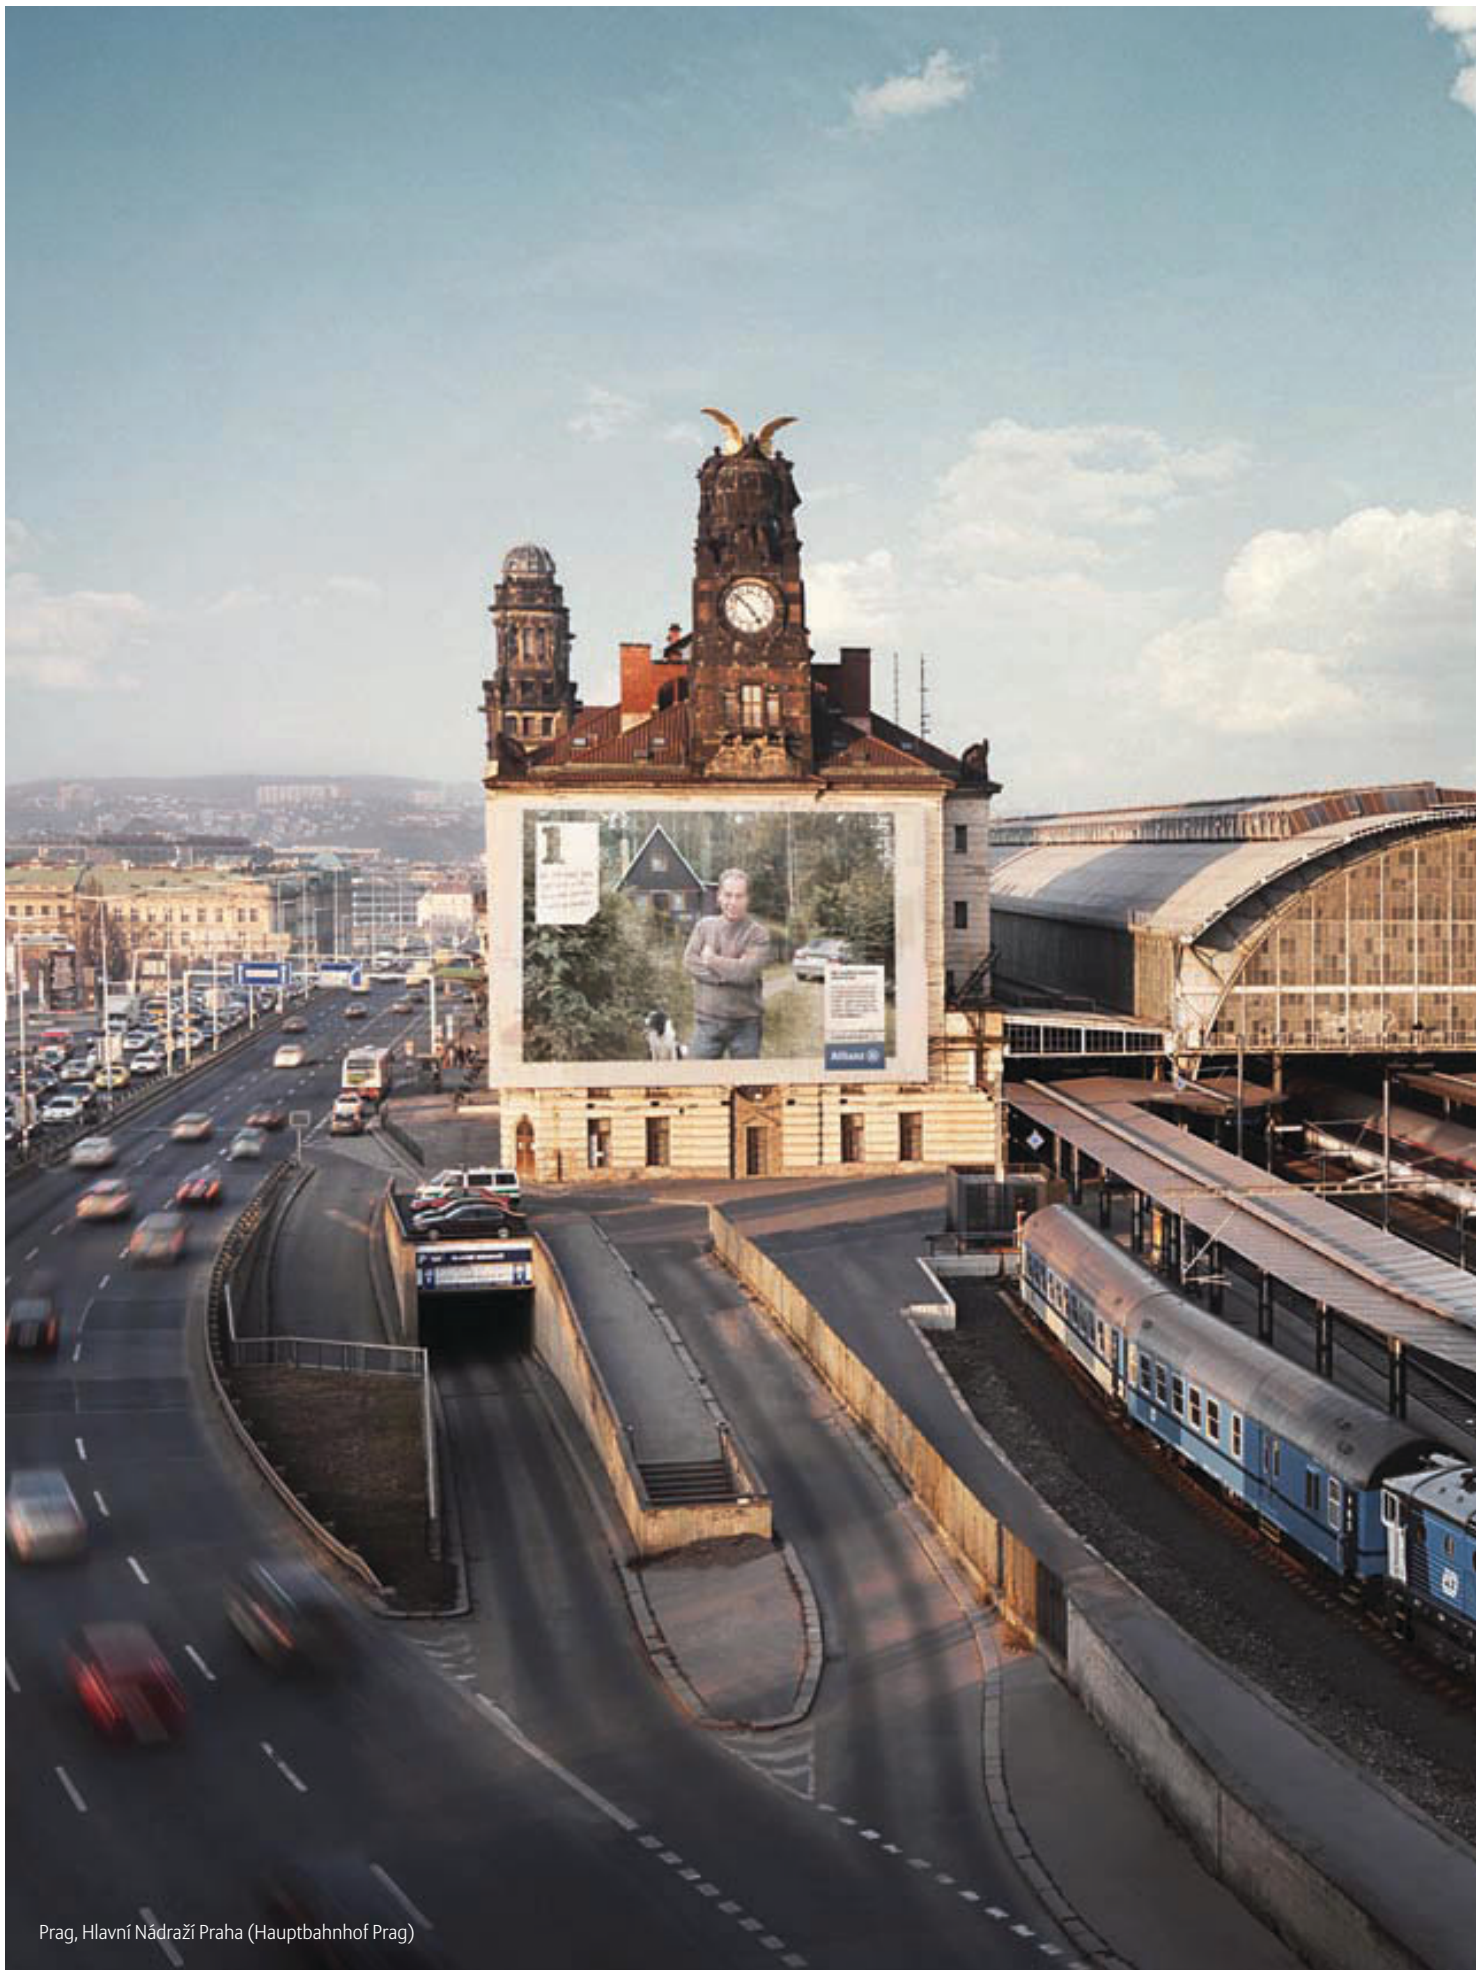

Prag, Hlavní Nádraží Praha (Hauptbahnhof Prag)





## Corporate Governance

- 22 Corporate-Governance-Bericht  
und Erklärung zur Unternehmensführung
- 31 Übernahmerelevante Angaben und  
Erläuterungen
- 35 Vergütungsbericht

# Corporate-Governance-Bericht und Erklärung zur Unternehmensführung

Gute Corporate Governance und Transparenz sind wesentliche Voraussetzungen für das Vertrauen unserer Aktionäre, Geschäftspartner und Mitarbeiter.

## Corporate-Governance-Bericht

Eine gute Corporate Governance ist unabdingbar für einen nachhaltigen Unternehmenserfolg. Deshalb ist es wichtig, dass die bestehenden Corporate-Governance-Strukturen ständig überprüft und, soweit nötig, fortentwickelt werden.

Der Deutsche Corporate Governance Kodex gilt in der Fassung vom 26. Mai 2010. Er enthält neben der Darstellung wesentlicher gesetzlicher Bestimmungen Empfehlungen und Anregungen für eine gute Corporate Governance. Eine gesetzliche Pflicht zur Befolgung dieser Standards besteht nicht. Nach § 161 Aktiengesetz sind die börsennotierten Gesellschaften jedoch verpflichtet, jährlich im Sinne eines „comply or explain“ eine Entsprechenserklärung zu den Kodex-Empfehlungen abzugeben. Abweichungen von den Kodex-Empfehlungen sind dabei zu erläutern. Die von Vorstand und Aufsichtsrat am 15. Dezember 2010 abgegebene Entsprechenserklärung sowie die Stellungnahme zu den Kodexanregungen finden Sie in der Erklärung zur Unternehmensführung auf den Seiten 28 bis 30.

In Deutschland gilt der Kodex als Maßstab für gute Unternehmensleitung und -kontrolle. Analysen zeigen, dass die Zustimmung zum Deutschen Corporate Governance Kodex unverändert hoch ist. Zum Jahresende 2010 haben die DAX-30-Gesellschaften durchschnittlich 97 Prozent aller Empfehlungen verwirklicht, während im M-DAX etwa 93 Prozent und im S-DAX rund 87 Prozent der Empfehlungen von den Unternehmen befolgt wurden.

Im Hinblick auf den hohen Stellenwert einer guten Corporate Governance wurde im September 2010 in der Allianz SE die neue Funktion eines Corporate Governance Officers eingerichtet. Dieser koordiniert die wesentlichen Corporate-Governance-Themen in der Allianz SE und der Allianz Gruppe.

## Unternehmensverfassung der Europäischen Aktiengesellschaft

Als Europäische Aktiengesellschaft unterliegt die Allianz SE zusätzlich zu dem deutschen Aktienrecht den speziellen europäischen SE-Regelungen und dem deutschen SE-Ausführungsgesetz. Die wesentlichen Grundzüge der bisherigen Unternehmensverfassung, insbesondere das duale Leitungssystem (Vorstand und Aufsichtsrat), und der Grundsatz der paritätischen Mitbestimmung im Aufsichtsrat bestehen in der Allianz SE unverändert fort. Auf unserer Internetseite unter [www.allianz.com/se](http://www.allianz.com/se) haben wir die Unterschiede zwischen einer deutschen Aktiengesellschaft und einer Europäischen Aktiengesellschaft mit Sitz in Deutschland dargestellt.

## Arbeitsweise des Vorstands

Der Vorstand leitet die Allianz SE und den Allianz Konzern. Er umfasst derzeit zehn Mitglieder aus verschiedenen Ländern, ist also international wie die Allianz selbst. Zu seinen Aufgaben zählen die Festlegung der Unternehmensziele und der strategischen Ausrichtung, die Steuerung und Überwachung der operativen Einheiten sowie die Einrichtung und Überwachung eines effizienten Risikomanagementsystems.

Die Mitglieder des Vorstands tragen gemeinsam die Verantwortung für die gesamte Geschäftsführung. Unbeschadet der Gesamtverantwortung aller Vorstandsmitglieder führen die einzelnen Mitglieder des Vorstands die ihnen zugewiesenen Ressorts selbstständig und in eigener Verantwortung. Neben geschäftlichen Zuständigkeitsbereichen gibt es funktionale Zuständigkeiten. Letztere umfassen den Bereich des Vorstandsvorsitzenden, die Bereiche Controlling/Reporting/Risk und Finanzen sowie den des Chief Operating Officers. Die geschäftlichen Zuständigkeitsbereiche sind entweder regional ausgerichtet

oder beziehen sich auf ein operatives Geschäftsfeld. Bis zum 31. Dezember 2010 handelte es sich hierbei um Insurance Europe, NAFTA Markets, Insurance German Speaking Countries, Insurance Growth Markets, Global Insurance Lines & Anglo Markets und Asset Management Worldwide. Die nähere Ausgestaltung der Arbeit im Vorstand wird durch die Geschäftsordnung des Vorstands bestimmt. Darin hat der Vorstand insbesondere die Ressortzuständigkeiten der Vorstandsmitglieder, dem Gesamtvorstand vorbehaltene Angelegenheiten und sonstige Beschlussmodalitäten näher geregelt.

Der Vorstand tagt regelmäßig im Rahmen von Vorstandssitzungen. Diese werden vom Vorstandsvorsitzenden einberufen. Jedes Vorstandsmitglied kann die Einberufung einer Sitzung unter Mitteilung des Beratungsgegenstands verlangen. Der Gesamtvorstand entscheidet nach seiner Geschäftsordnung durch Beschluss mit der einfachen Mehrheit der an der Beschlussfassung teilnehmenden Mitglieder.

Der Vorstandsvorsitzende koordiniert die Arbeit im Vorstand. Seine Stellung wurde im Zuge der Umwandlung in die Allianz SE durch ein satzungsmäßiges Vetorecht bei der Beschlussfassung des Vorstands gestärkt. Widerspricht er einem Beschluss, so gilt dieser als nicht gefasst. Umgekehrt kann der Vorstandsvorsitzende jedoch keine Entscheidung gegen das Mehrheitsvotum im Vorstand durchsetzen. Im Falle der Stimmengleichheit gibt seine Stimme den Ausschlag.

Der Vorstand hat aus seiner Mitte das Group Finance Committee, das Group Risk Committee und das Group Capital Committee als Vorstands Ausschüsse gebildet.

- Aufgaben des Group Finance Committee sind die Erstellung und Überwachung von Grundsätzen der konzernweiten Investmentpolitik sowie die Konzernfinanzierung und das Kapitalmanagement.
- Das Group Risk Committee ist für die Einrichtung und Überwachung eines konzernweiten Risikomanagement- und Risikoüberwachungssystems einschließlich dynamischer Stress-Tests verantwortlich.

- Das Group Capital Committee unterbreitet dem Vorstand Vorschläge zur Risikostrategie sowie zur strategischen Zuweisung von Vermögen und Risikokapital im Konzern.

Die Zuständigkeiten und die Zusammensetzung der Vorstands Ausschüsse sind in den jeweiligen Geschäftsordnungen festgelegt, die der Zustimmung des Vorstands bedürfen.

Der Vorstand hat ferner das International Executive Committee als ständige Konzernkommission gebildet. Die Konzernkommission hat die Aufgabe, dem Gesamtvorstand der Allianz SE vorbehaltene Entscheidungen vorzubereiten, Beschlussvorschläge zu unterbreiten und den Informationsaustausch im Konzern sicherzustellen. Das Group Compensation Committee besteht sowohl aus Vorstandsmitgliedern als auch aus Führungskräften unterhalb des Vorstands der Allianz SE und entspricht den Anforderungen der im Oktober 2010 in Kraft getretenen Versicherungsvergütungsverordnung. Es ist zuständig für die Ausgestaltung, Überprüfung und Weiterentwicklung der Vergütungssysteme und legt jährlich einen Bericht mit den Ergebnissen seiner Überprüfung und Vorschlägen zur Weiterentwicklung vor.

Die operativen Einheiten und Geschäftssegmente der Allianz Gruppe werden über einen integrierten Management- und Kontrollprozess gesteuert. Holding und operative Einheiten definieren zunächst die geschäftsspezifischen Strategien und Ziele. Auf dieser Grundlage werden gemeinsame Pläne erstellt, die der Aufsichtsrat im Rahmen der Zielsetzung für die leistungsorientierte Vergütung der einzelnen Vorstandsmitglieder berücksichtigt (Einzelheiten finden sich im Vergütungsbericht auf den Seiten 35 ff.).

Der Vorstand berichtet dem Aufsichtsrat regelmäßig und umfassend über Geschäftsentwicklung, Finanz- und Ertragslage, Planung und Zielerreichung sowie Compliance-Themen, ferner über die Strategie und bestehende Risiken. Gemäß der Empfehlung des Deutschen Corporate Governance Kodex hat der Aufsichtsrat die Informations- und Berichtspflichten des Vorstands in einer Berichtsordnung näher festgelegt.

#### Vorstands Ausschüsse

Stand:  
31. Dezember 2010  
(und nachfolgende  
Änderungen)

Group Finance  
Committee  
Dr. Paul Achleitner  
Oliver Bäte  
Dr. Joachim Faber  
Dr. Werner Zedelius

Group Risk Committee  
Dr. Paul Achleitner  
Oliver Bäte  
Clement B. Booth  
Jay Ralph

Group Capital Committee  
Michael Diekmann  
Dr. Paul Achleitner  
Oliver Bäte



Bestimmte Vorstandsentscheidungen von besonderem Gewicht bedürfen der Zustimmung des Aufsichtsrats. Einige dieser Zustimmungsvorbehalte sind gesetzlich geregelt oder finden sich in Beschlüssen der Hauptversammlung, etwa in Ermächtigungen des Vorstands zur Erhöhung des Grundkapitals (Genehmigtes Kapital), zum Erwerb eigener Aktien oder zur Ausgabe von Wandel- oder Optionsschuldverschreibungen. Über diese Zustimmungsvorbehalte hinaus entscheidet der Aufsichtsrat nach § 9 der Satzung über die Zustimmung zum Abschluss von Unternehmensverträgen und zur Erschließung neuer oder zur Aufgabe bestehender Geschäftssegmente, soweit die Maßnahme für den Konzern von wesentlicher Bedeutung ist. Ebenfalls zustimmungspflichtig sind der Erwerb von Unternehmen und Unternehmensbeteiligungen sowie die Veräußerung von Beteiligungen an einer Konzerngesellschaft, sofern die Gesellschaft durch die Veräußerung aus dem Konzern ausscheidet. Voraussetzung für die Zustimmungspflicht ist in diesen Fällen, dass es sich nicht um eine Finanzbeteiligung handelt und dass im Einzelfall der Verkehrswert oder in Ermangelung des Verkehrswerts der Buchwert der erworbenen oder veräußerten Beteiligung zehn Prozent des Eigenkapitals der letzten Konzernbilanz erreicht oder übersteigt. Nach der Geschäftsordnung des Aufsichtsrats bedarf darüber hinaus die Benennung des für Arbeit und Soziales zuständigen Vorstandsmitglieds durch den Vorstand der Zustimmung des Aufsichtsrats.

## Grundlagen und Arbeitsweise des Aufsichtsrats

Aufgrund der Rechtsform als Europäische Aktiengesellschaft (SE) gilt das deutsche Mitbestimmungsgesetz für die Allianz SE nicht. Größe und Zusammensetzung des Aufsichtsrats bestimmen sich vielmehr nach den europäischen Rahmenbedingungen für die SE. Ausgefüllt werden diese durch Satzungsregelungen und durch die Vereinbarung über die Beteiligung der Arbeitnehmer in der Allianz SE, die mit Vertretern der europäischen Allianz Arbeitnehmer am 20. September 2006 geschlossen wurde. Diese Vereinbarung finden Sie auf unserer Internetseite unter [www.allianz.com/se](http://www.allianz.com/se).

Die Größe des Aufsichtsrats ist in der Satzung festgelegt. Danach besteht der Aufsichtsrat aus zwölf Mitgliedern, die von der Hauptversammlung bestellt werden. Von den zwölf Mitgliedern sind sechs Mitglieder auf Vorschlag der Arbeitnehmer zu bestellen. Die Hauptversammlung ist an die Vorschläge der Arbeitnehmer gebunden.

Nach der Vereinbarung über die Beteiligung der Arbeitnehmer in der Allianz SE sind die sechs Sitze der Arbeitnehmervertreter nach dem Verhältnis der Anzahl der Allianz Arbeitnehmer in den EU-Mitgliedsstaaten zu verteilen. Dem derzeit amtierenden Aufsichtsrat gehören vier Arbeitnehmervertreter aus Deutschland und je ein Arbeitnehmervertreter aus Frankreich und Großbritannien an. Die letzte Wahl des Aufsichtsrats erfolgte 2007 für eine Amtszeit bis zum Ablauf der ordentlichen Hauptversammlung 2012.

Der Aufsichtsrat überwacht und berät den Vorstand bei der Führung der Geschäfte. Daneben ist er insbesondere für die Bestellung der Mitglieder des Vorstands und die Festsetzung der Gesamtvergütung der einzelnen Vorstandsmitglieder sowie für die Prüfung des Jahresabschlusses der Allianz SE und des Konzerns zuständig. Die Tätigkeit des Aufsichtsrats im Geschäftsjahr 2010 wird im Bericht des Aufsichtsrats erläutert.

Der Aufsichtsrat trifft regelmäßig zu ordentlichen Sitzungen im März, im April oder Mai, im September und im Dezember zusammen. Nach Bedarf werden darüber hinaus außerordentliche Sitzungen abgehalten. Die Ausschüsse halten ebenfalls regelmäßig Sitzungen ab. Der Aufsichtsrat trifft alle Entscheidungen mit einfacher Mehrheit. Die besonderen Beschlussfordernde für die Vorstandsbestellung nach dem Mitbestimmungsgesetz entfallen bei einer SE ebenso wie der Vermittlungsausschuss. Bei Stimmengleichheit entscheidet die Stimme des Aufsichtsratsvorsitzenden. Aufsichtsratsvorsitzender der Allianz SE kann nur ein Anteilseignervertreter sein. Im Falle der Verhinderung des Aufsichtsratsvorsitzenden gibt bei Stimmengleichheit die Stimme des von der Anteilseignerseite stammenden Stellvertreters den Ausschlag. Ein weiterer Stellvertreter des Aufsichtsrats

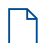

Eine Übersicht über die Zusammensetzung des Vorstands finden Sie auf Seite 12.

ratsvorsitzenden wird auf Vorschlag der Arbeitnehmervertreter gewählt; ihm steht ein Stichtscheid nicht zu.

Der Aufsichtsrat überprüft regelmäßig die Effizienz seiner Tätigkeit. Die Effizienzprüfung wird vom Ständigen Ausschuss vorbereitet. Anschließend erörtert das Plenum Verbesserungsmöglichkeiten und beschließt in geeigneten Fällen entsprechende Maßnahmen.

### Ausschüsse des Aufsichtsrats

Ein Teil der Aufsichtsratsstätigkeit wird durch Ausschüsse des Aufsichtsrats wahrgenommen. Die Zusammensetzung der Ausschüsse und die von den Ausschüssen wahrzunehmenden Aufgaben sind in der Geschäftsordnung des Aufsichtsrats geregelt. Über die Arbeit der Ausschüsse wird der Aufsichtsrat regelmäßig unterrichtet.

Der **Prüfungsausschuss** (Audit Committee) hat fünf Mitglieder. Drei Mitglieder werden auf Vorschlag der Anteilseignervertreter und zwei Mitglieder auf Vorschlag der Arbeitnehmervertreter vom Aufsichtsrat gewählt. Der Vorsitzende des Ausschusses wird ebenfalls vom Aufsichtsrat gewählt. Der Prüfungsausschuss hat die Aufgabe, den Jahres- und Konzernabschluss sowie den Lagebericht (einschließlich des Risikoberichts) und den Gewinnverwendungsvorschlag vorab zu prüfen. Darüber hinaus prüft er die Quartalsabschlüsse. Außerdem überwacht der Prüfungsausschuss den Rechnungslegungsprozess sowie die Wirksamkeit des internen Kontrollsystems, des Risikomanagementsystems und des internen Revisionssystems und befasst sich mit Compliance-Themen. Schließlich ist der Prüfungsausschuss wichtiger Ansprechpartner des Abschlussprüfers und überwacht die Abschlussprüfung einschließlich der Unabhängigkeit des Abschlussprüfers sowie die vom Abschlussprüfer zusätzlich erbrachten Leistungen.

Die Allianz befolgt die Anregung des Deutschen Corporate Governance Kodex, wonach der Vorsitzende des Prüfungsausschusses unabhängig und kein ehemaliges Vorstandsmitglied sein sollte, dessen Bestellung vor weniger als zwei Jahren endete. Außerdem muss mindestens ein unabhängiges Mitglied des Prüfungsausschusses über Sachverstand auf den

Gebieten Rechnungslegung oder Abschlussprüfung verfügen. Der Aufsichtsrat hat festgestellt, dass Herr Dr. Wulf H. Bernotat und Herr Igor Landau diese Voraussetzungen erfüllen. Der Prüfungsausschuss hat sich eine Geschäftsordnung gegeben, in der die wahrzunehmenden Aufgaben und die Arbeitsweise im Einklang mit der Geschäftsordnung des Aufsichtsrats weiter konkretisiert werden.

Der **Ständige Ausschuss** hat fünf Mitglieder. Ihm gehören der Vorsitzende des Aufsichtsrats sowie zwei auf Vorschlag der Anteilseignerseite und jeweils zwei auf Vorschlag der Arbeitnehmerseite vom Aufsichtsrat zu wählende Mitglieder an. In der Regel soll dabei ein Mitglied der Arbeitnehmerseite der auf Vorschlag der Arbeitnehmervertreter gewählte Stellvertreter des Aufsichtsratsvorsitzenden sein. Den Vorsitz im Ausschuss führt der Vorsitzende des Aufsichtsrats. Dem Ständigen Ausschuss obliegt die Zustimmung zu einigen Geschäften, die vom Aufsichtsrat genehmigt werden müssen. Hierunter fallen insbesondere bestimmte Kapitalmaßnahmen und Akquisitionen beziehungsweise Desinvestitionen. Des Weiteren ist er zuständig für die Vorbereitung der Entsprechenserklärung nach § 161 Aktiengesetz und für die regelmäßige Kontrolle der Corporate Governance. Für die Prüfung der Effizienz der Aufsichtsratsstätigkeit unterbreitet er dem Aufsichtsratsplenum Vorschläge.

Dem **Personalausschuss** gehören der Vorsitzende des Aufsichtsrats und je ein auf Vorschlag der Arbeitnehmervertreter und der Anteilseignervertreter vom Aufsichtsrat zu wählendes Mitglied an. Den Vorsitz im Ausschuss führt der Vorsitzende des Aufsichtsrats. Der Personalausschuss ist für die Personalangelegenheiten der Vorstandsmitglieder sowie für die Vorbereitung der Arbeit des Plenums in diesem Bereich zuständig. Er bereitet die Bestellung von Vorstandsmitgliedern sowie die Entscheidung des Plenums über das Vergütungssystem und die Gesamtvergütung der einzelnen Vorstandsmitglieder vor und unterbreitet dem Plenum Beschlussvorschläge. In die langfristige Nachfolgeplanung für den Vorstand ist der Ausschuss eingebunden.

Der **Risikoausschuss** hat fünf Mitglieder. Drei Mitglieder werden auf Vorschlag der Anteilseignervertreter und zwei Mitglieder auf Vorschlag der Arbeitnehmervertreter vom Aufsichtsrat gewählt. Der Vorsitzende des Ausschusses wird ebenfalls vom Aufsichtsrat gewählt. Der Risikoausschuss überwacht die allgemeine Risikosituation sowie besondere Risikoentwicklungen in der Allianz Gruppe. Außerdem prüft er vorab die speziell risikobezogenen Aussagen im Rahmen von Jahresabschluss und Lagebericht und informiert den Prüfungsausschuss über das Ergebnis der Vorprüfung. Auch der Risikoausschuss hat eine Geschäftsordnung, welche die Zuständigkeit des Ausschusses und seine Tätigkeit auf der Grundlage der Geschäftsordnung des Aufsichtsrats näher regelt.

Im Dezember 2007 hat der Aufsichtsrat gemäß einer Empfehlung des Deutschen Corporate Governance Kodex einen **Nominierungsausschuss** neu gebildet, der sich aus dem Aufsichtsratsvorsitzenden und zwei weiteren, von der Anteilseignerseite zu wählenden Anteilseignervertretern zusammensetzt. Den Vorsitz im Ausschuss führt der Vorsitzende des Aufsichtsrats. Aufgabe des Ausschusses ist es, Anforderungsprofile für Anteilseignervertreter im Aufsichtsrat zu erarbeiten, geeignete Kandidaten für die Wahl von Anteilseignervertretern in den Aufsichtsrat zu suchen und diese dem Aufsichtsrat für dessen Wahlvorschläge an die Hauptversammlung vorzuschlagen. Neben den gesetzlichen Anforderungen stellt der Ausschuss die Befolgung der Kodex-Empfehlungen zur Zusammensetzung des Aufsichtsrats sicher und achtet auch auf die Vielfalt (Diversity) der Zusammensetzung.

### **Ziele des Aufsichtsrats hinsichtlich seiner Zusammensetzung**

Der Aufsichtsrat hat in seiner Sitzung am 15. Dezember 2010 in Umsetzung einer neuen Empfehlung des Kodex nachfolgende Ziele für seine Zusammensetzung beschlossen:

Der Aufsichtsrat der Allianz SE strebt eine Zusammensetzung an, die eine qualifizierte Aufsicht und Beratung der Geschäftsführung der Allianz SE sicherstellt. Für die Wahl in den Aufsichtsrat sollen Kandidaten vorgeschlagen werden, die aufgrund ihrer fachlichen Kenntnis und Erfahrung, Integrität, Leis-

tungsbereitschaft, Unabhängigkeit und Persönlichkeit die Aufgaben eines Aufsichtsratsmitglieds in einem international tätigen Finanzdienstleistungsinstitut erfolgreich wahrnehmen können. Bei der Auswahl der Kandidaten soll ferner im Interesse eines ergänzenden Zusammenwirkens im Gremium auf eine hinreichende Vielfalt im Hinblick auf unterschiedliche berufliche Hintergründe, Fachkenntnisse und Erfahrungen geachtet werden.

Die unternehmerische Mitbestimmung in der Allianz SE gemäß der SE-Vereinbarung über die Arbeitnehmerbeteiligung vom 20. September 2006 trägt zur Vielfalt hinsichtlich beruflicher Erfahrungen und kultureller Herkunft bei. Für die Benennung der deutschen Arbeitnehmervertreter sollen nach der Regelung des § 6 Absatz 2 Satz 2 SEBG Frauen und Männer entsprechend ihrem zahlenmäßigen Verhältnis in den deutschen Gesellschaften gewählt werden. Eine Auswahlmöglichkeit hinsichtlich der Arbeitnehmervertreter hat der Aufsichtsrat jedoch nicht.

Folgende Anforderungen und Zielsetzungen sollen für die Zusammensetzung des Aufsichtsrats der Allianz SE gelten:

- I. Anforderungen an die einzelnen Aufsichtsratsmitglieder
  1. Allgemeines Anforderungsprofil:
    - Unternehmerische bzw. betriebliche Erfahrung
    - Allgemeine Kenntnis des Versicherungs- und Finanzdienstleistungsgeschäfts
    - Bereitschaft und Fähigkeit zu ausreichend zeitlichem und inhaltlichem Engagement
    - Erfüllung der aufsichtsrechtlichen Anforderungen:
      - Zuverlässigkeit
      - Kenntnisse auf dem Gebiet der Corporate Governance und des Aufsichtsrechts<sup>1</sup>
      - Kenntnisse der Grundzüge der Bilanzierung und des Risikomanagements<sup>1</sup>
    - Einhaltung der vom Deutschen Corporate Governance Kodex empfohlenen und der von § 7 Absatz 4 VAG geforderten Begrenzung der Mandatszahl

<sup>1</sup> vgl. BaFin-Merkblatt zur Kontrolle von Mitgliedern von Verwaltungs- und Aufsichtsorganen gemäß KWG und VAG vom 22. Februar 2010

## 2. Unabhängigkeit:

Alle Aufsichtsratsmitglieder sollten unabhängig i. S. v. Ziffer 5.4.2 des Corporate Governance Kodex sein, d. h. in keiner geschäftlichen oder persönlichen Beziehung zur Allianz SE oder deren Vorstand stehen, die Interessenkonflikte begründen kann. Zudem soll ein Mitglied unabhängig i. S. v. § 100 Absatz 5 AktG sein.

Es ist zu berücksichtigen, dass das Entstehen von Interessenkonflikten im Einzelfall nicht generell ausgeschlossen werden kann. Mögliche Interessenkonflikte sind gegenüber dem Aufsichtsratsvorsitzenden offenzulegen und werden durch angemessene Maßnahmen gelöst.

## 3. Altersgrenze:

Nach der Geschäftsordnung des Aufsichtsrats sollen die Mitglieder in der Regel nicht älter als 70 Jahre sein.

## II. Anforderungen an die Zusammensetzung des Gesamtgremiums

### 1. Spezifische Fachkenntnisse:

- Mindestens ein Mitglied mit ausgeprägter Erfahrung im Versicherungs- und Finanzdienstleistungsgeschäft
- Mindestens ein Mitglied, das über Sachverstand auf den Gebieten Rechnungslegung oder Abschlussprüfung verfügt i. S. v. § 100 Absatz 5 AktG
- Fachkenntnisse oder Erfahrungen aus anderen Wirtschaftsbereichen

### 2. Internationalität:

Mindestens vier Mitglieder sollten aufgrund von Herkunft oder Tätigkeit Regionen oder Kulturräume vertreten, in denen die Allianz SE maßgebliches Geschäft betreibt.

Auf Basis der SE-Vereinbarung über die Arbeitnehmerbeteiligung gehören bereits zwei Arbeitnehmervertreter aus anderen Mitgliedstaaten der EU dem Aufsichtsrat an.

### 3. Vielfalt und angemessene Beteiligung von Frauen:

Die Mitglieder des Aufsichtsrats sollten sich im

Hinblick auf ihren Hintergrund, die berufliche Erfahrung und Fachkenntnisse ergänzen, sodass das Gremium auf einen möglichst breit gefächerten Erfahrungsfundus und unterschiedliche Spezialkenntnisse zurückgreifen kann.

Für die nächste Aufsichtsratswahl im Frühjahr 2012 wird ein Anteil von mindestens 25 Prozent Frauen im Aufsichtsrat angestrebt. Die Beteiligung von Frauen wird grundsätzlich als gemeinsame Verantwortung von Anteilseigner- und Arbeitnehmerseite gesehen.

Zukünftige Wahlvorschläge des Aufsichtsrats zur Wahl von Aufsichtsratsmitgliedern werden diese Ziele berücksichtigen. Dies gilt insbesondere im Hinblick auf die Neuwahl im Frühjahr 2012. Die aktuelle Zusammensetzung des Aufsichtsrats und seiner Ausschüsse ist auf den Seiten 15 und 9 dargestellt.

## Hauptversammlung

In der Hauptversammlung üben die Aktionäre ihre Rechte aus. Bei der Beschlussfassung gewährt jede Aktie eine Stimme. Um die Wahrnehmung der Anteilseignerrechte zu erleichtern, bietet die Allianz SE ihren Aktionären an, die Hauptversammlung über das Internet zu verfolgen und sich in der Hauptversammlung durch von der Allianz SE benannte Stimmrechtsvertreter vertreten zu lassen, die das Stimmrecht ausschließlich auf der Grundlage der vom Aktionär erteilten Weisungen ausüben. Darüber hinaus besteht die Möglichkeit zur Stimmabgabe per Briefwahl. Als Online-Briefwahl wird dieser Service auch über das Internet angeboten. Die Nutzung von E-Mail und Internetservices wird von der Allianz SE nachhaltig gefördert.

Die Hauptversammlung wählt die Mitglieder des Aufsichtsrats. Bei der Wahl der Arbeitnehmervertreter ist sie an die Vorschläge der Arbeitnehmer gebunden. Die Hauptversammlung beschließt über die Entlastung des Vorstands und des Aufsichtsrats. Sie entscheidet über die Verwendung des Bilanzgewinns, über Kapitalmaßnahmen und die Zustimmung zu Unternehmensverträgen, ferner über die Vergütung des Aufsichtsrats und über Satzungsänderungen der



Gesellschaft. Sofern bei der Beschlussfassung über eine Satzungsänderung nicht mindestens die Hälfte des Grundkapitals vertreten ist, bedarf es nach europarechtlichen Vorgaben und der Satzung einer Beschlussmehrheit von mindestens zwei Drittel der abgegebenen Stimmen. Jedes Jahr findet eine ordentliche Hauptversammlung statt, in der Vorstand und Aufsichtsrat Rechenschaft über das abgelaufene Geschäftsjahr ablegen. Für besondere Fälle sieht das Aktiengesetz die Einberufung einer außerordentlichen Hauptversammlung vor.

## Rechnungslegung und Abschlussprüfung

Die Rechnungslegung des Allianz Konzerns erfolgt gemäß § 315 a Handelsgesetzbuch (HGB) auf der Grundlage der internationalen Rechnungslegungsstandards IFRS, wie sie in der Europäischen Union anzuwenden sind. Der Jahresabschluss der Allianz SE wird nach Maßgabe des deutschen Rechts, insbesondere des HGB erstellt.

Aufgrund einer gesetzlichen Sonderregelung für Versicherungsunternehmen werden der Abschlussprüfer und der Prüfer für die prüferische Durchsicht des Halbjahresfinanzberichts durch den Aufsichtsrat und nicht durch die Hauptversammlung bestellt. Der Prüfungsausschuss des Aufsichtsrats bereitet die Bestellungen vor. Die Abschlussprüfung umfasst den Einzelabschluss der Allianz SE sowie den Konzernabschluss der Allianz Gruppe.

Um eine größtmögliche Transparenz zu gewährleisten, informieren wir unsere Aktionäre, Finanzanalysten, Medien und die interessierte Öffentlichkeit regelmäßig und zeitnah über die Lage des Unternehmens. Der Jahresabschluss der Allianz SE und der Konzernabschluss der Allianz Gruppe sowie die Lageberichte werden innerhalb von 90 Tagen nach Ende des jeweiligen Geschäftsjahrs veröffentlicht. Darüber hinaus werden Aktionäre und Dritte durch den Halbjahresfinanzbericht und die Quartalsfinanzberichte der Allianz Gruppe informiert. Der Halbjahresfinanzbericht und die Quartalsfinanzberichte werden einer prüferischen Durchsicht durch den Abschlussprüfer unterzogen. Informationen werden auch in der Hauptversammlung, in Presse- und Analystenkonfe-

renzen sowie auf der Internetseite der Allianz Gruppe gegeben. Auf der Allianz Internetseite besteht außerdem Zugriff auf einen Finanzkalender, der die Termine der wesentlichen Veröffentlichungen und Veranstaltungen, wie Geschäftsbericht, Quartalsberichte und Hauptversammlungen, enthält.

Der Finanzkalender für 2011 und 2012 findet sich auf der Seite 20 des Geschäftsberichts.

## Anteilsbesitz von Vorstand und Aufsichtsrat

Der Gesamtbesitz aller Vorstands- und Aufsichtsratsmitglieder an Aktien der Allianz SE betrug zum 31. Dezember 2010 weniger als ein Prozent der von der Gesellschaft ausgegebenen Aktien.

## Meldepflichtige Wertpapiergeschäfte (Directors' Dealings)

Mitglieder des Vorstands und des Aufsichtsrats sind nach dem Wertpapierhandelsgesetz verpflichtet, den Erwerb oder die Veräußerung von Wertpapieren der Allianz SE offenzulegen, soweit der Wert der von dem Mitglied und den ihm nahestehenden Personen getätigten Erwerbs- und Veräußerungsgeschäfte die Summe von 5 000 Euro innerhalb eines Kalenderjahrs erreicht oder übersteigt. Diese Meldungen werden auf unserer Internetseite unter [www.allianz.com/cg](http://www.allianz.com/cg) veröffentlicht.

## Erklärung zur Unternehmensführung gemäß § 289 a HGB

Die Erklärung zur Unternehmensführung nach § 289 a HGB ist Bestandteil des zusammengefassten Lageberichts. Gemäß § 317 Absatz 2 Satz 3 HGB sind die Angaben nach § 289 a HGB nicht in die Prüfung einzubeziehen.

## Entsprechenserklärung zum Deutschen Corporate Governance Kodex

Vorstand und Aufsichtsrat haben am 15. Dezember 2010 die Entsprechenserklärung der Allianz SE zum Deutschen Corporate Governance Kodex wie folgt abgegeben:

„Erklärung des Vorstands und des Aufsichtsrats der Allianz SE zu den Empfehlungen der ‚Regierungskommission Deutscher Corporate Governance Kodex‘ gemäß § 161 Aktiengesetz

1. Seit der letzten Entsprechenserklärung vom 17. Dezember 2009, die sich auf den Deutschen Corporate Governance Kodex in der Fassung vom 18. Juni 2009 bezog, hat die Allianz SE sämtlichen Empfehlungen der ‚Regierungskommission Deutscher Corporate Governance Kodex‘ in der damals geltenden Fassung entsprochen.
2. Die Allianz SE wird sämtlichen Empfehlungen der ‚Regierungskommission Deutscher Corporate Governance Kodex‘ in der Fassung vom 26. Mai 2010 mit folgender Ausnahme entsprechen:

Die Mitglieder des Aufsichtsrats erhalten bislang neben einer festen auch eine erfolgsorientierte Vergütung (Ziffer 5.4.6 DCGK). Die Gesellschaft beabsichtigt, der ordentlichen Hauptversammlung 2011 die Umstellung auf eine reine Festvergütung vorzuschlagen. Insofern ist eine Abweichung von Ziffer 5.4.6 Absatz 2 Satz 1 Deutscher Corporate Governance Kodex geplant. Die Gesellschaft hält eine angemessene feste Vergütung für besser geeignet, der unabhängig vom Unternehmenserfolg zu erfüllenden Kontrollfunktion des Aufsichtsrats Rechnung zu tragen.

München, 15. Dezember 2010

Allianz SE

Für den Vorstand:  
gez. Michael Diekmann      gez. Dr. Paul Achleitner

Für den Aufsichtsrat:  
gez. Dr. Henning Schulte-Noelle“

Darüber hinaus erfüllen wir alle unverbindlichen Anregungen des Deutschen Corporate Governance Kodex. In der Zukunft werden wir von Ziffer 5.4.6 Absatz 2 Satz 2 zur erfolgsorientierten Vergütung für den Aufsichtsrat abweichen.

Die Entsprechenserklärung und weitere Informationen zur Corporate Governance bei der Allianz finden Sie auch auf unserer Internetseite unter [www.allianz.com/cg](http://www.allianz.com/cg).

Die börsennotierte Gruppengesellschaft Oldenburgische Landesbank AG hat im Dezember 2010 eine eigene Entsprechenserklärung abgegeben, wonach sie allen Empfehlungen des Deutschen Corporate Governance Kodex entspricht.

## Praktiken der Unternehmensführung

### Compliance- und Anti-Geldwäsche-Programm

Der nachhaltige Erfolg der Allianz Gruppe beruht auf Vertrauen, Respekt sowie verantwortungsbewusstem und von Integrität geprägtem Verhalten aller Mitarbeiter des Konzerns. Im Jahr 2008 wurde die Allianz Gruppe vom Ethisphere Institute zu einem der ethischsten Unternehmen weltweit erklärt.

Mit ihrem Compliance- und Anti-Geldwäsche-Programm unterstützt und befolgt die Allianz Gruppe international und national anerkannte Vorgaben und Standards für eine regelgerechte und werteorientierte Unternehmensführung. Dazu gehören das UN Global Compact Program, die OECD-Leitsätze für multinationale Unternehmen, die jeweils anwendbaren Embargo-Vorschriften sowie die Empfehlungen der Financial Action Task Force on Money Laundering (FATF). Mit der Anerkennung und Unterstützung dieser internationalen und nationalen Grundsätze steuert die Allianz SE das Risiko von Verstößen gegen gesetzliche Vorschriften und Anforderungen (Compliance-Risiko). Zugleich werden damit Nachhaltigkeit und gesellschaftliche Verantwortung in das geschäftliche Verhalten integriert. Für die wirksame Umsetzung und Überwachung des Compliance- und Anti-Geldwäsche-Programms in der Allianz Gruppe ist Group Compliance in enger Zusammenarbeit mit den zuständigen lokalen Compliance-Abteilungen

verantwortlich. Bei einem Verdacht auf einen Verstoß gegen die oben genannten Vorgaben oder die internen Compliance-Richtlinien übernimmt Group Compliance – gegebenenfalls in Zusammenarbeit mit anderen Funktionen – die Aufklärung dieser Fälle.

Die in dem Verhaltenskodex für Business Ethik und Compliance der Allianz Gruppe (Code of Conduct) festgelegten Verhaltensgrundsätze setzen diese Leitsätze und Prinzipien um und sind weltweit für alle Mitarbeiter verbindlich. Der Code of Conduct ist unter folgendem Link im Internet zugänglich: [www.allianz.com/cg](http://www.allianz.com/cg).

Der Code of Conduct und die auf dessen Basis erlassenen internen Richtlinien geben jedem Mitarbeiter klare Orientierungshilfen zu einem den Wertmaßstäben der Allianz Gruppe entsprechenden Verhalten. Um die Grundsätze des Code of Conduct und der sonstigen internen Compliance-Richtlinien und -Kontrollen effektiv und nachhaltig zu vermitteln, führt die Allianz Gruppe weltweit interaktive Trainingsprogramme durch. So erhalten die Mitarbeiter praktikable Vorgaben, um eigene Entscheidungen treffen zu können und potenzielle Interessenkonflikte zu vermeiden. Der Code of Conduct bildet darüber hinaus die Grundlage für Richtlinien und Kontrollen, die einen fairen Umgang mit den Kunden der Allianz Gruppe sicherstellen (Sales Compliance).

In nahezu allen Ländern, in denen die Allianz geschäftlich vertreten ist, bestehen rechtliche Vorschriften gegen Korruption und Bestechung. Daher ist im Sommer 2009 ein weltweites Anti-Korruptions-Programm eingerichtet worden, welches die fortlaufende Überwachung und Verbesserung der internen Anti-Korruptionskontrollen gewährleistet.

Ein wesentlicher Bestandteil des Compliance-Programms der Allianz Gruppe ist ein Hinweisgebersystem, über das Mitarbeiter die zuständige Compliance-Abteilung vertraulich auf Unregelmäßigkeiten hinweisen können. Kein Mitarbeiter muss Nachteile befürchten, wenn er in redlicher Absicht auf Unregelmäßigkeiten hinweist, selbst wenn sich diese später als unbegründet herausstellen.

In Zweifelsfällen steht die zuständige Compliance-Abteilung beratend zur Verfügung. Zu den Aufgaben der Mitarbeiter der Compliance-Abteilungen gehört die Beratung der geschäftlichen Einheiten zu regulatorischen Vorschriften und die Erstellung, Umsetzung und Überwachung der Einhaltung von internen Richtlinien und Standards sowie die regelmäßige Schulung der Mitarbeiter zu den für diese geltenden Regeln.

### **Code of Ethics**

Die Allianz SE hat über den für alle Mitarbeiter geltenden Code of Conduct hinaus einen speziellen „Code of Ethics“ verabschiedet, der sich an die Mitglieder des Vorstands und leitende Mitarbeiter bestimmter Ressorts, überwiegend im Finanzbereich, richtet. Er enthält Regeln ethischen und integren Verhaltens im persönlichen und im beruflichen Bereich, insbesondere im Hinblick auf den Umgang mit Interessenkonflikten und in Bezug auf die Einhaltung hoher Standards der Unternehmenspublizität. Der Code of Ethics findet sich im Internet unter [www.allianz.com/cg](http://www.allianz.com/cg).

### **Beschreibung der Arbeitsweise von Vorstand und Aufsichtsrat sowie der Zusammensetzung und Arbeitsweise ihrer Ausschüsse**

Die Zusammensetzung des Aufsichtsrats und seiner Ausschüsse ist im Geschäftsbericht auf den Seiten 15 und 9 zu finden. Über die Zusammensetzung des Vorstands wird auf Seite 12 berichtet, die Zusammensetzung der Ausschüsse des Vorstands findet sich im Corporate-Governance-Bericht auf Seite 23. Ferner ist die Zusammensetzung im Internet unter folgendem Link zugänglich: [www.allianz.com/cg](http://www.allianz.com/cg).

Eine allgemeine Beschreibung der Arbeitsweise von Vorstand und Aufsichtsrat und deren Ausschüssen findet sich im Corporate-Governance-Bericht auf den Seiten 22 ff. und unter folgendem Link im Internet: [www.allianz.com/cg](http://www.allianz.com/cg).

# Übernahmerelevante Angaben und Erläuterungen<sup>1</sup>

## Zusammensetzung des gezeichneten Kapitals

Das Grundkapital der Allianz SE belief sich zum 31. Dezember 2010 auf 1 163 520 000 Euro. Es war eingeteilt in 454 500 000 auf den Namen lautende, vollständig eingezahlte, nennwertlose Stückaktien mit einem anteiligen Grundkapitalbetrag von 2,56 Euro je Aktie. Mit allen Aktien sind die gleichen Rechte und Pflichten verbunden. Jede Stückaktie hat eine Stimme.

## Stimmrechts- und Übertragungsbeschränkungen; Stimmrechtsausübung bei Arbeitnehmerbeteiligung am Kapital

Die Aktien können nur mit Zustimmung der Gesellschaft übertragen werden. Die Gesellschaft darf die ordnungsgemäß beantragte Zustimmung nur dann verweigern, wenn sie es aus außerordentlichen Gründen im Interesse des Unternehmens für erforderlich hält. Die Gründe werden dem Antragsteller bekannt gegeben.

Aktien, die von Mitarbeitern der Allianz Gruppe im Rahmen des Mitarbeiter-Aktienkaufprogramms erworben werden, unterliegen grundsätzlich einer einjährigen Veräußerungssperre. Im Ausland dauert die Veräußerungssperre zum Teil bis zu fünf Jahre. In einigen Ländern werden die Mitarbeiteraktien während der Sperrfrist von einer Bank oder einer anderen natürlichen oder juristischen Person treuhänderisch gehalten, um die Einhaltung der Sperrfrist sicherzustellen. Die Mitarbeiter können dem Treuhänder jedoch Anweisungen für die Ausübung des Stimmrechts geben, beziehungsweise sich eine Vollmacht für die Stimmrechtsausübung erteilen lassen. Sperrfristen unterstützen das Ziel der Mitarbeiter-Aktienkaufprogramme, die Mitarbeiter an das Unternehmen zu binden und sie an der Entwicklung des Aktienkurses teilhaben zu lassen.

## Beteiligungen am Kapital, die 10 Prozent der Stimmrechte überschreiten

Direkte oder indirekte Beteiligungen am Grundkapital der Allianz SE, die 10 Prozent der Stimmrechte überschreiten, sind der Allianz SE nicht gemeldet worden und sind ihr auch nicht anderweitig bekannt.

## Aktien mit Sonderrechten, die Kontrollbefugnisse verleihen

Aktien mit Sonderrechten, die Kontrollbefugnisse verleihen, bestehen nicht.

## Gesetzliche Vorschriften und Satzungsbestimmungen über Ernennung und Abberufung von Vorstandsmitgliedern und über Satzungsänderungen

Die Vorstandsmitglieder der Allianz SE werden vom Aufsichtsrat für einen Zeitraum von höchstens fünf Jahren bestellt (Art. 9 Abs. 1, Art. 39 Abs. 2 und Art. 46 SE-Verordnung, §§ 84, 85 AktG, § 5 Abs. 3 der Satzung). Wiederbestellungen, jeweils für höchstens fünf Jahre, sind zulässig. Für die Bestellung von Vorstandsmitgliedern ist die einfache Mehrheit der abgegebenen Stimmen im Aufsichtsrat erforderlich. Bei Stimmengleichheit gibt die Stimme des Aufsichtsratsvorsitzenden, der nach Art. 42 Satz 2 SE-Verordnung zwingend ein Anteilseignervertreter sein muss, den Ausschlag (§ 8 Abs. 3 der Satzung). Bei Nichtteilnahme des Vorsitzenden hat bei Stimmengleichheit der Stellvertreter die entscheidende Stimme, sofern dieser ein Anteilseignervertreter ist. Einem Stellvertreter, der Arbeitnehmervertreter ist, steht der Stichentscheid nicht zu (§ 8 Abs. 3 der Satzung). Fehlt ein erforderliches Vorstandsmitglied, so haben in dringenden Fällen die Gerichte auf Antrag eines Beteiligten das Mitglied zu bestellen (§ 85 AktG). Vorstandsmitglieder können vom Aufsichtsrat abberufen werden, wenn hierfür ein wichtiger Grund vorliegt (§ 84 Abs. 3 AktG).

<sup>1</sup> Die folgenden Angaben erfolgen gemäß § 289 Abs. 4 HGB.



Der Vorstand besteht gemäß § 5 Abs. 1 der Satzung aus mindestens zwei Personen. Im Übrigen bestimmt der Aufsichtsrat die Anzahl der Vorstandsmitglieder. Der Aufsichtsrat hat gemäß § 84 Abs. 2 AktG einen Vorsitzenden des Vorstands benannt.

Nach deutschem Aufsichtsrecht ist es erforderlich, dass die Vorstandsmitglieder zuverlässig und fachlich für die Leitung eines Versicherungsunternehmens geeignet sind. Vorstand kann nicht werden, wer bereits bei zwei weiteren Versicherungsunternehmen, Pensionsfonds, Versicherungs-Holdinggesellschaften oder Versicherungs-Zweckgesellschaften als Geschäftsleiter bestellt ist. Die Aufsichtsbehörde kann jedoch mehr als zwei entsprechende Mandate zulassen, wenn diese innerhalb derselben Versicherungs- oder Unternehmensgruppe gehalten werden (§§ 121 a, 7a Versicherungsaufsichtsgesetz, VAG). Die Absicht der Bestellung eines Vorstandsmitglieds ist der Bundesanstalt für Finanzdienstleistungsaufsicht anzuzeigen (§§ 121 a, 13 d Nr. 1 VAG).

Über Änderungen der Satzung hat die Hauptversammlung zu beschließen. Gemäß § 13 Abs. 4 Satz 2 der Satzung der Allianz SE bedürfen sie, soweit nicht zwingende gesetzliche Vorschriften entgegenstehen, einer Mehrheit von zwei Dritteln der abgegebenen Stimmen beziehungsweise, wenn mindestens die Hälfte des Grundkapitals vertreten ist, der einfachen Mehrheit der abgegebenen Stimmen. Damit macht die Satzung Gebrauch vom Wahlrecht des § 51 Satz 1 SE-Ausführungsgesetz, dem wiederum Art. 59 Abs. 1 und 2 SE-Verordnung zugrunde liegt. Eine höhere Mehrheit ist etwa für die Änderung des Gegenstands des Unternehmens oder für eine Sitzverlegung in einen anderen Mitgliedstaat vorgeschrieben (§ 51 Satz 2 SE-Ausführungsgesetz). Der Aufsichtsrat kann die Fassung der Satzung ändern (§ 179 Abs. 1 Satz 2 AktG und § 10 der Satzung).

## Befugnisse des Vorstands, Aktien auszugeben oder zurückzukaufen

Der Vorstand hat die folgenden Befugnisse zur Ausgabe von Aktien sowie zum Erwerb und zur Verwendung eigener Aktien:

Er darf das Grundkapital der Gesellschaft bis zum Mai 2015 mit Zustimmung des Aufsichtsrats durch Ausgabe neuer, auf den Namen lautender Stückaktien gegen Bar- und/oder Sacheinlagen einmal oder mehrmals erhöhen:

- um bis zu insgesamt 550 000 000 Euro (Genehmigtes Kapital 2010/I). Das Bezugsrecht der Aktionäre kann mit Zustimmung des Aufsichtsrats für Spitzenbeträge zur Sicherung der Rechte von Inhabern von Options- oder Wandelschuldverschreibungen und im Fall einer Barkapitalerhöhung um bis zu 10 Prozent ausgeschlossen werden, wenn der Ausgabebetrag der neuen Aktien den Börsenpreis nicht wesentlich unterschreitet. Gleiches gilt, vorbehaltlich der Zustimmung des Aufsichtsrats, auch im Fall einer Sachkapitalerhöhung und
- um bis zu insgesamt 13 464 000 Euro (Genehmigtes Kapital 2010/II). Das Bezugsrecht der Aktionäre kann ausgeschlossen werden, um die neuen Aktien an Mitarbeiter der Allianz SE und ihrer Konzerngesellschaften auszugeben, ferner für Spitzenbeträge.

Außerdem ist das Grundkapital bedingt erhöht um 250 000 000 Euro (Bedingtes Kapital 2010). Diese bedingte Kapitalerhöhung wird jedoch nur durchgeführt, soweit Wandlungs- oder Optionsrechte aus Schuldverschreibungen, welche die Allianz SE oder deren Tochterunternehmen aufgrund der Ermächtigung der Hauptversammlung vom 5. Mai 2010 ausgegeben haben, ausgeübt oder soweit Wandlungspflichten aus solchen Schuldverschreibungen erfüllt werden.

Der Vorstand darf des Weiteren aufgrund des Beschlusses der Hauptversammlung vom 5. Mai 2010 gemäß § 71 Abs. 1 Nr. 8 AktG bis zum 4. Mai 2015 eigene Aktien erwerben und zu sonstigen Zwecken verwenden. Diese dürfen zusammen mit anderen

eigenen Aktien, die sich im Besitz der Allianz SE befinden oder ihr nach den §§ 71 a ff. AktG zuzurechnen sind, zu keinem Zeitpunkt 10 Prozent des Grundkapitals übersteigen. Die gemäß dieser Ermächtigung erworbenen Aktien können unter Ausschluss des Bezugsrechts der Aktionäre zu allen gesetzlich zulässigen, insbesondere den in der Ermächtigung genannten Zwecken, verwendet werden. Darüber hinaus darf der Erwerb eigener Aktien gemäß dieser Ermächtigung durch den Einsatz von Derivaten wie Put-Optionen, Call-Optionen, Terminkäufen oder einer Kombination dieser Instrumente vorgenommen werden, sofern sich diese Derivate nicht auf mehr als 5 Prozent des Grundkapitals beziehen.

In- oder ausländische Banken im Mehrheitsbesitz der Allianz SE dürfen im Rahmen einer bis zum 4. Mai 2015 geltenden Ermächtigung der Hauptversammlung Allianz Aktien für Zwecke des Wertpapierhandels erwerben und veräußern (§ 71 Abs. 1 Nr. 7 und Abs. 2 AktG). Die in diesem Zusammenhang erworbene Anzahl von Aktien darf zusammen mit den anderen von der Allianz SE gehaltenen oder ihr nach den §§ 71 a ff. AktG zuzurechnenden eigenen Aktien zu keinem Zeitpunkt 10 Prozent des Grundkapitals der Allianz SE überschreiten.

### Wesentliche Vereinbarungen der Allianz SE mit Change-of-Control-Klauseln und Entschädigungsvereinbarungen für den Fall eines Übernahmeangebots

Folgende wesentliche Vereinbarungen der Gesellschaft stehen unter der Bedingung eines Kontrollwechsels infolge eines Übernahmeangebots:

Unsere Rückversicherungsverträge enthalten grundsätzlich eine Klausel, die beiden Vertragspartnern ein außerordentliches Kündigungsrecht einräumt für den Fall, dass der andere Vertragspartner fusioniert oder sich seine Eigentums- und Beherrschungsverhältnisse wesentlich verändern. Verträge mit Brokern über die Erbringung von Dienstleistungen im Zusammenhang mit dem Einkauf von Rückversicherungen sehen ebenfalls Kündigungsrechte für den Fall eines Kontrollwechsels vor. Derartige Klauseln entsprechen der marktüblichen Praxis.

Bilaterale Kreditverträge sehen zum Teil Kündigungsrechte vor für den Fall des Kontrollwechsels, der zu meist als Erwerb von mindestens 30 Prozent der Stimmrechte im Sinne des § 29 Abs. 2 Wertpapiererwerbs- und Übernahmegesetz (WpÜG) definiert ist. In Fällen einer Ausübung der Kündigungsrechte müssten diese Kreditlinien durch neue Kreditlinien zu den dann gültigen Konditionen ersetzt werden.

Folgende Entschädigungsvereinbarungen der Gesellschaft sind für den Fall eines Übernahmeangebots mit Vorstandsmitgliedern oder Arbeitnehmern getroffen:

Eine sogenannte Change-of-Control-Klausel in den Dienstverträgen der Vorstandsmitglieder der Allianz SE greift ein, falls innerhalb von zwölf Monaten nach Erwerb von mehr als 50 Prozent des Grundkapitals durch einen Aktionär oder durch mehrere zusammenwirkende Aktionäre (Kontrollwechsel) die Bestellung als Mitglied des Vorstands einseitig durch den Aufsichtsrat widerrufen, das Organverhältnis einvernehmlich beendet oder das Organverhältnis von dem Vorstandsmitglied durch Mandatsniederlegung beendet wird, weil die Verantwortlichkeiten als Vorstand wesentlich verringert werden, ohne dass das Vorstandsmitglied dazu schuldhaft Anlass gegeben hat. In einem solchen Fall bekommt das Vorstandsmitglied seine vertraglichen Bezüge für die restliche Laufzeit des Dienstvertrags in Form einer Einmalzahlung ausbezahlt. Die Einmalzahlung ermittelt sich auf der Basis der festen Jahresbezüge zuzüglich 50 Prozent der variablen Zielvergütung, maximal jedoch auf Basis der im letzten Geschäftsjahr gezahlten Vergütung. Sofern die restliche Laufzeit des Dienstvertrags nicht mindestens drei Jahre beträgt, erhöht sich die Einmalzahlung grundsätzlich entsprechend einer Laufzeit von drei Jahren. Entsprechendes gilt, wenn ein auslaufendes Vorstandsmandat vor Ablauf von zwei Jahren nach einem Kontrollwechsel nicht verlängert wird, wobei die Einmalzahlung dann für die Zeit zwischen Mandatsende und dem Ablauf von drei Jahren nach Kontrollwechsel gewährt wird. Weitere Einzelheiten enthält der Vergütungsbericht auf den Seiten 35 bis 55.

Im Rahmen des Allianz Sustained Performance Plan (ASPP) werden Restricted Stock Units (RSU), also virtuelle Allianz Aktien, als aktienbasierter Vergütungsbestandteil weltweit an das Top-Management der Allianz Gruppe ausgegeben. Darüber hinaus wurden bis 2010 im Rahmen des Group-Equity-Incentive (GEI)-Programms auch Stock Appreciation Rights (SAR), also virtuelle Optionen auf Allianz Aktien, ausgegeben, die teilweise noch bestehen. Die Bedingungen für diese RSU und SAR enthalten Change-of-Control-Klauseln, die Anwendung finden, wenn die Mehrheit des stimmberechtigten Kapitals der Allianz SE durch einen oder mehrere Dritte, die nicht zum Allianz Konzern gehören, unmittelbar oder mittelbar erworben wird. Diese Klauseln sehen eine Ausnahme von den ordentlichen Ausübungsfristen vor. Die RSU werden gemäß den Rahmenbedingungen für die RSU-Pläne am Tag des Kontrollwechsels durch die Gesellschaft für die betroffenen Planteilnehmer ohne Berücksichtigung der ansonsten geltenden Sperrfrist ausgeübt. Die Barzahlung je RSU muss mindestens dem in einem vorangehenden Übernahmeangebot gebotenen Preis entsprechen. Im Fall eines oben beschriebenen Kontrollwechsels werden die SAR gemäß den Rahmenbedingungen für die SAR-Pläne am Tag des Kontrollwechsels abweichend von den ordentlichen Ausübungsfristen durch die Gesellschaft für die betroffenen Planteilnehmer ausgeübt, soweit die anwendbaren Erfolgshürden erfüllt sind. Der für den Fall eines Kontrollwechsels vorgesehene Wegfall der Sperrfrist trägt dem Umstand Rechnung, dass sich die Bedingungen für die Aktienkursentwicklung bei einem Kontrollwechsel wesentlich ändern.

# Vergütungsbericht

Der Vergütungsbericht beschreibt die Struktur und die Ausgestaltung der Vergütung für

- den Vorstand der Allianz SE,
- die Führungskräfte unterhalb des Vorstands,
- den Aufsichtsrat.

Der Bericht entspricht den Vorgaben des deutschen Handelsrechts (HGB) und den Internationalen Rechnungslegungsvorschriften (IFRS). Er berücksichtigt die Empfehlungen des deutschen Corporate Governance Kodex sowie die Regelungen zur Vergütung in Versicherungsunternehmen (Versicherungs-Vergütungsverordnung, VersVergV; in Kraft seit dem 13. Oktober 2010).

## Der Vergütungsbericht 2010 im Überblick

### Vorstand

- Einführung des neuen Vergütungssystems
- Gegenüber dem Vorjahr unveränderte Grundvergütung
- Jahresboni für 2010 bestätigen eine Zielerreichung über den gesetzten Leistungszielen.
- Die Vergütung ist individualisiert in der Tabelle auf Seite 43 aufgeführt.
- Das Vergütungssystem wurde bei der Jahreshauptversammlung 2010 freiwillig zur Abstimmung gestellt.

### Führungskräfte unterhalb des Vorstands

- Einführung einer einheitlichen Vergütungsstruktur in den Versicherungsgesellschaften
- Die Governance im Vergütungsbereich und das Risikomanagement wurden weiter verbessert.
- Für „Führungskräfte“ im Sinne der VersVergV stehen die fixe Jahresvergütung und variable Zielvergütung im Verhältnis 40 zu 60 Prozent (Seite 51).

### Aufsichtsrat

- Die fixe Vergütung und Sitzungsgelder blieben im Vergleich zum Vorjahr unverändert.
- Die variable Vergütung spiegelt die starke Leistung der Gruppe wider.
- Die individualisierte Vergütung ist in der Tabelle auf Seite 54 aufgeführt.
- Geplante Umstellung auf reine Fixvergütung ab 2011

## Vorstandsvergütung

Um die Transparenz weiter zu verbessern, werden folgende Themen auf Basis des seit dem 1. Januar 2010 gültigen Vergütungssystems beschrieben:

- Governance-System
- Grundsätze und Marktpositionierung der Vorstandsvergütung
- Struktur der Vorstandsvergütung
- Bestandteile der Vorstandsvergütung
- Zielvereinbarung und Leistungsbemessung der variablen Vergütung
- Zielerreichung und Vergütung für 2010
- Ausblick auf 2011

## Governance-System

Die Vorstandsvergütung wird vom gesamten Aufsichtsrat festgelegt. Sitzungen werden vom Personalausschuss vorbereitet, der bei Bedarf von Group HR und anderen Zentralfunktionen unterstützt wird. Wenn erforderlich, werden auch externe Berater hinzugezogen. Vergütungsstudien wurden zuletzt von zwei Beratungsfirmen mit signifikanter Marktexpertise bezogen. Der Personalausschuss und der Aufsichtsrat beraten sich im angemessenen Maße mit dem Vorstandsvorsitzenden, um Leistung und Vergütung aller Vorstandsmitglieder zu beurteilen. Der Vorstandsvorsitzende ist nicht anwesend, wenn die eigene Vergütung besprochen wird.

Personalausschuss und Aufsichtsrat haben 2010 mehrfach getagt, um die in der folgenden Tabelle aufgeführten Personalangelegenheiten und Vergütungsthemen zu behandeln:

| Monat     | Thema/Entscheidung                                                                                                                                                                                                                                                                                                                                                                                                                                                                                                |
|-----------|-------------------------------------------------------------------------------------------------------------------------------------------------------------------------------------------------------------------------------------------------------------------------------------------------------------------------------------------------------------------------------------------------------------------------------------------------------------------------------------------------------------------|
| Februar   | <ul style="list-style-type: none"><li>– Bestellung von Manuel Bauer in den Vorstand zum 1. Januar 2011</li><li>– Festlegung der variablen Vergütung auf der Grundlage der Zielerreichung für:<ul style="list-style-type: none"><li>– Jährlichen Bonus 2009</li><li>– Drei-Jahre-Bonus 2007 – 2009</li><li>– Schätzung der Zuteilung der aktienbezogenen Vergütung 2010</li></ul></li></ul>                                                                                                                        |
| März      | <ul style="list-style-type: none"><li>– Verlängerung der Vorstandsmandate: Clement Booth, Enrico Cucchiani, Dr. Joachim Faber</li><li>– Festsetzung der endgültigen Zuteilungswerte der aktienbezogenen Vergütung 2010</li></ul>                                                                                                                                                                                                                                                                                  |
| September | <ul style="list-style-type: none"><li>– Corporate Governance Kodex zum Thema Diversity</li></ul>                                                                                                                                                                                                                                                                                                                                                                                                                  |
| Dezember  | <ul style="list-style-type: none"><li>– Dienstvertrag für Manuel Bauer</li><li>– Horizontale (externe) und vertikale (interne) Prüfung der Angemessenheit der Vergütung</li><li>– Vorbereitung zur Überprüfung der variablen Vergütung 2010</li><li>– Individuelle Festlegung der Zielvergütung für 2011 und Festsetzung der Ziele der Vorstandsmitglieder</li><li>– Anpassung des Grundgehalts einzelner Vorstandsmitglieder</li><li>– Festsetzung der Pensionsbeiträge und der Risikoprämien für 2011</li></ul> |

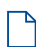

Eine ausführliche Beschreibung der Aufgaben des Aufsichtsrats und des Personalausschusses finden Sie im Abschnitt „Grundlagen und Arbeitsweise des Aufsichtsrats“ auf Seiten 24 bis 25.



Das Vergütungssystem wurde in der Hauptversammlung 2010 erläutert und zur Abstimmung gebracht.

## Grundsätze und Marktpositionierung der Vorstandsvergütung

Die Vorstandsvergütung ist so ausgestaltet, dass sie für die Geschäftstätigkeit der Gruppe, das operative Geschäftsumfeld und unter Berücksichtigung der Geschäftsergebnisse im Vergleich zum Wettbewerbsumfeld angemessen ist. Sie ist darauf ausgerichtet, hochqualifizierte Führungskräfte zu gewinnen und an das Unternehmen zu binden. Ihr übergeordnetes Ziel ist es, eine nachhaltig wertorientierte Unternehmensführung zu gewährleisten und zu fördern.

Grundsätze der Vorstandsvergütung:

- **Unterstützung der Gruppenstrategie:** die Leistungsziele spiegeln die Gruppenstrategie wider. Zielvereinbarungen messen quantitative, finanzielle, operative Ergebnisse. Darüber hinaus wird die Erfüllung qualitativer Maßnahmen und Initiativen berücksichtigt, die eine nachhaltige Entwicklung der Gesellschaft fördern. Die Einhaltung der Allianz Führungsgrundsätze und des Verhaltenskodex sind weitere qualitative Leistungsparameter.
- **Verknüpfung von Vergütung und Leistung:** signifikante leistungsabhängige Komponente.
- **Betonung der variablen Vergütung auf Langfristigkeit:** Ein großer Teil der variablen Vergütung berücksichtigt die Erbringung nachhaltiger Leistungen über einen Zeitraum von drei beziehungsweise fünf Jahren.
- **Angleichung an Aktionärsinteressen:** Ein Kernelement der Vergütung ist an die Aktienkursentwicklung geknüpft.
- **Integration und Ausgewogenheit:** Variable Vergütungskomponenten ergänzen sich gegenseitig

und sorgen für ein harmonisches Verhältnis von Chancen und Risiken für unterschiedliche Ergebnisszenarien; insofern stehen sie im Einklang mit wertorientierter Unternehmensführung und effektiver Governance.

Marktpositionierung der Vorstandsvergütung:

Der Aufsichtsrat berät über Struktur, Gewichtung und Höhe der einzelnen Vergütungskomponenten. Ziel ist es, Top-Talente zu gewinnen, diese zu motivieren und an das Unternehmen zu binden. Die Vergleichsgruppe besteht in erster Linie aus DAX-30-Unternehmen. Weitere maßgebliche diversifizierte Versicherungs- und Finanzdienstleistungsinstitute in Europa werden ebenfalls zum Vergleich herangezogen. Die Allianz liegt im Hinblick auf Unternehmensgröße (zum Beispiel bezogen auf den Marktwert) und Komplexität typischerweise im oberen Quartil, aber nicht in der Spitzengruppe.

- Die Höhe der Grundvergütung liegt im Allgemeinen um den Median der Vergleichsmärkte.
- Die Zusammensetzung der Gesamtvergütung ist stärker auf erfolgsbezogene sowie langfristige Vergütung ausgerichtet.

Die Vergütungsstruktur und Nebenleistungen werden regelmäßig mit den besten Praktiken im europäischen Finanzdienstleistungssektor und denen anderer relevanter Großkonzerne verglichen. Pensionsregelungen werden periodisch überprüft, um Veränderungen in den Marktgegebenheiten sowie andere Entwicklungen zu berücksichtigen.

Über die Notwendigkeit von Anpassungen befindet der Aufsichtsrat. Dabei werden relevante Marktdaten, die Wettbewerbsfähigkeit der Gesamtvergütung, die Unternehmensergebnisse, allgemeine wirtschaftliche Bedingungen und die Entwicklung der Vorstandsvergütung in Relation zu den Vergütungshöhen innerhalb der Gruppe berücksichtigt.

## Struktur der Vorstandsvergütung

Die Vorstandsvergütung besteht im Wesentlichen, unter Ausschluss der Pensionszusagen und Neben-

leistungen, aus vier Hauptelementen, die bei der jährlichen Zielvergütung etwa gleich gewichtet sind: Grundvergütung, Jährlicher Bonus, Drei-Jahre-Bonus

und aktienbezogene Vergütung. Das Verhältnis von fixer zu variabler Vergütung liegt 2010 bei 25 zu 75 Prozent.

### Zusammensetzung und Höhe der jährlichen Zielvergütung<sup>1</sup>

| Verteilung zwischen<br>fixer und variabler<br>Vergütung<br>% |                                        | Prozentualer<br>Anteil<br>% | Ordentliches<br>Vorstands-<br>mitglied <sup>2</sup><br>Tsd € | Vorstands-<br>vorsitzender<br>Tsd € |
|--------------------------------------------------------------|----------------------------------------|-----------------------------|--------------------------------------------------------------|-------------------------------------|
| <b>25</b>                                                    | <b>Grundvergütung</b>                  | 25                          | 700                                                          | 1 200                               |
|                                                              | <b>Variable Zielvergütung</b>          |                             |                                                              |                                     |
|                                                              | Jährlicher Bonus (kurzfristig)         | 25                          | 700                                                          | 1 180                               |
| <b>75</b>                                                    | Drei-Jahre-Bonus (mittelfristig)       | 25                          | 700                                                          | 1 180                               |
|                                                              | Aktienbezogene Vergütung (langfristig) | 25                          | 700                                                          | 1 180                               |
|                                                              | <b>Summe Zielvergütung</b>             | <b>100</b>                  | <b>2 800</b>                                                 | <b>4 740</b>                        |

## Bestandteile der Vorstandsvergütung

### Grundvergütung

Die Grundvergütung ist ein fixer Vergütungsbestandteil.

### Zielsetzung

Die Grundvergütung richtet sich nach den Aufgaben- und Verantwortungsbereichen und reflektiert nachhaltige Leistung in Ausübung der Rolle.

### Umsetzung

Die Grundvergütung wird als jährlicher Barbetrag ausgewiesen und in zwölf monatlichen Raten gezahlt. Die aktuelle Grundvergütung des Vorstandsvorsitzenden und des Vorstands für Finanzen unterscheidet sich von der Grundvergütung der übrigen ordentlichen Vorstandsmitglieder. Bei den meisten Vorstandsmitgliedern ist aber das Niveau der Grundvergütung gleich hoch. Die Gesamtvergütung variiert jedoch nach erbrachter individueller Leistung und Zielerfüllung.

### Variable Vergütung

Die variable Vergütung wird entsprechend den Regelungen des Allianz Sustained Performance Plan (ASPP) gewährt. Die variable Vergütung besteht aus den folgenden, gleich gewichteten Komponenten:

1. Jährlicher Bonus (kurzfristig): eine leistungsbezogene Barzahlung, die von der Zielerreichung im jeweiligen Geschäftsjahr abhängt.
2. Drei-Jahre-Bonus (mittelfristig): eine leistungsbezogene Barzahlung, welche die Zielerreichung über einen Zeitraum von drei Jahren abbildet.
3. Aktienbezogene Vergütung (langfristig): besteht aus virtuellen Aktien, sogenannten „Restricted Stock Units“ (RSU). Die Erreichung jährlicher Ziele bildet die Basis für den Zuteilungswert. Die langfristige Performance der Gruppe spiegelt sich in der Börsenkursentwicklung der Allianz SE Aktie in dem Vier-Jahres-Zeitraum zwischen Zuteilung der RSU und dem Ablauf der Sperrfrist wider. Die Auszahlung erfolgt nach fünf Jahren.

### Zielsetzung

Die variable Vergütung zielt auf Ausgewogenheit zwischen kurzfristiger Zielerreichung, langfristigem Erfolg und nachhaltiger Wertschöpfung ab. Sie sorgt für ein ausgewogenes Verhältnis von Risiko und Chancen und ist so konzipiert, dass sie auch in unterschiedlichen Ergebnisszenarien und einem sich ändernden Geschäftsumfeld effektiv funktioniert. Verschiedene Leistungsniveaus schlagen sich in der Vergütung nieder, sodass die Vergütung bei sehr guter Leistung höher und bei schlechter Leistung geringer ausfällt.

<sup>1</sup> Alle Prozentangaben zeigen ungefähre Verteilungswerte.

<sup>2</sup> alle ordentlichen Mitglieder des Vorstands mit Ausnahme von Dr. Paul Achleitner (Zielvergütung 3 200 Tsd €)

**Strategieumsetzung wird durch das Vergütungssystem voll unterstützt**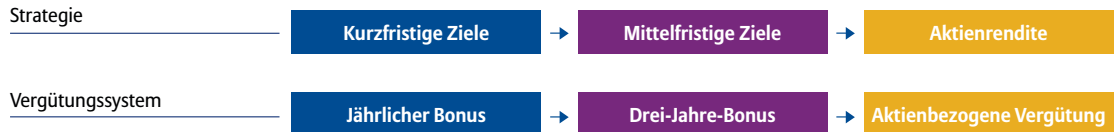

Wie bereits in den Grundsätzen der Vorstandsvergütung erläutert, ist die Vergütung eng mit den strategischen Zielen der Gruppe verknüpft.

**Leistungsbezug**

Die jährliche Zielerreichung ist ausschlaggebend für den Wert des jährlichen Bonus. Sie beeinflusst außerdem die Bonuschance der mittel- und langfristigen variablen Vergütung. Letztlich sind die Auszahlungen des Drei-Jahre-Bonus und der aktienbezogenen Vergütung jedoch von der nachhaltigen Entwicklung über einen längeren Leistungszeitraum abhängig.

**Umsetzung**

Die maximale Zielerreichung für die variablen Vergütungsbestandteile ist einheitlich auf 165 Prozent begrenzt. Der Aufsichtsrat kann in der Bewertung der Zielerreichung die variable Vergütung dementsprechend innerhalb einer Spanne von 0 Prozent bis 165 Prozent der Zielvergütung festlegen. Darüber hinaus ist der mögliche Wertzuwachs der RSU auf maximal 200 Prozent des Zuteilungskurses begrenzt.

Die übrigen Bestandteile der Vorstandsvergütung, die Pensionszusagen und vergleichbare Leistungen sowie Nebenleistungen umfassen, werden im Folgenden beschrieben.

**Betriebliche Altersvorsorge und vergleichbare Leistungen**

Seit dem 1. Januar 2005 nehmen Vorstandsmitglieder an einem beitragsorientierten Altersvorsorgesystem teil.

Vor 2005 sahen die Pensionsverträge für Vorstandsmitglieder die Zusage eines Festbetrags vor, der nicht an die Entwicklung der fixen oder variablen Vergütung gekoppelt war. Die aus diesem Plan sich ergebenden Anwartschaften wurden zum Jahresende 2004 festgeschrieben.

Darüber hinaus sind alle Vorstände Mitglieder der Pensionskasse, der Allianz Versorgungskasse VVaG (AVK), und der rückgedeckten Unterstützungskasse, des Allianz Pensionsvereins e.V. (APV). Diese umfassen die betriebliche Altersversorgung für Grundgehälter bis zur Beitragsbemessungsgrenze der gesetzlichen Rentenversicherung.

**Zielsetzung**

Gewährung eines wettbewerbsgerechten, kosteneffektiven und risikoadäquaten Angebots von Vorsorgeleistungen (Altersrente, Berufs- und Erwerbsunfähigkeitsrente, Hinterbliebenenleistungen) durch entsprechende Pensionszusagen.

**Umsetzung**

Beiträge der Gesellschaft für den aktuellen Pensionsplan sind von der Dauer der Vorstandstätigkeit abhängig und werden in einem Fonds mit einer garantierten jährlichen Mindestverzinsung angelegt. Bei Renteneintritt wird das angesammelte Kapital in Rentenleistungen umgewandelt. Eine zusätzliche Risikoprämie von 5 Prozent des regulären Pensionsbeitrags wird für die Abdeckung des Todesfall-, Berufs- oder Erwerbsunfähigkeitsrisikos gezahlt. Die Altersrente beginnt frühestens mit Vollendung des 60. Lebensjahres.

**Nebenleistungen**

Vorstandsmitglieder erhalten zusätzlich bestimmte Nebenleistungen. Diese umfassen im Wesentlichen Beiträge für Unfall- und Haftpflichtversicherungen, die Bereitstellung eines Dienstwagens und in begründeten Fällen Sicherheitsmaßnahmen. Diese Nebenleistungen sind von den Vorstandsmitgliedern zu versteuern. Gegebenenfalls werden Reisespesen für nicht ortsansässige Vorstandsmitglieder gewährt.

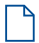

Genauere Angaben finden Sie im Abschnitt „Zielvereinbarung und Leistungsbemessung“ auf Seiten 39 ff.

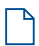

Details zur betrieblichen Altersvorsorge finden Sie in der Tabelle und den Fußnoten auf Seite 42

Nebenleistungen sind nicht leistungsabhängig. Die Höhe der Nebenleistungen wird in regelmäßigen Abständen durch den Aufsichtsrat überprüft.

### Zielsetzung

Gewährung marktüblicher Nebenleistungen.

### Umsetzung

Überwiegend zentrale Koordination, um die Einhaltung von Richtlinien und relevanten Vorschriften sicherzustellen.

Die folgende Darstellung zeigt den Gesamtwert des Vergütungspakets (ohne Pensionszusagen und Nebenleistungen) für unterschiedliche Ergebnisszenarien (Null, Zielwert, Maximum). Zudem werden die einzelnen Vergütungsbestandteile und deren Anteil an der fixen und variablen Vergütung dargestellt.

### Jährliche Vergütungshöhe bei unterschiedlichen Ergebnisszenarien

(Beispiel: ordentliches Vorstandsmitglied mit einer Grundvergütung in Höhe von 700 Tsd € und einer variablen Zielvergütung in Höhe von 2 100 Tsd €)

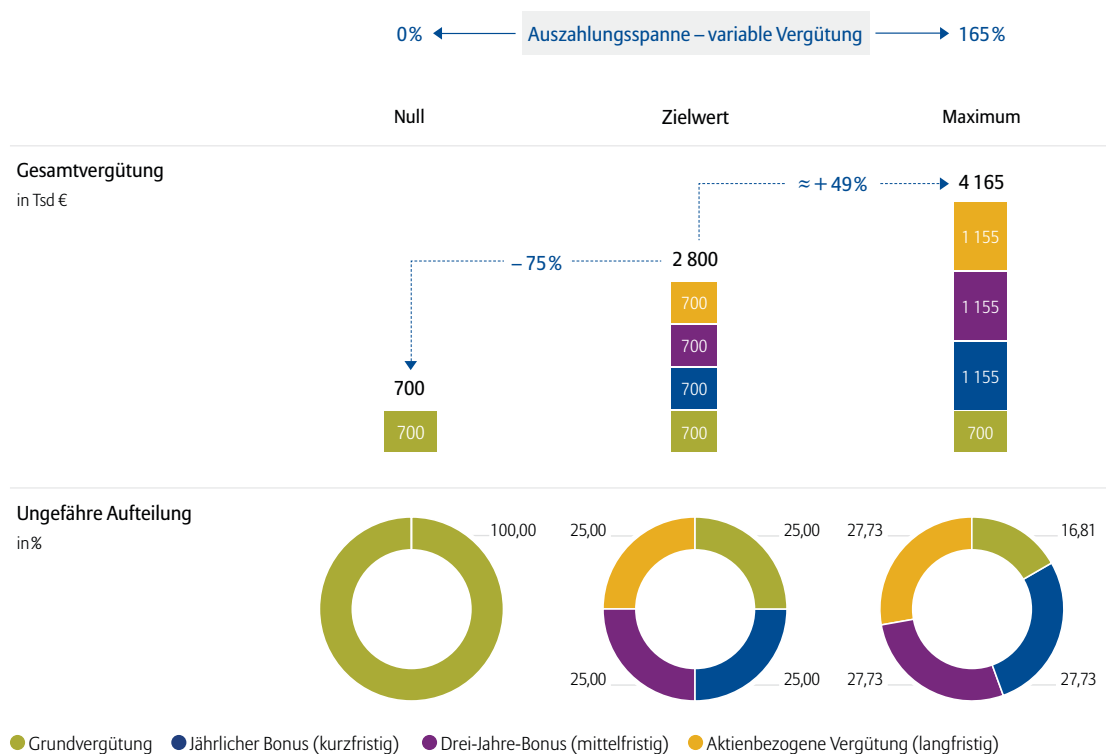

Eine maximale Auszahlung der variablen Vergütung von 165% würde zu einem Anstieg der Gesamtvergütung um rund 49% führen, eine Auszahlung von 0% zu einer Verringerung um 75%. Die jährliche Rückstellung für den Drei-Jahre-Bonus deutet lediglich eine vorläufig angenommene Entwicklung aufgrund der jährlichen Zielerreichung an. Nach Ablauf der dreijährigen Leistungsperiode bewertet der Aufsichtsrat die Zielerreichung und setzt die Auszahlungshöhe abschließend fest.

### Zielvereinbarung und Leistungsbemessung der variablen Vergütung

Die Leistungsziele für die variable Vergütung der Vorstandsmitglieder werden jährlich vom Aufsichtsrat

festgesetzt. In der jährlichen Zielvereinbarung werden die quantitativen und qualitativen Ziele für das jeweils nächste Geschäftsjahr sowie alle drei Jahre die Ziele für die mittelfristige Leistungsperiode festgelegt. Die Zielkategorien sind nachfolgend beschrieben.

**Zielkategorien der variablen Vergütung**

|                                                   | Geschäftsbereich/Funktionen                                                                                                                                                                                                                                                      |                                                                                                                                                                                                                                                                                                                                      | Zentralfunktionen                                                                                                                                                                                                                                                                                                                                                                                            |
|---------------------------------------------------|----------------------------------------------------------------------------------------------------------------------------------------------------------------------------------------------------------------------------------------------------------------------------------|--------------------------------------------------------------------------------------------------------------------------------------------------------------------------------------------------------------------------------------------------------------------------------------------------------------------------------------|--------------------------------------------------------------------------------------------------------------------------------------------------------------------------------------------------------------------------------------------------------------------------------------------------------------------------------------------------------------------------------------------------------------|
| <b>Jährlicher Bonus</b><br>(kurzfristig)          | <b>Quantitative Ziele</b>                                                                                                                                                                                                                                                        | <b>75 %</b>                                                                                                                                                                                                                                                                                                                          |                                                                                                                                                                                                                                                                                                                                                                                                              |
|                                                   | Gruppenziele                                                                                                                                                                                                                                                                     | 50 %                                                                                                                                                                                                                                                                                                                                 | – Jährlicher Operativer Gewinn<br>– Jahresüberschuss auf Anteilseigner entfallend                                                                                                                                                                                                                                                                                                                            |
|                                                   | Ziele des Geschäftsbereichs/<br>Funktionen                                                                                                                                                                                                                                       | 25 %                                                                                                                                                                                                                                                                                                                                 | Operativer Gewinn des entsprechenden Geschäftsbereichs<br><br><b>Controlling, Reporting, Risiko</b><br>– Solvency I ratio<br>– Dividendenausschüttung<br><br><b>Finance</b><br>– Investment-Ergebnis<br>– Cash-Flow Generierung<br><br><b>Operations</b><br>– Effizienz<br>– Operatives Ergebnis von Travel/Assistance <sup>1</sup>                                                                          |
|                                                   | <b>Qualitative Ziele</b>                                                                                                                                                                                                                                                         | <b>25 %</b>                                                                                                                                                                                                                                                                                                                          | 5 Kategorien, die für die Gruppenstrategie 2010 – 2012 wesentlich sind<br>– Bevorzugter Partner (Partner of Choice) für alle Interessengruppen (Kunden, Mitarbeiter, Investoren, Öffentlichkeit)<br>– Profitables Wachstum<br>– Stärkung der Wettbewerbsfähigkeit<br>– Entwicklung des Marktmanagements (z. B. Vertriebskanäle, Kundensegmente und profitables Kundenwachstum)<br>– Schutz des Eigenkapitals |
|                                                   | Die Zielerreichung des Vorstandsvorsitzenden bemisst sich nach der durchschnittlichen Zielerreichung der anderen Vorstandsmitglieder und kann unter Berücksichtigung der persönlichen Leistung des Vorstandsvorsitzenden gegebenenfalls durch den Aufsichtsrat angepasst werden. |                                                                                                                                                                                                                                                                                                                                      |                                                                                                                                                                                                                                                                                                                                                                                                              |
| <b>Drei-Jahre-Bonus</b><br>(mittelfristig)        | Portfolioentwicklung                                                                                                                                                                                                                                                             | <b>Basis auf Gruppenebene</b><br>– durchschnittliches Wachstum 2010 – 2012<br>– Kapitalrendite 2012<br><br><b>Basis auf Ebene des Geschäftsbereichs</b><br>– durchschnittliches Wachstum 2010 – 2012<br>– Kapitalrendite 2012                                                                                                        |                                                                                                                                                                                                                                                                                                                                                                                                              |
|                                                   | Nachhaltigkeitsprüfung anhand qualitativer Kriterien                                                                                                                                                                                                                             | – Vergleich von tatsächlichem und erwartetem Wachstum<br>– Entwicklung der Profitabilität<br>– Vergleich mit den wesentlichen Wettbewerbern<br>– Eintritt außergewöhnlicher Ereignisse<br>– Eigenkapital gemessen am internen Risikokapitalmodell<br>– zusätzliche Nachhaltigkeitskriterien (z. B. Kunden-/Mitarbeiterzufriedenheit) |                                                                                                                                                                                                                                                                                                                                                                                                              |
| <b>Aktien-bezogene Vergütung</b><br>(langfristig) | Nachhaltige Steigerung des Aktienkurses                                                                                                                                                                                                                                          |                                                                                                                                                                                                                                                                                                                                      |                                                                                                                                                                                                                                                                                                                                                                                                              |

<sup>1</sup> Aufgrund der Zuständigkeit für die Mondial Assistance wurden für Dr. Christof Mascher zusätzliche operative Gewinnziele festgelegt.

Im nachfolgenden Abschnitt werden die Bestandteile der variablen Vergütung erläutert.

Die Auszahlungshöhe beim **Jährlichen Bonus** hängt von der quantitativen und qualitativen Zielerreichung innerhalb des jeweiligen Geschäftsjahres ab. Der Aufsichtsrat legt hierfür angemessene Kapitalrenditeziele fest.

Der **Drei-Jahre-Bonus** berücksichtigt die nachhaltige Zielerreichung über den dreijährigen Leistungszeitraum sowie das Ergebnis einer qualitativen Nachhaltigkeitsprüfung. Die quantitativen Drei-Jahres-Ziele stellen ab auf die Portfolioentwicklung, gemessen am Wachstum und am Ergebnis, und setzen letztlich eine angemessene Kapitalrendite und eine entsprechende Performance im Vergleich zu Wettbewerbern voraus. Der Aufsichtsrat bewertet in einem ersten Schritt die Zielerreichung anhand einer Portfolio-Entwicklungsmatrix.



Durch die Berücksichtigung von Wachstum und Kapitalrendite in der Leistungsbewertung wird sichergestellt, dass die spätere Auszahlungshöhe sowohl die Gewinnmarge als auch profitables Wachstum berücksichtigt. Wachstum wird dabei über einen dreijährigen Zeitraum gemessen. Dadurch werden Auszahlungen, die nicht auf nachhaltige Leistungserbringung, sondern auf kurzfristige Schwankungen zurückzuführen sind, vermieden.

Die endgültige Bewertung erfolgt nicht rein auf Basis einer Formel. Der Aufsichtsrat bezieht vielmehr zusätzlich qualitative Nachhaltigkeitskriterien in die Leistungsbeurteilung ein, sodass die Auszahlungshöhe nach Ermessen angepasst werden kann. Sollte die Zielerreichung im Vergleich zu Wettbewerbern im Markt signifikant schlechter ausfallen oder als nicht nachhaltig beurteilt werden, kann die Bewertung merklich verringert und im Extremfall auf Null reduziert werden.

Die **Aktienbezogene Vergütung** wird nach Ablauf des Geschäftsjahres im Zusammenhang mit der Festlegung des jährlichen Bonus zugeteilt. Die Anzahl der RSU ergibt sich dabei aus der Höhe des jährlichen Bonus für das abgelaufene Geschäftsjahr, geteilt durch den berechneten Wert einer RSU zum Zeitpunkt der Zuteilung. Nach Ablauf der vierjährigen Sperrfrist erfolgt die Auszahlung in bar, basierend auf dem dann aktuellen Börsenkurs der Allianz SE Aktie. Auf diese Weise wird der endgültige Wert durch die Wertentwicklung der Allianz SE Aktie bestimmt, wodurch den Interessen der Aktionäre Rechnung getragen wird. Um extreme Auszahlungen zu verhindern, ist der Wertzuwachs der RSU auf 200 Prozent des Zuteilungswertes beschränkt. Zuteilungen verfallen, sofern das Vorstandsmitglied das Unternehmen auf eigenen Wunsch verlässt (oder fristlos entlassen wird), was die Bindung an das Unternehmen stärkt.

## Zielerreichung und Vergütung für 2010

In den folgenden Ausführungen wird die Vergütung für das Jahr 2010 und der Zusammenhang mit der Zielerreichung dargestellt. Die für das Jahr 2010 festgesetzte Zielerreichung und Vergütung berücksichtigen entsprechende finanzstrategische Aspekte, wie im Geschäftsbericht erörtert.

**Grundvergütung:** Nach entsprechender Prüfung hat der Aufsichtsrat entschieden, die Grundvergütung für 2010 unverändert beizubehalten. Mit der Bestellung in den Vorstand der Allianz SE wurde die Grundvergütung von Jay Ralph im Januar 2010 auf 700 000 Euro festgesetzt.

**Jährlicher Bonus:** Die durchschnittliche Zielerreichung für die Gruppe, die Geschäftsbereiche/Zentralfunktionen und die qualitativen Ziele wurde mit 131 Prozent festgestellt und lag zwischen 120 Prozent und 147 Prozent. Folglich betrugen die Auszahlungen für den jährlichen Bonus 120 Prozent bis 147 Prozent des Zielbonus, bei einer durchschnittlichen Bonushöhe von 131 Prozent des Zielwerts. Dies entspricht 79 Prozent der maximal möglichen Auszahlung.

**Drei-Jahre-Bonus:** Die Zielerreichung für die Leistungsperiode 2010 bis 2012 und die Höhe der Bonuszahlung werden innerhalb der ersten Jahreshälfte 2013 festgelegt. Zum Zweck der Rückstellungsbildung für den Drei-Jahre-Bonus wird die Zielerreichung für den jährlichen Bonus als vorläufige Indikation verwandt.

**Aktienbezogene Vergütung:** Wie zuvor beschrieben, wurden im März 2011 jedem Vorstandsmitglied RSU zugeteilt. Die zugeteilte aktienbezogene Vergütung entspricht der Höhe nach dem für das Geschäftsjahr 2010 erzielten jährlichen Bonus und wird in der Vergütungstabelle entsprechend ausgewiesen.

**Nebenleistungen:** Insgesamt belief sich der Wert der Nebenleistungen im Jahr 2010 auf einen Betrag in Höhe von 0,5 (0,6) Millionen Euro. Die Vergütungstabelle zeigt den Wert der individuell bezogenen Leistungen.

**Pensionen:** Die Beitragszahlungen durch die Gesellschaft für den aktuellen Pensionsplan der Allianz SE betragen 30 Prozent der Grundvergütung und werden nach fünf Jahren der Bestellung in den Allianz SE Vorstand auf 37,5 Prozent und nach zehn Jahren der Bestellung in den Allianz SE Vorstand auf 45 Prozent

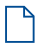

Nähere Informationen zu den Zuteilungen und der Anzahl gehaltener Stücke im Rahmen der aktienbezogenen Vergütung finden Sie auf Seite 44

erhöht. Die garantierte Mindestverzinsung beträgt 2,75 Prozent pro Jahr. Sofern die jährliche Nettoverzinsung der AVK 2,75 Prozent übersteigt, wird eine entsprechende Gewinnbeteiligung im selben Jahr gutgeschrieben.

Für Mitglieder mit Anwartschaften aus dem festgeschriebenen Plan werden die oben genannten Beitragszahlungen zur aktuellen Pensionszusage um 19 Prozent der im alten Plan erreichbaren jährlichen Pension verringert.

Die Alterspension beginnt frühestens mit Vollendung des 60. Lebensjahres, es sei denn, es handelt sich um eine medizinisch bedingte Berufs- oder Erwerbsunfähigkeit oder einen Todesfall. In diesen Fällen werden die erreichten Altersrentenbausteine gegebenenfalls um eine Zurechnungsrente ergänzt. Hinterbliebene erhalten für gewöhnlich 60 Prozent (für Witwe/Witwer) und 20 Prozent (je Kind) der Pensionsleistungen des Mitarbeiters, wobei die Gesamtsumme 100 Prozent nicht übersteigen darf. Wird das Mandat aus anderen Gründen vor Erreichen der Altersgrenze beendet, bleibt gegebenenfalls ein Anspruch auf eine unverfallbare Versorgungsanwartschaft bestehen.

Die folgende Tabelle zeigt die Rückstellungszuführungen (Service Cost in 2010) und die Beiträge für jedes Vorstandsmitglied der Allianz SE.

| Mitglieder des Vorstands                 | Bisherige leistungsorientierte Pensionszusage (festgeschrieben) <sup>1</sup> |                                        |                  |                  | Aktuelle Pensionszusage |                  | AVK/APV <sup>2</sup> |                  | Übergangsgeld <sup>3</sup> |                  | Summe           |                  |
|------------------------------------------|------------------------------------------------------------------------------|----------------------------------------|------------------|------------------|-------------------------|------------------|----------------------|------------------|----------------------------|------------------|-----------------|------------------|
|                                          | Rechnerisches Renteneintrittsalter                                           | Jährliche Pensionszahlung <sup>4</sup> | SC <sup>5</sup>  | DBO <sup>6</sup> | SC <sup>5</sup>         | DBO <sup>6</sup> | SC <sup>5</sup>      | DBO <sup>6</sup> | SC <sup>5</sup>            | DBO <sup>6</sup> | SC <sup>5</sup> | DBO <sup>6</sup> |
|                                          |                                                                              |                                        |                  |                  |                         |                  |                      |                  |                            |                  |                 |                  |
|                                          |                                                                              | Tsd €                                  | 2010 Tsd €       | 2010 Tsd €       | 2010 Tsd €              | 2010 Tsd €       | 2010 Tsd €           | 2010 Tsd €       | 2010 Tsd €                 | 2010 Tsd €       | 2010 Tsd €      | 2010 Tsd €       |
| Michael Diekmann (Vorstandsvorsitzender) | 60                                                                           | 337                                    | 183              | 4 790            | 555                     | 2 535            | 5                    | 133              | 0                          | 826              | 743             | 8 284            |
| Dr. Paul Achleitner                      | 60                                                                           | 344                                    | 271              | 3 449            | 350                     | 1 502            | 5                    | 67               | 11                         | 361              | 637             | 5 379            |
| Oliver Bäte                              | 60                                                                           | —                                      | —                | —                | 268                     | 793              | 2                    | 7                | 8                          | 72               | 278             | 872              |
| Clement B. Booth                         | 60                                                                           | —                                      | —                | —                | 258                     | 1 345            | 2                    | 11               | 2                          | 362              | 262             | 1 718            |
| Enrico Cucchiani <sup>7</sup>            | 62 (65) <sup>8</sup>                                                         | 635 <sup>9</sup>                       | 30 <sup>10</sup> | n.a.             | 166                     | 856              | 0                    | 9                | 1                          | 693              | 197             | 1 558            |
| Dr. Joachim Faber                        | 62                                                                           | 225                                    | 0                | 4 380            | 349                     | 1 459            | 0                    | 72               | 0                          | 686              | 349             | 6 597            |
| Dr. Christof Mascher                     | 60                                                                           | —                                      | —                | —                | 267                     | 1 048            | 2                    | 11               | 15                         | 81               | 284             | 1 140            |
| Jay Ralph                                | 60                                                                           | —                                      | —                | —                | 261                     | 261              | 3                    | 3                | 0                          | 0                | 264             | 264              |
| Dr. Gerhard Rupprecht                    | 62                                                                           | 315                                    | 0                | 5 972            | 358                     | 1 467            | 0                    | 159              | 0                          | 482              | 358             | 8 080            |
| Dr. Werner Zedelius                      | 60                                                                           | 225                                    | 95               | 2 545            | 320                     | 1 487            | 5                    | 131              | 8                          | 273              | 428             | 4 436            |

1 für Herrn Cucchiani der betriebliche Pensionsfonds und TFR (Trattamento di fine rapporto)

2 Seit der Gründung des APV durch die Allianz im Jahr 1998 zahlen Planteilnehmer 3 % ihres beitragspflichtigen Einkommens in die AVK ein. Abhängig vom Eintrittsdatum in die Allianz liegt die garantierte Mindestverzinsung bei 2,75 – 3,50 %. Grundsätzlich finanziert die Gesellschaft eine gleichwertige Zusage über den APV (für Beschäftigte mit Eintrittsdatum vor Januar 2005 finanziert die Gesellschaft das 2,2-Fache). Vor 1998 haben die Allianz und die Planteilnehmer in die AVK eingezahlt.

3 Details bezüglich des Übergangsgelds befinden sich im Abschnitt „Beendigung des Dienstverhältnisses“ auf Seite 45.

4 erwartete jährliche Pensionszahlung im rechnerischen Renteneintrittsalter

5 SC = Service Cost

6 DBO = Defined Benefit Obligation (Pensionsverpflichtung) am Jahresende

7 Die deutschen Pensionspläne für Herrn Cucchiani basieren nur auf dem von der Allianz SE bezogenen Grundgehalt (460 Tsd €) sowie einem rechnerischen Renteneintrittsalter von 62 Jahren. Die italienischen Pensionspläne basieren auf dem aus Italien bezogenen Gehalt. In Italien verfügt Herr Cucchiani, zusätzlich zu dem gesetzlich vorgeschriebenen staatlichen Rentensystem INPS (Istituto Nazionale della Previdenza Sociale), über TFR und den betrieblichen Pensionsfonds. Im TFR wird jährlich ein Betrag angesammelt, der bei Austritt aus der Gesellschaft ausgezahlt wird (unabhängig vom Alter). Durch einen Arbeitgeberwechsel Herrn Cucchianis wurden 2010 18 Tsd € im Rahmen des TFR ausgezahlt. Zukünftig wird der TFR-Beitrag dem Pensionsfonds zufließen, sodass keine weiteren TFR-Auszahlungen anfallen werden. Alle italienischen Pensionspläne sind beitragsorientierte Systeme. Die Beiträge werden in der Tabelle ausgewiesen.

8 Für die italienische Pension wird ein rechnerisches Renteneintrittsalter von 65 Jahren verwendet.

9 die erwartete Zahlung beim rechnerischen Renteneintritt, sofern Herr Cucchiani bis 2015 tätig ist (Renteneintrittsalter 65)

10 direkter Beitrag in den betrieblichen Pensionsfonds 5 Tsd € sowie 25 Tsd € aus dem TFR

Die Gruppe hat 4 (4) Millionen Euro aufgewandt, um Pensionsrückstellungen und Rückstellungen für vergleichbare Leistungen der aktiven Vorstandsmitglieder zu erhöhen. Am 31. Dezember 2010 betrugen die Pensionsrückstellungen und die Rückstellungen für vergleichbare Leistungen an Vorstandsmitglieder, die zu diesem Zeitpunkt aktiv waren, 38 (28) Millionen Euro.

**Gesamtvergütung:** Aus der folgenden Tabelle gehen die fixe und variable Vergütung des Vorstands der Allianz SE für die Jahre 2009 und 2010 hervor. Darüber hinaus werden die Zuführung zur Pensionsrückstellung und die sich ergebende Gesamtsumme aufgeführt. Die veränderte Gewichtung innerhalb der variablen Vergütungsstruktur aufgrund des im Januar 2010 neu eingeführten Vergütungssystems wird deutlich und führt auch zu Verschiebungseffekten zwischen den einzelnen Vergütungsbestandteilen im Vergleich zum Vorjahr.

| Mitglieder des Vorstands                               |                   | Fix            |                              | Variabel <sup>1</sup>                       |                                               |                                                       |                                                       | Gesamtsumme   | Pensionszusage | Gesamtsumme einschließlich Pensionszusage |
|--------------------------------------------------------|-------------------|----------------|------------------------------|---------------------------------------------|-----------------------------------------------|-------------------------------------------------------|-------------------------------------------------------|---------------|----------------|-------------------------------------------|
|                                                        |                   | Grundvergütung | Nebenleistungen <sup>2</sup> | Jährlicher Bonus (kurzfristig) <sup>3</sup> | Drei-Jahre-Bonus (mittelfristig) <sup>4</sup> | Wert der SAR bei Zuteilung (langfristig) <sup>5</sup> | Wert der RSU bei Zuteilung (langfristig) <sup>5</sup> |               |                |                                           |
|                                                        |                   | Tsd €          | Tsd €                        | Tsd €                                       | Tsd €                                         | Tsd €                                                 | Tsd €                                                 | Tsd €         | Tsd €          | Tsd €                                     |
| Michael Diekmann (Chairman)                            | 2010              | 1 200          | 24                           | 1 544                                       | 1 544                                         | —                                                     | 1 544                                                 | 5 856         | 743            | 6 599                                     |
|                                                        | 2009              | 1 200          | 28                           | 2 081                                       | 257                                           | 440                                                   | 771                                                   | 4 777         | 728            | 5 505                                     |
| Dr. Paul Achleitner                                    | 2010              | 800            | 61                           | 1 075                                       | 1 075                                         | —                                                     | 1 075                                                 | 4 086         | 637            | 4 723                                     |
|                                                        | 2009              | 800            | 49                           | 1 387                                       | 165                                           | 291                                                   | 513                                                   | 3 205         | 525            | 3 730                                     |
| Oliver Bäte                                            | 2010              | 700            | 47                           | 948                                         | 948                                           | —                                                     | 948                                                   | 3 591         | 278            | 3 869                                     |
|                                                        | 2009              | 700            | 56                           | 1 175                                       | 241                                           | 259                                                   | 453                                                   | 2 884         | 294            | 3 178                                     |
| Clement B. Booth                                       | 2010              | 700            | 125                          | 992                                         | 992                                           | —                                                     | 992                                                   | 3 801         | 262            | 4 063                                     |
|                                                        | 2009              | 700            | 110                          | 1 148                                       | 264                                           | 336                                                   | 583                                                   | 3 141         | 260            | 3 401                                     |
| Enrico Cucchiani                                       | 2010              | 700            | 46                           | 925                                         | 925                                           | —                                                     | 925                                                   | 3 521         | 197            | 3 718                                     |
|                                                        | 2009              | 700            | 99                           | 1 090                                       | 105                                           | 330                                                   | 467                                                   | 2 791         | 286            | 3 077                                     |
| Dr. Joachim Faber                                      | 2010              | 700            | 20                           | 1 029                                       | 1 029                                         | —                                                     | 1 029                                                 | 3 807         | 349            | 4 156                                     |
|                                                        | 2009              | 700            | 23                           | 1 244                                       | 215                                           | 385                                                   | 628                                                   | 3 195         | 421            | 3 616                                     |
| Dr. Christof Mascher                                   | 2010              | 700            | 22                           | 881                                         | 881                                           | —                                                     | 881                                                   | 3 365         | 284            | 3 649                                     |
|                                                        | 2009              | 216            | 12                           | 324                                         | 62                                            | 118                                                   | 251                                                   | 983           | 247            | 1 230                                     |
| Jay Ralph                                              | 2010              | 700            | 81                           | 845                                         | 845                                           | —                                                     | 845                                                   | 3 316         | 264            | 3 580                                     |
|                                                        | 2009              | —              | —                            | —                                           | —                                             | —                                                     | —                                                     | —             | —              | —                                         |
| Dr. Gerhard Rupprecht                                  | 2010              | 700            | 31                           | 845                                         | 845                                           | —                                                     | 845                                                   | 3 266         | 358            | 3 624                                     |
|                                                        | 2009              | 700            | 78                           | 1 021                                       | 107                                           | 352                                                   | 491                                                   | 2 749         | 356            | 3 105                                     |
| Dr. Werner Zedelius                                    | 2010              | 700            | 16                           | 837                                         | 837                                           | —                                                     | 837                                                   | 3 227         | 428            | 3 655                                     |
|                                                        | 2009              | 700            | 16                           | 1 115                                       | 75                                            | 595                                                   | 818                                                   | 3 319         | 358            | 3 677                                     |
| <b>Total</b>                                           | 2010              | <b>7 600</b>   | <b>473</b>                   | <b>9 921</b>                                | <b>9 921</b>                                  | <b>—</b>                                              | <b>9 921</b>                                          | <b>37 836</b> | <b>3 800</b>   | <b>41 636</b>                             |
|                                                        | 2009 <sup>6</sup> | <b>7 620</b>   | <b>570</b>                   | <b>12 358</b>                               | <b>1 653</b>                                  | <b>3 279</b>                                          | <b>5 122</b>                                          | <b>30 602</b> | <b>3 704</b>   | <b>34 306</b>                             |
| <b>Veränderung zum Vorjahr<sup>6</sup></b>             |                   | <b>– 0,3%</b>  | <b>– 17,0%</b>               | <b>– 19,7%</b>                              | <b>500,2%</b>                                 | <b>– 100,0%</b>                                       | <b>93,7%</b>                                          | <b>23,6%</b>  | <b>2,6%</b>    | <b>21,4%</b>                              |
| <b>Veränderung der variablen Vergütung zum Vorjahr</b> |                   |                |                              |                                             | <b>32,8%</b>                                  |                                                       |                                                       |               |                |                                           |

<sup>1</sup> Mit Einführung des neuen Vorstandsvergütungssystems zum 1. Januar 2010 wurden die variablen Vergütungsbestandteile anders gewichtet als in dem bis Ende 2009 gültigen System. Daher sind die Werte für 2009 und 2010 in Bezug auf die Zielerreichung nur bedingt vergleichbar. Das bis zum 31. Dezember 2009 gültige Vergütungssystem ist im Geschäftsbericht 2009 beschrieben (Seite 18 ff.).

<sup>2</sup> Die Bandbreite begründet sich mit dem Ausweis der Reisespesen für nicht ortsansässige Vorstandsmitglieder.

<sup>3</sup> Tatsächliche Höhe des für das Geschäftsjahr 2010 im Jahr 2011 und für das Geschäftsjahr 2009 im Jahr 2010 ausbezahlten Bonus.

<sup>4</sup> Zum Zweck der Rückstellungsbildung entspricht der Drei-Jahre-Bonus der Auszahlungshöhe des Jährlichen Bonus für 2010. Da die Leistungsbeurteilung und Auszahlung erst nach Ablauf der Leistungsperiode erfolgen, entspricht der Wert einer angenommenen Indikation.

<sup>5</sup> Die Angaben für den Wert der SAR/RSU im Geschäftsbericht 2009 basierte auf bestmöglichen Schätzungen. Die hier genannten Werte zeigen den aktuellen Wert zum Zeitpunkt der Zuteilung (1. März 2010). Die hier ausgewiesenen Werte für das Jahr 2009 weichen daher von den genannten Werten im Geschäftsbericht 2009 ab.

<sup>6</sup> Die Gesamtvergütung und die prozentuale Veränderung 2009 – 2010 zeigen die Vergütung aller aktiven Vorstandsmitglieder in den jeweiligen Jahren. Die folgenden Vorstandsmitglieder sind 2009 aus dem Vorstand ausgeschieden: Dr. Helmut Perlet, Jean-Philippe Thierry, Dr. Herbert Walter.

In Bezug auf den Drei-Jahre-Bonus 2010–2012 zeigt die Tabelle den geschätzten Betrag für die Rückstellungen für 2010; so bleibt die Vergleichbarkeit mit den Vorjahren erhalten. Wie bereits im Geschäftsbericht 2009 wird nachfolgend zusätzlich die Gesamtvergütung für die entsprechenden Jahre individualisiert ausgewiesen. Die Gesamtvergütung für 2010, ohne die angenommene Rückstellung für den Drei-Jahre-Bonus 2010–2012, und die Gesamtvergütung für 2009<sup>1</sup> (in Klammern angegeben), einschließlich der Auszahlung des Drei-Jahre-Bonus 2007–2009, waren wie folgt:

Michael Diekmann 4 312 (5 560) Tausend Euro  
Dr. Paul Achleitner 3 011 (3 720) Tausend Euro  
Oliver Bäte 2 643 (3 093) Tausend Euro  
Clement B. Booth 2 809 (3 664) Tausend Euro  
Enrico Cucchiani 2 596 (3 400) Tausend Euro  
Dr. Joachim Faber 2 778 (3 718) Tausend Euro  
Dr. Christof Mascher 2 484 (983) Tausend Euro  
Jay Ralph 2 471 (—) Tausend Euro  
Dr. Gerhard Rupprecht 2 421 (3 317) Tausend Euro  
Dr. Werner Zedelius 2 390 (3 967) Tausend Euro.

Die Gesamtvergütung des Vorstands der Allianz SE für 2010 (ohne die vorläufige Rückstellung für den Drei-Jahre-Bonus) beträgt 28 Millionen Euro (2009: 36 Millionen Euro einschließlich der Auszahlung des Drei-Jahre-Bonus für den Zeitraum 2007 bis 2009).

Die Gesamtvergütung des Vorstands der Allianz SE einschließlich Pensionsaufwendungen beläuft sich für 2010 (ohne die vorläufige Rückstellung für den Drei-Jahre-Bonus) auf 32 Millionen Euro (2009: 40 Millionen Euro einschließlich der Auszahlung des Drei-Jahre-Bonus für den Zeitraum 2007 bis 2009).

**Zuteilungen und Bestände aktienbezogener Vergütung:** Im Rahmen des bis 31. Dezember 2009 gültigen Vergütungssystems bestand die aktienbezogene Vergütung aus virtuellen Aktienoptionen, sogenannten Stock Appreciation Rights (SAR), und virtuellen Aktien, sogenannten Restricted Stock Units (RSU). Auf Basis des zum 1. Januar 2010 neu eingeführten Vergütungssystems werden ausschließlich RSU zugeteilt. Die folgende Tabelle zeigt die Anzahl gehaltener SAR und RSU zum 31. Dezember 2010 sowie eine bestmögliche Schätzung der RSU, die im März 2011 für den abgelaufenen Leistungszeitraum 2010 zugeteilt werden.

#### Zugeteilte Rechte und Bestände im Rahmen der Allianz Aktienvergütung<sup>2</sup>

| Mitglieder des Vorstands                 | RSU                                              |                                     | SAR                                 |                                      |
|------------------------------------------|--------------------------------------------------|-------------------------------------|-------------------------------------|--------------------------------------|
|                                          | Anzahl am 10.3.2011 zugeteilter RSU <sup>3</sup> | Anzahl am 31.12.2010 gehaltener RSU | Anzahl am 31.12.2010 gehaltener SAR | Bandbreite des Ausübungspreises in € |
| Michael Diekmann (Vorstandsvorsitzender) | 17 764                                           | 37 417                              | 129 136                             | 51,95 – 160,13                       |
| Dr. Paul Achleitner                      | 12 370                                           | 25 059                              | 92 622                              | 51,95 – 160,13                       |
| Oliver Bäte                              | 10 905                                           | 12 951                              | 26 362                              | 51,95 – 117,38                       |
| Clement B. Booth                         | 11 413                                           | 25 094                              | 50 464                              | 51,95 – 160,13                       |
| Enrico Cucchiani                         | 10 647                                           | 25 187                              | 84 366                              | 51,95 – 160,13                       |
| Dr. Joachim Faber                        | 11 842                                           | 26 639                              | 89 105                              | 51,95 – 160,13                       |
| Dr. Christof Mascher                     | 10 140                                           | 14 026                              | 36 174                              | 51,95 – 160,13                       |
| Jay Ralph                                | 9 725                                            | 12 531                              | 25 449                              | 51,95 – 117,38                       |
| Dr. Gerhard Rupprecht                    | 9 718                                            | 24 583                              | 84 348                              | 51,95 – 160,13                       |
| Dr. Werner Zedelius                      | 9 632                                            | 32 994                              | 95 835                              | 51,95 – 160,13                       |

<sup>1</sup> Die Werte der Gesamtvergütung für 2009 beinhalten den Wert der aktienbezogenen Vergütung am Tag der Zuteilung (11. März 2010). Die Werte weichen von denen im Geschäftsbericht 2009 ab, da im letzten Berichtsjahr für die aktienbezogene Vergütung noch eine bestmögliche Schätzung berücksichtigt wurde.

<sup>2</sup> Wie im Geschäftsbericht 2009 ausgewiesen, wurde die aktienbezogene Vergütung für das Jahr 2010 als gewährte Vergütung für das Jahr 2009 angesehen. Der Ausweis der SAR und RSU im Geschäftsbericht 2009 basierten auf einer bestmöglichen Schätzung. Die tatsächlichen Zuteilungen am 11. März 2010 weichen von der Schätzung ab und müssen entsprechend ausgewiesen werden. Die tatsächlichen Zuteilungen im Rahmen des Group Equity Programms in Form von SAR und RSU betragen: Michael Diekmann: SAR 20 884; RSU 10 367, Dr. Paul Achleitner: SAR 13 923; RSU 6 911, Oliver Bäte: SAR 12 183; RSU 6 048, Clement B. Booth: SAR 15 572; RSU 7 730, Enrico Cucchiani: SAR 9 757; RSU 4 843, Dr. Joachim Faber: SAR 15 764; RSU 7 825, Dr. Christof Mascher: SAR 7 892; RSU 3 918, Dr. Gerhard Rupprecht: SAR 10 093; RSU 5 010, Dr. Werner Zedelius: SAR 16 296; RSU 8 089. Das bis Dezember 2009 gültige Vergütungssystem wird im Geschäftsbericht 2009 beschrieben (Seite 18 ff.)

<sup>3</sup> Der anzusetzende Wert einer RSU steht erst am Tag der Zuteilung (10. März 2011) und somit erst nach dem Testat durch die KPMG fest. Die ausgewiesenen Stücke basieren auf einer bestmöglichen Schätzung.

Die Bezüge im Rahmen des Allianz Aktienvergütungsprogramms werden als Vergütungen mit Barausgleich bilanziert; ihr Zeitwert über die Sperrfrist wird als Personalaufwand erfasst. Nach Ablauf der Sperrfrist werden jegliche Änderungen des Zeitwertes der noch nicht ausgeübten SAR als Personalaufwand verbucht. Der Zeitwert zum Ende des Geschäftsjahres 2010 betrug 5 246 Tausend Euro, davon für Herrn Diekmann 697 Tausend Euro, für Dr. Achleitner 434 Tausend Euro, für Herrn Bäte 407 Tausend Euro, für Herrn Booth 639 Tausend Euro, für Enrico Cucchiani 474 Tausend Euro, für Dr. Faber 509 Tausend Euro, für Dr. Mascher 412 Tausend Euro, für Mr. Ralph 443 Tausend Euro, für Dr. Rupprecht 492 Tausend Euro und für Dr. Zedelius 739 Tausend Euro.

Die SAR können nach Ablauf der Sperrfrist ausgeübt werden, vorausgesetzt, die Ausübungshürden sind genommen. Für SAR, die bis einschließlich 2008 gewährt wurden, beträgt die Sperrfrist zwei Jahre. Für SAR, die ab 2009 gewährt wurden, beträgt die Sperrfrist vier Jahre. SAR können ausgeübt werden, wenn der Kurs der Allianz SE Aktie um mindestens 20 Prozent über dem Ausgabekurs der SAR liegt. Darüber hinaus muss der Kurs der Allianz SE Aktie während der Laufzeit den Dow Jones EURO STOXX Price Index (600) mindestens einmal an fünf aufeinanderfolgenden Börsentagen übertroffen haben. Die RSU werden am ersten Handelstag nach Ablauf der Sperrfrist durch die Gesellschaft ausgeübt.

2010 wurden für ausgeschiedene Vorstandsmitglieder beziehungsweise ihre Hinterbliebenen Vergütungen und andere Versorgungsleistungen in Höhe von 7 (4) Millionen Euro ausbezahlt. Außerdem beliefen sich die Pensionsverpflichtungen für laufende Pensionen und Anwartschaften auf Pensionen auf 58 (52) Millionen Euro.

#### **Darlehen an Vorstandsmitglieder**

Zum 31. Dezember 2010 gab es keine ausstehenden Darlehen, die Mitgliedern des Vorstands der Allianz SE von Gruppengesellschaften gewährt wurden. Wenn Darlehen oder Dispositionskredite vergeben werden, erfolgt dies zu gängigen Marktkonditionen oder zu den üblichen Konditionen für Allianz Mitarbeiter. Sie enthalten keine größeren Risiken als das gewöhnliche

Ausfallrisiko und keine sonstigen möglicherweise ungünstigen Besonderheiten.

#### **Beendigung des Dienstverhältnisses**

Vorstandsverträge werden normalerweise zunächst für eine Dienstzeit von drei Jahren geschlossen und sind nach deren Ablauf verlängerbar. Sofern der Vertrag nach Ablauf der ersten Bestellperiode erneuert wird, erfolgt die Wiederbestellung für eine Dauer von maximal fünf Jahren. Die Bestellperiode verkürzt sich jedoch entsprechend, sofern das 60. Lebensjahr vorher vollendet wird. Für die Beendigung des Dienstverhältnisses (einschließlich Pensionierung) gelten nachfolgend dargelegte Regelungen.

Vorstandsmitgliedern, die vor dem 1. Januar 2010 in den Vorstand bestellt wurden und dem Vorstand mindestens fünf Jahre angehörten, steht ein Übergangsgeld für die ersten sechs Monate nach dem Ausscheiden aus dem Vorstand zu. Vorstände, die ein Übergangsgeld erhalten, unterliegen einem sechsmonatigen Wettbewerbsverbot. Die fällige Summe wird auf der Grundlage der letzten Grundvergütung und eines Teils des jährlichen Zielbonus berechnet. Pensionszahlungen aus Allianz Pensionsplänen werden angerechnet, sofern ein Anspruch auf sofort beginnende Pensionszahlung besteht. Derzeit aktive Vorstandsmitglieder sind berechtigt, den Dienstwagen in den ersten zwölf Monaten nach Renteneintritt weiter zu nutzen.

Abfindungszahlungen im Falle vorzeitiger Beendigung der Vorstandstätigkeit entsprechen dem Deutschen Corporate Governance Kodex. Der Dienstvertrag sieht vor, dass Zahlungen aufgrund vorzeitiger Beendigung weder (i) mehr als die Restlaufzeit des Dienstvertrags vergüten noch (ii) das Zweifache einer Jahresvergütung überschreiten. Die Jahresvergütung ermittelt sich hierbei aus der im letzten Geschäftsjahr gewährten Grundvergütung plus 50 Prozent der variablen Zielvergütung und ist in keinem Fall höher als die für das letzte Geschäftsjahr gewährte Gesamtvergütung (Abfindungsbegrenzung).

Wenn ein Dienstverhältnis infolge eines sogenannten Kontrollwechsels (Change of Control) beendet wird, gilt die nachfolgend aufgeführte Sonderregelung. Ein



Kontrollwechsel setzt voraus, dass ein Aktionär der Allianz SE allein oder zusammen mit anderen Aktionären mehr als 50 Prozent der Stimmrechte an der Allianz SE hält. Die Auflösung des Dienstverhältnisses „infolge eines Kontrollwechsels“ erfolgt, wenn innerhalb einer Zeitspanne von zwölf Monaten (i) die Bestellung eines Vorstandsmitglieds einseitig durch den Aufsichtsrat widerrufen wird; oder (ii) ein Vorstandsmitglied sein Mandat niederlegt, weil seine Verantwortlichkeiten als Vorstand wesentlich verringert wurden, und zwar ohne dass das betreffende Vorstandsmitglied schuldhaft Anlass zu der Beendigung gegeben hat; (iii) das Organverhältnis einvernehmlich beendet wird; oder wenn vor dem Ablauf von zwei Jahren nach dem Kontrollwechsel die Bestellung eines Vorstandsmitglieds nicht verlängert wird.

Im Falle einer vorzeitigen Dienstbeendigung wegen Kontrollwechsels dürfen die Zahlungen nicht höher sein als 150 Prozent des Höchstbetrages bei Abfindungszahlungen. Die Dienstverträge der Vorstandsmitglieder sehen keine weiteren Regelungen zur vorzeitigen Beendigung des Dienstverhältnisses vor.

## Sonstiges

### Interne und externe Mandate von Vorstandsmitgliedern

Wenn Vorstandsmitglieder ein Mandat bei einer zum Konzern gehörenden Gesellschaft ausüben und dafür eine Vergütung erhalten, wird der Betrag in voller Höhe an die Allianz SE abgeführt. Unter Berücksichtigung der Interessen der Allianz Gruppe können Vorstandsmitglieder eine begrenzte Anzahl von Aufsichtsratsmandaten in konzernfremden Gesellschaften ausüben. In diesem Fall wird die dafür erhaltene Vergütung zu 50 Prozent an die Allianz SE abgeführt. Vorstandsmitglieder behalten die volle Vergütung für Mandate nur dann, wenn diese vom Aufsichtsrat als persönliche Mandate eingestuft werden. Die Vergütung für konzernfremde Mandate wird in den Geschäftsberichten der jeweiligen Gesellschaften ausgewiesen. Die Vergütung für externe Mandate wird von der Unternehmensführung der jeweiligen Gesellschaft festgelegt.

## Ausblick auf 2011

- Der Aufsichtsrat beschloss am 15. Dezember 2010 eine Anpassung der Grundvergütung für Vorstandsmitglieder, deren Grundvergütung sich seit 2006 nicht verändert hat. Zum 1. Januar 2011 wird die Grundvergütung von Clement B. Booth, Enrico Cucchiani, Dr. Joachim Faber und Dr. Werner Zedelius um jeweils 50 000 Euro auf 750 000 Euro erhöht.
- In Übereinstimmung mit den aktuellen gesetzlichen Bestimmungen wurde eine zusätzliche Klausel in die Zielvereinbarungen aufgenommen. Danach kann die Auszahlung variabler Vergütungsbestandteile unterbleiben oder eingeschränkt werden, wenn die staatliche Aufsichtsbehörde die Auszahlung kraft gesetzlicher Ermächtigung untersagt oder beschränkt.
- Ein Kernthema in 2011 wird die kontinuierliche Prüfung der Einhaltung neuer und gegebenenfalls erweiterter nationaler und internationaler Vorschriften für den Versicherungs- beziehungsweise Finanzdienstleistungssektor sein.
- Die Beiträge der Gesellschaft für den beitragsorientierten Pensionsplan werden ab 2011 leicht gesenkt, um den Versorgungsgrad mit aktuellen versicherungsmathematischen Annahmen und zunehmender Lebenserwartung in Einklang zu bringen.

| Allianz SE Vorstandsmitgliedschaft | Beiträge 2010 | Beiträge 2011 |
|------------------------------------|---------------|---------------|
| Weniger als 5 Jahre                | 30,00%        | 29,25%        |
| Nach 5 Jahren                      | 37,50%        | 36,56%        |
| Nach 10 Jahren                     | 45,00%        | 43,88%        |

## Führungskräftevergütung unterhalb des Vorstands

Um die Transparenz weiter zu verbessern und in Übereinstimmung mit den regulatorischen Anforderungen werden zur Führungskräftevergütung unterhalb des Vorstands folgende Themen beschrieben:

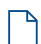

Eine Liste der konzernfremden Aufsichtsratsmandate finden Sie auf Seite 322

- Governance-System
- Rahmenbedingungen und Mindestanforderungen
- Grundsätze der Führungskräftevergütung
- Vergütungsbestandteile
- Vergütung für 2010
- Ausblick auf 2011

Innerhalb dieses Berichts werden Führungskräfte als Stelleninhaber definiert, die entweder erheblichen Einfluss auf Finanz- oder Risikopositionen haben oder entscheidende Geschäftsbereiche der Gruppe leiten (ungefähr 160 Personen). Im Allgemeinen gelten für diese Personengruppe die gleichen Vergütungsgrundsätze und Richtlinien, die bereits für Mitglieder des Vorstands beschrieben wurden. Führungskräfte unterhalb der Vorstandsebene sind jedoch unmittelbar für spezifische Geschäftsbereiche oder Produktgruppen verantwortlich. Daher ist ihre Vergütung entsprechend enger an das jeweilige operative Geschäftsfeld sowie nationale und/oder regionale Gegebenheiten geknüpft. Folglich variieren auch die Vergütungspraktiken und -höhen.

Ziel der Führungskräftevergütung ist es, eine wettbewerbsfähige Vergütung in Bezug auf Vergütungsbestandteile, -struktur und -höhe sicherzustellen, wodurch hoch qualifizierte Mitarbeiter gewonnen, motiviert und an die Gesellschaft gebunden werden können. Gleichzeitig soll exzessive Risikobereitschaft vermieden werden.

## Governance-System

Die Governance im Vergütungsbereich basiert gruppenweit auf fünf Prinzipien:

- effektive Vergütungsausschüsse
- dokumentierte Richtlinien und Grundsätze
- klar definierte und angemessene Zuständigkeiten
- Aufsicht und Kontrolle
- effektiver Informationsfluss

Diese Prinzipien bauen auf dem soliden Fundament der Risikomanagement-Grundsätze, den Allianz Führungsgrundsätzen und dem internen Verhaltenskodex auf.

Die Allianz Gruppe verfügt über Vergütungsausschüsse auf Geschäftsbereichs-, regionaler und Gesellschaftsebene. Die Ausschüsse überprüfen in regelmäßigen Abständen die Vergütungsrichtlinien und entscheiden über deren Anwendung für Mitarbeiter und Führungskräfte unterhalb des Vorstands. Je nach Art und Umfang der Geschäftstätigkeit hat der Vorstand eine angemessene Aufsicht durch die Vergütungsausschüsse festgelegt.

Der Vergütungsausschuss auf Gruppenebene (Group Compensation Committee, GCC) entlastet und unterstützt den Vorstand der Allianz SE in seiner Zuständigkeit für alle Vergütungsfragen. Die Zuständigkeit umfasst im Wesentlichen Geschäftsführer und Vorstandsmitglieder von Gesellschaften des internationalen Führungskräftekomitees (International Executive Committee, IEC) sowie Führungskräfte in Zentralfunktionen der Allianz SE. Darüber hinaus wurde eine weitere Gruppe von Führungskräften, die signifikanten Einfluss auf Finanz- oder Risikopositionen der Gesellschaft haben oder kritische Geschäftsbereiche der Gruppe leiten, für eine nähere Überprüfung bestimmt. Die zu überprüfenden Positionen und deren Stelleninhaber wurden vom GCC gemeinsam mit Vertretern von Gesellschaften, die im Rahmen der VersVergV, gültig seit 13. Oktober 2010, als wesentlich eingestuft wurden, festgelegt.

Die Zuständigkeit lokaler Vergütungsausschüsse, in Bezug auf Vergütungssysteme und die Kontrolle für sie relevanter/entsprechender Führungskräfte, entspricht weitestgehend jener des GCC.

Gruppenweit gültige Rahmenbedingungen regeln die Tätigkeiten der Vergütungsausschüsse und stellen die einheitliche Beachtung und Anwendung von Allianz Mindestanforderungen und gesetzlichen Vorgaben sicher. In Übereinstimmung mit aktuellen Vorschriften umfasst dies:

- wichtige Anforderungen an die Zusammensetzung der Vergütungsausschüsse,
- Rolle und Zuständigkeiten der Mitglieder,
- operative Abläufe sowie
- Grundsätze der Vergütung und Mindestanforderungen an diese.

Die Mitgliederstruktur des GCC spiegelt das Geschäftsmodell der Allianz Gruppe sowie die erforderliche Breite und Tiefe an Erfahrung zur Ausübung der gruppenweiten Aufsicht und Kontrolle wider. Die Mitglieder werden durch den Vorstand der Allianz SE bestimmt. Überlappende Mitgliedschaften im Vergütungs-, Risiko-, Finanz- und Kapitalausschuss unterstützen den Informationsaustausch zwischen diesen Gremien.

In 2010 hatte das GCC folgende Mitglieder: Michael Diekmann (Vorsitzender), Oliver Bäte (Controlling, Reporting und Risiko), Clement B. Booth (Global Insurance Lines/Anglo Markets), Dr. Joachim Faber (Asset Management Worldwide) und Dr. Gerhard Rupprecht (Insurance German Speaking Countries). Darüber hinaus waren Vertreter aus dem Personalbereich (einschließlich Vergütungsexperten) bei jeder Sitzung anwesend. Wenn erforderlich, wurden weitere Experten oder beratende Funktionen für einzelne Themen hinzugezogen.

Lokale Vergütungsausschüsse setzen sich üblicherweise aus regionalen Geschäftsführern, Geschäftsbereichsleitern, Chief Financial Officers oder Chief Operating Officers und Personalleitern zusammen; letztere sind in der Regel beratend tätig. Ab 2011 ist vorgesehen, dass Recht und/oder Compliance-Funktionen durch ein stimmberechtigtes Mitglied vertreten sind.

Das GCC muss über die Aufsichtsfunktion der lokalen Vergütungsausschüsse hinweg vierteljährlich über Zahlungen sowie individuelle Regelungen oberhalb bestimmter Grenzwerte unterrichtet werden.

### Rahmenbedingungen und Mindestanforderungen

Die globalen Governance-Strukturen und die entsprechenden Mindestanforderungen werden zentral verwaltet. Dadurch ist ein global einheitliches Vorgehen gewährleistet, das an kurzfristige Änderungen im Geschäftsumfeld und neue Vorschriften angepasst werden kann. Zudem können darüber hinaus das nachhaltige Performance-Management und die Governance-Grundsätze fortlaufend verbessert werden.

Zur Überprüfung der Angemessenheit und Transparenz der Vergütungsstrukturen sowie deren Ausrichtung an der nachhaltigen Entwicklung der Gruppe wurde 2010 eine umfassende Risikobewertung für Führungskräfte in Gesellschaften, die im Rahmen der VersVergV als wesentlich eingestuft wurden, durchgeführt. Die Untersuchung zielte darauf ab, Vorschläge für eine verbesserte Risikovermeidung und leistungsbezogene Vergütung zu entwickeln. Letztlich sollte die Einhaltung geltender Vergütungsvorschriften überprüft und bestätigt werden.

Spezialisten aus verschiedenen Zentralfunktionen und Geschäftsbereichen sowie externe Vergütungsexperten nahmen eine umfangreiche qualitative Prüfung vor, um Funktionen, die einen erheblichen Einfluss auf das Risikoprofil der Gesellschaft haben, festzustellen.

Die Analyse umfasste im Wesentlichen:

- eine genaue Überprüfung der Bemessungsgrundlagen für Bonuspläne und entsprechenden Gewichtungen in den Zielvereinbarungen der Führungskräfte;
- eine eingehende Überprüfung der bestehenden Mindestanforderungen für das Performance-Management und deren Implikationen für den jährlichen Zielvereinbarungsprozess;
- eine Überprüfung, ob die leistungsbezogene Vergütung die Allianz Strategie unterstützt und den regulatorischen Anforderungen an deutsche Versicherungsinstitute ausreichend entspricht;
- eine Überprüfung der Effektivität der Governance- und Kontrollprozesse, inklusive Selbsteinschätzung der Gesellschaften auf Basis der aktualisierten Anforderungen an die Vergütungsausschüsse.

Die Ergebnisse der Analyse flossen in den internen Vergütungsbericht an den Vorstand ein. Basierend auf diesem Vergütungsbericht übergab der Vorstand dem Aufsichtsrat eine Zusammenfassung der Analyse sowie Vorschläge zur weiteren Verbesserung der Vergütungs- und Governance-Systeme und bestätigte die Einhaltung relevanter Vorschriften.

## Grundsätze der Führungskräftevergütung

Die Vergütungsstruktur und Anreizsysteme sind so konzipiert, dass sie nachhaltiges und wertorientiertes Handeln fördern. Gruppenweit werden zahlreiche verschiedene Vergütungsstrukturen und -strategien angewandt, die den jeweiligen Rollen der Führungskräfte, den Geschäftstätigkeiten, den lokalen Vergütungsgepflogenheiten und regulatorischen Anforderungen Rechnung tragen.

In 2010 wurde eine Reihe von Anpassungen an den Vergütungsprogrammen für Führungskräfte vorgenommen. Diese basieren unter anderem auf den Ergebnissen einer umfangreichen Überprüfung der Governance-Prozesse, die auch für künftige Anpassungen berücksichtigt werden. Die allgemeinen Grundsätze zur Strategie der Führungskräftevergütung gelten jedoch weiterhin wie folgt:

- Transparentes, faires und integriertes Angebot, um hochqualifizierte Führungskräfte zu gewinnen, zu motivieren und an das Unternehmen zu binden.
- Eine Gesamtvergütung, die wettbewerbsfähig in den relevanten Märkten ist.
- Kopplung der Vergütung an das Erreichen individueller, finanzieller und strategischer Ziele der Allianz Gruppe – im Einklang mit Aktionärsinteressen.
- Abstimmung von Zusammensetzung und Gewichtung fixer/variabler Vergütung auf die Rolle und Verantwortung der Führungskraft. Damit wird der Einfluss einer Führungskraft auf das Ergebnis der Gruppe beziehungsweise des Geschäftsbereichs oder der Gesellschaft entsprechend berücksichtigt.
- Gewährleistung, dass die Vergütung in unterschiedlichen Ergebnis- und Geschäftsszenarien effektiv funktioniert.
- Entgegenwirkung unangemessener Risikobereitschaft und Anerkennung effektiver Risikokontrolle.

Die Vergütungsstrukturen sind generell so ausgestaltet, dass unangemessene Risikobereitschaft verhindert wird. Das bedeutet:

- Es bestehen Begrenzungen für alle variablen Vergütungsbestandteile, um das Setzen extremer Leistungsanreize, die das Eingehen großer Risiken fördern könnten, zu vermeiden.
- Wesentliche Teile der Vergütung sind zeitlich aufgeschoben; so kann die Nachhaltigkeit kurzfristiger erzielter Erfolge bestätigt werden.
- Bemessungsgrundlagen der variablen Vergütung, wie Operativer Gewinn und Jahresüberschuss, werden auf Grundlage risikoadjustierter Margen festgelegt. Diese sind keine reinen Umsatzziele. Anforderungen an die Mindestkapitalausstattung werden durch die Verwendung interner Risikokapitalmodelle während des Zielsetzungsprozesses unterstützt. Die mittelfristigen Ziele messen die Kapitalrendite des Kapitaleinsatzes unter Berücksichtigung der eingegangenen Risiken.
- Risiko wird auf allen Hierarchieebenen berücksichtigt, auf denen es von Personen beeinflusst werden kann.

## Vergütungsbestandteile

Das Vergütungsmodell des Allianz Versicherungsgeschäftes bildet das gruppenweite Kernmodell. Dieses gewährleistet ein ausgewogenes Verhältnis zwischen fixen und variablen Vergütungsbestandteilen. Bei der Festlegung der auszuzahlenden Vergütung wird die längerfristige Zielerreichung stärker berücksichtigt. 2010 war das erste Jahr, in dem der „Allianz Sustained Performance Plan“ zur Anwendung kam, der die meisten Führungskräfte im Versicherungsbereich einschließt.

Für die meisten Gesellschaften setzt sich die Vergütung für Führungskräfte aus den folgenden Bestandteilen zusammen, wenn auch nicht jede Führungskraft alle Vergütungsbestandteile erhält oder in der gleichen Gewichtung:

- Grundvergütung
- Variable Vergütung, bestehend aus
  - kurz- und gegebenenfalls mittelfristigen Anreizen
  - langfristigen Anreizen in Form von aktienbezogener Vergütung

Nachstehend werden für die einzelnen Vergütungsbestandteile deren Zielsetzung, Leistungsbezug und Umsetzung beschrieben.

### Grundvergütung

#### Zielsetzung

Berücksichtigt den Marktwert und die nachhaltige Leistung in Ausübung der Rolle. Der fixe Anteil der Gesamtvergütung ist so ausgestaltet, dass der leistungsabhängige Anteil ausgewogen ist und somit überhöhte Risikobereitschaft vermieden wird.

#### Leistungsbezug

Jährliche Anpassungen berücksichtigen die nachhaltige Leistung des Positionsinhabers, das Ergebnis der Gesellschaft, das wirtschaftliche Umfeld sowie Grundgehaltsanpassungen generell in der Gruppe.

#### Umsetzung

Die Grundvergütung wird als jährlicher Barbetrag ausgewiesen und in zwölf monatlichen Raten gezahlt.

### Variable Vergütung

#### Zielsetzung

Grundsätzlich ist die variable Vergütung so ausgestaltet, dass sie sowohl die Erfüllung von jährlichen Zielen als auch den nachhaltigen Erfolg der Gruppe und der lokalen Gesellschaften berücksichtigt und fördert.

#### Leistungsbezug

Die variable Vergütung berücksichtigt die Strategie zum Umgang mit Risiken und den persönlichen Beitrag der Führungskraft.

#### Umsetzung

Jährliche, gegebenenfalls mehrjährige Ziele werden vor der Leistungsperiode festgelegt, kommuniziert und schriftlich festgehalten. Sie müssen grundsätzlich spezifisch, messbar, erreichbar, relevant und zeitbezogen sein. Für den Fall, dass gegen den internen

Verhaltenskodex, Compliance-Kriterien oder andere wesentliche Grundsätze verstoßen wird, kann die Zahlung teilweise oder komplett unterbleiben.

Für Gesellschaften, die sich mit der Vermögensverwaltung, Finanzanlagen für die Allianz oder für Dritte befassen, bestehen spezielle Anreizprogramme und Vergütungsstrukturen, in Übereinstimmung mit marktüblichen Praktiken und unter Berücksichtigung eingegangener Risiken. Diese können sich inhaltlich von den in der Allianz sonst üblichen Anreizprogrammen unterscheiden. So gibt es beispielsweise in diesen Gruppengesellschaften Gewinnbeteiligungs-, Eigeninvestment- und andere Anreizsysteme mit Barvergütung. Geeignete Maßnahmen zur Risikokontrolle sowie Vergütungsausschüsse, deren Mitglieder Experten mit Fach- und Branchenkenntnis sind, stellen eine angemessene Aufsicht und Kontrolle der Vergütungsstrukturen sicher.

Obere Führungskräfte sind auch berechtigt, zu bevorzugten Konditionen Mitarbeiteraktien zu kaufen, sofern sie keine Organfunktion innehaben.

Ferner bietet die Allianz je nach Land und Gesellschaft Pensionspläne und flexible Nebenleistungsprogramme an, insbesondere Entgeltumwandlungspläne, die Teilnehmer darin unterstützen, Kapital für ihre Altersversorgung anzusparen.

Weitere Informationen über den globalen Mitarbeiteraktienkaufplan und die Vergütung für Mitarbeiter entnehmen Sie bitte unter [www.allianz.com/geschaeftsbericht](http://www.allianz.com/geschaeftsbericht).

### Vergütung für 2010

Für Führungskräfte im Sinne der VersVergV werden im Folgenden zusammengefasste Informationen zu deren Zielvergütung im Geschäftsjahr 2010 dargestellt. Es handelt sich gruppenweit um 161 Positionen beziehungsweise deren Stelleninhaber.

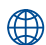

Weitere Informationen zur Vergütung für Mitarbeiter finden Sie unter [www.allianz.com/geschaeftsbericht](http://www.allianz.com/geschaeftsbericht)



## Merkmale der Zielvergütung 2010<sup>1,2</sup>

### Verhältnis von fixer zu variabler Vergütung

in %

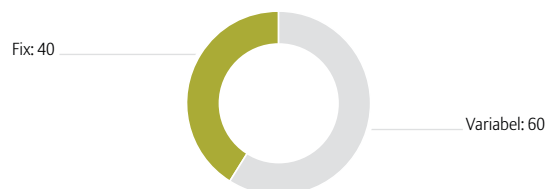

### Verteilung nach Vergütungsbestandteilen

in %

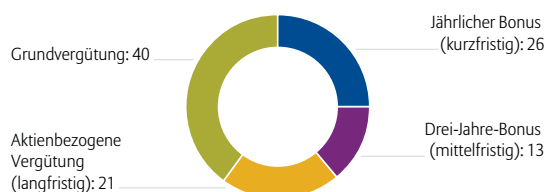

### Verhältnis von kurzfristiger zu mittel- und langfristiger variabler Vergütung

in %

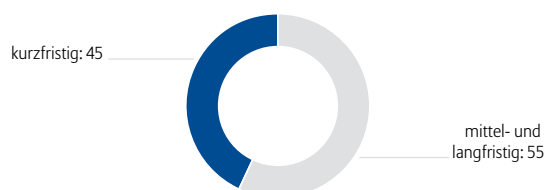

### Verhältnis von bar- zu aktienbezogener variabler Vergütung

in %

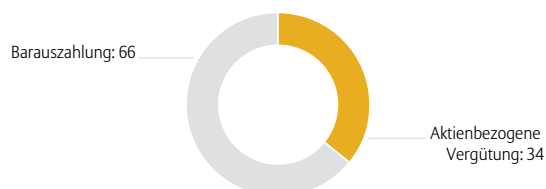

## Ausblick auf 2011

Am 13. Januar 2011 hat der Vorstand der Allianz SE Dr. Christian Finckh (Chief Human Resources Officer, Allianz SE), Thomas Munkel (Chief Governance Officer, Allianz SE), Dr. Thomas Naumann (Head of Group Planning and Controlling, Allianz SE) und Dr. Werner Zedelius (Mitglied des Vorstands, Allianz SE) mit sofortiger Wirkung zu Mitgliedern des GCC ernannt. Dr. Werner Zedelius übernimmt den Vorsitz von Michael Diekmann, der reguläres Mitglied im GCC bleibt. Dr. Gerhard Rupprecht hat mit seiner Pensionierung das GCC zum 31. Dezember 2010 verlassen. Diese Veränderungen stärken Fachwissen, erhöhen die Kapazität des Ausschusses und entsprechen den Vorgaben der deutschen Vergütungsvorschriften für Versicherungsunternehmen.<sup>3</sup>

Die Prüfung der Führungskräftevergütung, die im Rahmen des internen Vergütungsberichts dem Vorstand und dem Aufsichtsrat vorgelegt wurde, hat darüber hinaus zu Änderungen in der Vergütungsstruktur einiger Führungskräfte geführt.

Um die Vergütungsvorschriften für deutsche Versicherungsunternehmen zu erfüllen, nehmen fortan alle Führungskräfte gemäß der VersVergV an einem aktienbezogenen Vergütungsprogramm mit RSU teil. Im Einklang mit regulatorischen Anforderungen wird ein Teil der Vergütung aufgeschoben und kann auch auf der Grundlage einer späteren Leistungsneubewertung reduziert werden.

Die variablen Ziele werden aus den Renditeerwartungen auf das erforderliche Kapital abgeleitet.

<sup>1</sup> Werte ohne Pensionen und Nebenleistungen; beinhaltet die Mitglieder des Vorstands der Allianz SE.  
<sup>2</sup> eingeschränkte Vergleichbarkeit mit dem Geschäftsbericht 2009 aufgrund neuer regulatorischer Definitionen bzw. Interpretationen zur Zusammensetzung dieser Personengruppe

<sup>3</sup> In Übereinstimmung mit der VersVergV bestehen die Vergütungsausschüsse der Allianz nicht ausschließlich aus Vorstandsmitgliedern/Geschäftsleitern. Die Mitgliedschaft umfasst Vertreter aus den Geschäftsbereichen sowie aus dem Personalwesen und den Kontrollfunktionen. Um potenziellen Interessenkonflikten vorzubeugen, wird darauf geachtet, dass die Vergütungsausschüsse Mitglieder einschließen, deren eigene Vergütung nicht in den Aufgabenbereich des Ausschusses fallen.

## Aufsichtsratsvergütung

Der folgende Abschnitt zur Aufsichtsratsvergütung beinhaltet:

- Governance
- Strategische Grundsätze
- Vergütungsstruktur und -bestandteile
- Vergütung für 2010
- Ausblick auf 2011

### Governance

Die Aufsichtsratsvergütung richtet sich nach der Satzung der Allianz SE und dem Aktiengesetz.

Die Struktur der Aufsichtsratsvergütung erfüllt die Anforderungen des Deutschen Corporate Governance Kodex und wird regelmäßig auf die Einhaltung zusätzlicher deutscher, europäischer und internationaler Empfehlungen und Vorschriften überprüft.

### Strategische Grundsätze

Die Struktur der Aufsichtsratsvergütung fördert zum einen den Gleichlauf mit den Interessen der Stakeholder und ermöglicht zum anderen aufgrund des Unterschieds zur Struktur der Vorstandsvergütung eine angemessene Kontrolle der Geschäftsführung sowie unabhängige Vergütungsentscheidungen für den Vorstand.

Die wesentlichen strategischen Grundsätze für die Aufsichtsratsvergütung 2010 sind folgende:

- Die Gesamtvergütung entspricht in ihrer Höhe der Verantwortung und Komplexität der Aufgabe der Aufsichtsratsmitglieder sowie der Geschäfts- und Finanzlage des Unternehmens.
- Es besteht Ausgewogenheit zwischen fixen Vergütungsbestandteilen sowie kurzfristigen und langfristigen variablen Vergütungskomponenten.

- Die Vergütung berücksichtigt die individuellen Rollen und Zuständigkeiten der Aufsichtsratsmitglieder, also den Vorsitz oder den stellvertretenden Vorsitz im Aufsichtsrat sowie Mandate in Ausschüssen.

### Vergütungsstruktur und -bestandteile

#### Grundvergütung

Die Grundvergütung<sup>1</sup> eines Mitglieds des Aufsichtsrats der Allianz SE setzt sich aus drei Bestandteilen zusammen:

- Fixe Vergütung: fest bestimmter Barbetrag, der jährlich an jedes Aufsichtsratsmitglied ausgezahlt wird.
- Kurzfristige variable Vergütung, die auf einen einjährigen Horizont ausgerichtet ist. Dabei wird der Erfolg an der Steigerung des Konzernergebnisses je Aktie (Earnings Per Share, EPS) im Vergleich zum Vorjahr gemessen.<sup>2</sup> Wenn keine Steigerung (0 Prozent) erzielt wird, erfolgt keine Auszahlung, bei Erreichen von 16 Prozent EPS-Wachstum erfolgt die maximale Auszahlung.
- Langfristige variable Vergütung, die auf einen dreijährigen Horizont ausgerichtet ist. Der Erfolg wird an der EPS-Steigerung im Vergleich zum entsprechenden Wert vor drei Jahren gemessen.<sup>3</sup> Sofern EPS in diesem Zeitraum nicht wuchs, erfolgt keine Auszahlung, der maximale Auszahlungsbetrag wird bei einem EPS-Wachstum von 40 Prozent erreicht.

Für beide erfolgsbezogenen Vergütungskomponenten wird nur ein EPS-Zuwachs über einem Schwellenwert von 5 Euro gemessen.

Der Vorsitzende des Aufsichtsrats erhält das Doppelte, die stellvertretenden Vorsitzenden erhalten das Eineinhalbfache der Grundvergütung eines regulären Aufsichtsratsmitglieds.

<sup>1</sup> d. h. ohne Berücksichtigung von Ausschussvergütung oder Vergütung für Vorsitzende

<sup>2</sup> 150 Euro für jeden Zehntelprozentpunkt, um den das Konzernergebnis je Aktie im Vergleich zum Vorjahr verbessert wurde

<sup>3</sup> 60 Euro für jeden Zehntelprozentpunkt, um den das Konzernergebnis je Aktie gegenüber dem Referenzwert vor drei Jahren verbessert wurde

Die nachfolgende Tabelle zeigt die mögliche Bandbreite der Grundvergütung je nach Position im Aufsichtsrat:

| Vergütungsbestandteil                            | Vorsitz<br>Tsd € | Stellvertretender<br>Vorsitz<br>Tsd € | Aufsichtsratsmitglied<br>Tsd € |
|--------------------------------------------------|------------------|---------------------------------------|--------------------------------|
| Fixe Vergütung                                   | 100              | 75                                    | 50                             |
| Bandbreite der kurzfristigen variablen Vergütung | 0 – 48           | 0 – 36                                | 0 – 24                         |
| Bandbreite der langfristigen variablen Vergütung | 0 – 48           | 0 – 36                                | 0 – 24                         |
| Bandbreite der Grundvergütung                    | 100 – 196        | 75 – 147                              | 50 – 98                        |

### Ausschussvergütung

Mitglieder und Vorsitzende von Aufsichtsratsausschüssen erhalten eine zusätzliche Vergütung. In der Mehrzahl der Ausschüsse sind die Vergütungen mit einem Prozentsatz an die tatsächliche Grundvergütung gekoppelt, die ein reguläres Mitglied in dem entsprechenden Geschäftsjahr erhält. Insofern findet sich auch in der Ausschussvergütung der erfolgsbezogene Bestandteil wieder.

Die Ausschussvergütungen sind im Einzelnen wie folgt festgelegt:

| Funktion und Mitgliedschaft in Ausschüssen                                           | Ausschussvergütung                             |
|--------------------------------------------------------------------------------------|------------------------------------------------|
| Vorsitz des Personalausschusses, des Ständigen Ausschusses und des Risikoausschusses | 50 % der Grundvergütung, höchstens: 49 Tsd €   |
| Mitgliedschaft im Personalausschuss, im Ständigen Ausschuss und im Risikoausschuss   | 25 % der Grundvergütung, höchstens: 24,5 Tsd € |
| Vorsitz des Prüfungsausschusses                                                      | 45 Tsd €                                       |
| Mitgliedschaft im Prüfungsausschuss                                                  | 30 Tsd €                                       |
| Mitgliedschaft im Nominierungsausschuss                                              | 0 €                                            |

### Höchstgrenzen

Die Gesamtvergütung (Grundvergütung und Ausschussvergütung, ohne Sitzungsgeld) jedes Aufsichtsratsmitglieds ist nach oben begrenzt. Die Vergütung des Aufsichtsratsvorsitzenden darf 300 Prozent der Grundvergütung eines regulären Mitglieds nicht übersteigen; dies ergibt somit eine Höchstgrenze von 294 000 Euro. Für die anderen Mitglieder liegt die Grenze bei 200 Prozent der

Grundvergütung und somit bei einer Höchstgrenze von 196 000 Euro.

### Sitzungsgeld

Die Aufsichtsratsmitglieder erhalten für jede Aufsichtsrats- beziehungsweise Ausschusssitzung, an der sie persönlich teilgenommen haben, 500 Euro Sitzungsgeld. Es wird kein zusätzliches Sitzungsgeld gezahlt, wenn mehrere Sitzungen an einem Tag oder an aufeinanderfolgenden Tagen stattfinden.

### Vergütung für 2010

Die entscheidende Kennziffer zur Bestimmung der Aufsichtsratsvergütung ist das Konzernergebnis je Aktie (EPS), das im Jahr 2010 11,20 Euro betrug. Im Vergleich zu den Geschäftsjahren 2009 und 2007 wurde eine EPS-Steigerung von jeweils 20,04 Prozent und 0,0 Prozent erzielt. Unter Berücksichtigung der Mindestschwelle von 5 Euro wurde das Maximum der erreichbaren kurzfristigen variablen Vergütung erreicht und 0,0 Prozent bei der langfristigen variablen Vergütung.

Die nachfolgende Tabelle bietet einen Überblick über die Grundvergütung für die unterschiedlichen Positionen im Aufsichtsrat in 2010.

| Vergütungsbestandteil           |      | Vorsitz<br>Tsd € | Stellvertretender<br>Vorsitz<br>Tsd € | Aufsichtsratsmitglied<br>Tsd € |
|---------------------------------|------|------------------|---------------------------------------|--------------------------------|
| Fixe Vergütung                  | 2010 | 100              | 75                                    | 50                             |
|                                 | 2009 | 100              | 75                                    | 50                             |
| Kurzfristige variable Vergütung | 2010 | 48               | 36                                    | 24                             |
|                                 | 2009 | 48               | 36                                    | 24                             |
| Langfristige variable Vergütung | 2010 | 0                | 0                                     | 0                              |
|                                 | 2009 | 0                | 0                                     | 0                              |
| Summe Grundvergütung            | 2010 | 148              | 111                                   | 74                             |
|                                 | 2009 | 148              | 111                                   | 74                             |

Die Gesamtvergütung des Aufsichtsrats einschließlich der Sitzungsgelder betrug im Berichtsjahr 1 463 (1 491) Tausend Euro. Dementsprechend reduzierte sich die durchschnittliche Jahresvergütung der einzelnen Aufsichtsratsmitglieder auf 122 (123) Tausend Euro. Auch 2009 wurde keine langfristige erfolgsbezogene Vergütung gezahlt.

In der folgenden Tabelle sind die einzelnen Vergütungskomponenten für den Aufsichtsrat in den Jahren 2010 und 2009 aufgeführt.

| Mitglieder des Aufsichtsrats                              | PA <sup>1</sup> | NA <sup>2</sup> | PA <sup>3</sup> | RA <sup>4</sup> | SA <sup>5</sup> |                   | Fixe<br>Vergütung | Variable<br>Vergütung<br>(kurz-<br>fristig) | Variable<br>Vergütung<br>(lang-<br>fristig) | Aus-<br>schuss-<br>vergütung | Sitzungs-<br>geld | Gesamt-<br>vergütung<br>(nach<br>Kappung) |
|-----------------------------------------------------------|-----------------|-----------------|-----------------|-----------------|-----------------|-------------------|-------------------|---------------------------------------------|---------------------------------------------|------------------------------|-------------------|-------------------------------------------|
|                                                           |                 |                 |                 |                 |                 |                   | Tsd €             | Tsd €                                       | Tsd €                                       | Tsd €                        | Tsd €             | Tsd €                                     |
| Dr. Henning Schulte-Noelle<br>(Vorsitzender)              | M               | V               | V               | V               | V               | 2010              | 100,0             | 48,0                                        | 0,0                                         | 141,0                        | 3,5               | 225,5 <sup>6</sup>                        |
|                                                           |                 | V               | V               | V               | V               | 2009              | 100,0             | 48,0                                        | 0,0                                         | 111,0                        | 2,5               | 224,5 <sup>7</sup>                        |
| Dr. Gerhard Cromme<br>(Stellvertretender<br>Vorsitzender) |                 | M               | M               |                 | M               | 2010              | 75,0              | 36,0                                        | 0,0                                         | 37,0                         | 2,5               | 150,5                                     |
|                                                           |                 | M               | M               |                 | M               | 2009              | 75,0              | 36,0                                        | 0,0                                         | 37,0                         | 2,0               | 150,0                                     |
| Rolf Zimmermann<br>(Stellvertretender<br>Vorsitzender)    |                 |                 | M               |                 | M               | 2010              | 75,0              | 36,0                                        | 0,0                                         | 37,0                         | 2,5               | 150,5                                     |
|                                                           |                 |                 | M               |                 | M               | 2009              | 70,8              | 34,0                                        | 0,0                                         | 35,5                         | 2,5               | 142,8                                     |
| Dr. Wulf H. Bernotat                                      | V               |                 |                 |                 | M               | 2010              | 50,0              | 24,0                                        | 0,0                                         | 63,5                         | 4,0               | 141,5                                     |
|                                                           |                 |                 |                 | M               |                 | 2009              | 50,0              | 24,0                                        | 0,0                                         | 48,5                         | 2,0               | 124,5                                     |
| Jean Jacques Cette                                        | M               |                 |                 |                 |                 | 2010              | 50,0              | 24,0                                        | 0,0                                         | 30,0                         | 3,0               | 107,0                                     |
|                                                           | M               |                 |                 |                 |                 | 2009              | 50,0              | 24,0                                        | 0,0                                         | 30,0                         | 3,5               | 107,5                                     |
| Karl Grimm                                                |                 |                 |                 |                 | M               | 2010              | 50,0              | 24,0                                        | 0,0                                         | 18,5                         | 2,5               | 95,0                                      |
|                                                           |                 |                 |                 |                 | M               | 2009              | 50,0              | 24,0                                        | 0,0                                         | 17,0                         | 1,5               | 92,5                                      |
| Godfrey Robert Hayward                                    |                 |                 |                 | M               |                 | 2010              | 50,0              | 24,0                                        | 0,0                                         | 18,5                         | 2,5               | 95,0                                      |
|                                                           |                 |                 |                 | M               |                 | 2009              | 50,0              | 24,0                                        | 0,0                                         | 18,5                         | 2,0               | 94,5                                      |
| Prof. Dr. Renate Köcher                                   |                 | M               |                 | M               |                 | 2010              | 50,0              | 24,0                                        | 0,0                                         | 18,5                         | 2,0               | 94,5                                      |
|                                                           |                 |                 |                 | M               |                 | 2009              | 50,0              | 24,0                                        | 0,0                                         | 18,5                         | 2,0               | 94,5                                      |
| Peter Kossubek                                            |                 |                 |                 | M               |                 | 2010              | 50,0              | 24,0                                        | 0,0                                         | 18,5                         | 2,5               | 95,0                                      |
|                                                           |                 |                 |                 | M               |                 | 2009              | 50,0              | 24,0                                        | 0,0                                         | 18,5                         | 2,0               | 94,5                                      |
| Igor Landau                                               | M               |                 |                 |                 |                 | 2010              | 50,0              | 24,0                                        | 0,0                                         | 30,0                         | 2,5               | 106,5                                     |
|                                                           | M               |                 |                 |                 |                 | 2009              | 50,0              | 24,0                                        | 0,0                                         | 30,0                         | 2,5               | 106,5                                     |
| Jörg Reinbrecht                                           | M               |                 |                 |                 |                 | 2010              | 50,0              | 24,0                                        | 0,0                                         | 30,0                         | 3,5               | 107,5                                     |
|                                                           | M               |                 |                 |                 |                 | 2009              | 50,0              | 24,0                                        | 0,0                                         | 30,0                         | 2,5               | 106,5                                     |
| Peter D. Sutherland                                       |                 |                 |                 | M               |                 | 2010              | 50,0              | 24,0                                        | 0,0                                         | 18,5                         | 2,0               | 94,5                                      |
|                                                           |                 |                 |                 |                 |                 | 2009              | —                 | —                                           | —                                           | —                            | —                 | —                                         |
| <b>Summe</b>                                              |                 |                 |                 |                 |                 | 2010              | <b>700,0</b>      | <b>336,0</b>                                | <b>0,0</b>                                  | <b>461,0</b>                 | <b>33,0</b>       | <b>1 463,0</b>                            |
|                                                           |                 |                 |                 |                 |                 | 2009 <sup>8</sup> | <b>702,1</b>      | <b>337,0</b>                                | <b>0,0</b>                                  | <b>461,0</b>                 | <b>28,0</b>       | <b>1 491,1</b>                            |

Legende: V = Vorsitzender, M = Mitglied

1 Prüfungsausschuss

2 Nominierungsausschuss

3 Personalausschuss

4 Risikoausschuss

5 Ständiger Ausschuss

6 Gesamtvergütung (ohne Sitzungsgeld) ist auf 222 Tsd € begrenzt (für den Aufsichtsratsvorsitzenden liegt die Begrenzung bei dem 3-Fachen der Grundvergütung für 2010).

7 Gesamtvergütung (ohne Sitzungsgeld) war auf 222 Tsd € begrenzt (für den Aufsichtsratsvorsitzenden lag die Begrenzung bei dem 3-Fachen der Grundvergütung für 2009).

8 Die Summen geben die Vergütung aller aktiven Mitglieder des Aufsichtsrats während des genannten Zeitraums wieder.

### Darlehen an Aufsichtsratsmitglieder

Zum 31. Dezember 2010 gab es keine ausstehenden Darlehen, die Mitgliedern des Aufsichtsrats der Allianz SE von Allianz Gruppengesellschaften gewährt wurden.

### Ausblick auf 2011

Vorstand und Aufsichtsrat haben beschlossen, der Hauptversammlung 2011 eine neue Vergütungsstruktur für den Aufsichtsrat vorzuschlagen. Im Mittelpunkt steht dabei die Umstellung auf eine reine Festvergütung, die erfolgsbezogenen Komponenten werden abgeschafft. Zudem sollen bei der Ausschussvergütung der Umfang der Verantwortung und der tatsächliche Arbeitsaufwand in stärkerem Maß berücksichtigt werden. Grundsätzlich wird das künftige Vergütungsniveau das bisherige Zielniveau nicht übersteigen:

Die Grundfestvergütung eines Aufsichtsratsmitglieds soll jährlich 100 000 Euro betragen. Ein stellvertretender Vorsitz im Aufsichtsrat soll mit jährlich 150 000 Euro und der Vorsitz mit jährlich 200 000 Euro vergütet werden. Die künftige Ausschussvergütung stellt sich wie folgt dar:

| Funktion und Mitgliedschaft in Ausschüssen                                           | Ausschussvergütung |
|--------------------------------------------------------------------------------------|--------------------|
| Vorsitz des Personalausschusses, des Ständigen Ausschusses und des Risikoausschusses | 40 Tsd €           |
| Mitgliedschaft im Personalausschuss, Ständigen Ausschuss und Risikoausschuss         | 20 Tsd €           |
| Vorsitz des Prüfungsausschusses                                                      | 80 Tsd €           |
| Mitgliedschaft im Prüfungsausschuss                                                  | 40 Tsd €           |
| Mitgliedschaft im Nominierungsausschuss                                              | 0 Tsd €            |

Die neue Vergütungsstruktur soll, die Zustimmung der Hauptversammlung und die Eintragung der Satzungsänderung im Handelsregister vorausgesetzt, bereits für das Geschäftsjahr 2011 Anwendung finden. Die aktuelle Fassung des Deutschen Corporate Governance Kodex empfiehlt eine erfolgsbezogene Vergütungskomponente für den Aufsichtsrat. Die Gesellschaft beabsichtigt, in Zukunft hiervon abzuweichen, weil sie eine angemessene feste Vergütung für besser geeignet hält, der unabhängig vom Unternehmenserfolg zu erfüllenden Kontrollfunktion des Aufsichtsrats Rechnung zu tragen. Der Aufsichtsrat hat die Veränderungen des Vergütungssystems in seinen Sitzungen im September und Dezember auf der Grundlage der Vorbereitung durch den Personalausschuss sowie eines Gutachtens über Vergütungspraktiken und -niveaus von Kienbaum Management Consultants behandelt.



## Konzernlagebericht

- 58 Ihre Allianz
- 65 Analyse und Diskussion der Ergebnisse
- 122 Risikobericht, Kontrollen und Verfahren

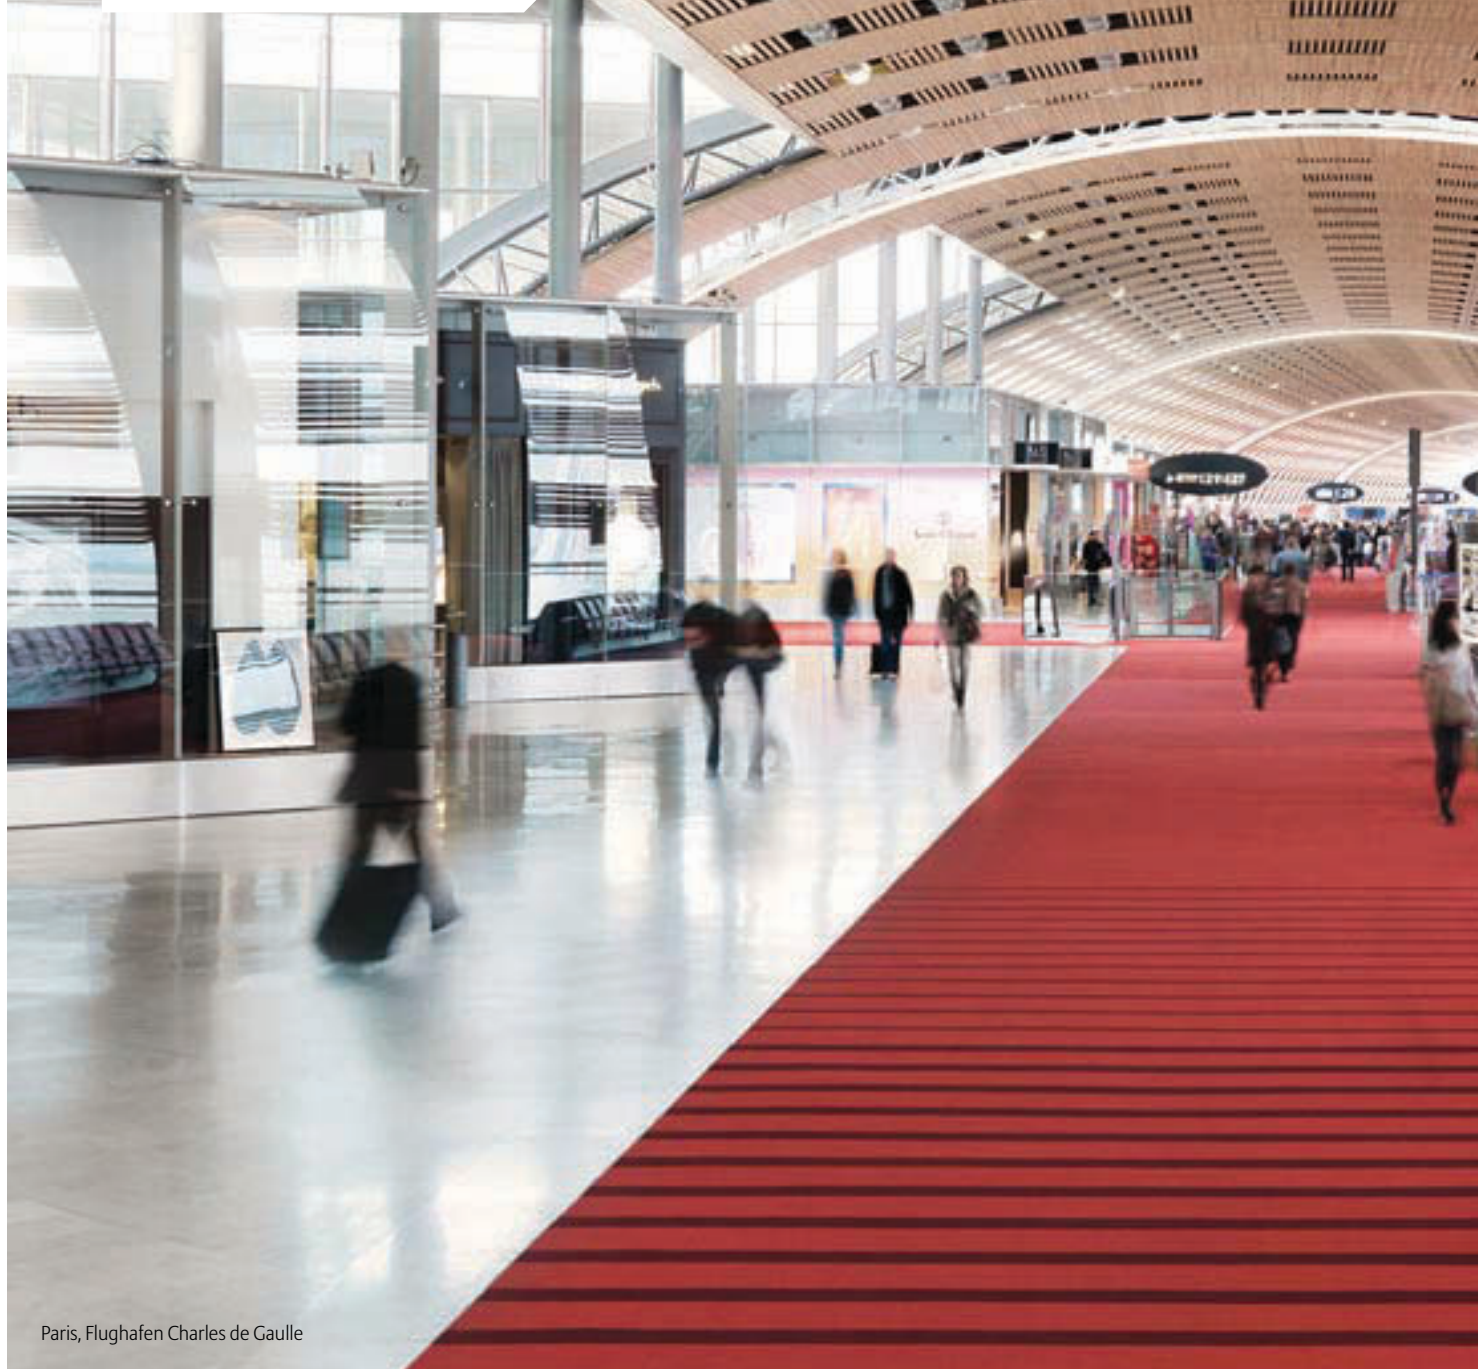

Paris, Flughafen Charles de Gaulle



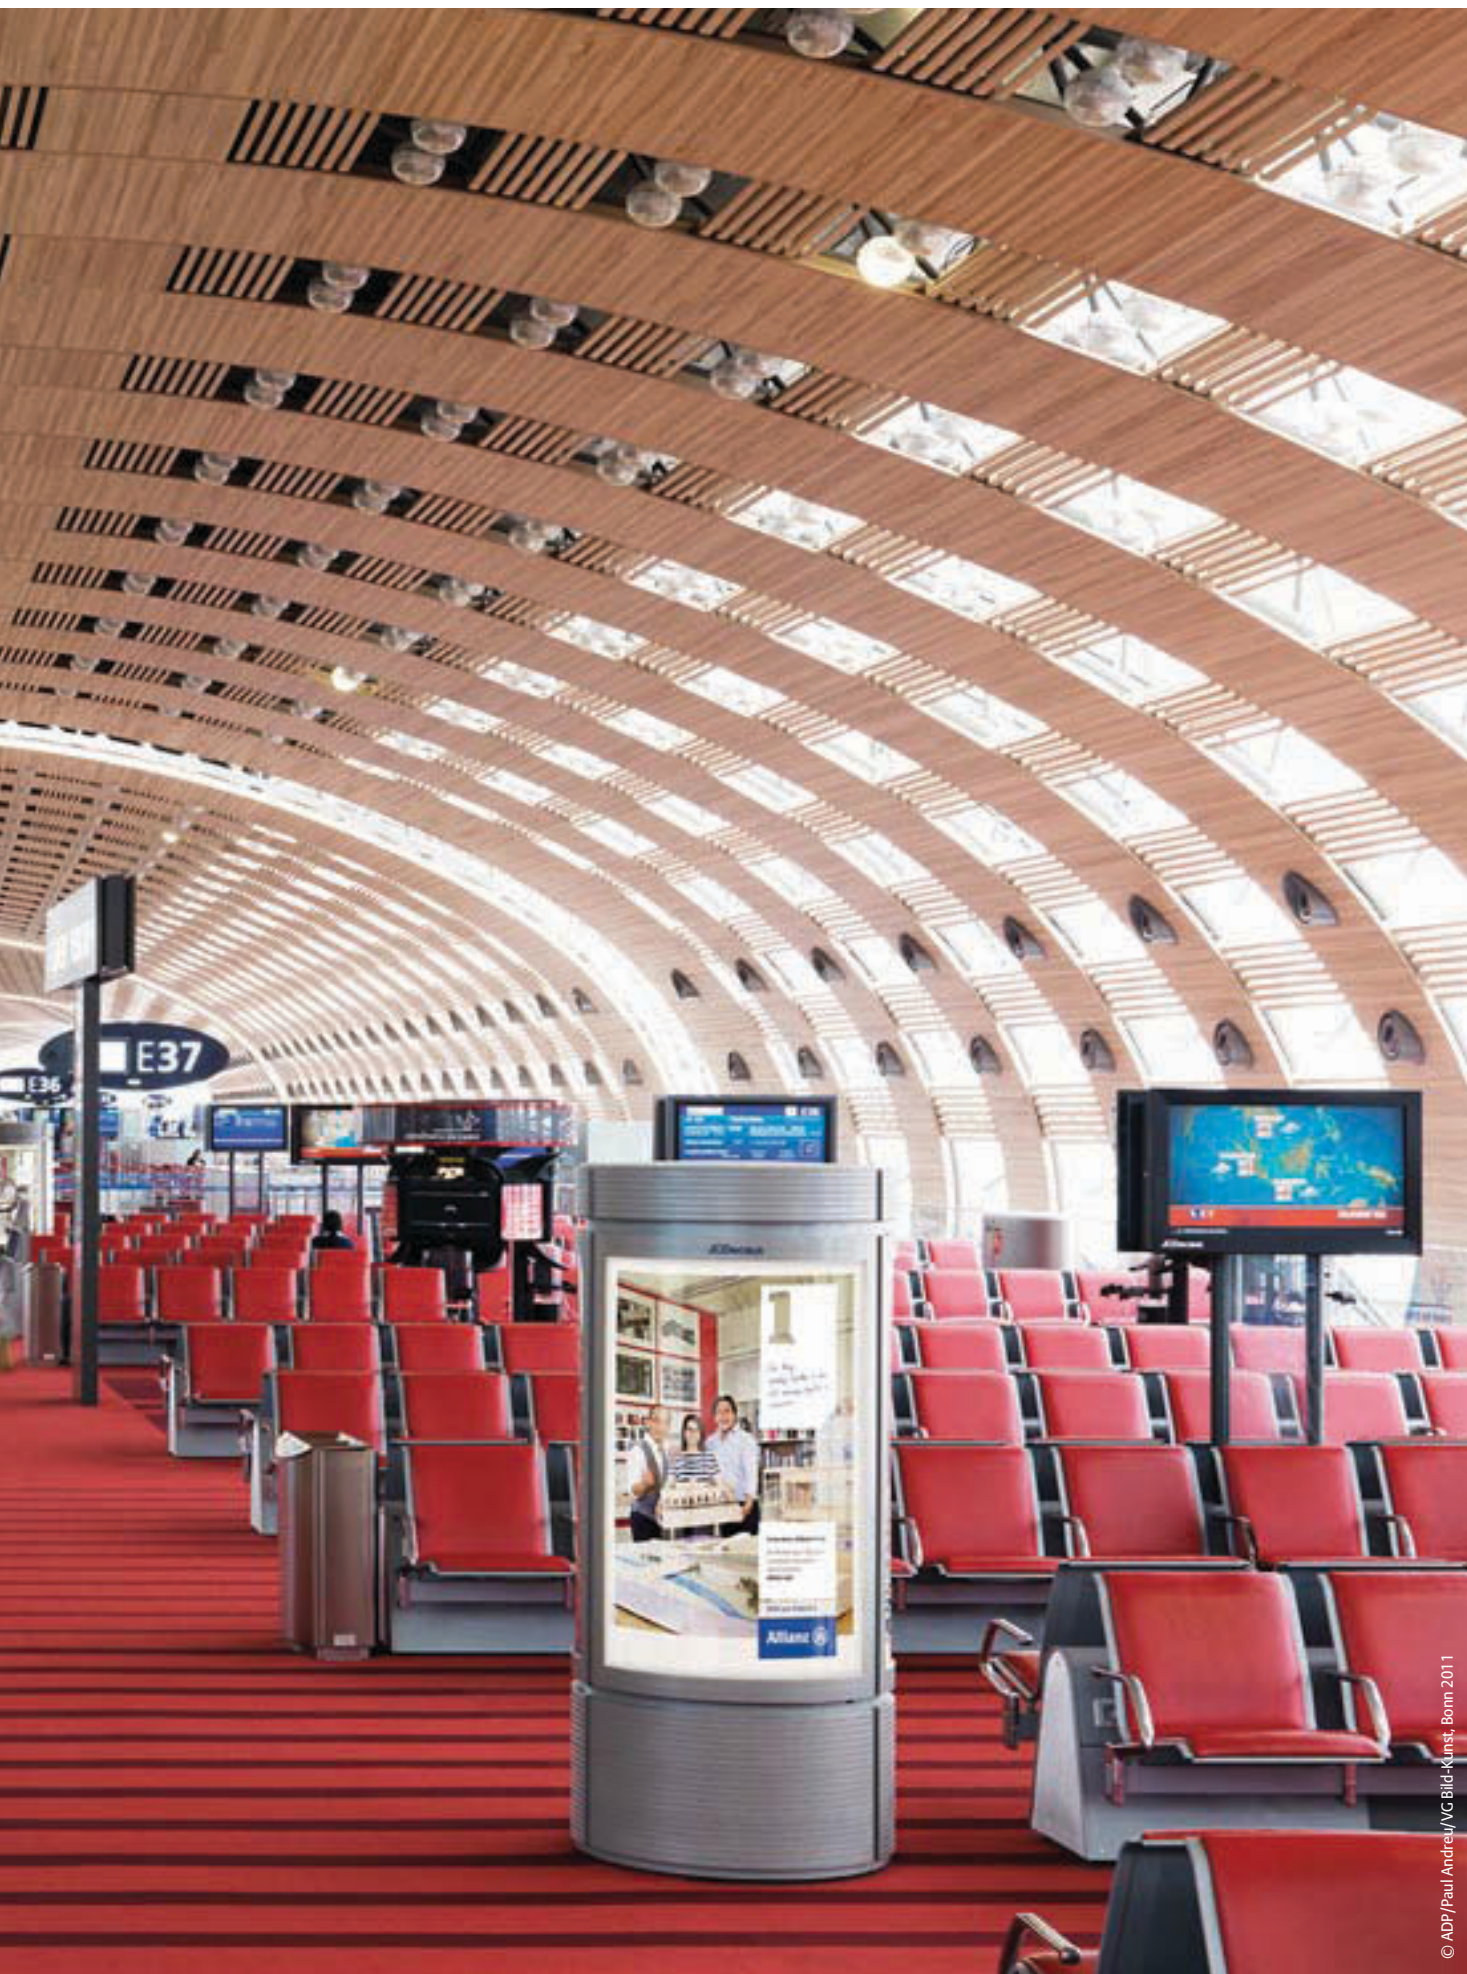



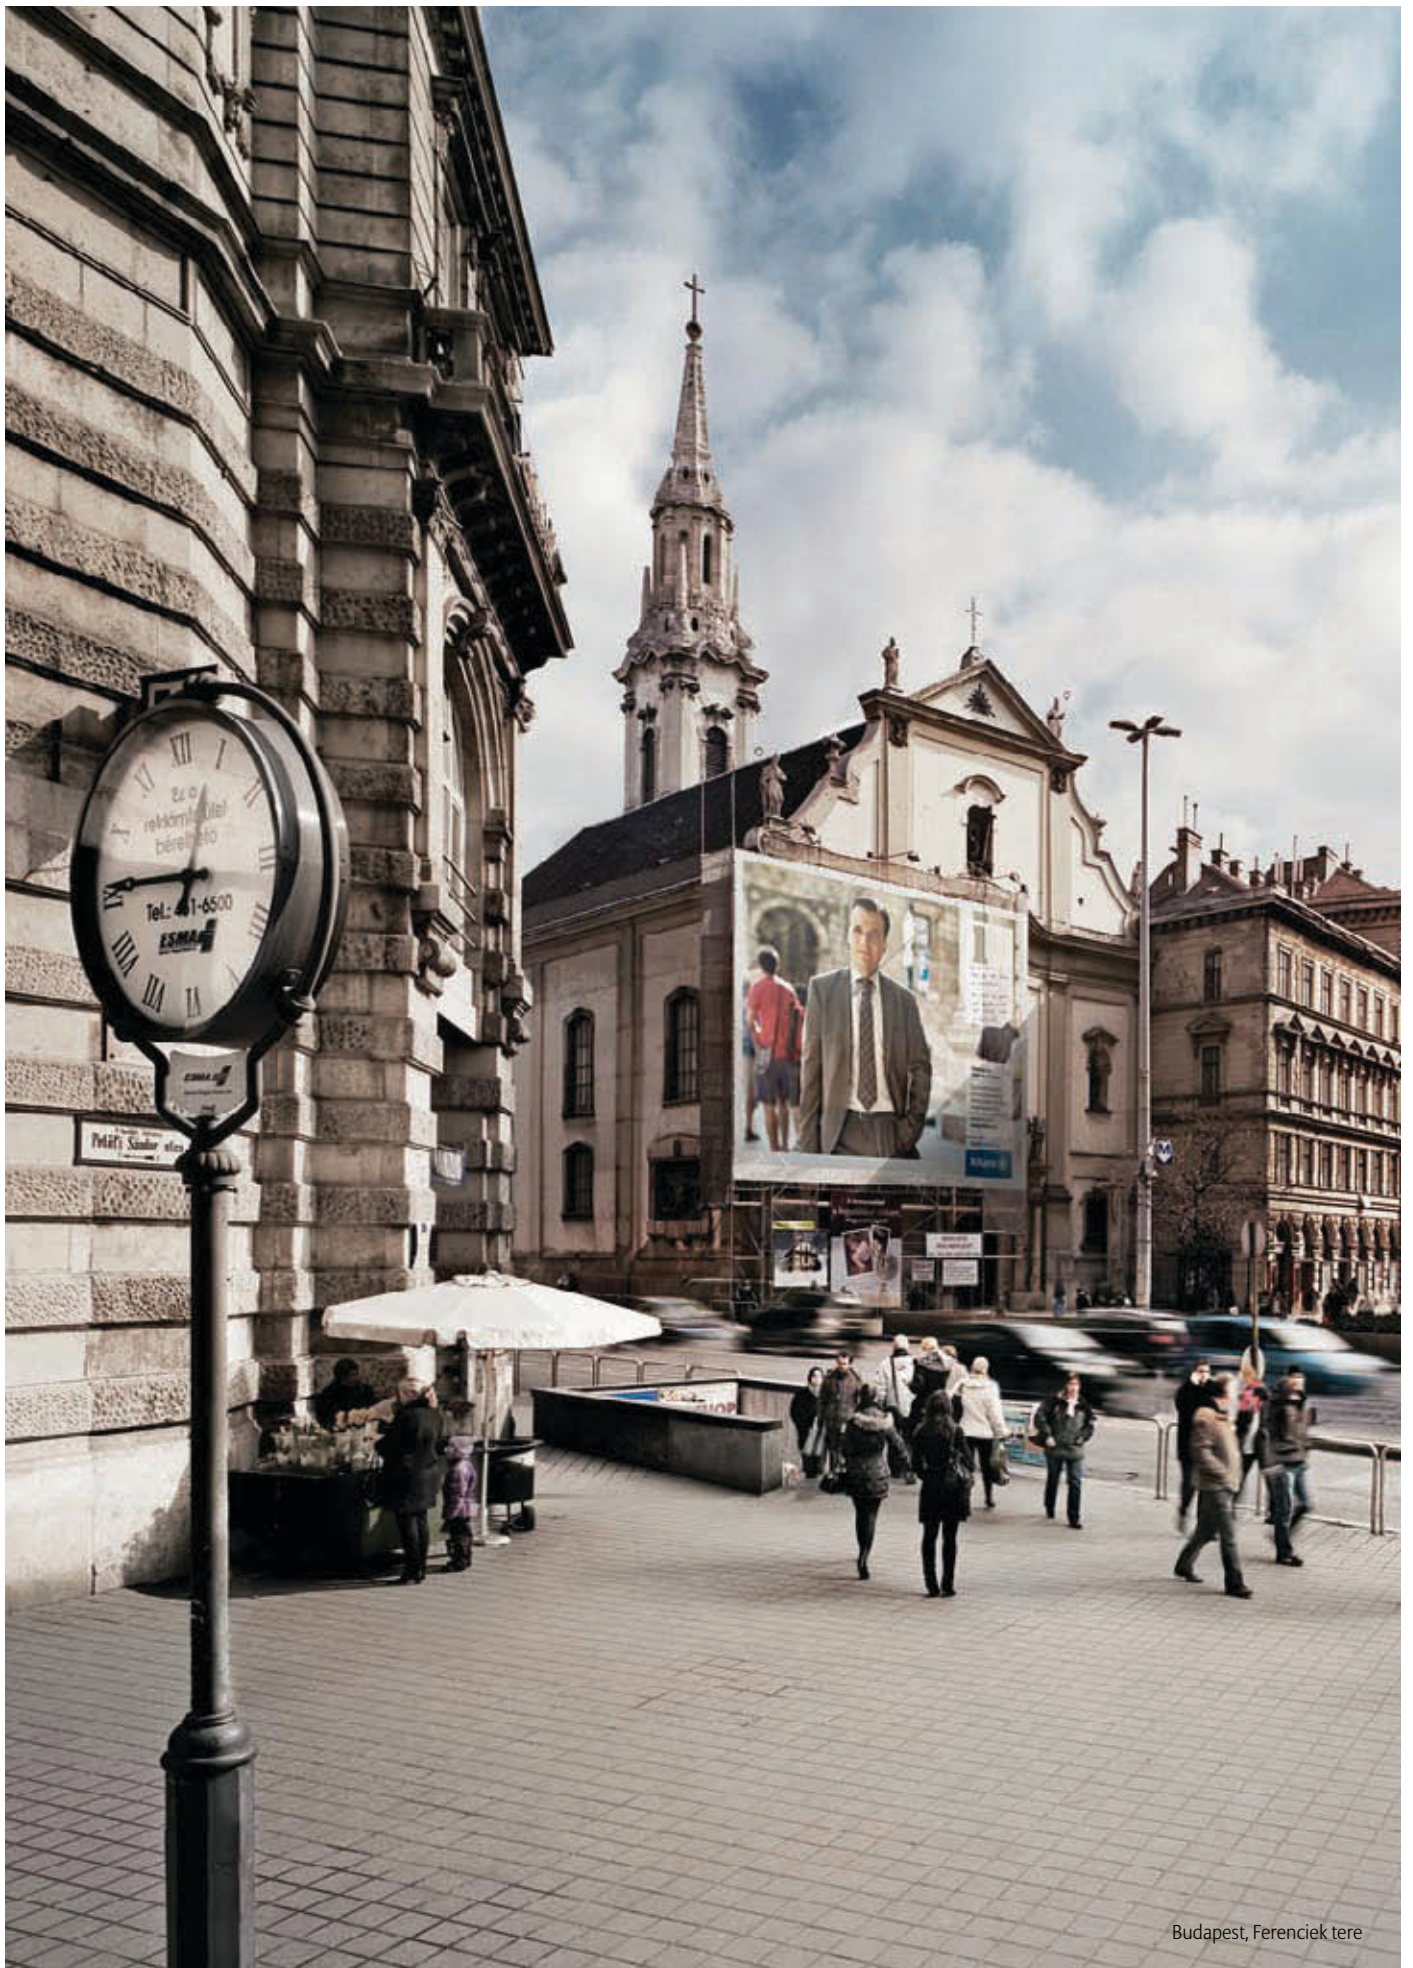

Budapest, Ferenciek tere

# Konzernlagebericht

## Detailliertes Inhaltsverzeichnis

### Ihre Allianz

|    |                                         |
|----|-----------------------------------------|
| 58 | Weltweite Präsenz und Geschäftsbereiche |
| 59 | Unser Geschäft                          |
| 60 | Unsere Strategie                        |
| 61 | Die Marke Allianz                       |
| 62 | Der Kunde im Mittelpunkt                |
| 63 | Unsere Mitarbeiter                      |
| 64 | Nachhaltige Entwicklung                 |

### Analyse und Diskussion der Ergebnisse

|     |                                                                            |
|-----|----------------------------------------------------------------------------|
| 65  | Geschäftsumfeld                                                            |
| 65  | Wirtschaftliches Umfeld 2010                                               |
| 66  | Geschäftsumfeld 2010                                                       |
| 68  | Überblick über den Geschäftsverlauf 2010                                   |
| 69  | Gesamter Umsatz                                                            |
| 69  | Operatives Ergebnis                                                        |
| 70  | Nichtoperatives Ergebnis                                                   |
| 71  | Ertragsteuern                                                              |
| 71  | Jahresüberschuss                                                           |
| 71  | Eigenkapital                                                               |
| 73  | Vorschlag zur Verwendung des Bilanzgewinns                                 |
| 73  | Ereignisse nach dem Bilanzstichtag                                         |
| 74  | Neue Segmentberichterstattung, Darstellung und Bilanzierungsgrundsätze     |
| 74  | Weitere Bestandteile des Konzernlageberichts                               |
| 75  | Schaden- und Unfallversicherung                                            |
| 76  | Bruttobeiträge                                                             |
| 79  | Operatives Ergebnis                                                        |
| 82  | Schaden- und Unfallversicherungsgeschäft nach Geschäftsbereichen           |
| 84  | Lebens- und Krankenversicherung                                            |
| 85  | Gesamte Beitragseinnahmen                                                  |
| 86  | Operatives Ergebnis                                                        |
| 88  | Lebens- und Krankenversicherungsgeschäft nach Geschäftsbereichen           |
| 90  | Asset Management                                                           |
| 91  | Verwaltetes Vermögen                                                       |
| 92  | Operative Erträge                                                          |
| 93  | Operatives Ergebnis                                                        |
| 94  | Corporate und Sonstiges                                                    |
| 95  | Ergebnisübersicht Holding & Treasury                                       |
| 95  | Ergebnisübersicht Bankgeschäft                                             |
| 95  | Ergebnisübersicht Alternative Investments                                  |
| 96  | Ausblick 2011 und 2012                                                     |
| 96  | Überblick: Vergleich von Prognose und tatsächlichem Ergebnis 2010          |
| 97  | Wirtschaftlicher Ausblick                                                  |
| 97  | Ausblick für die Branche                                                   |
| 98  | Ausblick für die Allianz Gruppe                                            |
| 99  | Überblick: Ausblick 2011                                                   |
| 100 | Beurteilung der erwarteten Ertragslage und Umsätze 2011 durch den Vorstand |
| 101 | Finanzierungs und Liquiditätsentwicklung                                   |

|     |                                                                          |
|-----|--------------------------------------------------------------------------|
| 102 | Voraussichtliche Dividendenentwicklung                                   |
| 102 | Beurteilung der erwarteten Ertragslage 2012 durch den Vorstand           |
| 102 | Einschätzung künftiger Chancen und Herausforderungen                     |
| 104 | Chancenmanagement und strategische Investitionen                         |
| 105 | Allgemeine Einschätzung der aktuellen Wirtschaftslage durch den Vorstand |
| 106 | Vermögenslage und Eigenkapital                                           |
| 106 | Eigenkapital                                                             |
| 106 | Gesetzliche Kapitalanforderungen                                         |
| 107 | Bilanzsumme und gesamtes Fremdkapital                                    |
| 113 | Nicht in der Bilanz erfasste Geschäfte                                   |
| 114 | Liquidität und Finanzierung                                              |
| 114 | Organisation                                                             |
| 114 | Liquiditätsmanagement unserer Operativen Einheiten                       |
| 115 | Liquiditätsmanagement der Allianz SE                                     |
| 118 | Kapitalflussrechnung der Allianz Gruppe                                  |
| 120 | Überleitungen                                                            |
| 120 | Zusammensetzung des gesamten Umsatzes                                    |
| 121 | Zusammensetzung des Umsatzwachstums                                      |

### Risikobericht, Kontrollen und Verfahren

|     |                                                              |
|-----|--------------------------------------------------------------|
| 122 | Risikobericht                                                |
| 122 | Gesamtrisikoprofil                                           |
| 122 | Markt- und Geschäftsumfeld                                   |
| 123 | Kapitalmanagementsystem                                      |
| 127 | Risikomanagementsystem                                       |
| 128 | Risikoorganisation und -prinzipien (Risk Governance)         |
| 130 | Internes Risikokapitalsystem                                 |
| 137 | Konzentration von Risiken                                    |
| 139 | Marktrisiken                                                 |
| 143 | Kreditrisiko                                                 |
| 147 | Versicherungstechnische Risiken                              |
| 152 | Geschäftsrisiko                                              |
| 153 | Sonstige Risiken                                             |
| 156 | Angabepflichten bei Finanzinstrumenten                       |
| 156 | Prioritäten des Risikomanagements für 2011                   |
| 158 | Kontrolle der Finanzberichterstattung und des Risikokapitals |
| 158 | Interne Kontrollen der Finanzberichterstattung               |
| 159 | Kontrolle des Risikokapitals                                 |

In Anlehnung an die jüngste internationale Debatte um die vermehrte Online-Bereitstellung von Geschäftsberichten haben wir unsere Publikationsstrategie und damit auch die Struktur unseres Konzernlageberichts geändert. Wir bieten nun ungeprüfte Zusatzinformationen unter [www.allianz.com/geschaeftsbericht](http://www.allianz.com/geschaeftsbericht) an, die gesetzlich zwar nicht vorgeschrieben sind, sich unseren Lesern jedoch als nützlich erweisen können. Darunter:

- Unser Geschäft
- Unsere Strategie
- Die Marke Allianz
- Der Kunde im Mittelpunkt
- Unsere Mitarbeiter
- Nachhaltige Entwicklung

Diese neue Inhaltsstruktur bietet unseren Lesern eine größere Transparenz und einfachere Navigation, sodass sie sich vor allem auf die Analyse unseres Kerngeschäfts konzentrieren können. Ebenso dürfte dieser Schritt positiv zu unserem Ziel einer nachhaltigen Berichterstattung beitragen.

# Ihre Allianz

## Weltweite Präsenz und Geschäftsbereiche

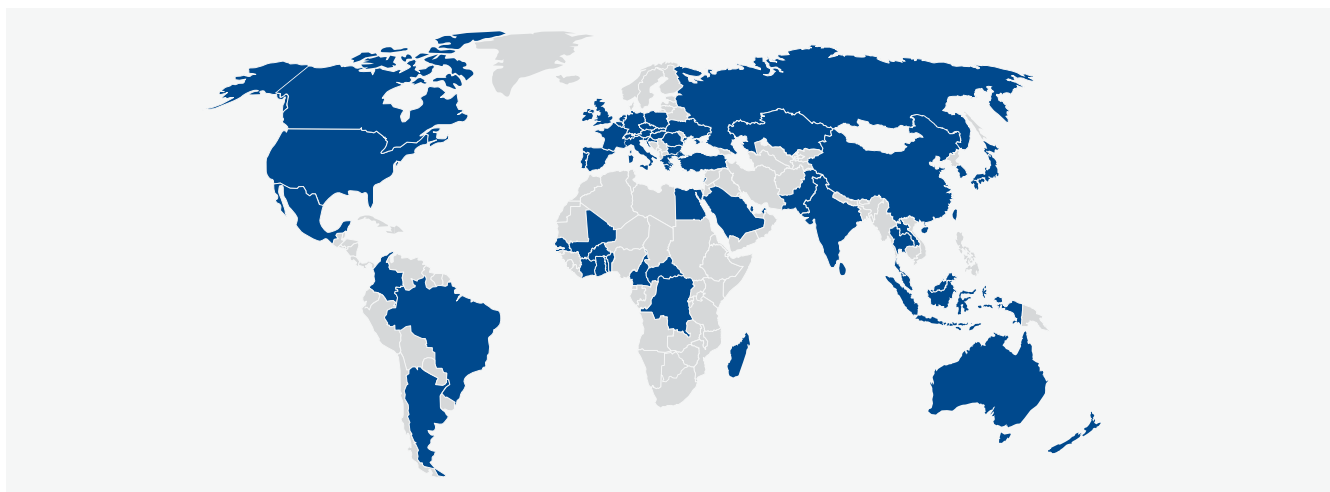

### Versicherung German Speaking Countries

|       |        |        |             |
|-------|--------|--------|-------------|
| ● I.  | ● I.   | ● I.   | Deutschland |
| ● II. | ● II.  | ● II.  | Schweiz     |
| ● II. | ● III. | ● III. | Österreich  |

### Versicherung Europe, South America, Africa

|        |        |        |              |
|--------|--------|--------|--------------|
| ● II.  | ● II.  | ● II.  | Italien      |
| ● II.  | ● IV.  | ● IV.  | Spanien      |
| ● III. | ● III. | ● III. | Portugal     |
| ● III. | ● III. | ● III. | Griechenland |
| ● II.  | ● III. | ● III. | Türkei       |
| ● II.  | ● III. | ● III. | Frankreich   |
| ● III. | ● III. | ● III. | Belgien      |
| ● II.  | ● III. | ● III. | Niederlande  |
| ● IV.  | ● IV.  | ● IV.  | Luxemburg    |

#### Süd Amerika

|        |        |        |             |
|--------|--------|--------|-------------|
| ● IV.  | ● IV.  | ● IV.  | Argentinien |
| ● III. | ● III. | ● III. | Brasilien   |
| ● II.  | ● III. | ● III. | Kolumbien   |

#### Afrika

|       |       |       |                              |
|-------|-------|-------|------------------------------|
| ● II. | ● II. | ● II. | Benin                        |
| ● II. | ● II. | ● II. | Burkina Faso                 |
| ● II. | ● I.  | ● I.  | Kamerun                      |
| ● II. | ● II. | ● II. | Zentralafrikanische Republik |
| ● —   | ● —   | ● —   | Ghana                        |
| ● II. | ● II. | ● II. | Elfenbeinküste               |
| ● II. | ● —   | ● —   | Madagaskar                   |
| ● II. | ● —   | ● —   | Mali                         |
| ● I.  | ● II. | ● II. | Senegal                      |
| ● II. | ● —   | ● —   | Togo                         |

### Versicherung NAFTA Markets

|       |        |        |        |
|-------|--------|--------|--------|
| ● IV. | ● III. | ● III. | USA    |
| ● IV. | ● IV.  | ● IV.  | Mexiko |

### Global Insurance Lines & Anglo Markets

|        |       |       |                                        |
|--------|-------|-------|----------------------------------------|
| ● III. | ● IV. | ● IV. | Großbritannien                         |
| ● II.  | ● IV. | ● IV. | Australien                             |
| ● II.  | ● IV. | ● IV. | Irland                                 |
| ● II.  | ● IV. | ● IV. | Allianz Global Corporate and Specialty |
| ● I.   | ● IV. | ● IV. | Kreditversicherung                     |
| ● —    | ● —   | ● —   | Rückversicherung                       |
| ● —    | ● —   | ● —   | Allianz Worldwide Care                 |

### Versicherung Growth Markets

#### Asien

|        |        |        |            |
|--------|--------|--------|------------|
| ● I.   | ● IV.  | ● IV.  | Brunei     |
| ● IV.  | ● IV.  | ● IV.  | China      |
| ● IV.  | ● IV.  | ● IV.  | Hongkong   |
| ● II.  | ● II.  | ● II.  | Indien     |
| ● III. | ● II.  | ● II.  | Indonesien |
| ● IV.  | ● IV.  | ● IV.  | Japan      |
| ● I.   | ● I.   | ● I.   | Laos       |
| ● I.   | ● III. | ● III. | Malaysia   |
| ● —    | ● —    | ● —    | Pakistan   |
| ● IV.  | ● IV.  | ● IV.  | Singapur   |
| ● III. | ● III. | ● III. | Sri Lanka  |
| ● III. | ● III. | ● III. | Südkorea   |
| ● III. | ● III. | ● III. | Taiwan     |
| ● IV.  | ● III. | ● III. | Thailand   |

#### Zentral- und Osteuropa

|       |        |        |                       |
|-------|--------|--------|-----------------------|
| ● II. | ● I.   | ● I.   | Bulgarien             |
| ● II. | ● I.   | ● I.   | Kroatien              |
| ● II. | ● III. | ● III. | Tschechische Republik |
| ● I.  | ● II.  | ● II.  | Ungarn                |
| ● II. | ● II.  | ● II.  | Kasachstan            |
| ● II. | ● II.  | ● II.  | Polen                 |
| ● II. | ● III. | ● III. | Rumänien              |
| ● II. | ● III. | ● III. | Russland              |
| ● I.  | ● I.   | ● I.   | Slowakei              |
| ● IV. | ● IV.  | ● IV.  | Ukraine               |

### Versicherung Growth Markets

#### Mittlerer Osten und Nordafrika

|        |        |        |               |
|--------|--------|--------|---------------|
| ● IV.  | ● III. | ● III. | Bahrain       |
| ● III. | ● II.  | ● II.  | Ägypten       |
| ● II.  | ● II.  | ● II.  | Libanon       |
| ● —    | ● —    | ● —    | Qatar         |
| ● III. | ● III. | ● III. | Saudi-Arabien |

### Asset Management

#### Amerika

|   |   |   |        |
|---|---|---|--------|
| ● | ● | ● | USA    |
| ● | ● | ● | Kanada |

#### Europa/Mittlerer Osten

|   |   |   |                       |
|---|---|---|-----------------------|
| ● | ● | ● | Deutschland           |
| ● | ● | ● | Frankreich            |
| ● | ● | ● | Italien               |
| ● | ● | ● | Portugal              |
| ● | ● | ● | Spanien               |
| ● | ● | ● | Schweiz               |
| ● | ● | ● | Österreich            |
| ● | ● | ● | Niederlande           |
| ● | ● | ● | Großbritannien        |
| ● | ● | ● | Skandinavische Länder |
| ● | ● | ● | Mittlerer Osten       |

#### Asien-Pazifik

|   |   |   |            |
|---|---|---|------------|
| ● | ● | ● | Japan      |
| ● | ● | ● | Hongkong   |
| ● | ● | ● | Taiwan     |
| ● | ● | ● | Singapur   |
| ● | ● | ● | Südkorea   |
| ● | ● | ● | China      |
| ● | ● | ● | Indien     |
| ● | ● | ● | Australien |

● Schaden- und Unfallversicherung ● Lebens- und Krankenversicherung ● Bankgeschäft ● Private Kunden Asset Management ● Institutionelle Kunden Asset Management  
Marktposition im Versicherungsgeschäft nach Bruttobeiträgen: I. Position 1 II. Position 2 bis 5 III. Position 6 bis 10 IV. nicht unter den Top 10

### Reiseversicherung und Assistance-Leistungen

Mit der Mondial Assistance Gruppe sind wir nach Umsätzen<sup>1</sup> der weltweit größte Anbieter von Reiseversicherungen und Assistance-Leistungen. Mondial Assistance ist eine unserer schnell wachsenden Einheiten, die neue Märkte erobert und erfolgreich neue, äußerst differenzierte Produkte entwickelt. Die von Mondial Assistance bereitgestellten Dienstleistungen werden teilweise zusammen mit unseren Versicherungsprodukten angeboten und bereichern so unser globales Portfolio.

<sup>1</sup> Quelle: nach eigenen lokalen Schätzungen. Stand: 2009



# Unser Geschäft

Die Allianz ist in etwa 70 Ländern tätig und bietet mehr als 76 Millionen Kunden eine Vielfalt von Versicherungs- und Vermögensverwaltungsprodukten an.

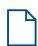

Weitere Informationen zu den Aufgaben und Steuerung des Vorstands finden Sie jeweils auf den Seiten 12 und 35.

## Versicherungsgeschäft

Wir sind der weltweit führende Anbieter in der Schaden- und Unfallversicherung und zählen zu den Top 5 im Lebens- und Krankenversicherungsgeschäft. Die meisten Versicherungsmärkte werden über örtliche Allianz Gesellschaften bedient, während ausgewählte Geschäftsbereiche (Global Corporate Customers, Kreditversicherung, Assistance-Leistungen, Worldwide Care, Rückversicherung) global agieren.

### Auswahl des Produktportfolios

| Schaden- und Unfallversicherung                                                                                                                                                                |                                                                                                                                                                                                                                                                      | Lebens- und Krankenversicherung                                                                                                                                                                                                                 |                                                                                                                            |
|------------------------------------------------------------------------------------------------------------------------------------------------------------------------------------------------|----------------------------------------------------------------------------------------------------------------------------------------------------------------------------------------------------------------------------------------------------------------------|-------------------------------------------------------------------------------------------------------------------------------------------------------------------------------------------------------------------------------------------------|----------------------------------------------------------------------------------------------------------------------------|
| Privatkunden                                                                                                                                                                                   | Geschäftskunden                                                                                                                                                                                                                                                      | Privatkunden                                                                                                                                                                                                                                    | Geschäftskunden                                                                                                            |
| <ul style="list-style-type: none"> <li>– Kraftfahrzeug (Haftpflicht und Kasko)</li> <li>– Haftpflicht</li> <li>– Bauen und Wohnen</li> <li>– Unfall</li> <li>– Reise und Assistance</li> </ul> | <ul style="list-style-type: none"> <li>– Schadenversicherung</li> <li>– Haftpflicht</li> <li>– Fahrzeugflotten</li> <li>– Directors-and-Officers-Versicherung</li> <li>– Kreditversicherung</li> <li>– Schifffahrt-, Luftfahrt- und Transportversicherung</li> </ul> | <ul style="list-style-type: none"> <li>– Kapitallebensversicherung</li> <li>– Rentenprodukte</li> <li>– Risikolebensversicherung</li> <li>– Invalidität</li> <li>– Anlageorientierte Produkte</li> <li>– Private Krankenversicherung</li> </ul> | <ul style="list-style-type: none"> <li>– Gruppen-Lebensversicherungen</li> <li>– Rentenprodukte für Mitarbeiter</li> </ul> |

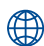

Weitere Informationen über unsere Geschäftsbereiche und Märkte finden Sie unter [www.allianz.com/ge-schaeftsbericht](http://www.allianz.com/ge-schaeftsbericht)

## Asset Management

Wir gehören weltweit zu den größten aktiven Vermögensverwaltern. Unsere diesbezüglichen Geschäftsaktivitäten umfassen Produkt- und Serviceangebote für Drittinvestoren sowie für die Versicherungsgesellschaften der Allianz Gruppe.

### Auswahl des Produktportfolios

| Private und institutionelle Kunden                                                                                                      |                                                                                                                                                                                                                                                                                   |                                                                                                                                                                                       |                                                                                                                                                                                                                       |
|-----------------------------------------------------------------------------------------------------------------------------------------|-----------------------------------------------------------------------------------------------------------------------------------------------------------------------------------------------------------------------------------------------------------------------------------|---------------------------------------------------------------------------------------------------------------------------------------------------------------------------------------|-----------------------------------------------------------------------------------------------------------------------------------------------------------------------------------------------------------------------|
| Aktien                                                                                                                                  | Festverzinslich                                                                                                                                                                                                                                                                   | Alternative Anlagen                                                                                                                                                                   | Lösungen                                                                                                                                                                                                              |
| <ul style="list-style-type: none"> <li>– systematisch</li> <li>– Sektorenfonds</li> <li>– Länderfonds</li> <li>– Stocks Plus</li> </ul> | <ul style="list-style-type: none"> <li>– Geldmarkt</li> <li>– kurze Duration</li> <li>– reale Rendite</li> <li>– global</li> <li>– Investment Grade</li> <li>– diversifizierte Erträge</li> <li>– hochrentierlich</li> <li>– Schwellenmärkte</li> <li>– Wandelanleihen</li> </ul> | <ul style="list-style-type: none"> <li>– Hedgefonds-Dachfonds</li> <li>– Rohstofffonds</li> <li>– Zertifikatefonds</li> <li>– Immobilien</li> <li>– strukturierte Produkte</li> </ul> | <ul style="list-style-type: none"> <li>– Lebenszyklus-Konzepte</li> <li>– Multi-Asset-Lösung</li> <li>– variable Rentenprodukte</li> <li>– Asset Liability Management</li> <li>– Risikomanagement-Konzepte</li> </ul> |

## Corporate und Sonstiges

Die Aktivitäten dieses Segments umfassen die Verwaltung und Unterstützung der Geschäftsbereiche der Allianz Gruppe durch zentralisierte Funktionen sowie das Bankgeschäft und den Bereich Alternative Investments. Unser Bankgeschäft unterstützt unser Versicherungsgeschäft und rundet unser Produktangebot in Deutschland, Italien, Frankreich sowie Mittel- und Osteuropa ab.

# Unsere Strategie

2010 war ein schwieriges Jahr. Unsere starken Ergebnisse zeigen jedoch unsere führende Position in unseren Märkten und wie konsequent wir unseren Geschäftsplan in die Tat umgesetzt haben. Mit unserer nachweislich erfolgreichen Strategie, unserem robusten Geschäftsmodell und unserer starken Marke sind wir auf dem besten Weg, die vertrauenswürdigste Finanzgemeinschaft weltweit zu bilden.

## Fünf Ziele unserer Strategie

### 1. Profitables und nachhaltiges Wachstum

Wir streben in unseren drei Geschäftssegmenten Schaden- und Unfallversicherung, Lebens- und Krankenversicherung sowie Asset Management profitables und nachhaltiges Wachstum an.

### 2. Ausgeglichenes Geschäftsportfolio mit Synergien

Unsere Geschäftssegmente und unsere operativen Einheiten ergänzen und bereichern einander, vor allem indem sie den vielschichtigen Bedürfnissen unserer Kunden dienen. Wir nutzen Gruppensynergien, die sich aus unserer starken Marke, unserer Kapitalallokation, aus funktionalen und versicherungstechnischen „Best Practices“ sowie aus gemeinsamen Abwicklungen und Technologieinvestitionen ergeben.

### 3. Solide Kapitalausstattung

Wir streben nach Kapitalerhalt für unsere Investoren und sind stets darauf bedacht, dass unser Geschäft auf einer guten Kapitalausstattung gründet, um unter Schocks an den Kapitalmärkten zu bestehen und den Wohlstand unserer Kunden zu schützen.

### 4. Weltweit erstklassiges Vermögensverwaltungsgeschäft

Eine seriöse und nachhaltige Anlagestrategie, mit der sich stabile Renditen erzielen und, sofern notwendig, niedrige Zinsen oder eine drohende Inflation ausgleichen lassen, ist Grundlage eines qualitativ starken Wachstums und einer soliden Kapitalausstattung.

### 5. Zukunftweisender Risikorahmen

Durch unsere Ansätze, Richtlinien und Systeme für das Risikomanagement legen wir für unsere anlage-spezifischen, versicherungstechnischen und operativen Entscheidungen den Rahmen einer umsichtig definierten Toleranz für vorhersagbare Risiken fest.

Unsere „3+One“-Strategie verfolgt die Erreichung dieser Ziele durch wohl definierte Maßnahmen, um unsere Kapitalbasis zu schützen, unsere operative Profitabilität zu stärken, die Komplexität unserer Struktur und unseres Betriebsmodells zu reduzieren und unsere nachhaltige Wettbewerbsfähigkeit zu steigern.

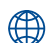

Weitere Informationen  
über unsere Strategie  
finden Sie auf [www.allianz.com/geschaeftsbericht](http://www.allianz.com/geschaeftsbericht)

# Die Marke Allianz

Eine starke Marke sorgt für Vertrauen und fördert bei Kunden und Anteilseignern die Identifikation mit dem Unternehmen. Die historisch erfolgreich gewachsene Marke Allianz baut im Wesentlichen auf zwei Säulen auf: einem herausragenden Produkt-, Dienstleistungs- und Vertriebsangebot sowie einem nachhaltigen Markenmanagement, welches sich innerhalb eines globalen Gesamtkontexts bewegt. Unsere Marke unterstützt Konsumenten im Kaufentscheidungsprozess, indem sie Sicherheit und Vertrauen vermittelt.

## Kerninformationen zu unserer Marke

- Die Allianz Gruppe ist in etwa 70 Ländern tätig; 79 Prozent ihrer Umsätze werden derzeit unter dem Markennamen Allianz erzielt. Mit dem für 2011/2012 geplanten Rebranding für Mondial wird sich der Anteil der unter der Marke Allianz erzielten Umsätze am Gesamtumsatz auf über 80 Prozent erhöhen.
- Unser einheitlicher Markenauftritt bietet auch Spielraum für renommierte Spezialmarken wie PIMCO, den größten US-Verwalter festverzinslicher Anlagen, und Euler Hermes, den Weltmarktführer im Bereich Kreditversicherungen.
- Allianz ist eine weltweit eingetragene und geschützte Marke, was auch für unsere Webdomains gilt.
- Gemessen am Interbrand-Ranking stieg der Wert der Marke Allianz von rund 3,8 Milliarden US-Dollar im Vorjahr auf 4,9 Milliarden US-Dollar im Jahr 2010.

## Das „One“-Konzept

- Unserer Strategie folgend haben wir in den letzten Jahren die Organisationsstruktur der Allianz in stärker kunden- und marktorientierte Einheiten adaptiert. Mit dem „One“-Konzept gehen wir einen Schritt weiter und stellen den Kunden in den Mittelpunkt unserer Kommunikation, indem wir uns mit tatsächlichen Kunden – nicht mit Werbefiguren – auseinandersetzen und ihre Erfahrungen, Ratschläge und Erkenntnisse mit anderen teilen.

### Berichtete Mediaausgaben für die „One“-Kampagne

|             | 2010<br>Mio € |
|-------------|---------------|
| Deutschland | 26,1          |
| Österreich  | 4,1           |
| Ungarn      | 5,9           |
| Portugal    | 1,8           |

Quelle: Focus Media Research, Infoadex, Marktest, Kantar, TNS Media Intelligence

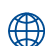

Weitere Informationen  
 über die Allianz Marke  
 finden Sie unter  
[www.allianz.com/  
 geschaeftsbericht](http://www.allianz.com/geschaeftsbericht)

### Auswahl von Auszeichnungen 2010

- Booz & Co verlieh der Allianz Gruppe 2010 den Chief Marketing Officer Award in Anerkennung der außerordentlichen und konsequenten Verwirklichung einer klaren, globalen Markenarchitektur.
- 2010 verbesserte sich die Allianz im Top-100-Interbrand-Markenwert-Ranking um 14 Plätze und zählt damit zu den größten Gewinnern weltweit.

# Der Kunde im Mittelpunkt

Unser Ziel ist es, weiterhin profitabel zu wachsen und langjährige Kundenbeziehungen aufzubauen. Hierfür fördern wir die Marktmanagementfunktion in all unseren Landesgesellschaften, um die Maßnahmen unserer Geschäftsbereiche zur Verstärkung ihrer Kunden- und Marktorientierung zu unterstützen.

## Marktmanagement

Aufbauend auf Markt- und Kundenerkenntnissen versetzt unsere Marktmanagementfunktion uns in die Lage:

- ein ganzheitliches Bild unserer Kunden über alle relevanten Kundeninteraktionen zu gewinnen,
- strategische Kundensegmente zu identifizieren,
- Produkt-, Dienstleistungs- und Vertriebsangebote zu entwickeln,
- die Kundenloyalität zu fördern und
- die Markenführung nach Geschäftszielen auszurichten.

### Kunden nach Regionen/Ländern zum 31. Dezember 2010 (31. Dezember 2009) in %

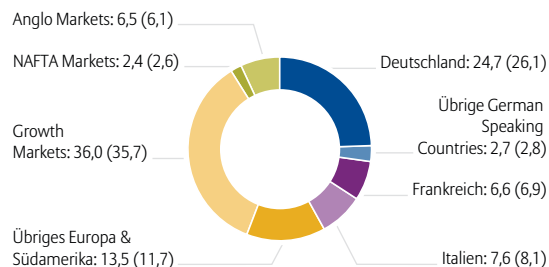

## Net Promoter Score (NPS)

Der NPS dient als wichtiges Instrument unserer Kundenorientierung. Wir nutzen ihn in doppelter Hinsicht:

- um jährlich zu messen, wie hoch die Loyalität unserer Kunden im Vergleich zu denen der Wettbewerber ist. 2010 haben wir dies in 57 Märkten durchgeführt.
- um systematisch bei unseren Kunden Rückmeldungen über ihre persönlichen Erfahrungen mit uns bei Verkaufsgesprächen oder Schadenregulierungen einzuholen. 2010 haben wir in 40 Tochtergesellschaften (die rund 90 Prozent der Bruttoprämie erwirtschaften) den NPS etabliert und konnten auf diese Weise Rückmeldungen von über einer Million Kunden erhalten.

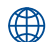

Weitere Informationen  
über unsere Kunden-  
orientierung finden Sie  
unter [www.allianz.com/geschaeftsbericht](http://www.allianz.com/geschaeftsbericht)

Die Entwicklung und immer stärkere Nutzung des NPS zeigen, dass unsere Maßnahmen erfolgreich sind: Seit Beginn unserer NPS-Messungen 2006 ist die Anzahl unserer Tochtergesellschaften mit höherer Kundenloyalität gegenüber dem Branchendurchschnitt deutlich gestiegen.

# Unsere Mitarbeiter

Unser Erfolg hängt maßgeblich davon ab, dass sich unsere Mitarbeiter mit außergewöhnlichem Engagement und einem hohen Anspruch an die eigene Leistung für unsere Kunden einsetzen. Wir setzen auf exzellente Führung, fortlaufende Talentförderung und persönliche Weiterentwicklung unserer Mitarbeiterschaft. Denn nur wenn wir das Potenzial unserer Mitarbeiter beständig fördern, können wir unser wichtigstes Ziel erreichen: unseren Kunden ein zuverlässiger Partner zu sein.

## Mitarbeitermanagement

2010 wurde eine gruppenweit einheitliche Mitarbeiterbefragung durchgeführt, die es erlaubte, die Ergebnisse einzelner Tochtergesellschaften miteinander zu vergleichen. Die Ergebnisse gehen in die Vorstandsvergütung ein und beeinflussen den variablen Gehaltsbestandteil des Topmanagements.

## Vielfalt

Die gesellschaftliche Alterung und der absehbare Fachkräftemangel machen es erforderlich, das Mitarbeiterpotenzial gesamthaft zu fördern und zu nutzen. Dabei setzen wir auf unsere Internationalität und unsere grenzüberschreitende Zusammenarbeit. Vielfalt zu stärken bedeutet für uns auch Frauenförderung. Fasst man sämtliche Führungsebenen der Allianz Gruppe zusammen, sind dort 32 Prozent der Positionen von Frauen besetzt<sup>1</sup>.

## Talent Management

Insgesamt investierte die Allianz Gruppe im Berichtsjahr 130 (147) Millionen Euro in Trainings- und Fortbildungsmaßnahmen; das sind im Schnitt 980 (1 100) Euro je Mitarbeiter weltweit.

## Vergütung

Die Summe aller Leistungen, welche die Allianz Gruppe 2010 weltweit an ihre Mitarbeiter auszahlte, betrug 8,3 (7,7) Milliarden Euro. Davon entfielen etwa 24 Prozent auf leistungsbezogene (variable) Vergütungsanteile. Für Sozialabgaben, Altersversorgung und sonstige Sozialleistungen wurden 2,2 (2,2) Milliarden Euro aufgewandt.

### Mitarbeiter nach Ländern

| Stand 31. Dezember              | 2010           | 2009           |
|---------------------------------|----------------|----------------|
| Deutschland                     | 47 889         | 49 051         |
| Frankreich                      | 18 127         | 18 489         |
| USA                             | 9 808          | 9 908          |
| Russland                        | 8 434          | 8 311          |
| Großbritannien                  | 7 253          | 7 043          |
| Italien                         | 6 914          | 6 961          |
| Australien                      | 4 043          | 3 866          |
| Schweiz                         | 3 633          | 3 984          |
| Spanien                         | 3 448          | 3 426          |
| Österreich                      | 3 258          | 3 194          |
| Brasilien                       | 2 876          | 2 963          |
| Polen                           | 2 560          | 2 589          |
| Slowakei                        | 2 432          | 2 487          |
| China (einschließlich Hongkong) | 2 143          | 2 225          |
| Rumänien                        | 2 121          | 2 152          |
| Niederlande                     | 2 041          | 2 102          |
| Übrige                          | 24 358         | 24 452         |
| <b>Total</b>                    | <b>151 338</b> | <b>153 203</b> |

### Mitarbeiter nach Regionen/Ländern zum 31. Dezember 2010

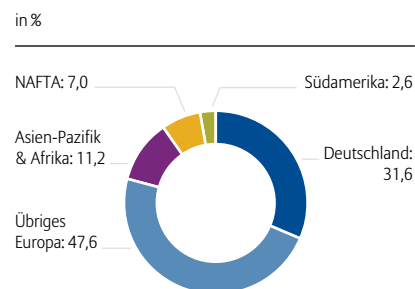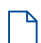

Weitere Informationen über die Vorstandsvergütung finden Sie auf den Seiten 35 bis 46.

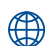

Weitere Informationen über unsere Mitarbeiter finden Sie auf [www.allianz.com/geschaeftsbericht](http://www.allianz.com/geschaeftsbericht)

### Auswahl von Auszeichnungen 2010

- Die Unternehmensberatung Potentialpark kürte unser Internetportal [allianz.com/careers](http://allianz.com/careers) zur „Besten Unternehmenskarriere-Website 2010“.
- Das Berufsbildungswerk der Deutschen Versicherungswirtschaft verlieh der Allianz Deutschland den „InnoWard“.
- Mondial Assistance wurde als einer der besten Arbeitgeber in mehreren Regionen ausgezeichnet.
- In einem von der Tageszeitung Akzia organisierten Ranking wählte die russische Karriereplattform Superjob unser Unternehmen ROSNO als „Attraktivsten Arbeitgeber“ und einen der „50 Traum-Arbeitgeber für Hochschulabsolventen“ aus.
- Das Personalmagazin „51job“ nannte Allianz China Life eines der „100 besten Personalmanagement-Unternehmen“ und eines der „100 besten Fortbildungs-Unternehmen“.

<sup>1</sup> Bezieht sich auf Frauen in Führungspositionen im Vorstand sowie die drei Ebenen darunter (Bereichs-, Abteilungs- und Referatsleiter).



# Nachhaltige Entwicklung

Während der letzten 120 Jahre hat die Allianz ein solides Fundament geschaffen, das uns in die Lage versetzt, effektiv auf Umfeld- und Marktänderungen einzugehen. Indem wir weiterhin Nachhaltigkeit in unserem Geschäft verankern, sichern wir unseren langfristigen Erfolg, auch und gerade dann, wenn der Wandel sich beschleunigt.

## Wir haben es uns zum Ziel gesetzt, gemäß den Grundsätzen ökologischer und sozialer Verantwortung sowie guter Corporate Governance langfristig Mehrwert zu schaffen.

### 1. Schutz natürlicher Ressourcen in den internen Prozessen

Wir überwachen und kontrollieren unsere Umweltauswirkungen, insbesondere im Hinblick auf die Verringerung des Kohlendioxidausstoßes für die gesamte Gruppe, über ein konzernweites Umweltmanagementsystem unter der Führung des Group Environmental Officer.

### 2. Zunehmend nachhaltiges Geschäft durch ein wachsendes Produkt- und Dienstleistungsportfolio

Wir entwickeln neue Produkte und Dienstleistungen, die unseren Kunden dabei helfen, die Auswirkungen des Klimawandels zu reduzieren oder ihre eigene Umwelteinwirkung einzudämmen und zu mindern. Darüber hinaus erweitern wir unser Portfolio erneuerbarer Energien durch zusätzliche Investitionen in europäische Solarenergieprojekte. Über Allianz Global Investors, unsere Asset-Management-Einheit, verwalten wir zusätzlich zahlreiche nachhaltige und sozial verantwortliche Anlagen (Sustainable and Responsible Investments, SRI), und zwar in sämtlichen wesentlichen Anlageklassen.

### 3. Festigung der langfristigen und wechselseitig förderlichen Partnerschaft mit unseren Stakeholdern

2010 kooperierten die Allianz und ihre Partner, um eine Initiative zur Förderung finanzieller Allgemeinbildung und Unabhängigkeit an Schulen zu gründen. „My Finance Coach“ ist nur ein Beispiel dafür, wie die Allianz das soziale Engagement unserer Mitarbeiter unterstützt und fördert, ebenso wie die Nutzung der Expertise und der Kompetenzen des Unternehmens zum Vorteil der Gesellschaft.

### 4. Streben nach Transparenz unserer Nachhaltigkeitsperformance.

#### Kennzahlen

|                                               |       | 2010 | 2009 |
|-----------------------------------------------|-------|------|------|
| Anzahl umweltfreundlicher Lösungen (gerundet) |       | 70   | 50   |
| Verwaltetes Vermögen in SRI-Fonds             | Mrd € | 3,1  | 4,8  |
| Anzahl Mikrofinanz-Kunden (gerundet)          | Mio   | 4,0  | 3,8  |

#### CO<sub>2</sub>-Emissionen der Allianz Gruppe in Kilogramm pro Mitarbeiter

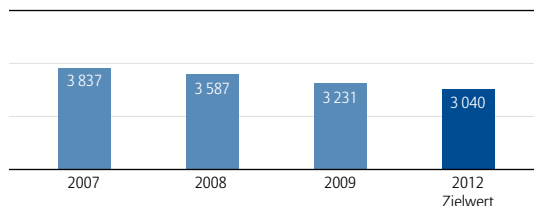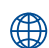

Weitere Informationen über unsere nachhaltige Entwicklung finden Sie unter [www.allianz.com/geschaeftsbericht](http://www.allianz.com/geschaeftsbericht)

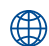

Der Nachhaltigkeitsbericht der Allianz Gruppe ist ab Mai 2011 im Internet unter [www.allianz.com/nachhaltigkeit](http://www.allianz.com/nachhaltigkeit) verfügbar.

#### Auswahl von Auszeichnungen 2010

- Dow Jones Sustainability Index: Wir sind in diesem Index seit 2000 vertreten und wurden 2010 zum fünften Mal in Folge als bester Erstversicherer ausgezeichnet.
- Carbon Disclosure Project: Die Allianz ist Gründungsmitglied und Teil des Carbon Disclosure Leadership Index Deutschland 2010.
- FTSE4Good: Wir gehören zu den Unternehmen, die am längsten in diesem Index geführt werden, nämlich seit 2001.
- Goldman Sachs GS Sustain: Die Allianz zählt zu den drei als führend in Bezug auf Nachhaltigkeit gewürdigten Versicherungsunternehmen, eine ganz besondere Auszeichnung insofern, als hier sowohl finanzielle als auch nichtfinanzielle Gesichtspunkte bewertet wurden.

## Analyse und Diskussion der Ergebnisse

# Geschäftsumfeld

- Die Aktienmärkte entwickelten sich in der zweiten Jahreshälfte 2010 positiv, aber die langfristigen Zinsen blieben niedrig.
- Die instabile Wirtschaft belastete das Geschäftsumfeld.

## Wirtschaftliches Umfeld 2010

### Globale Erholung der Wirtschaft

Die Weltwirtschaft hat sich im Berichtsjahr merklich erholt. Ende 2010 befand sich die weltweite Industrieproduktion bereits wieder über dem Stand von vor der Wirtschaftskrise 2008. Auch der Welthandel erreichte fast wieder Vorkrisenniveau. Die Schwellenmärkte erzielten erneut deutlich bessere Ergebnisse als die Volkswirtschaften der Industrieländer und ihre gesamte Wirtschaftsleistung im Jahr 2010 lag bereits weit über der von 2008.

Während 2010 das Bruttoinlandsprodukt in den Industrieländern im Durchschnitt um rund 2,5 Prozent stieg, erreichten die Schwellenländer ein durchschnittliches Wachstum von rund 7 Prozent, wobei die in Asien sogar die Marke von 9 Prozent übertrafen.

Der US-Wirtschaft mangelte es 2010 indes an Dynamik. So war am Arbeitsmarkt nur eine allmähliche Stabilisierung zu verspüren. In der EU fiel die Wirtschaftsleistung uneinheitlich aus. Während Griechenlands Wirtschaft um rund 4 Prozent schrumpfte, wuchs die von Schweden um beinahe 5 Prozent. Dank stark steigender Exporte und eines robusten Arbeitsmarktes erwies sich Deutschland mit 3,6 Prozent als wichtiger Wachstumsmotor in Europa. Die Erholung in Frankreich (1,6 Prozent) und Italien (1,1 Prozent) zeigte sich vergleichsweise verhalten.

An den Finanzmärkten machte unterdessen die Schuldenkrise einigen Ländern der Europäischen Währungsunion erheblich zu schaffen. Trotz angekündigter drastischer Konsolidierungsmaßnahmen verloren die Finanzmärkte offensichtlich das Vertrauen in die Fähigkeit Griechenlands und Irlands, insbesondere ihre Staatsverschuldung in den Griff

zu bekommen. Die Risikoaufschläge für die Staatsanleihen dieser Länder blieben gegen Ende des Jahres extrem hoch, und das trotz des von der EU und dem IWF aufgelegten Rettungspakets. Im Gegenzug verzeichneten die Renditen deutscher Staatsanleihen, die offensichtlich als „sicherer Hafen“ angestrebt wurden, Rekordtiefs. In den USA verharrten die Renditen von Staatsanleihen auf äußerst niedrigem Niveau, ungeachtet des zunehmenden Schuldenstands. Dies ist nicht zuletzt auf die Entscheidung zurückzuführen, die unkonventionellen geldpolitischen Maßnahmen weiter zu forcieren. Der Euro, der im Schatten der Schuldenkrise zu Beginn des Jahres eine deutliche Abwertung erfahren hatte, konnte in der zweiten Jahreshälfte 2010 namentlich gegenüber dem US-Dollar wieder deutlich Boden gutmachen.

Im Jahresverlauf legten die Rohstoffpreise markant zu. Teilweise war dies der globalen Wirtschaftserholung geschuldet. Allerdings erwiesen sich Rohstoffe auch als attraktive Anlageinstrumente in einem Niedrigzinsumfeld. Die Aktienmärkte zeigten sich von den staatlichen Schuldenkrisen nicht beeindruckt. Nach einem längeren Seitwärtstrend erlebten die meisten Kursindizes eine Jahresendrallye, die größtenteils auf stattliche Unternehmensgewinne zurückzuführen war.

### Positive Entwicklung der Aktienmärkte im zweiten Halbjahr 2010

in %

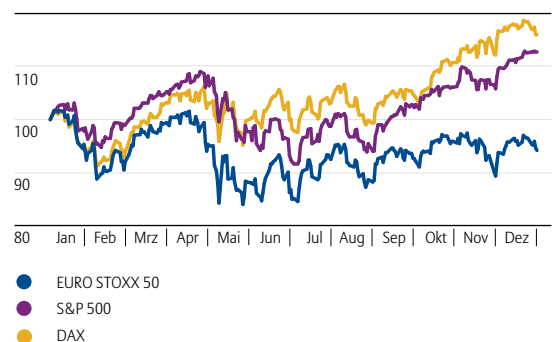

**Sehr hohe Risikoaufläge im Euroraum**

in %

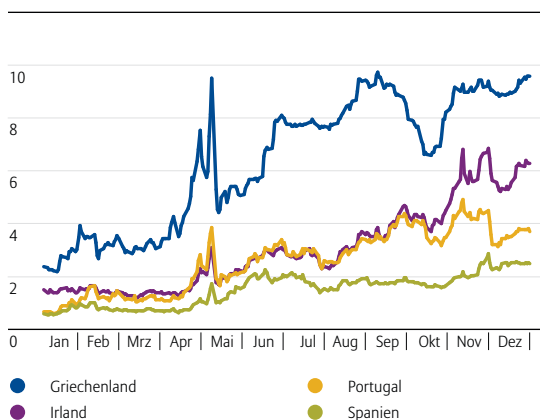**Langfristige Zinsen noch immer niedrig**

in %

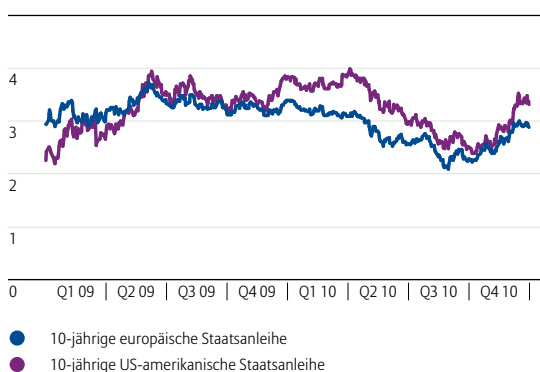**Geschäftsumfeld 2010**

Die kräftige Erholung der Weltwirtschaft verschaffte der Versicherungsbranche Rückenwind und ließ sie 2010 nach zwei schwierigen, von extremen Finanz-turbulenzen gekennzeichneten Krisenjahren wieder auf einen Wachstumskurs zurückkehren. Die Kapitalpositionen konnten wiederhergestellt werden. Trotz des vorteilhaften Konjunkturmiedels war 2010 kein einfaches Jahr für die Branche, weil es die zweit-höchste Anzahl von Naturkatastrophen seit 1980 aufwies, darunter schwere Erdbeben in Haiti, Chile, China und Neuseeland mit sehr hohen Schäden. Auch die extrem niedrigen Zinsen blieben eine zentrale Herausforderung. Der jüngste Zinsanstieg von den

Rekordtiefs ist noch kein Grund zur Erleichterung, verharren doch beispielsweise die Renditen deutscher Staatsanleihen noch immer weit unter dem 20-Jahre-Durchschnitt von 5,5 Prozent. Erschwerend kommt hinzu, dass die Bonität einiger Staatsanleihen im Zuge der europäischen Schuldenkrise Schaden genommen hat. Staatsanleihen von OECD-Ländern galten lange als solide, werden nun aber auf dem Niveau sogenannter Junk-Bonds eingestuft. Und schließlich belasteten den Sektor im Jahresverlauf Ungewissheiten hinsichtlich Solvency II, also der neuen Regeln zur Kapitalausstattung von Versicherern. Obwohl die Assekuranz die Finanzkrise größtenteils glimpflich überstanden hat, scheinen die Aufsichtsbehörden sehr vorsichtig zu sein, was die Verwirklichung des neuen Regelwerks überaus kompliziert macht.

In vielen wichtigen Märkten erholte sich die Wirtschaft, und die Bedingungen in der **Schaden- und Unfallversicherung** verbesserten sich ein wenig. In den meisten Industrieländern ergab sich nach Abflauen der Rezession wieder ein Prämienplus. Schwellenländer setzten wegen stärkerer wirtschaftlicher Fundamentaldaten ihren Wachstumskurs fort. Besonders kräftig erhöhten sich die Beitragseinnahmen in Asien, weil sich dort der Handel erholte und die Urbanisierung fortsetzte, große Infrastrukturprojekte durchgeführt werden und die Anzahl der Autobesitzer wächst. Preissteigerungen haben zugenommen und durchdringen immer mehr Märkte, vor allem in Westeuropa und in Australien, wo die Allianz stark präsent ist. Wie erwartet, stiegen die Preise insbesondere in der Autoversicherung und im Privatkundengeschäft, das sich dadurch vorteilhaft von vielen Firmenkundenmärkten abhob, wo die Preise in der Regel stagnierten oder fielen, weil Überkapazitäten und eine schleppende Nachfrage herrschten, Letzteres auch eine Folge hoher Arbeitslosenquoten. Im Anlagegeschäft wurden verhältnismäßig schwache Ergebnisse erzielt. Engere Gewinnspannen (Spreads) bei Unternehmensanleihen und steigende Aktienmärkte ermöglichten ansehnliche Kapitalgewinne, doch Zinsen auf Rekordtief dämpften die Investorserträge im operativen Geschäft. Insgesamt verbesserten sich die Erträge in der Schaden- und Unfallversicherung leicht, blieben aber weiterhin schwach, weil die Preisniveaus und die Renditen festverzinslicher Wertpapiere niedrig blieben.

Die weltwirtschaftliche Erholung bescherte den [Lebensversicherungen](#) ein robustes Prämienwachstum, insbesondere in den Schwellenmärkten, wo die Beitragseinnahmen um über 10 Prozent stiegen. Das Neugeschäft erholte sich in allen Regionen, allerdings mit einer deutlichen Ausnahme: In den USA gingen im dritten Jahr in Folge die Umsätze zurück wegen niedriger Verkaufszahlen bei den Rentenprodukten. In anderen maßgeblichen Märkten erlebte das Neugeschäft einen Aufschwung dank einer hohen Nachfrage nach Risikoprodukten (zum Beispiel Risikolebens- oder Invaliditätsversicherungen) und eines wiederbelebten Interesses an Sparprodukten zur Abdeckung des fortlaufend ansteigenden Bedarfs an privater Altersvorsorge. Das starke Wachstum in den Schwellenmärkten spiegelt vor allem robuste wirtschaftliche Fundamentaldaten wider. Steigende Haushaltseinkommen und -vermögen kurbeln hier die Nachfrage nach Sparprodukten an. Weil auch in diesen Ländern die demografischen Veränderungen wirken und die Lebenserwartung der Menschen steigt, ist der Verkauf von Rentenprodukten besonders dynamisch. Die Investmenterträge erholten sich leicht, blieben aber aufgrund des niedrigen Renditeumfeldes schwach. Nach bisheriger Prognose ist das für Dritte verwaltete Vermögen um rund 10 Prozent gestiegen. Das verhältnismäßig kräftige Prämienwachstum in der Lebensversicherung hat aber auch seine Kehrseite. Die Kunden sind nach wie vor risikoscheu und bevorzugen Produkte mit garantierten Renditen gegenüber jenen mit Anlagerisiken (beispielsweise fondsgebundenen Lebensversicherungen). Langfristige Garantien können indes erhebliche Marktrisiken bergen, und extrem niedrige Zinsen sowie bevorstehende regulatorische Veränderungen sorgen für einen immer höheren Kapitalbedarf. Außerdem war das Prämienwachstum in einigen Märkten abhängig von einlagenähnlichem Geschäft, weil die Kunden nur zurückhaltend langfristige Sparverträge abschlossen. Steigende Aktienmärkte zum Jahresende hin ließen dann die Risikobereitschaft wieder ansteigen, und zwar besonders in den Schwellenmärkten; dort wuchs die Nachfrage nach fondsgebundenen Versicherungsprodukten dynamisch an.

Die Rentabilität stabilisierte sich, weil die Bereitschaft der Unternehmen sank, Volumenzuwächse durch geringere Margen zu erkaufen, und weil sie ihre Kosten strenger kontrollierten.

Wie das Versicherungsgeschäft profitierte auch das [Asset Management](#) vom globalen Aufschwung; es erzielte wie im Vorjahr robuste Nettomittelzuflüsse, auch im Vergleich mit den Wettbewerbern, und baute Marktanteile weiter aus. Zum 31. Dezember 2010 belief sich das insgesamt verwaltete Vermögen auf 1 518 Milliarden Euro, ein Plus um 26,2 Prozent gegenüber dem entsprechenden Vorjahreswert. Das darin enthaltene, für Dritte verwaltete Vermögen betrug 1 164 Milliarden Euro. Höhere Volatilität, geändertes Anlageverhalten, steigender Argwohn angesichts der Staatsverschuldung in Europa und verschärfte aufsichtsrechtliche Erfordernisse erschwerten das Rentenfondsgeschäft; dennoch waren in den ersten drei Quartalen 2010 die Nettomittelzuflüsse beträchtlich, denn die Anleger waren an Sicherheit und Erträgen interessiert. Im vierten Quartal indes überwogen die Bedenken hinsichtlich der europäischen Schuldenkrise, was die Zinsen leicht ansteigen ließ auf ein Niveau, das aber im historischen Vergleich immer noch niedrig war. Dadurch wurden die Renditen von Renteninvestments geschmälert. Trotz robuster Konjunkturindikatoren und Aktienkurse, die wegen der Umsatz- und Gewinndynamik in den Unternehmen zu einem Höhenflug ansetzten, wandten sich die Anleger nur zögerlich wieder Aktienfonds zu. Die dominierende Anlageklasse bleiben weltweit Rentenfonds, in die rund 60 Prozent der Gesamtzuflüsse eingingen; beliebteste Anlagekategorie waren Anleihen aus Schwellenmärkten.

# Überblick über den Geschäftsverlauf 2010

- Der Gesamtumsatz wuchs um 9,3 Prozent auf 106,5 Milliarden Euro.
- Das operative Ergebnis verbesserte sich um 17,0 Prozent auf 8,2 Milliarden Euro.
- Wir erzielten einen Jahresüberschuss von 5,2 Milliarden Euro.
- Unsere Solvabilitätsquote lag bei 173 Prozent.<sup>1</sup>

## Allianz Gruppe im Überblick

- Die Gruppenergebnisse werden nach Produkt- und Dienstleistungsarten gegliedert: Schaden- und Unfallversicherung, Leben- und Krankenversicherung, Asset Management sowie Corporate und Sonstiges.
- Zwar stammt der überwiegende Teil des operativen Ergebnisses weiterhin aus dem Versicherungsgeschäft, doch in den letzten Jahren wuchsen die Beiträge aus dem Asset Management kontinuierlich an.

**Operatives Ergebnis<sup>2</sup>** **+17,0%**  
in Mio €

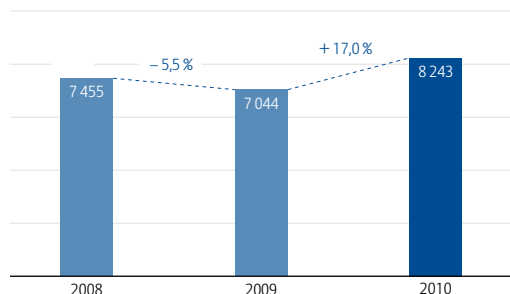

## Kennzahlen

|                                                                      | 2010<br>Mio € | 2009<br>Mio € | 2008<br>Mio € |
|----------------------------------------------------------------------|---------------|---------------|---------------|
| Gesamter Umsatz                                                      | 106 451       | 97 385        | 92 568        |
| Operatives Ergebnis <sup>2</sup>                                     | 8 243         | 7 044         | 7 455         |
| Jahresüberschuss aus fortzuführenden Geschäftsbereichen <sup>2</sup> | 5 209         | 4 650         | 4 268         |
| Solvabilitätsquote in % <sup>1</sup>                                 | 173           | 164           | 157           |

## Ergebnisübersicht

### Gesamtaussage des Vorstands zu den Ergebnissen 2010

2010 erzielten wir starke Ergebnisse. Der Umsatz wuchs um 9,3 Prozent (intern gerechnet: 6,2 Prozent<sup>3</sup>), und das operative Ergebnis verbesserte sich um 17,0 Prozent auf 8 243 Millionen Euro, den höchsten Stand seit 2007. Sämtliche Geschäftssegmente trugen zu diesen Erfolgen bei, insbesondere das Asset Management.

Der Jahresüberschuss aus fortzuführenden Geschäftsbereichen stieg um 12,0 Prozent auf 5 209 Millionen Euro an.

- <sup>1</sup> Solvabilität gemäß EU-Finanzkonglomeraterichtlinie. Außerbilanzielle Bewertungsreserven werden im Rahmen der Berichterstattung an die Aufsichtsbehörden nur auf Antrag als verfügbare Eigenmittel angesetzt; die Allianz SE hat bisher keinen Antrag auf Anerkennung gestellt. Ohne die außerbilanziellen Bewertungsreserven beläuft sich die Deckungsquote auf 164 (155) %.
- <sup>2</sup> Beträge vor 2010 wurden angepasst, um eine Änderung der Bilanzierungs- und Bewertungsmethode des Allianz Konzerns zu berücksichtigen. Weitere Informationen finden sich unter Anmerkung 4 im Konzernanhang.
- <sup>3</sup> Internes Wachstum, bereinigt um Wechselkurseffekte und Effekte aus Akquisitionen und Unternehmensverkäufen. Weitere Informationen zur Überleitung vom nominellen zum internen Wachstum unserer Segmente und der Allianz Gruppe als Ganzes finden sich auf Seite 121.



## Gesamter Umsatz<sup>1</sup>

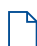

Weitere Informationen über die Zusammensetzung des gesamten Umsatzes finden Sie auf Seite 120.

### Gesamter Umsatz nach Segmenten

in Mio €

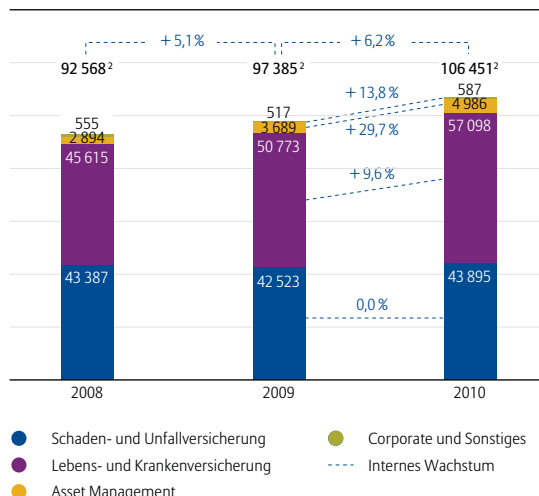

Die Bruttobeiträge in der **Schaden- und Unfallversicherung** blieben, intern gerechnet, nahezu unverändert. Der vorteilhafte Preiseffekt von 0,9 Prozent stammte im Wesentlichen aus den Geschäftseinheiten in Italien, Australien und Großbritannien sowie aus dem Kreditversicherungsgeschäft. Er wurde durch einen nachteiligen Volumeneffekt von ebenfalls 0,9 Prozent aufgehoben.

Die **Lebens- und Krankenversicherung** lieferte dank eines Nachfrageschubs bei den anlageorientierten Produkten und einer Prämienzunahme in der traditionellen Lebensversicherung den größten Beitrag zum Umsatzplus; das interne Wachstum betrug 9,6 Prozent.

Der Umsatz im **Asset Management** erhöhte sich, intern gerechnet, sehr stark um 29,7 Prozent. Das gesamte verwaltete Vermögen ist seit Jahresultimo 2009 um 316 Milliarden Euro auf 1 518 Milliarden Euro angewachsen.

Der gesamte Umsatz des Bankgeschäfts – es wird im Segment **Corporate und Sonstiges** ausgewiesen – nahm, intern gerechnet, um 13,8 Prozent zu. Erstmals

nach Aufnahme des Geschäftsbetriebs im Juni 2009 trug die Allianz Bank Deutschland mit den operativen Erträgen eines vollständigen Geschäftsjahres zum Ergebnis bei.

## Operatives Ergebnis<sup>3</sup>

### Operatives Ergebnis nach Segmenten

in Mio €

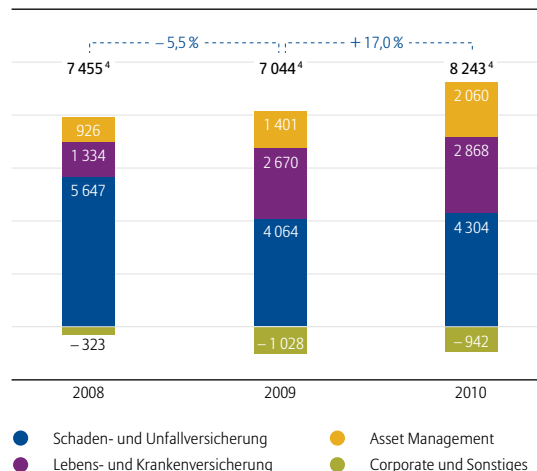

Obwohl die Aufwendungen für Naturkatastrophen 1 264 Millionen Euro betrugen und damit 817 Millionen Euro höher waren als 2009, wuchs das operative Ergebnis in der **Schaden- und Unfallversicherung** um 5,9 Prozent auf 4 304 Millionen Euro. Weil die Combined Ratio mit 97,2 Prozent um 0,2 Prozentpunkte besser als im Vorjahr war, erhöhte sich das versicherungstechnische Ergebnis um 133 Millionen Euro. Der Anstieg des operativen Nettoanlageertrages um 101 Millionen Euro beruhte auf höheren Dividenden-erträgen und geringeren Wertminderungen.

Das operative Ergebnis der **Lebens- und Krankenversicherung** stieg um 7,4 Prozent auf 2 868 Millionen Euro. Das operative Anlageergebnis stieg erfreulicherweise von 2 038 Millionen Euro auf 15 988 Millionen Euro, weil die Zunahme des Kapitalanlagenbestands positiver zu Buche schlug als der Effekt fallender Renditen. Geringere Wertberichtigungen

<sup>1</sup> Der gesamte Umsatz umfasst die gesamten Bruttobeitragseinnahmen in der Schaden- und Unfall- sowie in der Lebens- und Krankenversicherung, die operativen Erträge aus dem Asset Management und den gesamten Umsatz aus Corporate und Sonstiges (Bankgeschäft).

<sup>2</sup> Der gesamte Umsatz enthält – 115 Mio €, – 117 Mio € und 117 Mio € aus Konsolidierungen für die Geschäftsjahre 2010, 2009 und 2008.

<sup>3</sup> Beträge vor 2010 wurden angepasst, um eine Änderung der Bilanzierungs- und Bewertungsmethode des Allianz Konzerns zu berücksichtigen. Weitere Informationen finden sich unter Anmerkung 4 im Konzernanhang.

<sup>4</sup> Enthält – 47 Mio €, – 63 Mio € und – 129 Mio € aus Konsolidierungen in den Geschäftsjahren 2010, 2009 und 2008.

sowie höhere Zinserträge und ähnliche Erträge glichen den Ergebnisverfall bei erfolgswirksam zum Zeitwert bewerteten Finanzanlagen mehr als aus; Letzterer rührt daher, dass wir im Vorjahr Erträge aus Credit Spreads und Bewegungen auf den Aktienmärkten realisieren konnten.

Unser **Asset Management** erzielte mit einem Plus von 659 Millionen Euro (im Vergleich zu 2009) ein herausragendes operatives Ergebnis von 2 060 Millionen Euro, gestützt auf eine exzellente Geschäftsentwicklung und ein starkes Wachstum des verwalteten Vermögens. Die Cost-Income Ratio verbesserte sich um 3,3 Prozentpunkte auf 58,7 Prozent.

Der operative Verlust im Segment **Corporate und Sonstiges** verringerte sich von 1 028 Millionen Euro 2009 auf 942 Millionen Euro, insbesondere durch das Ergebnis der Allianz Bank in Deutschland. 2009 belasteten zudem einmalige Anlaufkosten von 134 Millionen Euro die operativen Aufwendungen.

## Nichtoperatives Ergebnis

Der **nichtoperative Verlust** betrug 1 070 Millionen Euro. Im Vorjahr waren es 1 854 Millionen Euro.

Das **nichtoperative Kapitalanlageergebnis** wuchs um 251 Millionen Euro auf 1 022 Millionen Euro.

Die **nichtoperativen Erträge aus den erfolgswirksam zum Zeitwert bewerteten Finanzaktiva und Finanzpassiva** sanken um 205 Millionen Euro auf – 57 Millionen Euro; davon entfielen 160 Millionen Euro auf die insgesamt geringeren kumulierten Veränderungen des beizulegenden Zeitwertes der The-Hartford-Optionsscheine.

Die **realisierten Gewinne** waren um 4,8 Prozent geringfügig niedriger als im Vorjahr und betrugen 1 539 Millionen Euro. In diesem Posten sind 864 Millionen Euro (666 Millionen Euro) aus dem Verkauf von Anteilen an der Industrial and Commercial Bank of China (ICBC) enthalten. Zum 31. Dezember 2010 beliefen sich die nichtrealisierten Gewinne (brutto) aus ICBC-

Anteilen auf 364 Millionen Euro. Die gesamten nichtrealisierten Gewinne im Eigenkapital machten 5 057 Millionen Euro aus.

Wegen der Erholung an den Kapitalmärkten gaben die **Wertminderungen** um 534 Millionen Euro auf 460 Millionen Euro nach.

Die hervorragende Geschäftsentwicklung unseres Asset Managements ließ die **akquisitionsbedingten Aufwendungen** um 34 Millionen Euro auf 440 Millionen Euro anwachsen. Die grundlegende Geschäftsverbesserung und die Kaufrechtsausübung für 25 680 B-Units im ersten und im dritten Quartal 2010 (2009 wurden keine Kaufrechte ausgeübt) hatten eine stärkere Auswirkung auf die Erfolgsrechnung als der Rückgang der im Umlauf befindlichen B-Units um 46 Prozent auf 30 129 Stück zum Stichtag 31. Dezember 2010. Wir sind jetzt im Besitz von 79,9 Prozent aller im Umlauf befindlichen B-Units<sup>1</sup>.

Die **Abschreibungen auf immaterielle Vermögenswerte** und vor allem Goodwill stiegen um 202 Millionen Euro auf 327 Millionen Euro.

Die **nichtoperativen Restrukturierungsaufwendungen** wuchsen um 80 Millionen Euro auf 263 Millionen Euro. In 2010 hatten wir Aufwendungen für Restrukturierungsmaßnahmen bei einigen unserer operativen Einheiten, einschließlich Euler Hermes Group, Allianz France, Allianz Beratungs- und Vertriebs AG und Allianz Managed Operations and Services SE.

Die Aufwendungen für die **Umgliederung von Steuererträgen** gingen um 703 Millionen Euro zurück. Dies ist die Folge einer Gewinnbeteiligung der Versicherungskunden an den Steuererstattungen des Jahres 2009 von 730 Millionen Euro, die im Zusammenhang mit einem vorteilhaften Gerichtsurteil über eine einmalig rückwirkende Steuerentlastung für das Geschäftsjahr 2001 steht. Innerhalb der operativen Erträge gibt es einen entsprechenden Ausgleichseffekt.

<sup>1</sup> Bei der Übernahme von PIMCO wurden B-Units geschaffen, die der PIMCO-Geschäftsleitung das Recht auf Gewinnbeteiligung einräumen. Auf diese B-Units hat die Allianz ein Kaufrecht, während die PIMCO-Geschäftsleitung ein Verkaufsrecht über mehrere Jahre hält. Variiert der Zeitwert, weil die zugrunde liegenden operativen Ergebnisse sich ändern, wird das in den akquisitionsbedingten Aufwendungen sichtbar. Außerdem sind die Dividendenzahlungen an die B-Unit-Halter berücksichtigt.

## Ertragsteuern

Der **Ertragsteueraufwand** stieg um 1 424 Millionen Euro auf 1 964 Millionen Euro an, vorwiegend aufgrund des höheren Vorsteuerergebnisses. Außerdem hatte dieser Posten im Vorjahr einen Ertrag von 505 Millionen Euro aus Steuern der Vorjahre enthalten, der in erster Linie ein Ergebnis des zuvor erwähnten Gerichtsurteils war. Der effektive Steuersatz belief sich auf 27,4 Prozent (10,4 Prozent).

## Jahresüberschuss

### Jahresüberschuss aus fortzuführenden Geschäftsbereichen

in Mio €

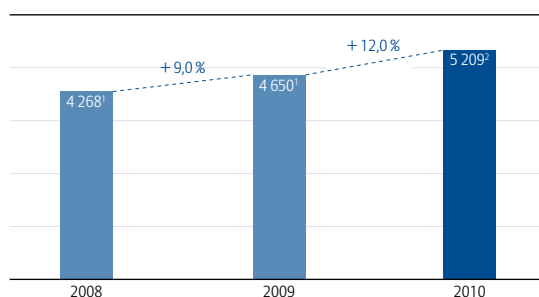

Der **Jahresüberschuss aus fortzuführenden Geschäftsbereichen** erhöhte sich um 559 Millionen Euro auf 5 209 Millionen Euro.

Der **Jahresüberschuss für Anteilseigner** betrug 5 053 Millionen Euro.

### Ergebnis je Aktie<sup>3</sup>

in €

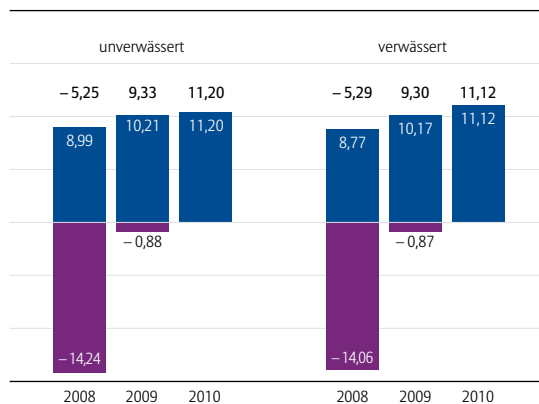

- Ergebnis je Aktie aus fortzuführenden Geschäftsbereichen
- Ergebnis je Aktie aus aufgegebenen Geschäftsbereichen

## Eigenkapital

### Eigenkapital<sup>4</sup>

in Mio €

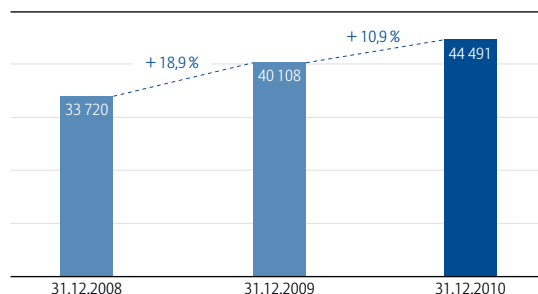

Im Stichtagsvergleich zum 31. Dezember wuchs das **Eigenkapital** von 40 108 Millionen Euro im Vorjahr um 4 383 Millionen Euro auf 44 491 Millionen Euro. Der Jahresüberschuss für Anteilseigner erhöhte das Eigenkapital um 5 053 Millionen Euro, vorteilhafte Wechselkurseffekte trugen 1 297 Millionen Euro dazu bei. Die nichtrealisierten Gewinne gingen um 400 Millionen Euro zurück. Das Eigenkapital verringerte sich um die im zweiten Quartal 2010 von der Allianz SE gezahlte Dividende für das Geschäftsjahr 2009 in Höhe von 1 850 Millionen Euro.

Zum 31. Dezember 2010 betrugen die **Eigenmittel, die bei der Solvabilität<sup>5</sup>** für das Versicherungs-, das Bank- und das Asset-Management-Geschäft berücksichtigt werden dürfen, 39,6 Milliarden Euro, einschließlich außerbilanzieller Reserven<sup>6</sup> von 2,1 Milliarden Euro. Damit wurden die gesetzlichen Mindestanforderungen um 16,7 Milliarden Euro überschritten. Daraus errechnet sich zum 31. Dezember 2010 eine Deckungsquote von 173 Prozent, ein Plus von 9 Prozentpunkten im Vergleich zum entsprechenden Vorjahresstichtag. Zum Jahresresultimo 2010 wurden die verfügbaren Eigenmittel um 2,0 Milliarden Euro gekürzt, die für voraussichtliche Dividendenzahlungen für das Geschäftsjahr 2010 vorgesehen sind. Diese Summe entspricht 40 Prozent des Jahresüberschusses. Unsere Solvabilitätsposition ist stark.

- Jahresüberschuss aus fortzuführenden Geschäftsbereichen
- Jahresüberschuss
- Weitere Informationen finden sich unter Anmerkung 51 im Konzernanhang.
- ohne Anteile anderer Gesellschafter am Eigenkapital
- Solvabilität gemäß EU-Finanzkonglomeraterichtlinie
- Außerbilanzielle Bewertungsreserven werden im Rahmen der Berichterstattung an die Aufsichtsbehörden nur auf Antrag als verfügbare Eigenmittel angesetzt; die Allianz SE hat bisher keinen Antrag auf Anerkennung gestellt. Ohne die außerbilanziellen Bewertungsreserven beläuft sich die Deckungsquote auf 164 (155)%.

**Gesamter Umsatz sowie Überleitung vom operativen Ergebnis zum Jahresüberschuss (-fehlbetrag)<sup>1</sup>**

|                                                                                                          | 2010<br>Mio €  | 2009<br>Mio €  | 2008<br>Mio €  |
|----------------------------------------------------------------------------------------------------------|----------------|----------------|----------------|
| <b>Gesamter Umsatz<sup>2</sup></b>                                                                       | <b>106 451</b> | <b>97 385</b>  | <b>92 568</b>  |
| Verdiente Beiträge (netto)                                                                               | 63 337         | 59 792         | 60 394         |
| <b>Operatives Kapitalanlageergebnis</b>                                                                  |                |                |                |
| Zinserträge und ähnliche Erträge                                                                         | 19 428         | 18 233         | 19 072         |
| Operative Erträge aus erfolgswirksam zum Zeitwert bewerteten Finanzaktiva und Finanzpassiva (netto)      | 19             | 726            | 301            |
| Operative realisierte Gewinne/Verluste (netto)                                                           | 2 169          | 1 799          | 947            |
| Zinsaufwendungen ohne Zinsaufwendungen für externe Fremdfinanzierung                                     | – 522          | – 579          | – 948          |
| Operative Wertminderungen auf Finanzanlagen (netto)                                                      | – 384          | – 1 738        | – 6 199        |
| Aufwendungen für Finanzanlagen                                                                           | – 827          | – 755          | – 771          |
| <b>Zwischensumme</b>                                                                                     | <b>19 883</b>  | <b>17 686</b>  | <b>12 402</b>  |
| Provisions- und Dienstleistungserträge                                                                   | 7 920          | 6 239          | 6 032          |
| Sonstige Erträge                                                                                         | 118            | 41             | 408            |
| Schadenaufwendungen (netto)                                                                              | – 46 096       | – 45 646       | – 45 659       |
| Veränderung der Rückstellungen für Versicherungs- und Investmentverträge (netto)                         | – 13 871       | – 9 760        | – 5 378        |
| Risikovorsorge im Kreditgeschäft                                                                         | – 50           | – 141          | – 59           |
| Abschluss- und Verwaltungsaufwendungen (netto) ohne akquisitionsbedingte Aufwendungen                    | – 20 443       | – 19 712       | – 18 354       |
| Provisions- und Dienstleistungsaufwendungen                                                              | – 2 561        | – 2 212        | – 2 344        |
| Operative Restrukturierungsaufwendungen                                                                  | – 8            | – 15           | 1              |
| Sonstige Aufwendungen                                                                                    | – 57           | – 2            | – 12           |
| Umgliederung von Steuererträgen                                                                          | 71             | 774            | 24             |
| <b>Operatives Ergebnis</b>                                                                               | <b>8 243</b>   | <b>7 044</b>   | <b>7 455</b>   |
| <b>Nichtoperatives Kapitalanlageergebnis</b>                                                             |                |                |                |
| Nichtoperative Erträge aus erfolgswirksam zum Zeitwert bewerteten Finanzaktiva und Finanzpassiva (netto) | – 57           | 148            | 72             |
| Nichtoperative realisierte Gewinne/Verluste (netto)                                                      | 1 539          | 1 617          | 2 656          |
| Nichtoperative Wertminderungen auf Finanzanlagen (netto)                                                 | – 460          | – 994          | – 3 296        |
| <b>Zwischensumme</b>                                                                                     | <b>1 022</b>   | <b>771</b>     | <b>– 568</b>   |
| Erträge aus vollkonsolidierten Private-Equity-Beteiligungen (netto)                                      | – 102          | – 232          | 79             |
| Zinsaufwendungen für externe Fremdfinanzierung                                                           | – 889          | – 905          | – 945          |
| Akquisitionsbedingte Aufwendungen                                                                        | – 440          | – 406          | – 245          |
| Abschreibungen auf immaterielle Vermögenswerte                                                           | – 327          | – 125          | – 23           |
| Nichtoperative Restrukturierungsaufwendungen                                                             | – 263          | – 183          | – 130          |
| Umgliederung von Steuererträgen                                                                          | – 71           | – 774          | – 24           |
| <b>Nichtoperative Positionen</b>                                                                         | <b>– 1 070</b> | <b>– 1 854</b> | <b>– 1 856</b> |
| <b>Ergebnis aus fortzuführenden Geschäftsbereichen vor Ertragsteuern</b>                                 | <b>7 173</b>   | <b>5 190</b>   | <b>5 599</b>   |
| Ertragsteuern                                                                                            | – 1 964        | – 540          | – 1 331        |
| <b>Jahresüberschuss (-fehlbetrag) aus fortzuführenden Geschäftsbereichen</b>                             | <b>5 209</b>   | <b>4 650</b>   | <b>4 268</b>   |
| <b>Jahresüberschuss (-fehlbetrag) aus aufgegebenen Geschäftsbereichen, nach Ertragsteuern</b>            | <b>—</b>       | <b>– 395</b>   | <b>– 6 373</b> |
| <b>Jahresüberschuss (-fehlbetrag)</b>                                                                    | <b>5 209</b>   | <b>4 255</b>   | <b>– 2 105</b> |
| <b>Jahresüberschuss (-fehlbetrag)</b>                                                                    |                |                |                |
| auf Anteile anderer Gesellschafter entfallend                                                            | 156            | 48             | 257            |
| auf Anteilseigner entfallend                                                                             | 5 053          | 4 207          | – 2 362        |

<sup>1</sup> Beträge vor 2010 wurden angepasst, um eine Änderung der Bilanzierungs- und Bewertungsmethode des Allianz Konzerns zu berücksichtigen. Weitere Informationen finden sich unter Anmerkung 4 im Konzernanhang.

<sup>2</sup> Der gesamte Umsatz umfasst die gesamten Bruttobeitragseinnahmen in der Schaden- und Unfall- sowie in der Lebens- und Krankenversicherung, die operativen Erträge aus dem Asset Management und den gesamten Umsatz aus Corporate und Sonstiges (Bankgeschäft).

## Vorschlag zur Verwendung des Bilanzgewinns

Vorstand und Aufsichtsrat schlagen vor, den 2010 erzielten Bilanzgewinn der Allianz SE von 2 045 250 000 Euro wie folgt zu verwenden:

Ausschüttung einer Dividende von 4,50 Euro auf jede gewinnberechtigte Stückaktie: 2 045 250 000 Euro.

Der Bilanzgewinn ergibt sich aus dem nach dem HGB aufgestellten Einzelabschluss der Allianz SE.

Soweit die Gesellschaft am Tag der Hauptversammlung eigene Aktien hält, die gemäß § 71 b AktG nicht dividendenberechtigt sind, wird der auf diese Aktien entfallende Betrag auf neue Rechnung vorgetragen.

München, den 21. Februar 2011  
Allianz SE

## Ereignisse nach dem Bilanzstichtag

### Aufstockung des Anteils an China Pacific Insurance

Am 8. Januar 2011 erhöhte der Allianz Konzern den Anteil seiner H-Shares an der China Pacific Insurance (Group) Co., Ltd. um 855 Millionen US-Dollar.

### Überschwemmungen in Australien

Seit dem 10. Januar 2011 verursachten Überschwemmungen in Queensland, Australien, große Schäden. Nach bisherigem Kenntnisstand wird eine Nettoschadenbelastung von ungefähr 87 Millionen Euro vor Ertragssteuern erwartet.

### Verkauf eines Anteils von Industrial and Commercial Bank of China (ICBC)

Im Januar 2011 verkaufte der Allianz Konzern 0,2 Milliarden ICBC Aktien mit einem Gewinn von rund 0,1 Milliarden Euro.

### Zyklon „Yasi“ in Australien

Am 2. Februar 2011 verursachte der Zyklon „Yasi“ in Ost-Australien große Schäden. Nach bisherigem Kenntnisstand wird eine Nettoschadenbelastung von ungefähr 37 Millionen Euro vor Ertragssteuern erwartet.

### Erdbeben in Christchurch, Neuseeland

Am 22. Februar 2011 wurde die Innenstadt von Christchurch, Neuseeland, durch ein Erdbeben verwüstet. Momentan ist eine verlässliche Schätzung der Nettoschadenbelastung durch das Erdbeben nicht möglich.

### EuGH-Urteil zur europäischen Gender-Richtlinie

Am 1. März 2011 hat der Europäische Gerichtshof entschieden, dass die europarechtliche Befugnis der Mitgliedstaaten, Versicherungstarife nach dem Geschlecht zu differenzieren, wenn dies statistisch gerechtfertigt ist (Art. 5 Abs. 2 Richtlinie 2004/113/EU), mit Wirkung zum 21. Dezember 2012 unwirksam wird. Die Entscheidung enthält keine Aussage, dass bestehende Verträge von dem Unwirksamwerden der vorgenannten Ausnahmeregelung betroffen sein werden.



## Neue Segmentberichterstattung, Darstellung und Bilanzierungs- grundsätze

Ab Anfang 2010 hat der Allianz Konzern seine Versicherungsaktivitäten in Übereinstimmung mit der Veränderung der Zuständigkeiten der Mitglieder des Vorstands neu organisiert. Die Versicherungsaktivitäten in den Bereichen Schaden-Unfall und Leben/Kranken in Europa wurden zusammengefasst, während Global Insurance Lines & Anglo Markets getrennt von den NAFTA Markets ausgewiesen werden. Des Weiteren wird Assistance (Mondial) als separates berichtspflichtiges Segment im Bereich Schaden-Unfall ausgewiesen. Um die Veränderung in der Zusammensetzung der berichtspflichtigen Segmente des Allianz Konzerns widerzuspiegeln, wurden die bisher berichteten Informationen rückwirkend angepasst.

Mit Ausnahme einer Änderung der Bilanzierungsmethode in Bezug auf die Bewertung von Fixed-Indexed-Annuity-Produkten hat es 2010 keine wesentlichen Veränderungen an unseren Darstellungs- und Bilanzierungsgrundsätzen gegeben. Weitere Informationen finden sich unter Anmerkung 4 im Konzernanhang.

## Weitere Bestandteile des Konzernlageberichts

Die folgenden Kapitel sind Bestandteile des Konzernlageberichts:

- Erklärung zur Unternehmensführung gemäß § 289 a HGB auf den Seiten 28 ff.;
- Übernahmerelevante Angaben und Erläuterungen auf den Seiten 31 ff.

# Schaden- und Unfallversicherungsgeschäft

- Die Bruttobeiträge stiegen um 3,2 Prozent auf 43,9 Milliarden Euro.
- Das operative Ergebnis verbesserte sich um 5,9 Prozent auf 4,3 Milliarden Euro.
- Die Combined Ratio lag bei 97,2 Prozent.

## Segmentüberblick

- In der Schaden- und Unfallversicherung bieten wir Privat- und Firmenkunden ein breites Produktsortiment an.
- Unser Produktangebot umfasst unter anderem Unfall-, Invaliditäts-, Sach-, allgemeine Haftpflicht- und Autoversicherungen.
- Das Versicherungsgeschäft betreiben wir in mehr als 55 Ländern.
- Darüber hinaus sind wir weltweit der größte Anbieter von Reiseversicherungen und Assistance-Leistungen sowie Kreditversicherungen.
- Wir vertreiben unsere Versicherungsprodukte über ein weites Netz selbstständiger Vertreter, Broker, Banken und über direkte Kanäle.

## Kennzahlen

|                     | 2010<br>Mio € | 2009<br>Mio € | 2008<br>Mio € |
|---------------------|---------------|---------------|---------------|
| Bruttobeiträge      | 43 895        | 42 523        | 43 387        |
| Operatives Ergebnis | 4 304         | 4 064         | 5 647         |
| Schadenquote in %   | 69,1          | 69,5          | 68,0          |
| Kostenquote in %    | 28,1          | 27,9          | 27,4          |
| Combined Ratio in % | 97,2          | 97,4          | 95,4          |

## Ergebnisübersicht

Die **Bruttobeiträge** stiegen um 3,2 Prozent oder 1 372 Millionen Euro auf 43 895 Millionen Euro, unter Einrechnung vorteilhafter Wechselkurseffekte von 1 356 Millionen Euro. Intern gerechnet, blieben die Umsätze nahezu unverändert.

Das **operative Ergebnis** verbesserte sich um 5,9 Prozent oder 240 Millionen Euro auf 4 304 Millionen Euro. Diese Verbesserung war sowohl auf unser verbessertes versicherungstechnisches Ergebnis (plus 133 Millionen Euro) als auch auf den Anstieg unserer operativen Nettoanlageerträge (plus 101 Millionen Euro) zurückzuführen. Der Anstieg des versicherungstechnischen Ergebnisses erfolgte ungeachtet der Tatsache, dass 2010 die Versicherungsleistungen für Schäden aus Naturkatastrophen 817 Millionen Euro höher waren als im Vorjahr.

Die **Combined Ratio** lag bei 97,2 Prozent. Das entspricht einem leichten Rückgang von 0,2 Prozentpunkten gegenüber dem Vorjahr. Nachteilige Effekte wie ungewöhnlich hohe Verluste aus Naturkatastrophen und leicht gestiegene Aufwendungen wurden durch vorteilhafte Einflüsse mehr als ausgeglichen. Diese ergaben sich durch Preissteigerungen, welche die Schadeninflation kompensierten, eine deutliche Verbesserung unseres Kreditgeschäfts und ein günstigeres Abwicklungsergebnis.

Operatives Ergebnis  
in Mio €

**+5,9%**

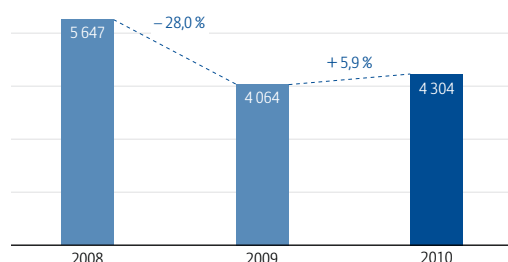

## Bruttobeiträge<sup>1</sup>

Nominal erhöhten sich unsere **Bruttobeiträge** um 3,2 Prozent oder 1 372 Millionen Euro auf 43 895 Millionen Euro; darin sind Wechselkurseffekte von 1 356 Millionen Euro enthalten, vornehmlich die Folge von Aufwertungen des australischen Dollars, des US-Dollars und des brasilianischen Reals gegenüber dem Euro.

Intern gerechnet, blieben die Bruttobeiträge nahezu unverändert. Sie wurden durch einen positiven Preiseffekt von 0,9 Prozent und einen negativen Volumeneffekt von 0,9 Prozent beeinflusst. In Bezug auf unsere Portfolio-Strategie haben wir an unserem differenzierten Ansatz festgehalten, der eine disziplinierte Zeichnungspolitik, selektives Wachstum und eine gute Risikodiversifikation vorsieht. Infolgedessen war das Volumen in jenen Geschäftssegmenten rückläufig, deren Rentabilität aufgrund ihrer Preisniveaus noch nicht adäquat war. Die positiven Auswirkungen beschleunigter Preiserhöhungen zeigten sich hauptsächlich in Italien, Australien, Großbritannien und im Kreditversicherungsgeschäft.

Mit Blick auf das Beitragswachstums insgesamt ging es vor allem in Australien und Südamerika sowie im Reiseversicherungs- und Assistancesgeschäft voran, doch wurde das dortige Plus durch Beitragsminderungen in Deutschland, den USA und Italien teilweise aufgehoben.

### Bruttobeiträge nach Regionen/Ländern zum 31. Dezember 2010 (31. Dezember 2009)<sup>2</sup>

in %

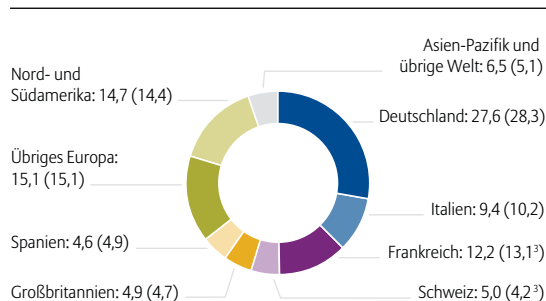

Bei der Analyse der Preis- und Volumeneffekte auf das interne Beitragswachstum legen wir vier Kategorien zugrunde, die das interne Wachstum der Jahre 2010 und 2009 zum Vergleich heranziehen.

**Wachstums-kategorie 1:** Insgesamt Umsatzplus; Preis- und Volumeneffekte sind positiv.

**Wachstums-kategorie 2:** Insgesamt Umsatzplus; entweder Preis- oder Volumeneffekte sind positiv.

**Wachstums-kategorie 3:** Insgesamt Umsatzminus; entweder Preis- oder Volumeneffekte sind positiv.

**Wachstums-kategorie 4:** Insgesamt Umsatzminus; Preis- und Volumeneffekte sind negativ.

### Bruttobeiträge nach operativen Einheiten

#### – interne Wachstumsrate<sup>4</sup>

in %

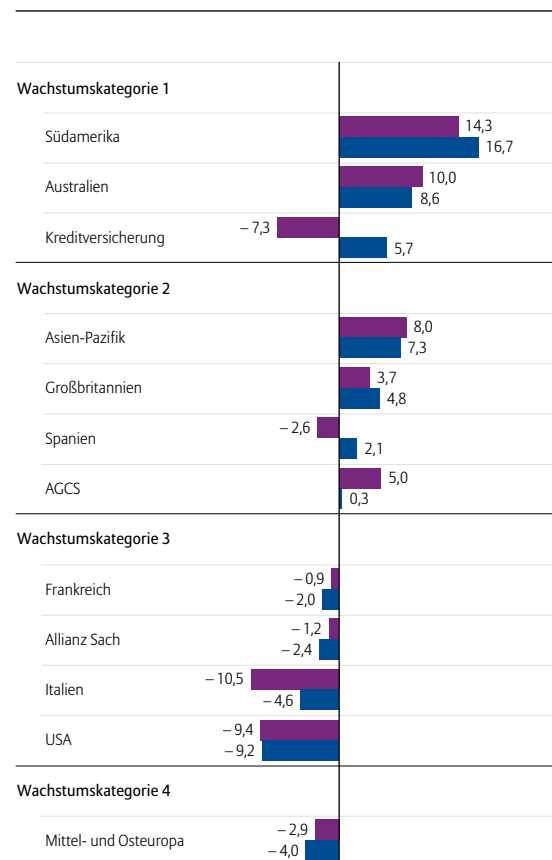

● 2009 zu 2008

● 2010 zu 2009

<sup>1</sup> Um vergleichbare Informationen bereitzustellen, kommentieren wir die Entwicklung unserer Bruttobeiträge intern gerechnet, das heißt bereinigt um Wechselkurs- und (Ent-)Konsolidierungseffekte.

<sup>2</sup> Nach Bereinigung um länder- und segmentübergreifende Transaktionen zwischen Gesellschaften der Allianz Gruppe. Die Bruttobeiträge aus unserem Spezialversicherungsgeschäft sind in dieser Darstellung den Regionen zugeordnet worden.

<sup>3</sup> Die Bruttobeiträge aus unserem Spezialversicherungsgeschäft Travel und Assistance (Mondial) sind nun Frankreich zugeordnet, da der Hauptsitz aus der Schweiz nach Frankreich 2010 wechselte. 2010 betrug Mondials Anteil an Bruttobeiträgen 3,5 (3,2) Prozent. 2009 Zahlen wurden rückwirkend angepasst.

<sup>4</sup> vor Bereinigung länder- und segmentübergreifender Transaktionen zwischen Gesellschaften der Allianz Gruppe

## Wachstums-kategorie 1

In **Südamerika** stiegen die Bruttobeiträge um 16,7 Prozent. Der Umsatz lag bei 1 563 Millionen Euro. Alle dortigen Länder trugen zum Wachstum bei, insbesondere Brasilien. Dort erzielten hauptsächlich die Krankenversicherung und das sonstige Firmenkundengeschäft (ohne Kfz-Geschäft) ein Plus; die Autoversicherung erholte sich in der ersten Jahreshälfte vom Druck auf die Versicherungstarife und erreichte zweistellige Wachstumsraten. Unter Berücksichtigung vorteilhafter Wechselkurseffekte von 220 Millionen Euro erzielten wir nominal ein Plus von 35,8 Prozent.

In **Australien** beliefen sich die Bruttobeiträge auf 2 161 Millionen Euro. Davon entfielen 398 Millionen Euro auf günstige Wechselkurseffekte. Intern gerechnet wuchsen wir um 8,6 Prozent, vorwiegend im Privatkundengeschäft, nachdem wir in den meisten Versicherungsarten bereits 2009 die Preise erhöht hatten. Die Autoversicherung nahm zweistellig zu, bedingt durch eine höhere Marktdurchdringung und Zuwächse im Flottengeschäft; das Plus in den weiteren Versicherungszweigen war von der Hausratversicherung beeinflusst. Wir schätzen den positiven Preiseffekt auf 5,1 Prozent.

In der **Kreditversicherung** stiegen die Bruttobeiträge um 5,7 Prozent auf 1 767 Millionen Euro, weil unsere Preisanpassungen umsatzsteigernd wirkten, auch wenn wir infolge gesunkener Schadenbelastungen höhere Nachlässe gewährten. Der positive Preiseffekt lag bei rund 3,0 Prozent.

## Wachstums-kategorie 2

In **Asien-Pazifik** beliefen sich die Bruttobeiträge auf 486 Millionen Euro. Das interne Wachstum betrug 7,3 Prozent, unter Berücksichtigung der Umgliederung von der Allianz Fire and Marine Insurance Japan zur AGCS sowie dem Sri-Lanka-Geschäft von der Region Mittlerer Osten und Nordafrika auf Asien-Pazifik sowie vorteilhafter Wechselkurseffekte von 58 Millionen Euro. Ein starkes zweistelliges Wachstum der Autoversicherung in Malaysia erhöhte insgesamt das Geschäftsvolumen und unterstützte den Anstieg der Bruttobeiträge. Der Preiseffekt war leicht negativ und belief sich auf etwa 0,5 Prozent.

Die Bruttobeiträge in **Großbritannien** machten 1 939 Millionen Euro aus. Intern gerechnet stiegen die Beiträge um 4,8 Prozent, und zwar ohne den vorteilhaften Wechselkurseffekt von 71 Millionen Euro. Die positive Entwicklung stammte im Wesentlichen aus Auto-, Hausrat-, Tierkrankenversicherungen mit Privatkunden sowie Haftpflicht und dem Geschäft mit unseren Kooperationspartnern. Der sehr vorteilhafte Preiseffekt von etwa 5,4 Prozent kam vor allem von der Autoversicherung.

Trotz der Wirtschaftskrise in **Spanien** erhöhten sich die Bruttobeiträge um 2,1 Prozent, bereinigt um die Portfolioübertragung von Spanien auf die AGCS. Insgesamt waren Bruttobeiträge von 2 011 Millionen Euro zu verzeichnen. Unser hervorragendes Geschäftsmodell, gutes Zyklusmanagement und geringere Abschlüsse vergrößerten das Geschäftsvolumen, besonders im Geschäft mit privaten Autoversicherungskunden. Höhere Autoverkäufe nach Einführung einer Abwrackprämie im letzten Vorjahresquartal unterstützten den Volumeneffekt. Der nachteilige Preiseffekt dürfte 1,7 Prozent ausmachen.

Die **AGCS** erzielte Bruttobeiträge von 4 007 Millionen Euro. Nach der Übertragung mehrerer Portfolios aus der allgemeinen Schaden- und Unfallversicherung auf die AGCS wuchsen die Bruttobeiträge geringfügig um 0,3 Prozent. Trotz schwieriger Marktbedingungen, eines intensiven Wettbewerbs und Umsatzrückgängen bei unseren Kunden gelang es, das Geschäftsvolumen zu steigern, vor allem in der Luftfahrtversicherung. Der Preiseffekt war in allen Ländern leicht negativ; wir schätzen ihn auf 1,4 Prozent.

### Wachstums-kategorie 3

In **Frankreich** sanken die Bruttoprämien um 2,0 Prozent auf 3 300 Millionen Euro. Das Geschäftsvolumen war nach Tarifierhöhungen im Flottengeschäft sowie für kleine und große Firmenkunden rückläufig. Wir setzten im gesamten Portfolio Preissteigerungen durch. Diese fielen im Privatkundengeschäft höher aus und bescherten allen Geschäften mit Ausnahme der Autoversicherung ein Plus. Der positive Preiseffekt lag bei rund 2,4 Prozent.

Bei der **Allianz Sach** sanken die Bruttobeiträge um 2,4 Prozent auf 9 013 Millionen Euro. Dieser Rückgang rührte in erster Linie aus der Autoversicherung und beruhte zum Teil auf der Portfoliobereinigung im Flottengeschäft; außerdem waren die Anschlussverträge im Privatkundengeschäft rückläufig. Die anhaltend schwierigen Marktbedingungen in Deutschland beeinträchtigten die Bruttobeiträge in sämtlichen Versicherungsarten. Wir schätzen den positiven Preiseffekt auf 0,1 Prozent.

In **Italien** blieb das Marktumfeld, trotz Verbesserungstendenzen, schwierig. Die Bruttobeiträge verringerten sich um 4,6 Prozent infolge unserer disziplinierten Portfoliobereinigung und der rezessionsbedingten Auswirkungen auf das Geschäft mit Firmenkunden. Es scheint, als habe sich der Preistrend endlich gedreht. Wir zeichneten Risiken nach wie vor selektiv und bevorzugten Rentabilität vor Wachstum. Angesichts des schwierigen Marktumfelds war unser Direct-Geschäft (Genialloyd) mit einem Wachstum

von 22,4 Prozent besonders hervorzuheben. Insgesamt beliefen sich die Bruttobeiträge auf 3 986 Millionen Euro. Der Preiseffekt war wegen unserer erheblichen Tarifierhöhungen in der Autoversicherung positiv; er dürfte 4,1 Prozent betragen.

In den **USA** sanken die Bruttobeiträge um 9,2 Prozent, vor allem infolge des Volumenrückgangs in allen Geschäftssegmenten. Die Bruttobeiträge beliefen sich auf 3 350 Millionen Euro unter Berücksichtigung eines positiven Wechselkurseffekts in Höhe von 190 Millionen Euro und der Übertragung des Schifffahrtsversicherungsgeschäfts auf die AGCS. Etwa ein Drittel des Volumenrückgangs war durch die Ernteausfallversicherung verursacht. Im Privat- und Firmenkundengeschäft war der Rückgang in erster Linie auf die langsame Konjunkturerholung und unsere Maßnahmen zur Sicherung der Rentabilität zurückzuführen. Dennoch konnten wir unsere Durchschnittsprämie steigern, besonders im Privatkundengeschäft. Der positive Preiseffekt betrug schätzungsweise 1,1 Prozent.

### Wachstums-kategorie 4

In **Mittel- und Osteuropa** beliefen sich die Bruttobeiträge auf 2 629 Millionen Euro. Intern gerechnet, und zwar vor Berücksichtigung günstiger Wechselkurseffekte, ging das Volumen um 4,0 Prozent zurück. Dieser Rückgang resultierte vor allem aus der Entwicklung in der wettbewerbsintensiven Autoversicherung, die wir weiter von unrentablem Geschäft befreiten und in der wir Risiken selektiv zeichneten. Die nachteiligen wirtschaftlichen Umstände ließen die Durchschnittsprämien deutlich absinken, vornehmlich in Ungarn, Rumänien und der Tschechischen Republik. Der negative Preiseffekt dürfte 3,0 Prozent betragen.



## Operatives Ergebnis

Das **operative Ergebnis** verbesserte sich um 5,9 Prozent beziehungsweise 240 Millionen Euro auf 4 304 Millionen Euro. Sowohl das versicherungstechnische Ergebnis als auch die operativen Nettoanlageerträge trugen zu diesem Plus bei.

Das versicherungstechnische Ergebnis stieg um 133 Millionen Euro auf 999 Millionen Euro, bedingt durch eine positive Preisentwicklung, den Aufschwung unserer Kreditversicherung und ein günstigeres Abwicklungsergebnis. Im Gegensatz dazu erhöhten sich unsere Belastungen aus Naturkatastrophen erheblich um 817 Millionen Euro auf 1 264 Millionen Euro.

Die operativen Nettoanlageerträge wuchsen um 101 Millionen Euro auf 3 218 Millionen Euro. Die höheren Erträge aus Aktienanlagen und die geringeren Wertminderungen übertrafen den Rückgang der operativen Erträge aus erfolgswirksam zum Zeitwert bewerteten Finanzaktiva und Finanzpassiva (netto).

### Versicherungstechnisches Ergebnis

|                                                                          | 2010<br>Mio € | 2009<br>Mio € | 2008<br>Mio € |
|--------------------------------------------------------------------------|---------------|---------------|---------------|
| Verdiente Beiträge (netto)                                               | 39 303        | 37 828        | 38 213        |
| Auf das Schadenjahr bezogene<br>Schadenaufwendungen                      | - 28 685      | - 27 387      | - 27 429      |
| Auflösungen von Schadenrück-<br>stellungen aus den vergangenen<br>Jahren | 1 544         | 1 067         | 1 443         |
| Abschluss- und Verwaltungs-<br>aufwendungen (netto)                      | - 11 044      | - 10 540      | - 10 478      |
| Versicherungstechnische<br>Restgröße <sup>1</sup>                        | - 119         | - 102         | - 155         |
| <b>Versicherungstechnisches<br/>Ergebnis</b>                             | <b>999</b>    | <b>866</b>    | <b>1 594</b>  |

Die **Combined Ratio** lag bei 97,2 Prozent, verglichen mit 97,4 Prozent im Vorjahr. Diese geringfügige Verbesserung ist die Folge höherer Preisniveaus in unseren Kernmärkten, trotz deutlich höherer Belastungen aus Naturkatastrophen und leicht gestiegener Aufwendungen.

Unsere **auf das Schadenjahr bezogene Schadenquote** lag in diesem schwierigen Umfeld bei 73,0 Prozent. Die Auswirkungen von Naturkatastrophen waren ungewöhnlich hoch und machten 3,2 Prozentpunkte der auf das Schadenjahr bezogenen Schadenquote aus. Im Vergleich dazu entfielen im Vorjahr 1,2 Prozentpunkte der auf das Schadenjahr bezogenen Schadenquote von 72,4 Prozent auf Schäden durch Naturkatastrophen. Ohne Naturkatastrophenschäden verbesserte sich die auf das Schadenjahr bezogene Schadenquote um 1,4 Prozentpunkte, vor allem weil die jährliche Durchschnittsprämie anstieg, die Großschäden geringer waren und die Schadenhäufigkeit in der Kreditversicherung infolge restriktiver Risikozeichnung und Einschränkungen unseres Engagements in riskanteren Geschäftsbereichen sowie Preiserhöhungen zurückging.

Die auf das Schadenjahr bezogene Schadenquote wurde durch folgende Einheiten begünstigt:

- Die Kreditversicherung mit minus 0,6 Prozentpunkten wegen deutlich geringerer Schadenhäufigkeit und -höhe, was darauf zurückzuführen war, dass wir seit Ende 2007 erheblich restriktiver bei der Risikozeichnung sind, unser Engagement in riskanteren Geschäftsbereichen eingeschränkt haben und die Preise erhöht wurden.
- Italien mit minus 0,3 Prozentpunkten vor allem wegen Preiserhöhungen und strengen Maßnahmen zur Erhaltung der Rentabilität, die die stark negative Auswirkung der sogenannten „Mailänder Tabellen“ (neue Invaliditätstabellen für Personenschäden, die 2009 eingeführt wurden), mehr als ausgleichen konnten.
- Frankreich mit minus 0,2 Prozentpunkten wegen unseres aktiven Portfoliomanagements, in dessen Rahmen das Portfolio bereinigt und die Tarife erhöht wurden. Diese Verbesserung konnte höhere Belastungen durch Naturkatastrophen wie den Sturm „Xynthia“ im ersten Halbjahr mehr als ausgleichen.

<sup>1</sup> Enthalten sind Deckungsrückstellungen für Versicherungsverträge und übrige versicherungstechnische Rückstellungen.

Folgende Einheiten belasteten die auf das Schadenjahr bezogene Schadenquote:

- Deutschland mit 0,6 Prozentpunkten wegen höheren Belastung aus Naturkatastrophen. So verursachten die Stürme „Xynthia“ und „Olivia/Norina“, die Flut „Viola“ und der Hagelsturm „Petra“ Schäden von rund 246 Millionen Euro netto, mehr als doppelt so viel wie im Vorjahr. Auch die anhaltend schwierigen Marktbedingungen in der Autoversicherung und im Firmenkundengeschäft wirkten sich nachteilig aus.
- Mittel- und Osteuropa mit 0,3 Prozentpunkten, weil Verluste infolge von Naturkatastrophen anstiegen und die anhaltende Rezession in der Region die Durchschnittsprämien drückte.
- Die AGCS mit 0,4 Prozentpunkten als Folge höherer Belastungen aus Naturkatastrophen. Außerdem stieg die Belastung aus mittelgroßen Schadereignissen, insbesondere in der Luftfahrt- und Sach-

versicherung, eine Entwicklung, die teilweise durch eine geringere Anzahl Großschäden ausgeglichen wurde.

Die **Kostenquote** nahm um 0,2 Prozentpunkte auf 28,1 Prozent zu. Davon waren 0,2 Prozentpunkte den einmaligen Effekten in den Verwaltungskosten zuzuschreiben, wie die Abschreibung von Forderungen an Rückversicherer für einen Großschaden in Russland und die Integration der Schweizer Hauptverwaltung. Weitere 0,2 Prozentpunkte ergaben sich aus der kurzfristigen Einführung der Finanzmarktsteuer in Ungarn und aus der Anpassung unserer Richtlinien an das Bilanzrechtsmodernisierungsgesetz (BilMoG) in Deutschland. Wir verbesserten unsere Kostenquote um 0,2 Prozentpunkte wegen der ergriffenen Maßnahmen in unseren Kernmärkten Deutschland, Frankreich, Italien und in den USA. Diese Effekte wurden leider durch einen Rückgang der Prämien ausgeglichen, was allerdings unserer Strategie geschuldet war, rentablere und damit selektivere Risiken zu zeichnen. Eine weitere Verbesserung von 0,2 Prozentpunkten war auf die vorteilhafte, wenn auch einmalige Entwicklung der Provisionskostenquote zurückzuführen.

#### Operative Nettoanlageerträge<sup>1</sup>

|                                                                                                     | 2010<br>Mio € | 2009<br>Mio € | 2008<br>Mio € |
|-----------------------------------------------------------------------------------------------------|---------------|---------------|---------------|
| Zinserträge und ähnliche Erträge (bereinigt um Zinsaufwendungen)                                    | 3 588         | 3 508         | 4 182         |
| Operative Erträge aus erfolgswirksam zum Zeitwert bewerteten Finanzaktiva und Finanzpassiva (netto) | 18            | 118           | 9             |
| Operative realisierte Gewinne/Verluste (netto)                                                      | 42            | 57            | 37            |
| Operative Wertminderungen auf Finanzanlagen (netto)                                                 | – 9           | – 75          | – 437         |
| Aufwendungen für Finanzanlagen                                                                      | – 240         | – 238         | – 254         |
| Veränderungen bei Rückstellungen für Versicherungs- und Investmentverträge (Beitragsrückerstattung) | – 181         | – 253         | 158           |
| <b>Operative Nettoanlageerträge</b>                                                                 | <b>3 218</b>  | <b>3 117</b>  | <b>3 695</b>  |

<sup>1</sup> Die oben definierten operativen Nettoanlageerträge schließen den anlagebezogenen Teil (Beitragsrückerstattungen) der Veränderung der Rückstellungen für Versicherungs- und Investmentverträge (netto) mit ein und weichen deshalb vom operativen Kapitalanlageergebnis ab, wie es unter Anmerkung 6 im Konzernanhang ausgewiesen ist.

Die operativen Nettoanlageerträge wuchsen um 101 Millionen Euro auf 3 218 Millionen Euro. Dies ist vorwiegend auf höhere Zinserträge und ähnliche Erträge sowie geringere Wertminderungen aus Aktienanlagen zurückzuführen.

Zinserträge und ähnliche Erträge stiegen um 80 Millionen Euro auf 3 588 Millionen Euro (nach Zinsaufwendungen). Mit 98 Millionen Euro leisteten Aktienanlagen den größten Beitrag zu diesem Plus; weitere 7 Millionen Euro trugen Rentenpapiere bei. Der positive Volumeneffekt aus dem höheren Anteil festverzinslicher Wertpapiere in unserem Portfolio wurde nahezu vollständig durch den nachteiligen Einfluss gesunkener Renditen aufgehoben. Die gesamte

durchschnittliche Anlagebasis stieg von 88,6 Milliarden Euro zum 31. Dezember 2009 auf 92,9 Milliarden Euro.

Die operativen Wertminderungen auf Finanzanlagen (netto) beliefen sich auf minus 9 Millionen Euro. Dies entspricht einer Verbesserung von 66 Millionen Euro, die überwiegend auf die im Vergleich zum Vorjahr gesunkenen Wertminderungen aus Aktienanlagen zurückzuführen ist.

Der Rückgang der operativen Erträge aus erfolgswirksam zum Zeitwert bewerteten Finanzaktiva und Finanzpassiva (netto) um 100 Millionen Euro auf 18 Millionen Euro neutralisierte zum Teil die insgesamt positive Entwicklung der Finanzanlagen.

#### Informationen zu unserer Schaden- und Unfallversicherung

|                                                                                                     | 2010<br>Mio €   | 2009<br>Mio €   | 2008<br>Mio €   |
|-----------------------------------------------------------------------------------------------------|-----------------|-----------------|-----------------|
| <b>Bruttobeiträge<sup>1</sup></b>                                                                   | <b>43 895</b>   | <b>42 523</b>   | <b>43 387</b>   |
| Abgegebene Rückversicherungsbeiträge                                                                | – 4 346         | – 4 574         | – 4 972         |
| Veränderung in Beitragsüberträgen                                                                   | – 246           | – 121           | – 202           |
| <b>Verdiente Beiträge (netto)</b>                                                                   | <b>39 303</b>   | <b>37 828</b>   | <b>38 213</b>   |
| Zinserträge und ähnliche Erträge                                                                    | 3 680           | 3 612           | 4 477           |
| Operative Erträge aus erfolgswirksam zum Zeitwert bewerteten Finanzaktiva und Finanzpassiva (netto) | 18              | 118             | 9               |
| Operative realisierte Gewinne/Verluste (netto)                                                      | 42              | 57              | 37              |
| Provisions- und Dienstleistungserträge                                                              | 1 099           | 1 075           | 1 247           |
| Sonstige Erträge                                                                                    | 22              | 19              | 271             |
| <b>Operative Erträge</b>                                                                            | <b>44 164</b>   | <b>42 709</b>   | <b>44 254</b>   |
| Schadenaufwendungen (netto)                                                                         | – 27 141        | – 26 320        | – 25 986        |
| Veränderung der Rückstellungen für Versicherungs- und Investmentverträge (netto)                    | – 300           | – 355           | 3               |
| Zinsaufwendungen                                                                                    | – 92            | – 104           | – 295           |
| Risikovorsorge im Kreditgeschäft                                                                    | —               | – 18            | – 17            |
| Operative Wertminderungen auf Finanzanlagen (netto)                                                 | – 9             | – 75            | – 437           |
| Aufwendungen für Finanzanlagen                                                                      | – 240           | – 238           | – 254           |
| Abschluss- und Verwaltungsaufwendungen (netto)                                                      | – 11 044        | – 10 540        | – 10 478        |
| Provisions- und Dienstleistungsaufwendungen                                                         | – 1 024         | – 995           | – 1 141         |
| Sonstige Aufwendungen                                                                               | – 10            | —               | – 2             |
| <b>Operative Aufwendungen</b>                                                                       | <b>– 39 860</b> | <b>– 38 645</b> | <b>– 38 607</b> |
| <b>Operatives Ergebnis</b>                                                                          | <b>4 304</b>    | <b>4 064</b>    | <b>5 647</b>    |
| Schadenquote <sup>2</sup> in %                                                                      | 69,1            | 69,5            | 68,0            |
| Kostenquote <sup>3</sup> in %                                                                       | 28,1            | 27,9            | 27,4            |
| <b>Combined Ratio<sup>4</sup> in %</b>                                                              | <b>97,2</b>     | <b>97,4</b>     | <b>95,4</b>     |

- 1 Im Geschäftsbereich Schaden- und Unfallversicherung wird der gesamte Umsatz an den Bruttobeiträgen gemessen.  
2 Verhältnis von Schadenaufwendungen (netto) zu verdienten Beiträgen (netto)  
3 Verhältnis von Abschluss- und Verwaltungsaufwendungen (netto) zu verdienten Beiträgen (netto)  
4 Verhältnis von Abschluss- und Verwaltungsaufwendungen (netto) sowie Schadenaufwendungen (netto) zu verdienten Beiträgen (netto)

## Schaden- und Unfallversicherungsgeschäft nach Geschäftsbereichen

|                                                         | Bruttobeiträge |               |               |                     |               | Verdiente Beiträge (netto) |               |               | Operatives Ergebnis      |                        |               |
|---------------------------------------------------------|----------------|---------------|---------------|---------------------|---------------|----------------------------|---------------|---------------|--------------------------|------------------------|---------------|
|                                                         | 2010<br>Mio €  | 2009<br>Mio € | 2008<br>Mio € | intern <sup>1</sup> |               | 2010<br>Mio €              | 2009<br>Mio € | 2008<br>Mio € | 2010<br>Mio €            | 2009<br>Mio €          | 2008<br>Mio € |
|                                                         |                |               |               | 2010<br>Mio €       | 2009<br>Mio € |                            |               |               |                          |                        |               |
| Deutschland                                             | 9 013          | 9 235         | 9 344         | 9 013               | 9 235         | 7 286                      | 7 263         | 7 356         | 617                      | 739                    | 1 375         |
| Schweiz                                                 | 1 389          | 1 309         | 1 241         | 1 311               | 1 299         | 1 377                      | 1 274         | 1 190         | 155                      | 150                    | 147           |
| Österreich                                              | 890            | 888           | 900           | 890                 | 888           | 691                        | 704           | 734           | 71                       | 75                     | 81            |
| <b>German Speaking Countries</b>                        | <b>11 292</b>  | <b>11 432</b> | <b>11 485</b> | <b>11 214</b>       | <b>11 422</b> | <b>9 354</b>               | <b>9 241</b>  | <b>9 280</b>  | <b>843</b>               | <b>964</b>             | <b>1 603</b>  |
| Italien                                                 | 3 986          | 4 190         | 4 740         | 3 986               | 4 178         | 3 935                      | 4 182         | 4 647         | 370                      | 346                    | 692           |
| Frankreich <sup>3</sup>                                 | 3 300          | 3 368         | 3 930         | 3 300               | 3 368         | 3 085                      | 3 118         | 3 281         | 174                      | 26                     | 282           |
| Spanien <sup>4</sup>                                    | 2 011          | 2 101         | 2 156         | 2 011               | 1 970         | 1 834                      | 1 803         | 1 863         | 282                      | 294                    | 287           |
| Südamerika                                              | 1 563          | 1 151         | 1 048         | 1 343               | 1 151         | 1 086                      | 825           | 764           | 119                      | 73                     | 82            |
| Niederlande                                             | 910            | 916           | 913           | 910                 | 916           | 801                        | 803           | 800           | 54                       | 53                     | 73            |
| Türkei <sup>5</sup>                                     | 487            | 417           | 180           | 451                 | 417           | 342                        | 261           | 128           | 25                       | 16                     | 9             |
| Belgien                                                 | 357            | 353           | 335           | 357                 | 333           | 268                        | 265           | 261           | 37                       | 43                     | 40            |
| Portugal                                                | 293            | 288           | 298           | 293                 | 288           | 241                        | 238           | 247           | 37                       | 37                     | 36            |
| Griechenland                                            | 116            | 99            | 83            | 116                 | 99            | 86                         | 63            | 55            | 16                       | 11                     | 10            |
| Afrika                                                  | 71             | 67            | 62            | 71                  | 67            | 42                         | 40            | 37            | 7                        | 5                      | 10            |
| <b>Europe incl. South America</b>                       | <b>13 094</b>  | <b>12 950</b> | <b>13 745</b> | <b>12 838</b>       | <b>12 787</b> | <b>11 720</b>              | <b>11 598</b> | <b>12 083</b> | <b>1 136<sup>6</sup></b> | <b>926<sup>6</sup></b> | <b>1 547</b>  |
| USA <sup>7</sup>                                        | 3 350          | 3 521         | 4 420         | 3 160               | 3 479         | 2 710                      | 3 010         | 3 298         | 266                      | 341                    | 280           |
| Mexiko                                                  | 226            | 192           | 205           | 201                 | 192           | 90                         | 76            | 82            | 12                       | 14                     | 19            |
| <b>NAFTA Markets</b>                                    | <b>3 576</b>   | <b>3 713</b>  | <b>4 625</b>  | <b>3 361</b>        | <b>3 671</b>  | <b>2 800</b>               | <b>3 086</b>  | <b>3 380</b>  | <b>278</b>               | <b>355</b>             | <b>299</b>    |
| Allianz Global Corporate & Specialty <sup>3,4,7,8</sup> | 4 007          | 3 806         | 2 859         | 4 007               | 3 994         | 2 903                      | 2 487         | 1 812         | 461                      | 590                    | 435           |
| Reinsurance PC                                          | 4 014          | 3 719         | 3 470         | 4 014               | 3 719         | 3 274                      | 3 076         | 2 823         | 331                      | 365                    | 498           |
| Großbritannien                                          | 1 939          | 1 783         | 1 925         | 1 868               | 1 783         | 1 782                      | 1 603         | 1 769         | 185                      | 230                    | 245           |
| Kreditversicherung                                      | 1 767          | 1 672         | 1 804         | 1 767               | 1 672         | 1 139                      | 1 111         | 1 360         | 445                      | 13                     | 145           |
| Australien                                              | 2 161          | 1 607         | 1 484         | 1 745               | 1 607         | 1 632                      | 1 203         | 1 171         | 302                      | 235                    | 267           |
| Irland                                                  | 682            | 627           | 672           | 682                 | 627           | 600                        | 570           | 597           | 64                       | -30                    | 115           |
| Allianz Risk Transfer (ART)                             | 532            | 452           | 349           | 492                 | 452           | 183                        | 176           | 168           | 56                       | 50                     | 55            |
| <b>Global Insurance Lines &amp; Anglo Markets</b>       | <b>15 102</b>  | <b>13 666</b> | <b>12 563</b> | <b>14 575</b>       | <b>13 854</b> | <b>11 513</b>              | <b>10 226</b> | <b>9 700</b>  | <b>1 844</b>             | <b>1 453</b>           | <b>1 760</b>  |
| Russland                                                | 698            | 642           | 820           | 639                 | 642           | 565                        | 525           | 679           | -32                      | 31                     | 50            |
| Ungarn                                                  | 420            | 454           | 546           | 409                 | 454           | 363                        | 414           | 471           | 11                       | 65                     | 81            |
| Polen                                                   | 443            | 372           | 460           | 410                 | 372           | 342                        | 297           | 337           | -7                       | 12                     | 38            |
| Slowakei                                                | 349            | 361           | 348           | 349                 | 361           | 295                        | 306           | 296           | 48                       | 75                     | 90            |
| Rumänien                                                | 223            | 282           | 346           | 221                 | 282           | 169                        | 140           | 135           | —                        | 5                      | 10            |
| Tschechische Republik                                   | 268            | 274           | 278           | 256                 | 274           | 206                        | 219           | 209           | 27                       | 41                     | 44            |
| Kroatien                                                | 86             | 87            | 95            | 85                  | 87            | 73                         | 77            | 78            | 10                       | 7                      | 6             |
| Bulgarien                                               | 95             | 101           | 110           | 95                  | 101           | 67                         | 75            | 81            | 18                       | 19                     | 18            |
| Kasachstan                                              | 38             | 33            | 14            | 38                  | 33            | 7                          | 6             | 8             | 2                        | -1                     | 2             |
| Ukraine                                                 | 9              | 9             | 23            | 9                   | 9             | 6                          | 6             | 18            | —                        | -3                     | -11           |
| Mittel- und Osteuropa <sup>9</sup>                      | 2 629          | 2 615         | 3 040         | 2 511               | 2 615         | 2 093                      | 2 065         | 2 312         | 55                       | 230                    | 300           |
| Asien-Pazifik (exkl. Australien) <sup>8</sup>           | 486            | 472           | 426           | 428                 | 399           | 280                        | 259           | 226           | 49                       | 36                     | 23            |
| Mittlerer Osten und Nordafrika                          | 76             | 69            | 54            | 73                  | 61            | 44                         | 35            | 25            | 2                        | 1                      | 3             |
| <b>Growth Markets</b>                                   | <b>3 191</b>   | <b>3 156</b>  | <b>3 520</b>  | <b>3 012</b>        | <b>3 075</b>  | <b>2 417</b>               | <b>2 359</b>  | <b>2 563</b>  | <b>106</b>               | <b>267</b>             | <b>326</b>    |
| Assistance (Mondial)                                    | 1 540          | 1 355         | 1 228         | 1 540               | 1 355         | 1 487                      | 1 307         | 1 196         | 97                       | 95                     | 107           |
| Konsolidierung <sup>10</sup>                            | -3 900         | -3 749        | -3 779        | -4 024              | -3 651        | 12                         | 11            | 11            | —                        | 4                      | 5             |
| <b>Summe</b>                                            | <b>43 895</b>  | <b>42 523</b> | <b>43 387</b> | <b>42 516</b>       | <b>42 513</b> | <b>39 303</b>              | <b>37 828</b> | <b>38 213</b> | <b>4 304</b>             | <b>4 064</b>           | <b>5 647</b>  |

1 Zeigt die Bruttobeiträge auf interner Basis, bereinigt um Währungskurs- und (Ent-)Konsolidierungseffekte.

2 Nettoveränderung der Reserven, bezogen auf die Sparkomponente des UBR-Geschäfts, ist seit 2009 in den Schadenaufwendungen enthalten: Für 2010 sind 14 Mio € und für 2009 sind 49 Mio € berücksichtigt. Vorangehende Perioden wurden rückwirkend nicht angepasst.

3 Das Industrieversicherungsgeschäft in Frankreich wurde 2009 auf die AGCS übertragen.

4 Das Industrieversicherungsgeschäft in Spanien wurde 2010 auf die AGCS übertragen.

5 Mit Wirkung ab dem 21. Juli 2008 haben wir die Koç Allianz Sigorta AS konsolidiert, nachdem die Allianz Gruppe etwa 47,1 % der Anteile hinzugewonnen hat; damit hat die Allianz Gruppe ihren Anteil an Koç Allianz Sigorta AS auf etwa 84,2 % erhöht.

|                                                            | Combined Ratio     |                   |              | Schadenquote      |                   |             | Kostenquote |             |             |
|------------------------------------------------------------|--------------------|-------------------|--------------|-------------------|-------------------|-------------|-------------|-------------|-------------|
|                                                            | 2010<br>%          | 2009<br>%         | 2008<br>%    | 2010<br>%         | 2009<br>%         | 2008<br>%   | 2010<br>%   | 2009<br>%   | 2008<br>%   |
| Deutschland                                                | 100,8 <sup>2</sup> | 98,7 <sup>2</sup> | 95,5         | 73,4 <sup>2</sup> | 70,9 <sup>2</sup> | 69,4        | 27,4        | 27,8        | 26,1        |
| Schweiz                                                    | 94,6               | 93,5              | 93,1         | 73,1              | 70,5              | 70,2        | 21,5        | 23,0        | 22,9        |
| Österreich                                                 | 96,0               | 95,9              | 94,1         | 69,7              | 69,2              | 70,0        | 26,3        | 26,7        | 24,1        |
| <b>German Speaking Countries</b>                           | <b>99,6</b>        | <b>97,8</b>       | <b>95,1</b>  | <b>73,1</b>       | <b>70,8</b>       | <b>69,5</b> | <b>26,5</b> | <b>27,0</b> | <b>25,6</b> |
| Italien                                                    | 99,6               | 100,8             | 96,9         | 74,8              | 76,0              | 73,1        | 24,8        | 24,8        | 23,8        |
| Frankreich <sup>3</sup>                                    | 102,7              | 106,8             | 97,5         | 75,1              | 78,7              | 69,3        | 27,6        | 28,1        | 28,2        |
| Spanien <sup>4</sup>                                       | 90,3               | 89,7              | 90,6         | 69,8              | 69,3              | 69,9        | 20,5        | 20,4        | 20,7        |
| Südamerika                                                 | 96,7               | 98,4              | 98,5         | 64,9              | 66,0              | 65,0        | 31,8        | 32,4        | 33,5        |
| Niederlande                                                | 98,7               | 98,8              | 98,0         | 68,6              | 69,2              | 67,5        | 30,1        | 29,6        | 30,5        |
| Türkei <sup>5</sup>                                        | 99,7               | 105,8             | 109,5        | 74,1              | 79,4              | 85,6        | 25,6        | 26,4        | 23,9        |
| Belgien                                                    | 99,2               | 97,3              | 97,1         | 64,3              | 61,1              | 60,2        | 34,9        | 36,2        | 36,9        |
| Portugal                                                   | 92,8               | 92,8              | 92,8         | 68,8              | 65,8              | 65,1        | 24,0        | 27,0        | 27,7        |
| Griechenland                                               | 88,4               | 90,7              | 91,1         | 52,4              | 61,2              | 59,9        | 36,0        | 29,5        | 31,2        |
| Afrika                                                     | 96,1               | 98,4              | 91,7         | 48,3              | 48,8              | 48,8        | 47,8        | 49,6        | 42,9        |
| <b>Europe incl. South America</b>                          | <b>98,5</b>        | <b>100,2</b>      | <b>96,3</b>  | <b>72,2</b>       | <b>73,9</b>       | <b>70,3</b> | <b>26,3</b> | <b>26,3</b> | <b>26,0</b> |
| USA <sup>7</sup>                                           | 102,4              | 99,8              | 101,3        | 69,9              | 69,9              | 74,3        | 32,5        | 29,9        | 27,0        |
| Mexiko                                                     | 95,7               | 89,4              | 95,4         | 69,8              | 64,3              | 70,0        | 25,9        | 25,1        | 25,4        |
| <b>NAFTA Markets</b>                                       | <b>102,1</b>       | <b>99,5</b>       | <b>101,2</b> | <b>69,8</b>       | <b>69,7</b>       | <b>74,3</b> | <b>32,3</b> | <b>29,8</b> | <b>26,9</b> |
| Allianz Global<br>Corporate & Specialty <sup>3,4,7,8</sup> | 93,7               | 87,2              | 90,1         | 66,8              | 61,9              | 62,3        | 26,9        | 25,3        | 27,8        |
| Reinsurance PC                                             | 93,2               | 92,3              | 87,9         | 68,5              | 66,4              | 61,9        | 24,7        | 25,9        | 26,0        |
| Großbritannien                                             | 96,0               | 92,9              | 95,1         | 61,7              | 59,3              | 60,4        | 34,3        | 33,6        | 34,7        |
| Kreditversicherung                                         | 71,7               | 110,4             | 104,8        | 41,7              | 82,4              | 77,7        | 30,0        | 28,0        | 27,1        |
| Australien                                                 | 96,1               | 94,8              | 97,5         | 70,8              | 70,2              | 72,6        | 25,3        | 24,6        | 24,9        |
| Irland                                                     | 97,1               | 114,5             | 92,4         | 74,0              | 84,7              | 67,0        | 23,1        | 29,8        | 25,4        |
| Allianz Risk Transfer (ART)                                | 82,5               | 89,4              | 81,3         | 38,0              | 47,1              | 31,3        | 44,5        | 42,3        | 50,0        |
| <b>Global Insurance Lines &amp;<br/>Anglo Markets</b>      | <b>92,1</b>        | <b>94,6</b>       | <b>93,3</b>  | <b>64,5</b>       | <b>67,1</b>       | <b>65,0</b> | <b>27,6</b> | <b>27,5</b> | <b>28,3</b> |
| Russland                                                   | 109,5              | 97,0              | 99,1         | 64,3              | 58,7              | 59,2        | 45,2        | 38,3        | 39,9        |
| Ungarn                                                     | 107,6              | 94,0              | 93,5         | 65,2              | 60,8              | 61,1        | 42,4        | 33,2        | 32,4        |
| Polen                                                      | 105,9              | 99,9              | 93,4         | 71,4              | 65,3              | 60,6        | 34,5        | 34,6        | 32,8        |
| Slowakei                                                   | 89,6               | 79,9              | 77,5         | 59,5              | 51,1              | 46,1        | 30,1        | 28,8        | 31,4        |
| Rumänien                                                   | 104,2              | 100,6             | 102,2        | 78,1              | 78,9              | 73,1        | 26,1        | 21,7        | 29,1        |
| Tschechische<br>Republik                                   | 91,2               | 82,9              | 81,0         | 66,4              | 56,9              | 60,5        | 24,8        | 26,0        | 20,5        |
| Kroatien                                                   | 92,9               | 99,3              | 98,1         | 58,0              | 60,6              | 64,9        | 34,9        | 38,7        | 33,2        |
| Bulgarien                                                  | 75,2               | 79,0              | 78,4         | 46,4              | 44,6              | 48,0        | 28,8        | 34,4        | 30,4        |
| Kasachstan                                                 | 78,4               | 132,3             | 106,6        | 21,3              | 42,3              | 18,6        | 57,1        | 90,0        | 88,0        |
| Ukraine                                                    | 122,8              | 169,2             | 172,4        | 38,0              | 69,4              | 95,1        | 84,8        | 99,8        | 77,3        |
| Mittel- und Osteuropa <sup>9</sup>                         | 102,0              | 92,9              | 92,9         | 65,2              | 59,7              | 59,0        | 36,8        | 33,2        | 33,9        |
| Asien-Pazifik (exkl. Australien) <sup>8</sup>              | 91,2               | 93,1              | 96,9         | 61,4              | 58,6              | 63,0        | 29,8        | 34,5        | 33,9        |
| Mittlerer Osten und<br>Nordafrika                          | 109,9              | 135,4             | 128,8        | 73,9              | 72,2              | 65,9        | 36,0        | 63,2        | 62,9        |
| <b>Growth Markets</b>                                      | <b>101,0</b>       | <b>93,6</b>       | <b>93,6</b>  | <b>65,0</b>       | <b>59,8</b>       | <b>59,4</b> | <b>36,0</b> | <b>33,8</b> | <b>34,2</b> |
| Assistance (Mondial)                                       | 95,6               | 95,5              | 93,4         | 59,6              | 60,1              | 57,6        | 36,0        | 35,4        | 35,8        |
| Konsolidierung <sup>10</sup>                               | —                  | —                 | —            | —                 | —                 | —           | —           | —           | —           |
| <b>Summe</b>                                               | <b>97,2</b>        | <b>97,4</b>       | <b>95,4</b>  | <b>69,1</b>       | <b>69,5</b>       | <b>68,0</b> | <b>28,1</b> | <b>27,9</b> | <b>27,4</b> |

6 Enthält 15 Mio € (2010) und 14 Mio € (2009) einer Verwaltungs-Holding in Luxemburg; außerdem sind – 0,1 Mio € (2010) und 8 Mio € (2009) aus AGF UK enthalten.

7 Zu Beginn des Jahres 2009 wurde das US-Schiffahrtsversicherungsgeschäft zur AGCS übertragen.

8 Mit Wirkung ab dem ersten Quartal 2010 weisen wir die Allianz Fire and Marine Insurance Japan Ltd. innerhalb der AGCS aus. Die Vorjahreszahlen wurden nicht angepasst.

9 Enthält Ertrags- und Aufwandspositionen einer Verwaltungs-Holding.

10 Die Transaktionen zwischen Gesellschaften der Allianz Gruppe in den verschiedenen Regionen wurden hierin bereinigt.



# Lebens- und Krankenversicherung

- Der Umsatz stieg um 12,5 Prozent auf 57,1 Milliarden Euro.
- Das operative Ergebnis betrug 2,9 Milliarden Euro.
- Ein größerer Kapitalanlagenbestand und geringere Wertminderungen führten zu einem soliden Anlageergebnis.

## Segmentüberblick

- Die Allianz bietet eine Reihe von Lebensversicherungs-, Spar- und anlageorientierten Produkten an, einschließlich Einzel- und Gruppenversicherungen.
- Über unsere Vertriebskanäle, überwiegend Vertreter, Broker und Bankpartner, vertreiben wir Lebens- und Krankenversicherungsprodukte für Privat- und Firmenkunden.
- Als einer der Weltmarktführer im Lebensversicherungsgeschäft betreuen wir Kunden in mehr als 45 Ländern.
- Gemessen am Beitragsvolumen gehören wir in zwölf Ländern zu den größten Lebensversicherungsunternehmen.

**Operatives Ergebnis<sup>1</sup>** **+7,4%**  
in Mio €

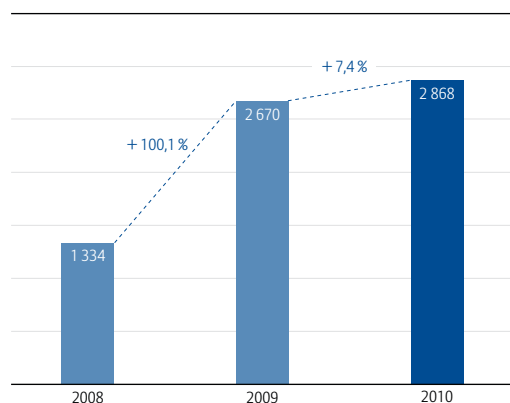

## Kennzahlen

|                                     | 2010<br>Mio € | 2009<br>Mio € | 2008<br>Mio € |
|-------------------------------------|---------------|---------------|---------------|
| Gesamte Beitragseinnahmen           | 57 098        | 50 773        | 45 615        |
| Operatives Ergebnis <sup>1</sup>    | 2 868         | 2 670         | 1 334         |
| Cost-Income Ratio in % <sup>1</sup> | 96,1          | 95,8          | 97,5          |

## Ergebnisübersicht

Die **gesamten Beitragseinnahmen** stiegen nominal um 12,5 Prozent oder 6 325 Millionen Euro auf 57 098 Millionen Euro. Intern gerechnet, betrug der Umsatzanstieg 9,6 Prozent. Insgesamt beruhte etwa ein Drittel der Zuwächse auf unserem Geschäft mit traditionellen Lebensversicherungsprodukten; die verbleibenden zwei Drittel stammten von höheren Beitragseinnahmen aus anlageorientierten Verträgen, vorwiegend aus fondsgebundenen Produkten.

Das **operative Ergebnis** verbesserte sich um 7,4 Prozent auf 2 868 Millionen Euro. Weil das Geschäftsvolumen und damit auch der Kapitalanlagenbestand anstieg, flossen uns höhere Zinserträge und ähnliche Erträge zu. Höhere realisierte Gewinne und geringere Wertminderungen unterstützten zusätzlich die operative Ergebnisverbesserung. Das Ergebnis für zum Zeitwert bewertete Anlagen<sup>2</sup> ging zurück, weil im Vorjahr außerordentlich hohe Gewinne aus Credit Spreads und Kapitalmarktbebewegungen erzielt worden waren.

<sup>1</sup> Beträge vor 2010 wurden angepasst, um eine Änderung der Bilanzierungs- und Bewertungsmethode des Allianz Konzerns zu berücksichtigen. Weitere Informationen finden sich unter Anmerkung 4 im Konzernanhang.

<sup>2</sup> erfasst im Nettogewinn aus den erfolgswirksam zum Zeitwert bewerteten Finanzaktiva und Finanzpassiva

## Gesamte Beitragseinnahmen<sup>1</sup>

Die Beitragseinnahmen stiegen nominal um 12,5 Prozent und intern gerechnet um 9,6 Prozent, vorwiegend aufgrund von positiven Entwicklungen in einigen unserer größten Märkte, wie Deutschland, Frankreich, Belgien, Asien-Pazifik und den USA.

### Gesamte Beitragseinnahmen nach Regionen/Ländern zum 31. Dezember 2010 (31. Dezember 2009)<sup>2</sup>

in %

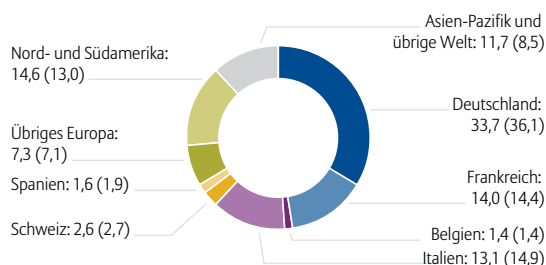

In **Asien-Pazifik** stiegen die gesamten Beitragseinnahmen, intern gerechnet, um 32,7 Prozent auf 6 487 Millionen Euro. Die hohe Nachfrage nach fondsgebundenen und anlageorientierten Produkten, die nach der Kapitalmarkterholung 2009 eingesetzt hatte, hielt im Berichtsjahr weiter an. Eine höhere Anzahl Bankvertriebspartner und der Verkauf aktienindizierter Rentenprodukte hob in Japan die Beitragseinnahmen um 887 Millionen Euro auf 1 202 Millionen Euro. Die Beitragseinnahmen in Südkorea wuchsen, intern gerechnet, um 10,3 Prozent, was dem Geschäft mit anlageorientierten Garantieprodukten zu verdanken ist. Stark gefragt waren auch unsere aktienindizierten Rentenprodukte gegen Einmalprämie und andere anlageorientierte Produkte, die wir über den Bankassurance-Vertrieb vermarkten. In Taiwan beruhten die Zuwächse vorwiegend auf dem Geschäft mit rein fondsgebundenen Produkten ohne Garantien. Insgesamt betrug der Umsatzanstieg in Taiwan, intern gerechnet, 10,2 Prozent.

### Gesamte Beitragseinnahmen – interne Wachstumsraten<sup>3</sup> in %

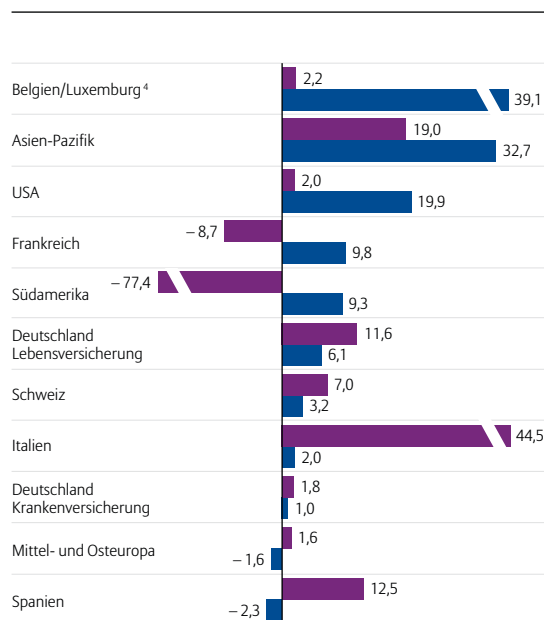

● 2009 zu 2008  
● 2010 zu 2009

Die gesamten Beitragseinnahmen in **Belgien/Luxemburg** beliefen sich auf 1 160 Millionen Euro.<sup>4</sup> Das Plus um 39,1 Prozent steuerten größtenteils fondsgebundene Produkte bei; dabei profitierten wir von guten Vertriebspartnerschaften in Luxemburg und der höheren Nachfrage nach langfristigen Anlageformen in Belgien.

In den **USA** wuchsen die gesamten Beitragseinnahmen, intern gerechnet, um 19,9 Prozent auf 8 155 Millionen Euro, vor allem weil unsere indexgebundenen und aktienindizierten Rentenprodukte sich gut verkauften. Der Umsatz nahm auch deshalb zu, weil wir am Ende des ersten Vorjahresquartals den Absatz der Erlebensfallrenten eingestellt und erst im dritten Quartal 2009 mit der Vermarktung des neu kalkulierten Nachfolgeprodukts begonnen hatten.

Die Beitragseinnahmen in **Frankreich** stiegen um 9,8 Prozent auf 8 014 Millionen Euro, vornehmlich deshalb, weil eine rege Nachfrage nach rein fondsgebundenen Produkten gegen Einmalprämie und nach

<sup>1</sup> Um vergleichbare Informationen bereitzustellen, kommentieren wir die Entwicklung unserer Bruttobeiträge intern gerechnet, das heißt bereinigt um Wechselkurs- und (Ent-)Konsolidierungseffekte.

<sup>2</sup> nach Bereinigung länder- und segmentübergreifender Transaktionen zwischen Gesellschaften der Allianz Gruppe

<sup>3</sup> vor Bereinigung länder- und segmentübergreifender Transaktionen zwischen Gesellschaften der Allianz Gruppe

<sup>4</sup> Ab dem ersten Quartal 2010 wurde Luxembourg Life für die Finanzberichterstattung in Belgien konsolidiert.

klassischen Produkten herrschte. Außerdem verkauften wir nach einer Werbekampagne im ersten Quartal 2010 eine größere Anzahl weiterer anlageorientierter Produkte über unsere Vertriebspartner.

Die Beitragseinnahmen im **deutschen** Lebensversicherungsgeschäft erhöhten sich um 6,1 Prozent auf 15 961 Millionen Euro, angetrieben durch starke Zuwächse bei Einmalprämien aus traditionellen Lebensversicherungsprodukten. Die Einnahmen aus laufenden Prämien blieben unverändert auf hohem Niveau. Der Umsatz aus dem anlageorientierten Geschäft ging zurück, weil weniger kurzfristige Investmentverträge verkauft wurden. Alle Vertriebswege trugen zum Wachstum bei; insbesondere Brokern und unserem Partner Commerzbank gelang es, die Vermarktung von Lebensversicherungen zu steigern. Der Umsatz im deutschen Krankenversicherungsgeschäft stieg um 1,0 Prozent. Dieses Wachstum ist vor allem auf Beitragsanpassungen und auf eine geringe Anzahl von Kündigungen in der Vollversicherung zurückzuführen.

In der **Schweiz** erhöhten sich die Beitragseinnahmen, intern gerechnet, um 3,2 Prozent auf insgesamt 1 502 Millionen Euro. Die Zuwächse sind in erster Linie auf höhere Einmalprämien aus dem anlageorientierten Geschäft zurückzuführen, zumeist auf Produkte mit Garantien. Sie wurden allerdings durch den geplanten Umsatzrückgang bei den traditionellen Lebensversicherungen gedämpft.

In **Italien** wuchsen die gesamten Beitragseinnahmen um 2,0 Prozent auf 8 841 Millionen Euro. In der ersten Jahreshälfte stiegen die Umsätze über den Bankassurance-Vertrieb und das Finanzberaternetz stark an, doch im zweiten Halbjahr gingen die Verkaufszahlen teilweise wieder zurück, denn der Gesamtmarkt verlor an Dynamik.

Die Beitragseinnahmen in **Mittel- und Osteuropa** verringerten sich, intern gerechnet, um 1,6 Prozent auf 1 057 Millionen Euro. Gründe für den Rückgang in Polen waren Umsatzeinbußen bei den Anlageprodukten in der Lebensversicherung und ein geringerer Absatz von Restschuldversicherungen. Hingegen gab es ein Beitragseinnahmenplus bei fondsgebundenen Produkten und klassischen Gruppenversicherungen,

das die Einbußen teilweise ausglich. In Ungarn wuchsen die Beitragseinnahmen durch den gestiegenen Verkauf fondsgebundener Produkte infolge einer Werbekampagne im zweiten Quartal 2010. Das Umsatzplus in der Tschechischen Republik beruhte hauptsächlich auf der starken Nachfrage nach Einmalprämienprodukten.

## Operatives Ergebnis<sup>1</sup>

Das **operative Ergebnis** verbesserte sich von 2 670 Millionen Euro auf 2 868 Millionen Euro, weil die Erholung an den Kapitalmärkten und geringere Wertminderungen zu einem soliden Anlageergebnis führten.

Die **um Zinsaufwendungen bereinigten Zinserträge und ähnliche Erträge** stiegen um 1 138 Millionen Euro auf 14 982 Millionen Euro. Die Hauptursache dafür waren die durch Mehrgeschäft gestiegenen Kapitalanlagen, die vorwiegend in festverzinslichen Wertpapiere angelegt wurden. Der wachstumsbedingte Zuwachs in unserem Rentenportfolio konnte die niedrigeren Renditen aus verzinslichen Anlageformen mehr als wettmachen.

Der **Nettogewinn aus den erfolgswirksam zum beizulegenden Zeitwert bewerteten Finanzaktiva und Finanzpassiva** ging von 636 Millionen Euro auf 19 Millionen Euro zurück. Im Vergleich zu den außerordentlich hohen Erträgen im Jahr 2009 fielen die Erträge aus Fair-Value-Optionen in diesem Jahr bedeutend niedriger aus, besonders in Frankreich, wo sich der Aktienindex im Jahr 2009 vergleichsweise besser entwickelt hatte, und in den USA, wo wir höhere Gewinne aus günstigen Veränderungen der Credit Spreads erzielt hatten.

Die **Aufwendungen für Finanzanlagen** erhöhten sich um 82 Millionen Euro, vornehmlich bedingt durch den größeren Kapitalanlagenbestand und neue Investitionen in Immobilienanlagen.

Verbesserte Marktbedingungen trugen zu einer Erhöhung der **realisierten Nettogewinne** von 1 755 Millionen Euro auf 2 125 Millionen Euro bei.

<sup>1</sup> Beträge vor 2010 wurden angepasst, um eine Änderung der Bilanzierungs- und Bewertungsmethode des Allianz Konzerns zu berücksichtigen. Weitere Informationen finden sich unter Anmerkung 4 im Konzernanhang.

Die **Wertminderungen auf Finanzanlagen (netto)** gingen von 1 663 Millionen Euro auf 434 Millionen Euro zurück, aufgrund von deutlich geringeren Wertminderungen des Aktienportfolios im Zuge der Stabilisierung der Kapitalmärkte.

Die **Veränderung der Rückstellungen für Versicherungs- und Investmentverträge (netto)** betrug 13 329 Millionen Euro, wobei sich die Erhöhung von 4 830 Millionen Euro vorwiegend deshalb ergab, weil wir nach Mehrverkäufen klassischer Produkte in Deutschland, Frankreich und Asien-Pazifik höhere Deckungsrückstellungen bildeten.

Der **Nettoschadenaufwand** sank um 1,9 Prozent auf 18 955 Millionen Euro.

Die **Abschluss- und Verwaltungsaufwendungen (netto)** gingen von 5 591 Millionen Euro auf 5 175 Millionen Euro zurück. Die Verwaltungsaufwendungen verzeichneten nur eine geringe Abnahme von 0,7 Prozent, während die Abschlussaufwendungen um ganze 10,0 Prozent rückläufig waren. Dieser Rückgang beruht vorwiegend auf einer Darstellungsänderung von Netto auf Brutto der aktivierten Verkaufsförderungen (DSI) in den USA und vergleichsweise niedrigen Abschreibungen auf aktivierte Abschlusskosten (DAC) infolge der jährlichen Überprüfung der Berechnungsannahmen in Deutschland, Frankreich und den USA.

#### Informationen zu unserer Lebens- und Krankenversicherung<sup>1</sup>

|                                                                                                     | 2010<br>Mio €   | 2009<br>Mio €   | 2008<br>Mio €   |
|-----------------------------------------------------------------------------------------------------|-----------------|-----------------|-----------------|
| <b>Gesamte Beitragseinnahmen<sup>2</sup></b>                                                        | <b>57 098</b>   | <b>50 773</b>   | <b>45 615</b>   |
| Abgegebene Rückversicherungsbeiträge                                                                | – 564           | – 549           | – 588           |
| Veränderung in Beitragsüberträgen                                                                   | – 127           | – 51            | – 54            |
| Gesamte Beitragseinnahmen (netto)                                                                   | 56 407          | 50 173          | 44 973          |
| Einlagen aus SFAS 97 Versicherungs- und Investmentverträgen                                         | – 32 373        | – 28 209        | – 22 792        |
| <b>Verdiente Beiträge (netto)</b>                                                                   | <b>24 034</b>   | <b>21 964</b>   | <b>22 181</b>   |
| Zinserträge und ähnliche Erträge                                                                    | 15 085          | 13 971          | 13 772          |
| Operative Erträge aus erfolgswirksam zum Zeitwert bewerteten Finanzaktiva und Finanzpassiva (netto) | 19              | 636             | 405             |
| Operative realisierte Gewinne/Verluste (netto)                                                      | 2 125           | 1 755           | 874             |
| Provisions- und Dienstleistungserträge                                                              | 539             | 491             | 571             |
| Sonstige Erträge                                                                                    | 81              | 17              | 140             |
| <b>Operative Erträge</b>                                                                            | <b>41 883</b>   | <b>38 834</b>   | <b>37 943</b>   |
| Schadenaufwendungen (netto)                                                                         | – 18 955        | – 19 326        | – 19 673        |
| Veränderung der Rückstellungen für Versicherungs- und Investmentverträge (netto)                    | – 13 329        | – 8 499         | – 5 360         |
| Zinsaufwendungen                                                                                    | – 103           | – 127           | – 283           |
| Risikovorsorge im Kreditgeschäft                                                                    | 6               | – 75            | – 13            |
| Operative Wertminderungen auf Finanzanlagen (netto)                                                 | – 434           | – 1 663         | – 5 747         |
| Aufwendungen für Finanzanlagen                                                                      | – 704           | – 622           | – 583           |
| Abschluss- und Verwaltungsaufwendungen (netto)                                                      | – 5 175         | – 5 591         | – 4 691         |
| Provisions- und Dienstleistungsaufwendungen                                                         | – 258           | – 246           | – 253           |
| Operative Restrukturierungsaufwendungen                                                             | – 8             | – 15            | 1               |
| Sonstige Aufwendungen                                                                               | – 55            | —               | – 7             |
| <b>Operative Aufwendungen</b>                                                                       | <b>– 39 015</b> | <b>– 36 164</b> | <b>– 36 609</b> |
| <b>Operatives Ergebnis</b>                                                                          | <b>2 868</b>    | <b>2 670</b>    | <b>1 334</b>    |
| <b>Cost-Income Ratio<sup>3</sup> in %</b>                                                           | <b>96,1</b>     | <b>95,8</b>     | <b>97,5</b>     |

- 1 Beträge vor 2010 wurden angepasst, um eine Änderung der Bilanzierungs- und Bewertungsmethode des Allianz Konzerns zu berücksichtigen. Weitere Informationen finden sich unter Anmerkung 4 im Konzernanhang.
- 2 Im Segment Leben/Kranken wird der gesamte Umsatz an den gesamten Beitragseinnahmen gemessen. Die gesamten Beitragseinnahmen enthalten die Bruttobeiträge aus dem Verkauf von Lebensversicherungspolice sowie die Bruttoeinnahmen aus dem Verkauf fondsgebundener und anderer anlageorientierter Produkte in Übereinstimmung mit den statutorischen Bilanzierungsrichtlinien, die im Heimatland des Versicherers anwendbar sind.
- 3 Verhältnis von Einlagen aus Versicherungs- und Investmentverträgen, Schadenaufwendungen (netto), Veränderung der Rückstellungen für Versicherungs- und Investmentverträge (netto) sowie Abschluss- und Verwaltungsaufwendungen (netto) zu gesamten Beitragseinnahmen (netto), Zinserträgen und ähnlichen Erträgen, operativen Erträgen aus erfolgswirksam zum Zeitwert bewerteten Finanzaktiva und Finanzpassiva (netto), operativen realisierten Gewinnen/Verlusten (netto), Provisions- und Dienstleistungserträgen, sonstigen Erträgen, Zinsaufwendungen, Risikovorsorge im Kreditgeschäft, operativen Wertminderungen auf Finanzanlagen (netto), Aufwendungen für Finanzanlagen, Provisions- und Dienstleistungsaufwendungen, operativen Restrukturierungsaufwendungen und sonstigen Aufwendungen

## Lebens- und Krankenversicherungsgeschäft nach Geschäftsbereichen<sup>1</sup>

|                                                | Gesamte Beitragseinnahmen <sup>2</sup> |               |               |                                      |                                      | Verdiente Beiträge (netto) |               |               |
|------------------------------------------------|----------------------------------------|---------------|---------------|--------------------------------------|--------------------------------------|----------------------------|---------------|---------------|
|                                                | 2010<br>Mio €                          | 2009<br>Mio € | 2008<br>Mio € | 2010<br>intern <sup>3</sup><br>Mio € | 2009<br>intern <sup>3</sup><br>Mio € | 2010<br>Mio €              | 2009<br>Mio € | 2008<br>Mio € |
| Deutschland Lebensversicherung                 | 15 961                                 | 15 049        | 13 487        | 15 961                               | 15 049                               | 11 651                     | 10 137        | 10 313        |
| Deutschland Krankenversicherung <sup>4</sup>   | 3 209                                  | 3 176         | 3 120         | 3 209                                | 3 176                                | 3 209                      | 3 176         | 3 120         |
| Schweiz                                        | 1 502                                  | 1 364         | 1 205         | 1 407                                | 1 364                                | 582                        | 577           | 478           |
| Österreich                                     | 398                                    | 447           | 461           | 398                                  | 447                                  | 289                        | 296           | 277           |
| <b>German Speaking Countries</b>               | <b>21 070</b>                          | <b>20 036</b> | <b>18 273</b> | <b>20 975</b>                        | <b>20 036</b>                        | <b>15 731</b>              | <b>14 186</b> | <b>14 188</b> |
| Italien                                        | 8 841                                  | 8 664         | 5 996         | 8 841                                | 8 664                                | 657                        | 763           | 929           |
| Frankreich                                     | 8 014                                  | 7 299         | 7 991         | 8 014                                | 7 299                                | 3 085                      | 2 860         | 2 887         |
| Spanien                                        | 926                                    | 948           | 843           | 926                                  | 948                                  | 374                        | 449           | 394           |
| Südamerika                                     | 56                                     | 43            | 190           | 47                                   | 43                                   | 45                         | 36            | 183           |
| Niederlande                                    | 315                                    | 354           | 371           | 315                                  | 354                                  | 135                        | 151           | 133           |
| Türkei                                         | 103                                    | 83            | 18            | 95                                   | 83                                   | 36                         | 35            | 17            |
| Belgien/Luxemburg                              | 1 160                                  | 834           | 763           | 1 160                                | 834                                  | 423                        | 375           | 371           |
| Portugal                                       | 183                                    | 158           | 130           | 183                                  | 158                                  | 84                         | 82            | 80            |
| Griechenland                                   | 116                                    | 119           | 109           | 116                                  | 119                                  | 67                         | 67            | 72            |
| Afrika                                         | 41                                     | 42            | 40            | 41                                   | 42                                   | 22                         | 20            | 17            |
| <b>Europe incl. South America</b>              | <b>19 755</b>                          | <b>18 544</b> | <b>16 451</b> | <b>19 738</b>                        | <b>18 544</b>                        | <b>4 928</b>               | <b>4 838</b>  | <b>5 083</b>  |
| USA                                            | 8 155                                  | 6 507         | 6 036         | 7 805                                | 6 507                                | 624                        | 591           | 721           |
| Mexiko                                         | 111                                    | 50            | 75            | 98                                   | 50                                   | 56                         | 33            | 31            |
| <b>NAFTA Markets</b>                           | <b>8 266</b>                           | <b>6 557</b>  | <b>6 111</b>  | <b>7 903</b>                         | <b>6 557</b>                         | <b>680</b>                 | <b>624</b>    | <b>752</b>    |
| AZ Reinsurance                                 | 314                                    | 350           | 294           | 314                                  | 350                                  | 307                        | 343           | 291           |
| <b>Anglo Broker Markets &amp; Global Lines</b> | <b>314</b>                             | <b>350</b>    | <b>294</b>    | <b>314</b>                           | <b>350</b>                           | <b>307</b>                 | <b>343</b>    | <b>291</b>    |
| Südkorea                                       | 1 836                                  | 1 440         | 1 580         | 1 589                                | 1 440                                | 707                        | 641           | 709           |
| Taiwan                                         | 2 170                                  | 1 782         | 997           | 1 963                                | 1 782                                | 166                        | 117           | 148           |
| Malaysia                                       | 242                                    | 177           | 142           | 209                                  | 177                                  | 183                        | 154           | 121           |
| Indonesien                                     | 431                                    | 255           | 214           | 362                                  | 255                                  | 169                        | 80            | 75            |
| Sonstige                                       | 1 808                                  | 543           | 532           | 1 448                                | 544                                  | 512                        | 301           | 124           |
| <b>Asien-Pazifik</b>                           | <b>6 487</b>                           | <b>4 197</b>  | <b>3 465</b>  | <b>5 571</b>                         | <b>4 198</b>                         | <b>1 737</b>               | <b>1 293</b>  | <b>1 177</b>  |
| Ungarn                                         | 182                                    | 124           | 181           | 179                                  | 124                                  | 62                         | 65            | 79            |
| Slowakei                                       | 244                                    | 256           | 290           | 244                                  | 256                                  | 171                        | 170           | 175           |
| Tschechische Republik                          | 143                                    | 112           | 101           | 136                                  | 112                                  | 57                         | 51            | 60            |
| Polen                                          | 368                                    | 428           | 428           | 338                                  | 428                                  | 121                        | 198           | 192           |
| Rumänien                                       | 22                                     | 23            | 32            | 22                                   | 23                                   | 12                         | 14            | 15            |
| Kroatien                                       | 47                                     | 46            | 59            | 47                                   | 46                                   | 45                         | 43            | 42            |
| Bulgarien                                      | 26                                     | 25            | 33            | 27                                   | 25                                   | 25                         | 23            | 29            |
| Russland                                       | 25                                     | 18            | 17            | 23                                   | 18                                   | 24                         | 17            | 16            |
| <b>Mittel- und Osteuropa</b>                   | <b>1 057</b>                           | <b>1 032</b>  | <b>1 141</b>  | <b>1 016</b>                         | <b>1 032</b>                         | <b>517</b>                 | <b>581</b>    | <b>608</b>    |
| Mittlerer Osten und Nordafrika                 | 137                                    | 101           | 88            | 120                                  | 101                                  | 126                        | 95            | 82            |
| Global Life                                    | 270                                    | 182           | —             | 270                                  | 182                                  | 8                          | 4             | —             |
| <b>Growth Markets</b>                          | <b>7 951</b>                           | <b>5 512</b>  | <b>4 694</b>  | <b>6 977</b>                         | <b>5 513</b>                         | <b>2 388</b>               | <b>1 973</b>  | <b>1 867</b>  |
| Konsolidierung <sup>5</sup>                    | – 258                                  | – 226         | – 208         | – 243                                | – 227                                | —                          | —             | —             |
| <b>Summe</b>                                   | <b>57 098</b>                          | <b>50 773</b> | <b>45 615</b> | <b>55 664</b>                        | <b>50 773</b>                        | <b>24 034</b>              | <b>21 964</b> | <b>22 181</b> |

<sup>1</sup> Beträge vor 2010 wurden angepasst, um eine Änderung der Bilanzierungs- und Bewertungsmethode des Allianz Konzerns zu berücksichtigen. Weitere Informationen finden sich unter Anmerkung 4 im Konzernanhang.

<sup>2</sup> Die gesamten Beitragseinnahmen enthalten die Bruttobeiträge aus dem Verkauf von Lebensversicherungspolizen sowie die Bruttoeinnahmen aus dem Verkauf fondsgebundener und anderer anlageorientierter Produkte in Übereinstimmung mit den statutorischen Bilanzierungsrichtlinien, die im Heimatland des Versicherers anwendbar sind.



|                                                | Operatives Ergebnis |               |               | Cost-Income Ratio |             |              |
|------------------------------------------------|---------------------|---------------|---------------|-------------------|-------------|--------------|
|                                                | 2010<br>Mio €       | 2009<br>Mio € | 2008<br>Mio € | 2010<br>%         | 2009<br>%   | 2008<br>%    |
| Deutschland Lebensversicherung                 | 980                 | 677           | 621           | 95,7              | 96,7        | 96,6         |
| Deutschland Krankenversicherung <sup>4</sup>   | 174                 | 152           | 112           | 95,8              | 96,1        | 97,0         |
| Schweiz                                        | 74                  | 43            | 71            | 95,9              | 97,3        | 94,7         |
| Österreich                                     | 28                  | 25            | 17            | 94,6              | 95,3        | 96,4         |
| <b>German Speaking Countries</b>               | <b>1 256</b>        | <b>897</b>    | <b>821</b>    | <b>95,7</b>       | <b>96,6</b> | <b>96,5</b>  |
| Italien                                        | 293                 | 245           | 206           | 97,1              | 97,5        | 97,0         |
| Frankreich                                     | 439                 | 662           | 129           | 95,8              | 93,1        | 98,4         |
| Spanien                                        | 113                 | 115           | 103           | 90,4              | 90,5        | 90,8         |
| Südamerika                                     | 9                   | 9             | 10            | 88,5              | 84,6        | 95,3         |
| Niederlande                                    | 48                  | 47            | - 1           | 88,0              | 89,1        | 100,2        |
| Türkei                                         | 6                   | 9             | 5             | 95,7              | 92,7        | 90,4         |
| Belgien/Luxemburg                              | 64                  | 58            | 56            | 95,7              | 94,9        | 94,2         |
| Portugal                                       | 20                  | 17            | 1             | 89,6              | 89,8        | 98,9         |
| Griechenland                                   | 4                   | 3             | 2             | 96,4              | 96,9        | 97,9         |
| Afrika                                         | 1                   | 4             | 3             | 97,4              | 92,4        | 93,3         |
| <b>Europe incl. South America</b>              | <b>997</b>          | <b>1 169</b>  | <b>514</b>    | <b>95,9</b>       | <b>94,8</b> | <b>97,1</b>  |
| USA                                            | 361                 | 432           | - 105         | 96,5              | 94,9        | 101,6        |
| Mexiko                                         | 5                   | 4             | 4             | 95,7              | 92,9        | 94,9         |
| <b>NAFTA Markets</b>                           | <b>366</b>          | <b>436</b>    | <b>- 101</b>  | <b>96,5</b>       | <b>94,9</b> | <b>101,5</b> |
| AZ Reinsurance                                 | 23                  | 29            | 7             | 93,2              | 93,7        | 98,0         |
| <b>Anglo Broker Markets &amp; Global Lines</b> | <b>23</b>           | <b>29</b>     | <b>7</b>      | <b>93,2</b>       | <b>93,7</b> | <b>98,1</b>  |
| Südkorea                                       | 87                  | 61            | 96            | 96,2              | 96,5        | 94,7         |
| Taiwan                                         | 51                  | 17            | 11            | 97,7              | 99,1        | 99,1         |
| Malaysia                                       | 14                  | 13            | 9             | 93,9              | 92,7        | 93,3         |
| Indonesien                                     | 37                  | 18            | 12            | 91,2              | 92,4        | 94,2         |
| Sonstige                                       | - 31                | - 59          | - 85          | 101,7             | 110,0       | 117,3        |
| <b>Asien-Pazifik</b>                           | <b>158</b>          | <b>50</b>     | <b>43</b>     | <b>97,7</b>       | <b>98,9</b> | <b>98,9</b>  |
| Ungarn                                         | 6                   | 12            | 15            | 96,9              | 91,3        | 92,2         |
| Slowakei                                       | 20                  | 37            | 28            | 92,7              | 87,2        | 91,1         |
| Tschechische Republik                          | 11                  | 9             | 4             | 92,9              | 92,7        | 96,0         |
| Polen                                          | 20                  | 16            | 6             | 94,9              | 96,6        | 98,5         |
| Rumänien                                       | 2                   | 2             | 2             | 92,9              | 92,6        | 92,7         |
| Kroatien                                       | 4                   | 2             | 4             | 92,7              | 95,7        | 93,9         |
| Bulgarien                                      | 6                   | 6             | 2             | 82,9              | 80,1        | 93,5         |
| Russland                                       | - 6                 | - 8           | - 15          | 119,6             | 141,7       | 183,3        |
| <b>Mittel- und Osteuropa</b>                   | <b>63</b>           | <b>76</b>     | <b>46</b>     | <b>94,6</b>       | <b>93,4</b> | <b>96,0</b>  |
| <b>Mittlerer Osten und Nordafrika</b>          | <b>12</b>           | <b>8</b>      | <b>11</b>     | <b>92,1</b>       | <b>93,0</b> | <b>88,0</b>  |
| Global Life                                    | - 2                 | 4             | —             | 100,9             | 97,6        | —            |
| <b>Growth Markets</b>                          | <b>231</b>          | <b>138</b>    | <b>100</b>    | <b>97,3</b>       | <b>97,7</b> | <b>98,0</b>  |
| Konsolidierung <sup>5</sup>                    | - 5                 | 1             | - 7           | —                 | —           | —            |
| <b>Summe</b>                                   | <b>2 868</b>        | <b>2 670</b>  | <b>1 334</b>  | <b>96,1</b>       | <b>95,8</b> | <b>97,5</b>  |

3 Beitragseinnahmen, bereinigt um Währungskurs- und (Ent-)Konsolidierungseffekte

4 Die Schadenquote betrug in den Jahren 2010, 2009 und 2008 entsprechend 75,0%, 73,5% und 74,7%.

5 Die Transaktionen zwischen den Gesellschaften der Allianz Gruppe in den verschiedenen Regionen wurden hierin bereinigt.

# Asset Management

- Das gesamte verwaltete Vermögen betrug über 1 500 Milliarden Euro.
- Die Nettomittelzuflüsse Dritter erreichten einen Rekordwert von 113 Milliarden Euro.
- Wir erzielten ein hervorragendes operatives Ergebnis von 2,1 Milliarden Euro.

## Segmentüberblick

- Wir bieten Drittinvestoren und innerhalb der Allianz Gruppe Asset-Management-Produkte und -Dienstleistungen an.
- Unsere Kundenbasis, eine Vielzahl privater und institutioneller Investoren, wird weltweit betreut.
- Die Allianz ist in allen wichtigen Märkten, vornehmlich in den USA, Europa und Asien-Pazifik, mit Investment- und Vertriebskapazitäten vertreten.
- Gemessen am verwalteten Vermögen zählen wir zu den vier größten aktiven Vermögensverwaltern der Welt.

**Operatives Ergebnis** **+47,0%**  
in Mio €

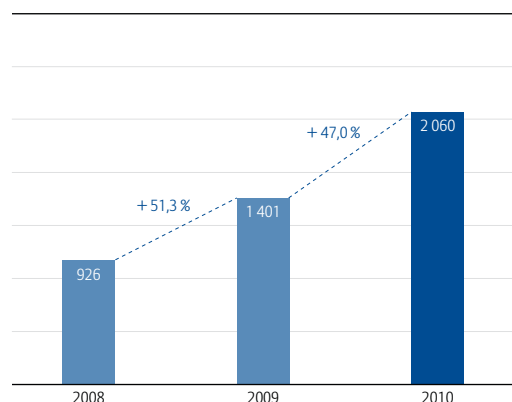

## Kennzahlen

|                               | 2010<br>Mio € | 2009<br>Mio € | 2008<br>Mio € |
|-------------------------------|---------------|---------------|---------------|
| Operative Erträge             | 4 986         | 3 689         | 2 894         |
| Operatives Ergebnis           | 2 060         | 1 401         | 926           |
| Cost-Income Ratio in %        | 58,7          | 62,0          | 68,0          |
| Verwaltetes Vermögen in Mrd € | 1 518         | 1 202         | 951           |

## Ergebnisübersicht

Die operativen Erträge erhöht sich um 1 297 Millionen Euro auf 4 986 Millionen Euro. Intern gerechnet, betrug dieser Zuwachs 29,7 Prozent.

Ein beträchtlicher Anstieg des gesamten verwalteten Vermögens und außergewöhnlich hohe erfolgsabhängige Provisionen verbesserten das operative Ergebnis um 47 Prozent auf 2 060 Millionen Euro. Die Nettomittelzuflüsse erreichten 121 Milliarden Euro; davon entfiel ein Rekordwert von 113 Milliarden Euro auf Nettomittelzuflüsse Dritter.

Mit 58,7 Prozent lag die Cost-Income Ratio um 3,3 Prozentpunkte niedriger als im Vorjahr.

## Verwaltetes Vermögen

Das gesamte verwaltete Vermögen machte zum Jahresresultimo 1 518 Milliarden Euro aus; davon entfielen 1 164 Milliarden Euro auf Vermögen, das für Dritte verwaltet wird, und 354 Milliarden Euro auf Vermögenswerte der Allianz Gruppe.

### Entwicklung des gesamten verwalteten Vermögens in Mrd €

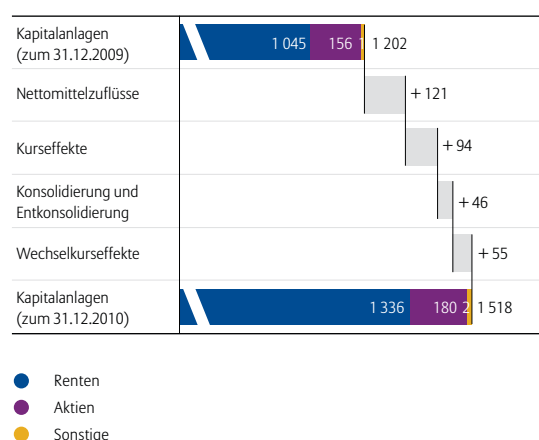

Hauptursache für den Zuwachs des verwalteten Vermögens in Höhe von 316 Milliarden Euro waren mit einem Rekordwert von 113 Milliarden Euro Nettomittelzuflüsse Dritter, ergänzt durch weitere 8 Milliarden Euro Nettomittelzuflüsse der Allianz Gruppe. Die Nettomittelzuflüsse von 121 Milliarden Euro stammten im Wesentlichen aus dem Rentengeschäft. Weitere 94 Milliarden Euro ergaben sich aus marktbedingten Wertsteigerungen; davon entfielen 72 Milliarden Euro auf Rentenanlagen und 21 Milliarden Euro auf Aktienprodukte. Günstige Wechselkurseffekte, namentlich die Folge eines gegenüber dem Euro erstarkten US-Dollars im Vergleich zum Vorjahr, unterstützten das verwaltete Vermögen mit 55 Milliarden Euro; weitere 46 Milliarden Euro Anstieg des verwalteten Vermögens stammten großenteils aus der Übertragung verwalteten Vermögens der Allianz Gruppe in den USA auf Allianz Global Investors.

Im folgenden Abschnitt konzentrieren wir uns auf die Entwicklung des für Dritte verwalteten Vermögens.

### Kapitalanlagen für Dritte nach Regionen/Ländern zum 31. Dezember 2010 (31. Dezember 2009)<sup>1</sup>

in %

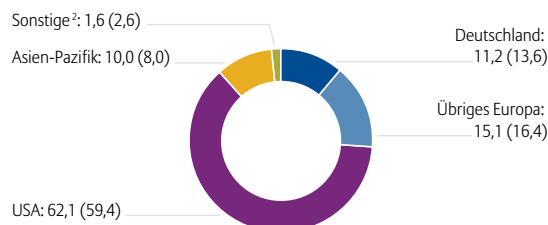

Der Großteil des für Dritte verwalteten Vermögens, nämlich 62,1 Prozent, stammte aus den USA, unterstützt durch hohe Nettomittelzuflüsse aus dem Rentengeschäft. Die für Dritte verwalteten Kapitalanlagen wuchsen absolut betrachtet in allen wichtigen Regionen.

Das Verhältnis zwischen für Dritte verwaltete Renten- und Aktienanlagen veränderte sich kaum: Rentenprodukte machten 86 Prozent aus (31. Dezember 2009: 85 Prozent), Aktienprodukte 14 Prozent (31. Dezember 2009: 15 Prozent).

Aufgrund hoher Nettomittelzuflüsse im Privatkundengeschäft erhöhte sich der Privatkundenanteil auf 34 Prozent (31. Dezember 2009: 32 Prozent); der Anteil institutioneller Investoren an dem für Dritte verwalteten Vermögen verringerte sich entsprechend auf 66 Prozent (31. Dezember 2009: 68 Prozent).

<sup>1</sup> Ausschlaggebend ist die Herkunft der Kapitalanlagen.

<sup>2</sup> Enthalten sind Kapitalanlagen, die von anderen Gesellschaften der Allianz Gruppe (rund 19 Mrd € zum 31. Dezember 2010 bzw. rund 24 Mrd € zum 31. Dezember 2009) verwaltet wurden.

## Rollierende Anlageentwicklung von Allianz Global Investors<sup>1</sup>

in %

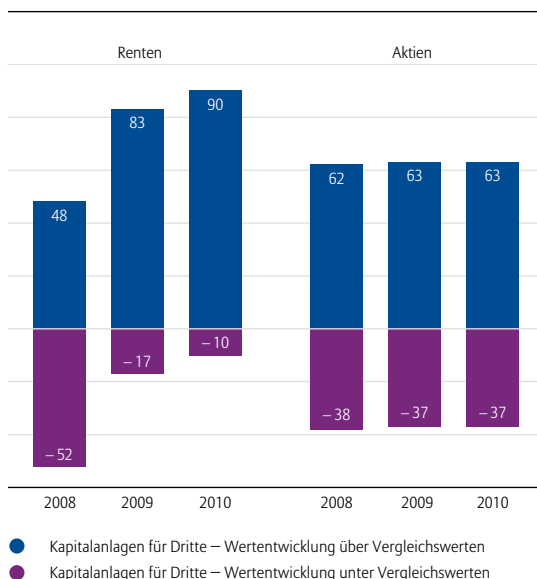

Die gesamte Wertentwicklung des durch Allianz Global Investors verwalteten Vermögens war hervorragend. Die jeweiligen Vergleichswerte wurden um 87 Prozent übertroffen (31. Dezember 2009: 81 Prozent). Rentenanlagen verzeichneten eine hervorragende Wertentwicklung gegenüber den jeweiligen Vergleichswerten mit 90 Prozent. Die Aktienentwicklung blieb stabil und lag mit 63 Prozent über den jeweiligen Vergleichswerten.

## Operative Erträge

Die operativen Erträge erhöhten sich um 1 297 Millionen Euro auf 4 986 Millionen Euro, vor allem durch kräftige Zuwächse des verwalteten Vermögens. Günstig für unser Ergebnis erwies sich auch der Zuwachs an Produkten mit höheren Margen. Bereinigt um vorteilhafte Wechselkurseffekte von 211 Millionen Euro und Konsolidierungseffekte betrug das Wachstum der operativen Erträge 29,7 Prozent.

Der Provisionsüberschuss stieg um 1 337 Millionen Euro auf 4 927 Millionen Euro. Dazu zählen Verwaltungsprovisionen und Ausgabeaufgelder in Höhe von 1 471 Millionen Euro, die zum Teil durch höhere Provisionsaufwendungen aufgehoben wurden.

2010 verzeichneten wir wieder ein hohes Niveau an erfolgsabhängigen Provisionen, die von 432 Millionen Euro auf 514 Millionen Euro stiegen und die außergewöhnlich gute Entwicklung des Provisionsüberschusses unterstützten.

Die Erträge aus erfolgswirksam zum Zeitwert bewerteten Finanzaktiva und Finanzpassiva (netto) beliefen sich auf 19 Millionen Euro und lagen damit um 21 Millionen Euro unter dem Vorjahreswert, vornehmlich aufgrund niedrigerer Gewinne aus der Marktbewertung von Anfangsinvestitionen.

<sup>1</sup> Mandatsbasierte und volumengewichtete 3-jährige Anlageperformance von allen AllianzGI Drittgeldern, die von AllianzGI Aktien- und Rentenmanagern verwaltet werden, im Vergleich zur Benchmark. Bei einigen Publikums-Aktienfonds wird die gebührenbereinigte Performance mit der gebührenbereinigten Medianperformance einer Gruppe vergleichbarer Fonds verglichen. Diese sogenannten Peer-Group-Berechnungen werden durch die Datenanbieter Morningstar beziehungsweise Lipper vorgenommen. Eine Positionierung im ersten oder im zweiten Quartil in der Gruppe vergleichbarer Fonds (Peer Group) ist gleichbedeutend mit einer Wertentwicklung über Benchmark (Outperformance). Für alle anderen Publikumsfonds und für alle Mandate institutioneller Anleger wird die Performance basierend auf Schlusskursen ohne Gebührenbereinigung verwendet und mit der Benchmark jedes einzelnen Fonds oder Mandats verglichen. Anders als nach GIPS (Global Investment Performance Standards) wird die Performance aufgelöster Fonds oder Mandate nicht in die Analyse einbezogen. Dachfonds von AllianzGI Solutions, Mandate von AllianzGI Investments Europe, Niederlassung Zürich, und des Joint Venture GTJA China sowie Teile der WRAP Accounts wurden nicht berücksichtigt. Bis zum Q3 2009 waren AllianzGI Taiwan, AllianzGI Singapur, AllianzGI Korea, AllianzGI Investments Europe Paris, AllianzGI Investments Europe Milan und Allianz Netherlands Asset Management nicht einbezogen.

## Operatives Ergebnis

Außergewöhnlich kräftige Zuwächse beim verwalteten Vermögen und starke erfolgsabhängige Provisionen führten zu einem operativen Ergebnis von 2 060 Millionen Euro. Unter Berücksichtigung vorteilhafter Wechselkurseffekte von 94 Millionen Euro betrug das Plus, intern gerechnet, 41,4 Prozent.

Die **Verwaltungsaufwendungen** stiegen um 638 Millionen Euro auf 2 926 Millionen Euro; davon waren 117 Millionen wechsellkursbedingt, vornehmlich wegen des stärkeren US-Dollars gegenüber dem Euro. Die dynamische Geschäftsentwicklung ließ die variablen Personalkosten steigen; die übrigen Aufwendungen stiegen proportional zum Zuwachs des verwalteten Vermögens.

Weil das Plus bei den operativen Erträgen, unterstützt durch starke erfolgsabhängige Provisionen, höher war als die Zunahme der operativen Aufwendungen, verbesserte sich die **Cost-Income Ratio** von 62 Prozent auf ausgezeichnete 58,7 Prozent 2010.

### Informationen zu unserem Asset Management

|                                                                                           | 2010<br>Mio €  | 2009<br>Mio €  | 2008<br>Mio €  |
|-------------------------------------------------------------------------------------------|----------------|----------------|----------------|
| Verwaltungsprovisionen und Ausgabeaufgelder                                               | 5 393          | 3 922          | 3 572          |
| Erfolgsabhängige Provisionen                                                              | 514            | 432            | 83             |
| Übrige                                                                                    | 147            | 86             | 377            |
| <b>Provisions- und Dienstleistungserträge</b>                                             | <b>6 054</b>   | <b>4 440</b>   | <b>4 032</b>   |
| Vermittlerprovisionen                                                                     | – 1 099        | – 822          | – 794          |
| Übrige                                                                                    | – 28           | – 28           | – 364          |
| <b>Provisions- und Dienstleistungsaufwendungen</b>                                        | <b>– 1 127</b> | <b>– 850</b>   | <b>– 1 158</b> |
| <b>Provisionsüberschuss</b>                                                               | <b>4 927</b>   | <b>3 590</b>   | <b>2 874</b>   |
| Zinsüberschuss <sup>1</sup>                                                               | 21             | 30             | 63             |
| Erträge aus erfolgswirksam zum Zeitwert bewerteten Finanzaktiva und Finanzpassiva (netto) | 19             | 40             | – 71           |
| Sonstige Erträge                                                                          | 19             | 29             | 28             |
| <b>Operative Erträge</b>                                                                  | <b>4 986</b>   | <b>3 689</b>   | <b>2 894</b>   |
| Verwaltungsaufwendungen (netto) ohne akquisitionsbedingte Aufwendungen                    | – 2 926        | – 2 288        | – 1 968        |
| <b>Operative Aufwendungen</b>                                                             | <b>– 2 926</b> | <b>– 2 288</b> | <b>– 1 968</b> |
| <b>Operatives Ergebnis</b>                                                                | <b>2 060</b>   | <b>1 401</b>   | <b>926</b>     |
| <b>Cost-Income Ratio<sup>2</sup> in %</b>                                                 | <b>58,7</b>    | <b>62,0</b>    | <b>68,0</b>    |

<sup>1</sup> Zinserträge und ähnliche Erträge abzüglich Zinsaufwendungen

<sup>2</sup> Verhältnis operative Aufwendungen zu operativen Erträgen



# Corporate und Sonstiges

- Der operative Verlust verringerte sich um 86 Millionen Euro auf 942 Millionen Euro.
- Die Erholung geht auf das Bankgeschäft zurück. Der operative Verlust in den Bereichen Holding & Treasury und Alternative Investments blieb nahezu unverändert auf Vorjahresniveau.

## Segmentüberblick

- Das Segment Corporate und Sonstiges umfasst die Geschäftsbereiche Holding & Treasury, das Bankgeschäft und Alternative Investments.
- Im Geschäftsfeld Holding & Treasury sind die Bereiche Strategie, Risikomanagement, Corporate Finance, Treasury, Finanzcontrolling, Kommunikation, Recht, Personal und IT vereint, über die das Geschäft der Allianz Gruppe gesteuert und unterstützt wird.
- In Deutschland, Italien, Frankreich und Mittel- und Osteuropa ergänzen wir unser Versicherungsangebot durch Bankprodukte.
- Unsere globalen Dienstleistungen im Geschäftsfeld Alternative Investments umfassen die Bereiche Private Equity, Immobilien, erneuerbare Energien und Infrastruktur und richten sich vornehmlich an die Versicherungsunternehmen der Allianz Gruppe.

## Kennzahlen

|                                            | 2010<br>Mio € | 2009<br>Mio €  | 2008<br>Mio € |
|--------------------------------------------|---------------|----------------|---------------|
| <b>Corporate und Sonstiges<sup>1</sup></b> |               |                |               |
| Operative Erträge                          | 1 702         | 1 684          | 2 513         |
| Operative Aufwendungen                     | – 2 644       | – 2 712        | – 2 836       |
| <b>Operatives Ergebnis</b>                 | <b>– 942</b>  | <b>– 1 028</b> | <b>– 323</b>  |
| <b>Holding &amp; Treasury</b>              |               |                |               |
| Operative Erträge                          | 450           | 446            | 1 008         |
| Operative Aufwendungen                     | – 1 313       | – 1 295        | – 1 338       |
| <b>Operatives Ergebnis</b>                 | <b>– 863</b>  | <b>– 849</b>   | <b>– 330</b>  |
| <b>Bankgeschäft</b>                        |               |                |               |
| Operative Erträge                          | 1 129         | 1 114          | 1 425         |
| Operative Aufwendungen                     | – 1 193       | – 1 279        | – 1 456       |
| <b>Operatives Ergebnis</b>                 | <b>– 64</b>   | <b>– 165</b>   | <b>– 31</b>   |
| <b>Alternative Investments</b>             |               |                |               |
| Operative Erträge                          | 134           | 134            | 200           |
| Operative Aufwendungen                     | – 149         | – 147          | – 178         |
| <b>Operatives Ergebnis</b>                 | <b>– 15</b>   | <b>– 13</b>    | <b>22</b>     |

## Ergebnisübersicht

Obwohl die niedrigen Zinssätze weiterhin die Zinserträge belasten, ging der operative Verlust um 86 Millionen Euro auf 942 Millionen Euro zurück.

Das Bankgeschäft trug mit 101 Millionen Euro zu dieser Entwicklung bei. In den Bereichen Holding & Treasury und Alternative Investments fielen die Verluste geringfügig höher als im Vorjahr aus.

<sup>1</sup> Enthält Konsolidierungen; weitere Informationen zum Segment Corporate und Sonstiges finden sich unter Anmerkung 6 im Konzernanhang.

## Ergebnisübersicht Holding & Treasury

Im Bereich Holding & Treasury betrug der **operative Verlust** 863 Millionen Euro und blieb gegenüber dem Vorjahr mit 849 Millionen Euro nahezu unverändert. Ein verbessertes Währungsergebnis nach Absicherungsgeschäften (2010: –34 Millionen Euro, 2009 –138 Millionen Euro) glich das schlechtere Provisions- und Dienstleistungsergebnis sowie die gestiegenen Aufwendungen aus.

**Zinsen und ähnliche Erträge** gingen um 66 Millionen Euro auf 293 Millionen Euro zurück, was in erster Linie auf die gesunkenen Renditen auf Rentenpapiere zurückzuführen war. Dieser Effekt wurde nach der Erholung der Aktienmärkte zum Teil durch Dividendenerträge aufgefangen. Die **Zinsaufwendungen ohne Zinsaufwendungen für externe Fremdfinanzierung** verringerten sich um 62 Millionen Euro auf 383 Millionen Euro, was ebenfalls eine Folge des niedrigen Zinsumfelds war.

Der **operative Verlust aus den erfolgswirksam zum Zeitwert bewerteten Finanzaktiva und Finanzpassiva** verbesserte sich um 81 Millionen Euro auf 41 Millionen Euro, vor allem aufgrund eines höheren Währungsergebnisses.

## Ergebnisübersicht Bankgeschäft

Unser **Zinsergebnis sowie unser Dienstleistungs- und Provisionsergebnis (netto)** betrug 585 Millionen Euro und stieg somit um 83 Millionen Euro im Vergleich zum Vorjahr, vornehmlich wegen der positiven Entwicklung der Allianz Bank in Deutschland. Erstmals nach Aufnahme des Geschäftsbetriebs im Juni 2009 steuerte die Bank einen vollständigen operativen Jahresertrag zum Ergebnis bei.

Die **Verwaltungsaufwendungen** nahmen um 43 Millionen Euro auf 591 Millionen Euro ab, nachdem 2009 noch einmalige Anlaufkosten die operativen Aufwendungen der Allianz Bank in Deutschland belasteten.

Unsere Aufwendungen für die **Risikovorsorge im Kreditgeschäft** stiegen um 8 Millionen Euro, hauptsächlich aufgrund des Bankgeschäfts in Mittel- und Osteuropa.

Der gesamte **operative Verlust** aus dem Bankgeschäft ging um 101 Millionen Euro auf 64 Millionen Euro zurück. Ein Teil des operativen Verlustes war auf unser Bankgeschäft in Mittel- und Osteuropa zurückzuführen, das weiterhin unter einem schwierigen Marktumfeld litt.

## Ergebnisübersicht Alternative Investments

Im Bereich Alternative Investments lag der operative Verlust mit 15 Millionen Euro auf dem Niveau des Vorjahres.

# Ausblick 2011 und 2012

- Der wirtschaftliche Aufschwung wird sich in schwächerem Tempo fortsetzen.
- Das operative Ergebnis der Allianz Gruppe sollte 2011 bei 8,0 Milliarden Euro, plus oder minus 0,5 Milliarden Euro, liegen und dürfte sich 2012 verbessern.

## Überblick: Vergleich von Prognose und tatsächlichem Ergebnis 2010

|                                        | Prognose für 2010 aus dem Geschäftsbericht 2009                                                                                                                                                                                                                                                                                                                                                                                                                                                                                                                                                                                                                                                                                            | Ergebnis 2010                                                                                                                                                                                                                                                                                                                                                                                                                                                                                                                                                                                                                                                                                                                                                                                                                                                                                                                                                                                              |
|----------------------------------------|--------------------------------------------------------------------------------------------------------------------------------------------------------------------------------------------------------------------------------------------------------------------------------------------------------------------------------------------------------------------------------------------------------------------------------------------------------------------------------------------------------------------------------------------------------------------------------------------------------------------------------------------------------------------------------------------------------------------------------------------|------------------------------------------------------------------------------------------------------------------------------------------------------------------------------------------------------------------------------------------------------------------------------------------------------------------------------------------------------------------------------------------------------------------------------------------------------------------------------------------------------------------------------------------------------------------------------------------------------------------------------------------------------------------------------------------------------------------------------------------------------------------------------------------------------------------------------------------------------------------------------------------------------------------------------------------------------------------------------------------------------------|
| <b>Allianz Gruppe</b>                  | <p>Operatives Ergebnis von 7,2 Milliarden Euro, plus oder minus 0,5 Milliarden Euro</p> <p>US-Dollar-Wechselkurs von 1,45 Euro</p> <p>Schutz unserer Kapital- und Solvabilitätsposition</p> <p>In diesen Zeiten großer Unsicherheit müssen wir darauf achten, nicht nur die Investitionen unserer Aktionäre zu schützen, sondern auch weiterhin attraktive Renditen und Dividenden zu bieten.</p> <p>In den kommenden drei Jahren wollen wir das profitable Wachstum steigern.</p> <p>Unsere Anlagestrategie bleibt darauf ausgerichtet, trotz niedrigen Zinsumfeldes eine attraktive Rendite zu erwirtschaften und die Anfälligkeit für Kursausschläge gering zu halten.</p>                                                              | <p>Operatives Ergebnis von 8,2 Milliarden Euro, 0,5 Milliarden Euro über unserem Zielkorridor: Dieses Ergebnis war begünstigt durch vorteilhafte Wechselkursbewegungen und die Änderungen der Bilanzierungsmethode unseres US-Versicherers Allianz Life.</p> <p>Der US-Dollar-Wechselkurs lag bei 1,33 Euro.</p> <p>Solvabilitätsquote von 173 Prozent, „AA“-Rating durch Standard &amp; Poor's seit 2007 mit stabilem Ausblick</p> <p>Eigenkapitalrendite nach Steuern von 11,9 Prozent (2009: 12,5 Prozent) und vorgeschlagene Dividendenzahlung von 4,50 Euro (2009: 4,10 Euro) je Aktie</p> <p>Das operative Ergebnis wuchs mit 17,0 Prozent kräftiger als der gesamte Umsatz (plus 9,3 Prozent).</p> <p>Um 2,4 Milliarden Euro höhere Nettoanlageerträge als im Vorjahr (absolut: 20,9 Milliarden Euro) aufgrund von gestiegenen Erträgen aus festverzinslichen Wertpapieren und geringeren Wertberichtigungen. Niedrige Zinssätze wurden durch einen höheren Kapitalanlagenbestand ausgeglichen.</p> |
| <b>Schaden- und Unfallversicherung</b> | <p>Bruttobeiträge legen nur leicht zu, weil die Marktpreise weiter nachgeben und wir eine strenge Zeichnungspolitik verfolgen.</p> <p>Operatives Ergebnis zwischen 4 und 5 Milliarden Euro</p> <p>Wir halten eine Combined Ratio von 96 Prozent im Zyklusverlauf für möglich und prognostizieren, dass sich dieser Wert 2010 dahingehend verbessern wird.</p> <p>Für Großschäden aus Naturkatastrophen erwarten wir einen Schadenaufwand von etwa 900 Millionen Euro.</p> <p>Leicht rückläufige Anlageerträge</p> <p>Wir vermuten, dass höhere Preise sowie Verbesserungen beim Schadenmanagement und bei der Produktivität nachteilige Effekte wie Schadeninflation und leicht rückläufige Anlageerträge mehr als ausgleichen werden.</p> | <p>Bruttobeiträge wuchsen nominal um 3,2 Prozent, nach interner Rechnung blieben sie konstant.</p> <p>Operatives Ergebnis von 4,3 Milliarden Euro im unteren Bereich unseres Zielkorridors, teilweise wegen Schäden aus Naturkatastrophen, die höher als erwartet ausfielen</p> <p>Die Combined Ratio profitierte von der starken Erholung im Kreditversicherungsgeschäft und sank um 0,2 Prozentpunkte auf 97,2 Prozent. Dabei fielen die Schäden aus Naturkatastrophen höher als erwartet aus.</p> <p>Großschäden aus Naturkatastrophen in Höhe von 1 264 Millionen Euro</p> <p>Die operativen Anlageerträge legten um 3,2 Prozent auf 3 218 Millionen Euro zu.</p> <p>Die Verbesserung des versicherungstechnischen und des Anlageergebnisses trugen zur Steigerung des operativen Ergebnisses bei.</p>                                                                                                                                                                                                 |
| <b>Lebens- und Krankenversicherung</b> | <p>Beitragseinnahmen von etwa 47 Milliarden Euro</p> <p>In der Lebens- und Krankenversicherung erwarten wir ein operatives Ergebnis in einer Größenordnung zwischen 2,2 und 2,8 Milliarden Euro. Wir weisen darauf hin, dass die Marktvolatilität und das Ausmaß der Gewinnmitnahmen (netto) dies deutlich beeinflussen können. 2009 wären die realisierten Bruttogewinne bei weniger turbulenten Kapitalmärkten höher ausgefallen als 0,1 Milliarden Euro nach Wertminderungen, sodass 2010 in dieser Bilanzposition Verbesserungspotenzial besteht.</p>                                                                                                                                                                                  | <p>Beitragseinnahmen von 57 Milliarden Euro, im Vergleich zu 51 Milliarden Euro gestiegen, getrieben durch die gestiegene Nachfrage nach anlageorientierten und traditionellen Versicherungsprodukten. Wechselkurseffekte steuerten 1,3 Milliarden Euro zum Wachstum bei.</p> <p>Operatives Ergebnis von 2,9 Milliarden Euro (beinhaltet einen positiven Effekt aufgrund geänderter Bilanzierungsmethodik bei unserem US-Versicherer Allianz Life).</p> <p>Bruttogewinne von 1,7 Milliarden Euro nach Wertminderungen (operativ) aufgrund wesentlich niedrigerer Wertminderungen</p>                                                                                                                                                                                                                                                                                                                                                                                                                       |
| <b>Asset Management</b>                | <p>Weiterhin hohe Zuflüsse, hauptsächlich bei Rentenprodukten</p> <p>Operatives Ergebnis zwischen 1,1 und 1,3 Milliarden Euro</p> <p>Die Cost-Income Ratio wird voraussichtlich unter 65 Prozent bleiben.</p>                                                                                                                                                                                                                                                                                                                                                                                                                                                                                                                              | <p>Nettomittelzuflüsse Dritter von 113 Milliarden Euro im Vergleich zu 84 Milliarden Euro 2009</p> <p>Operatives Ergebnis von 2,1 Milliarden Euro, 0,8 Milliarden Euro über dem oberen Grenzwert unseres Zielkorridors, getrieben durch ein starkes Wachstum des verwalteten Vermögens und herausragenden erfolgsabhängigen Provisionen</p> <p>Die Cost-Income Ratio erreichte 58,7 Prozent.</p>                                                                                                                                                                                                                                                                                                                                                                                                                                                                                                                                                                                                           |

## Wirtschaftlicher Ausblick<sup>1</sup>

Es hat den Anschein, als werde sich der globale Konjunkturaufschwung 2011 und 2012 fortsetzen. Das globale Wachstum dürfte jedoch mit 3 bis 3,5 Prozent gegenüber dem Jahr 2010 etwas moderater ausfallen als noch 2010, als ein Plus von 4,0 Prozent erzielt wurde. Die Notwendigkeit der Konsolidierung zahlreicher Staatshaushalte, kombiniert mit Maßnahmen zum Schuldenabbau in Privathaushalten und Unternehmen, dürfte der weltweiten Wirtschaftsdynamik einen Dämpfer versetzen. Die in den USA, Japan und Europa indes nach wie vor lockere Geldpolitik sowie günstige Finanzierungsbedingungen lassen allerdings kräftige wirtschaftliche Impulse für Privathaushalte und für den Unternehmenssektor erwarten. Selbst eine leichte Straffung der Geldpolitik, die für das zweite Halbjahr 2011, spätestens aber für 2012 erwartet wird, dürfte hieran grundsätzlich nichts ändern. Außerdem ist das fundamentale Wachstumspotenzial der Schwellenmärkte nach wie vor nicht ausgeschöpft, und die Nachfrage aus diesen Ländern wird die konjunkturelle Erholung in aller Welt auch weiterhin stützen. Wir rechnen damit, dass die Schwellenmärkte 2011 und 2012 ein Wachstum von ungefähr 6 Prozent verzeichnen werden. Ein weiterer Faktor, der hier ins Spiel kommt, ist der Investitionszyklus. Da sich die Kapazitätsauslastungen erst kürzlich normalisiert haben, befindet er sich noch in der Anfangsphase. Hiervon werden insbesondere Länder mit einer wettbewerbsstarken Investitionsgüterindustrie profitieren.

Für die Wirtschaft in den USA, deren Fiskalpolitik frühestens 2012 auf Konsolidierung umschwenken dürfte, wird für 2011 ein Wachstum von 2,5 bis 3 Prozent und von 2,5 Prozent für das Jahr 2012 erwartet. Dementsprechend rechnen wir allenfalls mit einem bescheidenen wirtschaftlichen Aufschwung. Gleiches gilt für den Euroraum, wo eine zunehmend restriktive Steuerpolitik die wirtschaftlichen Impulse abschwächen dürfte. Für 2011 wird eine Steigerung des Bruttoinlandsprodukts um 1,5 bis 2 Prozent erwartet, für 2012 wird mit einem Plus von 2 Prozent gerechnet. Die deutsche Wirtschaft scheint in einer guten

Position zu sein, um 2011 ein für die Region überdurchschnittliches Wachstum von 2,5 bis 3 Prozent zu erzielen, bevor sie sich 2012 wieder weitgehend an den europäischen Durchschnitt angleicht.

Die Überwindung der Haushaltskrise wird zwar für Europa weiterhin eine erhebliche Herausforderung darstellen; wir sind jedoch davon überzeugt, dass die damit einhergehenden Turbulenzen an den Finanzmärkten allmählich abklingen werden. Dies dürfte dabei helfen, Risikoprämien wieder zu senken. Renditen europäischer und US-amerikanischer Anleihen werden indes mit hoher Wahrscheinlichkeit ihren allmählichen Anstieg fortsetzen. Für die Aktienmärkte dürften weitere Steigerungen der Unternehmensgewinne bedeuten, dass das allgemeine Umfeld 2011 und vermutlich auch 2012 freundlich bleibt.

Die weiterhin für 2011 und 2012 existierenden Risiken für die Wirtschaft und die Finanzmärkte dürfen nicht unterschätzt werden. Nach aktuellem Stand liegt das größte Risiko in einem starken Anstieg der Rohstoffpreise, einer Verschärfung der staatlichen Schuldenkrisen, erheblichen Wechselkursschwankungen, insbesondere in einer deutlichen Abschwächung des US-Dollars, und einem erneuten Aufflackern der Bankenkrise.

## Ausblick für die Branche

2011 und 2012 wird sich das Beitragswachstum in der Versicherungsbranche aller Voraussicht nach erhöhen, jedoch sollten nicht zu hohe Erwartungen geweckt werden. Das Wachstum in den Industrieländern dürfte eher verhalten sein, während sich die Schwellenländer aufgrund ihrer günstigen wirtschaftlichen Fundamentaldaten und ihrer zunehmenden Reife wohl positiver entwickeln werden. Solvency II wird während dieses Zeitraums sicherlich weiterhin das beherrschende Branchenthema sein. Wir sind jedoch optimistisch, dass die derzeitige Unsicherheit über die endgültige Ausgestaltung nachlassen wird, je mehr wir uns der geplanten Einführung 2013 nähern. Renditen festverzinslicher Wertpapiere dürften sich bis dahin zwar verbessern, doch ist damit zu rechnen, dass sie gemessen am gleitenden Mittelwert

<sup>1</sup> Der Abschluss wurde erstellt und testiert vor dem schweren Erdbeben in Japan am 11. März 2011 und den dadurch verursachten schweren Störfällen an verschiedenen japanischen Atomkraftwerken; eine zuverlässige Schätzung über die finanziellen Auswirkungen liegt uns zum aktuellen Zeitpunkt noch nicht vor.

unter dem Vorkrisenniveau bleiben werden. Auch wenn sich die Preise in der Schaden- und Unfallversicherung, wie wir vermuten, leicht erholen werden, dürfte das allgemeine Preisniveau der Branche jedoch weiterhin Sorgen bereiten. Insgesamt prognostizieren wir, dass Margen und Renditen im Lebensversicherungsgeschäft günstiger ausfallen werden als in der Schaden- und Unfallversicherung.

Der für 2011 und 2012 erwartete wirtschaftliche Aufschwung müsste sich unserer Meinung nach auch vorteilhaft auf das Beitragswachstum in der **Schaden- und Unfallversicherung** auswirken. Obgleich in den Schwellenländern nach wie vor ein stärkerer Aufwärtstrend zu erwarten ist, ermutigen uns doch die Wachstumsaussichten unserer wichtigsten europäischen Märkte. Unser Ausblick auf die Preisentwicklung 2011 und 2012 bleibt jedoch uneinheitlich. In den für uns wichtigen Märkten (einschließlich Westeuropa), in denen bereits 2010 die Preise erhöht wurden, rechnen wir mit einer anhaltend positiven Dynamik und einer Ausweitung dieses Trends auf andere Zweige. Hingegen lassen sich die positiven Faktoren, die zu einer deutlichen Verbesserung beitragen könnten (beispielsweise ein besseres Gleichgewicht zwischen Angebot und Nachfrage und ein Ende der Auflösung von Vorjahresschadenreserven, die niedrige Preise nach sich ziehen), andernorts, beispielsweise im US-Firmenkundengeschäft, nur schwer erkennen. Wir bleiben unverändert bei unserer Ansicht, dass die Preise auf breiter Front deutlich höher sein müssten, um einen Ausgleich für Schadeninflation, niedrigere Kapitalanlagerenditen und den langfristigen Trend der Belastungen aus Naturkatastrophen zu bieten.

In der **Lebensversicherung** erwarten wir ein moderates Wachstum im hohen einstelligen Bereich. Der Großteil des Wachstums in diesem Sektor dürfte aus Anlageergebnissen stammen, die sich nach und nach von ihrem derzeit niedrigen Stand erholen. Auch wenn niedrige Zinsen und Inflation 2011 und 2012 der Branche weiterhin Sorgen bereiten dürften, gehen wir nach wie vor davon aus, dass sich die Margen über diesen Zeitraum hinweg verbessern. Bei den Produkten rechnen wir mit einem Anstieg der Margen

aus dem Gebührengeschäft, begünstigt durch das Wachstum des verwalteten Vermögens und eine Kostenbasis, die zur Hälfte fix ist. Dank sich allmählich verbessernder Anlageergebnisse dürften sich die Margen im Zinsgeschäft (Spread-Geschäft) zwar verbessern, wenn auch im Vergleich zu früheren, Niveaus weiterhin niedrig bleiben. Wenn das gegenwärtig niedrige Zinsumfeld und die Unsicherheit im Zusammenhang mit Solvency II anhalten, könnten wir uns eine Verlagerung vom Spread-Geschäft hin zu Risikoprodukten mit höheren Margen vorstellen. Wir erwarten, dass 2011 und 2012 Margen von geringeren Zuführungen in Reserven profitieren werden. Ebenso dürften unsere Kostensenkungsprogramme zu einer Verbesserung beitragen.

## Ausblick für die Allianz Gruppe<sup>1</sup>

Wie im vorherigen Abschnitt erläutert, erwarten wir einen anhaltenden Aufschwung, wenn auch weniger dynamisch. Wir rechnen mit einer Phase moderaten globalen Wachstums. Trotz der recht starken Erholung der Weltwirtschaft sehen wir dennoch Risiken für das Jahr 2011 und die Folgejahre.

Unser Ausblick geht von einer geringen Wahrscheinlichkeit massiver Erschütterungen aus, beispielsweise weitreichender geopolitischer Spannungen, staatlicher Schuldenkrisen in großen Industrienationen oder von Währungs- und Handelskriegen. Wir prognostizieren das operative Gruppenergebnis sowie den entsprechenden Wert für jedes einzelne Segment; dabei erläutern wir die wichtigsten Abhängigkeitsfaktoren und ihre möglichen Auswirkungen. Darüber hinaus legen wir unsere Erwartungen hinsichtlich der Entwicklung von Erträgen und Schäden sowie der wichtigsten Kennzahlen und Positionen der Gewinn- und Verlustrechnung dar. Der Ausblick, insbesondere auf das zukünftige operative Ergebnis, berücksichtigt einen Diversifizierungseffekt, der stabilisierend wirkt und sich aus unserem globalen, segmentübergreifenden Portfolio ergibt.

<sup>1</sup> Der Abschluss wurde erstellt und testiert vor dem schweren Erdbeben in Japan am 11. März 2011 und den dadurch verursachten schweren Störfällen an verschiedenen japanischen Atomkraftwerken; eine zuverlässige Schätzung über die finanziellen Auswirkungen liegt uns zum aktuellen Zeitpunkt noch nicht vor.



## Annahmen

Unser Ausblick beruht auf den folgenden Annahmen:

- moderates weltwirtschaftliches Wachstum;
- leichter Anstieg des Zinsniveaus;
- keine dramatische Änderung des Zinsumfeldes;
- keine drastischen finanzpolitischen und regulatorischen Eingriffe;
- keine ungünstige Entwicklung der Schadenhöhe von Naturkatastrophen;
- keine massiven Erschütterungen der Kapitalmärkte.

Wir gehen davon aus, dass die Struktur unserer Segmente sowie ihr relativer Beitrag zur Rentabilität unverändert bleiben. Den größten Teil unseres operativen Ergebnisses steuert demnach weiterhin unsere Schaden- und Unfallversicherung bei. Wir rechnen aber damit, dass sich einige positive und negative Effekte des Jahres 2010 im Geschäftsjahr 2011 und später nicht wiederholen werden. Obwohl sich 2010 die Weltwirtschaft stark erholte, werden die Anlageerträge wegen des nur geringfügig steigenden Zinsniveaus weiter unter Druck stehen. Dieser Einfluss wird zum Teil durch die bessere Geschäftsentwicklung in den einzelnen Segmenten und den wachstumsgetriebenen Anstieg unseres Kapitalanlagenbestandes ausgeglichen. Angesichts der Höhe der Marktwertanpassungen in der Gewinn- und Verlustrechnung ist es zu diesem Zeitpunkt unmöglich, eine zuverlässige Vorhersage des Jahresüberschusses 2011 und der Folgejahre zu treffen.

## Überblick: Ausblick 2011

|                                        | Ausblick 2011                                                                                                                                                                                                                                                                                                                                                                                                                                                                                                                                                                                                                                                                                                                                                                                                                                                                                                                                  |
|----------------------------------------|------------------------------------------------------------------------------------------------------------------------------------------------------------------------------------------------------------------------------------------------------------------------------------------------------------------------------------------------------------------------------------------------------------------------------------------------------------------------------------------------------------------------------------------------------------------------------------------------------------------------------------------------------------------------------------------------------------------------------------------------------------------------------------------------------------------------------------------------------------------------------------------------------------------------------------------------|
| <b>Allianz Gruppe</b>                  | <p>Operatives Ergebnis von 8,0 Milliarden Euro plus oder minus 0,5 Milliarden Euro.</p> <p>US-Dollar-Wechselkurs von 1,40 Euro.</p> <p>Schutz unserer Kapital- und Solvabilitätspositionen.</p> <p>Wie immer müssen wir darauf achten, nicht nur die Investitionen unserer Aktionäre zu schützen, sondern auch weiterhin attraktive Renditen und Dividenden zu bieten.</p> <p>Wir wollen das profitable Wachstum steigern.</p> <p>In Bezug auf das aktuelle niedrige Zinsumfeld bleibt unsere Anlagestrategie darauf ausgerichtet, eine attraktive Rendite zu erwirtschaften und die Anfälligkeit für Kursausschläge gering zu halten.</p>                                                                                                                                                                                                                                                                                                     |
| <b>Schaden- und Unfallversicherung</b> | <p>In der Schaden- und Unfallversicherung prognostizieren wir für 2011 wieder ein leichtes Wachstum der Bruttobeiträge, nach zwei Jahren ohne positive Wachstumsimpulse (intern gerechnet).</p> <p>Wir erwarten ein operatives Ergebnis zwischen 4,2 und 4,8 Milliarden Euro.</p> <p>Wir bleiben weiterhin bei unserem Ziel von 96 Prozent für die Combined Ratio.</p> <p>Wir erwarten, dass Großschäden aus Naturkatastrophen auf das langfristige Durchschnittsniveau zurückgehen.</p> <p>Das Anlageergebnis bleibt durch die kurze Duration der Kapitalanlagen in diesem Segment und aufgrund der Niedrigzinsumgebung weiter unter Druck. Gleichwohl streben wir unbeirrt danach, unsere Anlagestrategie den aktuellen Marktbedingungen anzupassen.</p> <p>Wir vermuten, dass höhere Preise sowie Verbesserungen beim Schadenmanagement und bei der Produktivität nachteilige Effekte wie Schadeninflation mehr als ausgleichen werden.</p> |
| <b>Lebens- und Krankenversicherung</b> | <p>Wir erwarten für 2011 ein weiteres starkes, aber stabiles Umsatzergebnis.</p> <p>Wir erwarten für 2011 ein operatives Ergebnis in einer Größenordnung zwischen 2,2 und 2,8 Milliarden Euro.</p> <p>Das operative Ergebnis 2010 war von hohen realisierten Gewinnen begünstigt, die 2011 voraussichtlich nicht das gleiche Niveau erreichen.</p>                                                                                                                                                                                                                                                                                                                                                                                                                                                                                                                                                                                             |
| <b>Asset Management</b>                | <p>Wir erwarten anhaltende Nettomittelzuflüsse, insbesondere im Rentengeschäft, jedoch auf einem insgesamt niedrigeren Niveau als 2010.</p> <p>Wir erwarten ein operatives Ergebnis innerhalb des Zielkorridors von 1,8 bis 2,2 Milliarden Euro.</p> <p>Wir erwarten eine Cost-Income Ratio deutlich unter 65 Prozent.</p>                                                                                                                                                                                                                                                                                                                                                                                                                                                                                                                                                                                                                     |

## Beurteilung der erwarteten Ertragslage und Umsätze 2011 durch den Vorstand

2010 wuchs unser gesamter Umsatz, intern gerechnet, im Vergleich zum Vorjahr um 6,2 Prozent auf einen historischen Höchststand von 106,5 Milliarden Euro, dank der Rückkehr des Kundenvertrauens nach der Finanzkrise. Wir erwarten für 2011 einen stabilen Gesamtumsatz, weil sich dieser Aufholeffekt erschöpft haben dürfte. Unser Umsatz hängt von Marktzyklen und vom Ausschöpfen der im Abschnitt Chancen geschilderten neuen Geschäftschancen ab.

Unser Produktportfolio weist länderspezifische Unterschiede auf; deshalb sind Angaben über künftige Absatzmärkte und über Produkteinführungen regional unterschiedlich. Wir rechnen damit, dass sich unsere Absatzmärkte und unser Produktportfolio nicht wesentlich verändern.

2010 erreichte unser operatives Ergebnis 8,2 Milliarden Euro und lag damit um 0,5 Milliarden Euro über dem oberen Grenzwert unseres Zielkorridors von 7,7 Milliarden Euro. Dieses Ergebnis war begünstigt durch vorteilhafte Wechselkursbewegungen und die Änderungen der Bilanzierungsmethode unseres US-Versicherers Allianz Life.

Darum erwarten wir für 2011 ein operatives Ergebnis von 8,0 Milliarden Euro plus oder minus 0,5 Milliarden Euro, und zwar unter der Voraussetzung, dass es zu keinen erheblichen Abweichungen von den hier dargelegten Prämissen und den unten angeführten segmentspezifischen Abhängigkeiten kommt. Die Schwankungsbreite geht auf die Abhängigkeit des operativen Ergebnisses von Änderungen des Zinsniveaus und der Wechselkurse zurück:

- Ein Zinsanstieg (Zinsrückgang) um 100 Basispunkte würde das operative Ergebnis um rund 0,2 Milliarden Euro steigern (verringern). Dies beinhaltet nicht die erfolgswirksam erfassten Zeitwertveränderungen bei Bilanzpositionen.

- Eine 10-prozentige Abwertung (Aufwertung) des US-Dollars gegenüber einem Euro-Richtkurs von 1,40 würde einen negativen (positiven) Effekt von rund 0,3 Milliarden Euro haben.

## Schaden- und Unfallversicherung

Für 2011 erwarten wir wieder ein leichtes Wachstum der Bruttobeitragseinnahmen nach zwei Jahren ohne positive Wachstumsimpulse (gerechnet nach internem Wachstum). Das erwartete Wachstum wird durch die günstige Entwicklung unserer Wachstumsmärkte, der Global Insurance Lines & Anglo Markets, sowie durch eine Verbesserung in einigen unserer Kernmärkte wie Italien getragen werden. Weil die Preise in der Schaden- und Unfallversicherung von Marktzyklen abhängen, die in jedem Land anders sind, und wegen der voraussichtlich andauernden Schwäche des Marktumfelds in einigen unserer Kernmärkte 2011 werden wir an unserer strengen Zeichnungspolitik festhalten und sind darauf vorbereitet, auf Umsatz zu verzichten, sofern in diesen Märkten die angestrebte Profitabilität nicht erreicht werden kann.

Das operative Ergebnis in der Schaden- und Unfallversicherung belief sich 2010 auf 4,3 Milliarden Euro, bei einer Combined Ratio von 97,2 Prozent. Das Ergebnis profitierte von einer deutlichen Erholung unseres Kreditversicherungsgeschäfts, dessen Einfluss 2011 jedoch weniger stark sein wird. In deutlichem Gegensatz hierzu standen die großen Verluste aus Naturkatastrophen in Höhe von 1,3 Milliarden Euro, die fast dreimal so hoch ausfielen wie 2009. Wir erwarten, dass sich derartige Schäden 2011 auf das langfristige Durchschnittsniveau verringern.

Wir bleiben weiterhin unserem Ziel einer Combined Ratio von 96 Prozent verpflichtet. In der Erwartung, dass höhere Preise sowie Verbesserungen beim Schadenmanagement und bei der Produktivität nachteilige Effekte wie Schadeninflation mehr als ausgleichen werden, rechnen wir damit, dass wir 2011 weitere Fortschritte auf diesem Weg machen werden. Eine Veränderung der Combined Ratio um einen Prozentpunkt würde sich mit rund 0,4 Milliarden Euro auf das operative Ergebnis auswirken. Wir weisen darauf hin,

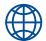

Weitere Informationen über unsere größten Versicherungsmärkte finden Sie unter [www.allianz.com/geschaeftsbericht](http://www.allianz.com/geschaeftsbericht)

dass wegen der kurzen Haltefristen bei Kapitalanlagen in der Schaden- und Unfallversicherung sowie aufgrund der Niedrigzinsumgebung die Anlageerträge weiter unter Druck stehen werden. Wir streben aber unaufhörlich danach, unsere Anlagestrategie den aktuellen Marktbedingungen anzupassen.

Insgesamt erwarten wir ein operatives Ergebnis von 4,2 bis 4,8 Milliarden Euro für 2011.

## Lebens- und Krankenversicherung

Die Umsätze sind 2010 um mehr als 6,3 Milliarden Euro stark gewachsen und haben mit 57,1 Milliarden Euro ihr bisher höchstes Niveau erreicht, insbesondere durch Impulse aus Asien-Pazifik, den USA und Deutschland. Das 2010 erzielte Wachstum ist zum Teil auf die Erholung des Kundenvertrauens nach der Finanzkrise zurückzuführen. Wir erwarten daher für 2011 ein weiteres starkes und stabiles Umsatzergebnis.

Das operative Ergebnis 2010 erreichte 2,9 Milliarden Euro und lag damit um 0,1 Milliarden Euro über dem oberen Zielwert von 2,8 Milliarden Euro. Dazu trugen zum einen hohe realisierte Gewinne bei, mit denen 2011 voraussichtlich nicht auf diesem Niveau zu rechnen ist, zum anderen ein Effekt des Wechsels der Bilanzierungsmethode bei unserem US-Versicherer Allianz Life. In der Lebens- und Krankenversicherung erwarten wir für 2011 ein operatives Ergebnis in einer Größenordnung zwischen 2,2 und 2,8 Milliarden Euro. Wir weisen darauf hin, dass die Marktvolatilität und das Ausmaß der Gewinnmitnahmen (netto) unser operatives Ergebnis deutlich beeinflussen können und eine genaue Prognose erschweren.

## Asset Management

Die Erfolgsgeschichte unseres Asset-Management-Geschäfts setzte sich 2010 fort. Aufgrund außerordentlich hoher Nettomittelzuflüsse und dank der Markterholung erreichten unsere Kapitalanlagen für Dritte ein noch höheres Niveau. Insbesondere aufgrund des starken Anstieges des Provisionsüberschusses (plus 37,2 Prozent) hat sich unser operatives Ergebnis um 47 Prozent auf 2,1 Milliarden Euro erhöht. Für 2011 rechnen wir mit geringeren, aber

weiteren Zuflüssen, hauptsächlich in Rentenprodukte. Hier ist jedoch zu beachten, dass der Provisionsüberschuss einschließlich der erfolgsabhängigen Provisionen stark von den Marktwerten, der Anlageperformance und dem Geschäftsportfolio abhängt. Das außerordentlich starke Wachstum, das wir 2010 gesehen haben, wird sich 2011 nicht fortsetzen. Wir erwarten ein operatives Ergebnis, das in etwa auf dem gleich hohen Niveau wie 2010 liegt. Der Zielkorridor für 2011 reicht von 1,8 bis 2,2 Milliarden Euro. Dies setzt jedoch voraus, dass sich die Nettomittelzuflüsse, die Märkte, der US-Dollar, die Anlagenperformance und die Risikoeinstellung der Investoren so entwickeln, wie angenommen. Wir gehen davon aus, unsere Cost-Income Ratio weiterhin deutlich unter 65 Prozent zu halten.

## Corporate und Sonstiges und Konsolidierung

Im Segment Corporate und Sonstiges haben wir einen operativen Verlust von 0,9 Milliarden Euro für 2010 ausgewiesen. Infolge des niedrigen Zinsumfeldes und der Wertschwankungen in den Zeitwerten von Forderungen und Verbindlichkeiten sowie des steigenden Pensionsaufwandes erwarten wir für 2011 (einschließlich Konsolidierung) einen operativen Verlust von etwa 0,9 bis 1,1 Milliarden Euro, vor allem wegen der Kosten in der Holding-&-Treasury-Funktion.

## Finanzierung und Liquiditätsentwicklung

Sämtliche Finanzierungsaktivitäten der Allianz Gruppe werden bei der Allianz SE gebündelt. Als Mittel der Finanzierung stehen Commercial Papers, mittel- und langfristige Anleihen sowie Aktien zur Verfügung. Zugang zu Bankkrediten und langfristigen Kreditlinien erhöhen zusätzlich die finanzielle Flexibilität der Allianz SE und können darüber hinaus zur Verbesserung der Finanzierungsstruktur genutzt werden.

Die Allianz Gruppe wahrt eine solide Liquiditätsausstattung und eine Kapitalisierung über den gegenwärtigen Anforderungen der Aufsichtsbehörden sowie eine ausgezeichnete finanzielle Stärke und Stabilität. Wir sind zuversichtlich, dass die Allianz Gruppe ihre starke finanzielle Flexibilität weiterhin durch einen verlässlichen Zugriff auf die Finanzmärkte bei angemessenen Kosten sichern kann, unterstützt durch eine umsichtige Steuerung ihrer Liquidität sowie dadurch, dass bei den Verbindlichkeiten langfristige Restlaufzeiten überwiegen. Aufgrund unserer aktuellen Einschätzung der Entwicklung des Zinsniveaus sollten unsere kapitalmarktgebundenen Finanzierungskosten 2011 im Großen und Ganzen denen des Vorjahres entsprechen.

## Voraussichtliche Dividendenentwicklung

Da wir stetig das Vermögen unserer Investoren schützen und gleichzeitig attraktive Renditen und Dividenden bieten wollen, bemühen wir uns bei der Entscheidung über den Gewinnverwendungsvorschlag um eine Balance zwischen Ausschüttung und Solvabilität. Unsere Dividendenpolitik ist im Grundsatz ergebnisbezogen. Seit 2008 liegt unsere Ausschüttungsquote bei 40 Prozent des Periodenüberschusses der Anteilseigner aus fortzuführenden Geschäftsbereichen. Diese Quote hat es uns ermöglicht, die für unser Wachstum erforderliche Kapitalbasis zu wahren, und bildet die Grundlage für unsere künftigen Gewinnverwendungsvorschläge an den Aufsichtsrat und die Hauptversammlung.

Um unsere Aktionäre an der positiven Geschäftsentwicklung teilhaben zu lassen, werden wir der Hauptversammlung vorschlagen, die Dividende je Aktie von 4,10 Euro für 2009 auf 4,50 Euro für 2010 zu erhöhen. Das entspricht einer Ausschüttungsquote von weiterhin 40 Prozent.

## Beurteilung der erwarteten Ertragslage 2012 durch den Vorstand

Auf der Grundlage der aktuellen Schätzwerte erwarten wir für 2012 eine Verbesserung des operativen Ergebnisses, das von allen unseren Geschäftsbereichen getragen wird.

Das volatile Marktumfeld macht es schwierig, für Jahre nach 2011 eine konkrete Prognose über die Entwicklung des Jahresüberschusses zu erstellen.

Die Aussagen stehen unter dem Vorbehalt, dass Naturkatastrophen, widrige Entwicklungen an den Kapitalmärkten sowie andere Faktoren, die in unserem Vorbehalt bei Zukunftsaussagen dargelegt sind, unsere Prognosen mehr oder minder beeinträchtigen können.

## Einschätzung künftiger Chancen und Herausforderungen

Die Pflege und Stärkung des Vertrauens, das uns von Kunden, Mitarbeitern, Investoren und der Öffentlichkeit entgegengebracht wird, sind für uns sehr wichtig. Wir sind davon überzeugt, dass unsere Strategie dazu bestens geeignet ist und sie uns auch in die Lage versetzt, künftige Herausforderungen zu meistern und Chancen zu nutzen.

Viele Herausforderungen und Chancen sind segment-, geschäftsbereich- und marktspezifisch. Die übrigen haben dagegen globale und bereichsübergreifende Bedeutung. Einige Beispiele:

**Finanzmarktstabilität:** Die globale Finanzkrise ist noch in frischer Erinnerung. Unsicherheit und Volatilität werden noch einige Zeit andauern. Versicherungen erfreuen sich hoher gesellschaftlicher Zustimmung, weil sie Einzelpersonen, Familien und Geschäfte schützen, ihre langfristigen Anlagestrategien zur Stabilität der Finanzmärkte beitragen und sie über ein strenges Risikomanagement verfügen. Außerdem engagiert sich die Allianz Gruppe für Bildungsprojekte, die das gesellschaftliche Verständnis für Finanzangelegenheiten und die finanzielle Unabhängigkeit fördern.

**Demografischer Wandel:** Unsere starke Marktposition in Kontinentaleuropa und den USA, die Strahlkraft unserer Marke, unser gutes Rating und unser sorgfältig diversifiziertes Produktportfolio verschaffen uns eine chancenreiche Position in der Alters- und Krankenvorsorge und im Assistance-Markt (zum Beispiel Langzeitpflege).

Die wachsende Mittelschicht in Schwellenmärkten wie China, Indien, Brasilien und Indonesien eröffnet weitere Wachstumschancen für sämtliche Geschäftsbereiche. Unsere starke Präsenz und unsere reiche Erfahrung in diesen Märkten, gepaart mit dem weltweit guten Ruf unserer Marke, werden uns bei der Erschließung dieses Kundenpotenzials Vorteile verschaffen.

**Zugriff auf Finanzierungsquellen:** Rund 40 Prozent der Weltbevölkerung verfügen über weniger als 2 US-Dollar täglich für ihren Lebensunterhalt. Menschen in Entwicklungsländern haben unter Naturkatastrophen, Unfällen und Krankheit besonders hart zu leiden. Sie haben keine Möglichkeit zu sparen und können sich gegen derartige Schläge nicht versichern. Inzwischen haben mehr als 4 Millionen Kunden eine Mikroversicherung bei uns abgeschlossen. Die Marge ist gering, die Produktgattung kann aber profitabel sein, wenn auch in viel bescheidenerem Maße als im traditionellen Geschäft. Langfristig sollte es sich lohnen, Kunden mit geringem Einkommen an Versicherungen heranzuführen, zumal dann, wenn sich ihre wirtschaftliche Lage langsam verbessert.

**Klimawandel:** Aufgrund ihrer Kompetenz bei der Schadenbegrenzung und im Risikomanagement sind Versicherungsunternehmen in der Lage, einen wichtigen Beitrag zur Lösung der globalen Klimaprobleme zu leisten. Die Allianz Gruppe hat mehr als 70 Produkte und Dienstleistungen entwickelt, die dazu beitragen, den Klimawandel zu bremsen oder Umwelteinwirkungen zu dämpfen. Besitzer von Hybrid-Fahrzeugen können beispielsweise günstige Versicherungskonditionen in Anspruch nehmen, und wir haben besondere Sachversicherungen im Angebot, mit denen die Nutzung alternativer Energiequellen und die umweltfreundliche Sanierung von Immobilien abgesichert werden können.

Je stärker das Bewusstsein der Weltbevölkerung für die Bedeutung des Klimawandels ist, desto höher ist die Nachfrage nach grünen Investitionen, zum Beispiel in erneuerbare Energien. Unser Asset Management bietet schon jetzt Nachhaltigkeits-Fonds an, die in erneubare Energien, Umwelttechnik und -unternehmen investieren und sich durch nachhaltiges Management und umweltbewusstes Handeln auszeichnen.

**Angebote für den „Kunden von heute“:** Während der vergangenen zwei Jahrzehnte erlebten wir die Etablierung von Mobiltelefonen, Laptops, Breitband-Internetverbindungen und E-Mail-Verkehr, insbesondere in den Industrieländern und bei jüngeren Personen mit gehobenen Einkommen und gutem Bildungsabschluss, hauptsächlich Männern. Inzwischen gehört diese Kommunikationswelt zum Lebensalltag unserer Kunden, Investoren und Partner, unabhängig davon, wo diese leben, arbeiten und mit der Allianz in Verbindung stehen. Sie sind unabhängiger bei ihren Entscheidungen geworden und wünschen schnellen und unkomplizierten Zugang zu Informationen. Wir investieren in digitale Lösungen an der Schnittstelle zum Kunden und in der Administration. Es geht uns dabei aber nicht allein um Prozessautomatisierung; vielmehr wollen wir in erster Linie den Mehrwert für unsere Kunden und Investoren steigern.

**Innovative Vertriebskanäle:** Ein großer Teil unseres Vertriebsnetzes in traditionellen Märkten ist durch eine langjährige, enge Partnerschaft mit unseren Vertretern gewachsen. Unbeschadet dessen legen wir angesichts des stark eingeschränkten Umsatzwachstumspotentials und der flachen Margen in reifen Märkten, während wir unsere Position in wichtigen Wachstumsmärkten ausbauen, großen Wert auf die Entwicklung innovativer und wirtschaftlich attraktiver Absatzkanäle und die Überleitung des Geschäftsgeschehens dorthin.

**Kostenmanagement:** Eine unserer Herausforderungen ist es, in den eher gesättigten, traditionellen Märkten unsere Leistung zu halten und zu verbessern. Dabei wächst zunehmend die Notwendigkeit, unsere operativen Aufwendungen und Kosten so intelligent und nachhaltig zu steuern, dass die Beiträge



und der Wert unserer Mitarbeiter in aller Welt zum Tragen kommen. Unsere Gruppengesellschaften in aller Welt können beispielsweise Dienstleistungen vom Zentrum für IT-Entwicklung und Geschäftsabwicklung der Allianz UK in Südindien nutzen.

**Komplexitätsverringering:** Wir verringern stetig die Komplexität unseres Geschäfts. Dabei nutzen wir unser Betriebsmodell (Target Operating Model) und unsere operativen Transformationsprogramme. Ziel ist es, Geschäftsprozesse und Organisationsstrukturen im Versicherungsgeschäft zu standardisieren und zu vereinfachen. Gleichzeitig bekämpfen wir die organisationelle Entropie durch eine auf Gruppenebene angestoßene Initiative zur Verminderung der Anzahl der juristischen Einheiten, insbesondere der Versicherungsträger, in Westeuropa.

## Chancenmanagement und strategische Investitionen

Unser Betriebsmodell hat die Grundlage dafür geschaffen, global und örtlich Chancen strukturiert und nach gleichem Vorgehen zu nutzen.

Wir haben die diesbezüglichen Prozesse, Aufgaben und Verantwortlichkeiten klar definiert und dafür gesorgt, dass alle Interessengruppen einbezogen werden, sodass wir gut gerüstet sind, neue Geschäftsmöglichkeiten zu erkennen, zu beurteilen und für profitables Wachstum zu nutzen.

So ist beispielsweise das Marktmanagement dafür verantwortlich, die örtlichen Marktstrategien weiterzuentwickeln und dabei sorgfältig zu beachten, dass Einzelstrategien im Hinblick auf Kunden, Vertriebskanäle, Produkte, Dienstleistungen und Marken verbunden werden.

Der Prozess der Strategieentwicklung umfasst drei Schritte:

1. Markt- und Kundenanalysen erstellen, um Einblicke in Trends, Kundenwünsche, Kundenverhalten und Ähnliches zu gewinnen;

2. Diskussion der Ergebnisse dieser Erhebungen und ihrer Relevanz für das angewandte Geschäftsmodell und die örtliche Strategie;

3. Übertragung der Ergebnisse auf die Marktstrategie.

Genauso wichtig wie deren Entwicklung ist die Anwendung der Strategie, also Anstoß und Durchführung konkreter Initiativen und Projekte. Beides liegt im Verantwortungsbereich des örtlichen Vorstands, ist aber auch Gegenstand des Managementdialogs zwischen den operativen Einheiten und der Holding. Dies illustriert, wie wichtig für das Top-Management die Chancenausbeute global und örtlich ist.

Die Allianz Gruppe ist ein globales Unternehmen mit operativen Einheiten in rund 70 Ländern; entsprechend groß und örtlich differenziert ist das Spezialwissen und die Erfahrung mit besten Geschäftspraktiken. Eine zentrale Aufgabe der Holding ist es, diese wertvolle Ressource gruppenweit nutzbar zu machen und den Wissenstransfer zwischen den Tochterunternehmen zu unterstützen. Auch dieser Austausch leistet einen ständigen Beitrag zur Erkennung und zur Wahrnehmung von Chancen.

Neben dem strategischen Ansatz und dem Wissensmanagement sind Kundenkontakte und die Ideen von Mitarbeitern die wesentlichen Quellen von Chancen. Um Nutzen aus diesen beiden wichtigen Erkenntnisbereichen ziehen zu können, haben wir eine Reihe von Prozessen und Werkzeugen implementiert. Die Allianz führt beispielsweise deutlich mehr als eine Million Telefonanrufe bei Kunden durch, um deren Feedback an kritischen Punkten der Interaktion einzuholen. Dieses Feedback wird systematisch analysiert, um Geschäftsprozesse zu optimieren und der Stimme des Kunden innerhalb der gesamten Organisation Gehör zu verschaffen.

Wir nutzen die Chancen der Digitalisierung und wollen veränderten Kundenbedürfnissen Rechnung tragen; deshalb investieren wir in Technologie, über die unsere Kunden an der Schnittstelle zur Allianz einen anwenderfreundlichen, digitalen Zugriff auf unsere Dienstleistungen erhalten, der den hohen Sicherheits- und Vertraulichkeitsansprüchen eines globalen Versiche-

rungsunternehmens genügt. Beispiele hierfür sind unsere Kunden-, Vertreter- und Mitarbeiterportale sowie mobile Anwendungen.

Ein zentrales strategisches Thema ist die Weiterentwicklung und Implementierung von global nutzbaren Abwicklungs- und IT-Plattformen für das Kern-Versicherungsgeschäft. Sie bauen auf flexiblen, wiederverwendbaren und anpassbaren Komponenten auf und können in den örtlichen Märkten jeweils unterschiedlich eingesetzt werden. Dadurch erzielen wir Skalenvorteile, verbessern den Wissenstransfer und beschleunigen unsere Geschäftsprozesse.

In den Jahren 2011 und 2012 wird die Allianz Gruppe mehr als 2 Milliarden Euro in IT-Funktionen investieren, die uns helfen, unser Geschäft effizienter zu betreiben und zu entwickeln.

Ein weiterer wesentlicher Handlungsbereich ist die Infrastruktur für Kommunikation und Zusammenarbeit. So rüsten wir in den kommenden Jahren unser weltweites Daten- und Kommunikationsnetz auf. Diese Investition ermöglicht die Nutzung neuer Kommunikationsdienste mit höherer Sicherheit und niedrigeren Kosten.

Kostensenkung, verbesserte Anwendungen und einen hohen Sicherheitsstandard verspricht auch die Entwicklung des „Workstation Operating System“ für internationale Kunden.

Darüber hinaus wird die Allianz Gruppe erhebliche Beträge in die strategischen Initiativen auf Gruppenebene investieren, die als Treiber hinter der Implementierung der Gruppenstrategie stehen. Mit der Zielsetzung, die weltweit stärkste Finanzgemeinschaft aufzubauen, wurden große Gruppeninitiativen für Versicherungssegmente und den Vertrieb ins Leben gerufen, mit denen die Stärken der Gruppe nutzbar gemacht, Chancen ergriffen und zukünftige Herausforderungen aktiv angenommen werden sollen.

Die Investitionen in den Vertrieb dienen hauptsächlich der Fortentwicklung und dem Umbau der Vertriebsnetzwerke sowie der Beschleunigung der Leistungsabwicklung im Broker-Geschäft. In der Schaden- und Unfallversicherung wurden eigene Initiativen eingerichtet, mit denen Probleme identifiziert und Ausführungskompetenzen gestärkt werden sollen, damit Marktchancen voll ausgeschöpft werden können, und die außerdem der Pflege und dem Ausbau der technischen Fertigkeiten sowie der Mitarbeiterentwicklung dienen. Damit unterstreichen wir unsere Zielsetzung, eine weltweit führende Position in Zeichnungspolitik und Schadenmanagement aufzubauen und zu halten.

Wir bereiten uns auf die Einführung des Solvency-II-Regelwerks für Versicherungsunternehmen vor.

## Allgemeine Einschätzung der aktuellen Wirtschaftslage durch den Vorstand

Zum Zeitpunkt der Veröffentlichung dieses Geschäftsberichts, gestützt auf aktuelle Informationen bezüglich Naturkatastrophen, der Zins- und Wechselkursentwicklung sowie der Entwicklung am Kapitalmarkt, liegen unserem Vorstand keine Erkenntnisse vor, die auf wesentliche negative Entwicklungen hinweisen.<sup>1</sup>

### Vorbehalt bei Zukunftsaussagen

Die in diesem Dokument enthaltenen Aussagen können Prognosen, Erwartungen oder andere die Zukunft betreffende Aussagen enthalten, die auf den aktuellen Einschätzungen und Annahmen des Managements beruhen und mit bekannten und unbekannten Risiken und Ungewissheiten verbunden sind. Die tatsächlichen Ergebnisse und Entwicklungen können daher wesentlich von den geäußerten Erwartungen und Annahmen abweichen. Neben weiteren hier nicht aufgeführten Gründen können sich Abweichungen aus Veränderungen der allgemeinen wirtschaftlichen Lage und der Wettbewerbssituation, vor allem in Allianz Kerngeschäftsfeldern und -märkten, oder aus Akquisitionen sowie der anschließenden Integration von Unternehmen und aus Restrukturierungsmaßnahmen ergeben. Abweichungen können außerdem aus dem Ausmaß oder der Häufigkeit von Versicherungsfällen (zum Beispiel durch Naturkatastrophen), der Entwicklung von Schadenkosten, Stornoraten, Sterblichkeits- und Krankheitsraten beziehungsweise -tendenzen und, insbesondere im Bankbereich, aus der Ausfallrate von Kreditnehmern resultieren. Auch die Entwicklungen der Finanzmärkte (zum Beispiel Marktschwankungen oder Kreditausfälle) und der Wechselkurse sowie nationale und internationale Gesetzesänderungen, insbesondere hinsichtlich steuerlicher Regelungen, können entsprechenden Einfluss haben. Terroranschläge und deren Folgen können die Wahrscheinlichkeit und das Ausmaß von Abweichungen erhöhen. Die Gesellschaft übernimmt keine Verpflichtung, Zukunftsaussagen zu aktualisieren.

<sup>1</sup> Der Abschluss wurde erstellt und testiert vor dem schweren Erdbeben in Japan am 11. März 2011 und den dadurch verursachten schweren Störfällen an verschiedenen japanischen Atomkraftwerken; eine zuverlässige Schätzung über die finanziellen Auswirkungen liegt uns zum aktuellen Zeitpunkt noch nicht vor.

# Vermögenslage und Eigenkapital

- Das Eigenkapital erhöhte sich um 10,9 Prozent auf 44,5 Milliarden Euro.
- Unsere bereits starke Solvabilitätsquote stieg um 9 Prozentpunkte auf 173 Prozent.<sup>1</sup>

## Eigenkapital<sup>2</sup>

### Eigenkapital<sup>3</sup>

in Mio €

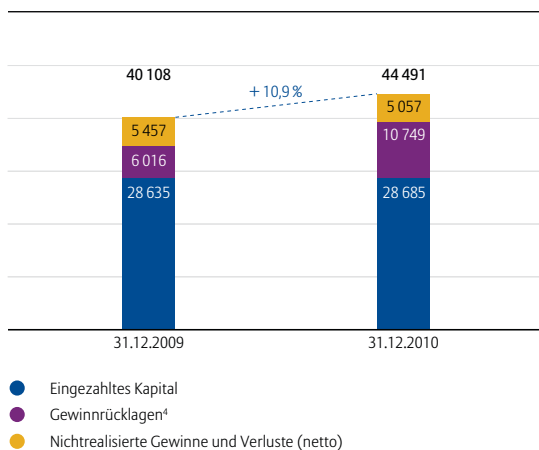

Zum 31. Dezember 2010 belief sich das Eigenkapital auf 44 491 Millionen Euro und lag damit um 4 383 Millionen Euro über dem Vorjahresniveau. Der auf die Anteilseigner entfallende Jahresüberschuss und günstige Wechselkurseffekte erhöhten unser Eigenkapital um jeweils 5 053 Millionen Euro beziehungsweise 1 297 Millionen Euro. Die nichtrealisierten Gewinne gingen aufgrund höherer Realisierungen, mit dem Ziel am Marktaufschwung teilzuhaben, um 400 Millionen Euro zurück. Das Eigenkapital verringerte sich um die im zweiten Quartal 2010 von der Allianz SE für das Geschäftsjahr 2009 gezahlte Dividende in Höhe von 1 850 Millionen Euro.

## Gesetzliche Kapitalanforderungen

Der Allianz Konzern ist ein Finanzkonglomerat im Sinne der Finanzkonglomeraterichtlinie und des entsprechenden deutschen Gesetzes, wirksam seit dem 1. Januar 2005. Die Richtlinie verlangt, dass ein Finanzkonglomerat die Erfüllung der Solvabilitätsanforderungen auf konsolidierter Basis berechnet.

### Finanzkonglomerate-Solvabilität<sup>1</sup>

in Mrd €

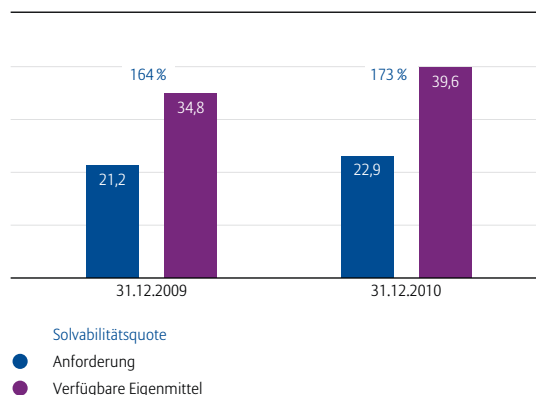

Zum 31. Dezember 2010 betrugen die verfügbaren Eigenmittel des Allianz Konzerns, die zu Solvabilitätszwecken für das Versicherungs-, das Bank- und das Asset-Management-Geschäft berücksichtigt werden dürfen, 39,6 Milliarden Euro, einschließlich außerbilanzieller Rücklagen von 2,1 Milliarden Euro sowie eines Abzugs für voraussichtliche Dividendenzahlungen für das Jahr 2010 von 2,0 Milliarden Euro. Die verfügbaren Eigenmittel erhöhten sich vergleichbar mit der Entwicklung des Eigenkapitals. Die Kapitalanforderung wuchs um 1,7 Milliarden Euro, vor allem aufgrund der positiven Geschäftsentwicklung in der Lebens- und Krankenversicherung. Insgesamt überschritten die verfügbaren Eigenmittel die gesetzlichen Kapitalanforderungen um 16,7 Milliarden Euro. Daraus resultiert eine Deckungsquote zum 31. Dezember 2010 von 173 Prozent, eine Verbesserung unserer bereits starken Solvabilitätsposition um 9 Prozentpunkte.

<sup>1</sup> Außerbilanzielle Bewertungsreserven werden im Rahmen der Berichterstattung an die Aufsichtsbehörden nur auf Antrag als verfügbare Eigenmittel angesetzt; die Allianz SE hat bisher keinen Antrag auf Anerkennung gestellt. Ohne die außerbilanziellen Bewertungsreserven beläuft sich die Solvabilitätsquote auf 164 % (2009: 155 %).

<sup>2</sup> Die Anteile anderer Gesellschafter in Höhe von 2 071 Mio Euro zum 31. Dezember 2010 (31. Dezember 2009: 2 121 Mio Euro) sind nicht berücksichtigt. Weitere Informationen finden sich unter Anmerkung 25 im Konzernanhang.

<sup>3</sup> Beträge aus 2009 wurden angepasst, um eine Änderung der Bilanzierungs- und Bewertungsmethode des Allianz Konzerns zu berücksichtigen. Weitere Informationen finden sich unter Anmerkung 4 im Konzernanhang.

<sup>4</sup> Enthält Wechselkurseffekte.

## Bilanzsumme und gesamtes Fremdkapital

In den folgenden Abschnitten zeigen wir die Anlagestruktur für unser Versicherungsportfolio und kommentieren wichtige Bilanzentwicklungen in der Schaden- und Unfallversicherung, der Lebens- und Krankenversicherung, im Asset Management sowie im Segment Corporate und Sonstiges.

Zum 31. Dezember 2010 belief sich die Bilanzsumme auf 624,9 Milliarden Euro; das gesamte Fremdkapital betrug 578,4 Milliarden Euro. Im Vergleich zum Jahresende 2009 stiegen die Bilanzsumme um 41,2 Milliarden Euro und das gesamte Fremdkapital um 36,9 Milliarden Euro.

## Marktumfeld unterschiedlicher Anlageklassen

Die **Aktienmärkte** erwiesen sich 2010 als volatil. Das erste Halbjahr 2010 war durch eine Seitwärtsbewegung gekennzeichnet. Mit der Erholung der Weltwirtschaft und gestützt von günstigen Gewinnprognosen, legten fast alle wichtigen Aktienmärkte im zweiten Halbjahr zu und beendeten das Jahr im Plus.

### Entwicklung der Zinssätze und Credit Spreads

in %

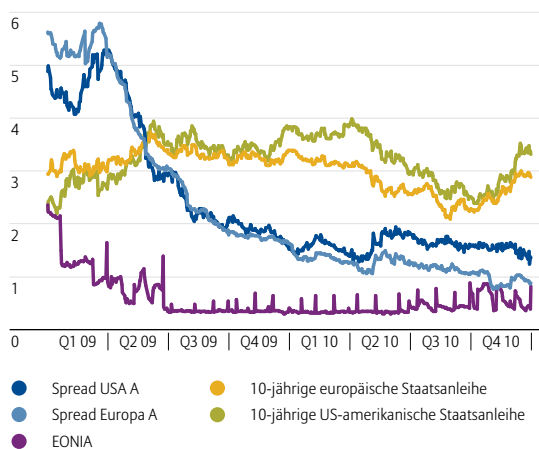

Die zehnjährigen **Zinssätze** auf Staatsanleihen der größten Industrieländer entwickelten sich in den ersten neun Monaten 2010 rückläufig. Erst im vierten Quartal kehrte sich dieser Trend um, nachdem es erste Anzeichen einer wirtschaftlichen Erholung gab. Insgesamt verharrten die Zinsen während des gesamten Jahres auf einem niedrigen Niveau, das sogar unter dem von 2009 lag; dadurch gerieten Zinserträge und ähnliche Erträge unter Druck.

Die Risikoaufschläge (**Credit Spreads**) verringerten sich 2010 weiter, doch weniger stark als im Vorjahr.

## Struktur der Kapitalanlagen: Portfolioübersicht

Das Anlageportfolio der Allianz Gruppe stammt in erster Linie aus unserem Kerngeschäft mit Versicherungen. Die folgende Portfoliostruktur gibt die Versicherungssegmente sowie das Segment Corporate und Sonstiges wieder.

### Portfoliostruktur<sup>1</sup>

in %

Portfolio Allianz Gruppe zum 31. Dezember 2010: 444,9 Milliarden Euro (zum 31. Dezember 2009: 408,7 Milliarden Euro)

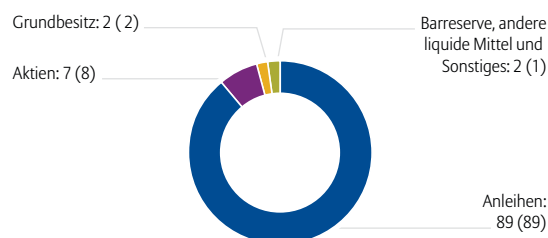

Das Anlageportfolio der Gruppe wuchs im Vergleich zum Jahresende 2009 um 36,2 Milliarden Euro. Dieser Anstieg war vornehmlich den Mittelzuflüssen aus unserem Kerngeschäft, besonders aus der Lebens- und Krankenversicherung, zuzuschreiben und wurde durch die Marktentwicklung weiter gestützt.

Unser Bruttoengagement in **Aktien** erhöhte sich von 30,6 Milliarden Euro auf 33,0 Milliarden Euro aufgrund der günstigen Marktentwicklung, die durch den Abbau von Aktienpositionen leicht abgeschwächt

<sup>1</sup> ohne unser Bankgeschäft

wurde. Unser Equity Gearing blieb unverändert bei 0,4, und zwar nach Überschussbeteiligung der Versicherungskunden und nach Absicherungsgeschäften. Bei diesem Wert wird das dem Eigenkapitalgeber zurechenbare Investitionsvolumen in Aktien ins Verhältnis zum Eigenkapital plus außerbilanziellen Reserven nach Goodwill gesetzt.

Der größte Anteil unseres Anlagenportfolios besteht aus **Rentenprodukten**. Unsere Investitionen in dieser Anlagenklasse stiegen von 364,8 Milliarden Euro auf 395,6 Milliarden Euro, hauptsächlich infolge von Nettomittelzuflüssen, insbesondere aus der Lebensversicherung.

In dieser Anlageklasse sind mehr als 60 Prozent unseres gut diversifizierten Engagements in Staatsanleihen und Pfandbriefe investiert. Rund 94 Prozent des Portfolios sind in Anleihen und Darlehen mit Investment Grade angelegt. 65 Prozent unseres Rentenportfolios sind im Einklang mit unserem Geschäftsprofil in Anleihen aus der Eurozone angelegt.

Im Verlauf der letzten Quartale weiteten sich in einigen europäischen Ländern wie Portugal, Irland, Griechenland und Spanien die Credit Spreads aus, weil die Unsicherheit hinsichtlich der Solvabilität dieser Staaten anstieg. Die gemeinsamen Unterstützungsmaßnahmen der EU-Mitgliedstaaten und des Internationalen Währungsfonds trugen zur finanziellen Stabilisierung der betroffenen Länder bei. Zum 31. Dezember 2010 betrug unser Engagement (brutto) in Staatsanleihen aus Portugal, Irland, Griechenland und Spanien 8,1 Milliarden Euro. Die derzeit nichtrealisierten Verluste auf Staatsanleihen dieser Staaten beliefen sich zum 31. Dezember 2010 auf 1,1 Milliarden Euro.

Fast 60 Prozent der Pfandbriefe sind deutsche Pfandbriefe, die entweder durch Darlehen an die öffentliche Hand oder durch Hypothekendarlehen gesichert sind. Diese und alle anderen Pfandbriefe unterliegen Mindestanforderungen an die Risikoabsicherung, und zwar durch eine vorgegebene Beleihungsgrenze für das zugrunde liegende Objekt sowie zusätzlich durch eine freiwillige Überdeckung. Damit stellen sie einen wesentlichen Sicherheitspuffer für sinkende Immobilienpreise und Zahlungsausfälle dar.

Unser Portfolio umfasst ABS-Papiere im Wert von 20,2 Milliarden Euro. Bei etwa 25 Prozent oder 5,1 Milliarden Euro unserer ABS-Papiere handelt es sich um Agency-MBS, die von der US-Regierung gestützt werden.

Unser Engagement in nachrangig besicherten Anleihen aus dem Bankensektor bezifferte sich auf 10,6 Milliarden Euro. Der Tier-1-Anteil ist mit 0,5 Prozent unseres Gesamtengagements in festverzinslichen Wertpapieren nach wie vor gering.

Unser Engagement in **Immobilienanlagen** nahm um 16,0 Prozent auf 8,7 Milliarden Euro zu.

## Anlageergebnis

### Nettoanlageergebnis

| Zum 31. Dezember                                                                                  | Gruppe        |               |                |
|---------------------------------------------------------------------------------------------------|---------------|---------------|----------------|
|                                                                                                   | 2010<br>Mio € | 2009<br>Mio € | Delta<br>Mio € |
| Zinserträge und ähnliche Erträge <sup>1</sup>                                                     | 18 906        | 17 654        | 1 252          |
| Erträge (netto) aus erfolgswirksam zum Zeitwert bewerteten Finanzaktiva und Finanzpassiva (netto) | – 38          | 874           | – 912          |
| Realisierte Gewinne/Verluste (netto)                                                              | 3 708         | 3 416         | 292            |
| Wertminderungen auf Finanzanlagen (netto)                                                         | – 844         | – 2 732       | 1 888          |
| Aufwendungen für Finanzanlagen                                                                    | – 827         | – 755         | – 72           |
| <b>Nettoanlageergebnis</b>                                                                        | <b>20 905</b> | <b>18 457</b> | <b>2 448</b>   |

Das **Nettoanlageergebnis** wuchs um 13,3 Prozent auf 20 905 Millionen Euro, weil der Kapitalanlagenbestand, vor allem in der Lebens- und Krankenversicherung, anstieg und weil die Wertminderungen bei Aktienanlagen geringer als im Vorjahr waren. Diese Effekte wurden dadurch abgeschwächt, dass unsere Ergebnisse der Fair-Value-Optionen und des Handelsgeschäfts niedriger als im Vorjahr ausfielen.

<sup>1</sup> bereinigt um Zinsaufwendungen (ohne Zinsaufwendungen für externe Fremdfinanzierung)

Die **Zinserträge und ähnlichen Erträge**<sup>1</sup> erhöhten sich um 1 252 Millionen Euro auf 18 906 Millionen Euro, vornehmlich aufgrund der höheren Erträge aus festverzinslichen Wertpapieren. Der größere Bestand an festverzinslichen Anlagen, vorwiegend in der Lebens- und Krankenversicherung, konnte die niedrigeren Renditen auf festverzinsliche Wertpapiere mehr als ausgleichen.

Die **Erträge aus erfolgswirksam zum Zeitwert bewerteten Finanzaktiva und -passiva (netto)** gingen um 912 Millionen Euro auf minus 38 Millionen Euro zurück. Wir verzeichneten im Vorjahr vorteilhafte Effekte zum einen aus geringeren Credit Spreads in der US-Lebens- und Krankenversicherung, zum anderen durch eine günstige Aktienmarktentwicklung in unserem Geschäftsbereich in Frankreich.

Die **realisierten Gewinne und Verluste (netto)** stiegen um 292 Millionen Euro auf 3 708 Millionen Euro. Realisierte Gewinne aus Anleihen profitierten von einem unverändert niedrigen Zinsniveau und trugen 277 Millionen Euro zum Plus bei. Realisierte Gewinne und Verluste aus Aktien- und Immobilienanlagen blieben auf dem Vorjahresniveau. Eine unserer größten Transaktionen war der Verkauf einer weiteren Tranche von ICBC-Aktien, die mit 1,0 Milliarden Euro zu Buche schlug. Im Vorjahr hatten wir bei der Veräußerung von ICBC-Anteilen einen Gewinn von 0,7 Milliarden Euro verbucht.

Die **Wertminderungen (netto)** nahmen um 1 888 Millionen Euro auf 844 Millionen Euro ab. Im ersten Quartal 2009 hatten wir bei unseren Aktienanlagen erhebliche Wertminderungen verzeichnet. 2010 bezogen sich die Wertminderungen hauptsächlich auf Aktienanlagen im Bankensektor.

## Vermögenslage und Fremdkapital Schaden- und Unfallversicherung

### Kapitalanlagen Schaden- und Unfallversicherung

Die Kapitalanlagen in der Schaden- und Unfallversicherung stiegen um 5,1 Milliarden Euro auf 97,3 Milliarden Euro, in erster Linie wegen des Zuwachses bei den festverzinslichen Wertpapieren um 2,4 Milliarden Euro. Dieser war auf günstige Wechselkurseffekte und Nettomittelzuflüsse zurückzuführen. Die Aktienanlagen profitierten von der Marktentwicklung und legten um 0,4 Milliarden Euro auf 5,4 Milliarden Euro zu. Unsere Barreserven und anderen liquiden Mittel erhöhten sich leicht auf 5,3 Milliarden Euro.

### Zusammensetzung Kapitalanlagen

Zeitwerte<sup>2</sup>

| Zum 31. Dezember                                                       | 2010<br>Mrd € | 2009<br>Mrd € |
|------------------------------------------------------------------------|---------------|---------------|
| <b>Erfolgswirksam zum Zeitwert bewertete Finanzaktiva und -passiva</b> |               |               |
| Aktien                                                                 | 0,2           | 0,2           |
| Festverzinsliche Wertpapiere                                           | 1,5           | 1,7           |
| Sonstiges <sup>3</sup>                                                 | 0,1           | 0,1           |
| <b>Zwischensumme</b>                                                   | <b>1,8</b>    | <b>2,0</b>    |
| <b>Finanzanlagen<sup>4</sup></b>                                       |               |               |
| Aktien                                                                 | 5,4           | 5,0           |
| Festverzinsliche Wertpapiere                                           | 60,4          | 58,0          |
| Barreserve und andere liquide Mittel <sup>5</sup>                      | 5,3           | 4,4           |
| Sonstiges                                                              | 6,7           | 6,5           |
| <b>Zwischensumme</b>                                                   | <b>77,8</b>   | <b>73,9</b>   |
| <b>Forderungen an Kreditinstitute und Kunden</b>                       | <b>17,7</b>   | <b>16,3</b>   |
| <b>Kapitalanlagen Schaden- und Unfallversicherung</b>                  | <b>97,3</b>   | <b>92,2</b>   |

2 Forderungen an Kreditinstitute und Kunden, bis zur Endfälligkeit gehaltene Wertpapiere und fremdgenutzter Grundbesitz sind zu fortgeführten Anschaffungskosten berücksichtigt. Anteile an assoziierten Unternehmen und Gemeinschaftsunternehmen sind, abhängig unter anderem von unserer Anteilshöhe, entweder zu fortgeführten Anschaffungskosten oder mit dem anteiligen Eigenkapital berücksichtigt.

3 Enthält Kapitalanlagen von 0,2 Mrd € zum 31. Dezember 2010 (31. Dezember 2009: 0,2 Mrd €) sowie Verbindlichkeiten von – 0,1 Mrd € zum 31. Dezember 2010 (31. Dezember 2009: – 0,1 Mrd €).

4 Anteile an verbundenen Unternehmen von 10,3 Mrd € zum 31. Dezember 2010 (31. Dezember 2009: 10,9 Mrd €) sind nicht berücksichtigt.

5 Enthält Barreserven und andere liquide Mittel, wie in der Konzernbilanz gegliedert nach Geschäftsbereichen ausgewiesen, in Höhe von 2,5 Mrd € zum 31. Dezember 2010 (31. Dezember 2009: 2,3 Mrd €) und Forderungen aus dem Cashpooling in Höhe von 3,0 Mrd € zum 31. Dezember 2010 (31. Dezember 2009: 2,1 Mrd €), bereinigt um erhaltene Sicherheiten für Wertpapierleihgeschäfte und Derivate in Höhe von – 0,2 Mrd € zum 31. Dezember 2010 (31. Dezember 2009: 0,001 Mrd €).

1 bereinigt um Zinsaufwendungen (ohne Zinsaufwendungen für externe Fremdfinanzierung)



Zum 31. Dezember 2010 entsprach der Wert der Asset-Backed Securities (ABS) in der Schaden- und Unfallversicherung 4,3 Milliarden Euro. Das entspricht einem Anteil von rund 4,4 Prozent an unserem Kapitalanlagenbestand. Davon entfielen auf Colateralized Debt Obligations (CDO) nur 47 Millionen Euro.

### Fremdkapital Schaden- und Unfallversicherung

#### Entwicklung der Rückstellungen für noch nicht abgewinkelte Versicherungsfälle<sup>1</sup>

in Mrd €

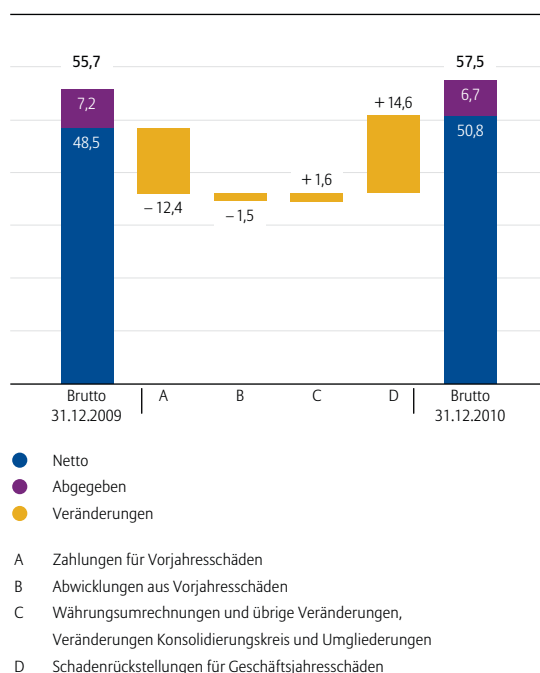

Zum 31. Dezember 2010 erhöhten sich die Bruttorekstellungen für noch nicht abgewinkelte Versicherungsfälle um 3,2 Prozent auf 57,5 Milliarden Euro. Die Nettorückstellungen nahmen um 4,7 Prozent auf 50,8 Milliarden Euro zu. Effekte aus Währungsumrechnungen und übrigen Veränderungen trugen 1,6 Milliarden Euro zum Zuwachs bei.

## Vermögenslage und Fremdkapital Lebens- und Krankenversicherung

### Kapitalanlagen Lebens- und Krankenversicherung

Unsere Kapitalanlagen in der Lebens- und Krankenversicherung wuchsen um 9,5 Prozent auf 417,6 Milliarden Euro. Davon entfielen 64,8 Milliarden Euro auf fondsgebundene Verträge, die 7,8 Milliarden Euro zum Gesamtanstieg beisteuerten. Ohne die fondsgebundenen Verträge stiegen die festverzinslichen Anlagen deutlich von 182,5 Milliarden Euro auf 212,8 Milliarden Euro, bedingt durch hohe Nettomittelzuflüsse in der Lebensversicherung. Unsere Aktienanlagen erhöhten sich, gestützt durch die positive Marktentwicklung, um 3,5 Milliarden Euro auf 24,4 Milliarden Euro. Die Barreserven und die anderen liquiden Mittel nahmen um 1,4 Milliarden Euro auf 7,4 Milliarden Euro zu.

In Verbindung mit der Änderung der Bilanzierungs- und Bewertungsmethode verkaufte die Allianz Gruppe ein Portfolio, welches erfolgswirksam zum Zeitwert bewertet wurde. Dieses war zuvor zur Verringerung der Zinsvolatilität der eingebetteten Derivate gehalten worden. Dieses Portfolio hatte zum 31. Dezember 2009 einen Zeitwert von rund 3,5 Milliarden Euro. Es wurde zum Jahresultimo vollständig aufgelöst und in jederzeit veräußerbare Anleihen reinvestiert.

<sup>1</sup> Nach Gruppen Konsolidierung. Weitere Informationen über die Veränderung der Rückstellungen für noch nicht abgewinkelte Versicherungsfälle im Schaden- und Unfallsegment finden sich unter Anmerkung 19 im Konzernanhang.

## Zusammensetzung Kapitalanlagen

Zeitwerte

| Zum 31. Dezember                                                       | 2010<br>Mrd € | 2009<br>Mrd € |
|------------------------------------------------------------------------|---------------|---------------|
| <b>Erfolgswirksam zum Zeitwert bewertete Finanzaktiva und -passiva</b> |               |               |
| Aktien                                                                 | 2,7           | 2,8           |
| Festverzinsliche Wertpapiere                                           | 3,2           | 7,3           |
| Sonstiges <sup>1,2</sup>                                               | – 3,9         | – 3,5         |
| <b>Zwischensumme</b>                                                   | <b>2,0</b>    | <b>6,6</b>    |
| <b>Finanzanlagen<sup>3</sup></b>                                       |               |               |
| Aktien                                                                 | 24,4          | 20,9          |
| Festverzinsliche Wertpapiere                                           | 212,8         | 182,5         |
| Barreserve und andere liquide Mittel <sup>4</sup>                      | 7,4           | 6,0           |
| Sonstiges                                                              | 8,8           | 7,9           |
| <b>Zwischensumme</b>                                                   | <b>253,4</b>  | <b>217,3</b>  |
| <b>Forderungen an Kreditinstitute und Kunden</b>                       | <b>97,4</b>   | <b>100,3</b>  |
| <b>Finanzaktiva aus fondsgebundenen Verträgen<sup>5</sup></b>          | <b>64,8</b>   | <b>57,0</b>   |
| <b>Kapitalanlagen Lebens- und Krankenversicherung</b>                  | <b>417,6</b>  | <b>381,2</b>  |

Zum 31. Dezember 2010 enthielt der Anlagenbestand in der Lebens- und Krankenversicherung ABS-Wertpapiere im Wert von 15,2 Milliarden Euro. Das sind weniger als 4 Prozent der gesamten Segmentkapitalanlagen. Auf CDO entfielen 1,0 Milliarden Euro.

## Finanzaktiva aus fondsgebundenen Verträgen

in Mrd €

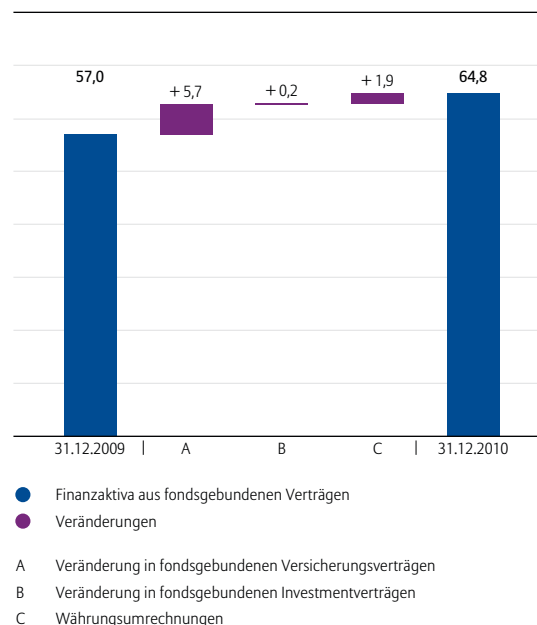

Die Finanzaktiva aus fondsgebundenen Verträgen stiegen um 7,8 auf 64,8 Milliarden Euro. Fondsgebundene Versicherungsverträge legten aufgrund guter Anlageentwicklung sowie Prämienzuflüssen, welche die Abflüsse um 5,2 Milliarden Euro überstiegen, um 5,7 Milliarden Euro zu. Unsere Gesellschaften in den USA und Japan trugen mit 2,5 bzw. 1,1 Milliarden Euro einen Großteil zu diesem Wachstum bei. Fondsgebundene Investmentverträge erhöhten sich um 0,2 Milliarden Euro, hauptsächlich dank der Geschäftsentwicklung in Taiwan.

Die Wechselkurseffekte waren vorwiegend die Folge eines höher notierten US-Dollars und stärkerer asiatischer Währungen.

- 1 Beträge aus 2009 wurden angepasst, um eine Änderung der Bilanzierungs- und Bewertungsmethode des Allianz Konzerns zu berücksichtigen. Weitere Informationen finden sich unter Anmerkung 4 im Konzernanhang.
- 2 Enthält Kapitalanlagen von 1,0 Mrd € zum 31. Dezember 2010 (31. Dezember 2009: 1,2 Mrd €) und Verbindlichkeiten von –4,9 Mrd € zum 31. Dezember 2010 (31. Dezember 2009: – 4,7 Mrd €).
- 3 Anteile an verbundenen Unternehmen von 1,6 Mrd € zum 31. Dezember 2010 (31. Dezember 2009: 1,8 Mrd €) sind nicht berücksichtigt.
- 4 Enthält Barreserven und andere liquide Mittel, wie in der Konzernbilanz gegliedert nach Geschäftsbereichen ausgewiesen, in Höhe von 4,4 Mrd € zum 31. Dezember 2010 (31. Dezember 2009: 2,5 Mrd €) und Forderungen aus dem Cashpooling in Höhe von 3,3 Mrd € zum 31. Dezember 2010 (31. Dezember 2009: 3,5 Mrd €), bereinigt um erhaltene Sicherheiten für Wertpapierleihgeschäfte und Derivate in Höhe von – 0,3 Mrd € zum 31. Dezember 2010 (31. Dezember 2009: 0,04 Mrd €).
- 5 Stellen Kapitalanlagen dar, die Versicherungsnehmern der Allianz Gruppe gehören und in ihrem Namen verwaltet werden; sämtliche Wertänderungen dieser Kapitalanlagen werden den Versicherungsnehmern zugeordnet. Daher stimmt ihr Wert in unserer Bilanz mit demjenigen der Finanzpassiva aus fondsgebundenen Verträgen überein.

## Fremdkapital Lebens- und Krankenversicherung Entwicklung der Rückstellungen für Versicherungs- und Investmentverträge

in Mrd €

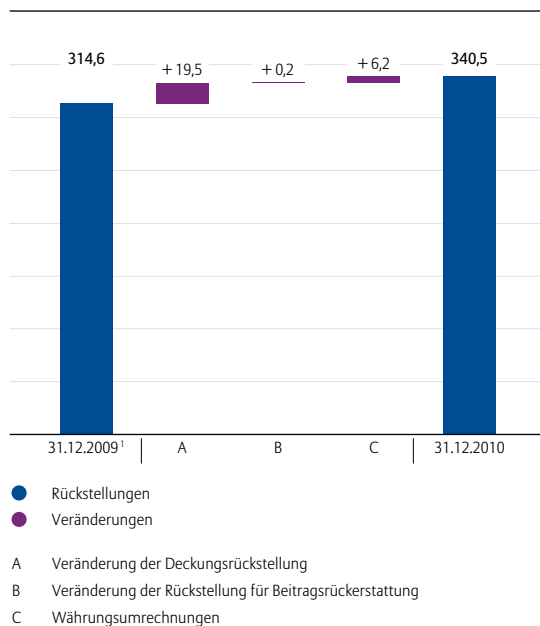

Die Rückstellungen für Versicherungs- und Investmentverträge der Lebens- und Krankenversicherung wuchsen um 25,9 Milliarden Euro oder 8 Prozent. Davon waren 19,5 Milliarden Euro auf Kapitalmarktentwicklungen und höhere Nettomittelzuflüsse zurückzuführen, die zu höheren Deckungsrückstellungen führten. Die größten Beiträge leisteten unsere Einheiten in Deutschland, den USA, Italien und Frankreich. Die Rückstellungen für Beitragsrückerstattungen blieben unverändert bei 23,8 Milliarden Euro.

Die Wechselkurseffekte sind vor allem auf die Entwicklung des US-Dollars, der asiatischen Währungen und des Schweizer Frankens zurückzuführen.

## Vermögenslage und Fremdkapital Asset Management

### Vermögenswerte Asset Management

Das Asset-Management-Ergebnis wird im Wesentlichen durch das Geschäftsvolumen der Vermögensverwaltung für Dritte bestimmt.<sup>2</sup> In diesem Abschnitt zeigen wir indes unsere eigenen Vermögenswerte.

Der Kapitalanlagenbestand umfasst in erster Linie Barreserven, andere liquide Mittel und festverzinsliche Wertpapiere. Die Kapitalanlagen stiegen um 0,3 Milliarden Euro auf 3,3 Milliarden Euro.

### Fremdkapital Asset Management

Die Verbindlichkeiten erhöhten sich um 2,2 Prozent auf 4,3 Milliarden Euro, weil insbesondere die Verbindlichkeiten gegenüber Kreditinstituten und Kunden anwuchsen.

## Vermögenslage und Fremdkapital Segment Corporate und Sonstiges

### Kapitalanlagen Segment Corporate und Sonstiges

Unsere Kapitalanlagen im Segment Corporate und Sonstiges verringerten sich um 3,2 Prozent auf 39,1 Milliarden Euro. Die größte Bewegung ergab sich bei den Forderungen an Kreditinstitute und Kunden; diese schrumpften um 4,3 Milliarden Euro auf 16,4 Milliarden Euro wegen Darlehensrückzahlungen und eines Rückgangs von Reverse-Repo-Geschäften. Außerdem minderten sich unsere Aktienanlagen um 1,5 Milliarden Euro, besonders wegen des Verkaufs von ICBC-Aktien. Die Anlagen in festverzinsliche Wertpapiere wuchsen infolge einer Umschichtung in unserem Portfolio um 4,0 Milliarden Euro.

<sup>1</sup> Beträge aus 2009 wurden angepasst, um eine Änderung der Bilanzierungs- und Bewertungsmethode des Allianz Konzerns zu berücksichtigen. Weitere Informationen finden sich unter Anmerkung 4 im Konzernanhang.

<sup>2</sup> Weitere Informationen zur Entwicklung der Vermögenswerte für Dritte finden sich auf Seite 91.

## Zusammensetzung Kapitalanlagen

Zeitwerte

| Zum 31. Dezember                                                       | 2010<br>Mrd € | 2009<br>Mrd € |
|------------------------------------------------------------------------|---------------|---------------|
| <b>Erfolgswirksam zum Zeitwert bewertete Finanzaktiva und -passiva</b> |               |               |
| Aktien                                                                 | 0,1           | 0,0           |
| Festverzinsliche Wertpapiere                                           | 0,2           | 0,1           |
| Sonstiges <sup>1</sup>                                                 | 0,0           | 0,0           |
| <b>Zwischensumme</b>                                                   | <b>0,3</b>    | <b>0,1</b>    |
| <b>Finanzanlagen<sup>2</sup></b>                                       |               |               |
| Aktien                                                                 | 3,3           | 4,8           |
| Festverzinsliche Wertpapiere                                           | 17,3          | 13,3          |
| Barreserve und andere liquide Mittel <sup>3</sup>                      | 1,6           | 1,3           |
| Sonstiges                                                              | 0,2           | 0,2           |
| <b>Zwischensumme</b>                                                   | <b>22,4</b>   | <b>19,6</b>   |
| Forderungen an Kreditinstitute und Kunden                              | 16,4          | 20,7          |
| <b>Kapitalanlagen Corporate und Sonstiges</b>                          | <b>39,1</b>   | <b>40,4</b>   |

Der Wert von ABS betrug zum 31. Dezember 0,7 Milliarden Euro. Das sind rund 1,9 Prozent der Segmentkapitalanlagen.

### Fremdkapital Segment Corporate und Sonstiges

Unsere Verbindlichkeiten gegenüber Kreditinstituten und Kunden fielen, jeweils zum 31. Dezember, von 21,2 Milliarden im Vorjahr auf 20,5 Milliarden Euro, weil Verbindlichkeiten und Repo-Geschäfte mit unseren Bankeinheiten zurückgingen.

Die sonstigen Verbindlichkeiten sanken um 0,8 Milliarden Euro auf 15,3 Milliarden Euro. Verbindlichkeiten, die als zur Veräußerung gehalten klassifiziert sind, betrugen 0,2 Milliarden Euro und stammen von unserem polnischen Bankgeschäft.

Die verbrieften Verbindlichkeiten wuchsen von 14,1 Milliarden Euro auf 14,4 Milliarden Euro und waren vornehmlich auf einen Anstieg der Emissionen der Allianz SE<sup>4</sup> um 0,3 Milliarden Euro zurückzuführen.

## Nicht in der Bilanz erfasste Geschäfte

Im Rahmen ihrer normalen Aktivitäten kann die Allianz Gruppe auch Geschäfte abschließen, die nach den IFRS-Regeln nicht als Aktiva und Passiva in der Konzernbilanz erfasst werden. Da außerbilanzielle Geschäfte keine wesentliche Ertragsquelle für die Allianz Gruppe darstellen, ist unser Verlustrisiko aufgrund solcher Geschäfte im Vergleich zu unserer Vermögens- und Finanzlage sehr gering.

Die Allianz Gruppe geht verschiedene Verpflichtungen ein: Darlehensverpflichtungen, Verpflichtungen aus Leasinggeschäften, Zahlungsverpflichtungen und sonstige Verpflichtungen. Detaillierte Informationen hierzu finden sich unter Anmerkung 47 des Konzernanhangs.

Die Allianz Gruppe ist außerdem an vier Zweckgesellschaften beteiligt. Detaillierte Informationen über diese Investments finden sich unter der Anmerkung 5, Informationen zu unseren CDO finden sich unter Anmerkung 45 des Konzernanhangs.

Für Informationen zu den größten Risikokonzentrationen und zu anderen wesentlichen Risikopositionen verweisen wir auf den Risikobericht.

<sup>1</sup> Enthält Kapitalanlagen von 0,5 Mrd € zum 31. Dezember 2010 (31. Dezember 2009: 0,5 Mrd €) und Verbindlichkeiten von – 0,5 Mrd € zum 31. Dezember 2010 (31. Dezember 2009: – 0,5 Mrd €).

<sup>2</sup> Anteile an verbundenen Unternehmen von 69,2 Mrd € zum 31. Dezember 2010 (31. Dezember 2009: 67,5 Mrd €) sind nicht berücksichtigt.

<sup>3</sup> Enthält Barreserven und andere liquide Mittel, wie in der Konzernbilanz gegliedert nach Geschäftsbereichen ausgewiesen, in Höhe von 1,1 Mrd € zum 31. Dezember 2010 (31. Dezember 2009: 1,1 Mrd €) und Forderungen aus dem Cashpooling in Höhe von 0,5 Mrd € zum 31. Dezember 2010 (31. Dezember 2009: 0,2 Mrd €), bereinigt um erhaltene Sicherheiten für Wertpapierleihgeschäfte und Derivate in Höhe von 0 Mrd € zum 31. Dezember 2010 (31. Dezember 2009: 0 Mrd €).

<sup>4</sup> Weitere Informationen über die Emissionen der Allianz SE zum 31. Dezember 2010 finden sich unter den Anmerkungen 23 und 24 im Konzernanhang.

# Liquidität und Finanzierung

## Organisation

Das Liquiditätsmanagement der Allianz Gruppe beruht auf vom Vorstand der Allianz SE genehmigten Regeln und Richtlinien. Die Liquiditätssteuerung der Allianz SE beziehungsweise ihrer Tochtergesellschaften erfolgt grundsätzlich zunächst vor Ort in Abhängigkeit von den Anforderungen des jeweiligen Geschäftsmodells. Zusätzlich übernimmt die Allianz SE die Koordinierung der Liquiditäts- und Kapitalströme für die Gruppe ebenso wie das zentrale Liquiditätspooling. Dadurch lassen sich sowohl Liquidität als auch Kapital effizient in der Gruppe einsetzen. So ist gewährleistet, dass sowohl auf Gruppenebene als auch bei den einzelnen operativen Einheiten die jeweils gewünschte Liquiditäts- und Kapitalausstattung gegeben ist.

## Liquiditätsmanagement unserer Operativen Einheiten

### Versicherung

Die Haupteinnahmequellen unserer laufenden Geschäftstätigkeit sind die eingenommenen Beiträge für Erst- und Rückversicherungen, Zahlungen aufgrund von Rückversicherungsforderungen sowie Erträge aus Anlagen und Erlöse aus dem Verkauf von Kapitalanlagen. Die Mittel werden hauptsächlich für folgende Vorgänge verwendet: Bezahlung von Ansprüchen aus der Schaden- und Unfallversicherung sowie Ausgaben für ähnliche Ansprüche, Zahlung von Leistungen aus Lebensversicherungen sowie Deckung von Rückkauf- und Kündigungsaufwendungen, ferner für Abschlussaufwendungen und sonstige Betriebskosten.

Einen erheblichen Kapitalfluss generieren wir dadurch, dass die meisten Beiträge bei uns eingehen, bevor die Zahlung von Ansprüchen oder Leistungen erforderlich ist; dies ermöglicht es uns, diese Mittel in der Zwischenzeit gewinnbringend zu investieren.

Unser Versicherungsgeschäft hält außerdem einen hohen Anteil liquider Anlagen, die unter normalen Marktbedingungen für die Zahlung von Schadenansprüchen in Barmittel umgewandelt werden können.

Unsere Gesamtliquidität wird beeinflusst von Faktoren wie der Aktienmarktentwicklung, dem Zinsumfeld und den Möglichkeiten zur Realisierung des Buchwerts unserer Anlageportfolios, damit wir fällige Versicherungsansprüche und Leistungen an die Versicherungskunden erfüllen können. Darüber hinaus wird die Liquiditätslage unserer Schaden- und Unfallversicherung durch Faktoren wie Zeitpunkt, Häufigkeit und Ausmaß der versicherten Schäden sowie durch die Anzahl der Verlängerungen von Versicherungsverträgen beeinflusst. Der Liquiditätsbedarf unserer Lebensversicherung richtet sich im Allgemeinen nach der Entwicklung der tatsächlichen Sterblichkeit und des Kündigungsverhaltens der Kunden im Vergleich zu den entsprechenden Annahmen, die der Preisgestaltung unserer Lebensversicherungsverträge zugrunde liegen. Außerdem richtet er sich nach der Höhe der Gutschriften oder Mindestverzinsungen für unsere Lebensversicherungsprodukte sowie nach der Anzahl der Rückkäufe und der Kündigungen.

### Asset Management

Die Haupteinnahmequellen sind die Provisionserträge für unsere Tätigkeit auf diesem Gebiet. Sie werden in erster Linie für die operativen Aufwendungen verwendet.

### Bankgeschäft

Hier sind die wichtigsten Liquiditätsquellen unter anderem Kundeneinlagen, Interbankenkredite sowie Zinserträge und ähnliche Erträge aus unseren Kreditvergaben. Diese Mittel werden vornehmlich für Anlagen in festverzinsliche Wertpapiere und die Vergabe neuer Kredite verwendet.

Die Liquidität unseres Bankgeschäfts hängt weitestgehend davon ab, ob Privatkunden und Unternehmen in der Lage sind, ihren Zahlungsverpflichtungen aus den von uns vergebenen Krediten und ihren sonstigen ausstehenden Verpflichtungen nachzukommen. Ebenso wichtig ist es, das Volumen der Einlagen stabil zu halten.

## Liquiditätsmanagement der Allianz SE

Die Allianz SE ist dafür verantwortlich, den Liquiditätsbedarf der Allianz Gruppe zu ermitteln, den Zugang zu Finanzierungsquellen zu optimieren und gleichzeitig die Kapitalkosten möglichst gering zu halten.

### Liquiditätsausstattung und Liquiditätsnutzung

Die Allianz SE sichert ihren Tochtergesellschaften den Zugang zu geeigneten Liquiditäts- und Kapitalquellen. Die wichtigsten Liquiditätsquellen sind Dividendeneinnahmen von den Tochtergesellschaften und Kapitalzuflüsse aus Transaktionen am Kapitalmarkt. Unter Liquiditätsausstattung sind jene Vermögenswerte zu verstehen, die jederzeit verfügbar sind, also liquide Mittel, Geldmarktpapiere und Staatsanleihen, und die zur unverzüglichen Deckung kurzfristig entstehender Zahlungsverpflichtungen verwendet werden können.

Die Mittel werden vornehmlich für die Bedienung unserer Verbindlichkeiten aus Fremdkapital, für Betriebskosten, interne und externe Wachstumsinvestitionen sowie für Dividendenzahlungen an unsere Aktionäre verwendet.

### Finanzierungsquellen

Der Zugang der Allianz Gruppe zu Finanzierungsmitteln wird von verschiedenen Faktoren beeinflusst, wie Kapitalmarktbedingungen, unserem Zugang zu Bankkrediten, der Liquiditätskapazität und von unserer Bonität.

Die Finanzierungsquellen, die der Allianz SE zur Deckung des kurz- und langfristigen Finanzierungsbedarfs zur Verfügung stehen, werden nachstehend näher beschrieben. In der Regel werden zur Deckung des mittel- bis langfristigen Finanzierungsbedarfs vor- und nachrangige Anleihen oder Stammaktien ausgegeben.

### Eigenmittelausstattung

Zum 31. Dezember 2010 betrug das im Handelsregister eingetragene gezeichnete Kapital 1 163 520 000 Euro, eingeteilt in 454 500 000 vinkulierte Namensaktien. Zum 31. Dezember 2010 hielt die Allianz SE 2 832 789 (2009: 2 584 367) eigene Aktien.

Darüber hinaus hat die Allianz SE die Möglichkeit, ihre Eigenkapitalausstattung durch die Ausgabe neuer Aktien gemäß den nachstehenden Kapitalermächtigungen zu erhöhen. Die folgende Tabelle gibt Aufschluss über die zum 31. Dezember 2010 bestehenden Kapitalermächtigungen der Allianz SE.

| Kapitalermächtigung                                              | Nominalwert                                                                                                       | Fälligkeit                                                                                    |
|------------------------------------------------------------------|-------------------------------------------------------------------------------------------------------------------|-----------------------------------------------------------------------------------------------|
| Genehmigtes Kapital 2010/I                                       | 550 000 000 €<br>(214 843 750 Aktien)                                                                             | 4.5.2015                                                                                      |
| Genehmigtes Kapital 2010/II                                      | 13 464 000 €<br>(5 259 375 Aktien)                                                                                | 4.5.2015                                                                                      |
| Genehmigte Anleiheemissionen mit Wandel- und/oder Optionsrechten | 10 000 000 000 €<br>(Nennwert)                                                                                    | 4.5.2015<br>(Emission von Anleihen)                                                           |
| Bedingtes Kapital 2010                                           | 250 000 000 €<br>(97 656 250 Aktien)<br>Zum 31.12.2010 bestanden keinerlei Wandel- oder Optionsrechte dieser Art. | Bedingtes Kapital 2010 unbefristet<br>(Emission bei Ausübung von Options- oder Wandelrechten) |

### Langfristige Fremdfinanzierung

Zum 31. Dezember 2010 hatte die Allianz SE ausstehende vor- und nachrangige Anleihen mit einer breitgestreuten Fristenstruktur, die einen überwiegend langfristig orientierten Finanzierungsbedarf widerspiegelt. Kapitalmarktbedingungen allgemein, Rahmenbedingungen für die gesamte Finanzdienstleistungsbranche oder spezifisch für die Allianz können sich nachteilig auf die Finanzierungskosten und die Verfügbarkeit von Fremdkapital der Allianz SE auswirken. Wir sind jedoch bestrebt, Refinanzierungsrisiken durch die aktive Steuerung unserer Finanzierungsstruktur möglichst gering zu halten.



**Fristenstruktur der vor- und nachrangigen Anleihen der Allianz SE zum 31. Dezember 2010**

ausgewiesen zum Nominalwert in Mrd €

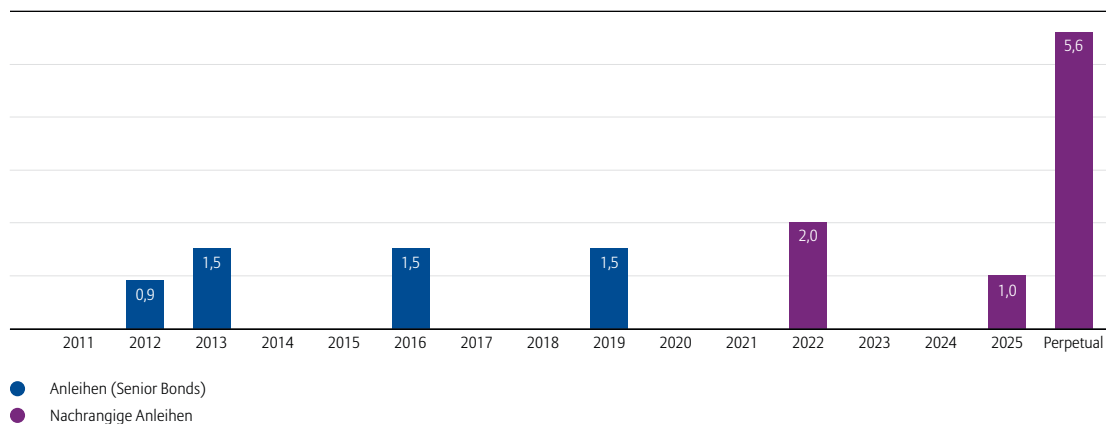

Der Zinsaufwand für vorrangige Anleihen stieg aufgrund der Ausgabe einer vorrangigen Anleihe im Volumen von 1,5 Milliarden Euro im Juli 2009 auf 262,2 Millionen Euro (2009: 220,9 Millionen Euro); für nachrangige Anleihen erhöhte sich der Zinsaufwand wegen der Aufwertung des US-Dollars im Jahr 2010 auf 543,8 Millionen Euro (2009: 525,1 Millionen Euro).

Die folgende Tabelle zeigt von der Allianz SE ausgegebene oder garantierte vor- und nachrangige Anleihen der Allianz SE:

| Zum 31. Dezember        | 2010                 |                   |                      |                                                  | 2009                 |                   |                      |                                                  |
|-------------------------|----------------------|-------------------|----------------------|--------------------------------------------------|----------------------|-------------------|----------------------|--------------------------------------------------|
|                         | Nominalwert<br>Mio € | Buchwert<br>Mio € | Zinsaufwand<br>Mio € | Durchschnittlicher<br>Zinssatz <sup>1</sup><br>% | Nominalwert<br>Mio € | Buchwert<br>Mio € | Zinsaufwand<br>Mio € | Durchschnittlicher<br>Zinssatz <sup>1</sup><br>% |
| Anleihen (Senior Bonds) | 5 400                | 5 336             | 262,2                | 4,9                                              | 5 400                | 5 330             | 220,9                | 4,1                                              |
| Nachrangige Anleihen    | 8 564                | 8 300             | 543,8                | 6,3                                              | 8 442                | 8 162             | 525,1                | 6,2                                              |
| <b>Summe</b>            | <b>13 964</b>        | <b>13 636</b>     | <b>806,0</b>         | <b>5,8</b>                                       | <b>13 842</b>        | <b>13 492</b>     | <b>746,0</b>         | <b>5,4</b>                                       |

1 auf Grundlage des Nennwerts

## Emissionen der Allianz SE zum 31. Dezember 2010<sup>1</sup>

|                                                       |                  | Zinsaufwand 2010   |
|-------------------------------------------------------|------------------|--------------------|
| <b>1. Anleihen (Senior bonds)<sup>2</sup></b>         |                  |                    |
| 5,625%-Anleihe der Allianz Finance II B.V., Amsterdam |                  |                    |
| Volumen                                               | 0,9 Mrd €        |                    |
| Ausgabejahr                                           | 2002             |                    |
| Fällig                                                | 29.11.2012       |                    |
| ISIN                                                  | XS 015 879 238 1 |                    |
| Zinsaufwand                                           |                  | 50,9 Mio €         |
| 5,0%-Anleihe der Allianz Finance II B.V., Amsterdam   |                  |                    |
| Volumen                                               | 1,5 Mrd €        |                    |
| Ausgabejahr                                           | 2008             |                    |
| Fällig                                                | 6.3.2013         |                    |
| ISIN                                                  | DE 000 A0T R7K 7 |                    |
| Zinsaufwand                                           |                  | 76,7 Mio €         |
| 4,0%-Anleihe der Allianz Finance II B.V., Amsterdam   |                  |                    |
| Volumen                                               | 1,5 Mrd €        |                    |
| Ausgabejahr                                           | 2006             |                    |
| Fällig                                                | 23.11.2016       |                    |
| ISIN                                                  | XS 027 588 026 7 |                    |
| Zinsaufwand                                           |                  | 61,8 Mio €         |
| 4,75%-Anleihe der Allianz Finance II B.V., Amsterdam  |                  |                    |
| Volumen                                               | 1,5 Mrd €        |                    |
| Ausgabejahr                                           | 2009             |                    |
| Fällig                                                | 22.7.2019        |                    |
| ISIN                                                  | DE 000 A1A KHB 8 |                    |
| Zinsaufwand                                           |                  | 72,8 Mio €         |
| <b>Summe Zinsaufwand Anleihen</b>                     |                  | <b>262,2 Mio €</b> |
| <b>2. Nachrangige Anleihen<sup>3</sup></b>            |                  |                    |
| 6,125%-Anleihe der Allianz Finance II B.V., Amsterdam |                  |                    |
| Volumen                                               | 2,0 Mrd €        |                    |
| Ausgabejahr                                           | 2002             |                    |
| Fällig                                                | 31.5.2022        |                    |
| ISIN                                                  | XS 014 888 756 4 |                    |
| Zinsaufwand                                           |                  | 117,1 Mio €        |
| 6,5%-Anleihe der Allianz Finance II B.V., Amsterdam   |                  |                    |
| Volumen                                               | 1,0 Mrd €        |                    |
| Ausgabejahr                                           | 2002             |                    |
| Fällig                                                | 13.1.2025        |                    |
| ISIN                                                  | XS 015 952 750 5 |                    |
| Zinsaufwand                                           |                  | 66,1 Mio €         |
| 7,25%-Anleihe der Allianz Finance II B.V., Amsterdam  |                  |                    |
| Volumen                                               | 0,5 Mrd USD      |                    |
| Ausgabejahr                                           | 2002             |                    |
| Fällig                                                | Perpetual Bond   |                    |
| ISIN                                                  | XS 015 915 072 0 |                    |
| Zinsaufwand                                           |                  | 28,2 Mio €         |

|                                                                    |                  | Zinsaufwand 2010   |
|--------------------------------------------------------------------|------------------|--------------------|
| 5,5%-Anleihe der Allianz SE                                        |                  |                    |
| Volumen                                                            | 1,5 Mrd €        |                    |
| Ausgabejahr                                                        | 2004             |                    |
| Fällig                                                             | Perpetual Bond   |                    |
| ISIN                                                               | XS 018 716 232 5 |                    |
| Zinsaufwand                                                        |                  | 84,5 Mio €         |
| 4,375%-Anleihe der Allianz Finance II B.V., Amsterdam              |                  |                    |
| Volumen                                                            | 1,4 Mrd €        |                    |
| Ausgabejahr                                                        | 2005             |                    |
| Fällig                                                             | Perpetual Bond   |                    |
| ISIN                                                               | XS 021 163 783 9 |                    |
| Zinsaufwand                                                        |                  | 63,2 Mio €         |
| 5,375%-Anleihe <sup>4</sup> der Allianz Finance II B.V., Amsterdam |                  |                    |
| Volumen                                                            | 0,8 Mrd €        |                    |
| Ausgabejahr                                                        | 2006             |                    |
| Fällig                                                             | Perpetual Bond   |                    |
| ISIN                                                               | DE 000 A0G NPZ 3 |                    |
| Zinsaufwand                                                        |                  | 46,5 Mio €         |
| 8,375%-Anleihe <sup>4</sup> der Allianz SE                         |                  |                    |
| Volumen                                                            | 2,0 Mrd USD      |                    |
| Ausgabejahr                                                        | 2008             |                    |
| Fällig                                                             | Perpetual Bond   |                    |
| ISIN                                                               | US 018 805 200 7 |                    |
| Zinsaufwand                                                        |                  | 138,2 Mio €        |
| <b>Summe Zinsaufwand Nachrangige Anleihen</b>                      |                  | <b>543,8 Mio €</b> |
| <b>3. 2010 ausgelaufene Emissionen</b>                             |                  |                    |
| Genussscheine der Allianz SE <sup>5</sup>                          |                  |                    |
| Volumen                                                            | 85,1 Mio €       |                    |
| ISIN                                                               | DE 000 840 405 4 |                    |
| Zinsaufwand                                                        |                  | 0,0 Mio €          |
| <b>Summe Zinsaufwand</b>                                           |                  | <b>806,0 Mio €</b> |

- Weitere Informationen über die Emissionen der Allianz SE zum 31. Dezember 2010 finden sich unter Anmerkung 23 und 24 im Konzernanhang.
- Für nicht nachrangige Schuldverschreibungen und Commercial Paper Emissionen bestehen vorzeitige Kündigungsrechte im Fall der Nichtzahlung von Zins und Hauptforderung sowie im Fall der Insolvenz. Dies gilt auch für zwei nachrangige Anleihen, die wir im Jahr 2002 emittiert haben.
- Bei den nachrangigen Schuldverschreibungen (mit Ausnahme der unter Anmerkung 2 genannten nachrangigen Schuldverschreibungen) sehen die Anleihebedingungen keine Gläubigerkündigungsrechte vor. Zinszahlungen stehen unter besonderen Bedingungen, die unter anderem auf das Ergebnis des laufenden Jahres Bezug nehmen; sie können zu einer Aussetzung vereinbarter Zinszahlungen führen. In diesen Fällen greift ein alternativer Zahlungsmechanismus, der uns die Zahlung von Zinsen aus den Erlösen der Emission definierter Instrumente erlaubt.
- Am 23. Oktober 2009 wurde die nachrangige 8,375%-Anleihe zum letzten Mal an der New Yorker Börse notiert. Sie wird nun am US-amerikanischen OTC-Markt gehandelt; die Kursinformationen können auf der Website der FINRA (U.S. Financial Industry Regulatory Authority, Inc., der US-Aufsichtsbehörde für die Finanzindustrie) eingesehen werden.
- Mit Wirkung zum 31. Dezember 2009 wurden die von der Allianz emittierten Genussscheine gemäß Abschnitt 6 § 4 der Bedingungen für Genussscheine gekündigt. Am 4. Januar 2010 erhielten die Inhaber einen Ablösungsbetrag von 103,32 € je Genussschein mit einem Nominalwert von 5,12 €. Der gesamte Rückzahlungsbetrag zum 31. Dezember 2009, der für die 1 175 554 ausstehenden Genussscheine bezahlt wurde, ist in einer separaten Position in der Bilanz ausgewiesen.

### Kurzfristige Fremdfinanzierung

Zur Deckung des kurzfristigen Finanzierungsbedarfs stehen der Allianz SE das Medium-Term-Note-Programm und das Commercial-Paper-Programm zur Verfügung.

Zum 31. Dezember 2010 belief sich der Buchwert der von der Allianz SE ausgegebenen Geldmarktpapiere auf 1 791 Millionen Euro. Damit stieg der Einsatz von Commercial Papers im Vergleich zum Vorjahr um 287 Millionen Euro. Der Zinsaufwand für Geldmarktpapiere fiel auf 13,9 Millionen Euro (2009: 31,3 Millionen Euro), was auf die im Vergleich zum Vorjahr niedrigeren Zinsen für kurzfristige Schuldtitel zurückzuführen war.

| Zum 31. Dezember        | 2010              |                           |                                          | 2009              |                           |                                          |
|-------------------------|-------------------|---------------------------|------------------------------------------|-------------------|---------------------------|------------------------------------------|
|                         | Buchwert<br>Mio € | Zins-<br>aufwand<br>Mio € | Durch-<br>schnittlicher<br>Zinssatz<br>% | Buchwert<br>Mio € | Zins-<br>aufwand<br>Mio € | Durch-<br>schnittlicher<br>Zinssatz<br>% |
| <b>Geldmarktpapiere</b> | 1 791             | 13,9                      | 0,8                                      | 1 504             | 31,3                      | 2,1                                      |

Mit A-1+/Prime-1 blieb das Rating der Gruppe für ihre kurzfristigen Emissionen stabil. Daher können wir unseren Liquiditätsbedarf im Rahmen des Euro-Commercial-Paper-Programms weiterhin mit einem im Durchschnitt unter dem Euribor liegenden Satz finanzieren. Dasselbe gilt für das USD-Commercial-Paper-Programm, wo der Satz im Durchschnitt ebenfalls unter dem US-Libor liegt.

Als weitere kurzfristige Finanzierungsquellen stehen uns Kreditlinien von Banken sowie Akkreditive zur Verfügung, die zur Optimierung der Kapitalstruktur der Allianz Gruppe genutzt werden können.

## Kapitalflussrechnung der Allianz Gruppe

### Veränderung der Finanzmittel zum 31. Dezember<sup>1</sup>

in Mio €

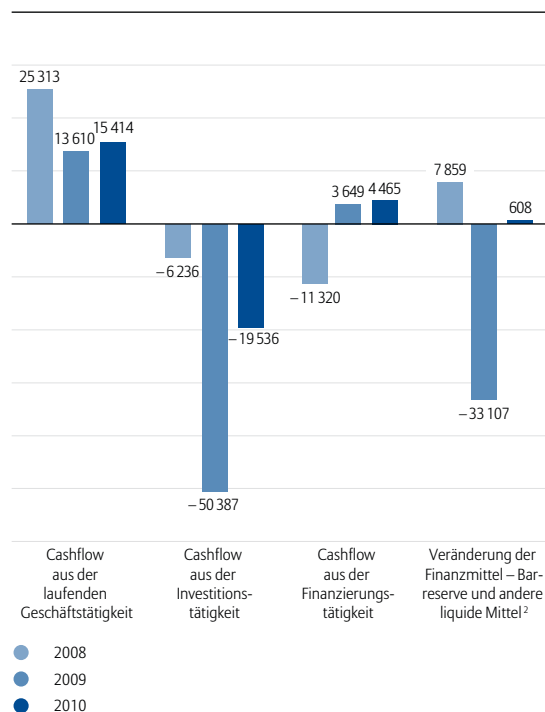

<sup>1</sup> Die Beträge vor 2010 wurden angepasst in der Absicht, eine Änderung der Bilanzierungs- und Bewertungsmethode des Allianz Konzerns zu berücksichtigen. Weitere Informationen finden sich unter Anmerkung 4 im Konzernanhang.

<sup>2</sup> Enthält Auswirkungen der Währungsumrechnung auf die Finanzmittel in Höhe von 265 Mio €, 21 Mio € bzw. 102 Mio € für die Geschäftsjahre 2010, 2009 und 2008.

Insgesamt belief sich der **Nettocashflow aus der laufenden Geschäftstätigkeit** auf 15,4 Milliarden Euro. Das entspricht im Vergleich zum Vorjahr einem Anstieg um 1,8 Milliarden Euro. Der Nettocashflow aus der laufenden Geschäftstätigkeit umfasst den Jahresüberschuss (-fehlbetrag), bereinigt um nicht liquiditätswirksame Aufwendungen, Erträge und andere Posten, die im Jahresergebnis enthalten sind, sowie die Cashflows aus der Nettoveränderung operativer Aktiva und Passiva. Der Jahresüberschuss nach Bereinigung zahlungsunwirksamer Aufwendungen, Erträge und ähnlicher Posten erhöhte sich von 7 692 Millionen Euro im Jahr 2009 um 809 Millionen Euro auf 8 501 Millionen Euro für das Jahr 2010, vor allem aufgrund des entsprechenden Anstiegs des Jahresüberschusses. Der aus der Nettoveränderung der operativen Aktiva und Passiva resultierende Anstieg der Cashflows aus der laufenden Geschäftstätigkeit um 995 Millionen Euro auf 6 913 Millionen Euro ist vor allem auf die höheren Rückstellungen für Versicherungs- und Investmentverträge aufgrund des Wachstums in der Lebens- und Krankenversicherung, insbesondere in Deutschland und Frankreich, zurückzuführen. Die Nettomittelabflüsse aus Handelsaktiva und Handelspassiva schwächten diese positiven Effekte ab.

Die **Nettomittelabflüsse aus der Investitionstätigkeit** gingen 2010 um 30,9 Milliarden Euro auf 19,5 Milliarden Euro zurück, was vor allem der Veräußerung der Dresdner Bank im Jahr 2009 zuzuschreiben ist. Der Dresdner-Bank-Verkauf an die Commerzbank führte 2009 zu Nettomittelabflüssen von 27,0 Milliarden Euro, was aus dem Abgang des Kassenbestands der Dresdner Bank von 30,2 Milliarden Euro aus der Allianz Gruppe resultierte.

Darüber hinaus verzeichneten wir 2010 höhere Nettomittelzuflüsse aus Forderungen an Kreditinstitute und Kunden, insbesondere durch die Holding-Gesellschaft und unser deutsches Lebensversicherungsgeschäft.

Diese Effekte wurden durch höhere Nettomittelabflüsse für jederzeit veräußerbare Wertpapiere, die vor allem auf das Wachstum in der Lebens- und Krankenversicherung zurückzuführen waren, teilweise ausgeglichen.

Die **Nettomittelzuflüsse aus der Finanzierungstätigkeit** beliefen sich 2010 auf 4,5 Milliarden Euro, verglichen mit 3,6 Milliarden Euro im Jahr 2009. Grund hierfür waren vor allem die niedrigeren Nettomittelabflüsse aus Refinanzierungen.<sup>1</sup> Darüber hinaus entwickelten sich die Nettomittelabflüsse aus der Auflösung externer Verbindlichkeiten gegenüber Kreditinstituten und Kunden rückläufig. Höhere Dividendenzahlungen an Aktionäre sowie die im Jahr 2010 geringfügig niedrigeren Nettomittelzuflüsse aus Einlagen/Einlagenentnahmen von Versicherungskunden glichen diese Effekte teilweise aus.

Die **Barreserven und die anderen liquiden Mittel** wuchsen um 0,6 Milliarden Euro. Bei Berücksichtigung der Umklassifizierung kurzfristiger Anlagen unserer US-amerikanischen Geschäftsbereiche erhöhten sich die Barreserven und die anderen liquiden Mittel zum 31. Dezember 2010 um 2,6 Milliarden Euro auf 8,7 Milliarden Euro.

#### Barreserve und andere liquide Mittel

| Zum 31. Dezember                                                                                                             | 2010<br>Mio € | 2009<br>Mio € |
|------------------------------------------------------------------------------------------------------------------------------|---------------|---------------|
| Täglich fällige Guthaben bei Kreditinstituten                                                                                | 5 813         | 5 243         |
| Guthaben bei Zentralnotenbanken                                                                                              | 279           | 198           |
| Kassenbestand                                                                                                                | 169           | 159           |
| Schatzwechsel, unverzinsliche Schatzanweisungen, ähnliche Schuldtitel öffentlicher Stellen, Wechsel und Schecks <sup>2</sup> | 2 486         | 489           |
| <b>Summe Barreserve und andere liquide Mittel</b>                                                                            | <b>8 747</b>  | <b>6 089</b>  |

<sup>1</sup> Bezieht sich auf Rückzahlungen von und Erlöse aus der Ausgabe von Genussrechtskapital, nachrangigen und verbrieften Verbindlichkeiten.

<sup>2</sup> Beinhaltet die Umgliederung von 2 050 Mio € aus den Forderungen an Kreditinstitute und Kunden bei den US Tochtergesellschaften.

# Überleitungen

Die vorangegangene Analyse fußt auf unserem Konzernabschluss und sollte im Zusammenhang mit diesem gelesen werden. Zusätzlich zu unseren nach den International Financial Reporting Standards (IFRS) ausgewiesenen Zahlen zieht die Allianz Gruppe das operative Ergebnis und interne Wachstumsraten heran, um das Verständnis hinsichtlich unserer Ergebnisse zu erweitern. Diese zusätzlichen Werte sind als ergänzende Angaben und nicht als Ersatz für unsere nach IFRS ausgewiesenen Zahlen zu sehen.

Weitere Informationen finden sich unter Anmerkung 6 im Konzernanhang.

## Zusammensetzung des gesamten Umsatzes

Der gesamte Umsatz umfasst die gesamten Bruttobeitrageinnahmen in der Schaden- und Unfall- sowie in der Lebens- und Krankenversicherung, die operativen Erträge aus dem Asset Management und den gesamten Umsatz aus Corporate und Sonstiges (Bankgeschäft).

## Zusammensetzung des gesamten Umsatzes

|                                                                                           | 2010<br>Mio €  | 2009<br>Mio € | 2008<br>Mio € |
|-------------------------------------------------------------------------------------------|----------------|---------------|---------------|
| <b>Schaden-Unfall</b>                                                                     |                |               |               |
| <b>Bruttobeiträge</b>                                                                     | <b>43 895</b>  | <b>42 523</b> | <b>43 387</b> |
| <b>Leben/Kranken</b>                                                                      |                |               |               |
| <b>Gesamte Beitragseinnahmen</b>                                                          | <b>57 098</b>  | <b>50 773</b> | <b>45 615</b> |
| <b>Asset Management</b>                                                                   |                |               |               |
| <b>Operative Erträge</b>                                                                  | <b>4 986</b>   | <b>3 689</b>  | <b>2 894</b>  |
| bestehend aus:                                                                            |                |               |               |
| Provisionsüberschuss                                                                      | 4 927          | 3 590         | 2 874         |
| Zinsüberschuss                                                                            | 21             | 30            | 63            |
| Erträge aus erfolgswirksam zum Zeitwert bewerteten Finanzaktiva und Finanzpassiva (netto) | 19             | 40            | – 71          |
| Sonstige Erträge                                                                          | 19             | 29            | 28            |
| <b>Corporate und Sonstiges</b>                                                            |                |               |               |
| <b>Gesamter Umsatz</b>                                                                    | <b>587</b>     | <b>517</b>    | <b>555</b>    |
| bestehend aus:                                                                            |                |               |               |
| Zinserträge und ähnliche Erträge                                                          | 683            | 708           | 989           |
| Erträge aus erfolgswirksam zum Zeitwert bewerteten Finanzaktiva und Finanzpassiva (netto) | 1              | 17            | 6             |
| Provisions- und Dienstleistungserträge                                                    | 445            | 389           | 430           |
| Zinsaufwendungen                                                                          | – 333          | – 395         | – 677         |
| Provisions- und Dienstleistungsaufwendungen                                               | – 210          | – 200         | – 193         |
| Konsolidierungseffekte (Bankgeschäft innerhalb Corporate und Sonstiges)                   | 1              | – 2           | —             |
| <b>Konsolidierung</b>                                                                     | <b>– 115</b>   | <b>– 117</b>  | <b>117</b>    |
| <b>Allianz Gruppe</b>                                                                     | <b>106 451</b> | <b>97 385</b> | <b>92 568</b> |

## Zusammensetzung des Umsatzwachstums

Wir sind zudem davon überzeugt, dass es für das Verständnis unserer Umsatzentwicklung wichtig ist, wenn wir Wechselkurseffekte sowie Effekte aus Akquisitionen und Unternehmensverkäufen (Konsolidierungseffekte) separat analysieren. Daher weisen wir zusätzlich zu unserem nominalen Umsatzwachstum auch das interne Umsatzwachstum aus, das um Wechselkurs- und Konsolidierungseffekte bereinigt ist.

### Überleitung des nominalen Umsatzwachstums auf die entsprechenden internen Raten

|                         | Internes<br>Wachstum | Konsolidierungseffekte | Wechselkurseffekte | Nominales<br>Wachstum |
|-------------------------|----------------------|------------------------|--------------------|-----------------------|
|                         | %                    | %                      | %                  | %                     |
| <b>2010</b>             |                      |                        |                    |                       |
| Schaden-Unfall          | 0,0                  | 0,0                    | 3,2                | 3,2                   |
| Leben/Kranken           | 9,6                  | 0,4                    | 2,5                | 12,5                  |
| Asset Management        | 29,7                 | – 0,2                  | 5,7                | 35,2                  |
| Corporate und Sonstiges | 13,8                 | – 0,4                  | 0,1                | 13,5                  |
| <b>Allianz Gruppe</b>   | <b>6,2</b>           | <b>0,2</b>             | <b>2,9</b>         | <b>9,3</b>            |
| <b>2009</b>             |                      |                        |                    |                       |
| Schaden-Unfall          | – 0,9                | – 0,4                  | – 0,7              | – 2,0                 |
| Leben/Kranken           | 10,3                 | 0,5                    | 0,5                | 11,3                  |
| Asset Management        | 20,2                 | 4,9                    | 2,3                | 27,4                  |
| Corporate und Sonstiges | – 7,0                | 0,0                    | 0,2                | – 6,8                 |
| <b>Allianz Gruppe</b>   | <b>5,1</b>           | <b>0,2</b>             | <b>– 0,1</b>       | <b>5,2</b>            |



## Risikobericht, Kontrollen und Verfahren

# Risikobericht

- Unser Risikomanagement ist darauf ausgerichtet, durch gezielte Abwägung von Risiken und Ertrag zur Wertschöpfung beizutragen.
- Die Allianz Gruppe ist gut kapitalisiert, und ihre Solvabilität ist belastbar.

### Gesamtrisikoprofil

Das Management der Allianz Gruppe hält das Gesamtrisikoprofil der Gruppe für angemessen und vertraut der Wirksamkeit des Risikomanagementsystems der Gruppe im Hinblick auf die schnellen Veränderungen des Umfelds und die Erfordernisse der täglichen Arbeit. Dieses Vertrauen gründet auf verschiedenen Faktoren, die in den nachstehenden Abschnitten genauer beschrieben und hier zusammengefasst sind:

Die Allianz Gruppe ist gut kapitalisiert und erfüllt zum 31. Dezember 2010 bequem ihre internen und aufsichtsrechtlichen Solvabilitätsziele. Die Allianz ist im Hinblick auf Solvabilitätsquote und Ratings eine der stärksten Versicherungsgruppen der Branche. Auch während der Finanzkrise in den Jahren 2008 und 2009 haben externe Rating-Agenturen an ihrer Bewertung der Allianz SE festgehalten. Insbesondere verfügte die Allianz SE zum 31. Dezember 2010 bei Standard & Poor's über eines der besten Ratings aller international tätigen Erstversicherungsgruppen in Europa.

Das Management der Gruppe hält die Allianz für gut positioniert, um mögliche künftige widrige Ereignisse bewältigen zu können, unter anderem auch aufgrund unseres internen Limitsystems, durch das die Auswirkungen ungünstiger Marktentwicklungen auf unsere aufsichtsrechtlich und ökonomisch vorgeschriebenen Solvabilitätsquoten beherrschbar bleiben. Das Nettorisiko der Gruppe hinsichtlich Naturkatastrophen ist ebenfalls begrenzt und entspricht unserer Risikoneigung. Das Management der Gruppe ist davon überzeugt, dass wir so ein angemessenes Gleichgewicht zwischen dem potenziellen Ertrag, Ertragschwankungen und Solvabilität erreicht haben.

Im Hinblick auf den Wettbewerb in der Versicherungsbranche verfügt die Gruppe über den zusätzlichen, wesentlichen Vorteil, international diversifiziert zu sein, mit einem konservativen Kapitalanlageprofil und disziplinierten Geschäftspraktiken in den Bereichen Schaden- und Unfallversicherung, Lebens- und Krankenversicherung wie auch im Segment Asset Management.

### Markt- und Geschäftsumfeld

Obwohl allmählich mehr Klarheit über zukünftige aufsichtsrechtliche Anforderungen („Solvency II“) herrscht, gibt es diesbezüglich noch keine abschließende Regelung. Dies bringt einen gewissen Grad der Unsicherheit im Hinblick auf endgültige Kapitalanforderungen und Auswirkungen auf das Geschäft mit sich. Es ist abzusehen, dass die Solvency-II-Regelung aufgrund der „marktgerechten“ Bewertung von Vermögenswerten und Verbindlichkeiten zu einer erhöhten Volatilität in den Kapitalanforderungen führen wird, insbesondere bei Produkten der langfristigen Vermögensbildung und Sparprodukten im Lebensversicherungsgeschäft. Produkte, Anlagestrategien und Absicherungsprogramme müssen möglicherweise branchenweit angepasst werden, um diese Volatilität zu mindern.

Je nach individueller Anlagestrategie könnte ein Anhalten der Niedrigzinsumgebung bei einigen Versicherungsunternehmen zu Herausforderungen führen, besonders bei der Erwirtschaftung ausreichender Erträge, um den Erwartungen der Versicherungsnehmer und den in ihren Lebensversicherungsprodukten enthaltenen Garantien gerecht zu werden. In einer Niedrigzinsumgebung steigt zudem die Nachfrage nach bestimmten Arten von Vermögenswerten.

Gleichzeitig sieht sich die Branche wegen des Inflationspotenzials mit der Gefahr höherer Zinssätze konfrontiert, was sie in einen gefährlichen Balanceakt im Zinsbereich bringen könnte.

Zudem herrscht auch einige Unsicherheit im Hinblick auf eine Eskalation der staatlichen Schuldenkrise in Europa.

Außerdem sehen sich die Versicherungsunternehmen dem anhaltenden Trend zum Verbraucherschutz gegenüber, speziell im Rahmen von Transparenz, Vertriebspraktiken und der Eignung für Lebensversicherungsprodukte.

In den folgenden Abschnitten geben wir einen Überblick über das Kapital- und Risikomanagementsystem der Allianz, das es der Allianz Gruppe erlaubt, Risiken effektiv zu beherrschen.

## Kapitalmanagementsystem

Im Interesse unserer Aktionäre und unserer Versicherungskunden ist es unser Ziel, dass die Allianz Gruppe jederzeit angemessen kapitalisiert ist, selbst nach einem erheblichen nachteiligen Ereignis, und dass unsere gesamten operativen Einheiten ihre jeweiligen Kapitalanforderungen erfüllen. Risikokapital und Kapitalkosten sind ein wichtiger Aspekt beim Füllen von Geschäftsentscheidungen.

Das interne Risikokapitalmodell der Allianz spielt eine wichtige Rolle im Management und bei der Zuteilung des internen Kapitals. Wir berücksichtigen darüber hinaus die externen Anforderungen der Aufsichtsbehörden und der Rating-Agenturen. Die Kapitalanforderungen der Aufsichtsbehörden sind eine bindende Auflage. Die Kapitalanforderungen der Rating-Agenturen einzuhalten und starke Credit Ratings zu wahren, gehört hingegen zu unseren strategischen Geschäftszielen. Aufsichtsbehörden und Rating-Agenturen setzen Mindestkapitalausstattungen sowohl für unsere operativen Einheiten als auch für die Gruppe insgesamt fest.

Wir führen eine genaue Überwachung der Kapitalpositionen auf der Ebene des Konzerns und der operativen Einheiten sowie regelmäßige Stresstests unter Zugrundelegung standardisierter Risikoszenarien durch. So können wir vorausschauend angemessene Maßnahmen ergreifen, um die dauerhafte Stärke unserer Kapital- und Solvabilitätspositionen zu gewährleisten. Derartige Maßnahmen können sich auf Vermögenswerte oder Verbindlichkeiten erstrecken, etwa eine Neukalibrierung unserer Anlagepolitik (zum Beispiel eine Verminderung des Aktienengagements und des Konzentrationsrisikos durch Verkaufs- oder Absicherungsaktivitäten) oder die Rückversicherung bestimmter Verbindlichkeiten. So würde beispielsweise eine Verringerung des Aktienengagements in Bezug auf das Eigenkapital der Gruppe unsere Solvabilität als Finanzkonglomerat und auf wirtschaftlicher Basis besser gegen Einbrüche an den Aktienmärkten schützen.

Unser effektives Kapitalmanagement hat dazu geführt, dass die Allianz Gruppe zum 31. Dezember 2010 gut kapitalisiert ist und alle internen und aufsichtsrechtlichen Solvabilitätsziele erreicht hat.

Das Kapitalmanagementsystem wird durch ein wirkungsvolles Liquiditätsmanagementsystem ergänzt, das darauf ausgerichtet ist, unseren finanziellen Spielraum durch die Wahrung einer starken Liquiditätsposition und des Zugangs zu diversen Kapitalmärkten zu erhalten.<sup>1</sup>

## Interne Kapitalausstattung

Das verfügbare Kapital der Allianz besteht aus dem Eigenkapital der Gruppe, das aber bereinigt wird, um die vollständige wirtschaftliche Kapitalbasis wiederzugeben, die für den Ausgleich unerwarteter Schwankungen der Geschäftsentwicklung zur Verfügung steht. So werden beispielsweise nachrangige Verbindlichkeiten sowie der Barwert künftiger Gewinne in der Lebens- und Krankenversicherung dem Eigenkapital hinzugefügt, der Firmenwert und andere immaterielle Vermögenswerte indes vom Eigenkapital abgezogen.

<sup>1</sup> Weitere Informationen zum Liquiditätsmanagement finden sich im Abschnitt „Sonstige Risiken – Liquiditätsrisiko“.

Unser Ziel ist es, ausreichend Kapital auf Gruppenebene verfügbar zu halten, und zwar über die Mindestanforderungen hinaus, die unser internes Risikokapitalmodell mit einer Solvenzwahrscheinlichkeit von 99,97 Prozent bei einer Haltedauer von einem Jahr vorgibt.<sup>1</sup> In dieser Absicht fordern wir von allen unseren lokalen operativen Einheiten, dass sie genügend verfügbares Kapital vorhalten, um bei einem leicht geringeren Konfidenzniveau von 99,93 Prozent und einer ebenfalls einjährigen Haltedauer solvent zu bleiben. Dieser Ansatz ist darauf ausgerichtet, einen über die Gruppe konsistenten Kapitalstandard sicherzustellen. Ferner kommen dadurch die Vorteile zum Tragen, die unseren operativen Einheiten aus der Zugehörigkeit zu einer großen, diversifizierten Unternehmensgruppe erwachsen.

Wir haben 2010 unser internes Risikokapitalmodell verbessert, um es in Übereinstimmung mit den Standards für interne Modelle zu bringen, die im Rahmen von Solvency II entwickelt werden. Im Folgenden werden sämtliche Ergebnisse zum Risikokapital aus dem Jahr 2009 auf der Grundlage des neuen Modells dargelegt. Weitere Informationen zu den Veränderungen und deren Auswirkungen auf das interne Risikokapital sind dem Abschnitt „Einführung eines neuen internen Risikokapitalsystems“ zu entnehmen.

### Verfügbares Kapital und internes Risikokapital

in Mrd. €

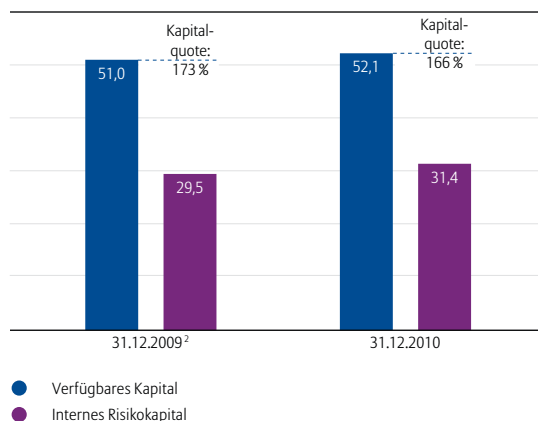

Die Zunahme des verfügbaren Kapitals begründet sich hauptsächlich in einer Zunahme des Eigenkapitals der Gruppe und wurde teilweise durch den Rückgang des Barwerts künftiger Gewinne in der Lebens- und Krankenversicherung reduziert. Die Kapitalquote verringerte sich jedoch aufgrund höherer interner Risikokapitalanforderungen.

Der Risikobericht enthält Angaben zum gruppendifferenzierten internen Risikokapital und zum internen Risikokapital vor Diversifikationseffekten zwischen den einzelnen Risikokategorien. Das Letztere berücksichtigt schon Diversifikationseffekte innerhalb dieser Kategorien (d. h. Markt-, Kredit-, versicherungstechnische und Geschäftsrisiken). Das gruppendifferenzierte interne Risikokapital berücksichtigt dagegen Diversifikationseffekte über alle Risikokategorien und Regionen hinweg. Das interne Risikokapital vor Diversifikation zwischen Risikokategorien dient als Grundlage zur Messung von Konzentrationsrisiken. Da Risiken hauptsächlich auf Ebene der operativen Einheiten gesteuert werden, wird das interne Risikokapital vor Diversifikation zwischen Risikokategorien auf Grundlage eines Konfidenzniveaus von 99,93 Prozent berechnet, wie durch unsere Risikokapitalstandards für operative Einheiten vorgesehen. Das gruppendifferenzierte interne Risikokapital bestimmt die internen Kapitalanforderungen der Gruppe und wird demzufolge auf Grundlage eines Konfidenzniveaus von 99,97 Prozent berechnet.

Zum Jahresultimo 2010 beinhaltet das gruppendifferenzierende interne Risikokapital von 31,4 Milliarden Euro vor Abzug der Anteile anderer Gesellschafter einen Effekt von etwa 30 Prozent,<sup>3</sup> der durch Diversifizierung über Risikoquellen und Länderregionen hervorgerufen wird. Das interne Risikokapital vor und nach Berücksichtigung der Diversifizierungseffekte auf Gruppenebene setzt sich wie folgt zusammen:

<sup>1</sup> Weitere Informationen zum internen Risikokapitalsystem finden sich im Abschnitt „Internes Risikokapitalsystem“.

<sup>2</sup> Neuberechnung des internen Risikokapitals auf der Grundlage des neuen internen Risikokapitalsystems. Neuberechnung des verfügbaren Kapitals beinhaltet auch die neue Methode der Zinskurvenberechnung, wie von der European Insurance and Occupational Pensions Authority („EIOPA“) derzeit vorgeschlagen.

<sup>3</sup> Auf der Grundlage des neuen Risikokapitalmodells belief sich der Diversifizierungseffekt auf Gruppenebene zum 31. Dezember 2009 auf etwa 33 Prozent.

### Zugeordnetes internes Risikokapital nach Risikoquelle (Gesamtbestand vor Abzug der Anteile anderer Gesellschafter) zum 31. Dezember 2010 (31. Dezember 2009)<sup>1</sup>

Vor Diversifikationseffekten zwischen Risikokategorien und vor Steuern,  
in Mio €

Gesamtes internes Risikokapital der Gruppe: 45 149 (43 809)

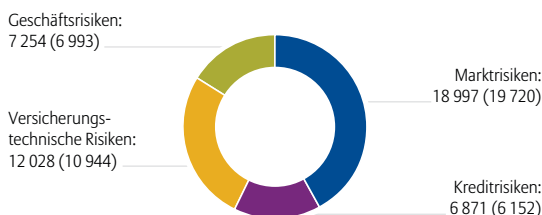

Gruppendiversifiziert, in Mio €

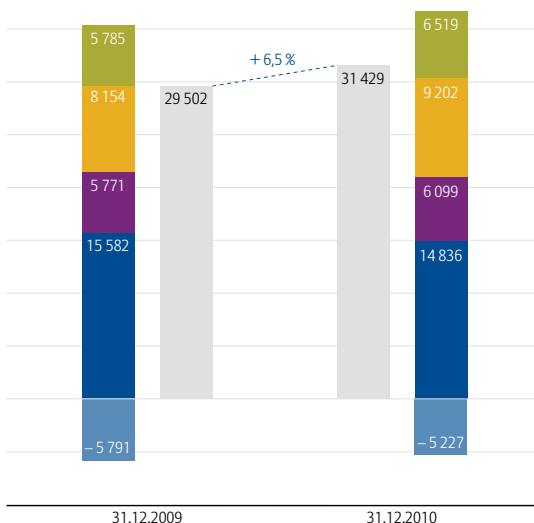

● Marktrisiken  
● Kreditrisiken  
● Versicherungstechnische Risiken  
● Geschäftsrisiken  
● Steuereffekte  
● Insgesamt nach Steuern

### Zugeordnetes internes Risikokapital nach Geschäfts- segment (Gesamtbestand vor Abzug der Anteile anderer Gesellschafter) zum 31. Dezember 2010 (31. Dezember 2009)<sup>1</sup>

Vor Diversifikationseffekten zwischen Risikokategorien und vor Steuern,  
in Mio €

Gesamtes internes Risikokapital der Gruppe: 45 149 (43 809)

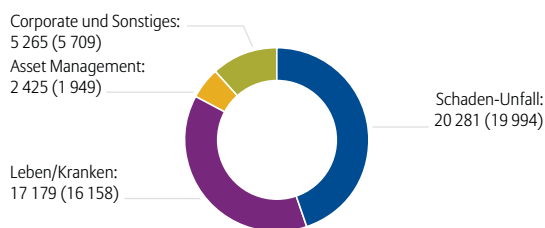

Gruppendiversifiziert, in Mio €

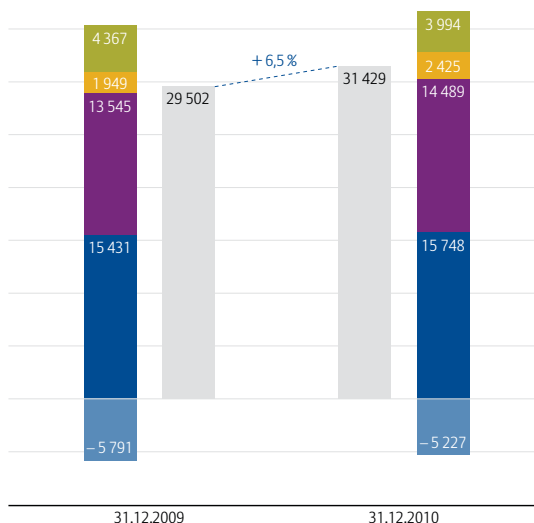

● Schaden- und Unfallversicherung  
● Lebens- und Krankenversicherung  
● Asset Management  
● Corporate und Sonstiges  
● Steuereffekte  
● Insgesamt nach Steuern

Das gruppendiversifizierte interne Risikokapital ist insgesamt gegenüber dem Vorjahr gestiegen. Dies lag in erster Linie daran, dass wir höhere versicherungstechnische und Geschäftsrisiken zu tragen hatten. Dieser Anstieg wird jedoch zum Teil durch geringere Marktrisiken kompensiert. Genauere Erläuterungen zu diesen Entwicklungen sind den Abschnitten zu entnehmen, die sich genau mit diesen Risikokategorien auseinandersetzen.

<sup>1</sup> Neuberechnung auf der Grundlage des neuen Risikokapitalsystems

Während sich das interne Risikokapital als wirtschaftliche Messgröße der Solvabilität auf extreme Ereignisse unter Voraussetzung eines Konfidenzniveaus von 99,97 Prozent über eine Haltefrist von einem Jahr konzentriert, berücksichtigen wir auch verhältnismäßig wahrscheinliche wirtschaftliche Werteinflüsse mit höherer „Greifbarkeit“ bzw. Wahrscheinlichkeit. Dazu gehören beispielsweise die maximalen wirtschaftlichen Verluste über denselben Betrachtungszeitraum bei einem signifikant niedrigeren Konfidenzniveau von 90 Prozent (13,0 Milliarden Euro zum 31. Dezember 2010).

## Gesetzliche Kapitalanforderungen

Bei der Allianz Gruppe handelt es sich nach der EU-Finanzkonglomeraterichtlinie und den betreffenden deutschen Gesetzen um ein Finanzkonglomerat. Das Gesetz verlangt, dass ein Finanzkonglomerat die verfügbaren Eigenmittel zur Erfüllung der Solvabilitätsanforderung auf konsolidierter Basis berechnet. Mit Beginn des Jahres 2013 wird erwartet, dass diese Anforderungen die Solvency-II-Bestimmungen berücksichtigen.

### Finanzkonglomerate-Solvabilität

in Mrd €

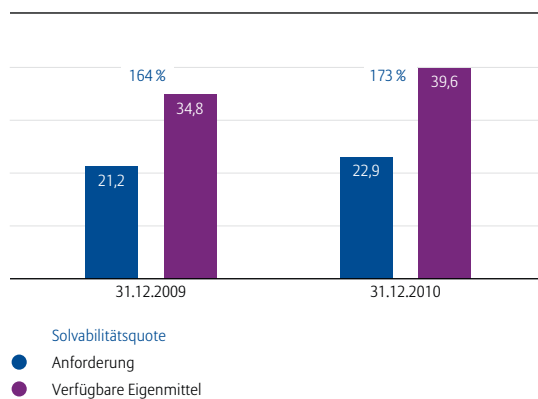

Zum 31. Dezember 2010 beliefen sich die Eigenmittel, die bei der Solvabilität für das Versicherungs-, das Asset-Management- und das Bank-Geschäft berücksichtigt werden dürfen, auf 39,6 Milliarden Euro einschließlich außerbilanzieller Rücklagen<sup>1</sup> in Höhe von

2,1 Milliarden Euro. Damit wurden die gesetzlichen Mindestanforderungen um 16,7 Milliarden Euro überschritten, sodass sich zum 31. Dezember 2010 eine Deckungsquote von 173 Prozent ergibt.

Die verfügbaren Eigenmittel stiegen im Einklang mit dem Eigenkapital der Gruppe. Da unser Wachstum in erster Linie aus dem Lebens- und Krankenversicherungsgeschäft rührt, ist unsere Solvabilitätsanforderung ebenfalls gestiegen. Die Solvabilitätsquote hat sich jedoch verbessert, da die Solvabilitätsanforderung in geringerem Maße gestiegen ist als die verfügbaren Eigenmittel.

## Kapitalanforderungen der Rating-Agenturen

Rating-Agenturen haben ihre eigenen Modelle, um das Verhältnis zwischen dem erforderlichen Risikokapital und der verfügbaren Kapitalausstattung eines Unternehmens festzustellen. Die Bewertung der Kapitalausstattung ist üblicherweise ein wesentlicher Bestandteil des Ratingprozesses. Es gehört zu den strategischen Geschäftszielen der Allianz Gruppe, die Kapitalanforderungen der Rating-Agenturen zu erfüllen und ein starkes Kredit-Rating aufrechtzuerhalten. In der folgenden Tabelle sind Nachweise der nachhaltigen Finanzstärke der Allianz SE und ihrer Fähigkeit, ihre laufenden Verbindlichkeiten zu bedienen, zusammengefasst. Bemerkenswert ist die Tatsache, dass die Ratings während der Finanzkrise 2008 und 2009 unverändert bestätigt wurden:

### Insurer Financial Strength Rating (Finanzkraft-Rating) der Allianz SE

| Stand 31. 12. | Standard & Poor's       | Moody's                | A.M. Best             |
|---------------|-------------------------|------------------------|-----------------------|
| 2007 bis 2010 | AA<br>Ausblick stabil   | Aa3<br>Ausblick stabil | A+<br>Ausblick stabil |
| 2006          | AA-<br>Ausblick positiv | Aa3<br>Ausblick stabil | A+<br>Ausblick stabil |

Zum 31. Dezember 2010 wies die Allianz SE bei Standard & Poor's eines der besten Ratings unter den führenden international tätigen Versicherungskonzernen in Europa auf.

<sup>1</sup> Außerbilanzielle Bewertungsreserven werden im Rahmen der Berichterstattung an die Aufsichtsbehörden nur auf Antrag als verfügbare Eigenmittel angesetzt; die Allianz SE hat keinen Antrag auf Anerkennung gestellt. Ohne die außerbilanziellen Bewertungsreserven beläuft sich die Solvabilitätsquote auf 164% (2009: 155%).

Neben der geläufigen Bonitätseinstufung hat Standard & Poor's eine neue Rating-Kategorie für Enterprise Risk Management (ERM) eingeführt, die separat bewertet wird. Zum 30. September 2010 bewertete die Agentur das ERM im Allianz Versicherungsgeschäft mit der Note „Strong“. Gemäß diesem Rating hielt es Standard & Poor's für „unwahrscheinlich, dass die Allianz Gruppe wesentliche Verluste außerhalb ihrer Risikotoleranz erleiden wird“. Die Rating-Agentur bezog sich dabei nach eigenen Angaben auf unsere starke Risikomanagementkultur, unsere umfassende Überwachung der wichtigsten Risiken und unser ausgeprägtes strategisches Risikomanagement.

Der folgende Überblick stellt detailliert die Bonitätseinstufungen der Allianz SE durch führende Rating-Agenturen zum 31. Dezember 2010 dar. Sämtliche Ratings blieben im Vergleich zum Vorjahr unverändert.

| Ratings <sup>1</sup>                                                       | Standard & Poor's                            | Moody's                                                      | A.M. Best                                                  |
|----------------------------------------------------------------------------|----------------------------------------------|--------------------------------------------------------------|------------------------------------------------------------|
| Insurer financial strength rating (Finanzkraft-Rating)                     | AA<br>Ausblick stabil (bestätigt 07.09.2010) | Aa3<br>Ausblick stabil (bestätigt 22.11.2010)                | A+<br>Ausblick stabil (bestätigt 13.04.2010)               |
| Counterparty credit rating (Emittenten-Rating)                             | AA<br>Ausblick stabil (bestätigt 07.09.2010) | kein Rating                                                  | aa <sup>2</sup><br>Ausblick stabil (bestätigt 13.04.2010)  |
| Senior unsecured debt rating (Rating für vorrangige unbesicherte Anleihen) | AA<br>(bestätigt 07.09.2010)                 | Aa3<br>Ausblick stabil (bestätigt 22.11.2010)                | aa<br>Ausblick stabil (bestätigt 13.04.2010)               |
| Subordinated debt rating (Rating für nachrangige Anleihen)                 | A+/A <sup>3</sup><br>(bestätigt 07.09.2010)  | A2/A3 <sup>3</sup><br>Ausblick stabil (bestätigt 22.11.2010) | aa- <sup>3</sup><br>Ausblick stabil (bestätigt 13.04.2010) |
| Commercial paper (short-term) rating (Kurzfristiges Rating)                | A-1+<br>(bestätigt 07.09.2010)               | Prime -1<br>Ausblick stabil (bestätigt 22.11.2010)           | kein Rating                                                |

## Risikomanagementsystem

Risikomanagement ist eine Kernkompetenz der Allianz und daher ein wesentlicher Bestandteil unserer Geschäftssteuerung. Die Hauptelemente des Allianz Risikomanagementsystems sind:

- eine starke Risikomanagementkultur, gefördert durch eine robuste Risikoorganisation und effektive Risikoprinzipien (Risk Governance);
- eine umfassende Risikokapitalberechnung, die auf die gesamte Gruppe mit dem Ziel angewandt wird, unsere Kapitalbasis zu schützen und effektives Kapitalmanagement zu unterstützen;
- Einbeziehung von Risikoerwägungen und Kapitalbedarf in den Entscheidungsfindungs- und Managementprozess, indem Risiko und Kapital den verschiedenen Geschäftssegmenten zugeordnet werden.

Dieser umfassende Ansatz stellt sicher, dass Risiken angemessen identifiziert, analysiert und bewertet werden, wobei gruppenweit der gleiche, geordnete Prozess zur Anwendung kommt („Top Risk Assessment“). Unsere Risikoneigung wird durch eine klare Risikostrategie und ein Limitsystem definiert. Eine strenge Risikoüberwachung und entsprechende Berichte lassen uns jeweils auf der Gruppenebene als auch auf der Ebene der operativen Einheiten frühzeitig mögliche Abweichungen von unserer Risikotoleranz erkennen.

Das Risikomanagementsystem der Allianz trägt mit seinen vier aufeinandergeschichteten Hauptkomponenten (siehe Diagramm) zur Wertschöpfung der Allianz SE und ihrer operativen Einheiten bei mit dem Ziel, die Interessen unserer Aktionäre und unserer Versicherungskunden zu schützen.

<sup>1</sup> einschließlich der Ratings für Wertpapiere, die von der Allianz Finance II B.V. und der Allianz Finance Corporation begeben werden

<sup>2</sup> Emittenten-Rating

<sup>3</sup> Ratings variieren letztlich auf Grundlage der jeweiligen Bedingungen.



### Risikozeichnung und -identifikation

Grundlage für angemessene Entscheidungen zur Risikoübernahme und zum Risikomanagement ist ein solides System von Risikozeichnung und -identifikation, das bei der Genehmigung einzelner Transaktionen und neuer Produkte sowie bei der strategischen oder taktischen Gewichtung von Anlageklassen zum Einsatz kommt. Bestandteile des Systems sind Risikoeinschätzung, Risikostandards, Bewertungsmethoden und klare Ziele.

### Risikobewertung, -berichterstattung und -controlling

Unser umfassendes System qualitativer und quantitativer Risikoberichterstattung einschließlich Controlling bietet der Geschäftsführung einen Überblick über das gesamte Risikoprofil und entsprechende Frühwarnindikatoren. Es beantwortet auch die Frage, ob unser Profil den festgelegten Limits und Befugnissen entspricht. So werden regelmäßig sogenannte Risk Dashboards und Berichte zur Allokation von Risikokapital und zur Auslastung von Limits erstellt, weitergeleitet und überwacht.

### Risikostrategie und -neigung

Unsere Risikostrategie legt unsere Risikoneigung fest. Sie stellt sicher, dass das Risiko-Ertrags-Verhältnis stimmt und die Entscheidungsbefugnisse mit unserer Gesamtrisikotragfähigkeit in Einklang stehen. Das Risiko-Ertrags-Profil wird verbessert, indem Risikoerwägungen und Kapitalbedarf in den Management- und Entscheidungsfindungsprozess einbezogen werden. Dadurch wird auch gewährleistet, dass die Risikostrategie und unsere Geschäftsziele einander nicht widersprechen und wir im Rahmen unserer Risikotoleranz Vorteile aus sich ergebenden Chancen ziehen können.<sup>1</sup>

### Kommunikation und Transparenz

Eine transparente und fundierte Risikoberichterstattung bildet die Grundlage, auf der wir unseren internen und externen Stakeholdern unsere Risikostrategie vermitteln können, um so nachhaltig positive Auswirkungen auf Bewertung und Finanzierung sicherzustellen.

**Das Risikomanagementsystem der Allianz trägt mit seinen vier Hauptkomponenten zur Wertschöpfung bei**

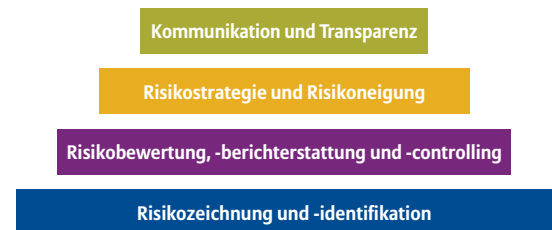

## Risikoorganisation und -prinzipien (Risk Governance)

Als ein wesentliches Element unseres Risikomanagementsystems ist der Allianz Risk-Governance-Ansatz so beschaffen, dass wir unsere lokalen und globalen Risiken ganzheitlich steuern können und gleichzeitig gewährleistet wird, dass unser Gesamtrisikoprofil weiterhin mit unserer Risikostrategie und unserer Risikotragfähigkeit übereinstimmt.

Der Vorstand der Allianz SE legt die geschäftspolitischen Ziele und die Risikostrategie sowie die Kapitalausstattung und die Limits der Allianz Gruppe mit dem Ziel fest, ein angemessenes Verhältnis von Ertrag und Risiko zu erreichen. Beispielsweise hat er 2010 die Naturkatastrophenlimits der Allianz Gruppe neu definiert. Der Vorstand der Allianz SE ist insgesamt für das Risikomanagement verantwortlich. Er hat jedoch einige Teile davon an verschiedene Ausschüsse delegiert. Auf Vorstandsebene befassen sich drei Ausschüsse mit dem Thema Risiko:

- das Group Capital Committee
- das Group Risk Committee
- das Group Finance Committee

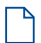

Für weitergehende Informationen über die Arbeit unserer Ausschüsse auf Vorstandsebene verweisen wir auf das Kapitel „Corporate-Governance-Bericht und Erklärung zur Unternehmensführung“.

<sup>1</sup> Weitere Informationen zu Chancen finden sich im Abschnitt „Ausblick 2011 und 2012“.

Im Allgemeinen sind es die Geschäftsleiter der lokalen operativen Einheiten und der Allianz Investment-Management-Einheiten, die an erster Stelle stehen und die Verantwortung für Risiken und Ergebnisse ihrer Entscheidungen tragen. Erst dahinter steht unser unabhängiges globales Risikomanagement unter der Leitung der Abteilung Group Risk. Die dritte Ebene bildet schließlich Group Audit; hier werden unabhängig und regelmäßig die Implementierung der Risikoorganisation und die Beachtung der Risikoprinzipien und Risikoprozesse überprüft sowie die Einhaltung der Unternehmensrichtlinien.

Der Risikoausschuss und der Prüfungsausschuss des Aufsichtsrats der Allianz SE treten regelmäßig und auch kurzfristig zusammen, um die Risikostrategie und das Risikoprofil der Allianz Gruppe anhand von Risikoberichten zu überwachen, die der Chief Financial Officer, der dem Group Risk Committee vorsitzt, vorlegt. Der Prüfungsausschuss des Aufsichtsrats der Allianz SE kümmert sich um die Wirksamkeit des Allianz Risikomanagement- und Risikoüberwachungssystems; der Risikoausschuss des Aufsichtsrats hingegen konzentriert sich auf das allgemeine Risikoprofil der Allianz Gruppe und überwacht risikobezogene Entwicklungen wie auch allgemeine und besondere Risiken. Der Risikoausschuss erstattet dem Prüfungsausschuss regelmäßig Bericht, insbesondere in Bezug auf erforderliche Verbesserungen des Risikomanagementsystems aufgrund aufsichtsrechtlicher Änderungen oder Änderungen der Märkte beziehungsweise des Geschäftsumfelds.

Die Abteilung Group Risk, die an den Chief Financial Officer berichtet, entwickelt Methoden und Prozesse, die geeignet sind, Risiken gruppenweit auf der Grundlage einer systematischen qualitativen und quantitativen Analyse zu identifizieren, zu bewerten und zu überwachen. Auf dieser Grundlage wird der Vorstand der Allianz SE und das Management vierteljährlich über das Risikoprofil der Gruppe informiert. Ferner entwickelt Group Risk das Allianz Risikomanagementsystem und wacht darüber, dass die operativen Einheiten dieses einhalten. Die Group Risk Policy, die vom Vorstand der Allianz SE genehmigt wurde,

enthält die Hauptelemente des Risikomanagementsystems und schreibt Mindestanforderungen für alle operativen Einheiten der Gruppe fest. Darüber hinaus gibt es zusätzliche Risikostandards, die sich unter anderem auf spezifische Geschäftssegmente oder Risikokategorien beziehen. Zudem ist Group Risk für das operative Setzen der Limits verantwortlich und überwacht zentral über alle Geschäftsbereiche spezifische Konzentrationsrisiken, vornehmlich Naturkatastrophen-, Finanzmarkt- und Kontrahentenrisiken. Group Risk stärkt und fördert überdies das Risikonez der Gruppe durch regelmäßige und enge Zusammenarbeit mit der Geschäftsleitung unserer operativen Einheiten und den dortigen Schlüsselbereichen wie den jeweiligen lokalen Finanz- und Kapitalanlagebereichen sowie der Risikofunktion und dem Aktuariat. Ein starkes gruppenweites Risikonez ermöglicht es uns, Risiken frühzeitig zu erkennen und das Management darauf aufmerksam zu machen.

Innerhalb unserer dezentralen Organisation müssen sämtliche operativen Einheiten weltweit die externen Vorschriften (zum Beispiel örtlicher Aufsichtsbehörden) und unsere internen Standards (etwa gruppenweite Standards zur Risikozeichnung) erfüllen. Insbesondere sind die operativen Einheiten für ihr eigenes Risikomanagement verantwortlich. Die Struktur ihrer Risikoüberwachungsfunktionen und -ausschüsse entspricht derjenigen auf Gruppenebene. Es ist ein Grundprinzip unserer Risikoorganisation und unserer Risikoprozesse, dass die Risikoüberwachung unabhängig erfolgt. Geschäftsbereiche, die entscheiden und Risikoverantwortung übernehmen, sind von der unabhängigen Risikoüberwachungsfunktion klar getrennt. Wenn die Ausrichtung der Organisationsstruktur einer operativen Einheit auf dieses Grundprinzip der Unabhängigkeit unverhältnismäßige Effizienzeinbußen zur Folge hätte, würden angemessene Maßnahmen zur Abhilfe getroffen. Die Risikoüberwachung muss unabhängig Risiken erkennen, bewerten, überwachen und darüber Bericht erstatten. Sie muss

aber auch Alternativen analysieren und Empfehlungen an die Risikokomitees, das örtliche Management oder den Vorstand der Allianz SE aussprechen. Lokale Chief Risk Officers leiten die Risikoüberwachungsfunktionen der örtlichen operativen Einheiten. Zur Stärkung des Risikodialogs zwischen Gruppe und operativen Einheiten ist Group Risk in den jeweiligen Risikokomitees vertreten.

Unsere Risk-Governance-Struktur wird überdies durch die Abteilungen Group Compliance und Group Legal Services ergänzt. Group Compliance ist für das Integritätsmanagement verantwortlich, mit dem die Allianz Gruppe samt ihren operativen Einheiten und ihren Mitarbeitern gegen aufsichtsrechtliche Risiken abgesichert werden soll. Group Legal Services mindert die Rechtsrisiken und wird dabei von anderen Abteilungen unterstützt. Rechtsrisiken erwachsen aus Gesetzesänderungen, Rechtsstreitigkeiten, aufsichtsrechtlichen Verfahren und Vertragsklauseln, die für Gerichte unterschiedlich interpretierbar sind. Group Legal Services verfolgt das Ziel, sicherzustellen, dass Änderungen gesetzlicher und aufsichtsrechtlicher Anforderungen beobachtet werden und angemessen auf anstehende Gesetzesänderungen sowie neue Entwicklungen in der Rechtsprechung reagiert wird, die Auswirkungen auf die Allianz Gruppe haben könnten. Die Einheit wickelt ferner Rechtsstreitigkeiten ab und erarbeitet juristisch angemessene Lösungen für Transaktionen und Geschäftsvorgänge.

Ständige Veränderungen unseres Geschäftsumfeldes beeinflussen unser Risikoprofil. Das Global Issues Forum legt die Grundlagen dafür, dass wir uns jederzeit an die neuesten Entwicklungen anpassen können. Es soll frühzeitig neue Risiken und Chancen erkennen sowie langfristige Trends bewerten, die wichtige Auswirkungen auf das Risikoprofil der Allianz Gruppe haben könnten. Group Risk pflegt das Risikonez der Gruppe, das sich mit neuen versicherungstechnischen Risiken auseinandersetzt und in enger Verbindung zum Global Issues Forum steht. Beispielsweise untersuchen unsere eigenen Klimaexperten insbesondere, inwieweit Klimaänderungen möglicherweise unser Geschäft beeinflussen, entwickeln

darauf abgestimmte Risikomanagementstrategien und identifizieren neue Geschäftsfelder, die sich aus der Klimaänderung für die Allianz Gruppe ergeben. Darüber hinaus engagiert sich die Allianz als Mitglied in der Emerging Risk Initiative des Chief Risk Officers Forum, einer Vereinigung der Chief Risk Officers der führenden europäischen Versicherungsgesellschaften und Finanzkonglomerate. Dort werden ständig branchenweite Risiken überwacht; gleichzeitig soll das Bewusstsein für wesentliche Risiken in der Versicherungsbranche geschärft werden.

## Internes Risikokapitalsystem

Internes Risikokapital sind für uns jene Finanzmittel, die wir benötigen, um uns vor unerwarteten, extremen wirtschaftlichen Verlusten zu schützen. Das interne Risikokapital wird quartalsweise segmentübergreifend berechnet und zusammengeführt (Schaden- und Unfallversicherung, Lebens- und Krankenversicherung, Asset Management sowie Corporate und Sonstiges). Dadurch werden die Risiken unterschiedlicher Aktivitäten eines integrierten Finanzdienstleisters, wie die Allianz es ist, innerhalb eines gemeinsamen Systems gemessen und miteinander verglichen.

## Einführung eines neuen internen Risikokapitalsystems

Die Allianz Gruppe verwendet nun schon seit einigen Jahren ein internes Risikokapitalmodell für das Management ihrer Risiken und ihrer Solvabilität. Um den künftigen Anforderungen von Solvency II ab Beginn 2013 gerecht zu werden, hat die Allianz 2008 ein mehrjähriges internes Projekt (Solvency II Umbrella Project) ins Leben gerufen. Die übergeordneten Ziele dieses Projekts bestehen darin, (i) die Datenqualität zu verbessern, (ii) die Analysekapazitäten auszuweiten, (iii) die Robustheit des Modells und die Prozess-Governance zu stärken sowie (iv) sicherzustellen, dass alle künftigen qualitativen Anforderungen hinsichtlich Solvency II erfüllt werden.

Viele dieser Ziele sind nun erreicht. Wir haben unsere Infrastruktur für die Risikoanalyse gestärkt, indem wir eine technische Best-Practice-Plattform eingerichtet haben, die eine verbesserte Methode, eine bessere Abdeckung modellierter Risikoquellen und eine erhöhte Funktionalität sowie bessere Anwendervorteile im Rahmen unseres internen Risikokapitalsystems mit sich bringt. Nach der erfolgreichen Implementierung und einer Phase des Parallelbetriebs mit dem zuvor genutzten Modell hat der Vorstand der Allianz SE der Verwendung des neuen Systems für das Risikomanagement und die Risikoberichterstattung 2010 zugestimmt.

In die Entwicklung unseres neuen internen Risikokapitalsystems sind unser internes Herangehen an das Risikomanagement und unsere aktuelle Interpretation der kommenden Solvency-II-Standards eingeflossen. Das System wird im Lauf der kommenden Jahre durch die europäischen Aufsichtsbehörden bewertet und an die endgültigen Solvency-II-Bestimmungen angepasst.

Weitere Informationen hierzu finden sich im Abschnitt „Value-at-Risk-Ansatz“.

### Vergleich

Um einen Vergleich des neuen und vormaligen Risikokapitalsystems zu ermöglichen, stellen wir hier eine Neuberechnung des internen Risikokapitals zum 31. Dezember 2009 vor. Die Darstellung der Ergebnisse ist so angepasst worden, dass ein direkter Vergleich des internen Risikokapitals gemäß unserer internen Berichterstattung im Rahmen des neuen Systems möglich wird.

Im Folgenden werden die wichtigsten Veränderungen im Vergleich zum alten internen Risikokapitalsystem und ihre Auswirkungen auf die Ergebnisse erläutert.

### Zugeordnetes gruppendifferenziertes internes Risikokapital nach Risikoquelle und Geschäftssegment (Gesamtbestand vor Abzug der Anteile anderer Gesellschafter)

|                                 | Neuberechnung<br>gemäß dem<br>neuen Modell<br>2009<br>in Mio € | Berichtet<br>gemäß dem<br>alten Modell<br>2009<br>in Mio € |
|---------------------------------|----------------------------------------------------------------|------------------------------------------------------------|
| Stand 31.12.                    |                                                                |                                                            |
| <b>Nach Risikoquelle</b>        |                                                                |                                                            |
| Marktrisiken                    | 15 582                                                         | 14 284                                                     |
| Kreditrisiken                   | 5 771                                                          | 3 872                                                      |
| Versicherungstechnische Risiken | 8 157                                                          | 7 933                                                      |
| Geschäftsrisiken                | 5 785                                                          | 6 765                                                      |
| Steuereffekte                   | - 5 791                                                        | - 2 463                                                    |
| <b>Gruppe Gesamt</b>            | <b>29 502</b>                                                  | <b>30 391</b>                                              |
| <b>Nach Geschäftssegment</b>    |                                                                |                                                            |
| Schaden-Unfall                  | 15 431                                                         | 15 639                                                     |
| Leben/Kranken                   | 13 545                                                         | 11 179                                                     |
| Asset Management                | 1 949                                                          | 1 948                                                      |
| Corporate und Sonstiges         | 4 367                                                          | 4 088                                                      |
| Steuereffekte                   | - 5 791                                                        | - 2 463                                                    |
| <b>Gruppe Gesamt</b>            | <b>29 502</b>                                                  | <b>30 391</b>                                              |

### Allgemeine Veränderungen

Unser neues internes Risikokapitalsystem beruht auf einer Monte-Carlo-Simulation, die darauf ausgelegt wurde, den Wert einzelner und aggregierter Portfolios über eine bestimmte Haltedauer mit einem beliebigen Konfidenzniveau zu ermitteln. Wir können jetzt besser spezifische Portfoliorisiken analysieren, indem wir eine große Anzahl unterschiedlicher Krisenszenarien betrachten. Darüber hinaus ermöglicht uns das neue System, sämtliche Geschäftssegmente auf einer technischen Plattform zusammenzubringen, was zu einer Harmonisierung der Marktparameter (zum Beispiel Volatilitäten) und der Modellannahmen führt.

Im alten System wurde das interne Risikokapital über unterschiedliche Risikoquellen und -stufen unserer Portfolio-Hierarchie hinweg bis auf die Gruppenebene zusammengezogen, wobei vorgewählte Krisenszenarien zugrunde gelegt wurden. Im neuen System wurde die Risikoaggregation dadurch erheblich verbessert, dass ein Gauß-Copula-Ansatz für die Bestimmung der Abhängigkeitsbeziehungen zwischen sämtlichen Risikoquellen vorgeschaltet wurde. Dieser Ansatz ermöglicht eine feinere Modellierung der Abhängigkeiten und gibt den Diversifizierungseffekt über sämtliche Risikoquellen und Regionen hinweg

entsprechend besser wieder. Darüber hinaus haben wir nun einen größeren Bestand historischer Marktdaten zur Abschätzung von Marktkorrelationen eingebunden.

Die großen Veränderungen an unserem internen Risikokapitalsystem betreffen die Module Marktrisiken und Kreditrisiken, die im Weiteren genauer beschrieben werden. An den versicherungstechnischen Modulen, die für die Schaden- und Unfall- sowie die Lebens- und Krankenversicherung zum Einsatz kommen, hat es keine wesentlichen Änderungen gegeben. Darüber hinaus sind wir zu einer harmonisierten Behandlung von ökonomischen Steuerverbindlichkeiten in den Segmenten Schaden- und Unfallversicherung sowie Lebens- und Krankenversicherung übergegangen. Dies führt zu einer exakteren Darstellung der durch die im Risikokapitalmodell berücksichtigten Extremereignisse verminderten Steuerverbindlichkeiten.

### **Veränderungen in der Modellierung von Marktrisiken**

Im neuen internen Risikokapitalsystem werden zusätzliche Risikoquellen wie das Risiko aus veränderten Credit Spreads bei Anleihen und aus impliziten Volatilitäten mit einbezogen. Wir verwenden replizierende Portfolios, um Verbindlichkeiten aus dem Lebensversicherungsgeschäft effektiv in unsere Monte-Carlo-Simulation einzubauen. Weil nun zusätzliche Risikoquellen eingeschlossen und auf einzelne Portfolios passende Marktrisikoszenarien, zum Beispiel nichtparallele Verschiebungen der Ertragskurve, berücksichtigt worden sind, ist das Marktrisiko allgemein gestiegen. Die Lebens- und Krankenversicherung wurde davon besonders stark betroffen. Dieser Effekt wird zum Teil wieder ausgeglichen, weil wir auch die Methode geändert haben, mit der Zinskurven zu Bewertungszwecken bestimmt werden. Wir folgen dem aktuellen Vorschlag der European Insurance and Occupational Pensions Authority (EIOPA) und verwenden bei Laufzeiten, für die es keine hinreichend bedeutenden und liquiden Märkte gibt, makroökonomische Techniken zur Ableitung langfristiger Zinssätze. Außerdem passen wir die risikofreien Zinskurven für die Lebens- und Krankenversicherung an, um Liquiditätsprämien zu berücksichtigen.

### **Veränderungen in der Modellierung von Kreditrisiken**

Die Berechnung von Kreditrisiken wurde durch Berücksichtigung des Rating-Migrationsrisikos, die höhere Granularität der geschätzten Verluste bei Ausfällen und das weiter entwickelte Korrelationsmodell, in dem eine Länder- und Branchenkategorisierung von Kreditnehmern und deren Vermögen zur Anwendung kommt, verbessert. Darüber hinaus werden Konzentrationsrisiken auf Gruppenebene besser erfasst.

### **Veränderungen in der Modellierung von Geschäftsrisiken**

Mit der Einführung des neuen internen Risikokapitalsystems folgen wir auch mit unserem Ansatz zur Messung des operationellen Risikos dem aktuellen Vorschlag der European Insurance and Occupational Pensions Authority („EIOPA“).

### **Value-at-Risk-Ansatz**

Unser internes Risikokapitalmodell beruht auf einem Value-at-Risk (VaR)-Ansatz. Er bestimmt den höchstmöglichen Wertverlust im Portfolio von Geschäftsbereichen, die vom Modell abgedeckt sind, und zwar innerhalb eines bestimmten Zeithorizonts (Haltedauer) und mit einer bestimmten Wahrscheinlichkeit (Konfidenzniveau). Wir betrachten ungünstige Kapitalmarktbedingungen, Kreditausfälle, Versicherungsverluste und andere negative Geschäftsereignisse (Risikoquellen) und berechnen den Nettomarktwert unseres Geschäfts unter den gegenwärtigen Bedingungen und unter vielen abweichenden Bedingungen, die durch Szenarien für jede Risikokategorie bestimmt werden. Diese abweichenden Bedingungen werden durch eine Kombination simulierter Szenarien beschrieben, die durch gemeinsame Auftretenswahrscheinlichkeiten definiert sind. Dieser Ansatz wird im Allgemeinen als Monte-Carlo-Simulation bezeichnet. Er ist darauf ausgelegt, einen Portfoliowert über eine bestimmte Haltedauer mit einem beliebigen Konfidenzniveau zu ermitteln. Als erforderliches internes Risikokapital wird die Differenz zwischen dem Wert des Portfolios unter den günstigsten anzunehmenden Bedingungen und dessen Wert unter den mit dem angestrebten Konfidenz-

niveau verbundenen ungünstigen Bedingungen festgelegt, wobei 30 000 Szenarien zugrunde gelegt werden.

Da wir den Einfluss ungünstiger Kapitalmarktbedingungen, von Kreditausfällen, Versicherungsverlusten und anderen negativen Geschäftsereignissen auf sämtliche Bereiche unseres Geschäfts gleichzeitig betrachten, werden auch die Diversifizierungseffekte berücksichtigt, die über verschiedene Risikoquellen und Regionen hinweg wirken.

Darüber hinaus können wir mit unserem System das interne Risikokapital für ausgewählte Einflussfaktoren (zum Beispiel Marktgeschehnisse) bestimmen, indem wir nur diese Faktoren verändern und die anderen konstant halten. Außerdem ist es uns möglich, das interne Risikokapital für verschiedene Stufen unserer Portfolio-Hierarchie bis hinauf zur Gruppenebene (zum Beispiel für lokale operative Einheiten oder die Ebene der Geschäftsbereiche) zu berechnen.

Eine Voraussetzung dafür, genaue und vorausschauende Analysen durchführen zu können, die für ein wirkungsvolles Risikomanagement wesentliche Bedeutung haben, ist die effektive Neubewertung der Verbindlichkeiten aus unserem Versicherungsgeschäft unter Annahme zahlreicher Szenarien. Dazu ziehen wir das branchenweit anerkannte Konzept replizierender Portfolios heran. Da es normalerweise einfach ist, handelsübliche Finanzmarktinstrumente zu bewerten, werden die Verbindlichkeiten und deren durch Marktbewegungen verursachte Wertveränderungen durch Portfolios repliziert, die aus diesen Instrumenten aufgebaut sind. Dabei werden insbesondere die mit unseren Lebensversicherungsportfolios verknüpften Garantien berücksichtigt. Jedes einzelne replizierte Portfolio wird speziellen statistischen Qualitäts- und Sensitivitätsprüfungen unterzogen, damit gewährleistet ist, dass die qualitativen Mindestanforderungen des Group Parameters and Assumptions Approval Committee erfüllt werden.

Zur Berechnung des internen Risikokapitals für die Allianz Gruppe mittels des VaR-Ansatzes verwenden wir ein Konfidenzniveau von 99,97 Prozent und eine Haltedauer von einem Jahr. Diese Annahmen sollen einem „AA“-Rating nach Standard & Poor's entsprechen. Wir haben uns für diese Haltedauer entschieden, weil allgemein veranschlagt wird, dass es maximal ein Jahr lang dauert, bis ein Kontrahent gefunden ist, der die Vermögenswerte und Verbindlichkeiten in unserem Portfolio übernehmen kann. Der so ermittelte Kapitalbedarf reicht also aus, um in einem Jahr Verluste zu decken, die in drei von 10 000 Jahren eintreten können. Obwohl unser internes Risikokapital stark darauf abhebt, Ereignisse mit extremen Auswirkungen zu betrachten, ist es doch auch darauf ausgerichtet, weniger extreme Risiken zu steuern, die möglicherweise in näherer Zukunft eintreten. Wir können das, weil unser internes Risikokapitalmodell geeignet ist, sämtliche Risiken separat oder aggregiert zu analysieren.

Unser internes Risikokapitalmodell setzt verschiedene Techniken ein, die zahlreiche Schätzungen und Annahmen im Hinblick auf Risiko- und Finanzdaten erforderlich machen. Schätzungen und Annahmen werden sowohl intern als auch extern abgeleitet. Das interne Risikokapital fällt unter unser Finanzberichterstattungssystem, das auch die Verwendung von Schätzungen und Annahmen einschließt.<sup>1</sup> Im Folgenden möchten wir besonders auf drei Arten von Annahmen eingehen.

## Zinskurve

Bei der Berechnung des beizulegenden Marktwerts von Vermögenswerten und Verbindlichkeiten sind die Annahmen bezüglich der zugrunde liegenden risikofreien Zinskurve für die Bestimmung und die Diskontierung künftiger Zahlungsströme von zentraler Bedeutung. Wir wenden jetzt die von EIOPA für die fünfte quantitative Auswirkungsstudie (QIS 5) vorgegebene Methode an, was einen bedeutenden Schritt zur Prüfung der endgültigen Anwendungsmaßnahmen für die noch nicht abschließend festgelegten Modellstandards für Solvabilität II darstellt. Unter der

<sup>1</sup> Weitere Informationen zum Finanzberichterstattungssystem finden sich im Abschnitt „Kontrollen und Verfahren – Rahmenwerk für die Finanzberichterstattung“.



Annahme eines langfristigen Gleichgewichtszinssatzes für jede Währung werden makroökonomische Verfahren angewandt, aus denen sich langfristige Zinssätze für Laufzeiten ableiten lassen, für die keine ausreichend umfangreichen und liquiden Märkte vorliegen. Das Gesamtziel besteht darin, einen stabilen und robusten Bewertungsrahmen zu schaffen, der aktuelle Marktbedingungen widerspiegelt und gleichzeitig die wirtschaftliche Sicht bezüglich des erwarteten Verhaltens nicht beobachtbarer langfristiger Zinsen darstellt. In Anbetracht ihres langfristigen Lebensversicherungsgeschäfts ist dies für die Allianz Gruppe von besonderer Bedeutung.

Im Einklang mit der von EIOPA empfohlenen Methodik passen wir außerdem die risikofreien Zinskurven für die Lebens- und Krankenversicherungen an, um eine Liquiditätsprämie zu berücksichtigen. Die Liquiditätsprämie war in jüngster Zeit aufgrund der Turbulenzen an den Märkten zwar recht hoch, doch ist zu erwarten, dass sie unter normalen Marktbedingungen unerheblich ist. Da sich der Liquiditätsgrad eines Finanzinstruments auf die Höhe eines Anlagenportfoliowerts auswirkt, gilt es als angemessen, Liquidität auch bei der Bewertung von Verbindlichkeiten aus dem Versicherungsgeschäft zu berücksichtigen.

## Diversifikations- und Korrelationsannahmen

Wenn unser internes Risikokapitalmodell Ergebnisse über die verschiedenen Ebenen unserer Portfoliohierarchie bis hin zur Gruppenebene zusammenfasst, berücksichtigt es Korrelations- und Konzentrationseffekte und bildet die Tatsache ab, dass potenzielle Verluste im schlimmsten Fall wahrscheinlich nicht alle gleichzeitig entstehen. Dies wird allgemein Diversifikationseffekt genannt. Ihn zu steuern ist ein zentraler Bestandteil unseres Risikomanagements. Wir arbeiten also darauf hin, unsere Risiken zu streuen, um die Auswirkungen von Risiken gleichen Ursprungs einzuschränken und gleichzeitig zu gewährleisten, dass der günstige Geschäftsverlauf an einer Stelle die möglicherweise ungünstige Entwicklung an anderer Stelle ausgleicht.

Inwieweit der Diversifikationseffekt genutzt werden kann, hängt teilweise davon ab, wie hoch die jeweilige relative Risikokonzentration ist. Die höchste Diversifikation erreicht im Allgemeinen ein Portfolio, das keine unverhältnismäßig großen Risiken enthält und ausgewogen ist. Ferner hängt die Größe des Diversifikationseffekts vom Verhältnis der Risiken untereinander ab. Lineare Korrelation ist eine Größe, welche dieses Verhältnis zweier Risiken misst. Sie nimmt Werte zwischen „-1“ und „+1“ an.

Wo immer möglich entwickeln wir Korrelationsparameter für jedes Marktrisikopaar, indem wir historische Marktdaten statistisch analysieren. Hierbei berücksichtigen wir über einen Zeitraum von mehreren Jahren wöchentlich gemessene Werte. Falls keine ausreichende Menge historischer Daten oder portfolio-spezifischen Beobachtungen verfügbar sind, verwenden wir konservativ angelegte Schätzungen unserer Fachleute unter Berücksichtigung der von EIOPA empfohlenen Standardeinstellungen. Darüber hinaus schließen wir negative Korrelationen aus. Die Korrelationsparameter werden generell so festgelegt, dass sie die wechselseitige Abhängigkeit unter ungünstigen Bedingungen darstellen. Auf Grundlage dieser Korrelationen wenden wir einen branchenüblichen Ansatz, den Gauß-Copula-Ansatz, an, um die Abhängigkeitsstruktur aller Risikoquellen zu bestimmen. Bezüglich der Marktrisiken ähnelt unser Ansatz demjenigen, den Banken nach Basel II anwenden.

## Nicht vom Markt bestimmte Annahmen

Soweit verfügbar, folgen wir bei Modellannahmen, die nicht durch den Kapitalmarkt bestimmt sind, den Vorschlägen von Aufsichtsbehörden und Aktuarsvereinigungen. Außerdem treffen wir Annahmen zu Schadentrends und Inflation sowie zu Sterblichkeits-, Krankheits- und Stornoraten.

Insgesamt halten wir unsere internen Annahmen für die Berechnung von Risikokapital und die Bildung von Rücklagen für angemessen und ausreichend.

## Anwendungsbereich

Unser internes Risikokapitalmodell berücksichtigt standardmäßig die nachfolgend genannten Risikoquellen, eingestuft nach Risikokategorien je Segment:

| Risikokategorie                                                                                                                                                                      | Ver-sicherung         | Asset Manage-ment | Corporate und Sonstiges | Beschreibung                                                                                                                                                                                                                                                                 | Beispiel Management-maßnahmen                                                                   |
|--------------------------------------------------------------------------------------------------------------------------------------------------------------------------------------|-----------------------|-------------------|-------------------------|------------------------------------------------------------------------------------------------------------------------------------------------------------------------------------------------------------------------------------------------------------------------------|-------------------------------------------------------------------------------------------------|
| <b>Marktrisiko:</b><br>– Zinsen einschließlich Volatilität<br>– Credit Spread<br>– Eigenkapital einschließlich Volatilität<br>– Immobilien einschließlich Volatilität<br>– Währungen | ✓<br>✓<br>✓<br>✓<br>✓ | ✓ <sup>2</sup>    | ✓<br>✓<br>✓<br>✓<br>✓   | Mögliche wirtschaftliche Verluste durch Änderung von Zinsen, Aktienkursen und Immobilienwerten oder deren Volatilitäten sowie durch Veränderungen der Credit Spreads und Wechselkursen verursacht                                                                            | Vorgaben für strategische Gewichtung von Anlageklassen, Limits für Eigenkapital/Duration etc.   |
| <b>Kreditrisiko</b>                                                                                                                                                                  | ✓ <sup>1</sup>        | ✓ <sup>2</sup>    | ✓                       | Mögliche wirtschaftliche Verluste im Marktwert des Portfolios aufgrund einer Verschlechterung der Bonität der Geschäftspartner einschließlich ihrer Nichteinhaltung von Zahlungsverpflichtungen oder wegen Nichterfüllung von Instrumenten (z. B. überfällige Zahlung)       | Länderlimits, Konzentrationslimits für einzelne Kontrahenten etc.                               |
| <b>Versicherungstechnisches Risiko:</b><br>– Prämie Katastrophenrisiko<br>– Prämie Nichtkatastrophenrisiko<br>– Reserve<br>– Biometrie                                               | ✓<br>✓<br>✓<br>✓      |                   |                         | Unerwartete wirtschaftliche Verluste aufgrund unzureichender Prämien für Katastrophen- und Nichtkatastrophen-Risiken, unzureichender Reserven oder der Unvorhersehbarkeit von Sterblichkeit bzw. Lebenserwartung                                                             | Minimum Standards für Risikozeichnung, Naturkatastrophenlimits, Rückversicherungsprogramme etc. |
| <b>Geschäftsrisiko:</b><br>– Operationell<br>– Kosten                                                                                                                                | ✓<br>✓                | ✓<br>✓            | ✓<br>✓                  | Wirtschaftliche Verluste aufgrund unzureichender oder versagender interner Prozesse, Mitarbeiter oder Systeme bzw. externer Ereignisse sowie unerwarteter Änderungen von Geschäftsannahmen und unerwarteter Ertragsschwankungen durch geringere Einnahmen ohne Kostensenkung | Interne Kontrollen, Business Continuity Management, adäquates Produktdesign etc.                |

Und umfasst folgende Bereiche:

- wesentliche Versicherungsgeschäfte;
- wesentliche Vermögenswerte (einschließlich Anleihen, Hypotheken, Investmentfonds, Kredite, variabel verzinsliche Schudltitel, Aktien, Immobilien) und Verbindlichkeiten (einschließlich der Zahlungsströme unserer gesamten technischen Rückstellungen sowie aller Einlagen und emittierten Wertpapiere); in der Lebens- und Krankenversicherung

reflektiert das Modell gegebenenfalls auch, wie Vermögenswerte, Verbindlichkeiten und lokale Managemententscheidungen (etwa über Anlagestrategien und Beteiligungsregeln für Versicherungskunden) zusammenwirken;

- wesentliche Derivate (Optionen, Swaps, Futures), besonders wenn sie ein Teil des üblichen Geschäftsmodells der operativen Einheit sind (etwa bei Allianz Life Insurance Company of North America) oder wenn sie eine erhebliche Auswirkung auf das

<sup>1</sup> Das Kreditrisiko erfasst auch das Prämienrisiko, dem unser Kreditversicherer Euler Hermes aufgrund seines Geschäftsmodells ausgesetzt ist, weil diese Art von Risiko eine spezielle Form des Kreditrisikos darstellt.

<sup>2</sup> Obgleich die Anforderungen bezüglich des internen Risikokapitals an das Segment Asset Management nur das Geschäftsrisiko widerspiegeln (zusätzliche Informationen finden sich weiter unten), ist die Bewertung des Markt- und Kreditrisikos bei Kapitalanlagen für Dritte ein wesentlicher Bestandteil des Risikomanagementprozesses unserer lokalen operativen Einheiten.

Risikokapital haben (zum Beispiel Absicherungen der Allianz SE oder in der Lebens- und Krankenversicherung, wenn wesentliche Verpflichtungen gegenüber Policeninhabern durch Finanzderivate abgesichert werden). In der Regel zählen Derivate, die in strukturierte Finanztransaktionen eingebettet sind, ebenfalls dazu.<sup>1</sup>

Für kleinere operative Versicherungseinheiten, die eine unwesentliche Auswirkung auf das Risikoprofil der Gruppe haben, und für das Asset Management stützt sich unsere Zuordnung der internen Risikokapitalanforderungen auf einen Ansatz, der lokalen aufsichtsrechtlichen Vorgaben Rechnung trägt, sowie auf Ergebnisse eines risikofaktorbasierten Ansatzes. Dieser Ansatz ist in die Risikokategorien unseres internen Risikokapitalmodells eingebettet. Das versetzt uns in die Lage, innerhalb unseres internen Risikokapitalrahmens das Risikokapital für alle Segmente gruppenweit konsistent zusammenzufassen. Etwa 99 Prozent des im Segment Asset Management verwalteten Vermögens werden für Dritte oder Allianz Versicherungseinheiten gehalten. Sie bergen also keine wesentlichen Markt- und Kreditrisiken für dieses Segment. Daraus ergibt sich, dass die internen Risikokapitalanforderungen für das Asset Management nur Geschäftsrisiken abbilden. Die Bewertung von Markt- und Kreditrisiken Dritter ist indes unerlässlicher Bestandteil des Risikomanagementprozesses unserer örtlichen operativen Einheiten.

Internes Risikokapital im Zusammenhang mit unserem Bankgeschäft in Deutschland, Italien, Frankreich und Osteuropa wird auf Grundlage des Ansatzes, der von Banken gemäß Basel II angewandt wird, dem Segment Corporate und Sonstiges zugerechnet. Es macht einen unwesentlichen Betrag von rund 1,6 Prozent des gesamten internen Risikokapitals vor Diversifikation zwischen Risikokategorien aus. Aus diesem Grund gehen wir auf das Risikomanagement im Hinblick auf das Bankgeschäft im Folgenden nicht näher ein.

## Einschränkungen

Unser internes Risikokapitalmodell stellt den potenziellen Betrag dar, den wir „im schlimmsten Fall“, also unter besonders ungünstigen Bedingungen, auf einem bestimmten Konfidenzniveau verlieren könnten. Es besteht jedoch eine statistisch geringe Wahrscheinlichkeit von 0,03 Prozent, dass die tatsächlichen Verluste diese Schwelle überschreiten.

Nach unserer Auffassung eignen sich die Modell- und Szenarioparameter, die aus historischen Daten abgeleitet sind, für eine annähernde Darstellung möglicher künftiger Risikoereignisse. Sollten jedoch Marktbedingungen stark von bisherigen Entwicklungen abweichen, wie dies etwa während der beispiellosen Finanzkrise der Jahre 2008 und 2009 der Fall war, kann es sein, dass unser VaR-Ansatz zu hoch oder zu niedrig ist. Wir können die Modellgenauigkeit nur eingeschränkt mit der tatsächlichen Entwicklung in der Vergangenheit vergleichen, weil wir uns für ein hohes Konfidenzniveau von 99,97 Prozent und eine einjährige Haltedauer entschieden haben und für bestimmte Versicherungsrisiken wie Naturkatastrophen nur in begrenztem Umfang Daten zur Verfügung stehen. Weil das Modell, sofern möglich, historische Daten verwendet, kann es nicht gleichzeitig auf diese bezogen werden. Stattdessen nehmen wir Sensitivitätsanalysen vor und lassen Modell und Parameter durch unabhängige externe Beratungsfirmen prüfen, die auch die Methoden für die Parameterauswahl und die zugehörigen Kontrollprozesse betrachten. Insgesamt sind wir der Meinung, dass unsere Maßnahmen zur Validierung in dem Maße, in dem eine Validierung überhaupt möglich ist, wirksam sind und unser Modell unsere Risiken angemessen bewertet.

Wie oben beschrieben, werden die Verbindlichkeiten aus dem Versicherungsgeschäft durch Portfolios mit Standardfinanzmarktinstrumenten repliziert, damit ein effektives Risikomanagement erfolgen kann. Insbesondere für Lebensversicherungsportfolios mit eingebetteten Garantien sind die verfügbaren Instrumente zur Replizierung unter Umständen zu einfach beziehungsweise zu restriktiv, um sämtliche Faktoren zu berücksichtigen, die sich auf die Veränderung des

<sup>1</sup> Weitere Angaben bzgl. Risiken derivativer Finanzinstrumente finden sich unter Anmerkung 44 im Konzernabschluss.

Wertes von Verbindlichkeiten aus dem Versicherungsgeschäft auswirken. Daher kann das Replikationsportfolio, das zur Berechnung des internen Risikokapitals verwendet wird, nur vorbehaltlich der jeweils verfügbaren Replikationsinstrumente als optimal angesehen werden, und es besteht die Möglichkeit, dass es bei Marktbewegungen vom Wert und vom Verhalten der echten Verbindlichkeiten aus dem Versicherungsgeschäft abweicht. Wir sind jedoch der Meinung, dass die Verbindlichkeiten insgesamt aufgrund unserer strengen Anforderungen an die Datenqualität angemessen durch die Replikationsportfolios dargestellt werden.

Weil unser internes Risikokapitalmodell darauf abstellt, wie der „beizulegende Marktwert“ unserer Vermögenswerte und Verbindlichkeiten sich ändert, muss dieser Wert für jeden Posten bestimmt werden. Bei einigen Vermögenswerten und Verbindlichkeiten wird es in turbulenten Finanzmärkten schwierig, wenn nicht sogar unmöglich, entweder einen aktuellen Marktpreis zu ermitteln oder den „Mark to Market“-Ansatz sinnvoll zu verwenden. Für bestimmte Vermögenswerte und Verbindlichkeiten verwenden wir, sofern kein aktueller Marktpreis für dieses Instrument oder ihm ähnliche Instrumente zur Verfügung steht, einen „Mark to Model“-Ansatz. Die Genauigkeit der beizulegenden Marktwerte hängt bei einigen unserer Verbindlichkeiten außerdem davon ab, wie zutreffend die geschätzten versicherungstechnischen Zahlungsströme sind. Trotz dieser Einschränkungen halten wir die geschätzten beizulegenden Marktwerte für angemessen bewertet.

Für Derivate verwenden wir im internen Risikokapitalmodell Bewertungsmodelle, die unser Geschäftsmodell grundsätzlich angemessen abbilden können. Derzeit kann das interne Risikokapitalmodell für unsere wesentlichen Versicherungsgeschäfte nur herkömmliche Derivate wie Aktienkauf- und -verkaufsoptionen, Terminkontrakte und Zinsswaps direkt modellieren. Damit sich komplexere Instrumente in das interne Risikokapitalsystem einbeziehen lassen, etwa Derivate,

die in strukturierte Finanztransaktionen eingebettet sind, werden sie im Modell durch diejenigen Standardderivate abgebildet, die ihnen am ähnlichsten sind. Das Volumen der komplexen, nichtstandardisierten Instrumente ist bei der Allianz sowohl auf lokaler als auch auf Gruppenebene unerheblich. Dennoch kann sich eine präzisere Modellierung der Instrumente auf den beizulegenden Marktwert der Derivate und das interne Risikokapital auswirken. Wir sind jedoch der Ansicht, dass eine solche Veränderung unerheblich wäre.

## Konzentration von Risiken

Als integrierter Finanzdienstleistungsanbieter mit einer breiten Produktpalette, die sich über verschiedene Geschäftssegmente und geografische Regionen erstreckt, ist die Diversifikation für unser Geschäftsmodell ausschlaggebend. Sie unterstützt uns bei der effizienten Handhabung unserer Risiken, weil sie den wirtschaftlichen Einfluss eines einzelnen Ereignisses beschränkt. Zudem trägt sie zu einem insgesamt relativ stabilen Ertrags- und Risikoprofil bei. Wie bereits oben erwähnt, hängt der Grad, in dem der Diversifikationseffekt realisiert werden kann, nicht nur von der Korrelation zwischen den Risiken ab, sondern auch von der relativen Konzentration derselben. Daher zielen wir stets darauf ab, große Einzelrisiken zu vermeiden und ein ausgewogenes Risikoprofil aufrechtzuerhalten.

Auf Gruppenebene identifizieren und messen wir die Konzentrationsrisiken generell über alle Segmente hinweg einheitlich auf Grundlage des internen Risikokapitals vor Diversifikation zwischen Risikokategorien und entsprechend den Risikokategorien unseres internen Risikokapitalmodells. Innerhalb der einzelnen Kategorien wenden wir die im weiteren Verlauf dieses Abschnitts beschriebenen ergänzenden Ansätze zur Steuerung von Konzentrationsrisiken an. In den folgenden Abschnitten werden alle Risiken vor Diversifikation zwischen Risikokategorien und gruppen-diversifiziert dargestellt und die Konzentration einzelner Risikoquellen entsprechend benannt.

In Bezug auf Anlagen werden Top-Down-Indikatoren wie beispielsweise Vorgaben für die strategische Portfoliostruktur definiert und sorgfältig überwacht mit dem Ziel, eine Ausgewogenheit der Anlagenportfolios zu wahren. Auf Grundlage des internen Risikokapitalmodells wurden auf Gruppenebene sowie separat für die Segmente Lebens- und Krankenversicherung sowie Schaden- und Unfallversicherung VaR-Limits für Finanzmarktrisiken zu dem Zweck eingerichtet, die ökonomische Kapitalbasis zu schützen und Höchst Risiken zu kontrollieren. Darüber hinaus wird die Einhaltung der Vorgaben für die strategische Portfoliostruktur der Gruppe anhand von Bandbreitenlimits für diese Segmente überwacht.

Unverhältnismäßig große Einzelrisiken, die sich häufig und zu substantiellen Verlusten führen können (zum Beispiel Naturkatastrophen oder Kreditereignisse), werden einzeln (das heißt vor Eintritt des Diversifikationseffekts) streng beobachtet und unterliegen einem globalen Limitsystem.

Deshalb hat der Vorstand der Allianz SE beispielsweise für die operativen Einheiten und für die Gesamtgruppe Limits für Naturkatastrophen bestimmt. Sie dienen dazu, die potenzielle Ertragsvolatilität zu dämpfen und mögliche Verluste durch einzelne Ereignisse sowie auf aggregierter Jahresbasis zu mindern. Das Risiko wird auf Ereignisse mit einer Eintrittswahrscheinlichkeit von einmal in 250 Jahren begrenzt. Diese Limits werden jährlich überprüft. Zwei Instrumente, die wir heranziehen, um Höchst Risiken zu mindern und finanzielle Folgen nachteiliger Ereignisse für Unternehmen und Eigentümer zu begrenzen (etwa bei schweren Schäden durch Naturkatastrophen), sind beispielsweise die traditionelle Rückversicherungsdeckung und zweckbestimmte Finanztransaktionen auf Gruppenebene. Im Jahr 2010 haben wir zum Beispiel unsere Swaps verlängert, mit denen wir Risiken aus Orkanen in Europa sowie Hurrikanen und Erdbeben in den USA, die zu unseren größten Risiken aus Naturkatastrophen zählen, gegen Risiken bei Taifunen und Erdbeben in Japan eintauschen. Unsere Aktivitäten in der Schaden- und Unfallversicherung sind dort gering. Darüber hinaus haben wir eine neue Katastrophenanleihe (Blue Fin 3)

emittiert, die uns vor Hurrikan- und Erdbebenrisiken in den USA schützt.

Zu Beginn des Jahres 2010 haben wir ein neues konzernweites System zur Steuerung von Landes- und Schuldnergruppenlimits (CRisP) für das Kreditrisiko eingeführt, das auf einheitlichen Daten beruht, die von den Anlage- und Risikofunktionen sowohl auf Gruppenebene als auch auf der Ebene der operativen Einheiten verwendet werden. Es ist Grundlage für die Erörterung angemessener Kreditmaßnahmen und bietet Benachrichtigungsdienste für eine schnelle und umfassende konzernweite Kommunikation. Klar definierte Prozesse gewährleisten, dass Risikokonzentrationen und die Ausreizung von Limits angemessen überwacht und gesteuert werden. Das Limitsystem überwacht das Konzentrationsrisiko gegenüber Kontrahenten und beinhaltet das Risiko sowohl aus festverzinslichen Wertpapieren als auch aus Aktienpositionen.

In letzter Instanz ist der Vorstand der Allianz SE dafür verantwortlich, die Höchstwerte für Landes- und Schuldner Risiken (also das maximale Konzentrationslimit) aus Konzernsicht zu bestimmen. Dieses Limit berücksichtigt die Größe und die Zusammensetzung des Portfolios der Allianz Gruppe ebenso wie die allgemeine Risikostrategie. Der Vorstand der Allianz SE delegiert durch klare Definition von Höchstgrenzen Befugnisse für die Festlegung und die Änderung von Limits an das Group Risk Committee und den Group Chief Risk Officer. Alle Limits unterliegen einer jährlichen Prüfung und Genehmigung gemäß den delegierten Befugnissen.

Im Allgemeinen werden Schuldnerlimits vom CRisP-System auf der Grundlage vordefinierter Regeln und Kennzahlen (zum Beispiel der Bonität, der Bilanzsumme, des Geschäftssegments des Schuldners oder des Landes, in dem der Schuldner tätig ist) berechnet. Das CRisP-System weist Gruppenschuldnerlimits nach einem faktorbasierten Ansatz auf der Ebene der operativen Einheit zu. Hierbei werden verschiedene Indikatoren berücksichtigt, beispielsweise die Bilanzsumme der operativen Einheit, das Land, in dem diese tätig ist, und das Geschäftssegment des Schuldners oder das Land, in dem der Schuldner tätig ist.

## Marktrisiken

Im Rahmen der Steuerung ihrer Geschäfte hält und verwendet die Allianz Gruppe viele unterschiedliche Finanzinstrumente. Im Rahmen unseres Versicherungsgeschäfts nehmen wir Prämien von unseren Kunden ein und investieren diese in eine Vielzahl von Anlagen. Diese Anlagenportfolios decken letztlich die künftigen Schäden unserer Kunden. Darüber hinaus müssen wir das für die Übernahme der versicherten Risiken erforderliche Eigenkapital anlegen.

Da die beizulegenden Marktwerte unserer Anlagenportfolios von Finanzmärkten abhängen, die sich im Lauf der Zeit verändern können, sind wir Marktrisiken ausgesetzt. Eine unerwartete allgemeine Erhöhung der Zinsen oder ein unerwarteter Einbruch der Aktienmärkte kann beispielsweise zu einer allgemeinen Abwertung der Portfolios führen. Um die Auswirkungen dieser Finanzmarktänderungen einzuschränken, haben wir ein Limitsystem eingeführt, das auf verschiedenen Risikokennzahlen beruht. Hierzu zählen unter anderem VaR für Finanzmarktrisiken, Aktiensensitivitäten, Anlagen- und Nettolaufzeiten, Durationslücken sowie Anlagebandbreiten im Verhältnis zu dem vom Vorstand der Allianz SE genehmigten Benchmarkportfolio.

Im Folgenden werden die (nach Marktwert) höchsten Marktrisiken aufgezählt, kategorisiert wie in unserem internen Risikokapitalmodell: Zinsrisiko (aus Anleihen, Darlehen und anderen Finanzierungsinstrumenten) und Aktienkursrisiko (einschließlich der Risiken aus Stammaktien und Vorzugsaktien).

Aufgrund unseres diversifizierten Immobilienportfolios ist das Immobilienrisiko für die Allianz Gruppe derzeit von nachrangiger Bedeutung. Etwa 5,6 Prozent des gesamten internen Risikokapitals vor Diversifikation zwischen Risikokategorien beziehen sich auf das Immobilienrisiko.

Zusätzlich zu geltenden lokalen aufsichtsrechtlichen Vorschriften fordern wir von unseren operativen Einheiten, dass sie ihre wesentlichen Vermögenswerte und Verbindlichkeiten hinsichtlich der Währungen aneinander anpassen oder allgemein offene Währungsrisiken anderweitig absichern. Aus bilanzieller Sicht der operativen Einheit verbleibt hierdurch nur noch ein unwesentliches Währungsrisiko auf Ebene der jeweiligen Landeswährung. Für die Gruppe jedoch, die in Euro berichtet, ergibt sich das Währungsrisiko aus dem Marktwert des Nettovermögens der operativen Einheiten, die nicht in Euro berichten. Wenn diese Währungen im Vergleich zum Euro abgewertet werden, vermindern sich auf Gruppenebene auch die Nettovermögenswerte in Euro. Das Risiko wird den jeweiligen Geschäftssegmenten zugeordnet.

Unsere größten Währungsrisiken liegen in den Währungen US-Dollar, Schweizer Franken, Australischer Dollar und Südkoreanischer Won.

Bewegungen der Finanzmärkte haben außerdem Auswirkungen auf den Wert unserer Verbindlichkeiten aus dem Versicherungsgeschäft. Daher wird unser Marktrisiko schließlich durch unsere Aktiv- und Passivnettopositionen bestimmt. Diese wechselseitigen Abhängigkeiten sind detailliert im nachfolgenden Abschnitt „Schaden- und Unfall- sowie Lebens- und Krankenversicherung“ beschrieben.

Im Folgenden zeigen wir das gruppenweite interne Risikokapital für Marktrisiken.



**Zugeordnetes internes Marktrisikokapital nach Geschäftssegment und Risikoquelle (Gesamtbestand vor Steuern sowie Abzug der Anteile anderer Gesellschafter)**

|                                                                         | Zinssatz      |                            | Credit Spread |                            | Aktien        |                            | Immobilien    |                            | Währung       |                            | Summe         |                            |
|-------------------------------------------------------------------------|---------------|----------------------------|---------------|----------------------------|---------------|----------------------------|---------------|----------------------------|---------------|----------------------------|---------------|----------------------------|
| Zum 31. Dezember                                                        | 2010<br>Mio € | 2009 <sup>1</sup><br>Mio € |
| <b>Vor Diversifikations-<br/>effekten zwischen<br/>Risikokategorien</b> |               |                            |               |                            |               |                            |               |                            |               |                            |               |                            |
| Schaden- und Unfall-<br>versicherung                                    | 717           | 903                        | 482           | 456                        | 2 084         | 2 207                      | 1 305         | 1 297                      | 542           | 937                        | 5 130         | 5 800                      |
| Lebens- und Kranken-<br>versicherung                                    | 2 944         | 3 148                      | 2 445         | 2 110                      | 3 584         | 3 507                      | 1 069         | 1 201                      | 788           | 631                        | 10 830        | 10 598                     |
| Asset Management                                                        | —             | —                          | —             | —                          | —             | —                          | —             | —                          | —             | —                          | —             | —                          |
| Corporate und Sonstiges                                                 | 421           | 288                        | 732           | 487                        | 1 660         | 2 121                      | 166           | 143                        | 56            | 283                        | 3 036         | 3 322                      |
| <b>Gruppe gesamt</b>                                                    | <b>4 082</b>  | <b>4 340</b>               | <b>3 660</b>  | <b>3 053</b>               | <b>7 328</b>  | <b>7 835</b>               | <b>2 541</b>  | <b>2 641</b>               | <b>1 386</b>  | <b>1 851</b>               | <b>18 997</b> | <b>19 720</b>              |
| Anteil am gesamten<br>internen Risikokapital für<br>die Gruppe in %     |               |                            |               |                            |               |                            |               |                            |               |                            | 42            | 45                         |
| <b>Gruppendiversifiziert</b>                                            |               |                            |               |                            |               |                            |               |                            |               |                            |               |                            |
| Schaden- und Unfall-<br>versicherung                                    | 530           | 706                        | 298           | 373                        | 1 599         | 1 816                      | 958           | 1 023                      | 178           | 451                        | 3 564         | 4 369                      |
| Lebens- und Kranken-<br>versicherung                                    | 2 643         | 2 898                      | 1 756         | 1 574                      | 3 104         | 2 839                      | 965           | 997                        | 530           | 479                        | 8 998         | 8 787                      |
| Asset Management                                                        | —             | —                          | —             | —                          | —             | —                          | —             | —                          | —             | —                          | —             | —                          |
| Corporate und Sonstiges                                                 | 321           | 216                        | 466           | 357                        | 1 305         | 1 547                      | 142           | 120                        | 41            | 188                        | 2 275         | 2 427                      |
| <b>Gruppe gesamt</b>                                                    | <b>3 494</b>  | <b>3 820</b>               | <b>2 519</b>  | <b>2 304</b>               | <b>6 009</b>  | <b>6 201</b>               | <b>2 065</b>  | <b>2 141</b>               | <b>749</b>    | <b>1 117</b>               | <b>14 836</b> | <b>15 582</b>              |

Insgesamt blieb das gruppendifferenzierte Marktrisikokapital nahezu auf Vorjahresniveau, da sich die Struktur unseres Geschäftsportfolios nicht wesentlich verändert hat und der Markt keine nennenswerten Entwicklungen verzeichnete. Die Verringerung des internen Kapitalbedarfs für Währungsrisiken ist vor allem auf die verbesserte Risikomessung durch unsere weltweit operierende Versicherungsgesellschaft Allianz Global Corporate and Specialty zurückzuführen, die eine feinere Darstellung der Verbindlichkeiten der jeweiligen Währungen erlaubt.

Seit 2010 sind wir in der Lage, die Risikoangaben im Zusammenhang mit dem Marktrisiko, das unsere Hauptrisikofaktor darstellt, anhand unserer neuen Infrastruktur für die Risikoanalyse zu verbessern. Die folgende Tabelle zeigt die erwarteten Änderungen des beizulegenden Nettomarktwertes unserer Vermögenswerte und Verbindlichkeiten in bestimmten finanziellen Standardszenarien. Diese werden anhand realistisch möglicher Einzelbewegungen wesentlicher Marktparameter definiert, wobei jeweils alle anderen Parameter konstant gehalten werden. Die Korrelationen dieser Szenarien haben erhebliche Auswirkungen auf das anhand unseres internen Risikokapitalmodells gemessene letztendliche Gesamtmarktrisiko. Die entsprechenden Ergebnisse sind im folgenden Diagramm aufgeführt. Sie ersetzt die in den Vorjahren bereitgestellten Angaben zum durchschnittlichen, zum hohen und zum niedrigen internen Marktrisikokapital.

<sup>1</sup> auf Grundlage des neuen internen Risikokapitalmodells neu berechnet

### Auswirkungen finanzieller Standardszenarien auf das verfügbare Kapital dargestellt anhand der internen Solvenzquote (Gesamtbestand vor Abzug der Anteile anderer Gesellschafter und nach Steuern und Gruppendifersifikation)

in %

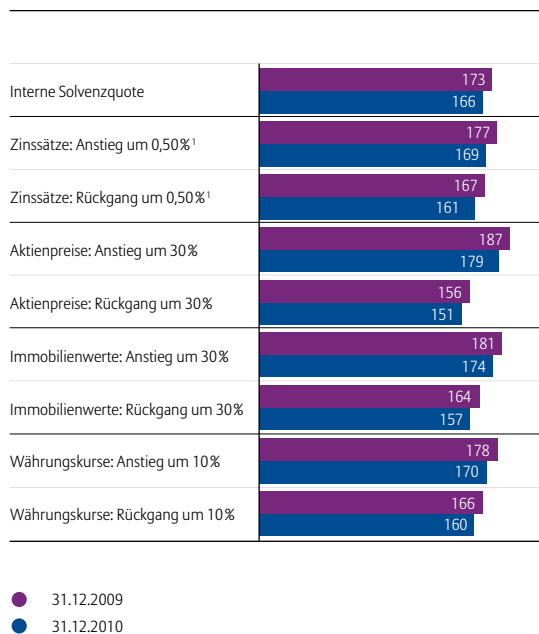

### Schaden- und Unfall- sowie Lebens- und Krankenversicherung

Bedingt durch unser Versicherungsgeschäftsmodell hat das Zinsrisiko für die Schaden- und Unfallversicherung sowie die Lebens- und Krankenversicherung große Relevanz. Dies gilt insbesondere für unser Lebensversicherungsgeschäft, das in der Regel Produkte der langfristigen Vermögensbildung und Sparprodukte anbietet. Einige der lokalen Kapitalmärkte verfügen nicht über hinreichende Bedeutung und Liquidität, um unseren langfristigen Verbindlichkeiten aus der Lebensversicherung gerecht zu werden, und bergen für uns das Risiko strukturellen Ungleichgewichts. Das Zinsrisiko ergibt sich aus den Nettopositionen zwischen unseren Versicherungsverbindlichkeiten und

den Anlagen in festverzinslichen Instrumenten, insbesondere Anleihen, Darlehen und Hypotheken mit unterschiedlicher Fälligkeit und Höhe. Unser internes Risikokapitalmodell zeigt dem Management Zahlungsströme der Verbindlichkeiten. Dadurch können Vermögenswerte und Verbindlichkeiten überwacht und gesteuert werden. Die Vorgaben für die strategische Portfoliostruktur, die Bandbreitenlimits sowie weitere Portfoliolimits (z. B. Aktiensensitivität, Anlagenlaufzeiten) berücksichtigen, werden auf Gruppenebene separat für die Lebens- und Krankenversicherung sowie die Schaden- und Unfallversicherung festgelegt. Damit bleibt gewährleistet, dass die Anlagen eine angemessene Abdeckung der Verbindlichkeiten gegenüber Versicherungsnehmern bieten und so gehalten werden, dass sie Erträge erwirtschaften, die den Erwartungen der Versicherungsnehmer entsprechen.

Die Allianz Gruppe zielt außerdem darauf ab, sich den Diversifikationseffekt zunutze zu machen. So ist in der Schaden- und Unfallversicherung die Fälligkeit der Verbindlichkeiten üblicherweise kurzfristiger als die der Kapitalanlagen, die sie decken. In der Lebens- und Krankenversicherung ist aufgrund der langfristigen Lebensversicherungsverträge im Allgemeinen das Gegenteil der Fall. Dadurch entsteht auf Gruppenebene ein natürlicher, ökonomischer Ausgleich.

Die Laufzeit von Vermögenswerten und Verbindlichkeiten wird durch das Konzept der effektiven Duration abgebildet. Genauer gesagt, misst die effektive Duration, wie sich der Wert eines bestimmten Aktiv- oder Passivportfolios aufgrund von Veränderungen der Zinssätze ändert. Wenn demzufolge Verbindlichkeiten (etwa im Fall langfristiger Lebensversicherungsprodukte) eine längere Duration haben als die Vermögenswerte, durch die sie gedeckt sind, erhöht sich der Wert der Verbindlichkeiten im Fall einer Zinssenkung stärker als jener der Vermögenswerte, was einen Verlust auf die Nettoposition zur Folge hat. Dieser Effekt schlägt sich in den internen Risikokapitalergebnissen nieder und wird durch Limits auf Inkongruenzen zwischen Durationen kontrolliert. Die Limits werden auf Grundlage des internen Risikokapitalmodells auf

¹ Für 2009 wird eine Parallelverschiebung der Zinskurve angenommen. Für 2010 verwenden wir ein Szenario, von dem angenommen wird, dass es mit höherer Wahrscheinlichkeit den noch nicht abschließend festgelegten Solvabilität-II-Standards entspricht. Hierbei wird angenommen, dass die langfristigen Zinssätze für Laufzeiten, für die keine ausreichend umfangreichen und liquiden Märkte vorliegen, auf einen langfristigen Gleichgewichtszinssatz zulaufen, der anhand makroökonomischer Verfahren abgeleitet wird. Dieser Ansatz führt zu einer nichtparallelen Verschiebung der Zinskurven.

Gruppenebene sowohl für die Lebens- und Krankenversicherung als auch für die Schaden- und Unfallversicherung festgelegt.

Ein beträchtlicher Anteil des internen Risikokapitals vor Diversifikation zwischen Risikokategorien für Zinsrisiken der Lebens- und Krankenversicherung entfällt auf Westeuropa, und zwar überwiegend zur Absicherung traditioneller Lebensversicherungsprodukte (zum 31. Dezember 2010: 84 Prozent). Diese traditionellen Produkte zeichnen sich dadurch aus, dass die Versicherungskunden an den Gewinnen (wie an den Verlusten) derjenigen Versicherungsgesellschaften teilhaben, die den Vertrag ausstellen, vorbehaltlich einer garantierten Mindestverzinsung und innerhalb des Ermessens der Geschäftsleitung. Ein Großteil unserer Lebens- und Krankenversicherungsverträge in Deutschland, Frankreich, der Schweiz und Österreich beteiligt die Versicherungskunden in hohem Maße am Risiko, etwa an Markt- und Kreditrisiken, versicherungstechnischen Risiken und Kostenrisiken.<sup>1</sup> Dies begrenzt unsere Risiken.

Andererseits müssen wir bei diesen Verträgen jeweils eine Mindestverzinsung garantieren (so in Deutschland, Frankreich, Italien, den USA und Südkorea).<sup>2</sup> In den meisten dieser Märkte übersteigen die effektiven Einkünfte aus Zinsen auf das Anlagenportfolio jedoch jeweils diese garantierte Mindestverzinsung. Das Zinsrisiko liegt hier also darin begründet, dass die Zinssätze in diesen Märkten unter die zugesagte Verzinsung sinken können. Ein wesentlicher Bestandteil unseres internen Risikokapitalmodells ist es, diese Garantien unter Berücksichtigung des Wechselverhältnisses von Anlagestrategie und unseren Kundenverpflichtungen zu bewerten. Die entsprechenden Risiken werden daher auf Grundlage des internen Risikokapitalmodells über die VaR Limits für Finanzmarktrisiken und Durationsdifferenzen kontrolliert. Darüber hinaus ist unser Asset-Liability-Management-Ansatz eng mit dem internen Risikokapitalrahmen verknüpft und darauf ausgelegt, langfristige

Anlageergebnisse zu erzielen, die über die Verpflichtungen aus Versicherungs- und Investmentverträgen hinausgehen. Eine regionale Diversifikation hilft außerdem, Zinsrisiken einzelner Märkte zu mindern.<sup>3</sup>

Für gewöhnlich dienen die versicherungsbezogenen Aktienanlagen der Allianz Gruppe der Portfoliodiversifizierung und der Stärkung attraktiver, langfristiger Renditen der betreffenden operativen Einheiten. Vorgaben für die strategische Portfoliostruktur sowie Bandbreitenlimits verwenden wir, um diese Risiken zu kontrollieren und zu überwachen. Darüber hinaus unterliegen sie zur Vermeidung unverhältnismäßig großer Konzentrationsrisiken dem konzernweiten System zur Steuerung von Landes- und Schuldnergruppenlimits (CRisP). 81 Prozent des internen Risikokapitals vor Diversifikationseffekten zwischen Risikokategorien, das den Aktienrisiken in diesen Segmenten zugewiesen ist, entfallen auf unsere operativen Einheiten in Deutschland, Italien, Frankreich und den USA.

Die operative Einheit Allianz Life Insurance Company of North America bietet in erster Linie Equity Indexed Annuities und Fixed Annuities sowie Variable Annuities an. Diese Rentenprodukte gewähren den Versicherungskunden in der Regel einige Garantien. Je nach Art gewinnen derlei garantierte Leistungen für den Versicherungskunden an Wert, wenn Zinsen sinken, Aktienmärkte einbrechen oder die Volatilität zunimmt. Wir betreiben Absicherungsgeschäfte, um diese Risiken zu mindern. Während wir die Risiken aus den Garantien der variablen Annuitäten größtenteils selbst tragen, können Verluste von Equity Indexed Annuities und Fixed Annuities mit Versicherungskunden geteilt werden, jeweils vorbehaltlich einer garantierten Mindestverzinsung und eines Höchstsatzes für den Index. Da die Bewertung dieser Garantien in unserem internen Risikokapitalmodell berücksichtigt ist, werden auch sie auf der Grundlage des internen Modells über das Limitsystem gesteuert.

<sup>1</sup> Weitere Informationen zum traditionellen Lebensversicherungsgeschäft mit Gewinnbeteiligung finden sich unter Anmerkung 20 im Konzernanhang.

<sup>2</sup> Weitere Informationen zu den gewichteten Durchschnittsgarantieverzinsungen der wichtigsten operativen Einheiten im Lebens- und Krankenversicherungssegment der Allianz Gruppe finden sich unter Anmerkung 20 im Konzernanhang.

<sup>3</sup> Weitere Informationen zur Konzentration des Lebensversicherungsgeschäfts finden sich unter Anmerkung 20 im Konzernanhang.

2010 hat die Allianz Gruppe Standards für Absicherungsmaßnahmen definiert, um ihr Marktrisiko aufgrund von Optionen und Garantien oder in Lebensversicherungsprodukten eingebetteten Fair-Value-Optionen zu mindern. Sämtliche operativen Einheiten der Lebens- und Krankenversicherung müssen diese Standards einhalten.

## Corporate und Sonstiges

Die primären Marktrisiken im Segment Corporate und Sonstiges sind Aktienrisiken. Das Segment Corporate und Sonstiges steuert die Aktienanlagen der Allianz SE einschließlich strategischer Beteiligungen und ihrer Finanzholdinggesellschaften sowie die emittierten Wertpapiere zur Finanzierung des Kapitalbedarfs der Allianz Gruppe. Einige dieser Wertpapiere gelten als anrechnungsfähiges Kapital für gesetzliche Solvabilitätsanforderungen, und zwar in dem Umfang, wie sie nachrangige Verbindlichkeiten darstellen oder ihrem Wesen nach zeitlich unbegrenzt sind.

Aufgrund der Tatsache, dass das Management unseres Nettozinsrisikos auf Gruppenebene erfolgt, sind die Zinsdurationen der Vermögenswerte und der Verbindlichkeiten des Segments Corporate und Sonstiges nicht unbedingt identisch. Jedoch gibt das auf das Segment Corporate und Sonstiges entfallende interne Zinsrisikokapital diese Nichtübereinstimmung angemessen wieder.

Wie im Vorfeld beschrieben, ergibt sich unser verbleibendes Währungsrisiko in erster Linie aus dem beizulegenden Nettovermögenswert unserer operativen Einheiten, die nicht in Euro berichten. Außerdem werden einige nicht in Euro geführte Vermögenswerte und Verbindlichkeiten auf der Ebene des Segments Corporate und Sonstiges gehalten. Auf Grundlage eines Systems zur Steuerung von Währungslimits wird das Währungsrisiko auf Gruppenebene über den Group Finance Committee Process, unterstützt durch Group Treasury & Corporate Finance, überwacht und gesteuert.

Marktrisiken im Zusammenhang mit unserem Bankgeschäft betrachten wir auf Konzernebene als unerheblich.

## Kreditrisiko

Wir klassifizieren Kreditrisiken nach Kontrahentenrisiken und Länderrisiken. Beide Arten von Risiken werden von unserem internen Kreditrisikokapitalmodell abgedeckt.

Kontrahentenrisiken ergeben sich aus unseren Festzinsanlagen, Barpositionen, Derivaten, strukturierten Transaktionen, Forderungen gegenüber Allianz Vertretern und sonstigen Schuldnern sowie Rückversicherungsforderungen. Auch im Rahmen unserer Kreditversicherungstätigkeit sind wir einem Kontrahentenrisiko ausgesetzt. Wenn sich die Bonität eines Kontrahenten verschlechtert (Migrationsrisiko), sinkt der beizulegende Marktwert des Instruments, was einen Wertverlust des Portfolios zur Folge hat. Das Migrationsrisiko umfasst außerdem das Unvermögen oder die Unwilligkeit des Kontrahenten, vertraglichen Verpflichtungen sowie überfälligen Zahlungen nachzukommen (Ausfallrisiko).

Das Länderrisiko bezieht sich speziell auf Kontrahenten mit grenzübergreifenden Zahlungsverpflichtungen. Beispielsweise können Kapitalbewegungen durch staatlichen Erlass, Währungsmoratorien, das Einfrieren von Geldbeträgen oder Kapitalrückführungsbeschränkungen verboten oder eingeschränkt werden (Übertragungsrisiko). Auch der Währungsumtausch kann verboten oder eingeschränkt werden (Konvertierbarkeitsrisiko).

Die Allianz Gruppe überwacht und steuert Kreditrisiken und Kreditkonzentrationen mit dem Ziel, sicherzustellen, dass sie in der Lage ist, ihren Verpflichtungen gegenüber Versicherungsnehmern bei Fälligkeit nachzukommen, und um angemessene Kapital- und Solvabilitätspositionen für die operativen Einheiten und den Konzern als Ganzes zu wahren. Dieses Ziel wird von dem unter „Konzentration von Risiken“ beschriebenen konzernweiten System zur Steuerung von Landes- und Schuldnergruppenlimits (CRisP)

unterstützt. Darüber hinaus sind Standardanalyseberichte zum Kreditportfolio für die Anlage- und Risikofunktionen auf Gruppenebene sowie auf der Ebene der operativen Einheiten verfügbar. Sie ermöglichen eine genaue Überwachung des Kreditrisikoprofils der einzelnen Portfolios.

Das interne Kreditrisikokapitalmodell der Allianz Gruppe stellt einen wesentlichen Bestandteil des allgemeinen internen Risikokapitalsystems dar. Es wird zentral entwickelt, parametrisiert und kontrolliert. Konzernweite Kreditdaten werden anhand eines zentralisierten Prozesses und unter Verwendung standardmäßiger Schuldner- und Schuldnergruppenzuordnungen erfasst.

Das interne Kreditrisikokapitalmodell beruht auf Schuldnerbonitäten und Schätzungen bezüglich des Ausfallrisikos, des Verlustes bei Ausfall und der Ausfallkorrelationen. Ausfallkorrelationen erfassen Abhängigkeiten zwischen einzelnen Schuldnern innerhalb des Portfolios bezüglich ihrer Ausfallwahrscheinlichkeit. Die Schätzungen für diese Parameter beruhen auf statistischen Analysen und Fachgutachten. Auch unsere Aggregationsmethode ist mit dem in der Branche üblichen Ansatz des „Structural Models“ vergleichbar. Dieses Modell unterstellt den Ausfall eines Unternehmens, wenn der Wert seines Gesamtvermögens niedriger ist als seine Gesamtverbindlichkeiten. Da Vermögenswertänderungen eines Unternehmens festlegen, ob dieses als Schuldner ausfällt, bestimmt die Abhängigkeit der Vermögenswerte verschiedener Unternehmen voneinander die Korrelation zwischen den Ausfällen. Das Kreditrisiko individueller Schuldner wird gruppenweit zusammengefasst und unter Verwendung von Monte-Carlo-Simulationen bewertet. So erhalten wir das Verlustprofil eines bestimmten Portfolios, das heißt die Wahrscheinlichkeitsverteilung der Verluste. Die Portfolio-Verlustprofile werden auf unterschiedlichen Ebenen unserer Portfoliohierarchie berechnet (also auf der Ebene der jeweiligen operativen Einheit oder auf Segmentebene). Sie werden dem allgemeinen internen Risikokapitalmodell zur weiteren Zusammenfassung über Risikoquellen hinweg zugeführt mit dem Ziel, das diversifizierte interne Kreditrisikokapital der Gruppe abzuleiten.

### Zugeordnetes internes Kreditrisikokapital nach Geschäftssegment (Gesamtbestand vor Steuern und Abzug der Anteile anderer Gesellschafter) zum 31. Dezember 2010 (31. Dezember 2009)<sup>1</sup>

Vor Diversifikationseffekten zwischen Risikokategorien, in Mio €

Gesamtes internes Kreditrisikokapital der Gruppe: 6 871 (6 152)  
Anteil am internen Gesamtrisikokapital der Gruppe: 15% (14%)

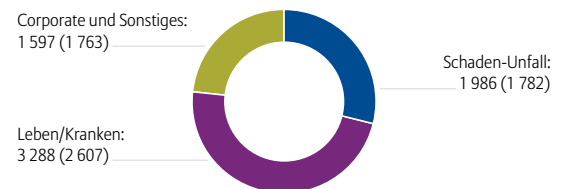

Gruppendifersifiziert, in Mio €

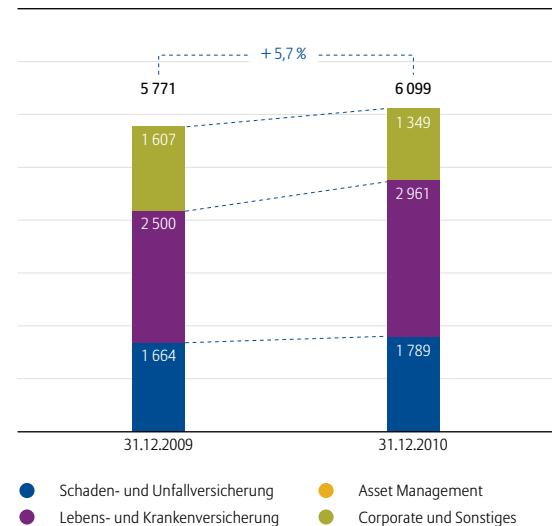

Unser gesamter gruppendifersifizierter interner Kapitalbedarf für das Kreditrisiko der Schaden- und Unfallversicherung sowie der Lebens- und Krankenversicherung ist gestiegen, da sich das Risiko infolge neuer Rückversicherungsverträge und Finanzanlagen sowie von Wechselkursänderungen erhöht hat.

<sup>1</sup> auf Grundlage des neuen internen Risikokapitalmodells neu berechnet

Die folgende Tabelle zeigt das durchschnittliche interne Risikokapital für Kreditrisiken über die vier Quartale der Jahre 2010 und 2009 sowie die Höchst- und Niedrigstbeträge über die Quartale aus jeweils beiden Jahren.

**Durchschnittliches zugeordnetes internes Kreditrisikokapital sowie Höchst- und Tiefstbeträge (Gesamtbestand vor Abzug der Anteile anderer Gesellschafter und nach Gruppendiversifikation)**

|                           | Summe                      |                            |
|---------------------------|----------------------------|----------------------------|
|                           | 2010 <sup>1</sup><br>Mio € | 2009 <sup>2</sup><br>Mio € |
| Zum 31. Dezember          |                            |                            |
| <b>Über Quartalswerte</b> |                            |                            |
| Durchschnitt              | 6 602                      | 3 692                      |
| Hoch                      | 7 153                      | 3 792                      |
| Niedrig                   | 6 099                      | 3 549                      |

Die Veränderungen in den oben gezeigten Werten zwischen 2009 und 2010 sind durch Änderungen im internen Risikokapitalmodell erklärt. Erläuterungen hinsichtlich der Änderung des Risikokapitalmodells sind dem Kapitel „Einführung eines neuen internen Risikokapitalsystems“ zu entnehmen.

## Schaden- und Unfall-, Lebens- und Krankenversicherung sowie Corporate und Sonstiges

Das Kreditrisiko der Schaden- und Unfall- sowie der Lebens- und Krankenversicherung besteht aus dem Kreditrisiko, das sich im Zusammenhang mit Rückversicherungskontrakten ergibt, und jenem, das sich auf das Emittenten- und Kontrahentenrisiko in unserem Kapitalanlagengeschäft bezieht. Für das Segment Corporate und Sonstiges berücksichtigt unser internes Risikokapitalmodell nur das Kreditrisiko aus Kapitalanlagen, weil Rückversicherungsaktivitäten in der Regel der Schaden- und Unfallversicherung zugeordnet werden. Wir betrachten Kreditrisiken im Zusammenhang mit unserem Bankgeschäft auf Konzernebene als unerheblich.

## Kreditrisiko – Rückversicherung

Die Allianz Gruppe begrenzt ihre Haftung aus dem Versicherungsgeschäft, indem sie einen Teil der übernommenen Risiken an den internationalen Rückversicherungsmarkt weitergibt. Hierdurch sind wir einem Kreditrisiko bezüglich externer Rückversicherer ausgesetzt. Weil manchmal in der Bilanz geführte Forderungen an Rückversicherer nicht wiederzuerlangen sind oder bei geltenden Rückversicherungsverträgen Zahlungen ausfallen, können über einen bestimmten Zeitraum hinweg Verluste auftreten.

Zum 31. Dezember 2010 wurden 6 Prozent unseres gesamten internen Kreditrisikokapitals vor Diversifikationseffekten zwischen Risikokategorien den Kreditrückversicherungsrisiken zugeordnet. Davon entfallen 58 Prozent auf Rückversicherungskontrahenten in Deutschland und den USA.

Ein spezielles Team wählt unsere Rückversicherungspartner aus, wobei für uns ausschließlich Unternehmen mit hoher Kreditwürdigkeit in Betracht kommen. Wir können ferner Akkreditive, Bareinlagen oder andere finanzielle Maßnahmen fordern, um unser Kreditrisiko weiter zu senken. Zum 31. Dezember 2010 entfielen 78 (2009: 76) Prozent der Rückversicherungsforderungen der Allianz Gruppe auf Rückversicherer, die von Standard & Poor's zumindest ein „A“-Rating erhalten haben. Die Forderungen an Rückversicherer, die nicht geratet sind, machten zum 31. Dezember 2010 21 (2009: 23) Prozent der gesamten Rückversicherungsforderungen aus. Zu dieser Kategorie zählten Engagements bei nichtgerateten Brokern, Unternehmen in der Abwicklung und Pools sowie bei Unternehmen, die nur durch A.M. Best geratet sind.

<sup>1</sup> Werte vor Steuern basieren auf dem neuen internen Risikokapitalmodell und sind konsistent mit der Darstellung des internen Kreditrisikokapitals in diesem Abschnitt.  
<sup>2</sup> Angaben nach Steuern entsprechend dem früheren internen Risikokapitalmodell. Erläuterungen hinsichtlich der Änderung des Risikokapitalmodells sind dem Kapitel „Einführung eines neuen internen Risikokapitalsystems“ zu entnehmen.



**Forderungen gegenüber Rückversicherern nach Ratingklassen<sup>1</sup> zum 31. Dezember 2010**

in Mrd €

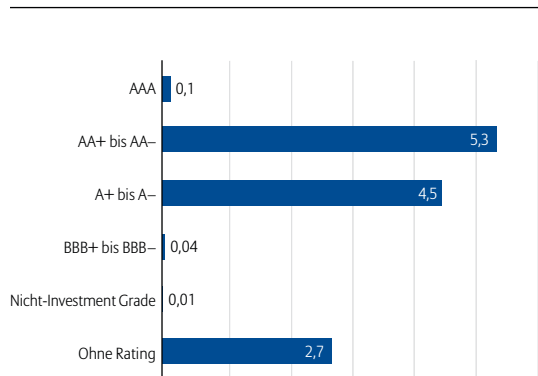**Kreditrisiko – Kapitalanlage**

Im Rahmen unseres Versicherungsgeschäfts nehmen wir Prämien von unseren Kunden ein und investieren diese weitgehend in festverzinsliche Instrumente. Diese Anlagenportfolios decken letztlich die künftigen Schäden unserer Kunden. Darüber hinaus müssen wir das für die Übernahme der versicherten Risiken erforderliche Eigenkapital anlegen. Daher sind wir einem Kreditrisiko ausgesetzt.

Für bestimmte Lebensversicherungsprodukte sind wir jedoch in der Lage, Verluste aus Kreditereignissen mit Versicherungskunden zu teilen, wie im Abschnitt über Marktrisiken dargelegt ist.

Zum 31. Dezember 2010 wurden 80 Prozent unseres gesamten internen Kreditrisikokapitals vor Diversifikationseffekten zwischen Risikokategorien für Kreditrisiken aus Kapitalanlagen der Schaden- und Unfall-, der Lebens- und Krankenversicherung sowie dem Segment Corporate und Sonstiges zugeordnet. Hier-von beziehen sich 64 Prozent auf Emittenten und Kontrahenten in den USA und Deutschland.

Wir begrenzen das Kreditrisiko unserer Festzinsanlagen dadurch, dass wir hohe Anforderungen an die Kreditwürdigkeit unserer Emittenten stellen, unsere Kapitalanlagen diversifizieren und Limits für Schuldnerkonzentrationen einrichten. Zum 31. Dezember

2010 verfügten rund 94 (2009: 95) Prozent der Festzinsanlagen unserer Versicherungsgesellschaften über ein Investment Grade Rating, und rund 85 (2009: 87) Prozent der Festzinsanlagen waren auf Schuldner mit zumindest einem „A“-Rating von Standard & Poor's verteilt.

**Festverzinsliche Kapitalanlagen nach Ratingklassen zum 31. Dezember 2010**

beizulegende Marktwerte in Mrd €

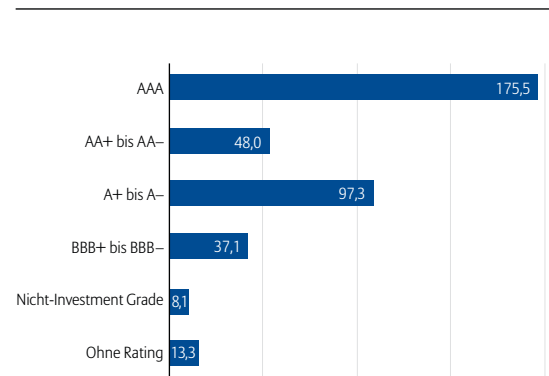

Zusätzlich zu diesen Festzinsanlagen verfügt die Allianz Gruppe hauptsächlich in Deutschland und den USA über Portfolios von nicht handelbaren, selbstausgegebenen Hypothekendarlehen. 96 Prozent des deutschen Hypothekenportfolios wiesen zum Berichtsjahresende eine Bonität auf, die wir nach unserer internen Bewertung mit einem Investment Grade Rating von Standard & Poor's gleichsetzen. Die US-amerikanischen gewerblichen Hypothekenanlagen werden bei der Kreditvergabe im Einzelnen dahingehend überprüft, ob sie unseren konservativen Risikoübernehmerichtlinien entsprechen und Kreditwürdigkeit gegeben ist. Im Berichtszeitraum wurden zwei Fälle von überfälligen oder zwangsvollstreckten gewerblichen Hypothekendarlehen, hervorgerufen durch die Finanzkrise, beobachtet. Es gab seit 1994 insgesamt nur fünf Fälle von überfälligen oder zwangsvollstreckten gewerblichen Hypothekendarlehen. Deshalb, und basierend auf zusätzlichen Stress-tests und Analysen, halten wir ein Investment Grade Rating für das Portfolio immer noch für gerechtfertigt. Die US-amerikanischen Versicherungsgesellschaften der Allianz sind mit weniger als 1,0 Millionen Euro im Hypothekengeschäft mit Wohnimmobilien engagiert.

<sup>1</sup> Bezieht sich auf das Bruttorisiko, aufgegliedert nach Rückversicherern.

### Kreditrisiko – Kreditversicherung

Das Prämienrisiko, dem unser Kreditversicherer Euler Hermes aufgrund seines Geschäftsmodells ausgesetzt ist, stellt eine Spezialform von Kreditrisiko dar. Im Rahmen eines Kreditversicherungsvertrags schützt der Versicherungsnehmer einen kurzfristigen Warenkredit, den er einem Käufer gewährt hat, vor Kreditverlusten, indem er das Risiko teilweise an Euler Hermes überträgt. Wenn sich die Bonität eines Käufers verschlechtert (auch etwa im Fall eines Ausfalls), ist dieser nicht in der Lage, seinen Zahlungsverpflichtungen nachzukommen, und Euler Hermes ersetzt dem Versicherungsnehmer den Schaden. Ein Kreditrisiko ergibt sich aus potenziellen Schadenzahlungen innerhalb der Limits, die Euler Hermes seinen Versicherungsnehmern gewährt.

Die für die Modellierung von Kreditversicherungsportfolios verwendeten Parameter werden von Euler Hermes auf der Grundlage selbst entwickelter Modelle geschätzt und als Input-Parameter an das interne Kreditrisikokapitalmodell der Gruppe geleitet. Da Kreditrisiken aktiv von Euler Hermes verwaltet werden, wird insbesondere ein firmeneigenes Bonitätssystem statt der langfristigen öffentlichen Ratings, die primär für Investmentportfolios verwendet werden, angewandt. Euler-Hermes-Ratings beurteilen die kurzfristige Bonität eines Unternehmens. Hierfür werden diverse Risikokennzahlen berücksichtigt, die über den Markt sowie von Versicherungsnehmern erhältlich sind.

Zum 31. Dezember 2010 wurden 14 Prozent unseres gesamten internen Kreditrisikokapitals vor Diversifikation zwischen Risikokategorien den Kreditversicherungsrisiken von Euler Hermes zugeordnet.

### Versicherungstechnische Risiken

Versicherungstechnische Risiken setzen sich in erster Linie aus Prämien- und Reserverisiken (Schaden- und Unfallversicherung) sowie biometrischen Risiken (Lebens- und Krankenversicherung) zusammen. Im Asset Management und im Bankgeschäft sind versicherungstechnische Risiken unerheblich. Das Segment Corporate und Sonstiges bietet einige Garantien, durch die geringfügige Teile des versicherungstechnischen Risikos der jeweiligen Gesellschaften auf dieses Segment übertragen werden. Das Risiko wird jedoch in der Regel durch interne Rückversicherung weitergereicht und der Schaden- und Unfallversicherung zugewiesen.

### Zugeordnetes internes versicherungstechnisches Risikokapital nach Risikoquelle<sup>1</sup> (Gesamtbestand vor Steuern und Abzug der Anteile anderer Gesellschafter) zum 31. Dezember 2010 (31. Dezember 2009)<sup>2</sup>

Vor Diversifikationseffekten zwischen Risikokategorien, in Mio €

Gesamtes internes versicherungstechnisches Risikokapital der Gruppe: 12 028 (10 944). Anteil am internen Gesamtrisikokapital der Gruppe: 27% (25%)

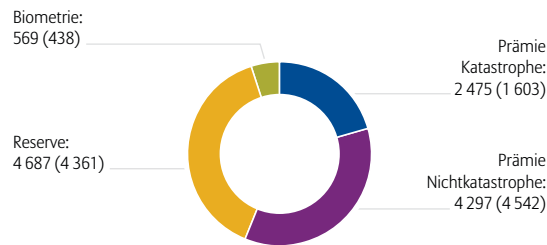

Gruppendiversifiziert, in Mio €

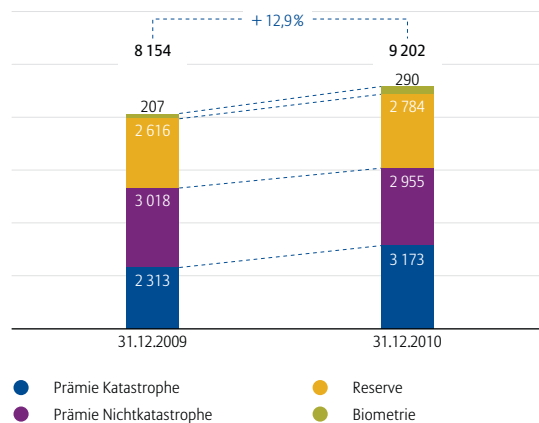

Unser gesamter gruppendiversifizierter interner Kapitalbedarf für das versicherungstechnische Risiko stieg in erster Linie aufgrund höherer Beitragseinnahmen für Katastrophenrisiken. Dabei waren vor allem zwei Faktoren maßgeblich. Erstens änderten wir unser Rückversicherungsprogramm nach einer Entscheidung des Group Risk Committee. Wir verringerten den Versicherungsschutz externer Rückversicherer für extreme Großschäden mit dem Ziel, den Versicherungsschutz für Mehrfachschäden größerer Häufigkeit und mittlerer Größenordnung zu erhöhen und Ertragsschwankungen zu mindern. Zweitens erhöhte sich unser Risiko für Naturkatastrophen aufgrund

<sup>1</sup> Da die Risiken anhand eines ganzheitlichen Konzepts auf ökonomischer Basis gemessen werden, werden für das interne Risikokapital Rückversicherungseffekte berücksichtigt.

<sup>2</sup> Neuberechnung anhand des neuen internen Risikokapitalmodells

eines wachsenden Geschäftsvolumens und ungünstiger Entwicklungen der Wechselkurse, besonders im Zusammenhang mit dem US-Dollar, dem australischen Dollar und dem japanischen Yen.

### Zugeordnetes internes versicherungstechnisches Risikokapital nach Geschäftssegment<sup>3</sup> (Gesamtbestand vor Steuern und Abzug der Anteile anderer Gesellschafter) zum 31. Dezember 2010 (31. Dezember 2009)<sup>4</sup>

Vor Diversifikationseffekten zwischen Risikokategorien, in Mio €

Gesamtes internes versicherungstechnisches Risikokapital der Gruppe: 12 028 (10 944). Anteil am internen Gesamtrisikokapital der Gruppe: 27% (25%)

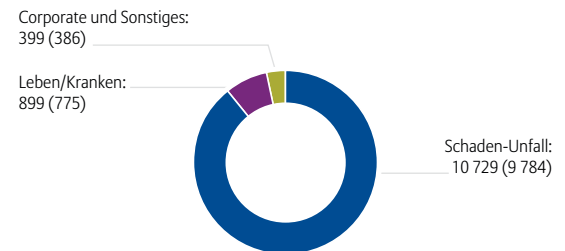

Gruppendiversifiziert, in Mio €

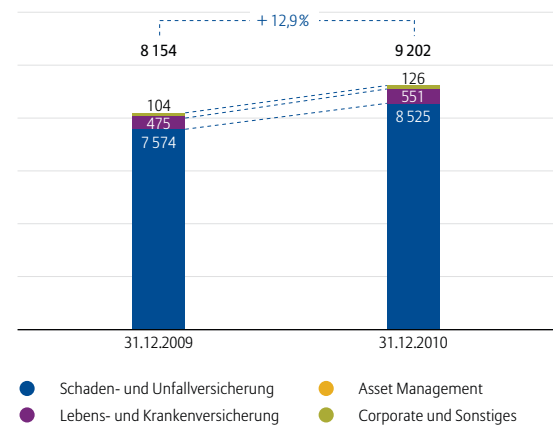

● Schaden- und Unfallversicherung ● Asset Management  
● Lebens- und Krankenversicherung ● Corporate und Sonstiges

<sup>3</sup> Da die Risiken anhand eines ganzheitlichen Konzepts auf ökonomischer Basis gemessen werden, werden für das interne Risikokapital Rückversicherungseffekte berücksichtigt. Unter Berücksichtigung eines Selbstbehalts bestehen bedingte Verpflichtungen in Höhe von bis zu maximal 465 Mio USD gegenüber Fireman's Fund Insurance Co., Novato, im Zusammenhang mit bestimmten Versicherungsrückstellungen, die dem Segment Corporate und Sonstiges zugeordnet werden.

<sup>4</sup> Neuberechnung anhand des neuen internen Risikokapitalmodells

Die folgende Tabelle zeigt das durchschnittliche interne Risikokapital für versicherungstechnische Risiken über die vier Quartale von 2010 und 2009 sowie die Höchst- und Niedrigstbeträge über die Quartale aus jeweils beiden Jahren.

**Durchschnittliches zugeordnetes internes versicherungstechnisches Risikokapital nach Risikoquelle  
(Gesamtbestand vor Abzug der Anteile anderer Gesellschafter und Gruppendiversifikation)**

|                           | Prämie Katastrophe |                   | Prämie Nichtkatastrophe |                   | Reserve           |                   | Biometrie         |                   | Gruppe insgesamt  |                   |
|---------------------------|--------------------|-------------------|-------------------------|-------------------|-------------------|-------------------|-------------------|-------------------|-------------------|-------------------|
|                           | 2010 <sup>1</sup>  | 2009 <sup>2</sup> | 2010 <sup>1</sup>       | 2009 <sup>2</sup> | 2010 <sup>1</sup> | 2009 <sup>2</sup> | 2010 <sup>1</sup> | 2009 <sup>2</sup> | 2010 <sup>1</sup> | 2009 <sup>2</sup> |
|                           | Mio €              | Mio €             | Mio €                   | Mio €             | Mio €             | Mio €             | Mio €             | Mio €             | Mio €             | Mio €             |
| <b>Über Quartalswerte</b> |                    |                   |                         |                   |                   |                   |                   |                   |                   |                   |
| Durchschnitt              | 3 040              | 1 452             | 3 139                   | 3 721             | 2 839             | 2 514             | 389               | 134               | 9 407             | 7 820             |
| Hoch                      | 3 173              | 1 473             | 3 253                   | 3 883             | 2 961             | 2 544             | 592               | 305               | 9 847             | 7 977             |
| Niedrig                   | 2 910              | 1 434             | 2 955                   | 3 554             | 2 685             | 2 480             | 290               | 72                | 9 111             | 7 669             |

## Schaden- und Unfallversicherung

Unser Schaden- und Unfallversicherungsgeschäft ist Prämien- und Reserverisiken ausgesetzt, die sowohl auf das laufende Geschäft als auch auf in diesem Jahr erstmals beziehungsweise wieder aufgenommene Geschäfte zurückzuführen sind. Ein wesentlicher Teil des dem versicherungstechnischen Risiko zugeordneten internen Risikokapitals vor Diversifikation zwischen Risikokategorien in der Schaden- und Unfallversicherung wurde zum 31. Dezember 2010 unseren Gesellschaften in Deutschland, Italien, Frankreich und den USA zugewiesen (47 Prozent).

### Prämienrisiko

Im Zuge dieser Geschäftstätigkeit erhalten wir von unseren Kunden Prämien und bieten ihnen dafür Versicherungsschutz. Sollten die Prämien zur Abdeckung der anfallenden Schadenaufwendungen über eine Zeitspanne von einem Jahr aufgrund unerwarteter Ereignisse nicht ausreichend sein, werden wir Verluste (Prämienrisiko), das heißt eine niedrigere versicherungstechnische Rentabilität als vorhergesehen, in Kauf nehmen müssen. Veränderungen der Rentabilität über die Zeit lassen sich auf der Grundlage von Schadenquoten und deren Schwankungen messen.<sup>3</sup>

### Schadenquoten in der Schaden- und Unfallversicherung<sup>4</sup> für die letzten sieben Jahre

in %

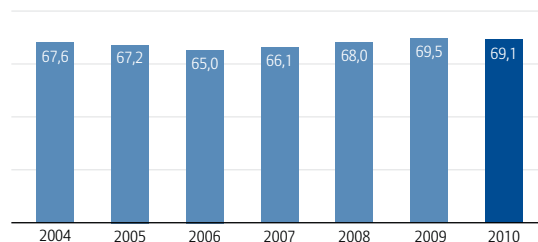

Man unterscheidet beim Prämienrisiko zwischen Katastrophenrisiko (CAT-Risiko) und Nichtkatastrophenrisiko (Nicht-CAT-Risiko). In erster Linie quantifizieren wir das Prämienrisiko mittels versicherungsmathematischer Modelle, die genutzt werden, um Verlustverteilungen abzuleiten.

Das Prämienrisiko wird von der Allianz Gruppe und den örtlichen operativen Einheiten aktiv gesteuert. Die Beurteilung der Risiken im Rahmen des Versicherungsprozesses ist ein wesentliches Element unseres Risikomanagementsystems. Es bestehen eindeutige zentral festgelegte versicherungstechnische Grenzen und Beschränkungen, die innerhalb der gesamten Gruppe angewandt werden. Spezielle, als Risikoträger

<sup>1</sup> Werte vor Steuern basieren auf dem neuen internen Risikokapitalmodell und sind konsistent mit der Darstellung des internen versicherungstechnischen Risikokapitals in diesem Abschnitt.

<sup>2</sup> Angaben nach Steuern entsprechend dem früheren internen Risikokapitalmodell. Erläuterungen hinsichtlich der Änderung des Risikokapitalmodells sind dem Kapitel „Einführung eines neuen internen Risikokapitalsystems“ zu entnehmen.

<sup>3</sup> Eine Aufschlüsselung der Schadenquoten nach Geschäftsbereichen in den letzten drei Jahren ist dem Kapitel „Schaden- und Unfallversicherung – Schaden- und Unfallversicherungsgeschäft nach Geschäftsbereichen“ zu entnehmen.

<sup>4</sup> Verhältnis von Schadenaufwendungen (netto) zu verdienten Beiträgen (netto)

fungierende Versicherungszweige wie Allianz Global Corporate & Specialty übernehmen bestimmte Risiken, die einschlägiges Fachwissen erfordern. Zusätzlich zu den zentral festgelegten versicherungstechnischen Grenzen werden von den örtlichen operativen Einheiten spezielle Limits angewandt, die der jeweiligen Geschäftsumgebung angepasst sind. Sowohl auf der Ebene der örtlichen operativen Einheiten als auch auf Gruppenebene wird das Prämienrisiko in Bezug auf die zugrunde liegenden Basiswerte durch Diversifikationseffekte zwischen verschiedenen Geschäftszweigen auf lokaler Ebene und verschiedenen Märkten auf Konzernebene positiv beeinflusst. Zusätzlich werden die Risiken durch externe Rückversicherungsverträge abgeschwächt.

Eine besondere Herausforderung für das Risikomanagement sind wegen der Kumulierungseffekte sowie ihrer naturbedingt äußerst begrenzten Vorhersehbarkeit Naturkatastrophen wie Erdbeben, Stürme und Überschwemmungen. Um solche Risiken zu quantifizieren und ihre potenziellen Auswirkungen besser abzuschätzen, nutzen wir spezielle Methoden zur Modellierung. Dabei werden Portfoliodaten, etwa über die geografische Verteilung sowie über Wert und Eigenschaft der versicherten Objekte, mit simulierten Naturkatastrophenszenarien kombiniert. Aus dieser Zusammenschau lassen sich sodann mögliche Schadenauswirkungen und -häufungen feststellen. Wo solche Wahrscheinlichkeitsmodelle noch nicht existieren, zum Beispiel für das Überschwemmungsrisiko in Italien, verwenden wir deterministische, szenariogestützte Ansätze für die Einschätzung der möglichen Verluste.

2010 dehnten wir die von unserem Modell erfassten Anwendungsbereiche weiter aus und nahmen in unser integriertes Risikomodell für Naturkatastrophen einige zusätzliche Regionen und Gefahren auf, außerdem Risiken aus kleineren Geschäftsvolumina in Osteuropa und Asien.

Im Zusammenhang mit Naturkatastrophen entsprach das Nettorisiko der Gruppe 2010 unserer generellen Risikoneigung. Um die Ertragsvolatilität zu einem gewissen Teil weiter zu senken, erwarben wir etwas mehr Kapazitäten für Szenarien in einigen unserer Regionen mit kleineren Geschäftsvolumina, auch unter Ausnutzung der niedrigeren Preise. Unser Rückversicherungsprogramm war ebenfalls weiterhin auf die Verringerung der Ertragsvolatilität ausgerichtet, indem der Schutz gegen mehrere, häufiger auftretende und mittelgroße Verluste erhöht wurde.

Etwa 35 Prozent unseres internen Prämienrisikokapitals vor Diversifikationseffekten zwischen Risikokategorien im Geschäftsjahr 2010, das auf das Naturkatastrophenrisiko entfällt, lag bei unseren örtlichen operativen Gesellschaften in Deutschland und den USA. Unsere größten Risiken in Bezug auf Naturkatastrophen sind in der folgenden Tabelle dargestellt:

**Die fünf größten globalen Kumulationsszenarien: Verlustpotenzial für einzelne Ereignisse, und zwar unter Annahme einer Eintrittswahrscheinlichkeit von einmal in 250 Jahren (das heißt 0,4 Prozent) und bereinigt um die Rückversicherung**

| Zum 31. Dezember 2010                     | Verlustpotenzial <sup>1</sup><br>Mio € |
|-------------------------------------------|----------------------------------------|
| Orkane in Europa (außertropische Zyklone) | 860                                    |
| Hurrikane in den USA (tropische Zyklone)  | 820                                    |
| Erdbeben in Australien                    | 780                                    |
| Hagel in Deutschland                      | 730                                    |
| Erdbeben in Kalifornien, USA              | 670                                    |

### Reserverisiko

Für in der Vergangenheit eingetretene und noch nicht abgewickelte Schadenersatzansprüche schätzen und halten wir Reserven. Sollten diese Reserven durch Eintritt unerwarteter Veränderungen nicht ausreichen, um künftige Schadenersatzansprüche abzudecken, verzeichnen wir Verluste (Reserverisiko). Ein Indikator für diese Abdeckung ist die Höhe des Nettoüberschusses<sup>2</sup> im Vergleich zu den anfänglichen

<sup>1</sup> Basierend auf aktuellen Schätzungen werden Verlustpotenziale auf der Grundlage fremdentwickelter Modelle und eigener Modelle, entwickelt von unseren eigenen Experten, berechnet. Alle Modelle unterliegen Unsicherheiten bezüglich wissenschaftlicher Annahmen und zugrunde liegender Daten.

<sup>2</sup> Der kumulierte Nettoüberschuss resultiert aus der Neubewertung der Rückstellungen für noch nicht abgewickelte Versicherungsfälle für in früheren Geschäftsjahren eingetretene Schäden und enthält Effekte aus der Währungsumrechnung. Weitere Informationen finden sich in Anmerkung 19 des Konzernabschlusses.

Rückstellungen, die in Anmerkung 19 zu unserem Konzernabschluss auf der Grundlage eines Kalenderjahres für die letzten fünf Jahre ausgewiesen werden.

Die künftigen Unsicherheiten in Bezug auf die Entwicklung potenzieller Verluste werden durch die Risikozeichnung maßgeblich beeinflusst. Im Allgemeinen wird die Veränderung unserer Reserven für Versicherungsfälle von den operativen Einheiten auf der Ebene des Geschäftszweiges laufend verfolgt.<sup>1</sup> Die Ergebnisse werden von den lokalen Rückstellungsausschüssen mindestens vierteljährlich besprochen. Bei Bedarf werden die Rückstellungen nach versicherungsmathematischen Standards neu bewertet. Zusätzlich werden die Rückstellungen von den operativen Einheiten normalerweise einmal im Jahr einer Unsicherheitsanalyse unterzogen. Die hier eingesetzten Verfahren ähneln denjenigen zur Berechnung des Reserverisikos. Die Allianz Gruppe führt regelmäßig unabhängige Überprüfungen dieser Analysen durch, wobei Gruppenvertreter an den Sitzungen des örtlichen Rückstellungsausschusses teilnehmen. Ähnlich dem Prämienrisiko wird auch das Reserverisiko durch den Diversifikationseffekt zwischen verschiedenen Geschäftszweigen auf lokaler Ebene und verschiedenen Märkten auf Gruppenebene positiv beeinflusst.

### **Versicherungstechnische Risiken im Firmen- und Industriekundengeschäft**

Die Grundlage für angemessene Entscheidungen zur Risikoübernahme und zum Risikomanagement bildet unser solides gruppenweites Risikozeichnungssystem. Dieses hilft uns, potenziell hohe Einzelrisiken, etwa Reputationsrisiken, zu beschränken. Zudem legt es gemeinsame Mindeststandards zur Risikoübernahme im internationalen Schaden- und Unfallversicherungsgeschäft für Firmen- und Industriekunden fest, und zwar für Erst- und Rückversicherungen.

Spezielle Mindeststandards dienen dazu, uns vor unerwünschten oder übermäßigen Risiken zu schützen. Mit ihnen wird festgelegt, welche Risiken nicht versichert werden können. Sie bieten klare Anforderungen an Genehmigungen auf den verschiedenen Konzernebenen. Vor allem bestimmen sie, welche Aktivitäten durch das Group Insurance Risk Committee, ein Unterkomitee des Group Risk Committee, zu genehmigen oder an dieses zu berichten sind. Diese Standards dokumentieren auch die einzelnen Zuständigkeiten bei der Risikozeichnung und legen verbindliche Vorschriften für einzelne Policen oder Versicherungsgeschäfte fest. Für Ausnahmen bedarf es der Zustimmung des lokalen Chief Underwriting Officer und der Unterrichtung des Group Insurance Risk Committee.

## **Lebens- und Krankenversicherung**

### **Biometrisches Risiko**

Wir berücksichtigen Sterblichkeits- und Langlebighkeitsrisiken, die Unsicherheiten darstellen, wie hoch die Leistungen für Versicherungskunden sein werden. Diese Unsicherheit ist dadurch bedingt, dass es nicht vorhersehbar ist, wann eine versicherte Person stirbt. Bei der Modellierung dieser Risiken in unserem internen Risikokapitalmodell unterscheiden wir zwischen Sterblichkeitsniveau, Sterblichkeitstrend und Kalamitätsrisiko. Biometrische Annahmen, etwa über die Lebenserwartung, spielen hier eine bedeutende Rolle.<sup>2</sup>

Unser Lebens- und Krankenversicherungsgeschäft weist zum 31. Dezember 2010 keine bedeutende Konzentration biometrischer Risiken auf. Dies gilt zum einen deshalb, weil das Portfolio sowohl aus Lebens- als auch aus Rentenversicherungen besteht, also aus Sterblichkeits- und Langlebighkeitsrisiken, und auf diese Weise ein portfoliointerner Risikoausgleich stattfindet. Zum anderen verhindert unsere geografische Diversifikation eine übermäßige Konzentration biometrischer Risiken.<sup>3</sup>

<sup>1</sup> Weitere Informationen finden sich in Anmerkung 19 des Konzernabschlusses.

<sup>2</sup> Weitere Informationen zu biometrischen Annahmen finden sich im Abschnitt „Internes Risikokapitalssystem – Nicht vom Markt bestimmte Annahmen“.

<sup>3</sup> Weitere Informationen zur Konzentration von Versicherungsrisiken im Segment Lebens- und Krankenversicherungen finden sich unter Anmerkung 20 im Konzernabschluss.



Gemäß unserem Produktmanagement für Lebensversicherungsprodukte obliegen Produktentwicklung und -genehmigung den operativen Einheiten. Es bestehen auf Konzernebene jedoch eindeutige Richtlinien für neue Produkte mit hohem Risiko oder riskanten Produktmerkmalen, die gewährleisten, dass die operativen Einheiten sich der damit verbundenen Risiken bewusst sind, alternative risikosenkende Merkmale in der Entwicklungsphase berücksichtigt werden und maßgebliche praxisnahe Annahmen als wesentlicher Bestandteil des Geschäftsmodells ausdrücklich anerkannt werden. Im Genehmigungsverfahren werden auch Rentabilitätsstandards festgelegt und angesichts der lokalen Marktsituation gleichzeitig einzelne, aus Wettbewerbsgründen erforderliche Ausnahmen berücksichtigt. Die Rentabilität neuer und bestehender Geschäfte wird ständig überprüft und regelmäßig an den Vorstand der Allianz SE berichtet.

## Geschäftsrisiko

Geschäftsrisiken setzen sich aus operationellen Risiken und Kostenrisiken zusammen. Operationelle Risiken beziehen sich auf Verluste, die entstehen, weil Betriebsabläufe, Mitarbeiter oder Systeme ungeeignet sind und Fehlentwicklungen nach sich ziehen, weil externe Ereignisse wie Stromausfall oder Überschwemmung zu einer Betriebsunterbrechung führen, weil Betrugsschäden durch Mitarbeiter anfallen oder weil das Unternehmen bei einem Gerichtsverfahren unterliegt. Während in den operationellen Risiken auch rechtliche Risiken enthalten sind, werden die strategischen und die Reputationsrisiken im Einklang mit den Anforderungen von Solvency II und Basel II ausgeschlossen. Kostenrisiken ergeben sich aus ungünstigen Veränderungen von Geschäftsannahmen und unerwarteten Ergebnisschwankungen, die dadurch entstehen, dass die Aufwendungen nicht im selben Ausmaß verringert werden können, wie die Erträge sinken. In die Kostenrisiken ist auch das Budgetdefizitrisiko eingeschlossen, das aus geringeren Einnahmen oder höheren Kosten herrührt, als dies im Budget vorgesehen ist.

### Zugeordnetes internes Geschäftsrisikokapital nach Geschäftssegment (Gesamtbestand vor Steuern und Abzug der Anteile anderer Gesellschafter) zum 31. Dezember 2010 (31. Dezember 2009)<sup>1</sup>

Vor Diversifikationseffekten zwischen Risikokategorien, in Mio €

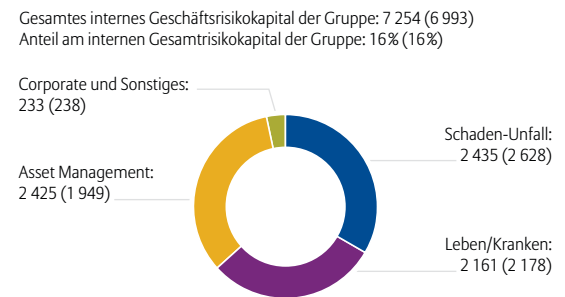

Gruppendiversifiziert, in Mio €

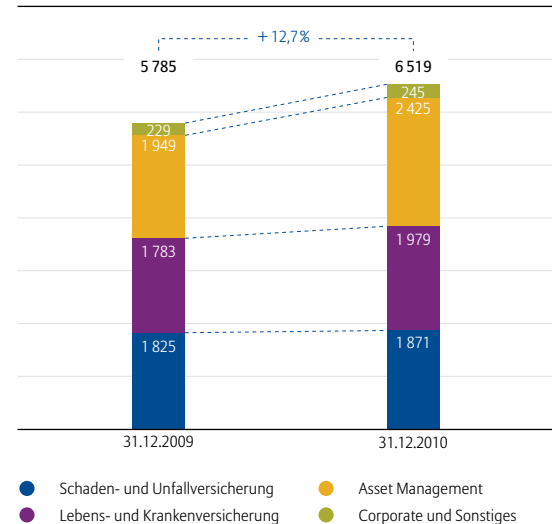

Unser gesamter gruppendifferenzierter interner Kapitalbedarf für das Geschäftsrisiko im Asset Management ist erheblich gestiegen, was vor allem auf den Anstieg der für Dritte verwalteten Kapitalanlagen zurückzuführen ist.

Die internen Risikokapitalanforderungen für das Segment Asset Management bilden nur Geschäftsrisiken ab, da nahezu alle Asset-Management-Anlagen für Dritte oder für Allianz Versicherungseinheiten gehalten werden.<sup>2</sup>

<sup>1</sup> Neuberechnung anhand des neuen internen Risikokapitalmodells

<sup>2</sup> Internes Risikokapital für Garantien im Segment Asset Management ist nicht von Bedeutung.

Die Allianz hat ein gruppenweites Risikomanagementsystem entwickelt, durch das operationelle Risiken frühzeitig erkannt und gesteuert werden können. Es definiert Aufgaben und Zuständigkeiten, Risikoprozesse und Methoden und gilt in den großen Unternehmen der Gruppe. Dort kümmern sich die örtlichen Risikomanager um seine Einhaltung. Die Gesellschaften orten und bewerten ihre operationellen Risiken und überwachen Schwachstellen. Hierbei dient eine strukturierte Selbsteinschätzung als Maßstab. Ergänzend werden Verluste aus dem operationellen Risiko in einer zentralen Datenbank gespeichert. Fallen hohe Verluste an, erfolgt eine Ursachenanalyse mit dem Ziel, solche Verluste künftig zu vermeiden oder zumindest zu verringern. Prozesse, fehlgeschlagene oder unzureichende Kontrollen sowie Notfallpläne werden in der Folge überarbeitet und verbessert sowie umfassende Sicherheitssysteme eingerichtet. Dieses strukturierte Berichtswesen erlaubt es uns, die Geschäftsführungen der Allianz Gruppe und der betreffenden Gesellschaft rechtzeitig und umfassend zu informieren.

Die Allianz Gruppe und ihre operativen Einheiten sind bei schwerwiegenden Ausfällen oder Katastrophen, die eine ernste Unterbrechung für das Arbeitsumfeld sowie für Einrichtungen und Personal mit sich bringen können, einem wesentlichen operationellen Risiko ausgesetzt. Unser Business-Continuity-Management-(BCM)-System zielt darauf ab, kritische Geschäftsfunktionen vor derlei Auswirkungen zu schützen, damit sie ihre Kernaufgaben zeitgerecht und nach den erforderlichen Qualitätsstandards erfüllen können. BCM-Aktivitäten und -Know-how werden stetig verbessert; sie sind unerlässlicher Bestandteil der Unternehmenskultur.

Es gibt gruppenweite Mindestsicherheitsstandards für IT-Systeme, welche die ordnungsgemäße Nutzung und den Schutz des Informationsbestands der Gruppe sicherstellen. Unser internes Kontrollsystem zielt darauf ab, bei der Finanzberichterstattung operationelle Risiken zu verringern.<sup>1</sup> Wir sind im Allgemeinen bestrebt, Prozessversagen dadurch zu verringern, dass wir konzernweit relevante Methoden,

Vorgehensweisen, Strukturen und Prozesse klar dokumentieren. Als ein wesentliches Prinzip, das in der Allianz Group Risk Policy aufgeführt ist, verlangen wir über die gesamte Gruppe hinweg eine umfassende und zeitnahe Dokumentation. Wie im Kapitel „Risikoorganisation und -prinzipien (Risk Governance)“ beschrieben, befasst sich die Abteilung Group Legal Services darüber hinaus mit der Minderung von Rechtsrisiken, unterstützt durch weitere Abteilungen.

## Sonstige Risiken

Es gibt bestimmte Risiken, die mit unserem internen Risikokapitalmodell nicht hinreichend gruppenweit quantifiziert werden können. Um diese Risiken zu identifizieren, zu analysieren, zu bewerten und zu überwachen, verfolgen wir einen systematischen Risikobewertungsansatz. Er stützt sich im Allgemeinen auf qualitative Kriterien oder Szenarioanalysen. Zu den wichtigsten dieser sonstigen Risiken zählen das Liquiditäts-, das Reputations- und das strategische Risiko.

### Liquiditätsrisiko

Liquiditätsrisiko hat zwei Ausprägungen, zum einen verstehen wir darunter das Risiko, dass das Unternehmen seinen kurzfristigen oder künftigen Zahlungsverpflichtungen nicht oder nur unter geänderten Bedingungen nachkommen kann, zum anderen umfasst es das Risiko, dass im Fall einer Liquiditätskrise des Unternehmens Refinanzierungsmittel nur zu erhöhten Zinssätzen beschafft beziehungsweise Aktivposten nur mit Abschlägen liquidiert werden können. Das Liquiditätsrisiko kann insbesondere aus Inkongruenzen zwischen der Fälligkeit von Zahlungseingängen und Finanzierungsverpflichtungen entstehen. Zum Liquiditätsrisiko gehört nicht das Marktpreisänderungsrisiko aufgrund von Verschlechterungen der Marktliquidität von Aktiva, weil dieses als Marktrisiko durch unser internes Risikokapitalmodell abgebildet wird. So ziehen wir beispielsweise die historische Entwicklung heran, um die im Modell verwendeten Wertschwankungen von Immobilienanlagen zu schätzen. Das Refinanzierungsrisiko, das

<sup>1</sup> Weitere Informationen zum internen Kontrollsystem für Finanzberichterstattung finden sich im Abschnitt „Kontrollen und Verfahren – Interne Kontrolle der Finanzberichterstattung“.

eine bestimmte Form des Liquiditätsrisikos ist, entsteht, wenn die erforderliche Liquidität zur Finanzierung illiquider Vermögenspositionen nicht zu den erwarteten Bedingungen und nicht rechtzeitig gegeben ist.

Weitere, genauere Informationen zum Liquiditätsrisiko der Allianz, zu ihrer Liquidität und ihrer Finanzierung, darunter Änderungen hinsichtlich der Barreserve und anderer liquider Mittel, finden sich etwa im Kapitel „Liquidität und Finanzierung“ sowie in den Anmerkungen 17, 23, 24 und 44 des Konzernabschlusses.

### **Corporate und Sonstiges**

Im Segment Corporate und Sonstiges entstehen Liquiditätsrisiken vornehmlich aus Kapitalanforderungen der Tochtergesellschaften und aus der Notwendigkeit, fällig werdende strategische Finanzierungsverbindlichkeiten zu refinanzieren.

Die wichtigste Zielsetzung in der Planung und der Steuerung der Liquiditätsposition der Allianz SE besteht darin, sicherzustellen, dass die Allianz SE alle laufenden und künftigen Zahlungsverpflichtungen jederzeit erfüllen kann. Zu diesem Zweck wird die Liquiditätsposition der Allianz SE täglich überwacht und eine entsprechende Vorschau erstellt. Die strategische Liquiditätsplanung über eine Zeitspanne von zwölf Monaten beziehungsweise drei Jahren wird dem Vorstand regelmäßig mitgeteilt. Die wichtigsten Instrumente zur Erfüllung eines unvorhergesehenen Liquiditätsbedarfs sind verbindlich zugesagte Kreditlinien von Banken, Finanzierung über Commercial Papers, mittelfristige Kreditvergabeprogramme, ein zentral verwaltetes hochliquides Anleihenportfolio mit direktem Zugang zum Markt für Verkaufs- und Rückkaufvereinbarungen (dem sogenannten Repo-Markt) sowie interne Ressourcen in Form konzerninterner Darlehen und eines internationalen Cashpools.

Die kumulierte, kurzfristige Liquiditätsprognose wird täglich aktualisiert und unter Berücksichtigung eines absoluten strategischen Mindestpufferbetrags sowie eines absoluten Mindestwertes für die angestrebte Liquidität erstellt. Beide Werte werden für den Cashpool der Allianz SE festgelegt, um diese vor kurzfristi-

gen Liquiditätskrisen zu schützen. In diese strategische Planung fließen sowohl der eventuelle Liquiditätsbedarf als auch mögliche Liquiditätsquellen ein, damit die Allianz SE auch bei nachteiligen Veränderungen ihre künftigen Zahlungsverpflichtungen erfüllen kann. Zu den maßgeblichen eventuellen Liquiditätsanforderungen zählen die Nichtverfügbarkeit externer Kapitalmärkte, kombinierte Szenarien aus Markt- und Katastrophenrisiken für Tochtergesellschaften sowie eine Unterschreitung der von den Tochtergesellschaften erwarteten Gewinne und Dividenden.

Aufgrund des geringen Umfangs der risikogewichteten Aktiva und des Gesamtvermögens (zum 31. Dezember 2010 9,2 Milliarden Euro beziehungsweise 19,2 Milliarden Euro) gilt das Liquiditätsrisiko für unser Bankgeschäft auf Gruppenebene als unerheblich.

### **Schaden- und Unfall- sowie Lebens- und Krankenversicherung**

Unsere operativen Versicherungsgesellschaften steuern das Liquiditätsrisiko lokal. Sie verwenden dabei örtliche Systeme zum Management von Vermögenswerten und Verbindlichkeiten, die gewährleisten, dass diese Positionen auf geeignete Weise aufeinander abgestimmt werden. Für die Lebens- und Krankenversicherungen ist unser Asset-Liability-Management-Ansatz eng mit dem internen Risikokapitalrahmen verknüpft und darauf ausgelegt, langfristige Anlageergebnisse zu erzielen, die über die Verpflichtungen aus Versicherungs- und Investmentverträgen hinausgehen. Dieser dezentrale Ansatz ermöglicht es, die Bereitstellung von Liquidität mit der nötigen Flexibilität zu gestalten.

In den Versicherungsgeschäftssegmenten ist das Liquiditätsrisiko ein Sekundärrisiko, das nach Eintritt externer Ereignisse, etwa einer Naturkatastrophe, wirksam wird. Solche Ereignisse werden für gewöhnlich in unserem internen Risikokapitalmodell berücksichtigt. Daher tragen Begrenzung und Überwachung der damit verbundenen Primärrisiken (zum Beispiel durch Rückversicherungen) ebenfalls zur Begrenzung des daraus erwachsenden Liquiditätsrisikos bei.

Äußerst ungünstige Veränderungen von Geschäftsannahmen wie Storno- oder Vertragserneuerungsfaktoren oder -kosten können ebenfalls zu Liquiditätsrisiken führen. Diese Auswirkungen werden jedoch von unserem internen Risikokapitalmodell abgedeckt.

Die lokalen Investmentstrategien konzentrieren sich insbesondere auf die Qualität der Kapitalanlagen und stellen sicher, dass die Portfolios einen nicht unerheblichen Anteil an liquiden Vermögenswerten enthalten (zum Beispiel Staatsanleihen oder Pfandbriefe). Dadurch ist ein gewisses Maß an Sicherheit gegeben, dass wir nach eher unwahrscheinlichen Ereignissen den erhöhten Liquiditätsbedarf decken können.

Außerdem ist zu berücksichtigen, dass nach einem außergewöhnlichen Ereignis in der Regel ein Teil der anfallenden Zahlungen erst einige Zeit später geleistet werden muss. Dadurch verringert sich das Risiko, dass kurzfristige Zahlungsverpflichtungen nicht eingehalten werden können.

Wir wenden versicherungsmathematische Methoden zur Schätzung unserer Verbindlichkeiten aus Versicherungsverträgen an. Im Zuge unserer standardisierten Liquiditätsplanung stimmen wir die Zahlungsströme aus unserem Anlagenportfolio mit den Schätzungen von Zahlungsströmen ab, die aus unseren Verbindlichkeiten resultieren. Diese Analysen werden für die einzelnen Gesellschaften vorgenommen und auf Gruppenebene zusammengeführt. Überschüssige Liquidität wird von der Gruppe in einem zentralen Cashpool verwaltet und kann bei Bedarf einzelnen Gesellschaften zugewiesen werden.

### Asset Management

Liquiditätsprognose und -management sind im Hinblick auf das Asset-Management-Geschäft ein fortlaufender Prozess, der dazu dient, sowohl die aufsichtsrechtlichen Anforderungen als auch die Standards der Gruppe zu erfüllen. Dieser Prozess wird durch Liquiditätsrichtlinien für neue Produkte unterstützt, die in den Allianz Global-Investors-Gesellschaften eingeführt werden.

## Reputationsrisiko

Das Reputationsrisiko ist das Risiko eines direkten Verlustes oder eines Verlustes künftigen Geschäftsvolumens, das aus einem Ansehensverlust der Allianz Gruppe insgesamt oder einer oder mehrerer ihrer Gesellschaften bei den Stakeholdern (das heißt Aktionären, Kunden, Mitarbeitern, Geschäftspartnern oder in der Öffentlichkeit) erwächst. Zum einen kann jede Maßnahme, jedes bestehende oder neue Geschäft oder Produkt entweder direkt oder indirekt zu Ansehensverlusten führen und außerdem Verluste in anderen Risikokategorien nach sich ziehen. Zum anderen birgt jeder Verlust der Allianz Gruppe in anderen Risikokategorien ein Reputationsrisiko, unabhängig davon, wie hoch dieser Verlust war. Das Reputationsrisiko kann also Verluste in weiteren Risikokategorien, darunter Markt- und Kreditrisiken, verursachen oder durch Verluste in anderen Risikokategorien selbst wirksam werden.

Unsere operativen Einheiten erkennen, bewerten und steuern Reputationsrisiken innerhalb ihrer Geschäftsprozesse (beispielsweise im Zuge des Zeichnungs- oder Produktentwicklungsprozesses). Reputationsrisiken, die ausschließlich auf der Ebene einer einzelnen operativen Einheit relevant sind, werden durch die örtliche Risikoorganisation gesteuert. Geplante Aktivitäten, die dem Ansehen der Allianz Gruppe insgesamt schaden können, müssen zur Genehmigung an die Allianz SE weitergeleitet werden. Zudem erkennen und bewerten Group Risk und die lokalen Risikofunktionen dieses Risiko qualitativ im Rahmen einer systematischen vierteljährlichen Analyse (Top Risk Assessment). Auf dieser Grundlage erstellt Group Risk einen Überblick über die lokalen und globalen Risiken einschließlich der Reputationsrisiken, analysiert das Risikoprofil der Allianz Gruppe und informiert die Geschäftsleitung regelmäßig über den aktuellen Stand.

## Strategisches Risiko

Das strategische Risiko ist das Risiko einer unerwarteten nachteiligen Veränderung des Unternehmenswertes, die dadurch entsteht, dass Entscheidungen des Managements hinsichtlich der Geschäftsstrategie oder deren Ausführung negative Folgen haben. Dieses

Risiko ergibt sich aus der Verträglichkeit strategischer Ziele, einzelner Geschäftsstrategien und der Ressourcen, die dafür eingesetzt werden, diese Ziele zu erreichen. Dem strategischen Risiko zugehörig ist auch die Fähigkeit des Managements, externe Faktoren (beispielsweise Marktbedingungen), welche die künftige Ausrichtung einer bestimmten operativen Einheit oder der gesamten Gruppe beeinflussen können, zu erkennen und darauf angemessen einzuwirken.

Diese Risiken werden vierteljährlich bewertet und analysiert, und zwar nach der Methode, wie sie auch beim Reputationsrisiko zum Einsatz kommt. Die Geschäftsziele werden vom Vorstand der Allianz SE ausgearbeitet. Strategische Ziele werden in einem Unternehmensplan festgeschrieben, der sich über drei Jahre erstreckt und vom Aufsichtsrat der Allianz SE genehmigt wird. Strategische Kontrollen sollen die entsprechende Verwirklichung der strategischen Ziele gewährleisten, indem sie eine Überwachung der jeweiligen Geschäftsziele ermöglichen. Auch Markt- und Wettbewerbsbedingungen, Kapitalmarkterfordernisse, aufsichtsrechtliche Bedingungen und dergleichen werden im Hinblick auf Veränderungen überwacht, die eine strategische Anpassung notwendig machen. Darüber hinaus werden strategische Entscheidungen in verschiedenen Ausschüssen auf Vorstandsebene diskutiert (zum Beispiel Group Capital Committee, Group Risk Committee oder Group Finance Committee). Die Beurteilung der damit zusammenhängenden Risiken ist ein wesentliches Element dieser Diskussion. So unterliegen beispielsweise große Fusionen und Übernahmen einer Prüfung durch das Group Finance Committee, sofern das Transaktionsvolumen je nach Art der Transaktion eindeutig festgelegte Schwellenwerte überschreitet.

## Angabepflichten bei Finanzinstrumenten

Den Angabeanforderungen nach IFRS 7 wird im Konzernabschluss und im vorangehenden Risikobericht, der im Konzernlagebericht der Geschäftsleitung dargestellt ist, Rechnung getragen.

Mit Ausnahme des Abschnitts „Prioritäten des Risikomanagements für 2011“ ist dieser Risikobericht wesentlicher Bestandteil des geprüften Konzernabschlusses.

## Prioritäten des Risikomanagements für 2011

Im Hinblick auf das Risikomanagement haben wir uns für das Jahr 2011 drei Ziele gesetzt. Zuerst möchten wir im Risikomanagement und in der Berichterstattung so erfolgreich wie 2010 sein. Zweitens soll unser Risikomanagementsystem samt Risikonetzwerk global weiterentwickelt und gestärkt werden. Drittens wollen wir alles Notwendige tun, um bis Anfang 2013 den internen Modellanforderungen nach Solvency II zu entsprechen. Dieses Ziel ist vom Vorstand der Allianz SE zu einer der Top-Prioritäten der Allianz Gruppe erklärt worden.

Solvency II ist ein umfangreiches, auf mehrere Jahre angelegtes europäisches Projekt, dessen Ergebnisse, so die allgemeine Einschätzung, die Solvabilitätsanforderungen in der europäischen Versicherungsbranche wesentlich verändern dürften. Die Allianz Gruppe nimmt aktiv an diesem Prozess teil. Wir geben ständig unsere Rückmeldungen zu den Vorschlägen und Analysen des European Insurance and Occupational Pensions Authority (EIOPA) und der EU-Kommission. Des Weiteren nehmen wir an den Quantitative Impact Studies teil und bieten technische Beratung, zum Beispiel über das Chief Risk Officer Forum und das Chief Financial Officer Forum; auch am freiwilligen Vorgehmigungsverfahren für Solvency II mit den entsprechenden europäischen Aufsichtsorganen ist die Allianz Gruppe aktiv beteiligt. Angesichts der verbleibenden Unsicherheit um die endgültige Anwendung der Maßnahmen und deren Auslegung unter-

liegen unser internes Risikokapitalmodell und die entsprechenden Risikoprozesse einer ständigen Prüfung und gegebenenfalls einer Änderung, damit sie der Weiterentwicklung des Solvency-II-Standards entsprechen.

Nach der erfolgreichen Anpassung unserer neuen Infrastruktur zur Risikoanalyse und der damit verbundenen Risikoberichterstattung zu Beginn des Jahres 2010 konzentrieren wir uns nunmehr auf die weitere Verbesserung unseres internen Risikokapitalmodells gemäß den EIOPA-Richtlinien, um die Übereinstimmung des Modells mit den Solvency-II-Standards zu gewährleisten.

Im Zuge dieser Bemühungen beschloss das Group Risk Committee 2010 die Einführung eines speziellen Versicherungsrisikomodells in der Schaden- und Unfallversicherung (Property-Casualty Insurance Risk Model, PRISM) zur Berechnung des Risikokapitals und für die Berichterstattung 2011. Diese stochastische Modellierung ermöglicht die Angleichung verschiedener Aspekte der versicherungsmathematischen Portfoliobewertung und bietet große Flexibilität hinsichtlich der Analyse von Szenarioauswirkungen auf Versicherungsrisiken im Nicht-Lebensversicherungsbereich. Außerdem ist es Teil des freiwilligen Vorgehensverfahrens für Solvency II mit den entsprechenden europäischen Aufsichtsorganen.

Zusätzlich konzentrieren wir uns auf die Entwicklung und die Verwirklichung eines internen Modells für operationelle Risiken, das vollständig in unsere bestehende Infrastruktur zur Risikoanalyse einbezogen werden soll.

Ferner ist eine weitere Verstärkung unserer Risikoorganisation geplant, indem zusätzliche relevante Solvency-II-Komponenten, etwa ein verbessertes Modellmanagementsystem und bessere Kontrollen hinsichtlich der Risikoberichterstattung, eingeführt werden sollen.

Außerdem bereiten wir uns auf die Wahrnehmung der neuen Berichts- und Angabepflichten gemäß Solvency II vor. All diese Initiativen werden durch die Ausarbeitung einer angemessenen Dokumentation unterstützt und unterliegen den formellen internen Genehmigungsprozessen, die vor der endgültigen Annahme gegebenenfalls erforderlich sind.

Auf Grundlage der verschiedenen laufenden Initiativen sind wir zuversichtlich, die endgültigen Anforderungen von Solvency II bei ihrem verbindlichen Inkrafttreten 2013 in vollem Umfang erfüllen zu können.



# Kontrolle der Finanzberichterstattung und des Risikokapitals

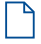

Informationen über die Verwendung von Schätzungen und Annahmen finden sich unter Anmerkung 3 im Konzernanhang.

## Interne Kontrollen der Finanzberichterstattung

Wir setzen in Übereinstimmung mit einer umsichtigen Risikoorganisation und aufsichtsrechtlichen Vorschriften ein internes System zur Kontrolle der Finanzberichter-

stattung ein (internes Kontrollsystem). Damit soll das Risiko von wesentlichen Fehlern in unseren Konzernabschlüssen erkannt und verringert werden. Unser internes Kontrollsystem fußt auf dem Kontroll-Rahmenwerk, das vom „Committee of Sponsoring Organizations of the Treadway Commission“ (COSO) entwickelt wurde.

### Ansatz der internen Kontrolle

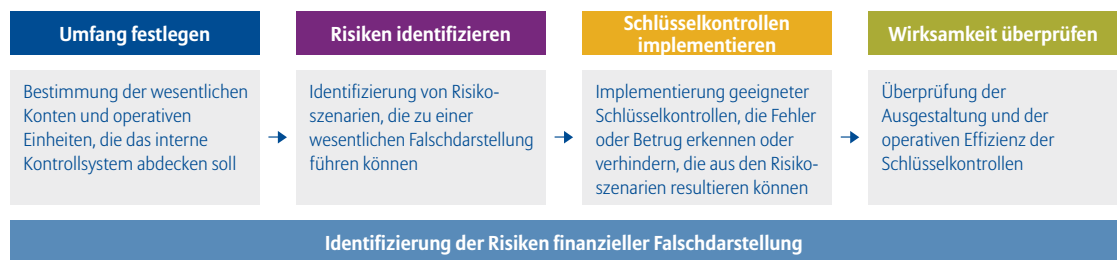

Um den **Umfang** unseres internen Kontrollsystems abzustecken, verwenden wir einen am Risiko ausgerichteten Top-down-Ansatz. Wir führen jährlich eine qualitative und quantitative Analyse unseres Konzernabschlusses durch, um jene Bilanzposten und operativen Einheiten herauszufiltern, die das interne Kontrollsystem abdecken soll.

Die jeweils zuständigen Einheiten **identifizieren örtlich Prozesse und Risikoszenarien**, die zu einer wesentlichen Falschdarstellung führen könnten. Dies geschieht einerseits auf der Grundlage der Eintrittswahrscheinlichkeit der Risikoszenarien, andererseits dahingehend, wie gravierend sich Fehler auswirken könnten. Zusätzlich sind qualitative Überlegungen fester Bestandteil des Risikoidentifikationsprozesses, etwa in Bezug auf die Zusammensetzung der Bilanzposten.

Für jedes innerhalb eines Prozesses festgestellte bedeutende Risiko sind **Schlüsselkontrollen** erforderlich, welche die Wahrscheinlichkeit und den potenziellen Umfang eines Falschausweises wegen Risikoeintritts mindern (Kontrollen auf Prozessebene).

Außerdem müssen **unternehmensweite Kontrollen** eingerichtet werden. Das sind Kontrollen, die nicht nur bestimmte Bilanzposten oder Prozesse betreffen, sondern sich auf die gesamte interne Kontrollstruktur einer Einheit erstrecken. Wie im COSO-Rahmenwerk

aufgeführt, geht es dabei um die Überprüfung des Kontrollumfelds einer Organisation, der Effektivität des Informations- und Kommunikationsflusses, des Risikobewertungsprozesses und des internen Kontrollsystems selbst.

Prozesse der Finanzberichterstattung sind außerdem stark von IT-Systemen abhängig. **IT-Kontrollen** sind daher unerlässlich für ein leistungsfähiges internes Kontrollsystem.

Es ist von wesentlicher Bedeutung, dass Kontrollen für die Verringerung des Risikos **konzipiert** und in diesem Sinne effektiv angewandt werden.

Elemente des internen Kontrollsystems wie Prozessabläufe, maßgebliche Kontrollen und ihre Anwendung müssen im gesamten Konzern durchgängig dokumentiert werden. Um die Qualität der Konzeption und der Anwendung von Kontrollen aufrechtzuerhalten, führen wir **jährlich** eine **Bewertung unseres Systems** durch, bei der die **Effektivität von Konzeption und Anwendung** der Kontrollen auf Prozessebene, Unternehmensebene und für die IT geprüft wird.

Group Audit und die örtlichen internen Revisionsabteilungen tragen dafür Sorge, dass die Qualität unseres internen Kontrollsystems einer fortlaufenden genauen Prüfung unterzogen wird.

## Governance

Der Chief Executive Officer (CEO) und der Chief Financial Officer (CFO) der Allianz SE, die von den zuständigen Abteilungen der Zentralressorts, vom „Group Disclosure Committee“ und von den operativen Einheiten unterstützt werden, müssen die Vollständigkeit, die Richtigkeit und die Zuverlässigkeit der Konzernabschlüsse der Allianz Gruppe sicherstellen.

Die Aufgabe des Group Disclosure Committee besteht darin, den CEO und den CFO der Allianz SE über alle wesentlichen Entwicklungen zu unterrichten, die möglicherweise unsere Angabepflichten in Finanzberichten betreffen, sowie Vollständigkeit und Richtigkeit der Informationen in Quartals- und Geschäftsberichten zu gewährleisten. Das Komitee trifft sich vierteljährlich vor der Herausgabe unserer Finanzberichte.

Die Tochtergesellschaften innerhalb unseres Kontrollsystems sind dafür verantwortlich, dass die interne Kontrollstrategie des Konzerns eingehalten und Local Disclosure Committees eingerichtet werden, die jenem der Gruppe gleichen müssen. Die CEO und die CFO der operativen Einheiten berichten dem Vorstand der Allianz SE regelmäßig darüber, wie effektiv ihre jeweiligen Kontrollsysteme sind, sowie über Vollständigkeit, Richtigkeit und Zuverlässigkeit der Finanzdaten, die der Gruppe übermittelt werden.

## Weitere Kontrollmechanismen

Wir sind davon überzeugt, dass leistungsstarke interne Kontrollmechanismen mit ausschlaggebend für Geschäftserfolg und Vertrauensverlust in der Öffentlichkeit sind. Aus diesem Grund haben wir optimierte interne Kontrollmechanismen eingerichtet, ähnlich jenen unseres internen Kontrollsystems im Hinblick auf die Finanzberichterstattung. Ein Beispiel dafür ist die Berechnung des „Market Consistent Embedded Value“ (MCEV) bei den größeren operativen Einheiten im Lebensversicherungsgeschäft.

## Kontrolle des Risikokapitals

Bei der Berechnung und Aggregation des internen Risikokapitals kommen Modelle und Verfahren zum Einsatz, die zum Großteil auf Schätzungen und Annahmen beruhen.

Wir verfügen über eine robuste und umfassende **Risikooorganisation**. Sie wird, ähnlich wie unsere Finanzberichtsorganisation, von Revisions-, Compliance- und unabhängigen Prüffunktionen unterstützt. Weil die Risikokapitalbestimmung jedoch wirtschaftliche Faktoren einbezieht, die in unseren bilanziellen Ergebnissen nicht vollständig enthalten sind, haben wir im Zuge unserer Berichterstattung durch die Geschäftsleitung gesonderte Kontrollen für die zusätzlich notwendigen Schätzungen eingeführt. Diese schließen auch die eingesetzten Methoden und die entsprechenden Annahmen ein.

Sie bestätigen die Zulässigkeit der Modelle und der Annahmen durch unabhängige externe Überprüfungen und gleichen fortlaufend Annahmen und Marktentwicklung beziehungsweise die Entwicklung vergleichbarer Unternehmen miteinander ab. Soweit sie vorliegen, verwenden wir zur Analyse und zur Verbesserung unserer Modelle auch über den Markt hinausgehende Annahmen, wenn sie von Aufsichtsbehörden und Aktuarvereinigungen genehmigt sind.

Die Einführungsphase der optimierten internen Kontrollmechanismen für die Berechnung unseres internen Risikokapitals unter dem künftigen Solvency-II-Regime ist für 2011 geplant.

Allgemein wird unser Berichterstattungsprozess, auf dem unser Risikokapitalrahmen fußt, umsichtig und einheitlich angewandt; hinsichtlich der darin enthaltenen Schätzungen und Annahmen wird er genauso gut kontrolliert, wie das bei unserem Finanzberichts-wesen der Fall ist.

München, 21. Februar 2011  
Allianz SE

Der Vorstand

Diekmann  
Bäte  
Booth  
Dr. Faber  
Ralph

Dr. Achleitner  
Bauer  
Cucchiani  
Dr. Mascher  
Dr. Zedelius



## Konzernabschluss

- 162 Konzernabschluss
- 170 Konzernanhang
- 224 Angaben zur Konzernbilanz
- 260 Angaben zur Konzern-Gewinn- und  
Verlustrechnung
- 275 Sonstige Angaben

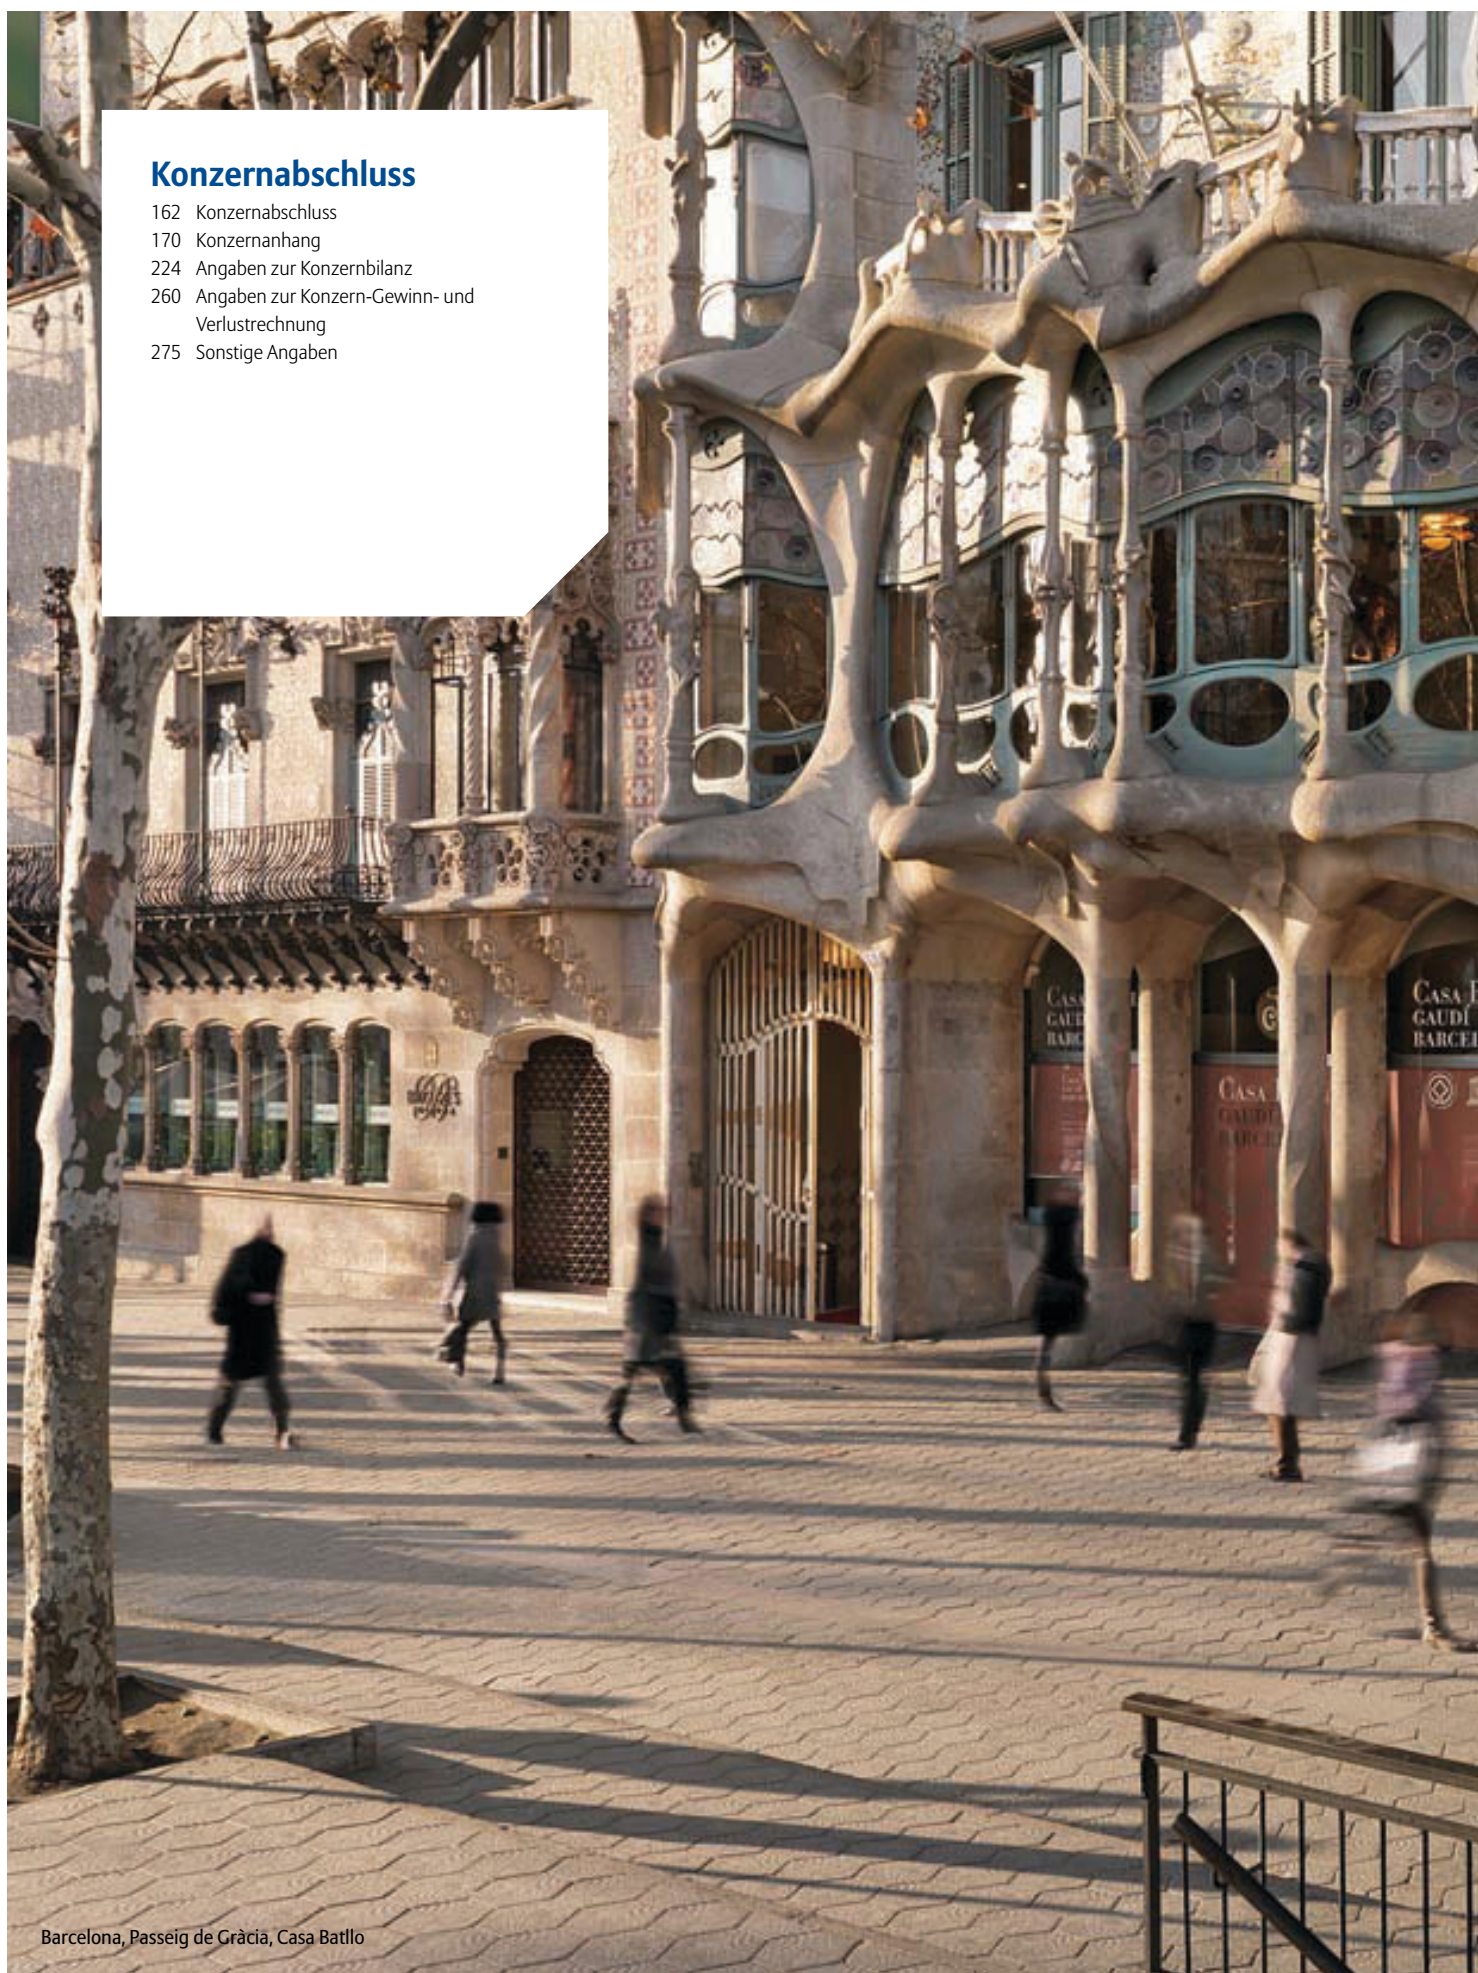

Barcelona, Passeig de Gràcia, Casa Batlló



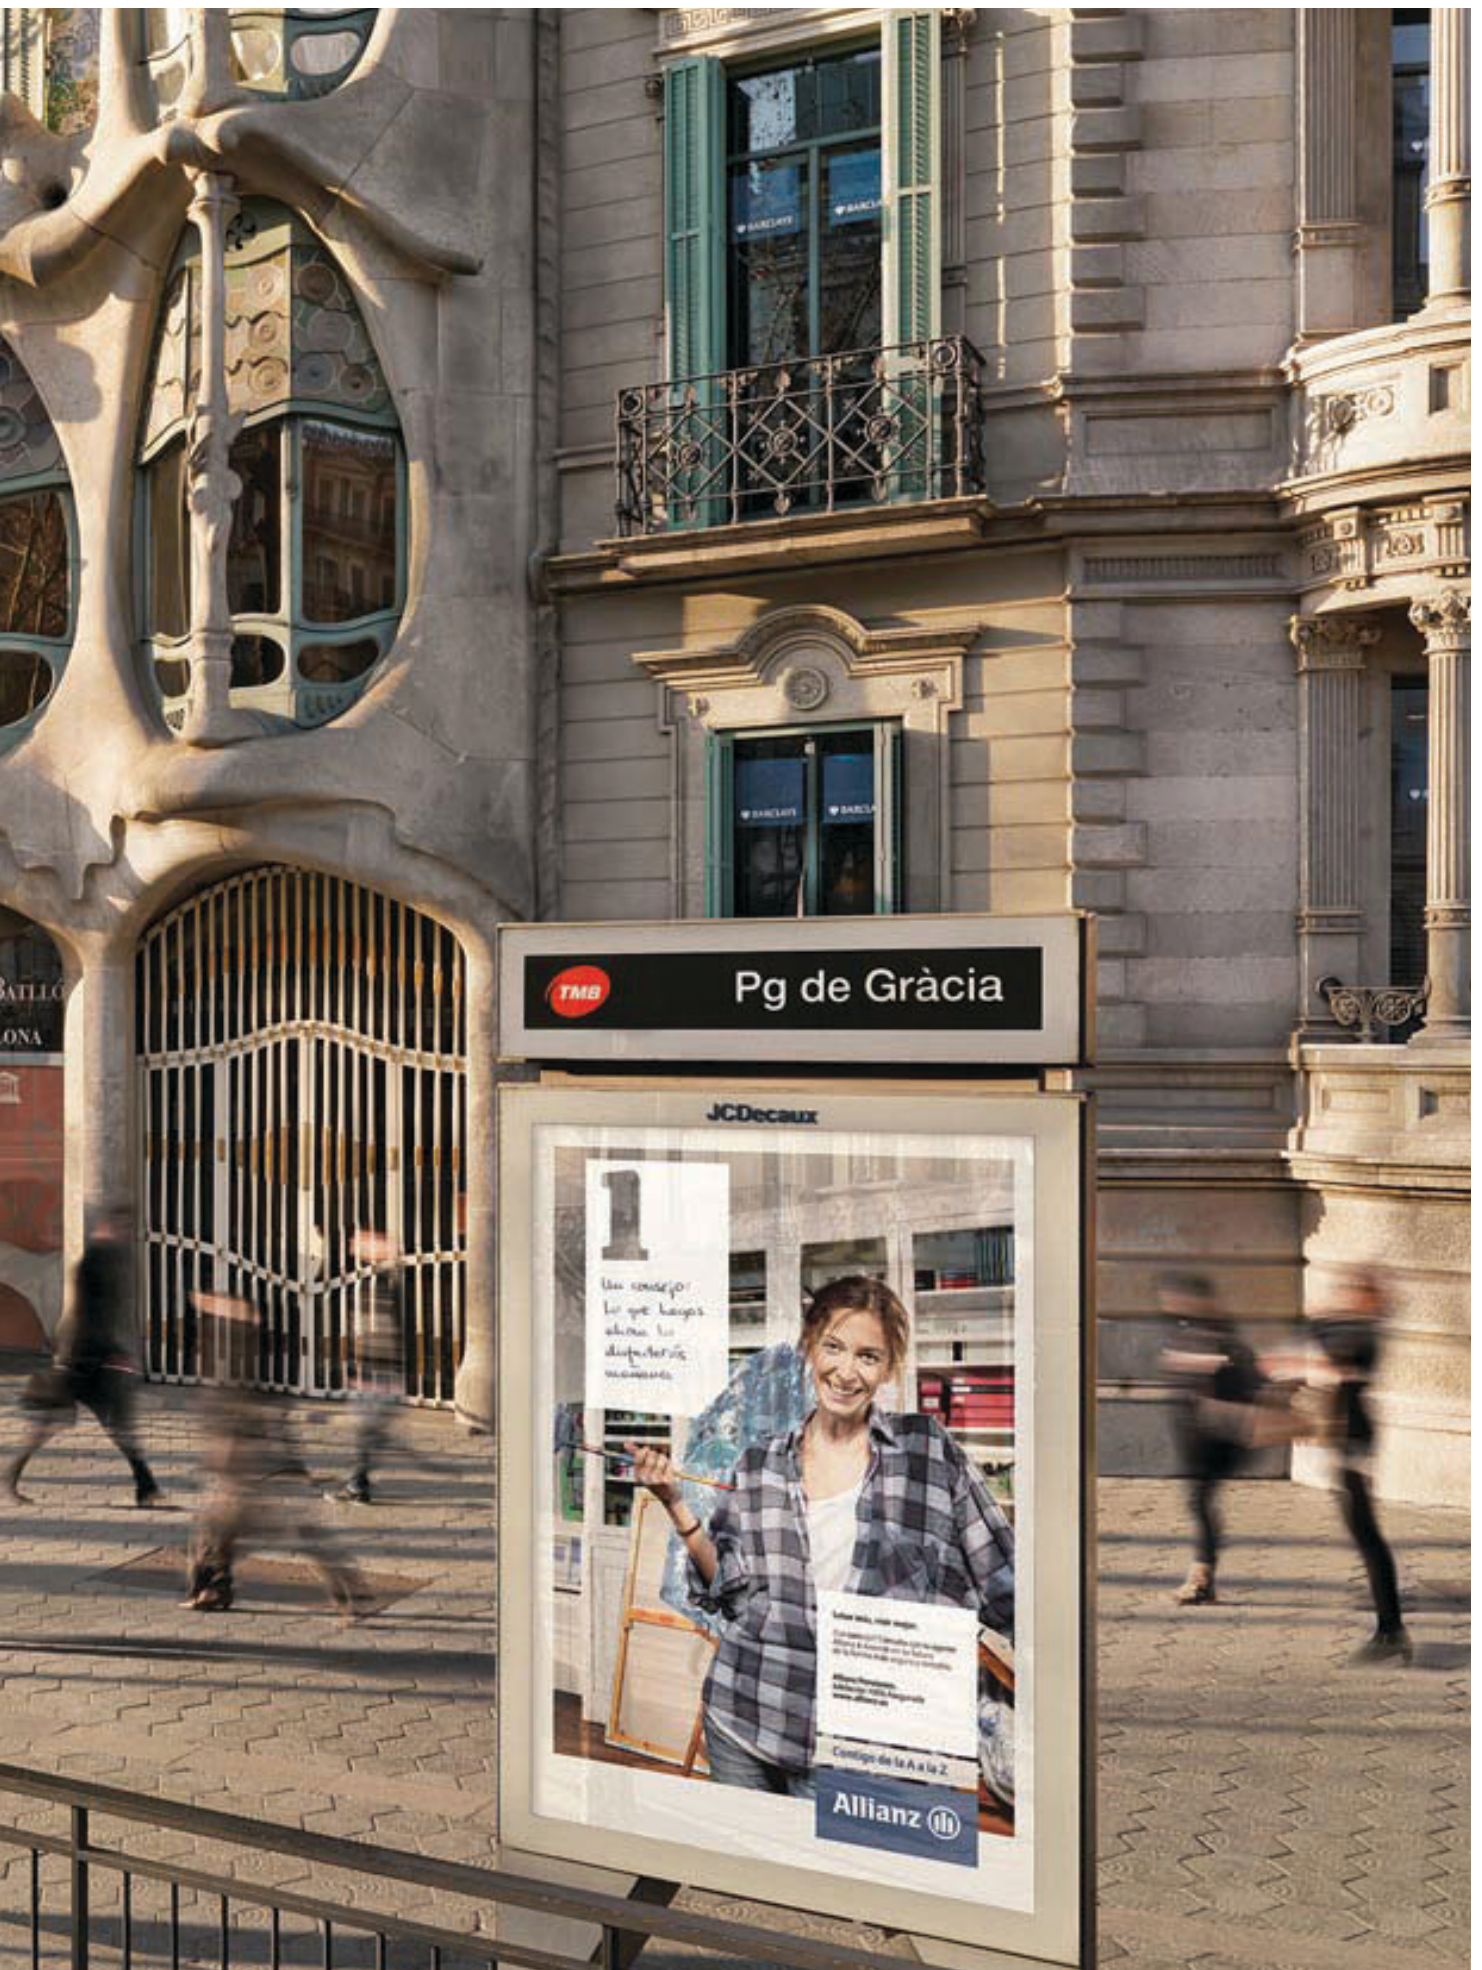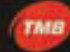

Pg de Gràcia

JCDecaux

**1**

Un consejo:  
Lo que tengas  
ahora, lo  
disfrutarás  
mañana.

Salvo error, este seguro  
te garantiza el 100% de la indemnización  
por fallecimiento o invalidez total y permanente  
de la persona asegurada.

**Allianz Seguros**  
Asesoramiento gratuito y personalizado  
www.allianz.es

Cómpelo de la A a la Z

**Allianz**



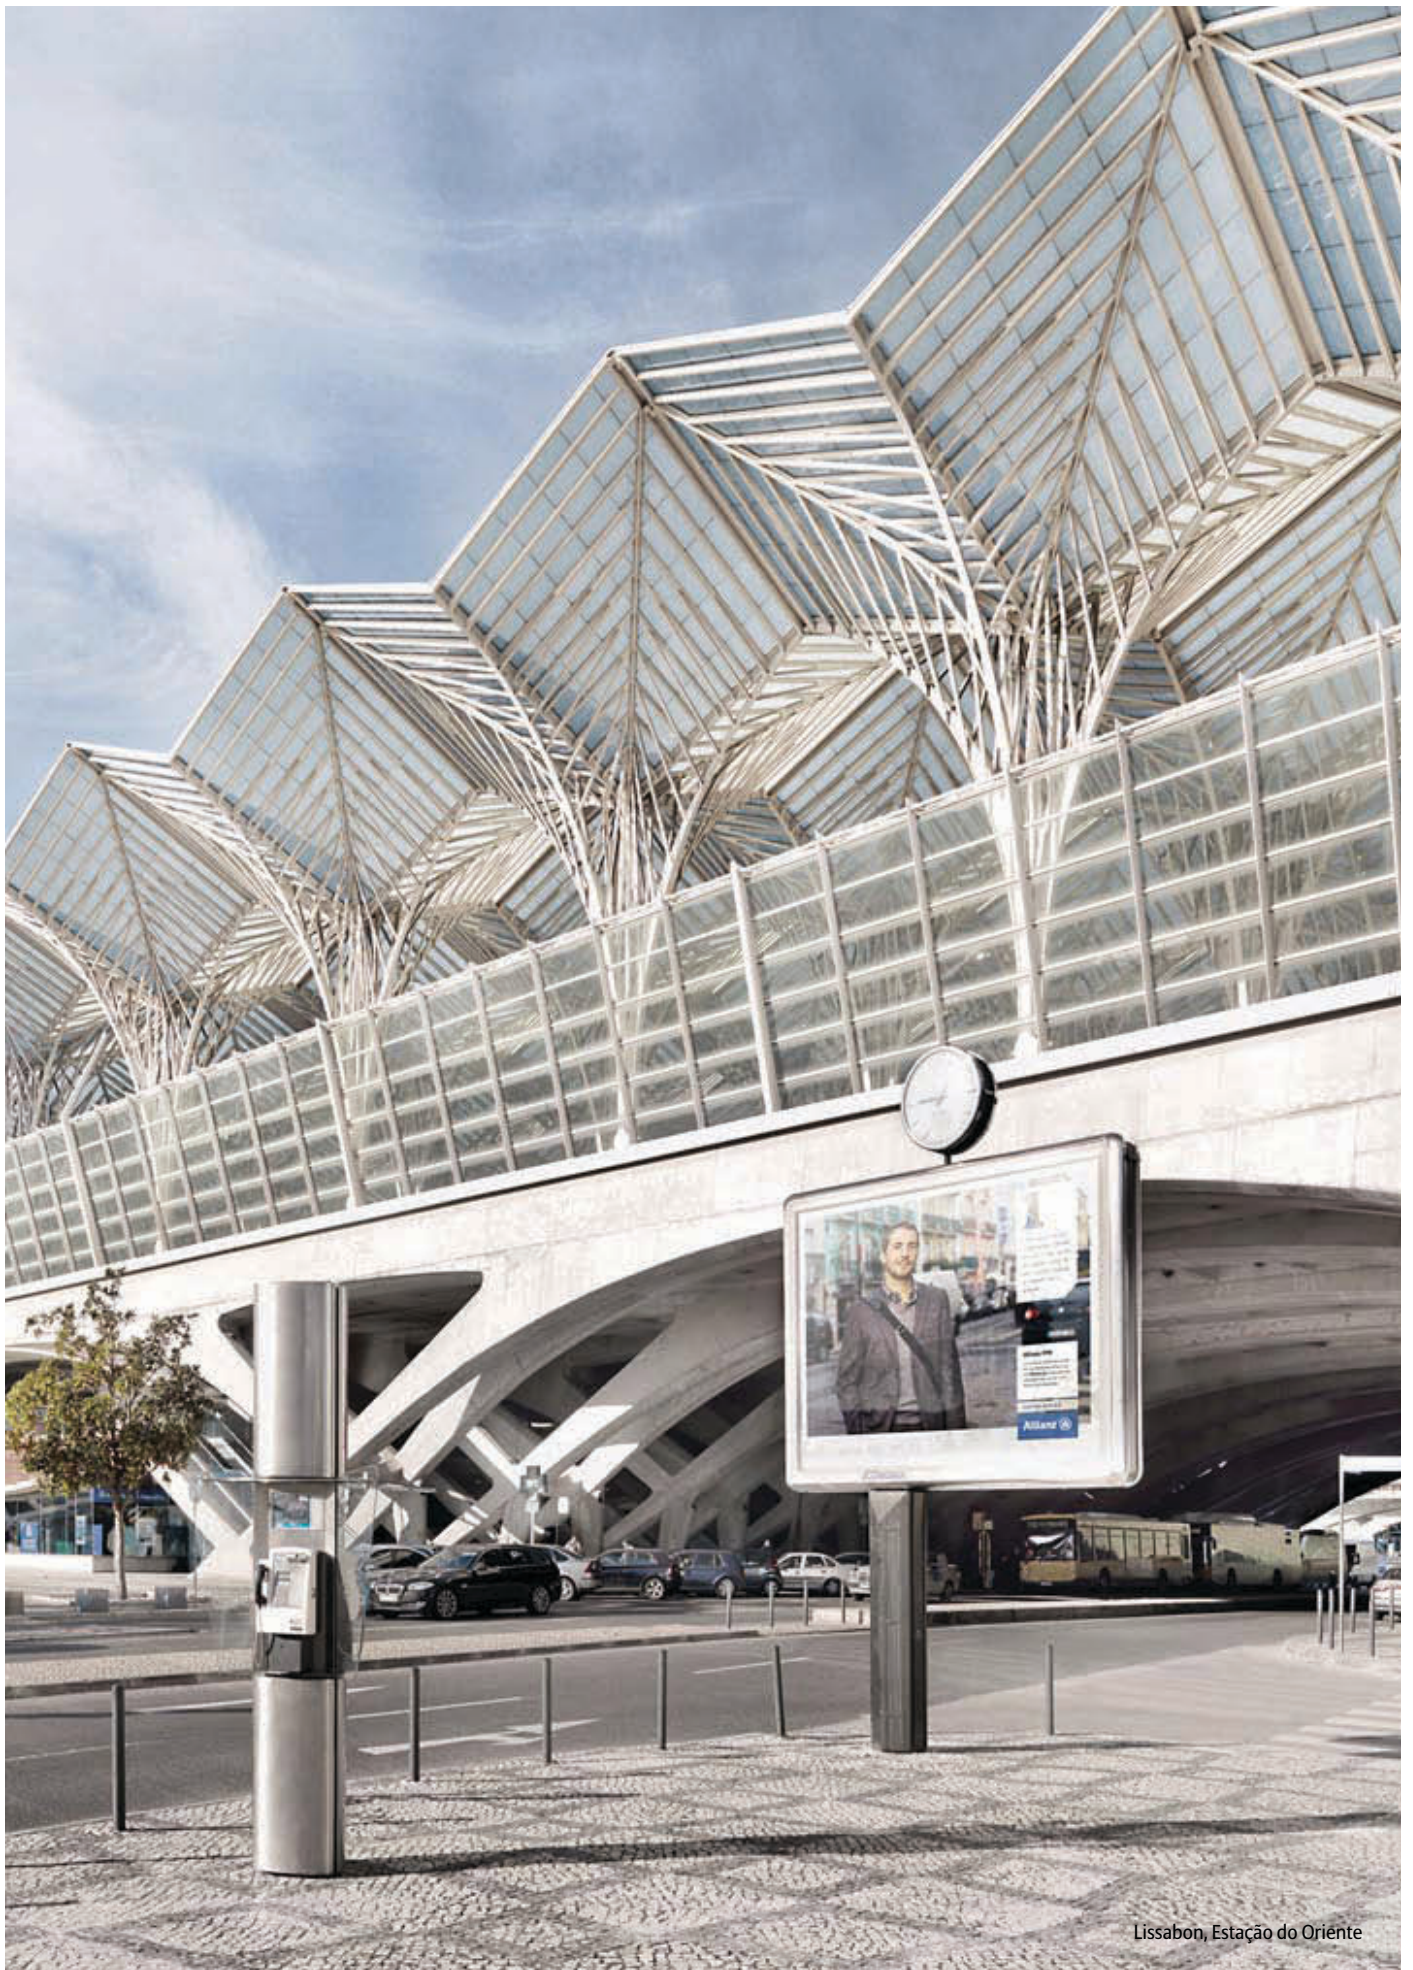

Lissabon, Estação do Oriente

# Allianz Gruppe

## Konzernabschluss

### Detailliertes Inhaltsverzeichnis

|     |                                     |
|-----|-------------------------------------|
| 162 | Konzernbilanz                       |
| 163 | Konzern-Gewinn- und Verlustrechnung |
| 164 | Gesamtergebnisrechnung              |
| 165 | Entwicklung des Eigenkapitals       |
| 166 | Kapitalflussrechnung                |

#### Konzernanhang

|     |   |                                                                                                   |
|-----|---|---------------------------------------------------------------------------------------------------|
| 170 | 1 | Geschäftstätigkeit und Berichtsgrundlage                                                          |
| 170 | 2 | Zusammenfassung wesentlicher Bilanzierungsgrundsätze                                              |
| 193 | 3 | Verwendung von Schätzungen und Annahmen                                                           |
| 199 | 4 | Änderungen der Bilanzierungs- und Bewertungsgrundsätze und der Darstellung des Konzernabschlusses |
| 204 | 5 | Konsolidierung                                                                                    |
| 209 | 6 | Segmentberichterstattung                                                                          |

#### Angaben zur Konzernbilanz

|     |    |                                                                                                                                                       |
|-----|----|-------------------------------------------------------------------------------------------------------------------------------------------------------|
| 224 | 7  | Barreserve und andere liquide Mittel                                                                                                                  |
| 224 | 8  | Erfolgswirksam zum Zeitwert bewertete Finanzaktiva                                                                                                    |
| 224 | 9  | Finanzanlagen                                                                                                                                         |
| 228 | 10 | Forderungen an Kreditinstitute und Kunden                                                                                                             |
| 230 | 11 | Rückversicherungsaktiva                                                                                                                               |
| 231 | 12 | Aktivierte Abschlusskosten                                                                                                                            |
| 232 | 13 | Übrige Aktiva                                                                                                                                         |
| 234 | 14 | Langfristige Vermögenswerte und Vermögenswerte sowie Verbindlichkeiten von Veräußerungsgruppen, die als zur Veräußerung gehalten klassifiziert werden |
| 235 | 15 | Immaterielle Vermögenswerte                                                                                                                           |
| 240 | 16 | Erfolgswirksam zum Zeitwert bewertete Finanzpassiva                                                                                                   |
| 240 | 17 | Verbindlichkeiten gegenüber Kreditinstituten und Kunden                                                                                               |
| 241 | 18 | Beitragsüberträge                                                                                                                                     |
| 241 | 19 | Rückstellungen für noch nicht abgewickelte Versicherungsfälle                                                                                         |
| 250 | 20 | Rückstellungen für Versicherungs- und Investmentverträge                                                                                              |
| 254 | 21 | Finanzpassiva aus fondsgebundenen Verträgen                                                                                                           |
| 254 | 22 | Andere Verbindlichkeiten                                                                                                                              |
| 255 | 23 | Verbriefte Verbindlichkeiten                                                                                                                          |
| 256 | 24 | Genussrechtskapital und nachrangige Verbindlichkeiten                                                                                                 |
| 257 | 25 | Eigenkapital                                                                                                                                          |

#### Angaben zur Konzern-Gewinn- und Verlustrechnung

|     |    |                                                                                           |
|-----|----|-------------------------------------------------------------------------------------------|
| 260 | 26 | Verdiente Beiträge (netto)                                                                |
| 261 | 27 | Zinserträge und ähnliche Erträge                                                          |
| 262 | 28 | Erträge aus erfolgswirksam zum Zeitwert bewerteten Finanzaktiva und Finanzpassiva (netto) |
| 263 | 29 | Realisierte Gewinne/Verluste (netto)                                                      |
| 264 | 30 | Provisions- und Dienstleistungserträge                                                    |
| 265 | 31 | Sonstige Erträge                                                                          |
| 265 | 32 | Erträge und Aufwendungen aus vollkonsolidierten Private-Equity-Beteiligungen              |
| 266 | 33 | Schadenaufwendungen (netto)                                                               |
| 267 | 34 | Veränderung der Rückstellungen für Versicherungs- und Investmentverträge (netto)          |
| 268 | 35 | Zinsaufwendungen                                                                          |
| 268 | 36 | Risikoversorge im Kreditgeschäft                                                          |
| 268 | 37 | Wertminderungen auf Finanzanlagen (netto)                                                 |
| 268 | 38 | Aufwendungen für Finanzanlagen                                                            |
| 269 | 39 | Abschluss- und Verwaltungsaufwendungen (netto)                                            |
| 270 | 40 | Provisions- und Dienstleistungsaufwendungen                                               |
| 270 | 41 | Sonstige Aufwendungen                                                                     |
| 270 | 42 | Jahresüberschuss (-fehlbetrag) aus aufgegebenen Geschäftsbereichen, nach Ertragsteuern    |
| 271 | 43 | Ertragsteuern                                                                             |

#### Sonstige Angaben

|     |    |                                                                                                       |
|-----|----|-------------------------------------------------------------------------------------------------------|
| 275 | 44 | Derivative Finanzinstrumente                                                                          |
| 277 | 45 | Finanzinstrumente                                                                                     |
| 286 | 46 | Beziehungen zu nahestehenden Unternehmen und Personen                                                 |
| 286 | 47 | Eventualverbindlichkeiten, Verpflichtungen, Bürgschaften, verpfändete Vermögenswerte und Sicherheiten |
| 292 | 48 | Rückstellungen für Pensionen und ähnliche Verpflichtungen                                             |
| 294 | 49 | Aktienbasierte Vergütungspläne                                                                        |
| 301 | 50 | Rückstellungen für Restrukturierungsmaßnahmen                                                         |
| 306 | 51 | Ergebnis je Aktie                                                                                     |
| 307 | 52 | Sonstige Angaben                                                                                      |
| 308 | 53 | Ereignisse nach dem Bilanzstichtag                                                                    |
| 310 |    | Aufstellung des Anteilsbesitzes des Allianz Konzerns zum 31. Dezember 2010 gemäß § 313 Abs. 2 HGB     |
| 317 |    | Versicherung der gesetzlichen Vertreter                                                               |
| 318 |    | Bestätigungsvermerk des Abschlussprüfers                                                              |
| 324 |    | Fachbegriffe                                                                                          |
| 328 |    | Register                                                                                              |



## Allianz Gruppe Konzernbilanz

|                                                                                                                                  | Anmerkung | 31.12.2010<br>Mio € | 31.12.2009<br>Mio € | 1.1.2009<br>Mio € |
|----------------------------------------------------------------------------------------------------------------------------------|-----------|---------------------|---------------------|-------------------|
| <b>AKTIVA</b>                                                                                                                    |           |                     |                     |                   |
| Barreserve und andere liquide Mittel                                                                                             | 7         | 8 747               | 6 089               | 8 958             |
| Erfolgswirksam zum Zeitwert bewertete Finanzaktiva <sup>1</sup>                                                                  | 8         | 9 843               | 14 321              | 14 240            |
| Finanzanlagen <sup>2</sup>                                                                                                       | 9         | 334 618             | 294 252             | 258 812           |
| Forderungen an Kreditinstitute und Kunden                                                                                        | 10        | 122 678             | 128 996             | 116 990           |
| Finanzaktiva aus fondsgebundenen Verträgen                                                                                       |           | 64 847              | 56 963              | 50 450            |
| Rückversicherungsaktiva                                                                                                          | 11        | 13 135              | 13 559              | 14 599            |
| Aktivierte Abschlusskosten                                                                                                       | 12        | 20 733              | 20 295              | 22 005            |
| Aktive Steuerabgrenzung                                                                                                          | 43        | 2 663               | 2 719               | 3 977             |
| Übrige Aktiva                                                                                                                    | 13        | 34 001              | 33 047              | 34 004            |
| Langfristige Vermögenswerte und Vermögenswerte von<br>Veräußerungsgruppen, die als zur Veräußerung gehalten klassifiziert werden | 14        | 299                 | —                   | 419 513           |
| Immaterielle Vermögenswerte                                                                                                      | 15        | 13 381              | 13 476              | 11 451            |
| <b>Summe Aktiva</b>                                                                                                              |           | <b>624 945</b>      | <b>583 717</b>      | <b>954 999</b>    |

|                                                                                                     | Anmerkung | 31.12.2010<br>Mio € | 31.12.2009<br>Mio € | 1.1.2009<br>Mio € |
|-----------------------------------------------------------------------------------------------------|-----------|---------------------|---------------------|-------------------|
| <b>PASSIVA</b>                                                                                      |           |                     |                     |                   |
| Erfolgswirksam zum Zeitwert bewertete Finanzpassiva                                                 | 16        | 5 013               | 4 891               | 4 131             |
| Verbindlichkeiten gegenüber Kreditinstituten und Kunden                                             | 17        | 21 155              | 21 248              | 18 451            |
| Beitragsüberträge                                                                                   | 18        | 16 497              | 15 676              | 15 233            |
| Rückstellungen für noch nicht abgewickelte Versicherungsfälle                                       | 19        | 66 474              | 64 441              | 63 924            |
| Rückstellungen für Versicherungs- und Investmentverträge                                            | 20        | 349 793             | 323 801             | 298 057           |
| Finanzpassiva aus fondsgebundenen Verträgen                                                         | 21        | 64 847              | 56 963              | 50 450            |
| Passive Steuerabgrenzung                                                                            | 43        | 3 976               | 3 874               | 3 833             |
| Andere Verbindlichkeiten                                                                            | 22        | 33 213              | 33 285              | 32 930            |
| Verbindlichkeiten von Veräußerungsgruppen, die als zur<br>Veräußerung gehalten klassifiziert werden | 14        | 188                 | —                   | 411 816           |
| Verbriefte Verbindlichkeiten                                                                        | 23        | 8 229               | 7 962               | 9 544             |
| Genussrechtskapital und nachrangige Verbindlichkeiten                                               | 24        | 8 998               | 9 347               | 9 346             |
| <b>Summe Fremdkapital</b>                                                                           |           | <b>578 383</b>      | <b>541 488</b>      | <b>917 715</b>    |
| Eigenkapital                                                                                        |           | 44 491              | 40 108              | 33 720            |
| Anteile anderer Gesellschafter                                                                      |           | 2 071               | 2 121               | 3 564             |
| <b>Summe Eigenkapital</b>                                                                           | 25        | <b>46 562</b>       | <b>42 229</b>       | <b>37 284</b>     |
| <b>Summe Passiva</b>                                                                                |           | <b>624 945</b>      | <b>583 717</b>      | <b>954 999</b>    |

<sup>1</sup> Enthalten zum 31. Dezember 2010 613 (2009: 887) Mio € an veräußerbaren oder wiederverpfändbaren Sicherheiten.

<sup>2</sup> Enthalten zum 31. Dezember 2010 90 (2009: 123) Mio € an veräußerbaren oder wiederverpfändbaren Sicherheiten.

## Allianz Gruppe Konzern-Gewinn- und Verlustrechnung

|                                                                                              | Anmerkung | 2010<br>Mio €   | 2009<br>Mio €   | 2008<br>Mio €   |
|----------------------------------------------------------------------------------------------|-----------|-----------------|-----------------|-----------------|
| <b>Gebuchte Bruttobeiträge</b>                                                               |           | 68 582          | 65 025          | 66 121          |
| Abgegebene Rückversicherungsbeiträge                                                         |           | – 4 873         | – 5 061         | – 5 474         |
| Veränderung in Beitragsüberträgen                                                            |           | – 372           | – 172           | – 253           |
| <b>Verdiente Beiträge (netto)</b>                                                            | <b>26</b> | <b>63 337</b>   | <b>59 792</b>   | <b>60 394</b>   |
| Zinserträge und ähnliche Erträge                                                             | 27        | 19 428          | 18 233          | 19 072          |
| Erträge aus erfolgswirksam zum Zeitwert bewerteten Finanzaktiva und Finanzpassiva (netto)    | 28        | – 38            | 874             | 373             |
| Realisierte Gewinne/Verluste (netto)                                                         | 29        | 3 708           | 3 416           | 3 603           |
| Provisions- und Dienstleistungserträge                                                       | 30        | 7 920           | 6 239           | 6 032           |
| Sonstige Erträge                                                                             | 31        | 118             | 41              | 408             |
| Erträge aus vollkonsolidierten Private-Equity-Beteiligungen                                  | 32        | 1 701           | 1 910           | 2 549           |
| <b>Summe Erträge</b>                                                                         |           | <b>96 174</b>   | <b>90 505</b>   | <b>92 431</b>   |
| Schadenaufwendungen (brutto)                                                                 |           | – 48 038        | – 47 879        | – 48 287        |
| Schadenaufwendungen (abgegebene Rückversicherungsbeiträge)                                   |           | 1 942           | 2 233           | 2 628           |
| <b>Schadenaufwendungen (netto)</b>                                                           | <b>33</b> | <b>– 46 096</b> | <b>– 45 646</b> | <b>– 45 659</b> |
| Veränderung der Rückstellungen für Versicherungs- und Investmentverträge (netto)             | 34        | – 13 871        | – 9 760         | – 5 378         |
| Zinsaufwendungen                                                                             | 35        | – 1 411         | – 1 484         | – 1 893         |
| Risikovorsorge im Kreditgeschäft                                                             | 36        | – 50            | – 141           | – 59            |
| Wertminderungen auf Finanzanlagen (netto)                                                    | 37        | – 844           | – 2 732         | – 9 495         |
| Aufwendungen für Finanzanlagen                                                               | 38        | – 827           | – 755           | – 771           |
| Abschluss- und Verwaltungsaufwendungen (netto)                                               | 39        | – 20 883        | – 20 118        | – 18 599        |
| Provisions- und Dienstleistungsaufwendungen                                                  | 40        | – 2 561         | – 2 212         | – 2 344         |
| Abschreibungen auf immaterielle Vermögenswerte                                               | 15        | – 327           | – 125           | – 23            |
| Restrukturierungsaufwendungen                                                                | 50        | – 271           | – 198           | – 129           |
| Sonstige Aufwendungen                                                                        | 41        | – 57            | – 2             | – 12            |
| Aufwendungen aus vollkonsolidierten Private-Equity-Beteiligungen                             | 32        | – 1 803         | – 2 142         | – 2 470         |
| <b>Summe Aufwendungen</b>                                                                    |           | <b>– 89 001</b> | <b>– 85 315</b> | <b>– 86 832</b> |
| <b>Ergebnis aus fortzuführenden Geschäftsbereichen vor Ertragsteuern</b>                     |           | <b>7 173</b>    | <b>5 190</b>    | <b>5 599</b>    |
| Ertragsteuern                                                                                | 43        | – 1 964         | – 540           | – 1 331         |
| <b>Jahresüberschuss aus fortzuführenden Geschäftsbereichen</b>                               |           | <b>5 209</b>    | <b>4 650</b>    | <b>4 268</b>    |
| <b>Jahresüberschuss (-fehlbetrag) aus angegebenen Geschäftsbereichen, nach Ertragsteuern</b> | <b>42</b> | <b>—</b>        | <b>– 395</b>    | <b>– 6 373</b>  |
| <b>Jahresüberschuss (-fehlbetrag)</b>                                                        |           | <b>5 209</b>    | <b>4 255</b>    | <b>– 2 105</b>  |
| <b>Jahresüberschuss (-fehlbetrag)</b>                                                        |           |                 |                 |                 |
| auf Anteile anderer Gesellschafter entfallend                                                |           | 156             | 48              | 257             |
| auf Anteilseigner entfallend                                                                 |           | 5 053           | 4 207           | – 2 362         |

|                                        | Anmerkung | 2010<br>€    | 2009<br>€   | 2008<br>€     |
|----------------------------------------|-----------|--------------|-------------|---------------|
| <b>Ergebnis je Aktie</b>               | <b>51</b> | <b>11,20</b> | <b>9,33</b> | <b>– 5,25</b> |
| aus fortzuführenden Geschäftsbereichen |           | 11,20        | 10,21       | 8,99          |
| aus angegebenen Geschäftsbereichen     |           | —            | – 0,88      | – 14,24       |
| <b>Verwässertes Ergebnis je Aktie</b>  | <b>51</b> | <b>11,12</b> | <b>9,30</b> | <b>– 5,29</b> |
| aus fortzuführenden Geschäftsbereichen |           | 11,12        | 10,17       | 8,77          |
| aus angegebenen Geschäftsbereichen     |           | —            | – 0,87      | – 14,06       |

## Allianz Gruppe

### Gesamtergebnisrechnung

|                                                                                       | 2010<br>Mio € | 2009<br>Mio € | 2008<br>Mio € |
|---------------------------------------------------------------------------------------|---------------|---------------|---------------|
| Jahresüberschuss (-fehlbetrag)                                                        | 5 209         | 4 255         | - 2 105       |
| Direkt im Eigenkapital erfasste Erträge und Aufwendungen                              |               |               |               |
| Währungsänderungen                                                                    |               |               |               |
| Reklassifizierung aufgrund von Gewinn- und Verlustrealisierungen                      | - 9           | 516           | 2             |
| Veränderungen während des Geschäftsjahres                                             | 1 347         | - 122         | - 268         |
| Zwischensumme                                                                         | 1 338         | 394           | - 266         |
| Jederzeit veräußerbare Wertpapiere                                                    |               |               |               |
| Reklassifizierung aufgrund von Gewinn- und Verlustrealisierungen                      | - 1 353       | - 753         | 560           |
| Veränderungen während des Geschäftsjahres                                             | 925           | 4 242         | - 9 116       |
| Zwischensumme                                                                         | - 428         | 3 489         | - 8 556       |
| Cashflow Hedges                                                                       |               |               |               |
| Reklassifizierung aufgrund von Gewinn- und Verlustrealisierungen                      | - 2           | - 5           | —             |
| Veränderungen während des Geschäftsjahres                                             | 11            | - 11          | 28            |
| Zwischensumme                                                                         | 9             | - 16          | 28            |
| Anteil des direkt im Eigenkapital erfassten Nettoertrags von assoziierten Unternehmen |               |               |               |
| Reklassifizierung aufgrund von Gewinn- und Verlustrealisierungen                      | - 2           | 6             | —             |
| Veränderungen während des Geschäftsjahres                                             | 41            | 26            | - 107         |
| Zwischensumme                                                                         | 39            | 32            | - 107         |
| Sonstiges                                                                             |               |               |               |
| Reklassifizierung aufgrund von Gewinn- und Verlustrealisierungen                      | - 1           | —             | —             |
| Veränderungen während des Geschäftsjahres                                             | 194           | - 87          | 100           |
| Zwischensumme                                                                         | 193           | - 87          | 100           |
| Summe der direkt im Eigenkapital erfassten Erträge und Aufwendungen                   | 1 151         | 3 812         | - 8 801       |
| Gesamtergebnis                                                                        | 6 360         | 8 067         | - 10 906      |
| Gesamtergebnis                                                                        |               |               |               |
| auf Anteile anderer Gesellschafter entfallend                                         | 169           | 79            | 359           |
| auf Anteilseigner entfallend                                                          | 6 191         | 7 988         | - 11 265      |

Für Informationen bezüglich der Ertragsteuern auf Bestandteile der direkt im Eigenkapital erfassten Aufwendungen und Erträge siehe Anmerkung 43.

## Allianz Gruppe Entwicklung des Eigenkapitals

|                                                               | Eingezahltes<br>Kapital | Gewinn-<br>rücklagen | Währungs-<br>änderungen | Nicht-<br>realisierte<br>Gewinne<br>und<br>Verluste<br>(netto) | Eigenkapital  | Anteile<br>anderer<br>Gesell-<br>schafter | Summe<br>Eigenkapital |
|---------------------------------------------------------------|-------------------------|----------------------|-------------------------|----------------------------------------------------------------|---------------|-------------------------------------------|-----------------------|
|                                                               | Mio €                   | Mio €                | Mio €                   | Mio €                                                          | Mio €         | Mio €                                     | Mio €                 |
| <b>Stand 1. Januar 2008, wie ursprünglich<br/>ausgewiesen</b> | <b>28 321</b>           | <b>12 618</b>        | <b>– 3 656</b>          | <b>10 470</b>                                                  | <b>47 753</b> | <b>3 628</b>                              | <b>51 381</b>         |
| Anpassungen <sup>1</sup>                                      | —                       | – 39                 | —                       | —                                                              | – 39          | —                                         | – 39                  |
| <b>Stand 1. Januar 2008, wie ausgewiesen</b>                  | <b>28 321</b>           | <b>12 579</b>        | <b>– 3 656</b>          | <b>10 470</b>                                                  | <b>47 714</b> | <b>3 628</b>                              | <b>51 342</b>         |
| Gesamtjahresergebnis                                          | —                       | – 2 427              | – 347                   | – 8 491                                                        | – 11 265      | 359                                       | – 10 906              |
| Eingezahltes Kapital                                          | 248                     | —                    | —                       | —                                                              | 248           | —                                         | 248                   |
| Eigene Aktien                                                 | —                       | 25                   | —                       | —                                                              | 25            | —                                         | 25                    |
| Transaktionen zwischen Anteilseignern                         | —                       | – 552                | – 10                    | 32                                                             | – 530         | – 136                                     | – 666                 |
| Gezahlte Dividenden                                           | —                       | – 2 472              | —                       | —                                                              | – 2 472       | – 287                                     | – 2 759               |
| <b>Stand 31. Dezember 2008</b>                                | <b>28 569</b>           | <b>7 153</b>         | <b>– 4 013</b>          | <b>2 011</b>                                                   | <b>33 720</b> | <b>3 564</b>                              | <b>37 284</b>         |
| Gesamtjahresergebnis                                          | —                       | 4 154                | 388                     | 3 446                                                          | 7 988         | 79                                        | 8 067                 |
| Eingezahltes Kapital                                          | 66                      | —                    | —                       | —                                                              | 66            | —                                         | 66                    |
| Eigene Aktien                                                 | —                       | – 66                 | —                       | —                                                              | – 66          | —                                         | – 66                  |
| Transaktionen zwischen Anteilseignern <sup>2</sup>            | —                       | – 19                 | – 1                     | —                                                              | – 20          | – 1 401                                   | – 1 421               |
| Gezahlte Dividenden                                           | —                       | – 1 580              | —                       | —                                                              | – 1 580       | – 121                                     | – 1 701               |
| <b>Stand 31. Dezember 2009</b>                                | <b>28 635</b>           | <b>9 642</b>         | <b>– 3 626</b>          | <b>5 457</b>                                                   | <b>40 108</b> | <b>2 121</b>                              | <b>42 229</b>         |
| Gesamtjahresergebnis                                          | —                       | 5 294                | 1 297                   | – 400                                                          | 6 191         | 169                                       | 6 360                 |
| Eingezahltes Kapital                                          | 50                      | —                    | —                       | —                                                              | 50            | —                                         | 50                    |
| Eigene Aktien                                                 | —                       | – 24                 | —                       | —                                                              | – 24          | —                                         | – 24                  |
| Transaktionen zwischen Anteilseignern                         | —                       | 26                   | – 10                    | —                                                              | 16            | – 91                                      | – 75                  |
| Gezahlte Dividenden                                           | —                       | – 1 850              | —                       | —                                                              | – 1 850       | – 128                                     | – 1 978               |
| <b>Stand 31. Dezember 2010</b>                                | <b>28 685</b>           | <b>13 088</b>        | <b>– 2 339</b>          | <b>5 057</b>                                                   | <b>44 491</b> | <b>2 071</b>                              | <b>46 562</b>         |

<sup>1</sup> Die Anpassungen resultieren aus der in Anmerkung 4 beschriebenen Änderung der Bilanzierungsmethode für Fixed-Indexed-Annuity-Produkte.

<sup>2</sup> Enthält Veränderungen der Anteile anderer Gesellschafter aus dem Abgang der Dresdner Bank in Höhe von – 1 738 Mio € und weitere 337 Mio € aus Eigenkapitalveränderungen von nicht zu 100% vom Allianz Konzern gehaltenen Tochterunternehmen.

## Allianz Gruppe

### Kapitalflussrechnung

|                                                                                                                                                                                                                     | 2010<br>Mio € | 2009<br>Mio €   | 2008<br>Mio €  |
|---------------------------------------------------------------------------------------------------------------------------------------------------------------------------------------------------------------------|---------------|-----------------|----------------|
| <b>Zusammenfassung:</b>                                                                                                                                                                                             |               |                 |                |
| Nettocashflow aus der laufenden Geschäftstätigkeit                                                                                                                                                                  | 15 414        | 13 610          | 25 313         |
| Nettocashflow aus der Investitionstätigkeit                                                                                                                                                                         | – 19 536      | – 50 387        | – 6 236        |
| Nettocashflow aus der Finanzierungstätigkeit                                                                                                                                                                        | 4 465         | 3 649           | – 11 320       |
| Auswirkungen der Währungsumrechnung auf die Finanzmittel                                                                                                                                                            | 265           | 21              | 102            |
| <b>Veränderung der Finanzmittel (Barreserve und andere liquide Mittel)</b>                                                                                                                                          | <b>608</b>    | <b>– 33 107</b> | <b>7 859</b>   |
| Finanzmittel am Anfang der Berichtsperiode aus fortzuführenden Geschäftsbereichen                                                                                                                                   | 6 089         | 8 958           | 31 337         |
| Finanzmittel am Anfang der Berichtsperiode, die in Vermögenswerte von Veräußerungsgruppen, die als zur Veräußerung gehalten klassifiziert werden, umgegliedert wurden                                               | —             | 30 238          | —              |
| Umgliederungen <sup>1</sup>                                                                                                                                                                                         | 2 050         | —               | —              |
| <b>Finanzmittel am Ende der Berichtsperiode</b>                                                                                                                                                                     | <b>8 747</b>  | <b>6 089</b>    | <b>39 196</b>  |
| Finanzmittel, die in Vermögenswerte von Veräußerungsgruppen, die als zur Veräußerung gehalten klassifiziert werden, umgegliedert wurden                                                                             | —             | —               | 30 238         |
| <b>Finanzmittel am Ende der Berichtsperiode aus fortzuführenden Geschäftsbereichen</b>                                                                                                                              | <b>8 747</b>  | <b>6 089</b>    | <b>8 958</b>   |
| <b>Cashflow aus der laufenden Geschäftstätigkeit:</b>                                                                                                                                                               |               |                 |                |
| <b>Jahresüberschuss (-fehlbetrag)</b>                                                                                                                                                                               | <b>5 209</b>  | <b>4 255</b>    | <b>– 2 105</b> |
| <b>Anpassungen zur Überleitung vom Jahresüberschuss (-fehlbetrag) auf den Nettocashflow aus der laufenden Geschäftstätigkeit</b>                                                                                    |               |                 |                |
| Anteiliges Ergebnis aus assoziierten Unternehmen und Gemeinschaftsunternehmen                                                                                                                                       | – 183         | – 80            | – 12           |
| Wertminderung aufgrund der Bewertung der Vermögenswerte von Veräußerungsgruppen zum Zeitwert abzüglich Veräußerungskosten zum 30. September 2008                                                                    | —             | —               | 1 409          |
| Realisierte Gewinne/Verluste (netto) und Wertminderungen auf Finanzanlagen (netto) aus:                                                                                                                             |               |                 |                |
| jederzeit veräußerbaren und bis zur Endfälligkeit gehaltenen Wertpapieren, Anteilen an assoziierten Unternehmen und Gemeinschaftsunternehmen, fremdgenutztem Grundbesitz, Forderungen an Kreditinstitute und Kunden | – 2 864       | – 684           | 5 710          |
| sonstigen Finanzanlagen, insbesondere Handelsaktiva und Finanzaktiva als „erfolgswirksam zum Zeitwert bewertet“ klassifiziert                                                                                       | 444           | – 1 008         | 2 633          |
| Ergebnis aus der Transaktion der Dresdner Bank zwischen 30. September und 31. Dezember 2008                                                                                                                         | —             | —               | 2 933          |
| Abschreibungen                                                                                                                                                                                                      | 1 098         | 902             | 640            |
| Risikovorsorge im Kreditgeschäft                                                                                                                                                                                    | 50            | 141             | 385            |
| Versicherungsvertragskonten gutgeschriebene Zinsen                                                                                                                                                                  | 4 747         | 4 166           | 4 145          |
| <b>Nettoveränderung:</b>                                                                                                                                                                                            |               |                 |                |
| Handelsaktiva und Handelspassiva                                                                                                                                                                                    | – 1 525       | 100             | 6 779          |
| Reverse-Repo-Geschäfte und gestellte Sicherheiten für Wertpapierleihgeschäfte                                                                                                                                       | – 189         | 751             | 32 463         |
| Repo-Geschäfte und erhaltene Sicherheiten für Wertpapierleihgeschäfte                                                                                                                                               | 346           | 47              | – 30 763       |
| Rückversicherungsaktiva                                                                                                                                                                                             | 1 143         | 1 041           | 818            |
| Aktiviert Abschlusskosten                                                                                                                                                                                           | – 821         | 3               | – 1 053        |
| Beitragsüberträge                                                                                                                                                                                                   | 247           | 258             | 345            |
| Rückstellungen für noch nicht abgewickelte Versicherungsfälle                                                                                                                                                       | 74            | – 117           | 527            |
| Rückstellungen für Versicherungs- und Investmentverträge                                                                                                                                                            | 8 138         | 5 190           | 390            |
| Aktive und passive Steuerabgrenzung                                                                                                                                                                                 | 159           | – 612           | 395            |
| Finanzaktiva als „erfolgswirksam zum Zeitwert bewertet“ klassifiziert (nur Bankgeschäft)                                                                                                                            | —             | —               | 3 204          |
| Finanzpassiva als „erfolgswirksam zum Zeitwert bewertet“ klassifiziert (nur Bankgeschäft)                                                                                                                           | —             | —               | 2 925          |
| Übrige (netto)                                                                                                                                                                                                      | – 659         | – 743           | – 6 455        |
| <b>Zwischensumme</b>                                                                                                                                                                                                | <b>10 205</b> | <b>9 355</b>    | <b>27 418</b>  |
| <b>Nettocashflow aus der laufenden Geschäftstätigkeit</b>                                                                                                                                                           | <b>15 414</b> | <b>13 610</b>   | <b>25 313</b>  |

<sup>1</sup> Beinhalten Umgliederungen von Forderungen an Kreditinstitute und Kunden in Barreserve und andere liquide Mittel bei den US-Tochtergesellschaften.

## Allianz Gruppe Kapitalflussrechnung – Fortsetzung

|                                                                                                                                                                         | 2010<br>Mio €    | 2009<br>Mio €    | 2008<br>Mio €    |
|-------------------------------------------------------------------------------------------------------------------------------------------------------------------------|------------------|------------------|------------------|
| <b>Cashflow aus der Investitionstätigkeit:</b>                                                                                                                          |                  |                  |                  |
| <b>Einzahlungen aus Verkauf, Fälligkeit oder Rückzahlung von:</b>                                                                                                       |                  |                  |                  |
| Finanzaktiva als „erfolgswirksam zum Zeitwert bewertet“ klassifiziert                                                                                                   | 14 161           | 4 193            | 4 105            |
| jederzeit veräußerbaren Wertpapieren                                                                                                                                    | 125 134          | 94 459           | 106 665          |
| bis zur Endfälligkeit gehaltenen Wertpapieren                                                                                                                           | 242              | 419              | 319              |
| Anteilen an assoziierten Unternehmen und Gemeinschaftsunternehmen                                                                                                       | 1 042            | 1 957            | 1 285            |
| langfristigen Vermögenswerten und Vermögenswerten von Veräußerungsgruppen, die als zur Veräußerung gehalten klassifiziert werden                                        | —                | —                | 2 199            |
| fremdgenutztem Grundbesitz                                                                                                                                              | 682              | 391              | 491              |
| Forderungen an Kreditinstitute und Kunden (gekaufte Darlehen)                                                                                                           | 9 248            | 11 537           | 8 735            |
| Sachanlagen                                                                                                                                                             | 380              | 210              | 431              |
| <b>Zwischensumme</b>                                                                                                                                                    | <b>150 889</b>   | <b>113 166</b>   | <b>124 230</b>   |
| <b>Auszahlungen für den Erwerb oder die Beschaffung von:</b>                                                                                                            |                  |                  |                  |
| Finanzaktiva als „erfolgswirksam zum Zeitwert bewertet“ klassifiziert                                                                                                   | – 8 973          | – 2 513          | – 4 107          |
| jederzeit veräußerbaren Wertpapieren                                                                                                                                    | – 153 527        | – 112 667        | – 114 041        |
| bis zur Endfälligkeit gehaltenen Wertpapieren                                                                                                                           | – 463            | – 192            | – 182            |
| Anteilen an assoziierten Unternehmen und Gemeinschaftsunternehmen                                                                                                       | – 448            | – 973            | – 610            |
| langfristigen Vermögenswerten und Vermögenswerten von Veräußerungsgruppen, die als zur Veräußerung gehalten klassifiziert werden                                        | —                | – 36             | – 97             |
| fremdgenutztem Grundbesitz                                                                                                                                              | – 1 610          | – 349            | – 395            |
| Forderungen an Kreditinstitute und Kunden (gekaufte Darlehen)                                                                                                           | – 7 624          | – 20 584         | – 10 169         |
| Sachanlagen                                                                                                                                                             | – 1 472          | – 1 160          | – 953            |
| <b>Zwischensumme</b>                                                                                                                                                    | <b>– 174 117</b> | <b>– 138 474</b> | <b>– 130 554</b> |
| <b>Unternehmenszusammenschlüsse (Anmerkung 5):</b>                                                                                                                      |                  |                  |                  |
| Erlöse aus Veräußerungen von Tochterunternehmen abzüglich veräußerter Barreserve                                                                                        | 193              | – 26 975         | 103              |
| Erwerb von Tochterunternehmen abzüglich der erworbenen Barreserve                                                                                                       | —                | 77               | – 152            |
| <b>Nettocashflows im 4. Quartal 2008 aus Vermögensgegenständen und Verbindlichkeiten von Veräußerungsgruppen, die als zur Veräußerung gehalten klassifiziert werden</b> | <b>—</b>         | <b>—</b>         | <b>9 327</b>     |
| <b>Veränderung von Forderungen an Kreditinstitute und Kunden (begebene Darlehen)</b>                                                                                    | <b>3 696</b>     | <b>1 384</b>     | <b>– 8 673</b>   |
| <b>Übrige (netto)</b>                                                                                                                                                   | <b>– 197</b>     | <b>435</b>       | <b>– 517</b>     |
| <b>Nettocashflow aus der Investitionstätigkeit</b>                                                                                                                      | <b>– 19 536</b>  | <b>– 50 387</b>  | <b>– 6 236</b>   |
| <b>Cashflow aus der Finanzierungstätigkeit:</b>                                                                                                                         |                  |                  |                  |
| Einlagen der Versicherungsnehmer                                                                                                                                        | 20 061           | 20 162           | 13 205           |
| Einlagenentnahmen der Versicherungsnehmer                                                                                                                               | – 12 958         | – 12 233         | – 11 020         |
| Nettoveränderung von Verbindlichkeiten gegenüber Kreditinstituten und Kunden                                                                                            | – 272            | – 1 097          | – 4 920          |
| Erlöse aus der Ausgabe von Genussrechtskapital, nachrangigen und verbrieften Verbindlichkeiten                                                                          | 7 157            | 12 541           | 40 672           |
| Rückzahlungen von Genussrechtskapital, nachrangigen und verbrieften Verbindlichkeiten                                                                                   | – 7 428          | – 14 189         | – 45 868         |
| Mittelzufluss aus Kapitalerhöhungen                                                                                                                                     | 44               | 56               | 239              |
| Transaktionen zwischen Anteilseignern                                                                                                                                   | – 75             | 276              | – 666            |
| Dividendenzahlungen                                                                                                                                                     | – 1 978          | – 1 701          | – 2 759          |
| Nettocashflow aus dem Verkauf oder dem Kauf eigener Aktien                                                                                                              | – 21             | – 135            | 40               |
| <b>Übrige (netto)</b>                                                                                                                                                   | <b>– 65</b>      | <b>– 31</b>      | <b>– 243</b>     |
| <b>Nettocashflow aus der Finanzierungstätigkeit</b>                                                                                                                     | <b>4 465</b>     | <b>3 649</b>     | <b>– 11 320</b>  |

Der Nettocashflow aus aufgegebenen Geschäftsbereichen für die ersten neun Monate des Jahres 2008 ist im Nettocashflow aus der laufenden Geschäftstätigkeit, der Investitionstätigkeit und der Finanzierungstätigkeit ent-

halten. Nur der Nettocashflow aus aufgegebenen Geschäftsbereichen für das 4. Quartal 2008 wird in einer separaten Zeile innerhalb der Investitionstätigkeit ausgewiesen.



## Allianz Gruppe

### Kapitalflussrechnung – Fortsetzung

Die folgende Tabelle zeigt den Nettocashflow aus aufgegebenen Geschäftsbereichen für die zum 31. Dezember 2010, 2009 und 2008 endenden Geschäftsjahre, der in der obigen Kapitalflussrechnung enthalten ist.

|                                                                                        | 2010<br>Mio € | 2009<br>Mio € | 2008<br>Mio € |
|----------------------------------------------------------------------------------------|---------------|---------------|---------------|
| Nettocashflow aus der laufenden Geschäftstätigkeit aus aufgegebenen Geschäftsbereichen | —             | —             | 24 367        |
| Nettocashflow aus der Investitionstätigkeit aus aufgegebenen Geschäftsbereichen        | —             | —             | – 1 888       |
| Nettocashflow aus der Finanzierungstätigkeit aus aufgegebenen Geschäftsbereichen       | —             | —             | – 8 520       |
| <b>Nettocashflow aus aufgegebenen Geschäftsbereichen</b>                               | <b>—</b>      | <b>—</b>      | <b>13 959</b> |

|                                                                                                 | 2010<br>Mio € | 2009<br>Mio € | 2008<br>Mio € |
|-------------------------------------------------------------------------------------------------|---------------|---------------|---------------|
| <b>Ergänzende Angaben zur Kapitalflussrechnung:</b>                                             |               |               |               |
| Ertragsteuerzahlungen                                                                           | – 1 347       | – 831         | – 2 890       |
| Erhaltene Dividenden                                                                            | 1 015         | 876           | 1 845         |
| Erhaltene Zinsen                                                                                | 17 129        | 15 689        | 21 361        |
| Gezahlte Zinsen                                                                                 | – 1 468       | – 1 492       | – 5 931       |
| <b>Wesentliche zahlungsunwirksame Transaktionen</b>                                             |               |               |               |
| <b>Rückzahlung einer von der Allianz Finance II B.V. emittierten Wandelanleihe durch Aktien</b> |               |               |               |
| Jederzeit veräußerbare Wertpapiere                                                              | —             | —             | – 450         |
| Verbriefte Verbindlichkeiten                                                                    | —             | —             | – 450         |
| <b>Kündigung eines Quotenrückversicherungsvertrags</b>                                          |               |               |               |
| Rückversicherungsaktiva                                                                         | —             | —             | – 29          |
| Aktiviert Abschlusskosten                                                                       | —             | —             | 1             |
| Verbindlichkeiten aus Rückversicherungsverträgen                                                | —             | —             | – 28          |
| <b>Auswirkungen aus der Erstkonsolidierung von K2</b>                                           |               |               |               |
| Handelsaktiva                                                                                   | —             | —             | 107           |
| Finanzaktiva als „erfolgswirksam zum Zeitwert bewertet“ klassifiziert                           | —             | —             | 8 665         |
| Forderungen an Kreditinstitute und Kunden                                                       | —             | —             | 1 714         |
| Übrige Aktiva                                                                                   | —             | —             | 51            |
| Handelspassiva                                                                                  | —             | —             | 497           |
| Finanzpassiva als „erfolgswirksam zum Zeitwert bewertet“ klassifiziert                          | —             | —             | 8 889         |
| Verbindlichkeiten gegenüber Kreditinstituten und Kunden                                         | —             | —             | 1 076         |
| Andere Verbindlichkeiten                                                                        | —             | —             | 75            |

## Allianz Gruppe Kapitalflussrechnung – Fortsetzung

|                                                                                                  | 2010<br>Mio € | 2009<br>Mio € | 2008<br>Mio € |
|--------------------------------------------------------------------------------------------------|---------------|---------------|---------------|
| <b>Auswirkungen aus der Entkonsolidierung der Dresdner Bank</b>                                  |               |               |               |
| <b>Commerzbank Aktien</b>                                                                        |               |               |               |
| Jederzeit veräußerbare Wertpapiere                                                               | —             | 746           | —             |
| Vermögenswerte von Veräußerungsgruppen, die als zur Veräußerung gehalten klassifiziert werden    | —             | – 746         | —             |
| <b>Vertriebsvereinbarung</b>                                                                     |               |               |               |
| Immaterielle Vermögensgegenstände                                                                | —             | 480           | —             |
| Vermögenswerte von Veräußerungsgruppen, die als zur Veräußerung gehalten klassifiziert werden    | —             | – 480         | —             |
| <b>Cominvest</b>                                                                                 |               |               |               |
| Jederzeit veräußerbare Wertpapiere                                                               | —             | 179           | —             |
| Forderungen an Kreditinstitute und Kunden                                                        | —             | 7             | —             |
| Aktive Steuerabgrenzung                                                                          | —             | 14            | —             |
| Immaterielle Vermögensgegenstände                                                                | —             | 691           | —             |
| Sachanlagen                                                                                      | —             | 3             | —             |
| Übrige Aktiva                                                                                    | —             | 39            | —             |
| Vermögenswerte von Veräußerungsgruppen, die als zur Veräußerung gehalten klassifiziert werden    | —             | – 933         | —             |
| Verbindlichkeiten gegenüber Kreditinstituten und Kunden                                          | —             | 1             | —             |
| Passive Steuerabgrenzung                                                                         | —             | – 72          | —             |
| Genussrechtskapital, verbriefte und nachrangige Verbindlichkeiten                                | —             | – 57          | —             |
| Sonstige Passiva                                                                                 | —             | – 148         | —             |
| Anteile anderer Gesellschafter                                                                   | —             | – 5           | —             |
| Verbindlichkeiten von Veräußerungsgruppen, die als zur Veräußerung gehalten klassifiziert werden | —             | 281           | —             |
| <b>Erlöse aus Veräußerungen jederzeit veräußerbarer Wertpapiere</b>                              |               |               |               |
| Anleihen                                                                                         | 85 481        | 62 774        | 60 265        |
| Aktien                                                                                           | 8 754         | 14 152        | 26 645        |
| <b>Summe</b>                                                                                     | <b>94 235</b> | <b>76 926</b> | <b>86 910</b> |

# Allianz Gruppe

## Konzernanhang

### 1 Geschäftstätigkeit und Berichtsgrundlage

#### Geschäftstätigkeit

Die Allianz SE und ihre Konzernunternehmen (der Allianz Konzern) betreiben in rund 70 Ländern Geschäfte in den Bereichen Schaden- und Unfallversicherung, Lebens- und Krankenversicherung und Asset Management, wobei das Hauptgeschäft in Europa betrieben wird. Die Hauptverwaltung des Allianz Konzerns sowie die Allianz SE als Muttergesellschaft befinden sich in München, Deutschland. Die Allianz SE ist im Handelsregister des Amtsgerichts München unter der Adresse Königinstraße 28, 80802 München eingetragen.

Die Allianz SE ist eine Europäische Aktiengesellschaft (Societas Europaea). Aktien der Allianz SE sind an allen Börsen in Deutschland gelistet, und American Depositary Receipts (ADRs) werden in den USA over-the-counter auf OTCQX gehandelt.

Der vorliegende Konzernabschluss wurde mit Beschluss des Vorstands vom 21. Februar 2011 zur Veröffentlichung freigegeben.

#### Berichtsgrundlage

Der Konzernabschluss des Allianz Konzerns wurde auf der Grundlage des § 315 a HGB in Übereinstimmung mit den International Financial Reporting Standards (IFRS), wie von der Europäischen Union (EU) übernommen, erstellt. Im Rahmen des Konzernabschlusses hat der Allianz Konzern alle vom IASB verabschiedeten und von der EU übernommenen Standards und Interpretationen angewendet, die zum 31. Dezember 2010 verpflichtend anzuwenden waren. Die IFRS umfassen International Financial Reporting Standards (IFRS), International Accounting Standards (IAS) sowie die Interpretationen des International Financial Reporting Interpretations Committee (IFRIC) und des vorherigen Standing Interpretations Committee (SIC).

Die IFRS enthalten keine spezifischen Regelungen, die den Ansatz und die Bewertung von Versicherungs- und Rückversicherungsverträgen und Investmentverträgen mit ermessensabhängiger Überschussbeteiligung vollständig regeln. Insoweit wurden in den Fällen, in denen IFRS 4, Versicherungsverträge, keine spezifischen Regelungen für diese Geschäftsvorfälle enthält, in Übereinstimmung mit IAS 8, Bilanzierungs- und Bewertungsmethoden, Änderungen von Schätzungen und Fehlern, die Bestimmungen der US-amerikanischen Generally Accepted Accounting Principles (US GAAP) angewandt.

Die angewendeten Bilanzierungs- und Bewertungsmethoden sind bis auf die in Anmerkung 4 beschriebenen, erstmals zum 1. Januar 2010 angewendeten IFRS-Rechnungslegungsvorschriften und Änderungen der Bilanzierungs- und Bewertungsmethoden konsistent zum Vorjahr.

Der Konzernabschluss wurde, soweit nicht anders ausgewiesen, für das zum 31. Dezember endende Geschäftsjahr in Millionen Euro (€) erstellt.

### 2 Zusammenfassung wesentlicher Bilanzierungsgrundsätze

#### Konsolidierungsgrundsätze

##### Konsolidierungskreis

Der Abschluss des Allianz Konzerns enthält die Jahresabschlüsse der Allianz SE, ihrer Tochtergesellschaften sowie bestimmter Investmentfonds und Zweckgesellschaften. Tochtergesellschaften, Investmentfonds und Zweckgesellschaften (nachfolgend „Konzernunternehmen“) werden konsolidiert, wenn sie direkt oder indirekt vom Allianz Konzern kontrolliert werden. Kontrolle besteht, wenn der Allianz Konzern die Möglichkeit hat, die Finanz- und Geschäftspolitik der Konzernunternehmen zu steuern. Kontrolle kann vorliegen, wenn der Allianz Konzern direkt oder indirekt mehr als die Hälfte der Stimmrechte des Tochterunternehmens besitzt oder wenn Kontrolle anderweitig durch Vereinbarungen mit anderen Investoren oder durch die Satzung rechtlich nachgewiesen werden kann. Bei der Beurteilung, ob Kontrolle besteht, sind potenzielle Stimmrechte, die gegenwärtig ausgeübt oder umgewandelt werden können, zu berücksichtigen. Sofern Kontrolle aus rechtlicher Sicht nicht gegeben ist, ist zu prüfen, ob Kontrolle aus wirtschaftlicher Sicht gegeben ist, wie im Falle von Zweckgesellschaften.

Konzernunternehmen werden ab dem Tag konsolidiert, an dem der Allianz Konzern die Kontrolle über sie erhält. Konzernunternehmen werden so lange konsolidiert, bis der Allianz Konzern die Kontrolle über diese verliert. Bilanzierungs- und Bewertungsgrundsätze von Tochterunternehmen wurden, soweit notwendig, angepasst, um eine einheitliche Anwendung von Bilanzierungs- und Bewertungsgrundsätzen im Allianz Konzern sicherzustellen. Die Auswirkungen konzerninterner Geschäftsvorfälle wurden eliminiert.

Vermögenswerte Dritter, die der Allianz Konzern treuhänderisch oder kommissarisch hält, sind keine Vermögenswerte des Allianz Konzerns und werden nicht im Konzernabschluss gezeigt.

#### **Unternehmenszusammenschlüsse einschließlich Zukäufe und Abgänge von Anteilen anderer Gesellschafter**

Ein Unternehmenszusammenschluss liegt dann vor, wenn der Allianz Konzern die Beherrschung über ein Unternehmen erhält.

**Unternehmenszusammenschlüsse ab dem 1. Januar 2010** werden nach der Erwerbsmethode bilanziert. Die Anschaffungskosten bemessen sich nach der Summe aus der hingegebenen Gegenleistung, bewertet zum Zeitwert am Erwerbsstichtag, und dem Betrag der Anteile, die auf andere Gesellschafter entfallen. Kosten in Zusammenhang mit dem Erwerb werden grundsätzlich als Aufwand erfasst. Bei jedem Unternehmenszusammenschluss hat der Allianz Konzern ein Bewertungswahlrecht, nach dem Anteile anderer Gesellschafter entweder direkt zum beizulegenden Zeitwert oder zum Zeitwert des Nettovermögens des erworbenen Unternehmens, das auf Anteile anderer Gesellschafter entfällt, bewertet werden können.

Der Wertansatz eines Geschäfts- oder Firmenwerts bemisst sich nach dem Unterschiedsbetrag aus den Anschaffungskosten und dem Zeitwert des erworbenen Reinvermögens. Bereits vor dem Erwerbsstichtag vom Erwerber gehaltene Anteile am erworbenen Unternehmen werden zum Zeitpunkt der Erlangung der Beherrschung auf den Zeitwert umbewertet; ein Differenzbetrag zu ihrem ursprünglichen Wertansatz wird in der Konzern-Gewinn- und Verlustrechnung erfasst. Wenn der Anteil des Allianz Konzerns am Zeitwert des Nettovermögens die Anschaffungskosten übersteigt, beurteilt

der Allianz Konzern die Identifizierung und die Bewertung von identifizierbaren Vermögenswerten, Schulden und Eventualschulden sowie die Bemessung der Anschaffungskosten neu und erfasst nach der erneuten Beurteilung einen noch verbleibenden Überschuss sofort erfolgswirksam.

Bedingte Gegenleistungen, die vom Erwerber zu entrichten sind, werden mit dem Zeitwert am Erwerbsstichtag angesetzt. Liegen nach dem Erwerbsstichtag wertaufhellende Tatsachen vor, die den Betrag der bedingten Gegenleistung, die zum Ansatz eines Vermögenswertes oder einer Schuld führen, ändern, werden die Änderungen im Einklang mit den einschlägigen IFRS erfasst. Sofern die bedingte Gegenleistung im Eigenkapital zu erfassen ist, wird der ursprüngliche Betrag nicht neu bewertet, und Differenzen zum späteren Erfüllungsbetrag werden direkt im Eigenkapital erfasst.

Jeder weitere Anteil, der nach Erreichung des beherrschenden Einflusses erworben wurde, beeinflusst den zuvor angesetzten Geschäfts- oder Firmenwert nicht. Der Erwerb und die Veräußerung von Anteilen anderer Gesellschafter, wie beispielsweise Veränderungen in der Anteilsquote des Mutterunternehmens, ohne dass die Beherrschung verloren geht, werden als Transaktionen zwischen Eigenkapitalgebern behandelt. Verluste werden den Anteilen anderer Gesellschafter zugewiesen, selbst wenn sie den Eigenkapitalanteil, der auf andere Gesellschafter entfällt, übersteigen. In dem Zeitpunkt, in dem der beherrschende Einfluss verloren geht, werden alle zurückbehaltenen Anteile zum Zeitwert neu bewertet.

Erwirbt der Allianz Konzern ein Unternehmen, werden für eine zutreffende Klassifizierung und Kennzeichnung aller übernommenen finanziellen Vermögenswerte und Schulden Vertragsbedingungen sowie ökonomische und andere einschlägige, im Erwerbszeitpunkt bestehende Gegebenheiten herangezogen. Wenn ein Versicherungsunternehmen erworben wird, klassifiziert der Allianz Konzern Versicherungsverträge nach eigenen Bilanzierungsgrundsätzen um.

**Unternehmenszusammenschlüsse vor dem 1. Januar 2010** werden nach der Erwerbsmethode bilanziert. Die Bilanzierung nach der Erwerbsmethode erfordert, dass der Allianz Konzern die Anschaffungskosten des Unternehmenszusammenschlusses zum Erwerbszeitpunkt verteilt, indem die identifizierbaren Vermögenswerte,

Schulden und Eventualverbindlichkeiten des erworbenen Unternehmens mit den Zeitwerten angesetzt werden. Die Anschaffungskosten eines Unternehmenszusammenschlusses entsprechen den Zeitwerten der entrichteten Vermögenswerte, der emittierten Eigenkapitalinstrumente und der eingegangenen oder übernommenen Schulden zum Erwerbszeitpunkt zuzüglich sämtlicher dem Erwerb direkt zurechenbaren Kosten. Falls die Anschaffungskosten den Zeitwert des vom Allianz Konzern gehaltenen Anteils am Nettovermögen des erworbenen Unternehmens übersteigen, wird die Differenz in der Position Geschäfts- oder Firmenwert ausgewiesen. Alle Anteile anderer Gesellschafter (vormals Minderheitsanteile genannt) werden zum anteiligen Zeitwert des Reinvermögens des erworbenen Unternehmens erfasst.

Für [Unternehmenszusammenschlüsse, die vor dem 31. März 2004](#) abgeschlossen wurden, werden Anteile anderer Gesellschafter mit deren Anteilen an den Vermögenswerten und Schulden zu fortgeführten Anschaffungskosten bewertet.

### **Assoziierte Unternehmen und Gemeinschaftsunternehmen**

Assoziierte Unternehmen sind Unternehmen, auf die der Allianz Konzern einen maßgeblichen Einfluss ausüben kann und die weder Tochterunternehmen noch Gemeinschaftsunternehmen sind. Ein maßgeblicher Einfluss ist die Möglichkeit, an der Finanz- und Geschäftspolitik eines Unternehmens mitzuwirken, ohne diese zu kontrollieren. Ein maßgeblicher Einfluss wird vermutet, wenn der Allianz Konzern mindestens 20%, aber nicht mehr als 50% der Stimmrechte hält, es sei denn, dies kann eindeutig widerlegt werden. Bei einem gehaltenen Stimmrechtsanteil von weniger als 20% wird vermutet, dass kein signifikanter Einfluss besteht, es sei denn, dass dieser Einfluss eindeutig nachgewiesen werden kann. Gemeinschaftsunternehmen sind Unternehmen, über die der Allianz Konzern zusammen mit einem oder mehreren anderen Unternehmen gemeinsam die Kontrolle ausübt.

Anteile an assoziierten Unternehmen und Gemeinschaftsunternehmen werden im Allgemeinen nach der At-Equity-Methode bilanziert. Bei dieser Methode entsprechen die Ergebniswirkungen und der Buchwert der Finanzanlage dem auf den Konzern entfallenden Anteil am Ergebnis und am Nettovermögen des Unternehmens. Die Anteile werden bei Zugang zu Anschaffungs-

kosten angesetzt. In den Folgeperioden erhöht oder verringert sich der Buchwert der Anteile entsprechend dem Anteil des Allianz Konzerns am Periodenergebnis des Beteiligungsunternehmens. Die Anteile werden auf Wertminderung getestet, wenn die entsprechenden auslösenden Ereignisse für einen Wertminderungstest eintreten. Falls zutreffend, bestimmt sich die Höhe der Wertminderung aus der Differenz zwischen dem Buchwert und dem realisierbaren Wert. Die entsprechenden auslösenden Ereignisse ähneln denen für den Wertminderungstest von Finanzinstrumenten, wobei die Vorgehensweise zur Ermittlung eines Abwertungsbedarfs der für übrige Vermögenswerte vergleichbar ist.

Anteilige Ergebnisse aller wesentlichen Beteiligungen an assoziierten Unternehmen werden mit einer Verzögerung von nicht mehr als drei Monaten erfasst. Ein positiver Unterschiedsbetrag zwischen den Anschaffungskosten der Beteiligung und dem Anteil des Allianz Konzerns an den Zeitwerten der identifizierbaren Vermögenswerte, Schulden und Eventualschulden des assoziierten Unternehmens oder Gemeinschaftsunternehmens stellt einen Geschäfts- oder Firmenwert dar, der im Buchwert der Beteiligung enthalten ist. Erträge aus Anteilen an assoziierten Unternehmen und Gemeinschaftsunternehmen, ausgenommen Gewinnausschüttungen, werden gesondert als Zinserträge und ähnliche Erträge behandelt. Gewinne und Verluste aus Transaktionen zwischen dem Allianz Konzern und dem assoziierten Unternehmen oder Gemeinschaftsunternehmen werden entsprechend dem Anteil am assoziierten Unternehmen oder Gemeinschaftsunternehmen eliminiert. Die Bilanzierungsgrundsätze der assoziierten Unternehmen und Gemeinschaftsunternehmen wurden, soweit erforderlich, angepasst, um eine einheitliche Anwendung von Bilanzierungs- und Bewertungsgrundsätzen im Allianz Konzern zu gewährleisten.

Im Falle des Verlustes des maßgeblichen Einflusses oder der gemeinsamen Kontrolle über ein assoziiertes Unternehmen oder ein Gemeinschaftsunternehmen wird folgender Differenzbetrag als Gewinn oder Verlust in der Konzern-Gewinn- und Verlustrechnung erfasst: (i) die Summe bestehend aus Erlösen aus der Veräußerung von Anteilen, dem Wert zurückbehaltener Anteile und dem Wert der Beträge, die aus dem Eigenkapital umzugliedern sind, abzüglich (ii) dem Buchwert der Beteiligung im Zeitpunkt des Verlustes des maßgeblichen Einflusses oder der gemeinsamen Kontrolle.

## Währungsumrechnung

### Umrechnung von Fremdwährungen in die funktionale Währung

Die Einzelabschlüsse jeder Tochtergesellschaft des Allianz Konzerns werden in der Währung erstellt, die im Umfeld der ordentlichen Geschäftstätigkeit des Unternehmens vorherrscht (funktionale Währung). Geschäftsvorfälle, die in einer Währung notieren, die von der funktionalen Währung abweichen, werden mit dem Währungskurs zum Zeitpunkt des Geschäftsvorfalles umgerechnet. Zum Stichtag werden monetäre Vermögenswerte und Verbindlichkeiten, die in Fremdwährung notieren, in die funktionale Währung mit dem Stichtagskurs umgerechnet. Nichtmonetäre Vermögenswerte und Verbindlichkeiten, die in Fremdwährung notieren und mit Anschaffungskosten bewertet werden, werden zum historischen Wechselkurs umgerechnet. Nichtmonetäre Vermögenswerte und Verbindlichkeiten, die in Fremdwährung notieren und zum Zeitwert bewertet werden, werden zum Stichtagskurs umgerechnet. Kursgewinne und -verluste aus Fremdwährungsgeschäften werden in den Erträgen aus erfolgswirksam zum Zeitwert bewerteten Finanzaktiva und Finanzpassiva (netto) ausgewiesen, außer wenn die Gewinne oder Verluste von nichtmonetären Vermögenswerten oder nichtmonetären Verbindlichkeiten, die zum Zeitwert bewertet werden, direkt im Eigenkapital erfasst werden. In diesem Fall wird die Komponente des Kursgewinns oder -verlusts auch direkt im Eigenkapital erfasst.

### Umrechnung von der funktionalen Währung in die Berichtswährung

Im Konzernabschluss werden die Vermögens-, Finanz- und Ertragslage jeder Tochtergesellschaft des Allianz Konzerns in Euro, der Berichtswährung des Allianz Konzerns, dargestellt. Vermögenswerte und Verbindlichkeiten von Tochtergesellschaften, die nicht in Euro berichten, werden zum Stichtagskurs umgerechnet, während Erträge und Aufwendungen mit dem Quartalsdurchschnittskurs umgerechnet werden. Umrechnungsdifferenzen, auch soweit sie sich aus der Bilanzierung nach der At-Equity-Methode ergeben, werden in der Gesamtperiodenrechnung und unter der Position Währungsänderungen ausgewiesen.

## Barreserve und andere liquide Mittel

In dieser Position sind täglich fällige Guthaben bei Kreditinstituten, Guthaben bei Zentralnotenbanken, Kassenbestand, Schatzwechsel, sofern sie nicht unter den Handelsaktiva ausgewiesen werden, sowie Schecks und Wechsel, die zur Refinanzierung bei Notenbanken zugelassen sind, ausgewiesen; die maximale Laufzeit beträgt drei Monate ab dem Erwerbszeitpunkt.

## Fremdgenutzter Grundbesitz

Fremdgenutzter Grundbesitz (Grundstücke und Bauten einschließlich der Bauten auf fremden Grundstücken) wird mit den Anschaffungs- bzw. Herstellungskosten, vermindert um planmäßige Abschreibungen und Wertminderungen, angesetzt. Fremdgenutzter Grundbesitz wird linear über die erwartete Nutzungsdauer und maximal über 50 Jahre abgeschrieben. Zu jedem Bilanzstichtag oder immer dann, wenn Anhaltspunkte dafür vorliegen, dass der Buchwert nicht erzielbar sein könnte, wird der fremdgenutzte Grundbesitz auf Wertminderung hin überprüft, indem dessen Zeitwert nach der Discounted-Cashflow-Methode ermittelt wird. Ausgaben werden aktiviert, wenn sie zu einer Werterhöhung des fremdgenutzten Grundbesitzes führen oder die wirtschaftliche Nutzungsdauer verlängern, ansonsten werden sie als Aufwand erfasst.

## Finanzinstrumente

### Klassifizierung, Ansatz und erstmalige Bewertung

Finanzaktiva gemäß IAS 39 werden entweder als

- erfolgswirksam zum Zeitwert bewertet,
- jederzeit veräußerbare Wertpapiere,
- bis zur Endfälligkeit gehaltene Wertpapiere,
- Forderungen an Kreditinstitute und Kunden oder als
- derivative Finanzinstrumente, welche die Kriterien des Hedge Accounting erfüllen,

klassifiziert. Darüber hinaus umfassen Finanzaktiva die Depotforderungen aus dem in Rückdeckung übernommenen Versicherungsgeschäft und Finanzaktiva aus fondsgebundenen Verträgen.



Finanzpassiva gemäß IAS 39 werden entweder als

- erfolgswirksam zum Zeitwert bewertet,
- Verbindlichkeiten gegenüber Kreditinstituten und Kunden,
- Investmentverträge mit Versicherungsnehmern,
- derivative Finanzinstrumente, welche die Kriterien des Hedge Accounting erfüllen,
- Verbindlichkeiten für kündbare Eigenkapitalinstrumente,
- verbrieft Verbindlichkeiten oder als Genussrechtskapital und nachrangige Verbindlichkeiten

klassifiziert. Darüber hinaus umfassen die Finanzpassiva die Finanzpassiva aus fondsgebundenen Verträgen.

Die Klassifizierung ist abhängig von Art und Verwendungszweck der Finanzinstrumente und wird bei Zugang bestimmt.

Finanzinstrumente werden bei erstmaligem Ansatz zu ihrem beizulegenden Zeitwert bewertet. Im Falle eines finanziellen Vermögenswertes oder einer finanziellen Verbindlichkeit, die nicht erfolgswirksam zum beizulegenden Zeitwert bewertet wird, erfolgt dies unter Einschluss von Transaktionskosten, die direkt dem Erwerb oder der Emission zuzurechnen sind.

Finanzinstrumente werden grundsätzlich am Handelstag angesetzt und ausgebucht, wenn der Allianz Konzern sich verpflichtet, Wertpapiere zu kaufen, zu verkaufen oder eine Verbindlichkeit zu übernehmen.

### **Zeitwert von Finanzinstrumenten**

Der Allianz Konzern bestimmt den Zeitwert (Fair Value) von Finanzinstrumenten gemäß den Regelungen des IAS 39 zur Fair-Value-Bewertung.

**Aktiver Markt – Notierter Preis** Der Zeitwert von Finanzinstrumenten, die an einem aktiven Markt gehandelt werden, wird von notierten Marktpreisen oder Preisquotierungen der Händler abgeleitet, die am letzten Handelstag vor dem Stichtag sowie am Stichtag festgestellt werden. Der notierte Marktpreis, der für Finanzaktiva des Allianz Konzerns herangezogen wird, ist der aktuelle Geldkurs. Der notierte Marktpreis für Finanzpassiva ist der aktuelle Briefkurs.

**Kein aktiver Markt – Bewertungsmethoden** Der Zeitwert der Finanzinstrumente, die nicht an einem aktiven Markt gehandelt werden, wird durch die Anwendung von Bewertungsmethoden bestimmt. Es werden Bewertungsmethoden verwendet, die auf am Markt beobachtbaren Inputgrößen basieren, sofern diese verfügbar sind. Solche Marktinputgrößen umfassen Verweise auf ehemals notierte Preise für identische Instrumente auf aktiven Märkten, notierte Preise für identische Instrumente auf nichtaktiven Märkten, notierte Preise für ähnliche Instrumente auf aktiven Märkten sowie notierte Preise für ähnliche Instrumente auf nichtaktiven Märkten. Auf dem Markt beobachtbare Inputgrößen umfassen auch Zinsertragskurven, Volatilitäten von Optionen und Währungsumrechnungskurse. Wenn beobachtbare Inputgrößen nicht verfügbar sind, wird der Zeitwert auf der Basis angemessener Bewertungsmethoden ermittelt, die auf dem Markt nicht beobachtbare Inputgrößen verwenden. Bewertungsmethoden umfassen die Barwertmethode, die Discounted-Cashflow-Methode, den Vergleich mit ähnlichen Finanzinstrumenten, für die ein beobachtbarer Marktpreis existiert, und andere Bewertungsmodelle. Im Bewertungsprozess werden geeignete Anpassungen bezüglich Kreditrisiken vorgenommen. Insbesondere wenn auf dem Markt beobachtbare Inputgrößen nicht zur Verfügung stehen, wird die Bewertung wesentlich von der Verwendung von Schätzungen und Annahmen beeinflusst. In Anmerkung 3 werden die Prozesse und Kontrollen, die eingeführt wurden, um eine angemessene Verwendung von Schätzungen und Annahmen sicherzustellen, erklärt.

**Kein aktiver Markt – Eigenkapitalinstrumente** Eigenkapitalinstrumente mit Anteilsbesitz unter 20% werden zum Zeitwert bewertet, sofern der Zeitwert verlässlich ermittelbar ist. Nicht börsennotierte Eigenkapitalinstrumente, deren beizulegender Zeitwert nicht verlässlich ermittelt werden kann, sowie Derivate auf solche nicht börsennotierten Eigenkapitalinstrumente werden solange zu Anschaffungskosten bewertet, bis der Zeitwert verlässlich bewertet werden kann. Diese Finanzinstrumente unterliegen den normalen Wertminderungstests.

### Fortgeführte Anschaffungskosten von Finanzinstrumenten

Als fortgeführte Anschaffungskosten eines Finanzinstruments wird der Betrag bezeichnet, mit dem ein Finanzinstrument bei erstmaligem Ansatz bewertet wurde, abzüglich Tilgungen, zuzüglich oder abzüglich der kumulierten Amortisation einer etwaigen Differenz zwischen dem ursprünglichen Betrag und dem bei Endfälligkeit rückzahlbaren Betrag unter Anwendung der Effektivzinsmethode sowie abzüglich etwaiger Beträge für Wertminderungen oder Uneinbringlichkeit.

### Erfassung von „Day-One-Gewinnen oder -Verlusten“

Ein „Day-One-Gewinn oder -Verlust“ wird erfasst, sofern der Zeitwert eines Finanzinstruments von seinem Transaktionspreis bei Zugang abweicht. In diesem Fall wird der Zeitwert durch Vergleich mit anderen beobachtbaren aktuellen Marktpreisen desselben Instruments abgeleitet oder es wird eine Bewertungsmethode verwendet, die nur auf am Markt beobachtbaren Inputgrößen basiert.

### Folgebewertung von Finanzinstrumenten

Die Folgebewertung von Finanzinstrumenten hängt von ihrer Klassifizierung wie folgt ab:

#### Erfolgswirksam zum Zeitwert bewertete Finanzaktiva und Finanzpassiva

Erfolgswirksam zum Zeitwert bewertete Finanzaktiva und Finanzpassiva umfassen die Handelsaktiva und die Handelspassiva sowie die als „erfolgswirksam zum Zeitwert bewertet“ klassifizierten Finanzaktiva und Finanzpassiva.

Finanzaktiva, die als Handelsaktiva klassifiziert werden, umfassen Anleihen und Aktien, sofern diese hauptsächlich mit der Absicht zur Gewinnerzielung aus kurzfristigen Preisschwankungen oder zum kurzfristigen Verkauf erworben wurden, sowie derivative Finanzinstrumente, welche die Kriterien der Bilanzierung von Sicherungsgeschäften (Hedge Accounting) nicht erfüllen und positive Zeitwerte aufweisen.

Finanzpassiva, die als Handelspassiva klassifiziert werden, umfassen vor allem derivative Finanzinstrumente mit negativen Zeitwerten, die nicht die Kriterien des Hedge Accounting erfüllen.

Derivative Finanzinstrumente der Handelsaktiva und -passiva schließen eingebettete Derivate ein, die als Bestandteil von strukturierten Finanzinstrumenten, getrennt vom Basisvertrag, bilanziert werden.

Erfolgswirksam zum Zeitwert bewertete Finanzaktiva und Finanzpassiva werden zum Zeitwert bewertet. Aus der Bewertung resultierende Gewinne und Verluste werden erfolgswirksam in der Konzern-Gewinn- und Verlustrechnung erfasst. Die erfassten Nettogewinne und -verluste enthalten Dividenden und Zinsen der entsprechenden Finanzinstrumente. Die Klassifizierung als erfolgswirksam zum Zeitwert bewertet kann nur bei Zugang vorgenommen und in nachfolgenden Perioden nicht geändert werden.

#### Jederzeit veräußerbare Wertpapiere

Jederzeit veräußerbare Wertpapiere umfassen festverzinsliche Wertpapiere und Aktien, die als jederzeit veräußerbare Wertpapiere klassifiziert werden oder die nicht als bis zur Endfälligkeit gehaltene Wertpapiere, Forderungen an Kreditinstitute und Kunden oder als erfolgswirksam zum Zeitwert bewertete Finanzaktiva klassifiziert sind. Jederzeit veräußerbare Wertpapiere werden zum Bilanzstichtag mit dem Zeitwert bewertet. Nichtrealisierte Gewinne und Verluste, die sich als Unterschiedsbetrag zwischen Zeitwert und fortgeführten Anschaffungskosten ergeben, werden nach Abzug latenter Steuern und der Beträge, die bei Realisierung aufgrund gesetzlicher oder vertraglicher Regelungen den gewinnbeteiligungsberechtigten Versicherungsnehmern zustünden und somit der latenten Rückstellung für Beitragsrückerstattung zugeführt werden, als gesonderter Eigenkapitalposten erfasst. Werden jederzeit veräußerbare Wertpapiere ausgebucht oder als wertgemindert betrachtet, wird der vorher im Eigenkapital ausgewiesene kumulierte Gewinn oder Verlust erfolgswirksam in der Konzern-Gewinn- und Verlustrechnung erfasst. Die Ermittlung der realisierten Gewinne und Verluste erfolgt grundsätzlich unter Anwendung der Durchschnittskostenmethode auf der Ebene der Konzernunternehmen.

Jederzeit veräußerbare Aktien mit einem Anteilsbesitz unter 20% werden zum Zeitwert bewertet, sofern der Zeitwert verlässlich ermittelbar ist. Jederzeit veräußerbare Aktien enthalten Investitionen in Limited Partnerships (z. B. Kommanditgesellschaften). Der Allianz Konzern bilanziert seine Investitionen in Limited Partnerships mit

Anteilsbesitz unter 20% zu Anschaffungskosten, sofern Limited Partnerships nicht über einen notierten Marktpreis verfügen und der Zeitwert nicht verlässlich ermittelbar ist. Investitionen in Limited Partnerships mit 20% oder höherem Anteilsbesitz werden im Allianz Konzern im Allgemeinen nach der At-Equity-Methode bilanziert, gemäß der widerlegbaren Vermutung, dass der beschränkt haftende Gesellschafter keine Kontrolle über die Limited Partnership hat.

### **Bis zur Endfälligkeit gehaltene Wertpapiere**

Die bis zur Endfälligkeit gehaltenen Wertpapiere enthalten festverzinsliche Wertpapiere mit festen oder bestimmbar Zahlungen und fester Laufzeit, die in Daueranlageabsicht bis zur Endfälligkeit gehalten werden können und sollen. Sie werden über die Laufzeit mit ihren fortgeführten Anschaffungskosten nach der Effektivzinsmethode abzüglich Abschreibungen wegen Wertminderungen auf den erzielbaren Betrag angesetzt. Die Tilgung von Agio und Disagio wird unter Zinserträge und ähnliche Erträge ausgewiesen.

### **Kredite und Forderungen an Kreditinstitute und Kunden**

Forderungen an Kreditinstitute und Kunden umfassen nichtderivative finanzielle Vermögenswerte mit festen oder bestimmbar Zahlungen, die nicht an einem aktiven Markt notiert und auch nicht als bis zur Endfälligkeit gehaltene oder jederzeit veräußerbare Finanzanlagen, als Handelsaktiva oder als erfolgswirksam zum Zeitwert bewertete Finanzaktiva, klassifiziert sind. Forderungen an Kreditinstitute und Kunden werden anfänglich zum Zeitwert erfasst. In den Folgeperioden werden sie zu fortgeführten Anschaffungskosten gemäß der Effektivzinsmethode angesetzt. Die Zinserträge werden auf den noch ausstehenden Nominalwert ohne Ausbuchungen abgegrenzt. Abgegrenzte Gebühren sowie Agien oder Disagien werden durch Verwendung der Effektivzinsmethode als Zinserträge oder Zinsaufwendungen über die Laufzeit der betreffenden Darlehen berücksichtigt.

Ein Teil der Forderungen an Kreditinstitute und Kunden sind noch nicht abgewinkelte Reverse-Repo-Geschäfte und gegebene Sicherheiten im Rahmen von Wertpapierleihgeschäften. Bei einem Reverse-Repo-Geschäft werden Wertpapiere mit der gleichzeitigen Verpflichtung erworben, diese Wertpapiere an den ursprünglichen Veräußerer zu einem späteren Termin zu einem vereinbarten Preis wieder zu verkaufen. Wenn die mit dem

Wertpapier verbundenen Chancen und Risiken während der gesamten Laufzeit des Geschäfts im Wesentlichen beim Veräußerer verbleiben, werden die betreffenden Wertpapiere nicht als Vermögenswerte in der Konzernbilanz ausgewiesen. Der gezahlte Kaufpreis wird unter Forderungen an Kreditinstitute und Kunden ausgewiesen. Zinsen aus Reverse-Repo-Geschäften werden erfolgswirksam über die Laufzeit abgegrenzt und unter Zinserträge und ähnliche Erträge ausgewiesen.

Im Rahmen von Wertpapierleihgeschäften muss der Allianz Konzern grundsätzlich eine Barsicherheit beim Verleiher hinterlegen. Gezahlte Entleihgebühren werden unter Zinsaufwendungen ausgewiesen.

### **Depotforderungen aus dem in Rückdeckung übernommenen Versicherungsgeschäft**

Depotforderungen aus dem in Rückdeckung übernommenen Versicherungsgeschäft sind dem Allianz Konzern zustehende Bareinlagen, die jedoch vom Erstversicherer als Sicherheit für künftige Leistungen des Allianz Konzerns einbehalten werden. Die Depotforderungen werden zum Nennwert abzüglich Wertminderungen für Forderungen ausgewiesen, die als nicht vollständig einbringbar erachtet werden.

### **Finanzaktiva aus fondsgebundenen Verträgen**

Finanzaktiva aus fondsgebundenen Verträgen werden zum Bilanzstichtag mit ihrem Zeitwert bewertet. Die Wertschwankungen werden, saldiert mit den Wertschwankungen der entsprechenden Finanzpassiva aus fondsgebundenen Verträgen, erfolgswirksam in der Gewinn- und Verlustrechnung erfasst.

### **Verbindlichkeiten gegenüber Kreditinstituten und Kunden**

Verbindlichkeiten gegenüber Kreditinstituten und Kunden werden zu fortgeführten Anschaffungskosten bewertet. Zu den Verbindlichkeiten gegenüber Kreditinstituten und Kunden gehören auch Repo-Geschäfte und Wertpapierleihgeschäfte. Repo-Geschäfte umfassen den Verkauf von Wertpapieren des Allianz Konzerns an eine Gegenpartei bei gleichzeitiger vertraglicher Vereinbarung des Rückkaufs dieser Wertpapiere zu einem späteren Zeitpunkt und zu einem vereinbarten Preis. Wenn die mit dem Wertpapier verbundenen Chancen und Risiken während der gesamten Laufzeit des Geschäfts im Wesentlichen beim Allianz Konzern verbleiben, werden die betreffenden Wertpapiere im Allianz Konzern

nicht ausgebucht. Die erhaltenen Geldzahlungen werden als Verbindlichkeiten gegenüber Kreditinstituten oder Kunden in der Konzernbilanz ausgewiesen. Zinsaufwendungen aus solchen Repo-Geschäften werden über die Vertragslaufzeit abgegrenzt und unter Zinsaufwendungen und ähnliche Aufwendungen ausgewiesen.

Bei Wertpapierleihgeschäften erhält der Allianz Konzern in der Regel Barsicherheiten, die unter Verbindlichkeiten gegenüber Kreditinstituten oder Kunden ausgewiesen werden. Erhaltene Wertpapierleihgebühren werden unter Zinserträge und ähnliche Erträge ausgewiesen.

#### **Investmentverträge mit Versicherungsnehmern**

Die Zeitwerte von Investment- und Rentenversicherungsverträgen werden mittels Rückkaufswerten für Versicherungsnehmer und Kontensalden von Versicherungsnehmern bestimmt.

#### **Finanzpassiva aus fondsgebundenen Verträgen**

Die Ermittlung der Zeitwerte für Finanzpassiva aus fondsgebundenen Verträgen entspricht der Ermittlung der Zeitwerte für Finanzaktiva aus fondsgebundenen Verträgen.

#### **Verbindlichkeiten für kündbare Eigenkapitalinstrumente**

Verbindlichkeiten für kündbare Eigenkapitalinstrumente enthalten die Anteile anderer Gesellschafter am Eigenkapital bestimmter konsolidierter Investmentfonds. Diese Anteile sind deshalb als Verbindlichkeit des Allianz Konzerns zu klassifizieren, weil sie den Inhaber zur Rückgabe an den Emittenten gegen flüssige Mittel oder andere finanzielle Vermögenswerte berechtigen (kündbares Instrument). Verbindlichkeiten für kündbare Eigenkapitalinstrumente sind mit ihrem Rückkaufswert zu bilanzieren und die Veränderung ist grundsätzlich erfolgswirksam in der Gewinn- und Verlustrechnung zu erfassen.

#### **Verbriefte Verbindlichkeiten, Genussrechtskapital und nachrangige Verbindlichkeiten**

Verbriefte Verbindlichkeiten, Genussrechtskapital und nachrangige Verbindlichkeiten werden zu fortgeführten Anschaffungskosten bewertet. Agio-/Disagiobeträge werden nach der Effektivzinsmethode über die Laufzeit der Verbindlichkeit verteilt.

#### **Finanzgarantien**

Vom Allianz Konzern ausgegebene Finanzgarantien sind solche, die zur Leistung einer Zahlung verpflichten, die den Garantiennehmer für einen Verlust entschädigen, der entsteht, weil ein bestimmter Schuldner seinen Zahlungsverpflichtungen gemäß den ursprünglichen oder geänderten Bedingungen eines Schuldinstruments nicht fristgerecht nachkommt. Finanzgarantien, die nicht als Versicherungsverträge bilanziert werden, sind bei Zugang mit dem Zeitwert zu erfassen. In den Folgeperioden hat der Allianz Konzern die Finanzgarantie mit dem höheren Wert aus der bestmöglichen Schätzung für die Ausgabe, die für die Begleichung der gegenwärtigen Verpflichtung erforderlich ist, und dem ursprünglich angesetzten Betrag abzüglich kumulierter Abschreibungen, sofern angebracht, zu bewerten, es sei denn, die Finanzgarantie wurde bei Zugang als zum Zeitwert bewertet klassifiziert.

#### **Wertminderungen von Finanzaktiva**

##### **Wertminderungen von bis zur Endfälligkeit gehaltenen und jederzeit veräußerbaren festverzinslichen Wertpapieren sowie von Krediten**

Wertminderungen auf festverzinsliche Wertpapiere, die bis zur Endfälligkeit gehalten werden oder jederzeit veräußerbar sind, sowie auf Kredite werden dann ergebniswirksam erfasst, wenn objektive Hinweise vorliegen, dass zwischen der erstmaligen Erfassung des Wertpapiers und dem relevanten Konzernbilanzstichtag ein Verlustereignis eingetreten ist, das die erwarteten Zahlungsströme reduziert; d. h., wenn der Gesamtbetrag der aus den Vertragsbedingungen des Wertpapiers hervorgehenden Ansprüche als ganz oder teilweise uneinbringlich betrachtet werden muss.

Falls bei einem bis zur Endfälligkeit gehaltenen festverzinslichen Wertpapier oder einem Kredit eine Wertminderung vorliegt, wird der entsprechende Verlust aus der Wertminderung in Höhe der Differenz zwischen dem Buchwert und dem Barwert seiner erwarteten zukünftigen Zahlungsströme, abgezinst mit dem ursprünglichen effektiven Zinssatz des Wertpapiers, erfasst.

Falls bei einem jederzeit veräußerbaren festverzinslichen Wertpapier eine Wertminderung vorliegt, wird der entsprechende Verlust in Höhe der Differenz zwischen den fortgeführten Anschaffungskosten des Wertpapiers und dem aktuellen Zeitwert, abzüglich aller schon früher erfassten Verluste aus Wertminderungen, erfasst.

Erhöht oder verringert sich die Wertminderung bei einem bis zur Endfälligkeit gehaltenen festverzinslichen Wertpapier oder einem Kredit in folgenden Berichtsperioden aufgrund eines Ereignisses, das objektiv auf einen nach der Erfassung der Wertminderung eingetretenen Sachverhalt zurückzuführen ist, wird die Veränderung der Wertminderung in der Konzern-Gewinn- und Verlustrechnung erfasst.

Erhöht sich bei jederzeit veräußerbaren festverzinslichen Wertpapieren in folgenden Berichtsperioden der Zeitwert und der Anstieg kann objektiv auf einen nach der Erfassung der Wertminderung eingetretenen Sachverhalt zurückgeführt werden (wie beispielsweise die Verbesserung des Bonitätsratings eines Schuldners), wird die früher erfasste Wertminderung um diesen Betrag in den Wertminderungen Finanzanlagen (netto) zurückgenommen.

In Anmerkung 3 werden die Prozesse und Kontrollen, die eingeführt wurden, um eine angemessene Verwendung von Schätzungen und Annahmen sicherzustellen, erklärt.

### **Wertminderung von jederzeit veräußerbaren Aktien**

Liegen objektive Hinweise auf eine Wertminderung jederzeit veräußerbarer Aktien vor, ist diese erfolgswirksam zu erfassen. Objektive Hinweise auf eine Wertminderung umfassen neben qualitativen Wertminderungskriterien einen signifikanten oder dauerhaften Rückgang des Zeitwertes unter die Anschaffungskosten. Der Allianz Konzern geht von einem signifikanten Rückgang aus, wenn der Zeitwert um mehr als 20% unter die gewichteten durchschnittlichen Anschaffungskosten gefallen ist. Ein dauerhafter Rückgang wird angenommen, wenn der Zeitwert länger als neun Monate unter den gewichteten durchschnittlichen Anschaffungskosten liegt.

Wurde eine Wertminderung auf jederzeit veräußerbare Aktien vorgenommen, so ist jeder weitere Rückgang des Zeitwertes in den darauffolgenden Perioden ebenfalls als Wertminderung zu erfassen. Folglich ist zu jedem Bilanzstichtag für jederzeit veräußerbare Aktien eine Wertminderung in Höhe der Differenz zwischen dem Zeitwert und den ursprünglichen Anschaffungskosten abzüglich der Wertminderungen aus Vorperioden zu

erfassen. Ergebniswirksam erfasste Wertminderungen für jederzeit veräußerbare Aktien dürfen nicht ergebniswirksam rückgängig gemacht werden, sondern werden aus dem Eigenkapital erfolgswirksam in die Konzern-Gewinn- und Verlustrechnung umgebucht, wenn das Wertpapier verkauft wird.

### **Umklassifizierungen von Finanzinstrumenten**

Wird ein Finanzinstrument bei der erstmaligen Erfassung einer bestimmten Kategorie zugeordnet, so kann es für bestimmte Kategorien nicht und für andere nur unter bestimmten Voraussetzungen umklassifiziert werden.

Die im Oktober 2008 veröffentlichten Änderungen zu IAS 39 erlauben einem Unternehmen die Umklassifizierung bestimmter nicht-derivativer finanzieller Vermögenswerte aus der Kategorie Handelsaktiva (erfolgswirksam zum Zeitwert bewertet) und der Kategorie jederzeit veräußerbar, sofern bestimmte Bedingungen erfüllt sind.

- Festverzinsliche Wertpapiere der Kategorien Handelsaktiva (erfolgswirksam zum Zeitwert bewertet) oder jederzeit veräußerbar können in die Kategorie Kredite und Forderungen umklassifiziert werden, wenn sie die Definition der Kategorie Kredite und Forderungen zum Umklassifizierungszeitpunkt erfüllen und der Allianz Konzern diese Vermögenswerte nunmehr in Daueranlageabsicht bis in absehbare Zukunft oder bis zur Endfälligkeit halten will und kann.
- Alle übrigen festverzinslichen Wertpapiere und alle Eigenkapitalinstrumente der Kategorie Handelsaktiva (erfolgswirksam zum Zeitwert bewertet) können in seltenen Fällen (z. B die Wertminderung auf den weltweiten Finanzmärkten in 2008) in die Kategorie bis zur Endfälligkeit gehalten (festverzinsliche Wertpapiere) oder in die Kategorie jederzeit veräußerbar umklassifiziert werden, wenn der Allianz Konzern diese Vermögenswerte nicht länger kurzfristig handeln oder verkaufen will.

Zum Zeitpunkt der Umklassifizierung müssen die nicht-derivativen Finanzinstrumente zum Zeitwert umklassifiziert werden. Abhängig von der Umklassifizierung stellt der Zeitwert dann die Anschaffungskosten oder fortgeführten Anschaffungskosten dar. In Vorperioden erfasste

Gewinne und Verluste können nicht rückgängig gemacht werden. Nach Umklassifizierung sind die entsprechenden Bewertungsvorschriften aus IAS 39 für zu Anschaffungskosten oder zu fortgeführten Anschaffungskosten bewertete Vermögenswerte anzuwenden.

### Saldierung von Finanzinstrumenten

Finanzielle Vermögenswerte und finanzielle Schulden werden nur dann saldiert und als Nettobeträge in der Bilanz ausgewiesen, wenn ein Rechtsanspruch besteht, die erfassten Beträge miteinander zu verrechnen, und die Absicht besteht, den Ausgleich auf Nettobasis herbeizuführen oder gleichzeitig mit der Verwertung des Vermögenswertes die Verbindlichkeit abzulösen.

### Ausbuchung von Finanzaktiva und Finanzpassiva

Ein finanzieller Vermögenswert wird ausgebucht, wenn die vertraglichen Rechte auf die Zahlungsströme aus dem finanziellen Vermögenswert auslaufen oder wenn der Allianz Konzern den Vermögenswert und alle wesentlichen Risiken und Chancen, die mit dem Eigentum verbunden sind, überträgt. Eine finanzielle Schuld wird ausgebucht, wenn sie getilgt ist.

### Derivative Finanzinstrumente

Im Allianz Konzern werden derivative Finanzinstrumente wie Swaps, Optionen und Futures zur Absicherung gegen Marktrisiken (d. h. Zins-, Aktien- oder Währungsschwankungen) oder Kreditrisiken in den jeweiligen Anlageportfolios eingesetzt.

Derivative Finanzinstrumente, die nicht die Kriterien des Hedge Accounting erfüllen, werden zum Zeitwert unter den Handelsaktiva erfasst, sofern der Zeitwert positiv ist, oder als Handelspassiva, wenn der Zeitwert negativ ist. Die Gewinne oder Verluste, die aus der Bewertung zum Zeitwert resultieren, sind im Handelsergebnis enthalten. Diese Vorgehensweise ist auch für separierte eingebettete Derivate hybrider Finanzinstrumente anwendbar.

Ein Bestandteil eines Basisvertrags, der die Definition eines Derivats erfüllt, ist abzuspalten und wie ein freistehendes Derivat zu bewerten, sofern dessen wirtschaftliche Merkmale nicht eng mit denjenigen des Basisvertrags verbunden sind.

Bei den derivativen Finanzinstrumenten, die zu Absicherungszwecken gehalten werden und die Kriterien für Hedge Accounting erfüllen, unterscheidet der Allianz Konzern die Derivate hinsichtlich ihrer Zweckbestimmung zwischen Fair Value Hedges, Cashflow Hedges und Absicherung einer Nettoinvestition in eine wirtschaftlich selbstständige Teileinheit im Ausland. Der Allianz Konzern dokumentiert die Sicherungsbeziehung ebenso wie seine Risikomanagementziele und die Strategie für den Abschluss der Hedge-Transaktion. Der Allianz Konzern überprüft ferner sowohl zu Beginn der Sicherungsbeziehung als auch auf fortlaufender Basis, ob die für die Hedge-Transaktionen verwendeten derivativen Finanzinstrumente Schwankungen des Zeitwertes oder des Cashflow des abgesicherten Grundgeschäfts mit hoher Effektivität ausgleichen. Derivative Finanzinstrumente, die Teil des Hedge Accounting sind, werden wie folgt ausgewiesen:

### Fair Value Hedges

Mittels eines Fair Value Hedge werden bilanzierte Aktiva oder Passiva oder eine feste Verpflichtung gegen ein näher beschriebenes Risiko von Schwankungen des Zeitwertes abgesichert. Wertänderungen des Zeitwertes des derivativen Sicherungsinstruments werden zusammen mit der anteiligen Wertänderung des Zeitwertes des abgesicherten Grundgeschäfts, bezogen auf das abgesicherte Risiko, in Erträgen aus erfolgswirksam zum Zeitwert bewerteten Finanzaktiva und Finanzpassiva (netto) erfasst.

### Cashflow Hedges

Cashflow Hedges beseitigen das Risiko von Schwankungen in erwarteten zukünftigen Zahlungsströmen, das einem bestimmten Risiko in Zusammenhang mit einem bereits bilanzierten Vermögenswert, einer Verbindlichkeit oder einer geplanten Transaktion (Forecasted Transaction) zugeordnet werden kann. Wertänderungen des Zeitwertes eines derivativen Sicherungsinstruments, das eine effektive Absicherung darstellt, werden in der Position Nichtrealisierte Gewinne und Verluste im Eigenkapital ausgewiesen und erst dann in die Konzern-Gewinn- und Verlustrechnung umgebucht, wenn der gegenläufige Gewinn oder Verlust aus dem abgesicherten Grundgeschäft realisiert und erfasst wird. Die dem ineffektiven Teil der Absicherung zuzuschreibende Wertänderung des Zeitwertes des Sicherungsinstruments



wird direkt in Erträgen aus erfolgswirksam zum Zeitwert bewerteten Finanzaktiva und Finanzpassiva (netto) erfasst.

### **Absicherung einer Nettoinvestition in eine wirtschaftlich selbstständige Teileinheit im Ausland**

Hedge Accounting kann auch zur Absicherung einer Nettoinvestition in eine wirtschaftlich selbstständige Teileinheit im Ausland angewandt werden. Der Teil der Gewinne oder Verluste aus der Bewertung des derivativen Sicherungsinstruments, der als effektive Absicherung zu betrachten ist, wird in der Position Währungsänderungen im Eigenkapital erfasst, während der ineffektive Teil direkt in die Erträge aus erfolgswirksam zum Zeitwert bewerteten Finanzaktiva und Finanzpassiva (netto) einfließt.

Bei allen Fair Value Hedges, Cashflow Hedges und Absicherungen einer Nettoinvestition in eine wirtschaftlich selbstständige Teileinheit im Ausland werden die derivativen Finanzinstrumente unter Übrige Aktiva oder Andere Verbindlichkeiten ausgewiesen.

Der Allianz Konzern beendet das Hedge Accounting prospektiv, wenn festgestellt wird, dass das derivative Finanzinstrument keine hocheffektive Absicherung mehr darstellt, das derivative Finanzinstrument oder das abgesicherte Grundgeschäft ausläuft, verkauft, gekündigt oder ausgeübt wird oder wenn der Allianz Konzern feststellt, dass die Klassifizierung des derivativen Finanzinstruments als Sicherungsinstrument nicht mehr gerechtfertigt ist. Mit Beendigung eines Fair Value Hedge wird das derivative Finanzinstrument weiterhin zum Zeitwert bilanziert; Veränderungen im Zeitwert des abgesicherten Grundgeschäfts werden jedoch nicht mehr ergebniswirksam in der Konzern-Gewinn- und Verlustrechnung erfasst. Mit Beendigung eines Cashflow Hedge wird das derivative Finanzinstrument weiterhin zum Zeitwert bilanziert; alle in der Gesamtperiodenrechnung ausgewiesenen nichtrealisierten Gewinne und Verluste werden aus dem Eigenkapital erfolgswirksam umgebucht, wenn sich die geplante Transaktion in der Konzern-Gewinn- und Verlustrechnung niederschlägt. Mit Beendigung eines Hedge zur Absicherung einer Nettoinvestition in eine wirtschaftlich selbstständige

Teileinheit im Ausland wird das derivative Finanzinstrument weiterhin zum Zeitwert bilanziert; alle im Eigenkapital ausgewiesenen nichtrealisierten Gewinne und Verluste bleiben bis zur Veräußerung der ausländischen Einheit Bestandteil des Eigenkapitals.

### **Anhangsangaben bezüglich Finanzinstrumenten**

Gemäß IFRS 7, Finanzinstrumente: Angaben, sind Finanzinstrumente in Klassen zusammenzufassen, die der Wesensart der anzugebenden Informationen Rechnung tragen und die Charakteristika dieser Finanzinstrumente berücksichtigen. Nach IFRS 7 sind angesetzte Finanzinstrumente (im Anwendungsbereich von IAS 39) wie auch nicht angesetzte Finanzinstrumente (außerhalb des Anwendungsbereichs von IAS 39 aber im Anwendungsbereich des IFRS 7) zu berücksichtigen. Die Klassen von Finanzinstrumenten, die im Allianz Konzern gebildet wurden, sind im Wesentlichen im Einklang mit jenen nach IAS 39.

Die Angabeanforderungen von IFRS 7 zu Risiken von Finanzinstrumenten und die Angaben von IAS 1, Darstellung des Abschlusses, bezüglich Eigenkapital sind im Risikobericht im Konzernlagebericht enthalten.

Der Risikobericht ist integraler Bestandteil des Konzernanhangs.

Die folgende Tabelle stellt die Zusammenhänge zwischen den Bilanzpositionen und den Klassen von Finanzinstrumenten gemäß IFRS 7 dar. Die Bilanzpositionen stellen gleichzeitig die Kategorien gemäß IAS 39 dar, falls nicht in Klammern anderweitig angegeben.

| Bilanzpositionen, IAS 39 Kategorien und Klassen von Finanzinstrumenten nach IFRS 7                            | Bewertungsgrundlage             |
|---------------------------------------------------------------------------------------------------------------|---------------------------------|
| <b>Finanzaktiva</b>                                                                                           |                                 |
| Barreserve und liquide Mittel                                                                                 | Nominalwert                     |
| Erfolgswirksam zum Zeitwert bewertete Finanzaktiva                                                            |                                 |
| – Handelsaktiva                                                                                               | Zeitwert                        |
| – Als „erfolgswirksam zum Zeitwert bewertet“ klassifizierte Finanzaktiva                                      | Zeitwert                        |
| Finanzanlagen                                                                                                 |                                 |
| – Jederzeit veräußerbare Wertpapiere                                                                          | Zeitwert                        |
| – Bis zur Endfälligkeit gehaltene Wertpapiere                                                                 | Fortgeführte Anschaffungskosten |
| Forderungen an Kreditinstitute und Kunden (Forderungen)                                                       | Fortgeführte Anschaffungskosten |
| Finanzaktiva aus fondsgebundenen Verträgen                                                                    | Zeitwert                        |
| Übrige Aktiva                                                                                                 |                                 |
| – Derivative Finanzinstrumente, welche die Kriterien des Hedge Accounting erfüllen, und feste Verpflichtungen | Zeitwert                        |
| Treuhänderisch verwaltete Vermögenswerte <sup>1</sup>                                                         | Zeitwert                        |
| <b>Finanzpassiva</b>                                                                                          |                                 |
| Erfolgswirksam zum Zeitwert bewertete Finanzpassiva                                                           |                                 |
| – Handelspassiva                                                                                              | Zeitwert                        |
| – Als „erfolgswirksam zum Zeitwert bewertet“ klassifizierte Finanzpassiva                                     | Zeitwert                        |
| Verbindlichkeiten gegenüber Kreditinstituten und Kunden (Übrige Verbindlichkeiten)                            | Fortgeführte Anschaffungskosten |
| Rückstellungen für Versicherungs- und Investmentverträge                                                      |                                 |
| – Nicht fondsgebundene Investmentverträge                                                                     | Fortgeführte Anschaffungskosten |
| Finanzpassiva aus fondsgebundenen Verträgen                                                                   | Zeitwert                        |
| Andere Verbindlichkeiten                                                                                      |                                 |
| – Derivative Finanzinstrumente, welche die Kriterien des Hedge Accounting erfüllen, und feste Verpflichtungen | Zeitwert                        |
| – Verbindlichkeiten für kündbare Eigenkapitalinstrumente                                                      | Rückzahlungsbetrag              |
| Verbriefte Verbindlichkeiten (Übrige Verbindlichkeiten)                                                       | Fortgeführte Anschaffungskosten |
| Genussrechtskapital und nachrangige Verbindlichkeiten (Übrige Verbindlichkeiten)                              | Fortgeführte Anschaffungskosten |
| Treuhänderisch verwaltete Verbindlichkeiten <sup>1</sup>                                                      | Zeitwert                        |
| <b>Außerbilanzielles Geschäft</b>                                                                             |                                 |
| Finanzgarantien                                                                                               | Nominalwert                     |
| Unwiderrufliche Kreditzusagen                                                                                 | Nominalwert                     |

<sup>1</sup> Enthält in einen Trust ausgegliederte Forderungen und Verbindlichkeiten aus Entgeldumwandlungen.

## Versicherungs-, Investment- und Rückversicherungsverträge

### Versicherungs- und Investmentverträge

Alle von Versicherungsgesellschaften des Allianz Konzerns abgeschlossenen Verträge werden gemäß IFRS 4 entweder als Versicherungsverträge oder als Investmentverträge klassifiziert. Bei Versicherungsverträgen handelt es sich um Verträge, durch die der Allianz Konzern ein signifikantes Versicherungsrisiko vom Versicherungsnehmer übernimmt. Verträge ohne signifikantem Ver-

sicherungsrisiko werden als Investmentverträge klassifiziert. Bestimmte Versicherungs- und Investmentverträge enthalten eine ermessensabhängige Überschussbeteiligung. Alle Versicherungsverträge und Investmentverträge mit ermessensabhängiger Überschussbeteiligung werden nach den maßgeblichen Bestimmungen der US GAAP bilanziert, wenn IFRS 4 keine spezifischen Regelungen zur Bilanzierung derartiger Verträge enthält. Investmentverträge ohne ermessensabhängige Überschussbeteiligung werden als Finanzinstrumente gemäß IAS 39 bilanziert.

### Rückversicherungsverträge

Der Konzernabschluss des Allianz Konzerns gibt die Auswirkungen abgegebener und übernommener Rückversicherungsverträge wieder. Übernommenes Rückversicherungsgeschäft bezieht sich auf die Übernahme bestimmter Versicherungsrisiken durch den Allianz Konzern, die andere Unternehmen gezeichnet haben. Zediertes Rückversicherungsgeschäft bezieht sich auf die Übertragung von Versicherungsrisiken, zusammen mit den entsprechenden Prämien, auf einen oder mehrere Rückversicherer, die sich an den Risiken beteiligen. Wenn Rückversicherungsverträge kein wesentliches Versicherungsrisiko in Übereinstimmung mit den maßgeblichen Regelungen unter US GAAP übertragen, werden diese Verträge gemäß der Depotbilanzierung in Übereinstimmung mit den maßgeblichen Regelungen unter US GAAP beziehungsweise in Übereinstimmung mit IAS 39 abgebildet.

Übernommene Rückversicherungsprämien, Provisionen und Schadenregulierungen sowie übernommene Teile der versicherungstechnischen Rückstellungen werden entsprechend den Bedingungen der Rückversicherungsverträge unter Berücksichtigung der ursprünglichen Verträge, für die die Rückversicherung abgeschlossen wurde, bilanziert.

Abgegebene Rückversicherungsbeiträge und Vergütungen aus Rückversicherungsverträgen auf eingetretene Leistungen und Schäden werden von den verdienten Beiträgen und Leistungen aus Versicherungs- und Investmentverträgen abgezogen. Vermögenswerte und Verbindlichkeiten im Zusammenhang mit abgegebener Rückversicherung werden auf Bruttobasis ausgewiesen. Die rückversicherten Teile der Rückstellungen werden konsistent mit den auf das rückversicherte Risiko entfallenden Rückstellungen geschätzt. Entsprechend werden Erträge und Aufwendungen im Zusammenhang mit Rückversicherungsverträgen konsistent mit dem zugrunde liegenden Risiko des rückversicherten Geschäfts ausgewiesen.

In dem Maße, wie die übernehmenden Rückversicherer ihren Verpflichtungen nicht nachkommen können, haftet der Allianz Konzern weiterhin gegenüber seinen Versicherungsnehmern für den rückversicherten Anteil. Folglich werden Wertberichtigungen auf die Forderungen von Rückversicherungsverträgen vorgenommen, die als uneinbringlich eingestuft werden.

### Aktivierte Abschlusskosten

Die in der Konzernbilanz ausgewiesenen aktivierten Abschlusskosten enthalten aktivierte Abschlusskosten, den Bestandswert von Versicherungsbeständen aus Erwerben und aktivierte Kosten, die bei der Verkaufsförderung von Versicherungsverträgen anfallen (Deferred Sales Inducements).

Aktivierte Abschlusskosten enthalten in erster Linie gezahlte Provisionen sowie die Kosten für die Antragsbearbeitung und die Ausfertigung des Versicherungsscheins, die im direkten Zusammenhang mit dem Abschluss und der Erneuerung von Versicherungsverträgen stehen und deren Höhe sich hierzu variabel verhält. Sofern diese Abschlusskosten voraussichtlich über die Laufzeit der Verträge werthaltig sind, werden sie aktiviert und entsprechend amortisiert. Werthaltigkeitstests am Ende jeder Bilanzierungsperiode stellen sicher, dass von den aktivierten Abschlusskosten ausschließlich der zukünftig werthaltige Betrag weiterhin in der Bilanz erfasst wird.

Bei kurz- und langfristigen traditionellen Versicherungsverträgen und Versicherungsverträgen mit abgekürzter Beitragszahlungsdauer werden die aktivierten Abschlusskosten proportional zu den Prämieinnahmen amortisiert. Bei Universal-Life-Type-Verträgen, Lebensversicherungsverträgen mit natürlicher Überschussbeteiligung und Investmentverträgen mit ermessensabhängiger Überschussbeteiligung werden die aktivierten Abschlusskosten jeweils über die Vertragslaufzeit des Vertragsbestands entsprechend erwarteter Bruttogewinne oder erwarteter Bruttomargen, die auf Erfahrungswerten und zukünftigen Erwartungen beruhen und regelmäßig überprüft werden, abgeschrieben.

Für fondsgebundene Investmentverträge ohne ermessensabhängige Überschussbeteiligung, die gemäß IAS 39 mit dem Zeitwert abzubilden sind, werden Abschlusskosten in Übereinstimmung mit IAS 18, Umsatzerlöse, dann aktiviert, wenn sie dem Vertrag direkt zurechenbar sind. Abschlusskosten sind dem Vertrag direkt zurechenbar, wenn die Kosten ohne Vertragsausstellung nicht entstanden wären. Für Investmentverträge, die weder fondsgebunden sind noch eine ermessensabhängige Überschussbeteiligung enthalten und die gemäß IAS 39 zu fortgeführten Anschaffungskosten bilanziert werden, werden Abschlusskosten, die die Voraussetzungen von Transaktionskosten gem. IAS 39 erfüllen, in die Bewertung der Deckungsrückstellung einbezogen.

Der Bestandswert von Versicherungsbeständen aus Erwerben ist der Barwert der erwarteten zukünftigen Netto-Zahlungsströme aus bestehenden Versicherungsverträgen zum Zeitpunkt des Hinzuerwerbs. Er wird über die Laufzeit der damit verbundenen Verträge abgeschrieben. Der Bestandswert von Versicherungsbeständen aus Erwerben wurde unter Verwendung von Diskontierungszinssätzen zwischen 8,0% und 12,0% ermittelt. Zinsen für den Bestandswert von Versicherungsbeständen aus Erwerben werden in Höhe der Verzinsung der entsprechenden Rückstellungen oder der vertraglich vereinbarten Verzinsung vereinnahmt. Es ergeben sich derzeit Zinssätze auf den Bestandswert zwischen 2,0% und 6,5%.

Kosten, die bei der Verkaufsförderung von Versicherungsverträgen anfallen (Sales Inducements), werden mit der gleichen Methode und den gleichen Annahmen wie aktivierte Abschlusskosten abgegrenzt und abgeschrieben, sofern sie folgende Kriterien erfüllen:

- Sie sind als Teil der Rückstellungen für Versicherungs- und Investmentverträge erfasst.
- Sie sind ausdrücklich im Vertrag zu Vertragsbeginn als solche identifiziert.
- Es handelt sich um Beträge, die der Allianz Konzern zusätzlich zu Zahlungen bei vergleichbaren Verträgen ohne Sales Inducements zahlt.
- Sie erhöhen die Gutschrift für den Versicherungsnehmer gegenüber vergleichbaren Verträgen ohne Sales Inducement.

In Anmerkung 3 werden die Prozesse und Kontrollen, die eingeführt wurden, um eine angemessene Verwendung von Schätzungen und Annahmen sicherzustellen, erklärt.

### Schattenbilanzierung (Shadow Accounting)

Für Versicherungs- und Investmentverträge mit ermessensabhängiger Überschussbeteiligung wird die Schattenrechnung auf aktivierte Abschlusskosten, den Bestandswert von Versicherungsbeständen aus Erwerben und aktivierbare Kosten, die bei der Verkaufsförderung von Versicherungs- und Investmentverträgen mit ermessensabhängiger Überschussbeteiligung anfallen, angewandt. In die Bewertung dieser Aktiva werden erwartete Bruttogewinne oder erwartete Bruttomargen

einbezogen, die ausschließlich realisierte Gewinne und Verluste berücksichtigen. Die Schattenrechnung wird angewandt, um nicht realisierte Gewinne und Verluste in gleicher Weise wie realisierte Gewinne und Verluste einzubeziehen. Die entsprechenden Anpassungen der Aktiva werden in den direkt im Eigenkapital erfassten Aufwendungen und Erträgen als Komponente der zugehörigen nicht realisierten Gewinne oder Verluste erfasst. Im Falle der Realisierung von Gewinnen oder Verlusten werden die entsprechenden Beträge mittels des sogenannten Recycling in der Gewinn- und Verlustrechnung erfasst und vorhergehende Anpassungen, die aus der Schattenrechnung resultieren, zurückgenommen.

Die Schattenrechnung im weiteren Sinne wird darüber hinaus auf alle Bewertungsunterschiede zwischen statutorischer Bilanzierung, die Grundlage für die Gewinnbeteiligung der Versicherungsnehmer ist, und IFRS-Bilanzierung angewandt. Diese Bewertungsunterschiede werden als latente Beitragsrückerstattung (RfB) bilanziert. Weitere Informationen hierzu sind in dem Abschnitt Rückstellungen für Versicherungs- und Investmentverträge sowie Finanzpassiva aus fondsgebundenen Verträgen enthalten.

### Beitragsüberträge

Bei kurzfristigen Versicherungsverträgen, wie beispielsweise den meisten Schaden- und Unfallversicherungen, werden die auf künftige Jahre entfallenden Beiträge in Übereinstimmung mit den maßgeblichen Regelungen unter US GAAP als Beitragsüberträge ausgewiesen. Die Höhe dieser Beitragsüberträge entspricht dem in künftigen Perioden gewährten Versicherungsschutz.

Beträge, die bei Abschluss bestimmter langfristiger Verträge erhoben werden (z. B. Vorabgebühren), werden als Beitragsüberträge ausgewiesen. In Übereinstimmung mit den maßgeblichen Regelungen unter US GAAP werden diese Gebühren nach der gleichen Methode wie die Abschreibungen aktivierter Abschlusskosten erfasst.

### Entflechtung von Versicherungs- und Einlagenkomponenten (Unbundling)

Die Einlagenkomponente eines Versicherungsvertrags wird von der Versicherungskomponente dieses Versicherungsvertrags getrennt, wenn die beiden folgenden Bedingungen erfüllt sind:

1. Die Einlagenkomponente (einschließlich aller eingebetteten Rückkaufsrechte) kann getrennt bewertet werden (d. h. ohne Berücksichtigung der Versicherungskomponente).
2. Der Ansatz aller Verpflichtungen und Rechte, die aus der Einlagenkomponente resultieren, ist in den Bilanzierungs- und Bewertungsgrundsätzen des Allianz Konzerns nicht vorgeschrieben.

Der Allianz Konzern erfasst in Übereinstimmung mit seinen Bilanzierungs- und Bewertungsgrundsätzen alle Rechte und Verpflichtungen aus eingegangenen Versicherungsverträgen. Folglich hat der Allianz Konzern die Einlagenkomponente nicht getrennt von der Versicherungskomponente der Versicherungsverträge erfasst und keine zugehörige Rückstellung im Konzernabschluss gebildet.

#### **Abtrennung von Optionen in Versicherungsverträgen (Bifurcation)**

Vertragsbestandteile von bestimmten Universal-Life-Type- und Investmentverträgen enthalten Investmentrisiken, die der Allianz Konzern trägt. Diese Bestandteile werden von dem Versicherungsvertrag getrennt als Derivate gemäß IAS 39 bilanziert, wenn sie nicht in einem engen Zusammenhang mit dem Versicherungsvertrag stehen.

#### **Rückstellungen für noch nicht abgewickelte Versicherungsfälle**

Die Rückstellungen für noch nicht abgewickelte Versicherungsfälle werden für Zahlungsverpflichtungen aus Versicherungsfällen gebildet, die eingetreten, aber noch nicht abgewickelt sind. Rückstellungen für noch nicht abgewickelte Versicherungsfälle werden unterteilt in Rückstellungen für am Bilanzstichtag gemeldete Versicherungsfälle und in Rückstellungen für am Bilanzstichtag eingetretene, aber noch nicht gemeldete Versicherungsfälle.

Rückstellungen für am Bilanzstichtag gemeldete Versicherungsfälle basieren auf Schätzungen für künftige Schadenaufwendungen einschließlich Schadenregulierungskosten. Diese Schätzungen werden auf Einzelfallbasis vorgenommen und beruhen auf Tatsachen und Gegebenheiten, wie sie zum Zeitpunkt der Rückstellungsbildung bekannt sind. Die Schätzungen werden von Schadensachbearbeitern fallweise unter Berücksich-

tigung allgemeiner Grundsätze der Versicherungspraxis sowie der jeweiligen Schadensituation und Versicherungsdeckung vorgenommen. Die Rückstellungen werden während der Schadenabwicklung unter Einbeziehung neuer Informationen regelmäßig neu bewertet, und Anpassungen werden vorgenommen, wenn neue Informationen zur Verfügung stehen.

Rückstellungen für bis zum Stichtag eingetretene, aber noch nicht gemeldete Versicherungsfälle werden in der Absicht gebildet, die geschätzten Schadenaufwendungen zu berücksichtigen, die bereits eingetreten sind, aber dem Allianz Konzern noch nicht mitgeteilt wurden. Rückstellungen für bis zum Bilanzstichtag eingetretene, aber noch nicht gemeldete Versicherungsfälle werden, ähnlich wie Rückstellungen für am Bilanzstichtag gemeldete Versicherungsfälle, gebildet, um die geschätzten Aufwendungen und Schadenregulierungskosten zu berücksichtigen, die bis zur endgültigen Schadenabwicklung voraussichtlich nötig sein werden. In die Schätzung der Rückstellungen des Allianz Konzerns fließen Erfahrungswerte ein, die gemäß aktuellen Trends und anderen relevanten Faktoren angepasst werden. Die Rückstellungen für eingetretene, aber noch nicht gemeldete Versicherungsfälle werden auf der Grundlage versicherungsmathematischer und statistischer Modelle der erwarteten Kosten für die endgültige Abwicklung und die Verwaltung von Schäden gebildet. Die Analysen basieren auf aktuell bekannten Fakten und Gegebenheiten, Prognosen künftiger Ereignisse, Schätzungen der künftigen Inflationsentwicklung und weiteren sozioökonomischen Faktoren. Beispiele für die zur Rückstellungsbildung für eingetretene, aber noch nicht gemeldete Versicherungsfälle herangezogenen Faktoren sind Entwicklungen bei der Schadenhäufigkeit, Schadenhöhe und der Zeitverzögerung von gemeldeten Schäden. Die Rückstellungen für eingetretene, aber noch nicht gemeldete Versicherungsfälle werden regelmäßig geprüft und zusätzliche Informationen und tatsächliche Schadenmeldungen entsprechend berücksichtigt.

Aufgrund der großen Anzahl von Variablen, die die endgültigen Schadensummen beeinflussen, ist das Verfahren zur Schätzung von Rückstellungen naturgemäß unsicher. Der Allianz Konzern reduziert die mit der Schätzung von Rückstellungen verbundenen Unsicherheiten, indem verschiedene versicherungsmathematische Reservierungsmethoden verwendet werden sowie durch bestimmte gruppenweite Prozesse und Kontrollen. Für weitere Informationen siehe Anmerkung 3.

Für einige Risiken aus dem Haftpflichtbereich wie Umwelt- und Asbestoseschäden ebenso wie für einzelne Großschäden liegen keine ausreichenden statistischen Daten vor, weil einige Eigenschaften dieser Schäden mitunter sehr langsam bekannt werden und sich entwickeln. In solchen Fällen wurden nach Analysen des mit diesen Risiken behafteten Portfolios angemessene Rückstellungen gebildet. Diese Rückstellungen berücksichtigen Schadenentwicklungen und entsprechen bestmöglichen Schätzungen des Allianz Konzerns. Die aktuellen Rückstellungen für noch nicht abgewinkelte Versicherungsfälle im Zusammenhang mit Asbestoseschäden in den Vereinigten Staaten von Amerika wurden zum Jahresende 2005 von unabhängigen Aktuarien begutachtet, eine Aktualisierung der unabhängigen Asbestosestudie wurde 2010 abgeschlossen. Hieraus ergaben sich keine Auswirkungen auf das Ergebnis des Allianz Konzerns. Zusätzlich analysieren die operativen Versicherungsunternehmen regelmäßig die Asbestose- und Umwelthaftpflichttrends.

#### **Rückstellungen für Versicherungs- und Investmentverträge sowie Finanzpassiva aus fondsgebundenen Verträgen**

Die Rückstellungen für Versicherungs- und Investmentverträge enthalten die Deckungsrückstellung, die Rückstellung für Beitragsrückerstattung sowie die übrigen versicherungstechnischen Rückstellungen.

Die Deckungsrückstellung für traditionelle langfristige Versicherungsverträge, wie beispielsweise traditionelle Lebens- und Krankenversicherungsverträge, wird in Übereinstimmung mit den maßgeblichen Regelungen unter US GAAP nach der Net-Level-Premium-Methode ermittelt. Sie stellt die Differenz aus dem Barwert erwarteter künftiger Versicherungsleistungen einschließlich der künftigen Schadenbearbeitungskosten sowie Verwaltungsgebühren und dem Barwert erwarteter künftiger Nettobeiträge dar, die vom Versicherungsnehmer einzubringen sind. Die Methode stützt sich auf Annahmen gemäß bester Schätzung für Sterblichkeit, Invalidität, erwartetes Finanzanlageergebnis, Rückkauf und Abschlussaufwendungen unter Einschluss einer Marge für ungünstige Abweichungen. Diese Annahmen werden für die Folgezeit festgeschrieben, es sei denn, ein Prämiendefizit (drohender Verlust) tritt ein. Aktivierte Abschlusskosten und der Bestandswert von Versicherungsbeständen aus Erwerben für traditionelle langfristige Versicherungsverträge werden über die Laufzeit der

Prämienzahlungen für die betreffenden Verträge im Verhältnis zum verdienten Beitrag abgeschrieben, wobei mit der Berechnung der Deckungsrückstellung übereinstimmende Annahmen gelten.

Die Deckungsrückstellung für Versicherungsverträge mit natürlicher Überschussbeteiligung wird in Übereinstimmung mit den maßgeblichen Regelungen unter US GAAP nach der Net-Level-Premium-Methode berechnet. Diese Methode stützt sich auf Annahmen für Sterblichkeit, Invalidität und die Verzinsung, die vertraglich garantiert ist oder der Bestimmung der Überschussbeteiligung (oder Beitragsrückerstattung) zugrunde liegt. Die aktivierten Abschlusskosten und der Bestandswert von Versicherungsbeständen aus Erwerben für Versicherungsverträge mit natürlicher Überschussbeteiligung werden über die erwartete Vertragslaufzeit im Verhältnis zu den erwarteten Bruttomargen basierend auf Erfahrungswerten und zukünftigen Erwartungen abgeschrieben. Diese Erfahrungswerte werden ihrerseits regelmäßig gemäß bester Schätzung ermittelt und überprüft. Der Barwert der erwarteten Bruttomargen errechnet sich mittels der erwarteten Finanzanlagerendite. Die erwarteten Bruttomargen enthalten Prämien, Erträge aus Finanzanlagen einschließlich realisierter Gewinne und Verluste, Versicherungsleistungen, Verwaltungskosten, Änderungen der Deckungsrückstellung und die Gewinnbeteiligung der Versicherungsnehmer. Die Auswirkungen der Veränderung der erwarteten Bruttomargen werden in der Periode erfolgswirksam erfasst, in der sie anfallen.

In Übereinstimmung mit den maßgeblichen Regelungen unter US GAAP entspricht die Deckungsrückstellung für Universal-Life-Type- und fondsgebundene Versicherungsverträge dem Saldo aus den eingenommenen Beiträgen und dem den Versicherungsnehmern gutgeschriebenen Finanzanlageergebnis abzüglich der Aufwendungen für Sterbefälle und anderer Aufwendungen. Die aktivierten Abschlusskosten und der Bestandswert von Versicherungsbeständen aus Erwerben für Universal-Life-Type- und für fondsgebundene Versicherungsverträge werden über die erwartete Vertragsdauer im Verhältnis zu den erwarteten Bruttogewinnen basierend auf Erfahrungswerten und zukünftigen Erwartungen gemäß bester Schätzung ermittelt und regelmäßig überprüft. Der Barwert der erwarteten Bruttogewinne wird unter Verwendung der auflaufenden Zinsen für die Versicherungsnehmer oder der vertraglich vereinbarten Verzinsung ermittelt. Die erwarteten Bruttogewinne



enthalten Gewinnspannen aus Sterblichkeit, Verwaltung, Finanzanlagen einschließlich realisierter Gewinne und Verluste sowie Rückkaufkosten. Die Auswirkungen der Veränderung der erwarteten Bruttogewinne werden in der Periode erfolgswirksam erfasst, in der sie anfallen.

Aktuelle und historische Kundendaten sowie Branchendaten werden zur Ermittlung dieser Annahmen herangezogen.

Zinsschätzungen reflektieren erwartete Erträge aus Finanzanlagen, welche die künftigen Leistungen an die Versicherungsnehmer decken. Die von den Versicherungsmathematikern des Allianz Konzerns für die Annahmen verwendeten Daten umfassen unter anderem Annahmen aus der Prämienkalkulation, verfügbare Erfahrungstudien und Rentabilitätsanalysen.

Die der Berechnung der aktivierten Abschlusskosten und der Deckungsrückstellung als Annahme zugrunde liegenden Zinssätze sind folgende:

|                            | Traditionelle Lebens- und Krankenversicherungsprodukte | Traditionelle überschussberechtigte Versicherungsprodukte |
|----------------------------|--------------------------------------------------------|-----------------------------------------------------------|
| Aktivierte Abschlusskosten | 2,5 – 6,0%                                             | 3,1 – 5,3%                                                |
| Deckungsrückstellung       | 2,5 – 6,0%                                             | 2,0 – 4,3%                                                |

Die versicherungstechnischen Rückstellungen enthalten auch Verbindlichkeiten für garantierte Mindestleistungen im Todesfall und ähnliche Todesfall- und Invaliditätsleistungen im Zusammenhang mit nichttraditionellen Verträgen mit Verrentungsoptionen. Diese Rückstellungen werden auf der Basis vertraglicher Verpflichtungen unter Verwendung versicherungsmathematischer Annahmen berechnet.

Die Deckungsrückstellung für Investmentverträge mit ermessensabhängiger Überschussbeteiligung entspricht dem Saldo aus den eingenommenen Beiträgen und dem den Versicherungsnehmern gutgeschriebenen Anlageergebnis abzüglich der Kosten für Sterblichkeit und Verwaltungsgebühren. Die Deckungsrückstellung für fondsgebundene Investmentverträge ohne ermessensabhängige Überschussbeteiligung entspricht dem Zeitwert, die Deckungsrückstellung für nicht fondsgebundene Investmentverträge, die keine ermessensabhängige Überschussbeteiligung enthalten, entspricht den fortgeführten Anschaffungskosten.

Die Rückstellung für Beitragsrückerstattung (RfB) umfasst die Beträge, die gemäß den jeweiligen nationalen gesetzlichen oder vertraglichen Regelungen den Versicherungsnehmern zugewiesen werden, sowie die Beträge, die aus Unterschiedsbeträgen zwischen dem Konzernabschluss nach IFRS und den lokalen Jahresabschlüssen resultieren (latente RfB) und sich auf die künftigen Berechnungen der Überschussbeteiligung auswirken. Nichtrealisierte Gewinne und Verluste jederzeit veräußerbarer Finanzanlagen werden zu dem Anteil der latenten Rückstellung für Beitragsrückerstattung zugeführt, mit dem im Fall ihrer Realisierung die Versicherungsnehmer aufgrund gesetzlicher oder vertraglicher Regelung partizipieren werden. Die den überschussberechtigten Versicherungsnehmern zugewiesene und ausgezahlte Überschussbeteiligung mindert die Rückstellung.

In den wichtigsten Ländern sind die Bezugsgrößen und die entsprechenden Prozentsätze zur Ermittlung der latenten Überschussbeteiligung der Versicherungsnehmer wie folgt bestimmt:

| Land               | Basis                 | Prozentsatz |
|--------------------|-----------------------|-------------|
| <b>Deutschland</b> |                       |             |
| Leben              | Alle Gewinnquellen    | 90%         |
| Kranken            | Alle Gewinnquellen    | 80%         |
| <b>Frankreich</b>  |                       |             |
| Leben              | Alle Gewinnquellen    | 85%         |
| <b>Italien</b>     |                       |             |
| Leben              | Kapitalanlageergebnis | 85%         |
| <b>Schweiz</b>     |                       |             |
| Gruppe Leben       | Alle Gewinnquellen    | 90%         |
| Einzel Leben       | Alle Gewinnquellen    | 100%        |

Die einzelnen Versicherungsbestände werden sogenannten Liability-Adequacy-Tests unterzogen, die drohende Verluste frühzeitig aufzeigen sollen. In die Tests fließen Erwartungswerte zu Schäden, Kosten, verdienten Beiträgen und anteiligem Finanzanlageergebnis ein. Für kurzfristige Verträge wird eine Rückstellung für drohende Verluste ausgewiesen, wenn die Summe von erwartetem Schaden- und Schadenregulierungsaufwand, erwarteter Überschussbeteiligung der Versicherungsnehmer, nicht getilgten Abschlusskosten und Verwaltungskosten das entsprechende nicht verdiente Beitragsaufkommen zuzüglich künftiger Finanzanlage-

erträge übersteigt. Für traditionelle langfristige und Versicherungsverträge mit abgekürzter Beitragszahlungsdauer wird eine Rückstellung für drohende Verluste ausgewiesen, wenn die tatsächlichen Erfahrungen hinsichtlich Anlageerträgen, Sterblichkeit, Invalidität, Storno oder Kosten darauf hindeuten, dass bestehende existierende Reserven zusammen mit dem Barwert künftiger Bruttobeiträge nicht ausreichend sein werden, um den Barwert künftiger Leistungen und die aktivierten Abschlusskosten zu decken. Für andere langfristige Verträge wird eine Rückstellung für drohende Verluste ausgewiesen, wenn der Barwert erwarteter künftiger Bruttogewinne oder Gewinnmargen und gegebenenfalls bestimmte Rückstellungen für Beitragsüberträge nicht ausreichend sein werden, um den Barwert künftiger Leistungen und die aktivierten Abschlusskosten zu decken.

In Anmerkung 3 werden die Prozesse und Kontrollen, die eingeführt wurden, um eine angemessene Verwendung von Schätzungen und Annahmen sicherzustellen, erklärt.

### Übrige Aktiva

Die übrigen Aktiva enthalten im Wesentlichen Forderungen, aktive Rechnungsabgrenzungsposten, derivative Finanzinstrumente, die zur Absicherung gehalten werden und die Kriterien des Hedge Accounting erfüllen, sowie feste Verpflichtungen, Sachanlagen und sonstige Vermögenswerte.

Forderungen werden grundsätzlich mit dem Nennwert abzüglich erhaltener Forderungseingänge und Wertberichtigungen angesetzt.

Die Sachanlagen enthalten den eigengenutzten Grundbesitz, die Software, die Geschäftsausstattung und das Anlagevermögen von vollkonsolidierten Private-Equity-Beteiligungen und Alternativer Investments.

Eigengenutzter Grundbesitz (z. B. Grundstücke und Bauten einschließlich der Bauten auf fremden Grundstücken) wird mit den Anschaffungs- bzw. Herstellungskosten, vermindert um die planmäßigen Abschreibungen und Wertminderungen, angesetzt. Gebäude werden, ausgehend von den Anschaffungskosten und entsprechend ihren erwarteten Nutzungsdauern, längstens über 50 Jahre linear abgeschrieben. Eine Wertminderung wird erfasst, wenn der realisierbare Wert dieser Aktiva niedriger als ihr Buchwert ist. Wenn es nicht möglich ist, separate Cashflows eines Vermögenswertes

zu identifizieren, um dessen erzielbaren Betrag zu schätzen, wird der erzielbare Betrag auf Basis des erzielbaren Betrags der „Cash-Generating Unit“ geschätzt, welcher der Vermögenswert zugeordnet ist.

Software enthält erworbene und selbst erstellte Software. Software wird bei Zugang mit den Anschaffungskosten angesetzt und linear über ihre geschätzte wirtschaftliche Nutzungsdauer, grundsätzlich über 3 bis 5 Jahre, abgeschrieben.

Die Geschäftsausstattung wird zu Anschaffungskosten, vermindert um die planmäßigen Abschreibungen und Wertminderungen, ausgewiesen. Die planmäßige Abschreibung erfolgt grundsätzlich linear über die erwartete wirtschaftliche Nutzungsdauer des Vermögenswertes. Die erwartete wirtschaftliche Nutzungsdauer beträgt bei der Geschäftsausstattung 2 bis 10 Jahre, mit Ausnahme erworbener IT-Anlagen, bei denen die wirtschaftliche Nutzungsdauer 2 bis 8 Jahre beträgt.

Der Allianz Konzern erfasst auch das Anlagevermögen von seinen vollkonsolidierten Private-Equity-Beteiligungen und Alternativer Investments, z. B. Windparks, Solarparks, Produktionsstätten und Automaten, in den Sachanlagen. Diese Vermögenswerte werden zu Anschaffungs- und Herstellungskosten, vermindert um planmäßige Abschreibungen und Wertminderungen, angesetzt. Die planmäßige Abschreibung erfolgt grundsätzlich linear über die erwartete wirtschaftliche Nutzungsdauer der Vermögenswerte. Die erwartete wirtschaftliche Nutzungsdauer für Windparks beträgt zwischen 20 und 25 Jahren, für die Produktionsstätten zwischen 5 und 15 Jahren und für Automaten zwischen 4 und 8 Jahren.

Kosten für Wartung und Instandhaltung werden unmittelbar als Aufwand erfasst, während Ausgaben für die Verlängerung der wirtschaftlichen Nutzungsdauer, für zusätzliche Funktionalitäten oder eine anderweitige Werterhöhung des Vermögenswertes aktiviert werden.

### Als zur Veräußerung gehalten klassifizierte langfristige Vermögenswerte und Veräußerungsgruppen sowie aufgegebene Geschäftsbereiche

Langfristige Vermögenswerte oder Veräußerungsgruppen werden als zur Veräußerung gehalten klassifiziert, wenn der zugehörige Buchwert überwiegend durch ein Veräußerungsgeschäft und nicht durch fortgesetzte Nutzung

realisiert wird. Dies erfordert, dass der Vermögenswert oder die Veräußerungsgruppe im gegenwärtigen Zustand sofort veräußerbar und eine solche Veräußerung höchstwahrscheinlich ist. Die zuständige Managementebene muss einen Plan für den Verkauf des Vermögenswertes oder der Veräußerungsgruppe beschlossen haben, und die Veräußerung muss erwartungsgemäß innerhalb eines Jahres ab dem Zeitpunkt der Klassifizierung für eine Erfassung als abgeschlossener Verkauf in Betracht kommen.

Langfristige Vermögenswerte oder Veräußerungsgruppen, die als zur Veräußerung gehalten klassifiziert werden, sind zum niedrigeren Wert aus Buchwert und Zeitwert abzüglich Veräußerungskosten anzusetzen. Ein späterer Anstieg des Zeitwertes abzüglich Veräußerungskosten ist als Gewinn zu erfassen, jedoch nur bis zur Höhe des erfassten kumulierten Wertminderungsaufwands. Ein langfristiger Vermögenswert wird nicht planmäßig abgeschrieben, solange er als zur Veräußerung gehalten klassifiziert ist. Ein Gewinn oder Verlust, der bis zum Tag der Veräußerung bisher nicht erfasst wurde, wird am Tag der Ausbuchung erfasst.

Ein aufgegebenen Geschäftsbereich ist definiert als ein Unternehmensbestandteil, der veräußert wurde oder als zur Veräußerung gehalten klassifiziert wird und der

- einen gesonderten, wesentlichen Geschäftszweig oder geografischen Geschäftsbereich darstellt,
- Teil eines einzelnen, abgestimmten Plans zur Veräußerung eines gesonderten wesentlichen Geschäftszweigs oder geografischen Geschäftsbereichs ist oder
- ein Tochterunternehmen darstellt, das ausschließlich mit der Absicht der Weiterveräußerung erworben wurde.

Erträge und Aufwendungen aus aufgegebenen Geschäftsbereichen werden in der Konzern-Gewinn- und Verlustrechnung der Berichtsperiode und den Vergleichsperioden der Vorjahre getrennt von Erträgen und Aufwendungen aus fortzuführenden Geschäftsbereichen ausgewiesen.

### **Geschäfts- oder Firmenwert sowie immaterielle Vermögenswerte**

Immaterielle Vermögenswerte umfassen immaterielle Vermögenswerte mit nicht bestimmbarer Nutzungsdauer wie den Geschäfts- oder Firmenwert und Markennamen sowie immaterielle Vermögenswerte mit bestimmbarer Nutzungsdauer wie langfristige Vertriebsvereinbarungen und Kundenbeziehungen.

Der aus Unternehmenszusammenschlüssen resultierende Geschäfts- oder Firmenwert wird zu Anschaffungskosten, vermindert um aufgelaufene Wertminderungen, ausgewiesen. Zur Überprüfung der Werthaltigkeit wird der Geschäfts- oder Firmenwert jener „Cash-Generating Unit“ des Allianz Konzerns zugeordnet, von der erwartet wird, dass sie von der Unternehmensübernahme profitiert.

Der Allianz Konzern nimmt hinsichtlich des Geschäfts- oder Firmenwertes im 4. Quartal eine Überprüfung der Werthaltigkeit vor oder öfter, wenn Anzeichen einer Wertminderung vorliegen. Die Überprüfung der Werthaltigkeit enthält den Vergleich des realisierbaren Wertes jeder bedeutsamen „Cash-Generating Unit“ mit ihrem Buchwert in der Konzernbilanz, einschließlich des Geschäfts- oder Firmenwertes. Übersteigt der Buchwert der „Cash-Generating Unit“ den realisierbaren Wert dieser Einheit, wird eine Wertminderung vorgenommen. Die Höhe der Wertminderung bestimmt sich aus der Differenz zwischen dem Buchwert und dem realisierbaren Wert und wird zuerst mit dem Geschäfts- oder Firmenwert und anschließend mit den Buchwerten der übrigen nicht finanziellen Vermögenswerte verrechnet. Wertminderungen des Geschäfts- oder Firmenwertes werden bei anschließender Wertaufholung nicht rückgängig gemacht. In der Berechnung der Gewinne oder der Verluste aus Veräußerungen von Konzernunternehmen findet der noch nicht abgeschriebene Geschäfts- oder Firmenwert Berücksichtigung. In Anmerkung 3 werden die Prozesse und Kontrollen, die eingeführt wurden, um eine angemessene Verwendung von Schätzungen und Annahmen sicherzustellen, erklärt.

Gesondert erworbene immaterielle Vermögenswerte werden bei Zugang mit ihren Anschaffungskosten, die gewöhnlich den Kaufpreis und direkt zurechenbare Kosten umfassen, bewertet. Immaterielle Vermögenswerte, die bei Unternehmenszusammenschlüssen erworben wurden, werden mit dem Zeitwert zum Erwerbszeitpunkt erfasst, wenn der immaterielle

Vermögenswert separierbar ist oder aus vertraglichen oder gesetzlichen Rechten entsteht und wenn sein Zeitwert verlässlich bewertet werden kann. Selbst geschaffene immaterielle Vermögenswerte werden bei Zugang mit ihren Anschaffungskosten, die der Summe der Kosten entsprechen, die ab dem Zeitpunkt anfallen, wenn die entsprechenden Ansatzkriterien in der Entwicklungsphase erfüllt sind, erfasst.

Immaterielle Vermögenswerte mit nicht bestimmbarer Nutzungsdauer werden nicht abgeschrieben und zu Anschaffungskosten, vermindert um aufgelaufene Wertminderungen, bilanziert. Immaterielle Vermögenswerte mit zeitlich bestimmbarer Nutzungsdauer werden über diese abgeschrieben und zu Anschaffungskosten, vermindert um aufgelaufene Abschreibungen und Wertminderungen, ausgewiesen.

Ähnlich wie beim Geschäfts- oder Firmenwert werden bei immateriellen Vermögenswerten mit nicht bestimmbarer Nutzungsdauer einmal jährlich Werthaltigkeitstests durchgeführt oder öfter, wenn es Hinweise darauf gibt, dass der Vermögenswert nicht werthaltig ist. Der Werthaltigkeitstest umfasst einen Vergleich des realisierbaren Wertes mit dem Buchwert. Sofern es nicht möglich ist, die separaten Zahlungsströme für die Schätzung des erzielbaren Betrags eines individuellen Vermögenswertes zu identifizieren, schätzt der Allianz Konzern den erzielbaren Betrag einer „Cash-Generating Unit“, zu der der immaterielle Vermögenswert gehört. Übersteigt der Buchwert den erzielbaren Betrag, wird eine Wertminderung vorgenommen. Die Höhe der Wertminderung bestimmt sich aus der Differenz zwischen dem Buchwert und dem erzielbaren Betrag. Für immaterielle Vermögenswerte mit unbestimmbarer Nutzungsdauer wird eine Wertminderung erfasst, wenn der realisierbare Wert dieser Aktiva niedriger als ihr Buchwert ist. Wenn es nicht möglich ist, separate Cashflows eines Vermögenswertes zu identifizieren, um dessen erzielbaren Betrag zu schätzen, wird der erzielbare Betrag auf Basis des erzielbaren Betrags der „Cash-Generating Unit“ geschätzt, welcher der Vermögenswert zugeordnet ist.

## Andere Verbindlichkeiten

Die anderen Verbindlichkeiten enthalten Abrechnungsverbindlichkeiten, passive Rechnungsabgrenzungsposten, Rückstellungen, einbehaltene Einlagen aus dem abgegebenen Rückversicherungsgeschäft, derivative Finanzinstrumente, die zu Absicherungszwecken gehalten werden und die Kriterien des Hedge Accounting erfüllen, sowie feste Verpflichtungen, Verbindlichkeiten für kündbare Eigenkapitalinstrumente sowie die übrigen Verbindlichkeiten. Diese Verbindlichkeiten sind mit dem Rückzahlungsbetrag angesetzt.

Steuerverbindlichkeiten sind gemäß den jeweiligen nationalen Steuervorschriften ermittelt.

## Eigenkapital

Das gezeichnete Kapital entspricht dem rechnerischen Nennwert je Aktie, der bei der Emission der Aktien erreicht wurde.

Die Kapitalrücklage stellt den Betrag dar, der bei der Ausgabe der Aktien über den rechnerischen Nennwert hinaus eingenommen wurde (zusätzliche Kapitaleinzahlung).

Gewinnrücklagen umfassen den Jahresüberschuss des aktuellen Jahres, die noch nicht ausgeschütteten Gewinne vorheriger Jahre, eigene Aktien sowie Sachverhalte, die nach IFRS direkt im Eigenkapital ausgewiesen werden. Eigene Aktien werden vom Eigenkapital abgezogen. Bei Verkauf, Ausgabe, Kauf oder Kündigung dieser Aktien wird kein Gewinn oder Verlust erfasst. Jede gezahlte oder erhaltene Leistung wird direkt im Eigenkapital erfasst.

Umrechnungsdifferenzen aus Fremdwährungsumrechnung, auch soweit sie sich aus der Bilanzierung nach der At-Equity-Methode ergeben, werden als Anpassungen aus Währungsänderungen ergebnisneutral mit dem Eigenkapital verrechnet.

Die nichtrealisierten Gewinne und Verluste (netto) enthalten nichtrealisierte Gewinne und Verluste aus der Marktbewertung jederzeit veräußerbarer Wertpapiere und derivativer Finanzinstrumente, welche die Kriterien des Hedge Accounting erfüllen. Hierzu gehören Cash-flow Hedges und Hedges zur Absicherung einer Nettoinvestition in eine wirtschaftlich selbstständige Teileinheit im Ausland.

Die Anteile anderer Gesellschafter am Eigenkapital stellen die proportionalen Minderheitenanteile am Eigenkapital der Tochtergesellschaften dar.

### **Verdiente Beiträge und Schadenaufwendungen**

Beiträge für kurzfristige Versicherungsverträge, wie z. B. für kurzfristige Lebens- und Krankenversicherungsverträge oder für Schaden- und Unfallversicherungsverträge, werden über die Laufzeit der Versicherungsverträge im Verhältnis zum bereitgestellten Versicherungsschutz vereinnahmt. Nicht verdiente Beiträge werden einzeln für jeden Versicherungsvertrag berechnet zu dem Zweck, den nicht erfolgswirksamen Teil des Beitragsaufkommens zu ermitteln. Für diese Versicherungsverträge werden Versicherungsleistungen bei Eintritt des Versicherungsfalls gebucht.

Langfristige Versicherungsverträge sind vom Versicherungsunternehmen unkündbare, zu garantierten Bedingungen verlängerbare Verträge, die voraussichtlich über einen langen Zeitraum im Bestand bleiben werden. Beiträge für langfristige Versicherungsverträge werden bei Fälligkeit als verdient und als Ertrag gebucht. Langfristige Versicherungsverträge umfassen Schaden-Unfall sowie Leben- und Krankenversicherungsverträge.

Beiträge aus Universal-Life-Type-Verträgen und variablen Rentenversicherungsverträgen („Variable Annuities“) setzen sich zusammen aus Risikobeiträgen, Kosten- und Stornobeiträgen sowie dem Saldo vorausbezahlter Gebühren und der Veränderung der abgegrenzten Gewinnreserve. Diese werden vom Kontensaldo des Versicherungsnehmers abgezogen und in Verdiente Beiträge (netto) erfasst.

Als Aufwand werden in der Berichtsperiode entstandene Leistungsansprüche gebucht, die den Saldo der betreffenden Versicherungsvertragskonten übersteigen, sowie Zinsen, die dem entsprechenden Versicherungsvertragskonto gutgeschrieben werden.

### **Zinserträge und ähnliche Erträge/Aufwendungen**

Zinserträge und Zinsaufwendungen werden periodengerecht abgegrenzt. Zinserträge werden nach der Effektivzinsmethode erfasst. Die laufenden Erträge enthalten auch Dividenden aus jederzeit veräußerbaren Aktien, aus Finanzierungsleasing resultierende Zinserträge und Erträge aus Anteilen an assoziierten Unternehmen und

Gemeinschaftsunternehmen. Dividendenerträge werden dann erfasst, wenn der Rechtsanspruch auf Zahlung entstanden ist. Zinserträge aus Finanzierungsleasing werden so über die Grundmietzeit vereinnahmt, dass eine konstante Periodenrendite aus der Nettobarinvestition erzielt wird.

Erträge aus Anteilen an assoziierten Unternehmen und Gemeinschaftsunternehmen (netto) enthalten den anteiligen Jahresüberschuss von Unternehmen, die nach der At-Equity-Methode bilanziert werden.

### **Erträge aus erfolgswirksam zum Zeitwert bewerteten Finanzaktiva und Finanzpassiva (netto)**

Erträge aus erfolgswirksam zum Zeitwert bewerteten Finanzaktiva und Finanzpassiva umfassen alle Investorserträge sowie die realisierten und die nichtrealisierten Gewinne und Verluste aus den zum Zeitwert bewerteten Finanzaktiva und Finanzpassiva. Darüber hinaus sind Provisionen sowie Zinsaufwendungen und Refinanzierungskosten aus Anlagen des Handelsbestandes und Transaktionskosten in dieser Position enthalten. Gewinne und Verluste aus Fremdwährungstransaktionen werden ebenfalls in der Position Erträge aus erfolgswirksam zum Zeitwert bewerteten Finanzaktiva und Finanzpassiva (netto) ausgewiesen.

### **Provisions- und Dienstleistungserträge sowie -aufwendungen**

Provisions- und Dienstleistungserträge werden bei Erbringung von Finanzdienstleistungen erfasst. Diese Erträge umfassen Provisionseinnahmen für Wertpapiergeschäfte, Finanzberatung, Treuhand- und Verwahr-geschäfte, Vermittlung von Versicherungspolice und Leistungen mit Bezug auf Kreditkarten, Hypothekendarlehen, Sparverträge und Immobilien.

Die vom Allianz Konzern treuhänderisch verwalteten Vermögenswerte und Schulden, die im eigenen Namen, aber für fremde Rechnung gehalten werden, sind nicht in der Konzernbilanz ausgewiesen. Die Vergütungen aus diesen Geschäften werden als Provisions- und Dienstleistungserträge ausgewiesen.

Anlageberatungsvergütungen werden zum Zeitpunkt der Erbringung der Dienstleistung erfasst. Diese Vergütungen basieren in erster Linie auf Prozentsätzen des

Zeitwertes von Assets under Management. Die für Privatkonten vereinnahmten Anlageberatungsvergütungen werden in der Regel vierteljährlich berechnet. Auf Privatkonten können auch an die Investmentperformance gebundene Vergütungen anfallen, die bei Erreichen der vereinbarten Performanceziele am Ende der jeweiligen Vertragsperiode erfasst werden.

Distributions- und Service- und Verwaltungsvergütungen werden bei Erbringung der Leistung erfasst. Diese Vergütungen basieren grundsätzlich auf Prozentsätzen des Zeitwertes der Assets under Management.

### **Erträge und Aufwendungen aus vollkonsolidierten Private-Equity-Beteiligungen**

Alle Erträge aus vollkonsolidierten Private-Equity-Beteiligungen werden in einer Position für Erträge und alle Aufwendungen aus vollkonsolidierten Private-Equity-Beteiligungen in einer Position für Aufwendungen ausgewiesen. Umsatzerlöse aus vollkonsolidierten Private-Equity-Beteiligungen werden ausgewiesen, wenn die Kunden die gelieferten Waren abgenommen haben und die zugehörigen Dienstleistungen erbracht wurden.

### **Ertragsteuern**

Der Steueraufwand enthält die tatsächliche Steuerbelastung auf Unternehmensgewinne für einzelne Konzernunternehmen sowie Veränderungen der aktiven und der passiven latenten Steuern. Aufwand und Ertrag aus Zinsen und Strafen, die an die Steuerbehörden gezahlt werden, sind im tatsächlichen Steueraufwand enthalten. Die Berechnung der aktiven und der passiven Steuerabgrenzung beruht auf temporären Unterschiedsbeträgen zwischen den Buchwerten von Vermögenswerten und Verbindlichkeiten in der Konzernbilanz des Allianz Konzerns und deren Steuerwerten, auf ungenutzten Steuergutschriften und auf steuerlichen Verlustvorträgen. Die Berechnung der latenten Steuerabgrenzung erfolgt mit den jeweiligen landesspezifischen Steuersätzen; am oder vor dem Bilanzstichtag bereits beschlossene Steuersatzänderungen sind berücksichtigt. Aktive latente Steuern auf Verlustvorträge werden angesetzt, soweit es wahrscheinlich ist, dass künftig zu versteuernde Einkommen in ausreichender Höhe zur Realisierung verfügbar sind.

In Anmerkung 3 werden die Prozesse und Kontrollen, die eingeführt wurden, um eine angemessene Verwendung von Schätzungen und Annahmen sicherzustellen, erklärt.

### **Leasingverhältnisse**

Die für die Nutzung anfallenden Zahlungen an den Leasinggeber im Rahmen eines Operating-Leasing-Verhältnisses werden in Form linearer Leasingraten über die Laufzeit in den Verwaltungsaufwendungen berücksichtigt. Wird ein Leasingverhältnis vor Ablauf des Leasingzeitraums beendet, werden etwaige Vertragsstrafen zum Beendigungszeitpunkt in voller Höhe aufwandswirksam.

### **Rückstellungen für Pensionen und ähnliche Verpflichtungen**

Beiträge zu leistungsorientierten Plänen werden als Aufwand erfasst, wenn der Arbeitnehmer Arbeitsleistungen erbracht hat, die ihn zu diesen Beiträgen berechtigen.

Für leistungsorientierte Pläne wendet der Allianz Konzern für die versicherungsmathematische Berechnung des Barwertes der erdienten Pensionsansprüche, des Netto-Pensionsaufwands sowie ggf. der Mehrkosten aus Änderungen leistungsorientierter Pensionspläne die Projected Unit Credit Method an. Die wesentlichen Bewertungsprämissen sind in Anmerkung 48 dargestellt. Die Erhebung der personenbezogenen Daten erfolgt in der Regel im Zeitraum Oktober bis November, mit Fortschreibung bei wesentlichen Änderungen jeweils auf den 31. Dezember.

Gemäß IAS 19 gibt es für leistungsorientierte Pensionspläne drei Optionen für die Berücksichtigung von versicherungsmathematischen Gewinnen und Verlusten:

- sofortige vollständige erfolgswirksame Erfassung der versicherungsmathematischen Gewinne und Verluste,
- sofortige erfolgsneutrale Erfassung der versicherungsmathematischen Gewinne und Verluste im Eigenkapital und Ausweis als nicht realisierte Aufwendungen und Erträge über ein sog. „Statement Of Recognized Income and Expense (SORIE)“ oder
- verzögerte Erfassung durch das Korridorverfahren.

Der Allianz Konzern hat sich für das Korridorverfahren entschieden, d. h., für jeden einzelnen leistungsorientierten Pensionsplan erfasst der Allianz Konzern im Geschäftsjahr einen Teil der versicherungsmathematischen Gewinne und Verluste als Erträge oder Aufwendungen,



sofern die zum 31. Dezember des Vorjahres bislang nicht berücksichtigten versicherungsmathematischen Gewinne oder Verluste den größeren der beiden folgenden Beträge übersteigen:

- a) 10 % des Barwertes der erdienten Pensionsansprüche zum 31. Dezember des Vorjahres oder
- b) 10 % des Zeitwertes des separierten Fondsvermögens zum 31. Dezember des Vorjahres.

Die den höheren der beiden genannten Beträge übersteigenden, bislang nicht berücksichtigten versicherungsmathematischen Gewinne oder Verluste werden grundsätzlich über die erwartete durchschnittlich verbleibende Restdienstzeit der Begünstigten verteilt als Ertrag oder Aufwand erfasst.

In Anmerkung 3 werden die Prozesse und Kontrollen, die eingeführt wurden, um eine angemessene Verwendung von Schätzungen und Annahmen sicherzustellen, erklärt.

#### **Aktienbasierte Vergütungspläne**

Die aktienbasierten Vergütungspläne des Allianz Konzerns werden entweder als in Aktien oder als in bar zu erfüllende Vergütungspläne klassifiziert. In Aktien zu erfüllende Pläne werden mit dem Zeitwert zum Gewährungsstichtag bewertet. Dieser Zeitwert wird über den Erdienungszeitraum aufwandswirksam verteilt, mit einer damit einhergehenden Zunahme des Eigenkapitals. Darüber hinaus ist bei in Aktien zu erfüllenden Plänen ein Aufwand zu erfassen, der auf der bestmöglichen Schätzung der Anzahl der erwarteten ausübenden Eigenkapitalinstrumente basiert. Bei in bar zu erfüllenden Vergütungsplänen des Allianz Konzerns wird der Zeitwert des Plans als Aufwand über den Erdienungszeitraum verteilt. Danach wird jede Änderung des Zeitwertes von nicht ausgeübten Plänen in der Gewinn- und Verlustrechnung erfasst.

#### **Rückstellungen für Restrukturierungsmaßnahmen**

Rückstellungen für Restrukturierungsmaßnahmen werden dann angesetzt, wenn der Allianz Konzern einen detaillierten formellen Plan für die Restrukturierungsmaßnahmen besitzt und bei den Betroffenen eine gerechtfertigte Erwartung geweckt hat, dass die Restrukturierungsmaßnahmen umgesetzt werden, entweder durch den Beginn der Umsetzung des Plans oder durch die Ankündi-

gung seiner wesentlichen Bestandteile. Der detaillierte Plan umfasst die betroffenen Geschäftsbereiche, die ungefähre Anzahl der Mitarbeiter, die im Fall einer betriebsbedingten Kündigung entschädigt werden müssen, die damit verbundenen Kosten und den Zeitraum, in dem die Restrukturierungsmaßnahme durchgeführt werden soll. Der detaillierte Plan muss in einer Art und Weise kommuniziert werden, dass die Betroffenen mit seiner Verwirklichung rechnen können. Die Bewertung der Restrukturierungsrückstellung enthält nur direkte Kosten, die durch die Restrukturierung entstehen, d. h. diejenigen Beträge, die zwangsweise durch die Restrukturierung entstehen und nicht mit den laufenden Aktivitäten des Unternehmens in Zusammenhang stehen. Die Position Restrukturierungsaufwendungen in der Gewinn- und Verlustrechnung enthält weitere im Zusammenhang mit Restrukturierungen stehende Aufwendungen, die zwangsweise im Zuge der Restrukturierung entstehen und nicht mit den laufenden Aktivitäten des Unternehmens in Zusammenhang stehen, aber nicht in der Restrukturierungsrückstellung enthalten sind, wie z. B. Wertminderungen von Vermögenswerten, die von der Restrukturierung betroffen sind.

In Anmerkung 3 werden die Prozesse und Kontrollen, die eingeführt wurden, um eine angemessene Verwendung von Schätzungen und Annahmen sicherzustellen, erklärt.

### 3 Verwendung von Schätzungen und Annahmen

Die vorherige Anmerkung 2 beschreibt die Bilanzierungsgrundsätze, die der Allianz Konzern bei der Aufstellung des Konzernabschlusses berücksichtigt. Dieser Abschnitt beschreibt, wie bestimmte ausgewiesene Zahlen durch die Verwendung von Schätzungen und Annahmen wesentlich beeinflusst werden können, sowie die Prozesse, die der Allianz Konzern zur Überwachung der vorgenommenen Beurteilungen etabliert hat.

Beide Seiten der Bilanz des Allianz Konzerns sind in einem hohen Maß von Schätzungen und zahlreichen Annahmen beeinflusst, die der Bewertung von Vermögenswerten und Verbindlichkeiten zugrunde liegen. Die benutzten Schätzverfahren und die Auswahl angemessener Annahmen erfordern ein gutes Urteilsvermögen sowie die Entscheidungskompetenz des Managements, um geeignete Werte für diese Vermögenspositionen und Verbindlichkeiten zu ermitteln. Jede Änderung der Schätzungen und Annahmen kann unter bestimmten Umständen die veröffentlichten Werte und Ergebnisse erheblich beeinflussen, da die Ermessensspanne in einigen Fällen sehr groß sein kann. Dem Allianz Konzern ist bewusst, in welchem Ausmaß sich solche Ermessensfestlegungen auswirken können. Daher wurden ein solides Steuerungssystem sowie Kontrollen, Verfahren und Richtlinien implementiert, um Konsistenz und Zuverlässigkeit der Ermessensentscheidungen sicherzustellen.

Tochtergesellschaften des Allianz Konzerns haben Vorkehrungen zu treffen, dass Schätzungen im Zusammenhang mit der Rechnungslegung nach solidem Urteilsvermögen erfolgen. Hierzu gehören Schulungen, die Einstellung von Mitarbeitern mit passendem Anforderungsprofil (etwa Wirtschaftsprüfern, erfahrenen Buchhaltern, Aktuaren und Finanzfachleuten) sowie Handbücher zu Rechnungslegungsrichtlinien, -verfahren und -kontrollen.

Auf Konzernebene sind entsprechend Prozesse und Ausschüsse eingerichtet worden, um sicherzustellen, dass die Standards des Allianz Konzerns angemessen und konsistent angewendet werden. Zudem hat der Allianz Konzern ein Umfeld geschaffen, das sich zu Verlässlichkeit bekennt, sowie eine Kultur, die zu offenen Diskussionen ermutigt, die Gelegenheit zu Fragen bietet

sowie Erkenntnisgewinne aus Fehlern erlaubt, Meinungsäußerungen von Fachleuten zulässt und auf das Vier-Augen-Prinzip achtet. Die Aufgabe von Ausschüssen ist es, Ermessensentscheidungen und die Auswahl der Annahmen offen unter Fachleuten zu diskutieren sowie Abweichungen festzustellen und zu korrigieren. In keinem der Ausschüsse führt der Chief Financial Officer des Allianz Konzerns den Vorsitz.

Besonders die im Folgenden aufgeführten komplexen Gebiete der Rechnungslegung werden wesentlich von Schätzungen und Annahmen beeinflusst.

#### Rückstellungen für noch nicht abgewickelte Versicherungsfälle, Versicherungs- und Investmentverträge und aktivierte Abschlusskosten

Zum 31. Dezember 2010 veröffentlichte der Allianz Konzern:<sup>1</sup>

- Rückstellungen für noch nicht abgewickelte Versicherungsfälle von 66 474 Mio €, vor allem für das Schaden- und Unfallversicherungsgeschäft einschließlich des in Abwicklung befindlichen Versicherungsgeschäfts und des Rückversicherungsgeschäfts;
- Rückstellungen für Versicherungs- und Investmentverträge von 349 793 Mio €, im Wesentlichen für das Lebens- und Krankenversicherungsgeschäft;
- aktivierte Abschlusskosten von 20 733 Mio € für beide Versicherungssegmente.

Die Rückstellungen aus dem **Lebens- und Krankenversicherungsgeschäft** sind abhängig von Annahmen, zum Beispiel über die Lebenserwartung einer versicherten Person (Sterblichkeits- und Langlebigkeitsrisiko) oder die Entwicklung der Zinssätze und der Investmenterträge (Risiko aus einem „Asset-Liability Mismatch“). Diese Annahmen haben auch eine Auswirkung auf die Darstellung der Kosten für den Abschluss von Versicherungsgeschäften (Abschlusskosten und Verkaufsförderung für Versicherungsverträge) und den Wert der übernommenen Versicherungsgeschäfte (Bestandwert von Lebens- und Krankenversicherungsbeständen). Damit innerhalb des gesamten Allianz Konzerns die versicherungsmathe-

<sup>1</sup> Weitere Informationen finden sich unter Anmerkung 2 Zusammenfassung wesentlicher Bilanzierungsgrundsätze, Anmerkung 12 Aktivierte Abschlusskosten, Anmerkung 19 Rückstellungen für noch nicht abgewickelte Versicherungsfälle und Anmerkung 20 Rückstellungen für Versicherungs- und Investmentverträge.

matischen Methoden und Annahmen bei der Bildung von Lebens- und Krankenversicherungsrückstellungen einheitlich angewandt werden, hat der Allianz Konzern ein zweistufiges Verfahren für die Bildung von Rückstellungen entwickelt. Zuerst werden die Rückstellungen für das Lebens- und Krankenversicherungsgeschäft von erfahrenen und qualifizierten Mitarbeitern der Tochtergesellschaften vor Ort berechnet. Auch die Prüfung der Angemessenheit der Prämien beziehungsweise der Rückstellungen für die Erfüllung von zukünftigen Ansprüchen und Ausgaben („Premium Deficiency Test“ und „Liability Adequacy Test“) erfolgt auf lokaler Ebene. Maßgeblich dafür sind die konzernweiten Standards für die Anwendung einheitlicher und plausibler Annahmen. Der zuständige örtliche Aktuar bestätigt die Angemessenheit der Rückstellungen und die Einhaltung der konzernweiten Standards. In einem zweiten Schritt prüft die Abteilung Group Actuarial des Allianz Konzerns regelmäßig die Rückstellungsverfahren bei den Tochtergesellschaften, einschließlich der Angemessenheit und Einheitlichkeit der Annahmen, und analysiert Veränderungen in den Reserven. Jegliche Anpassungen der Rückstellungen und anderer versicherungstechnischer Positionen werden an den Rückstellungsausschuss (Group Reserve Committee) des Allianz Konzerns berichtet und gemeinsam mit diesem analysiert.

Die Bildung von Rückstellungen im **Schaden- und Unfallversicherungsgeschäft** zeichnet sich insbesondere durch die Verwendung von Schätzungen und den Einsatz von Ermessensentscheidungen über die Entwicklung der Schadenreserven aus. Ähnlich dem Prozess im Lebens- und Krankenversicherungsgeschäft ist auch ein zweistufiger Prozess implementiert worden.

Im ersten Schritt werden die Rückstellungen in jedem Rechtsgebiet unter Berücksichtigung zahlreicher örtlicher Faktoren für einzelne Geschäftszweige berechnet. Dieser Prozess beginnt mit der Datenerfassung der zuständigen Aktuar vor Ort. Die Tochtergesellschaften gruppieren die Rückstellungsdaten in der Regel in möglichst kleine homogene Segmente, die noch genügend Aussagekraft besitzen, um als Grundlage für stabile Prognosen zu dienen. Sobald die Daten erfasst sind, werden daraus Muster für die Schadenregulierung und das Auftreten von Versicherungsfällen abgeleitet. Die Grundlage bilden historische Daten, die in Abwicklungsdreiecken zusammengefasst und nach Anfalljahren gegenüber Entwicklungsjahren angeordnet werden. Die Schadenre-

gulierungs- und -meldungsmuster werden anhand der beobachteten historischen Entwicklungsfaktoren ausgewählt und zudem vom zuständigen Aktuar beurteilt, der mit dem jeweiligen Versicherungsgeschäft, der Schadenbearbeitung, den Daten und Systemen sowie mit den Marktbedingungen, der Wirtschaftslage und dem gesellschaftlichen und rechtlichen Umfeld vertraut ist. Anschließend werden die voraussichtlichen Schadenquoten ermittelt, die sich aus der Analyse historisch beobachteter Schadenquoten, korrigiert um Faktoren wie Schadenentwicklung, Schadeninflation, Beitragsänderungen, Veränderungen der Portfoliozusammensetzung und Veränderungen der allgemeinen Geschäftsbedingungen, ergeben.

Anhand der oben genannten Abwicklungsmuster und der voraussichtlichen Schadenquoten schätzen die Aktuar vor Ort die letztendlichen Schäden und die zugeordneten Schadenregulierungskosten mithilfe verschiedener Methoden wie z. B. der Schadenabwicklungsmethode (Chain-Ladder-Verfahren), der Bornhuetter-Ferguson-Methode oder dem Frequency-Severity-Ansatz.

Nach Maßgabe der obigen Prognose der endgültigen Schäden nach Anfalljahr – also in Bezug auf das Entstehungsjahr der Schäden – nehmen die Tochtergesellschaften des Allianz Konzerns eine unmittelbare Schätzung der Gesamtrückstellungen für noch nicht abgewickelte Versicherungsfälle vor, indem die kumulierten Schadenzahlungen bis zum jeweiligen Bilanzstichtag subtrahiert werden. Anschließend berechnen die Aktuar die Rückstellungen für eingetretene, aber noch nicht gemeldete Versicherungsfälle der jeweiligen Einheiten als Differenz zwischen

- a) den Gesamtrückstellungen für Schäden und noch nicht abgewickelte Versicherungsfälle und
- b) den Rückstellungen, die von den Schadenregulierern im Einzelfall gebildet werden.

Die Schätzungen für das laufende Anfalljahr bestimmen die Schadenquoten und die Rentabilität der Geschäftstätigkeit im jeweils zurückliegenden Jahr. Für alle früheren Anfalljahre wird die Veränderung der Schätzungen als (positives oder negatives) Abwicklungsergebnis in der Konzern-Gewinn- und Verlustrechnung ausgewiesen.

Da die Schadenrückstellungen eine Schätzung ungewisser künftiger Ereignisse darstellen, ermitteln die Aktuare vor Ort verschiedene realistische Szenarien. Um die Streuung der geschätzten Schadenrückstellungen zu analysieren, verwenden die Aktuare verschiedene Methoden und Ansätze, darunter sowohl einfache Sensitivitätstests mittels alternativer Annahmen als auch komplexere stochastische Verfahren. Die Rückstellungsstandards des Allianz Konzerns schreiben vor, dass der Rückstellungsausschuss jeder Tochtergesellschaft in vierteljährlichen Abständen zusammenkommt, um einerseits die beschlossenen Rückstellungen zu erörtern und zu dokumentieren, andererseits die bestmögliche Schätzung der endgültigen Rückstellungshöhe aus einer Reihe möglicher Szenarien sowie die entsprechende Auswahl-Argumentation für die jeweilige Einheit auszuwählen.

Im zweiten Schritt erfolgt eine zentrale Überprüfung der Rückstellungen durch die Abteilung Group Actuarial des Allianz Konzerns. Dies schließt die Überprüfung der Konsistenz der gewählten Annahmen ein. Wesentliche Aspekte, die sich durch die Überprüfung ergeben, werden an den Rückstellungsausschuss des Allianz Konzerns (Group Reserve Committee) gemeldet.

Für das Lebens- und Krankenversicherungsgeschäft sowie für das Schaden- und Unfallversicherungsgeschäft besteht der Überprüfungsprozess aus den folgenden Kernelementen:

- **Konzernweite Standards und Richtlinien:** Sie definieren bestimmte Aspekte des Prozesses für die Rückstellungsbildung, die von allen Tochtergesellschaften durchgeführt werden müssen, einschließlich bestimmter Bereiche der Schätzungen und Annahmen. Die Vorgaben beziehen sich auf die Organisationsstruktur, Daten, Methoden und Berichterstattung. Die Abteilung Group Actuarial des Allianz Konzerns überwacht die Einhaltung gemäß dieser Standards und Richtlinien.
- **Regelmäßige Besuche der Tochtergesellschaften:** Die Abteilung Group Actuarial des Allianz Konzerns besucht regelmäßig die Tochtergesellschaften, um sicherzustellen, dass die konzernweiten Standards und Richtlinien angewandt werden. Bei diesen Besuchen liegt der Schwerpunkt auf wesentlichen Veränderungen in den Annahmen und den Methoden sowie auf

den Prozessen und der etablierten Praxis bei der Reservenbildung. Zudem dienen diese Treffen dazu, sich über die Geschäftsentwicklungen vor Ort auszutauschen.

- **Regelmäßige quantitative und qualitative Rückstellungskontrollen:** Die Abteilung Group Actuarial des Allianz Konzerns überprüft in vierteljährlichen Abständen den Stand, die Entwicklung und die Trends in der Rückstellungsbildung des gesamten Allianz Konzerns. Diese Kontrolle erfolgt anhand der quartalsmäßigen Datenlieferung der Tochtergesellschaften sowie durch regelmäßigen Dialog mit den zuständigen lokalen Aktuaren.

Am Ende der Aufsicht und Überwachung der konzernweiten Rückstellungen stehen die Quartalsitzungen des Rückstellungsausschusses des Allianz Konzerns, der die wichtigsten Entwicklungen der Reserven innerhalb des Konzerns überwacht. Er überwacht insbesondere die zentralen Entwicklungen im gesamten Allianz Konzern, die die Angemessenheit der Schadenrückstellung beeinflussen.

### Zeitwert und Wertminderungen von Finanzinstrumenten

Zum 31. Dezember 2010 veröffentlichte der Allianz Konzern zum Zeitwert bewertete Finanzinstrumente wie folgt:<sup>1</sup>

- zum Zeitwert bewertete Finanzaktiva in Höhe von 230 739 Mio € und Finanzpassiva in Höhe von 66 288 Mio € in Level 1 der „Fair Value Hierarchie“ (notierte Marktpreise auf aktiven Märkten);
- zum Zeitwert bewertete Finanzaktiva in Höhe von 155 650 Mio € und Finanzpassiva in Höhe von 3 373 Mio € in Level 2 der „Fair Value Hierarchie“ (Bewertungsmethoden, deren wesentliche Parameter ausschließlich auf beobachtbaren Marktdaten basieren);
- zum Zeitwert bewertete Finanzaktiva in Höhe von 7 314 Mio € und Finanzpassiva in Höhe von 4 842 Mio € in Level 3 der „Fair Value Hierarchie“ (Bewertungsmethoden, für die zumindest ein wesentlicher

<sup>1</sup> Weitere Einzelheiten zum Zeitwert der Finanzinstrumente finden sich unter Anmerkung 2 Zusammenfassung wesentlicher Bilanzierungsgrundsätze, Anmerkung 37 Wertminderung auf Finanzanlagen (netto) und unter Anmerkung 45 Finanzinstrumente.

Parameter nicht auf beobachtbaren Marktdaten basiert). Finanzaktiva in Level 3 stellen 2% der gesamten zum Zeitwert bewerteten Finanzaktiva des Allianz Konzerns dar.

Schätzungen und Annahmen haben insbesondere dann einen wesentlichen Einfluss, wenn der Zeitwert für Finanzinstrumente bestimmt werden soll, für die zumindest ein wesentlicher Parameter nicht auf beobachtbaren Marktdaten basiert (Level 3 der „Fair Value Hierarchie“). Die Verfügbarkeit von Marktinformationen wird durch das relative Handelsniveau identischer oder ähnlicher Instrumente am Markt bestimmt, wobei der Schwerpunkt auf Informationen über die tatsächliche Marktaktivität und über verbindliche Kurse von Brokern oder Händlern liegt. Sofern angemessen, werden die Werte gegebenenfalls gemäß Marktinformationen über Preisbildung, Kreditfaktoren, Schwankungshöhen und Liquiditätsüberlegungen angepasst. Falls ausreichende Marktinformationen nicht verfügbar sind, wird die beste Schätzung des Managements für einen bestimmten Parameter verwendet, um den Wert zu bestimmen.

Die Beurteilung, ob ein Schuldtitel im Wert gemindert ist, erfordert eine Analyse der Kreditwürdigkeit des Emittenten des zugrunde liegenden Vertrages und ist mit erheblichem Ermessensspielraum durch das Management verbunden. Aktuelle und öffentlich verfügbare Informationen mit Bezug auf den relevanten Emittenten und das spezielle Wertpapier werden berücksichtigt. Diese Informationen betreffen im Wesentlichen Hinweise auf signifikante finanzielle Schwierigkeiten des Emittenten und Verletzung von Vertragspflichten, die mit dem Wertpapier einhergehen, wie beispielsweise Ausfall oder Verzug bei Zins- oder Tilgungszahlungen, sind aber nicht beschränkt darauf. Zusätzlich werden andere Faktoren, wie z. B. die Ausfallwahrscheinlichkeit und das Fehlen eines aktiven Marktes aufgrund von finanziellen Schwierigkeiten, die objektive Hinweise auf ein Verlustereignis liefern, vom Allianz Konzern herangezogen. Der Rückgang des Zeitwertes eines Wertpapiers unter die fortgeführten historischen Kosten oder eine Herunterstufung der Kreditwürdigkeit des Emittenten stellen jeweils für sich noch keinen objektiven Hinweis für ein Verlustereignis dar; sie können aber einen objektiven Hinweis für ein Verlustereignis liefern, wenn sie in Verbindung mit anderen verfügbaren Informationen beobachtet werden.

Grundsätzlich sind die Tochtergesellschaften für die Bestimmung der Zeitwerte und die Ermittlung von Wertminderungen von Finanzinstrumenten zuständig. Dieses Verfahren entspricht der dezentralisierten Organisationsstruktur und wird der Tatsache gerecht, dass die Handelnden vor Ort häufig am besten den örtlichen Wertpapierhandel analysieren können. Dennoch müssen die Tochtergesellschaften die internen Kontrollrichtlinien des Allianz Konzerns für Wertminderungen, Bewertung und Offenlegung beachten. Sämtliche Wertminderungsentscheidungen bei Schuldverschreibungen müssen von den Tochtergesellschaften an die Abteilung Group Financial Reporting des Allianz Konzerns berichtet werden, die diese dann auf Einheitlichkeit überprüft und bei Abweichungen Korrekturen vornimmt.

### Geschäfts- oder Firmenwert

Zum 31. Dezember 2010 belief sich der gesamte Geschäfts- oder Firmenwert des Allianz Konzerns auf 12 020 Mio €. Dieser verteilt sich wie folgt:<sup>1</sup>

- 2 194 Mio € bezogen auf das Schaden- und Unfallversicherungsgeschäft;
- 2 328 Mio € bezogen auf das Lebens- und Krankenversicherungsgeschäft;
- 6 884 Mio € bezogen auf das Asset-Management-Geschäft;
- 614 Mio € bezogen auf den Geschäftsbereich Corporate und Sonstiges.

Der Geschäfts- oder Firmenwert entspricht der Differenz zwischen den Anschaffungskosten eines Unternehmens und dem Zeitwert des erworbenen Vermögens. Im Erwerbszeitpunkt wird der Geschäfts- oder Firmenwert eines gekauften Unternehmens den sog. Cash-Generating Units (CGU) zugeordnet, die einen Nutzen aus der Akquisition ziehen. Da der Geschäfts- oder Firmenwert nicht planmäßig abgeschrieben wird, muss mindestens einmal im Jahr überprüft werden, ob der Buchwert der CGU als werthaltig betrachtet wird. Dies wird angenommen, wenn der Buchwert den geschätzten Nutzungswert (Barwert der erwarteten Zahlungsströme) nicht

<sup>1</sup> Weitere Informationen hierzu finden sich unter Anmerkung 2 Zusammenfassung wesentlicher Bilanzierungsgrundsätze und 15 Immaterielle Vermögenswerte.

übersteigt. Wird der Buchwert als nicht werthaltig eingestuft, muss der Geschäfts- oder Firmenwert entsprechend abgeschrieben werden. Die Ermittlung des erzielbaren Betrags einer CGU erfordert signifikante Ermessensentscheidungen hinsichtlich geeigneter Bewertungsverfahren und Annahmen. Zu den Annahmen zählen die Auswahl der Abzinsungssätze, Planungshorizonte und Anforderungen an die Kapitalausstattung sowie erwartete künftige Geschäftsergebnisse. Die Annahmen sind gegebenenfalls an Veränderungen ökonomischer, Markt- und Geschäftsbedingungen anzupassen. Entsprechend werden die externen Einflussgrößen sowie die operative Entwicklung der CGU laufend überprüft.

Die Prüfprozesse des Allianz Konzerns zur Einschätzung der erzielbaren Beträge erfolgen auf Konzernebene und sind darauf angelegt, Subjektivitätsaspekte zu minimieren. So müssen beispielsweise die angewandten Annahmen mit jenen übereinstimmen, die im allgemeinen Planungs- und Kontrollprozess verwendet werden. Der erzielbare Betrag aller CGU wird generell auf Basis des Nutzungswertes (Value in Use) ermittelt. Diese Berechnungen basieren auf Geschäftsplänen, Schätzungen über nachhaltig erzielbare Ergebnisse und langfristige Wachstumsraten. Dies wird ausführlicher in Anmerkung 15 erläutert. In Bezug auf die wichtigsten Parameter werden Sensitivitätsanalysen durchgeführt, z. B. in Bezug auf langfristig prognostizierte Combined Ratios oder Diskontierungssätze. Außerdem werden, sofern verfügbar, marktbasierte transaktionsbezogene Multiples überprüft. Der Allianz Konzern nutzt diese Daten, um die Angemessenheit von Annahmen zu beurteilen, da vergleichbare Marktwertinformationen nicht grundsätzlich vorliegen. Zwar ist der Allianz Konzern davon überzeugt, dass kurzfristige Schwankungen des Marktwertes den langfristigen Wert aller CGU nicht zutreffend widerspiegeln, dennoch werden im Verlauf des übergeordneten Prüfprozesses die beiden Werte miteinander abgeglichen. Dieses Verfahren, die Werthaltigkeit des Geschäfts- oder Firmenwerts zu beurteilen, gewährleistet nach der Überzeugung des Allianz Konzerns konsistente und zuverlässige Ergebnisse.

## Aktive Steuerabgrenzung

Zum 31. Dezember 2010 wies der Allianz Konzern ein latentes Steuerguthaben von 2 663 Mio € aus, wovon 1 985 Mio € auf steuerliche Verlustvorträge entfielen.<sup>1</sup>

Die Ermittlung von Steuerabgrenzungen resultiert aus temporären Differenzen zwischen den Buchwerten der Vermögenswerte und Schulden in der Konzernbilanz der Allianz und deren Steuerwerten, ungenutzten Steuergutschriften und steuerlichen Verlustvorträgen. Aktive Steuerabgrenzungen werden bilanziert, soweit es wahrscheinlich ist, dass ausreichendes zu versteuerndes Ergebnis für ihre Realisierung zur Verfügung stehen wird. Die Beurteilung der Realisierbarkeit latenter Steuerguthaben bedingt die Einschätzung über die Höhe zukünftiger steuerpflichtiger Gewinne. Dabei wird die Höhe und die Art dieser zu versteuernden Einkünfte sowie die Perioden, in denen sie anfallen werden, berücksichtigt.

Die entsprechenden Analysen und Prognosen, und im Ergebnis die Ermittlung der aktiven Steuerabgrenzungen, werden in den jeweiligen Ländern von den lokalen Steuer- und Finanzfachleuten vorgenommen. Weil die Auswirkungen der zugrunde liegenden Schätzungen wesentlich sein können, gibt es konzerneinheitliche Richtlinien und Verfahren, die Konsistenz und Zuverlässigkeit des Beurteilungsprozesses gewährleisten. Die Ergebnisprognosen beruhen auf Geschäftsplänen, die in einem ordentlichen Verfahren geprüft und genehmigt wurden. Einen besonders aussagekräftigen Nachweis für die Bilanzierung aktiver Steuerabgrenzungen wird entsprechend konzerneinheitlicher Grundsätze verlangt, wenn die betreffende Einheit aktuell oder in einer Vorperiode einen Verlust erlitten hat.

Der Ansatz und die Werthaltigkeit wesentlicher aktiver Steuerabgrenzungen werden von Steuerexperten sowie dem Allianz Group Tax Committee geprüft. Das Allianz Group Tax Committee besteht aus leitenden Mitarbeitern des Finanzressorts des Konzerns, Vorsitzender ist der Leiter der Allianz Konzernsteuerabteilung.

<sup>1</sup> Weitere Informationen hierzu finden sich in Anmerkung 2 Zusammenfassung wesentlicher Bilanzierungsgrundsätze und 43 Ertragsteuern.



### Pensionsrückstellungen

Zum 31. Dezember 2010 wies der Allianz Konzern Pensionsverpflichtungen aus leistungsorientierten Pensionsplänen in Höhe von 15 320 Mio € aus. Diesen stand ein Planvermögen von 9 780 Mio € gegenüber.<sup>1</sup>

Um den Pensionsaufwand und die Pensionsverbindlichkeiten für diese Zusagen zu bestimmen, sind umfassende Annahmen notwendig. Die wichtigsten Annahmen wie Abzinsungssätze, Inflationsraten und erwartete Renditen des Planvermögens, werden, unter Berücksichtigung der individuellen Gegebenheiten in den jeweiligen Ländern, auf Konzernebene unter Einbeziehung von Versicherungsmathematikern und Volkswirten festgelegt. Die Schätzung künftiger Renditen ist mitunter ermessensbehaftet, da mögliche künftige Marktrenditen auf Basis der Zusammensetzung des Planvermögens und bisher beobachtbarer Renditen geschätzt werden müssen. Um eine fundierte und konsistente Bestimmung des Pensionsaufwandes und der Pensionsverbindlichkeit sicherzustellen, werden alle Eingangsparameter diskutiert und unter Berücksichtigung von wirtschaftlichen Entwicklungen, Expertengutachten, verfügbaren Markt- und Branchendaten sowie tatsächlich eingetretenen Ereignissen bei den Pensionsplänen und dem Planvermögen festgelegt. Außerdem führt der Allianz Konzern Sensitivitätsanalysen durch, deren Ergebnisse sowie bestimmte Eingangsparameter in der Anmerkung 48 dargestellt sind.

Auf Basis konzernweiter Standards werden der Pensionsaufwand und die Pensionsverpflichtungen von den einzelnen Tochtergesellschaften ermittelt, an die Abteilung Group Human Resources des Allianz Konzerns gemeldet und von externen Gutachtern überprüft.

### Rückstellungen für Restrukturierungsmaßnahmen

Zum 31. Dezember 2010 wies der Allianz Konzern Rückstellungen für Restrukturierungsmaßnahmen in Höhe von 409 Mio € aus.<sup>2</sup>

Restrukturierungsrückstellungen werden angesetzt, wenn der Allianz Konzern einen detaillierten formellen Plan für die Restrukturierungsmaßnahmen besitzt und bei den Betroffenen eine berechtigte Erwartung geweckt hat, dass die Restrukturierungsmaßnahmen umgesetzt werden, indem entweder mit der Umsetzung des Plans begonnen oder seine wesentlichen Bestandteile angekündigt wurden. Der detaillierte, offizielle Restrukturierungsplan basiert insbesondere auf Schätzungen und Annahmen, z. B. der Anzahl der von Entlassungen betroffenen Mitarbeiter, der Höhe der Abfindungszahlungen, Auswirkungen belastender Verträge, Möglichkeiten der Untervermietung, dem Zeitplan für die Umsetzung der verschiedenen Maßnahmen des Programms und demzufolge der zeitlichen Verteilung zu erwartender Auszahlungen.

Grundsätzlich stellen die Tochtergesellschaften, die eine Restrukturierung durchführen wollen, den formellen Restrukturierungsplan auf und legen die zugrunde liegenden Annahmen und Schätzungen fest. Entsprechend gibt die Richtlinie für Restrukturierungen des Allianz Konzerns vor, dass die Verantwortung für einen angemessenen Planungsprozess, die Überwachung der Durchführung des Programms und die Einhaltung der IFRS bei den Tochtergesellschaften liegt. Die dafür zu erstellende Dokumentation ist der Abteilung Group Accounting des Allianz Konzerns vorzulegen, wo qualifizierte Mitarbeiter alle Restrukturierungsprogramme überprüfen. Dies beinhaltet die Überprüfung aller zugrunde liegenden Schätzungen und Annahmen und eine Einschätzung, ob alle Voraussetzungen für den Ansatz einer Restrukturierungsrückstellung erfüllt sind und welche Kostenbestandteile als Restrukturierungsaufwendungen behandelt werden können.

<sup>1</sup> Detaillierte Informationen zu den Pensionsrückstellungen finden sich unter Anmerkung 2 Zusammenfassung wesentlicher Bilanzierungsgrundsätze und Anmerkung 48 Rückstellungen für Pensionen und ähnliche Verpflichtungen.

<sup>2</sup> Detaillierte Informationen zu den Rückstellungen für Restrukturierungsmaßnahmen finden sich unter Anmerkung 2 Zusammenfassung wesentlicher Bilanzierungsgrundsätze und Anmerkung 50 Rückstellungen für Restrukturierungsmaßnahmen.

## 4 Änderungen der Bilanzierungs- und Bewertungsgrundsätze und der Darstellung des Konzernabschlusses

### Kürzlich übernommene Rechnungslegungsvorschriften – erstmalige Anwendung zum 1. Januar 2010 und vorzeitige Anwendung Überarbeitung von IFRS 3, Unternehmenszusammenschlüsse, und Änderungen zu IAS 27, Konzern- und Einzelabschlüsse

Im Januar 2008 hat das IASB eine Überarbeitung von IFRS 3, Unternehmenszusammenschlüsse, und eine Änderung zu IAS 27, Konzern- und Einzelabschlüsse, veröffentlicht. Die Überarbeitung von IFRS 3 umfasst folgende wesentliche Änderungen:

- Der Anwendungsbereich von IFRS 3 wurde erweitert und ist nun auch für Unternehmenszusammenschlüsse, die rein vertraglich erfolgen, anzuwenden.
- Für jeden Unternehmenszusammenschluss werden Anteile anderer Gesellschafter entweder mit dem prozentualen Anteil des übernommenen Reinvermögens des erworbenen Unternehmens oder zum beizulegenden Zeitwert bewertet.
- Wenn der beherrschende Einfluss in mehreren Stufen erreicht wurde, forderte die alte Version des IFRS 3, sämtliche Vermögenswerte und Schulden bei jeder Stufe zum beizulegenden Zeitwert zu bewerten, damit der Anteil des Geschäfts- oder Firmenwertes ermittelt werden kann. Der überarbeitete Standard verlangt, dass der Geschäfts- oder Firmenwert einmalig bei Erreichen des beherrschenden Einflusses erfasst wird. Für weitere Anteile, die nach Erreichung des beherrschenden Einflusses erworben wurden, wird kein zusätzlicher Geschäfts- oder Firmenwert erfasst. Der Käufer bewertet alle zuvor bereits gehaltenen Eigenkapitalanteile zum beizulegenden Zeitwert an dem Tag neu, an dem Kontrolle erlangt wird. Eine dabei entstehende Differenz wird in der Gewinn- und Verlustrechnung erfasst.

- In Zusammenhang mit dem Unternehmenszusammenschluss stehende Kosten sind grundsätzlich aufwandswirksam zu erfassen.
- Bedingte Verpflichtungen müssen erfasst und zum beizulegenden Zeitwert zum Erwerbszeitpunkt bewertet werden. Spätere Änderungen im beizulegenden Zeitwert sind im Einklang mit anderen IFRS, normalerweise in der Gewinn- und Verlustrechnung, zu erfassen ohne Anpassung des Geschäfts- oder Firmenwerts.

Die Überarbeitung von IAS 27 enthält folgende Änderungen:

- Transaktionen mit Anteilen anderer Gesellschafter, d. h., Änderungen der Beteiligung des Mutterunternehmens an dem Tochterunternehmen, die nicht zu einem Verlust der Beherrschung führen, werden als Eigenkapitaltransaktionen bilanziert.
- Verluste werden Anteilen anderer Gesellschafter auch dann zugerechnet, wenn sie deren Anteil am Eigenkapital des Tochterunternehmens übersteigen.
- Ein zurückbehaltener Anteil an einem Unternehmen wird an dem Tag, an dem die Kontrolle verloren wird, zum beizulegenden Zeitwert neu bewertet.

Der Allianz Konzern hat den überarbeiteten IFRS 3 und den geänderten IAS 27 zum 1. Januar 2010 übernommen. Die Buchwerte sämtlicher Vermögenswerte und Schulden, die aus Unternehmenszusammenschlüssen vor der Anwendung des überarbeiteten IFRS 3 stammen, sind nicht anzupassen. Die Änderungen von IAS 27 sind mit bestimmten Ausnahmen retrospektiv anzuwenden. Beide Standards müssen zusammen angewendet werden. Die Übernahme der Änderungen hatte keinen wesentlichen Einfluss auf den Konzernabschluss des Allianz Konzerns.

### Weitere übernommene Rechnungslegungsvorschriften

Zusätzlich zu den oben genannten kürzlich übernommenen Rechnungslegungsvorschriften wurden die folgenden geänderten und überarbeiteten Standards sowie die folgende Interpretation vom Allianz Konzern zum 1. Januar 2010 übernommen:

- IAS 39, Finanzinstrumente: Ansatz und Bewertung
  - Änderungen zu anrechenbaren, abgesicherten Grundgeschäften
- IFRS 2, Anteilsbasierte Vergütung – Änderungen mit Bezug auf konzernweite anteilsbasierte Vergütungs-transaktionen mit Barausgleich
- Jährliche Verbesserungen an den IFRS, veröffentlicht im Mai 2008 und April 2009, die zum 1. Januar 2010 in Kraft getreten sind
- IFRIC 17, Sachausschüttungen an Eigentümer

Der Allianz Konzern hat diese Änderungen und Interpretation zum 1. Januar 2010 übernommen. Die Übernahme der Änderungen und Interpretation hatte keinen wesentlichen Einfluss auf die Vermögens-, Finanz- und Ertragslage des Allianz Konzerns.

**Kürzlich überarbeitete bzw. veröffentlichte Rechnungslegungsvorschriften – erstmalige Anwendung zum oder nach dem 1. Januar 2011 und keine vorzeitige Anwendung**  
**IFRS 9, Finanzinstrumente: Klassifizierung und Bewertung**

Im November 2009 hat das IASB IFRS 9, Finanzinstrumente: Klassifizierung und Bewertung, veröffentlicht. Die Veröffentlichung stellt die Komplettierung des ersten Teils eines Projektes dar, dessen Ziel es ist, IAS 39 durch IFRS 9 zu ersetzen. Momentan arbeitet das IASB an den

anderen Teilen des Projektes, dies beinhaltet die Abschreibungsmethodik für finanzielle Vermögenswerte und die Bilanzierung von Absicherungsgeschäften. Die Absicht des IASB ist es, den gesamten IAS 39 in 2011 zu ersetzen.

IFRS 9 benutzt ein einziges Konzept zur Bestimmung, ob ein finanzieller Vermögenswert zu fortgeführten Anschaffungskosten oder zum beizulegenden Zeitwert bewertet wird. Dies ersetzt die vielen verschiedenen Regeln in IAS 39. Das Konzept in IFRS 9 basiert darauf, wie ein Unternehmen die Finanzinstrumente handhabt (d. h. sein Geschäftsmodell), sowie auf der Charakteristik der vertraglichen Gestaltung der Zahlungsströme des finanziellen Vermögenswertes. Die neuen Vorschläge erfordern ebenfalls die Anwendung einer einzigen Abschreibungsmethode. Dies ersetzt die vielen verschiedenen Abschreibungsmethoden aus IAS 39.

IFRS 9 ist anzuwenden für Geschäftsjahre, die am oder nach dem 1. Januar 2013 beginnen. IFRS 9 wurde noch nicht in EU-Recht übernommen. Der Allianz Konzern untersucht derzeit die Auswirkungen auf den Konzernabschluss.

**Weitere Änderungen und Interpretationen**

Zusätzlich zu den oben genannten kürzlich veröffentlichten Rechnungslegungsvorschriften wurden folgende Änderungen von Standards und Interpretationen vom IASB veröffentlicht, die jedoch noch nicht in Kraft getreten sind oder vorzeitig vom Allianz Konzern angewendet wurden:

| Standard / Interpretation                                                                                                                                                                                    | Zeitpunkt des Inkrafttretens                                  |
|--------------------------------------------------------------------------------------------------------------------------------------------------------------------------------------------------------------|---------------------------------------------------------------|
| IAS 32, Finanzinstrumente: Darstellung – Änderungen in Bezug auf die Klassifizierung von Bezugsrechten                                                                                                       | Geschäftsjahre, die am oder nach dem 1. Februar 2010 beginnen |
| IFRIC 19, Tilgung finanzieller Verbindlichkeiten durch Eigenkapitalinstrumente                                                                                                                               | Geschäftsjahre, die am oder nach dem 1. Juli 2010 beginnen    |
| IAS 24, Angaben über Beziehungen zu nahestehenden Unternehmen und Personen – Überarbeitung                                                                                                                   | Geschäftsjahre, die am oder nach dem 1. Januar 2011 beginnen  |
| IFRIC 14, IAS 19 – Die Begrenzung eines leistungsorientierten Vermögenswerts, Mindestnotierungsvorschriften und ihre Wechselwirkung                                                                          | Geschäftsjahre, die am oder nach dem 1. Januar 2011 beginnen  |
| Jährliche Verbesserungen an den IFRS 2010:<br>– Änderungen bezogen auf IFRS 3, Unternehmenszusammenschlüsse<br>– Änderungen bezogen auf IAS 27, Konzern- und Einzelabschlüsse                                | Geschäftsjahre, die am oder nach dem 1. Juli 2011 beginnen    |
| Jährliche Verbesserungen an den IFRS 2010:<br>– IFRS 7, Ausweis von Finanzinstrumenten<br>– IAS 1, Darstellung des Abschlusses<br>– IAS 34, Zwischenberichterstattung<br>– IFRIC 13, Kundenbindungsprogramme | Geschäftsjahre, die am oder nach dem 1. Januar 2011 beginnen  |

Es wird erwartet, dass die Übernahme dieser Änderungen und Interpretationen keinen wesentlichen Einfluss auf die Vermögens-, Finanz- und Ertragslage des Allianz Konzerns haben wird. Eine vorzeitige Anwendung ist grundsätzlich erlaubt, aber vom Allianz Konzern nicht beabsichtigt.

### **Änderungen der Bilanzierungs- und Bewertungsmethoden mit Wirkung auf den Konzernabschluss**

#### **Änderung der Bilanzierungsmethode für Fixed-Indexed-Annuity-Produkte**

Künftige Versicherungsleistungen beinhalten bei Fixed-Indexed-Annuity-Produkten verschiedene jährliche Market-Value-Liability-Optionen (MVLO), die als Derivate zum Zeitwert bilanziert werden. Diese eingebetteten Derivate wurden von den dazugehörigen Deckungsrückstellungen getrennt und als „erfolgswirksam zum Zeitwert bewertete Finanzpassiva“ in der Konzernbilanz ausgewiesen. In der Vergangenheit wurden auch die jährlichen Indexgewinne, die den Versicherungsnehmern als fester Betrag bereits gutgeschrieben waren, als Derivat zum Zeitwert bilanziert. Dementsprechend wäre die MVLO im Zeitverlauf angewachsen.

Mit Wirkung zum 1. Juli 2010 hat der Allianz Konzern freiwillig seine Bilanzierungsmethode in Bezug auf die Bewertung der MVLO geändert. Insbesondere die festen Leistungsbeträge, welche dem Konto des Versicherungsnehmers gutgeschrieben werden, werden zum Zeitpunkt der Gutschrift in die Deckungsrückstellung umgegliedert. Zudem wurde die Ermittlung des Zeitwertes der MVLO verfeinert, indem ein Diskontierungssatz verwendet wird, der stärker mit den Renditen der entsprechenden Finanzanlagen übereinstimmt.

Als Folge dieser Änderungen wird der Teil, der dem Versicherungsnehmer gutgeschrieben wurde, nicht mehr zum Zeitwert bewertet; zudem stellt die zukünftige Bewertung der MVLO mögliche Indexgewinne der Versicherungsnehmer besser dar. Der Allianz Konzern ist der Auffassung, dass diese Änderungen die künstliche Volatilität unserer Bilanzierung reduzieren und die wirtschaftlichen Grundlagen der Fixed-Indexed-Annuity-Produkte besser darstellen. Dies führt zu einer zuverlässigeren und relevanteren Darstellung von Finanzinformationen.

Die Änderung der Bilanzierungsmethode wurde retrospektiv angewendet und führt zu einer Änderung der Darstellung, wie sie in den unten aufgeführten Tabellen gezeigt wird.

In Verbindung mit der Änderung der Bilanzierungsmethode verkaufte der Allianz Konzern außerdem ein Portfolio von finanziellen Vermögenswerten, welches erfolgswirksam zum Zeitwert bewertet wurde. Dieses war zuvor zur Verringerung der Zinsvolatilität der eingebetteten Derivate gehalten worden. Zum 31. Dezember 2009 hatte das Portfolio einen Zeitwert von ungefähr 3,6 Mrd €. Das Portfolio wurde im Geschäftsjahr 2010 liquidiert. Die Erlöse wurden in jederzeit veräußerbare Anleihen reinvestiert.

#### **Sonstige Umgliederungen**

Bestimmte Positionen des Vorjahres wurden umgegliedert, um mit der derzeitigen Darstellung übereinzustimmen.

### Auswirkungen der Änderungen der Bilanzierungs- und Bewertungsmethoden auf die Konzernbilanz sowie die Konzern-Gewinn- und Verlustrechnung

Die folgende Tabelle fasst die Auswirkungen auf die Konzernbilanz zum 31. Dezember 2009 und zum 1. Januar 2009 in Bezug auf die Änderung der Bilanzierungsmethode für Fixed-Indexed-Annuity-Produkte zusammen:

|                                                                                                                                 | 31.12.2009                   |                                                                      |                 | 1.1.2009                     |                                                                      |                 |
|---------------------------------------------------------------------------------------------------------------------------------|------------------------------|----------------------------------------------------------------------|-----------------|------------------------------|----------------------------------------------------------------------|-----------------|
|                                                                                                                                 | Wie ursprünglich ausgewiesen | Änderung der Bilanzierungsmethode für Fixed-Indexed-Annuity-Produkte | Wie ausgewiesen | Wie ursprünglich ausgewiesen | Änderung der Bilanzierungsmethode für Fixed-Indexed-Annuity-Produkte | Wie ausgewiesen |
|                                                                                                                                 | Mio €                        | Mio €                                                                | Mio €           | Mio €                        | Mio €                                                                | Mio €           |
| <b>AKTIVA</b>                                                                                                                   |                              |                                                                      |                 |                              |                                                                      |                 |
| Barreserve und andere liquide Mittel                                                                                            | 6 089                        | —                                                                    | 6 089           | 8 958                        | —                                                                    | 8 958           |
| Erfolgswirksam zum Zeitwert bewertete Finanzaktiva                                                                              | 14 321                       | —                                                                    | 14 321          | 14 240                       | —                                                                    | 14 240          |
| Finanzanlagen                                                                                                                   | 294 252                      | —                                                                    | 294 252         | 258 812                      | —                                                                    | 258 812         |
| Forderungen an Kreditinstitute und Kunden                                                                                       | 128 996                      | —                                                                    | 128 996         | 116 990                      | —                                                                    | 116 990         |
| Finanzaktiva aus fondsgebundenen Verträgen                                                                                      | 56 963                       | —                                                                    | 56 963          | 50 450                       | —                                                                    | 50 450          |
| Rückversicherungsaktiva                                                                                                         | 13 559                       | —                                                                    | 13 559          | 14 599                       | —                                                                    | 14 599          |
| Aktivierete Abschlusskosten                                                                                                     | 20 623                       | – 328                                                                | 20 295          | 22 563                       | – 558                                                                | 22 005          |
| Aktive Steuerabgrenzung                                                                                                         | 2 719                        | —                                                                    | 2 719           | 3 996                        | – 19                                                                 | 3 977           |
| Übrige Aktiva                                                                                                                   | 33 047                       | —                                                                    | 33 047          | 34 004                       | —                                                                    | 34 004          |
| Langfristige Vermögenswerte sowie Vermögenswerte von Veräußerungsgruppen, die als zur Veräußerung gehalten klassifiziert werden | —                            | —                                                                    | —               | 419 513                      | —                                                                    | 419 513         |
| Immaterielle Vermögenswerte                                                                                                     | 13 476                       | —                                                                    | 13 476          | 11 451                       | —                                                                    | 11 451          |
| <b>Summe Aktiva</b>                                                                                                             | <b>584 045</b>               | <b>– 328</b>                                                         | <b>583 717</b>  | <b>955 576</b>               | <b>– 577</b>                                                         | <b>954 999</b>  |
|                                                                                                                                 |                              |                                                                      |                 |                              |                                                                      |                 |
|                                                                                                                                 | 31.12.2009                   |                                                                      |                 | 1.1.2009                     |                                                                      |                 |
|                                                                                                                                 | Wie ursprünglich ausgewiesen | Änderung der Bilanzierungsmethode für Fixed-Indexed-Annuity-Produkte | Wie ausgewiesen | Wie ursprünglich ausgewiesen | Änderung der Bilanzierungsmethode für Fixed-Indexed-Annuity-Produkte | Wie ausgewiesen |
|                                                                                                                                 | Mio €                        | Mio €                                                                | Mio €           | Mio €                        | Mio €                                                                | Mio €           |
| <b>PASSIVA</b>                                                                                                                  |                              |                                                                      |                 |                              |                                                                      |                 |
| Erfolgswirksam zum Zeitwert bewertete Finanzpassiva                                                                             | 6 743                        | – 1 852                                                              | 4 891           | 6 244                        | – 2 113                                                              | 4 131           |
| Verbindlichkeiten gegenüber Kreditinstituten und Kunden                                                                         | 21 248                       | —                                                                    | 21 248          | 18 451                       | —                                                                    | 18 451          |
| Beitragsüberträge                                                                                                               | 15 676                       | —                                                                    | 15 676          | 15 233                       | —                                                                    | 15 233          |
| Rückstellungen für noch nicht abgewinkelte Versicherungsfälle                                                                   | 64 441                       | —                                                                    | 64 441          | 63 924                       | —                                                                    | 63 924          |
| Rückstellungen für Versicherungs- und Investmentverträge                                                                        | 322 188                      | 1 613                                                                | 323 801         | 296 557                      | 1 500                                                                | 298 057         |
| Finanzpassiva aus fondsgebundenen Verträgen                                                                                     | 56 963                       | —                                                                    | 56 963          | 50 450                       | —                                                                    | 50 450          |
| Passive Steuerabgrenzung                                                                                                        | 3 905                        | – 31                                                                 | 3 874           | 3 833                        | —                                                                    | 3 833           |
| Andere Verbindlichkeiten                                                                                                        | 33 285                       | —                                                                    | 33 285          | 32 930                       | —                                                                    | 32 930          |
| Verbindlichkeiten von Veräußerungsgruppen, die als zur Veräußerung gehalten klassifiziert werden                                | —                            | —                                                                    | —               | 411 816                      | —                                                                    | 411 816         |
| Verbriefte Verbindlichkeiten                                                                                                    | 7 962                        | —                                                                    | 7 962           | 9 544                        | —                                                                    | 9 544           |
| Genussrechtskapital und nachrangige Verbindlichkeiten                                                                           | 9 347                        | —                                                                    | 9 347           | 9 346                        | —                                                                    | 9 346           |
| <b>Summe Fremdkapital</b>                                                                                                       | <b>541 758</b>               | <b>– 270</b>                                                         | <b>541 488</b>  | <b>918 328</b>               | <b>– 613</b>                                                         | <b>917 715</b>  |
| Eigenkapital                                                                                                                    | 40 166                       | – 58                                                                 | 40 108          | 33 684                       | 36                                                                   | 33 720          |
| Anteile anderer Gesellschafter                                                                                                  | 2 121                        | —                                                                    | 2 121           | 3 564                        | —                                                                    | 3 564           |
| <b>Summe Eigenkapital</b>                                                                                                       | <b>42 287</b>                | <b>– 58</b>                                                          | <b>42 229</b>   | <b>37 248</b>                | <b>36</b>                                                            | <b>37 284</b>   |
| <b>Summe Passiva</b>                                                                                                            | <b>584 045</b>               | <b>– 328</b>                                                         | <b>583 717</b>  | <b>955 576</b>               | <b>– 577</b>                                                         | <b>954 999</b>  |

Die folgende Tabelle fasst die Auswirkungen auf die Konzern-Gewinn- und Verlustrechnung für die Geschäftsjahre 2009 und 2008 in Bezug auf die Änderung der Bilanzierungsmethode für Fixed-Indexed-Annuity-Produkte zusammen:

|                                                                                               | 2009                         |                                                                      |                 | 2008                         |                                                                      |                 |
|-----------------------------------------------------------------------------------------------|------------------------------|----------------------------------------------------------------------|-----------------|------------------------------|----------------------------------------------------------------------|-----------------|
|                                                                                               | Wie ursprünglich ausgewiesen | Änderung der Bilanzierungsmethode für Fixed-Indexed-Annuity-Produkte | Wie ausgewiesen | Wie ursprünglich ausgewiesen | Änderung der Bilanzierungsmethode für Fixed-Indexed-Annuity-Produkte | Wie ausgewiesen |
|                                                                                               | Mio €                        | Mio €                                                                | Mio €           | Mio €                        | Mio €                                                                | Mio €           |
| <b>Gebuchte Bruttobeiträge</b>                                                                | 65 090                       | – 65                                                                 | 65 025          | 66 171                       | – 50                                                                 | 66 121          |
| Abgegebene Rückversicherungsbeiträge                                                          | – 5 061                      | —                                                                    | – 5 061         | – 5 474                      | —                                                                    | – 5 474         |
| Veränderung in Beitragsüberträgen                                                             | – 172                        | —                                                                    | – 172           | – 253                        | —                                                                    | – 253           |
| <b>Verdiente Beiträge (netto)</b>                                                             | <b>59 857</b>                | <b>– 65</b>                                                          | <b>59 792</b>   | <b>60 444</b>                | <b>– 50</b>                                                          | <b>60 394</b>   |
| Zinserträge und ähnliche Erträge                                                              | 18 233                       | —                                                                    | 18 233          | 19 072                       | —                                                                    | 19 072          |
| Erträge aus erfolgswirksam zum Zeitwert bewerteten Finanzaktiva und Finanzpassiva (netto)     | 954                          | – 80                                                                 | 874             | – 341                        | 714                                                                  | 373             |
| Realisierte Gewinne/Verluste (netto)                                                          | 3 416                        | —                                                                    | 3 416           | 3 603                        | —                                                                    | 3 603           |
| Provisions- und Dienstleistungserträge                                                        | 6 239                        | —                                                                    | 6 239           | 6 032                        | —                                                                    | 6 032           |
| Sonstige Erträge                                                                              | 41                           | —                                                                    | 41              | 408                          | —                                                                    | 408             |
| Erträge aus vollkonsolidierten Private-Equity-Beteiligungen                                   | 1 910                        | —                                                                    | 1 910           | 2 549                        | —                                                                    | 2 549           |
| <b>Summe Erträge</b>                                                                          | <b>90 650</b>                | <b>– 145</b>                                                         | <b>90 505</b>   | <b>91 767</b>                | <b>664</b>                                                           | <b>92 431</b>   |
| Schadenaufwendungen (brutto)                                                                  | – 47 879                     | —                                                                    | – 47 879        | – 48 287                     | —                                                                    | – 48 287        |
| Schadenaufwendungen (abgegebene Rückversicherungsbeiträge)                                    | 2 233                        | —                                                                    | 2 233           | 2 628                        | —                                                                    | 2 628           |
| <b>Schadenaufwendungen (netto)</b>                                                            | <b>– 45 646</b>              | <b>—</b>                                                             | <b>– 45 646</b> | <b>– 45 659</b>              | <b>—</b>                                                             | <b>– 45 659</b> |
| Veränderung der Rückstellungen für Versicherungs- und Investmentverträge (netto)              | – 9 560                      | – 200                                                                | – 9 760         | – 5 140                      | – 238                                                                | – 5 378         |
| Zinsaufwendungen                                                                              | – 1 484                      | —                                                                    | – 1 484         | – 1 893                      | —                                                                    | – 1 893         |
| Risikoversorge im Kreditgeschäft                                                              | – 141                        | —                                                                    | – 141           | – 59                         | —                                                                    | – 59            |
| Wertminderungen auf Finanzanlagen (netto)                                                     | – 2 732                      | —                                                                    | – 2 732         | – 9 495                      | —                                                                    | – 9 495         |
| Aufwendungen für Finanzanlagen                                                                | – 755                        | —                                                                    | – 755           | – 771                        | —                                                                    | – 771           |
| Abschluss- und Verwaltungsaufwendungen (netto)                                                | – 20 325                     | 207                                                                  | – 20 118        | – 18 299                     | – 300                                                                | – 18 599        |
| Provisions- und Dienstleistungsaufwendungen                                                   | – 2 212                      | —                                                                    | – 2 212         | – 2 344                      | —                                                                    | – 2 344         |
| Abschreibungen auf immaterielle Vermögenswerte                                                | – 125                        | —                                                                    | – 125           | – 23                         | —                                                                    | – 23            |
| Restrukturierungsaufwendungen                                                                 | – 198                        | —                                                                    | – 198           | – 129                        | —                                                                    | – 129           |
| Sonstige Aufwendungen                                                                         | – 2                          | —                                                                    | – 2             | – 12                         | —                                                                    | – 12            |
| Aufwendungen aus vollkonsolidierten Private-Equity-Beteiligungen                              | – 2 142                      | —                                                                    | – 2 142         | – 2 470                      | —                                                                    | – 2 470         |
| <b>Summe Aufwendungen</b>                                                                     | <b>– 85 322</b>              | <b>7</b>                                                             | <b>– 85 315</b> | <b>– 86 294</b>              | <b>– 538</b>                                                         | <b>– 86 832</b> |
| <b>Ergebnis aus fortzuführenden Geschäftsbereichen vor Ertragsteuern</b>                      | <b>5 328</b>                 | <b>– 138</b>                                                         | <b>5 190</b>    | <b>5 473</b>                 | <b>126</b>                                                           | <b>5 599</b>    |
| Ertragsteuern                                                                                 | – 588                        | 48                                                                   | – 540           | – 1 287                      | – 44                                                                 | – 1 331         |
| <b>Jahresüberschuss aus fortzuführenden Geschäftsbereichen</b>                                | <b>4 740</b>                 | <b>– 90</b>                                                          | <b>4 650</b>    | <b>4 186</b>                 | <b>82</b>                                                            | <b>4 268</b>    |
| <b>Jahresüberschuss (-fehlbetrag) aus aufgegebenen Geschäftsbereichen, nach Ertragsteuern</b> | <b>– 395</b>                 | <b>—</b>                                                             | <b>– 395</b>    | <b>– 6 373</b>               | <b>—</b>                                                             | <b>– 6 373</b>  |
| <b>Jahresüberschuss (-fehlbetrag)</b>                                                         | <b>4 345</b>                 | <b>– 90</b>                                                          | <b>4 255</b>    | <b>– 2 187</b>               | <b>82</b>                                                            | <b>– 2 105</b>  |
| <b>Jahresüberschuss (-fehlbetrag)</b>                                                         |                              |                                                                      |                 |                              |                                                                      |                 |
| auf Anteile anderer Gesellschafter entfallend                                                 | 48                           | —                                                                    | 48              | 257                          | —                                                                    | 257             |
| auf Anteilseigner entfallend                                                                  | 4 297                        | – 90                                                                 | 4 207           | – 2 444                      | 82                                                                   | – 2 362         |
| <b>Ergebnis je Aktie (in €)</b>                                                               | <b>9,53</b>                  | <b>– 0,20</b>                                                        | <b>9,33</b>     | <b>– 5,43</b>                | <b>0,18</b>                                                          | <b>– 5,25</b>   |
| <b>Verwässertes Ergebnis je Aktie (in €)</b>                                                  | <b>9,50</b>                  | <b>– 0,20</b>                                                        | <b>9,30</b>     | <b>– 5,47</b>                | <b>0,18</b>                                                          | <b>– 5,29</b>   |



## 5 Konsolidierung

### Konsolidierungskreis

In den Konzernabschluss zum 31. Dezember 2010 sind neben der Allianz SE grundsätzlich alle in- und ausländischen Unternehmen einbezogen, bei denen die Allianz SE unmittelbar oder mittelbar über die Mehrheit der Stimmrechte der Gesellschaft verfügt oder auf eine andere Weise beherrschenden Einfluss auf deren Tätigkeit nehmen kann. Die Unternehmen werden beginnend mit dem Zeitpunkt in den Konzernabschluss einbezogen, zu dem die Allianz SE die Möglichkeit zur Beherrschung erlangt.

Neben der Allianz SE als Mutterunternehmen umfasst der Konsolidierungskreis die in untenstehender Tabelle aufgeführten Unternehmen.

|                                                                                   | 2010       | 2009       | 2008         |
|-----------------------------------------------------------------------------------|------------|------------|--------------|
| <b>Konsolidierungskreis</b>                                                       |            |            |              |
| <b>Anzahl der vollkonsolidierten Unternehmen (Tochterunternehmen)<sup>1</sup></b> |            |            |              |
| Inland                                                                            | 139        | 135        | 152          |
| Ausland                                                                           | 775        | 753        | 935          |
| <b>Summe</b>                                                                      | <b>914</b> | <b>888</b> | <b>1 087</b> |
| <b>Anzahl der vollkonsolidierten Investmentfonds</b>                              |            |            |              |
| Inland                                                                            | 46         | 46         | 49           |
| Ausland                                                                           | 22         | 11         | 9            |
| <b>Summe</b>                                                                      | <b>68</b>  | <b>57</b>  | <b>58</b>    |
| <b>Anzahl der vollkonsolidierten Zweckgesellschaften (SPE)</b>                    | <b>4</b>   | <b>4</b>   | <b>59</b>    |
| <b>Summe der vollkonsolidierten Unternehmen</b>                                   | <b>986</b> | <b>949</b> | <b>1 204</b> |
| <b>Anzahl der at equity bilanzierten Gemeinschaftsunternehmen</b>                 | <b>17</b>  | <b>14</b>  | <b>10</b>    |
| <b>Anzahl der at equity bilanzierten assoziierten Unternehmen</b>                 | <b>125</b> | <b>146</b> | <b>167</b>   |

Alle verbundenen Unternehmen, Gemeinschaftsunternehmen und assoziierten Unternehmen sind in der Aufstellung des Anteilsbesitzes des Allianz Konzerns ab Seite 310 dieses Konzernabschlusses einzeln aufgeführt.

<sup>1</sup> Umfasst 6 (2009: 8; 2008: 10) Tochterunternehmen, an denen der Allianz Konzern nicht die Mehrheit der Stimmrechte der jeweiligen Tochtergesellschaften hält, darunter CreditRas Vita S.p.A. (CreditRas) und Antoniana Veneta Popolare Vita S.p.A. (Antoniana). Der Allianz Konzern kontrolliert diese Gesellschaften auf der Grundlage von Managementvereinbarungen zwischen einer Tochtergesellschaft des Allianz Konzerns, die jeweils 50,0% der Anteile an diesem Unternehmen hält, und den anderen Aktionären. Gemäß diesen Managementvereinbarungen hat der Allianz Konzern den beherrschenden Einfluss, die Finanz- und Geschäftspolitik dieser Tochtergesellschaften zu bestimmen, und das Recht, den Geschäftsführer, so im Fall von CreditRas, sowie den CEO, wie im Fall von Antoniana, zu ernennen. Dem CEO der Antoniana wurde die alleinige Autorität über alle Aspekte der Finanz- und Geschäftspolitik für die genannte Gesellschaft übertragen einschließlich der Anstellung und der Kündigung von Personal sowie des Kaufs und des Verkaufs von Vermögenswerten. Außerdem werden alle Managementaufgaben dieser

Konzernunternehmen von Mitarbeitern des Allianz Konzerns wahrgenommen, und alle Geschäfte werden in Einrichtungen des Allianz Konzerns getätigt. Der Allianz Konzern entwickelt ferner alle Versicherungsprodukte, deren Zeichnung über diese Konzernunternehmen erfolgt. Obgleich der Allianz Konzern und die anderen Aktionäre das Recht haben, die Hälfte der Mitglieder im Vorstand jeder Tochtergesellschaft zu ernennen, sind die Rechte der anderen Aktionäre auf Angelegenheiten beschränkt, die dem Vorstand nach italienischem Recht vorbehalten sind; hierzu gehören Entscheidungen über Kapitalerhöhungen, Satzungsänderungen oder ähnliche Sachverhalte. Im Fall von Antoniana hat der Allianz Konzern ferner das Recht, den Vorstandsvorsitzenden zu ernennen, der im Vorstand über doppelte Stimmrechte verfügt und damit dem Allianz Konzern die Stimmrechtsmehrheit verschafft. Die Managementvereinbarungen für CreditRas und Antoniana unterliegen der automatischen Verlängerung und sind nicht vor dem festgelegten Vertragsende kündbar.

## Wesentliche Zugänge

Im Geschäftsjahr 2010 waren keine wesentlichen Zugänge zu verzeichnen. Die wesentlichen Zugänge der Geschäftsjahre 2009 und 2008 sind nachfolgend aufgeführt:

|                                                           | Kapitalanteil<br>% | Erstkonsolidierungs-<br>zeitpunkt | Segment             | Geschäfts-<br>oder<br>Firmenwert <sup>1</sup><br>Mio € | Transaktion            |
|-----------------------------------------------------------|--------------------|-----------------------------------|---------------------|--------------------------------------------------------|------------------------|
| <b>2009</b>                                               |                    |                                   |                     |                                                        |                        |
| Cominvest Asset Management GmbH, Frankfurt am Main        | 100,0              | 12.01.2009                        | Asset<br>Management | 452                                                    | Erwerb                 |
| Ayudhya Allianz C.P. Life Public Company Limited, Bangkok | 62,6               | 29.06.2009                        | Leben/<br>Kranken   | —                                                      | Erlangung<br>Kontrolle |
| <b>2008</b>                                               |                    |                                   |                     |                                                        |                        |
| Allianz Sigorta AŞ, Istanbul                              | 84,2               | 21.07.2008                        | Schaden-<br>Unfall  | 166                                                    | Anteils-<br>erhöhung   |
| Allianz Hayat ve Emeklilik AŞ, Istanbul                   | 89,0               | 21.07.2008                        | Leben/<br>Kranken   | 81                                                     | Anteils-<br>erhöhung   |

<sup>1</sup> zum Zeitpunkt der Erstkonsolidierung

## 2009 Wesentliche Zugänge

### Cominvest

Am 12. Januar 2009 erwarb der Allianz Konzern, im Gegenzug für den Verkauf der Dresdner Bank an die Commerzbank, 100% der Anteile an dem Fondsmanager cominvest (beinhaltet die Gesellschaften cominvest Asset Management GmbH, cominvest Asset Management S.A. (Luxemburg), cominvest Vertriebs AG und MK Luxinvest S.A. (Luxemburg)).

### Darstellung der Kostenbestandteile

Der Erwerb der cominvest war Teil der Gegenleistung der Commerzbank für den Verkauf der Dresdner Bank am 12. Januar 2009. Der Zeitwert der cominvest-Gesellschaften wurde auf 700 Mio € beziffert und stellte die Kosten dieser Akquisition dar.

Die Beträge, die für die Hauptgruppen von Vermögenswerten und Schulden erfasst wurden, sind wie folgt:

|                                                       | Zeitwert<br>Mio € | Buchwert<br>Mio € |
|-------------------------------------------------------|-------------------|-------------------|
| Barreserve und andere liquide Mittel                  | 48                | 48                |
| Finanzanlagen                                         | 186               | 186               |
| Aktive Steuerabgrenzung                               | 14                | 8                 |
| Übrige Aktiva                                         | 42                | 41                |
| Immaterielle Vermögenswerte                           | 239               | —                 |
| <b>Summe Aktiva</b>                                   | <b>529</b>        | <b>283</b>        |
| Passive Steuerabgrenzung                              | 72                | 1                 |
| Andere Verbindlichkeiten                              | 147               | 128               |
| Genussrechtskapital und nachrangige Verbindlichkeiten | 57                | 50                |
| Summe Eigenkapital                                    | 253               | 104               |
| <b>Summe Passiva</b>                                  | <b>529</b>        | <b>283</b>        |

Zum Zeitpunkt der Akquisition reflektiert der Geschäfts- oder Firmenwert die Stärkung sowie den Ausbau der Marktstellung des Allianz Konzerns im Asset-Management-Bereich.

Durch den Zugang der cominvest hat sich der Konzernjahresüberschuss für das Geschäftsjahr 2009 um 23 Mio € reduziert.

Unter der Annahme, dass der Akquisitionszeitpunkt der zusammengeschlossenen Unternehmen (Allianz Konzern inklusive cominvest) der 1. Januar 2009 gewesen wäre, würde sich der Umsatz und Konzernjahresüberschuss nur unwesentlich von dem in der Konzern-Gewinn- und Verlustrechnung für das Geschäftsjahr 2009 ausgewiesenen unterscheiden.

Details bzgl. der Auswirkung dieser Akquisition auf die Kapitalflussrechnung sind in der Kapitalflussrechnung beschrieben.

### Ayudhya Allianz C.P. Life Public Company Limited

Am 29. Juni 2009 erlangte der Allianz Konzern die Kontrolle über den thailändischen Lebensversicherer Ayudhya Allianz C.P. Life Public Company Limited, Bangkok, durch die Benennung der Mehrheit der Vorstandsmitglieder.

Die Anschaffungskosten für die Beteiligung an der Ayudhya Allianz C.P. Life Public Company Limited belaufen sich auf 71 Mio €.

Die Beträge, die für die Hauptgruppen von Vermögenswerten und Schulden erfasst wurden, sind wie folgt:

|                                                                                               | Zeitwert<br>Mio € | Buchwert<br>Mio € |
|-----------------------------------------------------------------------------------------------|-------------------|-------------------|
| Barreserve und andere liquide Mittel                                                          | 77                | 77                |
| Finanzanlagen                                                                                 | 1 708             | 1 714             |
| Aktivierte Abschlusskosten<br>(Bestandswert von Lebens- und<br>Krankenversicherungsbeständen) | 230               | 209               |
| Übrige Aktiva                                                                                 | 93                | 40                |
| <b>Summe Aktiva</b>                                                                           | <b>2 108</b>      | <b>2 040</b>      |
| Beitragsüberträge                                                                             | 5                 | 5                 |
| Rückstellungen für Versicherungs-<br>und Investmentverträge                                   | 1 973             | 1 853             |
| Andere Verbindlichkeiten                                                                      | 26                | 11                |
| Summe Eigenkapital                                                                            | 104               | 171               |
| <b>Summe Passiva</b>                                                                          | <b>2 108</b>      | <b>2 040</b>      |

Durch den Zugang der Ayudhya hat sich der Konzernjahresüberschuss für das Geschäftsjahr 2009 um 4 Mio € erhöht.

Die gebuchten Bruttobeiträge der zusammengeschlossenen Unternehmen (Allianz Konzern inklusive Ayudhya C.P. Life Public Company Limited) hätten sich für das Geschäftsjahr 2009, unter der Annahme, dass der Akquisitionszeitpunkt der 1. Januar 2009 gewesen wäre, auf 65 172 Mio € belaufen. Der Konzernjahresüberschuss der zusammengeschlossenen Unternehmen hätte sich für das Geschäftsjahr 2009, unter der Annahme, dass der Akquisitionszeitpunkt der 1. Januar 2009 gewesen wäre, auf 4 279 Mio € belaufen.

Dieser Zugang, abzüglich der erworbenen Barreserve und anderer liquider Mittel, hat sich auf die Kapitalflussrechnung für das Geschäftsjahr 2009 wie folgt ausgewirkt:

|                                                                                                            | Mio €     |
|------------------------------------------------------------------------------------------------------------|-----------|
| Finanzanlagen                                                                                              | – 1 708   |
| Aktivierte Abschlusskosten (Bestandswert von<br>Lebens- und Krankenversicherungsbeständen)                 | – 230     |
| Übrige Aktiva                                                                                              | – 93      |
| Beitragsüberträge                                                                                          | 5         |
| Rückstellungen für Versicherungs- und<br>Investmentverträge                                                | 1 973     |
| Andere Verbindlichkeiten                                                                                   | 26        |
| Anteile anderer Gesellschafter                                                                             | 33        |
| Abzüglich früherer Investitionen in Ayudhya                                                                | 71        |
| <b>Erwerb des Tochterunternehmens, abzüglich der<br/>erworbenen Barreserve und anderer liquider Mittel</b> | <b>77</b> |

## 2008 Wesentliche Zugänge

### Allianz Sigorta AŞ, Istanbul und Allianz Hayat ve Emeklilik AŞ, Istanbul

Im April 2008 hat der Allianz Konzern einen Kaufvertrag über den Erwerb von 47,1 % der Anteile des Schaden- und Unfallversicherers Allianz Sigorta AŞ, Istanbul, und 51,0 % der Anteile des Lebens- und Rentenversicherers Allianz Hayat ve Emeklilik AŞ, Istanbul, zu einem Kaufpreis von 373 Mio € unterzeichnet. Die Transaktion wurde von den zuständigen Behörden am 21. Juli 2008 genehmigt, so dass die Allianz damit 84,2 % bzw. 89,0 % der Anteile besitzt.

### Darstellung der Kostenbestandteile

|                                                           | Mio €      |
|-----------------------------------------------------------|------------|
| Anschaffungskosten Allianz Sigorta AŞ (47,1 %)            | 248        |
| Anschaffungskosten Allianz Hayat ve Emeklilik AŞ (51,0 %) | 125        |
| Transaktionskosten                                        | —          |
| <b>Summe Anschaffungskosten</b>                           | <b>373</b> |

Die Beträge, die für die Hauptgruppen von Vermögenswerten und Schulden erfasst wurden, sind wie folgt:

|                                                                  | Zeitwert<br>Mio € | Buchwert<br>Mio € |
|------------------------------------------------------------------|-------------------|-------------------|
| Barreserve und andere liquide Mittel                             | 221               | 221               |
| Finanzanlagen                                                    | 386               | 374               |
| Finanzaktiva aus fondsgebundenen<br>Verträgen                    | 150               | 150               |
| Rückversicherungsaktiva                                          | 136               | 136               |
| Aktivierte Abschlusskosten                                       | 51                | 6                 |
| Übrige Aktiva                                                    | 201               | 183               |
| <b>Summe Aktiva</b>                                              | <b>1 145</b>      | <b>1 070</b>      |
| Beitragsüberträge                                                | 249               | 249               |
| Rückstellungen für noch nicht<br>abgewinkelte Versicherungsfälle | 117               | 117               |
| Rückstellungen für Versicherungs-<br>und Investmentverträge      | 269               | 263               |
| Finanzpassiva aus fondsgebundenen<br>Verträgen                   | 150               | 150               |
| Andere Verbindlichkeiten                                         | 90                | 85                |
| Summe Eigenkapital                                               | 270               | 206               |
| <b>Summe Passiva</b>                                             | <b>1 145</b>      | <b>1 070</b>      |

Zum Zeitpunkt der Akquisition reflektiert der Geschäfts- oder Firmenwert im Wesentlichen die Marktposition und das Wachstumspotenzial des türkischen Versicherungsmarktes.

Durch den Zugang von Allianz Sigorta AŞ und Allianz Hayat ve Emeklilik AŞ hat sich der Konzernjahresüberschuss für das Geschäftsjahr 2008 um 8 Mio € erhöht.

Die gebuchten Bruttobeiträge der zusammengeschlossenen Unternehmen (Allianz Konzern inklusive Allianz Hayat und Allianz Sigorta) hätten sich für das Geschäftsjahr 2008, unter der Annahme, dass der Akquisitionszeitpunkt der 1. Januar 2008 gewesen wäre, auf 66 367 Mio € belaufen. Der Konzernjahresfehlbetrag der zusammengeschlossenen Unternehmen hätte sich für das Geschäftsjahr 2008, unter der Annahme, dass der Akquisitionszeitpunkt der 1. Januar 2008 gewesen wäre, auf 2 071 Mio € belaufen.

Diese Akquisition, abzüglich der erworbenen Barreserve und anderer liquider Mittel, hat sich auf die konsolidierte Kapitalflussrechnung für das Geschäftsjahr 2008 wie folgt ausgewirkt:

|                                                                                                       | Mio €        |
|-------------------------------------------------------------------------------------------------------|--------------|
| Immaterielle Vermögenswerte                                                                           | – 247        |
| Übrige Aktiva                                                                                         | – 914        |
| Übrige Verbindlichkeiten                                                                              | 870          |
| Anteile anderer Gesellschafter                                                                        | 38           |
| Abzüglich früherer Investitionen in Allianz Sigorta und Hayat                                         | 101          |
| <b>Erwerb der Tochterunternehmen, abzüglich der erworbenen Barreserve und anderer liquider Mittel</b> | <b>– 152</b> |

## Wesentliche Abgänge

|                                                                       | Kapitalanteil<br>% | Entkonsolidierungszeitpunkt | Verkaufserlös<br>Mio € | Segment                 | Geschäfts- oder Firmenwert<br>Mio € | Transaktion       |
|-----------------------------------------------------------------------|--------------------|-----------------------------|------------------------|-------------------------|-------------------------------------|-------------------|
| <b>2010</b>                                                           |                    |                             |                        |                         |                                     |                   |
| Alba Allgemeine Versicherungs-Gesellschaft AG, Basel                  | 100,0              | 01.11.2010                  | 219                    | Schaden-Unfall          | —                                   | Verkauf an Dritte |
| Phenix Compagnie d'assurances SA, Lausanne                            | 100,0              |                             |                        | Schaden-Unfall          |                                     |                   |
| Phenix Compagnie d'assurances sur la vie SA, Lausanne                 | 100,0              |                             |                        | Leben/Kranken           |                                     |                   |
| Allianz Bank Zrt., Budapest                                           | 100,0              | 30.09.2010                  | 10                     | Corporate und Sonstiges | —                                   | Verkauf an Dritte |
| <b>2009</b>                                                           |                    |                             |                        |                         |                                     |                   |
| Dresdner Bank Aktiengesellschaft, Frankfurt am Main                   | 100,0              | 12.01.2009                  | 5 140                  | Corporate und Sonstiges | 1 511                               | Verkauf an Dritte |
| <b>2008</b>                                                           |                    |                             |                        |                         |                                     |                   |
| DEGI Deutsche Gesellschaft für Immobilienfonds mbH, Frankfurt am Main | 94,0               | 01.01.2008                  | 103                    | Corporate und Sonstiges | —                                   | Verkauf an Dritte |

## 2010 Wesentliche Abgänge

### Alba Allgemeine Versicherungs-Gesellschaft AG (Alba), Basel, Phenix Compagnie d'assurances SA (Phenix), Lausanne und Phenix Compagnie d'assurances sur la vie SA (Phenix Vie), Lausanne

Am 1. November 2010 hat der Allianz Konzern Alba, Phenix und Phenix Vie verkauft. Dieser Verkauf, abzüglich der veräußerten Barreserven und anderer liquider Mittel, hat sich auf die Kapitalflussrechnung für das Geschäftsjahr 2010 wie folgt ausgewirkt:

|                                                                                                                        | Mio €      |
|------------------------------------------------------------------------------------------------------------------------|------------|
| Finanzanlagen                                                                                                          | 686        |
| Rückversicherungsaktiva                                                                                                | 29         |
| Aktivierete Abschlusskosten                                                                                            | 16         |
| Übrige Aktiva                                                                                                          | 39         |
| Beitragsüberträge                                                                                                      | – 38       |
| Rückstellungen für Versicherungs- und Investmentverträge                                                               | – 548      |
| Andere Verbindlichkeiten                                                                                               | – 80       |
| Im Eigenkapital erfasste Erträge und Aufwendungen                                                                      | – 27       |
| Veräußerungsgewinn                                                                                                     | 130        |
| Konsolidierungen                                                                                                       | – 7        |
| <b>Erlöse aus der Veräußerung von Tochterunternehmen, abzüglich veräußerter Barreserve und anderer liquider Mittel</b> | <b>200</b> |

**Allianz Bank Zrt., Budapest**

Im September 2010 hat der Allianz Konzern den Verkauf der Allianz Bank Zrt., Budapest, abgeschlossen. Dieser Verkauf, abzüglich der veräußerten Barreserven und anderer liquider Mittel, hat sich auf die Kapitalflussrechnung für das Geschäftsjahr 2010 wie folgt ausgewirkt:

|                                                                                                                        | Mio €      |
|------------------------------------------------------------------------------------------------------------------------|------------|
| Finanzanlagen                                                                                                          | 284        |
| Übrige Aktiva                                                                                                          | 15         |
| Verbindlichkeiten gegenüber Kreditinstituten und Kunden                                                                | – 173      |
| Andere Verbindlichkeiten                                                                                               | – 32       |
| Im Eigenkapital erfasste Erträge und Aufwendungen                                                                      | 2          |
| abzüglich nicht liquider Bestandteile:                                                                                 |            |
| Erhaltene jederzeit veräußerbare Wertpapiere                                                                           | – 8        |
| Verluste aus Wertminderungen                                                                                           | – 42       |
| Konsolidierungen                                                                                                       | – 53       |
| <b>Erlöse aus der Veräußerung von Tochterunternehmen, abzüglich veräußerter Barreserve und anderer liquider Mittel</b> | <b>– 7</b> |

**2009 Wesentliche Abgänge****Dresdner Bank AG**

Der Eigentumsübergang der Dresdner Bank auf die Commerzbank wurde am 12. Januar 2009 vollzogen. Entsprechend der Vereinbarung erhielt die Allianz eine Barzahlung von 3,215 Mrd € zuzüglich der Barreserve und anderer liquider Mittel des Asset Managers cominvest in Höhe von 48 Mio €.

Dieser Verkauf, abzüglich der veräußerten Barreserven und anderer liquider Mittel, hat sich auf die Kapitalflussrechnung für das Geschäftsjahr 2009 wie folgt ausgewirkt:

|                                                                                                                        | Mio €           |
|------------------------------------------------------------------------------------------------------------------------|-----------------|
| Vermögenswerte von Veräußerungsgruppen, die als zur Veräußerung gehalten klassifiziert werden                          | 417 874         |
| abzüglich: Barreserve und andere liquide Mittel                                                                        | – 30 238        |
| Verbindlichkeiten von Veräußerungsgruppen, die als zur Veräußerung gehalten klassifiziert werden                       | – 410 469       |
| Anteile anderer Gesellschafter                                                                                         | – 1 738         |
| Eigene Aktien                                                                                                          | 69              |
| abzüglich nicht liquider Bestandteile der erhaltenen Gegenleistung:                                                    |                 |
| Commerzbank Aktien                                                                                                     | – 746           |
| Vertriebsvereinbarung                                                                                                  | – 480           |
| Cominvest (abzüglich der erworbenen Barreserve)                                                                        | – 652           |
| Konsolidierungen                                                                                                       | – 595           |
| <b>Erlöse aus der Veräußerung von Tochterunternehmen, abzüglich veräußerter Barreserve und anderer liquider Mittel</b> | <b>– 26 975</b> |

**Akquisitionen und Veräußerungen wesentlicher Anteile anderer Gesellschafter**

|                                                           | Zeitpunkt der Akquisition | Änderung Kapitalanteil | Anschaffungskosten | Minderung des Eigenkapitals vor Minderheiten | Minderung der Anteile anderer Gesellschafter am Konzern-eigenkapital |
|-----------------------------------------------------------|---------------------------|------------------------|--------------------|----------------------------------------------|----------------------------------------------------------------------|
|                                                           |                           | %                      | Mio €              | Mio €                                        | Mio €                                                                |
| <b>2010</b>                                               |                           |                        |                    |                                              |                                                                      |
| Allianz Seguros S.A., Sao Paulo                           | 14.01.2010                | 14,0                   | 77                 | – 14                                         | – 63                                                                 |
| <b>2009</b>                                               |                           |                        |                    |                                              |                                                                      |
| Roland Holding GmbH, München                              | 10.11.2009                | 12,0                   | 50                 | – 28                                         | – 22                                                                 |
| <b>2008</b>                                               |                           |                        |                    |                                              |                                                                      |
| Allianz Lebensversicherungs-Aktiengesellschaft, Stuttgart | während 2008              | 5,2                    | 425                | – 352                                        | – 73                                                                 |
| Allianz Global Investors of America L.P., Dover/Delaware  | 28.02.2008                | 2,5                    | 122                | – 122                                        | —                                                                    |
| Russian People's Insurance Society „ROSNO“, Moskau        | 27.10.2008                | 2,6                    | 34                 | – 30                                         | – 4                                                                  |
| Allianz Mena Holding Bermuda, Beirut                      | 25.08.2008                | 30,3                   | 26                 | – 16                                         | – 10                                                                 |

## 6 Segmentberichterstattung

### Bestimmung berichtspflichtiger Segmente

Die geschäftlichen Aktivitäten des Allianz Konzerns sind zunächst nach Produkten und Art der Dienstleistung untergliedert: Versicherung, Asset Management und Corporate und Sonstiges. Aufgrund der unterschiedlichen Produktarten, Risiken und Kapitalzuordnungen sind die Versicherungsaktivitäten des Weiteren in die Bereiche Schaden-Unfall und Leben/Kranken unterteilt. In Übereinstimmung mit den Zuständigkeiten der Mitglieder des Vorstands sind die Versicherungsbereiche in die folgenden berichtspflichtigen Segmente unterteilt:

- German Speaking Countries
- Europe incl. South America
- NAFTA Markets
- Global Insurance Lines & Anglo Markets
- Growth Markets
- Assistance (Mondial) (nur Schaden-Unfall)

Asset Management bildet ein separates berichtspflichtiges Segment. Aufgrund der unterschiedlichen Arten von Produkten, Risiken und Kapitalzuordnungen sind die Aktivitäten des Bereichs Corporate und Sonstiges in drei berichtspflichtige Segmente unterteilt: Holding & Treasury, Bankgeschäft und Alternative Investments. Insgesamt hat somit der Allianz Konzern in Übereinstimmung mit IFRS 8, Operative Segmente, 15 berichtspflichtige Segmente identifiziert.

Im Folgenden sind die Produkte und Dienstleistungen, mit denen die berichtspflichtigen Segmente Erträge erzielen, aufgelistet.

#### Schaden-Unfall

Im Bereich Schaden-Unfall bieten die berichtspflichtigen Segmente eine breite Auswahl an Versicherungsprodukten für Privat- und Firmenkunden an, z. B. Kraftfahrzeughaftpflicht- und Kasko-, Unfall-, Haftpflicht-, Feuer- und Gebäude-, Rechtsschutz-, Kredit- und Reiseversicherungen.

#### Leben/Kranken

Im Bereich Leben/Kranken bieten die berichtspflichtigen Segmente eine Vielzahl von Lebens- und Krankenversicherungsprodukten für Einzelpersonen und Gruppen an,

einschließlich Kapitallebens-, Risikolebens- und Rentenversicherungen, fondsgebundene und anlageorientierte Produkte sowie private Krankenvoll- und -zusatzversicherungen und Pflegeversicherungen.

### Asset Management

Das berichtspflichtige Segment Asset Management tritt als globaler Anbieter von Asset-Management-Produkten für institutionelle Anleger und Privatkunden sowie von Dienstleistungen für Investoren auf Rechnung Dritter auf; ferner bietet dieser Geschäftsbereich Asset-Management-Dienstleistungen für die Versicherer des Allianz Konzerns an. Die Produkte für private und institutionelle Kunden beinhalten Aktien- und Rentenfonds sowie alternative Anlagen. Die wichtigsten Asset-Management-Märkte sind die USA und Deutschland sowie Frankreich, Italien und der asiatisch-pazifische Raum.

### Corporate und Sonstiges

Die Aktivitäten des berichtspflichtigen Segments Holding & Treasury enthalten die Steuerung und die Unterstützung der Geschäfte des Allianz Konzerns durch die Bereiche Strategie, Risikomanagement, Corporate Finance, Treasury, Finanzcontrolling, Kommunikation, Recht, Personal und IT.

Das berichtspflichtige Segment Bankgeschäft besteht aus den Bankaktivitäten in Deutschland, Frankreich, Italien sowie Zentral- und Osteuropa. Die Banken bieten eine Vielzahl von Produkten für Geschäftskunden und insbesondere Privatkunden an.

Das berichtspflichtige Segment Alternative Investments bietet hauptsächlich für die Versicherer des Allianz Konzerns globale Alternative-Investment-Management-Dienstleistungen in den Bereichen Private Equity, Immobilien, erneuerbare Energien und Infrastruktur an. Das berichtspflichtige Segment Alternative Investments umfasst zudem bestimmte vollkonsolidierte Private-Equity-Beteiligungen.

Transferpreise zwischen berichtspflichtigen Segmenten werden wie Geschäfte mit Dritten auf der Basis von Marktpreisen ermittelt. Transaktionen zwischen berichtspflichtigen Segmenten werden in der Konsolidierung eliminiert. Für das berichtspflichtige Segment Asset Management werden die Zinserträge und Zinsaufwendungen netto als Zinsüberschuss ausgewiesen.



### Bewertungsgrundlage für das Ergebnis der berichtspflichtigen Segmente

Um den finanziellen Erfolg der berichtspflichtigen Segmente und des Allianz Konzerns als Ganzes zu beurteilen, zieht der Allianz Konzern als Kriterium das operative Ergebnis heran. Das operative Ergebnis stellt den Anteil des Ergebnisses vor Ertragsteuern heraus, der auf das laufende Kerngeschäft des Allianz Konzerns zurückzuführen ist. Der Allianz Konzern ist davon überzeugt, dass diese Kennziffer für Anleger nützlich und aussagekräftig ist, da sie das Verständnis hinsichtlich der operativen Profitabilität erweitert und die Vergleichbarkeit über die Zeit verbessert.

Zum besseren Verständnis des laufenden Geschäfts schließt der Allianz Konzern grundsätzlich folgende nichtoperative Positionen aus:

- akquisitionsbedingte Aufwendungen und Abschreibungen auf immaterielle Vermögenswerte, weil diese Positionen aus Unternehmenszusammenschlüssen resultieren;
- Restrukturierungsaufwendungen, da der Allianz Konzern deren Anfall weitgehend zeitlich steuern kann. Demzufolge gewährt ihr Ausschluss einen besseren Einblick in die Geschäftsentwicklung;
- Zinsaufwendungen für externe Fremdfinanzierung, da diese mit der Kapitalstruktur des Allianz Konzerns zusammenhängen;
- Erträge aus vollkonsolidierten Private-Equity-Beteiligungen (netto), da es sich hierbei um Industriebeteiligungen handelt, die nicht zum operativen Kerngeschäft des Allianz Konzerns zählen;
- Erträge aus erfolgswirksam zum Zeitwert bewerteten Finanzaktiva und Finanzpassiva (netto), da diese nicht die langfristige Ertragskraft des Allianz Konzerns widerspiegeln;
- realisierte Gewinne und Verluste (netto) sowie Wertminderungen auf Finanzanlagen (netto), da es weitgehend im Ermessen des Allianz Konzerns steht, zu welchem Zeitpunkt solche Gewinne oder Verluste aus Verkäufen realisiert werden, und Wertminderungen stark von den Entwicklungen an den Kapitalmärkten und emittentenspezifischen Vorgängen abhängen, die der Allianz Konzern wenig oder überhaupt nicht beeinflussen kann und die im Zeitverlauf hohen Schwankungen unterliegen können.

Im Gegensatz zu dieser generellen Regel werden folgende Ausnahmen angewendet:

- In allen Segmenten werden Erträge aus erfolgswirksam zum Zeitwert bewerteten Finanzaktiva und Finanzpassiva (netto) als operatives Ergebnis behandelt, wenn diese Erträge im Zusammenhang mit operativen Geschäften stehen.
- Zudem werden die Erträge aus dem Handelsergebnis in den Bereichen Asset Management und Bankgeschäft grundsätzlich als operatives Ergebnis behandelt.
- Im Lebens- und Krankenversicherungsgeschäft sowie bei Unfallversicherungsprodukten mit Beitragsrückerstattung des Schaden- und Unfallversicherungsgeschäfts werden alle oben aufgeführten Positionen im operativen Ergebnis behalten, sofern der Versicherungsnehmer an den Ergebnissen beteiligt wird. Dies ist auch relevant, wenn der Versicherungsnehmer an Steuererträgen des Allianz Konzerns beteiligt wird. Die IFRS verlangen, dass in der Konzern-Gewinn- und Verlustrechnung alle Steuererträge in der Zeile Ertragsteuern ausgewiesen werden, selbst wenn diese den Versicherungsnehmern gehören. In der Segmentberichterstattung werden die Steuererträge umgegliedert und im operativen Ergebnis gezeigt, um die Beteiligung der Versicherungsnehmer an den Steuererträgen korrekt darzustellen.

Das operative Ergebnis ist kein Ersatz für das Ergebnis aus fortzuführenden Geschäftsbereichen vor Ertragsteuern und den Jahresüberschuss gemäß IFRS, sondern sollte als ergänzende Information hierzu gesehen werden.

### Neueste organisatorische Änderungen

Mit Beginn des Jahres 2010 hat der Allianz Konzern seine Versicherungsaktivitäten in Übereinstimmung mit der Veränderung der Zuständigkeiten der Mitglieder des Vorstands neu organisiert. Die Versicherungsaktivitäten in den Bereichen Schaden-Unfall und Leben/Kranken in Europa wurden zusammengefasst, während Global Insurance Lines & Anglo Markets getrennt von den NAFTA Markets ausgewiesen werden. Des Weiteren wird Assistance (Mondial) als separates berichtspflichtiges Segment im Bereich Schaden-Unfall ausgewiesen. Um die Veränderung in der Zusammensetzung der berichtspflichtigen Segmente des Allianz Konzerns widerzuspiegeln, wurden die bisher berichteten Informationen rückwirkend angepasst.

## Konzernbilanz, gegliedert nach Geschäftsbereichen

| Stand 31. Dezember                                                                                                                         | Schaden-Unfall |                | Leben/Kranken  |                |
|--------------------------------------------------------------------------------------------------------------------------------------------|----------------|----------------|----------------|----------------|
|                                                                                                                                            | 2010<br>Mio €  | 2009<br>Mio €  | 2010<br>Mio €  | 2009<br>Mio €  |
| <b>AKTIVA</b>                                                                                                                              |                |                |                |                |
| Barreserve und andere liquide Mittel                                                                                                       | 2 520          | 2 281          | 4 482          | 2 478          |
| Erfolgswirksam zum Zeitwert bewertete Finanzaktiva                                                                                         | 1 852          | 2 100          | 6 867          | 11 269         |
| Finanzanlagen                                                                                                                              | 82 786         | 80 401         | 247 568        | 213 036        |
| Forderungen an Kreditinstitute und Kunden                                                                                                  | 17 697         | 16 325         | 97 377         | 100 316        |
| Finanzaktiva aus fondsgebundenen Verträgen                                                                                                 | —              | —              | 64 847         | 56 963         |
| Rückversicherungsaktiva                                                                                                                    | 8 365          | 8 885          | 4 793          | 4 691          |
| Aktivierte Abschlusskosten                                                                                                                 | 4 121          | 3 789          | 16 460         | 16 357         |
| Aktive Steuerabgrenzung                                                                                                                    | 1 110          | 1 329          | 208            | 316            |
| Übrige Aktiva                                                                                                                              | 21 738         | 19 980         | 16 424         | 16 024         |
| Langfristige Vermögenswerte und Vermögenswerte von Veräußerungsgruppen, die als zur Veräußerung gehalten klassifiziert werden <sup>1</sup> | 28             | —              | 24             | —              |
| Immaterielle Vermögenswerte                                                                                                                | 2 308          | 2 361          | 2 346          | 2 306          |
| <b>Summe Aktiva</b>                                                                                                                        | <b>142 525</b> | <b>137 451</b> | <b>461 396</b> | <b>423 756</b> |

| Stand 31. Dezember                                                                                            | Schaden-Unfall |               | Leben/Kranken  |                |
|---------------------------------------------------------------------------------------------------------------|----------------|---------------|----------------|----------------|
|                                                                                                               | 2010<br>Mio €  | 2009<br>Mio € | 2010<br>Mio €  | 2009<br>Mio €  |
| <b>PASSIVA</b>                                                                                                |                |               |                |                |
| Erfolgswirksam zum Zeitwert bewertete Finanzpassiva                                                           | 79             | 68            | 4 905          | 4 689          |
| Verbindlichkeiten gegenüber Kreditinstituten und Kunden                                                       | 1 368          | 426           | 796            | 861            |
| Beitragsüberträge                                                                                             | 14 206         | 13 471        | 2 291          | 2 210          |
| Rückstellungen für noch nicht abgewickelte Versicherungsfälle                                                 | 57 509         | 55 715        | 8 984          | 8 738          |
| Rückstellungen für Versicherungs- und Investmentverträge                                                      | 9 338          | 9 159         | 340 539        | 314 631        |
| Finanzpassiva aus fondsgebundenen Verträgen                                                                   | —              | —             | 64 847         | 56 963         |
| Passive Steuerabgrenzung                                                                                      | 2 461          | 2 656         | 1 559          | 1 286          |
| Andere Verbindlichkeiten                                                                                      | 16 756         | 15 642        | 15 124         | 14 131         |
| Verbindlichkeiten von Veräußerungsgruppen, die als zur Veräußerung gehalten klassifiziert werden <sup>2</sup> | —              | —             | —              | —              |
| Verbriefte Verbindlichkeiten                                                                                  | —              | 139           | 2              | 2              |
| Genussrechtskapital und nachrangige Verbindlichkeiten                                                         | 398            | 846           | 65             | 65             |
| <b>Summe Fremdkapital</b>                                                                                     | <b>102 115</b> | <b>98 122</b> | <b>439 112</b> | <b>403 576</b> |

1 Enthält die Vermögenswerte der Veräußerungsgruppe Allianz Bank Polska S.A., Warschau, in Corporate und Sonstiges, sowie als zur Veräußerung gehalten klassifizierte langfristige Vermögenswerte u.a. der Allianz IARD S.A., Paris, in Schaden-Unfall sowie der Allianz Vie S.A., Paris, in Leben/Kranken. Siehe Anmerkung 14 für weitere Informationen.

2 Enthält die Verbindlichkeiten der Veräußerungsgruppe Allianz Bank Polska S.A., Warschau, in Corporate und Sonstiges. Siehe Anmerkung 14 für weitere Informationen.

| Asset Management |               | Corporate und Sonstiges |                | Konsolidierung   |                  | Konzern        |                |
|------------------|---------------|-------------------------|----------------|------------------|------------------|----------------|----------------|
| 2010<br>Mio €    | 2009<br>Mio € | 2010<br>Mio €           | 2009<br>Mio €  | 2010<br>Mio €    | 2009<br>Mio €    | 2010<br>Mio €  | 2009<br>Mio €  |
| 899              | 701           | 1 045                   | 1 089          | – 199            | – 460            | 8 747          | 6 089          |
| 729              | 731           | 826                     | 621            | – 431            | – 400            | 9 843          | 14 321         |
| 1 208            | 1 103         | 90 039                  | 85 732         | – 86 983         | – 86 020         | 334 618        | 294 252        |
| 358              | 276           | 16 443                  | 20 745         | – 9 197          | – 8 666          | 122 678        | 128 996        |
| —                | —             | —                       | —              | —                | —                | 64 847         | 56 963         |
| —                | —             | —                       | —              | – 23             | – 17             | 13 135         | 13 559         |
| 152              | 149           | —                       | —              | —                | —                | 20 733         | 20 295         |
| 271              | 169           | 1 372                   | 1 272          | – 298            | – 367            | 2 663          | 2 719          |
| 3 725            | 3 770         | 5 525                   | 5 636          | – 13 411         | – 12 363         | 34 001         | 33 047         |
| —                | —             | 248                     | —              | – 1              | —                | 299            | —              |
| 7 065            | 6 901         | 1 662                   | 1 908          | —                | —                | 13 381         | 13 476         |
| <b>14 407</b>    | <b>13 800</b> | <b>117 160</b>          | <b>117 003</b> | <b>– 110 543</b> | <b>– 108 293</b> | <b>624 945</b> | <b>583 717</b> |

| Asset Management |               | Corporate und Sonstiges |               | Konsolidierung     |                 | Konzern        |                |
|------------------|---------------|-------------------------|---------------|--------------------|-----------------|----------------|----------------|
| 2010<br>Mio €    | 2009<br>Mio € | 2010<br>Mio €           | 2009<br>Mio € | 2010<br>Mio €      | 2009<br>Mio €   | 2010<br>Mio €  | 2009<br>Mio €  |
| —                | —             | 461                     | 534           | – 432              | – 400           | 5 013          | 4 891          |
| 876              | 739           | 20 499                  | 21 236        | – 2 384            | – 2 014         | 21 155         | 21 248         |
| —                | —             | —                       | —             | —                  | – 5             | 16 497         | 15 676         |
| —                | —             | —                       | —             | – 19               | – 12            | 66 474         | 64 441         |
| —                | —             | 42                      | 161           | – 126              | – 150           | 349 793        | 323 801        |
| —                | —             | —                       | —             | —                  | —               | 64 847         | 56 963         |
| 80               | 93            | 174                     | 206           | – 298              | – 367           | 3 976          | 3 874          |
| 3 364            | 3 396         | 15 333                  | 16 108        | – 17 364           | – 15 992        | 33 213         | 33 285         |
| —                | —             | 241                     | —             | – 53               | —               | 188            | —              |
| —                | —             | 14 448                  | 14 134        | – 6 221            | – 6 313         | 8 229          | 7 962          |
| 14               | 14            | 8 778                   | 8 679         | – 257              | – 257           | 8 998          | 9 347          |
| <b>4 334</b>     | <b>4 242</b>  | <b>59 976</b>           | <b>61 058</b> | <b>– 27 154</b>    | <b>– 25 510</b> | <b>578 383</b> | <b>541 488</b> |
|                  |               |                         |               | Summe Eigenkapital |                 | <b>46 562</b>  | <b>42 229</b>  |
|                  |               |                         |               | Summe Passiva      |                 | <b>624 945</b> | <b>583 717</b> |

## Gesamter Umsatz sowie Überleitung vom Operativen Ergebnis auf den Jahresüberschuss (-fehlbetrag), gegliedert nach Geschäftsbereichen

|                                                                                                          | Schaden-Unfall |               |               | Leben/Kranken |               |               |
|----------------------------------------------------------------------------------------------------------|----------------|---------------|---------------|---------------|---------------|---------------|
|                                                                                                          | 2010<br>Mio €  | 2009<br>Mio € | 2008<br>Mio € | 2010<br>Mio € | 2009<br>Mio € | 2008<br>Mio € |
| <b>Gesamter Umsatz<sup>1</sup></b>                                                                       | <b>43 895</b>  | <b>42 523</b> | <b>43 387</b> | <b>57 098</b> | <b>50 773</b> | <b>45 615</b> |
| Verdiente Beiträge (netto)                                                                               | 39 303         | 37 828        | 38 213        | 24 034        | 21 964        | 22 181        |
| <b>Operatives Kapitalanlageergebnis</b>                                                                  |                |               |               |               |               |               |
| Zinserträge und ähnliche Erträge                                                                         | 3 680          | 3 612         | 4 477         | 15 085        | 13 971        | 13 772        |
| Operative Erträge aus erfolgswirksam zum Zeitwert bewerteten Finanzaktiva und Finanzpassiva (netto)      | 18             | 118           | 9             | 19            | 636           | 405           |
| Operative realisierte Gewinne/Verluste (netto)                                                           | 42             | 57            | 37            | 2 125         | 1 755         | 874           |
| Zinsaufwendungen ohne Zinsaufwendungen für externe Fremdfinanzierung                                     | – 92           | – 104         | – 295         | – 103         | – 127         | – 283         |
| Operative Wertminderungen auf Finanzanlagen (netto)                                                      | – 9            | – 75          | – 437         | – 434         | – 1 663       | – 5 747       |
| Aufwendungen für Finanzanlagen                                                                           | – 240          | – 238         | – 254         | – 704         | – 622         | – 583         |
| <b>Zwischensumme</b>                                                                                     | <b>3 399</b>   | <b>3 370</b>  | <b>3 537</b>  | <b>15 988</b> | <b>13 950</b> | <b>8 438</b>  |
| Provisions- und Dienstleistungserträge                                                                   | 1 099          | 1 075         | 1 247         | 539           | 491           | 571           |
| Sonstige Erträge                                                                                         | 22             | 19            | 271           | 81            | 17            | 140           |
| Schadenaufwendungen (netto)                                                                              | – 27 141       | – 26 320      | – 25 986      | – 18 955      | – 19 326      | – 19 673      |
| Veränderung der Rückstellungen für Versicherungs- und Investmentverträge (netto)                         | – 300          | – 355         | 3             | – 13 329      | – 8 499       | – 5 360       |
| Risikovorsorge im Kreditgeschäft                                                                         | —              | – 18          | – 17          | 6             | – 75          | – 13          |
| Abschluss- und Verwaltungsaufwendungen (netto) ohne akquisitionsbedingte Aufwendungen                    | – 11 044       | – 10 540      | – 10 478      | – 5 175       | – 5 591       | – 4 691       |
| Provisions- und Dienstleistungsaufwendungen                                                              | – 1 024        | – 995         | – 1 141       | – 258         | – 246         | – 253         |
| Operative Restrukturierungsaufwendungen                                                                  | —              | —             | —             | – 8           | – 15          | 1             |
| Sonstige Aufwendungen                                                                                    | – 10           | —             | – 2           | – 55          | —             | – 7           |
| Umgliederung von Steuererträgen                                                                          | —              | —             | —             | —             | —             | —             |
| <b>Operatives Ergebnis</b>                                                                               | <b>4 304</b>   | <b>4 064</b>  | <b>5 647</b>  | <b>2 868</b>  | <b>2 670</b>  | <b>1 334</b>  |
| <b>Nichtoperatives Kapitalanlageergebnis</b>                                                             |                |               |               |               |               |               |
| Nichtoperative Erträge aus erfolgswirksam zum Zeitwert bewerteten Finanzaktiva und Finanzpassiva (netto) | – 64           | – 45          | 44            | – 40          | – 22          | – 26          |
| Nichtoperative realisierte Gewinne/Verluste (netto)                                                      | 605            | 732           | 2 349         | 36            | 63            | – 39          |
| Nichtoperative Wertminderungen auf Finanzanlagen (netto)                                                 | – 191          | – 519         | – 2 012       | – 47          | – 76          | – 414         |
| <b>Zwischensumme</b>                                                                                     | <b>350</b>     | <b>168</b>    | <b>381</b>    | <b>– 51</b>   | <b>– 35</b>   | <b>– 479</b>  |
| Erträge aus vollkonsolidierten Private-Equity-Beteiligungen (netto)                                      | —              | —             | —             | —             | —             | – 2           |
| Zinsaufwendungen für externe Fremdfinanzierung                                                           | —              | —             | —             | —             | —             | —             |
| Akquisitionsbedingte Aufwendungen                                                                        | —              | —             | —             | —             | —             | —             |
| Abschreibungen auf immaterielle Vermögenswerte                                                           | – 156          | – 21          | – 17          | – 3           | – 3           | – 3           |
| Nichtoperative Restrukturierungsaufwendungen                                                             | – 178          | – 69          | – 75          | – 31          | – 19          | – 51          |
| Umgliederung von Steuererträgen                                                                          | —              | —             | —             | —             | —             | —             |
| <b>Nichtoperative Positionen</b>                                                                         | <b>16</b>      | <b>78</b>     | <b>289</b>    | <b>– 85</b>   | <b>– 57</b>   | <b>– 535</b>  |
| <b>Ergebnis aus fortzuführenden Geschäftsbereichen vor Ertragsteuern</b>                                 | <b>4 320</b>   | <b>4 142</b>  | <b>5 936</b>  | <b>2 783</b>  | <b>2 613</b>  | <b>799</b>    |
| Ertragsteuern                                                                                            | – 1 216        | – 1 363       | – 1 489       | – 934         | – 656         | – 304         |
| <b>Jahresüberschuss (-fehlbetrag) aus fortzuführenden Geschäftsbereichen</b>                             | <b>3 104</b>   | <b>2 779</b>  | <b>4 447</b>  | <b>1 849</b>  | <b>1 957</b>  | <b>495</b>    |
| <b>Jahresüberschuss (-fehlbetrag) aus aufgegebenen Geschäftsbereichen, nach Ertragsteuern</b>            | <b>—</b>       | <b>—</b>      | <b>—</b>      | <b>—</b>      | <b>—</b>      | <b>—</b>      |
| <b>Jahresüberschuss (-fehlbetrag)</b>                                                                    | <b>3 104</b>   | <b>2 779</b>  | <b>4 447</b>  | <b>1 849</b>  | <b>1 957</b>  | <b>495</b>    |
| <b>Jahresüberschuss (-fehlbetrag)</b>                                                                    |                |               |               |               |               |               |
| auf Anteile anderer Gesellschafter entfallend                                                            | 161            | 55            | 112           | 72            | 48            | 86            |
| auf Anteilseigner entfallend                                                                             | 2 943          | 2 724         | 4 335         | 1 777         | 1 909         | 409           |

<sup>1</sup> Der gesamte Umsatz umfasst die gesamten Bruttobeitragsentnahmen im Schaden- und Unfall- sowie im Lebens- und Krankenversicherungsgeschäft, die operativen Erträge aus dem Asset-Management-Geschäft und den gesamten Umsatz aus Corporate und Sonstiges (Bankgeschäft).

## Konzernabschluss



## Berichtspflichtige Segmente – Schaden-Unfall

|                                                                                                     | German Speaking Countries |                |                | Europe incl. South America <sup>1</sup> |                 |                 |
|-----------------------------------------------------------------------------------------------------|---------------------------|----------------|----------------|-----------------------------------------|-----------------|-----------------|
|                                                                                                     | 2010<br>Mio €             | 2009<br>Mio €  | 2008<br>Mio €  | 2010<br>Mio €                           | 2009<br>Mio €   | 2008<br>Mio €   |
| <b>Bruttobeiträge</b>                                                                               | <b>11 292</b>             | <b>11 432</b>  | <b>11 485</b>  | <b>13 094</b>                           | <b>12 950</b>   | <b>13 745</b>   |
| Abgegebene Rückversicherungsbeiträge                                                                | – 1 956                   | – 2 133        | – 2 130        | – 1 356                                 | – 1 452         | – 1 793         |
| Veränderung in Beitragsüberträgen                                                                   | 18                        | – 58           | – 75           | – 18                                    | 100             | 131             |
| <b>Verdiente Beiträge (netto)</b>                                                                   | <b>9 354</b>              | <b>9 241</b>   | <b>9 280</b>   | <b>11 720</b>                           | <b>11 598</b>   | <b>12 083</b>   |
| Zinserträge und ähnliche Erträge                                                                    | 1 180                     | 1 185          | 1 500          | 1 037                                   | 1 002           | 1 414           |
| Operative Erträge aus erfolgswirksam zum Zeitwert bewerteten Finanzaktiva und Finanzpassiva (netto) | 28                        | 37             | 8              | 60                                      | 115             | – 8             |
| Operative realisierte Gewinne/Verluste (netto)                                                      | 42                        | 57             | 37             | —                                       | —               | —               |
| Provisions- und Dienstleistungserträge                                                              | 131                       | 182            | 350            | 33                                      | 49              | 55              |
| Sonstige Erträge                                                                                    | 12                        | 4              | 242            | 1                                       | 10              | 14              |
| <b>Operative Erträge</b>                                                                            | <b>10 747</b>             | <b>10 706</b>  | <b>11 417</b>  | <b>12 851</b>                           | <b>12 774</b>   | <b>13 558</b>   |
| Schadenaufwendungen (netto)                                                                         | – 6 838                   | – 6 537        | – 6 453        | – 8 456                                 | – 8 566         | – 8 496         |
| Veränderung der Rückstellungen für Versicherungs- und Investmentverträge (netto)                    | – 280                     | – 312          | 56             | – 1                                     | – 2             | – 11            |
| Zinsaufwendungen                                                                                    | – 79                      | – 71           | – 166          | – 51                                    | – 82            | – 178           |
| Risikovorsorge im Kreditgeschäft                                                                    | —                         | – 9            | – 12           | —                                       | —               | – 1             |
| Operative Wertminderungen auf Finanzanlagen (netto)                                                 | – 9                       | – 75           | – 437          | —                                       | —               | —               |
| Aufwendungen für Finanzanlagen                                                                      | – 89                      | – 80           | – 93           | – 94                                    | – 96            | – 111           |
| Abschluss- und Verwaltungsaufwendungen (netto)                                                      | – 2 475                   | – 2 497        | – 2 372        | – 3 083                                 | – 3 052         | – 3 143         |
| Provisions- und Dienstleistungsaufwendungen                                                         | – 125                     | – 161          | – 337          | – 30                                    | – 50            | – 71            |
| Sonstige Aufwendungen                                                                               | – 9                       | —              | —              | —                                       | —               | —               |
| <b>Operative Aufwendungen</b>                                                                       | <b>– 9 904</b>            | <b>– 9 742</b> | <b>– 9 814</b> | <b>– 11 715</b>                         | <b>– 11 848</b> | <b>– 12 011</b> |
| <b>Operatives Ergebnis</b>                                                                          | <b>843</b>                | <b>964</b>     | <b>1 603</b>   | <b>1 136</b>                            | <b>926</b>      | <b>1 547</b>    |
| Schadenquote <sup>3</sup> in %                                                                      | 73,1                      | 70,8           | 69,5           | 72,2                                    | 73,9            | 70,3            |
| Kostenquote <sup>4</sup> in %                                                                       | 26,5                      | 27,0           | 25,6           | 26,3                                    | 26,3            | 26,0            |
| <b>Combined Ratio<sup>5</sup> in %</b>                                                              | <b>99,6</b>               | <b>97,8</b>    | <b>95,1</b>    | <b>98,5</b>                             | <b>100,2</b>    | <b>96,3</b>     |

<sup>1</sup> In 2010 wurde das Industrieversicherungsgeschäft in Spanien zur AGCS umgegliedert. Vorjahreszahlen wurden nicht angepasst.

<sup>2</sup> Ab 2010 wird die Allianz Fire and Marine Insurance Japan Ltd. innerhalb der AGCS ausgewiesen. Vorjahreszahlen wurden nicht angepasst.

<sup>3</sup> Verhältnis von Schadenaufwendungen (netto) zu verdienten Beiträgen (netto)

<sup>4</sup> Verhältnis von Abschluss- und Verwaltungsaufwendungen (netto) zu verdienten Beiträgen (netto)

<sup>5</sup> Verhältnis von Abschluss- und Verwaltungsaufwendungen (netto) sowie Schadenaufwendungen (netto) zu verdienten Beiträgen (netto)

<sup>6</sup> Darstellung nicht aussagekräftig

| NAFTA Markets |               |               | Global Insurance Lines & Anglo Markets <sup>1,2</sup> |               |               | Growth Markets <sup>2</sup> |               |               | Assistance (Mondial) |               |               |
|---------------|---------------|---------------|-------------------------------------------------------|---------------|---------------|-----------------------------|---------------|---------------|----------------------|---------------|---------------|
| 2010<br>Mio € | 2009<br>Mio € | 2008<br>Mio € | 2010<br>Mio €                                         | 2009<br>Mio € | 2008<br>Mio € | 2010<br>Mio €               | 2009<br>Mio € | 2008<br>Mio € | 2010<br>Mio €        | 2009<br>Mio € | 2008<br>Mio € |
| 3 576         | 3 713         | 4 625         | 15 102                                                | 13 666        | 12 563        | 3 191                       | 3 156         | 3 520         | 1 540                | 1 355         | 1 228         |
| -895          | -847          | -1 336        | -3 352                                                | -3 108        | -2 617        | -690                        | -785          | -876          | -9                   | -9            | -10           |
| 119           | 220           | 91            | -237                                                  | -332          | -246          | -84                         | -12           | -81           | -44                  | -39           | -22           |
| 2 800         | 3 086         | 3 380         | 11 513                                                | 10 226        | 9 700         | 2 417                       | 2 359         | 2 563         | 1 487                | 1 307         | 1 196         |
| 343           | 350           | 351           | 1 016                                                 | 961           | 1 077         | 160                         | 166           | 177           | 24                   | 28            | 39            |
| —             | —             | —             | -71                                                   | -40           | 9             | 1                           | 1             | 4             | -2                   | 2             | -8            |
| —             | —             | —             | —                                                     | —             | —             | —                           | —             | —             | —                    | —             | —             |
| —             | —             | —             | 586                                                   | 528           | 578           | 60                          | 59            | 62            | 358                  | 336           | 371           |
| —             | —             | —             | 4                                                     | —             | 10            | 5                           | 5             | 5             | —                    | —             | —             |
| 3 143         | 3 436         | 3 731         | 13 048                                                | 11 675        | 11 374        | 2 643                       | 2 590         | 2 811         | 1 867                | 1 673         | 1 598         |
| -1 955        | -2 152        | -2 510        | -7 428                                                | -6 859        | -6 306        | -1 570                      | -1 410        | -1 523        | -885                 | -785          | -689          |
| —             | -1            | -2            | -18                                                   | -24           | -39           | -1                          | -15           | -1            | —                    | -1            | —             |
| —             | —             | —             | -36                                                   | -34           | -31           | -6                          | -7            | -14           | -1                   | -1            | -1            |
| —             | -1            | -1            | —                                                     | —             | —             | —                           | -8            | -3            | —                    | —             | —             |
| —             | —             | —             | —                                                     | —             | —             | —                           | —             | —             | —                    | —             | —             |
| -5            | -7            | -9            | -38                                                   | -39           | -28           | -14                         | -11           | -6            | -1                   | —             | -1            |
| -905          | -920          | -910          | -3 174                                                | -2 816        | -2 746        | -870                        | -797          | -875          | -536                 | -463          | -428          |
| —             | —             | —             | -510                                                  | -450          | -462          | -75                         | -75           | -63           | -347                 | -328          | -372          |
| —             | —             | —             | —                                                     | —             | -2            | -1                          | —             | —             | —                    | —             | —             |
| -2 865        | -3 081        | -3 432        | -11 204                                               | -10 222       | -9 614        | -2 537                      | -2 323        | -2 485        | -1 770               | -1 578        | -1 491        |
| 278           | 355           | 299           | 1 844                                                 | 1 453         | 1 760         | 106                         | 267           | 326           | 97                   | 95            | 107           |
| 69,8          | 69,7          | 74,3          | 64,5                                                  | 67,1          | 65,0          | 65,0                        | 59,8          | 59,4          | 59,6                 | 60,1          | 57,6          |
| 32,3          | 29,8          | 26,9          | 27,6                                                  | 27,5          | 28,3          | 36,0                        | 33,8          | 34,2          | 36,0                 | 35,4          | 35,8          |
| 102,1         | 99,5          | 101,2         | 92,1                                                  | 94,6          | 93,3          | 101,0                       | 93,6          | 93,6          | 95,6                 | 95,5          | 93,4          |

|                                                                                                     | Konsolidierung       |                      |                      | Schaden-Unfall  |                 |                 |
|-----------------------------------------------------------------------------------------------------|----------------------|----------------------|----------------------|-----------------|-----------------|-----------------|
|                                                                                                     | 2010<br>Mio €        | 2009<br>Mio €        | 2008<br>Mio €        | 2010<br>Mio €   | 2009<br>Mio €   | 2008<br>Mio €   |
| <b>Bruttobeiträge</b>                                                                               | <b>– 3 900</b>       | <b>– 3 749</b>       | <b>– 3 779</b>       | <b>43 895</b>   | <b>42 523</b>   | <b>43 387</b>   |
| Abgegebene Rückversicherungsbeiträge                                                                | 3 912                | 3 760                | 3 790                | – 4 346         | – 4 574         | – 4 972         |
| Veränderung in Beitragsüberträgen                                                                   | —                    | —                    | —                    | – 246           | – 121           | – 202           |
| <b>Verdiente Beiträge (netto)</b>                                                                   | <b>12</b>            | <b>11</b>            | <b>11</b>            | <b>39 303</b>   | <b>37 828</b>   | <b>38 213</b>   |
| Zinserträge und ähnliche Erträge                                                                    | – 80                 | – 80                 | – 81                 | 3 680           | 3 612           | 4 477           |
| Operative Erträge aus erfolgswirksam zum Zeitwert bewerteten Finanzaktiva und Finanzpassiva (netto) | 2                    | 3                    | 4                    | 18              | 118             | 9               |
| Operative realisierte Gewinne/Verluste (netto)                                                      | —                    | —                    | —                    | 42              | 57              | 37              |
| Provisions- und Dienstleistungserträge                                                              | – 69                 | – 79                 | – 169                | 1 099           | 1 075           | 1 247           |
| Sonstige Erträge                                                                                    | —                    | —                    | —                    | 22              | 19              | 271             |
| <b>Operative Erträge</b>                                                                            | <b>– 135</b>         | <b>– 145</b>         | <b>– 235</b>         | <b>44 164</b>   | <b>42 709</b>   | <b>44 254</b>   |
| Schadenaufwendungen (netto)                                                                         | – 9                  | – 11                 | – 9                  | – 27 141        | – 26 320        | – 25 986        |
| Veränderung der Rückstellungen für Versicherungs- und Investmentverträge (netto)                    | —                    | —                    | —                    | – 300           | – 355           | 3               |
| Zinsaufwendungen                                                                                    | 81                   | 91                   | 95                   | – 92            | – 104           | – 295           |
| Risikovorsorge im Kreditgeschäft                                                                    | —                    | —                    | —                    | —               | – 18            | – 17            |
| Operative Wertminderungen auf Finanzanlagen (netto)                                                 | —                    | —                    | —                    | – 9             | – 75            | – 437           |
| Aufwendungen für Finanzanlagen                                                                      | 1                    | – 5                  | – 6                  | – 240           | – 238           | – 254           |
| Abschluss- und Verwaltungsaufwendungen (netto)                                                      | – 1                  | 5                    | – 4                  | – 11 044        | – 10 540        | – 10 478        |
| Provisions- und Dienstleistungsaufwendungen                                                         | 63                   | 69                   | 164                  | – 1 024         | – 995           | – 1 141         |
| Sonstige Aufwendungen                                                                               | —                    | —                    | —                    | – 10            | —               | – 2             |
| <b>Operative Aufwendungen</b>                                                                       | <b>135</b>           | <b>149</b>           | <b>240</b>           | <b>– 39 860</b> | <b>– 38 645</b> | <b>– 38 607</b> |
| <b>Operatives Ergebnis</b>                                                                          | <b>—</b>             | <b>4</b>             | <b>5</b>             | <b>4 304</b>    | <b>4 064</b>    | <b>5 647</b>    |
| Schadenquote <sup>2</sup> in %                                                                      | — <sup>6</sup>       | — <sup>6</sup>       | — <sup>6</sup>       | 69,1            | 69,5            | 68,0            |
| Kostenquote <sup>3</sup> in %                                                                       | — <sup>6</sup>       | — <sup>6</sup>       | — <sup>6</sup>       | 28,1            | 27,9            | 27,4            |
| <b>Combined Ratio<sup>4</sup> in %</b>                                                              | <b>—<sup>6</sup></b> | <b>—<sup>6</sup></b> | <b>—<sup>6</sup></b> | <b>97,2</b>     | <b>97,4</b>     | <b>95,4</b>     |



## Berichtspflichtige Segmente – Leben/Kranken

|                                                                                                     | German Speaking Countries |                 |                 | Europe incl. South America |                |                | NAFTA Markets  |                |                |
|-----------------------------------------------------------------------------------------------------|---------------------------|-----------------|-----------------|----------------------------|----------------|----------------|----------------|----------------|----------------|
|                                                                                                     | 2010<br>Mio €             | 2009<br>Mio €   | 2008<br>Mio €   | 2010<br>Mio €              | 2009<br>Mio €  | 2008<br>Mio €  | 2010<br>Mio €  | 2009<br>Mio €  | 2008<br>Mio €  |
| <b>Gesamte Beitragseinnahmen<sup>1</sup></b>                                                        | <b>21 070</b>             | <b>20 036</b>   | <b>18 273</b>   | <b>19 755</b>              | <b>18 544</b>  | <b>16 451</b>  | <b>8 266</b>   | <b>6 557</b>   | <b>6 111</b>   |
| Abgegebene Rückversicherungsbeiträge                                                                | – 187                     | – 196           | – 205           | – 355                      | – 355          | – 373          | – 144          | – 150          | – 158          |
| Veränderung in Beitragsüberträgen                                                                   | – 57                      | – 78            | – 34            | 38                         | 65             | 16             | 14             | 5              | 8              |
| Gesamte Beitragseinnahmen (netto)                                                                   | 20 826                    | 19 762          | 18 034          | 19 438                     | 18 254         | 16 094         | 8 136          | 6 412          | 5 961          |
| Einlagen aus Versicherungs- und Investmentverträgen                                                 | – 5 095                   | – 5 576         | – 3 846         | – 14 510                   | – 13 416       | – 11 011       | – 7 456        | – 5 788        | – 5 209        |
| <b>Verdiente Beiträge (netto)</b>                                                                   | <b>15 731</b>             | <b>14 186</b>   | <b>14 188</b>   | <b>4 928</b>               | <b>4 838</b>   | <b>5 083</b>   | <b>680</b>     | <b>624</b>     | <b>752</b>     |
| Zinserträge und ähnliche Erträge                                                                    | 7 848                     | 7 501           | 7 628           | 4 132                      | 3 868          | 3 820          | 2 389          | 2 027          | 1 715          |
| Operative Erträge aus erfolgswirksam zum Zeitwert bewerteten Finanzaktiva und Finanzpassiva (netto) | 148                       | 5               | 2 018           | 65                         | 355            | – 960          | – 216          | 216            | – 646          |
| Operative realisierte Gewinne/Verluste (netto)                                                      | 1 331                     | 1 104           | 312             | 597                        | 613            | 569            | 156            | 13             | 2              |
| Provisions- und Dienstleistungserträge                                                              | 30                        | 27              | 44              | 410                        | 379            | 421            | 49             | 35             | 38             |
| Sonstige Erträge                                                                                    | 65                        | 12              | 112             | 2                          | 3              | 6              | —              | 1              | 1              |
| <b>Operative Erträge</b>                                                                            | <b>25 153</b>             | <b>22 835</b>   | <b>24 302</b>   | <b>10 134</b>              | <b>10 056</b>  | <b>8 939</b>   | <b>3 058</b>   | <b>2 916</b>   | <b>1 862</b>   |
| Schadenaufwendungen (netto)                                                                         | – 12 974                  | – 13 408        | – 13 797        | – 4 479                    | – 4 557        | – 4 449        | – 103          | – 81           | – 69           |
| Veränderung der Rückstellungen für Versicherungs- und Investmentverträge (netto)                    | – 8 640                   | – 5 062         | – 3 697         | – 2 216                    | – 1 495        | 163            | – 1 574        | – 1 219        | – 1 382        |
| Zinsaufwendungen                                                                                    | – 114                     | – 126           | – 162           | – 35                       | – 51           | – 172          | – 7            | – 5            | – 5            |
| Risikovorsorge im Kreditgeschäft                                                                    | – 3                       | – 14            | – 10            | —                          | 1              | —              | 3              | – 62           | – 3            |
| Operative Wertminderungen auf Finanzanlagen (netto)                                                 | – 274                     | – 1 168         | – 3 863         | – 151                      | – 427          | – 1 580        | – 8            | – 66           | – 153          |
| Aufwendungen für Finanzanlagen                                                                      | – 422                     | – 361           | – 340           | – 206                      | – 191          | – 203          | – 46           | – 40           | – 27           |
| Abschluss- und Verwaltungsaufwendungen (netto)                                                      | – 1 381                   | – 1 759         | – 1 572         | – 1 854                    | – 1 986        | – 1 998        | – 912          | – 959          | – 296          |
| Provisions- und Dienstleistungsaufwendungen                                                         | – 30                      | – 25            | – 41            | – 194                      | – 181          | – 186          | – 45           | – 48           | – 28           |
| Operative Restrukturierungsaufwendungen                                                             | – 8                       | – 15            | 1               | —                          | —              | —              | —              | —              | —              |
| Sonstige Aufwendungen                                                                               | – 51                      | —               | —               | – 2                        | —              | —              | —              | —              | —              |
| <b>Operative Aufwendungen</b>                                                                       | <b>– 23 897</b>           | <b>– 21 938</b> | <b>– 23 481</b> | <b>– 9 137</b>             | <b>– 8 887</b> | <b>– 8 425</b> | <b>– 2 692</b> | <b>– 2 480</b> | <b>– 1 963</b> |
| <b>Operatives Ergebnis</b>                                                                          | <b>1 256</b>              | <b>897</b>      | <b>821</b>      | <b>997</b>                 | <b>1 169</b>   | <b>514</b>     | <b>366</b>     | <b>436</b>     | <b>– 101</b>   |
| <b>Cost-Income Ratio<sup>2</sup> in %</b>                                                           | <b>95,7</b>               | <b>96,6</b>     | <b>96,5</b>     | <b>95,9</b>                | <b>94,8</b>    | <b>97,1</b>    | <b>96,5</b>    | <b>94,9</b>    | <b>101,5</b>   |

1 Die gesamten Beitragseinnahmen enthalten die Bruttobeiträge aus dem Verkauf von Lebens- und Krankenversicherungspolicen sowie die Bruttoeinnahmen aus dem Verkauf fondsgebundener und anderer anlageorientierter Produkte in Übereinstimmung mit den statutorischen Bilanzierungsrichtlinien, die im Heimatland des Versicherers anwendbar sind.

2 Verhältnis von Einlagen aus Versicherungs- und Investmentverträgen, Schadenaufwendungen (netto), Veränderung der Rückstellungen für Versicherungs- und Investmentverträge (netto) und Abschluss- und Verwaltungsaufwendungen (netto) zu gesamten Beitragseinnahmen (netto), Zinserträgen und ähnlichen Erträgen, operativen Erträgen aus erfolgswirksam zum Zeitwert bewerteten Finanzaktiva und Finanzpassiva (netto), operativen realisierten Gewinnen/Verlusten (netto), Provisions- und Dienstleistungserträgen, sonstigen Erträgen, Zinsaufwendungen, Risikovorsorge im Kreditgeschäft, operativen Wertminderungen auf Finanzanlagen (netto), Aufwendungen für Finanzanlagen, Provisions- und Dienstleistungsaufwendungen, operativen Restrukturierungsaufwendungen und sonstigen Aufwendungen

3 Darstellung nicht aussagekräftig

| Global Insurance Line & Anglo Markets |               |               | Growth Markets |               |               | Konsolidierung |                |                | Leben/Kranken |               |               |
|---------------------------------------|---------------|---------------|----------------|---------------|---------------|----------------|----------------|----------------|---------------|---------------|---------------|
| 2010<br>Mio €                         | 2009<br>Mio € | 2008<br>Mio € | 2010<br>Mio €  | 2009<br>Mio € | 2008<br>Mio € | 2010<br>Mio €  | 2009<br>Mio €  | 2008<br>Mio €  | 2010<br>Mio € | 2009<br>Mio € | 2008<br>Mio € |
| 314                                   | 350           | 294           | 7 951          | 5 512         | 4 694         | - 258          | - 226          | - 208          | 57 098        | 50 773        | 45 615        |
| - 10                                  | - 2           | - 2           | - 126          | - 72          | - 58          | 258            | 226            | 208            | - 564         | - 549         | - 588         |
| 3                                     | - 5           | - 1           | - 125          | - 38          | - 43          | —              | —              | —              | - 127         | - 51          | - 54          |
| 307                                   | 343           | 291           | 7 700          | 5 402         | 4 593         | —              | —              | —              | 56 407        | 50 173        | 44 973        |
| —                                     | —             | —             | - 5 312        | - 3 429       | - 2 726       | —              | —              | —              | - 32 373      | - 28 209      | - 22 792      |
| 307                                   | 343           | 291           | 2 388          | 1 973         | 1 867         | —              | —              | —              | 24 034        | 21 964        | 22 181        |
| 73                                    | 109           | 81            | 695            | 528           | 493           | - 52           | - 62           | 35             | 15 085        | 13 971        | 13 772        |
| - 35                                  | 11            | 1             | 68             | 46            | - 8           | - 11           | 3              | —              | 19            | 636           | 405           |
| —                                     | —             | —             | 41             | 25            | - 7           | —              | —              | - 2            | 2 125         | 1 755         | 874           |
| —                                     | —             | - 1           | 62             | 59            | 73            | - 12           | - 9            | - 4            | 539           | 491           | 571           |
| —                                     | —             | —             | 14             | 1             | 22            | —              | —              | - 1            | 81            | 17            | 140           |
| 345                                   | 463           | 372           | 3 268          | 2 632         | 2 440         | - 75           | - 68           | 28             | 41 883        | 38 834        | 37 943        |
| - 307                                 | - 355         | - 326         | - 1 092        | - 925         | - 1 032       | —              | —              | —              | - 18 955      | - 19 326      | - 19 673      |
| 48                                    | - 21          | 19            | - 947          | - 702         | - 470         | —              | —              | 7              | - 13 329      | - 8 499       | - 5 360       |
| - 2                                   | - 2           | - 1           | - 6            | - 7           | - 12          | 61             | 64             | 69             | - 103         | - 127         | - 283         |
| —                                     | —             | —             | 6              | —             | —             | —              | —              | —              | 6             | - 75          | - 13          |
| —                                     | —             | —             | - 1            | - 2           | - 39          | —              | —              | - 112          | - 434         | - 1 663       | - 5 747       |
| - 3                                   | - 3           | —             | - 24           | - 24          | - 13          | - 3            | - 3            | —              | - 704         | - 622         | - 583         |
| - 58                                  | - 53          | - 57          | - 970          | - 834         | - 765         | —              | —              | - 3            | - 5 175       | - 5 591       | - 4 691       |
| —                                     | —             | —             | - 1            | —             | - 2           | 12             | 8              | 4              | - 258         | - 246         | - 253         |
| —                                     | —             | —             | —              | —             | —             | —              | —              | —              | - 8           | - 15          | 1             |
| —                                     | —             | —             | - 2            | —             | - 7           | —              | —              | —              | - 55          | —             | - 7           |
| - 322                                 | - 434         | - 365         | - 3 037        | - 2 494       | - 2 340       | 70             | 69             | - 35           | - 39 015      | - 36 164      | - 36 609      |
| 23                                    | 29            | 7             | 231            | 138           | 100           | - 5            | 1              | - 7            | 2 868         | 2 670         | 1 334         |
| 93,2                                  | 93,7          | 98,1          | 97,3           | 97,7          | 98,0          | — <sup>3</sup> | — <sup>3</sup> | — <sup>3</sup> | 96,1          | 95,8          | 97,5          |



## Berichtspflichtige Segmente – Asset Management

|                                                                                           | 2010<br>Mio €  | 2009<br>Mio €  | 2008<br>Mio €  |
|-------------------------------------------------------------------------------------------|----------------|----------------|----------------|
| Provisionsüberschuss <sup>1</sup>                                                         | 4 927          | 3 590          | 2 874          |
| Zinsüberschuss <sup>2</sup>                                                               | 21             | 30             | 63             |
| Erträge aus erfolgswirksam zum Zeitwert bewerteten Finanzaktiva und Finanzpassiva (netto) | 19             | 40             | – 71           |
| Sonstige Erträge                                                                          | 19             | 29             | 28             |
| <b>Operative Erträge</b>                                                                  | <b>4 986</b>   | <b>3 689</b>   | <b>2 894</b>   |
| Verwaltungsaufwendungen (netto) ohne akquisitionsbedingte Aufwendungen                    | – 2 926        | – 2 288        | – 1 968        |
| <b>Operative Aufwendungen</b>                                                             | <b>– 2 926</b> | <b>– 2 288</b> | <b>– 1 968</b> |
| <b>Operatives Ergebnis</b>                                                                | <b>2 060</b>   | <b>1 401</b>   | <b>926</b>     |
| <b>Cost-Income Ratio<sup>3</sup> in %</b>                                                 | <b>58,7</b>    | <b>62,0</b>    | <b>68,0</b>    |

1 Provisions- und Dienstleistungserträge abzüglich Provisions- und Dienstleistungsaufwendungen

2 Zinserträge und ähnliche Erträge abzüglich Zinsaufwendungen

3 Verhältnis von operativen Aufwendungen zu operativen Erträgen

|            |                                                 |
|------------|-------------------------------------------------|
| 162        | Konzernabschluss                                |
| <b>170</b> | <b>Konzernanhang</b>                            |
| 224        | Angaben zur Konzernbilanz                       |
| 260        | Angaben zur Konzern-Gewinn- und Verlustrechnung |
| 275        | Sonstige Angaben                                |

## Berichtspflichtige Segmente – Corporate und Sonstiges

|                                                                                                     | Holding & Treasury |                |                | Bankgeschäft   |                |                |
|-----------------------------------------------------------------------------------------------------|--------------------|----------------|----------------|----------------|----------------|----------------|
|                                                                                                     | 2010<br>Mio €      | 2009<br>Mio €  | 2008<br>Mio €  | 2010<br>Mio €  | 2009<br>Mio €  | 2008<br>Mio €  |
| Zinserträge und ähnliche Erträge                                                                    | 293                | 359            | 819            | 683            | 708            | 989            |
| Operative Erträge aus erfolgswirksam zum Zeitwert bewerteten Finanzaktiva und Finanzpassiva (netto) | – 41               | – 122          | 135            | 1              | 17             | 6              |
| Provisions- und Dienstleistungserträge                                                              | 198                | 209            | 53             | 445            | 389            | 430            |
| Sonstige Erträge                                                                                    | —                  | —              | 1              | —              | —              | —              |
| <b>Operative Erträge</b>                                                                            | <b>450</b>         | <b>446</b>     | <b>1 008</b>   | <b>1 129</b>   | <b>1 114</b>   | <b>1 425</b>   |
| Zinsaufwendungen ohne Zinsaufwendungen für externe Fremdfinanzierung                                | – 383              | – 445          | – 648          | – 333          | – 395          | – 677          |
| Risikovorsorge im Kreditgeschäft                                                                    | —                  | —              | —              | – 56           | – 48           | – 29           |
| Aufwendungen für Finanzanlagen                                                                      | – 94               | – 81           | – 150          | —              | —              | —              |
| Verwaltungsaufwendungen (netto) ohne akquisitionsbedingte Aufwendungen                              | – 621              | – 574          | – 531          | – 591          | – 634          | – 554          |
| Provisions- und Dienstleistungsaufwendungen                                                         | – 215              | – 195          | – 9            | – 210          | – 200          | – 193          |
| Sonstige Aufwendungen                                                                               | —                  | —              | —              | – 3            | – 2            | – 3            |
| <b>Operative Aufwendungen</b>                                                                       | <b>– 1 313</b>     | <b>– 1 295</b> | <b>– 1 338</b> | <b>– 1 193</b> | <b>– 1 279</b> | <b>– 1 456</b> |
| <b>Operatives Ergebnis</b>                                                                          | <b>– 863</b>       | <b>– 849</b>   | <b>– 330</b>   | <b>– 64</b>    | <b>– 165</b>   | <b>– 31</b>    |
| <b>Cost-Income Ratio<sup>1</sup> für das berichtspflichtige Segment Bankgeschäft in %</b>           |                    |                |                | <b>101,4</b>   | <b>122,5</b>   | <b>100,4</b>   |

<sup>1</sup> Verhältnis von Aufwendungen für Finanzanlagen, Verwaltungsaufwendungen (netto) ohne akquisitionsbedingte Aufwendungen und sonstigen Aufwendungen zu Zinserträgen und ähnlichen Erträgen, operativen Erträgen aus erfolgswirksam zum Zeitwert bewerteten Finanzaktiva und Finanzpassiva (netto), Provisions- und Dienstleistungserträgen, sonstigen Erträgen, Zinsaufwendungen ohne Zinsaufwendungen für externe Fremdfinanzierung und Provisions- und Dienstleistungsaufwendungen

| Alternative Investments |               |               | Konsolidierung |               |               | Corporate und Sonstiges |                |                |
|-------------------------|---------------|---------------|----------------|---------------|---------------|-------------------------|----------------|----------------|
| 2010<br>Mio €           | 2009<br>Mio € | 2008<br>Mio € | 2010<br>Mio €  | 2009<br>Mio € | 2008<br>Mio € | 2010<br>Mio €           | 2009<br>Mio €  | 2008<br>Mio €  |
| 6                       | 2             | 29            | - 4            | - 3           | - 113         | 978                     | 1 066          | 1 724          |
| - 1                     | - 1           | - 1           | —              | —             | - 2           | - 41                    | - 106          | 138            |
| 123                     | 132           | 172           | - 5            | - 7           | - 5           | 761                     | 723            | 650            |
| 6                       | 1             | —             | - 2            | —             | —             | 4                       | 1              | 1              |
| <b>134</b>              | <b>134</b>    | <b>200</b>    | <b>- 11</b>    | <b>- 10</b>   | <b>- 120</b>  | <b>1 702</b>            | <b>1 684</b>   | <b>2 513</b>   |
| - 1                     | —             | —             | 3              | 2             | 132           | - 714                   | - 838          | - 1 193        |
| —                       | —             | —             | —              | —             | —             | - 56                    | - 48           | - 29           |
| - 3                     | - 1           | —             | —              | 3             | 4             | - 97                    | - 79           | - 146          |
| - 145                   | - 142         | - 178         | 7              | 2             | —             | - 1 350                 | - 1 348        | - 1 263        |
| —                       | - 4           | —             | 1              | 2             | —             | - 424                   | - 397          | - 202          |
| —                       | —             | —             | —              | —             | —             | - 3                     | - 2            | - 3            |
| <b>- 149</b>            | <b>- 147</b>  | <b>- 178</b>  | <b>11</b>      | <b>9</b>      | <b>136</b>    | <b>- 2 644</b>          | <b>- 2 712</b> | <b>- 2 836</b> |
| - 15                    | - 13          | 22            | —              | - 1           | 16            | - 942                   | - 1 028        | - 323          |

## Angaben zur Konzernbilanz

### 7 Barreserve und andere liquide Mittel

| Stand 31. Dezember                                                                                                           | 2010<br>Mio € | 2009<br>Mio € |
|------------------------------------------------------------------------------------------------------------------------------|---------------|---------------|
| Täglich fällige Guthaben bei Kreditinstituten                                                                                | 5 813         | 5 243         |
| Guthaben bei Zentralnotenbanken                                                                                              | 279           | 198           |
| Kassenbestand                                                                                                                | 169           | 159           |
| Schatzwechsel, unverzinsliche Schatzanweisungen, ähnliche Schuldtitel öffentlicher Stellen, Wechsel und Schecks <sup>1</sup> | 2 486         | 489           |
| <b>Summe</b>                                                                                                                 | <b>8 747</b>  | <b>6 089</b>  |

<sup>1</sup> Beinhaltet die Umgliederung von 2 050 Mio € aus den Forderungen an Kreditinstitute und Kunden bei den US-Tochtergesellschaften.

Zum 31. Dezember 2010 beliefen sich die gesetzlich vorgeschriebenen Guthaben bei den nationalen Zentralnotenbanken, die aufgrund der Rücklagenvorschriften der Europäischen Zentralbank Beschränkungen unterliegen, auf 279 (2009: 198) Mio €.

### 8 Erfolgswirksam zum Zeitwert bewertete Finanzaktiva

| Stand 31. Dezember                                                           | 2010<br>Mio € | 2009<br>Mio € |
|------------------------------------------------------------------------------|---------------|---------------|
| <b>Handelsaktiva</b>                                                         |               |               |
| Festverzinsliche Wertpapiere                                                 | 546           | 363           |
| Aktien                                                                       | 139           | 105           |
| Derivate                                                                     | 1 416         | 1 663         |
| <b>Zwischensumme</b>                                                         | <b>2 101</b>  | <b>2 131</b>  |
| <b>Finanzaktiva als „erfolgswirksam zum Zeitwert bewertet“ klassifiziert</b> |               |               |
| Festverzinsliche Wertpapiere                                                 | 4 430         | 8 814         |
| Aktien                                                                       | 3 312         | 3 376         |
| <b>Zwischensumme</b>                                                         | <b>7 742</b>  | <b>12 190</b> |
| <b>Summe</b>                                                                 | <b>9 843</b>  | <b>14 321</b> |

### In Handelsaktiva ausgewiesene festverzinsliche Wertpapiere und Aktien

Die in den Handelsaktiva ausgewiesenen festverzinslichen Wertpapiere und Aktien sind größtenteils börsenfähig und börsennotiert. Zum 31. Dezember 2010 entfielen von den festverzinslichen Wertpapieren 173 (2009: 31) Mio € auf öffentliche Emittenten und 373 (2009: 332) Mio € auf andere Emittenten.

### 9 Finanzanlagen

| Stand 31. Dezember                                                         | 2010<br>Mio €  | 2009<br>Mio €  |
|----------------------------------------------------------------------------|----------------|----------------|
| Jederzeit veräußerbare Wertpapiere                                         | 318 315        | 279 045        |
| Bis zur Endfälligkeit gehaltene Wertpapiere                                | 3 987          | 3 475          |
| Depotforderungen aus dem in Rückdeckung übernommenen Versicherungsgeschäft | 1 117          | 1 193          |
| Anteile an assoziierten Unternehmen und Gemeinschaftsunternehmen           | 2 527          | 3 025          |
| Fremdgenutzter Grundbesitz                                                 | 8 672          | 7 514          |
| <b>Summe</b>                                                               | <b>334 618</b> | <b>294 252</b> |

## Jederzeit veräußerbare Wertpapiere

| Stand 31. Dezember                                  | 2010                                                            |                                           |                                            |                    | 2009                                                            |                                           |                                            |                    |
|-----------------------------------------------------|-----------------------------------------------------------------|-------------------------------------------|--------------------------------------------|--------------------|-----------------------------------------------------------------|-------------------------------------------|--------------------------------------------|--------------------|
|                                                     | Fort-<br>geführte<br>An-<br>schaf-<br>fungs-<br>kosten<br>Mio € | Nicht-<br>realisierte<br>Gewinne<br>Mio € | Nicht-<br>realisierte<br>Verluste<br>Mio € | Zeitwerte<br>Mio € | Fort-<br>geführte<br>An-<br>schaf-<br>fungs-<br>kosten<br>Mio € | Nicht-<br>realisierte<br>Gewinne<br>Mio € | Nicht-<br>realisierte<br>Verluste<br>Mio € | Zeitwerte<br>Mio € |
| <b>Festverzinsliche Wertpapiere</b>                 |                                                                 |                                           |                                            |                    |                                                                 |                                           |                                            |                    |
| Staatliche, hypothekarisch<br>besicherte Anleihen   | 5 043                                                           | 235                                       | – 6                                        | 5 272              | 8 202                                                           | 209                                       | – 53                                       | 8 358              |
| Industrielle, hypothekarisch<br>besicherte Anleihen | 10 023                                                          | 625                                       | – 174                                      | 10 474             | 8 116                                                           | 76                                        | – 444                                      | 7 748              |
| Übrige durch Vermögenswerte<br>besicherte Anleihen  | 3 501                                                           | 186                                       | – 34                                       | 3 653              | 3 878                                                           | 119                                       | – 110                                      | 3 887              |
| <b>Staats- und Regierungsanleihen</b>               |                                                                 |                                           |                                            |                    |                                                                 |                                           |                                            |                    |
| Deutschland                                         | 14 475                                                          | 740                                       | – 24                                       | 15 191             | 12 282                                                          | 445                                       | – 30                                       | 12 697             |
| Italien                                             | 29 242                                                          | 183                                       | – 778                                      | 28 647             | 25 545                                                          | 946                                       | – 100                                      | 26 391             |
| Frankreich                                          | 18 248                                                          | 1 194                                     | – 73                                       | 19 369             | 15 850                                                          | 959                                       | – 34                                       | 16 775             |
| USA                                                 | 6 667                                                           | 197                                       | – 97                                       | 6 767              | 4 181                                                           | 143                                       | – 34                                       | 4 290              |
| Spanien                                             | 5 142                                                           | 31                                        | – 332                                      | 4 841              | 6 798                                                           | 190                                       | – 79                                       | 6 909              |
| Belgien                                             | 4 466                                                           | 102                                       | – 56                                       | 4 512              | 3 611                                                           | 158                                       | – 9                                        | 3 760              |
| Griechenland                                        | 1 815                                                           | —                                         | – 554                                      | 1 261              | 3 647                                                           | —                                         | – 189                                      | 3 458              |
| Portugal                                            | 1 148                                                           | 1                                         | – 90                                       | 1 059              | 1 651                                                           | 46                                        | – 8                                        | 1 689              |
| Irland                                              | 990                                                             | 3                                         | – 136                                      | 857                | 1 582                                                           | 22                                        | – 10                                       | 1 594              |
| Summe übrige Länder                                 | 41 533                                                          | 1 888                                     | – 113                                      | 43 308             | 35 403                                                          | 1 160                                     | – 174                                      | 36 389             |
| <b>Zwischensumme</b>                                | <b>123 726</b>                                                  | <b>4 339</b>                              | <b>– 2 253</b>                             | <b>125 812</b>     | <b>110 550</b>                                                  | <b>4 069</b>                              | <b>– 667</b>                               | <b>113 952</b>     |
| Industrieanleihen                                   | 138 576                                                         | 4 786                                     | – 2 743                                    | 140 619            | 113 338                                                         | 4 338                                     | – 1 902                                    | 115 774            |
| Übrige                                              | 1 723                                                           | 123                                       | – 9                                        | 1 837              | 1 570                                                           | 66                                        | – 34                                       | 1 602              |
| <b>Zwischensumme</b>                                | <b>282 592</b>                                                  | <b>10 294</b>                             | <b>– 5 219</b>                             | <b>287 667</b>     | <b>245 654</b>                                                  | <b>8 877</b>                              | <b>– 3 210</b>                             | <b>251 321</b>     |
| Aktien                                              | 19 893                                                          | 10 903                                    | – 148                                      | 30 648             | 17 647                                                          | 10 227                                    | – 150                                      | 27 724             |
| <b>Summe</b>                                        | <b>302 485</b>                                                  | <b>21 197</b>                             | <b>– 5 367</b>                             | <b>318 315</b>     | <b>263 301</b>                                                  | <b>19 104</b>                             | <b>– 3 360</b>                             | <b>279 045</b>     |

## Bis zur Endfälligkeit gehaltene Wertpapiere

| Stand 31. Dezember             | 2010                                                            |                                           |                                            |                    | 2009                                                            |                                           |                                            |                    |
|--------------------------------|-----------------------------------------------------------------|-------------------------------------------|--------------------------------------------|--------------------|-----------------------------------------------------------------|-------------------------------------------|--------------------------------------------|--------------------|
|                                | Fort-<br>geführte<br>An-<br>schaf-<br>fungs-<br>kosten<br>Mio € | Nicht-<br>realisierte<br>Gewinne<br>Mio € | Nicht-<br>realisierte<br>Verluste<br>Mio € | Zeitwerte<br>Mio € | Fort-<br>geführte<br>An-<br>schaf-<br>fungs-<br>kosten<br>Mio € | Nicht-<br>realisierte<br>Gewinne<br>Mio € | Nicht-<br>realisierte<br>Verluste<br>Mio € | Zeitwerte<br>Mio € |
| Staats- und Regierungsanleihen | 2 264                                                           | 165                                       | – 5                                        | 2 424              | 1 859                                                           | 108                                       | – 4                                        | 1 963              |
| Industrieanleihen <sup>1</sup> | 1 719                                                           | 68                                        | – 4                                        | 1 783              | 1 608                                                           | 68                                        | – 18                                       | 1 658              |
| Übrige                         | 4                                                               | —                                         | —                                          | 4                  | 8                                                               | —                                         | —                                          | 8                  |
| <b>Summe</b>                   | <b>3 987</b>                                                    | <b>233</b>                                | <b>– 9</b>                                 | <b>4 211</b>       | <b>3 475</b>                                                    | <b>176</b>                                | <b>– 22</b>                                | <b>3 629</b>       |

<sup>1</sup> Enthalten auch industrielle, hypothekarisch besicherte Anleihen.



### Nichtrealisierte Verluste aus jederzeit veräußerbaren und bis zur Endfälligkeit gehaltenen Wertpapieren

Die folgende Tabelle stellt die nichtrealisierten Verluste und die korrespondierenden Zeitwerte für jederzeit

veräußerbare und bis zur Endfälligkeit gehaltene Wertpapiere zum 31. Dezember 2010 und 2009 dar, aufgeteilt nach Wertpapierkategorien und Zeitdauer, für welche diese Wertpapiere sich ununterbrochen in einer nichtrealisierten Verlustposition befanden.

|                                                  | Weniger als 12 Monate |                            | Mehr als 12 Monate |                            | Summe         |                            |
|--------------------------------------------------|-----------------------|----------------------------|--------------------|----------------------------|---------------|----------------------------|
|                                                  | Zeitwerte             | Nicht-realisierte Verluste | Zeitwerte          | Nicht-realisierte Verluste | Zeitwerte     | Nicht-realisierte Verluste |
|                                                  | Mio €                 | Mio €                      | Mio €              | Mio €                      | Mio €         | Mio €                      |
| Stand 31. Dezember                               |                       |                            |                    |                            |               |                            |
| <b>2010</b>                                      |                       |                            |                    |                            |               |                            |
| <b>Festverzinsliche Wertpapiere</b>              |                       |                            |                    |                            |               |                            |
| Staatliche, hypothekarisch besicherte Anleihen   | 761                   | – 6                        | 1                  | —                          | 762           | – 6                        |
| Industrielle, hypothekarisch besicherte Anleihen | 627                   | – 33                       | 1 230              | – 141                      | 1 857         | – 174                      |
| Übrige durch Vermögenswerte besicherte Anleihen  | 655                   | – 5                        | 493                | – 29                       | 1 148         | – 34                       |
| Staats- und Regierungsanleihen                   | 39 520                | – 1 366                    | 3 762              | – 892                      | 43 282        | – 2 258                    |
| Industrieanleihen                                | 38 664                | – 1 408                    | 7 807              | – 1 339                    | 46 471        | – 2 747                    |
| Übrige                                           | 244                   | – 8                        | 16                 | – 1                        | 260           | – 9                        |
| <b>Zwischensumme</b>                             | <b>80 471</b>         | <b>– 2 826</b>             | <b>13 309</b>      | <b>– 2 402</b>             | <b>93 780</b> | <b>– 5 228</b>             |
| <b>Aktien</b>                                    | <b>1 503</b>          | <b>– 131</b>               | <b>44</b>          | <b>– 17</b>                | <b>1 547</b>  | <b>– 148</b>               |
| <b>Summe</b>                                     | <b>81 974</b>         | <b>– 2 957</b>             | <b>13 353</b>      | <b>– 2 419</b>             | <b>95 327</b> | <b>– 5 376</b>             |
| <b>2009</b>                                      |                       |                            |                    |                            |               |                            |
| <b>Anleihen</b>                                  |                       |                            |                    |                            |               |                            |
| Staatliche, hypothekarisch besicherte Anleihen   | 2 205                 | – 53                       | 4                  | —                          | 2 209         | – 53                       |
| Industrielle, hypothekarisch besicherte Anleihen | 2 841                 | – 127                      | 3 105              | – 317                      | 5 946         | – 444                      |
| Übrige durch Vermögenswerte besicherte Anleihen  | 475                   | – 18                       | 1 237              | – 92                       | 1 712         | – 110                      |
| Staats- und Regierungsanleihen                   | 18 475                | – 457                      | 3 533              | – 214                      | 22 008        | – 671                      |
| Industrieanleihen                                | 12 463                | – 286                      | 13 777             | – 1 634                    | 26 240        | – 1 920                    |
| Übrige                                           | 290                   | – 23                       | 166                | – 11                       | 456           | – 34                       |
| <b>Zwischensumme</b>                             | <b>36 749</b>         | <b>– 964</b>               | <b>21 822</b>      | <b>– 2 268</b>             | <b>58 571</b> | <b>– 3 232</b>             |
| <b>Aktien</b>                                    | <b>728</b>            | <b>– 122</b>               | <b>76</b>          | <b>– 28</b>                | <b>804</b>    | <b>– 150</b>               |
| <b>Summe</b>                                     | <b>37 477</b>         | <b>– 1 086</b>             | <b>21 898</b>      | <b>– 2 296</b>             | <b>59 375</b> | <b>– 3 382</b>             |

### Hypothekarisch besicherte Industrieanleihen

Die nichtrealisierten Verluste beliefen sich zum 31. Dezember 2010 auf 174 Mio €. Sie stammen hauptsächlich aus Emissionen vom Wertpapiermarkt aus diversen europäischen Ländern. Der Großteil dieser Emissionen ist durch Gewerbeimmobilien besichert. In 2010 schnitten die Industrieanleihen aufgrund der Verringerung der Spreads positiv ab und verminderten somit die nichtrealisierten Verluste um 270 Mio €. Basierend auf einer detaillierten Analyse der zugrunde liegenden Wertpapiere und Sicherheiten, betrachtet der Allianz Konzern diese Wertpapiere zum 31. Dezember 2010 nicht als dauerhaft in ihrem Wert gemindert.

### Staats- und Regierungsanleihen

Die nichtrealisierten Verluste beliefen sich zum 31. Dezember 2010 auf 2 258 Mio €. Der Allianz Konzern hält eine große Anzahl von Staatsanleihen. Bei den Emittenten

handelt es sich in der Regel um Mitgliedsländer der OECD (Organisation für wirtschaftliche Zusammenarbeit und Entwicklung). Angesichts der Tatsache, dass die Emittenten dieser Wertpapiere über ein Investment-Grade-Länder- oder Emittenten-Rating verfügen, stellt das Kreditrisiko im Regelfall keinen signifikanten Einflussfaktor für die Wertentwicklung dar. Die nichtrealisierten Verluste auf vom Allianz Konzern gehaltene Staats- und Regierungsanleihen stammen hauptsächlich aus Investitionen in diversen europäischen Ländern. Der nichtrealisierte Verlust ist im Wesentlichen auf die Veränderungen der Credit Spreads zurückzuführen, verursacht durch Bedenken am Markt. Der Allianz Konzern ist der Meinung, dass dies temporär ist und sich die Märkte erholen werden. Basierend auf einer detaillierten Analyse der zugrunde liegenden Wertpapiere und Sicherheiten, betrachtet der Allianz Konzern diese Wertpapiere zum 31. Dezember 2010 nicht als dauerhaft in ihrem Wert gemindert.

## Industrieanleihen

Die nichtrealisierten Verluste beliefen sich zum 31. Dezember 2010 auf 2 747 Mio €. Der Allianz Konzern hält eine Vielzahl von Anleihen, die von Unternehmen aus OECD-Ländern emittiert wurden. Die Mehrzahl dieser Industrieanleihen bzw. der Emittenten verfügt über ein Investment-Grade-Rating. Die nichtrealisierten Verluste haben sich um 827 Mio € erhöht, hauptsächlich verursacht durch die schlechte Performance des Anleihemarktes für den Bankensektor. Basierend auf einer detaillierten Analyse der zugrunde liegenden Wertpapiere, betrachtet der Allianz Konzern diese Wertpapiere zum 31. Dezember 2010 nicht als dauerhaft in ihrem Wert gemindert.

## Aktien

Die nichtrealisierten Verluste auf Aktien beliefen sich zum 31. Dezember 2010 auf 148 Mio €. Diese Verluste stammen von Aktien, welche die Wertminderungskriterien des Allianz Konzerns für Aktien, wie sie in Anmerkung 2 beschrieben werden, nicht erfüllen. Im Wesentlichen befanden sich alle nichtrealisierten Verluste in einer weniger als sechs Monate dauernden ununterbrochenen Verlustposition.

## Fälligkeiten

Die fortgeführten Anschaffungskosten und die geschätzten Zeitwerte bis zur Endfälligkeit gehaltener und jederzeit veräußerbarer festverzinslicher Wertpapiere stellen sich am 31. Dezember 2010, untergliedert nach der vertraglichen Restlaufzeit, wie folgt dar:

|                                                                         | Fortgeführte<br>Anschaffungs-<br>kosten<br>Mio € | Zeitwerte<br>Mio € |
|-------------------------------------------------------------------------|--------------------------------------------------|--------------------|
| Stand 31. Dezember 2010                                                 |                                                  |                    |
| <b>Jederzeit veräußerbare<br/>festverzinsliche Wertpapiere</b>          |                                                  |                    |
| bis zu 1 Jahr                                                           | 24 481                                           | 24 731             |
| mehr als 1 Jahr und bis 5 Jahre                                         | 89 189                                           | 91 274             |
| mehr als 5 Jahre und bis 10 Jahre                                       | 74 749                                           | 76 526             |
| mehr als 10 Jahre                                                       | 94 173                                           | 95 136             |
| <b>Summe</b>                                                            | <b>282 592</b>                                   | <b>287 667</b>     |
| <b>Bis zur Endfälligkeit gehaltene<br/>festverzinsliche Wertpapiere</b> |                                                  |                    |
| bis zu 1 Jahr                                                           | 130                                              | 135                |
| mehr als 1 Jahr und bis 5 Jahre                                         | 1 790                                            | 1 908              |
| mehr als 5 Jahre und bis 10 Jahre                                       | 835                                              | 880                |
| mehr als 10 Jahre                                                       | 1 232                                            | 1 288              |
| <b>Summe</b>                                                            | <b>3 987</b>                                     | <b>4 211</b>       |

Die tatsächlichen Restlaufzeiten können von den vertraglich festgelegten Restlaufzeiten abweichen, weil bestimmte Emittenten das Recht haben, mit oder ohne Kündigungs- bzw. Vorfälligkeitsstrafen bestimmte Wertpapiere zu kündigen oder vorzeitig zurückzuzahlen. Finanzanlagen, die nicht zu einem einzelnen Termin fällig sind, werden in der Regel nicht über verschiedene Laufzeiten verteilt, sondern mit der vertraglichen Endfälligkeit aufgeführt.

## Zu Anschaffungskosten bewertete Aktien

Zum 31. Dezember 2010 konnten die Zeitwerte für Aktien mit einem Buchwert von 352 (2009: 375) Mio € nicht verlässlich geschätzt werden. Diese werden vornehmlich in Unternehmen investiert, die an keiner Börse gelistet sind. Im Geschäftsjahr 2010 wurden solche Finanzanlagen mit einem Buchwert von 52 (2009: —) Mio € veräußert, was zu Gewinnen von 1 (2009: —) Mio € und Verlusten von — (2009: —) Mio € führte.

## Anteile an assoziierten Unternehmen und Gemeinschaftsunternehmen

Darlehen an assoziierte Unternehmen und Gemeinschaftsunternehmen sowie jederzeit veräußerbare festverzinsliche Wertpapiere, die von assoziierten Unternehmen und Gemeinschaftsunternehmen emittiert wurden und vom Allianz Konzern gehalten werden, beliefen sich zum 31. Dezember 2010 auf 192 (2009: 114) Mio €. Der Zeitwert der Anteile an assoziierten Unternehmen und Gemeinschaftsunternehmen belief sich zum 31. Dezember 2010 auf 2 598 (2009: 3 045) Mio €.

**Fremdgenutzter Grundbesitz**

|                                                                                                                                                 | 2010<br>Mio € | 2009<br>Mio € | 2008<br>Mio € |
|-------------------------------------------------------------------------------------------------------------------------------------------------|---------------|---------------|---------------|
| Bruttobuchwert 1.1.                                                                                                                             | 10 413        | 10 139        | 10 114        |
| Kumulierte Abschreibungen 1.1.                                                                                                                  | – 2 899       | – 2 588       | – 2 356       |
| <b>Bilanzwert 1.1.</b>                                                                                                                          | <b>7 514</b>  | <b>7 551</b>  | <b>7 758</b>  |
| Zugänge                                                                                                                                         | 1 041         | 325           | 385           |
| Veränderungen                                                                                                                                   |               |               |               |
| Konsolidierungskreis                                                                                                                            | 544           | —             | 14            |
| Abgänge                                                                                                                                         | – 409         | – 197         | – 296         |
| Umgliederungen                                                                                                                                  | – 22          | 180           | – 102         |
| Umgliederungen in langfristige Vermögenswerte und Vermögenswerte von Veräußerungsgruppen, die als zur Veräußerung gehalten klassifiziert werden | – 46          | —             | – 62          |
| Währungsänderungen                                                                                                                              | 292           | 14            | 93            |
| Abschreibungen                                                                                                                                  | – 171         | – 174         | – 165         |
| Wertminderungen                                                                                                                                 | – 106         | – 199         | – 128         |
| Wertaufholungen                                                                                                                                 | 35            | 14            | 54            |
| <b>Bilanzwert 31.12.</b>                                                                                                                        | <b>8 672</b>  | <b>7 514</b>  | <b>7 551</b>  |
| Kumulierte Abschreibungen 31.12.                                                                                                                | 2 958         | 2 899         | 2 588         |
| Bruttobuchwert 31.12.                                                                                                                           | 11 630        | 10 413        | 10 139        |

Der Zeitwert des fremdgenutzten Grundbesitzes belief sich zum 31. Dezember 2010 auf 12 929 (2009: 11 444) Mio €. Verfügungsbeschränkungen und Verpfändungen als Sicherheiten bestanden zum 31. Dezember 2010 in Höhe von 73 (2009: 146) Mio €.

**10 Forderungen an Kreditinstitute und Kunden**

| Stand 31. Dezember                                              | 2010                          |                 |                | 2009                          |                 |                |
|-----------------------------------------------------------------|-------------------------------|-----------------|----------------|-------------------------------|-----------------|----------------|
|                                                                 | Kredit-<br>institute<br>Mio € | Kunden<br>Mio € | Summe<br>Mio € | Kredit-<br>institute<br>Mio € | Kunden<br>Mio € | Summe<br>Mio € |
| Kurzfristige Geldanlagen und Einlagenzertifikate <sup>1</sup>   | 5 216                         | —               | 5 216          | 10 530                        | —               | 10 530         |
| Reverse-Repo-Geschäfte                                          | 1 018                         | —               | 1 018          | 848                           | 19              | 867            |
| Gestellte Sicherheiten für Wertpapierleihgeschäfte und Derivate | 38                            | —               | 38             | —                             | —               | —              |
| Kredite                                                         | 67 303                        | 46 575          | 113 878        | 69 845                        | 44 313          | 114 158        |
| Sonstige Forderungen                                            | 2 605                         | 69              | 2 674          | 3 525                         | 60              | 3 585          |
| <b>Zwischensumme</b>                                            | <b>76 180</b>                 | <b>46 644</b>   | <b>122 824</b> | <b>84 748</b>                 | <b>44 392</b>   | <b>129 140</b> |
| Risikovorsorge im Kreditgeschäft                                | —                             | – 146           | – 146          | —                             | – 144           | – 144          |
| <b>Summe</b>                                                    | <b>76 180</b>                 | <b>46 498</b>   | <b>122 678</b> | <b>84 748</b>                 | <b>44 248</b>   | <b>128 996</b> |

<sup>1</sup> In 2010 wurden bei den US-Tochtergesellschaften aus dieser Position 2 050 Mio € in Barreserve und andere liquide Mittel umgegliedert.

## Forderungen an Kreditinstitute und Kunden nach vertraglicher Restlaufzeit

| Stand 31. Dezember 2010        | Bis 3 Monate<br>Mio € | > 3 Monate<br>bis 1 Jahr<br>Mio € | > 1 Jahr bis<br>3 Jahre<br>Mio € | > 3 Jahre bis<br>5 Jahre<br>Mio € | Über 5 Jahre<br>Mio € | Summe<br>Mio € |
|--------------------------------|-----------------------|-----------------------------------|----------------------------------|-----------------------------------|-----------------------|----------------|
| Forderungen an Kreditinstitute | 6 738                 | 3 787                             | 10 262                           | 9 243                             | 46 150                | 76 180         |
| Forderungen an Kunden          | 2 849                 | 2 985                             | 6 541                            | 7 007                             | 27 262                | 46 644         |
| <b>Summe</b>                   | <b>9 587</b>          | <b>6 772</b>                      | <b>16 803</b>                    | <b>16 250</b>                     | <b>73 412</b>         | <b>122 824</b> |

## Forderungen an Kreditinstitute und Kunden nach Regionen

| Stand 31. Dezember                                              | 2010            |                  |                | 2009            |                  |                |
|-----------------------------------------------------------------|-----------------|------------------|----------------|-----------------|------------------|----------------|
|                                                                 | Inland<br>Mio € | Ausland<br>Mio € | Summe<br>Mio € | Inland<br>Mio € | Ausland<br>Mio € | Summe<br>Mio € |
| Kurzfristige Geldanlagen und Einlagenzertifikate                | 1 165           | 4 051            | 5 216          | 5 406           | 5 124            | 10 530         |
| Reverse-Repo-Geschäfte                                          | —               | 1 018            | 1 018          | —               | 867              | 867            |
| Gestellte Sicherheiten für Wertpapierleihgeschäfte und Derivate | 25              | 13               | 38             | —               | —                | —              |
| Kredite                                                         | 92 088          | 21 790           | 113 878        | 94 417          | 19 741           | 114 158        |
| Sonstige Forderungen                                            | 1 286           | 1 388            | 2 674          | 1 227           | 2 358            | 3 585          |
| <b>Zwischensumme</b>                                            | <b>94 564</b>   | <b>28 260</b>    | <b>122 824</b> | <b>101 050</b>  | <b>28 090</b>    | <b>129 140</b> |
| Risikovorsorge im Kreditgeschäft                                | – 70            | – 76             | – 146          | – 70            | – 74             | – 144          |
| <b>Summe</b>                                                    | <b>94 494</b>   | <b>28 184</b>    | <b>122 678</b> | <b>100 980</b>  | <b>28 016</b>    | <b>128 996</b> |

## Forderungen an Kunden (vor Risikovorsorge) nach Wirtschaftsbereichen

| Stand 31. Dezember                                    | 2010<br>Mio € | 2009<br>Mio € |
|-------------------------------------------------------|---------------|---------------|
| <b>Inland</b>                                         |               |               |
| <b>Firmenkunden</b>                                   |               |               |
| Produzierendes Gewerbe                                | 1 353         | 1 075         |
| Baugewerbe                                            | 262           | 311           |
| Groß- und Einzelhandel                                | 450           | 405           |
| Finanzinstitute (außer Banken) und Versicherungen     | 439           | 122           |
| Dienstleister                                         | 2 171         | 1 503         |
| Übrige                                                | 2 494         | 1 572         |
| <b>Zwischensumme</b>                                  | <b>7 169</b>  | <b>4 988</b>  |
| <b>Öffentliche Haushalte</b>                          | <b>6 824</b>  | <b>6 812</b>  |
| <b>Privatkunden</b>                                   | <b>17 514</b> | <b>18 125</b> |
| <b>Zwischensumme</b>                                  | <b>31 507</b> | <b>29 925</b> |
| <b>Ausland</b>                                        |               |               |
| <b>Firmenkunden</b>                                   |               |               |
| Industrie, Groß- und Einzelhandel sowie Dienstleister | 5 854         | 5 500         |
| Finanzinstitute (außer Banken) und Versicherungen     | 1 521         | 989           |
| Übrige                                                | 1 759         | 2 245         |
| <b>Zwischensumme</b>                                  | <b>9 134</b>  | <b>8 734</b>  |
| <b>Öffentliche Haushalte</b>                          | <b>84</b>     | <b>115</b>    |
| <b>Privatkunden</b>                                   | <b>5 919</b>  | <b>5 618</b>  |
| <b>Zwischensumme</b>                                  | <b>15 137</b> | <b>14 467</b> |
| <b>Summe</b>                                          | <b>46 644</b> | <b>44 392</b> |

### Entwicklung des Bestands an Risikovorsorge nach Klassen von Finanzinstrumenten

Zum 31. Dezember 2010 setzte sich der Bestand an Risikovorsorge zusammen aus der aktivisch abgesetzten

Risikovorsorge in Höhe von 146 (2009: 144; 2008: 119) Mio € und den unter andere Verbindlichkeiten passivisch ausgewiesenen Rückstellungen im Kreditgeschäft in Höhe von 7 (2009: 8; 2008: 8) Mio €.

|                                                                                                                                                 | Aktivisch abgesetzte Risikovorsorge |               |               | Rückstellungen im Kreditgeschäft |               |               | Summe         |               |               |
|-------------------------------------------------------------------------------------------------------------------------------------------------|-------------------------------------|---------------|---------------|----------------------------------|---------------|---------------|---------------|---------------|---------------|
|                                                                                                                                                 | 2010<br>Mio €                       | 2009<br>Mio € | 2008<br>Mio € | 2010<br>Mio €                    | 2009<br>Mio € | 2008<br>Mio € | 2010<br>Mio € | 2009<br>Mio € | 2008<br>Mio € |
| <b>Stand 1.1.</b>                                                                                                                               | <b>144</b>                          | <b>119</b>    | <b>830</b>    | <b>8</b>                         | <b>8</b>      | <b>201</b>    | <b>152</b>    | <b>127</b>    | <b>1 031</b>  |
| Veränderungen Konsolidierungskreis                                                                                                              | - 19                                | —             | —             | - 1                              | —             | —             | - 20          | —             | —             |
| Zuführungen zu Lasten der Konzern-Gewinn- und Verlustrechnung                                                                                   | 110                                 | 212           | 118           | 13                               | 3             | 3             | 123           | 215           | 121           |
| Verbrauch                                                                                                                                       | - 35                                | - 157         | - 73          | —                                | —             | —             | - 35          | - 157         | - 73          |
| Auflösungen                                                                                                                                     | - 46                                | - 35          | - 31          | - 7                              | - 4           | - 4           | - 53          | - 39          | - 35          |
| Sonstige Zu-/Abgänge                                                                                                                            | - 9                                 | 3             | - 1           | —                                | 1             | —             | - 9           | 4             | - 1           |
| Währungsänderungen                                                                                                                              | 1                                   | 2             | - 3           | —                                | —             | —             | 1             | 2             | - 3           |
| Umgliederungen in langfristige Vermögenswerte und Vermögenswerte von Veräußerungsgruppen, die als zur Veräußerung gehalten klassifiziert werden | —                                   | —             | - 721         | - 6                              | —             | - 192         | - 6           | —             | - 913         |
| <b>Stand 31.12.</b>                                                                                                                             | <b>146</b>                          | <b>144</b>    | <b>119</b>    | <b>7</b>                         | <b>8</b>      | <b>8</b>      | <b>153</b>    | <b>152</b>    | <b>127</b>    |

Die folgende Tabelle enthält Angaben zu den ausfallgefährdeten Krediten.

|                                                                                  |               |               |
|----------------------------------------------------------------------------------|---------------|---------------|
| Stand 31. Dezember                                                               | 2010<br>Mio € | 2009<br>Mio € |
| Ausfallgefährdete Kredite                                                        | 1 074         | 1 149         |
| Ausfallgefährdete Kredite, auf die eine Einzelwertberichtigung vorgenommen wurde | 1 063         | 1 129         |
| Durchschnittlicher Bestand ausfallgefährdeter Kredite                            | 874           | 713           |
| Darauf entfallene Zinserträge                                                    | 10            | 4             |

## 11 Rückversicherungsaktiva

|                                                             |               |               |
|-------------------------------------------------------------|---------------|---------------|
| Stand 31. Dezember                                          | 2010<br>Mio € | 2009<br>Mio € |
| Beitragsüberträge                                           | 1 372         | 1 424         |
| Rückstellung für noch nicht abgewickelte Versicherungsfälle | 6 986         | 7 456         |
| Deckungsrückstellung                                        | 4 674         | 4 613         |
| Übrige versicherungstechnische Rückstellungen               | 103           | 66            |
| <b>Summe</b>                                                | <b>13 135</b> | <b>13 559</b> |

Die Veränderung der in Rückdeckung gegebenen Deckungsrückstellung ist in folgender Tabelle dargestellt.

|                                                                   | 2010<br>Mio € | 2009<br>Mio € | 2008<br>Mio € |
|-------------------------------------------------------------------|---------------|---------------|---------------|
| <b>Stand 1.1.</b>                                                 | <b>4 613</b>  | <b>5 018</b>  | <b>5 319</b>  |
| Währungsänderungen                                                | 193           | - 82          | 150           |
| In der Konzern-Gewinn- und Verlustrechnung erfasste Veränderungen | - 46          | - 11          | - 47          |
| Sonstige Veränderungen                                            | - 86          | - 312         | - 404         |
| <b>Stand 31.12.</b>                                               | <b>4 674</b>  | <b>4 613</b>  | <b>5 018</b>  |

Der Allianz Konzern zediert einen Teil der gezeichneten Risiken, um sein Risiko gegenüber Verlusten und bestimmten Ereignissen zu steuern und die Kapitalressourcen zu schützen. Das Industriegeschäft wird grundsätzlich entweder von der Allianz Global Corporate & Specialty AG (AGCS) direkt gezeichnet oder von anderen Allianz Konzerngesellschaften an die AGCS abgegeben. Für dieses Geschäftssegment kauft die AGCS globalen

Rückversicherungsschutz entweder im externen Rückversicherungsmarkt oder gruppenintern bei der Allianz SE. Der Allianz Konzern führt ein zentralisiertes Programm für Naturkatastrophen, welches das Risiko einiger Tochterunternehmen durch interne Rückversicherungsabkommen mit der Allianz SE bündelt. Die Allianz SE begrenzt das Risiko aus diesem Portfolio durch externe Rückversicherung. Für sonstige Risiken haben die Tochterunternehmen des Allianz Konzerns individuelle Rückversicherungsprogramme abgeschlossen. Allianz SE nimmt als Rückversicherer an diesen Programmen zu marktüblichen Konditionen teil.

Rückversicherung ist mit einem Kreditrisiko verbunden und unterliegt aggregierten Verlustlimiten. Die Rückversicherung befreit den Allianz Konzern nicht von seiner primären Deckungsverpflichtung für die rückversicherten Verträge. Obwohl der Rückversicherer gegenüber dem Allianz Konzern in Höhe des in Rückdeckung zedierten Geschäfts haftet, bleibt der Konzern als Erstversicherer für alle übernommenen Risiken einschließlich des Rückversicherungsanteils in voller Höhe haftbar. Der Allianz Konzern überwacht die Zahlungsfähigkeit seiner Rückversicherer laufend und überprüft in regelmäßigen Abständen seine Rückversicherungsvereinbarungen, um die Fähigkeit des Rückversicherers zur Erfüllung der im Rahmen von bestehenden und geplanten Rückversicherungsverträgen eingegangenen Verpflichtungen gegenüber dem Allianz Konzern zu bewerten. Die Beurteilungskriterien des Allianz Konzerns, zu denen auch die Bonitätsbewertung, das Kapital- und Überschussniveau sowie die Marktreputation seiner Rückversicherer gehören, sind so konzipiert, dass keine nennenswerten Risiken im Zusammenhang mit der Einbringung von Forderungen anzunehmen sind. In der Vergangenheit ist es zu keinen wesentlichen Forderungsausfällen aus Rückversicherungsbeziehungen gekommen. Ferner kann der Allianz Konzern soweit erforderlich Bürgschaften, Einlagen oder sonstige Finanzmaßnahmen fordern, um die Gefährdung durch Kreditrisiken weiter zu vermindern. In bestimmten Fällen bildet der Allianz Konzern allerdings für zweifelhafte Forderungen aus dem Rückversicherungsgeschäft eine Wertberichtigung, sofern dies angebracht erscheint; diese Beträge waren jedoch zum 31. Dezember 2010 und 2009 unbedeutend. Der Allianz Konzern unterhält hauptsächlich Geschäftsbeziehungen zu Rückversicherern mit einem hohen Rating.

## 12 Aktivierter Abschlusskosten

| Stand 31. Dezember                                                | 2010<br>Mio € | 2009<br>Mio € |
|-------------------------------------------------------------------|---------------|---------------|
| <b>Aktivierter Abschlusskosten</b>                                |               |               |
| Schaden-Unfall                                                    | 4 121         | 3 789         |
| Leben/Kranken                                                     | 14 459        | 14 452        |
| Asset Management                                                  | 152           | 149           |
| <b>Zwischensumme</b>                                              | <b>18 732</b> | <b>18 390</b> |
| <b>Bestandswert von Lebens- und Krankenversicherungsbeständen</b> | <b>1 180</b>  | <b>1 212</b>  |
| <b>Aktivierter Verkaufsförderungen</b>                            | <b>821</b>    | <b>693</b>    |
| <b>Summe</b>                                                      | <b>20 733</b> | <b>20 295</b> |

### Aktivierter Abschlusskosten

|                                                          | 2010<br>Mio € | 2009<br>Mio € | 2008<br>Mio € |
|----------------------------------------------------------|---------------|---------------|---------------|
| <b>Schaden-Unfall</b>                                    |               |               |               |
| <b>Bilanzwert 1.1.</b>                                   | <b>3 789</b>  | <b>3 721</b>  | <b>3 675</b>  |
| Zugänge                                                  | 4 798         | 4 506         | 3 754         |
| Veränderungen<br>Konsolidierungskreis                    | – 4           | —             | – 13          |
| Währungsänderungen                                       | 151           | 54            | – 85          |
| Tilgungen                                                | – 4 613       | – 4 492       | – 3 610       |
| <b>Bilanzwert 31.12.</b>                                 | <b>4 121</b>  | <b>3 789</b>  | <b>3 721</b>  |
| <b>Leben/Kranken</b>                                     |               |               |               |
| <b>Bilanzwert 1.1.</b>                                   | <b>14 452</b> | <b>16 214</b> | <b>13 889</b> |
| Zugänge                                                  | 2 719         | 2 285         | 2 400         |
| Veränderungen<br>Konsolidierungskreis                    | – 10          | —             | 18            |
| Währungsänderungen                                       | 492           | – 42          | 53            |
| Veränderung der Schattenbilanzierung (Shadow accounting) | – 977         | – 1 693       | 1 360         |
| Tilgungen                                                | – 2 217       | – 2 312       | – 1 506       |
| <b>Bilanzwert 31.12.</b>                                 | <b>14 459</b> | <b>14 452</b> | <b>16 214</b> |
| <b>Asset Management</b>                                  | <b>152</b>    | <b>149</b>    | <b>147</b>    |
| <b>Summe</b>                                             | <b>18 732</b> | <b>18 390</b> | <b>20 082</b> |



**Bestandswert von Lebens- und Krankenversicherungsbeständen**

|                                                          | 2010<br>Mio € | 2009<br>Mio € | 2008<br>Mio € |
|----------------------------------------------------------|---------------|---------------|---------------|
| Bruttobuchwert 1.1.                                      | 2 694         | 2 415         | 2 344         |
| Kumulierte Abschreibungen 1.1.                           | - 1 482       | - 1 180       | - 1 139       |
| <b>Bilanzwert 1.1.</b>                                   | <b>1 212</b>  | <b>1 235</b>  | <b>1 205</b>  |
| Veränderungen                                            |               |               |               |
| Konsolidierungskreis                                     | —             | 230           | 54            |
| Währungsänderungen                                       | 48            | - 2           | 3             |
| Veränderung der Schattenbilanzierung (Shadow accounting) | - 1           | - 70          | 75            |
| Tilgungen <sup>1</sup>                                   | - 79          | - 181         | - 102         |
| <b>Bilanzwert 31.12.</b>                                 | <b>1 180</b>  | <b>1 212</b>  | <b>1 235</b>  |
| Kumulierte Abschreibungen 31.12.                         | 1 602         | 1 482         | 1 180         |
| <b>Bruttobuchwert 31.12.</b>                             | <b>2 782</b>  | <b>2 694</b>  | <b>2 415</b>  |

<sup>1</sup> Enthält auf den nicht getilgten Bestandswert von Lebens- und Krankenversicherungsbeständen entfallende Zinsen für das Geschäftsjahr 2010 in Höhe von 65 (2009: 40; 2008: 65) Mio €.

Zum 31. Dezember 2010 betrug der Prozentsatz des Bestandswertes von Lebens- und Krankenversicherungsbeständen, dessen Tilgung für 2011 erwartet wird, 13,02 % (2012: 12,01 %; 2013: 10,51 %; 2014: 9,26 %; 2015: 8,37 %).

**Aktiviert Verkaufsförderungen**

|                                                          | 2010<br>Mio € | 2009<br>Mio € | 2008<br>Mio € |
|----------------------------------------------------------|---------------|---------------|---------------|
| <b>Bilanzwert 1.1.</b>                                   | <b>693</b>    | <b>688</b>    | <b>493</b>    |
| Zugänge                                                  | 335           | 256           | 91            |
| Währungsänderungen                                       | 46            | - 17          | 27            |
| Veränderung der Schattenbilanzierung (Shadow accounting) | - 124         | - 141         | 98            |
| Tilgungen                                                | - 129         | - 93          | - 21          |
| <b>Bilanzwert 31.12.</b>                                 | <b>821</b>    | <b>693</b>    | <b>688</b>    |

**13 Übrige Aktiva**

| Stand 31. Dezember                                                                                                 | 2010<br>Mio € | 2009<br>Mio € |
|--------------------------------------------------------------------------------------------------------------------|---------------|---------------|
| <b>Forderungen</b>                                                                                                 |               |               |
| Versicherungsnehmer                                                                                                | 5 322         | 4 865         |
| Versicherungsvermittler                                                                                            | 4 129         | 3 922         |
| Rückversicherer                                                                                                    | 2 581         | 2 437         |
| Übrige                                                                                                             | 3 515         | 3 480         |
| Abzüglich Wertminderung für zweifelhafte Forderungen                                                               | - 629         | - 564         |
| <b>Zwischensumme</b>                                                                                               | <b>14 918</b> | <b>14 140</b> |
| <b>Steuerforderungen</b>                                                                                           |               |               |
| Ertragsteuern                                                                                                      | 1 691         | 2 277         |
| Sonstige Steuern                                                                                                   | 1 043         | 950           |
| <b>Zwischensumme</b>                                                                                               | <b>2 734</b>  | <b>3 227</b>  |
| <b>Dividenden-, Zins- und Mietforderungen</b>                                                                      | <b>7 356</b>  | <b>6 865</b>  |
| <b>Rechnungsabgrenzungsposten</b>                                                                                  |               |               |
| Zinsen und Mieten                                                                                                  | 16            | 20            |
| Übrige Rechnungsabgrenzungsposten                                                                                  | 334           | 284           |
| <b>Zwischensumme</b>                                                                                               | <b>350</b>    | <b>304</b>    |
| <b>Derivative Finanzinstrumente, welche die Kriterien des Hedge Accounting erfüllen, und feste Verpflichtungen</b> | <b>452</b>    | <b>304</b>    |
| <b>Sachanlagen</b>                                                                                                 |               |               |
| Eigengenutzter Grundbesitz                                                                                         | 3 075         | 2 916         |
| Software                                                                                                           | 1 287         | 1 297         |
| Geschäftsausstattung                                                                                               | 735           | 803           |
| Anlagevermögen Alternativer Investments                                                                            | 1 117         | 822           |
| <b>Zwischensumme</b>                                                                                               | <b>6 214</b>  | <b>5 838</b>  |
| <b>Übrige Aktiva<sup>1</sup></b>                                                                                   | <b>1 977</b>  | <b>2 369</b>  |
| <b>Summe</b>                                                                                                       | <b>34 001</b> | <b>33 047</b> |

<sup>1</sup> Enthält zum 31. Dezember 2010 vorausbezahlten Aufwand für leistungsorientierte Pensionspläne in Höhe von 372 (2009: 276) Mio €.

Zum 31. Dezember 2010 beliefen sich die übrigen Aktiva, die innerhalb eines Jahres fällig sind, auf 27 448 (2009: 24 898) Mio € und übrige Aktiva, die nach mehr als einem Jahr fällig sind, auf 6 553 (2009: 8 149) Mio €.

## Sachanlagen

### Eigengenutzter Grundbesitz

|                                                                                                                                                                                     | 2010<br>Mio € | 2009<br>Mio € | 2008<br>Mio € |
|-------------------------------------------------------------------------------------------------------------------------------------------------------------------------------------|---------------|---------------|---------------|
| Bruttobuchwert 1.1.                                                                                                                                                                 | 4 008         | 4 136         | 4 847         |
| Kumulierte Abschreibungen 1.1.                                                                                                                                                      | – 1 092       | – 1 014       | – 1 139       |
| <b>Bilanzwert 1.1.</b>                                                                                                                                                              | <b>2 916</b>  | <b>3 122</b>  | <b>3 708</b>  |
| Zugänge                                                                                                                                                                             | 243           | 84            | 227           |
| Veränderungen<br>Konsolidierungskreis                                                                                                                                               | – 97          | 27            | 27            |
| Abgänge                                                                                                                                                                             | – 70          | – 31          | – 61          |
| Umgliederungen                                                                                                                                                                      | 96            | – 240         | 239           |
| Umgliederungen aus (+)/in (–)<br>langfristige(n) Vermögenswerte(n)<br>und Vermögenswerte(n) von<br>Veräußerungsgruppen, die als zur<br>Veräußerung gehalten klassifiziert<br>werden | – 11          | 4             | – 902         |
| Währungsänderungen                                                                                                                                                                  | 89            | 31            | – 40          |
| Abschreibungen                                                                                                                                                                      | – 92          | – 81          | – 78          |
| Wertminderungen                                                                                                                                                                     | —             | —             | – 9           |
| Wertaufholungen                                                                                                                                                                     | 1             | —             | 11            |
| <b>Bilanzwert 31.12.</b>                                                                                                                                                            | <b>3 075</b>  | <b>2 916</b>  | <b>3 122</b>  |
| Kumulierte Abschreibungen 31.12.                                                                                                                                                    | 1 194         | 1 092         | 1 014         |
| Bruttobuchwert 31.12.                                                                                                                                                               | 4 269         | 4 008         | 4 136         |

Der Zeitwert des eigengenutzten Grundbesitzes des Allianz Konzerns belief sich zum 31. Dezember 2010 auf 4 363 (2009: 4 053) Mio €. In Höhe von 266 (2009: 262) Mio € bestanden Verfügungsbeschränkungen und Verpfändungen als Sicherheiten.

## Software

|                                                                                                                                                                                                  | 2010<br>Mio € | 2009<br>Mio € | 2008<br>Mio € |
|--------------------------------------------------------------------------------------------------------------------------------------------------------------------------------------------------|---------------|---------------|---------------|
| Bruttobuchwert 1.1.                                                                                                                                                                              | 3 828         | 3 400         | 3 946         |
| Kumulierte Abschreibungen 1.1.                                                                                                                                                                   | – 2 531       | – 2 284       | – 2 781       |
| <b>Bilanzwert 1.1.</b>                                                                                                                                                                           | <b>1 297</b>  | <b>1 116</b>  | <b>1 165</b>  |
| Zugänge                                                                                                                                                                                          | 426           | 492           | 540           |
| Veränderungen<br>Konsolidierungskreis                                                                                                                                                            | – 5           | – 2           | – 10          |
| Abgänge                                                                                                                                                                                          | – 88          | – 45          | – 55          |
| Währungsänderungen                                                                                                                                                                               | 21            | – 3           | 1             |
| Abschreibungen                                                                                                                                                                                   | – 329         | – 275         | – 288         |
| Wertminderungen                                                                                                                                                                                  | – 27          | – 4           | – 3           |
| Umgliederungen aus (+)/in (–)<br>langfristige(n) Vermögenswerte(n)<br>und Vermögenswerte(n) von<br>Veräußerungsgruppen, die als zur<br>Veräußerung gehalten klassifiziert<br>werden <sup>1</sup> | – 8           | 18            | – 234         |
| <b>Bilanzwert 31.12.<sup>2</sup></b>                                                                                                                                                             | <b>1 287</b>  | <b>1 297</b>  | <b>1 116</b>  |
| Kumulierte Abschreibungen 31.12.                                                                                                                                                                 | 2 875         | 2 531         | 2 284         |
| Bruttobuchwert 31.12.                                                                                                                                                                            | 4 162         | 3 828         | 3 400         |

<sup>1</sup> Beinhaltet Software der Allianz Bank Polska, Selecta und Dresdner Bank für die Geschäftsjahre 2010, 2009 bzw. 2008.

<sup>2</sup> Der in der Konzernbilanz zum 31. Dezember 2010 ausgewiesene Wert für Software enthält 829 (2009: 812; 2008: 701) Mio € für selbst erstellte Software und 458 (2009: 485; 2008: 415) Mio € für erworbene Software.

## Geschäftsausstattung

|                                                                                                                                                                                                  | 2010<br>Mio € | 2009<br>Mio € | 2008<br>Mio € |
|--------------------------------------------------------------------------------------------------------------------------------------------------------------------------------------------------|---------------|---------------|---------------|
| Bruttobuchwert 1.1.                                                                                                                                                                              | 3 311         | 3 102         | 4 189         |
| Kumulierte Abschreibungen 1.1.                                                                                                                                                                   | – 2 508       | – 2 279       | – 2 876       |
| <b>Bilanzwert 1.1.</b>                                                                                                                                                                           | <b>803</b>    | <b>823</b>    | <b>1 313</b>  |
| Zugänge                                                                                                                                                                                          | 318           | 295           | 318           |
| Veränderungen<br>Konsolidierungskreis                                                                                                                                                            | 3             | 6             | – 48          |
| Abgänge                                                                                                                                                                                          | – 101         | – 124         | – 59          |
| Umgliederungen                                                                                                                                                                                   | – 27          | —             | —             |
| Umgliederungen aus (+)/in (–)<br>langfristige(n) Vermögenswerte(n)<br>und Vermögenswerte(n) von<br>Veräußerungsgruppen, die als zur<br>Veräußerung gehalten klassifiziert<br>werden <sup>1</sup> | – 22          | —             | – 482         |
| Währungsänderungen                                                                                                                                                                               | 22            | 13            | – 14          |
| Abschreibungen                                                                                                                                                                                   | – 244         | – 206         | – 190         |
| Wertminderungen                                                                                                                                                                                  | – 17          | – 4           | – 15          |
| <b>Bilanzwert 31.12.</b>                                                                                                                                                                         | <b>735</b>    | <b>803</b>    | <b>823</b>    |
| Kumulierte Abschreibungen 31.12.                                                                                                                                                                 | 2 562         | 2 508         | 2 279         |
| Bruttobuchwert 31.12.                                                                                                                                                                            | 3 297         | 3 311         | 3 102         |

<sup>1</sup> Beinhaltet Geschäftsausstattung der Allianz Bank Polska und der Dresdner Bank für die Geschäftsjahre 2010 bzw. 2008.

**Anlagevermögen Alternativer Investments<sup>1</sup>**

|                                                                                                                                                                  | 2010<br>Mio € | 2009<br>Mio € | 2008<br>Mio € |
|------------------------------------------------------------------------------------------------------------------------------------------------------------------|---------------|---------------|---------------|
| Bruttobuchwert 1.1.                                                                                                                                              | 1 152         | 538           | 426           |
| Kumulierte Abschreibungen 1.1.                                                                                                                                   | – 330         | – 119         | – 73          |
| <b>Bilanzwert 1.1.</b>                                                                                                                                           | <b>822</b>    | <b>419</b>    | <b>353</b>    |
| Zugänge                                                                                                                                                          | 177           | 153           | 76            |
| Veränderungen                                                                                                                                                    |               |               |               |
| Konsolidierungskreis                                                                                                                                             | 248           | 164           | 35            |
| Abgänge                                                                                                                                                          | – 3           | – 7           | – 1           |
| Umgliederungen aus langfristigen Vermögenswerten und Vermögenswerten von Veräußerungsgruppen, die als zur Veräußerung gehalten klassifiziert werden <sup>2</sup> | —             | 309           | —             |
| Währungsänderungen                                                                                                                                               | 13            | – 4           | —             |
| Abschreibungen                                                                                                                                                   | – 140         | – 212         | – 44          |
| <b>Bilanzwert 31.12.</b>                                                                                                                                         | <b>1 117</b>  | <b>822</b>    | <b>419</b>    |
| Kumulierte Abschreibungen 31.12.                                                                                                                                 | 470           | 330           | 119           |
| Bruttobuchwert 31.12.                                                                                                                                            | 1 587         | 1 152         | 538           |

1 Beinhaltet das Anlagevermögen von Windparks, Solarparks, manroland und Selecta.

2 Beinhaltet Anlagevermögen von Selecta für das Geschäftsjahr 2009.

## 14 Langfristige Vermögenswerte sowie Vermögenswerte und Verbindlichkeiten von Veräußerungsgruppen, die als zur Veräußerung gehalten klassifiziert werden

| Stand 31. Dezember                                                                                                                   | 2010<br>Mio € | 2009<br>Mio € |
|--------------------------------------------------------------------------------------------------------------------------------------|---------------|---------------|
| <b>Langfristige Vermögenswerte und Vermögenswerte von Veräußerungsgruppen, die als zur Veräußerung gehalten klassifiziert werden</b> |               |               |
| Allianz Bank Polska S.A.                                                                                                             | 247           | —             |
| Fremdgenutzter Grundbesitz (Schaden-Unfall)                                                                                          | 22            | —             |
| Fremdgenutzter Grundbesitz (Leben/Kranken)                                                                                           | 24            | —             |
| Eigengenutzter Grundbesitz (Schaden-Unfall)                                                                                          | 6             | —             |
| <b>Summe</b>                                                                                                                         | <b>299</b>    | <b>—</b>      |
| <b>Verbindlichkeiten von Veräußerungsgruppen, die als zur Veräußerung gehalten klassifiziert werden</b>                              |               |               |
| Allianz Bank Polska S.A.                                                                                                             | 188           | —             |
| <b>Summe</b>                                                                                                                         | <b>188</b>    | <b>—</b>      |

### Langfristige Vermögenswerte sowie Vermögenswerte und Verbindlichkeiten von Veräußerungsgruppen, die als zur Veräußerung gehalten klassifiziert werden, zum 31. Dezember 2010

#### Allianz Bank Polska S.A.

Während des 4. Quartals 2010 hat der Allianz Konzern einen Vertrag zur Veräußerung der Allianz Bank Polska S.A. abgeschlossen. Demzufolge wurden die Vermögenswerte und Verbindlichkeiten der hundertprozentigen Beteiligung an der Allianz Bank Polska S.A., die dem Segment Corporate und Sonstiges zugeordnet sind, als zur Veräußerung gehaltene Veräußerungsgruppe umklassifiziert.

Die folgende Tabelle zeigt die Vermögenswerte und Verbindlichkeiten, die als zur Veräußerung gehalten klassifiziert wurden:

| Stand 31. Dezember 2010                                                                                          | Allianz Bank Polska S.A.,<br>Mio € |
|------------------------------------------------------------------------------------------------------------------|------------------------------------|
| Barreserve und andere liquide Mittel                                                                             | 39                                 |
| Finanzanlagen                                                                                                    | 49                                 |
| Forderungen an Kreditinstitute und Kunden                                                                        | 126                                |
| Aktive Steuerabgrenzung                                                                                          | 2                                  |
| Übrige Aktiva                                                                                                    | 31                                 |
| <b>Summe der Vermögenswerte der Veräußerungsgruppe, die als zur Veräußerung gehalten klassifiziert wurden</b>    | <b>247</b>                         |
| Verbindlichkeiten gegenüber Kreditinstituten und Kunden                                                          | 144                                |
| Passive Steuerabgrenzung                                                                                         | 1                                  |
| Andere Verbindlichkeiten                                                                                         | 43                                 |
| <b>Summe der Verbindlichkeiten der Veräußerungsgruppe, die als zur Veräußerung gehalten klassifiziert wurden</b> | <b>188</b>                         |

Zum 31. Dezember 2010 betragen die aufgelaufenen, direkt im Eigenkapital erfassten Verluste der Veräußerungsgruppe, die als zur Veräußerung gehalten klassifiziert wurde, 11 Mio €.

Der Verkauf soll im 1. Halbjahr 2011 erfolgen und steht unter dem Vorbehalt der Genehmigung durch die Aufsichtsbehörden. Aus der Bewertung der Veräußerungsgruppe zum Zeitwert abzüglich Veräußerungskosten wurde eine Wertminderung in Höhe von 34 Mio € erfolgswirksam erfasst.

#### Fremdgenutzter Grundbesitz

Während des 4. Quartals 2010 hat der Allianz Konzern Verträge über die einzelne Veräußerung verschiedener in Paris gelegener Wohngebäude der Allianz IARD S.A. und Allianz Vie S.A. abgeschlossen. Demzufolge wurden

die zuvor als fremdgenutzter Grundbesitz klassifizierten Vermögenswerte im Segment Schaden-Unfall und Leben/Kranken umgegliedert und als zur Veräußerung gehaltene langfristige Vermögenswerte ausgewiesen. Der Verkauf soll im 1. Quartal 2011 erfolgen. Aus der Bewertung des langfristigen Vermögenswertes zum Zeitwert abzüglich Veräußerungskosten wurde keine Wertminderung erfasst.

Während des 4. Quartals 2010 hat der Allianz Konzern einen Vertrag über die Veräußerung eines Geschäftsgebäudes in Budapest von Allianz Ungarn abgeschlossen. Demzufolge wurde der zuvor eigengenutzte Grundbesitz, der dem Segment Schaden-Unfall zugeordnet ist, umgegliedert und als zur Veräußerung gehaltener langfristiger Vermögenswert ausgewiesen. Der Verkauf soll im 1. Quartal 2011 erfolgen. Aus der Bewertung des langfristigen Vermögenswertes zum Zeitwert abzüglich Veräußerungskosten wurde eine Wertminderung in Höhe von 5 Mio € erfolgswirksam erfasst.

### Veräußerungen im Geschäftsjahr 2010

#### Alba Allgemeine Versicherungs-Gesellschaft AG (Alba), Basel, Phenix Compagnie d'assurances SA (Phenix), Lausanne und Phenix Compagnie d'assurances sur la vie SA (Phenix Vie), Lausanne

Im November 2010 hat der Allianz Konzern Alba, Phenix und Phenix Vie, die während des 3. Quartals 2010 als zur Veräußerung gehaltene Veräußerungsgruppen klassifiziert wurden, an die Helvetia Gruppe veräußert. Unrealisierte Gewinne in Höhe von 27 Mio € wurden aus dem Eigenkapital in die Konzern-Gewinn- und Verlustrechnung umgegliedert.

#### Allianz Bank Zrt., Budapest

Im September 2010 hat der Allianz Konzern den Verkauf der Allianz Bank Zrt., Budapest, die während des 2. Quartals 2010 als zur Veräußerung gehaltene Veräußerungsgruppe klassifiziert wurde, abgeschlossen. Bis zum Abgang sind Wertminderungen aus Bewertung der Veräußerungsgruppe zum Zeitwert abzüglich Veräußerungskosten in Höhe von insgesamt 43 Mio € angefallen.

#### Galleria Commerciale Porta di Roma S.p.A., Rom

Während des 2. Quartals 2010 hat der Allianz Konzern 100-% des Shopping Centers Galleria Commerciale Porta di Roma S.p.A., in Rom, Italien, erworben. Gleichzeitig hat der Allianz Konzern der Veräußerung eines 50-prozentigen Anteils zugestimmt. Der Verkauf wurde während

des 3. Quartals 2010 abgeschlossen. Der verbleibende 50-prozentige Anteil wird als at equity bilanziertes Gemeinschaftsunternehmen gezeigt. Aus der Umgliederung ergaben sich keine Auswirkungen auf die Konzern-Gewinn- und Verlustrechnung.

## 15 Immaterielle Vermögenswerte

| Stand 31. Dezember                                          | 2010<br>Mio € | 2009<br>Mio € |
|-------------------------------------------------------------|---------------|---------------|
| <b>Vermögenswerte mit nicht bestimmbarer Nutzungsdauer</b>  |               |               |
| Geschäfts- oder Firmenwert                                  | 12 020        | 12 014        |
| Markennamen <sup>1</sup>                                    | 311           | 309           |
| <b>Zwischensumme</b>                                        | <b>12 331</b> | <b>12 323</b> |
| <b>Vermögenswerte mit bestimmbarer Nutzungsdauer</b>        |               |               |
| Langfristige Vertriebsvereinbarungen mit der Commerzbank AG | 585           | 620           |
| Kundenbeziehungen                                           | 287           | 352           |
| Übrige <sup>2</sup>                                         | 178           | 181           |
| <b>Zwischensumme</b>                                        | <b>1 050</b>  | <b>1 153</b>  |
| <b>Summe</b>                                                | <b>13 381</b> | <b>13 476</b> |

<sup>1</sup> Enthält im Wesentlichen den Markennamen Selecta AG, Muntelier.

<sup>2</sup> Enthält im Wesentlichen Forschungs- und Entwicklungskosten von 67 (2009: 81) Mio € sowie Bankassurance-Vereinbarungen von 14 (2009: 14) Mio €.

### Geschäfts- oder Firmenwert

|                                                                                                                                                                    | 2010<br>Mio € | 2009<br>Mio € | 2008<br>Mio € |
|--------------------------------------------------------------------------------------------------------------------------------------------------------------------|---------------|---------------|---------------|
| Bruttobuchwert 1.1.                                                                                                                                                | 12 291        | 11 445        | 12 677        |
| Kumulierte Wertminderungen 1.1.                                                                                                                                    | – 277         | – 224         | – 224         |
| <b>Bilanzwert 1.1.</b>                                                                                                                                             | <b>12 014</b> | <b>11 221</b> | <b>12 453</b> |
| Zugänge                                                                                                                                                            | 56            | 468           | 247           |
| Währungsänderungen                                                                                                                                                 | 256           | – 113         | 32            |
| Wertminderungen                                                                                                                                                    | – 306         | – 53          | —             |
| Umgliederung aus (+)/in (–) langfristige(n) Vermögenswerte(n) und Vermögenswerte(n) von Veräußerungsgruppen, die als zur Veräußerung gehalten klassifiziert werden | —             | 491           | – 1 511       |
| <b>Bilanzwert 31.12.</b>                                                                                                                                           | <b>12 020</b> | <b>12 014</b> | <b>11 221</b> |
| Kumulierte Wertminderungen 31.12.                                                                                                                                  | 583           | 277           | 224           |
| Bruttobuchwert 31.12.                                                                                                                                              | 12 603        | 12 291        | 11 445        |

### 2010

Die Zugänge enthalten im Wesentlichen einen Geschäfts- oder Firmenwert aus dem Erwerb von 100 % der Anteile an Windpark Werder Zinndorf GmbH & Co. KG, Sehestedt, dem Erwerb von 100 % der Anteile an Solarpark BPS Brindisi S.r.l., Brindisi, und dem Erwerb von 100 % der Anteile an Solarpark Orsa Maggiore PV S.r.l., Mailand.

**2009**

Die Zugänge enthalten im Wesentlichen einen Geschäfts- oder Firmenwert aus dem Erwerb von 100% der Anteile an der cominvest Asset Management GmbH, Frankfurt am Main.

Der Geschäfts- oder Firmenwert der „Cash-Generating Unit“ (CGU) Bankgeschäft wurde im Rahmen des jährlichen Werthaltigkeitstests abgeschrieben.

Die Umgliederung betrifft den Geschäfts- oder Firmenwert an der Selecta AG, Muntelier, die aus der Bilanzposition „Langfristige Vermögenswerte und Vermögenswerte von Veräußerungsgruppen, die als zur Veräußerung gehalten klassifiziert werden“ zurückgegliedert wurde.

**2008**

Die Umgliederung betrifft den Geschäfts- oder Firmenwert an der Dresdner Bank AG, Frankfurt am Main, der in die Bilanzposition „Langfristige Vermögenswerte und Vermögenswerte von Veräußerungsgruppen, die als zur Veräußerung gehalten klassifiziert werden“ umgegliedert wurde.

**Werthaltigkeitstest für den Geschäfts- oder Firmenwert und immaterielle Vermögenswerte mit unbegrenzter Nutzungsdauer**

Zum Zweck des Werthaltigkeitstests hat der Allianz Konzern den Geschäfts- oder Firmenwert auf „Cash-Generating Units“ (CGU) aufgeteilt. Diese CGU repräsentieren die niedrigstmögliche Ebene im Unternehmen, auf der ein Geschäfts- oder Firmenwert für interne Managementzwecke beobachtet wird.

Zum Zweck des Werthaltigkeitstests wurden die aktivierten langfristigen Vertriebsvereinbarungen mit der Commerzbank AG der CGU Deutschsprachige Länder im Segment Leben/Kranken zugeordnet, da die Cashflows in dieser CGU ökonomisch erwirtschaftet werden.

Als Resultat der Werthaltigkeitstests in 2010 wurde der Geschäfts- oder Firmenwert der CGU Central and Eastern Europe im Segment Schaden-Unfall um 140 Mio € vermindert, der Geschäfts- oder Firmenwert der CGU manroland AG im Segment Corporate und Sonstiges um 115 Mio € vermindert und der Geschäfts- oder Firmenwert der CGU Bankgeschäft Europa um 51 Mio € vermindert.

Die CGU im Segment Schaden-Unfall sind:

- Deutschsprachige Länder,
- Europa, umfasst Frankreich, Niederlande, Belgien, Luxemburg, Italien, Spanien, Portugal, Griechenland, Türkei und Afrika,
- Südamerika,
- Asien Pazifik und Mittlerer Osten,
- Central and Eastern Europe, umfasst Bulgarien, Kroatien, Tschechische Republik, Ungarn, Slowakei, Polen, Rumänien und Russland,
- Global Insurance Lines & Anglo Markets,
- NAFTA Markets,
- Spezial-Versicherungsgeschäft I, umfasst Allianz Global Corporate & Specialty und Kreditversicherung,
- Spezial-Versicherungsgeschäft II, umfasst Reiseversicherung und Assistance.

Die CGU im Segment Leben/Kranken sind:

- Deutschsprachige Länder,
- Deutschland Kranken,
- Europa, umfasst Frankreich, Niederlande, Belgien, Luxemburg, Italien, Spanien, Portugal, Griechenland, Türkei und Afrika,
- Asien Pazifik und Mittlerer Osten,
- NAFTA Markets.

Die CGU im Segment Corporate und Sonstiges sind:

- Bankgeschäft Deutschland,
- Bankgeschäft Europa,
- manroland AG,
- Selecta AG.

In 2010 wurde im Segment Corporate und Sonstiges die CGU Bankgeschäft in die CGU Bankgeschäft Deutschland und Bankgeschäft Europa aufgeteilt. Ferner wurde die CGU Alternative Investments im Segment Corporate und Sonstiges in die CGU manroland AG und in die CGU Selecta AG unterteilt. Die neue Struktur der CGU im Segment Corporate und Sonstiges entspricht der niedrigstmöglichen Ebene, auf der dieser Geschäfts- oder Firmenwert für interne Managementzwecke beobachtet wird.

Die den ehemaligen CGU Alternative Investments und Bankgeschäft zugeordneten Geschäfts- oder Firmenwerte wurden auf jede einzelne CGU verteilt. Die Verteilung der Geschäfts- oder Firmenwerte erfolgte dabei gemäß den im Rahmen der Erstkonsolidierung entstandenen Geschäfts- oder Firmenwerten, da innerhalb des Allianz Konzerns keine anderen CGU von diesen bilanzierten Geschäfts- oder Firmenwerten profitieren.

Der erzielbare Betrag aller CGU wird auf der Basis des Nutzungswertes (Value in Use) ermittelt. Der Nutzungswert wird vom Allianz Konzern unter Anwendung allgemein anerkannter Bewertungsgrundsätze ermittelt, wobei die angewendeten Bewertungsmethoden für die CGU manroland AG und Selecta AG branchenspezifische Standards berücksichtigen.

Der Nutzungswert aller CGU in den Segmenten Schaden-Unfall, der CGU Asset Management sowie der CGU Bankgeschäft Deutschland und der CGU Bankgeschäft Europa wird unter Anwendung der Ertragswertmethode ermittelt. Ausgangspunkt für die Ermittlung des Ertragswertes sind die Planungsrechnung (Detailplanungsphase) der CGU und die Schätzung der von dieser CGU auf lange Sicht erzielbaren nachhaltigen Ergebnisse („ewige Rente“) sowie der langfristigen Wachstumsrate. Der Ertragswert ergibt sich aus der Abzinsung der zukünftigen Ertragsüberschüsse unter Verwendung eines geeigneten Kapitalisierungszinssatzes. Die für die Nutzungswertberechnung verwendeten Unternehmenspläne sind das Resultat eines strukturierten Managementdialogs zwischen dem Vorstand des Allianz Konzerns und den operativen Einheiten in Verbindung mit einem in diesen Dialog integrierten Berichtsprozess. Die Unternehmensplanung umfasst im Allgemeinen einen Zeitraum von drei Jahren und berücksichtigt das gegenwärtige Marktumfeld. Die Endwerte beruhen weitgehend auf den erwarteten Ergebnissen des letzten Jahres der Planungsrechnung. Soweit erforderlich wurden für die Ermittlung der ewigen Rente die geplanten Ergebnisse angepasst, damit sie den langfristig erzielbaren nachhaltigen Ergebnissen entsprechen. Zur Finanzierung des unterstellten langfristigen Wachstums in der ewigen Rente wird bei deren Ermittlung eine Ertragsthesaurierung in geeigneter Höhe berücksichtigt.

Der Kapitalisierungszinssatz basiert auf dem Capital Asset Pricing Model (CAPM) und angemessenen Wachstumsraten. Die der Ermittlung des Kapitalisierungszinssatzes zugrunde liegenden Annahmen bezüglich risikofreiem Zinssatz, Marktrisikoprämie, Segment-Betas und Verschuldungsgrad sind konsistent mit den Parametern, die im Allianz Planungs- und Controlling-Prozess verwendet werden.

Der Kapitalisierungszinssatz und die langfristige Wachstumsrate sind für die nachfolgenden CGU aufgelistet:

| Cash-Generating Unit                   | Kapitalisierungszinssatz<br>% | langfristige Wachstumsrate<br>% |
|----------------------------------------|-------------------------------|---------------------------------|
| <b>Schaden-Unfall</b>                  |                               |                                 |
| Deutschsprachige Länder                | 7,7                           | 1,5                             |
| Europa                                 | 8,1                           | 1,5                             |
| Südamerika                             | 14,3                          | 3,0                             |
| Asien-Pazifik und Mittlerer Osten      | 9,6                           | 3,0                             |
| Central and Eastern Europe             | 10,2                          | 2,3                             |
| Global Insurance Lines & Anglo Markets | 8,4                           | 1,5                             |
| NAFTA Markets                          | 7,8                           | 1,5                             |
| Spezialversicherungsgeschäft I         | 7,9                           | 1,0                             |
| Spezialversicherungsgeschäft II        | 7,9                           | 2,0                             |
| <b>Asset Management</b>                | 8,9                           | 1,0                             |
| <b>Bankgeschäft</b>                    |                               |                                 |
| Bankgeschäft Deutschland               | 8,5                           | 1,5                             |
| Bankgeschäft Europa                    | 9,0                           | 1,5                             |

Sensitivitätsanalysen in Bezug auf den Kapitalisierungszinssatz und die Hauptwerttreiber wurden durchgeführt. Für alle CGU im Segment Schaden-Unfall wurden hinsichtlich der langfristigen Combined Ratio Sensitivitätsanalysen durchgeführt. Ferner wurden für die CGU Asset Management sowie die CGU im Bankgeschäft Sensitivitätsanalysen bezüglich der Cost-Income Ratio durchgeführt.

Bei allen CGU mit Ausnahme von Asien-Pazifik und Mittlerer Osten sowie NAFTA Markets im Segment Schaden-Unfall und mit Ausnahme der CGU Bankgeschäft Deutschland liegen die Nutzungswerte bei den Sensitivitätsanalysen über dem Buchwert.

Bei einer Erhöhung um 0,5 %-Punkte des Kapitalisierungszinssatzes oder der langfristigen Combined Ratio würde der Nutzungswert von NAFTA Markets dem Buchwert entsprechen. Bei der CGU Asien-Pazifik und Mittlerer Osten würde der Nutzungswert bei einer zeitgleichen Erhöhung des Kapitalisierungszinssatzes und der langfristigen Combined Ratio um 1 %-Punkt dem Buchwert entsprechen.



Für alle CGU im Segment Leben/Kranken wird der Zeitwert für den Werthaltigkeitstest für den Geschäfts- oder Firmenwert auf Basis des Appraisal Values bestimmt, der aus dem Market Consistent Embedded Value sowie einem Vielfachen des entsprechenden Neugeschäftes abgeleitet wird.

Der Market Consistent Embedded Value ist eine branchenspezifische Bewertungsmethode, um den Zeitwert des gegenwärtigen Bestandes zu ermitteln. Der Market Consistent Embedded Value stimmt mit den Grundsätzen der Ertragswertmethode überein. Die verwendeten Embedded-Value-Zahlen basieren auf den Embedded-Value-Richtlinien des Allianz Konzerns.

Der Appraisal Value für Taiwan und die USA wurde von einem traditionellen Embedded Value und der Neugeschäftsberechnung abgeleitet, da bei einer Bewertung auf Grundlage des Market Consistent Embedded Value den Langfristerwartungen sowohl aus Management- wie auch aus Markt-Perspektive nicht vollkommen Rechnung getragen wird.

Sensitivitätsanalysen in Bezug auf den Neugeschäftswert wurden durchgeführt. Für die CGU Deutschsprachige Länder und Deutschland Kranken würde auch eine signifikante Reduzierung des angewandten Neugeschäftsfaktors zu Nutzungswerten führen, die über den entsprechenden Buchwerten liegen würden. Dies ist nicht der Fall bei den CGU Asien-Pazifik und Mittlerer Osten sowie NAFTA Markets, deren Appraisal Value den Buchwert übersteigt, sofern das 5-fache des Neugeschäftswertes bei Asien-Pazifik und Mittlerer Osten bzw. das 3-fache des Neugeschäftswertes für NAFTA Markets angesetzt wird.

Der Geschäfts- oder Firmenwert und die Markennamen des Allianz Konzerns zum 31. Dezember 2010 und 2009 wurden den einzelnen CGU wie folgt zugeordnet:

| Stand 31. Dezember                     | 2010                                |                      | 2009                                |                      |
|----------------------------------------|-------------------------------------|----------------------|-------------------------------------|----------------------|
|                                        | Geschäfts- oder Firmenwert<br>Mio € | Markennamen<br>Mio € | Geschäfts- oder Firmenwert<br>Mio € | Markennamen<br>Mio € |
| Cash-Generating Unit                   |                                     |                      |                                     |                      |
| <b>Schaden-Unfall</b>                  |                                     |                      |                                     |                      |
| Deutschsprachige Länder                | 283                                 | —                    | 278                                 | —                    |
| Europa                                 | 874                                 | —                    | 868                                 | —                    |
| Südamerika                             | 21                                  | —                    | 21                                  | —                    |
| Asien-Pazifik und Mittlerer Osten      | 87                                  | —                    | 78                                  | —                    |
| Central and Eastern Europe             | 467                                 | 25                   | 576                                 | 23                   |
| Global Insurance Lines & Anglo Markets | 312                                 | —                    | 286                                 | —                    |
| NAFTA Markets                          | 94                                  | —                    | 94                                  | —                    |
| Spezial-Versicherungsgeschäft I        | 38                                  | —                    | 38                                  | —                    |
| Spezial-Versicherungsgeschäft II       | 18                                  | —                    | 18                                  | —                    |
| <b>Zwischensumme</b>                   | <b>2 194</b>                        | <b>25</b>            | <b>2 257</b>                        | <b>23</b>            |
| <b>Leben/Kranken</b>                   |                                     |                      |                                     |                      |
| Deutschsprachige Länder                | 590                                 | —                    | 563                                 | —                    |
| Deutschland Kranken                    | 325                                 | —                    | 325                                 | —                    |
| Europa                                 | 653                                 | —                    | 648                                 | —                    |
| NAFTA Markets                          | 320                                 | —                    | 320                                 | —                    |
| Asien-Pazifik und Mittlerer Osten      | 440                                 | —                    | 431                                 | —                    |
| <b>Zwischensumme</b>                   | <b>2 328</b>                        | <b>—</b>             | <b>2 287</b>                        | <b>—</b>             |
| <b>Asset Management</b>                | <b>6 884</b>                        | <b>—</b>             | <b>6 690</b>                        | <b>—</b>             |
| <b>Corporate und Sonstiges</b>         |                                     |                      |                                     |                      |
| Bankgeschäft Deutschland               | 95                                  | —                    | 95                                  | —                    |
| Bankgeschäft Europa                    | —                                   | —                    | 51                                  | —                    |
| manroland AG                           | 28                                  | —                    | 143                                 | —                    |
| Selecta AG                             | 491                                 | 286                  | 491                                 | 286                  |
| <b>Zwischensumme</b>                   | <b>614</b>                          | <b>286</b>           | <b>780</b>                          | <b>286</b>           |
| <b>Summe</b>                           | <b>12 020</b>                       | <b>311</b>           | <b>12 014</b>                       | <b>309</b>           |

### **Markennamen**

Die Position Markennamen besteht überwiegend aus dem Markennamen „Selecta“. Der Markenname „Selecta“ hat eine unbestimmte Nutzungsdauer, weil es kein voraussehbares Ende der wirtschaftlichen Nutzungsdauer gibt. Für den als Markenzeichen eingetragenen Namen wurde der Zeitwert unter Anwendung einer Lizenzpreis-analogie (Royalty Savings Approach) ermittelt.

### **Immaterielle Vermögensgegenstände mit bestimmbarer Nutzungsdauer**

Die Abschreibungen auf immaterielle Vermögenswerte mit bestimmbarer Nutzungsdauer belaufen sich 2011 voraussichtlich auf 96 Mio €, 2012 auf 88 Mio €, 2013 auf 73 Mio €, 2014 auf 73 Mio € und 2015 auf 73 Mio €.

Langfristige Vertriebsvereinbarungen haben eine durch Vertrag geregelte bestimmbare Nutzungsdauer von 13,5 bzw. 15 Jahren. Diese werden linear über die verbleibende Nutzungsdauer von 12,5 bzw. 13 Jahren abgeschrieben.

Kundenbeziehungen zu cominvest und Selecta haben eine bestimmbare Nutzungsdauer von 4 bzw. 10 Jahren, die über eine durchschnittliche Kundenbindung für deutsche Publikumsfonds und durch die Multi-Period-Excess-Earnings-Methode ermittelt wurden. Diese werden linear über die verbleibende Nutzungsdauer von 2 bzw. 6,5 Jahren abgeschrieben.

## 16 Erfolgswirksam zum Zeitwert bewertete Finanzpassiva

| Stand 31. Dezember                                                            | 2010<br>Mio € | 2009<br>Mio € |
|-------------------------------------------------------------------------------|---------------|---------------|
| <b>Handelspassiva</b>                                                         |               |               |
| Derivate                                                                      | 5 012         | 4 808         |
| Sonstige Handelspassiva                                                       | 1             | 83            |
| <b>Zwischensumme</b>                                                          | <b>5 013</b>  | <b>4 891</b>  |
| <b>Finanzpassiva als „erfolgswirksam zum Zeitwert bewertet“ klassifiziert</b> | <b>—</b>      | <b>—</b>      |
| <b>Summe</b>                                                                  | <b>5 013</b>  | <b>4 891</b>  |

## 17 Verbindlichkeiten gegenüber Kreditinstituten und Kunden

| Stand 31. Dezember                                              | 2010                 |               |               | 2009                 |               |               |
|-----------------------------------------------------------------|----------------------|---------------|---------------|----------------------|---------------|---------------|
|                                                                 | Kredit-<br>institute | Kunden        | Summe         | Kredit-<br>institute | Kunden        | Summe         |
|                                                                 | Mio €                | Mio €         | Mio €         | Mio €                | Mio €         | Mio €         |
| Täglich fällige Gelder                                          | 68                   | 4 110         | 4 178         | 366                  | 4 106         | 4 472         |
| Spareinlagen                                                    | —                    | 2 504         | 2 504         | —                    | 1 980         | 1 980         |
| Befristete Einlagen und Einlagenzertifikate                     | 1 328                | 2 301         | 3 629         | 1 188                | 2 185         | 3 373         |
| Repo-Geschäfte                                                  | 867                  | 129           | 996           | 1 025                | 172           | 1 197         |
| Erhaltene Sicherheiten für Wertpapierleihgeschäfte und Derivate | 591                  | —             | 591           | 44                   | —             | 44            |
| Übrige                                                          | 6 278                | 2 979         | 9 257         | 6 885                | 3 297         | 10 182        |
| <b>Summe</b>                                                    | <b>9 132</b>         | <b>12 023</b> | <b>21 155</b> | <b>9 508</b>         | <b>11 740</b> | <b>21 248</b> |

### Verbindlichkeiten gegenüber Kreditinstituten und Kunden nach vertraglicher Restlaufzeit

| Stand 31. Dezember 2010                      | Bis 3<br>Monate<br>Mio € | > 3 Monate<br>bis 1 Jahr<br>Mio € | > 1 Jahr<br>bis 3 Jahre<br>Mio € | > 3 Jahre<br>bis 5 Jahre<br>Mio € | Über<br>5 Jahre<br>Mio € | Summe<br>Mio € |
|----------------------------------------------|--------------------------|-----------------------------------|----------------------------------|-----------------------------------|--------------------------|----------------|
| Verbindlichkeiten gegenüber Kreditinstituten | 2 594                    | 1 566                             | 1 817                            | 1 414                             | 1 741                    | 9 132          |
| Verbindlichkeiten gegenüber Kunden           | 9 033                    | 903                               | 1 015                            | 163                               | 909                      | 12 023         |
| <b>Summe</b>                                 | <b>11 627</b>            | <b>2 469</b>                      | <b>2 832</b>                     | <b>1 577</b>                      | <b>2 650</b>             | <b>21 155</b>  |

### Verbindlichkeiten gegenüber Kreditinstituten und Kunden nach Kundengruppen und Regionen

| Stand 31. Dezember                                  | 2010            |                  |                | 2009            |                  |                |
|-----------------------------------------------------|-----------------|------------------|----------------|-----------------|------------------|----------------|
|                                                     | Inland<br>Mio € | Ausland<br>Mio € | Summe<br>Mio € | Inland<br>Mio € | Ausland<br>Mio € | Summe<br>Mio € |
| <b>Verbindlichkeiten gegenüber Kreditinstituten</b> | <b>5 358</b>    | <b>3 774</b>     | <b>9 132</b>   | <b>5 250</b>    | <b>4 258</b>     | <b>9 508</b>   |
| <b>Verbindlichkeiten gegenüber Kunden</b>           |                 |                  |                |                 |                  |                |
| Firmenkunden                                        | 2 431           | 1 518            | 3 949          | 2 529           | 1 518            | 4 047          |
| Öffentliche Haushalte                               | 193             | 8                | 201            | 289             | 5                | 294            |
| Privatkunden                                        | 4 749           | 3 124            | 7 873          | 4 485           | 2 914            | 7 399          |
| <b>Zwischensumme</b>                                | <b>7 373</b>    | <b>4 650</b>     | <b>12 023</b>  | <b>7 303</b>    | <b>4 437</b>     | <b>11 740</b>  |
| <b>Summe</b>                                        | <b>12 731</b>   | <b>8 424</b>     | <b>21 155</b>  | <b>12 553</b>   | <b>8 695</b>     | <b>21 248</b>  |

Zum 31. Dezember 2010 enthielten die Verbindlichkeiten gegenüber Kunden 987 (2009: 1 017) Mio € an zinslosen Einlagen.

## 18 Beitragsüberträge

| Stand 31. Dezember | 2010<br>Mio € | 2009<br>Mio € |
|--------------------|---------------|---------------|
| Schaden-Unfall     | 14 206        | 13 471        |
| Leben/Kranken      | 2 291         | 2 210         |
| Konsolidierung     | —             | – 5           |
| <b>Summe</b>       | <b>16 497</b> | <b>15 676</b> |

## 19 Rückstellungen für noch nicht abgewickelte Versicherungsfälle

| Stand 31. Dezember | 2010<br>Mio € | 2009<br>Mio € |
|--------------------|---------------|---------------|
| Schaden-Unfall     | 57 509        | 55 715        |
| Leben/Kranken      | 8 984         | 8 738         |
| Konsolidierung     | – 19          | – 12          |
| <b>Summe</b>       | <b>66 474</b> | <b>64 441</b> |

### Rückstellung für noch nicht abgewickelte Versicherungsfälle für den Geschäftsbereich Schaden-Unfall

#### Überleitung der Anfangs- und Endsalden der Rückstellungen für Schäden und noch nicht abgewickelte Versicherungsfälle

Die folgende Tabelle ist eine Überleitung der Anfangs- und Endsalden der Rückstellungen, einschließlich des Effekts zedierter Rückversicherungen, im Geschäftsbereich Schaden-Unfall des Allianz Konzerns für jedes Jahr im dreijährigen Zeitraum bis 31. Dezember 2010.

### Entwicklung der Rückstellungen für Schäden und noch nicht abgewickelte Versicherungsfälle im Geschäftsbereich Schaden-Unfall

|                                                                        | 2010            |                         |                 | 2009            |                         |                 | 2008            |                         |                 |
|------------------------------------------------------------------------|-----------------|-------------------------|-----------------|-----------------|-------------------------|-----------------|-----------------|-------------------------|-----------------|
|                                                                        | Brutto<br>Mio € | Ab-<br>gegeben<br>Mio € | Netto<br>Mio €  | Brutto<br>Mio € | Ab-<br>gegeben<br>Mio € | Netto<br>Mio €  | Brutto<br>Mio € | Ab-<br>gegeben<br>Mio € | Netto<br>Mio €  |
| <b>Stand 1.1.</b>                                                      | <b>55 715</b>   | <b>– 7 175</b>          | <b>48 540</b>   | <b>55 616</b>   | <b>– 7 820</b>          | <b>47 796</b>   | <b>56 943</b>   | <b>– 8 266</b>          | <b>48 677</b>   |
| <b>Schadenaufwendungen</b>                                             |                 |                         |                 |                 |                         |                 |                 |                         |                 |
| Geschäftsjahres-<br>schäden                                            | 31 158          | – 2 473                 | 28 685          | 30 072          | – 2 685                 | 27 387          | 30 398          | – 2 969                 | 27 429          |
| Vorjahresschäden                                                       | – 2 551         | 1 007                   | – 1 544         | – 1 962         | 895                     | – 1 067         | – 2 241         | 798                     | – 1 443         |
| <b>Zwischensumme</b>                                                   | <b>28 607</b>   | <b>– 1 466</b>          | <b>27 141</b>   | <b>28 110</b>   | <b>– 1 790</b>          | <b>26 320</b>   | <b>28 157</b>   | <b>– 2 171</b>          | <b>25 986</b>   |
| <b>Zahlungen für Schäden</b>                                           |                 |                         |                 |                 |                         |                 |                 |                         |                 |
| Geschäftsjahres-<br>schäden                                            | – 14 899        | 805                     | – 14 094        | – 14 159        | 791                     | – 13 368        | – 14 049        | 919                     | – 13 130        |
| Vorjahresschäden                                                       | – 13 860        | 1 495                   | – 12 365        | – 14 531        | 1 732                   | – 12 799        | – 13 607        | 1 602                   | – 12 005        |
| <b>Zwischensumme</b>                                                   | <b>– 28 759</b> | <b>2 300</b>            | <b>– 26 459</b> | <b>– 28 690</b> | <b>2 523</b>            | <b>– 26 167</b> | <b>– 27 656</b> | <b>2 521</b>            | <b>– 25 135</b> |
| <b>Währungsumrechnung<br/>und übrige<br/>Veränderungen<sup>1</sup></b> | <b>2 188</b>    | <b>– 344</b>            | <b>1 844</b>    | <b>679</b>      | <b>– 88</b>             | <b>591</b>      | <b>– 497</b>    | <b>48</b>               | <b>– 449</b>    |
| <b>Veränderungen<br/>Konsolidierungskreis</b>                          | <b>– 242</b>    | <b>26</b>               | <b>– 216</b>    | <b>—</b>        | <b>—</b>                | <b>—</b>        | <b>127</b>      | <b>– 39</b>             | <b>88</b>       |
| <b>Umgliederungen<sup>2</sup></b>                                      | <b>—</b>        | <b>—</b>                | <b>—</b>        | <b>—</b>        | <b>—</b>                | <b>—</b>        | <b>– 1 458</b>  | <b>87</b>               | <b>– 1 371</b>  |
| <b>Stand 31.12.</b>                                                    | <b>57 509</b>   | <b>– 6 659</b>          | <b>50 850</b>   | <b>55 715</b>   | <b>– 7 175</b>          | <b>48 540</b>   | <b>55 616</b>   | <b>– 7 820</b>          | <b>47 796</b>   |

1 Enthält Effekte aus Währungsumrechnung für Brutto-Schadenaufwendungen der Vorjahre in Höhe von 1 999 (2009: 607; 2008: – 313) Mio € und für Netto-Schadenaufwendungen der Vorjahre in Höhe von 1 707 (2009: 536; 2008: – 284) Mio €.

2 Seit dem 1. Quartal 2008 wird das Krankenversicherungsgeschäft in Belgien und Frankreich im Segment Leben/Kranken ausgewiesen. Vergleichsperioden wurden nicht angepasst.

Die Netto-Schadenaufwendungen des Vorjahres spiegeln die geänderten Schätzungen gegenüber der zum Jahresanfang gebildeten Schadenrückstellung wider. Diese können das Ergebnis des aktuellen Geschäftsjahres erhöhen oder verringern. Der Allianz Konzern weist für das Geschäftsjahr 2010 zusätzliche Erträge von 1 544 (2009: 1 067; 2008: 1 443) Mio € aus Vorjahresschäden aus. Bezogen auf die Netto-Schadenrückstellungen zum Jahresanfang waren dies 3,2 % für 2010 (2009: 2,2 %; 2008: 3,0 %).

### Veränderungen der historischen Rückstellungen für Schäden und noch nicht abgewickelte Versicherungsfälle

Die Analyse der Rückstellungen durch die Aktuarien und das Management erfolgt nach Geschäftszweig und für spezifische Versicherungsfälle wie Asbestschäden separat. Das Entstehungsjahr der Schäden wird berücksichtigt, indem jeder Geschäftszweig auch nach Anfalljahr analysiert wird. Während die Schätzungen der Rückstellungen für Schäden und noch nicht abgewickelte Versicherungsfälle nach Anfalljahr gemäß Ansatz in der

Konzernbilanz festgelegt werden, kombiniert der Effekt in der Konzern-Gewinn- und Verlustrechnung des jeweiligen Kalenderjahres die Schadenquote des Anfalljahres für das laufende Jahr mit der positiven oder negativen Entwicklung früherer Jahre (Abwicklungsergebnis). Die Tabellen zeigen zunächst die Schadenabwicklung nach Anfalljahr, gefolgt von der daraus resultierenden Veränderung in den letzten Kalenderjahren.

Die folgenden Tabellen zeigen die Abwicklungsdreiecke (netto) im Schaden- und Unfallgeschäft.

Das Abwicklungsdreieck, auch Schadendreieck genannt, ist eine tabellarische Darstellung der schadenbezogenen Daten (wie Zahlungen, Schadenrückstellungen, endgültige Schäden) auf zwei zeitbezogenen Ebenen. Die eine Ebene ist das Kalenderjahr, die andere das Anfalljahr (Jahr der Schadenentstehung). Als Bemessungsgrundlage für die Schadenrückstellungen verdeutlichen Abwicklungsdreiecke, wie sich die Schadenrückstellungen aufgrund geleisteter Zahlungen und neuer Schätzungen des erwarteten endgültigen Schadens zum jeweiligen Bilanzstichtag im Lauf der Zeit verändern.

### Schadenzahlungen für die einzelnen Anfalljahre (nach Kalenderjahr, netto)

| Kalenderjahr | Anfalljahr               |               |               |               |               |               |               |               | Summe  |
|--------------|--------------------------|---------------|---------------|---------------|---------------|---------------|---------------|---------------|--------|
|              | 2003 und früher<br>Mio € | 2004<br>Mio € | 2005<br>Mio € | 2006<br>Mio € | 2007<br>Mio € | 2008<br>Mio € | 2009<br>Mio € | 2010<br>Mio € |        |
| 2003         | 25 015                   |               |               |               |               |               |               |               | 25 015 |
| 2004         | 11 808                   | 11 445        |               |               |               |               |               |               | 23 253 |
| 2005         | 4 827                    | 5 889         | 11 881        |               |               |               |               |               | 22 597 |
| 2006         | 4 048                    | 1 561         | 6 632         | 11 761        |               |               |               |               | 24 002 |
| 2007         | 2 830                    | 963           | 2 058         | 6 403         | 12 631        |               |               |               | 24 885 |
| 2008         | 2 163                    | 644           | 1 158         | 1 643         | 6 397         | 13 130        |               |               | 25 135 |
| 2009         | 1 907                    | 312           | 531           | 955           | 1 744         | 7 350         | 13 368        |               | 26 167 |
| 2010         | 1 363                    | 211           | 432           | 586           | 934           | 2 151         | 6 688         | 14 094        | 26 459 |

### Rückstellungen für Schäden und noch nicht abgewickelte Versicherungsfälle für die einzelnen Anfalljahre zum jeweiligen Bilanzstichtag (netto)

| Stand 31. Dezember | Anfalljahr               |               |               |               |               |               |               |               | Summe  |
|--------------------|--------------------------|---------------|---------------|---------------|---------------|---------------|---------------|---------------|--------|
|                    | 2003 und früher<br>Mio € | 2004<br>Mio € | 2005<br>Mio € | 2006<br>Mio € | 2007<br>Mio € | 2008<br>Mio € | 2009<br>Mio € | 2010<br>Mio € |        |
| 2003               | 44 683                   |               |               |               |               |               |               |               | 44 683 |
| 2004               | 31 455                   | 14 025        |               |               |               |               |               |               | 45 480 |
| 2005               | 27 221                   | 7 658         | 14 777        |               |               |               |               |               | 49 656 |
| 2006               | 22 324                   | 4 921         | 8 238         | 13 848        |               |               |               |               | 49 331 |
| 2007               | 18 820                   | 3 354         | 4 879         | 7 612         | 14 012        |               |               |               | 48 677 |
| 2008               | 16 007                   | 2 382         | 3 248         | 4 488         | 7 449         | 14 222        |               |               | 47 796 |
| 2009               | 14 055                   | 1 987         | 2 334         | 3 432         | 5 038         | 7 620         | 14 074        |               | 48 540 |
| 2010               | 12 838                   | 1 624         | 1 811         | 2 815         | 3 911         | 5 666         | 7 456         | 14 729        | 50 850 |

### Endgültiger Schadenaufwand für die einzelnen Anfalljahre zum jeweiligen Bilanzstichtag (netto)

| Stand 31. Dezember                     | Anfalljahr               |               |               |               |               |               |               |                | Summe |
|----------------------------------------|--------------------------|---------------|---------------|---------------|---------------|---------------|---------------|----------------|-------|
|                                        | 2003 und früher<br>Mio € | 2004<br>Mio € | 2005<br>Mio € | 2006<br>Mio € | 2007<br>Mio € | 2008<br>Mio € | 2009<br>Mio € | 2010<br>Mio €  |       |
| 2003                                   | 69 698                   |               |               |               |               |               |               |                |       |
| 2004                                   | 68 278                   | 25 470        |               |               |               |               |               |                |       |
| 2005                                   | 68 871                   | 24 993        | 26 658        |               |               |               |               |                |       |
| 2006                                   | 68 022                   | 23 816        | 26 751        | 25 610        |               |               |               |                |       |
| 2007                                   | 67 349                   | 23 212        | 25 450        | 25 776        | 26 643        |               |               |                |       |
| 2008                                   | 66 699                   | 22 884        | 24 977        | 24 295        | 26 477        | 27 353        |               |                |       |
| 2009                                   | 66 654                   | 22 801        | 24 594        | 24 194        | 25 810        | 28 100        | 27 442        |                |       |
| 2010                                   | 66 800                   | 22 650        | 24 502        | 24 164        | 25 617        | 28 297        | 27 512        | 28 823         |       |
| Überschuss <sup>1</sup>                | 2 899                    | 2 821         | 2 155         | 1 446         | 1 026         | – 944         | – 70          | — <sup>2</sup> | 9 333 |
| Veränderung 2009 bis 2010 <sup>1</sup> | – 146                    | 151           | 92            | 30            | 193           | – 197         | – 70          | — <sup>2</sup> | 53    |

<sup>1</sup> Enthält Effekte aus Währungsumrechnung.

<sup>2</sup> Darstellung nicht aussagekräftig.

### Im Kalenderjahr verdiente Beiträge und endgültige Schadenquote für die einzelnen Anfalljahre zum jeweiligen Bilanzstichtag (netto)

| Stand 31. Dezember | Verdiente Beiträge (netto)<br>Mio € | Anfalljahr |      |      |      |      |      |      |
|--------------------|-------------------------------------|------------|------|------|------|------|------|------|
|                    |                                     | 2004       | 2005 | 2006 | 2007 | 2008 | 2009 | 2010 |
|                    |                                     | %          | %    | %    | %    | %    | %    | %    |
| 2004               | 37 385                              | 68,1       |      |      |      |      |      |      |
| 2005               | 37 686                              | 66,9       | 70,7 |      |      |      |      |      |
| 2006               | 37 950                              | 63,7       | 71,0 | 67,5 |      |      |      |      |
| 2007               | 38 553                              | 62,1       | 67,5 | 67,9 | 69,1 |      |      |      |
| 2008               | 38 213                              | 61,2       | 66,3 | 64,0 | 68,7 | 71,6 |      |      |
| 2009               | 37 828                              | 61,0       | 65,3 | 63,8 | 66,9 | 73,5 | 72,5 |      |
| 2010               | 39 303                              | 60,6       | 65,0 | 63,7 | 66,4 | 74,1 | 72,7 | 73,3 |

Der endgültige Schadenaufwand eines Anfalljahres enthält alle Zahlungen, die bis zum Bilanzstichtag für dieses Anfalljahr geleistet wurden, zuzüglich der Schadenrückstellungen zum Bilanzstichtag. Bei vollständigen Informationen über alle bis zum Bilanzstichtag entstandenen Schäden bliebe der endgültige Schadenstand für jedes Anfalljahr unverändert. In der Praxis ist der endgültige Schadenstatus (der auf Schätzungen basiert) jedoch gewissen Schwankungen ausgesetzt, die den zunehmenden Kenntnisstand hinsichtlich Schadenfälle widerspiegeln. Die tatsächliche Schadenquote weicht leicht von der ausgewiesenen Schadenquote ab, weil der endgültige Schadenaufwand in der obigen Tabelle auf der Gesamtsumme der Regulierungszahlungen zuzüglich der Schadenrückstellungen beruht, nicht aber auf dem entstandenen Schaden in der Konzern-Gewinn- und Verlustrechnung.

Die Schadendreiecke sind nicht wechselkursbereinigt. Das heißt, dass alle Zahlen aus der jeweiligen Landeswährung in die Konzernwährung der Allianz (€) umgerechnet werden, und zwar einheitlich gemäß den zum Bilanzstichtag geltenden Wechselkursen. Damit ist gewährleistet, dass die Rückstellungen mit den Rückstellungen in der Konzernbilanz übereinstimmen.

Die folgende Tabelle fasst die Entwicklung der Rückstellungen für Schäden und noch nicht abgewinkelte Versicherungsfälle des Allianz Konzerns in den letzten sechs Jahren zusammen. Grundlage ist dabei das Kalenderjahr, nicht das Anfalljahr.

Jede Spalte dieser Tabelle zeigt die Rückstellungen zu einem einzelnen Bilanzstichtag und die anschließende Entwicklung dieser Rückstellungen. In der obersten Zeile jeder Spalte sind die Nettoreserven angegeben, die ursprünglich am Ende jedes dargestellten Jahres gebildet wurden. Der nächste Abschnitt gibt von oben nach unten die kumulierten ausgezahlten Nettobeträge zum Ende



der Folgejahre in Bezug auf die ursprünglich gebildeten Rückstellungen an. Der darauffolgende Abschnitt zeigt die rückwirkende Neuschätzung der ursprünglich gebildeten Nettoreserven für Schäden und noch nicht abgewickelte Versicherungsfälle zum Ende eines jeden Folgejahres. Diese Neuschätzung ergibt sich in erster Linie aus den neu bekannt gewordenen Sachverhalten und Umständen offener Versicherungsfälle.

Der untere Abschnitt vergleicht die zuletzt neu geschätzten Brutto- bzw. Nettorückstellungen für Schäden und noch nicht abgewickelte Versicherungsfälle mit den ursprünglich gebildeten Brutto- beziehungsweise Nettorückstellungen und gibt die kumulierte Entwicklung der ursprünglich gebildeten Rückstellungen bis 31. Dezember 2010 an. Der Überschuss (Fehlbetrag), der in der Tabelle für jedes Jahr angegeben ist, stellt den Gesamtbetrag dar, um den sich die zum Ende des jeweiligen Jahres ursprünglich geschätzten Rückstellungen in den folgenden Jahren verändert haben. Daher bezieht sich der kumulierte Überschuss (Fehlbetrag) zum Ende eines Jahres nur auf die Rückstellungen zum jeweiligen Jahresende, und diese Beträge sind nicht addierbar. Die Informationen in dieser Tabelle sind mit der Einschränkung zu sehen, dass in jedem Betrag alle Veränderungen der Wertansätze früherer Zeiträume berücksichtigt sind. Beispielsweise wird die Entwicklung der Rückstellungen 2005 im Laufe des Jahres 2008 im kumulierten Überschuss (Fehlbetrag) der Spalten für 2005 bis 2007 berücksichtigt.

Da die folgende Tabelle die Daten des Kalenderjahres und nicht wie oben des Anfalljahres darstellt, werden sich die Bedingungen und Trends, welche die bisherige Entwicklung der Verbindlichkeiten beeinflusst haben, in der Zukunft eventuell nicht unbedingt wiederholen. Daher lassen sich aus den Angaben in dieser Tabelle keine Schlussfolgerungen über künftige Ergebnisse ableiten.

Gesellschaften, die während des in der Tabelle dargestellten Zeitraums erworben oder veräußert wurden, können den kumulierten Überschuss beziehungsweise Fehlbetrag verzerren. Die Tabelle beginnt mit der Darstellung der Netto- und Bruttoverbindlichkeiten für ausgewiesene nicht regulierte Versicherungsschäden sowie Schadenregulierungskosten zum jeweiligen Bilanzstichtag. Im Laufe der Zeit werden diese Verbindlichkeiten neu geschätzt. Darüber hinaus ändern sich die Verbindlichkeiten, wenn durch Akquisition oder Verkauf einer Gesellschaft oder durch Umklassifizierung gänzlich neue Portfolios von Schadenregulierungen und -rückstellungen hinzukommen oder abgezogen werden. Auch Wechselkursschwankungen können den kumulierten Überschuss bzw. Fehlbetrag verzerren.

|                                                                                                              | 2004<br>Mio € | 2005<br>Mio € | 2006<br>Mio € | 2007<br>Mio € | 2008<br>Mio € | 2009<br>Mio € | 2010<br>Mio € |
|--------------------------------------------------------------------------------------------------------------|---------------|---------------|---------------|---------------|---------------|---------------|---------------|
| <b>Rückstellungen für noch nicht abgewickelte Versicherungsfälle (brutto)</b>                                | <b>55 529</b> | <b>60 259</b> | <b>58 664</b> | <b>56 943</b> | <b>55 616</b> | <b>55 715</b> | <b>57 509</b> |
| Rückstellungen für noch nicht abgewickelte Versicherungsfälle (zediert)                                      | 10 049        | 10 604        | 9 333         | 8 266         | 7 820         | 7 175         | 6 659         |
| <b>Rückstellungen für noch nicht abgewickelte Versicherungsfälle (netto)</b>                                 | <b>45 480</b> | <b>49 655</b> | <b>49 331</b> | <b>48 677</b> | <b>47 796</b> | <b>48 540</b> | <b>50 850</b> |
| <b>Netto reguliert (kumuliert) per</b>                                                                       |               |               |               |               |               |               |               |
| 1 Jahr später                                                                                                | 10 716        | 12 241        | 12 254        | 12 005        | 12 799        | 12 364        |               |
| 2 Jahre später                                                                                               | 16 326        | 18 093        | 17 863        | 17 455        | 18 476        |               |               |
| 3 Jahre später                                                                                               | 20 119        | 22 058        | 21 568        | 20 980        |               |               |               |
| 4 Jahre später                                                                                               | 22 926        | 24 807        | 24 159        |               |               |               |               |
| 5 Jahre später                                                                                               | 25 145        | 26 812        |               |               |               |               |               |
| 6 Jahre später                                                                                               | 26 719        |               |               |               |               |               |               |
| <b>Neu geschätzte Verbindlichkeiten per</b>                                                                  |               |               |               |               |               |               |               |
| 1 Jahr später                                                                                                | 45 595        | 47 725        | 46 919        | 45 579        | 47 265        | 48 486        |               |
| 2 Jahre später                                                                                               | 43 570        | 45 145        | 43 988        | 44 300        | 47 142        |               |               |
| 3 Jahre später                                                                                               | 42 293        | 43 695        | 43 375        | 43 980        |               |               |               |
| 4 Jahre später                                                                                               | 41 315        | 43 183        | 43 248        |               |               |               |               |
| 5 Jahre später                                                                                               | 41 187        | 43 086        |               |               |               |               |               |
| 6 Jahre später                                                                                               | 41 181        |               |               |               |               |               |               |
| <b>Kumulierter Überschuss (Fehlbetrag)</b>                                                                   |               |               |               |               |               |               |               |
| Nettoüberschuss <sup>1</sup>                                                                                 | 4 299         | 6 570         | 6 083         | 4 697         | 654           | 53            |               |
| Nettoüberschuss nach Veränderungen der konsolidierten Tochtergesellschaften der Allianz Gruppe <sup>2</sup>  | 4 299         | 6 570         | 6 083         | 3 326         | 654           | – 163         |               |
| <b>Nettoüberschuss in % der ursprünglichen Rückstellungen</b>                                                | <b>9,5%</b>   | <b>13,2%</b>  | <b>12,3%</b>  | <b>6,8%</b>   | <b>1,4%</b>   | <b>– 0,3%</b> |               |
| Bruttoüberschuss <sup>1</sup>                                                                                | 4 989         | 7 756         | 7 211         | 5 541         | 1 769         | 794           |               |
| Bruttoüberschuss nach Veränderungen der konsolidierten Tochtergesellschaften der Allianz Gruppe <sup>2</sup> | 4 989         | 7 756         | 7 211         | 4 083         | 1 769         | 552           |               |

- 1 Der kumulierte Brutto- bzw. Nettoüberschuss resultiert aus der Neubewertung der Rückstellungen für noch nicht abgewickelte Versicherungsfälle für in früheren Geschäftsjahren eingetretene Schäden und enthält Effekte aus der Währungsumrechnung von brutto 1 999 (2009: 607) Mio € und netto 1 707 (2009: 536) Mio €. Dies führt zu einem effektiven Abwicklungsergebnis ohne Währungseffekte von brutto 2 551 (2009: 1 962) Mio € und netto 1 544 (2009: 1 067) Mio €, was sich in der Tabelle „Veränderung der Rückstellungen für Schäden und noch nicht abgewickelte Versicherungsfälle im Jahr 2010, brutto und netto“ in dieser Anmerkung wiederfindet. Es ist zu beachten, dass sich die angegebenen Beträge für das Jahr 2009 auf die Abwicklungsergebnisse des Geschäftsjahres 2009 und nicht auf die kumulierten Abwicklungsergebnisse des Kalenderjahres 2009 in der obigen Tabelle beziehen.
- 2 Im Geschäftsjahr 2008 wurden drei größere Umklassifizierungen vorgenommen, in deren Rahmen das Unfall- und Krankenversicherungsgeschäft von Allianz IARD und das Krankenversicherungsgeschäft von Allianz Belgien von Segment Schaden-Unfall auf das Segment Leben/Kranken übertragen wurden. Gleichzeitig wurde die Krankenversicherungssparte der brasilianischen Tochtergesellschaft Allianz Seguros vom Segment Leben/Kranken auf das Segment Schaden-Unfall übertragen, sodass sich 2008 ein Effekt von brutto 1 458 Mio € und netto 1 371 Mio € ergab. Der Effekt auf die neu geschätzten Verbindlichkeiten besteht aus den Effekten auf die regulierten und nicht regulierten Schäden früherer Jahre im Jahr der Transaktion, während der Effekt der (Veräußerungen)/Übernahmen in der Tabelle „Veränderung der Rückstellungen für noch nicht abgewickelte Versicherungsfälle“ den Gesamtbetrag der erstmals dekonsolidierten bzw. konsolidierten Schadenrückstellungen angibt. 2010 wurden Alba und Phenix an Dritte verkauft, sodass sich ein Effekt von 242 Mio € brutto und 216 Mio € netto ergab (Stand: 3. Quartal 2010).

2010 stiegen die Rückstellungen für Schäden und noch nicht abgewickelte Versicherungsfälle um 2 310 Mio € beziehungsweise 4,8% auf 50 850 Mio €, was vorwiegend den im Laufe des Jahres verzeichneten Wechselkursschwankungen zuzuschreiben war. Die Entwicklung der Rückstellungen im Jahr 2010 wird im nachfolgenden Abschnitt „Veränderungen der Rückstellungen für Schäden und noch nicht abgewickelte Versicherungsfälle im Jahr 2010“ näher erläutert.

### Zusammensetzung der Schäden und noch nicht abgewickelter Versicherungsfälle nach Versicherungszweig

Wie lange es dauert, bis die Versicherung von einem Schadenfall erfährt und diesen abwickelt, ist ein bei der Bildung von Rückstellungen wichtiger Gesichtspunkt. Schadenfälle mit kurzer Abwicklungsdauer (Short-Tail), etwa bei Sachschäden in der Kraftfahrtversicherung, werden in der Regel innerhalb weniger Tage oder Wochen gemeldet und innerhalb von zwei bis drei Jahren abgewickelt. Schadenfälle mit mittlerer Abwicklungsdauer (Medium-Tail) wie in der privaten und gewerblichen Kraftfahrzeughaftpflicht werden normalerweise nach vier bis sechs Jahren abgewickelt, während die längerfristigen Fälle (Long-Tail) wie jene in der allgemeinen Haftpflicht, in der Berufsunfallversicherung sowie in der Bau- und Berufshaftpflicht mehr Zeit in Anspruch nehmen.

Die folgende Tabelle gibt einen Überblick über die Rückstellungen des Allianz Konzerns für Schäden und noch nicht abgewickelte Versicherungsfälle, und zwar sowohl insgesamt als auch separat nach Rückstellungen für bis zum Bilanzstichtag eingetretene, aber noch nicht gemeldete Versicherungsfälle und Einzelschadenrückstellungen, vor Rückversicherungen und nach Geschäftszweigen für die am 31. Dezember 2010, 2009 und 2008 endenden Geschäftsjahre.

Der Allianz Konzern schätzt, dass die Rückstellungen für Schäden und noch nicht abgewickelte Versicherungsfälle zu etwa 10% aus Short-Tail-Geschäften, 50% aus Medium-Tail-Geschäften und 40% aus Long-Tail-Geschäften bestehen.

### Rückstellungen für Schäden und noch nicht abgewickelte Versicherungsfälle nach Jahr und Geschäftszweig und vor Rückversicherungen

|                                           | 2010<br>Mio € | 2009<br>Mio € | 2008<br>Mio € |
|-------------------------------------------|---------------|---------------|---------------|
| <b>Kfz</b>                                | <b>19 088</b> | <b>19 018</b> | <b>18 710</b> |
| Einzelschadenrückstellung                 | 15 540        | 15 851        | 15 237        |
| Spätschadenrückstellungen                 | 3 547         | 3 167         | 3 474         |
| <b>Allgemeine Haftpflicht</b>             | <b>11 619</b> | <b>11 063</b> | <b>10 930</b> |
| Einzelschadenrückstellung                 | 7 211         | 6 909         | 6 255         |
| Spätschadenrückstellungen                 | 4 408         | 4 153         | 4 674         |
| <b>Berufshaftpflicht</b>                  | <b>4 560</b>  | <b>4 273</b>  | <b>4 224</b>  |
| Einzelschadenrückstellung                 | 2 227         | 2 038         | 2 097         |
| Spätschadenrückstellungen                 | 2 333         | 2 235         | 2 127         |
| <b>Sachversicherung</b>                   | <b>4 127</b>  | <b>3 952</b>  | <b>3 682</b>  |
| Einzelschadenrückstellung                 | 3 862         | 3 595         | 3 269         |
| Spätschadenrückstellungen                 | 265           | 357           | 414           |
| <b>Eingehende Rückversicherung</b>        | <b>2 186</b>  | <b>1 854</b>  | <b>1 899</b>  |
| Einzelschadenrückstellung                 | 1 219         | 1 095         | 1 106         |
| Spätschadenrückstellungen                 | 967           | 759           | 792           |
| <b>Private Unfallversicherung</b>         | <b>1 377</b>  | <b>1 278</b>  | <b>1 264</b>  |
| Einzelschadenrückstellung                 | 1 366         | 1 243         | 1 167         |
| Spätschadenrückstellungen                 | 11            | 35            | 98            |
| <b>Bauschaden und Bauhaftung</b>          | <b>2 019</b>  | <b>1 945</b>  | <b>1 872</b>  |
| Einzelschadenrückstellung                 | 505           | 517           | 535           |
| Spätschadenrückstellungen                 | 1 515         | 1 428         | 1 338         |
| <b>Kreditversicherung</b>                 | <b>1 302</b>  | <b>1 417</b>  | <b>1 407</b>  |
| Einzelschadenrückstellung                 | 1 179         | 1 387         | 1 315         |
| Spätschadenrückstellungen                 | 123           | 31            | 92            |
| <b>AGCS<sup>1</sup></b>                   | <b>7 632</b>  | <b>7 062</b>  | <b>7 215</b>  |
| Einzelschadenrückstellung                 | 4 553         | 4 189         | 4 477         |
| Spätschadenrückstellungen                 | 3 079         | 2 873         | 2 738         |
| <b>Sonstige<sup>2</sup></b>               | <b>3 598</b>  | <b>3 638</b>  | <b>4 201</b>  |
| Einzelschadenrückstellung                 | 2 221         | 2 129         | 2 064         |
| Spätschadenrückstellungen                 | 1 377         | 1 509         | 2 137         |
| <b>Allianz Konzern gesamt<sup>3</sup></b> | <b>57 509</b> | <b>55 501</b> | <b>55 405</b> |
| <b>Einzelschadenrückstellung</b>          | <b>39 883</b> | <b>38 954</b> | <b>37 522</b> |
| <b>Spätschadenrückstellungen</b>          | <b>17 626</b> | <b>16 547</b> | <b>17 883</b> |

- 1 Allianz Global Corporate & Specialty wurde 2006 gegründet und bündelt Rückstellungen, die zuvor unter Schiff- und Luftfahrt und als Teil der Rückstellungen für Deutschland, die NAFTA-Region und Allianz Risk Transfer (ART) erfasst wurden.
- 2 Sonstige umfasst in erster Linie Pauschal-/Einheitsversicherungen, Rechtsschutz, Luftfahrt- und Reiseversicherungen.
- 3 Alba und Phenix wurden 2010 an Dritte verkauft. Infolgedessen wurden die historischen Daten für diese Einheit im Ausweis für 2008 und 2009 nicht mehr berücksichtigt. Die nicht mehr berücksichtigten Brutto-Gesamtrückstellungen beliefen sich für 2009 auf 214 Mio € und für 2008 auf 204 Mio €. Ein Teil des Krankenversicherungsportfolios von Allianz Schweiz wurde zum 1. Januar 2008 auf eine andere Schweizer Versicherungsgesellschaft übertragen. Infolgedessen wurden die historischen Daten für diese Einheit im Ausweis für 2008 nicht mehr berücksichtigt. Die nicht mehr berücksichtigten Brutto-Gesamtrückstellungen beliefen sich für 2008 auf 7,44 Mio €. Des Weiteren wurde ein Portfolio von der spanischen Tochtergesellschaft auf AGCS übertragen, sodass die bisherige Entwicklung für 2009 und 2008 angepasst wurde. Die an die AGCS übertragenen Brutto-Gesamtrückstellungen belaufen sich auf 154 Mio €.

Bei der Durchsicht der obigen Tabellen sollte Vorsicht geboten sein, wenn die Unterteilung in Einzelschaden- und Spätschadenrückstellungen (Rückstellungen für bis zum Bilanzstichtag eingetretene, aber noch nicht gemeldete Versicherungsfälle) für verschiedene Geschäftszweige verglichen wird. Der Anteil der Spätschadenrückstellungen an den Schadenrückstellungen insgesamt variiert nach Versicherungszweig, und zwar aufgrund unterschiedlicher Berichts- und Abwicklungsstrukturen. Beim Short-Tail-Geschäft, wie z. B. in den Sachversicherungen, werden die Schäden in der Regel unmittelbar nach Entstehen gemeldet und binnen weniger Jahre abgewickelt. Beim Long-Tail-Geschäft wie etwa der Prokthaftung ist es dagegen nicht ungewöhnlich, dass

ein Schadenfall erst Jahre nach seiner Entstehung gemeldet wird, und auch die Abwicklung kann erhebliche Zeit in Anspruch nehmen, insbesondere bei Personenschäden.

### Veränderungen der Rückstellungen für Schäden und noch nicht abgewickelte Versicherungsfälle im Jahr 2010

Die Vorjahresrückstellungen des Allianz Konzerns für Schäden und noch nicht abgewickelte Versicherungsfälle haben sich 2010, wie oben erwähnt, günstig entwickelt und stiegen um 2 551 Mio € einschließlich Rückversicherung und um 1 544 Mio € nach Abzug der Rückversicherung. Dies entspricht 4,6 % der Bruttorekstellungen und 3,2 % der Nettorückstellungen zum 31. Dezember 2009. Die folgende Tabelle gibt einen Überblick über diese Beträge nach Geschäftszweigen.

### Veränderung der Rückstellungen für Schäden und noch nicht abgewickelte Versicherungsfälle im Jahr 2010, brutto und netto

|                                    | Bruttoreserven per 31. Dezember 2009<br>Mio € | Bruttoentwicklung in früheren Jahren<br>Mio € | % <sup>1</sup> | Nettoreserven per 31. Dezember 2009<br>Mio € | Nettoentwicklung in früheren Jahren<br>Mio € | % <sup>2</sup> |
|------------------------------------|-----------------------------------------------|-----------------------------------------------|----------------|----------------------------------------------|----------------------------------------------|----------------|
| Kfz                                | 19 018                                        | – 627                                         | – 3,3 %        | 16 835                                       | – 659                                        | – 3,9 %        |
| Allgemeine Haftpflicht             | 11 063                                        | 164                                           | 1,5 %          | 9 062                                        | – 51                                         | – 0,6 %        |
| Berufshaftpflicht                  | 4 273                                         | – 48                                          | – 1,1 %        | 4 095                                        | – 43                                         | – 1,0 %        |
| Sachversicherungen                 | 3 952                                         | – 196                                         | – 4,9 %        | 2 893                                        | – 123                                        | – 4,2 %        |
| Eingehende Rückversicherung        | 1 854                                         | – 155                                         | – 8,4 %        | 3 822                                        | – 92                                         | – 2,4 %        |
| Private Unfallversicherung         | 1 278                                         | – 28                                          | – 2,2 %        | 1 008                                        | – 4                                          | – 0,4 %        |
| Bauschaden und Bauhaftpflicht      | 1 945                                         | – 20                                          | – 1,0 %        | 1 770                                        | – 30                                         | – 1,7 %        |
| Kreditversicherung                 | 1 417                                         | – 281                                         | – 19,8 %       | 1 135                                        | – 199                                        | – 17,5 %       |
| AGCS                               | 7 062                                         | – 803                                         | – 11,4 %       | 4 865                                        | – 278                                        | – 5,7 %        |
| Sonstige                           | 3 638                                         | – 559                                         | – 15,4 %       | 2 863                                        | – 65                                         | – 2,3 %        |
| <b>Allianz Konzern<sup>3</sup></b> | <b>55 501</b>                                 | <b>– 2 551</b>                                | <b>– 4,6 %</b> | <b>48 348</b>                                | <b>– 1 544</b>                               | <b>– 3,2 %</b> |

<sup>1</sup> in % der Bruttoreerven zum 31. Dezember 2009

<sup>2</sup> in % der Nettoreserven zum 31. Dezember 2009

<sup>3</sup> Alba und Phenix wurden 2010 an Dritte verkauft. Infolgedessen wurden die historischen Daten für diese Einheit im Ausweis für 2009 nicht mehr berücksichtigt. Die nicht mehr berücksichtigten Rückstellungen beliefen sich brutto auf 214 Mio € und netto auf 191 Mio €. Des Weiteren wurde ein Portfolio von der spanischen Tochtergesellschaft auf AGCS übertragen, sodass die bisherige Entwicklung für 2009 angepasst wurde. Die an die AGCS übertragenen Gesamtrückstellungen belaufen sich auf 154 Mio € brutto und 14 Mio € netto.

Im Folgenden werden die wichtigsten Eckdaten der Entwicklung der Rückstellungen 2010 nach Geschäftszweigen erläutert. Die Erläuterungen beruhen auf den Nettorückstellungen für Schäden und noch nicht abgewickelte Versicherungsfälle in der Landeswährung der jeweiligen operativen Einheit vor Konsolidierung. Zur

einheitlichen Darstellung wurden die Beträge in € umgerechnet. Die folgenden Erläuterungen der einzelnen Beträge, die nur nennenswerte Entwicklungen in unseren maßgeblichen operativen Einheiten berücksichtigen, stimmen mit den Gesamtsummen in der obigen Tabelle nicht genau überein.

### Kfz-Versicherung

Im Kfz-Versicherungsgeschäft haben sich die Nettorückstellungen für Schäden und noch nicht abgewinkelte Versicherungsfälle im Jahr 2010 um rund 659 Mio € bzw. 3,9% der Rückstellungen verbessert (Stand: 31. Dezember 2009). Diese Entwicklung ging auf verschiedene Effekte zurück. Folgende Tochtergesellschaften leisteten den größten Beitrag:

122 Mio € bei der spanischen Tochtergesellschaft des Allianz Konzerns. Diese Reduzierung wurde durch eine günstige Entwicklung des Schadendurchschnittes verursacht, der auf drei Ursachen beruht: Es wurde mit einem Anstieg durch eine Gesetzesänderung gerechnet, die nicht in Kraft getreten ist; eine außerordentlich niedrige Inflation; und es wurden günstigere Vereinbarungen mit externen Anbietern getroffen, insbesondere mit Reparaturwerkstätten, Anwälten und Ärzten.

94 Mio € bei der Kraftfahrzeughaftpflichtversicherung der australischen Tochtergesellschaft des Allianz Konzerns, primär aufgrund der anhaltend positiven Entwicklung im Medium-Tail-Geschäft, wo sich Schadenhöheninflation und Gesetzesänderungen der Vorjahre erneut günstiger auswirkten als in früheren Berichtsjahren angenommen.

91 Mio € bei den italienischen Tochtergesellschaften des Allianz Konzerns. Der Vorteil aus den Ausgleichszahlungen zwischen unseren italienischen Gesellschaften und anderen Marktteilnehmern war erheblich günstiger als zuvor angenommen.

51 Mio € bei der britischen Tochtergesellschaft des Allianz Konzerns, vor allem durch Einsparungen bei Personenschadenfällen aufgrund veränderter Schadenentwicklungsmuster, überwiegend in der gewerblichen Kraftfahrzeugversicherung. Diese Veränderungen gehen auf die Reorganisation der Schadenabteilungen und der Nachhaltigkeitsprojekte zurück, durch die sich schnellere und größere Erfolge erzielen ließen als erwartet.

### Kreditversicherung

Kreditversicherungen werden innerhalb des Allianz Konzerns von Euler Hermes übernommen. Im Jahr 2010 verzeichnete Euler Hermes eine günstige Entwicklung

von 199 Mio € nach Abzug der Rückversicherung; Hauptursache dafür war die Erholung der Wirtschaft in 2010, aus der in Frankreich, Deutschland, Großbritannien und Italien weniger Insolvenzen hervorgingen als erwartet.

### Allianz Global Corporate and Specialty

Allianz Global Corporate and Specialty (AGCS) ist innerhalb des Allianz Konzerns der globale Versicherer von Unternehmens- und Spezialrisiken und umfasst zudem das Konzernkundengeschäft der deutschen Sparte. Insgesamt verbuchte AGCS im Jahr 2010 eine positive Entwicklung von 278 Mio € nach Abzug der Rückversicherung bzw. 5,7% der Rückstellungen (Stand: 31. Dezember 2009). Die Hauptursachen des Abwicklungsergebnisses sind:

144 Mio € aus der globalen technischen Versicherung und der Haftpflichtversicherung, entstanden durch günstige Schadenregulierung für einige individuelle Großschäden und ein geringeres Auftreten von Großschäden im Long-Tail-Geschäft.

51 Mio € aus dem globalen Geschäft der Luftfahrtversicherung, hauptsächlich bedingt durch vorteilhaft verlaufende Schadenregulierung von größeren Schäden an Flugzeugen aus dem Jahre 2009.

### Diskontierung der Rückstellungen für Schäden und noch nicht abgewinkelte Versicherungsfälle

Zum 31. Dezember 2010, 2009 und 2008 enthielten die konsolidierten Rückstellungen des Allianz Konzerns in der Schaden- und Unfallversicherung Diskontierungen von 1 846 Mio €, 1 675 Mio € und 1 712 Mio €.

Grundsätzlich werden Rückstellungen für Schäden und noch nicht abgewinkelte Versicherungsfälle nicht diskontiert, außer wenn die Rückstellungen festgelegte Zahlungsbeträge und einen einigermaßen determinierbaren Zeithorizont aufweisen. Die Rückstellungen in den USA, Deutschland, Ungarn, der Schweiz, Portugal und Frankreich werden in unterschiedlicher Höhe diskontiert. Diese Diskontierungen beziehen sich auf Rückstellungen für strukturierte Abwicklungen in verschiedenen Versicherungsklassen. Diese umfassen die private Unfallversicherung, die allgemeine Haftpflicht und Kraftfahrzeughaftpflicht in Deutschland und Ungarn, die Berufshaftpflichtversicherung in den USA, der Schweiz und Portugal sowie die Kraftfahrzeughaftpflicht in Frankreich.

Die folgende Tabelle zeigt die Buchwerte der diskontierten Rückstellungen für Schäden und noch nicht abgewinkelte Versicherungsfälle nach Geschäftszweigen sowie die zur Diskontierung verwendeten Zinssätze für die Jahre mit Geschäftsjahresende zum 31. Dezember.

### Diskontierung der Rückstellungen für Schäden und noch nicht abgewinkelte Versicherungsfälle

| Stand 31. Dezember              | Diskontierte Rückstellungen |               |               | Diskontierungsbetrag |               |               | Zinssatz der Diskontierung <sup>1</sup> |             |             |
|---------------------------------|-----------------------------|---------------|---------------|----------------------|---------------|---------------|-----------------------------------------|-------------|-------------|
|                                 | 2010<br>Mio €               | 2009<br>Mio € | 2008<br>Mio € | 2010<br>Mio €        | 2009<br>Mio € | 2008<br>Mio € | 2010<br>%                               | 2009<br>%   | 2008<br>%   |
| Kfz-Haftpflicht                 | 626                         | 583           | 632           | 452                  | 426           | 446           | 2,25 – 5,98                             | 2,25 – 5,55 | 1,40 – 5,25 |
| Allgemeine Haftpflicht          | 187                         | 184           | 190           | 161                  | 156           | 164           | 2,25 – 5,98                             | 2,25 – 5,55 | 1,40 – 5,25 |
| Private Unfallversicherung      | 387                         | 360           | 325           | 229                  | 218           | 201           | 2,25 – 4,00                             | 2,25 – 4,00 | 2,25 – 4,00 |
| Berufsunfall/ Berufshaftpflicht | 630                         | 533           | 539           | 350                  | 312           | 309           | 3,00 – 5,98                             | 3,00 – 5,55 | 3,00 – 5,25 |
| Sonstige                        | 16                          | 15            | 26            | 12                   | 12            | 19            | 2,25 – 5,98                             | 2,25 – 5,55 | 1,40 – 5,25 |
| <b>Summe</b>                    | <b>1 846</b>                | <b>1 675</b>  | <b>1 712</b>  | <b>1 204</b>         | <b>1 124</b>  | <b>1 139</b>  |                                         |             |             |

<sup>1</sup> Die breite Streuung der Zinssätze ergibt sich dadurch, dass die obigen Angaben nach Versicherungszweigen dargestellt sind, sodass jeder Versicherungszweig die in den einzelnen Ländern verwendeten Zinssätze widerspiegelt.

### Rückstellungen für Asbest- und Umweltschäden (A&U)

Bei der Schätzung der Rückstellungen für Schäden und noch nicht abgewinkelte Versicherungsfälle im Asbest- und Umweltbereich ergeben sich bedeutende Unsicherheiten. Die Rückstellungen für Schäden aufgrund asbestbedingter Erkrankungen und Umweltsanierungen können nicht nach traditionellen versicherungsmathematischen Methoden geschätzt werden. Das liegt an den langen Latenzzeiten und den Veränderungen der rechtlichen, sozialwirtschaftlichen und regulatorischen Gegebenheiten. Die Einzelschadenrückstellungen werden gebildet, sobald genügend Informationen verfügbar sind, dass eine bestimmte Versicherung betroffen ist. Darüber hinaus werden Spätschadenrückstellungen zu dem Zweck gebildet, zusätzliche Risiken aus bekannten sowie noch nicht gemeldeten Schäden abzudecken. Soweit es möglich ist, basieren die geschätzten Rückstellungen für Asbest- und Umweltschäden nicht nur auf den bis dato gemeldeten Schadenfällen, sondern auch auf der Analyse von Versicherungen, die eventuell mit künftig gemeldeten Ansprüchen rechnen müssen (z. B. Risikoanalyse).

Bei der Festlegung der Verbindlichkeiten für Asbest- und Umweltschäden berücksichtigt das Management die aktuell bekannten Tatsachen und die aktuelle Gesetzeslage einschließlich etwaiger Rechtsstreitigkeiten. Da der Versicherungsschutz und die Haftungsansprüche von Gerichten und Gesetzgebern zuletzt jedoch ausgeweitet wurden und in Zukunft ähnliche Auslegungen möglich

sind, bestehen erhebliche Unsicherheiten hinsichtlich der Sanierungs- und Versicherungshaftung. Daher weisen die realistischen Szenarien für die künftige Haftung in diesem Bereich in den Analysen eine auffallend große Bandbreite auf. Aufgrund der naturgemäßen Ungenauigkeit bei der Prognose der Asbest- und Umweltverbindlichkeiten ist eine deutliche Abweichung vom aktuellen Buchwert der Rückstellungen für Asbest- und Umweltschäden möglich.

Während die Asbest- und Umweltschäden in den USA nach wie vor den überwiegenden Teil aller Asbest- und Umweltschäden ausmachen, die dem Allianz Konzern bislang gemeldet worden sind, muss sich die Versicherungsbranche künftig weltweit auf derartige Haftungsansprüche einrichten. Der Allianz Konzern arbeitet weiter an der Analyse dieser Risiken außerhalb der USA. Die Ergebnisse der laufenden Analyse der Asbest- und Umweltrückstellungen außerhalb der USA bestärken den bisherigen und aktuellen Buchwert der Asbest- und Umweltrückstellungen, ohne dass für 2010 eine weitere Anhebung der Rückstellungen erforderlich wäre.

Für die Asbest- und Umweltrisiken in den USA wurde 2009 eine unabhängige versicherungsmathematische Analyse eingeleitet und 2010 abgeschlossen. Als Folge aus dieser Studie hat die Fireman's Fund Insurance Company ihre Reserven für Asbest- und Umweltschäden um 301 Mio USD netto auf lokaler Basis erhöht. Die Reservenerhöhung bei der Fireman's Fund Insurance Company hatte keinen Einfluss auf das Ergebnis des Allianz Konzerns.



Die folgende Tabelle fasst die Brutto- und Nettoschäden und Reserven für Schäden und Schadenregulierungskosten für Asbest- und Umweltrisiken zusammen.

### Brutto- und Nettorückstellungen für noch nicht regulierte Asbest- und Umweltschäden

| Stand 31. Dezember                                                          | 2010<br>Mio € | 2009<br>Mio € | 2008<br>Mio € |
|-----------------------------------------------------------------------------|---------------|---------------|---------------|
| A&U Rückstellungen netto                                                    | 2 713         | 2 652         | 2 618         |
| A&U Rückstellungen brutto                                                   | 3 272         | 3 099         | 3 140         |
| in % der Bruttorekstellungen im Segment Schaden-Unfall des Allianz Konzerns | 5,7 %         | 5,6 %         | 5,6 %         |

Die folgende Tabelle zeigt die Gesamtentwicklung der Asbest- und Umweltschäden in den letzten drei Jahren auf.

### Brutto-Asbest- und Umweltschäden sowie Schadenregulierungskosten vor Rückversicherung

|                                             | 2010<br>Mio € | 2009<br>Mio € | 2008<br>Mio € |
|---------------------------------------------|---------------|---------------|---------------|
| <b>Asbest- und Umweltschäden insgesamt:</b> |               |               |               |
| Schadenrückstellungen zum 1.1.              | 3 099         | 3 140         | 3 287         |
| abzgl. Schadenregulierung                   | – 195         | – 166         | – 199         |
| zzgl. Veränderung der Schadenrückstellungen | 368           | 125           | 52            |
| Schadenrückstellungen zum 31.12.            | 3 272         | 3 099         | 3 140         |

## 20 Rückstellungen für Versicherungs- und Investmentverträge

| Stand 31. Dezember                              | 2010<br>Mio €  | 2009<br>Mio €  |
|-------------------------------------------------|----------------|----------------|
| Deckungsrückstellung                            | 324 189        | 298 725        |
| Rückstellung für Beitragsrückerstattung         | 24 802         | 24 430         |
| Sonstige versicherungstechnische Rückstellungen | 802            | 646            |
| <b>Summe</b>                                    | <b>349 793</b> | <b>323 801</b> |

### Deckungsrückstellung

| Stand 31. Dezember                                | 2010<br>Mio €  | 2009<br>Mio €  |
|---------------------------------------------------|----------------|----------------|
| Lebensversicherungsverträge mit Gewinnbeteiligung | 138 588        | 132 774        |
| Traditionelle langlaufende Versicherungsverträge  | 54 860         | 50 948         |
| Verträge vom Typ Universal Life                   | 129 680        | 114 054        |
| Nicht fondsgebundene Investmentverträge           | 1 061          | 949            |
| <b>Summe</b>                                      | <b>324 189</b> | <b>298 725</b> |

Die Deckungsrückstellungen aus Lebensversicherungsverträgen mit Gewinnbeteiligung und aus traditionellen langlaufenden Versicherungsverträgen haben sich in den Geschäftsjahren 2010 und 2009 wie folgt entwickelt:

|                                                                   | 2010                                                       |                                                           | 2009                                                       |                                                           |
|-------------------------------------------------------------------|------------------------------------------------------------|-----------------------------------------------------------|------------------------------------------------------------|-----------------------------------------------------------|
|                                                                   | Lebensversicherungsverträge mit Gewinnbeteiligung<br>Mio € | Traditionelle langlaufende Versicherungsverträge<br>Mio € | Lebensversicherungsverträge mit Gewinnbeteiligung<br>Mio € | Traditionelle langlaufende Versicherungsverträge<br>Mio € |
| <b>Stand 1.1.</b>                                                 | <b>132 774</b>                                             | <b>50 948</b>                                             | <b>129 859</b>                                             | <b>46 943</b>                                             |
| Währungsänderungen                                                | 748                                                        | 1 220                                                     | 5                                                          | 262                                                       |
| Veränderungen Konsolidierungskreis                                | —                                                          | – 67                                                      | —                                                          | 1 942                                                     |
| In der Konzern-Gewinn- und Verlustrechnung erfasste Veränderungen | 4 265                                                      | 929                                                       | 1 933                                                      | 736                                                       |
| Zugewiesene Dividenden                                            | 1 135                                                      | 461                                                       | 1 193                                                      | 311                                                       |
| Zugänge und Abgänge                                               | 4                                                          | – 47                                                      | – 302                                                      | 288                                                       |
| Sonstige Veränderungen <sup>2</sup>                               | – 338 <sup>1</sup>                                         | 1 416 <sup>3</sup>                                        | 86 <sup>1</sup>                                            | 466                                                       |
| <b>Stand 31.12.</b>                                               | <b>138 588</b>                                             | <b>54 860</b>                                             | <b>132 774</b>                                             | <b>50 948</b>                                             |

1 Enthält für das zum 31. Dezember 2010 endende Geschäftsjahr Veränderungen der Schattenbilanzierung in Höhe von – 9 (2009: 87) Mio €.

2 Enthält für das zum 31. Dezember 2010 endende Geschäftsjahr Übertragungen von Lebensversicherungsverträgen mit Gewinnbeteiligung zu traditionellen langlaufenden Versicherungsverträgen in Höhe von 270 Mio €.

3 Enthält für das zum 31. Dezember 2010 endende Geschäftsjahr Übertragungen von Verträgen vom Typ Universal Life zu den traditionellen langlaufenden Versicherungsverträgen in Höhe von 913 Mio €.

Die Deckungsrückstellungen aus Verträgen vom Typ Universal Life und aus nicht fondsgebundenen Investmentverträgen haben sich in den Geschäftsjahren 2010 und 2009 wie folgt entwickelt:

|                                                       | 2010                                        |                                                        | 2009                                        |                                                        |
|-------------------------------------------------------|---------------------------------------------|--------------------------------------------------------|---------------------------------------------|--------------------------------------------------------|
|                                                       | Verträge vom Typ<br>Universal Life<br>Mio € | Nicht<br>fondsgebundene<br>Investmentverträge<br>Mio € | Verträge vom Typ<br>Universal Life<br>Mio € | Nicht<br>fondsgebundene<br>Investmentverträge<br>Mio € |
| <b>Stand 1.1.</b>                                     | <b>114 054</b>                              | <b>949</b>                                             | <b>102 560</b>                              | <b>839</b>                                             |
| Währungsänderungen                                    | 3 606                                       | 23                                                     | – 978                                       | 2                                                      |
| Veränderungen Konsolidierungskreis                    | – 85                                        | —                                                      | —                                           | —                                                      |
| Eingenommene Beiträge                                 | 19 585                                      | 472                                                    | 19 739                                      | 423                                                    |
| Abgetrennte, eingebettete Derivate                    | – 321                                       | – 1                                                    | – 610                                       | – 3                                                    |
| Zinszuführungen                                       | 4 719                                       | 28                                                     | 4 086                                       | 80                                                     |
| Abgänge aufgrund von Tod, Rückkäufen<br>und Entnahmen | – 11 227                                    | – 420                                                  | – 10 824                                    | – 385                                                  |
| Kosten und Gebühren                                   | – 1 303                                     | – 8                                                    | – 1 005                                     | – 11                                                   |
| Portfoliozugänge und -abgänge                         | 4                                           | —                                                      | – 8                                         | —                                                      |
| Übertragungen <sup>1</sup>                            | 648 <sup>2</sup>                            | 18                                                     | 1 094                                       | 4                                                      |
| <b>Stand 31.12.</b>                                   | <b>129 680</b>                              | <b>1 061</b>                                           | <b>114 054</b>                              | <b>949</b>                                             |

1 Diese Übertragungen betreffen im Wesentlichen Versicherungsverträge, wenn Versicherungsnehmer von einem fondsgebundenen Vertrag zu einem Vertrag vom Typ Universal Life wechseln.

2 Enthält für das zum 31. Dezember 2010 endende Geschäftsjahr Übertragungen von Verträgen vom Typ Universal Life zu den traditionellen langlaufenden Versicherungsverträgen in Höhe von – 913 Mio €.

Der Bestand an überschussberechtigten Lebensversicherungen lag zum 31. Dezember 2010 bei 59% (2009: 62%) des Bruttoversicherungsbestands des Allianz Konzerns. Überschussberechtigte Versicherungsverträge hatten 2010 einen Anteil von 64% (2009: 64%) an den Bruttobeiträgen und von 63% (2009: 63%) an den verdienten Beiträgen in der Lebensversicherung. Rückstellungen für traditionelle Versicherungsverträge mit Gewinnbeteiligung machten etwa 49% (2009: 51%) der gesamten Deckungsrückstellungen zum 31. Dezember 2010 aus.

### Rückstellung für Beitragsrückerstattung (RfB)

|                                                                     | 2010<br>Mio € | 2009<br>Mio € | 2008<br>Mio € |
|---------------------------------------------------------------------|---------------|---------------|---------------|
| <b>Nach nationalen Vorschriften<br/>bereits zugewiesene Beträge</b> |               |               |               |
| <b>Stand 1.1.</b>                                                   | <b>12 409</b> | <b>12 458</b> | <b>13 438</b> |
| Währungsänderungen                                                  | 35            | 4             | 6             |
| Veränderungen<br>Konsolidierungskreis                               | – 20          |               |               |
| Veränderungen                                                       | – 859         | – 53          | – 986         |
| <b>Stand 31.12.</b>                                                 | <b>11 565</b> | <b>12 409</b> | <b>12 458</b> |
| <b>Latente RfB</b>                                                  |               |               |               |
| <b>Stand 1.1.</b>                                                   | <b>12 021</b> | <b>4 737</b>  | <b>13 787</b> |
| Währungsänderungen                                                  | 150           | – 6           | 67            |
| Veränderungen aufgrund<br>von Zeitwertschwankungen                  | – 682         | 6 599         | – 7 024       |
| Veränderungen<br>Konsolidierungskreis                               | – 7           |               |               |
| Veränderungen<br>aufgrund ergebniswirksamer<br>Umbewertungen        | 1 755         | 691           | – 2 093       |
| <b>Stand 31.12.</b>                                                 | <b>13 237</b> | <b>12 021</b> | <b>4 737</b>  |
| <b>Summe</b>                                                        | <b>24 802</b> | <b>24 430</b> | <b>17 195</b> |

### Konzentration des Versicherungsrisikos im Segment Leben/Kranken

Im Geschäftsbereich Leben/Kranken werden eine Vielzahl von Versicherungs- und Investmentverträgen für Einzelpersonen und Gruppen in rund 30 Ländern angeboten. Einzelverträge umfassen sowohl traditionelle als auch fondsgebundene Verträge. Ohne die Berücksichtigung der Überschussbeteiligung der Versicherungs-

nehmer bergen die traditionellen Verträge generell wesentliche Kapitalanlagerisiken für den Allianz Konzern, während fondsgebundene Verträge normalerweise eine Beteiligung des Versicherungsnehmers am Kapitalanlagerisiko vorsehen. Traditionelle Verträge umfassen Versicherungen für den Todes- und den Erlebensfall, Rentenversicherungen und Krankenversicherungen.

Traditionelle Rentenverträge werden mit aufgeschobener oder sofort beginnender Auszahlung angeboten. Der Allianz Konzern betreibt außerdem in erheblichem Umfang Lebensversicherungsgeschäft in den USA in Form aktienkursindizierter Renten. Zusätzlich bietet der Allianz Konzern auf bestimmten Märkten Gruppenlebens-, Gruppenkranken- und Gruppenrentenversicherungen an.

Zum 31. Dezember 2010 und 2009 setzten sich die aktivierten Abschlusskosten sowie die Rückstellungen für Versicherungs- und Investmentverträge im Segment Leben/Kranken wie folgt zusammen:

|                             | Aktiviert<br>Abschluss-<br>kosten | Deckungs-<br>rückstellung | Rückstellung<br>für<br>Beitragsrück-<br>erstattung | Sonstige<br>versicherungs-<br>technische<br>Rück-<br>stellungen | Summe<br>nicht fonds-<br>gebundener<br>Rück-<br>stellungen | Verbindlich-<br>keiten aus<br>fonds-<br>gebundenen<br>Verträgen | Summe          |
|-----------------------------|-----------------------------------|---------------------------|----------------------------------------------------|-----------------------------------------------------------------|------------------------------------------------------------|-----------------------------------------------------------------|----------------|
| Stand 31. Dezember          | Mio €                             | Mio €                     | Mio €                                              | Mio €                                                           | Mio €                                                      | Mio €                                                           | Mio €          |
| <b>2010</b>                 |                                   |                           |                                                    |                                                                 |                                                            |                                                                 |                |
| Deutschland Leben           | 6 290                             | 134 431                   | 16 127                                             | 120                                                             | 150 678                                                    | 3 153                                                           | 153 831        |
| Deutschland Kranken         | 971                               | 15 983                    | 4 943                                              | 16                                                              | 20 942                                                     | —                                                               | 20 942         |
| Frankreich                  | 1 396                             | 50 374                    | 1 578                                              | 186                                                             | 52 138                                                     | 12 715                                                          | 64 853         |
| Italien                     | 755                               | 25 437                    | — 319                                              | —                                                               | 25 118                                                     | 19 415                                                          | 44 533         |
| Schweiz                     | 220                               | 8 511                     | 1 030                                              | 140                                                             | 9 681                                                      | 721                                                             | 10 402         |
| Österreich                  | 190                               | 3 307                     | 206                                                | 1                                                               | 3 514                                                      | 586                                                             | 4 100          |
| Südkorea                    | 573                               | 7 261                     | 35                                                 | —                                                               | 7 296                                                      | 770                                                             | 8 066          |
| Belgien                     | 110                               | 6 522                     | 23                                                 | 38                                                              | 6 583                                                      | 257                                                             | 6 840          |
| Spanien                     | 21                                | 5 502                     | 39                                                 | —                                                               | 5 541                                                      | 37                                                              | 5 578          |
| Übriges West- und Südeuropa | 335                               | 2 352                     | 25                                                 | 5                                                               | 2 382                                                      | 4 661                                                           | 7 043          |
| Osteuropa                   | 351                               | 1 986                     | 7                                                  | 4                                                               | 1 997                                                      | 1 153                                                           | 3 150          |
| USA                         | 4 181                             | 47 365                    | —                                                  | —                                                               | 47 365                                                     | 14 407                                                          | 61 772         |
| Taiwan                      | 272                               | 1 748                     | —                                                  | 26                                                              | 1 774                                                      | 4 171                                                           | 5 945          |
| Übrige Asien-Pazifik        | 785                               | 3 799                     | 131                                                | 37                                                              | 3 967                                                      | 2 737                                                           | 6 704          |
| Mittel- und Südamerika      | 3                                 | 491                       | —                                                  | —                                                               | 491                                                        | 3                                                               | 494            |
| Übrige                      | 7                                 | 1 067                     | 3                                                  | 2                                                               | 1 072                                                      | 61                                                              | 1 133          |
| <b>Summe</b>                | <b>16 460</b>                     | <b>316 136</b>            | <b>23 828</b>                                      | <b>575</b>                                                      | <b>340 539</b>                                             | <b>64 847</b>                                                   | <b>405 386</b> |
| <b>2009</b>                 |                                   |                           |                                                    |                                                                 |                                                            |                                                                 |                |
| Deutschland Leben           | 5 928                             | 126 993                   | 15 185                                             | 3                                                               | 142 181                                                    | 2 715                                                           | 144 896        |
| Deutschland Kranken         | 938                               | 15 048                    | 4 698                                              | 19                                                              | 19 765                                                     | —                                                               | 19 765         |
| Frankreich                  | 1 409                             | 47 834                    | 1 739                                              | 167                                                             | 49 740                                                     | 11 876                                                          | 61 616         |
| Italien                     | 787                               | 22 681                    | 410                                                | —                                                               | 23 091                                                     | 19 580                                                          | 42 671         |
| Schweiz                     | 214                               | 6 957                     | 806                                                | 116                                                             | 7 879                                                      | 604                                                             | 8 483          |
| Österreich                  | 225                               | 3 274                     | 177                                                | 1                                                               | 3 452                                                      | 486                                                             | 3 938          |
| Südkorea                    | 643                               | 5 871                     | 34                                                 | —                                                               | 5 905                                                      | 763                                                             | 6 668          |
| Belgien                     | 108                               | 5 968                     | 31                                                 | 38                                                              | 6 037                                                      | 272                                                             | 6 309          |
| Spanien                     | 21                                | 5 321                     | 186                                                | —                                                               | 5 507                                                      | 44                                                              | 5 551          |
| Übriges West- und Südeuropa | 335                               | 2 228                     | 12                                                 | 6                                                               | 2 246                                                      | 3 964                                                           | 6 210          |
| Osteuropa                   | 346                               | 1 954                     | 19                                                 | 4                                                               | 1 977                                                      | 1 022                                                           | 2 999          |
| USA                         | 4 628                             | 40 907                    | —                                                  | —                                                               | 40 907                                                     | 11 100                                                          | 52 007         |
| Taiwan                      | 232                               | 1 526                     | —                                                  | 22                                                              | 1 548                                                      | 3 332                                                           | 4 880          |
| Übrige Asien-Pazifik        | 534                               | 2 877                     | 85                                                 | 34                                                              | 2 996                                                      | 1 195                                                           | 4 191          |
| Mittel- und Südamerika      | 3                                 | 371                       | —                                                  | —                                                               | 371                                                        | —                                                               | 371            |
| Übrige                      | 6                                 | 1 021                     | 8                                                  | —                                                               | 1 029                                                      | 10                                                              | 1 039          |
| <b>Summe</b>                | <b>16 357</b>                     | <b>290 831</b>            | <b>23 390</b>                                      | <b>410</b>                                                      | <b>314 631</b>                                             | <b>56 963</b>                                                   | <b>371 594</b> |

Ein wesentlicher Teil der Aktivitäten des Geschäftsberichts Leben/Kranken des Allianz Konzerns entfällt auf Westeuropa. Gesetze und Vorschriften für Versicherungen sehen dort historisch bedingt eine gesetzliche oder

vertragliche Mindestbeteiligung der Versicherungsnehmer am Ergebnis des Versicherers vor. Insbesondere Deutschland, die Schweiz und Österreich, die zum 31. Dezember 2010 und 2009 rund 48 % bzw. 49 % der Rück-

stellungen für Versicherungs- und Investmentverträge hielten, sind durch wesentliche Beteiligungen der Versicherungsnehmer an allen Ergebnisquellen einschließlich Risiko-, Kapitalanlage- und Kostenergebnis gekennzeichnet. Als Ergebnis dieser Beteiligung von Versicherungsnehmern ist das Versicherungs-, Kapitalanlage- und Kostenrisiko des Allianz Konzerns begrenzt.

Des Weiteren erfüllen alle Rentenversicherungsverträge des Allianz Konzerns in den USA die Anforderungen für die Klassifizierung als Versicherungsvertrag nach IFRS 4, weil diese Verträge Wahlrechte für die Versicherungsnehmer enthalten, eine lebenslange Rente zu beziehen. Diese Verträge setzen den Allianz Konzern weder derzeit einem signifikanten Langlebighkeitsrisiko aus, noch wird erwartet, dass sie den Allianz Konzern in Zukunft einem solchen Risiko aussetzen werden, da sowohl die angenommenen als auch die beobachteten Verrrentungsraten sehr niedrig sind. Darüber hinaus bergen zahlreiche traditionelle Verträge im Allianz Konzern, die in Frankreich und Italien vertrieben werden, kein signifikantes versicherungstechnisches Risiko, ungeachtet der Tatsache, dass diese Verträge aufgrund der ermessensabhängigen Überschussbeteiligung als Versicherungsverträge bilanziert werden. Ebenso birgt ein Großteil der

fondsgebundenen Verträge des Allianz Konzerns in Frankreich und Italien kein signifikantes versicherungstechnisches Risiko.

Aufgrund der erheblichen Vielfalt von Vertragsarten, einschließlich der sich gegenseitig ausgleichenden Effekte wie Sterberisiko und Langlebighkeitsrisiko in kombinierten Portfolios aus Lebens- und Rentenversicherungen, der geographischen Aufteilung des Geschäftsbereichs Leben/Kranken sowie der Höhe der Beteiligung von Versicherungsnehmern am Sterbe- und Krankheitsrisiko in bestimmten westeuropäischen Ländern ist der Allianz Konzern der Überzeugung, dass der Geschäftsbereich Leben/Kranken keine wesentlichen Versicherungsrisiken birgt und dass der Jahresüberschuss oder das Eigenkapital keinem besonderen versicherungstechnischen Risiko unterliegen.

Aufgrund der Garantieverzinsung in den meisten der nicht fondsgebundenen Verträge ist der Geschäftsbereich Leben/Kranken des Allianz Konzerns einem wesentlichen Kapitalanlagerisiko unterworfen. Eine Übersicht über die gewichtete Durchschnittsgarantieverzinsung der wichtigsten operativen Konzerngesellschaften des Segments Leben/Kranken (die in 2010 und 2009 jeweils 85 % der nicht fondsgebundenen Rückstellungen hielten) stellt sich nach Ländern wie folgt dar:

| Stand 31. Dezember   | 2010                    |                                                  |                                                                 | 2009                    |                                                  |                                                                 |
|----------------------|-------------------------|--------------------------------------------------|-----------------------------------------------------------------|-------------------------|--------------------------------------------------|-----------------------------------------------------------------|
|                      | Garantie-<br>verzinsung | Nicht fonds-<br>gebundene<br>Rück-<br>stellungen | %-Satz der<br>nicht fonds-<br>gebundenen<br>Rück-<br>stellungen | Garantie-<br>verzinsung | Nicht fonds-<br>gebundene<br>Rück-<br>stellungen | %-Satz der<br>nicht fonds-<br>gebundenen<br>Rück-<br>stellungen |
|                      | in %                    | Mrd €                                            | in %                                                            | in %                    | Mrd €                                            | in %                                                            |
| Deutschland Leben    | 3,3                     | 129,0                                            | 98,0                                                            | 3,3                     | 122,3                                            | 98,2                                                            |
| Frankreich           | 1,1                     | 50,4                                             | 79,8                                                            | 1,2                     | 47,8                                             | 80,1                                                            |
| Italien <sup>1</sup> | 2,6                     | 25,2                                             | 56,7                                                            | 2,8                     | 22,4                                             | 53,6                                                            |
| USA                  | 1,5                     | 51,0                                             | 78,0                                                            | 1,4                     | 44,2                                             | 79,9                                                            |
| Schweiz              | 2,6                     | 8,6                                              | 92,3                                                            | 2,6                     | 7,0                                              | 92,0                                                            |
| Südkorea             | 4,9                     | 7,3                                              | 90,5                                                            | 5,2                     | 5,9                                              | 88,6                                                            |

<sup>1</sup> Beinhaltet nicht Assicuratrice Vita (285 Mio € nicht fondsgebundener Rückstellungen).

Auf den meisten dieser Märkte übersteigt der Effektivzinssatz, der sich aus dem Investmentportfolio ergibt, die Garantieverzinsung. Zusätzlich kann die Geschäftstätigkeit in diesen Märkten wesentliche Sterblichkeits- und Kostenmargen enthalten. Aus diesem Grund ist der

Allianz Konzern davon überzeugt, dass der Geschäftsbereich Leben/Kranken zum 31. Dezember 2010 und 2009 keinem wesentlichen Risiko der Unterdeckung von Reserven unterlag. Allerdings haben die Leben/Kranken-Konzerngesellschaften in der Schweiz, Belgien, Südkorea und Taiwan eine hohe Garantieverzinsung in Altverträgen und können dadurch sensibel auf ein Sinken der Investortrträge bzw. auf ein anhaltend niedriges Zinsniveau reagieren.

## 21 Finanzpassiva aus fondsgebundenen Verträgen

| Stand 31. Dezember                   | 2010<br>Mio € | 2009<br>Mio € |
|--------------------------------------|---------------|---------------|
| Fondsgebundene Versicherungsverträge | 43 027        | 35 576        |
| Fondsgebundene Investmentverträge    | 21 820        | 21 387        |
| <b>Summe</b>                         | <b>64 847</b> | <b>56 963</b> |

Die Finanzpassiva aus fondsgebundenen Versicherungsverträgen und fondsgebundenen Investmentverträgen haben sich 2010 und 2009 wie folgt entwickelt:

|                                                    | 2010                                          |                                            | 2009                                          |                                            |
|----------------------------------------------------|-----------------------------------------------|--------------------------------------------|-----------------------------------------------|--------------------------------------------|
|                                                    | Fondsgebundene Versicherungsverträge<br>Mio € | Fondsgebundene Investmentverträge<br>Mio € | Fondsgebundene Versicherungsverträge<br>Mio € | Fondsgebundene Investmentverträge<br>Mio € |
| <b>Stand 1.1.</b>                                  | <b>35 576</b>                                 | <b>21 387</b>                              | <b>29 056</b>                                 | <b>21 394</b>                              |
| Währungsänderungen                                 | 1 677                                         | 241                                        | – 233                                         | 14                                         |
| Veränderungen Konsolidierungskreis                 | – 4                                           | —                                          | —                                             | —                                          |
| Eingenommene Beiträge                              | 8 804                                         | 5 932                                      | 5 849                                         | 4 054                                      |
| Zinszuführungen                                    | 3 405                                         | 915                                        | 5 401                                         | 2 121                                      |
| Abgänge aufgrund von Tod, Rückkäufen und Entnahmen | – 3 610                                       | – 6 348                                    | – 2 520                                       | – 5 977                                    |
| Kosten und Gebühren                                | – 1 187                                       | – 99                                       | – 950                                         | – 126                                      |
| Portfoliozugänge und -abgänge                      | – 44                                          | – 3                                        | – 21                                          | – 1                                        |
| Übertragungen <sup>1</sup>                         | – 1 590                                       | – 205                                      | – 1 006                                       | – 92                                       |
| <b>Stand 31.12.</b>                                | <b>43 027</b>                                 | <b>21 820</b>                              | <b>35 576</b>                                 | <b>21 387</b>                              |

<sup>1</sup> Diese Übertragungen betreffen im Wesentlichen Versicherungsverträge, wenn Versicherungsnehmer von einem fondsgebundenen Vertrag zu einem Vertrag vom Typ Universal Life wechseln.

## 22 Andere Verbindlichkeiten

| Stand 31. Dezember                                                                                                 | 2010<br>Mio € | 2009<br>Mio € |
|--------------------------------------------------------------------------------------------------------------------|---------------|---------------|
| <b>Verbindlichkeiten gegenüber</b>                                                                                 |               |               |
| Versicherungsnehmern                                                                                               | 4 855         | 4 798         |
| Rückversicherern                                                                                                   | 1 813         | 1 804         |
| Versicherungsvermittlern                                                                                           | 1 471         | 1 407         |
| <b>Zwischensumme</b>                                                                                               | <b>8 139</b>  | <b>8 009</b>  |
| <b>Verbindlichkeiten im Rahmen der Sozialversicherung</b>                                                          | <b>434</b>    | <b>398</b>    |
| <b>Steuerverbindlichkeiten</b>                                                                                     |               |               |
| Ertragsteuern                                                                                                      | 1 661         | 1 890         |
| Sonstige Steuern                                                                                                   | 1 086         | 1 028         |
| <b>Zwischensumme</b>                                                                                               | <b>2 747</b>  | <b>2 918</b>  |
| <b>Zins- und Mietverbindlichkeiten</b>                                                                             | <b>659</b>    | <b>715</b>    |
| <b>Rechnungsabgrenzungsposten</b>                                                                                  |               |               |
| Zinsen und Mieten                                                                                                  | 13            | 9             |
| Übrige Rechnungsabgrenzungsposten                                                                                  | 293           | 316           |
| <b>Zwischensumme</b>                                                                                               | <b>306</b>    | <b>325</b>    |
| <b>Rückstellungen für</b>                                                                                          |               |               |
| Pensionen und ähnliche Verpflichtungen                                                                             | 3 925         | 3 819         |
| Mitarbeiter                                                                                                        | 1 887         | 1 887         |
| aktienbasierte Vergütungspläne                                                                                     | 1 099         | 1 296         |
| Restrukturierungsmaßnahmen                                                                                         | 409           | 346           |
| Darlehensverpflichtungen                                                                                           | 7             | 8             |
| Drohverluste aus dem Nichtversicherungsgeschäft                                                                    | 155           | 137           |
| sonstige Verpflichtungen                                                                                           | 1 564         | 1 395         |
| <b>Zwischensumme</b>                                                                                               | <b>9 046</b>  | <b>8 888</b>  |
| <b>Einbehaltene Einlagen aus dem abgegebenen Rückversicherungsgeschäft</b>                                         | <b>2 320</b>  | <b>2 547</b>  |
| <b>Derivative Finanzinstrumente, welche die Kriterien des Hedge Accounting erfüllen, und feste Verpflichtungen</b> | <b>225</b>    | <b>310</b>    |
| <b>Verbindlichkeiten für kündbare Eigenkapitalinstrumente</b>                                                      | <b>3 111</b>  | <b>3 451</b>  |
| <b>Übrige Verbindlichkeiten</b>                                                                                    | <b>6 226</b>  | <b>5 724</b>  |
| <b>Summe</b>                                                                                                       | <b>33 213</b> | <b>33 285</b> |

Zum 31. Dezember 2010 beliefen sich die Verbindlichkeiten mit einer Restlaufzeit bis zu einem Jahr auf 24 748 (2009: 25 411) Mio €, die mit Restlaufzeiten von über einem Jahr auf 8 465 (2009: 7 874) Mio €.

## 23 Verbriefte Verbindlichkeiten

|                                                | Fälligkeit         |                    |                    |                    |                    |                     | Stand                | Stand                |
|------------------------------------------------|--------------------|--------------------|--------------------|--------------------|--------------------|---------------------|----------------------|----------------------|
|                                                | 2011               | 2012               | 2013               | 2014               | 2015               | Fällig nach<br>2015 | 31. Dezember<br>2010 | 31. Dezember<br>2009 |
|                                                | Mio € <sup>1</sup>  | Mio €                | Mio €                |
| <b>Allianz SE<sup>2</sup></b>                  |                    |                    |                    |                    |                    |                     |                      |                      |
| <b>Anleihen</b>                                |                    |                    |                    |                    |                    |                     |                      |                      |
| mit fester Verzinsung                          | —                  | 883                | 1 485              | —                  | —                  | 2 968               | 5 336                | 5 330                |
| Zinssatz                                       | —                  | 5,63 %             | 5,00 %             | —                  | —                  | 4,37 %              | —                    | —                    |
| <b>Geldmarktpapiere</b>                        |                    |                    |                    |                    |                    |                     |                      |                      |
| mit fester Verzinsung                          | 1 791              | —                  | —                  | —                  | —                  | —                   | 1 791                | 1 504                |
| Zinssatz                                       | 0,70 %             | —                  | —                  | —                  | —                  | —                   | —                    | —                    |
| <b>Summe Allianz SE<sup>2</sup></b>            | <b>1 791</b>       | <b>883</b>         | <b>1 485</b>       | <b>—</b>           | <b>—</b>           | <b>2 968</b>        | <b>7 127</b>         | <b>6 834</b>         |
| <b>Kreditinstitute</b>                         |                    |                    |                    |                    |                    |                     |                      |                      |
| <b>Anleihen</b>                                |                    |                    |                    |                    |                    |                     |                      |                      |
| mit fester Verzinsung                          | 59                 | 179                | 98                 | 22                 | 28                 | —                   | 386                  | 350                  |
| Zinssatz                                       | 3,74 %             | 3,27 %             | 2,33 %             | 4,46 %             | 1,22 %             | —                   | —                    | —                    |
| mit variabler Verzinsung                       | 24                 | —                  | —                  | —                  | 2                  | 687                 | 713                  | 750                  |
| aktueller Zinssatz                             | 0,89 %             | —                  | —                  | —                  | 0,72 %             | 1,29 %              | —                    | —                    |
| <b>Summe Kreditinstitute</b>                   | <b>83</b>          | <b>179</b>         | <b>98</b>          | <b>22</b>          | <b>30</b>          | <b>687</b>          | <b>1 099</b>         | <b>1 100</b>         |
| <b>Sonstige Konzernunternehmen</b>             |                    |                    |                    |                    |                    |                     |                      |                      |
| <b>Verbriefte Verbindlichkeiten</b>            |                    |                    |                    |                    |                    |                     |                      |                      |
| mit fester Verzinsung                          | —                  | —                  | —                  | —                  | —                  | 3                   | 3                    | 3                    |
| Zinssatz                                       | —                  | —                  | —                  | —                  | —                  | 2,11 %              | —                    | —                    |
| mit variabler Verzinsung                       | —                  | —                  | —                  | —                  | —                  | —                   | —                    | 25                   |
| aktueller Zinssatz                             | —                  | —                  | —                  | —                  | —                  | —                   | —                    | —                    |
| <b>Summe sonstige Konzern-<br/>unternehmen</b> | <b>—</b>           | <b>—</b>           | <b>—</b>           | <b>—</b>           | <b>—</b>           | <b>3</b>            | <b>3</b>             | <b>28</b>            |
| <b>Summe</b>                                   | <b>1 874</b>       | <b>1 062</b>       | <b>1 583</b>       | <b>22</b>          | <b>30</b>          | <b>3 658</b>        | <b>8 229</b>         | <b>7 962</b>         |

1 Außer für Zinssätze; diese sind gewichtete Mittelwerte.

2 Einschließlich der von Allianz Finance II B.V. ausgegebenen und von der Allianz SE garantierten Anleihen sowie der ausgegebenen Geldmarktpapiere der Allianz Finance Corporation, eines hundertprozentigen Tochterunternehmens der Allianz SE, für welche die Allianz SE vollständig und ohne Einschränkungen garantiert.



## 24 Genusssrechtskapital und nachrangige Verbindlichkeiten

|                                          | Fälligkeit         |                    |                    |                    |                    |                     | Stand                  | Stand                |
|------------------------------------------|--------------------|--------------------|--------------------|--------------------|--------------------|---------------------|------------------------|----------------------|
|                                          | 2011               | 2012               | 2013               | 2014               | 2015               | Fällig nach<br>2015 | 31. Dezember<br>2010   | 31. Dezember<br>2009 |
|                                          | Mio € <sup>1</sup>  | Mio €                  | Mio €                |
| <b>Allianz SE<sup>2</sup></b>            |                    |                    |                    |                    |                    |                     |                        |                      |
| <b>Nachrangige Anleihen</b>              |                    |                    |                    |                    |                    |                     |                        |                      |
| mit fester Verzinsung                    | —                  | —                  | —                  | —                  | —                  | 2 639               | 2 639                  | 2 506                |
| Zinssatz                                 | —                  | —                  | —                  | —                  | —                  | 7,31 %              | —                      | —                    |
| mit variabler Verzinsung                 | —                  | —                  | —                  | —                  | —                  | 5 662               | 5 662                  | 5 656                |
| aktueller Zinssatz                       | —                  | —                  | —                  | —                  | —                  | 5,60 %              | —                      | —                    |
| <b>Zwischensumme</b>                     | —                  | —                  | —                  | —                  | —                  | <b>8 301</b>        | <b>8 301</b>           | <b>8 162</b>         |
| <b>Genussscheine<sup>3</sup></b>         |                    |                    |                    |                    |                    |                     |                        |                      |
| mit variabler Verzinsung                 | —                  | —                  | —                  | —                  | —                  | —                   | —                      | 121                  |
| <b>Summe Allianz SE<sup>2</sup></b>      | —                  | —                  | —                  | —                  | —                  | <b>8 301</b>        | <b>8 301</b>           | <b>8 283</b>         |
| <b>Kreditinstitute</b>                   |                    |                    |                    |                    |                    |                     |                        |                      |
| <b>Nachrangige Anleihen</b>              |                    |                    |                    |                    |                    |                     |                        |                      |
| mit fester Verzinsung                    | —                  | —                  | 70                 | 48                 | —                  | 136                 | 254                    | 173                  |
| Zinssatz                                 | —                  | —                  | 5,66 %             | 5,04 %             | —                  | 4,75 %              | —                      | —                    |
| <b>Summe Kreditinstitute</b>             | —                  | —                  | <b>70</b>          | <b>48</b>          | —                  | <b>136</b>          | <b>254</b>             | <b>173</b>           |
| <b>Sonstige Konzernunternehmen</b>       |                    |                    |                    |                    |                    |                     |                        |                      |
| <b>Nachrangige Verbindlichkeiten</b>     |                    |                    |                    |                    |                    |                     |                        |                      |
| mit fester Verzinsung                    | —                  | —                  | —                  | —                  | —                  | 398                 | 398                    | 621                  |
| Zinssatz                                 | —                  | —                  | —                  | —                  | —                  | 4,62 %              | —                      | —                    |
| mit variabler Verzinsung                 | —                  | —                  | —                  | —                  | —                  | —                   | —                      | 225                  |
| aktueller Zinssatz                       | —                  | —                  | —                  | —                  | —                  | —                   | —                      | —                    |
| <b>Zwischensumme</b>                     | —                  | —                  | —                  | —                  | —                  | <b>398</b>          | <b>398<sup>4</sup></b> | <b>846</b>           |
| <b>Hybrides Eigenkapital</b>             |                    |                    |                    |                    |                    |                     |                        |                      |
| mit fester Verzinsung                    | —                  | —                  | —                  | —                  | —                  | 45                  | 45                     | 45                   |
| Zinssatz                                 | —                  | —                  | —                  | —                  | —                  | 2,44 %              | —                      | —                    |
| <b>Summe sonstige Konzernunternehmen</b> | —                  | —                  | —                  | —                  | —                  | <b>443</b>          | <b>443</b>             | <b>891</b>           |
| <b>Summe</b>                             | —                  | —                  | <b>70</b>          | <b>48</b>          | —                  | <b>8 880</b>        | <b>8 998</b>           | <b>9 347</b>         |

1 Außer für Zinssätze; diese sind gewichtete Mittelwerte.

2 einschließlich der von Allianz Finance II B.V. ausgegebenen und von der Allianz SE garantierten nachrangigen Anleihen

3 Die von der Allianz SE begebenen Genussscheine wurden gemäß § 6 Absatz 4 der Genussscheinbedingungen mit Wirkung zum 31. Dezember 2009 gekündigt. Am 4. Januar 2010 erhielten die Halter eine Zahlung von 103,32 € für jeden Genussschein im Nennbetrag von 5,12 €. Die Bilanzposition „Genusssrechtskapital und nachrangige Verbindlichkeiten“ enthielt zum 31. Dezember 2009 den Gesamtablösungsbetrag für alle zum Bilanzstichtag im Umlauf befindlichen 1 175 554 Genussscheine der Allianz SE.

4 Der Rückgang resultiert aus der vorzeitigen Rückzahlung der von der Allianz France ausgegebenen nachrangigen Anleihen in Höhe von 450 Mio €.

## 25 Eigenkapital

| Stand 31. Dezember                                         | 2010<br>Mio € | 2009<br>Mio € |
|------------------------------------------------------------|---------------|---------------|
| <b>Eigenkapital</b>                                        |               |               |
| Gezeichnetes Kapital                                       | 1 164         | 1 162         |
| Kapitalrücklage                                            | 27 521        | 27 473        |
| Gewinnrücklagen <sup>1</sup>                               | 13 088        | 9 642         |
| Währungsänderungen                                         | - 2 339       | - 3 626       |
| Nichtrealisierte Gewinne und Verluste (netto) <sup>1</sup> | 5 057         | 5 457         |
| <b>Zwischensumme</b>                                       | <b>44 491</b> | <b>40 108</b> |
| <b>Anteile anderer Gesellschafter</b>                      | <b>2 071</b>  | <b>2 121</b>  |
| <b>Summe</b>                                               | <b>46 562</b> | <b>42 229</b> |

<sup>1</sup> Enthält - 237 (2009: - 213) Mio € aus eigenen Aktien zum 31. Dezember 2010.

<sup>2</sup> Enthält 196 (2009: 187) Mio € aus Cashflow Hedges zum 31. Dezember 2010.

### Gezeichnetes Kapital

Zum 31. Dezember 2010 betrug das gezeichnete Kapital 1 163 520 000 €. Es verteilt sich auf 454 500 000 vinkulierte Namensaktien. Dabei handelt es sich um nennwertlose Stückaktien mit einem rechnerischen Anteil am gezeichneten Kapital von 2,56 € je Stück.

### Genehmigtes Kapital

Zum 31. Dezember 2010 bestand ein Genehmigtes Kapital 2010/I in Höhe von 550 000 000 € (214 843 750 Aktien), das bis zum 4. Mai 2015 befristet ist. Die Bezugsrechte der Aktionäre können im Fall von Kapitalerhöhungen gegen Sacheinlagen sowie für Spitzenbeträge ausgeschlossen werden. Im Fall einer Kapitalerhöhung gegen Bareinlagen kann das Bezugsrecht der Aktionäre ausgeschlossen werden, wenn der Ausgabebetrag der neuen Aktien den Börsenpreis nicht wesentlich unterschreitet und die Aktien unter Ausschluss des Bezugsrechts gemäß § 186 Abs. 3 Satz 4 AktG 10% des Grundkapitals nicht überschreiten. Des Weiteren können die Bezugsrechte der Aktionäre ausgeschlossen werden, sofern dies erforderlich ist, um Inhabern mit Wandlungs- oder Optionsrecht ausgestatteter Anleihen ein Bezugsrecht zuzuerkennen. Insgesamt darf aber das Bezugsrecht für neue Aktien aus dem Genehmigten Kapital 2010/I und dem Bedingten Kapital 2010 nur für einen Betrag von maximal 20% des Grundkapitals (berechnet auf das Grundkapital zum Jahresende 2009) ausgeschlossen werden.

Aus einem weiteren genehmigten Kapital (Genehmigtes Kapital 2010/II) können bis zum 4. Mai 2015 Aktien gegen Bareinlagen ausgegeben werden. Das Bezugsrecht der Aktionäre kann ausgeschlossen werden zu dem Zweck, die neuen Aktien an Mitarbeiter der Allianz SE und ihrer Konzerngesellschaften auszugeben. Zum 31. Dezember 2010 belief sich das Genehmigte Kapital 2010/II auf 13 464 000 € (5 259 375 Aktien).

Zum 31. Dezember 2010 bestand ein bedingtes Kapital in Höhe von 250 000 000 € (97 656 250 Aktien) (Bedingtes Kapital 2010). Diese bedingte Kapitalerhöhung wird nur insoweit durchgeführt, als die Inhaber von Wandlungs- oder Optionsrechten aus Schuldverschreibungen, welche die Allianz SE oder ihre Tochtergesellschaften aufgrund der Ermächtigung der Hauptversammlung vom 5. Mai 2010 gegen bar ausgegeben haben, ihre Wandlungs- oder Optionsrechte ausüben oder Wandlungspflichten aus solchen Schuldverschreibungen erfüllt werden und nicht eigene Aktien oder Aktien aus genehmigtem Kapital hierfür verwendet werden.

### Entwicklung der Anzahl im Umlauf befindlicher Aktien

|                                                                    | 2010               | 2009               | 2008               |
|--------------------------------------------------------------------|--------------------|--------------------|--------------------|
| <b>Im Umlauf befindliche Aktien zum 1.1.</b>                       | <b>451 197 223</b> | <b>451 490 223</b> | <b>448 910 648</b> |
| Ausübung von Optionsscheinen                                       | —                  | —                  | 2 200 000          |
| Kapitalerhöhung für Mitarbeiteraktien                              | 600 000            | 850 000            | 700 000            |
| Änderung der Anzahl eigener Aktien zu sonstigen Zwecken            | - 248 463          | - 2 038 558        | - 96 521           |
| Änderung der Anzahl eigener Aktien zum Zweck des Wertpapierhandels | —                  | 895 558            | - 223 904          |
| <b>Im Umlauf befindliche Aktien zum 31.12.</b>                     | <b>451 548 760</b> | <b>451 197 223</b> | <b>451 490 223</b> |
| Eigene Aktien                                                      | 2 951 240          | 2 702 777          | 1 559 777          |
| <b>Anzahl der ausgegebenen Aktien insgesamt</b>                    | <b>454 500 000</b> | <b>453 900 000</b> | <b>453 050 000</b> |

Im November 2010 wurden 600 000 (2009: 850 000) Aktien zu einem Emissionskurs von 83,34 (2009: 77,62) € je Aktie begeben und damit den Mitarbeitern der in- und ausländischen Allianz Gesellschaften der Bezug von 373 380 (2009: 599 968) Mitarbeiteraktien

zu Preisen zwischen 58,34 (2009: 36,78) € und 69,58 (2009: 64,68) € je Aktie ermöglicht. Die restlichen 226 620 (2009: 250 032) Aktien werden weiterhin als eigene Aktien für die künftige Ausgabe von Mitarbeiterbeteiligungsplänen im Rahmen des Programms für 2011 bilanziert. Dies führte zu einer Erhöhung des gezeichneten Kapitals um 2 Mio € und der Kapitalrücklagen um 48 Mio €.

Alle in den Jahren 2010, 2009 und 2008 ausgegebenen Aktien waren ab Beginn des Ausgabejahres gewinnberechtig.

### Dividenden

Der Vorstand wird den Aktionären auf der Hauptversammlung für das Geschäftsjahr 2010 die Ausschüttung einer Dividende von 4,50 € auf jede gewinnberechtigte Stückaktie vorschlagen. Für die Geschäftsjahre 2009 und 2008 wurde eine Dividende von 4,10 € bzw. 3,50 € auf jede gewinnberechtigte Stückaktie ausgeschüttet.

### Eigene Aktien

Zum 31. Dezember 2010 hielt die Allianz SE 2 832 789 (2009: 2 584 367) eigene Aktien. Hiervon wurden 226 620 (2009: 250 032) Aktien zur Bedienung des Mitarbeiteraktienplanes 2011 vorgehalten, und 2 606 169 (2009: 2 334 335) Aktien dienten der Absicherung von Verpflichtungen aus dem Allianz Equity Incentive Programm (vormals Group Equity Incentive Programm).

Im vierten Quartal 2010 wurden 271 834 eigene Aktien zur Absicherung von Verpflichtungen aus dem Allianz Equity Incentive Programm zu einem Kurs von 89,71 € gekauft. Des Weiteren wurden im vierten Quartal 2010 im Rahmen einer Kapitalerhöhung für Mitarbeiteraktien 600 000 neue Aktien ausgegeben. Für den Mitarbeiteraktienkaufplan der Allianz SE und ihrer Tochterunternehmen wurden im Geschäftsjahr 2010 623 412 Aktien an Mitarbeiter verkauft. Hiervon stammten 250 032 Aktien aus der Kapitalerhöhung für Mitarbeiteraktien 2009 und 373 380 Aktien aus der Kapitalerhöhung für Mitarbeiteraktien 2010. Die verbleibenden 226 620 Aktien aus der Kapitalerhöhung 2010 werden für den Mitarbeiteraktienkaufplan der Allianz SE und ihrer Tochterunternehmen im Jahr 2011 verwendet. Die gesamte Veränderung der Anzahl eigener Aktien im Geschäftsjahr 2010

beläuft sich auf einen Zuwachs von 248 422 (2009: 2 038 560) Aktien und entspricht 635 960 (2009: 5 218 714) € oder 0,05 % (2009: 0,45 %) des gezeichneten Kapitals.

Die eigenen Aktien haben sich wie folgt entwickelt:

| Stand 31. Dezember | Anschaffungskosten<br>Mio € | Stückzahl        | Anteil am<br>gezeichneten<br>Kapital<br>% |
|--------------------|-----------------------------|------------------|-------------------------------------------|
| <b>2010</b>        |                             |                  |                                           |
| Allianz SE         | 224                         | 2 832 789        | 0,62                                      |
| Übrige             | 13                          | 118 451          | 0,03                                      |
| <b>Summe</b>       | <b>237</b>                  | <b>2 951 240</b> | <b>0,65</b>                               |
| <b>2009</b>        |                             |                  |                                           |
| Allianz SE         | 200                         | 2 584 367        | 0,57                                      |
| Übrige             | 13                          | 118 410          | 0,02                                      |
| <b>Summe</b>       | <b>213</b>                  | <b>2 702 777</b> | <b>0,59</b>                               |

### Anteile anderer Gesellschafter

| Stand 31. Dezember                            | 2010<br>Mio € | 2009<br>Mio € |
|-----------------------------------------------|---------------|---------------|
| Nichtrealisierte Gewinne und Verluste (netto) | 36            | 52            |
| Anteile am Ergebnis                           | 156           | 48            |
| Übrige Fremdanteile                           | 1 879         | 2 021         |
| <b>Summe</b>                                  | <b>2 071</b>  | <b>2 121</b>  |

### Kapitalanforderungen

Das Wachstum, die Art der Geschäfte, die der Allianz Konzern tätigt, und die jeweiligen Marktbedingungen sowie die Branche und die Standorte, in denen er tätig ist, beeinflussen den Kapitalbedarf des Allianz Konzerns. Wichtig ist ferner die Allokation des Anlageportfolios des Allianz Konzerns. Im Zuge des Managementdialogs wird anhand der Geschäftspläne der Kapitalbedarf der operativen Einheiten prognostiziert, wobei Umfang und zeitliche Streckung von Wachstum und Investitionen zu berücksichtigen sind. Die Mindestkapitalausstattung der operativen Einheiten und des Allianz Konzerns insgesamt unterliegen des Weiteren auch gesetzlichen Bestimmungen.

Mit Wirkung zum 1. Januar 2005 wurde in Deutschland die Finanzkonglomeraterichtlinie, eine ergänzende EU-Richtlinie, wirksam. Gemäß dieser Richtlinie versteht der Gesetzgeber unter einem Finanzkonglomerat eine Holding und ihre Tochtergesellschaften, die grenzüberschreitend und branchenübergreifend aktiv sind. Beim Allianz Konzern handelt es sich nach dieser Richtlinie und den betreffenden deutschen Gesetzen um ein Finanzkonglomerat. Die Richtlinie verlangt, dass ein Finanzkonglomerat die Erfüllung der Solvabilitätsanforderung auf konsolidierter Basis berechnet.

Zum 31. Dezember 2010 beliefen sich die Eigenmittel, die bei der Solvabilität für das Versicherungs-, das Asset-Management- und das Bankgeschäft berücksichtigt werden dürfen, auf 39,6 (2009: 34,8) Mrd € einschließlich außerbilanzieller Bewertungsreserven<sup>1</sup> in Höhe von 2,1 (2009: 2,0) Mrd €. Damit wurden die gesetzlichen Anforderungen um 16,7 (2009: 13,6) Mrd € überschritten, sodass sich zum 31. Dezember 2010 eine vorläufige Deckungsquote von 173 (2009: 164)% ergibt.

Neben den gesetzlichen Vorschriften zur Kapitalausstattung setzt der Allianz Konzern auch ein internes Risikokapitalmodell ein, um zu ermitteln, wie viel Kapital notwendig ist, um unerwartete Ergebnisschwankungen aufzufangen.

Bestimmte Versicherungsunternehmen des Allianz Konzerns erstellen ihre Abschlüsse nach lokalen Gesetzen und Vorschriften. Diese Gesetze basieren auf Anforderungen, die ein Minimum bei der Höhe des Kapitals und der einzubehaltenden Überschüsse von Versicherungsunternehmen sowie Beschränkungen der an die Aktionäre ausschüttbaren Dividenden vorsehen. Die Anforderungen an das Mindestkapital und die Beschränkungen der Dividenden variieren in Abhängigkeit von den gesetzlichen Vorschriften. Die Regelungen bezüglich des Mindestkapitals basieren auf verschiedenen Kriterien, z. B. gebuchten Beiträgen oder Versicherungsleistungen, Höhe der Rückstellungen für Versicherungsverträge, Kapitalanlage-, Sterbe-, Kredit-, versicherungstechnischen Risiken und außerbilanziellen Risiken. Die Aufzählung der Kriterien ist nicht abschließend.

Zum 31. Dezember 2010 wurden von den Tochtergesellschaften des Allianz Konzerns sämtliche aufsichtsrechtliche Anforderungen erfüllt.

Bestimmte Versicherungsunternehmen des Allianz Konzerns sind aufsichtsrechtlichen Vorgaben in Bezug auf die Höhe der Dividenden unterworfen, die an die Allianz SE ohne vorhergehende Genehmigung durch die zuständige Aufsichtsbehörde ausgeschüttet werden dürfen. Diese Auflagen gewährleisten, dass Unternehmen Dividenden lediglich bis zu einem gewissen Betrag oberhalb einer bestimmten aufsichtsrechtlichen Kapitalausstattung oder in Bezug auf die Höhe der nicht ausgeschütteten Überschüsse oder bis zum Jahresergebnis (oder einem bestimmten Prozentsatz davon) auszahlen. Beispielsweise sind die Geschäftsbereiche der in den Vereinigten Staaten von Amerika ansässigen Versicherungsunternehmen des Allianz Konzerns Beschränkungen in Bezug auf Dividendenzahlungen an das Mutterunternehmen nach dem anzuwendenden bundesstaatlichen Versicherungsrecht unterworfen. Dividenden, die über diese Beschränkungen hinaus ausgezahlt werden, benötigen im Allgemeinen die vorherige Zustimmung des Versicherungsbeauftragten des Heimatstaates. Der Vorstand des Allianz Konzerns ist überzeugt, dass diese Beschränkungen die Fähigkeit des Allianz Konzerns, künftig Dividenden an seine Aktionäre auszuschütten, nicht beeinflussen. Zudem bestehen für die Allianz SE keine rechtlichen Beschränkungen in Bezug auf die Höhe der Dividende, die an ihre Aktionäre ausgeschüttet werden kann, mit Ausnahme der gesetzlichen Rücklage in den entsprechenden Gewinnrücklagen nach § 150 Abs. 1 AktG.

<sup>1</sup> Außerbilanzielle Bewertungsreserven werden im Rahmen der Berichterstattung an die Aufsichtsbehörden nur auf Antrag als verfügbare Eigenmittel angesetzt; die Allianz SE hat bisher keinen Antrag auf Anerkennung gestellt. Ohne die außerbilanziellen Bewertungsreserven beläuft sich die Deckungsquote auf 164 (2009: 155)%.

## Angaben zur Konzern-Gewinn- und Verlustrechnung

## 26 Verdiente Beiträge (netto)

|                                                           | Schaden-Unfall<br>Mio € | Leben/Kranken<br>Mio € | Konsolidierung<br>Mio € | Konzern<br>Mio € |
|-----------------------------------------------------------|-------------------------|------------------------|-------------------------|------------------|
| <b>2010</b>                                               |                         |                        |                         |                  |
| <b>Gebuchte Bruttobeiträge</b>                            |                         |                        |                         |                  |
| aus dem selbst abgeschlossenen Versicherungsgeschäft      | 40 720                  | 24 294                 | —                       | 65 014           |
| aus dem in Rückdeckung übernommenen Versicherungsgeschäft | 3 175                   | 415                    | – 22                    | 3 568            |
| <b>Zwischensumme</b>                                      | <b>43 895</b>           | <b>24 709</b>          | <b>– 22</b>             | <b>68 582</b>    |
| Abgegebene Rückversicherungsbeiträge                      | – 4 346                 | – 549                  | 22                      | – 4 873          |
| <b>Gebuchte Nettobeiträge</b>                             | <b>39 549</b>           | <b>24 160</b>          | <b>—</b>                | <b>63 709</b>    |
| <b>Veränderung Beitragsüberträge</b>                      |                         |                        |                         |                  |
| aus dem selbst abgeschlossenen Versicherungsgeschäft      | – 110                   | – 126                  | —                       | – 236            |
| aus dem in Rückdeckung übernommenen Versicherungsgeschäft | 50                      | —                      | – 4                     | 46               |
| <b>Zwischensumme</b>                                      | <b>– 60</b>             | <b>– 126</b>           | <b>– 4</b>              | <b>– 190</b>     |
| Abgegebene Rückversicherungsbeiträge                      | – 186                   | —                      | 4                       | – 182            |
| <b>Veränderung (netto)</b>                                | <b>– 246</b>            | <b>– 126</b>           | <b>—</b>                | <b>– 372</b>     |
| <b>Verdiente Beiträge</b>                                 |                         |                        |                         |                  |
| aus dem selbst abgeschlossenen Versicherungsgeschäft      | 40 610                  | 24 168                 | —                       | 64 778           |
| aus dem in Rückdeckung übernommenen Versicherungsgeschäft | 3 225                   | 415                    | – 26                    | 3 614            |
| <b>Zwischensumme</b>                                      | <b>43 835</b>           | <b>24 583</b>          | <b>– 26</b>             | <b>68 392</b>    |
| Abgegebene Rückversicherungsbeiträge                      | – 4 532                 | – 549                  | 26                      | – 5 055          |
| <b>Summe</b>                                              | <b>39 303</b>           | <b>24 034</b>          | <b>—</b>                | <b>63 337</b>    |
| <b>2009</b>                                               |                         |                        |                         |                  |
| <b>Gebuchte Bruttobeiträge</b>                            |                         |                        |                         |                  |
| aus dem selbst abgeschlossenen Versicherungsgeschäft      | 39 490                  | 22 125                 | —                       | 61 615           |
| aus dem in Rückdeckung übernommenen Versicherungsgeschäft | 3 033                   | 401                    | – 24                    | 3 410            |
| <b>Zwischensumme</b>                                      | <b>42 523</b>           | <b>22 526</b>          | <b>– 24</b>             | <b>65 025</b>    |
| Abgegebene Rückversicherungsbeiträge                      | – 4 574                 | – 511                  | 24                      | – 5 061          |
| <b>Gebuchte Nettobeiträge</b>                             | <b>37 949</b>           | <b>22 015</b>          | <b>—</b>                | <b>59 964</b>    |
| <b>Veränderung Beitragsüberträge</b>                      |                         |                        |                         |                  |
| aus dem selbst abgeschlossenen Versicherungsgeschäft      | – 135                   | – 43                   | —                       | – 178            |
| aus dem in Rückdeckung übernommenen Versicherungsgeschäft | —                       | – 5                    | – 5                     | – 10             |
| <b>Zwischensumme</b>                                      | <b>– 135</b>            | <b>– 48</b>            | <b>– 5</b>              | <b>– 188</b>     |
| Abgegebene Rückversicherungsbeiträge                      | 14                      | – 3                    | 5                       | 16               |
| <b>Veränderung (netto)</b>                                | <b>– 121</b>            | <b>– 51</b>            | <b>—</b>                | <b>– 172</b>     |
| <b>Verdiente Beiträge</b>                                 |                         |                        |                         |                  |
| aus dem selbst abgeschlossenen Versicherungsgeschäft      | 39 355                  | 22 082                 | —                       | 61 437           |
| aus dem in Rückdeckung übernommenen Versicherungsgeschäft | 3 033                   | 396                    | – 29                    | 3 400            |
| <b>Zwischensumme</b>                                      | <b>42 388</b>           | <b>22 478</b>          | <b>– 29</b>             | <b>64 837</b>    |
| Abgegebene Rückversicherungsbeiträge                      | – 4 560                 | – 514                  | 29                      | – 5 045          |
| <b>Summe</b>                                              | <b>37 828</b>           | <b>21 964</b>          | <b>—</b>                | <b>59 792</b>    |

## 26 Verdiente Beiträge (netto) – Fortsetzung

|                                                           | Schaden-Unfall<br>Mio € | Leben/Kranken<br>Mio € | Konsolidierung<br>Mio € | Konzern<br>Mio € |
|-----------------------------------------------------------|-------------------------|------------------------|-------------------------|------------------|
| <b>2008</b>                                               |                         |                        |                         |                  |
| <b>Gebuchte Bruttobeiträge</b>                            |                         |                        |                         |                  |
| aus dem selbst abgeschlossenen Versicherungsgeschäft      | 40 116                  | 22 392                 | —                       | 62 508           |
| aus dem in Rückdeckung übernommenen Versicherungsgeschäft | 3 271                   | 367                    | – 25                    | 3 613            |
| <b>Zwischensumme</b>                                      | <b>43 387</b>           | <b>22 759</b>          | <b>– 25</b>             | <b>66 121</b>    |
| Abgegebene Rückversicherungsbeiträge                      | – 4 972                 | – 527                  | 25                      | – 5 474          |
| <b>Gebuchte Nettobeiträge</b>                             | <b>38 415</b>           | <b>22 232</b>          | <b>—</b>                | <b>60 647</b>    |
| <b>Veränderung Beitragsüberträge</b>                      |                         |                        |                         |                  |
| aus dem selbst abgeschlossenen Versicherungsgeschäft      | – 93                    | – 49                   | —                       | – 142            |
| aus dem in Rückdeckung übernommenen Versicherungsgeschäft | – 36                    | – 2                    | 1                       | – 37             |
| <b>Zwischensumme</b>                                      | <b>– 129</b>            | <b>– 51</b>            | <b>1</b>                | <b>– 179</b>     |
| Abgegebene Rückversicherungsbeiträge                      | – 73                    | —                      | – 1                     | – 74             |
| <b>Veränderung (netto)</b>                                | <b>– 202</b>            | <b>– 51</b>            | <b>—</b>                | <b>– 253</b>     |
| <b>Verdiente Beiträge</b>                                 |                         |                        |                         |                  |
| aus dem selbst abgeschlossenen Versicherungsgeschäft      | 40 023                  | 22 343                 | —                       | 62 366           |
| aus dem in Rückdeckung übernommenen Versicherungsgeschäft | 3 235                   | 365                    | – 24                    | 3 576            |
| <b>Zwischensumme</b>                                      | <b>43 258</b>           | <b>22 708</b>          | <b>– 24</b>             | <b>65 942</b>    |
| Abgegebene Rückversicherungsbeiträge                      | – 5 045                 | – 527                  | 24                      | – 5 548          |
| <b>Summe</b>                                              | <b>38 213</b>           | <b>22 181</b>          | <b>—</b>                | <b>60 394</b>    |

## 27 Zinserträge und ähnliche Erträge

|                                                                               | 2010<br>Mio € | 2009<br>Mio € | 2008<br>Mio € |
|-------------------------------------------------------------------------------|---------------|---------------|---------------|
| Zinsen aus bis zur Endfälligkeit gehaltenen Wertpapieren                      | 177           | 171           | 180           |
| Dividenden aus jederzeit veräußerbaren Wertpapieren                           | 1 001         | 873           | 1 864         |
| Zinsen aus jederzeit veräußerbaren Wertpapieren                               | 11 699        | 10 618        | 10 164        |
| Anteiliges Ergebnis aus assoziierten Unternehmen und Gemeinschaftsunternehmen | 183           | 80            | – 37          |
| Erträge aus fremdgenutztem Grundbesitz                                        | 699           | 693           | 703           |
| Zinsen aus Forderungen an Kreditinstitute und Kunden                          | 5 507         | 5 617         | 5 991         |
| Übrige                                                                        | 162           | 181           | 207           |
| <b>Summe</b>                                                                  | <b>19 428</b> | <b>18 233</b> | <b>19 072</b> |

## 28 Erträge aus erfolgswirksam zum Zeitwert bewerteten Finanzaktiva und Finanzpassiva (netto)

|                                                                                                                              | Schaden-<br>Unfall | Leben/<br>Kranken | Asset<br>Manage-<br>ment | Corporate<br>und<br>Sonstiges | Konsoli-<br>dierung | Konzern     |
|------------------------------------------------------------------------------------------------------------------------------|--------------------|-------------------|--------------------------|-------------------------------|---------------------|-------------|
|                                                                                                                              | Mio €              | Mio €             | Mio €                    | Mio €                         | Mio €               | Mio €       |
| <b>2010</b>                                                                                                                  |                    |                   |                          |                               |                     |             |
| Handelsergebnis                                                                                                              | - 114              | - 1 040           | 1                        | 76                            | 3                   | - 1 074     |
| Erträge (Aufwendungen) aus als „erfolgswirksam zum Zeitwert bewertet“ klassifizierten Finanzaktiva und Finanzpassiva (netto) | 107                | 867               | 27                       | 2                             | - 1                 | 1 002       |
| Erträge (Aufwendungen) aus Verbindlichkeiten für kündbare Eigenkapitalinstrumente (netto)                                    | - 21               | - 286             | - 12                     | —                             | —                   | - 319       |
| Gewinne und Verluste aus Währungseffekten (netto)                                                                            | - 18               | 438               | 3                        | - 68                          | - 2                 | 353         |
| <b>Summe</b>                                                                                                                 | <b>- 46</b>        | <b>- 21</b>       | <b>19</b>                | <b>10</b>                     | <b>—</b>            | <b>- 38</b> |
| <b>2009</b>                                                                                                                  |                    |                   |                          |                               |                     |             |
| Handelsergebnis                                                                                                              | - 23               | - 584             | 5                        | 293                           | 4                   | - 305       |
| Erträge (Aufwendungen) aus als „erfolgswirksam zum Zeitwert bewertet“ klassifizierten Finanzaktiva und Finanzpassiva (netto) | 158                | 1 499             | 106                      | 19                            | —                   | 1 782       |
| Erträge (Aufwendungen) aus Verbindlichkeiten für kündbare Eigenkapitalinstrumente (netto)                                    | - 31               | - 400             | - 71                     | - 4                           | —                   | - 506       |
| Gewinne und Verluste aus Währungseffekten (netto)                                                                            | - 31               | 99                | —                        | - 165                         | —                   | - 97        |
| <b>Summe</b>                                                                                                                 | <b>73</b>          | <b>614</b>        | <b>40</b>                | <b>143</b>                    | <b>4</b>            | <b>874</b>  |
| <b>2008</b>                                                                                                                  |                    |                   |                          |                               |                     |             |
| Handelsergebnis                                                                                                              | 89                 | 1 812             | —                        | - 66                          | - 69                | 1 766       |
| Erträge (Aufwendungen) aus als „erfolgswirksam zum Zeitwert bewertet“ klassifizierten Finanzaktiva und Finanzpassiva (netto) | - 112              | - 2 108           | - 236                    | - 24                          | —                   | - 2 480     |
| Erträge (Aufwendungen) aus Verbindlichkeiten für kündbare Eigenkapitalinstrumente (netto)                                    | 29                 | 765               | 166                      | 1                             | —                   | 961         |
| Gewinne und Verluste aus Währungseffekten (netto)                                                                            | 47                 | - 90              | - 1                      | 166                           | 4                   | 126         |
| <b>Summe</b>                                                                                                                 | <b>53</b>          | <b>379</b>        | <b>- 71</b>              | <b>77</b>                     | <b>- 65</b>         | <b>373</b>  |

### Handelsergebnis

#### Segment Leben/Kranken

Das Handelsergebnis des Segments Leben/Kranken enthält für die Zeit vom 1. Januar bis 31. Dezember 2010 Aufwendungen in Höhe von 1 040 (2009: 584; 2008: Erträge von 1 812) Mio € für derivative Finanzinstrumente. Hierin sind aus deutschen Einheiten Aufwendungen in Höhe von 351 (2009: 158; 2008: Erträge von 2 229) Mio € aus derivativen Finanzinstrumenten für die Absicherung von Aktien- und Fremdwährungsrisiken sowie für das Durationsmanagement enthalten. Des Weiteren sind für derivative Finanzinstrumente in den US-Einheiten unter anderem im Zusammenhang mit Fixed-Indexed-Annuity-Produkten und fondsgebundenen Versicherungsverträgen Aufwendungen in Höhe von 670 (2009: 313; 2008: 627) Mio € angefallen.

#### Segment Corporate und Sonstiges

Das Handelsergebnis des Segments Corporate und Sonstiges enthält für die Zeit vom 1. Januar bis 31. Dezember 2010 Erträge in Höhe von 72 (2009: 317; 2008: Aufwendungen von 173) Mio € für derivative Finanzinstrumente. Hierin sind Erträge in Höhe von 33 (2009: 84; 2008: Aufwendungen von 11) Mio € aus Geschäften zur Absicherung von Kapitalanlagen und Verbindlichkeiten gegenüber Währungsrisiken enthalten. Aus der Absicherung strategischer Aktieninvestments, die nicht als Hedge Accounting designiert sind, sind in 2010 Aufwendungen in Höhe von 16 (2009: 182; 2008: Erträge von 420) Mio € entstanden. Aus Derivaten in Verbindung mit Investmentstrategien sind in 2010 Erträge von 68 (2009: 370; 2008: Aufwendungen von 118) Mio € entstanden. Zudem enthält das Handelsergebnis für die Zeit vom 1. Januar bis 31. Dezember 2010 Aufwendungen in Höhe von 14 (2009: 36; 2008: Erträge von 110) Mio € aus der Absicherung aktienbasierter Vergütungspläne (Restricted Stock Units).



## Gewinne und Verluste aus Währungseffekten (netto)

Gewinne und Verluste aus Währungseffekten werden innerhalb der Erträge aus erfolgswirksam zum Zeitwert bewerteten Finanzaktiva und Finanzpassiva (netto) ausgewiesen. Diese Gewinne und Verluste aus Währungseffekten entstehen nach der erstmaligen Bewertung bei allen monetären Vermögenswerten und Verbindlichkeiten, die in einer Fremdwährung ausgegeben wurden. Hiervon ausgenommen sind Währungsdifferenzen, die bei zum Zeitwert bewerteten Finanzaktiva und Finanzpassiva entstehen. Diese Differenzen müssen nicht separat ausgewiesen werden. Der Allianz Konzern ist überwiegend gegen Währungskursänderungen durch freistehende Derivate abgesichert, aus welchen sich im Geschäftsjahr 2010 ein gegenläufiger Effekt von – 267 (2009: 89) Mio € zu den Gewinnen und Verlusten aus Währungseffekten (netto) ergibt.

## 29 Realisierte Gewinne/Verluste (netto)

|                                                                                     | 2010<br>Mio €  | 2009<br>Mio €  | 2008<br>Mio €  |
|-------------------------------------------------------------------------------------|----------------|----------------|----------------|
| <b>Realisierte Gewinne</b>                                                          |                |                |                |
| <b>Jederzeit veräußerbare Wertpapiere</b>                                           |                |                |                |
| Aktien                                                                              | 2 587          | 4 248          | 5 890          |
| Festverzinsliche Wertpapiere                                                        | 1 834          | 1 480          | 716            |
| <b>Zwischensumme</b>                                                                | <b>4 421</b>   | <b>5 728</b>   | <b>6 606</b>   |
| <b>Anteile an assoziierten Unternehmen und Gemeinschaftsunternehmen<sup>1</sup></b> | <b>237</b>     | <b>26</b>      | <b>158</b>     |
| <b>Fremdgenutzter Grundbesitz</b>                                                   | <b>277</b>     | <b>206</b>     | <b>268</b>     |
| <b>Forderungen an Kreditinstitute und Kunden</b>                                    | <b>135</b>     | <b>150</b>     | <b>101</b>     |
| <b>Zwischensumme</b>                                                                | <b>5 070</b>   | <b>6 110</b>   | <b>7 133</b>   |
| <b>Realisierte Verluste</b>                                                         |                |                |                |
| <b>Jederzeit veräußerbare Wertpapiere</b>                                           |                |                |                |
| Aktien                                                                              | – 204          | – 1 602        | – 2 608        |
| Festverzinsliche Wertpapiere                                                        | – 1 052        | – 970          | – 789          |
| <b>Zwischensumme</b>                                                                | <b>– 1 256</b> | <b>– 2 572</b> | <b>– 3 397</b> |
| <b>Anteile an assoziierten Unternehmen und Gemeinschaftsunternehmen<sup>2</sup></b> | <b>– 21</b>    | <b>– 8</b>     | <b>– 6</b>     |
| <b>Fremdgenutzter Grundbesitz</b>                                                   | <b>– 3</b>     | <b>– 12</b>    | <b>– 99</b>    |
| <b>Forderungen an Kreditinstitute und Kunden</b>                                    | <b>– 82</b>    | <b>– 102</b>   | <b>– 28</b>    |
| <b>Zwischensumme</b>                                                                | <b>– 1 362</b> | <b>– 2 694</b> | <b>– 3 530</b> |
| <b>Summe</b>                                                                        | <b>3 708</b>   | <b>3 416</b>   | <b>3 603</b>   |

<sup>1</sup> Enthält im Geschäftsjahr 2010 realisierte Gewinne aus dem Abgang von Tochterunternehmen und Geschäftsbereichen in Höhe von 224 (2009: 14; 2008: 143) Mio €.

<sup>2</sup> Enthält im Geschäftsjahr 2010 realisierte Verluste aus dem Abgang von Tochterunternehmen in Höhe von 15 (2009: 2; 2008: 1) Mio €.

## 30 Provisions- und Dienstleistungserträge

|                                         | 2010         |                |              | 2009         |                |              | 2008         |                |              |
|-----------------------------------------|--------------|----------------|--------------|--------------|----------------|--------------|--------------|----------------|--------------|
|                                         | Segment      | Konsolidierung | Konzern      | Segment      | Konsolidierung | Konzern      | Segment      | Konsolidierung | Konzern      |
|                                         | Mio €        | Mio €          | Mio €        | Mio €        | Mio €          | Mio €        | Mio €        | Mio €          | Mio €        |
| <b>Schaden-Unfall</b>                   |              |                |              |              |                |              |              |                |              |
| Kredit- und Assistance-Geschäft         | 661          | – 4            | 657          | 663          | —              | 663          | 769          | – 2            | 767          |
| Dienstleistungsgeschäft                 | 438          | – 53           | 385          | 412          | – 82           | 330          | 470          | – 32           | 438          |
| Vermögensverwaltung                     | —            | —              | —            | —            | —              | —            | 8            | —              | 8            |
| <b>Zwischensumme</b>                    | <b>1 099</b> | <b>– 57</b>    | <b>1 042</b> | <b>1 075</b> | <b>– 82</b>    | <b>993</b>   | <b>1 247</b> | <b>– 34</b>    | <b>1 213</b> |
| <b>Leben/Kranken</b>                    |              |                |              |              |                |              |              |                |              |
| Dienstleistungsgeschäft                 | 107          | – 31           | 76           | 102          | – 36           | 66           | 102          | – 42           | 60           |
| Vermögensverwaltung                     | 432          | – 33           | 399          | 384          | – 24           | 360          | 459          | – 34           | 425          |
| Übrige                                  | —            | —              | —            | 5            | – 5            | —            | 10           | – 10           | —            |
| <b>Zwischensumme</b>                    | <b>539</b>   | <b>– 64</b>    | <b>475</b>   | <b>491</b>   | <b>– 65</b>    | <b>426</b>   | <b>571</b>   | <b>– 86</b>    | <b>485</b>   |
| <b>Asset Management</b>                 |              |                |              |              |                |              |              |                |              |
| Verwaltungsprovisionen                  | 5 012        | – 110          | 4 902        | 3 641        | – 108          | 3 533        | 3 315        | – 112          | 3 203        |
| Ausgabeaufgelder                        | 381          | —              | 381          | 281          | – 2            | 279          | 257          | —              | 257          |
| Erfolgsabhängige Provisionen            | 514          | – 14           | 500          | 432          | – 4            | 428          | 83           | —              | 83           |
| Übrige                                  | 147          | – 5            | 142          | 86           | – 1            | 85           | 377          | – 2            | 375          |
| <b>Zwischensumme</b>                    | <b>6 054</b> | <b>– 129</b>   | <b>5 925</b> | <b>4 440</b> | <b>– 115</b>   | <b>4 325</b> | <b>4 032</b> | <b>– 114</b>   | <b>3 918</b> |
| <b>Corporate und Sonstiges</b>          |              |                |              |              |                |              |              |                |              |
| Dienstleistungsgeschäft                 | 198          | – 31           | 167          | 211          | – 28           | 183          | 54           | – 18           | 36           |
| Vermögensverwaltung und Bankaktivitäten | 563          | – 252          | 311          | 512          | – 200          | 312          | 596          | – 216          | 380          |
| <b>Zwischensumme</b>                    | <b>761</b>   | <b>– 283</b>   | <b>478</b>   | <b>723</b>   | <b>– 228</b>   | <b>495</b>   | <b>650</b>   | <b>– 234</b>   | <b>416</b>   |
| <b>Summe</b>                            | <b>8 453</b> | <b>– 533</b>   | <b>7 920</b> | <b>6 729</b> | <b>– 490</b>   | <b>6 239</b> | <b>6 500</b> | <b>– 468</b>   | <b>6 032</b> |

## 31 Sonstige Erträge

|                                                                  | 2010<br>Mio € | 2009<br>Mio € | 2008<br>Mio € |
|------------------------------------------------------------------|---------------|---------------|---------------|
| <b>Erträge aus eigengenutztem Grundbesitz</b>                    |               |               |               |
| Realisierte Gewinne aus dem Verkauf eigengenutzten Grundbesitzes | 18            | 3             | 374           |
| Sonstige Erträge aus eigengenutztem Grundbesitz                  | 1             | 5             | 11            |
| <b>Zwischensumme</b>                                             | <b>19</b>     | <b>8</b>      | <b>385</b>    |
| <b>Erträge aus alternativen Investments<sup>1</sup></b>          | <b>78</b>     | <b>—</b>      | <b>—</b>      |
| <b>Übrige</b>                                                    | <b>21</b>     | <b>33</b>     | <b>23</b>     |
| <b>Summe</b>                                                     | <b>118</b>    | <b>41</b>     | <b>408</b>    |

<sup>1</sup> Ab dem Geschäftsjahr 2010 werden die Erträge und Aufwendungen aus alternativen Investments brutto in den sonstigen Erträgen und Aufwendungen gezeigt.

## 32 Erträge und Aufwendungen aus vollkonsolidierten Private-Equity-Beteiligungen

|                                    | 2010<br>Mio €              | 2009<br>Mio €              | 2008<br>Mio €  |
|------------------------------------|----------------------------|----------------------------|----------------|
| <b>Erträge</b>                     |                            |                            |                |
| Umsatzerlöse                       | 1 684                      | 1 812                      | 2 516          |
| Sonstige betriebliche Erträge      | 15                         | 96                         | 20             |
| Zinserträge                        | 2                          | 2                          | 13             |
| <b>Zwischensumme</b>               | <b>1 701</b>               | <b>1 910</b>               | <b>2 549</b>   |
| <b>Aufwendungen</b>                |                            |                            |                |
| Umsatzkosten                       | – 1 040                    | – 1 186                    | – 1 644        |
| Vertriebskosten                    | – 114                      | – 126                      | – 155          |
| Allgemeine Verwaltungsaufwendungen | – 573                      | – 704                      | – 481          |
| Sonstige betriebliche Aufwendungen | – 112                      | – 159                      | – 96           |
| Zinsaufwendungen                   | – 77                       | – 99                       | – 94           |
| <b>Zwischensumme</b>               | <b>– 1 916<sup>1</sup></b> | <b>– 2 274<sup>1</sup></b> | <b>– 2 470</b> |
| <b>Summe</b>                       | <b>– 215<sup>1</sup></b>   | <b>– 364<sup>1</sup></b>   | <b>79</b>      |

<sup>1</sup> Die hier dargestellte Zwischensumme der Aufwendungen sowie die Summe der Erträge und Aufwendungen aus vollkonsolidierten Private-Equity-Beteiligungen für die Zeit vom 1. Januar bis 31. Dezember 2010 weicht von den Werten der „Konzern-Gewinn- und Verlustrechnung“ sowie von den Werten ausgewiesen in „Gesamter Umsatz sowie Überleitung vom Operativen Ergebnis auf den Jahresüberschuss (-fehlbetrag)“ ab. Diese Differenz resultiert aus einem Konsolidierungseffekt in Höhe von 113 (2009: 132) Mio € für die Zeit vom 1. Januar bis 31. Dezember 2010, ausgelöst durch eine Umgliederung von latenten Rückstellungen für Beitragsrückerstattung in die Aufwendungen aus vollkonsolidierten Private-Equity-Beteiligungen. Diese Rückstellung wurde auf Ergebnisse vollkonsolidierter Private-Equity-Beteiligungen im Segment Leben/Kranken innerhalb des operativen Ergebnisses gebildet und in das nichtoperative Ergebnis umgegliedert, um eine konsistente Darstellung des operativen Ergebnisses des Allianz Konzerns zu gewährleisten.

### 33 Schadenaufwendungen (netto)

|                                                                               | Schaden-<br>Unfall<br>Mio € | Leben/<br>Kranken<br>Mio € | Konsoli-<br>dierung<br>Mio € | Konzern<br>Mio € |
|-------------------------------------------------------------------------------|-----------------------------|----------------------------|------------------------------|------------------|
| <b>2010</b>                                                                   |                             |                            |                              |                  |
| <b>Brutto</b>                                                                 |                             |                            |                              |                  |
| Zahlungen für Schadens- und Versicherungsleistungen                           | – 28 759                    | – 19 189                   | 11                           | – 47 937         |
| Veränderung der Rückstellungen für noch nicht abgewickelte Versicherungsfälle | 152                         | – 258                      | 5                            | – 101            |
| <b>Zwischensumme</b>                                                          | <b>– 28 607</b>             | <b>– 19 447</b>            | <b>16</b>                    | <b>– 48 038</b>  |
| <b>Abgegebene Rückversicherungsbeiträge</b>                                   |                             |                            |                              |                  |
| Zahlungen für Schadens- und Versicherungsleistungen                           | 2 300                       | 451                        | – 11                         | 2 740            |
| Veränderung der Rückstellungen für noch nicht abgewickelte Versicherungsfälle | – 834                       | 41                         | – 5                          | – 798            |
| <b>Zwischensumme</b>                                                          | <b>1 466</b>                | <b>492</b>                 | <b>– 16</b>                  | <b>1 942</b>     |
| <b>Netto</b>                                                                  |                             |                            |                              |                  |
| Zahlungen für Schadens- und Versicherungsleistungen                           | – 26 459                    | – 18 738                   | —                            | – 45 197         |
| Veränderung der Rückstellungen für noch nicht abgewickelte Versicherungsfälle | – 682                       | – 217                      | —                            | – 899            |
| <b>Summe</b>                                                                  | <b>– 27 141</b>             | <b>– 18 955</b>            | <b>—</b>                     | <b>– 46 096</b>  |
| <b>2009</b>                                                                   |                             |                            |                              |                  |
| <b>Brutto</b>                                                                 |                             |                            |                              |                  |
| Zahlungen für Schadens- und Versicherungsleistungen                           | – 28 690                    | – 19 537                   | 16                           | – 48 211         |
| Veränderung der Rückstellungen für noch nicht abgewickelte Versicherungsfälle | 580                         | – 248                      | —                            | 332              |
| <b>Zwischensumme</b>                                                          | <b>– 28 110</b>             | <b>– 19 785</b>            | <b>16</b>                    | <b>– 47 879</b>  |
| <b>Abgegebene Rückversicherungsbeiträge</b>                                   |                             |                            |                              |                  |
| Zahlungen für Schadens- und Versicherungsleistungen                           | 2 523                       | 463                        | – 16                         | 2 970            |
| Veränderung der Rückstellungen für noch nicht abgewickelte Versicherungsfälle | – 733                       | – 4                        | —                            | – 737            |
| <b>Zwischensumme</b>                                                          | <b>1 790</b>                | <b>459</b>                 | <b>– 16</b>                  | <b>2 233</b>     |
| <b>Netto</b>                                                                  |                             |                            |                              |                  |
| Zahlungen für Schadens- und Versicherungsleistungen                           | – 26 167                    | – 19 074                   | —                            | – 45 241         |
| Veränderung der Rückstellungen für noch nicht abgewickelte Versicherungsfälle | – 153                       | – 252                      | —                            | – 405            |
| <b>Summe</b>                                                                  | <b>– 26 320</b>             | <b>– 19 326</b>            | <b>—</b>                     | <b>– 45 646</b>  |
| <b>2008</b>                                                                   |                             |                            |                              |                  |
| <b>Brutto</b>                                                                 |                             |                            |                              |                  |
| Zahlungen für Schadens- und Versicherungsleistungen                           | – 27 656                    | – 20 057                   | 13                           | – 47 700         |
| Veränderung der Rückstellungen für noch nicht abgewickelte Versicherungsfälle | – 501                       | – 89                       | 3                            | – 587            |
| <b>Zwischensumme</b>                                                          | <b>– 28 157</b>             | <b>– 20 146</b>            | <b>16</b>                    | <b>– 48 287</b>  |
| <b>Abgegebene Rückversicherungsbeiträge</b>                                   |                             |                            |                              |                  |
| Zahlungen für Schadens- und Versicherungsleistungen                           | 2 521                       | 490                        | – 13                         | 2 998            |
| Veränderung der Rückstellungen für noch nicht abgewickelte Versicherungsfälle | – 350                       | – 17                       | – 3                          | – 370            |
| <b>Zwischensumme</b>                                                          | <b>2 171</b>                | <b>473</b>                 | <b>– 16</b>                  | <b>2 628</b>     |
| <b>Netto</b>                                                                  |                             |                            |                              |                  |
| Zahlungen für Schadens- und Versicherungsleistungen                           | – 25 135                    | – 19 567                   | —                            | – 44 702         |
| Veränderung der Rückstellungen für noch nicht abgewickelte Versicherungsfälle | – 851                       | – 106                      | —                            | – 957            |
| <b>Summe</b>                                                                  | <b>– 25 986</b>             | <b>– 19 673</b>            | <b>—</b>                     | <b>– 45 659</b>  |

## 34 Veränderung der Rückstellungen für Versicherungs- und Investmentverträge (netto)

|                                                 | Schaden-<br>Unfall<br>Mio € | Leben/<br>Kranken<br>Mio € | Konsoli-<br>dierung<br>Mio € | Konzern<br>Mio € |
|-------------------------------------------------|-----------------------------|----------------------------|------------------------------|------------------|
| <b>2010</b>                                     |                             |                            |                              |                  |
| <b>Brutto</b>                                   |                             |                            |                              |                  |
| Deckungsrückstellung                            | – 146                       | – 8 126                    | —                            | – 8 272          |
| Sonstige versicherungstechnische Rückstellungen | 3                           | – 255                      | —                            | – 252            |
| Aufwendungen für Beitragsrückerstattung         | – 185                       | – 5 010                    | – 242                        | – 5 437          |
| <b>Zwischensumme</b>                            | <b>– 328</b>                | <b>– 13 391</b>            | <b>– 242</b>                 | <b>– 13 961</b>  |
| <b>Abgegebene Rückversicherungsbeiträge</b>     |                             |                            |                              |                  |
| Deckungsrückstellung                            | 23                          | 32                         | —                            | 55               |
| Sonstige versicherungstechnische Rückstellungen | 1                           | 12                         | —                            | 13               |
| Aufwendungen für Beitragsrückerstattung         | 4                           | 18                         | —                            | 22               |
| <b>Zwischensumme</b>                            | <b>28</b>                   | <b>62</b>                  | <b>—</b>                     | <b>90</b>        |
| <b>Netto</b>                                    |                             |                            |                              |                  |
| Deckungsrückstellung                            | – 123                       | – 8 094                    | —                            | – 8 217          |
| Sonstige versicherungstechnische Rückstellungen | 4                           | – 243                      | —                            | – 239            |
| Aufwendungen für Beitragsrückerstattung         | – 181                       | – 4 992                    | – 242                        | – 5 415          |
| <b>Summe</b>                                    | <b>– 300</b>                | <b>– 13 329</b>            | <b>– 242</b>                 | <b>– 13 871</b>  |
| <b>2009</b>                                     |                             |                            |                              |                  |
| <b>Brutto</b>                                   |                             |                            |                              |                  |
| Deckungsrückstellung                            | – 105                       | – 5 036                    | 1                            | – 5 140          |
| Sonstige versicherungstechnische Rückstellungen | – 1                         | – 98                       | —                            | – 99             |
| Aufwendungen für Beitragsrückerstattung         | – 259                       | – 3 444                    | – 907                        | – 4 610          |
| <b>Zwischensumme</b>                            | <b>– 365</b>                | <b>– 8 578</b>             | <b>– 906</b>                 | <b>– 9 849</b>   |
| <b>Abgegebene Rückversicherungsbeiträge</b>     |                             |                            |                              |                  |
| Deckungsrückstellung                            | 3                           | 70                         | —                            | 73               |
| Sonstige versicherungstechnische Rückstellungen | 1                           | 9                          | —                            | 10               |
| Aufwendungen für Beitragsrückerstattung         | 6                           | —                          | —                            | 6                |
| <b>Zwischensumme</b>                            | <b>10</b>                   | <b>79</b>                  | <b>—</b>                     | <b>89</b>        |
| <b>Netto</b>                                    |                             |                            |                              |                  |
| Deckungsrückstellung                            | – 102                       | – 4 966                    | 1                            | – 5 067          |
| Sonstige versicherungstechnische Rückstellungen | —                           | – 89                       | —                            | – 89             |
| Aufwendungen für Beitragsrückerstattung         | – 253                       | – 3 444                    | – 907                        | – 4 604          |
| <b>Summe</b>                                    | <b>– 355</b>                | <b>– 8 499</b>             | <b>– 906</b>                 | <b>– 9 760</b>   |
| <b>2008</b>                                     |                             |                            |                              |                  |
| <b>Brutto</b>                                   |                             |                            |                              |                  |
| Deckungsrückstellung                            | – 154                       | – 4 283                    | – 1                          | – 4 438          |
| Sonstige versicherungstechnische Rückstellungen | 7                           | – 89                       | —                            | – 82             |
| Aufwendungen für Beitragsrückerstattung         | 142                         | – 1 118                    | – 22                         | – 998            |
| <b>Zwischensumme</b>                            | <b>– 5</b>                  | <b>– 5 490</b>             | <b>– 23</b>                  | <b>– 5 518</b>   |
| <b>Abgegebene Rückversicherungsbeiträge</b>     |                             |                            |                              |                  |
| Deckungsrückstellung                            | – 18                        | 110                        | 2                            | 94               |
| Sonstige versicherungstechnische Rückstellungen | 10                          | 9                          | —                            | 19               |
| Aufwendungen für Beitragsrückerstattung         | 16                          | 11                         | —                            | 27               |
| <b>Zwischensumme</b>                            | <b>8</b>                    | <b>130</b>                 | <b>2</b>                     | <b>140</b>       |
| <b>Netto</b>                                    |                             |                            |                              |                  |
| Deckungsrückstellung                            | – 172                       | – 4 173                    | 1                            | – 4 344          |
| Sonstige versicherungstechnische Rückstellungen | 17                          | – 80                       | —                            | – 63             |
| Aufwendungen für Beitragsrückerstattung         | 158                         | – 1 107                    | – 22                         | – 971            |
| <b>Summe</b>                                    | <b>3</b>                    | <b>– 5 360</b>             | <b>– 21</b>                  | <b>– 5 378</b>   |

## 35 Zinsaufwendungen

|                                                         | 2010<br>Mio €  | 2009<br>Mio €  | 2008<br>Mio €  |
|---------------------------------------------------------|----------------|----------------|----------------|
| Verbindlichkeiten gegenüber Kreditinstituten und Kunden | – 379          | – 483          | – 753          |
| Einlagen aus dem abgegebenen Rückversicherungsgeschäft  | – 74           | – 72           | – 71           |
| Verbriefte Verbindlichkeiten                            | – 300          | – 294          | – 411          |
| Genussrechtskapital und nachrangige Verbindlichkeiten   | – 557          | – 548          | – 492          |
| Übrige                                                  | – 101          | – 87           | – 166          |
| <b>Summe</b>                                            | <b>– 1 411</b> | <b>– 1 484</b> | <b>– 1 893</b> |

## 36 Risikovorsorge im Kreditgeschäft

|                                                                                              | 2010<br>Mio € | 2009<br>Mio € | 2008<br>Mio € |
|----------------------------------------------------------------------------------------------|---------------|---------------|---------------|
| Zuführungen zu Wertberichtigungen einschließlich direkter Abschreibungen wegen Wertminderung | – 123         | – 215         | – 121         |
| Auflösungen                                                                                  | 53            | 39            | 35            |
| Eingänge auf abgeschriebene Forderungen                                                      | 20            | 35            | 27            |
| <b>Summe</b>                                                                                 | <b>– 50</b>   | <b>– 141</b>  | <b>– 59</b>   |

## 37 Wertminderungen auf Finanzanlagen (netto)

|                                                                                                                                      | 2010<br>Mio € | 2009<br>Mio €  | 2008<br>Mio €  |
|--------------------------------------------------------------------------------------------------------------------------------------|---------------|----------------|----------------|
| <b>Wertminderungen</b>                                                                                                               |               |                |                |
| <b>Jederzeit veräußerbare Wertpapiere</b>                                                                                            |               |                |                |
| Aktien                                                                                                                               | – 531         | – 2 289        | – 8 736        |
| Festverzinsliche Wertpapiere                                                                                                         | – 142         | – 286          | – 698          |
| <b>Zwischensumme</b>                                                                                                                 | <b>– 673</b>  | <b>– 2 575</b> | <b>– 9 434</b> |
| <b>Bis zur Endfälligkeit gehaltene Wertpapiere</b>                                                                                   | <b>– 1</b>    | <b>—</b>       | <b>—</b>       |
| <b>Anteile an assoziierten Unternehmen und Gemeinschaftsunternehmen</b>                                                              | <b>—</b>      | <b>– 4</b>     | <b>– 71</b>    |
| <b>Fremdgenutzter Grundbesitz</b>                                                                                                    | <b>– 106</b>  | <b>– 199</b>   | <b>– 128</b>   |
| <b>Forderungen an Kreditinstitute und Kunden</b>                                                                                     | <b>– 28</b>   | <b>—</b>       | <b>—</b>       |
| <b>Langfristige Vermögenswerte sowie Vermögenswerte und Verbindlichkeiten, die als zur Veräußerung gehalten klassifiziert werden</b> | <b>– 82</b>   | <b>—</b>       | <b>—</b>       |
| <b>Zwischensumme</b>                                                                                                                 | <b>– 890</b>  | <b>– 2 778</b> | <b>– 9 633</b> |
| <b>Wertaufholungen</b>                                                                                                               |               |                |                |
| <b>Jederzeit veräußerbare Wertpapiere</b>                                                                                            |               |                |                |
| Festverzinsliche Wertpapiere                                                                                                         | 10            | 32             | 84             |
| <b>Fremdgenutzter Grundbesitz</b>                                                                                                    | <b>35</b>     | <b>14</b>      | <b>54</b>      |
| <b>Forderungen an Kreditinstitute und Kunden</b>                                                                                     | <b>1</b>      | <b>—</b>       | <b>—</b>       |
| <b>Zwischensumme</b>                                                                                                                 | <b>46</b>     | <b>46</b>      | <b>138</b>     |
| <b>Summe</b>                                                                                                                         | <b>– 844</b>  | <b>– 2 732</b> | <b>– 9 495</b> |

## 38 Aufwendungen für Finanzanlagen

|                                                    | 2010<br>Mio € | 2009<br>Mio € | 2008<br>Mio € |
|----------------------------------------------------|---------------|---------------|---------------|
| Aufwendungen für die Verwaltung von Finanzanlagen  | – 466         | – 394         | – 429         |
| Abschreibungen auf fremdgenutzten Grundbesitz      | – 171         | – 174         | – 165         |
| Übrige Aufwendungen für fremdgenutzten Grundbesitz | – 190         | – 187         | – 177         |
| <b>Summe</b>                                       | <b>– 827</b>  | <b>– 755</b>  | <b>– 771</b>  |

## 39 Abschluss- und Verwaltungsaufwendungen (netto)

|                                                                                                      | 2010            |                |                 | 2009            |                |                 | 2008            |                |                 |
|------------------------------------------------------------------------------------------------------|-----------------|----------------|-----------------|-----------------|----------------|-----------------|-----------------|----------------|-----------------|
|                                                                                                      | Segment         | Konsolidierung | Konzern         | Segment         | Konsolidierung | Konzern         | Segment         | Konsolidierung | Konzern         |
|                                                                                                      | Mio €           | Mio €          | Mio €           | Mio €           | Mio €          | Mio €           | Mio €           | Mio €          | Mio €           |
| <b>Schaden-Unfall<sup>1</sup></b>                                                                    |                 |                |                 |                 |                |                 |                 |                |                 |
| <b>Abschlusskosten</b>                                                                               |                 |                |                 |                 |                |                 |                 |                |                 |
| Angefallene Aufwendungen                                                                             | - 8 936         | 1              | - 8 935         | - 7 844         | 1              | - 7 843         | - 7 731         | —              | - 7 731         |
| Erhaltene Provisionen und Gewinnbeteiligungen aus dem in Rückdeckung gegebenen Versicherungsgeschäft | 509             | - 3            | 506             | 555             | - 4            | 551             | 643             | - 5            | 638             |
| Aktiviert Abschlusskosten                                                                            | 5 081           | —              | 5 081           | 4 811           | —              | 4 811           | 4 146           | —              | 4 146           |
| Abschreibungen auf aktiviert Abschlusskosten                                                         | - 4 966         | —              | - 4 966         | - 4 807         | —              | - 4 807         | - 4 089         | —              | - 4 089         |
| <b>Zwischensumme</b>                                                                                 | <b>- 8 312</b>  | <b>- 2</b>     | <b>- 8 314</b>  | <b>- 7 285</b>  | <b>- 3</b>     | <b>- 7 288</b>  | <b>- 7 031</b>  | <b>- 5</b>     | <b>- 7 036</b>  |
| <b>Verwaltungsaufwendungen</b>                                                                       | <b>- 2 732</b>  | <b>9</b>       | <b>- 2 723</b>  | <b>- 3 255</b>  | <b>4</b>       | <b>- 3 251</b>  | <b>- 3 447</b>  | <b>6</b>       | <b>- 3 441</b>  |
| <b>Zwischensumme</b>                                                                                 | <b>- 11 044</b> | <b>7</b>       | <b>- 11 037</b> | <b>- 10 540</b> | <b>1</b>       | <b>- 10 539</b> | <b>- 10 478</b> | <b>1</b>       | <b>- 10 477</b> |
| <b>Leben/Kranken</b>                                                                                 |                 |                |                 |                 |                |                 |                 |                |                 |
| <b>Abschlusskosten</b>                                                                               |                 |                |                 |                 |                |                 |                 |                |                 |
| Angefallene Aufwendungen                                                                             | - 4 365         | 3              | - 4 362         | - 3 871         | 4              | - 3 867         | - 3 829         | 5              | - 3 824         |
| Erhaltene Provisionen und Gewinnbeteiligungen aus dem in Rückdeckung gegebenen Versicherungsgeschäft | 94              | - 1            | 93              | 79              | - 1            | 78              | 83              | —              | 83              |
| Aktiviert Abschlusskosten                                                                            | 3 069           | —              | 3 069           | 2 316           | —              | 2 316           | 2 437           | —              | 2 437           |
| Abschreibungen auf aktiviert Abschlusskosten                                                         | - 2 450         | 1              | - 2 449         | - 2 582         | —              | - 2 582         | - 1 692         | —              | - 1 692         |
| <b>Zwischensumme</b>                                                                                 | <b>- 3 652</b>  | <b>3</b>       | <b>- 3 649</b>  | <b>- 4 058</b>  | <b>3</b>       | <b>- 4 055</b>  | <b>- 3 001</b>  | <b>5</b>       | <b>- 2 996</b>  |
| <b>Verwaltungsaufwendungen</b>                                                                       | <b>- 1 523</b>  | <b>40</b>      | <b>- 1 483</b>  | <b>- 1 533</b>  | <b>6</b>       | <b>- 1 527</b>  | <b>- 1 690</b>  | <b>- 5</b>     | <b>- 1 695</b>  |
| <b>Zwischensumme</b>                                                                                 | <b>- 5 175</b>  | <b>43</b>      | <b>- 5 132</b>  | <b>- 5 591</b>  | <b>9</b>       | <b>- 5 582</b>  | <b>- 4 691</b>  | <b>—</b>       | <b>- 4 691</b>  |
| <b>Asset Management</b>                                                                              |                 |                |                 |                 |                |                 |                 |                |                 |
| Personalaufwendungen                                                                                 | - 2 272         | —              | - 2 272         | - 1 849         | —              | - 1 849         | - 1 448         | —              | - 1 448         |
| Sachaufwendungen                                                                                     | - 1 094         | 13             | - 1 081         | - 842           | 15             | - 827           | - 798           | 13             | - 785           |
| <b>Zwischensumme</b>                                                                                 | <b>- 3 366</b>  | <b>13</b>      | <b>- 3 353</b>  | <b>- 2 691</b>  | <b>15</b>      | <b>- 2 676</b>  | <b>- 2 246</b>  | <b>13</b>      | <b>- 2 233</b>  |
| <b>Corporate und Sonstiges</b>                                                                       |                 |                |                 |                 |                |                 |                 |                |                 |
| Verwaltungsaufwendungen                                                                              | - 1 350         | - 11           | - 1 361         | - 1 351         | 30             | - 1 321         | - 1 230         | 32             | - 1 198         |
| <b>Zwischensumme</b>                                                                                 | <b>- 1 350</b>  | <b>- 11</b>    | <b>- 1 361</b>  | <b>- 1 351</b>  | <b>30</b>      | <b>- 1 321</b>  | <b>- 1 230</b>  | <b>32</b>      | <b>- 1 198</b>  |
| <b>Summe</b>                                                                                         | <b>- 20 935</b> | <b>52</b>      | <b>- 20 883</b> | <b>- 20 173</b> | <b>55</b>      | <b>- 20 118</b> | <b>- 18 645</b> | <b>46</b>      | <b>- 18 599</b> |

<sup>1</sup> Die Zurechnung der Gemeinkosten auf die Funktionsbereiche im Geschäftsbereich Schaden-Unfall wurde 2010 prospektiv angepasst. Diese Änderung führte zu einer Umgliederung in Höhe von 746 Mio € aus den Verwaltungsaufwendungen in die Abschlusskosten.



## 40 Provisions- und Dienstleistungsaufwendungen

|                                         | 2010           |                |                | 2009           |                |                | 2008           |                |                |
|-----------------------------------------|----------------|----------------|----------------|----------------|----------------|----------------|----------------|----------------|----------------|
|                                         | Segment        | Konsolidierung | Konzern        | Segment        | Konsolidierung | Konzern        | Segment        | Konsolidierung | Konzern        |
|                                         | Mio €          |
| <b>Schaden-Unfall</b>                   |                |                |                |                |                |                |                |                |                |
| Kredit- und Assistance-Geschäft         | - 597          | —              | - 597          | - 594          | —              | - 594          | - 606          | —              | - 606          |
| Dienstleistungsgeschäft                 | - 427          | 51             | - 376          | - 401          | 84             | - 317          | - 535          | 33             | - 502          |
| <b>Zwischensumme</b>                    | <b>- 1 024</b> | <b>51</b>      | <b>- 973</b>   | <b>- 995</b>   | <b>84</b>      | <b>- 911</b>   | <b>- 1 141</b> | <b>33</b>      | <b>- 1 108</b> |
| <b>Leben/Kranken</b>                    |                |                |                |                |                |                |                |                |                |
| Dienstleistungsgeschäft                 | - 61           | 13             | - 48           | - 66           | 21             | - 45           | - 66           | 41             | - 25           |
| Vermögensverwaltung                     | - 197          | 5              | - 192          | - 180          | 9              | - 171          | - 187          | 19             | - 168          |
| <b>Zwischensumme</b>                    | <b>- 258</b>   | <b>18</b>      | <b>- 240</b>   | <b>- 246</b>   | <b>30</b>      | <b>- 216</b>   | <b>- 253</b>   | <b>60</b>      | <b>- 193</b>   |
| <b>Asset Management</b>                 |                |                |                |                |                |                |                |                |                |
| Vermittlerprovisionen                   | - 1 099        | 168            | - 931          | - 822          | 134            | - 688          | - 794          | 298            | - 496          |
| Übrige                                  | - 28           | 7              | - 21           | - 28           | 2              | - 26           | - 364          | 14             | - 350          |
| <b>Zwischensumme</b>                    | <b>- 1 127</b> | <b>175</b>     | <b>- 952</b>   | <b>- 850</b>   | <b>136</b>     | <b>- 714</b>   | <b>- 1 158</b> | <b>312</b>     | <b>- 846</b>   |
| <b>Corporate und Sonstiges</b>          |                |                |                |                |                |                |                |                |                |
| Dienstleistungsgeschäft                 | - 215          | 27             | - 188          | - 195          | 25             | - 170          | - 9            | 4              | - 5            |
| Vermögensverwaltung und Bankaktivitäten | - 209          | 1              | - 208          | - 202          | 1              | - 201          | - 193          | 1              | - 192          |
| <b>Zwischensumme</b>                    | <b>- 424</b>   | <b>28</b>      | <b>- 396</b>   | <b>- 397</b>   | <b>26</b>      | <b>- 371</b>   | <b>- 202</b>   | <b>5</b>       | <b>- 197</b>   |
| <b>Summe</b>                            | <b>- 2 833</b> | <b>272</b>     | <b>- 2 561</b> | <b>- 2 488</b> | <b>276</b>     | <b>- 2 212</b> | <b>- 2 754</b> | <b>410</b>     | <b>- 2 344</b> |

## 41 Sonstige Aufwendungen

|                                                                   | 2010        | 2009       | 2008        |
|-------------------------------------------------------------------|-------------|------------|-------------|
|                                                                   | Mio €       | Mio €      | Mio €       |
| <b>Aufwendungen für eigengenutzten Grundbesitz</b>                |             |            |             |
| Realisierte Verluste aus dem Verkauf eigengenutzten Grundbesitzes | - 3         | —          | - 1         |
| Wertminderungen eigengenutzten Grundbesitzes                      | —           | —          | - 9         |
| <b>Zwischensumme</b>                                              | <b>- 3</b>  | <b>—</b>   | <b>- 10</b> |
| <b>Aufwendungen aus alternativen Investments<sup>1</sup></b>      | <b>- 51</b> | <b>—</b>   | <b>—</b>    |
| Übrige                                                            | - 3         | - 2        | - 2         |
| <b>Summe</b>                                                      | <b>- 57</b> | <b>- 2</b> | <b>- 12</b> |

<sup>1</sup> Ab dem Geschäftsjahr 2010 werden die Erträge und Aufwendungen aus alternativen Investments brutto in den sonstigen Erträgen und Aufwendungen gezeigt.

## 42 Jahresüberschuss (-fehlbetrag) aus aufgegebenen Geschäftsbereichen, nach Ertragsteuern

|                                                                                               | 2010     | 2009         | 2008           |
|-----------------------------------------------------------------------------------------------|----------|--------------|----------------|
|                                                                                               | Mio €    | Mio €        | Mio €          |
| <b>Jahresüberschuss (-fehlbetrag) aus aufgegebenen Geschäftsbereichen, nach Ertragsteuern</b> | <b>—</b> | <b>- 395</b> | <b>- 6 373</b> |
| <b>Jahresüberschuss (-fehlbetrag) aus aufgegebenen Geschäftsbereichen</b>                     |          |              |                |
| auf Anteile anderer Gesellschafter entfallend                                                 | —        | —            | 38             |
| auf Anteilseigner entfallend                                                                  | —        | - 395        | - 6 411        |

Der Jahresfehlbetrag aus aufgegebenen Geschäftsbereichen, nach Ertragsteuern, der Geschäftsjahre 2009 und 2008 bezieht sich auf den Eigentumsübergang der Dresdner Bank auf die Commerzbank AG, der am 12. Januar 2009 wie geplant vollzogen wurde. In der Folge wurden die Vermögenswerte und Schulden der Dresdner Bank, die zum 31. Dezember 2008 als zur Veräußerung gehalten klassifiziert wurden, im ersten Quartal 2009 entsprechend entkonsolidiert. Der Verlust aus der Entkonsolidierung von aufgegebenen Geschäftsbereichen in Höhe von 395 Mio € in 2009 stellt hauptsächlich die Reklassifizierung direkt im Eigenkapital erfasster Erträge und Aufwendungen aufgrund von Gewinn- und Verlustrealisierungen dar.

## 43 Ertragsteuern

|                             | 2010<br>Mio €  | 2009<br>Mio €  | 2008<br>Mio €  |
|-----------------------------|----------------|----------------|----------------|
| <b>Tatsächliche Steuern</b> |                |                |                |
| Inland                      | – 198          | 299            | – 181          |
| Ausland                     | – 1 723        | – 1 494        | – 925          |
| <b>Zwischensumme</b>        | <b>– 1 921</b> | <b>– 1 195</b> | <b>– 1 106</b> |
| <b>Latente Steuern</b>      |                |                |                |
| Inland                      | 89             | 500            | – 575          |
| Ausland                     | – 132          | 155            | 350            |
| <b>Zwischensumme</b>        | <b>– 43</b>    | <b>655</b>     | <b>– 225</b>   |
| <b>Summe</b>                | <b>– 1 964</b> | <b>– 540</b>   | <b>– 1 331</b> |

Für die Geschäftsjahre 2010, 2009 und 2008 beinhalten die Ertragsteuern, die sich auf die Bestandteile der direkt im Eigenkapital erfassten Erträge und Aufwendungen beziehen, folgende Komponenten:

|                                                                                       | 2010<br>Mio € | 2009<br>Mio €  | 2008<br>Mio € |
|---------------------------------------------------------------------------------------|---------------|----------------|---------------|
| Währungsänderungen                                                                    | 41            | – 13           | 63            |
| Jederzeit veräußerbare Wertpapiere                                                    | – 146         | – 1 312        | 972           |
| Cashflow Hedges                                                                       | – 9           | 3              | – 32          |
| Anteil des direkt im Eigenkapital erfassten Nettoertrags von assoziierten Unternehmen | – 6           | —              | 21            |
| Sonstiges                                                                             | 23            | 3              | – 26          |
| <b>Total</b>                                                                          | <b>– 97</b>   | <b>– 1 319</b> | <b>998</b>    |

Im tatsächlichen Steueraufwand des Geschäftsjahres 2010 ist ein Ertrag von 150 (2009: Ertrag von 320; 2008: Aufwand von 6) Mio € enthalten, der frühere Geschäftsjahre betrifft.

Aufgrund der im Steuersenkungsgesetz 2001 geregelten Umstellung vom Anrechnungsverfahren zum klassischen Steuersystem in Deutschland (sog. „Halbeinkünfteverfahren“) hat der Allianz Konzern Steuerguthaben verloren. Dies ist durch das im Dezember 2010 veröffentlichte Jahressteuergesetz korrigiert worden und führte in 2010 zu einem Steuerertrag aus Aktivierung des zusätzlichen Körperschaftsteuerminderungsguthabens von 110 Mio €. Dieser Steuerertrag ist in dem oben genannten Steuerertrag betreffend frühere Geschäftsjahre enthalten.

In 2009 wurden aufgrund der Entscheidungen des Europäischen Gerichtshofs (Fall Steko) und des Bundesfinanzhofs (BFH) die in 2001 vorgenommenen Teilwertabschreibungen auf bestimmte Finanzanlagen als steuerlich abzugsfähig anerkannt. Diese Gerichtsentscheidungen führten in 2009 zu einem Ertrag für den

Allianz Konzern von 283 Mio € und für die Versicherungsnehmer von 730 Mio €. Der Steuerertrag aufgrund dieser Gerichtsentscheidungen besteht aus tatsächlichen und latenten Steuern und bezieht sich auf 2009 sowie Vorjahre.

Der latente Steueraufwand des Geschäftsjahres 2010 resultiert mit einem Ertrag von 69 (2009: Ertrag von 197; 2008: Aufwand von 431) Mio € aus der Veränderung latenter Steuern auf temporäre Differenzen und mit einem Aufwand von 117 (2009: Ertrag von 452; 2008: Ertrag von 227) Mio € aus der Veränderung latenter Steuern auf steuerliche Verlustvorträge. Aus der Änderung der anzuwendenden Steuersätze infolge von Gesetzesänderungen ergibt sich ein latenter Steuerertrag von 5 (2009: Ertrag von 6; 2008: Aufwand von 21) Mio €.

Der ausgewiesene Ertragsteueraufwand ist für das Geschäftsjahr 2010 um 135 (2009: 1 007; 2008: 312) Mio € niedriger als der erwartete Ertragsteueraufwand. Die nachstehende Übersicht zeigt eine Überleitung vom erwarteten Ertragsteueraufwand zum effektiv ausgewiesenen Steueraufwand. Die Überleitungsrechnung für den Konzern ergibt sich hierbei als Zusammenfassung der einzelnen gesellschaftsbezogenen und mit dem jeweiligen länderspezifischen Steuersatz erstellten Überleitungsrechnungen nach Berücksichtigung ergebniswirksamer Konsolidierungseffekte. Der in der Überleitungsrechnung angewendete erwartete Steuersatz für inländische Konzernunternehmen umfasst die Körperschaftsteuer, die Gewerbesteuer und den Solidaritätszuschlag und beträgt 31,0% (2009: 31,0%; 2008: 31,0%).

Der effektive Steuersatz bestimmt sich auf der Basis der effektiven Steuerbelastung, bezogen auf das Ergebnis aus fortzuführenden Geschäftsbereichen vor Ertragsteuern.

|                                                                          | 2010<br>Mio € | 2009<br>Mio € | 2008<br>Mio € |
|--------------------------------------------------------------------------|---------------|---------------|---------------|
| <b>Ergebnis aus fortzuführenden Geschäftsbereichen vor Ertragsteuern</b> |               |               |               |
| Inland                                                                   | 651           | – 221         | 3 213         |
| Ausland                                                                  | 6 522         | 5 411         | 2 386         |
| <b>Summe</b>                                                             | <b>7 173</b>  | <b>5 190</b>  | <b>5 599</b>  |
| Erwarteter Ertragsteuersatz                                              | 29,3%         | 29,8%         | 29,3%         |
| <b>Erwarteter Ertragsteueraufwand</b>                                    | <b>2 099</b>  | <b>1 547</b>  | <b>1 643</b>  |
| Gewerbesteuer und ähnliche Steuern                                       | 176           | 150           | 166           |
| Steuerfreie Nettoeinnahmen                                               | – 571         | – 599         | – 469         |
| Auswirkungen steuerlicher Verluste                                       | 279           | – 59          | 28            |
| Sonstige                                                                 | – 19          | – 499         | – 37          |
| <b>Ertragsteueraufwand</b>                                               | <b>1 964</b>  | <b>540</b>    | <b>1 331</b>  |
| <b>Effektiver Steuersatz</b>                                             | <b>27,4%</b>  | <b>10,4%</b>  | <b>23,8%</b>  |

Von den sonstigen Effekten von – 499 Mio € in der steuerlichen Überleitungsrechnung für 2009 betreffen – 505 Mio € tatsächliche und latente Steuern für Vorjahre, darunter resultiert ein wesentlicher Teil aus den oben erwähnten Gerichtsentscheidungen (Steko/BFH).

Wertberichtigungen der aktiven latenten Steuern auf Verlustvorträge früherer Perioden führten im Geschäftsjahr 2010 zu einem latenten Steueraufwand von 153 (2009: 11; 2008: 5) Mio €. Der Nichtansatz aktiver latenter Steuern auf laufende Geschäftsjahresverluste hat sich mit 142 (2009: 85; 2008: 46) Mio € aufwandserhöhend ausgewirkt. Aufgrund der Nutzung von Verlustvorträgen, für die bisher keine aktiven latenten Steuern angesetzt waren, verringerte sich der tatsächliche Ertragsteueraufwand um 15 (2009: 5; 2008: 19) Mio €. Aus dem Ansatz aktiver latenter Steuern auf Verlustvorträge früherer Perioden, die bislang nicht angesetzt oder abgewertet waren, ergab sich ein latenter Steuerertrag von 1 (2009: 150; 2008: 4) Mio €. Die vorstehend genannten Effekte sind in der Überleitungsrechnung in der Position „Auswirkungen steuerlicher Verluste“ enthalten.

Die Berechnung der latenten Steuern erfolgt mit den jeweiligen landesspezifischen Steuersätzen, die im Jahr 2010 zwischen 10,00% und 42,05% lagen. Zum 31. Dezember 2010 bereits beschlossene Steuersatzänderungen sind berücksichtigt.

Latente Steuern auf Verlustvorträge werden aktiviert, soweit mit großer Wahrscheinlichkeit künftig zu versteuernde Einkommen in ausreichender Höhe zur Realisierung verfügbar sein werden. Unternehmen, die im laufenden Geschäftsjahr oder im Vorjahr steuerliche Verluste erlitten haben, haben einen Überhang der aktiven Steuerabgrenzungen über die passiven Steuerabgrenzungen in Höhe von 873 Mio € angesetzt.

### Aktive und passive Steuerabgrenzungen

| Stand 31. Dezember                                                                   | 2010<br>Mio €  | 2009<br>Mio €  |
|--------------------------------------------------------------------------------------|----------------|----------------|
| <b>Aktive Steuerabgrenzung</b>                                                       |                |                |
| Erfolgswirksam zum Zeitwert bewertete Finanzaktiva                                   | 84             | 45             |
| Finanzanlagen                                                                        | 2 869          | 2 477          |
| Aktivierete Abschlusskosten                                                          | 958            | 561            |
| Übrige Aktiva                                                                        | 845            | 891            |
| Immaterielle Vermögenswerte                                                          | 137            | 140            |
| Steuerliche Verlustvorträge                                                          | 2 748          | 2 560          |
| Versicherungstechnische Rückstellungen                                               | 3 763          | 3 751          |
| Rückstellungen für Pensionen und ähnliche Verpflichtungen                            | 225            | 189            |
| Übrige Passiva                                                                       | 842            | 637            |
| <b>Summe</b>                                                                         | <b>12 471</b>  | <b>11 251</b>  |
| Nichtansatz oder Wertberichtigungen latenter Steuern auf steuerliche Verlustvorträge | – 763          | – 484          |
| Saldierungseffekt                                                                    | – 9 045        | – 8 048        |
| <b>Summe nach Saldierung</b>                                                         | <b>2 663</b>   | <b>2 719</b>   |
| <b>Passive Steuerabgrenzung</b>                                                      |                |                |
| Erfolgswirksam zum Zeitwert bewertete Finanzaktiva                                   | 100            | 61             |
| Finanzanlagen                                                                        | 4 625          | 3 641          |
| Aktivierete Abschlusskosten                                                          | 4 114          | 3 819          |
| Übrige Aktiva                                                                        | 448            | 573            |
| Immaterielle Vermögenswerte                                                          | 336            | 346            |
| Versicherungstechnische Rückstellungen                                               | 2 468          | 2 552          |
| Rückstellungen für Pensionen und ähnliche Verpflichtungen                            | 228            | 203            |
| Übrige Passiva                                                                       | 702            | 728            |
| <b>Summe</b>                                                                         | <b>13 021</b>  | <b>11 923</b>  |
| Saldierungseffekt                                                                    | – 9 045        | – 8 048        |
| <b>Summe nach Saldierung</b>                                                         | <b>3 976</b>   | <b>3 875</b>   |
| <b>Saldo aktive (passive) Steuerabgrenzung</b>                                       | <b>– 1 313</b> | <b>– 1 156</b> |

Zu versteuernde temporäre Differenzen im Zusammenhang mit Anteilen an Allianz Konzerngesellschaften, für die keine latenten Steuerabgrenzungen passiviert wurden, weil der Allianz Konzern deren Umkehrung steuern kann und sie sich in absehbarer Zukunft nicht umkehren werden, betragen 521 (2009: 418) Mio €. Abzugsfähige temporäre Differenzen im Zusammenhang mit Anteilen an Allianz Konzerngesellschaften, für die keine latenten Steuerabgrenzungen aktiviert wurden, weil es nicht wahrscheinlich ist, dass sie sich in absehbarer Zeit umkehren, belaufen sich auf 208 (2009: 253) Mio €.

### Steuerliche Verlustvorträge

Es bestehen zum 31. Dezember 2010 nicht genutzte steuerliche Verlustvorträge in Höhe von 10 829 (2009: 10 191) Mio €, für die aktive latente Steuern insoweit gebildet wurden, als ihre Realisierung mit ausreichender Sicherheit gewährleistet ist. Von den Verlustvorträgen können 9 572 (2009: 9 049) Mio € zeitlich unbegrenzt genutzt werden.

Die steuerlichen Verlustvorträge werden gemäß ihren Verfallsperioden wie folgt gegliedert:

|                  | 2010<br>Mio € |
|------------------|---------------|
| 2011             | 38            |
| 2012             | 63            |
| 2013             | 162           |
| 2014             | 255           |
| 2015             | 198           |
| 2016             | 130           |
| 2017             | 94            |
| 2018             | 43            |
| 2019             | 45            |
| 2020             | 3             |
| >10 Jahre        | 226           |
| Unbegrenzt       | 9 572         |
| <b>Insgesamt</b> | <b>10 829</b> |



## Sonstige Angaben

### 44 Derivative Finanzinstrumente

Der Zeitwert derivativer Finanzinstrumente ergibt sich aus dem Wert der ihnen zugrunde liegenden Vermögenswerte oder spezifischer Referenzwerte.

Beispiele für derivative Finanzinstrumente sind Verträge über künftige Lieferungen in Form von Termingeschäften oder Forwards, Optionen auf Aktien oder Indizes, Zinsoptionen, wie Caps und Floors, sowie Swaps, die sich sowohl auf Zinsmärkte als auch auf Nichtzinsmärkte beziehen können. Letztere enthalten Vereinbarungen über den Tausch zuvor definierter Vermögenswerte oder Zahlungsreihen.

Der Einsatz von Derivaten erfolgt in den einzelnen Tochterunternehmen des Allianz Konzerns im Rahmen der jeweiligen aufsichtsrechtlichen Vorschriften und nach Maßgabe zusätzlicher interner Richtlinien des Allianz Konzerns. Die Anlagerichtlinien des Allianz Konzerns sowie die Richtlinien zur Überwachung der Finanzanlagen gehen über die aufsichtsrechtlichen Anforderungen hinaus. Neben lokalen Überwachungsmechanismen existiert ein den gesamten Allianz Konzern umfassendes Finanz- und Risikocontrolling. Das Risikomanagement ist Bestandteil des internen Kontrollsystems des Allianz Konzerns, das die Identifizierung, die Messung, die Aggregierung und das Management von Risiken umfasst. Die Ziele des Risikomanagements werden sowohl auf Konzernebene als auch auf Ebene der operativen Einheiten verfolgt. Der Einsatz von Derivaten ist eine der wesentlichen Strategien des Allianz Konzerns zum Management von Markt- und Anlagerisiken.

Verschiedene Versicherungsgesellschaften des Allianz Konzerns nutzen Derivate, um Risiken in ihren Finanzanlageportfolios innerhalb vorgegebener Grenzen und basierend auf definierten Zielen zu verwalten. Das wichtigste Ziel hierbei ist die Immunisierung ausgewählter Wertpapiere oder Teile eines Portfolios gegen ungünstige Marktentwicklungen. Insbesondere nutzt der Allianz Konzern ausgewählte derivative Finanzinstrumente wie Swaps, Optionen und Forwards zur Absicherung seines Finanzanlagebestands gegen Marktpreis- oder Zinschwankungen.

Innerhalb des Bankgeschäfts des Allianz Konzerns werden derivative Finanzinstrumente sowohl zu Handelszwecken als auch zur Absicherung von Finanzanlagen, Forderungen und Einlagenverbindlichkeiten sowie anderen zinsabhängigen Aktiva und Passiva gegen Zins-, Währungskurs- und andere Marktpreisschwankungen eingesetzt.

Markt- und Kreditrisiken, die sich aus dem Einsatz derivativer Finanzinstrumente ergeben, unterliegen besonderen Kontrollverfahren. Kreditrisiken in Bezug auf Geschäftspartner werden abgeschätzt, indem die Wiederbeschaffungskosten auf Bruttobasis errechnet werden. Die Marktrisiken werden mittels aktueller Value-at-Risk-Verfahren und Stresstests überwacht und mit Stop-Loss-Limiten beschränkt.

Das Adressenausfallrisiko ist im Fall börsennotierter Produkte faktisch ausgeschlossen, da es sich um standardisierte Produkte handelt. Dagegen besteht bei außerbörslichen, individuell ausgehandelten Kontrakten (OTC) ein theoretisches Adressenausfallrisiko in Höhe der Wiederbeschaffungswerte. Der Allianz Konzern verfolgt deshalb bei OTC-Derivaten aufmerksam die Bonität der Kontrahenten. Um das Adressenausfallrisiko im Handelsgeschäft zu verringern, werden mit den Geschäftspartnern Rahmenverträge zu produktübergreifender Aufrechnung abgeschlossen, sogenannte Cross-Product Netting Master Agreements. Bei einem Adressenausfall ermöglicht die Aufrechnung eine Verrechnung noch nicht fälliger Forderungen und Verbindlichkeiten.

## Derivative Finanzinstrumente im Allianz Konzern

| Stand 31. Dezember            | 2010                            |                       |                          |                   |                       |                       | 2009              |                       |                       |
|-------------------------------|---------------------------------|-----------------------|--------------------------|-------------------|-----------------------|-----------------------|-------------------|-----------------------|-----------------------|
|                               | Restlaufzeiten der Nominalwerte |                       |                          | Nominal-<br>werte | Positive<br>Zeitwerte | Negative<br>Zeitwerte | Nominal-<br>werte | Positive<br>Zeitwerte | Negative<br>Zeitwerte |
|                               | Bis zu 1<br>Jahr<br>Mio €       | 1–5<br>Jahre<br>Mio € | Über 5<br>Jahre<br>Mio € |                   |                       |                       |                   |                       |                       |
| <b>Zinsgeschäfte</b>          |                                 |                       |                          |                   |                       |                       |                   |                       |                       |
| <b>Außerbörslich</b>          |                                 |                       |                          |                   |                       |                       |                   |                       |                       |
| Forwards                      | —                               | 61                    | 16                       | 77                | —                     | – 1                   | 10                | —                     | —                     |
| Swaps                         | 1 011                           | 3 011                 | 10 754                   | 14 776            | 231                   | – 238                 | 14 787            | 189                   | – 164                 |
| Swaptions                     | —                               | 14                    | 3 250                    | 3 264             | 9                     | – 36                  | 200               | —                     | —                     |
| Caps                          | 7 142                           | 357                   | 2 760                    | 10 259            | 4                     | – 1                   | 7 554             | 1                     | – 23                  |
| Floors                        | —                               | —                     | 129                      | 129               | 1                     | —                     | 129               | 1                     | —                     |
| Options                       | —                               | —                     | 315                      | 315               | —                     | – 1                   | 21                | —                     | – 1                   |
| <b>Börsengehandelt</b>        |                                 |                       |                          |                   |                       |                       |                   |                       |                       |
| Futures                       | 2 458                           | —                     | —                        | 2 458             | 5                     | – 8                   | 2 469             | 3                     | – 7                   |
| Swaps                         | —                               | —                     | 250                      | 250               | 8                     | – 4                   | —                 | —                     | —                     |
| Optionen                      | 1                               | —                     | —                        | 1                 | —                     | —                     | 519               | —                     | – 1                   |
| <b>Zwischensumme</b>          | <b>10 612</b>                   | <b>3 443</b>          | <b>17 474</b>            | <b>31 529</b>     | <b>258</b>            | <b>– 289</b>          | <b>25 689</b>     | <b>194</b>            | <b>– 196</b>          |
| <b>Aktien-/Indexgeschäfte</b> |                                 |                       |                          |                   |                       |                       |                   |                       |                       |
| <b>Außerbörslich</b>          |                                 |                       |                          |                   |                       |                       |                   |                       |                       |
| Forwards                      | 1 857                           | 277                   | 50                       | 2 184             | 374                   | – 87                  | 2 559             | 363                   | – 227                 |
| Swaps                         | 155                             | 100                   | 2 048                    | 2 303             | 1                     | – 28                  | 531               | 1                     | – 19                  |
| Floors                        | 1                               | —                     | —                        | 1                 | —                     | —                     | 2                 | 2                     | —                     |
| Optionen <sup>1</sup>         | 82 055                          | 2 640                 | 3 068                    | 87 763            | 942                   | – 4 599               | 64 505            | 1 066                 | – 4 257               |
| Structured Note               | —                               | —                     | —                        | —                 | —                     | —                     | 6                 | —                     | —                     |
| <b>Börsengehandelt</b>        |                                 |                       |                          |                   |                       |                       |                   |                       |                       |
| Futures                       | 3 456                           | —                     | —                        | 3 456             | 2                     | – 10                  | 2 803             | 2                     | – 9                   |
| Forwards                      | —                               | —                     | 149                      | 149               | —                     | – 3                   | —                 | —                     | —                     |
| Options                       | 6 258                           | 1                     | 155                      | 6 414             | 87                    | – 60                  | 11 193            | 184                   | – 187                 |
| Warrants                      | —                               | 13                    | —                        | 13                | 1                     | —                     | 10                | 3                     | —                     |
| <b>Zwischensumme</b>          | <b>93 782</b>                   | <b>3 031</b>          | <b>5 470</b>             | <b>102 283</b>    | <b>1 407</b>          | <b>– 4 787</b>        | <b>81 609</b>     | <b>1 621</b>          | <b>– 4 699</b>        |
| <b>Währungsgeschäfte</b>      |                                 |                       |                          |                   |                       |                       |                   |                       |                       |
| <b>Außerbörslich</b>          |                                 |                       |                          |                   |                       |                       |                   |                       |                       |
| Forwards                      | 11 812                          | 132                   | 401                      | 12 345            | 125                   | – 140                 | 8 379             | 91                    | – 206                 |
| Swaps                         | 93                              | 132                   | 229                      | 454               | 39                    | – 8                   | 471               | 49                    | – 6                   |
| Optionen                      | 74                              | 2                     | —                        | 76                | 3                     | – 3                   | 64                | 2                     | – 2                   |
| <b>Zwischensumme</b>          | <b>11 979</b>                   | <b>266</b>            | <b>630</b>               | <b>12 875</b>     | <b>167</b>            | <b>– 151</b>          | <b>8 914</b>      | <b>142</b>            | <b>– 214</b>          |
| <b>Kreditkontrakte</b>        |                                 |                       |                          |                   |                       |                       |                   |                       |                       |
| <b>Außerbörslich</b>          |                                 |                       |                          |                   |                       |                       |                   |                       |                       |
| Swaps                         | 113                             | 785                   | 185                      | 1 083             | 27                    | – 10                  | 1 185             | 15                    | – 27                  |
| <b>Börsengehandelt</b>        |                                 |                       |                          |                   |                       |                       |                   |                       |                       |
| Swaps                         | —                               | —                     | 19                       | 19                | 9                     | —                     | 35                | 15                    | —                     |
| <b>Zwischensumme</b>          | <b>113</b>                      | <b>785</b>            | <b>204</b>               | <b>1 102</b>      | <b>36</b>             | <b>– 10</b>           | <b>1 220</b>      | <b>30</b>             | <b>– 27</b>           |
| <b>Summe</b>                  | <b>116 486</b>                  | <b>7 525</b>          | <b>23 778</b>            | <b>147 789</b>    | <b>1 868</b>          | <b>– 5 237</b>        | <b>117 432</b>    | <b>1 987</b>          | <b>– 5 136</b>        |

<sup>1</sup> Enthält zum 31. Dezember 2010 in indexgebundene Rentenverträge eingebettete Derivate mit einem negativen Zeitwert von 3 861 (2009: 3 724) Mio €.

### In Hedges verwendete derivative Finanzinstrumente

Wichtige Absicherungsinstrumente sind Aktientermingeschäfte, Aktienoptionen, Total Return Swaps, Zinsswaps und -terminkontrakte sowie Devisenswaps und -terminkontrakte. Dabei erfolgt die Absicherung auf Einzelgeschäftsebene (Mikro-Hedge) oder auf Portfolioebene, wobei gleichartige Aktiva oder Passiva zusammengefasst werden (Portfolio-Hedge). Die Tochtergesellschaften sind verpflichtet zu beurteilen, ob die

Voraussetzungen für eine Sicherungsbeziehung erfüllt sind. Dies beinhaltet insbesondere die Beurteilung, ob die Sicherungsbeziehung zwischen dem Sicherungsinstrument und dem Grundgeschäft in Bezug auf ausgleichenden Änderungen des Zeitwerts bzw. der Zahlungsströme hochwirksam ist. Zudem müssen die Tochtergesellschaften die erforderliche Dokumentation erstellen. Alle Sicherungsbeziehungen werden zu Beginn auf Gruppenebene dahingehend überprüft, ob die Voraussetzungen einer Sicherungsbeziehung erfüllt und die Dokumentation vollständig sind.



## Fair Value Hedges

Im Rahmen von Sicherungsgeschäften zur Absicherung von Aktien haben Unternehmen des Allianz Konzerns Fair Value Hedges abgeschlossen. Die dabei eingesetzten Finanzinstrumente weisen zum Jahresende einen positiven Zeitwert von 302 (2009: 26) Mio € auf.

Zusätzlich setzt der Allianz Konzern Fair Value Hedges zur Absicherung des Fair Value finanzieller Vermögenswerte gegen Zins- und Währungskursschwankungen ein. Die dabei im Rahmen von Fair Value Hedges vom Allianz Konzern verwendeten derivativen Finanzinstrumente hatten am 31. Dezember 2010 insgesamt einen negativen Zeitwert von 92 (2009: negativer Zeitwert von 75) Mio €.

Im Geschäftsjahr 2010 wurden im Allianz Konzern für Fair Value Hedges Nettoverluste aus Sicherungsderivaten von 1 (2009: Nettoverluste von 412; 2008: Nettogewinne von 2 115) Mio € und Nettoverluste aus abgesicherten

Grundgeschäften von 30 (2009: Nettogewinne von 390; 2008: Nettoverlust von 2 027) Mio € erfasst, was zu einer Ineffektivität von – 31 (2009: – 22) Mio € führte.

## Cashflow Hedges

Zur Absicherung zins- und währungsabhängiger variabler Zahlungsströme wurden im Berichtsjahr Cashflow Hedges genutzt. Zum 31. Dezember 2010 wiesen die genutzten Derivate einen positiven Zeitwert in Höhe von 17 (2009: 43) Mio € auf. Die nichtrealisierten Gewinne und Verluste (netto) im Eigenkapital stiegen um 9 (2009: sanken um 16) Mio €.

## Absicherung einer Nettoinvestition in einem ausländischen Geschäftsbetrieb

Zum 31. Dezember 2010 bestanden im Allianz Konzern Devisenabsicherungen für Nettoinvestitionen in ausländische Geschäftsbetriebe durch die Begebung von US-Dollar und Australischem Dollar Verbindlichkeiten von nominal 1,2 Mrd USD und 211 Mio AUD.

# 45 Finanzinstrumente

## Zeitwerte und Buchwerte von Finanzinstrumenten

Die folgende Tabelle stellt die Buchwerte und die Zeitwerte der vom Allianz Konzern gehaltenen Finanzinstrumente dar.

| Stand 31. Dezember                                                                            | 2010              |                   | 2009              |                   |
|-----------------------------------------------------------------------------------------------|-------------------|-------------------|-------------------|-------------------|
|                                                                                               | Buchwert<br>Mio € | Zeitwert<br>Mio € | Buchwert<br>Mio € | Zeitwert<br>Mio € |
| <b>Finanzaktiva</b>                                                                           |                   |                   |                   |                   |
| Barreserve und andere liquide Mittel                                                          | 8 747             | 8 747             | 6 089             | 6 089             |
| Handelsaktiva                                                                                 | 2 101             | 2 101             | 2 131             | 2 131             |
| Finanzaktiva als „erfolgswirksam zum Zeitwert bewertet“ klassifiziert                         | 7 742             | 7 742             | 12 190            | 12 190            |
| Jederzeit veräußerbare Wertpapiere                                                            | 318 315           | 318 315           | 279 045           | 279 045           |
| Bis zur Endfälligkeit gehaltene Wertpapiere                                                   | 3 987             | 4 211             | 3 475             | 3 629             |
| Forderungen an Kreditinstitute und Kunden                                                     | 122 678           | 127 351           | 128 996           | 130 444           |
| Finanzaktiva aus fondsgebundenen Verträgen                                                    | 64 847            | 64 847            | 56 963            | 56 963            |
| Derivative Finanzinstrumente und feste Verpflichtungen, enthalten in Übrige Aktiva            | 452               | 452               | 304               | 304               |
| Treuhänderisch verwaltete Vermögenswerte <sup>1</sup>                                         | 246               | 246               | 265               | 265               |
| <b>Finanzpassiva</b>                                                                          |                   |                   |                   |                   |
| Handelspassiva                                                                                | 5 013             | 5 013             | 4 891             | 4 891             |
| Verbindlichkeiten gegenüber Kreditinstituten und Kunden                                       | 21 155            | 21 445            | 21 248            | 21 248            |
| Investmentverträge mit Versicherungsnehmern                                                   | 130 741           | 130 741           | 113 390           | 113 390           |
| Finanzpassiva aus fondsgebundenen Verträgen                                                   | 64 847            | 64 847            | 56 963            | 56 963            |
| Derivative Finanzinstrumente und feste Verpflichtungen, enthalten in Andere Verbindlichkeiten | 225               | 225               | 310               | 310               |
| Verbindlichkeiten für kündbare Eigenkapitalinstrumente                                        | 3 111             | 3 111             | 3 451             | 3 451             |
| Verbriefte Verbindlichkeiten, Genussrechtskapital und nachrangige Verbindlichkeiten           | 17 227            | 17 534            | 17 309            | 17 351            |
| Treuhänderisch verwaltete Verbindlichkeiten <sup>1</sup>                                      | 246               | 246               | 265               | 265               |

1 Enthält in einen Trust ausgliederte Forderungen und Verbindlichkeiten aus Entgeldumwandlungen

Der Zeitwert eines Finanzinstruments ist als der Betrag definiert, zu dem Finanzaktiva bzw. Finanzpassiva zwischen sachverständigen, vertragswilligen und voneinander unabhängigen Geschäftspartnern getauscht bzw. beglichen werden können.

### **Bestimmung von Zeitwerten von Finanzinstrumenten, die nicht zum Zeitwert bilanziert werden**

Nachfolgend wird die Bestimmung von Zeitwerten derjenigen Finanzinstrumente dargestellt, welche nicht zum Zeitwert bilanziert werden, deren Zeitwerte jedoch gemäß IFRS 7 darzustellen sind:

**Barreserve und andere liquide Mittel** Die Barreserve und andere liquide Mittel umfassen Barreserven und Sichteinlagen bei Banken sowie kurzfristige Investments hoher Liquidität, die unmittelbar zu einem bekannten Barbetrag eingelöst werden können und bei denen kein signifikantes Risiko der Wertänderung besteht. Für Barreserven und andere liquide Mittel wird als Zeitwert der Buchwert angesetzt.

**Bis zur Endfälligkeit gehaltene Wertpapiere** Zur Ermittlung der Zeitwerte werden die am Bilanzstichtag notierten Marktpreise herangezogen.

**Forderungen an Kreditinstitute und Kunden** Für Finanzinstrumente dieser Kategorie bestehen keine notierten Marktpreise auf aktiven Märkten. Die Ermittlung der Zeitwerte erfolgt daher anhand von Bewertungsmethoden mit aktuellen Bewertungsparametern. Für kurzfristige Forderungen wird als Zeitwert der Buchwert angesetzt. Für langfristige Forderungen wird der Zeitwert durch Abzinsung zukünftiger Cashflows mit risikospezifischen Zinssätzen ermittelt. Hierbei wird das spezifische Kreditrisiko, einschließlich Sicherheiten, berücksichtigt.

**Verbindlichkeiten gegenüber Kreditinstituten und Kunden** Für kurzfristige Verbindlichkeiten wird als Zeitwert der Buchwert angesetzt. Für langfristige Verbindlichkeiten erfolgt die Ermittlung des Zeitwertes durch Abzinsung der zukünftigen Cashflows. Hierbei werden aktuelle Zinssätze verwendet, die das eigene Kreditrisiko des Allianz Konzerns widerspiegeln.

**Verbriefte Verbindlichkeiten, Genussrechtskapital und nachrangige Verbindlichkeiten** Der Zeitwert von verbrieften Verbindlichkeiten, Genussrechtskapital

und nachrangigen Verbindlichkeiten wird, soweit verfügbar, auf Grundlage von notierten Marktpreisen ermittelt. Soweit keine notierten Marktpreise verfügbar sind, wird für kurzfristige Verbindlichkeiten als Zeitwert der Buchwert angesetzt. Für langfristige Verbindlichkeiten wird der Zeitwert durch Abzinsung der zu leistenden vertraglichen Cashflows ermittelt. Dabei werden aktuelle Zinssätze verwendet, zu denen der Allianz Konzern Schuldtitel mit vergleichbarer Restlaufzeit am Bilanzstichtag hätte emittieren können und welche das eigene Kreditrisiko des Allianz Konzerns widerspiegeln.

### **Bestimmung von Zeitwerten von Finanzinstrumenten, die zum Zeitwert bilanziert werden**

Die Ermittlung der Zeitwerte ist für folgende Finanzinstrumente, deren Buchwert dem Zeitwert entspricht, in Anmerkung 2 „Zusammenfassung wesentlicher Bilanzierungsgrundsätze“ dargestellt:

- Handelsaktiva und Handelspassiva
- Finanzaktiva und Finanzpassiva als „erfolgswirksam zum Zeitwert bewertet“ klassifiziert
- Jederzeit veräußerbare Wertpapiere
- Finanzaktiva und Finanzpassiva aus fondsgebundenen Verträgen
- Derivative Finanzinstrumente und feste Verpflichtungen, enthalten in Übrige Aktiva und Andere Verbindlichkeiten
- Investmentverträge mit Versicherungsnehmern
- Verbindlichkeiten für einlösable Eigenkapitalinstrumente
- Treuhänderisch verwaltete Vermögenswerte und Verbindlichkeiten

### **Hierarchie zu Zeitwerten von Finanzinstrumenten**

IFRS 7 fordert, dass die zum Zeitwert in der Konzernbilanz bewerteten Finanzinstrumente in einer 3-Stufen-Hierarchie („Fair Value Hierarchie“) klassifiziert werden, abhängig von den verwendeten Bewertungsmethoden und davon, ob die zur Ableitung der Zeitwerte verwendeten Parameter auf Märkten beobachtbar sind.

**Level 1** Finanzinstrumente, für die der Zeitwert durch notierte (nicht angepasste) Marktpreise auf aktiven Märkten für identische Vermögenswerte und Verbindlichkeiten bestimmt wird, werden in diese Kategorie eingeordnet. Gemäß IAS 39 wird ein Finanzinstrument als auf einem aktiven Markt notiert bezeichnet, wenn die Marktpreise leicht und regelmäßig erhältlich sind und

wenn diese Preise aktuelle und regelmäßig auftretende Markttransaktionen wie unter unabhängigen Dritten darstellen.

**Level 2** Finanzinstrumente, für die der Zeitwert mittels Bewertungsmethoden, deren wesentliche Parameter ausschließlich auf beobachtbaren Marktdaten basieren (beobachtbare Inputs), bestimmt wird, werden in diese Kategorie eingeordnet.

**Level 3** Finanzinstrumente, für die der Zeitwert mittels Bewertungsmethoden, für die zumindest ein wesentlicher Parameter nicht auf beobachtbaren Marktdaten basiert (nicht beobachtbare Inputs), bestimmt wird, werden in diese Kategorie eingeordnet.

Die folgenden Tabellen zeigen die Hierarchie zu Zeitwerten von Finanzinstrumenten, die zum Zeitwert bilanziert werden, zum 31. Dezember 2010 und 2009:

| Stand 31. Dezember                                                                                   | 2010                                                                      |                                                                                                     |                                                                                                           |                                |
|------------------------------------------------------------------------------------------------------|---------------------------------------------------------------------------|-----------------------------------------------------------------------------------------------------|-----------------------------------------------------------------------------------------------------------|--------------------------------|
|                                                                                                      | Level 1<br>Notierte<br>Marktpreise<br>auf aktiven<br>Märkten<br><br>Mio € | Level 2<br>Auf<br>beobachtbaren<br>Marktdaten<br>basierende<br>Bewertungs-<br>methoden<br><br>Mio € | Level 3<br>Auf nicht<br>beobachtbaren<br>Marktdaten<br>basierende<br>Bewertungs-<br>methoden<br><br>Mio € | Summe<br>Zeitwert<br><br>Mio € |
| <b>Finanzaktiva</b>                                                                                  |                                                                           |                                                                                                     |                                                                                                           |                                |
| <b>Erfolgswirksam zum Zeitwert bewertete Finanzaktiva</b>                                            |                                                                           |                                                                                                     |                                                                                                           |                                |
| <b>Handelsaktiva</b>                                                                                 |                                                                           |                                                                                                     |                                                                                                           |                                |
| Festverzinsliche Wertpapiere                                                                         | 282                                                                       | 219                                                                                                 | 45                                                                                                        | 546                            |
| Aktien                                                                                               | 46                                                                        | 93                                                                                                  | —                                                                                                         | 139                            |
| Derivate                                                                                             | 52                                                                        | 1 311                                                                                               | 53                                                                                                        | 1 416                          |
| <b>Zwischensumme</b>                                                                                 | <b>380</b>                                                                | <b>1 623</b>                                                                                        | <b>98</b>                                                                                                 | <b>2 101</b>                   |
| <b>Finanzaktiva als „erfolgswirksam zum Zeitwert bewertet“ klassifiziert</b>                         |                                                                           |                                                                                                     |                                                                                                           |                                |
| Festverzinsliche Wertpapiere                                                                         | 3 610                                                                     | 820                                                                                                 | —                                                                                                         | 4 430                          |
| Aktien                                                                                               | 3 018                                                                     | 86                                                                                                  | 208                                                                                                       | 3 312                          |
| <b>Zwischensumme</b>                                                                                 | <b>6 628</b>                                                              | <b>906</b>                                                                                          | <b>208</b>                                                                                                | <b>7 742</b>                   |
| <b>Zwischensumme</b>                                                                                 | <b>7 008</b>                                                              | <b>2 529</b>                                                                                        | <b>306</b>                                                                                                | <b>9 843</b>                   |
| <b>Jederzeit veräußerbare Wertpapiere</b>                                                            |                                                                           |                                                                                                     |                                                                                                           |                                |
| Aktien                                                                                               | 25 281                                                                    | 1 387                                                                                               | 3 980 <sup>2</sup>                                                                                        | 30 648                         |
| Staatliche, hypothekarisch besicherte Anleihen                                                       | 1                                                                         | 5 271                                                                                               | —                                                                                                         | 5 272                          |
| Industrielle, hypothekarisch besicherte Anleihen                                                     | 24                                                                        | 10 251                                                                                              | 199                                                                                                       | 10 474                         |
| Übrige durch Vermögenswerte besicherte Anleihen                                                      | 91                                                                        | 3 386                                                                                               | 176                                                                                                       | 3 653                          |
| Staats- und Regierungsanleihen                                                                       | 108 951                                                                   | 16 842                                                                                              | 19                                                                                                        | 125 812                        |
| Industrieanleihen                                                                                    | 25 988                                                                    | 112 535                                                                                             | 2 096                                                                                                     | 140 619                        |
| Übrige Anleihen                                                                                      | 533                                                                       | 943                                                                                                 | 361                                                                                                       | 1 837                          |
| <b>Zwischensumme</b>                                                                                 | <b>160 869</b>                                                            | <b>150 615</b>                                                                                      | <b>6 831</b>                                                                                              | <b>318 315</b>                 |
| <b>Finanzaktiva aus fondsgebundenen Verträgen</b>                                                    | <b>62 641</b>                                                             | <b>2 054</b>                                                                                        | <b>152</b>                                                                                                | <b>64 847</b>                  |
| <b>Derivative Finanzinstrumente und feste Verpflichtungen, enthalten in Übrige Aktiva</b>            | <b>—</b>                                                                  | <b>452</b>                                                                                          | <b>—</b>                                                                                                  | <b>452</b>                     |
| <b>Treuhänderisch verwaltete Vermögenswerte</b>                                                      | <b>221</b>                                                                | <b>—</b>                                                                                            | <b>25</b>                                                                                                 | <b>246</b>                     |
| <b>Summe</b>                                                                                         | <b>230 739</b>                                                            | <b>155 650</b>                                                                                      | <b>7 314</b>                                                                                              | <b>393 703</b>                 |
| <b>Finanzpassiva</b>                                                                                 |                                                                           |                                                                                                     |                                                                                                           |                                |
| <b>Handelspassiva</b>                                                                                |                                                                           |                                                                                                     |                                                                                                           |                                |
| Derivate                                                                                             | 78                                                                        | 808                                                                                                 | 4 126                                                                                                     | 5 012                          |
| Sonstige Handelspassiva                                                                              | —                                                                         | 1                                                                                                   | —                                                                                                         | 1                              |
| <b>Zwischensumme</b>                                                                                 | <b>78</b>                                                                 | <b>809</b>                                                                                          | <b>4 126</b>                                                                                              | <b>5 013</b>                   |
| <b>Investmentverträge mit Versicherungsnehmern<sup>1</sup></b>                                       | <b>340</b>                                                                | <b>259</b>                                                                                          | <b>462</b>                                                                                                | <b>1 061</b>                   |
| <b>Finanzpassiva aus fondsgebundenen Verträgen</b>                                                   | <b>62 641</b>                                                             | <b>2 054</b>                                                                                        | <b>152</b>                                                                                                | <b>64 847</b>                  |
| <b>Derivative Finanzinstrumente und feste Verpflichtungen, enthalten in Andere Verbindlichkeiten</b> | <b>—</b>                                                                  | <b>225</b>                                                                                          | <b>—</b>                                                                                                  | <b>225</b>                     |
| <b>Verbindlichkeiten für kündbare Eigenkapitalinstrumente</b>                                        | <b>3 008</b>                                                              | <b>26</b>                                                                                           | <b>77</b>                                                                                                 | <b>3 111</b>                   |
| <b>Treuhänderisch verwaltete Verbindlichkeiten</b>                                                   | <b>221</b>                                                                | <b>—</b>                                                                                            | <b>25</b>                                                                                                 | <b>246</b>                     |
| <b>Summe</b>                                                                                         | <b>66 288</b>                                                             | <b>3 373</b>                                                                                        | <b>4 842</b>                                                                                              | <b>74 503</b>                  |

<sup>1</sup> Enthält nicht Verträge vom Typ Universal Life.

<sup>2</sup> Zum Zwecke der Vergleichbarkeit dieser Angaben mit den Angaben in Anmerkung 9 sind die nicht gelisteten Aktien und Investments in Limited Partnerships des Allianz Konzerns in Höhe von 352 Mio €, welche zu Anschaffungskosten abzüglich Wertminderungen bewertet werden, weil die Zeitwerte nicht verlässlich ermittelt werden können, enthalten.

| Stand 31. Dezember                                                                                   | 2009                                                         |                                                                                               |                                                                                                     |                   |
|------------------------------------------------------------------------------------------------------|--------------------------------------------------------------|-----------------------------------------------------------------------------------------------|-----------------------------------------------------------------------------------------------------|-------------------|
|                                                                                                      | Level 1<br>Notierte<br>Marktpreise<br>auf aktiven<br>Märkten | Level 2<br>Auf<br>beobacht-<br>baren Markt-<br>daten<br>basierende<br>Bewertungs-<br>methoden | Level 3<br>Auf nicht<br>beobacht-<br>baren Markt-<br>daten<br>basierende<br>Bewertungs-<br>methoden | Summe<br>Zeitwert |
|                                                                                                      | Mio €                                                        | Mio €                                                                                         | Mio €                                                                                               | Mio €             |
| <b>Finanzaktiva</b>                                                                                  |                                                              |                                                                                               |                                                                                                     |                   |
| <b>Erfolgswirksam zum Zeitwert bewertete Finanzaktiva</b>                                            |                                                              |                                                                                               |                                                                                                     |                   |
| <b>Handelsaktiva</b>                                                                                 |                                                              |                                                                                               |                                                                                                     |                   |
| Festverzinsliche Wertpapiere                                                                         | 212                                                          | 107                                                                                           | 44                                                                                                  | 363               |
| Aktien                                                                                               | 29                                                           | 76                                                                                            | —                                                                                                   | 105               |
| Derivate                                                                                             | 186                                                          | 1 416                                                                                         | 61                                                                                                  | 1 663             |
| <b>Zwischensumme</b>                                                                                 | <b>427</b>                                                   | <b>1 599</b>                                                                                  | <b>105</b>                                                                                          | <b>2 131</b>      |
| <b>Finanzaktiva als „erfolgswirksam zum Zeitwert bewertet“ klassifiziert</b>                         |                                                              |                                                                                               |                                                                                                     |                   |
| Festverzinsliche Wertpapiere                                                                         | 4 526                                                        | 4 270                                                                                         | 18                                                                                                  | 8 814             |
| Aktien                                                                                               | 3 199                                                        | 18                                                                                            | 159                                                                                                 | 3 376             |
| <b>Zwischensumme</b>                                                                                 | <b>7 725</b>                                                 | <b>4 288</b>                                                                                  | <b>177</b>                                                                                          | <b>12 190</b>     |
| <b>Zwischensumme</b>                                                                                 | <b>8 152</b>                                                 | <b>5 887</b>                                                                                  | <b>282</b>                                                                                          | <b>14 321</b>     |
| <b>Jederzeit veräußerbare Wertpapiere</b>                                                            |                                                              |                                                                                               |                                                                                                     |                   |
| Aktien                                                                                               | 23 673                                                       | 991                                                                                           | 3 060 <sup>2</sup>                                                                                  | 27 724            |
| Staatliche, hypothekarisch besicherte Anleihen                                                       | 280                                                          | 8 074                                                                                         | 4                                                                                                   | 8 358             |
| Industrielle, hypothekarisch besicherte Anleihen                                                     | 36                                                           | 7 658                                                                                         | 54                                                                                                  | 7 748             |
| Übrige durch Vermögenswerte besicherte Anleihen                                                      | 64                                                           | 3 493                                                                                         | 330                                                                                                 | 3 887             |
| Staats- und Regierungsanleihen                                                                       | 103 991                                                      | 9 922                                                                                         | 39                                                                                                  | 113 952           |
| Industrieanleihen                                                                                    | 18 060                                                       | 95 188                                                                                        | 2 526                                                                                               | 115 774           |
| Übrige Anleihen                                                                                      | 516                                                          | 855                                                                                           | 231                                                                                                 | 1 602             |
| <b>Zwischensumme</b>                                                                                 | <b>146 620</b>                                               | <b>126 181</b>                                                                                | <b>6 244</b>                                                                                        | <b>279 045</b>    |
| <b>Finanzaktiva aus fondsgebundenen Verträgen</b>                                                    | <b>54 798</b>                                                | <b>2 152</b>                                                                                  | <b>13</b>                                                                                           | <b>56 963</b>     |
| <b>Derivative Finanzinstrumente und feste Verpflichtungen, enthalten in Übrige Aktiva</b>            | <b>—</b>                                                     | <b>304</b>                                                                                    | <b>—</b>                                                                                            | <b>304</b>        |
| <b>Treuhänderisch verwaltete Vermögenswerte</b>                                                      | <b>265</b>                                                   | <b>—</b>                                                                                      | <b>—</b>                                                                                            | <b>265</b>        |
| <b>Summe</b>                                                                                         | <b>209 835</b>                                               | <b>134 524</b>                                                                                | <b>6 539</b>                                                                                        | <b>350 898</b>    |
| <b>Finanzpassiva</b>                                                                                 |                                                              |                                                                                               |                                                                                                     |                   |
| <b>Handelspassiva</b>                                                                                |                                                              |                                                                                               |                                                                                                     |                   |
| Derivate                                                                                             | 204                                                          | 906                                                                                           | 3 698                                                                                               | 4 808             |
| Sonstige Handelspassiva                                                                              | —                                                            | 83                                                                                            | —                                                                                                   | 83                |
| <b>Zwischensumme</b>                                                                                 | <b>204</b>                                                   | <b>989</b>                                                                                    | <b>3 698</b>                                                                                        | <b>4 891</b>      |
| <b>Investmentverträge mit Versicherungsnehmern<sup>1</sup></b>                                       | <b>219</b>                                                   | <b>299</b>                                                                                    | <b>431</b>                                                                                          | <b>949</b>        |
| <b>Finanzpassiva aus fondsgebundenen Verträgen</b>                                                   | <b>54 798</b>                                                | <b>2 152</b>                                                                                  | <b>13</b>                                                                                           | <b>56 963</b>     |
| <b>Derivative Finanzinstrumente und feste Verpflichtungen, enthalten in Andere Verbindlichkeiten</b> | <b>—</b>                                                     | <b>310</b>                                                                                    | <b>—</b>                                                                                            | <b>310</b>        |
| <b>Verbindlichkeiten für kündbare Eigenkapitalinstrumente</b>                                        | <b>3 388</b>                                                 | <b>2</b>                                                                                      | <b>61</b>                                                                                           | <b>3 451</b>      |
| <b>Treuhänderisch verwaltete Verbindlichkeiten</b>                                                   | <b>265</b>                                                   | <b>—</b>                                                                                      | <b>—</b>                                                                                            | <b>265</b>        |
| <b>Summe</b>                                                                                         | <b>58 874</b>                                                | <b>3 752</b>                                                                                  | <b>4 203</b>                                                                                        | <b>66 829</b>     |

<sup>1</sup> Enthält nicht Verträge vom Typ Universal Life.

<sup>2</sup> Zum Zwecke der Vergleichbarkeit dieser Angaben mit den Angaben in Anmerkung 9 sind die nicht gelisteten Aktien und Investments in Limited Partnerships des Allianz Konzerns in Höhe von 375 Mio €, welche zu Anschaffungskosten abzüglich Wertminderungen bewertet werden, weil die Zeitwerte nicht verlässlich ermittelt werden können, enthalten.

### Signifikante Umgliederungen von zum Zeitwert bilanzierten Finanzinstrumenten zwischen Level 1 und Level 2

|                                                                                        | 2010<br>Mio € |
|----------------------------------------------------------------------------------------|---------------|
| <b>Finanzaktiva umgeliert von Level 1 in Level 2</b>                                   |               |
| Staats- und Regierungsanleihen                                                         | 1,105         |
| <b>Finanzaktiva umgeliert von Level 2 in Level 1</b>                                   |               |
| Festverzinsliche Wertpapiere, als „erfolgswirksam zum Zeitwert bewertet“ klassifiziert | 111           |
| Industrieanleihen                                                                      | 4 181         |
| <b>Total</b>                                                                           | <b>4 292</b>  |

Bestimmte Staats- und Regierungsanleihen wurden im Geschäftsjahr 2010 von Level 1 in Level 2 umgeliert, weil sich die Beurteilung der Liquidität dieser Anleihen geändert hat.

Bestimmte festverzinsliche Wertpapiere, die als erfolgswirksam zum Zeitwert bewertet klassifiziert sind, und Industrieanleihen wurden im Geschäftsjahr 2010 von Level 2 in Level 1 umgeliert, da sich die Liquidität, Handelsfrequenz und Aktivität der Märkte, auf denen diese Finanzinstrumente gelistet sind, verbessert hat.

### Level 3 Portfolios

Die Zeitwerte bestimmter Finanzinstrumente werden durch Bewertungsmethoden ermittelt, die auf nicht beobachtbaren Marktdaten basieren (Level 3).

Eigenkapitalinvestments der Bilanzpositionen „Erfolgswirksam zum Zeitwert bewertete Finanzaktiva“ und „Jederzeit veräußerbare Wertpapiere“ bestehen im Wesentlichen aus Private-Equity-Fonds-Investments des Allianz Konzerns. Die Bewertung dieser Investments erfolgt üblicherweise auf Basis der vom jeweiligen Fondsmanager ermittelten Net Asset Values, d. h., Grundlage der Bewertung bilden nicht am Markt beobachtbare Daten. Der Fondsmanager bewertet die einzelnen Portfoliounternehmen grundsätzlich auf Basis von Discounted-Cashflow-Verfahren oder Multiple-Ansätzen. Unabdingbare Voraussetzung hierfür ist der Zugang zu unternehmensspezifischen Daten. Darüber hinaus beeinflusst jede weitere Transaktion, beispielsweise Investition oder Desinvestition, die Sensitivität der Fondsbeurteilung. Dadurch kann eine aussagefähige Sensitivitätsanalyse nicht durchgeführt werden.

Der Zeitwert bestimmter jederzeit veräußerbarer Industrieanleihen in Höhe von 1,5 Mrd € wird anhand Matrix-Bewertungen bestimmt, welche auf nicht beobachtbaren Marktdaten basieren. Die übrigen als Level 3 klassifizierten Industrieanleihen bestehen aus einer Vielzahl von Portfolios, deren Zeitwerte anhand verschiedener, auf nicht beobachtbaren Marktdaten basierender Bewertungsmethoden, inklusive Preisstellungen von Wertpapierhändlern und anderen Preisanbietern, bestimmt werden. Obwohl der Effekt aus der Änderung der Bewertungsparameter zu annehmbaren alternativen Werten insgesamt einen signifikanten Einfluss auf die Zeitwerte haben könnte, ist dieser Effekt bei individueller Betrachtungsweise je Portfolio nicht signifikant.

Die Handelspassiva beinhalten 4,1 Mrd € eingebettete Derivate aus Rentenversicherungsverträgen. Zur Bestimmung des Barwertes der zugrunde liegenden Versicherungsreserven und -aufwendungen werden interne Discounted-Cashflow-Modelle verwendet. Sensitivitäten der Zeitwerte auf Änderungen auf annehmbare alternative Bewertungsparameter werden durch Veränderung der Annuitäten und Stornoraten um jeweils 10% bestimmt. Eine Erhöhung der Annuitäten um 10% und Verringerung der Stornoraten um 10% würden den Zeitwert um 158 Mio € erhöhen. Eine Verringerung der Annuitäten um 10% und ein Anstieg der Stornoraten um 10% würde den Zeitwert um 156 Mio € verringern.

**Überleitung der Finanzinstrumente in Level 3**

Die folgende Tabelle zeigt eine Überleitung der zum Zeitwert bewerteten und in Level 3 klassifizierten Finanzinstrumente:

|                                                                              | Buchwert<br>(Zeitwert)<br>Stand<br>1. Januar 2010 | Zugänge<br>aufgrund von<br>Käufen und<br>Emissionen | Umgliederungen<br>(netto)<br>in (+)/aus (-)<br>Level 3 | Abgänge<br>aufgrund von<br>Verkäufen und<br>Abgeltungen |
|------------------------------------------------------------------------------|---------------------------------------------------|-----------------------------------------------------|--------------------------------------------------------|---------------------------------------------------------|
|                                                                              | Mio €                                             | Mio €                                               | Mio €                                                  | Mio €                                                   |
| <b>Finanzaktiva</b>                                                          |                                                   |                                                     |                                                        |                                                         |
| <b>Erfolgswirksam zum Zeitwert bewertete Finanzaktiva</b>                    |                                                   |                                                     |                                                        |                                                         |
| <b>Handelsaktiva</b>                                                         |                                                   |                                                     |                                                        |                                                         |
| Festverzinsliche Wertpapiere                                                 | 44                                                | 1                                                   | —                                                      | —                                                       |
| Derivate                                                                     | 61                                                | 28                                                  | —                                                      | - 6                                                     |
| <b>Zwischensumme</b>                                                         | <b>105</b>                                        | <b>29</b>                                           | <b>—</b>                                               | <b>- 6</b>                                              |
| <b>Finanzaktiva als „erfolgswirksam zum Zeitwert bewertet“ klassifiziert</b> |                                                   |                                                     |                                                        |                                                         |
| Festverzinsliche Wertpapiere                                                 | 18                                                | —                                                   | —                                                      | - 8                                                     |
| Aktien                                                                       | 159                                               | 21                                                  | —                                                      | - 8                                                     |
| <b>Zwischensumme</b>                                                         | <b>177</b>                                        | <b>21</b>                                           | <b>—</b>                                               | <b>- 16</b>                                             |
| <b>Zwischensumme</b>                                                         | <b>282</b>                                        | <b>50</b>                                           | <b>—</b>                                               | <b>- 22</b>                                             |
| <b>Jederzeit veräußerbare Wertpapiere</b>                                    |                                                   |                                                     |                                                        |                                                         |
| Aktien                                                                       | 3 060                                             | 897                                                 | - 22                                                   | - 299                                                   |
| Staatliche, hypothekarisch besicherte Anleihen                               | 4                                                 | —                                                   | - 4                                                    | —                                                       |
| Industrielle, hypothekarisch besicherte Anleihen                             | 54                                                | 99                                                  | 123                                                    | - 78                                                    |
| Übrige durch Vermögenswerte besicherte Anleihen                              | 330                                               | 127                                                 | - 126                                                  | - 228                                                   |
| Staats- und Regierungsanleihen                                               | 39                                                | —                                                   | - 21                                                   | —                                                       |
| Industrieanleihen                                                            | 2 526                                             | 554                                                 | - 759                                                  | - 260                                                   |
| Übrige Anleihen                                                              | 231                                               | 141                                                 | —                                                      | - 24                                                    |
| <b>Zwischensumme</b>                                                         | <b>6 244</b>                                      | <b>1 818</b>                                        | <b>- 809</b>                                           | <b>- 889</b>                                            |
| <b>Finanzaktiva aus fondsgebundenen Verträgen</b>                            | <b>13</b>                                         | <b>19</b>                                           | <b>131</b>                                             | <b>- 8</b>                                              |
| <b>Treuhänderisch verwaltete Vermögenswerte</b>                              | <b>—</b>                                          | <b>56</b>                                           | <b>—</b>                                               | <b>- 35</b>                                             |
| <b>Summe</b>                                                                 | <b>6 539</b>                                      | <b>1 943</b>                                        | <b>- 678</b>                                           | <b>- 954</b>                                            |

|                                                               | Buchwert<br>(Zeitwert)<br>Stand<br>1. Januar 2010 | Zugänge<br>aufgrund von<br>Käufen und<br>Emissionen | Umgliederungen<br>(netto)<br>in (+)/aus (-)<br>Level 3 | Abgänge<br>aufgrund von<br>Verkäufen und<br>Abgeltungen |
|---------------------------------------------------------------|---------------------------------------------------|-----------------------------------------------------|--------------------------------------------------------|---------------------------------------------------------|
|                                                               | Mio €                                             | Mio €                                               | Mio €                                                  | Mio €                                                   |
| <b>Finanzpassiva</b>                                          |                                                   |                                                     |                                                        |                                                         |
| <b>Handelspassiva</b>                                         |                                                   |                                                     |                                                        |                                                         |
| Derivate                                                      | 3 698                                             | 269                                                 | —                                                      | - 330                                                   |
| Investmentverträge mit Versicherungsnehmern <sup>1</sup>      | 431                                               | 236                                                 | —                                                      | - 247                                                   |
| <b>Finanzpassiva aus fondsgebundenen Verträgen</b>            | <b>13</b>                                         | <b>19</b>                                           | <b>131</b>                                             | <b>- 8</b>                                              |
| <b>Verbindlichkeiten für kündbare Eigenkapitalinstrumente</b> | <b>61</b>                                         | <b>—</b>                                            | <b>—</b>                                               | <b>—</b>                                                |
| <b>Treuhänderisch verwaltete Verbindlichkeiten</b>            | <b>—</b>                                          | <b>56</b>                                           | <b>—</b>                                               | <b>- 35</b>                                             |
| <b>Summe</b>                                                  | <b>4 203</b>                                      | <b>580</b>                                          | <b>131</b>                                             | <b>- 620</b>                                            |

<sup>1</sup> Enthält nicht Verträge vom Typ Universal Life.

| Netto-Gewinne<br>(-Verluste), in der<br>Konzern-Gewinn-<br>und Verlust-<br>rechnung erfasst<br>Mio € | Netto-Gewinne<br>(-Verluste),<br>direkt im<br>Eigenkapital<br>erfasst<br>Mio € | Wertminderungen<br>Mio € | Währungs-<br>änderungen<br>Mio € | Veränderungen<br>Konsolidierungskreis<br>Mio € | Buchwert<br>(Zeitwert)<br>Stand<br>31. Dezember 2010<br>Mio € | Netto-Gewinne<br>(-Verluste) für zum<br>Bilanzstichtag<br>gehaltene Finanz-<br>instrumente<br>Mio € |
|------------------------------------------------------------------------------------------------------|--------------------------------------------------------------------------------|--------------------------|----------------------------------|------------------------------------------------|---------------------------------------------------------------|-----------------------------------------------------------------------------------------------------|
|                                                                                                      |                                                                                |                          |                                  |                                                |                                                               |                                                                                                     |
|                                                                                                      |                                                                                |                          |                                  |                                                |                                                               |                                                                                                     |
| —                                                                                                    | —                                                                              | – 1                      | 1                                | —                                              | 45                                                            | —                                                                                                   |
| – 36                                                                                                 | —                                                                              | —                        | 6                                | —                                              | 53                                                            | – 20                                                                                                |
| <b>– 36</b>                                                                                          | <b>—</b>                                                                       | <b>– 1</b>               | <b>7</b>                         | <b>—</b>                                       | <b>98</b>                                                     | <b>– 20</b>                                                                                         |
|                                                                                                      |                                                                                |                          |                                  |                                                |                                                               |                                                                                                     |
| —                                                                                                    | —                                                                              | —                        | 1                                | – 11                                           | —                                                             | —                                                                                                   |
| 36                                                                                                   | —                                                                              | —                        | —                                | —                                              | 208                                                           | —                                                                                                   |
| <b>36</b>                                                                                            | <b>—</b>                                                                       | <b>—</b>                 | <b>1</b>                         | <b>– 11</b>                                    | <b>208</b>                                                    | <b>—</b>                                                                                            |
| <b>—</b>                                                                                             | <b>—</b>                                                                       | <b>– 1</b>               | <b>8</b>                         | <b>– 11</b>                                    | <b>306</b>                                                    | <b>– 20</b>                                                                                         |
|                                                                                                      |                                                                                |                          |                                  |                                                |                                                               |                                                                                                     |
| – 3                                                                                                  | 406                                                                            | – 73                     | 10                               | 4                                              | 3 980                                                         | —                                                                                                   |
| —                                                                                                    | —                                                                              | —                        | —                                | —                                              | —                                                             | —                                                                                                   |
| —                                                                                                    | —                                                                              | —                        | —                                | 1                                              | 199                                                           | 7                                                                                                   |
| 11                                                                                                   | 34                                                                             | – 11                     | – 3                              | 42                                             | 176                                                           | —                                                                                                   |
| —                                                                                                    | —                                                                              | —                        | 1                                | —                                              | 19                                                            | —                                                                                                   |
| 14                                                                                                   | – 22                                                                           | 13                       | 69                               | – 39                                           | 2 096                                                         | —                                                                                                   |
| —                                                                                                    | 21                                                                             | – 20                     | —                                | 12                                             | 361                                                           | —                                                                                                   |
| <b>22</b>                                                                                            | <b>439</b>                                                                     | <b>– 91</b>              | <b>77</b>                        | <b>20</b>                                      | <b>6 831</b>                                                  | <b>7</b>                                                                                            |
| – 3                                                                                                  | —                                                                              | —                        | —                                | —                                              | 152                                                           | – 1                                                                                                 |
| —                                                                                                    | —                                                                              | —                        | 4                                | —                                              | 25                                                            | —                                                                                                   |
| <b>19</b>                                                                                            | <b>439</b>                                                                     | <b>– 92</b>              | <b>89</b>                        | <b>9</b>                                       | <b>7 314</b>                                                  | <b>– 14</b>                                                                                         |

| Netto-Verluste<br>(-Gewinne), in der<br>Konzern-Gewinn-<br>und Verlust-<br>rechnung erfasst<br>Mio € | Netto-Verluste<br>(-Gewinne),<br>direkt im<br>Eigenkapital<br>erfasst<br>Mio € | Wertminderungen<br>Mio € | Währungs-<br>änderungen<br>Mio € | Veränderungen<br>Konsolidierungskreis<br>Mio € | Buchwert<br>(Zeitwert)<br>Stand<br>31. Dezember 2010<br>Mio € | Netto-Verluste<br>(-Gewinne) für zum<br>Bilanzstichtag<br>gehaltene Finanz-<br>instrumente<br>Mio € |
|------------------------------------------------------------------------------------------------------|--------------------------------------------------------------------------------|--------------------------|----------------------------------|------------------------------------------------|---------------------------------------------------------------|-----------------------------------------------------------------------------------------------------|
|                                                                                                      |                                                                                |                          |                                  |                                                |                                                               |                                                                                                     |
|                                                                                                      |                                                                                |                          |                                  |                                                |                                                               |                                                                                                     |
| 235                                                                                                  | 1                                                                              | —                        | 253                              | —                                              | 4 126                                                         | —                                                                                                   |
| <b>26</b>                                                                                            | <b>—</b>                                                                       | <b>—</b>                 | <b>16</b>                        | <b>—</b>                                       | <b>462</b>                                                    | <b>—</b>                                                                                            |
| – 3                                                                                                  | —                                                                              | —                        | —                                | —                                              | 152                                                           | – 1                                                                                                 |
| —                                                                                                    | <b>16</b>                                                                      | —                        | —                                | —                                              | 77                                                            | —                                                                                                   |
| —                                                                                                    | —                                                                              | —                        | 4                                | —                                              | 25                                                            | —                                                                                                   |
| <b>258</b>                                                                                           | <b>17</b>                                                                      | <b>—</b>                 | <b>273</b>                       | <b>—</b>                                       | <b>4 842</b>                                                  | <b>– 1</b>                                                                                          |



Im Geschäftsjahr 2010 hat der Allianz Konzern bestimmte Industriefinanzierungen von Level 3 in Level 2 umgegliedert, weil die Bewertungsmethoden dieser Finanzinstrumente modifiziert wurden und nicht länger auf nicht beobachtbaren Bewertungsparametern basieren.

### Umklassifizierung von Finanzaktiva

Im Januar 2009 wurden bestimmte auf USD lautende CDOs mit einem Zeitwert von 1,1 Mrd € (Nominalwert in Höhe von 2,2 Mrd €) von der Dresdner Bank einbehalten. Im Anschluss an die Entkonsolidierung der Dresdner Bank wurden am 31. Januar 2009 die CDOs von den Handelsaktiva gemäß IAS 39 zu den Forderungen an Kreditinstitute und Kunden umklassifiziert. Der Zeitwert von 1,1 Mrd € wurde als neuer Buchwert der CDOs am Umbuchungstichtag übernommen. Die erwarteten erzielbaren Cashflows am Umbuchungstichtag von 1,8 Mrd € ergeben einen Effektivzinssatz von ca. 7%.

Mitte 2009 wurden die CDOs auf eine Tochtergesellschaft, deren funktionale Währung der USD ist, übertragen. Der Buchwert der CDOs am 31. Dezember 2009 betrug 863 Mio € und der Zeitwert 856 Mio €. Am 31. Dezember 2010 betrug der Buchwert 808 Mio € und der Zeitwert 810 Mio €. Im Geschäftsjahr 2010 beruht die Änderung des Buchwerts und des Zeitwerts überwiegend auf erhaltenen Zahlungen und dem Anstieg des USD. Die Wechselkurseffekte wurden direkt im Eigenkapital erfasst. Der Nettogewinn aus den CDOs war nicht signifikant.

### Fälligkeiten der Finanzpassiva

Die Anforderungen an die Offenlegung des Risikos gemäß IFRS 7 in Bezug auf das Liquiditätsrisiko werden im Risikobericht innerhalb des Konzernlageberichts dargestellt. Der Risikobericht ist integraler Bestandteil des geprüften Konzernanhangs.

### Tabellarischer Überblick über vertragliche Verpflichtungen

Die Tabelle stellt die vertraglichen Verpflichtungen des Allianz Konzerns zum 31. Dezember 2010 dar. Vertragliche Verpflichtungen umfassen keine Eventualschulden oder Verpflichtungen. Es werden nur Transaktionen mit Parteien außerhalb des Allianz Konzerns berücksichtigt.

Die Tabelle enthält nur Verbindlichkeiten, die feste oder bestimmbare Beträge darstellen. Die Tabelle umfasst keine Zinsen variabel verzinslicher langfristiger Schuldscheine und Zinsen von Geldmarktpapieren, da die vertraglichen Zinssätze für eine variable Verzinsung nicht fixiert oder bestimmbar sind. Der Betrag und der Zeitpunkt von Zinsen von Geldmarktpapieren sind nicht fixiert und bestimmbar, weil diese Instrumente täglich fällig sind. Für weitere Informationen siehe Anmerkungen 23 und 24 des Konzernabschlusses.

Zum 31. Dezember 2010 betrugen die Ertragsteuerverpflichtungen 1 661 Mio €. Der Allianz Konzern erwartet, dass davon 1 316 Mio € innerhalb der nächsten zwölf Monate nach dem Bilanzstichtag gezahlt werden. Für den verbleibenden Betrag von 345 Mio € ist eine Schätzung für den Zeitpunkt der Auszahlung nicht vernünftig möglich. Die Ertragsteuerverpflichtungen sind nicht in untenstehender Tabelle enthalten.

|                                                                                                     | Zahlungen nach Fälligkeiten zum 31. Dezember 2010 |                                   |                              |                |
|-----------------------------------------------------------------------------------------------------|---------------------------------------------------|-----------------------------------|------------------------------|----------------|
|                                                                                                     | Fällig in 2011<br>Mio €                           | Fällig in<br>2012 – 2015<br>Mio € | Fällig nach<br>2015<br>Mio € | Summe<br>Mio € |
| <b>Finanzpassiva</b>                                                                                |                                                   |                                   |                              |                |
| Erfolgswirksam zum Zeitwert bewertete Finanzpassiva                                                 |                                                   | siehe Anmerkung 44                |                              |                |
| Verbindlichkeiten gegenüber Kreditinstituten und Kunden <sup>1</sup>                                | 14 096                                            | 4 409                             | 2 650                        | 21 155         |
| Derivative Finanzinstrumente und feste Verpflichtungen,<br>enthalten in Andere Verbindlichkeiten    |                                                   | siehe Anmerkung 44                |                              |                |
| Verbindlichkeiten für kündbare Eigenkapitalinstrumente                                              | 3 111                                             | —                                 | —                            | 3 111          |
| Verbriefte Verbindlichkeiten, Genussrechtskapital und nachrangige<br>Verbindlichkeiten <sup>1</sup> | 1 874                                             | 2 815                             | 12 538                       | 17 227         |
| <b>Verbindlichkeiten aus dem Versicherungsgeschäft</b>                                              |                                                   |                                   |                              |                |
| Künftige Versicherungsleistungen <sup>2</sup>                                                       | 41 707                                            | 149 948                           | 857 378                      | 1 049 033      |
| Rückstellungen für noch nicht abgewinkelte Versicherungsfälle                                       | 16 991                                            | 22 216                            | 18 302                       | 57 509         |
| <b>Andere</b>                                                                                       |                                                   |                                   |                              |                |
| Verpflichtungen aus operativen Leasinggeschäften <sup>3</sup>                                       | 250                                               | 871                               | 1 141                        | 2 262          |
| Kaufverpflichtungen <sup>4</sup>                                                                    | 261                                               | 570                               | 171                          | 1 002          |

<sup>1</sup> Aus Wesentlichkeitsgründen wurde der Buchwert in die verschiedenen Fälligkeiten unterteilt.

<sup>2</sup> Beinhaltet Investmentverträge mit Versicherungsnehmern und Finanzpassiva aus fondsgebundenen Verträgen.

<sup>3</sup> Der Betrag von 2 262 Mio € enthält 50 Mio € aufgrund von Untervermietungen, die Zahlungseingänge für den Allianz Konzern darstellen.

<sup>4</sup> Kaufverpflichtungen enthalten nur Transaktionen in Bezug auf Güter und Dienstleistungen; Kaufverpflichtungen für Finanzinstrumente sind nicht enthalten.

## Künftige Versicherungsleistungen

Die Rückstellungen von Versicherungs- und Investmentverträgen in Höhe von 1 049 033 Mio €, die in der Tabelle dargestellt sind, umfassen Verträge, bei denen der Zeitpunkt und der Betrag der Zahlungen als fest und bestimmbar betrachtet werden, sowie Verträge, die keinen spezifischen Fälligkeitstermin haben und die zu einer Zahlung an den Vertragsinhaber in Abhängigkeit der Sterbe- und der Morbiditätswahrscheinlichkeit und bei Eintreten von Rückkauf, Erlöschen oder Fälligkeit führen können. Darüber hinaus werden die Beträge in der Tabelle undiskontiert gezeigt und übersteigen daher die Rückstellungen für Versicherungs- und Investmentverträge, wie sie in der Konzernbilanz dargestellt werden.

Für Verträge, die keine festen oder bestimmbaren Zahlungen haben, hat der Allianz Konzern Annahmen getroffen, um die undiskontierten Zahlungsströme der vertraglichen Versicherungsleistungen zu schätzen, einschließlich Annahmen hinsichtlich Sterbe- und Morbiditätswahrscheinlichkeiten, Zinssätzen, Überschussbeteiligungen von Versicherungsnehmern und künftigen Stornowahrscheinlichkeiten. Diese Annahmen sind aktuelle beste Schätzungen und können von den ursprünglichen Schätzungen abweichen, die für die Ermittlung der Rückstellungen für Versicherungs- und Investmentverträge aufgrund des „Lock-in“ der Annahmen zum Ausgabzeitpunkt des Vertrags, wie von den Bilanzierungsgrundsätzen des Allianz Konzerns gefordert, verwendet wurden. Der Diskontierungseffekt sowie die

Unterschiede zwischen „Locked-in“-Annahmen und bester Schätzung beträgt 497 787 Mio €. Für weitere Informationen siehe Anmerkung 2 des Konzernabschlusses. Aufgrund der Unsicherheiten der verwendeten Annahmen können die dargestellten Beträge wesentlich von den tatsächlichen Zahlungen in künftigen Perioden abweichen. Außerdem enthalten diese Beträge keine zu erwartenden Prämien und Gebühren (158 255 Mio €), Aufwendungen an andere Parteien außer den Versicherungsnehmern, wie z. B. Versicherungsvermittlern, sowie keine Verwaltungsaufwendungen. Erwartete Kapitalerträge sind ebenfalls nicht enthalten. Zusätzlich werden diese Beträge nach Rückversicherung dargestellt, wie sie als Ergebnis dieser Zahlungsströme erwartet werden. Für weitere Informationen zu den Rückstellungen aus Versicherungs- und Investmentverträgen siehe Anmerkung 20 des Konzernabschlusses.

## Ausbuchung von finanziellen Vermögenswerten

Der Allianz Konzern tritt in Repurchase-Agreement-Transaktionen ein, bei denen zuvor erfasste finanzielle Vermögenswerte, hauptsächlich jederzeit veräußerbare festverzinsliche Wertpapiere, übertragen, aber alle wesentlichen mit diesen Vermögenswerten verbundenen Risiken und Chancen zurückbehalten werden. Zum 31. Dezember 2010 betrug der Buchwert dieser Vermögenswerte 868 (2009: 967) Mio € und der Buchwert der dazugehörigen Verbindlichkeiten 875 (2009: 1 004) Mio €.

## 46 Beziehungen zu nahestehenden Unternehmen und Personen

Angaben über die Bezüge der Organmitglieder sowie Geschäftsvorfälle mit diesen sind im Vergütungsbericht ab Seite 35 veröffentlicht.

Geschäftsvorfälle zwischen der Allianz SE und deren Tochterunternehmen, die als nahestehende Unternehmen anzusehen sind, wurden durch die Konsolidierung eliminiert und werden im Anhang nicht erläutert.

Geschäftsbeziehungen, die mit assoziierten Unternehmen bestehen, werden wie Geschäfte mit Dritten auf der Basis von Marktpreisen behandelt. Darüber hinaus sind diese insgesamt von untergeordneter Bedeutung.

## 47 Eventualverbindlichkeiten, Verpflichtungen, Bürgschaften, verpfändete Vermögenswerte und Sicherheiten

### Eventualverbindlichkeiten

#### Rechtsstreitigkeiten

Gesellschaften des Allianz Konzerns sind im Rahmen des normalen Geschäftsbetriebs unter anderem in ihrer Eigenschaft als Versicherungs-, Bank- und Vermögensverwaltungsgesellschaften, Arbeitgeber, Investoren und Steuerzahler in gerichtliche und aufsichtsrechtliche Verfahren sowie in Schiedsverfahren in Deutschland und anderen Ländern, einschließlich der Vereinigten Staaten von Amerika, involviert. Der Ausgang der schwebenden oder drohenden Verfahren ist nicht bestimmbar oder vorhersagbar. Unter Beachtung der für diese Verfahren gebildeten Rückstellungen ist das Management der Ansicht, dass keines dieser Verfahren, einschließlich der nachfolgend aufgeführten, wesentliche Auswirkungen auf die finanzielle Lage und das operative Ergebnis des Allianz Konzerns hat.

Am 24. Mai 2002 hat die Hauptversammlung der Dresdner Bank AG die Übertragung der Aktien ihrer Minderheitsaktionäre auf die Allianz als Hauptaktionär gegen Gewährung einer Barabfindung in Höhe von 51,50 € je Aktie beschlossen (sogenanntes Squeeze-out). Die Höhe der Barabfindung wurde von der Allianz auf der Basis eines Wirtschaftsprüfergutachtens festgelegt und ihre Angemessenheit von einem gerichtlich

bestellten Prüfer bestätigt. Einige der ausgeschiedenen Minderheitsaktionäre haben in einem gerichtlichen Spruchverfahren vor dem Landgericht Frankfurt beantragt, die angemessene Barabfindung zu bestimmen. Das Management ist der Ansicht, dass die Höhe der Barabfindung angemessen ist und der Antrag der Minderheitsaktionäre keinen Erfolg haben wird. Sollte das Gericht den Betrag der Barabfindung höher festsetzen, wirkt sich dies auf alle rund 16 Mio an die Allianz übertragenen Aktien aus.

Gegen Allianz Global Investors of America L.P. und einige ihrer Tochtergesellschaften sind Schadenersatzklagen von Privatinvestoren und andere Verfahren im Zusammenhang mit Vorwürfen in Bezug auf „Market Timing“ in der Fondsbranche anhängig. Diese Klagen wurden zusammengefasst und in Form eines Multi-District-Litigation-Verfahrens an den US District Court for the District of Maryland verwiesen. Der Ausgang dieser Verfahren kann noch nicht vorhergesagt werden. Allerdings erwartet das Management derzeit keine wesentlichen negativen finanziellen Auswirkungen auf den Allianz Konzern.

Pacific Investment Management Company LLC (PIMCO), eine Tochtergesellschaft der Allianz Global Investors of America L.P., und PIMCO Fonds waren Beklagte einer Sammelklage, in welcher geltend gemacht wurde, dass die Kläger jeweils Terminkontrakte auf 10-Jahres-US-Schatzanweisungen gekauft und verkauft haben und dadurch Schaden erlitten hätten, dass PIMCO einen Engpass dieser Wertpapiere durch das gleichzeitige Halten von Kassabeständen und Terminpositionen für Rechnung ihrer Kunden unter Verstoß gegen die Regelungen des bundesstaatlichen Commodity Exchange Act betreffend Marktmanipulation herbeigeführt habe. Im Juli 2007 wurde die Klage als Sammelklage für all diejenigen Personen zugelassen, die Terminkontrakte auf die entsprechenden Wertpapiere zum Ausgleich nicht gedeckter Positionen zwischen dem 9. Mai 2005 und dem 30. Juni 2005 gekauft haben. Das Management ist der Ansicht, dass alle entsprechenden Transaktionen im besten Interesse der Kunden richtig ausgeführt wurden. Die Parteien haben sich auf einen Vergleich geeinigt, der alle entsprechenden Forderungen gegen PIMCO und PIMCO Fonds erledigt. Im Rahmen der Beilegung des Verfahrens haben PIMCO und PIMCO Fonds jegliches Fehlverhalten bestritten. Am 26. Januar 2011 hat das Gericht dem Vergleich im Grundsatz zugestimmt.

Das U.S. Department of Justice (DOJ) führt eine Untersuchung darüber durch, ob Mitarbeiter von Fireman's Fund Insurance Company (FFIC), einer US-Tochtergesellschaft der Allianz SE, im Zusammenhang mit FFIC's Geschäft als Anbieter bundesstaatlicher Agrarversicherungen in den Jahren 1997 bis 2003 in Verstöße (zivil- oder strafrechtlicher Natur) gegen den False Claims Act involviert waren. Die Untersuchung betrifft die Frage, ob Mitarbeiter von FFIC mittels verschiedener Vorgehensweisen, unter anderem Rückdatierungen und unangemessene Vergabe des „new producer Status“, falsche Ansprüche bei der Regierung eingereicht haben. Zwei ehemalige Mitarbeiter aus dem Schadenbereich von FFIC und ein Sachverständiger haben sich schuldig bekannt, Landwirten in betrügerischer Weise bei der Geltendmachung von Ansprüchen behilflich gewesen zu sein. Das DOJ und FFIC verhandeln über eine endgültige Lösung dieser Angelegenheit. Der Ausgang des Verfahrens kann derzeit nicht vorhergesagt werden.

Drei zur Fireman's Fund Gruppe in den Vereinigten Staaten von Amerika gehörende Gesellschaften des Allianz Konzerns sind unter einer Gruppe von Beklagten einer Sammelklage, die am 1. August 2005 beim United States District Court of New Jersey eingereicht wurde. Die Klage steht im Zusammenhang mit Vorwürfen in Bezug auf Gewinnbeteiligungszahlungen (sogenannte Contingent Commissions) in der Versicherungsbranche. Die Klage wurde noch nicht als Sammelklage anerkannt. Das Gericht hat die auf Bundesrecht beruhenden Klagegründe rechtskräftig und die auf einzelstaatlichem Recht beruhenden Klagegründe nicht rechtskräftig abgewiesen. Das Berufungsgericht hat die Klageabweisung im Wesentlichen bestätigt und im Übrigen an das erstinstanzliche Gericht zurückverwiesen. Es ist derzeit nicht möglich, den Ausgang des Verfahrens vorherzusagen.

Allianz Life Insurance Company of North America (Allianz Life) ist im Zusammenhang mit der Vermarktung und dem Verkauf nach bestimmter Zeit fällig werdender Rentenprodukte als Beklagte in mutmaßlichen Sammelklagen, vorwiegend in Minnesota und Kalifornien, benannt. Drei dieser Klagen sind momentan als Sammelklagen in Kalifornien zugelassen. Die Vorwürfe beziehen sich im Wesentlichen auf irreführende Handelspraktiken und irreführende Werbung im Zusammenhang mit dem Verkauf dieser Produkte. In einer dieser Klagen haben sich die Parteien auf einen Vergleich geeinigt, dem das Gericht im Grundsatz zugestimmt

hat. Die anderen Verfahren sind noch nicht in einem Stadium, in welchem das Ergebnis oder das Risiko bestimmbar ist. In einer anderen Sammelklage in Minnesota, die ähnliche Vorwürfe zum Gegenstand hat wie die in Kalifornien anhängigen Klagen und außerdem eine Verletzung des Minnesota Consumer Fraud and Deceptive and Unlawful Trade Practices Act behauptete, kam es zum Schwurgerichtsverfahren. Basierend auf einem Juryurteil vom Oktober 2009 hat das Gericht im Januar 2010 die Klage rechtskräftig abgewiesen.

### Sonstige Eventualverbindlichkeiten

Gemäß § 5 Abs. 10 des Gesellschaftsvertrages des Einlagensicherungsfonds hat sich die Allianz SE verpflichtet, den Bundesverband deutscher Banken e.V. von etwaigen Verlusten freizustellen, die durch Maßnahmen zugunsten der Oldenburgischen Landesbank AG (OLB), der Münsterländischen Bank Thie & Co. KG und des Bankhauses W. Fortmann & Söhne KG entstehen.

Mit dem Wirksamwerden der Veräußerung der Dresdner Bank am 12. Januar 2009 hat der Allianz Konzern die im Jahr 2001 abgegebene Freistellungserklärung zu Gunsten des Bundesverbandes deutscher Banken e.V. im Hinblick auf die Dresdner Bank widerrufen. Damit gilt die Freistellung nur noch für Hilfsmaßnahmen, die auf Tatsachen beruhen, die zum Zeitpunkt des Widerrufs bereits bestanden.

Die Allianz und die HT1 Funding GmbH haben im Juli 2006 eine bedingte Zahlungsvereinbarung unterzeichnet, welche die Allianz unter bestimmten Voraussetzungen verpflichtet, Zahlungen an die HT1 Funding GmbH zu leisten. HT1 Funding GmbH hat 1 000 Mio € „Tier 1 Capital Securities“ mit einer jährlicher Verzinsung von 6,352% (ab 30. Juni 2017 12-Monats-EURIBOR plus Aufschlag von 2,0% p.a.) emittiert. Die entsprechenden Wertpapiere haben keinen Fälligkeitstermin und die Inhaber haben kein Kündigungsrecht. Der Emittent hat ab 30. Juni 2017 ein ordentliches Kündigungsrecht. Eine mögliche Zahlungsverpflichtung für das Geschäftsjahr 2011 und die Zukunft kann nicht vorhergesagt werden. Allerdings erwartet das Management derzeit keinen wesentlichen negativen finanziellen Effekt für den Allianz Konzern.

## Verpflichtungen

### Darlehensverpflichtungen

Der Allianz Konzern geht verschiedene Darlehensverpflichtungen ein, um dem Finanzierungsbedarf seiner Kunden zu entsprechen. Die Zahlen in der folgenden Tabelle reflektieren die Beträge, die im Falle der vollständigen Ausnutzung der Fazilitäten durch den Kunden und eines darauf folgenden Zahlungsverzugs unter der Voraussetzung, dass keine Sicherheiten vorhanden sind, abgeschrieben werden müssten. Da der Großteil dieser Verpflichtungen möglicherweise ausläuft, ohne in Anspruch genommen zu werden, spiegeln die Zahlen eventuell nicht die aus diesen Verpflichtungen tatsächlich erwachsenden Liquiditätserfordernisse wider.

| Stand 31. Dezember                 | 2010<br>Mio € | 2009<br>Mio € |
|------------------------------------|---------------|---------------|
| Buchkredite                        | 598           | 620           |
| Stand-by-Fazilitäten               | 28            | 26            |
| Avalkredite                        | 89            | 101           |
| Hypothekendarlehen/Kommunalkredite | 59            | 68            |
| <b>Summe</b>                       | <b>774</b>    | <b>815</b>    |

### Verpflichtungen aus Leasinggeschäften

Der Allianz Konzern nutzt an vielen Standorten geleaste Büroräume auf der Basis verschiedener langfristiger Operating-Lease-Verträge und hat verschiedene Leasingverträge über die langfristige Nutzung von Datenverarbeitungsanlagen und anderen Büroeinrichtungen abgeschlossen.

Am 31. Dezember 2010 hatten die künftigen Mindest-Leasingraten für nicht kündbare Operating-Lease-Verträge folgenden Umfang:

|                             | 2010<br>Mio € |
|-----------------------------|---------------|
| 2011                        | 250           |
| 2012                        | 248           |
| 2013                        | 223           |
| 2014                        | 200           |
| 2015                        | 200           |
| Danach                      | 1 141         |
| <b>Zwischensumme</b>        | <b>2 262</b>  |
| Abzüglich Untervermietungen | – 50          |
| <b>Summe</b>                | <b>2 212</b>  |

Der Mietaufwand im Berichtsjahr 2010 betrug nach Berücksichtigung von Erträgen aus Untervermietungen in Höhe von 12 Mio € insgesamt 239 (2009: 271; 2008: 253) Mio €.

### Zahlungsverpflichtungen

Zum 31. Dezember 2010 hatte der Allianz Konzern Verpflichtungen aus noch nicht ausgezahlten Darlehens-tranchen und Grundschuldforderungen in Höhe von 3 647 (2009: 3 937) Mio € sowie Zahlungsverpflichtungen gegenüber Private-Equity-Fonds in Höhe von 2 517 (2009: 2 556) Mio €. Die Verpflichtungen zum Erwerb fremd- und eigengenutzten Grundbesitzes bzw. anderer Sachanlagen beliefen sich zum 31. Dezember 2010 auf 310 (2009: 393) Mio € bzw. 16 (2009: —) Mio €.

Darüber hinaus bestanden am 31. Dezember 2010 weitere Zahlungsverpflichtungen aus Instandhaltungsverträgen, Grundbesitzerschließung, Sponsoringverträgen und anderen Verpflichtungen in Höhe von 252 (2009: 193) Mio €.

### Sonstige Verpflichtungen

Es bestehen folgende weitere Verpflichtungen, die der Allianz Konzern eingegangen ist:

Durch die §§ 124 ff. Versicherungsaufsichtsgesetz (VAG) wurde ein gesetzlicher Sicherungsfonds für Lebensversicherer in Deutschland eingeführt. Jedes Mitglied des Sicherungsfonds ist verpflichtet, an den Sicherungsfonds jährliche Beiträge sowie in bestimmten Fällen Sonderbeiträge zu leisten. Der genaue Betrag der Zahlungsverpflichtungen für jedes Mitglied wird durch die Sicherungsfonds-Finanzierungs-Verordnung (Leben) (SichLVFinV) festgelegt. Zum 31. Dezember 2010 beliefen sich die künftigen Verpflichtungen der Allianz Lebensversicherungs-AG und ihrer Tochtergesellschaften gegenüber dem Sicherungsfonds auf jährliche Beiträge von 0,1 (2009: 2) Mio € und die Verpflichtungen für Sonderbeiträge auf 101 (2009: 97) Mio €.

Im Dezember 2002 wurde mit der Protektor Lebensversicherungs-AG (Protektor) ein Lebensversicherungsunternehmen gegründet, dessen Aufgabe der Schutz aller Versicherungsnehmer deutscher Lebensversicherungsunternehmen ist. Die Allianz Lebensversicherungs-AG und einige ihrer Tochtergesellschaften sind verpflichtet, entweder dem Sicherungsfonds oder alternativ der Protektor zusätzliche finanzielle Mittel zur Verfügung zu stellen, sofern die Mittel des Sicherungsfonds bei einem Sanierungsfall nicht ausreichen. Die Verpflichtung beträgt 1 % der Summe der versicherungstechnischen

Netto-Rückstellungen abzüglich der zu diesem Zeitpunkt bereits an den Sicherungsfonds geleisteten Beiträge. Zum 31. Dezember 2010 und unter Einschluss der obengenannten Einzahlungsverpflichtungen aus den Beitragszahlungen an den Sicherungsfonds beträgt die Gesamtverpflichtung der Allianz Lebensversicherungs-AG und ihrer Tochtergesellschaften gegenüber dem Sicherungsfonds und der Protektor 905 (2009: 879) Mio €.

Gemäß dem Einlagensicherungs- und Anlegerentschädigungsgesetz (EAEG) sind alle Kreditinstitute und Kapitalanlagegesellschaften mit einer Geschäftserlaubnis in Deutschland gesetzlich dazu verpflichtet, einer Entschädigungseinrichtung anzugehören. Allianz Global Investors Advisory GmbH, Allianz Global Investors Kapitalanlagegesellschaft mbH und Allianz Global Investors Europe GmbH sind gegenwärtig Mitglieder der EdW (Entschädigungseinrichtung der Wertpapierhandelsunternehmen, Berlin). Der Jahresbeitrag richtet sich für jedes Mitglied nach dessen Geschäftsumfang. Darüber hinaus kann die EdW Sonderbeiträge von den Kapitalanlagegesellschaften erheben, sofern die der EdW zur Verfügung stehenden Mittel nicht ausreichen, um berechnete Ansprüche zu bedienen. Sonderbeiträge bemessen sich anhand des Beitrags des abgelaufenen Jahres. Jährliche Beiträge und Sonderbeiträge dürfen einen bestimmten Prozentsatz vom Jahresüberschuss des jeweiligen Mitglieds nicht übersteigen. Im Geschäftsjahr 2010 entrichteten die AGI Gesellschaften einen Gesamtbetrag an jährlichen Beiträgen von ungefähr 1 Mio €. Im Hinblick auf die Insolvenz der Phoenix Kapitaldienst GmbH hat die Bundesanstalt für Finanzdienstleistungsaufsicht (BaFin) festgelegt, dass bestimmte Entschädigungsansprüche von Investoren im Rahmen der anwendbaren Entschädigungsregelungen abgedeckt sind; vor diesem Hintergrund wurden in 2010 Sonderbeiträge von den Mitgliedern erhoben. Den AGI Gesellschaften wurden im Geschäftsjahr 2010 Sonderbeiträge in Höhe von 3 Mio € in Rechnung gestellt. In diesem Zusammenhang haben die AGI Gesellschaften auch angemessene Rückstellungen für Verpflichtungen aus zukünftig zu erwartenden Sonderbeiträgen gebildet.

## Bürgschaften

In nachfolgender Tabelle sind die vom Allianz Konzern gewährten Bürgschaften nach Restlaufzeiten sowie die erhaltenen Sicherheiten dargestellt:

|                  | Akkreditive<br>und sonstige<br>Bürgschaften<br>Mio € | Marktwert-<br>garantien<br>Mio € | Entschä-<br>digungs-<br>verträge<br>Mio € |
|------------------|------------------------------------------------------|----------------------------------|-------------------------------------------|
| <b>2010</b>      |                                                      |                                  |                                           |
| Bis 1 Jahr       | 424                                                  | 134                              | 7                                         |
| 1 bis 3 Jahre    | 16                                                   | 432                              | 30                                        |
| 3 bis 5 Jahre    | 22                                                   | 652                              | —                                         |
| Mehr als 5 Jahre | 14                                                   | 852                              | 17                                        |
| <b>Summe</b>     | <b>476</b>                                           | <b>2 070</b>                     | <b>54</b>                                 |
| Sicherheiten     | 31                                                   | —                                | —                                         |
| <b>2009</b>      |                                                      |                                  |                                           |
| Bis 1 Jahr       | 383                                                  | 332                              | 23                                        |
| 1 bis 3 Jahre    | 34                                                   | 207                              | 4                                         |
| 3 bis 5 Jahre    | 14                                                   | 531                              | —                                         |
| Mehr als 5 Jahre | 121                                                  | 1 598                            | 47                                        |
| <b>Summe</b>     | <b>552</b>                                           | <b>2 668</b>                     | <b>74</b>                                 |
| Sicherheiten     | 25                                                   | —                                | 4                                         |

Fast alle Empfänger von Akkreditiven und Entschädigungsverträgen sind ohne externes Kreditranking.

## Akkreditive und sonstige Bürgschaften

Die meisten Akkreditive und sonstigen Bürgschaften des Allianz Konzerns werden den Kunden im Rahmen des Bankgeschäfts des Allianz Konzerns gegen Provisions- und Dienstleistungserträge ausgestellt. Die Höhe der Provisions- und Dienstleistungserträge basiert im Allgemeinen auf Zinssätzen, die vom Nominalbetrag der Bürgschaften und von den mit den Bürgschaften verbundenen Kreditrisiken abgeleitet werden. Sobald eine Bürgschaft in Anspruch genommen wurde, wird jeglicher vom Allianz Konzern an Dritte ausgezahlte Betrag als Forderung an Kunden behandelt und unterliegt daher prinzipiell der vom Kunden gemäß dem Vertrag verpfändeten Sicherheit.

## Marktwertgarantien

Marktwertgarantien sind Zusicherungen, die Kunden bei bestimmten Investmentfonds und Fondsverwaltungsvereinbarungen erteilt werden, in deren Rahmen der anfängliche Wert von Anlagen und/oder eine Mindestmarktwertentwicklung solcher Anlagen bis zu einer bestimmten Höhe garantiert werden. Diese Höhe ist in den betreffenden Vereinbarungen festgelegt. Die Erfüllungspflichtung bei einer Marktwertgarantie wird

ausgelöst, wenn der Marktwert solcher Anlagen die garantierten Vorgaben an bestimmten Terminen nicht erreicht.

Der Geschäftsbereich Asset Management stellt Marktwertgarantien im laufenden Geschäft im Zusammenhang mit Depots von Investmentgesellschaften und von ihm selbst verwalteten Investmentfonds aus. Die Höhe der Marktwertgarantien und die Fälligkeitstermine variieren aufgrund der für die einzelnen Depots von Investmentgesellschaften und Investmentfonds jeweils geltenden Vereinbarungen. Zum 31. Dezember 2010 belief sich der potenzielle Höchstbetrag der künftigen Zahlungen für Marktwertgarantien auf 799 (2009: 1 150) Mio €. Dies entspricht dem im Rahmen der jeweiligen Vereinbarungen garantierten Gesamtwert einschließlich der Verpflichtung, die bei Fälligkeit der Anlagen zu jenem Termin zahlbar gewesen wäre. Der Zeitwert der Depots von Investmentgesellschaften und der Investmentfonds in Bezug auf diese Garantien belief sich zum 31. Dezember 2010 auf 881 (2009: 1 248) Mio €.

Gesellschaften des Bankgeschäfts des Allianz Konzerns in Frankreich stellen im laufenden Geschäft in Verbindung mit den von Gesellschaften des Geschäftsbereichs Asset Management des Allianz Konzerns in Frankreich angebotenen Investmentfonds Marktwertgarantien und Garantien der Wertentwicklung bei Fälligkeit aus. Die Höhe der Marktwertgarantien und der Garantien der Wertentwicklung bei Fälligkeit sowie die Fälligkeitstermine variieren aufgrund der diesbezüglichen Vereinbarungen. In den meisten Fällen bietet ein Investmentfonds sowohl eine Marktwertgarantie als auch eine Garantie der Wertentwicklung bei Fälligkeit. Zusätzlich sind die Marktwertgarantien bei Fälligkeit im Allgemeinen an die Wertentwicklung eines Aktienindex oder einer Gruppe von Aktienindizes gebunden. Zum 31. Dezember 2010 belief sich der potenzielle Höchstbetrag der künftigen Zahlungen für Marktwertgarantien und Garantien der Wertentwicklung bei Fälligkeit auf 1 271 (2009: 1 518) Mio €. Dies entspricht dem gemäß den jeweiligen Vereinbarungen garantierten Gesamtwert. Der Zeitwert der Investmentfonds mit Bezug auf die Marktgarantien belief sich zum 31. Dezember 2010 auf annähernd 1 204 (2009: 1 425) Mio €. Derartige Fonds haben im Allgemeinen eine Laufzeit von fünf bis acht Jahren.

### Entschädigungsverträge

Entschädigungsverträge werden vom Allianz Konzern im Rahmen bestehender Service-, Miet- oder Akquisitionstransaktionen mit verschiedenen Gegenparteien abgeschlossen. Derartige Verträge können auch genutzt werden, um eine Gegenpartei für diverse Eventualverbindlichkeiten, beispielsweise die Änderung von Gesetzen oder Vorschriften sowie Ansprüche aus Rechtsstreitigkeiten, zu entschädigen.

Im Zusammenhang mit dem Verkauf verschiedener ehemaliger Private-Equity-Investments des Allianz Konzerns stellten bestimmte Konzernunternehmen den jeweiligen Käufern für den Fall des Eintretens bestimmter vertraglicher Gewährleistungsfälle Entschädigungen bereit. Die Bedingungen der Entschädigungsverträge decken die normale vertragliche Gewährleistung, Kosten in Bezug auf die Umwelt sowie jegliche potenziellen Steuerverbindlichkeiten ab, die dem Unternehmen entstanden, während es ein Konzernunternehmen war.

### Kreditderivate

Kreditderivate setzen sich zusammen aus Credit Default Swaps, die im Falle des Verzugs eines Schuldners eine Zahlung erfordern, sowie Total Return Swaps, bei denen die Wertentwicklung der Basiswerte garantiert ist. Die nominalen Kapitalbeträge und der Zeitwert der Positionen des Allianz Konzerns in Kreditderivaten zum 31. Dezember 2010 sind Anmerkung 44 zu entnehmen.



## Verpfändete Vermögenswerte und Sicherheiten

Der Buchwert der als Sicherheit verpfändeten Vermögenswerte lautet wie folgt:

| Stand 31. Dezember                                                       | 2010<br>Mio € | 2009<br>Mio € |
|--------------------------------------------------------------------------|---------------|---------------|
| <b>Vermögenswerte ohne Recht auf Weiterveräußerung oder -verpfändung</b> |               |               |
| Finanzanlagen                                                            | 810           | 987           |
| Forderungen an Kreditinstitute und Kunden                                | 2 278         | 2 845         |
| <b>Zwischensumme</b>                                                     | <b>3 088</b>  | <b>3 832</b>  |
| <b>Vermögenswerte mit Recht auf Weiterveräußerung oder -verpfändung</b>  |               |               |
| Erfolgswirksam zum Zeitwert bewertete Finanzaktiva                       | 613           | 887           |
| Finanzanlagen                                                            | 90            | 123           |
| <b>Zwischensumme</b>                                                     | <b>703</b>    | <b>1 110</b>  |
| <b>Summe</b>                                                             | <b>3 791</b>  | <b>4 842</b>  |

Zum 31. Dezember 2010 hat der Allianz Konzern Sicherheiten, bestehend aus Anleihen und Aktien, mit einem Zeitwert von 567 (2009: 660) Mio € erhalten, zu deren Verkauf oder erneuter Verpfändung der Allianz Konzern berechtigt ist. Zum 31. Dezember 2010 und 2009 hat der Allianz Konzern keine erhaltenen Sicherheiten verkauft oder erneut verpfändet.

Zum 31. Dezember 2010 hat der Allianz Konzern keine als Sicherheiten gestellte Wertpapiere in Anspruch genommen und bilanziert (2009: 21 Mio €).

## 48 Rückstellungen für Pensionen und ähnliche Verpflichtungen

Der Allianz Konzern unterhält sowohl leistungsorientierte Pensionspläne als auch Beitragszusagen für seine Mitarbeiter. Die Unternehmen des Allianz Konzerns erteilen ihren Mitarbeitern und in Deutschland auch Vertretern Pensionszusagen. In Deutschland sind dies überwiegend leistungsorientierte Pensionspläne.

Bei leistungsorientierten Pensionsplänen wird dem Begünstigten durch das Unternehmen oder über einen externen Versorgungsträger eine bestimmte Leistung zugesagt; im Gegensatz zu den Beitragszusagen sind die vom Unternehmen zu erbringenden Aufwendungen aus Leistungszusagen nicht im Vorhinein festgelegt.

### Leistungsorientierte Pensionspläne

An Rückstellungen für leistungsorientierte Pensionspläne werden folgende Beträge in der Konzernbilanz erfasst:

| Stand 31. Dezember                 | 2010<br>Mio € | 2009<br>Mio € |
|------------------------------------|---------------|---------------|
| <b>Bilanzwert 1.1.</b>             | <b>3 543</b>  | <b>3 611</b>  |
| Veränderungen Konsolidierungskreis | —             | 5             |
| Währungsänderungen                 | 2             | – 2           |
| Aufwand                            | 658           | 571           |
| Zahlungen                          | – 650         | – 642         |
| <b>Bilanzwert 31.12.</b>           | <b>3 553</b>  | <b>3 543</b>  |
| davon vorausbezahlter Aufwand      | – 372         | – 276         |
| davon Pensionsrückstellung         | 3 925         | 3 819         |

Im Folgenden werden die Veränderungen beim Verpflichtungsumfang und beim Zeitwert des Fondsvermögens sowie der Stand der Bilanzwerte für die verschiedenen leistungsorientierten Pensionspläne des Allianz Konzerns dargestellt.

|                                                                      | 2010<br>Mio € | 2009<br>Mio € |
|----------------------------------------------------------------------|---------------|---------------|
| <b>Veränderung des Verpflichtungsumfangs</b>                         |               |               |
| <b>Barwert der erdienten Pensionsansprüche 1.1.</b>                  | <b>13 727</b> | <b>12 247</b> |
| Laufender Dienstzeitaufwand                                          | 340           | 288           |
| Kalkulatorischer Zinsaufwand                                         | 693           | 695           |
| Mitarbeiterbeiträge                                                  | 72            | 68            |
| Kosten aus Planänderungen                                            | 2             | 2             |
| Versicherungsmathematische Gewinne (–) / Verluste (+)                | 835           | 956           |
| Währungsänderungen                                                   | 240           | 70            |
| Pensionszahlungen                                                    | – 593         | – 582         |
| Veränderungen Konsolidierungskreis                                   | 64            | 54            |
| Abgänge                                                              | – 43          | —             |
| Beendigung und Kürzungen von Plänen                                  | – 17          | – 71          |
| <b>Barwert der erdienten Pensionsansprüche 31.12.<sup>1</sup></b>    | <b>15 320</b> | <b>13 727</b> |
| <b>Veränderung im Zeitwert des Fondsvermögens</b>                    |               |               |
| <b>Zeitwert des Fondsvermögens 1.1.</b>                              | <b>8 913</b>  | <b>7 964</b>  |
| Erwarteter Vermögensertrag                                           | 454           | 440           |
| Versicherungsmathematische Gewinne (+) / Verluste (–)                | 53            | 283           |
| Arbeitgeberbeiträge                                                  | 392           | 385           |
| Mitarbeiterbeiträge                                                  | 72            | 68            |
| Währungsänderungen                                                   | 229           | 60            |
| Pensionszahlungen <sup>2</sup>                                       | – 336         | – 327         |
| Veränderungen Konsolidierungskreis                                   | 61            | 93            |
| Abgänge                                                              | – 48          | —             |
| Effekt aufgrund von Plankürzungen                                    | – 10          | – 53          |
| <b>Zeitwert des Fondsvermögens 31.12.</b>                            | <b>9 780</b>  | <b>8 913</b>  |
| <b>Finanzierungsstatus 31.12.</b>                                    | <b>5 540</b>  | <b>4 814</b>  |
| Nicht getilgte versicherungsmathematische Gewinne (+) / Verluste (–) | – 2 058       | – 1 375       |
| Nicht getilgte Kosten aus Planänderungen                             | 5             | 3             |
| Effekt aufgrund der Begrenzung des Vermögenswertes                   | 66            | 101           |
| <b>Bilanzwert 31.12.</b>                                             | <b>3 553</b>  | <b>3 543</b>  |

1 Zum 31. Dezember 2010 waren 5 329 (2009: 4 707) Mio € vom Barwert der erdienten Pensionsansprüche nicht durch Vermögenswerte gedeckt, während 9 991 (2009: 9 020) Mio € ganz oder teilweise durch Vermögenswerte gedeckt waren.

2 Zusätzlich zahlte der Allianz Konzern direkt 257 (2009: 255) Mio € an die Begünstigten.

Der Anstieg der versicherungsmathematischen Verluste beruht im Wesentlichen auf dem Rückgang des Rechnungszinses. Dies ist zudem die Hauptursache für das Überschreiten des 10%-Korridors zum 31. Dezember 2010 und führt zu einer erfolgswirksamen Amortisation eines Teils der noch nicht getilgten versicherungsmathematischen Verluste in der Gewinn- und Verlustrechnung in 2011.

Vom Barwert der erdienten Pensionsansprüche entfielen zum 31. Dezember 2010 insgesamt 11 (2009: 6) Mio € auf Gesundheitsfürsorgeleistungen bzw. 11 (2009: 7) Mio € auf die Rückstellungen für Gesundheitsfürsorgeleistungen.

Der für leistungsorientierte Pensionspläne in der Konzern-Gewinn- und Verlustrechnung erfasste Netto-Pensionsaufwand setzt sich wie folgt zusammen:

|                                                                   | 2010<br>Mio € | 2009<br>Mio € | 2008<br>Mio € |
|-------------------------------------------------------------------|---------------|---------------|---------------|
| Laufender Dienstzeitaufwand                                       | 340           | 288           | 321           |
| Kalkulatorischer Zinsaufwand                                      | 693           | 695           | 672           |
| Erwarteter Vermögensertrag                                        | - 454         | - 440         | - 448         |
| Tilgung der Kosten aus Planänderungen                             | 3             | - 8           | 38            |
| Tilgung der versicherungsmathematischen Gewinne (-)/ Verluste (+) | 124           | - 55          | 6             |
| Auswirkungen aufgrund der Begrenzung des Vermögenswertes          | - 48          | 99            | —             |
| Auswirkungen von Plankürzungen bzw. Abgeltungen                   | —             | - 8           | —             |
| <b>Netto-Pensionsaufwand</b>                                      | <b>658</b>    | <b>571</b>    | <b>589</b>    |

Vom dargestellten Netto-Pensionsaufwand entfielen im Geschäftsjahr 2010 auf Gesundheitsfürsorgeleistungen 1 (2009: - 46; 2008: - 7) Mio €.

Die tatsächlichen Vermögenserträge aus dem Fondsvermögen beliefen sich im Geschäftsjahr 2010 auf 507 (2009: 723; 2008: - 333) Mio €.

Die wichtigsten Kennzahlen für leistungsorientierte Pensionspläne stellen sich wie folgt dar:

|                                                                                                      | 2010<br>Mio € | 2009<br>Mio € | 2008<br>Mio € | 2007<br>Mio € | 2006<br>Mio € |
|------------------------------------------------------------------------------------------------------|---------------|---------------|---------------|---------------|---------------|
| Barwert der erdienten Pensionsansprüche                                                              | 15 320        | 13 727        | 12 247        | 16 142        | 17 280        |
| Zeitwert des Fondsvermögens                                                                          | 9 780         | 8 913         | 7 964         | 10 931        | 10 888        |
| Finanzierungsstatus                                                                                  | 5 540         | 4 814         | 4 283         | 5 211         | 6 392         |
| <b>Versicherungsmathematische Gewinne (-)/ Verluste (+) aus erfahrungsbedingten Anpassungen für:</b> |               |               |               |               |               |
| Verpflichtungsumfang                                                                                 | - 125         | - 73          | - 42          | - 56          | 8             |
| Fondsvermögen                                                                                        | - 53          | - 283         | 781           | 331           | 90            |

## Bewertungsprämissen

Die Prämissen für die versicherungsmathematische Bewertung des Barwerts der erdienten Pensionsansprüche sowie des Netto-Pensionsaufwands richten sich nach den Verhältnissen des Landes, in dem der Pensionsplan eingerichtet wurde.

Bei den Berechnungen werden aktuelle, versicherungsmathematisch entwickelte biometrische Wahrscheinlichkeiten zugrunde gelegt. Des Weiteren kommen Annahmen über die künftige Fluktuation in Abhängigkeit von Alter und Dienstjahren ebenso zur Anwendung wie konzerninterne Pensionierungswahrscheinlichkeiten.

Die gewichteten Annahmen für die Ermittlung des Barwertes der erdienten Pensionsansprüche sowie für die Ermittlung des Netto-Pensionsaufwands stellen sich wie folgt dar:

| Stand 31. Dezember                     | 2010<br>% | 2009<br>% | 2008<br>% |
|----------------------------------------|-----------|-----------|-----------|
| Rechnungszins                          | 4,7       | 5,1       | 5,8       |
| Langfristig erwarteter Vermögensertrag | 5,0       | 5,4       | 5,5       |
| Gehaltstrend/Anwartschaftsdynamik      | 2,4       | 2,4       | 2,5       |
| Rentendynamik                          | 1,5       | 1,6       | 1,9       |
| Trend der medizinischen Versorgung     | 4,1       | 5,4       | 7,5       |

Für den Netto-Pensionsaufwand gelten die jeweiligen Annahmen zum Bilanzstichtag des vorhergehenden Geschäftsjahres. Bezüglich der Annahmen zum langfristig erwarteten Vermögensertrag ist der jeweilige Wert des aktuellen Jahres maßgeblich.

Die Annahmen zum Rechnungszins spiegeln die Marktverhältnisse am Bilanzstichtag für erstklassige festverzinsliche Anleihen entsprechend der Währung und der Duration der Pensionsverbindlichkeiten wider.

Insbesondere die Annahme zum Rechnungszins führt zu Unsicherheit und einem erheblichen Risiko. Eine Veränderung des Rechnungszinses um 25 Basispunkte hätte einen Effekt von 603 Mio € auf den Barwert der erdienten Pensionsansprüche.

Eine Veränderung des Trends der medizinischen Versorgung um einen Prozentpunkt hätte einen Effekt von 1 Mio € auf den Barwert der erdienten Pensionsansprüche und keinen wesentlichen Effekt auf den in der Gewinn- und Verlustrechnung erfassten Netto-Pensionsaufwand.

Der langfristig erwartete Vermögensertrag für das Geschäftsjahr 2010 basiert auf der folgenden Zielallokation und den zugehörigen langfristig erwarteten Vermögensrenditen je Anlageklasse (gewichtete Durchschnitte):

|               | Zielallokation<br>% | Langfristig<br>erwartete<br>Vermögensrendite<br>% |
|---------------|---------------------|---------------------------------------------------|
| Aktien        | 20,0                | 7,7                                               |
| Anleihen      | 72,0                | 4,2                                               |
| Immobilien    | 6,2                 | 4,9                                               |
| Sonstige      | 1,8                 | 7,5                                               |
| <b>Gesamt</b> | <b>100,0</b>        | <b>5,0</b>                                        |

Die Festlegung der langfristig erwarteten Vermögensrendite je Anlageklasse basiert auf Kapitalmarktstudien.

### Fondsvermögen

Bezogen auf den Zeitwert des Fondsvermögens, stellt sich die aktuelle Allokation der Vermögenswerte (gewichtete Durchschnitte) folgendermaßen dar:

| Stand 31. Dezember | 2010<br>%    | 2009<br>%    |
|--------------------|--------------|--------------|
| Aktien             | 14,4         | 14,1         |
| Anleihen           | 75,6         | 78,3         |
| Immobilien         | 4,8          | 4,5          |
| Sonstige           | 5,2          | 3,1          |
| <b>Gesamt</b>      | <b>100,0</b> | <b>100,0</b> |

Der Großteil des Fondsvermögens entfällt auf die Allianz Versorgungskasse VVaG, München. Diese Einrichtung versichert alle Mitarbeiter der deutschen Versicherungsunternehmen und wird nicht konsolidiert.

Das Fondsvermögen enthält keine Aktien von Unternehmen des Allianz Konzerns und keine vom Allianz Konzern genutzten Immobilien.

Der Allianz Konzern beabsichtigt, langfristig die Aktienquote für das Fondsvermögen der leistungsorientierten Pensionspläne schrittweise an die Zielallokation heranzuführen.

### Beitragszahlungen

Für das Geschäftsjahr 2011 erwartet der Allianz Konzern für leistungsorientierte Pensionspläne Arbeitgeberbeiträge zum Fondsvermögen in Höhe von 288 Mio € sowie direkte Pensionszahlungen an Begünstigte in Höhe von 263 Mio €.

### Beitragszusagen

Beitragszusagen werden über externe Versorgungsträger oder ähnliche Institutionen finanziert. Dabei werden an diese Einrichtungen fest definierte Beiträge (z. B. basierend auf dem Einkommen) gezahlt, wobei der Anspruch des Leistungsempfängers gegenüber diesen Einrichtungen besteht und der Arbeitgeber über die Zahlung der Beiträge hinaus faktisch keine weitere Verpflichtung hat.

Im Geschäftsjahr 2010 wurden Aufwendungen für Beitragszusagen in Höhe von 163 (2009: 149; 2008: 212) Mio € durch den Allianz Konzern getätigt. Zusätzlich zahlte der Allianz Konzern Beiträge zu staatlichen Pensionsplänen in Höhe von 367 (2009: 373; 2008: 317) Mio €.

## 49

## Aktienbasierte Vergütungspläne

### Group-Equity-Incentive-Pläne

Die Group-Equity-Incentive-Pläne (GEI-Pläne) des Allianz Konzerns unterstützen die Ausrichtung des Top-Managements, insbesondere des Vorstands, auf die nachhaltige Steigerung des Unternehmenswertes. Bis 2010 umfassen die GEI virtuelle Optionen (Stock Appreciation Rights, SAR) und virtuelle Aktien (Restricted Stock Units, RSU). Ab der Gewährung in 2011 ersetzt der Allianz Equity-Incentive-Plan (AEI) die GEI-Pläne. Im AEI-Plan werden den Planteilnehmern nur noch virtuelle Aktien (Restricted Stock Units) gewährt.

### Stock-Appreciation-Rights-Pläne

Die SAR, die einem Planteilnehmer gewährt wurden, verpflichten den Allianz Konzern in Bezug auf jedes gewährte Recht, den Unterschiedsbetrag zwischen dem Börsenkurs der Allianz Aktie am Tag der Ausübung und dem Referenzkurs als Barzahlung zu leisten. Der maximale Unterschied ist auf 150 % des Referenzkurses begrenzt. Der Referenzkurs entspricht dem Durchschnitt der Schlusskurse der Allianz SE Aktie an den zehn Börsentagen, die im Ausgabejahr der Bilanzpressekonferenz der Allianz SE folgen. Die bis 2008 gewährten SAR können

nach einer Sperrfrist von zwei Jahren ausgeübt werden und verfallen nach sieben Jahren. Für SAR, die ab 2009 gewährt wurden, gilt eine Sperrfrist von vier Jahren, und sie verfallen ebenfalls nach sieben Jahren. Nach Ablauf der Sperrfrist können die SAR vom Planteilnehmer ausgeübt werden, sofern folgende Marktbedingungen erfüllt sind:

- der Kurs der Allianz SE Aktie hat während der Laufzeit den Dow Jones Europe STOXX Price Index mindestens einmal für einen Zeitraum von fünf aufeinanderfolgenden Börsentagen übertroffen und
- der Aktienkurs der Allianz SE übersteigt den Referenzkurs bei Ausübung um mindestens 20%.

Darüber hinaus werden SAR vor dem Ablauf der Sperrfrist unter der Voraussetzung, dass die genannten Marktbedingungen erfüllt sind, durch das Unternehmen ausgeübt, wenn ein Planteilnehmer stirbt, sich die Mehrheitsverhältnisse ändern oder ein Planteilnehmer wegen betriebsbedingter Kündigung ausscheidet.

Die am letzten Tag des Plans nicht ausgeübten Rechte werden automatisch ausgeübt, sofern die obengenannten Bedingungen erfüllt sind. Wenn diese Bedingungen nicht erfüllt sind oder ein Teilnehmer des Plans aus dem Beschäftigungsverhältnis zum Allianz Konzern ausgeschieden ist, verfallen die Rechte.

Der Zeitwert der SAR zum Zeitpunkt der Gewährung wird mittels eines Cox-Rubinstein binomialen Optionsbewertungsmodells bestimmt. Die Volatilität wird aus beobachtbaren historischen Marktpreisen abgeleitet. Sind bezüglich des Ausübungsverhaltens der SAR keine historischen Informationen verfügbar (vor allem die Pläne, die von 2006 bis 2008 ausgegeben wurden, sind nicht im Geld), wird angenommen, dass die erwartete Laufzeit der Zeit bis zum Verfall der SAR entspricht.

Die folgende Tabelle stellt die Annahmen für die Berechnung des Zeitwertes der SAR zum Zeitpunkt der Gewährung dar.

|                             | 2010    | 2009    | 2008     |
|-----------------------------|---------|---------|----------|
| Erwartete Volatilität       | 29,0%   | 60,0%   | 32,0%    |
| Risikofreier Zinssatz       | 2,7%    | 2,6%    | 3,6%     |
| Erwartete Dividendenrendite | 5,6%    | 6,2%    | 5,3%     |
| Aktienkurs                  | € 88,09 | € 55,19 | € 112,83 |
| Erwartete Laufzeit (Jahre)  | 7       | 7       | 7        |

Die SAR werden vom Allianz Konzern als Vergütungen mit Barausgleich bilanziert. Daher erfasst der Allianz Konzern den Zeitwert der SAR periodengerecht über die Sperrfrist als Personalaufwand. Nach Ablauf der Sperrfrist werden jegliche Änderungen des Zeitwertes der nicht ausgeübten Rechte als Personalaufwand erfasst. In dem zum 31. Dezember 2010 endenden Geschäftsjahr belief sich der gesamte Personalaufwand im Zusammenhang mit den nicht ausgeübten Rechten auf 5 (2009: 12; 2008: – 116) Mio €.

Zum 31. Dezember 2010 bildete der Allianz Konzern für die nicht ausgeübten SAR eine Rückstellung in Höhe von 48 (2009: 50) Mio € und erfasste sie unter Andere Verbindlichkeiten.

### Restricted-Stock-Units-Pläne

Durch die einem Planteilnehmer gewährten RSU ist der Allianz Konzern verpflichtet, eine dem durchschnittlichen Börsenkurs der Allianz SE Aktie in den zehn Handelstagen, die dem Ablauf der Sperrfrist vorausgehen, entsprechende Barzahlung zu leisten oder für jedes gewährte Recht eine Allianz SE Aktie oder ein anderes gleichwertiges Eigenkapitalinstrument auszugeben. Die RSU haben eine Sperrfrist von fünf Jahren. Der Allianz Konzern übt die RSU am ersten Handelstag nach Ablauf ihrer Sperrfrist aus. Am Ausübungstag kann der Allianz Konzern die Erfüllungsmethode für die einzelnen RSU bestimmen.

Darüber hinaus werden RSU vor dem Ablauf der Sperrfrist durch das Unternehmen ausgeübt, wenn ein Planteilnehmer stirbt, sich die Mehrheitsverhältnisse ändern oder ein Planteilnehmer wegen betriebsbedingter Kündigung ausscheidet.

Die RSU sind virtuelle Aktien ohne Berücksichtigung von Dividendenzahlungen. Die Berechnung des Zeitwertes erfolgt durch Subtraktion der Barwerte der erwarteten künftigen Dividendenzahlungen vom jeweils herrschenden Kurs am Bewertungstag.

Die folgende Tabelle stellt die Annahmen für die Berechnung des Zeitwertes der RSU zum Zeitpunkt der Gewährung dar.

|                                       | 2010<br>% | 2009<br>% | 2008<br>% |
|---------------------------------------|-----------|-----------|-----------|
| Durchschnittlicher Zinssatz           | 1,4       | 2,1       | 3,4       |
| Durchschnittlicher Dividendenenertrag | 5,5       | 7,1       | 5,7       |

Die RSU werden vom Allianz Konzern als Vergütungen mit Barausgleich bilanziert, weil der Allianz Konzern einen Barausgleich plant. Daher erfasst der Allianz Konzern den Zeitwert der RSU periodengerecht über die Sperrfrist als Personalaufwand. In dem zum 31. Dezember 2010 endenden Geschäftsjahr belief sich der im Zusammenhang mit den nicht ausübbaaren RSU stehende Personalaufwand auf 58 (2009: 72; 2008: – 19) Mio €.

Zum 31. Dezember 2010 bildete der Allianz Konzern für die nicht ausübbaaren RSU eine Rückstellung in Höhe von 121 (2009: 123) Mio € und erfasste sie unter Andere Verbindlichkeiten.

### Allianz Equity-Incentive-Plan

Ab dem Gewährungsjahr 2011 ersetzt der AEI-Plan die GEI-Pläne.

Aufgrund der neuen Vergütungsstruktur, die seit dem 1. Januar 2010 gültig ist, werden die RSU 2011 als den Teilnehmern gewährte Vergütung für das Jahr 2010 angesehen. Die zusätzliche Rückstellung und der Personalaufwand für die im März 2011 ausgegebenen RSU sind geschätzt und basieren auf einer Zielerreichung von 100%, wie sie in der Zielvereinbarung für das Jahr 2010 für jeden einzelnen Planteilnehmer enthalten ist.

Der Allianz Konzern ist durch die einem Planteilnehmer gewährten RSU verpflichtet, eine dem durchschnittlichen Aktienkurs der Allianz SE Aktie am Ausübungstag und den vorangehenden neun Handelstagen entsprechende Barzahlung zu leisten oder jede virtuelle Aktie in eine Allianz SE Aktie umzutauschen. Die Auszahlung ist begrenzt und entspricht maximal einem 200%-igen Aktienkursanstieg über dem Ausgabekurs.

Die RSU innerhalb des AEI-Plans unterliegen einer vierjährigen Sperrfrist. Die Freigabe der RSU erfolgt am letzten Tag der Sperrfrist. Der Allianz Konzern kann die Erfüllungsmethode für die einzelnen RSU bestimmen.

Darüber hinaus werden RSU vor dem Ablauf der Sperrfrist durch das Unternehmen ausgeübt, wenn ein Planteilnehmer stirbt, sich die Mehrheitsverhältnisse ändern oder ein Planteilnehmer wegen betriebsbedingter Kündigung ausscheidet.

Die RSU sind virtuelle Aktien ohne Dividendenauszahlung, die einer Auszahlungsbeschränkung unterliegen. Der Zeitwert ermittelt sich aus dem jeweils herrschenden Kurs am Bewertungstag abzüglich der Barwertsumme der bis zur Fälligkeit erwarteten künftigen Dividendenzahlungen und des Zeitwertes der Auszahlungsbeschränkung. Die Auszahlungsbeschränkung wird als Europäische Short Call Option auf Basis aktueller Marktdaten am Bewertungstag bewertet.

Die folgende Tabelle stellt die Annahmen für die Berechnung des Zeitwertes der RSU zum Zeitpunkt der Gewährung dar.

|                                       | 2011 <sup>1</sup> |
|---------------------------------------|-------------------|
| Aktienkurs                            | € 105,85          |
| Durchschnittlicher Dividendenenertrag | 4,7%              |
| Durchschnittlicher Zinssatz           | 2,6%              |
| Erwartete Volatilität                 | 18,0%             |

<sup>1</sup> Die RSU 2011 werden als den Teilnehmern gewährte Vergütung für das Jahr 2010 angesehen. Folglich basieren die Annahmen für die im März 2011 ausgegebenen RSU auf bestmöglicher Schätzung.

Die RSU innerhalb der neuen Vergütungsstruktur werden vom Allianz Konzern als Vergütungen mit Barausgleich bilanziert, weil der Allianz Konzern einen Barausgleich plant. Daher erfasst der Allianz Konzern den Zeitwert der RSU periodengerecht über den Erdienungszeitraum von einem Jahr und anschließend über die Sperrfrist als Personalaufwand. In dem zum 31. Dezember 2010 endenden Geschäftsjahr belief sich der im Zusammenhang mit der RSU Komponente des AEI Plans stehende Personalaufwand auf 17 Mio €.

Zum 31. Dezember 2010 bildete der Allianz Konzern für diese RSU eine Rückstellung in Höhe von 17 Mio € und erfasste sie unter Andere Verbindlichkeiten.

## Aktienbezogene Vergütungspläne von Tochterunternehmen des Allianz Konzerns

### PIMCO LLC Class B Unit Purchase Plan

Bei der Übernahme von Allianz Global Investors of America L.P. (AGI L.P.) in dem zum 31. Dezember 2000 endenden Geschäftsjahr hat die Allianz SE die Pacific Investment Management Company LLC (PIMCO LLC), eine Tochtergesellschaft von AGI L.P., dazu veranlasst, einen Class B Unit Purchase Plan (Class B Plan) zugunsten der Mitglieder der Geschäftsleitung der PIMCO LLC aufzulegen. Gemäß diesem Plan haben die Teilnehmer einen vorrangigen Anspruch auf 15 % des berichtigten operativen Ergebnisses von PIMCO LLC.

Die im Rahmen des Plans ausgegebenen Class B Units haben eine drei- bis fünfjährige Sperrfrist und können von AGI L.P. bei Tod, Invalidität oder Ausscheiden des Teilnehmers vor Ablauf der Sperrfrist zurückgekauft werden. Außerdem hat AGI L.P. seit dem 1. Januar 2005 das Recht, jährlich einen Teil der ausgeübten Class B Units zurückzukaufen, und die Beteiligten haben das Recht, dies von AGI L.P. zu verlangen. Das Kauf- oder Verkaufsrecht kann erstmals sechs Monate nach Ablauf der Sperrfrist ausgeübt werden. Der Rückkaufpreis wird am Rückkaufstag auf dem dann ermittelten Wert der zurückgekauften Class B Units basieren. Da die Teilnehmer eine Verkaufsoption auf Class B Units besitzen, wird der Class B Plan als Vergütung mit Barausgleich bilanziert.

Der Allianz Konzern erfasst daher den Zeitwert der Class B Units periodengerecht über die Sperrfrist als Personalaufwand. Bei Ablauf der Sperrfrist werden jegliche Änderungen des Zeitwertes der Class B Units als Personalaufwand erfasst. In dem zum 31. Dezember 2010 endenden Geschäftsjahr erfasste der Allianz Konzern im Zusammenhang mit Class B Units einen Personalaufwand von 367 (2009: 311; 2008: 185) Mio €. Zusätzlich wies der Allianz Konzern im Zusammenhang mit dem Anspruch auf das berichtigte operative Ergebnis von PIMCO LLC einen Aufwand von 74 (2009: 92; 2008: 93) Mio € aus. In dem zum 31. Dezember 2010 endenden Geschäftsjahr übten Planteilnehmer Verkaufsoptionen auf 174 Class B Units aus. Der ausgezahlte Gesamtbetrag im Zusammenhang mit dieser Transaktion belief

sich auf 4 Mio €. Zudem übte der Allianz Konzern in 2010 Kaufoptionen auf 25 680 Class B Units aus. Der ausgezahlte Gesamtbetrag in diesem Zusammenhang belief sich auf 636 Mio €.

Der kumulierte Personalaufwand für nicht ausgeübte Class B Units wird als Rückstellung unter Andere Verbindlichkeiten erfasst. Zum 31. Dezember 2010 bildete der Allianz Konzern für die Class B Units eine Rückstellung in Höhe von 902 (2009: 1 118) Mio €.

### PIMCO LLC Class M-Unit Plan

In 2008 hat Allianz Global Investors of America (AGI L.P.) den Class M-Unit Purchase Plan zugunsten der Mitglieder der oberen Führungsebene der PIMCO LLC und bestimmter Tochtergesellschaften aufgelegt. Planteilnehmern wird gewährt, Optionen einer neuen Klasse von Eigenkapitalinstrumenten zu erwerben (M-Units). Diese im Rahmen des Plans ausgegebenen M-Units erlangen ihren Leistungsanspruch in drei Phasen nach einer Laufzeit von drei, vier und fünf Jahren. Nach Ablauf der Sperrfrist werden die Optionen automatisch in einer bargeldlosen Transaktion ausgeübt. Planteilnehmer können wählen, ob sie den Erhalt der M-Units mittels des M-Unit Deferral Plan aufschieben wollen. Mit dem M-Unit Plan können die Teilnehmer direkt am Ergebnis der PIMCO LLC partizipieren. M-Units sind Aktien ohne Stimmrecht mit begrenzten Informationsrechten. Sie besitzen ein Recht auf vierteljährliche Dividendenausüttungen. Deferred M-Units haben ein Recht auf vierteljährliche Kompensationszahlungen in Höhe der sonst fälligen vierteljährlichen Dividendenzahlungen.

Maximal dürfen 250 000 M-Units im Rahmen des M-Unit Plan ausgegeben werden.

Der Zeitwert der gewährten M-Optionen wurde mittels des Black-Scholes-Optionspreismodells bestimmt. Die Volatilität wurde teils aus der durchschnittlichen historischen und teils aus einer unterstellten Volatilität einer ausgewählten Vergleichsgruppe abgeleitet. Die erwartete Laufzeit wurde auf der Basis der drei Phasen der Leistungszeiträume (jeweils ein Drittel in den Jahren 3, 4 und 5) in drei separaten Schritten ermittelt.



Die folgende Tabelle zeigt die Annahmen, die zur Berechnung des Zeitwertes der M-Optionen zum Zeitpunkt der Ausgabe benutzt wurden.

|                                                                   | 2010       | 2009       | 2008     |
|-------------------------------------------------------------------|------------|------------|----------|
| Gewichteter durchschnittlicher Zeitwert der ausgegebenen Optionen | € 1 462,84 | € 1 207,91 | € 577,44 |
| <b>Annahmen:</b>                                                  |            |            |          |
| Erwartete Laufzeit (Jahre)                                        | 3,83       | 3,85       | 3,85     |
| Erwartete Volatilität                                             | 45,9%      | 48,9%      | 32,5%    |
| Erwarteter Dividendenertrag                                       | 10,9%      | 10,5%      | 11,1%    |
| Risikofreier Zinssatz                                             | 1,9%       | 1,7%       | 2,7%     |

Es folgt ein Überblick über die Anzahl und den gewichteten durchschnittlichen Ausübungspreis der ausstehenden und der ausübenden M-Optionen.

|                                    | 2010          |                                                    | 2009          |                                                    | 2008          |                                                    |
|------------------------------------|---------------|----------------------------------------------------|---------------|----------------------------------------------------|---------------|----------------------------------------------------|
|                                    | Anzahl        | Gewichteter durchschnittlicher Ausübungspreis<br>€ | Anzahl        | Gewichteter durchschnittlicher Ausübungspreis<br>€ | Anzahl        | Gewichteter durchschnittlicher Ausübungspreis<br>€ |
| <b>Zum 1. Januar ausstehend</b>    | <b>66 889</b> | <b>6 323,40</b>                                    | <b>26 532</b> | <b>6 230,01</b>                                    | —             | —                                                  |
| Gewährt                            | 36 010        | 11 489,07                                          | 41 606        | 6 102,66                                           | 27 674        | 6 230,05                                           |
| Ausgeübt                           | —             | —                                                  | —             | —                                                  | —             | —                                                  |
| Verfallen                          | – 6 448       | 7 487,13                                           | – 1 249       | 6 206,01                                           | – 1 142       | 6 230,86                                           |
| <b>Zum 31. Dezember ausstehend</b> | <b>96 451</b> | <b>8 478,86</b>                                    | <b>66 889</b> | <b>6 323,40</b>                                    | <b>26 532</b> | <b>6 230,01</b>                                    |
| <b>Zum 31. Dezember ausübbar</b>   | <b>—</b>      | <b>—</b>                                           | <b>—</b>      | <b>—</b>                                           | <b>—</b>      | <b>—</b>                                           |

Für das zum 31. Dezember 2010 endende Geschäftsjahr betrug der gesamte innere Wert der ausstehenden Optionen auf M-Units 93 (2009: 59) Mio €.

Die ausstehenden Optionen hatten zum 31. Dezember 2010 einen Ausübungspreis zwischen 6 335,95 € und 11 515,04 € und eine gewichtete durchschnittliche Restlaufzeit von 3,31 Jahren.

Die Ansprüche auf Übertragung von Class M-Units der PIMCO LLC werden durch die PIMCO LLC als Vergütungen mit Ausgleich durch Eigenkapitalinstrumente bilanziert. Der gesamte Personalaufwand wird über den Zeitwert zum Gewährungsdatum ermittelt und über die Sperrfrist als Aufwand erfasst.

In dem zum 31. Dezember 2010 endenden Geschäftsjahr erfasste der Allianz Konzern im Zusammenhang mit den M-Unit-Optionen einen Personalaufwand in Höhe von 28 (2009: 9; 2008: 2) Mio €.

### Aktienoptionsplan der AGF Gruppe (jetzige Allianz France)

Die ehemalige AGF Gruppe hat berechtigten Führungskräften der AGF Gruppe und ihrer Tochtergesellschaften sowie bestimmten Angestellten, deren Leistung dies rechtfertigte, Kaufoptionen auf AGF Aktien angeboten.

In dem zum 31. Dezember 2007 endenden Geschäftsjahr wurden im Rahmen des Tender Offer sowie des Squeeze-out alle verbliebenen AGF Aktien von Minderheitsaktionären aufgekauft. Gemäß einer Vereinbarung („Liquidity Agreement“) zwischen Allianz SE, AGF und den Berechtigten (AGF Mitarbeiter) der Aktienoptionspläne aus den Jahren 2003–2006 hat der Allianz Konzern das Recht, alle AGF Aktien aufzukaufen, die aufgrund der Ausübung dieser Aktienoptionspläne ausgegeben wurden (nach der „Verkaufsperiode“, in der die Berechtigten ein Verkaufsrecht gegenüber der Allianz haben). Der Barausgleich durch die Allianz SE erfolgt in Höhe des Durchschnittskurses der Allianz SE Aktien der letzten 20 Tage vor Ausübung des Verkaufs- bzw. Kaufrechts, multipliziert mit dem Verhältnis aus dem im Tender Offer für

jede AGF Aktie vorgeschlagenen Barausgleich (126,43 €) und dem Aktienkurs der Allianz SE am 16. Januar 2007 (155,72 €). Im Falle von Transaktionen, die das Stammkapital bzw. das Eigenkapital der Allianz oder der AGF beeinflussen, wird dieses Verhältnis entsprechend angepasst. Der Barausgleich beruht auf dem ursprünglichen Angebot für jede AGF Aktie im Tender Offer. Zum 31. Dezember 2007 waren alle ausgegebenen Aktien aus diesen Plänen ausübbar.

Aufgrund der Auswirkungen des Liquidity Agreement erfasst der Allianz Konzern die AGF Aktienoptionspläne nun als Pläne mit Barausgleich, da alle AGF Mitarbeiter einen Barausgleich für ihre AGF Aktien erhalten werden. Somit erfasst der Allianz Konzern alle Änderungen des Zeitwertes in Zusammenhang mit noch nicht ausgeübten Plänen als Personalaufwand.

In dem zum 31. Dezember 2010 endenden Geschäftsjahr belief sich der gesamte Personalaufwand im Allianz Konzern im Zusammenhang mit den geänderten Aktienoptionsplänen auf – 0,4 (2009: 3; 2008: – 33) Mio €. Zum 31. Dezember 2010 bildete der Allianz Konzern für diese Pläne eine Rückstellung in Höhe von 10 (2009: 14) Mio €.

### Allianz SE Aktienoptionsplan der ehemaligen RAS Gruppe (modifizierter Aktienoptionsplan der RAS Gruppe 2005)

Die ehemalige RAS Gruppe hat berechtigten Mitgliedern der oberen Führungsebene Kaufoptionen auf RAS Stammaktien gewährt.

Der Zeitwert der Optionen zum Zeitpunkt der Gewährung wurde mittels eines trinomialen Optionspreismodells bestimmt. Die Volatilität wurde aus beobachtbaren historischen Marktpreisen entsprechend der erwarteten Laufzeit der Optionen abgeleitet. Als erwartete Laufzeit wurde die Zeit bis zum Verfall der Optionen angesetzt.

Mit Inkrafttreten der Fusion von Allianz SE und RAS wurde der RAS Aktienoptionsplan geändert. Die noch ausstehenden, im Geschäftsjahr 2005 ausgegebenen Aktienoptionen sind durch Allianz SE Aktienoptionen auf der Basis des Verhältnisses von 1 Allianz SE Option zu 5,501 RAS Aktienoptionen ersetzt worden. Die ausstehenden 953 000 RAS Aktienoptionen wurden durch 173 241 Allianz SE Optionen ersetzt. Die Allianz SE Aktienoptionen haben ebenfalls eine Sperrfrist von zwei Jahren. Die vorher festgelegten Marktbedingungen wurden durch Ergebnisbedingungen ersetzt, die bereits am Tag der Planänderung erfüllt waren.

Es folgt ein Überblick über die Anzahl und den gewichteten durchschnittlichen Ausübungspreis der ausstehenden und der ausübenden Optionen.

|                             | 2010     |                                                 | 2009     |                                                 | 2008     |                                                 |
|-----------------------------|----------|-------------------------------------------------|----------|-------------------------------------------------|----------|-------------------------------------------------|
|                             | Anzahl   | Gewichteter durchschnittlicher Ausübungspreis € | Anzahl   | Gewichteter durchschnittlicher Ausübungspreis € | Anzahl   | Gewichteter durchschnittlicher Ausübungspreis € |
| Zum 1. Januar ausstehend    | 84 920   | 93,99                                           | 117 825  | 93,99                                           | 131 249  | 93,99                                           |
| Gewährt                     | —        | —                                               | —        | —                                               | —        | —                                               |
| Ausgeübt                    | —        | —                                               | —        | —                                               | – 13 424 | 93,99                                           |
| Verfallen                   | – 13 087 | 93,99                                           | – 32 905 | 93,99                                           | —        | —                                               |
| Zum 31. Dezember ausstehend | 71 833   | 93,99                                           | 84 920   | 93,99                                           | 117 825  | 93,99                                           |
| Zum 31. Dezember ausübbar   | 71 833   | 93,99                                           | 84 920   | 93,99                                           | 117 825  | 93,99                                           |

Für das zum 31. Dezember 2010 endende Geschäftsjahr betrug der gesamte innere Wert der ausstehenden Aktienoptionen 4 (2009: 4) Mio €.

Die ausstehenden Optionen hatten zum 31. Dezember 2010 einen Ausübungspreis von 93,99 € und eine gewichtete durchschnittliche Restlaufzeit von einem Jahr.

Die Ansprüche auf Übertragung von Aktien der Allianz SE werden durch die Allianz S.p.A. und die ACIF als Vergütungen mit Ausgleich durch Eigenkapitalinstrumente bilanziert. Der gesamte Personalaufwand wird über den Zeitwert zum Gewährungsdatum ermittelt und über die Sperrfrist als Aufwand erfasst.

Da alle Aktienoptionspläne ausübbar sind, erfasste der Allianz Konzern für die zum 31. Dezember 2010, 2009 und 2008 endenden Geschäftsjahre keinen Personalaufwand.

### **Aktienkaufpläne für Mitarbeiter**

Aktien der Allianz SE werden berechtigten Mitarbeitern in 19 Ländern durch den Allianz Konzern zu vergünstigten Konditionen angeboten. Für diese Aktien gelten Haltefristen zwischen einem und fünf Jahren. Die Anzahl der im Rahmen dieser Pläne an Mitarbeiter verkauften Aktien belief sich im Geschäftsjahr 2010 auf 623 465 (2009: 721 740; 2008: 721 830) Stück. Zum 31. Dezember 2010 erfasste der Allianz Konzern einen Personalaufwand in Höhe des Unterschiedsbetrags zwischen dem Marktpreis (Schlusskurs der Allianz SE Aktie im Xetra-Handel am 7. September 2010) und dem vergünstigten Preis der von Mitarbeitern gekauften Aktien von 10 (2009: 11; 2008: 10) Mio €.

### **Andere Aktienoptions- und Beteiligungspläne**

Der Allianz Konzern verfügt über andere lokale aktienbasierte Vergütungspläne, darunter Aktienoptions- und Mitarbeiterbeteiligungspläne, die jedoch weder einzeln noch zusammengekommen erheblichen Einfluss auf den Konzernabschluss haben. Die Summe der Aufwendungen für diese Pläne belief sich im Geschäftsjahr 2010 auf 1 (2009: 2; 2008: 2) Mio €.

## 50 Rückstellungen für Restrukturierungsmaßnahmen

Zum 31. Dezember 2010 hat der Allianz Konzern im Zuge mehrerer Restrukturierungsprogramme in verschiedenen Geschäftsbereichen Rückstellungen für

Restrukturierungsmaßnahmen gebildet. Diese Rückstellungen enthalten hauptsächlich Personalkosten für Abfindungszahlungen und Kosten im Zusammenhang mit der Beendigung von Verträgen einschließlich Aufhebungskosten für Mietverträge, die sich im Zusammenhang mit der Durchführung der jeweiligen Maßnahmen ergeben werden.

Entwicklung der Rückstellungen für Restrukturierungsmaßnahmen:

|                                                                                                                  | Allianz<br>Deutschland<br>AG | Allianz<br>France | manroland<br>AG      | Allianz<br>Beratungs-<br>und<br>Vertriebs AG | Euler<br>Hermes<br>Gruppe | Übrige             | Summe      |
|------------------------------------------------------------------------------------------------------------------|------------------------------|-------------------|----------------------|----------------------------------------------|---------------------------|--------------------|------------|
|                                                                                                                  | Mio €                        | Mio €             | Mio €                | Mio €                                        | Mio €                     | Mio €              | Mio €      |
| <b>Stand 1.1.2008</b>                                                                                            | <b>226</b>                   | <b>—</b>          | <b>—</b>             | <b>—</b>                                     | <b>—</b>                  | <b>315</b>         | <b>541</b> |
| Neue Rückstellungen                                                                                              | —                            | 77                | —                    | —                                            | —                         | 31                 | 108        |
| Zuführung zu bestehenden Rückstellungen                                                                          | 3                            | —                 | —                    | —                                            | —                         | 16                 | 19         |
| Auflösung von Rückstellungen früherer Jahre                                                                      | – 10                         | —                 | —                    | —                                            | —                         | – 1                | – 11       |
| Verbrauch von Rückstellungen durch Zahlungen                                                                     | – 10                         | – 2               | —                    | —                                            | —                         | – 70               | – 82       |
| Verbrauch von Rückstellungen durch Umbuchungen                                                                   | – 61                         | —                 | —                    | —                                            | —                         | – 5                | – 66       |
| Umgliederung in Verbindlichkeiten von Veräußerungsgruppen, die als zur Veräußerung gehalten klassifiziert werden | —                            | —                 | —                    | —                                            | —                         | – 166 <sup>2</sup> | – 166      |
| <b>Stand 31.12.2008</b>                                                                                          | <b>148</b>                   | <b>75</b>         | <b>—</b>             | <b>—</b>                                     | <b>—</b>                  | <b>120</b>         | <b>343</b> |
| Umgliederung aufgrund separater Darstellung                                                                      | —                            | —                 | 4                    | —                                            | —                         | – 4                | —          |
| <b>Stand 1.1.2009</b>                                                                                            | <b>148</b>                   | <b>75</b>         | <b>4<sup>1</sup></b> | <b>—</b>                                     | <b>—</b>                  | <b>116</b>         | <b>343</b> |
| Neue Rückstellungen                                                                                              | —                            | —                 | 89                   | 37                                           | —                         | 145                | 271        |
| Zuführung zu bestehenden Rückstellungen                                                                          | 3                            | —                 | —                    | —                                            | —                         | 24                 | 27         |
| Auflösung von Rückstellungen früherer Jahre                                                                      | – 53                         | —                 | —                    | —                                            | —                         | – 16               | – 69       |
| Verbrauch von Rückstellungen durch Zahlungen                                                                     | – 16                         | – 40              | – 28                 | —                                            | —                         | – 81               | – 165      |
| Verbrauch von Rückstellungen durch Umbuchungen                                                                   | – 27                         | —                 | – 2                  | —                                            | —                         | – 57               | – 86       |
| Währungsänderungen                                                                                               | —                            | —                 | —                    | —                                            | —                         | 1                  | 1          |
| Sonstige                                                                                                         | —                            | —                 | 24                   | —                                            | —                         | —                  | 24         |
| <b>Stand 31.12.2009</b>                                                                                          | <b>55</b>                    | <b>35</b>         | <b>87</b>            | <b>37</b>                                    | <b>—</b>                  | <b>132</b>         | <b>346</b> |
| <b>Stand 1.1.2010</b>                                                                                            | <b>55</b>                    | <b>35</b>         | <b>87</b>            | <b>37</b>                                    | <b>—</b>                  | <b>132</b>         | <b>346</b> |
| Neue Rückstellungen                                                                                              | —                            | —                 | —                    | 42                                           | 67                        | 64                 | 173        |
| Zuführung zu bestehenden Rückstellungen                                                                          | 13                           | 13                | 47                   | —                                            | —                         | 29                 | 102        |
| Auflösung von Rückstellungen früherer Jahre                                                                      | —                            | —                 | —                    | – 5                                          | —                         | – 12               | – 17       |
| Verbrauch von Rückstellungen durch Zahlungen                                                                     | – 7                          | – 25              | – 44                 | —                                            | —                         | – 63               | – 139      |
| Verbrauch von Rückstellungen durch Umbuchungen                                                                   | – 13                         | —                 | —                    | – 21                                         | —                         | – 24               | – 58       |
| Währungsänderungen                                                                                               | —                            | —                 | —                    | —                                            | —                         | 2                  | 2          |
| <b>Stand 31.12.2010</b>                                                                                          | <b>48</b>                    | <b>23</b>         | <b>90</b>            | <b>53</b>                                    | <b>67</b>                 | <b>128</b>         | <b>409</b> |

1 Rückstellung wurde bereits vor 2008 gebildet und steht nicht im Zusammenhang mit den Restrukturierungsaktivitäten aus 2009.

2 Beinhaltet die Restrukturierungsrückstellung der Dresdner Bank Gruppe, die im Geschäftsjahr 2008 in Verbindlichkeiten von Veräußerungsgruppen, die als zur Veräußerung gehalten klassifiziert werden, umgegliedert wurden.

Die Entwicklung der Restrukturierungsrückstellungen gibt den Stand der Umsetzung der Restrukturierungsmaßnahmen wieder. Gemäß den spezifischen IFRS-Vorschriften sind Restrukturierungsrückstellungen zu bilden, bevor diese die Ansatzkriterien anderer Rückstellungsarten gemäß den maßgeblichen Vorschriften erfüllen. Damit der Stand der Umsetzungen der verschiedenen Restrukturierungsmaßnahmen besser erkennbar wird, werden Restrukturierungsrückstellungen, soweit diese schon angesetzt waren, in die Rückstellungsart umgegliedert, die man herangezogen hätte, wenn kein Restrukturierungsplan bestünde. Das gilt für jeden einzelnen Vertrag. In Bezug auf Personalaufwand wird, wenn der Mitarbeiter sich vertraglich zur Altersteilzeit (spezifisches Programm des vorgezogenen Ruhestands in Deutschland) verpflichtet oder einen Abfindungsvertrag unterzeichnet hat, der entsprechende Teil der Restrukturierungsrückstellung in Rückstellungen für Mitarbeiter umgegliedert. Darüber hinaus sind zu Restrukturierungszwecken vorgesehene Rückstellungen für leerstehende Büroräume in sonstige Rückstellungen umgegliedert worden, nachdem die Büros vollständig geräumt waren.

### Rückstellungen für Restrukturierungsmaßnahmen der Allianz Deutschland AG

Im Geschäftsjahr 2006 hat die Allianz Deutschland AG einen Restrukturierungsplan für die Neuordnung ihres Versicherungsgeschäftes bekanntgegeben. Das ursprüngliche Ziel, rund 5 345 Stellen abzubauen, wurde nahezu erreicht. Mit Ausnahme von zwei Versicherungsstandorten endete der Restrukturierungsplan zum 31. Dezember 2009. An den verbleibenden zwei Standorten werden die Restrukturierungsmaßnahmen bis zum 31. Dezember 2012 abgeschlossen sein. Weitere Aufwendungen dieses Restrukturierungsplans beziehen sich im Wesentlichen auf laufende Zahlungen für belastende Verträge bis zu deren Ablauf.

|                                                                                     | 2010<br>Mio € |
|-------------------------------------------------------------------------------------|---------------|
| Neue Rückstellungen                                                                 | —             |
| Zuführung zu bestehenden Rückstellungen                                             | 13            |
| Auflösung von Rückstellungen früherer Jahre                                         | —             |
| Restrukturierungsaufwand, direkt in der Konzern-Gewinn- und Verlustrechnung erfasst | 2             |
| <b>Summe Restrukturierungsaufwand im Geschäftsjahr 2010</b>                         | <b>15</b>     |
| Bis zum Berichtszeitpunkt angefallene Restrukturierungsaufwendungen                 | 469           |

Zusammenfassung der Änderungen der Restrukturierungsrückstellungen der Allianz Deutschland AG im Geschäftsjahr 2010:

|                                      | Rückstellungen<br>Stand<br>1. Januar<br>2010 | Rückstellungsbuchungen 2010  |                                                  |                                                      |                                                       | Verbrauch<br>von Rückstellungen<br>durch Umbuchungen | Währungsänderungen | Übrige   | Rückstellungen<br>Stand<br>31. Dezember 2010 |
|--------------------------------------|----------------------------------------------|------------------------------|--------------------------------------------------|------------------------------------------------------|-------------------------------------------------------|------------------------------------------------------|--------------------|----------|----------------------------------------------|
|                                      | Mio €                                        | Neue Rückstellungen<br>Mio € | Zuführung zu bestehenden Rückstellungen<br>Mio € | Auflösung von Rückstellungen früherer Jahre<br>Mio € | Verbrauch von Rückstellungen durch Zahlungen<br>Mio € | Mio €                                                | Mio €              | Mio €    | Mio €                                        |
| <b>Programme 2006</b>                |                                              |                              |                                                  |                                                      |                                                       |                                                      |                    |          |                                              |
| Personalaufwand                      | 20                                           | —                            | 11                                               | —                                                    | —                                                     | – 14                                                 | —                  | —        | 17                                           |
| Aufwendungen aus Vertragsauflösungen | 35                                           | —                            | 2                                                | —                                                    | – 7                                                   | 1                                                    | —                  | —        | 31                                           |
| Übrige                               | —                                            | —                            | —                                                | —                                                    | —                                                     | —                                                    | —                  | —        | —                                            |
| <b>Summe</b>                         | <b>55</b>                                    | <b>—</b>                     | <b>13</b>                                        | <b>—</b>                                             | <b>– 7</b>                                            | <b>– 13</b>                                          | <b>—</b>           | <b>—</b> | <b>48</b>                                    |

### Restrukturierungspläne der Allianz France

Im Geschäftsjahr 2008 hat die Allianz France einen Restrukturierungsplan für die Neuordnung des Versicherungsgeschäfts in Frankreich bekanntgegeben, den sogenannten Comprehensive Adaption Plan („Plan Global d'Adaptation“), der voraussichtlich 2011 abgeschlossen sein wird. Ziele dieses Restrukturierungsplans sind die Zurückgewinnung von Marktanteilen und die Qualitätssteigerung von Dienstleistungen. Dies soll mittels der Erhöhung der Anzahl des Vertriebspersonals und der Steigerung der Vertriebseffizienz, durch die Entwicklung der Mitarbeiterkompetenzen und durch die Einführung eines umfangreichen Wettbewerbsplans erreicht werden.

Die Restrukturierungsmaßnahmen der Allianz France führten zu einer Verringerung der Anzahl von Standorten in Frankreich von 14 auf 10 sowie zu einer Verlagerung von Mitarbeitern und Aktivitäten, um sicherzustellen, dass an jedem Standort Experten verfügbar sind, und einer starken Verringerung nicht personalbezogener Kosten (insbesondere IT, Einkauf und Einrichtungen).

Mit dem Comprehensive Adaption Plan hat sich die Allianz France dazu verpflichtet, die Anzahl der Stellen für administrative Tätigkeiten um 688 Stellen zu verringern. Der Personalabbau im Rahmen dieses Programms umfasst Maßnahmen der freiwilligen Beendigung des Arbeitsverhältnisses unter restriktiven Bedingungen und Vorruhestandsregelungen für Mitarbeiter, die von der Schließung der Standorte betroffen sind.

Im Geschäftsjahr 2010 dehnte die Allianz France ihre Restrukturierungsmaßnahmen weiter aus. Diese umfassen nun eine zweite Welle an Maßnahmen zur Eigenkündigung des Arbeitsverhältnisses mit dem neuen Ziel, 830 (statt der 688) Stellen abzubauen sowie die Räumung von sieben gemieteten oder eigengenutzten Gebäuden in der Pariser Innenstadt (Zusammenführung der Aktivitäten am Standort La Defense). Bis zum 31. Dezember 2010 wurden aufgrund von Eigenkündigungen, Altersteilzeitmaßnahmen und Entlassungen 685 Mitarbeiter freigesetzt.

Im Geschäftsjahr 2010 fielen bei der Allianz France Restrukturierungsaufwendungen in Höhe von 36 (2009: —; 2008: 81) Mio € an.

Zusammenfassung der Änderungen der Restrukturierungsrückstellungen der Allianz France im Geschäftsjahr 2010:

|                                      | Rückstellungen Stand 1. Januar 2010 | Rückstellungsbuchungen 2010 |                                         |                                             |                                              | Verbrauch von Rückstellungen durch Umbuchungen | Währungsänderungen | Übrige   | Rückstellungen Stand 31. Dezember 2010 |
|--------------------------------------|-------------------------------------|-----------------------------|-----------------------------------------|---------------------------------------------|----------------------------------------------|------------------------------------------------|--------------------|----------|----------------------------------------|
|                                      |                                     | Neue Rückstellungen         | Zuführung zu bestehenden Rückstellungen | Auflösung von Rückstellungen früherer Jahre | Verbrauch von Rückstellungen durch Zahlungen |                                                |                    |          |                                        |
|                                      | Mio €                               | Mio €                       | Mio €                                   | Mio €                                       | Mio €                                        | Mio €                                          | Mio €              | Mio €    | Mio €                                  |
| <b>Comprehensive Adaption Plan</b>   |                                     |                             |                                         |                                             |                                              |                                                |                    |          |                                        |
| Personalaufwand                      | 35                                  | —                           | 11                                      | —                                           | – 25                                         | —                                              | —                  | —        | 21                                     |
| Aufwendungen aus Vertragsauflösungen | —                                   | —                           | —                                       | —                                           | —                                            | —                                              | —                  | —        | —                                      |
| Übrige                               | —                                   | —                           | 2                                       | —                                           | —                                            | —                                              | —                  | —        | 2                                      |
| <b>Summe</b>                         | <b>35</b>                           | <b>—</b>                    | <b>13</b>                               | <b>—</b>                                    | <b>– 25</b>                                  | <b>—</b>                                       | <b>—</b>           | <b>—</b> | <b>23</b>                              |

### Restrukturierungspläne der manroland AG

Aufgrund des wirtschaftlich angespannten Umfeldes sowie der weiterhin unbefriedigenden Nachfrage nach Druckmaschinen hat die manroland AG ihr Restrukturierungsprogramm aus 2009 im Geschäftsjahr 2010 ausgeweitet. Das Unternehmen hat weitere vertragliche Vereinbarungen (Interessenausgleich und Sozialplan) mit

den Arbeitnehmervertretern für einen zusätzlichen Personalabbau getroffen. Des Weiteren wurden die Möglichkeiten der Altersteilzeit zum Zwecke des Personalabbaus konsequent genutzt. Eine Qualifizierungs- und Beschäftigungsgesellschaft wird im ersten Quartal 2011 eingerichtet, um so die Folgen für die betroffenen Mitarbeiter abzufedern. Die unternehmerische Neuausrichtung betrifft sämtliche Unternehmensteile und mehrere Standorte und wird zu einer Reduktion des Mitarbeiterbestandes um circa 24% führen.

Der Abschluss des Programms ist für das Jahr 2012 geplant. Die Maßnahmen werden zu einer Absenkung des Kostenniveaus führen und somit zur Sicherung der Wettbewerbsfähigkeit des Unternehmens beitragen.

Im Geschäftsjahr 2010 fielen bei der manroland AG Restrukturierungsaufwendungen in Höhe von 52 (2009: 89) Mio € an. Zum 31. Dezember 2010 erfasste die manroland AG Restrukturierungsrückstellungen in Höhe von 90 (2009: 87) Mio €.

### **Restrukturierungspläne der Allianz Beratungs- und Vertriebs AG (ABV AG)**

Im Geschäftsjahr 2009 hat die ABV AG Restrukturierungspläne für die Neuordnung der Vertriebsorganisation in Deutschland bekanntgegeben, die 2012 abgeschlossen werden soll. Ziel der Neuordnung ist die Steigerung der Qualität, Effizienz und Prozesssicherheit des Vertriebsinnendienstes und des Spezialvertriebs. Im Rahmen der Restrukturierung wurden die Reorganisation der Hauptverwaltung und der dezentralen Stäbe des Vertriebsinnendienstes sowie die Neuordnung und Zentralisierung der Personal- und Vertragssachbearbeitung durchgeführt. Der Spezialvertrieb wurde zur besseren Unterstützung der Agenturen neu aufgestellt. Der im Rahmen der Umstrukturierung erforderliche Personalabbau soll vorrangig im Wege einvernehmlicher Lösungen verlaufen. Vom ursprünglichen Abbauziel von 225 Stellen besteht zum 31. Dezember 2010 noch ein Abbaubedarf von 76 Positionen.

Zum 31. Dezember 2010 bestand bei der ABV AG eine Restrukturierungsrückstellung für den in 2009 bekanntgegebenen Plan in Höhe von 11 (2009: 37) Mio €. Im Geschäftsjahr 2010 fielen Restrukturierungsaufwendungen in Höhe von – 5 (2009: 37) Mio € an.

Im Geschäftsjahr 2010 hat die ABV AG einen Restrukturierungsplan für die Neuordnung des Vertriebs über die nebenberuflichen Versicherungsvertreter bekanntgegeben, der bis Ende 2014 abgeschlossen sein soll. Ziele der Neuausrichtung bei der ABV AG sind die Optimierung und Effizienzsteigerung der Betreuungsstruktur für die nebenberuflichen Vertreter sowie die Steigerung der Attraktivität dieses Vertriebsweges. Zum 31. Dezember 2010 betrifft der im Rahmen der Restrukturierung erforderliche Personalabbau rund 454 Bezirksleiterstellen

und soll vorrangig im Wege einvernehmlicher Lösungen verlaufen. Einige Altersteilzeitvereinbarungen wurden bereits vor Ankündigung des Restrukturierungsplans getroffen und sind von diesem somit nicht berührt.

Zum 31. Dezember 2010 bestand bei der ABV AG eine Restrukturierungsrückstellung für den in 2010 bekanntgegebenen Plan in Höhe von 42 Mio €. Im Geschäftsjahr 2010 fielen Restrukturierungsaufwendungen in Höhe von 42 Mio € an.

### **Restrukturierungspläne der Euler Hermes Gruppe**

Die Euler Hermes Gruppe startete im Geschäftsjahr 2010 das Programm „Excellence“, welches über einen Zeitraum von drei Jahren umgesetzt werden soll. Dieses Programm umfasst verschiedene Maßnahmen wie Eigenkündigungen, Vorruhestand und Altersteilzeit sowie Entlassungen und die Beendigung von Mietverträgen. Bis zum Ende des Jahres 2013 wird erwartet, dass sich der Personalbestand um rund 570 Mitarbeiter reduzieren wird. Der Personalabbau betrifft im Wesentlichen Euler Hermes in Deutschland, Großbritannien, Italien, Belgien und Frankreich.

Zum 31. Dezember 2010 erfasste die Euler Hermes Gruppe Restrukturierungsrückstellungen in Höhe von 57 Mio €. Im Geschäftsjahr 2010 fielen bei der Euler Hermes Gruppe Restrukturierungsaufwendungen in Höhe von 73 Mio € an.

Weiterhin beschloss Euler Hermes Belgien im Geschäftsjahr 2010, sein Konsumentenkreditversicherungs-geschäft am Brüsseler Standort, welches auf lange Sicht nicht mehr rentabel ist, zu schließen. Diese Maßnahme beinhaltet den Abbau von ca. 40 Mitarbeitern, überwiegend mittels Vorruhestand. Das Programm wird bis zum dritten Quartal 2011 abgeschlossen sein.

Zum 31. Dezember 2010 erfasste Euler Hermes Belgien Restrukturierungsrückstellungen in Höhe von 10 Mio €. Im Geschäftsjahr 2010 fielen bei Euler Hermes Belgien Restrukturierungsaufwendungen in Höhe von 10 Mio € an.



## Weitere Restrukturierungspläne

|                                                               | Restrukturierungs-<br>rückstellung,<br>Stand 31. Dezember, |               | Restrukturierungsaufwendungen<br>für das Geschäftsjahr |               |               |
|---------------------------------------------------------------|------------------------------------------------------------|---------------|--------------------------------------------------------|---------------|---------------|
|                                                               | 2010<br>Mio €                                              | 2009<br>Mio € | 2010<br>Mio €                                          | 2009<br>Mio € | 2008<br>Mio € |
| Allianz S.p.A., Italien                                       | 7                                                          | 17            | 5                                                      | - 6           | 2             |
| Allianz Belgium S.A. (Allianz Belgien)                        | 16                                                         | 17            | 7                                                      | 14            | —             |
| Companhia de Seguros Allianz Portugal S.A. (Allianz Portugal) | 3                                                          | 16            | - 5                                                    | 21            | —             |
| Cominvest Gruppe                                              | 3                                                          | 14            | 18                                                     | 67            | —             |
| Allianz Nederland Group (Allianz Niederlande)                 | 20                                                         | —             | 27                                                     | 2             | —             |
| Übrige                                                        | 79                                                         | 68            | 48                                                     | 110           | 55            |
| <b>Summe</b>                                                  | <b>128</b>                                                 | <b>132</b>    | <b>100</b>                                             | <b>208</b>    | <b>57</b>     |

### Allianz S.p.A., Italien

In 2007 wurde durch die Vorstände von RAS, Lloyd Adriatico und Allianz Subalpina ein Restrukturierungsplan bekanntgegeben, mit dem diese drei Gesellschaften in die zum 1. Oktober 2007 gegründete Allianz S.p.A. integriert werden sollen. Ziel ist eine strategische und wirtschaftliche Neuordnung durch Anpassung der Strategie im Versicherungsgeschäft. Außerdem werden einige Geschäftszweige in den Bereichen Versicherung und Asset Management neu ausgerichtet, indem alle unterstützenden Bereiche nach optimalen Gesichtspunkten zusammengeführt werden. Darüber hinaus werden einige Funktionen innerhalb der italienischen Standorte neu geordnet, während andere in einem Unternehmen zusammengefasst werden.

### Allianz Belgium S.A. (Allianz Belgien)

In 2009 wurde durch den Vorstand von Allianz Belgien die Umsetzung von zwei großen Initiativen des Operational Transformation Program bekanntgegeben: die Schließung des Hauptquartiers in Antwerpen und die Auslagerung der IT-Entwicklung.

### Companhia de Seguros Allianz Portugal S.A. (Allianz Portugal)

In 2009 hat Allianz Portugal ein Restrukturierungsprogramm zur Integration der IT-Plattformen zwischen Portugal und Spanien bekanntgegeben. Ziel des Programms ist die Einrichtung einer gemeinsam genutzten IT-Infrastruktur durch IT-Umgestaltung und Neuordnung von Prozessen sowie die Erweiterung der Dienstleistungen der Allianz Iberica Services Center. Das Programm beabsichtigt die Integration von Dienstleistungen und die Harmonisierung von Abläufen. Die Produktvielfalt soll ausgedehnt werden, während die Komplexität

der Produkte reduziert werden soll. Weiterhin soll die Einsatzmöglichkeit der Vertriebssoftware erweitert werden. Außerdem plant Allianz Portugal eine Verbesserung des Einsatzes eigener ungenutzter Kapazitäten zur Reduzierung der Nutzung externer Ressourcen, um von geringeren Kosten zu profitieren.

### Cominvest Gruppe

Mit Wirkung zum 12. Januar 2009 hat Allianz Global Investors Deutschland (AGI) die cominvest-Einheiten vom Allianz Konzern erworben. Seit der Übernahme wurden gemäß dem Beschluss der Geschäftsleitungen von AGI und cominvest Geschäftsbereiche und Funktionen dieser Einheiten zusammengeführt, begleitet von einem Personalabbau, wenn dieser unvermeidlich war. Die Integration von cominvest wurde im zweiten Quartal 2010 mit der Fusion von cominvest Gesellschaften auf AGI Gesellschaften, rückwirkend zum 1. Januar 2010, vollzogen. Die vollständige Integration von cominvest umfasst die Zusammenlegung von operativen Funktionen und Personal, die Vereinheitlichung der Produktpalette verbunden mit der Änderung der Marke und die Umsetzung von Maßnahmen zur Kostenoptimierung, um weitere Marktanteile der AGI in Deutschland hinzuzugewinnen.

### Allianz Nederland Group (Allianz Niederlande)

Als Teil des Restrukturierungsprogramms Allianz 2012, dessen Umsetzung schon 2009 begonnen hat, gab Allianz Niederlande 2010 bekannt, alle wesentlichen Aktivitäten an ihrem Hauptsitz in Rotterdam zu zentralisieren. Diese Umstrukturierung ist das direkte Ergebnis der Implementierung des Target Operating Model und zielt auf Kosteneinsparungen im Rahmen des Operational Transformation Plan.

## 51 Ergebnis je Aktie

### Ergebnis je Aktie

Das Ergebnis je Aktie errechnet sich aus dem Verhältnis des auf die Anteilseigner entfallenden Jahresüberschusses (-fehlbetrags) des Allianz Konzerns zum gewichteten Durchschnitt der Anzahl der Stammaktien, die sich im Berichtszeitraum in Umlauf befanden.

|                                                                                                                  | 2010<br>Mio €      | 2009<br>Mio €      | 2008<br>Mio €      |
|------------------------------------------------------------------------------------------------------------------|--------------------|--------------------|--------------------|
| <b>Auf die Anteilseigner entfallender Jahresüberschuss (-fehlbetrag) zur Berechnung des Ergebnisses je Aktie</b> | <b>5 053</b>       | <b>4 207</b>       | <b>- 2 362</b>     |
| aus fortzuführenden Geschäftsbereichen                                                                           | 5 053              | 4 602              | 4 049              |
| aus aufgegebenen Geschäftsbereichen                                                                              | —                  | - 395              | - 6 411            |
| <b>Gewichteter Durchschnitt der Anzahl ausstehender Stammaktien</b>                                              | <b>451 280 092</b> | <b>450 845 024</b> | <b>450 161 145</b> |
| <b>Ergebnis je Aktie (in €)</b>                                                                                  | <b>11,20</b>       | <b>9,33</b>        | <b>- 5,25</b>      |
| aus fortzuführenden Geschäftsbereichen                                                                           | 11,20              | 10,21              | 8,99               |
| aus aufgegebenen Geschäftsbereichen                                                                              | —                  | - 0,88             | - 14,24            |

### Verwässertes Ergebnis je Aktie

Das verwässerte Ergebnis je Aktie errechnet sich aus dem Verhältnis des auf die Anteilseigner entfallenden Jahresüberschusses (-fehlbetrags) des Allianz Konzerns zum gewichteten Durchschnitt der Anzahl der Stamm-

aktien, die sich im Berichtszeitraum in Umlauf befanden, jeweils korrigiert um die Effekte aus potenziell verwässernden Wertpapieren. Diese enthalten Genussscheine der Allianz SE, die in Stammaktien der Allianz SE getauscht werden können, sowie von der Allianz SE emittierte Optionsscheine, aktienbasierte Vergütungspläne und in Aktien zu erfüllende Derivate auf eigene Aktien.

|                                                                                                 | 2010<br>Mio €      | 2009<br>Mio €      | 2008<br>Mio €      |
|-------------------------------------------------------------------------------------------------|--------------------|--------------------|--------------------|
| <b>Auf die Anteilseigner entfallender Jahresüberschuss (-fehlbetrag)</b>                        | <b>5 053</b>       | <b>4 207</b>       | <b>- 2 362</b>     |
| Verwässerungseffekt                                                                             | - 22               | —                  | - 49               |
| <b>Jahresüberschuss (-fehlbetrag) zur Berechnung des verwässerten Ergebnisses je Aktie</b>      | <b>5 031</b>       | <b>4 207</b>       | <b>- 2 411</b>     |
| aus fortzuführenden Geschäftsbereichen                                                          | 5 031              | 4 602              | 4 000              |
| aus aufgegebenen Geschäftsbereichen                                                             | —                  | - 395              | - 6 411            |
| <b>Gewichteter Durchschnitt der Anzahl ausstehender Stammaktien</b>                             | <b>451 280 092</b> | <b>450 845 024</b> | <b>450 161 145</b> |
| <b>Potenziell verwässernde Anzahl von Stammaktien bei unterstelltem Umtausch von:</b>           |                    |                    |                    |
| Genussrechtskapital                                                                             | —                  | 728 683            | 1 469 443          |
| Optionsscheinen                                                                                 | —                  | —                  | 36 338             |
| Aktienbasierten Vergütungsplänen                                                                | 1 221 057          | 814 046            | 3 226 670          |
| Derivaten auf eigene Aktien                                                                     | —                  | —                  | 1 139 945          |
| <b>Zwischensumme</b>                                                                            | <b>1 221 057</b>   | <b>1 542 729</b>   | <b>5 872 396</b>   |
| <b>Gewichteter Durchschnitt der Anzahl ausstehender Stammaktien nach unterstelltem Umtausch</b> | <b>452 501 149</b> | <b>452 387 753</b> | <b>456 033 541</b> |
| <b>Verwässertes Ergebnis je Aktie (in €)</b>                                                    | <b>11,12</b>       | <b>9,30</b>        | <b>- 5,29</b>      |
| aus fortzuführenden Geschäftsbereichen                                                          | 11,12              | 10,17              | 8,77               |
| aus aufgegebenen Geschäftsbereichen                                                             | —                  | - 0,87             | - 14,06            |

Im gewichteten Durchschnitt der Anzahl der Aktien sind 2 725 114 (2009: 2 365 661; 2008: 2 004 155) eigene Aktien für den Zeitraum vom 1. Januar bis 31. Dezember 2010 nicht enthalten.

## 52 Sonstige Angaben

### Mitarbeiterinformationen

| Stand 31. Dezember | 2010           | 2009           |
|--------------------|----------------|----------------|
| Inland             | 47 889         | 49 051         |
| Ausland            | 103 449        | 104 152        |
| <b>Summe</b>       | <b>151 338</b> | <b>153 203</b> |

Im Geschäftsjahr 2010 betrug die durchschnittliche Anzahl der Mitarbeiterinnen und Mitarbeiter 151 642.

### Personalaufwand

|                                                    | 2010<br>Mio € | 2009<br>Mio € | 2008<br>Mio € |
|----------------------------------------------------|---------------|---------------|---------------|
| Löhne und Gehälter                                 | 8 344         | 7 707         | 9 153         |
| Soziale Abgaben und Aufwendungen für Unterstützung | 1 107         | 1 051         | 1 298         |
| Aufwendungen für die Altersversorgung              | 1 100         | 1 123         | 1 223         |
| <b>Summe<sup>1</sup></b>                           | <b>10 551</b> | <b>9 881</b>  | <b>11 674</b> |

<sup>1</sup> Enthält in 2008 Personalaufwand in Höhe von 2 532 Mio € der Dresdner Bank Gruppe.

### Abgabe der Erklärungen zum Deutschen Corporate Governance Kodex nach § 161 AktG

Vorstand und Aufsichtsrat der Allianz SE haben am 15. Dezember 2010 die Entsprechenserklärung nach § 161 AktG abgegeben und den Aktionären auf der Internetseite der Gesellschaft dauerhaft zugänglich gemacht.

Die Entsprechenserklärung der börsennotierten Konzerngesellschaft Oldenburgische Landesbank AG ist im Dezember 2010 abgegeben und den Aktionären dauerhaft zugänglich gemacht worden.

### Honorare und Dienstleistungen des Abschlussprüfers

Abschlussprüfer der Allianz Gruppe ist die KPMG AG Wirtschaftsprüfungsgesellschaft (KPMG AG).

Die von KPMG AG und verbundenen Unternehmen beziehungsweise KPMG AG und den weltweiten Mitgliedsfirmen von KPMG International (KPMG) in Rechnung gestellten Honorare gliedern sich nach vier Honorararten auf:

### Honorare der KPMG

|                                                               | KPMG weltweit |               | davon: KPMG AG und verbundene Unternehmen <sup>1</sup> |               |
|---------------------------------------------------------------|---------------|---------------|--------------------------------------------------------|---------------|
|                                                               | 2010<br>Mio € | 2009<br>Mio € | 2010<br>Mio €                                          | 2009<br>Mio € |
| Honorare für Abschlussprüfungen                               | 34,4          | 35,5          | 15,8                                                   | 16,3          |
| Honorare für sonstige Bestätigungs- oder Bewertungsleistungen | 5,0           | 5,0           | 4,1                                                    | 4,3           |
| Steuerberatungshonorare                                       | 1,9           | 1,6           | 1,3                                                    | 1,0           |
| Übrige Honorare                                               | 1,8           | 2,6           | 1,7                                                    | 2,4           |
| <b>Gesamt</b>                                                 | <b>43,1</b>   | <b>44,7</b>   | <b>22,9</b>                                            | <b>24,0</b>   |

### Honorare für Abschlussprüfungen

KPMG berechnete der Allianz Gruppe insgesamt 34,4 (2009: 35,5) Mio € im Zusammenhang mit der Prüfung unseres Konzernabschlusses sowie der gesetzlich vorgeschriebenen Prüfung von Jahresabschlüssen der Allianz SE und ihrer Tochtergesellschaften und für Testate im Zusammenhang mit der Erfüllung von Einreichungspflichten bei Behörden und der Einhaltung anderer gesetzlicher Bestimmungen. Die Dienstleistungen bestanden in erster Linie aus periodischen Prüfungstätigkeiten und der jährlichen Prüfungsarbeit.

### Honorare für sonstige Bestätigungs- oder Bewertungsleistungen

KPMG berechnete der Allianz Gruppe insgesamt 5,0 (2009: 5,0) Mio € an Honoraren für prüfungsnahe Leistungen, die in unmittelbarem Bezug zur Prüfung der Abschlüsse stehen und nicht unter den Honoraren für Abschlussprüfungen ausgewiesen werden. Diese umfassten hauptsächlich Beratungsleistungen hinsichtlich der Rechnungslegung und der Finanzberichterstattung sowie Due-Diligence-Leistungen.

### Steuerberatungshonorare

KPMG berechnete der Allianz Gruppe hauptsächlich für Steuerberatungs-, aber auch für Steuerrechtsberatungsdienste insgesamt ein Honorar von 1,9 (2009: 1,6) Mio €.

<sup>1</sup> KPMG AG und deren verbundene Unternehmen umfassten zum 31. Dezember 2010 KPMG Gesellschaften in Belgien, Deutschland, Großbritannien, Kasachstan, Luxemburg, Niederlande, Russland, Schweiz, Spanien, Türkei und der Ukraine.

### Übrige Honorare

KPMG berechnete der Allianz Gruppe insgesamt 1,8 (2009: 2,6) Mio € an Honoraren für übrige Dienstleistungen. Diese umfassten vor allem allgemeine Beratungsleistungen und Dienstleistungen unter Leitung und Verantwortung des Managements der Allianz Gruppe.

Alle von KPMG weltweit erbrachten Leistungen für die Allianz müssen vom Prüfungsausschuss des Aufsichtsrats der Allianz SE genehmigt werden. Dienstleistungen, die nicht unter die Kategorie Abschlussprüfungen fallen, müssen vom Prüfungsausschuss vorab genehmigt werden. Dieser Prozess basiert auf der „Positivliste“, die vom Prüfungsausschuss verabschiedet wurde. Zusätzlich wird ein sogenannter „Guiding Principles and User Test“ angewendet. Group Compliance und KPMG stellen dem Prüfungsausschuss regelmäßig eine Übersicht der durchgeführten Dienstleistungen zur Verfügung.

KPMG führt die meisten Prüfungen für die Allianz Gruppe durch und wird mit über 75 % aller Prüfungstätigkeiten beauftragt. Sonstige Abschlussprüfer stellten der Allianz Gruppe insgesamt 13,1 (2009: 12,3) Mio € in Rechnung.

### Bezüge des Vorstands

Zum 31. Dezember 2010 setzte sich der Vorstand aus 10 (2009: 10) aktiven Mitgliedern zusammen.

Die Barvergütung des Vorstands im Geschäftsjahr 2010 (ohne die vorläufige Rückstellung für den Drei-Jahres-Bonus) betrug 18,0 Mio € (für 2009 einschließlich der Auszahlung des Drei-Jahres-Bonus für den Zeitraum 2007–2009: 27,8 Mio €). Im Rahmen des bis 31. Dezember 2009 gültigen Vergütungssystem bestand die aktienbezogene Vergütung aus virtuellen Aktienoptionen (SAR) und virtuellen Aktien (RSU). Auf Basis des zum 1. Januar 2010 eingeführten Vergütungssystems werden ausschließlich RSU zugeteilt. Demzufolge wurden dem Vorstand 114 156<sup>1</sup> (2009: 95 288) RSU (und 2009: 192 709 SAR) mit einem Zeitwert bei Gewährung von insgesamt 9,9 (2009: 8,4) Mio € im Geschäftsjahr 2010 zugeteilt.<sup>2</sup>

Die Vergütung und andere Versorgungsleistungen für ausgeschiedene Vorstandsmitglieder bzw. ihre Hinterbliebenen betrug 7,0 (2009: 4,0) Mio €. Außerdem beliefen sich die Pensionsverpflichtungen und Anwartschaften auf Pensionen im Geschäftsjahr 2010 auf 58,0 (2009: 52,0) Mio €.

Die Vergütung des Aufsichtsrats im Geschäftsjahr 2010 betrug 1,5 (2009: 1,5) Mio €.

Ein individualisierter Ausweis der Vergütung des Vorstands und des Aufsichtsrats findet sich im Vergütungsbericht. Die dortigen Informationen sind Bestandteil des Konzernabschlusses.

## 53 Ereignisse nach dem Bilanzstichtag

### Aufstockung des Anteils an China Pacific Insurance

Am 8. Januar 2011 erhöhte der Allianz Konzern den Anteil seiner H-Shares an der China Pacific Insurance (Group) Co., Ltd. um 855 Mio USD.

### Überschwemmungen in Australien

Seit dem 10. Januar 2011 verursachten Überschwemmungen in Queensland, Australien, große Schäden. Nach bisherigem Kenntnisstand wird eine Nettoschadenbelastung von ungefähr 87 Mio € vor Ertragsteuern erwartet.

### Verkauf von Anteilen an Industrial and Commercial Bank of China (ICBC)

Im Januar 2011 verkaufte der Allianz Konzern 0,2 Mrd ICBC Aktien mit einem Gewinn von rund 0,1 Mrd €.

### Zyklon „Yasi“ in Australien

Am 2. Februar 2011 verursachte der Zyklon „Yasi“ in Ost-Australien große Schäden. Nach bisherigem Kenntnisstand wird eine Nettoschadenbelastung von ungefähr 37 Mio € vor Ertragsteuern erwartet.

<sup>1</sup> Der anzusetzende Wert einer RSU steht erst am Tag der Zuteilung (10.3.2011) und somit erst nach dem Testat durch die KPMG fest. Die ausgewiesenen Stücke basieren auf einer bestmöglichen Schätzung.

<sup>2</sup> Die Angaben für die aktienbezogene Vergütung im Geschäftsbericht 2009 basierten auf einer bestmöglichen Schätzung. Die hier gezeigten Werte zeigen den aktuellen Wert zum Zeitpunkt der Zuteilung.

## Erdbeben in Christchurch, Neuseeland

Am 22. Februar 2011 wurde die Innenstadt von Christchurch, Neuseeland, durch ein Erdbeben verwüstet. Momentan ist eine verlässliche Schätzung der Nettoschadenbelastung durch das Erdbeben nicht möglich.

## EuGH-Urteil zur europäischen Gender-Richtlinie

Am 1. März 2011 hat der Europäische Gerichtshof entschieden, dass die europarechtliche Befugnis der Mitgliedstaaten, Versicherungstarife nach dem Geschlecht zu differenzieren, wenn dies statistisch gerechtfertigt ist (Art. 5 Abs. 2 Richtlinie 2004/113/EU), mit Wirkung zum 21. Dezember 2012 unwirksam wird. Die Entscheidung enthält keine Aussage, dass bestehende Verträge von dem Unwirksamwerden der vorgenannten Ausnahmeregelung betroffen sein werden.

München, den 21. Februar 2011

Allianz SE  
Der Vorstand

|          |                                                                                     |
|----------|-------------------------------------------------------------------------------------|
| Nielsen  | Mr. James                                                                           |
| Speltz   | Oliver Zick                                                                         |
| 83003    |  |
| Lulu     | Wosches                                                                             |
| J. Rulph | Zurri                                                                               |

# Aufstellung des Anteilsbesitzes des Allianz Konzerns zum 31. Dezember 2010 gemäß § 313 Abs. 2 HGB

|                                                                           | Anteil <sup>1</sup><br>% |                                                                    | Anteil <sup>1</sup><br>% |                                                                            | Anteil <sup>1</sup><br>% |
|---------------------------------------------------------------------------|--------------------------|--------------------------------------------------------------------|--------------------------|----------------------------------------------------------------------------|--------------------------|
| <b>INLÄNDISCHE UNTERNEHMEN</b>                                            |                          |                                                                    |                          |                                                                            |                          |
| <b>Konsolidierte verbundene Unternehmen</b>                               |                          |                                                                    |                          |                                                                            |                          |
| ACM-Compagnie Mercur Aktiengesellschaft, Bremen                           | 50,0 <sup>2</sup>        | Allianz PV WS Fonds, Frankfurt am Main                             | 100,0 <sup>3</sup>       | AZL PE Nr. 1 GmbH, München                                                 | 100,0                    |
| ACP GmbH & Co. Beteiligungen KG II, München                               | 0,0 <sup>2</sup>         | Allianz PV-RD Fonds, Frankfurt am Main                             | 100,0 <sup>3</sup>       | AZS-Arges Vermögensverwaltungsgesellschaft mbH, München                    | 100,0                    |
| ACP GmbH & Co. Beteiligungen KG, München                                  | 0,0 <sup>2</sup>         | Allianz RCM Best Styles Euroland                                   | 51,5 <sup>3</sup>        | AZ-SGD Private Equity Fonds GmbH, München                                  | 100,0                    |
| ACP Vermögensverwaltung GmbH & Co. KG Nr. 4, München                      | 100,0                    | Allianz Re Asia, Frankfurt am Main                                 | 100,0 <sup>3</sup>       | AZT Automotive GmbH, Ismaning                                              | 100,0                    |
| ACP Vermögensverwaltung GmbH & Co. KG Nr. 4a, München                     | 100,0                    | Allianz Real Estate Germany GmbH, Stuttgart                        | 100,0                    | AZT Risk & Technology GmbH, München                                        | 100,0                    |
| ACP Vermögensverwaltung GmbH & Co. KG Nr. 4b, München                     | 100,0                    | Allianz Real Estate GmbH, München                                  | 100,0                    | Bankhaus W. Fortmann & Söhne KG, Oldenburg                                 | 100,0                    |
| ACP Vermögensverwaltung GmbH & Co. KG Nr. 4c, München                     | 100,0                    | Allianz Rechtsschutz-Service GmbH, München                         | 100,0                    | BCA Betriebs Catering GmbH Verpflegungsdienste, Gerlingen                  | 100,0                    |
| ACP Vermögensverwaltung GmbH & Co. KG Nr. 4d, München                     | 100,0                    | Allianz Renewable Energy Management GmbH, München                  | 100,0                    | Brahms Beteiligungs GmbH & Co. KG, Stuttgart                               | 94,9                     |
| ACP Vermögensverwaltung GmbH & Co. KG Nr. 4e, München                     | 100,0                    | Allianz Renewable Energy Subholding GmbH & Co. KG, Haar            | 100,0                    | Bürgel Wirtschaftsinformationen GmbH & Co. KG, Hamburg                     | 50,1                     |
| ACP Vermögensverwaltung GmbH Nr. 4 d. 1, München                          | 99,3                     | Allianz Service Center GmbH, München                               | 100,0                    | Bürgel Wirtschaftsinformationen Verwaltungs-GmbH, Hamburg                  | 50,4                     |
| ADEUS Aktienregister-Service-GmbH, Frankfurt am Main                      | 79,6                     | Allianz SIN Fonds, München                                         | 100,0 <sup>3</sup>       | DBI-FONDS ADPF2, Frankfurt am Main                                         | 100,0 <sup>3</sup>       |
| ADEIG Fondsvertrieb AG, München                                           | 50,0 <sup>2</sup>        | Allianz Strategiefonds Balance, Frankfurt am Main                  | 99,8 <sup>3</sup>        | dbi-Fonds Ammerland, Frankfurt am Main                                     | 100,0 <sup>3</sup>       |
| Aequitas GmbH Allianz Equity - Alternative Strategies, München            | 100,0                    | Allianz Strategiefonds Stabilität, Frankfurt am Main               | 99,6 <sup>3</sup>        | dbi-Fonds DAV, Frankfurt am Main                                           | 100,0 <sup>3</sup>       |
| AGI Total Germany Bond Portfolio, Frankfurt am Main                       | 100,0 <sup>3</sup>       | Allianz Strategiefonds Wachstum, Frankfurt am Main                 | 100,0                    | dbi-Fonds WE, Frankfurt am Main                                            | 100,0 <sup>3</sup>       |
| Alida Grundstücksgesellschaft mbH & Co. KG, Hamburg                       | 55,0                     | Allianz Taunusanlage GbR, Stuttgart                                | 99,5                     | Deutsche Lebensversicherungs-Aktiengesellschaft, Berlin                    | 100,0                    |
| Allianz AADB Fonds, Frankfurt am Main                                     | 100,0 <sup>3</sup>       | Allianz Treuhand GmbH, München                                     | 100,0                    | DONATOR Beratungs GmbH, München                                            | 100,0                    |
| Allianz ABS Fonds, Frankfurt am Main                                      | 100,0 <sup>3</sup>       | Allianz Venture Partners Beteiligungs-GmbH, München                | 100,0                    | Donator Beteiligungsverwaltung GmbH, München                               | 100,0                    |
| Allianz AKR Fonds, Frankfurt am Main                                      | 100,0 <sup>3</sup>       | Allianz Versicherungs-Aktiengesellschaft, München                  | 100,0                    | Dresdner Kleinwort Capital Italia Beteiligungsverwaltung GmbH, Grünwald    | 100,0                    |
| Allianz ALSI Fonds, Frankfurt am Main                                     | 100,0 <sup>3</sup>       | Allianz VKA Fonds, Frankfurt am Main                               | 100,0 <sup>3</sup>       | ESA Cargo & Logistics GmbH, Bad Friedrichshall                             | 100,0                    |
| Allianz Alternative Assets Holding GmbH, München                          | 100,0                    | Allianz VKRD-Fonds, Frankfurt am Main                              | 100,0 <sup>3</sup>       | esa EuroShip GmbH, Bad Friedrichshall                                      | 51,0                     |
| Allianz APAV Fonds, Frankfurt am Main                                     | 100,0 <sup>3</sup>       | Allianz VLBR-Fonds, Frankfurt am Main                              | 100,0 <sup>3</sup>       | Euler Hermes Collections GmbH, Potsdam                                     | 100,0                    |
| Allianz APKR Pimco Emerging Markets Fonds, Frankfurt am Main              | 100,0 <sup>3</sup>       | Allianz VSR Fonds, Frankfurt am Main                               | 100,0 <sup>3</sup>       | Euler Hermes Forderungsmanagement GmbH, Hamburg                            | 100,0                    |
| Allianz Automotive Services GmbH, Aschheim                                | 100,0                    | Allianz_ALD_Fonds, Frankfurt am Main                               | 100,0 <sup>3</sup>       | Euler Hermes Kreditversicherungs-Aktiengesellschaft, Hamburg               | 100,0                    |
| Allianz AVM Fonds, Frankfurt am Main                                      | 100,0 <sup>3</sup>       | Allianz_ALIK_Fonds, Frankfurt am Main                              | 100,0 <sup>3</sup>       | Euler Hermes Rating GmbH, Hamburg                                          | 100,0                    |
| Allianz AZL Vermögensverwaltung GmbH & Co. KG, München                    | 94,9                     | Allianz_AVL_1 Fonds, Frankfurt am Main                             | 100,0 <sup>3</sup>       | Frey printcom GmbH, Lauf a.d. Pegnitz                                      | 100,0                    |
| Allianz Beratungs- und Vertriebs-AG, München                              | 100,0                    | Allianz_AVM_8_Fonds, Frankfurt am Main                             | 100,0 <sup>3</sup>       | Gamma-Vermögensverwaltungsgesellschaft mbH, München                        | 100,0                    |
| Allianz Capital Partners GmbH, München                                    | 100,0 <sup>4</sup>       | Allianz_DGD_Fonds, Frankfurt am Main                               | 100,0 <sup>3</sup>       | German Real Estate Equity Fund I, Frankfurt am Main                        | 100,0 <sup>3</sup>       |
| Allianz Capital Partners Verwaltungen GmbH, München                       | 100,0                    | Allianz_FAD_Fonds, Frankfurt am Main                               | 100,0 <sup>3</sup>       | grapho metronic Mess- und Regeltechnik GmbH, München                       | 100,0                    |
| Allianz Climate Solutions GmbH, München                                   | 100,0                    | Allianz_LAD_Fonds, Frankfurt am Main                               | 100,0 <sup>3</sup>       | Grundstücks-Gesellschaft mbH, Oldenburg                                    | 100,0                    |
| Allianz Deutschland AG, München                                           | 100,0                    | Allianz_LFE_Fonds, Frankfurt am Main                               | 100,0 <sup>3</sup>       | Jota-Vermögensverwaltungsgesellschaft mbH, München                         | 100,0                    |
| Allianz dit Strategiefonds Wachstum Plus, Frankfurt am Main               | 79,5 <sup>3</sup>        | Allianz_PV_1_Fonds, Frankfurt am Main                              | 100,0 <sup>3</sup>       | manroland 1. Verwaltungsgesellschaft mbH, Offenbach                        | 100,0                    |
| Allianz EEE Fonds, Frankfurt am Main                                      | 100,0 <sup>3</sup>       | Allianz_RFG_Fonds, Frankfurt am Main                               | 100,0 <sup>3</sup>       | manroland AG, Offenbach                                                    | 100,0 <sup>3</sup>       |
| Allianz Finanzbeteiligungs GmbH, München                                  | 100,0                    | Allianz_RMO_1_Fonds, Frankfurt am Main                             | 100,0 <sup>3</sup>       | manroland Vertrieb und Service GmbH, Mülheim am Main                       | 100,0                    |
| Allianz GLA Fonds, Frankfurt am Main                                      | 100,0 <sup>3</sup>       | Allianz_SDR_Fonds, Frankfurt am Main                               | 100,0 <sup>3</sup>       | manroland Vertrieb und Servicegesellschaft Süddeutschland mbH, München     | 100,0                    |
| Allianz Global Corporate & Specialty AG, München                          | 100,0                    | Allianz_SOA_Fonds, Frankfurt am Main                               | 100,0 <sup>3</sup>       | Mondial Assistance Deutschland GmbH, München                               | 99,2                     |
| Allianz Global Investors Advisory GmbH, Frankfurt am Main                 | 100,0                    | Allianz_SysFI_Fonds (SysFI), Frankfurt am Main                     | 100,0 <sup>3</sup>       | Mondial Kunden Service, München                                            | 100,0                    |
| Allianz Global Investors AG, München                                      | 100,0                    | Allianz_UCD_1_Fonds (UPR), Frankfurt am Main                       | 100,0 <sup>3</sup>       | Münchener und Magdeburger Agrarversicherung Aktiengesellschaft, München    | 77,0                     |
| Allianz Global Investors Asia Pacific GmbH, München                       | 100,0                    | Allianz_VAD_Fonds, Frankfurt am Main                               | 100,0 <sup>3</sup>       | Münsterländische Bank Thie & Co. KG, Münster                               | 100,0                    |
| Allianz Global Investors Deutschland GmbH, München                        | 100,0                    | Allianz_VAE_Fonds, Frankfurt am Main                               | 100,0 <sup>3</sup>       | Objekt Burchardplatz GmbH & Co. KG, Stuttgart                              | 100,0                    |
| Allianz Global Investors Europe GmbH, München                             | 100,0                    | Allianz_VGL_1_Fonds (UPR), Frankfurt am Main                       | 100,0 <sup>3</sup>       | OLB-Beteiligungsgesellschaft mbH, Oldenburg                                | 98,8                     |
| Allianz Global Investors Europe Holding GmbH, München                     | 100,0                    | Allianz_VGL_Fonds, Frankfurt am Main                               | 100,0 <sup>3</sup>       | OLB-Service GmbH, Oldenburg                                                | 100,0                    |
| Allianz Global Investors Kapitalanlagegesellschaft mbH, Frankfurt am Main | 100,0                    | AllSecur Deutschland AG, München                                   | 100,0                    | Oldenburgische Landesbank Aktiengesellschaft, Oldenburg                    | 89,6                     |
| Allianz Global Investors Product Solutions GmbH, München                  | 100,0                    | ALZGI-Ferrostaal Renten 1, Frankfurt am Main                       | 70,0 <sup>3</sup>        | ppi Media GmbH, Hamburg                                                    | 74,8                     |
| Allianz GLR Fonds, Frankfurt am Main                                      | 100,0 <sup>3</sup>       | ALZGI-Ferrostaal Renten 2, Frankfurt am Main                       | 70,0 <sup>3</sup>        | rehacare GmbH, München                                                     | 74,9                     |
| Allianz GLRS Fonds, Frankfurt am Main                                     | 100,0 <sup>3</sup>       | Atropos Vermögensverwaltungsgesellschaft mbH, München              | 100,0                    | risklab GmbH, München                                                      | 100,0                    |
| Allianz GLU Fonds, Frankfurt am Main                                      | 100,0 <sup>3</sup>       | Auros GmbH, München                                                | 100,0                    | Roland Holding GmbH, München                                               | 74,1                     |
| Allianz GREQ Fonds, Frankfurt am Main                                     | 100,0 <sup>3</sup>       | Az Pensionsfonds AG (Metall), Stuttgart                            | 55,0                     | Selecta Deutschland GmbH, Eschborn                                         | 100,0                    |
| Allianz GRGB Fonds, Frankfurt am Main                                     | 100,0 <sup>3</sup>       | AZ-Arges Vermögensverwaltungsgesellschaft mbH, München             | 100,0                    | Selecta Holding GmbH, Eschborn                                             | 100,0                    |
| Allianz Handwerker Services GmbH, München                                 | 95,0                     | AZ-Argos 14 Vermögensverwaltungsgesellschaft mbH, München          | 100,0                    | Signa 12 Verwaltungen GmbH, Düsseldorf                                     | 94,9                     |
| Allianz Investment Management SE, München                                 | 100,0                    | AZ-Argos 22 Vermögensverwaltungsgesellschaft mbH, München          | 100,0                    | SITIA Beteiligungs- und Verwaltungen-GmbH, Köln                            | 100,0                    |
| Allianz Leben Private Equity Fonds 1998 GmbH, München                     | 100,0                    | AZ-Argos 41 Vermögensverwaltungsgesellschaft mbH, München          | 100,0                    | Sphæron Beteiligung GmbH & Co. KG, Düsseldorf                              | 94,9                     |
| Allianz Leben Private Equity Fonds 2001 GmbH, München                     | 100,0                    | AZ-Argos 44 Vermögensverwaltungsgesellschaft mbH & Co. KG, München | 100,0                    | Sphæron Objekt GmbH & Co. KG, Düsseldorf                                   | 100,0                    |
| Allianz Leben Private Equity Fonds 2008 GmbH, München                     | 100,0                    | AZ-Argos 46 Vermögensverwaltungsgesellschaft mbH, München          | 100,0                    | Vereinte Spezial Krankenversicherung Aktiengesellschaft, München           | 100,0                    |
| Allianz Leben Private Equity Fonds Plus GmbH, München                     | 100,0                    | AZ-Argos 47 Vermögensverwaltungsgesellschaft mbH, München          | 100,0                    | Werner Lies GmbH Großhandel für die Graphische Industrie, Neuhausen a.d.F. | 100,0                    |
| Allianz LEBENCO Fonds, Frankfurt am Main                                  | 100,0 <sup>3</sup>       | AZ-Argos 50 Vermögensverwaltungsgesellschaft mbH & Co. KG, München | 100,0                    | Windpark Berge-Kleeste GmbH & Co.KG, Haar                                  | 100,0                    |
| Allianz Lebensversicherungs-Aktiengesellschaft, Stuttgart                 | 100,0                    | AZ-Argos 51 Vermögensverwaltungsgesellschaft mbH & Co. KG, München | 100,0                    | Windpark Büttel GmbH & Co. KG, Sehestedt                                   | 100,0                    |
| Allianz Managed Operations & Services SE, München                         | 100,0                    | AZ-Argos 55 Vermögensverwaltungsgesellschaft mbH, München          | 100,0                    | Windpark Emmendorf GmbH & Co.KG, Emmendorf                                 | 100,0                    |
| Allianz of Asia-Pacific and Africa GmbH, München                          | 100,0                    | AZ-Argos 57 Vermögensverwaltungsgesellschaft mbH, München          | 100,0                    | Windpark Freyenstein GmbH & Co. KG, Husum                                  | 100,0                    |
| Allianz Pension Partners GmbH, München                                    | 100,0                    | AZ-Argos 58 Vermögensverwaltungsgesellschaft mbH & Co. KG, München | 100,0                    | Windpark Halenbeck GmbH & Co. KG, Husum                                    | 100,0                    |
| Allianz Pensionsfonds Aktiengesellschaft, Stuttgart                       | 100,0                    | AZ-GARI Vermögensverwaltungsgesellschaft mbH & Co. KG, München     | 100,0                    | Windpark Kesfeld - Heckschueid GmbH & Co KG, Pinneberg                     | 100,0                    |
| Allianz Pensionskasse Aktiengesellschaft, Stuttgart                       | 100,0                    | AZL AI Nr. 1 GmbH, München                                         | 100,0                    | Windpark Kirl GmbH & Co. KG, Pinneberg                                     | 100,0                    |
| Allianz Private Equity GmbH, München                                      | 100,0                    |                                                                    |                          | Windpark Kittitz KG GmbH & Co. KG, Husum                                   | 100,0                    |
| Allianz Private Equity Partners Verwaltungen GmbH, München                | 100,0                    |                                                                    |                          | Windpark Pröttlin GmbH & Co. KG, Sehestedt                                 | 100,0                    |
| Allianz Private Krankenversicherungs-Aktiengesellschaft, München          | 100,0                    |                                                                    |                          | Windpark Quitzow GmbH & Co. KG, Sehestedt                                  | 100,0                    |
| Allianz Prozess Finanz GmbH, München                                      | 100,0                    |                                                                    |                          | Windpark Redekin GmbH & Co KG, Genthin                                     | 100,0                    |

1 Berechnung berücksichtigt die von abhängigen Unternehmen gehaltenen Anteile vollständig, auch wenn der Konzernanteil an diesem abhängigen Unternehmen unter 100% liegt.  
2 Kontrolle durch Allianz Konzern

3 Publikums-, Private Equity- oder Spezialfonds  
4 Konzernabschluss und -lagebericht der Allianz SE haben gemäß Anwendung des § 264 Abs. 3 HGB befreiende Wirkung.  
5 Konzernanteil über haltende Gesellschaft Roland Holding GmbH, München: 74,1%

6 Klassifizierung als assoziiertes Unternehmen nach SIC-12  
7 Special Purpose Entity nach SIC-12 (SPE)  
8 Maßgeblicher Einfluss

|     |                                                 |
|-----|-------------------------------------------------|
| 162 | Konzernabschluss                                |
| 170 | Konzernanhang                                   |
| 224 | Angaben zur Konzernbilanz                       |
| 260 | Angaben zur Konzern-Gewinn- und Verlustrechnung |
| 275 | Sonstige Angaben                                |

|                                                                                                     | Anteil <sup>1</sup><br>% |
|-----------------------------------------------------------------------------------------------------|--------------------------|
| Windpark Schönwalde GmbH & Co. KG, Potsdam                                                          | 100,0                    |
| Windpark Waltersdorf GmbH Co. KG Renditefonds, Bremen                                               | 100,0                    |
| Windpark Werder Zinndorf GmbH & Co. KG, Sehestedt                                                   | 100,0                    |
| <b>Nicht konsolidierte verbundene Unternehmen</b>                                                   |                          |
| AFC Assecuranz- und Finanzvermittlungs-Contor GmbH, Münster                                         | 51,0                     |
| Alida Grundstücksverwaltung GmbH, Hamburg                                                           | 55,0                     |
| All Net GmbH, Stuttgart                                                                             | 100,0                    |
| Allianz Autowelt GmbH, München                                                                      | 100,0                    |
| Allianz Beteiligungs Management GmbH, München                                                       | 100,0                    |
| Allianz Immobilienfonds 1 GmbH & Co. KG, München                                                    | 63,5                     |
| Allianz Immobilienfonds GmbH, Stuttgart                                                             | 100,0                    |
| Allianz Objektbeteiligungs - GmbH, Stuttgart                                                        | 100,0                    |
| Allianz OrtungsServices GmbH, Stuttgart                                                             | 100,0                    |
| Allianz Pension Consult GmbH, Stuttgart                                                             | 100,0                    |
| Bürgel Beteiligungs GmbH, Hamburg                                                                   | 100,0                    |
| Bürgel Erfurt Beteiligungsgesellschaft mbH, Erfurt                                                  | 100,0                    |
| Bürgel Erfurt GmbH & Co. KG, Erfurt                                                                 | 100,0                    |
| Bürgel Internationale Inkassogesellschaft GmbH, Hamburg                                             | 100,0                    |
| Bürgel Wirtschaftsinformationen Vertriebsgesellschaft mbH, Hamburg                                  | 100,0                    |
| Dealis Fund Operations GmbH, München                                                                | 50,1                     |
| EUROGRAFICA Systemplanungs-GmbH, Augsburg                                                           | 100,0                    |
| EURO-Pro Gesellschaft für Data Processing mbH, Gräfenwiesbach                                       | 75,2                     |
| Failure & Risk Consulting GmbH, Ismaning                                                            | 100,0                    |
| Grundstücksgesellschaft der Vereinten Versicherungen mbH, München                                   | 100,0                    |
| IDS GmbH - Analysis and Reporting Services, München                                                 | 100,0                    |
| Infrastruktur Putlitz Ost GmbH, Putlitz                                                             | 70,8                     |
| Infrastruktur Putlitz Ost II GmbH, Putlitz                                                          | 100,0                    |
| manroland Heusenstamm GmbH, Heusenstamm                                                             | 100,0                    |
| manroland Versicherungsvermittlungs GmbH, Offenbach                                                 | 100,0                    |
| META Finanz-Informationssysteme GmbH, München                                                       | 100,0                    |
| MetallRente Pensionsfonds AG i.G., Stuttgart                                                        | 55,0                     |
| OLB-Immobilienfond-GmbH, Oldenburg                                                                  | 100,0                    |
| Rhein-Main Metallverarbeitung GmbH, Mainhausen                                                      | 100,0                    |
| Supercheck GmbH, Köln                                                                               | 100,0                    |
| <b>Gemeinschaftsunternehmen</b>                                                                     |                          |
| Janus-Vermögensverwaltungsgesellschaft mbH, München                                                 | 50,0                     |
| Partenreederei MT "Multitank Britannia", Hamburg                                                    | 50,0                     |
| <b>Assoziierte Unternehmen</b>                                                                      |                          |
| ALLIANZ RCM DEEP VALUE EUROPE, Frankfurt am Main                                                    | 41,1                     |
| Allianz RCM Global Alpha Plus, Frankfurt am Main                                                    | 20,7                     |
| AV Packaging GmbH, München                                                                          | 51,0 <sup>6</sup>        |
| Bürgel Braunschweig GmbH, Braunschweig                                                              | 25,1                     |
| Fondsdepot Bank GmbH, Hof                                                                           | 49,0                     |
| Mühl Product & Service und Thüringer Baustoffhandel Beteiligungs- und Verwaltungs GmbH, Kranichfeld | 25,0                     |
| PrintCity GmbH & Co. KG, Augsburg                                                                   | 27,9                     |
| PrintCity GmbH, Augsburg                                                                            | 25,0                     |
| REISEGARANT, Hamburg                                                                                | 24,0                     |
| Scandferries Holding GmbH, Hamburg                                                                  | 47,7                     |
| Umspannwerk Putlitz GmbH & Co., Putlitz                                                             | 25,8                     |
| <b>Sonstige Anteile zwischen 5 und 20% Stimmrechtsanteil</b>                                        |                          |
| Commerzbank AG, Frankfurt am Main                                                                   | 10,3                     |
| EXTREMUS Versicherungs-AG, Köln                                                                     | 16,0                     |
| Heidelberger Druckmaschinen AG, Heidelberg                                                          | 13,2                     |
| Marschollek, Lautenschlaeger u. Partner AG, Wiesloch                                                | 8,9                      |
| Sana Kliniken AG, München                                                                           | 13,8                     |
| <b>AUSLÄNDISCHE UNTERNEHMEN</b>                                                                     |                          |
| <b>Konsolidierte verbundene Unternehmen</b>                                                         |                          |
| AB Servicios Selecta Espana S.L., Madrid                                                            | 100,0                    |
| ACMAR S.A., Casablanca                                                                              | 55,0                     |
| Acropole Monde A, Paris                                                                             | 88,0 <sup>3</sup>        |
| ACTIP 3, Paris                                                                                      | 79,4 <sup>3</sup>        |
| Administradora de Inversión Coleseguros S.A. en Liquidación, Bogotá D.C.                            | 100,0                    |
| Aero-Fonte S.r.l., Catania                                                                          | 100,0                    |

|                                                                    | Anteil <sup>1</sup><br>% |
|--------------------------------------------------------------------|--------------------------|
| AGCS Marine Insurance Company, Chicago, IL                         | 100,0                    |
| AGF 2X, S.A., Paris                                                | 100,0                    |
| AGF Ameriques D, S.A., Paris                                       | 99,4 <sup>3</sup>        |
| AGF Asac Actions, S.A., Paris                                      | 100,0 <sup>3</sup>       |
| AGF Assurfinance, S.A., Paris                                      | 99,8                     |
| AGF Balanced, Paris Cedex 09                                       | 99,7 <sup>3</sup>        |
| AGF Benelux S.A., Luxemburg                                        | 100,0                    |
| AGF Capital Investissement 2, Paris                                | 93,6 <sup>3</sup>        |
| AGF Capital Investissement, Paris                                  | 92,7 <sup>3</sup>        |
| AGF CREATIONS2, S.A., Paris                                        | 100,0 <sup>3</sup>       |
| AGF Euro Actions C et D, S.A., Paris                               | 88,4 <sup>3</sup>        |
| AGF FCR, Paris                                                     | 100,0 <sup>3</sup>       |
| AGF FIF Inst. Multimercado FI, São Paulo                           | 100,0 <sup>3</sup>       |
| AGF Holdings (UK) Limited, Guildford                               | 100,0                    |
| AGF HOSPITAL EURO L, S.A., Paris                                   | 100,0 <sup>3</sup>       |
| AGF Hospitaliers Monde, S.A., Paris                                | 100,0 <sup>3</sup>       |
| AGF IART VINTAGE, Paris                                            | 100,0 <sup>3</sup>       |
| AGF Indice Euroland, SARL, Paris                                   | 69,8 <sup>3</sup>        |
| AGF Insurance Limited, Guildford                                   | 100,0                    |
| AGF Inversiones S.A., Buenos Aires                                 | 100,0                    |
| AGF Marches Emergents, S.A., Paris                                 | 74,8 <sup>3</sup>        |
| AGF Multi Alternatives L, S.A., Paris                              | 80,8 <sup>3</sup>        |
| AGF Peh Europe V A, Paris                                          | 69,5 <sup>3</sup>        |
| AGF Private Equity FCPR, Paris                                     | 56,5 <sup>3</sup>        |
| AGF RAS Holding BV, Amsterdam                                      | 100,0                    |
| AGF USA, S.A., Paris                                               | 85,8 <sup>3</sup>        |
| AGF Imo, S.A., Paris                                               | 72,8 <sup>3</sup>        |
| AGIF RCM Asia                                                      | 87,6 <sup>3</sup>        |
| AGIF-Allianz US High Yield                                         | 48,9 <sup>3</sup>        |
| Agricola Holdings Pty Ltd., Melbourne                              | 70,0                     |
| Agricola Underwriting Management Ltd. (NZ), Melbourne              | 100,0                    |
| Agricola Underwriting Pty Ltd., Melbourne                          | 100,0                    |
| AIM EQUITY EMU 1, Paris                                            | 100,0 <sup>3</sup>       |
| AIM EQUITY US, Paris                                               | 100,0 <sup>3</sup>       |
| AIM LIQUIDITY                                                      | 86,3 <sup>3</sup>        |
| AIM Singapore Pte. Ltd., Singapur                                  | 100,0                    |
| AIM Underwriting Limited, Toronto                                  | 100,0                    |
| Allegiance Marketing Group LLC, North Palm Beach, FL               | 100,0                    |
| Allianz (UK) Limited, Guildford                                    | 100,0                    |
| Allianz Actio France, Paris                                        | 67,2 <sup>3</sup>        |
| Allianz Actions Aéquitas, Paris                                    | 68,3 <sup>3</sup>        |
| Allianz Actions Euro Value, Paris                                  | 94,6 <sup>3</sup>        |
| Allianz Actions Euroland, Paris                                    | 94,7 <sup>3</sup>        |
| Allianz Actions France MidCap, Paris                               | 69,1 <sup>3</sup>        |
| Allianz Actions France, Paris                                      | 73,0 <sup>3</sup>        |
| Allianz Actions Indice Japon (couvert), Paris                      | 74,6 <sup>3</sup>        |
| Allianz Actions Indice US (couvert), Paris                         | 92,7 <sup>3</sup>        |
| Allianz Actions Internationales, Paris                             | 93,6 <sup>3</sup>        |
| Allianz Actions Japon, Paris                                       | 83,3 <sup>3</sup>        |
| Allianz Actions Valeurs Moyennes, Paris                            | 90,4 <sup>3</sup>        |
| Allianz Actions VD, Paris                                          | 97,2 <sup>3</sup>        |
| Allianz Africa S.A., Paris                                         | 100,0                    |
| Allianz Africa, Paris                                              | 100,0                    |
| Allianz Air France IFC, Paris                                      | 99,1 <sup>3</sup>        |
| Allianz Alapkezelő Zrt., Budapest                                  | 100,0                    |
| Allianz Alp Sp. z oo, Warschau                                     | 100,0                    |
| Allianz America Holding B.V., Amsterdam                            | 100,0                    |
| Allianz Amériques StocksPLUS (couvert), Paris                      | 90,0 <sup>3</sup>        |
| Allianz Annuity Company of Missouri, Clayton                       | 100,0                    |
| Allianz Argentina Compania de Seguros Generales S.A., Buenos Aires | 100,0                    |
| Allianz Ascension 2011, Paris                                      | 100,0 <sup>3</sup>       |
| Allianz Asset Allocation Russia, Moskau                            | 80,7 <sup>3</sup>        |
| Allianz Asset Management správcovská spol a.s., Bratislava         | 100,0                    |
| Allianz Australia Advantage Ltd., Sydney                           | 100,0                    |
| Allianz Australia Employee Share Plan Pty Ltd., Sydney             | 100,0                    |
| Allianz Australia Insurance Limited, Sydney                        | 100,0                    |
| Allianz Australia Life Insurance Limited, Sydney                   | 100,0                    |
| Allianz Australia Limited, Sydney                                  | 100,0                    |
| Allianz Australia Services (No. 2) Pty Ltd., Sydney                | 100,0                    |
| Allianz Australia Services Pty Limited, Sydney                     | 100,0                    |
| Allianz Australia Workers Compensation (NSW) Limited, Sydney       | 100,0                    |
| Allianz Australia Workers Compensation (SA) Limited, Adelaide      | 100,0                    |

|                                                                      | Anteil <sup>1</sup><br>% |
|----------------------------------------------------------------------|--------------------------|
| Allianz Australia Workers Compensation (Victoria) Limited, Melbourne | 100,0                    |
| Allianz Australian Claims Services Limited, Sydney                   | 100,0                    |
| Allianz Aviation Managers, Burbank                                   | 100,0                    |
| Allianz Balanced Investment Fund, Budapest                           | 95,1 <sup>3</sup>        |
| Allianz Bank Bulgaria ISC, Sofia                                     | 99,9                     |
| Allianz Bank Financial Advisors S.p.A., Mailand                      | 100,0                    |
| Allianz Bank Polska S.A., Warschau                                   | 100,0                    |
| Allianz Banque S.A., Courbevoie                                      | 100,0                    |
| Allianz Belgium S.A., Brüssel                                        | 100,0                    |
| Allianz Bénin dommages, Cotonou                                      | 81,0                     |
| Allianz Biplus 2, Paris                                              | 100,0 <sup>3</sup>       |
| Allianz Biznes Sp. z o.o., Warschau                                  | 100,0                    |
| Allianz Bonds Diversified Euro, Paris                                | 100,0 <sup>3</sup>       |
| Allianz Bulgaria Holding Company Ltd., Sofia                         | 66,2                     |
| Allianz Bulgaria Insurance and Reinsurance Company Ltd., Sofia       | 78,0                     |
| Allianz Bulgaria Life Insurance Company Ltd., Sofia                  | 99,0                     |
| Allianz Bulgaria Pension Company AD, Sofia                           | 65,9                     |
| Allianz Burkina dommages, Ouagadougou                                | 52,4                     |
| Allianz Burkina vie, Ouagadougou                                     | 70,0                     |
| Allianz Business Services Limited, Lancaster                         | 100,0                    |
| Allianz business services s.r.o., Bratislava                         | 100,0                    |
| Allianz Cameroun dommages, Douala                                    | 75,4                     |
| Allianz Cameroun Vie, Douala                                         | 75,8                     |
| ALLIANZ CAP ISR 2016                                                 | 97,7 <sup>3</sup>        |
| Allianz Capital Partners Ltd., London                                | 100,0                    |
| Allianz Capital Partners of America, Inc., New York, NY              | 100,0                    |
| Allianz Cash Pool II LLC, Westport                                   | 100,0                    |
| Allianz Centrafrique dommages, Bangui                                | 88,3                     |
| Allianz China General Insurance Company Ltd., Guangzhou              | 100,0                    |
| Allianz China Life Insurance Co. Ltd., Shanghai                      | 100,0                    |
| Allianz Citizen Care SRI, Mailand                                    | 73,3 <sup>3</sup>        |
| Allianz Compagnia Italiana Finanziamenti 2 S.p.A., Mailand           | 100,0                    |
| Allianz Compagnia Italiana Finanziamenti S.p.A., Mailand             | 100,0                    |
| Allianz Compañía de Seguros y Reaseguros S.A., Madrid                | 99,9                     |
| Allianz Consultores S.C., Mexiko-Stadt                               | 66,0                     |
| Allianz Cornhill Information Services Private Ltd., Trivandrum       | 100,0                    |
| Allianz Côte d'Ivoire dommages, Abidjan                              | 74,1                     |
| Allianz Côte d'Ivoire vie, Abidjan                                   | 71,0                     |
| Allianz Creactions 1, Paris                                          | 100,0 <sup>3</sup>       |
| Allianz Destination 2014, Paris                                      | 99,9 <sup>3</sup>        |
| Allianz Direct Agent di Assicurare s.r.l., Bukarest                  | 100,0                    |
| Allianz Direct Kft., Budapest                                        | 100,0                    |
| Allianz Direct New Europe d.o.o., Zagreb                             | 100,0                    |
| Allianz Direct New Europe Sp. z o.o., Warschau                       | 100,0                    |
| Allianz Direct s.r.o., Prag                                          | 100,0                    |
| Allianz do Brasil Ltda., São Paulo                                   | 100,0                    |
| Allianz Dynamic Investment Fund, Budapest                            | 98,4 <sup>3</sup>        |
| Allianz EDUKACJA S.A., Bialobrzegi                                   | 100,0                    |
| Allianz Efficio Confort, Paris                                       | 99,8 <sup>3</sup>        |
| Allianz Efficio Plus, Paris                                          | 100,0 <sup>3</sup>       |
| Allianz Efficio, Paris                                               | 100,0 <sup>3</sup>       |
| Allianz Elementar Lebensversicherungs-Aktiengesellschaft, Wien       | 100,0                    |
| Allianz Elementar Versicherungs-Aktiengesellschaft, Wien             | 100,0                    |
| Allianz Engineering Services Limited, Guildford                      | 100,0                    |
| Allianz Equity Investments Ltd., Guildford                           | 100,0                    |
| Allianz Equity Large Cap EMU                                         | 100,0 <sup>3</sup>       |
| Allianz EURECO Equity, Paris                                         | 79,9 <sup>3</sup>        |
| Allianz Euro Bond Plus, Paris                                        | 85,5 <sup>3</sup>        |
| Allianz Euro Credit SRI, Paris                                       | 73,5 <sup>3</sup>        |
| Allianz Euro Emprunts d'Etat, Paris                                  | 60,7 <sup>3</sup>        |
| Allianz Euro Gagnant, Paris                                          | 99,8 <sup>3</sup>        |
| Allianz Euro Inflation, Paris                                        | 74,4 <sup>3</sup>        |
| Allianz Euro Investment Grade, Paris                                 | 63,0 <sup>3</sup>        |
| Allianz Euro Oblig 1-3 Plus, Paris                                   | 62,6 <sup>3</sup>        |
| Allianz Euro Obligations Crédit ISR, Paris                           | 78,2 <sup>3</sup>        |
| Allianz Europe B.V., Amsterdam                                       | 100,0                    |
| Allianz Europe Ltd., Amsterdam                                       | 100,0                    |
| Allianz Finance Corporation, Westport                                | 100,0                    |
| Allianz Finance Euro Immobilier                                      | 57,4 <sup>3</sup>        |
| Allianz Finance Europe Convertible                                   | 78,9 <sup>3</sup>        |
| Allianz Finance II B.V., Amsterdam                                   | 100,0                    |

- 1 Berechnung berücksichtigt die von abhängigen Unternehmen gehaltenen Anteile vollständig, auch wenn der Konzernanteil an diesem abhängigen Unternehmen unter 100% liegt.
- 2 Kontrolle durch Allianz Konzern

- 3 Publikums-, Private Equity- oder Spezialfonds
- 4 Konzernabschluss und -lagebericht der Allianz SE haben gemäß Anwendung des § 264 Abs. 3 HGB befreiende Wirkung.
- 5 Konzernanteil über haltende Gesellschaft Roland Holding GmbH, München: 74,1%

- 6 Klassifizierung als assoziiertes Unternehmen nach SIC-12
- 7 Special Purpose Entity nach SIC-12 (SPE)
- 8 Maßgeblicher Einfluss



|                                                                                       | Anteil¹<br>% |
|---------------------------------------------------------------------------------------|--------------|
| Allianz Finance II Luxembourg S.A., Luxemburg                                         | 100,0        |
| Allianz Finance III B.V., Amsterdam                                                   | 100,0        |
| Allianz Finance IV Lux Sàrl, Luxemburg                                                | 100,0        |
| Allianz Finance Management Pty Ltd., Sydney                                           | 100,0        |
| Allianz Finance Obligations Monde, Paris                                              | 96,5³        |
| Allianz Finance Pty Ltd., Sydney                                                      | 100,0        |
| Allianz Finance V Lux. S.à r.l., Luxemburg                                            | 100,0        |
| Allianz Finance VI Luxembourg S.à r.l., Luxemburg                                     | 100,0        |
| Allianz FinanzPlan 2015, Luxemburg                                                    | 74,0³        |
| Allianz FinanzPlan 2020, Luxemburg                                                    | 86,7³        |
| Allianz FinanzPlan 2025, Luxemburg                                                    | 91,2³        |
| Allianz FinanzPlan 2030, Luxemburg                                                    | 96,1³        |
| Allianz FinanzPlan 2035, Luxemburg                                                    | 96,4³        |
| Allianz FinanzPlan 2040, Luxemburg                                                    | 97,9³        |
| Allianz FinanzPlan 2045, Luxemburg                                                    | 99,3³        |
| Allianz FinanzPlan 2050, Luxemburg                                                    | 99,6³        |
| Allianz Fire and Marine Insurance Japan Ltd., Tokio                                   | 100,0        |
| Allianz Foncier, Paris                                                                | 63,7³        |
| Allianz Formuléo ISR                                                                  | 98,9³        |
| Allianz France International S.A., Paris                                              | 100,0        |
| Allianz France Real Estate Invest, Paris                                              | 100,0        |
| Allianz France S.A., Paris                                                            | 100,0        |
| Allianz General Insurance Company (Malaysia) Berhad p.l.c., Kuala Lumpur              | 100,0        |
| Allianz generalni sluzby s.r.o., Prag                                                 | 100,0        |
| Allianz Gestion Sociedad Gestora de Instituciones de Inversion Colectiva S.A., Madrid | 100,0        |
| Allianz Global Corporate & Specialty France, S.A., Paris                              | 100,0        |
| Allianz Global Investors (UK) Ltd., London                                            | 100,0        |
| Allianz Global Investors Asian Value Opportunities Segregated Portfolio, Grand Cayman | 100,0³       |
| Allianz Global Investors Australia Ltd., Sydney                                       | 100,0        |
| Allianz Global Investors Capital Limited, Cardiff                                     | 100,0        |
| Allianz Global Investors Capital LLC, Dover (Delaware)                                | 100,0        |
| Allianz Global Investors Distributors LLC, Dover (Delaware)                           | 100,0        |
| Allianz Global Investors Financial Services LLC, Dover (Delaware)                     | 100,0        |
| Allianz Global Investors France S.A., Paris                                           | 99,9         |
| Allianz Global Investors Fund Management LLC, Dover (Delaware)                        | 100,0        |
| Allianz Global Investors Holdings Inc., Dover (Delaware)                              | 100,0        |
| Allianz Global Investors Hong Kong Ltd., Hongkong                                     | 100,0        |
| Allianz Global Investors Ireland Ltd., Dublin                                         | 100,0        |
| Allianz Global Investors Italia S.p.A., Mailand                                       | 100,0        |
| Allianz Global Investors Japan Co. Ltd., Tokio                                        | 100,0        |
| Allianz Global Investors Korea Limited, Seoul                                         | 100,0        |
| Allianz Global Investors Luxembourg S.A., Senningerberg                               | 100,0        |
| Allianz Global Investors Managed Accounts LLC, Dover (Delaware)                       | 100,0        |
| Allianz Global Investors Nominee Services Ltd., Grand Cayman                          | 100,0        |
| Allianz Global Investors Nominees (UK) Ltd., London                                   | 100,0        |
| Allianz Global Investors NY Holdings LLC, Dover (Delaware)                            | 100,0        |
| Allianz Global Investors of America L.P., Dover (Delaware)                            | 100,0        |
| Allianz Global Investors of America LLC, Dover (Delaware)                             | 100,0        |
| Allianz Global Investors Services (UK) Ltd., London                                   | 100,0        |
| Allianz Global Investors Singapore Ltd., Singapur                                     | 100,0        |
| Allianz Global Investors Solutions LLC, Dover (Delaware)                              | 100,0        |
| Allianz Global Investors Taiwan Ltd., Taipei                                          | 100,0        |
| Allianz Global Investors U.S. Holding II LLC, Dover (Delaware)                        | 100,0        |
| Allianz Global Investors U.S. Retail LLC, Dover (Delaware)                            | 100,0        |
| Allianz Global Life Ltd., Dublin                                                      | 100,0        |
| Allianz Global Risks US Insurance Company, Corp., Burbank                             | 100,0        |
| Allianz Graduello, Paris                                                              | 100,0³       |
| Allianz Hayat ve Emeklilik AS, Istanbul                                               | 89,0         |
| Allianz Hedge Fund Partners (Cayman) LLC, George Town                                 | 100,0        |
| Allianz Hedge Fund Partners Holding L.P., Dover (Delaware)                            | 100,0        |
| Allianz Hellas Insurance Company S.A., Athen                                          | 100,0        |
| Allianz Héxéo                                                                         | 98,3³        |
| Allianz Holding eins GmbH, Wien                                                       | 100,0        |
| Allianz Holding France SAS, Paris                                                     | 100,0        |
| Allianz Holdings plc, Guildford                                                       | 100,0        |
| Allianz Holland Paraplufonds N.V., Nieuwegein                                         | 80,0³        |
| Allianz Hospitalier Valeurs Durables, Paris                                           | 100,0³       |
| Allianz Hungária Biztosító Zrt., Budapest                                             | 100,0        |
| Allianz IARD S.A., Paris                                                              | 100,0        |

|                                                                     | Anteil¹<br>% |
|---------------------------------------------------------------------|--------------|
| Allianz Income Managment Services Inc., Minneapolis, MN             | 100,0        |
| Allianz Indice Matières Premières, Paris                            | 62,6³        |
| ALLIANZ INDICEO 2015                                                | 93,9³        |
| Allianz Individual Insurance Group, LLC, Minneapolis, MN            | 100,0        |
| Allianz Informatique G.I.E., Paris                                  | 100,0        |
| Allianz Informatyka Sp. z o.o., Warschau                            | 100,0        |
| Allianz Infrastructure Partners Ltd., London                        | 100,0        |
| Allianz Insurance (Hong Kong) Ltd., Hongkong                        | 100,0        |
| Allianz Insurance Company Lanka Limited, Saram                      | 100,0        |
| Allianz Insurance Company of Singapore Pte. Ltd., Singapur          | 100,0        |
| Allianz Insurance Company-Egypt S.A.E., Kairo                       | 85,0         |
| Allianz Insurance Management Asia Pacific Pte. Ltd., Singapur       | 100,0        |
| Allianz Insurance plc., Guildford                                   | 100,0        |
| Allianz Invest 50, Wien                                             | 100,0³       |
| Allianz Invest Alternativ, Wien                                     | 100,0³       |
| ALLIANZ INVEST d.o.o., Zagreb                                       | 100,0        |
| Allianz Invest Eurorent Liquid, Wien                                | 28,9³        |
| Allianz Invest Kapitalanlage GmbH, Wien                             | 100,0        |
| Allianz Invest Osteuropa, Wien                                      | 42,6³        |
| Allianz Invest Ostrent, Wien                                        | 100,0³       |
| Allianz Invest Portfolio Blue,                                      | 100,0³       |
| Allianz Investment Company LLC, Westport, CT                        | 100,0        |
| Allianz Investment Management LLC, Minneapolis MN                   | 100,0        |
| Allianz Investment Properties Ltd., Guildford                       | 100,0        |
| Allianz Investmentbank Aktiengesellschaft, Wien                     | 100,0        |
| Allianz Investments I Luxembourg S.à r.l., Luxemburg                | 100,0        |
| Allianz Investments II Luxembourg S.à r.l., Luxemburg               | 100,0        |
| Allianz Investments III Luxembourg S.à r.l., Luxemburg              | 100,0        |
| Allianz Investments IV Luxembourg S.à r.l., Luxemburg               | 100,0        |
| Allianz Investments Management Italia S.p.A., Mailand               | 100,0        |
| Allianz Irish Life Holdings p.l.c., Dublin                          | 66,4         |
| Allianz Kazakhstan, ZAO, Almaty                                     | 100,0        |
| Allianz kontakt s.r.o., Prag                                        | 100,0        |
| Allianz Leasing & Services JSC, Sofia                               | 51,0         |
| Allianz Life & Annuity Company, LP, Minneapolis, MN                 | 100,0        |
| Allianz Life (BERMUDA) LTD., Hamilton                               | 100,0        |
| Allianz Life Assurance Company-Egypt S.A.E., Kairo                  | 100,0        |
| Allianz Life Financial Services LLC, Minneapolis, MN                | 100,0        |
| Allianz Life Insurance Co. Ltd., Seoul                              | 100,0        |
| Allianz Life Insurance Company of Missouri, Clayton                 | 100,0        |
| Allianz Life Insurance Company of New York, Corp., New York NY      | 100,0        |
| Allianz Life Insurance Company of North America, Corp., Minneapolis | 100,0        |
| Allianz Life Insurance Japan Ltd., Tokio                            | 100,0        |
| Allianz Life Insurance Lanka Ltd., Colombo                          | 100,0        |
| Allianz Life Insurance Malaysia Berhad p.l.c., Kuala Lumpur         | 100,0        |
| Allianz Life Luxembourg S.A., Luxemburg                             | 100,0        |
| Allianz Life Moskau, Moskau                                         | 100,0        |
| Allianz Long Short Equity, Paris                                    | 62,6³        |
| Allianz Madagascar, Antananarivo                                    | 100,0        |
| Allianz Malaysia Berhad p.l.c., Kuala Lumpur                        | 75,0         |
| Allianz Mali dommages, Bamako                                       | 77,1         |
| Allianz Management Services Limited, Guildford                      | 100,0        |
| Allianz Marine (UK) Ltd., Ipswich                                   | 100,0        |
| Allianz Mena Holding Bermuda, Beirut                                | 99,9         |
| Allianz Mena Holding Co. SPC, Manama                                | 100,0        |
| Allianz Mexiko-Stadt S.A. Compañía de Seguros, SA, Mexiko (Stadt)   | 100,0        |
| Allianz Multi Actions Emergentes, Paris                             | 53,5³        |
| Allianz Multi Actions Europe, Paris                                 | 89,5³        |
| Allianz Multi Actions Monde, Paris                                  | 89,1³        |
| Allianz Multi Actions Valeurs Or, Paris                             | 65,6³        |
| Allianz Multi Croissance II, Paris                                  | 96,7³        |
| Allianz Multi Croissance III, Paris                                 | 96,1³        |
| Allianz Multi Croissance, Paris                                     | 97,7³        |
| Allianz Multi Dynamic, Paris                                        | 100,0³       |
| Allianz Multi Dynamisme, Paris                                      | 95,8³        |
| Allianz Multi Equilibre, Paris                                      | 96,1³        |
| Allianz Multi Horizon 2012-2013, Paris                              | 74,2³        |
| Allianz Multi Horizon 2014-2015, Paris                              | 71,1³        |
| Allianz Multi Horizon 2016-2017, Paris                              | 68,7³        |
| Allianz Multi Horizon 2018-2020, Paris                              | 93,7³        |
| Allianz Multi Horizon 2021-2023, Paris                              | 92,5³        |
| Allianz Multi Horizon 2024-2026, Paris                              | 93,0³        |

|                                                         | Anteil¹<br>% |
|---------------------------------------------------------|--------------|
| Allianz Multi Horizon 2027-2029, Paris                  | 91,7³        |
| Allianz Multi Horizon 2030-2032, Paris                  | 92,2³        |
| Allianz Multi Horizon 2033-2035, Paris                  | 91,2³        |
| Allianz Multi Horizon 2036-2038, Paris                  | 92,7³        |
| Allianz Multi Horizon 2039-2041, Paris                  | 93,2³        |
| Allianz Multi Horizon Court Terme, Paris                | 77,9³        |
| Allianz Multi Horizon Long Terme, Paris                 | 60,9³        |
| Allianz Multi Opportunités, Paris                       | 96,4³        |
| Allianz Multi Rendement Réel, Paris                     | 88,5³        |
| Allianz Multi Sérénité, Paris                           | 97,1³        |
| Allianz Multi Top Croissance, Paris                     | 67,4³        |
| Allianz Multi Top Défensif, Paris                       | 93,6³        |
| Allianz Multi Top Harmonie, Paris                       | 88,2³        |
| Allianz Mutual Funds Management Hellas S.A., Athen      | 100,0        |
| Allianz NACM Global Systematic, Paris                   | 85,9³        |
| Allianz Nederland Administratie B.V., Utrecht           | 100,0        |
| Allianz Nederland Asset Management B.V., Amsterdam      | 100,0        |
| Allianz Nederland Groep N.V., Rotterdam                 | 100,0        |
| Allianz Nederland Levensverzekering N.V., Utrecht       | 100,0        |
| Allianz Nederland Schadeverzekering N.V., Rotterdam     | 100,0        |
| Allianz New Europe Holding GmbH, Wien                   | 100,0        |
| Allianz New Zealand Limited, Auckland                   | 100,0        |
| Allianz Obligations Convertibles, Paris                 | 82,3³        |
| Allianz Obligations Court Terme, Paris                  | 90,1³        |
| Allianz Obligations Internationales, Paris              | 77,7³        |
| Allianz Obligations Monde, Paris                        | 98,7³        |
| Allianz Octomax 2, Paris                                | 100,0³       |
| Allianz Octomax, Paris                                  | 99,7³        |
| Allianz Octoplus 2, Paris                               | 99,2³        |
| Allianz Octoplus 3, Paris                               | 98,8³        |
| Allianz Octoplus, Paris                                 | 98,8³        |
| Allianz of America Corporation, Novato                  | 100,0        |
| Allianz of America Inc., Westport, CT                   | 100,0        |
| Allianz One Beacon GP LLC, Wilmington                   | 100,0        |
| Allianz One Beacon LP, Wilmington                       | 100,0        |
| Allianz Opéra, Paris                                    | 100,0³       |
| Allianz Optéo, Mailand                                  | 97,2³        |
| Allianz P.E.P. Europa 1, Mailand                        | 87,2         |
| Allianz P.E.P. Europa 2, Mailand                        | 92,0         |
| Allianz p.l.c., Dublin                                  | 100,0        |
| Allianz Participations B.V., Amsterdam                  | 100,0        |
| Allianz Pension Fund Trustees Ltd., Guildford           | 100,0        |
| Allianz Pensionskasse Aktiengesellschaft, Wien          | 100,0        |
| Allianz penzijnij fond a.s., Prag                       | 100,0        |
| Allianz Pimco Corporate, Wien                           | 100,0³       |
| Allianz Pimco Mortgage, Wien                            | 100,0³       |
| Allianz pojistovna a.s., Prag                           | 100,0        |
| Allianz Primio 2015, Paris                              | 98,9³        |
| ALLIANZ PRIVATE EQUITY PARTNERS EUROPA III, Mailand     | 99,6³        |
| Allianz Private Equity UK Holdings Limited, London      | 100,0        |
| Allianz Prudence, Paris                                 | 100,0³       |
| Allianz RCM Islamic Global Emerging Markets Equity      | 100,0³       |
| Allianz RCM Islamic Global Equity Opportunities         | 100,0³       |
| Allianz Re Dublin Limited, Dublin                       | 100,0        |
| Allianz Real Estate France, Paris                       | 100,0        |
| Allianz Real Estate Securities Europe (AT)              | 86,8³        |
| Allianz Renewable Energy Fund Management 1 Ltd., London | 100,0        |
| Allianz Renewable Energy Partners I LP, London          | 100,0³       |
| Allianz Renewable Energy Partners II Limited, London    | 100,0³       |
| Allianz Renewable Energy Partners IV Limited, London    | 99,4         |
| Allianz Renewable Energy Partners V PLC, London         | 100,0        |
| Allianz Risk Audit, Moskau                              | 100,0        |
| Allianz Risk Consultants Inc., Los Angeles              | 100,0        |
| Allianz Risk Transfer (Bermuda) Ltd., Hamilton          | 100,0        |
| Allianz Risk Transfer (UK) Limited, London              | 100,0        |
| Allianz Risk Transfer AG, Zürich                        | 100,0        |
| Allianz Risk Transfer Inc., New York                    | 100,0        |
| Allianz Risk Transfer N.V., Amsterdam                   | 100,0        |
| Allianz Rosno Asset Management, Moskau                  | 100,0        |
| Allianz Rosno Life, Moskau                              | 100,0        |
| Allianz S.A. A.S. Agencia de Seguros, Barcelona         | 100,0        |
| Allianz S.A. de C.V., Mexiko                            | 100,0        |

- 1 Berechnung berücksichtigt die von abhängigen Unternehmen gehaltenen Anteile vollständig, auch wenn der Konzernanteil an diesem abhängigen Unternehmen unter 100 % liegt.
- 2 Kontrolle durch Allianz Konzern

- 3 Publikums-, Private Equity- oder Spezialfonds
- 4 Konzernabschluss und -lagebericht der Allianz SE haben gemäß Anwendung des § 264 Abs. 3 HGB befreiende Wirkung.
- 5 Konzernanteil über haltende Gesellschaft Roland Holding GmbH, München: 74,1 %

- 6 Klassifizierung als assoziiertes Unternehmen nach SIC-12
- 7 Special Purpose Entity nach SIC-12 (SPE)
- 8 Maßgeblicher Einfluss

|     |                                                 |
|-----|-------------------------------------------------|
| 162 | Konzernabschluss                                |
| 170 | Konzernanhang                                   |
| 224 | Angaben zur Konzernbilanz                       |
| 260 | Angaben zur Konzern-Gewinn- und Verlustrechnung |
| 275 | Sonstige Angaben                                |

|                                                                                    | Anteil¹<br>% |
|------------------------------------------------------------------------------------|--------------|
| Allianz S.p.A., Triest                                                             | 100,0        |
| Allianz Saint Marc CL, Paris                                                       | 100,0³       |
| Allianz Saude S.A., São Paulo                                                      | 100,0        |
| Allianz Scalinvest, Paris                                                          | 97,8³        |
| Allianz Secteur Euro Immobilier, Paris                                             | 86,1³        |
| Allianz Secteur Europe Immobilier, Paris                                           | 80,5³        |
| Allianz Seguros S.A., São Paulo                                                    | 100,0        |
| Allianz Sénégal dommages, Dakar                                                    | 83,2         |
| Allianz Sénégal vie, Dakar                                                         | 95,5         |
| Allianz Services (UK) Limited, London                                              | 100,0        |
| Allianz Sigorta AS, Istanbul                                                       | 84,2         |
| Allianz SNA Sal, Beirut                                                            | 100,0        |
| Allianz Sociedade Gestora de Fundos de Pensões SA, Lissabon                        | 84,4         |
| Allianz Société Financière S.à.r.l., Luxemburg                                     | 100,0        |
| Allianz South America Holding B.V., Amsterdam                                      | 100,0        |
| Allianz Specialised Investments Limited, London                                    | 100,0        |
| Allianz Stability Investment Fund, Budapest                                        | 68,0³        |
| ALLIANZ SUBALPINA HOLDING S.p.A., Turin                                            | 98,1         |
| Allianz Suisse Flexible Fund                                                       | 78,6³        |
| Allianz Suisse Immobilien AG, Volketswil                                           | 100,0        |
| Allianz Suisse Lebensversicherungs-Gesellschaft AG, Zürich                         | 100,0        |
| Allianz Suisse Rückversicherungs AG, Zürich                                        | 100,0        |
| Allianz Suisse Versicherungs-Gesellschaft AG, Zürich                               | 100,0        |
| Allianz Taiwan Life Insurance Co. Ltd., Taipei                                     | 99,7         |
| Allianz Takaful, Bahrain                                                           | 100,0        |
| Allianz Tiriac Asigurari SA, Bukarest                                              | 52,2         |
| Allianz Togo dommages, Lome                                                        | 97,9         |
| Allianz Triplus, Paris                                                             | 99,7³        |
| Allianz Ukraine LLC, Kiev                                                          | 100,0        |
| Allianz Underwriters Insurance Company, Corp., Burbank                             | 100,0        |
| Allianz US Investment GP LLC, Wilmington                                           | 100,0        |
| Allianz US Investment LP, Wilmington                                               | 100,0        |
| Allianz US Private REIT GP LLC, Wilmington                                         | 100,0        |
| Allianz US Private REIT LP, Wilmington                                             | 100,0        |
| Allianz Usluge d.d., Zagreb                                                        | 100,0        |
| Allianz Valeurs Durables, Paris                                                    | 77,7³        |
| Allianz Vermögenskonzept Ausgewogen                                                | 100,0³       |
| Allianz Vermögenskonzept Defensiv                                                  | 100,0³       |
| Allianz Vermögenskonzept Dynamisch                                                 | 100,0³       |
| Allianz Vie S.A., Paris                                                            | 100,0        |
| Allianz Voltissimo, Paris                                                          | 97,7³        |
| Allianz Worldwide Care Ltd., Dublin                                                | 100,0        |
| Allianz Zagreb d.d., Zagreb                                                        | 83,2         |
| Allianz ZB d.o.o. Company for the Management of an Obligatory Pension Fund, Zagreb | 51,0         |
| Allianz ZB d.o.o. company of the management of voluntary pension funds, Zagreb     | 51,0         |
| Allianz_Invest_10 Division S/U, Wien                                               | 100,0³       |
| Allianz_Invest_11 Division Leben/Kranken, Wien                                     | 100,0³       |
| Allianz_Invest_12 Division Leben/Kranken, Wien                                     | 100,0³       |
| Allianz_Invest_Spezial_3, Wien                                                     | 100,0³       |
| Allianz-Slovenská DSS a.s., Bratislava                                             | 100,0        |
| Allianz-Slovenská poisťovňa a.s., Bratislava                                       | 84,6         |
| ALLIANZ-TIRIAC PENSII PRIVATE SAFFP SA, Bukarest                                   | 100,0        |
| ALLSecur B.V., Den Bosch                                                           | 100,0        |
| Amaya Compania de Seguros y Reaseguros S.A., Madrid                                | 100,0        |
| American Automobile Insurance Company, Corp., Earth City, MO                       | 100,0        |
| American Financial Marketing Inc., Minneapolis, MN                                 | 100,0        |
| American Standard Lloyd's Insurance Company, Corp., Dallas                         | 100,0        |
| Ann Arbor Annuity Exchange Inc., Ann Arbor, Michigan                               | 100,0        |
| Antoniana Veneta Popolare Assicurazioni S.p.A., Triest                             | 50,0²        |
| Antoniana Veneta Popolare Vita S. p. a., Triest                                    | 50,0²        |
| APKV US Private REIT GP LLC, New York                                              | 100,0        |
| APKV US Private REIT LP, New York                                                  | 100,0        |
| Approfrais SA, Evreux                                                              | 99,9         |
| Arab Gulf Health Services LLC, Beirut                                              | 100,0        |
| Arcalis 22, Paris                                                                  | 99,7³        |
| Arcalis 23, Paris                                                                  | 99,7³        |
| Arcalis 24, Paris                                                                  | 99,7³        |
| Arcalis 28, Paris                                                                  | 99,4³        |
| Arcalis Assur 5                                                                    | 99,2³        |
| Arcalis UN, Paris                                                                  | 99,9³        |
| Arcalis, Paris                                                                     | 99,9         |

|                                                                                    | Anteil¹<br>% |
|------------------------------------------------------------------------------------|--------------|
| ART Asset Management LLC, New York                                                 | 100,0        |
| AS Selecta s.r.o., Bratislava                                                      | 100,0        |
| Aseguradora Colseguros S.A., Bogotá D.C.                                           | 100,0        |
| Aseguradora de Vida Colseguros S.A. (Salud), Bogotá D.C.                           | 100,0        |
| Aspley AVT Pty Limited, Sydney                                                     | 66,7         |
| Assistance Courtaige d'Assurance et de Réassurance S.A., Paris                     | 100,0        |
| Associated Indemnity Corporation, Novato, CA                                       | 100,0        |
| Assurance Vie et Prévoyance (AVIP) SA, Paris                                       | 100,0        |
| Assurances Générales du Laos Ltd., Vientiane                                       | 51,0         |
| Athena Nouveau March, Paris                                                        | 55,1³        |
| Audit Consulting Production, Moskau                                                | 100,0        |
| Automaty Servis Selecta Sro, Prag                                                  | 100,0        |
| AVIP ACTIONS 100, Paris                                                            | 96,2³        |
| AVIP ACTIONS 60, Paris                                                             | 96,6³        |
| AVIP TOP CROISSANCE, Paris                                                         | 68,8³        |
| AVIP TOP DEFENSIF, Paris                                                           | 96,3³        |
| AVIP TOP HARMONIE, Paris                                                           | 93,5³        |
| Axioma Insurance (Cyprus) Ltd., Nikosia                                            | 100,0        |
| Ayudhya Allianz C.P. Life Public Company Limited, Bangkok                          | 62,6         |
| AZ AAAM GLOBAL ALTERNATIVE STR, Mailand                                            | 100,0³       |
| AZ Butterfield, LLC, Delaware                                                      | 100,0        |
| AZ Euro Investments II S.à.r.l., Luxemburg                                         | 100,0        |
| AZ Euro Investments S.à.r.l., Luxemburg                                            | 100,0        |
| AZ Jupiter 4 B.V., Amsterdam                                                       | 100,0        |
| AZ Jupiter 8 B.V., Amsterdam                                                       | 100,0        |
| AZ Jupiter 9 B.V., Amsterdam                                                       | 100,0        |
| AZ SERVISI CENTAR d.o.o., Zagreb                                                   | 100,0        |
| AZ Vers US Private REIT GP LLC, New York                                           | 100,0        |
| AZ Vers US Private REIT LP, New York                                               | 100,0        |
| AZB HS INSTITUCIONAL PLUS RENDA FIXA FI, São Paulo                                 | 100,0³       |
| AZB ST FI Institucional Renda Fixa, São Paulo                                      | 100,0³       |
| AZB ST Institucional Plus II Renda Fixa FI, São Paulo                              | 100,0³       |
| AZL PF Investments Inc., Minneapolis, MN                                           | 100,0        |
| Baladau, Paris                                                                     | 99,0³        |
| BAWAG Allianz Mitarbeitervorsorgekasse AG, Wien                                    | 50,0²        |
| Bernese S.p.A., Rom                                                                | 99,8         |
| Bilan Services S.N.C., Nanterre                                                    | 66,0         |
| Blikman & Sartorius B.V., Amsterdam                                                | 100,0        |
| BMM AUDACE, Marseille                                                              | 63,7³        |
| BMM HARMONIE, Marseille                                                            | 62,2³        |
| BNP PARIBAS THR                                                                    | 100,0³       |
| Borgo San Felice S.r.l., Castelnuovo Berardenga (Siena)                            | 100,0        |
| Botanic Building S.P.R.L., Brüssel                                                 | 100,0        |
| BPS Brindisi 213 S.r.l., Brindisi                                                  | 100,0        |
| BPS Brindisi 222 S.r.l., Brindisi                                                  | 100,0        |
| BPS Mesagne 214 S.r.l., Brindisi                                                   | 100,0        |
| BPS Mesagne 215 S.r.l., Brindisi                                                   | 100,0        |
| BPS Mesagne 223 S.r.l., Brindisi                                                   | 100,0        |
| BPS Mesagne 224 S.r.l., Brindisi                                                   | 100,0        |
| Brasil de Imoveis e Participacoes Ltda., São Paulo                                 | 100,0        |
| Bright Mission Berhad Ltd., Kuala Lumpur                                           | 100,0        |
| British Reserve Insurance Co. Ltd., Guildford                                      | 100,0        |
| BSMC, Bangkok                                                                      | 100,0        |
| Bulgaria Net Co. Ltd., Sofia                                                       | 98,4         |
| Bureau d'Expertises Despretz S.A., Brüssel                                         | 100,0        |
| BURLCO p.l.c., Dublin                                                              | 100,0        |
| Bx3 S.r.l., Triest                                                                 | 100,0        |
| Calypso S.A., Paris                                                                | 100,0        |
| CAP Rechtsschutz-Versicherungsgesellschaft AG, Zürich                              | 100,0        |
| CAPEX, Paris                                                                       | 86,5³        |
| Capital Messine S.à.r.l., Luxemburg                                                | 100,0        |
| Caywood-Scholl Capital Management LLC, Wilmington (Delaware)                       | 100,0        |
| Cédulas Colón de Capitalización Colseguros S.A., Bogotá D.C.                       | 100,0        |
| CEPE de Langres Sud SARL, Avignon                                                  | 100,0        |
| CEPE de Mont Gimont, Versailles                                                    | 100,0        |
| Challenging Financial Careers Insurance Marketing Corp., LLC, Huntington Beach, CA | 100,0        |
| Château Larose Trintaudon S.A., Saint Laurent de Médoc                             | 100,0        |
| Chicago Insurance Company, Corp., Chicago, IL                                      | 100,0        |
| CIC Allianz Insurance Ltd., Sydney                                                 | 100,0        |
| Club Marine Limited, Sydney                                                        | 100,0        |
| Colisee S.à.r.l., Luxemburg                                                        | 100,0        |

|                                                                          | Anteil¹<br>% |
|--------------------------------------------------------------------------|--------------|
| COLSEGUROS S.A.S., Bogota D.C.                                           | 100,0        |
| Compagnie de Gestion et Prevoyance, Straßburg                            | 99,9         |
| Companhia de Seguros Allianz Portugal S.A., Lissabon                     | 64,8         |
| Compania Colombiana de Inversion Colseguros S.A., Bogotá D.C.            | 100,0        |
| Compañía Colombiana de Servicio Automotriz S.A., Bogotá D.C.             | 100,0        |
| Coparc, Paris                                                            | 100,0        |
| Cornhill Solutions Limited, Guildford                                    | 100,0        |
| Cornhill Trustee (Guernsey) Ltd., St Peter Port, Guernsey                | 100,0        |
| Corsetec, Ltda, São Paulo                                                | 99,5         |
| CPRN Thailand Ltd., Bangkok                                              | 100,0        |
| CPRN-Holdings Limited, Bangkok                                           | 100,0        |
| CreditRas Assicurazioni S.p.A., Mailand                                  | 50,0²        |
| CreditRas Vita S.p.A., Mailand                                           | 50,0²        |
| DARTA SAVING LIFE ASSURANCE LTD., Dublin                                 | 100,0        |
| DBI Insurance Company Ltd., Guildford                                    | 100,0        |
| Deeside Investments Inc., Wilmington                                     | 100,0        |
| Delaware Valley Financial Services LLC, Berwyn PA                        | 100,0        |
| Delta Technical Services Ltd., London                                    | 100,0        |
| Dresdner Kleinwort Capital Jersey Ltd., St. Helier/Jersey                | 100,0        |
| Dresdner RCM Global Investors (Jersey) Ltd., Jersey                      | 100,0        |
| EDB Investments S.C.A., Weiswampach                                      | 79,9         |
| EF Solutions LLC, Delaware                                               | 100,0        |
| EH SIAC Information, Rom                                                 | 100,0        |
| ELVIA Inc, Richmond                                                      | 100,0        |
| Emerald Global Inv., Paris                                               | 99,8³        |
| Energie Eolienne Lusanger, Orléans                                       | 100,0        |
| ETI Australia Pty Ltd., Toowong (QLD)                                    | 100,0        |
| ETI First Source Limited, London                                         | 100,0        |
| ETI International Limited, London                                        | 100,0        |
| ETI Property Limited, London                                             | 100,0        |
| ETI Sales Limited, London                                                | 100,0        |
| Euler & Hermes International Ltd., London                                | 100,0        |
| Euler Agent Limited, London                                              | 100,0        |
| Euler do Brasil Seguros Exportacao, Sao Paulo                            | 100,0        |
| Euler Gestion, Paris                                                     | 100,0³       |
| Euler Hermes ACI Holding, Inc., New York                                 | 100,0        |
| Euler Hermes ACI Inc., Baltimore                                         | 100,0        |
| Euler Hermes ACI Services LLP, Baltimore                                 | 100,0        |
| Euler Hermes ACMAR Services, Casablanca                                  | 100,0        |
| EULER HERMES ARGENTINA, Buenos Aires                                     | 100,0        |
| Euler Hermes Canada Services, Montréal                                   | 100,0        |
| Euler Hermes Cashflow Solutions Limited, London                          | 100,0        |
| Euler Hermes Cescob Service, s.r.o., Prag                                | 100,0        |
| Euler Hermes Cescob uverová pojistovna, a.s., Prag                       | 100,0        |
| Euler Hermes Chile Servicios Limitada, Santiago de Chile                 | 100,0        |
| Euler Hermes Collections Sp. z o.o., Warschau                            | 100,0        |
| Euler Hermes Collections UK Limited, London                              | 100,0        |
| Euler Hermes Colombia, Bogota D.C.                                       | 100,0        |
| EULER HERMES CREDIT INSURANCE AGENCY (S) PTE. LTD., Singapur             | 100,0        |
| EULER HERMES CREDIT INSURANCE BELGIUM S.A., Brüssel                      | 100,0        |
| Euler Hermes Credit Management Services Ireland Ltd., Ballygowan, Dublin | 100,0        |
| Euler Hermes Credit Services (JP) Ltd., Tokio                            | 100,0        |
| Euler Hermes Credit Underwriters Hong Kong Ltd., Hongkong                | 100,0        |
| Euler Hermes Crédito Companhia de Seguros y Reaseguros S.A., Madrid      | 100,0        |
| EULER HERMES EMPORIKI SA, Athen                                          | 60,0         |
| EULER HERMES EMPORIKI Services Ltd., Athen                               | 100,0        |
| Euler Hermes Guarantee plc., Tonbridge, Kent                             | 100,0        |
| Euler Hermes Holdings UK plc, London                                     | 100,0        |
| Euler Hermes Information Consulting (Shanghai) Co. Ltd., Shanghai        | 100,0        |
| Euler Hermes Kreditförsäkring Norden AB, Stockholm                       | 100,0        |
| Euler Hermes Kreditverzekering N.V., Hertogenbosch                       | 100,0        |
| Euler Hermes Magyar Hitelbiztosító Rt., Budapest                         | 100,0        |
| Euler Hermes Magyar Követeléskezelő Kft., Budapest                       | 100,0        |
| Euler Hermes Management Services UK Ltd., London                         | 100,0        |
| Euler Hermes Management UK Limited, London                               | 100,0        |
| Euler Hermes Netherlands, Hertogenbosch                                  | 100,0        |
| Euler Hermes Réassurance, Zürich                                         | 100,0        |
| Euler Hermes Risk Services UK Limited, London                            | 100,0        |
| Euler Hermes S.A., Paris                                                 | 70,3         |
| Euler Hermes Seguros de Crédito S.A., Mexiko-Stadt                       | 100,0        |

- 1 Berechnung berücksichtigt die von abhängigen Unternehmen gehaltenen Anteile vollständig, auch wenn der Konzernanteil an diesem abhängigen Unternehmen unter 100% liegt.
- 2 Kontrolle durch Allianz Konzern

- 3 Publikums-, Private Equity- oder Spezialfonds
- 4 Konzernabschluss und -lagebericht der Allianz SE haben gemäß Anwendung des § 264 Abs. 3 HGB befreiende Wirkung.
- 5 Konzernanteil über haltende Gesellschaft Roland Holding GmbH, München: 74,1%

- 6 Klassifizierung als assoziiertes Unternehmen nach SIC-12
- 7 Special Purpose Entity nach SIC-12 (SPE)
- 8 Maßgeblicher Einfluss

|                                                                       | Anteil <sup>1</sup><br>% |
|-----------------------------------------------------------------------|--------------------------|
| Euler Hermes Seguros de Crédito S.A., Santiago de Chile               | 100,0                    |
| Euler Hermes Seguros de Crédito S.A., Sao Paulo                       | 100,0                    |
| Euler Hermes Service AB, Stockholm                                    | 100,0                    |
| Euler Hermes Services (HK) Limited, Hongkong                          | 100,0                    |
| Euler Hermes Services AG, Zürich                                      | 100,0                    |
| Euler Hermes Services B.V., Hertogenbosch                             | 100,0                    |
| Euler Hermes Services Baltic UAB, Vilnius                             | 100,0                    |
| Euler Hermes Services Belgium S.A., Brüssel                           | 100,0                    |
| Euler Hermes Services Estonia OÜ, Tallinn                             | 100,0                    |
| Euler Hermes Services India Privat Limited, Mumbai                    | 100,0                    |
| Euler Hermes Services Latvija SIA, Riga                               | 100,0                    |
| Euler Hermes Services S.A.S., Paris                                   | 100,0                    |
| Euler Hermes Services Sp. z o.o., Warschau                            | 100,0                    |
| Euler Hermes Servicii Financiare S.R.L., Bukarest                     | 100,0                    |
| Euler Hermes Servicios de Crédito S.L., Madrid                        | 100,0                    |
| Euler Hermes Servicios S.A., Mexiko-Stadt                             | 100,0                    |
| Euler Hermes Servicos Ltda., Sao Paulo                                | 100,0                    |
| Euler Hermes Servis s.r.o., Bratislava                                | 100,0                    |
| Euler Hermes SFAC Crédit S.A.S., Paris                                | 100,0                    |
| Euler Hermes SFAC Recouvrement S.A.S., Paris                          | 100,0                    |
| Euler Hermes SFAC S.A., Paris                                         | 100,0                    |
| Euler Hermes SIAC S.p.A., Rom                                         | 100,0                    |
| Euler Hermes Trade Credit Limited, Auckland                           | 100,0                    |
| Euler Hermes Trade Credit Underwriting Agents, Pty. Ltd., Sydney      | 100,0                    |
| Euler Hermes UK plc, London                                           | 100,0                    |
| Euler Hermes UMA, Louisville                                          | 100,0                    |
| Euler Hermes World Agency SASU, Paris                                 | 100,0                    |
| Euler Hermes, Mierzejewska-Kancelaria Prawna Sp.k, Warschau           | 100,0                    |
| Euler Re, SA, Senningerberg                                           | 100,0                    |
| Euler SFAC Asset Management, Paris                                    | 100,0                    |
| Euler Tech, SAS, Nanterre                                             | 100,0                    |
| Eurl 20/22 Le Peletier, Paris                                         | 100,0                    |
| EURO GESTION, Paris                                                   | 100,0 <sup>3</sup>       |
| European Credit Underwriters Limited, London                          | 100,0                    |
| Eurosol Invest S.r.l., Udine                                          | 100,0                    |
| Eurovida S.A. Compañía de Seguros y Reaseguros, Madrid                | 51,0                     |
| F Jupiter SAS, Paris                                                  | 100,0                    |
| FAI Allianz Ltd., Sydney                                              | 100,0                    |
| FCPR Fregate                                                          | 58,1 <sup>3</sup>        |
| Fenix Directo Compañia de Seguros y Reaseguros S.A., Madrid           | 100,0                    |
| Ferme Eolienne de Villemur-sur-Tan, Toulouse                          | 100,0                    |
| Ferme Eolienne des Jaladeaux, Toulouse                                | 100,0                    |
| FFIC County Mutual Insurance Company, Corp., Dallas                   | 100,0                    |
| Fiduciaria Coleseguros S.A., Bogota D.C.                              | 100,0                    |
| Fireman's Fund Financial Services, LLC, Dallas, TX                    | 100,0                    |
| Fireman's Fund Indemnity Corporation, Liberty Corner, NJ              | 100,0                    |
| Fireman's Fund Insurance Company of Bermuda, Hamilton                 | 100,0                    |
| Fireman's Fund Insurance Company of Hawaii Inc., Honolulu, HI         | 100,0                    |
| Fireman's Fund Insurance Company of Louisiana, Corp., Harahan, LA     | 100,0                    |
| Fireman's Fund Insurance Company of Ohio, Corp., Cincinnati, OH       | 100,0                    |
| Fireman's Fund Insurance Company, Corp., Novato                       | 100,0                    |
| FLORALIS, Paris                                                       | 96,5 <sup>3</sup>        |
| FRAGONARD ASSURANCE, SACS, Paris                                      | 100,0                    |
| Gaipare Action, Paris                                                 | 95,9 <sup>3</sup>        |
| GamePlan Financial Marketing LLC, Woodstock, GA                       | 100,0                    |
| GAP Reactif Canton A                                                  | 64,9 <sup>3</sup>        |
| Generali Investissement (C), Paris                                    | 56,0 <sup>3</sup>        |
| Generation Vie, Paris                                                 | 52,5                     |
| Genialloyd S.p.A., Mailand                                            | 100,0                    |
| Gestion Produits Dyn                                                  | 69,5 <sup>3</sup>        |
| Gestion Produits Str                                                  | 81,2 <sup>3</sup>        |
| GIE AZ Investment Management, Paris                                   | 100,0                    |
| GIE Euler Hermes SFAC Services, Paris                                 | 100,0                    |
| Global Transport & Automotive Insurance Solutions Pty Limited, Sydney | 53,5                     |
| Go Express Distributione Automatica S.p.A., Mailand                   | 100,0                    |
| Gosman & Kraan B.V., Amsterdam                                        | 100,0                    |
| GTS - GESTION DE TELESECURITE ET DE SERVICES S.A., Chatillon          | 100,0                    |
| Guangzhou printcom Printing Supplies Co. Ltd., Guangzhou              | 100,0                    |
| GWS Printing Service B.V., Schijndel                                  | 100,0                    |
| GWS Printing Systems Holding B.V., Schijndel                          | 100,0                    |

|                                                                                             | Anteil <sup>1</sup><br>% |
|---------------------------------------------------------------------------------------------|--------------------------|
| Hauteville Insurance Company Limited, Guernsey                                              | 100,0                    |
| Havelaar et Van Stolk B.V., Rotterdam                                                       | 100,0                    |
| HELVIASS Verzekeringen BV, Rotterdam                                                        | 100,0                    |
| Home & Legacy (Holdings) Limited, London                                                    | 100,0                    |
| Home & Legacy Insurance Services Limited, London                                            | 100,0                    |
| Hungária Biztosító Számítástechnikai Kft. (Hungária EDV-Betriebsgesellschaft mbH), Budapest | 100,0                    |
| Hunter Premium Funding Ltd., Sydney                                                         | 100,0                    |
| IDR Actions Euros, Paris                                                                    | 93,7 <sup>3</sup>        |
| Immovalor Gestion S.A., Paris                                                               | 100,0                    |
| Insolvency Risk Insurance Services Limited, London                                          | 100,0                    |
| Insolvency Risk Management Limited, London                                                  | 100,0                    |
| Insurance and Reinsurance AG Energy, Sofia                                                  | 50,9                     |
| Insurance Company "Progress Garant", Moskau                                                 | 100,0                    |
| Insurance Joint Stock Company "Allianz", AOOT/OAO, Moskau                                   | 100,0                    |
| Intermediass S.r.l., Mailand                                                                | 100,0                    |
| International Film Guarantors LLC, Santa Monica, CA                                         | 100,0                    |
| International Film Guarantors Ltd., London                                                  | 100,0                    |
| Interstate Fire & Casualty Company, Chicago, IL                                             | 100,0                    |
| Investitori SGR S.p.a., Mailand                                                             | 98,7                     |
| ITEB B.V., Gouda                                                                            | 100,0                    |
| JCR Intertrade Ltd., Bangkok                                                                | 40,0                     |
| Jefferson Insurance Company of N.Y., Corp., New York                                        | 100,0                    |
| Kiinteistöaskeyhtiö Etelaesplanadi 2, Helsinki                                              | 100,0                    |
| Königinstrasse I S.a.r.l., Luxemburg                                                        | 100,0 <sup>7</sup>       |
| LA RURALE, Charenton-le-Pont                                                                | 99,8                     |
| Larose Trintaudon Chile S.A., Santiago                                                      | 100,0                    |
| L'Assicuratrice Italiana Vita S.p.A., Mailand                                               | 100,0                    |
| Le Profil des Profils, Paris                                                                | 67,4 <sup>3</sup>        |
| Life Sales LLC, Novato, CA                                                                  | 100,0                    |
| LLC "Allianz Eurasia Healthcare", St. Petersburg                                            | 100,0                    |
| LLC "Allianz Life and Finance Rus", Moskau                                                  | 100,0                    |
| Lloyd Adriatico Holding S.p.A., Triest                                                      | 99,9                     |
| LOGICA SOFTWARE srl, Reggio Emilia                                                          | 100,0                    |
| London Verzekeringen N.V., Amsterdam                                                        | 100,0                    |
| LYXOR Höchststandgarant. 2023, Puteaux                                                      | 100,0 <sup>3</sup>       |
| LYXOR HÖCHSTSTANDSGARANT. 2018, Puteaux                                                     | 100,0 <sup>3</sup>       |
| LYXOR HÖCHSTSTANDSGARANT. 2021, Puteaux                                                     | 100,0 <sup>3</sup>       |
| LYXOR Höchststandsgarantie 2020, Puteaux                                                    | 100,0 <sup>3</sup>       |
| LYXOR Höchststandsgarantie 2022, Puteaux                                                    | 98,6 <sup>3</sup>        |
| LYXOR HÖCHSTSTANDSGARANTIEFONDS 2019, Puteaux                                               | 100,0 <sup>3</sup>       |
| Magador BV., Amsterdam                                                                      | 100,0                    |
| Magdeburger Sigorta A.S., Istanbul                                                          | 100,0                    |
| manroland (China) Ltd., Hongkong                                                            | 100,0                    |
| manroland (India) Pvt. Ltd., New Delhi                                                      | 100,0                    |
| manroland (Korea) Ltd., Seoul                                                               | 100,0                    |
| manroland (Shenzhen) Ltd., Shenzhen                                                         | 100,0                    |
| manroland (Taiwan) Ltd., Taipei                                                             | 100,0                    |
| manroland Australasia PTY Limited, Regents Park                                             | 100,0                    |
| manroland Baltics SIA, Riga                                                                 | 100,0                    |
| manroland Benelux N.V., Wemmel                                                              | 100,0                    |
| manroland Bulgaria-eood, Sofia                                                              | 100,0                    |
| manroland Canada Inc., Toronto                                                              | 100,0                    |
| manroland CEE AG, Wien                                                                      | 100,0                    |
| manroland Česká Republika spol. S.r.o., Prag                                                | 100,0                    |
| manroland Co. Ltd., Tokio                                                                   | 100,0                    |
| manroland d.o.o., Ljubljana                                                                 | 100,0                    |
| manroland Danmark A/S, Værløse                                                              | 100,0                    |
| manroland do Brasil Servicos Ltda., Sao Paulo                                               | 100,0                    |
| manroland Finland Oy, Vantaa                                                                | 100,0                    |
| manroland France SA, Rissy Charles de Gaulle Cedex                                          | 100,0                    |
| manroland Great Britain Ltd., Mitcham, Surrey                                               | 100,0                    |
| manroland Hrvatska d.o.o., Novaki-SV. Nedjelja                                              | 100,0                    |
| manroland Iberica Sistemas S.A., Cascais                                                    | 74,0                     |
| manroland Iberica Sistemas S.L., Madrid                                                     | 100,0                    |
| manroland Inc., Westmont/Illinois                                                           | 100,0                    |
| manroland Ireland Ltd., Dublin                                                              | 99,7                     |
| manroland Italia SpA, Mailand                                                               | 99,3                     |
| manroland latina Argentina, Buenos Aires                                                    | 100,0                    |
| manroland latina Colombia, Bogota D.C.                                                      | 100,0                    |
| manroland latina Peru, Lima                                                                 | 100,0                    |
| manroland latina S.A. de C.V., Mexiko (Stadt)                                               | 100,0                    |
| manroland latina S.A., Santiago de Chile                                                    | 100,0                    |

|                                                                                          | Anteil <sup>1</sup><br>% |
|------------------------------------------------------------------------------------------|--------------------------|
| manroland Magyarorszag Kft., Budapest                                                    | 100,0                    |
| manroland Mexico Servicios S.A. de C.V., Mexiko (Stadt)                                  | 100,0                    |
| manroland Norge AS, Lørenskog                                                            | 100,0                    |
| manroland Poland SP. Z.o.o., Nadarzyn                                                    | 100,0                    |
| manroland Polska Sp. z o.o., Nadarzyn                                                    | 100,0                    |
| manroland Printing Equipment (Shanghai) Ltd., Shanghai                                   | 100,0                    |
| manroland Printing Equipment (Shenzhen) Co. Ltd., Shenzhen                               | 100,0                    |
| manroland Romania S.R.L., Bukarest                                                       | 100,0                    |
| manroland Singapore PTE.Ltd., Singapur                                                   | 100,0                    |
| manroland Southern Africa (Pty) Ltd., Kapstadt                                           | 100,0                    |
| manroland Sverige AB, Trollhättan                                                        | 100,0                    |
| manroland Swiss AG, Kirchberg                                                            | 100,0                    |
| manroland Thailand Ltd., Bangkok                                                         | 100,0                    |
| manroland Western Europe Group B.V., Amsterdam                                           | 100,0                    |
| Martin Maurel Vie, Paris                                                                 | 66,0                     |
| Medexpress Plus, St. Petersburg                                                          | 100,0                    |
| Medexpress, St. Petersburg                                                               | 99,7                     |
| Medibroker s.r.o., Bratislava                                                            | 100,0                    |
| Medisadul Compania Colombiana de Medicina Prepagada S.A. en Liquidación, SA, Bogotá D.C. | 100,0                    |
| METALLRENTE FONDS PORTFOLIO, Luxemburg                                                   | 56,3 <sup>3</sup>        |
| Mondial Assistance (Thailand) CO Ltd., Bangkok                                           | 97,6                     |
| Mondial Assistance Agent de Asigurar SRL, Vienne                                         | 100,0                    |
| Mondial Assistance Asia-Pacific Ltd., Singapur                                           | 100,0                    |
| Mondial Assistance Australia Holding, Pty, Toowong (QLD)                                 | 100,0                    |
| Mondial Assistance Beijing Services Co. Ltd., Peking                                     | 100,0                    |
| Mondial Assistance BV, Amsterdam                                                         | 100,0                    |
| Mondial Assistance Europe NV, Amsterdam                                                  | 100,0                    |
| Mondial Assistance France SAS, Paris                                                     | 95,0                     |
| Mondial Assistance France, Paris                                                         | 100,0                    |
| MONDIAL ASSISTANCE GmbH, Wien                                                            | 100,0                    |
| Mondial Assistance International SA, Paris                                               | 100,0                    |
| MONDIAL ASSISTANCE IRELAND LIMITED, Dublin                                               | 100,0                    |
| Mondial Assistance OOO, Moskau                                                           | 100,0                    |
| Mondial Assistance Portugal Servicos de Assistência LDA, Paco de Aros                    | 100,0                    |
| Mondial Assistance Réunion S.A., Paris                                                   | 100,0                    |
| Mondial Assistance S.A.S., Paris                                                         | 100,0                    |
| Mondial Assistance s.p. Z.O.O, Warschau                                                  | 100,0                    |
| Mondial Assistance s.r.o, Prag                                                           | 100,0                    |
| MONDIAL ASSISTANCE SERVICES HELLAS SA, Athen                                             | 51,0                     |
| Mondial Assistance Sigorta Aracilik Hizmetleri Limited Sirketi, LS, Istanbul             | 100,0                    |
| Mondial Assistance United Kingdom Ltd. (MAUK), Croydon Surrey                            | 100,0                    |
| Mondial Contact Center Italia Srl., Taurisano                                            | 70,0                     |
| Mondial Mexico S.A. de C.V., Mexiko (Stadt)                                              | 100,0                    |
| Mondial Protection Corretora de Seguros Ltda., Centro                                    | 100,0                    |
| MONDIAL SERVICE ARGENTINA, SA, Buenos Aires                                              | 100,0                    |
| Mondial Service- Belgium SA, Brüssel                                                     | 100,0                    |
| Mondial Service Italia S.r.l, Mailand                                                    | 100,0                    |
| Mondial Service Switzerland AG, Bern                                                     | 100,0                    |
| Mondial Services (India) Private Limited, Gurgaon                                        | 89,7                     |
| MONDIAL SERVICIOS Ltda., Centro                                                          | 100,0                    |
| Mondial Servicios S.A. de C.V., Mexiko (Stadt)                                           | 100,0                    |
| Monéger, Dakar                                                                           | 100,0                    |
| National Surety Corporation, Chicago, IL                                                 | 100,0                    |
| NEM Insurance Ireland Limited, Dublin                                                    | 100,0                    |
| Nemian Life & Pensions S.A., Senningerberg                                               | 100,0                    |
| Neosistencia Manoteras S.L., Madrid                                                      | 100,0                    |
| Nextcare Egypt, Kairo                                                                    | 100,0                    |
| Nextcare Holding, LC, Manama                                                             | 75,0                     |
| Nextcare Lebanon SAL, Beirut                                                             | 100,0                    |
| NFI Investment Group LLC, Dover (Delaware)                                               | 100,0                    |
| Nicholas-Applegate Capital Management LLC, Dover (Delaware)                              | 100,0                    |
| Nicholas-Applegate Holdings LLC, Dover (Delaware)                                        | 100,0                    |
| Nicholas-Applegate Securities LLC, Dover (Delaware)                                      | 100,0                    |
| North American London Underwriters Ltd., Hamilton                                        | 100,0                    |
| Oddo Europe Mid Cap, Paris                                                               | 85,6 <sup>3</sup>        |
| Oddo Gestion Audac, Paris                                                                | 56,5 <sup>3</sup>        |
| Oddo Proactif Europe, Paris                                                              | 73,7 <sup>3</sup>        |
| Oddo Quattro 2, Paris                                                                    | 94,6 <sup>3</sup>        |
| Oddo Quattro, Paris                                                                      | 98,1 <sup>3</sup>        |
| Oddo Rendement 2013,                                                                     | 39,3 <sup>3</sup>        |

- 1 Berechnung berücksichtigt die von abhängigen Unternehmen gehaltenen Anteile vollständig, auch wenn der Konzernanteil an diesem abhängigen Unternehmen unter 100 % liegt.
- 2 Kontrolle durch Allianz Konzern

- 3 Publikums-, Private Equity- oder Spezialfonds
- 4 Konzernabschluss und -lagebericht der Allianz SE haben gemäß Anwendung des § 264 Abs. 3 HGB befreiende Wirkung.
- 5 Konzernanteil über haltende Gesellschaft Roland Holding GmbH, München: 74,1 %

- 6 Klassifizierung als assoziiertes Unternehmen nach SIC-12
- 7 Special Purpose Entity nach SIC-12 (SPE)
- 8 Maßgeblicher Einfluss

|     |                                                 |
|-----|-------------------------------------------------|
| 162 | Konzernabschluss                                |
| 170 | Konzernanhang                                   |
| 224 | Angaben zur Konzernbilanz                       |
| 260 | Angaben zur Konzern-Gewinn- und Verlustrechnung |
| 275 | Sonstige Angaben                                |

|                                                                      | Anteil <sup>1</sup><br>% |
|----------------------------------------------------------------------|--------------------------|
| ODDO TRESORERIE REGULIERE                                            | 9,7 <sup>3</sup>         |
| OISC "My Clinic", Moskau                                             | 100,0                    |
| Omega Thai Investment Holding, Amsterdam                             | 100,0                    |
| Ontario Limited, Toronto                                             | 100,0                    |
| OOO Euler Hermes Credit Management, Moskau                           | 100,0                    |
| Open Joint Stock Company Insurance Company ROSNO, Moskau             | 100,0                    |
| Oppenheimer Capital LLC, Dover (Delaware)                            | 100,0                    |
| Oppenheimer Group Inc., Dover (Delaware)                             | 100,0                    |
| Orion Direct Nederland B.V., Etten-Leur                              | 100,0                    |
| Orsa Maggiore PV S.r.l., Mailand                                     | 100,0                    |
| OY Selecta AB, Helsinki                                              | 100,0                    |
| Pacific Investment Management Company LLC, Dover (Delaware)          | 97,0                     |
| Parc Eolien de Bonneuil, Vincennes Cedex                             | 100,0                    |
| Parc Eolien de la Sole du Bois SAS, Paris                            | 100,0                    |
| Parc Eolien des Barbes d'Or, Paris                                   | 100,0                    |
| Parc Eolien des Joyeuses, Paris                                      | 100,0                    |
| Parc Eolien du Bois Guillaume SAS, Paris                             | 100,0                    |
| Personalized Brokerage Service LLC, Topeka, Kansas                   | 100,0                    |
| Pet Plan Ltd., Guildford                                             | 100,0                    |
| PPF Holdings Inc., Dover (Delaware)                                  | 100,0                    |
| PGREF V 1301 Sixth Investors I LLC, Wilmington                       | 100,0                    |
| PGREF V 1301 SIXTH INVESTORS I LP, Wilmington                        | 100,0                    |
| Phenix Alternative Holding, S.A., Paris                              | 69,5 <sup>3</sup>        |
| Phenix Sécurité L, S.A., Paris                                       | 74,0 <sup>3</sup>        |
| PIMCO Switzerland S.a.r.l., Zürich                                   | 100,0                    |
| PIMCO Asia Ltd., Hongkong                                            | 100,0                    |
| PIMCO Asia PTE Ltd., Singapur                                        | 100,0                    |
| PIMCO Australia Pty Ltd., Sydney                                     | 100,0                    |
| PIMCO Canada Corp., Toronto                                          | 100,0                    |
| PIMCO Canada Holding LLC, Dover (Delaware)                           | 100,0                    |
| PIMCO Europe Ltd., London                                            | 100,0                    |
| PIMCO Global Advisors (Ireland) Ltd., Dublin                         | 100,0                    |
| PIMCO Global Advisors (Resources) Ltd., George Town (Cayman Islands) | 100,0                    |
| PIMCO Global Advisors LLC, Dover (Delaware)                          | 100,0                    |
| PIMCO Investments LLC, Dover (Delaware)                              | 100,0                    |
| PIMCO Japan Ltd., Road Town, Tortola (British Virgin Islands)        | 100,0                    |
| PIMCO Luxembourg III S.A., Luxemburg                                 | 100,0                    |
| PIMCO Luxembourg IV S.A., Luxemburg                                  | 100,0                    |
| PIMCO Luxembourg S.A., Luxemburg                                     | 100,0                    |
| PPI Media US Inc., Westmont                                          | 100,0                    |
| Primacy Underwriting Agency Pty Ltd., Milson's Point                 | 70,0                     |
| printcom (Asia) Limited, Hongkong                                    | 100,0                    |
| Prism Re, Hamilton                                                   | 100,0                    |
| Progress, Moskau                                                     | 100,0                    |
| Progress-Med, Moskau                                                 | 100,0                    |
| Pronto Lloyd S.r.l., Triest                                          | 100,0                    |
| Protexia France S.A., Lyon                                           | 66,0                     |
| PT Asuransi Allianz Life Indonesia p.l.c., Jakarta                   | 99,8                     |
| PT Asuransi Allianz Utama Indonesia Ltd., Jakarta                    | 75,0                     |
| PT manroland Indonesia, Jakarta                                      | 100,0                    |
| PTE Allianz Polska S.A., Warschau                                    | 100,0                    |
| Quality 1 AG, Hombrechtikon                                          | 70,0                     |
| Questar Agency Inc., Minneapolis                                     | 100,0                    |
| Questar Agency of Alabama Inc., Alabama                              | 100,0                    |
| Questar Agency of Colorado Inc., Denver                              | 100,0                    |
| Questar Agency of New Mexico Inc., Santa Fe                          | 100,0                    |
| Questar Agency of Ohio Inc.                                          | 100,0                    |
| Questar Agency of Texas Inc.                                         | 100,0                    |
| Questar Asset Management, Corp., Ann Arbor, MI                       | 100,0                    |
| Questar Capital Corporation, Minneapolis                             | 100,0                    |
| Quintet Properties Ltd., Dublin                                      | 100,0                    |
| RAS ANTARES, Mailand                                                 | 100,0 <sup>3</sup>       |
| Ras Private Bank (Suisse) S.A., Lugano                               | 100,0                    |
| RB Fiduciaria SpA, Mailand                                           | 100,0                    |
| RB Vita S.p.A., Mailand                                              | 100,0                    |
| RCM (UK) Ltd., London                                                | 100,0                    |
| RCM Asia Pacific Ltd., Hongkong                                      | 100,0                    |
| RCM Capital Management (Australia) Pty Ltd., Sydney                  | 100,0                    |
| RCM Capital Management LLC, Wilmington (Delaware)                    | 100,0                    |
| RCM Japan Co. Ltd., Tokio                                            | 100,0                    |
| RCM US Holdings LLC, Wilmington (Delaware)                           | 100,0                    |

|                                                                    | Anteil <sup>1</sup><br>% |
|--------------------------------------------------------------------|--------------------------|
| Real Faubourg Haussmann SAS, Paris                                 | 100,0                    |
| Real FR Haussmann SAS, Paris                                       | 100,0                    |
| Redoma S.à r.l., Luxemburg                                         | 100,0                    |
| Resurs-Stimul-Universal, Moskau                                    | 100,0                    |
| Retail Vending Ltd., Birmingham                                    | 100,0                    |
| Return 10, Paris                                                   | 74,6 <sup>3</sup>        |
| RHEA, SA, Luxemburg                                                | 100,0                    |
| Riskomanagement und Softwareentwicklung GmbH, Wien                 | 100,0                    |
| Riskon Aktiengesellschaft geschlossenen Typs, AOZT/ZAO, Moskau     | 100,0                    |
| Roland Print B.V., Amsterdam                                       | 100,0                    |
| Rosno Centre, Moskau                                               | 100,0                    |
| Rosno MS, St. Petersburg                                           | 100,0                    |
| Roster Financial LLC, Quincy                                       | 100,0                    |
| S.C. ASIT REAL ESTATE S.R.L., Bukarest                             | 100,0                    |
| S.I.B.I., S.A., Paris                                              | 100,0                    |
| SA CARENE ASSURANCE, Paris                                         | 100,0                    |
| Saint-Barth Assurances S.A.R.L., Gustavia                          | 100,0                    |
| San Francisco Reinsurance Company, Corp., Novato, CA               | 100,0                    |
| SAS Allianz Colisée, Paris                                         | 100,0                    |
| SAS LAENNEC, Paris                                                 | 100,0                    |
| SAS Madeleine Opéra, Paris                                         | 100,0                    |
| SAT S.A., Istanbul                                                 | 97,0                     |
| Saudi Nextcare, Al Khobar                                          | 52,0                     |
| SC Tour Michelet, Paris                                            | 100,0                    |
| SCAPI, Paris                                                       | 100,0                    |
| SCI Allianz Messine, Paris                                         | 100,0                    |
| SCI AVIP La Temples, Paris                                         | 100,0 <sup>7</sup>       |
| SCI AVIP SCPI Selection, Paris                                     | 100,0 <sup>7</sup>       |
| SCI ESQ, Paris                                                     | 75,0                     |
| SCI PRELLOYD, Paris                                                | 100,0                    |
| SCI Stratus, Paris                                                 | 100,0 <sup>7</sup>       |
| SCI Volnay, Paris                                                  | 100,0                    |
| Selecta A/S, Rodovre                                               | 100,0                    |
| Selecta AB, Stockholm                                              | 100,0                    |
| Selecta AG, Muntelier                                              | 100,0                    |
| Selecta AS, Oslo                                                   | 100,0                    |
| Selecta Betriebsverpflegung GmbH, Wien                             | 100,0                    |
| Selecta Eestli Osuuhing, Tallinn                                   | 100,0                    |
| Selecta Group B.V., Amsterdam                                      | 98,7                     |
| Selecta Holding B.V., Amsterdam                                    | 100,0                    |
| Selecta Holding Ltd., London                                       | 100,0                    |
| Selecta Hungary Automataüzemeltető KFT, Budapest                   | 100,0                    |
| Selecta Luxembourg SA, Leudelange                                  | 100,0                    |
| Selecta Management AG, Zug                                         | 100,0                    |
| Selecta Nordic Holding AB, Stockholm                               | 100,0                    |
| Selecta Olland BV, Waardenburg                                     | 100,0                    |
| Selecta Purchasing AG, Zug                                         | 100,0                    |
| Selecta Refreshments Ltd., Dublin                                  | 100,0                    |
| Selecta SA, Paris                                                  | 100,0                    |
| Selecta SA, Zaventem                                               | 99,9                     |
| Selecta TMP AG, Zug                                                | 100,0                    |
| Selecta UK Ltd., Birmingham                                        | 100,0                    |
| Selection Multi-Gerant Emerg, Paris                                | 63,8 <sup>3</sup>        |
| Selection Multi-Gerants Value, Paris                               | 51,9 <sup>3</sup>        |
| Semaphore, Paris                                                   | 100,0 <sup>3</sup>       |
| SI 173-175 Boulevard Haussmann SAS, Paris                          | 100,0                    |
| SIA Baltic Payment Systems, Riga                                   | 100,0                    |
| SIA Selecta, Riga                                                  | 100,0                    |
| Siac Services Srl, Rom                                             | 100,0                    |
| Sistemi Informativi Allianz S.p.a., Mailand                        | 100,0                    |
| SMG ASIE EMERGENTE                                                 | 53,7 <sup>3</sup>        |
| SNAM S.A.L., Hazmieh                                               | 66,0                     |
| SNC AGF Cash, Paris                                                | 100,0                    |
| SNC AGF Clearing, Paris                                            | 99,9                     |
| SNC Maxium, Wasquehal                                              | 100,0                    |
| SOCIEDAD MUNDIAL DE ASISTENCIA SA, Madrid                          | 100,0                    |
| Società Agricola San Felice S.p.A., Mailand                        | 100,0                    |
| Société Civile Construction Vente 33 Lafayette, Paris              | 100,0                    |
| Société de Production D'électricité D'harcourt Moulaine SAS, Paris | 100,0                    |
| Société d'Énergie Eolien Cambon SAS, Paris                         | 100,0                    |

|                                                                                               | Anteil <sup>1</sup><br>% |
|-----------------------------------------------------------------------------------------------|--------------------------|
| SOCIETE EUROPEENNE DE PROTECT. ET DE SERVICES D'ASSIST. A DOMICILE "S.E.P.S.A.D." S.A., Paris | 56,0                     |
| Société Nationale Foncière S.A.L., Beirut                                                     | 66,0                     |
| Sofiholding S.A., Brüssel                                                                     | 100,0                    |
| Sonimm, Paris                                                                                 | 100,0                    |
| South City Office Broodthaers SA, Brüssel                                                     | 100,0                    |
| SPACECO, Paris                                                                                | 100,0                    |
| Standard General Agency Inc., Dallas, TX                                                      | 100,0                    |
| Stanislas H. Haine N.V., Edegem                                                               | 100,0                    |
| StocksPLUS Management Inc., Dover (Delaware)                                                  | 100,0                    |
| Synergie Select EV, Paris                                                                     | 56,8 <sup>3</sup>        |
| Tagil-MedService LLC, Nizhni Tagil                                                            | 100,0                    |
| TELESERVICES ET SECURITE "TEL2S", SARL, Chatillon                                             | 99,9                     |
| TFI ALLIANZ POLSKA S.A., Warschau                                                             | 100,0                    |
| The American Insurance Company, Corp., Cincinnati, OH                                         | 100,0                    |
| The Annuity Store Financial & Insurance Services LLC, Sacramento, CA                          | 100,0                    |
| The Export Credit Clearing House Limited, London                                              | 100,0                    |
| The MI Group Limited, Guildford                                                               | 99,4                     |
| The MI Property Management Company Limited, Guildford                                         | 100,0                    |
| Three Pillars Business Solutions Limited, Guildford                                           | 100,0                    |
| Tihama Investments B.V., Amsterdam                                                            | 100,0                    |
| Top Assistance Service GmbH, Wien                                                             | 100,0                    |
| Top Versicherungsservice GmbH, Wien                                                           | 100,0                    |
| Top Vorsorge-Management GmbH, Wien                                                            | 75,0                     |
| Towarzystwo Ubezpieczeń Euler Hermes S.A., Warschau                                           | 100,0                    |
| Trade Debtor Insurance Services Limited, London                                               | 100,0                    |
| Trade Indemnity Credit Corporation Limited, London                                            | 100,0                    |
| Trade Indemnity Factors Limited, London                                                       | 100,0                    |
| Trafalgar Insurance Public Limited Company, Guildford                                         | 100,0                    |
| Travel Care Inc., Richmond                                                                    | 100,0                    |
| Treewalk Finance UK Limited, Guildford                                                        | 100,0                    |
| Trust Investment Company, Moskau                                                              | 100,0                    |
| TU Allianz Polska S.A., Warschau                                                              | 100,0                    |
| TU Allianz Zycie Polska S.A., Warschau                                                        | 100,0                    |
| UAB Selecta, Vilnius                                                                          | 100,0                    |
| Vendicare (Holdings) Limited, Birmingham                                                      | 100,0                    |
| Vendicare Services Ltd., Birmingham                                                           | 100,0                    |
| Vernon, Paris                                                                                 | 100,0                    |
| VertBois S.à.r.l., Luxemburg                                                                  | 100,0                    |
| Via Pierre 1, Paris                                                                           | 100,0                    |
| Villa La Pagliaia S.r.l., Castelnuovo Berardenga (Siena)                                      | 100,0                    |
| Viveole SAS, Paris                                                                            | 100,0                    |
| Votra S.A., Lausanne                                                                          | 100,0                    |
| W Finance Amerique, Paris                                                                     | 53,6 <sup>3</sup>        |
| W Finance Assurances, S.A., Paris                                                             | 100,0                    |
| W Finance Croissance                                                                          | 56,4 <sup>3</sup>        |
| W Finance Europe, Paris                                                                       | 72,1 <sup>3</sup>        |
| W Finance, Paris                                                                              | 100,0                    |
| WATTINVEST C, Paris                                                                           | 59,8 <sup>3</sup>        |
| WF Administration, Paris                                                                      | 100,0                    |
| Willemsbruggen, Rotterdam                                                                     | 100,0                    |
| Windpark Les Cent Jalois, Paris                                                               | 100,0                    |
| Wm. H McGee & Co. (Bermuda) Ltd., Hamilton                                                    | 100,0                    |
| Wm. H McGee & Co. Inc., New York                                                              | 100,0                    |
| Wm. H McGee & Co. of Puerto Rico Inc., San Juan                                               | 100,0                    |
| World Access Canada Inc., Waterloo                                                            | 100,0                    |
| World Access Europe Ltd., Croydon Surrey                                                      | 100,0                    |
| World Access Inc., Richmond                                                                   | 100,0                    |
| World Access Insurance Broker Ltd., Waterloo                                                  | 100,0                    |
| World Access Service Corp., Richmond                                                          | 100,0                    |
| YAO Investment S.à.r.l., Luxemburg                                                            | 100,0                    |
| Yorktown Financial Companies Inc., Minneapolis, MN                                            | 100,0                    |
| <b>Nicht konsolidierte verbundene Unternehmen</b>                                             |                          |
| 75 WALL STREET ADVISERS, New York                                                             | 99,8                     |
| A. Diffusion, Paris                                                                           | 99,9                     |
| AFA, Paris                                                                                    | 99,9                     |
| AGF Pension Trustees, Guildford                                                               | 100,0                    |
| Allianz America Latina S.C. Ltda., Rio de Janeiro                                             | 100,0                    |
| Allianz Cash Pool LLC, Westport                                                               | 100,0                    |
| Allianz Financial Services S.A., Athen                                                        | 100,0                    |

- 1 Berechnung berücksichtigt die von abhängigen Unternehmen gehaltenen Anteile vollständig, auch wenn der Konzernanteil an diesem abhängigen Unternehmen unter 100% liegt.
- 2 Kontrolle durch Allianz Konzern

- 3 Publikums-, Private Equity- oder Spezialfonds
- 4 Konzernabschluss und -lagebericht der Allianz SE haben gemäß Anwendung des § 264 Abs. 3 HGB befreiende Wirkung.
- 5 Konzernanteil über haltende Gesellschaft Roland Holding GmbH, München: 74,1%

- 6 Klassifizierung als assoziiertes Unternehmen nach SIC-12
- 7 Special Purpose Entity nach SIC-12 (SPE)
- 8 Maßgeblicher Einfluss

|                                                                                               | Anteil <sup>1</sup><br>% |
|-----------------------------------------------------------------------------------------------|--------------------------|
| Allianz Global Corporate & Specialty AG Escritorio de Representacao no Brasil Ltda, Sao Paulo | 99,0                     |
| Allianz Insurance Cie of Ghana Limited, Accra                                                 | 100,0                    |
| Allianz Insurance Limited, Johannesburg                                                       | 100,0                    |
| Allianz Insurance Services LTD., Athen                                                        | 100,0                    |
| Allianz International Ltd., Guildford                                                         | 100,0                    |
| Allianz Northern Ireland Limited, Belfast                                                     | 100,0                    |
| Allianz of South Africa (Proprietary) Ltd., Johannesburg                                      | 100,0                    |
| Allianz Polska Services Sp. z o.o., Warschau                                                  | 100,0                    |
| Allianz Risk Consultants B.V., Rotterdam                                                      | 100,0                    |
| ASREX, Paris                                                                                  | 100,0                    |
| Atrium SAS, Paris                                                                             | 100,0                    |
| business lounge GmbH, Wien                                                                    | 100,0                    |
| CCA, Paris                                                                                    | 100,0                    |
| Cogar, Paris                                                                                  | 100,0                    |
| Cornhill Investment Properties (Reigate) Ltd., Guildford                                      | 100,0                    |
| Dealis Fund Operations S.A., Luxembourg, Luxemburg                                            | 95,0                     |
| EH Sigorta Anonim Sirketi, Istanbul                                                           | 100,0                    |
| ELF Technologies Limited, Dublin                                                              | 100,0                    |
| EULER HERMES RISK YÖNETİMİ, Istanbul                                                          | 100,0                    |
| First Call Direct Limited, Dublin                                                             | 100,0                    |
| First Rate Direct Limited, Belfast                                                            | 100,0                    |
| Fundatia Allianz pentru Romania, Bukarest                                                     | 100,0                    |
| Gesellschaft für Vorsorgeberatung, AG, Bern                                                   | 100,0                    |
| KNIGHTSBRIDGE ALLIANZ LP, Bartlesville, Oklahoma                                              | 99,5                     |
| manroland Malaysia Sdn. Bhd., Kuala Lumpur                                                    | 100,0                    |
| Organizacão G.o.a. S.A., Lima                                                                 | 100,0                    |
| OSECA, Dakar                                                                                  | 99,6                     |
| PACT OFFICE, LYON                                                                             | 100,0                    |
| Previndustria - Fiduciaria Previdenza Imprenditori S.p.A., Mailand                            | 50,0                     |
| RE-AA, Abidjan                                                                                | 97,5                     |
| Risk & Safety Services Limited, Dublin                                                        | 100,0                    |
| SA EGPA RHONE ALPES, Paris                                                                    | 100,0                    |
| SA Immobilière de L'Avenue du Roule, Paris                                                    | 100,0 <sup>7</sup>       |
| Schmalbach-Lubeca Service Center N.V., Brecht                                                 | 100,0                    |
| SCI Avip des Pivolles, Paris                                                                  | 100,0 <sup>7</sup>       |
| SCI AVIP Marly-Saint Cyr, Paris                                                               | 100,0 <sup>7</sup>       |
| SCI champ laurent, Paris                                                                      | 100,0 <sup>7</sup>       |
| SCI DE LA PAILLERE, Paris                                                                     | 99,0 <sup>7</sup>        |
| SCI J.T., Paris                                                                               | 100,0 <sup>7</sup>       |
| SCI La Balandrane, Paris                                                                      | 100,0 <sup>7</sup>       |
| SCI La Rize, Paris                                                                            | 100,0 <sup>7</sup>       |
| SCI Paris X, Paris                                                                            | 100,0 <sup>7</sup>       |
| SCI Vilaje, Paris                                                                             | 100,0 <sup>7</sup>       |
| SIFCOM Assurances, Abidjan                                                                    | 60,0                     |
| Société Foncière Européenne, Amsterdam                                                        | 100,0                    |
| Top Versicherungs-Vermittler Service GmbH, Wien                                               | 100,0                    |
| <b>Gemeinschaftsunternehmen</b>                                                               |                          |
| Allée-Center Budapest, Budapest                                                               | 50,0                     |
| Allianz CP Genral Insurance Company Limited, Bangkok                                          | 50,0                     |
| Atencion Integral a la Dependencia S.L., Cordoba                                              | 50,0                     |
| Bajaj Allianz Financial Distributors Limited, Pune                                            | 50,0                     |
| Compania de Seguro de Creditos S.A. (Cosec)                                                   | 50,0                     |
| Dorcasia Ltd., Sydney                                                                         | 50,0                     |
| Euro Nederland, Amsterdam                                                                     | 50,0                     |
| Insaudi Insurance Company E.C., Manama                                                        | 50,0                     |
| International Shopping Centre Investment S.A., Luxemburg, Luxemburg                           | 50,0                     |
| Market Street Trust, Sydney                                                                   | 50,0                     |
| Millea Mondial Co Ltd., Tokio                                                                 | 50,0                     |
| One Beacon Joint Venture LP, Wilmington                                                       | 50,0                     |
| SC HOLDING, Paris                                                                             | 50,0                     |
| TopTorony Ingatlanhasznosító Zártkörűen Működő Részvénytársaság, Kft., Budapest               | 50,0                     |
| UTE Gesecopri Servearcar, Barcelona                                                           | 50,0                     |
| <b>Assoziierte Unternehmen</b>                                                                |                          |
| 21 Gestion Active, Paris                                                                      | 24,8 <sup>3</sup>        |
| ABS Credit Plus, Paris                                                                        | 22,7 <sup>3</sup>        |
| Addax Alpha Pat., Paris                                                                       | 29,4 <sup>3</sup>        |
| AGF Peh France IV FCPR, Paris                                                                 | 51,4 <sup>3</sup>        |

|                                                                                                       | Anteil <sup>1</sup><br>% |
|-------------------------------------------------------------------------------------------------------|--------------------------|
| AGF Peh France IV C, Paris                                                                            | 35,7 <sup>3</sup>        |
| AGF SECURICASH L, S.A., Paris                                                                         | 16,3 <sup>3</sup>        |
| AGIF RCM EUROPEAN EQUITY DIVIDEND AT/IT, Paris                                                        | 21,7 <sup>3</sup>        |
| Agrigest S.p.A., Rom                                                                                  | 50,0                     |
| Allianz Actions Euro MidCap, Paris                                                                    | 34,2 <sup>3</sup>        |
| Allianz Actions Indice France, Paris                                                                  | 24,5 <sup>3</sup>        |
| Allianz Asian Multi Income Plus, Singapur                                                             | 27,7 <sup>3</sup>        |
| Allianz EFU Health Insurance Ltd., Karachi                                                            | 49,0                     |
| Allianz Euro High Yield, Paris                                                                        | 9,8 <sup>3</sup>         |
| Allianz Euro Liquidity, Paris                                                                         | 44,3 <sup>3</sup>        |
| Allianz Euro Tactique, Paris                                                                          | 43,0 <sup>3</sup>        |
| Allianz Europe Convertible, Paris                                                                     | 19,5 <sup>3</sup>        |
| Allianz Finance Actions France, Paris                                                                 | 48,7 <sup>3</sup>        |
| Allianz Finance Alternative Holdings, Paris                                                           | 39,6 <sup>3</sup>        |
| Allianz Finance MidCap, Paris                                                                         | 43,4 <sup>3</sup>        |
| Allianz Invest Vorsorgefonds, Wien                                                                    | 30,2                     |
| Allianz Multi Rendement Premium (R), Paris                                                            | 9,8 <sup>3</sup>         |
| Allianz Obligations Revenus, Paris                                                                    | 6,1 <sup>3</sup>         |
| Allianz PIMCO Euro Bond Total Return, Senningerberg                                                   | 11,9                     |
| Allianz Saudi Fransi, Ryadh                                                                           | 32,5                     |
| Allianz Sécurité PEA, Paris                                                                           | 42,4 <sup>3</sup>        |
| Allianz-dit Small Cap Europa, Luxemburg                                                               | 5,6                      |
| ALTAPROFITS, Paris                                                                                    | 20,0                     |
| Ariel, Paris                                                                                          | 22,8 <sup>3</sup>        |
| ASSURCARD, NV/SA, Haasrode                                                                            | 33,3                     |
| Autoelektro tehnicki pregledi društvo s ogranicenom odgovornoscu za trgovinu i usluge, Vojnić         | 49,0                     |
| Ayudhya Insurance Public Company Limited, Bangkok                                                     | 16,8 <sup>8</sup>        |
| Bajaj Allianz General Insurance Company Ltd., Pune                                                    | 26,0                     |
| Bajaj Allianz Life Insurance Company Ltd., Pune                                                       | 26,0                     |
| Biosphere A, Paris                                                                                    | 44,9 <sup>3</sup>        |
| BMM France Croissance, Marseille                                                                      | 26,4 <sup>3</sup>        |
| BMM Long Terme (D), Marseille                                                                         | 43,3 <sup>3</sup>        |
| BMM Obligations (D), Marseille                                                                        | 25,1 <sup>3</sup>        |
| Brunei National Insurance Company Berhad Ltd., Bandar Seri Begawan                                    | 25,0                     |
| Caducee Patrimoine, Paris                                                                             | 29,4                     |
| Capimmovalor, Paris                                                                                   | 33,6                     |
| Chicago Parking Meters, LLC, Wilmington                                                               | 49,9                     |
| Citylife Srl., Mailand                                                                                | 31,9                     |
| Cofitem Cofimur, Paris                                                                                | 22,1                     |
| CYRIL CONVERTIBLE TALUX, Paris                                                                        | 22,6 <sup>3</sup>        |
| CYRIL Convertibles, Paris                                                                             | 30,4 <sup>3</sup>        |
| Data Quest SAL, Beirut                                                                                | 36,0                     |
| DIGITAL FDS STAR EUR, Paris                                                                           | 27,7 <sup>3</sup>        |
| Douglas Emmett Partnership X, LP, California                                                          | 28,6                     |
| Dr. Ignaz Fiala GmbH, Wien                                                                            | 33,3                     |
| Essor France Oppor, Marseille                                                                         | 29,9 <sup>3</sup>        |
| Euro Media Télévision S.A., Bry-sur-Marne                                                             | 21,4                     |
| EUROPENSIONES S.A. - Entidad Gestora de Fondos de Pensiones, Madrid                                   | 49,0                     |
| Eurotax Garantie AG, Pfaffikon                                                                        | 30,0                     |
| FEDERATION DES INDEPENDANTS, Lyon                                                                     | 23,1                     |
| Fondika SA de CV sociedad distribuidora integral de acciones de sociedades de inversion, Mexiko-Stadt | 26,8                     |
| GAP 1 AN Canton, Paris                                                                                | 33,0 <sup>3</sup>        |
| GAP 1 AN, Paris                                                                                       | 47,3 <sup>3</sup>        |
| GAP Euros Canton, Paris                                                                               | 37,7 <sup>3</sup>        |
| GMAC VersicherungsService GmbH, Wien                                                                  | 40,0                     |
| Graydon Holding N.V., Amsterdam                                                                       | 27,5                     |
| Guotai Jun'an Allianz Fund Management Company, Shanghai                                               | 49,0                     |
| Henderson UK Outlet Mall Partnership LP., Edinburgh                                                   | 19,5 <sup>7</sup>        |
| Heracles, Paris                                                                                       | 30,9 <sup>3</sup>        |
| ICG Conv Rendemt, Paris                                                                               | 21,6 <sup>3</sup>        |
| ICIC, Tel Aviv                                                                                        | 33,3                     |
| Interpolis Kredietverzekeringen, Hertogenbosch                                                        | 45,0                     |
| Invesc Multi Plus E, Paris                                                                            | 33,1 <sup>3</sup>        |
| IPE TANK RAIL INVEST A 1 Sca, Luxemburg                                                               | 48,8                     |
| JPMorgan IIF UK1 LP, Dublin                                                                           | 46,1                     |
| KGH FD Licorne Red Eur CL, Paris                                                                      | 32,3 <sup>3</sup>        |
| Le Cottage, Paris                                                                                     | 40,8 <sup>3</sup>        |
| Marianne (C), Paris                                                                                   | 28,8 <sup>3</sup>        |
| MedCentreStrakh, Moskau                                                                               | 30,0                     |
| METROPOLE NEW EURO I, Paris                                                                           | 28,3 <sup>3</sup>        |

|                                                              | Anteil <sup>1</sup><br>% |
|--------------------------------------------------------------|--------------------------|
| MM Composition Amerique, Marseille                           | 49,6 <sup>3</sup>        |
| MMGI EUROMIX ACTION, Paris                                   | 21,0 <sup>3</sup>        |
| MULTI ALTERNATIF ARBITRAGE, Paris                            | 23,6 <sup>3</sup>        |
| Natinium 2007-1, Plc, Dublin                                 | 48,4 <sup>7</sup>        |
| NORA, LC, Maroua                                             | 20,0                     |
| OBJECTIF CREDIT FI C, Paris                                  | 31,1 <sup>3</sup>        |
| Oddo Avenir (D), Paris                                       | 24,3 <sup>3</sup>        |
| Oddo Court Terme, Paris                                      | 40,2 <sup>3</sup>        |
| ODDO ET CIE, SCA, Paris Cedex 09                             | 20,0                     |
| Oddo Euro Index AC, Paris                                    | 30,4 <sup>3</sup>        |
| Oddo Europe, Paris                                           | 44,1 <sup>3</sup>        |
| Oddo FR IND ACT A, Paris                                     | 36,8 <sup>3</sup>        |
| Oddo Generation C, Paris                                     | 22,5 <sup>3</sup>        |
| Oddo Gestion Prudente, Paris                                 | 33,8 <sup>3</sup>        |
| Oddo Indice Japon, Paris                                     | 39,3 <sup>3</sup>        |
| ODDO OPPORTUNITES B, Paris                                   | 47,2 <sup>3</sup>        |
| ODDO RENDEMENT 2015, Paris                                   | 29,0 <sup>3</sup>        |
| ODDO US MID CAP, Paris                                       | 38,5 <sup>3</sup>        |
| Oddo USA Index Actif, Paris                                  | 41,9 <sup>3</sup>        |
| Oddo Valeurs Rende, Paris                                    | 35,1 <sup>3</sup>        |
| OeKB EH Beteiligungss- und Management AG, Wien               | 49,0                     |
| Opera Valeurs, Paris                                         | 33,2 <sup>3</sup>        |
| PAR Holdings Limited, Hamilton                               | 20,1                     |
| Parv US Small Cap, Luxemburg                                 | 27,1 <sup>3</sup>        |
| PERFECTIS I Ltd., Paris                                      | 27,3                     |
| PGREF V 1301 SIXTH HOLDING LP, Wilmington                    | 24,5                     |
| PHRV (Paris Hotels Roissy Vaugirard), Paris                  | 30,6                     |
| Pinatton France, Paris                                       | 29,1 <sup>3</sup>        |
| Povolzhskiy Leasing Center, Moskau                           | 20,0                     |
| Proxinvest Active Investors C, Paris                         | 26,2 <sup>3</sup>        |
| Red Mountain Capital Partners I LP., Los Angeles             | 24,9                     |
| Roskurort, Moskau                                            | 50,0                     |
| SDU Finco B.V., Amsterdam                                    | 49,7                     |
| Select Multi. Ger. Croissance, Paris                         | 48,7 <sup>3</sup>        |
| SISF Glob Property, Zürich                                   | 22,9 <sup>3</sup>        |
| SK Versicherung AG, Wien                                     | 25,8                     |
| Societe de Distributuin Automatique, Tunis                   | 49,0                     |
| Sogesection Energie, Paris                                   | 32,5 <sup>3</sup>        |
| Solent, Paris                                                | 27,7 <sup>3</sup>        |
| Sunderland Ins. Services Inc., Fargo, ND                     | 40,0                     |
| THE EMERGING COMMO, Paris                                    | 32,9 <sup>3</sup>        |
| Trusteam CB Patrim, Paris                                    | 49,5 <sup>3</sup>        |
| UNIM, Paris                                                  | 30,0                     |
| VERONIA SHEL F s.r.o., Prag                                  | 49,0                     |
| W Finance Arbitrage, Paris                                   | 45,6 <sup>3</sup>        |
| Wheelabrator INV, Paris                                      | 26,8                     |
| White Knight FCPR, SARL, Paris                               | 21,0                     |
| XAnge Capital, SARL, Paris                                   | 21,0                     |
| <b>Sonstige Anteile zwischen 5 und 20% Stimmrechtsanteil</b> |                          |
| Al Nisr Al Arabi, Amman                                      | 18,0                     |
| Banco BPI S.A., Porto                                        | 8,8                      |
| Banco Popular Espanol S.A., Madrid                           | 9,2                      |
| Pirelli & Co. SpA, Mailand                                   | 7,0                      |
| SGS SA, Geneve                                               | 5,4                      |
| The Hartford Financial Services Group, Inc., Hartford        | 5,2                      |
| Zagrebacka banka d.d., Zagreb                                | 11,7                     |
| Zagrebacka banka d.d., Zagreb                                | 11,7                     |

1 Berechnung berücksichtigt die von abhängigen Unternehmen gehaltenen Anteile vollständig, auch wenn der Konzernanteil an diesem abhängigen Unternehmen unter 100 % liegt.

2 Kontrolle durch Allianz Konzern

3 Publikums-, Private Equity- oder Spezialfonds

4 Konzernabschluss und -lagebericht der Allianz SE haben gemäß Anwendung des § 264 Abs. 3 HGB befreiende Wirkung.

5 Konzernanteil über haltende Gesellschaft Roland Holding GmbH, München: 74,1 %

6 Klassifizierung als assoziiertes Unternehmen nach SIC-12

7 Special Purpose Entity nach SIC-12 (SPE)

8 Maßgeblicher Einfluss



## Versicherung der gesetzlichen Vertreter

Wir versichern nach bestem Wissen, dass gemäß den anzuwendenden Rechnungslegungsgrundsätzen der Konzernabschluss ein den tatsächlichen Verhältnissen entsprechendes Bild der Vermögens-, Finanz- und Ertragslage des Konzerns vermittelt und im Konzernlagebericht der Geschäftsverlauf einschließlich des Geschäftsergebnisses und die Lage des Konzerns so dargestellt sind, dass ein den tatsächlichen Verhältnissen entsprechendes Bild vermittelt wird, sowie die wesentlichen Chancen und Risiken der voraussichtlichen Entwicklung des Konzerns beschrieben sind.

München, den 21. Februar 2011

Allianz SE  
Der Vorstand

|          |                                                                                     |
|----------|-------------------------------------------------------------------------------------|
| Nikun    | Mr. James                                                                           |
| G. Webb  | Oliver Bile                                                                         |
| 83003    |  |
| Lulu     | Worches                                                                             |
| J. Rulph | Zurri                                                                               |

# Bestätigungsvermerk des Abschlussprüfers

Wir haben den von der Allianz SE, München, aufgestellten Konzernabschluss – bestehend aus Konzernbilanz, Konzern-Gewinn- und Verlustrechnung, Gesamtergebnisrechnung, Entwicklung des Eigenkapitals, Kapitalflussrechnung und Konzernanhang – sowie den Konzernlagebericht für das Geschäftsjahr vom 1. Januar bis 31. Dezember 2010 geprüft. Die Aufstellung von Konzernabschluss und Konzernlagebericht nach den IFRS, wie sie in der EU anzuwenden sind, und den ergänzend nach § 315 a Abs. 1 HGB anzuwendenden handelsrechtlichen Vorschriften sowie den ergänzenden Bestimmungen der Satzung liegt in der Verantwortung der gesetzlichen Vertreter der Gesellschaft. Unsere Aufgabe ist es, auf der Grundlage der von uns durchgeführten Prüfung eine Beurteilung über den Konzernabschluss und den Konzernlagebericht abzugeben.

Wir haben unsere Konzernabschlussprüfung nach § 317 HGB unter Beachtung der vom Institut der Wirtschaftsprüfer (IDW) festgestellten deutschen Grundsätze ordnungsmäßiger Abschlussprüfung vorgenommen. Danach ist die Prüfung so zu planen und durchzuführen, dass Unrichtigkeiten und Verstöße, die sich auf die Darstellung des durch den Konzernabschluss unter Beachtung der anzuwendenden Rechnungslegungsvorschriften und durch den Konzernlagebericht vermittelten Bildes der Vermögens-, Finanz- und Ertragslage wesentlich auswirken, mit hinreichender Sicherheit erkannt werden. Bei der Festlegung der Prüfungshandlungen werden die Kenntnisse über die Geschäftstätigkeit und über das wirtschaftliche und rechtliche Umfeld des Konzerns sowie die Erwartungen über mögliche Fehler berücksichtigt. Im Rahmen der Prüfung werden die Wirksamkeit des rechnungslegungsbezogenen internen Kontrollsystems sowie Nachweise für die Angaben im Konzernabschluss und Konzernlagebericht überwiegend auf der Basis von Stichproben beurteilt. Die

Prüfung umfasst die Beurteilung der Jahresabschlüsse der in den Konzernabschluss einbezogenen Unternehmen, der Abgrenzung des Konsolidierungskreises, der angewandten Bilanzierungs- und Konsolidierungsgrundsätze und der wesentlichen Einschätzungen der gesetzlichen Vertreter sowie die Würdigung der Gesamtdarstellung des Konzernabschlusses und des Konzernlageberichts. Wir sind der Auffassung, dass unsere Prüfung eine hinreichend sichere Grundlage für unsere Beurteilung bildet.

Unsere Prüfung hat zu keinen Einwendungen geführt.

Nach unserer Beurteilung aufgrund der bei der Prüfung gewonnenen Erkenntnisse entspricht der Konzernabschluss den IFRS, wie sie in der EU anzuwenden sind, und den ergänzend nach § 315 a Abs. 1 HGB anzuwendenden handelsrechtlichen Vorschriften sowie den ergänzenden Bestimmungen der Satzung und vermittelt unter Beachtung dieser Vorschriften ein den tatsächlichen Verhältnissen entsprechendes Bild der Vermögens-, Finanz- und Ertragslage des Konzerns. Der Konzernlagebericht steht in Einklang mit dem Konzernabschluss, vermittelt insgesamt ein zutreffendes Bild von der Lage des Konzerns und stellt die Chancen und Risiken der zukünftigen Entwicklung zutreffend dar.

München, den 2. März 2011

KPMG AG  
Wirtschaftsprüfungsgesellschaft



Dr. Frank Ellenbürger  
Wirtschaftsprüfer

Johannes Pastor  
Wirtschaftsprüfer



|     |                                                 |
|-----|-------------------------------------------------|
| 162 | Konzernabschluss                                |
| 170 | Konzernanhang                                   |
| 224 | Angaben zur Konzernbilanz                       |
| 260 | Angaben zur Konzern-Gewinn- und Verlustrechnung |
| 275 | <b>Sonstige Angaben</b>                         |

## Weitere Informationen

- 320 Gemeinsamer Beirat  
und Internationaler Beraterkreis
- 321 Mandate
- 324 Fachbegriffe
- 328 Register

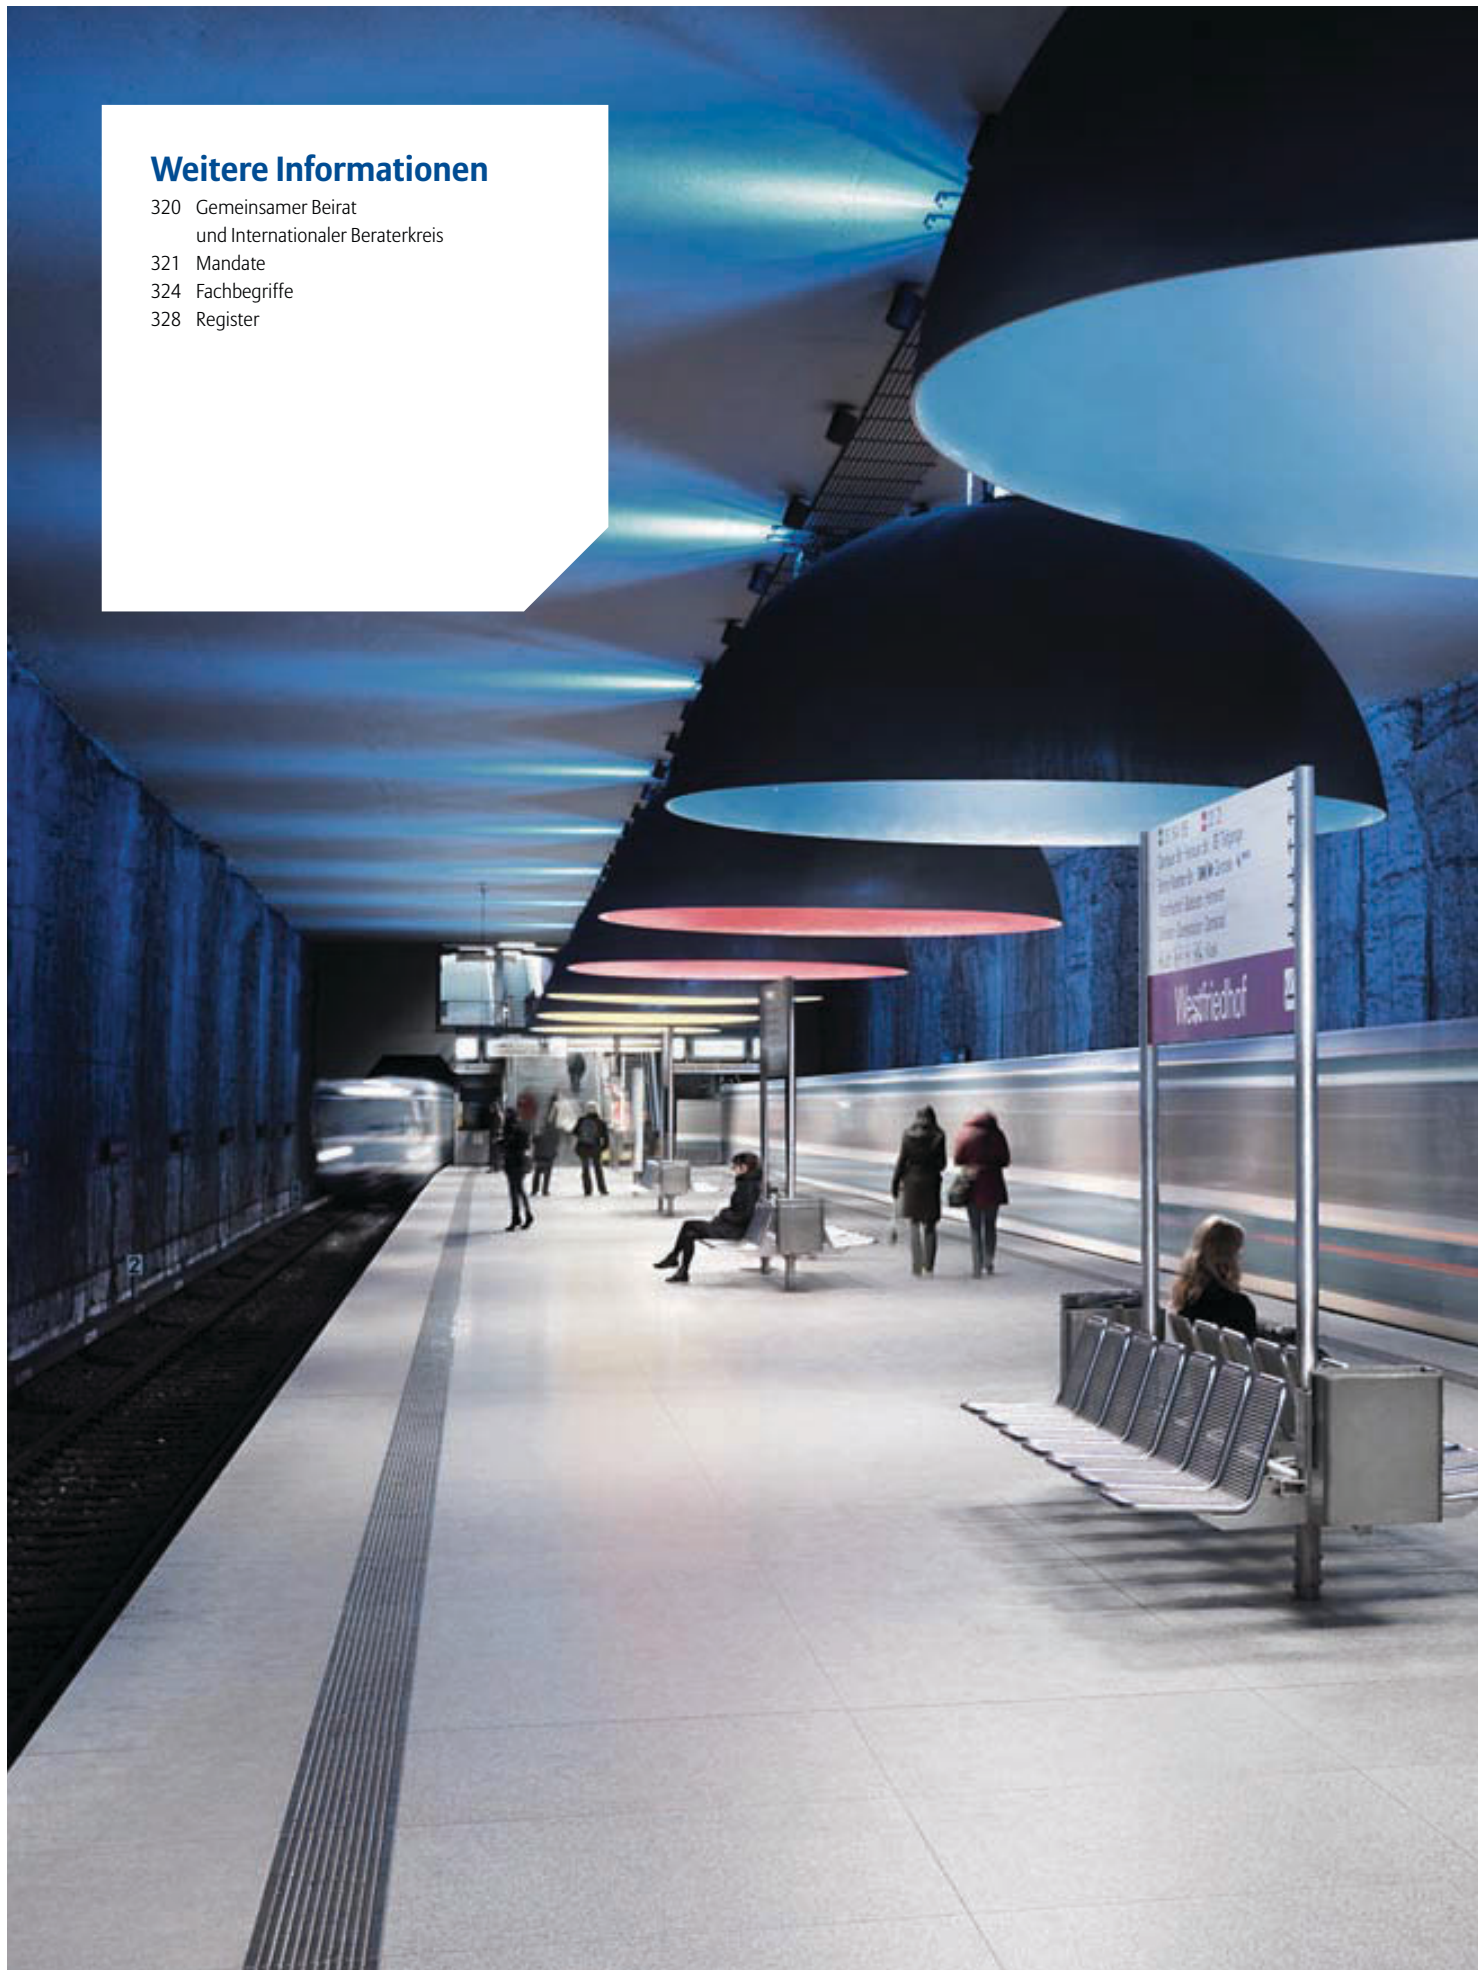



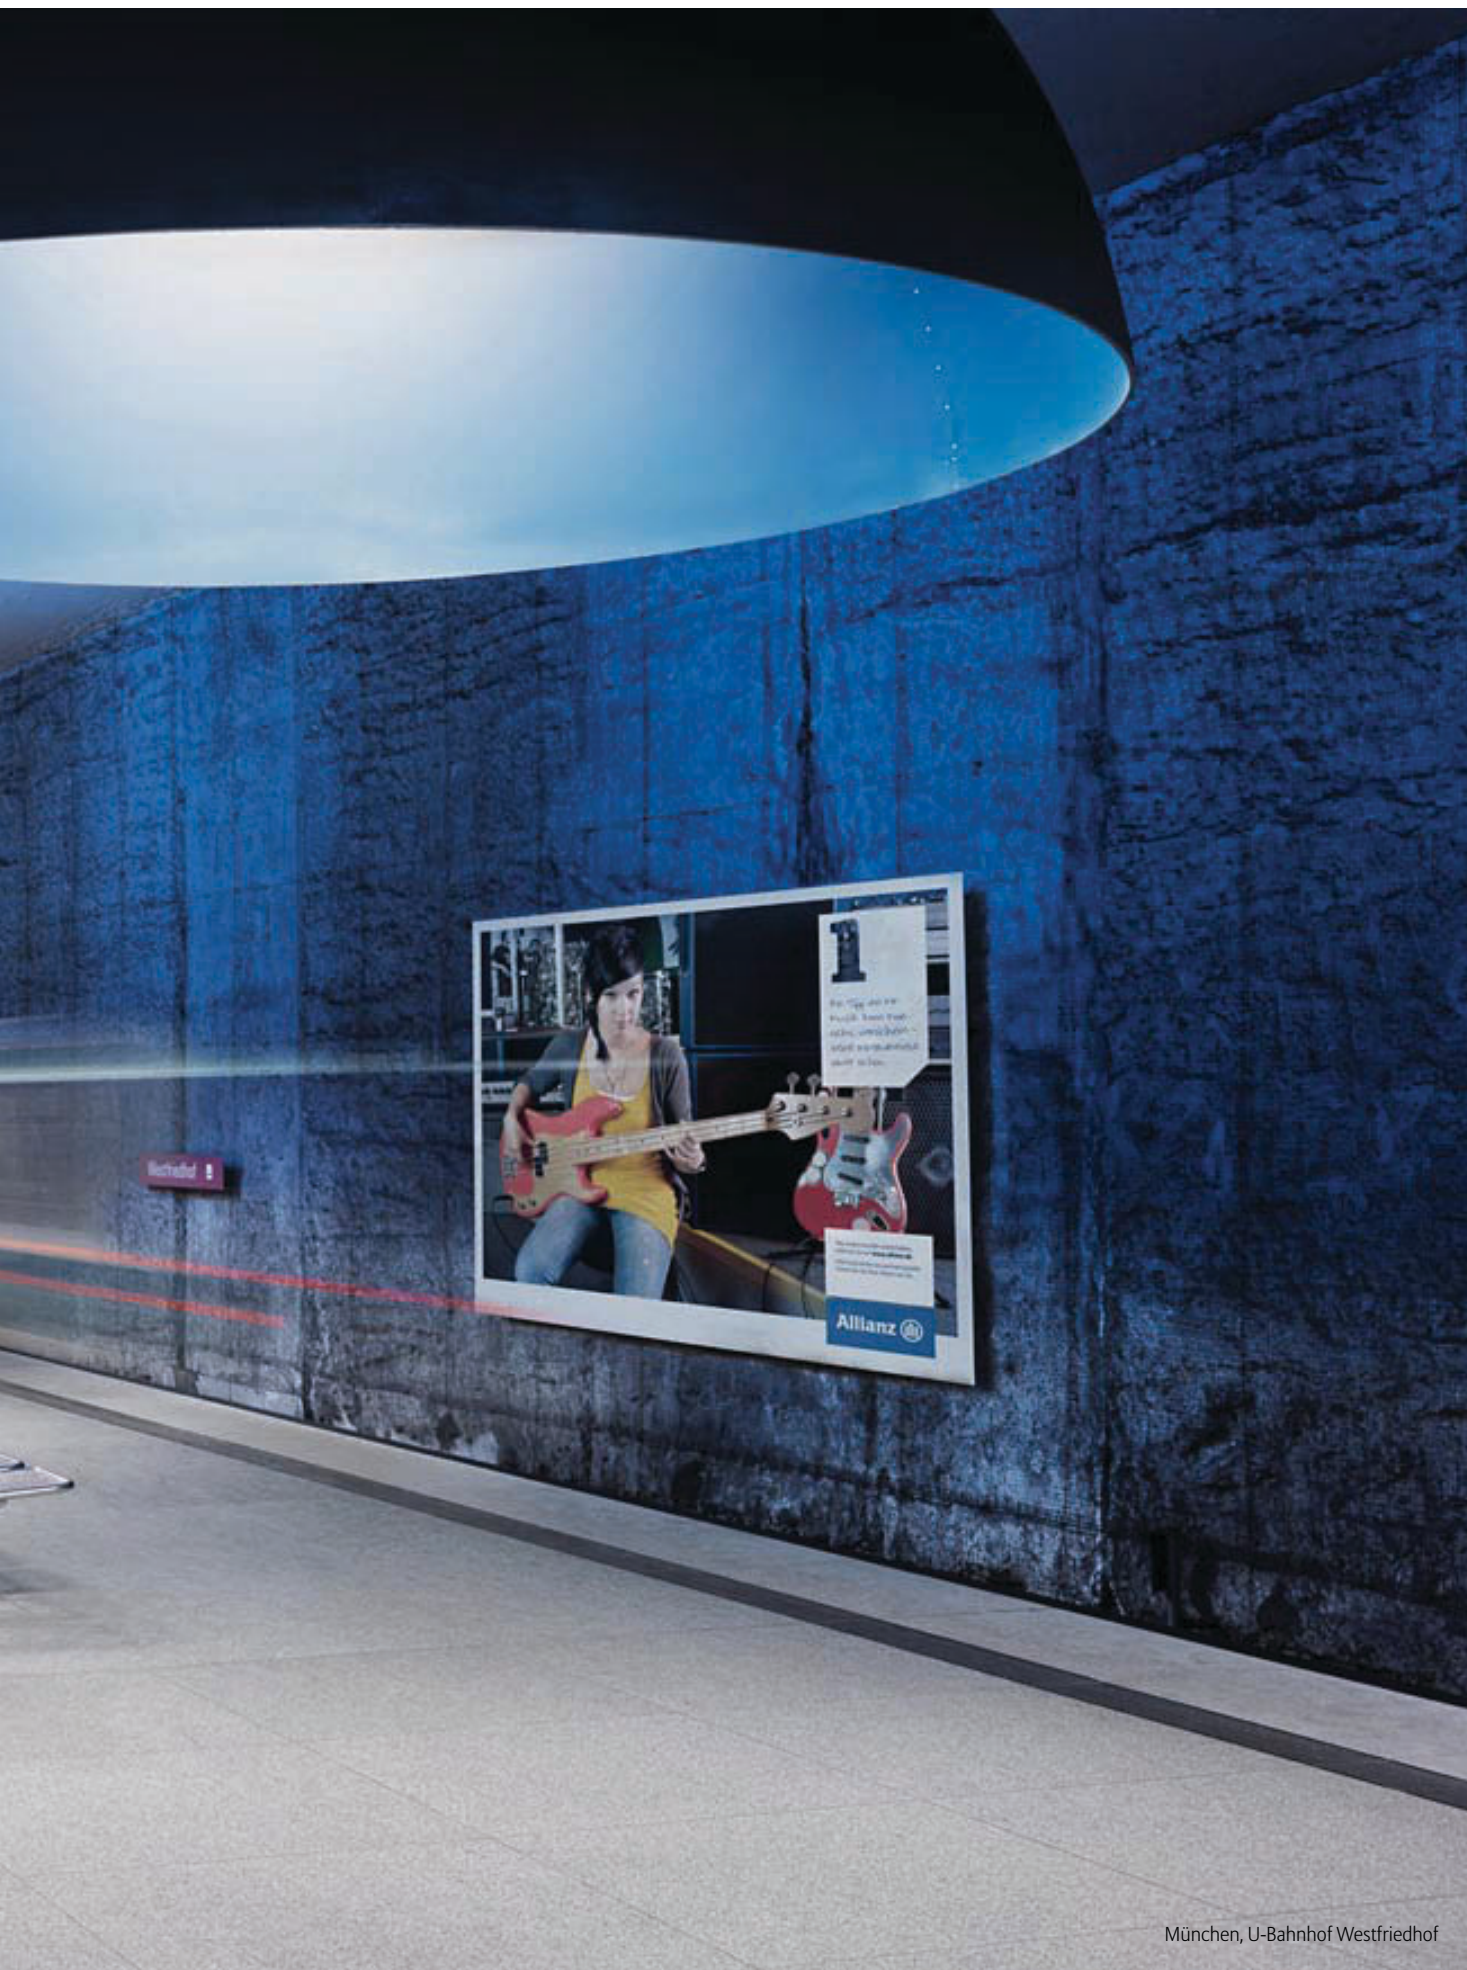

München, U-Bahnhof Westfriedhof

## Gemeinsamer Beirat der Allianz Gesellschaften

### Dr. Henning Schulte-Noelle

Vorsitzender  
Vorsitzender des Aufsichtsrats, Allianz SE

### Franz Fehrenbach

Vorsitzender der Geschäftsführung,  
Robert Bosch GmbH

### Professor Dr. Bernd Gottschalk

Geschäftsführender Gesellschafter,  
AutoValue GmbH

### Dr. Rüdiger Grube

Vorsitzender des Vorstands, Deutsche Bahn AG

### Herbert Hainer

Vorsitzender des Vorstands, adidas AG

### Prof. Dr.-Ing. e. h. Hans-Olaf Henkel

Honoraryprofessor, Universität Mannheim

### Dr. Jürgen Heraeus

Vorsitzender des Aufsichtsrats,  
Heraeus Holding GmbH

### Dr.-Ing. Dieter Hundt, Honorary Senator

Vorsitzender des Aufsichtsrats,  
Allgaier Werke GmbH

### Dr. Hans-Peter Keitel

Mitglied des Aufsichtsrats, Hochtief AG

### Dr. Nicola Leibinger-Kammüller

Vorsitzende der Geschäftsführung  
Trumpf GmbH & Co. KG  
seit 1. Juli 2010

### Dr. Bernd Pischetsrieder

Volkswagen AG

### Dr.-Ing. Norbert Reithofer

Vorsitzender des Vorstands, BMW Group

### Harry Roels

### Kasper Rorsted

Vorsitzender des Vorstands, Henkel AG & Co. KGaA  
seit 1. Juli 2010

### Dr. h. c. Walter Scheel

Bundespräsident a. D.

### Dr. Manfred Schneider

Vorsitzender des Aufsichtsrats, Bayer AG

### Prof. Dr. Dennis J. Snower

Präsident des Instituts für Weltwirtschaft,  
Universität Kiel

### Dipl.-Kfm. Holger Strait

Geschäftsführender Gesellschafter,  
J. G. Niederegger GmbH & Co. KG

### Dr.-Ing. e. h. Heinrich Weiss

Vorsitzender der Geschäftsführung, SMS GmbH

### Manfred Wennemer

ehem. Vorsitzender des Vorstands, Continental AG

## Internationaler Beraterkreis

### Khalifa Al-Kindi

Managing Director,  
Abu Dhabi Investment Council

### Belmiro de Azevedo

Presidente, Sonae SGPS SA

### Alfonso Cortina de Alcocer

Senior Advisor, Rothschild  
Senior Advisor, Texas Pacific Group

### Dr. Jürgen Hambrecht

Vorsitzender des Vorstands, BASF SE

### Fred Hu

Managing Director, Goldman Sachs

### Franz B. Humer

Vorsitzender des Vorstands, Roche Holding Ltd.

### Rahmi Koç

Honorary Chairman of the Board of Directors,  
Koç Holding AS

### Minoru Makihara

Senior Corporate Advisor, Mitsubishi Corporation

### Christophe de Margerie

CEO, Total SA

### Jacques A. Nasser

Managing Director, One Equity Partners LLC

### James W. Owens

Chairman and CEO, Caterpillar Inc.

### Dr. Gianfelice Rocca

Chairman, Techint Group

### Angel Ron

Chairman, Banco Popular

### Anthony Salim

President and CEO, Salim Group

### Louis Schweitzer

Chairman, Renault SA

### Iain Lord Vallance of Tummel

### Dr. Marco Tronchetti Provera

Chairman and CEO, Pirelli & Co. S.p.A.

## Mandate der Aufsichtsratsmitglieder<sup>1</sup>

### Dr. Henning Schulte-Noelle

Mitgliedschaft in gesetzlich zu bildenden inländischen Aufsichtsräten  
und SE-Verwaltungsräten  
E.ON AG  
ThyssenKrupp AG (bis 21. Januar 2011)

### Dr. Wulf H. Bernotat

Mitgliedschaft in gesetzlich zu bildenden inländischen Aufsichtsräten  
und SE-Verwaltungsräten  
Bertelsmann AG  
Deutsche Telekom AG  
METRO AG

### Jean-Jacques Cette

Mitgliedschaft in vergleichbaren<sup>2</sup> Kontrollgremien  
Konzernmandate  
Allianz France S. A.

### Dr. Gerhard Cromme

Mitgliedschaft in gesetzlich zu bildenden inländischen Aufsichtsräten  
und SE-Verwaltungsräten  
Axel Springer AG  
Siemens AG (Vorsitzender)  
ThyssenKrupp AG (Vorsitzender)

Mitgliedschaft in vergleichbaren<sup>2</sup> Kontrollgremien  
Compagnie de Saint-Gobain S. A.

### Karl Grimm bis 31. Dezember 2010

Mitgliedschaft in gesetzlich zu bildenden inländischen Aufsichtsräten  
und SE-Verwaltungsräten  
Konzernmandate  
Allianz Versorgungskasse VVaG (Stv. Vorsitzender)

### Godfrey Robert Hayward

**Franz HeiB** seit 1. Januar 2011  
Allianz Deutschland AG

### Prof. Dr. Renate Köcher

Mitgliedschaft in gesetzlich zu bildenden inländischen Aufsichtsräten  
und SE-Verwaltungsräten  
BMW AG  
Infineon Technologies AG  
MAN SE

### Peter Kossubek

Mitgliedschaft in gesetzlich zu bildenden inländischen Aufsichtsräten  
und SE-Verwaltungsräten  
Konzernmandate  
Allianz Versorgungskasse VVaG (bis 25. Mai 2011)

### Igor Landau

Mitgliedschaft in gesetzlich zu bildenden inländischen Aufsichtsräten  
und SE-Verwaltungsräten  
adidas AG (Vorsitzender)

Mitgliedschaft in vergleichbaren<sup>2</sup> Kontrollgremien

HSBC France  
Sanofi-Aventis S. A.

### Jörg Reinbrecht

### Peter D. Sutherland

Mitgliedschaft in vergleichbaren<sup>2</sup> Kontrollgremien  
BW Group Ltd.  
Goldman Sachs International (Vorsitzender)  
Koç Holding A.Ş.

### Rolf Zimmermann

<sup>1</sup> Stand: 31. Dezember 2010 oder (bei ausgeschiedenen Mitgliedern) Tag des Ausscheidens

<sup>2</sup> Mandate in anderen Kontrollgremien sehen wir dann als „vergleichbar“ an, wenn das Unternehmen börsennotiert ist oder mehr als 500 Mitarbeiter hat.

## Mandate der Vorstandsmitglieder<sup>1</sup>

### Michael Diekmann

Mitgliedschaft in gesetzlich zu bildenden inländischen Aufsichtsräten und SE-Verwaltungsräten  
BASF SE (Stv. Vorsitzender)  
Linde AG (Stv. Vorsitzender)  
Siemens AG

#### Konzernmandate

Allianz Deutschland AG  
Allianz Global Investors AG (Vorsitzender)

#### Mitgliedschaft in vergleichbaren<sup>2</sup> Kontrollgremien

Konzernmandate  
Allianz France S.A. (Vizepräsident)  
Allianz S.p.A.

### Dr. Paul Achleitner

Mitgliedschaft in gesetzlich zu bildenden inländischen Aufsichtsräten und SE-Verwaltungsräten  
Bayer AG  
Daimler AG  
RWE AG

#### Konzernmandate

Allianz Global Investors AG  
Allianz Investment Management SE (Vorsitzender)

### Oliver Bäte

Mitgliedschaft in gesetzlich zu bildenden inländischen Aufsichtsräten und SE-Verwaltungsräten  
Konzernmandate  
Allianz Global Corporate & Specialty AG (Stv. Vorsitzender)  
Allianz Global Investors AG  
Allianz Investment Management SE (Stv. Vorsitzender)

### Manuel Bauer

seit 1. Januar 2011  
Mitgliedschaft in vergleichbaren<sup>2</sup> Kontrollgremien  
Zagrebacka Banka

#### Konzernmandate

Allianz Bulgaria Insurance and Reinsurance Company Ltd. (Vorsitzender)  
Allianz Hungária Biztosító Rt.  
Allianz Life Insurance Co. Ltd. Korea  
Allianz pojistovna a.s. (Vorsitzender)  
Allianz-Slovenská poisťovňa a.s.  
Allianz Tiriac Asigurari SA (Vorsitzender)  
Allianz Zagreb d.d. (Vorsitzender)  
Russian People's Insurance Society „ROSNO“  
TU Allianz Polska S.A.  
TU Allianz Życie Polska S.A.

### Clement B. Booth

Mitgliedschaft in gesetzlich zu bildenden inländischen Aufsichtsräten und SE-Verwaltungsräten  
Konzernmandate  
Allianz Global Corporate & Specialty AG (Vorsitzender)

#### Mitgliedschaft in vergleichbaren<sup>2</sup> Kontrollgremien

Konzernmandate  
Allianz Australia Limited  
Allianz Holdings plc (Vorsitzender)  
Allianz Insurance plc (Vorsitzender)  
Allianz Irish Life Holdings plc  
Allianz UK Ltd (Vorsitzender)  
Euler Hermes S.A. (Vorsitzender)

### Enrico Cucchiani

Mitgliedschaft in vergleichbaren<sup>2</sup> Kontrollgremien  
Pirelli & C. S.p.A.  
Unicredit S.p.A.

#### Konzernmandate

Allianz Compañia de Seguros S.A. Barcelona (Stv. Vorsitzender)  
Allianz Hayat ve Emeklilik A.Ş. (Stv. Vorsitzender)  
Allianz Sigorta P&C A.Ş. (Stv. Vorsitzender)  
Allianz S.p.A. (Vorsitzender)  
Companhia de Seguros Allianz Portugal S.A.

### Dr. Joachim Faber

Mitgliedschaft in gesetzlich zu bildenden inländischen Aufsichtsräten und SE-Verwaltungsräten  
Deutsche Börse AG

#### Konzernmandate

Allianz Global Investors Deutschland GmbH (Vorsitzender)  
Allianz Global Investors Kapitalanlagegesellschaft mbH (Vorsitzender)

#### Mitgliedschaft in vergleichbaren<sup>2</sup> Kontrollgremien

Konzernmandate  
Allianz France S.A.  
Allianz S.p.A.

### Dr. Christof Mascher

Mitgliedschaft in gesetzlich zu bildenden inländischen Aufsichtsräten und SE-Verwaltungsräten  
Konzernmandate  
Allianz Deutschland AG (bis 31. Dezember 2010)  
Allianz Managed Operations and Services SE (Vorsitzender)

Mitgliedschaft in vergleichbaren<sup>2</sup> Kontrollgremien Konzernmandate  
Mondial Assistance Group SAS (Vorsitzender)

<sup>1</sup> Stand: 31. Dezember 2010 oder (bei ausgeschiedenen Mitgliedern) Tag des Ausscheidens

<sup>2</sup> Mandate in anderen Kontrollgremien sehen wir dann als „vergleichbar“ an, wenn das Unternehmen börsennotiert ist oder mehr als 500 Mitarbeiter hat.

## Jay Ralph

Mitgliedschaft in gesetzlich zu bildenden inländischen Aufsichtsräten  
 und SE-Verwaltungsräten

### Konzernmandate

Allianz Global Corporate & Specialty AG

Mitgliedschaft in vergleichbaren<sup>1</sup> Kontrollgremien

### Konzernmandate

Allianz Life Insurance Company of North America

(Vorsitzender)

Fireman's Fund Insurance Company (Vorsitzender)

**Dr. Gerhard Rupprecht** bis 31. Dezember 2010

Mitgliedschaft in gesetzlich zu bildenden inländischen Aufsichtsräten  
 und SE-Verwaltungsräten

Fresenius SE

Heidelberger Druckmaschinen AG

### Konzernmandate

Allianz Deutschland AG (Vorsitzender)

(bis 31. Dezember 2010)

Mitgliedschaft in vergleichbaren<sup>1</sup> Kontrollgremien

**Konzernmandate** (bis 31. Januar 2010)

Allianz Elementar Lebensversicherungs-AG

(Vorsitzender)

Allianz Elementar Versicherungs-AG (Vorsitzender)

Allianz Investmentbank AG (Stv. Vorsitzender)

Allianz Suisse Lebensversicherungs-Gesellschaft

Allianz Suisse Versicherungs-Gesellschaft

## Dr. Werner Zedelius

Mitgliedschaft in gesetzlich zu bildenden inländischen Aufsichtsräten  
 und SE-Verwaltungsräten

### Konzernmandate

Allianz Deutschland AG (Vorsitzender)

(seit 1. Januar 2011)

Allianz Private Krankenversicherungs-AG

(Stv. Vorsitzender) (bis 31. Januar 2011)

Mitgliedschaft in vergleichbaren<sup>1</sup> Kontrollgremien

Bajaj Allianz General Insurance Company Limited

(bis 31. Dezember 2010)

Bajaj Allianz Life Insurance Company Limited

(bis 31. Dezember 2010)

### Konzernmandate

Allianz Elementar Lebensversicherungs-AG

(designierter Vorsitzender)

Allianz Elementar Versicherungs-AG

(designierter Vorsitzender)

Allianz Hungária Biztosító Rt. (Vorsitzender)

Allianz Investmentbank AG

(designierter stv. Vorsitzender)

Allianz-Slovenská poisťovňa a.s. (Vorsitzender)

Russian People's Insurance Society „ROSNO“

(Vorsitzender)

TU Allianz Polska S.A. (Vorsitzender)

TU Allianz Życie Polska S.A. (Vorsitzender)

<sup>1</sup> Mandate in anderen Kontrollgremien sehen wir dann als „vergleichbar“ an, wenn das Unternehmen börsennotiert ist oder mehr als 500 Mitarbeiter hat.



## Fachbegriffe

Die nachfolgenden Fachbegriffe aus der Rechnungslegung sollen die Interpretation dieses Geschäftsberichts erleichtern. Der Schwerpunkt liegt dabei auf Begriffen aus Bilanz sowie Gewinn- und Verlustrechnung. Fachwörter aus den einzelnen Segmenten werden hier nicht berücksichtigt.

### Absicherungsgeschäft

Einsatz spezieller Finanzkontrakte, insbesondere derivativer Finanzinstrumente, zur Verminderung von Verlusten, die durch eine ungünstige Kurs- oder Preisentwicklung entstehen können (Hedging-Geschäfte).

### Aktivierete Abschlusskosten

Die Kosten des Versicherungsunternehmens, die im Zusammenhang mit dem Abschluss neuer oder der Verlängerung bestehender Versicherungsverträge stehen. Dazu zählen unter anderem Provisionen sowie die Kosten für die Antragsbearbeitung und die Ausfertigung des Versicherungsscheins.

### Anschaffungskosten

Der zum Erwerb eines Vermögenswertes entrichtete Betrag an Zahlungsmitteln bzw. Zahlungsmitteläquivalenten oder der beizulegende Zeitwert einer anderen Entgeltform zum Zeitpunkt des Erwerbs.

### Anteile anderer Gesellschafter am Eigenkapital

Anteile am Eigenkapital verbundener Unternehmen, die nicht von Unternehmen des Konzerns gehalten werden.

### Assets Under Management

Die Summe der Kapitalanlagen, bewertet zu Zeitwerten, die der Konzern mit Verantwortung für die Wertentwicklung dieser Anlagen managt. Neben den konzerneigenen Kapitalanlagen zählen hierzu die Kapitalanlagen für Dritte.

### Assoziierte Unternehmen

Bei den assoziierten Unternehmen werden alle Unternehmen, soweit sie nicht verbundene Unternehmen oder Gemeinschaftsunternehmen sind, mit einem Konzernanteil von 20 % bis 50 % berücksichtigt, unabhängig davon, ob ein maßgeblicher Einfluss tatsächlich ausgeübt wird.

### Beitragsüberträge

Beitrageinnahmen, die den Erträgen künftiger Geschäftsjahre zuzuordnen sind. Die Berechnung erfolgt für jeden Versicherungsvertrag grundsätzlich einzeln und taggenau.

### Beitragszusagen

Beitragszusagen (defined contribution plans) werden über externe Versorgungsträger oder ähnliche Institutionen finanziert. Dabei werden an diese Einrichtungen fest definierte Beiträge (z. B. bezogen auf das maßgebliche Einkommen) gezahlt, wobei der Anspruch des Leistungsempfängers gegenüber diesen Einrichtungen besteht und der Arbeitgeber über die Zahlung der Beiträge hinaus faktisch keine weitere Verpflichtung hat. Gleichzeitig partizipiert das Unternehmen nicht am Anlageerfolg der Beiträge.

### Bis zur Endfälligkeit gehaltene Wertpapiere

Diese Wertpapiere (Held to Maturity) umfassen festverzinsliche Wertpapiere, die in Daueranlageabsicht grundsätzlich bis zur Endfälligkeit gehalten werden sollen. Sie sind „at amortized cost“ bilanziert.

### Brutto/netto

In der Versicherungsterminologie bedeuten „brutto/netto“ vor bzw. nach Abzug der Rückversicherung. Im Kapitalanlagebereich wird der Begriff „netto“ dann verwendet, wenn von den Erträgen die entsprechenden Aufwendungen (z. B. Abschreibungen und Verluste aus dem Abgang) bereits abgezogen wurden.

### CFO Forum

Das CFO-Forum der europäischen Versicherungsindustrie ist eine hochrangige Diskussionsgruppe, an der die CFOs der größten europäischen börsennotierten Versicherungsunternehmen teilnehmen. Ziel ist die Einflussnahme auf die Entwicklung der Rechnungslegung, auf eine wertorientierte Berichterstattung und auf die damit verbundenen regulatorischen Entwicklungen für die Versicherungsindustrie im Namen ihrer Mitglieder, die einen wesentlichen Teil der europäischen Versicherungsindustrie repräsentieren.

### Combined Ratio

Verhältnis von Abschluss- und Verwaltungsaufwendungen (netto) sowie Schadenaufwendungen (netto) zu verdienten Beiträgen (netto).

### Cost-Income Ratio

Verhältnis von operativen Aufwendungen zu operativen Erträgen.

### Deckungsrückstellung

Aus bestehenden Verträgen, vor allem in der Lebens-, Kranken- und Unfallversicherung, ergeben sich Verpflichtungen, für die Gelder zurückgelegt werden müssen. Ihre Höhe wird nach versicherungsmathematischen Grundsätzen ermittelt.

### Depotforderungen/Depotverbindlichkeiten

Depotforderungen stehen dem Rückversicherer zu, werden jedoch vom Erstversicherer als Sicherheit für künftige Rückversicherungsleistungen einbehalten. Auf Seiten des Erstversicherers wird dieser Posten als Depotverbindlichkeit ausgewiesen.

### Derivative Finanzinstrumente

Finanzkontrakte, deren Werte von der Kursentwicklung eines zugrunde liegenden Vermögenswertes abhängen. Eine Systematisierung derivativer Finanzinstrumente kann nach dem Bezug auf die ihnen zugrunde liegenden Vermögenswerte (Zinssätze, Aktienkurse, Wechselkurse oder Warenpreise) vorgenommen werden. Wichtige Beispiele für derivative Finanzinstrumente sind Optionen, Futures, Forwards und Swaps.

### Equity-Methode

Nach dieser Methode werden die Anteile an Gemeinschaftsunternehmen sowie an assoziierten Unternehmen bilanziert. Der Wertansatz entspricht grundsätzlich dem konzernanteiligen Eigenkapital dieser Unternehmen. Im Falle von Anteilen an Unternehmen, die selbst einen Konzernabschluss aufstellen, wird jeweils deren Konzerneigenkapital entsprechend angesetzt. Im Rahmen der laufenden Bewertung ist dieser Wertansatz um die anteiligen Eigenkapitalveränderungen fortzuschreiben, die anteiligen Jahresergebnisse werden dabei dem Konzernergebnis zugerechnet.

### Erfolgswirksam zum Zeitwert bewertete Finanzaktiva

Erfolgswirksam zum Zeitwert bewertete Finanzaktiva umfassen die Handelsaktiva sowie die als „erfolgswirksam zum Zeitwert bewertet“ klassifizierten Finanzaktiva.

### Erfolgswirksam zum Zeitwert bewertete Finanzpassiva

Erfolgswirksam zum Zeitwert bewertete Finanzpassiva umfassen die Handelspassiva sowie die als „erfolgswirksam zum Zeitwert bewertet“ klassifizierten Finanzpassiva.

### Ergebnis je Aktie (normal/verwässert)

Kennzahl, die den auf die Anteilseigner entfallenden Jahresüberschuss der gewichteten durchschnittlichen Anzahl der im Umlauf befindlichen Stammaktien gegenüberstellt. Das verwässerte Ergebnis je Aktie bezieht ausgeübte oder noch zur Ausübung stehende Bezugsrechte in die Berechnung der Anzahl der Aktien sowie in den auf die Anteilseigner entfallenden Jahresüberschuss mit ein. Die Bezugsrechte entstehen aus Genussscheinen und aktienbasierten Vergütungsplänen.

### Erträge aus erfolgswirksam zum Zeitwert bewerteten Finanzaktiva und Finanzpassiva (netto)

Die Erträge aus erfolgswirksam zum Zeitwert bewerteten Finanzaktiva und Finanzpassiva (netto) umfassen alle realisierten und unrealisierten Gewinne und Verluste inklusive Zins- und Dividenden erträge aus den erfolgswirksam zum Zeitwert bewerteten Finanzaktiva und Finanzpassiva, die Erträge (netto) aus Verbindlichkeiten für kündbare Eigenkapitalinstrumente sowie die Gewinn und Verluste (netto) aus Währungseffekten.

### Eventualverbindlichkeiten

Nicht bilanzierte Verbindlichkeiten mit geringerer Eintrittswahrscheinlichkeit, z. B. Haftungsverhältnisse aus Bürgschaftsverpflichtungen.

### Fortgeführte Anschaffungskosten

Gemäß diesem Bilanzierungsgrundsatz wird der Unterschied zwischen Anschaffungskosten und Rückzahlungsbetrag zeit- bzw. kapitalanteilig den Anschaffungskosten ergebniswirksam zugerechnet bzw. von diesen abgesetzt.

### Forwards

Lieferung und Abnahme bei diesen Termingeschäften erfolgen zu einem bei Geschäftsabschluss festgelegten zukünftigen Termin. Der Preis der zugrunde liegenden Vermögenswerte wird bei Geschäftsabschluss bestimmt.

### Funktionale Währung

Unter der funktionalen Währung versteht man die im Umfeld der ordentlichen Geschäftstätigkeit eines Unternehmens vorherrschende Währung.

### Futures

Standardisierte Termingeschäfte, die an einer Börse gehandelt werden. Üblicherweise wird zu dem vereinbarten Termin statt einer tatsächlichen Lieferung oder Abnahme eine Ausgleichszahlung geleistet.

### Gebuchte/verdiente Beiträge

Gebuchte Beiträge sind die Beitragseinnahmen des jeweiligen Geschäftsjahres. Die Anteile, die davon auf den Versicherungsschutz im Geschäftsjahr entfallen, sind verdiente Beiträge. Von den Beiträgen für Lebensversicherungsprodukte, bei denen der Kunde das Kapitalanlagerisiko trägt (z. B. fondsgebundene Lebensversicherungen), werden nur die zur Deckung des Risikos und der Kosten kalkulierten Teile als Beitragseinnahmen ausgewiesen.

### Gemeinschaftsunternehmen

Unternehmen, das von einem Unternehmen des Konzerns gemeinsam mit einem oder mehreren Unternehmen geführt wird, die nicht in den Konzernabschluss einbezogen werden. Die Zielsetzung der gemeinsamen Führung liegt zwischen dem maßgeblichen Einfluss beim assoziierten Unternehmen und der Kontrolle bei verbundenen Unternehmen.

### Genussrechtskapital

Rückzahlungsbetrag der ausgegebenen Genussscheine. Die Genussscheine der Allianz SE gewähren an den Dividenden orientierte Ausschüttungsansprüche und Bezugsrechte bei Kapitalerhöhungen, jedoch keine Stimmrechte, keine Beteiligung am Liquiditätserlös und keinen Anspruch auf Umwandlung in Aktien.

### Geschäfts- oder Firmenwert

Unterschiedsbetrag zwischen den Anschaffungskosten und dem Zeitwert des erworbenen Reinvermögens.

### Gewinnrücklagen

Enthalten neben der gesetzlichen Rücklage der Konzernobergesellschaft im Wesentlichen die nicht ausgeschütteten Gewinne der Konzernunternehmen und Zuführungen aus dem Konzernjahresüberschuss.

### Gezeichnetes Kapital und Kapitalrücklagen

Diese Position setzt sich zusammen aus dem Grundkapital, dem Agio aus der Ausgabe von Aktien sowie Einstellungen aus der Ausübung von Optionsrechten.

### IAS

International Accounting Standards (Internationale Rechnungslegungsgrundsätze).

### IFRS

International Financial Reporting Standards (Internationale Grundsätze zur Finanzberichterstattung). Seit 2002 gilt die Bezeichnung IFRS für das Gesamtkonzept der vom International Accounting Standards Board verabschiedeten Standards. Bereits verabschiedete Standards werden weiter als International Accounting Standards (IAS) zitiert.

### IFRS Framework

Rahmenkonzept für International Financial Reporting Standards (IFRS), das die Konzeptionen darlegt, die der Aufstellung und der Darstellung von Jahresabschlüssen für externe Adressaten zugrunde liegen.

### Jahresüberschuss auf Anteile anderer Gesellschafter entfallend

Anteile am Jahresüberschuss, die nicht den Anteilseignern des Allianz Konzerns, sondern Konzernfremden, die Anteile an verbundenen Unternehmen halten, zuzurechnen sind.

### Jederzeit veräußerbare Wertpapiere

Die jederzeit veräußerbaren Wertpapiere (available-for-sale) enthalten diejenigen Wertpapiere, die weder bis zur Endfälligkeit gehalten werden sollen noch für kurzfristige Handelszwecke erworben wurden; diese jederzeit veräußerbaren Wertpapiere werden mit dem Zeitwert am Bilanzstichtag angesetzt.

**Kapitalflussrechnung**

Darstellung der Bewegungen von Zahlungsmitteln und Zahlungsmitteläquivalenten während eines Geschäftsjahres mit einer Gliederung in die drei Bereiche

- laufende Geschäftstätigkeit,
- Investitionstätigkeit,
- Finanzierungstätigkeit.

**Kapitalkonsolidierung**

Verrechnung der Anschaffungskosten mit dem anteiligen Eigenkapital des Tochterunternehmens.

**Konzernanteil (in %)**

Die Addition aller Anteile, die verbundene Unternehmen und Gemeinschaftsunternehmen an verbundenen Unternehmen, Gemeinschaftsunternehmen und assoziierten Unternehmen halten, ergeben den Konzernanteil.

**Korridorverfahren**

Bei leistungsorientierten Pensionsplänen (defined benefit plans) entstehen Abweichungen zwischen der rechnerisch erwarteten und der tatsächlichen Entwicklung des Verpflichtungsumfanges sowie des Fondsvermögens (sog. versicherungsmathematische Gewinne bzw. Verluste), die bei Anwendung des sog. Korridorverfahrens nicht sofort bei Entstehen aufwandswirksam gebucht werden. Erst wenn die aufgelaufenen versicherungsmathematischen Gewinne bzw. Verluste den Korridor verlassen, wird ab dem folgenden Geschäftsjahr erfolgswirksam getilgt. Der Korridor beträgt 10% des Barwerts der erdienten Pensionsansprüche bzw. des Zeitwerts des Fondsvermögens, falls dieser höher ist.

**Kostenquote**

Verhältnis von Abschluss- und Verwaltungsaufwendungen (netto) zu verdienten Beiträgen (netto).

**Kreditrisiko**

Mögliche Gefahr, dass ein Vertragspartner bei einem Geschäft seinen Verpflichtungen nicht nachkommen kann und dadurch bei dem anderen Partner finanzielle Verluste verursacht.

**Laufender Dienstzeitaufwand**

Entstehender Nettoaufwand im Rahmen eines leistungsorientierten Pensionsplans, der gegebenenfalls um die Beiträge des Begünstigten in ein Fondsvermögen gekürzt ist (current employer service cost).

**Leistungsorientierte Pensionspläne**

Bei leistungsorientierten Pensionsplänen (defined benefit plans) wird dem Begünstigten durch das Unternehmen oder über einen externen Versorgungsträger eine bestimmte Leistung zugesagt; im Gegensatz zu den Beitragszusagen (defined contribution plans) sind die vom Unternehmen zu erbringenden Aufwendungen aus Leistungszusagen nicht im Vorhinein festgelegt. Um den periodengerechten Aufwand zu bestimmen, sind nach den Bilanzierungsvorschriften versicherungsmathematische Berechnungen nach festen Regeln durchzuführen.

**Marktwert**

Betrag, der in einem aktiven Markt bei Veräußerung einer Finanzanlage erzielbar ist.

**Nachrangige Verbindlichkeiten**

Verbindlichkeiten, die im Liquidations- oder Konkursfall erst nach den übrigen Verbindlichkeiten erfüllt werden dürfen.

**Nicht getilgte Gewinne/Verluste**

Versicherungsmathematische Gewinne bzw. Verluste, die im Zusammenhang mit leistungsorientierten Pensionsplänen entstehen und noch nicht in der Rückstellung/Bilanz erfasst sind (vgl. auch Korridorverfahren).

**Nicht getilgte Mehrkosten aus Planänderungen**

Aus der Änderung leistungsorientierter Pensionspläne resultierende Erhöhung des Barwerts der erdienten Pensionsansprüche (past service cost), die in der Rückstellung/Bilanz noch nicht berücksichtigt ist.

**Optionen**

Derivative Finanzinstrumente, bei denen der Käufer berechtigt, aber nicht verpflichtet ist, den zugrunde liegenden Vermögensgegenstand zu einem in der Zukunft liegenden Zeitpunkt für einen vorab festgelegten Preis zu erwerben (Kaufoption) oder zu veräußern (Verkaufsoption). Hingegen ist der Verkäufer der Option zur Abgabe bzw. zum Kauf des Vermögensgegenstandes verpflichtet und erhält für die Bereitstellung des Optionsrechts eine Prämie.

**OTC-Derivate**

Derivative Finanzinstrumente, die nicht standardisiert sind und nicht an einer Börse gehandelt werden, sondern zwischen zwei Vertragspartnern individuell (Over the Counter – OTC) ausgehandelt werden.

**Repo- und Reverse-Repo-Geschäfte**

Bei einem Repo-Geschäft (echtes Pensionsgeschäft) verkauft der Konzern Wertpapiere an einen Kontrahenten und vereinbart gleichzeitig, diese Wertpapiere an einem bestimmten Termin zu einem vereinbarten Kurs zurückzukaufen. Bleibt die Kontrolle über die Wertpapiere während der gesamten Laufzeit der Geschäfte im Konzern erhalten, verbleiben die Wertpapiere weiterhin in der Bilanz des Konzerns und werden nach den Rechnungslegungsvorschriften für erfolgswirksam zum Zeitwert bewertete Finanzaktiva bzw. denen für Finanzanlagen bewertet. Das Entgelt aus dem Verkauf ist in der Bilanzposition „Verbindlichkeiten gegenüber Kreditinstituten und Kunden“ enthalten. Bei einem Reverse-Repo-Geschäft werden Wertpapiere mit der gleichzeitigen Verpflichtung eines zukünftigen Verkaufs erworben. Verbleibt die Kontrolle über die Wertpapiere beim Pensionsgeber, erfolgt der Ausweis in der Bilanzposition „Forderungen an Kreditinstitute und Kunden“. Zinserträge aus Reverse-Repo- bzw. Zinsaufwendungen aus Repo-Geschäften werden linear über die Laufzeit abgegrenzt und unter „Zinserträge und ähnliche Erträge“ bzw. unter „Zinsaufwendungen“ ausgewiesen.

**Risikovorsorge im Kreditgeschäft**

Der Gesamtbestand an Risikovorsorge setzt sich zusammen aus der aktivisch abgesetzten Risikovorsorge für Forderungen und der passivisch unter den Rückstellungen ausgewiesenen Risikovorsorge für Eventualverbindlichkeiten wie Bürgschaften, Kreditzusagen und andere Verpflichtungen.

Sobald eine Forderung uneinbringlich geworden ist, wird sie zu Lasten einer gegebenenfalls bestehenden Einzelwertberichtigung oder aber direkt zu Lasten der Gewinn- und Verlustrechnung ausgebucht. Eingänge auf abgeschriebene Forderungen werden erfolgswirksam in der Position „Risikovorsorge“ erfasst.

### Rückstellung für Beitragsrückerstattung

Der Teil des Überschusses, der zukünftig an Versicherungskunden ausgeschüttet wird, und zwar aufgrund gesetzlicher, satzungsgemäßer, vertraglicher oder freiwilliger Verpflichtung.

### Rückstellungen für Pensionen und ähnliche Verpflichtungen

Rückstellungen für Anwartschaften auf Pensionen und laufende Pensionen, die für die leistungsorientierten Pensionspläne aktiver und ehemaliger Mitarbeiter gebildet werden. Hierunter fallen auch Rückstellungen für Gesundheitsfürsorgeleistungen (health care benefits) und Abfertigungszahlungen.

### Rückstellungen für noch nicht abgewickelte Versicherungsfälle

Rückstellung für den Aufwand aus Versicherungsfällen, die bis zum Ende des jeweiligen Geschäftsjahres eingetreten sind, aber noch nicht abgewickelt werden konnten.

### Rückversicherung

Ein Versicherungsunternehmen versichert einen Teil seines Risikos bei einem anderen Versicherungsunternehmen.

### Schadenfrequenz

Anzahl der Schäden im Verhältnis zur Anzahl der versicherten Risiken.

### Schadenquote

Verhältnis von Schadenaufwendungen (netto) zu verdienten Beiträgen (netto).

### Segmentberichterstattung

Darstellung des Konzernabschlusses nach Geschäftsbereichen (Schaden-Unfall, Leben/Kranken, Asset Management und Corporate und Sonstiges) sowie nach berichtspflichtigen Segmenten.

### Steuerabgrenzung (aktive/passive)

Die Steuerabgrenzung beruht auf steuerlichen Verlustvorträgen, vorzugsfähigen Steuergutschriften und auf den zwischen Handels- und Steuerbilanz sowie den sich aus der konzerneinheitlichen Bewertung ergebenden temporären Unterschiedsbeträgen. Die Berechnung der latenten Steuern erfolgt mit den jeweiligen landesspezifischen Steuersätzen der einbezogenen Konzernunternehmen; am Bilanzstichtag bereits beschlossene Steueränderungen werden berücksichtigt.

### Swaps

Vereinbarungen zweier Vertragspartner über den Austausch von Zahlungsströmen über eine bestimmte Zeitspanne. Wichtige Beispiele sind Währungsswaps (bei denen auf unterschiedliche Währungen lautende Zahlungsströme und Kapitalbeträge getauscht werden) und Zinsswaps (die den Tausch von üblicherweise fixen gegen variable Zinszahlungen derselben Währung vorsehen).

### US GAAP

US-amerikanische „Generally Accepted Accounting Principles“ (Rechnungslegungsgrundsätze).

### Unternehmenszusammenschluss

Ein Unternehmenszusammenschluss ist ein Geschäftsvorfall oder ein Ereignis, in dessen Rahmen ein Erwerber Kontrolle über ein oder mehrere Geschäftsbetriebe erlangt. Unternehmenszusammenschlüsse werden nach der Erwerbsmethode bilanziert.

### Verbriefte Verbindlichkeiten

Schuldverschreibungen und andere Verbindlichkeiten, für die übertragbare Urkunden ausgestellt wurden.

### Verbundene Unternehmen

Das Mutterunternehmen (Konzernobergesellschaft) und alle Tochterunternehmen. Tochterunternehmen sind Unternehmen, bei denen das Mutterunternehmen gemäß dem Control-Prinzip beherrschenden Einfluss auf die Geschäftspolitik ausüben kann. Dies ist z. B. dann möglich, wenn die Konzernmutter, direkt oder indirekt, die Mehrheit der Stimmrechte hält, das Recht auf Bestellung oder Abberufung der Mehrheit der Verwaltungs-, Leitungs- oder Aufsichtsratsmitglieder besitzt oder wenn vertragliche Beherrschungsrechte bestehen.

### Zeitwert

Der Betrag, zu dem ein Vermögenswert zwischen sachverständigen, vertragswilligen und voneinander unabhängigen Geschäftspartnern getauscht werden könnte (Fair Value).

### Zur Veräußerung gehalten (held for sale)

Ein langfristiger Vermögenswert ist als „zur Veräußerung gehalten“ zu klassifizieren, wenn der zugehörige Buchwert überwiegend durch ein Veräußerungsgeschäft und nicht durch fortgesetzte Nutzung realisiert wird. Ab dem Zeitpunkt, bei dem die Kriterien für eine Klassifizierung als „zur Veräußerung gehalten“ erfüllt sind, ist der Vermögenswert zum niedrigeren Wert aus Buchwert und Zeitwert abzüglich Verkaufskosten anzusetzen.

### Variable Annuitäten

Die Höhe der Leistungen dieser Art von Lebensversicherung hängt in erster Linie von der Wertentwicklung der in einem Fonds zusammengefassten Vermögensanlagen ab. Der Versicherungsnehmer ist gleichermaßen am Gewinn und am Verlust dieser Vermögensanlage beteiligt.

# Register

## A

Absatzmärkte 58, 62  
AGCS 78, 80  
Aktie 16  
Aktienbasierte Vergütungspläne 44, 294  
Aktienkurs 16  
Aktionärsbrief 3  
Allgemeine Einschätzung der aktuellen  
Wirtschaftslage durch den Vorstand 105  
Allianz Worldwide Care 59  
Alternative Investments 59, 95  
Analysten 16  
Änderungen 74, 199  
Anlageergebnis 80, 108  
Asien-Pazifik 77, 85, 101  
Asset Management 59, 64, 90, 101, 112  
Assoziierte Unternehmen  
und Gemeinschaftsunternehmen 310  
Aufsichtsrat 6, 15, 321  
Aufsichtsratsvergütung 52  
Aufsichtsratsvergütung – Grundsätze 52  
Aufsichtsratsvergütung – Struktur 52  
Aufwendungen für Rückstellungen für  
noch nicht abgewinkelte Versicherungsfälle 110  
Ausblick 96  
Außerbilanzielle Geschäfte 113  
Australien 66, 73, 77

## B

Bankgeschäft 59, 95  
Belgien/Luxemburg 85  
Bilanzierungsgrundsätze 28, 74, 170

## C

Chancenmanagement 104  
Combined Ratio 75, 79, 100  
Corporate Governance und Entsprechenserklärung 9  
Corporate und Sonstiges 59, 94, 112  
Corporate-Governance-Bericht 22  
Cost-Income ratio 93, 101

## D

Demografischer Wandel 103  
Deutschland 59, 65, 78, 80, 87, 95, 112, 119  
Dividende 17

## E

Eigenkapital 71, 106  
Einschätzung künftiger Chancen und  
Herausforderungen durch den Vorstand 102  
Ereignisse nach Bilanzstichtag 73  
Ergebnis je Aktie 17, 306  
Erklärung zur Unternehmensführung  
gemäß § 289 a HGB 28

## F

Finanzielle Allgemeinbildung 64  
Finanzierung 114  
Finanzkalender 20  
Finanzkennzahlen 69, 79, 86, 93, 94  
Finanzkonglomerate-Solvabilität 106  
Frankreich 59, 65, 78, 79, 85, 112, 119  
Führungskräftevergütung unterhalb des Vorstands 46

## G

Gesamtaussage des Vorstands  
zu den Ergebnissen 2010 68  
Gesamte Kapitalanlagen 91  
Geschäft 59  
Geschäfts- oder Firmenwert 196  
Geschäftsbereiche 58, 82, 88  
Geschäftsumfeld 65  
Global Insurance Lines & Anglo Markets 100  
Großbritannien 77  
Grundsätze der Vorstandsvergütung 36

## H

Hauptversammlung 16, 20, 27  
Holding & Treasury 95

## I

Immaterielle Vermögenswerte 61, 70, 235  
International Executive Committee 13  
Interne Kontrollen der Finanzberichterstattung 158  
Investitionen 73, 104  
Investor Relations 19, 20  
Investoren 18  
Italien 59, 65, 78, 79, 86, 100, 112

## K

Kapitalanlagen Dritter 91  
Kapitalflussrechnung 118  
Kennzahlen Umschlagseiten  
Klimawandel 64, 103  
Konsolidierung 204  
Konzernstruktur 59, 61, 211, 310  
Kreditversicherung 59, 77, 79  
Kunden 62

## L

Lebens- und Krankenversicherung 59, 84, 101, 110  
Liquidität 114

## M

Marke 61  
Marktposition 58  
Mediaausgaben 61  
Mehrperiodenübersicht Umschlagseiten  
Meldepflichtige Wertpapiergeschäfte 28  
Mikrofinanz (Microinsurance) 64  
Mitarbeiter 63, 307  
Mitarbeiteraktienkaufplan 50, 300  
Mittel- und Osteuropa 59, 78, 80, 86, 95

## N

Nachhaltige Entwicklung 64  
Net Promoter Score (NPS) 62  
Nominierungsausschuss 9, 10

## O

Online-Services 20

## P

Personalausschuss 9  
Produkte und Dienstleistungen 59, 64  
Prüfungsausschuss 9, 25

## R

Rating 18, 126  
Reiseversicherung und Assistance-Leistungen 58, 76  
Risikoausschuss 9, 10  
Risikobericht 122  
Rückstellungen 110, 112  
Rückversicherung Schaden-Unfall 59

## S

Schaden- und Unfallversicherung 59, 75, 100, 109  
Schweiz 86  
Sozialverantwortung 64  
Spanien 77, 108  
Ständiger Ausschuss 9  
Strategie 60  
Südamerika 77

## T

Talent Management 63

## Ü

Überblick über den Geschäftsverlauf 68  
Überleitungen 120  
Übernahmerelevante Angaben und Erläuterungen 31

## U

USA 78, 85, 91, 97, 101, 111

## V

Verbundene Unternehmen 310  
Vergleich von Prognose und  
tatsächlichem Ergebnis 2010 96  
Vergütungsbericht 35  
Vermögenslage 106  
Vermögenslage und Eigenkapital 106  
Veröffentlichungsdatum Umschlagseiten  
Vertrieb 103  
Verwendung von Schätzungen und Annahmen 193  
Vielfalt 27, 63  
Vorstand 12, 22  
Vorstandsausschüsse 23, 30  
Vorstandsvergütung 35

## W

Wachstumsmärkte (Growth Markets) 100  
Wirtschaftliches Umfeld 65

## Z

Zweckgesellschaften 204

# Finanzkalender

## Wichtige Termine für Aktionäre und Analysten

|              |                                                 |
|--------------|-------------------------------------------------|
| 04. 05. 2011 | Hauptversammlung                                |
| 12. 05. 2011 | Zwischenbericht 1. Quartal 2011                 |
| 05. 08. 2011 | Zwischenbericht 2. Quartal 2011                 |
| 11. 11. 2011 | Zwischenbericht 3. Quartal 2011                 |
| 23. 02. 2012 | Bilanzpressekonferenz zum<br>Geschäftsjahr 2011 |
| 24. 02. 2012 | Analystenkonferenz zum<br>Geschäftsjahr 2011    |
| 23. 03. 2012 | Geschäftsbericht 2011                           |
| 09. 05. 2012 | Hauptversammlung                                |

Das deutsche Wertpapierhandelsgesetz verpflichtet Emittenten, Informationen mit erheblichem Kursbeeinflussungspotenzial unverzüglich zu veröffentlichen. Aufgrund dessen ist es möglich, dass wir Eckdaten unserer Quartals- und Geschäftsjahresergebnisse vor den oben genannten Terminen publizieren.

Da wir Terminverschiebungen grundsätzlich nicht ausschließen können, empfehlen wir, die Termine kurzfristig im Internet unter [www.allianz.com/finanzkalender](http://www.allianz.com/finanzkalender) zu überprüfen.

## Online-Geschäftsbericht

Der Geschäftsbericht 2010 steht Ihnen auch im Internet unter [www.allianz.com/geschaeftsbericht](http://www.allianz.com/geschaeftsbericht) zur Verfügung. Dort können Sie

- Daten individuell auswählen und Kennzahlen über mehrere Jahre vergleichen,
- einzelne Kapitel und Tabellen herunterladen (im PDF- und Excelformat) und
- über eine Suchfunktion und Verlinkungen innerhalb des Berichtes leichter zu den gewünschten Informationen gelangen.

## Impressum

### Gestaltung

Anzinger | Wüschner | Rasp

### Fotografie

Christian Höhn

Vorstand, Aufsichtsrat und IEC:

Andreas Pohlmann

### Druck

Mediahaus Biering GmbH

### Veröffentlichungstag

18. März 2011

Allianz SE  
Königinstraße 28  
80802 München

Telefon 089 38 00 0  
Fax 089 38 00 3425

[info@allianz.com](mailto:info@allianz.com)  
[www.allianz.com](http://www.allianz.com)

Geschäftsbericht im Internet  
[www.allianz.com/geschaeftsbericht](http://www.allianz.com/geschaeftsbericht)

This Annual Report is also available as  
an English version.
