# Supplementary material
Source: publisher site journal article supplement (https://www.degruyterbrill.com/publication/isbn/9783110432879/downloadAsset/9783110432879_Elektronischer_Anhang_2.zip)
Supplement: Supplementary file 5 [file Allianz Kultur und Werte.pdf › Korpustexte/Korpustexte pdf/Allianz/Allianz Kultur und Werte.pdf]

# Kultur & Werte: Der Mensch im Mittelpunkt

Unsere Arbeit dreht sich um Menschen – um ihre Bedürfnisse, Sorgen, Wünsche und Träume. Deshalb ist unser wichtigster Maßstab: Vertrauen. Dieses Vertrauen entsteht, wenn wir gemeinsam bestimmte Werte leben. Etwa den offenen Umgang miteinander, Fairness, Respekt und Verbindlichkeit. So schaffen wir die ideale Voraussetzung für den gemeinsamen Erfolg – und für die Erfolge jedes Einzelnen von uns.

[https://perspektiven.allianz.de/arbeitgeber/kultur\\_und\\_werte/](https://perspektiven.allianz.de/arbeitgeber/kultur_und_werte/)
