# Supplementary material
Source: publisher site journal article supplement (https://www.degruyterbrill.com/publication/isbn/9783110432879/downloadAsset/9783110432879_Elektronischer_Anhang_2.zip)
Supplement: Supplementary file 6 [file Allianz Unsere Prinzipien.pdf › Korpustexte/Korpustexte pdf/Allianz/Allianz Unsere Prinzipien.pdf]

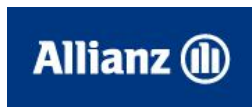
[Ihr Arbeitgeber](#)
[Schüler](#)
[Studenten](#)
[Absolventen](#)
[Berufserfahrene](#)
[Tipps und Infos](#)
[Interaktiv](#)
[Stellenmarkt](#)
[Karriere](#)

[Login Global Talent Pool](#)
[Karriere](#) [Ihr Arbeitgeber](#) [Kultur & Werte](#) [Unsere Prinzipien](#)
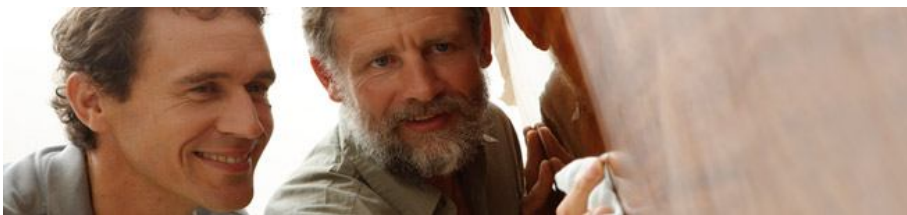

## Unsere Prinzipien: Kompetenz, Integrität, Nachhaltigkeit

Die Allianz hat sich ein klares Ziel gesteckt: Sie will die weltweit stärkste Finanzgemeinschaft aufbauen – und der globale Finanzdienstleister werden, der das höchste Vertrauen genießt. Dieses Ziel können wir nur erreichen, wenn wir ein Höchstmaß an Kompetenz, Integrität und Nachhaltigkeit beweisen. Entsprechende Richtlinien haben wir in unserem Code of Conduct und in den Leadership Values verbindlich festgelegt.

### Die Basis unserer Arbeit – der Code of Conduct

Die Allianz Gruppe hat gemeinsame Werte- und Leistungsvorstellungen. Diese bringt ein weltweit für alle Allianz Mitarbeiter gültiger Verhaltenskodex, der „Code of Conduct“ zum Ausdruck. In 22 Abschnitten verbietet der Kodex Diskriminierung von Mitarbeitern oder Insiderhandel, regelt die Annahme von Geschenken, setzt Standards für die Informationen an Kunden, Medien und Aktionäre, fordert zum Schutz natürlicher Ressourcen auf und vieles mehr.

Der Kodex bezieht sich in seiner Präambel ausdrücklich auf den UN Global Compact und die OECD-Richtlinien für multinationale Unternehmen, deren Prinzipien die Verhaltensregeln der Allianz umsetzen. Damit wird auf den größeren Zusammenhang verwiesen, in dem die Regelungen zu sehen sind.

[Der Verhaltenskodex der Allianz Gruppe zum Download](#)

### Unsere Führungswerte – Leadership Values

Um für die Geschäftsplanung und die operative Umsetzung der Strategie in der Allianz Gruppe gemeinsame Werte und Grundsätze zu schaffen, wurden konzernweit Leadership Values eingeführt, die nun lokal in den Gesellschaften umgesetzt werden.

Die Leadership Values wurden eingeführt, um die Qualität des Führungsverhaltens zu verbessern und die Entwicklung einer Leistungskultur in der Allianz Gruppe zu beschleunigen. Sie sollen sicherstellen, dass die Führungskräfte konzernweit ein gemeinsames Verständnis unserer grundlegenden Ziele haben. Sie vermitteln jedem Manager einen klaren Rahmen und verbinden die Unternehmensziele mit dem entsprechenden Führungsverhalten.

Der Kulturwandel, den die Leadership Values zum Ziel haben, soll eine offene Kommunikation und vertrauensvolle Atmosphäre im Umgang mit Mitarbeitern und Kunden schaffen. Beides ist notwendig, um die Erreichung unserer strategischen Ziele voranzutreiben.

### Unsere Strategie konsistent vermitteln

Wir arbeiten zusammen, um eine konsistente Umsetzung unserer Unternehmensstrategie in der gesamten Gruppe zu erreichen. Dabei ist es eine unserer Hauptaufgaben als Führungskräfte, diese Strategie glaubhaft nach innen und nach außen zu kommunizieren.

### Unsere Leistungskultur stärken

Wir setzen und vereinbaren gemeinsam klare Ziele, die auf unsere Unternehmensziele ausgerichtet sind. Wir geben unseren Mitarbeitern Feedback und Unterstützung und wir sorgen dafür, dass gute Leistungen auch die entsprechende Anerkennung finden.

### Unseren Fokus auf die Kunden richten

Bei allem, was wir tun, stellen wir unsere Kunden in den Mittelpunkt. Wir bauen gute Kundenbeziehungen auf und festigen diese. So erreichen wir ein profitables Wachstum und erhöhen den Wert unseres Unternehmens. Das erfordert, dass unsere Produkte und Unternehmensabläufe exzellent und unser Verhalten beispielhaft gut sind.

### Unsere Mitarbeiterinnen und Mitarbeiter fördern

Wir investieren in unsere Mitarbeiter. Bei der Auswahl und Entwicklung

### Kontakt

Follow us:

Hilfe & Feedback

Ansprechpartner

Fragen zum Unternehmen

Gemerkte Inhalte

Schnellzugriff

Ausbildung

Duales Studium

Praktikum

Einstiegsprogramme

Direkteinstieg für Absolventen & Berufserfahrene

Karriere im Vertrieb

Aktuelle Stellen in Deutschland - Schnellsuche

Stelle suchen / Referenzcode eingeben

Funktion wählen

Stadt oder Region eingeben

[Zum Stellenmarkt](#)

Working Student in Corporate Communications  
(m/f) / München

Ausbildung zum Fachinformatiker Systemintegrati...  
/ Frankfurt am Main

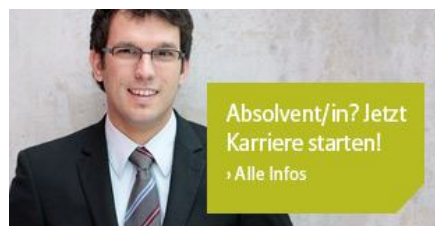

Absolvent/in? Jetzt  
Karriere starten!

[Alle Infos](#)

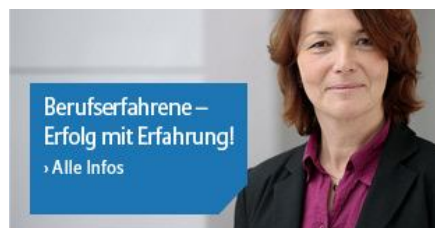

Berufserfahrene –  
Erfolg mit Erfahrung!

[Alle Infos](#)

## Auf Vertrauen und Feedback bauen

Unser Erfolg basiert auf gegenseitigem Vertrauen, Fairness, Integrität und einer klaren und offenen Kommunikation. Wir ermutigen unsere Mitarbeiter, innovativ zu sein, Geschäfts- und Verbesserungspotenziale aufzuzeigen, Wissen und Ideen weiterzugeben und sorgen für motivierendes und konstruktives Feedback.

[Weiter zu „Soziale Verantwortung“](#)

### Stellenmarkt

Jetzt bewerben: Alle Stellenangebote in Deutschland und weltweit.

### Informationen für Bewerber

Tipps zu Bewerbung und Bewerbungsgespräch, Veranstaltungen, FAQs und mehr.

### Events in Ihrer Region

Informieren Sie sich vor Ort über Ihre Karrieremöglichkeiten bei der Allianz.

### Einblicke in die Allianz

Gewinnen Sie wahre Einblicke ins Unternehmen mit Bild und Ton in der Mediengalerie.

 [Merken](#) [Share:](#)

© Allianz 2000-2014   [Impressum](#)   [Datenschutz-Grundsätze](#)   [Nutzungsbedingungen](#)

Für uns zählen Ihre Qualifikationen und Stärken. Deshalb ist jeder unabhängig von sonstigen Merkmalen wie z. B. Geschlecht, Herkunft und Abstammung oder einer eventuellen Behinderung willkommen.

( [> Unser Verhaltenskodex](#) )

#### JOBS FÜR SCHÜLER

Ausbildungs- und Duale  
Studienplätze  
Duales Studium Vertrieb

#### JOBS FÜR STUDENTEN

Praktika  
Werkstudium

#### JOBS FÜR ABSOLVENTEN

Einstiegsprogramme  
Headquarter  
Einstiegsprogramme  
Vertrieb

#### JOBS NACH FACHRICHTUNG

Mathematik  
Recht  
Finance  
Vertrieb  
IT
