# Supplementary material
Source: publisher site journal article supplement (https://www.degruyterbrill.com/publication/isbn/9783110432879/downloadAsset/9783110432879_Elektronischer_Anhang_2.zip)
Supplement: Supplementary file 8 [file BASF GB 2010.pdf › Korpustexte/Korpustexte pdf/BASF/BASF GB 2010.pdf]

# BASF Bericht 2010

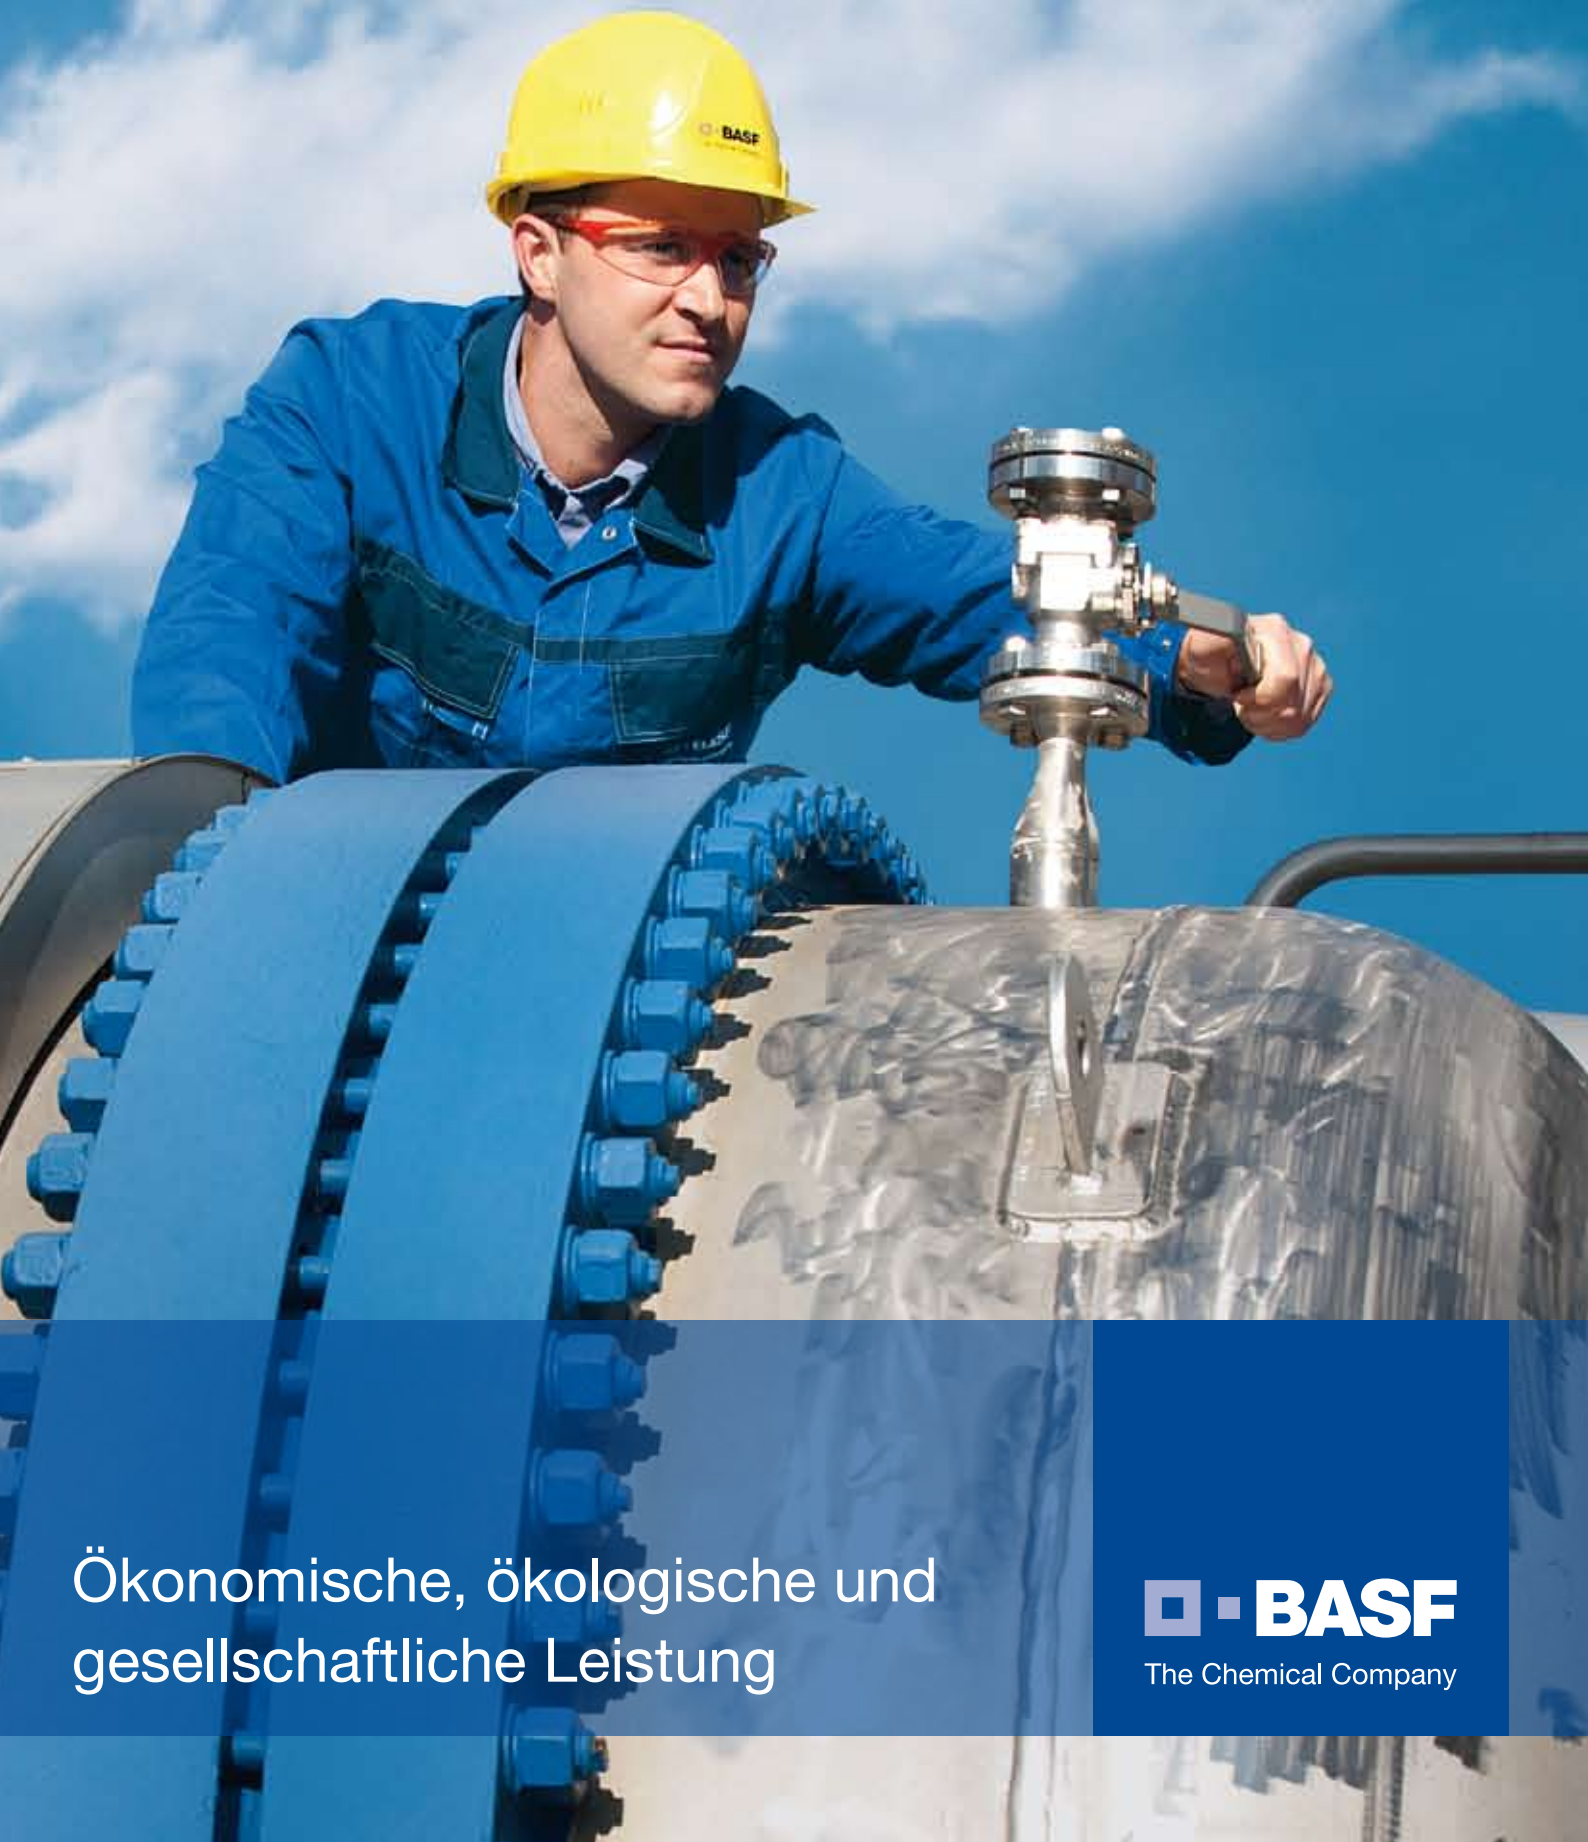

Ökonomische, ökologische und  
gesellschaftliche Leistung

 **BASF**  
The Chemical Company

# BASF-Gruppe 2010\*

## Wirtschaftliche Lage (Millionen €)

|                                                                      | 2010   | 2009   | Veränderung in % |
|----------------------------------------------------------------------|--------|--------|------------------|
| Umsatz                                                               | 63.873 | 50.693 | 26,0             |
| Ergebnis der Betriebstätigkeit vor Abschreibungen (EBITDA)           | 11.131 | 7.388  | 50,7             |
| Ergebnis der Betriebstätigkeit (EBIT) vor Sondereinflüssen           | 8.138  | 4.852  | 67,7             |
| Ergebnis der Betriebstätigkeit (EBIT)                                | 7.761  | 3.677  | 111,1            |
| Ergebnis vor Ertragsteuern                                           | 7.373  | 3.079  | 139,5            |
| Jahresüberschuss nach Anteilen anderer Gesellschafter                | 4.557  | 1.410  | 223,2            |
| Ergebnis je Aktie (€)                                                | 4,96   | 1,54   | 223,2            |
| Bereinigtes Ergebnis je Aktie (€) <sup>1</sup>                       | 5,73   | 3,01   | 90,4             |
| Dividende je Aktie (€)                                               | 2,20   | 1,70   | 29,4             |
| Cashflow aus laufender Geschäftstätigkeit                            | 6.460  | 5.693  | 13,5             |
| Investitionen in Sachanlagen und immaterielles Vermögen <sup>2</sup> | 5.304  | 5.972  | -11,2            |
| Abschreibungen auf Sachanlagen und immaterielles Vermögen            | 3.370  | 3.711  | -9,2             |
| Gesamtkapitalrendite (%)                                             | 14,7   | 7,5    | 96,0             |
| Eigenkapitalrendite nach Steuern (%)                                 | 24,6   | 8,9    | 176,4            |
| Forschungsaufwand                                                    | 1.492  | 1.398  | 6,7              |

## Umwelt und Sicherheit

|                                                              |                       | 2010 | 2009 | Veränderung in % |
|--------------------------------------------------------------|-----------------------|------|------|------------------|
| Betriebskosten für Umweltschutz                              | Millionen €           | 729  | 669  | 9,0              |
| Investitionen für Umweltschutz                               | Millionen €           | 122  | 141  | -13,5            |
| Emissionen von Treibhausgasen (CO <sub>2</sub> -Äquivalente) | Millionen Tonnen/Jahr | 25,2 | 31,1 | -19,0            |
| Emissionen in die Luft (luftfremde Stoffe) <sup>3</sup>      | 1.000 Tonnen/Jahr     | 33,9 | 31,3 | 8,3              |
| Emissionen in das Wasser <sup>3</sup> von                    |                       |      |      |                  |
| – organischen Stoffen                                        | 1.000 Tonnen/Jahr     | 26,1 | 18,6 | 40,3             |
| – Stickstoff                                                 | 1.000 Tonnen/Jahr     | 4,0  | 3,6  | 11,1             |
| – Schwermetallen                                             | Tonnen/Jahr           | 25   | 24   | 4,2              |
| Transportunfälle                                             | je 10.000 Transporte  | 0,28 | 0,24 | 16,7             |
| Zahl der Umwelt- und Sicherheitsaudits                       |                       | 97   | 99   | -2,0             |

## Mitarbeiter und Gesellschaft

|                                                     |                                           | 2010    | 2009    | Veränderung in % |
|-----------------------------------------------------|-------------------------------------------|---------|---------|------------------|
| Zahl der Mitarbeiter zum Jahresende <sup>4</sup>    |                                           | 109.140 | 104.779 | 4,2              |
| Zahl der Auszubildenden zum Jahresende <sup>4</sup> |                                           | 2.442   | 2.401   | 1,7              |
| Personalaufwand                                     | Millionen €                               | 8.228   | 7.107   | 15,8             |
| Spenden und Sponsoring                              | Millionen €                               | 49,8    | 48,1    | 3,5              |
| Persönliche Erfolgsbeteiligung                      | % der Gruppengesellschaften               | 92,9    | 74,9    | 18,0             |
| Arbeitsunfälle mit Ausfalltagen                     | je eine Million geleistete Arbeitsstunden | 2,0     | 1,8     | 11,1             |
| Angezeigte Berufskrankheiten                        | je eine Million geleistete Arbeitsstunden | 0,5     | 0,4     | 25,0             |

<sup>1</sup> Erläuterung siehe Seite 38

<sup>2</sup> Einschließlich Akquisitionen

<sup>3</sup> Ohne Emissionen aus der Gas- und Erdölförderung

<sup>4</sup> Einschließlich Beschäftigte der Cognis-Gruppe

\* Bei allen angegebenen finanziellen Leistungsindikatoren sind die Beiträge der zum 9. Dezember 2010 erworbenen Cognis-Gruppe zeitanteilig berücksichtigt. Die Einbeziehung ihrer Beiträge zu den nichtfinanziellen Leistungsindikatoren erfolgt, sofern nicht anders ausgewiesen, in der Berichterstattung 2011.

# Die Segmente der BASF

## Chemicals

→ Seite 46

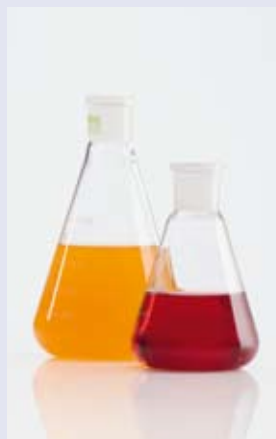

Im Segment Chemicals liefern wir Produkte an Kunden aus den Branchen Chemie, Elektronik, Bau, Textil, Automobil, Pharma, Agro und viele mehr. Darüber hinaus stellen wir die Versorgung anderer BASF-Segmente mit Chemikalien zur Herstellung höherveredelter Produkte sicher. Das Portfolio reicht von Basischemikalien, Leimen und Elektronikchemikalien für die Halbleiter- und Solarzellenindustrie, über Lösemittel und Weichmacher bis zu Ausgangsstoffen für Waschmittel, Kunststoffe, Textilfasern, Farben und Lacke sowie Medikamente.

### Kennzahlen Chemicals (Millionen €)

|                                                     | 2010   | 2009  | Veränd. % |
|-----------------------------------------------------|--------|-------|-----------|
| Umsatz                                              | 11.377 | 7.515 | 51,4      |
| EBITDA                                              | 3.000  | 1.571 | 91,0      |
| Ergebnis der Betriebstätigkeit vor Sondereinflüssen | 2.302  | 1.021 | 125,5     |
| Ergebnis der Betriebstätigkeit (EBIT)               | 2.310  | 735   | 214,3     |

### Umsatz (%)

|   |                |    |
|---|----------------|----|
| 1 | Inorganics     | 11 |
| 2 | Petrochemicals | 67 |
| 3 | Intermediates  | 22 |

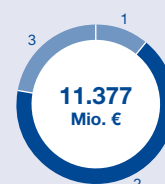

## Plastics

→ Seite 52

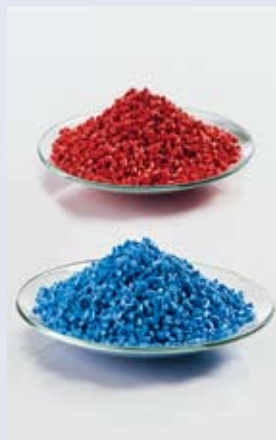

Das Segment Plastics umfasst ein breites Angebot an Produkten, Systemlösungen und Dienstleistungen. Für den Automobilbau, die Elektroindustrie sowie für Anwendungen in Haushalt, Sport und Freizeit bieten wir eine Vielzahl an technischen Kunststoffen. Unsere styrolbasierten Schaumstoffe werden bei Dämmstoffen für die Bauindustrie und für Verpackungen eingesetzt. Extrem vielseitig sind unsere Polyurethane: Als weiche Schaumstoffe verbessern sie zum Beispiel Autositze oder Matratzen, als dämmender Hartschaum steigern sie die Energieeffizienz von Kühlschränken.

### Kennzahlen Plastics (Millionen €)

|                                                     | 2010  | 2009  | Veränd. % |
|-----------------------------------------------------|-------|-------|-----------|
| Umsatz                                              | 9.830 | 7.128 | 37,9      |
| EBITDA                                              | 1.721 | 994   | 73,1      |
| Ergebnis der Betriebstätigkeit vor Sondereinflüssen | 1.284 | 576   | 122,9     |
| Ergebnis der Betriebstätigkeit (EBIT)               | 1.273 | 554   | 129,8     |

### Umsatz (%)

|   |                      |    |
|---|----------------------|----|
| 1 | Performance Polymers | 45 |
| 2 | Polyurethanes        | 55 |

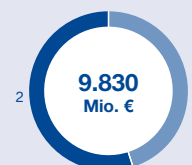

## Performance Products

→ Seite 57

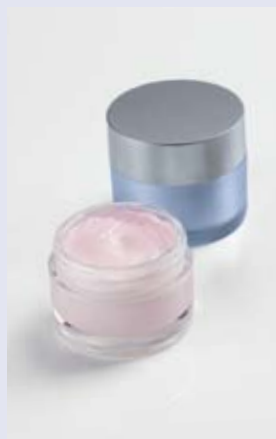

Unsere Performance Products verleihen unzähligen Produkten des täglichen Lebens Stabilität, Farbe und ein verbessertes Anwendungsprofil. Zu unserem Produktportfolio gehören Vitamine und Lebensmittelzusatzstoffe, aber auch Inhaltsstoffe für Pharmazeutika, Körperpflege und Kosmetik sowie für Hygieneartikel und Haushaltspflege. Andere Performance Products verbessern Prozesse in der Papierindustrie, bei der Gewinnung von Öl, Gas und Erzen und bei der Wasseraufbereitung. Zudem helfen sie, Kraft- und Schmierstoffe effizienter, Klebstoffe und Lacke leistungsfähiger und Kunststoffe stabiler zu machen.

### Kennzahlen Performance Products (Millionen €)

|                                                     | 2010   | 2009  | Veränd. % |
|-----------------------------------------------------|--------|-------|-----------|
| Umsatz                                              | 12.288 | 9.356 | 31,3      |
| EBITDA                                              | 2.162  | 926   | 133,5     |
| Ergebnis der Betriebstätigkeit vor Sondereinflüssen | 1.554  | 698   | 122,6     |
| Ergebnis der Betriebstätigkeit (EBIT)               | 1.345  | -150  | .         |

### Umsatz (%)

|   |                        |    |
|---|------------------------|----|
| 1 | Dispersions & Pigments | 26 |
| 2 | Care Chemicals         | 22 |
| 3 | Nutrition & Health     | 12 |
| 4 | Paper Chemicals        | 14 |
| 5 | Performance Chemicals  | 26 |

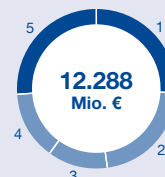

## Functional Solutions

→ Seite 65

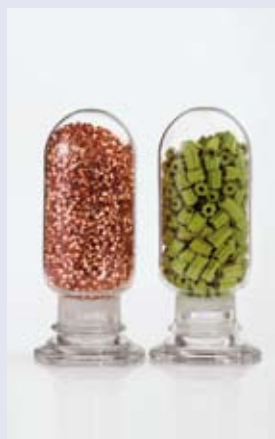

Im Segment Functional Solutions bündeln wir branchen- und kunden-spezifische Systemlösungen und innovative Produkte, insbesondere für die Automobil- und Bauindustrie. Das Portfolio umfasst Fahrzeug- und Industriekatalysatoren, Auto- und Industrielacke, Betonadditive sowie Ausbauprodukte wie Fliesenkleber und Bautenanstrichmittel.

### Kennzahlen Functional Solutions (Millionen €)

|                                                     | 2010  | 2009  | Veränd. % |
|-----------------------------------------------------|-------|-------|-----------|
| Umsatz                                              | 9.703 | 7.115 | 36,4      |
| EBITDA                                              | 861   | 511   | 68,5      |
| Ergebnis der Betriebstätigkeit vor Sondereinflüssen | 467   | 209   | 123,4     |
| Ergebnis der Betriebs-tätigkeit (EBIT)              | 457   | 107   | 327,1     |

### Umsatz (%)

|   |                        |    |
|---|------------------------|----|
| 1 | Catalysts              | 52 |
| 2 | Construction Chemicals | 22 |
| 3 | Coatings               | 26 |

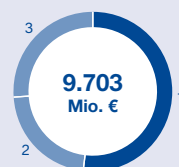

## Agricultural Solutions

→ Seite 70

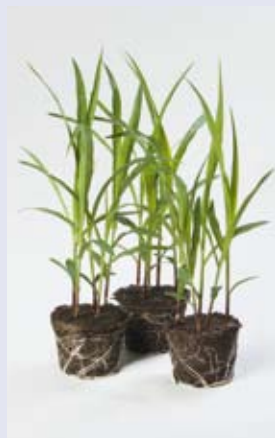

Unsere Pflanzenschutzmittel schützen Nutzpflanzen vor Pilzkrankheiten, Insekten oder Unkräutern, erhöhen die Qualität und sichern die Ernteerträge. Die Forschung in der Pflanzenbiotechnologie konzentriert sich auf Pflanzen für eine leistungsfähigere Landwirtschaft, eine gesündere Ernährung sowie für die Gewinnung von nachwachsenden Rohstoffen. Forschungskosten, Umsatz, Ergebnis und alle weiteren Daten der BASF Plant Science werden nicht im Segment Agricultural Solutions, sondern unter „Sonstige“ ausgewiesen.

### Kennzahlen Agricultural Solutions (Millionen €)

|                                                     | 2010  | 2009  | Veränd. % |
|-----------------------------------------------------|-------|-------|-----------|
| Umsatz                                              | 4.033 | 3.646 | 10,6      |
| EBITDA                                              | 938   | 973   | -3,6      |
| Ergebnis der Betriebstätigkeit vor Sondereinflüssen | 749   | 776   | -3,5      |
| Ergebnis der Betriebs-tätigkeit (EBIT)              | 749   | 769   | -2,6      |

### Umsatz (%)

|   |                 |     |
|---|-----------------|-----|
| 1 | Crop Protection | 100 |
|---|-----------------|-----|

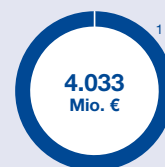

## Oil & Gas

→ Seite 75

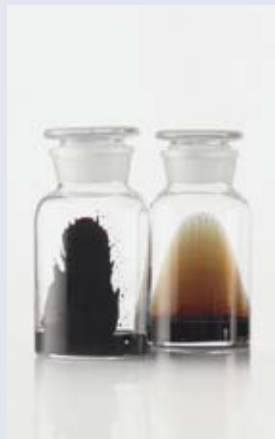

Als größtes deutsches Unternehmen der Öl- und Gasförderung konzentrieren wir uns bei der Exploration und Produktion auf öl- und gasreiche Regionen in Europa, Nordafrika, Südamerika, Russland und den Raum am Kaspischen Meer. Gemeinsam mit unserem russischen Partner Gazprom sind wir in Europa im Transport und in der Speicherung von Erdgas sowie im Erdgashandel aktiv.

### Kennzahlen Oil & Gas (Millionen €)

|                                                       | 2010   | 2009   | Veränd. % |
|-------------------------------------------------------|--------|--------|-----------|
| Umsatz                                                | 10.791 | 11.356 | -5,0      |
| EBITDA                                                | 2.977  | 2.830  | 5,2       |
| Ergebnis der Betriebstätigkeit vor Sondereinflüssen   | 2.430  | 2.289  | 6,2       |
| Ergebnis der Betriebs-tätigkeit (EBIT)                | 2.334  | 2.289  | 2,0       |
| Jahresüberschuss nach Anteilen anderer Gesellschafter | 923    | 712    | 29,6      |

### Umsatz (%)

|   |                          |    |
|---|--------------------------|----|
| 1 | Exploration & Production | 35 |
| 2 | Natural Gas Trading      | 65 |

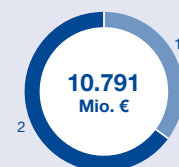



## Auszeichnungen

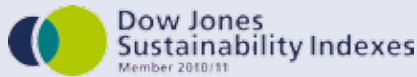

### Dow Jones Sustainability World Index

BASF-Aktie seit zehn Jahren im bedeutendsten Nachhaltigkeitsindex gelistet

Auch 2010 ist die BASF-Aktie wieder im Dow Jones Sustainability World Index (DJSI World) vertreten. Besondere Anerkennung erhielt BASF für das Risiko- und Krisenmanagement, die Umweltberichterstattung und die Klimastrategie.

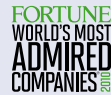

### World's Most Admired Companies 2010

Auszeichnung als angesehenstes Chemieunternehmen

Das US-Wirtschaftsmagazin Fortune zeichnet BASF erneut als das angesehenste Chemieunternehmen der Welt aus. BASF belegte in den Kategorien Produkt- und Servicequalität, globale Wettbewerbsfähigkeit und Qualität des Managements den ersten Platz.

### CARBON DISCLOSURE PROJECT

### Carbon Disclosure Project

Carbon Disclosure Leadership Index und Carbon Performance Leadership Index

BASF führt auch 2010 den Carbon Disclosure Leadership Index im Sektor Materials an. Außerdem wurde BASF in den neuen Carbon Performance Leadership Index aufgenommen. Dieser bewertet die Unternehmensleistungen im Umgang mit dem Klimawandel.

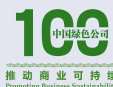

### China Green Companies Top 100

BASF für Engagement ausgezeichnet

Zum dritten Mal in Folge ist BASF in den China Green Companies Top 100 vertreten. Die Auszeichnung würdigt Unternehmen, die ihre Wettbewerbsfähigkeit durch langfristiges Engagement für Umweltschutz, Gesellschaft, Innovation und Firmenkultur stärken.

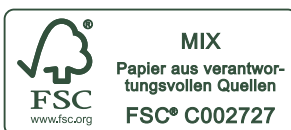

Dieser Bericht ist auf FSC®-zertifiziertem Kunstdruckpapier gedruckt.

→ Weitere Informationen zum Produktionsprozess, über die Auswahl des Papiers und den Druck unter [basf.com/bericht\\_produktion](http://basf.com/bericht_produktion)

### Herausgeber:

BASF SE  
Communications & Government Relations  
67056 Ludwigshafen

### Design:

Strichpunkt, Stuttgart

### Fotografie:

Philipp Rohner  
Bernhard Kunz  
Hans-Jürgen Dölger  
Andreas Pohlmann (Vorstandsphotografie)

## Zukunftsgerichtete Aussagen und Prognosen

Dieser Bericht enthält zukunftsgerichtete Aussagen. Diese Aussagen basieren auf den gegenwärtigen Einschätzungen und Prognosen des Vorstands sowie den ihm derzeit verfügbaren Informationen. Die zukunftsgerichteten Aussagen sind nicht als Garantien der darin genannten zukünftigen Entwicklungen und Ergebnisse zu verstehen. Die zukünftigen Entwicklungen und Ergebnisse sind vielmehr abhängig von einer Vielzahl von Faktoren; sie beinhalten verschiedene Risiken und Unwägbarkeiten und beruhen auf Annahmen, die sich möglicherweise als nicht zutreffend erweisen. Zu diesen Risikofaktoren gehören insbesondere die im Risikobericht auf den Seiten 103 bis 111 genannten Faktoren. Wir übernehmen keine Verpflichtung, die in diesem Bericht gemachten zukunftsgerichteten Aussagen zu aktualisieren.

---

Hauptversammlung 2011/Zwischenbericht 1. Quartal 2011

**06.05.2011**

---

Zwischenbericht 1. Halbjahr 2011

**28.07.2011**

---

Zwischenbericht 3. Quartal 2011

**27.10.2011**

---

Berichterstattung Gesamtjahr 2011

**24.02.2012**

---

Hauptversammlung 2012/Zwischenbericht 1. Quartal 2012

**27.04.2012**

---

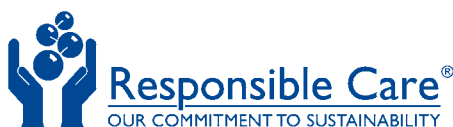

BASF unterstützt die weltweite Responsible Care® Initiative der chemischen Industrie.

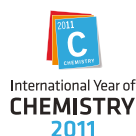

BASF ist Sponsor des internationalen Jahres der Chemie 2011.  
→ Mehr dazu unter [basf.com/IJC](http://basf.com/IJC)

#### Weitere Informationen

Diese und andere Veröffentlichungen der BASF finden Sie im Internet unter [www.basf.com](http://www.basf.com)

Sie können die Berichte auch bestellen:

- telefonisch: +49 621 60-99895
- via Internet: [basf.com/broschuerenbestellung](http://basf.com/broschuerenbestellung)

#### Kontakt

##### Allgemeine Anfragen

Zentrale, Tel.: +49 621 60-0

##### Corporate Media Relations

Michael Grabicki, Tel.: +49 621 60-99938

##### Sustainability Center

Dr. Eckhard Koch, Tel.: +49 621 60-78638

##### Investor Relations

Magdalena Moll, Tel.: +49 621 60-48230

##### Internet

[www.basf.com](http://www.basf.com)

# Chemie, die verbindet

Als weltweit führendes Chemieunternehmen verbinden wir wirtschaftlichen Erfolg mit gesellschaftlicher Verantwortung und dem Schutz der Umwelt. Daher dokumentieren wir in diesem integrierten Bericht unsere ökonomische, ökologische und gesellschaftliche Leistung 2010.

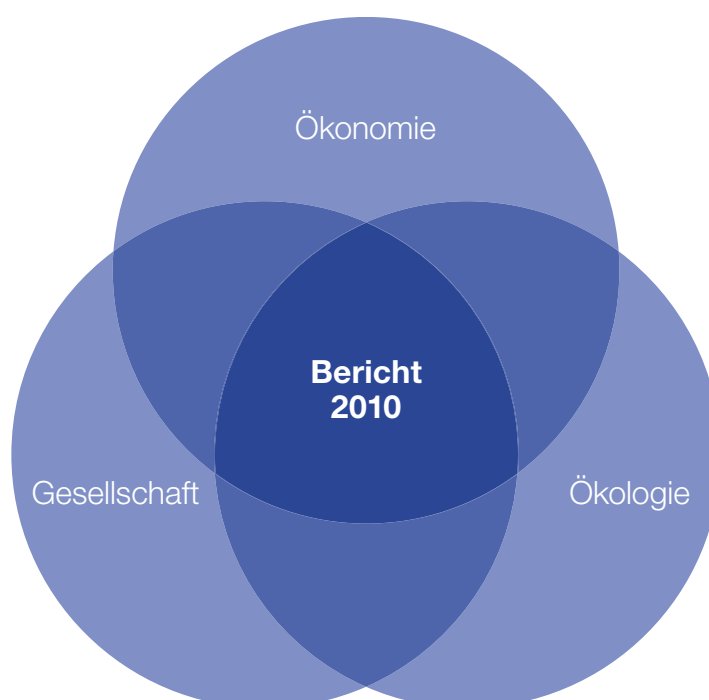

## Wert für die BASF

Nachhaltigkeit ist ein fester Bestandteil unserer Strategie. Daher verbindet dieser Bericht die Finanz- und Nachhaltigkeitsberichterstattung in einer Publikation. Wir dokumentieren unsere wirtschaftliche Leistung und zeigen an konkreten Beispielen, wie Nachhaltigkeit zum Unternehmenserfolg beiträgt.

## Wert für die Gesellschaft

Dieser Bericht zeigt, wie wir Wert schaffen – für Mitarbeiter, Aktionäre, Geschäftspartner, Nachbarn und die Öffentlichkeit. Mit nachhaltigen und innovativen Produkten, Technologien und Services tragen wir dazu bei, Antworten auf globale Herausforderungen wie Klimaschutz, Ressourcenschonung, Ernährung und den demografischen Wandel zu finden.

## Über diesen Bericht

### Inhalt und Struktur

Der vorliegende Bericht verbindet unsere Finanz- und Nachhaltigkeitsberichterstattung miteinander und richtet sich an Leser aus beiden Bereichen. Der Kurzbericht BASF Kompakt 2010 ergänzt die Berichterstattung der BASF-Gruppe.

Zusätzlich zu unserem integrierten Unternehmensbericht veröffentlichen wir Informationen zu Nachhaltigkeitsthemen im Internet. Auf diese ergänzenden Informationen auf unseren Internetseiten verweisen wir in den einzelnen Kapiteln.

Die Informationen des BASF-Berichts 2010 dienen zugleich als Fortschrittsbericht für die Umsetzung der zehn Prinzipien des UN Global Compact. Das Symbol  deutet auf Informationen mit Relevanz im Sinne des Global Compact hin. Der Global-Compact-Index auf Seite 213 listet die Themen auf.

Neben dem klassischen Inhaltsverzeichnis geben die „Themen auf einen Blick“ einen Überblick über Schwerpunkte zu Geschäftsverlauf, zu globalen Megatrends, Innovationen und zu weiteren Themen mit zentraler Bedeutung für unser Geschäft.

- Der Onlinebericht 2010 ist abrufbar unter [basf.com/bericht](http://basf.com/bericht)
- Mehr zum Kurzbericht BASF Kompakt 2010 unter [basf.com/kompakt](http://basf.com/kompakt)
- Mehr zu Nachhaltigkeit unter [basf.com/nachhaltigkeit](http://basf.com/nachhaltigkeit)
- Mehr zur Umsetzung der Global-Compact-Prinzipien unter [basf.com/globalcompact\\_d](http://basf.com/globalcompact_d)
- Mehr zum Global Compact der Vereinten Nationen unter [www.globalcompact.org](http://www.globalcompact.org) und der Teilnahme der BASF im Global Compact Lead unter [basf.com/gclead\\_d](http://basf.com/gclead_d)

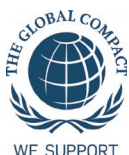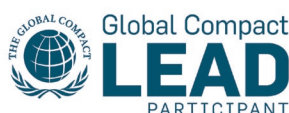

### Themen

Die Informationen zur Vermögens-, Finanz- und Ertragslage der BASF-Gruppe beruhen auf den Anforderungen der International Financial Reporting Standards (IFRS) und, soweit anwendbar, des deutschen Handelsrechts sowie der deutschen Rechnungslegungsstandards (DRS). Das Kontrollsystem für die Finanzberichterstattung nach den Vorgaben des Sarbanes-Oxley Act haben wir nach dem Delisting von der NYSE in angepasster Form beibehalten. Interne Kontrollmechanismen sichern die Verlässlichkeit der in diesem Bericht vorgelegten Informationen. Das Management der BASF bestätigte die Wirksamkeit der Kontrollen und die Einhaltung der Regelwerke für die Finanzberichterstattung.

Die Nachhaltigkeitsberichterstattung ist an den internationalen Leitlinien (G3) der Global Reporting Initiative (GRI) ausgerichtet. Wir wollen für BASF relevante Themen in Bezug auf Nachhaltigkeit frühzeitig erkennen und bearbeiten. Darum bewerten und analysieren wir gemeinsam mit Experten Nachhaltigkeitsthemen in unserer Materialitätsanalyse. Ziel ist es, frühzeitig Strategien im Umgang mit möglichen Chancen und Risiken zu entwickeln. Im Jahr 2010 haben wir die Analyse erneut aktualisiert und das Ergebnis in einer Materialitätsmatrix dargestellt. Diese berücksichtigt neben dem gesellschaftlichen Interesse auch die Bedeutung der Themen für die BASF. Auf Basis dieser Untersuchung werden wesentliche Themen für den Bericht identifiziert.

- Mehr zur Global Reporting Initiative unter [www.globalreporting.org](http://www.globalreporting.org)
- Mehr zur Auswahl von Nachhaltigkeitsthemen auf Seite 25 und unter [basf.com/materialitaet](http://basf.com/materialitaet)
- Ein kurzer GRI- und Global-Compact-Index befindet sich auf Seite 213, die ausführlich kommentierte Darstellung unter [basf.com/gri\\_gc\\_d](http://basf.com/gri_gc_d)

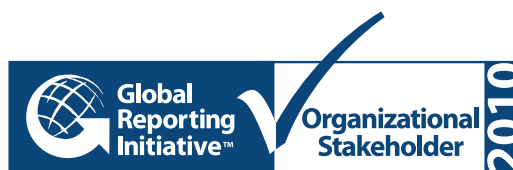

### Im Überblick

- BASF-Bericht 2010 integriert Finanz- und Nachhaltigkeitsberichterstattung
- HTML-Version des Berichts mit zusätzlichen Informationen und Serviceelementen im Internet
- Weiterführende Informationen zu Nachhaltigkeit im Internet
- Bericht dient als Fortschrittsbericht im Sinne des UN Global Compact
- Finanzberichterstattung nach Anforderungen der International Financial Reporting Standards, des deutschen Handelsrechts und der deutschen Rechnungslegungsstandards
- Nachhaltigkeitsberichterstattung orientiert sich an Leitlinien der Global Reporting Initiative
- Dialog mit Nachhaltigkeitsexperten und Stakeholdern über Themenrelevanz



## Daten

Alle Daten und Berechnungsgrundlagen dieses Berichts sind an nationalen und internationalen Standards der Finanz- und Nachhaltigkeitsberichterstattung ausgerichtet. Sämtliche Daten und Informationen wurden von den jeweils fachlich zuständigen Einheiten mit repräsentativen Methoden für den Berichtszeitraum erhoben. Der Berichtszeitraum umfasst das Geschäftsjahr 2010. Einbezogen in die Berichterstattung der BASF-Gruppe sind die BASF SE mit Sitz in Ludwigshafen sowie alle wesentlichen Tochterunternehmen. Bei allen angegebenen finanziellen Leistungsindikatoren sind die Beiträge der zum 9. Dezember 2010 erworbenen Cognis-Gruppe zeitanteilig berücksichtigt. Die Einbeziehung ihrer Beiträge zu den nichtfinanziellen Leistungsindikatoren erfolgt in der Berichterstattung 2011. In den Informationen des Mitarbeiterkapitels sind alle Mitarbeiter in der BASF-Gruppe zum 31. Dezember 2010 repräsentiert, inklusive die Mitarbeiter der Cognis-Gruppe. Daten, bei denen Cognis nicht einbezogen ist, sind gesondert ausgewiesen.

Unsere Datenerhebung zu Umweltschutz und Sicherheit richtet sich nach den Empfehlungen des europäischen Verbandes der chemischen Industrie (CEFIC). Im Bereich Emissionen und Energie berichten wir über rund 98 % aller Emissionen unserer weltweiten Produktionsstandorte. Die Emissionen von Gemeinschaftsunternehmen sind entsprechend unserem Anteil berücksichtigt. Angaben zu Arbeitsunfällen erheben wir weltweit an allen Standorten. Unfälle an Standorten von Gemeinschaftsunternehmen werden insgesamt erfasst und berichtet. Weitere Daten zur gesellschaftlichen Verantwortung beziehen sich, soweit nicht anders angegeben, auf alle konsolidierten Gruppengesellschaften.

Um die Aktualität des Berichts zu erhöhen, haben wir relevante Informationen berücksichtigt, die bis zum Redaktionsschluss am 23. Februar 2011 vorlagen. Der Bericht erscheint jährlich in deutscher und englischer Sprache.

- **Mehr zu Emissionen in den Kapiteln Ziele, Klimaschutz, Energie und Rohstoffe, Wasser sowie Umwelt- und Sicherheitsmanagement**
- **Der Konzernabschluss befindet sich auf Seite 135**

## Externe Prüfung und Bewertung

Unsere Berichterstattung lassen wir von Dritten prüfen. Die KPMG AG Wirtschaftsprüfungsgesellschaft hat den Konzernabschluss und -lagebericht geprüft und mit dem uneingeschränkten Bestätigungsvermerk versehen. Die Prüfung von Konzernabschluss einschließlich Konzernanhang stützt sich auf die geprüften Abschlüsse der BASF-Gruppengesellschaften.

Die Prüfung umfasst finanzielle und nichtfinanzielle Informationen. Sie erfolgte auch unter Anwendung des für Nachhaltigkeitsberichterstattung einschlägigen Prüfungsstandards „International Standard on Assurance Engagements 3000“.

Auch im Jahr 2010 bestätigte uns die Global Reporting Initiative (GRI), dass die Nachhaltigkeitsberichterstattung der BASF-Gruppe die höchste Anwendungsebene, A+, des GRI Standards erreicht.

- **Der Bestätigungsvermerk der Wirtschaftsprüfungsgesellschaft befindet sich auf Seite 136**
- **Der GRI-Bestätigungsvermerk befindet sich auf Seite 214**

- Daten und Berechnungsgrundlagen an internationalen Standards der Finanz- und Nachhaltigkeitsberichterstattung ausgerichtet
- Datenerhebung zu Umweltschutz und Sicherheit richtet sich nach Empfehlungen des europäischen Verbandes der chemischen Industrie
- Relevante Informationen berücksichtigt bis Redaktionsschluss am 23. Februar 2011

- Prüfung finanzieller und nichtfinanzieller Informationen durch KPMG AG Wirtschaftsprüfungsgesellschaft
- Prüfung auch unter Anwendung von Prüfungsstandards der Nachhaltigkeitsberichterstattung
- Level A+ bei der Nachhaltigkeitsberichterstattung durch Global Reporting Initiative bestätigt

# BASF Bericht 2010

## Inhalt

### An unsere Aktionäre

|                                       |    |
|---------------------------------------|----|
| Brief des Vorstandsvorsitzenden ..... | 7  |
| Der Vorstand .....                    | 10 |

|                            |    |
|----------------------------|----|
| BASF am Kapitalmarkt ..... | 12 |
|----------------------------|----|

### Konzernlagebericht

|                                           |    |
|-------------------------------------------|----|
| Die BASF-Gruppe .....                     | 17 |
| Strategie und Werte .....                 | 17 |
| Unsere Ziele .....                        | 20 |
| Märkte, Strukturen und Organisation ..... | 22 |
| Wertmanagement .....                      | 24 |
| Nachhaltigkeitsmanagement .....           | 25 |
| Wertschöpfung .....                       | 29 |
| Forschung und Entwicklung .....           | 30 |

|                                              |    |
|----------------------------------------------|----|
| Das Geschäftsjahr der BASF-Gruppe .....      | 32 |
| Entwicklung der Weltwirtschaft .....         | 32 |
| Entwicklung wichtiger Abnehmerbranchen ..... | 33 |
| Entwicklung der chemischen Industrie .....   | 34 |
| Geschäftsentwicklung der BASF-Gruppe .....   | 35 |
| Bilanz .....                                 | 39 |
| Investitionen und Finanzierung .....         | 41 |
| Geschäftsentwicklung in den Segmenten .....  | 44 |
| Die Segmente der BASF .....                  | 46 |
| Chemicals .....                              | 46 |
| Plastics .....                               | 52 |
| Performance Products .....                   | 57 |
| Functional Solutions .....                   | 65 |
| Agricultural Solutions .....                 | 70 |
| Oil & Gas .....                              | 75 |
| Regionenbericht .....                        | 81 |

|                                               |    |
|-----------------------------------------------|----|
| Mitarbeiter und Gesellschaft .....            | 84 |
| Mitarbeiter .....                             | 84 |
| Arbeitssicherheit und Gesundheitsschutz ..... | 89 |
| Gesellschaftliches Engagement .....           | 90 |

|                                         |     |
|-----------------------------------------|-----|
| Umwelt und Sicherheit .....             | 91  |
| Umwelt- und Sicherheitsmanagement ..... | 91  |
| Klimaschutz .....                       | 95  |
| Energie und Rohstoffe .....             | 97  |
| Wasser .....                            | 99  |
| Produktverantwortung .....              | 101 |

|                     |     |
|---------------------|-----|
| Risikobericht ..... | 103 |
|---------------------|-----|

|                                                      |     |
|------------------------------------------------------|-----|
| Prognosebericht .....                                | 112 |
| Wirtschaftliche Rahmenbedingungen im Jahr 2011 ..... | 112 |
| Ausblick und Chancen der BASF-Gruppe .....           | 115 |

### Corporate Governance-Bericht

|                                            |     |
|--------------------------------------------|-----|
| Corporate Governance der BASF-Gruppe ..... | 117 |
| Organe der Gesellschaft .....              | 122 |
| Vergütungsbericht .....                    | 125 |

|                                 |     |
|---------------------------------|-----|
| Bericht des Aufsichtsrats ..... | 131 |
| Entsprechenserklärung .....     | 134 |

### Konzernabschluss

|                                   |     |
|-----------------------------------|-----|
| Erklärung des Vorstands .....     | 135 |
| Bestätigungsvermerk .....         | 136 |
| Gewinn- und Verlustrechnung ..... | 137 |
| Ertrags- und Aufwandsposten ..... | 138 |

|                                     |     |
|-------------------------------------|-----|
| Bilanz .....                        | 139 |
| Kapitalflussrechnung .....          | 140 |
| Entwicklung des Eigenkapitals ..... | 141 |
| Konzernabschluss und Anhang .....   | 142 |

## Ergänzende Angaben zum Öl-und-Gas-Geschäft

|                                            |     |
|--------------------------------------------|-----|
| Ergänzende Angaben zum Öl-und-Gas-Geschäft | 195 |
|--------------------------------------------|-----|

## Übersichten

|                      |     |                               |     |
|----------------------|-----|-------------------------------|-----|
| Glossar              | 203 | Zehnjahresübersicht           | 210 |
| Stichwortverzeichnis | 207 | GRI- und Global-Compact-Index | 213 |
| Eingetragene Marken  | 209 | GRI-Bestätigungsvermerk       | 214 |

### Themen auf einen Blick

#### → Übersicht

|                      |         |
|----------------------|---------|
| Über diesen Bericht  | 2–3     |
| Stichwortverzeichnis | 207–208 |

#### → Strategie

|                    |                                               |
|--------------------|-----------------------------------------------|
| Ziele              | 18, 20–21, 24, 41–43, 86, 89, 93, 95, 99, 101 |
| Chancen nutzen     | 25–28, 30–31, 81–83, 85, 96, 100, 115         |
| Risiken minimieren | 19, 25–28, 85, 89, 91–94, 101–111, 115, 120   |
| Portfolio          | 17, 22, 57                                    |
| Effizienz          | 17, 81–83, 97–98                              |
| Segmentstrategien  | 46, 52, 57, 65, 70, 75                        |

#### → Lösungen für globale Herausforderungen

|                          |                            |
|--------------------------|----------------------------|
| Klimaschutz              | 30, 47, 53, 76, 95–98      |
| Ressourcen               | 31, 34, 59, 75–80, 97–100  |
| Gesundheit und Ernährung | 31, 33, 57, 63, 70–72, 113 |
| Demografischer Wandel    | 85, 108                    |
| Bauen und Wohnen         | 31, 33, 52, 113            |
| Mobilität                | 30, 33, 53, 82, 113        |

#### → Vermögens-, Finanz- und Ertragslage

|                                     |                                                 |
|-------------------------------------|-------------------------------------------------|
| Aktie                               | 12–16, 35, 38                                   |
| Vermögenslage                       | 39–40                                           |
| Finanzlage                          | 41–43                                           |
| Ertragslage                         | 35–38                                           |
| Geschäftsentwicklung nach Segmenten | 44–45, 49–51, 55–56, 61–64, 67–69, 73–74, 78–80 |

#### → Prognose

|                                      |         |
|--------------------------------------|---------|
| Wirtschaftliche Rahmenbedingungen    | 112–114 |
| Ausblick und Chancen der BASF-Gruppe | 115–116 |

#### → Innovationen

|                            |                            |
|----------------------------|----------------------------|
| Wachstumscluster           | 17, 30–31, 72, 98          |
| Innovationen schaffen Wert | 17, 47, 53, 59, 65, 71, 76 |

#### → Partnerschaften

|                              |                         |
|------------------------------|-------------------------|
| Strategische Partnerschaften | 17, 30, 31, 72, 83, 115 |
| Kooperationen                | 17, 30, 72, 102         |
| Lieferkette                  | 26                      |
| Nachhaltigkeitsservices      | 27, 96                  |

#### → Dialog

|                     |                                  |
|---------------------|----------------------------------|
| Kunden              | 18, 28, 33, 59, 66, 71           |
| Weitere Stakeholder | 2, 15, 25, 27–28, 87–88, 90, 102 |

#### → Auszeichnungen

Umschlagrückseite

### GRI- und Global-Compact-Index 213

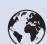

### Global-Compact-Relevanz

## WWW.BASF.COM

Der Bericht 2010 im Internet

Diesen Bericht gibt es auch als HTML-Version und als PDF-Download auf unserer Internetseite. Zusatzfunktionen ermöglichen das individuelle Zusammenstellen von Texten, Tabellen und Diagrammen und eine schnelle Auswahl nach Themen. Der direkte Link zum Vorjahresbericht erleichtert einen Vergleich von Aussagen. Beispiele aus diesem Bericht zeigen, wie wir Wert schaffen – für BASF und für die Gesellschaft.

## Chemie, die verbindet

Die BASF verbindet ihren Unternehmenserfolg mit Vorteilen für Kunden, Mitarbeiter, Aktionäre und die Umwelt. An sechs Beispielen zeigen wir, wie wir Wert schaffen – für die BASF und für die Gesellschaft.

1

### Schön sein in jedem Alter

Mit der Akquisition von Cognis werden wir zum führenden Anbieter von Inhaltsstoffen für die Kosmetikindustrie.

2

### Ökoeffiziente Windeln

Die Ökoeffizienz-Analyse der BASF bewertet die Nachhaltigkeit von Produkten und hilft Kunden bei der Wahl optimaler Lösungen.

3

### Nachhaltiger Küstenschutz

Elastocoast®, ein Verbund aus BASF-Spezialkunststoffen und Schotter, schützt Küsten und Deiche langfristig vor Erosion.

4

### Spaß am Lernen

Weltweit unterstützt BASF im Umkreis der Standorte Projekte, die den Zugang zu Bildung und den Spaß am Lernen fördern.

5

### Ernten steigern

BASF entwickelt Nutzpflanzen, die resistenter gegen Trockenheit sind.

6

### Energiespeicher der Zukunft

Zusammen mit Partnern aus Wissenschaft und Wirtschaft forscht BASF an effizienten Batteriematerialien für den Einsatz in Elektroautos.

# 1

## Schön sein in jedem Alter

Jedes Alter erfordert spezielle Produkte in der Kosmetik. Daher wird die Nachfrage nach neuen Inhaltsstoffen in Zukunft weiter steigen. Mit der Akquisition von Cognis wird BASF der führende Anbieter von Inhaltsstoffen für die Kosmetikindustrie. So wird unser Portfolio nicht nur vielfältiger, sondern auch konjunkturrobuster.

→ Mehr zur Akquisition von Cognis ab Seite 57

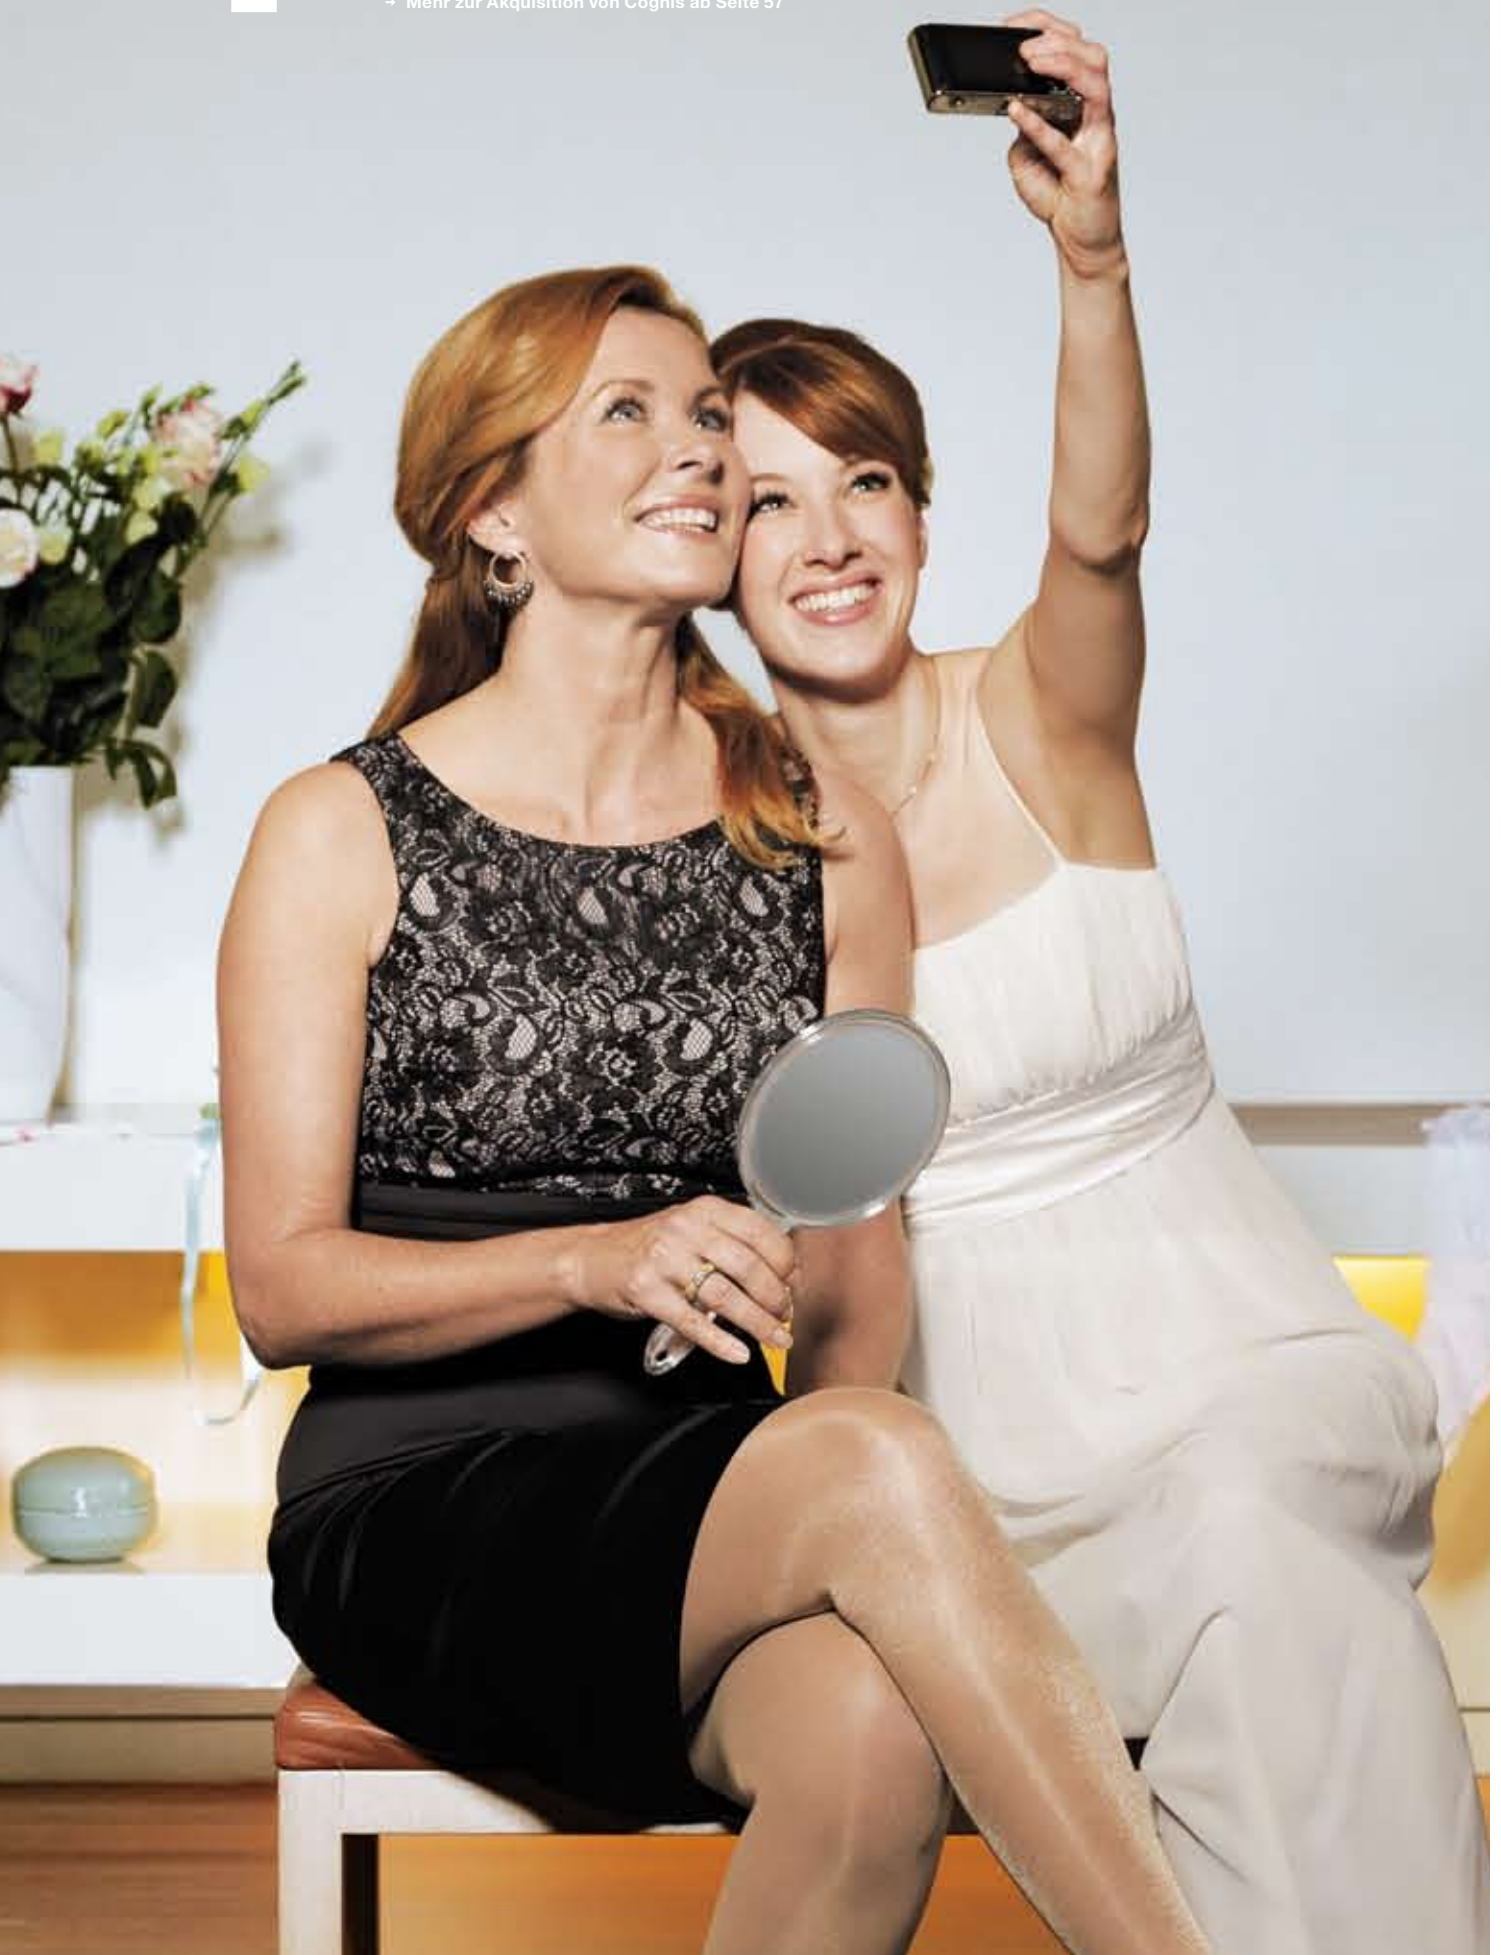



# An unsere Aktionäre

- 7 Brief des Vorstandsvorsitzenden
- 10 Der Vorstand
- 12 BASF am Kapitalmarkt

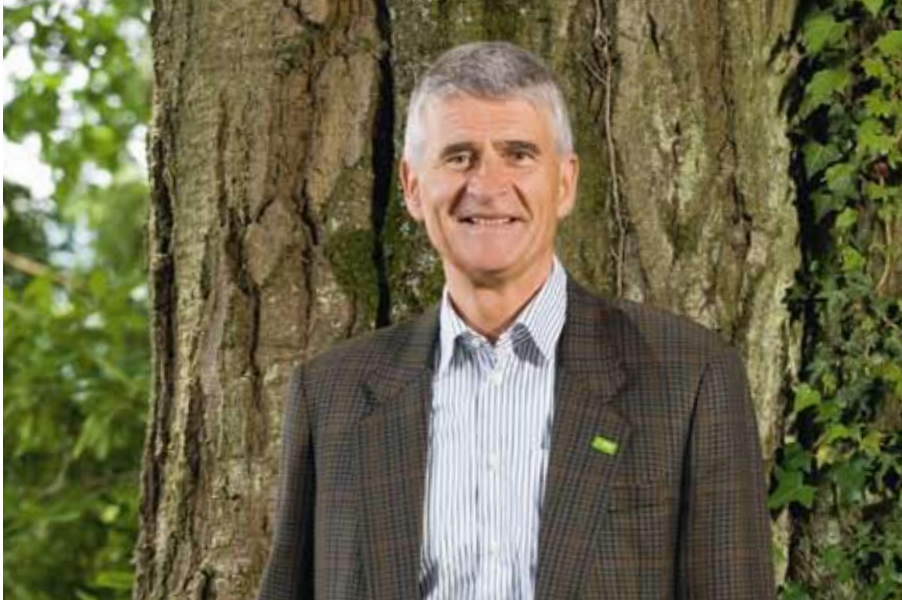

Dr. Jürgen Hambrecht, Vorsitzender des Vorstands der BASF SE

## *Sehr geehrte Aktionäre, liebe Freunde,*

2010 war ein ereignisreiches und zugleich erfolgreiches Geschäftsjahr. Wir haben den starken wirtschaftlichen Aufschwung genutzt und gleichzeitig die Weichen für unsere Zukunft gestellt. Das Resultat sind Spitzenwerte bei Umsatz und Ergebnis, und was noch wichtiger ist: Wir haben wieder eine hohe Prämie auf unsere Kapitalkosten verdient. Unsere Akquisitionen von Ciba und Cognis sowie Innovationen in Zukunftsmärkten stärken uns weiter. Das BASF-Team schreibt damit die Erfolgsgeschichte der BASF fort. Darauf sind wir alle stolz. Allen Mitarbeiterinnen und Mitarbeitern danke ich für diese außerordentliche Leistung.

Auch die Aktie der BASF gehörte 2010 zu den Gewinnern. Ihr Kurs erreichte im Dezember ein neues Allzeithoch. Mit einem Kursanstieg von 37,4 % übertraf die BASF-Aktie die wichtigsten Leit- und Branchenindizes deutlich. Wir stehen zu unserer anspruchsvollen Dividen-denpolitik und schlagen der Hauptversammlung eine Dividende von 2,20 € pro Aktie vor – eine Erhöhung von 29 % gegenüber dem Vorjahr.

Insgesamt kommen wir gestärkt aus der Wirtschaftskrise. Das zeigt: Wir haben in den zurückliegenden Jahren unsere langfristige Strategie für profitables Wachstum erfolgreich umgesetzt und unser Geschäft konjunkturrobuster gemacht.

**Portfolio stärken**

Im Jahr 2010 haben wir unser Portfolio noch besser auf unsere Kunden ausgerichtet, um mit ihnen gemeinsam nachhaltig Wert zu schaffen. Unsere beiden großen Akquisitionen haben uns dabei entscheidende Schritte vorangebracht: Die ehemaligen Ciba-Geschäfte haben wir zügig und erfolgreich integriert und zum Jahresende den Kauf von Cognis abgeschlossen. Damit haben wir unser Geschäft um innovationsstarke Aktivitäten erweitert, die über dem Branchendurchschnitt wachsen sollen. Zum Jahreswechsel haben wir mit der Ausgründung eines Großteils unseres Styrolkunststoffgeschäfts den Devestitionsprozess begonnen. Zusammen mit INEOS planen wir, das 50:50-Gemeinschaftsunternehmen Styrolution zu gründen, in das wir unsere Geschäfte einbringen und so ein weltweit führendes Unternehmen für Styrolkunststoffe etablieren wollen.

**„Unternehmen, die nachhaltig wirtschaften und verantwortlich handeln, sind langfristig erfolgreicher als der Wettbewerb. Deshalb ist Nachhaltigkeit seit langem ein fester Bestandteil der BASF-Strategie.“**

**Künftiges Wachstum sichern**

Um künftig weiter profitabel zu wachsen, engagieren wir uns in Wachstumsmärkten. Für den Zeitraum von 2011 bis 2015 planen wir, teilweise gemeinsam mit unseren starken Partnern, Investitionen von 12,6 Milliarden €. Dazu gehören die Erweiterung unseres Verbundstandorts in Nanjing/China mit Sinopec und Investitionen in World-Scale-Anlagen für Spezialchemikalien in Malaysia zusammen mit PETRONAS. Zudem sind wir in Explorations- und Pipelineprojekten im Öl- und Gas-Segment aktiv, unter anderem gemeinsam mit Gazprom.

Unsere Regionalstrategien haben wir in den vergangenen Jahren neu erarbeitet und uns ambitionierte Ziele gesteckt: Wir wollen in Europa, Asien sowie Nord- und Südamerika über dem Marktdurchschnitt wachsen und bis 2020 ein Umsatzniveau von über 90 Milliarden € erreichen.

**Zukunftsmärkte erschließen**

Mit Innovationen erschließen wir neue Märkte und helfen, wesentliche Zukunftsfragen und drängende Herausforderungen der Menschen zu bewältigen: Dazu gehören das weltweit starke Bevölkerungswachstum, der wachsende Bedarf an Nahrungsmitteln, die zunehmende Verstädterung und der steigende Verbrauch von Rohstoffen und Energie. Unsere Ausgaben für Forschung und Entwicklung haben wir deshalb weiter auf nahezu 1,5 Milliarden € erhöht.

Mit unserem Fokus auf die fünf Wachstumsfelder Pflanzenbiotechnologie, Weiße Biotechnologie, Nanotechnologie, Energiemanagement und Rohstoffwandel haben wir unsere Forschung und Entwicklung im Wesentlichen auf diese Herausforderungen ausgerichtet.

So forschen wir beispielsweise gemeinsam mit Partnern aus Wissenschaft und Wirtschaft an Materialien und Komponenten für neuartige Batteriesysteme für Elektromobilität und Stromspeicherung. Weitere Beispiele sind ertragreichere Nutzpflanzen, neue Katalysatoren und Verfahren zur Herstellung von Petrochemikalien aus alternativen Rohstoffen sowie Verfahren zur Abtrennung und Nutzung von CO<sub>2</sub> als Synthesebaustein. Insgesamt investieren wir jährlich bis zu 350 Millionen € in Forschungsprojekte dieser Wachstumsfelder, das entspricht 25 % unserer Ausgaben für Forschung und Entwicklung.

Mit Produktinnovationen – also neuen oder verbesserten Produkten oder Anwendungen, die nicht länger als fünf Jahre auf dem Markt sind, wollen wir im Jahr 2015 einen Umsatz von bis zu 8 Milliarden € erzielen.

### **Nachhaltig wirtschaften**

Unternehmen, die nachhaltig wirtschaften und verantwortlich handeln, sind langfristig erfolgreicher als der Wettbewerb. Deshalb ist Nachhaltigkeit seit langem ein fester Bestandteil der BASF-Strategie.

Wir sehen es als ständige Aufgabe, uns kontinuierlich zu verbessern und uns für die Umsetzung der Prinzipien des Global Compact zu engagieren. Unsere Strategie zur Reduktion von Treibhausgasemissionen und unsere transparente Berichterstattung überzeugt Investoren: Die BASF wurde bereits zum zehnten Mal in Folge in den weltweit bedeutendsten Nachhaltigkeitsindex, den Dow Jones Sustainability World Index (DJSI World), aufgenommen. Außerdem sind wir erneut im renommierten Carbon Disclosure Leadership Index (CDLI) vertreten und jetzt in den neuen Carbon Performance Leadership Index (CPLI) aufgenommen worden.

Wir blicken voller Zuversicht in das Jahr 2011. Die Weltwirtschaft wird trotz weiterhin bestehender Risiken moderat wachsen. Zugleich stellen wir uns darauf ein, dass die Märkte immer volatiler werden und der Wettbewerb sich weiter verschärft. Das bedeutet: Gewinnen wird, wer flexibler, schneller und erfolgreicher als der Wettbewerb handelt. Diese Herausforderung nehmen wir voller Selbstbewusstsein an. Das weltweite Team der BASF wird seine Chancen aktiv nutzen und die Zukunft der BASF mit höchstem Einsatz gestalten. Dabei freuen wir uns auf Ihre Unterstützung.

Mit freundlichen Grüßen



**Dr. Jürgen Hambrecht**

Vorsitzender des Vorstands der BASF SE



## Der Vorstand der BASF SE nach einer Strategietagung

**Dr. Stefan Marcinowski**  
58 Jahre, 32 Jahre BASF

- Crop Protection
- Coatings
- BASF Plant Science
- Region South America
- Specialty Chemicals Research

**Dr. Kurt Bock**  
Finanzvorstand  
52 Jahre, 20 Jahre BASF

- Catalysts
- Market & Business Development North America
- Regional Functions North America
- Information Services
- Finance
- Corporate Controlling
- Corporate Audit

**Dr. Harald Schwager**  
Arbeitsdirektor  
50 Jahre, 23 Jahre BASF

- Human Resources
- Engineering & Maintenance
- Environment, Health & Safety
- Verbund Site Management Europe

**Dr. Hans-Ulrich Engel**  
51 Jahre, 23 Jahre BASF

- Oil & Gas
- Region Europe
- Global Procurement & Logistics

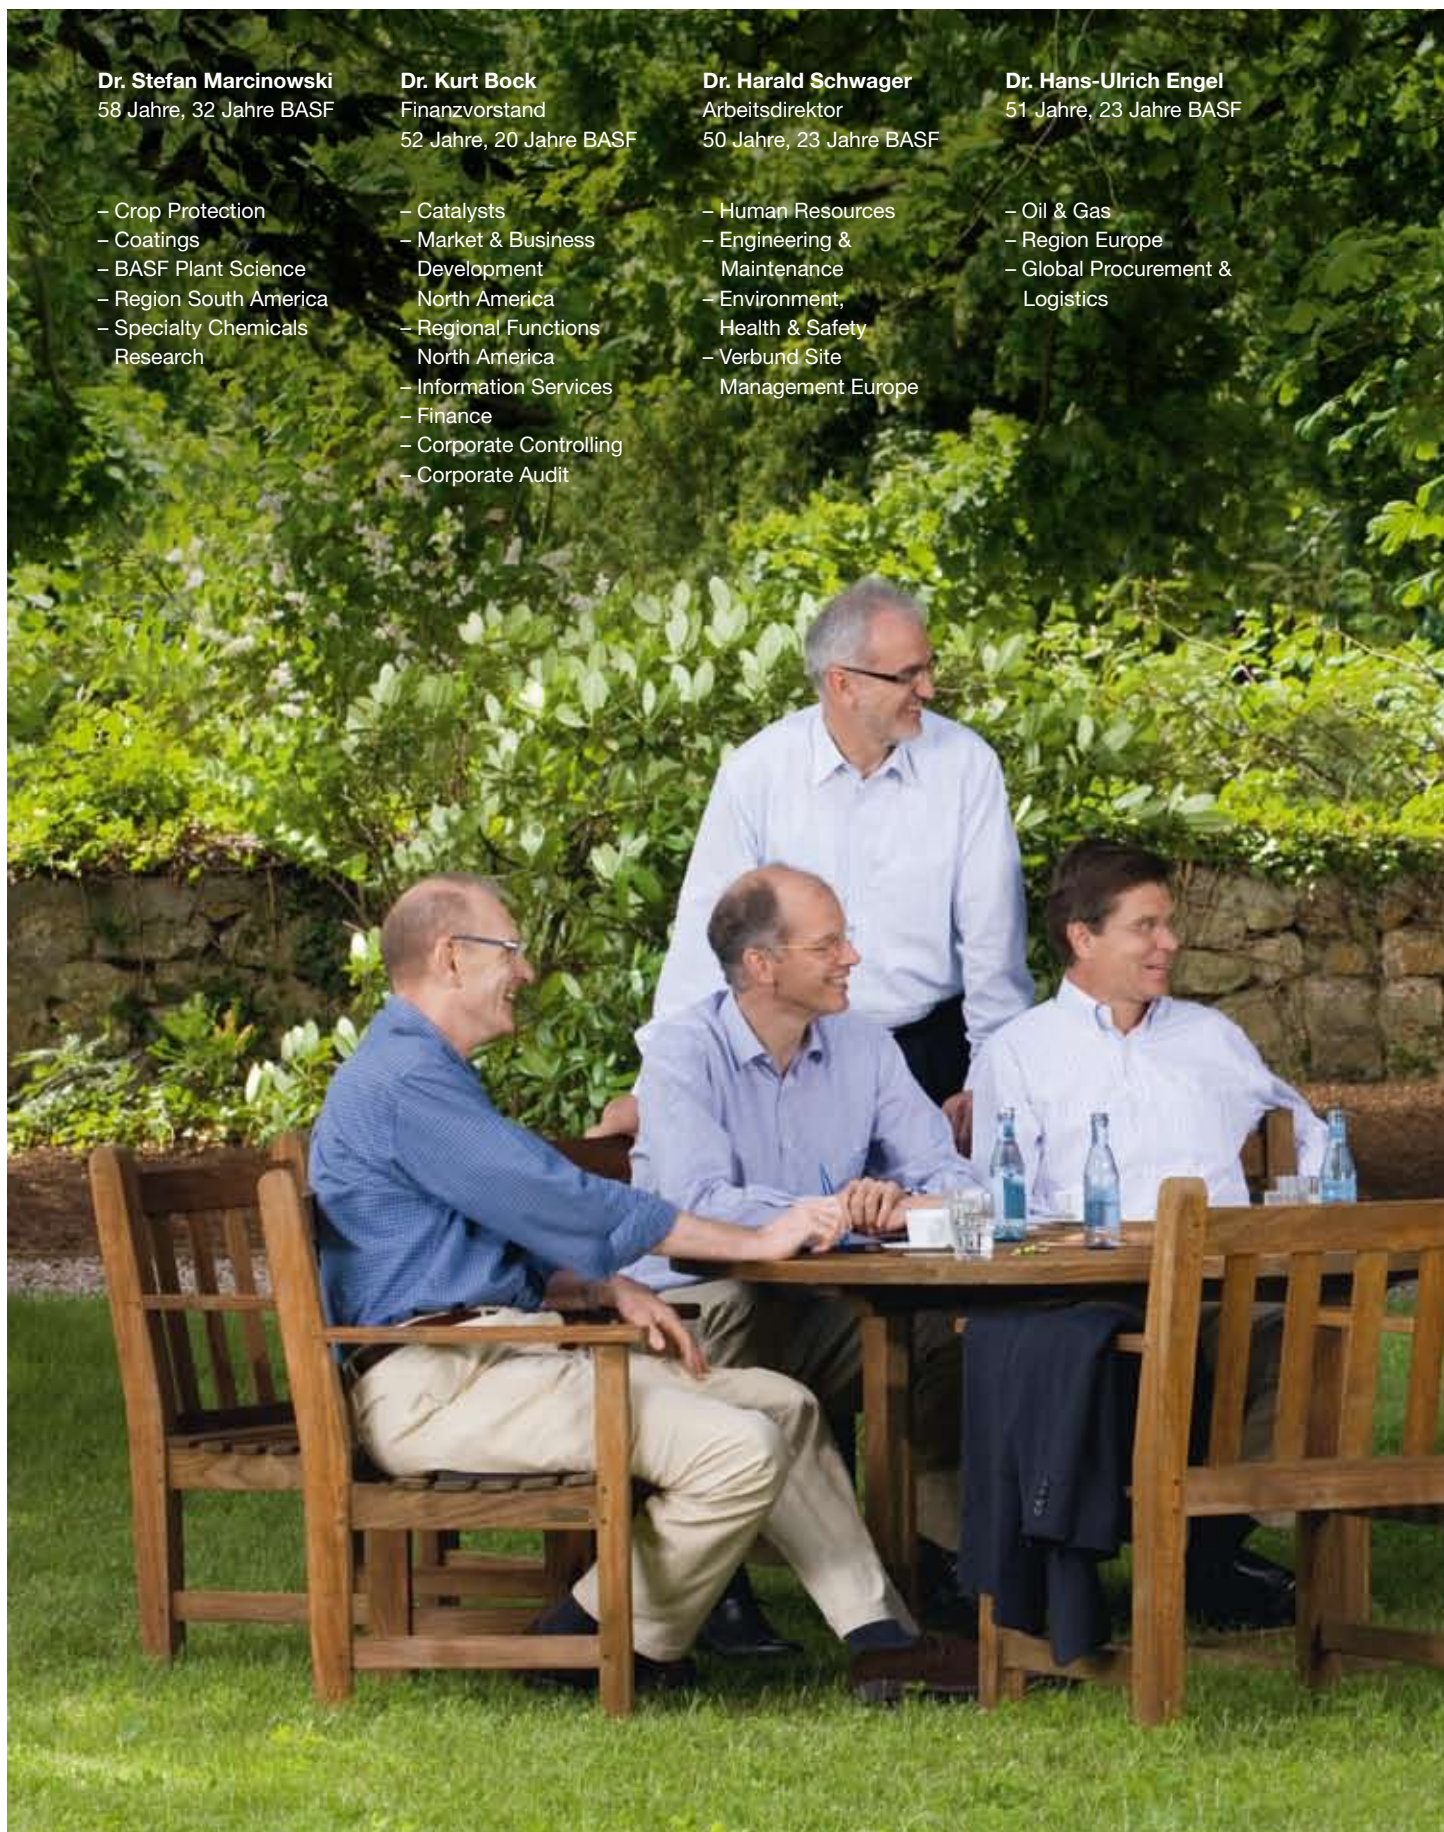



**Dr. Jürgen Hambrecht**  
Vorstandsvorsitzender  
64 Jahre, 35 Jahre BASF

- Chief Compliance Officer
- Communications & Government Relations
- Global HR – Executive Management & Development
- Investor Relations
- Legal, Taxes & Insurance
- Strategic Planning & Controlling

**Dr. John Feldmann**  
61 Jahre, 23 Jahre BASF

- Construction Chemicals
- Dispersions & Pigments
- Care Chemicals
- Nutrition & Health
- Paper Chemicals
- Performance Chemicals
- Polymer Research

**Dr. Andreas Kreimeyer**  
Sprecher der Forschung  
55 Jahre, 25 Jahre BASF

- Inorganics
- Petrochemicals
- Intermediates
- BASF Future Business
- Chemicals Research & Engineering

**Dr. Martin Brudermüller**  
49 Jahre, 23 Jahre BASF

- Styrenics
- Performance Polymers
- Polyurethanes
- Market & Business Development Asia Pacific
- Regional Functions & Country Management Asia Pacific

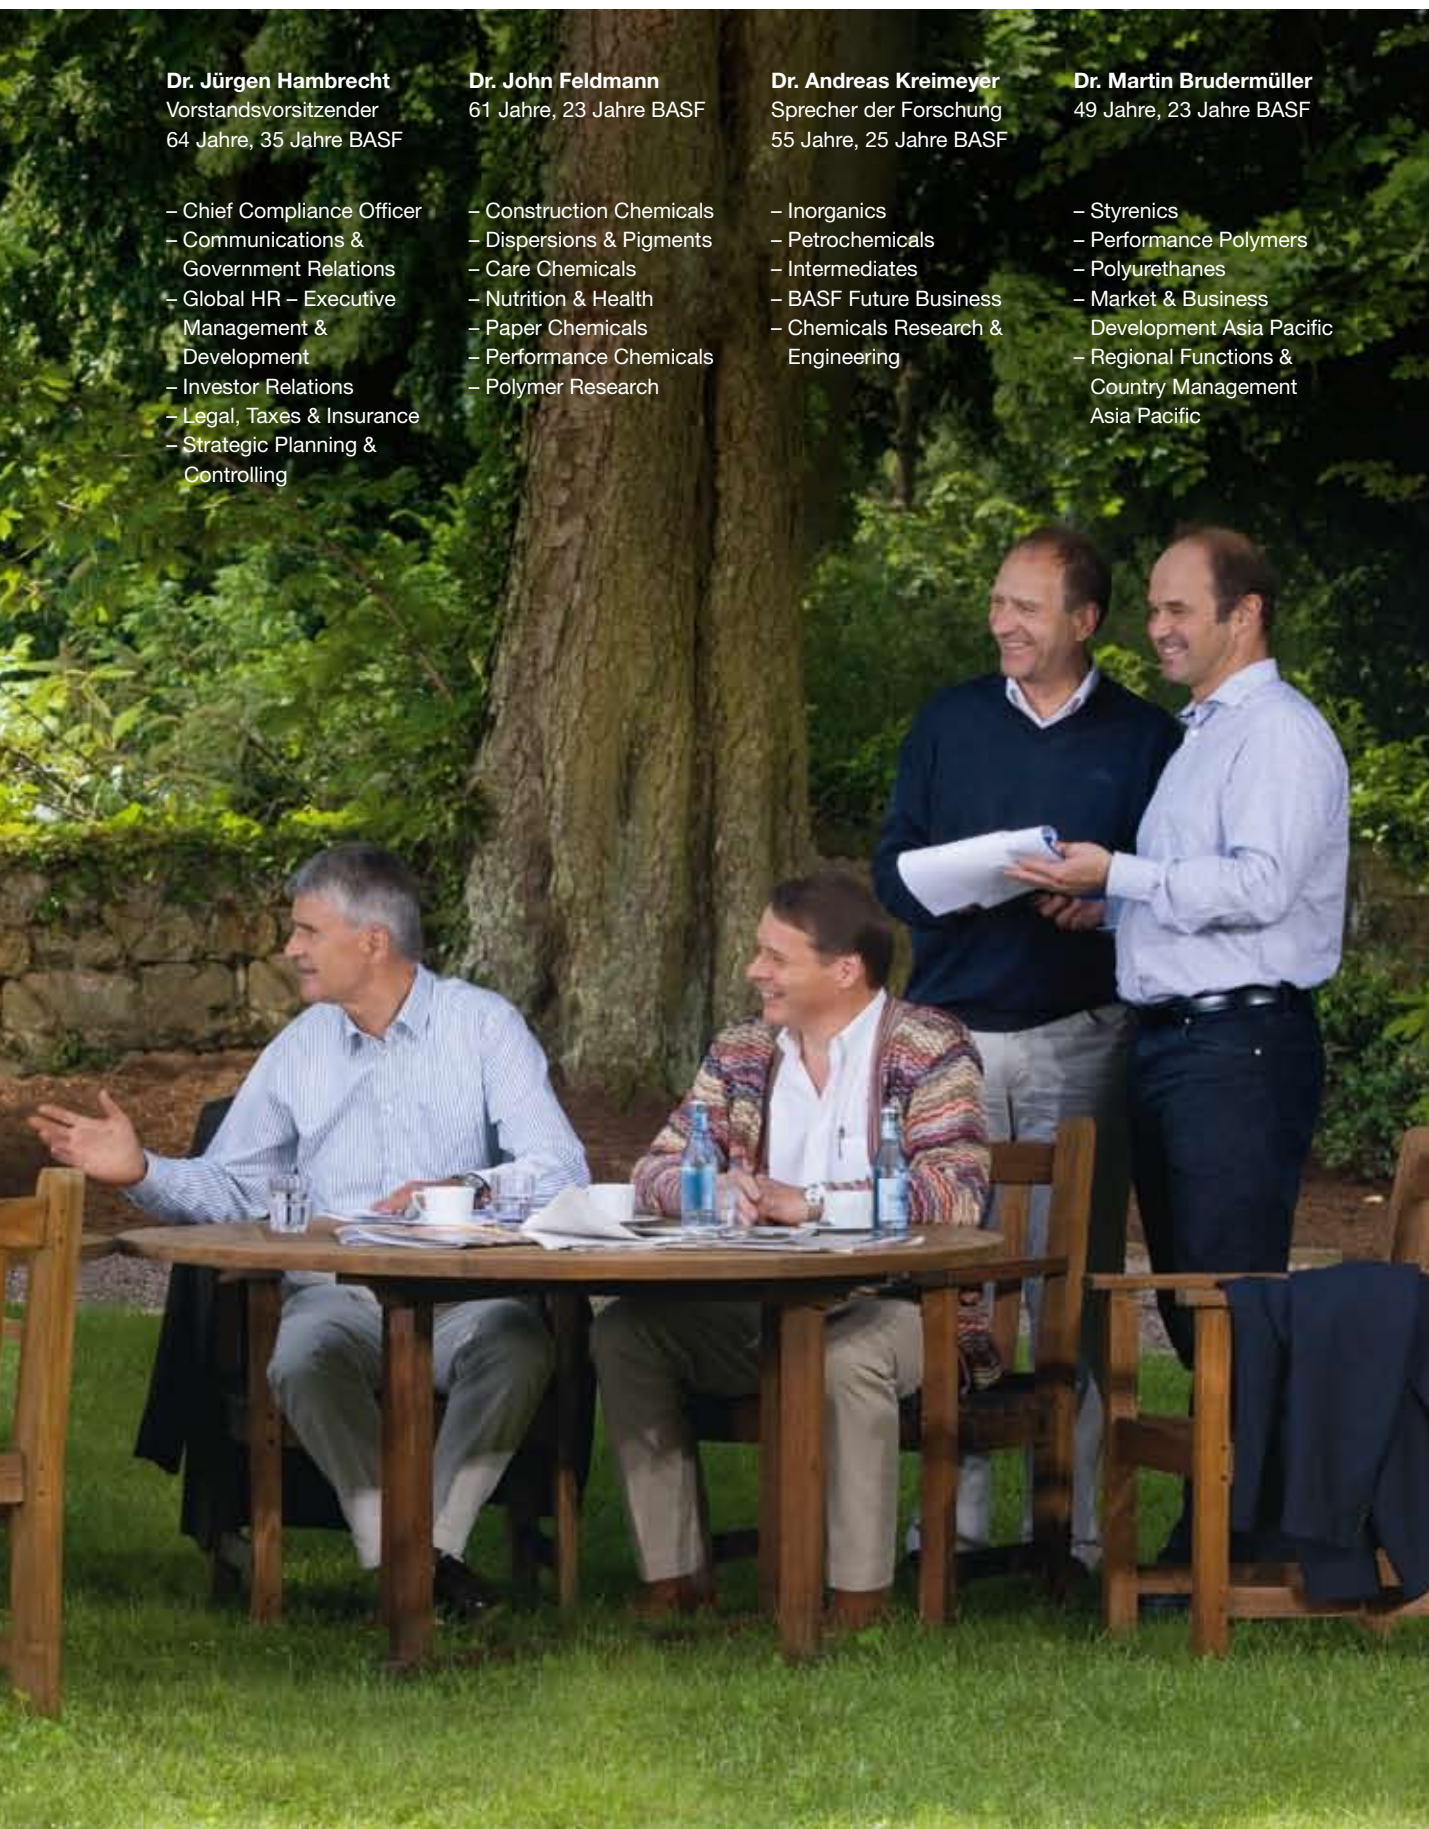

## BASF am Kapitalmarkt

### Dividendenerhöhung, überdurchschnittliche Aktienperformance

**Die BASF-Aktie notierte Ende 2010 mit 59,70 € um 37,4 % über dem Schlusskurs des Vorjahres. Damit übertraf die Aktienperformance der BASF die der wichtigsten Leit- und Branchenindizes, zum Beispiel des DAX 30 oder des DJ Chemicals, deutlich. Wir stehen zu unserer anspruchsvollen Dividendenpolitik und schlagen der Hauptversammlung eine Dividende von 2,20 € pro Aktie vor – eine Erhöhung von 29 % gegenüber dem Vorjahr. Die BASF verfügt über eine solide Finanzierung und gute Kreditratings, insbesondere im Vergleich zu Wettbewerbern in der chemischen Industrie.**

#### Starke Kursentwicklung der BASF-Aktie

Nachdem die Aktienmärkte in der ersten Jahreshälfte 2010 noch von Unsicherheiten geprägt waren, führten starke Unternehmensergebnisse und die weiterhin expansive Geldpolitik wichtiger Wirtschaftsnationen im zweiten Halbjahr zu einem positiven Börsenklima mit steigenden Aktienkursen. Insbesondere deutsche Aktientitel und Chemiewerte zeigten seit September

einen deutlichen Aufwärtstrend. Der Kurs der BASF-Aktie erreichte im Dezember ein neues Allzeithoch und stieg im Jahresverlauf um 37,4 %. Ende 2010 lag er bei 59,70 €. Bei Wiederanlage der Dividende betrug die Wertentwicklung der Aktie im Jahr 2010 +42,7 %. Mit dieser Performance entwickelte sich die BASF-Aktie besser als die deutschen und europäischen Aktienmärkte, deren Leitindizes DAX 30 und DJ EURO STOXX 50 im gleichen Zeitraum 16,1 % an Wert gewannen beziehungsweise 2,4 % an Wert verloren. Auch die weltweiten Branchenindizes DJ Chemicals und MSCI World Chemicals, die um 28,4 % beziehungsweise um 19,6 % zulegten, wurden 2010 von der BASF-Aktie übertroffen.

Das Vermögen eines Anlegers, der Ende 2000 1.000 € in BASF-Aktien angelegt hat und die zugeflossenen Dividenden wieder in die Aktie investierte, stieg bis Ende 2010 auf 3.663 €. Mit dieser Rendite von 13,9 % pro Jahr liegt die BASF-Aktie deutlich über den Werten der Vergleichsindizes EURO STOXX 50 (-2,7 %), DAX 30 (+0,7 %) und MSCI World Chemicals (+7,1 %).

Wertentwicklung BASF-Aktiendepot 2010  
(bei Wiederanlage der Dividende; indexiert)

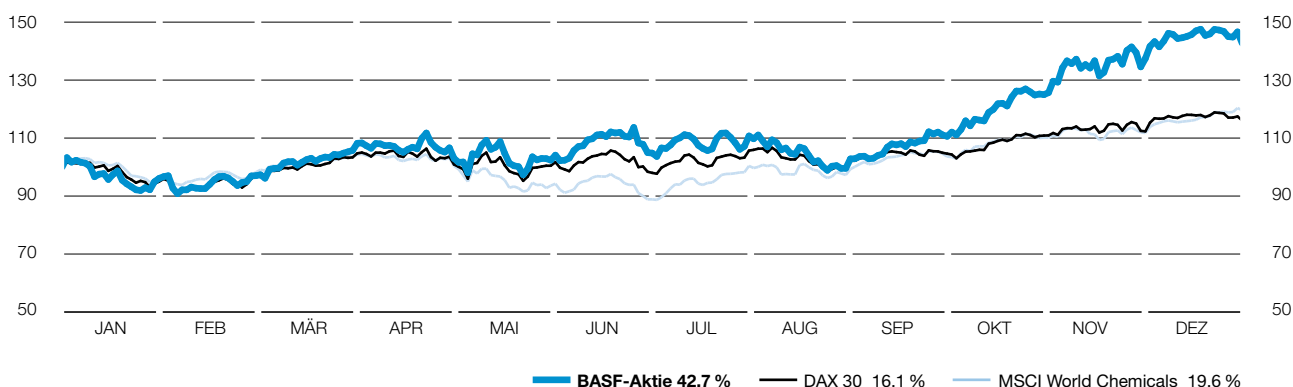

#### BASF am Kapitalmarkt

- Aktienperformance der BASF deutlich besser als die der wichtigsten Leit- und Branchenindizes
- Nach Unsicherheiten in der ersten Jahreshälfte deutlicher Aufwärtstrend der Aktienmärkte ab September
- Kurs der BASF-Aktie im Dezember mit neuem Allzeithoch; Anstieg im Jahresverlauf um 37,4 %
- Dividendenvorschlag von 2,20 € je Aktie; Erhöhung von 29 % gegenüber Vorjahr

Dividendenentwicklung<sup>1</sup> (€ je Aktie)

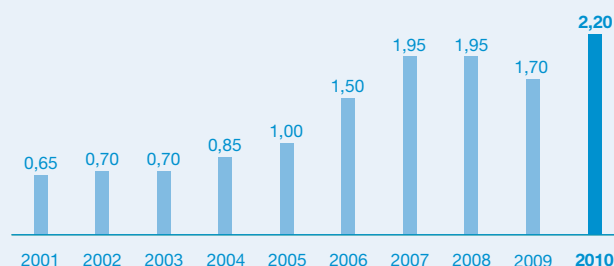

<sup>1</sup> Angepasst an Aktiensplit im Verhältnis 1:2, der im zweiten Quartal 2008 durchgeführt wurde.

### Langfristige Wertentwicklung der BASF-Aktie im Marktvergleich (durchschnittliche jährliche Steigerung bei Wiederanlage der Dividende)

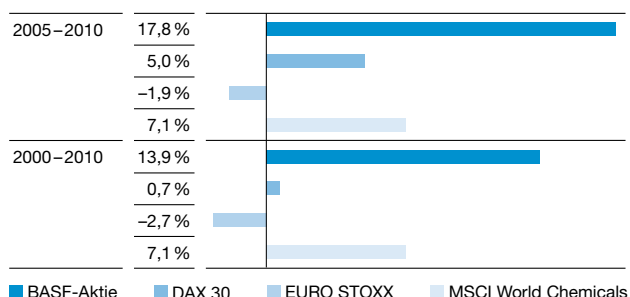

### Dividendenerhöhung auf 2,20 € je Aktie

Vorstand und Aufsichtsrat werden der Hauptversammlung vorschlagen, eine Dividende von 2,20 € je Aktie auszuschütten. Wir stehen zu unserer anspruchsvollen Dividendenpolitik und planen, etwa 2 Milliarden € an unsere Aktionäre auszuzahlen (bezogen auf die am 31. Dezember 2010 dividendenberechtigten Aktien). Legt man den Jahresschlusskurs 2010 zu Grunde, bietet die BASF-Aktie eine hohe Dividendenrendite von 3,69 %. Die BASF gehört dem Aktienindex DivDAX an, der die 15 Unternehmen mit den höchsten Dividendenrenditen im DAX 30 enthält. Wir streben weiterhin an, die Dividende jährlich zu steigern, sie zumindest aber auf dem Niveau des jeweiligen Vorjahres zu halten.

### Umstellung auf Namensaktie erfolgt

Anfang August 2010 sind die BASF-Aktien von Inhaber- auf Namensaktien umgestellt worden. Hierdurch ist eine noch bessere und direktere Kommunikation mit den Anteilseignern möglich. Darüber hinaus vereinfacht sich der Anmeldeprozess und die Vollmachtserteilung zur Hauptversammlung.

### Breite internationale Aktionärsstruktur

Mit über 400.000 Aktionären gehört die BASF zu den großen Publikumsgesellschaften mit breit gestreutem Aktienbesitz. Eine im September 2010 durchgeführte Analyse der Aktionärsstruktur hat gezeigt, dass die USA und Kanada mit 15 % des Grundkapitals die größte regionale Gruppe institutioneller Anleger stellen. Der Anteil institutioneller Investoren aus Deutschland beträgt 12 %. Aktionäre aus Großbritannien und Irland halten ebenfalls 12 % der BASF-Aktien, weitere 16 % des Kapitals befinden sich im Besitz institutioneller Investoren aus dem übrigen Europa. Etwa 26 % des Grundkapitals werden von privaten Aktionären gehalten, die ihren Wohnsitz überwiegend in Deutschland haben. Rund 6 % aller Anleger stammen aus dem Großraum Ludwigshafen. Mit einem Privatanlegeranteil von rund einem Viertel ist die BASF das DAX-30-Unternehmen mit dem zweithöchsten Privatanlegeranteil in Deutschland.

### Mitarbeiter werden Aktionäre

Wir bieten in zahlreichen Ländern Beteiligungsprogramme an, die Mitarbeiter zu Aktionären der BASF machen. So haben im Jahr 2010 mehr als 18.900 Mitarbeiter (2009: 20.800) Belegschaftsaktien im Wert von rund 28 Millionen € (2009: 33 Millionen €) erworben.

→ Mehr zu Beteiligungsprogrammen für Mitarbeiter auf Seite 87

### Aktionärsstruktur (regionale Verteilung)

|   |                       |      |
|---|-----------------------|------|
| 1 | Deutschland           | 38 % |
| 2 | USA/Kanada            | 15 % |
| 3 | Großbritannien/Irland | 12 % |
| 4 | Übriges Europa        | 16 % |
| 5 | Übrige Welt           | 4 %  |
| 6 | Nicht identifiziert   | 15 % |

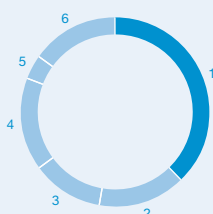

### Gewichtung der BASF-Aktie in wichtigen Indizes am 31.12.2010

|                  | %   |
|------------------|-----|
| DAX 30           | 9,2 |
| DJ Chemicals     | 7,4 |
| MSCI World Index | 0,3 |



**BASF in den wichtigsten Nachhaltigkeitsindizes**

Die BASF wurde bereits zum zehnten Mal in Folge in den weltweit bedeutendsten Nachhaltigkeitsindex, den Dow Jones Sustainability World Index (DJSI World), aufgenommen. Besondere Anerkennung erhielten wir für unser Risiko- und Krisenmanagement, unsere Umweltberichterstattung und unsere Klimastrategie.

Außerdem ist die BASF erneut im renommierten Carbon Disclosure Leadership Index (CDLI) vertreten. Wie bereits im Vorjahr, erreichten wir hier den Spitzenplatz im Sektor Materials. Der CDLI dient Investoren als Bewertungsinstrument für Unternehmen, die sich durch besondere Leistungen im Umgang mit dem Klimawandel und durch diesbezügliche Transparenz in der Berichterstattung auszeichnen. Das Carbon Disclosure Project repräsentiert mehr als 500 institutionelle Investoren, die ein Fondsvermögen von über 60 Billionen US\$ verwalten.

Darüber hinaus wurden wir in den neuen Carbon Performance Leadership Index (CPLI) aufgenommen. Auch der CPLI bewertet die Leistungen von Unternehmen im Umgang mit den Chancen und Risiken des Klimawandels.

→ **Mehr zu den wichtigsten Nachhaltigkeitsindizes unter**  
**[basf.com/nachhaltigkeitsindizes](http://basf.com/nachhaltigkeitsindizes)**

**Gute Kreditratings und solide Finanzierung**

Mit „A/A-1/Ausblick stabil“ bei der Ratingagentur Standard & Poor's und „A1/P-1/Ausblick negativ“ bei Moody's verfügt die BASF weiterhin über gute Ratings, insbesondere im Vergleich zu Wettbewerbern in der chemischen Industrie.

Die Finanzschulden der BASF-Gruppe betrugen zum Jahresende 2010 15 Milliarden € bei liquiden Mitteln von 1,5 Milliarden €. Die durchschnittliche Restlaufzeit unserer Finanzschulden lag bei 3,4 Jahren. Die mittel- und langfristige Fremdkapitalfinanzierung beruht auf Unternehmensanleihen mit einem ausgewogenen Fälligkeitsprofil. Zur kurzfristigen Fremdkapitalfinanzierung verfügt die BASF über ein Commercial-Paper-Programm mit einem Emissionsvolumen von bis zu 12,5 Milliarden US\$. Als Back-up-Linien für das Programm stehen verbindlich zugesagte und nicht ausgenutzte Kreditlinien über 6 Milliarden US\$ zur Verfügung.

→ **Mehr zu Finanzschulden und deren Fälligkeiten im Anhang zum Konzernabschluss auf Seite 181**

**Empfehlungen der Analysten**

Etwa dreißig Finanzanalysten veröffentlichen regelmäßig Studien über die BASF. Am Ende des Jahres 2010 sprachen 73 % der Analysten eine Kaufempfehlung für unsere Aktie aus (Ende 2009: 65 %). 21 % der Analysten empfahlen, unsere Aktie zu halten (Ende 2009: 19 %), und 6 % stuften sie zum Verkauf ein (Ende 2009: 16 %). Der durchschnittliche Zielkurs der BASF-Aktie betrug nach Einschätzung der Analysten am 31. Dezember 2010 63,26 €.

→ **Laufend aktualisierte Analystenschätzungen zur BASF im Internet unter [basf.com/aktie](http://basf.com/aktie)**

**BASF in Nachhaltigkeitsindizes**

- Erneute Aufnahme in wichtigste Nachhaltigkeitsindizes
- DJSI World: Besondere Anerkennung für Risiko- und Krisenmanagement, Umweltberichterstattung und Klimastrategie
- CDLI: Spitzenplatz im Sektor Materials erreicht
- CPLI: Aufnahme in neuen Index, der Leistungen von Unternehmen im Umgang mit Chancen und Risiken des Klimawandels bewertet

**Solide Finanzierung**

- Finanzschulden der BASF-Gruppe in Höhe von 15 Milliarden € zum Jahresende 2010; durchschnittliche Restlaufzeit von 3,4 Jahren
- Commercial-Paper-Programm mit Emissionsvolumen von bis zu 12,5 Milliarden US\$
- Verbindlich zugesagte Back-up-Linien über 6 Milliarden US\$

### Intensiver Dialog mit dem Kapitalmarkt

Für unsere auf nachhaltige Wertsteigerung ausgerichtete Unternehmensstrategie ist die kontinuierliche und offene Kommunikation mit allen Kapitalmarktteilnehmern wichtig. Institutionelle Anleger und Ratingagenturen informieren wir in zahlreichen Einzelgesprächen und Roadshows weltweit, Privatanlegern geben wir auf Informationsveranstaltungen Einblick in die Welt der BASF.

Zur Vertiefung bestimmter Themen haben wir im Jahr 2010 zusätzlich sogenannte Roundtable-Gespräche und einen Investorentag durchgeführt. Ziel dieser Gespräche war es, unsere Investoren direkt in den wichtigen Finanzzentren über bestimmte Schwerpunkte unseres Geschäfts zu informieren. Auf dem Investorentag „Performance Products“, der Anfang Juni in London und New York stattgefunden hat, stellte das BASF-Management die Neuausrichtung und die Ziele des nach der Ciba-Integration umstrukturierten Segments Performance Products vor. Dieser direkte Kontakt von Analysten und Investoren zum Management ist uns sehr wichtig, denn unsere Investoren sollen die Menschen kennenlernen, die unsere Geschäfte leiten.

Zusätzlich haben wir für Investoren, die ihre Anlageentscheidung an Nachhaltigkeitskriterien ausrichten, zielgerichtete Roadshows durchgeführt. Hier haben wir vor allem unsere Maßnahmen zu Klimaschutz und Energieeffizienz erläutert.

Auf unserer Internetseite finden Anleger umfassende Informationen zur BASF und der BASF-Aktie. Um der gestiegenen Nutzung sozialer Medien Rechnung zu tragen, haben wir unsere Kommunikation durch Social-Media-Kanäle, wie zum Beispiel Twitter oder Facebook, erweitert. So erhalten interessierte Nutzer immer die aktuellsten Informationen über die BASF im Web 2.0.

Analysten und Investoren bestätigten die Qualität unserer Kommunikationsarbeit und wählten BASF Investor Relations mehrfach auf den ersten Platz: Im Juni haben wir zum vierten Mal in Folge den Investor Relations Preis des Wirtschaftsmagazins Capital gewonnen. Bei der Thomson Extel Pan-European Survey 2010 wurde das Investor-Relations-Team außerdem als „Best IR Team in Europe“ sowie als „Best IR Team in the Chemicals Sector“ ausgezeichnet. Auch bei den IR Magazine Europe Awards 2010 belegte die BASF drei erste Plätze: Unser Investor-Relations-Team gewann den Grand Prix für große börsennotierte Unternehmen, den ersten Platz im Chemiesektor sowie den ersten Platz für Investor Relations in Deutschland.

### Dialog mit Kapitalmarkt

- Weltweit Roadshows und Einzelgespräche, um institutionelle Anleger und Ratingagenturen zu informieren
- Informationsveranstaltungen für Privatanleger
- Roundtable-Gespräche und Investorentage zur Vertiefung von Themen
- Zahlreiche Auszeichnungen für BASF Investor Relations

### Investor Relations

ist erreichbar per

- Telefon: +49 621 60-48230
- E-Mail: [ir@basf.com](mailto:ir@basf.com)
- Internet: [basf.com/aktie](http://basf.com/aktie)

Der Newsletter des Investor-Relations-Teams informiert aktuell über neue Themen rund um die BASF und erinnert die Empfänger an wichtige BASF-Termine. Registrierung unter: [basf.com/aktie/newsletter](http://basf.com/aktie/newsletter)



Kenndaten der BASF-Aktie <sup>1</sup>

|                                           |                 | 2006  | 2007  | 2008  | 2009  | 2010  |
|-------------------------------------------|-----------------|-------|-------|-------|-------|-------|
| Schlusskurs                               | €               | 36,93 | 50,71 | 27,73 | 43,46 | 59,70 |
| Höchstkurs                                | €               | 37,12 | 50,81 | 52,41 | 43,95 | 61,73 |
| Tiefstkurs                                | €               | 29,49 | 35,98 | 19,95 | 20,71 | 39,43 |
| Durchschnittskurs                         | €               | 32,41 | 44,50 | 38,88 | 31,62 | 46,97 |
| Börsentäglicher Umsatz <sup>2</sup>       |                 |       |       |       |       |       |
| – in Millionen €                          |                 | 198,6 | 298,3 | 282,1 | 157,4 | 197,5 |
| – in Millionen Stück                      |                 | 6,2   | 6,7   | 7,3   | 5,0   | 4,2   |
| Anzahl der Aktien am 31.12. <sup>3</sup>  | Millionen Stück | 999,4 | 956,4 | 918,5 | 918,5 | 918,5 |
| Marktkapitalisierung am 31.12.            | Milliarden €    | 36,9  | 48,5  | 25,5  | 39,9  | 54,8  |
| Ergebnis je Aktie <sup>4</sup>            | €               | 3,19  | 4,16  | 3,13  | 1,54  | 4,96  |
| Dividende je Aktie                        | €               | 1,50  | 1,95  | 1,95  | 1,70  | 2,20  |
| Dividendenrendite <sup>5</sup>            | %               | 4,06  | 3,85  | 7,03  | 3,91  | 3,69  |
| Ausschüttungsquote                        | %               | 46    | 45    | 62    | 111   | 44    |
| Kurs-Gewinn-Verhältnis (KGV) <sup>5</sup> |                 | 11,6  | 12,2  | 8,9   | 28,2  | 8,3   |

<sup>1</sup> Alle Werte angepasst an Aktiensplit im Verhältnis 1:2, der im zweiten Quartal 2008 durchgeführt wurde<sup>2</sup> Durchschnitt, Xetra-Handel<sup>3</sup> Nach Abzug der zur Einziehung vorgesehenen Aktien<sup>4</sup> Bereinigt um Sondereinflüsse und Abschreibungen auf immaterielle Vermögenswerte, betrug das Ergebnis je Aktie 5,73 € im Jahr 2010 und 3,01 € im Jahr 2009.<sup>5</sup> Bezugsgröße ist der Jahresschlusskurs

## Stammdaten der BASF-Aktie

| Wertpapier-Kennnummern                         |              | Internationale Kürzel |     |
|------------------------------------------------|--------------|-----------------------|-----|
| Deutschland                                    | BASF11       | Deutsche Börse        | BAS |
| Großbritannien                                 | 0083142      | London Stock Exchange | BFA |
| Schweiz                                        | 323600       | Swiss Exchange        | AN  |
| USA (CUSIP-Nummer)                             | 055262505    |                       |     |
| ISIN International Stock Identification Number | DE000BASF111 |                       |     |

# 2

## Ökoeffiziente Windeln

Ressourcen zu schonen, ist eine globale Herausforderung. BASF hat eine Ökoeffizienz-Analyse entwickelt, um die Nachhaltigkeit eines Produkts über dessen gesamten Lebenszyklus hinweg zu bewerten. Das darauf aufbauende Ökoeffizienz-Label kennzeichnet so optimierte Produkte. Babywindeln sind das erste Endverbraucherprodukt mit diesem Siegel. Kunden und Verbraucher können somit bereits vor dem Kauf nachhaltigere Produkte erkennen und dies bei ihrer Kaufentscheidung berücksichtigen.

→ Mehr zur Ökoeffizienz-Analyse auf Seite 27

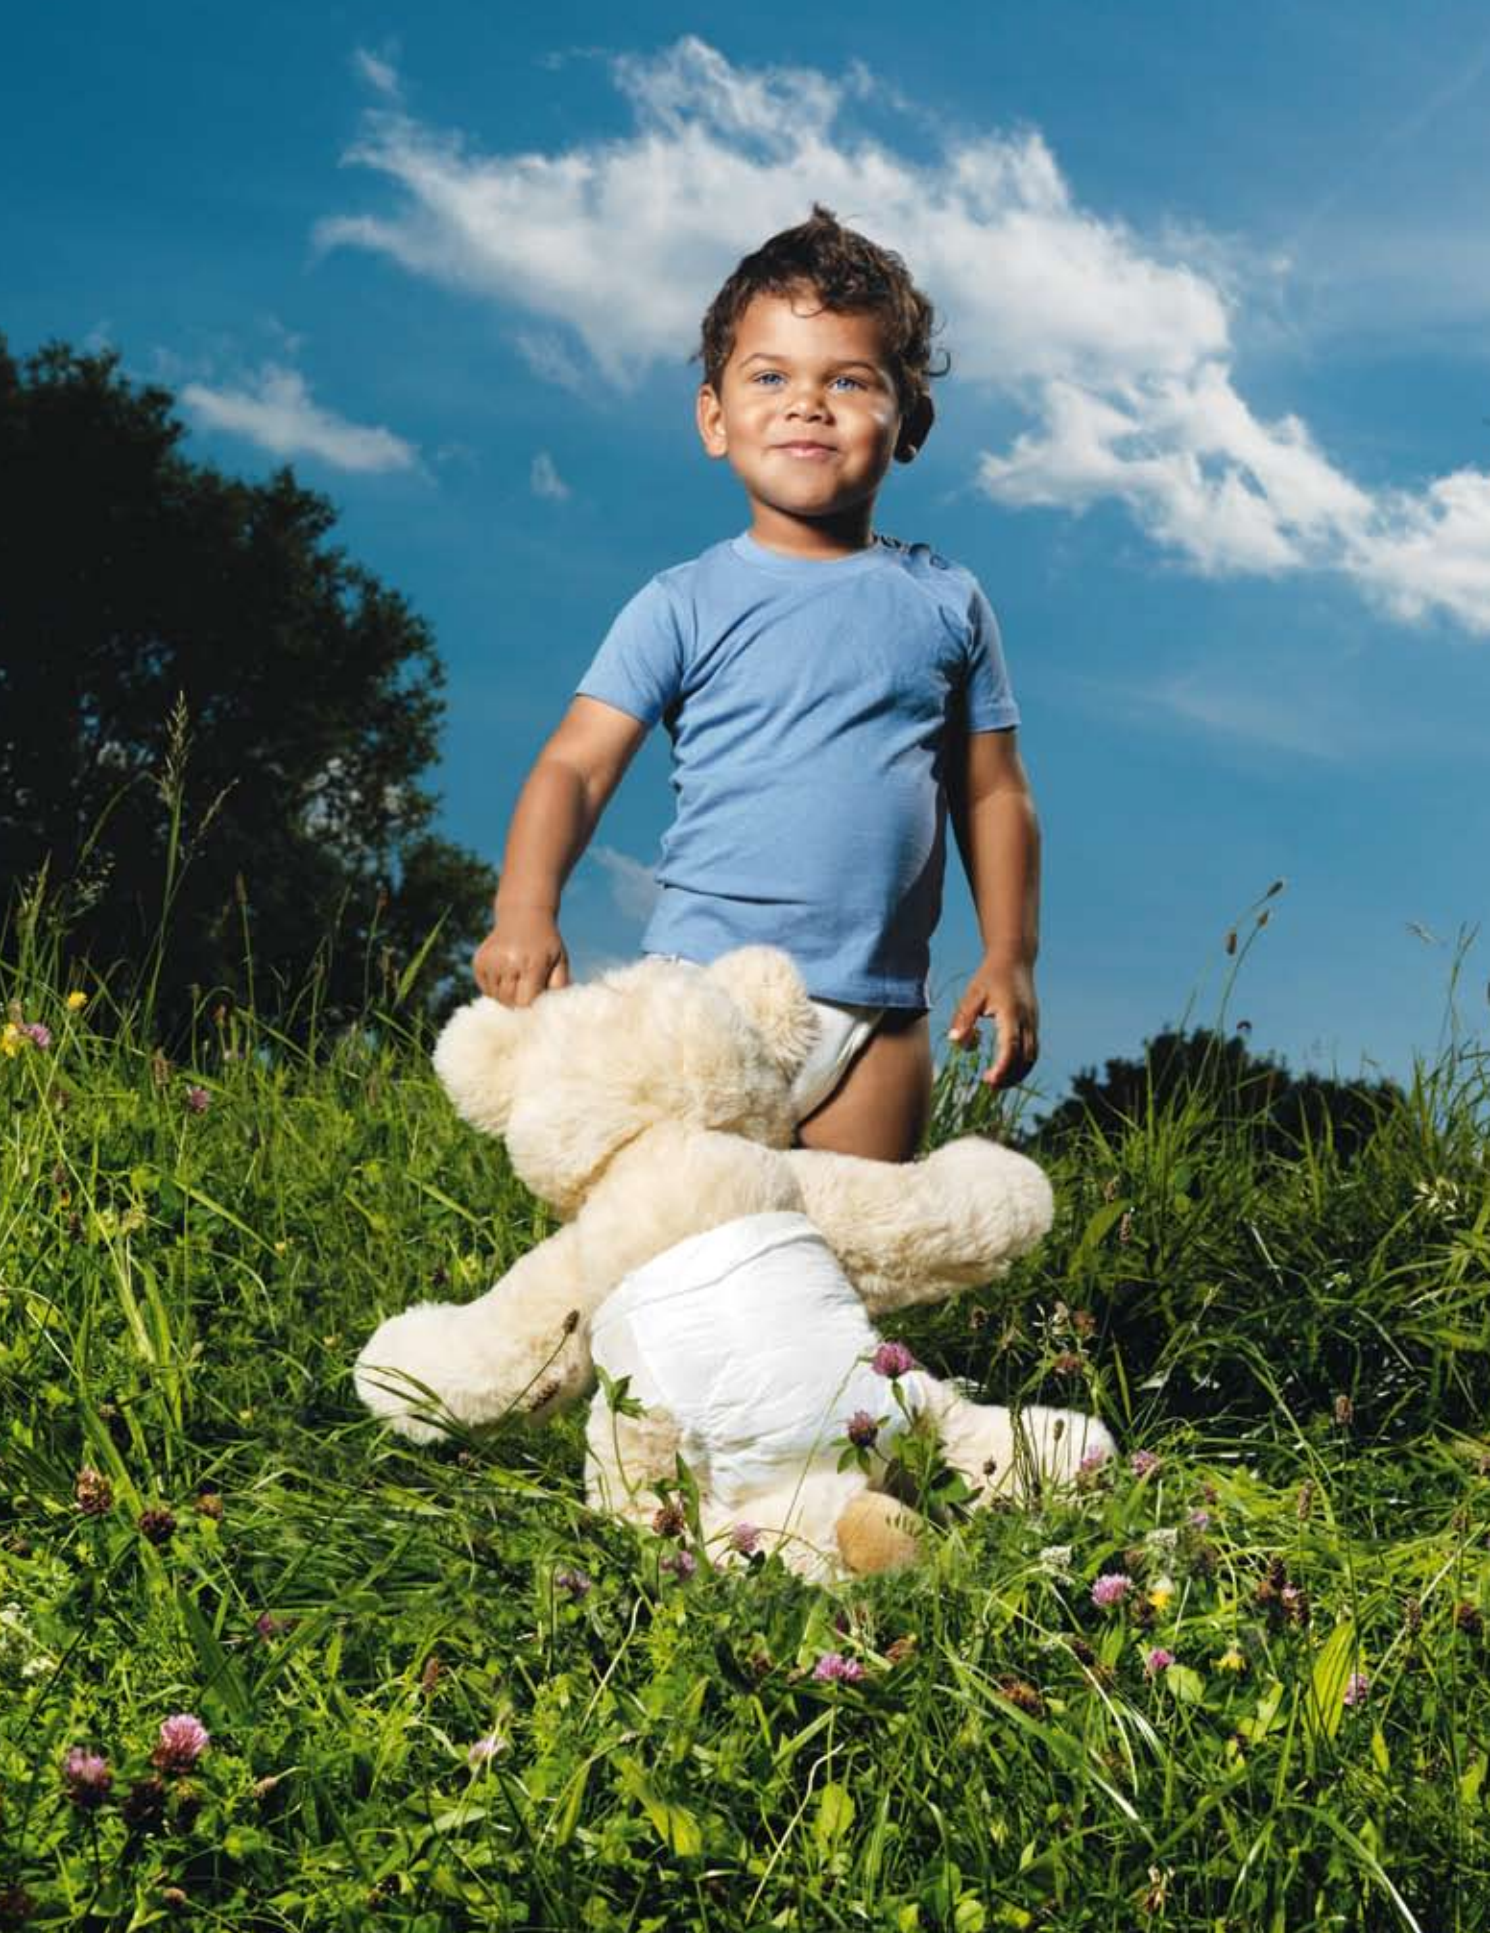

# Konzernlagebericht

|            |                                                |
|------------|------------------------------------------------|
| <b>17</b>  | <b>Die BASF-Gruppe</b>                         |
| <b>17</b>  | Strategie und Werte                            |
| <b>20</b>  | Unsere Ziele                                   |
| <b>22</b>  | Märkte, Strukturen und Organisation            |
| <b>24</b>  | Wertmanagement                                 |
| <b>25</b>  | Nachhaltigkeitsmanagement                      |
| <b>29</b>  | Wertschöpfung                                  |
| <b>30</b>  | Forschung und Entwicklung                      |
| <br>       |                                                |
| <b>32</b>  | <b>Das Geschäftsjahr der BASF-Gruppe</b>       |
| <b>32</b>  | Entwicklung der Weltwirtschaft                 |
| <b>33</b>  | Entwicklung wichtiger Abnehmerbranchen         |
| <b>34</b>  | Entwicklung der chemischen Industrie           |
| <b>35</b>  | Geschäftsentwicklung der BASF-Gruppe           |
| <b>39</b>  | Bilanz                                         |
| <b>41</b>  | Investitionen und Finanzierung                 |
| <b>44</b>  | Geschäftsentwicklung in den Segmenten          |
| <b>46</b>  | Die Segmente der BASF                          |
| <b>46</b>  | – Chemicals                                    |
| <b>52</b>  | – Plastics                                     |
| <b>57</b>  | – Performance Products                         |
| <b>65</b>  | – Functional Solutions                         |
| <b>70</b>  | – Agricultural Solutions                       |
| <b>75</b>  | – Oil & Gas                                    |
| <b>81</b>  | Regionenbericht                                |
| <br>       |                                                |
| <b>84</b>  | <b>Mitarbeiter und Gesellschaft</b>            |
| <b>84</b>  | Mitarbeiter                                    |
| <b>89</b>  | Arbeitssicherheit und Gesundheitsschutz        |
| <b>90</b>  | Gesellschaftliches Engagement                  |
| <br>       |                                                |
| <b>91</b>  | <b>Umwelt und Sicherheit</b>                   |
| <b>91</b>  | Umwelt- und Sicherheitsmanagement              |
| <b>95</b>  | Klimaschutz                                    |
| <b>97</b>  | Energie und Rohstoffe                          |
| <b>99</b>  | Wasser                                         |
| <b>101</b> | Produktverantwortung                           |
| <br>       |                                                |
| <b>103</b> | <b>Risikobericht</b>                           |
| <br>       |                                                |
| <b>112</b> | <b>Prognosebericht</b>                         |
| <b>112</b> | Wirtschaftliche Rahmenbedingungen im Jahr 2011 |
| <b>115</b> | Ausblick und Chancen der BASF-Gruppe           |



## Strategie und Werte

**Unser Ziel als weltweit führendes Chemieunternehmen ist es, dauerhaft profitabel zu wachsen. Dafür setzen wir auf operative Exzellenz, Innovationen und Investitionen in Wachstumsmärkte. Unser Handeln ist am Leitbild der nachhaltigen Entwicklung ausgerichtet. Die BASF-Leitlinien fassen zusammen, auf welche Weise wir unsere Unternehmensziele erreichen wollen und wie wir unsere Werte im Unternehmen verankern und umsetzen.**

Wir wollen auch in Zukunft das weltweit führende Chemieunternehmen sein. Dabei profitieren wir von unserem breiten Portfolio, von operativer Exzellenz und solider Finanzierung. Bei BASF haben wirtschaftliche Belange keinen Vorrang gegenüber Sicherheit, Gesundheits- und Umweltschutz. Mit Innovationen differenzieren wir uns vom Wettbewerb und gestalten die Zukunft. Forschungs- und Geschäftsschwerpunkte konzentrieren wir auf innovationsstarke Geschäftsfelder und investieren frühzeitig in Wachstumsmärkte. Strategische Partnerschaften mit auf ihrem Gebiet führenden Partnern helfen uns dabei. Zu unseren wichtigsten Kooperationspartnern zählen Gazprom in Russland, Monsanto, Shell und Total in den USA, Sinopec in China sowie PETRONAS in Malaysia.

Wir arbeiten kontinuierlich daran, unsere Standorte, Anlagen und Prozesse zu verbessern. Maßnahmen zur Restrukturierung und Kostensenkung setzen wir weiter fort. Aus unserem 2008 gestarteten Exzellenzprogramm NEXT erwarten wir ab 2012 einen Ergebnisbeitrag von über einer Milliarde € pro Jahr.

→ **Mehr zu strategischen Partnerschaften auf den Seiten 31, 72 und 115, mehr zu den regionalen Strategien ab Seite 81, mehr zu Effizienzprojekten auf den Seiten 56 und 82**

### Aktives Portfoliomanagement

Durch Akquisitionen bauen wir unsere Stärken aus und machen die BASF noch wettbewerbsfähiger. Im Jahr 2010 haben wir die Akquisition der Cognis-Gruppe erfolgreich abgeschlossen, die unser Portfolio an wachstumsstarken Spezialchemikalien erweitert. Durch den Erwerb von Cognis wird BASF ein global führender Anbieter von Inhaltsstoffen für die Kosmetikindustrie. Wir bauen unsere führende Rolle bei Wasch- und Reinigungsmitteln weiter aus und nehmen eine starke Position in der Humanernährung ein. Darüber hinaus kann BASF ihren Kunden für Schmierstoffe und Lackadditive ein noch attraktiveres Portfolio anbieten. Die Akquisition vergrößert vor allem unser Angebot von Produkten, die auf nachwachsenden Rohstoffen basieren.

Ein weiterer wichtiger Schritt in unserem aktiven Portfoliomanagement ist Styrolution – ein 50:50-Gemeinschaftsunternehmen, das wir mit INEOS planen. Vom Jahr 2011 an sollen die gemeinsamen Styrolkunststoff-Aktivitäten in diesem eigenständigen Unternehmen geführt werden.

→ **Informationen zur Akquisition von Cognis ab Seite 57**

### Innovationsstärke als Erfolgsfaktor

Wir steigern die Investitionen in Forschung und Entwicklung, denn Innovationen sind für uns ein Schlüssel zu profitabilem Wachstum. Im Fokus steht für uns, Lösungen für globale Herausforderungen zu entwickeln. Dabei legen wir einen Schwerpunkt auf Zukunftsmärkte und -technologien mit hohem Wachstumspotenzial: Dazu gehören Energiemanagement, Rohstoffwandel, Nanotechnologie, Pflanzenbiotechnologie und Weiße Biotechnologie. In diesen Wachstumsclustern bündeln wir unsere Forschungsaktivitäten. In zahlreichen Kooperationen mit Universitäten, Forschungsinstituten, Kunden und industriellen Partnern weltweit erschließen wir neues Wissen und neue Technologien. → **Mehr zu Forschung und Entwicklung ab Seite 30**

### Wege zu wertsteigerndem Wachstum

- Stärkung der Geschäftsfelder durch Innovation
- Investitionen in Forschung und Entwicklung gesteigert
- Investitionen in Wachstumsmärkte
- Strategische Partnerschaften
- Restrukturierung und Kostensenkung
- Wirtschaftliche Belange haben keinen Vorrang gegenüber Sicherheit, Gesundheits- und Umweltschutz

### Aktives Portfoliomanagement

- Stärkung der Wettbewerbsfähigkeit durch Akquisitionen
- Ausbau der Spezialitätenchemie
- Akquisition von Cognis abgeschlossen
- Gemeinschaftsunternehmen für Styrolkunststoff-Aktivitäten geplant (Styrolution)

## Unsere vier strategischen Leitlinien

### Wir verdienen eine Prämie auf unsere Kapitalkosten

Voraussetzung für langfristigen Erfolg ist, dass wir eine Prämie auf unsere Kapitalkosten verdienen. Das Ergebnis der Betriebstätigkeit nach Kapitalkosten ist dabei unsere zentrale Ziel- und Steuerungsgröße.

→ Mehr zur Umsetzung der Leitlinie auf Seite 24

### Wir helfen unseren Kunden, noch erfolgreicher zu sein

Wir wollen erkennen, was unsere Kunden morgen brauchen. Als verlässlicher Partner entwickeln wir gemeinsam mit ihnen Lösungen für ihre individuellen Anforderungen und zur Stärkung ihrer Wettbewerbsfähigkeit. Dafür sind wir dort präsent, wo unsere Kunden sind – in allen wichtigen Märkten der Welt.

→ Mehr zur Umsetzung der Leitlinie auf den Seiten 28, 47, 59

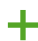

### Wir bilden das beste Team der Industrie

Wir wollen die besten Mitarbeiter gewinnen, fördern und halten. Dazu investieren wir in ihre Entwicklung und die Vereinbarkeit von Beruf und Familie. Mit unserer Initiative Diversity + Inclusion fördern wir Teams, die mit unterschiedlichen Hintergründen und Erfahrungen Wert schaffen.

→ Mehr zur Umsetzung der Leitlinie ab Seite 84

### Wir wirtschaften nachhaltig für eine lebenswerte Zukunft

Nachhaltig wirtschaften heißt für uns, ökonomischen Erfolg mit Verantwortung für Umwelt und Gesellschaft zu verbinden. Wir haben Nachhaltigkeit strategisch und organisatorisch im Unternehmen verankert und schaffen mit nachhaltigen Produkten und Services Wettbewerbsvorteile für uns und unsere Kunden.

→ Mehr zur Umsetzung der Leitlinie ab Seite 25

## Strategische Leitlinien

Wir richten unser Handeln an vier strategischen Leitlinien aus:

- Wir verdienen eine Prämie auf unsere Kapitalkosten
- Wir helfen unseren Kunden, noch erfolgreicher zu sein
- Wir bilden das beste Team der Industrie
- Wir wirtschaften nachhaltig für eine lebenswerte Zukunft



## Unsere Werte und weltweite Standards

Wir haben klare Werte und Verhaltensgrundsätze definiert, nach denen wir handeln. Diese gehen über Gesetze und Vorschriften hinaus. Als globales Unternehmen ist es unser Anspruch, dass unser Handeln mindestens den international anerkannten Standards entspricht. Wir achten und fördern

- die Allgemeine Erklärung der Menschenrechte und der beiden UN-Menschenrechtspakte,
- die zehn Prinzipien des UN Global Compact,
- die ILO-Kernarbeitsnormen und die dreigliedrige Grundsatz-erklärung über Multinationale Unternehmen und Sozialpolitik (MNE-Deklaration),
- die OECD-Leitsätze für multinationale Unternehmen,
- die Responsible Care® Global Charter,
- den Deutschen Corporate Governance Kodex.

Diese internationalen Richtlinien haben wir für unser Geschäftsumfeld konkretisiert – in unseren gruppenweit geltenden Grundwerten und Leitlinien. Sechs Grundwerte bestimmen unser Handeln: nachhaltiger Erfolg; Innovation für den Erfolg unserer Kunden; Umweltschutz, Gesundheit und Sicherheit; persönliche und fachliche Kompetenz; gegenseitiger Respekt und offener Dialog; Integrität. Jeder dieser Grundwerte wird durch verbindliche Leitlinien ergänzt. Sie erklären, wie wir die Grundwerte im Unternehmensalltag umsetzen. Das Einhalten der Grundwerte und Leitlinien ist fester Bestandteil der jährlichen Zielvereinbarungen aller Oberen Führungskräfte der BASF-Gruppe. Mit weltweit gültigen Standards geben wir klare Regeln vor. Wir setzen uns ehrgeizige Ziele für Umwelt, Gesundheit und Sicherheit und überprüfen unsere Leistungen in diesen Bereichen mit regelmäßigen Audits. Damit unterstützen wir auch die globale Initiative der chemischen Industrie, Responsible Care. Im Bereich Arbeits- und Sozialstandards überprüfen wir unsere Leistung über ein Monitoringsystem. 

→ Mehr zu Werten unter [basf.com/wertesystem](http://basf.com/wertesystem)

→ Mehr zur Verankerung unserer Werte im Unternehmensalltag: Kapitel Nachhaltigkeitsmanagement ab Seite 25, Kapitel Mitarbeiter ab Seite 87 sowie Kapitel Umwelt- und Sicherheitsmanagement ab Seite 91

→ Mehr zu Umwelt-, Gesundheits- und Sicherheitsmanagement und Audits ab Seite 89

→ Mehr zum Monitoringsystem für Arbeits- und Sozialstandards auf Seite 26

## Verhaltenskodex und Compliance

Mit verbindlichen Verhaltensstandards verankern wir unsere Werte dauerhaft im Unternehmensalltag. Den Rahmen dafür bildet unser Corporate-Governance-System, das die Leitung und Überwachung des Unternehmens umfasst. Dazu gehören Organisation, geschäftspolitische Grundsätze und Leitlinien sowie interne und externe Kontroll- und Überwachungsmechanismen. Der Grundwert Integrität ist die Basis für das Compliance-Programm. Compliance bedeutet für uns die Pflicht, Gesetze und unternehmensinterne Richtlinien einzuhalten.

Basierend auf unseren gruppenweit geltenden Grundwerten und Leitlinien haben unsere Gruppengesellschaften in den einzelnen Ländern Verhaltenskodizes erstellt, die lokale Gesetze und Gebräuche berücksichtigen. Die Verhaltenskodizes sind verbindlich für alle Mitarbeiter in den entsprechenden Ländern, müssen erklärt und in den Unternehmensalltag eingebracht werden. Eine wichtige Voraussetzung für ihre erfolgreiche Umsetzung sind Compliance-Schulungen für alle Mitarbeiter weltweit. Außerdem bieten wir unseren Mitarbeitern Anlaufstellen, bei denen sie Fragen klären sowie Rat und Hilfe finden können: ihre Vorgesetzten, Rechts- und Personalabteilungen sowie unsere Compliance-Hotline. 

→ Mehr zum Compliance-Programm auf Seite 120

## Unsere Grundwerte

- Nachhaltiger Erfolg
- Innovation für den Erfolg unserer Kunden
- Umweltschutz, Gesundheit und Sicherheit
- Persönliche und fachliche Kompetenz
- Gegenseitiger Respekt und offener Dialog
- Integrität

## Weltweite Standards

- Regelmäßige Audits zu Umwelt, Gesundheit und Sicherheit
- Unterstützung der Responsible-Care-Initiative
- Globales Monitoringsystem für Arbeits- und Sozialstandards

## Unsere Ziele

### Ökonomische Ziele

|                                                                                                                 | Ziele 2010                   | Stand Ende 2010                                                                                 | Mehr dazu |
|-----------------------------------------------------------------------------------------------------------------|------------------------------|-------------------------------------------------------------------------------------------------|-----------|
| EBIT von mindestens 9 % auf das operative Vermögen in den Unternehmensbereichen                                 | Mindestens 4.261 Millionen € | Wir haben ein EBIT von 7.761 Millionen € erzielt.                                               | Seite 24  |
| Dividende je Aktie soll jährlich erhöht, zumindest aber auf dem Niveau des jeweiligen Vorjahres gehalten werden | Mindestens 1,70 €            | Vorstand und Aufsichtsrat schlagen der Hauptversammlung eine Dividende von 2,20 € je Aktie vor. | Seite 13  |
| EBITDA-Marge von 18 % bis 2012                                                                                  |                              | 17,4 %                                                                                          | Seite 35  |

### Umwelt, Sicherheit und Produktverantwortung

|                                                                                                                                     | Ziele 2020 | Ziel | Stand Ende 2010 <sup>1</sup> | Mehr dazu |
|-------------------------------------------------------------------------------------------------------------------------------------|------------|------|------------------------------|-----------|
| <b>Energie und Klimaschutz</b>                                                                                                      |            |      |                              |           |
| Emission Treibhausgase je Tonne Verkaufsprodukt <sup>2</sup> (Basisjahr 2002)                                                       | -25 %      |      | -28,9 %                      | Seite 95  |
| Verbesserung der Energieeffizienz bei Produktionsprozessen <sup>2</sup> (Basisjahr 2002)                                            | +25 %      |      | +23,7 %                      | Seite 97  |
| Begleitgas, das bei der Ölförderung der Wintershall freigesetzt wird, wird nicht mehr abgefackelt (Ziel 2012)                       | 100 %      |      | > 95 %                       | Seite 96  |
| <b>Reduktion der Emissionen im Chemiegeschäft (Basisjahr 2002)</b>                                                                  |            |      |                              |           |
| Emission luftfremder Stoffe in die Luft <sup>2</sup>                                                                                | -70 %      |      | -60,4 %                      | Seite 93  |
| Emission in das Wasser <sup>3</sup> von                                                                                             |            |      |                              | Seite 99  |
| organischen Stoffen                                                                                                                 | -80 %      |      | -71,5 %                      | Seite 99  |
| Stickstoff                                                                                                                          | -80 %      |      | -82,3 %                      | Seite 99  |
| Schwermetallen                                                                                                                      | -60 %      |      | -58,4 %                      | Seite 99  |
| <b>Transportsicherheit (Basisjahr 2003)</b>                                                                                         |            |      |                              |           |
| Reduzierung der Transportunfälle                                                                                                    | -70 %      |      | -50 %                        | Seite 93  |
| <b>Produktverantwortung</b>                                                                                                         |            |      |                              |           |
| Überprüfung aller Produkte, die wir weltweit in Mengen von mehr als einer Tonne pro Jahr verkaufen, auf Basis einer Risikobewertung | > 99 %     |      | 25 %                         | Seite 101 |

<sup>1</sup> Ohne Berücksichtigung von Beiträgen der zum 9. Dezember 2010 erworbenen Cognis-Gruppe

<sup>2</sup> Ohne Gas- und Erdölförderung

<sup>3</sup> Bei vergleichbarem Produktportfolio

### EBITDA-Marge

Ziel 2012: 18 %

17,4 %

### Energieeffizienz

Verbesserung der Energieeffizienz bei Produktionsprozessen  
Basisjahr 2002 (Ziel 2020: +25 %)

+24 %

## Mitarbeiter und Gesellschaft

|                                                                                           | Ziele 2020 | Ziel                   | Stand Ende 2010 <sup>1</sup> | Mehr dazu |
|-------------------------------------------------------------------------------------------|------------|------------------------|------------------------------|-----------|
| <b>Arbeitssicherheit</b> (Basisjahr 2002)                                                 |            |                        |                              |           |
| Reduzierung der Arbeitsunfälle mit Ausfalltagen je eine Million geleistete Arbeitsstunden | - 80 %     | <div><div></div></div> | - 39 %                       | Seite 89  |
| <b>Gesundheitsschutz</b> (Basisjahr 2004)                                                 |            |                        |                              |           |
| Reduzierung der Fälle von Berufskrankheiten                                               | - 80 %     |                        | +25 %                        | Seite 89  |
|                                                                                           |            |                        |                              |           |
|                                                                                           |            |                        |                              |           |
|                                                                                           |            |                        |                              |           |
|                                                                                           |            |                        |                              |           |
|                                                                                           |            |                        |                              |           |
|                                                                                           |            |                        |                              |           |
|                                                                                           |            |                        |                              |           |
|                                                                                           |            |                        |                              |           |
|                                                                                           |            |                        |                              |           |
|                                                                                           |            |                        |                              |           |
|                                                                                           |            |                        |                              |           |
|                                                                                           |            |                        |                              |           |
|                                                                                           |            |                        |                              |           |
|                                                                                           |            |                        |                              |           |
|                                                                                           |            |                        |                              |           |
|                                                                                           |            |                        |                              |           |
|                                                                                           |            |                        |                              |           |
|                                                                                           |            |                        |                              |           |
|                                                                                           |            |                        |                              |           |
|                                                                                           |            |                        |                              |           |
|                                                                                           |            |                        |                              |           |
|                                                                                           |            |                        |                              |           |
|                                                                                           |            |                        |                              |           |
|                                                                                           |            |                        |                              |           |
|                                                                                           |            |                        |                              |           |
|                                                                                           |            |                        |                              |           |
|                                                                                           |            |                        |                              |           |
|                                                                                           |            |                        |                              |           |
|                                                                                           |            |                        |                              |           |
|                                                                                           |            |                        |                              |           |
|                                                                                           |            |                        |                              |           |
|                                                                                           |            |                        |                              |           |
|                                                                                           |            |                        |                              |           |
|                                                                                           |            |                        |                              |           |
|                                                                                           |            |                        |                              |           |
|                                                                                           |            |                        |                              |           |
|                                                                                           |            |                        |                              |           |
|                                                                                           |            |                        |                              |           |
|                                                                                           |            |                        |                              |           |
|                                                                                           |            |                        |                              |           |
|                                                                                           |            |                        |                              |           |
|                                                                                           |            |                        |                              |           |
|                                                                                           |            |                        |                              |           |
|                                                                                           |            |                        |                              |           |
|                                                                                           |            |                        |                              |           |
|                                                                                           |            |                        |                              |           |
|                                                                                           |            |                        |                              |           |
|                                                                                           |            |                        |                              |           |
|                                                                                           |            |                        |                              |           |
|                                                                                           |            |                        |                              |           |
|                                                                                           |            |                        |                              |           |
|                                                                                           |            |                        |                              |           |
|                                                                                           |            |                        |                              |           |
|                                                                                           |            |                        |                              |           |
|                                                                                           |            |                        |                              |           |
|                                                                                           |            |                        |                              |           |
|                                                                                           |            |                        |                              |           |
|                                                                                           |            |                        |                              |           |
|                                                                                           |            |                        |                              |           |
|                                                                                           |            |                        |                              |           |
|                                                                                           |            |                        |                              |           |
|                                                                                           |            |                        |                              |           |
|                                                                                           |            |                        |                              |           |
|                                                                                           |            |                        |                              |           |
|                                                                                           |            |                        |                              |           |
|                                                                                           |            |                        |                              |           |
|                                                                                           |            |                        |                              |           |
|                                                                                           |            |                        |                              |           |
|                                                                                           |            |                        |                              |           |
|                                                                                           |            |                        |                              |           |
|                                                                                           |            |                        |                              |           |
|                                                                                           |            |                        |                              |           |
|                                                                                           |            |                        |                              |           |
|                                                                                           |            |                        |                              |           |
|                                                                                           |            |                        |                              |           |
|                                                                                           |            |                        |                              |           |
|                                                                                           |            |                        |                              |           |
|                                                                                           |            |                        |                              |           |
|                                                                                           |            |                        |                              |           |
|                                                                                           |            |                        |                              |           |
|                                                                                           |            |                        |                              |           |
|                                                                                           |            |                        |                              |           |
|                                                                                           |            |                        |                              |           |
|                                                                                           |            |                        |                              |           |
|                                                                                           |            |                        |                              |           |
|                                                                                           |            |                        |                              |           |
|                                                                                           |            |                        |                              |           |
|                                                                                           |            |                        |                              |           |
|                                                                                           |            |                        |                              |           |
|                                                                                           |            |                        |                              |           |
|                                                                                           |            |                        |                              |           |
|                                                                                           |            |                        |                              |           |
|                                                                                           |            |                        |                              |           |
|                                                                                           |            |                        |                              |           |
|                                                                                           |            |                        |                              |           |
|                                                                                           |            |                        |                              |           |
|                                                                                           |            |                        |                              |           |
|                                                                                           |            |                        |                              |           |
|                                                                                           |            |                        |                              |           |
|                                                                                           |            |                        |                              |           |
|                                                                                           |            |                        |                              |           |
|                                                                                           |            |                        |                              |           |
|                                                                                           |            |                        |                              |           |
|                                                                                           |            |                        |                              |           |
|                                                                                           |            |                        |                              |           |
|                                                                                           |            |                        |                              |           |
|                                                                                           |            |                        |                              |           |
|                                                                                           |            |                        |                              |           |
|                                                                                           |            |                        |                              |           |
|                                                                                           |            |                        |                              |           |
|                                                                                           |            |                        |                              |           |
|                                                                                           |            |                        |                              |           |
|                                                                                           |            |                        |                              |           |
|                                                                                           |            |                        |                              |           |
|                                                                                           |            |                        |                              |           |
|                                                                                           |            |                        |                              |           |
|                                                                                           |            |                        |                              |           |
|                                                                                           |            |                        |                              |           |
|                                                                                           |            |                        |                              |           |
|                                                                                           |            |                        |                              |           |
|                                                                                           |            |                        |                              |           |
|                                                                                           |            |                        |                              |           |
|                                                                                           |            |                        |                              |           |
|                                                                                           |            |                        |                              |           |
|                                                                                           |            |                        |                              |           |
|                                                                                           |            |                        |                              |           |
|                                                                                           |            |                        |                              |           |
|                                                                                           |            |                        |                              |           |
|                                                                                           |            |                        |                              |           |
|                                                                                           |            |                        |                              |           |
|                                                                                           |            |                        |                              |           |
|                                                                                           |            |                        |                              |           |
|                                                                                           |            |                        |                              |           |
|                                                                                           |            |                        |                              |           |
|                                                                                           |            |                        |                              |           |
|                                                                                           |            |                        |                              |           |
|                                                                                           |            |                        |                              |           |
|                                                                                           |            |                        |                              |           |
|                                                                                           |            |                        |                              |           |
|                                                                                           |            |                        |                              |           |
|                                                                                           |            |                        |                              |           |
|                                                                                           |            |                        |                              |           |
|                                                                                           |            |                        |                              |           |
|                                                                                           |            |                        |                              |           |
|                                                                                           |            |                        |                              |           |
|                                                                                           |            |                        |                              |           |
|                                                                                           |            |                        |                              |           |
|                                                                                           |            |                        |                              |           |
|                                                                                           |            |                        |                              |           |
|                                                                                           |            |                        |                              |           |
|                                                                                           |            |                        |                              |           |
|                                                                                           |            |                        |                              |           |
|                                                                                           |            |                        |                              |           |
|                                                                                           |            |                        |                              |           |
|                                                                                           |            |                        |                              |           |
|                                                                                           |            |                        |                              |           |
|                                                                                           |            |                        |                              |           |
|                                                                                           |            |                        |                              |           |
|                                                                                           |            |                        |                              |           |
|                                                                                           |            |                        |                              |           |
|                                                                                           |            |                        |                              |           |
|                                                                                           |            |                        |                              |           |
|                                                                                           |            |                        |                              |           |
|                                                                                           |            |                        |                              |           |
|                                                                                           |            |                        |                              |           |
|                                                                                           |            |                        |                              |           |
|                                                                                           |            |                        |                              |           |
|                                                                                           |            |                        |                              |           |
|                                                                                           |            |                        |                              |           |
|                                                                                           |            |                        |                              |           |
|                                                                                           |            |                        |                              |           |
|                                                                                           |            |                        |                              |           |
|                                                                                           |            |                        |                              |           |
|                                                                                           |            |                        |                              |           |
|                                                                                           |            |                        |                              |           |
|                                                                                           |            |                        |                              |           |
|                                                                                           |            |                        |                              |           |
|                                                                                           |            |                        |                              |           |
|                                                                                           |            |                        |                              |           |
|                                                                                           |            |                        |                              |           |
|                                                                                           |            |                        |                              |           |
|                                                                                           |            |                        |                              |           |
|                                                                                           |            |                        |                              |           |
|                                                                                           |            |                        |                              |           |
|                                                                                           |            |                        |                              |           |
|                                                                                           |            |                        |                              |           |
|                                                                                           |            |                        |                              |           |
|                                                                                           |            |                        |                              |           |
|                                                                                           |            |                        |                              |           |
|                                                                                           |            |                        |                              |           |
|                                                                                           |            |                        |                              |           |
|                                                                                           |            |                        |                              |           |
|                                                                                           |            |                        |                              |           |
|                                                                                           |            |                        |                              |           |
|                                                                                           |            |                        |                              |           |
|                                                                                           |            |                        |                              |           |
|                                                                                           |            |                        |                              |           |
|                                                                                           |            |                        |                              |           |
|                                                                                           |            |                        |                              |           |
|                                                                                           |            |                        |                              |           |
|                                                                                           |            |                        |                              |           |
|                                                                                           |            |                        |                              |           |
|                                                                                           |            |                        |                              |           |
|                                                                                           |            |                        |                              |           |
|                                                                                           |            |                        |                              |           |
|                                                                                           |            |                        |                              |           |
|                                                                                           |            |                        |                              |           |
|                                                                                           |            |                        |                              |           |
|                                                                                           |            |                        |                              |           |
|                                                                                           |            |                        |                              |           |
|                                                                                           |            |                        |                              |           |
|                                                                                           |            |                        |                              |           |
|                                                                                           |            |                        |                              |           |
|                                                                                           |            |                        |                              |           |
|                                                                                           |            |                        |                              |           |
|                                                                                           |            |                        |                              |           |
|                                                                                           |            |                        |                              |           |
|                                                                                           |            |                        |                              |           |
|                                                                                           |            |                        |                              |           |
|                                                                                           |            |                        |                              |           |
|                                                                                           |            |                        |                              |           |
|                                                                                           |            |                        |                              |           |
|                                                                                           |            |                        |                              |           |
|                                                                                           |            |                        |                              |           |
|                                                                                           |            |                        |                              |           |
|                                                                                           |            |                        |                              |           |
|                                                                                           |            |                        |                              |           |
|                                                                                           |            |                        |                              |           |
|                                                                                           |            |                        |                              |           |
|                                                                                           |            |                        |                              |           |
|                                                                                           |            |                        |                              |           |
|                                                                                           |            |                        |                              |           |
|                                                                                           |            |                        |                              |           |
|                                                                                           |            |                        |                              |           |
|                                                                                           |            |                        |                              |           |
|                                                                                           |            |                        |                              |           |
|                                                                                           |            |                        |                              |           |
|                                                                                           |            |                        |                              |           |
|                                                                                           |            |                        |                              |           |
|                                                                                           |            |                        |                              |           |
|                                                                                           |            |                        |                              |           |
|                                                                                           |            |                        |                              |           |
|                                                                                           |            |                        |                              |           |
|                                                                                           |            |                        |                              |           |
|                                                                                           |            |                        |                              |           |
|                                                                                           |            |                        |                              |           |
|                                                                                           |            |                        |                              |           |
|                                                                                           |            |                        |                              |           |
|                                                                                           |            |                        |                              |           |
|                                                                                           |            |                        |                              |           |
|                                                                                           |            |                        |                              |           |
|                                                                                           |            |                        |                              |           |
|                                                                                           |            |                        |                              |           |
|                                                                                           |            |                        |                              |           |
|                                                                                           |            |                        |                              |           |
|                                                                                           |            |                        |                              |           |
|                                                                                           |            |                        |                              |           |
|                                                                                           |            |                        |                              |           |
|                                                                                           |            |                        |                              |           |
|                                                                                           |            |                        |                              |           |
|                                                                                           |            |                        |                              |           |
|                                                                                           |            |                        |                              |           |
|                                                                                           |            |                        |                              |           |
|                                                                                           |            |                        |                              |           |
|                                                                                           |            |                        |                              |           |
|                                                                                           |            |                        |                              |           |
|                                                                                           |            |                        |                              |           |
|                                                                                           |            |                        |                              |           |
|                                                                                           |            |                        |                              |           |
|                                                                                           |            |                        |                              |           |
|                                                                                           |            |                        |                              |           |
|                                                                                           |            |                        |                              |           |
|                                                                                           |            |                        |                              |           |
|                                                                                           |            |                        |                              |           |
|                                                                                           |            |                        |                              |           |
|                                                                                           |            |                        |                              |           |
|                                                                                           |            |                        |                              |           |
|                                                                                           |            |                        |                              |           |
|                                                                                           |            |                        |                              |           |
|                                                                                           |            |                        |                              |           |
|                                                                                           |            |                        |                              |           |
|                                                                                           |            |                        |                              |           |
|                                                                                           |            |                        |                              |           |
|                                                                                           |            |                        |                              |           |
|                                                                                           |            |                        |                              |           |
|                                                                                           |            |                        |                              |           |
|                                                                                           |            |                        |                              |           |
|                                                                                           |            |                        |                              |           |
|                                                                                           |            |                        |                              |           |
|                                                                                           |            |                        |                              |           |
|                                                                                           |            |                        |                              |           |
|                                                                                           |            |                        |                              |           |
|                                                                                           |            |                        |                              |           |
|                                                                                           |            |                        |                              |           |
|                                                                                           |            |                        |                              |           |
|                                                                                           |            |                        |                              |           |
|                                                                                           |            |                        |                              |           |
|                                                                                           |            |                        |                              |           |
|                                                                                           |            |                        |                              |           |
|                                                                                           |            |                        |                              |           |
|                                                                                           |            |                        |                              |           |
|                                                                                           |            |                        |                              |           |
|                                                                                           |            |                        |                              |           |
|                                                                                           |            |                        |                              |           |
|                                                                                           |            |                        |                              |           |
|                                                                                           |            |                        |                              |           |
|                                                                                           |            |                        |                              |           |
|                                                                                           |            |                        |                              |           |
|                                                                                           |            |                        |                              |           |
|                                                                                           |            |                        |                              |           |
|                                                                                           |            |                        |                              |           |
|                                                                                           |            |                        |                              |           |
|                                                                                           |            |                        |                              |           |
|                                                                                           |            |                        |                              |           |
|                                                                                           |            |                        |                              |           |
|                                                                                           |            |                        |                              |           |
|                                                                                           |            |                        |                              |           |
|                                                                                           |            |                        |                              |           |
|                                                                                           |            |                        |                              |           |
|                                                                                           |            |                        |                              |           |
|                                                                                           |            |                        |                              |           |
|                                                                                           |            |                        |                              |           |
|                                                                                           |            |                        |                              |           |
|                                                                                           |            |                        |                              |           |
|                                                                                           |            |                        |                              |           |
|                                                                                           |            |                        |                              |           |
|                                                                                           |            |                        |                              |           |
|                                                                                           |            |                        |                              |           |
|                                                                                           |            |                        |                              |           |
|                                                                                           |            |                        |                              |           |
|                                                                                           |            |                        |                              |           |
|                                                                                           |            |                        |                              |           |
|                                                                                           |            |                        |                              |           |
|                                                                                           |            |                        |                              |           |
|                                                                                           |            |                        |                              |           |
|                                                                                           |            |                        |                              |           |
|                                                                                           |            |                        |                              |           |
|                                                                                           |            |                        |                              |           |
|                                                                                           |            |                        |                              |           |
|                                                                                           |            |                        |                              |           |
|                                                                                           |            |                        |                              |           |
|                                                                                           |            |                        |                              |           |
|                                                                                           |            |                        |                              |           |
|                                                                                           |            |                        |                              |           |
|                                                                                           |            |                        |                              |           |
|                                                                                           |            |                        |                              |           |
|                                                                                           |            |                        |                              |           |
|                                                                                           |            |                        |                              |           |
|                                                                                           |            |                        |                              |           |
|                                                                                           |            |                        |                              |           |
|                                                                                           |            |                        |                              |           |
|                                                                                           |            |                        |                              |           |
|                                                                                           |            |                        |                              |           |
|                                                                                           |            |                        |                              |           |
|                                                                                           |            |                        |                              |           |
|                                                                                           |            |                        |                              |           |
|                                                                                           |            |                        |                              |           |
|                                                                                           |            |                        |                              |           |
|                                                                                           |            |                        |                              |           |
|                                                                                           |            |                        |                              |           |
|                                                                                           |            |                        |                              |           |
|                                                                                           |            |                        |                              |           |
|                                                                                           |            |                        |                              |           |
|                                                                                           |            |                        |                              |           |
|                                                                                           |            |                        |                              |           |
|                                                                                           |            |                        |                              |           |
|                                                                                           |            |                        |                              |           |
|                                                                                           |            |                        |                              |           |
|                                                                                           |            |                        |                              |           |
|                                                                                           |            |                        |                              |           |
|                                                                                           |            |                        |                              |           |
|                                                                                           |            |                        |                              |           |
|                                                                                           |            |                        |                              |           |
|                                                                                           |            |                        |                              |           |
|                                                                                           |            |                        |                              |           |
|                                                                                           |            |                        |                              |           |
|                                                                                           |            |                        |                              |           |
|                                                                                           |            |                        |                              |           |
|                                                                                           |            |                        |                              |           |
|                                                                                           |            |                        |                              |           |
|                                                                                           |            |                        |                              |           |
|                                                                                           |            |                        |                              |           |
|                                                                                           |            |                        |                              |           |
|                                                                                           |            |                        |                              |           |
|                                                                                           |            |                        |                              |           |
|                                                                                           |            |                        |                              |           |
|                                                                                           |            |                        |                              |           |
|                                                                                           |            |                        |                              |           |
|                                                                                           |            |                        |                              |           |
|                                                                                           |            |                        |                              |           |
|                                                                                           |            |                        |                              |           |
|                                                                                           |            |                        |                              |           |
|                                                                                           |            |                        |                              |           |
|                                                                                           |            |                        |                              |           |
|                                                                                           |            |                        |                              |           |
|                                                                                           |            |                        |                              |           |
|                                                                                           |            |                        |                              |           |
|                                                                                           |            |                        |                              |           |
|                                                                                           |            |                        |                              |           |
|                                                                                           |            |                        |                              |           |
|                                                                                           |            |                        |                              |           |
|                                                                                           |            |                        |                              |           |
|                                                                                           |            |                        |                              |           |
|                                                                                           |            |                        |                              |           |
|                                                                                           |            |                        |                              |           |
|                                                                                           |            |                        |                              |           |
|                                                                                           |            |                        |                              |           |
|                                                                                           |            |                        |                              |           |
|                                                                                           |            |                        |                              |           |
|                                                                                           |            |                        |                              |           |
|                                                                                           |            |                        |                              |           |
|                                                                                           |            |                        |                              |           |
|                                                                                           |            |                        |                              |           |
|                                                                                           |            |                        |                              |           |
|                                                                                           |            |                        |                              |           |
|                                                                                           |            |                        |                              |           |
|                                                                                           |            |                        |                              |           |
|                                                                                           |            |                        |                              |           |
|                                                                                           |            |                        |                              |           |
|                                                                                           |            |                        |                              |           |
|                                                                                           |            |                        |                              |           |
|                                                                                           |            |                        |                              |           |
|                                                                                           |            |                        |                              |           |
|                                                                                           |            |                        |                              |           |

<sup>1</sup> Ohne Berücksichtigung von Beiträgen der zum 9. Dezember 2010 erworbenen Cognis-Gruppe

## Arbeitssicherheit

Arbeitsunfälle mit Ausfalltagen je eine Million Arbeitsstunden  
Basisjahr 2002 (Ziel 2020: -80 %)

-39%

## Führungskräfte

Obere Führungskräfte mit internationaler Erfahrung  
(Ziel: >70 %)

78%

## Märkte, Strukturen und Organisation

### Das führende Chemieunternehmen der Welt – The Chemical Company

**In der BASF-Gruppe arbeiten rund 109.000 Mitarbeiter daran, Kunden aus nahezu allen Branchen und in fast allen Ländern der Welt erfolgreicher zu machen. Unser Portfolio reicht von Öl und Gas, über Chemikalien und Kunststoffe bis hin zu Spezialitäten wie Pflanzenschutzmittel.**

#### Märkte und Standorte

Die BASF ist in mehr als achtzig Ländern mit Gesellschaften vertreten und liefert Produkte an eine Vielzahl von Geschäftspartnern nahezu überall auf der Welt. 2010 erzielten wir 52 % unseres Umsatzes mit Kunden in Europa, davon 30 Prozentpunkte im Segment Oil & Gas. Auf die Region Nordamerika entfielen 20 %, auf Asien, Pazifischer Raum 20 % und auf Südamerika, Afrika, Naher Osten 8 %. Wir betreiben weltweit sechs Verbundstandorte und rund 390 weitere Produktionsstandorte. Unser Verbund in Ludwigshafen ist der größte integrierte Chemiestandort der Welt. Hier wurde das Verbundprinzip entwickelt, kontinuierlich optimiert und später an weiteren Standorten realisiert. Im Energieverbund werden beispielsweise Produktionen und Energiebedarfe intelligent vernetzt, so dass Prozesswärme anderen Betrieben als Energie zur Verfügung steht – das spart Primärressourcen und Kosten. Neben dem Energieverbund ist der Wissensverbund ein wesentlicher Bestandteil der Verbundidee. Expertenwissen bündeln wir in unseren Technologieplattformen und Kompetenzzentren.

→ Mehr zum Verbundprinzip unter [basf.com/verbund\\_d](http://basf.com/verbund_d)

#### Organisation der BASF-Gruppe

Zusammengefasst in sechs Geschäftssegmente, tragen derzeit 15 Unternehmensbereiche die operative Verantwortung und steuern unsere 73 globalen und regionalen Geschäftseinheiten. Die Unternehmensbereiche entwickeln Strategien für unsere 86 Produktbereiche und sind branchen- oder produktorientiert ausgerichtet.

Der Unternehmensbereich Care Chemicals im Segment Performance Products wurde im August 2010 geteilt, um die Integration der Cognis-Geschäfte vorzubereiten. Der neue Bereich Nutrition & Health umfasst Produkte und Systemlösungen für den Ernährungs- und Gesundheitsmarkt sowie für die Duft- und Geschmacksstoffindustrie. Care Chemicals bündelt Produkte und Systemlösungen für Reinigung, Pflege, Kosmetik und Hygiene. → Mehr zur Cognis-Akquisition ab Seite 57 und ab Seite 153

Unsere Regionalbereiche tragen dazu bei, das Geschäft lokal weiterzuentwickeln und Marktpotenziale auszuschöpfen. Sie sind dafür verantwortlich, die Infrastruktur für unser Geschäft zu optimieren. Für die Finanzkommunikation werden die Regionalbereiche zu den vier Regionen Europa; Nordamerika; Asien, Pazifischer Raum sowie Südamerika, Afrika, Naher Osten zusammengefasst.

Drei Zentralbereiche, fünf Zentralabteilungen und neun Kompetenzzentren erbringen gruppenweit Leistungen, etwa in den Gebieten Finanzen, Investor Relations, Kommunikation, Personal, Forschung, Ingenieurtechnik oder Standortmanagement.

#### Struktur der BASF

| Geschäftssegmente                                                                                                 |                                                                                                   |                                                                                                                                                                                                        |                                                                                                                     |                                                                     |                                                                                                                       |
|-------------------------------------------------------------------------------------------------------------------|---------------------------------------------------------------------------------------------------|--------------------------------------------------------------------------------------------------------------------------------------------------------------------------------------------------------|---------------------------------------------------------------------------------------------------------------------|---------------------------------------------------------------------|-----------------------------------------------------------------------------------------------------------------------|
| Chemicals                                                                                                         | Plastics                                                                                          | Performance Products                                                                                                                                                                                   | Functional Solutions                                                                                                | Agricultural Solutions                                              | Oil & Gas                                                                                                             |
| Unternehmensbereiche                                                                                              |                                                                                                   |                                                                                                                                                                                                        |                                                                                                                     |                                                                     |                                                                                                                       |
| <ul style="list-style-type: none"> <li>– Inorganics</li> <li>– Petrochemicals</li> <li>– Intermediates</li> </ul> | <ul style="list-style-type: none"> <li>– Performance Polymers</li> <li>– Polyurethanes</li> </ul> | <ul style="list-style-type: none"> <li>– Dispersions &amp; Pigments</li> <li>– Care Chemicals</li> <li>– Nutrition &amp; Health</li> <li>– Paper Chemicals</li> <li>– Performance Chemicals</li> </ul> | <ul style="list-style-type: none"> <li>– Catalysts</li> <li>– Construction Chemicals</li> <li>– Coatings</li> </ul> | <ul style="list-style-type: none"> <li>– Crop Protection</li> </ul> | <ul style="list-style-type: none"> <li>– Oil &amp; Gas (Exploration &amp; Production, Natural Gas Trading)</li> </ul> |

#### Die BASF-Gruppe

- Sechs Verbundstandorte und rund 390 weitere Produktionsstandorte weltweit; etwa 109.000 Mitarbeiter
- Ludwigshafen ist größter BASF-Verbundstandort und zugleich Ausgangspunkt des Verbundkonzepts
- Verbund: Intelligente Vernetzung von Anlagen zur ressourcen- und energiesparenden Produktion; Wissens- und Forschungsverbund

#### Organisation der BASF-Gruppe

- 15 Unternehmensbereiche, die zu Segmenten zusammengefasst sind, steuern globale und regionale Geschäftseinheiten
- Regionalbereiche optimieren die Infrastruktur und unterstützen das Geschäft
- Zentralbereiche, -abteilungen und Kompetenzzentren erbringen gruppenweit Leistungen

## Rechtliche Unternehmensstruktur

In der BASF-Gruppe nimmt die BASF SE mit Sitz in Ludwigshafen die zentrale Stellung als größte operative Gesellschaft ein. Sie hält direkt oder indirekt die Anteile an den zur BASF-Gruppe gehörenden Gesellschaften. Die meisten Gesellschaften der BASF-Gruppe decken ein breites Spektrum unseres Geschäfts ab. Einige konzentrieren sich auf bestimmte Geschäfte, wie zum Beispiel die BASF-Tochtergesellschaft Wintershall. Im Abschluss der BASF-Gruppe werden einschließlich der BASF SE 318 Ge-

sellschaften vollkonsolidiert. 21 Gemeinschaftsunternehmen, die wir mit einem oder mehreren Partnern führen, berücksichtigen wir anteilig und 14 Gesellschaften erfassen wir nach der Equity-Methode. → Mehr im Anhang zum Konzernabschluss ab Seite 150

## Vergütungsbericht und Angaben gemäß § 315 Abs. 4 Handelsgesetzbuch

→ Der Vergütungsbericht ist ab Seite 125 zu finden, die übernahme-rechtlichen Angaben ab Seite 120. Sie sind Bestandteile des vom Abschlussprüfer geprüften Konzernlageberichts.

### Standorte der BASF

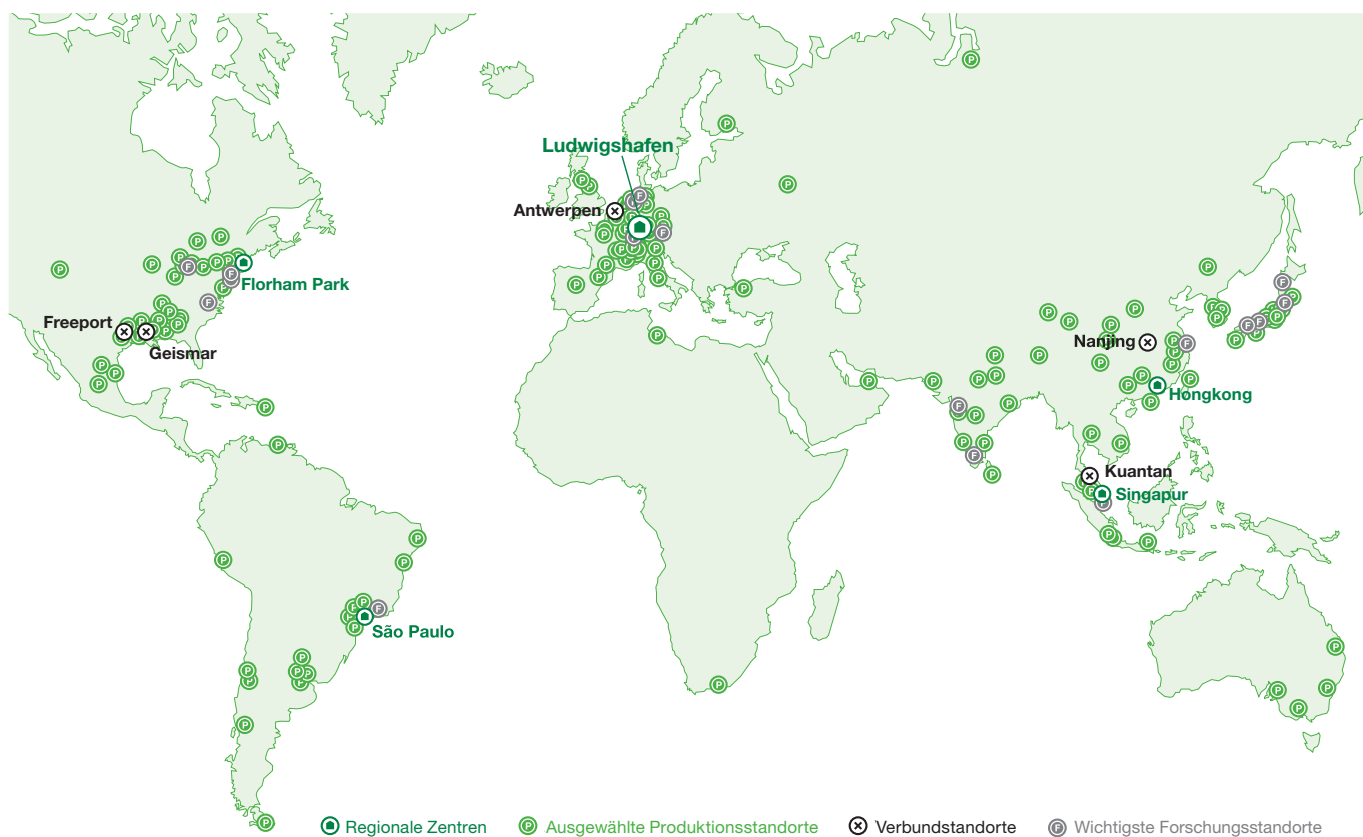

### Rechtliche Unternehmensstruktur

- BASF SE mit Sitz in Ludwigshafen größte operative Gesellschaft
- 318 Gesellschaften im Abschluss vollkonsolidiert
- 21 Gemeinschaftsunternehmen anteilig berücksichtigt
- 14 weitere Unternehmen nach der Equity-Methode erfasst

### Wichtigste Forschungsstandorte

- Europa: Ludwigshafen, Basel, Münster, Trostberg, Lemförde
- Nordamerika: Research Triangle Park, Iselin, Wyandotte, Tarrytown
- Asien, Pazifischer Raum: Schanghai, Singapur, Chandivali
- Südamerika, Afrika, Naher Osten: Guaratinguetá



## Wertmanagement

### Wir verdienen eine Prämie auf unsere Kapitalkosten

**„Wir verdienen eine Prämie auf unsere Kapitalkosten“ ist einer der vier Grundpfeiler unserer Strategie. Nur ein Unternehmen, dessen Ergebnis die Kosten für das eingesetzte Eigen- und Fremdkapital übersteigt, schafft Wert und ist langfristig überlebensfähig. Um den nachhaltigen Erfolg der BASF zu sichern, fördern wir im Rahmen unseres Wertmanagementkonzepts alle Mitarbeiter in ihrem unternehmerischen Denken und Handeln. Unser Ziel: Ein Bewusstsein dafür schaffen, wie jeder einzelne Mitarbeiter im täglichen Geschäftsleben wertorientierte Lösungen finden und diese effizient und effektiv umsetzen kann.**

#### Ergebnis der Betriebstätigkeit nach Kapitalkosten

Das Ergebnis der Betriebstätigkeit (EBIT) nach Kapitalkosten ist die zentrale Ziel- und Steuerungsgröße für unsere Unternehmensbereiche und Geschäftseinheiten. Mit dieser Kennzahl wird berücksichtigt, dass die Aktionäre und Gläubiger der BASF für das bereitgestellte Kapital eine Verzinsung erwarten. Die BASF-Gruppe schafft nur dann Mehrwert, wenn das EBIT mindestens die Kapitalkosten abdeckt.

#### Ermittlung des Kapitalkostensatzes

Die Höhe des Kapitalkostensatzes hängt im Wesentlichen von drei Faktoren ab:

- der Kapitalstruktur der BASF-Gruppe,
- der Höhe der Fremdkapitalverzinsung sowie
- den Renditeerwartungen der Aktionäre.

Die Fremdkapitalkosten ergeben sich aus den Zinszahlungen für Kapitalmarktverbindlichkeiten und Bankdarlehen. Die Eigenkapitalkosten entsprechen der Renditeerwartung der Eigenkapitalgeber. Diese werden aus dem Marktwert der BASF-Aktien und mit Hilfe des Capital Asset Pricing Model (CAPM) ermittelt.

Basierend auf Kapitalkosten und Ertragsteuern wird ein Schwellenwert für das EBIT bestimmt, den die operativen Einheiten der BASF-Gruppe mindestens erreichen müssen, um die Kapitalkosten zu verdienen. Der Kapitalkostensatz ergibt sich aus dem Verhältnis dieses Mindest-EBIT zum operativen Vermögen der BASF-Gruppe. Während für das Jahr 2010 ein Kapitalkostensatz von 9 % galt, wird der Kapitalkostensatz für das Jahr 2011 auf 11 % erhöht. Grund hierfür ist die gestiegene Marktkapitalisierung der BASF-Aktien.

#### Wertmanagement im gesamten Unternehmen

Wertmanagement ist nur dann erfolgreich, wenn es fest im Unternehmen verankert ist und konsequent angewendet wird. Für uns ist Wertmanagement deshalb die alltägliche Umsetzung von Wertorientierung durch alle Mitarbeiter. Wir haben entsprechend unseren vier strategischen Leitlinien Werttreiber definiert – Faktoren, die zeigen, wie jede einzelne Einheit des Unternehmens Wert schaffen kann. Für die einzelnen Werttreiber entwickeln wir Kennzahlen, die uns dabei helfen, beabsichtigte Veränderungen zu planen und zu verfolgen.

Ein wichtiger Bestandteil ist hierbei der Zielvereinbarungsprozess, bei dem die Ziele der BASF mit den individuellen Zielen der Mitarbeiter verknüpft werden. Oberste Zielebene in operativen Einheiten ist das Erreichen eines positiven EBIT nach Kapitalkosten. In funktionalen Einheiten hat hingegen der Wertbeitrag gemessen an Effektivität und Effizienz höchste Priorität.

Auf Basis unseres Wertmanagementkonzepts können alle Mitarbeiter in ihrem Arbeitsgebiet einen Beitrag dazu leisten, dass wir eine Prämie auf unsere Kapitalkosten erwirtschaften. Weltweit vermitteln wir unserem Team in zahlreichen Fortbildungsangeboten Kenntnisse zu diesem Thema – und stärken so das unternehmerische Denken auf allen Ebenen der BASF.

**EBIT nach Kapitalkosten** (Millionen €)  
5-Jahres-Übersicht<sup>1</sup>

| Jahr | EBIT nach Kapitalkosten (Millionen €) |
|------|---------------------------------------|
| 2010 | 3.500                                 |
| 2009 | -226                                  |
| 2008 | 1.621                                 |
| 2007 | 2.895                                 |
| 2006 | 2.126                                 |

**Ermittlung des EBIT nach Kapitalkosten** (Millionen €)

|                                                                      | 2010  | 2009  |
|----------------------------------------------------------------------|-------|-------|
| EBIT BASF-Gruppe                                                     | 7.761 | 3.677 |
| – EBIT der den Segmenten nicht zuordenbaren Aktivitäten <sup>1</sup> | -707  | -627  |
| – Nicht anrechenbare ausländische Ertragsteuern für die Ölförderung  | 983   | 870   |
| – Kapitalkosten <sup>2</sup>                                         | 3.985 | 3.660 |
| EBIT nach Kapitalkosten                                              | 3.500 | -226  |

<sup>1</sup> Seit dem 1. Januar 2008 werden die Kosten der Konzernzentrale nicht mehr den Segmenten zugeordnet, sondern unter „Sonstige“ ausgewiesen. Die Werte der Vorjahre wurden nicht angepasst.

<sup>1</sup> Der geplante Nettoaufwand ist durch einen Zuschlag im Kapitalkostensatz abgedeckt.

<sup>2</sup> In den Jahren 2009 und 2010 betrug der Kapitalkostensatz 9 %.

## Nachhaltigkeitsmanagement

### Neue Geschäftschancen erschließen und Risiken minimieren

**Mit unserem Nachhaltigkeitsmanagement setzen wir die BASF-Leitlinie „Wir wirtschaften nachhaltig für eine lebenswerte Zukunft“ um. Es verankert Nachhaltigkeit strategisch und organisatorisch im Unternehmen und regelt die Umsetzung im Unternehmensalltag. So hilft uns nachhaltiges Wirtschaften, bestehendes Geschäft zu fördern, neue Geschäftschancen zu erschließen und Risiken zu minimieren.**

#### Strategie

Nachhaltigkeit ist eine Querschnittsaufgabe für das gesamte Unternehmen. Dazu gehört, dass wir einen offenen Dialog mit unseren Stakeholdern pflegen, wichtige Themen rechtzeitig erkennen sowie unsere Selbstverpflichtungen weltweit umsetzen und überprüfen. Geschäftschancen nutzen wir mit Produkten und Services, die ökonomische und ökologische Vorteile für unsere Kunden haben. Um diese zu identifizieren, haben wir 2010 begonnen, Nachhaltigkeitsaspekte noch systematischer in der Entwicklung von Produktbereichsstrategien zu berücksichtigen.

Erworbene Unternehmen integrieren wir so schnell wie möglich in unsere Managementsysteme und unsere Organisation für Nachhaltigkeit. Wir sorgen dafür, dass neue Mitarbeiter mit unseren globalen Anforderungen an Umweltschutz, Gesundheitsschutz und Sicherheit sowie Arbeits- und Sozialstandards vertraut werden und diese übernehmen. Bei Akquisitionen berufen wir Expertenteams, um die Integration in Bezug auf Nachhaltigkeit zu betreuen.

→ **Informationen zur Umsetzung von Anforderungen zu Umwelt, Gesundheit und Sicherheit ab Seite 91**

#### Organisation für Nachhaltigkeit

Unser globaler Nachhaltigkeitsrat ist das zentrale Entscheidungsgremium für alle relevanten Nachhaltigkeitsthemen. Er berät den Vorstand in Entscheidungen zu Nachhaltigkeit. Mit weltweit gültigen Richtlinien steuert er die Ausrichtung der BASF-Gruppe am Leitbild der nachhaltigen Entwicklung. Der Rat setzt sich zusammen aus neun Leitern funktionaler, opera-

tiver und regionaler Bereiche. Vorsitzender des Gremiums ist Vorstandsmitglied Dr. Harald Schwager. Regionale Lenkungs-kreise unterstützen den Nachhaltigkeitsrat. Sie identifizieren regionale Schwerpunkte, initiieren entsprechende Projekte und setzen globale Entscheidungen in den Regionen um. Unser Sustainability Center koordiniert die Umsetzung der Nachhaltigkeitsstrategie im Kerngeschäft zwischen Nachhaltigkeitsrat, regionalen Netzwerken und Facheinheiten.

→ **Mehr dazu unter [basf.com/nachhaltigkeit](http://basf.com/nachhaltigkeit)**

#### Wichtige Themen erkennen

Wir wollen frühzeitig Themen erkennen, die heute oder in Zukunft Chancen oder Risiken für unser Geschäft sein können. Daher analysieren wir regelmäßig die Bedeutung von Nachhaltigkeitsthemen für BASF und die Gesellschaft. Im Jahr 2010 haben wir eine neue Materialitätsanalyse durchgeführt. Gemeinsam mit externen Partnern haben wir mehrere hundert externe Experten und Stakeholder sowie Manager der BASF zu zentralen Themen der Nachhaltigkeit befragt. Im Anschluss bewerteten Fachleute der BASF aus verschiedenen Funktionen die strategische Bedeutung der Themen für BASF. Die Ergebnisse nutzen wir, um Strategien zum Umgang mit diesen Themen zu entwickeln. Dabei betrachten wir besonders Themen, die stärker als bisher in den Fokus gerückt sind – zum Beispiel Wasser, Biodiversität und nachwachsende Rohstoffe. Im Jahr 2010 hat der Nachhaltigkeitsrat entschieden, dass die Nachhaltigkeitsstrategie in Bezug auf diese Themen weiterentwickelt werden soll. Dafür werden wir strategische Positionierungen erarbeiten und Ziele definieren. Die ersten Ergebnisse werden dem Nachhaltigkeitsrat 2011 vorgelegt.

→ **Mehr zum Prozess, mit dem wir Nachhaltigkeitsthemen identifizieren, sowie die neuen Ergebnisse unter [basf.com/materialitaet](http://basf.com/materialitaet)**

→ **Mehr zur Materialitätsanalyse auf Seite 2**

#### Strategie

- Querschnittsaufgabe für das gesamte Unternehmen
- Umsetzen der strategischen Leitlinie „Wir wirtschaften nachhaltig für eine lebenswerte Zukunft“
- Ziel: Geschäftschancen erschließen, Risiken minimieren
- Nachhaltigkeit wichtiger Aspekt bei Integration von Akquisitionen

#### Organisation

- Globaler Nachhaltigkeitsrat als zentrales Entscheidungsgremium
- Regionale Lenkungs-kreise für Nachhaltigkeit
- Sustainability Center koordiniert Umsetzung im Kerngeschäft

### Managementstrukturen für Nachhaltigkeit

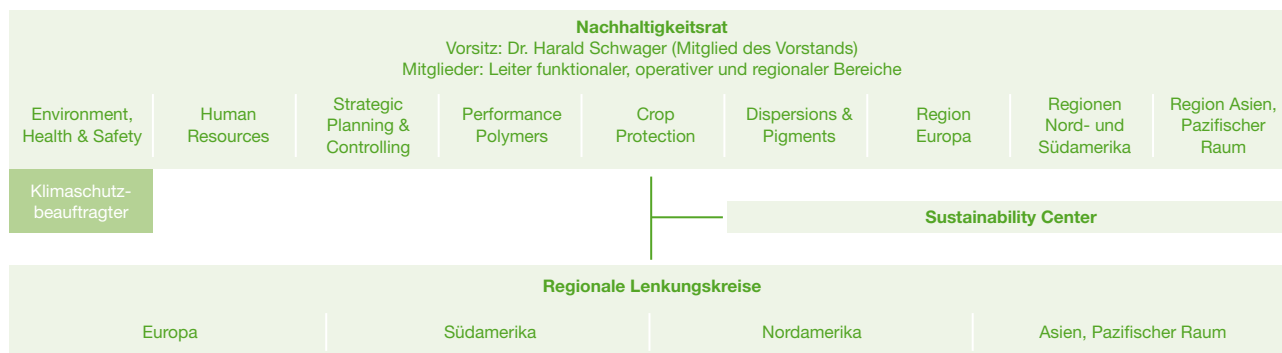

### Risiken minimieren

Wir haben uns globale Standards für unsere Standorte gesetzt. Mit verschiedenen Systemen prüfen wir, ob die BASF-Standorte diese Standards für Umwelt und Sicherheit einhalten und Verpflichtungen zu Arbeits- und Sozialstandards sowie Compliance erfüllen. Durch interne Audits kontrollieren wir Anlagen- und Arbeitssicherheit sowie Gesundheits- und Umweltschutz. Arbeits- und Sozialstandards überprüfen wir mit einem dreiteiligen Monitoringsystem. Es besteht aus einer anonymen Compliance-Hotline, einer weltweiten Abfrage in unseren Gruppengesellschaften sowie dem intensiven Dialog mit Arbeitnehmervertretungen und internationalen Organisationen.

Bei der Auswahl von Lieferanten stehen für uns nicht nur wirtschaftliche Kriterien im Vordergrund. In unseren Einkaufsbedingungen sind auch Umweltschutz-, Arbeitssicherheits- und Sozialstandards verankert. Sie sind Teil der Bewertung neuer und bestehender Lieferbeziehungen. Weltweit überprüfen wir Lieferanten abhängig von ihrem potenziellen Risiko vor Ort. Dabei helfen uns Risikomatrizes, mit denen wir nach Länder-, Produkt- oder Branchenrisiken Lieferanten mit hohem Risikopotenzial identifizieren. Auf Grundlage einer Länder- und Produktisikoanalyse haben wir 2010 rund 230 Rohstofflieferanten zu Umwelt-, Gesundheits- und Sicherheitsaspekten vor Ort

besucht. Wenn wir bei diesen Audits Verbesserungsbedarf feststellen, vereinbaren wir Korrekturmaßnahmen und bieten Hilfestellung an. Nach einigen Monaten führen wir dann ein erneutes Audit durch. Stellen wir keine Verbesserung fest, erfolgt der Einkaufsstopp von unserer Seite. 2010 haben wir uns in fünf Fällen für eine Verlagerung des Geschäfts auf andere Lieferanten entschieden. Etwa 690 Lieferanten haben im Jahr 2010 Prüfungsprozesse für Arbeits- und Sozialstandards durchlaufen. Die Lieferanten erkennen dabei unseren Verhaltenskodex für Lieferanten an und beantworten einen Fragebogen zu Arbeits- und Sozialstandards. Zu den wichtigsten Maßnahmen, um Risiken in der Lieferkette zu minimieren, gehören unsere „Supplier Days“. Dabei erläutern wir Lieferanten die Bedeutung von international anerkannten Arbeits- und Sozialstandards für BASF und zeigen, wie das Erfüllen der Standards für sie zum Wettbewerbsvorteil werden kann. In Indien nahmen 2010 beispielsweise über 150 Lieferanten an Supplier Days zu Arbeits- und Sozialstandards teil – darunter viele wichtige Lieferanten für Rohstoffe und technische Ausrüstung. 2010 hat BASF insgesamt etwa 500.000 verschiedene Rohstoffe, technische Güter sowie Dienstleistungen für Bau und Instandhaltung von Anlagen und für Logistik eingekauft. Von über 6.000 Lieferanten haben wir Rohstoffe bezogen.

### Risiken minimieren

- Monitoringsysteme helfen, die Einhaltung globaler Standards zu überprüfen
- Audits zu Anlagen- und Arbeitssicherheit sowie Gesundheits- und Umweltschutz; dreiteiliges Monitoringsystem für Arbeits- und Sozialstandards
- 2010: 690 Lieferanten durchliefen Prüfungsprozesse zu Arbeits- und Sozialstandards, 230 Audits zu Umwelt, Gesundheit und Sicherheit bei Rohstofflieferanten
- Über 150 Lieferanten nahmen in Indien an Supplier Days zu Arbeits- und Sozialstandards teil

Das Einkaufsvolumen der BASF-Gruppe betrug 2010 insgesamt 30,1 Milliarden € ohne Handelswaren. 

→ **Informationen zu Compliance ab Seite 120, mehr zum Monitoring-system für Arbeits- und Sozialstandards unter [basf.com/monitoring\\_d](http://basf.com/monitoring_d)**

→ **Mehr zum Lieferkettenmanagement unter [basf.com/lieferkette](http://basf.com/lieferkette)**

## Meilensteine 2010

### Nachhaltigkeitsmanagement

- Materialitätsanalyse überarbeitet
- 450. Ökoeffizienz-Analyse seit 1996 durchgeführt
- Supplier Days zu Arbeits- und Sozialstandards

## Geschäftschancen nutzen mit Nachhaltigkeit

Im Wettbewerb wollen wir uns durch Nachhaltigkeit differenzieren. Mit der Initiative „Success – Mehrwert durch Nachhaltigkeit“ bringen wir unsere Expertise in Kundenbeziehungen ein. Unsere Geschäftseinheiten prüfen dabei, wie sie durch Nachhaltigkeit Geschäftsbeziehungen zu Kunden und Lieferanten ausbauen oder festigen können. Ein Beispiel ist unsere S.E.T.-Initiative (Sustainability, Ecoefficiency, Traceability). Sie hilft Herstellern von Lebens- und Futtermitteln, nachhaltige Produkte zu entwickeln.

Als strategisches Instrument zur Bewertung von Produkten und Verfahren hat BASF die Ökoeffizienz-Analyse entwickelt. Sie setzt die Wirtschaftlichkeit eines Produkts ins Verhältnis zu dessen Auswirkungen auf die Umwelt. Dafür betrachten wir den gesamten Lebensweg – von der Rohstoffgewinnung, über die Verwendung bis zu Recycling oder Entsorgung. Zu den untersuchten Kategorien gehören beispielsweise Ressourcen- und Energieverbrauch sowie Emissionen. Die Ökoeffizienz-Analyse hilft unseren Kunden und uns, seit 1996 entscheidende Stell-schrauben für Verbesserungen bei Ökologie und Ökonomie von Produkten oder Verfahren zu finden. Wir haben 2010 die 450. Ökoeffizienz-Analyse durchgeführt. In der Sozio-Ökoeffizienz-Analyse SEEBALANCE® haben wir die Ökoeffizienz-Ana-

lyse um soziale Auswirkungen erweitert. Sie umfasst zusätzlich gesellschaftsrelevante Kriterien wie die Zahl der Arbeitsplätze oder auch Investitionen in Forschung und Entwicklung. Im Jahr 2010 haben wir ein neues Projekt gestartet, bei dem zukünftig wichtige Elemente speziell für die Landwirtschaft abgebildet werden. Dazu gehören beispielsweise Biodiversität und Aspekte des Bodenschutzes, wie die Vermeidung von Erosion. Ein Fokus kann dabei auch auf Märkte in Schwellenländern gelegt werden. Wir stehen weltweit im Dialog mit verschiedenen Stakeholdern, wie Umweltverbänden und Vertretern der Landwirtschaft, um eine umfassende Bewertung der wesentlichen Kriterien für nachhaltige Landwirtschaft zu entwickeln.

Gemeinsam mit der Gesellschaft für Technische Zusammenarbeit und lokalen Partnern bringt BASF in Brasilien seit fünf Jahren in der Stiftung Espaço ECO ihre Nachhaltigkeitsexpertise ein. Espaço ECO fördert eine nachhaltige Entwicklung durch Wissens- und Technologietransfer. Im Fokus stehen neben der Ökoeffizienz-Analyse Bildungsprojekte im Umweltbereich sowie Wiederaufforstungsprojekte. Die Stiftung hilft Organisationen in Südamerika dabei, sich mit Nachhaltigkeit im globalen Wettbewerb zu behaupten. Über 94.000 Menschen wurden seit 2005 über die Initiative erreicht. 

→ **Mehr zur S.E.T.-Initiative unter [www.set-initiative.com](http://www.set-initiative.com)**

→ **Mehr zu Espaço ECO unter [www.espacoeco.org](http://www.espacoeco.org)**

→ **Mehr zur Ökoeffizienz-Analyse und SEEBALANCE unter [basf.com/oekoeffizienz](http://basf.com/oekoeffizienz) und auf Seite 96**

→ **Mehr zu Responsible Care auf Seite 91**

→ **Mehr zu Produktverantwortung ab Seite 101**

→ **Mehr zu Chancen mit Klimaschutzprodukten auf Seite 96**

## Stakeholder einbeziehen

Zu unseren wichtigsten Stakeholdern gehören Kunden, Mitarbeiter, Aktionäre, Nachbarn, Arbeitnehmervertreter, Politik, Medien, Nichtregierungsorganisationen und Geschäftspartner. Der Austausch mit ihnen hilft uns, wichtige Themen und daraus folgende Chancen und Risiken für BASF zu erkennen. Die Ergebnisse des Dialogs mit Interessengruppen sind eine Grundlage unseres Themenmanagements für Nachhaltigkeit.

## Geschäftschancen mit Nachhaltigkeit

- Differenzierung durch Nachhaltigkeit mit Initiative „Success – Mehrwert durch Nachhaltigkeit“
- Ökoeffizienz-Analyse und SEEBALANCE als strategische Instrumente zur Bewertung der Nachhaltigkeit von Produkten und Verfahren
- Nachhaltigkeit als Bestandteil innovativer Geschäftsstrategien
- **Mehr zu Success unter [basf.com/success\\_d](http://basf.com/success_d)**

Wir haben eine besondere Verantwortung gegenüber unseren Nachbarn. In 73 Nachbarschaftsforen (Community Advisory Panels, CAPs) diskutieren wir mit ihnen über aktuelle Themen. Das CAP am spanischen Standort Tarragona wurde beispielsweise vor 15 Jahren gegründet. Hier standen im Jahr 2010 unter anderem Produktsicherheit, die Umsetzung des europäischen Chemikaliengesetzes und Pflanzenbiotechnologie auf dem Programm.

Die BASF nutzt unter anderem soziale Medien, um den direkten Dialog mit ihren Stakeholdern weiter zu intensivieren. Ein Beispiel dafür ist die Dialogplattform [amflora.de](http://amflora.de). Wir stellen uns auch dort kritischen Fragen zum Thema Pflanzenbiotechnologie.

Skepsis in der öffentlichen Diskussion wollen wir mit Transparenz über unsere Aktivitäten begegnen. Für die erfolgreiche Einführung von Produkten auf Basis neuer Technologien ist das Vertrauen von Verbrauchern, Nichtregierungsorganisationen, Politik und der allgemeinen Öffentlichkeit besonders wichtig. Schon in einem frühen Stadium der Technologieentwicklung treten wir in die politische und öffentliche Diskussion ein, beispielsweise im Bereich Nanotechnologie. Seit 2004 engagieren wir uns in nationalen und internationalen Dialogen für Nanotechnologie. Im Dialogforum Nano haben wir 2010 mit Vertretern von Umwelt- und Verbraucherverbänden sowie Kirchen die Frage diskutiert, wie eine transparente Kommunikation entlang des Lebenswegs von Produkten gestaltet werden sollte.

Wir unterstützen unter anderem die Umsetzung der Globalen Produktstrategie (GPS) des internationalen Verbandes der chemischen Industrie (ICCA). GPS soll globale Standards und Verfahren etablieren, um die Sicherheit im Umgang mit chemischen Stoffen insbesondere in Entwicklungsländern zu verbessern. GPS trägt zur Umsetzung der Responsible Care Global Charter bei. Ein Angebot für kleinere und mittlere Unternehmen im Rahmen der Umsetzung von GPS sind spezielle Workshops und Trainingsprogramme, die zurzeit sowohl in Europa in Kooperation mit der EU-Kommission als auch in Entwicklungsländern Asiens und Nordafrikas angeboten werden. BASF Experten sind dabei als Trainer vor Ort im Einsatz.

Eine wichtige Voraussetzung für unseren langfristigen Geschäftserfolg sind gute Beziehungen zu unseren Kunden und deren Zufriedenheit mit unserer Leistung. Mit unserem Non-Conformance-Management (NCM) messen wir Kundenzufriedenheit: In dem zentralen System für alle Einheiten erfassen wir Probleme, die bei den Kunden mit unseren Produkten und Prozessen auftreten, und gehen ihnen nach. So können wir aus Fehlern lernen, Kosten senken und unsere Leistung kontinuierlich verbessern. Im Jahr 2010 haben wir unser NCM-System stärker mit Lieferketten- und Finanzprozessen verknüpft.

Bei unserer Initiative „perspectives“ analysieren Kunden und BASF-Mitarbeiter bestehende Geschäftsbeziehungen und neue Geschäftschancen. Ziel ist es, die Kundenbindung weiter zu stärken. 2010 haben wir beispielsweise in einem bereichsübergreifenden Workshop mit Trelleborg Offshore, einem Hersteller von Isoliermaterial für Tiefwasser-Ölleitungen, neue Möglichkeiten der Zusammenarbeit entwickelt. Im Fokus standen verbesserte Produktionstechniken und der Einsatz innovativer Technologien, um die Effizienz von Prozessen zu steigern und neuen Umsatz und Ertrag zu generieren. Im Jahr 2010 haben 2.800 Mitarbeiter an speziellen Trainings und Workshops zu Themen aus Marketing und Vertrieb teilgenommen.

Unsere Leistung haben unsere Kunden auch 2010 honoriert: So erhielt BASF beispielsweise in Indien Auszeichnungen von Tata Motors, Mahindra & Mahindra sowie Honda Motorcycle and Scooter India (HMSI). 

→ **Mehr zum Dialog zu Pflanzenbiotechnologie unter**  
[basf.com/dialog\\_pflanzenbiotechnologie](http://basf.com/dialog_pflanzenbiotechnologie) und [www.amflora.de](http://www.amflora.de)

→ **Mehr zum Dialog zu Nanotechnologie unter**  
[basf.com/dialog-nanotechnologie](http://basf.com/dialog-nanotechnologie)

## Einbeziehen von Stakeholdern

- Wichtige Stakeholder der BASF sind Kunden, Mitarbeiter, Aktionäre, Nachbarn, Arbeitnehmervertreter, Politik, Medien, Nichtregierungsorganisationen und Geschäftspartner
- Dialog mit Interessengruppen hilft uns, wichtige Themen und daraus folgende Chancen und Risiken zu erkennen
- 73 Nachbarschaftsforen weltweit
- Dialog zu neuen Technologien informiert und schafft Vertrauen
- **Mehr zum Stakeholder-Dialog unter** [basf.com/dialog](http://basf.com/dialog)



## Wertschöpfung

**Die Wertschöpfungsrechnung erläutert den erwirtschafteten Beitrag der BASF-Gruppe zum privaten und öffentlichen Einkommen. Sie verdeutlicht, wie unser wirtschaftliches Handeln Wert für die Gesellschaft schafft.**

Die Wertschöpfung ergibt sich aus der Unternehmensleistung nach Abzug der Vorleistungen wie Materialaufwand oder Abschreibungen. Im Gegensatz zur Gewinn- und Verlustrechnung, der die Perspektive des Eigentümers zu Grunde liegt, ist die Verteilungsrechnung auf die Beteiligten an diesem Wertschöpfungsprozess – wie Mitarbeiter, Aktionäre oder dem Staat – ausgerichtet.

Im Jahr 2010 betrug die Wertschöpfung der BASF-Gruppe 16.658 Millionen €. Sie erhöhte sich damit um 49,3 % im Vergleich zum Vorjahr. Dieser Anstieg ist hauptsächlich auf die gestiegene Unternehmensleistung zurückzuführen.

Den größten Anteil der Wertschöpfung erhielten mit 8.228 Millionen € unsere Mitarbeiter: Dieser Anteil setzt sich aus Löhnen, Gehältern und Sozialleistungen zusammen. Ein weiterer bedeutender Teil der Wertschöpfung ging in Form von Steuern an den Staat. Er betrug 2.583 Millionen € im Vergleich zu 1.662 Millionen € im Vorjahr.

Für Spenden und Sponsoring sowie BASF-eigene Projekte haben wir im Jahr 2010 insgesamt 50 Millionen € aufgewendet (2009: 48 Millionen €). Dieser Betrag ist in den übrigen Aufwendungen enthalten.

Die verbleibende Wertschöpfung in Höhe von 4.557 Millionen € steht zur Ausschüttung als Dividende an die Aktionäre der BASF SE sowie zur Thesaurierung zur Verfügung.

→ **Mehr zu Löhnen und Gehältern auf Seite 84 und ab Seite 165, zu Steuern ab Seite 163 und zu Spenden und Sponsoring auf Seite 90**

### Wertschöpfung der BASF-Gruppe 2010

#### Entstehung der Wertschöpfung

(Millionen €, Vorjahreszahlen in Klammern)

|   |                                                                 |                 |
|---|-----------------------------------------------------------------|-----------------|
| 1 | Wertschöpfung                                                   | 16.658 (11.158) |
| 2 | Abschreibungen                                                  | 3.370 (3.746)   |
| 3 | Fremdlieferungen, Energiekosten, übrige Kosten und Aufwendungen | 11.459 (10.867) |
| 4 | Kosten für Rohstoffe und Handelswaren                           | 34.009 (26.413) |

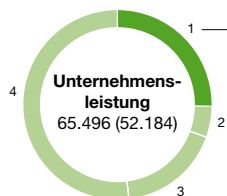

#### Verwendung der Wertschöpfung

(Vorjahreszahlen in Klammern)

|        |                                                                                   |
|--------|-----------------------------------------------------------------------------------|
| 49,4 % | <b>Mitarbeiter</b><br>(63,7 %)                                                    |
| 15,5 % | <b>Staat</b><br>(14,9 %)                                                          |
| 3,1 %  | <b>Andere Gesellschafter</b><br>(2,2 %)                                           |
| 4,6 %  | <b>Darlehensgeber</b><br>(6,5 %)                                                  |
| 27,4 % | <b>Verbleibende Wertschöpfung</b><br>(Ausschüttung und Thesaurierung)<br>(12,7 %) |

### Wertschöpfung

- Finanzieller Beitrag der BASF-Gruppe zum privaten und öffentlichen Einkommen
- Anstieg um 49,3 % auf 16,7 Milliarden € gegenüber 2009
- Größter Anteil entfällt auf Mitarbeiter

### Verwendung der Wertschöpfung

- 8.228 Millionen € für Mitarbeiter
- 2.583 Millionen € für Steuern
- 50 Millionen € für gesellschaftliches Engagement
- 4.557 Millionen € verbleibende Wertschöpfung für Ausschüttung an die Aktionäre der BASF SE und Thesaurierung

## Forschung und Entwicklung

Herausforderungen begegnen, Lösungen entwickeln, Zukunft gestalten

**Forschung und Entwicklung ist eine der tragenden Säulen der BASF. In internationalen und interdisziplinären Teams arbeiten die Mitarbeiter unserer Forschung an Antworten auf die Herausforderungen der Zukunft und sichern nachhaltiges organisches Wachstum für die BASF. Mit unseren neuen Produkten und Prozessen sind wir Innovationsmotor für fast alle Industriebranchen. Dadurch helfen wir unseren Kunden, langfristig noch erfolgreicher zu sein.**

Globale Megatrends wie Bevölkerungswachstum, zunehmende Verstädterung und steigender Ressourcen- und Energiebedarf geben die Zielrichtung für unsere zukunftsorientierten Projekte vor. Die weiter gesteigerten Forschungsleistungen der BASF begleiten den wirtschaftlichen Aufschwung und sind Motor unseres Wachstums.

Der wichtigste Pfeiler unserer Innovationskraft ist unser globales Team hochqualifizierter Mitarbeiter unterschiedlicher Fachrichtungen. Insgesamt stieg die Mitarbeiterzahl in Forschung und Entwicklung 2010 auf rund 9.600. Unsere Wissens- und Kompetenzzentren sind die vier zentralen Technologieplattformen Polymerforschung, Forschung Wirk- und Effektstoffe, Forschung und Technologie Chemikalien sowie Forschung Pflanzenbiotechnologie. Ergänzt werden sie durch die dezentralen Entwicklungseinheiten unserer Unternehmensbereiche.

Unser Projektportfolio umfasste 2010 etwa 3.000 Projekte. Die Aufwendungen für Forschung und Entwicklung stiegen um 94 Millionen € auf 1.492 Millionen €. Mit 78 % der gesamten Aufwendungen liegt die Verantwortung für die Forschung überwiegend bei den Unternehmensbereichen der Segmente. Weitere 22 % der Aufwendungen entfielen auf die bereichsübergreifende strategische Konzernforschung, die sich thematisch auf die Wachstumscluster der BASF konzentriert. Nach wie vor fließt etwa ein Drittel unserer Forschungs- und Entwicklungsaufwendungen in Produkte und Technologien zur Steigerung der Energieeffizienz sowie in Klimaschutz, Ressourcenschonung und alternative Rohstoffe.

→ Mehr zu Forschung und Entwicklung in den Segmenten ab Seite 46

Durch eine enge weltweite Vernetzung mit zahlreichen Partnern aus Wissenschaft und Wirtschaft schaffen wir einen internationalen und interdisziplinären Wissensverbund – ein wichtiger Erfolgsfaktor für effiziente und zukunftsorientierte Forschung und Entwicklung. Unser Netzwerk umfasst etwa 1.900 Kooperationen mit Universitäten, Forschungsinstituten, Start-up-Unternehmen und Industriepartnern.

→ Mehr dazu unter [basf.com/forschungsorganisation](http://basf.com/forschungsorganisation)

Beispiel für eine solche Kooperation ist das 2010 von der BASF gegründete internationale Kompetenznetzwerk für Elektrochemie, in dem grundlegende Fragen zu Materialien und Komponenten von Batteriesystemen für die Elektromobilität und die stationäre Stromspeicherung beantwortet werden sollen. Damit ergänzen wir das vom Bundesministerium für Bildung und Forschung geförderte HE-Lion-Projekt, in dem die BASF mit ihren insgesamt 17 Partnern aus Industrie und Wissenschaft leistungsfähigere, sichere und kostengünstigere Lithium-Ionen-Batterien für zukünftige Antriebssysteme entwickelt.

Mit unserem Projektportfolio tragen wir erheblich zum ökonomischen Erfolg der BASF bei. Unser Ziel, im Jahr 2010 einen Umsatz von 6 Milliarden € mit Produktinnovationen – also mit neuen und verbesserten Produkten oder Anwendungen, die maximal fünf Jahre auf dem Markt sind – zu generieren, haben wir deutlich übertroffen. Im Jahr 2015 wollen wir mit Produktinnovationen einen Umsatz von bis zu 8 Milliarden € erzielen.

Im Jahr 2010 haben wir erstmals den Barwert unserer Forschungspipeline veröffentlicht. Um diesen Wert zu bestimmen, werden für jedes Projekt Geschäftspläne aufgestellt, welche die voraussichtlichen Ausgaben für Forschung, Entwicklung und Herstellung der künftigen Produkte sowie die erwarteten Einnahmen berücksichtigen. Mit Hilfe dieser Geschäftspläne ermitteln wir den Barwert unserer Forschungsprojekte im Erfolgsfall. Insgesamt ist unsere Forschungspipeline knapp 21 Milliarden € wert – das zeigt, wie wichtig Forschung und Entwicklung für das nachhaltige Wachstum der BASF sind.

→ Mehrperiodenübersicht zu Aufwendungen im Bereich Forschung und Entwicklung siehe Zehnjahresübersicht, Seite 210

### Forschung und Entwicklung

- Rund 9.600 Mitarbeiter arbeiten im Bereich Forschung und Entwicklung
- Projektportfolio mit etwa 3.000 Projekten
- Für 2010 angestrebter Umsatz von 6 Milliarden € allein aus Produktinnovationen deutlich übertroffen
- Im Jahr 2015 Umsatz aus Produktinnovationen von bis zu 8 Milliarden € erwartet
- Barwert BASF-Forschungspipeline: Knapp 21 Milliarden €

### Ausgaben für Forschung und Entwicklung in den Segmenten

|   |                        |     |
|---|------------------------|-----|
| 1 | Chemicals              | 9%  |
| 2 | Plastics               | 10% |
| 3 | Performance Products   | 19% |
| 4 | Functional Solutions   | 12% |
| 5 | Agricultural Solutions | 26% |
| 6 | Oil & Gas              | 1%  |
| 7 | Sonstige               | 1%  |
| 8 | Konzernforschung       | 22% |

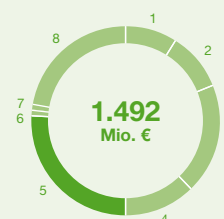

Eine wichtige Größe zur Messung der Forschungsleistung sind Patente. Sie dienen als Indikatoren für langfristige Wettbewerbsfähigkeit und sind ein Zeichen für die Innovationskraft eines Unternehmens. Auf Basis des an der Wissenschaftlichen Hochschule für Unternehmensführung (WHU) bei Koblenz entwickelten Patent Asset Index™ konnten wir 2009 erstmals unser Patentportfolio industrieweit mit anderen Unternehmen vergleichen. Wie schon im Vorjahr, belegten wir 2010 den ersten Platz in diesem Ranking. Wir sind damit global eines der innovativsten Unternehmen der Chemieindustrie. 2010 hat die BASF weltweit etwa 1.100 Patente neu angemeldet.

### Die Wachstumscluster der BASF

Mit Hilfe der Chemie als Querschnittstechnologie finden wir Lösungen für Herausforderungen, die sich aus den globalen Megatrends ergeben. Unsere Forschungsprojekte bündeln wir in den Wachstumsclustern Pflanzenbiotechnologie, Weiße Biotechnologie, Rohstoffwandel, Energiemanagement und Nanotechnologie. In ihnen stehen Technologien und Märkte der Zukunft im Mittelpunkt.

Eine Kernaufgabe im **Wachstumscluster Pflanzenbiotechnologie** ist es, Nutzpflanzen zu entwickeln, die Landwirten bessere und sicherere Ernten liefern – mit dem Ziel, auf der uns zur Verfügung stehenden landwirtschaftlichen Fläche Nahrungsmittel für immer mehr Menschen zu produzieren. Wir entwickeln unter anderem gemeinsam mit Monsanto gentechnisch veränderte Pflanzen, die widerstandsfähiger und ertragreicher sind. Erstes Produkt dieser Zusammenarbeit ist ein trocken-toleranter Mais, der voraussichtlich 2012 in den US-amerikanischen Markt eingeführt wird. Weitere Kooperationspartner bei der Entwicklung wichtiger Kulturpflanzen sind Bayer CropScience (Reis), das Forschungszentrum Centro de Tecnologia Canaveira (Zuckerrohr) und die KWS Saat AG (Zuckerrübe).

Im **Wachstumscluster Weiße Biotechnologie** nutzen wir innovative Technologien der Biokatalyse und Fermentation. Gemeinsam mit unserem Kooperationspartner Solix Biofuels

forschen wir zum Beispiel an der Herstellung von Spezialchemikalien mittels Algen. Solix testet mit einer eigenen Technologie verschiedene Algenarten für die BASF. Algen können in ihrem Lebenszyklus Kohlendioxid (CO<sub>2</sub>) aufnehmen und in ihre Stoffwechselprodukte integrieren. Wir ergänzen so unser Technologieportfolio im Bereich der industriellen Biotechnologie.

Im **Wachstumscluster Rohstoffwandel** suchen wir nach Alternativen zu Erdöl als Rohstoff für die Chemieindustrie. Erdgas, nachwachsende Rohstoffe oder auch CO<sub>2</sub> können langfristig neben Erdöl Ausgangsstoffe für unsere Wertschöpfungsketten sein und somit unsere Rohstoffbasis verbreitern. Wir entwickeln neue Technologien zur Nutzung von CO<sub>2</sub> zur Herstellung von Kunststoffen, Kunststoffvorprodukten oder wichtigen Zwischenprodukten.

Der steigende Energiebedarf ist ein Treiber in unserem **Wachstumscluster Energiemanagement**. Circa 20% des weltweiten Elektrizitätsverbrauchs wird für die Erzeugung von Licht benötigt. Wir arbeiten unter anderem an der Entwicklung von neuen Materialien für energiesparende Lichtlösungen auf Basis von organischen Leuchtdioden, den OLEDs. In einem vom Bundesministerium für Bildung und Forschung geförderten Verbundprojekt entwickeln wir zum Beispiel ein hocheffizientes, langzeitstabiles Blauemittersystem – ein Schlüsselement für neue OLED-Lichtquellen.

Nachhaltige Systemlösungen für die Automobil- und Bauindustrie stehen unter anderem im **Wachstumscluster Nanotechnologie** im Fokus. Beispiele dafür sind Wärmemanagementsysteme mit intelligenten Infrarotpigmenten und neue Schäume, welche die Wärmeaufnahme und -abgabe von Autos oder Gebäuden regulieren. Auf diese Weise wird weniger Energie für die Klimatechnik verbraucht.

Unsere erfolgreichen Projekte bestärken uns, unsere Forschungsaktivitäten weiterhin auf die globalen Megatrends auszurichten. Forschung und Entwicklung sind essenziell für das dauerhafte Wachstum der BASF und liefern einen wichtigen Beitrag für eine lebenswerte Zukunft. 

### Wachstumscluster der BASF

- In fünf Wachstumsclustern werden Lösungen für Herausforderungen gesucht, die sich aus globalen Megatrends ergeben
- Wachstumscluster: Pflanzenbiotechnologie, Weiße Biotechnologie, Rohstoffwandel, Energiemanagement und Nanotechnologie
- Technologien und Märkte der Zukunft stehen in Wachstumsclustern im Mittelpunkt

### BASF auf Platz 1 im Patent Asset Index

**Patent Asset Index** (normiert, Stand 31.12.2010)  
Indikator für die Innovationskraft von Unternehmen <sup>1</sup>

|              |            |                                                                                       |
|--------------|------------|---------------------------------------------------------------------------------------|
| <b>BASF</b>  | <b>100</b> |  |
| Bayer        | 74         |  |
| DuPont       | 66         |  |
| Dow Chemical | 64         |  |
| Evonik       | 29         |  |

Quelle: PatentSight; Methodik: Prof. Ernst, WHU

<sup>1</sup> Basierend auf der Portfoliogröße (Anzahl Patentfamilien) und der Wettbewerbswirkung (Zitathäufigkeit in weiteren Patenten und Marktabdeckung)

## Entwicklung der Weltwirtschaft

**Nach der schweren Rezession im Vorjahr erlebte die Weltwirtschaft 2010 eine dynamische konjunkturelle Erholung in allen Regionen. Dem kräftigen Aufschwung des ersten Halbjahres folgte ein schwächeres Wachstum in der zweiten Jahreshälfte. Das globale Bruttoinlandsprodukt stieg im Vergleich zum Vorjahr insgesamt deutlich (+3,9%) und lag über dem ursprünglich von uns prognostizierten Wert für 2010 (+2,7%).**

Im Jahr 2010 war das starke Wachstum des globalen Bruttoinlandsprodukts (+3,9%) vor allem auf die dynamische wirtschaftliche Entwicklung der Schwellenländer in Asien und Südamerika, auf die positiven Auswirkungen der staatlichen Konjunkturprogramme und auf den Wiederaufbau industrieller Lagerbestände zurückzuführen. Weitere Wachstumsimpulse resultierten aus der weltweit anziehenden Investitionsgüternachfrage und aus der spürbaren Belebung des internationalen Handels, die insbesondere den exportorientierten Volkswirtschaften wie Deutschland und Japan eine schnelle Erholung ermöglichte.

### Entwicklung nach Regionen

Vor dem Hintergrund der fiskalischen Probleme einiger europäischer Länder waren die Wachstumsraten in **Europa** im Jahr 2010 sehr unterschiedlich. Insgesamt nahm das Bruttoinlandsprodukt im ersten Halbjahr stark zu, in der zweiten Jahreshälfte schwächte sich das Wachstum dagegen ab. Insbesondere der private Konsum verlor mit Auslaufen der staatlichen Konjunkturprogramme an Dynamik. Im Gegensatz zum Vorjahr erholte sich das Wachstum des Bruttoinlandsprodukts in der Europäischen Union (2009: -4,2%; 2010: +1,9%). Die im Zuge der Wirtschaftskrise gesunkene Kapazitätsauslastung in der Industrie stieg deutlich an. Vor allem Deutschland profitierte von der Erholung der Weltwirtschaft: Die starke Auslandsnachfrage nach Investitionsgütern führte zu einem kräftigen Anstieg der Nettoexporte und somit zu einem überdurchschnittlich hohen Wachstum (+3,6%).

In den **USA** nahm die Wirtschaftsleistung im Jahresdurchschnitt 2010 wieder spürbar zu (+3,0%). Starke Impulse kamen von einer expansiven Fiskal- und Geldpolitik. Die vergleichsweise hohe Arbeitslosigkeit belastete die Erholung des privaten Konsums. Die anhaltend niedrigen Bauinvestitionen dämpften das gesamtwirtschaftliche Wachstum. Unsicherheiten auf den internationalen Kapital- und Devisenmärkten führten im Jahresverlauf zu erheblichen Schwankungen des US-Dollar gegenüber anderen Währungen.

**Asien (ohne Japan)** wuchs 2010 kräftig (+9,2%), was vor allem auf das dynamische Wirtschaftswachstum Chinas (+10,3%) zurückzuführen ist. Dort belebten die massiven staatlichen Konjunktur- und Infrastrukturprogramme die wirtschaftliche Entwicklung. Die Nachfrage nach Konsum- und Investitionsgütern in China stimulierte die übrigen ost- und südostasiatischen Volkswirtschaften. Indien war von der Wirtschaftskrise vergleichsweise schwach betroffen und verzeichnete 2010 ebenfalls ein kräftiges Wachstum (+10,6%).

Während die Wachstumsrate in **Japan** im ersten Quartal 2010 stark war, stagnierte die Wirtschaft gegen Ende des Jahres. Die deutliche Aufwertung des Yen minderte die Impulse der Auslandsnachfrage im zweiten Halbjahr. Auch die auslaufenden Konjunkturprogramme dämpften das Wachstum. Die Exportwirtschaft profitierte von der Nachfrage aus China. Im Vergleich zum Vorjahr stieg das Bruttoinlandsprodukt merklich (+3,5%).

**Südamerika** wuchs 2010 kräftig (+6,1%). Wieder ansteigende Rohstoffexporte, die anhaltend solide Konsumnachfrage sowie zunehmende ausländische Direktinvestitionen belebten die wirtschaftliche Entwicklung. Regionale Wachstumstreiber waren vor allem die ansteigende Binnennachfrage sowie die Investitionstätigkeit in Brasilien.

→ **Prognose der wirtschaftlichen Rahmenbedingungen im Jahr 2011**  
ab Seite 112

### Weltwirtschaftliche Entwicklung 2010

- Weltweites Bruttoinlandsprodukt stieg im Vorjahresvergleich deutlich (+3,9%) und lag über unserer ursprünglichen Prognose (+2,7%)
- Wachstum in der zweiten Jahreshälfte leicht rückläufig
- Wirtschaftswachstum durch dynamische Entwicklung der Schwellenländer in Asien und Südamerika, Konjunkturprogramme sowie Wiederaufbau von Lagerbeständen gestützt

### Bruttoinlandsprodukt 2010 Reale Veränderung gegenüber Vorjahr

|                    |             |                                                                                       |
|--------------------|-------------|---------------------------------------------------------------------------------------|
| <b>Welt</b>        | <b>3,9%</b> |  |
| EU                 | 1,9%        |  |
| USA                | 3,0%        |  |
| Asien (ohne Japan) | 9,2%        |  |
| Japan              | 3,5%        |  |
| Südamerika         | 6,1%        |  |

## Entwicklung wichtiger Abnehmerbranchen

**Nach dem Einbruch im Vorjahr (–8,1 %) nahm die globale Industrieproduktion 2010 stark zu (+8,9 %) und erholte sich besser als von uns prognostiziert (+4,9 %). Gründe für den konjunkturellen Aufschwung waren im Wesentlichen das kräftige Wachstum Asiens sowie die weltweiten fiskal- und geldpolitischen Konjunkturprogramme. In den Schwellenländern Asiens stieg die Industrieproduktion (+14,5 %) doppelt so stark wie in den Industrieländern der OECD (+7,2 %).**

Die **Automobilindustrie** profitierte bis Mitte 2010 von staatlichen Konjunkturprogrammen. Dank des kräftigen asiatischen Wirtschaftswachstums verzeichnete die Branche zudem eine stark gestiegene Nachfrage. Die Anzahl der produzierten Automobile nahm weltweit massiv zu (+21,5 %). Nach zwei schwachen Jahren wuchs die US-amerikanische Automobilproduktion sehr kräftig (+35,0 %). In Europa erzielte der Markt im Vorjahresvergleich ein deutliches Plus (+8,4 %).

Die **Bauwirtschaft** war weltweit rückläufig (–1,3 %). Insbesondere in den USA (–11,0 %), in Japan (–8,0 %) und in der Europäischen Union (–3,6 %) schrumpfte sie gegenüber dem Vorjahr erneut. Staatliche Infrastrukturprojekte konnten hier die Rückgänge der privaten und gewerblichen Bautätigkeit nicht kompensieren. In den Schwellenländern Asiens wuchs die Bauwirtschaft dagegen weiter kräftig (+8,2 %).

Dank weltweiter Nachholeffekte erholte sich die **Elektroindustrie** spürbar (+12,0 %). In den Industrieländern (+10,1 %), in Japan (+22,1 %) und in den Schwellenländern Asiens (+19,0 %) erhöhte sich die Produktion gegenüber dem Vorjahr deutlich.

Auch die **Informations- und Kommunikationstechnologieindustrie (ICT)** erlebte einen massiven Aufschwung, insbesondere auf Grund der hohen Nachfrage nach Unterhaltungselektronik. Wegen des starken Wachstums (+16,6 %) erreichte die Produktion bereits nach einem Jahr wieder das Vorkrisenniveau.

In der **Textilindustrie** setzte sich der globale Trend zur Verlagerung der Produktion nach Asien fort. Ausgehend von einem niedrigen Produktionsniveau, verzeichneten die Industrieländer erstmals seit sieben Jahren wieder ein positives Wachstum

(+6,4 %). In Asien (ohne Japan) nahm die Produktion deutlich zu (+10,5 %). Weltweit stieg sie insgesamt stark an (+8,8 %).

Die **Papierindustrie** wuchs global um 7,9 %. Vor allem die Nachfrage nach Verpackungspapieren bestimmte diese Entwicklung. Regional wurde das Wachstum von den Schwellenländern Asiens (+13,4 %) getrieben. Die Produktion in den Industrieländern stieg ebenfalls deutlich an (+4,4 %).

Das Wachstum der **Nahrungsmittelindustrie** war überdurchschnittlich (+3,9 %). Sowohl in den Industrieländern (+2,5 %) als auch in den Schwellenländern (+6,9 %) erhöhte sich die Produktion deutlich.

Die **Landwirtschaft** verzeichnete weltweit ein erhebliches Wachstum (+4,2 %). In den Industrieländern nahm die Produktion leicht zu (+1,7 %). In den Schwellenländern stieg sie auf Grund günstiger Witterungsverhältnisse in China und Indien insgesamt deutlich (+5,5 %).

→ **Prognose der wirtschaftlichen Rahmenbedingungen im Jahr 2011**  
ab Seite 112

### Wachstum wichtiger Abnehmerbranchen 2010 Reale Veränderung gegenüber Vorjahr

|                                         |      |        |  |
|-----------------------------------------|------|--------|--|
| Industrie gesamt                        | OECD | 7,2 %  |  |
|                                         | Welt | 8,9 %  |  |
| Automobilindustrie<br>(prod. Stückzahl) | OECD | 19,6 % |  |
|                                         | Welt | 21,5 % |  |
| Bauwirtschaft                           | OECD | –5,4 % |  |
|                                         | Welt | –1,3 % |  |
| Elektroindustrie                        | OECD | 10,1 % |  |
|                                         | Welt | 12,0 % |  |
| ICT-Industrie                           | OECD | 16,6 % |  |
|                                         | Welt | 16,6 % |  |
| Textilindustrie                         | OECD | 6,4 %  |  |
|                                         | Welt | 8,8 %  |  |
| Papierindustrie                         | OECD | 4,4 %  |  |
|                                         | Welt | 7,9 %  |  |
| Nahrungsmittel                          | OECD | 2,5 %  |  |
|                                         | Welt | 3,9 %  |  |
| Landwirtschaft                          | OECD | 1,7 %  |  |
|                                         | Welt | 4,2 %  |  |

### Entwicklung der Industrieproduktion 2010

- Starke Zunahme der globalen Industrieproduktion (+8,9 %); Impulse durch weltweite Konjunkturprogramme
- Automobilproduktion nachfragebedingt massiv erhöht (+21,5 %); Bauwirtschaft global geschrumpft (–1,3 %)
- Produktion in Elektro-, ICT-, Textil-, Papier- und Nahrungsmittelindustrie sowie in Landwirtschaft deutlich gestiegen

### BASF-Umsatz nach Branchen Direkte Kunden

|         |                                                          |
|---------|----------------------------------------------------------|
| > 15 %  | Chemie                                                   |
| 10–15 % | Automobil   Versorger                                    |
| 5–10 %  | Bau   Landwirtschaft   Kunststoffindustrie   Ölindustrie |
| < 5 %   | Elektro/Elektronik   Möbel   Papier                      |
| 10–15 % | Anteil sonstiger Branchen                                |



## Entwicklung der chemischen Industrie

Die chemische Industrie verzeichnete im Jahr 2010 einen kräftigen Aufschwung: Nach negativen Wachstumsraten in den beiden vorangegangenen Jahren erreichte die globale Chemieproduktion 2010 wieder das Vorkrisenniveau. Insbesondere das erste Halbjahr war von einer außerordentlich starken Erholung geprägt. In der zweiten Jahreshälfte nahm die Wachstumsdynamik ab. Die weltweite Chemieproduktion (ohne Pharma) wuchs um 9,3 %.

Auf Grund der großen Nachfrage und des Lageraufbaus in wichtigen Abnehmerbranchen erreichte die **weltweite Chemieproduktion** (ohne Pharma) im Jahr 2010 wieder das Vorkrisenniveau. In Industrieländern wie Deutschland und Japan wurde die Produktion durch ein dynamisches Auslandsgeschäft gestützt, das sich positiver entwickelte als erwartet. Zu Beginn des Aufschwungs in der chemischen Industrie kam es weltweit zu Produktionsengpässen, da Anlagen zunächst wieder in Betrieb genommen werden mussten.

Verglichen mit anderen Industrieländern, nahm die Chemieproduktion in der Europäischen Union besonders stark zu (+10,1 %). Auf Grund der engen Vernetzung der Chemieindustrie mit dynamisch wachsenden exportorientierten Abnehmerbranchen stieg vor allem die Produktion in Deutschland massiv an (+17,7 %). Auch Japan verzeichnete ein außergewöhnlich hohes Plus (+8,8 %). In den USA minderte der zeitweise starke US-Dollar die Wachstumsdynamik (+5,0 %). In Südamerika (+6,4 %) und Asien (ohne Japan) (+13,0 %) wuchs die Chemieproduktion dagegen kräftig.

### Chemieproduktion (ohne Pharma) 2010

Reale Veränderung gegenüber Vorjahr

|                    |        |
|--------------------|--------|
| Welt               | 9,3 %  |
| EU                 | 10,1 % |
| USA                | 5,0 %  |
| Asien (ohne Japan) | 13,0 % |
| Japan              | 8,8 %  |
| Südamerika         | 6,4 %  |

Der **Rohölpreis** der Sorte Brent stieg im Jahr 2010 an; Schwankungen im Jahresverlauf waren vergleichsweise moderat. Die Notierungen bewegten sich im Monatsdurchschnitt zwischen 73 US\$/Barrel und 92 US\$/Barrel. Die konjunkturelle Erholung und eine stärkere Nachfrage führten im Verlauf des Jahres zu steigenden Preisen. Im Jahresdurchschnitt lag der Ölpreis mit rund 80 US\$/Barrel um etwa 30 % über dem Vorjahreswert und übertraf somit auch den Durchschnitt des Vorkrisenjahres 2007.

Der monatliche Durchschnittspreis für den Chemierohstoff **Naphtha** schwankte im Verlauf des Jahres zwischen 620 US\$/Tonne im Juli und über 840 US\$/Tonne im Dezember. Im Jahresdurchschnitt lag der Preis für Naphtha mit 710 US\$/Tonne um rund 35 % über dem Vorjahreswert.

Der US-amerikanische Gaspreis bewegte sich im Verlauf des Jahres 2010 zwischen 3 US\$/mbtu und 6 US\$/mbtu. Im Jahresdurchschnitt lag er mit etwa 4 US\$/mbtu leicht über dem Durchschnitt von 2009. In Europa sank der durchschnittliche Gaspreis im Vergleich zum Vorjahr geringfügig und betrug rund 8 US\$/mbtu.

→ **Prognose der wirtschaftlichen Rahmenbedingungen im Jahr 2011**  
ab Seite 112

### Entwicklung der chemischen Industrie 2010

- Weltweite Chemieproduktion (ohne Pharma) um 9,3 % gewachsen; Vorkrisenniveau wieder erreicht
- Verglichen mit anderen Industrieländern besonders starker Anstieg der Chemieproduktion in der Europäischen Union (+10,1 %)
- Rohölpreis der Sorte Brent im Jahr 2010 gestiegen; vergleichsweise moderate Schwankungen

### Preisentwicklung für Rohöl (Brent) und Naphtha (US\$/Barrel, US\$/Tonne)

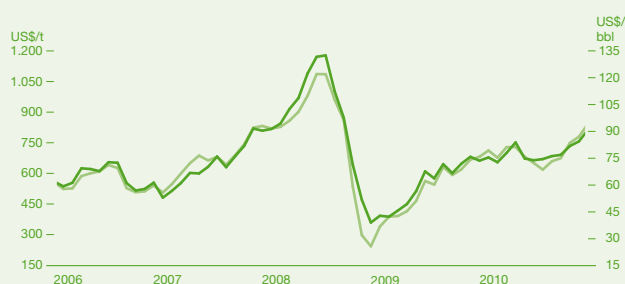

— Ölpreis (Brent blend spot) in US\$/Barrel  
— Naphthapreis (spot) in US\$/Tonne

## Geschäftsentwicklung der BASF-Gruppe

### Umsatz und Ergebnis (Millionen €)

|                                                            | 2010   | 2009   | Veränderung % |
|------------------------------------------------------------|--------|--------|---------------|
| Umsatz                                                     | 63.873 | 50.693 | 26,0          |
| Ergebnis der Betriebstätigkeit vor Abschreibungen (EBITDA) | 11.131 | 7.388  | 50,7          |
| EBITDA-Marge (%)                                           | 17,4   | 14,6   | –             |
| Ergebnis der Betriebstätigkeit (EBIT) vor Sondereinflüssen | 8.138  | 4.852  | 67,7          |
| Ergebnis der Betriebstätigkeit (EBIT)                      | 7.761  | 3.677  | 111,1         |
| Finanzergebnis                                             | –388   | –598   | 35,1          |
| Ergebnis vor Ertragsteuern                                 | 7.373  | 3.079  | 139,5         |
| Jahresüberschuss                                           | 5.074  | 1.655  | 206,6         |
| Jahresüberschuss nach Anteilen anderer Gesellschafter      | 4.557  | 1.410  | 223,2         |
| Ergebnis je Aktie (€)                                      | 4,96   | 1,54   | 223,2         |
| Bereinigtes Ergebnis je Aktie (€)                          | 5,73   | 3,01   | 90,4          |

### Umsatz und Ergebnis in den Quartalen 2010 (Millionen €)

|                                                            | 1. Quartal | 2. Quartal | 3. Quartal | 4. Quartal | Gesamtjahr |
|------------------------------------------------------------|------------|------------|------------|------------|------------|
| Umsatz                                                     | 15.454     | 16.214     | 15.781     | 16.424     | 63.873     |
| Ergebnis der Betriebstätigkeit vor Abschreibungen (EBITDA) | 2.627      | 2.867      | 2.934      | 2.703      | 11.131     |
| Ergebnis der Betriebstätigkeit (EBIT) vor Sondereinflüssen | 1.954      | 2.206      | 2.213      | 1.765      | 8.138      |
| Ergebnis der Betriebstätigkeit (EBIT)                      | 1.840      | 2.079      | 2.155      | 1.687      | 7.761      |
| Finanzergebnis                                             | –80        | –93        | –105       | –110       | –388       |
| Ergebnis vor Ertragsteuern                                 | 1.760      | 1.986      | 2.050      | 1.577      | 7.373      |
| Jahresüberschuss nach Anteilen anderer Gesellschafter      | 1.029      | 1.183      | 1.245      | 1.100      | 4.557      |
| Ergebnis je Aktie (€)                                      | 1,12       | 1,29       | 1,35       | 1,20       | 4,96       |
| Bereinigtes Ergebnis je Aktie (€)                          | 1,32       | 1,50       | 1,52       | 1,39       | 5,73       |

### Umsatz und Ergebnis in den Quartalen 2009 (Millionen €)

|                                                            | 1. Quartal | 2. Quartal | 3. Quartal | 4. Quartal | Gesamtjahr |
|------------------------------------------------------------|------------|------------|------------|------------|------------|
| Umsatz                                                     | 12.219     | 12.502     | 12.798     | 13.174     | 50.693     |
| Ergebnis der Betriebstätigkeit vor Abschreibungen (EBITDA) | 1.587      | 1.576      | 1.993      | 2.232      | 7.388      |
| Ergebnis der Betriebstätigkeit (EBIT) vor Sondereinflüssen | 985        | 1.140      | 1.248      | 1.479      | 4.852      |
| Ergebnis der Betriebstätigkeit (EBIT)                      | 928        | 772        | 971        | 1.006      | 3.677      |
| Finanzergebnis                                             | –202       | –59        | –173       | –164       | –598       |
| Ergebnis vor Ertragsteuern                                 | 726        | 713        | 798        | 842        | 3.079      |
| Jahresüberschuss nach Anteilen anderer Gesellschafter      | 375        | 343        | 237        | 455        | 1.410      |
| Ergebnis je Aktie (€)                                      | 0,41       | 0,37       | 0,26       | 0,50       | 1,54       |
| Bereinigtes Ergebnis je Aktie (€)                          | 0,55       | 0,79       | 0,61       | 1,06       | 3,01       |

### Umsatz

Spitzenwert erreicht; deutlich gestiegene Mengen infolge konjunktureller Erholung bei wichtigen Kundenbranchen; höhere Preise bei vielen Produkten

+26%

### Umsatz (Millionen €)

|      |        |  |
|------|--------|--|
| 2010 | 63.873 |  |
| 2009 | 50.693 |  |
| 2008 | 62.304 |  |
| 2007 | 57.951 |  |
| 2006 | 52.610 |  |

Die BASF hat im Jahr 2010 bei Umsatz und Ergebnis Spitzenwerte erzielt. Insbesondere das Chemiegeschäft<sup>1</sup> profitierte von der kräftigen wirtschaftlichen Erholung, die sich 2010 dynamischer entwickelt hat, als zunächst von uns erwartet. In der ersten Jahreshälfte wurde die Nachfrage zusätzlich durch das Wiederauffüllen von Lägern bei unseren Kunden in wichtigen Abnehmerindustrien gestärkt. Bei einigen chemischen Produkten kam es zeitweilig zu Angebotsengpässen. Gestiegene Rohstoffkosten konnten größtenteils an die Kunden weitergegeben werden. In diesem günstigen Marktumfeld haben sich die Margen bei zahlreichen Produkten verbessert.

Verglichen mit dem Jahr 2009, stieg der Umsatz um 26 % auf 63.873 Millionen €. Das Ergebnis der Betriebstätigkeit verbesserte sich um 111 % und lag bei 7.761 Millionen €.

→ Informationen zur Entwicklung der wirtschaftlichen Rahmenbedingungen im Jahr 2011 auf den Seiten 112 bis 114

## Umsatz und Ergebnis

Als Folge der konjunkturellen Erholung nahm die Nachfrage aus unseren wichtigen Abnehmerbranchen zu, der Absatz stieg signifikant. Das Geschäft entwickelte sich in allen Regionen erfreulich, Wachstumsimpulse kamen insbesondere aus Asien. Die Preise lagen bei vielen Produkten über dem Vorjahresniveau. Vor allem die Bereiche Petrochemicals und Catalysts verzeichneten kräftige Preissteigerungen. Die Aufwertung zahlreicher Währungen gegenüber dem Euro stützte die gute Umsatzentwicklung zusätzlich. Auch die ganzjährige Einbeziehung der ehemaligen Ciba-Geschäfte wirkte sich positiv auf das Umsatzwachstum aus. Andere Unternehmenskäufe oder -verkäufe hatten nur einen geringen Umsatzeinfluss; der Erwerb von Cognis erfolgte zum 9. Dezember 2010.

## Umsatzeinflüsse BASF-Gruppe (Millionen €)

|                                                         | 2010   | Veränderung zu 2009 (%) |
|---------------------------------------------------------|--------|-------------------------|
| Mengen                                                  | 5.718  | 11,3                    |
| Preise                                                  | 3.923  | 7,7                     |
| Währungen                                               | 2.364  | 4,7                     |
| Akquisitionen und Änderungen des Konsolidierungskreises | 1.233  | 2,4                     |
| Devestitionen                                           | -58    | -0,1                    |
|                                                         | 13.180 | 26,0                    |

Im Segment **Chemicals** lag der Umsatz preis- und mengenbedingt weit über dem Vorjahreswert. Bei einigen Produkten war zeitweilig das Angebot knapp. Gestiegene Rohstoffkosten konnten größtenteils über unsere Verkaufspreise weitergegeben werden. Insbesondere der Bereich Petrochemicals profitierte von dieser Entwicklung. Infolge gestiegener Margen, vor allem bei Grundprodukten, und höherer Mengen verbesserte sich das Ergebnis der Betriebstätigkeit des Segments stark.

Auch bei **Plastics** konnten wir den Umsatz des Vorjahres weit übertreffen. Der konjunkturelle Aufschwung wichtiger Kundenindustrien belebte die Nachfrage spürbar. Insbesondere die Automobilindustrie erholte sich schneller als von uns erwartet. Unsere Anlagen waren gut ausgelastet. Während die Preise bei Polyurethanes weitgehend stabil blieben, stiegen sie bei Performance Polymers vor allem infolge höherer Rohstoffkosten an. Bei insgesamt stabilen Margen verbesserte sich das Ergebnis der Betriebstätigkeit stark.

Das Segment **Performance Products** profitierte nicht nur von der wirtschaftlichen Erholung, sondern auch von der schnellen und erfolgreichen Ciba-Integration und der Restrukturierung der kombinierten Geschäfte. Nachfrage und Umsatz nahmen in allen Unternehmensbereichen zu. Besonders im ersten Halbjahr trug das Wiederauffüllen von Lägern in der gesamten Wertschöpfungskette dazu bei. Während die Sondereinflüsse aus der Ciba-Integration das Ergebnis der Betriebstätigkeit des

## Ergebnis der Betriebstätigkeit

Ergebnis gegenüber Vorjahr mehr als verdoppelt; Anstieg insbesondere im Chemiegeschäft auf Grund hoher Anlagenauslastung und guter Margen, vor allem bei Grundprodukten

+111%

## Ergebnis der Betriebstätigkeit (Millionen €)

|      |       |  |
|------|-------|--|
| 2010 | 7.761 |  |
| 2009 | 3.677 |  |
| 2008 | 6.463 |  |
| 2007 | 7.316 |  |
| 2006 | 6.750 |  |

<sup>1</sup> Unser Chemiegeschäft umfasst die Segmente Chemicals, Plastics, Performance Products und Functional Solutions.

Segments 2009 belasteten, haben Maßnahmen zur Fixkostenreduktion und konsequent realisierte Synergien das Ergebnis im Jahr 2010 stark verbessert.

Bei **Functional Solutions** lag der Umsatz mengen- und preisbedingt weit über dem Vorjahreswert. Bei Catalysts und Coatings führte vor allem die verbesserte Nachfrage aus der Automobilindustrie zu einer Absatz- und Umsatzsteigerung. Im Bereich Construction Chemicals stieg der Umsatz dagegen weniger kräftig. Dank unserer strikten Kostendisziplin und unserer Maßnahmen zur Effizienzsteigerung leisteten alle drei Bereiche einen deutlichen Beitrag zum stark verbesserten Ergebnis der Betriebstätigkeit des Segments.

**Agricultural Solutions** hat den sehr guten Umsatz des Vorjahres signifikant übertroffen. Bei Insektiziden, Herbiziden und Fungiziden lag der Absatz über dem des Vorjahres. Rückläufige Preise wurden durch die Ausweitung des Geschäftsvolumens und positive Währungseffekte kompensiert. Das Ergebnis der Betriebstätigkeit blieb trotz erhöhter Aufwendungen im Vertrieb sowie für Forschung und Entwicklung nahezu stabil.

Im Segment **Oil & Gas** ging der Umsatz zurück. Die Ursachen waren in den beiden Arbeitsgebieten unterschiedlich: Bei Exploration & Production sanken die Mengen insbesondere auf Grund der OPEC-Förderrestriktionen in Libyen. Höhere Rohölnotierungen und ein stärkerer US-Dollar glichen dies jedoch nahezu aus. Bei Natural Gas Trading nahm der Absatz zu. Dennoch war der Umsatz auf Grund niedrigerer Gaspreise rückläufig. Trotz des Umsatzrückgangs verbesserte sich das Ergebnis der Betriebstätigkeit des Segments leicht.

Der Umsatz von **Sonstige** nahm insbesondere auf Grund gestiegener Preise und höherer Absatzmengen bei Styrenics von 4.577 Millionen € im Vorjahr auf 5.851 Millionen € zu. Das Ergebnis der Betriebstätigkeit von Sonstige ging jedoch von –627 Millionen € auf –707 Millionen € zurück. Ausschlaggebend hierfür waren vor allem höhere Aufwendungen für das Long-Term-Incentive-Programm. Gegenläufig wirkten ein verbessertes Währungsergebnis sowie der höhere Ergebnisbeitrag von Styrenics.

Das Ergebnis nach Kapitalkosten betrug 3.500 Millionen €, ein Spitzenwert in der BASF-Geschichte. Insgesamt haben wir damit eine hohe Prämie auf unsere Kapitalkosten verdient.

### Sondereinflüsse

Im Jahr 2010 war das Ergebnis der Betriebstätigkeit deutlich weniger durch Sondereinflüsse belastet als im Vorjahr: 377 Millionen € nach 1.175 Millionen € im Jahr 2009. Grund für den Rückgang der Sondereinflüsse waren im Wesentlichen die geringeren Kosten für die Integration von Ciba. Gegenüber 718 Millionen € im Vorjahr, fielen hierfür 2010 nur noch 79 Millionen € an. Für die Cognis-Integration ergaben sich 77 Millionen € im Jahr 2010.

Auch für Strukturmaßnahmen fielen die Sonderbelastungen mit 100 Millionen € deutlich geringer aus als im Vorjahr (2009: 366 Millionen €).

Die Devestition verschiedener Geschäfte hat zu Sondererträgen von 31 Millionen € (2009: –1 Million €) geführt.

Für sonstige Sachverhalte wurden im Ergebnis Sonderbelastungen in Höhe von 146 Millionen € berücksichtigt. Darin enthalten sind Wertberichtigungen auf Öl- und Gaskonzessionen in der britischen und norwegischen Nordsee in Höhe von 96 Millionen €.

### Jahresüberschuss

Das Finanzergebnis hat sich im Vergleich zum Vorjahr von –598 Millionen € auf –388 Millionen € verbessert. Während das Zinsergebnis mit –623 Millionen € leicht zurückging, ist das Beteiligungsergebnis von 133 Millionen € auf 299 Millionen € gestiegen. Diese Entwicklung ist vor allem auf das höhere Equity-Ergebnis der OAO Severneftgazprom zurückzuführen.

Die Übrigen finanziellen Aufwendungen und Erträge verbesserten sich um 67 Millionen €. Wesentlich hierfür war der geringere Aufwand für Pensionsverpflichtungen.

### Ergebnis der Betriebstätigkeit

- Deutlich geringere Sonderbelastungen durch Integrationskosten und Strukturmaßnahmen
- Realisierung der erwarteten Synergien aus der Integration von Ciba
- Hohe Prämie auf die Kapitalkosten verdient

### Sondereinflüsse (Millionen €)

|                                  | 2010        | 2009          |
|----------------------------------|-------------|---------------|
| Integrationskosten               | –162        | –723          |
| Strukturmaßnahmen                | –100        | –366          |
| Devestitionen                    | 31          | –1            |
| Sonstige Belastungen und Erträge | –146        | –85           |
|                                  | <b>–377</b> | <b>–1.175</b> |

Das Ergebnis vor Ertragsteuern stieg stark von 3.079 Millionen € auf 7.373 Millionen €. Damit erhöhte sich auch die Gesamtkapitalrendite auf einen Wert von 14,7 % gegenüber 7,5 % im Vorjahr.

Mit dem gestiegenen Ergebnis vor Steuern nahm auch der Steueraufwand zu und wuchs von 1.424 Millionen € auf 2.299 Millionen €. Die Steuerquote sank jedoch deutlich von 46,2 % auf 31,2 %, was vor allem auf den geringeren Ergebnisanteil des hoch besteuerten Segments Oil & Gas zurückzuführen ist.

→ **Angaben zur Steuerquote im Anhang zum Konzernabschluss auf Seite 163**

Die Anteile anderer Gesellschafter stiegen von 245 Millionen € auf 517 Millionen €. Die größten Zuwächse ergaben sich bei der BASF FINA Petrochemicals Limited Partnership in Texas und der BASF PETRONAS Chemicals Sdn. Bhd. in Malaysia.

Der Jahresüberschuss nach Anteilen Dritter hat sich mehr als verdreifacht und erhöhte sich von 1.410 Millionen € auf 4.557 Millionen €. Damit nahm das Ergebnis je Aktie von 1,54 € auf 4,96 € zu.

→ **Angaben zu Bilanzierungsmethoden im Anhang zum Konzernabschluss auf Seite 143**

## Cashflow

Den Cashflow aus laufender Geschäftstätigkeit konnten wir gegenüber dem guten Wert des Vorjahres von 5.693 Millionen € auf 6.460 Millionen € steigern. Entscheidend für diese Entwicklung war das hohe Nachsteuerergebnis. Außerdem fiel die mit einer Erhöhung des Geschäftsvolumens einhergehende Ausweitung des Nettoumlaufvermögens vergleichsweise gering aus.

Die Ausgaben für Sachanlagen und immaterielles Vermögen lagen leicht über dem Vorjahresniveau. Damit ergab sich beim Free Cashflow insgesamt ein kräftiger Anstieg: Nach 3.186 Millionen € im Vorjahr betrug er 3.912 Millionen € im Jahr 2010.

## Bereinigtes Ergebnis je Aktie

Durch die Eliminierung von Sondereinflüssen und Abschreibungen auf immaterielle Vermögenswerte ist das bereinigte Ergebnis je Aktie eine im Zeitablauf vergleichbare und für Prognosen der zukünftigen Ertragskraft des Unternehmens geeignetere Kennzahl.

### Bereinigtes Ergebnis je Aktie

| Millionen €                                                                       | 2010         | 2009         |
|-----------------------------------------------------------------------------------|--------------|--------------|
| Ergebnis vor Ertragsteuern                                                        | 7.373        | 3.079        |
| Sondereinflüsse                                                                   | 377          | 1.175        |
| Abschreibungen auf immaterielle Vermögenswerte                                    | 703          | 1.097        |
| In den Sondereinflüssen enthaltene Abschreibungen auf immaterielle Vermögenswerte | -73          | -500         |
| <b>Bereinigtes Ergebnis vor Ertragsteuern</b>                                     | <b>8.380</b> | <b>4.851</b> |
| Bereinigte Steuern vom Einkommen und vom Ertrag                                   | 2.596        | 1.837        |
| <b>Bereinigter Jahresüberschuss</b>                                               | <b>5.784</b> | <b>3.014</b> |
| Bereinigte Anteile anderer Gesellschafter                                         | 523          | 253          |
| <b>Bereinigter Jahresüberschuss nach Anteilen anderer Gesellschafter</b>          | <b>5.261</b> | <b>2.761</b> |
| Gewichtete durchschnittliche Anzahl der ausgegebenen Aktien (1.000 Stück)         | 918.479      | 918.479      |
| <b>Bereinigtes Ergebnis je Aktie (€)</b>                                          | <b>5,73</b>  | <b>3,01</b>  |

Das bereinigte Ergebnis vor Ertragsteuern, der bereinigte Jahresüberschuss nach Anteilen anderer Gesellschafter sowie das bereinigte Ergebnis je Aktie sind Kennzahlen, die nicht nach International Financial Reporting Standards (IFRS) definiert sind. Sie sollten als ergänzende Information betrachtet werden.

Im Jahr 2010 betrug das bereinigte Ergebnis je Aktie 5,73 € nach 3,01 € im Vorjahr.

→ **Angaben zum Ergebnis je Aktie gemäß IFRS im Anhang zum Konzernabschluss auf Seite 157**

## Jahresüberschuss

- Finanzergebnis im Vergleich zum Vorjahr im Wesentlichen durch Beteiligungsergebnis verbessert
- Geringerer Aufwand für Pensionsverpflichtungen
- Steueraufwand auf Grund des höheren Vorsteuerergebnisses gestiegen
- Steuerquote wegen geringerem Ergebnisanteil von Oil & Gas gesunken

## Ergebnis je Aktie/Cashflow

- Ergebnis je Aktie mit 4,96 € gegenüber Vorjahr mehr als verdreifacht
- Bereinigtes Ergebnis je Aktie mit 5,73 € stark gestiegen
- Spitzenwert bei Cashflow aus laufender Geschäftstätigkeit



## Bilanz

### Aktiva

|                                              | 31.12.2010    |              | 31.12.2009    |              |
|----------------------------------------------|---------------|--------------|---------------|--------------|
|                                              | Millionen €   | %            | Millionen €   | %            |
| Immaterielles Vermögen                       | 12.245        | 20,6         | 10.449        | 20,4         |
| Sachanlagen                                  | 17.241        | 29,0         | 16.285        | 31,8         |
| At Equity bewertete Beteiligungen            | 1.328         | 2,2          | 1.340         | 2,6          |
| Sonstige Finanzanlagen                       | 1.953         | 3,3          | 1.619         | 3,2          |
| Latente Steuern                              | 1.112         | 1,9          | 1.042         | 2,0          |
| Übrige Forderungen und sonstiges Vermögen    | 653           | 1,1          | 946           | 1,8          |
| <b>Langfristiges Vermögen</b>                | <b>34.532</b> | <b>58,1</b>  | <b>31.681</b> | <b>61,8</b>  |
| Vorräte                                      | 8.688         | 14,7         | 6.776         | 13,2         |
| Forderungen aus Lieferungen und Leistungen   | 10.167        | 17,1         | 7.738         | 15,1         |
| Übrige Forderungen und sonstiges Vermögen    | 3.883         | 6,6          | 3.223         | 6,3          |
| Kurzfristige Wertpapiere                     | 16            | .            | 15            | .            |
| Zahlungsmittel und Zahlungsmitteläquivalente | 1.493         | 2,5          | 1.835         | 3,6          |
| Vermögen von Veräußerungsgruppen             | 614           | 1,0          | –             | –            |
| <b>Kurzfristiges Vermögen</b>                | <b>24.861</b> | <b>41,9</b>  | <b>19.587</b> | <b>38,2</b>  |
| <b>Gesamtvermögen</b>                        | <b>59.393</b> | <b>100,0</b> | <b>51.268</b> | <b>100,0</b> |

### Passiva

|                                                           | 31.12.2010    |              | 31.12.2009    |              |
|-----------------------------------------------------------|---------------|--------------|---------------|--------------|
|                                                           | Millionen €   | %            | Millionen €   | %            |
| Eingezahltes Kapital                                      | 4.392         | 7,4          | 4.405         | 8,6          |
| Gewinnrücklagen und Bilanzgewinn                          | 15.817        | 26,6         | 12.916        | 25,2         |
| Sonstige Eigenkapitalposten                               | 1.195         | 2,0          | 156           | 0,3          |
| Anteile anderer Gesellschafter                            | 1.253         | 2,1          | 1.132         | 2,2          |
| <b>Eigenkapital</b>                                       | <b>22.657</b> | <b>38,1</b>  | <b>18.609</b> | <b>36,3</b>  |
| Rückstellungen für Pensionen und ähnliche Verpflichtungen | 2.778         | 4,7          | 2.255         | 4,4          |
| Sonstige Rückstellungen                                   | 3.352         | 5,6          | 3.289         | 6,4          |
| Latente Steuern                                           | 2.467         | 4,2          | 2.093         | 4,1          |
| Finanzschulden                                            | 11.670        | 19,6         | 12.444        | 24,3         |
| Übrige Verbindlichkeiten                                  | 901           | 1,6          | 898           | 1,7          |
| <b>Langfristiges Fremdkapital</b>                         | <b>21.168</b> | <b>35,7</b>  | <b>20.979</b> | <b>40,9</b>  |
| Verbindlichkeiten aus Lieferungen und Leistungen          | 4.738         | 8,0          | 2.786         | 5,4          |
| Rückstellungen                                            | 3.324         | 5,6          | 3.276         | 6,4          |
| Steuerschulden                                            | 1.140         | 1,9          | 1.003         | 2,0          |
| Finanzschulden                                            | 3.369         | 5,7          | 2.375         | 4,6          |
| Übrige Verbindlichkeiten                                  | 2.802         | 4,7          | 2.240         | 4,4          |
| Schulden von Veräußerungsgruppen                          | 195           | 0,3          | –             | –            |
| <b>Kurzfristiges Fremdkapital</b>                         | <b>15.568</b> | <b>26,2</b>  | <b>11.680</b> | <b>22,8</b>  |
| <b>Gesamtkapital</b>                                      | <b>59.393</b> | <b>100,0</b> | <b>51.268</b> | <b>100,0</b> |

**Im Vergleich zum Vorjahr erhöhte sich die Bilanzsumme um 8.125 Millionen € auf 59.393 Millionen €. Dieser Anstieg resultierte vor allem aus der Akquisition von Cognis, die am 9. Dezember 2010 abgeschlossen wurde. Des Weiteren trugen Währungseffekte mit 2.231 Millionen € zur Bilanzverlängerung bei.**

### Aktiva

Das langfristige Vermögen stieg um 2.851 Millionen € auf 34.532 Millionen €. Dieser Anstieg ist im Wesentlichen durch die Kaufpreisallokation der Cognis-Akquisition begründet. Dabei entfielen auf den Goodwill 589 Millionen €, auf die übrigen immateriellen Vermögenswerte 1.301 Millionen € und auf das Sachanlagevermögen 833 Millionen €.

Das immaterielle Vermögen ist durch die Akquisitionen der letzten beiden Jahre gestiegen und hat einen Anteil von 20,6 % am Gesamtvermögen (2009: 20,4 %). Die Sachanlagenintensität ist gegenüber dem Vorjahr leicht auf 29,0 % gesunken (2009: 31,8 %).

Der Wert der at Equity einbezogenen Beteiligungen ging 2010 leicht zurück. Überwiegend resultierte diese Entwicklung aus der Aufstockung unserer Beteiligung an der N.E. Chemcat Corporation auf 50 %. Damit wird die Gesellschaft nun nicht mehr at Equity, sondern quotal einbezogen. Aktive latente Steuern stiegen vor allem durch die Erhöhung der zu Grunde liegenden Pensionsrückstellungen, gegenläufig wirkte die Nutzung von Verlustvorträgen in Höhe von 133 Millionen €.

Der Anstieg des kurzfristigen Vermögens, vor allem der Vorräte sowie der Forderungen aus Lieferungen und Leistungen, ist zum einen auf die starke Ausweitung des Geschäftsvolumens, zum anderen auf die Einbeziehung von Cognis zurückzuführen. Des Weiteren war eine Zunahme bei den positiven Marktwerten von Derivaten zu verzeichnen, die im sonstigen kurzfristigen Vermögen enthalten sind. Eine Veräußerungsgruppe wurde auf Grund unseres Veräußerungsplans für das Geschäftsfeld Styrolkunststoffe gebildet.

### Passiva

Das Eigenkapital ist im Vergleich zum Vorjahr stark gestiegen. Den größten Beitrag leistete der Jahresüberschuss nach Anteilen anderer Gesellschafter, der mit 4.557 Millionen € deutlich über den Dividendenzahlungen lag. Ein weiterer Anstieg ergab sich durch direkt im Eigenkapital verrechnete Effekte: Aus der Umrechnung von Abschlüssen ausländischer Tochtergesellschaften resultierte eine Eigenkapitalmehrung von 745 Millionen €, aus der Marktbewertung von Wertpapieren eine Mehrung um 311 Millionen €. Die Eigenkapitalquote verbesserte sich leicht auf einen Wert von 38 %.

Das langfristige Fremdkapital stieg um 189 Millionen €. Während die langfristigen Finanzschulden um 774 Millionen € reduziert wurden, erhöhten sich die Rückstellungen für Pensionsverpflichtungen sowie die latenten Steuern vor allem durch die Einbeziehung von Cognis.

### Nettoverschuldung (Millionen €)

|                                              | 31.12.2010    | 31.12.2009    |
|----------------------------------------------|---------------|---------------|
| Zahlungsmittel und Zahlungsmitteläquivalente | 1.493         | 1.835         |
| Finanzschulden                               | 15.039        | 14.819        |
| <b>Nettoverschuldung</b>                     | <b>13.546</b> | <b>12.984</b> |

Auch der Anstieg des kurzfristigen Fremdkapitals ist maßgeblich durch die Cognis-Akquisition begründet; vor allem durch die Finanzierung des Kaufpreises stiegen die kurzfristigen Finanzschulden um insgesamt 994 Millionen €. Die Verbindlichkeiten aus Lieferungen und Leistungen erhöhten sich sowohl geschäftsbedingt als auch durch die Einbeziehung von Cognis um insgesamt 1.952 Millionen €.

- Mehr zur Zusammensetzung und Entwicklung einzelner Bilanzpositionen im Anhang zum Konzernabschluss ab Seite 167
- Mehr zur Entwicklung der Bilanz in der Zehnjahresübersicht auf Seite 210
- Mehr zur Veräußerungsgruppe Styrolkunststoffe im Anhang zum Konzernabschluss auf Seite 156

### Aktiva

- Bilanzverlängerung um 8.125 Millionen €
- Anstieg des langfristigen Vermögens im Wesentlichen durch Cognis-Akquisition begründet
- Anstieg von Vorräten und Forderungen aus Lieferungen und Leistungen wegen der starken Geschäftsausweitung und durch die Einbeziehung von Cognis

### Passiva

- Eigenkapital auf Grund des hohen Jahresüberschusses deutlich gewachsen
- Eigenkapitalquote trotz Cognis-Akquisition gestiegen
- Fremdkapital vor allem infolge der Akquisition von Cognis gestiegen

## Investitionen und Finanzierung

### Wertorientierte Finanzierungsgrundsätze, hoher Cashflow

**Unsere wertorientierten Finanzierungsgrundsätze haben zum Ziel, Liquidität zu jedem Zeitpunkt sicherzustellen, finanzwirtschaftliche Risiken zu begrenzen und unsere Kapitalkosten zu optimieren. Unseren Finanzierungsbedarf decken wir bevorzugt über Kapitalmärkte. Wir streben weiterhin ein solides A-Rating an, das uns einen uneingeschränkten Kapitalmarktzugang gewährleistet. Die Finanzierungsmaßnahmen orientieren sich an den Planungen für das operative Geschäft sowie der strategischen Ausrichtung des Unternehmens und sollen darüber hinaus die finanzielle Flexibilität zur Nutzung strategischer Optionen gewährleisten.**

#### Finanzierungsgrundsätze und Kreditratings

Unsere mittel- und langfristige Fremdkapitalfinanzierung beruht in erster Linie auf Unternehmensanleihen, die wir in Euro und anderen Währungen mit unterschiedlichen Laufzeiten begeben, um ein ausgewogenes Fälligkeitsprofil und eine Diversifikation der Investoren zu erzielen.

Zur kurzfristigen Finanzierung nutzen wir unser Commercial-Paper-Programm mit einem Emissionsvolumen von bis zu 12,5 Milliarden US\$. Als Back-up-Linien für das Commercial-Paper-Programm stehen verbindlich zugesagte, breit syndizierte Kreditlinien über 6 Milliarden US\$ zur Verfügung. Die Fremdfinanzierung der BASF ist daher weitgehend unabhängig von kurzfristigen Schwankungen auf den Kreditmärkten. Die im Juni 2010 vor dem Hintergrund der Cognis-Akquisition abge-

schlossene Kreditlinie über 3 Milliarden € haben wir auf Grund des im Jahresverlauf guten Cashflows bereits im Dezember 2010 vorzeitig gekündigt. Sämtliche der genannten Kreditlinien waren und sind derzeit nicht gezogen.

Nach Bekanntgabe der Akquisition von Cognis im Juni 2010 hat Standard & Poor's das langfristige Rating der BASF um eine Stufe auf „A“ gesenkt. Dagegen hat Moody's das Langfrist-Rating der BASF im November mit A1 bestätigt, jedoch mit einem negativen Ausblick versehen. Das kurzfristige Rating der BASF haben beide Agenturen bestätigt. Die BASF verfügt mit „A/A-1/Ausblick stabil“ bei der Ratingagentur Standard & Poor's und „A1/P-1/Ausblick negativ“ bei Moody's weiterhin über gute Ratings, auch im Vergleich zu Wettbewerbern in der chemischen Industrie.

→ **Mehr zu eingesetzten Finanzierungsinstrumenten im Anhang zum Konzernabschluss ab Seite 187**

Das Finanzmanagement der BASF-Gruppe ist zentral organisiert und wird durch regionale Treasury-Einheiten unterstützt. Zur Minimierung von Risiken und Nutzung gruppeninterner Optimierungspotenziale bündeln wir Finanzierungen, Geldanlagen sowie Wechselkursicherungen von Tochtergesellschaften der BASF SE wenn möglich innerhalb der Gruppe. Wechselkursrisiken werden im Wesentlichen zentral mittels derivativer Finanzinstrumente im Markt gesichert.

Außerbilanzielle Finanzierungsinstrumente haben keine wesentliche Bedeutung für die BASF-Gruppe.

#### Fälligkeiten von Finanzverbindlichkeiten (Millionen €)

|                 |       |  |
|-----------------|-------|--|
| 2016 und später | 2.598 |  |
| 2015            | 2.539 |  |
| 2014            | 1.321 |  |
| 2013            | 2.100 |  |
| 2012            | 3.112 |  |
| 2011            | 3.369 |  |

#### Finanzierungsinstrumente

|   |                           |        |
|---|---------------------------|--------|
| 1 | Bankdarlehen <sup>1</sup> | 14,2 % |
| 2 | Euro-Bonds                | 65,1 % |
| 3 | Commercial Papers         | 9,2 %  |
| 4 | Sonstige Anleihen         | 11,5 % |

<sup>1</sup> Beinhaltet Schuldscheindarlehen

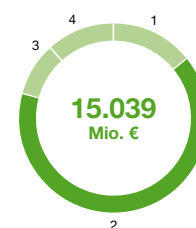

#### Finanzierungsgrundsätze

- Wertorientierte Finanzierungsgrundsätze, um Liquidität zu jedem Zeitpunkt sicherzustellen, finanzwirtschaftliche Risiken zu begrenzen und Kapitalkosten zu optimieren
- Ausgewogenes Fälligkeitsprofil und Diversifikation von Investoren
- Fremdfinanzierung der BASF auf Basis guter Kreditratings weitgehend unabhängig von kurzfristigen Schwankungen auf den Kreditmärkten

#### Kapitalflussrechnung

- Hoher Cashflow aus laufender Geschäftstätigkeit
- Nettoumlaufvermögen geschäftsbedingt um 1.680 Millionen € über Vorjahreswert
- Free Cashflow von 3.912 Millionen €
- Ausgaben von 2.548 Millionen € für Sachanlagen und immaterielles Vermögen
- Nettoverschuldung gegenüber Vorjahr durch Cognis-Erwerb um 562 Millionen € gestiegen

### Cashflow aus laufender Geschäftstätigkeit

Der operative Cashflow hat im Jahr 2010 mit 6.460 Millionen € den bisher höchsten Wert erreicht. Das sehr gute Nachsteuerergebnis hat die zusätzliche Mittelbindung im Umlaufvermögen infolge der Ausweitung des Geschäftsvolumens mehr als ausgeglichen. Bereinigt um den Einfluss der Cognis-Akquisition und Währungseffekte, nahmen die Vorräte um rund 1,3 Milliarden € und die Forderungen um etwa 1,8 Milliarden € zu. Die Abschreibungen lagen mit 3.393 Millionen € um 347 Millionen € unter dem Wert des Vorjahres, der durch hohe Abschreibungen im Rahmen der Ciba-Integration belastet war. Der verbesserte Wert bei den übrigen Posten resultiert insbesondere daraus, dass im Vorjahr eine Einzahlung in die BASF-Pensionskasse von 220 Millionen € den Cashflow minderte.

### Cashflow aus Investitionstätigkeit

Für Investitionen haben wir im Jahr 2010 den Betrag von 2.716 Millionen € und damit 1.366 Millionen € weniger als 2009 eingesetzt. Für die Akquisition von Cognis flossen unter Berücksichtigung der übernommenen Zahlungsmittel und Zahlungsmitteläquivalente in Höhe von 116 Millionen € insgesamt Zahlungsmittel in Höhe von 588 Millionen € ab. Im Vorjahr betrug der effektive Zahlungsmittelabfluss für die Akquisition von Ciba 1.505 Millionen €.

Auszahlungen für Sachanlagen und immaterielle Vermögenswerte lagen mit 2.548 Millionen € auf Vorjahresniveau und damit unter dem Wert der Abschreibungen. Aus Finanzanlagen und Übrigen Posten sind in diesem Jahr netto rund 394 Millionen € zugeflossen. Einnahmen erzielten wir vor allem aus dem

#### Kapitalflussrechnung (Millionen €)

|                                                                                        | 2010          | 2009          |
|----------------------------------------------------------------------------------------|---------------|---------------|
| Jahresüberschuss nach Anteilen anderer Gesellschafter                                  | 4.557         | 1.410         |
| Abschreibungen auf immaterielles Vermögen, Sachanlagen und Finanzanlagen               | 3.393         | 3.740         |
| Veränderung Nettoumlaufvermögen                                                        | -1.680        | 990           |
| Übrige Posten                                                                          | 190           | -447          |
| <b>Cashflow aus laufender Geschäftstätigkeit</b>                                       | <b>6.460</b>  | <b>5.693</b>  |
| Ausgaben für Sachanlagen und immaterielles Vermögen                                    | -2.548        | -2.507        |
| Akquisitionen/Devestitionen                                                            | -562          | -1.447        |
| Finanzanlagen und übrige Posten                                                        | 394           | -128          |
| <b>Cashflow aus Investitionstätigkeit</b>                                              | <b>-2.716</b> | <b>-4.082</b> |
| Kapitalerhöhungen, -rückzahlungen, Auszahlungen für den Rückkauf eigener Aktien        | -18           | -134          |
| Veränderung Finanzverbindlichkeiten                                                    | -2.295        | -333          |
| Dividenden                                                                             | -1.931        | -2.089        |
| <b>Cashflow aus Finanzierungstätigkeit</b>                                             | <b>-4.244</b> | <b>-2.556</b> |
| Liquiditätswirksame Veränderung der Zahlungsmittel                                     | -500          | -945          |
| Anfangsbestand Zahlungsmittel und Zahlungsmitteläquivalente und sonstige Veränderungen | 1.993         | 2.780         |
| <b>Zahlungsmittel und Zahlungsmitteläquivalente am Jahresende</b>                      | <b>1.493</b>  | <b>1.835</b>  |

#### Cashflow (Milliarden €)

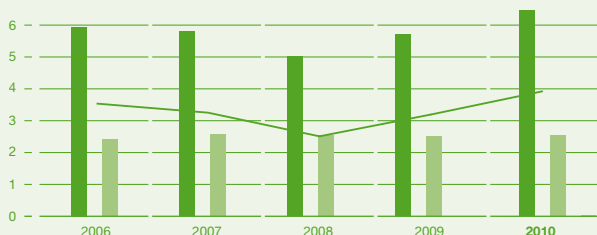

- Cashflow aus laufender Geschäftstätigkeit <sup>1</sup>
- Ausgaben für Sachanlagen und immaterielles Vermögen
- Free Cashflow <sup>2</sup>

<sup>1</sup> Berücksichtigt für die Jahre 2009 und 2010 die Ausweisänderung der Effekte aus regelmäßiger Verlängerung von US-Dollar-Sicherungsgeschäften

<sup>2</sup> Cashflow aus laufender Geschäftstätigkeit abzüglich Ausgaben für Sachanlagen und immaterielles Vermögen

Verkauf eines Anteils von 4,5 % an der Nord Stream AG sowie aus Rückzahlungen von Ausleihungen, insbesondere der Severnfttegazprom. Diesen standen Auszahlungen für eine Kapitalerhöhung bei der Nord Stream AG und verschiedene neue Ausleihungen gegenüber.

→ **Mehr zu Investitionen in Sachanlagen im Anhang zum Konzernabschluss ab Seite 170**

### Cashflow aus Finanzierungstätigkeit

Im Jahr 2010 betrug der Cashflow aus Finanzierungstätigkeit –4.244 Millionen €. Wesentliche Mittelabflüsse waren Dividendenzahlungen an die Aktionäre der BASF SE in Höhe von 1.561 Millionen € sowie an Minderheitsgesellschafter bei Gruppengesellschaften im Umfang von 370 Millionen €. Außerdem haben wir fällige Anleihen im Wert von 1 Milliarde € getilgt. Neue langfristige Kapitalmarktverbindlichkeiten wurden 2010 nicht aufgenommen. Zur Finanzierung der Investitionen in Gaspipelines in Deutschland hat WINGAS GmbH & Co. KG langfristige Bankdarlehen in Höhe von 1 Milliarde € aufgenommen, die zum 31. Dezember 2010 mit 350 Millionen € in Anspruch genommen waren. Im Verlauf des Jahres 2010 hatten wir die kurzfristigen Finanzschulden zunächst deutlich abgebaut. Mit der Übernahme und Tilgung von Finanzschulden der Cognis und der Aufnahme von Commercial Papers zur Finanzierung des Kaufpreises für Cognis im Dezember 2010 stiegen sie jedoch zum Jahresende wieder an. Insgesamt nahm die Nettoverschuldung im Vergleich zum Vorjahr leicht um 562 Millionen € zu; am 31. Dezember 2010 betrug sie 13.546 Millionen €.

In den Cashflows aus Finanzierungstätigkeit und laufender Geschäftstätigkeit haben wir 2010 im Zusammenhang mit der regelmäßigen Verlängerung von US-Dollar-Sicherungsgeschäften eine Ausweisänderung vorgenommen. Die Werte des Vorjahres haben wir entsprechend angepasst.

In der Summe sind die Zahlungsmittel und Zahlungsmitteläquivalente im Vergleich zum Vorjahr um 342 Millionen € zurückgegangen und beliefen sich zum 31. Dezember 2010 auf 1.493 Millionen €.

→ **Details zur Ausweisänderung beim Cashflow im Anhang zum Konzernabschluss ab Seite 166**

### Finanzierungsziele 2011

Für das Geschäftsjahr 2011 halten wir an unseren Finanzierungsgrundsätzen fest. Wir wollen unser solides A-Rating halten. Außerdem streben wir nach dem Erwerb von Cognis an, unsere Verschuldung zu reduzieren. Den Zahlungsmittelbestand wollen wir auf dem gleichen Niveau wie Ende des Jahres 2010 fortführen.

Mittelabflüsse erwarten wir vor allem aus der planmäßigen Tilgung von Anleihen mit einem Gesamtvolumen von umgerechnet 1.253 Millionen €. Außerdem werden Mittel in Höhe von voraussichtlich 2.021 Millionen € für die Zahlung der Dividende abfließen. Für Investitionen in Sachanlagen und immaterielle Werte erwarten wir Auszahlungen, die über dem Niveau des abgelaufenen Geschäftsjahres liegen werden. Vor dem Hintergrund unseres starken operativen Cashflows sehen wir derzeit keinen Bedarf für die Aufnahme zusätzlicher mittel- bis langfristiger Finanzierungsmittel. Unser uneingeschränkter Zugang zum Kapitalmarkt erlaubt es uns aber, attraktive Konditionen zur Finanzierung der BASF-Gruppe jederzeit flexibel zu nutzen.

#### Investitionen nach Regionen (Anteil in %)

|                                 | 2010 | 2009 |
|---------------------------------|------|------|
| Europa                          | 63   | 70   |
| Nordamerika                     | 19   | 19   |
| Asien, Pazifischer Raum         | 15   | 9    |
| Südamerika, Afrika, Naher Osten | 3    | 2    |
|                                 | 100  | 100  |

### Finanzierungsziele 2011

- Weiterhin solides A-Rating angestrebt; Abbau der Verschuldung geplant
- Derzeit kein mittel- bis langfristiger Finanzierungsbedarf auf Grund positiver Cashflow-Entwicklung
- Uneingeschränkter Kapitalmarktzugang erlaubt, günstige Finanzierungsbedingungen flexibel zu nutzen



## Geschäftsentwicklung in den Segmenten

### Segmente im Überblick (Millionen €)

|                        | Umsatz        |               | Ergebnis der Betriebs-<br>tätigkeit vor Abschreibungen<br>(EBITDA) |              | Ergebnis der<br>Betriebstätigkeit (EBIT)<br>vor Sondereinflüssen |              |
|------------------------|---------------|---------------|--------------------------------------------------------------------|--------------|------------------------------------------------------------------|--------------|
|                        | 2010          | 2009          | 2010                                                               | 2009         | 2010                                                             | 2009         |
| Chemicals              | 11.377        | 7.515         | 3.000                                                              | 1.571        | 2.302                                                            | 1.021        |
| Plastics               | 9.830         | 7.128         | 1.721                                                              | 994          | 1.284                                                            | 576          |
| Performance Products   | 12.288        | 9.356         | 2.162                                                              | 926          | 1.554                                                            | 698          |
| Functional Solutions   | 9.703         | 7.115         | 861                                                                | 511          | 467                                                              | 209          |
| Agricultural Solutions | 4.033         | 3.646         | 938                                                                | 973          | 749                                                              | 776          |
| Oil & Gas              | 10.791        | 11.356        | 2.977                                                              | 2.830        | 2.430                                                            | 2.289        |
| Sonstige <sup>1</sup>  | 5.851         | 4.577         | -528                                                               | -417         | -648                                                             | -717         |
|                        | <b>63.873</b> | <b>50.693</b> | <b>11.131</b>                                                      | <b>7.388</b> | <b>8.138</b>                                                     | <b>4.852</b> |

### Segmente im Überblick (Millionen €)

|                        | Ergebnis der Betriebstätigkeit<br>(EBIT) |              | Vermögen      |               | Investitionen <sup>2</sup> |              |
|------------------------|------------------------------------------|--------------|---------------|---------------|----------------------------|--------------|
|                        | 2010                                     | 2009         | 2010          | 2009          | 2010                       | 2009         |
| Chemicals              | 2.310                                    | 735          | 6.526         | 5.688         | 535                        | 482          |
| Plastics               | 1.273                                    | 554          | 5.114         | 4.530         | 250                        | 249          |
| Performance Products   | 1.345                                    | -150         | 13.409        | 9.242         | 3.000                      | 3.753        |
| Functional Solutions   | 457                                      | 107          | 9.364         | 8.265         | 208                        | 174          |
| Agricultural Solutions | 749                                      | 769          | 5.063         | 4.681         | 145                        | 183          |
| Oil & Gas              | 2.334                                    | 2.289        | 9.150         | 8.301         | 996                        | 1.012        |
| Sonstige <sup>1</sup>  | -707                                     | -627         | 10.767        | 10.561        | 170                        | 119          |
|                        | <b>7.761</b>                             | <b>3.677</b> | <b>59.393</b> | <b>51.268</b> | <b>5.304</b>               | <b>5.972</b> |

<sup>1</sup> Angaben zur Zusammensetzung von Sonstige sind im Anhang zum Konzernabschluss ab Seite 157 enthalten.

<sup>2</sup> Investitionen in Sachanlagen (davon aus Akquisitionen 833 Millionen € für das Jahr 2010 und 1.766 Millionen € für das Jahr 2009) und immaterielles Vermögen (davon aus Akquisitionen 1.906 Millionen € für das Jahr 2010 und 1.670 Millionen € für das Jahr 2009)

### Anteil der Segmente am Gesamtumsatz

|   |                        |      |
|---|------------------------|------|
| 1 | Chemicals              | 18 % |
| 2 | Plastics               | 16 % |
| 3 | Performance Products   | 19 % |
| 4 | Functional Solutions   | 15 % |
| 5 | Agricultural Solutions | 6 %  |
| 6 | Oil & Gas              | 17 % |
| 7 | Sonstige               | 9 %  |

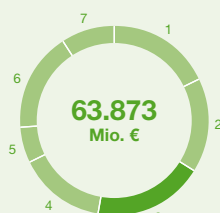

### Anteil der Segmente am EBITDA

|   |                        |      |             |
|---|------------------------|------|-------------|
| 1 | Chemicals              | 27 % | <div></div> |
| 2 | Plastics               | 16 % | <div></div> |
| 3 | Performance Products   | 19 % | <div></div> |
| 4 | Functional Solutions   | 8 %  | <div></div> |
| 5 | Agricultural Solutions | 8 %  | <div></div> |
| 6 | Oil & Gas              | 27 % | <div></div> |
| 7 | Sonstige               | -5 % | <div></div> |

## Umsatz (Millionen €)

|                        | 1. Quartal |        | 2. Quartal |        | 3. Quartal |        | 4. Quartal |        |
|------------------------|------------|--------|------------|--------|------------|--------|------------|--------|
|                        | 2010       | 2009   | 2010       | 2009   | 2010       | 2009   | 2010       | 2009   |
| Chemicals              | 2.588      | 1.556  | 2.970      | 1.809  | 2.874      | 2.000  | 2.945      | 2.150  |
| Plastics               | 2.197      | 1.463  | 2.584      | 1.750  | 2.598      | 1.967  | 2.451      | 1.948  |
| Performance Products   | 2.871      | 1.677  | 3.151      | 2.443  | 3.206      | 2.651  | 3.060      | 2.585  |
| Functional Solutions   | 2.090      | 1.568  | 2.453      | 1.755  | 2.591      | 1.888  | 2.569      | 1.904  |
| Agricultural Solutions | 1.145      | 1.145  | 1.211      | 1.175  | 832        | 623    | 845        | 703    |
| Oil & Gas              | 3.225      | 3.894  | 2.374      | 2.452  | 2.228      | 2.389  | 2.964      | 2.621  |
| Sonstige <sup>1</sup>  | 1.338      | 916    | 1.471      | 1.118  | 1.452      | 1.280  | 1.590      | 1.263  |
|                        | 15.454     | 12.219 | 16.214     | 12.502 | 15.781     | 12.798 | 16.424     | 13.174 |

## Ergebnis der Betriebstätigkeit (EBIT) vor Sondereinflüssen (Millionen €)

|                        | 1. Quartal |      | 2. Quartal |       | 3. Quartal |       | 4. Quartal |       |
|------------------------|------------|------|------------|-------|------------|-------|------------|-------|
|                        | 2010       | 2009 | 2010       | 2009  | 2010       | 2009  | 2010       | 2009  |
| Chemicals              | 461        | 84   | 687        | 258   | 617        | 364   | 537        | 315   |
| Plastics               | 279        | -29  | 349        | 138   | 371        | 216   | 285        | 251   |
| Performance Products   | 419        | 123  | 471        | 80    | 370        | 286   | 294        | 209   |
| Functional Solutions   | 111        | -46  | 165        | 48    | 158        | 106   | 33         | 101   |
| Agricultural Solutions | 321        | 344  | 320        | 367   | 66         | 21    | 42         | 44    |
| Oil & Gas              | 629        | 725  | 515        | 506   | 573        | 550   | 713        | 508   |
| Sonstige <sup>1</sup>  | -266       | -216 | -301       | -257  | 58         | -295  | -139       | 51    |
|                        | 1.954      | 985  | 2.206      | 1.140 | 2.213      | 1.248 | 1.765      | 1.479 |

## Ergebnis der Betriebstätigkeit (EBIT) (Millionen €)

|                        | 1. Quartal |      | 2. Quartal |      | 3. Quartal |      | 4. Quartal |       |
|------------------------|------------|------|------------|------|------------|------|------------|-------|
|                        | 2010       | 2009 | 2010       | 2009 | 2010       | 2009 | 2010       | 2009  |
| Chemicals              | 461        | 83   | 687        | 258  | 619        | 364  | 543        | 30    |
| Plastics               | 277        | -30  | 350        | 139  | 371        | 216  | 275        | 229   |
| Performance Products   | 341        | 123  | 450        | -214 | 377        | 125  | 177        | -184  |
| Functional Solutions   | 111        | -45  | 164        | 29   | 159        | 86   | 23         | 37    |
| Agricultural Solutions | 321        | 340  | 320        | 366  | 66         | 21   | 42         | 42    |
| Oil & Gas              | 629        | 725  | 515        | 506  | 573        | 550  | 617        | 508   |
| Sonstige <sup>1</sup>  | -300       | -268 | -407       | -312 | -10        | -391 | 10         | 344   |
|                        | 1.840      | 928  | 2.079      | 772  | 2.155      | 971  | 1.687      | 1.006 |

<sup>1</sup> Angaben zur Zusammensetzung von Sonstige sind im Anhang zum Konzernabschluss ab Seite 157 enthalten.

## Anteil der Segmente am EBIT (Millionen €)

|                        |       |  |  |
|------------------------|-------|--|--|
| Chemicals              | 2.310 |  |  |
| Plastics               | 1.273 |  |  |
| Performance Products   | 1.345 |  |  |
| Functional Solutions   | 457   |  |  |
| Agricultural Solutions | 749   |  |  |
| Oil & Gas              | 2.334 |  |  |
| Sonstige               | -707  |  |  |

## EBIT der BASF-Gruppe nach Quartalen (Millionen €)

|                 |       |  |
|-----------------|-------|--|
| 1. Quartal 2010 | 1.840 |  |
| 1. Quartal 2009 | 928   |  |
| 2. Quartal 2010 | 2.079 |  |
| 2. Quartal 2009 | 772   |  |
| 3. Quartal 2010 | 2.155 |  |
| 3. Quartal 2009 | 971   |  |
| 4. Quartal 2010 | 1.687 |  |
| 4. Quartal 2009 | 1.006 |  |

## Chemicals

### Exzellenz im Verbund, Technologie- und Kostenführerschaft

**Das Segment Chemicals besteht aus den Unternehmensbereichen Inorganics, Petrochemicals und Intermediates. In integrierten Produktionsanlagen – unserem Verbund – stellen wir in Europa, Asien und Nordamerika eine breite Palette an Basischemikalien und höherveredelten Produkten für interne und externe Kunden her.**

#### Strategie des Segments

Wir schaffen Wert, indem wir mit einem attraktiven Portfolio, Investitionen in Zukunftsmärkten sowie Verfahrens- und Produktinnovationen wachsen und unsere Produktion wettbewerbsfähig und flexibel in die Verbundstrukturen der BASF integrieren. Wir versorgen die Segmente der BASF mit Basischemikalien für die Herstellung höherveredelter Produkte. Als zuverlässiger Lieferant vermarkten wir unsere Chemikalien an Kunden aus weiterverarbeitenden Industrien, insbesondere aus den Branchen Chemie, Elektronik, Bau, Textil, Automobil, Pharma und Agro. Mit Innovationen, Investitionen und durch Akquisitionen in Zukunftsmärkten entwickeln wir unsere Wertschöpfungsketten kontinuierlich weiter. Technologie- und Kostenführerschaft zählen zu unseren wichtigsten Erfolgsfaktoren. Diese erreichen wir, indem wir Verfahren verbessern, marktgerechte Geschäftsmodelle implementieren sowie die Synergiepotenziale unseres Verbunds effizient nutzen. Wir optimieren ständig unser Portfolio und unsere Produktionsstrukturen und richten sie an regionalen Marktanforderungen aus.

#### Unsere Produkte

Der Erfolg von **Inorganics** basiert auf einer Produktpalette aus Grundstoffen und Spezialitäten für den Einsatz in unserem Verbund und für unser Geschäft mit Dritten. Unsere wichtigsten Grundprodukte sind Ammoniak, Methanol, Natronlauge, Chlor sowie Schwefel- und Salpetersäure. Unsere Spezialitäten sind insbesondere auf die Branchen Elektronik und Pharma ausgerichtet. Hierbei profitieren wir von der Kenntnis der technologischen Bedürfnisse und Anforderungen unserer Kunden: Für die Solarindustrie entwickeln wir beispielsweise spezielle Prozesschemikalien, die bei der Herstellung von Solarzellen einge-

setzt werden. Mit Seluris® Clean haben wir unser Portfolio 2010 um eine neue, umweltfreundliche Reinigungslösung ergänzt. In den entscheidenden Prozessschritten der Herstellung reinigt die Lösung die Solarzellen-Wafer und verhindert so elektrische Störungen beim späteren Betreiben.

Der Bereich **Petrochemicals** bildet mit einer breiten Palette an Basischemikalien das Fundament der Wertschöpfungsketten der BASF. Ausgehend von Naphtha oder Erdgas, werden im Steamcracker Produkte wie Ethylen, Propylen, Butadien und Benzol für die Eigenversorgung hergestellt. Daraus produzieren wir Alkohole und Lösemittel sowie Weichmacher für die Chemie- und Kunststoffindustrie. Alkylenoxide und Glykole sind Ausgangsprodukte für die Waschmittel-, Automobil-, Verpackungs- und Textilindustrie. Unsere Acrylmonomere werden unter anderem bei der Herstellung von Farben, Lacken und Kosmetik sowie bei Ölfeld-, Bau- und Papierchemikalien genutzt. Bei speziellen Kundenanforderungen können wir auf eine Vielzahl von Spezialmonomeren zurückgreifen, die sich ideal in die Wertschöpfungskette der Acrylate und Methacrylate einfügen.

Bei **Intermediates** entwickeln, produzieren und vermarkten wir mit mehr als 600 Produkten das umfassendste Sortiment an Zwischenprodukten weltweit. Zu unseren Produktlinien zählen Amine, Diole, Polyalkohole sowie Säuren und Spezialitäten. Sie dienen unter anderem als Ausgangsstoffe für Lacke, Kunststoffe, Pharmazeutika, Textilfasern, Pflanzenschutz- sowie Wasch- und Reinigungsmittel. Unsere Produktlinien tragen dazu bei, die Eigenschaften der mit ihnen hergestellten Erzeugnisse und die Effizienz der Produktionsprozesse zu verbessern. Weltweit zählt die BASF bei allen wesentlichen Zwischenprodukten zu den drei größten Anbietern.

#### Forschung und Entwicklung

Im Fokus unserer Forschungsaktivitäten steht die Entwicklung innovativer Produktionsverfahren, mit denen wir unsere Wettbewerbsfähigkeit weiter ausbauen. Bestehende Produkte und Anwendungen verbessern wir kontinuierlich. Bei der Entwicklung neuer Produkte orientieren wir uns an den Bedürfnissen interner und externer Kunden und nutzen die Chancen, welche

#### Strategie

- Versorgung der Wertschöpfungsketten im BASF-Verbund sowie Vermarktung unserer Produkte an externe Kunden
- Wichtigste Erfolgsfaktoren sind Technologie- und Kostenführerschaft
- Produktportfolio und regionale Produktionsstrukturen werden kontinuierlich optimiert

#### Produkte

- **Inorganics:** Grundstoffe für unseren Verbund und Spezialitäten unter anderem für die Elektronikbranche
- **Petrochemicals:** Breite Palette an Basischemikalien für die Eigenversorgung sowie für externe Kunden
- **Intermediates:** Mit mehr als 600 Produkten das umfassendste Sortiment an Zwischenprodukten weltweit; Marktführer bei vielen Zwischenprodukten

**Laser-Transferdruckverfahren (LTP)**

Effizientere Metallisierung von Solarzellen durch kontaktfreies Druckverfahren

**Wert für die BASF**  
in den nächsten sechs  
Jahren bis zu**20%****Marktanteil** im wachsen-  
den Bereich der Solar-  
zellen-Metallisierung**Wert für die Kunden**  
bis zu**80%****weniger Ausschuss** von  
Solarzellen im Metallisie-  
rungsprozess**Wert für die BASF** Gemeinsam mit der Firma  
aurentum Innovationstechnologien und dem Maschinen-  
hersteller Schmid haben wir das neue kontaktfreie LTP-  
Verfahren entwickelt. Mit dieser innovativen Technologie  
und unseren darauf abgestimmten Tinten mit dem Namen  
CypoSol festigen wir unsere Position als Material- und  
Technologielieferant für die Photovoltaikindustrie.**Wert für die Kunden** Der wachsende Kostendruck  
bei der Herstellung von Solarzellen erfordert optimierte  
Prozesse: Tests im Entwicklungszentrum von Schmid  
belegen, dass der Ausschuss mit Hilfe des kontaktfreien  
LTP-Verfahrens um bis zu 80 % gegenüber dem heute  
üblichen Metallisierungsprozess verringert wird.

die Wertschöpfungsketten des Verbunds und der Märkte eröffnen. So haben wir beispielsweise die neue Produktreihe CypoSol® zur Metallisierung von Solarzellen-Wafern im Markt lanciert. Solarzellen werden metallisiert, um den entstehenden Strom ableiten zu können. Die neuen Silber- und Aluminiumtinten wurden nicht nur für das heute übliche Siebdruckverfahren entwickelt, sondern speziell auch für das innovative Laser-Transferdruckverfahren (LTP), welches zurzeit in den Markt eingeführt wird.

Zur Energieversorgung der Zukunft können solarthermische Kraftwerke einen großen Beitrag leisten. Durch sie soll beispielsweise in Wüstengebieten Sonnenenergie genutzt werden, um elektrischen Strom zu erzeugen. Wärmespeichermedien, hauptsächlich Salzmischungen, ermöglichen es, die Sonnenenergie jederzeit – auch nachts – nutzbar zu machen. Für diese Speichermedien liefern wir bereits die wichtige Komponente Natriumnitrat. Darüber hinaus forschen wir an neuen Speichermedien, damit solarthermische Kraftwerke zukünftig noch effizienter werden.

Auch Gas spielt als Energieträger eine wichtige Rolle. Gemeinsam mit der Bilfinger Berger Industrial Service E.M.S. GmbH haben wir ein neues Verfahren zur effizienten Aufbereitung von Biogas entwickelt. Biogas besteht lediglich zu 50 bis 70 % aus nutzbarem Methan. Daneben enthält es Kohlendioxid (CO<sub>2</sub>) und Schwefelwasserstoff (H<sub>2</sub>S), die Korrosionen in den Anlagen verursachen können. Das neue Verfahren entfernt CO<sub>2</sub> und H<sub>2</sub>S ohne messbaren Methanverlust aus dem Biogas. Es vereinfacht außerdem den Anlagenbau und trägt so zur Kostensenkung bei. Mit Erfolg: Zwei der europaweit größten Reststoffvergäranlagen bei Bitterfeld arbeiten bereits mit dem Verfahren. 

**Marketing und Kundenbeziehungen**

Bei Standardprodukten ist es unser vorrangiges Ziel, unsere Kunden zuverlässig und kosteneffizient zu beliefern. Intern versorgen wir nahezu alle Unternehmensbereiche mit unseren Produkten. Die Vermarktung an externe Kunden erfolgt vorwiegend über E-Commerce. Organische und anorganische Spezialitäten bieten wir mit dem dazugehörigen technischen Anwendungswissen an. Hier arbeiten unsere Entwicklungslabore besonders eng mit Kunden und Partnern zusammen.

Sehr erfolgreich ist zum Beispiel die Zusammenarbeit mit unserem österreichischen Kunden Getzner Werkstoffe GmbH: Getzner rüstet die Bahn-Hochgeschwindigkeitsstrecke zwischen Peking und Schanghai derzeit mit elastischen Schienenlagern zur Schwingungsdämpfung aus. Dazu nutzt unser Kunde spezielle Dämpfungselemente, die auf unserem Zwischenprodukt PolyTHF® basieren, welches Getzner aus unserem Werk in Caojing/China bezieht.

**Forschung und Entwicklung**

- Fokus liegt auf innovativen Produktionsverfahren zum Ausbau unserer Wettbewerbsfähigkeit
- Neue Produktreihe CypoSol im Markt lanciert
- Forschung an Speichermedien für Energie aus solarthermischen Kraftwerken
- Neues Verfahren zur effizienten Aufbereitung von Biogas

**Marketing und Kundenbeziehungen**

- Zuverlässige und kosteneffiziente Vermarktung von Standardprodukten, vor allem über E-Commerce
- Vermarktung organischer und anorganischer Spezialitäten mit dazugehörigem technischen Anwendungswissen
- Enge Zusammenarbeit unserer Entwicklungslabore mit Kunden und Partnern

## Investitionen in Sachanlagen

| Standort                   | Projekt                             | Zusätzliche Jahreskapazität durch Erweiterung (Tonnen) | Jahreskapazität insgesamt (Tonnen) | Inbetriebnahme |
|----------------------------|-------------------------------------|--------------------------------------------------------|------------------------------------|----------------|
| Antwerpen/Belgien          | Neubau Oleum-Anlage                 |                                                        | 420.000                            | 2011           |
| Geismar/Louisiana          | Neubau Methylamin-Anlage            |                                                        | k.A.                               | 2011           |
| Guaratinguetá/Brasilien    | Neubau Natriummethylat-Anlage       |                                                        | 60.000                             | 2011           |
| Ludwigshafen/Deutschland   | Neubau Ethylenpipeline <sup>1</sup> |                                                        | k.A.                               | 2011           |
| Nanjing/China <sup>2</sup> | Ausbau Steamcracker                 | 140.000                                                | 740.000                            | 2011           |
|                            | Neubau 2-Propylheptanol             |                                                        | 80.000                             | 2011           |
|                            | Ausbau Ethylenoxid                  | 80.000                                                 | 330.000                            | 2011           |
|                            | Neubau Butadien                     |                                                        | 130.000                            | 2011           |
|                            | Neubau Isobuten                     |                                                        | 60.000                             | 2011           |
|                            | Neubau Aminkomplex                  |                                                        | 130.000                            | 2011/2012      |

<sup>1</sup> Beteiligung im Rahmen der EPS Ethylen-Pipeline-Süd GmbH & Co. KG

<sup>2</sup> Betrieben durch ein Gemeinschaftsunternehmen, an dem die BASF mit 50 % beteiligt ist und das quotale in den Gruppenabschluss einbezogen wird

Produktionskapazitäten wichtiger Produkte<sup>1</sup>

| Produkt                                                  | Standorte |             |                         |                                 | Jahreskapazität (Tonnen) |
|----------------------------------------------------------|-----------|-------------|-------------------------|---------------------------------|--------------------------|
|                                                          | Europa    | Nordamerika | Asien, Pazifischer Raum | Südamerika, Afrika, Naher Osten |                          |
| Acrylsäure                                               | X         | X           | X                       |                                 | 1.175.000                |
| Alkylamine                                               | X         |             | X                       | X                               | 220.000                  |
| Ameisensäure                                             |           |             |                         |                                 | 255.000                  |
| Propionsäure                                             | X         |             | X                       |                                 | 150.000                  |
| Ammoniak                                                 | X         |             |                         |                                 | 1.525.000                |
| Benzol                                                   | X         | X           | X                       |                                 | 820.000                  |
| Butadien                                                 | X         | X           |                         |                                 | 515.000                  |
| Butandiol-Äquivalente                                    | X         | X           | X                       |                                 | 535.000                  |
| Chlor                                                    | X         |             |                         |                                 | 385.000                  |
| Ethanolamine und Derivate                                | X         |             |                         |                                 | 285.000                  |
| Ethylen                                                  | X         | X           | X                       |                                 | 3.235.000                |
| Ethylenoxid                                              | X         | X           | X                       |                                 | 1.315.000                |
| Formaldehydkondensat                                     | X         |             |                         |                                 | 750.000                  |
| Neopentylglykol                                          | X         | X           | X                       |                                 | 165.000                  |
| Oxo-C <sub>4</sub> -Alkohole (gemessen als Butyraldehyd) | X         | X           | X                       |                                 | 1.415.000                |
| PolyTHF                                                  | X         | X           | X                       |                                 | 185.000                  |
| Propylen                                                 | X         | X           | X                       |                                 | 2.480.000                |
| Weichmacher                                              | X         | X           | X                       |                                 | 660.000                  |

<sup>1</sup> Alle Kapazitäten sind hier zu 100 % berücksichtigt, auch Anlagen in Gemeinschaftsunternehmen.

Umsatz Chemicals  
(Millionen €)

|      |        |  |
|------|--------|--|
| 2010 | 11.377 |  |
| 2009 | 7.515  |  |
| 2008 | 11.171 |  |

## Anteile am Umsatz

|   |                |      |
|---|----------------|------|
| 1 | Inorganics     | 11 % |
| 2 | Petrochemicals | 67 % |
| 3 | Intermediates  | 22 % |

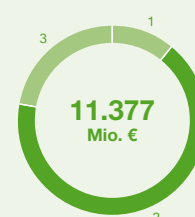



## Segmentdaten Chemicals (Millionen €)

|                                                            | 2010   | 2009   | Veränderung % |
|------------------------------------------------------------|--------|--------|---------------|
| Umsatz mit Dritten                                         | 11.377 | 7.515  | 51,4          |
| davon Inorganics                                           | 1.255  | 983    | 27,7          |
| Petrochemicals                                             | 7.593  | 4.664  | 62,8          |
| Intermediates                                              | 2.529  | 1.868  | 35,4          |
| Transfers zwischen den Segmenten                           | 5.476  | 3.564  | 53,6          |
| Umsatz inklusive Transfers                                 | 16.853 | 11.079 | 52,1          |
| Ergebnis der Betriebstätigkeit vor Abschreibungen (EBITDA) | 3.000  | 1.571  | 91,0          |
| EBITDA-Marge (%)                                           | 26,4   | 20,9   | –             |
| Ergebnis der Betriebstätigkeit (EBIT) vor Sondereinflüssen | 2.302  | 1.021  | 125,5         |
| Ergebnis der Betriebstätigkeit (EBIT)                      | 2.310  | 735    | 214,3         |
| Ergebnis der Betriebstätigkeit (EBIT) nach Kapitalkosten   | 1.722  | 185    | –             |
| Vermögen                                                   | 6.526  | 5.688  | 14,7          |
| Forschungskosten                                           | 130    | 129    | 0,8           |
| Investitionen in Sachanlagen und immaterielles Vermögen    | 535    | 482    | 11,0          |

Im Segment Chemicals wuchs der Umsatz mit Dritten um 3.862 Millionen € auf 11.377 Millionen €. Sowohl die konjunkturell bedingt größere Nachfrage als auch gestiegene Preise haben zu diesem hohen Wachstum geführt (Mengen 18 %, Preise 28 %, Währungen 5 %). Das Ergebnis der Betriebstätigkeit nahm um 1.575 Millionen € zu und lag bei 2.310 Millionen € – ein starker Anstieg im Vergleich zum Vorjahr. Unsere Kostensenkungs- und Effizienzsteigerungsprogramme haben wesentlich zu dieser Ergebnisentwicklung beigetragen.

Wir rechnen damit, dass sich der Umsatz 2011 leicht über dem Niveau des Vorjahres bewegt. Zusätzliche Kapazitäten werden den Margendruck insbesondere bei Crackerprodukten erhöhen. Das Ergebnis wird voraussichtlich leicht unter dem Wert des Jahres 2010 liegen.

## Inorganics

Unser Umsatz mit Dritten ist 2010 um 272 Millionen € auf 1.255 Millionen € gestiegen (Mengen 17 %, Preise 7 %, Währungen 4 %). Alle Arbeitsgebiete und Regionen haben hierzu dank der größeren Nachfrage aus unseren Abnehmerbranchen beigetragen. Besonders stark nahm der Umsatz in Asien zu, was im Wesentlichen auf die positive Entwicklung bei Elektronikchemikalien und bei Metallsystemen zurückzuführen ist. Ab dem zweiten Quartal beschleunigte sich die Erholung unseres Geschäfts; Ende 2010 lag der Umsatz wieder auf Vorkrisenniveau.

Das Ergebnis der Betriebstätigkeit übertraf den Wert des Jahres 2009 stark. Steigende Mengen – auch getrieben durch die größere interne Nachfrage nach Grundprodukten – trugen hierzu ebenso bei wie höhere Margen bei Grundprodukten, vor allem bei Ammoniak.

## Umsatzeinflüsse Chemicals

|                    |             |             |
|--------------------|-------------|-------------|
| Mengen             | 18 %        | <div></div> |
| Preise             | 28 %        | <div></div> |
| Portfoliomaßnahmen | 0 %         | <div></div> |
| Währungen          | 5 %         | <div></div> |
| <b>Umsatz</b>      | <b>51 %</b> | <div></div> |

Ergebnis der Betriebstätigkeit Chemicals  
(Millionen €)

|      |       |             |
|------|-------|-------------|
| 2010 | 2.310 | <div></div> |
| 2009 | 735   | <div></div> |
| 2008 | 1.369 | <div></div> |

Nach Einstellung der betrieblichen Tätigkeiten bei der BASF Fuel Cell GmbH in Frankfurt wurde der Standort zum 30. September 2010 geschlossen. Unsere Kompetenz zur Herstellung von Hochtemperatur-Membran-Elektroden-Einheiten (MEAs) bündeln wir nun am Standort Somerset/New Jersey.

Im Jahr 2011 werden wir eine Natriummethylat-Anlage mit einer Jahreskapazität von 60.000 Tonnen in Guaratinguetá/Brasilien in Betrieb nehmen. Natriummethylat ist eine Schlüsselchemikalie für die effiziente Produktion von Biodiesel.

Wir rechnen damit, dass das Geschäftsumfeld 2011 positiv bleibt. Der Umsatz wird vor diesem Hintergrund leicht wachsen. Bei gestiegenen Mengen und etwas niedrigeren Margen wird das Ergebnis der Betriebstätigkeit voraussichtlich auf Vorjahresniveau liegen.

#### Inorganics – Umsatz nach Regionen (nach Sitz der Kunden)

|   |                                 |      |
|---|---------------------------------|------|
| 1 | Europa                          | 60 % |
| 2 | Nordamerika                     | 7 %  |
| 3 | Asien, Pazifischer Raum         | 27 % |
| 4 | Südamerika, Afrika, Naher Osten | 6 %  |

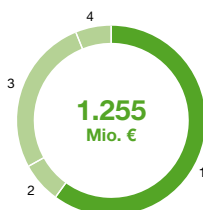

#### Petrochemicals

Der Umsatz mit Dritten wuchs 2010 um 2.929 Millionen € auf 7.593 Millionen € und übertraf den Wert des Vorjahres somit weit (Mengen 16 %, Preise 41 %, Währungen 6 %). Alle Arbeitsgebiete des Bereichs profitierten von der weltweit starken Nachfrage. Bei eingeschränktem Angebot am Markt konnten gestiegene Rohstoffkosten an die Kunden weitergegeben werden. In allen Produktlinien war es möglich, die Preise gegenüber dem Vorjahr zu erhöhen.

Unsere Anlagen waren sehr gut ausgelastet. Bei einigen Produkten, insbesondere bei Acrylaten und Lösemitteln, kam es infolge der großen Nachfrage zeitweise zu Lieferengpässen. Durch die Verzögerungen der Inbetriebnahme neuer Anlagen in

Asien und im Nahen Osten sowie durch zahlreiche ungeplante Anlagenausfälle bei unseren Wettbewerbern verschärfte sich die Produktknappheit zusätzlich. Unsere Margen entwickelten sich daher erfreulich. Anfang des zweiten Halbjahres verbesserte sich die Produktverfügbarkeit am Markt wieder. Trotz anhaltend guter Nachfrage gingen die Margen für Crackerprodukte in Asien und Nordamerika daraufhin zurück. Das Ergebnis der Betriebstätigkeit lag im Jahr 2010 weit über dem Vorjahreswert.

Im zweiten Quartal 2010 haben wir den gesamten Verbundstandort Nanjing nach fünfjährigem Betrieb erstmals zur Wartung abgestellt. Die Revisionsarbeiten verliefen erfolgreich; alle Anlagen konnten planmäßig wieder in Betrieb genommen werden. Im Jahr 2011 werden am Standort Nanjing außerdem zahlreiche neue und erweiterte Anlagen den Betrieb aufnehmen.

Wir erwarten, dass sich die positive Geschäftsentwicklung 2011 fortsetzt. Unser Umsatz wird voraussichtlich auf Vorjahresniveau liegen. Durch zusätzliche Kapazitäten im Nahen Osten und in Asien wird die Produktverfügbarkeit weiter zunehmen. Bei anhaltend hohen Rohstoffkosten verstärkt sich der Margendruck; wir rechnen mit einem Ergebnis leicht unter dem Niveau des außergewöhnlich guten Vorjahres.

#### Petrochemicals – Umsatz nach Regionen (nach Sitz der Kunden)

|   |                                 |      |
|---|---------------------------------|------|
| 1 | Europa                          | 39 % |
| 2 | Nordamerika                     | 42 % |
| 3 | Asien, Pazifischer Raum         | 17 % |
| 4 | Südamerika, Afrika, Naher Osten | 2 %  |

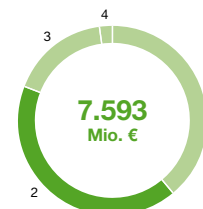

#### Inorganics

- Umsatz in allen Arbeitsgebieten und Regionen kräftig gewachsen; Ende 2010 Vorkrisenniveau wieder erreicht
- Ergebnis auf Grund gestiegener Mengen und höherer Margen für Grundprodukte stark verbessert
- BASF-Fuel-Cell-Standort in Frankfurt geschlossen
- Prognose 2011: Leichtes Umsatzwachstum; Ergebnis auf Vorjahresniveau

#### Petrochemicals

- Umsatz stark verbessert; weltweit hohe Nachfrage beeinflusst alle Arbeitsgebiete positiv
- Zeitweise Lieferengpässe bei einigen Produkten, insbesondere bei Acrylaten und Lösemitteln
- Ergebnis weit über Vorjahreswert
- Prognose 2011: Relativ stabiler Umsatz; Ergebnis vor allem wegen wachsenden Margendrucks leicht unter Vorjahresniveau

## Intermediates

Bei Intermediates erzielten wir im Jahr 2010 einen Umsatz mit Dritten in Höhe von 2.529 Millionen €. Gegenüber dem schwierigen Jahr 2009 stieg der Umsatz um 35 % (Mengen 24 %, Preise 7 %, Währungen 4 %). Damit konnten wir an das Vorkrisenniveau anknüpfen.

Hauptgrund für die positive Entwicklung des Bereichs war die weltweit kräftige Belebung wichtiger Abnehmerbranchen wie der Kunststoff-, Lack- und Textilindustrie. Das verfügbare Angebot konnte den Bedarf unserer Kunden 2010 nicht voll decken. Dies betraf hauptsächlich unseren Produktbereich Butandiol und Folgeprodukte, aber auch zahlreiche Amine und Polyalkohole. Bei insgesamt stabilen Rohstoffpreisen konnten wir unsere Verkaufspreise erhöhen.

Das Ergebnis der Betriebstätigkeit lag auf Grund des stärkeren Absatzes, verbesserter Margen in mehreren Produktlinien und der guten Auslastung unserer Anlagen weit über dem Vorjahreswert.

Mit der Inbetriebnahme einer Anlage zur Herstellung von Methylaminen an unserem Verbundstandort in Geismar/Louisiana im Jahr 2011 bauen wir unsere führende Position als globaler Hersteller von Standard- und Spezialaminen aus.

Für 2011 erwarten wir, dass die Nachfrage an das hohe Niveau des Vorjahres anknüpfen wird. Wir streben an, den Umsatz gegenüber 2010 leicht zu steigern. Trotz zusätzlicher Belastungen, die durch die Modernisierung und Erweiterung unserer Produktionsanlagen entstehen, wollen wir das sehr gute Ergebnisniveau des Vorjahres halten.

### Intermediates – Umsatz nach Regionen (nach Sitz der Kunden)

|   |                                 |      |
|---|---------------------------------|------|
| 1 | Europa                          | 46 % |
| 2 | Nordamerika                     | 16 % |
| 3 | Asien, Pazifischer Raum         | 34 % |
| 4 | Südamerika, Afrika, Naher Osten | 4 %  |

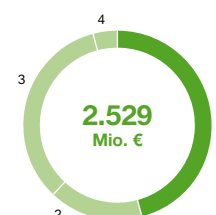

## Intermediates

- Umsatz 2010 stark gestiegen und wieder auf Vorkrisenniveau
- Verfügbares Angebot konnte Kundenbedarf nicht voll decken, insbesondere bei Butandiol und Folgeprodukten sowie bei zahlreichen Aminen und Polyalkoholen
- Ergebnis auf Grund gestiegener Mengen, verbesserter Margen und guter Anlagenauslastung weit über Vorjahreswert

- Prognose 2011: Leichter Umsatzanstieg bei anhaltend starker Nachfrage; Ergebnis trotz zusätzlicher Belastungen durch Erweiterung und Modernisierung von Produktionsanlagen auf Vorjahresniveau

## Plastics

### Energieeffiziente Produkte und Systemlösungen für unsere Kunden

**Die BASF ist einer der weltweit führenden Hersteller von hochwertigen Kunststoffen. In den Unternehmensbereichen Performance Polymers und Polyurethanes bieten wir energieeffiziente Produkte und kundenorientierte Systemlösungen an.**

#### Strategie

Wir konzentrieren uns auf Aktivitäten, die uns im Markt eine Differenzierung gegenüber unseren Wettbewerbern ermöglichen und profitable Wachstumschancen bieten. Unsere Kunden kommen vor allem aus der Bau-, Automobil-, Elektro- und Elektronik-, Textil-, Verpackungs- und Möbelindustrie. Die Vielseitigkeit unserer Produkte ermöglicht uns, für diverse Einsatzfelder nachhaltige Lösungen als Alternative zu herkömmlichen Materialien anzubieten und damit unser Portfolio auf viele Abnehmerindustrien auszuweiten. Darüber hinaus positionieren wir uns so, dass wir schneller wachsen als der Markt und noch unabhängiger gegenüber Konjunkturzyklen bestimmter Branchen werden. Wir arbeiten eng mit unseren Kunden zusammen – immer mit dem Ziel, die beste Lösung im Hinblick auf kostengünstige Rohstoffe, Energieeffizienz und Funktionalität anzubieten. 

#### Unsere Produkte

Der Unternehmensbereich **Performance Polymers** ist einer der weltweit führenden Anbieter von technischen Kunststoffen, Polyamid und Polyamidvorprodukten sowie Schaumstoffen und Spezialkunststoffen.

Wir bieten unseren Kunden ein breites Portfolio technischer Kunststoffe, die auf Polyamid 6 und Polyamid 6.6 (Ultramid®) basieren. Ergänzt wird es durch unsere Produkte Ultradur®, Ultraform® und Ultrason®. Unsere technischen Kunststoffe finden auf Grund ihrer besonderen mechanischen Eigenschaften, ihres geringen Gewichts und ihrer hohen Temperatur- und Chemikalienbeständigkeit breite Anwendung im Automobilbau, in der Elektronik- und in der Elektroindustrie. Sie werden außerdem für die Herstellung von Haushalts- und Freizeitartikeln sowie zunehmend auch für designorientierte Verbraucherprodukte genutzt.

Für die Verpackungs-, Textil- und Lebensmittelindustrie bieten wir Polyamidpolymere als wichtige Basisprodukte zur Herstellung von Fasern und Folien an. Mit Ecoflex® und Ecovio® umfasst unser Produktsortiment zudem biologisch abbaubare Spezialkunststoffe für Verpackungen.

Styropor® und seine Weiterentwicklung Neopor® – beides styrolbasierte Schaumstoffvorprodukte – werden als Dämmstoffe für Bau und Verpackungen eingesetzt. Unsere Schaumstoffe leisten dabei nicht nur einen Beitrag als energieeffiziente Werkstoffe: Der melaminbasierte Schaumstoff Basotect® zeichnet sich zusätzlich durch seine exzellente Schallabsorption in Gebäuden, Fahrzeugen und Flugzeugen aus.

Der Unternehmensbereich **Polyurethanes** ist führender Anbieter von Grundprodukten, Systemen und Spezialitäten. Mit unserem breiten Produkt- und Dienstleistungsportfolio sind wir bevorzugter Partner unserer Kunden in vielen Branchen.

Unsere Polyurethan-Lösungen helfen dabei, Energie zu sparen, und werden sehr häufig in Dämmmaterialien eingesetzt. In vielen Kühlsystemen für Lebensmittel oder auch Medikamente werden bevorzugt Polyurethan-Hartschaumprodukte genutzt. Polyurethan dämmt außerdem nahezu alle Kühl- und Gefriergeräte, die weltweit produziert werden. Mit einer Polyurethan-Dämmung in allen Stufen einer Kühlkette – das heißt von der Produktion, über den Transport bis hin zu Lagerung und Verkauf – kann bis zu 16-mal mehr Energie gespart werden, als zur Herstellung des Polyurethans notwendig ist. Unsere Produkte Elastopor®, Elastopir® und Elastocool® verbinden ein außerordentlich hohes Dämmvermögen mit einer innovativen Technologie, um eine optimale Kühlung zu gewährleisten. Darüber hinaus werden Polyurethan-Lösungen wirksam gegen Wärmeverlust eingesetzt, zum Beispiel zum Dämmen von Warmwasserspeichern und Fernwärme-Rohrsystemen.

→ Mehr zum Thema Energieeffizienz auf Seite 97

#### Strategie

- Erschließung neuer Marktsegmente durch vielseitiges und innovatives Portfolio
- Enge Zusammenarbeit mit Kunden bei der Entwicklung neuer Produkte und Systemlösungen
- Unser Ziel: Beste Lösung im Hinblick auf kostengünstige Rohstoffe, Energieeffizienz und Funktionalität anbieten

#### Produkte

- Performance Polymers: Technische Kunststoffe, Polyamid und Polyamidvorprodukte sowie Schaumstoffe und Spezialkunststoffe für vielfältige Anwendungen
- Polyurethanes: Grundprodukte, kundenspezifische Systeme und Spezialitäten für Bau, Automobil, Haushalts- und Sportgeräte

Im Automobilbau tragen Polyurethane dazu bei, dass Fahrzeuge attraktiver gestaltet, gewichtssparender konstruiert und – zum Beispiel durch unser Dämpferlager Cellasto® – funktional verbessert werden können. Auch Hersteller von Schuhsohlen, Matratzen sowie Haushalts- und Sportgeräten nutzen die vielfältigen Möglichkeiten und Vorteile dieser Kunststoffspezialität und profitieren von dem Wissen und der Erfahrung unserer Polyurethan-Experten weltweit. 

### Forschung und Entwicklung

Im Jahr 2010 haben wir zahlreiche innovative Produkte und Anwendungen für unsere Kunden in der Automobil-, Elektro-, Elektronik- und Verpackungsindustrie entwickelt.

So erfüllen wir beispielsweise mit Ultramid® Structure den Wunsch der Automobilindustrie nach immer leistungsfähigeren Materialien. Das langglasfaserverstärkte Polyamid kann Metall selbst in anspruchsvollsten Anwendungen ersetzen. Ebenfalls neu entwickelt haben wir die Ultramid® Endure-Typen. Sie haben eine Stabilisierung, die ihnen über einen langen Zeitraum hohe Temperaturbeständigkeit verleiht. Mit unserem Ultrasim® Simulationsverfahren haben wir die Einsatzfähigkeit unserer Ultramid® Kunststoffe weiterverbessert: Sie lassen sich nun auch in mechanisch hochbelastbaren Automobilbauteilen wie Pendelstützen und Getriebequerträgern nutzen.

Unser neuer Kunststoff Ecovio® FS Paper für die Innenbeschichtung von Papierbechern zeigt, wie das Wissen über biologisch abbaubare Kunststoffe genutzt werden kann, um Lösungen zu entwickeln, die für die Umwelt von Vorteil sind: Ecovio FS Paper ist biologisch noch schneller abbaubar als seine Vorgänger. 

Darüber hinaus haben wir – ergänzend zu unserem Verpackungsklassiker Styropor – das neue, sehr elastische und rissbeständige Verpackungsmaterial E-por® entwickelt, das sich gut für den Transport hochwertiger elektronischer Geräte eignet.

### Geschäftsmodell Cellasto Top Mount Automobilanwendung für Polyurethan-Dämpferlager

#### Wert für die BASF

20%

jährliches Absatzwachstum bei Cellasto von 2005 bis 2010

#### Wert für die Kunden Zweimal

15%

15 % Platzersparnis in der Autokarosserie und 15 % Gewichtsreduktion pro Bauteil

**Wert für die BASF** Die Automobilindustrie konnte weltweit in den vergangenen fünf Jahren im Schnitt nur um 2,3 % wachsen. Im gleichen Zeitraum hat die BASF den Absatz von Top-Mount-Anwendungen aus Cellasto um 20 % pro Jahr gesteigert. Nahezu alle Automobilhersteller verwenden BASF-Automobilzusatzfedern aus dem mikrozelligen Spezial-Polyurethan.

**Wert für die Kunden** Cellasto-Dämpferlager haben bessere Dämpfungseigenschaften und sind leichter als konkurrierende Materialien, zum Beispiel Gummi: Sie benötigen rund 15 % weniger Platz in der Karosserie und sind im Schnitt 15 % leichter als ähnliche Gummibauteile.

2010 wurde die BASF vom „Center for the Polyurethanes Industry“ mit dem Innovationspreis für das umweltfreundliche und wirtschaftliche Produkt FilterPave® ausgezeichnet. FilterPave ist ein besonders poröser Bodenbelag, den wir gemeinsam mit Presto Geosystems, einem Unternehmen für nachhaltige Baulösungen, entwickelt haben. Der Bodenbelag kombiniert speziell behandeltes Recyclingglas mit einem Polyurethan-Bindemittel. So entsteht eine poröse, aber dennoch feste Oberfläche, die auch bei starken Regenfällen den Boden nicht versiegelt, sondern das Wasser filtert und rasch versickern lässt.

### Forschung und Entwicklung

- Ultramid Structure: Langglasfaserverstärktes Polyamid ersetzt Metall selbst in anspruchsvollsten Anwendungen
- Ecovio FS Paper für die Innenbeschichtung von Papierbechern ist biologisch schnell abbaubar
- Innovationspreis für porösen Bodenbelag FilterPave
- Pursorb: Schwamm, der Öl von Wasser abtrennt und aufsaugt

### Marketing und Kundenbeziehungen

- Qualität und Effizienz bei der Vermarktung von Standardprodukten
- Individuell zugeschnittenes technisches Marketing bei Spezialitäten und kundenspezifischen Produkten
- Intensive Zusammenarbeit mit Kunden für optimale Lösungen und dauerhaften Erfolg



## Investitionen in Sachanlagen

| Standort                 | Projekt                                             | Zusätzliche Jahreskapazität durch Erweiterung (Tonnen) | Jahreskapazität insgesamt (Tonnen) | Inbetriebnahme |
|--------------------------|-----------------------------------------------------|--------------------------------------------------------|------------------------------------|----------------|
| Ansan/Südkorea           | Erweiterung Konfektionierung technische Kunststoffe | 13.000                                                 | 30.000                             | 2011           |
| Ludwigshafen/Deutschland | Ausbau Ecoflex                                      | 60.000                                                 | 74.000                             | 2010           |

## Produktionskapazitäten wichtiger Produkte

| Produkt             | Standorte |             |                         |                                 | Jahreskapazität (Tonnen) |
|---------------------|-----------|-------------|-------------------------|---------------------------------|--------------------------|
|                     | Europa    | Nordamerika | Asien, Pazifischer Raum | Südamerika, Afrika, Naher Osten |                          |
| Isocyanat           | X         | X           | X                       |                                 | 1.840.000                |
| Polyamid            | X         | X           |                         |                                 | 720.000                  |
| Polyamidvorprodukte | X         | X           |                         |                                 | 1.070.000                |
| Propylenoxid        | X         |             | X                       |                                 | 925.000 <sup>1</sup>     |

<sup>1</sup> Davon 800.000 Tonnen für Polyurethan-Anwendungen. Enthält die vollständige Kapazität von drei Gemeinschaftsunternehmen zur Produktion von Propylenoxid in Belgien, den Niederlanden und in Singapur, an denen die BASF jeweils 50 % hält und die quotal in den Gruppenabschluss einbezogen werden.

Ein weiteres innovatives Polyurethan-Produkt, das dazu beiträgt, die Umwelt zu schützen, ist Pursorb. Aus zwei Polyurethan-Komponenten entsteht ein hydrophob-lipophiler Schwamm, der Öl von Wasser abtrennt und aufsaugt. Pursorb kann überall dort eingesetzt werden, wo Öl Gewässer gefährdet. 

## Marketing und Kundenbeziehungen

Im Segment Plastics entwickeln, produzieren und vermarkten wir Standardprodukte, Spezialitäten sowie Systemlösungen und konfektionierte Polymere. Bei Standardprodukten, die wir in großen Mengen vermarkten, stehen Qualität und Effizienz im Vordergrund. Bei Spezialitäten und kundenspezifischen Produkten setzen wir auf ein individuell zugeschnittenes technisches Marketing, das uns eine wertorientierte Preisfindung ermöglicht.

Entwicklungslabore in den Regionen ermöglichen eine rasche Anpassung unserer Produkte an lokale Bedürfnisse. Im äußerst serviceorientierten Geschäft mit Polyurethan-Systemen und Spezialitäten sind Erfahrung und Kompetenz sowie vertrauensvolle Zusammenarbeit mit dem Kunden gefragt. Mit unserem Netzwerk von weltweit 38 Systemhäusern bieten wir eine schnelle lokale Betreuung bei der Entwicklung individueller Lösungen bis hin zu technischem Service, Vertrieb und Marketing.

Wir arbeiten bereits in einem frühen Entwicklungsstadium intensiv mit unseren Kunden zusammen, um gemeinsam mit ihnen optimale Lösungen zu finden und dauerhaft zu ihrem Erfolg beizutragen.

Umsatz Plastics  
(Millionen €)

|      |       |                                                                                     |
|------|-------|-------------------------------------------------------------------------------------|
| 2010 | 9.830 |  |
| 2009 | 7.128 |  |
| 2008 | 9.116 |  |

## Anteile am Umsatz

|   |                      |      |
|---|----------------------|------|
| 1 | Performance Polymers | 45 % |
| 2 | Polyurethanes        | 55 % |

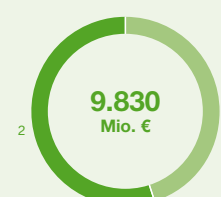

## Segmentdaten Plastics (Millionen €)

|                                                            | 2010   | 2009  | Veränderung % |
|------------------------------------------------------------|--------|-------|---------------|
| Umsatz mit Dritten                                         | 9.830  | 7.128 | 37,9          |
| davon Performance Polymers                                 | 4.389  | 3.005 | 46,1          |
| Polyurethanes                                              | 5.441  | 4.123 | 32,0          |
| Transfers zwischen den Segmenten                           | 546    | 363   | 50,4          |
| Umsatz inklusive Transfers                                 | 10.376 | 7.491 | 38,5          |
| Ergebnis der Betriebstätigkeit vor Abschreibungen (EBITDA) | 1.721  | 994   | 73,1          |
| EBITDA-Marge (%)                                           | 17,5   | 13,9  | –             |
| Ergebnis der Betriebstätigkeit (EBIT) vor Sondereinflüssen | 1.284  | 576   | 122,9         |
| Ergebnis der Betriebstätigkeit (EBIT)                      | 1.273  | 554   | 129,8         |
| Ergebnis der Betriebstätigkeit (EBIT) nach Kapitalkosten   | 816    | 139   | 487,1         |
| Vermögen                                                   | 5.114  | 4.530 | 12,9          |
| Forschungskosten                                           | 141    | 126   | 11,9          |
| Investitionen in Sachanlagen und immaterielles Vermögen    | 250    | 249   | 0,4           |

Im Segment Plastics steigerten wir den Umsatz mit Dritten im Vorjahresvergleich stark – er stieg um 2.702 Millionen € auf 9.830 Millionen € (Mengen 22 %, Preise 10 %, Währungen 6 %). Das Ergebnis der Betriebstätigkeit lag mit 1.273 Millionen € ebenfalls weit über dem Vorjahresniveau. Gründe für diese positive Entwicklung waren die unerwartet hohe Nachfrage aus nahezu allen Abnehmerbranchen sowie die Angebotsknappheit bei einigen Produkten, insbesondere bei Polyamid-Vorprodukten. Auch unsere Effizienzsteigerungsmaßnahmen trugen zum Anstieg des Ergebnisses bei.

Wir erwarten, dass Umsatz und Ergebnis 2011 das Vorjahresniveau leicht übertreffen. Wir rechnen damit, dass die Nachfrage nach unseren Produkten volatil bleibt und eine zunehmende Produktverfügbarkeit die Margen belastet.

## Performance Polymers

Der Umsatz mit Dritten lag mit 4.389 Millionen € weit über dem Wert des Vorjahres (Mengen 20 %, Preise 21 %, Währungen

5 %). Die weltwirtschaftliche Erholung beschleunigte sich im Jahr 2010; die Nachfrage aus unseren Hauptabnehmerbranchen – Automobil, Bau, Elektro sowie in Asien Textil – belebte sich kräftig. Unsere Produktionsanlagen waren sehr gut ausgelastet.

Während der Bereich in Asien bereits 2009 steigende Mengen verzeichnete, nahmen sie in Europa und in Nordamerika erst im Jahr 2010 wieder deutlich zu. Das von der Krise am stärksten betroffene Arbeitsgebiet Technische Kunststoffe profitierte unter anderem von staatlichen Konjunkturmaßnahmen zur Stützung der Automobil- und Haushaltsgeräteindustrie und verzeichnete ein Absatzplus von 40 % gegenüber dem Vorjahr. Ein wachsendes Interesse an der Wärmedämmung von Gebäuden förderte den Absatz von Schäumen – trotz der schwierigen konjunkturellen Situation in der Bauindustrie.

Neben den zunehmenden Mengen trugen höhere Preise zum Umsatzwachstum bei. Vor allem bei Standardprodukten wie Polyamiden und Schäumen stiegen die Verkaufspreise infolge stark erhöhter Rohstoffkosten. Dank der guten Nachfrage und der knappen Produktverfügbarkeit konnten wir bei technischen Kunststoffen Preissteigerungen durchsetzen.

## Umsatzeinflüsse Plastics

|                    |             |             |
|--------------------|-------------|-------------|
| Mengen             | 22 %        | <div></div> |
| Preise             | 10 %        | <div></div> |
| Portfoliomaßnahmen | 0 %         | <div></div> |
| Währungen          | 6 %         | <div></div> |
| <b>Umsatz</b>      | <b>38 %</b> | <div></div> |

Ergebnis der Betriebstätigkeit Plastics  
(Millionen €)

|      |       |             |
|------|-------|-------------|
| 2010 | 1.273 | <div></div> |
| 2009 | 554   | <div></div> |
| 2008 | 539   | <div></div> |

Getragen von der vor allem im Automobilsektor unerwartet kräftigen wirtschaftlichen Belebung, von teilweise bestehenden Angebotsengpässen und von deutlichen Preiserhöhungen, stieg das Ergebnis der Betriebstätigkeit stark an.

Projekte zur Effizienzsteigerung haben wir weltweit fortgeführt. Hierzu gehörten vor allem die Restrukturierung der Polyamid-6-Aktivitäten in Deutschland sowie die Schließung unwirtschaftlicher Produktionsanlagen in Pakistan und Brasilien. Darüber hinaus wurden Maßnahmen zur Erhöhung der Transparenz und Effizienz komplexer Geschäftsprozesse eingeleitet und Vertriebsstrukturen optimiert.

Für 2011 streben wir an, vor allem bei technischen Kunststoffen und Spezialitäten stärker als unsere wichtigsten Märkte zu wachsen. Trotz der besseren Produktverfügbarkeit am Markt wollen wir den Umsatz leicht steigern. Das Ergebnis wird voraussichtlich auf dem Niveau des Vorjahres liegen.

#### Performance Polymers – Umsatz nach Regionen (nach Sitz der Kunden)

|   |                                   |      |
|---|-----------------------------------|------|
| 1 | Europa                            | 49 % |
| 2 | Nordamerika                       | 20 % |
| 3 | Asien, Pazifischer Raum           | 26 % |
| 4 | Südamerika, Afrika,<br>Nahe Osten | 5 %  |

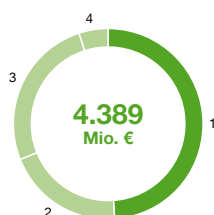

#### Polyurethanes

Mit 5.441 Millionen € übertraf der Umsatz mit Dritten das Vorjahresniveau um 1.318 Millionen € (Mengen 24 %, Preise 1 %, Währungen 7 %). In allen Regionen und allen Produktlinien steigerten wir den Umsatz im Jahr 2010 stark. Gründe hierfür waren neben größeren Verkaufsmengen auch positive Währungseffekte.

Die Nachfrage aus wichtigen Abnehmerbranchen wie der Automobil- und der Bauindustrie erholte sich schneller als erwartet, besonders in Asien und Europa. Dank des kräftigen

Aufschwungs in China nahm die Nachfrage nach Polyurethanen vor allem in Asien gegenüber dem Vorjahr deutlich zu.

Unsere Verkaufspreise erhöhten wir 2010 dagegen nur geringfügig. Erst gegen Mitte des Jahres konnten wir auf Grund von Angebotsengpässen die Preise von MDI sukzessiv steigern.

Infolge der zu Beginn des Jahres stark erhöhten Rohstoffpreise konnten unsere Margen – insbesondere bei MDI und TDI – das Vorjahresniveau nicht erreichen. Trotzdem lag das Ergebnis der Betriebstätigkeit mengenbedingt weit über dem Wert von 2009. Vor allem in unserem Geschäft mit Spezialitäten entwickelte sich das Ergebnis positiv, was auf die hohe Nachfrage aus der Automobilbranche zurückzuführen ist.

Als führender Anbieter von Polyurethan-Lösungen bauen wir unser weltweites Netzwerk von Systemhäusern kontinuierlich aus. In unseren nun 38 Systemhäusern bieten wir eine schnelle lokale Betreuung bei der Entwicklung individueller Lösungen bis hin zu technischem Service für unsere Kunden in zahlreichen bedeutenden Industrien an. Unsere Niederlassung im polnischen Śrem hat im Oktober 2010 den Betrieb aufgenommen. Ein weiteres Systemhaus wird 2011 in Dubai eröffnet. Zudem planen wir den Bau zweier Polyurethan-Systemhäuser in Chongqing/Westchina und Tianjin/Nordchina.

Für 2011 erwarten wir ein unverändertes Marktumfeld. Wir gehen davon aus, bei Umsatz und Ergebnis die Werte des Vorjahres leicht übertreffen zu können.

#### Polyurethanes – Umsatz nach Regionen (nach Sitz der Kunden)

|   |                                   |      |
|---|-----------------------------------|------|
| 1 | Europa                            | 36 % |
| 2 | Nordamerika                       | 20 % |
| 3 | Asien, Pazifischer Raum           | 37 % |
| 4 | Südamerika, Afrika,<br>Nahe Osten | 7 %  |

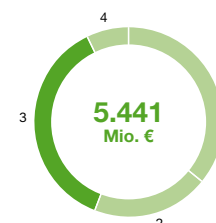

#### Performance Polymers

- Umsatz mengenbedingt stark gewachsen
- Ergebnis unter anderem auf Grund teilweise bestehender Angebotsengpässe und deutlicher Preiserhöhungen weit über Vorjahreswert
- Projekte zur Effizienzsteigerung weltweit erfolgreich fortgeführt
- Prognose 2011: Leichter Umsatzanstieg; Ergebnis auf Vorjahresniveau

#### Polyurethanes

- Umsatz in allen Regionen und Produktlinien durch gestiegene Verkaufsmengen und positive Währungseffekte stark erhöht
- Ergebnis weit über Vorjahresniveau
- Kontinuierlicher Ausbau unseres Netzwerkes von Systemhäusern
- Prognose 2011: Leichter Umsatz- und Ergebnisanstieg

## Performance Products

Innovativ, wachstumsstark und konjunkturrobust

**Das Segment Performance Products besteht aus den Bereichen Dispersions & Pigments, Care Chemicals, Nutrition & Health, Paper Chemicals und Performance Chemicals. Unsere Kunden nutzen unsere Produkte und Leistungen zum einen, um ihre Produktionsprozesse effizienter zu gestalten, und zum anderen, um ihren Produkten ein verbessertes Anwendungsprofil und besondere Eigenschaften zur Gestaltung, zum Schutz und zur Pflege von Oberflächen zu verleihen. Care Chemicals und Nutrition & Health bieten leistungsstarke Produkte für Reinigung und Pflege, für Kosmetik sowie für eine bessere Ernährung.**

### Strategie des Segments

Bei einem Großteil der Produkte unseres Sortiments handelt es sich um Spezialitäten. Entscheidende Erfolgsfaktoren sind Innovationen, enge Beziehungen zu führenden Unternehmen unserer Abnehmerbranchen sowie spezielle Anwendungs- und Entwicklungskompetenzen. Unsere Produkte schaffen einen zusätzlichen Nutzen für unsere Kunden, der ihnen eine Differenzierung im Wettbewerb erlaubt. Daher entwickeln wir neue Lösungen bevorzugt gemeinsam mit Kunden und streben langfristige Partnerschaften an, die für beide Seiten profitable Wachstumschancen eröffnen.

Ein anderes Geschäftsmodell verfolgen wir bei Standardprodukten, wie zum Beispiel bei Dispersionen zur Beschichtung von Papier oder bei Vitaminen. Hier stehen effiziente Produktionsstrukturen innerhalb des BASF-Verbunds, Kapazitätsmanagement sowie Technologie- und Kostenführerschaft im Vordergrund. Wir unterstützen unsere Kunden als zuverlässiger Lieferant mit schlanken Prozessen, konstanter Produktqualität und einem guten Preis-Leistungs-Verhältnis.

Ein zentrales Element der Wertschöpfungsstrategie ist das aktive Management unseres Geschäfts- und Produktportfolios. Durch Akquisitionen und Devestitionen erweitern wir den Anteil innovativer, konjunkturrobuster und wachstumsstarker Geschäfte. Im April 2010 haben wir die strukturelle Integration der übernommenen Ciba-Geschäfte wie geplant abgeschlossen.

Bis zum Jahresende 2010 stiegen die Synergien aus den kombinierten Geschäften bereits auf mehr als 350 Millionen €. Bis Ende 2012 werden sie auf über 450 Millionen € jährlich ansteigen. Mit dem Erwerb von Cognis am 9. Dezember 2010 haben wir das Segment Performance Products weiter gestärkt und Produkte hinzugewonnen, die auf nachwachsenden Rohstoffen basieren. Unsere Position in einigen Märkten ist deutlich gestärkt, insbesondere bei Personal Care, also Inhaltsstoffen für Körperpflegeprodukte. Hier sind wir jetzt Marktführer.

Im Segment Performance Products streben wir nachhaltiges, profitables Wachstum an. Während wir einige Geschäftsfelder aktiv ausbauen, steht in anderen Geschäftsfeldern die Umsetzung von Restrukturierungs- und Repositionierungsaufgaben im Vordergrund. Hierzu definieren und implementieren wir neue Strategien und adäquate Geschäftsmodelle.

### Akquisition von Cognis

Am 9. Dezember 2010 hat die BASF das Spezialchemieunternehmen Cognis erworben. Der Kaufpreis für das Eigenkapital betrug 704 Millionen €. Zum Erwerbszeitpunkt wurden Nettofinanzschulden in Höhe von 1.806 Millionen € und Pensionsverpflichtungen von 551 Millionen € übernommen.

Die Cognis-Geschäfte sind fast vollständig in das Segment Performance Products einbezogen worden. Um die Integration organisatorisch vorzubereiten, wurde die Bereichsstruktur des Segments bereits zum 1. August 2010 weiterentwickelt: Der bisherige Unternehmensbereich Care Chemicals wurde geteilt. Der neue Bereich Nutrition & Health umfasst Produkte und Systemlösungen für den Ernährungs- und Gesundheitsmarkt sowie für die Duft- und Geschmacksstoffindustrie. Er vereinigt die Geschäfte mit Human und Animal Nutrition, Pharma Ingredients & Services und Aroma Chemicals der BASF mit dem ehemaligen Cognis-Segment Nutrition & Health. Care Chemicals bündelt nun Produkte und Systemlösungen für Reinigung, Pflege, Kosmetik und Hygiene. Hier sind die BASF-Geschäfte Personal Care, Hygiene, Home Care sowie Formulation Technologies und das ehemalige Cognis-Segment Care Chemicals mit den Geschäften Personal Care und Home Care verschmolzen.

### Strategie

- Spezialitäten: Innovation, enge Beziehungen zu führenden Kundenunternehmen, Anwendungs- und Entwicklungskompetenzen
- Standardprodukte: Effiziente Produktionsstrukturen im Verbund, Technologie- und Kostenführerschaft
- Deutlich gestärkte Marktposition durch Cognis-Akquisition; jetzt auch Marktführer bei Personal Care

### Akquisition von Cognis

- 9. Dezember 2010: Erwerb des Spezialchemieunternehmens Cognis
- Kaufpreis für Eigenkapital: 704 Millionen €; Nettofinanzschulden: 1.806 Millionen €; Pensionsverpflichtungen: 551 Millionen €
- Nahezu vollständige Einbeziehung der Cognis-Geschäfte in das Segment Performance Products

Den Kunden der Bereiche Performance Chemicals und Dispersions & Pigments können wir ebenfalls durch die Integration von Cognis ein noch attraktiveres Produktportfolio bieten: Formulierungsadditive und Harze von Cognis ergänzen die Produktpalette des Bereichs Dispersions & Pigments. Bergbauchemikalien und synthetische Schmierstoffe von Cognis erweitern das Produktportfolio von Performance Chemicals.

Detaillierte Integrationspläne werden bis Ende März 2011 entwickelt. Die strukturelle Integration soll Ende 2011 abgeschlossen sein.

### Unsere Produkte

Im Bereich **Dispersions & Pigments** bündeln wir vor allem unsere Produkte für die Lack- und Anstrichmittelindustrie. Unser Portfolio umfasst Pigmente, Harze, Dispersionen und Zusatzstoffe wie Photoinitiatoren, Lichtschutzmittel und Formulierungsadditive. Weitere Abnehmerbranchen sind die Klebstoff- sowie die Druck- und Verpackungsindustrie. Hier reicht unsere Produktpalette von Dispersionen für Etiketten, Schutzfolien und Klebebänder, über Bunt- und Effektpigmente bis hin zu Harzen für wasserbasierte Drucksysteme. Unsere Dispersionen und Additive werden außerdem zur Herstellung von Vliesstoffen, Faserbauteilen und Bauchemikalien eingesetzt.

Das Portfolio von **Care Chemicals** umfasst Produkte für die Bereiche Kosmetik, Wasch- und Reinigungsmittel sowie Hygiene. Durch die Akquisition von Cognis sind wir führender Anbieter von Inhaltsstoffen für die Kosmetikindustrie geworden. Mit unserer breiten Produktauswahl sind wir in allen Anwendungen aus dem Bereich Personal Care vertreten, also Sonnenschutz, Haut- und Körperpflege, Mundhygiene, Haarpflege und dekorative Kosmetik. Unser umfassendes Angebot für die Wasch- und Reinigungsmittelindustrie bildet die Basis für Formulierungen unserer Kunden und wurde ebenfalls durch die Cognis-Akquisition gestärkt. Zu unserem Produktportfolio gehören vor allem Tenside, Polymere, Emollients, Komplexbildner, UV-Filter sowie weitere Spezialitäten, die auch in technischen Anwendungen zum Einsatz kommen. Abgerundet wird unser Angebot durch Superabsorber. Hier bieten wir unseren Kunden

maßgeschneiderte Produktentwicklungen an, passend zu den spezifischen Anforderungen des jeweiligen Anwendungsgebiets im Bereich Hygiene.

Human- und Tierernährung, Pharma sowie Aromachemikalien sind die Kernarbeitsgebiete von **Nutrition & Health**. Zu den wichtigsten Tierernährungsprodukten gehören Vitamine, Carotinoide und Enzyme. In der Humanernährung spielen neben Vitaminen, Carotinoiden und Omega-3-Fettsäuren verstärkt Produkte auf Basis nachwachsender Rohstoffe eine Rolle, wie zum Beispiel Sterine und konjugierte Linolsäuren. Auch Lebensmittelzusatzstoffe wie Emulgatoren und Enzyme gewinnen zunehmend an Bedeutung. Durch die Akquisition von Cognis haben wir unsere Marktposition in diesen Gebieten deutlich gestärkt. Für die Pharmaindustrie stellen wir Wirkstoffe wie Koffein und Ibuprofen, aber auch Hilfsstoffe und kundenspezifische Syntheseprodukte her. Darüber hinaus produzieren wir Aromachemikalien für die Aroma- und Duftstoffindustrie.

**Paper Chemicals** liefert Produkte für die Papierindustrie. Unser Portfolio besteht aus Bindern, funktionalen Chemikalien, Prozesschemikalien sowie Kaolinmineralien. Durch den Einsatz unserer Produkte wird die Effizienz im Prozess der Papierherstellung gesteigert – so können unsere Kunden Kosten senken. Darüber hinaus verleihen unsere Produkte dem Papier bestimmte individuelle Eigenschaften und verbessern die Ästhetik und Leistungscharakteristik bei Druckpapier und Karton.

**Performance Chemicals** ist innovativer Partner für verschiedene industrielle Abnehmerbranchen und bietet spezifische Systemlösungen. Das Arbeitsgebiet Kunststoffadditive umfasst ein Produktportfolio aus Antioxidantien, Pigmenten und Lichtschutzmitteln. In den Arbeitsgebieten Bergbau- und Ölfeldchemikalien sowie Chemikalien zur Wasserbehandlung wollen wir durch Innovationen und gezielte Marktentwicklung weiterwachsen. Für die Automobil- und Raffinerieindustrie entwickeln, produzieren und vermarkten wir Bremsflüssigkeiten, Kühlerschutzmittel, Kraft- und Schmierstoffadditive sowie Prozess- und Raffineriechemikalien. Ein weiteres Arbeitsgebiet sind Chemikalien zur Herstellung und Veredlung von Leder und Textilien.

### Teilung des Bereichs Care Chemicals

- Aufteilung des bisherigen Unternehmensbereichs Care Chemicals in zwei Unternehmensbereiche: Care Chemicals und Nutrition & Health
- Nutrition & Health umfasst Produkte und Systemlösungen für Ernährungs- und Gesundheitsmarkt sowie für Duft- und Geschmacksstoffindustrie
- Care Chemicals bündelt Produkte und Systemlösungen für Reinigung, Pflege, Kosmetik und Hygiene

### Produkte

- Dispersions & Pigments: Produkte für Lack- und Anstrichmittel
- Care Chemicals: Inhaltsstoffe für Kosmetik, Körperpflege, Wasch- und Reinigungsmittel sowie Hygiene
- Nutrition & Health: Produkte für Human- und Tierernährung, Pharma sowie Aromachemikalien
- Paper Chemicals: Produkte für die Papierindustrie
- Performance Chemicals: Systemlösungen für industrielle Anwendungen



## Forschung und Entwicklung

Produktinnovationen sind entscheidend für den Erfolg von Performance Products. Dabei orientieren wir uns an den Bedürfnissen unserer Kunden und an Markttrends. So besteht eine der jüngsten Ergänzungen unseres Portfolios, Cetiol® C5, zu 100 % aus nachwachsenden Rohstoffen. Das von der Cognis entwickelte Emollient bietet ein angenehmes Hautgefühl und ist ideal für Gesichts-, Körper-, Sonnen- und Haarpflegeprodukte sowie für die dekorative Kosmetik.

Wie unsere Innovationen das tägliche Leben erleichtern, zeigt auch ein neu entwickeltes Kunststoffadditiv zur Hitzeabdämmung. Heiße Innenräume machen im Sommer nicht nur den Autofahrern zu schaffen, sie bringen auch die Klimaanlage auf volle Touren – und sorgen so für einen gesteigerten Energieverbrauch. Mit Lumogen® IR kann dieser künftig eingedämmt werden: Lumogen ist eine Technologie für transparente Kunststoffanwendungen, die Infrarotstrahlung absorbiert und dadurch die Hitzeentwicklung im Auto vermindert.

Soluplus® hilft unseren Kunden aus der Pharmaindustrie bei der Entwicklung und Herstellung innovativer Arzneimittel, deren Wirkstoffe bisher nicht zu formulieren waren. Als Polymermatrix bildet Soluplus zusammen mit schlecht löslichen Wirkstoffen eine sogenannte feste Lösung, die zum Beispiel zu Tabletten verarbeitet werden kann. Auf diese Weise können Wirkstoffe im Körper besser verfügbar gemacht werden.

## Marketing und Kundenbeziehungen

Unser Kundenportfolio besteht sowohl aus großen als auch mittelständischen globalen und regionalen Kunden aus fast allen Bereichen der Konsum- und Investitionsgüterindustrie. Diese betreuen wir direkt und individuell – zu vielen unterhalten wir langjährige Geschäftsbeziehungen. Neben innovativen Produkten ist Anwendungsservice häufig Teil unseres Leistungspakets. Entwicklungslabore in den Regionen ermöglichen eine rasche Anpassung unserer Produkte an lokale Bedürfnisse. Wir verfolgen eine wertbasierte Preisstrategie, die sich am Gesamtnutzen unserer Lösungen für den Kunden orientiert.

### Superabsorber für Windeln

der neuen Generation mit geringem Zellstoffanteil

Wert für die BASF  
etwa

30%

Mengenwachstum im  
Jahr 2010 bei Superabsor-  
bern für Premiumwindeln  
der neuen Generation

Wert für die Umwelt  
bis zu

14%

reduzierter Energiever-  
brauch über den gesamten  
Lebensweg der Windeln  
hinweg

**Wert für die BASF** Weltweit besteht seit einigen Jahren ein klarer Trend zu immer dünner werdenden Premiumwindeln für Babys. Wir haben diesen Trend mitgestaltet, indem wir in enger Abstimmung mit unseren Kunden maßgeschneiderte Superabsorber zur Herstellung dieser Windeln entwickelt haben. Dadurch ist es uns gelungen, den Absatz unserer Superabsorber für Premiumwindeln im Jahr 2010 um etwa 30 % zu steigern.

**Wert für die Umwelt** Der Energieverbrauch über den gesamten Lebensweg einer neuen Premiumwindel hinweg verringert sich je nach Größe um bis zu 14 % gegenüber dem Vorgängermodell. Das liegt vor allem daran, dass energieintensive Einsatzkomponenten reduziert werden. Außerdem tragen unsere Produkte dazu bei, die Windelherstellungsprozesse zu vereinfachen – und somit noch mehr Energie zu sparen.

Für die Betreuung kleinerer Kunden und für bestimmte Produkte und Anwendungen arbeiten wir mit spezialisierten Vertriebspartnern zusammen. Wir beliefern auch interne Abnehmer, wie zum Beispiel die Unternehmensbereiche Coatings und Construction Chemicals, die wichtige Einsatzstoffe von den Bereichen des Segments Performance Products beziehen.

## Forschung und Entwicklung

- Produktinnovationen: Orientierung an Kundenbedürfnissen und Markttrends
- Cetiol C5: Neues Emollient, das zu 100 % aus nachwachsenden Rohstoffen besteht
- Lumogen IR: Technologie für transparente Kunststoffanwendungen, die Infrarotstrahlung absorbiert
- Soluplus: Hilft bei der Entwicklung und Herstellung innovativer Arzneimittel

## Marketing und Kundenbeziehungen

- Breites Kundenportfolio: Große sowie mittelständische globale und regionale Kunden aus fast allen Bereichen der Konsum- und Investitionsgüterindustrie
- Kundennahe Entwicklungslabore in allen Regionen für rasche Problemlösungen
- Spezialisierte Vertriebspartner für die Betreuung kleinerer Kunden sowie für bestimmte Produkte und Anwendungen

## Investitionen in Sachanlagen

| Standort                                   | Projekt                                                 | Zusätzliche<br>Jahreskapazität<br>durch Erweiterung<br>(Tonnen) | Jahres-<br>kapazität<br>insgesamt<br>(Tonnen) | Inbetriebnahme |
|--------------------------------------------|---------------------------------------------------------|-----------------------------------------------------------------|-----------------------------------------------|----------------|
| Antwerpen/Belgien                          | Ausbau Superabsorber                                    | 25.000                                                          |                                               | 2011/2012      |
| Bahrain                                    | Neubau Kunststoffadditive                               |                                                                 | k.A.                                          | 2012           |
| Freeport/USA                               | Ausbau Superabsorber                                    | 35.000                                                          |                                               | 2011/2012      |
| Huizhou/China                              | Neubau Dispersionen (XSB und Acrylat)                   |                                                                 | 100.000                                       | 2012           |
| Ludwigshafen/Deutschland                   | Neubau Komplexbildner                                   |                                                                 | k.A.                                          | 2010           |
|                                            | Ausbau Methansulfonsäure                                | 20.000                                                          | 30.000                                        | 2012           |
|                                            | Ausbau Polyisobuten                                     | 25.000                                                          | 40.000                                        | 2010           |
|                                            | Neubau L-Menthol                                        | k.A.                                                            | k.A.                                          | 2012           |
| Nanjing/China                              | Neubau kationische Polyacrylamide                       |                                                                 | 20.000                                        | 2012           |
|                                            | Neubau quaternisierte kationische Monomere (DMA3/DMA3Q) |                                                                 | 40.000                                        | 2012           |
|                                            | Neubau nichtionische Tenside                            |                                                                 | 60.000                                        | 2011           |
|                                            | Neubau Superabsorber                                    |                                                                 | noch offen                                    | noch offen     |
| <b>Investitionen der ehemaligen Cognis</b> |                                                         |                                                                 |                                               |                |
| Jinshan/China                              | Alkylpolyglucosid-Tenside (APG-Tenside)                 | k.A.                                                            | k.A.                                          | 2010           |
| Kuala Lumpur/Malaysia                      | Anwendungslabor für Lebensmittelzusätze                 |                                                                 |                                               | 2010           |

## Produktionskapazitäten wichtiger Produkte

| Produkt                     | Standorte |             |                            |                                    | Jahreskapazität<br>(Tonnen) |
|-----------------------------|-----------|-------------|----------------------------|------------------------------------|-----------------------------|
|                             | Europa    | Nordamerika | Asien,<br>Pazifischer Raum | Südamerika,<br>Afrika, Naher Osten |                             |
| Anionische Tenside          | X         | X           | X                          | X                                  | 550.000                     |
| Citral                      | X         |             |                            |                                    | 40.000                      |
| HDI (Hexamethylenisocyanat) | X         |             |                            |                                    | 10.000                      |
| Komplexbildner              | X         | X           |                            | X                                  | 120.000                     |
| Methansulfonsäure           | X         |             |                            |                                    | 10.000                      |
| Nichtionische Tenside       | X         | X           | X                          |                                    | 570.000                     |
| Organische Pigmente         | X         | X           | X                          | X                                  | k.A.                        |
| Polyisobuten                | X         |             | X                          |                                    | 165.000                     |
| Superabsorber               | X         | X           | X                          |                                    | 410.000                     |

Umsatz Performance Products  
(Millionen €)

|      |        |  |
|------|--------|--|
| 2010 | 12.288 |  |
| 2009 | 9.356  |  |
| 2008 | 8.125  |  |

## Anteile am Umsatz

|   |                        |      |
|---|------------------------|------|
| 1 | Dispersions & Pigments | 26 % |
| 2 | Care Chemicals         | 22 % |
| 3 | Nutrition & Health     | 12 % |
| 4 | Paper Chemicals        | 14 % |
| 5 | Performance Chemicals  | 26 % |

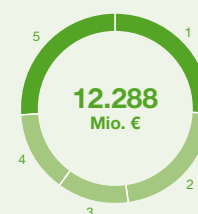

## Segmentdaten Performance Products (Millionen €)

|                                                            | 2010   | 2009  | Veränderung % |
|------------------------------------------------------------|--------|-------|---------------|
| Umsatz mit Dritten                                         | 12.288 | 9.356 | 31,3          |
| davon Dispersions & Pigments                               | 3.197  | 2.445 | 30,8          |
| Care Chemicals                                             | 2.755  | 2.067 | 33,3          |
| Nutrition & Health                                         | 1.482  | 1.338 | 10,8          |
| Paper Chemicals                                            | 1.713  | 1.326 | 29,2          |
| Performance Chemicals                                      | 3.141  | 2.180 | 44,1          |
| Transfers zwischen den Segmenten                           | 438    | 319   | 37,3          |
| Umsatz inklusive Transfers                                 | 12.726 | 9.675 | 31,5          |
| Ergebnis der Betriebstätigkeit vor Abschreibungen (EBITDA) | 2.162  | 926   | 133,5         |
| EBITDA-Marge (%)                                           | 17,6   | 9,9   | —             |
| Ergebnis der Betriebstätigkeit (EBIT) vor Sondereinflüssen | 1.554  | 698   | 122,6         |
| Ergebnis der Betriebstätigkeit (EBIT)                      | 1.345  | –150  | .             |
| Ergebnis der Betriebstätigkeit (EBIT) nach Kapitalkosten   | 441    | –930  | .             |
| Vermögen                                                   | 13.409 | 9.242 | 45,1          |
| Forschungskosten                                           | 289    | 285   | 1,4           |
| Investitionen in Sachanlagen und immaterielles Vermögen    | 3.000  | 3.753 | –20,1         |

**Der Umsatz mit Dritten stieg um 2.932 Millionen € auf 12.288 Millionen € (Mengen 12 %, Preise 4 %, Portfoliomaßnahmen 11 %, Währungen 4 %). Zu dieser positiven Geschäftsentwicklung haben neben der starken Nachfrage auch die ganzjährige Einbeziehung der eingegliederten Ciba-Geschäfte sowie die am 9. Dezember 2010 erfolgte Übernahme von Cognis beigetragen. Das Ergebnis der Betriebstätigkeit erhöhte sich um 1.495 Millionen € auf 1.345 Millionen € – trotz einmaliger Kostenbelastungen zum Jahresende. Gründe hierfür waren sowohl unsere erfolgreichen Maßnahmen zur Integration von Ciba sowie zur Restrukturierung der kombinierten Geschäfte als auch der deutliche Mengenanstieg.**

**Für 2011 erwarten wir eine stabile Nachfrage und – gestützt durch die Cognis-Akquisition – ein kräftiges Umsatzwachstum. Wir streben an, das Ergebnis stark zu steigern.**

## Dispersions &amp; Pigments

2010 erzielten wir mit 3.197 Millionen € einen im Vergleich zum Vorjahr um 752 Millionen € höheren Umsatz mit Dritten (Mengen 13 %, Preise 4 %, Portfoliomaßnahmen 8 %, Währungen 6 %). Gründe für den stark gestiegenen Umsatz waren der allgemeine konjunkturelle Aufschwung sowie das Wiederauffüllen der Lager in der gesamten Wertschöpfungskette. Auch die ganzjährige Einbeziehung der eingegliederten Ciba-Geschäfte stützte das Umsatzwachstum.

Infolge der weltweiten Wirtschaftserholung stieg die Nachfrage in allen Arbeitsgebieten erheblich an. Durch eine teilweise eingeschränkte Rohstoffverfügbarkeit und die hohe Auslastung unserer Anlagen konnten wir die zusätzliche Nachfrage nicht immer voll befriedigen. In unserem Geschäft mit Dispersionen nahmen die Mengen in allen Regionen deutlich zu. Auch bei Pigmenten konnten wir Absatz und Umsatz kräftig erhöhen. Der Umsatz mit Harzen übertraf den Vorjahreswert; nur das

## Umsatzeinflüsse Performance Products

|                    |             |                                                                                     |
|--------------------|-------------|-------------------------------------------------------------------------------------|
| Mengen             | 12 %        | 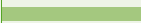 |
| Preise             | 4 %         |  |
| Portfoliomaßnahmen | 11 %        |  |
| Währungen          | 4 %         |  |
| <b>Umsatz</b>      | <b>31 %</b> |  |

Ergebnis der Betriebstätigkeit Performance Products  
(Millionen €)

|      |       |                                                                                       |
|------|-------|---------------------------------------------------------------------------------------|
| 2010 | 1.345 |  |
| 2009 | –150  |  |
| 2008 | 768   |  |

Geschäft mit Produkten für die Druckindustrie stagnierte. Bei Additiven resultierte der gestiegene Umsatz unter anderem aus dem erfolgreichen Geschäft mit Spezialitäten für die Herstellung von LCD-Displays, welche in Asien stark nachgefragt wurden.

Bei Dispersionen, Pigmenten und Harzen konnten die Margen trotz zunehmender Rohstoffkosten gehalten und vereinzelt sogar verbessert werden. Im Additiv-Geschäft gingen die Margen leicht zurück. Die Fixkosten lagen insbesondere durch strukturelle Effekte aus der Ciba-Integration über dem Niveau von 2009. Das Ergebnis der Betriebstätigkeit übertraf den Vorjahreswert dank der starken Geschäftsentwicklung weit.

Für 2011 erwarten wir insgesamt eine geringfügig steigende Nachfrage. Unsere Hauptabnehmerindustrien Automobil, Bau und Verpackung werden auch im kommenden Jahr wachsen. Wir rechnen deshalb damit, dass sich unser Umsatz im Vorjahresvergleich leicht erhöht. Mit zunehmender Rohstoffverfügbarkeit wird sich allerdings der Margendruck verstärken. Durch unsere fortgeführte Kostendisziplin und die Realisierung weiterer Synergien aus der Integration von Ciba wird das Ergebnis voraussichtlich kräftig steigen. In den nächsten Jahren werden wir die Restrukturierung unseres Pigmentgeschäfts fortsetzen und unsere Produktionskapazitäten in Asien ausbauen.

#### Dispersions & Pigments – Umsatz nach Regionen (nach Sitz der Kunden)

|   |                                 |      |
|---|---------------------------------|------|
| 1 | Europa                          | 43 % |
| 2 | Nordamerika                     | 25 % |
| 3 | Asien, Pazifischer Raum         | 25 % |
| 4 | Südamerika, Afrika, Naher Osten | 7 %  |

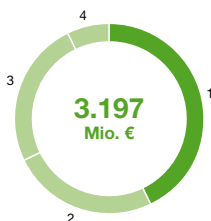

#### Care Chemicals

Anfang August 2010 wurden die Arbeitsgebiete Nutrition Ingredients, Pharma Ingredients & Services sowie Aroma Chemicals aus dem Unternehmensbereich Care Chemicals herausgelöst

und in den neu gegründeten Unternehmensbereich Nutrition & Health eingebracht. Der Bereich Care Chemicals umfasst nun die Geschäfte mit Personal Care, Hygiene, Home Care und Formulation Technologies. Die Teilung des Bereichs erfolgte zur Vorbereitung der Integration der Cognis-Aktivitäten.

Mit 2.755 Millionen € erreichte Care Chemicals einen Umsatz mit Dritten auf sehr hohem Niveau; er lag um 688 Millionen € über dem Wert des Vorjahres (Mengen 14 %, Preise 5 %, Portfoliomaßnahmen 11 %, Währungen 3 %). Auf Grund der stark gestiegenen Nachfrage konnten wir das Absatzvolumen beträchtlich erhöhen. In einigen Produktlinien überstieg die Nachfrage unsere Liefermöglichkeiten, da wichtige Rohstoffe nicht in ausreichender Menge zur Verfügung standen beziehungsweise unsere Kapazitäten bereits ausgeschöpft waren. Durch die positive Mengenentwicklung konnten wir den Umsatz in allen Arbeitsgebieten und in allen Regionen stark verbessern. Das deutlichste Umsatzwachstum verzeichneten die Arbeitsgebiete Home Care und Formulation Technologies.

Wegen der großen Nachfrage und der gestiegenen Rohstoffkosten konnten wir unsere Verkaufspreise anheben. Der stärkere US-Dollar und die ganzjährige Einbeziehung der eingegliederten Ciba-Geschäfte stützten die Umsatzentwicklung.

In diesem günstigen Marktumfeld haben wir das Ergebnis der Betriebstätigkeit stark gesteigert und ein hohes Niveau erreicht. Hauptgründe waren die positive Umsatzentwicklung, die verbesserte Anlagenauslastung und die schnelle und erfolgreiche Integration der Ciba-Aktivitäten. Die Sonderbelastungen gingen insgesamt zurück; sie ergaben sich aus der Ciba-Integration sowie durch den Verbrauch der bei der Cognis-Übernahme zu Marktwerten angesetzten Vorräte.

Diese erfolgreiche Entwicklung wollen wir 2011 fortsetzen. In Nanjing/China werden wir unsere erste Tensid-Fabrik in Asien in Betrieb nehmen. Wir rechnen mit einem leichten Absatzanstieg und mit einem durch die Cognis-Akquisition gestützten starken Umsatzwachstum. Obwohl sich Sonderbelastungen aus der Cognis-Integration ergeben, erwarten wir, dass sich das Ergebnis bei stabilen Margen signifikant erhöht.

#### Dispersions & Pigments

- Umsatz vor allem infolge des konjunkturellen Aufschwungs und des Lageraufbaus stark erhöht
- Margen bei Dispersionen, Pigmenten und Harzen trotz zunehmender Rohstoffkosten gehalten, vereinzelt sogar verbessert
- Ergebnis weit über Vorjahresniveau
- Prognose 2011: Leichtes Umsatzwachstum; kräftiger Ergebnisanstieg trotz zunehmenden Margendrucks

#### Care Chemicals

- Umsatz absatzbedingt in allen Arbeitsgebieten und Regionen stark gewachsen
- Ergebnis in günstigem Marktumfeld weit über Vorjahresniveau
- Sonderbelastungen insgesamt zurückgegangen
- Prognose 2011: Durch die Cognis-Akquisition gestützter starker Umsatzanstieg; signifikante Ergebnisverbesserung

**Care Chemicals – Umsatz nach Regionen (nach Sitz der Kunden)**

|   |                                 |      |
|---|---------------------------------|------|
| 1 | Europa                          | 47 % |
| 2 | Nordamerika                     | 27 % |
| 3 | Asien, Pazifischer Raum         | 13 % |
| 4 | Südamerika, Afrika, Naher Osten | 13 % |

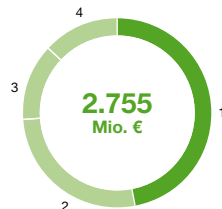**Nutrition & Health**

Der Unternehmensbereich Nutrition & Health wurde Anfang August 2010 gegründet, um die Integration der Cognis-Aktivitäten vorzubereiten. Er umfasst die vormals dem Bereich Care Chemicals zugeordneten Geschäfte mit Human und Animal Nutrition, Pharma Ingredients & Services sowie Aroma Chemicals.

Mit 1.482 Millionen € erzielte Nutrition & Health einen um 144 Millionen € höheren Umsatz mit Dritten als im Vorjahr (Mengen 8 %, Preise –2 %, Portfoliomaßnahmen 1 %, Währungen 4 %). Auf Grund der allgemeinen Belebung der Nachfrage konnten wir den Absatz kräftig steigern. Die positive Mengenentwicklung hat dazu geführt, dass sich der Umsatz in allen Arbeitsgebieten und in allen Regionen signifikant verbesserte. Das deutlichste Wachstum verzeichnete das Arbeitsgebiet Aroma Chemicals. Der stärkere US-Dollar hat die Umsatzentwicklung unterstützt und das niedrigere Preisniveau mehr als ausgeglichen.

In einem gegenüber dem Vorjahr verbesserten Marktumfeld konnten wir das Ergebnis der Betriebstätigkeit kräftig erhöhen. Hauptgründe hierfür waren die robuste Nachfrage, die gestiegene Anlagenauslastung und – trotz des intensiven Wettbewerbs bei Vitaminen – solide Margen. Alle Arbeitsgebiete haben zum Ergebniswachstum beigetragen. Sonderbelastungen ergaben sich durch den Verbrauch der bei der Cognis-Übernahme zu Marktwerten angesetzten Vorräte.

Wir rechnen damit, dass sich die positive Geschäftsentwicklung 2011 fortsetzt. Den Absatz beabsichtigen wir zu steigern. Wir erwarten ein durch die Cognis-Akquisition

gestütztes kräftiges Umsatzwachstum. Der Ausbau des Arbeitsgebiets Ernährung und die Integration von Cognis werden im Jahr 2011 zusätzliche Belastungen mit sich bringen. Dennoch streben wir an, das Ergebnis auf dem hohen Vorjahresniveau zu halten.

**Nutrition & Health – Umsatz nach Regionen (nach Sitz der Kunden)**

|   |                                 |      |
|---|---------------------------------|------|
| 1 | Europa                          | 49 % |
| 2 | Nordamerika                     | 20 % |
| 3 | Asien, Pazifischer Raum         | 21 % |
| 4 | Südamerika, Afrika, Naher Osten | 10 % |

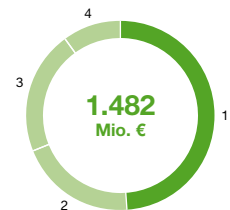**Paper Chemicals**

2010 erzielten wir einen Umsatz mit Dritten in Höhe von 1.713 Millionen € – eine Steigerung von 387 Millionen € im Vergleich zum Vorjahr (Mengen 5 %, Preise 8 %, Portfoliomaßnahmen 11 %, Währungen 5 %). Die Nachfrage nahm in allen regionalen Geschäftseinheiten spürbar zu.

In Europa und Nordamerika profitierten wir von dem allgemeinen wirtschaftlichen Aufschwung. Der Umsatz verbesserte sich mengen- und preisbedingt. In Asien konnten wir den Absatz unserer Produkte insbesondere in den Wachstumsmärkten China, Indien und Indonesien deutlich steigern. Auch in Südamerika nahm die Nachfrage nach unseren Produkten zu. Zusätzlich trugen hier positive Währungseffekte zum Umsatzwachstum bei.

Bei Kaolinmineralien führte die gute Marktsituation vor allem bei den industriellen Anwendungen zu einem Anstieg von Absatz und Umsatz.

Durch Restrukturierungsmaßnahmen, etwa die Anpassung der europäischen Produktionsstrukturen für Papierdispersionen an die Marktbedingungen oder den Ausstieg aus dem Stärke-Geschäft, konnten wir unsere Fixkosten deutlich senken. Unser striktes Kostenmanagement förderte diese Entwicklung

**Nutrition & Health**

- Umsatz in allen Arbeitsgebieten und Regionen infolge der starken Nachfrage signifikant verbessert
- Ergebnis gegenüber Vorjahr kräftig gestiegen
- Solide Margen trotz des intensiven Wettbewerbs bei Vitaminen
- Prognose 2011: Durch die Cognis-Akquisition gestützter kräftiger Umsatzanstieg; Ergebnis auf dem hohen Niveau des Jahres 2010

**Paper Chemicals**

- Umsatz kräftig gewachsen; Nachfrage in allen regionalen Geschäftseinheiten gestiegen
- Fixkosten durch Restrukturierungsmaßnahmen und striktes Kostenmanagement deutlich gesenkt
- Ergebnis weit über Vorjahreswert und positiv
- Prognose 2011: Umsatz des fortgeführten Geschäfts über Vorjahresniveau; starke Steigerung des Ergebnisses



zusätzlich. Das Ergebnis der Betriebstätigkeit übertraf den Vorjahreswert weit und war positiv. Gegenüber 2009 war die Ergebnisbelastung durch Sondereinflüsse geringer.

Trotz der günstigen Geschäftsentwicklung im Jahr 2010 befindet sich die Papierindustrie vor allem in den Regionen Europa und Nordamerika weiterhin in einem schwierigen wirtschaftlichen Umfeld. Neben den bereits lange bestehenden Überkapazitäten belasten geänderte Konsumgewohnheiten der Endkunden das Papiergeschäft. Die strukturellen Probleme entlang der gesamten Wertschöpfungskette werden dadurch größer. Wir gehen davon aus, dass die Papierproduktion in den Regionen Europa und Nordamerika nicht wieder an das Vorkrisenniveau anknüpfen wird. Wachstumsaussichten bestehen dagegen vor allem im asiatischen Markt. Deshalb planen wir den Bau von zwei Anlagen in China, die im Jahr 2012 in Betrieb genommen werden sollen. Wir erwarten, dass sich der Umsatz unseres fortgeführten Geschäfts 2011 erhöht. Wegen der Realisierung von Synergien aus der Ciba-Integration und wegen der laufenden Restrukturierungsmaßnahmen rechnen wir damit, im Jahr 2011 das Ergebnis stark zu steigern.

#### Paper Chemicals – Umsatz nach Regionen (nach Sitz der Kunden)

|   |                                 |      |
|---|---------------------------------|------|
| 1 | Europa                          | 46 % |
| 2 | Nordamerika                     | 21 % |
| 3 | Asien, Pazifischer Raum         | 26 % |
| 4 | Südamerika, Afrika, Naher Osten | 7 %  |

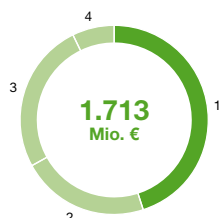

#### Performance Chemicals

Der Umsatz mit Dritten stieg 2010 um 961 Millionen € auf 3.141 Millionen € und übertraf damit den Wert des Vorjahres weit (Mengen 16 %, Preise 2 %, Portfoliomaßnahmen 21 %, Währungen 5 %). Nach dem schwierigen Jahr 2009 hat sich die Nachfrage nach unseren Produkten in allen unseren Kundenbranchen erfreulich entwickelt. Infolge der Rohstoffknappheit

und gut ausgelasteter Anlagen konnten wir die hohe Nachfrage nicht immer voll befriedigen. Im Geschäft mit Automobil- und Raffineriechemikalien lag der Umsatz absatz- und preisbedingt weit über dem Niveau des Vorjahres. Die ganzjährige Einbeziehung der eingegliederten Ciba-Geschäfte stärkte den Umsatz zusätzlich: In unseren Geschäften mit Kunststoffadditiven, Schmierstoffadditiven, Wasserbehandlungskemikalien sowie Ölfeldchemikalien haben wir den Absatz kräftig gesteigert. Dank unseres konsequenten Preismanagements konnten höhere Rohstoffkosten in vielen Arbeitsgebieten an den Markt weitergegeben werden.

Das Ergebnis der Betriebstätigkeit lag mengenbedingt weit über dem Vorjahreswert. Während die durch die Ciba-Akquisition hinzugekommenen Geschäftsfelder die Ergebnisentwicklung positiv beeinflussten, schwächten einmalige Aufwendungen für Wertberichtigungen auf Forderungen im Rahmen langfristiger Lieferverträge das Ergebnis ab.

Wir rechnen im Jahr 2011 mit einem leichten Umsatzwachstum. Unser striktes Preis- und Kostenmanagement werden wir gezielt fortführen. Durch Innovationen und Investitionen wachsen wir weiterhin profitabel – wie beispielsweise durch unsere neue Produktionsanlage für Polyisobuten in Ludwigshafen. Vor dem Hintergrund der Realisierung weiterer Synergien aus der Ciba-Integration und bereits eingeleiteter Maßnahmen zur Effizienzsteigerung erwarten wir eine starke Ergebnisverbesserung.

#### Performance Chemicals – Umsatz nach Regionen (nach Sitz der Kunden)

|   |                                 |      |
|---|---------------------------------|------|
| 1 | Europa                          | 41 % |
| 2 | Nordamerika                     | 21 % |
| 3 | Asien, Pazifischer Raum         | 27 % |
| 4 | Südamerika, Afrika, Naher Osten | 11 % |

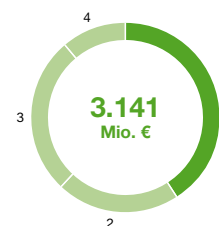

#### Performance Chemicals

- Umsatz 2010 auf Grund gestiegener Nachfrage stark verbessert; ganzjährige Einbeziehung der Ciba-Geschäfte stützt Umsatzwachstum zusätzlich
- Ergebnis trotz einmaliger Aufwendungen für Wertberichtigungen auf Forderungen im Rahmen langfristiger Lieferverträge weit über Vorjahresniveau

- Prognose 2011: Leichtes Umsatzwachstum; starke Ergebnisverbesserung durch Realisierung weiterer Synergien aus der Ciba-Integration sowie durch bereits eingeleitete Maßnahmen zur Effizienzsteigerung

## Functional Solutions

### Kundenspezifische Produkte und Systemlösungen

Im Segment **Functional Solutions** bündeln wir die Unternehmensbereiche **Catalysts**, **Construction Chemicals** und **Coatings**. Sie entwickeln innovative kundenspezifische Produkte und Systemlösungen, insbesondere für die Automobil-, Chemie- und Bauindustrie.

#### Strategie des Segments

Unser Portfolio besteht aus innovativen Produkten und Technologien, die unseren Kunden eine Differenzierung gegenüber ihren Wettbewerbern erlauben. Der Erfolg des Segments basiert vor allem auf Spezialitäten und Systemlösungen, die wir in Zusammenarbeit mit unseren Kunden entwickeln. Einen Schwerpunkt der Strategie bildet die kontinuierliche Optimierung unseres Produktportfolios und unserer Strukturen vor dem Hintergrund regional unterschiedlicher Marktanforderungen und Trends in den Abnehmerbranchen. Wir streben an, unsere führende Marktposition in Europa zu stärken, die Stellung im nord-amerikanischen Markt profitabel auszubauen sowie unsere Aktivitäten in den Wachstumsregionen Asien, Südamerika, Osteuropa und Naher Osten gezielt zu erweitern.

#### Unsere Produkte

Der Bereich **Catalysts** ist der weltweit führende Hersteller von Fahrzeug- und Prozesskatalysatoren zum Schutz der Luft, zur verbesserten Produktion von Kraftstoffen und zur effizienten Herstellung einer Vielzahl von Chemikalien und Kunststoffen. Wir produzieren beispielsweise Katalysatoren, die Schadstoffe im Abgasstrang von Nutzfahrzeugen und Pkws in unschädliche Verbindungen umwandeln. Mit Hilfe dieser Systeme konnten seit 1974 mehr als eine Milliarde Tonnen Emissionen vermieden werden. Außerdem stellen wir Prozesskatalysatoren her, die die Rohstoff- und Energieeffizienz in Chemieanlagen und Raffinerien erhöhen. Darüber hinaus bieten wir Dienstleistungen auf dem Gebiet der Edel- und Nichtedelmetalle an.

**Construction Chemicals** ist global führend in der Entwicklung von Betonzusatzmitteln wie Verflüssigern, Verzögerern oder auch Härtern. Mit diesen lässt sich Beton einfach und effizient verarbeiten. Darüber hinaus erhöhen sie die Stabilität und Lebensdauer von Betonstrukturen. Wir produzieren und ver-

#### Lacke für Windrotoren

Verbesserte Erosionsbeständigkeit

Wert für die BASF  
jährlich

20%

weltweiter **Absatzanstieg** bei Decklacken in den nächsten drei Jahren erwartet

Wert für den Kunden  
bis zu

5x

**besserer Schutz** vor extremen Umweltbedingungen verglichen mit herkömmlichen Lacksystemen

**Wert für die BASF** Mit Speziallacken für Windrotoren sind wir in allen wichtigen Märkten vertreten – in Südamerika sind wir Marktführer. Wir streben weltweit in den nächsten drei Jahren einen Absatzanstieg von je 20 % an.

**Wert für den Kunden** Der neu entwickelte High-Solid-Lack ist hoch beständig gegen Regenerosion: Er schützt im Vergleich zu herkömmlichen Systemen bis zu fünf Mal besser gegen extreme Umweltbedingungen.

treiben zudem Ausbauprodukte für Wohnungen sowie öffentliche oder gewerbliche Bauten. Unter dem Markennamen Ucrete® bieten wir zum Beispiel äußerst belastbare Industrieböden an. Unser Portfolio an Ausbauprodukten umfasst außerdem Sportböden, Fliesenkleber, Abdicht- und Dämmsysteme sowie Lösungen für die Instandsetzung von Beton. Wichtige Bauchemie-Marken sind Masterbuilders® und PCI®.

Der Bereich **Coatings** ist einer der weltweit größten Anbieter von innovativen und umweltfreundlichen Lackierlösungen für Automobile und industrielle Anwendungen. Mit unseren Marken Glasurit® und R-M® für das Autoreparaturgeschäft sind wir weltweit im Premiumsegment erfolgreich. In Brasilien sind wir der führende Hersteller von Bautenanstrichmitteln – mit einer herausragenden Stellung unserer Marke Suvinil®. Mit Norbin® haben wir eine neue Bautenanstrichmittel-Marke erfolgreich in China eingeführt. 🌐

#### Strategie

- Fokus auf innovative Produkte und Technologien mit Differenzierungspotenzial für unsere Kunden
- Entwicklung von Spezialitäten und Systemlösungen in enger Zusammenarbeit mit unseren Kunden
- Kontinuierliche Optimierung des Produktportfolios vor dem Hintergrund regionaler Marktanforderungen und Trends in den Abnehmerbranchen

#### Produkte

- Catalysts: Fahrzeug- und Prozesskatalysatoren
- Construction Chemicals: Betonzusatzmittel und Ausbauprodukte für den Baubereich
- Coatings: Lackierlösungen für Automobile und industrielle Anwendungen sowie Bautenanstrichmittel

## Investitionen in Sachanlagen

| Standort                | Projekt                                                   | Inbetriebnahme |
|-------------------------|-----------------------------------------------------------|----------------|
| Diverse Standorte/Asien | Ausbau Bauchemikalien                                     | 2010           |
| Gebze/Türkei            | Neubau Bauchemikalien                                     | 2010           |
| Mangalore/Indien        | Neubau regionaler Laboraktivitäten, Ausbau Bauchemikalien | 2011           |
| Nienburg/Deutschland    | Ausbau Nutzfahrzeugkatalysatoren                          | 2010           |
| Schanghai/China         | Ausbau Nutzfahrzeugkatalysatoren                          | 2010           |
| Sinzheim/Deutschland    | Neubau Bauchemikalien                                     | 2010           |
| Tultitlán/Mexiko        | Neubau regionaler Laboraktivitäten                        | 2012           |
| Windsor/Kanada          | Ausbau/Konzentration Automobillackproduktion              | 2010           |

## Forschung und Entwicklung

Bei Catalysts verfügen wir über eine branchenweit einzigartige Forschungs- und Entwicklungsplattform. Durch Prozess- und Produktinnovationen bauen wir unsere technologische Führungsposition kontinuierlich aus. Unser Fokus liegt darauf, die Leistung unserer Katalysatoren stetig zu erhöhen, um Ressourcen zu schonen und strenger werdende Abgasnormen zu erfüllen. Zu unseren Innovationen zählt unter anderem die hochmoderne Zeolith-SCR(Selective Catalytic Reduction)-Technologie, mit der über 90 % der schädlichen Stickoxidemissionen aus dem Abgasstrom von Dieselmotoren entfernt werden können.

Construction Chemicals richtet seine Forschungsaktivitäten an lokalen Kundenbedürfnissen und Trends in der Bauindustrie aus. Nachhaltigkeit, Kosten- und Ressourceneffizienz stehen im Fokus der Bereichsforschung. Ein Beispiel hierfür ist unser erfolgreich in den Markt eingeführter Härtingsbeschleuniger X-Seed®, der die Energieeffizienz der Betonverarbeitung verbessert und zugleich die Verarbeitungskosten senkt. Weitere Schwerpunktthemen sind organische Bindemittel für Anwendungen in den Bereichen Fußböden und Abdichtungen, neue Formulierungen für Trockenmörtel-Systemlösungen sowie Mineralogie und Nanotechnologie.

Bei Coatings entwickeln wir in enger Partnerschaft mit unseren Kunden aus der Automobilindustrie neue Lösungen für integrierte Prozesse, ökoefiziente Beschichtungen, kratzfeste

Klarlacke sowie wirksamere Korrosionsschutztechnologien. Ein weiteres Forschungsgebiet umfasst verbesserte Beschichtungsprodukte, die in zunehmend wichtigen Anwendungsfeldern, zum Beispiel bei Windkraftanlagen, eingesetzt werden. Zu unseren Innovationen gehören auch Lacke für die Beschichtung von Stahl- oder Aluminiumbändern, die unter anderem im Baubereich verwendet werden. Durch den Einsatz von Pigmenten mit wärmereflektierender Wirkung sorgen diese Lacke zum Beispiel für kühlere Dächer. 

## Marketing und Kundenbeziehungen

Unser Kundenportfolio reicht von Großkunden, über mittelständische regionale Kunden bis hin zu Handwerksbetrieben und Autowerkstätten. Unsere Geschäftsmodelle und Vertriebswege sind auf die jeweiligen Kundengruppen und Marktsegmente ausgerichtet. Großkunden betreuen wir individuell und bieten ihnen spezifische Entwicklungsarbeiten und technische Services. Entwicklungslabore in den Regionen ermöglichen eine rasche Anpassung unserer Produkte an lokale Bedürfnisse.

Die enge Zusammenarbeit mit unseren Kunden zeigt sich unter anderem beim Bau des neuen Gotthard-Basistunnels in der Schweiz: Als Partner für Bauchemie-Lösungen trägt die BASF mit Betonzusatzmitteln, Brandschutzmörtel sowie durch technische Unterstützung vor Ort zum Bau des längsten Eisenbahntunnels der Welt bei.

Umsatz Functional Solutions  
(Millionen €)

|      |       |             |
|------|-------|-------------|
| 2010 | 9.703 | <div></div> |
| 2009 | 7.115 | <div></div> |
| 2008 | 9.388 | <div></div> |

## Anteile am Umsatz

|   |                        |      |
|---|------------------------|------|
| 1 | Catalysts              | 52 % |
| 2 | Construction Chemicals | 22 % |
| 3 | Coatings               | 26 % |

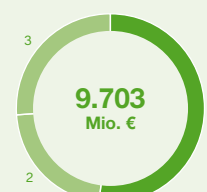

## Segmentdaten Functional Solutions (Millionen €)

|                                                            | 2010  | 2009  | Veränderung % |
|------------------------------------------------------------|-------|-------|---------------|
| Umsatz mit Dritten                                         | 9.703 | 7.115 | 36,4          |
| davon Catalysts                                            | 5.005 | 2.961 | 69,0          |
| Construction Chemicals                                     | 2.121 | 1.991 | 6,5           |
| Coatings                                                   | 2.577 | 2.163 | 19,1          |
| Transfers zwischen den Segmenten                           | 159   | 147   | 8,2           |
| Umsatz inklusive Transfers                                 | 9.862 | 7.262 | 35,8          |
| Ergebnis der Betriebstätigkeit vor Abschreibungen (EBITDA) | 861   | 511   | 68,5          |
| EBITDA-Marge (%)                                           | 8,9   | 7,2   | –             |
| Ergebnis der Betriebstätigkeit (EBIT) vor Sondereinflüssen | 467   | 209   | 123,4         |
| Ergebnis der Betriebstätigkeit (EBIT)                      | 457   | 107   | 327,1         |
| Ergebnis der Betriebstätigkeit (EBIT) nach Kapitalkosten   | –356  | –644  | 44,7          |
| Vermögen                                                   | 9.364 | 8.265 | 13,3          |
| Forschungskosten                                           | 179   | 163   | 9,8           |
| Investitionen in Sachanlagen und immaterielles Vermögen    | 208   | 174   | 19,5          |

**Der Umsatz mit Dritten erhöhte sich um 2.588 Millionen € auf 9.703 Millionen € und übertraf den Wert des Vorjahres stark (Mengen 17 %, Preise 10 %, Portfoliomaßnahmen 1 %, Währungen 8 %). Trotz einmaliger Kosten am Jahresende lag das Ergebnis der Betriebstätigkeit mit 457 Millionen € weit über dem schwachen Vorjahresniveau. Hauptgründe für diese Entwicklung waren die kräftige Erholung der globalen Automobilproduktion sowie unsere Maßnahmen zur Effizienzsteigerung.**

**Für 2011 rechnen wir mit einer steigenden Nachfrage aus unseren Hauptabnehmerbranchen, der Bau- und Automobilindustrie. Wir streben an, den Umsatz signifikant zu erhöhen und das Ergebnis kräftig zu verbessern.**

## Catalysts

Unser Geschäft profitierte 2010 von der schnellen und deutlichen Erholung der Automobilindustrie. Der Umsatz mit Dritten erhöhte sich um 2.044 Millionen € auf 5.005 Millionen €

(Mengen 31 %, Preise 27 %, Portfoliomaßnahmen 2 %, Währungen 9 %). Grund für diesen starken Anstieg waren zum einen die im Jahresdurchschnitt höheren Edelmetallpreise. Zum anderen trug das Geschäft mit Fahrzeugkatalysatoren mengenbedingt erheblich zum Umsatzwachstum bei. Bei Prozesskatalysatoren übertrafen wir das Umsatzniveau des Vorjahres.

Während die positive Entwicklung bei Fahrzeugkatalysatoren in Nordamerika auf die insgesamt gestiegene Nachfrage nach Pkws zurückzuführen ist, resultierte sie in Europa vor allem aus der kräftigen Belebung des Marktes für Premiumfahrzeuge. In beiden Regionen nahm außerdem die Nachfrage nach Dieselmotoren für Nutzfahrzeuge deutlich zu.

Der Aufschwung der Automobilindustrie wirkte sich auch auf die Geschäftsentwicklung unserer Einheit Precious and Base Metal Services positiv aus: Infolge höherer Edelmetallpreise und gesteigener Mengen verdoppelte sich der Umsatz und lag bei 2.482 Millionen € (2009: 1.229 Millionen €).

In diesem verbesserten Marktumfeld konnten wir das Ergebnis der Betriebstätigkeit stark steigern.

## Umsatzeinflüsse Functional Solutions

|                    |             |             |
|--------------------|-------------|-------------|
| Mengen             | 17 %        | <div></div> |
| Preise             | 10 %        | <div></div> |
| Portfoliomaßnahmen | 1 %         | <div></div> |
| Währungen          | 8 %         | <div></div> |
| <b>Umsatz</b>      | <b>36 %</b> | <div></div> |

Ergebnis der Betriebstätigkeit Functional Solutions  
(Millionen €)

|      |     |             |
|------|-----|-------------|
| 2010 | 457 | <div></div> |
| 2009 | 107 | <div></div> |
| 2008 | 151 | <div></div> |

Wir erwarten, dass der Umsatz im Jahr 2011 signifikant wächst. Ursächlich hierfür werden neben höheren Edelmetallpreisen auch steigende Mengen sein, vor allem bei Fahrzeug- und Chemiekatalysatoren. Wir rechnen damit, dass sich der Absatz bei Fahrzeugkatalysatoren infolge der zunehmenden Nachfrage sowie neu in Kraft tretender Emissionsverordnungen erhöht. Das Ergebnis wird 2011 auf Grund des stärkeren Umsatzes und unserer fortgesetzten Maßnahmen zur Kostensenkung voraussichtlich weit über dem Niveau des Vorjahres liegen.

#### Catalysts – Umsatz nach Regionen (nach Sitz der Kunden)

|   |                                 |      |
|---|---------------------------------|------|
| 1 | Europa                          | 39 % |
| 2 | Nordamerika                     | 32 % |
| 3 | Asien, Pazifischer Raum         | 18 % |
| 4 | Südamerika, Afrika, Naher Osten | 11 % |

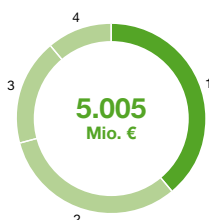

#### Construction Chemicals

Bei gesunkenen Rohstoffkosten stieg der Umsatz mit Dritten mengen- und währungsbedingt um 130 Millionen € auf 2.121 Millionen € (Mengen 3 %, Preise –2 %, Währungen 6 %). Dank starker Nachfrage konnten wir unseren Umsatz in China und Indien sowie in Russland, Ägypten und Saudi-Arabien kräftig steigern. Nach dem deutlichen Umsatzrückgang im Jahr 2009 stabilisierte sich unser Geschäft in Nordamerika und Nordeuropa wieder. In den wichtigen europäischen Märkten Deutschland und Frankreich zeigte sich unser Geschäft robust, dagegen sank der Umsatz in Spanien weiter.

Das Ergebnis der Betriebstätigkeit lag weit über dem Niveau des Vorjahres. Vor allem unsere fortgesetzten Maßnahmen zur Stärkung der Wettbewerbsfähigkeit wirkten sich positiv auf die Ergebnisentwicklung aus: Wir haben in allen

Regionen unsere Geschäftsmodelle und Organisationen der Marktentwicklung angepasst, die Komplexität unseres Leistungsangebots reduziert und die Effizienz unserer Prozesse in der gesamten Lieferkette erhöht. Aus diesen Maßnahmen ergaben sich Sondereinflüsse, die unser Ergebnis jedoch in geringerem Umfang belasteten als im Vorjahr.

Für 2011 erwarten wir folgende Entwicklungen in den für uns wichtigen Märkten: In Nordamerika, Europa und Japan wird die Baubranche leicht wachsen. Dagegen nimmt die Bautätigkeit in China weiterhin stark zu. Diesen Trend werden wir mit Investitionen begleiten. Insgesamt rechnen wir auch im Nahen Osten, in Indien und in Südamerika mit einem kräftigen Wachstum. Für 2011 streben wir bei Construction Chemicals eine leichte Steigerung des Umsatzes und eine starke Ergebnisverbesserung an.

#### Construction Chemicals – Umsatz nach Regionen (nach Sitz der Kunden)

|   |                                 |      |
|---|---------------------------------|------|
| 1 | Europa                          | 45 % |
| 2 | Nordamerika                     | 23 % |
| 3 | Asien, Pazifischer Raum         | 20 % |
| 4 | Südamerika, Afrika, Naher Osten | 12 % |

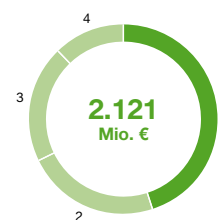

#### Catalysts

- Umsatz dank höherer Edelmetallpreise und steigender Mengen weit über Vorjahreswert
- Ergebnis in günstigem Marktumfeld stark verbessert
- Prognose 2011: Signifikantes Umsatzwachstum infolge höherer Edelmetallpreise und zunehmender Mengen; Ergebnis weit über dem Niveau des Vorjahres

#### Construction Chemicals

- Umsatz mengen- und währungsbedingt leicht gestiegen
- Ergebnis weit über Vorjahresniveau
- Maßnahmen zur Stärkung der Wettbewerbsfähigkeit erfolgreich umgesetzt
- Prognose 2011: Leichter Umsatzanstieg und starke Ergebnisverbesserung



## Coatings

2010 lag der Umsatz mit Dritten mit 2.577 Millionen € um 414 Millionen € über dem Vorjahresniveau (Mengen 12 %, Preise 0 %, Währungen 7 %). Von der gesamtwirtschaftlichen Erholung der Nachfrage profitierten alle Produktbereiche weltweit. Das verbesserte Marktumfeld der globalen Automobilindustrie und der gesteigerte Konsum in Südamerika trugen maßgeblich zum signifikanten Wachstum des Umsatzes bei. Vor diesem Hintergrund konnte der leichte Umsatzrückgang, der aus Devestitionen bei Industrielacken in Japan und Nordamerika resultierte, mehr als kompensiert werden.

Unser Geschäft mit Fahrzeuglacken verlief dank der schnellen Erholung der Automobilindustrie in Asien, speziell in China, sehr erfolgreich. Auch bei Autoreparaturlacken nahm der Umsatz zu; das Geschäftsumfeld blieb allerdings wettbewerbsintensiv. Die Nachfrage nach Lacken für Transport- und Landmaschinen erholte sich erst im zweiten Halbjahr 2010 langsam. In Europa profitierten wir von einer starken Nachfrage nach Coil Coatings aus der osteuropäischen Stahlindustrie. Der Absatz von Beschichtungen für Windenergieanlagen stabilisierte sich auf hohem Niveau. Im Produktbereich Bautenanstrichmittel lag der Umsatz insbesondere in Südamerika über dem Vorjahreswert. Hier stieg nicht nur die allgemeine Konsumentennachfrage an, sondern wir gewannen durch Produktinnovationen zusätzlich Marktanteile hinzu.

Das Ergebnis der Betriebstätigkeit übertraf den Wert des Jahres 2009 weit. Obwohl wir unsere Geschäftstätigkeit ausgeweitet haben, konnten wir den Fixkostenanstieg durch Restrukturierungsprojekte begrenzen und die stark gestiegenen Rohstoffkosten kompensieren.

Nach Sonderbelastungen im Jahr 2009 verzeichneten wir 2010 leicht positive Sondererträge. Sie ergaben sich aus dem Verkauf unserer Produktionsstätte in Burago/Italien. Diese Devestition diente der Bereinigung des Produktportfolios. Darüber hinaus haben wir interne Prozesse optimiert.

Für 2011 rechnen wir mit einer weiter steigenden Nachfrage aus der globalen Automobilindustrie und einer Zunahme des Privatkonsums. Die Schwellenländer werden hierbei die treibende Kraft sein. Wir erwarten deshalb, dass der Umsatz leicht über dem Wert des Jahres 2010 liegen wird. Auch das Ergebnis der Betriebstätigkeit wollen wir trotz der voraussichtlich höheren Rohstoffkosten leicht verbessern. Unsere Präsenz in den Wachstumsmärkten Asien und Osteuropa – speziell in China, Indien und Russland – werden wir stärken und gemeinsam mit unseren Kunden weiter ausbauen.

### Coatings – Umsatz nach Regionen (nach Sitz der Kunden)

|   |                                 |      |
|---|---------------------------------|------|
| 1 | Europa                          | 41 % |
| 2 | Nordamerika                     | 14 % |
| 3 | Asien, Pazifischer Raum         | 17 % |
| 4 | Südamerika, Afrika, Naher Osten | 28 % |

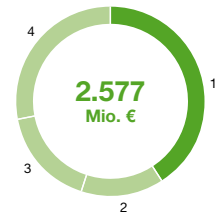

## Coatings

- Umsatz 2010 vor allem durch günstiges Marktumfeld der globalen Automobilindustrie sowie durch gesteigerten Konsum in Südamerika signifikant verbessert
- Ergebnis weit über dem Niveau des Vorjahres
- Verkauf unserer Produktionsstätte in Burago/Italien

- Prognose 2011: Leichter Umsatzanstieg; leichte Ergebnisverbesserung trotz höherer Rohstoffkosten

## Agricultural Solutions

### Innovationen für die Gesundheit von Nutzpflanzen

**Das Segment Agricultural Solutions besteht aus dem Unternehmensbereich Crop Protection, der innovative Wirkstoffe und Formulierungen zur Verbesserung der Gesundheit und des Ertrags von Kulturpflanzen entwickelt, herstellt und weltweit vermarktet. BASF Plant Science forscht auf dem Gebiet der Pflanzenbiotechnologie.**

#### Crop Protection – Strategie

Wir wachsen durch Innovation. Im Fokus steht die kontinuierliche Entwicklung neuer Produkte und Systemlösungen, um vorausschauend die Bedürfnisse unserer Kunden bedienen zu können. Wir konzentrieren uns auf Märkte für hochwertige Anwendungen und optimieren stetig unser Portfolio, wobei die Gesundheit von Nutzpflanzen im Mittelpunkt steht.

Innovationen sind entscheidend für unseren Erfolg. Deshalb investieren wir kontinuierlich in unsere Wirkstoffpipeline und entwickeln verbesserte Formulierungen. Zu erfolgreichem Wachstum gehört auch, das Potenzial neuer Geschäftsmodelle zu nutzen sowie neue Marktsegmente zu erschließen, gegebenenfalls durch Einlizenzierungen oder Akquisitionen.

#### Unsere Produkte

Mit unseren Produkten und Dienstleistungen sind wir ein verlässlicher Partner für Landwirte. Unsere Produkte tragen zur Verbesserung der Gesundheit und des Ertrags von Kulturpflanzen bei. Auch für nichtlandwirtschaftliche Anwendungen bieten wir Lösungen an: Zum Beispiel unser Produkt Termidor® zum Schutz von Gebäuden vor Termitenbefall oder unsere Interceptor® Moskitonetze zur Bekämpfung von Malaria. Mit einem Portfolio aus Fungiziden, Insektiziden, Herbiziden und Saatgutbeizen gehören wir zu den führenden Anbietern in der Branche.

Wir erschließen neue Märkte: Ein Ziel unseres Marktsegments Plant Health ist es, die Pflanzengesundheit zu verbessern und so die Erträge zu steigern. Dank unserer Produkte der Dachmarke AgCelence® sind Pflanzen unter anderem weniger anfällig für Belastungen wie Hitze oder Trockenheit. Landwirte erzielen durch die größere Ertragssicherheit und Ernteverbesserungen höhere Gewinne.

Besonders vielversprechend ist unser neues Herbizid Kixor®, das gegen breitblättrige und schwer zu kontrollierende

#### Pflanzenschutz-Pipeline

| Produkt                                   | Marktsegmente                                     | Phase 1 (Entwicklung 2011–2016) | Phase 2 (In der Markteinführung 2006–2010) | Phase 3 (Im Markt eingeführt 2002–2005) |
|-------------------------------------------|---------------------------------------------------|---------------------------------|--------------------------------------------|-----------------------------------------|
| F 500 (F), Boscalid (F)                   | Feldfrüchte, Sonderkulturen, Schädlingsbekämpfung | <div></div>                     | <div></div>                                | <div></div>                             |
| Metrafenone (F), Dimoxystrobin (F)        |                                                   | <div></div>                     | <div></div>                                | <div></div>                             |
| Tritosulfuron (H), Chlorfenapyr (I)       |                                                   | <div></div>                     | <div></div>                                | <div></div>                             |
| Orysaastrobin (F), F 500 Saatgutbeize (F) | Feldfrüchte, Sonderkulturen, Saatgutbeize         | <div></div>                     | <div></div>                                | <div></div>                             |
| Topramezone (H), Saflufenacil (Kixor) (H) |                                                   | <div></div>                     | <div></div>                                | <div></div>                             |
| Metaflumizone (I)                         |                                                   | <div></div>                     | <div></div>                                | <div></div>                             |
| Initium (F)                               | Feldfrüchte, Sonderkulturen, Saatgutbeize         | <div></div>                     | <div></div>                                | <div></div>                             |
| Xemium (F)                                |                                                   | <div></div>                     | <div></div>                                | <div></div>                             |
| HT Projekt Cultivance <sup>1</sup>        |                                                   | <div></div>                     | <div></div>                                | <div></div>                             |
| HT Projekt Dicamba                        |                                                   | <div></div>                     | <div></div>                                | <div></div>                             |
| 1 Insektizid                              |                                                   | <div></div>                     | <div></div>                                | <div></div>                             |
| <b>Spitzenumsatzpotenzial</b>             |                                                   | <b>700 Millionen €</b>          | <b>1.700 Millionen €</b>                   |                                         |

Abkürzungen: F = Fungizid, H = Herbizid, I = Insektizid, HT = Herbizid-Toleranz

<sup>1</sup> Herbizid-Toleranz-Projekt Cultivance wird auch in der BASF-Biotech-Pipeline berichtet.

#### Umsatz Agricultural Solutions (Millionen €)

|      |       |             |
|------|-------|-------------|
| 2010 | 4.033 | <div></div> |
| 2009 | 3.646 | <div></div> |
| 2008 | 3.409 | <div></div> |

#### Strategie und Produkte

- Spitzenplatz durch innovatives Portfolio für die Gesundheit von Nutzpflanzen
- Unsere Produkte: Fungizide, Insektizide, Herbizide, Saatgutbeizen, Pflanzengesundheitsprodukte und Anwendungen in nichtlandwirtschaftlichen Bereichen
- Erfolgreiche Einführung unseres neuen Herbizids Kixor in Nordamerika und einigen Ländern Lateinamerikas

Unkräuter eingesetzt wird. Vor allem gegen viele der immer häufiger auftretenden Unkräuter, die eine Resistenz gegenüber dem Herbizid Glyphosat aufweisen, ist es wirksam. Kixor ist 2010 erfolgreich in Nordamerika und einigen Ländern Lateinamerikas in den Markt eingeführt worden. Mit Kixor wurden im Jahr der Markteinführung über 4 Millionen Hektar Fläche behandelt – mehr als bei allen anderen US-Neueinführungen von Herbiziden in den vergangenen zehn Jahren. Die Einführung der Kixor-Produktfamilie werden wir 2011 weiter vorantreiben. Wir erwarten, dass Kixor ein Spitzenumsatzpotenzial von mehr als 200 Millionen € erreicht.

Auch bei unserem SeedSolutions-Geschäft stehen neben der Bekämpfung von Krankheiten und Schadinsekten Ertrags- und Qualitätsvorteile im Fokus. Die Behandlung von Saatgut ist ein Geschäftsfeld mit Wachstumspotenzial: Weltweit spielen gentechnisch veränderte Kulturpflanzen eine zunehmend wichtige Rolle. Dadurch steigt der Wert des Saatguts und somit das Bedürfnis des Landwirts, es wirksam vor Krankheiten und Schädlingen zu schützen. Im Geschäftsfeld SeedSolutions übertragen wir die Stärken unserer Pflanzengesundheitsprodukte auf unsere Saatgutbeizen. Mit Erfolg – unser 2010 in den brasilianischen Markt eingeführtes Produkt Standak® Top wurde stark nachgefragt. Standak Top verbindet den Schutz von Sojasaatgut vor Insekten und Krankheiten mit verbesserter Pflanzengesundheit.

### Forschung und Entwicklung

2010 haben wir unsere Ausgaben für Forschung und Entwicklung auf 393 Millionen € erhöht; gemessen am Umsatz sind dies etwa 10 %. Wir investieren gezielt, um neuartige Wirkstoffe frühzeitig zu identifizieren und Ergebnisse aus Forschungs- und Entwicklungsprojekten beschleunigt zur Marktreife zu bringen. Unsere Pipeline weist derzeit ein Spitzenumsatzpotenzial von 2.400 Millionen € auf. Davon entfallen 700 Millionen € auf Produkte, die sich in der Entwicklungsphase befinden, und 1.700 Millionen € auf die seit 2002 in den Markt eingeführten Wirkstoffe. Mit diesen haben wir 2010 etwa 70 % ihres erwarteten Umsatzpotenzials erreicht.

### Blockbuster Herbizid Kixor

Wichtiger Baustein im Herbizidportfolio der BASF

#### Wert für die BASF

>200 Mio. €

**Spitzenumsatzpotenzial,**  
also maximal erwarteter  
Jahresumsatz

#### Wert für die Kunden

3–5×

**schnellere Wirkung** gegen  
Unkräuter als herkömm-  
liche Herbizide

**Wert für die BASF** Wir haben Kixor 2010 sehr erfolgreich in den Markt eingeführt: Die Nachfrage nach unserem Herbizid ist groß. Wir streben an, ein Spitzenumsatzpotenzial von über 200 Millionen € mit Kixor zu erzielen.

**Wert für die Kunden** Kixor wirkt gegen mehr als achtzig verschiedene breitblättrige Unkräuter; auch gegen solche, die resistent gegen das Herbizid Glyphosat sind. Im Vergleich zu herkömmlichen Herbiziden wirkt es bis zu fünf Mal schneller – unsere Kunden können so Unkräuter effizient kontrollieren und erzielen bessere Erträge.

In der Entwicklung arbeiten wir an drei neuen Wirkstoffen und zwei Herbizid-Toleranz-Projekten. Initium®, ein neues Fungizid aus unserer innovativen Produktpipeline, ergänzt unser Portfolio für das dynamisch wachsende Geschäft mit Sonderkulturen ideal. In Feldversuchen ist es bereits erfolgreich getestet worden. Die Markteinführung ist für 2011 geplant. Xemium® ist ein besonders leistungsfähiges und breit einsetzbares Fungizid für Feld- und Sonderkulturen. Durch seine spezielle Molekülstruktur ist Xemium sehr wirksam und ermöglicht höhere Erträge bei gleichzeitig verbesserter Qualität. Die globale Markteinführung soll 2012 erfolgen.

### Marketing und Kundenbeziehungen

Wesentliche Erfolgsfaktoren für die gute Zusammenarbeit mit unseren Kunden sind innovative, hochwertige Produkte und Dienstleistungen sowie eine starke Kompetenz vor Ort. In Asien,

### Ergebnis der Betriebstätigkeit Agricultural Solutions (Millionen €)

|      |     |             |
|------|-----|-------------|
| 2010 | 749 | <div></div> |
| 2009 | 769 | <div></div> |
| 2008 | 705 | <div></div> |

### Forschung und Entwicklung

- 2010: Aufwendungen in Höhe von 393 Millionen € für Forschung und Entwicklung; 10 % gemessen am Umsatz
- Pipeline mit Spitzenumsatzpotenzial von 2.400 Millionen €
- Neues Fungizid Initium für Sonderkulturen erfolgreich getestet; Markteinführung für 2011 geplant
- Globale Markteinführung des breit einsetzbaren Fungizids Xemium für 2012 geplant

insbesondere in China und Indien, sehen wir großes Wachstumspotenzial: Mit unserem breiten Know-how in Bezug auf landwirtschaftliche Praktiken und technologische Lösungen wollen wir auch hier Landwirte unterstützen.

### Investitionen

Im Jahr 2010 haben wir 145 Millionen € investiert. Ein Großteil dieser Investitionssumme steht in direktem Zusammenhang mit der Kapazitätserweiterung für unser Fungizid F 500®. Darüber hinaus bauen wir neue Produktionskapazitäten für unser Fungizid Xemium auf. Um die anhaltend hohe Nachfrage nach unseren innovativen Pflanzenschutzmitteln auch in Zukunft vollständig bedienen zu können, werden wir weiter in unsere Produktionskapazitäten investieren. Dafür planen wir in den nächsten Jahren ein Investitionsvolumen von durchschnittlich 100 bis 150 Millionen € im Jahr ein.

### BASF Plant Science

#### Pflanzenbiotechnologie bei BASF

An acht Standorten in Europa und Nordamerika entwickeln die etwa 700 Mitarbeiter der BASF Plant Science Pflanzen mit klaren Vorteilen für Landwirte, Verbraucher und Umwelt. Die Pflanzenbiotechnologie erlaubt uns, Nutzpflanzen durch gezielte Übertragung von Genen gewünschte Eigenschaften zu verleihen. Im Vergleich zu konventionellen Züchtungsmethoden steht dafür ein viel größeres Repertoire an genetischen Eigenschaften aus unterschiedlichen Organismen zur Verfügung. Die Forschungsaufwendungen für die BASF Plant Science belaufen sich jährlich auf circa 150 Millionen €.

Im Jahr 2010 haben wir die Zulassung für das erste Produkt aus unserer Pipeline in Europa erhalten: Amflora®. Amflora ist eine Kartoffel mit einer optimierten Stärkezusammensetzung für den Einsatz in verschiedenen industriellen Anwendungen. Auf Amflorafeldern in Schweden haben wir 2010 wenige Pflanzen einer anderen genveränderten Kartoffelsorte gefunden. Neben der zeitnahen Klärung der Ursache wurden Maßnahmen ergriffen, um solche Vermischungen künftig zu verhindern.

→ Mehr zum Thema Amflora unter [www.amflora.de](http://www.amflora.de) und auf Seite 102

### Strategie

Als Partner führender Saatgutunternehmen erforschen und entwickeln wir Traits, also Eigenschaften wie beispielsweise höherer Ertrag, Trockentoleranz oder Krankheitsresistenz. Je nachdem, um welches Merkmal und welche Nutzpflanze es sich handelt, bieten wir den Saatgutunternehmen die Entwicklung bis zum Endprodukt an. Das Saatgut bringen wir gemeinsam mit unseren Partnern auf den Markt. Neben Nutzpflanzen, die Landwirten höhere und sicherere Ernten liefern, entwickeln wir Pflanzen, die eine gesündere Ernährung erlauben oder als nachwachsende Rohstoffe genutzt werden können.

Die Pflanzenbiotechnologie wird besonders in Europa kontrovers diskutiert. Wir nehmen unsere gesellschaftliche Verantwortung ernst: In engem Dialog mit Landwirten, Politikern und Verbrauchern erklären wir den Nutzen der verwendeten Verfahren sowie unserer Produkte und bemühen uns um eine verbesserte Akzeptanz der Pflanzenbiotechnologie.

### Forschung und Entwicklung

Die BASF Plant Science kooperiert weltweit mit einer Vielzahl von Forschungsinstituten, Universitäten und Biotechnologieunternehmen. Zusammen mit Monsanto entwickeln wir seit 2007 ertragreichere und widerstandsfähigere Mais-, Soja-, Raps- und Baumwollpflanzen. 2010 haben wir diese Kooperation weiter ausgebaut und arbeiten nun auch gemeinsam an der Entwicklung ertragreicherer und stresstoleranter Weizenpflanzen. Die Markteinführung des weltweit ersten Mais, der Trockenheitsphasen ohne Ertragseinbußen übersteht, erwarten wir in Nordamerika im Jahr 2012. Ende 2010 haben wir eine Kooperation mit dem Unternehmen Bayer CropScience gestartet. Ziel dieser langfristigen Zusammenarbeit ist die Entwicklung und Vermarktung von Hybrid-Reissaatgut mit einem gegenüber herkömmlichem Saatgut bis zu 10 % gesteigerten Ertrag. Das erste Produkt aus dem Projekt soll Ende dieses Jahrzehnts auf den Markt kommen. Weitere Kooperationspartner sind die KWS Saat AG und das brasilianische Forschungszentrum CTC (Centro de Tecnologia Canavieira), mit denen wir gemeinsam Zuckerrüben beziehungsweise Zuckerrohr mit gesteigertem Ertrag und höherer Trockentoleranz entwickeln.

### BASF Plant Science

- Pflanzenbiotechnologie-Unternehmen der BASF mit weltweit etwa 700 Mitarbeitern
- Entwicklung von Pflanzen mit klaren Vorteilen für Landwirte, Verbraucher und Umwelt
- Zulassung der Stärkekartoffel Amflora

### Forschung und Entwicklung

- Erweiterung unserer Kooperation mit Monsanto: Entwicklung ertragreicherer und stresstoleranter Weizenpflanzen
- Kooperation mit Bayer CropScience: Entwicklung und Vermarktung von Hybrid-Reissaatgut
- Kooperationen mit KWS Saat AG und CTC: Entwicklung von Zuckerrüben beziehungsweise Zuckerrohr mit gesteigertem Ertrag und höherer Trockentoleranz

Segmentdaten Agricultural Solutions<sup>1</sup> (Millionen €)

|                                                            | 2010  | 2009  | Veränderung % |
|------------------------------------------------------------|-------|-------|---------------|
| Umsatz mit Dritten                                         | 4.033 | 3.646 | 10,6          |
| Transfers zwischen den Segmenten                           | 25    | 33    | -24,2         |
| Umsatz inklusive Transfers                                 | 4.058 | 3.679 | 10,3          |
| Ergebnis der Betriebstätigkeit vor Abschreibungen (EBITDA) | 938   | 973   | -3,6          |
| EBITDA-Marge (%)                                           | 23,3  | 26,7  | -             |
| Ergebnis der Betriebstätigkeit (EBIT) vor Sondereinflüssen | 749   | 776   | -3,5          |
| Ergebnis der Betriebstätigkeit (EBIT)                      | 749   | 769   | -2,6          |
| Ergebnis der Betriebstätigkeit (EBIT) nach Kapitalkosten   | 289   | 329   | -12,2         |
| Vermögen                                                   | 5.063 | 4.681 | 8,2           |
| Forschungskosten                                           | 393   | 355   | 10,7          |
| Investitionen in Sachanlagen und immaterielles Vermögen    | 145   | 183   | -20,8         |

<sup>1</sup> Forschungskosten, Umsatz, Ergebnis und alle weiteren Daten der BASF Plant Science werden nicht im Segment Agricultural Solutions, sondern unter „Sonstige“ ausgewiesen.

**Gegenüber dem Vorjahr steigerten wir den Umsatz mit Dritten um 387 Millionen € auf 4.033 Millionen €. Trotz erhöhter Investitionen in Forschung und Entwicklung sowie in Wachstumsmärkte erreichte das Ergebnis der Betriebstätigkeit mit 749 Millionen € nahezu den starken Wert des Jahres 2009.**

**Unsere erfolgreiche Innovationsstrategie führen wir auch 2011 fort. Wir streben ein leichtes Umsatz- und Ergebniswachstum an.**

### Crop Protection

Der Bereich Crop Protection hat im Jahr 2010 den Umsatz mit Dritten signifikant steigern können. Der Umsatz erreichte 4.033 Millionen € und lag damit um 387 Millionen € über dem Niveau des Vorjahres (Mengen 9 %, Preise -3 %, Währungen 5 %). Grund für das Umsatzwachstum war im Wesentlichen der kräftig gestiegene Absatz. Darüber hinaus profitierten wir von positiven Währungseinflüssen. In der ersten Jahreshälfte dämpften niedrigere Agrarrohstoffpreise und der Abbau von

Lagerbeständen im Handel unsere Verkaufspreise; in der zweiten Jahreshälfte führte der intensive Wettbewerb zu Preisrückgängen.

Der Umsatz mit Kunden in **Europa** lag mit 1.566 Millionen € leicht über dem Vorjahresniveau. Nachdem ungünstige Witterungsbedingungen zunächst zu einem verspäteten Saisonstart und damit zu einer geringeren Nachfrage nach Pflanzenschutzmitteln geführt hatten, verlief die Herbstsaison sehr erfolgreich. Die Nachfrage nach Herbiziden für wichtige Feldkulturen war hoch, vor allem in den Wachstumsmärkten Osteuropas. Positive Währungseinflüsse unterstützten das Umsatzwachstum.

In **Nordamerika** stieg der Umsatz leicht auf 999 Millionen €. Wachstumstreiber waren vor allem die erfolgreiche Markteinführung unseres Herbizids Kixor® sowie der im Jahresdurchschnitt 2010 stärkere US-Dollar. Unser Programm „Headline Advantage“ – ein Bonussystem für unsere Kunden – hat dazu geführt, dass die Nachfrage deutlich gesteigert und hohe Fungizidlagerbestände im Handel abgebaut werden konnten.

### Umsatzeinflüsse Agricultural Solutions

|                    |             |  |
|--------------------|-------------|--|
| Mengen             | 9 %         |  |
| Preise             | -3 %        |  |
| Portfoliomaßnahmen | 0 %         |  |
| Währungen          | 5 %         |  |
| <b>Umsatz</b>      | <b>11 %</b> |  |

### Umsatzeinflüsse

- Europa: Leichter Umsatzanstieg dank guter Herbstsaison
- Nordamerika: Umsatz vor allem auf Grund erfolgreicher Markteinführung unseres Herbizids Kixor sowie infolge positiver Währungseinflüsse leicht gewachsen
- Asien: Umsatz mengen- und währungsbedingt signifikant verbessert
- Südamerika: Umsatz infolge des starken Volumenswachstums kräftig erhöht

In **Asien** verbesserte sich der Umsatz dank gestiegener Absatzmengen und positiver Währungseinflüsse signifikant auf 438 Millionen €. Zusätzlich stärkte die hohe Nachfrage nach Soja-herbiziden und Fungiziden für Sonderkulturen in Indien den Umsatz. Hier profitierten wir von unserem sehr erfolgreich laufenden Geschäftsmodell „Samruddhi“, in dessen Rahmen Landwirte in der richtigen Anwendung von Pflanzenschutz- und Düngemitteln geschult werden.

In **Südamerika** stieg der Umsatz infolge des starken Volumenwachstums kräftig auf 1.030 Millionen €. Die Erholung des Zuckerrohrmarktes führte zu einer steigenden Nachfrage nach Insektiziden. Der hohe Bedarf an Sojafungiziden konnte durch die Erweiterung unserer F 500® Kapazitäten abgedeckt werden. Unsere innovative Saatgutbeize Standak® Top für Sojabohnen haben wir erfolgreich in den Markt eingeführt. Standak Top bietet gleichzeitig Schutz vor Insekten- und Pilzbefall. In der zweiten Jahreshälfte haben wir auf Grund des intensiven Wettbewerbs selektive Preissenkungen vorgenommen.

Mit 749 Millionen € haben wir beim Ergebnis der Betriebs-tätigkeit nahezu das hohe Vorjahresniveau erreicht – trotz planmäßig um rund 100 Millionen € erhöhter Investitionen in Forschung und Entwicklung sowie in den Ausbau unserer Vertriebsmannschaft in Wachstumsregionen.

Das Vermögen hat sich um 382 Millionen € auf 5.063 Millionen € erhöht. Dies ist vor allem auf den Anstieg unseres Umlaufvermögens zurückzuführen. Sowohl die Vorräte als auch der Forderungsbestand sind im Rahmen des kräftigen Umsatzwachstums ab der zweiten Jahreshälfte angestiegen. Das von uns insbesondere in den Wachstumsmärkten Lateinamerikas und Osteuropas verfolgte strikte Kredit- und Risikomanagement zeigt weiterhin Erfolg.

Für 2011 erwarten wir ein nach wie vor positives Marktumfeld. Wir rechnen damit, dass die Preise für landwirtschaftliche Produkte weiterhin über den historischen Durchschnittswerten notieren, aber eine hohe Volatilität aufweisen. Neben den Agrarrohstoffpreisen wird die Entwicklung wichtiger Währungen eine entscheidende Rolle für unser Geschäft spielen. 2011 wollen wir vor dem Hintergrund unserer Kapazitätserweiterungen sowie jüngster Produkteinführungen im Volumen stärker als der Markt wachsen. Wir streben daher eine leichte Umsatz- und Ergebnisverbesserung an.

#### Crop Protection – Umsatz nach Regionen (nach Sitz der Kunden)

|   |                                 |      |
|---|---------------------------------|------|
| 1 | Europa                          | 38 % |
| 2 | Nordamerika                     | 25 % |
| 3 | Asien, Pazifischer Raum         | 11 % |
| 4 | Südamerika, Afrika, Naher Osten | 26 % |

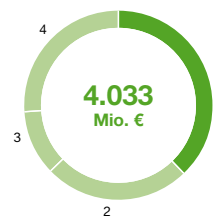

#### Crop Protection – Umsatz nach Indikationen

|   |                          |      |
|---|--------------------------|------|
| 1 | Fungizide                | 43 % |
| 2 | Herbizide                | 35 % |
| 3 | Insektizide und Sonstige | 22 % |

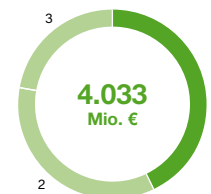

### Crop Protection

- Umsatz 2010 auf Grund des kräftig gestiegenen Absatzes und positiver Währungseinflüsse signifikant gewachsen
- Ergebnis trotz erhöhter Investitionen in Forschung und Entwicklung sowie in den Vertrieb nahezu auf starkem Vorjahresniveau

- Prognose 2011: Nach wie vor positives Marktumfeld bei tendenziell höheren, aber volatilen Preisen für landwirtschaftliche Produkte; leichte Umsatz- und Ergebnisverbesserung



## Oil & Gas

### Suche und Förderung von Erdöl und Erdgas; Handel, Transport und Speicherung von Erdgas

**Die Öl-und-Gas-Aktivitäten der BASF sind in der Wintershall-Gruppe zusammengefasst. Wintershall und ihre Tochtergesellschaften sind in den Arbeitsgebieten Exploration & Production sowie Natural Gas Trading tätig.**

#### Strategie des Segments

Bei der Exploration und Produktion von Erdöl und Erdgas konzentrieren wir uns auf öl- und gasreiche Gebiete in Europa, Nordafrika/Naher Osten, Südamerika sowie Russland und im Raum am Kaspischen Meer. Neben Investitionen in das Aufsuchen, Erschließen und Produzieren von Kohlenwasserstoffen trägt der Ausbau unserer technologischen Kompetenzen maßgeblich dazu bei, unseren nachhaltigen Erfolg sicherzustellen.

Bedingt durch den langfristig wachsenden Erdgasbedarf Westeuropas und die gleichzeitig rückläufige Eigenproduktion, muss Erdgas in immer größerem Umfang importiert werden. Dadurch ergeben sich Chancen für unsere Arbeitsgebiete, die wir im Rahmen der Strategie „Gas für Europa“ nutzen: Wir suchen und fördern Erdgas in und um Europa und schaffen die notwendige Infrastruktur, um das Gas zu den Kunden zu transportieren. Durch unser Pipelinenetz und strategisch positionierte Erdgasspeicher leisten wir einen wichtigen Beitrag zur Versorgungssicherheit in Deutschland und Europa.

Wir entwickeln unsere technologischen Kompetenzen kontinuierlich weiter. Inhaltliche Schwerpunkte liegen hierbei auf der Erhöhung der Ausbeute produzierender Lagerstätten sowie auf der Entwicklung von Technologien für Lagerstätten mit schwierigen Förderbedingungen. Dabei nutzen wir Synergien mit der in der BASF-Gruppe vorhandenen Forschungskompetenz, um uns verstärkt als Partner mit besonderer technologischer Kompetenz zu positionieren.

Wir arbeiten in ökologisch sensiblen Gebieten. Deshalb prüfen wir vor Beginn unserer Aktivitäten sorgfältig mögliche Auswirkungen auf die Umwelt, etwa auf Gewässer und Biodiversität. Zusammen mit Experten, unseren Kontraktoren und relevanten Interessengruppen legen wir Maßnahmen fest, um Einflüsse auf

Mensch und Umwelt zu minimieren. Wir verpflichten uns dabei zur Einhaltung internationaler Konventionen, lokaler Gesetzgebung und unserer eigenen Standards. 

#### Exploration & Production

**Europa:** Das Erdölfeld Mittelplate im Wattenmeer ist der wichtigste Bestandteil unserer Erdölförderung in Deutschland. An diesem größten bekannten Ölvorkommen des Landes sind wir gemeinsam mit RWE-DEA zu jeweils 50 % beteiligt. Im Jahr 2010 wurde die Produktionslizenz bis 2041 verlängert. In der südlichen Nordsee ist Wintershall mit einer Jahresproduktion von rund 1,3 Milliarden Kubikmetern einer der größten Produzenten von Erdgas: Wir betreiben dort 26 Offshore-Fördereinrichtungen, von denen 19 über eines der modernsten Funküberwachungssysteme der Welt zentral gesteuert werden. Diese Automatisierung ist eine wesentliche Voraussetzung für die weitere wirtschaftliche Förderung kleinerer und mittlerer Vorkommen.

In unserem Portfolio nehmen unsere Aktivitäten in Norwegen eine wichtige Stellung ein. Auf Grund der großen Öl- und Gasvorkommen und der guten Anbindungen an die westeuropäischen Märkte ist Norwegen neben Russland der bedeutendste Lieferant für Europa. Durch erfolgreiche Explorationsprojekte konnten wir 2010 unsere Ressourcenbasis in Norwegen weiter ausbauen.

**Russland/Raum am Kaspischen Meer:** Das westsibirische Erdgasfeld Juschno Russkoje, an dessen wirtschaftlichem Erfolg wir mit 35 % beteiligt sind, fördert seit Mitte 2009 auf Plateauniveau. An der Entwicklung eines Teilgebiets der Achimov-Formation des Urengoy-Feldes sind wir mit 50 % beteiligt. Hier sind zurzeit eine Gasaufbereitungsanlage sowie sechs Gas- und Kondensatbohrungen in Pilotbetrieb. Im Kaspischen Raum verfolgen wir Explorationsprojekte in Turkmenistan und Aserbaidschan.

**Nordafrika/Naher Osten:** In Libyen betreiben wir onshore acht Ölfelder in den Konzessionen 96 und 97. Das anfallende Erdölbegleitgas wird in einer Aufbereitungsanlage für den lokalen Bedarf nutzbar gemacht.

#### Segment Oil & Gas

- Zwei Arbeitsgebiete, Exploration & Production sowie Natural Gas Trading, gebündelt in der Wintershall-Gruppe
- Erfolg durch Investitionen in Exploration und Produktion sowie durch den Ausbau von technologischer Kompetenz
- Mit „Gas für Europa“-Strategie leisten wir einen wichtigen Beitrag zur Versorgungssicherheit in Europa
- Durch eigene Forschungs- und Entwicklungsaktivitäten stärken wir unsere Wettbewerbsposition

#### Exploration & Production

- Norwegen und Russland mit zentraler Stellung für unser Portfolio; erfolgreiche Explorationsprojekte
- Ganzjährige Plateauförderung im Erdgasfeld Juschno Russkoje
- Erste Bohrung im Explorationsblock 4N in Katar abgeteuft

Die seit Anfang 2008 laufenden Verhandlungen mit der libyschen Staatsölgesellschaft über eine Umstellung der bestehenden Konzessionsverträge in Produktionsteilungsverträge nach dem EPSA-IV-Standard dauern an. Wir streben an, diese Verhandlungen im Jahr 2011 abzuschließen.

Im Kufra-Becken im Süden Libyens sind wir in einem noch wenig untersuchten Gebiet an den Blöcken 1 bis 4 beteiligt. Unsere Explorationsaktivitäten haben wir dort mit einer Bohrung fortgesetzt. In Mauretanien sind wir in zwei Onshore-Explorationsblöcken tätig. Hier haben wir 2010 seismische Messungen durchgeführt. Im westlichen Teil des Explorationsblocks 4N in Katar wurde eine erste Bohrung abgeteuft. In Katar sind wir außerdem an Block 3 beteiligt; für Block 11 haben wir nach Ablauf der zweiten Explorationsphase den Vertrag nicht verlängert. In Oman hat das dortige Konsortium die Lizenz für Block 51 nach einer nicht fruchtigen Bohrung an den Staat zurückgegeben.

**Südamerika:** In Argentinien sind wir an 15 Feldern beteiligt; bei zwei Explorationslizenzen im Cañadón-Asfalto-Becken sind wir Betriebsführer. Die Tight-Gas-Entwicklung des Feldes Aguada Pichana Central West im Neuquén-Becken wurde fortgesetzt. In Chile halten wir Anteile an zwei Blöcken nahe unserer bestehenden Produktion in Feuerland. Hier haben wir unsere Explorationsaktivitäten mit seismischen Untersuchungen vorangetrieben.

→ Informationen zur Reservenreichweite auf den Seiten 79 und 197

### Natural Gas Trading

Unsere gemeinsam mit Gazprom betriebenen Aktivitäten in Bezug auf Erdgashandel, -transport und -speicherung sind im Wesentlichen in der WINGAS-Gruppe zusammengefasst.

**Gashandel:** Wir vermarkten das aus verschiedenen Quellen bezogene Erdgas in Deutschland und anderen europäischen Ländern. Unseren Gasbedarf decken wir überwiegend im Rahmen langfristiger Bezugsverträge. Auf Grund ihrer wachsenden Bedeutung sind wir zunehmend auf internationalen Spotthandelsmärkten aktiv.

### Natural Gas Trading

- Ausbau der Erdgasinfrastruktur in Deutschland und Europa gemeinsam mit Gazprom
- Festigung der Marktposition in Deutschland und weiteres Wachstum im übrigen Europa

### Deutsche Förderbetriebe der Wintershall versorgen sich mit eigenem Strom und Dampf Technische Umrüstung mindert CO<sub>2</sub>-Ausstoß

#### Wert für die BASF

5%

weniger Betriebskosten

#### Wert für die Umwelt

25%

weniger CO<sub>2</sub>-Emissionen

**Wert für die BASF** Durch technische Umrüstung (Kraft-Wärme-Kopplung) verwendet Wintershall künftig Restgas aus der Erdölförderung zur eigenen Stromerzeugung. Damit kann Wintershall ab 2011 sämtliche Betriebe in Deutschland autark mit Strom versorgen. Das spart 5 % der jährlichen Betriebskosten.

**Wert für die Umwelt** Durch Kraft-Wärme-Kopplung nutzt Wintershall am Standort Emlichheim die bei der Stromerzeugung entstehende Abwärme zur Produktion von mehr als 100.000 Tonnen Wasserdampf im Jahr. Diese können dann wieder in der Ölförderung eingesetzt werden. So wird Energie doppelt genutzt und der Strombezug deutlich reduziert. Die dadurch eingesparten CO<sub>2</sub>-Emissionen entsprechen rund 25 % des Gesamtausstoßes der deutschen Förderbetriebe der Wintershall – ein Gewinn für die Umwelt.

**Gastransport:** Das Dritte Liberalisierungspaket der EU-Kommission ist am 3. September 2009 in Kraft getreten. Kernelement der darin enthaltenen Gasrichtlinie ist die Sicherstellung einer stärkeren Unabhängigkeit von Netz- und Speicherbereich. Um diese Gasrichtlinie umzusetzen, hat WINGAS 2010 das Eigentum am Gasfernleitungsnetz auf WINGAS TRANSPORT übertragen. Das über 2.000 Kilometer lange Leitungsnetz verbindet die Märkte Westeuropas mit einer Infrastruktur, die bis zu den Gasquellen in Sibirien reicht.

### Wichtige Entwicklungen 2010

- Gasrichtlinie des Dritten Liberalisierungspakets der EU-Kommission umgesetzt
- Bauarbeiten an der Nord-Stream-Pipeline und der Ostsee-Pipeline-Anbindungsleitung verlaufen planmäßig
- Bauarbeiten am Erdgasspeicher Jemgum in Norddeutschland schreiten zügig voran

## Investitionen in Sachanlagen

| Standort              | Projekt                                                                                     | Gesamtkapazität               | Fertigstellung          |
|-----------------------|---------------------------------------------------------------------------------------------|-------------------------------|-------------------------|
| Haidach/Österreich    | Inbetriebnahme und Ausbau des Erdgasspeichers                                               | >2 Milliarden m³              | 2007 <sup>2</sup> /2011 |
| Haiming/Deutschland   | Inbetriebnahme und Ausbau der Verdichterstation                                             | 32 MW                         | 2007 <sup>2</sup> /2011 |
|                       | Bau der Onshore-Anbindungen OPAL und NEL an die Nord-Stream-Erdgasleitung                   | 55 Milliarden m³              | 2011/2012               |
| Jemgum/Deutschland    | Inbetriebnahme und Ausbau des Erdgasspeichers                                               | >1 Milliarde m³               | 2013 <sup>2</sup> /2016 |
| Sibirien/<br>Russland | Achimgaz, Entwicklung des Achimov-Horizonts in der Erdgas- und Kondensatlagerstätte Urengoy | 70 Millionen BOE <sup>1</sup> | 2008 <sup>2</sup> /2015 |

<sup>1</sup> BOE = Barrel Öläquivalent<sup>2</sup> Jahr der Inbetriebnahme

Seit 2010 gelten für WINGAS TRANSPORT die Rahmenbedingungen der sogenannten Anreizregulierung. Danach legt die Bundesnetzagentur kostenbasierte Erlösobergrenzen für den Erdgastransport fest.

Durch den Bau der Nord-Stream-Pipeline von Russland durch die Ostsee an die deutsche Küste und durch die damit verbundenen Onshore-Anschlussleitungen an das europäische Netz wird die Erdgasinfrastruktur in Europa entscheidend verstärkt. Anteilseigner der als Finanzanlage at Equity in den BASF-Gruppenabschluss einbezogenen Nord Stream AG – welche die Offshore-Pipeline baut und betreiben wird – sind neben Gazprom (51 %) auch E.ON Ruhrgas und Wintershall (je 15,5 %) sowie die N.V. Nederlandse Gasunie und GDF Suez (je 9 %).

Die Bauarbeiten an der bei Greifswald beginnenden Ostsee-Pipeline-Anbindungsleitung (OPAL) verlaufen planmäßig. Die 470 Kilometer lange Erdgas-Transitleitung wird eine Kapazität von mehr als 35 Milliarden Kubikmetern erreichen und im Herbst 2011 zeitgleich mit dem ersten Strang der Nord-Stream-Pipeline den Betrieb aufnehmen.

Für die zweite Anbindungsleitung, die Nordeuropäische Erdgasleitung (NEL), laufen derzeit die Genehmigungsverfahren; sie soll 2012 gemeinsam mit dem zweiten Strang der Nord-Stream-Pipeline in Betrieb gehen. Die Beteiligung der N.V. Nederlandse Gasunie (20 %) sowie der geplante Beitritt der belgischen Fluxys SA (19 %) unterstreichen die europäische Ausrichtung dieses Infrastrukturprojekts.

**Gasspeicherung:** Wichtige Bestandteile im Portfolio unseres Arbeitsgebiets Natural Gas Trading sind der größte Erdgasspeicher Westeuropas in Rehden/Niedersachsen sowie der Erdgasspeicher Haidach in Österreich. Unsere Wachstumsstrategie wird durch den weiteren Ausbau unserer Speicherkapazitäten gestützt. Die Bauarbeiten am Erdgasspeicher Jemgum in Norddeutschland schreiten zügig voran. Im Jahr 2010 hat sich die VNG-Verbundnetz Gas AG mit knapp 17 % an diesem Projekt beteiligt. Beim Erdgasspeicher Haidach ist die zweite Ausbaustufe nahezu fertiggestellt – die zusätzlichen Kapazitäten sollen ab April 2011 vermarktet werden.

Für 2011 ist die Gründung einer Speichergesellschaft geplant, um die Vorgaben der Gasrichtlinie des Dritten Liberalisierungspaketes auch in diesem Bereich zu erfüllen.

Umsatz Oil & Gas  
(Millionen €)

|      |        |  |
|------|--------|--|
| 2010 | 10.791 |  |
| 2009 | 11.356 |  |
| 2008 | 14.445 |  |

## Anteile am Umsatz

|   |                          |      |
|---|--------------------------|------|
| 1 | Exploration & Production | 35 % |
| 2 | Natural Gas Trading      | 65 % |

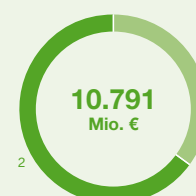

Segmentdaten Oil & Gas<sup>1</sup> (Millionen €)

|                                                                       | 2010   | 2009   | Veränderung % |
|-----------------------------------------------------------------------|--------|--------|---------------|
| Umsatz mit Dritten                                                    | 10.791 | 11.356 | -5,0          |
| davon Exploration & Production                                        | 3.819  | 3.847  | -0,7          |
| Natural Gas Trading                                                   | 6.972  | 7.509  | -7,2          |
| Transfers zwischen den Segmenten                                      | 852    | 702    | 21,4          |
| Umsatz inklusive Transfers                                            | 11.643 | 12.058 | -3,4          |
| Ergebnis der Betriebstätigkeit vor Abschreibungen (EBITDA)            | 2.977  | 2.830  | 5,2           |
| davon Exploration & Production                                        | 2.428  | 2.188  | 11,0          |
| Natural Gas Trading                                                   | 549    | 642    | -14,5         |
| EBITDA-Marge (%)                                                      | 27,6   | 24,9   | -             |
| Ergebnis der Betriebstätigkeit (EBIT) vor Sondereinflüssen            | 2.430  | 2.289  | 6,2           |
| davon Exploration & Production                                        | 2.014  | 1.781  | 13,1          |
| Natural Gas Trading                                                   | 416    | 508    | -18,1         |
| Ergebnis der Betriebstätigkeit (EBIT)                                 | 2.334  | 2.289  | 2,0           |
| davon Exploration & Production                                        | 1.918  | 1.781  | 7,7           |
| Natural Gas Trading                                                   | 416    | 508    | -18,1         |
| Ergebnis der Betriebstätigkeit (EBIT) nach Kapitalkosten <sup>2</sup> | 588    | 695    | -15,4         |
| Vermögen                                                              | 9.150  | 8.301  | 10,2          |
| davon Exploration & Production                                        | 5.158  | 4.997  | 3,2           |
| Natural Gas Trading                                                   | 3.992  | 3.304  | 20,8          |
| Explorationsaufwand                                                   | 190    | 143    | 32,9          |
| Investitionen in Sachanlagen und immaterielles Vermögen               | 996    | 1.012  | -1,6          |
| Nicht anrechenbare ausländische Ertragsteuern für die Ölförderung     | 983    | 870    | 13,0          |
| Jahresüberschuss nach Anteilen anderer Gesellschafter <sup>3</sup>    | 923    | 712    | 29,6          |

<sup>1</sup> Ergänzende Angaben zum Öl-und-Gas-Geschäft ab Seite 195<sup>2</sup> Für das Segment Oil & Gas werden die nicht anrechenbaren ausländischen Ertragsteuern für die Ölförderung abgezogen.<sup>3</sup> Informationen zum Jahresüberschuss nach Anteilen anderer Gesellschafter des Segments Oil & Gas sind in der Überleitungsrechnung Oil & Gas im Anhang zum Konzernabschluss auf Seite 158 zu finden.

## Umsatzeinflüsse Oil &amp; Gas

|                    |             |  |
|--------------------|-------------|--|
| Mengen             | -2 %        |  |
| Preise/Währungen   | -3 %        |  |
| Portfoliomaßnahmen | 0 %         |  |
| <b>Umsatz</b>      | <b>-5 %</b> |  |

Ergebnis der Betriebstätigkeit Oil & Gas  
(Millionen €)

|      |       |  |
|------|-------|--|
| 2010 | 2.334 |  |
| 2009 | 2.289 |  |
| 2008 | 3.844 |  |

**Im Segment Oil & Gas ist der Umsatz mit Dritten im Jahr 2010 um 565 Millionen € auf 10.791 Millionen € gesunken (Mengen –2%, Preise/Währungen –3%). Das Ergebnis der Betriebstätigkeit verbesserte sich dagegen um 45 Millionen € auf 2.334 Millionen €. Der Jahresüberschuss nach Anteilen anderer Gesellschafter nahm um 211 Millionen € auf 923 Millionen € zu.**

**Wir erwarten, dass der Ölpreis im Jahr 2011 über der Durchschnittsnotierung des Vorjahres liegen wird. Unsere Planung geht von einem Ölpreis in Höhe von 90 US\$/Barrel bei einem Wechselkurs von 1,35 US\$/€ im Jahresdurchschnitt 2011 aus. Auf dieser Basis wollen wir den Umsatz signifikant steigern und das Ergebnis kräftig verbessern.**

→ Mehr zum Jahresüberschuss nach Anteilen anderer Gesellschafter des Segments im Anhang zum Konzernabschluss auf Seite 158

## Exploration & Production

Der Umsatz mit Dritten lag mit 3.819 Millionen € auf dem Niveau des Vorjahres (2009: 3.847 Millionen €). Die Notierung für die Referenzrohölsorte Brent verbesserte sich im Jahresdurchschnitt 2010 gegenüber dem Vorjahr um rund 18 US\$/Barrel auf etwa 80 US\$/Barrel. Da zeitgleich der Kurs des US-Dollar gegenüber dem Euro stärker wurde, erhöhte sich der Rohölpreis auf Euro-Basis um circa 16 €/Barrel auf rund 60 €/Barrel. Die Erdöl- und Erdgasproduktion lag im Wesentlichen auf Grund einer Förderbeschränkung in unseren libyschen Onshore-Konzessionen mit 133 Millionen Barrel Öläquivalent (BOE) leicht unter dem Niveau des Vorjahres. In dieser Menge sind Anteile Dritter enthalten, die auf die Beteiligung von Gazprom an der deutschen Wintershall-Gesellschaft entfallen, die die libyschen Konzessionen 96 und 97 hält. Mengen aus dem westsibirischen Achimgaz-Projekt sind auf Grund gesetzlicher und vertraglicher Regelungen nicht enthalten.

Das Ergebnis der Betriebstätigkeit ist preisbedingt um 137 Millionen € auf 1.918 Millionen € gestiegen. Im Ergebnis sind 983 Millionen € nicht anrechenbare Ertragsteuern auf die Ölförderung in Libyen enthalten (2009: 870 Millionen €). Diese werden als Ertragsteuern ausgewiesen. Sonderbelastungen ergaben sich aus der Wertberichtigung von Öl- und Gaslizenzen in der Nordsee.

Für die Suche nach neuen Erdöl- und Erdgaslagerstätten wurden 2010 insgesamt 23 Aufschluss- und Erweiterungsbohrungen beendet, von denen 12 Bohrungen fündig wurden. Der Explorationsaufwand ist um 47 Millionen € auf 190 Millionen € gestiegen.

Die sicheren Erdöl- und Erdgasreserven sind gegenüber dem Jahresende 2009 um 1 % auf 1.123 Millionen BOE zurückgegangen. Die rechnerische Reichweite dieser Reserven, die sich auf den Wintershall-Anteil an der Förderung im Jahr 2010 und auf den Reservenbestand am Jahresende bezieht, beläuft sich auf 10 Jahre (2009: 10 Jahre). Die 2010 produzierten Mengen wurden zu 89 % ersetzt. In diesen Zahlen sind die Mengen des Achimgaz-Projektes wegen der zu Grunde liegenden Servicevereinbarung nicht enthalten.

Für 2011 rechnen wir im Arbeitsgebiet Exploration & Production mit einem signifikanten Umsatzwachstum und einer kräftigen Ergebnisverbesserung infolge höherer Preise und steigender Produktionsmengen.

## Segment Oil & Gas

- Umsatz 2010 gesunken; Ergebnis vor allem auf Grund des hohen Beitrags von Exploration & Production leicht verbessert
- Bau der Nord-Stream-Pipeline begonnen; Lieferung erster Gasmengen für Oktober 2011 erwartet
- Arbeiten am Erdgasspeicher Jemgum sowie an der Ostsee-Pipeline-Anbindungsleitung (OPAL) fortgesetzt

- Im Jahr 2011 wird der Ölpreis voraussichtlich über der Durchschnittsnotierung des Vorjahres liegen; Planwerte im Jahresdurchschnitt: Ölpreis 90 US\$/Barrel, Wechselkurs 1,35 US\$/€
- Prognose 2011: Signifikanter Umsatzanstieg; kräftige Verbesserung des Ergebnisses

## Natural Gas Trading

Der Umsatz mit Dritten ist preisbedingt um 537 Millionen € auf 6.972 Millionen € gesunken. Durch die konjunkturelle Erholung und infolge der kalten Witterung in den Wintermonaten nahm der Absatz dagegen im Vergleich zum Vorjahr um 6 % auf 413 Milliarden Kilowattstunden zu. Insbesondere der Inlandsabsatz konnte um 8 % auf 247 Milliarden Kilowattstunden gesteigert werden. Die WINGAS verkaufte rund 11 % ihrer Mengen an BASF-Gruppengesellschaften.

Das Ergebnis der Betriebstätigkeit lag mit 416 Millionen € um 92 Millionen € unter dem Wert des Vorjahres. Die Verkaufspreise für Erdgas folgten dem Verlauf des Ölpreises grundsätzlich mit einer zeitlichen Verzögerung von mehreren Monaten. Die im Jahresverlauf moderat, aber stetig steigenden Ölpreise wirkten sich daher negativ auf das Ergebnis aus. Auf Grund des anhaltend niedrigeren Preisniveaus an den Spotmärkten standen die Handelsmargen zudem stark unter Druck. Dem gestiegenen Wettbewerb auf der Absatzseite konnte durch Optimierungsmaßnahmen auf der Bezugsseite teilweise entgegengewirkt werden.

Ein zentraler Bestandteil unserer Wachstumsstrategie im Erdgashandel ist die Beteiligung an der Nord Stream AG. Diese Gesellschaft hat 2010 mit dem Bau einer Pipeline begonnen, die vom russischen Wyborg durch die Ostsee an die deutsche Küste bei Greifswald verläuft. Die Bauarbeiten schreiten planmäßig voran. Bis zum 31. Dezember 2010 sind rund 900 Kilometer verlegt worden. Wir erwarten die Lieferung erster Gas-mengen im Oktober 2011.

Im Zusammenhang mit dem Nord-Stream-Projekt wurden in Deutschland die Arbeiten am Erdgasspeicher Jemgum sowie an der Ostsee-Pipeline-Anbindungsleitung (OPAL) fortgesetzt. Bis zum Ende des Jahres wurden von der OPAL etwa 400 Kilometer verlegt. Die Planungsarbeiten für die Nord-europäische Erdgasleitung (NEL) wurden fortgeführt.

Für 2011 gehen wir wegen des weiterhin intensiven Wettbewerbs und der außergewöhnlich kalten Witterung in den Wintermonaten des Jahres 2010 von einem geringfügigen Absatzrückgang aus. Infolge der ölpreisbedingt höheren Gaspreise wird der Umsatz voraussichtlich dennoch leicht steigen. Auf Grund des nach wie vor herrschenden Margendrucks rechnen wir mit einem leicht rückläufigen Ergebnis.

### Oil & Gas – Umsatz nach Regionen (nach Sitz der Kunden)

|   |                                 |      |
|---|---------------------------------|------|
| 1 | Europa                          | 93 % |
| 2 | Nordamerika                     | 3 %  |
| 3 | Asien, Pazifischer Raum         | 0 %  |
| 4 | Südamerika, Afrika, Naher Osten | 4 %  |

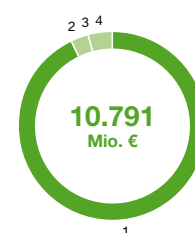

## Exploration & Production

- Umsatz auf Vorjahresniveau
- Erdöl- und Erdgasproduktion wegen OPEC-Förderrestriktionen in Libyen leicht gesunken
- Ergebnis preisbedingt signifikant gestiegen
- Prognose 2011: Signifikantes Umsatzwachstum und kräftige Ergebnisverbesserung infolge höherer Preise und steigender Produktionsmengen

## Natural Gas Trading

- Umsatz infolge niedrigerer Gaspreise gesunken
- Absatz auf Grund der weltwirtschaftlichen Erholung und der kalten Witterung in den Wintermonaten erhöht
- Ergebnis unter Wert des Vorjahres
- Prognose 2011: Leichte Umsatzsteigerung; Ergebnis infolge des anhaltenden Margendrucks leicht rückläufig



## Regionenbericht

### Regionen<sup>1</sup> (Millionen €)

|                                 | Umsatz<br>Sitz der Gesellschaften |        |               | Umsatz<br>Sitz der Kunden |        |               | Ergebnis der Betriebstätigkeit<br>(EBIT) |       |               |
|---------------------------------|-----------------------------------|--------|---------------|---------------------------|--------|---------------|------------------------------------------|-------|---------------|
|                                 | 2010                              | 2009   | Veränderung % | 2010                      | 2009   | Veränderung % | 2010                                     | 2009  | Veränderung % |
| Europa                          | 35.156                            | 30.375 | 15,7          | 33.201                    | 28.532 | 16,4          | 5.206                                    | 2.390 | 117,8         |
| davon Deutschland               | 25.426                            | 21.543 | 18,0          | 12.225                    | 10.666 | 14,6          | 3.769                                    | 1.855 | 103,2         |
| Nordamerika                     | 13.246                            | 9.404  | 40,9          | 12.886                    | 9.480  | 35,9          | 1.107                                    | 503   | 120,1         |
| Asien, Pazifischer Raum         | 11.642                            | 7.997  | 45,6          | 12.510                    | 8.706  | 43,7          | 1.271                                    | 503   | 152,7         |
| Südamerika, Afrika, Naher Osten | 3.829                             | 2.917  | 31,3          | 5.276                     | 3.975  | 32,7          | 177                                      | 281   | -37,0         |
|                                 | 63.873                            | 50.693 | 26,0          | 63.873                    | 50.693 | 26,0          | 7.761                                    | 3.677 | 111,1         |

<sup>1</sup> Die regionale Zuordnung einiger mittelamerikanischer Länder wurde geändert, Vorjahreswerte wurden entsprechend angepasst.

### Europa

Im Jahr 2010 erhöhte sich der Umsatz der Gesellschaften mit Sitz in der Region Europa gegenüber dem Vorjahreswert um 16 % und lag bei 35.156 Millionen €. Im Chemiegeschäft übertraf der Umsatz mit 19.363 Millionen € sogar das Vorkrisenniveau. Verglichen mit dem Jahr 2009, erzielten wir einen Anstieg um 32 %. Diese Entwicklung verdeutlicht, dass die BASF in der Region Europa gestärkt aus der Wirtschaftskrise hervorgegangen ist.

Bei Chemicals und Plastics stiegen Mengen und Preise in allen Bereichen, wodurch der Umsatz beider Segmente weit über dem Niveau des Jahres 2009 lag. Bei Performance Products wuchs der Umsatz kräftig. Dazu trug neben der starken Nachfrage nach unseren Produkten auch die ganzjährige Einbeziehung der ehemaligen Ciba-Geschäfte bei. Im Segment Functional Solutions verbesserte sich der Umsatz vor allem bei Catalysts stark. Agricultural Solutions konnte den hohen Umsatz des Jahres 2009 absatzbedingt übertreffen, während Oil & Gas auf Grund niedrigerer Gaspreise einen geringeren Umsatz verzeichnete.

Das Ergebnis der Betriebstätigkeit hat sich mit 5.206 Millionen € im Vergleich zum Vorjahr mehr als verdoppelt. Dazu trug vor allem das hervorragende Ergebnis im Chemiegeschäft bei – mit 3.212 Millionen € lag es um 2.579 Millionen € über dem Vorjahreswert und übertraf damit auch das Vorkrisenniveau deutlich.

Um die Chancen in der Region zu nutzen und zukünftige Herausforderungen zu meistern, haben wir für die Region Europa die Strategie 2020 mit dem Titel „More Market – More Value“ entwickelt. Bestehende erfolgreiche Ansätze rund um Länder, Kunden und vor allem Branchen werden dazu ausgeweitet. Zu den neuen Brancheninitiativen zählen unter anderem: Agro/Food/Feed/Fuel, Clean Tech Energy und Furniture/Wood. All diese segmentübergreifenden Initiativen werden dazu beitragen, unsere Wachstumsziele in der Region Europa im Jahr 2020 zu erreichen.

### Umsatz nach Regionen (nach Sitz der Gesellschaften)

|   |                                 |      |
|---|---------------------------------|------|
| 1 | Deutschland                     | 40 % |
| 2 | Europa (ohne Deutschland)       | 15 % |
| 3 | Nordamerika                     | 21 % |
| 4 | Asien, Pazifischer Raum         | 18 % |
| 5 | Südamerika, Afrika, Naher Osten | 6 %  |

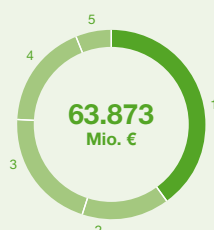

### Ergebnis der Betriebstätigkeit nach Regionen

|   |                                 |      |
|---|---------------------------------|------|
| 1 | Deutschland                     | 49 % |
| 2 | Europa (ohne Deutschland)       | 19 % |
| 3 | Nordamerika                     | 14 % |
| 4 | Asien, Pazifischer Raum         | 16 % |
| 5 | Südamerika, Afrika, Naher Osten | 2 %  |

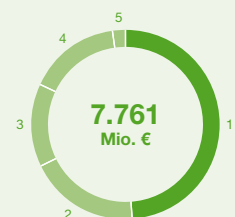

## Nordamerika

Zu Beginn des Jahres erholte sich die Industrieproduktion in der Region spürbar, wobei sich der wirtschaftliche Aufschwung im weiteren Jahresverlauf insgesamt abschwächte. Das Geschäftsumfeld in der Bauindustrie blieb schwierig.

Der Umsatz der Gesellschaften mit Sitz in Nordamerika stieg um 41 % auf 13.246 Millionen €. In lokaler Währung erhöhte er sich um 34 %. Fast alle Segmente konnten Absatz und Umsatz gegenüber den Vorjahreswerten erheblich steigern. Bei Agricultural Solutions wurde das hohe Umsatzniveau des Jahres 2009 dank der erfolgreichen Markteinführung unseres innovativen Herbizids Kixor® übertroffen. Vor allem bei Chemicals, Plastics und Functional Solutions trugen neben der guten Nachfrage auch höhere Preise zum Umsatzwachstum bei.

Das Ergebnis der Betriebstätigkeit erreichte im Jahr 2010 mit 1.107 Millionen € einen Spitzenwert und übertraf das Vorjahresniveau um 604 Millionen €. Nur Agricultural Solutions verzeichnete preisbedingt einen Ergebnismrückgang. Bei den übrigen Segmenten waren die gute Nachfrage und die verbesserte Auslastung unserer Anlagen Hauptgründe für das stark gestiegene Ergebnis. Bei einzelnen Grundprodukten, etwa in den Bereichen Petrochemicals und Performance Polymers, wurden infolge von Angebotsengpässen zusätzlich bessere Margen erzielt. Das Segment Performance Products war im Jahr 2009 mit hohen Kosten für die Integration von Ciba belastet. 2010 stärkten Synergieeffekte und die erfolgreiche Restrukturierung der kombinierten Geschäfte die Ertragskraft des Segments.

Am Standort Elyria/Ohio errichten wir eine Anlage zur Produktion von fortschrittlichen Kathodenmaterialien. Diese sollen ab 2012 in Lithium-Ionen-Batterien von Hybridfahrzeugen und Elektroautos für den nordamerikanischen Markt eingesetzt werden. Der Neubau in Elyria wird vom amerikanischen Energieministerium gefördert. Gemeinsam mit der Forschung am Standort Beachwood/Ohio ist die neue Anlage Teil unserer langfristigen Strategie für den Einstieg in den Zukunftsmarkt Elektromobilität.

Im Jahr 2011 werden wir außerdem an unserem Verbundstandort in Geismar/Louisiana eine Anlage zur Herstellung von Methylaminen in Betrieb nehmen.

Unsere 2008 entwickelte Regionalstrategie für Nordamerika setzen wir weiterhin erfolgreich um. Im Mittelpunkt dieser Strategie steht eine noch stärkere Markt- und Kundenorientierung. Wir konzentrieren uns auf Innovation, bereichsübergreifende Zusammenarbeit und auf attraktive Kunden- und Marktsegmente. Gleichzeitig steigern wir durch kontinuierliche Verbesserungen unsere operative Exzellenz und treiben die Harmonisierung und Effizienzverbesserung unserer Geschäftsprozesse weiter voran.

## Asien, Pazifischer Raum

In der Region Asien, Pazifischer Raum erholten sich unsere Geschäfte im Jahr 2010 rasch von der wirtschaftlichen Krise. Alle Bereiche entwickelten sich positiv. Durch die kräftige Belebung der Nachfrage, die ganzjährige Einbeziehung von Ciba und die strategische Ausrichtung auf attraktive Markt- und Kundensegmente erhöhte sich der Umsatz der Gesellschaften mit Sitz in der Region um 46 % auf 11.642 Millionen €. In lokaler Währung wuchs der Umsatz um 35 %. Er konnte in allen Segmenten, insbesondere in unserem Chemiegeschäft, gesteigert werden.

Beim Ergebnis der Betriebstätigkeit erzielten wir einen Spitzenwert. Es stieg vor allem mengenbedingt um 768 Millionen € auf 1.271 Millionen €. Auch unsere Kostendisziplin sowie die Fortschritte in unserem Asien-Pazifik-Projekt zur Standortoptimierung trugen zu dieser Entwicklung bei. Bis 2012 wollen wir im Rahmen des globalen Exzellenzprogramms NEXT in der Region Asien, Pazifischer Raum eine jährliche Ergebnisverbesserung von 150 Millionen € erreichen. Damit ist das Einsparpotenzial weit höher, als ursprünglich von uns erwartet.

Wir haben im Jahr 2010 darüber hinaus große Fortschritte bei der Umsetzung unserer Asien-Pazifik-Strategie 2020 gemacht, deren Hauptziel es ist, das jährliche Wachstum des Chemiemarkts in der Region um durchschnittlich zwei

## Entwicklungen in den Regionen

- Europa: Entwicklung der Strategie 2020; Ausweitung erfolgreicher Ansätze rund um Länder, Kunden und Branchen
- Nordamerika: Konzentration auf Innovation, bereichsübergreifende Zusammenarbeit und attraktive Kunden- und Marktsegmente; Bau einer Anlage in Elyria/Ohio zur Produktion von fortschrittlichen Kathodenmaterialien
- Asien, Pazifischer Raum: Ausbau der guten Zusammenarbeit mit unseren Partnern PETRONAS in Malaysia und Sinopec in China vereinbart; wichtige Fortschritte bei Umsetzung von Asien-Pazifik-Strategie 2020
- Südamerika, Afrika, Naher Osten: Bau einer Anlage für Natriummethylat, einer Schlüsselchemikalie für die effiziente Produktion von Biodiesel, in Guaratinguetá/Brasilien

Prozentpunkte zu übertreffen und gleichzeitig auch in dieser Region eine Prämie auf die Kapitalkosten zu verdienen. Ein weiteres Ziel dieser Strategie ist es, 70 % des Umsatzes aus lokaler Produktion zu erwirtschaften. Deshalb haben wir unsere Investitionen in der Region verstärkt. In China planen wir den Bau einer World-Scale-Anlage zur Herstellung von Wasseraufbereitungs- und Papierchemikalien in Nanjing sowie einer Produktionsanlage für die Polyurethan-Spezialität Cellasto® in Schanghai. Darüber hinaus werden wir Polyurethan-Systemhäuser in Tianjin und Chongqing errichten. Gleichzeitig setzen wir unsere Portfoliooptimierung fort: Unsere Anteile am Standort Wenzhou, an dem Effektpigmente produziert werden, haben wir an unseren lokalen Partner veräußert.

Um die erfolgreiche Zusammenarbeit in der Region Asien, Pazifischer Raum weiter auszubauen, haben wir gemeinsam mit unseren Partnern PETRONAS in Malaysia und Sinopec in China zwei wichtige Vereinbarungen zum Ausbau unserer Spezialitätenchemie getroffen.

In Chongqing/China planen wir den Bau einer Produktionsanlage für MDI, ein Vorprodukt zur Herstellung von Polyurethanen. Damit dehnen wir unser Geschäft auf Chinas schnell wachsende Inlandsprovinzen aus.

Am Standort Schanghai haben wir mit dem Bau des „Asia Pacific Innovation Campus“ begonnen, der Teil unseres globalen Netzwerks für Forschung und Entwicklung sein wird. Hier wollen wir unseren Kunden vor Ort unsere Forschungs- und Entwicklungsexpertise anbieten. Darüber hinaus haben wir ein Technisches Zentrum für Dispersionen in Jakarta/Indonesien, für Zwischenprodukte in Schanghai/China sowie für umweltfreundliche Autolacke in Seoul/Südkorea gegründet.

### Südamerika, Afrika, Naher Osten

Dank der kräftigen wirtschaftlichen Erholung lag der Umsatz der Gesellschaften in der Region weit über dem Niveau des Vorjahres: Er erhöhte sich um 31 % auf 3.829 Millionen €. In lokaler Währung lag der Umsatz um 19 % über dem Vorjahreswert.

In Südamerika konnten wir den Umsatz in allen Segmenten steigern. Bei Agricultural Solutions nahm die Nachfrage nach unseren innovativen Pflanzenschutzmitteln in allen Indikationen zu. Auch in unserem Geschäft mit Bautenanstrichmitteln verbesserte sich der Absatz deutlich.

In Afrika und im Nahen Osten konnte der Umsatz in allen Segmenten und nahezu allen Unternehmensbereichen gesteigert werden. Lediglich im Bereich Petrochemicals sank der Umsatz leicht.

Das Ergebnis der Betriebstätigkeit ging im Vorjahresvergleich um 104 Millionen € auf 177 Millionen € zurück. Grund hierfür waren einmalige Aufwendungen für Wertberichtigungen auf Forderungen im Rahmen langfristiger Lieferverträge.

Im Februar 2010 haben wir im brasilianischen Guaratinguetá, dem größten BASF-Standort in Südamerika, mit dem Bau einer Anlage für Natriummethylat begonnen. Die Anlage mit einer jährlichen Kapazität von 60.000 Tonnen soll vornehmlich den regionalen Markt bedienen. Natriummethylat ist eine Schlüsselchemikalie für die effiziente Produktion von Biodiesel, einer zunehmend bedeutenden Alternative für Dieselmotoren.

Darüber hinaus werden wir in Brasilien zukünftig besonderen Fokus auf unser Geschäft mit Lösungen für den Bausektor legen. Wir rechnen damit, dass sich die Branche durch Infrastrukturinvestitionen im Vorfeld sportlicher Großereignisse wie der Fußball-Weltmeisterschaft 2014 oder der Olympischen Spiele 2016, aber auch durch staatliche Wachstumsprogramme stark belebt.

Chancen in den Regionen Afrika und Naher Osten nutzen wir mit neuen Strategien und erschließen uns so weitere Geschäftspotenziale.

### Vermögen nach Regionen (Anteil in %)

|                                 | Sachanlagen |      | Vorräte |      | Forderungen aus Lieferungen und Leistungen |      |
|---------------------------------|-------------|------|---------|------|--------------------------------------------|------|
|                                 | 2010        | 2009 | 2010    | 2009 | 2010                                       | 2009 |
| Europa                          | 59          | 60   | 53      | 56   | 54                                         | 56   |
| Nordamerika                     | 21          | 21   | 26      | 25   | 16                                         | 16   |
| Asien, Pazifischer Raum         | 16          | 15   | 15      | 13   | 20                                         | 19   |
| Südamerika, Afrika, Naher Osten | 4           | 4    | 6       | 6    | 10                                         | 9    |
|                                 | 100         | 100  | 100     | 100  | 100                                        | 100  |

## Mitarbeiter

**Das beste Team der Industrie braucht engagierte und leistungsorientierte Mitarbeiter. Wir wollen die besten Talente gewinnen und halten. Daher investieren wir in unsere Attraktivität als Arbeitgeber, fördern unsere Mitarbeiter mit gezielter Personalentwicklung und bieten ihnen Unterstützung bei der Vereinbarkeit von Beruf und Familie. Wir legen Wert auf Vielfalt in unseren Teams.**

### Mitarbeiter weltweit

Zum Jahresende 2010 beschäftigte die BASF inklusive der akquirierten Cognis-Gesellschaften 109.140 Mitarbeiter, davon 2.442 Auszubildende. In unserem Auftrag führten rund 23.000 Mitarbeiter anderer Firmen an unseren Standorten Services und technische Dienstleistungen durch. Der Anteil von Mitarbeitern, die in den ersten drei Jahren nach ihrer Einstellung das Unternehmen auf eigenen Wunsch verließen, lag weltweit bei durchschnittlich 1,1 %. In Asien betrug die Fluktuationsrate 3,3 %, in Europa 0,4 %, in Nordamerika 1,0 % und in Südamerika 4,4 %.

### Mitarbeiter nach Regionen (Stichtag: 31.12.)

|                                 | 2010    | Anteil %<br>2010 | Anteil %<br>2009 |
|---------------------------------|---------|------------------|------------------|
| Europa                          | 69.809  | 64,0             | 64,5             |
| davon Deutschland               | 50.801  | 46,5             | 46,4             |
| davon BASF SE                   | 32.910  | 30,2             | 31,4             |
| Nordamerika                     | 16.487  | 15,1             | 15,2             |
| Asien, Pazifischer Raum         | 15.965  | 14,6             | 14,2             |
| Südamerika, Afrika, Naher Osten | 6.879   | 6,3              | 6,1              |
|                                 | 109.140 | 100,0            | 100,0            |

### Personalaufwand und Sozialleistungen

Für Gehälter, Sozialabgaben, Beiträge zur Altersversorgung und soziale Unterstützung wandte die BASF-Gruppe 2010 8.228 Millionen € auf (2009: 7.107 Millionen €). Der Personalaufwand stieg um 15,8 %, insbesondere auf Grund höherer Aufwendungen für erfolgsabhängige Entgeltbestandteile und das Long-Term-Incentive-Programm sowie der Ciba-Akquisition. Unsere Vergü-

tung für Mitarbeiter besteht aus Entgelt mit fixen und variablen Anteilen sowie Sozialleistungen, die über gesetzliche Verpflichtungen hinausgehen. Dazu gehören unter anderem betriebliche Altersversorgung, zusätzliche Krankenversicherung und Aktienprogramme.

### Personalaufwand BASF-Gruppe 2010 (Millionen €)

|                                                                         | 2010  | 2009  | Veränderung % |
|-------------------------------------------------------------------------|-------|-------|---------------|
| Löhne und Gehälter                                                      | 6.731 | 5.942 | 13,3          |
| Soziale Abgaben und Aufwendungen für Altersversorgung und Unterstützung | 1.497 | 1.165 | 28,5          |
| davon für Altersversorgung                                              | 408   | 178   | 129,2         |
| Personalaufwand                                                         | 8.228 | 7.107 | 15,8          |

### Wettbewerb um Talente

Der Wettbewerb um die besten Fach- und Führungskräfte verstärkt sich weltweit. Dieser Entwicklung begegnen wir mit einem verbesserten Profil als globaler Arbeitgeber: Weltweit stellen wir unsere Vorteile als internationaler und sozial verantwortlicher Arbeitgeber mit vielfältigen Einsatzbereichen heraus. Bereits zum fünften Mal in Folge wurde BASF 2010 im Ranking der Wirtschaftszeitung Guia Você S/A – Exame als einer der beliebtesten Arbeitgeber in Brasilien ausgezeichnet. In Europa haben wir 2010 in Deutschland, Spanien, Frankreich und Großbritannien einen einheitlichen Rekrutierungsprozess umgesetzt. Zu den Zielen gehört, Bewerber transparent über Jobchancen in ganz Europa zu informieren und Führungskräfte dabei zu unterstützen, auf dem gesamten europäischen Markt Talente zu finden. Wir sensibilisieren unsere Führungskräfte und Mitarbeiter für das Thema Talentwettbewerb und binden sie in Rekrutierungsveranstaltungen ein. Gute Mitarbeiter wollen wir halten und weiterentwickeln: In China und Indien bieten wir beispielsweise dreimonatige Einführungsprogramme an, die neue Mitarbeiter beim Einstieg ins Unternehmen unterstützen. Die Vernetzung innerhalb der BASF fördern wir unter anderem mit Seminarreihen.

## Überblick 2010

- 109.140 Mitarbeiter weltweit
- 8.228 Millionen € Personalaufwand
- Profil als attraktiver Arbeitgeber verbessert

### Mitarbeiterstruktur BASF-Gruppe 2010 (Vorjahreszahlen in Klammern)

|                              | Frauen          | Männer          |
|------------------------------|-----------------|-----------------|
| Beschäftigte insgesamt       | 22,9 % (22,5 %) | 77,1 % (77,5 %) |
| Management und Professionals | 24,4 % (24,1 %) | 75,6 % (75,9 %) |
| Obere Führungskräfte         | 7,6 % (6,5 %)   | 92,4 % (93,5 %) |

**Altersstruktur BASF-Mitarbeiter (Anteil Beschäftigte)**

|                           |        |                                                                                   |
|---------------------------|--------|-----------------------------------------------------------------------------------|
| bis einschl. 25 Jahre     | 6,8 %  |  |
| zwischen 26 und 39 Jahren | 33,4 % |  |
| zwischen 40 und 54 Jahren | 48,3 % |  |
| ab 55 Jahre               | 11,5 % |  |

**Herausforderung demografischer Wandel**

Auf die Auswirkungen des demografischen Wandels bereiten wir uns vor. Dabei fokussieren wir uns vor allem auf Europa und die USA. Wir haben die Altersstruktur unserer Belegschaften und die demografischen Entwicklungen im Umfeld unserer Standorte analysiert und so standortspezifische Risiken ermittelt. In Italien nutzen wir beispielsweise die Analyseergebnisse, um den Wissenstransfer und die Entwicklungsplanung zu verbessern. In den USA analysieren wir Modelle, die älteren Mitarbeitern einen gleitenden Übergang in den Ruhestand ermöglichen und gleichzeitig die Nachfolger durch Mentoring besser integrieren. Um unsere Wettbewerbs- und Innovationsfähigkeit zu erhalten, haben wir 2006 das Programm „Generations@Work“ gestartet. Bei der BASF SE haben wir mit den Mitarbeitern einheitsspezifische Maßnahmen zu den Schwerpunktthemen Gesundheitsförderung, Ergonomie und Qualifizierung entwickelt. Weltweit intensivieren wir unsere Anstrengungen beim Rekrutieren von Talenten, um unseren Personalbedarf langfristig zu decken.

Die BASF SE und alle tarifgebundenen deutschen Gruppengesellschaften stellen seit 2010 entsprechend dem „Tarifvertrag Lebensarbeitszeit und Demografie“ einen jährlichen Demografiebetrag von 300 € pro Tarifmitarbeiter zurück. Die Mittel aus dem Demografiefonds werden in nahezu allen Gruppengesellschaften zur Finanzierung sogenannter Wertkonten für Tarifmitarbeiter verwendet; die Konten machen einen vorgezogenen Übergang in den Ruhestand möglich. Seit Oktober 2010 haben 98 % der berechtigten Tarifmitarbeiter der BASF SE und 93 % in den tarifgebundenen Gruppengesellschaften (Datenbasis ohne Cognis) ihr individuelles Wertkonto eingerichtet.

Gemeinsam mit Partnern engagieren wir uns im Unternehmensnetzwerk zur Nachhaltigkeit „CSR Europe“ und führen im Rahmen der Initiative „Enterprise 2020“ Dialogveranstaltungen zu Chancen und Risiken des demografischen Wandels in verschiedenen europäischen Ländern durch.

**Wettbewerbsvorteile durch Vielfalt**

Die Vielfalt bei unseren Mitarbeitern hilft uns, weltweit auf unterschiedliche Kundenbedürfnisse einzugehen. Ziel unserer globalen Initiative „Diversity + Inclusion“ (Vielfalt + Einbeziehung) ist, die Kultur der Zusammenarbeit und der Wertschätzung im Unternehmen zu stärken und die Geschäftsverbesserung durch Vielfalt zu nutzen. Dadurch wollen wir die besten Mitarbeiter mit ausgeprägter fachlicher und sozialer Kompetenz gewinnen, fördern und an uns binden. Die Einheiten der BASF erarbeiten in sogenannten „D+I-Engagements“ eigene D+I-Strategien und -Ziele auf Basis ihrer jeweiligen Situation. Seit dem Start der Initiative sind rund 4.000 Mitarbeiter in mehr als 50 solcher Umsetzungsprojekte eingebunden. Für 2011 planen wir über 40 neue D+I-Engagements. Rund 2.000 Mitarbeiter nahmen seit 2008 an D+I-Trainings teil. Ende 2010 haben wir „Einbeziehung von Vielfalt“ als Kompetenz in unser globales Kompetenzprofil für die Beurteilung und Entwicklung von Mitarbeitern und Führungskräften aufgenommen. Für 2011 planen wir dazu neue Trainingseinheiten für Führungskräfte weltweit.

Als Arbeitgeber setzen wir uns für die Chancengleichheit aller Mitarbeiter und die Gleichstellung von Frauen und Männern ein. Bei Gehältern unterscheiden wir nicht zwischen Männern und Frauen. In der BASF-Gruppe lag der Anteil von Frauen in oberen Führungspositionen Ende 2010 bei 7,6 % (2009: 6,5 %). Der Anteil nichtdeutscher Oberer Führungskräfte lag 2010 bei 33,4 % (2009: 32,7 %), der Anteil Oberer Führungskräfte mit internationaler Erfahrung bei 77,7 % (2009: 76,8 %). Der Frauenanteil bei Kandidaten für obere Führungspositionen lag 2010 bei 19 %; der Anteil von Kandidatinnen und Kandidaten, die keine deutsche Staatsangehörigkeit haben, lag 2010 bei 36 %. 

→ Mehr dazu unter [basf.com/vielfalt](http://basf.com/vielfalt)

**Demografischer Wandel**

- Fokus auf Europa und den USA
- Einheitsspezifische Maßnahmen zu Gesundheitsförderung, Ergonomie und Qualifizierung
- Engagement mit externen Partnern im Unternehmensnetzwerk „CSR Europe“

→ Mehr dazu unter [basf.com/demografischer\\_wandel](http://basf.com/demografischer_wandel)

**Vielfalt der Mitarbeiter**

- Mehr als 50 Umsetzungsprojekte mit rund 4.000 Mitarbeitern
- Rund 2.000 Mitarbeiter bei D+I-Trainings seit 2008
- Anteil von Frauen in oberen Führungspositionen 7,6 %, bei Kandidaten für obere Führungspositionen 19 %
- Anteil nichtdeutscher Oberer Führungskräfte 33,4 %, bei Kandidatinnen und Kandidaten 36 %

## Ausbildung

Weltweit bildet BASF in 16 Ländern 2.442 Jugendliche in über 60 Berufen aus. 1.115 Auszubildende begannen 2010 bei deutschen Gruppengesellschaften sowie im BASF Ausbildungsverbund ihre Ausbildung. Seit 2004 schafft BASF mit derzeit rund 700 Partnerbetrieben im Ausbildungsverbund zusätzliche Ausbildungsplätze in Deutschland und bildet heute gemeinsam 3.572 Jugendliche aus. 96 % der Ausgebildeten der BASF SE erhielten 2010 nach bestandener Abschlussprüfung ein Übernahmeangebot. Im BASF Ausbildungsverbund lag diese Quote bei 77 %. Weltweit haben wir in unsere Auszubildenden 2010 rund 71,9 Millionen € investiert sowie circa 23,7 Millionen € für den Ausbildungsverbund als Teil unseres gesellschaftlichen Engagements.

In Austauschprogrammen, beispielsweise zwischen Deutschland, Frankreich, Norwegen und Spanien, bieten wir Auszubildenden die Möglichkeit, ihre interkulturellen Kompetenzen zu stärken. 2010 haben daran 50 Auszubildende der BASF SE und der BASF Schwarzheide teilgenommen.

→ Mehr zu Ausbildung bei BASF unter [basf.com/ausbildung](http://basf.com/ausbildung)

## Weiterbildung und Personalentwicklung

Die Weiterbildung unserer Mitarbeiter ist eine Investition in die Zukunftsfähigkeit der BASF. In Mitarbeitergesprächen definieren wir jährlich den Entwicklungs- und Weiterbildungsbedarf jedes Mitarbeiters. Neben individuellen Seminaren und Workshops bieten wir ein umfangreiches Angebot für eigenverantwortliches Lernen an, über elektronische Medien auch weltweit. Für die systematische Übergabe von Erfahrungswissen nutzen wir in der BASF SE die „Wissensstafette“: Dabei treffen Vorgänger und Nachfolger mit einem externen Experten zusammen und identifizieren und dokumentieren die Erfahrungen des Vorgängers.

In Aus- und Weiterbildung hat die BASF 2010 (Datenbasis ohne Cognis) rund 155 Millionen € investiert (2009: 134 Millionen €). Über 87.000 Mitarbeiter weltweit haben an Schulungsmaßnahmen teilgenommen. Im Durchschnitt nahm jeder von ihnen 4,1 Tage an einer Weiterbildung teil (2009: 3,5 Tage). Mit

unserer Initiative „Employee Development BASF Group“ wollen wir die gemeinsame Verantwortlichkeit von Führungskräften und Mitarbeitern für Personalentwicklung stärken. Ziel ist, Karrierepfade transparent zu machen und entsprechende Instrumente und Prozesse zu etablieren, die die Mitarbeiter befähigen, ihre Laufbahn aktiv zu planen.

## Beruf und Familie vereinbaren

Weltweit verstärken wir weiter unsere vielfältigen Angebote zur besseren Vereinbarkeit von Beruf und Familie. Damit stellen wir uns im Wettbewerb um die besten Mitarbeiter auf die Lebensphasen und die unterschiedlichen Bedürfnisse unserer Mitarbeiter ein. Zu unserem Angebot gehören flexible Arbeitszeitmodelle wie Telearbeit, Gleitzeit, Teilzeit und Freistellungen. Mit regionalen Initiativen gehen wir auf die individuellen Bedürfnisse der Mitarbeiter vor Ort ein. In Asien haben wir beispielsweise 2010 ein neues Programm zu Work-Life-Balance gestartet. Es enthält neben flexiblen Arbeitszeitmodellen auch Gesundheitsprogramme und spricht Führungskräfte in ihrer Vorbildfunktion an. An unserem Standort Ludwigshafen haben wir 2010 unsere Kinderkrippe LuKids erweitert und entwickeln gemeinsam mit Mitarbeitern bereits vor der Elternzeit Perspektiven zum Wiedereinstieg, den wir mit speziellen Seminaren unterstützen. Ende 2010 befanden sich 520 Mitarbeiter der BASF SE in Elternzeit, davon 45 (8,7 %) Väter. Die Teilzeitquote der BASF SE liegt bei 10,4 %. Für das Arbeiten in Teilzeit bieten wir auch spezielle Qualifizierungsangebote an.

Mitarbeiter, die ihre Angehörigen pflegen, profitieren von Erfahrungsaustausch, Pflegeberatung und einem erweiterten Medienangebot. Die BASF-Sozialberatung unterstützt Mitarbeiter insbesondere der BASF SE in schwierigen Lebenslagen und hilft ihnen dabei, die Beschäftigungsfähigkeit zu erhalten.

In Nordamerika wurde unser Engagement 2009 mit dem Alfred P. Sloan Award for Business Excellence in Workplace Flexibility ausgezeichnet, der vor allem unser 2008 eingeführtes regionales Programm „Designed to Fit“ zur flexiblen Arbeitszeitgestaltung würdigt.

→ Mehr dazu unter [basf.com/beruf\\_familie](http://basf.com/beruf_familie)

### Aus- und Weiterbildung

- Weltweit 2.442 Auszubildende in über 60 Berufen
- Rund 155 Millionen € in Aus- und Weiterbildung investiert
- Über 87.000 Mitarbeiter haben weltweit an Schulungen teilgenommen
- Programme zum Wissenstransfer
- Neue globale Initiative zur Personalentwicklung gestartet

### Vereinbarkeit von Beruf und Familie

- Modelle für flexibles Arbeiten
- Regionale Initiativen gehen auf Bedürfnisse der Mitarbeiter vor Ort ein
- Angebote für Mitarbeiter, die Angehörige pflegen
- BASF-Sozialberatung unterstützt Mitarbeiter in schwierigen Lebenslagen



### Mitarbeiterbeteiligung am Unternehmenserfolg

Wir wollen das Interesse unserer Mitarbeiter am Erfolg des Unternehmens und seiner Wertentwicklung fördern.

Mit variablen Entgeltsystemen beteiligen wir unsere Mitarbeiter am Unternehmenserfolg und belohnen persönliche Leistung. Dabei gelten für alle Mitarbeiter die gleichen Grundprinzipien. Den variablen Anteil bestimmen der wirtschaftliche Erfolg des Unternehmens – gemessen an der Gesamtkapitalrendite der BASF-Gruppe – und die individuelle Leistung des Mitarbeiters. Trotz des wirtschaftlich schwierigen Umfelds im Jahr 2009 konnte die BASF ihren Mitarbeitern 2010 eine Erfolgsbeteiligung zahlen und hat angekündigt, die Leistung in der Krise mit einer Sonderzahlung zu honorieren. Die Erfolgsbeteiligung für 2010 wird deutlich höher ausfallen als im Vorjahr.

Das Aktienprogramm „Plus“ fördert mit Incentive-Aktien die langfristige Beteiligung unserer Mitarbeiter: Sie können einen Teil ihrer Vergütung in BASF-Aktien investieren. 2010 erwarben 18.932 Mitarbeiter im Rahmen dieses Programms 632.560 Aktien. Den Oberen Führungskräften bietet die BASF seit 1999 die Teilnahme an einem aktienkursbasierten Vergütungsprogramm an. Das sogenannte Long-Term-Incentive (LTI)-Programm verknüpft einen Teil der Bezüge mit der langfristigen Wertentwicklung der BASF-Aktie. 2010 haben weltweit 91 % der circa 1.100 berechtigten Führungskräfte am LTI-Programm teilgenommen und bis zu 30 % ihrer variablen Vergütung investiert.

→ Mehr dazu im Anhang zum Konzernabschluss auf Seite 185

### Mitarbeiter geben Feedback

Im Folgeprozess zur ersten globalen Mitarbeiterbefragung 2008 haben wir weltweit über 1.500 Einzelmaßnahmen zur Verbesserung des Arbeitsumfelds eingeleitet. In der Nachfolgebefragung im Frühjahr 2010 konnten Mitarbeiter aus 72 Ländern das Umsetzen der Maßnahmen bewerten, 62 % der Befragten antworteten. Nach Abschluss der Erhebung diskutieren Mitarbeiter und Führungskräfte im nächsten Schritt die Befragungsergebnisse und ermitteln Verbesserungspotenziale. Im Fokus stehen insbesondere Themen aus den kritisch zurückgemeldeten Bereichen Kommunikation und Sichtbarkeit des Engagements von Füh-

rungskräften. Auch messen wir, wie unsere strategische Leitlinie „Wir bilden das beste Team der Industrie“ umgesetzt wird. Wir werden die globale Mitarbeiterbefragung inklusive Folgeprozess dauerhaft für die gesamte BASF-Gruppe etablieren.

Bei der BASF SE werden wir 2011 ein verbindliches Qualifizierungsprogramm für alle neuen Führungskräfte einführen, in das ab 2012 auch erfahrene Führungskräfte einbezogen werden. Für Führungskräfte im außertariflichen Bereich wird das Einholen eines systematischen Feedbacks verpflichtend.

### Dialog mit Arbeitnehmervertretungen

Arbeitnehmervertretungen beziehen wir durch festgelegte Verfahren in Entscheidungsprozesse und Abläufe unserer Gruppengesellschaften mit ein. Führen beispielsweise wie im Zuge der Ciba-Integration Restrukturierungen zu einem Personalabbau, binden wir die Arbeitnehmervertretungen bei der Ausarbeitung sozialverträglicher Umsetzungsmaßnahmen mit ein. Dies erfolgt gemäß der jeweiligen gesetzlichen Regeln und beiderseitiger Vereinbarungen. In Frankreich wurde 2010 zusätzlich zu den lokalen Strukturen der Zusammenarbeit eine landesweite Arbeitnehmervertretung eingerichtet. Bei grenzüberschreitenden Angelegenheiten ist seit 2008 der BASF Europa Betriebsrat für Mitarbeiter in Europa zuständig. Auf Grund gestiegener Mitarbeiterzahlen im Jahr 2009 wurde er 2010 um zwei Vertreter erweitert. Für die BASF SE haben wir 2010 mit den Arbeitnehmervertretungen am Standort Ludwigshafen eine Vereinbarung geschlossen, die unter anderem ein Maßnahmenpaket zur Erhöhung des flexiblen Personaleinsatzes enthält und den Verzicht auf betriebsbedingte Kündigungen bis 2015 festlegt.  → Mehr dazu unter [basf.com/arbeitnehmervertretung](http://basf.com/arbeitnehmervertretung)

### Verantwortung für Mitarbeiter – globale Standards

Es ist Grundlage unserer sozialen Verantwortung, dass wir nationales Recht und die Kernarbeitsnormen der Internationalen Arbeitsorganisation (ILO) einhalten. Darüber hinaus streben wir an, dass unsere Arbeitsbedingungen weltweit im Einklang mit unseren Selbstverpflichtungen und den einschlägigen ILO-Konventionen stehen. Die Einhaltung unserer Selbstverpflichtungen

### Beteiligung am Unternehmenserfolg

- Aktienprogramm „Plus“ fördert langfristige Beteiligung der Mitarbeiter mit Incentive-Aktien: 18.932 Mitarbeiter erwarben im Jahr 2010 632.560 BASF-Aktien
- Long-Term-Incentive (LTI)-Programm verknüpft Bezüge von Oberen Führungskräften mit langfristiger Wertentwicklung der BASF-Aktie: 2010 haben weltweit 91 % der berechtigten Führungskräfte teilgenommen

### Feedback von Mitarbeitern

- Über 1.500 Maßnahmen nach globaler Mitarbeiterbefragung 2008 eingeleitet
- Mitarbeiter bewerteten bei Folgebefragung im Frühjahr 2010 das Umsetzen der Maßnahmen
- Systematisches Einholen von Feedback für Führungskräfte im außertariflichen Bereich wird verpflichtend

überprüfen wir über ein gruppenweit implementiertes Monitoring-system. Es besteht aus drei zentralen Instrumenten:

- den Compliance-Hotlines,
- der jährlichen Umfrage bei unseren Gruppengesellschaften, um die dort geltenden Arbeitsbedingungen zu überprüfen,
- dem intensiven Dialog mit unseren Stakeholdern, wie Arbeitnehmervertretungen oder internationalen Organisationen.

Im Jahr 2010 erhielten wir 59 Anrufe zu Arbeits- und Sozialstandards bei den Compliance-Hotlines. 11 davon hatten nachweisbare Defizite zum Gegenstand. Mit den Ergebnissen der Umfrage können wir für 2010 Aussagen über 100% unserer Mitarbeiter (Datenbasis ohne Cognis) treffen. Ergeben sich bei der Auswertung Hinweise darauf, dass unsere Selbstverpflichtungen unzureichend umgesetzt werden, gehen wir diesen Hinweisen nach und leiten Abhilfemaßnahmen ein.

In einem Pilotprojekt in Europa untersuchen wir den Zusammenhang zwischen Wettbewerbsfaktoren, international anerkannten Standards und kulturellen Gegebenheiten.

In Brasilien wurde bei der OECD-Kontaktstelle eine Beschwerde gegen BASF eingereicht mit dem Vorwurf, gegen das Recht auf Versammlungsfreiheit und Kollektivverhandlungen verstoßen zu haben. Nach internen Prüfungen wurde ein Verstoß gegen die OECD-Leitsätze nicht festgestellt. Die Beurteilung unserer Gegendarstellung durch die Kontaktstelle steht noch aus.

Um Nachwuchsführungskräfte frühzeitig für Nachhaltigkeit zu sensibilisieren, haben wir in Südamerika ein „Virtual Sustainability Team“ eingesetzt. Derzeit 39 Mitglieder investieren zwei Jahre lang 10% ihrer Arbeitszeit, um unsere Nachhaltigkeitsstrategie zu implementieren.

Mit unseren deutschen Arbeitnehmervertretern diskutieren wir in den sogenannten „Wittenberg-Dialogen“ den Ethik-Kodex, der die Stärkung der sozialen Marktwirtschaft und verantwortliches Handeln zum Inhalt hat. BASF hat das „Leitbild für verantwortliches Handeln in der Wirtschaft“ mitinitiiert und unterzeichnet. Wir verpflichten uns zu einer sowohl erfolgs- als auch werteorientierten Führung im Sinne der Sozialen Marktwirtschaft. 

#### Abfrage der ILO-Kernarbeitsnormen 2010<sup>1</sup>

|                                                  | Prozess implementiert                                                                                          | Effektivität des Prozesses                                                                                                                                       |
|--------------------------------------------------|----------------------------------------------------------------------------------------------------------------|------------------------------------------------------------------------------------------------------------------------------------------------------------------|
| Verhinderung von Kinderarbeit                    | 100 % Prüfung des Alters des Mitarbeiters bei Anstellung                                                       | 100 % Mitarbeiter über 15 Jahre bei Anstellung                                                                                                                   |
| Verhinderung von Zwangsarbeit                    | 100 % Arbeitsvertrag basiert auf freiwilliger Zustimmung des Mitarbeiters                                      | 100 % Recht der Mitarbeiter auf einseitige Kündigung des Arbeitsvertrages                                                                                        |
| Verhinderung von Diskriminierung                 | 100 % Personalmaßnahmen basieren auf objektiven Kriterien                                                      | 2010 erhielten wir 43 Anrufe zu Diskriminierung. In 11 Fällen wurde Fehlverhalten nachgewiesen.                                                                  |
| Recht der Mitarbeiter auf Versammlungsfreiheit   | 100 % <sup>2</sup> Keine Maßnahmen der Gesellschaft zur grundlegenden Einschränkung der Versammlungsfreiheit   | 92 % Mitarbeiter beschäftigt bei einer Gesellschaft, in der eine Arbeitnehmervertretung existiert                                                                |
| Recht der Mitarbeiter auf Kollektivverhandlungen | 100 % <sup>2</sup> Keine Maßnahmen der Gesellschaft zur grundlegenden Einschränkung von Kollektivverhandlungen | 89 % Mitarbeiter beschäftigt bei einer Gesellschaft, in der eine Arbeitnehmervertretung existiert und die Arbeitsbedingungen auf einem Kollektivvertrag basieren |

<sup>1</sup> Datenbasis ohne Cognis

<sup>2</sup> Weniger als 1 % unserer Mitarbeiter sind in Staaten tätig, in denen das Recht auf Versammlungsfreiheit und Kollektivverhandlungen grundsätzlich durch nationales Recht eingeschränkt ist.

## Arbeits- und Sozialstandards

- Nationales Recht und Kernarbeitsnormen der Internationalen Arbeitsorganisation als Mindestanforderung
- Einhalten der Selbstverpflichtung wird durch globales Monitoringsystem überprüft
- Arbeitsbedingungen im Einklang mit ILO-Konventionen und Deklarationen, OECD-Richtlinien für multinationale Unternehmen sowie mit lokalen Bedingungen wie Industriestandards

→ Mehr zu Arbeits- und Sozialstandards auf Seite 19

## Arbeitssicherheit und Gesundheitsschutz

**Mit unseren Managementsystemen für Arbeitssicherheit und Arbeitsmedizin wollen wir die Sicherheit und Gesundheit unserer Mitarbeiter bestmöglich schützen. Dafür setzen wir auf umfassende Vorsorgemaßnahmen und aktive Beteiligung aller Mitarbeiter.**

### Globale Ziele

Um unsere Leistungen bei Arbeitssicherheit und Gesundheitsschutz weiterzuverbessern, haben wir uns ehrgeizige globale Ziele gesetzt. Wir wollen bei unseren Mitarbeitern weltweit die Arbeitsunfälle mit Ausfalltagen je eine Million geleistete Arbeitsstunden bis 2020 um 80 % senken (Basisjahr 2002). Berufskrankheiten in der BASF-Gruppe wollen wir um 80 % reduzieren (Basisjahr 2004).

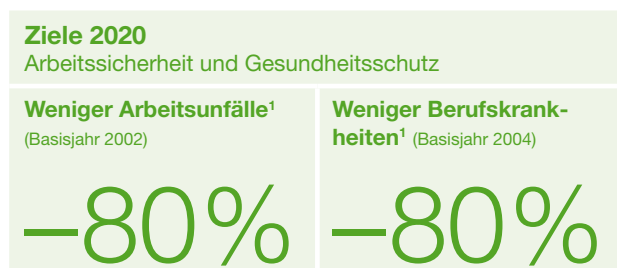

<sup>1</sup> Je eine Million geleistete Arbeitsstunden

### Schwerpunkte Arbeitssicherheit

Im Jahr 2010 haben wir unsere neue globale Gruppenrichtlinie zur Arbeitssicherheit verabschiedet. Einheitliche Anforderungsprofile erleichtern beispielsweise die Integration neuer Standorte bei Akquisitionen. Sicheres Arbeiten fördern und überprüfen wir durch Gefährdungsbeurteilungen, Sicherheitsregeln, Seminare, Schulungen und Audits. Mit einer weltweiten Initiative stärken wir das Sicherheitsbewusstsein jedes Einzelnen für sich und andere. In der „Sichermacherinitiative“ haben wir in zentralen Veranstaltungen bisher mit mehr als 16.000 Mitarbeitern und Kontraktoren an über 50 Standorten weltweit konkrete Verbesserungsmöglichkeiten der Sicherheitskultur erarbeitet.

Im Jahr 2010 ereigneten sich an BASF-Standorten insgesamt 2,0 Arbeitsunfälle pro eine Million Arbeitsstunden. Damit

verzeichneten wir einen leichten Anstieg gegenüber Vorjahr (2009: 1,8). Im Vergleich zu 2002 konnte die Quote um 39 % gesenkt werden. Leider hatten wir im Jahr 2010 insgesamt vier Todesfälle bei BASF-Mitarbeitern und Mitarbeitern von Kontraktoren zu beklagen. In Spanien starb ein BASF-Mitarbeiter nach dem Sturz von einem Dach. Erforderliche weitergehende Sicherungsmaßnahmen bei entsprechenden Arbeiten werden gruppenweit angewiesen. Bei Kontraktoren kam es bei der Arbeitsvorbereitung zu drei tödlichen Unfällen auf Baustellen für die Ostsee-Pipeline-Anbindungsleitung (OPAL). Die Rate der Arbeitsunfälle bei Kontraktoren konnte 2010 auf 2,6 (2009: 2,7) je eine Million geleistete Arbeitsstunden gesenkt werden. Wir haben gruppenweit Mindestanforderungen an Arbeitssicherheit bei Kontraktoren festgelegt und den Prozess der Auditierung weiterentwickelt.

→ **Mehr zu Arbeitssicherheit unter [basf.com/arbeitssicherheit](http://basf.com/arbeitssicherheit)**

### Schwerpunkte Gesundheitsschutz

Die Gesundheit und Leistungsfähigkeit unserer Mitarbeiter fördern und schützen wir mit unserem globalen Gesundheitsmanagement. Weltweit einheitliche Standards für Arbeitsmedizin und Gesundheitsschutz sind in einer Gruppenrichtlinie festgehalten, für deren Umsetzung ein weltweites Netzwerk von Gesundheitsexperten sorgt. Unsere Leistungen überprüfen wir regelmäßig durch arbeitsmedizinische Audits.

2010 gab es bei der BASF 0,5 neue Verdachtsfälle von Berufskrankheiten pro eine Million Arbeitsstunden (2009: 0,4). Dies stellt einen Anstieg gegenüber den Vorjahren dar. Allerdings ist die Zahl der bestätigten Berufskrankheiten rückläufig. Um das Gesundheitsmanagement in der BASF-Gruppe noch aussagekräftiger abzubilden, haben wir 2010 einen neuen Indikator entwickelt, der die bisherige einzelne Kennzahl ergänzt. Der „Health Performance Index“ (HPI) bezieht vier weitere Bereiche ein: vorausschauende medizinische Notfallplanung, Ersthelferquote an den Standorten, arbeitsmedizinische Überwachungsuntersuchungen und Aktivitäten zur Gesundheitsförderung. 2011 werden wir mit der vierten weltweiten BASF-Gesundheitsaktion das Thema Hautschutz in den Mittelpunkt stellen. 🌐

→ **Mehr zu arbeitsmedizinischen Audits ab Seite 91**

### Arbeitsunfälle mit Ausfalltagen je eine Million geleistete Arbeitsstunden (Reduktion zu Basisjahr 2002: -39 %)

|                   |                  |                                  |
|-------------------|------------------|----------------------------------|
| 2010              | 2,0              | <div style="width: 60%;"></div>  |
| 2009              | 1,8 <sup>2</sup> | <div style="width: 55%;"></div>  |
| 2008              | 1,8              | <div style="width: 55%;"></div>  |
| 2007              | 2,2              | <div style="width: 65%;"></div>  |
| 2006              | 1,7              | <div style="width: 50%;"></div>  |
| 2002 <sup>1</sup> | 3,3              | <div style="width: 100%;"></div> |

<sup>1</sup> Basisjahr

<sup>2</sup> Abweichung von Bericht 2009 (1,7) bedingt durch unterjährige Korrektur auf Grund zum Beispiel geänderter Einstufungen.

### Ereignisse 2010

- Mehr als 16.000 Mitarbeiter an rund 50 Standorten mit Veranstaltungen der „Sichermacherinitiative“ erreicht
- Leider vier Todesfälle bei BASF-Mitarbeitern und Mitarbeitern von Kontraktoren zu beklagen
- Neuer Health Performance Index (HPI) bildet Gesundheitsmanagement aussagekräftig ab

## Gesellschaftliches Engagement

**Wir übernehmen gesellschaftliche Verantwortung: Weltweit engagieren wir uns vor allem im Umfeld unserer Standorte mit vielfältigen Projekten. Den Schwerpunkt legen wir auf den Zugang zu Bildung und auf Wissenschaft. So fördern wir Innovationskraft und Zukunftsfähigkeit.**

### Strategie

Im Jahr 2010 hat die BASF-Gruppe für die Förderung von Projekten insgesamt 49,8 Millionen € eingesetzt (2009: 48,1 Millionen €). 29,4 % der Summe haben wir gespendet (2009: 27,7 %). Das Stiftungsvermögen der BASF Sozialstiftung haben wir 2010 um 5 Millionen € aufgestockt. Dem Prinzip der nachhaltigen Entwicklung folgen wir auch bei unserem gesellschaftlichen Engagement: Wir unterstützen Initiativen, die viele Menschen erreichen und langfristig wirken. Dafür arbeiten wir mit erfahrenen Partnern wie UN-Organisationen zusammen. Wir unterstützen vor allem Projekte, die den Zugang zu Bildung verbessern. Außerdem engagieren wir uns in den Bereichen Wissenschaft, Soziales, Sport und Kultur. Die BASF unterstützt grundsätzlich keine politischen Parteien. In den USA haben unsere Mitarbeiter das „BASF Corporation Employees' Political Action Committee“ (PAC) gegründet, eine unabhängige staatlich registrierte Vereinigung von Mitarbeitern, die Mitarbeiterspends für politische Kandidaten bündelt und über deren Verwendung eigenständig entscheidet. Mit Grameen Healthcare Trust betreibt BASF ein Social Business.

→ **Mehr zum Social Business unter [basf.com/socialbusiness\\_d](http://basf.com/socialbusiness_d)**

### Schwerpunkt Bildung und Wissenschaft

In 17 Ländern bieten wir an unseren Standorten Mitmach- und Schülerlabore an. Insgesamt 38.996 Kinder und Jugendliche haben diese im Jahr 2010 besucht. Neue Mitmachlabore haben wir 2010 in den USA und England eröffnet. Unser Programm „ReAção“ in Brasilien soll den Schulunterricht in Naturwissenschaften verbessern. Mehr als 800 Lehrer wurden bisher in Kursen ausgebildet und rund 12.000 Schüler erreicht. In Deutschland fördert BASF als Gründungsmitglied der „Wissensfabrik – Unternehmen für Deutschland“ gemeinsam mit über 70 weiteren Unternehmen Bildungsprojekte, Existenzgründer und Jung-

unternehmer. Seit der Gründung 2005 hat die Wissensfabrik mehr als 2.000 Bildungspartnerschaften mit Schulen abgeschlossen und damit rund 8.500 Lehrer sowie über 440.000 Kinder erreicht. Mit der Initiative „Offensive Bildung Plus“ setzt BASF 2010 die seit 2005 erfolgreiche Offensive Bildung in der Metropolregion Rhein-Neckar fort. Ziel ist es, die frühkindliche Bildung verstärkt zu fördern. Insgesamt unterstützen wir nun 230 Kitas und erreichen damit rund 18.000 Kinder in der Region.

→ **Mehr zur Offensive Bildung unter [www.offensive-bildung.de](http://www.offensive-bildung.de)**

### Spenden, Sponsoring und eigene Projekte der BASF-Gruppe 2010 (Millionen €)

|   |              |      |          |
|---|--------------|------|----------|
| 1 | Wissenschaft | 4,1  | (8,3 %)  |
| 2 | Soziales     | 8,3  | (16,6 %) |
| 3 | Kultur       | 5,4  | (10,9 %) |
| 4 | Sport        | 2,1  | (4,2 %)  |
| 5 | Bildung      | 28,0 | (56,2 %) |
| 6 | Sonstige     | 1,9  | (3,8 %)  |

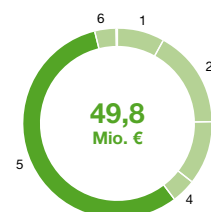

### Internationale Spendenprojekte

Das BASF-Team engagierte sich 2010 mehrfach für Opfer von Naturkatastrophen. Nach der Flutkatastrophe in Pakistan spendeten Unternehmen und Mitarbeiter weltweit 785.000 €. Die BASF Sozialstiftung arbeitete erstmals mit dem Nothilfefonds der Vereinten Nationen, CERF, zusammen. Er vergibt die Gelder an UN-Organisationen, die vor Ort in Pakistan Hilfe leisten. Nach dem Erdbeben in Haiti unterstützte die BASF unter anderem UN-HABITAT mit 200.000 € beim Aufbau eines Schulungszentrums in Port-au-Prince. In der Weihnachtsspendenaktion 2010 spendeten Mitarbeiter in Deutschland über 88.000 €. Das Geld fließt an UN-HABITAT für eine bessere Wasserversorgung an Schulen in Chalco/Mexiko. Als Startkapital stellte die BASF SE 100.000 € zur Verfügung. Daneben unterstützt die BASF Sozialstiftung UNICEF bei der Versorgung von Kindern mit lebenswichtigen Vitaminen: In Südafrika finden „Gesundheitswochen“ statt. In Usbekistan werden Lebensmittelproduzenten darin geschult, Grundnahrungsmittel mit Vitaminen anzureichern. 🌍

→ **Mehr dazu unter [basf.com/internationale-spendenprojekte](http://basf.com/internationale-spendenprojekte)**

### Grundsätze und Förderkriterien

- Unterstützung von Projekten mit langfristigem Nutzen
- Schwerpunkt Bildung und Wissenschaft
- Förderung vorwiegend im Umfeld der BASF-Standorte
- Zusammenarbeit mit ausgewählten Partnern wie den Vereinten Nationen

### Highlights 2010

- Neue Mitmachlabore in den USA und England eröffnet
- Mit über 2.000 Bildungspartnerschaften der Wissensfabrik rund 440.000 Kinder und 8.500 Lehrer erreicht
- BASF Sozialstiftung unterstützt UNICEF bei der Versorgung von Kindern mit lebenswichtigen Vitaminen

## Umwelt- und Sicherheitsmanagement

**Umweltschutz und Sicherheit sind in unseren Unternehmensleitlinien festgelegt und damit wichtige Managementaufgaben der BASF. Mit unserem Responsible-Care-Managementsystem legen wir die Rahmenbedingungen für das Umsetzen unserer Selbstverpflichtungen fest. Oberstes Ziel ist es, Mitarbeiter und Nachbarn zu schützen und die Verfügbarkeit unserer Anlagen sicherzustellen.**

### Strategie und Managementsysteme

Unser Responsible-Care-Managementsystem (RCMS) bildet unter anderem den Rahmen für Umweltschutz und Sicherheit bei der BASF. Darin legen wir mit klaren Regeln weltweit gültige Standards in diesen Themenfeldern fest. Verbindliche globale Richtlinien definieren Anforderungen, Verantwortlichkeiten und Bewertungsmethoden für die Umsetzung dieser Standards. Mit regelmäßigen Audits überprüfen wir unsere Leistung. Um uns weiterzuverbessern, setzen wir uns anspruchsvolle Umweltschutz- und Sicherheitsziele – über deren Stand wir regelmäßig berichten. Das RCMS definiert dazu Verfahren, wie wir den Fortschritt dieser Ziele messen. Im Jahr 2010 haben wir eine global gültige Gruppenrichtlinie zu Arbeitssicherheit verabschiedet. Daneben haben wir globale Mindestanforderungen für Arbeits- und Standortsicherheit definiert.

Wir arbeiten kontinuierlich daran, unser Umwelt- und Sicherheitsmanagementsystem zu verbessern. Dafür setzen wir auf präventive Maßnahmen und analysieren Schwachstellen von der Produktion bis zur Logistik mit möglichen Auswirkungen auf die Sicherheit unserer Mitarbeiter, die Umwelt oder unser Umfeld. Das globale Erfassen und Auswerten von Ereignissen hilft uns, systematisch aus Fehlern zu lernen. In Datenbanken werden alle Unfälle, Beinaheunfälle und weitere Ereignisse der Standorte sowie der Transportwege erfasst. Auch Ereignisse mit Leasing- und Kontraktorenmitarbeitern beziehen wir ein.

Wir fördern das Bewusstsein unserer Mitarbeiter für Umweltschutz und Sicherheit am Arbeitsplatz. Voraussetzung dafür ist der offene Dialog über Fehler und Herausforderungen,

den wir unter anderem mit unserer globalen Sicherheitsinitiative unterstützen. Wir beziehen auch Informationen aus dem Dialog mit Stakeholdern ein, beispielsweise aus unserer Materialitätsanalyse, um unsere Umwelt- und Sicherheitssysteme weiterzuverbessern.

Unsere Sicherheitsarbeit wurde 2010 mehrfach extern anerkannt. In Sri Lanka erhielt BASF Lanka (Pvt) Ltd. im Rahmen der Verleihung der National Safety Awards eine Auszeichnung für den sichersten Arbeitsplatz in der branchenübergreifenden Kategorie kleiner Unternehmen. Die deutschen Zollbehörden haben der BASF SE für die Standorte Ludwigshafen und Limburgerhof 2010 bescheinigt, bei der Lieferung von Waren vom Hersteller bis zum Endverbraucher besonders vertrauenswürdig zu sein. Diese Zertifizierung ist die Grundlage für zollrechtliche Vereinfachungen, die unseren Unternehmensbereichen die schnelle und termingerechte Belieferung der Kunden erleichtert. 

→ Mehr zu unseren Leitlinien auf Seite 18, mehr zu Standards für Arbeitssicherheit und Gesundheitsschutz auf Seite 19 und ab 87, mehr zu Responsible Care unter [basf.com/responsible-care\\_d](http://basf.com/responsible-care_d)

### Audits

Regelmäßige Audits helfen uns, einheitlich hohe Standards auf allen Gebieten von Umweltschutz, Sicherheit und Gesundheitsschutz innerhalb der BASF-Gruppe sicherzustellen. Die Anforderungen für die Prüfungen sind in unserer „Gruppenrichtlinie Responsible-Care-Audits“ festgeschrieben. Dazu gehört auch ein festgelegter Ablauf, wie wir vorgehen, wenn Standards nicht eingehalten werden. Bei der Auditierung eines Standorts oder eines Betriebs wird anhand von klar definierten Kriterien ein Umwelt- und Sicherheitsprofil erstellt. In einer Matrix stellen wir dar, ob die Sicherheits- und Umweltleistungen geeignet sind, mit dem vorhandenen Gefahrenpotenzial umzugehen. Sollte dies nicht der Fall sein, vereinbaren wir Maßnahmen, deren Umsetzung zeitnah mit Folgeaudits kontrolliert wird. Audits führen wir an BASF-Standorten und bei Unternehmen mit BASF-Mehrheitsbeteiligung durch.

2010 gab es in der BASF-Gruppe 97 Umwelt- und Sicherheitsaudits an 66 Standorten. Im Bereich Arbeitsmedizin und Gesundheitsschutz führte BASF Audits an 34 Standorten durch.

### Responsible-Care-Managementsystem

- RCMS bildet Rahmen für sichere Herstellung und sicheren Transport von Produkten und regelt Bedingungen für das Umsetzen unserer Selbstverpflichtungen
- Neue Gruppenrichtlinie zu Arbeitssicherheit 2010 verabschiedet
- Ereignisse werden erfasst und ausgewertet, um aus Fehlern zu lernen

### Audits

- Regelmäßige Audits helfen, einheitlich hohe Standards für Umweltschutz, Sicherheit und Gesundheit sicherzustellen
- Globale Richtlinie legt Anforderungen und Umsetzung von Audits fest
- 97 Umwelt- und Sicherheitsaudits, 34 Audits zu Arbeitsmedizin und Gesundheitsschutz im Jahr 2010



Unser internes Auditsystem entspricht den Standards externer Zertifizierungsverfahren ISO 19011 und OHSAS 18001. Weltweit sind 153 Produktionsstandorte der BASF nach ISO 14001 zertifiziert. 2010 haben wir in Ludwigshafen ein Zertifikat nach ISO 14001 für den Standort erhalten.

→ Mehr zu zertifizierten Standorten unter [basf.com/zertifiziert](http://basf.com/zertifiziert)

### Weltweite Sicherheitskonzepte

Globale Sicherheitskonzepte dienen dem Schutz unserer Mitarbeiter und Nachbarn und von Eigentum, Produkten, Prozessen und Informationen. Gleichzeitig vermeiden wir Produktionsausfälle und Umweltschäden. Um Produktaustritte, Explosionen oder Brände zu verhindern, wenden wir ein fünfstufiges System von Sicherheitsbetrachtungen für die Planung von Anlagen an. Es bezieht die wichtigsten Aspekte für Umweltschutz, Sicherheit und Gesundheitsschutz mit ein – von der Konzeption bis zur Produktion. Mit Hilfe einer Risikomatrix bewerten wir mögliche Risiken in BASF-Anlagen nach Eintrittswahrscheinlichkeit und möglichen Auswirkungen und leiten entsprechende Schutzmaßnahmen ab. Mehr als 10.000 Mitarbeiter haben wir 2010 zu Arbeitssicherheit und Anlagensicherheit geschult.

Wir untersuchen und vergleichen weltweit an unseren Standorten Ereignisse, bei denen es zu Brand, Explosionen oder Stofffreisetzungen kam. Ziel ist es, gemeinsame Ursachen zu analysieren und Prozesse zu verbessern, um die Anlagensicherheit zu erhöhen.

Auf mögliche Zwischenfälle sind wir durch unsere Konzepte für Gefahrenabwehr vorbereitet. Darin erstellen wir für Produktionsanlagen spezifische Gefahrenabwehrpläne. In diesen Prozess binden wir situationsbezogen Gemeinschaftsunternehmen, Partner, Lieferanten, benachbarte Unternehmen sowie Städte und Gemeinden mit ein. Die zentrale Notfallhilfe der BASF unterstützt die lokale Gefahrenabwehr weltweit rund um die Uhr. Unsere Notfallsysteme überprüfen wir regelmäßig auch in Übungen mit Mitarbeitern und Behörden. 2010 haben wir eine neue gruppenweite Richtlinie zur Gefahrenabwehr konzipiert. Sie vereinheitlicht regionale Managementpläne, die festlegen, wie im Ereignisfall zu handeln ist. Die Richtlinie legt grundsätzliche

Vorgaben für die Gefahrenabwehr und die Prävention – etwa vorbeugenden Brandschutz – sowie deren Organisation fest.

Als präventive Maßnahme für den Schutz von Standorten weltweit haben wir im Jahr 2010 neue Mindestanforderungen verabschiedet. Diese schließen auch Informationsschutz mit ein. Ziel dieser Maßnahme ist es, die Mitarbeiter und das Unternehmen zu schützen, um Schäden abzuwehren, die beispielsweise durch Know-how-Verlust, Kriminalität und internationalen Terrorismus drohen. Für die Sicherheitsarbeit relevante Menschenrechtsaspekte haben wir in die Ausbildung unseres Sicherheitspersonals aufgenommen. Dazu gehört beispielsweise das Prinzip der Verhältnismäßigkeit von Maßnahmen bei Sicherheitseinsätzen. In Deutschland haben wir die Ergänzungen bereits 2009 umgesetzt. Bis 2011 wollen wir diese Qualifizierungsanforderungen global verbindlich festschreiben. Das Beachten der Menschenrechte wird als verpflichtendes Element in neue Verträge mit Kontraktoren der BASF-Gruppe einfließen. → Mehr dazu unter [basf.com/gefahrenabwehr](http://basf.com/gefahrenabwehr)

### Transport- und Lagersicherheit

In unseren Richtlinien haben wir einheitliche Standards für den Transport und die Lagerung von chemischen Produkten in angemieteten Lagern festgelegt. Unsere Regeln und Maßnahmen für Transportsicherheit schließen Lieferung, Lagerung und Verteilung von Chemikalien zwischen allen BASF-Standorten, Zulieferern und Kunden ein. Unser globales Netzwerk für Transport- und Lagersicherheit haben wir 2010 in Russland und Südafrika ausgebaut und weltweit neue Schulungsmaßnahmen angeboten. Neben Standardschulungen zum Gefahrguttransport, die wir weltweit durchführen, nahmen beispielsweise in Ludwigshafen rund 300 Mitarbeiter aus Produktion und Logistik an einer speziellen praxisorientierten Gefahrgutschulung teil. Außerdem haben wir 2010 eine neue gruppenweite Richtlinie für den Umgang mit speziellen Kunststoffbehältern zum Transport von Flüssiggütern im Seecontainer – sogenannten „Flexitanks“ – verabschiedet.

Wenn es trotz aller Präventionsmaßnahmen zu einem Unfall kommt, leisten wir rasch Hilfe, und unsere Gefahrgutbeauftragten werten anschließend alle Informationen aus. Mehr als 100

**Transportunfälle pro 10.000 Transporte**  
(Reduktion zu Basisjahr 2003: –50 %)

|                   |      |             |
|-------------------|------|-------------|
| 2010              | 0,28 | <div></div> |
| 2009              | 0,24 | <div></div> |
| 2008              | 0,36 | <div></div> |
| 2007              | 0,28 | <div></div> |
| 2006              | 0,45 | <div></div> |
| 2003 <sup>1</sup> | 0,56 | <div></div> |

<sup>1</sup> Basisjahr

### Sicherheitskonzepte

- Schutz von Mitarbeitern, Nachbarn, Eigentum, Produkten, Prozessen und Informationen
- Mehr als 10.000 Mitarbeiter zu Arbeitssicherheit und Anlagensicherheit geschult
- Neue Mindestanforderungen für Standortsicherheit verabschiedet



unserer Mitarbeiter sind als Gefahrgutbeauftragte ausgebildet und in einem globalen Netzwerk organisiert. Auf Basis ihrer Berichte entwickeln wir Maßnahmen, um ähnliche Vorfälle künftig vermeiden zu können.

#### Ziel 2020

Weniger Transportunfälle

–70%

Auf Basis des Jahres 2003 wollen wir die Rate der weltweiten Transportunfälle pro 10.000 Transporte um 70 % senken.

Die Zahl der Transportunfälle haben wir von 0,56 im Jahr 2003 auf 0,28 pro 10.000 Transporte gesenkt. Gegenüber dem Vorjahr stieg die Zahl leicht an (2009: 0,24). Produktaustritte bei Transporten werden separat erfasst und ausgewertet, um neue Maßnahmen abzuleiten.

Auch unsere Logistikdienstleister überprüfen wir regelmäßig hinsichtlich Sicherheit und Qualität. 2010 wurden weltweit rund 480 Unternehmen bewertet. Die Überprüfung der Unternehmen erfolgt vor Ort oder unter Nutzung anerkannter Instrumente wie dem Safety Quality Assessment System (SQAS) in Europa. Festgestellte Abweichungen zu unseren Standards werden mit den Logistikdienstleistern in Qualitäts- und Sicherheitsgesprächen erörtert und die erforderlichen Maßnahmen umgehend eingeleitet.

Wir unterstützen aktiv externe Netzwerke, die im Notfall schnell Informationen liefern und Hilfe leisten. Dazu gehört die „International Chemical Environmental“ (ICE)-Initiative und das deutsche Transport-Unfall-Informations- und Hilfeleistungssystem (TUIS), das von BASF koordiniert wird. TUIS haben wir 2010 auf Asien ausgeweitet und eine neue regionale Risikomatrix eingeführt, die ab 2011 umgesetzt wird. Darin sind für asiatische Länder, in denen BASF tätig ist, die Anforderungen an Notfallhilfe und Unfallinformationen festgelegt. Einschließlich der Einsätze für Dritte, hat BASF 2010 in rund 250 Fällen Hilfe geleistet. Anfang

2011 führte die Havarie eines Tankers zu einer mehrwöchigen Behinderung des Rheinschiffverkehrs. Experten der BASF unterstützten im Rahmen eines TUIS-Einsatzes die Bergung des verunglückten Tankschiffs.

→ Mehr dazu unter [basf.com/transportssicherheit](http://basf.com/transportssicherheit)

#### Emissionen reduzieren

Es gehört zu unserem Umweltmanagement, Emissionen in die Luft regelmäßig zu kontrollieren. Neben dem Ausstoß von Treibhausgasen ermitteln wir die Emissionen luftfremder Stoffe. Dazu zählen anorganische Gase wie Kohlenmonoxid (CO), Schwefeldioxid (SO<sub>2</sub>), Stickoxide, Ammoniak sowie andere anorganische Verbindungen, Stäube, Schwermetalle und leichtflüchtige organische Verbindungen (NMVOC).

#### Ziel 2020

Reduzierung der Emissionen luftfremder Stoffe

–70%

Die Emissionen luftfremder Stoffe aus unseren Chemieanlagen wollen wir auf Basis des Jahres 2002 um 70 % senken.

An unserem Ziel zur Reduktion absoluter Emissionen halten wir unabhängig von einem wachsenden Portfolio fest: Die Emission luftfremder Stoffe aus unseren Chemieanlagen wollen wir noch stärker reduzieren – um 70 % bis zum Jahr 2020. Die Emissionen aus dem Öl- und Gas-Geschäft beziehen wir nicht mit ein, weil sie in den Explorationsphasen starken Schwankungen unterliegen. Im Jahr 2010 stiegen die Emissionen luftfremder Stoffe im Chemiegeschäft weltweit leicht auf 33.940 Tonnen (2009: 31.300 Tonnen). Die Emissionen von ozonabbauenden Substanzen nach dem Montreal-Abkommen sanken durch den Einsatz alternativer Treibmittel 2010 auf 93 Tonnen (2009: 108 Tonnen), die Emissionen von Schwermetallen lagen bei 4 Tonnen (2009: 4 Tonnen).

#### Transportsicherheit

- Einheitliche Standards für Transport und Lagerung von chemischen Produkten
- Mehr als 100 Gefahrgutbeauftragte
- Überprüfen von Logistikdienstleistern
- Transport-Unfall-Informations- und Hilfeleistungssystem (TUIS) auf Asien ausgeweitet

#### Emissionen luftfremder Stoffe

- Absolutes Ziel zur Reduktion von Emissionen unabhängig von wachsendem Portfolio und höheren Produktionsmengen
- 2010 weltweit 33.940 Tonnen luftfremder Stoffe emittiert, Rückgang seit 2002 um 60,4 %

**Emissionen in die Luft**Luftfremde Stoffe<sup>1</sup> (Reduktion zu Basisjahr 2002)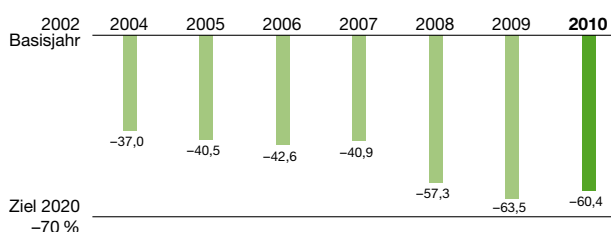

<sup>1</sup> Setzt sich zusammen aus: CO, NO<sub>x</sub> (Summe NO<sub>2</sub> + NO, berechnet als NO<sub>2</sub>), NMVOC (flüchtige organische Kohlenstoffverbindungen ohne Methan), SO<sub>x</sub>, Stäube und NH<sub>3</sub>/sonstige anorganische Stoffe

**Umgang mit Abfällen**

Wo immer möglich, versuchen wir Abfälle zu vermeiden oder zu vermindern. Wenn alle Verwertungsmöglichkeiten ausgeschöpft sind, entsorgen wir Abfälle ordnungsgemäß und umweltgerecht. BASF-eigene Deponien werden kontinuierlich überprüft. Über die Ergebnisse informieren wir die zuständigen Fach- und Genehmigungsbehörden. Bei externen Entsorgungsbetrieben führen wir regelmäßige Audits durch. Bei Akquisitionen sorgen wir im Rahmen unserer rechtlichen Zuständigkeit mit den gleichen Standards für einen verantwortlichen Umgang mit Deponien und Altlasten. Beispielsweise haben wir 2010 im elsässischen Le Letten nach aufwendiger Planung mit der Sanierung einer ehemaligen Sondermülldeponie begonnen. Es handelt sich dabei um eine Altlast eines ehemaligen Ciba-Standorts.

Im Jahr 2010 fielen bei der Produktion weltweit 1,86 Millionen Tonnen Abfall an (2009: 1,69 Millionen Tonnen). 0,06 Millionen Tonnen davon stammen aus der Erdgas- und Erdölexploration. Stofflich oder energetisch verwertet werden konnten 48,5 % der Abfälle (2009: 42 %); diesen Wert wollen wir weitersteigern. Der Rest wurde entsorgt, davon 15,8 % unter Tage. 50,5 % wurden verbrannt und 33,7 % deponiert. Nach den international gebräuchlichen Kategorien wurden rund 464.500 Tonnen der entsorgten Mengen als gefährliche sowie rund 492.700 Tonnen als nichtgefährliche Abfälle klassifiziert.

Am Standort Ludwigshafen führten unter anderem geänderte rechtliche Vorgaben und vermehrte Abriss- und Bauaktivitäten dazu, dass 2010 ein größerer Teil unserer Abfälle als gefährlich eingestuft wurde. Diese Umklassifizierung bisher ungefährlicher Abfälle ist nicht mit höherem Schadstoffeintrag in die Umwelt verbunden.

**Kosten und Rückstellungen für Umweltschutz**

Die Betriebskosten für Umweltschutz in der BASF-Gruppe lagen 2010 bei 729 Millionen € (2009: 669 Millionen €). In neue und verbesserte Umweltschutzanlagen und -einrichtungen investierte BASF zusätzlich 122 Millionen € (2009: 141 Millionen €); diese Investitionen umfassten sowohl nachsorgende als auch produktionsintegrierte Umweltschutzmaßnahmen.

Zum 31. Dezember 2010 waren 665 Millionen € für Umweltschutzmaßnahmen und die Beseitigung von Altlasten zurückgestellt (31. Dezember 2009: 598 Millionen €).

**Umgang mit Abfällen**

- Audits bei externen Entsorgungsbetrieben
- Beginn mit Altlastsanierung an einem ehemaligen Ciba-Standort
- 1,86 Millionen Tonnen Abfall bei der Produktion 2010

**Kosten und Rückstellungen Umweltschutz**

- 729 Millionen € Betriebskosten für Umweltschutz
- 122 Millionen € in neue und verbesserte Umweltschutzanlagen und -einrichtungen investiert
- 665 Millionen € für Beseitigung von Altlasten und Umweltschutzmaßnahmen zurückgestellt

## Klimaschutz

**Wir setzen uns für ambitionierten globalen Klimaschutz ein. Mit unseren Produkten für Klimaschutz und Ressourcenschonung sowie unseren Anstrengungen, die Emissionen entlang unserer Wertschöpfungskette weiter zu reduzieren, leisten wir einen wichtigen Beitrag. Forschung und Entwicklung sind auf eine stetige Verbesserung der Wirkung und Kostensenkung von Klimaschutzlösungen ausgerichtet. Unsere Leistung messen wir mit einer transparenten CO<sub>2</sub>-Bilanz.**

### Strategie

Ressourcenschonung und Klimaschutz sind Teil unserer Nachhaltigkeitsstrategie. Dafür haben wir weltweite Selbstverpflichtungen mit globalen Klimazielen festgelegt. Für die Umsetzung definieren wir Maßnahmen, deren Erfolg wir kontinuierlich messen.

Rund ein Drittel unserer Forschungsausgaben wenden wir auf, um neue Ressourceneffizienz- und Klimaschutzlösungen zu entwickeln. Unseren Kunden bieten wir Produkte, die Reduktionen von Emissionen ermöglichen. Als assoziierter Partner der Initiative „Desertec Industrial Initiative“ engagieren wir uns für die Erzeugung von Solar- und Windstrom in den Wüstenregionen Nordafrikas und des Nahen Ostens.

Unser Klimaschutzbeauftragter koordiniert alle Aktivitäten auf diesem Gebiet und berichtet direkt an den Vorstand. Um unsere Mitarbeiter noch stärker für diese Themen zu sensibilisieren, haben wir im Jahr 2010 Veranstaltungen zu Klimaschutz und Energieeffizienz durchgeführt. In Ludwigshafen diskutierten Klimaschutzexperten der BASF mit rund 800 Mitarbeitern über die BASF-Klimaschutzstrategie und informierten zu Best-Practice-Beispielen. Für unsere 16.000 Mitarbeiter in Nordamerika stand Klimaschutz beim „Earth Day“ im Fokus.

Unsere Klimaschutzstrategie wird extern anerkannt. Auch in den neuen Carbon Performance Leadership Index (CPLI) wurde BASF 2010 aufgenommen. Wie im Jahr zuvor, erreichte BASF 2010 den Spitzenplatz im Sektor Materials des renommierten Carbon Disclosure Leadership Index (CDLI).

→ Informationen zu Emissionszertifikaten auf Seite 107, zu Forschung und Entwicklung ab Seite 30, mehr zu Produkten für den Klimaschutz auf Seite 96

### Strategie und Zielerreichung

- Ziel zur Reduktion spezifischer Treibhausgasemissionen im Chemiegeschäft (–25 %) erstmalig erreicht
- Umsatz mit Klimaschutzprodukten gesteigert
- Rund ein Drittel der Forschungsausgaben verwendet, um neue Ressourceneffizienz- und Klimaschutzlösungen zu entwickeln
- Transparente CO<sub>2</sub>-Bilanz 2010 neu berechnet
- Mehr zum Klimaschutz unter [basf.com/klimaschutz](http://basf.com/klimaschutz)

### Ziel 2020

Weniger Treibhausgase

–25%

Wir wollen bis 2020 die spezifischen Emissionen von Treibhausgasen pro Tonne Verkaufsprodukt um 25 % senken (Basisjahr 2002).

### Globale Klimaschutzziele

In unserer eigenen Produktion arbeiten wir kontinuierlich daran, den Ausstoß von Treibhausgasen zu senken. 2010 emittierte BASF weltweit 25,2 Millionen Tonnen Treibhausgase (2009: 31,1 Millionen Tonnen), davon 23,8 Millionen Tonnen im Chemiegeschäft. Damit haben wir 2010 unser Ziel zur Reduktion spezifischer Treibhausgasemissionen erstmalig erreicht. Einen großen Anteil am Rückgang der Emissionen haben auch 2009 installierte BASF-eigene Katalysatoren, die am Standort Ludwigshafen in mehreren Anlagen klimaschädliches Lachgas effizienter zersetzen. Diese und andere Lachgaszersetzungskatalysatoren haben wir im Rahmen von sogenannten Joint-Implementation-Projekten auf Basis des Kioto-Protokolls sowie in weiteren freiwilligen Projekten in BASF-Anlagen eingebaut. Im Jahr 2010 wurden BASF erstmals rund 340.000 ERU-Zertifikate aus diesen Projekten zugeteilt. Außerdem trug die im Vergleich zum Jahr 2009 deutlich bessere Auslastung unserer Anlagen zur Zielerreichung bei. Insgesamt konnten wir seit 1990 die BASF-Treibhausgasemissionen im Chemiegeschäft um 41 % und spezifisch sogar um 72 % senken. Derzeit arbeiten wir an neuen Zielen zur Reduktion der Emissionen von Treibhausgasen.

Die Emissionen von Treibhausgasen aus der Öl- und Gasförderung beliefen sich 2010 auf rund 1,5 Millionen Tonnen (2009: 1,8 Millionen Tonnen). Die BASF-Tochter Wintershall hat sich zum Ziel gesetzt, bis 2012 an allen Produktionsstätten, an denen Erdöl gefördert wird, das kontinuierliche Abfackeln des Erdölbegleitgases im Routinebetrieb einzustellen. Für den letzten Standort, an dem Erdölbegleitgas noch nicht vollständig genutzt werden kann, wird derzeit die Machbarkeit verschiedener technischer Lösungen untersucht.

### Reduktion von spezifischen Treibhausgasemissionen im Chemiegeschäft<sup>1</sup> Je Tonne Verkaufsprodukt (in Prozent)

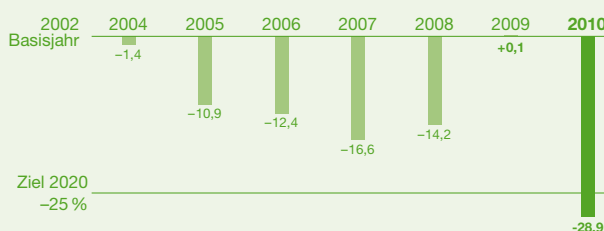

<sup>1</sup> Reduktion zum Basisjahr 2002

Bei unserem Einsatz, Emissionen entlang der gesamten Wertschöpfungskette zu senken, nahm 2010 das Thema nachhaltige Logistik einen Schwerpunkt ein. Auf dem BASF-Werks-gelände in Ludwigshafen haben wir mit der Erweiterung des Kombiverkehrsterminals begonnen, die 2012 abgeschlossen sein soll. Dadurch erhöht sich die Kapazität der Umschlaganlage von 300.000 auf 500.000 Ladeeinheiten pro Jahr. Durch die weitere Verlagerung des Transports von BASF-Gütern vom Straßen- auf den Schienenverkehr werden zusätzliche CO<sub>2</sub>-Emissionen reduziert: Beträgt die jährliche Reduktion heute 75.000 Tonnen CO<sub>2</sub>, werden dann 100.000 Tonnen CO<sub>2</sub> vermieden werden. 🌍

### Ziel 2012

Begleitgas nicht mehr abfackeln

100%

Wir wollen das Begleitgas, das bei der Erdölförderung der Wintershall freigesetzt wird, nicht mehr abfackeln.

### Chancen mit Klimaschutzprodukten

Rund 7,7 Milliarden € haben wir 2010 mit Klimaschutzprodukten erwirtschaftet – so definieren wir Produktgruppen, die in der Anwendung mindestens doppelt so viel CO<sub>2</sub> mindern, wie bei ihrer Herstellung und Entsorgung emittiert wird. Der Anteil dieser Produkte am BASF-Umsatz stieg damit von 10 % (2008) auf 12 %. In den USA hat BASF beispielsweise das Konzept Green Sense<sup>SM</sup> Concrete entwickelt – ein Service, um Betonrezepturen der Kunden im Hinblick auf Umwelteinfluss, Wirtschaftlichkeit und Leistung zu verbessern. Das Ergebnis ist ein mit Hilfe von BASF-Zusatzmitteln produzierter umweltfreundlicher Beton. In ihm werden Energie- und CO<sub>2</sub>-intensive Komponenten durch rezykliertes Material ersetzt. Ökoeffizienz-Analysen für Kunden im Jahr 2010 zeigten, dass Green Sense Concrete bei der Herstellung bis zu 30 % weniger Energie als herkömmlicher Beton benötigt, bis zu 37 % weniger CO<sub>2</sub> verursacht sowie bis zu 35 % weniger Rohstoffe verbraucht. 🌍 → Mehr zur Ökoeffizienz-Analyse auf Seite 27

### Treibhausgasemissionen der BASF-Gruppe (1.000 Tonnen CO<sub>2</sub>-Äquivalente/Jahr)

|                    | GWP-Faktor* | Basis-jahr 2002 | 2007   | 2008   | 2009   | 2010   |
|--------------------|-------------|-----------------|--------|--------|--------|--------|
| CO <sub>2</sub> ** | 1           | 19.877          | 22.654 | 22.023 | 21.300 | 23.189 |
| N <sub>2</sub> O   | 310         | 6.407           | 5.963  | 6.294  | 9.553  | 1.862  |
| CH <sub>4</sub>    | 21          | 244             | 82     | 91     | 137    | 94     |
| HFC ***            | 140–11.700  | 61              | 96     | 69     | 74     | 82     |
| PFC ***            | 6.500–9.200 | 0               | 0      | 0      | 0      | 0      |
| SF <sub>6</sub>    | 23.900      | 0               | 1      | 2      | 1      | 3      |
|                    |             | 26.589          | 28.796 | 28.479 | 31.065 | 25.230 |

\* GWP-Faktor: Globales Erwärmungs-Potenzial (Global Warming Potential) der einzelnen Gase, umgerechnet auf CO<sub>2</sub>-Emissionen

\*\* Bilanzierung der CO<sub>2</sub>-Emissionen umfasst prozessbedingte und energiebedingte Emissionen. Bei energiebedingten CO<sub>2</sub>-Emissionen werden direkte Emissionen der Strom- und Dampferzeugung und indirekte Emissionen durch Zu- und Verkauf von Strom und Dampf bilanziert.

\*\*\* Fluorkohlenwasserstoffe (HFC), Perfluorkohlenwasserstoffe (PFC); berechnet mit GWP-Faktoren ihrer individuellen Komponenten (IPCC 1995)

### Neue CO<sub>2</sub>-Bilanz

Als einziges Industrieunternehmen weltweit legt BASF seit 2008 regelmäßig eine umfassende CO<sub>2</sub>-Bilanz vor. Unser Know-how haben wir in die Entwicklung eines Standards zur Bilanzierung von Treibhausgasemissionen entlang der Wertschöpfungskette eingebracht (Greenhouse Gas Protocol „Scope-3-Standard“). 2010 berichten wir erstmals nach dem Entwurf dieses Standards und beziehen auch die Emissionen aus dem Öl- und Gasgeschäft ein. So berücksichtigen wir beispielsweise jetzt die Emissionen, die bei unseren Kunden durch die Verbrennung von Öl und Gas entstehen, das die BASF-Tochter Wintershall fördert. Neu berechnet haben wir auch, wie unsere Produkte für den Klimaschutz, zum Beispiel Dämmstoffe, Kraftstoffadditive und Industriekatalysatoren, die CO<sub>2</sub>-Emissionen unserer Kunden verringern: insgesamt 322 Millionen Tonnen CO<sub>2</sub>-Emissionen werden vermieden (2008: 287 Millionen Tonnen). Unser Ziel ist es, diesen Beitrag zum Klimaschutz kontinuierlich weiterzusteigern. 🌍

→ Mehr zu der neuen CO<sub>2</sub>-Bilanz unter [basf.com/co2-bilanz](http://basf.com/co2-bilanz)

### CO<sub>2</sub>-Bilanz 2010

Wesentliche Treibhausgasemissionen entlang der BASF-Wertschöpfungskette<sup>1</sup> (in Millionen Tonnen CO<sub>2</sub>-Äquivalenten)

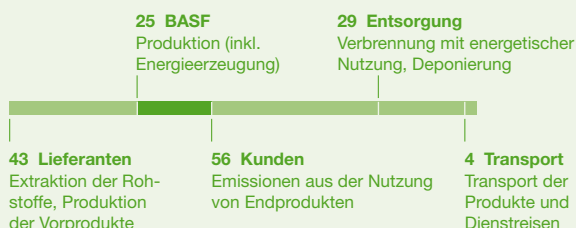

Vermeidung von Treibhausgasemissionen durch die Nutzung von BASF-Produkten nach Sektoren (in Millionen Tonnen CO<sub>2</sub>-Äquivalenten)

|   |                  |     |
|---|------------------|-----|
| 1 | Bauen und Wohnen | 263 |
| 2 | Industrie        | 28  |
| 3 | Verkehr          | 14  |
| 4 | Landwirtschaft   | 7   |
| 5 | Sonstiges        | 10  |

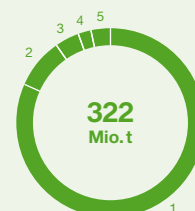

<sup>1</sup> Nach Greenhouse Gas Protocol, Scope 1, 2 und 3 (mit Bilanzierung der Emissionen aus dem Zu- und Verkauf von Strom und Dampf)

## Energie und Rohstoffe

**Der schonende Umgang mit Ressourcen ist für uns ein wirtschaftliches Grundprinzip. Wir setzen auf effiziente Technologien für die Energieerzeugung, energieeffiziente Produktion sowie auf ein umfassendes Energiemanagement. Mit unseren Produkten tragen wir zur Ressourcenschonung bei.**

### Strategie

Wir bieten unseren Kunden Produkte und Technologien, die ihnen helfen, Ressourcen zu schonen, Energie einzusparen und erneuerbare Energie langfristig wirtschaftlicher zu machen.

In unserer eigenen Produktion steht der sorgsame Umgang mit Rohstoffen im Fokus. Als Unternehmen einer energieintensiven Branche hängt unser Erfolg von einer langfristig gesicherten wettbewerbsfähigen Versorgung mit Energie und Rohstoffen ab. Energieeffizienz ist für uns dabei das wichtigste Mittel, um Klimaschutz, Ressourcenschonung und ökonomische Vorteile zu verbinden. Daher haben wir ein Programm zur Steigerung der Energieeffizienz – Menge der hergestellten Verkaufsprodukte bezogen auf den Energiebedarf – mit einem globalen Ziel für unsere Produktionsprozesse aufgesetzt. Unser Ziel verfolgen wir mit drei Ansätzen: Effizienz bei der Energieerzeugung, Einsparungen durch unseren Energieverbund und unser Energiemanagement, das alle Aktivitäten umfasst, mit denen wir die Energieeffizienz der BASF-Anlagen analysieren und weiterhin steigern. 

→ Mehr zu Produkten für erneuerbare Energien auf Seite 65 und 47

→ Mehr zu energieeffizienten Produkten auf Seite 52

#### Ziel 2020

##### Energieeffizienz steigern

**+25%**

Wir wollen die Energieeffizienz unserer Produktionsprozesse auf Basis des Jahres 2002 um 25 % verbessern.

### Globale Ziele

Um die Energieeffizienz in unserem Chemiegeschäft zu erhöhen, haben wir uns 2008 ein neues Ziel gesetzt. Die größten Potenziale zur Steigerung der Energieeffizienz haben wir in den vergangenen Jahren bereits gehoben – beispielsweise durch Nutzung der Kraft-Wärme-Kopplungs-Technologie. Weitere Einzelmaßnahmen haben 2010 dazu beigetragen, dass wir unserem Ziel näherkommen. In Asien haben wir durch Energieeffizienzmaßnahmen von 2008 bis 2010 rund 18 Millionen € eingespart. Die in den Vorjahren identifizierten Potenziale wurden damit zum größten Teil bereits umgesetzt. In Nordamerika wurden 2010 durch mehr als 60 Einzelprojekte Energieeinsparungen von über 5 Millionen € erzielt. In Europa summieren sich die Einsparungen im Jahr 2010 auf über 3 Millionen €, die an rund 40 Standorten erzielt wurden.

Im Jahr 2010 stieg die Energieeffizienz der BASF bezogen auf das Basisjahr 2002 um 23,7 %. Im Vergleich zum Vorjahr nahm sie damit um rund 8 Prozentpunkte zu. Dieser hohe Anstieg der Energieeffizienz geht im Wesentlichen auf die höheren Auslastungen unserer Anlagen zurück. Außerdem machen sich hier die ergriffenen Maßnahmen zur Einsparung von Energie bezahlt. Themen zur Energieeffizienz haben wir 2010 stärker in unserem Responsible-Care-Managementsystem verankert. Ab 2011 wollen wir Energiemanagement in unser Responsible-Care-Auditsystem integrieren.

### Energie- und Ressourceneffizienz

Bei unserer eigenen Energieerzeugung nutzen wir Gas- und Dampfturbinen (GuD) in besonders effizienten Kraft-Wärme-Kopplungsanlagen, um unsere Produktionsstandorte mit Energie zu versorgen. Mit dieser Technologie decken wir über 70 % des Strombedarfs der BASF und sparten gegenüber konventioneller Strom- und Dampferzeugung 2010 über 12 Millionen MWh an fossilen Brennstoffen ein. Den Einsatz erneuerbarer Energien prüfen wir. Sie können erst dann einen dauerhaften Platz in unserem Energiemix einnehmen, wenn sie im Hinblick

### Strategie

- Produkte, die Kunden helfen, Ressourcen zu schonen, Energie einzusparen und erneuerbare Energie langfristig wirtschaftlicher zu machen
- Dreiteiliger Ansatz: Effizienz bei Energieerzeugung, Einsparungen durch Energieverbund, erfolgreiches Energiemanagement
- Quantitatives Ziel zur Steigerung der Energieeffizienz

### Stand der Zielerreichung

- Einsparungen durch Energieeffizienzmaßnahmen in Asien von 2008 bis 2010 rund 18 Millionen €
- In Nordamerika Energieeinsparungen von über 5 Millionen € erzielt
- Energieeffizienz verbessert, im Vergleich zum Basisjahr 2002 um 23,7 %

## Energieversorgung der BASF-Gruppe 2010

## Stromversorgung

|   |                  |      |
|---|------------------|------|
| 1 | Eigene Erzeugung | 65 % |
| 2 | Zukauf           | 35 % |

## Dampfversorgung

|   |                  |      |
|---|------------------|------|
| 1 | Eigene Erzeugung | 47 % |
| 2 | Prozesswärme     | 44 % |
| 3 | Zukauf           | 9 %  |

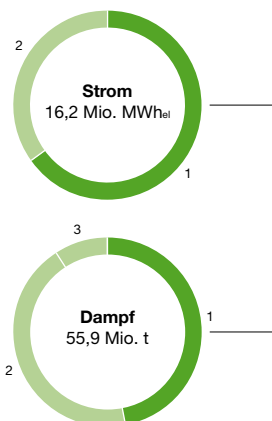

## Für die eigene Erzeugung eingesetzte fossile Brennstoffe und Restbrennstoffe in den Kraftwerken der BASF-Gruppe

|      |                        |               |
|------|------------------------|---------------|
| 84 % | <b>Erdgas</b>          | 31,5 Mio. MWh |
| 1 %  | <b>Heizöl</b>          | 0,4 Mio. MWh  |
| 2 %  | <b>Kohle</b>           | 0,9 Mio. MWh  |
| 13 % | <b>Restbrennstoffe</b> | 4,8 Mio. MWh  |

**Insgesamt:** 37,6 Mio. MWh

auf Kosten und Versorgungssicherheit wettbewerbsfähig sind. Wir analysieren weltweit Energieverbräuche und -kosten, identifizieren Einsparpotenziale und leiten daraus Maßnahmen ab. So wurde beispielsweise am amerikanischen Standort Geismar in der Ethylenoxid-Anlage durch den Einsatz von verbesserter Regelungstechnik die Ausbeute erhöht und Energie eingespart.

Unser Verbundsystem leistet einen wichtigen Beitrag zur Energieeffizienz, indem es Produktionen und Energiebedarfe verknüpft. So wird bei der Produktion entstehende Wärme anderen Betrieben als Energie zugeleitet. Durch den Energieverbund spart BASF jährlich über 1,6 Millionen Tonnen Rohöl-äquivalent ein – das entspricht einer Umweltentlastung von 3,8 Millionen Tonnen CO<sub>2</sub> pro Jahr.

Der Verbund leistet auch einen wesentlichen Beitrag zum effizienten Einsatz von Rohstoffen. Nebenprodukte der einen Fabrik dienen an anderer Stelle als Einsatzstoffe.

Die wichtigsten Rohstoffe für BASF sind Naphtha, Erdgas, Methanol, Ammoniak und Benzol. Bei einigen Anwendungen ersetzen wir fossile durch nachwachsende Rohstoffe, wenn sie ökologische und ökonomische Vorteile bieten.

Im Wachstumscluster Rohstoffwandel erforschen und identifizieren wir kosteneffiziente Prozesse zum Einsatz alternativer Rohstoffe, wie Erdgas, Kohle, nachwachsende Rohstoffe oder auch Kohlendioxid.

Neben Forschung und Entwicklung zu Wachstumsclustern bieten wir bereits innovative Lösungen, um die Energieeffizienz bei unseren Kunden weiterzuverbessern. Beispielsweise beschleunigt X-Seed® nicht nur die Härtung von Beton, sondern spart dabei auch Energie ein. BASF-Produkte tragen dazu bei, die Wettbewerbsfähigkeit erneuerbarer Energien zu verbessern: Seit 2010 wird unser Portfolio beispielsweise durch einen neuen Decklack ergänzt, der Rotorblätter von Windrädern noch besser vor Erosion schützt. 🌐

→ **Mehr zum Wachstumscluster Rohstoffwandel unter** [basf.com/rohstoffwandel](http://basf.com/rohstoffwandel)

→ **Mehr zum Umgang mit Risiken aus Verfügbarkeit von Rohstoffen und dem Rohstoffhandel ab Seite 107**

→ **Mehr zu Energieeffizienz unter** [basf.com/ressourcenschonung](http://basf.com/ressourcenschonung)

## Energie- und Ressourceneffizienz

- Weltweit Energieverbräuche und -kosten analysiert
- 12 Millionen MWh Einsparung durch Technologie der Kraft-Wärme-Kopplung
- Einsparung von über 1,6 Millionen Tonnen Rohöl-äquivalent pro Jahr durch Energieverbund
- Wichtigste Rohstoffe: Naphtha, Erdgas, Methanol, Ammoniak, Benzol

- Einsatz erneuerbarer Energien, wenn versorgungssicher und wettbewerbsfähig
- Einsatz nachwachsender Rohstoffe bei ökonomischen und ökologischen Vorteilen



## Wasser

**Wasser dient bei BASF als Kühl- und Reinigungsmittel sowie zur Herstellung von Produkten. Wir wollen nachhaltig mit Wasser umgehen und setzen uns dafür globale Ziele. Unseren Kunden bieten wir Lösungen, die ihnen helfen Wasser zu sparen, Emissionen in das Wasser zu verringern und Wasser zu reinigen.**

### Strategie

Weltweit arbeiten wir an unseren Standorten mit unterschiedlichen Methoden daran, Wasser nachhaltig einzusetzen – denn Verfügbarkeit und Qualität von Wasser sind regional unterschiedlich. Unsere globalen Ziele für den Umgang mit Wasser sehen vor, dass Emissionen in das Wasser weiterhin reduziert werden. Mit der Ökoeffizienz-Analyse können wir Produkte und Verfahren im Hinblick auf ihre Emissionen in das Wasser bewerten und weitere Kriterien, wie lokale Wasserknappheit, in Beurteilungen einbeziehen. Wir haben uns im Jahr 2010 an der Umfrage des Carbon Disclosure Project (CDP) zu Chancen und Risiken für Unternehmen beim Thema Wasser beteiligt.

Unser Know-how zu nachhaltiger Wasserwirtschaft bringen wir in Partnerschaften und internationale Initiativen ein. Als strategischer Partner der Initiative „European Water Partnership“ testete BASF im Jahr 2010 neue Standards für Wassermanagement. Ziel ist es, international gültige Indikatoren für den nachhaltigen Umgang mit Wasser zu erarbeiten und zu erproben. Insgesamt wird der größte Teil des Wasserbedarfs der BASF zu Kühlzwecken verwendet.

Weltweit haben wir im Jahr 2010 überprüft, ob unsere Standorte in Regionen mit zu erwartender Wasserknappheit liegen und ob Risiken in Bezug auf die langfristige Versorgung mit Wasser bestehen. Das Ergebnis zeigt, dass sich rund ein Fünftel unserer Standorte in solchen Regionen befindet. Ihr Anteil am benötigten Wasser der BASF insgesamt beträgt rund 7 %. Ein Teil dieser Standorte liegt in Küstenregionen. Dort kann Meerwasser zum Kühlen eingesetzt werden. Die Ergebnisse unserer globalen Erhebung beziehen wir beim Erarbeiten neuer Ziele mit ein.  **Mehr dazu unter [basf.com/wasser](http://basf.com/wasser)**

### Ziel 2020

Weniger Emissionen in das Wasser

Wir wollen die Emissionen von organischen Stoffen und Stickstoff in das Wasser um jeweils 80 % senken, die von Schwermetallen um 60 %. Basis ist hierbei das Jahr 2002.

### Globale Ziele zu Emissionen in das Wasser

Emissionen in das Wasser wollen wir so niedrig wie möglich halten. Insgesamt fielen 2010 an BASF-Produktionsstandorten rund 197 Millionen Kubikmeter Abwasser an. Auf Grund der im Vergleich zu 2009 gestiegenen Produktionsmenge wurden mit rund 26.100 Tonnen mehr organische Stoffe emittiert (2009: 18.600 Tonnen). Die Stickstoffemissionen (N-Gesamt) in das Wasser lagen bei 3.950 Tonnen (2009: 3.600 Tonnen) und konnten damit seit 2002 um 82 % gesenkt werden. Phosphoremissionen lagen bei 458 Tonnen (2009: 355 Tonnen). Unsere Abwässer enthielten 25 Tonnen Schwermetalle (2009: 24 Tonnen). Gegenüber 2002 sind die Schwermetallemissionen um 58,4 % zurückgegangen.

Eine undichte Pumpe an unserem Standort Ludwigshafen führte 2010 dazu, dass rund 1,2 Tonnen eines biologisch leicht abbaubaren Produkts in das Kanalsystem für Regenwasser und von dort in den Rhein gelangten. Auch wenn der Vorfall keine relevanten Auswirkungen auf die Umwelt hatte, haben wir daraufhin die bestehenden Ableitungen von Kühl- und Abwässern überprüft, um ähnliche Vorfälle zu verhindern. Im Jahr 2009 haben wir ein Projekt gestartet mit dem Ziel, bis 2015 an unseren großen Produktionsstandorten die Wasserschutzkonzepte zu überprüfen. Wir haben dies im Jahr 2010 auf alle Standorte ausgedehnt. Ziel ist es, unvorhergesehene Emissionen in das Wasser zu reduzieren. Diese und andere Maßnahmen haben dazu beigetragen, dass wir im Jahr 2010 unsere Ziele zu Emissionen von Stickstoff und Schwermetallen in das Wasser nahezu erreicht haben. Dieses Maß an Emissionsreduktionen bei Stickstoff und Schwermetallen wollen wir künftig halten und werden darüber weiter berichten. Darüber hinaus arbeiten wir an neuen Zielen zum Umgang mit Wasser, die wir 2011 erstmals

#### Emissionen in das Wasser

(Ziel 2020: Reduktion zu Basisjahr 2002 in Prozent)

##### Organische Stoffe

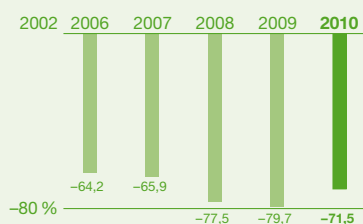

##### Stickstoff

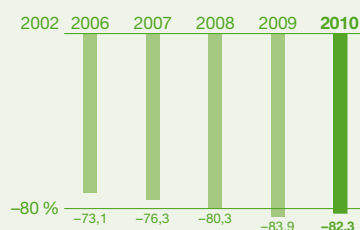

##### Schwermetalle

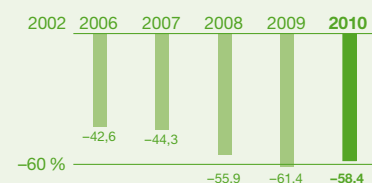

**Wasserbilanz BASF-Gruppe 2010**

(Millionen Kubikmeter pro Jahr)

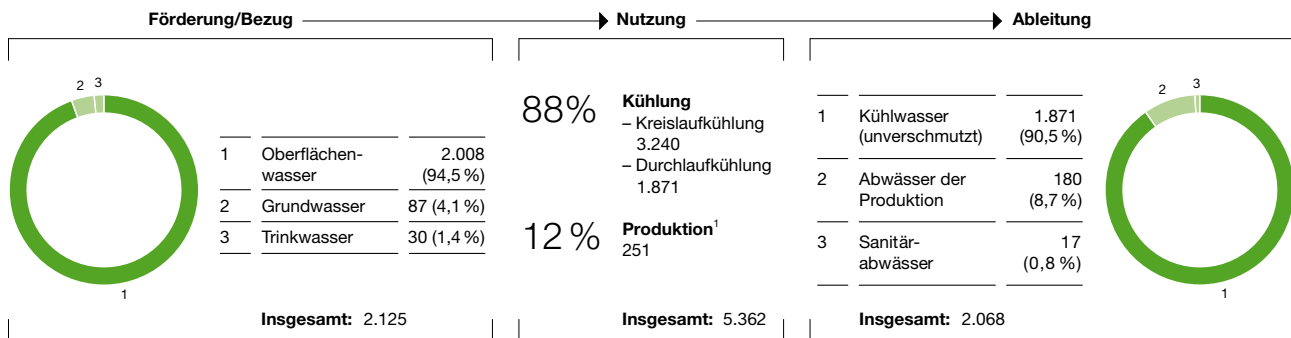

veröffentlicht werden. Wir betrachten dabei die Nutzung von Trinkwasser und den Wasserbedarf an Standorten in Regionen mit Wasserknappheit.

**Wasserbedarf bei BASF**

2010 lag der Wasserbedarf der BASF weltweit bei 2.125 Millionen Kubikmetern (2009: 1.977 Millionen Kubikmeter). 94,5 % des Wassers wurde aus Oberflächengewässern entnommen. Aus Grundwasser wurden 4,1 % gefördert; der Trinkwasseranteil betrug etwa 1,4 %. Der Großteil des genutzten Wassers wird bei BASF als Kühlwasser eingesetzt. Nur rund 12 % kommt mit Produkten in Kontakt und wird beispielsweise zum Waschen, als Lösemittel oder als Reaktionsmedium eingesetzt. Unseren spezifischen Wasserbedarf haben wir in den vergangenen Jahren gesenkt, unter anderem weil wir möglichst viel Wasser durch Kreisläufe mehrfach nutzen. Wir haben unsere Erhebungsmethode auf Grund der gesteigerten Bedeutung des Themas Wasser erweitert und können jetzt auch mehrfach genutztes Wasser nach Einsatz in Durchlaufkühlung und Kreislaufkühlung ausweisen. Die gemessene Menge des mehrfach genutzten Wassers lag 2010 höher als im Vorjahr. Gleichzeitig wollen wir

vermeiden, dass die Kreislaufnutzung, etwa durch Rückkühlung oder das Aufbereiten des Wassers, den Energieverbrauch erhöht und zu anderen negativen Auswirkungen auf die Umwelt führt. Rückkühlwerke setzen wir an unseren größeren Standorten ein, um die Temperatur des Kühlwassers vor der Rückleitung in Gewässer zu reduzieren.

**Marktchancen**

BASF ist bereits einer der führenden Anbieter für die Wasserbehandlungsindustrie und baut diese Position weiter aus. Das Angebot reicht von Chemikalien zur Aufbereitung kommunaler Abwässer bis hin zu Produkten für industrielle Prozesse. Dazu gehört beispielsweise die Trinkwasseraufbereitung, die Klärschlammeindickung oder das Verhindern von Belag bei der Wasserverwendung in Industrieprozessen.

BASF stellt Produkte und Technologien für den Zukunftsmarkt Wasser bereit. Diese Produkte helfen unseren Kunden Wasser zu reinigen, energieeffizient Meerwasser zu entsalzen oder Wasser in der Landwirtschaft effizienter zu nutzen.

**Wasserschutz bei BASF**

- Wasserschutzkonzepte an allen Standorten überprüft
- Produkte helfen Kunden Wasser zu sparen, Emissionen zu verringern und Wasser effizienter zu nutzen
- Erhebungsmethoden erweitert
- Mehr dazu unter [basf.com/wasser](http://basf.com/wasser)

**Highlights 2010**

- Standards für Wassermanagement der „European Water Partnership“ getestet
- Globale Ziele zu Emissionen von Stickstoff und Schwermetallen in das Wasser nahezu erreicht

## Produktverantwortung

**Produktverantwortung endet für uns nicht an den Werks-toren. Wir betrachten die Sicherheit unserer Produkte über die gesamte Wertschöpfungskette hinweg – von unseren Rohstofflieferanten, über unsere eigene Produktion bis hin zur Anwendung bei unseren Kunden. Oberstes Ziel ist immer, dass unsere Produkte bei verantwortungsvoller und sachgerechter Verwendung kein Risiko für Mensch und Umwelt darstellen.**

### Strategie

Wir stellen weltweit einheitlich hohe Standards für Produktverantwortung sicher, die oftmals über rechtliche Vorgaben hinausgehen. Grundlage dafür sind unsere weltweit gültigen Richtlinien zur Produktverantwortung mit Selbstverpflichtungen und globalen Zielen für diesen Bereich. Sie richten sich an alle operativen Entscheidungsträger der BASF weltweit, die für die Umsetzung verantwortlich sind. Unsere Kunden und die Öffentlichkeit informieren wir über die Eigenschaften unserer Stoffe. Basis dafür ist eine globale Datenbank, in der wir ständig aktualisierte Sicherheits-, Gesundheits- und Umweltinformationen für unsere Stoffe und Produkte speichern. Für alle unsere chemischen Verkaufsprodukte halten wir Sicherheitsdatenblätter in 39 Sprachen bereit. Über unser weltweites Netzwerk von Notfalltelefonen geben wir rund um die Uhr Auskunft. Bei Bedarf schulen wir unsere Kunden im sicheren Umgang mit unseren Produkten, wie zum Beispiel Pflanzenschutzmitteln.

Mit unseren globalen Zielen zur Risikobewertung unterstützen wir unter anderem die Umsetzung der Globalen Produktstrategie (GPS) des internationalen Verbandes der chemischen Industrie (ICCA). GPS soll globale Standards und Verfahren etablieren, um die Sicherheit im Umgang mit chemischen Stoffen zu verbessern. 2010 hat sich BASF federführend an der Einrichtung eines Informationsportals des ICCA beteiligt. Es enthält mehr als 1.600 sogenannte „GPS Safety Summaries“, die relevante Informationen zu einer Chemikalie oder einem Produkt zusammenfassen.

→ Mehr zur Überprüfung von Lieferanten auf Seite 26, mehr zu GPS unter [basf.com/gps\\_d](http://basf.com/gps_d) und auf Seite 28

### Ziel 2020

Risikobewertung aller Produkte

>99%

Risikobewertung aller Produkte, die wir in Mengen von mehr als einer Tonne pro Jahr verkaufen.

### Globale Ziele

Unsere globalen Ziele für Produktverantwortung gehen über gesetzliche Vorgaben hinaus. Für alle von uns weltweit in einer Menge von mehr als einer Tonne pro Jahr hergestellten oder verkauften Substanzen werden wir unsere Risikobewertungen überprüfen. Das Risiko durch die Verwendung einer Substanz ergibt sich dabei aus der Kombination ihrer gefährlichen Eigenschaften und dem Ausmaß des Kontaktes mit Mensch und Umwelt. Außerdem werden wir unsere Verkaufsprodukte, einschließlich Mischungen, auf die gleiche Art überprüfen.

### REACH und weitere gesetzliche Auflagen

BASF setzt die Anforderungen des neuen Chemikalienrechts der Europäischen Union (REACH) um und hat 2010 die erste Stufe der Registrierung erfolgreich abgeschlossen. Rund 600 Substanzen, von denen über 1.000 Tonnen pro Jahr produziert oder importiert werden, wurden offiziell bei der Europäischen Chemikalienagentur (ECHA) registriert. Dazu gehören auch die Substanzen der 2009 akquirierten Ciba Holding AG. Ab 2011 werden wir kontinuierlich an der Umsetzung der zweiten Registrierungsphase weiterarbeiten. Dabei werden bis 2013 alle Stoffe registriert, die im Umfang zwischen 100 und 1.000 Tonnen pro Jahr produziert oder importiert werden. Wir gehen weiterhin davon aus, dass sich die Kosten durch REACH im Bereich von durchschnittlich 50 Millionen € pro Jahr bewegen. Unsere Expertise bei der Bewertung von Stoffen sowie unsere kosteneffizienten Prozesse sehen wir bei der Umsetzung der Regelungen als wichtigen Wettbewerbsvorteil. Mit unseren Kunden und Lieferanten stehen wir in engem Austausch zu REACH, um die Liefersicherheit für von uns benötigte Rohstoffe zu gewähr-

### Strategie Produktverantwortung – GPS

- Sicherheit der Produkte wird über gesamte Wertschöpfungskette hinweg betrachtet
- Transparenz durch Datenbank mit Sicherheits-, Gesundheits- und Umweltinformationen zu Substanzen und Produkten
- Globale Richtlinien mit weltweit einheitlich hohen Standards für Produktsicherheit
- Umsetzung der Globalen Produktstrategie (GPS)

### Umsetzung von REACH

- Erste Stufe der Registrierung erfolgreich abgeschlossen, rund 600 Substanzen registriert
- Ab 2011 Umsetzung zweite Registrierungsphase
- Über 10.000 Anfragen von Kunden und Lieferanten beantwortet
- Wesentliche Änderungen des Portfolios durch REACH derzeit nicht erwartet

leisten und die Kundenbindung zu stärken. Dazu beantworteten unsere REACH-Experten bis 2010 über 10.000 Anfragen von Kunden und Lieferanten. Bei der Frage, ob wir auch in Zukunft ein Produkt herstellen, ist REACH nur einer der Faktoren, die wir betrachten. Wesentliche Änderungen unseres Portfolios durch REACH erwarten wir derzeit nicht.

Als weiteren Beitrag zur internationalen Chemikaliensicherheit unterstützt BASF das Ziel eines global harmonisierten Systems zur Einstufung und Kennzeichnung von Chemikalien (GHS). Weltweit werden wir entsprechende Etiketten und Sicherheitsdatenblätter zur Verfügung stellen.

### Ökologische und toxikologische Prüfungen

Bevor unsere Produkte auf den Markt kommen, unterziehen wir sie vielfältigen ökologischen und toxikologischen Prüfungen. Tierversuche mit chemischen Substanzen führen wir nur dann durch, wenn wir auf Grund gesetzlicher Bestimmungen und Vorgaben dazu verpflichtet sind. Die Anforderungen von REACH führen zu einem Anstieg dieser gesetzlich vorgeschriebenen Tierversuche, da mehr Informationen über die Eigenschaften chemischer Produkte verlangt werden. Wir entwickeln kontinuierlich Ersatz- und Ergänzungsmethoden, die wir einsetzen, wo immer das möglich und von den Behörden anerkannt ist. So war unter den Finalisten des BASF Innovation Award 2010 ein Forscherteam, das mehr als 20 alternative Ersatzmethoden zum Tierversuch entwickelt hat. Seit 2009 gibt es ein Labor, das toxikologische Routineuntersuchungen für BASF ausschließlich mit Alternativmethoden durchführt. Bei über einem Drittel aller toxikologischen Prüfungen setzen wir inzwischen Alternativmethoden ein. Derzeit sind 25 Alternativmethoden bei BASF im Einsatz, zehn weitere sind in der Entwicklung. Seit 1987 konnte die jährliche Zahl der bei Tierversuchen eingesetzten Wirbeltiere bei BASF um circa 60 % reduziert werden. Die Zahl der eingesetzten Fische verminderte sich um 80 %. Für Studien, bei denen die Umstellung auf Alternativmethoden nicht möglich

oder von Behörden nicht anerkannt ist, arbeiten wir kontinuierlich daran, unsere Tests zu optimieren und bessere Daten zu gewinnen.

### Umgang mit neuen Technologien

Innovative Technologien, wie die Nanotechnologie und Pflanzenbiotechnologie, bieten Lösungen für zentrale Herausforderungen der Gesellschaft – beispielsweise für Klimaschutz oder im Bereich Gesundheit und Ernährung. Für neue Technologien gelten die gleichen Standards der Produktverantwortung wie für alle anderen BASF-Produkte.

Der Umgang mit Nanomaterialien ist in unserem „Verhaltenskodex Nanotechnologie“ beschrieben. Eine wichtige Rolle spielt der Dialog mit Stakeholdern. Bereits seit 2004 engagieren wir uns in nationalen und internationalen Dialogforen für Nanotechnologie. Außerdem engagieren wir uns im Bereich Sicherheitsforschung. Die Ergebnisse werden veröffentlicht. Unser jüngstes Projekt ist das vom Bundesministerium für Bildung und Forschung (BMBF) geförderte Projekt NanoGEM. Es untersucht die Aufnahme und Verteilung von Nanopartikeln im menschlichen Körper. Allein in den vergangenen vier Jahren hat sich BASF an rund 20 verschiedenen Projekten, Kooperationen und Partnerschaften beteiligt.

Im Bereich Pflanzenbiotechnologie haben wir unsere internen Prozesse zur Qualitätssicherung für die genveränderte Kartoffelsorte Amflora® weiterverbessert, nachdem wir im Jahr 2010 bei eigenen Kontrollen geringe Mengen einer anderen genveränderten Kartoffelsorte auf Amflora-Feldern in Nordschweden entdeckt hatten. Die gesamte Dokumentation der Kartoffelproduktion wurde den Behörden offengelegt und die notwendigen Schritte mit ihnen festgelegt. Die Vorgeschichte sämtlicher Kartoffeln konnte somit zurückverfolgt und die Fehlerursache festgestellt werden.  → **Mehr zu Amflora unter [www.amflora.de](http://www.amflora.de)**

### Umgang mit Tierversuchen

- Ökologische und toxikologische Prüfungen von Produkten, bevor diese auf den Markt kommen
- Einsatz von Ersatzmethoden, wo immer möglich und von den Behörden anerkannt
- Eigenes Labor für die Entwicklung von Alternativmethoden

### Neue Technologien

- Innovative Technologien bieten Chancen für Herausforderungen der Gesellschaft
- Seit 2004 enger Dialog mit Stakeholdern zu Nanotechnologie
- Amflora: Prozesse zur Qualitätssicherung weiterverbessert
- **Mehr zu Nanotechnologie unter [basf.com/dialog-nanotechnologie](http://basf.com/dialog-nanotechnologie)**

## Risikobericht

### Risiken identifizieren, bewerten und steuern

**Das Risikomanagement der BASF hat zum Ziel, Risiken frühestmöglich zu identifizieren, zu bewerten und durch geeignete Maßnahmen geschäftliche Einbußen zu begrenzen. Damit soll eine Bestandsgefährdung der BASF verhindert und durch verbesserte unternehmerische Entscheidungen langfristig Wert geschaffen werden. Unter Risiko verstehen wir jedes Ereignis, das das Erreichen unserer kurzfristigen operativen oder unserer langfristigen strategischen Ziele negativ beeinflussen kann. Als Chancen definieren wir mögliche Erfolge, die über unsere definierten Ziele hinausgehen.**

#### Gesamtbewertung

Das Jahr 2010 war gekennzeichnet durch eine überraschend schnelle Erholung der Nachfrage in fast allen unseren Segmenten, teilweise deutliche Margensteigerungen durch ein knappes Marktangebot, insbesondere bei Petrochemicals, und positive Währungseffekte.

Verglichen mit dem Vorjahr, hat die Planungssicherheit für das Ergebnis der BASF-Gruppe 2011 zugenommen, vor allem als Resultat einer gestiegenen Zuversicht hinsichtlich der kurzfristigen Entwicklung unserer Absatzmärkte.

Die wichtigsten Chancen und Risiken ergeben sich aus der Unsicherheit hinsichtlich der Gesamtkonjunktur und der Entwicklung wichtiger Abnehmerindustrien sowie aus Wechselkurs- und Rohstoffpreisvolatilitäten.

#### Relativer Ergebnisbeitrag von Chancen, Risiken und Volatilitäten

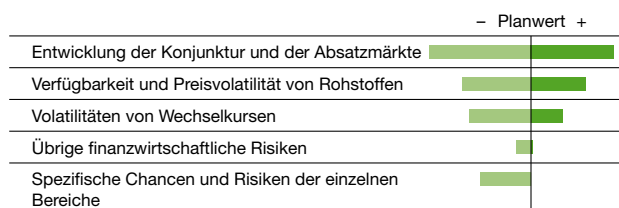

Unserer Einschätzung nach bestehen weiterhin keine wesentlichen Einzelrisiken, die den Fortbestand der BASF-Gruppe gefährden. Dasselbe gilt für die Gesamtbetrachtung aller Risiken.

#### Wesentliche Chancen- und Risikofelder

|                                                                                                          | Bewertung                                         |
|----------------------------------------------------------------------------------------------------------|---------------------------------------------------|
| Entwicklung der Konjunktur und der Absatzmärkte                                                          | Hoher Beitrag zur Gesamtvolatilität               |
| Volatilität von Rohstoffpreisen                                                                          | Hoher Beitrag zur Gesamtvolatilität               |
| Aufbau von Überkapazitäten                                                                               | Langfristige Auswirkungen, strategische Bedeutung |
| Volatilität von Wechselkursen                                                                            | Hoher Beitrag zur Gesamtvolatilität               |
| Übrige finanzwirtschaftliche Risiken                                                                     | Geringer Beitrag zur Gesamtvolatilität            |
| Regulatorische und politische Risiken                                                                    | Langfristige Auswirkungen, strategische Bedeutung |
| Spezifische Chancen und Risiken der einzelnen Bereiche                                                   | Mittlerer Beitrag, hohe Diversifizierung          |
| Weitere Risikofelder (Personal, Forschung und Entwicklung, Informationstechnologie, Akquisitionen u. a.) | Langfristige Auswirkungen, strategische Bedeutung |

#### Organisation, Zuständigkeiten und Instrumente

Der Risikomanagementprozess der BASF-Gruppe orientiert sich am internationalen Risikomanagementstandard COSO II Enterprise Risk Management – Integrated Framework und umfasst folgende Schritte:

##### – Identifikation von Chancen und Risiken

Generell erfolgt die Identifikation von Chancen und Risiken dezentral in den Unternehmensbereichen und Kompetenzzentren anhand unterschiedlicher Instrumente, wie Experteninterviews oder Teamansätze. Als Basis dienen neben den internen und externen Informationsquellen Markt-, Wettbewerbs- und Umfeld-

#### Strategie und Ziel

- Risiken frühestmöglich erkennen
- Maßnahmen zur Begrenzung geschäftlicher Einbußen ergreifen
- Bestandsgefährdung des Unternehmens vermeiden
- Unternehmerische Entscheidungen begleiten

#### Gesamtbewertung

- Wichtigste Ursachen für Risiken und Chancen sind die Entwicklung der Gesamtkonjunktur und wichtiger Kundenindustrien sowie Wechselkurs- und Rohstoffpreisvolatilitäten
- Planungssicherheit im Vergleich zum Vorjahr verbessert
- Keine Gefährdung des Fortbestands der BASF-Gruppe

## Organisation Risikomanagement der BASF-Gruppe

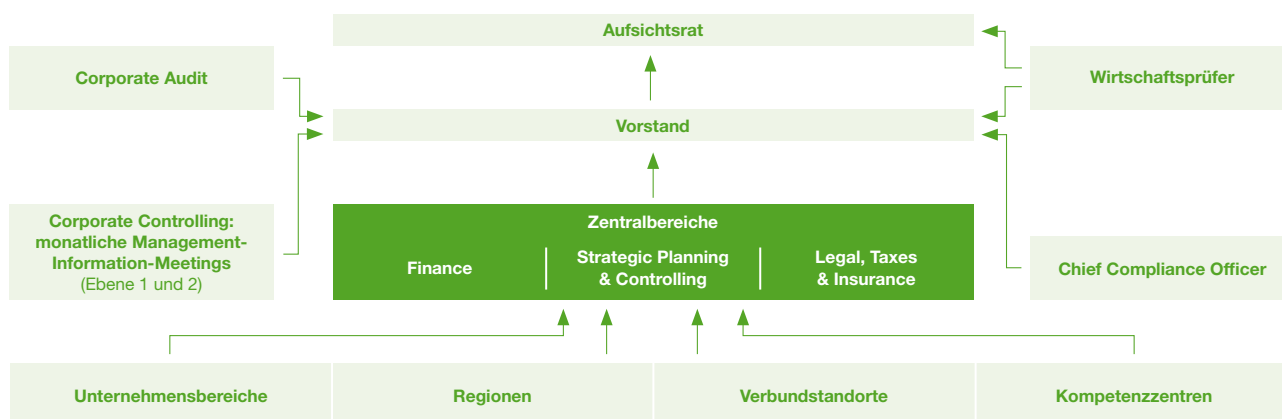

analysen, statistische Bewertungen sowie makroökonomische Szenarien, die wichtige Faktoren, wie Industriewachstumsraten, bewerten. Unterstützt wird der Identifikationsprozess durch unseren unternehmensweiten Risikokatalog, der als Checkliste dient.

Operative Chancen und Risiken werden der Unternehmensleitung im monatlich von Corporate Controlling erstellten Managementbericht dargestellt. Darüber hinaus besteht eine unmittelbare Berichtspflicht für Einzelrisiken, deren Ergebnisauswirkung 10 Millionen € übersteigt. Die Einheiten Legal, Taxes & Insurance sowie der Chief Compliance Officer berichten dem Vorstand jeweils unmittelbar über rechtliche und steuerliche Risiken sowie Compliance-Risiken.

Im Rahmen der Strategieentwicklung für unsere strategischen Geschäftseinheiten und bei größeren Investitionsentscheidungen führt die Einheit Strategic Planning & Controlling zusammen mit den jeweiligen Geschäftseinheiten Chancen-Risiken-Analysen mit einem zeitlichen Horizont von zehn Jahren durch. Diese werden im Zuge des strategischen Controllings überprüft und gegebenenfalls aktualisiert.

#### – Beurteilung und Quantifizierung

Chancen und Risiken werden – soweit möglich – über eine Ergebnisauswirkung und eine Eintrittswahrscheinlichkeit quantifiziert. Als Bezugsbasis dient der jeweilige Geschäftsplan. Zusätzlich quantifizieren wir die Abhängigkeit der einzelnen Geschäftsbereiche von makroökonomischen Faktoren, wie zum Beispiel Wechselkursen und Rohstoffpreisen.

#### – Aggregation

Chancen und Risiken sowie die Abhängigkeit von makroökonomischen Faktoren werden mittels Monte-Carlo-Simulation auf Unternehmensbereichs- und Gruppenebene aggregiert, um die Bandbreite der möglichen Ergebnisauswirkungen und deren Wahrscheinlichkeitsverteilung zu ermitteln. Korrelationen zwischen den einzelnen Ereignissen und Faktoren sowie die internen Wechselwirkungen im Verbund werden dabei berücksichtigt.

#### – Steuerung, Maßnahmen und Kontrolle

Die Steuerung von Chancen und Risiken sowie das Ergreifen von Maßnahmen erfolgt auf Ebene der Unternehmensbereiche. Für bestimmte Risiken, wie zum Beispiel Rohstoffpreis- und

### Internes Kontroll- und Risikomanagementsystem im Hinblick auf den Konzernrechnungslegungsprozess

- Gruppenweit einheitliche Richtlinie, die Bilanzierungsvorschriften, Prozesse und Termine festlegt
- Konsequente Umsetzung von Funktionstrennung, Vier-Augen-Prinzip und Regelung von Zugriffsrechten
- Jährliche Evaluierung des Kontrollumfelds bei wesentlichen Gesellschaften und Serviceeinheiten anhand eines zentralen Risikokatalogs



Wechselkursrisiken, die teilweise durch gruppenweite Hedging-Effekte gemindert werden, erfolgen Maßnahmen auf Ebene der BASF-Gruppe. Einzelheiten regeln unser Risikomanagement-Handbuch und darauf aufbauende bereichsspezifische Bestimmungen. Der Vorstand wird von den Zentralbereichen Strategic Planning & Controlling und Finance regelmäßig über die aggregierte Chancen-Risiken-Exposition der BASF-Gruppe informiert.

#### – Überwachung und Weiterentwicklung

Unser Risikomanagementsystem wird regelmäßig von der Einheit Corporate Audit überprüft. Der Abschlussprüfer prüft im Rahmen der Jahresabschlussprüfung das gemäß § 91 (2) Aktiengesetz eingerichtete Risikofrüherkennungssystem. Um unser Risikomanagementsystem fortwährend weiterzuentwickeln, suchen wir regelmäßig die Diskussion und den Ideenaustausch mit vergleichbaren Industrieunternehmen sowie mit Dienstleistern auf dem Gebiet des Risikomanagements. Bei der Aufnahme in den Dow Jones Sustainability Index erhielt die BASF im September 2010 erneut besondere Anerkennung für ihr Risikomanagementsystem.

### **Wesentliche Merkmale des internen Kontroll- und des Risikomanagementsystems im Hinblick auf den Konzernrechnungslegungsprozess (§ 315 Abs. 2 Nr. 5 HGB)**

Die Erstellung des Konzernabschlusses erfolgt durch eine Einheit im Zentralbereich Finance. Der Abschlussprozess der BASF-Gruppe basiert auf einer einheitlichen Bilanzierungsrichtlinie, die neben den Bilanzierungsvorschriften auch die wesentlichen Prozesse und Termine gruppenweit festlegt. Für die konzerninternen Abstimmungen und übrigen Abschlussarbeiten bestehen verbindliche Anweisungen. Zur Abbildung der buchhalterischen Vorgänge in den Einzelabschlüssen sowie der Aufstellung des Konzernabschlusses wird Standardsoftware eingesetzt, wobei die jeweiligen Zugriffsberechtigungen der Beteiligten eindeutig geregelt sind.

Die am Rechnungslegungsprozess beteiligten Mitarbeiter erfüllen die qualitativen Anforderungen und werden regelmäßig

geschult. Zwischen den beteiligten Facheinheiten, Gesellschaften und regionalen Serviceeinheiten besteht eine klare Aufgabenabgrenzung. Die Funktionstrennung und das Vier-Augen-Prinzip werden dabei konsequent umgesetzt. Komplexe versicherungsmathematische Gutachten und Bewertungen werden durch darauf spezialisierte Dienstleister oder entsprechend qualifizierte Mitarbeiter erstellt.

Durch das interne Kontrollsystem in der Finanzberichterstattung werden diese Grundsätze kontinuierlich überwacht. Dazu werden Methoden für eine strukturierte und gruppenweit einheitliche Evaluierung des internen Kontrollsystems in der Finanzberichterstattung zur Verfügung gestellt.

Die für die BASF-Gruppe wesentlichen Risiken in Bezug auf ein verlässliches Kontrollumfeld sowie eine ordnungsgemäße Finanzberichterstattung sind in einem Risikokatalog zentral erfasst. Dieser wird jährlich überprüft und aktualisiert.

In einem zentralen Auswahlprozess werden Gesellschaften und Einheiten bestimmt, die besonderen Risiken ausgesetzt sind, größere Bedeutung für den Konzernabschluss der BASF-Gruppe haben oder Serviceprozesse bereitstellen. Der Auswahlprozess wird jährlich durchgeführt. In den relevanten Gesellschaften und Einheiten ist ein Verantwortlicher benannt, der die Durchführung der Schritte koordiniert und überwacht.

Der **jährliche Evaluierungsprozess** umfasst die folgenden Schritte:

#### – Evaluierung des Kontrollumfelds

Die Einhaltung von internen und externen Richtlinien, die für die Aufrechterhaltung eines verlässlichen Kontrollumfelds relevant sind, wird durch die Beantwortung eines einheitlichen Fragebogens überprüft. Die Beurteilung erfolgt durch eine Abfrage des Regelbewusstseins der betroffenen Mitarbeiter und wird durch Stichproben unterstützt.

#### – Identifikation der Kontrollaktivitäten

Um den in unserem zentralen Risikokatalog aufgeführten Risiken der Finanzberichterstattungsprozesse zu begegnen, werden entsprechende Kontrollaktivitäten ausgeführt.

### **Risikomanagementprozess**

- Identifikation von Chancen und Risiken
- Beurteilung und Quantifizierung
- Aggregation von Chancen und Risiken zur Auswirkungsermittlung auf Gruppenebene
- Steuerung, Maßnahmen und Kontrolle
- Überwachung und Weiterentwicklung des Prozesses

### **Jährlicher Evaluierungsprozess**

- Evaluierung des Kontrollumfelds
- Identifikation der Kontrollaktivitäten
- Beurteilung der Kontrollaktivitäten
- Monitoring von Kontrollschwächen
- Interne Bestätigung des internen Kontrollsystems

**– Beurteilung der Kontrollaktivitäten**

Nach der Dokumentation erfolgt eine Überprüfung, ob die beschriebenen Kontrollen geeignet sind, die Risiken adäquat abzudecken. In der anschließenden Testphase wird mit Stichproben überprüft, ob die Kontrollen in der Praxis wirksam waren.

**– Monitoring von Kontrollschwächen**

Identifizierte Kontrollschwächen sowie deren Behebung werden dem verantwortlichen Management berichtet und von einem interdisziplinären Gremium auf ihre Bedeutung für die BASF-Gruppe untersucht. Bei der Feststellung von Kontrollschwächen mit einem wesentlichen Einfluss auf die Finanzberichterstattung wird der Vorstand informiert.

**– Interne Bestätigung des internen Kontrollsystems**

Die verantwortlichen Geschäfts- und Finanzleiter der konsolidierten Gruppengesellschaften bestätigen gegenüber dem Vorstand der BASF SE am Ende des jährlichen Zyklus die Effektivität des internen Kontrollsystems in Bezug auf Rechnungslegung und Ordnungsmäßigkeit der Finanzberichterstattung.

**Gesamtwirtschaftliche und branchenspezifische Chancen und Risiken**

**Entwicklung der Nachfrage:** Die Entwicklung der Nachfrage auf unseren Absatzmärkten gehört zu den drei bedeutendsten Ursachen für Chancen und Risiken, neben Währungs- und Rohstoffpreisvolatilitäten. Unsere Annahmen bezüglich der kurzfristigen Wachstumsraten der Weltwirtschaft, der Regionen und wichtiger Abnehmerindustrien (vor allem Chemie, Automobil und Bau) haben wir im Prognosebericht dargelegt.

Über dieses Basisszenario hinaus betrachten wir auch Risikoszenarien, wie beispielsweise eine erneute Rezession in Nordamerika oder einen deutlichen Rückgang des Wachstums in China. Dadurch könnte es zu einer weltweit verringerten Nachfrage, einer Abwertung des US-Dollar und einem Rückgang des Rohölpreises kommen, was unser Ergebnis der Betriebstätigkeit insgesamt negativ beeinflussen würde.

Einige Kunden sind noch in hohem Maße abhängig von Krediten. Sollte sich deren Verfügbarkeit verschlechtern und unsere Kunden sich deshalb nicht refinanzieren können, könnte dies ebenfalls unser Geschäft kurzfristig beeinträchtigen.

Umgekehrt besteht aber auch die Möglichkeit, die Chancen aus einer verstärkten Nachfrage im Rahmen unserer noch verfügbaren Produktionskapazitäten zu nutzen.

Insgesamt ist die vor einem Jahr noch bestehende Unsicherheit bezüglich der Entwicklung der Weltkonjunktur zurückgegangen. → **Mehr zum Ausblick im Prognosebericht ab Seite 115**

**Entwicklung des Angebots:** In der Chemieproduktion war das Jahr 2010 geprägt durch ungeplante Anlagenabstellungen und Projektverspätungen auch bei unseren Wettbewerbern und damit einhergehende Lieferengpässe. Für 2011 rechnen wir mit der Fertigstellung neuer petrochemischer Produktionsanlagen vor allem im Nahen Osten und in China und dadurch mit einem verbesserten Produktangebot.

Entsprechende Rückgänge der Anlagenauslastung und Preise sowie eine verminderte Weitergabemöglichkeit von Rohstoffpreiserhöhungen an unsere Kunden haben wir in unserer Planung berücksichtigt. Hier besteht das Risiko, dass unsere Annahmen noch unterschritten werden. Sollte sich die Ende 2010 bestehende Produktknappheit in einigen Wertschöpfungsketten allerdings fortsetzen, böte dies die Chance, die entsprechenden Margen stabil zu halten oder zu verbessern.

Risiken aus der Entwicklung der Absatzmärkte begegnen wir soweit möglich durch operative Maßnahmen: zum Beispiel durch enge Zusammenarbeit mit Kunden, optimale Steuerung unserer Produktion und entsprechende Terminierung wartungsbedingter Abstellungen. Produktspezifisch steuern wir Neubau und Erweiterung von Anlagen und Standorten gemäß dem erwarteten Bedarf. Auch unsere regionale Diversifizierung und Branchendiversifizierung trägt zur Risikoverminderung bei.

Wir verfolgen das Ziel, die Zyklicität unseres Geschäfts zu verringern. Wir ziehen uns aus Märkten zurück, bei denen wir langfristig keine ausreichenden Möglichkeiten sehen, uns von unseren Wettbewerbern zu differenzieren.

**Entwicklung der Nachfrage**

- Rückgang der Unsicherheiten bezüglich der Konjunkturentwicklung
- Weiterhin Refinanzierungsrisiken für unsere Kunden mit kurzfristigen Absatzrisiken für unser Geschäft
- Nutzung von Chancen aus einer erhöhten Nachfrage im Rahmen noch verfügbarer Produktionskapazitäten

**Entwicklung des Angebots**

- Global wachsendes Produktangebot durch Fertigstellung neuer Anlagen im Nahen Osten und in China erwartet; erhöhte Risiken für Anlagenauslastung, Preise und Margen
- Langfristiges Ziel, Zyklicität des Geschäfts zu verringern
- Bedarfsabhängige, produktspezifische Anlagen-erweiterungen beziehungsweise -neubauten
- Devestition von Geschäften ohne ausreichende Differenzierungsmöglichkeit gegenüber Wettbewerbern

Um dauerhaft profitabel zu wachsen, setzen wir auf operative Exzellenz, Innovationen und Investitionen in Wachstumsmärkte. Unsere Forschungs- und Geschäftsschwerpunkte konzentrieren wir auf innovationsstarke Geschäftsfelder, wie zum Beispiel Pflanzenschutz und Pflanzenbiotechnologie, die wir auch über strategische Partnerschaften mit wichtigen Kooperationspartnern erschließen.

**Regulatorische und politische Risiken:** Durch die 2007 in Kraft getretene europäische Chemikalienverordnung REACH besteht das Risiko, dass unsere europäischen Kunden und wir durch die kostenintensiven Test- und Registrierungsverfahren gegenüber außereuropäischen Wettbewerbern benachteiligt werden.

Im Rahmen des EU-Emissionshandels wurden der BASF-Gruppe in der zweiten Handelsperiode von 2008 bis 2012 Emissionszertifikate zugeteilt. Gegenwärtig erwarten wir für unsere Aktivitäten in Europa insgesamt keine Unterdeckung an Zertifikaten in dieser zweiten Handelsperiode. Die konkrete Menge an kostenfrei zugeteilten CO<sub>2</sub>-Zertifikaten ab 2013 ist derzeit noch unklar. Die jährliche Zertifikateunterdeckung wird voraussichtlich mehrere Millionen Zertifikate betragen. Abhängig vom Börsenpreis von CO<sub>2</sub>-Zertifikaten wird dies Auswirkungen auf unsere Kostenposition und damit die globale Wettbewerbsfähigkeit unserer deutschen beziehungsweise europäischen Standorte haben.

Dies gilt auch für die jüngste Erhöhung der Stromsteuer und Pläne der Bundesregierung, die Ausnahmeregelungen für die Abgabenzahlung energieintensiver Industriezweige nach dem Erneuerbare-Energien-Gesetz (EEG) einzuschränken.

Durch die Novellierung der EU-Richtlinie über Industrieemissionen (IED) drohen Mehraufwendungen für die Umrüstung existierender Anlagen und die Erfüllung zusätzlicher Berichtspflichten.

Risiken gehen für uns ferner von einer weiteren Regulierung beispielsweise der Verwendung von Chemikalien oder des Gasgeschäfts, der Verschärfung geopolitischer Spannungen, einer Destabilisierung politischer Systeme und der Errichtung von

Handelsbarrieren (zum Beispiel chinesische Ausfuhrbeschränkungen für Seltene Erden oder OPEC-Quoten für die Ölförderung) aus.

Insgesamt hat die Wahrscheinlichkeit für das Eintreten regulatorischer und politischer Risiken zugenommen; die finanziellen Auswirkungen sind kurzfristig als gering, mittelfristig aber als erhöht einzustufen.

**Witterung:** Durch kältere oder mildere Witterung im Winter kann der Gasverbrauch schwanken, was sich in der Folge positiv oder negativ auf das Geschäftsergebnis unseres Gashandels auswirken kann. Analog hat eine feuchte und warme beziehungsweise trockene und kalte Vegetationsperiode positive beziehungsweise negative Effekte auf das Geschäftsergebnis unseres Pflanzenschutzgeschäfts.

## Unternehmensspezifische Chancen und Risiken

**Rohstoffverfügbarkeit:** Im Zuge der unerwartet raschen wirtschaftlichen Erholung kam es 2010 vereinzelt zu Beschaffungsengpässen. Diese werden für 2011 kaum erwartet. Durch eine auch mittelfristig deutlich steigende Nachfrage hat aber die strukturelle Knappheit einiger Rohstoffe für die Segmente Performance Products und Functional Solutions an Bedeutung gewonnen. Hinzu kommt, dass China die Ausfuhr Seltener Erden beschränkt hat, die zum Beispiel bei der Produktion unserer Katalysatoren zum Einsatz kommen. Weiterhin bestehen Ausfallrisiken einzelner Lieferanten auf Grund ihrer finanziellen Schwäche.

Beschaffungsrisiken mindern wir durch ein breites Portfolio, weltweite Einkaufsaktivitäten sowie durch Kauf zusätzlicher Rohstoffe auf den Spotmärkten. Wir vermeiden es – soweit möglich – Rohstoffe von einem einzigen Lieferanten zu beziehen. Sofern dies nicht möglich ist, versuchen wir, Wettbewerb zu schaffen oder gehen diese Beziehung bewusst ein und bewerten die Auswirkung möglicher Ausfälle. Wir beobachten kontinuierlich die Bonität wichtiger Geschäftspartner – Kunden wie Lieferanten. Entsprechend gehen wir auch beim Einkauf von Dienstleistungen vor.

### Regulatorische und politische Risiken

- REACH: Wettbewerbsnachteile für europäische Unternehmen durch kostenintensive Test- und Registrierungsverfahren
- Emissionshandel: Risiken der Unterdeckung und zusätzlicher Kosten durch Zukauftsbedarf von Zertifikaten
- Verschärfung geopolitischer Spannungen sowie Errichtung von Handelsbarrieren

### Verfügbarkeit und Preisvolatilität von Rohstoffen

- Konjunktureller Aufschwung erhöht Risiken der Rohstoffverfügbarkeit
- Minderung von Beschaffungsrisiken durch breites Portfolio, globale Einkaufsaktivitäten und gezielte Lieferantenauswahl
- Weiterhin hohe Volatilität der Rohstoffpreise erwartet
- Einsatz von Warenderivaten, um Kostenrisiken zu mindern

Umweltschutz-, Arbeitssicherheits- und Sozialstandards sind neben wirtschaftlichen Kriterien Teil der Bewertung neuer und bestehender Lieferbeziehungen. Wenn wir feststellen, dass unsere Standards nicht oder nur teilweise erfüllt werden, vereinbaren wir Korrekturmaßnahmen und bieten Hilfestellung bei der Umsetzung an.

→ **Mehr zum Lieferkettenmanagement auf Seite 26**

**Rohstoffpreisvolatilität:** Die Preisvolatilität von Einsatzstoffen, insbesondere von erdölbasierten Chemikalien, und von Energie stellt für die BASF einen der drei Haupttreiber für Risiken und Chancen dar. Wir gehen weiterhin davon aus, dass die Volatilität von Rohstoffpreisen zumindest kurzfristig über dem historischen Niveau liegen wird. Unsere Abhängigkeit vom Ölpreis verringern wir durch den Beitrag unseres Öl- und Gas-Geschäfts, dessen Ergebnis mit einem Anstieg des Jahresdurchschnittsölpreises (Brent) um 1 US-Dollar pro Barrel um circa 35 Millionen € steigt.

Darüber hinaus mindern wir Kostenrisiken durch Waren-derivate. Diese Maßnahmen dienen der Margensicherung, wenn stark steigende Rohstoffkosten erwartet werden, die bei verminderter Nachfrage nicht oder nur begrenzt über die Preise unserer Produkte weitergegeben werden können. Bei gegenläufiger Rohstoffpreisentwicklung können Aufwendungen entstehen.

**Forschung und Entwicklung:** Wegen der hohen Komplexität und Unsicherheit chemischer und biologischer Forschung besteht das Risiko, dass Projekte aus technischen oder wirtschaftlichen Gründen nicht fortgeführt werden, es zu Budgetüberschreitungen kommt oder dass entwickelte Produkte nicht zur Vermarktung zugelassen werden beziehungsweise nicht den erwarteten kommerziellen Erfolg haben.

Hier wirken wir durch unseren weltweiten Wissensverbund, die Zusammenarbeit mit Partnern und Kunden sowie durch unseren Innovationsprozess entgegen. Im Rahmen unseres Projektmanagements werden Effizienz, Erfolgchancen und Rahmenbedingungen der Forschungsprojekte in den verschiedenen Phasen von der Ideenfindung bis zur Produkteinführung

fortlaufend überprüft. Für die erfolgreiche Einführung neuer Technologien ist das Vertrauen der Kunden und Verbraucher unverzichtbar. Deshalb treten wir bereits in einem frühen Stadium der Entwicklung in den Dialog mit Interessengruppen.

→ **Mehr zum Stakeholder-Dialog ab Seite 27**

**Exploration:** Durch geologische Unsicherheiten kann die Suche und Erschließung von Erdöl- und Erdgasvorkommen mehr oder weniger erfolgreich als geplant verlaufen. Durch modernste Erkundungsmethoden und ein ausgewogenes Explorationsportfolio mindern wir dieses Risiko.

**Personal:** Vor allem in Deutschland waren flexible Arbeitszeitmodelle einschließlich Kurzarbeit ein wirksames Mittel, den Stellenabbau in der Krise zu begrenzen und die Chancen wahrzunehmen, die die rasche wirtschaftliche Erholung im vergangenen Jahr bot. Auch die neue Vereinbarung zwischen Unternehmensleitung und Arbeitnehmervertretungen für unseren größten Standort Ludwigshafen bietet mit dem Maßnahmenpaket, das auch eine Erhöhung des flexiblen Personaleinsatzes umfasst, Chancen für die Bewältigung von Auslastungsschwankungen.

Unsere Führungskräfte haben die Möglichkeit, an einem aktienkursbasierten Vergütungsprogramm teilzunehmen. In Abhängigkeit von der Kursentwicklung der BASF-Aktie variiert der diesbezügliche Rückstellungsbedarf und führt zu einer entsprechenden Steigerung oder Senkung der Personalkosten.

Durch die stetige Verbesserung der Wirtschaftslage im letzten Jahr hat auch der internationale Wettbewerb um hochqualifizierte Fach- und Führungskräfte zugenommen, was zudem mittel- bis langfristig durch die demografische Entwicklung noch verstärkt werden wird. Damit erhöht sich das Risiko, dass offene Stellen nicht oder nur verzögert mit geeigneten Bewerbern besetzt werden können. In Europa sind hiervon insbesondere die ingenieur- und naturwissenschaftlichen Fachrichtungen betroffen, bei denen bereits heute ein Rückgang an geeigneten Bewerbern spürbar ist. Hier, aber auch in den Wirtschaftswissenschaften besteht die Herausforderung, die BASF als einen international bevorzugten Arbeitgeber zu positionieren.

## Forschungs- und Entwicklungsrisiken

- Risiko, dass Aktivitäten nicht zur Entwicklung marktfähiger Produkte führen und deshalb kommerzieller Erfolg ausbleibt
- Risikoreduktion durch Wissensverbund sowie kontinuierliche Überprüfung von Effizienz, Erfolgchancen und Rahmenbedingungen von Forschungsprojekten
- Kontinuierlicher Dialog mit Kunden und Verbrauchern zur Verbesserung von Erfolgchancen

## Personal

- Verstärkter internationaler Wettbewerb um hochqualifizierte Fach- und Führungskräfte
- Gefahr des Know-how-Verlusts durch zahlreiche altersbedingte Abgänge und ungewollte Fluktuation
- Effektivere Personalrekrutierung und -bindung mit Hilfe verschiedener Maßnahmen

Der Know-how-Verlust durch überproportional hohe altersbedingte Abgänge in Nordamerika und Europa sowie das vergleichsweise hohe Niveau an ungewollter Fluktuation in Asien kann mittel- bis langfristig zu Geschäftsbeeinträchtigungen führen.

Mit den globalen Programmen Generations@Work, Diversity + Inclusion, der Weiterentwicklung unserer Arbeitgebermarke (Employer Branding) und verstärkter Personalentwicklung sowie ergänzenden regionalen Initiativen wollen wir die BASF als Arbeitgeber attraktiv machen und Mitarbeiter langfristig an uns binden.

→ **Mehr zu den einzelnen Initiativen und unseren Zielen ab Seite 84**

Insgesamt schätzen wir das Risiko einer Beeinträchtigung unserer Geschäftsentwicklung durch den Verlust von Führungskräften und Mitarbeitern derzeit als gering ein. Mittel- bis langfristig erwarten wir allerdings ein Ansteigen dieses Risikos und begegnen dieser Entwicklung bereits heute mit den oben genannten Maßnahmen sowie verstärkten Investitionen in Personalmarketing und Personalentwicklung.

**Nachhaltigkeit:** Die BASF bekennt sich dazu, den Schutz der Umwelt und gesellschaftlich verantwortungsvolles Handeln in ihre Geschäftstätigkeit zu integrieren. Verstöße gegen unsere Selbstverpflichtungen im Rahmen der Nachhaltigkeit oder gegen Gesetze stellen ein Reputationsrisiko dar und können zu operativen und strategischen Risiken führen. Um Risiken und Chancen aus Nachhaltigkeitsaspekten frühzeitig erkennen zu können, haben wir ein globales Themenmanagement für Nachhaltigkeit eingeführt. Die Ergebnisse werden dazu genutzt, Veränderungsprozesse im Unternehmen anzustoßen, um auf etwaige Risiken vorbereitet zu sein und Chancen entsprechend nutzen zu können. Um das Einhalten von Gesetzen und unserer Selbstverpflichtungen in den Bereichen Umwelt, Sicherheit und Gesundheit sowie Arbeits- und Sozialstandards überprüfen zu können, haben wir globale Monitoringsysteme etabliert. Diese beziehen unternehmensübergreifend auch unsere Lieferkette mit ein. Wir stehen im kontinuierlichen Austausch mit den

relevanten Interessengruppen, um die gesellschaftliche Akzeptanz unserer Geschäftsaktivitäten sicherzustellen.

→ **Mehr zu den Monitoringinstrumenten ab Seite 120**

**Informationstechnologie:** Risiken resultieren vor allem aus der Nichtverfügbarkeit von IT-Systemen und Anwendungen, der verzögerten Bereitstellung wichtiger Daten, dem Verlust oder der Manipulation von Daten und der Offenlegung vertraulicher Informationen. Dieses kann zu negativen Konsequenzen für die jeweiligen Geschäftsprozesse führen.

Um derartige Risiken zu minimieren, verfügt die BASF über stabile und redundant ausgelegte IT-Systeme, Back-up-Verfahren, Viren- und Zugangsschutz, Verschlüsselungssysteme sowie integrierte, gruppenweit standardisierte IT-Infrastrukturen und Anwendungen. Die im Einsatz befindlichen Systeme zur Informationssicherheit werden permanent geprüft und fortlaufend aktualisiert. Zudem werden unsere Mitarbeiter regelmäßig im Informations- und Datenschutz geschult. Das IT-Risikomanagement erfolgt über einheitliche Regeln bei Organisation und Anwendung sowie ein darauf aufbauendes internes Kontrollsystem.

Die Gefährdung unserer IT-Systeme schätzen wir auf Grund der getroffenen Maßnahmen als begrenzt ein, potenzielle Auswirkungen aber als hoch.

**Rechtliche Risiken:** Zur Beurteilung von Risiken aus laufenden Rechtsstreitigkeiten und -verfahren sowie eines etwaigen Rückstellungsbedarfs werden eigene Analysen und Bewertungen der Sachverhalte und geltend gemachter Ansprüche erstellt und im Einzelfall die Ergebnisse vergleichbarer Verfahren und unabhängige Rechtsgutachten herangezogen. Außerdem werden Annahmen über Eintrittswahrscheinlichkeiten und Bandbreiten möglicher Inanspruchnahmen getroffen. Die tatsächlichen Belastungen können von diesen Einschätzungen abweichen.

Risiken aus möglichen Rechts- oder Gesetzesverletzungen begrenzen wir durch unser internes Kontrollsystem. Beispielsweise versuchen wir mit Hilfe von umfangreichen Abgrenzungsforschungen, Patent- und Lizenzkonflikte weitestgehend zu

## Nachhaltigkeit

- Selbstverpflichtung zu Umweltschutz und gesellschaftlich verantwortungsvollem Handeln
- Einhaltung von Standards durch Monitoringsysteme gewährleistet
- Globales Managementsystem zur Früherkennung wichtiger Themen
- Kontinuierlicher Austausch mit Interessengruppen

## Rechtliche Risiken

- Vermeidung von Rechtsrisiken mit Hilfe des internen Kontrollsystems
- Möglichst realistische Abschätzung der monetären Effekte aus Rechtsstreitigkeiten und -verfahren
- Regelmäßige Mitarbeiterschulung im Rahmen des konzernweiten Compliance-Programms

vermeiden. Im Rahmen unseres konzernweiten Compliance-Programms werden unsere Mitarbeiter regelmäßig geschult.

→ **Mehr zum konzernweiten Compliance-Programm auf Seite 19 und ab Seite 119**

**Akquisitionsrisiken:** Akquisitions- und Investitionsentscheidungen beinhalten in ihrer Umsetzung komplexe Risiken. Die Bewertung von Risiken und Chancen spielt bereits bei der Prüfung potenzieller Akquisitionsziele eine wesentliche Rolle. Eine detaillierte Analyse und Quantifizierung erfolgt im Rahmen der Due Diligence. Risiken sind beispielsweise erhöhte Personalfuktuation, eine verzögerte Realisierung von Synergien oder aber die Übernahme von im Vorfeld nicht exakt quantifizierbaren Verpflichtungen. Umsetzung und Nachkontrolle erfolgen deshalb nach festgelegten Prozessen. Naturgemäß unterliegen die akquirierten Geschäfte den allgemeinen Marktrisiken und geschäftsspezifischen Risiken. Deshalb werden akquirierte Geschäfte zeitnah in den BASF-Risikomanagement-Prozess eingebunden. Das neuerworbene Cognis-Geschäft wird derzeit in unseren Risikomanagementprozess integriert.

Auf Grund der getroffenen Maßnahmen stufen wir die Wahrscheinlichkeit für das Eintreten eines Schadens als gering und eine potenzielle Ergebnisauswirkung als mittel ein.

**Technische Risiken:** Über die Verfügbarkeit von Rohstoffen hinaus besteht das Risiko, dass wir unsere Anlagen aus technischen Gründen oder um ihre Sicherheit zu gewährleisten ungeplant abstellen müssen und dadurch Lieferengpässe bei unseren Produkten auftreten. Beispielsweise führen Hurrikan-Warnungen an unseren Standorten an der US-Golfküste zu vorsorglichen Abschaltungen.

Technische Risiken minimieren wir durch die ständige Überwachung und Verbesserung von Anlagen und Verfahren sowie durch unseren weltweiten Produktionsverbund, weshalb wir Eintrittswahrscheinlichkeit und Auswirkung als gering einschätzen.

## Finanzwirtschaftliche Risiken

Das Management von Währungs- und Zinsrisiken erfolgt in der Einheit Treasury, das Management von Warenpreissrisiken im Kompetenzzentrum Global Procurement & Logistics oder in dazu ermächtigten Gruppengesellschaften. Für den Umgang mit finanzwirtschaftlichen Risiken bestehen detaillierte Richtlinien und Vorgaben, die unter anderem eine Funktionstrennung von Handel und Abwicklung vorsehen.

**Volatilität von Wechselkursen:** Unsere Wettbewerbsfähigkeit auf den globalen Märkten wird durch die Veränderung der Wechselkurse beeinflusst. Für die BASF-Gruppe entstehen Risiken auf der Abnehmerseite vor allem bei Kursbewegungen des US-Dollar. Eine ganzjährige Aufwertung des US-Dollar um einen US-Cent pro Euro steigert bei sonst gleichen Bedingungen das Ergebnis der BASF-Gruppe um etwa 40 Millionen €.

Auf der Produktionsseite begegnen wir Wechselkursrisiken durch unsere lokalen Produktionsstandorte in den jeweiligen Währungsräumen. Finanzwirtschaftliche Währungsrisiken resultieren aus der Umrechnung zum Stichtagskurs in die funktionale Währung der jeweiligen Gruppengesellschaft bei Forderungen, Verbindlichkeiten und sonstigen monetären Posten im Sinne von IAS 21.

Des Weiteren berücksichtigen wir in unserem finanzwirtschaftlichen Währungsrisikomanagement geplante Einkaufs- und Umsatztransaktionen in fremder Währung. Diese Risiken werden bei Bedarf durch derivative Instrumente abgesichert. Wechselkursvolatilitäten gehören zu den drei größten Treibern für Chancen und Risiken in der BASF-Gruppe.

**Zinsänderungsrisiken:** Zinsänderungsrisiken bestehen auf Grund potenzieller Änderungen des Marktzinses und können bei festverzinslichen Finanzanlagen zu einer Änderung des beizulegenden Zeitwerts und bei variabel verzinslichen Finanzinstrumenten zu Zinszahlungsschwankungen führen. Zur Absicherung werden in Einzelfällen Zinsswaps und kombinierte Zins-/Währungsderivate abgeschlossen.

## Finanzwirtschaftliche Risiken

- Volatilität von Wechselkursen
- Zinsänderungsrisiken
- Risiken aus Metall- und Rohstoffhandel
- Liquiditätsrisiken
- Ausfallrisiken
- Wertminderungsrisiken
- Risiken aus Pensionsverpflichtungen

## Volatilität von Wechselkursen

- Wechselkursvolatilität wesentlicher Risikofaktor; absatzseitige Chancen und Risiken insbesondere durch Kursbewegungen des US-Dollar
- Produktionsseitige Wechselkursrisiken begrenzt durch lokale Standorte
- Absicherung von Fremdwährungsforderungen und -verbindlichkeiten sowie geplanten Fremdwährungstransaktionen mit Derivaten



Außerdem könnte eine Herabstufung unserer Kreditratings durch die Ratingagenturen die Kosten der Refinanzierung erhöhen. Kurz- bis mittelfristig ist die BASF auf Grund eines ausgewogenen Fälligkeitsprofils der Finanzschulden weitgehend gegen mögliche Auswirkungen auf das Zinsergebnis geschützt.

→ **Mehr zur Fristenstruktur unserer Finanzschulden im Anhang zum Konzernabschluss auf Seite 181**

**Risiken aus Metall- und Rohstoffhandel:** Die BASF setzt im Rahmen des Katalysatoren-geschäfts Warenderivate für Edelmetalle ein und handelt für Dritte sowie im eigenen Namen mit Edelmetallen. Des Weiteren nutzen wir unsere Kenntnisse der Märkte für Erdöl und Ölprodukte, um im Handel mit Rohstoffen innerhalb festgelegter Grenzen Erträge zu erwirtschaften. Diese Aktivitäten unterliegen einer ständigen Kontrolle.

**Liquiditätsrisiken:** Risiken aus Schwankungen der Zahlungsströme erkennen wir frühzeitig im Rahmen unserer Liquiditätsplanung. Durch die Begebung von mittel- bis langfristigen Anleihen haben wir im Jahr 2009 die Risiken der Refinanzierung erheblich reduziert. Auf Grund unserer guten Ratings, des Commercial-Paper-Programms sowie von Banken verbindlich zugesagter Kreditlinien haben wir jederzeit Zugang zu umfangreichen liquiden Mitteln. Das Commercial-Paper-Programm stellte für die BASF auch in der Finanzkrise eine verlässliche und kostengünstige Quelle für Liquidität dar, so dass wir Liquiditätsrisiken als gering bewerten.

→ **Mehr zu finanzwirtschaftlichen Risiken im Anhang zum Konzernabschluss ab Seite 187**

**Risiko von Forderungsausfällen:** Länderrisiken begrenzen wir durch die Ermittlung interner Länderratings, die fortlaufend an die sich ändernden Rahmenbedingungen angepasst werden. Als Hauptinstrumente zur Absicherung gegen spezifische Länderrisiken setzen wir Ausfuhrkreditversicherungen und

Investitionsgarantien ein. Kreditrisiken für unsere Geldanlagen mindern wir, indem wir nur Transaktionen im Rahmen festgelegter Limits mit Geschäftspartnern und Banken guter Bonität tätigen. Auch der Zahlungsverkehr wird über solche Banken abgewickelt. Wir überprüfen die Bonität unserer Partnerbanken fortlaufend. Ausfallrisiken für den Forderungsbestand reduzieren wir, indem die Bonität und das Zahlungsverhalten der Kunden ständig überwacht und entsprechende Kreditlimits festgelegt werden.

Auf Grund der weltweiten Tätigkeit und der diversifizierten Kundenstruktur der BASF-Gruppe liegen keine größeren Konzentrationen von Kreditausfallrisiken vor. Zudem werden Risiken durch Kreditversicherungen und Bankgarantien begrenzt.

**Wertminderungsrisiken:** Das Risiko einer Wertminderung von Vermögenswerten entsteht, wenn der für einen Wertminderungstest anzunehmende Zinssatz steigt oder die prognostizierten Cashflows sinken. Im derzeitigen Geschäftsumfeld halten wir das Wertminderungsrisiko bei einzelnen Vermögensgegenständen wie Kundenbeziehungen, Technologien oder Marken sowie beim Goodwill für gering.

**Risiken aus Pensionsverpflichtungen:** Betriebliche Pensionszusagen finanzieren wir überwiegend extern durch gesonderte Pensionsvermögen. Dies betrifft neben den großen Pensionsplänen unserer Gruppengesellschaften in Nordamerika, Großbritannien und der Schweiz insbesondere die BASF Pensionskasse VVaG und die BASF Pensionstreuhand e.V. in Deutschland. Risiken einer Unterdeckung der Altersversorgungssysteme durch marktbedingte Wertschwankungen der Vermögensanlagen begegnen wir durch ertrags- und risikooptimierte Anlagestrategien, die speziell auf die jeweilige Struktur der Pensionsverpflichtungen ausgerichtet sind. Mittels Portfolioanalysen werden regelmäßig auch Stressszenarien simuliert. Außerdem werden neuen Mitarbeitern fast ausschließlich beitragsorientierte Pläne angeboten.

## Liquiditätsrisiken

- Erkennen von Risiken aus der Schwankung von Zahlungsströmen mittels Liquiditätsplanung
- Gute Ratings, kostengünstiges und verlässliches Commercial-Paper-Programm sowie fest zugesagte Kreditlinien gewährleisten jederzeit Zugang zu liquiden Mitteln

## Ausfallrisiken

- Ausfuhrkreditversicherungen und Investitionsgarantien zur Absicherung von Länderrisiken
- Reduktion von Kreditrisiken durch Bonitätsprüfungen und Transaktionslimits
- Einsatz von Kreditversicherungen und Bankgarantien
- Keine Konzentration von Ausfallrisiken bei einzelnen Geschäftspartnern

## Wirtschaftliche Rahmenbedingungen im Jahr 2011

**Der kräftige weltwirtschaftliche Aufschwung im Jahr 2010 wurde durch massive staatliche Konjunkturprogramme und ein starkes Wachstum in Asien unterstützt. 2011 wird sich die Erholung der Weltwirtschaft fortsetzen. Notwendige Maßnahmen zur Konsolidierung der Staatsfinanzen in den Industrieländern dämpfen die Wachstumsdynamik. Im Jahresdurchschnitt erwarten wir 2011 ein solides Wachstum der Weltwirtschaft (+3,3%). In den Industrieländern wird das Wachstum schwächer sein (+2,2%); die Produktion wird aber größtenteils das Vorkrisenniveau wieder erreichen. Für 2011 gehen wir von einem durchschnittlichen Ölpreis von 90 US\$/Barrel und einem Wechselkurs in Höhe von 1,35 US\$ pro Euro aus. Da auf den Kapital- und Devisenmärkten weiterhin Unsicherheiten bestehen, erwarten wir im Jahresverlauf hohe Volatilitäten bei Wechselkursen.**

In **Europa** werden die Wachstumserwartungen für 2011 durch Programme zur Konsolidierung der Staatsfinanzen gedämpft. Der Binnenkonsum wird sich schwach entwickeln. Dagegen wird die Investitionsgüternachfrage zunehmen. Wir rechnen 2011 mit einem gegenüber dem Vorjahr kaum veränderten Wachstum (+1,7 %). In Deutschland wird das Wirtschaftswachstum abnehmen (+2,3 %) – Grund hierfür ist insbesondere das im Vorjahresvergleich schwächere Wachstum der Nettoexporte. Mit wenigen Ausnahmen werden die Mitgliedsländer der Europäischen Union positive Wachstumsraten erzielen. Erstmals nach der Krise wächst auch die europäische Bauwirtschaft wieder. Mittelfristig erwarten wir für die Europäische Union ein moderates durchschnittliches Wirtschaftswachstum (+1,9 %).

### Ausblick zum Bruttoinlandsprodukt 2011 (Reale Veränderung gegenüber Vorjahr)

|                  |              |                                                                                     |
|------------------|--------------|-------------------------------------------------------------------------------------|
| <b>Welt</b>      | <b>3,3 %</b> |  |
| EU               | 1,7 %        |  |
| USA              | 2,9 %        |  |
| Asien ohne Japan | 7,4 %        |  |
| Japan            | 1,1 %        |  |
| Südamerika       | 4,5 %        |  |

### Trends Bruttoinlandsprodukt 2011–2013 (Reale jährliche Veränderung im Durchschnitt)

|                  |              |                                                                                      |
|------------------|--------------|--------------------------------------------------------------------------------------|
| <b>Welt</b>      | <b>3,4 %</b> |   |
| EU               | 1,9 %        |   |
| USA              | 2,9 %        |   |
| Asien ohne Japan | 7,1 %        |   |
| Japan            | 1,5 %        |   |
| Südamerika       | 3,8 %        |  |

In den **USA** wird das Wirtschaftswachstum 2011 (+2,9 %) auf dem Niveau des Vorjahres liegen. Die gestiegene Arbeitslosigkeit und die durch die Finanzkrise verursachten Vermögensverluste bei großen Teilen der Bevölkerung dämpfen das Wachstum des privaten Konsums weiterhin. Auf Grund der hohen Staatsverschuldung und eines sehr geringen Zinsniveaus ist eine Stimulierung durch expansive Fiskal- oder Geldpolitik kaum mehr möglich. Dagegen wirken die zunehmende Investitionstätigkeit und steigende Nettoexporte als Wachstumstreiber. Mittelfristig erwarten wir in den USA eine nahezu gleichbleibende Wachstumsdynamik und ein solides Wachstum (+2,9 %).

### Für das Jahr 2011 gehen wir von folgenden Rahmenbedingungen aus:

- Erholung der Weltwirtschaft setzt sich fort, solides Wachstum (+3,3 %)
- Schwächeres Wachstum in den Industrieländern (+2,2 %); Vorkrisenniveau wird größtenteils wieder erreicht
- Verglichen mit dem Vorjahr kaum verändertes, eher schwaches Wachstum in Europa (+1,7 %)
- Solides Wachstum in den USA (+2,9 %); starkes Wachstum in Asien (ohne Japan) (+7,4 %) und in Südamerika (+4,5 %); schwaches Wachstum in Japan (+1,1 %)
- Wechselkurs durchschnittlich 1,35 US\$ pro Euro
- Ölpreis im Jahresdurchschnitt 90 US\$/Barrel

Das Wirtschaftswachstum in **Asien (ohne Japan)** wird 2011 leicht an Dynamik verlieren (+7,4 %), da die wachstumsbeschleunigenden Konjunkturprogramme Chinas auslaufen. Durch eine weitere Aufwertung der chinesischen Währung wird sich das Importwachstum Chinas stabilisieren, die Exportkonjunktur dagegen abschwächen. Positive Impulse für die Region erwarten wir von der Binnennachfrage. Mittelfristig rechnen wir mit einem hohen jährlichen Wachstum des regionalen Bruttoinlandsprodukts (+7,1 %), das insbesondere vom starken Wachstum der Industrieproduktion bestimmt wird.

In **Japan** wird das Wirtschaftswachstum im Jahr 2011 wieder zurückgehen (+1,1 %). Auf Grund der sinkenden weltwirtschaftlichen Dynamik und infolge eines relativ starken japanischen Yen wird das Exportwachstum schwächer ausfallen als im Vorjahr. Neben der generellen Konsumzurückhaltung der japanischen Verbraucher wird die Beendigung der staatlichen Konjunkturprogramme dazu beitragen, dass sich die Wachstumsrate normalisiert. Mittelfristig erwarten wir ein moderates jährliches Wachstum (+1,5 %).

Auch in **Südamerika** wird das Wachstum des Bruttoinlandsprodukts 2011 schwächer sein als im Vorjahr. Dennoch wächst die Region deutlich (+4,5 %), vor allem auf Grund der steigenden Binnennachfrage und der zunehmenden Rohstoffexporte. Mittelfristig rechnen wir mit einem robusten jährlichen Wirtschaftswachstum (+3,8 %).

### Aussichten wichtiger Abnehmerbranchen

Im Jahr 2011 wächst die globale Industrieproduktion weiter stark (+5,0 %) – das Vorkrisenniveau wird übertroffen. In den Industrieländern rechnen wir mit einer moderaten Zunahme der Produktion, in den asiatischen Schwellenländern mit einem kräftigen Wachstum.

Die weltweite Produktionsmenge der **Automobilindustrie** steigt 2011 kräftig, wenn auch weniger stark als im Vorjahr. Da viele Käufe im Rahmen der Abwrackprämienprogramme vorgezogen wurden, geht insbesondere in Europa die Nachfrage zurück; die Produktion bleibt aber verglichen mit dem Jahr 2010 exportgetrieben auf hohem Niveau. In den USA wird die Automobilproduktion weiter zunehmen, auf Stückzahlbasis jedoch unter dem Vorkrisenniveau liegen. In Asien, insbesondere in China, wird die Wachstumsdynamik der Automobilproduktion nachlassen.

Die **Bauwirtschaft** wird im Jahr 2011 wieder weltweit wachsen. Motor für diese Entwicklung sind insbesondere die Schwellenländer. In den Industrieländern bleibt die private und gewerbliche Bauaktivität nach wie vor schwach.

Die **Elektroindustrie** und die **Informations- und Kommunikationstechnologieindustrie (ICT)** werden auch 2011 weltweit überdurchschnittlich wachsen. Impulse kommen vor allem aus Asien (ohne Japan). In Europa und Japan erwarten wir ein schwächeres Wachstum als im Vorjahr.

Die Produktion in der **Papierindustrie** wird vom Wachstum in den Schwellenländern profitieren und sich 2011 weltweit stabilisieren. In der **Textilindustrie** rechnen wir in den Schwellen- und Entwicklungsländern mit einem anhaltend hohen Wachstum, in den Industrieländern schwächt sich das Wachstum dagegen ab.

Für die **Nahrungsmittelindustrie** erwarten wir im Jahr 2011 ein überdurchschnittliches Wachstum der globalen Produktion. Für die **Landwirtschaft** gehen wir weltweit von einem robusten durchschnittlichen Produktionswachstum aus.

### Aussichten wichtiger Abnehmerbranchen für 2011

- Weiterhin starkes Wachstum der globalen Industrieproduktion (+5,0 %)
- Automobilindustrie: Kräftiges Wachstum, wenn auch weniger stark als im Vorjahr
- Bauwirtschaft: Weltweites Wachstum, Impulse kommen insbesondere aus Schwellenländern
- Elektroindustrie und ICT: Starkes weltweites Wachstum

- Papierindustrie: Stabilisierung der weltweiten Produktion
- Textilindustrie: Wachstum, besonders stark in Schwellenländern
- Nahrungsmittelindustrie: Überdurchschnittliches Wachstum der globalen Produktion
- Landwirtschaft: Robustes Produktionswachstum weltweit

## Aussichten der chemischen Industrie

Das Wachstum der weltweiten Chemieproduktion (ohne Pharma) wird sich 2011 nach der rasanten Erholung im Vorjahr in allen Regionen verlangsamen. Wir rechnen mit einem deutlichen Wachstum (+5,2 %), das wir auch mittelfristig jährlich erwarten. Die meisten Industrieländer werden das Produktionsniveau der Vorkrisenzeit jedoch nicht vor Ende 2011 erreichen.

Für **Europa** prognostizieren wir im Jahr 2011 ein vergleichsweise moderates Wachstum (+2,9 %) der Chemieindustrie. In der Europäischen Union werden sich wichtige Abnehmerindustrien auf nationaler Ebene unterschiedlich schnell erholen. Mittelfristig erwarten wir ein moderates Wachstum der Chemieproduktion (+2,7 %). Das Niveau der Vorkrisenzeit wird damit erst im Jahr 2012 wieder erreicht.

Die Wachstumsrate der Chemieproduktion wird in den **USA** 2011 höher ausfallen (+3,3 %) als in anderen großen Industrieländern. Auf Grund niedrigerer Gaspreise rechnen wir mit einer größeren Wettbewerbsfähigkeit des US-Chemiesektors. Mittelfristig erwarten wir ein moderates jährliches Wachstum (+2,4 %).

In **Asien (ohne Japan)** verzeichnete die Chemieproduktion im Jahr 2010 einen massiven Aufschwung, vor allem dank des Wachstums der von staatlichen Konjunkturprogrammen profitierenden chinesischen Chemieindustrie. Infolge der auslaufenden fiskalpolitischen Programme erwarten wir für 2011 ein im Vorjahresvergleich niedrigeres, aber nach wie vor starkes Wachstum in der Region (+9,6 %) – insbesondere in China (+12,1 %). Auch mittelfristig erwarten wir ein kräftiges jährliches Wachstumsplus (+8,5 %).

Die Chemieindustrie in **Japan** profitierte 2010 erheblich von der Erholung der exportorientierten heimischen Automobil- und Elektronikindustrie. 2011 wird sie deutlich geringer wachsen (+1,9 %). Wir erwarten, dass der krisenbedingte Produktionseinbruch weitere strukturelle Veränderungen mit sich bringt und erst im Jahr 2015 vollständig kompensiert sein wird. Mittelfristig wird sich die Produktion bei niedrigen jährlichen Wachstumsraten stabilisieren (+1,4 %).

Die Chemieproduktion in **Südamerika** wird im Jahr 2011 auf Grund der robusten Binnennachfrage erneut wachsen (+4,3 %). Als Zulieferindustrie profitiert sie in der Region zusätzlich von den ansteigenden Bau- und Infrastrukturinvestitionen in Brasilien. Mittelfristig rechnen wir mit einem soliden durchschnittlichen Wachstum (+3,5 %).

### Ausblick zur Chemieproduktion 2011 (ohne Pharma) (Reale Veränderung gegenüber Vorjahr)

|                  |       |                                                                                       |
|------------------|-------|---------------------------------------------------------------------------------------|
| Welt             | 5,2 % |   |
| EU               | 2,9 % |  |
| USA              | 3,3 % |  |
| Asien ohne Japan | 9,6 % |  |
| Japan            | 1,9 % |  |
| Südamerika       | 4,3 % |  |

### Trends Chemieproduktion 2011–2013 (ohne Pharma) (Reale jährliche Veränderung im Durchschnitt)

|                  |       |                                                                                       |
|------------------|-------|---------------------------------------------------------------------------------------|
| Welt             | 4,7 % |  |
| EU               | 2,7 % |  |
| USA              | 2,4 % |  |
| Asien ohne Japan | 8,5 % |  |
| Japan            | 1,4 % |  |
| Südamerika       | 3,5 % |  |

## Aussichten der chemischen Industrie für 2011

- Weltweit deutliches Wachstum der Chemieproduktion (+5,2 %)
- Europa: Vergleichsweise moderates Wachstum (+2,9 %)
- USA: Stärkeres Wachstum (+3,3 %) als in anderen Industrieländern
- Asien (ohne Japan): Wachstum im Vorjahresvergleich niedriger, aber nach wie vor kräftig (+9,6 %), insbesondere in China (+12,1 %)

- Japan: Deutlich geringeres Wachstum als im Vorjahr (+1,9 %)
- Südamerika: Starkes Wachstum (+4,3 %), vor allem auf Grund robuster Binnennachfrage

## Ausblick und Chancen der BASF-Gruppe

### Profitables Wachstum mit der richtigen Strategie

**Die BASF hat im Jahr 2010 das günstige wirtschaftliche Umfeld genutzt und bei Umsatz und Ergebnis neue Spitzenwerte erzielt. Die Nachfrage nach chemischen Produkten war stark, Wachstumsimpulse kamen aus allen Regionen. Die erfolgreiche Integration der Ciba-Geschäfte und unsere Initiativen zur Steigerung der operativen Exzellenz haben maßgeblich zu dieser Entwicklung beigetragen.**

**Wir rechnen damit, dass sich das Wirtschaftswachstum im Jahr 2011 verlangsamt. Ohne Berücksichtigung von Akquisitionen oder Devestitionen wollen wir Absatz und Umsatz leicht steigern. Der Umsatz wird zusätzlich durch die Einbeziehung der Cognis-Geschäfte gestärkt. Insgesamt streben wir an, bei Umsatz und Ergebnis der Betriebstätigkeit die Spitzenwerte des Jahres 2010 signifikant zu übertreffen.**

#### Chancen

Im Jahr 2011 können sich für uns Chancen aus einem stärkeren Wachstum der globalen Wirtschaft und unserer Abnehmerbranchen ergeben. Sinkende Rohstoffkosten, eine anhaltende Produktknappheit – insbesondere in den Segmenten Chemicals und Plastics – sowie eine Aufwertung des US-Dollar würden sich darüber hinaus positiv auf unsere Margen auswirken. Zusätzliche Chancen für unser Segment Oil & Gas bestehen darin, dass unsere Erkundungsbohrungen erfolgreicher verlaufen und die Lagerstättenausbeute höher ausfällt als erwartet.

Durch den Erwerb von Ciba und Cognis haben wir unser Portfolio um innovationsgetriebene Geschäfte erweitert, die über dem Branchendurchschnitt wachsen und unser Portfolio noch konjunkturrobuster machen. Mit der profitablen Weiterentwicklung der kombinierten Geschäfte wollen wir im Segment Performance Products ab 2013 eine EBITDA-Marge von mindestens 20 % erzielen.

Ein wichtiger Schritt in unserem aktiven Portfoliomanagement ist die Gründung von Styrolution: Hierzu wollen die BASF und INEOS ihre Styrol-Aktivitäten in ein 50:50-Gemeinschaftsunternehmen einbringen. Eine entsprechende

Absichtserklärung ist im November 2010 unterzeichnet worden. Styrolution soll das weltweit führende Unternehmen für Styrolkunststoffe werden und bei Effizienz, Kundenservice, Produktqualität und Wettbewerbsfähigkeit neue Maßstäbe setzen.

Chancen ergeben sich außerdem durch den Ausbau unserer Präsenz in stark wachsenden Schwellenländern. So wollen wir beispielsweise die langjährige erfolgreiche Zusammenarbeit mit unseren Partnern PETRONAS in Malaysia und Sinopec in China weiter vertiefen. Hierzu haben wir zwei wichtige Vereinbarungen für zukünftige gemeinsame Projekte zum Ausbau unserer Zusammenarbeit im Bereich der Spezialitätenchemie unterzeichnet.

Globale Megatrends wie Bevölkerungswachstum, zunehmende Verstädterung und steigender Ressourcen- und Energiebedarf geben die Zielrichtung für unsere zukunftsorientierten Projekte vor. Unsere Konzernforschung ist ein strategisches Instrument, um Wachstumsfelder zu erschließen und unsere technische und methodische Kompetenz langfristig zu sichern. Im Jahr 2015 wollen wir allein mit Produktinnovationen – also neuen oder verbesserten Produkten oder Anwendungen, die nicht länger als fünf Jahre auf dem Markt sind – einen Umsatz von bis zu 8 Milliarden € erzielen. Vor allem die Segmente Agricultural Solutions und Performance Products werden in den nächsten Jahren durch Produktinnovationen zu profitabilem Wachstum beitragen.

#### Risiken

Wie im Risikobericht auf den Seiten 103 bis 111 ausführlich dargestellt, bestehen für unsere Geschäftsentwicklung unter anderem folgende Risiken:

- Schwächeres Geschäftsvolumen auf Grund des geringeren Wachstums unserer Abnehmerbranchen
- Verschärfung der Schuldenkrise
- Margenrückgänge infolge von steigenden Rohstoffpreisen oder Überkapazitäten, vor allem bei Grundprodukten und Kunststoffen
- Volatilität von Wechselkursen

#### Ausblick 2011

Im Jahr 2011 wird sich das Wirtschaftswachstum voraussichtlich verlangsamen. Ohne Berücksichtigung von Akquisitionen oder Devestitionen wollen wir Absatz und Umsatz leicht steigern. Der Umsatz wird zusätzlich durch die Einbeziehung der Cognis-Geschäfte gestärkt. Insgesamt streben wir an, bei Umsatz und Ergebnis der Betriebstätigkeit die Spitzenwerte des Jahres 2010 signifikant zu übertreffen. Wir werden auch 2011 eine hohe Prämie auf unsere Kapitalkosten verdienen.

- Lieferengpässe durch Ausfall von Produktionsanlagen oder mangelnde Rohstoffverfügbarkeit
- Steigende Personalkosten
- Wachsende geopolitische Spannungen
- Protektionismus und die Errichtung neuer Handelsbarrieren

Auf Basis der derzeit verfügbaren Informationen bestehen nach unserer Einschätzung gegenwärtig und in absehbarer Zukunft keine wesentlichen Einzelrisiken, die den Fortbestand der BASF-Gruppe gefährden. Auch die Gesamtsumme der einzelnen Risiken gefährdet den Fortbestand der BASF-Gruppe nicht.

### Prognose

Ausgehend von den auf den Seiten 112 bis 114 dargestellten wirtschaftlichen Rahmenbedingungen, erwarten wir im Jahr 2011 einen leichten Anstieg von Absatz und Umsatz – ohne Berücksichtigung von Akquisitionen oder Devestitionen. Zusätzlich wird der Umsatz durch die Einbeziehung von Cognis um circa 3 Milliarden € zunehmen; insgesamt rechnen wir mit einem signifikanten Umsatzwachstum. Durch die regional sehr unterschiedlichen Wachstumsraten werden die Anteile Asiens und Südamerikas an unserem Gesamtumsatz steigen.

Für das Jahr 2011 rechnen wir auf Grund zusätzlicher Kapazitäten und anhaltend hoher Rohstoffpreise in einigen Bereichen, insbesondere in den Segmenten Chemicals und Plastics, mit zunehmendem Margendruck. Vor diesem Hintergrund werden wir unsere Effizienz- und Restrukturierungsprogramme konsequent fortsetzen. So steigern wir unsere operative Exzellenz beispielsweise durch zahlreiche Einzelprojekte im Rahmen des 2008 gestarteten Programms NEXT. Ab 2012 wollen wir hierdurch Ergebnisverbesserungen von jährlich mehr als 1 Milliarde € erzielen. Zugleich werden im Jahr 2011 bereits Synergien von mehr als 350 Millionen € aus der Ciba-Integration ergebniswirksam. Gegenläufig wirken sich die ab 2011 anfallenden Kosten für die Cognis-Integration aus.

Insgesamt streben wir an, beim Ergebnis der Betriebstätigkeit den Spitzenwert des Jahres 2010 signifikant zu übertreffen. Wir werden auch 2011 eine hohe Prämie auf unsere Kapitalkosten verdienen. Sofern sich das wirtschaftliche Wachstum

fortsetzt, erwarten wir im Jahr 2012 einen weiteren Anstieg von Umsatz und Ergebnis.

→ **Die erwartete Geschäftsentwicklung in den Segmenten und Unternehmensbereichen ist auf den Seiten 46 bis 80 erläutert.**

→ **Informationen zu unseren Finanzierungsgrundsätzen auf Seite 41**

Zur Weiterentwicklung unserer Chemieaktivitäten planen wir in den kommenden fünf Jahren Investitionen von rund 8,2 Milliarden €. Darunter fallen unter anderem die stufenweise Erweiterung des Verbundstandorts Nanjing/China sowie der Bau einer MDI-Anlage in Chongqing/China. Darüber hinaus stärken wir unser Spezialchemikaliengeschäft, beispielsweise durch den Bau einer Produktionsanlage für die Aromachemikalie L-Menthol in Ludwigshafen. Der Schwerpunkt der Investitionen im Segment Oil & Gas von insgesamt 4,4 Milliarden € bis 2015 liegt zum einen auf dem Ausbau unserer Gastransport- und Speicherinfrastruktur – hierzu gehört der Bau der Transitpipelines OPAL und NEL sowie des Erdgasspeichers Jemgum und die Erweiterung des Erdgasspeichers Haidach –, zum anderen investieren wir verstärkt in die Exploration und Produktion von Gas- und Ölvorkommen in Sibirien und Norwegen.

### Dividende

Wir stehen zu unserer anspruchsvollen Dividendenpolitik und bieten unseren Aktionären weiterhin eine attraktive Dividendenrendite. Daher schlagen Vorstand und Aufsichtsrat der Hauptversammlung vor, eine Dividende von 2,20 € je Aktie auszuschütten. Wir streben an, die Dividende jährlich zu steigern, zumindest aber auf dem Niveau des jeweiligen Vorjahres zu halten.

### Nachtragsbericht

Die politische Lage in Libyen hat sich im Februar 2011 verschärft. Um unsere Mitarbeiter vor Ort zu schützen, haben wir die Produktion von Öl in der achten Kalenderwoche vorsorglich eingestellt. Momentan lässt sich nicht abschätzen, wann wir die Anlagen wieder in Betrieb nehmen werden.

Ansonsten haben sich seit Beginn des Geschäftsjahres 2011 keine wesentlichen Änderungen der Unternehmenssituation und des Branchenumfeldes ergeben.

#### Investitionen in Sachanlagevermögen nach Segmenten 2011–2015

|   |                                |      |
|---|--------------------------------|------|
| 1 | Chemicals                      | 15 % |
| 2 | Plastics                       | 14 % |
| 3 | Performance Products           | 14 % |
| 4 | Functional Solutions           | 6 %  |
| 5 | Agricultural Solutions         | 4 %  |
| 6 | Oil & Gas                      | 35 % |
| 7 | Sonstiges (Infrastruktur, F+E) | 12 % |

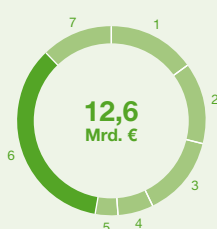

#### Investitionen in Sachanlagevermögen nach Regionen 2011–2015

|   |                                     |      |
|---|-------------------------------------|------|
| 1 | Europa                              | 63 % |
| 2 | Nordamerika                         | 14 % |
| 3 | Asien, Pazifischer Raum             | 17 % |
| 4 | Südamerika, Afrika, Naher Osten     | 4 %  |
| 5 | Standortalternativen werden geprüft | 2 %  |

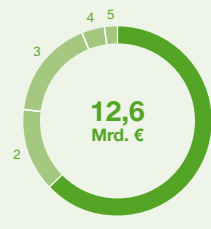



# 3

## Nachhaltiger Küstenschutz

Elastocoast®, ein Verbund aus BASF-Spezialkunststoffen und Schotter, sichert Deiche gegen die Kraft des Wassers. Das schützt Küsten langfristig vor Erosion und hilft so Mensch und Natur.

→ Mehr zu Spezialkunststoffen ab Seite 52

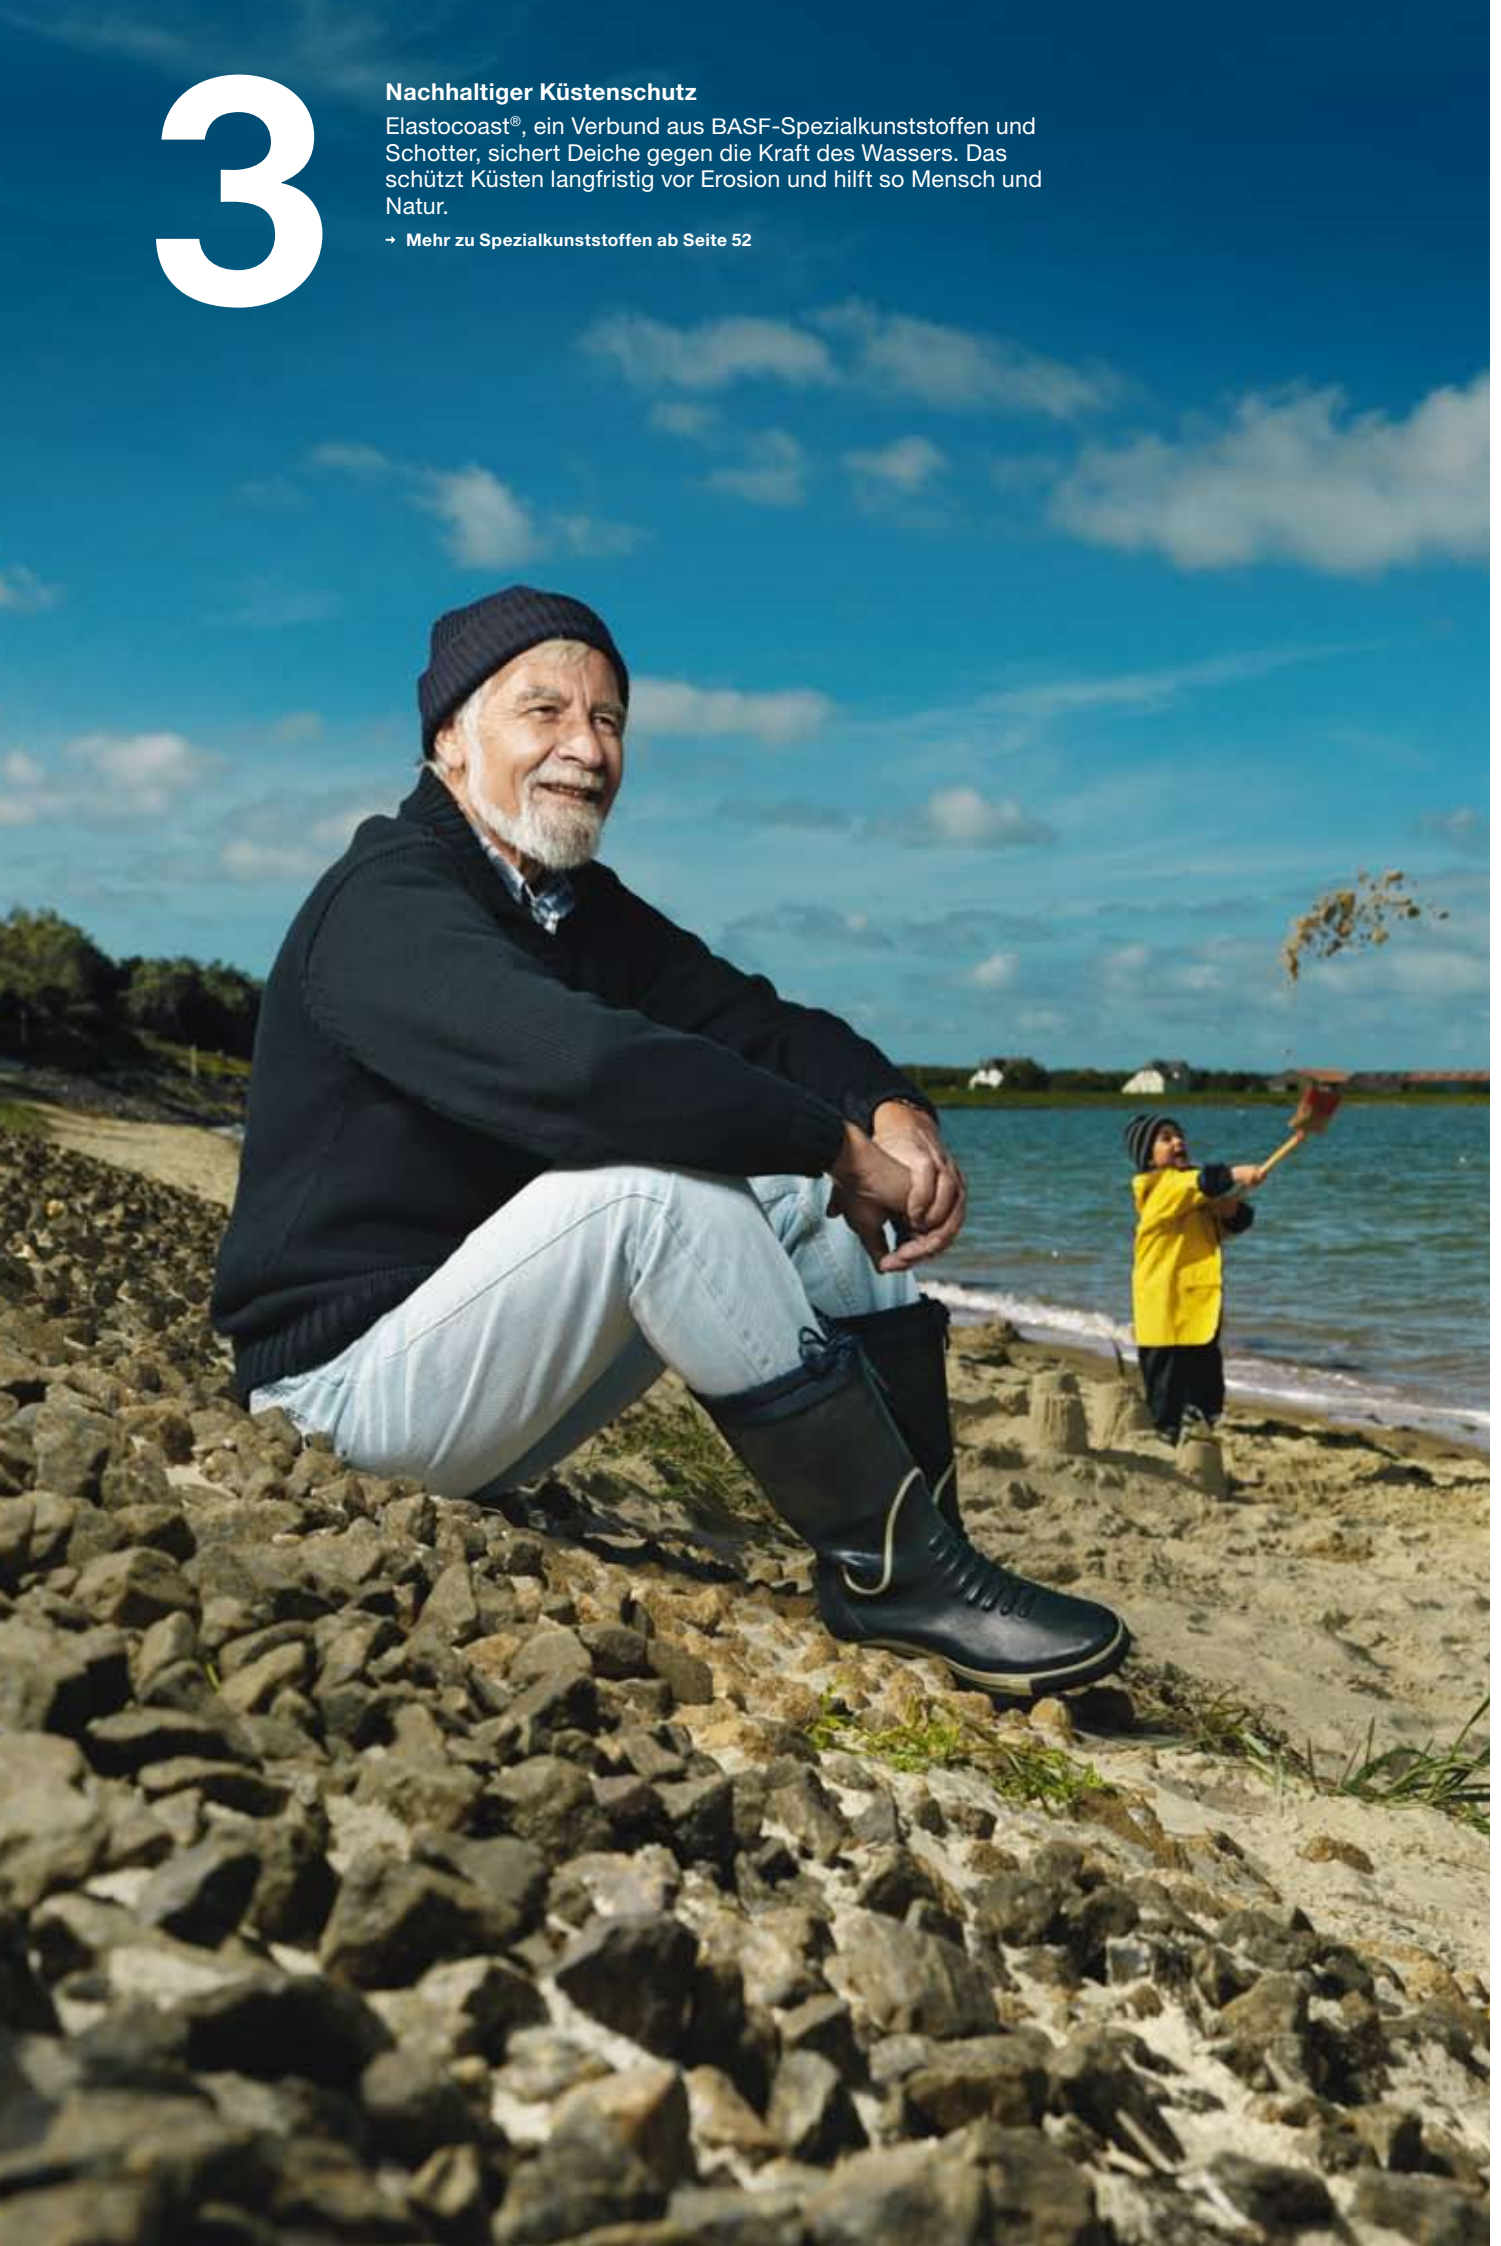

# Corporate Governance-Bericht

- 117** Corporate Governance der BASF-Gruppe
- 122** Organe der Gesellschaft
- 125** Vergütungsbericht
- 131** Bericht des Aufsichtsrats
- 134** Entsprechenserklärung

## Corporate Governance der BASF-Gruppe

**Corporate Governance umfasst das gesamte System der Leitung und Überwachung eines Unternehmens, einschließlich seiner Organisation, seiner geschäftspolitischen Grundsätze und Leitlinien sowie der internen und externen Kontroll- und Überwachungsmechanismen. Gute und transparente Corporate Governance gewährleistet eine verantwortliche, auf Wertschöpfung ausgerichtete Leitung und Kontrolle des Unternehmens. Sie fördert das Vertrauen der nationalen und internationalen Anleger, der Finanzmärkte, der Kunden und anderen Geschäftspartner, der Mitarbeiter sowie der Öffentlichkeit in die BASF.**

Seit dem 14. Januar 2008 besteht die BASF in der europäischen Rechtsform der Europäischen Aktiengesellschaft. Eine ganz wesentliche Zielsetzung der Umwandlung der BASF Aktiengesellschaft in die BASF SE war die Fortentwicklung der Corporate-Governance-Struktur der BASF. Die Verkleinerung des Aufsichtsrats auf zwölf Mitglieder bei Beibehaltung der paritätischen Besetzung aus Vertretern der Aktionäre und der Arbeitnehmer sowie die Europäisierung der Arbeitnehmerseite sind bedeutende Weichenstellungen für eine moderne und effiziente Unternehmensverfassung. Bewährte Strukturen, wie das duale Leitungssystem mit Vorstand und Aufsichtsrat, werden in der SE beibehalten.

### Leitung und Überwachung

Gesetzliche Grundlagen der Unternehmensverfassung der BASF SE sind im Wesentlichen die SE-Verordnung der Europäischen Union (SE-VO), das deutsche SE-Ausführungsgesetz und das deutsche Aktiengesetz. Trotz dieser neuen gesetzlichen Grundlagen bleiben die wesentlichen Bestandteile der bewährten Unternehmensverfassung der deutschen Aktiengesellschaft in der BASF SE unverändert: das duale Leitungssystem mit Vorstand und Aufsichtsrat, die paritätische Besetzung des Aufsichtsrats mit Vertretern der Aktionäre und der Arbeitnehmer, die Mitverwaltungs- und Kontrollrechte der Aktionäre in der Hauptversammlung.

### Leitung und Geschäftsführung durch den Vorstand

Im dualen Leitungssystem der BASF SE leitet der Vorstand das Unternehmen in eigener Verantwortung und vertritt die BASF SE bei Geschäften mit Dritten. Der Vorstand ist personell strikt vom Aufsichtsrat getrennt: Kein Mitglied des Vorstands kann zugleich Mitglied des Aufsichtsrats sein. Der Vorstand legt die Unternehmensziele und die strategische Ausrichtung der BASF-Gruppe fest. Er steuert und überwacht die Geschäftseinheiten der BASF-Gruppe durch Planung und Festlegung des Unternehmensbudgets, durch Allokation von Ressourcen und Managementkapazitäten, durch Begleitung und Entscheidung wesentlicher Einzelmaßnahmen und durch Kontrolle der operativen Geschäftsführung. Sein Handeln und seine Entscheidungen richtet er dabei am Unternehmensinteresse aus. Er

verpflichtet sich dem Ziel einer nachhaltigen Steigerung des Unternehmenswerts. Der Vorstand trifft Entscheidungen, die durch Gesetz, die Geschäftsordnung des Vorstands oder Beschluss des Vorstands dem Gesamtvorstand vorbehalten sind, grundsätzlich mit einfacher Mehrheit. Bei Stimmengleichheit entscheidet die Stimme des Vorstandsvorsitzenden. Ein Vetorecht gegen Beschlüsse des Vorstands hat der Vorstandsvorsitzende nicht. Im Übrigen ist jedes Vorstandsmitglied in den ihm zugewiesenen Arbeitsgebieten einzeln entscheidungsbefugt.

Der Vorstand berichtet dem Aufsichtsrat regelmäßig, zeitnah und umfassend über alle für das Unternehmen relevanten Fragen der Planung, der Geschäftsentwicklung, der Risikolage und des Risikomanagements und stimmt mit dem Aufsichtsrat die strategische Ausrichtung des Unternehmens ab. Für bestimmte in der Satzung der BASF SE festgelegte Geschäfte der Gesellschaft muss der Vorstand vor Abschluss die Zustimmung des Aufsichtsrats einholen. Dazu gehören der Erwerb und die Veräußerung von Unternehmen und Unternehmensteilen und die Emission von Anleihen und vergleichbaren Finanzinstrumenten, sofern der Erwerbs- oder Veräußerungspreis beziehungsweise der Emissionsbetrag im Einzelfall 3 % des im jeweils letzten festgestellten Konzernabschluss der BASF-Gruppe ausgewiesenen Eigenkapitals übersteigt.

→ Die Mitglieder des Vorstands und die von ihnen wahrgenommenen Mandate in Aufsichtsorganen anderer Gesellschaften sind auf Seite 122 aufgeführt. Die Vergütung des Vorstands wird ausführlich im Vergütungsbericht auf den Seiten 125 bis 129 dargestellt.

### Überwachung der Unternehmensleitung durch den Aufsichtsrat

Der Aufsichtsrat bestellt die Mitglieder des Vorstands und überwacht und berät diesen bei der Leitung des Unternehmens. Mitglieder des Aufsichtsrats können nicht zugleich dem Vorstand angehören, wodurch bereits strukturell ein hohes Maß an Unabhängigkeit bei der Überwachung des Vorstands sichergestellt ist.

Mit dem Rechtsformwechsel in eine SE sind wesentliche Veränderungen beim Aufsichtsrat eingetreten. Das deutsche Mitbestimmungsgesetz, die für die Aktiengesellschaft maßgebliche Rechtsgrundlage für Größe und Zusammensetzung des Aufsichtsrats, gilt für die SE nicht. Maßgebliche Rechtsgrundlagen sind vielmehr neben der SE-Verordnung die Satzung der BASF SE und die Vereinbarung über die Beteiligung der Arbeitnehmer in der BASF SE (Beteiligungsvereinbarung), die am 15. November 2007 zwischen der Unternehmensleitung und den Vertretern der europäischen Arbeitnehmer der BASF-Gruppe abgeschlossen worden ist.

→ Mehr zur Satzung der BASF SE und zur Beteiligungsvereinbarung unter [basf.com/investor/cg\\_d](http://basf.com/investor/cg_d)

Der Aufsichtsrat der BASF SE besteht aus zwölf Mitgliedern. Sechs Mitglieder werden von den Aktionären in der Hauptversammlung gewählt. Die anderen sechs Mitglieder werden vom BASF Europa Betriebsrat, der Vertretung der europäischen Arbeitnehmer der BASF-Gruppe, entsprechend den Vorgaben der Beteiligungsvereinbarung bestellt.

→ **Die Mitglieder des Aufsichtsrats der BASF SE und die von ihnen wahrgenommenen Mandate in Aufsichtsorganen anderer Gesellschaften sind auf den Seiten 123 und 124 aufgeführt. Die Vergütung des Aufsichtsrats wird ausführlich im Vergütungsbericht auf den Seiten 129 und 130 dargestellt.**

Ein wichtiges Anliegen guter Corporate Governance ist es, eine dem Unternehmen angemessene Besetzung der verantwortlichen Unternehmensorgane Vorstand und Aufsichtsrat sicherzustellen. Kriterien hierfür sind die fachliche und persönliche Qualifikation, die Vielfalt der Zusammensetzung und die Unabhängigkeit des Aufsichtsrats. In ihrer Gesamtheit sollen Vorstand und Aufsichtsrat mit Persönlichkeiten besetzt sein, die eine ausgewogene Berücksichtigung aller für die Leitung und Überwachung der BASF als einem großen, weltweit tätigen und kapitalmarktorientierten Unternehmen der chemischen Industrie erforderlichen Kenntnisse, Fähigkeiten und persönlichen Voraussetzungen gewährleisten.

In seiner Sitzung am 21. Oktober 2010 hat der Aufsichtsrat gemäß Ziffer 5.4.1 des Deutschen Corporate Governance Kodex konkrete **Ziele für die Zusammensetzung des Aufsichtsrats** beschlossen. Danach soll der Aufsichtsrat in seiner Gesamtheit durch seine Mitglieder über besondere Kenntnisse, Fähigkeiten und fachliche Erfahrungen

- in der Führung eines international tätigen Unternehmens,
- in industrieübergreifender Wertschöpfung entlang unterschiedlicher Wertschöpfungsketten,
- in der Anwendung von Rechnungslegungsgrundsätzen und internen Kontrollverfahren und
- auf dem Gebiet technischer und wissenschaftlicher Innovationen im Bereich der Chemie, chemienaher und Chemieprodukte verwendender Gebiete

verfügen. Im Hinblick auf Vielfalt sollen im Aufsichtsrat unterschiedliche berufliche und internationale Erfahrungen und die Beteiligung von Frauen berücksichtigt werden. Personen, bei denen ein Interessenkonflikt bestehen kann, sollen nicht zur Wahl in den Aufsichtsrat vorgeschlagen werden. Dies gilt grundsätzlich auch für Personen, die am Tag der Wahl das 70. Lebensjahr vollendet haben.

In Übereinstimmung mit diesen Zielen schlägt der Aufsichtsrat der Hauptversammlung am 6. Mai 2011 die Nachwahl von Frau Anke Schäferkordt als Mitglied des Aufsichtsrats für Herrn Stephen K. Green vor, der sein Aufsichtsratsmandat wegen seiner Berufung als britischer Minister für Handel und Investitionen niedergelegt hat. Dem aus zwölf Mitgliedern bestehenden

Aufsichtsrat werden damit zwei Frauen angehören. Wir sind bestrebt, bei der nächsten turnusgemäßen Aufsichtsratswahl im Jahr 2014 den Anteil von Frauen mindestens beizubehalten oder wenn möglich zu erhöhen. Der Nominierungsausschuss wird in seinen Auswahlprozess sowohl entsprechend qualifizierte Frauen als auch Personen mit internationalem Erfahrungshintergrund einbeziehen. Wir sind der Überzeugung, dass mit der gegenwärtigen Besetzung die vom Aufsichtsrat am 21. Oktober 2010 beschlossenen Ziele für seine Zusammensetzung bereits weitgehend erfüllt sind.

Der Aufsichtsrat trifft seine Entscheidungen durch Beschlüsse, die mit einfacher Mehrheit der bei der Abstimmung teilnehmenden Aufsichtsratsmitglieder gefasst werden. Bei Stimmengleichheit entscheidet die Stimme des Vorsitzenden, der immer ein von den Aktionären gewähltes Aufsichtsratsmitglied sein muss. Dieses Beschlussverfahren gilt auch für die Bestellung und Abberufung von Vorstandsmitgliedern durch den Aufsichtsrat.

Der Aufsichtsrat der BASF SE hat insgesamt drei Aufsichtsratsausschüsse eingerichtet: den Personalausschuss, den Prüfungsausschuss und den Nominierungsausschuss.

Der **Personalausschuss** bereitet unter anderem die Bestellung der Vorstandsmitglieder durch den Aufsichtsrat und die mit den Vorstandsmitgliedern abzuschließenden Anstellungsverträge vor. Bei den Vorschlägen für die Berufung von Mitgliedern des Vorstands achtet der Personalausschuss auf deren fachliche Eignung, internationale Erfahrung und Führungsqualität, die langfristige Nachfolgeplanung sowie auf Vielfalt (Diversity) und insbesondere die angemessene Berücksichtigung von Frauen. Außerdem bereitet er die Beschlussfassung des Aufsichtsrats über das System und die Festsetzung der Höhe der Vorstandsvergütung vor. Dem Ausschuss gehören der Aufsichtsratsvorsitzende Dr. h.c. Eggert Voscherau als Vorsitzender, die stellvertretenden Aufsichtsratsvorsitzenden Michael Diekmann und Robert Oswald sowie Michael Vassiliadis an.

Der **Prüfungsausschuss** bereitet die Verhandlungen und Beschlüsse des Aufsichtsrats zur Billigung des Jahres- und Konzernabschlusses vor und erörtert die Quartals- und Halbjahresberichte vor ihrer Veröffentlichung mit dem Vorstand. Darüber hinaus befasst er sich mit der Überwachung des Rechnungslegungsprozesses, der Abschlussprüfung, der Wirksamkeit des internen Kontrollsystems, des Risikomanagementsystems, des internen Revisionssystems sowie mit Fragen der Compliance. Der Prüfungsausschuss ist zudem für die Beziehungen zum Abschlussprüfer der Gesellschaft zuständig: Er bereitet den Vorschlag des Aufsichtsrats an die Hauptversammlung zur Wahl des Abschlussprüfers vor, überwacht dessen Unabhängigkeit, legt gemeinsam mit dem Abschlussprüfer die Schwerpunkte der Abschlussprüfung fest, vereinbart das Prüfungshonorar und legt die Bedingungen für die Erbringung von Leistungen außerhalb der Abschlussprüfung durch den



Abschlussprüfer fest. Der Prüfungsausschuss ist berechtigt, alle von ihm als erforderlich angesehenen Auskünfte vom Abschlussprüfer und vom Vorstand einzuholen. Er kann zudem in alle Geschäftsunterlagen der BASF Einsicht nehmen und diese und alle anderen Vermögensgegenstände der BASF prüfen. Mit diesen Prüfungen kann der Prüfungsausschuss auch Sachverständige wie Wirtschaftsprüfer und Rechtsanwälte beauftragen. Mitglieder dieses Ausschusses sind Max Dietrich Kley als Vorsitzender, Ralf-Gerd Bastian, Franz Fehrenbach und Michael Vassiliadis. Max Dietrich Kley verfügt über besondere Kenntnisse und Erfahrungen in der Anwendung von Rechnungslegungsgrundsätzen und internen Kontrollverfahren; er war bis April 2003 Finanzvorstand der BASF Aktiengesellschaft.

Entsprechend der Empfehlung des Deutschen Corporate Governance Kodex hat der Aufsichtsrat der BASF SE einen **Nominierungsausschuss** eingesetzt, der die Vorschläge an die Hauptversammlung zur Wahl der Aufsichtsratsmitglieder vorbereiten soll. Dem Nominierungsausschuss gehören die von der Hauptversammlung gewählten Mitglieder des Aufsichtsrats an, also Dr. h.c. Eggert Voscherau, Prof. Dr. François Diederich, Michael Diekmann, Franz Fehrenbach, Stephen K. Green (bis 16. Dezember 2010), Max Dietrich Kley und Anke Schäferkordt (seit 17. Dezember 2010).

### Rechte der Aktionäre

Die Aktionäre nehmen ihre Mitverwaltungs- und Kontrollrechte in der Hauptversammlung wahr. Jede Aktie der BASF SE gewährt eine Stimme. Nach der von der Hauptversammlung am 29. April 2010 beschlossenen Umstellung der BASF-Aktie auf die Namensaktie im August 2010 sind diejenigen Personen als Aktionäre stimmberechtigt, die im Aktienregister eingetragen sind. Eintragungsbeschränkungen und insbesondere eine Begrenzung der auf einen Aktionär höchstens eingetragenen Aktien bestehen nicht. Die Aktionäre haben die Möglichkeit, ihr Stimmrecht in der Hauptversammlung selbst auszuüben oder es durch einen Bevollmächtigten ihrer Wahl oder durch einen weisungsgebundenen Stimmrechtsvertreter der Gesellschaft ausüben zu lassen. Eine Höchstgrenze für Stimmrechte eines Aktionärs oder Sonderstimmrechte bestehen nicht. Damit ist das Prinzip „one share, one vote“ vollständig umgesetzt. Jeder im Aktienregister eingetragene Aktionär ist berechtigt, an der Hauptversammlung teilzunehmen, dort das Wort zu den jeweiligen Tagesordnungspunkten zu ergreifen und Auskunft über Angelegenheiten der Gesellschaft zu verlangen, soweit dies zur sachgemäßen Beurteilung eines Gegenstands der Tagesordnung erforderlich ist. Die Hauptversammlung wählt die Hälfte der Mitglieder des Aufsichtsrats und beschließt insbesondere über die Entlastung des Vorstands und des Aufsichtsrats, die Verwendung des Bilanzgewinns, Kapitalmaßnahmen, die Ermächtigung zum Aktienrückkauf sowie über Satzungsänderungen.

### Deutscher Corporate Governance Kodex

Die BASF misst guter Corporate Governance einen hohen Stellenwert bei. Sie unterstützt deshalb den Deutschen Corporate Governance Kodex als ein wichtiges Instrument zur kapitalmarktorientierten Weiterentwicklung von Unternehmensführung und -kontrolle und bekennt sich zu einer verantwortungsbewussten Unternehmensführung, die auf eine nachhaltige Steigerung des Unternehmenswertes ausgerichtet ist.

Die BASF SE entspricht sämtlichen Empfehlungen des im Mai 2010 geänderten Deutschen Corporate Governance Kodex. Dies gilt auch für die neuen Empfehlungen des Kodex zur Zusammensetzung von Vorstand und Aufsichtsrat und zur Besetzung von Führungsfunktionen im Unternehmen (Diversity). Die gemeinsame Entsprechenserklärung 2010 von Vorstand und Aufsichtsrat der BASF SE ist am Ende dieses Kapitels auf Seite 134 wiedergegeben.

Ebenso erfüllt die BASF fast vollständig die nichtobligatorischen Anregungen des Deutschen Corporate Governance Kodex. Ausnahmen sind lediglich die Anregungen, den Aktionären die Verfolgung der gesamten Hauptversammlung im Internet zu ermöglichen sowie zur Berücksichtigung von auf den langfristigen Unternehmenserfolg bezogenen Komponenten bei der Vergütung des Aufsichtsrats. Die Vergütung des Aufsichtsrats der BASF SE enthält keine besondere Vergütungskomponente, die durch eine mehrjährige Bemessungsgrundlage an den langfristigen Unternehmenserfolg geknüpft ist. Allerdings ist die am Gewinn pro Aktie bemessene jährliche variable Vergütungskomponente insofern an einer langfristigen Gewinnsteigerung ausgerichtet, als der für die gleiche variable Vergütung erforderliche Gewinn pro Aktie jährlich ansteigt. Damit besteht ein Anreiz, der langfristigen Entwicklung des Unternehmens besonderes Augenmerk zukommen zu lassen und den Unternehmenswert im Interesse der Aktionäre nachhaltig zu steigern. Die Hauptversammlung wird bis zum Ende der Rede des Vorstandsvorsitzenden für jedermann zugänglich im Internet übertragen. Die anschließende Behandlung der Gegenstände der Tagesordnung machen wir demgegenüber nicht im Internet zugänglich, um den Charakter der Hauptversammlung als einer Präsenzversammlung unserer Aktionäre zu wahren.

→ **Mehr zur Entsprechenserklärung 2010, zum Überblick über die Umsetzung der Kodex-Anregungen und zum Deutschen Corporate Governance Kodex unter [basf.com/governance\\_d](http://basf.com/governance_d)**

### Grundwerte und Leitlinien der BASF-Gruppe/ Verhaltenskodex

Zur Gewährung eines hohen Corporate-Governance-Standards hat der Vorstand mit den „Grundwerten und Leitlinien“ der BASF-Gruppe und dem „Verhaltenskodex/Compliance-Programm“ die geschäftspolitischen Grundsätze und Verhaltensleitlinien für die Tätigkeit der BASF festgelegt und im gesamten Unternehmen bekanntgemacht. Im Verhaltenskodex werden die Anforderungen an das Verhalten der Mitarbeiter, basierend auf dem Grundwert der Integrität, detailliert beschrieben. Besonders

wichtig ist für uns die Einhaltung aller einschlägigen Gesetze, und zwar insbesondere kartell- und wettbewerbsrechtlicher Vorschriften, von Embargo- und Exportkontrollbestimmungen einschließlich der Chemiewaffenkontrollgesetze sowie arbeitsrechtlicher und anlagensicherheitsrechtlicher Bestimmungen. Dazu gehört auch das Verbot, Insiderwissen für persönliche Zwecke auszunutzen, das Verbot, Geschäftspartnern und Vertretern staatlicher Stellen Vorteile zu gewähren oder sich solche Vorteile gewähren zu lassen, und der verantwortungsvolle Umgang mit dem Vermögen der BASF. Unsere Konzernrevision prüft regelmäßig in Zusammenarbeit mit dem Chief Compliance Officer der BASF die Einhaltung der Verhaltensregeln.

→ **Mehr zu Grundwerten und Leitlinien sowie zum Verhaltenskodex unter [basf.com/grundwerte](http://basf.com/grundwerte)**

## Compliance

Grundlage unseres Compliance-Programms ist ein System aus Schulungen, Beratungsstellen und Monitoringinstrumenten. Neue Mitarbeiter bei BASF erhalten eine verpflichtende Grundschulung zu Compliance. Anschließend Auffrischungsschulungen sowie Trainings zu speziellen Themen wie Kartellrecht und Embargobestimmungen ergänzen die Maßnahmen. Über 41.000 Mitarbeiter haben 2010 an Compliance-Schulungen teilgenommen.

Mit gruppenweiten Verhaltenskodices setzen wir unser Compliance-Programm im Unternehmen um. Wir schaffen damit die Voraussetzung, dass unsere Mitarbeiter Regeln und Richtlinien kennen. Ziel ist es, Rechtsverstößen wie Korruptionsvorfällen vorzubeugen und mögliche Compliance-Risiken für die BASF zu minimieren.

Unser Chief Compliance Officer steuert die weltweite Umsetzung des Programms. Rund 100 Compliance-Beauftragte weltweit unterstützen ihn bei seiner Arbeit. Der Chief Compliance Officer berichtet regelmäßig an den Vorstand über Umsetzung und gegebenenfalls Nachschärfung des Compliance-Programms sowie über Erkenntnisse aus dem Unternehmensgeschehen. Zudem berichtet der Chief Compliance Officer dem Prüfungsausschuss des Aufsichtsrats jährlich mindestens in einer seiner Sitzungen ausführlich über Inhalt und Umsetzung des Compliance-Programms und die Behandlung wesentlicher Einzel Sachverhalte. Bei wichtigen Ereignissen wird der Prüfungsausschuss vom Vorstand umgehend informiert.

Sollte es trotz aller vorbeugenden Maßnahmen zu Verstößen kommen, wollen wir diese möglichst schnell verfolgen und beheben. Über externe gruppenweite Hotlines können Mitarbeiter anonym Fragen zum persönlichen Verhalten stellen und auf fragwürdige Vorfälle im Unternehmen hinweisen. 2010 gingen 234 Anrufe und E-Mails ein. Ein Großteil betraf Fragen zum eigenen persönlichen Verhalten der Mitarbeiter. Das weitere vielfältige Themenspektrum reichte von geschäftsbezogenen Hinweisen, über Fragen zur Personalführung bis hin zum Verdacht auf persönliche Bereicherung zu Lasten des Unternehmens. Unsere Konzernrevision auditiert, ob unsere Grund-

sätze eingehalten werden. Im Jahr 2010 haben wir gruppenweit 48 (2009: 109) Compliance-Audits durchgeführt. Bei diesen Prüfungen erkannte oder bei unserer Hotline gemeldete Fälle, bei denen ein Verdacht auf Fehlverhalten besteht, untersuchen wir ausnahmslos. Bei gravierenden Verstößen reichen die Sanktionen bis zu Entlassung und Forderungen von Schadenersatz. Zusätzlich überprüfte der Chief Compliance Officer im Jahr 2010 gemeinsam mit den Datenschutzbeauftragten der BASF in Deutschland auch Prozesse für den korrekten Umgang mit Mitarbeiterdaten.

Bei der Auswahl von Lieferanten in Nicht-OECD-Ländern prüfen wir mit einem Fragebogen, ob sie einen Verhaltenskodex etabliert haben. Für den Einsatz von Kontraktoren, Beratern und Drittfirmen, die unsere Produkte vertreiben, haben wir 2010 eine neue Checkliste erarbeitet. Sie fragt den Umgang mit Compliance ab.

Außerhalb unseres Unternehmens setzen wir uns in Initiativen dafür ein, Korruption zu verhindern. Als Mitglied des UN Global Compact beteiligen wir uns an der Umsetzung des Global Compact Prinzips zur Korruptionsbekämpfung. Seit dem Jahr 2003 unterstützen wir Korruptionsbekämpfung als Mitglied bei Transparency International Deutschland e.V. An der „Partnering Against Corruption Initiative“ (PACI) des World Economic Forum Davos arbeiten wir seit 2008 mit.

In der BASF SE haben wir 2010 circa 1.000 Führungskräfte und Mitarbeiter zu ihrer Wahrnehmung von Compliance im Unternehmen befragt – etwa wie oft sie sich mit Konfliktsituationen konfrontiert fühlen und ob ihnen das Compliance-Programm ausreichend Orientierung gibt. An der freiwilligen, anonymen Umfrage beteiligten sich mehr als 50 % der Befragten. Für 2011 planen wir, die Befragung auf wichtige Gruppengesellschaften auszuweiten. 

→ **Mehr zu unseren Grundwerten, Leitlinien unter Strategie und Werte ab Seite 17**

## Angaben gemäß § 315 Abs. 4 Handelsgesetzbuch und erläuternder Bericht des Vorstands nach § 176 Abs. 1 Satz 1 Aktiengesetz

Zum 31. Dezember 2010 betrug das gezeichnete Kapital der BASF SE 1.175.652.728,32 €, eingeteilt in 918.478.694 Namensaktien ohne Nennbetrag. Jede Aktie gewährt in der Hauptversammlung eine Stimme. Stimmrechts- und Übertragungsbeschränkungen bestehen nicht. Mit allen Aktien sind die gleichen Rechte und Pflichten verbunden. Ein Anspruch der Aktionäre auf Verbriefung von Aktien (Ausstellung von Aktienurkunden) ist nach der Satzung ausgeschlossen. Verschiedene Aktiengattungen oder Aktien mit Sonderrechten bestehen nicht.

Für die Bestellung und die Abberufung der Mitglieder des Vorstands gelten die gesetzlichen Bestimmungen in Artikel 39 SE-VO, § 16 SE-Ausführungsgesetz und §§ 84, 85 Aktiengesetz sowie § 7 der Satzung der BASF SE. Danach werden die Mitglieder des Vorstands vom Aufsichtsrat bestellt und abberufen. Die Mitglieder des Vorstands werden für einen Zeitraum von



höchstens fünf Jahren bestellt, wobei Wiederbestellungen zulässig sind. Der Aufsichtsrat kann ein Vorstandsmitglied abberufen, wenn ein wichtiger Grund für die Abberufung besteht. Wichtige Gründe sind insbesondere eine grobe Verletzung der Vorstandspflichten und die Entziehung des Vertrauens durch die Hauptversammlung. Über die Bestellung und Abberufung entscheidet der Aufsichtsrat nach eigenem pflichtgemäßen Ermessen.

Die Änderung der Satzung der BASF SE bedarf nach Art. 59 Absatz 1 SE-VO eines Beschlusses der Hauptversammlung, der mit einer Mehrheit von nicht weniger als zwei Dritteln der abgegebenen Stimmen gefasst worden ist, sofern nicht die für deutsche Aktiengesellschaften nach dem Aktiengesetz geltenden Vorschriften eine größere Mehrheit vorsehen oder zulassen. Das Aktiengesetz sieht für Satzungsänderungen in § 179 Abs. 2 eine Mehrheit von mindestens drei Vierteln des bei der Beschlussfassung vertretenen Grundkapitals vor. Änderungen der Satzung, die lediglich die Satzungsfassung betreffen, kann nach § 12 Ziffer 6 der Satzung der BASF SE der Aufsichtsrat beschließen. Dies betrifft insbesondere die Anpassung des Grundkapitals und der Aktienzahl nach der Einziehung zurückgekaufter BASF-Aktien und nach einer Neuausgabe von Aktien aus dem genehmigten Kapital.

Der Vorstand der BASF SE ist durch Beschluss der Hauptversammlung vom 30. April 2009 ermächtigt, mit Zustimmung des Aufsichtsrats bis zum 30. April 2014 das gezeichnete Kapital um bis zu insgesamt 500 Millionen € durch Ausgabe neuer Aktien gegen Geldeinlage zu erhöhen (genehmigtes Kapital). Den Aktionären ist dabei ein Bezugsrecht auf die neuen Aktien zu gewähren. Dies kann auch dadurch geschehen, dass die neuen Aktien von einem Kreditinstitut mit der Verpflichtung übernommen werden, diese den Aktionären anzubieten (mittelbares Bezugsrecht). Der Vorstand ist demgegenüber ermächtigt, in bestimmten (in § 5 Ziffer 8 der Satzung der BASF SE genannten) eng begrenzten Ausnahmefällen das gesetzliche Bezugsrecht der Aktionäre auszuschließen. Dies ist insbesondere dann der Fall, wenn bei der Kapitalerhöhung gegen Geldeinlagen der Ausgabepreis der neuen Aktien den Börsenpreis der BASF-Aktie nicht wesentlich unterschreitet und gemessen am bisherigen Aktienbestand nicht mehr als 10 % neue Aktien ausgegeben werden.

Im Fall eines Kontrollwechsels erhalten die Vorstandsmitglieder unter bestimmten zusätzlichen Voraussetzungen eine Entschädigung, die im Einzelnen im Vergütungsbericht auf Seite 128 beschrieben ist. Ein Kontrollwechsel liegt dabei vor, wenn ein Aktionär der BASF den Besitz von mindestens 25 % der BASF-Aktien oder die Aufstockung einer solchen Beteiligung mitteilt. Darüber hinaus erhalten Arbeitnehmer der BASF SE und ihrer Tochtergesellschaften, die als sogenannte Obere Führungskräfte der BASF-Gruppe eingestuft sind, eine Abfindung, wenn ihr Anstellungsverhältnis innerhalb eines Zeitraums von 18 Monaten nach dem Eintritt eines Kontrollwechsels von Seiten des Unternehmens beendet wird, es sei denn, die Beendigung

ist durch ein schuldhaftes Verhalten des Arbeitnehmers veranlasst. Der gekündigte Arbeitnehmer erhält in diesem Fall eine Abfindung in Höhe von maximal 1,5 Jahresbezügen (Festgehalt), abhängig von der Anzahl der Monate, die seit dem Kontrollwechsel verstrichen sind.

Die übrigen nach § 315 Abs. 4 Handelsgesetzbuch geforderten Angaben betreffen Umstände, die bei der BASF SE nicht vorliegen.

### **Vermögensschaden-Haftpflichtversicherung**

Die Gesellschaft hat eine Vermögensschaden-Haftpflichtversicherung abgeschlossen, in deren Deckung die Tätigkeit der Mitglieder des Vorstands und des Aufsichtsrats einbezogen ist (D&O-Versicherung). Diese Versicherung sieht für den Vorstand den durch § 93 Abs. 2 Satz 3 Aktiengesetz gesetzlich vorgeschriebenen Selbstbehalt und für den Aufsichtsrat den in Ziffer 3.8 Abs. 3 des Deutschen Corporate Governance Kodex empfohlenen Selbstbehalt vor.

### **Aktienbesitz von Mitgliedern des Vorstands und des Aufsichtsrats**

Kein Mitglied des Vorstands oder des Aufsichtsrats hält Aktien der BASF SE und darauf bezogene Optionen oder sonstige Derivate, die 1 % des Grundkapitals oder mehr repräsentieren. Darüber hinaus beträgt auch der Gesamtbesitz an Aktien der BASF SE und sich darauf beziehender Finanzinstrumente aller Vorstands- und Aufsichtsratsmitglieder weniger als 1 % der von der Gesellschaft ausgegebenen Aktien.

### **Aktiengeschäfte von Vorstand und Aufsichtsrat (meldepflichtige Wertpapiergeschäfte nach § 15a Wertpapierhandelsgesetz)**

Die Mitglieder von Vorstand und Aufsichtsrat sowie bestimmte Angehörige sind nach § 15a Wertpapierhandelsgesetz verpflichtet, den Erwerb und die Veräußerung von BASF-Aktien und anderer darauf bezogener Rechte der Bundesanstalt für Finanzdienstleistungsaufsicht und der Gesellschaft mitzuteilen, sofern die Wertgrenze von 5.000 € innerhalb des Kalenderjahres überschritten wird.

Im Jahr 2010 sind von Mitgliedern von Vorstand und Aufsichtsrat und deren meldepflichtigen Angehörigen insgesamt sechs meldepflichtige Erwerbsgeschäfte mit Stückzahlen zwischen 100 und 2.000 BASF-Aktien mitgeteilt worden. Der Preis pro Stück lag zwischen 41,23 € und 45,00 €. Das Volumen der einzelnen Geschäfte lag zwischen 4.437 € und 90.000 €.

→ Mehr zu den im Jahr 2010 mitgeteilten Geschäften unter [basf.com/governance/shareddealings\\_d](http://basf.com/governance/shareddealings_d)

## Organe der Gesellschaft

### Vorstand

Dem **Vorstand der BASF SE** gehörten zum **31. Dezember 2010** acht Mitglieder an.

---

#### Dr. Jürgen Hambrecht Vorsitzender des Vorstands

**Aufgabenbereich:** Legal, Taxes & Insurance; Strategic Planning & Controlling; Communications & Government Relations BASF Group; Global HR – Executive Management & Development; Investor Relations; Chief Compliance Officer

**Erstbestellung:** 1997 (Vorsitzender seit 2003)

**Ablauf des Mandats:** 2011

#### Aufsichtsräte (ohne Konzernmandate):

Daimler AG (AR-Mitglied)  
Lufthansa AG (AR-Mitglied)

---

#### Dr. Kurt Bock

**Aufgabenbereich:** Catalysts; Market & Business Development North America; Regional Functions North America; Finance; Information Services; Corporate Controlling; Corporate Audit

**Erstbestellung:** 2003

**Ablauf des Mandats:** 2016

#### Konzernmandate i. S. v. § 100 Abs. 2 AktG:

Wintershall Holding GmbH (AR-Mitglied bis 31.03.2010)

---

#### Dr. Martin Brudermüller

**Aufgabenbereich:** Performance Polymers; Polyurethanes; Styrenics; Market & Business Development Asia Pacific; Regional Functions & Country Management Asia Pacific

**Erstbestellung:** 2006

**Ablauf des Mandats:** 2016

---

#### Dr. Hans-Ulrich Engel

**Aufgabenbereich:** Oil & Gas; Region Europe; Global Procurement & Logistics

**Erstbestellung:** 2008

**Ablauf des Mandats:** 2016

#### Konzernmandate i. S. v. § 100 Abs. 2 AktG:

Wintershall Holding GmbH (AR-Vorsitzender)  
Wintershall AG (AR-Vorsitzender)  
Cognis GmbH (AR-Mitglied seit 10.12.2010)

#### Vergleichbare in- und ausländische Kontrollgremien:

Nord Stream AG, Zug, Schweiz  
(Mitglied im Shareholders' Committee)

---

#### Dr. John Feldmann

**Aufgabenbereich:** Construction Chemicals; Dispersions & Pigments; Care Chemicals; Nutrition & Health; Paper Chemicals; Performance Chemicals; Polymer Research

**Erstbestellung:** 2000

**Ablauf des Mandats:** 2011

#### Aufsichtsräte (ohne Konzernmandate):

Bilfinger Berger AG (AR-Mitglied)

#### Konzernmandate i. S. v. § 100 Abs. 2 AktG:

BASF Coatings GmbH (AR-Mitglied)  
Cognis GmbH (AR-Mitglied seit 10.12.2010,  
AR-Vorsitzender seit 14.12.2010)

---

#### Dr. Andreas Kreimeyer

**Aufgabenbereich:** Inorganics; Petrochemicals; Intermediates; Chemicals Research & Engineering; BASF Future Business

**Erstbestellung:** 2003

**Ablauf des Mandats:** 2012

#### Konzernmandate i. S. v. § 100 Abs. 2 AktG:

Wintershall Holding GmbH (AR-Mitglied)

---

#### Dr. Stefan Marcinowski

**Aufgabenbereich:** Crop Protection; Coatings; Specialty Chemicals Research; BASF Plant Science; Region South America

**Erstbestellung:** 1997

**Ablauf des Mandats:** 2012

#### Aufsichtsräte (ohne Konzernmandate):

DWS Investment GmbH (AR-Mitglied)

#### Konzernmandate i. S. v. § 100 Abs. 2 AktG:

Wintershall Holding GmbH (AR-Mitglied)  
BASF Coatings GmbH (AR-Vorsitzender)

---

#### Dr. Harald Schwager

**Aufgabenbereich:** Human Resources; Environment, Health & Safety; Engineering & Maintenance; Verbund Site Management Europe

**Erstbestellung:** 2008

**Ablauf des Mandats:** 2016

#### Konzernmandate i. S. v. § 100 Abs. 2 AktG:

BASF Schwarzheide GmbH (AR-Vorsitzender)

#### Vergleichbare in- und ausländische Kontrollgremien:

BASF Antwerpen N.V. (Vorsitzender des Verwaltungsrats)

## Aufsichtsrat

Der **Aufsichtsrat der BASF SE** besteht nach der Satzung aus zwölf Mitgliedern. Er ist gemäß § 35 Abs. 1 SE-Beteiligungsgesetz (SEBG) und der Vereinbarung über die Beteiligung der Arbeitnehmer in der BASF SE (Beteiligungsvereinbarung) zwischen der Unternehmensleitung und den Vertretern der europäischen Arbeitnehmer der BASF-Gruppe vom 15. November 2007 paritätisch besetzt. Die sechs Anteilseignervertreter im Aufsichtsrat der BASF SE werden von der Hauptversammlung gewählt. Die sechs Arbeitnehmervertreter werden abweichend von Artikel 40 Abs. 2 SE-VO nicht von der Hauptversammlung gewählt, sondern gemäß der Beteiligungsvereinbarung von der Vertretung der Arbeitnehmer, dem BASF Europa Betriebsrat, bestellt. Die Amtszeit des Aufsichtsrats hat mit Ablauf der Hauptversammlung am 30. April 2009, in der die Anteilseignervertreter im Aufsichtsrat neu gewählt worden sind, begonnen. Sie endet mit Ablauf der Hauptversammlung, die über die Entlastung der Aufsichtsratsmitglieder für das vierte volle Geschäftsjahr nach dem Beginn der Amtszeit beschließt, also der Hauptversammlung 2014. Das von der Hauptversammlung am 30. April 2009 gewählte Mitglied Stephen K. Green hat seine Mitgliedschaft im Aufsichtsrat mit Ablauf des 16. Dezember 2010 niedergelegt, da er zu Beginn des Jahres 2011 in der britischen Regierung das Amt des Ministers für Handel und Investitionen übernommen hat. Auf Antrag des Aufsichtsratsvorsitzenden hat das Amtsgericht Ludwigshafen mit Beschluss vom 18. November 2010 Frau Anke Schäferkordt mit Wirkung ab dem 17. Dezember 2010 zum Mitglied des Aufsichtsrats bestellt. Aufsichtsrat und Vorstand beabsichtigen, der Hauptversammlung am 6. Mai 2011 die Wahl von Frau Schäferkordt als Mitglied des Aufsichtsrats vorzuschlagen. Der Aufsichtsrat setzt sich wie folgt zusammen:

---

### Dr. h.c. Eggert Voscherau, Wachenheim

**Vorsitzender des Aufsichtsrats der BASF SE**

**Ehemaliger stellvertretender Vorsitzender des Vorstands der BASF Aktiengesellschaft und der BASF SE**

**Aufsichtsräte (ohne Konzernmandate):**

Carl-Zeiss AG (AR-Vorsitzender bis 15.02.2010)

Schott AG (AR-Vorsitzender bis 15.02.2010)

**Vergleichbare in- und ausländische Kontrollgremien:**

Zentrum für Europäische Wirtschaftsforschung GmbH (ZEW) (AR-Mitglied)

---

### Michael Diekmann, München

**Stellvertretender Vorsitzender des Aufsichtsrats der BASF SE**

**Vorsitzender des Vorstands der Allianz SE**

**Aufsichtsräte (ohne Konzernmandate):**

Linde AG (stellvertretender AR-Vorsitzender)

Siemens AG (AR-Mitglied)

**Konzernmandate i. S. v. § 100 Abs. 2 AktG:**

Allianz Deutschland AG (AR-Mitglied)

Allianz Global Investors AG (AR-Vorsitzender)

**Vergleichbare in- und ausländische Kontrollgremien:**

Allianz France S.A. (stellvertretender Vorsitzender des Verwaltungsrats)

Allianz S.p.A. (Mitglied des Verwaltungsrats)

---

### Robert Oswald, Altrip

**Stellvertretender Vorsitzender des Aufsichtsrats der BASF SE**

**Vorsitzender des Betriebsrats des Werks Ludwigshafen der BASF SE und des Konzernbetriebsrats der BASF**

---

### Ralf-Gerd Bastian, Neuhofen

**Mitglied des Betriebsrats des Werks Ludwigshafen der BASF SE**

---

### Wolfgang Daniel, Limburgerhof

**Stellvertretender Vorsitzender des Betriebsrats des Werks Ludwigshafen der BASF SE**

---

### Prof. Dr. François Diederich, Zürich

**Professor an der Eidgenössischen Technischen Hochschule Zürich**

---

### Franz Fehrenbach, Stuttgart

**Vorsitzender der Geschäftsführung der Robert Bosch GmbH**

**Vergleichbare in- und ausländische Kontrollgremien:**

Robert Bosch Corporation (Mitglied des Board of Directors)

---

### Stephen K. Green, London (bis 16. Dezember 2010)

**Group Chairman HSBC Holdings plc**

**Vergleichbare in- und ausländische Kontrollgremien:**

HSBC Bank plc, Großbritannien (Vorsitzender des Board of Directors)

HSBC Private Banking Holdings (Suisse) SA

(Vorsitzender des Verwaltungsrats)

The Hongkong and Shanghai Banking Corporation Limited, Hongkong

(Mitglied des Board of Directors)

HSBC North America Holdings Inc., USA (Mitglied des Board of Directors)

HSBC France (Mitglied des Board of Directors)

---

### Max Dietrich Kley, Heidelberg

**Rechtsanwalt**

**Aufsichtsräte (ohne Konzernmandate):**

SGL Carbon SE (AR-Vorsitzender)

HeidelbergCement AG (AR-Mitglied)

Infineon Technologies AG (AR-Vorsitzender bis 11.02.2010)

---

**Anke Schäferkordt, Köln (seit 17. Dezember 2010)**

**Geschäftsführerin der Mediengruppe RTL Deutschland  
und RTL Television**

**Aufsichtsräte (ohne Konzernmandate):**

Software AG (AR-Mitglied)

---

**Denise Schellemans, Kalmthout**

**Freigestellte Gewerkschaftsdelegierte**

---

**Ralf Sikorski, Wiesbaden**

**Landesbezirksleiter der Industriegewerkschaft Bergbau, Chemie,  
Energie – Landesbezirk Rheinland-Pfalz/Saarland**

**Aufsichtsräte (ohne Konzernmandate):**

Villeroy & Boch AG (AR-Mitglied)

Villeroy & Boch Fliesen GmbH (AR-Mitglied)

Evonik Power Saar GmbH (stellvertretender AR-Vorsitzender)

Evonik New Energies GmbH (stellvertretender AR-Vorsitzender)

---

**Michael Vassiliadis, Hannover**

**Vorsitzender der Industriegewerkschaft Bergbau, Chemie, Energie**

**Aufsichtsräte (ohne Konzernmandate):**

K+S AG (stellvertretender AR-Vorsitzender)

Henkel KGaA (AR-Mitglied)

Evonik Steag GmbH (stellvertretender AR-Vorsitzender)

## Vergütungsbericht

**Der Vergütungsbericht beschreibt die Grundzüge des Vergütungssystems für die Vorstandsmitglieder und erläutert Struktur und Höhe der individuellen Vorstandseinkommen. Der Bericht enthält ferner Angaben zu Leistungen, die den Vorstandsmitgliedern für den Fall der Beendigung ihrer Tätigkeit zugesagt worden sind, sowie Angaben zur Vergütung des Aufsichtsrats.**

### Vergütung des Vorstands

Die Darstellung der Vergütung des Vorstands enthält die nach deutschem Handelsrecht, erweitert durch das Vorstandsvergütungs-Offenlegungsgesetz (VorstOG) sowie durch das Gesetz zur Angemessenheit der Vorstandsvergütung (VorstAG), erforderlichen Angaben und richtet sich nach den Empfehlungen des Deutschen Corporate Governance Kodex.

Die Systematik und die Höhe der Vergütung des Vorstands werden auf Vorschlag des Personalausschusses (siehe Seite 118) durch den Aufsichtsrat (siehe Seite 123) festgelegt. Diese Festlegung orientiert sich an der Größe und wirtschaftlichen Lage des Unternehmens sowie an der Leistung des Vorstands. Weltweit tätige Unternehmen aus Deutschland und Europa dienen als Referenz. Eine Überprüfung von Systematik und Höhe der Vorstandsvergütung erfolgt in regelmäßigen Abständen.

Im zweiten Halbjahr 2009 wurde das System der Vorstandsvergütung dem im August 2009 in Kraft getretenen Gesetz zur Angemessenheit der Vorstandsvergütung (VorstAG) angepasst und die Vorstandsverträge wurden, unabhängig von den bestehenden Vertragslaufzeiten, einvernehmlich und einheitlich für alle Vorstandsmitglieder mit Wirkung ab dem 1. Januar 2010 auf dieses System umgestellt. Das neue System wurde gemäß § 120 Abs. 4 AktG am 29. April 2010 durch die Hauptversammlung gebilligt.

Die Bezüge des Vorstands setzen sich zusammen aus

1. einem festen Jahresgehalt,
2. einer jährlichen variablen Vergütung,
3. einem aktienkursbasierten Langfristelement (Long-Term-Incentive- oder LTI-Programm),
4. Sachbezügen und sonstigen Zusatzvergütungen in unterschiedlichem Umfang sowie
5. einer betrieblichen Altersversorgung.

Die Vergütung des Vorstands ist darauf ausgerichtet, eine nachhaltige Unternehmensentwicklung zu fördern. Sie ist durch eine ausgeprägte Variabilität in Abhängigkeit von der Leistung des Vorstands und der Gesamtkapitalrendite der BASF-Gruppe gekennzeichnet.

Die Vergütungskomponenten stellen sich im Einzelnen wie folgt dar:

1. Die jährliche feste Vergütung wird in gleichen monatlichen Raten ausgezahlt.

2. Die jährliche variable Vergütung (Jahrestantieme) des Vorstands basiert auf der Leistung des Gesamtvorstands und der Höhe der Gesamtkapitalrendite. Die Gesamtkapitalrendite bildet auch die Bemessungsgrundlage für die variable Vergütung aller anderen Mitarbeitergruppen. Zur Bewertung der nachhaltigen Leistung des Vorstands trifft der Aufsichtsrat mit dem Gesamtvorstand jährlich eine Zielvereinbarung, die überwiegend mittel- und langfristige Ziele beinhaltet. Der Aufsichtsrat beurteilt die Zielerreichung bezogen auf die vorangegangenen drei Jahre. Auf der Grundlage der vom Aufsichtsrat festgestellten Zielerreichung wird ein Performancefaktor ermittelt, der sich zwischen 0 und 1,5 bewegt. Die Jahrestantieme wird jeweils im Anschluss an die Hauptversammlung für das abgelaufene Geschäftsjahr ausgezahlt.

Die Mitglieder des Vorstands können wie andere Mitarbeitergruppen auch zu Gunsten von Versorgungsanwartschaften auf Teile ihrer jährlichen variablen Bruttovergütung verzichten (Gehaltsumwandlung). Für Mitglieder des Vorstands beläuft sich der maximal umwandelbare Betrag, wie für alle anderen Oberen Führungskräfte der deutschen BASF-Gruppe, auf 30.000 €. Von dieser Möglichkeit haben die Vorstandsmitglieder in unterschiedlichem Umfang Gebrauch gemacht.

3. Für die Mitglieder des Vorstands besteht ein aktienkursbasiertes Vergütungsprogramm (sogenanntes Long-Term-Incentive- oder LTI-Programm), das auch allen übrigen Oberen Führungskräften der BASF-Gruppe angeboten wird. Gegenüber den allgemeinen Programmbedingungen bestehen für die Mitglieder des Vorstands engere Regelungen: So sind sie verpflichtet, mit mindestens 10 % der Bruttotantieme an dem LTI-Programm teilzunehmen. Dieses verpflichtende Eigeninvestment in Form von BASF-Aktien unterliegt einer Haltefrist von vier Jahren. Für ein freiwilliges Eigeninvestment von zusätzlich bis zu 20 % der Bruttotantieme gilt die allgemeine Haltefrist von zwei Jahren. Eine Ausübung der Optionsrechte ist im Rahmen des LTI-Programms für die Mitglieder des Vorstands frühestens vier Jahre nach Gewährung (Wartefrist) möglich. Zu den weiteren Einzelheiten des LTI-Programms siehe Seite 185.

4. Zu den Sachbezügen und sonstigen Zusatzvergütungen zählen Delegationszulagen, Prämien für Unfallversicherung und Ähnliches sowie geldwerte Vorteile durch die Zurverfügungstellung von Kommunikationsmitteln, Verkehrsmitteln und Sicherheitsmaßnahmen. Kredite und Vorschüsse wurden Mitgliedern des Vorstands nicht gewährt.

5. Die Einzelheiten der betrieblichen Altersversorgung sind im Abschnitt Versorgungszusagen auf Seite 127 dargestellt.

Auf Basis dieser Grundsätze ergab sich folgende Vergütung für die einzelnen Mitglieder des Vorstands:

Tausend €

|                                      | Erfolgsunabhängige Vergütung |                    |                                                           | Erfolgs-<br>bezogene<br>Vergütung | Bar-<br>vergütung<br>Gesamt | Gewährte Optionen |                                                  | Gesamt-<br>vergütung<br>(Barvergütung<br>plus gewährte<br>Optionsrechte) |
|--------------------------------------|------------------------------|--------------------|-----------------------------------------------------------|-----------------------------------|-----------------------------|-------------------|--------------------------------------------------|--------------------------------------------------------------------------|
|                                      | Jahr                         | Fest-<br>vergütung | Sachbe-<br>züge und<br>sonstige<br>Zusatzver-<br>gütungen | Jahres-<br>tantieme <sup>1</sup>  |                             | Anzahl            | Marktwert<br>zum Zeit-<br>punkt der<br>Gewährung |                                                                          |
| Dr. Jürgen Hambrecht<br>Vorsitzender | 2010                         | 1.100              | 129                                                       | 3.240                             | 4.469                       | 41.244            | 768                                              | 5.237                                                                    |
|                                      | 2009                         | 1.100              | 105                                                       | 1.525                             | 2.730                       | 94.200            | 647                                              | 3.377                                                                    |
| Dr. Kurt Bock                        | 2010                         | 695 <sup>3</sup>   | 1.174 <sup>4</sup>                                        | 1.620                             | 3.489                       | 20.620            | 384                                              | 3.873                                                                    |
|                                      | 2009                         | 705 <sup>3</sup>   | 1.075 <sup>4</sup>                                        | 763                               | 2.543                       | 47.100            | 324                                              | 2.867                                                                    |
| Dr. Martin Bruder Müller             | 2010                         | 578 <sup>3</sup>   | 753 <sup>4</sup>                                          | 1.620                             | 2.951                       | 20.620            | 384                                              | 3.335                                                                    |
|                                      | 2009                         | 583 <sup>3</sup>   | 982 <sup>4</sup>                                          | 763                               | 2.328                       | 47.100            | 324                                              | 2.652                                                                    |
| Dr. Hans-Ulrich Engel                | 2010                         | 550                | 109                                                       | 1.620                             | 2.279                       | 20.620            | 384                                              | 2.663                                                                    |
|                                      | 2009                         | 550                | 137                                                       | 763                               | 1.450                       | 41.840            | 287                                              | 1.737                                                                    |
| Dr. John Feldmann                    | 2010                         | 550                | 82                                                        | 1.620                             | 2.252                       | 20.620            | 384                                              | 2.636                                                                    |
|                                      | 2009                         | 550                | 66                                                        | 763                               | 1.379                       | 47.100            | 324                                              | 1.703                                                                    |
| Dr. Andreas Kreimeyer                | 2010                         | 550                | 105                                                       | 1.620                             | 2.275                       | 20.620            | 384                                              | 2.659                                                                    |
|                                      | 2009                         | 550                | 98                                                        | 763                               | 1.411                       | 40.000            | 275                                              | 1.686                                                                    |
| Dr. Stefan Marcinowski               | 2010                         | 550                | 89                                                        | 1.620                             | 2.259                       | 20.620            | 384                                              | 2.643                                                                    |
|                                      | 2009                         | 550                | 102                                                       | 763                               | 1.415                       | 47.100            | 324                                              | 1.739                                                                    |
| Dr. Harald Schwager                  | 2010                         | 550                | 108                                                       | 1.620                             | 2.278                       | 20.620            | 384                                              | 2.662                                                                    |
|                                      | 2009                         | 550                | 198 <sup>2</sup>                                          | 763                               | 1.511                       | 47.100            | 324                                              | 1.835                                                                    |
|                                      | <b>Summe 2010:</b>           | <b>5.123</b>       | <b>2.549</b>                                              | <b>14.580</b>                     | <b>22.252</b>               | <b>185.584</b>    | <b>3.456</b>                                     | <b>25.708</b>                                                            |
|                                      | Summe 2009:                  | 5.138              | 2.763                                                     | 6.866                             | 14.767                      | 411.540           | 2.829                                            | 17.596                                                                   |

<sup>1</sup> Basis für die Jahrestantieme ist die Gesamtkapitalrendite, die um Sondereffekte bereinigt wurde, sowie für 2010 der Performancefaktor. Der Ausweis erfolgt einschließlich etwaiger Gehaltssumwandlungsbeträge.

<sup>2</sup> Enthält Aufwand für Sicherheitsmaßnahmen am Wohnhaus anlässlich der Bestellung zum Vorstand.

<sup>3</sup> Auszahlung erfolgt im Ausland in lokaler Währung auf Basis eines sich in Deutschland theoretisch ergebenden Netto Gehalts. Hierdurch ergibt sich die Abweichung zur vertraglichen Brutto-Festvergütung in Euro (550 Tausend € pro Jahr).

<sup>4</sup> Enthält delegationsbedingte Zahlungen, wie zum Beispiel die Übernahme ortsüblicher Mietkosten.



Im Jahr 2010 führten die zugeteilten Optionsrechte zu einem Aufwand (Personalaufwand). Der Personalaufwand bezieht sich auf die Summe aller Optionsrechte aus den LTI-Programmen 2002 bis 2010. Er ergibt sich aus einer stichtagsbezogenen Bewertung dieser Optionsrechte zum 31. Dezember 2010 und der Veränderung dieses Wertes gegenüber dem 31. Dezember 2009 unter Berücksichtigung der im Jahr 2010 ausgeübten und neu gewährten Optionsrechte. Maßgeblich für die Bewertung der Optionsrechte sind dabei die Kursentwicklung der BASF-Aktie und ihre Outperformance gegenüber den in den LTI-Programmen 2002 bis 2010 festgelegten Vergleichsindizes. Der Anstieg des auf das Jahr 2010 entfallenden Personalaufwandes im Vergleich zum Vorjahr resultiert im Wesentlichen aus einer höheren Bewertung dieser Optionsrechte zum 31. Dezember 2010. Hauptursachen hierfür sind der höhere Aktienkurs am Jahresende (2010: 59,70 €; 2009: 43,46 €) und ihre bessere Entwicklung gegenüber den Vergleichsindizes.

Der nachstehend aufgeführte Personalaufwand ist als rechnerische Größe jeweils nicht mit dem tatsächlichen Zufluss der realisierten Gewinne bei Ausübung der Optionsrechte gleichzusetzen. Über Zeitpunkt und Umfang der Ausübungen der Optionsrechte aus den einzelnen Jahren entscheiden die Mitglieder des Vorstands unter Beachtung der allgemeinen Bedingungen und Obergrenzen des LTI-Programms individuell. Der auf das Jahr 2010 entfallende Personalaufwand aller zugeteilten Optionsrechte beträgt für Dr. Jürgen Hambrecht 12.171 Tausend € (2009: 3.666 Tausend €), für Dr. Kurt Bock 4.919 Tausend € (2009: 2.480 Tausend €), für Dr. Martin Brudermüller 4.087 Tausend € (2009: 1.883 Tausend €), für Dr. Hans-Ulrich Engel 3.198 Tausend € (2009: 1.918 Tausend €), für Dr. John Feldmann 5.256 Tausend € (2009: 1.833 Tausend €), für Dr. Andreas Kreimeyer 3.449 Tausend € (2009: 1.768 Tausend €), für Dr. Stefan Marcinowski 4.034 Tausend € (2009: 1.833 Tausend €) und für Dr. Harald Schwager 3.105 Tausend € (2009: 901 Tausend €). → **Mehr zum LTI-Programm ab Seite 185**

Die Mitglieder des Vorstands werden unter Berücksichtigung eines Selbstbehalts in die Deckung einer von der Gesellschaft abgeschlossenen Vermögensschadens-Haftpflichtversicherung (D&O-Versicherung) einbezogen.

## Versorgungszusagen

Im Rahmen der den Mitgliedern des Vorstands erteilten Versorgungszusagen („Performance Pension Vorstand“) werden jährliche Rentenbausteine angesammelt. Dabei entspricht die Systematik zur Bestimmung der Höhe der Versorgungsleistungen grundsätzlich derjenigen, die auch den Versorgungszusagen für andere Mitarbeitergruppen zu Grunde liegt. Ziel dieser Systematik ist es, sowohl dem Unternehmenserfolg als auch dem Karriereverlauf des jeweiligen Vorstandsmitglieds einen maßgeblichen Einfluss auf die Höhe der erreichbaren Versorgungsleistung einzuräumen.

Der im jeweiligen Geschäftsjahr zu erwerbende Pensionsanspruch (Rentenbaustein) setzt sich aus einem fixen und einem variablen Teil zusammen. Der fixe Teil ergibt sich durch Multiplikation der jährlichen Festvergütung oberhalb der Beitragsbemessungsgrenze in der gesetzlichen Rentenversicherung mit einem Prozentsatz (Versorgungsfaktor) von 32 %. Der hieraus resultierende Betrag wird mittels versicherungsmathematischer Faktoren verrentet, also unter Berücksichtigung eines Rechnungszinses (5 %), einer Sterbe-, Invaliditäts- und Hinterbliebenenwahrscheinlichkeit (Heubeck-Richttafeln 2005G) sowie einer angenommenen Rentenanpassung (1,5 % pro Jahr) in eine lebenslange Rente umgerechnet. Ab Eintritt des Versorgungsfalls wird diese Rente gezahlt. Der variable Teil des Rentenbausteins ist von der Gesamtkapitalrendite des jeweiligen Geschäftsjahres und dem Performancefaktor, der auch für die Tantieme maßgeblich ist, abhängig. Als Basis werden eine Gesamtkapitalrendite von 12 % sowie ein Performancefaktor von 1,0 zu Grunde gelegt, bei deren Erreichen der variable Teil des Rentenbausteins dem fixen Teil entspricht. Im Hinblick auf die Gesamtkapitalrendite entwickelt sich die Höhe des variablen Teils des Rentenbausteins zwischen 10 und 14 % Gesamtkapitalrendite linear. Oberhalb von 14 % Gesamtkapitalrendite flacht der Anstieg des variablen Teils ab, unterhalb von 10 % Gesamtkapitalrendite verstärkt sich sein Absinken. Im Hinblick auf den Performancefaktor entwickelt sich die Höhe des variablen Teils des Rentenbausteins zwischen einer Zielerreichung von über 50 % und unter 125 % linear. Bei einer Zielerreichung von 50 % und weniger beträgt der Performancefaktor 0, und bei einer Zielerreichung von 125 % und mehr beträgt der Performancefaktor 1,5. Der fixe und der variable Teil ergeben zusammen den für das entsprechende Geschäftsjahr erworbenen Rentenbaustein. Die einzelnen in den jeweiligen Geschäftsjahren erworbenen Rentenbausteine werden aufsummiert und bestimmen im Versorgungsfall die dem jeweiligen Vorstandsmitglied zustehende Versorgungsleistung. Der Versorgungsfall tritt ein bei Beendigung des Dienstverhältnisses nach Vollendung des 60. Lebensjahres oder auf Grund von Invalidität oder Tod. Die laufenden Rentenleistungen werden entsprechend der Veränderung des „Verbraucherpreisindex für Deutschland“, mindestens aber um 1 % pro Jahr, angepasst.

Die Rentenbausteine umfassen auch eine Anwartschaft auf Hinterbliebenenleistungen. Im Falle des Todes eines aktiven oder ehemaligen Vorstandsmitglieds erhalten der hinterbliebene Ehegatte 60 %, jede Halbwaise 10 %, eine Vollwaise 33 %, zwei Vollwaisen je 25 % sowie drei und mehr Vollwaisen je 20 % der Versorgungsleistung, auf die das (ehemalige) Vorstandsmitglied Anspruch oder Anwartschaft hatte. Die Höchstgrenze für die Hinterbliebenenleistungen insgesamt beträgt 75 % der Vorstandspension. Übersteigen die Hinterbliebenenleistungen diese Höchstgrenze, werden sie verhältnismäßig gekürzt.

Wie grundsätzlich alle Mitarbeiter der BASF SE, sind auch die Mitglieder des Vorstands Mitglied der BASF Pensionskasse VVaG. Beitragszahlung und Versorgungsleistungen bestimmen sich dabei nach deren Satzung und den Allgemeinen Versicherungsbedingungen.

Die Werte für die im Jahr 2010 erworbenen Versorgungsansprüche (Service Cost) beinhalten Kosten für die BASF Pensionskasse VVaG und für die Performance Pension. Die Kosten betragen für Dr. Jürgen Hambrecht 9 Tausend € (2009: 58 Tausend €), für Dr. Kurt Bock 430 Tausend € (2009: 163 Tausend €), für Dr. Martin Brudermüller 414 Tausend € (2009: 136 Tausend €), für Dr. Hans-Ulrich Engel 439 Tausend € (2009: 447 Tausend €), für Dr. John Feldmann 236 Tausend € (2009: 228 Tausend €), für Dr. Andreas Kreimeyer 456 Tausend € (2009: 209 Tausend €), für Dr. Stefan Marcinowski 460 Tausend € (2009: 219 Tausend €) und für Dr. Harald Schwager 420 Tausend € (2009: 175 Tausend €).

Der Barwert der Versorgungszusagen stellt einen bilanziellen Wert der Anwartschaften dar, die die Vorstandsmitglieder über ihre BASF-Dienstjahre erworben haben. Der Anwartschaftsbarwert für die bis einschließlich zum Jahr 2010 erworbenen Versorgungsansprüche beträgt für Dr. Jürgen Hambrecht 14.555 Tausend €, für Dr. Kurt Bock 7.416 Tausend €, für Dr. Martin Brudermüller 4.884 Tausend €, für Dr. Hans-Ulrich Engel 3.862 Tausend €, für Dr. John Feldmann 6.883 Tausend €, für Dr. Andreas Kreimeyer 6.899 Tausend €, für Dr. Stefan Marcinowski 7.914 Tausend € und für Dr. Harald Schwager 3.566 Tausend €.

### Leistungen bei Beendigung des Vorstandsmandats

Scheidet ein Vorstandsmitglied vor Vollendung des 60. Lebensjahres aus dem Dienstverhältnis aus, weil seine Bestellung entweder nicht verlängert oder aus wichtigem Grund widerrufen wurde, gilt dies als Eintritt des Versorgungsfalles im Sinne der Versorgungszusage, wenn das Vorstandsmitglied mindestens zehn Jahre im Vorstand war oder der Zeitraum bis zum Erreichen des gesetzlichen Renteneintrittsalters weniger als zehn Jahre beträgt. Das Unternehmen ist berechtigt, Bezüge aus einer anderweitigen Beschäftigung bis zum gesetzlichen Renteneintrittsalter auf die Pensionsbezüge anzurechnen.

Bei Beendigung des Vorstandsmandats nach Eintritt eines Kontrollwechsels („Change of Control“) gilt Folgendes: Ein „Change of Control“ im Sinne dieser Regelung liegt vor, wenn ein Aktionär gegenüber BASF den Besitz einer Beteiligung von mindestens 25 % oder die Aufstockung einer solchen Beteiligung mitteilt.

Bei Widerruf der Vorstandsbestellung innerhalb eines Jahres nach Eintritt eines „Change of Control“ erhält das Vorstandsmitglied die bis zum regulären Mandatsablauf ausstehende Vergütung (feste Vergütung und Jahrestantieme auf Basis einer Gesamtkapitalrendite von 12 % sowie einer Zielerreichung von 100 %) als Einmalzahlung. Weiterhin kann sich das Vorstandsmitglied innerhalb von drei Monaten seine im Rahmen des LTI-Programms noch vorhandenen Optionen zum beizulegenden Zeitwert abfinden oder aber die bestehenden Rechte programmgemäß fortbestehen lassen. Für die Ermittlung der Pensionsanwartschaft aus der „Performance Pension Vorstand“ wird auch die Zeit bis zum regulären Mandatsablauf berücksichtigt.

Bei allen Vorstandsmitgliedern besteht eine generelle Begrenzung einer etwaigen Abfindung (Abfindungs-Cap). Danach dürfen bei vorzeitiger Beendigung der Vorstandstätigkeit ohne wichtigen Grund die Zahlungen an das Vorstandsmitglied einschließlich Nebenleistungen den Wert von zwei Jahresvergütungen nicht überschreiten und nicht mehr als die Restlaufzeit des Anstellungsvertrages vergüten. Für die Berechnung des Abfindungs-Caps wird auf die Gesamtvergütung des abgelaufenen Geschäftsjahres und gegebenenfalls auch auf die voraussichtliche Gesamtvergütung des laufenden Geschäftsjahres abgestellt. Bei vorzeitiger Beendigung der Vorstandstätigkeit infolge eines „Change of Control“ dürfen die Leistungen 150 % des Abfindungs-Caps nicht übersteigen.

## Ehemalige Vorstände

Die Gesamtbezüge der früheren Mitglieder des Vorstands und ihrer Hinterbliebenen im Jahr 2010 beliefen sich auf 13,2 Millionen € (2009: 12,3 Millionen €). Hierin enthalten sind auch Zahlungen, die durch die früheren Mitglieder des Vorstands durch eine etwaige Gehaltsumwandlung selbst finanziert wurden, sowie der auf das Jahr 2010 entfallende Personalaufwand der Optionsrechte, welche die ehemaligen Vorstandsmitglieder aus ihrer aktiven Dienstzeit noch innehaben. Die Fortführung der bei Pensionierung noch nicht ausgeübten Optionen und die damit verbundene Weitergeltung der Haltefrist für das Eigeninvestment in BASF-Aktien gemäß Programmbedingungen ist bewusst vorgesehen, um die Ausrichtung der Vorstandsvergütung auf Nachhaltigkeit besonders zu betonen. Die Pensionsrückstellungen für die früheren Mitglieder des Vorstands und ihre Hinterbliebenen betragen 95,4 Millionen € (2009: 87,9 Millionen €).

## Vergütung des Aufsichtsrats

Die Darstellung der Vergütung des Aufsichtsrats enthält die nach deutschem Handelsrecht erforderlichen Angaben und richtet sich nach den Empfehlungen des Deutschen Corporate Governance Kodex. Die Vergütung des Aufsichtsrats ist in der von der Hauptversammlung beschlossenen Satzung der BASF SE festgelegt.

Jedes Mitglied des Aufsichtsrats erhält jährlich eine feste Vergütung von 60.000 € und eine erfolgsorientierte variable Vergütung für jeden vollen 0,01 €, um den das im Konzernabschluss für das Geschäftsjahr, für das die Vergütung gezahlt wird, ausgewiesene Ergebnis je Aktie der BASF-Gruppe das Mindestergebnis je Aktie übersteigt. Für das Geschäftsjahr 2010 beträgt das Mindestergebnis je Aktie 1,45 €. Die erfolgsorientierte variable Vergütung beträgt 800 € je vollen 0,01 € Ergebnis je Aktie bis zu einem Ergebnis je Aktie von 2,20 €, 600 € für jeden weiteren 0,01 € Ergebnis je Aktie bis zu einem Ergebnis je Aktie von 2,70 € und 400 € für jeden darüber hinausgehenden 0,01 €. Die erfolgsorientierte variable Vergütung ist begrenzt auf den Höchstbetrag von 120.000 €. Das Mindestergebnis je Aktie und die weiteren Schwellenwerte erhöhen sich für jedes folgende Geschäftsjahr um jeweils 0,05 €. Auf der Basis des im Konzernabschluss 2010 ausgewiesenen Ergebnisses je Aktie von 4,96 € erreicht die erfolgsorientierte Vergütung für das Jahr 2010 den Höchstbetrag von 120.000 €. Der Vorsitzende des Aufsichtsrats erhält das Zweieinhalbfache, ein stellvertretender Vorsitzender das Eineinhalbfache der Vergütung eines ordentlichen Mitglieds.

Aufsichtsratsmitglieder, die einem Ausschuss mit Ausnahme des Nominierungsausschusses angehören, erhalten hierfür eine weitere feste Vergütung in Höhe von 12.500 €. Für den Prüfungsausschuss beträgt die weitere feste Vergütung 25.000 €. Der Vorsitzende eines Ausschusses erhält das Doppelte, ein stellvertretender Vorsitzender das Eineinhalbfache der weiteren festen Vergütung.

Die Gesellschaft leistet jedem Aufsichtsratsmitglied Ersatz seiner Auslagen sowie der von ihm wegen seiner Tätigkeit als Mitglied des Aufsichtsrats oder eines Ausschusses zu entrichtenden Umsatzsteuer. Die Gesellschaft gewährt ferner den Mitgliedern des Aufsichtsrats für ihre Teilnahme an einer Sitzung des Aufsichtsrats oder eines seiner Ausschüsse, denen sie angehören, ein Sitzungsgeld von 500 € und bezieht die Aufgabenwahrnehmung der Mitglieder des Aufsichtsrats unter Berücksichtigung eines Selbstbehalts in die Deckung einer von ihr abgeschlossenen Vermögensschadens-Haftpflichtversicherung (D&O-Versicherung) mit ein.

Die Gesamtvergütung des Aufsichtsrats einschließlich des Sitzungsgeldes für die Tätigkeit im Jahr 2010 beträgt 2,9 Millionen € (2009: 1,3 Millionen €). Auf die einzelnen Mitglieder des Aufsichtsrats entfallen die in der nachfolgenden Tabelle aufgeführten Beträge:

## Tausend €

|                                                                      | Feste Vergütung |              | Erfolgsorientierte variable Vergütung |              | Vergütung für Ausschusstätigkeit |              | Gesamtvergütung |                |
|----------------------------------------------------------------------|-----------------|--------------|---------------------------------------|--------------|----------------------------------|--------------|-----------------|----------------|
|                                                                      | 2010            | 2009         | 2010                                  | 2009         | 2010                             | 2009         | 2010            | 2009           |
| Dr. h.c. Eggert Voscherau, Vorsitzender <sup>1</sup> (ab 30.04.2009) | 150,0           | 112,5        | 300,0                                 | 21,0         | 25,0                             | 18,7         | 475,0           | 152,2          |
| Prof. Dr. Jürgen Strube, Vorsitzender <sup>1</sup> (bis 30.04.2009)  | –               | 50,0         | –                                     | 9,3          | –                                | 8,3          | –               | 67,6           |
| Michael Diekmann, stellv. Vorsitzender <sup>2</sup>                  | 90,0            | 90,0         | 180,0                                 | 16,8         | 12,5                             | 9,4          | 282,5           | 116,2          |
| Robert Oswald, stellv. Vorsitzender <sup>2</sup>                     | 90,0            | 90,0         | 180,0                                 | 16,8         | 12,5                             | 12,5         | 282,5           | 119,3          |
| Ralf-Gerd Bastian <sup>4</sup>                                       | 60,0            | 60,0         | 120,0                                 | 11,2         | 25,0                             | 25,0         | 205,0           | 96,2           |
| Wolfgang Daniel                                                      | 60,0            | 60,0         | 120,0                                 | 11,2         | –                                | –            | 180,0           | 71,2           |
| Prof. Dr. François Diederich                                         | 60,0            | 60,0         | 120,0                                 | 11,2         | –                                | –            | 180,0           | 71,2           |
| Franz Fehrenbach <sup>4</sup>                                        | 60,0            | 60,0         | 120,0                                 | 11,2         | 25,0                             | 25,0         | 205,0           | 96,2           |
| Stephen K. Green (vom 30.04.2009 bis 16.12.2010)                     | 60,0            | 45,0         | 120,0                                 | 8,4          | –                                | –            | 180,0           | 53,4           |
| Dr. Tessen von Heydebreck <sup>2</sup> (bis 30.04.2009)              | –               | 20,0         | –                                     | 3,7          | –                                | 4,2          | –               | 27,9           |
| Max Dietrich Kley <sup>3</sup>                                       | 60,0            | 60,0         | 120,0                                 | 11,2         | 50,0                             | 50,0         | 230,0           | 121,2          |
| Anke Schäferkordt (ab 17.12.2010)                                    | 5,0             | –            | 10,0                                  | –            | –                                | –            | 15,0            | –              |
| Denise Schellemans                                                   | 60,0            | 60,0         | 120,0                                 | 11,2         | –                                | –            | 180,0           | 71,2           |
| Ralf Sikorski                                                        | 60,0            | 60,0         | 120,0                                 | 11,2         | –                                | –            | 180,0           | 71,2           |
| Michael Vassiliadis <sup>2, 4</sup>                                  | 60,0            | 60,0         | 120,0                                 | 11,2         | 37,5                             | 37,5         | 217,5           | 108,7          |
| <b>Summe:</b>                                                        | <b>875,0</b>    | <b>887,5</b> | <b>1.750,0</b>                        | <b>165,6</b> | <b>187,5</b>                     | <b>190,6</b> | <b>2.812,5</b>  | <b>1.243,7</b> |

<sup>1</sup> Vorsitzender des Personalausschusses

<sup>2</sup> Mitglied des Personalausschusses

<sup>3</sup> Vorsitzender des Prüfungsausschusses

<sup>4</sup> Mitglied des Prüfungsausschusses

Die Aufsichtsrats- und die Ausschussvergütungen werden fällig nach Ablauf der Hauptversammlung, die den für die Bemessung der variablen Vergütung maßgeblichen Konzernabschluss entgegennimmt. Die Vergütungen für das Jahr 2010 werden dementsprechend nach der Hauptversammlung am 6. Mai 2011 gezahlt.

Im Jahr 2010 hat die Gesellschaft dem Aufsichtsratsmitglied Prof. Dr. Diederich, wie bereits im Jahr 2009, auf Grund eines mit Zustimmung des Aufsichtsrats abgeschlossenen Beratungsvertrags auf dem Gebiet der chemischen Forschung Vergütungen in Höhe von insgesamt 38.400 CHF (2010: rund 27.800 €; 2009: rund 25.400 €) zuzüglich Umsatzsteuer und Auslagenersatz gezahlt.

Darüber hinaus haben keine weiteren Aufsichtsratsmitglieder im Jahr 2010 Vergütungen für persönlich erbrachte Leistungen, insbesondere Beratungs- und Vermittlungsleistungen, erhalten.

→ Mehr zum Aktienbesitz von Vorstand und Aufsichtsrat auf Seite 121

## Bericht des Aufsichtsrats

### Sehr geehrte Aktionärinnen und Aktionäre,

nach dem schwierigen Jahr 2009 haben wir 2010 eine in dieser Schnelligkeit und Stärke nicht erwartete Erholung der Wirtschaft erlebt. Dieser Aufschwung spiegelt sich auch in der Entwicklung der BASF mit neuen Rekordwerten bei Umsatz und Ergebnis wider. Entscheidend dafür waren die überzeugende Arbeit von Vorstand und Mitarbeitern sowie die Weichenstellungen der vergangenen Jahre. Sie haben die BASF robust gemacht. Die Strategie des Unternehmens mit einem breiten Spektrum an Geschäftsfeldern und ihrer Zukunftsorientierung auf wachstumsstarke und innovative Märkte der Chemie stimmt.

Mit den Entscheidungen über die künftige Zusammensetzung des Vorstands will der Aufsichtsrat einen entscheidenden Beitrag für die erfolgreiche Weiterentwicklung des Unternehmens leisten. Im Mai 2010 haben wir Dr. Kurt Bock zum Vorsitzenden des Vorstands und Dr. Martin Bruder Müller zu seinem Stellvertreter sowie im Oktober 2010 Margret Suckale und Michael Heinz zu Mitgliedern des Vorstands bestellt. Damit verfügt die BASF auch weiterhin über ein sehr gutes Team für die Fortschreibung ihrer Erfolgsgeschichte.

### Überwachung und Beratung im kontinuierlichen Dialog mit dem Vorstand

Der Aufsichtsrat der BASF SE hat im abgelaufenen Geschäftsjahr 2010 die ihm nach Gesetz und Satzung obliegenden Aufgaben mit großer Sorgfalt wahrgenommen. Wir haben die Geschäftsführung des Vorstands regelmäßig überwacht und in diesem Rahmen die strategische Weiterentwicklung der Gesellschaft und wesentliche Einzelmaßnahmen beratend begleitet. Hierzu hat sich der Aufsichtsrat vom Vorstand in sechs Sitzungen ausführlich unterrichten lassen. Dies erfolgte durch schriftliche und mündliche Berichte über die Geschäftspolitik, die Geschäftslage, die Geschäftsentwicklung, die Rentabilität sowie die Unternehmensplanung einschließlich der Finanz-, Investitions- und Personalplanung der Gesellschaft und ihrer wesentlichen Beteiligungsgesellschaften. Ebenso waren Abweichungen des Geschäftsverlaufs von den Planungen Gegenstand von Informationen. Der Aufsichtsrat hat die Berichte des Vorstands eingehend diskutiert und die Entwicklungsperspektiven des Unternehmens und der einzelnen Arbeitsgebiete mit dem Vorstand erörtert. Auch außerhalb der Aufsichtsratssitzungen ließ sich der Vorsitzende des Aufsichtsrats regelmäßig vom Vorstandsvorsitzenden über die aktuelle Entwicklung der Geschäftslage und wesentliche Geschäftsvorfälle informieren. In Entscheidungen von wesentlicher Bedeutung war der Aufsichtsrat stets frühzeitig eingebunden. Soweit zu Einzelmaßnahmen des Vorstands, die nach Gesetz oder Satzung der Zustimmung des Aufsichtsrats bedürfen, Entscheidungen des Aufsichtsrats erforderlich waren, haben wir darüber beraten und Beschluss gefasst.

Die von den Aktionären und von den Arbeitnehmern gewählten Mitglieder des Aufsichtsrats haben die Sitzungen in getrennten Vorbesprechungen vorbereitet. Mit Ausnahme von zwei Sitzungen, bei denen jeweils eines der zwölf Mitglieder des Aufsichtsrats nicht anwesend war, haben an den Sitzungen des Aufsichtsrats im Jahr 2010 sämtliche Mitglieder teilgenommen.

In allen Sitzungen hat sich der Aufsichtsrat mit der Weiterentwicklung der Geschäftsaktivitäten der BASF-Gruppe durch Akquisitionen, Devestitionen und Investitionsprojekte auseinandergesetzt und den Vorstand in diesen für die Zukunft des Unternehmens entscheidenden Fragen beraten. Herausragende Themen waren dabei der Erwerb von Cognis und das Vorhaben, das im Unternehmensbereich Styrenics zusammengefasste weltweite Geschäft der BASF mit Styrolkunststoffen in ein Gemeinschaftsunternehmen mit Ineos einzubringen. Mit beiden Projekten haben wir uns in sämtlichen Aufsichtsratssitzungen des Jahres 2010 beschäftigt. Weiterer Schwerpunkt unserer Überwachungstätigkeit war erneut das Arbeitsgebiet Oil & Gas. In der Sitzung am 22. Juli 2010 haben wir uns vor dem Hintergrund des Untergangs der Ölbohrplattform Deepwater Horizon von BP im Golf von Mexiko intensiv mit dem Risikomanagement und den Risikostandards bei der Exploration von Öl und Gas durch die Wintershall, in der das Öl- und Gas-Geschäft der BASF gebündelt ist, befasst. In der Sitzung am 21. Oktober 2010 haben wir uns ausführlich über die anstehenden Änderungen des deutschen Erneuerbare-Energien-Gesetzes (EEG) und des Stromsteuergesetzes und die damit verbundenen weiteren möglichen Belastungen für die BASF als einem Unternehmen mit energieintensiver Produktion informieren lassen. In der Sitzung am 16. Dezember 2010 haben wir die operative Planung und die Finanzplanung des Vorstands für das Jahr 2011 diskutiert und genehmigt. Ferner haben wir den Vorstand unter bestimmten Voraussetzungen zur Beschaffung von Finanzierungsmitteln ermächtigt.

Im Jahr 2010 hatten Personalthemen eine herausgehobene Bedeutung. In der Sitzung am 31. Mai 2010 hat der Aufsichtsrat Dr. Kurt Bock mit Wirkung ab Beendigung der Hauptversammlung am 6. Mai 2011 zum Vorsitzenden des Vorstands ernannt. Er folgt Dr. Jürgen Hambrecht nach, der zu diesem Zeitpunkt aus dem Vorstand ausscheidet. Zugleich hat der Aufsichtsrat Dr. Martin Bruder Müller ab dem gleichen Zeitpunkt zum stellvertretenden Vorsitzenden des Vorstands ernannt. Um die Langfristigkeit dieser Entscheidungen sicherzustellen, wurden die laufenden früheren Vorstandsbestellungen, die bei Dr. Bock bis zur Hauptversammlung 2012 und bei Dr. Bruder Müller bis zur Hauptversammlung 2013 liefen, einvernehmlich abgekürzt und mit Wirkung zum Ablauf der Hauptversammlung am 6. Mai 2011 beendet. Der Aufsichtsrat hat beide Vorstandsmitglieder sodann ab dieser Hauptversammlung bis zum Ablauf der Hauptversammlung 2016 wiederbestellt. In der Sitzung am 21. Oktober 2010 haben wir Margret Suckale und Michael Heinz, jeweils mit Wirkung nach der Hauptversammlung am 6. Mai 2011 bis zur Hauptversammlung 2014, zu Mit-

gliedern des Vorstands bestellt. Frau Suckale haben wir zugleich zur Arbeitsdirektorin der BASF SE ernannt. In der Sitzung am 16. Dezember 2010 haben wir die Bestellungen der Vorstandsmitglieder Dr. Hans-Ulrich Engel und Dr. Harald Schwager bis zur Hauptversammlung 2016 verlängert.

### Ausschüsse

Der Aufsichtsrat der BASF SE hat drei Ausschüsse gebildet, den Ausschuss für personelle Angelegenheiten des Vorstands und Kreditgewährungen gemäß § 89 Abs. 4 AktG (Personalausschuss), den Prüfungsausschuss und den Nominierungsausschuss. Dem Aufsichtsrat wurde regelmäßig über die Tätigkeit der Ausschüsse berichtet.

Dem Personalausschuss gehören der Aufsichtsratsvorsitzende Dr. h.c. Eggert Voscherau als Vorsitzender, die stellvertretenden Aufsichtsratsvorsitzenden Michael Diekmann und Robert Oswald sowie das Aufsichtsratsmitglied Michael Vassiliadis an. Der Personalausschuss tagte im Berichtszeitraum fünf Mal. Er hat sich in seinen Sitzungen, teilweise gemeinsam mit dem Vorsitzenden des Vorstands, insbesondere mit der langfristigen Nachfolgeplanung für den Vorstand befasst sowie die Vergütung des Vorstands und die Inhalte des Anstellungsvertrags für die Mitglieder des Vorstands eingehend beraten. Zentrales Thema der Beratungen des Personalausschusses waren die erforderlichen Neubesetzungen im Vorstand. Der Aufsichtsrat hat in seinen Sitzungen am 31. Mai, 21. Oktober und 16. Dezember 2010 entsprechend den Empfehlungen des Personalausschusses Beschlüsse gefasst. Weiterhin wurden der Prozess für die Zielvereinbarung zwischen dem Aufsichtsrat und den Mitgliedern des Vorstands, die Zielvereinbarungen für den Zeitraum 2010 bis 2012 und der Grad der Zielerreichung im Jahr 2010 beraten und dem Aufsichtsrat hierzu Beschlussempfehlungen vorgelegt.

Dem Prüfungsausschuss gehören die Aufsichtsratsmitglieder Max Dietrich Kley, Ralf Gerd Bastian, Franz Fehrenbach und Michael Vassiliadis an. Vorsitzender ist Max Dietrich Kley, der darüber hinaus als „Audit Committee Financial Expert“ benannt worden ist. Dem Prüfungsausschuss sind sämtliche in § 107 Absatz 3 Satz 2 AktG genannten sowie die weiteren in Ziffer 5.3.2 des Deutschen Corporate Governance Kodex vom 26. Mai 2010 aufgeführten Aufgabenfelder eines Prüfungsausschusses zugewiesen. Er hat im Berichtszeitraum fünf Mal getagt. Kernpunkte seiner Tätigkeit waren die Prüfung des Jahres- und des Konzernabschlusses 2009 der BASF SE sowie die Erörterung der Quartals- und Halbjahresberichte mit dem Vorstand jeweils vor deren Veröffentlichung. Weitere Schwerpunkte waren die Beratung des Vorstands in Rechnungslegungsfragen und die Erörterung und Festlegung der besonderen Schwerpunkte der Abschlussprüfung. Die Beziehungen zum Abschlussprüfer wurden mit der Beschlussfassung über die Ermächtigung zur Erbringung von Leistungen außerhalb der Abschlussprüfung (Non-Audit Services) geregelt. Ferner wurde mit dem Abschlussprüfer eine Vereinbarung über sein Honorar getroffen und seine Unabhängigkeit laufend überwacht. In einer Sitzung befasste sich der Prüfungsausschuss nach einem Bericht des Chief Compliance Officer intensiv mit dem Thema Compliance in der BASF-Gruppe.

Dem Nominierungsausschuss gehören mit Dr. h.c. Eggert Voscherau, Prof. Dr. François Diederich, Michael Diekmann, Franz Fehrenbach, Stephen K. Green (bis 16. Dezember 2010) und Max Dietrich Kley ausschließlich die von der Hauptversammlung gewählten Aufsichtsratsmitglieder an. Aufgabe des Nominierungsausschusses ist die Vorbereitung von Kandidatenvorschlägen für die Wahl der von der Hauptversammlung zu wählenden Aufsichtsratsmitglieder. Die Mitglieder des Nominierungsausschusses haben nach der Niederlegung des Aufsichtsratsmandats durch das Aufsichtsratsmitglied Stephen K. Green dessen Nachfolge im Aufsichtsrat beraten und haben dem Aufsichtsrat empfohlen, der Hauptversammlung Frau Anke Schäferkordt zur Wahl in den Aufsichtsrat vorzuschlagen. Der Nominierungsausschuss hat seiner Empfehlung die vom Aufsichtsrat in dessen Sitzung am 21. Oktober 2010 festgelegten Ziele für die Zusammensetzung des Aufsichtsrats zugrunde gelegt.

### Corporate Governance und Entsprechenserklärung

Der Aufsichtsrat hat sich auch im Jahr 2010 intensiv mit den von BASF praktizierten Corporate-Governance-Standards und den kapitalmarkt- und gesellschaftsrechtlichen Rahmenbedingungen in Deutschland befasst. Hierzu gehörte vor allem der im Jahr 2010 erneut geänderte und um weitere, auch den Aufsichtsrat betreffende Empfehlungen ergänzte Deutsche Corporate Governance Kodex (Fassung vom 26. Mai 2010), der in den Sitzungen am 21. Oktober und 16. Dezember 2010 behandelt wurde. Wir haben uns insbesondere mit den neuen Kodex-Empfehlungen befasst und beschlossen, auch ihnen zu entsprechen. Hauptthema der Beratungen war dabei die Festlegung von Zielen für die Zusammensetzung des Aufsichtsrats zur Umsetzung der Empfehlung in Ziffer 5.4.1 des Deutschen Corporate Governance Kodex. Diese haben wir in der Sitzung am 21. Oktober 2010 beschlossen. Sie adressieren sowohl die für die Mitgliedschaft im Aufsichtsrat der BASF erforderlichen Kenntnisse, Fähigkeiten und fachlichen Erfahrungen als auch die Notwendigkeiten der Vielfalt (Diversity) im Aufsichtsrat durch unterschiedliche berufliche und internationale Erfahrungen sowie insbesondere die Beteiligung von Frauen. Ferner sollen sie eine unabhängige Aufsichtsratsarbeit durch Vermeidung von Interessenkonflikten sicherstellen.

In der Sitzung am 16. Dezember 2010 hat der Aufsichtsrat die gemeinsame Entsprechenserklärung von Aufsichtsrat und Vorstand gemäß § 161 AktG beschlossen sowie eine Effizienzprüfung und eine Unabhängigkeitseinschätzung vorgenommen. Die BASF entspricht den Empfehlungen des Deutschen Corporate Governance Kodex in der Fassung vom 26. Mai 2010 ohne Ausnahmen. Der vollständige Wortlaut der Entsprechenserklärung ist auf Seite 134 wiedergegeben und wird den Aktionären auf der Website der Gesellschaft zugänglich gemacht.

Den Vergütungsbericht mit der ausführlichen Erläuterung von Struktur und Höhe der Vergütung von Vorstand und Aufsichtsrat einschließlich der den Mitgliedern des Vorstands gemachten Versorgungszusagen finden Sie auf den Seiten 125 bis 130.



## Jahres- und Konzernabschluss

Die von der Hauptversammlung als Prüfer der Abschlüsse des Geschäftsjahres 2010 gewählte KPMG AG Wirtschaftsprüfungsgesellschaft hat den Jahresabschluss der BASF SE und den Abschluss der BASF-Gruppe einschließlich der Lageberichte unter Einbeziehung der Buchführung geprüft und jeweils mit dem uneingeschränkten Bestätigungsvermerk versehen. Weiterhin stellte der Abschlussprüfer fest, dass der Vorstand die ihm gemäß § 91 Abs. 2 AktG obliegenden Maßnahmen in geeigneter Form getroffen hat. Er hat insbesondere ein angemessenes und den Anforderungen des Unternehmens entsprechendes Informations- und Überwachungssystem eingerichtet, das nach seiner Konzeption und der tatsächlichen Handhabung geeignet erscheint, den Fortbestand der Gesellschaft gefährdende Entwicklungen frühzeitig zu erkennen.

Die zu prüfenden Unterlagen und die Prüfungsberichte des Abschlussprüfers wurden jedem Aufsichtsratsmitglied rechtzeitig übermittelt. Der Abschlussprüfer nahm an der Bilanzprüfungssitzung des Prüfungsausschusses am 23. Februar 2011 und der Bilanzsitzung des Aufsichtsrats am 3. März 2011 teil und berichtete über die wesentlichen Ergebnisse seiner Prüfung. Zudem gab der Abschlussprüfer am Vortag der Bilanzsitzung des Aufsichtsrats ausführliche Erläuterungen zu den Prüfungsberichten.

Der Prüfungsausschuss hat die Abschlüsse und Lageberichte in seiner Sitzung am 23. Februar 2011 geprüft und intensiv mit dem Abschlussprüfer erörtert. Über die Ergebnisse dieser Vorprüfung hat der Vorsitzende des Prüfungsausschusses in der Sitzung des Aufsichtsrats am 3. März 2011 ausführlich Bericht erstattet.

Der Aufsichtsrat hat auf dieser Basis den Jahresabschluss und den Lagebericht der BASF SE für das Geschäftsjahr 2010, den Vorschlag des Vorstands für die Verwendung des Bilanzgewinns sowie den Konzernabschluss und -lagebericht 2010 geprüft. Die Berichte des Abschlussprüfers haben wir zustimmend zur Kenntnis genommen. Das Ergebnis der Vorprüfung des Prüfungsausschusses und das Ergebnis unserer eigenen Prüfung entsprechen vollständig dem Ergebnis der Abschlussprüfung. Der Aufsichtsrat sieht keinen Anlass, Einwendungen gegen die Geschäftsführung und die vorgelegten Abschlüsse zu erheben.

Wir haben den vom Vorstand aufgestellten Jahresabschluss der BASF SE und den Konzernabschluss der BASF-Gruppe in der Bilanzsitzung des Aufsichtsrats am 3. März 2011 gebilligt. Der Jahresabschluss der BASF SE ist damit festgestellt. Dem Vorschlag des Vorstands zur Verwendung des Bilanzgewinns mit der Ausschüttung einer Dividende von 2,20 € pro Aktie stimmen wir zu.

## Besetzung des Aufsichtsrats

Das von der Hauptversammlung am 30. April 2009 gewählte Mitglied Stephen K. Green hat seine Mitgliedschaft im Aufsichtsrat mit Ablauf des 16. Dezember 2010 niedergelegt, da er zu Beginn des Jahres 2011 in der britischen Regierung das Amt des Ministers für Handel und Investitionen übernommen hat. Auf Antrag des Aufsichtsratsvorsitzenden hat das Amtsgericht Ludwigshafen mit Beschluss vom 18. November 2010 Frau Anke Schäferkordt mit Wirkung ab dem 17. Dezember 2010 zum Mitglied des Aufsichtsrats bestellt.

## Dank

Der Aufsichtsrat dankt allen Mitarbeiterinnen und Mitarbeitern der BASF-Gruppe weltweit sowie der Unternehmensleitung für die im Geschäftsjahr 2010 erbrachten Leistungen.

Der Aufsichtsrat spricht Herrn Green seinen ganz besonderen Dank für seine Tätigkeit im Aufsichtsrat aus.

Ludwigshafen, den 3. März 2011

Der Aufsichtsrat

## Dr. h.c. Eggert Voscherau

Vorsitzender des Aufsichtsrats

## Entsprechenserklärung 2010

### des Vorstands und des Aufsichtsrats der BASF SE

#### **Vorstand und Aufsichtsrat der BASF SE erklären gemäß § 161 AktG**

1. Den vom Bundesministerium der Justiz am 5. August 2009 im amtlichen Teil des elektronischen Bundesanzeigers bekannt gemachten Empfehlungen der Regierungskommission Deutscher Corporate Governance Kodex wurde seit Abgabe der letzten Entsprechenserklärung vom 11. Dezember 2009 entsprochen.

2. Den vom Bundesministerium der Justiz am 2. Juli 2010 im amtlichen Teil des elektronischen Bundesanzeigers bekannt gemachten Empfehlungen der Regierungskommission Deutscher Corporate Governance Kodex wird entsprochen.

Ludwigshafen, den 16. Dezember 2010

**Der Aufsichtsrat**  
der BASF SE

**Der Vorstand**  
der BASF SE

# 4

## Spaß am Lernen

Wissen ist eine wichtige Zukunftsressource und ein Motor für Wachstum und Innovation. Wir verstehen Investitionen in die Bildung als Teil unserer gesellschaftlichen Verantwortung. In 17 Ländern bieten wir daher Mitmach- und Schülerlabore an und engagieren uns in Projekten, die Bildung und Spaß am Lernen fördern. Allein im Wachstumsmarkt Asien haben 2010 über 14.000 Kinder in unseren KidsLabs die Welt der Chemie erforscht.

→ Mehr zum Thema Gesellschaftliches Engagement auf Seite 90

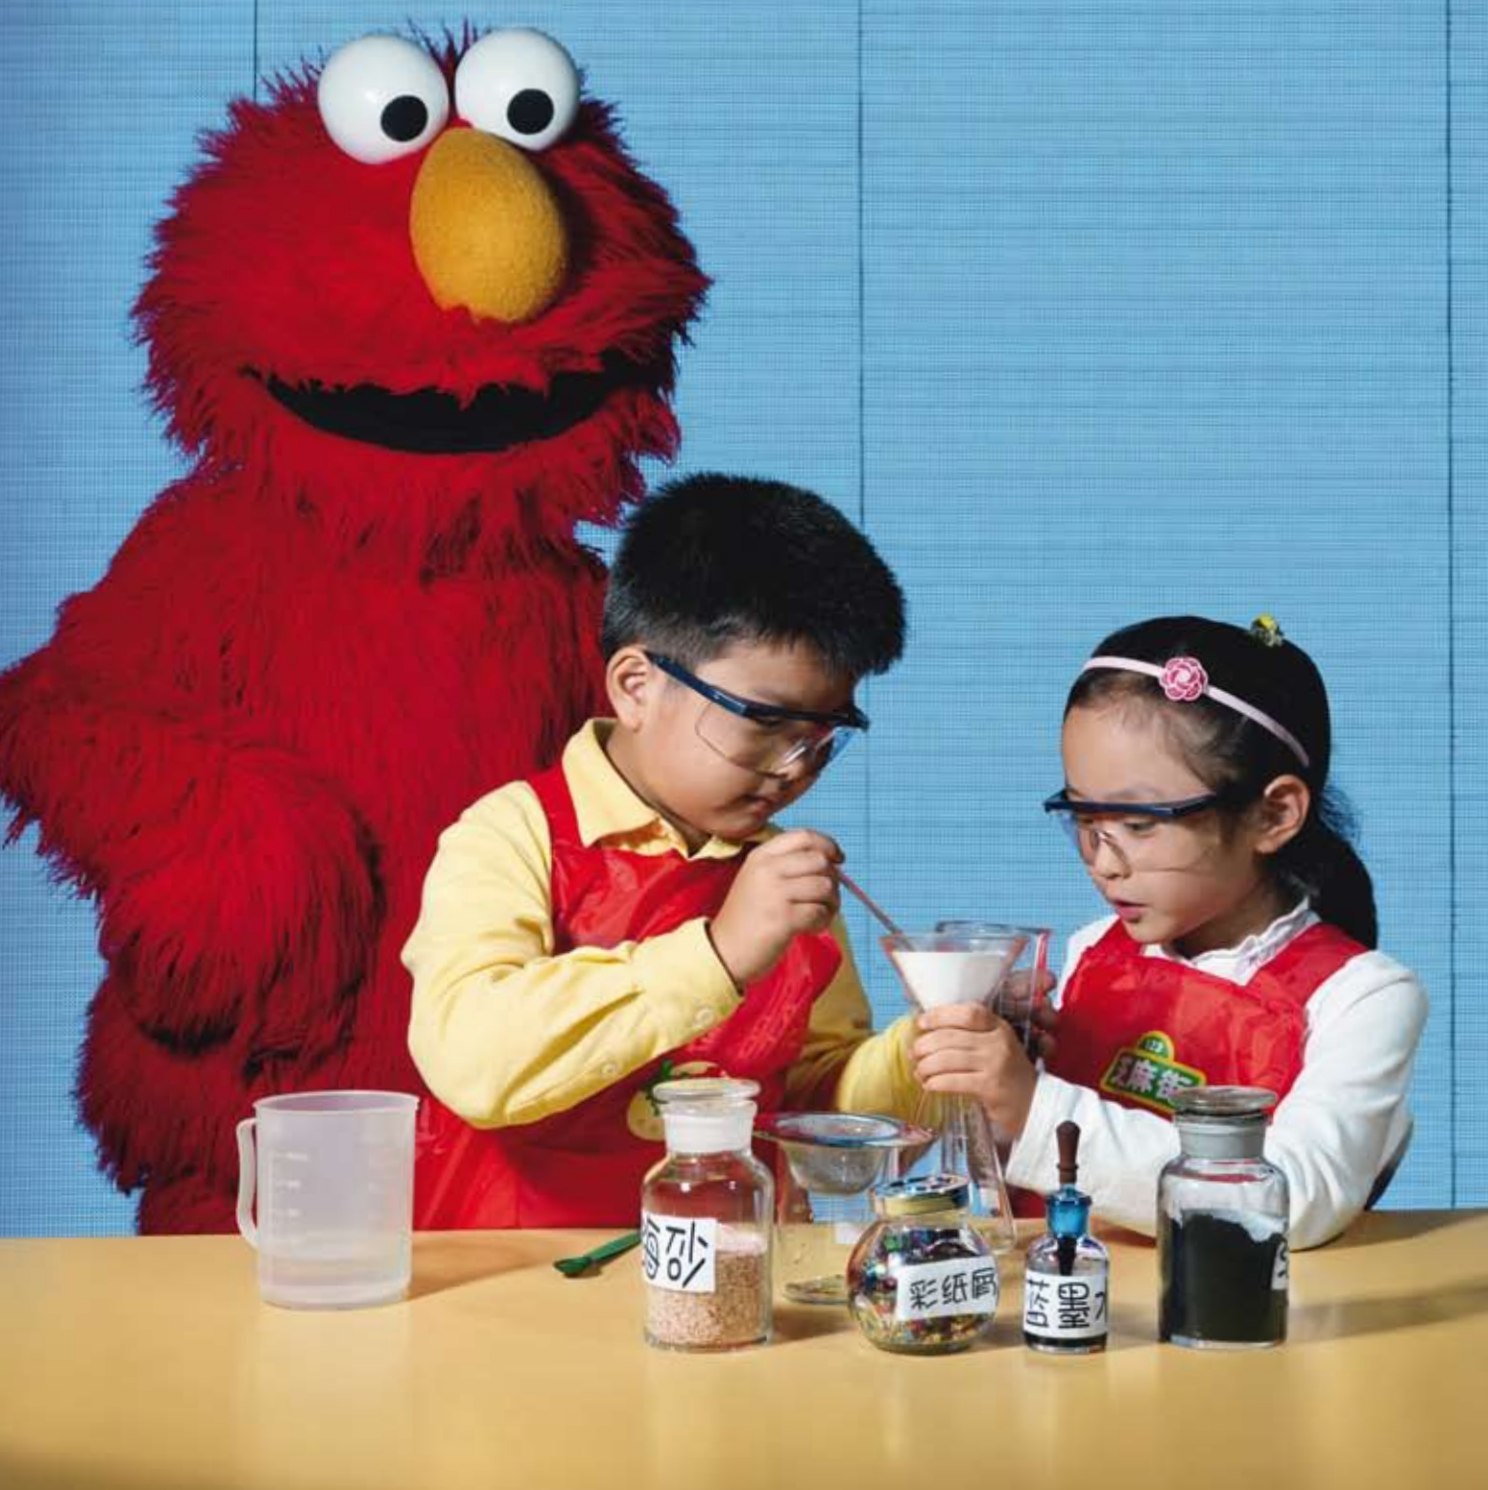

# Konzernabschluss und Anhang

|     |                                                                                 |
|-----|---------------------------------------------------------------------------------|
| 135 | Erklärung des Vorstands                                                         |
| 136 | Bestätigungsvermerk                                                             |
| 137 | Gewinn- und Verlustrechnung                                                     |
| 138 | Ertrags- und Aufwandsposten                                                     |
| 139 | Bilanz                                                                          |
| 140 | Kapitalflussrechnung                                                            |
| 141 | Entwicklung des Eigenkapitals                                                   |
| 142 | Konzernabschluss und Anhang                                                     |
| 142 | Zusammenfassung der Rechnungslegungsgrundsätze                                  |
| 150 | Konsolidierungskreis                                                            |
| 157 | Ergebnis je Aktie                                                               |
| 157 | Berichterstattung nach Segmenten und Regionen                                   |
| 160 | Sonstige betriebliche Erträge                                                   |
| 161 | Sonstige betriebliche Aufwendungen                                              |
| 162 | Finanzergebnis                                                                  |
| 163 | Steueraufwand                                                                   |
| 165 | Anteile anderer Gesellschafter                                                  |
| 165 | Sonstige Angaben                                                                |
| 166 | Kapitalflussrechnung und Kapitalstrukturmanagement                              |
| 167 | Immaterielle Vermögenswerte                                                     |
| 170 | Sachanlagen                                                                     |
| 172 | At Equity bewertete Beteiligungen und sonstige Finanzanlagen                    |
| 173 | Vorräte                                                                         |
| 173 | Forderungen und sonstiges Vermögen                                              |
| 175 | Kapital und Kapitalrücklage                                                     |
| 175 | Gewinnrücklagen und sonstige Eigenkapitalposten                                 |
| 176 | Anteile anderer Gesellschafter                                                  |
| 176 | Rückstellungen für Pensionen und ähnliche Verpflichtungen                       |
| 180 | Sonstige Rückstellungen                                                         |
| 181 | Verbindlichkeiten                                                               |
| 183 | Haftungsverhältnisse und sonstige finanzielle Verpflichtungen                   |
| 184 | Risiken aus Rechtsstreitigkeiten und -verfahren                                 |
| 185 | Aktienkursbasiertes Vergütungsprogramm und BASF-Mitarbeiterbeteiligungsprogramm |
| 187 | Finanzwirtschaftliche Risiken und derivative Finanzinstrumente                  |
| 192 | Leasingverhältnisse                                                             |
| 193 | Bezüge des Vorstands und des Aufsichtsrats                                      |
| 193 | Beziehungen zu nahestehenden Unternehmen und Personen (Related Parties)         |
| 194 | Dienstleistungen des Abschlussprüfers                                           |
| 194 | Anteilsbesitzliste                                                              |



## Konzernabschluss

### BASF-Gruppe

#### Erklärung des Vorstands und Versicherung nach §§ 297 Abs. 2, 315 Abs. 1 HGB

Für die Aufstellung des Abschlusses und des Konzernlageberichts der BASF-Gruppe ist der Vorstand der BASF SE verantwortlich.

Der Konzernabschluss der BASF-Gruppe wurde im Jahr 2010 nach den International Financial Reporting Standards (IFRS) aufgestellt, die vom International Accounting Standards Board (IASB), London, veröffentlicht und von der Europäischen Union anerkannt werden.

Um die Übereinstimmung des Konzernlageberichts und des Konzernabschlusses der BASF-Gruppe mit den anzuwendenden Rechnungslegungsregeln und die Ordnungsmäßigkeit der Unternehmensberichterstattung zu gewährleisten, haben wir wirksame interne Kontroll- und Steuerungssysteme eingerichtet.

Die Einhaltung unserer konzernweit einheitlichen Richtlinien für die Rechnungslegung und Berichterstattung sowie die Zuverlässigkeit und Funktionsfähigkeit der Kontrollsysteme werden kontinuierlich von der internen Revision konzernweit geprüft. Das von uns eingerichtete Risikomanagementsystem ist darauf ausgerichtet, dass der Vorstand wesentliche Risiken frühzeitig erkennen kann, um gegebenenfalls geeignete Maßnahmen zu ihrer Abwehr einleiten zu können.

Nach bestem Wissen versichern wir, dass gemäß den anzuwendenden Rechnungslegungsgrundsätzen der Konzernabschluss der BASF-Gruppe ein den tatsächlichen Verhältnissen entsprechendes Bild der Vermögens-, Finanz- und Ertragslage der BASF-Gruppe vermittelt und im Konzernlagebericht der BASF-Gruppe der Geschäftsverlauf einschließlich des Geschäftsergebnisses und die Lage der BASF-Gruppe so dargestellt sind, dass ein den tatsächlichen Verhältnissen entsprechendes Bild vermittelt wird sowie die wesentlichen Chancen und Risiken der voraussichtlichen Entwicklung der BASF-Gruppe beschrieben sind.

Die KPMG AG Wirtschaftsprüfungsgesellschaft hat den Konzernabschluss der BASF-Gruppe und den Konzernlagebericht geprüft und den uneingeschränkten Bestätigungsvermerk erteilt. Der Konzernabschluss der BASF-Gruppe, der Konzernlagebericht und der Prüfungsbericht des Abschlussprüfers wurden vom Prüfungsausschuss des Aufsichtsrats in Anwesenheit des Abschlussprüfers in seiner Sitzung am 23. Februar 2011 ausführlich behandelt. Bezüglich der Prüfung durch den Aufsichtsrat verweisen wir auf den Bericht des Aufsichtsrats.

Ludwigshafen, den 23. Februar 2011



**DR. JÜRGEN HAMBRECHT**

Vorsitzender



**DR. MARTIN BRUDERMÜLLER**



**DR. JOHN FELDMANN**



**DR. STEFAN MARCINOWSKI**



**DR. KURT BOCK**

Finanzvorstand



**DR. HANS-ULRICH ENGEL**



**DR. ANDREAS KREIMEYER**



**DR. HARALD SCHWAGER**

## Bestätigungsvermerk des Abschlussprüfers

Wir haben den von der BASF SE, Ludwigshafen am Rhein, aufgestellten Konzernabschluss – bestehend aus Gewinn- und Verlustrechnung, Bilanz, Darstellung der Ertrags- und Aufwandsposten, Kapitalflussrechnung, Entwicklung des Eigenkapitals und Anhang – sowie den Konzernlagebericht für das Geschäftsjahr vom 1. Januar bis 31. Dezember 2010 geprüft. Die Aufstellung von Konzernabschluss und Konzernlagebericht nach den IFRS, wie sie in der EU anzuwenden sind, und den ergänzend nach § 315a Abs. 1 HGB anzuwendenden handelsrechtlichen Vorschriften liegt in der Verantwortung des Vorstands der Gesellschaft. Unsere Aufgabe ist es, auf der Grundlage der von uns durchgeführten Prüfung eine Beurteilung über den Konzernabschluss und den Konzernlagebericht abzugeben. Ergänzend wurden wir beauftragt zu beurteilen, ob der Konzernabschluss auch den IFRS insgesamt entspricht.

Wir haben unsere Konzernabschlussprüfung nach § 317 HGB unter Beachtung der vom Institut der Wirtschaftsprüfer (IDW) festgestellten deutschen Grundsätze ordnungsmäßiger Abschlussprüfung vorgenommen.

Danach ist die Prüfung so zu planen und durchzuführen, dass Unrichtigkeiten und Verstöße, die sich auf die Darstellung des durch den Konzernabschluss unter Beachtung der anzuwendenden Rechnungslegungsvorschriften und durch den Konzernlagebericht vermittelten Bildes der Vermögens-, Finanz- und Ertragslage wesentlich auswirken, mit hinreichender Sicherheit erkannt werden. Bei der Festlegung der Prüfungshandlungen werden die Kenntnisse über die Geschäfts-

tätigkeit und über das wirtschaftliche und rechtliche Umfeld des Konzerns sowie die Erwartungen über mögliche Fehler berücksichtigt. Im Rahmen der Prüfung werden die Wirksamkeit des rechnungslegungsbezogenen internen Kontrollsystems sowie Nachweise für die Angaben im Konzernabschluss und Konzernlagebericht überwiegend auf der Basis von Stichproben beurteilt. Die Prüfung umfasst die Beurteilung der Jahresabschlüsse der in den Konzernabschluss einbezogenen Unternehmen, der Abgrenzung des Konsolidierungskreises, der angewandten Bilanzierungs- und Konsolidierungsgrundsätze und der wesentlichen Einschätzungen des Vorstands sowie die Würdigung der Gesamtdarstellung des Konzernabschlusses und des Konzernlageberichts. Wir sind der Auffassung, dass unsere Prüfung eine hinreichend sichere Grundlage für unsere Beurteilung bildet. Unsere Prüfung hat zu keinen Einwendungen geführt.

Nach unserer Beurteilung auf Grund der bei der Prüfung gewonnenen Erkenntnisse entspricht der Konzernabschluss den IFRS, wie sie in der EU anzuwenden sind, und den ergänzend nach § 315a Abs. 1 HGB anzuwendenden handelsrechtlichen Vorschriften sowie den IFRS insgesamt und vermittelt unter Beachtung dieser Vorschriften ein den tatsächlichen Verhältnissen entsprechendes Bild der Vermögens-, Finanz- und Ertragslage des Konzerns. Der Konzernlagebericht steht in Einklang mit dem Konzernabschluss, vermittelt insgesamt ein zutreffendes Bild von der Lage des Konzerns und stellt die Chancen und Risiken der zukünftigen Entwicklung zutreffend dar.

Frankfurt am Main, den 23. Februar 2011

KPMG AG  
Wirtschaftsprüfungsgesellschaft

**PROF. DR. JOACHIM SCHINDLER**  
Wirtschaftsprüfer

**HANS-DIETER KRAUSS**  
Wirtschaftsprüfer



## Gewinn- und Verlustrechnung

### BASF-Gruppe

#### Gewinn- und Verlustrechnung (Millionen €)

|                                                                             | Erläuterungen im Anhang | 2010          | 2009          |
|-----------------------------------------------------------------------------|-------------------------|---------------|---------------|
| Umsatzerlöse                                                                | (4)                     | 63.873        | 50.693        |
| Herstellungskosten der zur Erzielung der Umsatzerlöse erbrachten Leistungen |                         | 45.310        | 36.682        |
| <b>Bruttoergebnis vom Umsatz</b>                                            |                         | <b>18.563</b> | <b>14.011</b> |
| Vertriebskosten                                                             |                         | 6.700         | 5.667         |
| Allgemeine Verwaltungskosten                                                |                         | 1.138         | 1.133         |
| Forschungskosten                                                            |                         | 1.492         | 1.398         |
| Sonstige betriebliche Erträge                                               | (5)                     | 1.140         | 1.189         |
| Sonstige betriebliche Aufwendungen                                          | (6)                     | 2.612         | 3.325         |
| <b>Ergebnis der Betriebstätigkeit</b>                                       | <b>(4)</b>              | <b>7.761</b>  | <b>3.677</b>  |
| Ergebnis aus Unternehmen, die nach der Equity-Methode einbezogen werden     |                         | 201           | 61            |
| Übrige Erträge aus Beteiligungen                                            |                         | 137           | 112           |
| Übrige Aufwendungen aus Beteiligungen                                       |                         | 39            | 40            |
| Zinserträge                                                                 |                         | 150           | 134           |
| Zinsaufwendungen                                                            |                         | 773           | 734           |
| Übrige finanzielle Erträge                                                  |                         | 866           | 763           |
| Übrige finanzielle Aufwendungen                                             |                         | 930           | 894           |
| <b>Finanzergebnis</b>                                                       | <b>(7)</b>              | <b>-388</b>   | <b>-598</b>   |
| <b>Ergebnis vor Ertragsteuern</b>                                           |                         | <b>7.373</b>  | <b>3.079</b>  |
| Steuern vom Einkommen und vom Ertrag                                        | (8)                     | 2.299         | 1.424         |
| <b>Jahresüberschuss</b>                                                     |                         | <b>5.074</b>  | <b>1.655</b>  |
| Anteile anderer Gesellschafter                                              | (9)                     | 517           | 245           |
| <b>Jahresüberschuss nach Anteilen anderer Gesellschafter</b>                |                         | <b>4.557</b>  | <b>1.410</b>  |
| <b>Ergebnis je Aktie (€)</b>                                                | <b>(3)</b>              | <b>4,96</b>   | <b>1,54</b>   |
| Verwässerungseffekte                                                        | (3)                     | -             | -             |
| <b>Verwässertes Ergebnis je Aktie (€)</b>                                   | <b>(3)</b>              | <b>4,96</b>   | <b>1,54</b>   |

## Ertrags- und Aufwandsposten

### BASF-Gruppe

#### Darstellung der Ertrags- und Aufwandsposten (Millionen €)

|                                                                                                                      | 2010         | 2009         |
|----------------------------------------------------------------------------------------------------------------------|--------------|--------------|
| <b>Jahresüberschuss</b>                                                                                              | <b>5.074</b> | <b>1.655</b> |
| Versicherungsmathematische Gewinne/Verluste sowie Vermögenswertbegrenzungen bei leistungsorientierten Pensionsplänen | -171         | -22          |
| Translationsanpassung                                                                                                | 756          | 83           |
| Marktwertänderungen der zur Veräußerung verfügbaren Wertpapiere                                                      | 315          | 32           |
| Absicherung künftiger Zahlungsströme (Cashflow Hedge)                                                                | -9           | 206          |
| Absicherung von Nettoinvestitionen in ausländische Geschäftsbetriebe                                                 | -7           | -            |
| Neubewertung auf Grund von Mehrheitserwerb                                                                           | -2           | -2           |
| Latente Steuern                                                                                                      | 56           | 41           |
| Anteile anderer Gesellschafter                                                                                       | 42           | 43           |
| <b>Erfolgsneutral im Eigenkapital erfasste Erträge und Aufwendungen</b>                                              | <b>980</b>   | <b>381</b>   |
| <b>Summe der erfassten Erträge und Aufwendungen</b>                                                                  | <b>6.054</b> | <b>2.036</b> |
| davon Anteile der BASF                                                                                               | 5.495        | 1.748        |
| Anteile anderer Gesellschafter                                                                                       | 559          | 288          |

#### Entwicklung der ergebnisneutral im Eigenkapital der Aktionäre der BASF SE erfassten Erträge und Aufwendungen (Millionen €)

|                         | Gewinn-<br>rücklagen                                                                                            | Sonstige Eigenkapitalposten |                                                      |                                                                        |                                                                                              |                                                            |                                                     | Summe aller<br>direkt im<br>Eigenkapital<br>erfassten Erträge<br>und<br>Aufwendungen |
|-------------------------|-----------------------------------------------------------------------------------------------------------------|-----------------------------|------------------------------------------------------|------------------------------------------------------------------------|----------------------------------------------------------------------------------------------|------------------------------------------------------------|-----------------------------------------------------|--------------------------------------------------------------------------------------|
|                         | Versiche-<br>rungsma-<br>thematische<br>Gewinne<br>und Verluste<br>sowie<br>Vermögens-<br>wertbegren-<br>zungen | Translations-<br>anpassung  | Bewertung<br>von Wert-<br>papieren zu<br>Marktwerten | Absicherung<br>künftiger<br>Zahlungs-<br>ströme<br>(Cashflow<br>Hedge) | Absicherung<br>von Netto-<br>investitionen<br>in aus-<br>ländische<br>Geschäfts-<br>betriebe | Neubewer-<br>tung auf<br>Grund von<br>Mehrheits-<br>erwerb | Summe aller<br>sonstigen<br>Eigenkapital-<br>posten |                                                                                      |
| <b>Stand 01.01.2010</b> | -1.425                                                                                                          | -555                        | 698                                                  | 5                                                                      | -                                                                                            | 8                                                          | 156                                                 | -1.269                                                                               |
| Zuführungen             | -171                                                                                                            | 756                         | 315                                                  | -                                                                      | -7                                                                                           | -                                                          | 1.064                                               | 893                                                                                  |
| Auflösungen             | -                                                                                                               | -                           | -                                                    | -9                                                                     | -                                                                                            | -2                                                         | -11                                                 | -11                                                                                  |
| Latente Steuern         | 70                                                                                                              | -11                         | -4                                                   | 1                                                                      | -                                                                                            | -                                                          | -14                                                 | 56                                                                                   |
| <b>Stand 31.12.2010</b> | -1.526                                                                                                          | 190                         | 1.009                                                | -3                                                                     | -7                                                                                           | 6                                                          | 1.195                                               | -331                                                                                 |
| <b>Stand 01.01.2009</b> | -1.511                                                                                                          | -637                        | 668                                                  | -137                                                                   | -                                                                                            | 10                                                         | -96                                                 | -1.607                                                                               |
| Zuführungen             | -22                                                                                                             | -                           | 32                                                   | 206                                                                    | -                                                                                            | -                                                          | 238                                                 | 216                                                                                  |
| Auflösungen             | -                                                                                                               | 83                          | -                                                    | -                                                                      | -                                                                                            | -2                                                         | 81                                                  | 81                                                                                   |
| Latente Steuern         | 108                                                                                                             | -1                          | -2                                                   | -64                                                                    | -                                                                                            | -                                                          | -67                                                 | 41                                                                                   |
| <b>Stand 31.12.2009</b> | -1.425                                                                                                          | -555                        | 698                                                  | 5                                                                      | -                                                                                            | 8                                                          | 156                                                 | -1.269                                                                               |

## Bilanz

### BASF-Gruppe

#### Aktiva (Millionen €)

|                                              | Erläuterungen im Anhang | 31.12.2010    | 31.12.2009    |
|----------------------------------------------|-------------------------|---------------|---------------|
| Immaterielle Vermögenswerte                  | (12)                    | 12.245        | 10.449        |
| Sachanlagen                                  | (13)                    | 17.241        | 16.285        |
| At Equity bewertete Beteiligungen            | (14)                    | 1.328         | 1.340         |
| Sonstige Finanzanlagen                       | (14)                    | 1.953         | 1.619         |
| Latente Steueransprüche                      | (8)                     | 1.112         | 1.042         |
| Übrige Forderungen und sonstiges Vermögen    | (16)                    | 653           | 946           |
| <b>Langfristiges Vermögen</b>                |                         | <b>34.532</b> | <b>31.681</b> |
| Vorräte                                      | (15)                    | 8.688         | 6.776         |
| Forderungen aus Lieferungen und Leistungen   | (16)                    | 10.167        | 7.738         |
| Übrige Forderungen und sonstiges Vermögen    | (16)                    | 3.883         | 3.223         |
| Kurzfristige Wertpapiere                     |                         | 16            | 15            |
| Zahlungsmittel und Zahlungsmitteläquivalente |                         | 1.493         | 1.835         |
| Vermögen von Veräußerungsgruppen             | (2)                     | 614           | –             |
| <b>Kurzfristiges Vermögen</b>                |                         | <b>24.861</b> | <b>19.587</b> |
| <b>Gesamtvermögen</b>                        |                         | <b>59.393</b> | <b>51.268</b> |

#### Passiva (Millionen €)

|                                                           | Erläuterungen im Anhang | 31.12.2010    | 31.12.2009    |
|-----------------------------------------------------------|-------------------------|---------------|---------------|
| Gezeichnetes Kapital                                      | (17)                    | 1.176         | 1.176         |
| Kapitalrücklage                                           | (17)                    | 3.216         | 3.229         |
| Gewinnrücklagen und Bilanzgewinn                          | (18)                    | 15.817        | 12.916        |
| Sonstige Eigenkapitalposten                               | (18)                    | 1.195         | 156           |
| <b>Eigenkapital der Aktionäre der BASF SE</b>             |                         | <b>21.404</b> | <b>17.477</b> |
| Anteile anderer Gesellschafter                            | (19)                    | 1.253         | 1.132         |
| <b>Eigenkapital</b>                                       |                         | <b>22.657</b> | <b>18.609</b> |
| Rückstellungen für Pensionen und ähnliche Verpflichtungen | (20)                    | 2.778         | 2.255         |
| Sonstige Rückstellungen                                   | (21)                    | 3.352         | 3.289         |
| Latente Steuerschulden                                    | (8)                     | 2.467         | 2.093         |
| Finanzschulden                                            | (22)                    | 11.670        | 12.444        |
| Übrige Verbindlichkeiten                                  | (22)                    | 901           | 898           |
| <b>Langfristiges Fremdkapital</b>                         |                         | <b>21.168</b> | <b>20.979</b> |
| Verbindlichkeiten aus Lieferungen und Leistungen          |                         | 4.738         | 2.786         |
| Rückstellungen                                            | (21)                    | 3.324         | 3.276         |
| Steuerschulden                                            | (8)                     | 1.140         | 1.003         |
| Finanzschulden                                            | (22)                    | 3.369         | 2.375         |
| Übrige Verbindlichkeiten                                  | (22)                    | 2.802         | 2.240         |
| Schulden von Veräußerungsgruppen                          | (2)                     | 195           | –             |
| <b>Kurzfristiges Fremdkapital</b>                         |                         | <b>15.568</b> | <b>11.680</b> |
| <b>Gesamtkapital</b>                                      |                         | <b>59.393</b> | <b>51.268</b> |

## Kapitalflussrechnung

### BASF-Gruppe

#### Kapitalflussrechnung<sup>1</sup> (Millionen €)

|                                                                                                                | 2010          | 2009          |
|----------------------------------------------------------------------------------------------------------------|---------------|---------------|
| Jahresüberschuss nach Anteilen anderer Gesellschafter                                                          | 4.557         | 1.410         |
| Abschreibungen auf immaterielle Vermögenswerte, Sachanlagen und Finanzanlagen                                  | 3.393         | 3.740         |
| Veränderung der Vorräte                                                                                        | -1.341        | 1.094         |
| Veränderung der Forderungen                                                                                    | -1.839        | 2.065         |
| Veränderung der geschäftsbedingten Verbindlichkeiten und sonstigen Rückstellungen                              | 1.500         | -2.169        |
| Veränderung von Pensionsrückstellungen, von Vermögenswerten aus überdeckten Pensionsplänen und sonstige Posten | 273           | -394          |
| Gewinne(-)/Verluste(+) aus Abgängen von langfristigen Vermögenswerten und Wertpapieren                         | -83           | -53           |
| <b>Cashflow aus laufender Geschäftstätigkeit</b>                                                               | <b>6.460</b>  | <b>5.693</b>  |
| Ausgaben für immaterielle Vermögenswerte und Sachanlagen                                                       | -2.548        | -2.507        |
| Ausgaben für Finanzanlagen und Wertpapiere                                                                     | -480          | -641          |
| Auszahlungen für Akquisitionen                                                                                 | -605          | -1.509        |
| Erlöse aus Devestitionen                                                                                       | 43            | 62            |
| Erlöse aus dem Abgang von langfristigen Vermögenswerten und Wertpapieren                                       | 874           | 513           |
| <b>Cashflow aus Investitionstätigkeit</b>                                                                      | <b>-2.716</b> | <b>-4.082</b> |
| Kapitalerhöhungen/-rückzahlungen und sonstige Eigenkapitaltransaktionen                                        | -18           | -134          |
| Aufnahme von Finanz- und ähnlichen Verbindlichkeiten                                                           | 3.679         | 5.213         |
| Tilgung von Finanz- und ähnlichen Verbindlichkeiten                                                            | -5.974        | -5.546        |
| Gezahlte Dividende                                                                                             |               |               |
| an Aktionäre der BASF SE                                                                                       | -1.561        | -1.791        |
| an Minderheitsgesellschafter                                                                                   | -370          | -298          |
| <b>Cashflow aus Finanzierungstätigkeit</b>                                                                     | <b>-4.244</b> | <b>-2.556</b> |
| <b>Liquiditätswirksame Veränderung der Zahlungsmittel</b>                                                      | <b>-500</b>   | <b>-945</b>   |
| Veränderung der Zahlungsmittel                                                                                 |               |               |
| auf Grund von Umrechnungseinflüssen                                                                            | 86            | 4             |
| auf Grund von Änderungen des Konsolidierungskreises                                                            | 72            | -             |
| <b>Zahlungsmittel und Zahlungsmitteläquivalente am Jahresanfang</b>                                            | <b>1.835</b>  | <b>2.776</b>  |
| <b>Zahlungsmittel und Zahlungsmitteläquivalente am Jahresende</b>                                              | <b>1.493</b>  | <b>1.835</b>  |

<sup>1</sup> Die Kapitalflussrechnung wird im Konzernlagebericht unter Investitionen und Finanzierung ab Seite 41 erläutert. Sonstige Angaben zum Cashflow sind in Anmerkung 11 ab Seite 166 des Anhangs enthalten.

## Entwicklung des Eigenkapitals

### BASF-Gruppe

#### Entwicklung des Eigenkapitals (Millionen €)

|                                                                                         | Ausstehende<br>Aktien<br>(Stück) | Gezeichnetes<br>Kapital | Kapital-<br>rücklage | Gewinnrück-<br>lagen/<br>Bilanz-<br>gewinn | Sonstige<br>Eigenkapi-<br>talposten <sup>1</sup> | Eigenkapital<br>der Aktio-<br>näre der<br>BASF SE | Anteile<br>anderer<br>Gesell-<br>schafter | Eigenkapital  |
|-----------------------------------------------------------------------------------------|----------------------------------|-------------------------|----------------------|--------------------------------------------|--------------------------------------------------|---------------------------------------------------|-------------------------------------------|---------------|
| <b>Stand 01.01.2010</b>                                                                 | <b>918.478.694</b>               | <b>1.176</b>            | <b>3.229</b>         | <b>12.916</b>                              | <b>156</b>                                       | <b>17.477</b>                                     | <b>1.132</b>                              | <b>18.609</b> |
| Effekte aus Beherrschungs-<br>übergang                                                  | –                                | –                       | –                    | –                                          | –                                                | –                                                 | –53                                       | –53           |
| Kapitalrückzahlung/-einzahlung                                                          | –                                | –                       | –                    | –                                          | –                                                | –                                                 | –18                                       | –18           |
| Gezahlte Dividende                                                                      | –                                | –                       | –                    | –1.561                                     | –                                                | –1.561                                            | –370 <sup>2</sup>                         | –1.931        |
| Jahresüberschuss                                                                        | –                                | –                       | –                    | 4.557                                      | –                                                | 4.557                                             | 517                                       | 5.074         |
| Veränderung der direkt im<br>Eigenkapital zu erfassenden<br>Aufwendungen und Erträge    | –                                | –                       | –                    | –101                                       | 1.039                                            | 938                                               | 42                                        | 980           |
| Änderungen des Konsolidierungs-<br>kreises und sonstige<br>Veränderungen                | –                                | –                       | –13 <sup>3</sup>     | 6                                          | –                                                | –7                                                | 3                                         | –4            |
| <b>Stand 31.12.2010</b>                                                                 | <b>918.478.694</b>               | <b>1.176</b>            | <b>3.216</b>         | <b>15.817</b>                              | <b>1.195</b>                                     | <b>21.404</b>                                     | <b>1.253</b>                              | <b>22.657</b> |
| <b>Stand 01.01.2009</b>                                                                 | <b>918.478.694</b>               | <b>1.176</b>            | <b>3.241</b>         | <b>13.250</b>                              | <b>–96</b>                                       | <b>17.571</b>                                     | <b>1.151</b>                              | <b>18.722</b> |
| Rückkauf und Einziehung<br>einschließlich zur Einziehung<br>vorgesehener eigener Aktien | –                                | –                       | 6                    | –6                                         | –                                                | –                                                 | –                                         | –             |
| Effekte aus sukzessivem<br>Anteilsverkauf                                               | –                                | –                       | –                    | –28                                        | –                                                | –28                                               | –                                         | –28           |
| Kapitalrückzahlung/-einzahlung                                                          | –                                | –                       | –                    | –                                          | –                                                | –                                                 | –39                                       | –39           |
| Gezahlte Dividende                                                                      | –                                | –                       | –                    | –1.791                                     | –                                                | –1.791                                            | –298 <sup>2</sup>                         | –2.089        |
| Jahresüberschuss                                                                        | –                                | –                       | –                    | 1.410                                      | –                                                | 1.410                                             | 245                                       | 1.655         |
| Veränderung der direkt im<br>Eigenkapital zu erfassenden<br>Aufwendungen und Erträge    | –                                | –                       | –                    | 86                                         | 252                                              | 338                                               | 43                                        | 381           |
| Änderungen des Konsolidierungs-<br>kreises und sonstige<br>Veränderungen                | –                                | –                       | –18 <sup>3</sup>     | –5                                         | –                                                | –23                                               | 30                                        | 7             |
| <b>Stand 31.12.2009</b>                                                                 | <b>918.478.694</b>               | <b>1.176</b>            | <b>3.229</b>         | <b>12.916</b>                              | <b>156</b>                                       | <b>17.477</b>                                     | <b>1.132</b>                              | <b>18.609</b> |

<sup>1</sup> Die Zusammensetzung ist in der Darstellung der „Entwicklung der ergebnisneutral im Eigenkapital der Aktionäre der BASF SE erfassten Erträge und Aufwendungen“ auf Seite 138 erläutert.

<sup>2</sup> Inklusive Ergebnisabführung

<sup>3</sup> Gewährung von BASF-Aktien im Rahmen des Mitarbeiterbeteiligungsprogramms „Plus“

## 1 – Zusammenfassung der Rechnungslegungsgrundsätze

### A – Grundlagen der Konzernrechnungslegung

**Angewendete Rechnungslegungsstandards:** Der Konzernabschluss der BASF SE wurde zum 31. Dezember 2010 nach den Vorschriften der am Abschlussstichtag gültigen International Financial Reporting Standards (IFRS) und den gemäß § 315a Abs. 1 Handelsgesetzbuch (HGB) ergänzend anzuwendenden Regelungen aufgestellt. Die Abschlüsse der einbezogenen Gesellschaften sind zum Bilanzstichtag des Konzernabschlusses aufgestellt. Alle für das Geschäftsjahr 2010 verbindlichen IFRS und Verlautbarungen des International Financial Reporting Interpretations Committee (IFRIC) wurden angewendet.

IFRS, die bisher nicht durch die Europäische Union anerkannt wurden, haben keine Auswirkungen auf den BASF-Konzernabschluss.

Die angewandten Bilanzierungs- und Bewertungsmethoden entsprechen denen des Jahres 2009. Hiervon ausgenommen sind Änderungen, die sich durch die verpflichtende Anwendung neuer beziehungsweise überarbeiteter Rechnungslegungsstandards ergeben haben. Im Jahr 2010 ergaben sich diesbezüglich keine wesentlichen Änderungen. In der Kapitalflussrechnung wurde eine Ausweisänderung vorgenommen.

→ Mehr dazu unter Anmerkung 11 ab Seite 166

Dieser Abschluss wurde durch den Vorstand in seiner Sitzung am 22. Februar 2011 aufgestellt, zur Veröffentlichung freigegeben und wird durch den Prüfungsausschuss dem Aufsichtsrat für die Sitzung am 3. März 2011 zur Billigung vorgelegt.

**Konsolidierungskreis:** In den Konzernabschluss werden neben der BASF SE mit Sitz in Ludwigshafen alle wesentlichen Tochterunternehmen einbezogen. BASF kontrolliert diese Unternehmen beziehungsweise verfügt direkt oder indirekt über die Mehrheit der Stimmrechte.

Die wesentlichen gemeinschaftlich geführten Unternehmen werden anteilmäßig konsolidiert.

Assoziierte Unternehmen werden nach der Equity-Methode bilanziert. Als assoziiert gelten Unternehmen, bei denen unser Kapitalanteil grundsätzlich mindestens 20 % beträgt sowie ein maßgeblicher Einfluss auf die Geschäfts- und Finanzpolitik ausgeübt werden kann.

Tochtergesellschaften mit ruhender oder nur geringer Geschäftstätigkeit, die für die Ermittlung eines den tatsächlichen Verhältnissen entsprechenden Bildes der Vermögens-, Finanz- und Ertragslage sowie der Cashflows nur von untergeordneter Bedeutung sind, werden nicht konsolidiert. Diese Gesellschaften werden zu fortgeführten Anschaffungskosten bewertet und bei Wertminderung abgeschrieben. Die Summe des Vermögens und des Eigenkapitals dieser Tochtergesellschaften beträgt weniger als 1 % des Konzernwerts.

**Konsolidierungsmethoden:** Die in den Konzernabschluss übernommenen Vermögenswerte und Schulden der einbezogenen Gesellschaften werden einheitlich nach den hier beschriebenen Grundsätzen bilanziert und bewertet. Bei den nach der Equity-Methode bilanzierten Gesellschaften werden die wesentlichen Bewertungsabweichungen angepasst.

Innenbeziehungen sowie Zwischenergebnisse aus Lieferungen und Leistungen unter den einbezogenen Gesellschaften werden voll, bei Gemeinschaftsunternehmen anteilig eliminiert. Bei den nach der Equity-Methode bilanzierten Gesellschaften werden wesentliche Zwischenergebnisse eliminiert.

Die Kapitalkonsolidierung erfolgt zum Erwerbszeitpunkt nach der Erwerbsmethode. Dabei werden zunächst alle Vermögenswerte, Schulden und zusätzlich zu aktivierende immaterielle Vermögenswerte mit ihren beizulegenden Zeitwerten bewertet. Anschließend werden die Anschaffungskosten der Beteiligungen mit dem anteilig erworbenen, neu bewerteten Eigenkapital aufgerechnet. Hierbei entstehende positive Unterschiedsbeträge werden als Geschäfts- oder Firmenwerte aktiviert.

Die Anschaffungsnebenkosten eines Unternehmenszusammenschlusses werden ergebniswirksam erfasst.

**Umrechnung von Abschlüssen in fremder Währung:** Die Währungsumrechnung richtet sich nach der funktionalen Währung der einbezogenen Gesellschaften. Die Umrechnung in die Berichtswährung erfolgt gemäß Stichtagskursmethode: Bilanzposten werden zu Stichtagskursen am Abschlussstichtag, die Aufwendungen und Erträge zu Monatsdurchschnittskursen in Euro umgerechnet und im Jahreslauf kumuliert. Die Differenz zwischen dem zu historischen Kursen bei Einzahlung oder Einbehalt und dem zu Stichtagskursen am Abschlussstichtag umgerechneten Eigenkapital der Gesellschaften wird in den sonstigen Eigenkapitalposten (Translationsanpassung) gesondert im Eigenkapital ausgewiesen und erst bei Abgang einer Gesellschaft ergebniswirksam berücksichtigt.

Bei einigen Gesellschaften außerhalb des Euro- oder US-Dollar-Raumes bildet der Euro beziehungsweise der US-Dollar die funktionale Währung.

#### Ausgewählte Wechselkurse

|                            | Stichtagskurse |             | Durchschnittskurse |          |
|----------------------------|----------------|-------------|--------------------|----------|
|                            | 31.12. 2010    | 31.12. 2009 | 2010               | 2009     |
| 1 EUR entspricht           |                |             |                    |          |
| Brasilien (BRL)            | 2,22           | 2,51        | 2,33               | 2,77     |
| China (CNY)                | 8,82           | 9,84        | 8,97               | 9,53     |
| Großbritannien (GBP)       | 0,86           | 0,89        | 0,86               | 0,89     |
| Japan (JPY)                | 108,65         | 133,16      | 116,24             | 130,34   |
| Malaysia (MYR)             | 4,10           | 4,93        | 4,27               | 4,91     |
| Mexiko (MXN)               | 16,55          | 18,92       | 16,74              | 18,80    |
| Russische Föderation (RUB) | 40,82          | 43,15       | 40,26              | 44,14    |
| Schweiz (CHF)              | 1,25           | 1,48        | 1,38               | 1,51     |
| Südkorea (KRW)             | 1.499,06       | 1.666,97    | 1.531,82           | 1.772,90 |
| USA (USD)                  | 1,34           | 1,44        | 1,33               | 1,39     |



## B – Bilanzierungs- und Bewertungsmethoden

### Vermögen

**Geschäfts- oder Firmenwerte** werden nur bei Vorliegen einer Wertminderung abgeschrieben. Die Werthaltigkeit der Geschäfts- oder Firmenwerte wird einmal jährlich und zusätzlich bei Vorliegen einer Indikation für eine Wertminderung überprüft. Die Werthaltigkeitsprüfung (Goodwill-Impairment-Test) erfolgt auf Basis zahlungsmittelgenerierender Einheiten (Cash Generating Units) durch Vergleich des erzielbaren Betrags mit dem Buchwert. Die zahlungsmittelgenerierenden Einheiten sind bei BASF überwiegend die Geschäftseinheiten, in Einzelfällen auch die Unternehmensbereiche. Der erzielbare Betrag ist der höhere Wert aus beizulegender Zeitwert abzüglich Veräußerungskosten und Nutzungswert. Der Nutzungswert wird in der Regel mit Hilfe von Discounted-Cashflow-Verfahren bestimmt.

Ist der ermittelte Wertberichtigungsbedarf höher als der bestehende Geschäfts- oder Firmenwert, wird dieser zunächst vollständig abgeschrieben. Die verbleibende Wertminderung wird auf die übrigen Vermögenswerte der Cash Generating Unit verteilt. Vorzunehmende Abschreibungen auf Geschäfts- oder Firmenwerte werden in den sonstigen betrieblichen Aufwendungen erfasst.

**Erworbene immaterielle Vermögenswerte** werden zu Anschaffungskosten, vermindert um planmäßige lineare Abschreibungen, bewertet. Davon ausgenommen sind nur Geschäfts- oder Firmenwerte sowie immaterielles Vermögen mit unbestimmter Nutzungsdauer. Die jeweilige Nutzungsdauer bemisst sich anhand der Laufzeit des zu Grunde liegenden Vertrags und des voraussichtlichen Verbrauchs des Nutzenpotenzials des immateriellen Vermögenswerts. Wertminderungen werden vorgenommen, wenn der erzielbare Betrag dauerhaft unter dem Buchwert liegt. Der erzielbare Betrag ist der höhere Wert aus Nettoveräußerungspreis und Nutzungswert (Value in Use). Sollten die Gründe für eine Wertminderung entfallen, werden entsprechende Wertaufholungen vorgenommen.

Abhängig von der Art des immateriellen Vermögenswerts, werden die Abschreibungen in den Herstellungskosten, den Vertriebskosten, den Forschungskosten oder den sonstigen betrieblichen Aufwendungen ausgewiesen.

Immaterielle Vermögenswerte mit unbestimmter Nutzungsdauer betreffen Firmen- beziehungsweise Markennamen, die im Rahmen von Akquisitionen erworben wurden. Diese werden einmal jährlich auf ihre Werthaltigkeit hin überprüft.

**Selbstgeschaffene immaterielle Vermögenswerte** umfassen im Wesentlichen selbsterstellte Software. Diese sowie das sonstige selbstgeschaffene immaterielle Vermögen werden zu Herstellungskosten abzüglich planmäßiger Abschreibungen über die betriebsgewöhnliche Nutzungsdauer bewertet. Wertminderungen werden vorgenommen, wenn der fortgeführte Buchwert des Vermögenswerts über dem erzielbaren Betrag liegt.

Die Herstellungskosten enthalten neben den direkt zurechenbaren Kosten auch angemessene Teile von Gemeinkosten. Finanzierungskosten werden aktiviert, soweit sie auf den Zeitraum der Herstellung entfallen und nicht von untergeordneter Bedeutung sind.

Die durchschnittlichen gewichteten Nutzungsdauern des immateriellen Vermögens betrugen:

#### Durchschnittliche gewichtete Nutzungsdauern in Jahren

|                                               | 2010 | 2009 |
|-----------------------------------------------|------|------|
| Vertriebsrechte und ähnliche Rechte           | 13   | 14   |
| Produktrechte, Lizenzen und Trademarks        | 18   | 17   |
| Know-how, Patente und Produktionstechnologien | 11   | 9    |
| Selbstgeschaffene immaterielle Vermögenswerte | 5    | 6    |
| Sonstige Rechte und Werte                     | 5    | 3    |

**Emissionsrechte:** Die von der Deutschen Emissionshandelsstelle (DEHSt) oder einer vergleichbaren Behörde in anderen europäischen Ländern unentgeltlich ausgegebenen Zertifikate werden zu den geltenden Marktpreisen zum Zeitpunkt der Gutschrift auf den staatlich geführten Konten beziehungsweise bei entgeltlichem Erwerb zu Anschaffungskosten angesetzt. Die Folgebewertung erfolgt zu Marktpreisen, maximal bis zur Höhe der Anschaffungskosten. Im Falle eines niedrigeren beizulegenden Zeitwerts am Bilanzstichtag erfolgt eine Abwertung auf diesen Wert.

**Sachanlagen** werden zu Anschaffungs- oder Herstellungskosten abzüglich der über die betriebsgewöhnliche Nutzungsdauer verrechneten planmäßigen Abschreibungen und Wertminderungen bewertet. Geringwertige Anlagegegenstände werden im Erwerbsjahr voll abgeschrieben und als Abgänge ausgewiesen. Die Neubewertungsmethode wird nicht angewendet.

Die Herstellungskosten selbsterstellter Anlagen enthalten neben den direkt zurechenbaren Kosten auch angemessene Teile der Material- und Fertigungsgemeinkosten sowie der allgemeinen Verwaltungskosten der mit der Anlagenerrichtung befassten Bereiche. Fremdkapitalkosten werden aktiviert, soweit sie auf den Zeitraum der Herstellung entfallen. Für Gesellschaften in Deutschland wird ein Fremdkapitalkostensatz von 4,5 % zu Grunde gelegt, für ausländische Gruppengesellschaften werden vergleichbare länderspezifische Zinssätze angesetzt.

Aufwendungen für turnusmäßige Abststellungen wichtiger Großanlagen werden in Höhe der Kosten der Maßnahme als Teil des betreffenden Vermögenswerts selbständig angesetzt und linear über den Zeitraum bis zur nächsten Abststellung abgeschrieben. Die Kosten des Austauschs von Komponenten werden als Vermögenswert erfasst, sofern ein zukünftiger zusätzlicher Nutzen erwartet wird. Der Buchwert der ausgetauschten Komponenten wird ausgebucht. Die Kosten der Instandhaltung und Reparatur im Rahmen des normalen Geschäftsbetriebs werden als Aufwand erfasst.

Das bewegliche und das unbewegliche Anlagevermögen wird linear abgeschrieben. Die durchschnittlichen gewichteten Abschreibungsdauern betrugen:

**Durchschnittliche gewichtete Abschreibungsdauern in Jahren**

|                                                    | 2010 | 2009 |
|----------------------------------------------------|------|------|
| Gebäude und bauliche Betriebsvorrichtungen         | 18   | 19   |
| Technische Anlagen und Maschinen                   | 10   | 11   |
| Andere Anlagen, Betriebs- und Geschäftsausstattung | 6    | 7    |

Wertminderungen werden vorgenommen, wenn eine Wiederbringung des Buchwerts im Einzelfall nicht mehr zu erwarten ist. Die Beurteilung erfolgt auf Basis des Barwerts der zukünftig zu erwartenden Cashflows. Die Wertminderung erfolgt in Höhe des Unterschieds zwischen dem bisherigen Buchwert und den diskontierten künftigen Cashflows. Sollten die Gründe für eine Wertminderung entfallen, werden entsprechende Wertaufholungen vorgenommen.

Die zur Erzielung von Wertsteigerungen oder Mieteinnahmen gehaltenen Immobilien (Investment Properties) sind unwesentlich und werden zu Anschaffungskosten abzüglich planmäßiger Abschreibungen beziehungsweise zum niedrigeren beizulegenden Zeitwert angesetzt.

**Leasing:** Gemäß IAS 17 sind Leasingverträge in Operating-Leasing und Finanzierungsleasing zu unterteilen. Im Rahmen des Operating-Leasings genutzte Vermögenswerte werden nicht aktiviert. Die zu leistenden Leasingzahlungen werden in der Periode ergebniswirksam erfasst, in der sie anfallen.

Ein Finanzierungsleasing ist ein Leasingverhältnis, bei dem im Wesentlichen alle mit dem Eigentum verbundenen Risiken und Ertragschancen eines Vermögenswerts übertragen werden. Vermögenswerte, die im Rahmen des Finanzierungsleasings genutzt werden, werden mit dem Barwert der Mindestleasingzahlungen angesetzt. Gleichzeitig wird eine Leasingverbindlichkeit in entsprechender Höhe ausgewiesen. Die periodischen Leasingzahlungen sind in die Tilgungs- und Zinskomponente aufzuteilen. Die Tilgungskomponente reduziert die Verbindlichkeit, während die Zinskomponente als Zinsaufwand ausgewiesen wird. Abschreibungen erfolgen entsprechend der Nutzungsdauer der geleasten Wirtschaftsgüter oder der kürzeren Leasingdauer.

Leasingverträge können in andere Kontrakte eingebettet sein. Besteht gemäß den IFRS-Regelungen eine Trennungspflicht für ein eingebettetes Leasing, so werden die Vertragsbestandteile separiert und nach den entsprechenden Regelungen bilanziert und bewertet.

**Fremdkapitalkosten:** Erstreckt sich die Herstellung von Vermögenswerten des immateriellen Vermögens oder des Sachanlagevermögens über einen Zeitraum von mehr als einem Jahr, werden die bis zur Fertigstellung anfallenden direkt zurechenbaren Fremdkapitalkosten als Teil der Herstellungskosten aktiviert. Fremdkapitalkosten werden bis zu dem Zeitpunkt aktiviert, ab dem die Vermögenswerte für ihre vorgesehene Nutzung bereit sind. Alle sonstigen Fremdkapitalkosten werden in der Periode ihres Anfallens erfolgswirksam erfasst.

**Investitionszuschüsse:** Zuwendungen der öffentlichen Hand für den Erwerb oder den Bau von Sachanlagen verringern die Anschaffungs- oder Herstellungskosten der betreffenden Vermögenswerte. Sonstige gewährte Zuschüsse oder Beihilfen werden abgegrenzt und über den zu Grunde liegenden Zeitraum aufgelöst.

**At Equity bewertete Beteiligungen:** Die Kapitalkonsolidierung der nach der Equity-Methode bewerteten Beteiligungen erfolgt nach den gleichen Grundsätzen wie bei einer Vollkonsolidierung. Die Buchwerte dieser Gesellschaften werden jährlich um die anteiligen Ergebnisse, ausgeschütteten Dividenden oder auch sonstigen Eigenkapitalveränderungen erhöht beziehungsweise vermindert. Bei Hinweisen auf einen dauerhaft niedrigeren Wert einer Beteiligung wird eine ergebniswirksame Wertminderung vorgenommen.

**Vorräte** werden zu Anschaffungs- oder Herstellungskosten bewertet. Wenn die Börsen- oder Marktpreise beziehungsweise die beizulegenden Zeitwerte der Absatzprodukte auf der Basis von Nettoveräußerungswerten niedriger sind, erfolgt eine Wertminderung auf diesen niedrigeren Wert. Der Nettoveräußerungswert entspricht dem im normalen Geschäftsverlauf erzielbaren Verkaufserlös abzüglich der bis zum Verkauf noch anfallenden Aufwendungen für Fertigstellung und Vertrieb.

Als Herstellungskosten werden neben den direkt zurechenbaren Kosten auch angemessene Teile der Material- und Fertigungsgemeinkosten bei Normalkapazität der betreffenden Produktionsanlagen erfasst, soweit sie im Zusammenhang mit dem Herstellungsvorgang anfallen. Kosten für die betriebliche Altersversorgung, für soziale Einrichtungen des Betriebs und freiwillige soziale Leistungen des Unternehmens sowie Kosten der allgemeinen Verwaltung werden ebenfalls berücksichtigt, soweit sie auf die Herstellung entfallen. Fremdkapitalkosten werden nicht in die Herstellungskosten einbezogen.

Abschläge auf Vorräte ergeben sich neben einem Preisrückgang der Absatzprodukte auch durch mangelnde Gängigkeit oder hohe Lagerreichweiten der Produkte.

Bei der Bewertung von Vorratsbeständen des Edelmetallhandels wird die Ausnahmeregelung des IAS 2 für Händler angewendet. Hiernach können solche Vorräte, die ausschließlich zu Handelszwecken gehalten werden, grundsätzlich mit ihrem beizulegenden Zeitwert angesetzt werden. Alle Wertänderungen werden unmittelbar erfolgswirksam in der Gewinn- und Verlustrechnung erfasst.

**Latente Steueransprüche:** Für temporär abweichende Wertansätze zwischen IFRS- und Steuerbilanzen und steuerliche Verlustvorträge werden latente Steueransprüche angesetzt, soweit sich im Einzelfall oder für die jeweilige Fiskaleinheit ein Überhang an aktiven Unterschiedsbeträgen ergibt. Für Kapitalgesellschaften wird in Deutschland ein Steuersatz von 29 %, für die übrigen Gesellschaften werden länderspezifische Steuersätze angesetzt. Wertberichtigungen werden vorgenommen, wenn die erwarteten künftigen Ergebnisse einer Gesellschaft die Realisierung der Steuerminderung als nicht wahrscheinlich erscheinen lassen.

Maßgebend für die Beurteilung der Werthaltigkeit latenter Steueransprüche ist die Einschätzung der Wahrscheinlichkeit einer Umkehrung der Bewertungsunterschiede und der Nutzbarkeit der Verlustvorträge. Dies hängt ab von der Entstehung künftiger steuerpflichtiger Gewinne während der Perioden, in denen sich steuerliche Bewertungsunterschiede umkehren und steuerliche Verlustvorträge geltend gemacht werden können. Auf Grund der Erfahrungen aus der Vergangenheit und der erwarteten steuerlichen Einkommensentwicklung wird davon ausgegangen, dass die Vorteile aus den latenten Steueransprüchen realisiert werden können.

## Finanzinstrumente

Finanzielle Vermögenswerte und finanzielle Schulden werden in der Konzernbilanz angesetzt, wenn BASF bei einem Finanzinstrument Vertragspartei wird. Finanzielle Vermögenswerte werden ausgebucht, wenn die vertraglichen Rechte auf Zahlungen aus den finanziellen Vermögenswerten auslaufen oder die finanziellen Vermögenswerte mit allen wesentlichen Risiken und Chancen übertragen werden. Finanzielle Verbindlichkeiten werden ausgebucht, wenn die vertraglichen Verpflichtungen beglichen, aufgehoben oder ausgelaufen sind. Marktübliche Käufe und Verkäufe von Finanzinstrumenten werden grundsätzlich zum Erfüllungstag und im Edelmetallhandel zum Handelstag bilanziert.

Der Marktwert eines Finanzinstruments ist der Betrag, den zwei unabhängige vertragswillige Parteien für dieses Instrument vereinbaren würden. Sofern Preisnotierungen auf einem aktiven Markt vorliegen (zum Beispiel Börsenkurse), werden diese bei der Bewertung zu Grunde gelegt. Andernfalls werden bei der Bewertung interne Bewertungsmodelle unter Verwendung aktueller Marktparameter oder externe Bewertungen, zum Beispiel durch Banken, herangezogen. Bei interner Bewertung werden insbesondere die Barwertmethode und Optionspreismodelle angewandt.

Sollten bei nicht erfolgswirksam zum beizulegenden Zeitwert bewerteten Finanzinstrumenten Anzeichen für eine dauerhafte Wertminderung vorliegen, werden Wertminderungen vorgenommen.

Bei Wegfall der Gründe für Wertminderungen werden bei Ausleihungen und Forderungen sowie bei den bis zur Endfälligkeit gehaltenen Finanzinvestitionen erfolgswirksame Wertaufholungen bis zur Höhe der fortgeführten Anschaffungskosten vorgenommen. Bei allen Finanzinstrumenten werden Wertberichtigungen separat erfasst.

Finanzielle Vermögenswerte und Verbindlichkeiten werden in die folgenden Bewertungskategorien eingeteilt:

- **Finanzielle Vermögenswerte und Verbindlichkeiten, die erfolgswirksam zum beizulegenden Zeitwert bewertet werden**, umfassen Derivate und andere Handelsinstrumente. Bei BASF gehören dieser Bewertungskategorie ausschließlich Derivate an. Derivate sind im sonstigen Vermögen beziehungsweise in den übrigen Verbindlichkeiten ausgewiesen. Die Fair-Value-Option von IAS 39 wendet BASF nicht an. Die Ermittlung der beizulegenden Zeitwerte basiert auf Marktparametern beziehungsweise auf darauf basierenden Bewertungsmodellen.
- **Kredite und Forderungen** umfassen die nicht an einem aktiven Markt notierten finanziellen Vermögenswerte mit festen oder bestimmbar Zahlungen, die keine Derivate sind und nicht als zur Veräußerung verfügbar eingestuft werden. Dieser Bewertungskategorie werden Forderungen aus Lieferungen und Leistungen, die in der Position Sonstige Finanzanlagen enthaltenen Ausleihungen sowie die in den übrigen Forderungen und sonstigem Vermögen ausgewiesenen anderen Forderungen und Darlehen zugeordnet. Die Zugangsbewertung erfolgt zum beizulegenden Zeitwert, der regelmäßig dem Nennwert der Forderung beziehungsweise dem ausgereichten Kreditbetrag entspricht. Unverzinsliche und niedrigverzinsliche langfristige Kredite und Forderungen

werden zum Barwert angesetzt. Die erfolgswirksame Folgebewertung erfolgt grundsätzlich zu fortgeführten Anschaffungskosten unter Anwendung der Effektivzinsmethode. Liegen objektive Hinweise auf eine Wertminderung einer Forderung oder einer Ausleihung vor, wird eine Einzelwertberichtigung vorgenommen. Des Weiteren entsteht Wertberichtigungsbedarf, wenn die einer Forderung oder einer Ausleihung zu Grunde liegenden Vertragsbedingungen durch Neuverhandlungen dergestalt verändert werden, dass der Barwert der zukünftigen Zahlungen sinkt. Forderungen und Ausleihungen werden ausgebucht, wenn ihre Uneinbringlichkeit endgültig feststeht. Forderungen, für die kein objektiver Hinweis auf Wertminderung besteht, werden gegebenenfalls auf der Grundlage historischer Ausfallraten wertberichtigt. Des Weiteren werden Wertberichtigungen auf Forderungen für Transferrisiken bestimmter Länder gebildet.

- **Die bis zur Endfälligkeit zu haltenden finanziellen Vermögenswerte** umfassen nichtderivative finanzielle Vermögenswerte mit festen beziehungsweise bestimmbar Zahlungen und fester Laufzeit, bei denen die Absicht und die Fähigkeit zum Halten bis zur Endfälligkeit bestehen und die keiner der anderen Bewertungskategorien zugeordnet sind. Der erstmalige Ansatz erfolgt zum beizulegenden Zeitwert, der in den überwiegenden Fällen den Anschaffungskosten entspricht. Die Folgebewertung erfolgt zu fortgeführten Anschaffungskosten unter Anwendung der Effektivzinsmethode.

Bei BASF sind keine finanziellen Vermögenswerte von wesentlicher Bedeutung dieser Bewertungskategorie zugeordnet.

- **Die zur Veräußerung verfügbaren finanziellen Vermögenswerte** umfassen finanzielle Vermögenswerte, die keine Derivate sind und keiner der zuvor genannten Bewertungskategorie zugeordnet sind. Dieser Bewertungskategorie sind die in der Position Sonstige Finanzanlagen enthaltenen, nicht nach der Equity-Methode bewerteten Beteiligungen und langfristige Wertpapiere zugeordnet. Die in der Position Kurzfristige Wertpapiere enthaltenen Wertpapiere sind ebenfalls dieser Bewertungskategorie zugeordnet. Die Bewertung erfolgt zum beizulegenden Zeitwert. Änderungen des beizulegenden Zeitwerts werden erfolgsneutral im Eigenkapital (Sonstige Eigenkapitalposten) abgegrenzt und erst bei Veräußerung oder Wertminderung erfolgswirksam erfasst. Die beizulegenden Zeitwerte werden anhand von Marktnotierungen bestimmt. Beteiligungen, deren Zeitwert nicht zuverlässig bestimmt werden kann, werden zu fortgeführten Anschaffungskosten bewertet und bei Wertminderung abgeschrieben. Bei diesen Beteiligungen stellt der Buchwert den besten Schätzwert dar.

Bei den zur Veräußerung verfügbaren finanziellen Vermögenswerten werden spätere Wertaufholungen grundsätzlich erfolgsneutral im Eigenkapital (Sonstige Eigenkapitalposten) erfasst. Lediglich bei Schuldinstrumenten werden Zuschreibungen bis zur Höhe der ursprünglichen Wertminderung erfolgswirksam und darüber hinaus erfolgsneutral berücksichtigt.

- **Finanzielle Verbindlichkeiten, die keine Derivate sind**, werden beim erstmaligen Ansatz zum beizulegenden Zeitwert bewertet. Dieser entspricht regelmäßig dem vereinnahmten Betrag. Die Folgebewertung erfolgt zu fortgeführten Anschaffungskosten unter Anwendung der Effektivzinsmethode.
- **Zahlungsmittel und Zahlungsmitteläquivalente** setzen sich im Wesentlichen aus Kassenbeständen und Bankguthaben zusammen.

Umklassifizierungen zwischen den Bewertungskategorien wurden weder im Jahr 2010 noch im Jahr 2009 vorgenommen.

Erträge aus verzinslichen Aktiva werden unter Berücksichtigung der zum Bilanzstichtag bestehenden Forderungen und der nach der Effektivzinsmethode anzuwendenden Zinssätze abgegrenzt. Dividendenerträge aus nicht at Equity bewerteten Beteiligungen werden mit der Entstehung des Rechtsanspruches auf Zahlung erfasst.

Derivative Finanzinstrumente können in andere Kontrakte eingebettet sein. Besteht gemäß den IFRS-Regelungen eine Trennungspflicht für ein eingebettetes Derivat, so wird dieses vom Basisvertrag separat bilanziert und zum beizulegenden Zeitwert bewertet.

Finanzgarantien der BASF-Gruppe sind solche Verträge, die eine Ausgleichszahlung an den Garantiennehmer nach sich ziehen, falls ein Schuldner seinen Zahlungsverpflichtungen im Rahmen der Finanzgarantie nicht nachkommt. Finanzgarantien werden beim erstmaligen Ansatz zum beizulegenden Zeitwert bewertet. In den Folgeperioden werden diese Finanzgarantien zum höheren Wert aus fortgeführten Anschaffungskosten und der bestmöglichen Schätzung der gegenwärtigen Verpflichtung zum Abschlussstichtag bewertet.

**Cashflow Hedge Accounting** wird bei ausgewählten Geschäften zur Sicherung von zukünftigen Transaktionen angewendet. Der effektive Teil der Marktwertänderungen des Derivats wird dabei erfolgsneutral im Eigenkapital (Sonstige Eigenkapitalposten) unter Berücksichtigung latenter Steuerschulden/-ansprüche erfasst. Der ineffektive Teil wird unmittelbar in der Gewinn- und Verlustrechnung berücksichtigt. Bei zukünftigen Transaktionen, die zur Bilanzierung eines nichtfinanziellen Vermögenswerts oder einer nichtfinanziellen Schuld führen, werden die im Eigenkapital erfassten kumulierten Marktwertänderungen des Derivats beim erstmaligen Ansatz entweder gegen die Anschaffungskosten ausgebucht oder in den Berichtsperioden erfolgswirksam erfasst, in denen das gesicherte Grundgeschäft in der Gewinn- und Verlustrechnung erfasst wird. Liegen dem Sicherungsgeschäft finanzielle Vermögenswerte oder Schulden zu Grunde, werden die Marktwertänderungen des Sicherungsinstruments in den Berichtsperioden, in denen das gesicherte Grundgeschäft in der Gewinn- und Verlustrechnung erfasst wird, aus dem Eigenkapital in die Gewinn- und Verlustrechnung umgebucht. Die Laufzeit des Sicherungsinstruments ist auf den Eintritt der künftigen Transaktion abgestimmt.

Zur Absicherung von Translationsrisiken aus Investitionen in ausländische Tochtergesellschaften wendet BASF vereinzelt Hedge Accounting an (**Hedge of a Net Investment in a Foreign Operation**). Hierbei wird der effektive Teil der Absicherung im Eigenkapital erfasst. Wird der ausländische Geschäftsbetrieb veräußert, werden die im Eigenkapital gebuchten Effekte in die

Gewinn- und Verlustrechnung umgegliedert. Der ineffektive Teil der Absicherung wird unmittelbar ergebniswirksam erfasst.

BASF sichert derzeit keine beizulegenden Zeitwerte im Rahmen von Fair Value Hedges ab.

Die von BASF zu Sicherungszwecken eingesetzten Derivate stellen wirtschaftlich betrachtet wirksame Absicherungen dar. Den Marktwertänderungen der Derivate stehen nahezu kompensierende Wertänderungen aus den gesicherten Grundgeschäften gegenüber.

## Schulden

### Pensionsrückstellungen und ähnliche Verpflichtungen:

Pensionsrückstellungen werden versicherungsmathematisch nach dem Anwartschaftsbarwertverfahren (Projected Unit Credit Method) ermittelt. Vergleichbare Verpflichtungen, insbesondere aus Zusagen nordamerikanischer Groupen-gesellschaften zur Übernahme von Krankheitskosten und Lebensversicherungen pensionierter Mitarbeiter und von deren Angehörigen, werden als Pensionsrückstellungen ausgewiesen. Versicherungsmathematische Gewinne oder Verluste werden mit den Gewinnrücklagen verrechnet.

Für die Ermittlung der Pensionsrückstellungen liegen versicherungsmathematische Gutachten vor.

**Sonstige Rückstellungen:** Sonstige Rückstellungen werden gebildet, wenn auf Grund eines vergangenen Ereignisses eine gegenwärtige Verpflichtung besteht, ein Abfluss wirtschaftlicher Ressourcen wahrscheinlich ist und seine Höhe zuverlässig geschätzt werden kann. Rückstellungen werden in Höhe des wahrscheinlichen Erfüllungsbetrages angesetzt.

Rückstellungen für Gewerbesteuer und Körperschaftsteuer oder vergleichbare Einkommensteuern werden auf der Grundlage der erwarteten steuerpflichtigen Einkommen der einbezogenen Gesellschaften ermittelt und abzüglich geleisteter Vorauszahlungen angesetzt. Sonstige zu veranlagende Steuern werden entsprechend berücksichtigt.

Für bestimmte Umweltschutzmaßnahmen und -risiken werden Rückstellungen gebildet, wenn auf Grund eines vergangenen Ereignisses eine gegenwärtige rechtliche oder faktische Verpflichtung zur Durchführung von Maßnahmen besteht und die Maßnahmen nicht zur Aktivierung von Vermögenswerten führen. Rückstellungen für Rückbauverpflichtungen betreffen insbesondere Verpflichtungen für das Verfüllen von Bohrlöchern und die Beseitigung von Fördereinrichtungen nach Beendigung der Förderung im Segment Oil & Gas. Der Barwert der Verpflichtung erhöht gleichzeitig die Anschaffungskosten der betreffenden Anlage.

Rückstellungen für zu erwartende Abfindungszahlungen oder vergleichbare Personalaufwendungen sowie Abriss- oder Schließungskosten im Zusammenhang mit Restrukturierungsmaßnahmen werden gebildet, wenn ein entsprechender Plan von der jeweiligen Geschäftsleitung beschlossen und kommuniziert wurde.

Rückstellungen für Dienstaltersgeldprämien und Jubiläumsgaben werden überwiegend nach versicherungsmathematischen Grundsätzen ermittelt. Für abgeschlossene Altersteilzeitverträge werden die zugesagten Aufstockungszahlungen in voller Höhe zurückgestellt und die während der passiven Phase der Altersteilzeit zu leistenden Lohn- und Gehaltszahlungen ratierlich angesammelt. Für Altersteilzeitverträge, die



während der Laufzeit des tarifvertraglich vereinbarten Modells voraussichtlich abgeschlossen werden, sind die erwarteten Belastungen zurückgestellt.

→ **Erläuterungen zu Rückstellungen für das Long-Term-Incentive-Programm unter Anmerkung 25 ab Seite 185**

Der wahrscheinliche Erfüllungsbetrag von langfristigen Rückstellungen ist abzuzinsen, wenn der Abzinsungseffekt wesentlich ist. Der Ansatz erfolgt in diesem Fall zum Barwert. Die Finanzierungskosten werden im übrigen Finanzergebnis erfasst.

**Latente Steuerschulden:** Für temporär abweichende Wertansätze zwischen IFRS- und Steuerbilanzen werden latente Steuerschulden angesetzt, soweit sich für die jeweilige Fiskaleinheit ein Überhang an passiven Unterschiedsbeträgen ergibt.

Latente Steuerschulden ergaben sich insbesondere aus der Neubewertung von Vermögenswerten zum Marktwert im Rahmen der Kaufpreisallokationen der letzten Jahre.

## Übrige Bilanzierungs- und Bewertungsmethoden

**Erlösrealisierung:** Umsatzerlöse werden bei Auslieferung der Erzeugnisse und Waren beziehungsweise bei Erbringung der Leistungen realisiert, wenn Eigentum und Risiken auf den Erwerber übergegangen sind. Sie werden zum beizulegenden Zeitwert der Gegenleistung bemessen. Umsatzerlöse werden ohne Verbrauchsteuern ausgewiesen. Dabei werden erwartete Rabatte oder sonstige Preisnachlässe abgegrenzt beziehungsweise in Abzug gebracht. Wahrscheinliche Risiken aus der Rücknahme von Erzeugnissen und Waren und auf Grund von Gewährleistungen oder sonstigen Reklamationen werden nach dem Grundsatz der Einzelbewertung zurückgestellt.

Erlöse aus dem Verkauf von Edelmetallen an industrielle Kunden sowie einzelne Erlöse aus dem Handel mit Erdgas werden zum Zeitpunkt der Lieferung als Umsatz und die entsprechenden Einstandspreise als Herstellungskosten ausgewiesen. Im Handel mit Edelmetallen und deren Derivaten mit nichtindustriellen Kunden, bei denen in der Regel keine physische Lieferung erfolgt, werden Erlöse mit den zugehörigen Kosten saldiert. Ebenso wird mit Erlösen aus Erdgashandelstätigkeit einer von BASF konsolidierten Projektgesellschaft verfahren.

Bei bestimmten Lieferungen ist eine Annahmeerklärung durch den Erwerber notwendig. Bei diesen Lieferungen wird der Umsatz nach erfolgter Zustimmung des Käufers realisiert.

Erträge aus dem Verkauf oder der Auslizenzierung von Technologien oder technologischem Wissen werden gemäß dem vertraglich vereinbarten Übergang der Rechte und Pflichten an den betreffenden Technologien ergebniswirksam erfasst.

**Umrechnung von Fremdwährungsposten:** Die Anschaffungskosten von Vermögenswerten aus Bezügen in fremder Währung und die Erlöse aus Verkäufen in fremder Währung werden zu Kursen zum Zeitpunkt der Buchung der Geschäftsvorfälle bestimmt. Forderungen und Verbindlichkeiten in fremder Währung werden zu Kursen am Abschlussstichtag bewertet. Die umrechnungsbedingten Änderungen von Vermögensposten und Fremdkapital werden ergebniswirksam erfasst und in den Sonstigen betrieblichen Aufwendungen oder Erträgen ausgewiesen.

**Öl- und Gasgewinnung:** Explorations- und Feldentwicklungsausgaben werden nach der Successful Efforts Method bilanziert. Danach werden Ausgaben für fündige Explorationsbohrungen sowie für fündige und nichtfündige Entwicklungsbohrungen aktiviert.

Eine Explorationsbohrung ist eine Bohrung, die außerhalb eines Gebiets mit bereits nachgewiesenen Öl- und Gasreserven liegt. Eine Entwicklungsbohrung ist eine Bohrung, die bis zur Tiefe eines öl- oder gasführenden Horizonts innerhalb eines Gebiets mit nachgewiesenen Reserven abgeteuft wird.

Produktionsaufwendungen beinhalten alle Kosten, die entstehen, um die Bohrungen und die zugehörigen Anlagen und Hilfsausrüstungen zu betreiben, zu reparieren und zu warten sowie deren Abschreibungen.

Explorationsaufwendungen betreffen ausschließlich das Segment Oil & Gas und umfassen alle Kosten, die im Zusammenhang mit nicht nachgewiesenen Öl- oder Gasvorkommen stehen. Dazu zählen unter anderem Kosten für die Exploration von Gebieten mit möglichen Öl- und Gasreserven. Kosten für geologische und geophysikalische Untersuchungen werden grundsätzlich in den Explorationsaufwendungen ausgewiesen. Des Weiteren umfasst diese Position alle Abschreibungen von Explorationsbohrungen, die keine sicheren Reserven nachweisen konnten. Planmäßige Abschreibungen von fündigen Explorationsbohrungen sind Bestandteil der Herstellungskosten.

Explorationsbohrungen werden grundsätzlich bis zum Zeitpunkt der Feststellung der Fündigkeit als Anlagen im Bau ausgewiesen. Sofern Kohlenwasserstoffe nachgewiesen werden, die eine wirtschaftliche Feldesentwicklung wahrscheinlich machen, bleiben die Kosten der Bohrungen als suspendierte Explorationsbohrungen aktiviert. Alle suspendierten Explorationsbohrungen werden mindestens einmal jährlich wirtschaftlich, technisch und strategisch daraufhin überprüft, ob eine Entwicklung weiterhin beabsichtigt ist. Ist dies nicht der Fall, werden die betreffenden Bohrungen abgeschrieben. Wenn sichere Reserven nachgewiesen werden und eine Feldesentwicklung beginnt, werden die Explorationsbohrungen in die Position Technische Anlagen und Maschinen umgebucht.

Die Aufwendungen und Erträge aus den Phasen Exploration, Entwicklung und Produktion bei Erdöl- und Erdgaskonzessionen werden häufig über Explorations- und Produktionsteilungsverträge zwischen dem Staat und einem oder mehreren Entwicklungs- und Produktionsunternehmen nach definierten Schlüsseln aufgeteilt. Die aus diesen Verträgen BASF zustehenden Erlöse werden als Umsatzerlöse ausgewiesen. Bestehende libysche Konzessionsverträge werden derzeit neu verhandelt. Sie sollen auf den EPSA-IV-Standard umgestellt werden.

Rückstellungen für Rückbauverpflichtungen betreffen Verpflichtungen für das Verfüllen von Bohrlöchern und die Beseitigung von Fördereinrichtungen nach Beendigung der Förderung. Die Bewertung erfolgt zum Zeitpunkt der Entstehung der Verpflichtung zum Barwert der künftigen Rückbauausgaben. In gleicher Höhe wird ein Vermögenswert als Teil des Buchwertes der betreffenden Anlage aktiviert und mit diesem zusammen abgeschrieben. Die Rückstellung wird bis zum Zeitpunkt des vorgesehenen Rückbaus jährlich aufgezinst.

Die Abschreibung von Vermögenswerten aus der Öl- und Gasgewinnung erfolgt auf Feldes- beziehungsweise Lagerstättenebene gemäß der Unit of Production Method. Die Abschreibung wird grundsätzlich auf Basis der nachgewiesenen entwickelten Reserven in Relation zur Produktion der Periode berechnet.

Im Erdgashandel werden Erdgasfernleitungen linear abgeschrieben. Die durchschnittliche gewichtete Abschreibungsdauer belief sich im Jahr 2010 und im Jahr 2009 auf 25 Jahre. Der immaterielle Vermögenswert aus dem Vermarktungsvertrag für Erdgas aus dem Erdgasfeld Juschno Russkoje wird gemäß dem auf BASF entfallenden Anteil an der produzierten und vermarkteten Menge abgeschrieben.

Immaterielle Vermögenswerte im Segment Oil & Gas beinhalten im Wesentlichen Explorations- und Förderrechte. Während der Explorationsphase werden diese nicht planmäßig abgeschrieben, sondern jährlich auf ihre Werthaltigkeit geprüft. Bei wirtschaftlicher Fündigkeit werden die Rechte gemäß der Unit of Production Method abgeschrieben.

#### **Zur Veräußerung gehaltene Gruppen von Vermögenswerten und Schulden beziehungsweise Veräußerungsgruppen:**

Hierunter fallen separat in der Bilanz ausgewiesene Vermögenswerte sowie direkt mit ihnen in Verbindung stehende Schulden, deren Veräußerung im Rahmen einer Transaktion höchstwahrscheinlich ist. Die als Veräußerungsgruppe klassifizierten Vermögenswerte und Schulden werden zum niedrigeren Wert aus der Summe der Buchwerte und dem beizulegenden Zeitwert abzüglich der Veräußerungskosten angesetzt. Die planmäßige Abschreibung langfristiger Vermögenswerte wird ausgesetzt.

→ Eine Erläuterung der zur Veräußerung gehaltenen Gruppe von Vermögenswerten und Schulden ist in Anmerkung 2 auf Seite 156 enthalten

#### **Schätzungen oder Annahmen bei der Erstellung des Konzernabschlusses**

Die Höhe der im Konzernabschluss ausgewiesenen Vermögenswerte, Verbindlichkeiten und Rückstellungen, der Haftungsverhältnisse oder sonstigen finanziellen Verpflichtungen ist von Schätzungen oder Annahmen abhängig. Diese richten sich nach den Verhältnissen und Einschätzungen am Bilanzstichtag und beeinflussen insoweit auch die Höhe der ausgewiesenen Erträge und Aufwendungen der dargestellten Geschäftsjahre. Derartige Annahmen betreffen die Bestimmung der Nutzungsdauer des abnutzbaren Sachanlagevermögens oder immaterieller Vermögenswerte, die Bemessung von Rückstellungen, den Wertansatz von Beteiligungen und von anderen Vermögenswerten oder Verpflichtungen. Bestehende Unsicherheiten werden bei der Wertermittlung angemessen berücksichtigt, jedoch können tatsächliche Ergebnisse von den Schätzungen abweichen.

Bei **Unternehmenserwerben** werden die übernommenen Vermögenswerte und Schulden zum beizulegenden Zeitwert zum Zeitpunkt der erstmaligen Beherrschung bewertet. Die Bestimmung des beizulegenden Zeitwerts der erworbenen immateriellen Vermögenswerte und Sachanlagen, der übernommenen Verbindlichkeiten zum Zeitpunkt des Erwerbs sowie der Nutzungsdauern der erworbenen immateriellen Vermögenswerte und Sachanlagen ist mit Annahmen verbunden. Die Bewertung basiert in großem Umfang auf prognostizierten Cashflows. Die tatsächlichen Cashflows können von den bei der Ermittlung der beizulegenden Zeitwerte zu Grunde gelegten Cashflows signifikant abweichen. Bei der Kaufpreisaufteilung wesentlicher Akquisitionen werden externe unabhängige Gutachten erstellt. Die Bewertungen bei Unternehmenserwerben basieren auf Informationen, die zum Erwerbszeitpunkt verfügbar sind.

**Geschäfts- oder Firmenwerte** sind den zahlungsmittelgenerierenden Einheiten zuzuordnen und einmal jährlich auf ihre Werthaltigkeit zu überprüfen. Wenn eine verminderte Werthaltigkeit vorliegt, da der Buchwert einer zahlungsmittelgenerierenden Einheit den erzielbaren Betrag übersteigt, wird eine Wertminderung auf den niedrigeren Wert vorgenommen. Zur Überprüfung der Werthaltigkeit sind langfristige Ertragsprognosen der zahlungsmittelgenerierenden Einheit vor dem Hintergrund der gesamtwirtschaftlichen Entwicklung zu treffen. Von wesentlicher Bedeutung ist der gewichtete Kapitalkostensatz (WACC) gemäß dem Capital Asset Pricing Model. Dessen Komponenten sind der risikofreie Zins, die Schwankungen der BASF-Aktie im Vergleich zum Kapitalmarkt (Beta) sowie Annahmen zum Zuschlag für das Kreditrisiko (Spread) und zur Marktrisikooprämie für die Eigenkapitalkosten. Weitere wichtige Annahmen sind die Prognose zum Detailplanungszeitraum sowie die in der Folge angewendete Wachstumsrate.

→ Mehr dazu unter Anmerkung 12 ab Seite 167

**Immaterielle Vermögenswerte und Sachanlagen:** Die voraussichtlichen Nutzungsdauern und Abschreibungsverläufe von immateriellen Vermögenswerten und Sachanlagen beruhen auf Erfahrungswerten, Planungen und Schätzungen. Hierbei wird auch der Zeitraum und die Verteilung der zukünftigen Mittelzuflüsse geschätzt. Abschreibungsmethoden, Nutzungsdauern und Restwerte werden zu jedem Bilanzstichtag überprüft.



Sogenannte **Impairment-Tests** werden für Vermögenswerte durchgeführt, wenn bestimmte Indikatoren (Triggering Events) auf eine mögliche Wertminderung hinweisen. Zu den externen Indikatoren zählen beispielsweise Veränderungen in den Kundenbranchen, bei den verwendeten Technologien sowie eine rückläufige Konjunktorentwicklung. Eine reduzierte Profitabilität der Produkte, geplante Restrukturierungsmaßnahmen oder physische Schäden der Vermögenswerte stellen interne Indikatoren für eine Wertminderung dar.

Beim Impairment-Test werden die fortgeführten Buchwerte der Vermögenswerte mit dem erzielbaren Betrag der Vermögenswerte verglichen. Der erzielbare Betrag ist der höhere Wert aus Nettoveräußerungspreis und Nutzungswert des Vermögenswerts. Zur Ermittlung des Nutzungswerts erfolgt die Schätzung und Diskontierung von Cashflows. Die Schätzung der Cashflows und die getroffenen Annahmen basieren auf den jeweils zum Bilanzstichtag verfügbaren Informationen über die zukünftige Entwicklung des operativen Geschäfts und können von den tatsächlichen künftig eintretenden Entwicklungen abweichen.

Sollte der erzielbare Betrag unter den Buchwerten liegen, so ist eine Wertminderung in Höhe der Differenz vorzunehmen. Beim Entfallen der Gründe für eine Wertminderung werden entsprechende Wertaufholungen vorgenommen, welche die fortgeführten Anschaffungskosten nicht übersteigen dürfen. Immaterielle Vermögenswerte mit einer unbestimmten Nutzungsdauer unterliegen einem jährlichen Impairment-Test.

**Abgrenzungsposten für latente Steueransprüche/-schulden:** Die Realisierbarkeit latenter Steueransprüche hängt von künftigen steuerpflichtigen Ergebnissen der jeweiligen Gruppengesellschaft ab. Wenn Zweifel an der Realisierbarkeit bestehen, werden im Einzelfall entsprechende Wertberichtigungen der latenten Steueransprüche vorgenommen. Die Beurteilung der Werthaltigkeit latenter Steueransprüche basiert auf unternehmensinternen Prognosen über die zukünftige Ertragsituation der Gruppengesellschaft.

→ Mehr dazu unter Anmerkung 8 ab Seite 163

**Forderungen und Ausleihungen** werden zu fortgeführten Anschaffungskosten unter Anwendung der Effektivzinsmethode bewertet. Liegt eine Wertminderung vor, werden Forderungen und Ausleihungen erfolgswirksam wertberichtigt. Hinweise auf eine Wertminderung können beispielsweise das Bekanntwerden finanzieller Schwierigkeiten des Schuldners und das Eintreten von Zahlungsverzug sein. Bei der Beurteilung des Wertberichtigungsbedarfs werden regionale und branchenspezifische Gegebenheiten berücksichtigt. Weiterhin wird auf interne Bonitätsbeurteilungen sowie externe Ratings und die Einschätzungen von Inkassounternehmen und Kreditversicherern zurückgegriffen, soweit solche verfügbar sind. Ein erheblicher Teil des Forderungsbestands ist durch Kreditversicherungen gedeckt. Bankgarantien und Akkreditive werden in unwesentlichem Umfang genutzt. Es werden nur solche Forderungen wertberichtigt, die nicht durch eine Kreditversicherung oder durch andere Sicherheiten gedeckt sind. Forderungen, deren Versicherung einen Selbstbehalt vorsieht, werden maximal in Höhe des Selbstbehalts wertberichtigt. Bei Wertminderungen werden Erfahrungswerte zur Zahlungsfähigkeit der Kunden und zudem die Altersstruktur, die Überfälligkeit, vorhandene Versicherungen sowie kundenspezifische Risiken berücksichtigt. Verringert

sich die Höhe der Wertberichtigung in einer der folgenden Berichtsperioden und kann diese Verringerung objektiv auf einen nach der Erfassung der Wertminderung aufgetretenen Sachverhalt zurückgeführt werden, wird die früher erfasste Wertberichtigung erfolgswirksam rückgängig gemacht. Zuschreibungen dürfen maximal bis zur Höhe der fortgeführten Anschaffungskosten erfolgen.

**Pensionsrückstellungen und Vermögenswerte aus überdeckten Pensionsplänen** werden unter Anwendung versicherungsmathematischer Verfahren bewertet. Dabei werden unter anderem Annahmen zu folgenden Bewertungsparametern verwendet: künftige Entwicklung der Arbeitsentgelte und Renten, erwartete Wertentwicklung des Planvermögens von Pensionsfonds, Fluktuation der Beschäftigten, Lebenserwartung der Versorgungsberechtigten. Die auf Basis dieser Annahmen ermittelten Verpflichtungen werden mit der Rendite erstrangiger, festverzinslicher Unternehmensanleihen mit AA-Rating zum Bilanzstichtag abgezinst. Versicherungsmathematische Gewinne beziehungsweise Verluste werden ergebnisneutral mit den Gewinnrücklagen verrechnet. Sie entstehen durch die Abweichungen der tatsächlichen Entwicklung der Pensionsverpflichtungen und des Pensionsvermögens von den zu Jahresbeginn getroffenen Annahmen sowie durch die Aktualisierung der versicherungsmathematischen Annahmen.

→ Mehr zu Rückstellungen für Pensionen und ähnliche Verpflichtungen unter Anmerkung 20 ab Seite 176

**Sonstige Rückstellungen** decken auch Risiken aus Rechtsstreitigkeiten und -verfahren ab. Zur Beurteilung der Rückstellungshöhe werden neben der Sachverhaltsbeurteilung und den geltend gemachten Ansprüchen im Einzelfall auch die Ergebnisse vergleichbarer Verfahren und unabhängige Rechtsgutachten herangezogen sowie Annahmen über Eintrittswahrscheinlichkeiten und Bandbreiten möglicher Inanspruchnahmen getroffen. Die tatsächlichen Belastungen können von diesen Einschätzungen abweichen.

→ Mehr dazu unter Anmerkung 24 auf Seite 184

Daneben enthalten die sonstigen Rückstellungen auch erwartete Belastungen für die Sanierung kontaminierter Standorte, zur Rekultivierung von Deponien, zur Beseitigung von Umweltbeeinträchtigungen durch bestehende Produktions- oder Lagereinrichtungen und ähnliche Maßnahmen. Wird BASF als die einzige potenziell in Anspruch zu nehmende Partei identifiziert, deckt die Rückstellung die gesamte zu erwartende Belastung ab. Bei Standorten, die gemeinsam mit einem oder mehreren Partnern betrieben werden, umfasst die gebildete Rückstellung lediglich den BASF zurechenbaren Anteil an der erwarteten Gesamtbelastung. Die Ermittlung der Höhe der Rückstellung basiert auf den verfügbaren technischen Daten des Standorts, den genutzten Technologien, den gesetzlichen Vorschriften sowie behördlichen Auflagen.

Die Schätzung zukünftiger Kosten ist mit Unsicherheiten behaftet. Sie betrifft besonders Sanierungsmaßnahmen, bei denen mehrere Parteien beteiligt sind und die sich über einen längeren Zeitraum erstrecken.

Bei der Abzinsung langfristiger Rückstellungen sind Annahmen hinsichtlich des zu verwendenden Zinssatzes zu treffen.

**Noch nicht zu berücksichtigende IFRS und IFRIC**

Die Auswirkungen der im Geschäftsjahr 2010 noch nicht in Kraft getretenen beziehungsweise von der Europäischen Union nicht anerkannten IFRS und IFRIC auf den Abschluss der BASF-Gruppe wurden geprüft:

- **IFRS 9 „Financial Instruments“** wurde am 12. November 2009 veröffentlicht und ist der erste Schritt des Projekts zur Überarbeitung des IAS 39 Financial Instruments: Recognition and Measurement. Der Standard führt neue Klassen, Klassifizierungskriterien und Bewertungsmaßstäbe für Finanzinstrumente ein. Der Standard ist für Geschäftsjahre, die am oder nach dem 1. Januar 2013 beginnen, anzuwenden. Mögliche Auswirkungen auf BASF werden untersucht.

Zudem wurden am 28. Oktober 2010 weitere Neuregelungen des IFRS 9 zu finanziellen Verbindlichkeiten und zur Ausbuchung von Finanzinstrumenten veröffentlicht. Änderungen betreffen insbesondere die Regelungen für freiwillig zum beizulegenden Zeitwert bewertete finanzielle Verbindlichkeiten. Die Änderung hat keine Auswirkungen auf BASF.

- Inhalt der Änderung des **IAS 24 „Related Party Disclosures“** ist zum einen eine Vereinfachung der Angabepflichten von Regierungen nahestehenden Unternehmen. Weiterhin wurde durch die Änderung des IAS 24 die Definition eines nahestehenden Unternehmens oder einer nahestehenden Person verdeutlicht. Der geänderte Standard tritt für Berichtsperioden in Kraft, die am oder nach dem 1. Januar 2011 beginnen. Die Änderung hat keine wesentliche Auswirkung auf BASF.

- Die Änderung des **IAS 32 „Financial Instruments: Presentation“** regelt, dass bestimmte Bezugsrechte, Optionen und Optionsscheine auf den Erwerb einer festen Anzahl von Eigenkapitalinstrumenten zu einem festgelegten Betrag selbst als Eigenkapitalinstrumente zu klassifizieren sind. Die Währung, auf die der Ausgabepreis lautet, ist dabei unbeachtlich. Die Änderungen sind anzuwenden für Geschäftsjahre, die am oder nach dem 1. Februar 2010 beginnen. Die Änderung hat keine Auswirkung auf BASF.
- Die Änderung von **IFRIC 14 „Prepayments of a Minimum Funding Requirement“** ist in den Fällen relevant, in denen ein Unternehmen Mindestdotierungsverpflichtungen gegenüber einem externen Pensionsvermögen unterliegt und Beitragsvorauszahlungen leistet, um diese Mindestdotierungsverpflichtungen zu erfüllen. Die Änderung ist ab 1. Januar 2011 verpflichtend anzuwenden und hat keine Auswirkungen auf BASF.
- **IFRIC 19 „Extinguishing Financial Liabilities with Equity Instruments“** erläutert die Bilanzierung für den Fall, dass ein Unternehmen eine finanzielle Verbindlichkeit teilweise oder vollständig durch Ausgabe von Aktien oder anderen Eigenkapitalinstrumenten tilgt. Die Interpretation ist verpflichtend für Perioden anzuwenden, die am oder nach dem 1. Juli 2010 beginnen, und hat keine Auswirkungen auf BASF.

Sonstige Änderungen der Standards haben keine nennenswerten Auswirkungen auf BASF.

**2 – Konsolidierungskreis****A – Veränderungen des Konsolidierungskreises**

In den Gruppenabschluss 2010 werden 339 Unternehmen (345 im Jahr 2009) einbezogen. Davon wurden 46 Unternehmen (75 im Jahr 2009) neu in den Konsolidierungskreis einbezogen. Seit Jahresbeginn 2010 sind durch Verschmelzung, Verkauf oder auf Grund gesunkener Bedeutung insgesamt 52 Gesellschaften (23 im Jahr 2009) aus dem Konsolidierungskreis ausgeschieden.

**Konsolidierungskreis**

|                                | 2010       | 2009       |
|--------------------------------|------------|------------|
| Stand 01.01.                   | 345        | 293        |
| davon anteilmäßig konsolidiert | 19         | 19         |
| Neueinbeziehungen              | 46         | 75         |
| davon anteilmäßig konsolidiert | 2          | –          |
| Entkonsolidierungen            | 52         | 23         |
| davon anteilmäßig konsolidiert | –          | –          |
| <b>Stand 31.12.</b>            | <b>339</b> | <b>345</b> |
| davon anteilmäßig konsolidiert | 21         | 19         |

Neu in den Konsolidierungskreis einbezogen wurden im Jahr 2010

- insgesamt 40 Gesellschaften im Zusammenhang mit dem Erwerb der Cognis Holding GmbH,
- weitere sechs bisher nicht konsolidierte Gesellschaften mit Sitz in Deutschland, China, Japan und Algerien infolge ihrer gestiegenen Bedeutung.

Neu in den Konsolidierungskreis einbezogen wurden im Jahr 2009

- insgesamt 68 Gesellschaften im Zusammenhang mit dem Erwerb der Ciba Holding AG, Basel/Schweiz,
- weitere sieben bisher nicht konsolidierte Gesellschaften mit Sitz in Deutschland, Schweiz, Kolumbien, Argentinien und Ungarn infolge ihrer gestiegenen Bedeutung.

Die Zusammenstellung der in den Konzernabschluss einbezogenen Gesellschaften und des gesamten Anteilsbesitzes gemäß § 313 Abs. 2 HGB erfolgt in der Anteilsbesitzliste.

→ Mehr dazu unter Anmerkung 31 auf Seite 194

## Übersicht der Auswirkungen von Änderungen des Konsolidierungskreises (ohne Einbeziehung von Akquisitionen und Devestitionen)

|                                                               | 2010        |             | 2009        |            |
|---------------------------------------------------------------|-------------|-------------|-------------|------------|
|                                                               | Millionen € | %           | Millionen € | %          |
| <b>Umsatz</b>                                                 | <b>149</b>  | <b>0,2</b>  | <b>2</b>    | <b>.</b>   |
| Langfristiges Vermögen                                        | -146        | -0,4        | 8           | .          |
| davon Sachanlagen                                             | 46          | 0,3         | 7           | .          |
| Kurzfristiges Vermögen                                        | 111         | 0,4         | 31          | 0,2        |
| davon Zahlungsmittel und -äquivalente                         | 72          | 4,8         | .           | .          |
| <b>Vermögen</b>                                               | <b>-35</b>  | <b>-0,1</b> | <b>39</b>   | <b>0,1</b> |
| Eigenkapital                                                  | -126        | -0,6        | -4          | .          |
| Langfristiges Fremdkapital                                    | 25          | 0,1         | .           | .          |
| davon Finanzschulden                                          | .           | .           | .           | .          |
| Kurzfristiges Fremdkapital                                    | 66          | 0,4         | 43          | 0,4        |
| davon Finanzschulden                                          | 1           | .           | 1           | .          |
| <b>Kapital</b>                                                | <b>-35</b>  | <b>-0,1</b> | <b>39</b>   | <b>0,1</b> |
| Haftungsverhältnisse und sonstige finanzielle Verpflichtungen | 28          | 0,4         | .           | .          |

**B – Anteilmäßig konsolidierte und nach der Equity-Methode einbezogene Gesellschaften**

Bei den wesentlichen anteilmäßig konsolidierten Gemeinschaftsunternehmen handelt es sich um

- Wintershall Erdgas Handelshaus GmbH & Co. KG, Berlin, Wintershall Erdgas Handelshaus Zug AG, Zug/Schweiz, sowie ZAO Achimgaz, Novy Urengoi/Russische Föderation, Gemeinschaftsunternehmen mit Gazprom, über die wir Erdgashandelsaktivitäten beziehungsweise die Förderung von Erdgas und Kondensat in Sibirien betreiben,
- ELLBA C.V., Rotterdam/Niederlande, und ELLBA Eastern Private Ltd., Singapur, die gemeinsam mit Shell zur Produktion von Propylenoxid und Styrol-Monomeren betrieben werden,
- BASF DOW HPPO Production B.V.B.A., Antwerpen/Belgien, das gemeinsam mit The Dow Chemical Company zur Produktion von Propylenoxid betrieben wird,
- unseren gemeinsam mit Sinopec betriebenen Verbundstandort der BASF-YPC Company Ltd., Nanjing/China,
- N.E. Chemcat Corporation<sup>1</sup>, Tokio/Japan, das gemeinsam mit Sumitomo Metal Mining betrieben wird. Im Jahr 2010 wurde der Anteil an der Gesellschaft von 49 % auf 50 % erhöht. Dementsprechend wird die Gesellschaft nicht weiter nach der Equity-Methode, sondern quotall konsolidiert.

<sup>1</sup> Im Jahr 2010 erfolgte das Delisting der Aktie.

Insgesamt wurden 14 Unternehmen im Jahr 2010 (17 im Jahr 2009) nach der Equity-Methode bilanziert:

**At Equity einbezogene Unternehmen**

|                                | 2010      | 2009      |
|--------------------------------|-----------|-----------|
| Mehrheitsbeteiligungen         | 5         | 7         |
| Gemeinschaftsunternehmen       | 4         | 5         |
| Übrige assoziierte Unternehmen | 5         | 5         |
|                                | <b>14</b> | <b>17</b> |

Die folgenden wesentlichen assoziierten Gesellschaften werden nach der Equity-Methode einbezogen:

- Solvin-Gruppe (BASF-Anteil 25 %),
- CIMO Compagnie industrielle de Monthey S.A., Monthey/Schweiz (BASF-Anteil 50 %),
- Heesung Catalysts Corporation, Seoul/Südkorea (BASF-Anteil 49 %),
- Nord Stream AG, Zug/Schweiz (BASF-Anteil 15,5 %),
- OAO Severneftegazprom, Krasnoselkup/Russische Föderation (BASF-Anteil 25 %, wirtschaftliche Beteiligung 35 %),
- Shanghai Lianheng Isocyanate Co. Ltd., Schanghai/China (BASF-Anteil 35 %).

Eine vollständige Auflistung aller anteilmäßig konsolidierten Gesellschaften und nach der Equity-Methode einbezogenen Unternehmen enthält die Anteilsbesitzliste.

→ Mehr dazu unter Anmerkung 31 auf Seite 194

## Einbezogene Werte (BASF-Anteil) anteilmäßig konsolidierter Gesellschaften

| Millionen €                                                     | 2010         | 2009         |
|-----------------------------------------------------------------|--------------|--------------|
| <b>Ergebnisrechnung</b>                                         |              |              |
| Umsatzerlöse                                                    | 4.602        | 3.629        |
| Ergebnis der Betriebstätigkeit                                  | 383          | 224          |
| Ergebnis vor Ertragsteuern                                      | 408          | 219          |
| Jahresüberschuss                                                | 363          | 212          |
| <b>Bilanz</b>                                                   |              |              |
| Langfristiges Vermögen                                          | 1.533        | 1.239        |
| davon Sachanlagen                                               | 1.382        | 1.139        |
| Kurzfristiges Vermögen                                          | 1.262        | 877          |
| davon kurzfristige Wertpapiere, Zahlungsmittel und -äquivalente | 148          | 58           |
| <b>Vermögen</b>                                                 | <b>2.795</b> | <b>2.116</b> |
| Eigenkapital                                                    | 1.385        | 898          |
| Langfristiges Fremdkapital                                      | 426          | 497          |
| davon Finanzschulden                                            | 237          | 251          |
| Kurzfristiges Fremdkapital                                      | 984          | 721          |
| davon Finanzschulden                                            | 105          | 97           |
| <b>Kapital</b>                                                  | <b>2.795</b> | <b>2.116</b> |
| Haftungsverhältnisse und sonstige finanzielle Verpflichtungen   | 158          | 138          |
| <b>Kapitalflussrechnung</b>                                     |              |              |
| Cashflow aus laufender Geschäftstätigkeit                       | 486          | 495          |
| Cashflow aus Investitionstätigkeit                              | -213         | -221         |
| Cashflow aus Finanzierungstätigkeit                             | -300         | -266         |
| Liquiditätswirksame Veränderung der Zahlungsmittel              | -27          | 8            |

## Nach der Equity-Methode einbezogene assoziierte Gesellschaften (vollständiger Abschluss; 100 %)

| Millionen €                                                     | 2010         | 2009         |
|-----------------------------------------------------------------|--------------|--------------|
| <b>Ergebnisrechnung</b>                                         |              |              |
| Umsatzerlöse                                                    | 3.332        | 2.441        |
| Ergebnis der Betriebstätigkeit                                  | 712          | 228          |
| Ergebnis vor Ertragsteuern                                      | 702          | 132          |
| Jahresüberschuss                                                | 554          | 100          |
| BASF-Anteil am Jahresüberschuss                                 | 202          | 42           |
| <b>Bilanz</b>                                                   |              |              |
| Langfristiges Vermögen                                          | 7.431        | 4.921        |
| davon Sachanlagen                                               | 2.556        | 2.497        |
| Kurzfristiges Vermögen                                          | 1.535        | 1.945        |
| davon kurzfristige Wertpapiere, Zahlungsmittel und -äquivalente | 559          | 940          |
| <b>Vermögen</b>                                                 | <b>8.966</b> | <b>6.866</b> |
| Eigenkapital                                                    | 3.871        | 3.252        |
| Langfristiges Fremdkapital                                      | 2.598        | 903          |
| davon Finanzschulden                                            | 224          | 669          |
| Kurzfristiges Fremdkapital                                      | 2.497        | 2.711        |
| davon Finanzschulden                                            | 1.577        | 958          |
| <b>Kapital</b>                                                  | <b>8.966</b> | <b>6.866</b> |
| BASF-Anteil am Eigenkapital                                     | 958          | 940          |

## C – Akquisitionen und Devestitionen

### Akquisitionen

BASF akquirierte im Jahr 2010 das Spezialchemieunternehmen Cognis Holding GmbH (Cognis), Monheim. Am 22. Juni 2010 unterzeichneten BASF SE und die drei Eigentümer der Cognis Holding Luxembourg S.à r.l., Permira Fonds, GS Capital Partners und SV Life Sciences, den Kaufvertrag. Nach kartellrechtlicher Genehmigung erwarb BASF am 9. Dezember 2010 von der Cognis Holding Luxembourg S.à r.l. alle Anteile der Cognis Holding GmbH.

Cognis ist ein führender, weltweit tätiger Hersteller von innovativen Lösungen sowie Produkten auf Basis nachwachsender Rohstoffe für den Ernährungs- und Gesundheitsmarkt sowie für die Kosmetik-, Wasch- und Reinigungsmittelindustrie. Ein weiterer Schwerpunkt sind Produkte für industrielle Märkte wie Bergbau, Schmierstoffe, Farben und Lacke, sowie Pflanzenschutz. Das Unternehmen beschäftigt rund 5.500 Mitarbeiter und verfügt über Produktionsstätten und Servicecenter in 30 Ländern.

BASF wird die erworbenen Cognis-Aktivitäten in die BASF-Gruppe und dort im Wesentlichen in das Segment Performance Products integrieren. Dafür wurde der Unternehmensbereich Nutrition & Health zum 1. August 2010 gegründet. Der neue

Bereich umfasst Produkte und Systemlösungen für den Ernährungs- und Gesundheitsmarkt sowie für die Duft- und Geschmacksstoffindustrie. Er vereinigt die Geschäfte mit Nutrition Ingredients, Pharma Ingredients & Services und Aroma Chemicals der BASF mit dem ehemaligen Cognis-Segment Nutrition & Health. Der Unternehmensbereich Care Chemicals bündelt nun Produkte und Systemlösungen für Reinigung, Pflege, Kosmetik und Hygiene. In ihm sind die BASF-Geschäfte Personal Care, Hygiene, Home Care sowie Formulation Technologies und das ehemalige Cognis-Segment Care Chemicals mit den Geschäften Personal Care und Home Care verschmolzen. Das ehemalige Cognis-Segment Functional Products wird in die BASF-Unternehmensbereiche Care Chemicals, Dispersions & Pigments und Performance Chemicals integriert.

Der Kaufpreis für die am Übernahmetag gehaltenen Anteile der Cognis betrug 700 Millionen € zuzüglich 4 Millionen € Zinsen. Zum Erwerbszeitpunkt wurden Nettofinanzschulden in Höhe von 1.806 Millionen € und Pensionsverpflichtungen von 551 Millionen € übernommen.

Die folgende Übersicht gibt die vorläufigen Buch- und beizulegenden Zeitwerte der erworbenen Vermögenswerte und Schulden zum 9. Dezember 2010 wieder.

#### Vorläufige Kaufpreisallokation der Akquisition der Cognis im Jahr 2010 (Millionen €)

|                                            | Historische<br>Buchwerte | Anpassungen an beizulegende<br>Zeitwerte | Zeitwerte zum<br>Erwerbszeitpunkt |
|--------------------------------------------|--------------------------|------------------------------------------|-----------------------------------|
| <b>Langfristiges Vermögen</b>              | <b>935</b>               | <b>1.290</b>                             | <b>2.225</b>                      |
| Sachanlagen                                | 588                      | 245                                      | 833                               |
| Geschäfts- oder Firmenwert                 | 144                      | -144                                     | -                                 |
| Übriges immaterielles Vermögen             | 50                       | 1.251                                    | 1.301                             |
| Übriges langfristiges Vermögen             | 153                      | -62                                      | 91                                |
| <b>Kurzfristiges Vermögen</b>              | <b>1.071</b>             | <b>117</b>                               | <b>1.188</b>                      |
| Vorräte                                    | 424                      | 117                                      | 541                               |
| Forderungen aus Lieferungen und Leistungen | 461                      | -                                        | 461                               |
| Kassen-/Bankbestand                        | 116                      | -                                        | 116                               |
| Übriges kurzfristiges Vermögen             | 70                       | -                                        | 70                                |
| <b>Vermögen</b>                            | <b>2.006</b>             | <b>1.407</b>                             | <b>3.413</b>                      |
| <b>Langfristiges Fremdkapital</b>          | <b>474</b>               | <b>369</b>                               | <b>843</b>                        |
| Pensionsverpflichtungen                    | 399                      | 152                                      | 551                               |
| Sonstige Rückstellungen                    | 32                       | 20                                       | 52                                |
| Latente Steuerschulden                     | 18                       | 197                                      | 215                               |
| Übrige Verbindlichkeiten                   | 25                       | -                                        | 25                                |
| <b>Kurzfristiges Fremdkapital</b>          | <b>2.453</b>             | <b>-1</b>                                | <b>2.452</b>                      |
| Finanzschulden                             | 1.920                    | -                                        | 1.920                             |
| Übrige Verbindlichkeiten                   | 533                      | -1                                       | 532                               |
| <b>Fremdkapital</b>                        | <b>2.927</b>             | <b>368</b>                               | <b>3.295</b>                      |
| Anteile anderer Gesellschafter             | 3                        | -                                        | 3                                 |
| <b>Nettovermögen</b>                       | <b>-924</b>              | <b>1.039</b>                             | <b>115</b>                        |
| <b>Geschäfts- oder Firmenwert</b>          |                          |                                          | <b>589</b>                        |
| <b>Gesamtkaufpreis</b>                     |                          |                                          | <b>704</b>                        |

Der Geschäfts- oder Firmenwert repräsentiert die bei der Kaufpreisallokation nicht separierbaren Werte. Es handelt sich im Wesentlichen um das Know-how der Mitarbeiter und Synergien aus der Integration der erworbenen Geschäfte sowie der Zusammenlegung funktionaler Einheiten.

BASF erwartet, Kostensynergien in Höhe von mindestens 130 Millionen € jährlich erzielen zu können. Im Segment Performance Products zielt BASF auf ein Wachstum von mehr als 2 Prozentpunkten im Vergleich zu den relevanten Märkten sowie einer EBITDA-Marge von mindestens 20% ab 2013. Die Integration der Cognis wird durch die Realisierung von Wachstumssynergien zur Erreichung dieses Zieles beitragen.

Zum Umsatz des Geschäftsjahres 2010 trug Cognis mit 171 Millionen € und zum Jahresüberschuss nach Anteilen anderer Gesellschafter mit –50 Millionen € bei. Der negative Ergebnisbeitrag ist unter anderem auf die zeitanteilige Abschreibung der Marktwertanpassungen (Step-up) der Vorräte sowie auf Einmalaufwendungen wie Abfindungszahlungen zurückzuführen.

Bei einer Einbeziehung der Cognis in den Konzernabschluss der BASF seit dem 1. Januar 2010 hätten die Proforma-Umsatzerlöse 66.777 Millionen € und der Jahresüberschuss nach Anteilen anderer Gesellschafter 4.686 Millionen € betragen. Die Proforma-Angaben dienen Vergleichszwecken; sie stellen nicht zwangsläufig die Ergebnisse dar, die sich ergeben hätten, wenn die Transaktion zum 1. Januar 2010 erfolgt wäre, und sind nicht für die Prognose zukünftiger Entwicklungen und Ergebnisse geeignet.

Die Kaufpreisallokation der Akquisition der Cognis ist insgesamt vorläufig, da der Erwerbszeitpunkt kurz vor Bilanzstichtag lag. Nach IFRS kann die Kaufpreisallokation innerhalb eines Jahres nach dem Übernahmzeitpunkt auf Grund endgültiger Informationen angepasst werden.

Im Rahmen der Akquisition der Cognis wurden BASF durch die europäische Kartellbehörde Devestitionsauflagen erteilt. Die Freigabe durch die Kartellbehörde enthält die Auflage zum Verkauf von Geschäften mit einem jährlichen Umsatz von deutlich unter 100 Millionen €; das entspricht weniger als 3% des Gesamtumsatzes von Cognis. Folgende Geschäfte und Anlagen am Cognis-Standort Hythe in England sind demnach zu verkaufen:

- das Cognis-Geschäft mit Hydroxymethacrylaten,
- das Cognis-Geschäft mit multifunktionellen Methacrylaten (MFM) und Addukten,
- die Anlagen für die Produktion von Polyalkylenglykolen (PAG) und PAG-basierten Schmierstoffen. BASF wird das Geschäft mit PAG und PAG-basierten Schmierstoffen einschließlich des Kundenstamms und des geistigen Eigentums weiterführen und die Produkte künftig per Lohnfertigung aus Hythe beziehen. BASF wird außerdem dem Erwerber der Anlagen eine Lizenz zur Herstellung der Produkte gewähren.

Des Weiteren akquirierte BASF zum 30. Dezember 2010 das Styrolkatalysatoren-Geschäft von CRI/Criterion, Iselin/USA.

Im Jahr 2009 akquirierte BASF die folgenden Geschäfte:

- Am 9. April 2009 erwarb BASF die Ciba Holding AG (Ciba), Basel/Schweiz, ein führendes globales Spezialchemieunternehmen, das Kunststoffadditive, Pigmente und Fotoinitiatoren für eine Vielzahl von Branchen produziert. Ciba-Produkte werden ebenso für die Papierherstellung und Abwasserbehandlung verwendet. Der Kaufpreis für die am Übernahmetag gehaltenen 95,8% der Anteile der Ciba betrug 2.178 Millionen € (3.314 Millionen CHF). Im Übernahmzeitpunkt entstand ein Geschäfts- oder Firmenwert in Höhe von 571 Millionen €. BASF hat die erworbenen Ciba-Aktivitäten vollständig in die BASF-Gruppe, überwiegend in das Segment Performance Products, integriert. Der Konzernabschluss 2009 enthielt teilweise Werte, die vor dem Hintergrund der zum damaligen Zeitpunkt noch nicht abgeschlossenen Kaufpreisallokation für den Ciba-Konzern auf vorläufiger Basis ermittelt wurden. Im Jahr 2010 wurden keine wesentlichen Anpassungen dieser Werte vorgenommen. Die Integration von Ciba wurde 2010 abgeschlossen. Der Abschluss der Kaufpreisallokationen im Jahr 2010 führte nicht zu einer Anpassung der Konzernbilanz des Vorjahres.
- Des Weiteren akquirierte BASF am 31. Juli 2009 das Distributionsgeschäft für Bauchemikalien der Rimal Engineering in Abu Dhabi/Vereinigte Arabische Emirate.

Die folgende Übersicht zeigt die vorläufigen Kaufpreisallokationen der 2010 und 2009 getätigten Akquisitionen.



## Auswirkung der Akquisitionen im Erwerbsjahr

|                                       | 2010         |             | 2009         |             |
|---------------------------------------|--------------|-------------|--------------|-------------|
|                                       | Millionen €  | %           | Millionen €  | %           |
| <b>Langfristiges Vermögen</b>         | <b>2.830</b> | <b>8,2</b>  | <b>3.559</b> | <b>11,2</b> |
| Geschäfts- oder Firmenwert            | 589          | 10,0        | 571          | 11,3        |
| Übrige immaterielle Vermögenswerte    | 1.317        | 20,7        | 1.099        | 20,4        |
| Sachanlagen                           | 833          | 4,8         | 1.766        | 10,8        |
| Finanzanlagen                         | 19           | 0,6         | -315         | -10,6       |
| Übriges Vermögen                      | 72           | 4,1         | 438          | 22,0        |
| <b>Kurzfristiges Vermögen</b>         | <b>1.189</b> | <b>4,8</b>  | <b>2.009</b> | <b>10,3</b> |
| davon Zahlungsmittel und -äquivalente | 116          | 7,8         | 241          | 13,1        |
| <b>Vermögen</b>                       | <b>4.019</b> | <b>6,8</b>  | <b>5.568</b> | <b>10,9</b> |
| <b>Eigenkapital</b>                   | <b>3</b>     | <b>.</b>    | <b>93</b>    | <b>0,5</b>  |
| <b>Langfristiges Fremdkapital</b>     | <b>843</b>   | <b>4,0</b>  | <b>2.788</b> | <b>13,3</b> |
| davon Finanzschulden                  | 1            | .           | 1.176        | 9,5         |
| <b>Kurzfristiges Fremdkapital</b>     | <b>2.452</b> | <b>15,7</b> | <b>936</b>   | <b>8,0</b>  |
| davon Finanzschulden                  | 1.920        | 57,0        | 4            | 0,2         |
| <b>Kapital</b>                        | <b>3.298</b> | <b>5,6</b>  | <b>3.817</b> | <b>7,4</b>  |
| <b>Auszahlungen für Akquisitionen</b> | <b>721</b>   |             | <b>1.751</b> |             |

## Devestitionen

Folgende Aktivitäten wurden von der BASF im Jahr 2010 veräußert:

- Am 1. Dezember 2010 wurde der Verkauf des Geschäfts mit Eisenoxiden, das unter dem Namen Sicovits vertrieben wurde, an Rockwood Italia S.p.a. abgeschlossen. Eisenoxide werden in kosmetischen sowie pharmazeutischen Produkten und Nahrungsergänzungsmitteln eingesetzt. Die Aktivitäten waren dem Unternehmensbereich Care Chemicals zugeordnet.
- Am 22. November 2010 hat BASF die Devestition des Geschäfts mit Farb- und Markierstoffen, das die Marken Sudan®, Pigmoil, Somalia, Kerotect®, COVERTACE® und KeroDye® umfasst, an John Hogg Technical Solutions Ltd. abgeschlossen. Die Aktivitäten waren dem Unternehmensbereich Performance Chemicals zugeordnet.
- Im Rahmen der Akquisition der Ciba wurden BASF durch die europäischen und US-amerikanischen Kartellbehörden Devestitionsauflagen erteilt. Im dritten Quartal 2010 konnte das Geschäft mit Trockenverfestigern für die Papierindustrie zum 30. September 2010 veräußert werden. Daneben wurde das Geschäft mit Stärkeproduktions- und Stärkemodifikationsanlagen an Chemigate Oy veräußert. Bereits im ersten Quartal konnte BASF wesentliche Teile des Ciba-Expert-Services-Geschäfts an die Intertek Group plc. sowie die Geschäfte mit den Pigmenten Bismuthvanadat und Indanthron-Blau an die Dominion Colour Corporation gemäß den Devestitionsauflagen veräußern.
- Zum 28. September 2010 wurde der Verkauf des PIRA-Geschäfts an die Smithers Group abgeschlossen. PIRA ist ein unabhängiger Anbieter wissenschaftlicher Prüfverfahren und Informationsdienste für Kunden aus der Verpackungs-, Papier- und Druckindustrie weltweit.
- Am 7. Juni 2010 hat BASF die Devestition des Geschäfts mit Hydrophilierungsadditiven für Kunststoffe, die unter dem Markennamen Irgasurf HL vertrieben wurden, an Techmer PM, Tennessee/USA, abgeschlossen.

Folgende Aktivitäten wurden von der BASF im Jahr 2009 veräußert:

- Im Rahmen der Akquisition der Ciba wurden BASF durch die europäischen und US-amerikanischen Kartellbehörden Devestitionsauflagen erteilt. Bis zum Ende des Jahres 2009 konnten die Geschäfte mit DMA3 (Dimethylaminoethylacrylat, ein chemisches Zwischenprodukt), HALS (sterisch gehinderte Amine, für Kunststoffanwendungen) sowie Styrolacrylat (für die Papierindustrie) veräußert werden. Des Weiteren wurde ein Lizenzvertrag zur Herstellung von UV-Filtern (Lichtschutzmittel) für Hautpflegeprodukte abgeschlossen.
- Am 12. März 2009 hat BASF das Geschäft mit Dickfilm- und Keramikfarbenprodukten für Elektronik- und Dekorierungen an Heraeus veräußert.
- Am 1. April 2009 hat BASF das Pulverlackgeschäft für Hausgeräte, Haustechnik und Röhrenbeschichtung einschließlich der Pulverlack-Produktionsanlage in Verbania/Italien an Arsonsisi S.p.A., die Pulverlack-Sparte der italienischen Junghanns-Gruppe, veräußert. Des Weiteren devestierte BASF am 31. Dezember 2009 den Standort Ako/Japan und das damit verbundene Geschäft mit Schiffslacken an Kansai Paint Co., Ltd.
- Am 31. Juli 2009 hat BASF den Verkauf des Standorts zur Herstellung von Prozesskatalysatoren in Nanjing/China mit der Süd-Chemie AG vollzogen. Der verkaufte Standort ist unabhängig vom BASF-Verbundstandort Nanjing. Am Standort waren rund 400 Mitarbeiter mit der Herstellung von Syngas-Katalysatoren, unter anderem für die Produktion von Ammoniak und Methanol, beschäftigt.
- Im Laufe des Jahres 2009 hat BASF weitere Teile des Prämixgeschäfts, darunter Standorte in Spanien und Frankreich, veräußert. Prämixe sind eine Mischung aus Vitaminen und anderen Futtermittelzusatzstoffen für die Tierernährung.

– Mit zwei weiteren Devestitionen innerhalb der Styrolwert-schöpfungskette setzt die BASF die Restrukturierung ihres Bereichs Styrenics fort. Am 30. September 2009 hat BASF die Veräußerung des Polystyrolgeschäfts in Brasilien einschließlich der Produktionsanlagen an Companhia Brasileira de Estireno (CBE), eine Tochtergesellschaft von Unigel, abgeschlossen. Des Weiteren hat BASF am 18. August 2009 die Styrol-Anlage in Ulsan/Südkorea an SK Energy, ein südkoreanisches Raffinerieunternehmen, verkauft.

Die folgende Übersicht zeigt die Auswirkung der Devestitionen der Jahre 2010 und 2009 auf die Konzernbilanz. Beim Umsatz wird der durch die Devestitionen verursachte Rückgang gegenüber dem Vorjahr dargestellt. Die Auswirkung auf das Eigenkapital betrifft im Wesentlichen Abgangsgewinne beziehungsweise -verluste aus Devestitionen. Im Zusammenhang mit Devestitionen erfasste Aufwendungen für Restrukturierungsmaßnahmen sind nicht enthalten.

#### Auswirkung der Devestitionen im Jahr der Veräußerung

|                                       | 2010        |             | 2009        |             |
|---------------------------------------|-------------|-------------|-------------|-------------|
|                                       | Millionen € | %           | Millionen € | %           |
| <b>Umsatz</b>                         | <b>-58</b>  | <b>.</b>    | <b>-35</b>  | <b>-0,1</b> |
| <b>Langfristiges Vermögen</b>         | <b>-10</b>  | <b>.</b>    | <b>-27</b>  | <b>-0,1</b> |
| davon Sachanlagen                     | -9          | -0,1        | -15         | -0,1        |
| <b>Kurzfristiges Vermögen</b>         | <b>-19</b>  | <b>-0,1</b> | <b>-15</b>  | <b>-0,1</b> |
| davon Zahlungsmittel und -äquivalente | -           | -           | -1          | -0,1        |
| <b>Vermögen</b>                       | <b>-29</b>  | <b>.</b>    | <b>-42</b>  | <b>-0,1</b> |
| <b>Eigenkapital</b>                   | <b>19</b>   | <b>.</b>    | <b>22</b>   | <b>0,1</b>  |
| <b>Langfristiges Fremdkapital</b>     | <b>-</b>    | <b>-</b>    | <b>-</b>    | <b>-</b>    |
| davon Finanzschulden                  | -           | -           | -           | -           |
| <b>Kurzfristiges Fremdkapital</b>     | <b>-5</b>   | <b>.</b>    | <b>-1</b>   | <b>.</b>    |
| davon Finanzschulden                  | -           | -           | -           | -           |
| <b>Kapital</b>                        | <b>14</b>   | <b>.</b>    | <b>21</b>   | <b>.</b>    |
| <b>Verkaufspreis</b>                  | <b>43</b>   | <b>.</b>    | <b>63</b>   | <b>.</b>    |

#### Zur Veräußerung gehaltene Gruppen von Vermögenswerten und Schulden

BASF und INEOS Industries Holdings Limited beabsichtigen, ihre weltweiten Geschäftsaktivitäten in den Arbeitsgebieten Styrol-Monomere (SM), Polystyrol (PS), Acrylnitrilbutadienstyrol (ABS), Styrolbutadiencopolymere (SBC) und weitere styrol-basierte Copolymere (SAN, AMSAN, ASA, MABS) sowie Copolymerblends in einem gemeinschaftlich geführten Unternehmen mit dem Namen Styrolution zusammenzuführen.

Der Veräußerungsplan umfasst ausgewählte Vermögenswerte des Geschäftsfeldes Styrolkunststoffe. Die BASF-Styrolkunststoff-Aktivitäten wurden zum 1. Januar 2011 in separate Gesellschaften ausgegliedert. Bis zur Gründung des gemeinschaftlich geführten Unternehmens werden diese Gesellschaften in der BASF-Gruppe vollkonsolidiert.

Die Einbringung in das gemeinschaftlich geführte Unternehmen seitens BASF umfasst das Geschäft an Standorten in Deutschland (Ludwigshafen, Schwarzheide), in Antwerpen/Belgien, in Ulsan/Südkorea, in Dahej/Indien und in Altamira/Mexiko. Insgesamt beschäftigt BASF rund 1.460 Mitarbeiter in ihrem Styrolkunststoff-Geschäft und erzielte 2010 einen Umsatz von mehr als 3 Milliarden €.

Das Geschäft mit Polystyrol-Schäumen ist nicht Teil der Transaktion und verbleibt innerhalb der BASF. Das gilt auch für die zu ihrer Herstellung notwendigen SM- und PS-Kapazitäten der BASF in Ludwigshafen sowie die des SM- und PS-Geschäftes der BASF-YPC Company Ltd. in Nanjing/China.

Styrolution wird eine weltweite Präsenz haben und seinen Kunden aus der Styrolkunststoff-Industrie entscheidende

Vorteile durch verbesserte Effizienz, geringere Kosten und exzellenten Service bieten. Die Anteile am gemeinschaftlich geführten Unternehmen sollen jeweils zu 50 % von BASF und INEOS gehalten werden. BASF wird nach Abschluss der Transaktion eine Ausgleichszahlung erhalten.

Der Abschluss der Transaktion bedarf noch der Zustimmung der zuständigen Kartellbehörden. Der Abschluss wird im Laufe des Jahres 2011 erwartet.

Die Vermögenswerte und Schulden wurden in eine Veräußerungsgruppe umgegliedert. Die Werte der Veräußerungsgruppe sind in der folgenden Tabelle dargestellt.

#### Veräußerungsgruppe Styrolkunststoffe (Millionen €)

|                                                           | 31. 12. 2010 |
|-----------------------------------------------------------|--------------|
| Immaterielles Vermögen                                    | 42           |
| Sachanlagen                                               | 210          |
| Vorräte                                                   | 266          |
| Forderungen aus Lieferungen und Leistungen                | 74           |
| Übrige Forderungen und sonstiges Vermögen                 | 17           |
| Zahlungsmittel und Zahlungsmitteläquivalente              | 5            |
| <b>Vermögen der Veräußerungsgruppe</b>                    | <b>614</b>   |
| Rückstellungen für Pensionen und ähnliche Verpflichtungen | 6            |
| Sonstige Rückstellungen                                   | 74           |
| Verbindlichkeiten aus Lieferungen und Leistungen          | 97           |
| Übrige Verbindlichkeiten                                  | 18           |
| <b>Schulden der Veräußerungsgruppe</b>                    | <b>195</b>   |
| <b>Reinvermögen</b>                                       | <b>419</b>   |

### 3 – Ergebnis je Aktie

#### Ergebnis je Aktie

|                                                                     | 2010    | 2009    |
|---------------------------------------------------------------------|---------|---------|
| Jahresüberschuss nach Anteilen anderer Gesellschafter (Millionen €) | 4.557   | 1.410   |
| Anzahl der Aktien (1.000)                                           |         |         |
| Gewichteter Durchschnitt ausstehender Aktien                        | 918.479 | 918.479 |
| Ergebnis je Aktie (€)                                               | 4,96    | 1,54    |

Das Ergebnis je Aktie errechnet sich aus dem Jahresüberschuss nach Anteilen anderer Gesellschafter und der gewichteten Anzahl der durchschnittlich ausgegebenen Aktien. Bei der Berechnung des verwässerten Ergebnisses je Aktie werden die möglicherweise ausgebbaren Aktien sowie die daraus resultierenden Ergebniseffekte des BASF-Mitarbeiterbeteiligungsprogramms „Plus“ berücksichtigt.

In den Jahren 2010 und 2009 sind keine Verwässerungseffekte aufgetreten.

### 4 – Berichterstattung nach Segmenten und Regionen

Das weltweite Geschäft der BASF wird von Unternehmensbereichen geführt, die anhand vergleichbarer Erzeugnisse, Produktionsverfahren und Kundenbranchen zu sechs berichtspflichtigen Segmenten zusammengefasst sind. Die Segmente und Unternehmensbereiche tragen englische Bezeichnungen.

Chemicals setzt sich aus den Unternehmensbereichen Inorganics, Petrochemicals und Intermediates zusammen. Das Portfolio reicht von Basischemikalien bis zu Ausgangsstoffen für die Herstellung einer Vielzahl höherveredelter Produkte, wie zum Beispiel Kunststoffe, Farben und Lacke, Waschmittel, Medikamente.

Plastics mit den Unternehmensbereichen Performance Polymers und Polyurethanes bietet eine Vielzahl an technischen Kunststoffen sowie damit verbundene Systemlösungen und Dienstleistungen.

Das Segment Performance Products bietet innovative und spezifische Systemlösungen für zahlreiche weiterverarbeitende Industrien. Dazu zählen zum Beispiel die kunststoffverarbeitende Industrie, Automobilzulieferer, Papierindustrie, Raffinerien, Anwender von Ölfeld- und Bergbauchemikalien oder auch Leder- und Textilverarbeiter. Zur Integration der Cognis-Aktivitäten hat die BASF einen neuen Unternehmensbereich im Segment Performance Products gegründet. Hierzu wurde der bisherige Unternehmensbereich Care Chemicals in zwei Bereiche aufgeteilt: Der neue Unternehmensbereich Nutrition & Health umfasst Produkte und Systemlösungen für den Gesundheits- und Ernährungsmarkt sowie für die Duft- und Geschmacksstoffindustrie. Der Bereich Care Chemicals bündelt Produkte und Systemlösungen für Reinigung, Pflege, Kosmetik und Hygiene. Damit enthält das Segment nun die fünf Unternehmensbereiche Dispersions & Pigments, Care Chemicals, Nutrition & Health, Paper Chemicals und Performance Chemicals. Vorjahreswerte wurden entsprechend angepasst.

Functional Solutions umfasst die Unternehmensbereiche Catalysts, Construction Chemicals und Coatings. Hier bündeln wir branchen- und kundenspezifische Systemlösungen und innovative Produkte vor allem für die Automobil-, Chemie- und Bauindustrie.

Das Segment Agricultural Solutions entspricht dem Unternehmensbereich Crop Protection, der vor allem Pflanzenschutzmittel gegen Pilzkrankheiten, Insekten sowie Unkräuter anbietet.

Oil & Gas besteht aus dem gleichnamigen Unternehmensbereich mit den Arbeitsgebieten Exploration & Production und Natural Gas Trading.

Die keinem Unternehmensbereich zugeordneten Aktivitäten werden unter Sonstige ausgewiesen. Sie umfassen insbesondere Styrenics sowie unser Düngemittelgeschäft. Darüber hinaus sind unter Sonstige Rohstoffverkäufe, Ingenieur- und sonstige Dienstleistungen sowie Vermietung und Verpachtung ausgewiesen.

Die Kosten der Konzernzentrale umfassen die Aufwendungen für die Steuerung der BASF-Gruppe und werden nicht den Segmenten zugeordnet, sondern unter Sonstige ausgewiesen.

Mit der Konzernforschung, die ebenfalls unter Sonstige ausgewiesen wird, erschließen wir bereichsübergreifend Wachstumsfelder und sichern langfristig die technologische und methodische Kompetenz der BASF.

In Sonstige ausgewiesene Ergebnisse aus der Währungsumrechnung umfassen den Segmenten nicht zugeordnete Ergebnisse aus der Absicherung zukünftiger Fremdwährungsumsätze, aus der Absicherung von Fremdwährungspositionen durch Makro-Hedges sowie aus der Umrechnung von Finanzverbindlichkeiten. Des Weiteren sind in Sonstige Aufwendungen und Erträge aus dem Long-Term-Incentive-Programm (LTI-Programm) sowie den Segmenten nicht zugeordnete Ergebnisse aus Sicherungsgeschäften gegen Rohstoffpreisen enthalten.

Transfers zwischen den Segmenten werden fast ausschließlich auf der Grundlage von Marktpreisen abgerechnet. Die Zuordnung von Vermögenswerten und deren Abschreibungen zu den Segmenten erfolgt der wirtschaftlichen Verfügungsgewalt entsprechend. Von mehreren Segmenten gemeinsam genutzte Vermögenswerte werden nach der anteiligen Nutzung zugeordnet.

**Ergebnis der Betriebstätigkeit (EBIT) von Sonstige** (Millionen €)

|                                                                        | 2010        | 2009        |
|------------------------------------------------------------------------|-------------|-------------|
| Kosten der Konzernforschung                                            | -323        | -319        |
| Kosten der Konzernzentrale                                             | -226        | -209        |
| Styrenics, Düngemittel, sonstige Geschäfte                             | 400         | 339         |
| Währungsergebnisse, Sicherungsgeschäfte und sonstige Bewertungseffekte | -460        | -512        |
| Übrige Aufwendungen und Erträge                                        | -98         | 74          |
|                                                                        | <b>-707</b> | <b>-627</b> |

Im Vergleich zum Vorjahr stieg das Ergebnis der Betriebstätigkeit bei Styrenics stark, während es bei Düngemitteln deutlich zurückging.

Das Währungsergebnis von Sonstige hat sich gegenüber dem Vorjahr deutlich verbessert. Die Belastungen aus dem Long-Term-Incentive-Programm waren 2010 auf Grund der

Aktienkursentwicklung mit 418 Millionen € um 206 Millionen € höher als im Vorjahr.

In den übrigen Aufwendungen und Erträgen sind in diesem Jahr Belastungen unter anderem im Zusammenhang mit geschlossenen Betriebsstätten enthalten.

**Vermögen von Sonstige** (Millionen €)

|                                                                       | 2010          | 2009          |
|-----------------------------------------------------------------------|---------------|---------------|
| Vermögen der unter Sonstige erfassten Geschäfte                       | 2.690         | 2.647         |
| Finanzanlagen                                                         | 3.281         | 2.960         |
| Latente Steueransprüche                                               | 1.112         | 1.042         |
| Zahlungsmittel und Zahlungsmitteläquivalente/kurzfristige Wertpapiere | 1.509         | 1.850         |
| Vermögenswerte aus überdeckten Pensionsplänen                         | 260           | 549           |
| Übrige Forderungen/Rechnungsabgrenzungsposten                         | 1.915         | 1.513         |
|                                                                       | <b>10.767</b> | <b>10.561</b> |

Die Überleitungsrechnung Oil & Gas leitet das Ergebnis der Betriebstätigkeit des Segments Oil & Gas über auf den Beitrag des Segments zum Jahresüberschuss nach Anteilen anderer Gesellschafter der BASF-Gruppe.

Das Übrige Ergebnis von Oil & Gas umfasst die nicht im Ergebnis der Betriebstätigkeit des Segments erfassten Aufwendungen und Erträge, das Zinsergebnis sowie das Übrige Finanzergebnis.

Der Anstieg des Beteiligungsergebnisses resultierte vor allem aus dem höheren Gewinn der at Equity einbezogenen OAO Severneftegazprom (SNG), Krasnoselkup/Russische Föderation. SNG ist Inhaberin der Produktionslizenz am westsibirischen Erdgasfeld Jushno Russkoje, an dessen wirtschaftlichem Erfolg BASF zu 35 % beteiligt ist. Der Anstieg des übrigen Ergebnisses beruhte insbesondere auf nicht den Segmenten zugeordneten Ergebnissen aus Geschäften zur Absicherung von Fremdwährungsrisiken, die unter Sonstige erfasst werden.

**Überleitungsrechnung Oil & Gas** (Millionen €)

|                                                                         | 2010         | 2009         |
|-------------------------------------------------------------------------|--------------|--------------|
| <b>Ergebnis der Betriebstätigkeit</b>                                   | <b>2.334</b> | <b>2.289</b> |
| Beteiligungsergebnis                                                    | 226          | 62           |
| Übriges Ergebnis                                                        | -69          | -243         |
| <b>Ergebnis vor Ertragsteuern</b>                                       | <b>2.491</b> | <b>2.108</b> |
| Ertragsteuern                                                           | 1.340        | 1.223        |
| davon nicht anrechenbare ausländische Ertragsteuern für die Ölförderung | 983          | 870          |
| <b>Jahresüberschuss</b>                                                 | <b>1.151</b> | <b>885</b>   |
| Anteile anderer Gesellschafter                                          | 228          | 173          |
| <b>Jahresüberschuss nach Anteilen anderer Gesellschafter</b>            | <b>923</b>   | <b>712</b>   |

## Segmente 2010 (Millionen €)

|                                                                | Chemicals | Plastics | Performance<br>Products | Functional<br>Solutions | Agri-<br>cultural<br>Solutions | Oil & Gas | davon Ex-<br>ploration &<br>Production | Sonstige | BASF-<br>Gruppe |
|----------------------------------------------------------------|-----------|----------|-------------------------|-------------------------|--------------------------------|-----------|----------------------------------------|----------|-----------------|
| Umsatz                                                         | 11.377    | 9.830    | 12.288                  | 9.703                   | 4.033                          | 10.791    | 3.819                                  | 5.851    | 63.873          |
| Veränderung (%)                                                | 51,4      | 37,9     | 31,3                    | 36,4                    | 10,6                           | -5,0      | -0,7                                   | 27,8     | 26,0            |
| Transfers zwischen den Segmenten                               | 5.476     | 546      | 438                     | 159                     | 25                             | 852       | 41                                     | 275      | 7.771           |
| Umsatz inklusive Transfers                                     | 16.853    | 10.376   | 12.726                  | 9.862                   | 4.058                          | 11.643    | 3.860                                  | 6.126    | 71.644          |
| Ergebnis der Betriebstätigkeit                                 | 2.310     | 1.273    | 1.345                   | 457                     | 749                            | 2.334     | 1.918                                  | -707     | 7.761           |
| Veränderung (%)                                                | 214,3     | 129,8    | .                       | 327,1                   | -2,6                           | 2,0       | 7,7                                    | -12,8    | 111,1           |
| Vermögen                                                       | 6.526     | 5.114    | 13.409                  | 9.364                   | 5.063                          | 9.150     | 5.158                                  | 10.767   | 59.393          |
| davon Geschäfts-/Firmenwerte                                   | 22        | 118      | 1.859                   | 2.041                   | 1.394                          | 389       | 389                                    | 50       | 5.873           |
| Sachanlagen                                                    | 3.484     | 2.287    | 3.983                   | 1.676                   | 619                            | 4.414     | 2.005                                  | 778      | 17.241          |
| Schulden                                                       | 1.900     | 1.289    | 3.723                   | 2.154                   | 1.123                          | 2.825     | 1.279                                  | 23.722   | 36.736          |
| Forschungskosten                                               | 130       | 141      | 289                     | 179                     | 393                            | 15        | 15                                     | 345      | 1.492           |
| Investitionen in Sachanlagen und immaterielle Vermögenswerte   | 535       | 250      | 3.000                   | 208                     | 145                            | 996       | 478                                    | 170      | 5.304           |
| Abschreibungen auf Sachanlagen und immaterielle Vermögenswerte | 690       | 448      | 817                     | 404                     | 189                            | 643       | 510                                    | 179      | 3.370           |
| davon Wertminderung                                            | 2         | 3        | 89                      | 11                      | -                              | 96        | 96                                     | 1        | 202             |

## Segmente 2009 (Millionen €)

|                                                                | Chemicals | Plastics | Performance<br>Products | Functional<br>Solutions | Agri-<br>cultural<br>Solutions | Oil & Gas | davon Ex-<br>ploration &<br>Production | Sonstige | BASF-<br>Gruppe |
|----------------------------------------------------------------|-----------|----------|-------------------------|-------------------------|--------------------------------|-----------|----------------------------------------|----------|-----------------|
| Umsatz                                                         | 7.515     | 7.128    | 9.356                   | 7.115                   | 3.646                          | 11.356    | 3.847                                  | 4.577    | 50.693          |
| Veränderung (%)                                                | -32,7     | -21,8    | 15,2                    | -24,2                   | 7,0                            | -21,4     | -27,5                                  | -31,2    | -18,6           |
| Transfers zwischen den Segmenten                               | 3.564     | 363      | 319                     | 147                     | 33                             | 702       | 38                                     | 245      | 5.373           |
| Umsatz inklusive Transfers                                     | 11.079    | 7.491    | 9.675                   | 7.262                   | 3.679                          | 12.058    | 3.885                                  | 4.822    | 56.066          |
| Ergebnis der Betriebstätigkeit                                 | 735       | 554      | -150                    | 107                     | 769                            | 2.289     | 1.781                                  | -627     | 3.677           |
| Veränderung (%)                                                | -46,3     | 2,8      | .                       | -29,1                   | 9,1                            | -40,5     | -46,3                                  | 31,3     | -43,1           |
| Vermögen                                                       | 5.688     | 4.530    | 9.242                   | 8.265                   | 4.681                          | 8.301     | 4.997                                  | 10.561   | 51.268          |
| davon Geschäfts-/Firmenwerte                                   | 22        | 115      | 1.214                   | 1.894                   | 1.366                          | 389       | 389                                    | 69       | 5.069           |
| Sachanlagen                                                    | 3.446     | 2.353    | 3.390                   | 1.514                   | 592                            | 3.980     | 1.930                                  | 1.010    | 16.285          |
| Schulden                                                       | 1.384     | 1.053    | 2.412                   | 2.003                   | 1.046                          | 2.669     | 1.516                                  | 22.092   | 32.659          |
| Forschungskosten                                               | 129       | 126      | 285                     | 163                     | 355                            | 13        | 13                                     | 327      | 1.398           |
| Investitionen in Sachanlagen und immaterielle Vermögenswerte   | 482       | 249      | 3.753                   | 174                     | 183                            | 1.012     | 647                                    | 119      | 5.972           |
| Abschreibungen auf Sachanlagen und immaterielle Vermögenswerte | 836       | 440      | 1.076                   | 404                     | 204                            | 541       | 407                                    | 210      | 3.711           |
| davon Wertminderung                                            | 183       | 7        | 377                     | 38                      | -                              | -         | -                                      | 2        | 607             |

Regionen 2010 (Millionen €)<sup>1</sup>

|                                                                | Europa | davon<br>Deutsch-<br>land | Nord-<br>amerika | Asien,<br>Pazifischer<br>Raum | Süd-<br>amerika,<br>Afrika,<br>Nahe<br>Osten | BASF-<br>Gruppe |
|----------------------------------------------------------------|--------|---------------------------|------------------|-------------------------------|----------------------------------------------|-----------------|
| <b>Sitz der Kunden</b>                                         |        |                           |                  |                               |                                              |                 |
| Umsatz                                                         | 33.201 | 12.225                    | 12.886           | 12.510                        | 5.276                                        | 63.873          |
| Veränderung (%)                                                | 16,4   | 14,6                      | 35,9             | 43,7                          | 32,7                                         | 26,0            |
| Anteil (%)                                                     | 51,9   | 19,1                      | 20,2             | 19,6                          | 8,3                                          | 100,0           |
| <b>Sitz der Gesellschaften</b>                                 |        |                           |                  |                               |                                              |                 |
| Umsatz                                                         | 35.156 | 25.426                    | 13.246           | 11.642                        | 3.829                                        | 63.873          |
| Umsatz inklusive Transfers                                     | 41.312 | 30.197                    | 15.205           | 12.098                        | 4.037                                        | 72.652          |
| Ergebnis der Betriebstätigkeit                                 | 5.206  | 3.769                     | 1.107            | 1.271                         | 177                                          | 7.761           |
| Vermögen                                                       | 35.494 | 21.494                    | 11.885           | 8.411                         | 3.603                                        | 59.393          |
| davon Sachanlagen                                              | 10.134 | 6.424                     | 3.569            | 2.853                         | 685                                          | 17.241          |
| Investitionen in Sachanlagen und immaterielle Vermögenswerte   | 3.364  | 2.273                     | 981              | 788                           | 171                                          | 5.304           |
| Abschreibungen auf Sachanlagen und immaterielle Vermögenswerte | 2.137  | 1.140                     | 697              | 432                           | 104                                          | 3.370           |
| Mitarbeiter (31. Dezember)                                     | 69.809 | 50.801                    | 16.487           | 15.965                        | 6.879                                        | 109.140         |

## Regionen 2009 (Millionen €)

|                                                                | Europa | davon<br>Deutsch-<br>land | Nord-<br>amerika | Asien,<br>Pazifischer<br>Raum | Süd-<br>amerika,<br>Afrika,<br>Nahe<br>Osten | BASF-<br>Gruppe |
|----------------------------------------------------------------|--------|---------------------------|------------------|-------------------------------|----------------------------------------------|-----------------|
| <b>Sitz der Kunden</b>                                         |        |                           |                  |                               |                                              |                 |
| Umsatz                                                         | 28.532 | 10.666                    | 9.480            | 8.706                         | 3.975                                        | 50.693          |
| Veränderung (%)                                                | -22,2  | -22,7                     | -21,0            | -6,6                          | -7,4                                         | -18,6           |
| Anteil (%)                                                     | 56,2   | 21,0                      | 18,7             | 17,2                          | 7,9                                          | 100,0           |
| <b>Sitz der Gesellschaften</b>                                 |        |                           |                  |                               |                                              |                 |
| Umsatz                                                         | 30.375 | 21.543                    | 9.404            | 7.997                         | 2.917                                        | 50.693          |
| Umsatz inklusive Transfers                                     | 34.393 | 24.729                    | 10.564           | 8.263                         | 3.164                                        | 56.384          |
| Ergebnis der Betriebstätigkeit                                 | 2.390  | 1.855                     | 503              | 503                           | 281                                          | 3.677           |
| Vermögen                                                       | 31.994 | 18.790                    | 10.177           | 6.392                         | 2.705                                        | 51.268          |
| davon Sachanlagen                                              | 9.789  | 6.006                     | 3.352            | 2.526                         | 618                                          | 16.285          |
| Investitionen in Sachanlagen und immaterielle Vermögenswerte   | 4.194  | 2.101                     | 1.123            | 521                           | 134                                          | 5.972           |
| Abschreibungen auf Sachanlagen und immaterielle Vermögenswerte | 2.429  | 1.242                     | 750              | 428                           | 104                                          | 3.711           |
| Mitarbeiter (31. Dezember)                                     | 67.621 | 48.586                    | 16.027           | 14.817                        | 6.314                                        | 104.779         |

<sup>1</sup> Die regionale Zuordnung einiger mittelamerikanischer Länder wurde geändert, Vorjahreswerte wurden entsprechend angepasst.

## 5 – Sonstige betriebliche Erträge

| Millionen €                                                                       | 2010         | 2009         |
|-----------------------------------------------------------------------------------|--------------|--------------|
| Auflösung und Anpassung von Rückstellungen                                        | 244          | 348          |
| Erlöse aus nicht betriebstypischen sonstigen Geschäften                           | 142          | 116          |
| Erträge aus Fremdwährungs- und Sicherungsgeschäften                               | 136          | 171          |
| Erträge aus der Umrechnung von Fremdwährungsabschlüssen                           | 76           | 34           |
| Gewinne aus Anlagenabgängen und Devestitionen                                     | 101          | 79           |
| Zuschreibungen auf Sachanlagen                                                    | 40           | –            |
| Gewinne aus der Auflösung von Wertberichtigungen auf betriebsbedingte Forderungen | 36           | 77           |
| Sonstige                                                                          | 365          | 364          |
|                                                                                   | <b>1.140</b> | <b>1.189</b> |



Die **Auflösung und Anpassung von Rückstellungen** betraf überwiegend Stilllegungs- und Restrukturierungsmaßnahmen, Personalverpflichtungen, Prozess- und Schadenersatzrisiken sowie eine Vielzahl weiterer Einzelposten im Rahmen der üblichen Geschäftstätigkeit. Rückstellungen wurden aufgelöst oder angepasst, wenn nach den Verhältnissen am Bilanzstichtag nicht mehr oder mit einer geringeren Inanspruchnahme zu rechnen war.

**Erlöse aus nicht betriebstypischen sonstigen Geschäften** enthalten vor allem Miet- und Pachterträge, Erlöse aus Grundstücksverkäufen sowie Logistikdienstleistungen.

**Erträge aus Fremdwährungs- und Sicherungsgeschäften** betrafen Fremdwährungsgeschäfte, die Bewertung zu Marktwerten von Forderungen und Verbindlichkeiten in fremder Währung sowie von Währungsderivaten und sonstigen Sicherungsgeschäften.

**Erträge aus der Umrechnung von Fremdwährungsabschlüssen** enthalten Erträge aus der Umrechnung von Gesellschaften außerhalb des Euro-Raumes, für welche der Euro die funktionale Währung darstellt.

**Gewinne aus Anlagenabgängen und Devestitionen** ergaben sich im Jahr 2010 insbesondere aus dem Verkauf von Teilen des Polystyrolgeschäfts, des Ciba-Expert-Services-Geschäfts sowie aus dem Verkauf von Sachanlagen.

**Zuschreibungen auf Sachanlagen** betrafen den Standort Altamira/Mexiko.

**Gewinne aus der Auflösung von Wertberichtigungen auf betriebsbedingte Forderungen** resultierten überwiegend aus wertberichtigten Forderungen gegenüber Kunden, welche im Jahr 2010 beglichen wurden.

**Sonstige Erträge** enthalten Erstattungen und Vergleichszahlungen, Gewinne aus dem Edelmetallhandel und sonstigen Verkäufen sowie eine Vielzahl anderer Posten.

## 6 – Sonstige betriebliche Aufwendungen

| Millionen €                                                                                                                             | 2010         | 2009         |
|-----------------------------------------------------------------------------------------------------------------------------------------|--------------|--------------|
| Restrukturierungsmaßnahmen                                                                                                              | 276          | 548          |
| Umweltschutz- und Sicherheitsmaßnahmen, Abbruch-, Entsorgungs- und nicht aktivierungspflichtige Planungskosten für Investitionsprojekte | 98           | 140          |
| Abschreibungen auf immaterielle Vermögenswerte und Sachanlagen                                                                          | 247          | 717          |
| Gestehungskosten der nicht betriebstypischen sonstigen Geschäfte                                                                        | 180          | 76           |
| Aufwendungen aus Fremdwährungs- und Sicherungsgeschäften sowie aus Marktbewertung                                                       | 512          | 621          |
| Verluste aus der Umrechnung von Fremdwährungsabschlüssen                                                                                | 152          | 23           |
| Verluste aus Anlagenabgängen und Devestitionen                                                                                          | 24           | 35           |
| Aufwand für die Exploration von Öl und Gas                                                                                              | 190          | 143          |
| Aufwand aus der Zuführung von Wertberichtigungen auf betriebsbedingte Forderungen                                                       | 107          | 135          |
| Aufwand aus Verbrauch von zu Marktwerten bewerteten Vorräten und Ausbuchung nicht verwertbarer Vorräte                                  | 188          | 359          |
| Sonstige                                                                                                                                | 638          | 528          |
|                                                                                                                                         | <b>2.612</b> | <b>3.325</b> |

**Restrukturierungsmaßnahmen** führten im Jahr 2010 zu Aufwendungen aus der Ciba-Integration in Höhe von 113 Millionen € und in geringem Maße aus der im Dezember angefangenen Cognis-Integration. Die 2010 beschlossene Restrukturierung des Standorts Grenzach führte zu Aufwendungen in Höhe von 24 Millionen €. Im Jahr 2009 betrafen die Aufwendungen vor allem die Ciba-Integration in Höhe von 248 Millionen € und die Schließung und Restrukturierung mehrerer Standorte in Europa und Nordamerika.

Weitere Aufwendungen ergaben sich aus **Umweltschutz- und Sicherheitsmaßnahmen, Abbruch- und Entsorgungsmaßnahmen sowie aus der Vorbereitung von Investitionsprojekten**, soweit die Voraussetzungen für eine Aktivierung nach IFRS nicht vorlagen.

**Abschreibungen auf immaterielle Vermögenswerte und Sachanlagen** betrafen im Jahr 2010 unter anderem Wertminderungen auf Sachanlagen und immaterielle Vermögenswerte in Höhe von 40 Millionen € im Rahmen der Restrukturierung

des Standorts Grenzach. Zusätzlich wurde eine Wertminderung in Höhe von 96 Millionen € auf Sachanlagen und auf Konzessionen für die Öl- und Gasförderung in der britischen und norwegischen Nordsee vorgenommen. Im Jahr 2009 betrafen die Abschreibungen auf immaterielle Vermögenswerte und Sachanlagen unter anderem die Abschreibung des SAP-Systems der Ciba Holding AG in Höhe von 176 Millionen €. Außerdem führte die Wertminderung der immateriellen Vermögenswerte und Sachanlagen im Rahmen der Restrukturierungen von Ciba in Höhe von 86 Millionen € und von BASF Fuel Cell GmbH, Frankfurt am Main, in Höhe von 49 Millionen € zu einer zusätzlichen Belastung im vergangenen Jahr.

Die **Gestehungskosten der nicht betriebstypischen sonstigen Geschäfte** beziehen sich auf die unter den Sonstigen betrieblichen Erträgen ausgewiesenen Posten.

→ Mehr dazu unter Anmerkung 5 ab Seite 160

**Aufwendungen aus Fremdwährungs- und Sicherungsgeschäften sowie aus Marktbewertung** betrafen Fremdwährungsgeschäfte, die Bewertung zu Marktwerten von Forderungen und Verbindlichkeiten in fremder Währung sowie von Währungsderivaten und sonstigen Sicherungsgeschäften. Zusätzlich entstand ein Aufwand aus dem Long-Term-Incentive-Programm (LTI-Programm) in Höhe von 418 Millionen € auf Grund des höheren Marktwertes der BASF-Aktie. Im Jahr 2009 betrug der Aufwand für das LTI-Programm 212 Millionen €.

**Aufwendungen aus Verbrauch von zu Marktwerten bewerteten Vorräten und Ausbuchung nicht verwertbarer Vorräte** entstanden auf Grund der Ausbuchung von nicht mehr verwertbaren Vorräten im Jahr 2010 in Höhe von 126 Millionen € und im Jahr 2009 in Höhe von 147 Millionen €. Außerdem führte der Teilverbrauch der bei der Cognis-Übernahme zu Marktwerten bewerteten Vorräte zu einer Belastung in Höhe von 58 Mil-

lionen €. Im Jahr 2009 führte der Verbrauch der bei der Ciba-Übernahme zu Marktwerten bewerteten Vorräte zu einer Belastung in Höhe von 208 Millionen €.

**Sonstige Aufwendungen** resultierten aus der Rückstellungsbildung für Schadenersatz in Bezug auf den geschlossenen Standort Paulinia/Brasilien sowie aus langfristigen Lieferverträgen in Südamerika. Weitere Aufwendungen ergaben sich aus der Einführung von REACH sowie aus der Bildung einer Drohverlustrückstellung für einen Liefervertrag der BASF SE. Außerdem entstanden Aufwendungen auf Grund einer Vielzahl weiterer Posten. Im Jahr 2009 resultierten sonstige Aufwendungen aus der Rückstellungsbildung für die von der EU-Kommission auferlegte Strafe in Höhe von 68 Millionen € in Bezug auf das ehemalige Ciba-Hitzestabilisatoren-geschäft.

## 7 – Finanzergebnis

| Millionen €                                                                                | 2010        | 2009        |
|--------------------------------------------------------------------------------------------|-------------|-------------|
| <b>Ergebnis aus Unternehmen, die nach der Equity-Methode einbezogen werden</b>             | <b>201</b>  | <b>61</b>   |
| Erträge aus Beteiligungen von verbundenen und assoziierten Unternehmen                     | 59          | 88          |
| Erträge aus dem Abgang von Beteiligungen                                                   | 48          | 13          |
| Erträge aus Gewinnabführungsverträgen                                                      | 24          | 10          |
| Erträge aus Steuerumlagen an Beteiligungen                                                 | 6           | 1           |
| <b>Übrige Erträge aus Beteiligungen</b>                                                    | <b>137</b>  | <b>112</b>  |
| Aufwendungen aus Verlustübernahmen                                                         | –5          | –5          |
| Abschreibungen auf/Verluste aus dem Verkauf von Beteiligungen                              | –34         | –35         |
| <b>Übrige Aufwendungen aus Beteiligungen</b>                                               | <b>–39</b>  | <b>–40</b>  |
| Zinserträge aus Zahlungsmitteln und Zahlungsmitteläquivalenten                             | 131         | 106         |
| Zins- und Dividendenerträge aus Wertpapieren und Ausleihungen                              | 19          | 28          |
| <b>Zinserträge</b>                                                                         | <b>150</b>  | <b>134</b>  |
| <b>Zinsaufwendungen</b>                                                                    | <b>–773</b> | <b>–734</b> |
| Zuschreibungen/Gewinne aus der Veräußerung von Wertpapieren und Ausleihungen               | 1           | 14          |
| Erwartete Erträge aus Planvermögen zur Deckung von Pensionen und ähnlichen Verpflichtungen | 765         | 675         |
| Erträge aus Planvermögen zur Deckung sonstiger langfristiger Personalverpflichtungen       | 18          | 16          |
| Erträge aus Aktivierung von Bauzeitinsen                                                   | 65          | 58          |
| Sonstige finanzielle Erträge                                                               | 17          | –           |
| <b>Übrige finanzielle Erträge</b>                                                          | <b>866</b>  | <b>763</b>  |
| Abschreibungen/Verluste aus dem Abgang von Wertpapieren und Ausleihungen                   | –5          | –12         |
| Aufzinsung von Pensionsverpflichtungen und ähnlichen Verpflichtungen                       | –819        | –781        |
| Aufwendungen aus/Aufzinsung von sonstigen langfristigen Personalverpflichtungen            | –47         | –46         |
| Aufzinsung sonstiger langfristiger Schulden                                                | –59         | –42         |
| Sonstige finanzielle Aufwendungen                                                          | –           | –13         |
| <b>Übrige finanzielle Aufwendungen</b>                                                     | <b>–930</b> | <b>–894</b> |
| <b>Finanzergebnis</b>                                                                      | <b>–388</b> | <b>–598</b> |

Das **Ergebnis aus Unternehmen, die nach der Equity-Methode einbezogen werden**, stieg im Jahr 2010 insbesondere auf Grund des höheren Ergebnisses der OAO Severneftegazprom.

Die **Zinserträge und Zinsaufwendungen** enthalten Aufwendungen und Erträge im Zusammenhang mit verzinslichen Verbindlichkeiten oder Geldanlagen einschließlich Dividendenerträgen aus Wertpapieren. Zusätzlich werden unter diesen Positionen die laufenden Zinsaufwendungen beziehungsweise Zinserträge aus Zins- und Währungsswaps mit Banken berücksichtigt. Das Zinsergebnis ist im Vergleich zum Vorjahr gesunken. Dies ist insbesondere auf den gestiegenen Zinsaufwand für die im Jahr 2009 begebenen Anleihen zurückzuführen.

**Sonstige finanzielle Erträge und sonstige finanzielle Aufwendungen** betreffen Gewinne oder Verluste aus der Umrechnung einzeln gesicherter finanzbedingter Forderungen und Verbindlichkeiten und des dazugehörigen Sicherungsinstruments. Zusätzlich wird unter diesen Positionen unter anderem der Aufwand beziehungsweise Ertrag aus der nach IFRS vorgeschriebenen Auf- und Abzinsung langfristiger Verbindlichkeiten und Forderungen ausgewiesen.

## 8 – Steueraufwand

| Millionen €                                                      | 2010         | 2009         |
|------------------------------------------------------------------|--------------|--------------|
| Körperschaftsteuer, Solidaritätszuschlag und Gewerbeertragsteuer | 616          | 207          |
| Ausländische Ertragsteuern                                       | 1.603        | 1.381        |
| Steuern für Vorjahre                                             | -147         | -31          |
| <b>Laufender Aufwand für Ertragsteuern</b>                       | <b>2.072</b> | <b>1.557</b> |
| Latenter Steueraufwand (+)/-ertrag (-)                           | 227          | -133         |
| <b>Steuern vom Einkommen und vom Ertrag</b>                      | <b>2.299</b> | <b>1.424</b> |
| davon Ertragsteuern für Ölförderung                              | 1.175        | 1.033        |
| Sonstige Steuern sowie Umsatz- und andere Verbrauchsteuern       | 284          | 238          |
| <b>Steueraufwand</b>                                             | <b>2.583</b> | <b>1.662</b> |

Das Ergebnis vor Ertragsteuern teilt sich auf das In- und Ausland wie folgt auf:

| Millionen €                                                           | 2010         | 2009         |
|-----------------------------------------------------------------------|--------------|--------------|
| Deutschland                                                           | 2.415        | 535          |
| Ausländische Betriebsstätten deutscher Gesellschaften zur Ölförderung | 1.277        | 1.115        |
| Ausland                                                               | 3.681        | 1.429        |
|                                                                       | <b>7.373</b> | <b>3.079</b> |

In Deutschland wird auf ausgeschüttete und auf einbehaltene Gewinne einheitlich eine Körperschaftsteuer von 15,0 % und darauf ein Solidaritätszuschlag von 5,5 % erhoben. Neben der Körperschaftsteuer ist für die in Deutschland erzielten Gewinne eine Gewerbeertragsteuer zu zahlen. Diese variiert in Abhängigkeit von der Kommune, in der das Unternehmen ansässig ist. Für das Jahr 2010 ergab sich ein gewichteter Durchschnittssatz von 12,8 %, im Jahr 2009 von 12,7 %. Der von den ausländischen Gruppengesellschaften erzielte Gewinn wird mit den im jeweiligen Sitzland geltenden Sätzen versteuert.

Für die Berechnung der latenten Steuern im Konzernabschluss sind latente Steueransprüche und -schulden anhand der Steuersätze zu bewerten, welche für die Periode gelten, in der ein Vermögenswert realisiert oder eine Schuld erfüllt wird.

Bei deutschen Gruppengesellschaften wurden die latenten Steuern einheitlich mit 29,0 % berechnet.

Bei ausländischen Gruppengesellschaften wurden die latenten Steuern mit den im jeweiligen Sitzland maßgeblichen Steuersätzen von durchschnittlich 23,1 % im Jahr 2010 und 26,3 % im Jahr 2009 ermittelt.

Ertragsteuern für die Ölförderung ausländischer Betriebsstätten können bis zur Höhe der auf diese ausländischen Einkommensteile entfallenden deutschen Körperschaftsteuer angerechnet werden. Der nicht anrechenbare Betrag wird in der folgenden Tabelle gesondert ausgewiesen. Die Berechnung der ausgewiesenen nicht anrechenbaren ausländischen Ertragsteuern für die Ölförderung von 983 Millionen € basiert auf dem Körperschaftsteuersatz von 15,0 %.

In den sonstigen Steuern waren Grundsteuer und andere vergleichbare Steuern von 99 Millionen € im Jahr 2010 und 103 Millionen € im Jahr 2009 enthalten. Sie sind den betrieblichen Funktionskosten zugeordnet.

Aus der Veränderung von Wertberichtigungen auf latente Steueransprüche für steuerliche Verlustvorträge resultierte ein Ertrag in Höhe von 4 Millionen € im Jahr 2010 und 22 Millionen € im Jahr 2009.

#### Überleitungsrechnung auf den effektiven Steueraufwand und die Steuerquote

|                                                                                        | 2010         |             | 2009         |             |
|----------------------------------------------------------------------------------------|--------------|-------------|--------------|-------------|
|                                                                                        | Millionen €  | %           | Millionen €  | %           |
| Ergebnis vor Ertragsteuern                                                             | 7.373        | –           | 3.079        | –           |
| Erwartete Körperschaftsteuer nach der Tarifbelastung in Deutschland (15 %)             | 1.106        | 15,0        | 462          | 15,0        |
| Solidaritätszuschlag                                                                   | 15           | 0,2         | 4            | 0,1         |
| Gewerbeertragsteuer                                                                    | 347          | 4,7         | 119          | 3,9         |
| Einfluss abweichender Steuersätze für Einkommen ausländischer Gruppengesellschaften    | 299          | 4,1         | 146          | 4,7         |
| Steuerfreie Erträge                                                                    | –137         | –1,9        | –90          | –2,9        |
| Steuerlich nicht abzugsfähige Aufwendungen                                             | 71           | 1,0         | 75           | 2,4         |
| Ergebnis von nach der Equity-Methode bilanzierten Beteiligungen (Nach-Steuer-Ergebnis) | –30          | –0,4        | –9           | –0,3        |
| Steuern für Vorjahre                                                                   | –147         | –2,0        | –31          | –1,0        |
| Nicht anrechenbare ausländische Ertragsteuern für die Ölförderung                      | 983          | 13,3        | 870          | 28,2        |
| Latente Steuerschulden für geplante Ausschüttungen von Gruppengesellschaften           | 77           | 1,1         | –19          | –0,6        |
| Sonstiges                                                                              | –285         | –3,9        | –103         | –3,3        |
| <b>Effektive Ertragsteuern/Steuerquote</b>                                             | <b>2.299</b> | <b>31,2</b> | <b>1.424</b> | <b>46,2</b> |

Für geplante Ausschüttungen von Gruppengesellschaften werden die zukünftig entstehenden Ertrag- und Quellensteuern als latente Steuerschulden abgegrenzt. Eine Zunahme der geplanten Ausschüttungen führte zu einem latenten Steueraufwand von 77 Millionen € im Jahr 2010.

Die endgültige Steuerveranlagung in der Region Nordamerika führte zu einem Steuerertrag für Vorjahre von 100 Millionen €.

#### Abgrenzungsposten für latente Steuern (Millionen €)

|                                                | Latente Steueransprüche |              | Latente Steuerschulden |              |
|------------------------------------------------|-------------------------|--------------|------------------------|--------------|
|                                                | 2010                    | 2009         | 2010                   | 2009         |
| Immaterielle Vermögenswerte                    | 209                     | 88           | 1.710                  | 1.405        |
| Sachanlagen                                    | 250                     | 245          | 2.163                  | 1.743        |
| Finanzanlagen                                  | 13                      | 9            | 116                    | 86           |
| Vorräte und Forderungen                        | 301                     | 256          | 504                    | 433          |
| Pensionsrückstellungen                         | 1.278                   | 902          | 529                    | 368          |
| Übrige Rückstellungen und Verbindlichkeiten    | 939                     | 622          | 38                     | 52           |
| Steuerliche Verlustvorträge                    | 794                     | 927          | –                      | –            |
| Sonstiges                                      | 293                     | 260          | 246                    | 133          |
| Saldierungen                                   | –2.839                  | –2.127       | –2.839                 | –2.127       |
| Wertberichtigungen auf latente Steueransprüche | –126                    | –140         | –                      | –            |
| davon auf steuerliche Verlustvorträge          | –86                     | –90          | –                      | –            |
| <b>Gesamt</b>                                  | <b>1.112</b>            | <b>1.042</b> | <b>2.467</b>           | <b>2.093</b> |
| davon kurzfristig                              | 507                     | 367          | 370                    | 314          |

Latente Steuern ergeben sich insbesondere aus temporären Abweichungen zwischen steuerbilanziellen Wertansätzen und den gemäß IFRS bilanzierten Vermögenswerten und Schulden sowie aus steuerlichen Verlustvorträgen. Durch die Neubewertung aller Vermögenswerte und Schulden im Rahmen von Akquisitionen gemäß IFRS 3 bestehen wesentliche Abweichungen

zwischen den anzusetzenden Zeitwerten und den Werten in der Steuerbilanz, die hauptsächlich zur Bilanzierung von latenten Steuerschulden führen.

Latente Steueransprüche wurden mit latenten Steuerschulden derselben Fristigkeit saldiert, sofern diese sich gegen dieselbe Steuerbehörde richten.

Für nicht ausgeschüttete Gewinne von Tochtergesellschaften in Höhe von 3.576 Millionen € im Jahr 2010 sowie 6.561 Millionen € im Jahr 2009 wurden keine latenten Steuerschulden angesetzt, da diese Gewinne bei Ausschüttung keiner entsprechenden Besteuerung unterliegen oder auf unbestimmte Zeit reinvestiert werden sollen.

Die steuerlichen Verlustvorräte teilen sich regional wie folgt auf:

#### Steuerliche Verlustvorräte (Millionen €)

|             | Steuerliche Verlustvorräte |              | Latente Steueransprüche |            |
|-------------|----------------------------|--------------|-------------------------|------------|
|             | 2010                       | 2009         | 2010                    | 2009       |
| Deutschland | 19                         | 14           | 3                       | 9          |
| Ausland     | 3.004                      | 3.161        | 705                     | 828        |
|             | <b>3.023</b>               | <b>3.175</b> | <b>708</b>              | <b>837</b> |

Steuerliche Verluste können in Deutschland auf unbestimmte Zeit vorgetragen werden. Im Ausland bestehen Verlustvorräte vor allem in der Region Nordamerika. Sie verfallen dort erst ab

dem Jahr 2021. Im Jahr 2010 konnten die steuerlichen Verlustvorräte in der Region Nordamerika durch das hohe Ergebnis abgebaut werden. Für steuerliche Verlustvorräte von 78 Millionen €, im Vorjahr 74 Millionen €, wurden Wertberichtigungen aufgelöst.

Steuerschulden umfassen Steuerverbindlichkeiten und kurzfristige Steuerrückstellungen. Steuerverbindlichkeiten betreffen überwiegend veranlagte Ertragsteuern und sonstige Steuern. Steuerrückstellungen umfassen noch nicht veranlagte Ertragsteuern des laufenden Jahres und für Vorjahre.

#### Steuerschulden (Millionen €)

|                         | 2010         | 2009         |
|-------------------------|--------------|--------------|
| Steuerrückstellungen    | 499          | 431          |
| Steuerverbindlichkeiten | 641          | 572          |
|                         | <b>1.140</b> | <b>1.003</b> |

## 9 – Anteile anderer Gesellschafter

| Millionen €    | 2010       | 2009       |
|----------------|------------|------------|
| Gewinnanteile  | 517        | 259        |
| Verlustanteile | –          | 14         |
|                | <b>517</b> | <b>245</b> |

Gewinnanteile entstanden vor allem bei den im Erdgashandel tätigen Gesellschaften sowie aus der Beteiligung von Gazprom an einer Wintershall-Gesellschaft, die Produktions- und Explorationsrechte in Libyen hält. Höhere Gewinnanteile anderer Gesellschafter als im Vorjahr fielen insbesondere bei BASF PETRONAS Chemicals Sdn. Bhd., Malaysia, und bei BASF FINA Petrochemicals Ltd. Partnership, USA, an.

→ Mehr zu den Minderheitsanteilen an konsolidierten Gesellschaften unter Anmerkung 19 auf Seite 176

## 10 – Sonstige Angaben

### Erklärung nach § 161 AktG

Die jährliche Entsprechenserklärung zum Deutschen Corporate Governance Kodex gemäß § 161 AktG wurde von Vorstand und Aufsichtsrat der BASF SE am 16. Dezember 2010 abgegeben und ist im Internet veröffentlicht unter:

→ [basf.com/governance\\_d](http://basf.com/governance_d)

### Personalstand

Zum 31. Dezember 2010 betrug der Personalstand 109.140 Mitarbeiter und zum 31. Dezember 2009 104.779 Mitarbeiter. Der Anstieg im Vergleich zum Vorjahr resultiert im Wesentlichen aus der Akquisition der Cognis.

Die Personalzahl der anteilmäßig konsolidierten Unternehmen ist in der Aufstellung in voller Höhe ausgewiesen. Bei anteiliger Berücksichtigung ergibt sich ein durchschnittlicher Personalstand der BASF-Gruppe im Jahr 2010 von 104.043 Mitarbeitern und im Jahr 2009 von 103.612 Mitarbeitern.

### Personalaufwand

Der Personalaufwand ist um 15,8 % von 7.107 Millionen € im Jahr 2009 auf 8.228 Millionen € im Jahr 2010 gestiegen. Dies resultierte neben der Akquisition der Ciba Holding AG insbesondere aus höheren Aufwendungen für Rückstellungen für das aktienkursbasierte Vergütungsprogramm (Long-Term-Incentive-Programm) sowie für erfolgsabhängige Entgeltbestandteile.

**Personalaufwand** (Millionen €)

|                                                                             | 2010         | 2009         |
|-----------------------------------------------------------------------------|--------------|--------------|
| Löhne und Gehälter                                                          | 6.731        | 5.942        |
| Soziale Abgaben und Aufwendungen für Altersversorgung und für Unterstützung | 1.497        | 1.165        |
| davon für Altersversorgung                                                  | 408          | 178          |
|                                                                             | <b>8.228</b> | <b>7.107</b> |

**Durchschnittlicher Personalstand** <sup>1</sup>

|                                 | Vollkonsolidierte Unternehmen |         | Anteilmäßig konsolidierte Unternehmen |       | BASF-Gruppe |         |
|---------------------------------|-------------------------------|---------|---------------------------------------|-------|-------------|---------|
|                                 | 2010                          | 2009    | 2010                                  | 2009  | 2010        | 2009    |
| Europa                          | 66.772                        | 66.310  | 431                                   | 431   | 67.203      | 66.741  |
| davon Deutschland               | 48.620                        | 48.180  | 16                                    | 19    | 48.636      | 48.199  |
| Nordamerika                     | 15.517                        | 15.822  | 476                                   | 460   | 15.993      | 16.282  |
| Asien, Pazifischer Raum         | 13.776                        | 13.788  | 2.137                                 | 1.993 | 15.913      | 15.781  |
| Südamerika, Afrika, Naher Osten | 6.456                         | 6.250   | –                                     | –     | 6.456       | 6.250   |
| BASF-Gruppe                     | 102.521                       | 102.170 | 3.044                                 | 2.884 | 105.565     | 105.054 |
| davon mit Ausbildungsverträgen  | 2.113                         | 2.097   | 3                                     | 1     | 2.116       | 2.098   |
| zeitlich befristet Beschäftigte | 2.214                         | 2.129   | 105                                   | 37    | 2.319       | 2.166   |

<sup>1</sup> Die regionale Zuordnung einiger mittelamerikanischer Länder wurde geändert, Vorjahreswerte wurden entsprechend angepasst.

## 11 – Kapitalflussrechnung und Kapitalstrukturmanagement

### Ergänzende Angaben zum Cashflow

In den Cashflows aus Finanzierungstätigkeit und laufender Geschäftstätigkeit wurde 2010 eine Ausweisänderung vorgenommen. Zur Finanzierung des Geschäfts in Nordamerika werden im Rahmen von Sicherungsgeschäften mit Banken Euro in US-Dollar getauscht. Bei der regelmäßigen Verlängerung dieser Geschäfte ergeben sich durch die Entwicklung des US-Dollar-Kurses Zuflüsse oder Abflüsse in Euro. Diese Zahlungen waren bis 2009 Bestandteil des Cashflows aus laufender Geschäftstätigkeit und werden nunmehr im Posten Veränderung Finanzverbindlichkeiten im Cashflow aus Finanzierungstätigkeit ausgewiesen.

Die Ausweisänderung wurde wegen der nachhaltig gestiegenen Volatilität an den Devisenmärkten vorgenommen. Mit dem Ausweis von Währungseffekten bei Finanzverbindlichkeiten im Cashflow aus Finanzierungstätigkeit wird die Transparenz in der Kapitalflussrechnung erhöht.

Im Rahmen dieser Ausweisänderung wurden die Werte des Vorjahres entsprechend angepasst. Dadurch vermindert sich der Ausweis des Cashflows aus laufender Geschäftstätigkeit um 577 Millionen € zu Gunsten des Cashflows aus Finanzierungstätigkeit. Der Effekt im Jahr 2010 beläuft sich auf 382 Millionen €, um die sich der Cashflow aus laufender Geschäftstätigkeit im Vergleich zur bisherigen Zuordnung verbesserte.

Im Cashflow aus laufender Geschäftstätigkeit sind folgende Zahlungen enthalten:

| Millionen €           | 2010  | 2009  |
|-----------------------|-------|-------|
| Ertragsteuerzahlungen | 2.051 | 1.650 |
| Zinszahlungen         | 639   | 522   |
| Erhaltene Dividenden  | 75    | 93    |

Die Zinszahlungen beinhalten 106 Millionen € (2009: 98 Millionen €) erhaltene und 745 Millionen € (2009: 620 Millionen €) gezahlte Zinsen.

### Kapitalstrukturmanagement

Ziel des Kapitalstrukturmanagements ist es, finanzwirtschaftlich hinreichend flexibel zu bleiben, um das Geschäftsportfolio kontinuierlich weiterentwickeln und strategische Optionen wahrnehmen zu können. Ziele der Finanzierungspolitik sind die Sicherung der Liquidität, die Begrenzung finanzwirtschaftlicher Risiken sowie die Optimierung der Kapitalkosten durch eine adäquate Kapitalstruktur. Die Ausgestaltung der Kapitalstruktur orientiert sich am operativen Geschäft und an der strategischen Ausrichtung des Unternehmens.



Das Kapitalstrukturmanagement der BASF folgt der bilanziellen Eigenkapitaldefinition. Die Kapitalstruktur wird im Rahmen der Finanzplanung unter Berücksichtigung ausgewählter Finanzkennzahlen gesteuert. Das bilanzielle Eigenkapital der BASF betrug zum 31. Dezember 2010 22.657 Millionen € und zum 31. Dezember 2009 18.609 Millionen €, die Eigenkapitalquote belief sich am 31. Dezember 2010 auf 38,1 % nach 36,3 % zum 31. Dezember 2009.

Fremdkapital nimmt BASF bevorzugt über Kapitalmärkte auf. Zur kurzfristigen Finanzierung wird ein Commercial-Paper-Programm genutzt, während zur mittel- und langfristigen Finanzierung Unternehmensanleihen, die in Euro und anderen Währungen mit unterschiedlichen Laufzeiten begeben werden, zum Einsatz kommen. Dadurch wird ein ausgewogenes Fälligkeitsprofil und eine Diversifikation der Investoren erreicht.

BASF verfügt derzeit über folgende Ratings:

|                             | 31.12.2010 |                   | 31.12.2009 |                   |
|-----------------------------|------------|-------------------|------------|-------------------|
|                             | Moody's    | Standard & Poor's | Moody's    | Standard & Poor's |
| Langfristige Finanzschulden | A1         | A                 | A1         | A+                |
| Kurzfristige Finanzschulden | P-1        | A-1               | P-1        | A-1               |
| Ausblick                    | negativ    | stabil            | stabil     | negativ           |

Moody's hat das langfristige Rating im November 2010 mit A1 bestätigt, jedoch mit einem negativen Ausblick versehen. Nach der Bekanntgabe der Akquisition von Cognis im Juni 2010 hat Standard & Poor's das langfristige Rating der BASF um eine Stufe auf „A“ gesenkt, der Ausblick wurde heraufgesetzt auf stabil. Das kurzfristige Rating der BASF haben beide Agenturen bestätigt.

BASF strebt weiterhin ein solides A-Rating an, das einen uneingeschränkten Kapitalmarktzugang gewährleistet.

## 12 – Immaterielle Vermögenswerte

Die **Geschäfts- oder Firmenwerte** der BASF sind 31 zahlungsmittelgenerierenden Einheiten zugeordnet, die auf Basis der Geschäftseinheiten oder einer übergeordneten Ebene definiert wurden. Der im Jahr 2010 im Rahmen der Cognis-Akquisition zugegangene Geschäfts- oder Firmenwert in Höhe von 589 Millionen € wurde zahlungsmittelgenerierenden Einheiten in den Unternehmensbereichen Care Chemicals, Nutrition & Health und Performance Chemicals zugeordnet.

Die jährlichen Werthaltigkeitsprüfungen erfolgten im vierten Quartal auf Basis der zahlungsmittelgenerierenden Einheiten. Der erzielbare Betrag wurde dabei unter Verwendung des Nutzungswertes bestimmt. Dabei wurden von der Unternehmensführung genehmigte Planungen für die nächsten fünf Jahre verwendet. Die Zahlungsströme nach dem Planungszeitraum basieren auf dem letzten detailliert geplanten Geschäftsjahr, welches mit Hilfe einer langfristigen Wachstumsrate fortgeschrieben wird. Die Planungen beruhen auf gesammelten Erfahrungen, den aktuellen Geschäftsergebnissen und der bestmöglichen Schätzung der Unternehmensführung zur zukünftigen Entwicklung einzelner Einflussfaktoren wie Rohstoffpreise, Gewinnmargen und andere. Marktannahmen, wie zum Beispiel Konjunkturverlauf und Marktwachstum, werden unter Berücksichtigung externer makroökonomischer und industriespezifischer Quellen mit einbezogen.

Der für die Werthaltigkeitsprüfungen erforderliche gewichtete Kapitalkostensatz nach Steuern wird unter Verwendung des Capital Asset Pricing Model bestimmt. Dessen Komponenten sind ein risikofreier Zins, die Marktrisikoprämie sowie ein Zuschlag für das Kreditrisiko (Spread). Die Ermittlung berück-

sichtigt ebenfalls die Schwankungen der BASF-Aktie im Vergleich zum Kapitalmarkt (Beta) und die Kapitalstruktur der BASF-Gruppe sowie den durchschnittlichen Steuersatz jeder zahlungsmittelgenerierenden Einheit.

Der wesentliche Teil des Geschäfts- oder Firmenwertes in Höhe von insgesamt 5.873 Millionen € (2009: 5.069 Millionen €) ist den folgenden zahlungsmittelgenerierenden Einheiten zuzuordnen: Der Geschäfts- oder Firmenwert des Unternehmensbereichs Crop Protection im Segment Agricultural Solutions beläuft sich auf 1.394 Millionen € (2009: 1.366 Millionen €). Geschäfts- oder Firmenwerte in Höhe von 1.342 Millionen € (2009: 1.253 Millionen €) und von 685 Millionen € (2009: 627 Millionen €) betreffen die Unternehmensbereiche Catalysts und Construction Chemicals im Segment Functional Solutions. Geschäfts- oder Firmenwerte in Höhe von 389 Millionen € (2009: 389 Millionen €) sind dem Segment Oil & Gas zuzuordnen.

Die Werthaltigkeitsprüfungen wurden unter der Annahme gewichteter Kapitalkostensätze von 6,96 % bis 7,28 % (2009: 7,15 % bis 7,64 %) und langfristiger Wachstumsraten von 0,0 % bis 2,0 % (2009: 0,0 % bis 2,0 %) durchgeführt. Bei der Bestimmung der Nutzungswerte der zahlungsmittelgenerierenden Einheiten geht BASF davon aus, dass Veränderungen der wesentlichen Annahmen, die als möglich einzustufen sind, nicht dazu führen würden, dass die Buchwerte der Einheiten deren erzielbare Beträge übersteigen.

Im Jahr 2010 ergaben sich aus den Werthaltigkeitsprüfungen keine Wertminderungen der Geschäfts- oder Firmenwerte. Im Jahr 2009 wurden Wertminderungen in Höhe von 220 Millionen € vorgenommen.

## Entwicklung der immateriellen Vermögenswerte 2010 (Millionen €)

|                                             | Vertriebs-<br>und ähnliche<br>Rechte | Produktrechte,<br>Lizenzen und<br>Trademarks | Know-how,<br>Patente und<br>Produktions-<br>technologie | Selbst-<br>geschaffene<br>immaterielle<br>Vermögens-<br>werte | Sonstige<br>Rechte und<br>Werte <sup>1</sup> | Geschäfts-<br>oder Firmen-<br>werte | Gesamt        |
|---------------------------------------------|--------------------------------------|----------------------------------------------|---------------------------------------------------------|---------------------------------------------------------------|----------------------------------------------|-------------------------------------|---------------|
| <b>Anschaftungs- und Herstellungskosten</b> |                                      |                                              |                                                         |                                                               |                                              |                                     |               |
| Stand am 01.01.2010                         | 3.822                                | 1.666                                        | 1.761                                                   | 128                                                           | 857                                          | 5.069                               | 13.303        |
| Veränderungen des Konsolidierungskreises    | 34                                   | –                                            | –39                                                     | –                                                             | 2                                            | –                                   | –3            |
| Zugänge                                     | 809                                  | 93                                           | 434                                                     | 15                                                            | 70                                           | 589                                 | 2.010         |
| Abgänge                                     | –71                                  | –90                                          | –184                                                    | –55                                                           | –190                                         | –                                   | –590          |
| Umbuchungen                                 | –50                                  | 12                                           | –58                                                     | –7                                                            | 45                                           | –22                                 | –80           |
| Umrechnungsbedingte Wertänderungen          | 247                                  | 18                                           | 53                                                      | 2                                                             | 35                                           | 237                                 | 592           |
| Stand am 31.12.2010                         | 4.791                                | 1.699                                        | 1.967                                                   | 83                                                            | 819                                          | 5.873                               | 15.232        |
| <b>Abschreibungen</b>                       |                                      |                                              |                                                         |                                                               |                                              |                                     |               |
| Stand am 01.01.2010                         | 881                                  | 603                                          | 723                                                     | 87                                                            | 560                                          | –                                   | 2.854         |
| Veränderungen des Konsolidierungskreises    | –6                                   | –2                                           | –63                                                     | –                                                             | –1                                           | –                                   | –72           |
| Zugänge                                     | 313                                  | 136                                          | 167                                                     | 17                                                            | 70                                           | –                                   | 703           |
| Abgänge                                     | –69                                  | –86                                          | –183                                                    | –55                                                           | –185                                         | –                                   | –578          |
| Umbuchungen                                 | –32                                  | 30                                           | –28                                                     | –3                                                            | 2                                            | –                                   | –31           |
| Umrechnungsbedingte Wertänderungen          | 53                                   | 12                                           | 19                                                      | 1                                                             | 26                                           | –                                   | 111           |
| Stand am 31.12.2010                         | 1.140                                | 693                                          | 635                                                     | 47                                                            | 472                                          | –                                   | 2.987         |
| <b>Nettobuchwert am 31.12.2010</b>          | <b>3.651</b>                         | <b>1.006</b>                                 | <b>1.332</b>                                            | <b>36</b>                                                     | <b>347</b>                                   | <b>5.873</b>                        | <b>12.245</b> |

<sup>1</sup> Inklusive Lizenzen an solchen Rechten und Werten

Im Rahmen der Cognis-Akquisition und der damit verbundenen vorläufigen Kaufpreisaufteilung gingen im Jahr 2010 Produktionstechnologien, Marken, Kundenbeziehungen sowie weitere immaterielle Werte in Höhe von 1.301 Millionen € und ein Geschäfts- oder Firmenwert in Höhe von 589 Millionen € zu.

Konzessionen für die Öl- und Gasförderung mit einem Nettobuchwert in Höhe von 350 Millionen € im Jahr 2010 und 453 Millionen € im Jahr 2009 berechtigen zur Suche nach und Förderung von Öl und Gas in bestimmten Gebieten. Diese Rechte bedingen in geringem Umfang auch Verpflichtungen zur Lieferung eines Teils der Fördermenge an lokale Unternehmen. Nach Ende der Laufzeit einer Konzession werden die Rechte zurückgegeben.

Im Jahr 2010 wurden Wertminderungen in Höhe von 74 Millionen € vorgenommen. Wertminderungen werden unter den Sonstigen betrieblichen Aufwendungen ausgewiesen. Ein wesentlicher Anteil der Wertminderungen betraf Konzessionen für die Öl- und Gasförderung in der britischen und norwegischen Nordsee sowie immaterielle Werte aus der Ciba-Akquisition im Jahr 2009.

Die in den Umbuchungen ausgewiesenen Beträge resultierten überwiegend aus der Umstufung von immateriellen Vermögenswerten in zur Veräußerung gehaltene Vermögenswerte.

→ **Details zur Veräußerungsgruppe unter Anmerkung 2 auf Seite 156**

In den Sonstigen Rechten und Werten sind unter Umbuchungen die Marktwertanpassungen von Emissionsrechten zum Bilanzstichtag enthalten.

Die Veränderungen des Konsolidierungskreises betrafen überwiegend die erstmalige quotalle Einbeziehung der N.E. Chemcat Corporation, Tokio/Japan, sowie das Ausscheiden der BASF Fuel Cell, Frankfurt am Main, aus dem Konsolidierungskreis.

Wesentliche Zuschreibungen wurden im Jahr 2010 nicht vorgenommen.

## Entwicklung der immateriellen Vermögenswerte 2009 (Millionen €)

|                                             | Vertriebs-<br>und ähnliche<br>Rechte | Produktrechte,<br>Lizenzen und<br>Trademarks | Know-how,<br>Patente und<br>Produktions-<br>technologie | Selbst-<br>geschaffene<br>immaterielle<br>Vermögens-<br>werte | Sonstige<br>Rechte und<br>Werte <sup>1</sup> | Geschäfts-<br>oder Firmen-<br>werte | Gesamt        |
|---------------------------------------------|--------------------------------------|----------------------------------------------|---------------------------------------------------------|---------------------------------------------------------------|----------------------------------------------|-------------------------------------|---------------|
| <b>Anschaffungs- und Herstellungskosten</b> |                                      |                                              |                                                         |                                                               |                                              |                                     |               |
| Stand am 01.01.2009                         | 3.366                                | 1.518                                        | 1.632                                                   | 133                                                           | 1.011                                        | 4.748                               | 12.408        |
| Veränderungen des Konsolidierungskreises    | 1                                    | -2                                           | -                                                       | -                                                             | -                                            | -                                   | -1            |
| Zugänge                                     | 605                                  | 185                                          | 233                                                     | 12                                                            | 240                                          | 571                                 | 1.846         |
| Abgänge                                     | -58                                  | -14                                          | -111                                                    | -16                                                           | -375                                         | -222                                | -796          |
| Umbuchungen                                 | -                                    | -15                                          | 12                                                      | -                                                             | -32                                          | -7                                  | -42           |
| Umrechnungsbedingte Wertänderungen          | -92                                  | -6                                           | -5                                                      | -1                                                            | 13                                           | -21                                 | -112          |
| Stand am 31.12.2009                         | 3.822                                | 1.666                                        | 1.761                                                   | 128                                                           | 857                                          | 5.069                               | 13.303        |
| <b>Abschreibungen</b>                       |                                      |                                              |                                                         |                                                               |                                              |                                     |               |
| Stand am 01.01.2009                         | 668                                  | 519                                          | 641                                                     | 82                                                            | 609                                          | -                                   | 2.519         |
| Veränderungen des Konsolidierungskreises    | 1                                    | -                                            | -                                                       | -                                                             | -                                            | -                                   | 1             |
| Zugänge                                     | 267                                  | 96                                           | 192                                                     | 20                                                            | 302                                          | 220                                 | 1.097         |
| Abgänge                                     | -49                                  | -7                                           | -108                                                    | -15                                                           | -366                                         | -220                                | -765          |
| Umbuchungen                                 | -                                    | -1                                           | -                                                       | -                                                             | 1                                            | -                                   | -             |
| Umrechnungsbedingte Wertänderungen          | -6                                   | -4                                           | -2                                                      | -                                                             | 14                                           | -                                   | 2             |
| Stand am 31.12.2009                         | 881                                  | 603                                          | 723                                                     | 87                                                            | 560                                          | -                                   | 2.854         |
| <b>Nettobuchwert am 31.12.2009</b>          | <b>2.941</b>                         | <b>1.063</b>                                 | <b>1.038</b>                                            | <b>41</b>                                                     | <b>297</b>                                   | <b>5.069</b>                        | <b>10.449</b> |

<sup>1</sup> Inklusive Lizenzen an solchen Rechten und Werten

Im Rahmen der Akquisition der Ciba und der damit verbundenen vorläufigen Kaufpreisaufteilung gingen im Jahr 2009 Produktionstechnologien, Marken, Kundenbeziehungen sowie weitere immaterielle Werte in Höhe von 1.095 Millionen € und Geschäfts- oder Firmenwert in Höhe von 571 Millionen € zu.

Im Jahr 2009 wurden Wertminderungen in Höhe von 500 Millionen € vorgenommen. Diese sind als Abschreibungen in der Entwicklung des immateriellen Vermögens ausgewiesen. Ein wesentlicher Anteil der Wertminderungen in Höhe von 220 Millionen € betraf Wertminderungen der Geschäfts- oder Firmenwerte. Des Weiteren wurde eine Wertminderung für das SAP-System der Ciba in Höhe von 176 Millionen € vorgenommen. Die Schließung der Fuel Cell Aktivitäten in Frankfurt führte zu Wertminderungen des Know-hows, der Technologien sowie der Markenrechte in Höhe von insgesamt 47 Millionen €.

Wertminderungen werden unter den Sonstigen betrieblichen Aufwendungen ausgewiesen.

Die Abgänge der Geschäfts- oder Firmenwerte beziehen sich auf die Wertminderungen des Jahres 2009. Die in den Umbuchungen ausgewiesenen Beträge resultierten überwiegend aus der Anpassung der vorläufigen Kaufpreisallokationen der Akquisitionen der Revus sowie der Sorex des Geschäftsjahres 2008. In den Sonstigen Rechten und Werten sind unter Umbuchungen die Marktwertanpassungen von Emissionsrechten zum Bilanzstichtag enthalten.

Wesentliche Zuschreibungen wurden im Jahr 2009 nicht vorgenommen.

## 13 – Sachanlagen

### Entwicklung der Sachanlagen 2010 (Millionen €)

|                                                 | Grundstücke,<br>grundstücks-<br>gleiche Rechte<br>und Bauten | Technische<br>Anlagen und<br>Maschinen | Andere Anla-<br>gen, Betriebs-<br>und Geschäfts-<br>ausstattung | Anlagen<br>im Bau | Gesamt        |
|-------------------------------------------------|--------------------------------------------------------------|----------------------------------------|-----------------------------------------------------------------|-------------------|---------------|
| <b>Anschaffungs- und<br/>Herstellungskosten</b> |                                                              |                                        |                                                                 |                   |               |
| Stand am 01.01.2010                             | 8.071                                                        | 38.833                                 | 2.936                                                           | 2.103             | 51.943        |
| Veränderungen des Konsolidierungskreises        | 34                                                           | -2                                     | 21                                                              | -7                | 46            |
| Zugänge                                         | 368                                                          | 983                                    | 142                                                             | 1.801             | 3.294         |
| Abgänge                                         | -57                                                          | -464                                   | -107                                                            | -36               | -664          |
| Umbuchungen                                     | 96                                                           | -507                                   | -28                                                             | -857              | -1.296        |
| Umrechnungsbedingte Wertänderungen              | 281                                                          | 1.006                                  | 81                                                              | 41                | 1.409         |
| Stand am 31.12.2010                             | 8.793                                                        | 39.849                                 | 3.045                                                           | 3.045             | 54.732        |
| <b>Abschreibungen</b>                           |                                                              |                                        |                                                                 |                   |               |
| Stand am 01.01.2010                             | 4.561                                                        | 28.725                                 | 2.359                                                           | 13                | 35.658        |
| Veränderungen des Konsolidierungskreises        | 14                                                           | -20                                    | 17                                                              | -7                | 4             |
| Zugänge                                         | 276                                                          | 2.192                                  | 199                                                             | -                 | 2.667         |
| Abgänge                                         | -26                                                          | -399                                   | -98                                                             | -                 | -523          |
| Umbuchungen                                     | -12                                                          | -1.057                                 | -56                                                             | -                 | -1.125        |
| Umrechnungsbedingte Wertänderungen              | 105                                                          | 645                                    | 61                                                              | -1                | 810           |
| Stand am 31.12.2010                             | 4.918                                                        | 30.086                                 | 2.482                                                           | 5                 | 37.491        |
| <b>Nettobuchwert am 31.12.2010</b>              | <b>3.875</b>                                                 | <b>9.763</b>                           | <b>563</b>                                                      | <b>3.040</b>      | <b>17.241</b> |

Die Zugänge bei Sachanlagen resultierten im Jahr 2010 insbesondere aus Zugängen im Rahmen der Akquisition der Cognis und der damit verbundenen vorläufigen Kaufpreisaufteilung. Die Zugänge zum Anlagevermögen aus der Akquisition beliefen sich auf 833 Millionen €. Weitere Investitionen betrafen im Jahr 2010 insbesondere die Erweiterung der Ecoflex/Ecovio-Anlage in Ludwigshafen, den Bau von Erdgaspipelines in Europa (insbesondere OPAL und NEL), Erweiterungsmaßnahmen am Standort Nanjing/China, den Bau einer Oleum/Schwefelsäure-Anlage in Antwerpen/Belgien sowie einer Produktionsanlage für Methylamine in Geismar/Louisiana. Die in den Umbuchungen ausgewiesenen Beträge resultierten insbesondere aus der Umstufung ausgewählter Sachanlagen des Styrolkunststoff-geschäfts in zur Veräußerung gehaltene Vermögenswerte.

→ Mehr zur Veräußerungsgruppe unter Anmerkung 2 auf Seite 156

Im Jahr 2010 wurden Wertminderungen in Höhe von 128 Millionen € erfasst. Im Zusammenhang mit der Restrukturierung der im Jahr 2009 akquirierten Ciba wurden Wertminderungen in Höhe von 68 Millionen € erfasst, insbesondere an unserem Standort in Grenzach.

Die Veränderungen des Konsolidierungskreises betrafen überwiegend die erstmalige quotalle Einbeziehung der N.E. Chemcat Corporation, Tokio/Japan.

Eine im Jahr 2008 erfasste Wertminderung unseres Standorts Altamira/Mexiko wurde im Jahr 2010 infolge der deutlich verbesserten Geschäftsentwicklung wieder zugeschrieben. Diese Zuschreibung in Höhe von 40 Millionen € ist in den Umbuchungen enthalten.

## Entwicklung der Sachanlagen 2009 (Millionen €)

|                                                 | Grundstücke,<br>grundstücks-<br>gleiche Rechte<br>und Bauten | Technische<br>Anlagen und<br>Maschinen | Andere Anla-<br>gen, Betriebs-<br>und Geschäfts-<br>ausstattung | Anlagen<br>im Bau | Gesamt        |
|-------------------------------------------------|--------------------------------------------------------------|----------------------------------------|-----------------------------------------------------------------|-------------------|---------------|
| <b>Anschaffungs- und<br/>Herstellungskosten</b> |                                                              |                                        |                                                                 |                   |               |
| Stand am 01.01.2009                             | 7.470                                                        | 36.979                                 | 2.817                                                           | 1.881             | 49.147        |
| Veränderungen des Konsolidierungskreises        | -7                                                           | -3                                     | 1                                                               | -                 | -9            |
| Zugänge                                         | 633                                                          | 1.653                                  | 172                                                             | 1.668             | 4.126         |
| Abgänge                                         | -167                                                         | -746                                   | -115                                                            | -26               | -1.054        |
| Umbuchungen                                     | 163                                                          | 1.123                                  | 75                                                              | -1.399            | -38           |
| Umrechnungsbedingte Wertänderungen              | -21                                                          | -173                                   | -14                                                             | -21               | -229          |
| Stand am 31.12.2009                             | 8.071                                                        | 38.833                                 | 2.936                                                           | 2.103             | 51.943        |
| <b>Abschreibungen</b>                           |                                                              |                                        |                                                                 |                   |               |
| Stand am 01.01.2009                             | 4.427                                                        | 27.357                                 | 2.325                                                           | 6                 | 34.115        |
| Veränderungen des Konsolidierungskreises        | -12                                                          | -6                                     | -                                                               | -                 | -18           |
| Zugänge                                         | 281                                                          | 2.142                                  | 183                                                             | 8                 | 2.614         |
| Abgänge                                         | -128                                                         | -695                                   | -105                                                            | -1                | -929          |
| Umbuchungen                                     | -2                                                           | 27                                     | -34                                                             | -                 | -9            |
| Umrechnungsbedingte Wertänderungen              | -5                                                           | -100                                   | -10                                                             | -                 | -115          |
| Stand am 31.12.2009                             | 4.561                                                        | 28.725                                 | 2.359                                                           | 13                | 35.658        |
| <b>Nettobuchwert am 31.12.2009</b>              | <b>3.510</b>                                                 | <b>10.108</b>                          | <b>577</b>                                                      | <b>2.090</b>      | <b>16.285</b> |

Im Rahmen der Akquisition der Ciba und der damit verbundenen Kaufpreisaufteilung ist im Jahr 2009 Anlagevermögen im Wert von 1.766 Millionen € zugegangen. Darüber hinaus tätigten wir im Jahr 2009 vor allem Erweiterungsinvestitionen an unserem Standort Ludwigshafen, insbesondere in die Synthesegas-Anlage, den Bau der Anlage zur Herstellung von Cyclo-dodecanon sowie die Kapazitätserweiterung der Ecoflex/Eco-vio-Anlage und den Anschluss an die Propylenpipeline. Weiterhin wurden Investitionen in die Harz-Anlage in Wyandotte/Michigan, die Polyol-Anlage in Geismar/Louisiana, den Neubau der Oleum/Schwefelsäure-Anlage und der Deacon-Anlage in Antwerpen/Belgien sowie den Bau der OPAL-Erdgasleitung und die Entwicklung von Erdgasfeldern in Norwegen getätigt.

Insgesamt wurden 106 Millionen € Wertminderungen erfasst. Wertminderungen in Höhe von 67 Millionen € im Jahr 2009 fielen im Rahmen der Restrukturierung der akquirierten Ciba-Standorte an und wurden im Wesentlichen als Sondereinfluss im Segment Performance Products ausgewiesen.

Weitere Wertminderungen wurden im Segment Chemicals für Restrukturierungen an den Standorten Feluy/Belgien und Frankfurt/Deutschland sowie im Segment Functional Solutions am Standort Nanjing/China ausgewiesen.

## 14 – At Equity bewertete Beteiligungen und sonstige Finanzanlagen

### At Equity bewertete Beteiligungen (Millionen €)

|                                          | 2010         | 2009         |
|------------------------------------------|--------------|--------------|
| <b>Fortgeführte Anschaffungskosten</b>   |              |              |
| Stand am 01.01.                          | 1.340        | 1.196        |
| Veränderungen des Konsolidierungskreises | –280         | –7           |
| Zugänge                                  | 93           | 161          |
| Abgänge                                  | –84          | –50          |
| Umbuchungen/Marktwertänderung            | 219          | 40           |
| Umrechnungsbedingte Wertänderungen       | 40           | –            |
| Stand am 31.12.                          | 1.328        | 1.340        |
| <b>Abschreibungen</b>                    |              |              |
| Stand am 01.01.                          | –            | 50           |
| Veränderungen des Konsolidierungskreises | –            | –            |
| Zugänge                                  | –            | –            |
| Abgänge                                  | –            | –50          |
| Umbuchungen/Marktwertänderung            | –            | –            |
| Umrechnungsbedingte Wertänderungen       | –            | –            |
| Stand am 31.12.                          | –            | –            |
| <b>Nettobuchwert am 31.12.</b>           | <b>1.328</b> | <b>1.340</b> |

### Sonstige Finanzanlagen (Millionen €)

|                                             | 2010         | 2009         |
|---------------------------------------------|--------------|--------------|
| Anteile an übrigen verbundenen Unternehmen  | 309          | 276          |
| Anteile an übrigen assoziierten Unternehmen | 86           | 86           |
| Anteile an übrigen Beteiligungen            | 1.277        | 965          |
| <b>Beteiligungen</b>                        | <b>1.672</b> | <b>1.327</b> |
| Ausleihungen an verbundene Unternehmen      | 20           | 13           |
| Ausleihungen an assoziierte Unternehmen     | 105          | 215          |
| Sonstige Ausleihungen                       | 119          | 37           |
| <b>Ausleihungen</b>                         | <b>244</b>   | <b>265</b>   |
| Langfristige Wertpapiere                    | 37           | 27           |
|                                             | <b>1.953</b> | <b>1.619</b> |

Bei den Zugängen der at Equity bewerteten Beteiligungen im Jahr 2010 handelt es sich um eine Kapitalerhöhung bei der Nord Stream AG. Die Abgänge im Jahr 2010 resultierten aus der Aufnahme von GDF Suez Holding Switzerland AG als weiteren Partner an der Nord Stream AG. BASF (Anteil: 15,5 %) übt weiterhin einen maßgeblichen Einfluss auf die Nord Stream AG aus, da bei relevanten Gremienentscheidungen eine Zustimmung der BASF erforderlich ist. Die Abgänge aus dem Konsolidierungskreis im Jahr 2010 beinhalten den Anteil an der N.E. Chemcat Corporation, da die Gesellschaft nach der Erhöhung der Anteile im Jahr 2010 quotal konsolidiert wird.

Im Jahr 2009 resultierten die Zugänge bei at Equity bewerteten Beteiligungen im Wesentlichen aus den Kapitalerhöhungen bei der Nord Stream AG und der OAO Severneftegazprom sowie dem zusätzlichen Erwerb von Aktien der N.E. Chemcat Corporation und dem Zugang der CIMO Compagnie industrielle de Monthey S.A. im Rahmen der Ciba-Akquisition.

Der Anstieg der Anteile an übrigen Beteiligungen im Jahr 2010 resultierte aus der Wertsteigerung der Beteiligung an der K+S AG.

Zum Jahresende 2010 sind Wertminderungen in den Beteiligungen in Höhe von 22 Millionen € gebucht.

Der Rückgang der Ausleihungen an assoziierte Unternehmen im Jahr 2010 resultierte insbesondere aus der Rückzahlung eines Darlehens der OAO Severneftegazprom.



## 15 – Vorräte

| Millionen €                                     | 2010         | 2009         |
|-------------------------------------------------|--------------|--------------|
| Roh-, Hilfs- und Betriebsstoffe                 | 2.427        | 1.845        |
| Unfertige und fertige Erzeugnisse, Waren        | 6.171        | 4.860        |
| Geleistete Anzahlungen und unfertige Leistungen | 90           | 71           |
|                                                 | <b>8.688</b> | <b>6.776</b> |

Unfertige und fertige Erzeugnisse sowie Waren sind auf Grund der Produktionsgegebenheiten der chemischen Industrie zu einem Posten zusammengefasst. Unfertige Leistungen beinhalten überwiegend zum Stichtag noch nicht abgerechnete Leistungen.

Die Bewertung erfolgt nach der Durchschnittsmethode. Zuschreibungen zu Vorräten werden vorgenommen, wenn der Grund für die Abschreibungen entfallen ist.

Im Rahmen der Akquisition von Cognis wurden Vorräte mit einem Zeitwert von 541 Millionen € erworben.

Im Jahr 2010 wurde ein Aufwand aus Wertberichtigungen auf Vorräte in Höhe von 29 Millionen € erfasst, während im Jahr 2009 ein Ertrag aus Wertaufholungen in Höhe von 15 Millionen € erfasst wurde. Von den gesamten Vorräten sind im Jahr 2010 1.520 Millionen €, im Jahr 2009 1.346 Millionen € zum Nettoveräußerungswert bewertet.

## 16 – Forderungen und sonstiges Vermögen

### Übrige Forderungen und sonstiges Vermögen (Millionen €)

|                                                                             | 2010         |                   | 2009         |                   |
|-----------------------------------------------------------------------------|--------------|-------------------|--------------|-------------------|
|                                                                             |              | davon kurzfristig |              | davon kurzfristig |
| Forderungen gegen verbundene Unternehmen                                    | 273          | 273               | 190          | 190               |
| Rechnungsabgrenzungen                                                       | 181          | 162               | 182          | 161               |
| Vermögenswerte aus überdeckten Pensionsplänen                               | 260          | –                 | 549          | –                 |
| Forderungen gegen Unternehmen, mit denen ein Beteiligungsverhältnis besteht | 289          | 285               | 426          | 398               |
| Steuererstattungsansprüche                                                  | 780          | 766               | 778          | 722               |
| Darlehens- und Zinsforderungen                                              | 61           | 61                | 91           | 91                |
| Derivate mit positiven Marktwerten                                          | 440          | 437               | 286          | 277               |
| Forderungen an Mitarbeiter                                                  | 42           | 27                | 39           | 24                |
| Mieten, Kautionen                                                           | 81           | 19                | 59           | 18                |
| Versicherungserstattungen                                                   | 65           | 54                | 27           | 18                |
| Forderungen gegenüber Partnern von Gemeinschaftsunternehmen                 | 8            | 8                 | –            | –                 |
| Edelmetallhandelspositionen                                                 | 1.066        | 1.066             | 807          | 807               |
| Übrige                                                                      | 991          | 725               | 735          | 517               |
| <b>Gesamt</b>                                                               | <b>4.537</b> | <b>3.883</b>      | <b>4.169</b> | <b>3.223</b>      |
| davon finanzbedingt                                                         | 1.236        | 1.050             | 1.565        | 1.222             |

Rechnungsabgrenzungen enthielten im Jahr 2010 Vorauszahlungen für den laufenden Geschäftsbetrieb in Höhe von 23 Millionen € gegenüber 40 Millionen € im Jahr 2009 sowie im Voraus zu leistende Versicherungsbeiträge von 25 Millionen € im Jahr 2010 und 31 Millionen € im Jahr 2009.

Vermögenswerte aus überdeckten Pensionsplänen nahmen insbesondere auf Grund der Reduzierung des Rechnungszinsfußes ab.

Der Rückgang der Forderungen gegenüber Unternehmen, mit denen ein Beteiligungsverhältnis besteht, resultierte im Jahr 2010 aus der Rückzahlung eines kurzfristigen Darlehens zur

Finanzierung der Nord Stream AG. Edelmetallhandelspositionen bestehen vor allem aus Kaufpositionen, welche größtenteils durch Verkäufe und Derivate gesichert sind. Weiterhin sind auch ungesicherte Edelmetallpositionen enthalten. Gestiegene Edelmetallpreise im Jahr 2010 führten zum Anstieg im Vergleich zum Vorjahr.

Derivate mit positiven Marktwerten sind im Wesentlichen währungsbedingt durch höhere Marktwerte von US-Dollar-Devisenoptionsgeschäften gestiegen.

Durch die Cognis-Akquisition sind 72 Millionen € an übrigen Forderungen und sonstigen Vermögenswerten zugegangen.

**Wertberichtigungen auf Forderungen 2010** (Millionen €)

|                                            | Stand am<br>01.01.2010 | Erfolgs-<br>wirksame<br>Zuführung | Erfolgs-<br>wirksame<br>Auflösung | Nicht<br>erfolgs-<br>wirksame<br>Zuführung | Nicht<br>erfolgs-<br>wirksame<br>Auflösung | Stand am<br>31.12.2010 |
|--------------------------------------------|------------------------|-----------------------------------|-----------------------------------|--------------------------------------------|--------------------------------------------|------------------------|
| Forderungen aus Lieferungen und Leistungen | 348                    | 108                               | 42                                | 79                                         | 95                                         | 398                    |
| Sonstige Forderungen                       | 33                     | 2                                 | 1                                 | 84                                         | 7                                          | 111                    |
|                                            | <b>381</b>             | <b>110</b>                        | <b>43</b>                         | <b>163</b>                                 | <b>102</b>                                 | <b>509</b>             |

**Wertberichtigungen auf Forderungen 2009** (Millionen €)

|                                            | Stand am<br>01.01.2009 | Erfolgs-<br>wirksame<br>Zuführung | Erfolgs-<br>wirksame<br>Auflösung | Nicht<br>erfolgs-<br>wirksame<br>Zuführung | Nicht<br>erfolgs-<br>wirksame<br>Auflösung | Stand am<br>31.12.2009 |
|--------------------------------------------|------------------------|-----------------------------------|-----------------------------------|--------------------------------------------|--------------------------------------------|------------------------|
| Forderungen aus Lieferungen und Leistungen | 306                    | 124                               | 77                                | 34                                         | 39                                         | 348                    |
| Sonstige Forderungen                       | 25                     | 8                                 | –                                 | 10                                         | 10                                         | 33                     |
|                                            | <b>331</b>             | <b>132</b>                        | <b>77</b>                         | <b>44</b>                                  | <b>49</b>                                  | <b>381</b>             |

Die erfolgswirksame Zuführung von Wertberichtigungen auf Forderungen resultierte überwiegend aus Forderungen der Segmente Agricultural Solutions und Performance Products in Südamerika.

Ein wesentlicher Teil unseres Bestandes an Einzelforderungen ist durch Kreditversicherungen gedeckt.

Die nicht erfolgswirksamen Veränderungen ergaben sich aus Veränderungen des Konsolidierungskreises, aus umrechnungsbedingten Wertänderungen und aus der Ausbuchung wertberichtigter Forderungen.

Auch im gegenwärtigen wirtschaftlichen Umfeld beobachten wir keine wesentlichen Veränderungen der Kreditqualität unseres Forderungsbestands. Im Jahr 2010 wurden Einzelwertberichtigungen auf Forderungen aus Lieferungen und Leistungen in Höhe von 106 Millionen € gebildet und 36 Millionen €

aufgelöst. Auf Sonstige Forderungen wurden Einzelwertberichtigungen in Höhe von 2 Millionen € gebildet und 1 Million € aufgelöst. Im Jahr 2009 wurden Einzelwertberichtigungen auf Forderungen aus Lieferungen und Leistungen in Höhe von 97 Millionen € gebildet und 46 Millionen € aufgelöst. Auf Sonstige Forderungen wurden Einzelwertberichtigungen in Höhe von 8 Millionen € gebildet. Weder 2010 noch 2009 wurden in wesentlichem Ausmaß die Vertragsbedingungen von Forderungen nachverhandelt.

Die überfälligen, jedoch nicht einzelwertberichtigten Forderungen aus Lieferungen und Leistungen waren am 31. Dezember 2010 zu einem Betrag von 216 Millionen € und am 31. Dezember 2009 zu einem Betrag von 305 Millionen € in Kreditversicherungspolicen einbezogen.

**Überfälligkeitsanalyse von Forderungen aus Lieferungen und Leistungen** (Millionen €)

|                                  | 2010          |                  | 2009         |                  |
|----------------------------------|---------------|------------------|--------------|------------------|
|                                  | Bruttowert    | Wertberichtigung | Bruttowert   | Wertberichtigung |
| Noch nicht fällig                | 9.411         | 60               | 7.033        | 77               |
| Seit weniger als 30 Tagen fällig | 572           | 14               | 542          | 14               |
| Seit 30 bis 89 Tagen fällig      | 151           | 13               | 168          | 10               |
| Seit mehr als 90 Tagen fällig    | 431           | 311              | 343          | 247              |
|                                  | <b>10.565</b> | <b>398</b>       | <b>8.086</b> | <b>348</b>       |

**Überfälligkeitsanalyse finanzbedingter sonstiger Forderungen** (Millionen €)

|                                  | 2010         |                  | 2009         |                  |
|----------------------------------|--------------|------------------|--------------|------------------|
|                                  | Bruttowert   | Wertberichtigung | Bruttowert   | Wertberichtigung |
| Noch nicht fällig                | 1.188        | 7                | 1.454        | –                |
| Seit weniger als 30 Tagen fällig | 30           | –                | 19           | –                |
| Seit 30 bis 89 Tagen fällig      | 1            | –                | 83           | –                |
| Seit mehr als 90 Tagen fällig    | 25           | 1                | 11           | 2                |
|                                  | <b>1.244</b> | <b>8</b>         | <b>1.567</b> | <b>2</b>         |

## 17 – Kapital und Kapitalrücklage

### Umstellung auf Namensaktien

Die Hauptversammlung vom 29. April 2010 hat die Umstellung der Aktien der Gesellschaft von der Inhaber- auf die Namens-aktie beschlossen. Die Umstellung wurde Anfang August 2010 durchgeführt. Neue Aktien sind im Rahmen der Umstellung nicht ausgegeben worden.

### Aktienrückkauf/eigene Aktien

Im Geschäftsjahr 2010 hat die BASF SE keine eigenen Aktien erworben.

### Bedingtes Kapital

Ein Spitzenbetrag von weniger als 10.000 € dient der Erfüllung von Abfindungsansprüchen ehemaliger Wintershall-Aktionäre. Die Abfindungsansprüche sind seit 2004 verjährt. BASF SE wird daher keine weiteren Aktien aus dem bedingten Kapital ausgeben und Abfindungsansprüche nicht mehr erfüllen.

### Genehmigtes Kapital

Die Hauptversammlung vom 30. April 2009 ermächtigte den Vorstand, mit Zustimmung des Aufsichtsrats das gezeichnete Kapital bis zum 30. April 2014 um bis zu 500 Millionen € durch die Ausgabe neuer Aktien gegen Geldeinlage zu erhöhen. Der Vorstand ist ermächtigt, mit Zustimmung des Aufsichtsrats das gesetzliche Bezugsrecht in den im Ermächtigungsbeschluss genannten Fällen auszuschließen. Von der Ermächtigung ist bisher kein Gebrauch gemacht worden, und es wurden keine neuen Aktien ausgegeben.

### Kapitalrücklage

Die Kapitalrücklage enthält unter anderem Aufgelder aus Kapitalerhöhungen, Entgelte für Optionsscheine und passive Unterschiedsbeträge aus der Kapitalkonsolidierung, die sich aus dem Erwerb von Beteiligungen gegen Ausgabe von Aktien der BASF zu pari ergaben.

## 18 – Gewinnrücklagen und sonstige Eigenkapitalposten

| Millionen €                             | 2010          | 2009          |
|-----------------------------------------|---------------|---------------|
| Gesetzliche Rücklage                    | 436           | 429           |
| Andere Gewinnrücklagen und Bilanzgewinn | 15.381        | 12.487        |
|                                         | <b>15.817</b> | <b>12.916</b> |

Änderungen des Konsolidierungskreises führten im Jahr 2010 zu einer Verminderung der gesetzlichen Rücklage um 11 Millionen €. Im Jahr 2009 führten sie zu einer Erhöhung der gesetzlichen Rücklage um 2 Millionen €. Umgliederungen aus Andere Gewinnrücklagen und Bilanzgewinn erhöhten die gesetzliche Rücklage im Jahr 2010 um 18 Millionen € und 2009 um 7 Millionen €.

Der Erwerb von Anteilen an Unternehmen, die bereits von der BASF beherrscht wurden, wird als Transaktion zwischen Anteilseignern behandelt. Im Jahr 2010 fand kein Erwerb von Anteilen an beherrschten Unternehmen statt. Im Jahr 2009 wurden Anteile anderer Gesellschafter an Ciba Holding AG, Basel/Schweiz, und Ciba India Ltd., Mumbai/Indien, erworben. Die sich aus diesen Transaktionen ergebenden Unterschiedsbeträge zwischen dem Erwerbspreis und dem zugehenden anteiligen Reinvermögen in Höhe von 28 Millionen € im Jahr 2009 wurden mit den Gewinnrücklagen verrechnet.

Die Verrechnung versicherungsmathematischer Gewinne und Verluste führte im Jahr 2010 zu einer Verminderung der Gewinnrücklagen in Höhe von 101 Millionen € und im Jahr 2009 zu einer Erhöhung von 86 Millionen €.

### Sonstige Eigenkapitalposten

Bestimmte Aufwendungen oder Erträge werden gemäß den Regelungen der IFRS außerhalb der Ergebnisrechnung erfasst. Hierzu gehören Translationsanpassungen, die Bewertung von Wertpapieren zu Marktwerten, die Marktwertänderungen von Derivaten, die zur Absicherung künftiger Zahlungsströme und von Nettoinvestitionen in ausländische Geschäftsbetriebe eingesetzt werden, und Effekte aus der Neubewertung von Vermögenswerten und Schulden auf Grund von Mehrheitserwerb.

### Translationsanpassung

Die Differenz zwischen dem zu historischen Kursen bei Einzahlung oder Einbehalt und dem zu Stichtagskursen am Abschlussstichtag umgerechneten Eigenkapital der Gesellschaften wird als Translationsanpassung gesondert im Eigenkapital ausgewiesen und erst beim Abgang einer Gesellschaft erfolgswirksam berücksichtigt.

### Bewertung von Wertpapieren zu Marktwerten

Wertänderungen der zur Veräußerung verfügbaren Wertpapiere, die über den Anschaffungskosten liegen, werden so lange erfolgsneutral im Eigenkapital berücksichtigt, bis diese Wertpapiere veräußert werden. Bei Veräußerung werden die im Eigenkapital ausgewiesenen Wertänderungen erfolgswirksam in der Gewinn- und Verlustrechnung erfasst.

## 19 – Anteile anderer Gesellschafter

| Gruppengesellschaft                                      | Mitgesellschafter                                                                                                         | 2010              |              | 2009              |              |
|----------------------------------------------------------|---------------------------------------------------------------------------------------------------------------------------|-------------------|--------------|-------------------|--------------|
|                                                          |                                                                                                                           | Kapitalanteil (%) | Millionen €  | Kapitalanteil (%) | Millionen €  |
| WINGAS GmbH & Co. KG, Kassel/Deutschland                 | Gazprom-Gruppe, Moskau/Russland                                                                                           | 49,98             | 310          | 49,98             | 409          |
| WINGAS TRANSPORT GmbH, Kassel/Deutschland                | Gazprom-Gruppe, Moskau/Russland                                                                                           | 49,98             | 103          | 49,98             | 16           |
| Wintershall AG, Kassel/Deutschland                       | Gazprom-Gruppe, Moskau/Russland                                                                                           | 49,00             | 136          | 49,00             | 127          |
| BASF India Ltd., Mumbai/Indien                           | Börsennotiert                                                                                                             | 28,31             | 46           | 28,82             | 27           |
| BASF PETRONAS Chemicals Sdn. Bhd., Shah Alam/Malaysia    | PETRONAS (Petroleum Nasional Bhd.), Kuala Lumpur/Malaysia                                                                 | 40,00             | 135          | 40,00             | 119          |
| BASF Sonatrach PropanChem S.A., Tarragona/Spanien        | SONATRACH, Algier/Algerien                                                                                                | 49,00             | 49           | 49,00             | 54           |
| BASF FINA Petrochemicals L.P., Port Arthur/Texas         | Total Petrochemicals Inc., Houston/Texas                                                                                  | 40,00             | 263          | 40,00             | 162          |
| Shanghai BASF Polyurethane Company Ltd., Schanghai/China | Shanghai Hua Yi (Group) Company, Schanghai/China, und Sinopec Shanghai GaoQiao Petrochemical Corporation, Schanghai/China | 30,00             | 92           | 30,00             | 72           |
| Sonstige                                                 |                                                                                                                           |                   | 119          |                   | 146          |
|                                                          |                                                                                                                           |                   | <b>1.253</b> |                   | <b>1.132</b> |

Die Sacheinlage des Erdgasfernleitungsnetzes der WINGAS GmbH & Co. KG in die WINGAS TRANSPORT GmbH führte zur Veränderung der Anteile der Gazprom-Gruppe an beiden Gesellschaften.

## 20 – Rückstellungen für Pensionen und ähnliche Verpflichtungen

Den meisten Mitarbeitern der einbezogenen Gesellschaften stehen neben den Anwartschaften auf Leistungen aus gesetzlichen Altersversorgungseinrichtungen Ansprüche aus beitrags- oder leistungsorientierten Versorgungsplänen zu. Die Leistungen bemessen sich in der Regel nach Beschäftigungsdauer, Bezügen oder Beiträgen der begünstigten Mitarbeiter unter Berücksichtigung der arbeits-, steuer- und sozialrechtlichen Rahmenbedingungen in den einzelnen Ländern. Um die Risiken veränderter Kapitalmarktbedingungen und demographischer Entwicklungen zu begrenzen, werden den Mitarbeitern seit einigen Jahren fast ausschließlich beitragsorientierte Pläne angeboten.

Für BASF SE und andere deutsche Gruppengesellschaften wird eine Grundversorgung über die rechtlich selbständige BASF Pensionskasse VVaG gewährt, die aus Mitglieds- und Firmenbeiträgen und ihren Vermögenserträgen finanziert wird. Die BASF SE sichert die erforderlichen Zuwendungen zu, um die satzungsgemäßen Leistungen der BASF Pensionskasse VVaG ausreichend zu finanzieren. Für einen Teil der über die

BASF Pensionskasse VVaG finanzierten Leistungen bestehen Anpassungspflichten, die von den Unternehmen getragen werden, solange die BASF Pensionskasse VVaG diese auf Grund aufsichtsrechtlicher Rahmenbedingungen nicht übernehmen kann. Darüber hinausgehende Zusagen von Betriebsrenten werden bei den deutschen Gruppengesellschaften überwiegend durch Pensionsrückstellungen finanziert.

Bei ausländischen Gruppengesellschaften werden leistungsorientierte Versorgungszusagen teils durch Pensionsrückstellungen, überwiegend aber durch externe Versicherungen oder Pensionsfonds abgedeckt.

Die Bewertung der Pensionspläne erfolgt grundsätzlich anhand der aktuellen Sterbetafeln zum 31. Dezember des jeweiligen Berichtsjahres, die im Inland aus dem BASF-Bestand abgeleitet wurden.

Der Bewertung nach dem Anwartschaftsbarwertverfahren gemäß IAS 19 lagen folgende Annahmen zu Grunde:

**Annahmen zur Bewertung des Anwartschaftsbarwerts zum 31.12.**  
(gewichteter Durchschnitt in Prozent)

|                        | Deutschland |      | Ausland |      |
|------------------------|-------------|------|---------|------|
|                        | 2010        | 2009 | 2010    | 2009 |
| Rechnungszinsfuß       | 5,00        | 5,50 | 4,74    | 5,17 |
| Lohn- und Gehaltstrend | 2,75        | 2,75 | 3,79    | 3,91 |
| Rententrend            | 1,75        | 2,00 | 1,00    | 0,92 |

**Annahmen zur Ermittlung des Aufwands aus Pensionsplänen**  
(gewichteter Durchschnitt in Prozent)

|                                         | Deutschland |      | Ausland |      |
|-----------------------------------------|-------------|------|---------|------|
|                                         | 2010        | 2009 | 2010    | 2009 |
| Rechnungszinsfuß                        | 5,50        | 6,00 | 5,17    | 5,59 |
| Lohn- und Gehaltstrend                  | 2,75        | 2,75 | 3,91    | 3,82 |
| Rententrend                             | 2,00        | 2,00 | 0,92    | 0,76 |
| Erwartete Rendite des Pensionsvermögens | 5,13        | 5,42 | 6,28    | 6,60 |

Die zur Bestimmung des Anwartschaftsbarwertes am 31. Dezember festgelegten Annahmen werden im folgenden Geschäftsjahr für die Ermittlung des Aufwands aus Pensionsplänen verwendet.

Die pensionsähnlichen Verpflichtungen der nordamerikanischen Gruppengesellschaften aus der Übernahme von Krankheitskosten und Lebensversicherungen pensionierter Mitarbeiter und von deren Angehörigen wurden nach versicherungsmathematischen Grundsätzen bewertet und sind im Gesamtwert enthalten. Für die Krankheitskosten wird dabei eine Kostensteigerungsrate von 8 % p.a. (Vorjahr: 8 %) bis 2012 unterstellt, die sich anschließend linear bis zum Jahr 2018 auf 5 % p.a. (Vorjahr: 5 %) reduziert. Eine Änderung der zu Grunde gelegten Kostensteigerungsrate der Krankheitskosten um einen Prozentpunkt hätte folgende Auswirkungen:

**Sensitivität der Krankheitskosten (Millionen €)**

|                                           | Anstieg um<br>einen Prozentpunkt | Rückgang um<br>einen Prozentpunkt |
|-------------------------------------------|----------------------------------|-----------------------------------|
| Auswirkungen auf den Anwartschaftsbarwert | 13                               | -25                               |
| Auswirkungen auf den Versorgungsaufwand   | 1                                | -2                                |

Die Annahmen zu der erwarteten langfristigen Gesamtrendite des Pensionsvermögens basieren auf der angestrebten Portfoliostruktur und den zukünftigen Renditen für die einzelnen Anlageklassen. Die Prognosen orientieren sich an langfristigen historischen Durchschnittswerten und berücksichtigen das aktuelle Zinsniveau sowie den Inflationstrend. Die Rechnungszinssätze wurden im Jahr 2010 entsprechend der Kapitalmarktentwicklung angepasst.

Die Ziel-Portfoliostruktur der Pensionspläne wird mit Hilfe von Asset-Liability-Studien ermittelt und regelmäßig überprüft. Danach werden die Vermögensanlagen unter Berücksichtigung der Anlagerisiken und der gesetzlichen Bestimmungen für die Anlage von Pensionsvermögen langfristig auf die Verpflichtungen abgestimmt. Die bestehende Portfoliostruktur orientiert sich grundsätzlich an der Zielallokation und berücksichtigt darüber hinaus aktuelle Markteinschätzungen. Zur Begrenzung von Anlagerisiken und zur Ausschöpfung möglichst vieler Ertragspotenziale erfolgt eine breite weltweite Streuung der Einzelanlagen.

**Portfoliostruktur des Pensionsvermögens (%)**

|               | Ziel-<br>allokation | Anteil am<br>Pensionsvermögen |            |
|---------------|---------------------|-------------------------------|------------|
|               | 2011                | 2010                          | 2009       |
| Aktien        | 25                  | 31                            | 27         |
| Anleihen      | 64                  | 60                            | 63         |
| Immobilien    | 5                   | 4                             | 5          |
| Sonstige      | 6                   | 5                             | 5          |
| <b>Gesamt</b> | <b>100</b>          | <b>100</b>                    | <b>100</b> |

## Entwicklung des Anwartschaftsbarwerts der Pensionsverpflichtungen (Millionen €)

|                                                            | 2010          | 2009          |
|------------------------------------------------------------|---------------|---------------|
| Anwartschaftsbarwert am 01.01.                             | 15.264        | 11.814        |
| Kosten für im Geschäftsjahr erworbene Versorgungsansprüche | 220           | 244           |
| Zinskosten auf den Anwartschaftsbarwert                    | 819           | 781           |
| Rentenzahlungen                                            | -890          | -802          |
| Mitarbeiterbeiträge                                        | 53            | 52            |
| Versicherungsmathematische Verluste                        | 941           | 945           |
| Akquisitionsbedingte Effekte                               | 800           | 2.516         |
| Plananpassungen und sonstige Veränderungen                 | -96           | -251          |
| Umrechnungsbedingte Wertänderungen                         | 584           | -35           |
| <b>Anwartschaftsbarwert am 31.12.</b>                      | <b>17.695</b> | <b>15.264</b> |

## Entwicklung des Pensionsvermögens (Millionen €)

|                                            | 2010          | 2009          |
|--------------------------------------------|---------------|---------------|
| Pensionsvermögen am 01.01.                 | 13.810        | 10.325        |
| Erwartete Erträge aus dem Pensionsvermögen | 765           | 675           |
| Versicherungsmathematische Gewinne         | 569           | 1.120         |
| Firmenbeiträge                             | 181           | 413           |
| Mitarbeiterbeiträge                        | 53            | 52            |
| Rentenzahlungen                            | -801          | -516          |
| Akquisitionsbedingte Effekte               | 249           | 1.780         |
| Übrige Veränderungen                       | -62           | -27           |
| Umrechnungsbedingte Wertänderungen         | 462           | -12           |
| <b>Pensionsvermögen am 31.12.</b>          | <b>15.226</b> | <b>13.810</b> |

Der tatsächliche Vermögensertrag betrug im Jahr 2010 1.334 Millionen € und im Jahr 2009 1.795 Millionen €. In den Pensionsvermögen zum Bilanzstichtag waren von BASF-Gruppengesellschaften emittierte Wertpapiere mit einem Marktwert von 14 Millionen € im Jahr 2010 und 11 Millionen € im Jahr 2009 enthalten. Der Marktwert der von den rechtlich selbständigen Versorgungseinrichtungen an BASF-Gruppengesellschaften vermieteten Immobilien betrug 49 Millionen € am 31. Dezember 2010 und 50 Millionen € am 31. Dezember 2009.

Im Jahr 2010 wurde der BASF Pensionskasse ein Genussrechtskapital in Höhe von nominell 80 Millionen € zur Stärkung der Finanzierungsbasis gewährt, das jedoch kein Pensionsvermögen darstellt. Zur Erfüllung der gesetzlichen Solvabilitätsvorschriften (§ 53c VAG) erfolgte im Jahr 2009 eine ergebnisneutrale Zuführung zum Eigenkapital der BASF Pensionskasse in Höhe von 220 Millionen €. Zwischen den rechtlich selbständigen Versorgungseinrichtungen und den Unternehmen der BASF-Gruppe fanden im Jahr 2010 keine wesentlichen Transaktionen statt.

## Überleitung vom Finanzierungsstatus zum Bilanzansatz (Millionen €)

|                                                                     | 2010          | 2009          |
|---------------------------------------------------------------------|---------------|---------------|
| Pensionsvermögen am 31.12.                                          | 15.226        | 13.810        |
| abzüglich Anwartschaftsbarwert am 31.12.                            | 17.695        | 15.264        |
| <b>Finanzierungsstatus</b>                                          | <b>-2.469</b> | <b>-1.454</b> |
| Unrealisierter Aufwand aus Leistungszusagen für frühere Dienstjahre | -19           | -21           |
| Vermögenswertbegrenzung gemäß IAS 19.58                             | -30           | -231          |
| <b>Nettoverpflichtung in der Bilanz</b>                             | <b>-2.518</b> | <b>-1.706</b> |
| davon Vermögenswerte aus überdeckten Pensionsplänen                 | 260           | 549           |
| Pensionsrückstellungen                                              | -2.778        | -2.255        |



Versicherungsmathematische Gewinne und Verluste werden in der Periode ihrer Entstehung unmittelbar ergebnisneutral mit den Gewinnrücklagen verrechnet. Aufwand aus Leistungszusagen für frühere Dienstjahre wird über die durchschnittliche Dienstzeit der Versorgungsberechtigten bis zur Unverfallbarkeit der zugesagten Leistungen ergebniswirksam verteilt. Im Jahr 2010 wurden versicherungsmathematische Verluste in Höhe von

372 Millionen € und im Jahr 2009 Gewinne in Höhe von 175 Millionen € unmittelbar mit den Gewinnrücklagen verrechnet. Seit der Einführung dieser Bewertungsmethode im Jahr 2004 wurden somit ohne Berücksichtigung latenter Steuern versicherungsmathematische Verluste in Höhe von 2.180 Millionen € mit den Gewinnrücklagen verrechnet.

#### Vermögensdeckung der Pensionspläne (Millionen €)

|                                                | 2010                 |                  | 2009                 |                  |
|------------------------------------------------|----------------------|------------------|----------------------|------------------|
|                                                | Anwartschaftsbarwert | Pensionsvermögen | Anwartschaftsbarwert | Pensionsvermögen |
| Ohne Pensionsvermögensdeckung                  | 2.003                | –                | 1.467                | –                |
| Teilweise Pensionsvermögensdeckung             | 5.130                | 4.374            | 5.069                | 4.302            |
| <b>Unvollständige Pensionsvermögensdeckung</b> | <b>7.133</b>         | <b>4.374</b>     | <b>6.536</b>         | <b>4.302</b>     |
| Vollständige Pensionsvermögensdeckung          | 10.562               | 10.852           | 8.728                | 9.508            |
|                                                | <b>17.695</b>        | <b>15.226</b>    | <b>15.264</b>        | <b>13.810</b>    |

#### Abweichungen zwischen den versicherungsmathematischen Annahmen und der tatsächlichen Entwicklung (Millionen €)

|                                                                     | 2010          | 2009          | 2008          | 2007        | 2006          |
|---------------------------------------------------------------------|---------------|---------------|---------------|-------------|---------------|
| Anwartschaftsbarwert                                                | 17.695        | 15.264        | 11.814        | 12.348      | 13.164        |
| Enthaltene Auswirkungen der Abweichungen im laufenden Geschäftsjahr | 21            | –2            | 36            | –172        | –112          |
| Pensionsvermögen                                                    | 15.226        | 13.810        | 10.325        | 12.038      | 12.115        |
| Enthaltene Auswirkungen der Abweichungen im laufenden Geschäftsjahr | 569           | 1.120         | –2.163        | –121        | 159           |
| <b>Finanzierungsstatus</b>                                          | <b>–2.469</b> | <b>–1.454</b> | <b>–1.489</b> | <b>–310</b> | <b>–1.049</b> |

#### Erwartete Zahlungen aus den zum 31. Dezember 2010 bestehenden Pensionszusagen (Millionen €)

|               |       |
|---------------|-------|
| 2011          | 948   |
| 2012          | 953   |
| 2013          | 984   |
| 2014          | 992   |
| 2015          | 1.021 |
| 2016 bis 2020 | 5.767 |

#### Zusammensetzung des Aufwands aus Pensionsplänen (Millionen €)

|                                                                                           | 2010       | 2009       |
|-------------------------------------------------------------------------------------------|------------|------------|
| Kosten für im Geschäftsjahr erworbene Versorgungsansprüche                                | 220        | 244        |
| Aufwand aus Leistungszusagen für frühere Dienstjahre                                      | –2         | –3         |
| Ertrag aus Übertragung und Wegfall von Verpflichtungen                                    | –4         | –213       |
| <b>Aufwand aus leistungsorientierten Pensionsplänen im Ergebnis der Betriebstätigkeit</b> | <b>214</b> | <b>28</b>  |
| Aufwand aus beitragsorientierten Pensionsplänen im Ergebnis der Betriebstätigkeit         | 194        | 150        |
| <b>Aufwand für Altersversorgung im Ergebnis der Betriebstätigkeit</b>                     | <b>408</b> | <b>178</b> |
| Finanzierungskosten aus leistungsorientierten Pensionsplänen                              | 819        | 781        |
| Erwartete Erträge aus Pensionsvermögen                                                    | –765       | –675       |
| <b>Aufwand für Altersversorgung im Finanzergebnis</b>                                     | <b>54</b>  | <b>106</b> |

Im Berichtsjahr wurden an staatliche Rentenversicherungsträger Beiträge in Höhe von 473 Millionen € und im Vorjahr von 412 Millionen € geleistet.

Die voraussichtlichen Beitragszahlungen an leistungsorientierte Pensionspläne für das Jahr 2011 betragen 190 Millionen €.

## 21 – Sonstige Rückstellungen

| Millionen €                                                             | 2010         |                   | 2009         |                   |
|-------------------------------------------------------------------------|--------------|-------------------|--------------|-------------------|
|                                                                         |              | davon kurzfristig |              | davon kurzfristig |
| Rückbauverpflichtungen                                                  | 869          | 5                 | 846          | 2                 |
| Umweltschutzmaßnahmen und Beseitigung von Altlasten                     | 665          | 192               | 598          | 146               |
| Personalverpflichtungen                                                 | 2.043        | 1.380             | 1.442        | 873               |
| Verpflichtungen auf Grund von Verkaufsgeschäften oder Einkaufsverträgen | 865          | 828               | 1.088        | 1.050             |
| Restrukturierungsmaßnahmen                                              | 234          | 214               | 407          | 392               |
| Prozess-, Schadenersatz-, Gewährleistungs- und ähnliche Verpflichtungen | 249          | 125               | 257          | 144               |
| Übrige                                                                  | 1.751        | 580               | 1.927        | 669               |
|                                                                         | <b>6.676</b> | <b>3.324</b>      | <b>6.565</b> | <b>3.276</b>      |

**Rückbauverpflichtungen** betreffen insbesondere die voraussichtlichen Kosten für das Verfüllen von Bohrlöchern und die Beseitigung von Fördereinrichtungen nach Beendigung der Förderung.

Die Rückstellungen für **Umweltschutzmaßnahmen und Beseitigung von Altlasten** decken erwartete Belastungen aus der Sanierung kontaminierter Standorte, der Rekultivierung von Deponien, der Beseitigung von Umweltbeeinträchtigungen an bestehenden Produktions- oder Lagereinrichtungen und ähnlichen Maßnahmen ab. Des Weiteren werden Rückstellungen im Zusammenhang mit der Zuteilung von Emissionszertifikaten durch die Deutsche Emissionshandelsstelle und vergleichbaren Behörden in der Europäischen Union gebildet.

Die Zunahme der Rückstellungen für Umweltschutzmaßnahmen und Beseitigung von Altlasten resultierte unter anderem aus der Akquisition von Cognis.

Die Rückstellungen für **Personalverpflichtungen** enthalten Verpflichtungen zur Gewährung von Dienstaltersprämien und Jubiläumsgeldern, variable Vergütungen einschließlich hierauf entfallender Sozialversicherungsbeiträge und andere Abgrenzungen sowie Rückstellungen auf Grund von Frühpen-sionierungs- und Altersteilzeitmodellen. Die Altersteilzeitprogramme ermöglichen es den Mitarbeitern deutscher Gruppengesellschaften, die mindestens 55 Jahre alt sind, in einem Zeitraum von bis zu acht Jahren die Arbeitszeit auf die Hälfte zu reduzieren.

Die meisten Mitarbeiter arbeiten dabei in der ersten Hälfte der Altersteilzeit in Vollzeit und scheiden mit Beginn der zweiten Phase aus der Gesellschaft aus. Während der gesamten Altersteilzeit erhalten die Mitarbeiter mindestens 85 % ihres Nettogehalts.

Die Zunahme der kurzfristigen Rückstellungen für Personalverpflichtungen resultierte insbesondere aus höheren Rück-

stellungen für variable Vergütungen. Die Zunahme der langfristigen Rückstellungen für Personalverpflichtungen resultierte aus der Aufstockung der Rückstellung für das aktienkursbasierte Vergütungsprogramm (Long-Term-Incentive-Programm).

→ Erläuterungen zu Rückstellungen für das Long-Term-Incentive-Programm unter Anmerkung 25 ab Seite 185

Die Rückstellungen für **Verpflichtungen auf Grund von Verkaufsgeschäften oder Einkaufsverträgen** umfassen Verpflichtungen aus Gewährleistungen oder Produkthaftungen sowie noch zu gewährende Rabatte, Skonti oder sonstige Preisnachlässe, zu zahlende Provisionen für die Vermittlung von Verkäufen sowie drohende Verluste aus vertraglichen Vereinbarungen.

Die Rückstellungen für **Restrukturierungsmaßnahmen** enthalten Abfindungszahlungen für ausscheidende Mitarbeiter, erwartete Kosten für Standortschließungen sowie Abbruchverpflichtungen und vergleichbare Belastungen.

Infolge der Restrukturierungsmaßnahmen, die insbesondere im Rahmen der Ciba-Integration im Jahr 2010 durchgeführt wurden, nahmen die diesbezüglichen Rückstellungen ab.

Die Rückstellungen für **Prozess-, Schadenersatz-, Gewährleistungs- und ähnliche Verpflichtungen** enthalten erwartete Belastungen aus Prozessen, Schadenersatzverpflichtungen, sonstigen Gewährleistungen und aus kartellrechtlichen Verfahren.

**Übrige** enthalten langfristige Steuerrückstellungen sowie weitere gegenwärtige Verpflichtungen und Abgrenzungen.

**Sonstige Veränderungen** enthalten Konsolidierungskreisänderungen, Währungseffekte sowie die Umbuchung von Verpflichtungen, die sich hinsichtlich Höhe oder Zeitpunkt ihres Anfalls konkretisiert haben, in die Verbindlichkeiten. Zu einer Zunahme der Rückstellungen führte insbesondere die Akquisition der Cognis.

## Entwicklung sonstige Rückstellungen im Jahr 2010 (Millionen €)

|                                                                         | 01.01.2010   | Zuführung    | Aufzinsung | Inanspruchnahme | Auflösung   | Sonstige Veränderungen | 31.12.2010   |
|-------------------------------------------------------------------------|--------------|--------------|------------|-----------------|-------------|------------------------|--------------|
| Rückbauverpflichtungen                                                  | 846          | 20           | 37         | -9              | -38         | 13                     | 869          |
| Umweltschutzmaßnahmen und Beseitigung von Altlasten                     | 598          | 139          | 3          | -134            | -10         | 69                     | 665          |
| Personalverpflichtungen                                                 | 1.442        | 1.774        | 15         | -1.002          | -52         | -134                   | 2.043        |
| Verpflichtungen auf Grund von Verkaufsgeschäften oder Einkaufsverträgen | 1.088        | 748          | 5          | -906            | -97         | 27                     | 865          |
| Restrukturierungsmaßnahmen                                              | 407          | 78           | -          | -234            | -45         | 28                     | 234          |
| Prozess-, Schadenersatz-, Gewährleistungs- und ähnliche Verpflichtungen | 257          | 138          | 6          | -121            | -44         | 13                     | 249          |
| Übrige                                                                  | 1.927        | 764          | -          | -738            | -230        | 28                     | 1.751        |
|                                                                         | <b>6.565</b> | <b>3.661</b> | <b>66</b>  | <b>-3.144</b>   | <b>-516</b> | <b>44</b>              | <b>6.676</b> |

## 22 – Verbindlichkeiten

## Finanzschulden (Millionen €)

|                                                                          | Nominalvolumen<br>(Millionen<br>Emissionswährung) | Effektivzins | Wertansatz gemäß Effektivzins-<br>methode |               |
|--------------------------------------------------------------------------|---------------------------------------------------|--------------|-------------------------------------------|---------------|
|                                                                          |                                                   |              | 2010                                      | 2009          |
| 3,5-%-Euro-Anleihe 2003/2010 der BASF SE                                 | 1.000                                             | 3,63 %       | -                                         | 999           |
| 4-%-Euro-Anleihe 2006/2011 der BASF SE                                   | 1.000                                             | 4,05 %       | 1.000                                     | 999           |
| 3,375-%-Euro-Anleihe 2005/2012 der BASF SE                               | 1.400                                             | 3,42 %       | 1.399                                     | 1.399         |
| 3,75-%-Euro-Anleihe 2009/2012 der BASF SE                                | 1.350                                             | 3,97 %       | 1.345                                     | 1.343         |
| 4,5-%-Euro-Anleihe 2006/2016 der BASF SE                                 | 500                                               | 4,62 %       | 497                                       | 497           |
| 4,25-%-Euro-Anleihe 2009/2016 der BASF SE                                | 200                                               | 4,40 %       | 199                                       | 198           |
| 5,875-%-GBP-Anleihe 2009/2017 der BASF SE                                | 400                                               | 6,04 %       | 461                                       | 446           |
| 4,625-%-Euro-Anleihe 2009/2017 der BASF SE                               | 300                                               | 4,69 %       | 299                                       | 299           |
| 3,25-%-CHF-Anleihe 2008/2011 der BASF Finance Europe N.V.                | 300                                               | 3,39 %       | 240                                       | 202           |
| 6-%-Euro-Anleihe 2008/2013 der BASF Finance Europe N.V.                  | 1.250                                             | 6,15 %       | 1.245                                     | 1.244         |
| 5-%-Euro-Anleihe 2007/2014 der BASF Finance Europe N.V.                  | 1.000                                             | 5,09 %       | 997                                       | 996           |
| 5-%-Euro-Anleihe 2007/2014 der BASF Finance Europe N.V.                  | 250                                               | 4,83 %       | 251                                       | 252           |
| 3,625-%-CHF-Anleihe 2008/2015 der BASF Finance Europe N.V.               | 200                                               | 3,77 %       | 159                                       | 134           |
| 5,125-%-Euro-Anleihe 2009/2015 der BASF Finance Europe N.V.              | 1.500                                             | 5,30 %       | 1.489                                     | 1.488         |
| 5,125-%-Euro-Anleihe 2009/2015 der BASF Finance Europe N.V.              | 500                                               | 4,38 %       | 515                                       | 517           |
| 4,5-%-Euro Medium Term Note 2009/2016 der BASF Finance Europe N.V.       | 150                                               | 4,56 %       | 150                                       | 149           |
| USD Extendible Floating Rate Notes der BASF Finance Europe N.V.          |                                                   | 0,33 %       | -                                         | 3             |
| 3,25-%-CHF-Anleihe 2006/2012 der Ciba Spezialitätenchemie Finanz AG      | 225                                               | 3,32 %       | 177                                       | 147           |
| 4,875-%-Euro-Anleihe 2003/2018 der Ciba Spec. Chem. Finance Luxemb. S.A. | 477                                               | 4,88 %       | 401                                       | 393           |
| USD Commercial Papers                                                    | 1.850                                             |              | 1.384                                     | 487           |
| Andere Anleihen                                                          |                                                   |              | 696                                       | 650           |
| <b>Anleihen und sonstige Kapitalmarktverbindlichkeiten</b>               |                                                   |              | <b>12.904</b>                             | <b>12.842</b> |
| Verbindlichkeiten gegenüber Kreditinstituten                             |                                                   |              | 2.135                                     | 1.977         |
|                                                                          |                                                   |              | <b>15.039</b>                             | <b>14.819</b> |

**Zusammensetzung der Finanzschulden nach Währungen** (Millionen €)

|                       | 2010          | 2009          |
|-----------------------|---------------|---------------|
| Euro                  | 10.980        | 12.063        |
| US-Dollar             | 2.177         | 1.254         |
| Schweizer Franken     | 576           | 483           |
| Britisches Pfund      | 543           | 560           |
| Chinesischer Renminbi | 391           | 336           |
| Brasilianischer Real  | 205           | –             |
| Argentinischer Peso   | 30            | 41            |
| Südafrikanischer Rand | 28            | –             |
| Japanischer Yen       | 25            | 15            |
| Übrige Währungen      | 84            | 67            |
|                       | <b>15.039</b> | <b>14.819</b> |

**Laufzeiten der Finanzschulden** (Millionen €)

|                                                      | 2010          | 2009          |
|------------------------------------------------------|---------------|---------------|
| Folgejahr 1                                          | 3.369         | 2.375         |
| Folgejahr 2                                          | 3.112         | 1.363         |
| Folgejahr 3                                          | 2.100         | 3.067         |
| Folgejahr 4                                          | 1.321         | 2.075         |
| Folgejahr 5                                          | 2.539         | 1.329         |
| Folgejahr 6 und darüber hinausgehende Restlaufzeiten | 2.598         | 4.610         |
|                                                      | <b>15.039</b> | <b>14.819</b> |

**Anleihen und sonstige Kapitalmarktverbindlichkeiten**

Als Andere Anleihen sind überwiegend Industrieentwicklungs- und Umweltschutzbonds der BASF-Corporation-Gruppe ausgewiesen, die zur Finanzierung von Investitionen in den USA aufgenommen wurden. Der gewichtete durchschnittliche Zinssatz belief sich im Jahr 2010 auf 2,2 % und im Jahr 2009 auf 2,3 %. Der gewichtete Effektivzinssatz betrug im Jahr 2010 2,2 % und im Jahr 2009 2,3 %. Die durchschnittliche Restlaufzeit lag zum 31. Dezember 2010 bei 222 Monaten und zum 31. Dezember 2009 bei 234 Monaten.

**Verbindlichkeiten gegenüber Kreditinstituten**

Der durchschnittliche gewichtete Zinssatz für Kredite belief sich im Jahr 2010 auf 3,6 % gegenüber 3,0 % im Jahr 2009. Zur Finanzierung der Investition in den Ausbau der OPAL-Erdgasleitung wurden 342 Millionen € zu einem Zinssatz von 3,1 % durch WINGAS GmbH & Co. KG aufgenommen.

Die nicht ausgenutzten verbindlich zugesagten Kreditlinien betrugen für BASF SE am 31. Dezember 2010 4.490 Millionen € und am 31. Dezember 2009 4.165 Millionen € mit variabler Verzinsung.

**Übrige Verbindlichkeiten**

Der Anstieg der Übrigen Verbindlichkeiten im Jahr 2010 resultierte unter anderem aus negativen Marktwerten von Derivaten, die zur Absicherung gegen Währungsschwankungen und steigende Rohstoffpreise abgeschlossen wurden.

Verbindlichkeiten gegenüber Unternehmen, mit denen ein Beteiligungsverhältnis besteht, enthielten den nicht konsolidierten Anteil der Verbindlichkeiten gegenüber quotaleinbezogenen Gemeinschaftsunternehmen von 195 Millionen € im Jahr 2010 nach 313 Millionen € im Jahr 2009, davon Sonstige Verbindlichkeiten von 57 Millionen € im Jahr 2010 nach 145 Millionen € im Jahr 2009. Weitere Sonstige Verbindlichkeiten bestanden gegenüber Beteiligungen, die nach der Equity-Methode oder zu Anschaffungskosten einbezogen wurden. Sie betrugen 261 Millionen € im Jahr 2010 und 188 Millionen € im Jahr 2009. Darüber hinaus enthielten die Sonstigen Verbindlichkeiten zum Bilanzstichtag 2010 Edelmetallderivate mit einem negativen Marktwert von 74 Millionen € gegenüber 52 Millionen € im Jahr 2009.

→ **Mehr zu finanzwirtschaftlichen Risiken und derivativen Finanzinstrumenten unter Anmerkung 26 ab Seite 187**

→ **Mehr zu Verbindlichkeiten aus Leasingverhältnissen unter Anmerkung 27 auf Seite 192**

**Übrige Verbindlichkeiten** (Millionen €)

|                                                                   | 2010         |             | 2009         |             |
|-------------------------------------------------------------------|--------------|-------------|--------------|-------------|
|                                                                   | Kurzfristig  | Langfristig | Kurzfristig  | Langfristig |
| Erhaltene Anzahlungen auf Bestellungen                            | 283          | –           | 116          | –           |
| Verbindlichkeiten aus Wechseln                                    | 73           | 2           | 52           | 23          |
| Verbindlichkeiten im Rahmen der sozialen Sicherheit               | 166          | 26          | 156          | 30          |
| Verbindlichkeiten gegenüber Partnern von Gemeinschaftsunternehmen | 314          | 433         | 271          | 437         |
| Derivate mit negativen Marktwerten                                | 369          | 7           | 279          | –           |
| Verbindlichkeiten aus Finanzierungsleasing                        | 10           | 49          | 18           | 62          |
| Personalverbindlichkeiten                                         | 328          | 94          | 211          | 40          |
| Abzugrenzende Anleihe- und sonstige Darlehenszinsen               | 247          | –           | 237          | –           |
| Sonstige Verbindlichkeiten                                        | 858          | 87          | 785          | 124         |
| Passive Rechnungsabgrenzungsposten                                | 154          | 203         | 115          | 182         |
|                                                                   | <b>2.802</b> | <b>901</b>  | <b>2.240</b> | <b>898</b>  |

**Gesicherte Verbindlichkeiten** (Millionen €)

|                                              | 2010      | 2009      |
|----------------------------------------------|-----------|-----------|
| Verbindlichkeiten gegenüber Kreditinstituten | 14        | 8         |
| Sonstige Verbindlichkeiten                   | 26        | 37        |
|                                              | <b>40</b> | <b>45</b> |

Als Sicherheiten für Verbindlichkeiten gegenüber Kreditinstituten wurden insbesondere Grundschulden bestellt. Gesicherte Eventualverbindlichkeiten bestehen nicht.

## 23 – Haftungsverhältnisse und sonstige finanzielle Verpflichtungen

Der Ansatz der nachfolgend dargestellten Haftungsverhältnisse erfolgt zu Nominalwerten:

**Haftungsverhältnisse** (Millionen €)

|                                                                                       | 2010       | 2009       |
|---------------------------------------------------------------------------------------|------------|------------|
| Verbindlichkeiten aus der Begebung und Übertragung von Wechseln                       | 7          | 3          |
| davon gegenüber verbundenen Unternehmen                                               | –          | –          |
| Verbindlichkeiten aus Bürgschaften                                                    | 510        | 625        |
| davon gegenüber verbundenen Unternehmen                                               | 8          | 8          |
| Verbindlichkeiten aus Gewährleistungsverträgen                                        | 96         | 73         |
| Haftungsverhältnisse aus der Bestellung von Sicherheiten für fremde Verbindlichkeiten | 14         | 17         |
|                                                                                       | <b>627</b> | <b>718</b> |

Die Verbindlichkeiten aus Bürgschaften resultierten im Wesentlichen aus der im Jahr 2008 übernommenen Finanzgarantie für die Finanzierung der OAO Severneftegazprom.

BASF ist mit 15,5 % an der Projektgesellschaft Nord Stream AG, Zug/Schweiz, beteiligt, deren Zweck die Errichtung von Erdgaspipelines durch die Ostsee von Wyborg/Russische Föderation nach Greifswald/Deutschland ist. Zur Finanzierung des ersten von zwei Pipelinesträngen wurde im Jahr 2010 eine Projektfinanzierung abgeschlossen. Wie bei Finanzierungsvorhaben dieser Art üblich, wurden von den Gesellschaftern Garantien zu Gunsten der kreditgebenden Banken gestellt. Das

Risiko aus den von BASF gestellten Garantien ist auf das anteilige Projektvolumen begrenzt. Die Anteile an der Nord Stream AG und die an die Nord Stream AG gewährten nachrangigen Darlehensforderungen in Höhe von 99 Millionen € wurden an die kreditgebenden Banken verpfändet. Zum 31. Dezember 2010 ist nicht von einer Inanspruchnahme aus den von BASF vergebenen Garantien auszugehen.

Nach Abschluss des Genehmigungsverfahrens und der Verlegung des ersten Leitungsstrangs erfolgt 2011 dessen Inbetriebnahme. Bis 2012 wird eine zweite, parallel zum ersten Leitungsstrang verlaufende Pipeline gebaut. Durch die Fertig-

stellung des zweiten Leitungsstrangs wird mit 55 Milliarden Kubikmetern Erdgas pro Jahr im Jahr 2012 die volle Transportkapazität erreicht.

In Übereinstimmung mit den Vorschriften von Section 17 des Republic of Ireland Companies (Amendments) Act 1986 gibt die

BASF SE unwiderrufliche Garantien hinsichtlich der Verbindlichkeiten des irischen Tochterunternehmens Cognis Ireland Limited, Dublin, ab (gemäß Section 5 (c) ii des genannten Gesetzes). Die Verbindlichkeiten von Cognis Ireland Limited betragen zum 31. Dezember 2010 11,2 Millionen €.

#### Sonstige finanzielle Verpflichtungen (Millionen €)

|                                                                                    | 2010         | 2009         |
|------------------------------------------------------------------------------------|--------------|--------------|
| Begonnene Investitionsvorhaben                                                     | 4.642        | 3.888        |
| davon Bestellobligo                                                                | 752          | 556          |
| für den Erwerb immaterieller Vermögenswerte                                        | 8            | 57           |
| Verpflichtung aus langfristigen Mietverträgen (ohne Finanzierungsleasing)          | 1.679        | 1.357        |
| Einzahlungs- und Darlehensverpflichtungen und sonstige finanzielle Verpflichtungen | 3            | 5            |
|                                                                                    | <b>6.324</b> | <b>5.250</b> |

#### Im Rahmen langfristiger Mietverträge genutzte Vermögenswerte

Die im Rahmen langfristiger Mietverträge genutzten Vermögenswerte betreffen vor allem Gebäude sowie die IT-Infrastruktur.

→ Mehr zu Leasingverbindlichkeiten unter Anmerkung 27 auf Seite 192

#### Verpflichtungen aus langfristigen Mietverträgen (ohne Finanzierungsleasing) (Millionen €)

|                                               |              |
|-----------------------------------------------|--------------|
| 2011                                          | 521          |
| 2012                                          | 304          |
| 2013                                          | 242          |
| 2014                                          | 145          |
| 2015                                          | 116          |
| 2016 und darüber hinausgehende Restlaufzeiten | 351          |
|                                               | <b>1.679</b> |

#### Abnahmeverpflichtungen aus langfristigen Erdgas- und Rohstoffbezugsverträgen

BASF bezieht Erdgas im Arbeitsgebiet Natural Gas Trading auf Grund langfristiger Einkaufsverträge, die laufenden Preisanpassungen unterliegen. Diesen Abnahmeverpflichtungen stehen überwiegend Lieferverträge mit Laufzeiten zwischen einem und 20 Jahren mit den Erdgasabnehmern gegenüber. Der Anstieg der Abnahmeverpflichtungen gegenüber dem Vorjahr resultierte insbesondere aus den höheren Bezugspreisen.

BASF kauft Rohstoffe sowohl auf Basis langfristiger Verträge als auch an Spotmärkten ein. Aus Verträgen mit einer Restlaufzeit von mehr als einem Jahr bestanden zum 31. Dezember 2010 folgende feste Abnahmeverpflichtungen:

#### Abnahmeverpflichtungen aus Erdgas- und Rohstoffbezugsverträgen (Millionen €)

|                                               |                |
|-----------------------------------------------|----------------|
| 2011                                          | 10.433         |
| 2012                                          | 8.771          |
| 2013                                          | 7.817          |
| 2014                                          | 6.798          |
| 2015                                          | 6.636          |
| 2016 und darüber hinausgehende Restlaufzeiten | 95.836         |
|                                               | <b>136.292</b> |

## 24 – Risiken aus Rechtsstreitigkeiten und -verfahren

Seit 2005 sind insgesamt 38 Sammelklagen unter anderem gegen die BASF SE und die BASF Corporation bei US-Gerichten eingereicht worden, in denen die Verletzung kartellrechtlicher Vorschriften durch angebliche unzulässige Preisabsprachen beim Vertrieb von TDI, MDI und Polyetherolen behauptet wird. Die für die Sammelklagen notwendige sogenannte Class Certification wurde inzwischen gewährt und das Beweiserhebungsverfahren (Discovery) wird derzeit durchgeführt. Daneben verfolgen zwei Kläger die behaupteten Schadenersatzansprüche im Parallelverfahren außerhalb der Sammelklagen. BASF

verteidigt sich gegen diese Klagen. Das US-Justizministerium hat Ende 2007 ein Untersuchungsverfahren wegen des Verdachts unzulässiger Preisabsprachen eingestellt.

Darüber hinaus sind die BASF SE und ihre Beteiligungsgesellschaften Beklagte bzw. Beteiligte in weiteren gerichtlichen und schiedsgerichtlichen Klageverfahren und behördlichen Verfahren. Diese Verfahren haben auf Basis des heutigen Kenntnisstandes keinen erheblichen Einfluss auf die wirtschaftliche Lage der BASF.



## 25 – Aktienkursbasiertes Vergütungsprogramm und BASF-Mitarbeiterbeteiligungsprogramm

### Aktienkursbasiertes Vergütungsprogramm

Im Jahr 2010 wurde das seit 1999 bestehende aktienkursbasierte Vergütungsprogramm (sogenanntes Long-Term-Incentive- oder LTI-Programm) für Führungskräfte der BASF-Gruppe fortgeführt. Derzeit sind circa 1.100 Führungskräfte einschließlich des Vorstands zur Teilnahme an dem LTI-Programm berechtigt. Dieses Programm sieht die Gewährung von virtuellen Optionen vor. Bei Ausübung werden die Optionsrechte durch Barvergütung erfüllt (Cash Settlement).

Die Teilnahme am LTI-Programm ist freiwillig. Voraussetzung für die Teilnahme ist ein Eigeninvestment: Der Teilnehmer verpflichtet sich, für die Dauer von zwei Jahren ab Optionsgewährung BASF-Aktien in Höhe von 10 bis 30 % seiner variablen Gehaltsbezüge zu halten (Haltefrist). Für die Anzahl der zu haltenden Aktien ist neben der variablen Vergütung der mit dem Volumen gewichtete Durchschnittskurs am ersten Handelstag nach der Hauptversammlung maßgeblich, der am 30. April 2010 44,37 € betrug.

Für jede eingebrachte BASF-Aktie erhält der Teilnehmer vier Optionsrechte. Jedes Optionsrecht besteht aus den Teilrechten A und B, deren Werthaltigkeit sich an unterschiedlichen Erfolgszielen (Hürden) orientiert: Teilrecht A ist werthaltig, wenn der Kurs der BASF-Aktie gegenüber dem Basiskurs bei Gewährung der Optionsrechte um mehr als 30 % gestiegen ist (absolute Hürde). Der Wert des Teilrechts A ergibt sich aus der Differenz zwischen dem Börsenkurs am jeweiligen Ausübungstag und dem Basiskurs; er ist auf 100 % des Basiskurses begrenzt. Teilrecht B wird werthaltig, wenn die kumulierte Wertsteigerung der BASF-Aktie den Anstieg des MSCI World Chemicals Index<sup>SM</sup> (MSCI Chemicals) übersteigt (relative Hürde). Der Wert des Teilrechts B ergibt sich aus der doppelten prozentualen Outperformance der BASF-Aktie bei Ausübung, bezogen auf den Basiskurs; er ist begrenzt auf den um den rechnerischen Nennbetrag der BASF-Aktie verminderten Börsenschlusskurs bei Ausübung. Die Optionen wurden zum 1. Juli 2010 gewährt und können nach Ablauf einer zweijährigen Wartefrist zwischen dem 1. Juli 2012 und dem 30. Juni 2018 ausgeübt werden. Auch während der Ausübungs-

phase dürfen innerhalb bestimmter Sperrfristen (Closed Periods) die Optionen nicht ausgeübt werden. Jedes Optionsrecht kann nur insgesamt ausgeübt werden. Hierzu muss eine der Ausübungshürden überschritten worden sein. Ist die andere Ausübungshürde nicht übertroffen, verfällt das damit verbundene Teilrecht. Der maximal mögliche Ausübungsgewinn für einen Teilnehmer ist auf das Zehnfache des Eigeninvestments begrenzt. Die gewährten Optionen sind nicht übertragbar und verfallen, wenn der Teilnehmer vor Ablauf der zweijährigen Haltefrist Aktien aus seinem Eigeninvestment verkauft oder aus der BASF-Gruppe ausscheidet. Sie bleiben bei Eintritt in den Ruhestand erhalten.

Für die Mitglieder des Vorstands ist die langfristige Ausrichtung des Programms gegenüber den für die übrigen Teilnehmer geltenden Bedingungen deutlich verstärkt. Sie sind verpflichtet, mit mindestens 10 % der Bruttotantieme an dem LTI-Programm teilzunehmen. Dabei gilt im Hinblick auf dieses verpflichtende Eigeninvestment (in Form von BASF-Aktien) eine verlängerte Haltefrist von vier Jahren. Eine Ausübung der Optionsrechte ist für die Mitglieder des Vorstands frühestens vier Jahre nach Gewährung (Wartefrist) möglich.

Die Programme 2003 bis 2009 entsprechen in ihrer Grundstruktur dem LTI-Programm 2010.

Als Vergleichsindex für die Ermittlung der Werthaltigkeit von Teilrecht B wird für die Programme 2003 und 2004 der Dow Jones Chemicals Total Return Index (DJ Chemicals) herangezogen. Er wurde ab dem Programmjahr 2005 durch den MSCI Chemicals ersetzt. Der MSCI Chemicals ist ein weltweiter Branchenindex für die Chemieindustrie. Er misst die Performance der im Index enthaltenen Unternehmen in ihrer jeweiligen Landeswährung, wodurch Währungseinflüsse deutlich reduziert werden.

Die Modelle zur Bewertung der Optionspläne basieren auf der arbitragefreien Bewertung nach Black/Scholes.

Auf Grund der Komplexität der Programme wurde eine numerische Lösungsmethode (Monte-Carlo-Simulation) angewandt.

### Beizulegender Zeitwert der Optionen und Bewertungsparameter zum 31. Dezember 2010<sup>1</sup>

|                                        |   | LTI-Programm des Jahres |       |
|----------------------------------------|---|-------------------------|-------|
|                                        |   | 2010                    | 2009  |
| Beizulegender Zeitwert                 | € | 29,15                   | 51,44 |
| Dividendenrendite                      | % | 2,85                    | 2,85  |
| Risikoloser Zinssatz                   | % | 2,71                    | 2,46  |
| Volatilität BASF-Aktie                 | % | 25,76                   | 26,45 |
| Volatilität MSCI Chemicals             | % | 18,71                   | 19,30 |
| Korrelation BASF-Kurs – MSCI Chemicals | % | 80,80                   | 80,18 |

<sup>1</sup> Es wurde ein vom Gewinnpotenzial der Optionen abhängiges Ausübungsverhalten unterstellt.

Am Bilanzstichtag 31. Dezember 2010 betreffen die genannten beizulegenden Zeitwerte und Bewertungsparameter die LTI-Programme der Jahre 2010 und 2009. Für Programme aus Vorjahren wurden entsprechende beizulegende Zeitwerte ermittelt und Bewertungsparameter verwendet.

Die Anzahl der gewährten Optionen betrug 1.833.760 im Jahr 2010 und 3.669.668 im Jahr 2009.

Die Volatilitäten wurden ermittelt auf Basis der monatlichen Schlusskurse über einen historischen Zeitraum entsprechend der Restlaufzeit der Optionen.

Da durch Beschluss des Vorstands im Jahr 2002 die Optionsrechte bei Ausübung durch Barvergütung zu erfüllen sind, werden alle noch bestehenden Optionsrechte aus den Programmen 2003 bis 2010 zum 31. Dezember 2010 mit ihrem beizulegenden Zeitwert am Bilanzstichtag bewertet. Dieser Betrag wird, verteilt über die jeweilige Wartefrist der Optionen, ratierlich zurückgestellt. Die hierfür gebildete Rückstellung erhöhte sich auf Grund der gestiegenen beizulegenden Zeitwerte der Optionen von 256 Millionen € zum 31. Dezember 2009 auf 411 Millionen € zum 31. Dezember 2010. Hieraus entstand im Jahr 2010 ein Personalaufwand in Höhe von 418 Millionen € (2009: 212 Millionen €). Der Verbrauch der Rückstellung betrug im Jahr 2010 263 Millionen € und im Jahr 2009 36 Millionen €.

Der gesamte innere Wert der ausübaren Optionen betrug 266 Millionen € zum 31. Dezember 2010 und 165 Millionen € zum 31. Dezember 2009.

### BASF-Mitarbeiterbeteiligungsprogramm

Teilnahmeberechtigt am Mitarbeiterbeteiligungsprogramm „Plus“ sind alle Mitarbeiter mit Ausnahme der zur Teilnahme an dem LTI-Programm berechtigten Führungskräfte. Das Programm wurde 1999 eingeführt und wird derzeit außer in Deutschland in weiteren europäischen Ländern sowie in Mexiko angeboten. Mitarbeiter, die an „Plus“ teilnehmen, erwerben als Eigeninvestment aus ihrer variablen Vergütung BASF-Aktien. Je zehn BASF-Aktien berechtigen nach ein, drei, fünf, sieben und zehn Jahren zum kostenlosen Bezug einer BASF-Aktie. Das erste und zweite Zehnerpaket berechtigen grundsätzlich in jedem der folgenden zehn Jahre zum kostenlosen Bezug einer BASF-Aktie.

Die Rechte verfallen, wenn der Teilnehmer sein Eigeninvestment in BASF-Aktien verkauft oder seine Tätigkeit für eine Gruppengesellschaft beendet beziehungsweise ein Jahr nach dessen Pensionierung. Die Anzahl der zu gewährenden Gratisaktien hat sich wie folgt entwickelt:

#### Zu gewährende Gratisaktien (Stück)

|                          | 2010             | 2009             |
|--------------------------|------------------|------------------|
| Stand zum 01.01.         | 3.296.361        | 3.054.104        |
| Neu erworbene Ansprüche  | 485.080          | 790.820          |
| Ausgegebene Gratisaktien | -557.001         | -460.151         |
| Verfallene Ansprüche     | -139.365         | -88.412          |
| <b>Stand zum 31.12.</b>  | <b>3.085.075</b> | <b>3.296.361</b> |

An dem Tag, an dem die Mitarbeiter mit ihrem Eigeninvestment das Bezugsrecht erwerben, werden die auszugebenden unentgeltlichen Aktien zu ihrem Marktwert bewertet. Der Marktwert wird ermittelt auf Basis des Kurses der BASF-Aktie unter Berücksichtigung des Barwerts der während der Laufzeit des Programms nicht gezahlten Dividenden. Die gewichteten Marktwerte am Gewährungstag betrugen 32,93 € für das Programm 2010 und 18,11 € für das Programm 2009.

Der Marktwert der zu gewährenden Gratisaktien wird, über die Laufzeit des Programms verteilt, aufwandswirksam erfasst und in die Kapitalrücklage eingestellt.

Die Kosten für die Programme 2001 bis 2002 werden weiterhin ratierlich auf Basis des Schlusskurses der BASF-Aktie zurückgestellt.

Der Personalaufwand für das Mitarbeiterbeteiligungsprogramm betrug im Jahr 2010 16 Millionen € und im Jahr 2009 20 Millionen €.

## 26 – Finanzwirtschaftliche Risiken und derivative Finanzinstrumente

### Marktrisiken

**Währungsrisiken:** Änderungen von Wechselkursen können zu Wertverlusten bei Finanzinstrumenten sowie zu nachteiligen Veränderungen künftiger Zahlungsströme aus geplanten Transaktionen führen. Währungsrisiken aus Finanzinstrumenten resultieren aus der Umrechnung von finanziellen Forderungen, Ausleihungen, Wertpapieren, Barmitteln und finanziellen Verbindlichkeiten zum Stichtagskurs in die funktionale Währung der jeweiligen Gruppengesellschaft. Zur Sicherung des Wechselkursrisikos aus originären Finanzinstrumenten sowie aus geplanten Transaktionen werden Devisenkontrakte in einer Vielzahl von Währungen eingesetzt.

Das Währungsrisiko-Exposure entspricht dem Nettobetrag des Nominalvolumens der originären und der derivativen Finanzinstrumente, die Währungsrisiken ausgesetzt sind. Außerdem werden geplante Einkaufs- und Umsatztransaktionen des jeweiligen Folgejahres einbezogen, soweit diese im Währungsrisikomanagement berücksichtigt werden. Gegenläufige Positionen in derselben Währung werden gegeneinander aufgerechnet.

Bei der Ermittlung der Sensitivität wird eine Abwertung von 10 % aller Währungen gegenüber der jeweiligen funktionalen Währung simuliert. Die Auswirkung auf das Ergebnis vor Ertragsteuern der BASF hätte zum 31. Dezember 2010 –157 Millionen € und zum 31. Dezember 2009 –116 Millionen € betragen.

Der Effekt aus den im Rahmen von Hedge Accounting designierten Positionen hätte das Eigenkapital vor Ertragsteuern zum 31. Dezember 2010 um 11 Millionen € erhöht (2009: –15 Millionen €). Das Währungs-Exposure zum 31. Dezember 2010 lag bei 1.058 Millionen € und zum 31. Dezember 2009 bei 902 Millionen €.

Auf Grund des Einsatzes von Optionen zur Absicherung gegenüber Währungsrisiken ist die Sensitivität keine lineare Funktion der unterstellten Veränderung der Wechselkurse.

**Zinsänderungsrisiken:** Zinsänderungsrisiken bestehen auf Grund potenzieller Änderungen des Marktzinses und können bei festverzinslichen Finanzinstrumenten zu einer Änderung des beizulegenden Zeitwerts und bei variabel verzinslichen Finanzinstrumenten zu Zinszahlungsschwankungen führen. Zur Absicherung werden Zinsswaps und kombinierte Zins-/Währungsderivate abgeschlossen. Zinsänderungsrisiken sind im finanzwirtschaftlichen, nicht aber im operativen Bereich von wesentlicher Bedeutung.

Ein Anstieg aller relevanten Zinssätze um einen Prozentpunkt hätte zum 31. Dezember 2010 ein um 23 Millionen € niedrigeres Ergebnis und zum 31. Dezember 2009 ein um 40 Millionen € niedrigeres Ergebnis zur Folge gehabt. Die Sensitivität des Eigenkapitals gegenüber Zinsänderungen ist von unwesentlichem Ausmaß.

#### Buchwerte der originären verzinslichen Finanzinstrumente (Millionen €)

|                | 2010             |                      | 2009             |                      |
|----------------|------------------|----------------------|------------------|----------------------|
|                | Fest verzinslich | Variabel verzinslich | Fest verzinslich | Variabel verzinslich |
| Ausleihungen   | 169              | 75                   | 85               | 180                  |
| Wertpapiere    | 28               | 5                    | 6                | 24                   |
| Finanzschulden | 13.309           | 1.730                | 12.976           | 1.843                |

#### Nominal- und Marktwerte der Zins- und kombinierten Zins-/Währungsswaps (Millionen €)

|                                        | 2010         |           | 2009        |           |
|----------------------------------------|--------------|-----------|-------------|-----------|
|                                        | Nominalwert  | Marktwert | Nominalwert | Marktwert |
| <b>Zinsswaps</b>                       | <b>1.061</b> | <b>52</b> | <b>426</b>  | <b>33</b> |
| davon Festzinssahler-Swaps             | 1.061        | 52        | 426         | 33        |
| <b>Kombinierte Zins-/Währungsswaps</b> | <b>928</b>   | <b>60</b> | <b>948</b>  | <b>–1</b> |
| davon feste Verzinsung                 | 920          | 61        | 934         | –1        |
| variable Verzinsung                    | 8            | –1        | 14          | .         |

**Aktienkursrisiken:** Zum Zweck der Anlage liquider Mittel sowie in begrenztem Maß mit strategischer Beteiligungsabsicht hält BASF Aktien börsennotierter Unternehmen sowie Anteile an Aktienfonds. Diese sind in den Posten Beteiligungen, Langfristige Wertpapiere und Kurzfristige Wertpapiere enthalten und werden in der BASF als zur Veräußerung verfügbar eingestuft. Ein Rückgang aller relevanten Aktienkurse um 10 % hätte vor Berücksichtigung von Ertragsteuern am 31. Dezember 2010 ein um 117 Millionen € und am 31. Dezember 2009 ein um 86 Millionen € niedrigeres Eigenkapital zur Folge gehabt.

**Warenpreisrisiken:** Einige Unternehmensbereiche der BASF sind mitunter starken Schwankungen der Rohstoffpreise ausgesetzt. Diese resultieren vor allem aus folgenden Rohstoffen: Naphtha, Propylen, Benzol, Titandioxid, Cyclohexan, Methanol, Erdgas, Butadien, LPG-Kondensat, Ammoniak sowie Edelmetalle. BASF trifft die folgenden Maßnahmen, um Preisrisiken aus dem Rohstoffeinkauf zu reduzieren:

- BASF verwendet Warenderivate zur Absicherung gegen Risiken aus der Volatilität von Rohstoffpreisen. Dabei handelt es sich insbesondere um Optionen und Swaps auf Erdöl, Erdölprodukte und Erdgas.
- Das Segment Oil & Gas verwendet im Arbeitsgebiet Natural Gas Trading Warenderivate, insbesondere Swaps auf Ölprodukte, um Margen zu sichern. Margenrisiken entstehen in den volatilen Märkten, wenn Einkaufs- und Verkaufsverträge unterschiedlich verpreist werden.
- Der Unternehmensbereich Catalysts schließt sowohl kurzfristige als auch langfristige Abnahmeverträge mit Herstellern von Edelmetallen ab und kauft darüber hinaus an den Kassamärkten Edelmetalle von einer Vielzahl von Geschäftspartnern zu. Das Preisrisiko aus Edelmetallen, die für den Weiterverkauf an Dritte oder für die Verwendung in der Produktion von Katalysatoren erworben werden, wird mit derivativen Instrumenten gesichert. Dabei kommen vor allem Terminkontrakte zum Einsatz, die durch Abschluss gegenläufiger Kontrakte oder durch Lieferung des Edelmetalls erfüllt werden. Darüber hinaus hält Catalysts zu Eigenhandelszwecken in begrenztem Umfang ungesicherte Edelmetallpositionen, die auch derivative Instrumente umfassen können. Der Wert dieser Positionen ist der Volatilität der Marktpreise ausgesetzt und unterliegt einer ständigen Kontrolle.
- Im Unternehmensbereich Crop Protection ist der Verkaufspreis von Produkten teilweise an den Preis bestimmter Agrarprodukte gekoppelt. Um die daraus entstehenden Risiken abzusichern, werden Derivate auf Agrarprodukte abgeschlossen.

Auf Grund des Haltens von Warenderivaten und Edelmetallhandelspositionen ist BASF Preisrisiken ausgesetzt. Diese Risiken bestehen darin, dass die Bewertung von Warenderivaten und Edelmetallhandelspositionen zum Marktwert bei einer nachteiligen Veränderung der Marktpreise zu Belastungen von Ergebnis und Eigenkapital der BASF führen kann.

BASF führt Value-at-Risk-Analysen für alle Warenderivate und Edelmetallhandelspositionen durch. Mit Value at Risk wird fortlaufend das Marktrisiko quantifiziert und der maximal mögliche Verlust innerhalb des gegebenen Konfidenzintervalls über einen bestimmten Zeitraum prognostiziert. Der Value-at-Risk-

Rechnung liegt ein Konfidenzintervall von 95 % und eine Halte-dauer von einem Tag zu Grunde. Die Anwendung des Konfidenzintervalls von 95 % bedeutet, dass der maximale Verlust in einem Zeitraum von einem Tag mit einer Wahrscheinlichkeit von 95 % den Value at Risk nicht übersteigt. Für Edelmetalle basiert der Value at Risk auf einem Konfidenzintervall von 99 %. BASF wendet den Varianz-Kovarianz-Ansatz an.

BASF nutzt Value at Risk im Zusammenhang mit anderen Kennzahlen im Rahmen des Risikomanagementsystems. Neben Value at Risk werden volumenbasierte Grenzen, Exposure- und Stop-Loss-Limits gesetzt.

#### Risikoposition aus Warenderivaten (Millionen €)

|                                                  | 2010      |               | 2009      |               |
|--------------------------------------------------|-----------|---------------|-----------|---------------|
|                                                  | Expo-sure | Value at Risk | Expo-sure | Value at Risk |
| Erdöl, Erdölprodukte und Erdgas                  | -230      | 6             | 65        | 8             |
| Edelmetalle                                      | 4         | 1             | 31        | 2             |
| Swaps auf CO <sub>2</sub> -Emissions-zertifikate | 3         | .             | 4         | 1             |
| Agrarprodukte                                    | -95       | .             | 129       | .             |
|                                                  | -318      | 7             | 229       | 11            |

Das Exposure entspricht dem Nettobetrag aller Kauf- und Verkaufspositionen der jeweiligen Warenkategorie.

→ **Weitere Informationen zu finanzwirtschaftlichen Risiken und zum Risikomanagement der BASF sind im Lagebericht, Kapitel „Risiko-bericht“, ab Seite 103 zu finden**

Im Rahmen des CO<sub>2</sub>-Emissionshandels werden Swaps abgeschlossen, bei denen verschiedene Arten von CO<sub>2</sub>-Zertifikaten getauscht werden. Ziel dieser Transaktionen ist es, im Markt vorhandene Preisdifferenzen zu nutzen. Die Erfüllung der Geschäfte erfolgt durch physische Lieferung.

#### Ausfall- oder Bonitätsrisiken

Ausfall- oder Bonitätsrisiken bestehen, wenn Vertragspartner ihren Verpflichtungen nicht nachkommen. BASF analysiert regelmäßig die Kreditwürdigkeit jedes wesentlichen Schuldners und räumt auf dieser Grundlage Kreditlimits ein. Auf Grund der weltweiten Tätigkeit und der diversifizierten Kundenstruktur der BASF-Gruppe liegt keine wesentliche Konzentration von Ausfallrisiken vor. Der Buchwert aller Forderungen, Ausleihungen und verzinslichen Wertpapiere zuzüglich der Nominalwerte der Haftungsverhältnisse ohne potenzielle Gewährleistungsverpflichtungen stellt das maximale Ausfallrisiko der BASF dar.

→ **Mehr zu Bonitätsrisiken unter Anmerkung 16 ab Seite 173**

#### Liquiditätsrisiken

Risiken aus Zahlungsstromschwankungen werden frühzeitig im Rahmen der Liquiditätsplanung erkannt. Durch das laufende Commercial-Paper-Programm sowie von Banken verbindlich zugesagte Kreditlinien kann BASF jederzeit auf umfangreiche liquide Mittel zurückgreifen. Auch während der Finanzkrise war der Commercial-Paper-Markt für BASF auf Grund der soliden Ratings jederzeit liquide.

**Fälligkeiten vertraglicher Zahlungsströme aus finanziellen Verbindlichkeiten 2010 (Millionen €)**

|                         | Anleihen und sonstige Kapitalmarktverbindlichkeiten | Verbindlichkeiten gegenüber Kreditinstituten | Derivative Verbindlichkeiten | Sonstige Verbindlichkeiten |
|-------------------------|-----------------------------------------------------|----------------------------------------------|------------------------------|----------------------------|
| 2011                    | 3.616                                               | 795                                          | 437                          | 942                        |
| 2012                    | 3.396                                               | 235                                          | 62                           | 80                         |
| 2013                    | 1.799                                               | 686                                          | 1                            | 14                         |
| 2014                    | 1.518                                               | 53                                           | –                            | 11                         |
| 2015                    | 2.320                                               | 382                                          | –                            | 12                         |
| 2016 und darüber hinaus | 2.819                                               | 102                                          | 7                            | 388                        |
|                         | <b>15.468</b>                                       | <b>2.253</b>                                 | <b>507</b>                   | <b>1.447</b>               |

**Fälligkeiten vertraglicher Zahlungsströme aus finanziellen Verbindlichkeiten 2009 (Millionen €)**

|                         | Anleihen und sonstige Kapitalmarktverbindlichkeiten | Verbindlichkeiten gegenüber Kreditinstituten | Derivative Verbindlichkeiten | Sonstige Verbindlichkeiten |
|-------------------------|-----------------------------------------------------|----------------------------------------------|------------------------------|----------------------------|
| 2010                    | 2.042                                               | 920                                          | 327                          | 700                        |
| 2011                    | 1.721                                               | 187                                          | 20                           | 51                         |
| 2012                    | 3.368                                               | 206                                          | 16                           | 31                         |
| 2013                    | 1.798                                               | 675                                          | –                            | 34                         |
| 2014                    | 1.515                                               | 43                                           | –                            | 32                         |
| 2015 und darüber hinaus | 5.041                                               | 36                                           | 7                            | 436                        |
|                         | <b>15.485</b>                                       | <b>2.067</b>                                 | <b>370</b>                   | <b>1.284</b>               |

Relevant für die Darstellung der Fälligkeiten vertraglicher Zahlungsströme aus finanziellen Verbindlichkeiten sind Zinszahlungen und Zahlungen des Prinzipals sowie sonstige Zahlungen für derivative Finanzinstrumente. In dieser Darstellung werden künftige Zahlungsströme nicht abgezinst.

Derivate werden mit ihren Nettopaymentsströmen einbezogen, soweit sie negative Marktwerte haben und daher Verbindlichkeiten darstellen. Derivate mit positiven Marktwerten sind Vermögenswerte und werden daher nicht berücksichtigt.

Verbindlichkeiten aus Lieferungen und Leistungen sind im Wesentlichen unverzinslich und innerhalb eines Jahres fällig. Der Buchwert von Verbindlichkeiten aus Lieferungen und Leistungen entspricht daher der Summe der künftigen Zahlungsströme.

**Abweichungen zwischen Buch- und Marktwerten von Finanzinstrumenten**

Bei Forderungen aus Lieferungen und Leistungen, Übrigen Forderungen und sonstigem Vermögen, Ausleihungen, Zahlungsmitteln und Zahlungsmitteläquivalenten sowie Verbindlichkeiten aus Lieferungen und Leistungen und Sonstigen Verbindlichkeiten entspricht der Buchwert annähernd dem Marktwert. In den Sonstigen Finanzanlagen sind nicht an einem aktiven Markt notierte Beteiligungen enthalten, deren beizulegender Zeitwert nicht verlässlich ermittelt werden kann und die daher zu fortgeführten Anschaffungskosten bewertet werden.

Der Buchwert der Beteiligungen, die an einem aktiven Markt notiert sind und daher zum beizulegenden Zeitwert bewertet werden, belief sich zum 31. Dezember 2010 auf 1.116 Millionen € und zum 31. Dezember 2009 auf 805 Millionen €. Diese sind im Posten Anteile an übrigen Beteiligungen enthalten.

→ Mehr dazu unter Anmerkung 14 auf Seite 172

Der Buchwert der Finanzschulden betrug 15.039 Millionen € zum 31. Dezember 2010 sowie 14.819 Millionen € zum 31. Dezember 2009. Der Marktwert der Finanzschulden belief sich zum Jahresende 2010 auf 15.995 Millionen € gegenüber 15.621 Millionen € am Jahresende 2009. Der Marktwert von Finanzschulden wird auf der Grundlage von Interbank-Zinssätzen ermittelt. Die Differenz zwischen Buch- und Marktwert resultiert vornehmlich aus Zinsänderungen.

**Buchwerte von Finanzinstrumenten** (Millionen €)

|                                                                                                   | 2010   | 2009   |
|---------------------------------------------------------------------------------------------------|--------|--------|
| Erfolgswirksam zum beizulegenden Zeitwert bilanzierte finanzielle Vermögenswerte                  | 396    | 255    |
| Erfolgswirksam zum beizulegenden Zeitwert bilanzierte finanzielle Verbindlichkeiten               | 424    | 328    |
| Im Rahmen von Hedge Accounting als Sicherungsinstrumente designierte derivative Finanzinstrumente | 2      | 36     |
| Ausleihungen und Forderungen                                                                      | 12.179 | 9.531  |
| Zahlungsmittel und Zahlungsmitteläquivalente                                                      | 1.493  | 1.835  |
| Zur Veräußerung verfügbare finanzielle Vermögenswerte                                             | 1.725  | 1.369  |
| Zu fortgeführten Anschaffungskosten bewertete finanzielle Verbindlichkeiten                       | 21.850 | 19.865 |
| davon Finanzschulden                                                                              | 15.039 | 14.819 |

**Nettogewinne und Nettoverluste aus Finanzinstrumenten** (Millionen €)

|                                                                                     | 2010 | 2009 |
|-------------------------------------------------------------------------------------|------|------|
| Forderungen und Ausleihungen                                                        | -320 | -209 |
| davon Zinsergebnis                                                                  | 65   | 89   |
| Zur Veräußerung verfügbare finanzielle Vermögenswerte                               | 7    | -7   |
| davon Zinsergebnis                                                                  | 2    | 1    |
| Zu fortgeführten Anschaffungskosten bewertete finanzielle Verbindlichkeiten         | -910 | -499 |
| davon Zinsergebnis                                                                  | -603 | -612 |
| Erfolgswirksam zum beizulegenden Zeitwert bilanzierte finanzielle Finanzinstrumente | 302  | -361 |

Die Nettogewinne und Nettoverluste aus Finanzinstrumenten umfassen Bewertungsergebnisse, das Fortschreiben von Agien und Disagien, die Erfassung und das Stornieren von Aufwendungen aus Wertminderungen, Ergebnisse aus der Währungsumrechnung sowie Zinsen, Dividenden und alle sonstigen Ergebniswirkungen aus Finanzinstrumenten. Im Posten Erfolgswirksam zum beizulegenden Zeitwert bewertete Finanzinstrumente sind nur Ergebnisse aus solchen Instrumenten enthalten, die nicht als Sicherungsinstrumente im Rahmen einer Sicherungsbeziehung nach IAS 39 designiert sind. Nettogewinne und Nettoverluste aus zur Veräußerung verfügbaren finanziellen Vermögenswerten enthalten Ergebnisse aus Abschreibungen, Zuschreibungen, Zinsen, Dividenden sowie Umbuchungen von Bewertungseffekten aus dem Eigenkapital bei Veräußerung von Wertpapieren beziehungsweise Beteiligungen.

Die Nettoverluste aus Forderungen und Ausleihungen sowie die Nettogewinne aus zu fortgeführten Anschaffungskosten bewerteten finanziellen Verbindlichkeiten betreffen im Wesentlichen Ergebnisse aus der Währungsumrechnung.

→ **Die ergebnisunwirksam im Eigenkapital erfassten Bewertungsgewinne und Bewertungsverluste von Wertpapieren und Beteiligungen werden in der Entwicklung der ergebnisneutral im Eigenkapital der Aktionäre der BASF SE erfassten Erträge und Aufwendungen auf Seite 138 dargestellt**

**Einsatz derivativer Finanzinstrumente**

BASF ist im Rahmen der gewöhnlichen Geschäftstätigkeit Währungs-, Zinsänderungs- und Warenpreisrisiken ausgesetzt. Des Weiteren bestehen bei börsennotierten Finanzanlagen auch Aktienkursrisiken. Diese Risiken werden nach einer zentral festgelegten Strategie bei Bedarf durch derivative Instrumente abgesichert. Zusätzlich werden derivative Instrumente auch als Ersatz für originäre Finanzinstrumente, zum Beispiel festverzinsliche Wertpapiere, genutzt. Eine Absicherung wird nur für bestehende Grundgeschäfte aus dem Produktgeschäft, Geldanlagen und Finanzierungen, Nettoinvestitionen in ausländische Tochtergesellschaften sowie für erwartete Umsätze und Rohstoffbezüge vorgenommen. Die aus den Grundgeschäften resultierenden Risiken sowie die Derivate werden laufend überwacht. BASF unterliegt Kreditrisiken, soweit Derivate einen positiven Marktwert haben und die Vertragspartner ihre Leistungen nicht erfüllen können. Zur Beschränkung des Ausfallrisikos bei den positiven Marktwerten der Derivate werden Transaktionen nur im Rahmen festgelegter Limits mit Banken und Partnern guter Bonität getätigt.

Um ein effizientes Risikomanagement zu ermöglichen, werden Risikopositionen bei der BASF SE und bestimmten Gruppengesellschaften zentralisiert. Der Abschluss und die Abwicklung der zu Sicherungszwecken abgeschlossenen derivativen Finanzinstrumente erfolgt nach internen Richtlinien und unterliegt strengen Kontrollen.

Die beizulegenden Zeitwerte der derivativen Finanzinstrumente werden anhand von Bewertungsmodellen ermittelt, die auf am Markt beobachtbaren Input-Parametern basieren. Ausnahme hiervon bilden einige Warenderivate, deren Bewertung unmittelbar auf Marktpreisen beruht. Auf diese Weise wurden im Jahr 2010 Zeitwerte in Höhe von -24 Millionen € (Vorjahr: -25 Millionen €) bestimmt.



**Marktwerte derivativer Instrumente** (Millionen €)

|                                                                                   | 2010       | 2009       |
|-----------------------------------------------------------------------------------|------------|------------|
| Devisentermingeschäfte                                                            | -151       | -142       |
| Währungsoptionen                                                                  | 109        | 72         |
| <b>Fremdwährungsderivate</b>                                                      | <b>-42</b> | <b>-70</b> |
| davon als Sicherungsinstrumente im Sinne von IAS 39 designiert (Hedge Accounting) | 3          | 1          |
| Zinsswaps                                                                         | 52         | 33         |
| Kombinierte Zins-/Währungsswaps                                                   | 60         | -1         |
| <b>Zinsderivate</b>                                                               | <b>112</b> | <b>32</b>  |
| <b>Warenderivate</b>                                                              | <b>-96</b> | <b>1</b>   |
| davon als Sicherungsinstrumente im Sinne von IAS 39 designiert (Hedge Accounting) | -1         | 35         |

**Hedge Accounting**

In den Jahren 2010 und 2009 wurde ein Teil der geplanten Einkäufe von Naphtha mit Swaps und Optionen auf Öl und Ölprodukte gesichert. Diese Sicherungsbeziehungen wurden im Abschluss der BASF teilweise mittels Cashflow Hedge Accounting abgebildet, so dass Gewinne und Verluste aus den Sicherungsinstrumenten zunächst erfolgsneutral im Eigenkapital erfasst wurden. Die Gewinne oder Verluste aus den Sicherungsinstrumenten werden zu dem Zeitpunkt, in dem das Grundgeschäft in der Gewinn- und Verlustrechnung erfasst wird, in den Herstellungskosten berücksichtigt.

Im Jahr 2010 haben wir im Arbeitsgebiet Natural Gas Trading Cashflow Hedge Accounting für Swaps auf Erdöl, mit denen wir uns gegen Preisrisiken aus Einkaufsverträgen für Erdgas absichern, eingesetzt. Diese Einkaufsverträge sind variabel verpreist, die Preisformel ist an den Ölpreis gekoppelt.

Sowohl der überwiegende Teil der geplanten Transaktionen als auch die daraus resultierende Erfolgswirkung treten innerhalb des jeweils auf den Bilanzstichtag folgenden Jahres ein. Ein geringer Teil entfällt auf die Jahre 2012 bis 2014. Im Jahr 2010 glichen sich die effektiven Wertänderungen über alle Gesellschaften im Eigenkapital der Aktionäre der BASF SE aus. 2009 wurden 36 Millionen € an effektiven Wertänderungen von Sicherungsinstrumenten im Eigenkapital der Aktionäre der BASF SE gebucht. Aus dem Eigenkapital der Aktionäre der BASF SE ausgebucht und direkt als Ertrag in den Herstellungskosten erfasst wurden 2010 11 Millionen €. 2009 entstand hieraus ein Aufwand in Höhe von 155 Millionen €. Der ineffektive Teil der Wertänderungen der Sicherungsinstrumente betrug 12 Millionen € im Jahr 2010 und 27 Millionen € im Jahr 2009. Dieser Betrag wurde in der Gewinn- und Verlustrechnung in den Herstellungskosten sowie in den Sonstigen betrieblichen Erträgen beziehungsweise Sonstigen betrieblichen Aufwendungen erfasst.

In den Jahren 2004 und 2005 wurden die Marktwertänderungen von Forward-Zinsswaps, die zur Absicherung der Zinsrisiken aus der Refinanzierung einer auslaufenden Anleihe abgeschlossen worden waren, mittels Cashflow Hedge Accounting erfolgsneutral im Eigenkapital erfasst. Die Sicherungsinstrumente wurden im Jahr 2005 glattgestellt, als zur Refinanzierung der auslaufenden Anleihe eine neue Emission durchgeführt wurde. Die neu begebene Anleihe wird im Jahr 2012 fällig. Über die Laufzeit der Anleihe hinweg werden die im Eigenkapital erfassten Marktwertänderungen der Zinsswaps ratierlich aus dem Eigenkapital in die Gewinn- und Verlustrechnung umgebucht. In den Jahren 2010 und 2009 wurden je 8 Millionen € bei der Position Sonstige Eigenkapitalposten ausgebucht und als Zinsaufwand erfasst.

Für Effekte aus in Bezugsverträgen enthaltenen Fremdwährungsderivaten wendet BASF Cash Flow Hedge Accounting an. Die Erfolgswirkung aus den zu Grunde liegenden Transaktionen tritt überwiegend im Jahr 2011 ein, geringe Effekte werden sich auch auf die Jahre 2012 bis 2014 auswirken. 2010 wurden effektive Wertänderungen aus den Sicherungsgeschäften in Höhe von -12 Millionen € und 2009 in Höhe von 10 Millionen € im Eigenkapital der Aktionäre der BASF SE erfasst. Ausbuchungen aus dem Eigenkapital der Aktionäre der BASF SE erhöhten die Herstellkosten um 16 Millionen € (2009: Minderung der Herstellkosten um 3 Millionen €). Ineffektivitäten traten keine auf.

Des Weiteren wurde im Jahr 2010 erstmals das Translationsrisiko aus einer Investition in eine ausländische Tochtergesellschaft mit Devisentermingeschäften abgesichert. Die Absicherung war vollständig effektiv und verringerte das Eigenkapital der Aktionäre der BASF SE um 7 Millionen €.

## 27 – Leasingverhältnisse

### Geleaste Vermögenswerte

Die Sachanlagen beinhalten Vermögenswerte, welche im Rahmen von Finanzierungsleasing wirtschaftliches Eigentum begründen. Sie betreffen im Wesentlichen folgende Posten:

#### Geleaste Vermögenswerte (Millionen €)

|                                                    | 2010                |                | 2009                |                |
|----------------------------------------------------|---------------------|----------------|---------------------|----------------|
|                                                    | Anschaffungs-kosten | Nettobuchwerte | Anschaffungs-kosten | Nettobuchwerte |
| Grundstücke, grundstücksgleiche Rechte und Bauten  | 46                  | 29             | 24                  | 12             |
| Technische Anlagen und Maschinen                   | 275                 | 79             | 235                 | 78             |
| Andere Anlagen, Betriebs- und Geschäftsausstattung | 69                  | 13             | 67                  | 13             |
|                                                    | <b>390</b>          | <b>121</b>     | <b>326</b>          | <b>103</b>     |

#### Verbindlichkeiten aus Finanzierungsleasing (Millionen €)

|              | 2010                |            |                         | 2009                |            |                         |
|--------------|---------------------|------------|-------------------------|---------------------|------------|-------------------------|
|              | Mindest-leasingrate | Zinsanteil | Leasing-verbindlichkeit | Mindest-leasingrate | Zinsanteil | Leasing-verbindlichkeit |
| Folgejahr 1  | 35                  | 8          | 27                      | 23                  | 5          | 17                      |
| Folgejahr 2  | 25                  | 6          | 19                      | 27                  | 4          | 21                      |
| Folgejahr 3  | 15                  | 3          | 12                      | 16                  | 5          | 14                      |
| Folgejahr 4  | 12                  | 4          | 8                       | 7                   | 2          | 6                       |
| Folgejahr 5  | 10                  | 2          | 8                       | 6                   | 2          | 3                       |
| Über 5 Jahre | 27                  | 5          | 22                      | 27                  | 9          | 19                      |
|              | <b>124</b>          | <b>28</b>  | <b>96</b>               | <b>106</b>          | <b>27</b>  | <b>80</b>               |

Im laufenden Geschäftsjahr und im Vorjahr wurden keine über die Mindestleasingaufwendungen hinausgehenden zusätzlichen Leasingzahlungen auf Grund vertraglich festgelegter Bedingungen für Finanzierungsleasing ergebniswirksam erfasst.

Den Leasingverbindlichkeiten standen 2010 keine wesentlichen Mindestleasingzahlungen aus Unterleasingverträgen gegenüber.

Zusätzlich ist BASF Leasingnehmer im Rahmen von operativen Leasingverträgen. Die sich daraus ergebenden Verpflichtungen in Höhe von insgesamt 1.679 Millionen € im Jahr 2010 und 1.357 Millionen € im Jahr 2009 sind in den folgenden Jahren zu leisten:

#### Verpflichtungen aus operativen Leasingverträgen (Millionen €)

|              | Nominalwert der künftigen Mindestleasingzahlungen |              |
|--------------|---------------------------------------------------|--------------|
|              | 31.12.2010                                        | 31.12.2009   |
| Bis 1 Jahr   | 521                                               | 376          |
| 1–5 Jahre    | 807                                               | 632          |
| Über 5 Jahre | 351                                               | 349          |
|              | <b>1.679</b>                                      | <b>1.357</b> |

In operativen Leasingverpflichtungen bis zu einem Jahr waren im Jahr 2010 Leases von Edelmetallen in Höhe von 203 Millionen € und im Jahr 2009 von 133 Millionen € enthalten. Diese

wurden unmittelbar an Dritte weiterverleaset. Den übrigen Leasingverpflichtungen standen erwartete Mindestleasingzahlungen aus Unterleasingverträgen in Höhe von 16 Millionen € im Jahr 2010 und 13 Millionen € im Jahr 2009 gegenüber.

Im Ergebnis der Betriebstätigkeit waren im Jahr 2010 Mindestleasingzahlungen von 311 Millionen € und im Jahr 2009 von 279 Millionen € enthalten. Außerdem waren im Jahr 2010 1 Million € bedingte Leasingzahlungen enthalten gegenüber 2 Millionen € im Jahr 2009. Weiterhin wurden im Ergebnis der Betriebstätigkeit Leasingzahlungen aus Unterleasingverträgen im Jahr 2010 ebenso wie im Jahr 2009 von 4 Millionen € berücksichtigt.

### Verleaste Vermögenswerte

Im Rahmen des Finanzierungsleasings ist BASF sowohl Leasingnehmer als auch Leasinggeber. BASF tritt nur in unwesentlichem Umfang als Leasinggeber von Finanzierungsleasing auf. Die Forderungen aus Finanzierungsleasing lagen im Jahr 2010 bei 18 Millionen € und im Jahr 2009 bei 17 Millionen €.

Aus operativen Leasingverträgen resultierten im Jahr 2010 Mindestleasingzahlungen mit einem Nominalwert von 222 Millionen € innerhalb eines Jahres, 72 Millionen € über ein Jahr und im Jahr 2009 von 143 Millionen € innerhalb eines Jahres und 40 Millionen € über ein Jahr.

Weiterhin wurden Edelmetallkonten in Höhe von 706 Millionen € im Jahr 2010 und 578 Millionen € im Jahr 2009 für Kunden, deren Metalle physisch bei BASF lagern, geführt.

## 28 – Bezüge des Vorstands und des Aufsichtsrats

| Millionen €                                                                                  | 2010        | 2009        |
|----------------------------------------------------------------------------------------------|-------------|-------------|
| Erfolgsunabhängige und erfolgsbezogene Barvergütung des Vorstands                            | 22,2        | 14,8        |
| Marktwert der im Geschäftsjahr dem Vorstand gewährten Optionen zum Zeitpunkt ihrer Gewährung | 3,5         | 2,8         |
| <b>Gesamtvergütung des Vorstands</b>                                                         | <b>25,7</b> | <b>17,6</b> |
| Pensionsaufwendungen für Mitglieder des Vorstands                                            | 2,9         | 1,6         |
| Bezüge des Aufsichtsrats                                                                     | 2,9         | 1,3         |
| Gesamtbezüge früherer Mitglieder des Vorstands und ihrer Hinterbliebenen                     | 13,2        | 12,3        |
| Pensionsrückstellungen für frühere Mitglieder des Vorstands und ihre Hinterbliebenen         | 95,4        | 87,9        |
| Darlehen an Mitglieder des Vorstands und des Aufsichtsrats                                   | –           | –           |
| Haftungsverhältnisse zu Gunsten von Mitgliedern des Vorstands und des Aufsichtsrats          | –           | –           |

Bemessungsgrundlage der erfolgsbezogenen Vergütung des Vorstands ist – neben der Leistung des Gesamtvorstands – die Gesamtkapitalrendite, die ausgehend vom Ergebnis vor Ertragsteuern zuzüglich der Fremdkapitalzinsen bezogen auf das durchschnittliche Vermögen erwirtschaftet wird.

Ferner wurden den Mitgliedern des Vorstands im Jahr 2010 im Rahmen des Long-Term-Incentive-Programms (LTI-Programm) 185.584 Optionsrechte gewährt.

Die Optionsrechte der aktiven und ehemaligen Mitglieder des Vorstands führten im Jahr 2010 zu einem Personalaufwand von insgesamt 46,4 Millionen €. Im Jahr 2009 entstand aus den Optionsrechten ein Aufwand in Höhe von 20,9 Millionen €.

→ **Mehr zur Vergütung der Mitglieder des Vorstands im Vergütungsbericht ab Seite 125**

→ **Mehr zu den Mitgliedern des Aufsichtsrats und des Vorstands, einschließlich der von ihnen mitgeteilten Mandate, ab Seite 122**

## 29 – Beziehungen zu nahestehenden Unternehmen und Personen (Related Parties)

Nach IAS 24 ergeben sich Offenlegungsanforderungen, um die Beziehungen mit nahestehenden Unternehmen und Personen zu erläutern.

Nahestehende Unternehmen und Personen sind juristische oder natürliche Personen, auf die die BASF-Gruppe Einfluss nehmen kann beziehungsweise die der Kontrolle oder einem maßgeblichen Einfluss durch die BASF-Gruppe unterliegen. Ins-

besondere gehören hierzu die nicht konsolidierten Tochtergesellschaften, Gemeinschaftsnehmen, verbundene und assoziierte Unternehmen.

Die folgende Tabelle zeigt den Geschäftsumfang mit nahestehenden Unternehmen, die im Konzernabschluss zu fortgeführten Anschaffungskosten, at Equity oder anteilmäßig einbezogen wurden.

| Millionen €                            | 2010    |                                            |                                                  | 2009    |                                            |                                                  |
|----------------------------------------|---------|--------------------------------------------|--------------------------------------------------|---------|--------------------------------------------|--------------------------------------------------|
|                                        | Umsätze | Forderungen aus Lieferungen und Leistungen | Verbindlichkeiten aus Lieferungen und Leistungen | Umsätze | Forderungen aus Lieferungen und Leistungen | Verbindlichkeiten aus Lieferungen und Leistungen |
| Nicht konsolidierte Tochterunternehmen | 1.056   | 266                                        | 48                                               | 860     | 213                                        | 45                                               |
| Gemeinschaftsunternehmen               | 536     | 82                                         | 145                                              | 334     | 67                                         | 172                                              |
| Assoziierte und verbundene Unternehmen | 1.391   | 189                                        | 17                                               | 1.332   | 103                                        | 30                                               |

Die Umsätze von Gemeinschaftsunternehmen betrafen hauptsächlich die Umsätze mit Ellba C.V., Rotterdam/Niederlande, Ellba Eastern Private Ltd., Singapur, Polioles S.A. de C.V., Lerma, Estado de Mexico/Mexiko, BASF-YPC Company Ltd., Nanjing/China, Wintershall Erdgas Handelshaus Zug AG, Zug/Schweiz, und Wintershall Erdgas Handelshaus GmbH & Co. KG, Berlin. Der nicht konsolidierte Anteil der Umsätze mit diesen Unternehmen betrug im Jahr 2010 391 Millionen € und im Jahr 2009 253 Millionen €.

Umsätze mit assoziierten und verbundenen Unternehmen entstanden hauptsächlich aus dem Geschäft mit Erdgas Münster GmbH, Münster, und VNG – Verbundnetz Gas Aktiengesellschaft, Leipzig. Der nicht konsolidierte Anteil der Umsätze mit diesen Unternehmen betrug im Jahr 2010 1.291 Millionen € und im Jahr 2009 1.272 Millionen €.

Mit Mitgliedern des Vorstands und des Aufsichtsrats und diesen nahestehenden Unternehmen und Personen wurden keine berichtspflichtigen Geschäfte abgeschlossen.

Die BASF hat keine Kredite an Mitglieder des Vorstands oder des Aufsichtsrats und an diesen nahestehenden Unternehmen und Personen vergeben.

→ **Mehr Informationen zu Tochterunternehmen, Gemeinschaftsunternehmen, assoziierten Unternehmen und verbundenen Unternehmen siehe „Anteilsbesitzliste der BASF-Gruppe 2010“ auf Seite 194**

→ **Mehr Informationen zu Mitgliedern des Vorstands und des Aufsichtsrats siehe „Organe der Gesellschaft“ und „Vergütungsbericht“ ab Seite 125**

## 30 – Dienstleistungen des Abschlussprüfers

Unternehmen der BASF-Gruppe haben folgende Dienstleistungen von KPMG in Anspruch genommen:

| Millionen €                     | 2010        | 2009        |
|---------------------------------|-------------|-------------|
| Abschlussprüfung                | 24,5        | 22,7        |
| davon Inland                    | 7,6         | 6,6         |
| Sonstige Bestätigungsleistungen | 0,4         | 0,4         |
| davon Inland                    | 0,1         | 0,1         |
| Steuerberatung                  | .           | .           |
| davon Inland                    | –           | –           |
| Sonstige Leistungen             | 0,3         | 0,3         |
| davon Inland                    | 0,3         | 0,3         |
|                                 | <b>25,2</b> | <b>23,4</b> |

Hiervon entfielen auf die KPMG AG Wirtschaftsprüfungsgesellschaft und verbundene Unternehmen (zusammengeschlossen in der KPMG Europe LLP) im Jahr 2010 11,4 Millionen € und im Jahr 2009 10,3 Millionen € Honorare für Abschlussprüfungen.

Die Abschlussprüfung betraf Aufwendungen für die Prüfung des Konzernabschlusses der BASF-Gruppe sowie die gesetzlich vorgeschriebenen Jahresabschlüsse der BASF SE und der in den Konzernabschluss einbezogenen Tochter- und Gemeinschaftsunternehmen.

## 31 – Anteilsbesitzliste der BASF-Gruppe gemäß § 313 Abs. 2 HGB

### Anteilsbesitzliste

Die Zusammenstellung der einbezogenen Gesellschaften und des gesamten Anteilsbesitzes gemäß § 313 Abs. 2 HGB ist

Bestandteil des testierten und im elektronischen Bundesanzeiger eingereichten Konzernabschlusses. Sie ist außerdem im Internet veröffentlicht unter: → [basf.com/de/investor/cg](http://basf.com/de/investor/cg)



# 5

## Die Ernten steigern

Hitze oder Kälte entscheiden oft, wie gut oder schlecht eine Ernte ausfällt. Wenn Nutzpflanzen unter schwierigen Umweltbedingungen nicht den erwarteten Ernteertrag liefern, ist das für Landwirte und Verbraucher ein Problem. BASF arbeitet deshalb gemeinsam mit Monsanto an der Entwicklung stresstoleranter Nutzpflanzen, wie zum Beispiel Mais, die widerstandsfähiger gegenüber Trockenheit sind. So können Landwirte ihre Ernte steigern und gleichzeitig Wasser sorgsam nutzen.

→ Mehr zum Thema Pflanzenbiotechnologie auf Seite 72

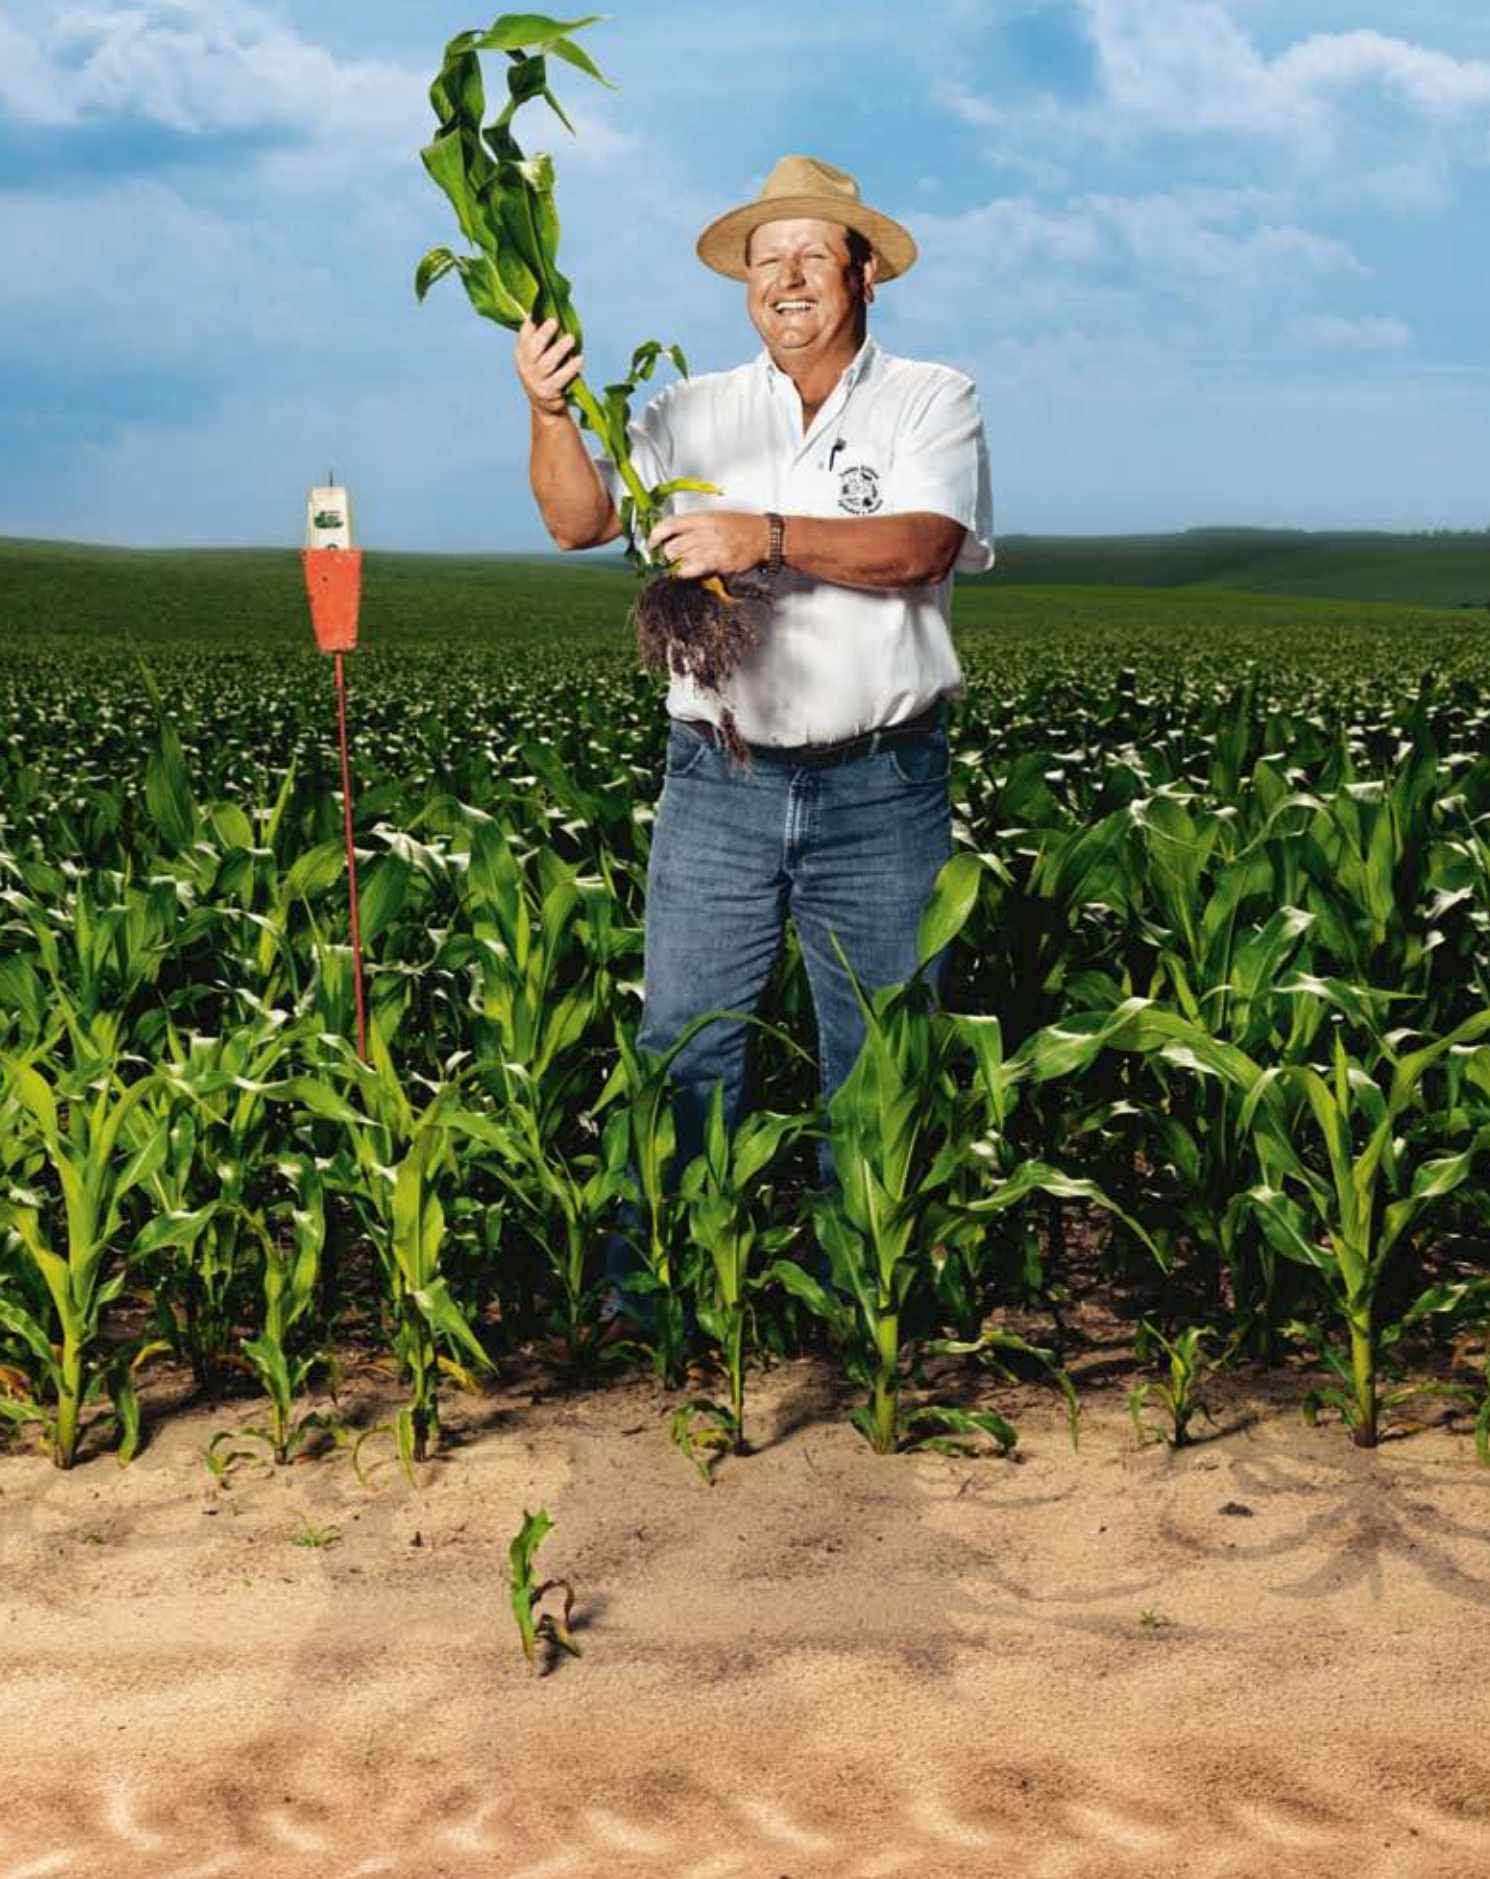

# Ergänzende Angaben zum Öl-und-Gas-Geschäft

195 Ergänzende Angaben zum Öl-und-Gas-Geschäft



## Ergänzende Angaben zum Öl-und-Gas-Geschäft (ungeprüft)

Im Folgenden werden zusätzliche Erläuterungen zu dem Geschäftsfeld Exploration & Production des Segments Oil & Gas gegeben. Da IFRS keine spezifischen Vorschriften für derartige Angaben enthält, wurden die folgenden Informationen entsprechend den Vorschriften des US-GAAP-Standards SFAS 69 (Disclosure of Oil and Gas Producing Activities) und denen der Securities and Exchange Commission ermittelt. Gegenüber der Darstellung nach SFAS 69 wurden Modifikationen vorgenommen, um eine wirtschaftlich aussagefähige Berichterstattung über die Kooperation mit Gazprom bei dem Projekt Juschno Russkoje in Russland zu ermöglichen. BASF ist über Severnftgazprom (SNG) als Inhaberin der Produktionslizenz mit insgesamt 35 % am wirtschaftlichen Erfolg dieses Feldes beteiligt. SNG wird nach der Equity-Methode einbezogen. Die Projektabwicklung erfolgt über eine eigenständige Gesellschaft, die vollkonsolidiert wird.

In den nachfolgenden Übersichten wird unser Anteil an dem Projekt unter Russland ausgewiesen. Zusätzlich werden die auf die nach der Equity-Methode einbezogene SNG entfallenden Werte separat ausgewiesen.

Alle vollkonsolidierten Gesellschaften werden mit 100 % ihrer Werte einbezogen. Sofern andere Gesellschafter an diesen Gesellschaften beteiligt sind, wird der auf sie entfallende Anteil separat offengelegt. Dies betrifft die im Rahmen des Vermögenstauschs mit Gazprom 2007 abgegebenen Anteile an einer Wintershall-Gesellschaft mit Produktions- und Explorationsrechten an den libyschen Onshore-Konzessionen 96 und 97. Auf Grund vertraglicher Regelungen sind in den nachfolgenden Angaben keine Mengen oder Werte aus dem Achimgaz-Projekt enthalten.

Die nachstehende Tabelle enthält eine Übersicht der wesentlichen Unterschiede zwischen den Angaben für das Arbeitsgebiet Exploration & Production in der konsolidierten Berichterstattung der BASF-Gruppe und den Zusatzangaben zu Öl und Gas.

|                                                                                      | <b>BASF-Bericht-<br/>erstattung</b>                                   | <b>Zusatzangaben<br/>zu Öl und Gas</b> |
|--------------------------------------------------------------------------------------|-----------------------------------------------------------------------|----------------------------------------|
| Sonstige Aktivitäten in E&P (z. B. Handelswarengeschäfte und Joint Venture Services) | enthalten                                                             | nicht enthalten                        |
| Achimgaz (Gemeinschaftsunternehmen)                                                  | quotale Konsolidierung (50 %)                                         | nicht enthalten                        |
| At Equity einbezogene Gesellschaften (Severnftgazprom und Wologodminoil)             | Einbeziehung des Ergebnisses aus der Equity-Methode im Finanzergebnis | enthalten                              |
| Übergeordnete Verwaltungskosten und Finanzierungskosten                              | enthalten                                                             | nicht enthalten                        |

In den aufgeführten Regionen sind folgende Länder mit operativen Aktivitäten enthalten:

| <b>Regionen</b>           | <b>Exploration &amp; Production</b>             | <b>Exploration</b> |
|---------------------------|-------------------------------------------------|--------------------|
| Russland/Kaspischer Raum  | Russland                                        | Turkmenistan       |
| Übriges Europa            | Großbritannien, Niederlande, Norwegen, Rumänien | Dänemark           |
| Nordafrika/<br>Nahe Osten | Libyen                                          | Katar, Mauretanien |
| Südamerika                | Argentinien                                     | Chile              |

Statistische Informationen über Konzessionsflächen oder Anzahl der Bohrungen haben eine geringe wirtschaftliche Aussagekraft und werden daher nicht berichtet.

### Erdöl- und Erdgasreserven

Bei den sicheren Erdöl- und Erdgasreserven handelt es sich um die Mengen an Erdöl, Erdgas und Kondensat, die unter Berücksichtigung der am Bilanzstichtag bestehenden geologischen, technischen und wirtschaftlichen Bedingungen zukünftig gefördert werden können. Dementsprechend können die auf dieser Grundlage vorgenommenen Reservenschätzungen erheblich von den Mengen abweichen, die letztlich gefördert werden. Um die Unsicherheiten zu reduzieren, arbeitet Wintershall mit unabhängigen, international anerkannten Reservengutachtern zusammen, die die Mengen ihrer wichtigsten Erdöl- und Erdgasfelder wiederkehrend überprüfen.

Die nachstehend aufgeführten Tabellen zeigen sowohl die geschätzten sicheren beziehungsweise entwickelten sicheren Reserven zum 31. Dezember 2009 und 2010 als auch Veränderungen, die auf Produktion oder andere Faktoren zurückzuführen sind.

## Öl 2010

|                                                                                                        | Deutschland | Übriges Europa | Russland/<br>Kaspischer Raum | Nordafrika/<br>Nahe Osten | Südamerika | Gesamt Gruppe |
|--------------------------------------------------------------------------------------------------------|-------------|----------------|------------------------------|---------------------------|------------|---------------|
| <b>Entwickelte und noch nicht entwickelte sichere Ölreserven am 01.01. in Millionen Barrel (MMbbl)</b> | <b>54</b>   | <b>3</b>       | <b>11</b>                    | <b>274</b>                | <b>30</b>  | <b>372</b>    |
| Revisionen und Sonstiges                                                                               | 6           | 3              |                              | 23                        | 1          | 33            |
| Erweiterungen und Neufunde                                                                             | –           | –              | –                            | –                         | –          | –             |
| Kauf/Verkauf von Reserven                                                                              | –           | –              | –                            | –                         | –          | –             |
| Produktion                                                                                             | 6           | 2              | 2                            | 29                        | 4          | 43            |
| <b>Sichere Reserven zum 31.12.</b>                                                                     | <b>54</b>   | <b>4</b>       | <b>9</b>                     | <b>268</b>                | <b>27</b>  | <b>362</b>    |
| Anteile Dritter                                                                                        | –           | –              | –                            | 123                       | –          | 123           |
| <b>Sichere Reserven nach Anteilen Dritter</b>                                                          | <b>54</b>   | <b>4</b>       | <b>9</b>                     | <b>145</b>                | <b>27</b>  | <b>239</b>    |
| Davon bei at Equity einbezogenen Gesellschaften                                                        | –           | –              | 9                            | –                         | –          | 9             |
| <b>Sichere Reserven nach Anteilen Dritter und At-Equity-Beteiligungen</b>                              | <b>54</b>   | <b>4</b>       | <b>–</b>                     | <b>145</b>                | <b>27</b>  | <b>230</b>    |
| Anteile Dritter an der Produktion                                                                      | –           | –              | –                            | 14                        | –          | 14            |
| Entwickelte sichere Reserven zum 31.12.                                                                | 42          | 3              | 9                            | 246                       | 22         | 322           |

## Gas 2010

|                                                                                                                                | Deutschland | Übriges Europa | Russland/<br>Kaspischer Raum | Nordafrika/<br>Nahe Osten | Südamerika   | Gesamt Gruppe |
|--------------------------------------------------------------------------------------------------------------------------------|-------------|----------------|------------------------------|---------------------------|--------------|---------------|
| <b>Entwickelte und noch nicht entwickelte sichere Gasreserven am 01.01. in Billion Standard Cubic Feet (BSCF) <sup>1</sup></b> | <b>278</b>  | <b>101</b>     | <b>3.562</b>                 | <b>202</b>                | <b>1.317</b> | <b>5.460</b>  |
| Revisionen und Sonstiges                                                                                                       | 5           | 38             | 391                          | 13                        | 29           | 476           |
| Erweiterungen und Neufunde                                                                                                     | –           | 5              | –                            | –                         | –            | 5             |
| Kauf/Verkauf von Reserven                                                                                                      | –           | –              | –                            | –                         | –            | –             |
| Produktion                                                                                                                     | 34          | 43             | 308                          | 20                        | 136          | 541           |
| <b>Sichere Reserven zum 31.12.</b>                                                                                             | <b>249</b>  | <b>101</b>     | <b>3.645</b>                 | <b>195</b>                | <b>1.210</b> | <b>5.400</b>  |
| Anteile Dritter                                                                                                                | –           | –              | –                            | 96                        | –            | 96            |
| <b>Sichere Reserven nach Anteilen Dritter</b>                                                                                  | <b>249</b>  | <b>101</b>     | <b>3.645</b>                 | <b>99</b>                 | <b>1.210</b> | <b>5.304</b>  |
| Davon bei at Equity einbezogenen Gesellschaften                                                                                | –           | –              | 3.645                        | –                         | –            | 3.645         |
| <b>Sichere Reserven nach Anteilen Dritter und At-Equity-Beteiligungen</b>                                                      | <b>249</b>  | <b>101</b>     | <b>–</b>                     | <b>99</b>                 | <b>1.210</b> | <b>1.659</b>  |
| Anteile Dritter an der Produktion                                                                                              | –           | –              | –                            | 9                         | –            | 9             |
| Entwickelte sichere Reserven zum 31.12.                                                                                        | 223         | 80             | 3.517                        | 158                       | 1.007        | 4.985         |

<sup>1</sup> Die Erdgasmengen können mit dem Faktor 6 BSCF pro MMBOE (Million Barrel Oil Equivalent) umgerechnet werden.

**Öl 2009**

|                                                                                                        | Deutschland | Übriges Europa | Russland/<br>Kaspischer Raum | Nordafrika/<br>Nahe Osten | Südamerika | Gesamt Gruppe |
|--------------------------------------------------------------------------------------------------------|-------------|----------------|------------------------------|---------------------------|------------|---------------|
| <b>Entwickelte und noch nicht entwickelte sichere Ölreserven am 01.01. in Millionen Barrel (MMbbl)</b> | <b>55</b>   | <b>12</b>      | <b>12</b>                    | <b>286</b>                | <b>39</b>  | <b>404</b>    |
| Revisionen und Sonstiges                                                                               | 6           | -5             | 1                            | 24                        | -6         | 20            |
| Erweiterungen und Neufunde                                                                             | -           | -              | -                            | -                         | -          | -             |
| Kauf/Verkauf von Reserven                                                                              | -           | -2             | -                            | -                         | -          | -2            |
| Produktion                                                                                             | 7           | 2              | 2                            | 36                        | 3          | 50            |
| <b>Sichere Reserven zum 31.12.</b>                                                                     | <b>54</b>   | <b>3</b>       | <b>11</b>                    | <b>274</b>                | <b>30</b>  | <b>372</b>    |
| Anteile Dritter                                                                                        | -           | -              | -                            | 129                       | -          | 129           |
| <b>Sichere Reserven nach Anteilen Dritter</b>                                                          | <b>54</b>   | <b>3</b>       | <b>11</b>                    | <b>145</b>                | <b>30</b>  | <b>243</b>    |
| Davon bei at Equity einbezogenen Gesellschaften                                                        | -           | -              | 11                           | -                         | -          | 11            |
| <b>Sichere Reserven nach Anteilen Dritter und At-Equity-Beteiligungen</b>                              | <b>54</b>   | <b>3</b>       | <b>-</b>                     | <b>145</b>                | <b>30</b>  | <b>232</b>    |
| Anteile Dritter an der Produktion                                                                      | -           | -              | -                            | 17                        | -          | 17            |
| Entwickelte sichere Reserven zum 31.12.                                                                | 39          | 3              | 11                           | 269                       | 24         | 346           |

**Gas 2009**

|                                                                                                                                | Deutschland | Übriges Europa | Russland/<br>Kaspischer Raum | Nordafrika/<br>Nahe Osten | Südamerika   | Gesamt Gruppe |
|--------------------------------------------------------------------------------------------------------------------------------|-------------|----------------|------------------------------|---------------------------|--------------|---------------|
| <b>Entwickelte und noch nicht entwickelte sichere Gasreserven am 01.01. in Billion Standard Cubic Feet (BSCF) <sup>1</sup></b> | <b>313</b>  | <b>144</b>     | <b>3.432</b>                 | <b>192</b>                | <b>1.281</b> | <b>5.362</b>  |
| Revisionen und Sonstiges                                                                                                       | 3           | 5              | 405                          | 31                        | 162          | 606           |
| Erweiterungen und Neufunde                                                                                                     | -           | 6              | -                            | -                         | -            | 6             |
| Kauf/Verkauf von Reserven                                                                                                      | -           | -2             | -                            | -                         | -            | -2            |
| Produktion                                                                                                                     | 38          | 52             | 275                          | 21                        | 126          | 512           |
| <b>Sichere Reserven zum 31.12.</b>                                                                                             | <b>278</b>  | <b>101</b>     | <b>3.562</b>                 | <b>202</b>                | <b>1.317</b> | <b>5.460</b>  |
| Anteile Dritter                                                                                                                | -           | -              | -                            | 99                        | -            | 99            |
| <b>Sichere Reserven nach Anteilen Dritter</b>                                                                                  | <b>278</b>  | <b>101</b>     | <b>3.562</b>                 | <b>103</b>                | <b>1.317</b> | <b>5.361</b>  |
| Davon bei at Equity einbezogenen Gesellschaften                                                                                | -           | -              | 3.562                        | -                         | -            | 3.562         |
| <b>Sichere Reserven nach Anteilen Dritter und At-Equity-Beteiligungen</b>                                                      | <b>278</b>  | <b>101</b>     | <b>-</b>                     | <b>103</b>                | <b>1.317</b> | <b>1.799</b>  |
| Anteile Dritter an der Produktion                                                                                              | -           | -              | -                            | 10                        | -            | 10            |
| Entwickelte sichere Reserven zum 31.12.                                                                                        | 275         | 101            | 3.554                        | 188                       | 1.108        | 5.226         |

<sup>1</sup> Die Erdgasmengen können mit dem Faktor 6 BSCF pro MMBOE (Million Barrel Oil Equivalent) umgerechnet werden.

### Operatives Ergebnis der Öl- und Gasproduktion

Das operative Ergebnis beinhaltet nur diejenigen Erträge und Aufwendungen, die im direkten Zusammenhang mit der Öl- und Gasproduktion stehen. Darin sind weder Finanzierungskosten (unter anderem Zinsaufwendungen) noch übergeordnete Verwaltungskosten berücksichtigt, so dass keine Übereinstimmung

mit den Beiträgen zum Segment Oil & Gas gegeben ist. Die Umsatzabweichung gegenüber der Segmentberichterstattung resultiert aus hier nicht aufzuführenden Handelswaren- und Dienstleistungsgeschäften. Die Ertragsteuern wurden unter Berücksichtigung des jeweils aktuell geltenden lokalen Steuersatzes berechnet.

#### 2010 (Millionen €)

|                                                                          | Deutschland | Übriges Europa | Russland/<br>Kaspischer Raum | Nordafrika/<br>Nahe Osten | Südamerika | Gesamt Gruppe |
|--------------------------------------------------------------------------|-------------|----------------|------------------------------|---------------------------|------------|---------------|
| Erlöse Erdöl (inkl. Kondensat und LPG)                                   | 339         | 105            | 57                           | 1.734                     | 171        | 2.406         |
| Erlöse Erdgas                                                            | 182         | 222            | 680                          | 6                         | 171        | 1.261         |
| Lokale Abgaben (Förderung, Export etc.)                                  | 88          | 2              | 58                           | 94                        | 82         | 324           |
| <b>Nettoerlöse abzüglich Abgaben</b>                                     | <b>433</b>  | <b>325</b>     | <b>679</b>                   | <b>1.646</b>              | <b>260</b> | <b>3.343</b>  |
| Produktionskosten                                                        | 109         | 124            | 43                           | 202                       | 79         | 557           |
| Explorationsaufwand                                                      | 8           | 120            | 21                           | 49                        | 8          | 206           |
| Abschreibungen und außerplanmäßige Wertberichtigungen                    | 56          | 213            | 87                           | 55                        | 40         | 451           |
| Sonstiges                                                                | 2           | -10            | 14                           | 19                        | 13         | 38            |
| <b>Ergebnis vor Steuern</b>                                              | <b>258</b>  | <b>-122</b>    | <b>514</b>                   | <b>1.321</b>              | <b>120</b> | <b>2.091</b>  |
| Einkommensteuer                                                          | 74          | -113           | 101                          | 1.211                     | 20         | 1.293         |
| <b>Operatives Ergebnis nach Steuern</b>                                  | <b>184</b>  | <b>-9</b>      | <b>413</b>                   | <b>110</b>                | <b>100</b> | <b>798</b>    |
| Anteile Dritter                                                          | -           | -              | -                            | 51                        | -          | 51            |
| <b>Operatives Ergebnis nach Steuern und Anteilen Dritter</b>             | <b>184</b>  | <b>-9</b>      | <b>413</b>                   | <b>59</b>                 | <b>100</b> | <b>747</b>    |
| At-Equity-Ergebnis                                                       | -           | -              | 193                          | -                         | -          | 193           |
| <b>Ergebnis nach Steuern, Anteilen Dritter und At-Equity-Ergebnissen</b> | <b>184</b>  | <b>-9</b>      | <b>220</b>                   | <b>59</b>                 | <b>100</b> | <b>554</b>    |

#### 2009 (Millionen €)

|                                                                          | Deutschland | Übriges Europa | Russland/<br>Kaspischer Raum | Nordafrika/<br>Nahe Osten | Südamerika | Gesamt Gruppe |
|--------------------------------------------------------------------------|-------------|----------------|------------------------------|---------------------------|------------|---------------|
| Erlöse Erdöl (inkl. Kondensat und LPG)                                   | 283         | 128            | 45                           | 1.491                     | 122        | 2.069         |
| Erlöse Erdgas                                                            | 216         | 296            | 579                          | 6                         | 142        | 1.239         |
| Lokale Abgaben (Förderung, Export etc.)                                  | 95          | 3              | 45                           | 111                       | 60         | 314           |
| <b>Nettoerlöse abzüglich Abgaben</b>                                     | <b>404</b>  | <b>421</b>     | <b>579</b>                   | <b>1.386</b>              | <b>204</b> | <b>2.994</b>  |
| Produktionskosten                                                        | 103         | 125            | 38                           | 169                       | 61         | 496           |
| Explorationsaufwand                                                      | 9           | 86             | 10                           | 40                        | 4          | 149           |
| Abschreibungen und außerplanmäßige Wertberichtigungen                    | 72          | 120            | 69                           | 58                        | 35         | 354           |
| Sonstiges                                                                | 5           | 36             | 9                            | 36                        | 24         | 110           |
| <b>Ergebnis vor Steuern</b>                                              | <b>215</b>  | <b>54</b>      | <b>453</b>                   | <b>1.083</b>              | <b>80</b>  | <b>1.885</b>  |
| Einkommensteuer                                                          | 63          | -              | 89                           | 1.026                     | 21         | 1.199         |
| <b>Operatives Ergebnis nach Steuern</b>                                  | <b>152</b>  | <b>54</b>      | <b>364</b>                   | <b>57</b>                 | <b>59</b>  | <b>686</b>    |
| Anteile Dritter                                                          | -           | -              | -                            | 41                        | -          | 41            |
| <b>Operatives Ergebnis nach Steuern und Anteilen Dritter</b>             | <b>152</b>  | <b>54</b>      | <b>364</b>                   | <b>16</b>                 | <b>59</b>  | <b>645</b>    |
| At-Equity-Ergebnis                                                       | -           | -              | 75                           | -                         | -          | 75            |
| <b>Ergebnis nach Steuern, Anteilen Dritter und At-Equity-Ergebnissen</b> | <b>152</b>  | <b>54</b>      | <b>289</b>                   | <b>16</b>                 | <b>59</b>  | <b>570</b>    |

### Ausgaben der Periode für Akquisition, Exploration und Entwicklung von Öl- und Gasvorkommen

Die Ausgaben der Periode umfassen alle Beträge, die im Zusammenhang mit der Akquisition, Exploration oder Entwicklung von Öl- und Gasvorkommen angefallen sind, unabhängig davon, ob eine Aktivierung oder eine Verrechnung im Aufwand erfolgte.

#### 2010 (Millionen €)

|                       | Deutschland | Übriges Europa | Russland/<br>Kaspischer<br>Raum | Nordafrika/<br>Nahe Osten | Südamerika | Gesamt<br>Gruppe |
|-----------------------|-------------|----------------|---------------------------------|---------------------------|------------|------------------|
| Akquisitionen         | –           | –              | –                               | –                         | –          | –                |
| Exploration           | 8           | 160            | 8                               | 82                        | 12         | 270              |
| Investitionen         | 54          | 132            | 34                              | 75                        | 23         | 318              |
| <b>Gesamtausgaben</b> | <b>62</b>   | <b>292</b>     | <b>42</b>                       | <b>157</b>                | <b>35</b>  | <b>588</b>       |

#### 2009 (Millionen €)

|                       | Deutschland | Übriges Europa | Russland/<br>Kaspischer<br>Raum | Nordafrika/<br>Nahe Osten | Südamerika | Gesamt<br>Gruppe |
|-----------------------|-------------|----------------|---------------------------------|---------------------------|------------|------------------|
| Akquisitionen         | –           | 1              | –                               | –                         | 19         | 20               |
| Exploration           | 14          | 192            | 8                               | 70                        | 5          | 289              |
| Investitionen         | 47          | 117            | 82                              | 97                        | 24         | 367              |
| <b>Gesamtausgaben</b> | <b>61</b>   | <b>310</b>     | <b>90</b>                       | <b>167</b>                | <b>48</b>  | <b>676</b>       |

### Aktiviert Kosten im Zusammenhang mit der Öl- und Gasproduktion

Die aktivierten Kosten umfassen die gesamten Anschaffungskosten für nachgewiesene und nicht nachgewiesene Öl- und Gasvorkommen mit den zugehörigen kumulierten Abschreibungen.

#### 2010 (Millionen €)

|                                          | Deutschland  | Übriges Europa | Russland/<br>Kaspischer<br>Raum | Nordafrika/<br>Nahe Osten | Südamerika | Gesamt<br>Gruppe |
|------------------------------------------|--------------|----------------|---------------------------------|---------------------------|------------|------------------|
| Nachgewiesene Öl- und Gasvorkommen       | 637          | 867            | 2.168                           | 1.414                     | 952        | 6.038            |
| Nicht nachgewiesene Öl- und Gasvorkommen | 19           | 848            | 6                               | 93                        | –          | 966              |
| Ausrüstung und Sonstiges                 | 638          | 636            | 4                               | 42                        | –          | 1.320            |
| <b>Bruttovermögen</b>                    | <b>1.294</b> | <b>2.351</b>   | <b>2.178</b>                    | <b>1.549</b>              | <b>952</b> | <b>8.324</b>     |
| Kumulierte Abschreibungen                | 952          | 1.477          | 280                             | 916                       | 634        | 4.259            |
| <b>Nettovermögen</b>                     | <b>342</b>   | <b>874</b>     | <b>1.898</b>                    | <b>633</b>                | <b>318</b> | <b>4.065</b>     |

#### 2009 (Millionen €)

|                                          | Deutschland  | Übriges Europa | Russland/<br>Kaspischer<br>Raum | Nordafrika/<br>Nahe Osten | Südamerika | Gesamt<br>Gruppe |
|------------------------------------------|--------------|----------------|---------------------------------|---------------------------|------------|------------------|
| Nachgewiesene Öl- und Gasvorkommen       | 601          | 750            | 2.016                           | 1.322                     | 913        | 5.602            |
| Nicht nachgewiesene Öl- und Gasvorkommen | 20           | 782            | 4                               | 87                        | 24         | 917              |
| Ausrüstung und Sonstiges                 | 624          | 602            | 4                               | 40                        | –          | 1.270            |
| <b>Bruttovermögen</b>                    | <b>1.245</b> | <b>2.134</b>   | <b>2.024</b>                    | <b>1.449</b>              | <b>937</b> | <b>7.789</b>     |
| Kumulierte Abschreibungen                | 904          | 1.225          | 119                             | 867                       | 608        | 3.723            |
| <b>Nettovermögen</b>                     | <b>341</b>   | <b>909</b>     | <b>1.905</b>                    | <b>582</b>                | <b>329</b> | <b>4.066</b>     |

### Aktivierte Explorationsbohrungen: Kosten für suspendierte Bohrungen

Die Kosten für Explorationsbohrungen werden zunächst bis zum Abschluss der Bohrarbeiten aktiviert. Wird ein Kohlenwasserstoff-Vorkommen entdeckt, das wahrscheinlich wirtschaftlich entwickelt werden kann, so bleiben die Kosten vorbehaltlich weiterer Erkundungsmaßnahmen, die Aufschlussbohrungen umfassen können, als Anlagen im Bau aktiviert. Diese aktivierten Kosten werden mindestens einmal jährlich technischen und wirtschaftlichen Bewertungen durch das Management unterzogen, um die weiterhin vorhandene Absicht einer Entwicklung oder sonstigen Nutzung des Fundes zu überprüfen. Ist diese Absicht nicht länger gegeben, werden die Beträge wertberichtigt. Werden sichere Erdöl- oder Erdgasreserven gefunden und deren Entwicklung genehmigt, dann werden die entsprechenden Aufwendungen innerhalb des Anlagevermögens in die Position Technische Anlagen und Maschinen umgebucht. Nicht-fündige Explorationsbohrungen werden im Explorationsaufwand wertberichtigt.

Die nachstehende Tabelle stellt die Veränderungen bei den aktivierten Explorationsbohrungen der Gesellschaft dar.

#### Aktivierte Explorationsbohrungen (Millionen €) <sup>1</sup>

|                                                        | 2010       | 2009       |
|--------------------------------------------------------|------------|------------|
| <b>Stand 01.01.</b>                                    | <b>175</b> | <b>91</b>  |
| Zugänge Explorationsbohrungen des Jahres               | 112        | 128        |
| Wertberichtigung von aktivierten Explorationsbohrungen | -29        | -8         |
| Umbuchung fündig deklarerter Explorationsbohrungen     | -4         | -36        |
| <b>Stand 31.12.</b>                                    | <b>254</b> | <b>175</b> |

<sup>1</sup> Nur vollkonsolidierte Unternehmen

Die nachstehende Tabelle gibt einen Überblick über die Aktivierungsdauer, die aktivierten Beträge für Explorationsbohrungen und nennt in der letzten Zeile die Anzahl suspendierter Explorationsbohrungen.

#### Aktivierte Explorationsbohrungen (Millionen €) <sup>1</sup>

|                                                 | 2010       | 2009       |
|-------------------------------------------------|------------|------------|
| Bohrungen, die noch nicht fertiggestellt sind   | 54         | 14         |
| Bohrungen, die kürzer als 1 Jahr aktiviert sind | 30         | 122        |
| Bohrungen, die länger als 1 Jahr aktiviert sind | 170        | 39         |
| <b>Summe</b>                                    | <b>254</b> | <b>175</b> |
| <b>Anzahl der suspendierten Bohrungen</b>       | <b>29</b>  | <b>14</b>  |

<sup>1</sup> Nur vollkonsolidierte Unternehmen

### Standardisierte Berechnung des diskontierten zukünftigen Netto-Cashflows der sicheren Öl- und Gasreserven

Die folgenden Informationen wurden entsprechend den Regelungen des US-GAAP-Standards SFAS 69 und den Vorschriften der Securities and Exchange Commission ermittelt. Hiernach ist eine standardisierte Berechnung der diskontierten zukünftigen Netto-Cashflows mit den jeweiligen Erlösen, Kosten und Ertragsteuersätzen vorzunehmen. Die sicheren Reserven werden mit einem Durchschnittspreis aus den jeweiligen Notierungen am Monatsersten bewertet. Die so ermittelten Werte sind mit einem jährlichen Diskontierungszinssatz von 10% abzuzinsen.

Die ermittelten Vorhersagewerte sollten nicht als realistische Schätzung zukünftiger Cashflows ausgelegt werden. Ebenso kann nicht davon ausgegangen werden, dass der Gesamtwert dem aktuellen Unternehmenswert entspricht.

Die erwarteten sicheren Reserven könnten in der Zukunft erheblich von den heutigen Schätzungen abweichen. Bei der Entwicklung und Produktion der Reserven könnten zeitliche Veränderungen eintreten, und die tatsächlich realisierten Preise und Kosten könnten erheblich abweichen.

Sowohl die operativen Entscheidungen als auch die Durchführung von Investitionsprojekten der Gesellschaft beruhen nicht auf den nachstehend aufgeführten Angaben, sondern auf einer größeren Bandbreite an Reservenschätzungen sowie auf abweichenden Preis- und Kostenannahmen.

Die „standardisierte Netto-Cashflow-Berechnung“ kann neben den oben genannten Aspekten auch nicht direkt mit den übrigen Vermögensdarstellungen, die an anderer Stelle im Konzernabschluss aufgeführt sind, verglichen werden, da jeder derartige Vergleich eine Überleitungsrechnung erfordern würde.



## Standardisierte Berechnung des diskontierten zukünftigen Netto-Cashflows 2010 (Millionen €)

|                                                                                                       | Deutschland | Übriges Europa | Russland/<br>Kaspischer Raum | Nordafrika/<br>Nahe Osten | Südamerika | Gesamt Gruppe |
|-------------------------------------------------------------------------------------------------------|-------------|----------------|------------------------------|---------------------------|------------|---------------|
| Zukünftige Umsätze                                                                                    | 3.470       | 862            | 6.647                        | 16.250                    | 2.306      | 29.535        |
| Zukünftige Produktions-/Entwicklungskosten                                                            | 1.980       | 687            | 1.364                        | 3.372                     | 1.377      | 8.780         |
| Zukünftige Ertragsteuern                                                                              | 326         | 84             | 723                          | 10.153                    | 120        | 11.406        |
| Zukünftige undiskontierte Netto-Cashflows                                                             | 1.164       | 91             | 4.560                        | 2.725                     | 809        | 9.349         |
| 10 % Diskontierungszinssatz                                                                           | 378         | 30             | 1.739                        | 925                       | 274        | 3.346         |
| <b>Standardisierte Berechnung des diskontierten zukünftigen Netto-Cashflows</b>                       | <b>786</b>  | <b>61</b>      | <b>2.821</b>                 | <b>1.800</b>              | <b>535</b> | <b>6.003</b>  |
| Anteile Dritter                                                                                       | –           | –              | –                            | 770                       | –          | 770           |
| <b>Standardisierte Berechnung des diskontierten zukünftigen Netto-Cashflows nach Anteilen Dritter</b> | <b>786</b>  | <b>61</b>      | <b>2.821</b>                 | <b>1.030</b>              | <b>535</b> | <b>5.233</b>  |
| At-Equity-Beteiligungen                                                                               | –           | –              | 1.340                        | –                         | –          | 1.340         |
| <b>Gesamt nach Anteilen Dritter und At-Equity-Beteiligungen</b>                                       | <b>786</b>  | <b>61</b>      | <b>1.481</b>                 | <b>1.030</b>              | <b>535</b> | <b>3.893</b>  |

## Standardisierte Berechnung des diskontierten zukünftigen Netto-Cashflows 2009 (Millionen €)

|                                                                                                       | Deutschland | Übriges Europa | Russland/<br>Kaspischer Raum | Nordafrika/<br>Nahe Osten | Südamerika | Gesamt Gruppe |
|-------------------------------------------------------------------------------------------------------|-------------|----------------|------------------------------|---------------------------|------------|---------------|
| Zukünftige Umsätze                                                                                    | 3.055       | 677            | 7.178                        | 10.795                    | 1.901      | 23.606        |
| Zukünftige Produktions-/Entwicklungskosten                                                            | 1.811       | 510            | 940                          | 3.819                     | 926        | 8.006         |
| Zukünftige Ertragsteuern                                                                              | 259         | 107            | 957                          | 5.594                     | 144        | 7.061         |
| Zukünftige undiskontierte Netto-Cashflows                                                             | 985         | 60             | 5.281                        | 1.382                     | 831        | 8.539         |
| 10 % Diskontierungszinssatz                                                                           | 293         | –28            | 2.046                        | 429                       | 318        | 3.058         |
| <b>Standardisierte Berechnung des diskontierten zukünftigen Netto-Cashflows</b>                       | <b>692</b>  | <b>88</b>      | <b>3.235</b>                 | <b>953</b>                | <b>513</b> | <b>5.481</b>  |
| Anteile Dritter                                                                                       | –           | –              | –                            | 364                       | –          | 364           |
| <b>Standardisierte Berechnung des diskontierten zukünftigen Netto-Cashflows nach Anteilen Dritter</b> | <b>692</b>  | <b>88</b>      | <b>3.235</b>                 | <b>589</b>                | <b>513</b> | <b>5.117</b>  |
| At-Equity-Beteiligungen                                                                               | –           | –              | 501                          | –                         | –          | 501           |
| <b>Gesamt nach Anteilen Dritter und At-Equity-Beteiligungen</b>                                       | <b>692</b>  | <b>88</b>      | <b>2.734</b>                 | <b>589</b>                | <b>513</b> | <b>4.616</b>  |

## Veränderung der standardisierten Berechnung des diskontierten zukünftigen Netto-Cashflows 2010 (Millionen €)

|                                                                                                                 | Deutschland | Übriges Europa | Russland/<br>Kaspischer<br>Raum | Nordafrika/<br>Nahe Osten | Südamerika | Gesamt<br>Gruppe |
|-----------------------------------------------------------------------------------------------------------------|-------------|----------------|---------------------------------|---------------------------|------------|------------------|
| <b>Stand am 01.01.</b>                                                                                          | <b>692</b>  | <b>88</b>      | <b>3.235</b>                    | <b>953</b>                | <b>513</b> | <b>5.481</b>     |
| Verkauf von gefördertem Öl und Gas abzüglich Produktionskosten in der laufenden Periode                         | -324        | -201           | -636                            | -1.444                    | -181       | -2.786           |
| Nettoveränderungen von stichtagsbezogenen Verkaufserlösen und Produktionskosten                                 | 277         | -13            | -403                            | 3.575                     | 83         | 3.519            |
| Nettoveränderungen aus Neufunden, Erweiterungen und verbesserten Fördertechniken abzüglich dazugehöriger Kosten | -           | -              | -                               | -                         | -          | -                |
| Revision früherer Reservenschätzungen                                                                           | 109         | 169            | 160                             | 1.054                     | 77         | 1.569            |
| Investitionen der laufenden Periode                                                                             | 53          | 109            | 34                              | 76                        | 23         | 295              |
| Veränderungen der erwarteten Investitionen zukünftiger Perioden                                                 | -56         | -136           | -54                             | 3                         | -51        | -294             |
| Kauf/Verkauf von Reserven                                                                                       | -           | -              | -                               | -                         | -          | -                |
| Nettoveränderungen Ertragsteuern                                                                                | -42         | 41             | 131                             | -2.851                    | 14         | -2.707           |
| Diskontierung                                                                                                   | 79          | 9              | 354                             | 434                       | 57         | 933              |
| Sonstiges                                                                                                       | -2          | -5             | -                               | -                         | -          | -7               |
| <b>Stand am 31.12.</b>                                                                                          | <b>786</b>  | <b>61</b>      | <b>2.821</b>                    | <b>1.800</b>              | <b>535</b> | <b>6.003</b>     |
| Anteile Dritter                                                                                                 | -           | -              | -                               | 770                       | -          | 770              |
| <b>Standardisierte Berechnung des diskontierten zukünftigen Netto-Cashflows ohne Anteile Dritter</b>            | <b>786</b>  | <b>61</b>      | <b>2.821</b>                    | <b>1.030</b>              | <b>535</b> | <b>5.233</b>     |
| At-Equity-Beteiligungen                                                                                         | -           | -              | 1.340                           | -                         | -          | 1.340            |
| <b>Gesamt ohne Anteile Dritter und At-Equity-Beteiligungen</b>                                                  | <b>786</b>  | <b>61</b>      | <b>1.481</b>                    | <b>1.030</b>              | <b>535</b> | <b>3.893</b>     |

## Veränderung der standardisierten Berechnung des diskontierten zukünftigen Netto-Cashflows 2009 (Millionen €)

|                                                                                                                 | Deutschland | Übriges Europa | Russland/<br>Kaspischer<br>Raum | Nordafrika/<br>Nahe Osten | Südamerika | Gesamt<br>Gruppe |
|-----------------------------------------------------------------------------------------------------------------|-------------|----------------|---------------------------------|---------------------------|------------|------------------|
| <b>Stand am 01.01.</b>                                                                                          | <b>626</b>  | <b>317</b>     | <b>3.794</b>                    | <b>502</b>                | <b>614</b> | <b>5.853</b>     |
| Verkauf von gefördertem Öl und Gas abzüglich Produktionskosten in der laufenden Periode                         | -301        | -295           | -542                            | -1.217                    | -143       | -2.498           |
| Nettoveränderungen von stichtagsbezogenen Verkaufserlösen und Produktionskosten                                 | 173         | -299           | -999                            | 2.428                     | -65        | 1.238            |
| Nettoveränderungen aus Neufunden, Erweiterungen und verbesserten Fördertechniken abzüglich dazugehöriger Kosten | -           | 18             | -                               | -                         | -          | 18               |
| Revision früherer Reservenschätzungen                                                                           | 115         | 16             | 193                             | 812                       | 8          | 1.144            |
| Investitionen der laufenden Periode                                                                             | 47          | 120            | 82                              | 82                        | 24         | 355              |
| Veränderungen der erwarteten Investitionen zukünftiger Perioden                                                 | -25         | -46            | -53                             | 50                        | -          | -74              |
| Kauf/Verkauf von Reserven                                                                                       | -           | -4             | -                               | -                         | -          | -4               |
| Nettoveränderungen Ertragsteuern                                                                                | -13         | 219            | 324                             | -1.935                    | 8          | -1.397           |
| Diskontierung                                                                                                   | 71          | 42             | 439                             | 230                       | 66         | 848              |
| Sonstiges                                                                                                       | -1          | -              | -3                              | 1                         | 1          | -2               |
| <b>Stand am 31.12.</b>                                                                                          | <b>692</b>  | <b>88</b>      | <b>3.235</b>                    | <b>953</b>                | <b>513</b> | <b>5.481</b>     |
| Anteile Dritter                                                                                                 | -           | -              | -                               | 364                       | -          | 364              |
| <b>Standardisierte Berechnung des diskontierten zukünftigen Netto-Cashflows ohne Anteile Dritter</b>            | <b>692</b>  | <b>88</b>      | <b>3.235</b>                    | <b>589</b>                | <b>513</b> | <b>5.117</b>     |
| At-Equity-Beteiligungen                                                                                         | -           | -              | 501                             | -                         | -          | 501              |
| <b>Gesamt ohne Anteile Dritter und At-Equity-Beteiligungen</b>                                                  | <b>692</b>  | <b>88</b>      | <b>2.734</b>                    | <b>589</b>                | <b>513</b> | <b>4.616</b>     |

# 6

## Energiespeicher der Zukunft

Klimaschutz stellt große Herausforderungen an die zukünftige Mobilität. Elektroautos mit Lithium-Ionen-Batterien gelten als eine Lösung. Schon heute bietet BASF Materialien an, mit denen diese Batterien mehr Energie speichern können. Darüber hinaus forscht BASF mit Partnern aus Wirtschaft und Wissenschaft an den nächsten Batteriegenerationen, damit Menschen in Zukunft mobil bleiben und gleichzeitig die Umwelt schonen.

→ Mehr zum Thema Elektromobilität auf Seite 30

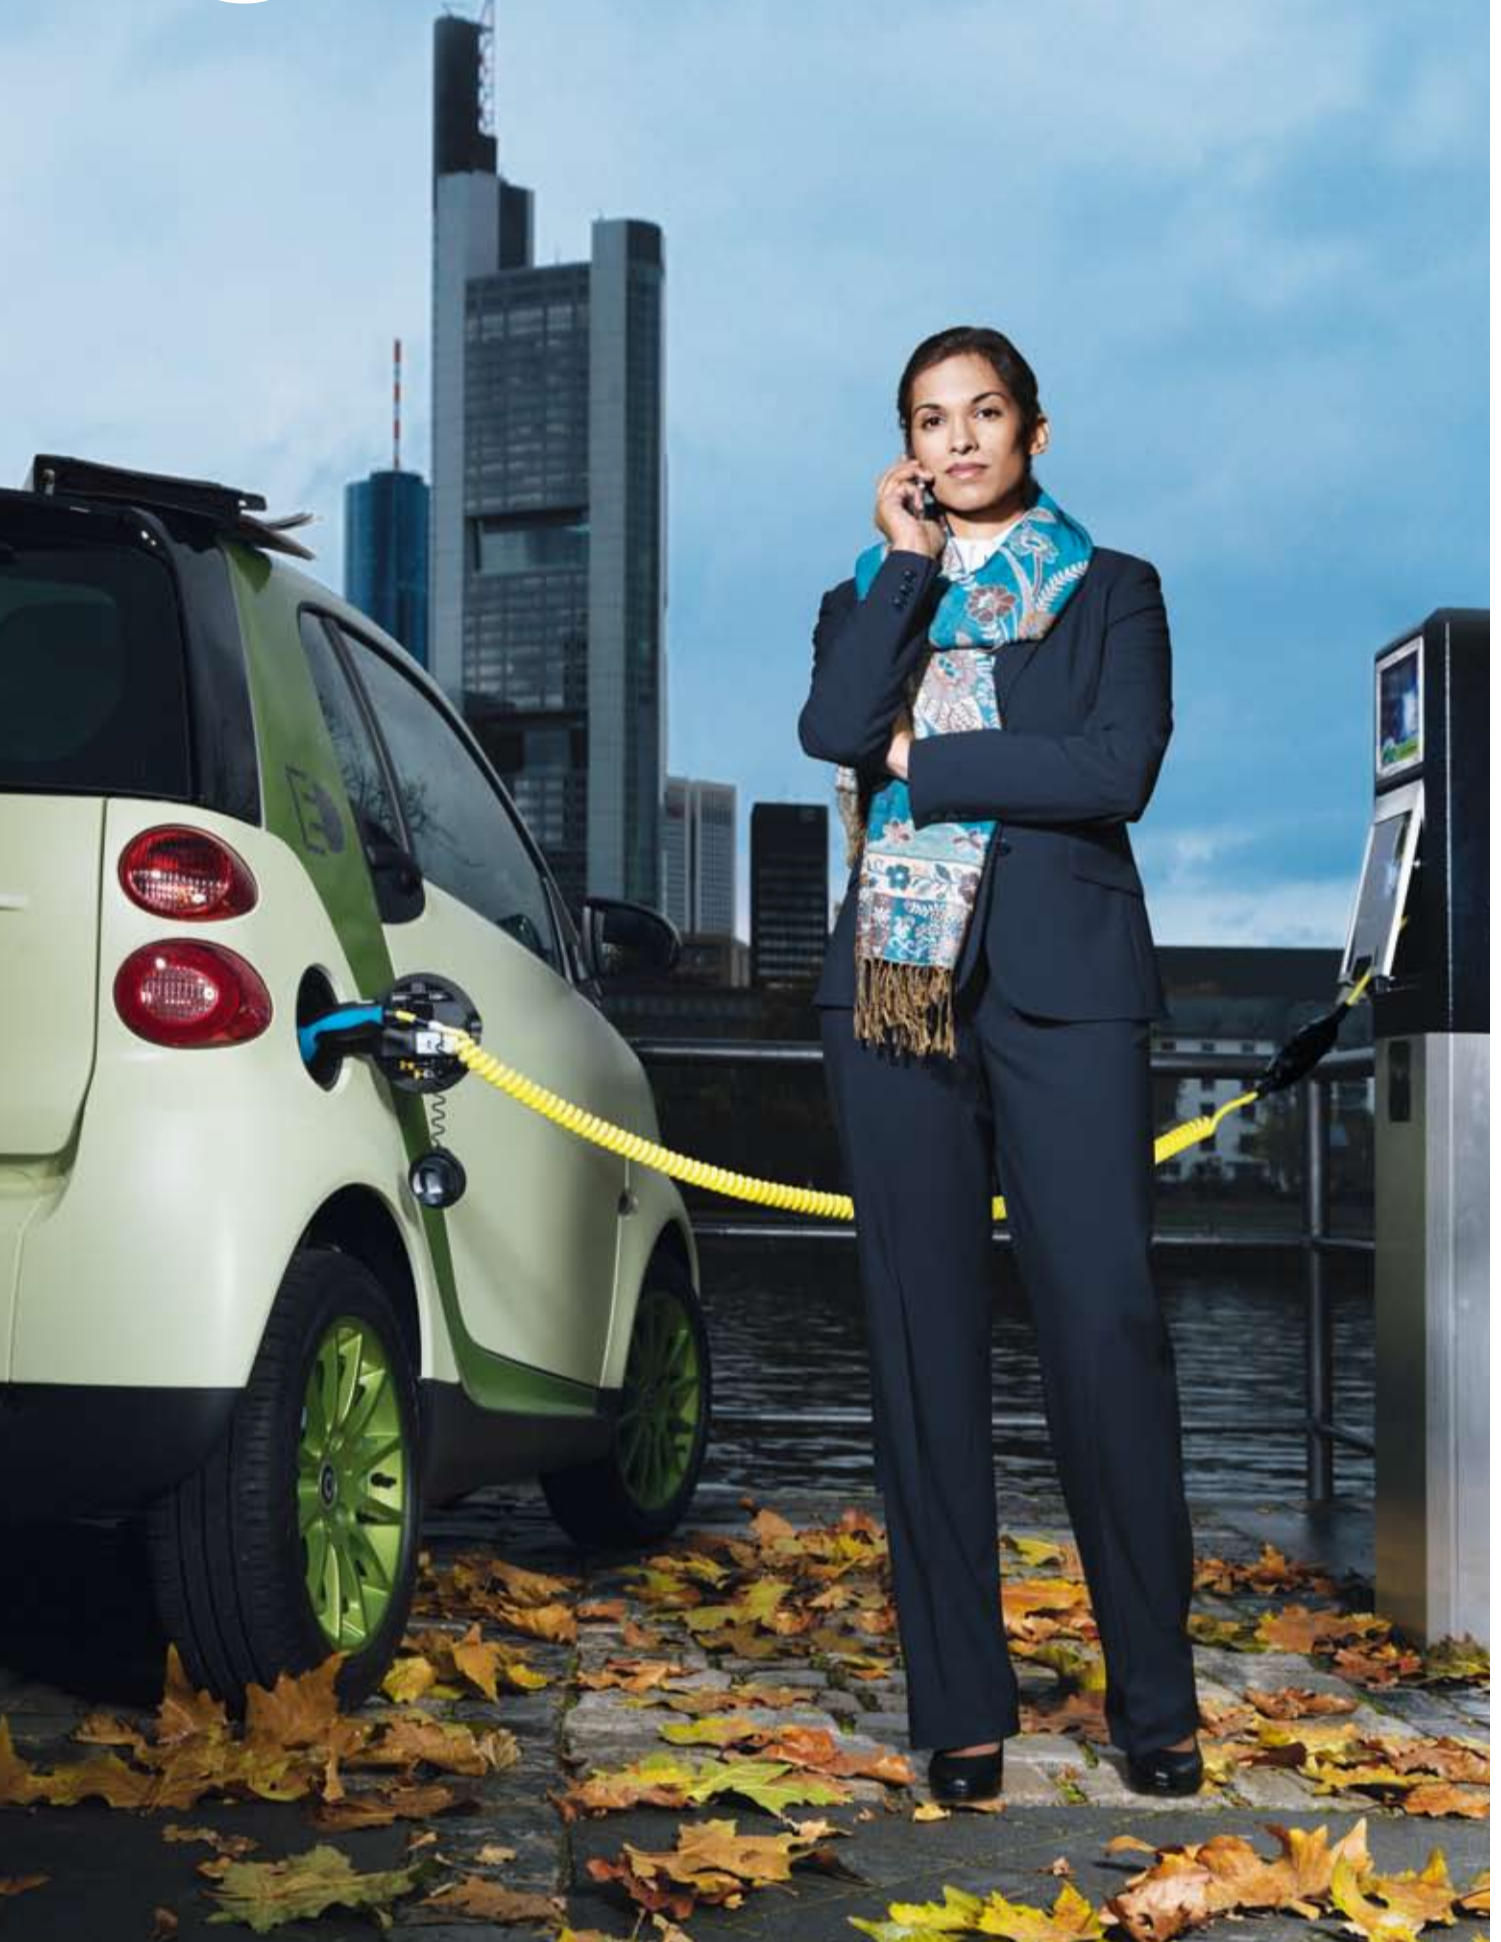

# Übersichten

|            |                               |
|------------|-------------------------------|
| <b>203</b> | Glossar                       |
| <b>207</b> | Stichwortverzeichnis          |
| <b>209</b> | Eingetragene Marken           |
| <b>210</b> | Zehnjahresübersicht           |
| <b>213</b> | GRI- und Global-Compact-Index |
| <b>214</b> | GRI-Bestätigungsvermerk       |

## Glossar

### A

#### Abteufen

Abteufen bezeichnet das Erstellen von Bohrlöchern zur Auffindung und Erschließung von Lagerstätten.

#### Amflora

Amflora ist eine gentechnisch veränderte Stärkekartoffel der BASF, die eine optimierte Stärkezusammensetzung für industrielle Anwendungen produziert.

#### Audits

Audits sind ein Instrument zur Kontrolle und Steuerung von Sicherheits- und Umweltstandards. Bei der Auditierung eines Standorts oder eines Betriebs wird anhand von klar definierten Kriterien ein Profil in den Bereichen Umwelt, Sicherheit oder auch Gesundheit erstellt.

#### Ausschüttungsquote

Die Ausschüttungsquote gibt an, welcher Anteil des Jahresüberschusses in Form der Dividendenzahlung an die Aktionäre ausgeschüttet wurde. Sie wird wie folgt berechnet: gezahlte Dividende, geteilt durch Jahresüberschuss nach Anteilen anderer Gesellschafter, in Prozent.

### B

#### Back-up-Linie

Fest zugesagte Kreditlinie, die im Zusammenhang mit Emissionen von Commercial Papers im Fall unzureichender Marktliquidität sowie zum Zweck der allgemeinen Unternehmensfinanzierung gezogen werden kann. Sie ist eines der Instrumente, welche die BASF nutzt, um jederzeit zahlungsfähig zu sein.

#### Barrel Öläquivalent (BOE)

Internationale Maßeinheit zum Vergleich des Brennwertes verschiedener Energieträger. Ein BOE entspricht einem Barrel Erdöl beziehungsweise 6.000 Kubikfuß oder 169 Kubikmetern Erdgas.

#### Biotechnologie

Biotechnologie umfasst alle Verfahren und Produkte, die lebende Organismen, zum Beispiel Bakterien und Pilze, oder ihre zellulären Bestandteile nutzen. Pflanzenbiotechnologie und Weiße Biotechnologie gehören zu den fünf Wachstumsclustern der BASF.

### C

#### CO<sub>2</sub>-Äquivalente

Berechnungsgröße für den Einfluss von Treibhausgasemissionen auf den Treibhauseffekt. Ein Faktor (Global Warming Potential) gibt die Treibhauswirkung der einzelnen Gase verglichen mit CO<sub>2</sub> als Referenzgröße an.

#### Commercial-Paper-Programm

Ist eine Rahmenvereinbarung zwischen der BASF und Banken über die Begebung von Schuldverschreibungen am Geldmarkt (Commercial Papers). Die unter dem Programm begebenen Commercial Papers haben den Charakter einer Daueremission, bei der die Laufzeiten individuell festgelegt werden können. Die Voraussetzung dafür ist ein gutes Rating.

### Compliance

Compliance ist ein wichtiges Element der Corporate Governance. Darunter versteht man die Einhaltung von Gesetzen und Richtlinien sowie von freiwilligen Kodizes im Unternehmen.

### D

#### Dividendenrendite

Diese Kennzahl gibt an, welche Rendite der Aktionär für seine zum Jahresschlusskurs bewertete Aktienanlage durch die Gewinnausschüttung erhält. Sie wird wie folgt berechnet: Dividende je Aktie, geteilt durch Jahresschlusskurs, multipliziert mit 100.

### E

#### EBIT

„Earnings before Interest and Taxes“ – bei der BASF entspricht das EBIT dem Ergebnis der Betriebstätigkeit.

#### EBITDA

„Earnings before Interest, Taxes, Depreciation and Amortization“ – bei der BASF entspricht das EBITDA dem Ergebnis der Betriebstätigkeit vor der Berücksichtigung von Abschreibungen.

#### EBITDA-Marge

Sie zeigt die Marge, die wir durch unsere operative Tätigkeit vor Abschreibungen aus dem Umsatz erwirtschaftet haben. Die EBITDA-Marge berechnet sich aus dem Ergebnis der Betriebstätigkeit vor Abschreibungen, bezogen auf den Umsatz.

#### EBIT nach Kapitalkosten

Das EBIT nach Kapitalkosten wird ermittelt, indem die Kapitalkosten vom EBIT, das die Unternehmensbereiche erwirtschaften, abgezogen werden. Ist das EBIT nach Kapitalkosten positiv, hat die BASF eine Prämie auf die Renditeerwartungen der Fremdkapital- und Eigenkapitalgeber verdient. Das EBIT nach Kapitalkosten ist die zentrale Ziel- und Steuerungsgröße der BASF.

#### Emollient

Emollients sind pflegende Ölkomponenten, die zugleich ein samtiges Hautgefühl vermitteln. Sie sind ein wesentlicher Bestandteil von Haut- und Haarpflegemitteln, zum Beispiel von Cremes und Haarmasken.

#### EPSA

Exploration and Production Sharing Agreements bezeichnen Produktionsteilungsverträge im Öl- und Gas-Geschäft. Sie sind eine verbreitete Vertragsform zwischen einer staatlichen Ölgesellschaft und einer internationalen Ölgesellschaft zur Suche und Förderung von Kohlenwasserstoffen.

#### Equity-Methode/at Equity

Mit der Equity-Methode werden Beteiligungen, bei denen die BASF über wesentlichen Einfluss verfügt, in den Jahresabschluss einbezogen. Der Buchwert der Beteiligung ändert sich dabei entsprechend deren Eigenkapital.

#### European Water Partnership

Die European Water Partnership wurde 2006 als unabhängige Non-Profit-Organisation gegründet, um nachhaltiges Wassermanagement zu unterstützen. Sie dient als Diskussionsforum, fördert Partnerschaften sowie den Informationsaustausch relevanter Stakeholder und initiiert und koordiniert Initiativen.



**Exploration**

Erkundung und Erschließung von Lagerstätten und Rohstoffvorkommen, wie zum Beispiel Erdöl und Erdgas, in der Erdkruste. Bei der Exploration werden Speichergesteine, die Ansammlungen von Öl und Gas beinhalten können, durch geeignete geophysikalische Verfahren ausfindig gemacht und ein möglicher Fund anschließend über Explorationsbohrungen nachgewiesen.

**F****Feldesentwicklung**

Bezeichnung für den Aufbau von Förderanlagen und das Durchführen von Produktionsbohrungen zur kommerziellen Ausbeutung von Erdöl- und Erdgaslagerstätten.

**Fermentation**

Die Fermentation ist die Umsetzung von Stoffen mit Hilfe von Bakterien-, Pilz- oder Zellkulturen beziehungsweise von Enzymen.

**Free Cashflow**

Cashflow aus laufender Geschäftstätigkeit abzüglich Ausgaben für Sachanlagen und immaterielles Vermögen.

**G****Gesamtkapitalrendite**

Rendite auf das während des Geschäftsjahres durchschnittlich eingesetzte Vermögen. Sie errechnet sich aus dem Ergebnis vor Ertragsteuern zuzüglich der Fremdkapitalzinsen, bezogen auf das durchschnittlich eingesetzte Vermögen.

**Globale Produktstrategie (GPS)**

Die Globale Produktstrategie sieht weltweit einheitliche Standards und Verfahren für Unternehmen in der Produktverantwortung vor. Das Programm des Weltchemieverbandes (ICCA) hat die Minimierung der negativen Auswirkungen von Chemikalien auf die menschliche Gesundheit und Umwelt insbesondere in Entwicklungsländern zum Ziel.

**Goodwill**

Der Goodwill bezeichnet den Betrag, der als Firmen- oder Geschäftswert eines Unternehmens angesetzt wird. Er bildet die Differenz zwischen dem Zeitwert des Nettovermögens und dem bezahlten Kaufpreis. Da der Goodwill Ertragserwartungen berücksichtigt, kann er den Buchwert übersteigen.

**Greenhouse Gas Protocol (GHG Protocol)**

Das Greenhouse Gas Protocol ist ein weltweit anerkannter Standard zur Quantifizierung und zum Management von Treibhausgas-Emissionen, der von vielen Unternehmen aus unterschiedlichen Industrien, NGOs und Regierungen angewendet wird. Die Berichtsstandards und Empfehlungen für die Durchführung von Projekten zur Emissionsreduzierung werden unter der Leitung des World Resources Institute und des World Business Council for Sustainable Development von Unternehmen, Regierungen und NGOs gemeinsam erarbeitet.

**H****HPPO**

Steht für ein Verfahren zur Herstellung von Propylenoxid (PO) mittels Wasserstoffperoxid (HP). Die HPPO-Technologie ist umweltverträglicher und wirtschaftlicher als herkömmliche PO-Herstellungsverfahren, da außer Wasser keine weiteren Nebenprodukte gebildet werden. PO ist ein Zwischenprodukt, zum Beispiel für die Herstellung von Polyurethan.

**I****IAS**

International Accounting Standards (siehe auch „IFRS“)

**IFRIC**

Das „International Financial Reporting Interpretations Committee“ ist ein Gremium, das Auslegungen und Interpretationen zu den Rechnungslegungsstandards IFRS beziehungsweise IAS veröffentlicht.

**IFRS**

Die „International Financial Reporting Standards“ (bis 2001: International Accounting Standards, IAS) sind internationale Rechnungslegungsvorschriften, die vom in London/Großbritannien ansässigen „International Accounting Standards Board“ (IASB) entwickelt und veröffentlicht werden. Seit 2005 sind die IFRS nach der sogenannten IAS-Verordnung von börsennotierten Unternehmen mit Sitz in der Europäischen Union verpflichtend anzuwenden.

**ILO-Kernarbeitsnormen**

Die ILO-Kernarbeitsnormen sind in einer Deklaration der Internationalen Arbeitsorganisation (ILO) niedergelegt. Sie umfasst acht Konventionen, in denen die Mindestanforderungen an menschenwürdige Arbeitsbedingungen definiert werden. BASF überprüft über ein gruppenweites Monitoringsystem die Einhaltung der Arbeitsstandards bei Mitarbeitern und Lieferanten.

**International Standard on Assurance Engagements 3000 (ISAE 3000)**

ISAE 3000 wird vom International Audit and Assurance Standards Board (IAASB) herausgegeben. Er stellt einen Leitfaden für umfangreiche Audits bereit, die sich mit nichtfinanziellen Daten beschäftigen, zum Beispiel für Audits von Nachhaltigkeitsberichten.

**ISO 14001**

ISO 14001 ist eine internationale Norm der International Organization for Standardization (ISO), die allgemeine Anforderungen an ein Umweltmanagementsystem für eine freiwillige Zertifizierung festlegt.

**ISO 19011**

ISO 19011 ist eine internationale Norm der International Organization for Standardization (ISO), die Anforderungen für Audits von Qualitätsmanagement- und Umweltmanagementsystemen festlegt.

**K****Kapitalkosten**

Kapitalkosten beschreiben Renditeerwartungen von Aktionären (in Form von Dividenden und Kurssteigerungen) und Verzinsungsansprüche von Fremdkapitalgebern. Um langfristig erfolgreich zu bleiben, muss ein Unternehmen dauerhaft mindestens die von Aktionären und Gläubigern geforderte Rendite auf das eingesetzte Kapital erwirtschaften.



**M****Materialitätsanalyse**

Mit der Materialitätsanalyse analysiert und bewertet BASF das gesellschaftliche Interesse an sowie die mögliche Bedeutung von Nachhaltigkeitsthemen für das Unternehmen. Ziel ist es, frühzeitig Strategien zum Umgang mit möglichen neuen Risiken und Chancen zu entwickeln. Mehrere hundert Stakeholder nahmen an der diesjährigen Analyse teil. Die Ergebnisse werden in einer Materialitätsmatrix dargestellt.

**MDI**

MDI steht für Diphenylmethandiisocyanat und ist eines der wichtigsten Grundprodukte für den Polyurethankunststoff. Das Anwendungsspektrum dieses Kunststoffes reicht von der Sohle in Hightech-Joggingschuhen, über die Dämmung von Automotoren oder auch Kühlschränken bis hin zur Isolation von Gebäuden.

**MEA (Membran-Elektroden-Einheit)**

Die MEA ist das Kernstück einer Brennstoffzelle; in ihr reagieren Wasserstoff und Sauerstoff zu Wasser und erzeugen elektrische Energie und Wärme.

**Monitoringsystem**

Monitoringsysteme und -instrumente dienen dazu, das Einhalten von Standards zu erfassen und sicherzustellen. Gegenstand von Monitoring sind unter anderem freiwillige Selbstverpflichtungen wie das Bekenntnis zur Einhaltung der Menschenrechte oder international anerkannte Arbeitsstandards.

**N****Nachhaltigkeit**

Das Leitbild der nachhaltig zukunftsverträglichen Entwicklung hat das Ziel, den ökonomischen, ökologischen und sozialen Bedürfnissen der Gesellschaft gerecht zu werden, ohne die Entwicklungschancen künftiger Generationen zu beeinträchtigen.

**Nanotechnologie**

Charakterisierung, Erzeugung und Anwendung von Strukturen und Systemen, die kleiner als hundert Nanometer sind.

**Naphtha**

Naphtha ist Rohbenzin und entsteht als Produkt bei der Raffinierung von Mineralölen in einer Rohölraffinerie. Schweres Naphtha ist Basisstoff der Fahrbenzinproduktion, leichtes Naphtha der wichtigste Einsatzstoff im Steamcracker.

**O****OECD**

Die „Organisation for Economic Cooperation and Development“ ist eine internationale Organisation für wirtschaftliche Zusammenarbeit und Entwicklung mit Sitz in Paris/Frankreich.

**OHSAS 18001**

Die Occupational Health and Safety Assessment Series (OHSAS) enthält unter anderem den Standard OHSAS 18001, der ein Managementsystem für Arbeitsschutz beinhaltet. Dieses kann in ein bestehendes Qualitäts- oder Umweltschutzmanagementsystem integriert und zertifiziert werden.

**Ökoeffizienz-Analyse**

Methode zur Bewertung von Produkten und Verfahren unter ökonomischen und ökologischen Aspekten. Ziel ist der Vergleich von Produkten hinsichtlich Wirtschaftlichkeit und Umweltverträglichkeit.

**P****Patent Asset Index**

Der Patent Asset Index misst die Stärke des Patentportfolios eines Unternehmens. Er setzt sich aus zwei Faktoren zusammen: (1) „Portfoliogröße“ (Anzahl der weltweit aktiven Patentfamilien) und (2) „Wettbewerbswirkung“, die aus den Werten zur technologischen Relevanz und Abdeckung des Marktes (gewichtet anhand der Marktgröße) ermittelt wird.

**PolyTHF**

THF steht für Tetrahydrofuran und ist eine Ausgangsverbindung für Polytetrahydrofuran (PolyTHF®). PolyTHF ist ein wichtiger Bestandteil bei der Herstellung von Elastomerfasern für Textilien. Elastomerfasern werden beispielsweise für Sportkleidung verwendet.

**Produktinnovation**

Neue oder verbesserte Produkte und Anwendungen, die seit maximal fünf Jahren auf dem Markt sind.

**R****REACH**

Verordnung der Europäischen Union, welche die Registrierung, Evaluierung und Autorisierung von Chemikalien regelt.

**Responsible Care**

Weltweite Initiative der chemischen Industrie zur kontinuierlichen Verbesserung auf den Gebieten Umweltschutz, Sicherheit und Gesundheit.

**S****Saatgutbeizen**

Saatgutbeizen sind Pflanzenschutzmittel, die mit Hilfe spezieller technischer Verfahren auf das Saatkorn aufgetragen werden und dadurch Nutzpflanzen in ihrer Keim- und frühen Wachstumsphase vor Schadpilzen und Schadinsekten schützen.

**SCR-Technologie** (Selective Catalytic Reduction)

Mit Hilfe dieser Technologie werden schädliche Stickoxide, die sich unter anderem im Abgasstrom von Dieselmotoren bei Nutzfahrzeugen befinden, in Wasserdampf und Stickstoff (einen natürlichen Bestandteil der Luft) umgewandelt.

**SEEBALANCE**

SEEBALANCE bezeichnet die von der BASF entwickelte Sozio-Ökoeffizienz-Analyse. Im Rahmen dieser Analyse werden die drei Dimensionen der Nachhaltigkeit – Ökologie, Ökonomie und Soziales – abgebildet. Das Instrument ermöglicht es erstmalig, neben Umweltbelastung und Kosten auch die sozialen Auswirkungen von Produkten und Herstellverfahren zu bewerten.

**Social Business**

Das Social Business BASF Grameen Ltd. dient einem sozialen Zweck, soll seine eigenen Kosten decken sowie die Anfangsinvestition der Partner wieder erwirtschaften. Darüber hinaus anfallende Gewinne werden vollständig in das Social Business reinvestiert.

**Sondereinflüsse**

Einmalkosten oder Einmalerträge, die das Ergebnis eines Segments oder der BASF-Gruppe insgesamt wesentlich beeinflusst haben. Darunter können beispielsweise Aufwendungen für Restrukturierungsmaßnahmen oder Erträge aus Devestitionen fallen.

**Spotmarkt (Kassamarkt)**

Markt, auf dem ein vereinbartes Geschäft, bestehend aus Lieferung, Abnahme und Bezahlung, unmittelbar abgewickelt wird. Im Gegensatz dazu erfolgen bei Geschäften am Terminmarkt Lieferung, Abnahme und Bezahlung zu einem späteren Zeitpunkt als der Abschluss des Geschäfts.

**Stakeholder**

Bezeichnung für Personen oder Gruppen, deren Interessen mit denen eines Unternehmens auf vielfältige Art verbunden sind. Zu unseren Stakeholdern gehören Aktionäre, Geschäftspartner, Mitarbeiter, Nachbarn und Gesellschaft.

**Steamcracker**

Steamcracker sind Anlagen, in denen unter Zuhilfenahme von Dampf (englisch: steam) Naphtha (Rohbenzin) oder Erdgas aufgespalten (englisch: to crack) wird. Die entstehenden Petrochemikalien sind Ausgangsprodukte für die Herstellung eines Großteils der Erzeugnisse der BASF.

**Styrol**

Die Herstellung des Vorprodukts Styrol dient überwiegend der Eigenversorgung (Rückwärtsintegration). Styrolkunststoffe finden in vielen Bereichen Anwendung, beispielsweise in der Bau-, Verpackungs-, Automobil-, Elektro- und Freizeitindustrie.

**Swap**

Eine Vereinbarung zwischen zwei Parteien, in Zukunft Waren- oder Zahlungsströme auszutauschen. Bei einem Zinsswap werden für einen vereinbarten Nominalbetrag fixe gegen variable Zinszahlungen getauscht.

**T****TDI**

Toluoldiisocyanat ist ein Ausgangsprodukt für Polyurethan.

**Thesaurierung**

Für erwirtschaftete Gewinne gibt es zwei Verwendungsmöglichkeiten: Ausschüttung an die Gesellschafter oder Einbehaltung im Unternehmen. Letzteres wird als Thesaurierung bezeichnet.

**Tight Gas**

Als Tight Gas wird Erdgas bezeichnet, das in sehr kompaktem, nahezu undurchlässigem Gestein eingelagert ist.

**Time-Lag-Effekt**

Zeitverzögerte Anpassung der Erdgaspreise an die Ölpreisentwicklung.

**Traits**

Traits sind genetisch bedingte Eigenschaften von Pflanzen, wie Trockentoleranz, Krankheitsresistenz oder höherer Ertrag.

**Transport-Unfall-Informations- und Hilfeleistungssystem (TUIS)**

TUIS ist ein gemeinsames Transport-Unfall-Informations- und Hilfeleistungssystem, an dem rund 130 Chemieunternehmen beteiligt sind. Die TUIS-Mitgliedsunternehmen sind jederzeit für öffentliche Dienststellen erreichbar und helfen mit telefonischer Beratung, Fachleuten vor Ort und der Bereitstellung von speziellen technischen Geräten.

**V****Verbund**

Im BASF-Verbund werden Produktionsanlagen, Energiefluss, Logistik und Infrastruktur intelligent miteinander vernetzt, um die Produktausbeute zu steigern, Ressourcen und Energie zu sparen und Logistikkosten zu senken. Ein wesentlicher Faktor der Verbund-idee ist der Wissensverbund. Mitarbeiter der BASF tauschen sich weltweit untereinander aus. Das Expertenwissen bündelt die BASF in ihren Forschungsplattformen.

**VOC (Flüchtige organische Verbindungen)**

VOC (Volatile Organic Compounds) sind Stoffe organischen Ursprungs, die bei niedrigen Temperaturen als Gas in der Luft vorliegen. Dazu gehören zum Beispiel manche Kohlenwasserstoffe, Alkohole, Aldehyde und organische Säuren. Der Umgang mit flüchtigen organischen Verbindungen wird durch die VOC-Richtlinie der Europäischen Union geregelt.

**W****Wachstumscluster**

Die BASF bündelt ihre Forschung an wichtigen technologiegetriebenen Zukunftsthemen in fünf Wachstumsclustern: Energiemanagement, Rohstoffwandel, Nanotechnologie, Pflanzenbiotechnologie und Weiße Biotechnologie.

**Weiße Biotechnologie**

Teilgebiet der Biotechnologie, auch industrielle Biotechnologie genannt, das Mikroorganismen und/oder Enzyme zur Herstellung von chemischen Produkten nutzt, die in verschiedenen Wertschöpfungsstufen der chemischen Industrie zum Einsatz kommen. Dabei handelt es sich beispielsweise um die biokatalytische Herstellung von chiralen Zwischenprodukten.

**Wertschöpfungskette**

Aufeinanderfolge von Veredlungsschritten im Produktionsprozess, angefangen von den Rohstoffen, über verschiedene Zwischenstufen bis zum fertigen Endprodukt.

## Stichwortverzeichnis

### A

Agricultural Solutions \_\_\_\_\_ 22, 37, 44 f., **70 ff.**, 115, 157, Umschlag  
 Akquisitionen \_\_\_\_\_ 17, 25, 40, **57 f.**, 131, **153 ff.**  
 Aktie \_\_\_\_\_ 12 ff., 20, 24, 35, **38**, 116, **119 ff.**, 157, Umschlag  
 Aktionäre \_\_\_\_\_ 12 ff., 27, 84 ff., **119 ff.**, **131 ff.**  
 Amflora \_\_\_\_\_ 28, **72**, 102  
 Arbeitnehmervertretung \_\_\_\_\_ 26, **87 f.**, 131  
 Arbeits- und Sozialstandards \_\_\_\_\_ 19, **25 ff.**, 88, 109  
 Audits \_\_\_\_\_ 19, 26, 89, **91**, 97  
 Aufsichtsrat \_\_\_\_\_ 117 ff., **123 ff.**, 129 ff., **131 ff.**  
 Ausbildung \_\_\_\_\_ 86

### B

Back-up-Linie \_\_\_\_\_ 14, **41**  
 BASF Plant Science \_\_\_\_\_ 70, **72 f.**  
 Bautenanstrichmittel \_\_\_\_\_ 65, **69**, 83  
 Bestätigungsvermerk \_\_\_\_\_ 136  
 Bilanz \_\_\_\_\_ 39 ff., 105, 133, **139 ff.**  
 Biotechnologie \_\_\_\_\_ 17, 28, 31, **72**, 102, 131

### C

Care Chemicals \_\_\_\_\_ 22, **58, 62**, 153, Umschlag  
 Cashflow \_\_\_\_\_ **38, 41 ff.**, 140 ff  
 Catalysts \_\_\_\_\_ 22, 37, **65, 67 f.**, 81, Umschlag  
 Chemicals \_\_\_\_\_ 22, 36, 44 f., **46 ff.**, 81 f., 157, Umschlag  
 Ciba-Integration \_\_\_\_\_ 15, 36 f., 42, 57, **61 ff.**, 154, 161  
 Coatings \_\_\_\_\_ 22, **65, 69**, Umschlag  
 Cognis \_\_\_\_\_ 3, 17, 22, 36, 40 ff., **57 ff.**,  
 \_\_\_\_\_ 61 ff., 84, 115 f., 150, 153 f.  
 Compliance \_\_\_\_\_ 19, 26, 110, **120**  
 Construction Chemicals \_\_\_\_\_ 22, 37, **65, 68**, Umschlag  
 Corporate Governance \_\_\_\_\_ 117 ff.  
 Crop Protection \_\_\_\_\_ 22, **70, 73 f.**, Umschlag

### D

Derivative Finanzinstrumente \_\_\_\_\_ 42, 145 ff., **187 ff.**  
 Demografischer Wandel \_\_\_\_\_ **85**, 108  
 Devestitionen \_\_\_\_\_ 36 f., 42, 57, 116, 131, 140, **155**  
 Dispersionen \_\_\_\_\_ **57 f.**, 62 f., 83  
 Dispersions & Pigments \_\_\_\_\_ 22, **58, 61**, 153, Umschlag  
 Diversity \_\_\_\_\_ 18, **85**, 109, 118 f.  
 Dividende \_\_\_\_\_ **12 ff.**, 29, 43, **116**, 133

### E

Eigenkapital \_\_\_\_\_ 24, 40, **141**  
 Eingetragene Marken \_\_\_\_\_ 209  
 Energieeffizienz \_\_\_\_\_ 20, 30, 52, **65 f.**, **97 f.**  
 Erklärung des Vorstands \_\_\_\_\_ 135

### F

Fahrzeuglacke \_\_\_\_\_ 69  
 Feldesentwicklung \_\_\_\_\_ 147  
 Forschung und Entwicklung \_\_\_\_\_ 17, **30 ff.**, 46 f., 53, 59, 66,  
 \_\_\_\_\_ 71 ff., 83, 95, 108  
 Functional Solutions \_\_\_\_\_ 22, 37, 44 f., **65 ff.**, **81 f.**, 157, Umschlag

### G

Gesundheitsschutz \_\_\_\_\_ 25, **89**, 91  
 Gewinn- und Verlustrechnung \_\_\_\_\_ 29, **137**, 191  
 Global Compact \_\_\_\_\_ 2, 19, 120, **213 f.**  
 Global Reporting Initiative \_\_\_\_\_ 2 f., **213 f.**  
 Goodwill \_\_\_\_\_ **40**, 111  
 Grundwerte \_\_\_\_\_ **19**, 119 f.

### I

Industrielacke \_\_\_\_\_ **69**, Umschlag  
 Innovation \_\_\_\_\_ 8 f., **17, 30 ff.**, 59, 66, 70, 73, 83, 85, 102, 115, 118  
 Inorganics \_\_\_\_\_ 22, **46, 49 f.**, Umschlag  
 Intermediates \_\_\_\_\_ 22, **46, 51**, Umschlag  
 Investitionen \_\_\_\_\_ 8, 17, 32, **41 ff.**, 48, 54, 60, 66, **72**, 83, 110  
 \_\_\_\_\_ 116, 144, 146, 210  
 Investor Relations \_\_\_\_\_ **12 ff.**, 15, Umschlag

### K

Kapitalkosten \_\_\_\_\_ 7, **18, 24**, 37, 41, 115 f., 166 f.  
 Klimaschutz \_\_\_\_\_ 20, **95 ff.**, 102  
 Kooperationen \_\_\_\_\_ 17, **30 f.**, 72  
 Kunden \_\_\_\_\_ 17 ff., 22, **27 f.**, 33, 36, 47 f., 53 f., 59, 65 f., 70 ff.,  
 \_\_\_\_\_ 91 f., 101 ff., 107 ff.

### L

Lieferanten \_\_\_\_\_ **26**, 92, 101 f., 107, 120

### M

Mitarbeiter \_\_\_\_\_ 3, 13, 18 f., 21 f., 24 ff., 72, **84 ff.**, 89, 90 ff.,  
 \_\_\_\_\_ 95, 109 ff., 210, Umschlag  
 Monitoring \_\_\_\_\_ **19, 26**, 88, 105 f., 109, 120

### N

Nachhaltigkeit \_\_\_\_\_ 2 f., 8, **14 f.**, **18, 25 ff.**, 66, 85,  
 \_\_\_\_\_ 88, 95, 109, 129, Umschlag  
 Nachtragsbericht \_\_\_\_\_ 116  
 Nachwachsende Rohstoffe \_\_\_\_\_ **25**, 31, 72, 98  
 Nanotechnologie \_\_\_\_\_ 17, 28, **31**, 66, 102  
 Nutrition & Health \_\_\_\_\_ 22, **57 f.**, **63**, 153, Umschlag

### O

Oil & Gas \_\_\_\_\_ 22, 37, 44 f., **75 ff.**, 115, 147, 157 f., **195 ff.**, Umschlag  
 Ökoeffizienz-Analyse \_\_\_\_\_ **27**, 96, 99

### P

Paper Chemicals \_\_\_\_\_ 22, **58, 63 f.**, Umschlag  
 Patente \_\_\_\_\_ **31**, 109, 168 f.  
 Performance Chemicals \_\_\_\_\_ 22, **58, 64**, 153 ff., Umschlag  
 Performance Polymers \_\_\_\_\_ 22, 36, **52, 55 f.**, 82, Umschlag  
 Performance Products \_\_\_\_\_ 22, 36, 44 f., **57 ff.**, 81 f., 107,  
 \_\_\_\_\_ 115, 153, 157, Umschlag  
 Personalaufwand \_\_\_\_\_ **84**, 127 ff., **165 f.**, 186, 193, Umschlag  
 Petrochemicals \_\_\_\_\_ 22, 36, **46, 50**, Umschlag  
 Plastics \_\_\_\_\_ 22, 36, 44 f., **52 ff.**, 115 f., 157, Umschlag  
 Polyurethanes \_\_\_\_\_ 22, 36, **52 f.**, **56**, Umschlag

**R**

Rating \_\_\_\_\_ **12 ff.**, 41 ff., 111, 167  
 REACH \_\_\_\_\_ 101 f.  
 Regionen \_\_\_\_\_ **32**, 43, 50 f., 56, 62 ff., 68 f., 74 ff., **81 ff.**, 99 f., 112 ff.  
 Responsible Care \_\_\_\_\_ 19, **91 ff.**, Umschlag  
 Ressourcen \_\_\_\_\_ 27, 30, 66, **95 f.**, **97 f.**

**S**

SEEBALANCE \_\_\_\_\_ 27  
 Segmentdaten \_\_\_\_\_ **49, 55, 61, 67, 73, 78**  
 Sicherheit \_\_\_\_\_ 3, **91 ff.**, 101, 109  
 Sondereinflüsse \_\_\_\_\_ **36 f.**, 64, 68 f., Umschlag  
 Sozialleistungen \_\_\_\_\_ 29, **84**  
 Spenden und Sponsoring \_\_\_\_\_ 29, **90**, Umschlag  
 Stakeholder \_\_\_\_\_ 25, **27 f.**, 91, 102  
 Steamcracker \_\_\_\_\_ **46**, 48  
 Strategie \_\_\_\_\_ **17 ff.**, 24 f., 46, 52, 57, 65, 70,  
 \_\_\_\_\_ 72, 75, 81, 90 f., 95, 97, 99

**T**

Time-Lag-Effekt \_\_\_\_\_ 79 f.

**U**

Umsatz \_\_\_\_\_ 16, 22, 30, **33, 35 ff.**, 44 f., 48 ff., 55 ff.,  
 \_\_\_\_\_ 60 ff., 66 ff., 73 ff., 78 ff., 81 ff., 115 ff. Umschlag  
 Umweltschutz \_\_\_\_\_ 3, 17, 19, 25 ff., **91 ff.**, 109, Umschlag

**V**

Verbund \_\_\_\_\_ **22 f.**, 30 f., 46 f., 86, **97 f.**, 108, 110  
 Vereinbarkeit von Beruf und Familie \_\_\_\_\_ 86  
 Vorstand \_\_\_\_\_ **7 ff.**, **10 f.**, 117 ff., **122**, 125 ff.

**W**

Wachstumscluster \_\_\_\_\_ 17, **30 f.**, 98, 131  
 Wasser \_\_\_\_\_ 20, 25 ff., **99 f.**  
 Weiterbildung \_\_\_\_\_ 86  
 Werte \_\_\_\_\_ **17 ff.**, 119 f.  
 Wertmanagement \_\_\_\_\_ 24 f.  
 Wertsteigerung \_\_\_\_\_ 15, **144**  
 Wintershall \_\_\_\_\_ 20, 23, **75 ff.**, 95 f., 151, 165

**Z**

Zehnjahresübersicht \_\_\_\_\_ 210

## Eingetragene Marken <sup>1</sup>

|                        |                                                    |
|------------------------|----------------------------------------------------|
| <b>AgCelence:</b>      | Reg. Marke der BASF                                |
| <b>AMFLORA:</b>        | Reg. Marke der BASF                                |
| <b>BASOTECT:</b>       | Reg. Marke der BASF                                |
| <b>CELLASTO:</b>       | Reg. Marke der BASF                                |
| <b>Cetiol:</b>         | Reg. Marke der BASF                                |
| <b>COVERTACE:</b>      | Reg. Marke der BASF                                |
| <b>CypoSol:</b>        | Reg. Marke der BASF                                |
| <b>ECOFLEX:</b>        | Reg. Marke der BASF                                |
| <b>ECOVIO:</b>         | Reg. Marke der BASF                                |
| <b>ELASTOCOAST:</b>    | Reg. Marke der BASF                                |
| <b>ELASTOCOOL:</b>     | Reg. Marke der BASF                                |
| <b>ELASTOPIR:</b>      | Reg. Marke der BASF                                |
| <b>ELASTOPOR:</b>      | Reg. Marke der BASF                                |
| <b>E-por:</b>          | Reg. Marke der BASF                                |
| <b>F 500:</b>          | Reg. Marke der BASF                                |
| <b>FILTERPAVE:</b>     | Reg. Marke der Reynolds<br>Consumer Products, Inc. |
| <b>GLASURIT:</b>       | Reg. Marke der BASF                                |
| <b>GREEN SENSE:</b>    | Reg. Marke der BASF                                |
| <b>INITIUM:</b>        | Reg. Marke der BASF                                |
| <b>INTERCEPTOR:</b>    | Reg. Marke der BASF                                |
| <b>KeroDye:</b>        | Reg. Marke der BASF                                |
| <b>Kerotect:</b>       | Reg. Marke der BASF                                |
| <b>KIXOR:</b>          | Reg. Marke der BASF                                |
| <b>LUMOGEN:</b>        | Reg. Marke der BASF                                |
| <b>MASTERBUILDERS:</b> | Reg. Marke der BASF                                |
| <b>NEOPOR:</b>         | Reg. Marke der BASF                                |
| <b>NORBIN:</b>         | Reg. Marke der BASF                                |

|                            |                                                            |
|----------------------------|------------------------------------------------------------|
| <b>Patent Asset Index:</b> | Trademark der PatentSight GmbH                             |
| <b>PCI:</b>                | Reg. Marke der BASF                                        |
| <b>POLYTHF:</b>            | Reg. Marke der BASF                                        |
| <b>RESPONSIBLE CARE:</b>   | Reg. Marke des Conseil<br>Européen de l'Industrie Chimique |
| <b>R-M:</b>                | Reg. Marke der BASF                                        |
| <b>SEEBALANCE:</b>         | Reg. Marke der BASF                                        |
| <b>SELURIS:</b>            | Reg. Marke der BASF                                        |
| <b>SOLUPLUS:</b>           | Reg. Marke der BASF                                        |
| <b>STANDAK:</b>            | Reg. Marke der BASF                                        |
| <b>STYROPOR:</b>           | Reg. Marke der BASF                                        |
| <b>SUVINIL:</b>            | Reg. Marke der BASF                                        |
| <b>Sudan:</b>              | Reg. Marke der BASF                                        |
| <b>TERMIDOR:</b>           | Reg. Marke der BASF                                        |
| <b>UCRETE:</b>             | Reg. Marke der BASF                                        |
| <b>ULTRADUR:</b>           | Reg. Marke der BASF                                        |
| <b>ULTRAFORM:</b>          | Reg. Marke der BASF                                        |
| <b>ULTRAMID:</b>           | Reg. Marke der BASF                                        |
| <b>ULTRAMID Endure:</b>    | Reg. Marke der BASF                                        |
| <b>ULTRAMID Structure:</b> | Reg. Marke der BASF                                        |
| <b>ULTRASIM:</b>           | Reg. Marke der BASF                                        |
| <b>ULTRASON:</b>           | Reg. Marke der BASF                                        |
| <b>XEMIUM:</b>             | Reg. Marke der BASF                                        |
| <b>X-SEED:</b>             | Reg. Marke der BASF                                        |

<sup>1</sup> Marken sind möglicherweise nicht in jedem Land eingetragen.

## Zehnjahresübersicht

| Millionen €                                                | 2001              | 2002    | 2003    | 2004    | 2005               | 2006   | 2007   | 2008   | 2009    | 2010    |
|------------------------------------------------------------|-------------------|---------|---------|---------|--------------------|--------|--------|--------|---------|---------|
| <b>Ergebnisrechnung <sup>1</sup></b>                       |                   |         |         |         |                    |        |        |        |         |         |
| Umsatz                                                     | 32.500            | 32.216  | 33.361  | 37.537  | 42.745             | 52.610 | 57.951 | 62.304 | 50.693  | 63.873  |
| Ergebnis der Betriebstätigkeit vor Abschreibungen (EBITDA) | 4.142             | 5.105   | 5.110   | 7.685   | 8.233              | 9.723  | 10.225 | 9.562  | 7.388   | 11.131  |
| Ergebnis der Betriebstätigkeit (EBIT)                      | 1.217             | 2.641   | 2.658   | 5.193   | 5.830              | 6.750  | 7.316  | 6.463  | 3.677   | 7.761   |
| Ergebnis der gewöhnlichen Geschäftstätigkeit               | 609               | 2.641   | 2.168   | 4.347   | 5.926              | 6.527  | 6.935  | 5.976  | 3.079   | 7.373   |
| Außerordentliches Ergebnis                                 | 6.121             | –       | –       | –       | –                  | –      | –      | –      | –       | –       |
| Ergebnis vor Ertragsteuern                                 | 6.730             | 2.641   | 2.168   | 4.347   | 5.926              | 6.527  | 6.935  | 5.976  | 3.079   | 7.373   |
| Jahresüberschuss                                           | 5.826             | 1.599   | 976     | 2.133   | 3.168              | 3.466  | 4.325  | 3.305  | 1.655   | 5.074   |
| Ergebnis nach Steuern und Anteilen anderer Gesellschafter  | 5.858             | 1.504   | 910     | 2.004   | 3.007              | 3.215  | 4.065  | 2.912  | 1.410   | 4.557   |
| <b>Investitionen, Abschreibungen <sup>1</sup></b>          |                   |         |         |         |                    |        |        |        |         |         |
| Investitionen in Sachanlagen und immaterielles Vermögen    | 3.313             | 3.055   | 3.415   | 2.163   | 2.523              | 10.039 | 4.425  | 3.634  | 5.972   | 5.304   |
| davon in Sachanlagen                                       | 3.037             | 2.677   | 2.293   | 2.022   | 2.188              | 4.068  | 2.564  | 2.809  | 4.126   | 3.294   |
| Abschreibungen auf Sachanlagen und immaterielles Vermögen  | 2.925             | 2.464   | 2.452   | 2.492   | 2.403              | 2.973  | 2.909  | 3.099  | 3.711   | 3.370   |
| davon auf Sachanlagen                                      | 2.307             | 2.012   | 1.951   | 2.053   | 2.035              | 2.482  | 2.294  | 2.481  | 2.614   | 2.667   |
| <b>Zahl der Mitarbeiter</b>                                |                   |         |         |         |                    |        |        |        |         |         |
| zum Jahresende                                             | 92.545            | 89.389  | 87.159  | 81.955  | 80.945             | 95.247 | 95.175 | 96.924 | 104.779 | 109.140 |
| im Jahresdurchschnitt                                      | 94.744            | 90.899  | 88.167  | 85.022  | 80.992             | 88.160 | 94.893 | 95.885 | 103.612 | 104.043 |
| <b>Personalaufwand <sup>1</sup></b>                        |                   |         |         |         |                    |        |        |        |         |         |
|                                                            | 6.028             | 5.975   | 5.891   | 5.615   | 5.574              | 6.210  | 6.648  | 6.364  | 7.107   | 8.228   |
| <b>Forschungskosten <sup>1</sup></b>                       |                   |         |         |         |                    |        |        |        |         |         |
|                                                            | 1.247             | 1.135   | 1.105   | 1.173   | 1.064              | 1.277  | 1.380  | 1.355  | 1.398   | 1.492   |
| <b>Kennzahlen <sup>1</sup></b>                             |                   |         |         |         |                    |        |        |        |         |         |
| Ergebnis je Aktie (€) <sup>6,7</sup>                       | 4,86 <sup>2</sup> | 1,30    | 0,81    | 1,83    | 2,87               | 3,19   | 4,16   | 3,13   | 1,54    | 4,96    |
| Cashflow aus laufender Geschäftstätigkeit <sup>8</sup>     | 2.319             | 2.313   | 4.878   | 4.634   | 5.250 <sup>3</sup> | 5.940  | 5.807  | 5.023  | 5.693   | 6.460   |
| EBITDA-Marge (%)                                           | 12,7              | 15,8    | 15,3    | 20,5    | 19,3               | 18,5   | 17,6   | 15,3   | 14,6    | 17,4    |
| Gesamtkapitalrendite (%)                                   | 3,1               | 8,4     | 7,4     | 13,2    | 17,7               | 17,5   | 16,4   | 13,5   | 7,5     | 14,7    |
| Eigenkapitalrendite nach Steuern (%)                       | 36,6 <sup>2</sup> | 9,3     | 6,0     | 12,9    | 18,6               | 19,2   | 22,4   | 17,0   | 8,9     | 24,6    |
| <b>Gewinnverwendung</b>                                    |                   |         |         |         |                    |        |        |        |         |         |
| Jahresüberschuss der BASF SE <sup>4</sup>                  | 5.904             | 1.045   | 1.103   | 1.363   | 1.273              | 1.951  | 2.267  | 2.982  | 2.176   | 3.737   |
| Einstellung in Gewinnrücklage <sup>4</sup>                 | 5.153             | 247     | 334     | 449     | –                  | –      | –      | –      | –       | –       |
| Dividende                                                  | 758               | 789     | 774     | 904     | 1.015              | 1.484  | 1.831  | 1.791  | 1.561   | 2.021   |
| Dividende je Aktie (€) <sup>6</sup>                        | 0,65              | 0,70    | 0,70    | 0,85    | 1,00               | 1,50   | 1,95   | 1,95   | 1,70    | 2,20    |
| <b>Anzahl Aktien zum 31.12. (Millionen) <sup>5,6</sup></b> |                   |         |         |         |                    |        |        |        |         |         |
|                                                            | 1.166,8           | 1.140,6 | 1.113,3 | 1.080,9 | 1.028,8            | 999,4  | 956,4  | 918,5  | 918,5   | 918,5   |

<sup>1</sup> Seit dem Jahr 2005 erfolgt die Rechnungslegung und Berichterstattung der BASF-Gruppe nach den International Financial Reporting Standards (IFRS). Die Vorjahreszahlen wurden an IFRS angepasst. Die Zahlen bis einschließlich 2003 wurden nach handelsrechtlichen Vorschriften erstellt.

<sup>2</sup> Einschließlich des außerordentlichen Ergebnisses

<sup>3</sup> Vor externer Finanzierung von Pensionsverpflichtungen

<sup>4</sup> Nach handelsrechtlichen Vorschriften ermittelt

<sup>5</sup> Nach Abzug der zur Einziehung vorgesehenen Aktien

<sup>6</sup> Im zweiten Quartal 2008 haben wir einen Aktiensplit im Verhältnis 1:2 durchgeführt. Das Ergebnis je Aktie, die Dividende je Aktie und die Anzahl der Aktien der Vorjahre haben wir der Vergleichbarkeit wegen rückwirkend angepasst.

<sup>7</sup> Bereinigt um Sondereinflüsse und Abschreibungen auf immaterielle Vermögenswerte, betrug das Ergebnis je Aktie 5,73 € im Jahr 2010 und 3,01 € im Jahr 2009.

<sup>8</sup> Berücksichtigt ab dem Jahr 2009 die Ausweisänderung der Effekte aus regelmäßiger Verlängerung von US-Dollar-Sicherungsgeschäften



**Bilanz (HGB)**

| Millionen €                                        | 2001          | 2002          | 2003          |
|----------------------------------------------------|---------------|---------------|---------------|
| Immaterielle Vermögensgegenstände                  | 3.943         | 3.464         | 3.793         |
| Sachanlagen                                        | 14.190        | 13.745        | 13.070        |
| Finanzanlagen                                      | 3.360         | 3.249         | 2.600         |
| <b>Anlagevermögen</b>                              | <b>21.493</b> | <b>20.458</b> | <b>19.463</b> |
| Vorräte                                            | 5.007         | 4.798         | 4.151         |
| Forderungen aus Lieferungen und Leistungen         | 5.875         | 5.316         | 4.954         |
| Übrige Forderungen                                 | 2.384         | 2.947         | 3.159         |
| Abgrenzungsposten für latente Steuern              | 1.373         | 1.204         | 1.247         |
| Kurzfristige Wertpapiere                           | 383           | 132           | 147           |
| Zahlungsmittel- und Zahlungsmitteläquivalente      | 360           | 231           | 481           |
| <b>Umlaufvermögen</b>                              | <b>15.382</b> | <b>14.628</b> | <b>14.139</b> |
| <b>Aktiva</b>                                      | <b>36.875</b> | <b>35.086</b> | <b>33.602</b> |
| Gezeichnetes Kapital                               | 1.494         | 1.460         | 1.425         |
| Kapitalrücklage                                    | 2.914         | 2.948         | 2.983         |
| Eingezahltes Eigenkapital                          | 4.408         | 4.408         | 4.408         |
| Gewinnrücklagen und Bilanzgewinn                   | 12.222        | 12.468        | 12.055        |
| Translationsanpassung                              | 532           | -330          | -972          |
| Anteile anderer Gesellschafter                     | 360           | 396           | 388           |
| <b>Eigenkapital</b>                                | <b>17.522</b> | <b>16.942</b> | <b>15.879</b> |
| Pensions- und sonstige langfristige Rückstellungen | 6.809         | 6.233         | 6.205         |
| Steuer- und sonstige kurzfristige Rückstellungen   | 3.332         | 2.764         | 2.982         |
| <b>Rückstellungen</b>                              | <b>10.141</b> | <b>8.997</b>  | <b>9.187</b>  |
| Finanzschulden                                     | 2.835         | 3.610         | 3.507         |
| Verbindlichkeiten aus Lieferungen und Leistungen   | 2.467         | 2.344         | 2.056         |
| Übrige Verbindlichkeiten                           | 3.910         | 3.193         | 2.973         |
| <b>Verbindlichkeiten</b>                           | <b>9.212</b>  | <b>9.147</b>  | <b>8.536</b>  |
| <b>Fremdkapital</b>                                | <b>19.353</b> | <b>18.144</b> | <b>17.723</b> |
| davon langfristig                                  | 9.955         | 9.211         | 10.285        |
| <b>Passiva</b>                                     | <b>36.875</b> | <b>35.086</b> | <b>33.602</b> |

## Bilanz (IFRS)

| Millionen €                                               | 2004          | 2005          | 2006          | 2007          | 2008          | 2009          | 2010          |
|-----------------------------------------------------------|---------------|---------------|---------------|---------------|---------------|---------------|---------------|
| Immaterielles Vermögen                                    | 3.607         | 3.720         | 8.922         | 9.559         | 9.889         | 10.449        | 12.245        |
| Sachanlagen                                               | 13.063        | 13.987        | 14.902        | 14.215        | 15.032        | 16.285        | 17.241        |
| At Equity bewertete Beteiligungen                         | 1.100         | 244           | 651           | 834           | 1.146         | 1.340         | 1.328         |
| Sonstige Finanzanlagen                                    | 938           | 813           | 1.190         | 1.952         | 1.947         | 1.619         | 1.953         |
| Latente Steuern                                           | 1.337         | 1.255         | 622           | 679           | 930           | 1.042         | 1.112         |
| Übrige Forderungen und sonstiges Vermögen                 | 473           | 524           | 612           | 655           | 642           | 946           | 653           |
| <b>Langfristiges Vermögen</b>                             | <b>20.518</b> | <b>20.543</b> | <b>26.899</b> | <b>27.894</b> | <b>29.586</b> | 31.681        | <b>34.532</b> |
| Vorräte                                                   | 4.645         | 5.430         | 6.672         | 6.578         | 6.763         | 6.776         | 8.688         |
| Forderungen aus Lieferungen und Leistungen                | 5.861         | 7.020         | 8.223         | 8.561         | 7.752         | 7.738         | 10.167        |
| Übrige Forderungen und sonstiges Vermögen                 | 2.133         | 1.586         | 2.607         | 2.337         | 3.948         | 3.223         | 3.883         |
| Kurzfristige Wertpapiere                                  | 205           | 183           | 56            | 51            | 35            | 15            | 16            |
| Zahlungsmittel- und Zahlungsmitteläquivalente             | 2.086         | 908           | 834           | 767           | 2.776         | 1.835         | 1.493         |
| Vermögen von Veräußerungsgruppen                          | –             | –             | –             | 614           | –             | –             | 614           |
| <b>Kurzfristiges Vermögen</b>                             | <b>14.930</b> | <b>15.127</b> | <b>18.392</b> | <b>18.908</b> | <b>21.274</b> | <b>19.587</b> | <b>24.861</b> |
| <b>Aktiva</b>                                             | <b>35.448</b> | <b>35.670</b> | <b>45.291</b> | <b>46.802</b> | <b>50.860</b> | <b>51.268</b> | <b>59.393</b> |
| Gezeichnetes Kapital                                      | 1.383         | 1.317         | 1.279         | 1.224         | 1.176         | 1.176         | 1.176         |
| Kapitalrücklage                                           | 3.028         | 3.100         | 3.141         | 3.173         | 3.241         | 3.229         | 3.216         |
| Gewinnrücklagen und Bilanzgewinn                          | 11.923        | 11.928        | 13.302        | 14.556        | 13.250        | 12.916        | 15.817        |
| Sonstige Eigenkapitalposten                               | –60           | 696           | 325           | 174           | –96           | 156           | 1.195         |
| Anteile anderer Gesellschafter                            | 328           | 482           | 531           | 971           | 1.151         | 1.132         | 1.253         |
| <b>Eigenkapital</b>                                       | <b>16.602</b> | <b>17.523</b> | <b>18.578</b> | <b>20.098</b> | <b>18.722</b> | <b>18.609</b> | <b>22.657</b> |
| Rückstellungen für Pensionen und ähnliche Verpflichtungen | 4.124         | 1.547         | 1.452         | 1.292         | 1.712         | 2.255         | 2.778         |
| Sonstige Rückstellungen                                   | 2.376         | 2.791         | 3.080         | 3.015         | 2.757         | 3.289         | 3.352         |
| Latente Steuern                                           | 948           | 699           | 1.441         | 2.060         | 2.167         | 2.093         | 2.467         |
| Finanzschulden                                            | 1.845         | 3.682         | 5.788         | 6.954         | 8.290         | 12.444        | 11.670        |
| Übrige Verbindlichkeiten                                  | 1.079         | 1.043         | 972           | 901           | 917           | 898           | 901           |
| <b>Langfristiges Fremdkapital</b>                         | <b>10.372</b> | <b>9.762</b>  | <b>12.733</b> | <b>14.222</b> | <b>15.843</b> | <b>20.979</b> | <b>21.168</b> |
| Verbindlichkeiten aus Lieferungen und Leistungen          | 2.372         | 2.777         | 4.755         | 3.763         | 2.734         | 2.786         | 4.738         |
| Rückstellungen                                            | 2.364         | 2.763         | 2.848         | 2.697         | 3.043         | 3.276         | 3.324         |
| Steuerschulden                                            | 644           | 887           | 858           | 881           | 860           | 1.003         | 1.140         |
| Finanzschulden                                            | 1.453         | 259           | 3.695         | 3.148         | 6.224         | 2.375         | 3.369         |
| Übrige Verbindlichkeiten                                  | 1.641         | 1.699         | 1.824         | 1.976         | 3.434         | 2.240         | 2.802         |
| Schulden von Veräußerungsgruppen                          | –             | –             | –             | 17            | –             | –             | 195           |
| <b>Kurzfristiges Fremdkapital</b>                         | <b>8.474</b>  | <b>8.385</b>  | <b>13.980</b> | <b>12.482</b> | <b>16.295</b> | <b>11.680</b> | <b>15.568</b> |
| <b>Passiva</b>                                            | <b>35.448</b> | <b>35.670</b> | <b>45.291</b> | <b>46.802</b> | <b>50.860</b> | <b>51.268</b> | <b>59.393</b> |

## GRI- und Global-Compact-Index

Den vollständigen GRI-Index mit Kern- und Zusatzindikatoren sowie die zehn Prinzipien des Global Compact finden Sie unter  
→ [basf.com/gri\\_gc\\_d](http://basf.com/gri_gc_d)

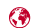

### Global- Compact- Prinzipien

|                  | GRI-Indikator                            | Thema                                                                       | Seite                                                              |
|------------------|------------------------------------------|-----------------------------------------------------------------------------|--------------------------------------------------------------------|
|                  | <b>Strategie und Profil</b>              |                                                                             |                                                                    |
|                  | 1.1                                      | Vorwort des Vorstandsvorsitzenden                                           | 7–9                                                                |
|                  | 1.2                                      | Beschreibung Auswirkungen, Risiken und Chancen                              | 17, 25–28, 30, 85, 101–102, 103–111, 115–116                       |
|                  | 2.1–2.10                                 | Organisationsprofil, Märkte, Strukturen                                     | Umschlag, 13, 15, 17, 22–23, 28, 35, 39–40, 57, 81–83, 84, 86, 209 |
|                  | 3.1–3.4                                  | Berichtsprofil                                                              | 3                                                                  |
|                  | 3.5–3.13                                 | Berichtsumfang und -grenzen, Bestätigung                                    | Umschlag, 2–3, 43, 136, 213                                        |
| 1 – 10           | 4.1–4.7                                  | Corporate Governance                                                        | 10–11, 17–19, 25–26, 95, 117–119, 122–124, 125–130                 |
| 1 – 10           | 4.8–4.13                                 | Leitbilder, Verhaltenskodizes, Verpflichtung gegenüber externen Initiativen | 2, 17–21, 25–28, 75, 87–88, 90, 91–93, 99, 101–102, 109, 120       |
|                  | 4.14–4.17                                | Einbindung von Stakeholdern                                                 | 2, 13–15, 26–28, 72, 85, 87–88, 91, 99, 102, 120                   |
|                  | <b>Ökonomische Leistungsindikatoren</b>  |                                                                             |                                                                    |
| 1, 4, 6, 7       | Managementansatz                         |                                                                             | 18, 20–21, 22, 24, 29, 103–111                                     |
|                  | EC1                                      | Unmittelbar erzeugter und ausgeschütteter Wert                              | 12, 26, 29, 30, 84, 90                                             |
| 7, 8, 9          | EC2                                      | Finanzielle Folgen des Klimawandels für das Unternehmen                     | 30, 95–96, 107                                                     |
|                  | EC3                                      | Umfang der betrieblichen sozialen Zuwendungen                               | 29, 84, 178–181                                                    |
|                  | EC4                                      | Finanzielle Zuwendungen der öffentlichen Hand                               | 30, 82, 102                                                        |
| 6                | EC7                                      | Lokales Personal                                                            | 21, 84–86                                                          |
|                  | EC8                                      | Entwickl. u. Auswirkungen von Investitionen im öffentl. Bereich             | 90, 95                                                             |
|                  | EC9                                      | Indirekte wirtschaftliche Auswirkungen                                      | 26, 90                                                             |
|                  | <b>Ökologische Leistungsindikatoren</b>  |                                                                             |                                                                    |
| 7, 8, 9          | Managementansatz                         |                                                                             | 19, 20, 25–28, 91–92, 95, 97, 99, 102                              |
| 8, 9             | EN1–EN2                                  | Materialien                                                                 | 26, 94, 98, 100                                                    |
| 8, 9             | EN3–EN7                                  | Energie                                                                     | 20, 30–31, 52, 59, 66, 95–96, 97–98                                |
| 8, 9             | EN8–EN10                                 | Wasser                                                                      | 99–100                                                             |
| 7, 8, 9          | EN16–EN20                                | Emissionen                                                                  | 30–31, 76, 93–94, 95–96, 97–98                                     |
| 8                | EN21                                     | Abwasser                                                                    | 99–100                                                             |
| 8                | EN22                                     | Abfall                                                                      | 94                                                                 |
| 7, 8, 9          | EN26                                     | Produkte und Dienstleistungen                                               | 27, 53–54, 59, 65–66, 97–98, 99–100, 102                           |
| 7, 8, 9          | EN29, EN30                               | Transport und Umweltschutzausgaben                                          | 92–94, 95–96                                                       |
|                  | <b>Soziale Leistungsindikatoren</b>      |                                                                             |                                                                    |
|                  | <b>Arbeitspraxis und Arbeitsqualität</b> |                                                                             |                                                                    |
| 1, 3, 6          | Managementansatz                         |                                                                             | 17–19, 20–21, 87–88, 89                                            |
| 1, 3, 6          | LA1–LA5                                  | Beschäftigung, Arbeitnehmer-Arbeitgeber-Verhältnis                          | 19, 84–88, 108                                                     |
| 1                | LA7, LA8                                 | Arbeitsschutz                                                               | 86, 89                                                             |
|                  | LA10, LA11                               | Aus- und Weiterbildung                                                      | 28, 84–86, 92                                                      |
| 1, 6             | LA13                                     | Zusammensetzung Führungsgremien                                             | 84–85                                                              |
| 1, 6             | LA14                                     | Gleichstellung                                                              | 19, 85, 88                                                         |
|                  | <b>Menschenrechte</b>                    |                                                                             |                                                                    |
| 1, 2, 3, 4, 5, 6 | Managementansatz                         |                                                                             | 19, 25–26, 87–88, 92                                               |
| 1, 2, 3, 4, 5, 6 | HR1                                      | Wesentliche Investitionsvereinbarungen                                      | 19, 92                                                             |
| 1, 2, 3, 4, 5, 6 | HR2                                      | Prüfung von Zulieferern                                                     | 26                                                                 |
| 1, 2, 6          | HR4                                      | Gleichbehandlung                                                            | 85, 87–88                                                          |
| 1, 2, 3          | HR5                                      | Vereinigungsfreiheit, Recht auf Kollektivverhandlungen                      | 87–88                                                              |
| 1, 2, 4, 5       | HR6, HR7                                 | Kinderarbeit, Zwangsarbeit und Pflichtarbeit                                | 87–88                                                              |
| 1, 2             | HR8                                      | Schulungen des Sicherheitspersonals                                         | 92                                                                 |
|                  | <b>Gesellschaft</b>                      |                                                                             |                                                                    |
| 10               | Managementansatz                         |                                                                             | 19, 25–28, 29, 87–88, 90, 120, 184                                 |
|                  | SO1                                      | Gemeinwesen                                                                 | 28, 29, 91–92                                                      |
| 10               | SO2–SO4                                  | Korruption                                                                  | 19, 120                                                            |
| 1 – 10           | SO5, SO6                                 | Politische Unterstützung                                                    | 27–28, 90                                                          |
|                  | <b>Produktverantwortung</b>              |                                                                             |                                                                    |
| 1, 8             | Managementansatz                         |                                                                             | 19, 20, 91, 101–102                                                |
| 1, 7             | PR 1                                     | Gesundheit und Sicherheit                                                   | 27, 91–93, 102                                                     |
| 8                | PR 3                                     | Kennzeichnung von Produkten                                                 | 101–102                                                            |
|                  | PR 5                                     | Kundenzufriedenheit                                                         | 27, 28                                                             |

Seit 2003 arbeitet die BASF in den Feedback-Runden der Global Reporting Initiative (GRI) zusammen mit Experten aus Wirtschaft, Nichtregierungsorganisationen, Analysten und Wirtschaftsprüfern an der Weiterentwicklung des Leitfadens. GRI will die Nachhaltigkeitsberichterstattung vergleichbarer machen. Im Unternehmensbericht 2003 haben wir zum ersten Mal in Anlehnung an die Richtlinien der GRI berichtet. Seit 2005 unterstützen wir die Global Reporting Initiative als Organizational Stakeholder. Der vorliegende Bericht wurde an den Indikatoren der aktuellen GRI-Richtlinie G3 ausgerichtet.

Dieser kurz gefasste Index zeigt, wo im vorliegenden Bericht 2010 Informationen zu Kern- und Zusatzindikatoren der GRI und zu Themen mit Relevanz für die Prinzipien des Global Compact zu finden sind. Eine erweiterte Übersicht steht im Internet unter [basf.com/gri\\_gc\\_d](http://basf.com/gri_gc_d) zur Verfügung. Der Online-Index beinhaltet alle GRI-Berichtselemente sowie alle Kern- und Zusatzindikatoren und verweist auf unsere Print- und Online-Berichterstattung. Wenn zu einem Indikator keine Informationen vorliegen, haben wir dies dort kurz begründet.

→ Weitere Informationen zu GRI unter: [www.globalreporting.org](http://www.globalreporting.org)

## GRI-Bestätigungsvermerk

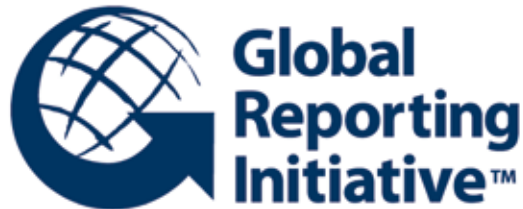

### Statement GRI Application Level Check

GRI bestätigt hiermit, dass **BASF SE** ihren Bericht „BASF Report 2010“ den GRI Report Services vorgelegt hat, die zum Schluss gekommen sind, dass der Bericht die Anforderungen der Anwendungsebene A+ erfüllt.

GRI Anwendungsebenen drücken den Umfang aus, in dem der Inhalt der GRI G3 Richtlinien in der eingereichten Nachhaltigkeitsberichterstattung umgesetzt wurde. Die Prüfung bestätigt, dass die geforderte Auswahl und Anzahl der Angaben für diese Anwendungsebene in der Berichterstattung enthalten ist. Die Prüfung bestätigt außerdem, dass der GRI-Content Index eine gültige Darstellung der vorgeschriebenen Offenlegungen gemäss den GRI G3 Richtlinien aufzeigt.

Anwendungsebenen geben keine Beurteilung der Nachhaltigkeitsleistungen des Berichterstatters oder der Qualität der im Bericht enthaltenen Informationen wieder.

18 Februar 2011, Amsterdam

A handwritten signature in blue ink, belonging to Nelmara Arbex.

Nelmara Arbex  
Deputy Chief Executive  
Global Reporting Initiative

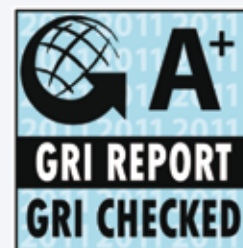

Das „+“ wurde dieser Anwendungsebene hinzugefügt, weil BASF SE für Teile des Berichts/den Bericht eine externe Bestätigung eingeholt hat. GRI akzeptiert dabei die Beurteilung des Berichterstatters selbst bezüglich der Auswahl seines Assurance Anbieters und des Umfangs des Untersuchungsgegenstandes der externen Bestätigung.

*Die Global Reporting Initiative (GRI) ist eine netzwerkbasierte Organisation, die den Weg für die Entwicklung des weltweit meist verwendeten Standards zur Nachhaltigkeitsberichterstattung bereitet hat und sich zu seiner kontinuierlichen Verbesserung und weltweiten Anwendung einsetzt. Die GRI Richtlinien legen die Prinzipien und Indikatoren fest, die Organisationen zur Messung und Berichterstattung ihrer ökonomischen, ökologischen und sozialen Leistungen verwenden können.*  
[www.globalreporting.org](http://www.globalreporting.org)

**Disclaimer:** Wo die entsprechende Nachhaltigkeitsberichterstattung externe Links enthält, einschliesslich audio-visuellen Materials, betrifft dieses Statement nur das bei GRI eingereichte Material zum Zeitpunkt der Prüfung am 9 Februar 2011. GRI schliesst explizit die Anwendung dieses Statements in Bezug auf jegliche spätere Änderungen dieses Materials aus.
