# Supplementary material
Source: publisher site journal article supplement (https://www.degruyterbrill.com/publication/isbn/9783110432879/downloadAsset/9783110432879_Elektronischer_Anhang_2.zip)
Supplement: Supplementary file 9 [file BASF Gemeinsam Zukunft gestalten.pdf › Korpustexte/Korpustexte pdf/BASF/BASF Gemeinsam Zukunft gestalten.pdf]

# Gemeinsam Zukunft gestalten

Wer wir sind. Was wir tun. Wie wir handeln.  
Wohin wir wollen.

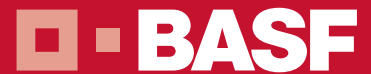

The Chemical Company

## **Gemeinsam Zukunft gestalten**

Als BASF – The Chemical Company wollen wir dazu beitragen, die Zukunft erfolgreich zu gestalten: durch gemeinsamen Erfolg mit unseren Kunden, intelligente Lösungen, durch Verlässlichkeit, Vertrauen und partnerschaftliche Zusammenarbeit.

Die Welt steht vor großen Herausforderungen: Die Bevölkerung wächst, die Ressourcen werden knapper und die Umweltbelastung steigt. Die Chemie kann und muss dabei helfen, diese Aufgaben zu meistern. Als weltweit führendes Chemieunternehmen wollen wir dabei mitwirken.

Dynamik und Schärfe im globalen Wettbewerb nehmen immer weiter zu. Dies gilt für uns genauso wie für unsere Kunden. Kosteneffizienz, Schnelligkeit und Marktinnovationen sind erfolgentscheidend, um im globalen Wettbewerb zu bestehen.

Um diesen Herausforderungen zu begegnen, brauchen wir eine unverwechselbare Identität, eine klare Ausrichtung und verbindliche Werte, denen wir in unserer täglichen Arbeit folgen.

Wer sind wir, was tun wir, wie handeln wir und wohin wollen wir? Auf diese Fragen geben wir unseren Mitarbeitern, Geschäftspartnern und allen Interessierten im Folgenden richtungsweisende Antworten.

**Der Vorstand**

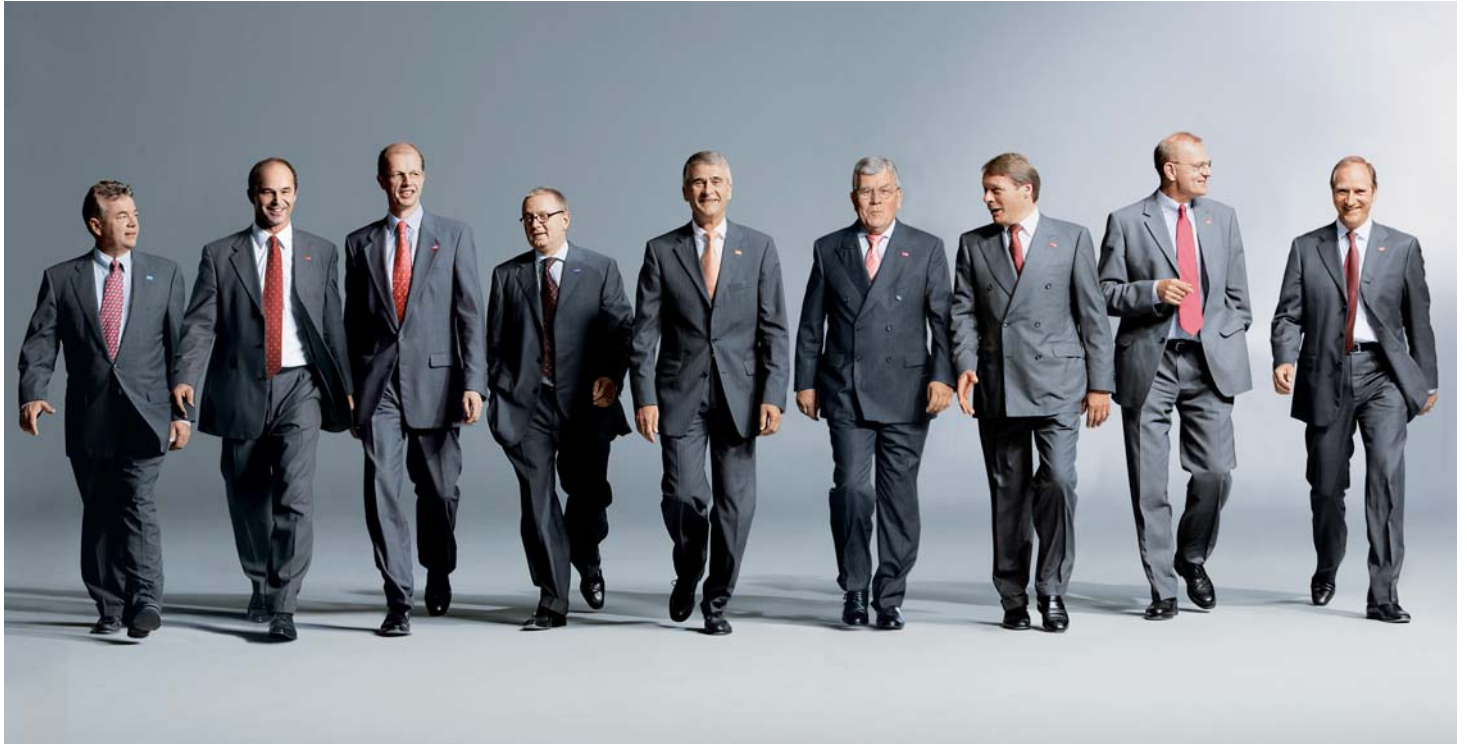

*Peter Oakley*

Peter Oakley

*Dr. Kurt Bock*

Dr. Kurt Bock

*Dr. Jürgen Hambrecht*

Dr. Jürgen Hambrecht

*Dr. John Feldmann*

Dr. John Feldmann

*Dr. Andreas Kreimeyer*

Dr. Andreas Kreimeyer

*Dr. Martin Brudermüller*

Dr. Martin Brudermüller

*Klaus Peter Löbbe*

Klaus Peter Löbbe

*Eggert Voscherau*

Eggert Voscherau

*Dr. Stefan Marcinowski*

Dr. Stefan Marcinowski

# Unsere Grundsätze

**Wer sind wir, was tun wir, wie handeln wir und wohin wollen wir?**

Unsere Strategie BASF 2015, unsere Grundwerte und Leitlinien sowie unser Führungskompass geben unseren Mitarbeitern, Partnern und allen Interessierten Antworten auf diese Fragen. **Diese Broschüre fasst alle unternehmensweit gültigen Grundsätze zusammen**, die wir bisher in einzelnen Publikationen aufgeführt haben.

# Wohin wir wollen

## Die Nummer 1 in der Chemie morgen

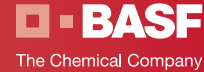

### Was wir tun

- eine Prämie auf unsere Kapitalkosten verdienen
- unseren Kunden helfen erfolgreicher zu sein
- das beste Team der Industrie bilden
- nachhaltig für eine bessere Zukunft wirtschaften

### Wie wir handeln

- mit Pioniergeist
- mit Kompetenz
- mit Leidenschaft
- mit Innovationskraft
- nach unseren Grundwerten und Leitlinien
- nach unserem Führungskompass

# Wer wir sind

## Die Nummer 1 in der Chemie heute

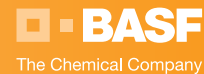

## Unser Selbstverständnis

Die BASF ist das weltweit führende Chemieunternehmen.

Wir bieten intelligente Lösungen mit innovativen Produkten und maßgeschneiderten Dienstleistungen.

Wir eröffnen Erfolgchancen durch vertrauensvolle und verlässliche Partnerschaft.

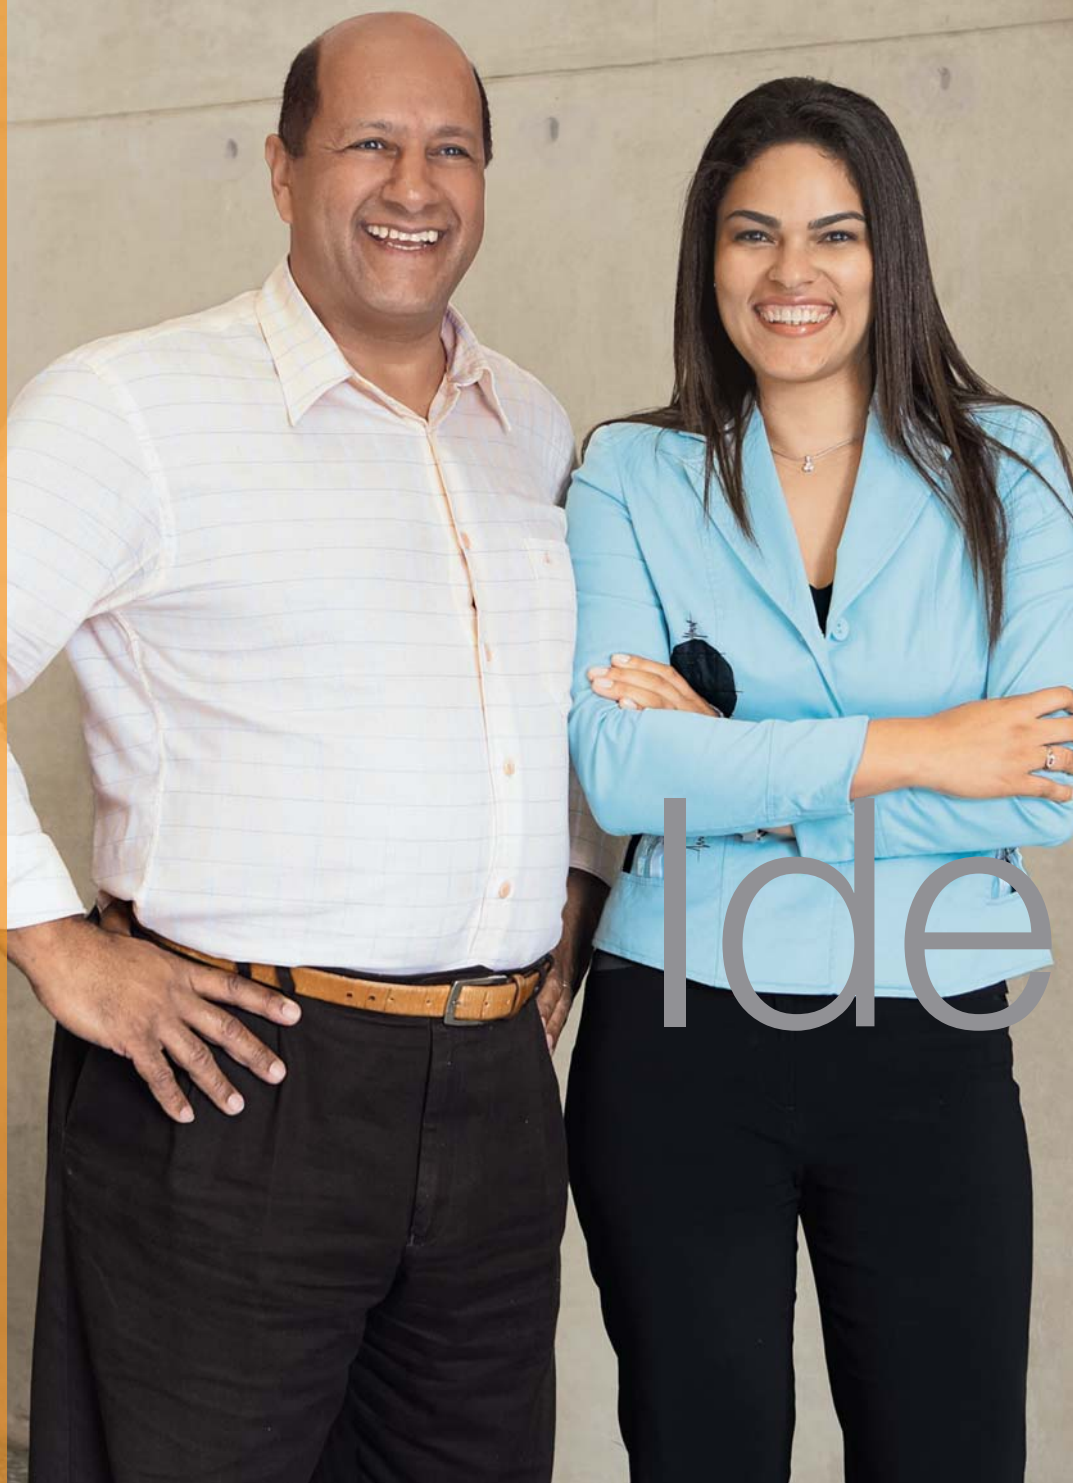

Idee

# Wer wir sind

Die BASF ist „**The Chemical Company**“ – das weltweit führende Chemieunternehmen. Wir sind die Nummer eins und wollen es bleiben. Wie kein anderes Unternehmen auf der Welt steht die BASF für Chemie. Darauf sind wir stolz.

Der Schlüssel zu unserem Erfolg sind unsere Mitarbeiter: Ihre **Leidenschaft**, ihr **Pioniergeist** und ihre **Kompetenz** haben uns an die Spitze gebracht. Jeder einzelne Mitarbeiter in jedem Geschäftsbereich und in jeder Position wirkt an unserer Erfolgsgeschichte mit. Als Team wollen wir dazu beitragen, die **Zukunft erfolgreich zu gestalten**.

ntität

# Was wir tun

Wir haben ein klares Konzept, mit dem wir die BASF heute und in Zukunft erfolgreich machen: unsere **Strategie BASF 2015**.

Voraussetzung für unsere erfolgreiche Weiterentwicklung ist, dass wir **eine Prämie auf unsere Kapitalkosten verdienen**. Nur dann sind wir attraktiv für Investoren und erhalten uns die Handlungsfreiheit, unsere Spitzenposition weiter auszubauen.

Wir wollen die Geschäfte unserer Kunden genauso verstehen wie unser eigenes: Nur so können wir **unseren Kunden helfen erfolgreicher zu sein**. Dabei müssen wir erkennen, was unsere Kunden morgen brauchen – um gemeinsam mit ihnen innovative Produkte und intelligente Lösungen zur Steigerung ihrer Wettbewerbsfähigkeit zu entwickeln. Um das leisten zu können, **bilden wir das beste Team der Industrie**: engagierte und qualifizierte Mitarbeiter, die gemeinsam den Erfolg der BASF schaffen.

Indem wir wirtschaftlichen Erfolg mit dem Schutz der Umwelt und gesellschaftlicher Verantwortung verbinden, **wirtschaften wir nachhaltig für eine lebenswerte Zukunft**. Das ist unser Beitrag für uns und kommende Generationen.

Ri





# achtung

## Unsere Strategie BASF 2015

### **Wir verdienen eine Prämie auf unsere Kapitalkosten**

Wir wollen mehr Wert schaffen, indem wir ein Ergebnis erzielen, das über den Kapitalkosten liegt.

### **Wir helfen unseren Kunden erfolgreicher zu sein**

Um profitabel zu wachsen, wollen wir uns künftig noch stärker auf die Bedürfnisse unserer Kunden einstellen – mit Innovationen und dem besten Geschäftsmodell.

### **Wir bilden das beste Team der Industrie**

Wesentlich für den Erfolg der BASF sind die Mitarbeiter. Auf sie kommt es an: auf ihr Können, ihre Ideen, ihre Erfahrung und ihr Engagement.

### **Wir wirtschaften nachhaltig für eine lebenswerte Zukunft**

Unter nachhaltiger Entwicklung verstehen wir die Verbindung von wirtschaftlichem Erfolg mit dem Schutz der Umwelt und gesellschaftlicher Verantwortung.

## Unsere Grundwerte und Leitlinien

Nachhaltiger Erfolg

Innovation für den Erfolg unserer Kunden

Sicherheit, Gesundheit und Umweltschutz

Persönliche und fachliche Kompetenz

Gegenseitiger Respekt und offener Dialog

Integrität

## Unser Führungskompass

Für Klarheit sorgen und Realitätssinn demonstrieren

Begeisterung und Inspiration fördern und zur Entfaltung bringen

Vorbild für Leistung und Schnelligkeit sein

Strategische und operative Führung demonstrieren

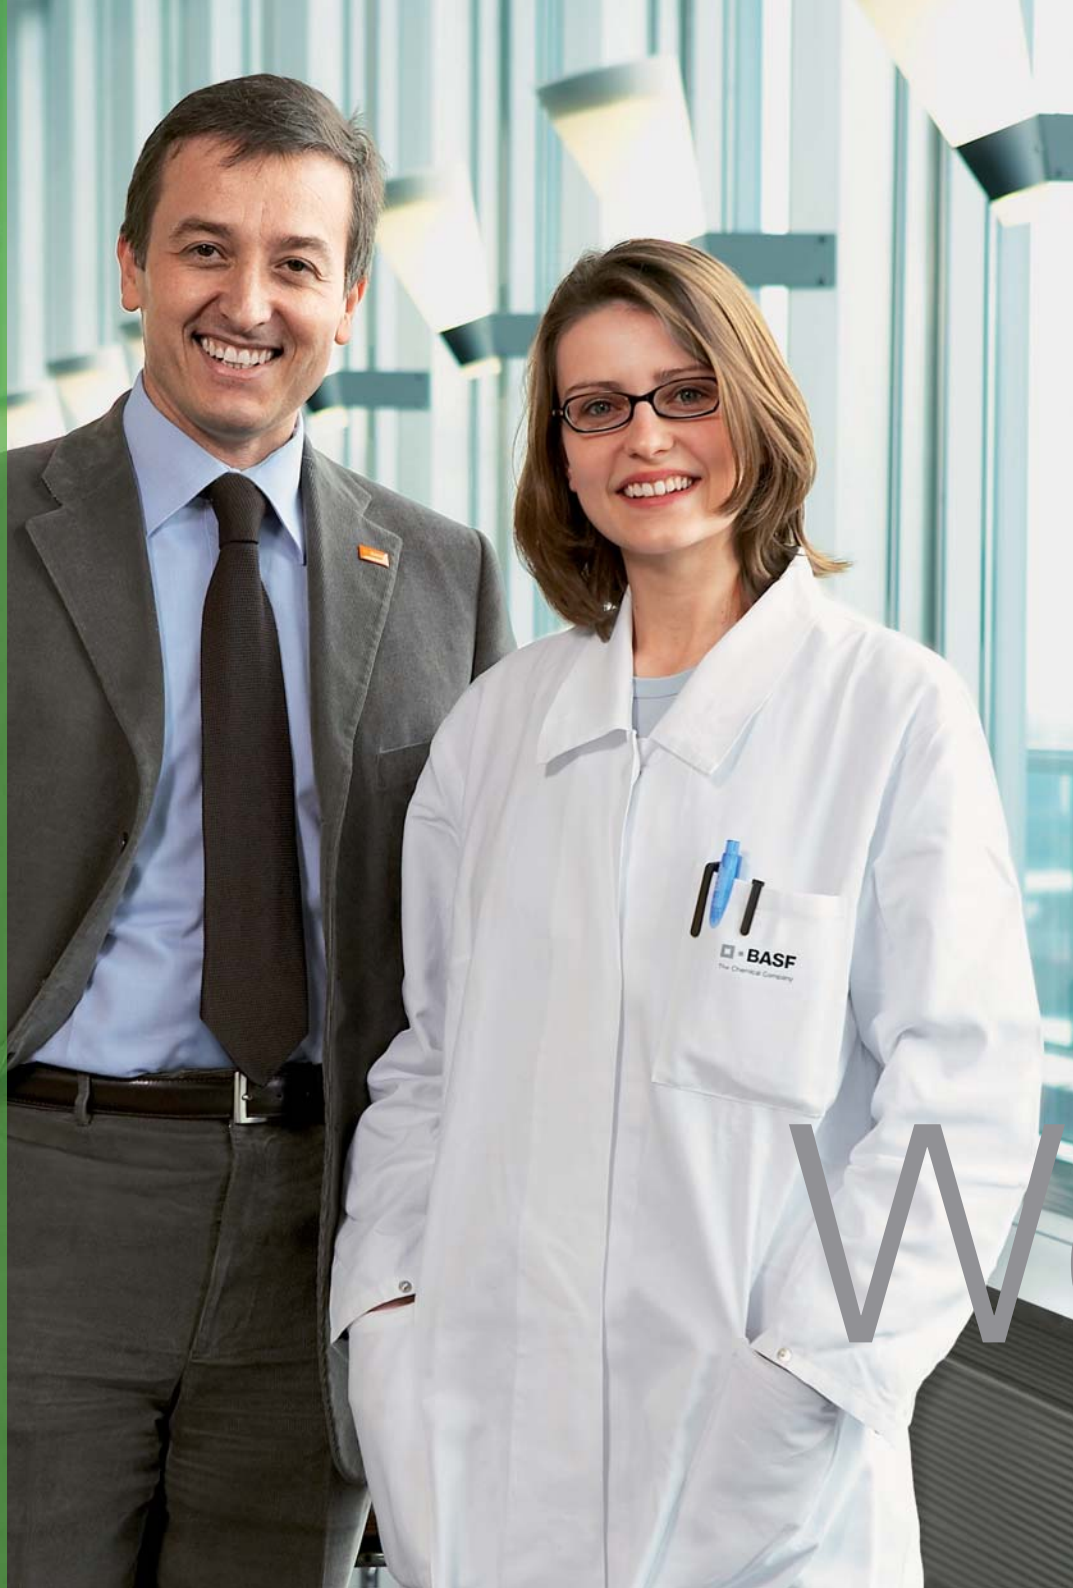



# Wie wir handeln

Was unsere Kunden, Aktionäre und andere Partner von uns erwarten können, drücken wir mit unserer **Marke BASF** aus. Dies symbolisieren wir mit unserem Logo: Die vier Buchstaben „BASF“ stehen für unsere **Tradition** und unsere **Stärken**, die beiden Quadrate für **Partnerschaft** und **intelligente Lösungen**. Der Claim „The Chemical Company“ ist Ausdruck unseres Versprechens, ein **verlässlicher Partner** zu sein, der mit **innovativen Produkten** hilft, die Zukunft erfolgreich zu gestalten. Um unser Versprechen zu erfüllen, setzen wir unser Fachwissen und unsere ganze Leidenschaft ein.

Dabei folgen wir verbindlichen Werten: **Unsere Grundwerte und Leitlinien** dienen als Basis für das Handeln der BASF als Unternehmen und setzen Maßstäbe für jeden einzelnen Mitarbeiter. Führungskräfte richten den Umgang mit ihren Mitarbeitern und Teams zudem an unserem **Führungskompass** aus. Alle Führungskräfte bekennen sich dazu.

erte

# Wohin wir wollen

Wenn wir unsere Stärken richtig einsetzen, werden wir auch in Zukunft die **Nummer eins der Chemie** sein – ein Unternehmen, in dem Menschen interessante **Perspektiven** und **Erfolgschancen** haben. Wir werden **attraktive Renditen** erzielen, weiter in unser Geschäft investieren und unsere Vorreiter-Rolle ausbauen. Wir bleiben ein verlässlicher Partner für Kunden, Aktionären und die Gesellschaft. Mit unseren Innovationen tragen wir dazu bei, die **Zukunft erfolgreich zu gestalten** – als das führende Chemieunternehmen der Welt:

**BASF – The Chemical Company.**

# Zuku



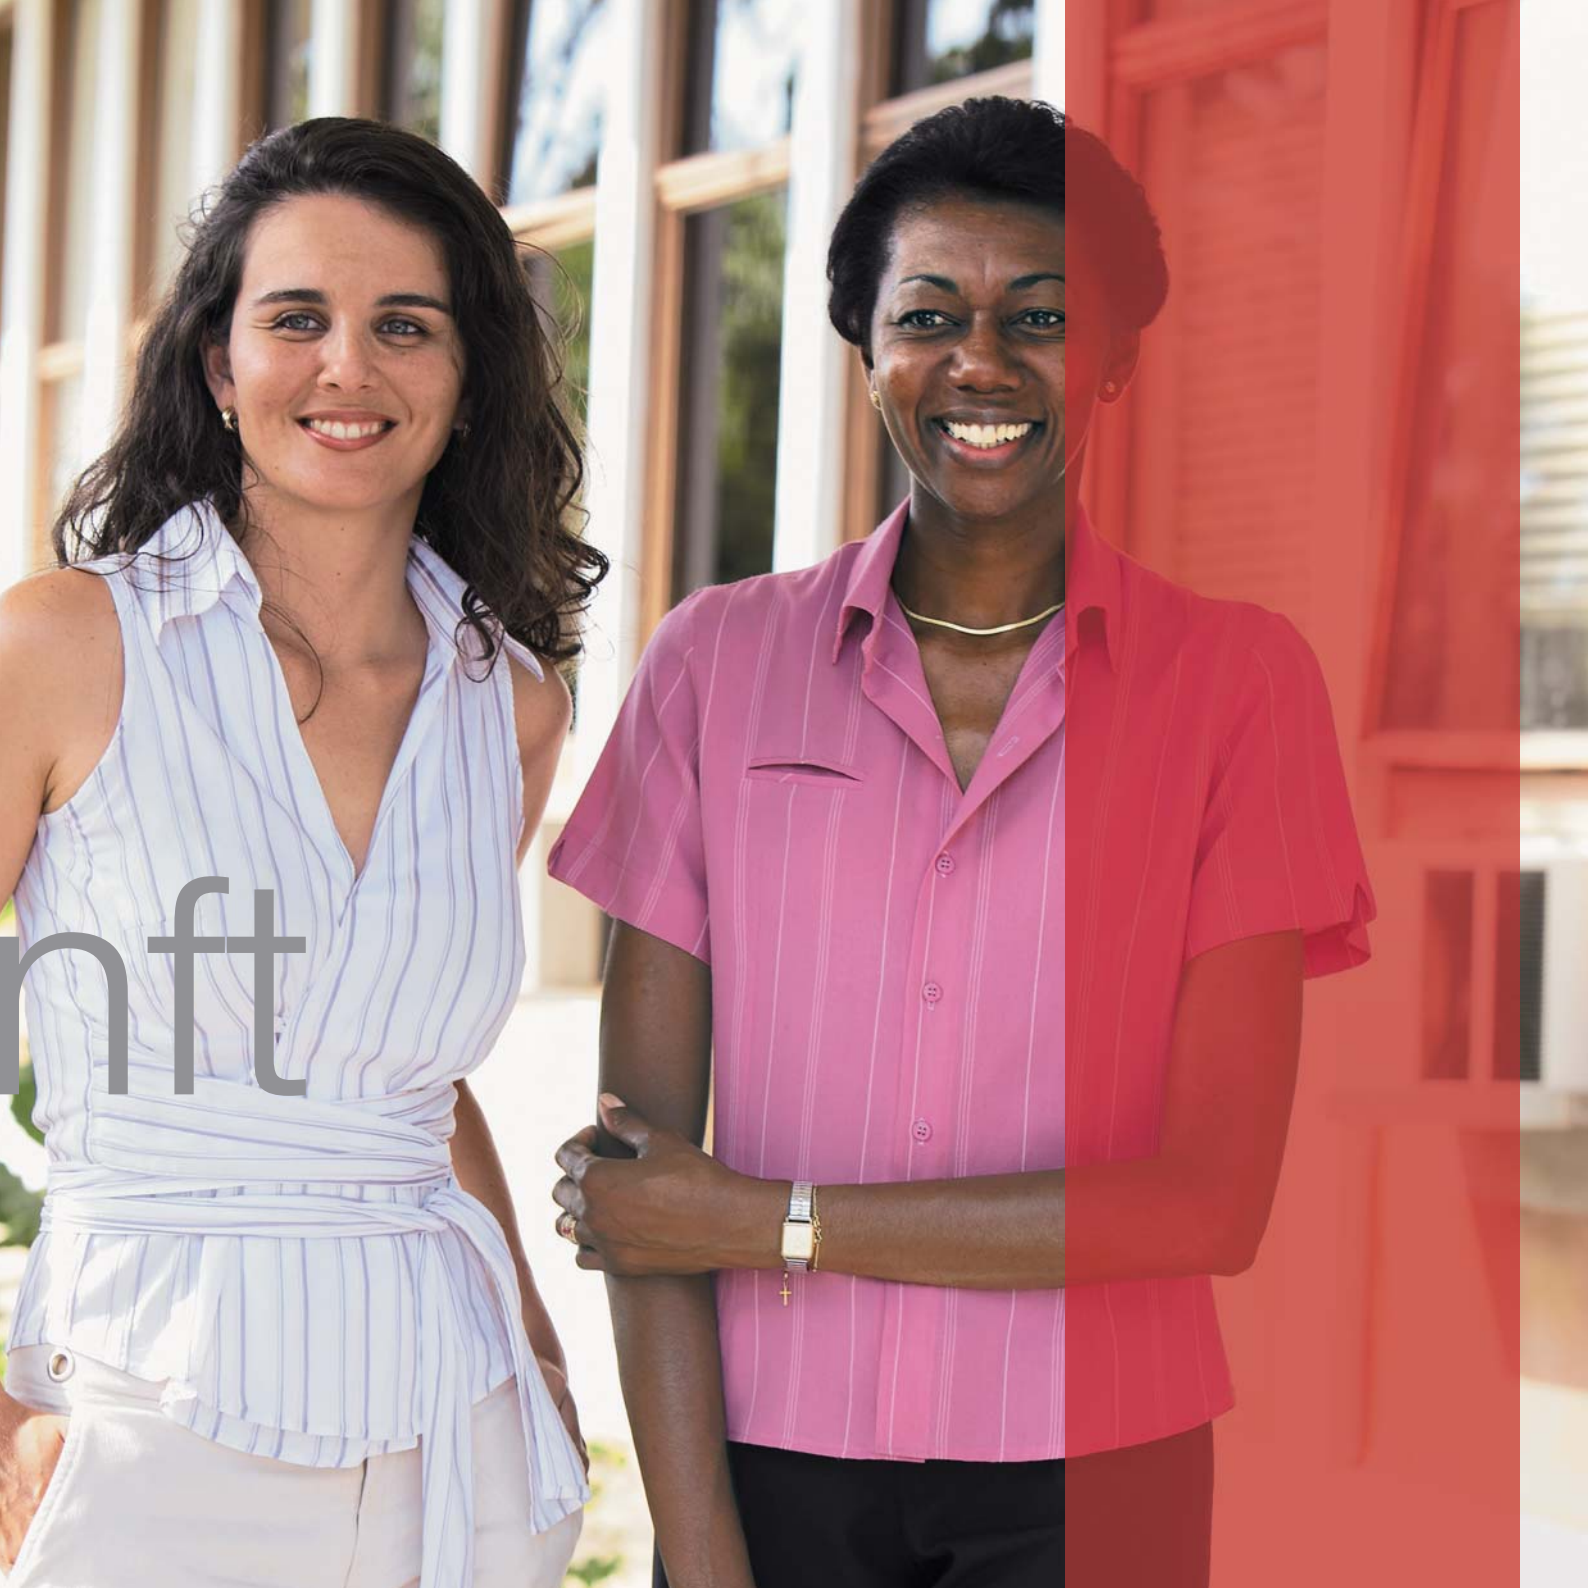

nft

# Unsere Grundwerte und Leitlinien

## Nachhaltiger Erfolg

Nachhaltiger wirtschaftlicher Erfolg im Sinne von Sustainable Development ist Voraussetzung für unsere Aktivitäten. Wir schaffen Werte im Interesse unserer Kunden, Anteilseigner sowie unserer Mitarbeiter und übernehmen Verantwortung in der Gesellschaft.

### Leitlinien

- Wir streben eine führende Markt- und Finanzposition an, die es uns ermöglicht, die BASF erfolgreich und unabhängig mit eigener, unverwechselbarer Identität weiter zu entwickeln.
- Wir erwirtschaften für die BASF-Gruppe ein Ergebnis, das im Durchschnitt der Konjunkturzyklen die Kapitalkosten übersteigt.
- Wir erzielen für unsere Aktionäre eine attraktive Rendite.
- Wir vergüten unsere Mitarbeiter marktgerecht und leistungsbezogen mit am wirtschaftlichen Erfolg orientierten Entgelten und Sozialleistungen. Dabei stehen unsere Arbeitsbedingungen im Einklang mit international anerkannten grundlegenden Arbeitsstandards.
- Wir leisten durch unsere wirtschaftlichen Aktivitäten sowie durch die gezielte Förderung von humanitären, sozialen und kulturellen Anliegen einen positiven Beitrag zur gesellschaftlichen Entwicklung.
- Der Verbund ist eine der Stärken der BASF. Wir können unsere Produkte damit kostengünstig, ressourcenschonend und umweltverträglich herstellen. Die Optimierung der Verbundstrukturen ist daher eine ständige Aufgabe.

## Innovation für den Erfolg unserer Kunden

Wir orientieren unsere Geschäftsprozesse an langfristiger Wertschöpfung und Wettbewerbsfähigkeit. Wir helfen unseren Kunden erfolgreicher zu sein. Hierfür erschließen wir gemeinsam Geschäftspotenziale und entwickeln Produkte, Verfahren und Dienstleistungen auf hohem wissenschaftlichen und technischen Niveau.

### Leitlinien

- Wir suchen die Herausforderungen in den Veränderungen der Märkte, der Wissenschaft und der Gesellschaft und nutzen sie als Chance zum wertsteigernden Wachstum.
- Wir gestalten den wissenschaftlich-technischen Fortschritt aus führender Position mit, entwickeln zukunftsweisende Produkte, Technologien und Problemlösungen und nutzen Synergieeffekte aus unserem Forschungsverbund.
- Wir entwickeln und optimieren unsere Produkte und Dienstleistungen gemeinsam mit unseren Kunden so, dass wir zur Wertsteigerung bei unseren Kunden und in unserem Unternehmen beitragen.
- Wir messen regelmäßig die Kundenzufriedenheit. Hinweise unserer Kunden und Partner nutzen wir konsequent zur Verbesserung unserer Geschäftsprozesse.

## Sicherheit, Gesundheit und Umweltschutz

Wir handeln verantwortungsvoll im Sinne von Responsible Care®. Wirtschaftliche Belange haben keinen Vorrang gegenüber Sicherheit, Gesundheits- und Umweltschutz.

### Leitlinien

- Wir fordern und fördern das Sicherheits-, Gesundheits- und Umweltbewusstsein und streben kontinuierliche Verbesserungen durch Zielvereinbarungen an.
- Wir erzeugen Produkte, die sicher herzustellen, zu verwenden, wiederzuverwerten oder zu entsorgen sind.
- Wir unterstützen unsere Kunden und Lieferanten im Bemühen um einen sicheren und umweltfreundlichen Umgang mit den Produkten, die sie von uns beziehen bzw. uns liefern.
- Wir minimieren die Belastung von Mensch und Umwelt bei Herstellung, Lagerung, Transport, Vertrieb, Verwendung und Entsorgung unserer Produkte.

## Persönliche und fachliche Kompetenz

Wir bilden das beste Team in der Industrie, indem wir die gruppenweite Vielfalt an persönlicher und fachlicher Kompetenz fördern. Interkulturelle Kompetenz ist unser Vorteil im globalen Wettbewerb. Wir ermutigen unsere Mitarbeiter, ihre Kreativität und ihr Potenzial für den gemeinsamen Erfolg einzubringen.

### Leitlinien

- Wir fördern Diversity-Programme und wollen Mitarbeiter aus allen Kulturen und Nationalitäten gewinnen, die mit sozialer und fachlicher Kompetenz bereit sind, sich engagiert für die Ziele und Werte unseres Unternehmens einzusetzen.
- Unser Führungsnachwuchs wird bevorzugt aus den eigenen Reihen herangebildet. Das Führungsteam wird systematisch anhand der folgenden vier Kriterien eingestellt, ausgewählt, entwickelt und positioniert: Wissen, Fähigkeiten, Führungskompetenz und das Handeln im Einklang mit unseren Grundwerten und Leitlinien.
- Unsere Organisation, Steuerungsprozesse und Zusammenarbeit sind auf das Erreichen von Spitzenleistungen durch Einzelne und durch Teams ausgerichtet.
- Wir tolerieren innerhalb der BASF-Gruppe keine Diskriminierungen wegen Nationalität, Geschlecht, Religion oder anderer persönlicher Merkmale.

## Gegenseitiger Respekt und offener Dialog

Wir gehen fair und respektvoll miteinander um. Wir suchen den offenen, vertrauensvollen Dialog im Unternehmen, mit unseren Geschäftspartnern und relevanten gesellschaftlichen Gruppen.

### Leitlinien

- Unsere Kommunikation im Unternehmen, mit unseren Geschäftspartnern, Nachbarn und gesellschaftlich relevanten Meinungsbildnern ist durch einen offenen und sachlichen Dialog geprägt.
- Unsere Mitarbeiter werden rechtzeitig durch offene Information und Kommunikation, auch über Hierarchie- und Einheitsgrenzen hinweg, in Arbeits- und Entscheidungsprozesse eingebunden.
- Führungskräfte und ihre Mitarbeiter oder Teams vereinbaren Ziele sowie Prioritäten und legen die Verantwortlichkeiten und Befugnisse fest.
- Wir bieten Voraussetzungen, die Eigeninitiative und unternehmerisches Handeln stärken. Führungskräfte sprechen regelmäßig mit ihren Mitarbeitern über ihre berufliche Weiterentwicklung und fördern ihre Lernbereitschaft.
- Wir stehen zu betrieblicher Partnerschaft mit den Arbeitnehmervertretungen und arbeiten in gegenseitiger Achtung vertrauensvoll mit ihnen zusammen. Die Form der Kooperation beachtet die international anerkannten grundlegenden Arbeitsstandards und orientiert sich an den jeweiligen Landesgegebenheiten.

## Integrität

Wir handeln in Übereinstimmung mit unseren Worten und Werten. Wir achten die Gesetze und respektieren die allgemein anerkannten Gebräuche der Länder, in denen wir tätig sind.

### Leitlinien

- Jede Führungskraft muss ihrer Vorbildfunktion gerecht werden und sich an unserer Vision und unseren Grundwerten orientieren.
- Wir unterlassen Handlungen, die ungesetzlich sind, die den fairen Wettbewerb behindern und die der Herstellung von illegalen Drogen oder chemischen Waffen dienen.
- Wir verurteilen jegliche Form von Kinderarbeit sowie von Zwangs- oder Pflichtarbeit.
- Die Interessen der BASF haben bei unseren Tätigkeiten Vorrang vor persönlichen Interessen. Wir schützen Firmeneigentum gegen Missbrauch.
- Jede Gruppengesellschaft erstellt auf der Basis der für die BASF-Gruppe geltenden Grundwerte und Leitlinien ihren Verhaltenskodex unter Berücksichtigung der Gesetze und allgemein anerkannten Gebräuche. Sie sorgt dafür, dass alle Mitarbeiter entsprechend informiert sind und der Kodex zur Grundlage ihres Handelns wird.
- Jeder Mitarbeiter hat auf der Grundlage des jeweiligen Compliance-Programms die Gelegenheit, sich in vertraulicher Weise Rat und Hilfe zu holen, wenn sich in seinem Arbeitsumfeld Hinweise auf rechtlich zweifelhafte Vorgänge ergeben.

# Unser Führungskompass

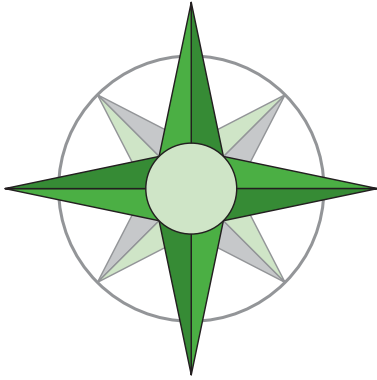

## Für Klarheit sorgen und Realitätssinn demonstrieren

- Wir agieren offen und aufrichtig und ermutigen andere zu direkten, auch harten, aber stets fairen Diskussionen.
- Wir fördern Meinungsvielfalt und pflegen eine konstruktive Streitkultur.
- Wir bevorzugen keine einzelnen Mitarbeiter und verzichten darauf, uns mit Leistungen anderer zu schmücken.
- Wir treffen nachvollziehbare Entscheidungen.
- Wir geben Vertrauensvorschuss, indem wir Befugnisse, Entscheidungsfreiräume und Verantwortung auf andere übertragen und Mitarbeiter durch Beratung und Unterstützung (z.B. durch sog. Coaching) fördern.
- Wir würdigen positive Leistungen zeitnah.

## Begeisterung und Inspiration fördern und zur Entfaltung bringen

- Wir schaffen ein Arbeitsklima, das alle Mitarbeiter und Geschäftspartner inspiriert und in dem alle ihr Bestes geben.
- Wir demonstrieren Begeisterung für die jeweilige Aufgabe sowie Optimismus und Tatendrang.
- Wir stellen den Mitarbeiter / die Mitarbeiterin in den Mittelpunkt und erzeugen gleichzeitig ein Gefühl für Verantwortung.
- Wir erreichen mit unserer Führung Kopf und Herz unserer Mitarbeiter und zeigen unser Interesse für sie als Personen.

## Strategische und operative Führung demonstrieren

- Wir verpflichten uns auf die Rollen und Verantwortlichkeiten gemäß „Fit for the Future“ und der Strategie „BASF 2015“. Hierzu setzen wir Prioritäten und halten eine Balance zwischen kurz- und langfristigen Denken und Handeln.
- Interessen der BASF-Gruppe gehen vor Einheitsinteressen oder den Interessen Einzelner.
- Die Führungsebenen I und II fokussieren sich primär auf die strategische Führung; das operative Tagesgeschäft wird noch stärker auf die Business Units übertragen.
- Wir verringern die Komplexität und konzentrieren uns auf wenige, einfache Geschäftsmodelle.
- Wir gehen eher weniger Aufgaben an, arbeiten diese aber vollständig ab.

## Vorbild für Leistung und Schnelligkeit sein

- Wir erzeugen eine Leistungskultur, leben eine Erfolgsmentalität vor und fördern sie.
- Wir setzen anspruchsvolle Ziele und akzeptieren keine defensiven Ziele.
- Wir sorgen dafür, dass aus Fehlern gelernt wird und pflegen ein ausgewogenes Verhältnis von Analyse, Risikofreude und Experimenten (zum Beispiel eine 80/20-Regel).
- Wir setzen Ideen und Projekte möglichst schnell in die Tat um.
- Wir vermeiden lähmenden Perfektionismus, beschleunigen Entscheidungsvorgänge und setzen Prioritäten. Wir vermeiden die „Analyse bis zur Paralyse“.
- Wir sind Vorbilder, die Reden und Handeln im Einklang halten.
- Wir vermeiden Bürokratie oder bauen sie konsequent ab.





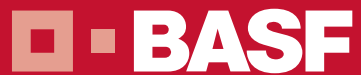

The Chemical Company

BASF Aktiengesellschaft  
Corporate Communications BASF Group  
C100  
67056 Ludwigshafen  
Deutschland

[corporate.messages@basf.com](mailto:corporate.messages@basf.com)
