# Supplementary material
Source: publisher site journal article supplement (https://www.degruyterbrill.com/publication/isbn/9783110432879/downloadAsset/9783110432879_Elektronischer_Anhang_2.zip)
Supplement: Supplementary file 10 [file BASF Vision.Grundwerte.Leitlinien.pdf › Korpustexte/Korpustexte pdf/BASF/BASF Vision.Grundwerte.Leitlinien.pdf]

# VISION GRUNDWERTE LEITLINIEN

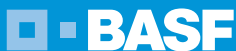

The Chemical Company

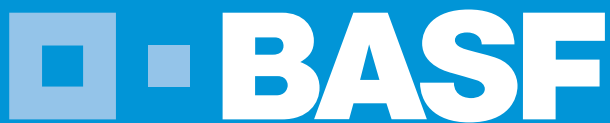

The Chemical Company

**A**ls das weltweit führende Unternehmen der chemischen Industrie wollen wir Werte schaffen, die allen zugute kommen: unseren Kunden, unseren Aktionären, unseren Mitarbeiterinnen und Mitarbeitern, uns als BASF sowie den Ländern, in denen wir tätig sind.

Die **Vision** der BASF zeigt auf, wohin sich das Unternehmen in den kommenden Jahren entwickeln will. Sie legt die Ziele unseres Handelns offen. Alle strategischen Entscheidungen werden an ihr ausgerichtet.

Die **Grundwerte** der BASF beschreiben unsere Einstellung und die Art und Weise, wie wir unsere Ziele erreichen wollen.

**Vision** und **Grundwerte** bilden gemeinsam den Rahmen für alle Entscheidungen und Handlungen. Sie sind somit Orientierung und Führungsinstrument zugleich und prägen unsere Unternehmenskultur.

Die **Leitlinien** der BASF konkretisieren, wie wir im Unternehmensalltag handeln wollen.

Unser Handeln als global operierendes Unternehmen ist beständig darauf ausgerichtet, den vielfältigen und unterschiedlichen rechtlichen wie kulturellen Rahmenbedingungen gerecht zu werden, unsere selbst gesetzten Standards zu erfüllen und das Ansehen der BASF zu mehren.

**Der Vorstand**

## **Unser Selbstverständnis**

**Die BASF ist das weltweit führende Chemieunternehmen. Wir bieten intelligente Lösungen mit innovativen Produkten und maßgeschneiderte Dienstleistungen. Wir eröffnen Erfolgchancen durch vertrauensvolle und verlässliche Partnerschaft.**

# Vision

- Wir sind „The Chemical Company“ und arbeiten erfolgreich auf allen wichtigen Märkten.
- Wir sind der bevorzugte Partner der Kunden.
- Wir sind mit unseren innovativen Produkten, intelligenten Problemlösungen und Dienstleistungen weltweit der leistungsfähigste Anbieter in der chemischen Industrie.
- Wir erwirtschaften eine hohe Rendite auf das eingesetzte Kapital.
- Wir treten für nachhaltige Entwicklung ein.
- Wir nutzen den Wandel als Chance.
- Wir, die BASF-Mitarbeiter, schaffen gemeinsam den Erfolg.

**Wir, die Mitarbeiterinnen und Mitarbeiter der BASF-Gruppe, fühlen uns gemeinsam folgenden Grundwerten verpflichtet:**

# Grund

→ **Nachhaltiger Erfolg**

Nachhaltiger wirtschaftlicher Erfolg im Sinne von Sustainable Development ist Voraussetzung für unsere Aktivitäten. Wir schaffen Werte im Interesse unserer Kunden, Anteilseigner sowie unserer Mitarbeiter und übernehmen Verantwortung in der Gesellschaft.

→ **Innovation für den Erfolg unserer Kunden**

Wir orientieren unsere Geschäftsprozesse an langfristiger Wertschöpfung und Wettbewerbsfähigkeit. Wir helfen unseren Kunden, erfolgreicher zu sein. Hierfür erschließen wir gemeinsam Geschäftspotenziale und entwickeln Produkte, Verfahren und Dienstleistungen auf hohem wissenschaftlichen und technischen Niveau.

→ **Sicherheit, Gesundheit und Umweltschutz**

Wir handeln verantwortungsvoll im Sinne von Responsible Care®. Wirtschaftliche Belange haben keinen Vorrang gegenüber Sicherheit, Gesundheits- und Umweltschutz.

# werte

## → **Persönliche und fachliche Kompetenz**

Wir bilden das beste Team in der Industrie, indem wir die gruppenweite Vielfalt an persönlicher und fachlicher Kompetenz fördern. Interkulturelle Kompetenz ist unser Vorteil im globalen Wettbewerb. Wir ermutigen unsere Mitarbeiter, ihre Kreativität und ihr Potenzial für den gemeinsamen Erfolg einzubringen.

## → **Gegenseitiger Respekt und offener Dialog**

Wir gehen fair und respektvoll miteinander um. Wir suchen den offenen, vertrauensvollen Dialog im Unternehmen, mit unseren Geschäftspartnern und relevanten gesellschaftlichen Gruppen.

## → **Integrität**

Wir handeln in Übereinstimmung mit unseren Worten und Werten. Wir achten die Gesetze und respektieren die allgemein anerkannten Gebräuche der Länder, in denen wir tätig sind.

Grundwert

# Nachhaltiger Erfolg

Nachhaltiger wirtschaftlicher Erfolg im Sinne von Sustainable Development ist Voraussetzung für unsere Aktivitäten. Wir schaffen Werte im Interesse unserer Kunden, Anteilseigner sowie unserer Mitarbeiter und übernehmen Verantwortung in der Gesellschaft.



## Leitlinien

- Wir streben eine führende Markt- und Finanzposition an, die es uns ermöglicht, die BASF erfolgreich und unabhängig mit eigener, unverwechselbarer Identität weiter zu entwickeln.
- Wir erwirtschaften für die BASF-Gruppe ein Ergebnis, das im Durchschnitt der Konjunkturzyklen die Kapitalkosten übersteigt.
- Wir erzielen für unsere Aktionäre eine attraktive Rendite.
- Wir vergüten unsere Mitarbeiter marktgerecht und leistungsbezogen mit am wirtschaftlichen Erfolg orientierten Entgelten und Sozialleistungen. Dabei stehen unsere Arbeitsbedingungen im Einklang mit international anerkannten grundlegenden Arbeitsstandards.
- Wir leisten durch unsere wirtschaftlichen Aktivitäten sowie durch die gezielte Förderung von humanitären, sozialen und kulturellen Anliegen einen positiven Beitrag zur gesellschaftlichen Entwicklung.
- Der Verbund ist eine der Stärken der BASF. Wir können unsere Produkte damit kostengünstig, ressourcenschonend und umweltverträglich herstellen. Die Optimierung der Verbundstrukturen ist daher eine ständige Aufgabe.



Grundwert

# Innovation für den Erfolg unserer Kunden

Wir orientieren unsere Geschäftsprozesse an langfristiger Wertschöpfung und Wettbewerbsfähigkeit. Wir helfen unseren Kunden, erfolgreicher zu sein. Hierfür erschließen wir gemeinsam Geschäftspotenziale und entwickeln Produkte, Verfahren und Dienstleistungen auf hohem wissenschaftlichen und technischen Niveau.



## Leitlinien

- Wir suchen die Herausforderungen in den Veränderungen der Märkte, der Wissenschaft und der Gesellschaft und nutzen sie als Chance zum wertsteigernden Wachstum.
- Wir gestalten den wissenschaftlich-technischen Fortschritt aus führender Position mit, entwickeln zukunftsweisende Produkte, Technologien und Problemlösungen und nutzen Synergieeffekte aus unserem Forschungsverbund.
- Wir entwickeln und optimieren unsere Produkte und Dienstleistungen gemeinsam mit unseren Kunden so, dass wir zur Wertsteigerung bei unseren Kunden und in unserem Unternehmen beitragen.
- Wir messen regelmäßig die Kundenzufriedenheit. Hinweise unserer Kunden und Partner nutzen wir konsequent zur Verbesserung unserer Geschäftsprozesse.

Grundwert

# Sicherheit, Gesundheit und Umweltschutz

Wir handeln verantwortungsvoll  
im Sinne von Responsible Care®.  
Wirtschaftliche Belange haben  
keinen Vorrang gegenüber Sicher-  
heit, Gesundheits- und Umwelt-  
schutz.



## Leitlinien

- Wir fordern und fördern das Sicherheits-, Gesundheits- und Umweltbewusstsein und streben kontinuierliche Verbesserungen durch Zielvereinbarungen an.
- Wir erzeugen Produkte, die sicher herzustellen, zu verwenden, wiederzuverwerten oder zu entsorgen sind.
- Wir unterstützen unsere Kunden und Lieferanten im Bemühen um einen sicheren und umweltfreundlichen Umgang mit den Produkten, die sie von uns beziehen bzw. uns liefern.
- Wir minimieren die Belastung von Mensch und Umwelt bei Herstellung, Lagerung, Transport, Vertrieb, Verwendung und Entsorgung unserer Produkte.



Grundwert

# Persönliche und fachliche Kompetenz

Wir bilden das beste Team in der Industrie, indem wir die gruppenweite Vielfalt an persönlicher und fachlicher Kompetenz fördern.

Interkulturelle Kompetenz ist unser Vorteil im globalen Wettbewerb. Wir ermutigen unsere Mitarbeiter, ihre Kreativität und ihr Potenzial für den gemeinsamen Erfolg einzubringen.



## Leitlinien

- Wir fördern Diversity-Programme und wollen Mitarbeiter aus allen Kulturen und Nationalitäten gewinnen, die mit sozialer und fachlicher Kompetenz bereit sind, sich engagiert für die Ziele und Werte unseres Unternehmens einzusetzen.
- Unser Führungsnachwuchs wird bevorzugt aus den eigenen Reihen herangebildet. Das Führungsteam wird systematisch anhand der folgenden vier Kriterien eingestellt, ausgewählt, entwickelt und positioniert: Wissen, Fähigkeiten, Führungskompetenz und das Handeln im Einklang mit unseren Grundwerten und Leitlinien.
- Unsere Organisation, Steuerungsprozesse und Zusammenarbeit sind auf das Erreichen von Spitzenleistungen durch Einzelne und durch Teams ausgerichtet.
- Wir tolerieren innerhalb der BASF-Gruppe keine Diskriminierungen wegen Nationalität, Geschlecht, Religion oder anderer persönlicher Merkmale.

Grundwert

# Gegenseitiger Respekt und offener Dialog

Wir gehen fair und respektvoll miteinander um. Wir suchen den offenen, vertrauensvollen Dialog im Unternehmen, mit unseren Geschäftspartnern und relevanten gesellschaftlichen Gruppen.





## Leitlinien

- Unsere Kommunikation im Unternehmen, mit unseren Geschäftspartnern, Nachbarn und gesellschaftlich relevanten Meinungsbildnern ist durch einen offenen und sachlichen Dialog geprägt.
- Unsere Mitarbeiter werden rechtzeitig durch offene Information und Kommunikation, auch über Hierarchie- und Einheitsgrenzen hinweg, in Arbeits- und Entscheidungsprozesse eingebunden.
- Führungskräfte und ihre Mitarbeiter oder Teams vereinbaren Ziele sowie Prioritäten und legen die Verantwortlichkeiten und Befugnisse fest.
- Wir bieten Voraussetzungen, die Eigeninitiative und unternehmerisches Handeln stärken. Führungskräfte sprechen regelmäßig mit ihren Mitarbeitern über ihre berufliche Weiterentwicklung und fördern ihre Lernbereitschaft.
- Wir stehen zu betrieblicher Partnerschaft mit den Arbeitnehmervertretungen und arbeiten in gegenseitiger Achtung vertrauensvoll mit ihnen zusammen. Die Form der Kooperation beachtet die international anerkannten grundlegenden Arbeitsstandards und orientiert sich an den jeweiligen Landesgegebenheiten.

Grundwert

# Integrität

Wir handeln in Übereinstimmung  
mit unseren Worten und Werten.

Wir achten die Gesetze und respek-  
tieren die allgemein anerkannten  
Gebräuche der Länder, in denen wir  
tätig sind.



## Leitlinien

- Jede Führungskraft muss ihrer Vorbildfunktion gerecht werden und sich an unserer Vision und unseren Grundwerten orientieren.
- Wir unterlassen Handlungen,
  - die ungesetzlich sind
  - die den fairen Wettbewerb behindern
  - die der Herstellung von illegalen Drogen oder chemischen Waffen dienen.
- Wir verurteilen jegliche Form von Kinderarbeit sowie von Zwangs- oder Pflichtarbeit.
- Die Interessen der BASF haben bei unseren Tätigkeiten Vorrang vor persönlichen Interessen. Wir schützen Firmeneigentum gegen Missbrauch.
- Jede Gruppengesellschaft erstellt auf der Basis der für die BASF-Gruppe geltenden Grundwerte und Leitlinien ihren Verhaltenskodex unter Berücksichtigung der Gesetze und allgemein anerkannten Gebräuche. Sie sorgt dafür, dass alle Mitarbeiter entsprechend informiert sind und der Kodex zur Grundlage ihres Handelns wird.
- Jeder Mitarbeiter hat auf der Grundlage des jeweiligen Compliance-Programms die Gelegenheit, sich in vertraulicher Weise Rat und Hilfe zu holen, wenn sich in seinem Arbeitsumfeld Hinweise auf rechtlich zweifelhafte Vorgänge ergeben.

**Herausgeber:**

BASF Aktiengesellschaft  
ZOF - Global Human Resources  
Executive Management  
and Development

Die Vision, Grundwerte und Leitlinien  
für die BASF-Gruppe wurden im Jahr 2004  
von einem internationalen Team unter  
Leitung von ZOF aktualisiert.
