# Supplementary material
Source: publisher site journal article supplement (https://www.degruyterbrill.com/publication/isbn/9783110432879/downloadAsset/9783110432879_Elektronischer_Anhang_2.zip)
Supplement: Supplementary file 11 [file BASF We create chemistry.pdf › Korpustexte/Korpustexte pdf/BASF/BASF We create chemistry.pdf]

# We create chemistry

Unsere  
Unternehmensstrategie

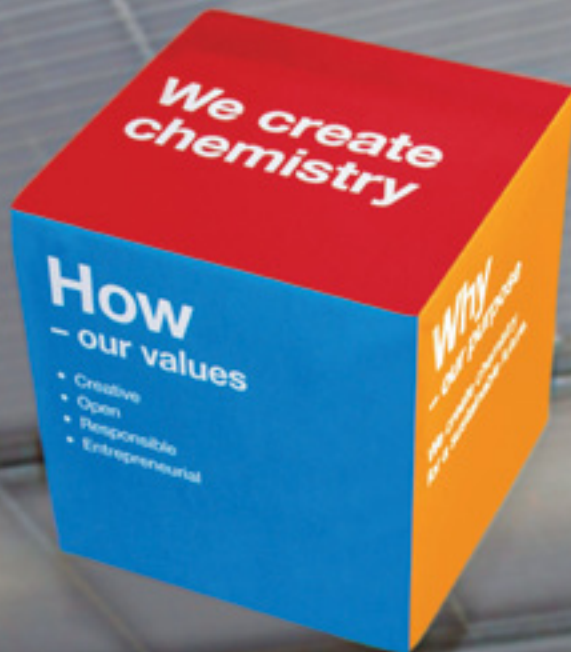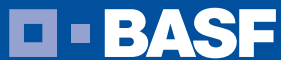

The Chemical Company

# Der Weg der BASF

Seit Gründung der BASF im Jahr 1865 hat sich unser Unternehmen ständig weiterentwickelt, um Antworten auf globale Veränderungen zu geben.

Wenn wir heute nach unserem Beitrag als Unternehmen zu einer nachhaltigen Zukunft fragen, steht fest: Wir werden nicht aufhören, uns zu verbessern, neue Herausforderungen anzugehen und mit Erfolg die Chancen wahrzunehmen, die sich uns bieten.

Um erfolgreich zu sein, brauchen wir ein gemeinsames Verständnis von dem, was wir als Unternehmen tun und warum und wie wir handeln. Dies bildet das starke Fundament, auf dem wir gemeinsam vorangehen.

So beweisen wir jeden Tag, dass wir nicht einfach nur Chemikalien herstellen: we create chemistry.

## Der Vorstand der BASF SE

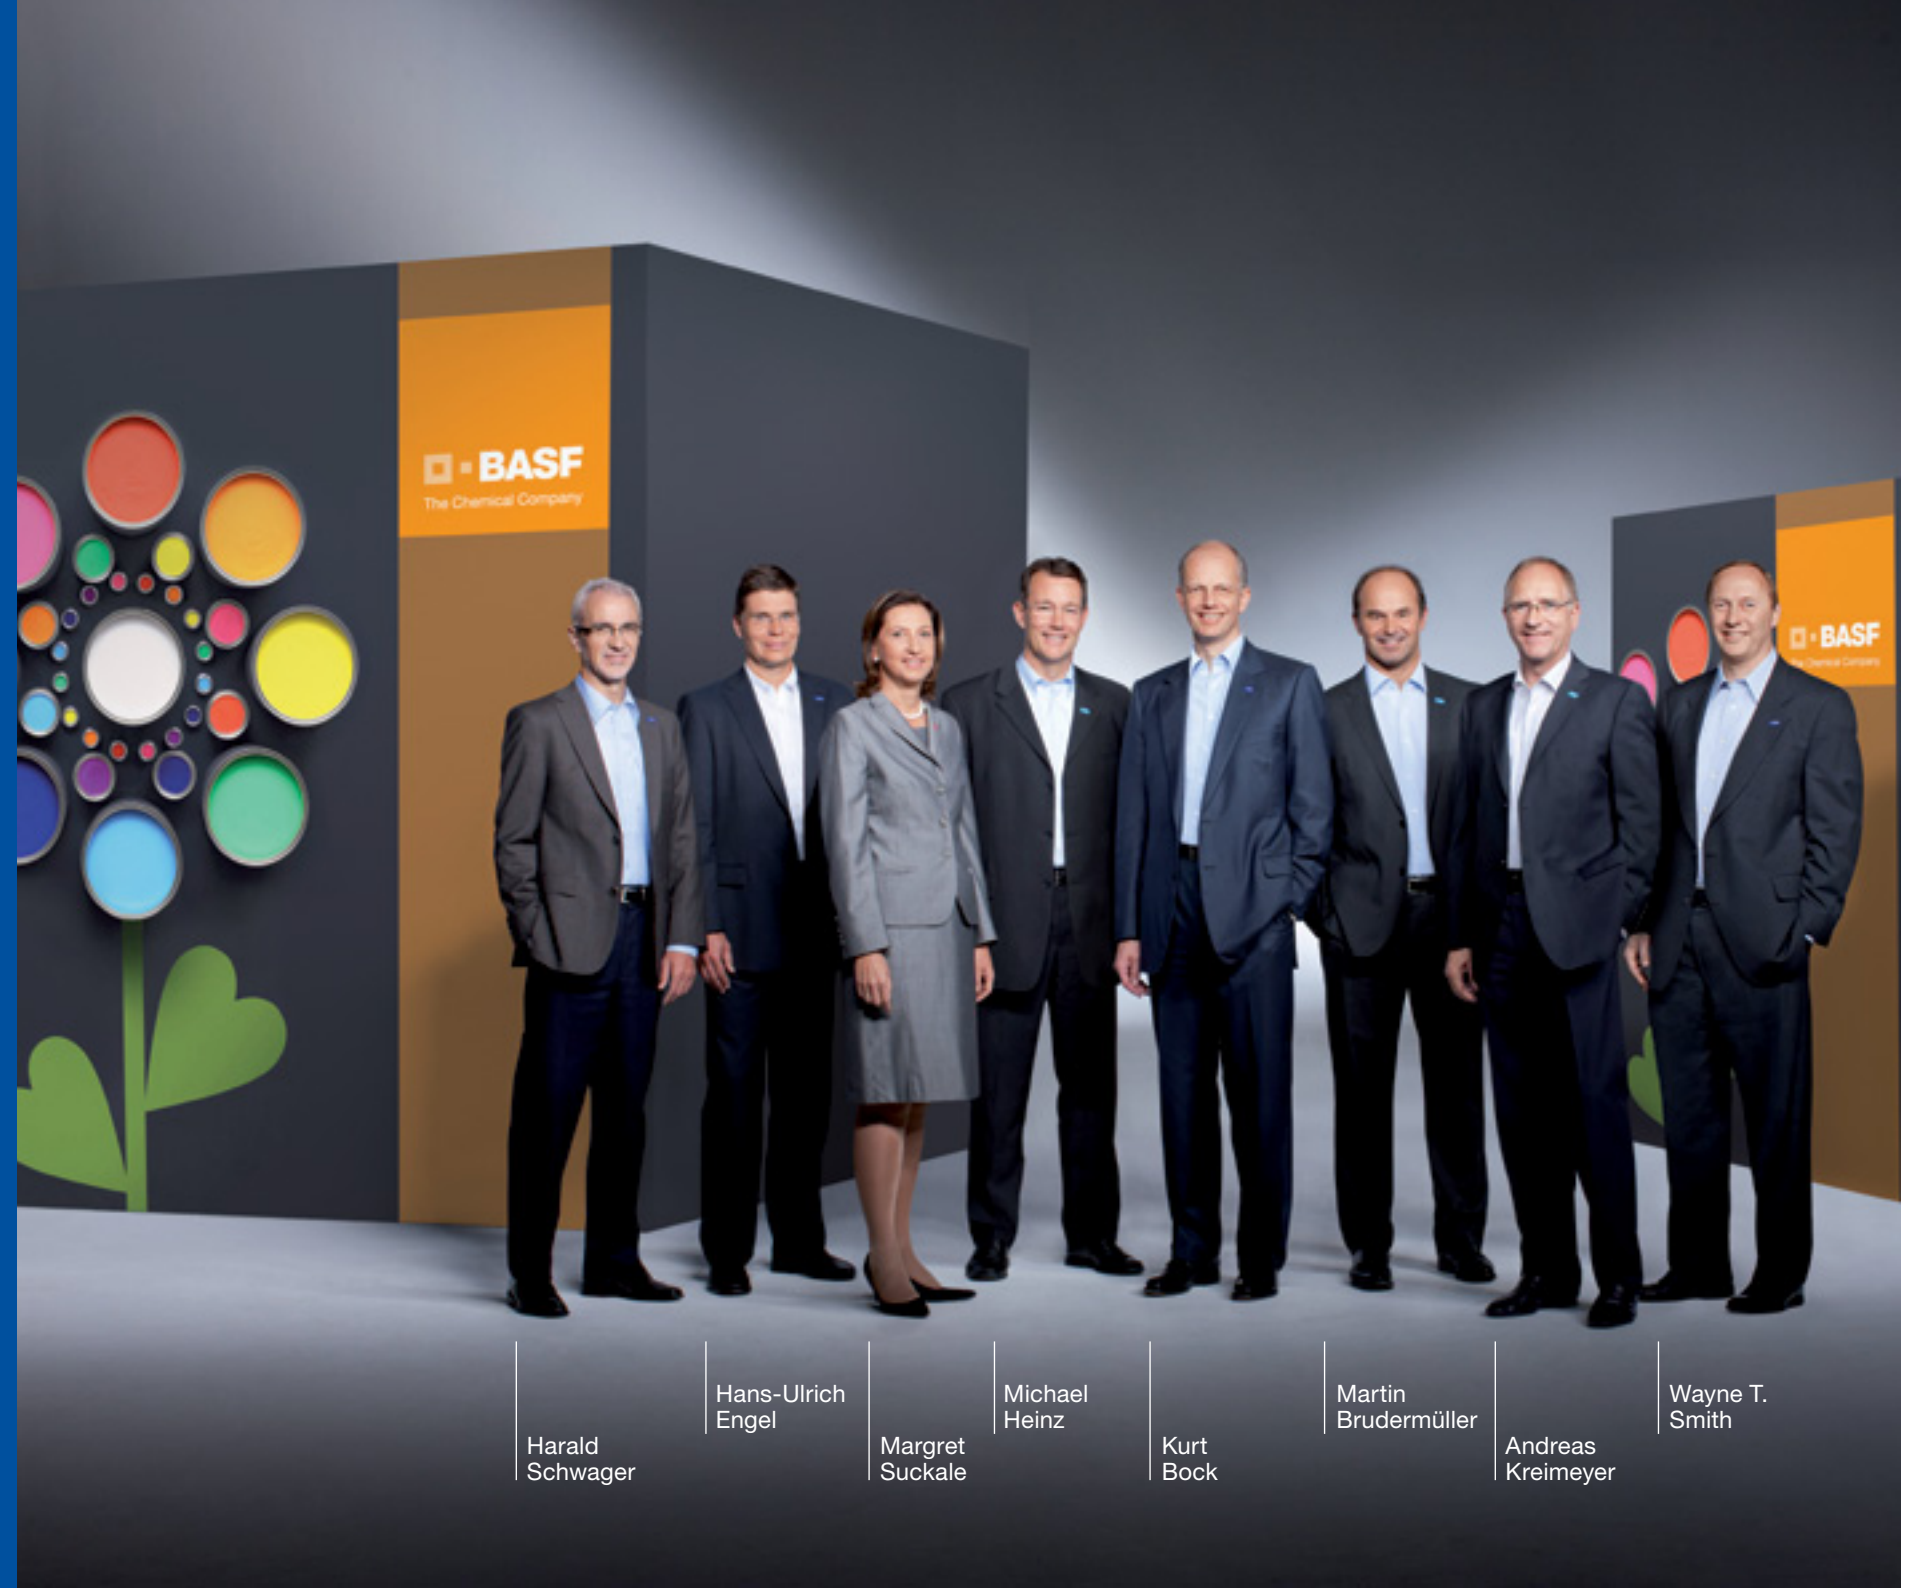

Harald  
Schwager

Hans-Ulrich  
Engel

Margret  
Suckale

Michael  
Heinz

Kurt  
Bock

Martin  
Brudermüller

Andreas  
Kreimeyer

Wayne T.  
Smith

# Warum – unser Unternehmenszweck

**Wir sind das führende Chemieunternehmen der Welt.**

**Aber was genau bedeutet das?** Die Antwort auf diese Frage ist in unserem Unternehmenszweck zusammengefasst.

---

**We create chemistry for a sustainable future.**

---

Übertragen ins Deutsche: Chemie, die verbindet – für eine nachhaltige Zukunft. Wir verbinden wirtschaftlichen Erfolg, gesellschaftliche Verantwortung und den Schutz der Umwelt. Mit Forschung und Innovation helfen wir unseren Kunden, heute und in Zukunft die Bedürfnisse der Gesellschaft zu erfüllen.

Im Jahr 2050 werden mehr als neun Milliarden Menschen auf der Erde leben. Die Weltbevölkerung und ihre Ansprüche wachsen, doch die Ressourcen unseres Planeten sind begrenzt. Wenn sich nichts ändert, brauchen wir in Zukunft die Ressourcen von annähernd drei Planeten so groß wie unsere Erde, um die Menschheit zu versorgen. Daher stehen wir vor enormen globalen Herausforderungen.

Wir sehen drei Bereiche, in denen Innovationen aus der Chemie eine wesentliche Rolle spielen werden.

---

## Rohstoffe, Umwelt und Klima

Der stark wachsende Energiebedarf ist eine der wichtigsten globalen Herausforderungen. Zudem werden der Zugang zu sauberem Trinkwasser und der effiziente Umgang mit Ressourcen entscheidender.

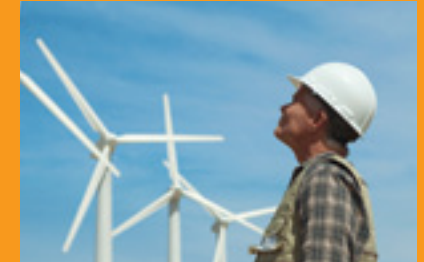

---

## Nahrungsmittel und Ernährung

Eine wachsende Weltbevölkerung braucht auch entsprechend mehr Nahrungsmittel – und wir müssen die Qualität der Ernährung verbessern.

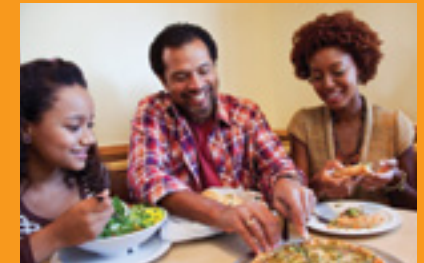

---

## Lebensqualität

Bevölkerungswachstum und Globalisierung bringen weitere Herausforderungen mit sich. Die Ansprüche und Wünsche der Menschen sind von Region zu Region und innerhalb verschiedener gesellschaftlicher Gruppen ganz unterschiedlich, aber eins haben alle gemeinsam: Sie wollen ihre individuelle Lebensqualität verbessern.

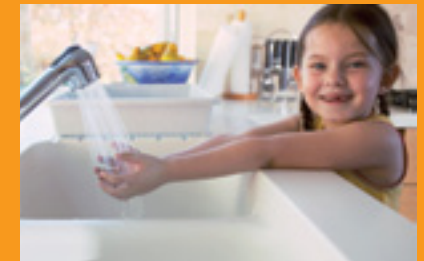



# Was – unsere strategischen Prinzipien

## Was werden wir tun, um diese Herausforderungen anzugehen?

Unsere einzigartige Position als integriertes, globales Chemieunternehmen eröffnet uns die Möglichkeit, in allen drei dargestellten Bereichen unsere Chancen wahrzunehmen.

Dabei richten wir uns nach vier strategischen Prinzipien:

- Wir schaffen Wert als *ein* Unternehmen.
- Wir setzen auf Innovationen, um unsere Kunden erfolgreicher zu machen.
- Wir treiben nachhaltige Lösungen voran.
- Wir bilden das beste Team.

Um unser Potenzial voll auszuschöpfen, verbinden wir unsere Stärken als *ein* Unternehmen – so können wir noch besser das ganze Spektrum der Fähigkeiten nutzen, die uns in der Industrie einzigartig machen. Wir werden neue Wachstumsmärkte erschließen, indem wir unsere Forschungs- und Entwicklungskompetenz, unsere operative Exzellenz, unsere Marktkennntnisse und unsere Kundenbeziehungen noch enger miteinander verzahnen. Auf diese Weise fördern wir mit nachhaltigen Produkten und Lösungen den langfristigen Erfolg unseres Unternehmens und den unserer Kunden.

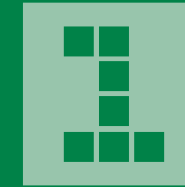

**Wir schaffen Wert als *ein* Unternehmen.**

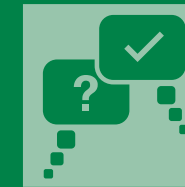

**Wir setzen auf Innovationen, um unsere Kunden erfolgreicher zu machen.**

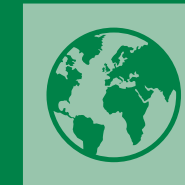

**Wir treiben nachhaltige Lösungen voran.**

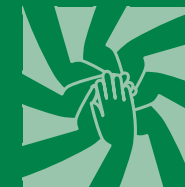

**Wir bilden das beste Team.**

# Wie – unsere Werte

## Wie wir handeln ist genauso wichtig wie das, was wir tun.

Ob wir unsere Strategie erfolgreich umsetzen, hängt wesentlich davon ab, wie wir handeln: Dafür stehen unsere Werte. Es ist entscheidend, dass jeder im BASF-Team unsere Unternehmenswerte versteht und lebt. Unsere Werte sind die Richtschnur für unser Verhalten gegenüber der Gesellschaft, unseren Partnern und untereinander.

### Kreativ

- Wir haben den Mut, außergewöhnliche Ideen zu verfolgen.
- Wir begeistern einander und schließen wertschaffende Partnerschaften.
- Wir verbessern ständig unsere Produkte, Services und Lösungen.

### Offen

- Wir schätzen Vielfalt – von Menschen, Meinungen und Erfahrungen.
- Wir fördern einen Dialog, der auf Ehrlichkeit, Respekt und gegenseitigem Vertrauen beruht.
- Wir entwickeln unsere Talente und Fähigkeiten.

### Verantwortungsvoll

- Wir handeln verantwortungsvoll als verlässlicher Teil der Gesellschaft.
- Wir halten uns strikt an unsere Compliance-Standards.
- Wir geben Sicherheit immer Vorrang.

### Unternehmerisch

- Wir tragen alle zum Erfolg unseres Unternehmens bei – einzeln und als Team.
- Wir übertragen Marktbedürfnisse in Kundenlösungen.
- Wir machen uns unsere Aufgaben zu eigen und stehen für die Ergebnisse ein.

# Die Marke BASF

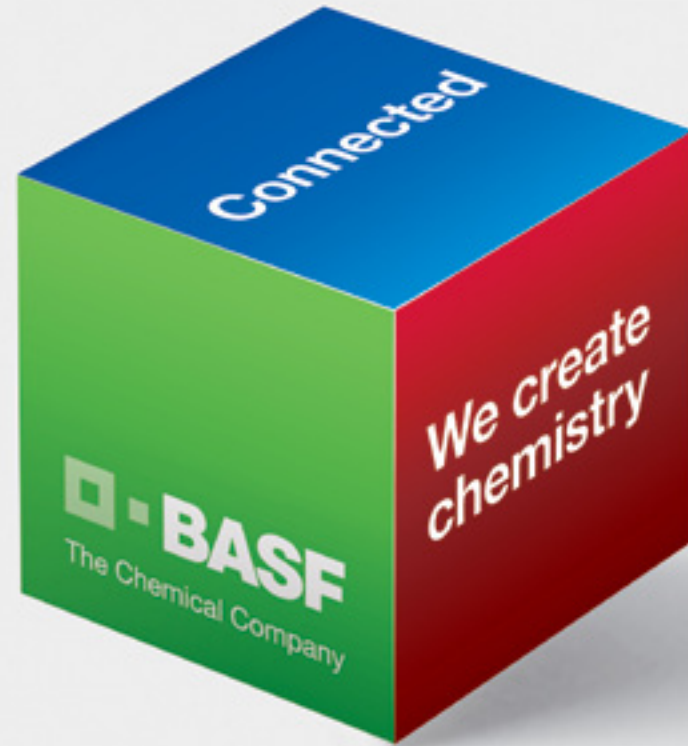

Unser Unternehmenszweck, unsere strategischen Prinzipien und unsere Werte sind das starke Fundament, das wir brauchen, um gemeinsam voranzugehen. Dieses Fundament, verbunden mit unserer Expertise in der Chemie, wird unseren Erfolg in der Zukunft sichern.

Um die verschiedenen Teile zusammenzufügen, sind wir auf den Beitrag jedes Einzelnen angewiesen: Wir alle sind Botschafter unseres Unternehmens und prägen durch unser Handeln das Bild der BASF. Die Verbindung aus allem, was wir tun, verleiht der Marke BASF Leben.

So beweisen wir jeden Tag, dass wir nicht einfach nur Chemikalien herstellen: [we create chemistry.](#)

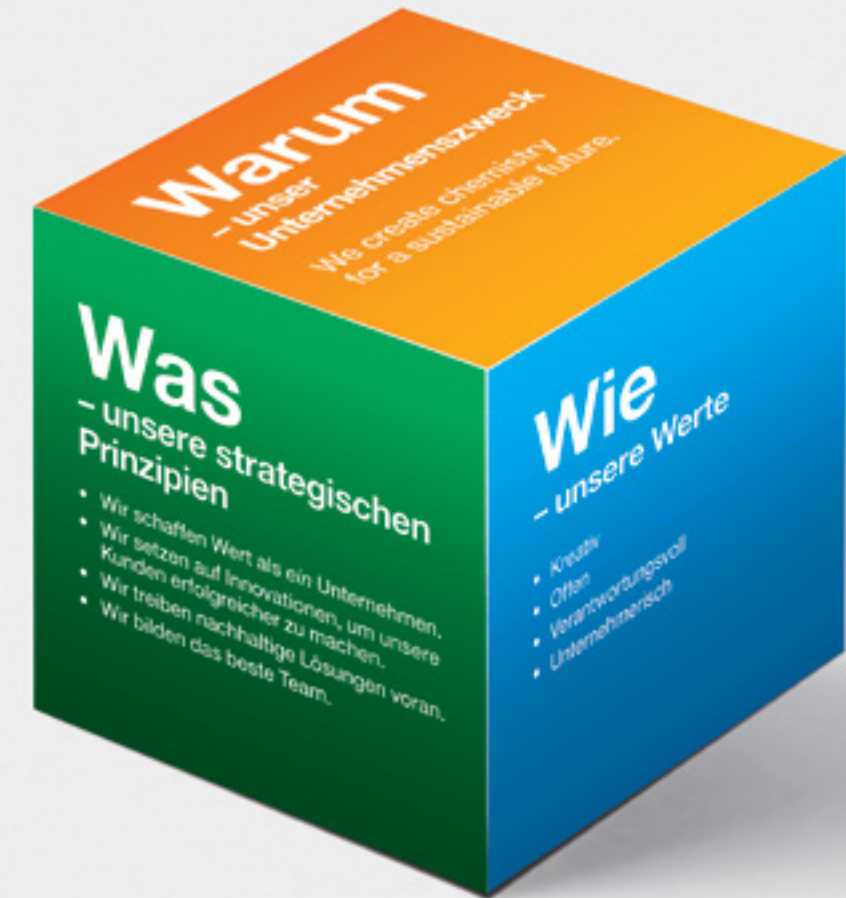

BASF SE  
Unternehmenskommunikation & Regierungsbeziehungen  
BASF-Gruppe  
67056 Ludwigshafen  
Telefon: 0621 60-22149  
Fax: 0621 60-20384
