# Supplementary material
Source: publisher site journal article supplement (https://www.degruyterbrill.com/publication/isbn/9783110432879/downloadAsset/9783110432879_Elektronischer_Anhang_2.zip)
Supplement: Supplementary file 12 [file BMW GB 2010.pdf › Korpustexte/Korpustexte pdf/BMW/BMW GB 2010.pdf]

# GESCHÄFTSBERICHT 2010

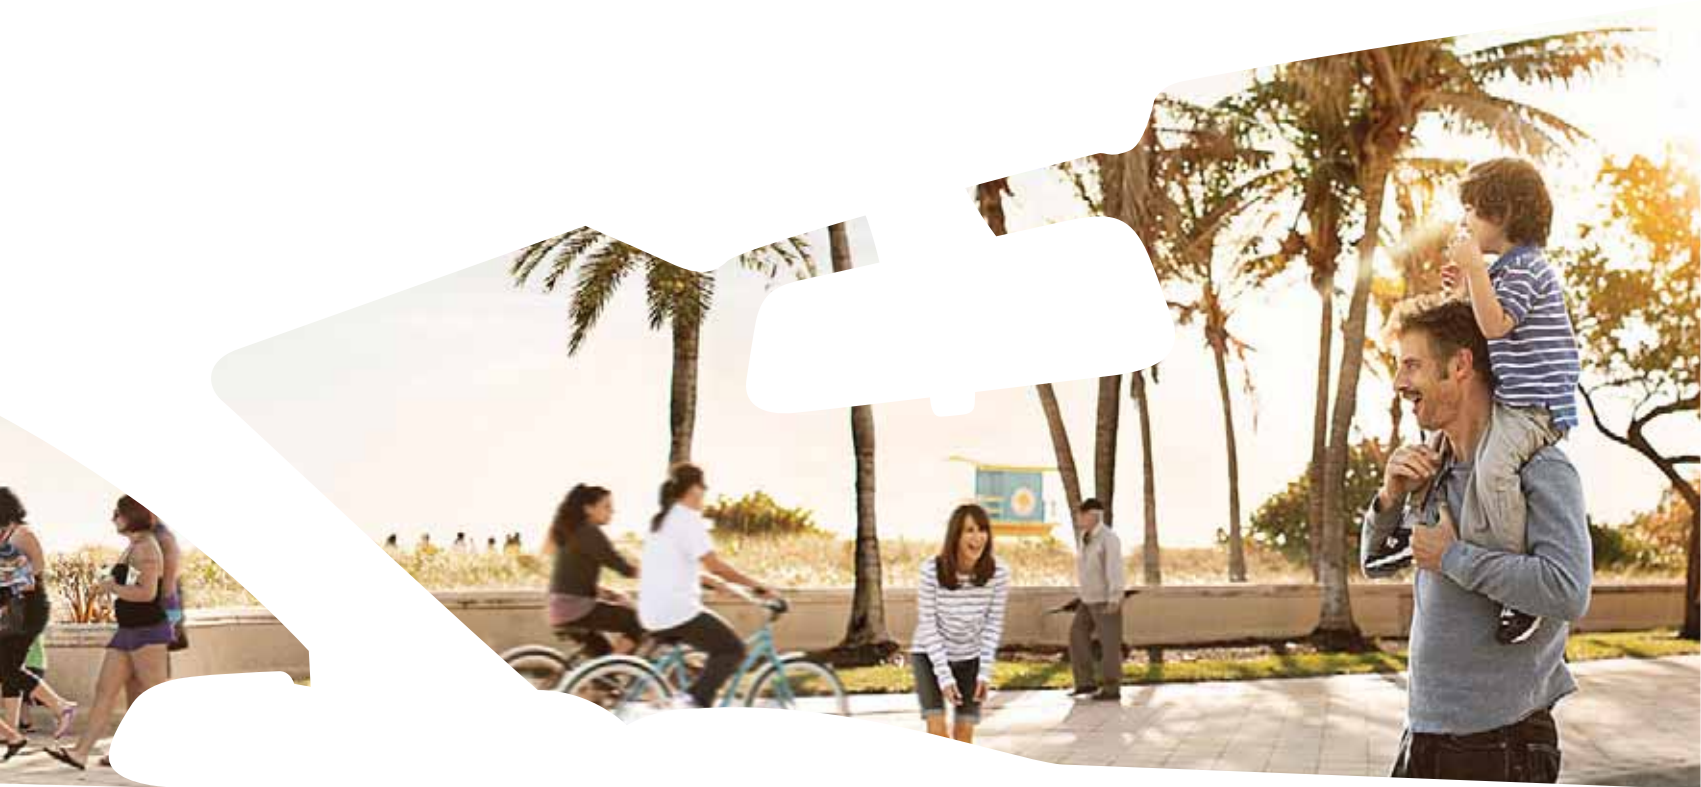

**BMW  
GROUP**

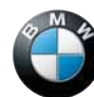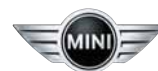

Rolls-Royce  
Motor Cars Limited



# ZAHLEN UND FAKTEN

---

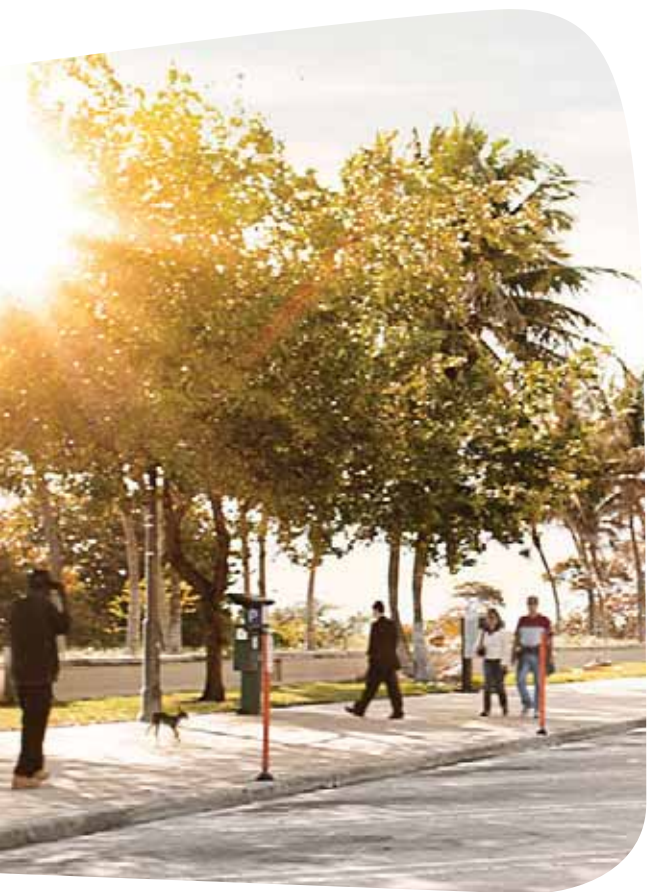

04 — BMW GROUP IN ZAHLEN

06 — BERICHT DES AUFSICHTSRATS

12 — KONZERNLAGEBERICHT

- 12 Das Geschäftsjahr im Überblick
- 14 Wirtschaftliche Rahmenbedingungen
- 18 Geschäftsverlauf
- 41 BMW Group – Kapitalmarktaktivitäten im Jahr 2010
- 44 Übernahmerelevante Angaben und Erläuterungen
- 47 Analyse der finanzwirtschaftlichen Situation
  - 47 Konzerninternes Steuerungssystem
  - 49 Ertragslage
  - 51 Finanzlage
  - 53 Vermögenslage
  - 55 Nachtragsbericht
  - 55 Wertschöpfungsrechnung
  - 57 Finanzwirtschaftliche Kennzahlen
  - 58 Erläuterungen zur BMW AG
- 62 Internes Kontrollsystem und Erläuterungen
- 63 Risikomanagement
- 70 Prognosebericht

74 — KONZERNABSCHLUSS

- 74 Gewinn-und-Verlust-Rechnungen
- 74 Gesamtergebnisrechnung
- 76 Bilanzen
- 78 Kapitalflussrechnungen
- 80 Entwicklung des Konzerneigenkapitals
- 81 Konzernanhang
  - 81 Grundsätze
  - 89 Erläuterungen zur Gewinn-und-Verlust-Rechnung
  - 95 Erläuterungen zur Gesamtergebnisrechnung
  - 96 Erläuterungen zur Bilanz
  - 117 Sonstige Angaben
  - 133 Segmentinformationen

138 — Versicherung der gesetzlichen Vertreter

139 — Bestätigungsvermerk des Abschlussprüfers

140 — ERKLÄRUNG ZUR UNTERNEHMENSFÜHRUNG

- Corporate Governance  
(Teil des Lageberichts)
- 140 Grundlegendes zur Unternehmensverfassung
- 142 Erklärung des Vorstands und des Aufsichtsrats gemäß § 161 AktG
- 143 Mitglieder des Vorstands
- 144 Mitglieder des Aufsichtsrats
- 147 Zur Arbeitsweise von Vorstand und Aufsichtsrat und der Zusammensetzung und Arbeitsweise von deren Ausschüssen
- 154 Vergütungsbericht
- 162 Angaben zu Unternehmensführungspraktiken, die über die gesetzlichen Anforderungen hinaus angewandt werden
- 163 Compliance in der BMW Group

166 — WEITERE INFORMATIONEN

- 166 BMW Group im Zehn-Jahres-Vergleich
- 168 BMW Group Standorte
- 170 Glossar
- 172 Index
- 175 Finanzkalender
- 176 Kontakte

# KONZERNPORTRÄT

---

Gegründet als Bayerische Flugzeugwerke AG (BFW) im Jahr 1916, entstand 1917 die Bayerische Motoren Werke G.m.b.H., die 1918 schließlich in Bayerische Motoren Werke Aktiengesellschaft (BMW AG) umgewandelt wurde.

Die BMW Group ist weltweit einer der erfolgreichsten Hersteller von Automobilen und Motorrädern und zählt zu den größten Industrieunternehmen in Deutschland. Das Unternehmen verfügt heute mit BMW, MINI und Rolls-Royce über drei der stärksten Premiummarken in der Automobilbranche. Die Fahrzeuge der BMW Group setzen höchste Standards hinsichtlich Ästhetik, Dynamik, Technik und Qualität und belegen damit die Technologie- und Innovationsführerschaft des Unternehmens. Neben einer starken Marktposition im Motorradgeschäft mit den Marken BMW und Husqvarna ist das Unternehmen auch im Geschäft mit Finanzdienstleistungen erfolgreich.

Mit der Strategie Number ONE haben wir im Jahr 2007 die Weichen für eine erfolgreiche Zukunft gestellt. Das Unternehmen wird dabei konsequent auf Profitabilität und langfristige Wertsteigerung ausgerichtet, unsere Aktivitäten sind weiter auf die Premiumsegmente der internationalen Automobilmärkte ausgerichtet. Die strategische Zielsetzung reicht bis in das Jahr 2020 und ist klar definiert: Die BMW Group ist der weltweit führende Anbieter von Premium-Produkten und Premium-Dienstleistungen für individuelle Mobilität.

Seit jeher bilden langfristiges Denken und verantwortungsvolles Handeln die Grundlage unseres wirtschaftlichen Erfolgs. Das Unternehmen hat ökologische und soziale Nachhaltigkeit entlang der gesamten Wertschöpfungskette, umfassende Produktverantwortung sowie ein klares Bekenntnis zur Schonung von Ressourcen fest in seiner Strategie verankert. Entsprechend ist die BMW Group seit sechs Jahren Branchenführer in den Dow Jones Sustainability Indizes.

---

 BMW Group in Zahlen
 

---



---

 Auslieferungen Automobile
 

---

in Tsd.

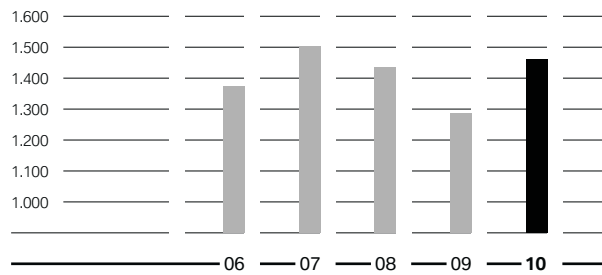


---

 1.374,0 1.500,7 1.435,9 1.286,3 **1.461,2**


---



---

 Umsatz
 

---

in Mrd. Euro

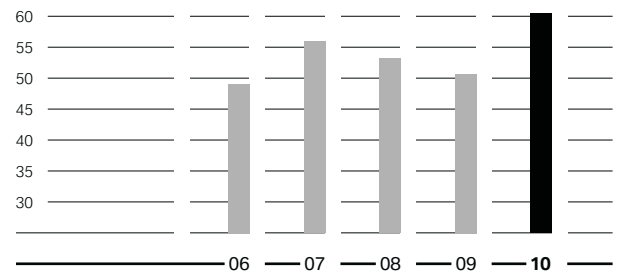


---

 49,0 56,0 53,2 50,7 **60,5**


---



---

 Ergebnis vor Finanzergebnis
 

---

in Mio. Euro

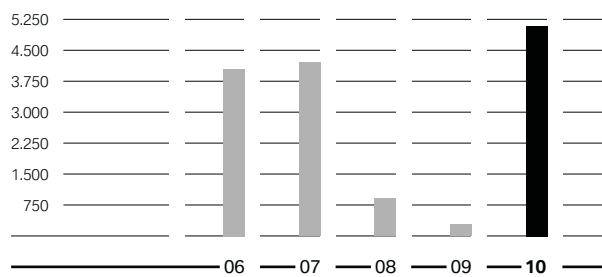


---

 4.050 4.212 921 289 **5.094**


---



---

 Ergebnis vor Steuern
 

---

in Mio. Euro

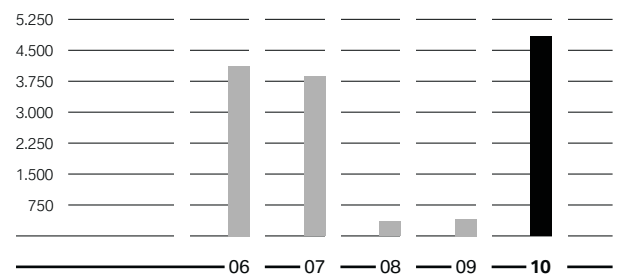


---

 4.124 3.873 351 413 **4.836**


---

## BMW Group in Zahlen

|                                              | 2006             | 2007             | 2008             | 2009             | 2010             | Veränderung in % |
|----------------------------------------------|------------------|------------------|------------------|------------------|------------------|------------------|
| <b>Automobilzulieferungen</b>                |                  |                  |                  |                  |                  |                  |
| BMW                                          | 1.185.088        | 1.276.793        | 1.202.239        | 1.068.770        | <b>1.224.280</b> | 14,6             |
| MINI                                         | 188.077          | 222.875          | 232.425          | 216.538          | <b>234.175</b>   | -8,1             |
| Rolls-Royce                                  | 805              | 1.010            | 1.212            | 1.002            | <b>2.711</b>     | -                |
| <b>Gesamt</b>                                | <b>1.373.970</b> | <b>1.500.678</b> | <b>1.435.876</b> | <b>1.286.310</b> | <b>1.461.166</b> | <b>13,6</b>      |
| <b>Motorradzulieferungen</b>                 |                  |                  |                  |                  |                  |                  |
| BMW                                          | 100.064          | 102.467          | 101.685          | 87.306           | <b>98.047</b>    | 12,3             |
| Husqvarna                                    | -                | -                | 13.511           | 13.052           | <b>12.066</b>    | -7,6             |
| <b>Gesamt</b>                                | <b>100.064</b>   | <b>102.467</b>   | <b>115.196</b>   | <b>100.358</b>   | <b>110.113</b>   | <b>9,7</b>       |
| <b>Automobilproduktion</b>                   |                  |                  |                  |                  |                  |                  |
| BMW                                          | 1.179.317        | 1.302.774        | 1.203.482        | 1.043.829        | <b>1.236.989</b> | 18,5             |
| MINI                                         | 186.674          | 237.700          | 235.019          | 213.670          | <b>241.043</b>   | 12,8             |
| Rolls-Royce                                  | 847              | 1.029            | 1.417            | 918              | <b>3.221</b>     | -                |
| <b>Gesamt</b>                                | <b>1.366.838</b> | <b>1.541.503</b> | <b>1.439.918</b> | <b>1.258.417</b> | <b>1.481.253</b> | <b>17,7</b>      |
| <b>Motorradproduktion</b>                    |                  |                  |                  |                  |                  |                  |
| BMW                                          | 103.759          | 104.396          | 104.220          | 82.631           | <b>99.236</b>    | 20,1             |
| Husqvarna                                    | -                | -                | 14.232           | 10.612           | <b>13.035</b>    | 22,8             |
| <b>Gesamt</b>                                | <b>103.759</b>   | <b>104.396</b>   | <b>118.452</b>   | <b>93.243</b>    | <b>112.271</b>   | <b>20,4</b>      |
| <b>Mitarbeiter am Jahresende<sup>1</sup></b> |                  |                  |                  |                  |                  |                  |
| BMW Group                                    | 106.575          | 107.539          | 100.041          | 96.230           | <b>95.453</b>    | -0,8             |
| <b>Finanzdaten</b>                           |                  |                  |                  |                  |                  |                  |
| in Mio. Euro                                 |                  |                  |                  |                  |                  |                  |
| Umsatz                                       | 48.999           | 56.018           | 53.197           | 50.681           | <b>60.477</b>    | 19,3             |
| Investitionen                                | 4.313            | 4.267            | 4.204            | 3.471            | <b>3.263</b>     | -6,0             |
| Abschreibungen                               | 3.272            | 3.683            | 3.670            | 3.600            | <b>3.682</b>     | 2,3              |
| Operativer Cashflow <sup>2</sup>             | 5.373            | 6.246            | 4.471            | 4.921            | <b>8.150</b>     | 65,6             |
| Ergebnis vor Finanzergebnis                  | 4.050            | 4.212            | 921              | 289              | <b>5.094</b>     | -                |
| Ergebnis vor Steuern                         | 4.124            | 3.873            | 351              | 413              | <b>4.836</b>     | -                |
| Jahresüberschuss                             | 2.874            | 3.134            | 330              | 210              | <b>3.234</b>     | -                |

<sup>1</sup> Werte ohne ruhende Arbeitsverhältnisse, ohne Mitarbeiter in Freizeitphase der Altersteilzeit, ohne Geringverdiener<sup>2</sup> in der Kapitalflussrechnung aufgeführter Mittelzufluss aus der betrieblichen Tätigkeit: bis 2006 des Industriegeschäfts, ab 2007 des Segments Automobile

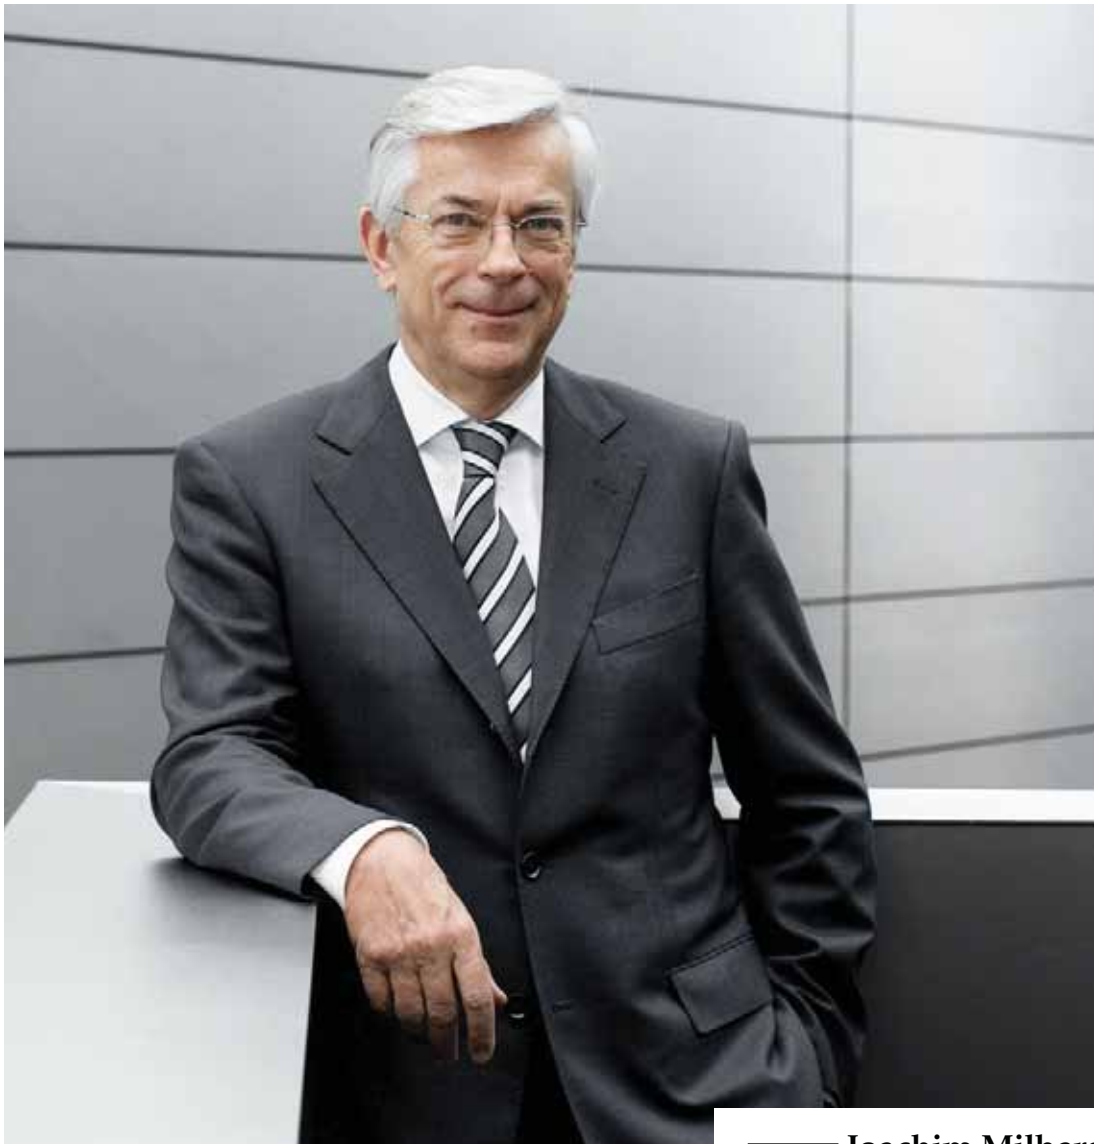

— **Joachim Milberg**  
Vorsitzender des Aufsichtsrats



## Sehr geehrte Damen und Herren,

das Geschäftsjahr 2010 war für die BMW Group ein Jahr des Aufschwungs nach der globalen Wirtschafts- und Finanzkrise. Wir freuen uns mit dem Vorstand und den Mitarbeiterinnen und Mitarbeitern über die positive Geschäftsentwicklung zum besten Konzernergebnis der Unternehmensgeschichte.

Wir haben in dieser Zeit die Geschäftsführung und die geschäftliche Entwicklung anhand regelmäßiger schriftlicher und mündlicher Berichte des Vorstands fortlaufend und sorgfältig überwacht und den Vorstand bei wichtigen Vorhaben und Planungen im Rahmen gemeinsamer Aussprachen beraten. Unser Austausch mit dem Vorstand war stets konstruktiv und vertrauensvoll.

**Schwerpunkte der Überwachungs- und Beratungstätigkeit des Aufsichtsrats** In fünf Aufsichtsratssitzungen, eine davon zweitägig, haben wir uns insbesondere mit der aktuellen Geschäfts- und Finanzlage des Unternehmens, mit der Unternehmensplanung und der Unternehmensstrategie, dem Risikomanagement und der Risikovorsorge, mit Personalentscheidungen, der Weiterentwicklung des Systems der Vorstandsvergütung sowie der Corporate Governance beschäftigt. Auch außerhalb der Sitzungen hat uns der Vorstand regelmäßig und zeitnah über die laufende Geschäftsentwicklung und wirtschaftliche Lage, insbesondere die laufenden Absatz- und Personalzahlen, sowie über Angelegenheiten von besonderer Bedeutung unterrichtet. Darüber hinaus wurde ich vom Vorstandsvorsitzenden über wichtige geschäftliche Vorgänge und Vorhaben fortlaufend direkt informiert.

Auch 2010 befasste sich der Aufsichtsrat mit der Führung und Organisation des Segments Financial Services. Zur Vorbereitung der fraglichen Plenarsitzung erörterten wir mit dem Vorstand im Präsidium die aktuelle Organisation des Geschäftsbereichs, der dem Vorstandsressort Finanzen zugeordnet ist, und ließen uns ausführlich zum Stand der Projekte berichten, mit denen Liquiditätsversorgung, Risikomanagement, Vertriebsunterstützung für Automobile sowie die Gesellschafts- und Führungsstruktur optimiert werden sollen. Auch die Rahmenbedingungen und organisatorischen Implikationen der geplanten Neuausrichtung wurden behandelt. Der Aufsichtsrat unterstützt eine gesellschaftsrechtliche und organisatorische Umstrukturierung des Geschäftsfelds, die geeignete Ausgleichs- und Kontrollmechanismen im Verhältnis zwischen Industrie-Kerngeschäft und Geschäftsfeld Financial Services vorsieht.

Eine Aufsichtsratssitzung fand am Werkstandort Regensburg in der Oberpfalz, Bayern, statt, wo u. a. Fahrzeuge der BMW 1er und 3er Reihe sowie der BMW Z4 produziert werden. Im dortigen Werk informierten wir uns über die Vorbereitungen für die im Jahr 2011 geplanten Modellanläufe. Anhand von Beispielen im Presswerk, Karosseriebau und in der Montage wurde den Mitgliedern des Aufsichtsrats die Anwendung der Prinzipien des Wertschöpfungsorientierten Produktionssystems (WPS) auf dem Weg zu weiteren Prozessverbesserungen demonstriert.

Im September fand wieder eine zweitägige Sitzung statt, die uns Gelegenheit für einen vertieften Austausch mit dem Vorstand zu technischen Innovationen und neuen Fahrzeugkonzepten bot. Dabei konnten die Aufsichtsratsmitglieder auch einige Fahrzeuge erproben, die Anforderungen der Kunden an zukunftsweisende Mobilität in verschiedenen Fahrzeugkategorien erfüllen, z. B. einen BMW 5er ActiveHybrid Prototyp der nächsten Generation, aber auch Serienfahrzeuge wie den BMW 320d EfficientDynamics Edition sowie Fahrzeuge, die wie der BMW X3 xDrive 20d kurz vor dem Produktionsbeginn standen. Ein weiterer Teil der Sitzung war dem Strategiereview gewidmet. Der Vorstand stellte uns die Fortschritte bei der Umsetzung der Strategie Number ONE anhand der vier Säulen „Wachstum“, „Zukunft gestalten“, „Profitabilität“ und „Zugang zu Technologien und Kunden“ seit dem Vorjahr dar. Die Markt- und Volumenplanung im Geschäftsfeld PKW wurde ausführlich behandelt; dabei wurden bestimmte Märkte auch erfolgreich einem Stresstest unterzogen. Der Aufsichtsrat unterstützt den Vorstand darin, bei den Vertriebsaktivitäten ein ausbalanciertes Verhältnis zwischen den wichtigen Märkten in Europa, Asien und Amerika anzustreben. Darüber hinaus diskutierten wir mit dem Vorstand ausgesuchte Fragen der Produkt- und Markenstrategie, wie z. B. die Planungen zu einer neuen BMW Submarke auf dem Gebiet der Elektromobilität. Nach Auffassung des Aufsichtsrats hat sich die Strategie Number ONE gerade in der Krise als robust erwiesen: Wir sehen den Vorstand strategisch weiterhin auf einem zukunftsfähigen Weg.

Mit der vom Vorstand zur Zustimmung vorgelegten Längerfristigen Unternehmensplanung (LUP), die für die Jahre 2011–2016 einen deutlich positiven, steigenden Wertbeitrag prognostiziert, haben wir uns gründlich auseinandergesetzt, bevor wir ihr die Zustimmung erteilten. Veränderungen gegenüber früher aufgestellten Planungen und Zielen hat uns der Vorstand erläutert. In Bericht und gemeinsamer Diskussion wurden auch die wichtigsten externen Risikofaktoren, wie z. B. regulatorische Anforderungen und denkbare neue krisenhafte Herausforderungen behandelt. Wir haben den Vorstand darin bestärkt, trotz des Aufschwungs Fixkosten und Personalbedarfe vorsichtig zu planen. Der Aufsichtsrat stellte anerkennend fest, dass die Anstrengungen der vergangenen Jahre trotz der Wirtschaftskrise auch

eine verbesserte Transparenz bei Financial Services, Fortschritte bei der Produktstrategie und Elektromobilität und neue positive Ansätze im Marketing bewirkt haben.

Ferner erörterten wir mit dem Vorstand die Situation und Positionierung der BMW Group in den Bereichen Personalmarketing, Nachwuchsprogramme, Weiterbildung und Berufsausbildung. Wir stimmen mit dem Vorstand überein, dass trotz der generell hohen Attraktivität von BMW als Arbeitgeber Kompetenzaufbau und -erhalt sowie Weiterbildung, auch vor dem Hintergrund des demografischen Wandels, eine zentrale Herausforderung für die Zukunftsfähigkeit auch der BMW Group darstellt. Der Aufsichtsrat ließ sich vom Vorstand darüber hinaus das Diversity-Konzept für die BMW Group vorstellen und erläutern.

Wir haben uns eingehend mit der vom Vorstand vorgestellten Jahresplanung für das Geschäftsjahr 2011 befasst und die Ergebnischancen und Risiken mit dem Vorstand erörtert. Die Planungsgrundlagen zeigen gute Aussichten, dass die Zielgrößen der Strategie Number ONE trotz der zwischenzeitlichen Wirtschaftskrise mindestens erreicht werden können.

Der Vorstand berichtete uns im Rahmen eines Sonderthemas ausführlich über die Tätigkeit sowie die organisatorische und strategische Ausrichtung des Vorstandsressorts „Einkauf und Lieferantennetzwerk“, das 2007 im Zuge der Strategie Number ONE eingerichtet wurde und den Anspruch verfolgt, die weltweit leistungsfähigste Fahrzeughersteller-Supply-Chain bei Qualität, Innovationen, Termintreue und Kosten zu schaffen. Dabei wurden unter anderem die Instrumente erläutert, mit denen die BMW Group Skalenvorteile größerer Hersteller auszugleichen beabsichtigt.

Im Rahmen regelmäßiger Berichte zur Lage informierte uns der Vorstand insbesondere über die Absatzentwicklung in den Segmenten Automobile und Motorräder, die Entwicklung des Neugeschäfts bei den Finanzdienstleistungen und der Fahrzeugrestwerte auf wichtigen Märkten sowie über die unterjährige Ertrags- und Profitabilitätsentwicklung. Die Berichte zur Lage nutzen Vorstand und Aufsichtsrat regelmäßig, um sich zu in der Automobilindustrie aktuellen Themen auszutauschen. In diesem Zusammenhang ließ sich der Aufsichtsrat vom Vorstand z. B. die BMW internen Regelungen und Prozesse zur Qualitätssicherung und zum Management etwaiger Produktfehler erläutern. Ferner ging der Vorstand in seinen Berichten zur Lage auf für die BMW Group bedeutsame Entwicklungen in China ein, wie z. B. die Fortschritte beim Ausbau der Produktionskapazitäten in Shenyang an den Standorten Tiexi und Dadong sowie das Engagement der BMW Group im Rahmen des Joint Venture mit Brilliance.

Auch im Geschäftsjahr 2010 befasste sich der Aufsichtsrat gründlich mit der Struktur und Höhe der Vorstandsvergütung. Dabei wurde auch ein vom Vorstand und vom Unternehmen unabhängiger externer Vergütungsberater hinzugezogen. Im Juli entschied der Aufsichtsrat im Anschluss an die Entscheidung des Vorstands, den Mitarbeitern der BMW AG eine Sonderzahlung zu bewilligen, nach dem Prinzip der Durchgängigkeit und unter Berücksichtigung der Vergütung der ersten Ebene unterhalb des Vorstands auch den Mitgliedern des Vorstands eine Sonderzahlung zu bewilligen. Damit drückte der Aufsichtsrat seine besondere Anerkennung dafür aus, dass der Vorstand frühzeitig strukturelle Maßnahmen ergriffen hat, die der BMW Group die Bewältigung der Wirtschafts- und Finanzkrise erleichtert haben. Im Dezember traf der Aufsichtsrat die Grundsatzentscheidung, das Vergütungssystem für den Vorstand für Geschäftsjahre ab dem 1. Januar 2011 um eine aktienorientierte Vergütungskomponente zu ergänzen. Weitere Angaben dazu enthält der ausführliche Vergütungsbericht im Corporate-Governance-Bericht (Seiten 154 ff.).

**Corporate Governance und Entsprechenserklärung** Vorstand und Aufsichtsrat haben in ihrer gemeinsamen Sitzung im Dezember die BMW Group Corporate Governance überprüft und Entscheidungen zu ihrer Fortentwicklung getroffen. Die gemeinsam beschlossene Entsprechenserklärung sowie weitere Erläuterungen sind im Corporate-Governance-Bericht zu finden. Die am 2. Juli 2010 im Rahmen der Überarbeitung des Deutschen Corporate Governance Kodex veröffentlichten Empfehlungen der Regierungskommission Deutscher Corporate Governance Kodex (Kodexfassung vom 26. Mai 2010) werden künftig ohne Ausnahme beachtet. Dies schließt auch die Empfehlungen des Kodex zur Nachfolgeplanung für den Vorstand ein: Personalausschuss und Aufsichtsratsplenum werden gemeinsam mit dem Vorstand für eine langfristige Nachfolgeplanung sorgen. Bei der Sichtung von Kandidaten und Kandidatinnen für eine Vorstandsposition stellen deren fachliche Qualifikation für das zu übernehmende Ressort, überzeugende Führungsqualitäten, bisherige Leistungen sowie profunde Kenntnisse über das Unternehmen aus Sicht des Aufsichtsrats die grundlegenden Eignungskriterien dar. Im Rahmen der Abwägung, welche Persönlichkeit den Vorstand als Gremium am besten ergänzen würde, achten wir auch auf Vielfalt (Diversity). Unter Vielfalt als Entscheidungsgesichtspunkt verstehen wir insbesondere unterschiedliche, sich gegenseitig ergänzende Profile, Berufs- und Lebenserfahrungen, auch im internationalen Bereich, sowie eine angemessene Vertretung beider Geschlechter. Im Rahmen mittel- und langfristig geplanter Neubesetzungen streben wir auch eine angemessene Vertretung von Frauen im Vorstand der BMW AG an. Über den Anteil und die Entwicklung der weiblichen Führungskräfte, insbesondere unter den Oberen Führungskräften und auf der ersten Führungsebene, wird der Vorstand dem Personalausschuss daher in regelmäßigen Abständen sowie auf An-

forderung vor Personalentscheidungen des Aufsichtsrats berichten. Mit welcher Persönlichkeit eine konkrete Vorstandsposition besetzt werden soll, entscheidet der Aufsichtsrat im Unternehmensinteresse und unter Würdigung aller Umstände des Einzelfalls.

Der Aufsichtsrat hat für seine eigene Zusammensetzung konkrete Besetzungsziele beschlossen, die im Corporate-Governance-Bericht (Seiten 153 ff.) wiedergegeben sind. Dabei hat sich der Aufsichtsrat bewusst für ein ausführliches Besetzungsprofil entschieden. Grundlage hierfür war ein bereits vom Nominierungsausschuss erarbeitetes und angewandtes Besetzungsprofil, das für den gesamten Aufsichtsrat weiterentwickelt wurde.

Die Effizienz der Aufsichtsratsstätigkeit zu überprüfen und zu verbessern sehen wir als dauernde Aufgabe an, deren Kernelement der offene, konstruktive Dialog innerhalb des Aufsichtsrats und im Verhältnis zum Vorstand ist. Die Überprüfung der eigenen Effizienz war auch Gegenstand einer gesonderten Aussprache im Aufsichtsratsplenum. Diese bereiteten wir auch anhand eines vorab verteilten, vom Aufsichtsrat erarbeiteten Fragebogens vor.

Anhaltspunkte für Interessenkonflikte von Vorstands- oder Aufsichtsratsmitgliedern traten im zurückliegenden Geschäftsjahr nicht auf. Die Überprüfung wesentlicher Geschäfte mit nahestehenden Personen im Sinne des IAS 24 auf Umfang und Üblichkeit wird hinsichtlich der Vorstands- und Aufsichtsratsmitglieder durch eine quartalsweise direkt bei diesen durchgeführte Abfrage ergänzt, die sich auch auf nahe Familienangehörige und zwischengeschaltete Unternehmen bezieht (siehe Seiten 128 f.).

Die Teilnahme an den fünf Aufsichtsratssitzungen, die individuell anhand der gezahlten Sitzungsgelder im Vergütungsbericht nachvollzogen werden kann (siehe Seiten 154 ff.), lag 2010 jeweils bei mindestens 90 % oder 18 von 20 Mitgliedern. Ein Mitglied des Aufsichtsrats konnte im Geschäftsjahr 2010 aufgrund längerer Erkrankung an drei Sitzungen des Aufsichtsrats nicht teilnehmen. Präsidium und Ausschüsse tagten stets vollzählig (siehe Seite 152).

**Aus der Arbeit des Präsidiums und der Ausschüsse** Der Schwerpunkt der insgesamt vier Sitzungen des Präsidiums lag bei der themenspezifischen Vorbereitung der Sitzungen des Aufsichtsratsplenums, soweit die Vorbereitung nicht in die Zuständigkeit eines Ausschusses fiel. Das Präsidium wählte zusätzliche Themen für die Aufsichtsratssitzung aus und gab dem Vorstand Anregungen für die Berichterstattung an das Aufsichtsratsplenum.

Der Prüfungsausschuss kam im Berichtsjahr 2010 zu vier Sitzungen zusammen. Ferner fanden gemäß der Empfehlung des Deutschen Corporate Governance Kodex drei Telefonkonferenzen mit dem Vorstand zur Erörterung der Zwischenberichte vor ihrer Veröffentlichung statt. An der Telefonkonferenz betreffend den Halbjahresfinanzbericht, der einer prüferischen Durchsicht unterzogen worden war, nahmen zeitweise auch Vertreter des Abschlussprüfers teil.

Eine Sitzung des Prüfungsausschusses diente vor allem der Vorbereitung der Bilanzaufsichtsratssitzung im Frühjahr 2010. Um seine Empfehlung an das Aufsichtsratsplenum für den Wahlvorschlag an die Hauptversammlung und die Beauftragung des Abschlussprüfers für das Geschäftsjahr 2010 vorzubereiten, holte der Prüfungsausschuss eine Unabhängigkeitserklärung des späteren Abschlussprüfers ein. Die Honorarangebote für die Prüfung der Jahresfinanzberichte und die prüferische Durchsicht des Halbjahresberichts hielt der Prüfungsausschuss für angemessen. Nach der Hauptversammlung 2010 erteilte der Prüfungsausschuss dem Abschlussprüfer den Prüfungsauftrag für das Geschäftsjahr 2010 und legte unter Berücksichtigung der Anregungen aus dem Aufsichtsratsplenum Prüfungsschwerpunkte fest, darunter auch Bilanzierungsänderungen aufgrund des Bilanzrechtsmodernisierungsgesetzes, die Bewertung der Rückstellungen für Gewährleistungskosten und die Bewertung derivativer Finanzinstrumente.

Zuvor hatte der Prüfungsausschuss im Hinblick auf die Wahrung der Unabhängigkeit des Abschlussprüfers auch den Umfang der Nichtprüfungsleistungen überprüft, die im Konzern von KPMG Unternehmen erbracht worden sind, und für die Zukunft Festlegungen zur Relation von Nichtprüfungsleistungen und Prüfungsleistungen getroffen. Anhaltspunkte für Ausschluss- oder Befangenheitsgründe ergaben sich nicht.

Das Risikomanagement, das im Rahmen des internen Berichterstattungsprozesses durch erweiterte Meldepflichten abgestützt wird, die aktuelle Risikosituation und die Risikoversorge bildeten einen weiteren Berichts- und Beratungsschwerpunkt im Prüfungsausschuss. In diesem Zusammenhang berichtete der Vorstand dem Prüfungsausschuss ebenfalls über die Entwicklung des internen Kontrollsystems des Unternehmens speziell in den Finanzberichterstattungsprozessen.

Der Prüfungsausschuss ließ sich vom Vorsitzenden des BMW Group Compliance Committee die aktuelle Compliance-Situation erläutern, die als unauffällig bewertet wurde. Der Ausschuss informierte sich insbesondere über die Auswertung des ersten Compliance-Berichtslaufs für das Jahr 2009, der die Rückmeldungen von 132 BMW Group Compliance-Ver-

antwortlichen beinhaltete, sowie über die Auswertung von Compliance-Anfragen und Hinweisen auf Verstoß- und Verdachtsfälle im Rahmen des laufenden Case-Managements. Auf die Planungen des BMW Group Compliance Committee, weitere Maßnahmen mit überprüfenden Elementen einzuführen und Korruptionsrisiken in der künftigen Ausrichtung der Compliance-Organisation stärker zu gewichten, wurde in der Sitzung ebenfalls eingegangen.

Vom Leiter der Konzernrevision ließ sich der Prüfungsausschuss die Schwerpunkte und Ergebnisse der durchgeführten Prüfungen sowie weitere Prüfungsvorhaben der Konzernrevision darstellen und erläutern.

Im Rahmen der ihm vom Aufsichtsratsplenium übertragenen Befugnis stimmte der Prüfungsausschuss der Entscheidung des Vorstands zu, das Grundkapital der Gesellschaft gemäß § 4 Ziffer 5 der Satzung (Genehmigtes Kapital 2009) um 498.050 Euro zu erhöhen und eine entsprechende Anzahl neuer, auf den Inhaber lautender Vorzugsaktien ohne Stimmrecht im Nennbetrag von 1 Euro für die Zwecke des Belegschaftsaktienprogramms zu vergünstigten Konditionen an Mitarbeiter auszugeben.

Im Geschäftsjahr 2010 fanden insgesamt vier Sitzungen des Personalausschusses statt, deren Schwerpunkt bei der Vorbereitung von Personal- und Vergütungsentscheidungen lag. In Einzelfällen erteilte der Personalausschuss auch die Zustimmung zur Übernahme von Mandaten von Vorstandsmitgliedern in konzernexternen Aufsichts- oder Beiratsgremien sowie zu Vertragsabschlüssen, die gemäß der Geschäftsordnung in seine Zuständigkeit fielen.

Der Nominierungsausschuss, der die Aufgabe hat, geeignete Kandidaten für die Wahl in den Aufsichtsrat zu ermitteln und dem Aufsichtsrat für dessen Wahlvorschläge an die Hauptversammlung vorzuschlagen, kam im abgelaufenen Geschäftsjahr zu einer Sitzung zusammen, um einen Kandidatenvorschlag und eine Empfehlung an den Aufsichtsrat für die Aufsichtsratswahl in der Hauptversammlung 2010 abzustimmen.

Der gesetzliche Vermittlungsausschuss (§ 27 Abs. 3 MitbestG) musste im Geschäftsjahr 2010 nicht zusammentreten.

Über die Arbeit des Präsidiums und der Ausschüsse berichtete der jeweilige Vorsitzende dem Aufsichtsratsplenium in jeder Sitzung regelmäßig und ausführlich. Die Arbeitsweise der Gremien des Aufsichtsrats ist im Corporate-Governance-Bericht näher beschrieben.

**Besetzung und Organisation des Vorstands** Das siebenköpfige Vorstandsteam blieb im Geschäftsjahr 2010 in seiner Zusammensetzung und Ressortverteilung unverändert. In drei Fällen traf der Aufsichtsrat Entscheidungen über Mandatsverlängerungen.

**Veränderungen in der Besetzung des Aufsichtsrats, des Präsidiums und der Ausschüsse** Mit Ablauf der Hauptversammlung am 18. Mai 2010 endete das Mandat von Herrn Prof. Dr. Jürgen Strube. Er hatte mit Blick auf die vereinbarte Altersgrenze für Aufsichtsratsmitglieder von einer erneuten Kandidatur abgesehen. Herr Prof. Strube gehörte dem Aufsichtsrat als Vertreter der Aktionäre neun Jahre lang an. Davon wirkte er zwei Jahre als Mitglied des Präsidiums, des Personalausschusses und des Nominierungsausschusses sowie des Prüfungsausschusses, dessen Vorsitz er 2008 übernahm und in den anspruchsvollen Zeiten der Wirtschafts- und Finanzkrise sehr kundig und mit Weitblick ausfüllte. Im Namen des Aufsichtsrats möchte ich Herrn Prof. Strube nochmals für seine langjährige wertvolle Mitarbeit im Aufsichtsrat und in den Ausschüssen, insbesondere im Prüfungsausschuss, sowie für die vertrauensvolle und gewinnbringende Zusammenarbeit im Interesse der BMW Group sehr herzlich danken. Am 18. Mai 2010 wurde Herr Prof. Henning Kagermann von der Hauptversammlung neu in den Aufsichtsrat gewählt. Im Anschluss an die Hauptversammlung wählte der Aufsichtsrat Herrn Dr. Karl-Ludwig Kley als unabhängiges Mitglied zum weiteren stellvertretenden Vorsitzenden, zum Mitglied des Personal- und Nominierungsausschusses sowie – aufgrund seiner Expertise auf dem Gebiet der Rechnungslegung, die er unter anderem als Finanzvorstand eines anderen DAX-Unternehmens erworben hat – zum Mitglied und Vorsitzenden des Prüfungsausschusses. Zum 31. Dezember 2010 legte Herr Werner Neugebauer sein Mandat als Arbeitnehmervertreter im Aufsichtsrat nieder. Er gehörte dem Aufsichtsrat über zehn Jahre lang an. Für seine engagierte und verdienstvolle Mitarbeit im Interesse des Unternehmens möchte ich mich bei Herrn Neugebauer im Namen des Aufsichtsrats sehr herzlich bedanken. An Stelle von Herrn Neugebauer bestellte das Amtsgericht München am 10. Februar 2011 Herrn Jürgen Wechsler, Bezirksleiter der IG Metall Bezirk Bayern, für die verbleibende Amtszeit als Arbeitnehmervertreter zum Mitglied des Aufsichtsrats.

Im Corporate-Governance-Bericht ist auch eine Übersicht zur Besetzung des Aufsichtsrats und seiner Gremien zu finden.

**Prüfung der Rechnungslegung und des Gewinnverwendungsvorschlags** Im abgelaufenen Geschäftsjahr hat die KPMG AG Wirtschaftsprüfungsgesellschaft den verkürzten Konzernzwischenabschluss und Konzernzwischenlage-

bericht für das erste Halbjahr einer prüferischen Durchsicht unterzogen. Die Ergebnisse ließ sich der Prüfungsausschuss ergänzend mündlich erläutern. Es wurden keine Sachverhalte festgestellt, die zu der Annahme veranlasst hätten, dass der verkürzte Konzernzwischenabschluss oder der Konzernzwischenlagebericht in wesentlichen Belangen nicht in Übereinstimmung mit den maßgeblichen Vorschriften aufgestellt wurden.

Die KPMG AG Wirtschaftsprüfungsgesellschaft hat ferner den vom Vorstand am 15. Februar 2011 aufgestellten Jahresabschluss und Konzernabschluss der Bayerische Motoren Werke Aktiengesellschaft zum 31. Dezember 2010 sowie den mit dem Lagebericht zusammengefassten Konzernlagebericht geprüft und mit dem uneingeschränkten Bestätigungsvermerk versehen.

In seiner Sitzung am 25. Februar 2011 hat sich zunächst der Prüfungsausschuss eingehend mit diesen Unterlagen befasst. In der Sitzung am 10. März 2011 hat sodann der Aufsichtsrat die genannten Vorlagen des Vorstands intensiv erörtert und geprüft, nachdem der Ausschussvorsitzende über die Sitzung des Prüfungsausschusses berichtet hatte.

An beiden Sitzungen nahmen Vertreter des Abschlussprüfers teil, berichteten über die wesentlichen Ergebnisse ihrer Prüfung und beantworteten ergänzende Fragen der Aufsichtsratsmitglieder. Die Vertreter des Abschlussprüfers bestätigten, dass das vom Vorstand eingerichtete Risikomanagementsystem geeignet ist, Entwicklungen frühzeitig zu erkennen, die den Fortbestand der Gesellschaft gefährden könnten, und dass keine wesentlichen Schwächen des internen Kontrollsystems und Risikomanagementsystems bezogen auf den Rechnungslegungsprozess festgestellt wurden. Während der Abschlussprüfung haben die Prüfer keine Tatsachen festgestellt, die der Entsprechenserklärung von Vorstand und Aufsichtsrat widersprechen.

Die Unterlagen zu den Abschlüssen und dem zusammengefassten Lagebericht, die Prüfungsberichte des Abschlussprüfers und der Gewinnverwendungsvorschlag des Vorstands wurden allen Mitgliedern des Aufsichtsrats rechtzeitig übermittelt.

Dem Ergebnis der Abschlussprüfung haben wir nach eigener Überprüfung zugestimmt und den vom Vorstand für das Geschäftsjahr 2010 aufgestellten Jahresabschluss sowie den Konzernabschluss der Bayerische Motoren Werke Aktiengesellschaft gebilligt. Der Jahresabschluss ist damit festgestellt. Im Prüfungsausschuss und im Aufsichtsrat haben wir auch den Vorschlag des Vorstands für die Verwendung des Bilanzgewinns geprüft. Wir halten diesen Vorschlag für angemessen und schließen uns dem Vorschlag an. Nach dem abschließenden Ergebnis der Prüfung durch den Prüfungsausschuss und den Aufsichtsrat sind keine Einwendungen zu erheben.

**Dank des Aufsichtsrats** 2010 war ein sehr erfolgreiches Jahr für die BMW Group. Das im abgelaufenen Geschäftsjahr erzielte Konzernergebnis wurde von Vorstand und Belegschaft hart erarbeitet. Die seit 2007 im Rahmen der Strategie Number ONE eingeleiteten Maßnahmen, insbesondere die konsequente Ausrichtung der Produktpalette auf Efficient Dynamics sowie die Maßnahmen zur Steigerung der Profitabilität, haben den Grundstein für diesen wirtschaftlichen Erfolg gelegt. Vorstand und Belegschaft haben in den letzten Jahren hohe Leistungsbereitschaft und Innovationskraft bewiesen. Sich ändernde Kundenanforderungen und Rahmenbedingungen für individuelle Mobilität und nicht zuletzt unser Premiumanspruch werden aber auch zukünftig ein hohes Maß an Veränderungsbereitschaft verlangen. Bei der Bewältigung der damit verbundenen Herausforderungen setzen wir auch weiterhin auf eine konstruktive und partnerschaftliche Zusammenarbeit mit den Arbeitnehmervertretungen.

Den Mitgliedern des Vorstands sowie allen Mitarbeiterinnen und Mitarbeitern weltweit möchte ich im Namen des Aufsichtsrats nicht nur für ihre Leistungen auf dem Weg zu dem beachtlichen Erfolg des letzten Geschäftsjahrs sehr herzlich danken, sondern auch für ihren Beitrag zur langfristigen Steigerung des Unternehmenswerts und zur Zukunftsfähigkeit der BMW Group.

München, 10. März 2011

Für den Aufsichtsrat



Joachim Milberg  
Vorsitzender des Aufsichtsrats

## KONZERNLAGEBERICHT

### Das Geschäftsjahr im Überblick

|    |                                              |
|----|----------------------------------------------|
| 12 | <b>KONZERNLAGEBERICHT</b>                    |
| 12 | Das Geschäftsjahr im Überblick               |
| 14 | Wirtschaftliche Rahmenbedingungen            |
| 18 | Geschäftsverlauf                             |
| 41 | BMW Group – Kapitalmarktaktivitäten          |
| 44 | Übernahmerelevante Angaben und Erläuterungen |
| 47 | Finanzwirtschaftliche Situation              |
| 47 | Konzerninternes Steuerungssystem             |
| 49 | Ertragslage                                  |
| 51 | Finanzlage                                   |
| 53 | Vermögenslage                                |
| 55 | Nachtragsbericht                             |
| 55 | Wertschöpfungsrechnung                       |
| 57 | Finanzwirtschaftliche Kennzahlen             |
| 58 | Erläuterungen zur BMW AG                     |
| 62 | Internes Kontrollsystem und Erläuterungen    |
| 63 | Risikomanagement                             |
| 70 | Prognosebericht                              |

#### BMW Group mit sehr erfolgreichem Geschäftsjahr 2010

Nach der globalen Wirtschafts- und Finanzkrise befand sich die Konjunktur im Jahr 2010 auf dem Weg der Erholung. Auch die internationalen Automobilmärkte stabilisierten sich. Insbesondere in Asien, aber auch in den USA ist die Nachfrage nach Premiumfahrzeugen kräftig gestiegen. Die BMW Group profitierte davon und baute durch ihr Angebot an neuen und attraktiven Modellen ihre Rolle als führender Anbieter im Premiumsegment der Automobilmärkte aus. Auch die Lage auf den internationalen Kapitalmärkten hat sich 2010 insgesamt weiter entspannt. Dies brachte zusätzlich positive Effekte für unser Finanzdienstleistungsgeschäft.

Vor dem Hintergrund der breiten Konjunkturbelebung ist unser Automobilabsatz deutlich gestiegen. Dabei legten die Verkäufe in der zweiten Jahreshälfte nochmals an Dynamik zu. Weltweit verkauften wir im Berichtsjahr insgesamt 1.461.166 Automobile der Marken BMW, MINI und Rolls-Royce (+ 13,6%) und verzeichneten damit eines der besten Absatzergebnisse in der Unternehmensgeschichte.

Das Motorradgeschäft entwickelte sich im Jahr 2010 trotz eines unverändert schwierigen Marktumfelds positiv. Weltweit setzten wir 110.113 Motorräder der Marken BMW und Husqvarna ab. Dies entspricht einem Zuwachs im Vergleich zum Vorjahr von 9,7%.

Auch das Segment Finanzdienstleistungen leistete einen wichtigen Beitrag zum Geschäftserfolg der BMW Group. Zum Stichtag wurden insgesamt 3.190.353 Leasing- und Finanzierungsverträge mit Händlern und Endkunden betreut (+ 3,4%).

#### Rekordwerte bei Umsatz und Ergebnis

Durch den kräftigen Anstieg der Fahrzeugauslieferungen konnten sowohl beim Konzernumsatz als auch beim Konzernergebnis neue Bestmarken erzielt werden. So lagen die Umsatzerlöse 2010 mit 60.477 Mio. Euro um 19,3% über dem Vorjahr. Entsprechend hat sich auch das Ergebnis sehr positiv entwickelt. Das Ergebnis vor Finanzergebnis (EBIT) legte im Berichtsjahr deutlich auf 5.094 Mio. Euro zu (2009: 289 Mio. Euro). Das Ergebnis vor Steuern erreichte 4.836 Mio. Euro (2009: 413 Mio. Euro).

Im Segment Automobile stieg der Umsatz um fast ein Viertel auf 54.137 Mio. Euro (+ 23,8%). Das EBIT legte auf 4.355 Mio. Euro zu (2009: – 265 Mio. Euro). Das Segmentergebnis vor Steuern erhöhte sich im Berichtsjahr auf 3.887 Mio. Euro (2009: – 588 Mio. Euro).

Die positive Absatzentwicklung des Segments Motorräder hat dazu beigetragen, dass auch der Umsatz im Jahr 2010 deutlich gestiegen ist. Im Vorjahresvergleich nahm der Umsatz um 22,0% auf 1.304 Mio. Euro zu. Das EBIT

#### BMW Group Umsatzerlöse nach Regionen

in Mio. Euro

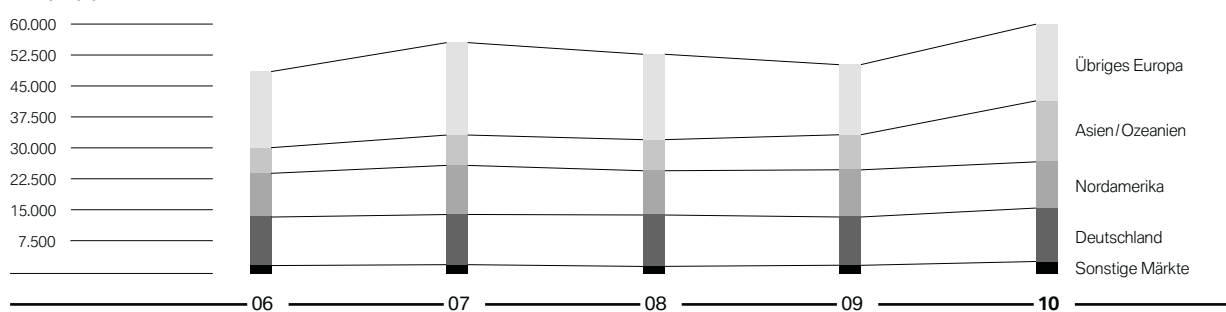

|                 |               |               |               |               |               |
|-----------------|---------------|---------------|---------------|---------------|---------------|
| Übriges Europa  | 18.440        | 22.395        | 20.693        | 16.989        | <b>18.581</b> |
| Asien/Ozeanien  | 6.200         | 7.353         | 7.523         | 8.495         | <b>14.776</b> |
| Nordamerika     | 11.779        | 12.161        | 12.461        | 11.724        | <b>12.966</b> |
| Deutschland     | 10.601        | 11.918        | 10.739        | 11.436        | <b>11.207</b> |
| Sonstige Märkte | 1.979         | 2.191         | 1.781         | 2.037         | <b>2.947</b>  |
| <b>Gesamt</b>   | <b>48.999</b> | <b>56.018</b> | <b>53.197</b> | <b>50.681</b> | <b>60.477</b> |

betrug 71 Mio. Euro (2009: 19 Mio. Euro) und das Ergebnis vor Steuern belief sich auf 65 Mio. Euro (2009: 11 Mio. Euro).

Von der konjunkturellen Erholung profitierte auch das Finanzdienstleistungsgeschäft. Im Berichtsjahr konnte der Umsatz auf 16.617 Mio. Euro gesteigert werden (+ 5,2%). Das EBIT übertraf mit 1.201 Mio. Euro das Vorjahr deutlich (2009: 355 Mio. Euro). Das Ergebnis vor Steuern verbesserte sich auf 1.214 Mio. Euro (2009: 365 Mio. Euro).

Die Ertragsteuern betragen im Berichtsjahr 1.602 Mio. Euro (2009: 203 Mio. Euro). Die Steuerlastquote verringerte sich um 16,1 Prozentpunkte auf 33,1%. Der Jahresüberschuss des Konzerns fiel mit 3.234 Mio. Euro deutlich höher aus als ein Jahr zuvor (2009: 210 Mio. Euro).

#### Dividende kräftig angehoben

Aufgrund der sehr guten Ergebnisentwicklung schlugen Vorstand und Aufsichtsrat der Hauptversammlung vor, den Bilanzgewinn der BMW AG in Höhe von 852 Mio. Euro zur Ausschüttung einer Dividende von 1,30 Euro je Stammaktie (2009: 0,30 Euro) und einer Dividende von 1,32 Euro je Vorzugsaktie (2009: 0,32 Euro) zu verwenden. Die Ausschüttungsquote für das Jahr 2010 würde damit 26,5% betragen.

#### Investitionen verringert

Das Investitionsvolumen lag im Jahr 2010 mit 3.263 Mio. Euro um 6,0% unter dem Vorjahr (2009: 3.471 Mio. Euro). Den Schwerpunkt bildeten Produktinvestitionen für den Anlauf neuer Modelle wie des BMW X3, 5er, des 6er Cabrio und des MINI Countryman sowie Strukturinvestitionen.

Im Jahr 2010 investierten wir 2.312 Mio. Euro in Sachanlagen und übrige Immaterielle Vermögenswerte (2009: 2.384 Mio. Euro / - 3,0%). Hinzu kommen aktivierte Entwicklungskosten in Höhe von 951 Mio. Euro (2009: 1.087 Mio. Euro / - 12,5%). Die Aktivierungsquote der Entwicklungskosten verringerte sich im Vergleich zum Vorjahr auf 34,3% (2009: 44,4%).

Das Verhältnis der gesamten Investitionen zum Konzernumsatz (Investitionsquote) ist im Jahr 2010 auf 5,4% gesunken (2009: 6,8%). Entwicklungsbedingt lag die Quote trotz unserer Investitionen in innovative Produkte und Technologien unter 7 % des Konzernumsatzes und damit

#### BMW Group Investitionen und Operativer Cashflow

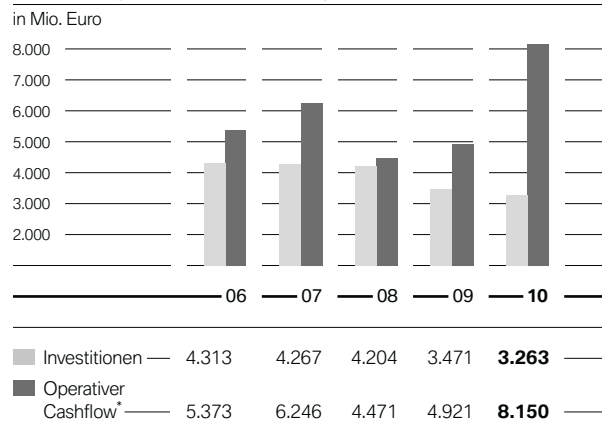

\* in der Kapitalflussrechnung aufgeführter Mittelzufluss aus der betrieblichen Tätigkeit: bis 2006 des Industriegeschäfts, ab 2007 des Segments Automobile

innerhalb des Zielkorridors, der im Rahmen der Strategie Number ONE festgelegt wurde.

|    |   |                                              |
|----|---|----------------------------------------------|
| 12 | — | <b>KONZERNLAGEBERICHT</b>                    |
| 12 |   | Das Geschäftsjahr im Überblick               |
| 14 | — | <b>Wirtschaftliche Rahmenbedingungen</b>     |
| 18 |   | Geschäftsverlauf                             |
| 41 |   | BMW Group – Kapitalmarktaktivitäten          |
| 44 |   | Übernahmerelevante Angaben und Erläuterungen |
| 47 |   | Finanzwirtschaftliche Situation              |
| 47 |   | Konzerninternes Steuerungssystem             |
| 49 |   | Ertragslage                                  |
| 51 |   | Finanzlage                                   |
| 53 |   | Vermögenslage                                |
| 55 |   | Nachtragsbericht                             |
| 55 |   | Wertschöpfungsrechnung                       |
| 57 |   | Finanzwirtschaftliche Kennzahlen             |
| 58 |   | Erläuterungen zur BMW AG                     |
| 62 |   | Internes Kontrollsystem und Erläuterungen    |
| 63 |   | Risikomanagement                             |
| 70 |   | Prognosebericht                              |

### Kräftiger Aufschwung nach der Krise

Nach dem Einbruch der Weltwirtschaft als Folge der internationalen Wirtschafts- und Finanzkrise konnte sich die Konjunktur im Jahr 2010 wieder erholen. Maßgeblich für die schnelle Überwindung der tiefsten Rezession seit dem Zweiten Weltkrieg waren die massiven staatlichen Konjunkturprogramme sowie eine ausgesprochen expansive Geldpolitik der weltweit wichtigsten Notenbanken.

Hinzu kam, dass die meisten Schwellenländer Asiens und Lateinamerikas während der Krise deutlich geringere Wachstumseinbußen hinnehmen mussten als die Industrieländer und die globale Konjunktur durch eine zügige Rückkehr auf ihre alten Wachstumspfade stützten. Im Ergebnis führte die Krise damit zu einer weiteren Verschiebung der wirtschaftlichen Kräfte in Richtung Asien.

Die Wirtschaft Chinas wuchs auch im Jahr 2010 mit 10,3% sehr kräftig. Im Verlauf der wirtschaftlichen Entwicklung stiegen viele Vermögenspreise weiter an, sodass die Gefahr einer Überhitzung vor allem auf einigen regionalen Immobilienmärkten anhält.

In den USA hat sich die Wirtschaft vom Rückgang im Jahr 2009 zwar erholt, der Aufschwung blieb aber mit 2,9% für amerikanische Verhältnisse eher moderat. Dies lag auch an der Konsumzurückhaltung der US-Amerikaner, die vor allem auf die hohe Arbeitslosigkeit, den immer noch schwächeren Immobilienmarkt sowie die zwar sinkende, aber weiter hohe private Verschuldung zurückzuführen ist.

Die Entwicklung in der Eurozone verlief im Jahr 2010 sehr heterogen. Im Durchschnitt war hier ein Wachstum von 1,7% zu verzeichnen. Bis auf Deutschland konnten die meisten größeren Länder nur sehr moderate Zuwach-

raten erzielen. Die südeuropäischen Länder und Irland schnitten aufgrund des Vertrauensverlusts in ihre Staatsanleihen und der damit einhergehenden politischen Verwerfungen deutlich schlechter ab. Während Spanien und Irland stagnierten, musste Griechenland sogar ein weiteres Jahr der Rezession hinnehmen. Lediglich Deutschland konnte sich mit einem kräftigen Zuwachs von 3,6% deutlich nach oben abheben. Dies lag vor allem an einem verbesserten Außenhandel, aber auch an einer von den Investitionen getriebenen stärkeren Binnen- nachfrage. Zwar sank die Arbeitslosigkeit weiter auf das niedrigste Niveau seit knapp 20 Jahren, die Konsumenten blieben insgesamt jedoch eher zurückhaltend.

Die britische Wirtschaft kam eher langsam aus der Rezession. Der Immobilienmarkt konnte sich hier auf niedrigem Niveau stabilisieren. Die stark gestiegene Arbeitslosigkeit, eine weiterhin hohe Verschuldung der privaten Haushalte und die damit einhergehende schwache Binnennachfrage erlaubten jedoch nur ein moderates Wachstum von 1,7%.

Japan konnte im Jahr 2010 ähnlich wie die deutsche Wirtschaft ein sehr robustes Wachstum aufweisen. So profitierte die Wirtschaft zum einen trotz des starken Yen massiv von dem globalen Konjunkturaufschwung, zum anderen zeigten sich die Verbraucher in Japan erstmals wieder sehr konsumfreudig und trugen damit zu einem BIP-Anstieg von 4,1% bei.

Die Schwellenländer Asiens und Lateinamerikas, die sich während der Krise als sehr stabil erwiesen hatten, konnten im Jahr 2010 zumeist ihre langfristigen Zuwachsraten bereits wieder erreichen oder sogar übertreffen. Vor allem Indien und Brasilien verzeichneten ein Wachstum von 8,7% beziehungsweise 7,6%. Die meisten osteuropäischen Länder wiesen hingegen eine deutlich geringere Dynamik als in den Jahren vor der Finanzkrise

### Wechselkurse im Vergleich zum Euro

(Index: 30.12.2005 = 100)

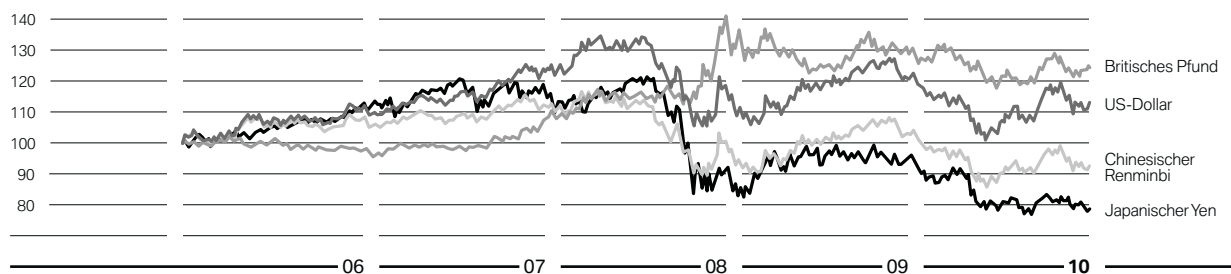

Quelle: Reuters



**Ölpreisentwicklung**

Preis je Barrel der Marke Brent

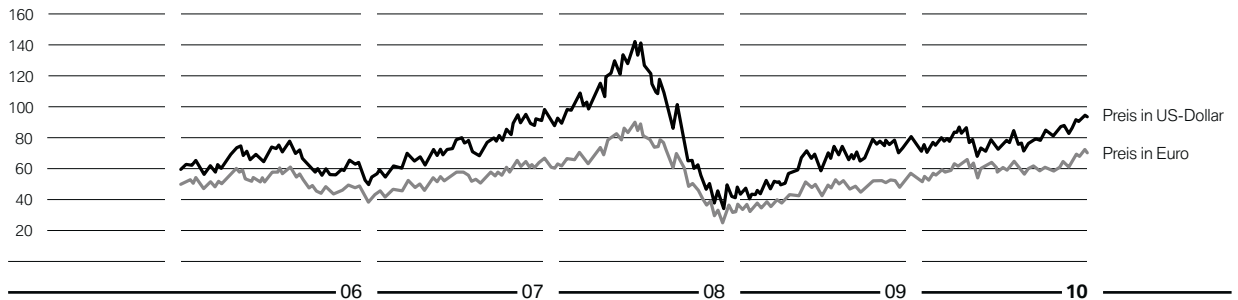

Quelle: Reuters

auf. Dies gilt insbesondere für Russland mit einer Wachstumsrate von 4,0%.

**US-Dollar und Yen stärker, britisches Pfund weiterhin schwach**

Der US-Dollar hat im Jahresverlauf unter deutlichen Schwankungen an Wert gegenüber dem Euro gewonnen. Nachdem er zu Jahresbeginn unter anderem aufgrund der Nullzinspolitik der US-Notenbank noch bei 1,44 US-Dollar je Euro gelegen hatte, wertete die US-Währung im Rahmen der Vertrauenskrise im Euroraum zwischenzeitlich auf 1,19 US-Dollar je Euro auf. Zum Jahresende 2010 notierte die amerikanische Währung bei 1,34 US-Dollar je Euro und damit um 7,4% stärker als im Vergleich zum Vorjahr.

Aufgrund der anhaltenden Schwäche der britischen Wirtschaft blieb das britische Pfund im Jahr 2010 gegenüber dem Euro schwach und pendelte um 0,85 Pfund je Euro. Der japanische Yen gewann 2010 nochmals deutlich an Wert gegenüber dem Euro und lag zum Jahresende bei 109 Yen je Euro. Die Währungen der Schwellenländer, die während der Finanzkrise teilweise deutlich an

Wert verloren hatten, konnten im Jahr 2010 wegen massiver Kapitalzuflüsse fast ausnahmslos an Wert zulegen.

**Rohstoffpreise mit weiteren Anstiegen**

Die Rohstoffpreise sind im Verlauf des Jahres 2010 weiter gestiegen. Zum Jahresende lag das Preisniveau der Nichtenergie-Rohstoffe sogar über den bisherigen

**Stahlpreisentwicklung**

(Index: Januar 2006 = 100)

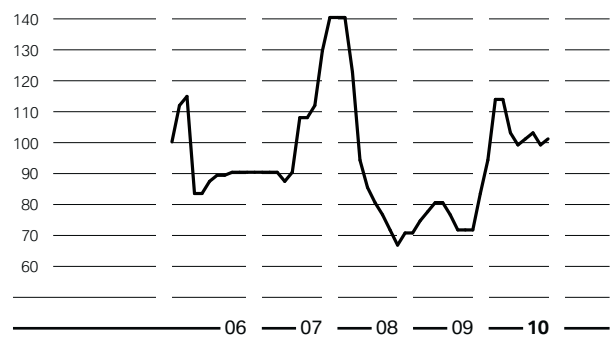

Quelle: Arbeitsgemeinschaft der Eisen und Metall verarbeitenden Industrie

**Preisentwicklung der Edelmetalle**

(Index: 30.12.2005 = 100)

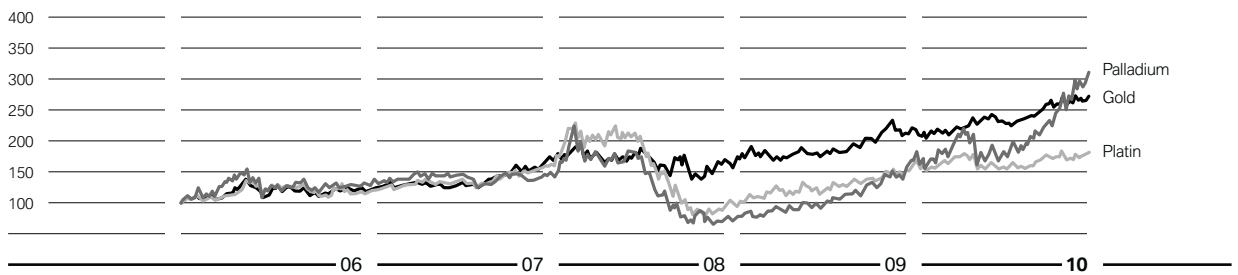

Quelle: Reuters

|    |   |                                              |
|----|---|----------------------------------------------|
| 12 | — | <b>KONZERNLAGEBERICHT</b>                    |
| 12 |   | Das Geschäftsjahr im Überblick               |
| 14 | — | <b>Wirtschaftliche Rahmenbedingungen</b>     |
| 18 |   | Geschäftsverlauf                             |
| 41 |   | BMW Group – Kapitalmarktaktivitäten          |
| 44 |   | Übernahmerelevante Angaben und Erläuterungen |
| 47 |   | Finanzwirtschaftliche Situation              |
| 47 |   | Konzerninternes Steuerungssystem             |
| 49 |   | Ertragslage                                  |
| 51 |   | Finanzlage                                   |
| 53 |   | Vermögenslage                                |
| 55 |   | Nachtragsbericht                             |
| 55 |   | Wertschöpfungsrechnung                       |
| 57 |   | Finanzwirtschaftliche Kennzahlen             |
| 58 |   | Erläuterungen zur BMW AG                     |
| 62 |   | Internes Kontrollsystem und Erläuterungen    |
| 63 |   | Risikomanagement                             |
| 70 |   | Prognosebericht                              |

Höchstwerten vom Sommer 2008. Maßgeblich hierfür waren sowohl die anziehende Weltkonjunktur und der weiterhin sehr hohe Bedarf Chinas als auch die immer noch herrschende Überschussliquidität und die weltweite Suche nach Anlagemöglichkeiten. Dies führte zu teilweise kräftigen Steigerungen bei Bunt- und Edelmetallen. Der Ölpreis stieg von 80 US-Dollar zu Jahresanfang auf 92 US-Dollar am Jahresende 2010.

### Die Automobilmärkte im Jahr 2010

Im Zuge der weltweiten Erholung legte der Markt für PKW und leichte Nutzfahrzeuge im Jahr 2010 wieder deutlich von 63,8 Mio. auf 69,6 Mio. Einheiten zu (+9,2%). China baute seine im Jahr 2009 eroberte Position als größter Automobilmarkt der Welt weiter aus. So stieg der Gesamtmarkt hier von 13,6 Mio. auf 18,1 Mio. Einheiten (+32,4%), während der ehemals größte Automobilmarkt USA zwar ein robustes, aber deutlich geringeres Wachstum von 10,4 Mio. auf 11,6 Mio. Einheiten aufweisen konnte (+11,1%).

In der Europäischen Union führten die zu unterschiedlichen Zeitpunkten auslaufenden Stützungsprogramme zu einem sehr heterogenen Bild. Insgesamt ging die Automobilnachfrage im Jahr 2010 nochmals um 5,5% auf 13,4 Mio. Fahrzeuge zurück. Maßgeblich hierfür war der Einbruch der PKW-Verkäufe in Deutschland als Folge der zum Jahresende 2009 ausgelaufenen Abwrackprämie. Trotz der positiven konjunkturellen Entwicklung sank die Zahl der neu zugelassenen PKW um rund ein Viertel auf 2,9 Mio. Aus dem gleichen Grund mussten auch auf dem französischen und dem italienischen Automobilmarkt Einbußen hingenommen werden. In Frankreich sanken die Verkäufe um 2,2% auf 2,3 Mio., in Italien um 9,2% auf 2,0 Mio. PKW.

In den meisten anderen Ländern konnte zumeist ein leichtes Wachstum verzeichnet werden. So stieg die Zahl der verkauften Fahrzeuge in Großbritannien um 1,8% auf 2,0 Mio., in Spanien um 3,1% auf fast 1 Mio. Einheiten. In den osteuropäischen EU-Ländern musste hingegen mit 0,8 Mio. Einheiten ein weiterer Rückgang verbucht werden (–3,2%).

Der japanische Automobilmarkt profitierte von dem bis in das Jahr 2010 geltenden Verschrottungsprogramm und konnte um 7,5% auf 5,0 Mio. Einheiten zulegen.

Die Entwicklung in den Schwellenländern war im Jahr 2010 durchweg positiv, wenn auch mit sehr unterschiedlicher Dynamik. In Russland konnte der Einbruch des

Jahres 2009 mit einem Wachstum von rund einem Drittel auf nunmehr 1,8 Mio. Fahrzeuge zumindest teilweise ausgeglichen werden. Ein ähnlich hohes Wachstum hatte auch der indische Markt aufzuweisen (2,8 Mio. Fahrzeuge /+ 35,7%). In Brasilien hingegen legte der Automobilmarkt nur leicht um 8% auf 3,2 Mio. Einheiten zu.

### Die Motorradmärkte im Jahr 2010

Weltweit lagen die Motorradmärkte im Berichtszeitraum im für die Marke BMW relevanten Hubraumsegment über 500 ccm um 11,7% unter dem Wert aus dem Vorjahr. In Europa waren im Jahr 2010 fast alle Märkte im Vorjahresvergleich im Minus (10,3%). In Deutschland ging der Motorradmarkt über 500 ccm um 7,2% zurück. In Italien (–14,8%), Frankreich (–7,1%) und Großbritannien (–17,8%) konnten die Vorjahreswerte ebenfalls nicht erreicht werden. Lediglich in Spanien lag der Motorradmarkt nach dem sehr starken Rückgang im Vorjahr mit 3,0% im Plus. Auch in den USA (–14,2%) und in Japan (–6,3%) konnten sich die Motorradmärkte über 500 ccm im Vergleich zum Vorjahr nicht erholen. Aussagen über das für die Marke Husqvarna relevante Hubraumsegment können nicht verlässlich getroffen werden. Der überwiegende Teil dieser Motorräder wird für den Sport- und Offroad-Bereich verwendet und ist somit nicht in den Zulassungsstatistiken geführt.

### Der Markt für Finanzdienstleistungen im Jahr 2010

Von der schnellen Überwindung der weltweiten Rezession profitierte auch die Finanzdienstleistungsbranche. Dennoch stand auch das Jahr 2010 unter dem Einfluss der Krisenfolgen. Erhebliche Wertberichtigungen der Banken sowie die verschärften Eigenkapital- und Liquiditätsanforderungen durch Basel III prägten das Finanzsystem. Griechenland und Irland benötigten Unterstützung durch die EU und den Internationalen Währungsfonds. Die Geld- und Kapitalmärkte reagierten zwar nervös, die Risikoauflage erhöhten sich jedoch nur kurzzeitig. Insgesamt verringerten sich die Risikoauflage während des Jahres 2010 leicht, wobei das Niveau von vor der Krise nicht erreicht werden konnte.

Im Verlauf des Jahres 2010 verharrten die Leitzinsen in den meisten Industrieländern auf ihrem historisch niedrigen Niveau. Die Bank von Japan senkte ihren Tagesgeldsatz im Oktober noch einmal um 20 Basispunkte auf eine Bandbreite von 0% bis 0,10%. Im Gegensatz dazu hob China seinen Leitzins um 25 Basispunkte auf 5,81% an und hat weitere Maßnahmen ergriffen, den Inflationsdruck zu dämpfen. Ebenso verteuerten die Notenbanken von Kanada und Australien im Herbst

ihre Leitzinsen um jeweils 25 Basispunkte auf 1,00% bzw. 4,75%. Dagegen führte die Aussicht auf weiterhin niedrige Leitzinsen im Euroraum zu leichten Zinsrückgängen bei den mittleren Laufzeitenbereichen.

Die Gebrauchtwagenmärkte haben sich 2010 insgesamt weiter stabilisiert. In Nordamerika und Großbritannien wurde das Vorkrisenniveau jedoch noch nicht wieder erreicht. In Kontinentaleuropa führten die Belebung der Wirtschaft und niedrigere Lagerbestände zu einer deutlichen Erholung der Gebrauchtwagenpreise in der zweiten Jahreshälfte 2010. Dennoch lagen die Gebrauchtwagenpreise noch nicht auf dem Vorkrisenniveau.

|    |                                              |
|----|----------------------------------------------|
| 12 | <b>KONZERNLAGEBERICHT</b>                    |
| 12 | Das Geschäftsjahr im Überblick               |
| 14 | Wirtschaftliche Rahmenbedingungen            |
| 18 | <b>Geschäftsverlauf</b>                      |
| 41 | BMW Group – Kapitalmarktaktivitäten          |
| 44 | Übernahmerelevante Angaben und Erläuterungen |
| 47 | Finanzwirtschaftliche Situation              |
| 47 | Konzerninternes Steuerungssystem             |
| 49 | Ertragslage                                  |
| 51 | Finanzlage                                   |
| 53 | Vermögenslage                                |
| 55 | Nachtragsbericht                             |
| 55 | Wertschöpfungsrechnung                       |
| 57 | Finanzwirtschaftliche Kennzahlen             |
| 58 | Erläuterungen zur BMW AG                     |
| 62 | Internes Kontrollsystem und Erläuterungen    |
| 63 | Risikomanagement                             |
| 70 | Prognosebericht                              |

### Automobilabsatz legt kräftig zu

Die weltweite konjunkturelle Erholung, unsere starke Wettbewerbsposition in Europa und Nordamerika sowie ein dynamisches Wachstum in Asien haben dazu beigetragen, dass unser Automobilabsatz im Jahr 2010 zweistellig gewachsen ist. Dank unserer attraktiven Modellpalette verkauften wir insgesamt 1.461.166 Automobile der Marken BMW, MINI und Rolls-Royce (+ 13,6%). Bei BMW betrug das Plus 14,6% (1.224.280 Automobile). Vom MINI verkauften wir im Jahr 2010 weltweit 234.175 Automobile an Kunden (+8,1%). Besonders stark konnte Rolls-Royce zulegen: Mit 2.711 Fahrzeugen (2009: 1.002 Automobile) wurde der Absatz mehr als verdoppelt.

### Märkte überwiegend im Plus

Während vor allem in Lateinamerika und Asien im Berichtszeitraum ein deutlich dynamisches Wachstum zu verzeichnen war, entwickelte sich der Absatz in Europa uneinheitlich, blieb aber im Vorjahresvergleich im Plus. Insgesamt verkauften wir dort 791.220 Fahrzeuge der Marken BMW, MINI und Rolls-Royce (+ 3,9%). In Deutschland, dem derzeit größten Einzelmarkt der BMW Group, setzten wir im Jahr 2010 insgesamt 267.160 Fahrzeuge ab und erreichten damit das Vorjahresniveau. In Großbritannien stieg unser Absatz deutlich um 12,9% auf 154.750 Auslieferungen. Auch in Frankreich (64.854 Automobile / + 2,4%) und Spanien (41.289 Automobile / + 1,4%) wurden die Vorjahreswerte jeweils übertroffen. Lediglich in Italien erreichten wir in einem stark rückläufigen Gesamtmarkt mit 69.161 Fahrzeugen das Vorjahresniveau nicht (-8,6%).

### BMW Group – wichtigste Automobilmärkte 2010

in % vom Absatz

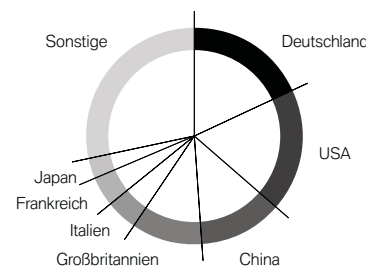

|                |      |            |      |
|----------------|------|------------|------|
| Deutschland    | 18,3 | Italien    | 4,7  |
| USA            | 18,2 | Frankreich | 4,4  |
| China          | 12,5 | Japan      | 3,0  |
| Großbritannien | 10,6 | Sonstige   | 28,3 |

Auch in Nordamerika haben sich die Märkte für Premiumautomobile im Jahr 2010 erholt. Dort lieferten wir im Berichtszeitraum mit 298.316 Automobilen 10,1% mehr aus als im Vorjahr. In den USA stieg der Absatz im Berichtsjahr auf 266.580 Fahrzeuge (+ 10,1%).

Besonders dynamisch war im Jahr 2010 die Entwicklung in Asien, wo wir mit 286.297 Auslieferungen um 56,3% über dem Vorjahreswert lagen. Dazu haben insbesondere die chinesischen Märkte (China, Hongkong, Taiwan) beigetragen. Mit 183.328 Fahrzeugen wuchs der Absatz

### BMW Group Auslieferungen Automobile nach Regionen und Märkten

in Tsd.

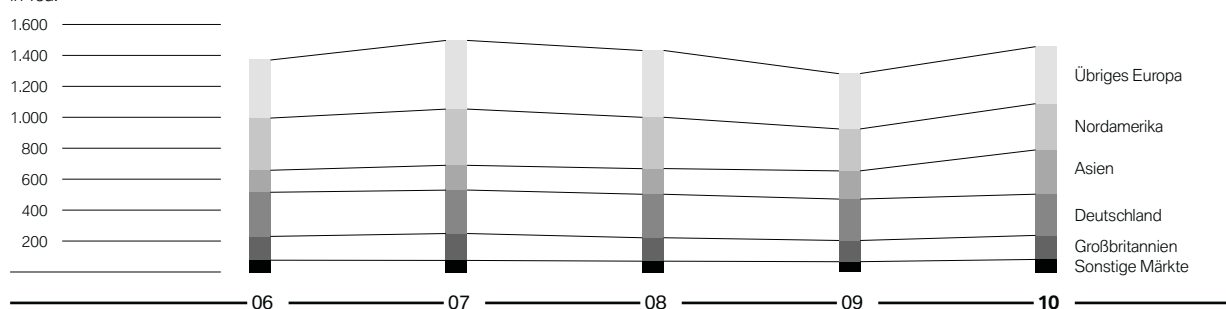

|                 |                |                |                |                |                |
|-----------------|----------------|----------------|----------------|----------------|----------------|
| Übriges Europa  | 375,0          | 443,6          | 432,2          | 357,3          | <b>369,3</b>   |
| Nordamerika     | 337,4          | 364,0          | 331,8          | 271,0          | <b>298,3</b>   |
| Asien           | 142,2          | 159,5          | 165,7          | 183,1          | <b>286,3</b>   |
| Deutschland     | 285,3          | 280,9          | 280,9          | 267,5          | <b>267,2</b>   |
| Großbritannien  | 154,1          | 173,8          | 151,5          | 137,1          | <b>154,8</b>   |
| Sonstige Märkte | 80,0           | 78,9           | 73,8           | 70,3           | <b>85,3</b>    |
| <b>Gesamt</b>   | <b>1.374,0</b> | <b>1.500,7</b> | <b>1.435,9</b> | <b>1.286,3</b> | <b>1.461,2</b> |

dort deutlich um 85,3%. In Japan betrug die Zahl der Auslieferungen 43.644 und erhöhte sich damit um 6,1%.

#### BMW bleibt führende Premiummarke

Zum Ende seines Lebenszyklus blieb der Absatz des BMW 1er mit 196.004 Einheiten im Berichtsjahr 9,7% unter dem Vorjahreswert. Die BMW 3er Modellreihe erreichte mit 399.009 Verkäufen das Vorjahresniveau (+ 0,5%).

Nach dem erfolgreichen Start der BMW 5er Limousine im Frühjahr ist seit Herbst 2010 auch der neue BMW 5er

Touring für Kunden verfügbar. Die Erneuerung der 5er Modelle führte im Berichtszeitraum zu einem deutlichen Absatzanstieg um 35,5% auf 238.454 Auslieferungen. Im vierten Quartal 2010 übernahm der BMW 5er damit weltweit die Marktführerschaft in seinem Segment. Im letzten Jahr des Lebenszyklus erreichten die Modelle des BMW 6er erwartungsgemäß die Vorjahreswerte nicht. Insgesamt lieferten wir 5.848 BMW 6er an Kunden aus (-32,4%). Anlässlich der Automobilmesse in Detroit feierte das neue BMW 6er Cabrio im Januar 2011 seine Weltpremiere. Mit 65.814 verkauften BMW 7er stieg der Absatz im Jahr 2010 im Vorjahresvergleich um 24,9%.

#### Auslieferungen BMW Automobile nach Modellen

in Einheiten

|                   | 2010             | 2009             | Veränderung<br>in % | Anteil an BMW<br>Auslieferungen<br>2010 in % |
|-------------------|------------------|------------------|---------------------|----------------------------------------------|
| <b>BMW 1er</b>    |                  |                  |                     |                                              |
| Dreitürer         | 31.980           | 44.034           | -27,4               |                                              |
| Fünftürer         | 113.030          | 120.323          | -6,1                |                                              |
| Coupé             | 26.191           | 24.081           | 8,8                 |                                              |
| Cabrio            | 24.803           | 28.506           | -13,0               |                                              |
|                   | <b>196.004</b>   | <b>216.944</b>   | <b>-9,7</b>         | <b>16,0</b>                                  |
| <b>BMW 3er</b>    |                  |                  |                     |                                              |
| Limousine         | 242.831          | 219.850          | 10,5                |                                              |
| Touring           | 74.008           | 84.601           | -12,5               |                                              |
| Coupé             | 46.358           | 54.852           | -15,5               |                                              |
| Cabrio            | 35.812           | 37.800           | -5,3                |                                              |
|                   | <b>399.009</b>   | <b>397.103</b>   | <b>0,5</b>          | <b>32,6</b>                                  |
| <b>BMW 5er</b>    |                  |                  |                     |                                              |
| Limousine         | 179.680          | 135.944          | 32,2                |                                              |
| Touring           | 32.288           | 36.987           | -12,7               |                                              |
| Gran Turismo      | 26.486           | 3.052            | -                   |                                              |
|                   | <b>238.454</b>   | <b>175.983</b>   | <b>35,5</b>         | <b>19,5</b>                                  |
| <b>BMW 6er</b>    |                  |                  |                     |                                              |
| Coupé             | 3.050            | 4.501            | -32,2               |                                              |
| Cabrio            | 2.798            | 4.147            | -32,5               |                                              |
|                   | <b>5.848</b>     | <b>8.648</b>     | <b>-32,4</b>        | <b>0,5</b>                                   |
| <b>BMW 7er</b>    |                  |                  |                     |                                              |
|                   | <b>65.814</b>    | <b>52.680</b>    | <b>24,9</b>         | <b>5,4</b>                                   |
| <b>BMW X1</b>     |                  |                  |                     |                                              |
|                   | <b>99.990</b>    | <b>8.499</b>     | <b>-</b>            | <b>8,2</b>                                   |
| <b>BMW X3</b>     |                  |                  |                     |                                              |
|                   | <b>46.004</b>    | <b>55.634</b>    | <b>-17,3</b>        | <b>3,7</b>                                   |
| <b>BMW X5</b>     |                  |                  |                     |                                              |
|                   | <b>102.178</b>   | <b>88.851</b>    | <b>15,0</b>         | <b>8,3</b>                                   |
| <b>BMW X6</b>     |                  |                  |                     |                                              |
|                   | <b>46.404</b>    | <b>41.667</b>    | <b>11,4</b>         | <b>3,8</b>                                   |
| <b>BMW Z4</b>     |                  |                  |                     |                                              |
|                   | <b>24.575</b>    | <b>22.761</b>    | <b>8,0</b>          | <b>2,0</b>                                   |
| <b>BMW gesamt</b> | <b>1.224.280</b> | <b>1.068.770</b> | <b>14,6</b>         | <b>100,0</b>                                 |

|    |                                              |
|----|----------------------------------------------|
| 12 | <b>KONZERNLAGEBERICHT</b>                    |
| 12 | Das Geschäftsjahr im Überblick               |
| 14 | <b>Wirtschaftliche Rahmenbedingungen</b>     |
| 18 | Geschäftsverlauf                             |
| 41 | BMW Group – Kapitalmarktaktivitäten          |
| 44 | Übernahmerelevante Angaben und Erläuterungen |
| 47 | Finanzwirtschaftliche Situation              |
| 47 | Konzerninternes Steuerungssystem             |
| 49 | Ertragslage                                  |
| 51 | Finanzlage                                   |
| 53 | Vermögenslage                                |
| 55 | Nachtragsbericht                             |
| 55 | Wertschöpfungsrechnung                       |
| 57 | Finanzwirtschaftliche Kennzahlen             |
| 58 | Erläuterungen zur BMW AG                     |
| 62 | Internes Kontrollsystem und Erläuterungen    |
| 63 | Risikomanagement                             |
| 70 | Prognosebericht                              |

Seit seiner Markteinführung ist der BMW X1 überaus erfolgreich. Im Berichtsjahr setzten wir weltweit 99.990 BMW X1 ab, seit der Markteinführung im Oktober 2009 bereits über 100.000 Einheiten. Auf Jahressicht erreichten wir beim BMW X3 aufgrund des Modellwechsels die Vorjahreswerte mit 46.004 Auslieferungen nicht (-17,3%). Der seit November weltweit verfügbare neue BMW X3 hat sehr positive Resonanz sowohl bei Kunden als auch in den Medien gefunden und wird für starke Impulse beim Absatz sorgen. Auch im Berichtszeitraum blieb der BMW X5 weltweit Marktführer in seinem Segment. Im Jahr 2010 stieg der Absatz um 15,0% auf 102.178 Automobile. Ebenso erfolgreich ist der BMW X6, der 46.404-mal an Kunden ausgeliefert wurde (+11,4%).

Den BMW Z4 verkauften wir im Jahr 2010 insgesamt an 24.575 Kunden. Dies entspricht einer Steigerung von 8,0% im Vergleich zum Vorjahr.

#### Anteil dieseltreibender BMW Fahrzeuge weltweit leicht angestiegen

Im Berichtsjahr stieg der Anteil an Dieselfahrzeugen weiter an und betrug weltweit 44,0%. Besonders hoch ist dieser Anteil in Europa, wo in einigen Ländern über 90% erreicht werden. Dazu zählen Spanien (90,9%), Belgien

#### Auslieferungen von BMW Dieselfahrzeugen

in Tsd. Einheiten und in % vom Gesamtabsatz

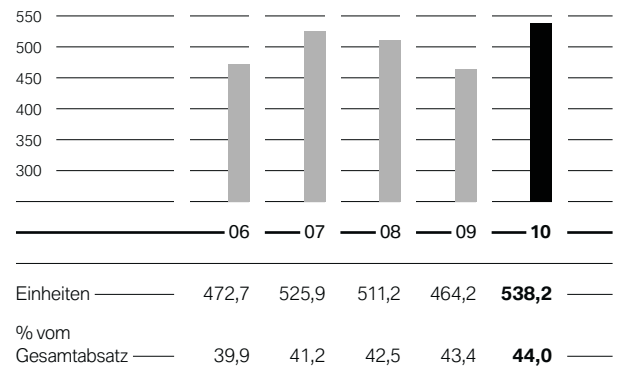

mit Luxemburg (91,4%), Italien (92,9%), Frankreich (95,0%) und Portugal (97,1%). In Deutschland nahm der Anteil dieseltreibender BMW um 6,1 Prozentpunkte zu und lag im Jahr 2010 bei 68,6%.

#### MINI Absatz übertrifft Vorjahresniveau deutlich

Die Absatzentwicklung beim MINI war im Jahr 2010 von der Modellpflege der bestehenden MINI Familie und der

#### Auslieferungen MINI Automobile nach Modellen

in Einheiten

|                        | 2010           | 2009           | Veränderung in % | Anteil an MINI Auslieferungen 2010 in % |
|------------------------|----------------|----------------|------------------|-----------------------------------------|
| <b>MINI</b>            |                |                |                  |                                         |
| One                    | 44.268         | 41.180         | 7,5              |                                         |
| Cooper                 | 76.520         | 75.213         | 1,7              |                                         |
| Cooper S               | 35.053         | 33.650         | 4,2              |                                         |
|                        | <b>155.841</b> | <b>150.043</b> | <b>3,9</b>       | <b>66,5</b>                             |
| <b>MINI Cabrio</b>     |                |                |                  |                                         |
| One                    | 4.525          | 186            | -                |                                         |
| Cooper                 | 16.613         | 16.565         | 0,3              |                                         |
| Cooper S               | 11.542         | 11.552         | -0,1             |                                         |
|                        | <b>32.680</b>  | <b>28.303</b>  | <b>15,5</b>      | <b>14,0</b>                             |
| <b>MINI Clubman</b>    |                |                |                  |                                         |
| One                    | 2.973          | 2.291          | 29,8             |                                         |
| Cooper                 | 19.551         | 24.265         | -19,4            |                                         |
| Cooper S               | 8.793          | 11.636         | -24,4            |                                         |
|                        | <b>31.317</b>  | <b>38.192</b>  | <b>-18,0</b>     | <b>13,4</b>                             |
| <b>MINI Countryman</b> |                |                |                  |                                         |
| One                    | 1.733          | -              | -                |                                         |
| Cooper                 | 7.770          | -              | -                |                                         |
| Cooper S               | 4.834          | -              | -                |                                         |
|                        | <b>14.337</b>  | <b>-</b>       | <b>-</b>         | <b>6,1</b>                              |
| <b>MINI gesamt</b>     | <b>234.175</b> | <b>216.538</b> | <b>8,1</b>       | <b>100,0</b>                            |

**MINI Automobile – Anteil der Motorvarianten 2010**

in % vom Absatz der Marke MINI

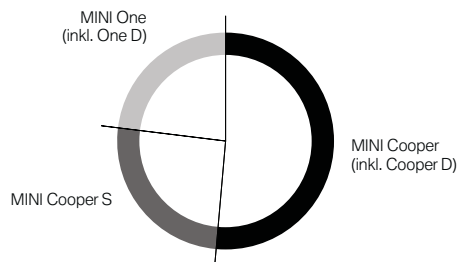

|                              |      |                        |      |
|------------------------------|------|------------------------|------|
| MINI Cooper (inkl. Cooper D) | 51,4 | MINI Cooper S          | 25,7 |
|                              |      | MINI One (inkl. One D) | 22,9 |

Markteinführung des Countryman geprägt. Dies spiegelt sich auch in einer positiven Absatzentwicklung wider. Weltweit verkauften wir 234.175 MINI Fahrzeuge (+8,1%) und erreichten damit einen neuen Höchstwert. Auch im Berichtsjahr war der Modellmix bei der Marke MINI sehr hochwertig. Für einen MINI Cooper entschieden sich 51,4% unserer Kunden, für einen Cooper S 25,7% und für einen MINI One 22,9%. Der neue Countryman ist seit seiner Markteinführung sehr erfolgreich und wurde in rund zwei Monaten bereits an 14.337 Kunden ausgeliefert.

**Rolls-Royce wächst kräftig**

Rolls-Royce war auch im Jahr 2010 im Segment der Luxusautomobile sehr erfolgreich. Weltweit lieferten wir 2.711 Rolls-Royce aus und steigerten damit den Absatz auf mehr als das Doppelte (2009: 1.002 Automobile). Dazu hat auch die sehr positive Geschäftsentwicklung auf den asiatischen Märkten beigetragen.

**Automobilproduktion deutlich erhöht**

Aufgrund der gestiegenen Nachfrage haben wir die Automobilproduktion im Berichtsjahr deutlich erhöht. Insgesamt verließen 1.481.253 Fahrzeuge der Marken

BMW, MINI und Rolls-Royce unser Produktionsnetzwerk (+17,7%). Von der Marke BMW fertigten wir im Jahr 2010 mit 1.236.989 Automobilen 18,5% mehr als im Vorjahr. Beim MINI stieg die Produktion um 12,8% auf 241.043 Einheiten. Rolls-Royce Motor Cars verdreifachte die Fertigung auf 3.221 Automobile (2009: 918 Automobile).

**Produktion auf Hochtouren**

Im Jahr 2010 bewies das Produktionsnetzwerk erneut seine hohe Flexibilität. Mit den Werkserweiterungen in China und den USA ging die Internationalisierung des Produktionsnetzwerks weiter voran. Mit 14 Produktionsanläufen auf weltweit einheitlichem, höchstem Qualitätsniveau stellten die Werke ihre Leistungsfähigkeit erneut unter Beweis. Gleichzeitig wurde innerhalb kürzester Zeit der reibungslose Wechsel von geringer Auslastung im Krisenjahr 2009 hin zur Volllast im Jahr 2010 vollzogen. Im vierten Quartal des Berichtsjahres erzielten die meisten Standorte Höchstwerte bei der Produktion. Im Zeitraum 2009 und 2010 investierten wir allein in die deutschen Werke rund 1,5 Mrd. Euro.

Das BMW Werk München hat mit mehr als 205.000 Fahrzeugen der BMW 3er Limousine und des 3er Touring im Jahr 2010 den zweithöchsten Produktionswert in seiner fast 90-jährigen Geschichte erzielt. Insbesondere im vierten Quartal 2010 lief die Produktion auf Hochtouren: Mit rund 56.000 gefertigten Fahrzeugen stellte das Münchener Stammwerk einen neuen Rekordwert auf. Parallel dazu investierte die BMW Group mit Blick auf die Einführung zukünftiger Modellgenerationen insbesondere in das Presswerk und den Karosseriebau. Zudem startete Anfang Dezember 2010 im Münchener Motorenbau die Produktion des neuen BMW Vierzylinder-Ottomotors.

Im BMW Werk Dingolfing startete im Januar 2010 erfolgreich die Produktion der neuen BMW 5er Limousine, im Juni folgte der Beginn der Fertigung des neuen BMW 5er Touring. Beide Modelle stehen für rund zwei Drittel der Gesamtproduktion in Dingolfing. Aufgrund der hohen Nachfrage erhöhten wir ab Oktober die Tages-

**Auslieferungen Rolls-Royce Automobile nach Modellen**

in Einheiten

|                                                | 2010         | 2009         | Veränderung in % |
|------------------------------------------------|--------------|--------------|------------------|
| <b>Rolls-Royce</b>                             |              |              |                  |
| Phantom (inklusive Phantom Extended Wheelbase) | 351          | 376          | -6,6             |
| Coupé (inklusive Drophead Coupé)               | 186          | 459          | -59,5            |
| Ghost                                          | 2.174        | 167          | -                |
| <b>Rolls-Royce gesamt</b>                      | <b>2.711</b> | <b>1.002</b> | <b>-</b>         |

## Automobilproduktion der BMW Group nach Werken im Jahr 2010

in Tsd.

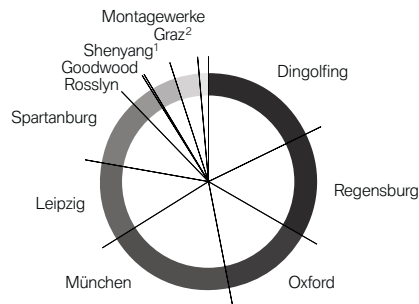

|             |       |                                 |      |
|-------------|-------|---------------------------------|------|
| Dingolfing  | 287,4 | Rosslyn                         | 49,0 |
| Regensburg  | 244,0 | Goodwood                        | 3,2  |
| Oxford      | 216,3 | Shenyang <sup>1</sup>           | 55,6 |
| München     | 205,7 | Graz (Magna Steyr) <sup>2</sup> | 54,9 |
| Leipzig     | 186,8 | Montagewerke                    | 19,1 |
| Spartenburg | 159,3 |                                 |      |

<sup>1</sup> Joint Venture

<sup>2</sup> Auftragsfertigung

produktion von 1.200 auf 1.400 Fahrzeuge: ein neuer Höchstwert für ein Werk der BMW Group. Im Dingolfinger Komponentenwerk erfolgte im Februar 2010 die Grundsteinlegung für die neue Achsgetriebefertigung, die im Frühsommer 2011 in Betrieb gehen wird. Bei der Planung des Projekts wurde ein besonderer Schwerpunkt auf Nachhaltigkeit gelegt. So wird der Energieverbrauch des Gebäudes um 25% unter den Vorgaben der Energieeinsparverordnung liegen. Auch der Energiebedarf bei den Schweißprozessen wird sich um 20% verringern. Darüber hinaus wird die neue Achsgetriebemontage entsprechend der demografischen Entwicklung vollständig nach den Prinzipien des BMW Group Programms Heute für Morgen altersgerecht gestaltet.

Im BMW Werk Regensburg fertigten wir Anfang Dezember den 50.000sten BMW Z4, seitdem die Produktion dieses Fahrzeugs nach Deutschland verlagert wurde. Des Weiteren setzten wir die im Jahr 2009 begonnenen Maßnahmen zu Gebäudeerweiterungen und Anlagenmodernisierung mit einer Gesamtsumme von rund 300 Mio. Euro fort. Diese Maßnahmen werden im Jahr 2011 fertiggestellt. Dazu gehören der Neubau und die Inbetriebnahme des neuen und erweiterten Montagefinishes, neue Roboteranlagen im Karosseriebau sowie Prozessumstellungen und neue Anlagen in der Lackiererei. Damit wurden die Voraussetzungen geschaffen, die Produk-

tionsanlagen für die Fertigung zukünftiger Modelle umzurüsten.

Im BMW Werk Wackersdorf erfolgte Mitte Juli der offizielle Produktionsbeginn der SGL Carbon Automotive Carbon Fibers GmbH, eines Joint Venture der BMW Group und der SGL Group. Dort werden die Gelege für die CFK-Produktion (CFK = kohlenstoffaserverstärkter Kunststoff) des geplanten Megacity Vehicle hergestellt.

Aufgrund der weltweit sehr hohen Nachfrage nach dem BMW X1 hat das BMW Werk Leipzig die Produktionszahl für dieses Modell um über 26% auf über 475 Einheiten pro Tag auf eine Gesamtproduktion von mehr als 720 Einheiten pro Tag gesteigert. Durch die sehr gute Auftragslage haben wir daher rund 100 Zeitarbeitskräfte im Werk Leipzig zum Jahreswechsel 2010/2011 in eine unbefristete Anstellung übernommen. Unter dem Motto „Wir bauen die Zukunft“ fiel in Leipzig am 5. November 2010 der Startschuss für den Ausbau des Werks zum Produktionsstandort des zukünftigen Megacity Vehicle. Die BMW Group investiert in Leipzig bis 2013 rund 400 Mio. Euro in neue Gebäude und Anlagen für die Großserienfertigung dieses Elektrofahrzeugs mit einer Fahrgastzelle aus CFK.

Am BMW Standort Landshut erweitern wir aktuell die bestehende CFK-Produktion. Auf rund 7.000 Quadratmeter Fläche werden künftig bis zu 100 Mitarbeiter Karbonfasergelege zu CFK-Komponenten für das Megacity Vehicle verarbeiten. Die BMW Group besitzt am Standort Landshut bereits seit mehr als zehn Jahren Verfahrensknow-how und Werkstoffkompetenz zu CFK. Aktuell kommt das Material für Komponenten der BMW M Modelle zum Einsatz.

Die Leichtmetallgießerei des Landshuter Werks hat 2010 die renommierten „Automotive Lean Production Award“ in der Kategorie „Exzellentes Gesamtsystem“ gewonnen. Der Preis zählt zu den wichtigsten Auszeichnungen in der Automobilindustrie. Die Ehrung „Exzellentes Gesamtsystem“ honoriert das über alle Bereiche und Ebenen auf den wertschöpfenden Produktionsmitarbeiter ausgerichtete Produktionssystem.

Zur Reinigung von Kunststoffkomponenten kommt im Produktionsbereich Exterieur des BMW Werks Landshut seit 2010 erstmals das innovative, ressourcenschonende „Snowcleaning“-Verfahren zum Einsatz. Die BMW Group ist weltweit eines der ersten Unternehmen, die das innovative Verfahren auch für großflächige Bauteile wie Stoßfänger oder Seitenwände einsetzen. Dabei werden die

|    |                                                  |
|----|--------------------------------------------------|
| 12 | <b>KONZERNLAGEBERICHT</b>                        |
| 12 | Das Geschäftsjahr im Überblick                   |
| 14 | <b>Wirtschaftliche Rahmenbedingungen</b>         |
| 18 | Geschäftsverlauf                                 |
| 41 | BMW Group – Kapitalmarktaktivitäten              |
| 44 | Übernahmerelevante Angaben und Erläuterungen     |
| 47 | <b>Finanzwirtschaftliche Situation</b>           |
| 47 | Konzerninternes Steuerungssystem                 |
| 49 | Ertragslage                                      |
| 51 | Finanzlage                                       |
| 53 | Vermögenslage                                    |
| 55 | Nachtragsbericht                                 |
| 55 | Wertschöpfungsrechnung                           |
| 57 | Finanzwirtschaftliche Kennzahlen                 |
| 58 | Erläuterungen zur BMW AG                         |
| 62 | <b>Internes Kontrollsystem und Erläuterungen</b> |
| 63 | Risikomanagement                                 |
| 70 | Prognosebericht                                  |



Kunststoffkomponenten vor dem Lackauftrag nicht mehr herkömmlich in einer Waschanlage gewaschen, sondern mithilfe von CO<sub>2</sub>-Schnee gereinigt. Damit reduziert das BMW Werk Landshut seinen jährlichen Energieverbrauch erheblich und senkt den Wasserverbrauch um rund 4.000 Kubikmeter pro Jahr.

Die Aktivitäten in unserem Werk im amerikanischen Spartanburg waren im Jahr 2010 vor allem von der Werkserweiterung und dem Produktionsstart des neuen BMW X3 geprägt. Mit der Erweiterung wurden die Kapazitäten deutlich erhöht, sodass täglich bis zu 1.000 beziehungsweise jährlich bis zu 240.000 Fahrzeuge gefertigt werden können. Gleichzeitig haben wir in Spartanburg auch eine neue Lackiertechnik eingeführt. Die neue Technologie reduziert den Lackierprozess um drei Prozessschritte und führt damit zu Einsparungen bei Energie- und Wasserverbrauch sowie zu Reduzierungen bei den Emissionen.

Während des Jahres 2010 startete im südafrikanischen Werk in Rosslyn erstmals die Produktion des BMW 3er xDrive. Seit November 2010 werden von hier aus lackierte Karosserien auch an unser Montagewerk im indischen Chennai geliefert.

Im chinesischen Werk Shenyang begann im Herbst 2010 die Fertigung der speziell für diesen Markt entwickelten neuen BMW 5er Limousine in der Langversion. Im Juni erfolgte der Baubeginn für das neue Werk in Shenyang, in dem zukünftig auch der BMW X1 gefertigt wird. Damit steigern wir ab 2012 die Produktionskapazitäten in China deutlich auf über 150.000 Fahrzeuge jährlich.

Im größten Motorenwerk im österreichischen Steyr erzielten wir im Jahr 2010 mit erstmals über 1 Mio. gefertigten Motoren einen Jahresproduktionsrekord. Damit wurde der bisherige Höchstwert von 817.000 Einheiten deutlich übertroffen. Darüber hinaus erfolgte der Serienanlauf des neuen 4-Zylinder-Dieselmotors für den MINI. Auch im Berichtsjahr setzte das Werk Steyr mit zwei Top-Platzierungen beim internationalen „Engine of the Year Award“ Standards in der Automobilbranche: Der BMW 6-Zylinder-Benzinmotor mit TwinPower Turbo und der BMW 4-Zylinder-Dieselmotor mit TwinPower Turbo wurden von der Jury zum Sieger ihrer Kategorien gewählt. Zusätzlich wurde das Werk Steyr im Juni 2010 mit dem Preis „Fabrik2010“ als effizientestes Produktionsunternehmen Österreichs ausgezeichnet.

Das MINI Werk Oxford produzierte im Jahr 2010 über 216.000 MINI aller Modelle bis auf den MINI Countryman.

Nahezu 25.000 MINI Countryman wurden im Berichtsjahr bei Magna Steyr in Graz gebaut. In Oxford begannen im Jahr 2010 auch die Vorbereitungen für die Serienproduktion des MINI Coupé und Roadster, die ab dem Jahr 2011 erfolgt. Beim Initial Quality Survey (IQS) von J.D. Power wählten über 1.000 US-amerikanische Kunden die Marke MINI zur am besten entwickelten Marke.

Im Motorenwerk im britischen Hams Hall wurde mit über 385.000 gefertigten Motoren für BMW und MINI im Berichtsjahr ein neuer Höchstwert erzielt.

Mit 3.221 gefertigten Rolls-Royce erreichte das Werk im britischen Goodwood im Berichtsjahr einen neuen Höchstwert. Dazu trug auch die hohe Nachfrage nach dem im Dezember 2009 eingeführten Ghost bei. Um der auch weiterhin hohen Nachfrage gerecht zu werden, erweiterten wir in Goodwood die Lederwerkstatt.

## 12 — KONZERNLAGEBERICHT

12 Das Geschäftsjahr im Überblick

14 Wirtschaftliche Rahmenbedingungen

## 18 — Geschäftsverlauf

41 BMW Group – Kapitalmarktaktivitäten

44 Übernahmerelevante Angaben und Erläuterungen

47 Finanzwirtschaftliche Situation

47 Konzerninternes Steuerungssystem

49 Ertragslage

51 Finanzlage

53 Vermögenslage

55 Nachtragsbericht

55 Wertschöpfungsrechnung

57 Finanzwirtschaftliche Kennzahlen

58 Erläuterungen zur BMW AG

62 Internes Kontrollsystem und Erläuterungen

63 Risikomanagement

70 Prognosebericht

**Motorradabsatz steigt deutlich**

Weltweit stieg der Motorradabsatz der Marken BMW und Husqvarna gegen den Markttrend im Berichtszeitraum um 9,7% auf insgesamt 110.113 Fahrzeuge. Davon entfielen 98.047 Motorräder auf die Marke BMW (+12,3%) und 12.066 Motorräder auf die Marke Husqvarna (-7,6%). Bei gleichzeitig rückläufigen internationalen Motorradmärkten konnten wir unsere Marktanteile ausbauen und in Ländern wie Deutschland, Italien, Spanien, den Niederlanden, Belgien, Österreich und Südafrika die Marktführerschaft im Segment über 500 ccm übernehmen.

**Überwiegend positive Absatzentwicklung in den Märkten**

In Europa steigerten wir den Motorradabsatz im Vorjahresvergleich um 9,6% auf 74.334 Fahrzeuge. In Deutschland konnten wir im Jahr 2010 ein deutliches Plus von 10,0% (18.260 Motorräder) erzielen. In Italien betrug das Wachstum mit 16.959 Auslieferungen 3,6%. Auch in Spanien (7.215 Motorräder/+4,8%), Frankreich (9.744 Motorräder/+18,0%) und Großbritannien (6.801 Motorräder/+11,1%) wurden im Jahr 2010 jeweils mehr Motorräder ausgeliefert als ein Jahr zuvor. Dagegen lag der Absatz in den USA mit 11.154 Verkäufen unter dem Vorjahreswert (-3,6%). In Japan lieferten wir 3.392 Motorräder an Kunden aus (+5,5%). Im Dezember weiteten wir unser Vertriebsnetz auf Indien aus.

**Ausbau der Modellpalette fortgeführt**

Im Jahr 2010 haben wir bei der Marke BMW die R 1200 GS und die R 1200 GS Adventure technisch überarbeitet und die Modellüberarbeitung der R 1200 RT in die Märkte eingeführt. Bei Husqvarna führten wir insgesamt elf neue Modelle beziehungsweise Modellvarianten und zwei Modellüberarbeitungen in den Markt ein.

Aus Anlass des 30-jährigen Jubiläums wurden im Frühsommer von den Enduromodellen R 1200 GS,

**Auslieferungen von BMW Group Motorrädern**

in Tsd.

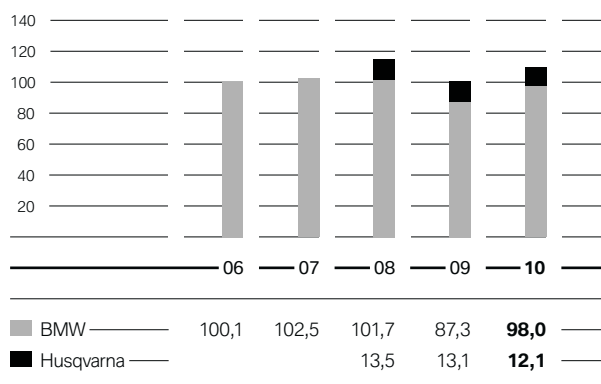**BMW Group – wichtigste Motorradmärkte 2010**

in % vom Absatz

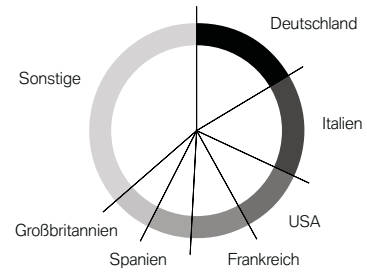

|             |      |                |      |
|-------------|------|----------------|------|
| Deutschland | 16,6 | Spanien        | 6,6  |
| Italien     | 15,4 | Großbritannien | 6,2  |
| USA         | 10,1 | Sonstige       | 36,3 |
| Frankreich  | 8,8  |                |      |

R 1200 GS Adventure, F 800 GS und F 650 GS limitierte Auflagen in spezieller Lackierung und mit hochwertiger Sonderausstattung im Markt eingeführt. Anfang Oktober stellten wir die neuen Modelle K 1600 GT und K 1600 GTL der Öffentlichkeit vor. Erstmals in der Geschichte von BMW werden dabei Motorräder mit einem Sechszylinder-Reihenmotor ausgestattet sein. Darüber hinaus präsentierten wir Anfang November die neuen Modelle G 650 GS, R 1200 R, R 1200 R Classic sowie das BMW Concept C. Die G 650 GS ist ein ideales Motorrad für Einsteiger. Sportlich-modernes Roadster-Design bei der R 1200 R oder klassisches Motorrad-Design bei der R 1200 R Classic verbinden sich zu nochmals deutlich gesteigerter Fahrdynamik. Mit dem BMW Concept C präsentierten wir eine seriennahe Studie im Segment der großen Scooter.

**Motorradproduktion ausgeweitet**

Aufgrund der deutlich gestiegenen Nachfrage haben wir die Motorradproduktion ausgeweitet. Insgesamt fertigten wir im Berichtsjahr 112.271 Motorräder der Marken BMW und Husqvarna. Von der Marke BMW rollten 99.236 Fahrzeuge vom Band (+20,1%). Darin enthalten sind 2.160 Bausätze für das Montagewerk in Manaus, Brasilien, das Ende 2009 in Betrieb genommen wurde. Die Husqvarna Produktion betrug 13.035 Einheiten und lag damit um 22,8% über dem Wert des Vorjahres.

Darüber hinaus erhielten wir im November den European Supply Chain Excellence Award 2010 für die beste Wertschöpfungskette. Die Auszeichnung würdigt innovative Lösungen im Lieferketten-Management, die dazu beitragen, die Wettbewerbsfähigkeit wesentlich zu verbessern und wegweisend für andere Unternehmen sind.

### Segment Finanzdienstleistungen mit erfolgreichem Geschäftsjahr

Auch das Segment Finanzdienstleistungen profitierte mit seinem attraktiven Produktportfolio von der weltweiten Konjunkturerholung und wuchs im Jahr 2010 profitabel. Das bilanzielle Geschäftsvolumen erreichte zum Jahresende 66.233 Mio. Euro und lag damit um 8,2% über dem Vorjahr. Zum Stichtag wurden insgesamt 3.190.353 Leasing- und Finanzierungsverträge mit Händlern und Endkunden betreut (+3,4%).

Das Segment Finanzdienstleistungen ist in mehr als 50 Ländern als ein starker und zuverlässiger Partner der Vertriebsorganisation vertreten und hält ein abgestimmtes Produktangebot für unsere Kunden bereit. Das Segment unterteilt sich in die folgenden sechs Geschäftsfelder: Leasing- und Kreditfinanzierung von BMW Group Fahrzeugen für Privatkunden, Mehrmarkenfinanzierung, Händlerfinanzierung, Leasing- und Kreditfinanzierung von Flottenkunden, Versicherungsgeschäft sowie Bankgeschäft.

Dabei sind die Kreditfinanzierung und das Leasing von Automobilen und Motorrädern der Marken BMW, MINI und Rolls-Royce durch Privatkunden das größte Geschäftsfeld. In der Mehrmarkenfinanzierung werden neben Fahrzeugen der Konzernmarken auch Fahrzeuge anderer Marken finanziert. Darüber hinaus unterstützen wir die Händlerorganisationen durch Finanzierung des Fahrzeugbestands in den Händlerbetrieben sowie Immobilien- und Betriebsmittelfinanzierungen. Die Betreuung des Bestands an Fahrzeugen der Marken BMW, MINI und Rolls-Royce sowie von Fremdmarken bei Großkunden ist Gegenstand des Flottengeschäfts. Hier stellen wir unter der Markenbezeichnung Alphabet sowohl Fahrzeugfinanzierungen als auch zahlreiche Serviceangebote bis hin zum kompletten Flottenmanagement für unsere Kunden bereit. Ergänzend zu den Leasing- und Finanzierungsverträgen bietet das Segment

seinen Kunden zudem ausgewählte Versicherungs- und Bankprodukte an.

### Kundenneugeschäft präsentiert sich stark

Das Finanzierungs- und Leasinggeschäft mit Endkunden konnte im Jahr 2010 weiter ausgebaut werden. Im Berichtszeitraum wurden mit 1.083.154 Neuverträgen deutlich mehr Abschlüsse vorgenommen als im Jahr zuvor (+6,6%). Das Leasinggeschäft wuchs im Berichtszeitraum um 3,2% gegenüber dem Vorjahr, die Kreditfinanzierung legte um 8,1% zu. Der Leasinganteil am gesamten Neugeschäftsvolumen betrug 28,8%, der des Finanzierungsgeschäfts lag bei 71,2%. Der Anteil von BMW Group Neufahrzeugen, der durch das Segment Finanzdienstleistungen verleast oder finanziert wurde, erreichte zum Ende des Berichtszeitraums 48,2%. Dies entspricht einem leichten Rückgang von 0,8 Prozentpunkten gegenüber dem Vergleichswert aus dem Vorjahr.

In der Gebrauchtwagenfinanzierung wurden im Berichtszeitraum 317.742 Verträge neu abgeschlossen. Damit lag die Anzahl der Neuverträge für BMW und MINI um 1,5% über dem Vorjahreswert.

Das Gesamtvolumen aller Finanzierungs- und Leasingverträge, die bis zum Ende des Berichtsjahres mit Endkunden abgeschlossen wurden, beträgt 28.045 Mio. Euro. Dies entspricht einem Anstieg von 13,5%.

Der Zuwachs im Kundenneugeschäft wirkte sich auch im Vertragsgesamtbestand aus. Zum 31. Dezember 2010 wurden im Segment Finanzdienstleistungen insgesamt 2.935.541 Verträge mit Endkunden betreut (+3,3%). Das Wachstum konnte dabei wie in der Vergangenheit über sämtliche Regionen hinweg erzielt werden. So legten die europäischen Märkte beim Vertragsbestand um 2,2% gegenüber dem Vorjahr zu, während die Region Asien/Ozeanien/Afrika um 3,0% wuchs. Den stärksten Anstieg erreichte erneut die Region Amerika mit 5,2%.

### Vertragsbestand des Segments Finanzdienstleistungen

in Tsd. Einheiten

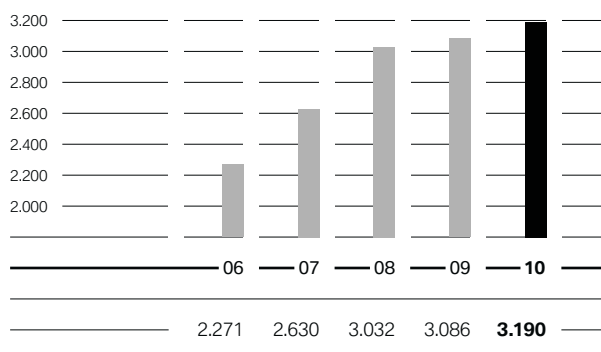

### BMW Group Neufahrzeuge durch Segment Finanzdienstleistungen finanziert

in %

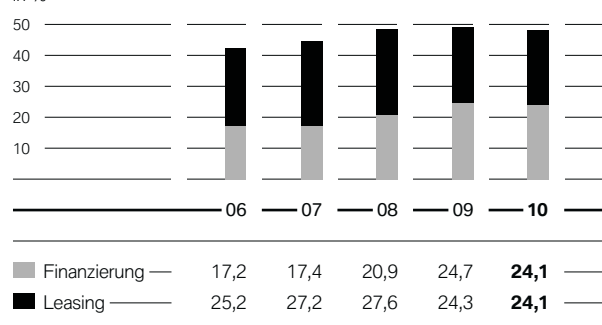

## Vertragsbestand Kundenfinanzierung des Segments Finanzdienstleistungen 2010

in % nach Regionen

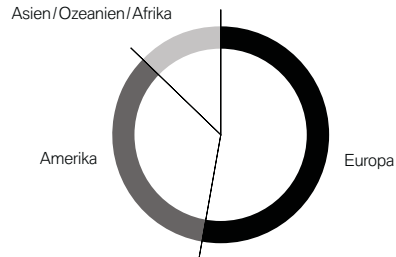

|         |      |                       |      |
|---------|------|-----------------------|------|
| Europa  | 52,8 | Asien/Ozeanien/Afrika | 12,7 |
| Amerika | 34,5 |                       |      |

### Spitzenpositionen in der Servicequalität

Auch im Jahr 2010 erhielt das Finanzdienstleistungsgeschäft der BMW Group international zahlreiche Auszeichnungen. Bei der jährlichen Umfrage des renommierten Marktforschungsinstituts J. D. Power and Associates zur Servicequalität belegte unser Finanzdienstleistungsgeschäft in den USA zum siebten Mal in Folge in der Dealer Financing Satisfaction Study<sup>SM</sup> den Spitzenplatz in der Kategorie Leasinggeschäft mit Kunden. In den Kategorien Händlerfinanzierung sowie Kundenkreditgeschäft in der Mehrmarkenfinanzierung wurden ebenfalls erste Plätze erzielt. In Kanada erreichte das Segment Finanzdienstleistungen unter allen herstellerverbundenen Finanzdienstleistern den ersten Platz in der Kategorie Kundenkreditgeschäft. Die Auszeichnungen sind das sichtbare Ergebnis der konsequenten Ausrichtung, unseren Kunden besten Service zu bieten.

### Ausbau der BMW Bank wird planmäßig fortgesetzt

Mit dem Ausbau der BMW Bank zu einem europaweit tätigen Kreditinstitut erhöht das Segment seine Flexibilität im Liquiditätsmanagement. Im Rahmen des EU-Pass-Projekts der BMW Group wurde 2009 daher die bisher rechtlich unabhängige Gesellschaft des Segments in Spanien in eine Zweigniederlassung der BMW Bank umgewandelt. Im Berichtsjahr 2010 wurde die Eingliederung der italienischen Finanzdienstleistungsgesellschaft bei gleichzeitiger Bildung einer Institutsgruppe erfolgreich vollzogen. Bereits in der Vergangenheit hatte die BMW Bank zum Betrieb der Niederlassung in Portugal auf die EU-Pass-Regelung zurückgegriffen. In den kommenden Jahren werden weitere Gesellschaften in die BMW Bank eingegliedert.

### Aufnahme der Geschäftstätigkeiten in zentralen Wachstumsmärkten

Im Berichtsjahr wurde die regionale Expansion in wichtigen Wachstumsmärkten der BMW Group weiter fortgesetzt. Im September erteilte die chinesische Bankenaufsicht der BMW Group die Lizenz zur Aufnahme der Geschäftstätigkeit eines Joint Ventures in China. In Indien nahmen wir im Oktober die operative Tätigkeit auf. Des Weiteren wurden in ausgewählten Märkten Kooperationen mit lokalen Finanzdienstleistern geschlossen.

### Flottengeschäft leicht rückläufig, Mehrmarkenfinanzierung mit dynamischem Wachstum

Die BMW Group ist durch die Marke Alphabet im internationalen markenübergreifenden Flottengeschäft tätig. Zum Ende des Berichtszeitraums wurde ein Bestand von 301.284 Flottenverträgen betreut. Dies entspricht einem Rückgang von 7,7%. Die Anzahl der Finanzierungsverträge lag dabei leicht über Vorjahr. Der Bestand an Serviceverträgen ohne Finanzierung wurde gezielt zurückgeführt.

In der Mehrmarkenfinanzierung wurde das Geschäft im Berichtsjahr gezielt ausgebaut und wuchs im Vergleich zum Vorjahr deutlich um 45,4%. Dies entspricht 122.840 Neuverträgen. Den größten Anteil am Vertragszugang hatte dabei die Region Europa. Mit der Ausweitung des Geschäfts auf die Russische Föderation werden mittlerweile in insgesamt 22 Märkten unter der Markenbezeichnung Alphera Kreditfinanzierungen, Leasing und Dienstleistungen über Handelsbetriebe an Endkunden vermittelt.

### Händlerfinanzierung legt zu

Das Segment Finanzdienstleistungen ist ein starker und zuverlässiger Partner der Handelsorganisation und unterstützt die Händler durch gezielte Finanzierungsangebote. Zum 31. Dezember 2010 lag die Händlerfinanzierung bei einem Geschäftsvolumen von 10.154 Mio. Euro um 7,7% über dem Vorjahr.

### Einlagengeschäft ausgeweitet

Durch den Ausbau der BMW Bank beabsichtigt das Segment Finanzdienstleistungen unter anderem, das Einlagengeschäft als zusätzliche Refinanzierungsquelle zu stärken. Zum Ende des Berichtszeitraums stieg das weltweite Einlagenvolumen des Segments um 7,6% gegenüber dem Vorjahr auf 10.688 Mio. Euro. Im Wertpapiergeschäft betreute das Unternehmen zum Ende des Jahres 24.471 Kundendepots (-9,4%). Das Kreditkartengeschäft lag leicht unter dem Vorjahresniveau. So verringerte sich der Bestand im Vergleich zum Vorjahr um 0,7% auf 293.266 Verträge.

#### 12 — KONZERNLAGEBERICHT

- 12 Das Geschäftsjahr im Überblick
- 14 Wirtschaftliche Rahmenbedingungen
- 18 — Geschäftsverlauf
- 41 BMW Group – Kapitalmarktaktivitäten
- 44 Übernahmerelevante Angaben und Erläuterungen
- 47 Finanzwirtschaftliche Situation
  - 47 Konzerninternes Steuerungssystem
  - 49 Ertragslage
  - 51 Finanzlage
  - 53 Vermögenslage
  - 55 Nachtragsbericht
  - 55 Wertschöpfungsrechnung
  - 57 Finanzwirtschaftliche Kennzahlen
  - 58 Erläuterungen zur BMW AG
- 62 Internes Kontrollsystem und Erläuterungen
- 63 Risikomanagement
- 70 Prognosebericht

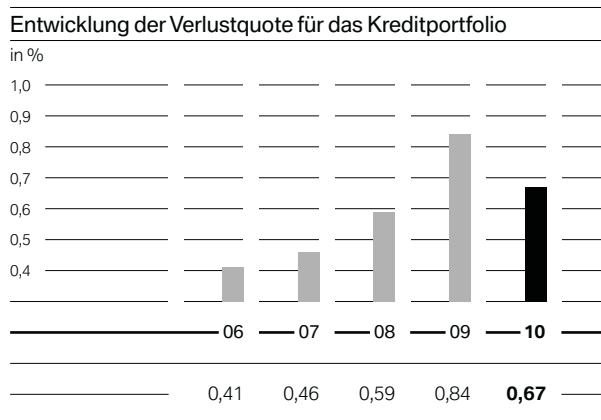

#### **Versicherungsgeschäft deutlich erhöht**

Ergänzend zum Finanzierungs- und Leasingangebot bieten wir unseren Kunden in mehr als 30 Märkten auch Fahrzeug-, Restschuld-, Garantie- sowie weitere fahrzeuggebundene Versicherungen an. Die Versicherungsprodukte werden von unseren Kunden unverändert stark nachgefragt. Dadurch wuchs das Neugeschäft zum Stichtag um 18,1% auf 689.928 Verträge. Zum 31. Dezember 2010 wurde ein Bestand von 1.571.708 Versicherungsverträgen betreut (+ 12,8%). Zur Ausweitung des Geschäfts hat im Wesentlichen die strategische Neuausrichtung des Geschäftsfelds in den USA beigetragen. Weiteres Wachstumspotenzial erschließt sich das Segment vor allem in den Schwellenländern Asiens sowie durch die Kooperation mit der Allianz SE.

#### **Risikosituation deutlich entspannt**

Die wirtschaftliche Erholung auf den Märkten trug maßgeblich dazu bei, dass sich auch die Risikosituation deutlich entspannt hat. Die risikobegrenzenden Maßnahmen im Forderungsmanagement, eine restriktivere Ankaufpolitik sowie höhere Besicherungen führten zu einer deutlichen Reduzierung der Verlustquote für das gesamte Kreditportfolio auf 0,67%. Die Quote lag damit um 17 Basispunkte unter dem Vorjahr (2009: 0,84%).

Das Zinsänderungsrisiko wird nach Risikoertragsgesichtspunkten gesteuert und mit dem Value at Risk (VaR) gemessen. Der VaR summiert über alle Finanzdienstleistungsgesellschaften beträgt bei einem Konfidenzniveau von 99% und einer Haltedauer von zehn Tagen zum Stichtag 58,5 Mio. Euro.

#### **Zahl der Mitarbeiter leicht reduziert**

Zum Ende des Geschäftsjahres 2010 hat sich der Personalstand der BMW Group durch natürliche Fluktuation, Altersteilzeit sowie freiwillige Aufhebungsverträge im Vergleich zum Vorjahr um 777 auf 95.453 Mitarbeiter leicht reduziert (- 0,8%). Aus Gründen des Kompetenzaufbaus und -erhalts, der Nachwuchssicherung und der Sicherstellung der langfristigen Wettbewerbsfähigkeit hat die BMW Group zusätzlich zu den mehr als 1.100 neuen Ausbildungsverträgen weltweit über 1.300 Mitarbeiter neu eingestellt.

#### **Zeitarbeit als Flexibilisierungsinstrument**

Unter stark schwankenden Umfeldbedingungen nutzt die BMW Group neben standortübergreifenden Einsätzen, Zeitkonten und flexiblen Arbeitszeitbausteinen auch die Zeitarbeit. Dabei wird die Zeitarbeit vor allem als wirksames Flexibilisierungsinstrument eingesetzt und deckt kurz- und mittelfristige Auslastungsschwankungen. Basierend auf einer Selbstverpflichtung des Unternehmens orientieren sich die Entgelte der eingesetzten Zeitarbeitnehmer nicht an den Tarifverträgen, die für die Zeitarbeitsbranche gelten, sondern an den für die BMW Group geltenden Tarifverträgen mit deutlich höheren Entgelten.

#### **Zahl der Auszubildenden auf anhaltend hohem Niveau**

Mit differenzierten Angeboten zur Berufsausbildung leistet die BMW Group einen wesentlichen Beitrag, ihren Fachkräftebedarf an in- und ausländischen Standorten auch langfristig zu decken. Zu Beginn des neuen Ausbildungsjahres starteten insgesamt 1.124 junge Menschen, davon 1.080 in Deutschland, ihr Berufsleben mit einer Ausbildung bei der BMW Group. Dabei bietet das Unternehmen den Auszubildenden verschiedene Perspektiven. Neben der klassischen Ausbildung zum Facharbeiter kann diese auch mit dem Erwerb der Fachhochschulreife kombiniert werden.

Insbesondere leistungsstarke Realschulabsolventen haben die Möglichkeit, im Anschluss an die Ausbildung ein Bachelorstudium zu belegen, das vom Unternehmen begleitet wird. Die Besten unter ihnen erhalten ein Stipendium und nehmen an zusätzlichen Schulungen im Rahmen unseres Nachwuchsprogramms SpeedUp teil. Auch auf diese Weise decken wir den langfristigen Bedarf an qualifiziertem Ingenieurwachstum.

Teil unserer gesellschaftlichen Verantwortung ist es, auch leistungsschwächeren Schulabgängern eine Perspektive zu bieten. Deshalb schafft die BMW Group eine zunehmende Anzahl von Plätzen für die sogenannte Einstiegsqualifizierung mit dem Ziel, die Schulabgänger zur Aus-

|    |                                              |
|----|----------------------------------------------|
| 12 | <b>KONZERNLAGEBERICHT</b>                    |
| 12 | Das Geschäftsjahr im Überblick               |
| 14 | Wirtschaftliche Rahmenbedingungen            |
| 18 | <b>Geschäftsverlauf</b>                      |
| 41 | BMW Group – Kapitalmarktaktivitäten          |
| 44 | Übernahmerelevante Angaben und Erläuterungen |
| 47 | Finanzwirtschaftliche Situation              |
| 47 | Konzerninternes Steuerungssystem             |
| 49 | Ertragslage                                  |
| 51 | Finanzlage                                   |
| 53 | Vermögenslage                                |
| 55 | Nachtragsbericht                             |
| 55 | Wertschöpfungsrechnung                       |
| 57 | Finanzwirtschaftliche Kennzahlen             |
| 58 | Erläuterungen zur BMW AG                     |
| 62 | Internes Kontrollsystem und Erläuterungen    |
| 63 | Risikomanagement                             |
| 70 | Prognosebericht                              |

Auszubildende der BMW Group am 31. Dezember

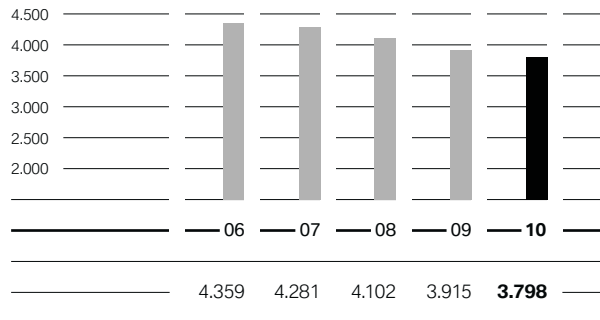

Frauenanteil im außertariflichen Bereich der BMW AG

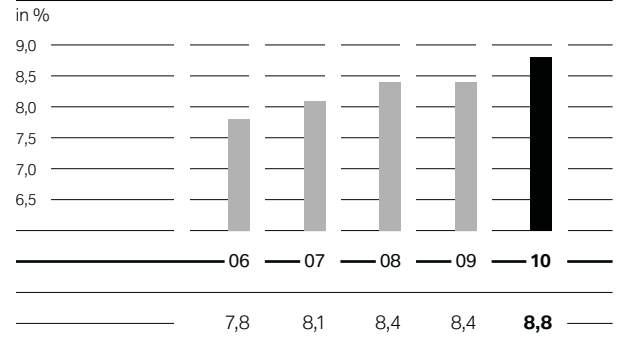

bildungsreife zu führen. Mit großem Erfolg: Etwa 64% der jungen Menschen erhalten anschließend einen regulären Ausbildungsvertrag.

Darüber hinaus kooperiert die BMW Group eng mit JOBLINGE, einer Initiative zur Bekämpfung von Jugendarbeitslosigkeit in Deutschland. In einem sechsmonatigen Programm wird Jugendlichen mit schwierigen Startbedingungen die Möglichkeit geboten, durch individuelle und praxisnahe Förderung einen Ausbildungs- oder Arbeitsplatz zu erwerben. Die BMW Group beteiligt sich nicht nur mit Finanz- und Sachspenden, sondern auch durch die Bereitstellung von bisher 19 Praktikums-, zwei Einstiegsqualifizierungs- und fünf Ausbildungsplätzen in München und Berlin. Die differenzierten Angebote zur Berufsausbildung sind ein wichtiger Beitrag, den Fachkräftebedarf der BMW Group an den in- und ausländischen Standorten auch langfristig zu decken.

#### Programme zur Aus- und Weiterbildung

Aus- und Weiterbildung sind in der BMW Group zentrale Anliegen, da sie die Schlüsselqualifikationen vermitteln, um auch die zukünftigen Herausforderungen im Wett-

bewerb erfolgreich zu bestehen. Daher hat das Unternehmen die Angebote an Weiterbildungsmaßnahmen für alle Mitarbeitergruppen deutlich ausgebaut. Für die Absolventen der Ausbildungsberufe sind ergänzend zu dem bereits seit mehreren Jahren bewährten Angebot neue Programme entwickelt worden. Die Ausbildungsabsolventen erhalten damit nicht nur eine gezielte Vorbereitung auf attraktive Tätigkeiten, sondern werden mithilfe dieser Programme auch individuell gefördert.

#### Mitarbeiterqualifizierung als Investition in die Zukunft

Kompetenzaufbau und Kompetenzerhalt in der Belegschaft sind zentrale Themen einer strategischen Unternehmensführung. Daher hat die BMW Group die Aufwendungen für Aus- und Weiterbildung im Vergleich zum Vorjahr um rund ein Viertel auf 179 Mio. Euro erhöht (+25,2%).

Neben den klassischen Trainingsmaßnahmen bildet der absehbare Bedarf an Qualifizierung die Grundlage für ein weitergehendes Angebot. Dabei kooperiert die BMW

Mitarbeiter der BMW Group

|                        | 31.12.2010    | 31.12.2009    | Veränderung in % |
|------------------------|---------------|---------------|------------------|
| Automobile             | 88.468        | 89.457        | -1,1             |
| Motorräder             | 2.814         | 2.796         | 0,6              |
| Finanzdienstleistungen | 4.053         | 3.882         | 4,4              |
| Sonstige               | 118           | 95            | 24,2             |
| <b>BMW Group</b>       | <b>95.453</b> | <b>96.230</b> | <b>-0,8</b>      |

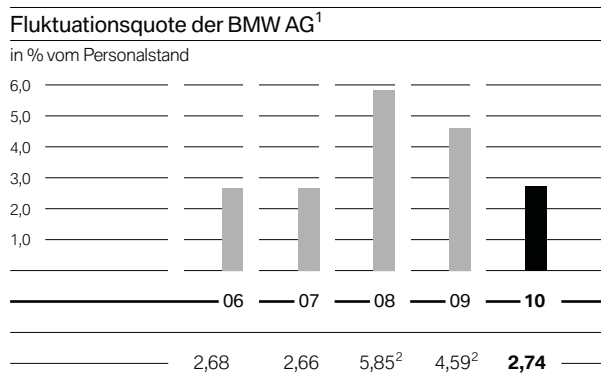

<sup>1</sup> Austritte von Mitarbeitern mit unbefristeten Arbeitsverhältnissen

<sup>2</sup> nach Umsetzung der angekündigten Personalmaßnahmen (freiwillige Aufhebungsverträge)

Group auch mit verschiedenen Hochschulen. Sowohl für Mitarbeiter, die bereits einen Hochschulabschluss besitzen, als auch für Mitarbeiter mit Techniker- oder Meisterabschluss wurden berufsbegleitende Studiengänge eingerichtet. Weitere Angebote sind auch für andere Themenfelder in Vorbereitung.

#### Dem Fachkräftemangel wirksam begegnen

Die BMW Group bereitet sich seit vielen Jahren darauf vor, einem drohenden Fachkräftemangel wirksam zu begegnen. Für die zukunftsorientierte Nachwuchssicherung spielen dabei zwei Themenfelder eine besondere Rolle:

Zum einen verfolgen wir unverändert das Ziel, einer der attraktivsten Arbeitgeber weltweit zu bleiben. Unser hervorragender Ruf erleichtert es uns entscheidend, qualifizierte Mitarbeiter zu gewinnen. Sehr gute Bewertungsergebnisse in internationalen Umfragen wie beispielsweise die Top Global 50 Studie von Universum bestätigen den Erfolg. So ist die BMW Group auch 2010 wieder attraktivster deutscher Arbeitgeber sowie das bestbewertete Automobilunternehmen weltweit.

Zum anderen wurden bestehende Nachwuchsprogramme weiterentwickelt oder neue Programme gestartet. So begannen im Berichtszeitraum neue Programme für unseren Führungsnachwuchs (BMW Group Graduate Programme) sowie für Schulabsolventen (SpeedUp – Das BMW Bachelorprogramm). Zusätzlich wurde das neue Doktorandenprogramm ProMotion entwickelt, das 2011 mit rund 200 Teilnehmern an den Start geht. Hier werden hoch qualifizierte Nachwuchskräfte, die in enger Zusammenarbeit mit Hochschulen oder intern an innovativen Themen arbeiten, gefördert. Ergänzend werden

weitere Maßnahmen wie die Formula Student genutzt, um engagierte Studenten kennenzulernen und Kontakte herzustellen.

#### Vielfalt in der Belegschaft als Schlüsselfaktor für die Zukunft

Gesellschaftliche Vielfalt auch in der Belegschaft zu erreichen, stellt aus unserer Sicht für jedes Unternehmen einen wettbewerbsrelevanten Faktor für die Zukunft dar. Vor diesem Hintergrund ist das Diversity-Konzept der BMW Group ein wichtiger Beitrag zur strategischen Neuausrichtung des Unternehmens. Diversity ist dabei mehr als ein Konzept zur Frauenförderung. Nur in dem Dreiklang von internationaler Belegschaft, Altersmischung und einer angemessenen Vertretung von Frauen werden wir über das nötige Wissen verfügen, bestehende Absatzmärkte optimal zu bedienen und neue Märkte zu erschließen. Damit schaffen wir die Voraussetzungen für ein leistungsfähiges Unternehmen auch in der Zukunft.

Vor dem Hintergrund der Herausforderungen wie des demografischen Wandels und des Zugangs zu neuen Absatzmärkten wurden das Geschlecht, der kulturelle Hintergrund und das Alter als Diversity-Kriterien ausgewählt. Sie sollen künftig – soweit die lokalen Rahmenbedingungen dies erlauben – unternehmensweit gelten.

Da die BMW Group die Eignung des Mitarbeiters in den Vordergrund stellt, streben wir keine starre Frauenquote an. Unser Ziel ist es vielmehr, die jeweils Besten für unser Unternehmen zu gewinnen.

Bereits in den vergangenen Jahren ist beim Frauenanteil eine positive Entwicklung erkennbar: So ist der Anteil weiblicher Mitarbeiter im außertariflichen Bereich zwischen 2005 und 2010 von 7,4 auf 8,8% gestiegen. Weltweit liegt der Anteil weiblicher Führungskräfte in der BMW Group bei über 10%. Dabei ist für die Erhöhung des Frauenanteils insbesondere bei den Nachwuchsprogrammen zu berücksichtigen, dass Frauen in Ingenieurstudiengängen sowie technischen Berufen deutlich unterrepräsentiert sind.

#### Demografiemanagement – Heute für Morgen

Durch den demografischen Wandel wird die BMW Group ihren Unternehmenserfolg künftig mit einer im Durchschnitt deutlich älteren Belegschaft erzielen. Um weiterhin führend im Wettbewerb zu bleiben, ist die BMW Group aufgefordert, sowohl Gesundheit und Kompetenzen ihrer Belegschaft zu stärken als auch die Arbeitswelt

## 12 — KONZERNLAGEBERICHT

12 Das Geschäftsjahr im Überblick

14 Wirtschaftliche Rahmenbedingungen

## 18 — Geschäftsverlauf

41 BMW Group – Kapitalmarktaktivitäten

44 Übernahmerelevante Angaben und Erläuterungen

47 Finanzwirtschaftliche Situation

47 Konzerninternes Steuerungssystem

49 Ertragslage

51 Finanzlage

53 Vermögenslage

55 Nachtragsbericht

55 Wertschöpfungsrechnung

57 Finanzwirtschaftliche Kennzahlen

58 Erläuterungen zur BMW AG

62 Internes Kontrollsystem und Erläuterungen

63 Risikomanagement

70 Prognosebericht

im Unternehmen einer sich ändernden Altersstruktur anzupassen.

Dies geschieht unter anderem im Projekt Heute für Morgen. Mit diesem Projekt verfolgen wir das Ziel, durch Präventionsmaßnahmen eine dauerhaft leistungsfähige Belegschaft auch zukünftig zu erhalten.

### Personalaufwand wettbewerbsfähig gestalten

Ein wettbewerbsfähiger Personalaufwand leistet einen wichtigen Beitrag zum Unternehmenserfolg. Dabei wird neben der Kostenorientierung auch das Ziel einer erhöhten Effizienz im gesamten Unternehmen verfolgt. Die hohe Motivation unserer Mitarbeiter und die Mitarbeiterorientierung des Unternehmens werden unterstützt beziehungsweise unterstrichen durch Gegenleistungen des Unternehmens, die individuell, leistungs- und erfolgsorientiert gestaltet sind. Flexible und individuell gestaltete Arbeitszeitsysteme sind ein weiterer wichtiger Baustein. Entgeltleistungen, Arbeitszeitregelungen und Zusatzleistungen werden dabei stets in enger Abstimmung mit der Arbeitnehmervertretung überprüft und bedarfsgerecht angepasst.

### Wettbewerbsvorteile durch exzellente Führung

Die Mitarbeiter der BMW Group tragen zur führenden Position der BMW Group im Wettbewerb entscheidend bei. In Zeiten hoher Komplexität und Veränderungsgeschwindigkeit spielt deshalb eine exzellente Führung, vor allem im Hinblick auf die anspruchsvollen Ziele der Strategie Number ONE, eine entscheidende Rolle. Voraussetzung für exzellente Führung ist ein gemeinsames Führungsverständnis. Dieses gemeinsame Verständnis haben wir im letzten Jahr in allen Führungsebenen vertieft.

Um als Unternehmen erfolgreich zu sein, wird auch ein offener Dialog zwischen Führungskräften und Mitarbeitern gefördert. Ein Beispiel dafür ist das Projekt E Change LIFE, in dem Führungskräfte der BMW Group für alle Mitarbeiter des Entwicklungsressorts übergreifende Workshops konzipieren und durchführen. Damit schaffen wir eine hohe Bereitschaft bei Führungskräften und Mitarbeitern, den Veränderungsprozess gemeinsam zu gestalten.

### Gesundheitsmanagement

Neben Kompetenz und Motivation ist die Gesundheit die wichtigste Voraussetzung für die Leistungsfähigkeit der Belegschaft. Dies gilt in Zukunft umso mehr, als der zu erwartende Fachkräftemangel und demografische Wandel eine längere durchschnittliche Lebensarbeitszeit erfordern werden. Hinzu kommt, dass eine sich permanent verändernde Arbeitswelt zukünftig noch höhere Anforderungen an die Belegschaft stellen wird.

Um die Gesundheit unserer Mitarbeiter zu erhalten und zu fördern, werden sowohl das Gesundheitsbewusstsein und -verhalten gefördert als auch in besonderem Maße auf sichere und gesunde Arbeitsbedingungen geachtet. Dazu haben wir unter dem Titel Gesundheitsmanagement 2020 ein integriertes betriebliches Konzept entwickelt. Anspruch ist, die für eine positive Entwicklung des Gesundheitszustands der Belegschaft wesentlichen Themen in ein Gesamtkonzept zusammenzufassen. Unser integriertes Gesundheitsmanagement ist damit ein fester Bestandteil der nachhaltigen Unternehmensführung in der BMW Group.



### **Nachhaltiges Wirtschaften unternehmensweit umsetzen**

Nachdem im Jahr 2009 die Nachhaltigkeitsstrategie der BMW Group umfassend weiterentwickelt worden war, wurden 2010 aus der konzernweiten Strategie für die einzelnen Ressorts Maßnahmen und Messkriterien abgeleitet mit dem Ziel, der nachhaltigste Automobilhersteller weltweit zu bleiben. 2010 wurde dies erneut erreicht und von unabhängiger Stelle wieder bestätigt: Bereits zum sechsten Mal in Folge ist die BMW Group Branchenführer der Automobilindustrie in der Dow Jones Sustainability Indexfamilie.

Kernziel ist es, Nachhaltigkeit in der gesamten Wertschöpfungskette und den zugrunde liegenden Prozessen zu verankern. So werden wir unsere innovativen Antriebstechnologien weiterentwickeln sowie Konzepte für nachhaltige Mobilität in Ballungsräumen umsetzen. Im Produktionsprozess ist beabsichtigt, den Ressourcenverbrauch und die Umweltbelastungen weiter zu senken sowie ökologische und soziale Anforderungen auch in der Lieferantenkette festzuschreiben. Darüber hinaus wollen wir auch in Zukunft für unsere Mitarbeiter ein attraktiver Arbeitgeber bleiben. Als Teil der Gesellschaft werden wir weiterhin an der Lösung gesellschaftlicher Herausforderungen mitwirken.

Nachhaltiges Wirtschaften als Unternehmensziel ist auf Basis einer Balanced Scorecard konzernweit verankert. Danach ist jedes Projekt am Konzernziel Nachhaltigkeit zu messen. Dabei sind beispielsweise Ressourcenverbrauch, Emissionen und soziale sowie gesellschaftspolitische Auswirkungen zu bewerten. Wichtige Elemente unseres Nachhaltigkeitsmanagements sind die kontinuierliche und systematische Analyse der externen Entwicklungen, ein permanenter Dialog mit unseren Stakeholdern und die Berücksichtigung von sozialen und ökologischen Aspekten bei Entscheidungen.

Zur strategischen Weiterentwicklung und zur Steuerung der Nachhaltigkeitsleistungen haben wir eine Nachhaltigkeitsorganisation eingerichtet. Auf oberster Konzernebene steht das Nachhaltigkeitsboard, in dem alle strategisch relevanten Entscheidungen getroffen werden. Diesem Gremium gehören alle Mitglieder des Konzernvorstands an. Die ressortübergreifende Umsetzung ist Aufgabe des Nachhaltigkeitskreises, der aus Vertretern der einzelnen Ressorts besteht und vom Konzernbeauftragten für Nachhaltigkeit und Umweltschutz geleitet wird.

### **Klare Ziele für eine saubere Produktion**

Unsere Absicht ist es, Umweltauswirkungen aus der Produktion so gering wie möglich zu halten. Die dazu verwendeten Beobachtungsgrößen umfassen den Ener-

gie- und Wasserverbrauch, das Prozessabwasser, die Lösungsmittlemissionen und den Abfall zur Beseitigung – ausgedrückt je produziertes Fahrzeug. Darüber hinaus kontrollieren wir die CO<sub>2</sub>-Emissionen, die als Ergebnis des Energieverbrauchs entstehen. Zielsetzung ist, bis zum Jahr 2012 Ressourcenverbrauch und Emissionen je produziertes Fahrzeug im Vergleich zu 2006 um 30% zu senken. Mithilfe einer Umwelteffizienzzahl werden die Veränderungen von Ressourcenverbrauch und Emissionen über alle Beobachtungsgrößen analysiert. Die Umwelteffizienzzahl 2010 konnte im Berichtszeitraum um 6 Prozentpunkte verbessert werden. Damit haben wir uns im Vergleich zum Jahr 2006 um 26% verbessert und den für 2010 angestrebten Wert von 20% übertroffen.

### **Energieverbrauch und Emissionen verringert**

Im Jahr 2010 ist es uns gelungen, den Gesamtenergieverbrauch deutlich um 380.000 MWh zu senken und gleichzeitig die Energieeffizienz zu verbessern. Der Energieverbrauch je produziertes Fahrzeug lag 2010 damit bei 2,75 MWh (– 4,8%). Begünstigt wurde dies durch eine verbesserte Anlagenauslastung. Durch den geringeren Energieverbrauch konnten in der Produktion auch die CO<sub>2</sub>-Emissionen um 74.700 t gesenkt werden. Mit 0,86 t CO<sub>2</sub> je produziertes Fahrzeug wurden die Emissionen um 5,5% verringert. Mit der konsequenten Umsetzung von Einsparmaßnahmen kommen wir unserem Ziel, die Energieeffizienz zwischen 2006 und 2012 um 30% zu verbessern, wie geplant näher.

Deutliche Energieeinsparungen wurden durch die Umsetzung des Best-Practice-Ansatzes für innovative Produktionstechnologien erreicht. So wurde beispielsweise 2010 die zunächst im Werk Oxford entwickelte neue Lackiertechnologie „Integrated Paint Process“ (IPP) auch im Werk Spartanburg eingeführt. Sie sorgt für eine deutlich geringere Umweltbelastung bei gleichzeitig höherer Produktivität. Der Energieverbrauch in der Lackiererei wird sich nach vollständiger Umstellung um 30%, der CO<sub>2</sub>-Ausstoß um 43% und die Emissionen von Lösungsmitteln (VOC) um 7% verringern. Gleichzeitig reduziert IPP die Bearbeitungszeit jedes Fahrzeugs und wird auf diese Weise eine Produktivitätssteigerung von rund 40% ermöglichen.

Für alle Produktionsstandorte der BMW Group gilt, dass die jeweils ökologisch wie wirtschaftlich nachhaltigste Energieressource genutzt werden soll. So deckt beispielsweise das US-Werk in Spartanburg rund 50% seines Energiebedarfs aus dem Deponiegas einer nahe gelegenen Mülldeponie und betreibt seine Gabelstaplerflotte mit Wasserstoff. Eine Solarthermieanlage sorgt im BMW Werk in Rosslyn für die Wassererhitzung in der Lackiererei. Im Forschungs- und Innovationszentrum

## 12 — KONZERNLAGEBERICHT

12 Das Geschäftsjahr im Überblick

14 Wirtschaftliche Rahmenbedingungen

## 18 — Geschäftsverlauf

41 BMW Group – Kapitalmarktaktivitäten

44 Übernahmerelevante Angaben und Erläuterungen

47 Finanzwirtschaftliche Situation

47 Konzerninternes

Steuerungssystem

49 Ertragslage

51 Finanzlage

53 Vermögenslage

55 Nachtragsbericht

55 Wertschöpfungsrechnung

57 Finanzwirtschaftliche Kennzahlen

58 Erläuterungen zur BMW AG

62 Internes Kontrollsystem und

Erläuterungen

63 Risikomanagement

70 Prognosebericht

in München wird die Kälte des Grundwassers zur Klimatisierung genutzt. Darüber hinaus betreibt die BMW Group an ausgewählten Produktionsstandorten eigene Kraftwärmekopplungsanlagen, die besonders ressourceneffizient arbeiten.

### Weniger Wasser, weniger Abwasser

Die BMW Group hat trotz des gestiegenen Produktionsvolumens den Wasserverbrauch im Vergleich zum Vorjahr um 370.000 m<sup>3</sup> reduziert. Je produziertes Fahrzeug wurden 2,31 m<sup>3</sup> Wasser verbraucht (-9,8%). Die Menge anfallenden Prozessabwassers hat sich um 60.000 m<sup>3</sup> verringert (-6,5%). Dazu beigetragen haben neue Technologien wie das sogenannte Snow Cleaning, ein im BMW Werk Landshut entwickeltes innovatives Verfahren, bei dem Kunststoffteile wie Stoßfänger und Außenspiegel vor der Lackierung nicht mit Wasser und Reinigungsmitteln, sondern mit Schnee aus tiefgekühltem CO<sub>2</sub> gereinigt werden. Das CO<sub>2</sub> wird dabei vollständig aufgefangen und im Kreislauf erneut verwendet.

### Abfall und Lösungsmittlemissionen weiter reduziert

Die Menge an Abfall aus der Produktion, der nicht verwertet werden kann, konnte im Jahr 2010 um weitere 5,1% reduziert werden. Je produziertes Fahrzeug entstanden damit nur noch 10,09 kg Abfall zur Beseitigung (2009: 10,63 kg). Nachdem bereits im Jahr zuvor die Menge um 28% verringert worden war, haben wir weitere Möglichkeiten zur Wiederverwertung und zum effizienteren Materialeinsatz entwickelt.

Die Emissionen von Lösungsmitteln (VOC) konnte die BMW Group 2010 um rund 10% verringern. Damit liegen die Lösungsmittlemissionen je produziertes Fahrzeug bei 1,60 kg (2009: 1,77 kg). Dies gelang unter an-

derem durch die Verwendung von lösungsmittelarmen und lösungsmittelfreien Spül- und Reinigungsprozessen bei der Lackierungsvorbehandlung. Optimierte Farbwechselzyklen bei der Lackierung verringerten die Anzahl der notwendigen Reinigungsvorgänge weiter. Seit 2006 haben wir die Lösungsmittlemissionen um über 30% reduziert. Damit haben wir schon heute das für 2012 gesteckte Ziel erreicht.

### Clean Production in Shenyang

Derzeit errichten wir ein weiteres Werk in Shenyang, China. Bereits bei der Auswahl des Standorts haben wir zahlreiche ökologische und soziale Kriterien berücksichtigt. Die Höhenlage des Werks wurde auch im Hinblick auf zukünftige klimatische Veränderungen geplant, um beispielsweise Schutz vor Überschwemmungen zu gewährleisten. Kriterium für die Standortentscheidung war darüber hinaus die grundsätzliche Verfügbarkeit erneuerbarer Energien. Die Lackiererei wird die nachhaltigste Anlage im gesamten Produktionsnetzwerk der BMW Group sein.

### Umweltfreundliche Transportlösungen

Durch Optimierung der Transportnetzwerke haben wir auch 2010 die Umweltauswirkungen aus dem Gütertransport reduziert. Aufgrund der regionalen Verschiebung des Absatzvolumens ergaben sich Änderungen bei den Anteilen der jeweiligen Verkehrsträger. Der Anteil der Luftfracht blieb mit 0,5% auch im Berichtsjahr auf einem sehr niedrigen Niveau (2009: 0,2%). Durch das Wachstum in China stieg der Seefrachtanteil auf 79,9% (2009: 78,0%). Der Anteil der Transporte auf dem Schienenweg nahm 2010 leicht auf 6,3% (2009: 6,0%) zu. Im Gegenzug sank der Anteil der Straßentransporte auf 13,3% (2009: 15,8%).

#### Energieverbrauch je produziertes Fahrzeug

in MWh/Fahrzeug

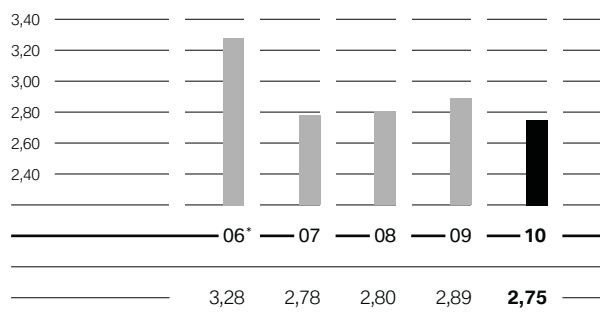

\* Wert hochgerechnet auf 17 Standorte. Berichtsumfang umfasste ursprünglich zehn Standorte.

#### Emissionen CO<sub>2</sub> je produziertes Fahrzeug

in t/Fahrzeug

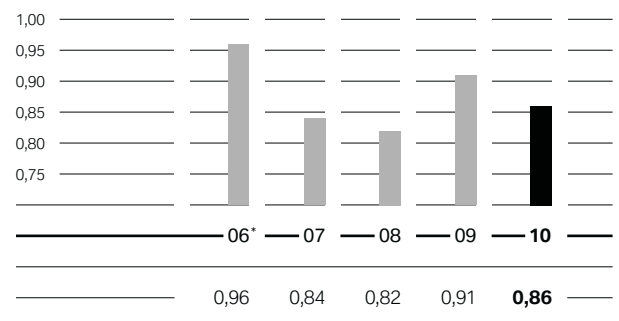

\* Wert hochgerechnet auf 17 Standorte. Berichtsumfang umfasste ursprünglich zehn Standorte.

Die Absatzentwicklung spiegelt sich auch in der Aufteilung der Transportwege für unsere Neufahrzeuge wider: Insgesamt verließen 49,5% aller Neufahrzeuge unsere Werke auf dem Schienenweg. Im Vergleich zum Vorjahr ist dies ein Anstieg um 2,5 Prozentpunkte (2009: 47,0%).

### Nachhaltigkeit in den Wertschöpfungsketten

Auch unsere Lieferanten haben die hohen ökologischen und sozialen Standards der BMW Group einzuhalten. Aus diesem Grund wurden die Nachhaltigkeitskriterien für die Lieferantenauswahl weiter konkretisiert und die Betreuung aktueller Lieferanten wurde intensiviert. Im Mittelpunkt standen dabei die Evaluierung und Betreuung der weltweiten Produktionsstandorte unserer Lieferanten.

### Konsequente CO<sub>2</sub>-Reduzierung durch Efficient Dynamics

Frühzeitig hat die BMW Group eine Entwicklungsstrategie begonnen, die heute messbare Vorteile für Klima, Ressourcen und Kunden schafft. Im Mittelpunkt steht dabei unser Technologiepaket Efficient Dynamics: Seit März 2007 werden die verbrauchs- und emissionsmindernden Technologien schrittweise in alle Modelle serienmäßig eingeführt. So entfalten sie mit jedem verkauften Fahrzeug ihre positive Wirkung und sind nicht nur auf einzelne Sondermodelle beschränkt. Die Efficient Dynamics Technologien umfassen:

- optimierte Motoren- und Getriebetechnik (z. B. Benzinmotoren mit High Precision Injection, TwinPower Turbo Technologie sowie besonders effiziente Dieselmotoren)
- Leichtbau und optimierte Aerodynamik (z. B. durch den intelligenten Einsatz von Aluminium und hochfesten Stählen)

- intelligentes Energiemanagement (z. B. durch Bremsenergieerückgewinnung und Auto Start Stop Funktion)

Oberste Leitlinie dabei ist: mehr Dynamik, weniger Verbrauch und weniger Emissionen. So haben wir den CO<sub>2</sub>-Ausstoß unserer neu verkauften Fahrzeuge in Europa (EU-15) zwischen 1995 und 2010 um 30% verringert. Dadurch konnten wir die Zusage der europäischen Automobilindustrie, die CO<sub>2</sub>-Emissionen im Durchschnitt der Neuwagenflotte von 1995 bis 2008 um 25% zu senken (ACEA-Selbstverpflichtung), mehr als erfüllen.

Unsere Fahrzeugflotte hatte im Jahr 2010 einen durchschnittlichen Kraftstoffverbrauch von 5,4 l Diesel/100 km bzw. 6,6 l Benzin/100 km und mittlere CO<sub>2</sub>-Emissionen von 148 g/km in Europa (EU-27). Auch im deutschen Vergleich nehmen wir mit einem CO<sub>2</sub>-Ausstoß von rund 154 g/km eine Spitzenposition ein. Dadurch bestätigten wir in Deutschland unsere Führungsrolle im Premiumsegment. Diese Fortschritte werden auch von Kunden anerkannt. Insbesondere in Märkten mit einer CO<sub>2</sub>-basierten Kraftfahrzeugsteuer haben wir mit Efficient Dynamics einen Wettbewerbsvorteil. Dort sind die laufenden Kosten unserer Fahrzeuge im Wettbewerbsvergleich deutlich niedriger.

Wir haben uns für die nächsten Jahre ein klares Ziel gesetzt: Von 2008 bis 2020 sollen die CO<sub>2</sub>-Emissionen unserer Fahrzeuge um mindestens weitere 25% reduziert werden. Um dieses Ziel zu erreichen und zu einer nachhaltigen Mobilität zu gelangen, gehen wir in drei Schritten vor:

1. Wir werden das Maßnahmenpaket Efficient Dynamics konsequent weiterentwickeln.

### Wasserverbrauch<sup>1</sup> je produziertes Fahrzeug

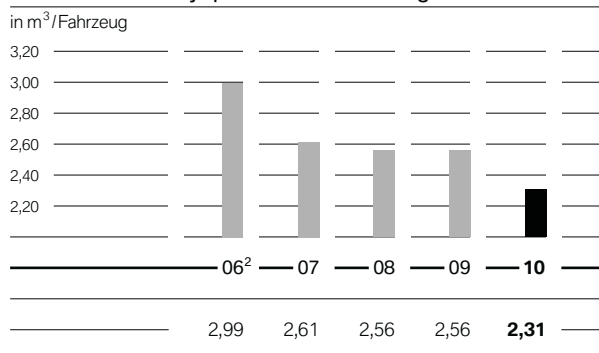

<sup>1</sup> Die Kennzahlen zum Wasserverbrauch beziehen sich auf die Produktionsstandorte der BMW Group. Der Wasserverbrauch umfasst den Prozesswasser-Input für die Fertigung sowie den allgemeinen Wasserverbrauch beispielsweise für Sanitäranlagen.

<sup>2</sup> Wert hochgerechnet auf 17 Standorte. Berichtsumfang umfasste ursprünglich zehn Standorte.

### Prozessabwasser je produziertes Fahrzeug

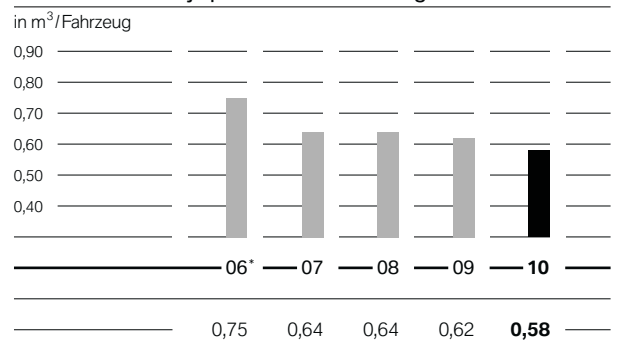

\* Wert hochgerechnet auf 17 Standorte. Berichtsumfang umfasste ursprünglich zehn Standorte.

|    |                                              |
|----|----------------------------------------------|
| 12 | <b>KONZERNLAGEBERICHT</b>                    |
| 12 | Das Geschäftsjahr im Überblick               |
| 14 | Wirtschaftliche Rahmenbedingungen            |
| 18 | <b>Geschäftsverlauf</b>                      |
| 41 | BMW Group – Kapitalmarktaktivitäten          |
| 44 | Übernahmerelevante Angaben und Erläuterungen |
| 47 | Finanzwirtschaftliche Situation              |
| 47 | Konzerninternes Steuerungssystem             |
| 49 | Ertragslage                                  |
| 51 | Finanzlage                                   |
| 53 | Vermögenslage                                |
| 55 | Nachtragsbericht                             |
| 55 | Wertschöpfungsrechnung                       |
| 57 | Finanzwirtschaftliche Kennzahlen             |
| 58 | Erläuterungen zur BMW AG                     |
| 62 | Internes Kontrollsystem und Erläuterungen    |
| 63 | Risikomanagement                             |
| 70 | Prognosebericht                              |

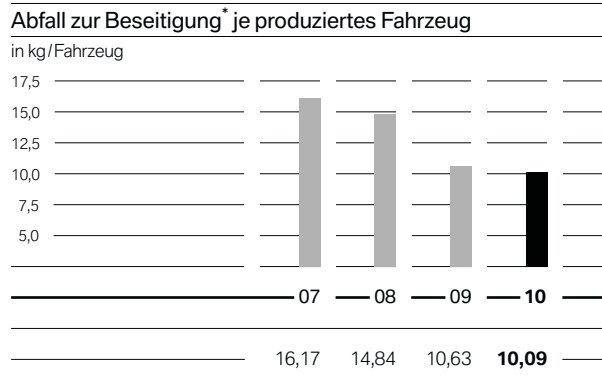

\* Die Kennzahl „Abfall zur Beseitigung je produziertes Fahrzeug“ dient seit 2007 als Steuerungsgröße und wird seitdem berichtet.

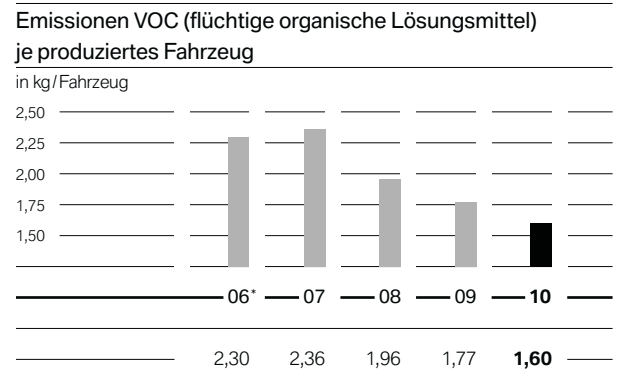

\* Wert hochgerechnet auf 17 Standorte. Berichtsumfang umfasste ursprünglich zehn Standorte.

- Wir werden die Verbrauchs- und Dynamikpotenziale der Elektrifizierung des Antriebs auf eine breite Modellpalette ausweiten.
- Langfristig setzen wir auf emissionsfreie Mobilität mit Elektro- und Wasserstofffahrzeugen.

#### Kompetenzaufbau für die Mobilität der Zukunft

Zur Entwicklung alternativer Konzepte für individuelle Mobilität haben wir bereits im Jahr 2007 das Zukunftsprojekt project i gestartet. Darunter verstehen wir nicht nur die Entwicklung alternativer Antriebe, sondern auch den Einsatz völlig neuer Materialien wie Verbundwerkstoffe. Im project i arbeiten wir an Fahrzeugen mit Elektroantrieben, aber auch an Konzepten, die die Umweltauswirkungen des Automobils in der gesamten Wertschöpfungskette deutlich reduzieren sollen.

Das erste öffentlich sichtbare Ergebnis von project i war der bisher größte Feldversuch zur Elektromobilität: Rund 600 vollelektrische MINI Automobile wurden an Privat- und Geschäftskunden in den USA, Großbritannien, Deutschland, Frankreich, Japan und China übergeben. Nach weit über 10 Mio. Kilometern Elektromobilität im Alltagseinsatz haben wir wertvolle Erkenntnisse gewonnen, die direkt in die Entwicklung des ersten vollelektrischen Serienfahrzeugs der BMW Group einfließen.

#### Nachhaltige Mobilität der Zukunft kommt aus Leipzig

Unter dem Arbeitstitel Megacity Vehicle (MCV) entwickeln wir derzeit das erste Großserienfahrzeug der Automobilindustrie, das konsequent auf die Anforderungen zukünftiger Elektromobilität in Ballungsräumen ausgelegt ist. Im November 2010 haben wir in Leipzig

den Startschuss für den Bau des Werks gegeben, 2013 wird das Fahrzeug auf den Markt kommen.

Die BMW Group legt in der gesamten Wertschöpfungskette des Megacity Vehicle größten Wert auf Nachhaltigkeit. Dieser Ansatz geht über den emissionsfreien Betrieb des Fahrzeugs weit hinaus. Auch bei der Produktion setzt sich die BMW Group im Hinblick auf Umweltschutz und Schonung natürlicher Ressourcen anspruchsvolle Ziele: So sollen bei der Montage im Werk Leipzig der Energiebedarf um 50% und der Wasserverbrauch um 70% pro Fahrzeug reduziert werden. Bei der Produktion des MCV wird angestrebt, die eingesetzte Energie vollständig aus regenerativen Energiequellen zu decken.

Bereits ab 2011 läuft im Werk Leipzig der BMW ActiveE auf Basis des BMW 1er Coupé vom Band. Dieses Fahrzeug ist nach dem MINI E der zweite Schritt der BMW Group hin zum emissionsfreien Elektrofahrzeug in Serienproduktion. Die Erfahrungen mit dem MINI E und dem BMW ActiveE fließen direkt in die Serienentwicklung des Megacity Vehicle ein. Leipzig wird damit schon ab 2011 ein Kompetenzzentrum für die Produktion von Elektroautos im weltweiten Netzwerk der BMW Group.

#### Gesellschaftliches Engagement fester Bestandteil der Unternehmensphilosophie

Gesellschaftliches Engagement ist seit Langem fester Bestandteil der Unternehmensphilosophie und der Nachhaltigkeitsstrategie der BMW Group. In diesem Rahmen engagiert sich die BMW Group beispielsweise auch mit dem Award für Interkulturelles Engagement weltweit für eine bessere Verständigung zwischen unterschiedlichen Nationen, Ethnien, Religionen und Kulturen. Im Mittel-

### Entwicklung der CO<sub>2</sub>-Emissionen der BMW Group Automobile in Europa

(Index: 1995 = 100; Basis ist der Flottenverbrauch neu zugelassener Fahrzeuge in Europa (EU-15) im Neuen Europäischen Fahrzyklus gemäß ACEA-Selbstverpflichtung)

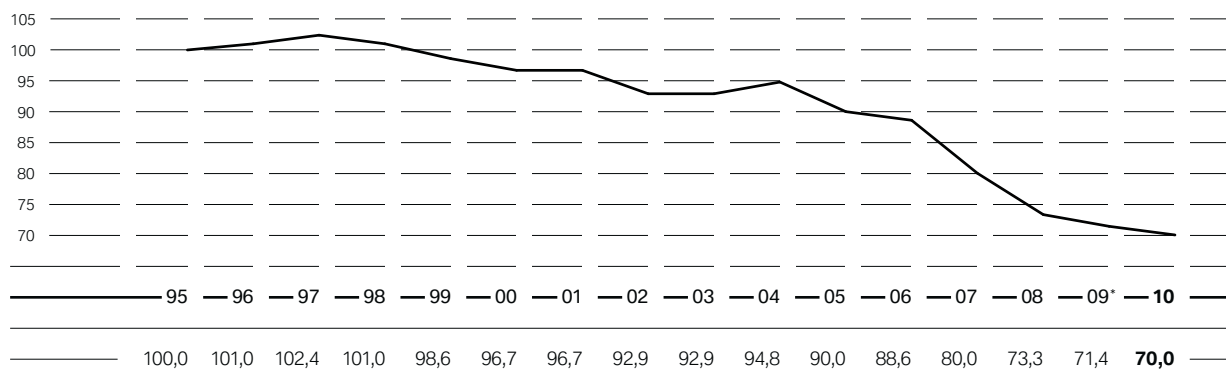

\* ab 2009 Berechnung nur noch auf Basis EU-27

punkt stehen dauerhafte Partnerschaften und Aktivitäten, die mit Innovationsgeist und Weitblick eine langfristige Basis für ein konstruktives Zusammenleben in der modernen Gesellschaft schaffen.

Die BMW Group engagiert sich weltweit seit 40 Jahren bei zahlreichen kulturellen Projekten. Vom größten Straßenfestival in Mexiko Stadt bis zur Staatsoper für alle in Berlin handelt das Unternehmen dabei stets längerfristig und nachhaltig. Als Kooperationspartner im Kulturbereich belässt die BMW Group sowohl kreative Freiheit als auch kuratorische Entscheidungskompetenz komplett bei den kulturellen Institutionen. 2010 wurde das BMW Guggenheim Lab initiiert. In zahlreichen europäischen, amerikanischen und asiatischen Metropolen bietet das Projekt temporäre, multidisziplinäre Plattformen, die zum internationalen Dialog über die Herausforderungen der Zukunft einladen.

12 — **KONZERNLAGEBERICHT**

12 Das Geschäftsjahr im Überblick

14 Wirtschaftliche Rahmenbedingungen

18 — **Geschäftsverlauf**

41 BMW Group – Kapitalmarktaktivitäten

44 Übernahmerelevante Angaben und Erläuterungen

47 Finanzwirtschaftliche Situation

47 Konzerninternes Steuerungssystem

49 Ertragslage

51 Finanzlage

53 Vermögenslage

55 Nachtragsbericht

55 Wertschöpfungsrechnung

57 Finanzwirtschaftliche Kennzahlen

58 Erläuterungen zur BMW AG

62 Internes Kontrollsystem und Erläuterungen

63 Risikomanagement

70 Prognosebericht

**Forschungs- und Entwicklungsleistungen gestiegen**

Die BMW Group beschäftigte im Berichtsjahr im Forschungs- und Innovationsnetzwerk über 9.000 Mitarbeiter an elf Standorten in fünf Ländern. Im Jahr 2010 stiegen die Forschungs- und Entwicklungsleistungen im Vergleich zum Jahr 2009 um 13,3% auf 2.773 Mio. Euro. Die Forschungs- und Entwicklungsquote betrug im Berichtszeitraum 4,6% und fiel damit im Vergleich zum Vorjahr um 0,2 Prozentpunkte niedriger aus. Nähere Angaben zu den Forschungs- und Entwicklungsleistungen sind im Konzernanhang unter der Textziffer 8 zu finden.

**Innovativ und nachhaltig**

Die permanente Suche nach effizienten Lösungen zur weiteren Reduzierung von Emissionen unserer Fahrzeugflotte ist für uns ein wichtiger Antrieb in der Forschung und Fahrzeugentwicklung. Aus diesem Grund setzen wir darauf, durch unser Maßnahmenpaket Efficient Dynamics sämtliche Verbesserungspotenziale zu erschließen.

Ein Umstieg auf elektrisch betriebene Fahrzeuge hat vor allem dann eine positive Auswirkung auf die CO<sub>2</sub>-Bilanz, wenn auch die verwendete Energie regenerativ erzeugt wird. Neue Antriebskonzepte wie Hybrid- und Elektroantriebe sowie langfristig auch der Wasserstoffantrieb werden wachsende Bedeutung bekommen.

Gegenwärtig entwickeln wir ein völlig neues Konzept für nachhaltige Mobilität im urbanen Umfeld. Dieses elektrisch betriebene Megacity Vehicle (MCV) verfügt über einen neu entwickelten Antrieb sowie eine revolutionäre Fahrzeugarchitektur, die konsequenten Leichtbau, optimale Raumfunktionalität und höchste Fahrzeugsicherheit miteinander verbindet. Das MCV wird 2013 als Serienfahrzeug im Premiumsegment eingeführt.

**Kundennutzen im Mittelpunkt**

Ein wesentlicher Baustein unserer starken Wettbewerbsposition besteht darin, mit innovativen Technologien unseren Kunden einen erkennbaren Mehrwert zu bieten. Einer unserer Innovationsschwerpunkte ist dabei das Maßnahmenpaket Efficient Dynamics. Mit Efficient Dynamics werden alle Effizienzmaßnahmen in der Motorentechnologie, im Energiemanagement sowie in Leichtbau und Aerodynamik vereint. Damit haben wir bei der Kraftstoffreduzierung in den vergangenen Jahren die Spitzenposition im Premiumsegment errungen.

Connected Drive ist der zweite Schwerpunkt in der Entwicklung innovativer Technologien und fasst alle Themen zum Informationsfluss rund um das Fahrzeug zu-

sammen. Zum Funktionsumfang gehören nicht nur die Dienste BMW Assist und BMW Online, sondern zahlreiche weitere Systeme, die durch Vernetzung ein Mehr an Komfort, Information und Unterhaltung sowie Sicherheit bieten. Dazu zählen unter anderem die Spurwechsel- und Spurverlassenswarnung, Speed Limit Info, BMW Night Vision mit Personenerkennung, Rückfahrkamera einschließlich Top View und der Parkassistent. Darüber hinaus optimieren wir die Einbindung von innovativen Endgeräten wie Smartphones und Musikplayern. Neben der Internetnutzung ermöglicht Connected Drive unter anderem auch die Darstellung durch Smartphones empfangener E-Mail-Nachrichten sowie die Nutzung internetbasierter Dienste zur Navigation und Unterhaltung.

Im neuen BMW 6er Cabrio, das ab Frühjahr 2011 für Kunden erhältlich ist, kommt erstmals die neue Generation des Head-Up-Display zum Einsatz. Das System projiziert für den Fahrer wesentliche Informationen im direkten Sichtfeld auf die Windschutzscheibe. Die Darstellung der dreidimensional aufbereiteten Grafiken umfasst das gesamte Farbspektrum, sodass auch Verkehrssymbole realitätsgetreu abgebildet werden.

**Energie- und umwelttechnisches Versuchszentrum eröffnet**

Im Mai 2010 eröffneten wir in München das neue Energie- und umwelttechnische Versuchszentrum (EVZ). Bereits in der Planung wurde Wert auf einen ökologisch nachhaltigen Betrieb gelegt. In diesem völlig neuen Simulationszentrum werden Innovationen vor ihrem Serieneinsatz unter einer Vielzahl klimatischer Bedingungen getestet. Hier sind wir nun in der Lage, wichtige Umwelteinflüsse wie Temperaturunterschiede, Luftfeuchtigkeit und Luftdruck, Niederschlag und Wind realitätsgetreu nachzustellen und dadurch aufwändige Heiß- und Kaltlanderprobungen zu vermeiden. So können Transportwege und -zeiten verringert sowie weniger Prototypen für insgesamt mehr Versuche genutzt werden. Darüber hinaus stehen durch die Konzentration der Testreihen unter einem Dach und der Unabhängigkeit von den Jahreszeiten Testergebnisse schneller zur Verfügung.

**Gemeinsam Chancen nutzen**

Im Berichtsjahr 2010 entschieden die BMW Group und der PSA Konzern ihre seit Jahren bestehende Kooperation künftig auch auf die Entwicklung und Fertigung von Hybridsystemen auszuweiten. Dazu unterzeichneten die BMW Group und PSA Peugeot Citroën im Februar 2011 eine Vereinbarung über den Aufbau eines Joint Venture. Ziel der Initiative der beiden Unternehmen ist vor allem, standardisierte Hybridkomponenten für die Elektrifizie-

nung ihrer Fahrzeugflotten zu entwickeln. Die gemeinsame Forschung, Entwicklung und Produktion sowie der gemeinsame Komponenteneinkauf werden für beide Konzerne bedeutende Kostenvorteile bringen.

#### **Forschung für die Zukunft fortgesetzt**

2010 stellten wir erstmals öffentlich ein Brennstoffzellen-Hybridfahrzeug vor. Auf Basis der BMW 1er Reihe zeigt dieses Forschungsfahrzeug eine neuartige Ausprägung von Hybridtechnologie in Verbindung mit der Nutzung von Wasserstoff als Energieträger. Neben einem Vierzylinder-Benzinmotor verfügt der Prototyp über einen Elektroantrieb für den Stadtverkehr. Durch die Verwendung einer vergleichsweise kleinen Brennstoffzelle zur Gewinnung von Strom aus Wasserstoff wird insbesondere im Stadtverkehr ein hoher Wirkungsgrad erzielt. Der Verbrennungsmotor wird ausschließlich für Fahrten mit höherer Geschwindigkeit eingesetzt. Diese Kombination könnte zukünftig eine emissionsfreie Reichweite von mehreren Hundert Kilometern im Stadtverkehr und ein Aufladen innerhalb weniger Minuten ermöglichen.

Der im Rahmen unserer Forschungsprojekte konzipierte Nothalteassistent trägt wesentlich zur Steigerung der Verkehrssicherheit bei. Wird eine gesundheitlich bedingte Notfallsituation des Fahrers erkannt, wechselt das System in einen autonomen Fahrmodus und absolviert anschließend ein abgesichertes Nothaltemanöver. Die Grundlage für die präzise und sichere Ausführung des Fahrmanövers bildet neben der Lokalisierung des Fahrzeugs innerhalb der eigenen Fahrspur vor allem die zuverlässige und vollständige Erkennung aller Fahrzeuge in der unmittelbaren Umgebung.

Als Mittel zur Vernetzung der Mobilität mit der Umwelt des Fahrers wurde der Prototyp eines multifunktionalen Autoschlüssels entwickelt. Der sogenannte BMW Key ist mit einem Sicherheitschip versehen, der beispielsweise bargeldloses Einkaufen ermöglicht oder die Buchung von Hotelzimmern speichert. Darüber hinaus bietet der Fahrzeugschlüssel mit integrierter Kreditkartenfunktion die Möglichkeit, elektronische Fahrkarten für Bus und Bahn sowie Flugtickets im Auto zu buchen und auf dem Schlüssel zu speichern.

#### **Zahlreiche Auszeichnungen für die BMW Group**

Für hervorragendes Produktdesign erhielten die Modelle Rolls-Royce Ghost, BMW 5er Limousine, BMW X1, BMW 5er Gran Turismo, BMW F 800 R und BMW S 1000 RR sowie fünf innovative Entwicklungen von BMW Group DesignworksUSA jeweils die Auszeichnung red dot. Dabei erhielt der neue Rolls-Royce Ghost den Sonderpreis

„red dot: best of the best“ für höchste Designqualität. Darüber hinaus wurde die neue BMW 5er Limousine vom Rat für Formgebung mit dem Designpreis der Bundesrepublik Deutschland in Silber ausgezeichnet.

Die BMW Group erreichte auch im Jahr 2010 beim „International Engine of the Year Award“ große Erfolge: In vier von acht Hubraumklassen belegte das Unternehmen den ersten Rang und dominierte diesen Wettbewerb. Die erfolgreichen Motoren sind das V8-Triebwerk des BMW M3, der Reihensechszylinder-Benziner mit BMW TwinPower Turbo Direkteinspritzung und VALVETRONIC aus der BMW 1er, 3er und 5er Modellreihe, der Vierzylinder-Dieselmotor mit BMW TwinPower Turbo aus dem BMW X1 xDrive23d und dem BMW 123d sowie der Vierzylinder-Twin-Scroll-Turbomotor des MINI Cooper S.

Beim ADAC EcoTest erzielte der BMW 320d EfficientDynamics Edition die Höchstwertung von fünf Sternen und damit das bisher beste ermittelte Ergebnis eines konventionell angetriebenen Fahrzeugs. Mit 92 von 100 möglichen Punkten erweist sich die viertürige Limousine als sparsamstes Dieselfahrzeug der Mittelklasse. Der BMW 320d EfficientDynamics Edition überzeugte im ADAC EcoTest mit einem Verbrauch von 4,4 Litern und einem CO<sub>2</sub>-Ausstoß von nur 116 Gramm pro Kilometer.

Das Sicherheitsprüfinstitut Euro NCAP (European New Car Assessment Programme) verlieh uns eine Sonderauszeichnung für den Erweiterten Notruf mit automatischer Ortung und Verletzungsrisikoproggnose, den BMW Assist Advanced eCall. Der erstmals vergebene Euro NCAP Advanced Award würdigt wegweisende Technologien auf dem Gebiet der Fahrzeugsicherheit und des Insassenschutzes, deren Wirkung über die Anforderungen des europaweit anerkannten Crashtests hinausreicht.

12 — **KONZERNLAGEBERICHT**

- 12 Das Geschäftsjahr im Überblick
- 14 Wirtschaftliche Rahmenbedingungen
- 18 — **Geschäftsverlauf**
- 41 BMW Group – Kapitalmarktaktivitäten
- 44 Übernahmerelevante Angaben und Erläuterungen
- 47 Finanzwirtschaftliche Situation
  - 47 Konzerninternes Steuerungssystem
  - 49 Ertragslage
  - 51 Finanzlage
  - 53 Vermögenslage
  - 55 Nachtragsbericht
  - 55 Wertschöpfungsrechnung
  - 57 Finanzwirtschaftliche Kennzahlen
  - 58 Erläuterungen zur BMW AG
- 62 Internes Kontrollsystem und Erläuterungen
- 63 Risikomanagement
- 70 Prognosebericht

## Neuausrichtung des Ressorts Einkauf und Lieferantennetzwerk

Der anhaltenden Internationalisierung und zunehmenden Komplexität auf den Beschaffungsmärkten und innerhalb der Produktionsnetzwerke trugen wir im Jahr 2010 durch die Ausrichtung der Einkaufsorganisation nach technologischen Warengruppen Rechnung. Dabei stand im Mittelpunkt, Verantwortungen weltweit zu bündeln sowie Markt- und Technologieverständnis weiter zu verbessern.

### Wieder zahlreiche Modellanläufe

Das Jahr 2010 war von zahlreichen Modellanläufen innerhalb unseres weltweiten Produktionsnetzwerks geprägt. Mit dem Produktionsstart der neuen BMW 5er Modellreihe sowie des neuen BMW 6er in Deutschland, der 5er Langversion in China, des neuen BMW X3 in den USA, aber auch der MINI Modellüberarbeitung in Großbritannien konnten die Herausforderungen durch frühzeitige Einbindung des Liefernetzwerks erneut erfolgreich gemeistert werden. Für die BMW 5er Langversion und den X3 wurden im Vorfeld verstärkt auch lokale Lieferanten ausgebildet, um die hohen Qualitätsanforderungen und Standards der BMW Group von Produktionsbeginn an sicherzustellen.

### Nutzung internationaler Beschaffungsmärkte

Im Geschäftsjahr 2010 setzten wir auch den Ausbau der globalen Beschaffungsaktivitäten für zukünftige Fahrzeugprojekte fort. Neben Europa standen dabei die wichtigsten Absatzmärkte im NAFTA-Raum sowie in Asien im Mittelpunkt. Im Rahmen der Auswahl unserer Lieferanten haben wir gezielt darauf geachtet, dass die Versorgung für zukünftige Modelle (BMW X-Baureihe, MINI, BMW 1er) verstärkt auch von ortsansässigen Lieferanten aus den jeweiligen Produktionsmärkten erfolgt. Auf diese Weise können vor allem Innovationspotenziale, aber auch Kostenvorteile stärker genutzt werden. Gleichzeitig wird durch den Einkauf in der jeweiligen Fremdwährung das Währungsrisiko sowohl für die BMW Group wie auch für den Lieferanten verringert. Dazu trägt auch die flächendeckende Anwendung der sogenannten Multiwährungsbestellungen bei. Bei diesem Novum in der Automobilindustrie erfolgen Bestellung und Abrechnung von Produktionsmaterial, abhängig vom jeweiligen Wertschöpfungsanteil, in verschiedenen Währungen.

### Produktivitäts- und Technologievorsprung in der CFK-Produktion

Durch die engere Abstimmung von Fertigungs- und Einkaufsaktivitäten für die Kunststoffaußenhaut des

## Regionale Verteilung des Einkaufsvolumens der BMW Group im Jahr 2010

in %, Basis: Produktionsmaterial

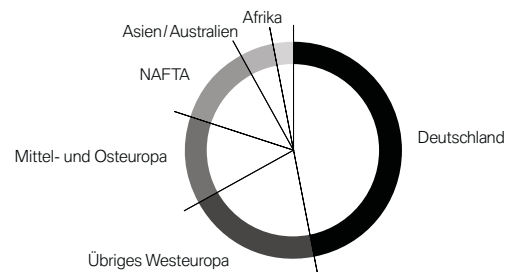

|                       |    |                  |    |
|-----------------------|----|------------------|----|
| Deutschland           | 47 | NAFTA            | 12 |
| Übriges Westeuropa    | 20 | Asien/Australien | 5  |
| Mittel- und Osteuropa | 13 | Afrika           | 3  |

Megacity Vehicle haben wir bedeutende Synergien innerhalb der Prozesskette erzielt. Dies versetzt uns in die Lage, die Entscheidung, ob Komponenten intern gefertigt oder extern bezogen werden, schnell und kompetent zu treffen. Die Kompetenzen aus Fertigung, Qualitätssicherung und Einkauf werden damit gebündelt und ermöglichen eine bessere Abstimmung mit unseren Lieferanten.

Der Ausbau der CFK-Produktion im BMW Werk Landshut und die gleichzeitige Inbetriebnahme der Anlagen zur Produktion von Kohlefasergelegten markierten den Beginn der Vorbereitungen zur Serienproduktion des Megacity Vehicle, das im Jahr 2013 auf den Markt kommen wird. Der Standort Wackersdorf liefert dazu die textilen Gelege aus Kohlefasern, die in Landshut zu Leichtbau-Karosseriekomponenten aus CFK verarbeitet werden. Die Fertigung des Fahrzeugs wird im BMW Werk Leipzig erfolgen.

### Kooperationen ausgeweitet

Die Kooperationsgespräche zwischen der BMW AG und der Daimler AG zum gemeinsamen Einkauf von Komponenten kommen gut voran. Wir haben inzwischen eine zweistellige Zahl von Komponenten identifiziert, die gemeinsam bezogen werden sollen. Die Zusammenarbeit bezieht sich dabei ausschließlich auf Komponenten, die nicht zur Unterscheidung der Marken beitragen und damit auch nicht wettbewerbsrelevant sind. Die Kooperation soll weiter ausgebaut werden, um so schrittweise mehr Teile und Komponenten gemeinsam einzukaufen.



Auch der gemeinsame Einkauf in China birgt für uns große Chancen. Ziel beider Unternehmen ist es, in der Evaluierung von Audit-Ergebnissen und der Qualifizierung von Lieferanten zusammenzuarbeiten.

#### **Nachhaltigkeit in den Wertschöpfungsketten**

Für die Auswahl von Lieferanten war die Einhaltung der hohen ökologischen und sozialen Standards der BMW Group auch im Jahr 2010 ein wesentliches Kriterium. Im Mittelpunkt standen dabei die intensive Evaluierung und Betreuung der weltweiten Produktionsstandorte unserer Lieferanten. Dies gilt gleichermaßen für die übergreifende Betrachtung unserer Inhouse-Komponenten und Kaufteile über den gesamten Produktlebenszyklus, von der Rohstoffgewinnung bis zum Reststoffrecycling.

#### **Modellpalette erweitert**

Unsere Produktoffensive setzten wir im Verlauf des Jahres 2010 fort. Nachdem der Marktstart des BMW X1 Ende des Jahres 2009 in den europäischen Märkten erfolgt war, wurde die weltweite Markteinführung des überaus erfolgreichen Modells 2010 fortgesetzt. Im Frühjahr 2010 startete die neue BMW 5er Limousine in ausgewählten Märkten. Seit Juni ist dieses Modell weltweit verfügbar. Im September ging auch der neue BMW 5er Touring an den Start. Speziell für die Kundenanforderungen auf dem chinesischen Markt wurde eine Langversion der BMW 5er Limousine entwickelt, die seit Anfang September dort verfügbar ist. Auf dem Pariser Autosalon haben wir Anfang Oktober den neuen BMW X3 vorgestellt. Die zweite Generation des Erfolgsmodells ist seit Ende November erhältlich. Darüber hinaus haben wir der Öffentlichkeit auch Konzeptstudien präsentiert. Im April 2010 stellten wir in Peking das BMW Concept Gran Coupé als Vorbild für die neue Generation großer BMW Coupés vor. Auf dem Pariser Automobilsalon zeigten wir im Oktober das BMW Concept 6 Series Coupé als Ausblick auf das neue BMW 6er Coupé. Mitte November kündigten wir an, dass im Frühjahr 2011 ein neues BMW 6er Cabrio für Kunden erhältlich sein wird.

#### **Countryman erweitert MINI Familie**

Das Jahr 2010 war gekennzeichnet durch die Einführung des vierten Mitglieds der MINI Familie. Auf die Enthüllung des MINI Countryman zu Beginn 2010 auf dem Genfer Auto-Salon folgte der Verkaufsbeginn in den europäischen Märkten im September 2010, die Einführung in Asien und Amerika findet Anfang 2011 statt.

Der MINI Countryman steht für eine bedeutende Erweiterung des MINI Portfolios. Mit seinen vier Türen und Allradantrieb richtet sich das Modell an eine neue Zielgruppe. Damit schreitet der gezielte Ausbau bei MINI zu einer Mehrproduktmarke voran. Im vergangenen Jahr wurde darüber hinaus die bestehende Modellpalette überarbeitet.

Mit drei Siegen bei der Rallye Monte Carlo war MINI bereits in den Sechzigerjahren ein fester Bestandteil des Rallyesports. An diese Tradition werden wir anknüpfen. Der neue MINI Countryman wird als Rallyeversion ab 2011 an der FIA World Rally Championship (WRC) teilnehmen.

#### **Angebot an Mobilitätsdienstleistungen ausgeweitet**

Mit der Strategie Number ONE hat sich die BMW Group zum Ziel gesetzt, der führende Anbieter von Premium-Produkten und Premium-Dienstleistungen für individu-

|    |   |                                              |
|----|---|----------------------------------------------|
| 12 | — | <b>KONZERNLAGEBERICHT</b>                    |
| 12 |   | Das Geschäftsjahr im Überblick               |
| 14 |   | Wirtschaftliche Rahmenbedingungen            |
| 18 | — | <b>Geschäftsverlauf</b>                      |
| 41 | — | <b>BMW Group – Kapitalmarktaktivitäten</b>   |
| 44 |   | Übernahmerelevante Angaben und Erläuterungen |
| 47 |   | Finanzwirtschaftliche Situation              |
| 47 |   | Konzerninternes Steuerungssystem             |
| 49 |   | Ertragslage                                  |
| 51 |   | Finanzlage                                   |
| 53 |   | Vermögenslage                                |
| 55 |   | Nachtragsbericht                             |
| 55 |   | Wertschöpfungsrechnung                       |
| 57 |   | Finanzwirtschaftliche Kennzahlen             |
| 58 |   | Erläuterungen zur BMW AG                     |
| 62 |   | Internes Kontrollsystem und Erläuterungen    |
| 63 |   | Risikomanagement                             |
| 70 |   | Prognosebericht                              |

elle Mobilität zu werden. Die BMW Group schafft mit innovativen Mobilitätsdienstleistungen ein zusätzliches profitables Geschäftsfeld.

Mit BMW ConnectedDrive bieten wir seit Jahren erfolgreich fahrzeuggebundene Dienstleistungen für BMW und MINI Kunden an. Dieses Angebot wird künftig deutlich erweitert. Dabei verfolgen wir einen ganzheitlichen Ansatz aus fahrzeuggebundenen und nicht fahrzeuggebundenen Mobilitätsdienstleistungen mit dem Ziel, ein komplettes Spektrum von Premium-Mobilitätsdienstleistungen anzubieten.

#### **Erweiterung des Vertriebsnetzes**

Um den Anforderungen der aufstrebenden Märkte gerecht zu werden, haben wir das Vertriebsnetz in China und den übrigen BRIC-Märkten erweitert. Insgesamt wurden in diesen Märkten rund 100 neue Betriebe eröffnet. Das weltweite Vertriebsnetz umfasst damit etwa 3.100 BMW, 1.300 MINI und 80 Rolls-Royce Handelsbetriebe.

#### **Stärkung der Vertriebsorganisation**

In dem 2009 gestarteten Händlerqualifizierungsprogramm sind bis Ende 2010 über 800 Händler in 14 Märkten individuell geschult worden. Ziel war es, insbesondere den Verkauf von Neuwagen zu unterstützen. Dabei konnte in einer schwierigen Zeit ein Beitrag zur Profitabilität des Händlernetzes geleistet werden. Aufgrund der Ergebnisse und auch der überaus positiven Resonanz aus der Handelsorganisation haben wir uns entschieden, die entwickelte Methode und die Inhalte des Programms auf weitere Bereiche des Handels auszuweiten. Damit etablieren wir ein langfristiges Instrument zur Stärkung der Handelsorganisation.

#### **Kundendienst als wichtiger Erfolgsfaktor**

Der Kundendienst liefert einen wichtigen Beitrag zur Kundenzufriedenheit. Für die BMW Group und ihr weltweites Händlernetz stellt der Vertrieb von BMW und MINI Teilen, Zubehör und Serviceleistungen einen wesentlichen Erfolgsfaktor dar. Neben einer insgesamt sehr positiven Umsatzentwicklung dieses Geschäftsfelds konnte insbesondere in den beiden Märkten Deutschland und China ein dynamisches Wachstum im Berichtszeitraum erzielt werden.

Im Jahr 2010 wurde das bestehende Distributionsnetzwerk ausgebaut. So wurden weltweit zehn weitere Metro-Auslieferungszentren in Ballungsräumen in Betrieb genommen. Diese ermöglichen eine taggleiche Mehrfachbelieferung der BMW und MINI Handelsorganisation

mit Originalersatzteilen und -zubehör. Seit 2008 sind weltweit bereits 32 Metro-Auslieferungszentren eingerichtet worden.

#### **Rolls-Royce startet „21st Century Legends“-Kampagne**

Im Oktober 2010 startete Rolls-Royce Motor Cars unter dem Titel „21st Century Legends“ eine weltweite Imagekampagne. In einer Serie von fünf Filmen gewährt die Kampagne außergewöhnliche Einblicke in die Marktwelt von Rolls-Royce.

### Automobilwerte beflügeln den DAX

Vor dem Hintergrund der Schuldenkrise in der Eurozone und der Konjunktursorgen in den USA haben sich die Weltbörsen im Jahr 2010 uneinheitlich entwickelt. Der Deutsche Aktienindex DAX profitierte von einem robusten Wirtschaftswachstum in Deutschland und legte signifikant zu. Dabei gingen im Jahresverlauf vor allem von den Automobilwerten deutlich positive Impulse aus.

So legte der deutsche Leitindex im Jahresverlauf um 956,76 Punkte zu und beendete das Börsenjahr 2010 bei 6.914,19 Punkten (+ 16,1%). Noch im Dezember wurde dabei ein neues Jahreshoch mit 7.087,84 Punkten markiert. Der starke Kursanstieg der deutschen Automobilwerte prägte auch die Entwicklung des Prime Automobile Index: Der Branchenindex konnte im Berichtszeitraum um 306,51 Punkte auf 849,29 Punkte zulegen. Das entspricht einem Anstieg von 56,5% gegenüber dem Schlussstand des Vorjahres. Rückläufig entwickelte sich im Jahr 2010 hingegen der EURO STOXX 50. Er beendete das Börsenjahr 2010 bei 2.792,82 Punkten (- 5,8%).

Für die BMW Aktien konnte ein sehr gutes Börsenjahr 2010 verzeichnet werden. Die BMW Stammaktie schloss am letzten Handelstag des Jahres 2010 bei 58,85 Euro. Das entspricht einem Anstieg von 85,1% gegenüber dem Schlusskurs des Vorjahres. Damit war die Stammaktie im Jahr 2010 der beste Einzelwert im DAX. Aufgrund ihrer Marktbedeutung wurde die BMW Stammaktie im September 2010 in den EURO STOXX 50 aufgenommen. Der europäische Aktienindex umfasst die 50 größten börsennotierten Unternehmen der Eurozone. Auch die BMW Vorzugsaktie hat sich im Berichtszeitraum sehr positiv entwickelt. Sie beendete das Börsenjahr 2010 bei 38,50 Euro und damit um 67,4% über dem letzten Kurs des Jahres 2009.

### Belegschaftsaktienprogramm fortgeführt

Die BMW AG beteiligt seit mehr als 35 Jahren ihre Mitarbeiterinnen und Mitarbeiter am Unternehmenserfolg, seit 1989 in Form eines Belegschaftsaktienprogramms. Im Rahmen dieses Programms wurden im Jahr 2010 insgesamt 499.590 Vorzugsaktien an die Mitarbeiter ausgeben. Davon stammten 498.050 aus dem Genehmigten Kapital 2009, die übrigen Anteile wurden über die Börse zurückgekauft. Die neuen Vorzugsaktien stehen den bisher ausgegebenen Vorzugsaktien gleich.

### Attraktive Konditionen in volatilen Finanzmärkten

Auch der internationale Fremdkapitalmarkt konnte sich 2010 insgesamt deutlich erholen. Damit profitierte auch die BMW Group von günstigen Refinanzierungsbedingungen. Bedingt durch die europäische Schuldenkrise ergaben sich aber auch am Fremdkapitalmarkt Phasen mit deutlich erhöhter Volatilität.

Zur Refinanzierung des Finanzdienstleistungsgeschäfts ist die BMW Group auch im Berichtszeitraum wieder als Emittentin von Anleihen, Schuldscheindarlehen und ABS-Papieren aufgetreten. Im Jahr 2010 konnte die BMW Group erfolgreich zwei Euro-Benchmarkanleihen mit einem Gesamtemissionsvolumen von 2,5 Mrd. Euro am europäischen Kapitalmarkt emittieren. Darüber hinaus haben wir Anleihen in kanadischen Dollar, südafrikanischen Rand und schweizer Franken mit einem Gegenwert von insgesamt rund 1,4 Mrd. Euro begeben. Hinzu kommen Privatplatzierungen in verschiedenen Währungen in Höhe von insgesamt 2,7 Mrd. Euro. Auch im Berichtsjahr konnten wir unsere Refinanzierungsstärke unter Beweis stellen. In den USA wurde ein Volumen von 1,75 Mrd. US-Dollar und in Deutschland ein Volumen von 800 Mio. Euro erfolgreich durch öffentliche ABS-Anleihen platziert. Zusätzlich wurden in Deutschland

### Entwicklung der BMW Aktien im Vergleich zu Börsenindizes

(Index: 29.12.2000 = 100)

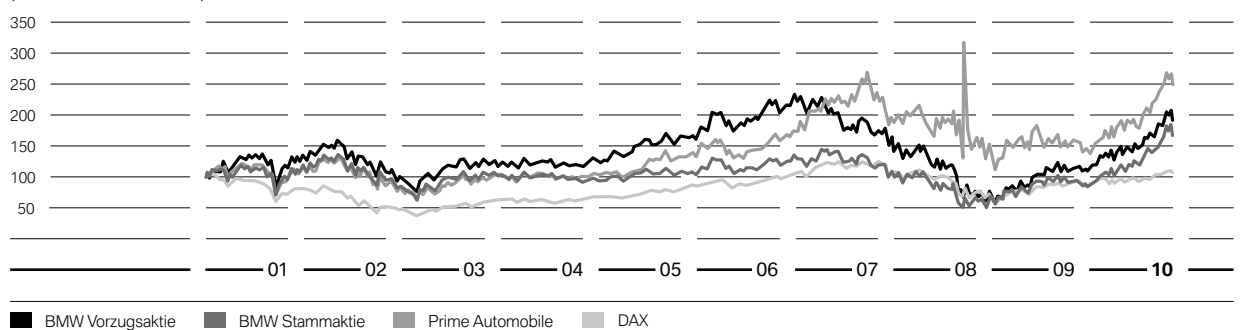

|    |                                              |
|----|----------------------------------------------|
| 12 | <b>KONZERNLAGEBERICHT</b>                    |
| 12 | Das Geschäftsjahr im Überblick               |
| 14 | Wirtschaftliche Rahmenbedingungen            |
| 18 | Geschäftsverlauf                             |
| 41 | <b>BMW Group – Kapitalmarktaktivitäten</b>   |
| 44 | Übernahmerelevante Angaben und Erläuterungen |
| 47 | Finanzwirtschaftliche Situation              |
| 47 | Konzerninternes Steuerungssystem             |
| 49 | Ertragslage                                  |
| 51 | Finanzlage                                   |
| 53 | Vermögenslage                                |
| 55 | Nachtragsbericht                             |
| 55 | Wertschöpfungsrechnung                       |
| 57 | Finanzwirtschaftliche Kennzahlen             |
| 58 | Erläuterungen zur BMW AG                     |
| 62 | Internes Kontrollsystem und Erläuterungen    |
| 63 | Risikomanagement                             |
| 70 | Prognosebericht                              |

400 Mio. Euro, in Japan 25 Mrd. Yen und in Kanada 428 Mio. kanadische Dollar verbrieft und als private ABS-Transaktion begeben. Sämtliche Emissionen wurden wie bereits in den Vorjahren sehr stark von institutionellen Anlegern wie auch von privaten Investoren nachgefragt.

### Ratingausblick angehoben

Im September 2010 wurde der Ratingausblick für die BMW AG durch die Ratingagenturen Moody's und S & P jeweils von „negativ“ auf „stabil“ angehoben. Begründet wird der verbesserte Ausblick mit der weltweit höheren Nachfrage nach Premiumautomobilen, von der die BMW Group in besonderem Maße profitieren wird.

### Nachhaltigkeit in der Finanzkommunikation

Die intensive Kommunikation mit Investoren und Analysten zur Nachhaltigkeitsstrategie der BMW Group und zu Maßnahmen zu deren Umsetzung wurde auch im

Jahr 2010 erfolgreich fortgeführt. Neben dem etablierten und jährlich stattfindenden Stakeholder-Round-Table in München wurde der Dialog auf Konferenzen zum Socially Responsible Investment und in zahlreichen Investorengesprächen vertieft.

### BMW Group zum sechsten Mal Branchenführer im Dow Jones Sustainability Index

Im September 2010 wurde die BMW Group von der Ratingagentur SAM zum sechsten Mal als Branchenführer im Dow Jones Sustainability Index World und Europe ausgezeichnet. Dabei betonten die Analysten von SAM, dass sich die BMW Group durch eine klare Nachhaltigkeitsstrategie und eine konsequente Umsetzung in der gesamten Wertschöpfungskette des Unternehmens auszeichnet. Darüber hinaus hoben die Analysten die großen Erfolge bei der Reduzierung des Kraftstoffverbrauchs und der CO<sub>2</sub>-Emissionen in der Fahrzeugflotte hervor. Als einziges Unternehmen der Branche ist die BMW Group

## Die BMW Aktie

|                                       | 2010              | 2009    | 2008    | 2007    | 2006    |
|---------------------------------------|-------------------|---------|---------|---------|---------|
| <b>Stammaktie</b>                     |                   |         |         |         |         |
| Anzahl der Aktien in 1.000 Stück      | 601.995           | 601.995 | 601.995 | 601.995 | 601.995 |
| Börsenkurs in Euro <sup>1</sup>       |                   |         |         |         |         |
| — Jahresschlusskurs                   | 58,85             | 31,80   | 21,61   | 42,35   | 43,51   |
| — Höchstkurs                          | 64,80             | 35,94   | 42,73   | 50,73   | 46,47   |
| — Tiefstkurs                          | 28,65             | 17,61   | 17,04   | 39,81   | 35,52   |
| <b>Vorzugsaktie</b>                   |                   |         |         |         |         |
| Anzahl der Aktien in 1.000 Stück      | 53.163            | 52.665  | 52.196  | 52.196  | 52.196  |
| Zurückgekaufte Aktien zum Stichtag    | -                 | -       | 363     | -       | -       |
| Börsenkurs in Euro <sup>1</sup>       |                   |         |         |         |         |
| — Jahresschlusskurs                   | 38,50             | 23,00   | 13,86   | 36,30   | 43,52   |
| — Höchstkurs                          | 41,90             | 24,79   | 36,51   | 47,52   | 45,91   |
| — Tiefstkurs                          | 21,45             | 11,05   | 13,00   | 33,64   | 31,80   |
| <b>Kennzahlen je Aktie in Euro</b>    |                   |         |         |         |         |
| Dividende                             |                   |         |         |         |         |
| — Stammaktie                          | 1,30 <sup>2</sup> | 0,30    | 0,30    | 1,06    | 0,70    |
| — Vorzugsaktie                        | 1,32 <sup>2</sup> | 0,32    | 0,32    | 1,08    | 0,72    |
| Ergebnis je Stammaktie <sup>3</sup>   | 4,91              | 0,31    | 0,49    | 4,78    | 4,38    |
| Ergebnis je Vorzugsaktie <sup>4</sup> | 4,93              | 0,33    | 0,51    | 4,80    | 4,40    |
| Cashflow <sup>5</sup>                 | 12,45             | 7,53    | 6,84    | 9,70    | 8,21    |
| Eigenkapital                          | 35,26             | 30,42   | 30,99   | 33,24   | 29,24   |

<sup>1</sup> Xetra-Schlusskurse

<sup>2</sup> Vorschlag der Verwaltung

<sup>3</sup> Gewichtung der Aktien im Jahresdurchschnitt

<sup>4</sup> Gewichtung der Aktien entsprechend der Dividendenberechtigung

<sup>5</sup> berechnet auf Basis des operativen Cashflows: bis 2006 des Industriegeschäfts, ab 2007 des Segments Automobile

seit Indexgründung im Jahr 1999 ohne Unterbrechung in dieser wichtigen Indexfamilie für nachhaltiges Wirtschaften vertreten.

Auch in dem renommierten FTSE4Good konnte die BMW Group sich in beiden Halbjahren des Jahres 2010 für den FTSE4Good Index und den FTSE4Good Environmental Index qualifizieren.

Im Rahmen der jährlichen Bewertung des Carbon Disclosure Project (CDP) – eine Gemeinschaftsinitiative von 534 global tätigen institutionellen Investoren – erreichte die BMW Group wie bereits im Vorjahr aufgrund ihrer transparenten Berichterstattung und des vorbildlichen Beitrags zum Klimaschutz wieder eine Spitzenposition. Erstmals hat das Carbon Disclosure Project im Jahr 2010 neben der Transparenz in der Berichterstattung auch die Leistungsfähigkeit des Klimaschutzmanagements und seine Erfolge bei der Reduktion von Treibhausgasemissionen berücksichtigt und den sogenannten Carbon Performance Leadership Index aufgesetzt. Die BMW Group wurde als eines von nur 48 Unternehmen in diesen Index aufgenommen.

#### **Investor-Relations-Aktivitäten erfolgreich ausgebaut**

Im Jahr 2010 wurde die umfangreiche Kapitalmarkt-kommunikation zur Unterstützung der Refinanzierungsaktivitäten und zur umfassenden Information der Investoren und Analysten weiter ausgebaut. Die Anzahl an Roadshows in den wesentlichen Finanzzentren der Welt sowie die Teilnahme an internationalen Investorenkonferenzen wurde signifikant erhöht. Auch die Anzahl an Investorengesprächen in München sowie Conference Calls hat stark zugenommen. Vom Kapitalmarkt wurden diese Aktivitäten sehr positiv aufgenommen und ausgezeichnet: Das BMW Group Investor-Relations-Team ist im Rahmen des Thomson-Extel-Surveys – der mit über 1.800 Teilnehmern wichtigsten Umfrage unter den Investment Professionals in Europa – zum besten IR-Team im europäischen Autosektor gewählt worden. Dieses Ergebnis wurde auch von der Fachzeitschrift Institutional Investor bestätigt. Im Rahmen einer Umfrage unter über 1.700 Investoren und Analysten wurde unser Team auch hier als bestes IR-Team des Automobilssektors ausgezeichnet.

## 12 — KONZERNLAGEBERICHT

12 Das Geschäftsjahr im Überblick

14 Wirtschaftliche Rahmenbedingungen

18 Geschäftsverlauf

41 BMW Group – Kapitalmarktaktivitäten

## 44 — Übernahmerelevante Angaben und Erläuterungen

47 Finanzwirtschaftliche Situation

47 Konzerninternes  
Steuerungssystem

49 Ertragslage

51 Finanzlage

53 Vermögenslage

55 Nachtragsbericht

55 Wertschöpfungsrechnung

57 Finanzwirtschaftliche Kennzahlen

58 Erläuterungen zur BMW AG

62 Internes Kontrollsystem und  
Erläuterungen

63 Risikomanagement

70 Prognosebericht

**Zusammensetzung des Gezeichneten Kapitals**

Das Gezeichnete Kapital (Grundkapital) der BMW AG belief sich zum 31. Dezember 2010 auf 655.158.608 Euro (2009: 654.660.558 Euro) und ist gemäß § 4 Abs. 1 der Satzung eingeteilt in 601.995.196 (91,89%) (2009: 601.995.196/91,96%) Stammaktien im Nennbetrag von 1 Euro und 53.163.412 (8,11%) (2009: 52.665.362/8,04%) Vorzugsaktien ohne Stimmrecht im Nennbetrag von 1 Euro. Die Aktien der Gesellschaft lauten auf den Inhaber. Die Rechte und Pflichten der Aktionäre ergeben sich aus dem Aktiengesetz (AktG) in Verbindung mit der Satzung der Gesellschaft, die unter [www.bmwgroup.com](http://www.bmwgroup.com) im Volltext zur Verfügung steht. Der Anspruch der Aktionäre auf Verbriefung ihrer Aktien ist satzungsgemäß ausgeschlossen.

Das Stimmrecht jeder Aktie entspricht ihrem Nennbetrag. Je 1 Euro Nennbetrag des bei der Abstimmung vertretenen Grundkapitals gewährt eine Stimme (§ 18 Abs. 1 der Satzung). Die Vorzugsaktien der Gesellschaft sind Vorzugsaktien ohne Stimmrecht im Sinne der §§ 139 ff. AktG, d. h., sie verleihen das Stimmrecht nur in den gesetzlich vorgesehenen Ausnahmefällen, insbesondere wenn der Vorzugsbetrag in einem Jahr nicht oder nicht vollständig gezahlt und der Rückstand im nächsten Jahr nicht neben dem vollen Vorzug dieses Jahres nachgezahlt wird. Mit Ausnahme des Stimmrechts gewähren die Vorzugsaktien die jedem Aktionär aus der Aktie zustehenden Rechte. Den Vorzugsaktien ohne Stimmrecht stehen bei der Verteilung des Bilanzgewinns die in § 24 der Satzung bestimmten Vorrechte zu. Danach wird der Bilanzgewinn in der Reihenfolge verwendet, dass

<sup>1</sup> Angaben gemäß den §§ 289 Abs. 4, 315 Abs. 4 HGB

- (a) etwaige Rückstände von Gewinnanteilen auf die Vorzugsaktien ohne Stimmrecht in der Reihenfolge ihrer Entstehung nachgezahlt werden,
- (b) auf die Vorzugsaktien ohne Stimmrecht ein Vorabgewinnanteil von 0,02 Euro je 1 Euro Nennwert gezahlt wird und
- (c) etwaige weitere Gewinnanteile gleichmäßig auf die Stamm- und Vorzugsaktien gezahlt werden, soweit die Hauptversammlung keine andere Verwendung beschließt.

**Beschränkungen, die Stimmrechte oder die Übertragung von Aktien betreffen**

Die Gesellschaft hat neben Stammaktien auch Vorzugsaktien ohne Stimmrecht ausgegeben, nähere Informationen dazu sind unter dem Punkt „Zusammensetzung des Gezeichneten Kapitals“ zuvor zu finden.

Soweit die Gesellschaft im Rahmen ihres Belegschaftsaktienprogramms Vorzugsaktien ohne Stimmrecht auch an Mitarbeiter ausgegeben hat, unterliegen diese Aktien einer firmenseitigen privatrechtlichen Veräußerungssperre von vier Jahren, gerechnet ab dem Beginn des Kalenderjahres der Ausgabe, vor deren Ablauf die Belegschaftsaktien von den begünstigten Mitarbeitern grundsätzlich nicht veräußert werden dürfen.

**Direkte oder indirekte Beteiligungen am Kapital, die 10% der Stimmrechte überschreiten**

Es bestanden nach Kenntnis der Gesellschaft zum angegebenen Stichtag folgende direkte oder indirekte Beteiligungen am Kapital, die zum Bilanzstichtag 10% der Stimmrechte überschreiten:<sup>2</sup>

|                                                                                       | Direkter Anteil der Stimmrechte in % | Indirekter Anteil der Stimmrechte in % |
|---------------------------------------------------------------------------------------|--------------------------------------|----------------------------------------|
| Stefan Quandt, Bad Homburg v. d. Höhe, Deutschland                                    | 17,4                                 | 17,4                                   |
| AQTON SE, Bad Homburg v. d. Höhe, Deutschland                                         | 17,4                                 | 17,4                                   |
| Stefan Quandt Verwaltungs GmbH, Bad Homburg v. d. Höhe, Deutschland                   | 17,4                                 | 17,4                                   |
| Stefan Quandt GmbH & Co. KG für Automobilwerte, Bad Homburg v. d. Höhe, Deutschland   | 17,4                                 | 17,4                                   |
| Johanna Quandt, Bad Homburg v. d. Höhe, Deutschland                                   | 0,4                                  | 16,3                                   |
| Johanna Quandt GmbH, Bad Homburg v. d. Höhe, Deutschland                              | 0,4                                  | 16,3                                   |
| Johanna Quandt GmbH & Co. KG für Automobilwerte, Bad Homburg v. d. Höhe, Deutschland  | 16,3                                 | 16,3                                   |
| Susanne Klatten, München, Deutschland                                                 | 12,6                                 | 12,6                                   |
| Susanne Klatten Beteiligungs GmbH, Bad Homburg v. d. Höhe, Deutschland                | 12,6                                 | 12,6                                   |
| Susanne Klatten GmbH, Bad Homburg v. d. Höhe, Deutschland                             | 12,6                                 | 12,6                                   |
| Susanne Klatten GmbH & Co. KG für Automobilwerte, Bad Homburg v. d. Höhe, Deutschland | 12,6                                 | 12,6                                   |

<sup>2</sup> freiwillige Bestandsmitteilungen der aufgeführten Aktionäre zum Stichtag 31. Dezember 2008

Bei den genannten Stimmrechtsanteilen können sich nach dem angegebenen Zeitpunkt Veränderungen ergeben haben, die der Gesellschaft gegenüber nicht meldepflichtig waren. Da die Aktien der Gesellschaft Inhaberkonten sind, werden der Gesellschaft Veränderungen beim Aktienbesitz grundsätzlich nur bekannt, soweit sie Meldepflichten unterliegen.

#### **Aktien mit Sonderrechten, die Kontrollbefugnisse verleihen**

Aktien mit Sonderrechten, die Kontrollbefugnisse verleihen, bestehen bei der Gesellschaft nicht.

#### **Art der Stimmrechtskontrolle, wenn Arbeitnehmer am Kapital beteiligt sind und ihre Kontrollrechte nicht unmittelbar ausüben**

Bei den im Rahmen des Belegschaftsaktienprogramms bisher ausgegebenen Aktien handelt es sich um Vorzugsaktien ohne Stimmrecht, die den Mitarbeitern jeweils allein und unmittelbar übertragen wurden. Die Mitarbeiter üben ihre Kontrollrechte aus diesen Aktien wie andere Aktionäre unmittelbar nach Maßgabe der gesetzlichen Bestimmungen und der Satzung aus.

#### **Gesetzliche Vorschriften und Bestimmungen der Satzung über die Ernennung und Abberufung von Vorstandsmitgliedern und die Änderung der Satzung**

Die Ernennung und Abberufung der Mitglieder des Vorstands richtet sich nach den §§ 84 f. AktG i. V. m. § 31 Mitbestimmungsgesetz (MitbestG).

Bei Satzungsänderungen sind die §§ 179 ff. AktG zu beachten. Über Satzungsänderungen hat die Hauptversammlung zu entscheiden (§§ 119 Abs. 1 Nr. 5, 179 Abs. 1 AktG). Der Aufsichtsrat ist befugt, Änderungen der Satzung zu beschließen, die die Fassung betreffen (§ 14 Ziff. 3 der Satzung); er ist auch ermächtigt, § 4 der Satzung entsprechend der jeweiligen Ausnutzung des Genehmigten Kapitals 2009 zu ändern. Die Beschlüsse der Hauptversammlung werden, soweit nicht das Gesetz zwingend etwas Abweichendes bestimmt, mit einfacher Mehrheit der abgegebenen Stimmen bzw., soweit eine Kapitalmehrheit vorgeschrieben ist, mit der einfachen Mehrheit des vertretenen Kapitals gefasst (§ 20 der Satzung).

#### **Befugnisse des Vorstands insbesondere hinsichtlich der Möglichkeit, Aktien auszugeben oder zurückzukaufen**

Aufgrund des Beschlusses der Hauptversammlung vom 14. Mai 2009 war der Vorstand ermächtigt, bis zum

12. November 2010 über die Börse Stamm- und/oder Vorzugsaktien ohne Stimmrecht der Gesellschaft unter Beachtung der von der Hauptversammlung vorgegebenen Preisgrenzen bis zu insgesamt 10% des zum Zeitpunkt der Beschlussfassung bestehenden Grundkapitals zu erwerben. Von dieser Ermächtigung wurde im Geschäftsjahr 2010 kein Gebrauch gemacht. Der Vorstand ist in den in § 71 AktG gesetzlich geregelten Fällen zum Rückkauf von Aktien und zur Veräußerung zurückgekaufter Aktien befugt, beispielsweise zur Abwendung eines schweren, unmittelbar bevorstehenden Schadens. Gemäß § 4 Ziffer 5 der Satzung ist der Vorstand ermächtigt, das Grundkapital für die Zwecke eines Belegschaftsaktienprogramms in der Zeit bis zum 13. Mai 2014 mit Zustimmung des Aufsichtsrats gegen Bareinlagen um bis zu 4.032.750 Euro durch Ausgabe neuer Vorzugsaktien ohne Stimmrecht, die den bisher ausgegebenen Vorzugsaktien ohne Stimmrecht gleichstehen, zu erhöhen (Genehmigtes Kapital 2009). Das Bezugsrecht der Aktionäre auf die neuen Aktien ist ausgeschlossen. Ein bedingtes Kapital besteht zum Berichtszeitpunkt nicht.

#### **Wesentliche Vereinbarungen der Gesellschaft, die unter der Bedingung eines Kontrollwechsels infolge eines Übernahmeangebots stehen**

Die BMW AG ist Partei folgender wesentlicher Vereinbarungen, die Regelungen für den Fall des Kontrollwechsels bzw. Kontrollerwerbs infolge eines Übernahmeangebots enthalten:

- Der mit einem internationalen Konsortium mehrerer Banken geschlossene Vertrag über eine zum Stichtag nicht beanspruchte syndizierte Kreditlinie berechtigt die kreditgebenden Banken zur außerordentlichen Kündigung der Kreditlinie mit der Folge der sofortigen Fälligkeit aller ausstehenden Beträge und Zinsen für den Fall, dass eine oder mehrere Personen gemeinsam direkt oder indirekt die Kontrolle über die BMW AG übernehmen. Der Begriff der Kontrolle ist definiert als Erwerb von mehr als 50% der Kapitalanteile an der BMW AG oder der Berechtigung zum Bezug von mehr als 50% der Dividenden oder des Rechts zur Führung der Geschäfte oder zur Benennung der Mehrheit der Aufsichtsratsmitglieder.
- Ein mit der Peugeot SA geschlossener Kooperationsvertrag betreffend die gemeinsame Entwicklung und Produktion einer neuen Familie kleiner 1- bis 1,6-Liter-Benzinmotoren berechtigt jeden Kooperationspartner zur außerordentlichen Kündigung für den Fall, dass ein Wettbewerber die Kontrolle über die jeweils andere Vertragspartei erlangt und die Bedenken des an-

## 12 — KONZERNLAGEBERICHT

|    |                                              |
|----|----------------------------------------------|
| 12 | Das Geschäftsjahr im Überblick               |
| 14 | Wirtschaftliche Rahmenbedingungen            |
| 18 | Geschäftsverlauf                             |
| 41 | BMW Group – Kapitalmarktaktivitäten          |
| 44 | Übernahmerelevante Angaben und Erläuterungen |
| 47 | Finanzwirtschaftliche Situation              |
| 47 | — Konzerninternes                            |
|    | Steuerungssystem                             |
| 49 | Ertragslage                                  |
| 51 | Finanzlage                                   |
| 53 | Vermögenslage                                |
| 55 | Nachtragsbericht                             |
| 55 | Wertschöpfungsrechnung                       |
| 57 | Finanzwirtschaftliche Kennzahlen             |
| 58 | Erläuterungen zur BMW AG                     |
| 62 | Internes Kontrollsystem und Erläuterungen    |
| 63 | Risikomanagement                             |
| 70 | Prognosebericht                              |

deren Vertragspartners betreffend die Auswirkungen des Kontrollwechsels auf die Kooperation während eines zunächst zu initiiierenden Diskussionsprozesses nicht ausgeräumt werden.

- Die BMW AG ist Garantiegeberin in Bezug auf sämtliche Pflichten aus der Vereinbarung betreffend das Joint Venture BMW Brilliance Automotive Ltd. in China, die ein außerordentliches Kündigungsrecht beider Joint-Venture-Partner für den Fall vorsieht, dass direkt oder indirekt mehr als 25% der Anteile an der jeweils anderen Partei von einer dritten Person erworben werden oder die andere Partei mit einer anderen rechtlichen Person verschmolzen wird. Eine Kündigung des Joint-Venture-Vertrags kann zum Verkauf der Geschäftsanteile an den jeweils anderen Joint-Venture-Partner oder zur Liquidation der Joint-Venture-Gesellschaft führen.
- Betreffend den Handel mit derivativen Finanzinstrumenten bestehen Rahmenverträge mit Kreditinstitutionen und Banken (ISDA Master Agreements), die jeweils ein außerordentliches Kündigungsrecht mit der Folge der Abwicklung aller laufenden Transaktionen für den Fall vorsehen, dass eine wesentliche Verschlechterung der Kreditwürdigkeit der betreffenden Vertragspartei Folge eines direkten oder indirekten Erwerbs des wirtschaftlichen Eigentums an Kapitalanteilen, die die Berechtigung zur Wahl der Mehrheit der Mitglieder des Aufsichtsrats einer Vertragspartei vermitteln, oder einer sonstigen Beteiligung, die die Kontrolle über eine Vertragspartei ermöglicht, oder einer Verschmelzung oder Vermögensübertragung ist.
- Mit der Europäischen Investitionsbank (EIB) geschlossene Finanzierungsverträge berechtigen die EIB im Falle des Bevorstehens oder Eintritts eines Kontrollwechsels bei der BMW AG (die überwiegend Bürgin, in einem Fall jedoch Darlehensnehmerin ist) dazu, die vorzeitige Rückzahlung der Darlehen zu verlangen, wenn die EIB nach Eintritt des Kontrollwechsels oder 30 Tage nach ihrem Verlangen nach Erörterung der Situation Grund zu der Annahme hat, dass der Kontrollwechsel wesentliche negative Auswirkungen haben kann, oder wenn – so in zwei Fällen – die Darlehensnehmerin eine solche Erörterung ablehnt. Ein Kontrollwechsel liegt in Bezug auf die BMW AG vor, wenn eine oder mehrere Personen die Kontrolle über die BMW AG übernehmen oder verlieren, wobei Kontrolle in den genannten Finanzierungsverträgen definiert ist als (i) das Innehaben von oder die Kontrolle über mehr als 50% der Stimmrechte, (ii) das Recht, die Mehrheit der Mitglieder von Vorstand oder Aufsichtsrat zu bestimmen, oder (iii) das Recht, mehr als 50% der auszuschüttenden Dividenden zu erhalten, und, in

einem Fall als zusätzliche Alternative, (iv) sonstiger vergleichbarer beherrschender Einfluss auf die BMW AG.

- Die BMW AG ist Partei einer Vereinbarung mit der SGL Carbon SE, Wiesbaden, betreffend die Gemeinschaftsunternehmen SGL Automotive Carbon Fibers LLC, Delaware, USA, und SGL Automotive Carbon Fibers GmbH & Co. KG, München, die Kauf- bzw. Verkaufsrechte vorsieht für den Fall, dass direkt oder indirekt 50% oder mehr der Stimmrechte in Bezug auf den jeweils anderen Gesellschafter der Gemeinschaftsunternehmen von einer dritten Person erworben werden oder bereits 25% solcher Stimmrechte von einer dritten Person erworben werden, für den Fall, dass es sich bei der dritten Person um einen Wettbewerber der jeweils nicht von dem Stimmrechtserwerb betroffenen Partei handelt. Für den Fall solcher Stimmrechtserwerbe durch eine dritte Person kann der nicht betroffene Gesellschafter den Erwerb der Geschäftsanteile an den Gemeinschaftsunternehmen von dem betroffenen Gesellschafter oder die Veräußerung der eigenen Geschäftsanteile an den betroffenen Gesellschafter verlangen.
- Die BMW AG ist Partei einer Vereinbarung mit der Peugeot SA, Paris, betreffend das Gemeinschaftsunternehmen BMW Peugeot Citroën Electrification B.V., Niederlande, die Kauf- bzw. Verkaufsrechte vorsieht für den Fall, dass direkt oder indirekt 50% oder mehr der Stimmrechte in Bezug auf den jeweils anderen Gesellschafter des Gemeinschaftsunternehmens von einer dritten Person erworben werden oder, für den Fall, dass es sich bei der dritten Person um einen Wettbewerber der jeweils nicht von dem Stimmrechtserwerb betroffenen Partei handelt, bereits mehr als ein Drittel solcher Stimmrechte von dieser dritten Person erworben werden. Für den Fall solcher Stimmrechtserwerbe durch eine dritte Person kann der nicht betroffene Gesellschafter den Erwerb der Geschäftsanteile an dem Gemeinschaftsunternehmen von dem betroffenen Gesellschafter oder die Veräußerung der eigenen Geschäftsanteile an den betroffenen Gesellschafter verlangen. Die Wirksamkeit dieser Vereinbarung zwischen der BMW AG und der Peugeot SA steht unter der aufschiebenden Bedingung der Genehmigung durch die zuständigen Kartellbehörden.

**Entschädigungsvereinbarungen der Gesellschaft, die für den Fall eines Übernahmeangebots mit den Mitgliedern des Vorstands oder Arbeitnehmern getroffen sind**

Entschädigungsvereinbarungen mit den Mitgliedern des Vorstands oder Arbeitnehmern für den Fall eines Übernahmeangebots hat die Gesellschaft nicht getroffen.



## Analyse der finanzwirtschaftlichen Situation

**Konzerninternes Steuerungssystem**

Die Berücksichtigung der Interessen und Ansprüche der Kapitalgeber stellt die Basis für die wertorientierte Unternehmenssteuerung in der BMW Group dar. Nur ein Unternehmen, dessen Gewinn die Kosten für das eingesetzte Eigen- und Fremdkapital dauerhaft übersteigt, sichert kontinuierliches Wachstum, Wertsteigerung für die Kapitalgeber, Arbeitsplätze und letztlich seine unternehmerische Unabhängigkeit. Im Zuge der Weiterentwicklung des konzerninternen Steuerungssystems wurde auf Konzernebene der Wertbeitrag als neue Kenngröße eingeführt. Der Wertbeitrag ist die konsequente Weiterent-

wicklung der bisherigen Steuerung der Kapitaleffizienz auf Basis des Return on Capital Employed (ROCE).

$$\text{Wertbeitrag Group} = \frac{(\text{ROCE Group} - \text{Kapitalkostensatz})}{\text{x Eingesetztes Kapital}}$$

Der Wertbeitrag kann auch über die Ergebnisgröße abzgl. der Kosten auf das eingesetzte Kapital dargestellt werden.

$$\text{Wertbeitrag Group} = \text{Ergebnisgröße} - \text{Kapitalkosten} = \text{Ergebnisgröße} - (\text{Kapitalkostensatz} \times \text{Eingesetztes Kapital})$$

| in Mio. Euro | Ergebnisgröße |      | Kapitalkosten (EK + FK) |       | Wertbeitrag Group |        |
|--------------|---------------|------|-------------------------|-------|-------------------|--------|
|              | 2010          | 2009 | 2010                    | 2009  | 2010              | 2009   |
| BMW Group    | 5.203         | 922  | 3.187                   | 3.351 | 2.016             | -2.429 |

Ein positiver Wertbeitrag bedeutet, dass ein Unternehmen mehr als seine Kapitalkosten verdient. Eine Zunahme oder ein Rückgang des Wertbeitrags ist ein wichtiges Maß für den finanziellen Erfolg.

**Kapitalkostensatz auf das eingesetzte Kapital**

Der Kapitalkostensatz wird als gewichteter Durchschnitt aus Eigen- und Fremdkapitalkosten ermittelt und basiert auf der Standardmethode des WACC- (Weighted Average Cost of Capital) Ansatzes. Die Eigenkapitalkosten werden nach dem CAPM (Capital Asset Pricing Model) bestimmt und leiten sich aus dem risikofreien Zinssatz zuzüglich des von den Investoren geforderten Risikozuschlags ab. Der Risikozuschlag berechnet sich aus der Marktrisikoprämie und einem Betafaktor. Der Betafaktor gibt an, wie stark die Aktie im Vergleich zum Markt schwankt. Die Fremdkapitalverzinsung ergibt sich aus der durchschnittlichen Verzinsung der langfristigen Fremdmittel und der Pensionsverpflichtungen. Zur Berechnung der durchschnittlichen Kapitalkosten wird eine Kapitalstruktur zugrunde gelegt, die sich an einer langfristigen Zielkapitalstruktur orientiert und somit eine Stabilität in der langfristigen Unternehmenssteuerung gewährleistet.

**Kapitalkostensatz (vor Steuern)**

in %

|           | 2010 | 2009 |
|-----------|------|------|
| BMW Group | 12   | 12   |

**Kapitalrenditen zur periodischen Wertmessung**

In der Periodenbetrachtung werden zur operativen Steuerung auf Segment- und Konzernebene spezifische Ergebnis- sowie Renditegrößen verwendet. Um eine stetige Ergebnisentwicklung sicherzustellen, werden diese periodenbezogenen Ziele langfristig überwacht und gesteuert. Im Einklang mit der Konzernsteuerung wird für die Segmente Automobile und Motorräder der Return on Capital Employed als Profitabilitätskennzahl zugrunde gelegt. Die Steuerung des Segments Finanzdienstleistungen erfolgt durch den Return on Equity (ROE). Der ROE unterstützt die wertorientierte Steuerung des Segments Finanzdienstleistungen dadurch, dass die begrenzt verfügbare Ressource Eigenkapital und der damit verbundene Anreiz für einen effizienten Kapitaleinsatz in den Mittelpunkt gestellt wird.

$$\text{ROCE Group} = \frac{\text{Ergebnis vor Zinsaufwand u. Steuern}}{\text{Eingesetztes Kapital}}$$

$$\text{ROCE Automobile und Motorräder} = \frac{\text{Ergebnis vor Finanzergebnis}}{\text{Eingesetztes Kapital}}$$

$$\text{ROE Finanzdienstleistungen} = \frac{\text{Ergebnis vor Steuern}}{\text{Eigenkapital}}$$

Der ROCE Group setzt die Ergebnisgröße in Beziehung zu dem hierfür durchschnittlich eingesetzten Kapital. Das eingesetzte Kapital beinhaltet das Konzerneigenkapital,

die Pensionsrückstellungen und die Finanzverbindlichkeiten der Segmente Automobile und Motorräder.

#### Eingesetztes Kapital im Segment Automobile

in Mio. Euro

|                             | 2010          | 2009          |
|-----------------------------|---------------|---------------|
| Eingesetztes Vermögen       | 27.787        | 27.659        |
| ./. Abzugskapital           | 16.948        | 14.516        |
| <b>Eingesetztes Kapital</b> | <b>10.839</b> | <b>13.143</b> |

Das durchschnittlich eingesetzte Kapital eines Jahres leitet sich aus dem Durchschnitt des eingesetzten Kapitals zu Beginn und zum Ende des Geschäftsjahres sowie zu den Quartalsstichtagen ab. Entsprechend der Berechnung des eingesetzten Kapitals wird die Ergebnismessgröße definiert

als Ergebnisgröße vor Zinsaufwendungen aus den Pensionsrückstellungen bzw. den Finanzverbindlichkeiten der Segmente Automobile und Motorräder (Ergebnis vor Zinsaufwand und Steuern).

Der ROCE der Segmente Automobile und Motorräder berechnet sich aus dem Ergebnis vor Finanzergebnis und dem durchschnittlich eingesetzten Kapital. Das eingesetzte Kapital setzt sich aus dem eingesetzten Vermögen, das die operativen langfristigen und kurzfristigen Vermögenswerte beinhaltet, bereinigt um das Abzugskapital, zusammen. Das Abzugskapital umfasst die Kapitalanteile, die dem operativen Geschäft zinslos zur Verfügung stehen, wie beispielsweise Verbindlichkeiten aus Lieferungen und Leistungen. Abgeleitet aus den Kapitalkosten als Mindestverzinsungsanspruch sowie den wettbewerbsorientierten Vergleichswerten liegt der Zielwert für den ROCE der Segmente Automobile und Motorräder bei mindestens 26%.

#### Return on Capital Employed

|            | Ergebnismessgröße<br>in Mio. Euro |      | Eingesetztes<br>Kapital<br>in Mio. Euro |        | Return on<br>Capital Employed<br>in % |      |
|------------|-----------------------------------|------|-----------------------------------------|--------|---------------------------------------|------|
|            | 2010                              | 2009 | 2010                                    | 2009   | 2010                                  | 2009 |
| BMW Group  | 5.203                             | 922  | 26.555                                  | 27.923 | 19,6                                  | 3,3  |
| Automobile | 4.355                             | -265 | 10.839                                  | 13.143 | 40,2                                  | -    |
| Motorräder | 71                                | 19   | 394                                     | 405    | 18,0                                  | 4,7  |

Der ROE ist definiert als Ergebnis vor Steuern, bezogen auf das durchschnittliche Eigenkapital des Segments Finanz-

dienstleistungen. Die dauerhaft angestrebte Zielrendite für das eingesetzte Eigenkapital beträgt mindestens 18%.

#### Return on Equity

|                        | Ergebnis<br>vor Steuern<br>in Mio. Euro |      | Eigenkapital<br>in Mio. Euro |       | Return<br>on Equity<br>in % |      |
|------------------------|-----------------------------------------|------|------------------------------|-------|-----------------------------|------|
|                        | 2010                                    | 2009 | 2010                         | 2009  | 2010                        | 2009 |
| Finanzdienstleistungen | 1.214                                   | 365  | 4.654                        | 3.978 | 26,1                        | 9,2  |

#### Wertmanagement in der Projektsteuerung

Die Segmente Automobile und Motorräder werden durch konkrete Produktprojekte sowie Prozess- und Strukturprojekte gesteuert, die den Rahmenbedingungen aus der Periodenplanung unterliegen. Die Projektentscheidung

und – damit verbunden – die Projektauswahl sind wichtige Bestandteile unserer wertorientierten Steuerung. Das Instrument für die Projektentscheidung ist eine Rendite- und Kapitalwertrechnung, die um eine standardisierte Betrachtung von Chancen und Risiken ergänzt wird. Aus

#### 12 — KONZERNLAGEBERICHT

- 12 Das Geschäftsjahr im Überblick
- 14 Wirtschaftliche Rahmenbedingungen
- 18 Geschäftsverlauf
- 41 BMW Group – Kapitalmarktaktivitäten
- 44 Übernahmerelevante Angaben und Erläuterungen
- 47 — Finanzwirtschaftliche Situation
  - 47 — Konzerninternes Steuerungssystem
  - 49 — Ertragslage
  - 51 Finanzlage
  - 53 Vermögenslage
  - 55 Nachtragsbericht
  - 55 Wertschöpfungsrechnung
  - 57 Finanzwirtschaftliche Kennzahlen
  - 58 Erläuterungen zur BMW AG
- 62 Internes Kontrollsystem und Erläuterungen
- 63 Risikomanagement
- 70 Prognosebericht

den Zahlungsströmen, die durch die Entscheidung für ein Projekt ausgelöst werden, ergeben sich dessen interne Rendite und der Kapitalwert (Modellrendite bei Fahrzeugprojekten). Ergänzend wird die Modellrendite wettbewerbsorientierten Vergleichswerten gegenübergestellt.

Auf diese Weise lässt sich zum Zeitpunkt der Entscheidung der Beitrag eines Projekts zum Gesamtwert des Segments darstellen. Zielvorgabe und Steuerung erfolgen anhand zahlungsstrombasierter Einzelsteuerungsgrößen.

#### Langfristige Wertsteigerung

Zielvorgabe für die Ergebnisgrößen ist ein kontinuierliches Wachstum. Maßgebend für die jeweiligen Renditegrößen ist der unternehmensspezifische Mindestverzinsungsanspruch. Diese Periodenziele ergänzen die Projekt- und Programmziele.

Bei sämtlichen Projektentscheidungen werden neben den Zahlungsstromauswirkungen auf die Modellrendite auch die periodischen Ergebniseffekte im Langfristzeitraum dargestellt. Die Berücksichtigung von Periodengrößen gewährleistet ein geschlossenes Zielvorgabe- und Steuerungsmodell. Durch diesen Steuerungsansatz lassen sich die Auswirkungen jeder Projektentscheidung auf die Ergebnis- und Renditeentwicklung analysieren. Die daraus resultierende Multiprojektplanung erlaubt einen perma-

nenten Abgleich zwischen periodenübergreifenden und periodenbezogenen Zielgrößen.

#### Ertragslage

Auf die Entwicklung der Ertragslage wirkte sich im Geschäftsjahr 2010 vor allem die Erholung auf den internationalen Automobilmärkten positiv aus. Die BMW Group profitierte von ihrer starken Wettbewerbsposition auf den internationalen Märkten insbesondere durch neue, attraktive Fahrzeugmodelle im Segment Automobile. Die Entspannung auf den internationalen Kapitalmärkten 2010 hat zusätzlich zu einer Verbesserung der Margen im Segment Finanzdienstleistungen geführt.

Der Konzern erzielte im Geschäftsjahr 2010 einen Jahresüberschuss von 3.234 Mio. Euro (2009: 210 Mio. Euro). Die Umsatzrendite nach Steuern beträgt 5,3% (2009: 0,4%). Der Konzern erwirtschaftete damit ein Ergebnis je Stammaktie von 4,91 Euro und je Vorzugsaktie von 4,93 Euro (2009: 0,31 Euro je Stammaktie und 0,33 Euro je Vorzugsaktie).

Die Umsatzerlöse des Konzerns stiegen gegenüber dem Vorjahr um 19,3% auf 60.477 Mio. Euro (2009: 50.681 Mio. Euro). Währungsbereinigt wären die Umsatzerlöse um 14,4% gestiegen. Die Umsatzerlöse aus dem Verkauf von Automobilen der Marken BMW, MINI und Rolls-Royce

#### Gewinn-und-Verlust-Rechnung

in Mio. Euro

|                                                  | 2010          | 2009         |
|--------------------------------------------------|---------------|--------------|
| Umsatzerlöse                                     | 60.477        | 50.681       |
| Umsatzkosten                                     | -49.562       | -45.356      |
| <b>Bruttoergebnis vom Umsatz</b>                 | <b>10.915</b> | <b>5.325</b> |
| Vertriebskosten und allgemeine Verwaltungskosten | -5.529        | -5.040       |
| Sonstige betriebliche Erträge                    | 766           | 808          |
| Sonstige betriebliche Aufwendungen               | -1.058        | -804         |
| <b>Ergebnis vor Finanzergebnis</b>               | <b>5.094</b>  | <b>289</b>   |
| — Ergebnis aus Equity-Bewertung                  | 98            | 36           |
| — Zinsen und ähnliche Erträge                    | 685           | 856          |
| — Zinsen und ähnliche Aufwendungen               | -966          | -1.014       |
| — Übriges Finanzergebnis                         | -75           | 246          |
| Finanzergebnis                                   | -258          | 124          |
| <b>Ergebnis vor Steuern</b>                      | <b>4.836</b>  | <b>413</b>   |
| Ertragsteuern                                    | -1.602        | -203         |
| <b>Jahresüberschuss</b>                          | <b>3.234</b>  | <b>210</b>   |

## 12 — KONZERNLAGEBERICHT

12 Das Geschäftsjahr im Überblick

14 Wirtschaftliche Rahmenbedingungen

18 Geschäftsverlauf

41 BMW Group – Kapitalmarktaktivitäten

44 Übernahmerelevante Angaben und Erläuterungen

## 47 — Finanzwirtschaftliche Situation

47 Konzerninternes

Steuerungssystem

49 — Ertragslage

51 — Finanzlage

53 Vermögenslage

55 Nachtragsbericht

55 Wertschöpfungsrechnung

57 Finanzwirtschaftliche Kennzahlen

58 Erläuterungen zur BMW AG

62 Internes Kontrollsystem und

Erläuterungen

63 Risikomanagement

70 Prognosebericht

erhöhten sich volumenbedingt um 24,2%. Die Umsatzerlöse im Motorradgeschäft lagen um 21,9% über dem Vorjahresniveau. Im Geschäft mit Finanzdienstleistungen sind die Umsatzerlöse um 6,8% angestiegen. Die Umsatzerlöse der Sonstigen Gesellschaften des Konzerns betragen wie im Vorjahr 1 Mio. Euro.

In den Gebieten Afrika, Asien und Ozeanien haben sich die Umsatzerlöse insgesamt um 68,2% erhöht. Dabei stiegen die Umsätze in China gegenüber dem Vorjahr um 109,1%. Während sich die Umsatzerlöse im übrigen Europa um 9,4% und in der Region Amerika um 14,0% erhöhten, gingen sie in Deutschland um 2,0% gegenüber dem Vorjahr zurück.

Die Umsatzkosten des Konzerns betragen 49.562 Mio. Euro (2009: 45.356 Mio. Euro) und sind mit 9,3% weniger stark gestiegen als die Umsatzerlöse. Ursache hierfür sind vor allem die gesunkenen Materialkosten sowie niedrigere Refinanzierungskosten. Das Bruttoergebnis vom Umsatz erhöhte sich damit im Vergleich zum Vorjahr um 105,0% auf 10.915 Mio. Euro. Die Bruttomarge beträgt 18,0% (2009: 10,5%).

Im Segment Automobile liegt der Anteil des Bruttoergebnisses, bezogen auf die Umsatzerlöse, bei 17,4% (2009: 9,4%); im Segment Motorräder beträgt die Bruttomarge 16,0% (2009: 13,5%). Im Segment Finanzdienstleistungen erhöhte sie sich um 5,1 Prozentpunkte auf 10,9%.

Die Forschungs- und Entwicklungskosten sind gegenüber dem Vorjahr um 19,1% auf 3.082 Mio. Euro gestiegen. Das Verhältnis zu den Umsatzerlösen beträgt wie im Vorjahr 5,1%. In den Forschungs- und Entwicklungskosten sind Abschreibungen aktivierter Entwicklungskosten von 1.260 Mio. Euro (2009: 1.226 Mio. Euro) enthalten. Die gesamten Forschungs- und Entwicklungsleistungen, das sind die Forschungs- und nicht aktivierungsfähigen Entwicklungskosten sowie die Investitionen in aktivierungspflichtige Entwicklungskosten, betragen im Berichtsjahr 2.773 Mio. Euro (2009: 2.448 Mio. Euro). Bezogen auf die Umsatzerlöse im Berichtsjahr ergibt sich damit eine Forschungs- und Entwicklungsquote von 4,6% (2009: 4,8%). Die Aktivierungsquote bei den Forschungs- und Entwicklungskosten beträgt im Berichtsjahr 34,3% (2009: 44,4%).

Die Vertriebskosten und allgemeinen Verwaltungskosten haben sich gegenüber dem Vorjahr um 9,7% erhöht. Die Relation zu den Umsatzerlösen beträgt 9,1% und liegt damit um 0,8 Prozentpunkte unter der des Vorjahres.

Die in den Umsatzkosten sowie den Vertriebskosten und allgemeinen Verwaltungskosten enthaltenen Ab-

schreibungen auf Immaterielle Vermögenswerte und Sachanlagen betragen insgesamt 3.682 Mio. Euro (2009: 3.600 Mio. Euro).

Der Saldo aus den Sonstigen betrieblichen Erträgen und Aufwendungen beträgt – 292 Mio. Euro und ist gegenüber dem Vorjahr um 296 Mio. Euro zurückgegangen. Ursache hierfür sind höhere Dotierungen von Rückstellungen sowie ein niedrigeres Ergebnis aus Währungsgeschäften.

Aufgrund der erwähnten positiven Geschäftsentwicklung beträgt das Ergebnis vor Finanzergebnis im Berichtsjahr 5.094 Mio. Euro (2009: 289 Mio. Euro).

Das Finanzergebnis liegt mit – 258 Mio. Euro um 382 Mio. Euro unter dem Wert des Vorjahres (2009: 124 Mio. Euro). Ursache hierfür ist vor allem ein um 172 Mio. Euro niedrigeres Beteiligungsergebnis aufgrund einer notwendigen Wertberichtigung auf Anteile an verbundenen Unternehmen. Das Sonstige Finanzergebnis verringerte sich um 149 Mio. Euro auf 96 Mio. Euro. Grund hierfür sind die im Vergleich zum Vorjahr geringeren positiven Effekte bei alleinstehenden Rohstoffderivaten. Innerhalb des Finanzergebnisses ist das Zinsergebnis um 123 Mio. Euro niedriger ausgefallen. Demgegenüber hat sich das Ergebnis aus der Equity-Bewertung um 62 Mio. Euro auf 98 Mio. Euro erhöht. Es enthält neben den anteiligen Ergebnissen aus den Beteiligungen an der BMW Brilliance Automotive Ltd., Shenyang, sowie an der Cirquent Gruppe erstmals auch die anteiligen Ergebnisse aus den Joint Ventures mit der SGL Carbon Gruppe.

Vor dem Hintergrund der oben beschriebenen Faktoren hat sich das Ergebnis vor Steuern auf 4.836 Mio. Euro erhöht (2009: 413 Mio. Euro). Die Umsatzrendite vor Steuern beträgt 8,0% (2009: 0,8%).

Die Ertragsteuern betragen 1.602 Mio. Euro (2009: 203 Mio. Euro). Die Steuerquote beträgt 33,1% nach 49,2% im Vorjahr. Ursache für die hohe Steuerquote im Vorjahr waren im Wesentlichen Steueraufwendungen aus einer steuerlichen Betriebsprüfung bei der BMW AG.

Im Berichtsjahr erzielte der Konzern somit einen Jahresüberschuss von 3.234 Mio. Euro (2009: 210 Mio. Euro). Die Umsatzrendite nach Steuern beträgt 5,3% (2009: 0,4%).

Die Umsatzerlöse haben sich im Segment Automobile um 23,8% erhöht. Das Ergebnis vor Steuern erhöhte sich auf 3.887 Mio. Euro (2009: – 588 Mio. Euro). Durch die schrittweise Erweiterung und Erneuerung des Modellportfolios sowie aufgrund des dynamischen Wachstums

**Umsatzerlöse nach Segmenten**

in Mio. Euro

|                         | 2010          | 2009          |
|-------------------------|---------------|---------------|
| Automobile              | 54.137        | 43.737        |
| Motorräder              | 1.304         | 1.069         |
| Finanzdienstleistungen  | 16.617        | 15.798        |
| Sonstige Gesellschaften | 4             | 3             |
| Konsolidierungen        | -11.585       | -9.926        |
| <b>Konzern</b>          | <b>60.477</b> | <b>50.681</b> |

**Ergebnis vor Steuern nach Segmenten**

in Mio. Euro

|                         | 2010         | 2009       |
|-------------------------|--------------|------------|
| Automobile              | 3.887        | -588       |
| Motorräder              | 65           | 11         |
| Finanzdienstleistungen  | 1.214        | 365        |
| Sonstige Gesellschaften | 45           | 51         |
| Konsolidierungen        | -375         | 574        |
| <b>Konzern</b>          | <b>4.836</b> | <b>413</b> |

in Asien erhöhten sich die Auslieferungen an Kunden um 13,6% gegenüber dem Vorjahr.

Im Segment Motorräder erhöhte sich die Auslieferung an Kunden von BMW Motorrädern um 12,3%. Die Umsatzerlöse stiegen im Vergleich zum Vorjahr um 22,0%. Das Ergebnis vor Steuern erhöhte sich um 54 Mio. Euro auf 65 Mio. Euro.

Die Umsatzerlöse des Segments Finanzdienstleistungen haben sich um 5,2% auf 16.617 Mio. Euro erhöht. Das Ergebnis vor Steuern erhöhte sich auf 1.214 Mio. Euro (2009: 365 Mio. Euro). Ursache hierfür waren insbesondere gesunkene Zuführungen zu Risikovorsorgen im Bereich der Kredite und der Restwerte sowie niedrigere Refinanzierungskosten.

Bei den Sonstigen Gesellschaften liegt das Ergebnis vor Steuern bei 45 Mio. Euro (2009: 51 Mio. Euro).

Insbesondere durch das steigende Neugeschäft im Leasingbereich sowie die gesunkenen Konzernherstellungskosten verminderten sich die segmentübergreifenden Konsolidierungen im Berichtsjahr auf -375 Mio. Euro (2009: 574 Mio. Euro).

**Finanzlage**

Die Kapitalflussrechnungen des Konzerns und der Segmente Automobile und Finanzdienstleistungen zeigen die Herkunft und Verwendung der Zahlungsströme in den Geschäftsjahren 2009 und 2010. Dabei wird in Zahlungsströme aus der betrieblichen Tätigkeit sowie der Investitions- und der Finanzierungstätigkeit unterschieden. Der in den Kapitalflussrechnungen betrachtete Finanzmittelfonds entspricht den Zahlungsmitteln und Zahlungsmitteläquivalenten in der Bilanz.

Die Zahlungsströme aus der betrieblichen Tätigkeit werden, ausgehend vom Jahresüberschuss des Konzerns und der Segmente, indirekt abgeleitet. Die Zah-

lungsströme aus der Investitions- und Finanzierungstätigkeit werden demgegenüber zahlungsbezogen ermittelt.

Aus der betrieblichen Tätigkeit des Konzerns ergibt sich im Geschäftsjahr ein Mittelzufluss von 13.651 Mio. Euro, der sich gegenüber dem Vorjahreszeitraum um 3.380 Mio. Euro bzw. 32,9% erhöht hat. Die Erhöhung des Jahresüberschusses führte im Geschäftsjahr 2010 zu einem um 3.024 Mio. Euro höheren Mittelzufluss. Die Veränderungen im Working Capital verringerten den Mittelzufluss aus der betrieblichen Tätigkeit gegenüber dem Vorjahr um 2.205 Mio. Euro. Dem stehen die Veränderung der sonstigen betrieblichen Aktiva und Passiva (+1.466 Mio. Euro) sowie die Veränderung der Rückstellungen (+910 Mio. Euro) gegenüber, die zu einer Erhöhung des Mittelzuflusses aus der betrieblichen Tätigkeit im Vergleich zum Vorjahr führten.

Der Mittelabfluss aus der Investitionstätigkeit des Konzerns beträgt 14.522 Mio. Euro und ist damit gegenüber dem Vorjahr um 3.194 Mio. Euro höher ausgefallen. Die Investitionen in Immaterielle Vermögenswerte und Sachanlagen haben im Vergleich zum Vorjahreszeitraum zu einem um 208 Mio. Euro geringeren Mittelabfluss geführt. Die Mittelabflüsse aus den Nettoinvestitionen in Vermietete Gegenstände und in Forderungen aus Finanzdienstleistungen betragen 9.332 Mio. Euro und sind gegenüber dem Vorjahreszeitraum um 3.632 Mio. Euro höher ausgefallen. Ursache hierfür ist ein höheres Neugeschäft im Segment Finanzdienstleistungen. Aus der Veränderung der Wertpapiere ergibt sich ein um 363 Mio. Euro geringerer Mittelabfluss.

Im Bereich der Finanzierungstätigkeit ist der Mittelzufluss mit 510 Mio. Euro um 842 Mio. Euro geringer als in der Vorperiode (2009: Mittelzufluss 1.352 Mio. Euro). Durch die Begebung von Anleihen flossen dem Konzern 4.578 Mio. Euro (2009: 9.762 Mio. Euro) zu, durch Tilgung flossen 3.406 Mio. Euro (2009: 6.440 Mio. Euro) ab.

### Veränderung der Zahlungsmittel und Zahlungsmitteläquivalente

in Mio. Euro

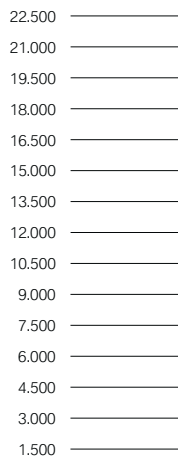

- 12 — KONZERNLAGEBERICHT
- 12 Das Geschäftsjahr im Überblick
- 14 Wirtschaftliche Rahmenbedingungen
- 18 Geschäftsverlauf
- 41 BMW Group – Kapitalmarktaktivitäten
- 44 Übernahmerelevante Angaben und Erläuterungen
- 47 — Finanzwirtschaftliche Situation
  - 47 Konzerninternes Steuerungssystem
  - 49 Ertragslage
  - 51 — Finanzlage
  - 53 — Vermögenslage
  - 55 Nachtragsbericht
  - 55 Wertschöpfungsrechnung
  - 57 Finanzwirtschaftliche Kennzahlen
  - 58 Erläuterungen zur BMW AG
- 62 Internes Kontrollsystem und Erläuterungen
- 63 Risikomanagement
- 70 Prognosebericht

| Zahlungsmittel und Zahlungsmitteläquivalente 31.12.2009 | Mittelzufluss aus betrieblicher Tätigkeit | Mittelabfluss aus Investitionstätigkeit | Mittelzufluss aus Finanzierungstätigkeit | Wechselkurs, Konsolidierungskreis | Zahlungsmittel und Zahlungsmitteläquivalente 31.12.2010 |
|---------------------------------------------------------|-------------------------------------------|-----------------------------------------|------------------------------------------|-----------------------------------|---------------------------------------------------------|
| 7.767                                                   | +13.651                                   | -14.522                                 | +510                                     | +26                               | 7.432                                                   |

Die Dividendenzahlung lag im Geschäftsjahr 2010 bei 197 Mio. Euro. Bei den Sonstigen Finanzverbindlichkeiten und Commercial Paper erfolgte ein Mittelabfluss von 260 Mio. Euro (2009: Mittelabfluss 1.562 Mio. Euro).

Der Mittelabfluss aus der Investitionstätigkeit wird zu 94,0% (2009: 90,7%) durch den Mittelzufluss aus der betrieblichen Tätigkeit gedeckt. Die Kapitalflussrechnung des Segments Automobile weist eine Überdeckung des Mittelabflusses aus der Investitionstätigkeit durch den

Mittelzufluss aus der betrieblichen Tätigkeit von 2.608 Mio. Euro bzw. 147,1% (2009: Unterdeckung 754 Mio. Euro) aus. Bereinigt um Nettoinvestitionen in Wertpapiere in Höhe von 1.863 Mio. Euro (2009: 2.210 Mio. Euro), im Wesentlichen für eine weitere Ausfinanzierung der Pensionsverpflichtungen, ergibt sich eine Überdeckung von 4.471 Mio. Euro (2009: Überdeckung 1.456 Mio. Euro) bzw. 221,5% (2009: 142,0%).

Insgesamt stellt sich der Free Cashflow des Segments Automobile wie folgt dar:

| in Mio. Euro                                  | 31.12.2010   | 31.12.2009   |
|-----------------------------------------------|--------------|--------------|
| Mittelzufluss aus der betrieblichen Tätigkeit | 8.150        | 4.921        |
| Mittelabfluss aus der Investitionstätigkeit   | -5.542       | -5.675       |
| Nettoinvestitionen in Wertpapiere             | 1.863        | 2.210        |
| <b>Free Cashflow Segment Automobile</b>       | <b>4.471</b> | <b>1.456</b> |

Die Kapitalflussrechnung des Segments Finanzdienstleistungen weist aufgrund höherer Investitionen in Vermietete Gegenstände und in Forderungen aus Finanzdienstleistungen eine Unterdeckung von 59,1% aus (2009: Überdeckung 115,8%).

Aus der Entwicklung der einzelnen Cashflows ergibt sich nach Bereinigung um wechselkurs- und konsolidierungskreisbedingte Effekte in Höhe von 26 Mio. Euro (2009: 18 Mio. Euro) ein Rückgang der Zahlungsmittel und Zahlungsmitteläquivalente von 335 Mio. Euro (2009: Zunahme von 313 Mio. Euro).

Das Nettofinanzvermögen des Segments Automobile stellt sich wie folgt dar:

| in Mio. Euro                                 | 31.12.2010    | 31.12.2009    |
|----------------------------------------------|---------------|---------------|
| Zahlungsmittel und Zahlungsmitteläquivalente | 5.585         | 4.331         |
| Wertpapiere und Investmentanteile            | 1.134         | 1.129         |
| Konzerninterne Nettofinanzforderungen        | 5.690         | 8.272         |
| <b>Finanzvermögen</b>                        | <b>12.409</b> | <b>13.732</b> |
| Abzüglich externer Finanzverbindlichkeiten*  | -1.123        | -4.770        |
| <b>Nettofinanzvermögen</b>                   | <b>11.286</b> | <b>8.962</b>  |

\* ohne derivative Finanzinstrumente

### Vermögenslage

Die Konzernbilanzsumme ist gegenüber dem 31. Dezember 2009 um 6.914 Mio. Euro bzw. 6,8% auf 108.867 Mio. Euro gestiegen. Währungsbereinigt hätte sich die Bilanzsumme um 1,7% erhöht.

Ausschlaggebend für den Anstieg auf der Aktivseite sind vor allem die Forderungen aus Finanzdienstleistungen (+ 11,8%), die Vorräte (+ 18,5%), die Sonstigen Vermögenswerte (+ 16,8%) sowie die Forderungen aus Lieferungen und Leistungen (+ 25,4%). Demgegenüber sind die Immateriellen Vermögenswerte (- 6,5%) sowie die Zahlungsmittel und Zahlungsmitteläquivalente (- 4,3%) zurückgegangen. Auf der Passivseite resultiert die Steigerung der Bilanzsumme aus der Zunahme des Eigenkapitals (+ 16,0%), der Sonstigen Verbindlichkeiten (+ 25,2%), der Verbindlichkeiten aus Lieferungen und Leistungen (+ 39,4%) sowie der Finanzverbindlichkeiten (+ 1,7%). Ein Rückgang ergibt sich bei den Rückstellungen für Pensionen (- 47,4%).

Die Immateriellen Vermögenswerte liegen mit 5.031 Mio. Euro um 348 Mio. Euro unter dem Vorjahr. Innerhalb dieser Position hat sich der Bestand an aktivierten Entwicklungskosten um 309 Mio. Euro auf 4.625 Mio. Euro verringert. Die Investitionen in aktivierte Entwicklungskosten betragen im Berichtsjahr 951 Mio. Euro (- 12,5%). Die Aktivierungsquote liegt damit bei 34,3% (2009: 44,4%). Die Verminderung der Investitionen in aktivierte Entwicklungskosten im Jahr 2010 ergibt sich aus Kosten- und Prozesseffizienzen in der Phase der Serienentwicklung. Die entsprechenden Abschreibungen belaufen sich auf 1.260 Mio. Euro (2009: 1.226 Mio. Euro).

Die Sachanlagen erhöhten sich leicht um 0,4% auf 11.427 Mio. Euro. Es wurden 2.235 Mio. Euro und damit 4,2% weniger als im Vorjahr investiert (2009: 2.334 Mio. Euro). Den Schwerpunkt bildeten Produktinvestitio-

nen für den Anlauf neuer Modelle sowie Strukturinvestitionen. Im Bereich der Sachanlagen fielen Abschreibungen in Höhe von 2.303 Mio. Euro an (+ 1,9%). Die Vorträge erstmals konsolidierter Tochterunternehmen betragen 14 Mio. Euro. Der Anteil der gesamten Investitionen an den Umsatzerlösen beträgt 5,4% (2009: 6,8%).

Die Vermieteten Gegenstände sind um 182 Mio. Euro bzw. 1,0% gesunken. Währungsbereinigt hätten sich die Vermieteten Gegenstände um 4,8% reduziert.

Die Sonstigen Finanzanlagen haben sich um 23,7% auf 177 Mio. Euro verringert. Dieser Rückgang beruht vor allem auf Abschreibungen auf Anteile an verbundenen Unternehmen.

Die Forderungen aus Finanzdienstleistungen haben, bedingt durch die Ausweitung des Geschäftsvolumens, um 11,8% auf 45.365 Mio. Euro zugenommen. Davon entfallen auf Kunden- und Händlerfinanzierungen 35.460 Mio. Euro (+ 10,9%) und auf Finance Leases 9.905 Mio. Euro (+ 14,9%).

Die Vorräte haben sich gegenüber dem Vorjahr um 1.211 Mio. Euro bzw. 18,5% auf 7.766 Mio. Euro erhöht. Währungsbereinigt wären die Vorräte um 13,1% gestiegen. Der Anstieg ist auf Bevorratungseffekte durch die Einführung neuer Modelle sowie auf die Ausweitung des Geschäftsbetriebs zurückzuführen.

Die Forderungen aus Lieferungen und Leistungen sind im Vergleich zum 31. Dezember 2009 um 25,4% höher ausgefallen.

Die Finanzforderungen sind insbesondere aufgrund des höheren Marktwerts der Derivateportfolios um 8,3% auf 5.129 Mio. Euro gestiegen.

## Bilanzstruktur Konzern

in Mrd. Euro

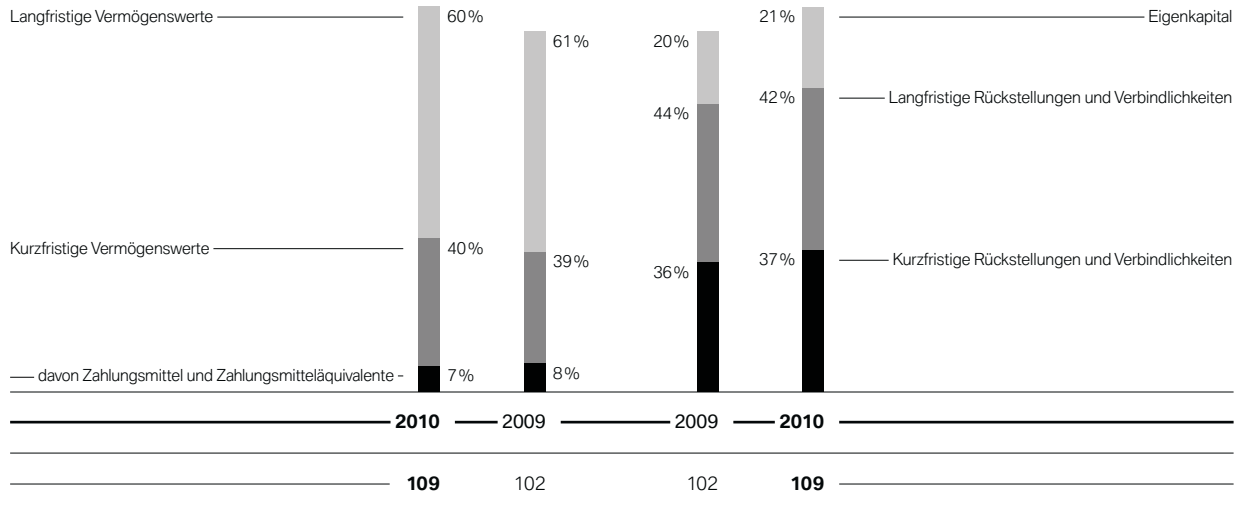

12 — **KONZERNLAGEBERICHT**  
 12 Das Geschäftsjahr im Überblick  
 14 Wirtschaftliche Rahmenbedingungen  
 18 Geschäftsverlauf  
 41 BMW Group – Kapitalmarktaktivitäten  
 44 Übernahmerelevante Angaben und Erläuterungen  
 47 — **Finanzwirtschaftliche Situation**  
 47 Konzerninternes Steuerungssystem  
 49 Ertragslage  
 51 Finanzlage  
 53 — **Vermögenslage**  
 55 — **Nachtragsbericht**  
 55 — **Wertschöpfungsrechnung**  
 57 Finanzwirtschaftliche Kennzahlen  
 58 Erläuterungen zur BMW AG  
 62 Internes Kontrollsystem und Erläuterungen  
 63 Risikomanagement  
 70 Prognosebericht

## Bilanzstruktur Segment Automobile

in Mrd. Euro

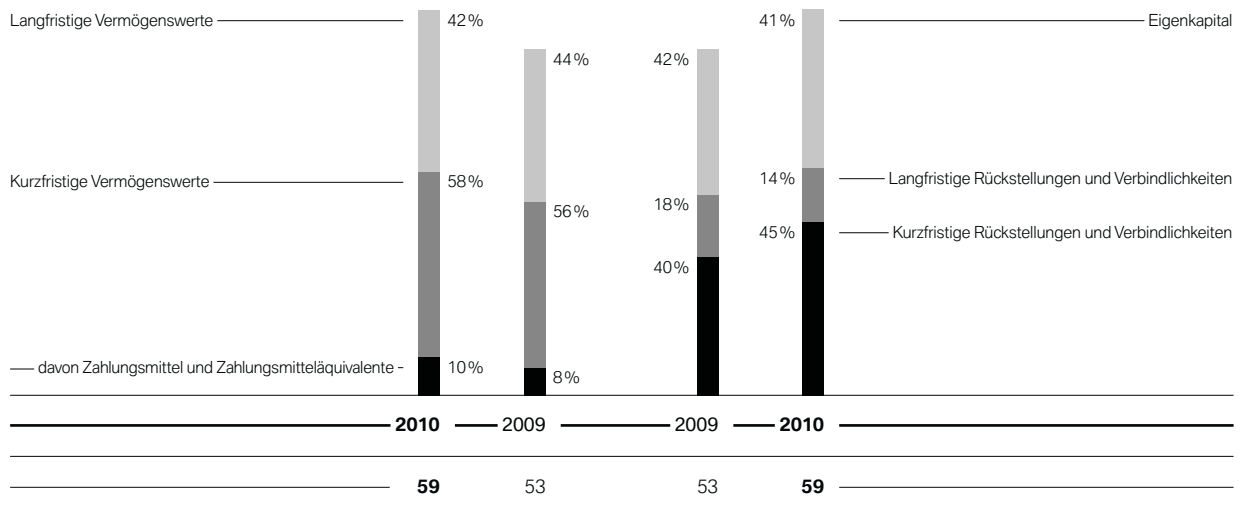

Der Bestand an liquiden Mitteln hat sich um 4,4% auf 8.998 Mio. Euro verringert. Die liquiden Mittel beinhalten neben den Zahlungsmitteln und Zahlungsmitteläquivalenten die unter den Finanzforderungen ausgewiesenen Wertpapiere und Investmentanteile. Dabei haben sich die Wertpapiere und Investmentanteile um 82 Mio. Euro verringert.

Die Zahlungsmittel und Zahlungsmitteläquivalente verminderten sich gegenüber dem Vorjahr um 335 Mio. Euro auf 7.432 Mio. Euro.

Auf der Passivseite erhöhte sich das Konzerneigenkapital um 3.185 Mio. Euro bzw. 16,0% auf 23.100 Mio. Euro. Ursache hierfür waren der Jahresüberschuss (+ 3.234 Mio. Euro) sowie die Währungsumrechnung (+ 683 Mio. Euro). Die latenten Steuern auf direkt mit dem Eigenkapital verrechneten Wertänderungen erhöhten das Eigenkapital um 263 Mio. Euro. Eine Verringerung des Konzerneigenkapitals ergibt sich aus versicherungsmathematischen Verlusten bei den Pensionszusagen aufgrund des gesunkenen Zinsniveaus (- 277 Mio. Euro) sowie der Marktbeurteilung der derivativen Finanzinstrumente (- 520 Mio. Euro) und der Wertpapiere (- 16 Mio. Euro). Die gezahlte



Dividende verringerte das Konzerneigenkapital um 197 Mio. Euro.

Im Geschäftsjahr wurde im Rahmen eines Belegschaftsaktienprogramms das in der Hauptversammlung vom 14. Mai 2009 geschaffene Genehmigte Kapital teilweise zur Ausgabe von Vorzugsaktien an Mitarbeiter in Anspruch genommen. Dadurch erhöhte sich das Gezeichnete Kapital um 0,5 Mio. Euro. Im Rahmen dieser Kapitalerhöhung wurden der Kapitalrücklage 18 Mio. Euro zugeführt. Übrige Veränderungen verringerten das Konzerneigenkapital um 3 Mio. Euro.

Die Eigenkapitalquote des Konzerns ist um 1,7 Prozentpunkte auf 21,2% gestiegen. Die Eigenkapitalquote des Segments Automobile beträgt 40,9% (2009: 41,7%), die des Segments Finanzdienstleistungen 7,1% (2009: 6,0%).

Die Rückstellungen für Pensionen verminderten sich um 47,4% auf 1.563 Mio. Euro. Sofern die Pensionsverpflichtungen durch Pensionsfonds gedeckt sind, wird das Fondsvermögen zu Marktwerten von der Verpflichtung abgesetzt. Die Verminderung der Rückstellungen resultiert vor allem aus der Ausfinanzierung einer weiteren Tranche von Pensionsverpflichtungen im Rahmen von Contractual Trust Arrangements (CTA) auf den BMW Trust e. V., München. Gegenläufig wirkt das gesunkene Zinsniveau in Deutschland.

Die Sonstigen Rückstellungen erhöhten sich um 783 Mio. Euro bzw. 16,4% auf 5.547 Mio. Euro. Innerhalb der Sonstigen Rückstellungen erhöhten sich die Rückstellungen für Personalaufwendungen um 432 Mio. Euro, die Anderen Rückstellungen um 207 Mio. Euro sowie die Rückstellungen aus laufendem Geschäftsbetrieb um 144 Mio. Euro.

Insbesondere währungsbedingt stiegen die Finanzverbindlichkeiten um 1,7% auf 62.353 Mio. Euro. Innerhalb der Finanzverbindlichkeiten erhöhten sich die Derivate um 83,9% auf 2.010 Mio. Euro, die Verbindlichkeiten aus dem Einlagengeschäft um 7,6% auf 10.689 Mio. Euro sowie die Anleihen um 2,0% auf 27.568 Mio. Euro. Gegenläufig verminderten sich die Verbindlichkeiten gegenüber Kreditinstituten um 15,6% auf 7.740 Mio. Euro sowie die Asset-Backed-Finanzierungen um 3,9% auf 7.506 Mio. Euro.

Die Verbindlichkeiten aus Lieferungen und Leistungen betragen 4.351 Mio. Euro und liegen damit um 39,4% über dem Vorjahr.

Die Sonstigen Verbindlichkeiten erhöhten sich um 1.572 Mio. Euro auf 7.822 Mio. Euro.

Insgesamt hat sich die Ertrags-, Finanz- und Vermögenslage der BMW Group im abgelaufenen Geschäftsjahr deutlich verbessert.

### **Vergütungsbericht**

Die Vergütung des Vorstands enthält als Elemente feste und variable Bezüge. Ferner bestehen Zusagen für den Fall der Mandatsbeendigung hauptsächlich in Form von Ruhegeldzusagen. Nähere Einzelheiten einschließlich der individualisiert ausgewiesenen Bezüge enthält der Vergütungsbericht, der im Kapitel Erklärung zur Unternehmensführung, Corporate Governance auf den Seiten 140 ff. zu finden ist. Der Vergütungsbericht ist Teil des Lageberichts.

### **Nachtragsbericht**

Nach dem Ende des Berichtsjahres sind keine Ereignisse eingetreten, die eine besondere Bedeutung für die Ertrags-, Finanz- und Vermögenslage des Konzerns haben.

### **Wertschöpfungsrechnung**

Die Wertschöpfungsrechnung zeigt die von der BMW Group im Geschäftsjahr erbrachte Unternehmensleistung abzüglich der Vorleistungen. Im Rahmen der Netto-Wertschöpfung werden die Abschreibungen ebenso wie der Materialaufwand und die sonstigen Aufwendungen als Vorleistungen angesehen. Mit der Verteilungsrechnung wird der Anteil der am Wertschöpfungsprozess Beteiligten ausgewiesen. Die Brutto-Wertschöpfung betrachtet die Abschreibungen als eine Komponente der Wertschöpfung, die im Rahmen der Verteilungsrechnung als Innenfinanzierung auszuweisen wäre.

Die Netto-Wertschöpfung der BMW Group ist im Jahr 2010 um 42,7% auf 14.902 Mio. Euro angestiegen. Ursache hierfür war ein überproportionaler Anstieg der Unternehmensleistung gegenüber den Vorleistungen.

Der größte Anteil der Netto-Wertschöpfung kommt mit 48,8% wiederum den Mitarbeitern zugute. Der Anteil der Kreditgeber ist gegenüber dem Vorjahr vor allem wegen einer weiteren Entspannung auf den internationalen Kapitalmärkten auf 15,9% gesunken. Für die öffentliche Hand ergibt sich einschließlich Latenter Steueraufwendungen des Konzerns eine Quote von 13,6%. Die Aktionäre liegen mit einem Anteil an der Netto-Wertschöpfung von 5,7% über Vorjahresniveau. Anderen Gesellschaftern kommen 0,1% der Netto-Wertschöpfung zu. Der verbleibende Anteil an der Netto-Wertschöpfung von 15,9% wird im Konzern zur Finanzierung der zukünftigen Geschäftstätigkeit zurückbehalten.

## BMW Group Wertschöpfungsrechnung

## 12 — KONZERNLAGEBERICHT

12 Das Geschäftsjahr im Überblick

14 Wirtschaftliche Rahmenbedingungen

18 Geschäftsverlauf

41 BMW Group – Kapitalmarktaktivitäten

44 Übernahmerelevante Angaben und Erläuterungen

## 47 — Finanzwirtschaftliche Situation

47 Konzerninternes  
Steuerungssystem

49 Ertragslage

51 Finanzlage

53 Vermögenslage

55 Nachtragsbericht

55 — Wertschöpfungsrechnung

57 — Finanzwirtschaftliche Kennzahlen

58 Erläuterungen zur BMW AG

62 Internes Kontrollsystem und  
Erläuterungen

63 Risikomanagement

70 Prognosebericht

|                                 | 2010<br>in Mio. Euro | 2010<br>in % | 2009<br>in Mio. Euro | 2009<br>in % | Veränderung<br>in % |
|---------------------------------|----------------------|--------------|----------------------|--------------|---------------------|
| <b>Entstehungsrechnung</b>      |                      |              |                      |              |                     |
| Umsatzerlöse                    | 60.477               | 98,7         | 50.681               | 97,5         |                     |
| Finanzerträge und -aufwendungen | -7                   | -            | 488                  | 0,9          |                     |
| Sonstige Erträge                | 766                  | 1,3          | 808                  | 1,6          |                     |
| <b>Unternehmensleistung</b>     | <b>61.236</b>        | <b>100,0</b> | <b>51.977</b>        | <b>100,0</b> | <b>17,8</b>         |
| Materialaufwand                 | 32.108               | 52,4         | 27.399               | 52,7         |                     |
| Sonstige Aufwendungen*          | 7.548                | 12,4         | 6.845                | 13,2         |                     |
| <b>Vorleistungen</b>            | <b>39.656</b>        | <b>64,8</b>  | <b>34.244</b>        | <b>65,9</b>  | <b>15,8</b>         |
| <b>Brutto-Wertschöpfung</b>     | <b>21.580</b>        | <b>35,2</b>  | <b>17.733</b>        | <b>34,1</b>  | <b>21,7</b>         |
| Abschreibungen                  | 6.678                | 10,9         | 7.292                | 14,0         |                     |
| <b>Netto-Wertschöpfung</b>      | <b>14.902</b>        | <b>24,3</b>  | <b>10.441</b>        | <b>20,1</b>  | <b>42,7</b>         |
| <b>Verteilungsrechnung</b>      |                      |              |                      |              |                     |
| Mitarbeiter                     | 7.278                | 48,8         | 6.395                | 61,2         | 13,8                |
| Kreditgeber                     | 2.363                | 15,9         | 3.243                | 31,1         | -27,1               |
| Öffentliche Hand                | 2.027                | 13,6         | 593                  | 5,7          | -                   |
| Aktionäre                       | 852                  | 5,7          | 197                  | 1,9          | -                   |
| Konzern                         | 2.366                | 15,9         | -7                   | 0,1          | -                   |
| Andere Gesellschafter           | 16                   | 0,1          | 6                    | -            | -                   |
| <b>Netto-Wertschöpfung</b>      | <b>14.902</b>        | <b>100,0</b> | <b>10.441</b>        | <b>100,0</b> | <b>42,7</b>         |

\* einschließlich der Aufwendungen für den Personalabbau

## BMW Group Wertschöpfung 2010

in %

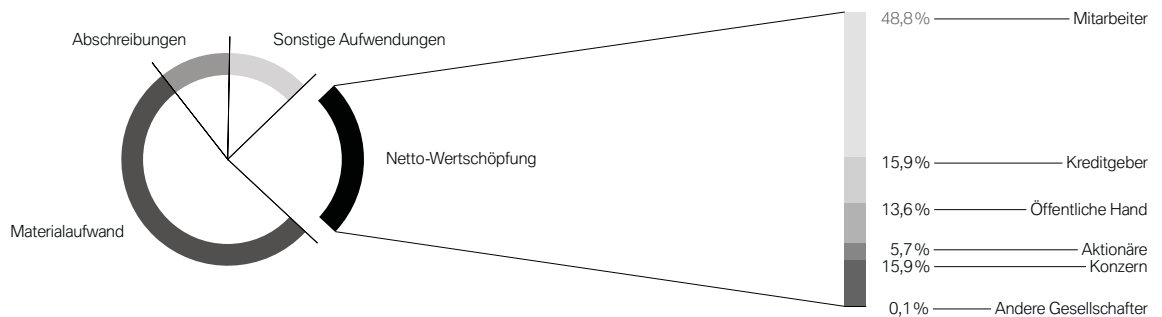

Netto-Wertschöpfung — 24,3

Abschreibungen — 10,9

Materialaufwand — 52,4

Sonstige Aufwendungen — 12,4

---

**Finanzwirtschaftliche Kennzahlen**


---

|                                                                             |           | <b>2010</b>   | 2009   |
|-----------------------------------------------------------------------------|-----------|---------------|--------|
| Bruttomarge                                                                 | %         | <b>18,0</b>   | 10,5   |
| EBITDA-Marge                                                                | %         | <b>14,5</b>   | 7,7    |
| EBIT-Marge                                                                  | %         | <b>8,4</b>    | 0,6    |
| Umsatzrendite vor Steuern                                                   | %         | <b>8,0</b>    | 0,8    |
| Umsatzrendite nach Steuern                                                  | %         | <b>5,3</b>    | 0,4    |
| Eigenkapitalrendite vor Steuern                                             | %         | <b>24,3</b>   | 2,0    |
| Eigenkapitalrendite nach Steuern                                            | %         | <b>16,2</b>   | 1,0    |
| Eigenkapitalausstattung Konzern                                             | %         | <b>21,2</b>   | 19,5   |
| — Automobile                                                                | %         | <b>40,9</b>   | 41,7   |
| — Finanzdienstleistungen                                                    | %         | <b>7,1</b>    | 6,0    |
| Deckung der Immateriellen Vermögenswerte und Sachanlagen durch Eigenkapital | %         | <b>140,4</b>  | 118,8  |
| Return on Capital Employed                                                  |           |               |        |
| — Konzern                                                                   | %         | <b>19,6</b>   | 3,3    |
| — Automobile                                                                | %         | <b>40,2</b>   | -      |
| — Motorräder                                                                | %         | <b>18,0</b>   | 4,7    |
| Return on Equity                                                            |           |               |        |
| — Finanzdienstleistungen                                                    | %         | <b>26,1</b>   | 9,2    |
| Mittelzufluss aus der betrieblichen Tätigkeit                               | Mio. Euro | <b>13.651</b> | 10.271 |
| Mittelabfluss aus der Investitionstätigkeit                                 | Mio. Euro | <b>14.522</b> | 11.328 |
| Deckung des Mittelabflusses durch den Mittelzufluss                         | %         | <b>94,0</b>   | 90,7   |
| Free Cashflow des Segments Automobile                                       | Mio. Euro | <b>4.471</b>  | 1.456  |
| Nettofinanzvermögen des Segments Automobile                                 | Mio. Euro | <b>11.286</b> | 8.962  |

---

## 12 — KONZERNLAGEBERICHT

- 12 Das Geschäftsjahr im Überblick
- 14 Wirtschaftliche Rahmenbedingungen
- 18 Geschäftsverlauf
- 41 BMW Group – Kapitalmarktaktivitäten
- 44 Übernahmerelevante Angaben und Erläuterungen
- 47 — Finanzwirtschaftliche Situation
  - 47 Konzerninternes Steuerungssystem
  - 49 Ertragslage
  - 51 Finanzlage
  - 53 Vermögenslage
  - 55 Nachtragsbericht
  - 55 Wertschöpfungsrechnung
  - 57 Finanzwirtschaftliche Kennzahlen
  - 58 — Erläuterungen zur BMW AG
- 62 Internes Kontrollsystem und Erläuterungen
- 63 Risikomanagement
- 70 Prognosebericht

**Erläuterungen zur BMW AG**

Der Jahresabschluss der BMW AG ist nach den Vorschriften des deutschen Handelsgesetzbuches und des Aktiengesetzes aufgestellt. Die Bestimmungen des Bilanzrechtsmodernisierungsgesetzes (BilMoG) wurden im Geschäftsjahr 2010 erstmals angewendet. Eine Anpassung der Vorjahreswerte erfolgte nicht. Durch die Anwendung der Vorschriften des BilMoG wurden sowohl das außerordentliche Ergebnis als auch die Gewinnrücklagen beeinflusst.

Die BMW AG entwickelt, fertigt und vertreibt eigene und von ausländischen Tochterunternehmen im Auftrag gefertigte Automobile und Motorräder. Der Vertrieb erfolgt dabei über eigene Niederlassungen, selbstständige Händler, Tochterunternehmen sowie Importeure. Die Produktion von Automobilen an den in- und ausländischen Standorten erhöhte sich um 17,7% auf 1.481.253 Einheiten. Die Anzahl der am 31. Dezember 2010 bei der BMW AG beschäftigten Mitarbeiter reduzierte sich angesichts natürlicher Fluktuation, Altersteilzeit sowie freiwilliger Aufhebungsverträge um 705 auf 69.518.

Die umfassende Konjunkturbelebung sowie modellzyklusbedingte Effekte führten zu einem starken Anstieg des Absatzvolumens. Dadurch stiegen die Umsatzerlöse im Vergleich zum Vorjahr um 20,5%. Der größte Anstieg war in der Region Asien zu verzeichnen. Auf den Umsatz von 45,8 Mrd. Euro entfiel ein konzerninterner Anteil von 32,6 Mrd. Euro, dies entspricht einer Quote von 71,2%. Die Herstellungskosten stiegen im Vergleich zum Vorjahr unterproportional zum Umsatz, was im Wesentlichen in gesunkenen Materialkosten begründet ist. Das Bruttoergebnis vom Umsatz erhöhte sich damit um 3,3 Mrd. Euro auf 8,6 Mrd. Euro.

Der Rückgang der sonstigen betrieblichen Erträge und Aufwendungen und des Beteiligungsergebnisses ist auf gesunkene Erträge von Konzerngesellschaften und auf geringere Auflösungen von Rückstellungen zurückzuführen.

Das Ergebnis der gewöhnlichen Geschäftstätigkeit erhöhte sich von 605 Mio. Euro auf 2.337 Mio. Euro.

In den außerordentlichen Aufwendungen und Erträgen sind überwiegend Umstellungseffekte aus der erstmaligen Anwendung des BilMoG in Höhe von 274 Mio. Euro enthalten. Weitere Informationen in Zusammenhang mit den BilMoG-Auswirkungen befinden sich im Anhang zum Jahresabschluss der BMW AG.

Der Steueraufwand resultierte sowohl aus der Veranlagung für das laufende Geschäftsjahr als auch aus Anpassungen für frühere Jahre infolge von Verrechnungspreisthemen. Die daraus drohende Doppelbesteuerung im Konzern wurde zum großen Teil durch bilaterale Rechtsbehelfsverfahren vermieden.

Nach Abzug von Steuern ergab sich ein Jahresüberschuss von 1.506 Mio. Euro, gegenüber 202 Mio. Euro im Vorjahr.

Die Finanzanlagen erhöhten sich von 1.303 Mio. Euro auf 1.875 Mio. Euro. Diese resultierte im Wesentlichen aus der Erhöhung der Kapitalrücklage bei der BMW Bank GmbH, München. Diese ergab sich aus einer Einzahlung der BMW AG sowie der Einbringung einer Beteiligung im Wege einer Sacheinlage. Dem entgegen wirkten die Abgänge der Anteile aus der Verschmelzung der BMW Ingenieur-Zentrum GmbH, Dingolfing, sowie der damit verbundenen Anwachsung der BMW Ingenieur-Zentrum GmbH + Co oHG, Dingolfing, an die BMW AG, München.

Im Geschäftsjahr wurden in Sachanlagen und Immaterielle Vermögensgegenstände 1.582 Mio. Euro (2009: 1.667 Mio. Euro) investiert, was einer Verminderung von 5,1% entspricht. Den Schwerpunkt bildeten Produktinvestitionen für den Anlauf neuer Modelle. Darüber hinaus wurden bei den Sachanlagen Restbuchwerte in Höhe von 703 Mio. Euro durch die oben erwähnte konzerninterne Umstrukturierung übertragen. Die Abschreibungen beliefen sich auf 1.540 Mio. Euro.

Zur Sicherung von Verpflichtungen aus Altersteilzeitverhältnissen und eines Teils der Pensionsverpflichtungen wurden Vermögensgegenstände im Rahmen von Contractual Trust Arrangements (CTA) treuhänderisch auf den BMW Trust e.V., München, übertragen. Hierbei handelt es sich im Wesentlichen um Anteile an Fondsvermögen und einer Forderung aus einem Kapitalisierungsgeschäft. Im Geschäftsjahr 2010 wurde ein weiterer Teil der Pensionsverpflichtungen ausfinanziert. Mit Einführung des BilMoG wurde erstmals eine Saldierung des Deckungsvermögens mit den gesicherten Verpflichtungen vorgenommen und sofern dieses die zu sichernde Verpflichtung übersteigt, wird der daraus resultierende Überhang als Aktiver Unterschiedsbetrag aus der Vermögensverrechnung ausgewiesen.

Das Eigenkapital erhöhte sich um 1.734 Mio. Euro auf 7.088 Mio. Euro. Durch die Erstanwendung des BilMoG wurden den Rücklagen 407 Mio. Euro zugeführt. Die Eigenkapitalquote stieg von 21,7% auf 29,1%.

Die Rückstellungen für Pensionen verringerten sich auf 24 Mio. Euro. Dies ist auf die erstmalige Saldierung der zur Ausfinanzierung auf den BMW Trust e.V., München, übertragenen Vermögensgegenstände mit den Pensionsverpflichtungen zurückzuführen.

Externe Verbindlichkeiten gegenüber Kreditinstituten und aus Commercial-Paper-Programmen wurden im Geschäftsjahr reduziert. Gegenläufig wurden konzerninterne Refinanzierungen gegenüber verbundenen Unternehmen erhöht.

## BMW AG Bilanz zum 31. Dezember

in Mio. Euro

|                                                                | 2010          | 2009          |
|----------------------------------------------------------------|---------------|---------------|
| <b>Aktiva</b>                                                  |               |               |
| Immaterielle Vermögensgegenstände                              | 141           | 145           |
| Sachanlagen                                                    | 6.257         | 5.536         |
| Finanzanlagen                                                  | 1.875         | 1.303         |
| <b>Anlagevermögen</b>                                          | <b>8.273</b>  | <b>6.984</b>  |
| Vorräte                                                        | 3.259         | 2.620         |
| Forderungen aus Lieferungen und Leistungen                     | 667           | 690           |
| Forderungen gegen verbundene Unternehmen                       | 6.448         | 6.197         |
| Übrige Forderungen und sonstige Vermögensgegenstände           | 1.122         | 882           |
| Wertpapiere                                                    | 2.556         | 4.987         |
| Flüssige Mittel                                                | 1.574         | 2.195         |
| <b>Umlaufvermögen</b>                                          | <b>15.626</b> | <b>17.571</b> |
| <b>Rechnungsabgrenzungsposten</b>                              | <b>106</b>    | <b>92</b>     |
| <b>Aktiver Unterschiedsbetrag aus der Vermögensverrechnung</b> | <b>341</b>    | <b>-</b>      |
| <b>Bilanzsumme</b>                                             | <b>24.346</b> | <b>24.647</b> |
| <b>Passiva</b>                                                 |               |               |
| Gezeichnetes Kapital                                           | 655           | 655           |
| Kapitalrücklage                                                | 2.019         | 2.001         |
| Gewinnrücklagen                                                | 3.562         | 2.501         |
| Bilanzgewinn                                                   | 852           | 197           |
| <b>Eigenkapital</b>                                            | <b>7.088</b>  | <b>5.354</b>  |
| <b>Namens-Gewinn-Scheine</b>                                   | <b>33</b>     | <b>34</b>     |
| Rückstellungen für Pensionen                                   | 24            | 4.586         |
| Übrige Rückstellungen                                          | 6.613         | 6.323         |
| <b>Rückstellungen</b>                                          | <b>6.637</b>  | <b>10.909</b> |
| Verbindlichkeiten gegenüber Kreditinstituten                   | 512           | 2.488         |
| Verbindlichkeiten aus Lieferungen und Leistungen               | 2.384         | 1.548         |
| Verbindlichkeiten gegenüber verbundenen Unternehmen            | 7.366         | 2.409         |
| Übrige Verbindlichkeiten                                       | 322           | 1.902         |
| <b>Verbindlichkeiten</b>                                       | <b>10.584</b> | <b>8.347</b>  |
| <b>Rechnungsabgrenzungsposten</b>                              | <b>4</b>      | <b>3</b>      |
| <b>Bilanzsumme</b>                                             | <b>24.346</b> | <b>24.647</b> |

---

**BMW AG Gewinn-und-Verlust-Rechnung**


---

in Mio. Euro

|                                                 | 2010                                                                        | 2009         |              |
|-------------------------------------------------|-----------------------------------------------------------------------------|--------------|--------------|
|                                                 | <b>2010</b>                                                                 | 2009         |              |
| 12 — <b>KONZERNLAGEBERICHT</b>                  |                                                                             |              |              |
| 12 Das Geschäftsjahr im Überblick               | Umsatzerlöse                                                                | 45.773       | 37.980       |
| 14 Wirtschaftliche Rahmenbedingungen            | Herstellungskosten der zur Erzielung der Umsatzerlöse erbrachten Leistungen | -37.125      | -32.679      |
| 18 Geschäftsverlauf                             | <b>Bruttoergebnis vom Umsatz</b>                                            | <b>8.648</b> | <b>5.301</b> |
| 41 BMW Group – Kapitalmarktaktivitäten          | Vertriebskosten                                                             | -2.783       | -3.105       |
| 44 Übernahmerelevante Angaben und Erläuterungen | Allgemeine Verwaltungskosten                                                | -1.345       | -1.379       |
| 47 — <b>Finanzwirtschaftliche Situation</b>     | Forschungs- und Entwicklungskosten                                          | -2.537       | -2.451       |
| 47 Konzerninternes                              | Sonstige betriebliche Erträge und Aufwendungen                              | 567          | 1.243        |
| 47 Steuerungs-system                            | Beteiligungsergebnis                                                        | 152          | 1.084        |
| 49 Ertragslage                                  | Finanzergebnis                                                              | -365         | -88          |
| 51 Finanzlage                                   | <b>Ergebnis der gewöhnlichen Geschäftstätigkeit</b>                         | <b>2.337</b> | <b>605</b>   |
| 53 Vermögenslage                                | Außerordentliche Erträge                                                    | 314          | -            |
| 55 Nachtragsbericht                             | Außerordentliche Aufwendungen                                               | -39          | -            |
| 55 Wertschöpfungsrechnung                       | Steuern vom Einkommen und vom Ertrag                                        | -1.088       | -393         |
| 57 Finanzwirtschaftliche Kennzahlen             | Sonstige Steuern                                                            | -18          | -10          |
| 58 — Erläuterungen zur BMW AG                   | <b>Jahresüberschuss</b>                                                     | <b>1.506</b> | <b>202</b>   |
| 62 Internes Kontrollsystem und Erläuterungen    | Einstellung in die Gewinnrücklagen                                          | -654         | -5           |
| 63 Risikomanagement                             | <b>Bilanzgewinn</b>                                                         | <b>852</b>   | <b>197</b>   |
| 70 Prognosebericht                              |                                                                             |              |              |

---

Der von der KPMG AG Wirtschaftsprüfungsgesellschaft, München, mit dem uneingeschränkten Bestätigungsvermerk versehene Abschluss der BMW AG, aus dem hier insbesondere die Bilanz und die Gewinn-und-Verlust-Rechnung wiedergegeben sind, wird beim Betreiber des elektronischen Bundesanzeigers eingereicht und ist über die Internetseite des Unternehmensregisters zugänglich. Dieser Abschluss kann bei der BMW AG, 80788 München, angefordert werden.

|    |   |                                                  |
|----|---|--------------------------------------------------|
| 12 | — | <b>KONZERNLAGEBERICHT</b>                        |
| 12 |   | Das Geschäftsjahr im Überblick                   |
| 14 |   | Wirtschaftliche Rahmenbedingungen                |
| 18 |   | Geschäftsverlauf                                 |
| 41 |   | BMW Group – Kapitalmarktaktivitäten              |
| 44 |   | Übernahmerelevante Angaben und Erläuterungen     |
| 47 |   | Finanzwirtschaftliche Situation                  |
| 47 |   | Konzerninternes Steuerungssystem                 |
| 49 |   | Ertragslage                                      |
| 51 |   | Finanzlage                                       |
| 53 |   | Vermögenslage                                    |
| 55 |   | Nachtragsbericht                                 |
| 55 |   | Wertschöpfungsrechnung                           |
| 57 |   | Finanzwirtschaftliche Kennzahlen                 |
| 58 |   | Erläuterungen zur BMW AG                         |
| 62 | — | <b>Internes Kontrollsystem und Erläuterungen</b> |
| 63 | — | <b>Risikomanagement</b>                          |
| 70 |   | Prognosebericht                                  |

Das interne Kontrollsystem der BMW Group hat die Aufgabe, die Wirksamkeit der Geschäftstätigkeit zu sichern. Es trägt zur Einhaltung der für die BMW Group maßgeblichen rechtlichen Vorschriften sowie zur Ordnungsmäßigkeit und Verlässlichkeit der internen und externen Rechnungslegung bei. Damit leistet es einen signifikanten Beitrag zum Management der Prozessrisiken. Im Folgenden werden die wesentlichen Merkmale des internen Kontrollsystems und Risikomanagementsystems im Hinblick auf den Rechnungslegungsprozess sowie den Konzernrechnungslegungsprozess dargestellt.

### Information und Kommunikation

Eine Komponente des internen Kontrollsystems ist die Information und Kommunikation. So wird gewährleistet, dass die zur Erreichung der Ziele des internen Kontrollsystems erforderlichen Informationen in geeigneter und zeitgerechter Form den verantwortlichen Stellen im Unternehmen zur Verfügung stehen. Die Bereitstellung der für die Rechnungslegungsprozesse der BMW AG und der sonstigen in den Konzernabschluss einbezogenen Unternehmen sowie für den Konzernrechnungslegungsprozess der BMW Group erforderlichen Informationen erfolgt im Wesentlichen durch Organisationshandbücher, Richtlinien zur internen und externen Rechnungslegung sowie Bilanzierungsanweisungen. Auf diese Informationen kann über das Intranet der BMW Group unternehmensweit zugegriffen werden. Sie bilden den Rahmen für eine einheitliche Anwendung der relevanten Vorschriften in allen Konzerngesellschaften. Die Qualität dieser Informationen wird durch eine regelmäßige Überprüfung der Aktualität sowie durch einen kontinuierlichen Austausch zwischen den verantwortlichen Fachbereichen sichergestellt.

### Organisatorische Maßnahmen

Die Rechnungslegungsprozesse sowie Konzernrechnungslegungsprozesse sind organisatorisch konsequent nach dem Prinzip der Funktionstrennung strukturiert. Zusammen mit einem durchgängigen Vieraugenprinzip trägt dies dazu bei, dass Fehler frühzeitig entdeckt werden oder mögliches Fehlverhalten verhindert wird. So stellt beispielsweise auch die regelmäßige Abstimmung von interner Planungsrechnung und externer Rechnungslegung die Qualität der Finanzberichterstattung sicher. Darüber hinaus gibt es als unternehmensinterne prozessunabhängige Funktion die interne Revision. Diese prüft und beurteilt im Rahmen ihrer Tätigkeit regelmäßig die Funktionsfähigkeit des internen Kontrollsystems und leitet bei Bedarf entsprechende Maßnahmen ein.

### Kontrollen

In allen Rechnungslegungsprozessen und Konzernrechnungslegungsprozessen werden umfangreiche Kontroll-

tätigkeiten durch die Führungskräfte durchgeführt. Damit wird gewährleistet, dass die gesetzlichen Vorschriften und internen Richtlinien eingehalten werden sowie eine ordnungsmäßige Geschäftstätigkeit sichergestellt wird. Zur Vermeidung der Prozessrisiken werden darüber hinaus Kontrollen mithilfe von IT-Anwendungen ausgeführt.

### IT-Berechtigungen

Die im Rechnungslegungsprozess und Konzernrechnungslegungsprozess eingesetzten IT-Anwendungen sind mit Zugangsbeschränkungen versehen. Diese erlauben lediglich den berechtigten Personen einen kontrollierten System- und Datenzugang. Die Zugangsberechtigungen werden jeweils gemäß der Aufgabenstellung vergeben. Außerdem wird bei der IT-Prozessgestaltung und der Vergabe der Berechtigungen das Vieraugenprinzip angewendet, sodass z. B. die Stellung und Freigabe eines Antrags nicht durch die gleiche Person erfolgen können.

### Mitarbeiterqualifizierung

Alle Mitarbeiter werden ihren Aufgaben entsprechend ausgebildet und insbesondere bezüglich Änderungen in den Vorschriften oder den Prozessen regelmäßig geschult. Zur weiteren Risikosensibilisierung werden den Führungskräften und Mitarbeitern umfangreiche Best-Practice-Beschreibungen für die Risiken und Kontrollen in den Prozessen zur Verfügung gestellt. Dies ermöglicht es, das interne Kontrollsystem regelmäßig zu evaluieren und weiter zu verbessern. Darüber hinaus können sich alle Mitarbeiter jederzeit und selbstständig über Methoden und Gestaltung von Kontrollen auf einer konzernweit verfügbaren Informationsplattform weiterbilden.

### Beurteilung der Wirksamkeit des internen Kontrollsystems

Die Verantwortung für die Wirksamkeit des internen Kontrollsystems im Rechnungslegungsprozess sowie Konzernrechnungslegungsprozess ist klar geregelt und liegt bei den jeweiligen Führungskräften und Prozessverantwortlichen. Die BMW Group beurteilt Aufbau und Wirksamkeit des internen Kontrollsystems anhand von internen Prüfungen, z. B. Management-Self-Audit sowie Erkenntnissen der internen Revision. Die in regelmäßigen Abständen durchgeführten Prüfungen zeigen, dass das in der BMW Group eingerichtete interne Kontrollsystem angemessen und wirksam ist. Durch die kontinuierliche Überarbeitung und Weiterentwicklung wird die Funktionsfähigkeit des internen Kontrollsystems gewährleistet. Im Rahmen eines implementierten Berichtswesens (Finanzberichtswesens) wird durch die Konzerneinheiten regelmäßig die Funktionsfähigkeit des internen Kontrollsystems bestätigt. Bei Auftreten und Meldung von Schwächen werden wirksame Maßnahmen eingeleitet.

\* Angaben nach den §§ 289 Abs. 5, 315 Abs. 2 Nr. 5 HGB



### Risikomanagement in der BMW Group

Das Risikomanagement in der BMW Group besteht aus aufeinander abgestimmten organisatorischen und methodischen Elementen, die integrativ miteinander verknüpft sind. Es ist dezentral über ein konzernweites Netzwerk von Risikomanagementbeauftragten aufgebaut und fördert das Bewusstsein für einen ausgewogenen Umgang mit Risiken auf allen Organisationsebenen. Der Risikomanagementprozess gilt konzernweit und umfasst die frühzeitige Identifikation und Analyse von Chancen und Risiken, deren Bewertung, den abgestimmten Einsatz geeigneter Instrumente zur Steuerung der Risiken sowie die Risikoüberwachung. Die Entscheidungsträger werden im Rahmen der Risikoberichterstattung regelmäßig über Risiken informiert, die die Geschäftsentwicklung und den Grad der Zielerreichung maßgeblich beeinflussen könnten. Unternehmerische Entscheidungen werden auf der Grundlage von weitreichenden Projektvorlagen getroffen, in denen Chancen und Risiken dargestellt werden. Im Rahmen der mittel- und langfristigen Unternehmensplanung sowie der innerjährigen Planung werden darüber hinaus Chancen und Risiken der Geschäftsaktivitäten beurteilt, um daraus Maßnahmen zur Risikobegrenzung und Zielerreichung abzuleiten. Wichtige Erfolgsfaktoren werden fortlaufend beobachtet, um signifikante Abweichungen frühzeitig zu erkennen und entsprechende Maßnahmen zur Gegensteuerung einzuleiten.

Um Änderungen der rechtlichen, wirtschaftlichen, ordnungspolitischen Rahmenbedingungen oder Veränderungen innerhalb des Unternehmens zeitnah zu beurteilen, ist ein permanenter Prozess die Voraussetzung. Die konzernweit geltenden Vorgaben und ihre einheitliche Anwendung stellen den Ausgangspunkt für eine lernende Organisation dar. Ein regelmäßiger Erfahrungsaustausch mit anderen Unternehmen stellt sicher, dass innovative Ansätze und Ideen in das Risikomanagement der BMW Group einfließen und eine Weiterentwicklung unserer Risikomanagementsysteme gewährleistet ist. Darüber hinaus sind regelmäßige Schulungen, Weiterbildungsmaßnahmen und Informationsveranstaltungen in der BMW Group ein wesentliches Element, die Prozessbeteiligten auf neue oder zusätzliche Anforderungen vorzubereiten.

Unser Risikomanagement wird zentral gesteuert und durch die interne Revision regelmäßig auf Angemessenheit und Wirksamkeit überprüft. Die dabei gewonnenen Erkenntnisse dienen als Grundlage für weitere Verbesserungen. Das bewusste Eingehen kalkulierbarer Risiken und die konsequente Nutzung der damit verbundenen Chancen sind für uns von jeher Grundlage unseres unternehmerischen Erfolgs.

Die BMW Group ist als weltweit tätiges Unternehmen einer Vielzahl von Risiken ausgesetzt, die unter anderem aus der zunehmenden Internationalisierung der Geschäftsaktivitäten und einer fortschreitenden Intensivierung des Wettbewerbs entstehen. Preisschwankungen an den weltweiten Devisen-, Geld-, Kapital- und Rohstoffmärkten sowie kürzere Innovationszyklen führen insgesamt zu steigender Komplexität mit entsprechend hohen Anforderungen an Unternehmen im internationalen Wettbewerbsumfeld.

Unter Risikogesichtspunkten lässt sich das Geschäftsjahr 2010 in zwei Abschnitte unterteilen: In der ersten Jahreshälfte waren die Auswirkungen der internationalen Wirtschafts- und Finanzkrise weiterhin deutlich spürbar und das Management der Risiken daraus stand im Vordergrund. Der Euro/Dollar-Wechselkurs lag zu Jahresbeginn bei rund 1,45 und damit gleichzeitig auf einem Jahreshoch. In einigen Absatzmärkten, insbesondere den USA, ließ eine rasche Erholung von den Krisenfolgen auf sich warten. Stattdessen bestand die Sorge vor einer erneuten Rezession. Erst im Jahresverlauf ergaben sich dank einer spürbaren Konjunkturbelebung in einzelnen Märkten mehrheitlich Chancen, die wir durch ein aktives Chancen- und Risikomanagement erfolgreich nutzen konnten.

Derzeit sind keine Risiken zu erkennen, die bestandsgefährdend sein könnten oder geeignet sind, die Vermögens-, Finanz- und Ertragslage des Unternehmens wesentlich zu beeinträchtigen. Dennoch können Risiken niemals vollständig ausgeschlossen werden.

Im Folgenden werden die wesentlichen Tätigkeitsfelder unseres Risikomanagements näher dargestellt. Ergänzende Erläuterungen zu Risiken im Zusammenhang mit Finanzinstrumenten sind darüber hinaus im Konzernanhang zu finden.

### Risiken aufgrund wirtschaftlicher Rahmenbedingungen

Die globalen Rahmenbedingungen unterlagen im abgelaufenen Geschäftsjahr starken Veränderungen. Regionale Unterschiede im Wirtschaftswachstum sowie allgemeine Maßnahmen zur Konjunkturbelebung als Folge der weltweiten Wirtschafts- und Finanzkrise waren für die Umsatz- und Ertragslage des Konzerns von Bedeutung.

Aus dem Vertrieb unserer Fahrzeuge außerhalb der Europäischen Währungsunion resultieren Währungskursrisiken insbesondere aus dem chinesischen Renminbi, dem US-Dollar, dem britischen Pfund sowie dem japanischen Yen. Der Anteil dieser vier Währungen betrug im Jahr 2010 über zwei Drittel unseres gesamten Fremdwährungsrisikos. Zur Messung von Fremdwährungsrisiken

## 12 — KONZERNLAGEBERICHT

|    |                                              |
|----|----------------------------------------------|
| 12 | Das Geschäftsjahr im Überblick               |
| 14 | Wirtschaftliche Rahmenbedingungen            |
| 18 | Geschäftsverlauf                             |
| 41 | BMW Group – Kapitalmarktaktivitäten          |
| 44 | Übernahmerelevante Angaben und Erläuterungen |
| 47 | Finanzwirtschaftliche Situation              |
| 47 | Konzerninternes Steuerungssystem             |
| 49 | Ertragslage                                  |
| 51 | Finanzlage                                   |
| 53 | Vermögenslage                                |
| 55 | Nachtragsbericht                             |
| 55 | Wertschöpfungsrechnung                       |
| 57 | Finanzwirtschaftliche Kennzahlen             |
| 58 | Erläuterungen zur BMW AG                     |
| 62 | Internes Kontrollsystem und Erläuterungen    |
| 63 | Risikomanagement                             |
| 70 | Prognosebericht                              |

werden Cashflow-at-Risk-Modelle und Szenarioanalysen eingesetzt. Diese Instrumente dienen im Währungsmanagement auch zur Entscheidungsfindung.

Den Währungsrisiken begegnen wir sowohl strategisch als auch operativ. In strategischer Hinsicht (mittel- und langfristig) werden Wechselkursrisiken durch die Erhöhung des Einkaufsvolumens im Fremdwährungsraum und die Steigerung der Produktion in Fremdwährungsländern gesteuert (Natural Hedging). In diesem Zusammenhang reduzieren die durchgeführte Werkserweiterung in Spartanburg, USA, sowie das sich im Bau befindende neue Werk in Shenyang, China, die Wechselkursrisiken in zwei großen Absatzmärkten. Operativ (kurz- und mittelfristig) werden Währungsrisiken auf den Finanzmärkten abgesichert. Die Sicherungsgeschäfte werden nur mit Finanzierungspartnern guter Bonität abgeschlossen. Dabei wird die Bonität durch ein Kontrahentenrisikomanagement kontinuierlich überwacht. Dieser Prozess ist durch eine Arbeitsanweisung verbindlich geregelt.

Zinsänderungsrisiken werden durch eine weitgehend fristenkongruente Aufnahme von Refinanzierungsmitteln sowie den Einsatz von Zinsderivaten gesteuert. Die Messung und Begrenzung der Zinsänderungsrisiken erfolgen sowohl auf Ebene der Landesgesellschaften als auch auf Konzernebene durch das Value-at-Risk-Konzept. Zur Limitbemessung sowie zur Bewertung der eingegangenen Zinsrisiken wird neben dem Risikotragfähigkeitskonzept eine im Rahmen des Benchmarkkonzepts definierte Zielgröße herangezogen. Weiterhin wird im Rahmen einer barwertorientierten Zinsbuchsteuerung die Risiko-Ertrags-Relation regelmäßig durch Simulationsrechnungen überprüft. Sensitivitätsanalysen, die auch Stressszenarien beinhalten und Auswirkungen möglicher Zinsänderungen auf das Ergebnis aufzeigen, ergänzen das Instrumentarium in der Zinsrisikosteuerung.

Die konzernweite Versorgung mit Liquidität wird durch eine breite Streuung der Refinanzierungsquellen sichergestellt. Die Nutzung vielfältiger Kapitalinstrumente hat sich insbesondere im schwierigen Umfeld der Banken- und Finanzkrise als erfolgreicher Ansatz bewährt. Erkenntnisse aus der Finanzkrise wurden in einem angepassten Zielliquiditätskonzept eingearbeitet. Die Liquiditätsrisikosituation wird auf Einzelgesellschaftsebene fortwährend überwacht und durch eine konzernweite rollierende Planung des Finanzbedarfs und der Finanzmittelbeschaffung kontinuierlich erfasst und gesteuert. Das Finanzierungs- und Leasinggeschäft im Segment Finanzdienstleistungen wird zum überwiegenden Teil über den Kapitalmarkt refinanziert.

Die BMW Group verfügt über einen guten Zugang zum Kapitalmarkt. Dafür war neben einer diversifizierten Refinanzierungsstrategie auch die anhaltend solide Finanzsituation verantwortlich, die von international anerkannten Ratingagenturen bestätigt wurde. Die gute Bonität drückt sich u. a. auch in den seit Jahren erstklassigen Kurzfrustratings bei Moody's (P-2) bzw. S & P (A-2) aus. Dadurch werden wettbewerbsfähige Refinanzierungsbedingungen im Kurzfristbereich erreicht.

Durch die Erholung der Absatzmärkte und die Verbesserung der gesamtwirtschaftlichen Rahmenbedingungen wurde auch der Ausblick, der als zusätzliche Bewertung zusammen mit den Ratings veröffentlicht wird, wieder angehoben. Im September 2010 erhöhten Moody's (Langfrustrating: A3) und S & P (Langfrustrating: A-) den Ausblick von negativ auf stabil.

Im abgelaufenen Geschäftsjahr konnten wir unverändert Finanzmittel zu guten Konditionen aufnehmen. Hierzu haben unsere diversifizierte Refinanzierungsstrategie und eine ausgesprochen solide Liquiditäts- und Free-Cashflow-Situation einen wesentlichen Beitrag geleistet. Sollte sich dieser Trend verfestigen, kann es auch vonseiten der Ratingagenturen zu verbesserten Bonitätseinschätzungen für die Unternehmen der Automobilbranche kommen.

Auch die Bedingungen auf den internationalen Rohstoffmärkten beeinflussen unsere Geschäftsentwicklung. Um die Versorgung mit Produktionsmaterial sicherzustellen und das Kostenrisiko zu minimieren, unterliegen die für uns wichtigen Rohstoffmärkte einer permanenten Beobachtung. Infolge der hohen Marktliquidität und der Wiederbelebung der Weltkonjunktur sind die Rohstoffpreise sukzessive angestiegen. Im Verlauf des Jahres 2010 konnten wir von bereits abgeschlossenen Sicherungen profitieren. Für Edelmetalle wie Platin, Palladium und Rhodium sowie Buntmetalle wurde das günstige Marktumfeld 2009 und zu Beginn des Jahres 2010 genutzt, um derivative Absicherungen für das laufende und die Folgejahre durchzuführen. Die Preisentwicklung von Rohöl, das als Grundstoff für Komponenten eine wichtige Rolle spielt, wirkt sich indirekt auch auf unsere Produktionskosten aus. Zudem beeinflusst der Rohölpreis durch die Entwicklung der Kraftstoffpreise direkt das Nachfrageverhalten der Autofahrer.

Eine Eskalation politischer Spannungen sowie terroristische Aktivitäten, Naturkatastrophen oder mögliche Pandemien könnten einerseits zur Rohstoffverknappung und bei Ausfall von Material- und Teilelieferungen direkt zu Produktionsausfällen führen, andererseits durch Auswirkungen auf die konjunkturelle Lage und

die internationalen Kapitalmärkte auch indirekt unsere Geschäftsentwicklung negativ beeinflussen.

### **Branchenrisiken**

Die Entwicklung der Kraftstoffpreise, die sowohl markt- als auch steuerpolitisch beeinflusst wird, sowie weltweit steigende Anforderungen an die Reduzierung von Verbrauch und Emissionen von Fahrzeugen stellen unverändert hohe Herausforderungen an unsere Motoren- und Produktentwicklung dar. Sichtbarer Erfolg bei der Minderung von Verbrauch und Emissionen ist unser Efficient Dynamics Konzept.

In Europa, Nordamerika, Japan, China und weiteren Ländern existieren mittel- bis langfristige Anforderungen an den Verbrauch oder die CO<sub>2</sub>-Emissionen eines Fahrzeugs. Über 90% des BMW Group Absatzes werden durch diese Vorgaben abgedeckt. Europa setzt bis 2015 im Durchschnitt über alle Neufahrzeuge der Automobilhersteller ein Ziel von 130 g/km. Die EU-Regelung definiert dabei auf Basis des Fahrzeuggewichts Vorgaben für CO<sub>2</sub>-Emissionen. Daraus leitet sich für die BMW Group unter Berücksichtigung des Produktangebots ein Ziel von unter 140 g/km ab. In den USA gilt eine einheitliche Verbrauchs- und CO<sub>2</sub>-Regelung für die Modelljahre 2012 bis 2016. Ausgehend von einer schrittweisen Reduktion im Modelljahr 2012 soll die Neuwagenflotte aller Hersteller im Modelljahr 2016 einen Durchschnittswert von 250 g CO<sub>2</sub> pro Meile erreichen. Die japanische Regierung hat mit gesetzlichen Regelungen für 2010 und 2015 gleichfalls anspruchsvolle Ziele zur Verringerung des Kraftstoffverbrauchs von Fahrzeugen definiert. Über die derzeit bestehende Verbrauchsregelung in China hinaus diskutiert die Regierung weiter gehende Verbrauchsanforderungen, die ab dem Jahr 2012 in Kraft treten sollen.

Weltweit werden politische Diskussionen über Nachfolgegesetzgebungen und deren Gestaltung bis 2020 und darüber hinaus geführt. Die erwartete verstärkte Markteinführung von alternativen Antrieben und Kraftstoffen stellt an die Unternehmen neue Herausforderungen. Wir stellen uns diesen Herausforderungen, indem wir die Technologiekompetenz und Innovationskraft nutzen und intensiv und konsequent den CO<sub>2</sub>-Ausstoß reduzieren. Verbrauchs- und Schadstoffreduzierung stellen bereits im Produktentstehungsprozess eine feste Messgröße dar. Daher arbeiten wir integrativ an den Themen Energiemanagement, Aerodynamik, Leichtbau, Fahrleistung und CO<sub>2</sub>-Emissionen. Bereits vor Jahren wurde das Konzept Efficient Dynamics verabschiedet: Ein Bündel aus hocheffizienten Motoren, verbesserter Aerodynamik, Leichtbaumaßnahmen und Energiemanagement senkt den Verbrauch und die Emissionen der Fahrzeugflotte. Mittelfristig realisieren wir zusätzliche Verbrauchs-

vorteile durch eine Elektrifizierung des Antriebsstrangs bis hin zu umfangreichen Hybridlösungen. Darüber hinaus arbeiten wir an Lösungen für nachhaltige Mobilität in Ballungsräumen. So werden groß angelegte Feldversuche mit dem MINI E in Großbritannien, Deutschland, Frankreich, den USA, China und Japan durchgeführt. Ab 2011 fährt der BMW ActiveE als Elektrofahrzeug auf Basis des BMW 1er Coupé. Die dadurch gewonnenen Praxiserfahrungen beider Projekte fließen in die laufende Serienentwicklung von Elektrofahrzeugen ein. Ab 2013 wird das Megacity Vehicle als Serienelektrofahrzeug eingeführt. Zusätzlich ist die zukunftsweisende Nutzung von regenerativ gewonnenem Wasserstoff im Verbrennungsmotor ein Baustein in der langfristigen Strategie zu einer nachhaltigen Mobilität.

Mit der BMW Group Efficient Dynamics Strategie entsprechen wir den gesetzlichen Regelungen. Das Risiko besteht in einer weiteren Verschärfung dieser gesetzlichen Vorgaben.

### **Risiken aus betrieblichen Aufgabenbereichen**

Die hohe Flexibilität unseres Produktionsnetzwerks und unserer Arbeitszeitmodelle wirkt sich grundsätzlich risikoreduzierend aus. Risiken aus Betriebsunterbrechungen und Produktionsausfällen sind zudem durch Verträge mit Versicherungsunternehmen hoher Bonität wirtschaftlich sinnvoll abgedeckt.

Bei der Lieferantenauswahl werden die Zulieferer auf technische und wirtschaftliche Leistungsfähigkeit überprüft. Von Beginn einer Vertragsbeziehung an trägt ein Supplier Relationship Management, das auch soziale und ökologische Aspekte erfasst, zur Risikominderung bei. Die Beurteilung und Steuerung der Leistungsfähigkeit unserer Lieferanten wird auch während der Serienphase unserer Fahrzeugmodelle fortgeführt. Dies schafft die Voraussetzung für eine langfristige stabile Beziehung zu unseren Lieferanten.

Die in der Automobilbranche übliche enge Zusammenarbeit zwischen Herstellern und Lieferanten verstärkt die gegenseitige Abhängigkeit ebenso wie die wirtschaftlichen Vorteile, sodass einzelne Zulieferer eine erhebliche Bedeutung für uns haben. Lieferverzögerungen und -ausfälle aufgrund von Streiks, Naturkatastrophen, Bränden oder Insolvenzen können zu Produktionsstörungen führen und dadurch die Ertragslage negativ beeinflussen. Durch konsequentes Interventionsmanagement wurden sämtliche Lieferantenkrisenfälle erfolgreich bewältigt.

### **Risiken aus den Finanzdienstleistungen**

Die im Laufe des vergangenen Jahres einsetzende wirtschaftliche Erholung hat zu einer Verbesserung wesentli-

## 12 — KONZERNLAGEBERICHT

|      |                                              |
|------|----------------------------------------------|
| 12   | Das Geschäftsjahr im Überblick               |
| 14   | Wirtschaftliche Rahmenbedingungen            |
| 18   | Geschäftsverlauf                             |
| 41   | BMW Group – Kapitalmarktaktivitäten          |
| 44   | Übernahmerelevante Angaben und Erläuterungen |
| 47   | Finanzwirtschaftliche Situation              |
| 47   | Konzerninternes Steuerungssystem             |
| 49   | Ertragslage                                  |
| 51   | Finanzlage                                   |
| 53   | Vermögenslage                                |
| 55   | Nachtragsbericht                             |
| 55   | Wertschöpfungsrechnung                       |
| 57   | Finanzwirtschaftliche Kennzahlen             |
| 58   | Erläuterungen zur BMW AG                     |
| 62   | Internes Kontrollsystem und Erläuterungen    |
| 63 — | Risikomanagement                             |
| 70   | Prognosebericht                              |

cher Risikogrößen beigetragen. Risiken werden in der BMW Group auf der Grundlage weltweit üblicher Standards und Vorschriften für dieses Segment identifiziert, gemessen, überwacht, bewertet und gesteuert. Dabei wird zur Risikosteuerung auf Konzepte, Methoden und Verfahren zurückgegriffen, die im bankregulierten Umfeld entwickelt und fortlaufend angepasst wurden, wie z. B. die „Mindestanforderungen an das Risikomanagement“ (MaRisk).

Die wesentlichen Risikoarten im Finanzdienstleistungsgeschäft umfassen das Kredit- bzw. das Adressausfallrisiko, das Restwertrisiko, das Zinsrisiko, das Liquiditätsrisiko und operationelle Risiken. Zur Messung des Kredit-, Restwert- und Zinsrisikos sowie der operationellen Risiken haben wir interne Methoden und Verfahren entwickelt, die nationalen und internationalen Standards sowie Anforderungen des regulatorischen Umfeldes wie Basel II entsprechen. Die Steuerung des Liquiditätsrisikos unterliegt internen Vorgaben und folgt zusätzlich aufsichtsrechtlichen Vorschriften.

Kreditrisiken entstehen in Verbindung mit der Kreditvergabe an Einzelkunden (Leasing, Finanzierung) und an kommerzielle Kunden (Händler, Flottenkunden, Importeure). Sogenannte Adressausfallrisiken entstehen beim Abschluss von Finanzgeschäften mit Banken und Finanzinstituten zur Refinanzierung und Risikosteuerung des Geschäfts. Zur Risikosteuerung werden im Rahmen der Kreditvergabe für die Bonitätsbeurteilung fortgeschrittene Scoring- und Ratingmodelle eingesetzt. Die Kreditvergaben erfolgen überwiegend auf Basis einer konservativen Sicherheitenbewertung, wobei in der Regel das finanzierte Fahrzeug oder Objekt als Kreditsicherheit verwendet wird.

Die Werthaltigkeit der akzeptierten Sicherheiten wird laufend hinsichtlich ihrer Auswirkungen auf das Blankorisiko überprüft, gemessen und bewertet. Stresstests und Backtestingverfahren stellen eine aktuelle Bewertung der Portfolios sicher. Als Messmethode dienen moderne Credit-Value-at-Risk-Methoden, die verbindliche und feste Limits für das Eingehen von Kreditrisiken vorgeben. Diese werden vierteljährlich überprüft. Zur Risikominimierung setzen wir bankübliche Instrumente wie Nachbesicherung, Zusatzsicherheiten, Einbehalten der Fahrzeugdokumente oder höhere Abschlagszahlungen ein.

Darüber hinaus tragen die engen und regelmäßigen Kontakte zu den Kreditnehmern, die genaue Kenntnis über die vermieteten und finanzierten Fahrzeuge (auch im Verwertungsprozess) sowie die konservative Bewertung der akzeptierten Sicherheiten erheblich zur Risikomini-

mierung bei. Bankübliche Kreditvergabekriterien und -richtlinien sowie aus den MaRisk abgeleitete Prinzipien wie die Funktionstrennung von Markt und Marktfolge, ein durchgängiges Vieraugenprinzip bei Kreditentscheidungen, risikobasierte Abschlagszahlungen oder verbindliche Kompetenzmatrizen sind Bestandteile der risikoorientierten Kreditprozesse.

Alle Prozessschritte, wie die Funktions- und Aufgabentrennung oder die Anwendung von Verfahren zur Früherkennung von Risiken, besitzen weltweit uneingeschränkte Gültigkeit; sie werden laufend auf ihre Aktualität überprüft und konsequent umgesetzt. Lokale, regionale und zentrale Kreditrevisionen der BMW Group überprüfen in regelmäßigen Zeitabständen die Einhaltung der weltweit gültigen und verbindlichen Kreditvergeberichtlinien, die Kreditprozesse und die dahinter liegenden IT-Systeme.

Wir entwickeln darüber hinaus die weltweite Standardisierung der Kreditentscheidungsprozesse weiter und arbeiten an der laufenden Verbesserung der Kreditantragsqualität, der Ratingsystematik und der Auswahlverfahren für Mitarbeiter im weltweiten Adressausfall-Risikonetzwerk.

Auf monatlicher bzw. quartalsmäßiger Basis berechnen und analysieren wir weltweit gültige Risikokriterien wie Überfälligkeiten im Einzelkundenbereich, Kreditausfallquoten, Zuführung zu den Wertberichtigungen sowie Anteile problembehafteter Händlerfinanzierungsvolumina und setzen diese zur aktiven Risikosteuerung ein. Dem lokalen, regionalen und zentralen Management überlassen wir diese Informationen mit klaren Handlungsempfehlungen als Entscheidungsbasis. Durch die ergriffenen Maßnahmen konnten wir im Jahr 2010 das Kreditrisiko transparenter darstellen, bewerten und steuern und das Ausfallrisiko entsprechend vermindern. Für das Kreditrisiko im Händlerfinanzierungsbereich haben wir im Jahr 2010 als Spätfolge der Finanzkrise eine erhöhte Kreditvorsorge getroffen. Die Normalisierung im Händlerfinanzierungsbereich dürfte erst mit einer ein- bis dreijährigen Zeitverzögerung spürbar werden.

Sämtliche Kreditrisikoentscheidungen im internationalen Händler-, Importeur- und Flottenkundenbereich treffen wir in einem dreistufigen Kreditentscheidungsprozess. Als Basis dienen neben der Kreditsumme (vor und nach Sicherheitenabzug) auch das vergebene Kreditrating sowie die Erfüllung der vorgegebenen Kreditrisikorichtlinien. Die finale Entscheidung trifft der nationale, der regionale oder der globale Kreditausschuss, wobei die Marktfolge in den jeweiligen Gremien nicht überstimmt werden kann. Identifizierte Risiken werden ent-

sprechend durch Einzel- und Pauschalwertberichtigungen bilanziell berücksichtigt; damit wird die erforderliche Vorsorge getroffen.

Für Fahrzeuge, die nach Vertragsablauf des Leasingvertrags bei Financial Services verbleiben (Leasingverträge und Kreditverträge mit Rückgabeoption), besteht das Risiko, bei der Vermarktung den ursprünglich kalkulierten Restwert nicht zu erzielen (Restwertrisiko). Die Volatilität der Gebrauchtwagenpreise in den großen Absatzmärkten hat sich als Folge der Finanzkrise verstärkt. Damit ist auch das Risiko von Restwertverlusten im Segment Finanzdienstleistungen angestiegen.

Die Restwertkalkulation erfolgt konzernweit einheitlich auf der Basis einer unternehmensweit verbindlichen Richtlinie. Die Entwicklung der Restwerte unserer Fahrzeuge auf den Gebrauchtwagenmärkten wird fortlaufend überwacht und prognostiziert. Ergänzend wird dazu auch auf externe Marktbeobachtungen zurückgegriffen. Die Gesamtrisikoposition wird durch den Abgleich von prognostiziertem Marktwert und Vertragsrestwert auf Modell- und Marktebene bewertet. Weiterhin ermitteln wir die Rückläuferquote. Die Quantifizierung des Risikos aus unerwarteten Verlusten erfolgt auf der Grundlage einer Value-at-Risk-Methodik. Die daraus resultierende Neubewertung des restwertrisikotragenden Portfolios sowie Verluste aus der Vermarktung von Gebrauchtfahrzeugen führen zu einer zusätzlichen Belastung für das Ergebnis im Finanzdienstleistungs- und im Automobilgeschäft. Erwartete Risiken sind durch Rückstellungen abgedeckt sowie durch Wertminderungen bei Leasingfahrzeugen in der Bilanz berücksichtigt. Im Geschäftsjahr 2010 hat sich die Situation auf dem Gebrauchtwagenmarkt stabilisiert. Dadurch war keine weitere Erhöhung des Rückstellungsniveaus notwendig. Durch ein aktives Lebenszyklusmanagement für aktuelle Modelle, Prozessoptimierungen in der internationalen Wiedervermarktung sowie Preis- und Volumenmaßnahmen wirken wir sinkenden Restwerten entgegen. Die Restwerte für das Leasinggeschäft werden regelmäßig überprüft und den aktuellen Marktgegebenheiten sowie der erwarteten zukünftigen Entwicklung angepasst.

Zinsrisiken werden auf Landesebene dezentral gemessen und konzernweit aggregiert. Auch die Risikobegrenzung erfolgt zunächst auf Landesebene durch Vorgabe von Risikolimits. Die Steuerung der Gesamtzinsrisikoposition wird auf Konzernebene durchgeführt.

Operationelle Risiken im Finanzdienstleistungsgeschäft umfassen die Gefahr von Schäden, die infolge des Versagens oder der mangelnden Angemessenheit von internen Verfahren und Systemen, durch menschliches Ver-

sagen oder durch externe Umstände eintreten können. Der Umfang des Managements operationeller Risiken in den jeweiligen Ländern setzt bei den Vorgaben aus Basel II an und beruht auf einem konzernweit gültigen Rahmen. Es umfasst den Entwurf sowie die anschließende Bewertung von Risikoszenarien, die fortlaufende Ermittlung und Überwachung von Schlüsselrisikoindikatoren, eine systematisierte Schadensfallerfassung sowie abgestimmte Maßnahmen zur Reduzierung des Risikos. Dabei berücksichtigen wir sowohl qualitative als auch quantitative Aspekte als Entscheidungsgrundlage. Dieser Prozess wird durch systemgesteuerte Lösungen unterstützt, die die Grundsätze des operationellen Risikomanagements wie Aufgabentrennung, Vieraugenprinzip, Historiendokumentation und Transparenz berücksichtigen. Darüber hinaus werden auch Effektivität und Effizienz des internen Kontrollsystems regelmäßig überprüft.

#### **Rechtliche Risiken**

Rechtmäßiges Handeln ist eine der Grundvoraussetzungen für unseren Erfolg. Das geltende Recht bildet den verbindlichen Rahmen für unsere vielfältigen unternehmerischen Aktivitäten weltweit. Durch die Internationalisierung des Wirtschaftsgeschehens sowie die Vielzahl und Komplexität rechtlicher Vorschriften steigt die Gefahr, dass bereits aus mangelnder Kenntnis gegen geltendes Recht verstoßen wird. Daher ergreifen wir alle erforderlichen Maßnahmen, um rechtmäßiges Handeln unserer Organe, unserer Führungskräfte und unserer Mitarbeiter sicherzustellen. Für alle Mitarbeiter ist es deshalb notwendig, die für sie relevanten Rechtspflichten zu kennen und einzuhalten. Der Umfang der Rechtspflichten ist in entsprechenden Unternehmensrichtlinien und Grundprinzipien festgeschrieben. Dennoch ist individuelles Fehlverhalten nie ganz auszuschließen. Unser Ziel ist es, diese Risiken so weit wie möglich zu minimieren und beispielsweise Fälle von Korruption, Bestechung oder Erpressung konsequent aufzudecken. Nähere Informationen zur Compliance in der BMW Group enthält der Compliance-Bericht.

Wie jedes Unternehmen sind auch wir mit Gewährleistungs- und Produkthaftungsansprüchen sowie anderen Rechtsstreitigkeiten konfrontiert, die branchentypisch oder Folge der Anpassung unserer Produkt- oder Einkaufsstrategie an veränderte Marktbedingungen sind. Zur Absicherung gegen derartige Ansprüche wurden ausreichend Rückstellungen gebildet. Ein Teil der Risiken, insbesondere aus dem amerikanischen Markt, wurde zudem durch entsprechende Versicherungen wirtschaftlich sinnvoll abgedeckt. Risikomindernd wirkt in diesen Fällen auch der hohe Qualitätsstandard unserer Produkte, der durch regelmäßige Überwachungsaudits

## 12 — KONZERNLAGEBERICHT

|    |                                              |
|----|----------------------------------------------|
| 12 | Das Geschäftsjahr im Überblick               |
| 14 | Wirtschaftliche Rahmenbedingungen            |
| 18 | Geschäftsverlauf                             |
| 41 | BMW Group – Kapitalmarktaktivitäten          |
| 44 | Übernahmerelevante Angaben und Erläuterungen |
| 47 | Finanzwirtschaftliche Situation              |
| 47 | Konzerninternes Steuerungssystem             |
| 49 | Ertragslage                                  |
| 51 | Finanzlage                                   |
| 53 | Vermögenslage                                |
| 55 | Nachtragsbericht                             |
| 55 | Wertschöpfungsrechnung                       |
| 57 | Finanzwirtschaftliche Kennzahlen             |
| 58 | Erläuterungen zur BMW AG                     |
| 62 | Internes Kontrollsystem und Erläuterungen    |
| 63 | Risikomanagement                             |
| 70 | Prognosebericht                              |

und kontinuierliche Verbesserungsmaßnahmen sichergestellt wird. Im Wettbewerbsvergleich können sich hier auch komparative Vorteile und Chancen für uns ergeben.

Im Übrigen ist die BMW Group derzeit nicht in Gerichts- oder Schiedsverfahren verwickelt, die einen erheblichen Einfluss auf die wirtschaftliche Lage des Konzerns haben könnten.

Änderungen regulatorischer Rahmenbedingungen können unsere Absatz-, Umsatz- und Ergebnisentwicklung auf einzelnen Märkten oder in einzelnen Wirtschaftsräumen beeinträchtigen. Zu Einzelheiten hierzu wird auf die Erläuterungen zu den Branchenrisiken verwiesen.

### Personalrisiken

Als attraktiver Arbeitgeber haben wir im intensiven Wettbewerb um Fach- und Führungskräfte seit Jahren eine sehr gute Position. Eine hohe Mitarbeiterzufriedenheit trägt dazu bei, das Risiko des Know-how-Verlusts zu minimieren.

Auch die konsequente Weiterentwicklung zielgruppenorientierter Nachwuchsprogramme leistet einen wichtigen Beitrag, hoch qualifizierte Mitarbeiter zu gewinnen und zu fördern. Im Jahr 2010 wurden diverse Programme für Führungsnachwuchs sowie für Schulabsolventen überarbeitet und neu gestartet. Ferner wurde das Doktorandenprogramm weiterentwickelt, das hoch motivierte Nachwuchskräfte bei der Erschließung innovativer Themenfelder für die BMW Group gezielt fördert.

Eine alternde und zugleich schrumpfende Bevölkerung in Deutschland wird die Bedingungen auf den Arbeits-, Produkt-, Dienstleistungs- und Finanzmärkten dauerhaft beeinflussen. Für die Unternehmen resultieren aus dem demografischen Wandel Risiken und Chancen, die in den kommenden Jahren verstärkt zu spüren sein werden. Wir begreifen den demografischen Wandel als eine der zentralen Herausforderungen und beschäftigen uns intensiv mit seinen betrieblichen Folgen. Dabei konzentrieren wir uns insbesondere auf die folgenden Handlungsfelder mit dem Ziel, motivierte Mitarbeiter langfristig zu binden:

- (1) zukunftsorientierte Gestaltung des Arbeitsumfelds,
- (2) Förderung und Erhalt der Leistungs- und Beschäftigungsfähigkeit,
- (3) Qualifizierung,
- (4) Stärkung des Bewusstseins der Mitarbeiter für die Eigenverantwortung bei der individuellen Zukunftsvorsorge und
- (5) individuelle Lebensarbeitszeitmodelle für Mitarbeiter.

Darüber hinaus unterstützt unsere Diversity-Strategie den langfristigen Erhalt unserer Leistungsfähigkeit.

Durch eine vielfältige Belegschaft werden wir über das nötige Wissen verfügen, um bestehende Absatzmärkte optimal zu bedienen und neue Absatzmärkte zu erschließen sowie die Leistungsfähigkeit des Unternehmens zu erhalten.

### Risiken aus Pensionsverpflichtungen

Die Pensionsverpflichtungen aus leistungsbezogenen Pensionsplänen gegenüber unseren Mitarbeitern werden auf der Basis von versicherungsmathematischen Gutachten ermittelt. Für die Abzinsung der zukünftigen Pensionszahlungen werden nach IAS 19 die Renditen von Unternehmensanleihen mit hoher Bonität verwendet. Diese unterliegen Marktschwankungen und beeinflussen damit die Höhe der Pensionsverpflichtungen. Auch eine Veränderung sonstiger Rahmenbedingungen wie beispielsweise steigende Inflationsraten oder eine höhere Lebenserwartung können sich auf die Höhe der Pensionsverpflichtungen auswirken. In Deutschland wurde im Jahr 2010 die letzte Tranche der Pensionsverpflichtungen ausfinanziert. Die entsprechenden Vermögenswerte wurden auf den BMW Trust e.V. übertragen. In Großbritannien, den USA und weiteren Ländern werden die Mittel für die Pensionsansprüche unserer Mitarbeiter ebenfalls getrennt vom Unternehmensvermögen in Pensionsfonds verwaltet. Damit wird für das Unternehmen künftig der Mittelbedarf für Pensionszahlungen aus dem operativen Geschäft erheblich reduziert. Die Pensionsvermögen der BMW Group bestehen aus verzinslichen Wertpapieren mit hoher Bonität, Aktien sowie Immobilien und sonstigen Anlageklassen.

Zur frühzeitigen Identifizierung von Risiken werden regelmäßig Risikokennzahlen wie beispielsweise der Value at Risk ermittelt, mit deren Hilfe Maßnahmen zur Risikobegrenzung entwickelt werden können. Die in den Pensionsfonds bestehenden Risiken werden fortlaufend überwacht und unter Risiko- und Ertragsgesichtspunkten gesteuert. Auf der Grundlage von regelmäßig durchgeführten Asset-Liability-Studien werden die zinstragenden Investitionen an den Laufzeiten der Pensionszahlungen ausgerichtet. Dieses Vorgehen vermindert die Zinsrisiken im Pensionsbereich. Zur weiteren Risikoreduzierung wird eine breite Streuung der Vermögensanlagen vorgenommen. Darüber hinaus sind fortlaufend überwachte Risikolimits für das Vermögensmanagement in den Pensionsfonds vorgegeben.

### Informations- und IT-Risiken

Der Schutz von Geschäftsgeheimnissen, innovativen Entwicklungen und Prozessdaten gegen unberechtigte Zugriffe, Zerstörung und Missbrauch hat bei uns einen sehr hohen Stellenwert. Dieser Schutz von Informationen und Daten ist integraler Bestandteil der Geschäftsprozesse und richtet sich am internationalen Sicherheitsstandard

ISO/IEC 27001 aus. Mitarbeiter, Prozessgestaltung und Informationstechnik werden in das umfassende Risiko- und Sicherheitsmanagement einbezogen.

Die konzernweit gültigen Vorgaben sind sowohl in unseren Grundsätzen verankert als auch in detaillierten Anweisungen dokumentiert. Sie verpflichten die Mitarbeiter zum sorgfältigen Umgang mit Informationen, zur sicheren Nutzung von Informationssystemen und zu transparentem Umgang mit Risiken der Informationstechnik (IT-Risiken). Zielgerichtete Kommunikations- und Qualifizierungsmaßnahmen führen zu einem hohen Sicherheits- und Risikobewusstsein aller Beteiligten. Darüber hinaus werden unsere Mitarbeiter verstärkt durch die Compliance-Organisation zur Einhaltung gesetzlicher und regelbasierter Forderungen qualifiziert.

Im Rahmen des Risikomanagements werden sowohl die aus der Nutzung der Informationstechnik als auch die bei der Verarbeitung von Informationen möglichen IT-Risiken regelmäßig festgestellt und berichtet. Das bewusste Eingehen von Risiken, ihre Minderung oder Vermeidung wird durch unsere Führungskräfte entschieden und verantwortet.

Die von uns eingesetzten technischen Schutzmaßnahmen umfassen vor allem prozessspezifische Sicherheitsvorkehrungen. Standardaktivitäten wie Virens Scanner, Firewallsysteme, Zugangs- und Zugriffskontrollen auf Betriebssystem- und Anwendungsebene sowie interne Testläufe und regelmäßige Datensicherung werden ergänzend eingesetzt. Ein konzernweites Sicherheitsnetzwerk gewährleistet, dass Sicherheitsvorgaben eingehalten werden. Regelmäßige Analysen und ein konsequentes Sicherheitsmanagement, wie beispielsweise unsere zentrale IT-Betriebssicherheit (Security Operation Centre), das den internen Netzwerkverkehr überwacht, gewährleisten ein hohes Schutzniveau.

Bei Kooperationen und Partnerbeziehungen spielt der Schutz unseres spezifischen Know-how eine sehr wichtige Rolle. Durch klar definierte Vorgaben zum Informationsschutz und zur Nutzung der Informationstechnologie schützen wir unser geistiges Eigentum. Informationen, die Kernkompetenzen darstellen, unterliegen besonders strengen Sicherheitsvorkehrungen.

|    |   |                                              |
|----|---|----------------------------------------------|
| 12 | — | <b>KONZERNLAGEBERICHT</b>                    |
| 12 |   | Das Geschäftsjahr im Überblick               |
| 14 |   | Wirtschaftliche Rahmenbedingungen            |
| 18 |   | Geschäftsverlauf                             |
| 41 |   | BMW Group – Kapitalmarktaktivitäten          |
| 44 |   | Übernahmerelevante Angaben und Erläuterungen |
| 47 |   | Finanzwirtschaftliche Situation              |
| 47 |   | Konzerninternes Steuerungssystem             |
| 49 |   | Ertragslage                                  |
| 51 |   | Finanzlage                                   |
| 53 |   | Vermögenslage                                |
| 55 |   | Nachtragsbericht                             |
| 55 |   | Wertschöpfungsrechnung                       |
| 57 |   | Finanzwirtschaftliche Kennzahlen             |
| 58 |   | Erläuterungen zur BMW AG                     |
| 62 |   | Internes Kontrollsystem und Erläuterungen    |
| 63 |   | Risikomanagement                             |
| 70 | — | <b>Prognosebericht</b>                       |

### Konjunktur im Jahr 2011

Wir gehen davon aus, dass der in der zweiten Jahreshälfte 2009 begonnene Aufschwung der Weltwirtschaft auch im Jahr 2011 anhalten wird, wenn auch mit einer deutlich geringeren Dynamik als bisher. Aufgrund der weiterhin bestehenden Risiken kann es dabei zu vorübergehenden Rückschlägen für die globale Konjunktur kommen.

In den USA wird der konjunkturelle Aufschwung auch 2011 eher moderat ausfallen. Aufgrund der langsamen Erholung am Arbeits- und Immobilienmarkt sowie der weiterhin hohen Verschuldung der privaten Haushalte werden die Ausgaben der US-Konsumenten auch 2011 nicht so dynamisch zunehmen wie in den Jahren vor der Krise. Der größte Wachstumsbeitrag dürfte von den privaten Investitionen kommen, während der Außenhandel erneut für leicht negative Impulse sorgen wird.

In Europa bleibt die gesamtwirtschaftliche Dynamik hinter den USA zurück. Deutschland wird dabei weiter die Rolle der Konjunkturlokomotive spielen, jedoch in deutlich schwächerer Form als noch im Jahr 2010. Hier macht sich vor allem die Abkühlung der globalen Konjunktur beim Außenhandel bemerkbar, während sich die Binnennachfrage aufgrund der positiven Entwicklung am Arbeitsmarkt als recht robust erweisen wird. Die französische Wirtschaft wird in ähnlichem Tempo wie bisher und damit etwas schwächer als die deutsche wachsen, während Italien weiterhin nur sehr moderate Zuwächse aufweisen wird. Spaniens Wirtschaft dürfte im Jahr 2011 erstmals nach vier Jahren wieder zulegen, auch wenn das Wachstum aufgrund der hohen Arbeitslosigkeit und der notwendigen Korrekturen am Immobilienmarkt weiterhin nur sehr schwach bleiben wird. Großbritannien wird hingegen trotz der drastischen Sparpläne der Regierung auch 2011 eine robuste Dynamik aufweisen können.

Japans Exporte werden aufgrund der sich abschwächenden Weltkonjunktur und des starken japanischen Yen nicht mehr so stark expandieren wie im Vorjahr. Der private Konsum wird nach einem starken Jahr ebenfalls nur noch moderat zulegen, sodass insgesamt mit einer deutlichen Abschwächung und einer anhaltend schwachen Deflation zu rechnen ist.

Die Wachstumstreiber der Weltwirtschaft werden erneut die Schwellenländer Asiens, Lateinamerikas und Osteuropas sein, allen voran China und Indien. Chinas Regierung wird im Jahr 2011 massive Versuche unternehmen, die weiterhin sehr hohe Dynamik vor allem bei der

Investitionstätigkeit zu dämpfen und die private Konsumnachfrage zu stärken. Dies dürfte sich in einer Abschwächung auf sehr hohem Niveau bemerkbar machen. Aufgrund des anhaltend hohen Wachstums in Indien dürfte dies dazu führen, dass beide Länder in etwa gleich stark zulegen werden. In Brasilien ist nach einem sehr starken Vorjahr im Jahr 2011 mit einer leichten Abschwächung zu rechnen. Russland wird mit etwas schwächeren Raten als in den Jahren vor der Finanzkrise wachsen.

### Euro bleibt voraussichtlich stark

Der US-Dollar wird auch im Jahr 2011 voraussichtlich leicht unterbewertet bleiben. Der Vertrauensverlust in den Euro aufgrund der Turbulenzen an den europäischen Märkten für Staatsanleihen dürfte zwar einen erneuten Absturz des US-Dollar verhindern, dämpfend auf die US-amerikanische Währung wirken aber das anhaltend niedrige Zinsniveau sowie die hohen Defizite des Staatshaushalts und der Leistungsbilanz. Das britische Pfund bleibt ebenfalls eher schwach gegenüber dem Euro, hier ist erst im Zuge einer langfristigen wirtschaftlichen Erholung mit einer dauerhaften Aufwertung zu rechnen. Der japanische Yen wird hingegen auch 2011 gegenüber dem Euro stark bleiben, da ihm weiterhin der Status einer sicheren Anlage und der Leistungsbilanzüberschuss der japanischen Wirtschaft zugutekommen. Aufgrund des weltweit immer noch hohen Liquiditätsüberschusses ist auch in naher Zukunft eher mit starken Währungen der Schwellenländer gegenüber dem US-Dollar und dem Euro zu rechnen.

### Die Automobilmärkte im Jahr 2011

Die internationalen Automobilmärkte dürften ihren Aufschwung auch im Jahr 2011 fortsetzen, wenn auch etwas weniger dynamisch als im Vorjahr. Für China als größten Automobilmarkt der Welt wird mit einem etwas schwächeren Wachstum als in den beiden Vorjahren gerechnet. In den USA setzt sich die Erholung auf immer noch recht niedrigem Niveau jedoch in ähnlichem Tempo fort.

In der Europäischen Union ist nach den Auswirkungen der staatlichen Förderprogramme wieder mit einer annähernden Normalisierung zu rechnen. Insgesamt dürfte nur ein sehr leichter Zuwachs zu verzeichnen sein, der vor allem auf der konjunkturellen Erholung in Osteuropa beruht. In Westeuropa bleibt die Entwicklung weiterhin eher heterogen. Während in Deutschland nach dem Rückschlag, der der Abwrackprämie folgte, mit einem Wachstum zu rechnen ist, dürfte sich der PKW-Markt in Frankreich nochmals rückläufig entwickeln. In Großbritannien, Italien und Spanien dürften die Märkte weitgehend stagnieren.



Auch in Japan ist mit einer Stagnation zu rechnen, nachdem die Verkäufe in den beiden Jahren zuvor deutlich von der staatlichen Förderung profitierten.

Von den großen Schwellenländern wird Indien voraussichtlich die stärkste Dynamik aufweisen, während in Brasilien und Russland mit etwas weniger starkem Wachstum zu rechnen ist.

#### **Die Motorradmärkte im Jahr 2011**

Trotz der konjunkturellen Erholung in vielen Ländern war die Entwicklung der Motorradmärkte im abgelaufenen Jahr erneut deutlich rückläufig. Für das Jahr 2011 erwarten wir, dass sich zumindest in einigen Regionen die Märkte wieder erholen. Weltweit gehen wir jedoch nur von einer Seitwärtsbewegung auf den Motorradmärkten aus. Für das Hubraumsegment über 500 ccm erwarten wir einen Zuwachs im niedrigen einstelligen Bereich.

#### **Der Markt für Finanzdienstleistungen im Jahr 2011**

Die Zeichen für eine Fortsetzung des Aufschwungs der Weltwirtschaft für das kommende Jahr stehen günstig, auch wenn das hohe Wachstum von 2010 vermutlich nicht wiederholt werden kann. Bei umfangreichen freien Kapazitäten und moderaten Inflationszahlen in den wichtigsten Industrieländern dürften die Notenbanken ihre expansive Geldpolitik bis auf Weiteres beibehalten.

Die amerikanische Notenbank hat ihre expansive Geldpolitik ausgeweitet. Aufgrund der eingetrübten Konjunkturaussichten wird in den USA nicht vor Anfang 2012 mit einer Abkehr von der Nullzinspolitik gerechnet. Die Europäische Zentralbank wird ihren Refinanzierungssatz nicht vor dem vierten Quartal 2011 anheben, solange die Gefahr einer erneuten Schuldenkrise besteht. In der ersten Jahreshälfte könnte die Europäische Zentralbank jedoch ihre Überschussliquidität schrittweise zurückführen, sodass mit einem leichten Zinsanstieg im mittleren Laufzeitensegment zu rechnen ist.

Risiken für die Finanzdienstleister erwachsen zum einen durch die anhaltend hohe Unsicherheit und Volatilität an den Finanzmärkten. Zum anderen könnten die Maßnahmen zur Haushaltskonsolidierung weltweit Steuererhöhungen und damit eine Abschwächung der Binnennachfrage nach sich ziehen.

In den Handelsorganisationen wird sich die Konsolidierung in einigen Märkten auch 2011 fortsetzen. Durch den damit verbundenen Risikoanstieg können branchenweit

weitere Belastungen aus dem Kreditrisiko auch für 2011 nicht ausgeschlossen werden.

Eine Prognose der weiteren Entwicklung auf den Gebrauchtwagenmärkten ist mit deutlichen Unsicherheiten behaftet. Weltweit kann grundsätzlich von einer Seitwärtsbewegung der Gebrauchtwagenpreise ausgegangen werden. Bei einer erneuten Konjunktüreintrübung könnte sich das Preisniveau wieder verringern.

#### **Erwartungen der BMW Group für das Jahr 2011**

Für das Jahr 2011 gehen wir von insgesamt stabilen gesamtwirtschaftlichen Rahmenbedingungen aus. Vorübergehende konjunkturelle Rückschläge aus den Nachwirkungen der zurückliegenden Krise sind dabei aber nicht auszuschließen. Wir rechnen ferner damit, dass der Aufschwung auf den internationalen Automobilmärkten anhalten wird. So erwarten wir eine weiterhin hohe Dynamik in den Wachstumsmärkten. In den USA sollte die konjunkturelle Erholung andauern und sich unser Absatz dadurch zusätzlich beleben. Vor diesem Hintergrund wird sich die positive Geschäftsentwicklung der BMW Group auch 2011 fortsetzen.

Neue Modelle, innovative Technologien sowie ein attraktives Design haben im abgelaufenen Jahr der bereits hohen Kundennachfrage zusätzliche Impulse verliehen. So ist neben der neuen BMW 5er Limousine seit Herbst vergangenen Jahres auch der neue 5er Touring erhältlich. Der BMW X1 ist weltweit sehr erfolgreich. Der MINI Countryman erweitert seit Herbst als viertes Modell das MINI Portfolio. Auch der Rolls-Royce Ghost trifft auf eine hohe Kundennachfrage. Nach den Modelleinführungen im vergangenen Jahr werden wir unsere Produktoffensive auch 2011 fortsetzen. Im Zuge dessen erneuern wir die BMW 6er Baureihe: Im Frühjahr kommt das Cabrio in Europa und Asien auf den Markt. Anfang Mai folgen neben den USA weitere Märkte. Im Herbst 2011 steht das 6er Coupé unseren Kunden zur Verfügung. Als Erfolgsmodell seiner Klasse wird der neue BMW X3 im Verlauf des Jahres weltweit verfügbar sein. Nachdem im Mai das BMW 1er M Coupé auf den Markt kommt, folgt im Herbst nach seiner Weltpremiere auf der IAA der neue BMW M5. Die neue Generation der 1er Reihe bringen wir ebenfalls ab Herbst 2011 in den Handel. Bei MINI geht mit dem MINI Coupé die fünfte Modellvariante an den Start.

Zusammen mit der Erschließung von Wachstumsmärkten, vor allem in Lateinamerika und Asien, sowie der weiteren Stärkung unseres internationalen Produktionsnetzwerks durch die Erweiterung der Werke in den USA

## 12 — KONZERNLAGEBERICHT

|    |                                              |
|----|----------------------------------------------|
| 12 | Das Geschäftsjahr im Überblick               |
| 14 | Wirtschaftliche Rahmenbedingungen            |
| 18 | Geschäftsverlauf                             |
| 41 | BMW Group – Kapitalmarktaktivitäten          |
| 44 | Übernahmerelevante Angaben und Erläuterungen |
| 47 | Finanzwirtschaftliche Situation              |
| 47 | Konzerninternes Steuerungssystem             |
| 49 | Ertragslage                                  |
| 51 | Finanzlage                                   |
| 53 | Vermögenslage                                |
| 55 | Nachtragsbericht                             |
| 55 | Wertschöpfungsrechnung                       |
| 57 | Finanzwirtschaftliche Kennzahlen             |
| 58 | Erläuterungen zur BMW AG                     |
| 62 | Internes Kontrollsystem und Erläuterungen    |
| 63 | Risikomanagement                             |
| 70 | Prognosebericht                              |

und China bauen wir die starke Wettbewerbsposition der BMW Group aus. Damit schaffen wir die Voraussetzungen für profitables Wachstum auch in der Zukunft.

Im Jahr 2011 werden wir unser consequentes Kostenmanagement durch die Steuerung von Fixkosten und Working Capital beibehalten. Dazu zählt der effiziente Einsatz von Ressourcen. Modulare Baukästen und Industriestandards erlauben die Nutzung von Skaleneffekten, verringern die Herstellungskosten und sind ein wichtiger Baustein unserer neuen effizienten Entwicklungsstrategie. Dies spiegelt sich in unserer F & E-Quote in Höhe von 4,6% wider (2009: 4,8%).

Mit der Strategie Number ONE betreiben wir unverändert die strategische Neuausrichtung der BMW Group. Die dabei erreichten Erfolge bei Effizienz und Profitabilität eröffnen uns zusätzliche Freiräume. Wir werden daher weiterhin in zukunftsweisende Technologien investieren und unseren Innovationsvorsprung ausbauen. Dazu gehören unter anderem die weitere Optimierung des Verbrennungsmotors und intelligenter Leichtbau im Rahmen unseres Technologiepakets Efficient Dynamics sowie die Entwicklung alternativer Antriebe und neuer Mobilitätskonzepte in unserem Zukunftsprojekt project i. Die sich weltweit etablierende Umweltgesetzgebung schafft für uns die dazu notwendigen institutionellen Rahmenbedingungen.

Mit dem Einsatz innovativer Technologien arbeiten wir unverändert an der Reduzierung von Verbrauch und Emissionen von Verbrennungsmotoren. Unser Konzept Efficient Dynamics kombiniert Technologieinnovationen beim Antrieb mit Leichtbau, verbesserter Aerodynamik und dem intelligenten Management von Energieströmen im Fahrzeug. Mit Efficient Dynamics wird ein globaler und modellübergreifender Ansatz verfolgt, der durch die Serienausstattung unserer Fahrzeuge über das gesamte Modellangebot wirkt.

Die aktuell andauernden Feldversuche in den USA und Europa mit über 600 MINI E liefern bereits wichtige Erkenntnisse über die Anforderungen an künftige Serienfahrzeuge mit Elektroantrieb.

Mit dem BMW ActiveE intensivieren wir die Erforschung von Elektromobilität im Alltagsbetrieb und weiten die Feldversuche auch im Hinblick auf die Fähigkeit aus, Elektrofahrzeuge in Großserie herzustellen. In einer Erprobungsflotte von über 1.000 Fahrzeugen wird der BMW ActiveE ab 2011 in den USA, Europa und China weitere wertvolle Erkenntnisse aus der Alltagsnutzung

liefern. Gleichzeitig werden die Antriebskomponenten und Energiespeicher für unser Megacity Vehicle (MCV) im Vorserienstadium erprobt. Die daraus gewonnenen Erkenntnisse fließen direkt in die Serienentwicklung des MCV ein.

Im Jahr 2013 wird die BMW Group mit dem MCV ihr erstes Serienelektrofahrzeug auf den Markt bringen. Dieses innovative Fahrzeug, das gezielt für die großen Metropolregionen der Welt entwickelt wird, wird emissionsfrei fahren und auch unter Nachhaltigkeitsgesichtspunkten eine neue Bestmarke setzen.

Mit diesen Vorleistungen sind wir in der Lage, auch mittel- und langfristig Chancen aus veränderten Rahmenbedingungen zu nutzen. Unsere Premium-Produkte und Premium-Dienstleistungen werden auch zukünftig den Bedürfnissen unserer Kunden optimal entsprechen.

Für das Gesamtjahr 2011 streben wir eine Zunahme des Konzernergebnisses vor Steuern im Vergleich zum Vorjahr an. Das erwartete Ergebnisniveau ist ein weiterer Schritt in der Umsetzung unserer Ziele aus der Strategie Number ONE.

### Segment Automobile

Unser Angebot an zahlreichen neuen und attraktiven Modellen wird dem Absatz auch 2011 deutlich positive Impulse verleihen. Dabei wird die Absatzentwicklung im ersten Halbjahr voraussichtlich dynamischer ausfallen als in der zweiten Hälfte des Jahres. Unter der Voraussetzung stabiler gesamtwirtschaftlicher Rahmenbedingungen und einer fortgesetzten Belegung der Nachfrage auf wichtigen Automobilmärkten erwarten wir auf Jahressicht einen Absatz von mehr als 1,5 Mio. Automobilen der Marken BMW, MINI und Rolls-Royce. Für alle drei Marken werden neue Höchstwerte angestrebt.

Durch die Wettbewerbsstärke der BMW Group gehen wir ferner davon aus, unsere Position als weltweit führender Premiumhersteller erneut zu behaupten. Weitere Fortschritte bei Effizienz und Profitabilität sichern den Geschäftserfolg zusätzlich ab. Für das Segment Automobile streben wir daher eine EBIT-Marge von über 8% sowie einen ROCE von mehr als 26% an.

### Segment Motorräder

Im Segment Motorräder erwarten wir für das Jahr 2011 erneut eine Absatzsteigerung, die jedoch nicht mehr so deutlich ausfallen wird wie im abgelaufenen Jahr. Vor allem die neuen Modelle K 1600 GT und K 1600 GTL so-

wie die insgesamt sehr attraktive Modellpalette werden auch im Jahr 2011 für eine positive Entwicklung sorgen.

### **Segment Finanzdienstleistungen**

Für 2011 ist davon auszugehen, dass sich das Segment Finanzdienstleistungen erneut in starker Verfassung präsentiert. Eine deutlich entspannte Lage im Gebrauchtwagengeschäft und die verbesserte Risikosituation im Kreditgeschäft sowie die sehr guten Liquiditäts- und Refinanzierungsbedingungen werden zum positiven Geschäftsverlauf maßgeblich beitragen. Darüber hinaus wird die Expansion insbesondere in den absatzstarken Wachstumsmärkten gezielt weitergeführt. Mit dem weiteren Ausbau der BMW Bank Deutschland zu einem europaweit tätigen Kreditinstitut erhöhen wir unsere Flexibilität in der Liquiditäts- und Eigenkapitalallokation. Neben den Gesellschaften in Spanien, Portugal und Italien, die bereits in die BMW Bank integriert wurden, sollen zukünftig weitere Gesellschaften als Zweigniederlassungen folgen. Gleichzeitig wird die strategische Neuausrichtung der Geschäftsfelder die positive Ergebnisentwicklung unterstützen.

Unter der Voraussetzung einer weiterhin stabilen Risikosituation streben wir an, für das Segment Finanzdienstleistungen erneut einen Return on Equity von über 18 % zu erzielen.

### **Profitabilitätsziele 2012 werden bestätigt**

Auch für das Jahr 2012 gehen wir weltweit von einem stabilen Konjunkturmilieu aus. Vor diesem Hintergrund setzen wir die Erneuerung unseres Produktportfolios planmäßig fort. Neue attraktive Modelle werden die Geschäftsentwicklung der BMW Group weiter beleben und Absatz, Umsatz und Ergebnis zusätzliche positive Impulse verleihen. Ferner arbeiten wir mit Nachdruck daran, unsere anspruchsvollen Ziele aus der strategischen Neuausrichtung der BMW Group zu erreichen. Dies umfasst die bereits angekündigten Profitabilitätsziele für das Jahr 2012. Wir beabsichtigen unverändert, im Automobilsegment eine Rendite auf das eingesetzte Kapital (ROCE) von mehr als 26 % sowie eine EBIT-Marge von 8 bis 10 % zu erzielen. Durch eine konsequente Wertorientierung werden wir unsere anspruchsvollen Ziele auch in Zukunft erreichen.

**KONZERNABSCHLUSS**

BMW Group  
Gewinn-und-Verlust-Rechnungen des Konzerns und der Segmente  
Gesamtergebnisrechnung des Konzerns

**Gewinn-und-Verlust-Rechnungen des Konzerns und der Segmente**

in Mio. Euro

|                                                      | Anhang | Konzern        |              | Automobile     |              |
|------------------------------------------------------|--------|----------------|--------------|----------------|--------------|
|                                                      |        | 2010           | 2009         | 2010           | 2009         |
| Umsatzerlöse                                         | 7      | <b>60.477</b>  | 50.681       | <b>54.137</b>  | 43.737       |
| Umsatzkosten                                         | 8      | <b>-49.562</b> | -45.356      | <b>-44.703</b> | -39.616      |
| <b>Bruttoergebnis vom Umsatz</b>                     |        | <b>10.915</b>  | <b>5.325</b> | <b>9.434</b>   | <b>4.121</b> |
| Vertriebskosten und allgemeine Verwaltungskosten     | 9      | <b>-5.529</b>  | -5.040       | <b>-4.778</b>  | -4.329       |
| Sonstige betriebliche Erträge                        | 10     | <b>766</b>     | 808          | <b>508</b>     | 443          |
| Sonstige betriebliche Aufwendungen                   | 10     | <b>-1.058</b>  | -804         | <b>-809</b>    | -500         |
| <b>Ergebnis vor Finanzergebnis</b>                   |        | <b>5.094</b>   | <b>289</b>   | <b>4.355</b>   | <b>-265</b>  |
| Ergebnis aus Equity-Bewertung                        | 11     | <b>98</b>      | 36           | <b>98</b>      | 42           |
| Zinsen und ähnliche Erträge                          | 12     | <b>685</b>     | 856          | <b>556</b>     | 560          |
| Zinsen und ähnliche Aufwendungen                     | 12     | <b>-966</b>    | -1.014       | <b>-871</b>    | -1.055       |
| Übriges Finanzergebnis                               | 13     | <b>-75</b>     | 246          | <b>-251</b>    | 130          |
| Finanzergebnis                                       |        | <b>-258</b>    | <b>124</b>   | <b>-468</b>    | <b>-323</b>  |
| <b>Ergebnis vor Steuern</b>                          |        | <b>4.836</b>   | <b>413</b>   | <b>3.887</b>   | <b>-588</b>  |
| Ertragsteuern                                        | 14     | <b>-1.602</b>  | -203         | <b>-1.280</b>  | 149          |
| <b>Jahresüberschuss/-fehlbetrag</b>                  |        | <b>3.234</b>   | <b>210</b>   | <b>2.607</b>   | <b>-439</b>  |
| Ergebnisanteil fremder Gesellschafter                |        | <b>16</b>      | 6            | <b>15</b>      | 6            |
| <b>Ergebnisanteil der Aktionäre der BMW AG</b>       |        | <b>3.218</b>   | <b>204</b>   | <b>2.592</b>   | <b>-445</b>  |
| <b>Ergebnis je Stammaktie</b> in Euro                | 15     | <b>4,91</b>    | 0,31         |                |              |
| <b>Ergebnis je Vorzugsaktie</b> in Euro              | 15     | <b>4,93</b>    | 0,33         |                |              |
| Verwässerungseffekte                                 |        | -              | -            | -              | -            |
| <b>Verwässertes Ergebnis je Stammaktie</b> in Euro   | 15     | <b>4,91</b>    | 0,31         |                |              |
| <b>Verwässertes Ergebnis je Vorzugsaktie</b> in Euro | 15     | <b>4,93</b>    | 0,33         |                |              |

|     |   |                                               |
|-----|---|-----------------------------------------------|
| 74  | — | <b>KONZERNABSCHLUSS</b>                       |
| 74  | — | Gewinn-und-Verlust-Rechnungen                 |
| 74  | — | Gesamtergebnisrechnung                        |
| 76  | — | Bilanzen                                      |
| 78  | — | Kapitalflussrechnungen                        |
| 80  | — | Entwicklung des Konzerneigenkapitals          |
| 81  | — | Konzernanhang                                 |
| 81  | — | Grundsätze                                    |
| 89  | — | Erläuterungen zur Gewinn-und-Verlust-Rechnung |
| 95  | — | Erläuterungen zur Gesamtergebnisrechnung      |
| 96  | — | Erläuterungen zur Bilanz                      |
| 117 | — | Sonstige Angaben                              |
| 133 | — | Segmentinformationen                          |

**Gesamtergebnisrechnung des Konzerns**

in Mio. Euro

|                                                                                                                     | Anhang | 2010         | 2009        |
|---------------------------------------------------------------------------------------------------------------------|--------|--------------|-------------|
| <b>Jahresüberschuss</b>                                                                                             |        | <b>3.234</b> | <b>210</b>  |
| Zur Veräußerung verfügbare Wertpapiere                                                                              |        | <b>-16</b>   | 4           |
| Zu Sicherungszwecken eingesetzte Finanzinstrumente                                                                  |        | <b>-520</b>  | 295         |
| Währungsumrechnung ausländischer Tochterunternehmen                                                                 |        | <b>683</b>   | 318         |
| Versicherungsmathematische Gewinne/Verluste aus leistungsorientierten Pensionszusagen und ähnlichen Verpflichtungen |        | <b>-277</b>  | -1.198      |
| Latente Steuern auf die Bestandteile des Sonstigen Ergebnisses                                                      |        | <b>263</b>   | 190         |
| <b>Sonstiges Ergebnis nach Steuern</b>                                                                              | 17     | <b>133</b>   | <b>-391</b> |
| <b>Gesamtergebnis</b>                                                                                               |        | <b>3.367</b> | <b>-181</b> |
| Gesamtergebnisanteil fremder Gesellschafter                                                                         |        | <b>16</b>    | 6           |
| <b>Gesamtergebnisanteil der Aktionäre der BMW AG</b>                                                                |        | <b>3.351</b> | <b>-187</b> |

| Motorräder    |            | Finanzdienstleistungen |            | Sonstige Gesellschaften |           | Konsolidierungen |            |                                                      |
|---------------|------------|------------------------|------------|-------------------------|-----------|------------------|------------|------------------------------------------------------|
| 2010          | 2009       | 2010                   | 2009       | 2010                    | 2009      | 2010             | 2009       |                                                      |
| <b>1.304</b>  | 1.069      | <b>16.617</b>          | 15.798     | <b>4</b>                | 3         | <b>-11.585</b>   | -9.926     | Umsatzerlöse                                         |
| <b>-1.095</b> | -925       | <b>-14.798</b>         | -14.880    | -                       | -         | <b>11.034</b>    | 10.065     | Umsatzkosten                                         |
| <b>209</b>    | <b>144</b> | <b>1.819</b>           | <b>918</b> | <b>4</b>                | <b>3</b>  | <b>-551</b>      | <b>139</b> | <b>Bruttoergebnis vom Umsatz</b>                     |
| <b>-140</b>   | -126       | <b>-589</b>            | -560       | <b>-16</b>              | -16       | <b>-6</b>        | -9         | Vertriebskosten und allgemeine Verwaltungskosten     |
| <b>3</b>      | 2          | <b>72</b>              | 41         | <b>224</b>              | 352       | <b>-41</b>       | -30        | Sonstige betriebliche Erträge                        |
| <b>-1</b>     | -1         | <b>-101</b>            | -44        | <b>-253</b>             | -309      | <b>106</b>       | 50         | Sonstige betriebliche Aufwendungen                   |
| <b>71</b>     | <b>19</b>  | <b>1.201</b>           | <b>355</b> | <b>-41</b>              | <b>30</b> | <b>-492</b>      | <b>150</b> | <b>Ergebnis vor Finanzergebnis</b>                   |
| -             | -          | -                      | -          | -                       | -6        | -                | -          | Ergebnis aus Equity-Bewertung                        |
| <b>7</b>      | 3          | <b>4</b>               | 3          | <b>1.984</b>            | 1.778     | <b>-1.866</b>    | -1.488     | Zinsen und ähnliche Erträge                          |
| <b>-13</b>    | -11        | <b>-7</b>              | -8         | <b>-2.058</b>           | -1.852    | <b>1.983</b>     | 1.912      | Zinsen und ähnliche Aufwendungen                     |
| -             | -          | <b>16</b>              | 15         | <b>160</b>              | 101       | -                | -          | Übriges Finanzergebnis                               |
| <b>-6</b>     | <b>-8</b>  | <b>13</b>              | <b>10</b>  | <b>86</b>               | <b>21</b> | <b>117</b>       | <b>424</b> | Finanzergebnis                                       |
| <b>65</b>     | <b>11</b>  | <b>1.214</b>           | <b>365</b> | <b>45</b>               | <b>51</b> | <b>-375</b>      | <b>574</b> | <b>Ergebnis vor Steuern</b>                          |
| <b>-20</b>    | -3         | <b>-446</b>            | -147       | <b>22</b>               | -13       | <b>122</b>       | -215       | Ertragsteuern                                        |
| <b>45</b>     | <b>8</b>   | <b>768</b>             | <b>218</b> | <b>67</b>               | <b>64</b> | <b>-253</b>      | <b>359</b> | <b>Jahresüberschuss / -fehlbetrag</b>                |
| -             | -          | <b>1</b>               | -          | -                       | -         | -                | -          | Ergebnisanteil fremder Gesellschafter                |
| <b>45</b>     | <b>8</b>   | <b>767</b>             | <b>218</b> | <b>67</b>               | <b>64</b> | <b>-253</b>      | <b>359</b> | <b>Ergebnisanteil der Aktionäre der BMW AG</b>       |
|               |            |                        |            |                         |           |                  |            | <b>Ergebnis je Stammaktie</b> in Euro                |
|               |            |                        |            |                         |           |                  |            | <b>Ergebnis je Vorzugsaktie</b> in Euro              |
|               |            |                        |            |                         |           |                  |            | Verwässerungseffekte                                 |
|               |            |                        |            |                         |           |                  |            | <b>Verwässertes Ergebnis je Stammaktie</b> in Euro   |
|               |            |                        |            |                         |           |                  |            | <b>Verwässertes Ergebnis je Vorzugsaktie</b> in Euro |

BMW Group  
Konzernbilanz und Segmentbilanzen zum 31. Dezember

| <b>Aktiva</b>                                            |    | Anhang         | Konzern        | Automobile    |               |
|----------------------------------------------------------|----|----------------|----------------|---------------|---------------|
| in Mio. Euro                                             |    | 2010           | 2009           | 2010          | 2009          |
| Immaterielle Vermögenswerte                              | 19 | 5.031          | 5.379          | 4.892         | 5.230         |
| Sachanlagen                                              | 20 | 11.427         | 11.385         | 11.216        | 11.181        |
| Vermietete Gegenstände                                   | 21 | 17.791         | 17.973         | 182           | 187           |
| At-Equity bewertete Beteiligungen                        | 22 | 212            | 137            | 189           | 114           |
| Sonstige Finanzanlagen                                   | 22 | 177            | 232            | 3.263         | 2.678         |
| Forderungen aus Finanzdienstleistungen                   | 23 | 27.126         | 23.478         | -             | -             |
| Finanzforderungen                                        | 24 | 1.867          | 1.519          | 662           | 475           |
| Latente Ertragsteuern                                    | 25 | 1.393          | 1.266          | 1.888         | 1.514         |
| Sonstige Vermögenswerte                                  | 26 | 692            | 640            | 2.473         | 2.114         |
| <b>Langfristige Vermögenswerte</b>                       |    | <b>65.716</b>  | <b>62.009</b>  | <b>24.765</b> | <b>23.493</b> |
| Vorräte                                                  | 27 | 7.766          | 6.555          | 7.468         | 6.289         |
| Forderungen aus Lieferungen und Leistungen               | 28 | 2.329          | 1.857          | 1.983         | 1.608         |
| Forderungen aus Finanzdienstleistungen                   | 23 | 18.239         | 17.116         | -             | -             |
| Finanzforderungen                                        | 24 | 3.262          | 3.215          | 1.911         | 1.666         |
| Laufende Ertragsteuern                                   | 25 | 1.166          | 950            | 1.068         | 789           |
| Sonstige Vermögenswerte                                  | 26 | 2.957          | 2.484          | 15.871        | 14.863        |
| Zahlungsmittel und Zahlungsmitteläquivalente             | 29 | 7.432          | 7.767          | 5.585         | 4.331         |
| <b>Kurzfristige Vermögenswerte</b>                       |    | <b>43.151</b>  | <b>39.944</b>  | <b>33.886</b> | <b>29.546</b> |
| <b>Bilanzsumme</b>                                       |    | <b>108.867</b> | <b>101.953</b> | <b>58.651</b> | <b>53.039</b> |
| <b>Passiva</b>                                           |    |                |                |               |               |
| in Mio. Euro                                             |    | 2010           | 2009           | 2010          | 2009          |
| Gezeichnetes Kapital                                     | 30 | 655            | 655            | -             | -             |
| Kapitalrücklage                                          | 30 | 1.939          | 1.921          | -             | -             |
| Gewinnrücklagen                                          | 30 | 23.447         | 20.426         | -             | -             |
| Kumuliertes übriges Eigenkapital                         | 30 | -2.967         | -3.100         | -             | -             |
| Anteile anderer Gesellschafter                           | 30 | 26             | 13             | -             | -             |
| <b>Eigenkapital</b>                                      |    | <b>23.100</b>  | <b>19.915</b>  | <b>23.993</b> | <b>22.101</b> |
| Rückstellungen für Pensionen                             | 31 | 1.563          | 2.972          | 349           | 1.652         |
| Sonstige Rückstellungen                                  | 32 | 2.721          | 2.706          | 2.348         | 2.295         |
| Latente Ertragsteuern                                    | 33 | 2.933          | 2.769          | 1.726         | 1.694         |
| Finanzverbindlichkeiten                                  | 34 | 35.833         | 34.391         | 1.164         | 259           |
| Sonstige Verbindlichkeiten                               | 35 | 2.583          | 2.281          | 2.873         | 3.401         |
| <b>Langfristige Rückstellungen und Verbindlichkeiten</b> |    | <b>45.633</b>  | <b>45.119</b>  | <b>8.460</b>  | <b>9.301</b>  |
| Sonstige Rückstellungen                                  | 32 | 2.826          | 2.058          | 2.336         | 1.759         |
| Laufende Ertragsteuern                                   | 33 | 1.198          | 836            | 1.026         | 650           |
| Finanzverbindlichkeiten                                  | 34 | 26.520         | 26.934         | 961           | 4.736         |
| Verbindlichkeiten aus Lieferungen und Leistungen         | 36 | 4.351          | 3.122          | 3.713         | 2.556         |
| Sonstige Verbindlichkeiten                               | 35 | 5.239          | 3.969          | 18.162        | 11.936        |
| <b>Kurzfristige Rückstellungen und Verbindlichkeiten</b> |    | <b>40.134</b>  | <b>36.919</b>  | <b>26.198</b> | <b>21.637</b> |
| <b>Bilanzsumme</b>                                       |    | <b>108.867</b> | <b>101.953</b> | <b>58.651</b> | <b>53.039</b> |

74 — KONZERNABSCHLUSS

74 Gewinn-und-Verlust-Rechnungen

74 Gesamtergebnisrechnung

76 — Bilanzen

78 Kapitalflussrechnungen

80 Entwicklung des Konzerneigenkapitals

81 Konzernanhang

81 Grundsätze

89 Erläuterungen zur Gewinn-und-Verlust-Rechnung

95 Erläuterungen zur Gesamtergebnisrechnung

96 Erläuterungen zur Bilanz

117 Sonstige Angaben

133 Segmentinformationen

|            |            |                        |               |                         |               |                  |                | <b>Aktiva</b>                                |
|------------|------------|------------------------|---------------|-------------------------|---------------|------------------|----------------|----------------------------------------------|
| Motorräder |            | Finanzdienstleistungen |               | Sonstige Gesellschaften |               | Konsolidierungen |                |                                              |
| 2010       | 2009       | 2010                   | 2009          | 2010                    | 2009          | 2010             | 2009           |                                              |
| 42         | 39         | 97                     | 110           | -                       | -             | -                | -              | Immaterielle Vermögenswerte                  |
| 192        | 184        | 19                     | 20            | -                       | -             | -                | -              | Sachanlagen                                  |
| -          | -          | 20.868                 | 20.608        | -                       | -             | -3.259           | -2.822         | Vermietete Gegenstände                       |
| -          | -          | -                      | -             | 23                      | 23            | -                | -              | At-Equity bewertete Beteiligungen            |
| -          | -          | 8                      | 8             | 5.134                   | 5.380         | -8.228           | -7.834         | Sonstige Finanzanlagen                       |
| -          | -          | 27.126                 | 23.478        | -                       | -             | -                | -              | Forderungen aus Finanzdienstleistungen       |
| -          | -          | 7                      | 28            | 1.622                   | 1.186         | -424             | -170           | Finanzforderungen                            |
| 1          | -          | 603                    | 575           | 320                     | 355           | -1.419           | -1.178         | Latente Ertragsteuern                        |
| -          | -          | 1.176                  | 1.375         | 12.538                  | 10.389        | -15.495          | -13.238        | Sonstige Vermögenswerte                      |
| <b>235</b> | <b>223</b> | <b>49.904</b>          | <b>46.202</b> | <b>19.637</b>           | <b>17.333</b> | <b>-28.825</b>   | <b>-25.242</b> | <b>Langfristige Vermögenswerte</b>           |
| 290        | 258        | 8                      | 9             | -                       | -             | -                | -1             | Vorräte                                      |
| 114        | 123        | 231                    | 123           | 1                       | 3             | -                | -              | Forderungen aus Lieferungen und Leistungen   |
| -          | -          | 18.239                 | 17.116        | -                       | -             | -                | -              | Forderungen aus Finanzdienstleistungen       |
| -          | -          | 815                    | 924           | 854                     | 916           | -318             | -291           | Finanzforderungen                            |
| -          | -          | 31                     | 28            | 67                      | 133           | -                | -              | Laufende Ertragsteuern                       |
| 44         | -          | 3.248                  | 4.071         | 29.224                  | 27.179        | -45.430          | -43.629        | Sonstige Vermögenswerte                      |
| 4          | -          | 1.227                  | 2.803         | 616                     | 633           | -                | -              | Zahlungsmittel und Zahlungsmitteläquivalente |
| <b>452</b> | <b>381</b> | <b>23.799</b>          | <b>25.074</b> | <b>30.762</b>           | <b>28.864</b> | <b>-45.748</b>   | <b>-43.921</b> | <b>Kurzfristige Vermögenswerte</b>           |
| <b>687</b> | <b>604</b> | <b>73.703</b>          | <b>71.276</b> | <b>50.399</b>           | <b>46.197</b> | <b>-74.573</b>   | <b>-69.163</b> | <b>Bilanzsumme</b>                           |

|            |            |                        |               |                         |               |                  |                | <b>Passiva</b>                                           |
|------------|------------|------------------------|---------------|-------------------------|---------------|------------------|----------------|----------------------------------------------------------|
| Motorräder |            | Finanzdienstleistungen |               | Sonstige Gesellschaften |               | Konsolidierungen |                |                                                          |
| 2010       | 2009       | 2010                   | 2009          | 2010                    | 2009          | 2010             | 2009           |                                                          |
| -          | -          | 5.216                  | 4.268         | 5.261                   | 4.118         | -11.370          | -10.572        | Gezeichnetes Kapital                                     |
| -          | -          | -                      | -             | -                       | -             | -                | -              | Kapitalrücklage                                          |
| -          | -          | -                      | -             | -                       | -             | -                | -              | Gewinnrücklagen                                          |
| -          | -          | -                      | -             | -                       | -             | -                | -              | Kumuliertes übriges Eigenkapital                         |
| -          | -          | -                      | -             | -                       | -             | -                | -              | Anteile anderer Gesellschafter                           |
| -          | -          | 32                     | 24            | 1.164                   | 1.222         | -                | -              | <b>Eigenkapital</b>                                      |
| 18         | 74         | 250                    | 311           | 30                      | 32            | -                | -              | Rückstellungen für Pensionen                             |
| 93         | 68         | 3.691                  | 3.191         | 3                       | 9             | -2.489           | -2.127         | Sonstige Rückstellungen                                  |
| 2          | 2          | 12.202                 | 10.848        | 22.891                  | 23.454        | -424             | -170           | Latente Ertragsteuern                                    |
| -          | -          | 13.619                 | 10.455        | 22                      | 133           | -14.245          | -11.965        | Finanzverbindlichkeiten                                  |
| 314        | 257        | 29.794                 | 24.829        | 24.110                  | 24.850        | -17.158          | -14.262        | Sonstige Verbindlichkeiten                               |
| <b>427</b> | <b>401</b> | <b>29.794</b>          | <b>24.829</b> | <b>24.110</b>           | <b>24.850</b> | <b>-17.158</b>   | <b>-14.262</b> | <b>Langfristige Rückstellungen und Verbindlichkeiten</b> |
| 47         | 21         | 337                    | 274           | 103                     | 1             | 3                | 3              | Sonstige Rückstellungen                                  |
| -          | -          | 121                    | 85            | 51                      | 101           | -                | -              | Laufende Ertragsteuern                                   |
| -          | -          | 13.746                 | 13.673        | 12.131                  | 8.816         | -318             | -291           | Finanzverbindlichkeiten                                  |
| 199        | 167        | 433                    | 385           | 6                       | 14            | -                | -              | Verbindlichkeiten aus Lieferungen und Leistungen         |
| 14         | 15         | 24.056                 | 27.762        | 8.737                   | 8.297         | -45.730          | -44.041        | Sonstige Verbindlichkeiten                               |
| <b>260</b> | <b>203</b> | <b>38.693</b>          | <b>42.179</b> | <b>21.028</b>           | <b>17.229</b> | <b>-46.045</b>   | <b>-44.329</b> | <b>Kurzfristige Rückstellungen und Verbindlichkeiten</b> |
| <b>687</b> | <b>604</b> | <b>73.703</b>          | <b>71.276</b> | <b>50.399</b>           | <b>46.197</b> | <b>-74.573</b>   | <b>-69.163</b> | <b>Bilanzsumme</b>                                       |

# BMW Group

## Kapitalflussrechnungen des Konzerns und der Segmente

|              |                                                                                                                | Anhang             | Konzern           |  |
|--------------|----------------------------------------------------------------------------------------------------------------|--------------------|-------------------|--|
| in Mio. Euro |                                                                                                                | 2010               | 2009 <sup>1</sup> |  |
|              | Jahresüberschuss/-fehlbetrag                                                                                   | 3.234              | 210               |  |
|              | Überleitung zwischen Jahresüberschuss/-fehlbetrag und Mittelzufluss aus der betrieblichen Tätigkeit            |                    |                   |  |
|              | — Laufende Ertragsteuern                                                                                       | 1.430              | 338               |  |
|              | — Sonstige Zinsen und ähnliche Erträge/Aufwendungen                                                            | 42 <sup>2</sup>    | -113 <sup>2</sup> |  |
|              | — Abwertungen von Vermieteten Gegenständen                                                                     | 5.381              | 5.476             |  |
|              | — Abschreibungen auf das übrige Anlagevermögen                                                                 | 3.861              | 3.603             |  |
|              | — Veränderung der Rückstellungen                                                                               | 911                | 1                 |  |
|              | — Veränderung der Latenten Steuern                                                                             | 340                | -95               |  |
|              | — Sonstige zahlungsunwirksame Erträge und Aufwendungen                                                         | -454               | 17                |  |
|              | — Ergebnis aus dem Verkauf von Anlagevermögen                                                                  | 5                  | -35               |  |
|              | — Ergebnis aus Equity-Bewertung                                                                                | -98                | -36               |  |
|              | — Veränderung des Working Capital                                                                              | -403               | 1.802             |  |
|              | — Veränderung der Vorräte                                                                                      | -1.170             | 855               |  |
|              | — Veränderung der Forderungen aus Lieferungen und Leistungen                                                   | -427               | 506               |  |
|              | — Veränderung der Verbindlichkeiten aus Lieferungen und Leistungen                                             | 1.194              | 441               |  |
|              | — Veränderung der sonstigen betrieblichen Aktiva und Passiva                                                   | 572                | -894              |  |
|              | — Gezahlte Ertragsteuern                                                                                       | -1.318             | -349              |  |
|              | — Erhaltene Zinsen                                                                                             | 148 <sup>2</sup>   | 346 <sup>2</sup>  |  |
|              | <b>Mittelzufluss aus der betrieblichen Tätigkeit</b>                                                           | <b>39— 13.651</b>  | <b>10.271</b>     |  |
|              | Investitionen in Immaterielle Vermögenswerte und Sachanlagen                                                   | -3.263             | -3.471            |  |
|              | Erlöse aus Abgängen von Immateriellen Vermögenswerten und Sachanlagen                                          | 55                 | 169               |  |
|              | Investitionen in Finanzanlagen                                                                                 | -80                | -53               |  |
|              | Erlöse aus dem Abgang von Finanzanlagen                                                                        | 23                 | 15                |  |
|              | Investitionen in Vermietete Gegenstände                                                                        | -11.898            | -10.433           |  |
|              | Abgänge von Vermieteten Gegenständen                                                                           | 7.422              | 6.515             |  |
|              | Zugänge von Forderungen aus Finanzdienstleistungen                                                             | -61.120            | -49.629           |  |
|              | Zahlungseingänge auf Forderungen aus Finanzdienstleistungen                                                    | 56.264             | 47.847            |  |
|              | Zahlungsausgänge durch den Kauf von Wertpapieren                                                               | -2.723             | -2.908            |  |
|              | Zahlungseingänge aus dem Verkauf von Wertpapieren                                                              | 798                | 620               |  |
|              | <b>Mittelabfluss aus der Investitionstätigkeit</b>                                                             | <b>39— -14.522</b> | <b>-11.328</b>    |  |
|              | Ausgabe eigener Aktien                                                                                         | -                  | 6                 |  |
|              | Einzahlungen ins Eigenkapital                                                                                  | 18                 | 7                 |  |
|              | Zahlung von Dividenden für das Vorjahr                                                                         | -197               | -197              |  |
|              | Gezahlte Zinsen                                                                                                | -223 <sup>2</sup>  | -224 <sup>2</sup> |  |
|              | Aufnahme von Anleihen                                                                                          | 4.578              | 9.762             |  |
|              | Rückzahlung von Anleihen                                                                                       | -3.406             | -6.440            |  |
|              | Konzerninterne Finanzierungen                                                                                  | -                  | -                 |  |
|              | Veränderung der sonstigen Finanzverbindlichkeiten                                                              | -292               | -1.307            |  |
|              | Veränderung der Commercial Paper                                                                               | 32                 | -255              |  |
|              | <b>Mittelzufluss/-abfluss aus der Finanzierungstätigkeit</b>                                                   | <b>39— 510</b>     | <b>1.352</b>      |  |
|              | <b>Wechselkurs- und konsolidierungskreisbedingte Änderung der Zahlungsmittel und Zahlungsmitteläquivalente</b> | <b>39— 26</b>      | <b>18</b>         |  |
|              | <b>Veränderung der Zahlungsmittel und Zahlungsmitteläquivalente</b>                                            | <b>-335</b>        | <b>313</b>        |  |
|              | Zahlungsmittel und Zahlungsmitteläquivalente am 1. Januar                                                      | 7.767              | 7.454             |  |
|              | <b>Zahlungsmittel und Zahlungsmitteläquivalente am 31. Dezember</b>                                            | <b>39— 7.432</b>   | <b>7.767</b>      |  |

<sup>1</sup> Vorjahr aufgrund geänderter Darstellung der sonstigen betrieblichen Aktiva und Passiva angepasst

<sup>2</sup> Zinsen im Finanzdienstleistungsgeschäft sind grundsätzlich als Umsatzerlöse/-kosten klassifiziert.



| Automobile |                   | Finanzdienstleistungen |                   |                                                                                                                |
|------------|-------------------|------------------------|-------------------|----------------------------------------------------------------------------------------------------------------|
| 2010       | 2009 <sup>1</sup> | 2010                   | 2009 <sup>1</sup> |                                                                                                                |
| 2.607      | -439              | 768                    | 218               | Jahresüberschuss/-fehlbetrag                                                                                   |
| -1.145     | 251               | 277                    | 152               | Überleitung zwischen Jahresüberschuss/-fehlbetrag und Mittelzufluss aus der betrieblichen Tätigkeit            |
| 150        | 255               | 2 <sup>2</sup>         | 4 <sup>2</sup>    | Laufende Ertragsteuern                                                                                         |
| 6          | -7                | 4.823                  | 5.732             | Sonstige Zinsen und ähnliche Erträge/Aufwendungen                                                              |
| 3.762      | 3.502             | 22                     | 25                | Abwertungen von Vermieteten Gegenständen                                                                       |
| 869        | 42                | -49                    | 93                | Abschreibungen auf das übrige Anlagevermögen                                                                   |
| 27         | -448              | 440                    | 69                | Veränderung der Rückstellungen                                                                                 |
| 116        | -170              | -408                   | 307               | Veränderung der Latenten Steuern                                                                               |
| 4          | -29               | 1                      | 1                 | Sonstige zahlungsunwirksame Erträge und Aufwendungen                                                           |
| -98        | -43               | -                      | -                 | Ergebnis aus dem Verkauf von Anlagevermögen                                                                    |
| -374       | 1.806             | 5                      | 6                 | Ergebnis aus Equity-Bewertung                                                                                  |
| -1.163     | 871               | 1                      | -                 | Veränderung des Working Capital                                                                                |
| -364       | 513               | -43                    | -                 | Veränderung der Vorräte                                                                                        |
| 1.153      | 422               | 47                     | 6                 | Veränderung der Forderungen aus Lieferungen und Leistungen                                                     |
| 999        | 214               | -176                   | 309               | Veränderung der Verbindlichkeiten aus Lieferungen und Leistungen                                               |
| -1.199     | -369              | -147                   | -99               | Veränderung der sonstigen betrieblichen Aktiva und Passiva                                                     |
| 136        | 342               | - <sup>2</sup>         | - <sup>2</sup>    | Gezahlte Ertragsteuern                                                                                         |
| 8.150      | 4.921             | 5.558                  | 6.817             | Erhaltene Zinsen                                                                                               |
|            |                   |                        |                   | <b>Mittelzufluss aus der betrieblichen Tätigkeit</b>                                                           |
| -3.183     | -3.409            | -10                    | -10               | Investitionen in Immaterielle Vermögenswerte und Sachanlagen                                                   |
| 59         | 98                | 1                      | 2                 | Erlöse aus Abgängen von Immateriellen Vermögenswerten und Sachanlagen                                          |
| -577       | -261              | -                      | -                 | Investitionen in Finanzanlagen                                                                                 |
| 23         | 33                | -                      | -                 | Erlöse aus dem Abgang von Finanzanlagen                                                                        |
| -172       | -197              | -11.726                | -10.236           | Investitionen in Vermietete Gegenstände                                                                        |
| 171        | 271               | 7.251                  | 6.215             | Abgänge von Vermieteten Gegenständen                                                                           |
| -          | -                 | -61.120                | -49.629           | Zugänge von Forderungen aus Finanzdienstleistungen                                                             |
| -          | -                 | 56.264                 | 47.847            | Zahlungsseingänge auf Forderungen aus Finanzdienstleistungen                                                   |
| -2.620     | -2.787            | -103                   | -121              | Zahlungsausgänge durch den Kauf von Wertpapieren                                                               |
| 757        | 577               | 41                     | 43                | Zahlungseingänge aus dem Verkauf von Wertpapieren                                                              |
| -5.542     | -5.675            | -9.402                 | -5.889            | <b>Mittelabfluss aus der Investitionstätigkeit</b>                                                             |
| -          | 6                 | -                      | -                 | Ausgabe eigener Aktien                                                                                         |
| 18         | 7                 | -                      | -                 | Einzahlungen ins Eigenkapital                                                                                  |
| -197       | -197              | -                      | -                 | Zahlung von Dividenden für das Vorjahr                                                                         |
| -212       | -76               | - <sup>2</sup>         | - <sup>2</sup>    | Gezahlte Zinsen                                                                                                |
| -          | -                 | 2.361                  | 658               | Aufnahme von Anleihen                                                                                          |
| -52        | -                 | -364                   | -1.230            | Rückzahlung von Anleihen                                                                                       |
| 2.703      | 180               | 204                    | 722               | Konzerninterne Finanzierungen                                                                                  |
| -2.117     | -874              | 68                     | -351              | Veränderung der sonstigen Finanzverbindlichkeiten                                                              |
| -1.519     | 964               | -                      | -                 | Veränderung der Commercial Paper                                                                               |
| -1.376     | 10                | 2.269                  | -201              | <b>Mittelzufluss/-abfluss aus der Finanzierungstätigkeit</b>                                                   |
| 22         | 2                 | -1                     | 23                | <b>Wechselkurs- und konsolidierungskreisbedingte Änderung der Zahlungsmittel und Zahlungsmitteläquivalente</b> |
| 1.254      | -742              | -1.576                 | 750               | <b>Veränderung der Zahlungsmittel und Zahlungsmitteläquivalente</b>                                            |
| 4.331      | 5.073             | 2.803                  | 2.053             | Zahlungsmittel und Zahlungsmitteläquivalente am 1. Januar                                                      |
| 5.585      | 4.331             | 1.227                  | 2.803             | <b>Zahlungsmittel und Zahlungsmitteläquivalente am 31. Dezember</b>                                            |

BMW Group  
Entwicklung des Konzerneigenkapitals

| in Mio. Euro                               | Gezeichnetes Kapital | Kapitalrücklage | Gewinnrücklagen | Kumuliertes übriges Eigenkapital  |             |                              |                 | Eigene Anteile | Anteile anderer Gesellschafter | -Gesamt       |
|--------------------------------------------|----------------------|-----------------|-----------------|-----------------------------------|-------------|------------------------------|-----------------|----------------|--------------------------------|---------------|
|                                            |                      |                 |                 | Unterschiede aus Währungsrechnung | Wertpapiere | Derivative Finanzinstrumente | Pensionszusagen |                |                                |               |
| <b>31. Dezember 2008</b>                   | <b>654</b>           | <b>1.911</b>    | <b>20.419</b>   | <b>-2.065</b>                     | <b>17</b>   | <b>45</b>                    | <b>-706</b>     | <b>-10</b>     | <b>8</b>                       | <b>20.273</b> |
| Ausgabe von eigenen Anteilen               | -                    | -               | -               | -                                 | -           | -                            | -               | 10             | -                              | 10            |
| Kapitalerhöhung aus genehmigtem Kapital    | 1                    | -               | -               | -                                 | -           | -                            | -               | -              | -                              | 1             |
| Agio aus Kapitalerhöhung für Vorzugsaktien | -                    | 10              | -               | -                                 | -           | -                            | -               | -              | -                              | 10            |
| Dividendenzahlungen                        | -                    | -               | -197            | -                                 | -           | -                            | -               | -              | -                              | -197          |
| Gesamtergebnis 2009                        | -                    | -               | -204            | 318                               | 3           | 164                          | -876            | -              | 6                              | -181          |
| Übrige Veränderungen                       | -                    | -               | -               | -                                 | -           | -                            | -               | -              | -1                             | -1            |
| <b>31. Dezember 2009</b>                   | <b>655</b>           | <b>1.921</b>    | <b>20.426</b>   | <b>-1.747</b>                     | <b>20</b>   | <b>209</b>                   | <b>-1.582</b>   | <b>-</b>       | <b>13</b>                      | <b>19.915</b> |
| Agio aus Kapitalerhöhung für Vorzugsaktien | -                    | 18              | -               | -                                 | -           | -                            | -               | -              | -                              | 18            |
| Dividendenzahlungen                        | -                    | -               | -197            | -                                 | -           | -                            | -               | -              | -                              | -197          |
| Gesamtergebnis 2010                        | -                    | -               | -3.218          | 683                               | -11         | -336                         | -203            | -              | 16                             | -3.367        |
| Übrige Veränderungen                       | -                    | -               | -               | -                                 | -           | -                            | -               | -              | -3                             | -3            |
| <b>31. Dezember 2010</b>                   | <b>655</b>           | <b>1.939</b>    | <b>23.447</b>   | <b>-1.064</b>                     | <b>9</b>    | <b>-127</b>                  | <b>-1.785</b>   | <b>-</b>       | <b>26</b>                      | <b>23.100</b> |

## 74 — KONZERNABSCHLUSS

74 Gewinn-und-Verlust-Rechnungen

74 Gesamtergebnisrechnung

76 Bilanzen

78 Kapitalflussrechnungen

80 — Entwicklung des

Konzerneigenkapitals

81 — Konzernanhang

81 — Grundsätze

89 Erläuterungen zur Gewinn-und-Verlust-Rechnung

95 Erläuterungen zur

Gesamtergebnisrechnung

96 Erläuterungen zur Bilanz

117 Sonstige Angaben

133 Segmentinformationen

**1 – Grundlagen**

Der Konzernabschluss der Bayerische Motoren Werke Aktiengesellschaft (BMW Group Konzernabschluss oder der Konzernabschluss) zum 31. Dezember 2010 ist nach den am Abschlussstichtag gültigen International Financial Reporting Standards (IFRSs), wie sie in der EU anzuwenden sind, erstellt. Die Bezeichnung IFRSs umfasst auch die noch gültigen International Accounting Standards (IASs). Alle für das Geschäftsjahr 2010 verbindlichen Interpretationen des IFRS Interpretations Committee (IFRICs) werden ebenfalls angewendet.

Der Konzernabschluss entspricht in der vorliegenden Fassung der Vorschrift des § 315 a des Handelsgesetzbuchs (HGB). Sie bildet die Rechtsgrundlage für die Konzernrechnungslegung nach internationalen Standards in Deutschland zusammen mit der Verordnung (EG) Nr. 1606 / 2002 des Europäischen Parlaments und des Rats vom 19. Juli 2002 betreffend die Anwendung internationaler Rechnungslegungsstandards und gilt für Geschäftsjahre, die am oder nach dem 1. Januar 2005 beginnen.

Die Gewinn-und-Verlust-Rechnungen des Konzerns und der Segmente sind nach dem Umsatzkostenverfahren aufgestellt. Die Konzernbilanz und die Bilanzen der Segmente entsprechen den Gliederungsvorschriften des IAS 1 (Presentation of Financial Statements).

Um die Klarheit der Darstellung zu verbessern, sind verschiedene Posten der Gewinn-und-Verlust-Rechnung und der Bilanz zusammengefasst. Diese Posten sind im Anhang gesondert ausgewiesen und erläutert.

Zur Überleitung des Jahresüberschusses auf das Gesamtergebnis wird auf Konzernebene eine Gesamtergebnisrechnung erstellt.

Zur Unterstützung des Vertriebs der Produkte der BMW Group werden den Kunden und Händlern verschiedene Finanzdienstleistungen – hauptsächlich Kredit- und Leasingfinanzierungen – angeboten. Der Konzernabschluss ist damit auch durch die Aktivitäten des Finanzdienstleistungsgeschäfts geprägt.

Um einen besseren Einblick in die Ertrags-, Finanz- und Vermögenslage der BMW Group zu ermöglichen, wird der Konzernabschluss über die Anforderungen des IFRS 8 (Operating Segments) hinaus um Gewinn-und-Verlust-Rechnungen und Bilanzen der Segmente Automobile, Motorräder, Finanzdienstleistungen und Sonstige Gesellschaften ergänzt. Die Kapitalflussrechnung des Konzerns wird um Kapitalflussrechnungen der Segmente Automobile und Finanzdienstleistungen erweitert.

Die zwischen den Segmenten bestehenden Beziehungen betreffen hauptsächlich interne Verkäufe von Produkten, die konzerninterne Mittelbeschaffung sowie damit verbundene Zinsen und werden in der Spalte Konsolidierungen eliminiert. Genauere Informationen zur Zuordnung der Aktivitäten der BMW Group zu den Segmenten und deren Grundlagen sind den Erläuterungen zur Segmentberichterstattung auf den Seiten 133 ff. zu entnehmen.

Im Rahmen der Refinanzierung des Finanzdienstleistungsgeschäfts werden wesentliche Umfänge von Forderungen aus der Kunden- und Händlerfinanzierung sowie auch Rechte und Pflichten aus Leasingverträgen veräußert. Der Verkauf von Forderungen ist fester Bestandteil des Finanzierungsinstrumentariums von Industrieunternehmen. Dabei handelt es sich in der Regel um Asset-Backed-Finanzierungen, in deren Rahmen ein Portfolio von Forderungen an eine Zweckgesellschaft veräußert wird, die wiederum Wertpapiere zur Refinanzierung des Kaufpreises begibt. Die BMW Group betreibt weiterhin die Verwaltung der Verträge (Servicing) und erhält hierfür eine angemessene Gebühr. Die rechtswirksam verkauften Vermögenswerte sind gemäß IAS 27 (Consolidated and Separate Financial Statements) und der Interpretation SIC-12 (Consolidation – Special Purpose Entities) weiterhin im Konzernabschluss auszuweisen. Gewinne und Verluste aus dem Verkauf der Vermögenswerte werden erst realisiert, wenn die Vermögenswerte durch die Übertragung der wesentlichen Chancen und Risiken aus der Konzernbilanz ausscheiden. Das Bilanzvolumen der verkauften Vermögenswerte beträgt am 31. Dezember 2010 insgesamt 7,5 Mrd. Euro (2009: 7,8 Mrd. Euro).

Neben Finanzierungs- und Leasingverträgen vermittelt das Segment Finanzdienstleistungen Versicherungen über Kooperationen mit lokalen Versicherungsgesellschaften. Dieses Geschäft ist für den Konzern von untergeordneter Bedeutung.

Die Konzernwährung lautet auf Euro. Alle Beträge werden in Millionen Euro (Mio. Euro) angegeben, soweit nichts anderes vermerkt ist.

Die Bayerische Motoren Werke Aktiengesellschaft hat ihren Firmensitz in München, Petuelring 130, und ist im Handelsregister des Amtsgerichts München unter der Registernummer HRB 42243 eingetragen.

Alle konsolidierten Tochterunternehmen mit Ausnahme der BMW India Private Limited, Neu Delhi, (Abschlussstichtag 31. März) haben einen mit der BMW AG übereinstimmenden Abschlussstichtag.

Der zum 31. Dezember 2010 gemäß § 315 a HGB aufgestellte Konzernabschluss und der Konzernlagebericht werden beim Betreiber des elektronischen Bundesanzeigers eingereicht und sind über die Internetseite des Unternehmensregisters zugänglich. Auf Anfrage werden gedruckte Exemplare zur Verfügung gestellt. Ferner können

der Konzernabschluss und der Konzernlagebericht auf der Homepage der BMW Group [www.bmwgroup.com/ir](http://www.bmwgroup.com/ir) abgerufen werden.

Am 15. Februar 2011 wurde die Freigabe zur Veröffentlichung des Konzernabschlusses vom Vorstand erteilt.

## 2 – Konsolidierungskreis

In den BMW Group Konzernabschluss werden neben der BMW AG alle wesentlichen Tochterunternehmen einschließlich sechs Wertpapierspezialfonds und 19 Zweckgesellschaften, fast ausschließlich für Asset-Backed-Finanzierungen, einbezogen.

Die Anzahl der in den Konzernabschluss einbezogenen Tochterunternehmen, einschließlich der Spezialfonds und Zweckgesellschaften, hat sich im Geschäftsjahr 2010 wie folgt verändert:

|                                         | Inland    | Ausland    | Gesamt     |
|-----------------------------------------|-----------|------------|------------|
| Einbezogen zum 31. Dezember 2009        | 32        | 149        | 181        |
| Erstmals einbezogen 2010                | -         | 4          | 4          |
| Ausgeschieden 2010                      | 2         | 7          | 9          |
| <b>Einbezogen zum 31. Dezember 2010</b> | <b>30</b> | <b>146</b> | <b>176</b> |

Nicht einbezogen werden 51 (2009: 53) Tochterunternehmen ohne Geschäftsbetrieb bzw. mit geringem Geschäftsvolumen. Auf die Einbeziehung wurde verzichtet, weil die daraus resultierenden Auswirkungen auf den Konzernabschluss die wirtschaftlichen Entscheidungen der Abschlussadressaten nicht beeinflussen. Die Nicht-einbeziehung von operativen Tochterunternehmen vermindert den Konzernumsatz um 0,3% (2009: 0,6%).

Die Husqvarna Motorcycles North America LLC, Wilmington, DE, und die Husqvarna Motorcycles S.r.l., Cassinetta di Biandronno, wurden zum 31. Dezember 2010 erstmals in den Konsolidierungskreis einbezogen.

Die BMW Ingenieur-Zentrum Verwaltungs GmbH, Dingolfing, ist mit der BMW Ingenieur-Zentrum GmbH + Co oHG, Dingolfing, (bis 16. Juli 2010 BMW Ingenieur-Zentrum GmbH + Co., Dingolfing) rückwirkend zum 1. Januar 2010 verschmolzen. Anschließend ist die BMW Ingenieur-Zentrum GmbH + Co oHG, Dingolfing, an die BMW AG, München, angewachsen. Somit sind die BMW Ingenieur-Zentrum Verwaltungs GmbH, Dingolfing, und die BMW Ingenieur-Zentrum GmbH + Co oHG, Dingolfing, aus dem Konsolidierungskreis ausgeschieden. Des Weiteren wurde die BMW Polska Sp. z o.o., Warschau, mit der BMW Vertriebs GmbH, Salzburg, verschmolzen und schied somit ebenfalls aus dem Konsolidierungskreis aus.

Ferner verändert sich der Konsolidierungskreis gegenüber dem Vorjahr durch die erstmalige Einbeziehung von zwei Zweckgesellschaften sowie durch das Ausscheiden von sechs Zweckgesellschaften.

Die Veränderungen im Konsolidierungskreis sind nicht wesentlich, weil die daraus resultierenden Auswirkungen auf den Konzernabschluss die wirtschaftlichen Entscheidungen der Abschlussadressaten nicht beeinflussen.

Das Joint Venture BMW Brilliance Automotive Ltd., Shenyang, und die Beteiligung an der Cirquent GmbH, München, werden nach der Equity-Methode bilanziert. Ebenso werden im Rahmen von Joint Ventures mit der SGL Carbon Gruppe die Gesellschaften SGL Automotive Carbon Fibers GmbH & Co. KG, München, SGL Automotive Carbon Fibers Verwaltungs GmbH, München, und SGL Automotive Carbon Fibers LLC, Dover, DE, nach der Equity-Methode bilanziert. Wegen Unwesentlichkeit wird bei 13 (2009: 15) Beteiligungen auf die Einbeziehung nach der Equity-Methode in den Konzernabschluss verzichtet. Sie werden unter den Sonstigen Finanzanlagen zu Anschaffungskosten, gegebenenfalls abzüglich Abschreibungen, ausgewiesen.

Die Aufstellung des Anteilsbesitzes des Konzerns nach § 313 Abs. 2 HGB wird beim Betreiber des elektronischen Bundesanzeigers eingereicht. Diese Aufstellung wird ebenso wie die Liste mit Beteiligungen an Drittunternehmen von nicht untergeordneter Bedeutung zusätzlich auf der Homepage der BMW Group [www.bmwgroup.com/ir](http://www.bmwgroup.com/ir) veröffentlicht.

|     |                                                |
|-----|------------------------------------------------|
| 74  | <b>KONZERNABSCHLUSS</b>                        |
| 74  | Gewinn- und Verlust-Rechnungen                 |
| 74  | Gesamtergebnisrechnung                         |
| 76  | Bilanzen                                       |
| 78  | Kapitalflussrechnungen                         |
| 80  | Entwicklung des Konzerneigenkapitals           |
| 81  | <b>Konzernanhang</b>                           |
| 81  | Grundsätze                                     |
| 89  | Erläuterungen zur Gewinn- und Verlust-Rechnung |
| 95  | Erläuterungen zur Gesamtergebnisrechnung       |
| 96  | Erläuterungen zur Bilanz                       |
| 117 | Sonstige Angaben                               |
| 133 | Segmentinformationen                           |

### 3 – Konsolidierungsgrundsätze

Die Kapitalkonsolidierung erfolgt gemäß IFRS 3 (Business Combinations). Nach IFRS 3 sind sämtliche Unternehmenszusammenschlüsse nach der Erwerbsmethode (acquisition method) zu bilanzieren, d. h., die erworbenen identifizierbaren Vermögenswerte und Schulden sind zum beizulegenden Zeitwert (fair value) im Erwerbszeitpunkt anzusetzen. Der positive Unterschiedsbetrag zwischen den Anschaffungskosten und dem Anteil am Nettozeitwert wird als Geschäfts- oder Firmenwert ausgewiesen und regelmäßig einer Prüfung auf dessen Werthaltigkeit unterzogen. Geschäfts- oder Firmenwerte in Höhe von 91 Mio. Euro, die vor dem 1. Januar 1995 entstanden sind, bleiben mit den Rücklagen verrechnet.

### 4 – Währungsumrechnung

Die Umrechnung der in fremder Währung aufgestellten Jahresabschlüsse der einbezogenen Konzernunternehmen erfolgt auf der Grundlage des Konzepts der funktionalen Währung (IAS 21, The Effects of Changes in Foreign Exchange Rates) nach der modifizierten Stichtagskursmethode. Für die Tochterunternehmen richtet sich die funktionale Währung grundsätzlich nach deren primärem Wirtschaftsumfeld und entspricht damit der jeweiligen Landeswährung. Im Konzernabschluss werden die Aufwendungen und Erträge aus Abschlüssen von Tochterunternehmen, die in fremder Währung aufgestellt sind, zum Jahresdurchschnittskurs, Vermögenswerte und Schulden zum Stichtagskurs umgerechnet. Der sich aus der Umrechnung des Eigenkapitals ergebende Währungsunterschied wird im Kumulierten übrigen

Forderungen, Verbindlichkeiten, Rückstellungen, Erträge und Aufwendungen sowie Ergebnisse zwischen den konsolidierten Unternehmen (Zwischengewinne) werden im Rahmen der Konsolidierung eliminiert.

Die nach der Equity-Methode bewerteten Beteiligungen werden mit dem anteiligen neu bewerteten Eigenkapital angesetzt. Ein Unterschiedsbetrag zu den Anschaffungskosten der Beteiligung wird entsprechend der Erwerbsmethode behandelt. Beteiligungen werden grundsätzlich nach der Equity-Methode einbezogen, wenn ein maßgeblicher Einfluss ausgeübt werden kann (IAS 28, Investments in Associates). Dies ist grundsätzlich bei einem Stimmrechtsanteil von 20% bis 50% der Fall (assoziierte Unternehmen).

Eigenkapital verrechnet. Die Umrechnungsdifferenzen, die aus abweichenden Umrechnungskursen in der Gewinn- und Verlust-Rechnung resultieren, werden ebenfalls erfolgsneutral im Kumulierten übrigen Eigenkapital ausgewiesen.

In den Einzelabschlüssen der BMW AG und der Tochterunternehmen werden Fremdwährungsforderungen und -verbindlichkeiten bei Zugang zum Anschaffungskurs bewertet. Zum Bilanzstichtag eingetretene Kursgewinne und -verluste werden erfolgswirksam berücksichtigt.

Die für die Währungsumrechnung zugrunde gelegten Wechselkurse mit wesentlichem Einfluss auf den Konzernabschluss stellen sich wie folgt dar:

|                       | Stichtagskurs | Durchschnittskurs |
|-----------------------|---------------|-------------------|
|                       | 31.12.2010    | 31.12.2009        |
| US-Dollar             | 1,34          | 1,43              |
| Britisches Pfund      | 0,86          | 0,89              |
| Chinesischer Renminbi | 8,80          | 9,78              |
| Japanischer Yen       | 108,61        | 133,17            |

### 5 – Bilanzierungs- und Bewertungsgrundsätze

Die Abschlüsse der BMW AG sowie der in- und ausländischen Tochterunternehmen werden entsprechend IAS 27 nach einheitlichen Bilanzierungs- und Bewertungsgrundsätzen aufgestellt.

**Umsatzerlöse** aus Verkäufen von Produkten werden mit dem Eigentums- bzw. Gefahrenübergang an den Kunden erfasst, sofern ein Preis vereinbart oder bestimmbar ist und von dessen Bezahlung ausgegangen werden kann. Die Umsatzerlöse sind abzüglich Skonti, Preisnachlässen, Kundenboni und Rabatten ausgewiesen. Die Umsatzerlöse enthalten außerdem die Leasingerlöse

und die Zinserträge aus dem Finanzdienstleistungsgeschäft.

Umfasst der Verkauf von Produkten einen bestimmbaren Teilbetrag für nachfolgende Dienstleistungen (Mehrkomponentenverträge), werden die darauf entfallenden Umsatzerlöse abgegrenzt und über die Vertragslaufzeit erfolgswirksam aufgelöst. Die Auflösung erfolgt in der Regel proportional zum Kostenverlauf.

Erlöse aus dem Verkauf von Fahrzeugen, für die Rückkaufverpflichtungen (Buy-back-Vereinbarungen) von Konzerngesellschaften bestehen, werden nicht sofort

realisiert. Die Fahrzeuge werden mit den Herstellungskosten unter den Vorräten angesetzt.

Die **Umsatzkosten** umfassen die Herstellungskosten der verkauften Erzeugnisse sowie die Anschaffungskosten der verkauften Handelswaren. Sie beinhalten neben den direkt zurechenbaren Material- und Fertigungseinzelkosten auch die Forschungs- und nicht aktivierungsfähigen Entwicklungskosten sowie die Abschreibungen auf aktivierte Entwicklungskosten. Darüber hinaus umfassen sie Gemeinkosten einschließlich der Abschreibungen auf die Produktionsanlagen und Übrigen Immateriellen Vermögenswerte sowie die Abwertungen auf die Vorräte. Die Umsatzkosten enthalten ferner die Aufwendungen für Frachten und Versicherungen aus Lieferungen an Händler sowie Vermittlungsgebühren im Direktvertrieb. In den Umsatzkosten werden auch die dem Finanzdienstleistungsgeschäft direkt zurechenbaren Aufwendungen sowie die Zinsaufwendungen aus der Refinanzierung des gesamten Finanzdienstleistungsgeschäfts und dessen Aufwendungen für Risikoversorgen ausgewiesen.

**Zuwendungen der öffentlichen Hand** werden gemäß IAS 20 (Accounting for Government Grants and Disclosure of Government Assistance) nur erfasst, wenn eine angemessene Sicherheit dafür besteht, dass die damit verbundenen Bedingungen erfüllt und die Zuwendungen gewährt werden. Sie werden erfolgswirksam behandelt und grundsätzlich in den Perioden verrechnet, in denen die Aufwendungen anfallen, die durch die Zuwendungen kompensiert werden sollen.

Das **Ergebnis je Aktie** (basic earnings per share) wird nach IAS 33 (Earnings per Share) ermittelt. Das unverwässerte Ergebnis je Aktie ergibt sich, indem sowohl für Stamm- als auch für Vorzugsaktien der auf die jeweilige Aktiegattung entfallende Konzernjahresüberschuss nach Minderheitenanteilen durch die durchschnittliche Anzahl der jeweiligen Aktien dividiert wird. Das Konzernergebnis ist demzufolge auf die verschiedenen Aktiegattungen aufzuteilen. Im Rahmen der Aufteilung wird der nicht für eine Ausschüttung vorgesehene Teil des Konzernergebnisses den Aktiegattungen in dem Verhältnis der jeweiligen Aktienzahl zugeordnet. Die zur Ausschüttung vorgesehenen Gewinne ergeben sich unmittelbar aus den beschlossenen Dividenden für Stamm- und Vorzugsaktien. Ein verwässertes Ergebnis je Aktie (diluted earnings per share) ist gesondert anzugeben.

Erworbene und selbst geschaffene **Immaterielle Vermögenswerte** werden gemäß IAS 38 (Intangible Assets) aktiviert, wenn es wahrscheinlich ist, dass mit der Nutzung des Vermögenswerts ein zukünftiger wirtschaftlicher Vorteil verbunden ist, und die Kosten des Vermögenswerts zuverlässig bestimmt werden können. Sie werden zu Anschaffungskosten bzw. Herstellungskosten angesetzt und bei begrenzter Nutzungsdauer entsprechend der Dauer ihrer Nutzung planmäßig linear abgeschrieben. Die Abschreibung Immaterieller Vermögenswerte, mit Ausnahme von aktivierten Entwicklungskosten, erfolgt grundsätzlich über eine Nutzungsdauer zwischen drei und fünf Jahren. Immaterielle Vermögenswerte mit unbegrenzter Nutzungsdauer werden regelmäßig auf ihre Werthaltigkeit überprüft und gegebenenfalls bei eingetretener Wertminderung auf ihren erzielbaren Betrag angepasst.

**Entwicklungskosten** für Fahrzeug- und Motorenprojekte werden zu Herstellungskosten aktiviert, soweit eine eindeutige Aufwandszuordnung möglich und sowohl die technische Realisierbarkeit als auch die erfolgreiche Vermarktung sichergestellt sind. Die Entwicklungstätigkeit muss ferner mit hinreichender Wahrscheinlichkeit einen künftigen wirtschaftlichen Nutzen erzeugen. Die aktivierten Entwicklungskosten umfassen alle direkt dem Entwicklungsprozess zurechenbaren Kosten einschließlich entwicklungsbezogener Gemeinkosten. Aktivierter Entwicklungskosten werden ab dem Produktionsstart planmäßig über den erwarteten Produktlebenszyklus von in der Regel sieben Jahren abgeschrieben.

Das gesamte **Sachanlagevermögen** unterliegt einer betrieblichen Nutzung und wird zu Anschaffungs- oder Herstellungskosten bilanziert. Abnutzbares Sachanlagevermögen wird darüber hinaus um planmäßige, nutzungsbedingte Abschreibungen abgewertet. Die Abschreibungen auf das Sachanlagevermögen werden entsprechend dem Nutzungsverlauf in der Regel nach der linearen Methode vorgenommen. Sofern abnutzbare Vermögenswerte des Sachanlagevermögens unterschiedliche Nutzungsdauern aufweisen, werden sie gesondert planmäßig abgeschrieben.

Den planmäßigen Abschreibungen liegen konzerneinheitlich folgende Nutzungsdauern zugrunde:

|                                                                                 |          |
|---------------------------------------------------------------------------------|----------|
| in Jahren                                                                       |          |
| Betriebs- und Geschäftsgebäude, baugebundene Verteilungsanlagen und Wohngebäude | 8 bis 50 |
| Technische Anlagen und Maschinen                                                | 4 bis 21 |
| Andere Anlagen, Betriebs- und Geschäftsausstattung                              | 3 bis 10 |

#### 74 — KONZERNABSCHLUSS

|      |                                                |
|------|------------------------------------------------|
| 74   | Gewinn- und Verlust-Rechnungen                 |
| 74   | Gesamtergebnisrechnung                         |
| 76   | Bilanzen                                       |
| 78   | Kapitalflussrechnungen                         |
| 80   | Entwicklung des Konzernkapitals                |
| 81 — | Konzernanhang                                  |
| 81 — | Grundsätze                                     |
| 89   | Erläuterungen zur Gewinn- und Verlust-Rechnung |
| 95   | Erläuterungen zur Gesamtergebnisrechnung       |
| 96   | Erläuterungen zur Bilanz                       |
| 117  | Sonstige Angaben                               |
| 133  | Segmentinformationen                           |

Für im Mehrschichtbetrieb eingesetzte Maschinen werden die Abschreibungen durch Schichtzuschläge entsprechend erhöht.

Die Herstellungskosten der selbst erstellten Anlagen enthalten alle direkt dem Herstellungsprozess zurechenbaren Kosten sowie angemessene Teile der produktionsbezogenen Gemeinkosten. Hierzu gehören die fertigungsbedingten Abschreibungen, anteilige Verwaltungskosten sowie die anteiligen Kosten des sozialen Bereichs.

Finanzierungskosten werden in der Regel nicht als Teil der Anschaffungs- oder Herstellungskosten angesetzt. Sind sie direkt dem Erwerb, dem Bau oder der Herstellung eines qualifizierten Vermögenswerts zuzurechnen, werden sie gemäß IAS 23 (Borrowing Costs) aktiviert.

Im Anlagevermögen werden auch Vermögenswerte aus **Leasing** ausgewiesen. Die BMW Group nutzt als Leasingnehmer Sachanlagen und vermietet als Leasinggeber vor allem selbst produzierte Automobile. IAS 17 (Leases) enthält Vorschriften, nach denen auf Basis von Chancen und Risiken beurteilt wird, ob das wirtschaftliche Eigentum am Leasinggegenstand dem Leasingnehmer (Finance Lease) oder dem Leasinggeber (Operating Lease) zuzurechnen ist.

Im Wege des Finance Lease gemietete Sachanlagen werden nach IAS 17 im Zugangszeitpunkt zum beizulegenden Wert bilanziert, soweit die Barwerte der Leasingzahlungen nicht niedriger sind. Die Abschreibungen erfolgen planmäßig linear über die voraussichtliche Nutzungsdauer bzw. über die kürzere Vertragslaufzeit. Die aus den künftigen Leasingraten resultierenden Zahlungsverpflichtungen werden unter den Sonstigen Finanzverbindlichkeiten passiviert.

Eigenerzeugnisse, die als Vermietete Gegenstände (Operating Leases) bei Leasinggesellschaften der BMW Group aktiviert sind, werden mit den Herstellungskosten, alle übrigen vermieteten Erzeugnisse zu Anschaffungskosten bewertet. Alle Vermieteten Gegenstände werden linear über die Vertragslaufzeit auf den vertraglichen Restwert abgeschrieben. Restwertvorsorgen werden als Wertminderungen behandelt und aktivisch von den Vermieteten Gegenständen abgesetzt.

Der kalkulatorische Restwert der Vermieteten Gegenstände wird von der BMW Group auf Grundlage von Prognosen externer Institute (z. B. EurotaxSchwacke) oder realisierter Marktwerte ermittelt. Darüber hinaus fließen aktuelle Erkenntnisse in die Bewertung ein. Die zugrunde liegenden Parameter werden im Rahmen eines internen Backtestings regelmäßig validiert.

Bei **Immateriellen Vermögenswerten** (einschließlich der aktivierten Entwicklungskosten und der Geschäfts- oder Firmenwerte) sowie bei Vermögenswerten des **Sachanlagevermögens** wird die Werthaltigkeit des aktivierten Buchwerts gemäß IAS 36 (Impairment of Assets) regelmäßig auf Basis von „cash generating units“ überprüft. Für den Fall, dass sich unterjährig kein Anhaltspunkt für eine Wertminderung ergibt, wird für nicht betriebsbereite immaterielle Vermögenswerte, immaterielle Vermögenswerte mit einer unbegrenzten Nutzungsdauer und für einen bei einem Unternehmenszusammenschluss erworbenen Geschäfts- oder Firmenwert zum Geschäftsjahresende ein Impairment-Test durchgeführt. In allen anderen Fällen erfolgt eine Überprüfung der Werthaltigkeit, wenn aufgrund veränderter Umstände oder Ereignisse Anhaltspunkte für eine Wertminderung vorliegen. Soweit der erzielbare Betrag des Vermögenswerts, der den höheren Betrag aus Nettoveräußerungswert und Nutzungswert repräsentiert, den Buchwert unterschreitet, wird eine Wertminderung vorgenommen. Der Nutzungswert wird mithilfe eines Kapitalwertkalküls bestimmt. Entfällt der Grund für eine frühere durchgeführte Wertminderung, erfolgt eine Zuschreibung auf die fortgeführten Anschaffungs- oder Herstellungskosten. Hiervon ausgenommen ist der Geschäfts- oder Firmenwert, dessen Wert nach einer Wertminderung nicht wieder aufgeholt wird.

**At-Equity bewertete Beteiligungen** werden mit ihrem anteiligen neu bewerteten Eigenkapital bilanziert, sofern keine Wertminderung vorliegt.

Die in den **Sonstigen Finanzanlagen** ausgewiesenen Anteile an nicht konsolidierten verbundenen Unternehmen werden zu Anschaffungskosten oder einem niedrigeren beizulegenden Zeitwert (fair value) angesetzt.

Beteiligungen werden zum notierten Marktpreis oder beizulegenden Zeitwert angesetzt. Soweit diese Werte nicht verfügbar sind bzw. nicht verlässlich bestimmt werden können, werden die Beteiligungen zu Anschaffungskosten bewertet.

Die Wertpapiere des Anlagevermögens werden entsprechend ihrer Zugehörigkeit zur jeweiligen Kategorie der finanziellen Vermögenswerte bilanziert. In dieser Position werden keine zu Handelszwecken gehaltenen finanziellen Vermögenswerte ausgewiesen.

Ein **Finanzinstrument** ist ein Vertrag, der gleichzeitig bei einem Unternehmen zur Entstehung eines finanziellen Vermögenswerts und bei einem anderen Unternehmen zu einer finanziellen Verbindlichkeit oder einem Eigenkapitalinstrument führt. Sobald die BMW Group Partner eines derartigen Vertrags wird, wird das Finanz-

instrument als finanzieller Vermögenswert oder als finanzielle Verbindlichkeit erfasst.

Die Bilanzierung von **finanziellen Vermögenswerten** erfolgt grundsätzlich zum Erfüllungstag (settlement date). Bei erstmaliger Erfassung werden die finanziellen Vermögenswerte mit ihren Anschaffungskosten angesetzt. Dabei werden Transaktionskosten mit einbezogen.

Nach dem erstmaligen Ansatz werden zur Veräußerung verfügbare finanzielle Vermögenswerte (available for sale) und zu Handelszwecken gehaltene finanzielle Vermögenswerte (held for trading) mit ihrem beizulegenden Zeitwert bewertet. Sofern kein Marktpreis vorhanden ist, wird der Marktwert der zur Veräußerung verfügbaren finanziellen Vermögenswerte anhand geeigneter Bewertungsverfahren, z. B. Discounted-Cashflow-Methoden, unter Berücksichtigung der am Bilanzstichtag vorliegenden Marktdaten ermittelt.

Die zur Veräußerung verfügbaren Vermögenswerte beinhalten Finanzanlagen, Wertpapiere und Investmentanteile. Dieser Kategorie werden diejenigen nicht derivativen finanziellen Vermögenswerte zugeordnet, die weder als Kredite und Forderungen (loans and receivables) noch als bis zur Endfälligkeit zu haltende (held to maturity) oder als zum beizulegenden Zeitwert zu bewertende (at fair value through profit and loss) finanzielle Vermögenswerte klassifiziert sind.

Kredite und Forderungen, die nicht zu Handelszwecken gehalten werden, bis zur Endfälligkeit zu haltende Finanzinvestitionen sowie alle finanziellen Vermögenswerte, die über keinen notierten Marktpreis auf einem aktiven Markt verfügen und deren beizulegender Zeitwert nicht verlässlich bestimmt werden kann, werden, soweit sie über eine feste Laufzeit verfügen, mit ihren fortgeführten Anschaffungskosten (amortised cost) unter Verwendung der Effektivzinsmethode bewertet. Verfügen diese finanziellen Vermögenswerte über keine feste Laufzeit, sind sie mit den Anschaffungskosten zu bewerten.

Nach IAS 39 (Financial Instruments: Recognition and Measurement) wird regelmäßig ermittelt, ob objektive substanzielle Hinweise darauf schließen lassen, dass eine Wertminderung eines finanziellen Vermögenswerts oder eines Portfolios von Vermögenswerten stattgefunden hat. Nach Durchführung eines Wertminderungstests wird ein erforderlicher Wertminderungsaufwand (impairment loss) im Ergebnis erfasst. Gewinne und Verluste aus einem zur Veräußerung verfügbaren finanziellen Vermögenswert werden direkt im Eigenkapital erfasst, bis der finanzielle Vermögenswert abgegangen ist oder bis eine Wertminderung festgestellt wird. Im Falle einer Wertminderung wird der kumulierte Nettoverlust dem Eigenkapital entnommen und im Ergebnis ausgewiesen.

Bei den **Forderungen und Sonstigen Vermögenswerten**, mit Ausnahme der derivativen Finanzinstrumente, handelt es sich um Kredite und Forderungen, die nicht zu Handelszwecken gehalten werden. Sie werden zu fortgeführten Anschaffungskosten bilanziert. Unverzinsliche oder niedrigverzinsliche Forderungen mit Laufzeiten von über einem Jahr werden abgezinst. Allen erkennbaren Risiken wird durch Wertminderungen Rechnung getragen.

Die **Forderungen aus Finanzdienstleistungen** beinhalten Forderungen aus der Kunden-, Händler- und Leasingfinanzierung.

Wertberichtigungen auf Forderungen im Finanzdienstleistungsgeschäft werden nach einer konzernweit gültigen einheitlichen Methodik gemäß den Anforderungen aus IAS 39 angesetzt. Die Methodik sieht sowohl die Bildung von Wertberichtigungen auf Einzel- als auch auf Gruppenbasis vor. Für den Fall, dass ein objektiver Hinweis auf eine Wertminderung vorliegt, werden Wertberichtigungen auf der Basis individueller Vermögenswerte gebildet. Im Kundenfinanzierungsgeschäft geben die aktuelle Überfälligkeit einer Forderung oder entsprechende Vorkommnisse in der Vergangenheit einen solchen Hinweis. Bei Überfälligkeit wird in Abhängigkeit von der Dauer der Überfälligkeit stets eine Wertberichtigung auf Einzelbasis gebildet. Bei den Forderungen im Händlerfinanzierungsgeschäft stellt die Zuordnung zu einer entsprechenden Ratingklasse einen objektiven Hinweis auf eine Wertminderung dar. Liegt ein objektiver Hinweis dagegen nicht vor, werden Wertberichtigungen der finanziellen Vermögenswerte im Rahmen einer Portfoliobetrachtung auf der Basis homogener Portfolios vorgenommen. Zur Bemessung der Höhe der Wertberichtigungen dienen gesellschaftsspezifische Ausfallwahrscheinlichkeiten und Ausfallquoten für homogene Teilportfolios, die auf der Basis historischer Daten ermittelt werden.

Für Wertberichtigungen auf Forderungen im industriellen Geschäft wird ebenfalls der im Finanzdienstleistungsgeschäft genutzte Prozess zur Bildung von Wertberichtigungen soweit möglich angewendet.

Wertberichtigungen auf Forderungen werden grundsätzlich auf separaten Wertberichtigungskonten erfasst. Sie werden zum selben Zeitpunkt wie die entsprechende wertberichtigte Forderung ausgebucht.

Unter den Finanzforderungen sind finanzielle Vermögenswerte erfasst, soweit sie aus dem Finanzverkehr resultieren.

**Derivative Finanzinstrumente** werden in der BMW Group nur zu Sicherungszwecken eingesetzt, um Währungs-, Zins-, Marktwert- und Marktpreisrisiken aus dem operativen Geschäft bzw. den daraus resultierenden

#### 74 — KONZERNABSCHLUSS

|     |                                                 |
|-----|-------------------------------------------------|
| 74  | Gewinn- und -Verlust-Rechnungen                 |
| 74  | Gesamtergebnisrechnung                          |
| 76  | Bilanzen                                        |
| 78  | Kapitalflussrechnungen                          |
| 80  | Entwicklung des Konzerneigenkapitals            |
| 81  | Konzernanhang                                   |
| 81  | — Grundsätze                                    |
| 89  | Erläuterungen zur Gewinn- und -Verlust-Rechnung |
| 95  | Erläuterungen zur Gesamtergebnisrechnung        |
| 96  | Erläuterungen zur Bilanz                        |
| 117 | Sonstige Angaben                                |
| 133 | Segmentinformationen                            |



Finanzierungserfordernissen zu reduzieren. Nach IAS 39 sind alle derivativen Finanzinstrumente wie z. B. Zins-, Währungs- und kombinierte Zins- und Währungsswaps sowie Devisen- und Rohstofftermingeschäfte zum Marktwert zu bilanzieren, und zwar unabhängig davon, zu welchem Zweck oder in welcher Absicht sie abgeschlossen wurden. Marktwerte derivativer Finanzinstrumente werden auf der Grundlage von Marktdaten und anerkannten Bewertungsverfahren ermittelt. Die Marktveränderungen der derivativen Finanzinstrumente, bei denen Hedge Accounting angewendet wird, werden entweder im Ergebnis oder im Eigenkapital als Bestandteil des Kumulierten übrigen Eigenkapitals ausgewiesen, je nachdem, ob es sich dabei um einen „Fair Value Hedge“ oder einen „Cash Flow Hedge“ handelt. Bei einem Fair Value Hedge werden die Ergebnisse aus der Marktbewertung derivativer Finanzinstrumente und der dazugehörigen Grundgeschäfte ergebniswirksam gebucht. Bei Marktveränderungen von Cash Flow Hedges, die zum Ausgleich zukünftiger Cashflow-Risiken aus bereits bestehenden Grundgeschäften oder geplanten Transaktionen eingesetzt werden, werden die unrealisierten Gewinne und Verluste in Höhe des eingedeckten Grundgeschäfts zunächst erfolgsneutral im Kumulierten übrigen Eigenkapital ausgewiesen. Eine Umbuchung in die Gewinn- und Verlustrechnung erfolgt zeitgleich mit der Ergebniswirkung des Grundgeschäfts bzw. des externen Umsatzgeschäfts. Der nicht durch das Grundgeschäft gedeckte Teil der Marktveränderungen wird unmittelbar im Ergebnis berücksichtigt. Kann entgegen der bei der BMW Group üblichen Praxis kein Hedge Accounting angewendet werden, wird die Marktveränderung derivativer Finanzinstrumente ergebniswirksam erfasst.

**Latente Ertragsteuern** werden entsprechend IAS 12 (Income Taxes) für sämtliche temporären Differenzen zwischen den steuerlichen und den bilanziellen Wertansätzen sowie auf Konsolidierungsmaßnahmen gebildet. Die aktiven Latenten Steuern umfassen auch Steuerminderungsansprüche, die sich aus der erwarteten Nutzung bestehender Verlustvorträge in Folgejahren ergeben und deren Realisierung wahrscheinlich (probable) ist. Die Latenten Steuern werden auf Basis der Steuersätze ermittelt, die nach der derzeitigen Rechtslage in den einzelnen Ländern zum Realisationszeitpunkt erwartet werden.

Die **Vorräte** an Roh-, Hilfs- und Betriebsstoffen sowie Handelswaren werden grundsätzlich mit ihren durchschnittlichen Anschaffungskosten unter Beachtung niedrigerer Nettoveräußerungswerte bewertet.

Unfertige und Fertige Erzeugnisse werden mit den Herstellungskosten unter Beachtung niedrigerer Nettoveräußerungswerte angesetzt. Sie enthalten alle direkt dem Herstellungsprozess zurechenbaren Kosten sowie an-

gemessene Teile der produktionsbezogenen Gemeinkosten. Hierzu gehören die fertigungsbedingten Abschreibungen, anteilige Verwaltungskosten sowie anteilige Kosten des sozialen Bereichs.

Die Finanzierungskosten werden bei den Vorräten nicht als Teil der Anschaffungs- oder Herstellungskosten angesetzt.

Die **Rückstellungen für Pensionen** werden nach dem Anwartschaftsbarwertverfahren (Projected Unit Credit Method) gemäß IAS 19 (Employee Benefits) gebildet. Bei diesem Verfahren werden nicht nur die am Bilanzstichtag bekannten Renten und erworbenen Anwartschaften, sondern auch künftig zu erwartende Steigerungen von Renten und Gehältern bei vorsichtiger Einschätzung der relevanten Einflussgrößen berücksichtigt. Die Berechnung beruht auf versicherungsmathematischen Gutachten unter Berücksichtigung biometrischer Rechnungsgrundlagen.

Versicherungsmathematische Gewinne und Verluste aus leistungsorientierten Pensionszusagen und ähnlichen Verpflichtungen werden unter Berücksichtigung Latenter Steuern erfolgsneutral im Eigenkapital erfasst.

Die Aufwendungen aus der Aufzinsung von Pensionsverpflichtungen sowie die erwarteten Vermögenserträge aus den Pensionsfonds werden gesondert im Finanzergebnis ausgewiesen. Alle übrigen Aufwendungen aus der Dotierung der Pensionsverpflichtungen werden den Kosten der betroffenen Funktionsbereiche zugeordnet.

Die **Sonstigen Rückstellungen** werden gebildet, wenn eine Verpflichtung gegenüber Dritten besteht, deren Inanspruchnahme wahrscheinlich ist, und wenn die voraussichtliche Höhe des notwendigen Rückstellungs Betrags zuverlässig schätzbar ist. Die Bewertung erfolgt zu Vollkosten. Langfristige Rückstellungen mit einer Restlaufzeit von mehr als einem Jahr werden mit ihrem auf den Bilanzstichtag abgezinsten Erfüllungsbetrag angesetzt.

Die **Finanzverbindlichkeiten** werden bei der erstmaligen Erfassung mit den Anschaffungskosten angesetzt, die dem beizulegenden Zeitwert der erhaltenen Gegenleistung entsprechen. Hierbei werden auch die Transaktionskosten berücksichtigt. In der Folge werden die Verbindlichkeiten mit Ausnahme der derivativen Finanzinstrumente mit den fortgeführten Anschaffungskosten bewertet. In der BMW Group bestehen keine Verbindlichkeiten, die Handelszwecken dienen. Verbindlichkeiten aus Finance Leases werden in Höhe des Barwerts der künftigen Leasingraten in den sonstigen Finanzverbindlichkeiten ausgewiesen.

Die Aufstellung des Konzernabschlusses unter Beachtung der IFRSs erfordert, dass Annahmen getroffen und Schät-

zungen verwendet werden, die sich auf Höhe und Ausweis der bilanzierten Vermögenswerte und Schulden, der Erträge und Aufwendungen sowie der Eventualverbindlichkeiten auswirken. Die Annahmen und Schätzungen beziehen sich im Wesentlichen auf die konzerneinheitliche Festlegung von Nutzungsdauern, die Bewertung des Vorratsbestands, die Bilanzierung und Bewertung von Rückstellungen sowie die Realisierbarkeit zukünftiger Steuerentlastungen. Sämtliche Annahmen und Schätzungen basieren auf Prämissen, die zum Bilanzstichtag Gültigkeit hatten. Zugrunde gelegt wurde die künftige Geschäftsentwicklung, für die die größte Wahrscheinlichkeit unterstellt wurde. Das gilt ebenso für die Entwicklung der Automobilbranche und des Unternehmens-

umfelds. Die Schätzungen und die zugrunde liegenden Annahmen werden fortlaufend überprüft. Die tatsächlichen Werte können von den getroffenen Annahmen und Schätzungen abweichen, wenn sich die genannten Rahmenbedingungen entgegen den Erwartungen zum Bilanzstichtag entwickeln. Änderungen werden zum Zeitpunkt einer besseren Kenntnis erfolgswirksam berücksichtigt und die Prämissen entsprechend angepasst. Aufgrund aktueller Erkenntnisse konnten die Schätzungen zur Bewertung der Sonstigen Rückstellungen im Bereich Garantie verfeinert werden. Die durch die Schätzungsänderung entstehende positive Gesamtveränderung beträgt 201 Mio. Euro und wurde im laufenden Geschäftsjahr in den Umsatzkosten erfasst.

## 6 – Neue Rechnungslegungsvorschriften

### (a) Im Geschäftsjahr 2010 erstmals angewendete Rechnungslegungsvorschriften

Die folgenden Standards und Überarbeitungen von Standards sowie Interpretationen werden im Geschäftsjahr 2010 erstmals angewendet:

#### 74 — KONZERNABSCHLUSS

|     |                                                  |
|-----|--------------------------------------------------|
| 74  | Gewinn- und Verlust-Rechnungen                   |
| 74  | Gesamtergebnisrechnung                           |
| 76  | Bilanzen                                         |
| 78  | Kapitalflussrechnungen                           |
| 80  | Entwicklung des Konzerneigenkapitals             |
| 81  | Konzernanhang                                    |
| 81  | — Grundsätze                                     |
| 89  | — Erläuterungen zur Gewinn- und Verlust-Rechnung |
| 95  | Erläuterungen zur Gesamtergebnisrechnung         |
| 96  | Erläuterungen zur Bilanz                         |
| 117 | Sonstige Angaben                                 |
| 133 | Segmentinformationen                             |

| Standard / Interpretation                                                                | Anwendungs-<br>pflicht | Übernahme<br>durch die EU<br>zum 31.12.2010 | Auswirkungen auf die BMW Group                                                      |
|------------------------------------------------------------------------------------------|------------------------|---------------------------------------------|-------------------------------------------------------------------------------------|
| IFRS 1 — Zusätzliche Ausnahmen für erstmalige Anwender                                   | 1.1.2010               | Ja                                          | Keine                                                                               |
| IFRS 1 — Erstmalige Anwendung der IFRS                                                   | 1.1.2010               | Ja                                          | Keine                                                                               |
| IFRS 2 — Bilanzierung anteilsbasierter Vergütungen im Konzern, die in bar erfüllt werden | 1.1.2010               | Ja                                          | Keine                                                                               |
| IFRS 3 / IAS 27 — Unternehmenszusammenschlüsse / Konzern- und Einzelabschlüsse           | 1.1.2010               | Ja                                          | Grundsätzlich von Bedeutung; Veränderte Abbildung von Unternehmenszusammenschlüssen |
| IAS 39 — Risikopositionen, die sich für das Hedge Accounting qualifizieren               | 1.1.2010               | Ja                                          | Keine                                                                               |
| Jährliche Verbesserung an den IFRS*                                                      | 1.1.2010               | Ja                                          | Unbedeutend                                                                         |
| IFRIC 17 — Sachausschüttungen an Eigentümer                                              | 1.1.2010               | Ja                                          | Keine                                                                               |
| IFRIC 18 — Übertragung von Vermögenswerten von Kunden                                    | 1.1.2010               | Ja                                          | Keine                                                                               |

\* Soweit im Einzelfall nichts anderes bestimmt ist, sind die Änderungen für Geschäftsjahre, die am oder nach dem 1.1.2010 beginnen, anzuwenden.

### (b) Im Geschäftsjahr 2010 neu herausgegebene Rechnungslegungsvorschriften

Die folgenden Standards und Überarbeitungen von Standards des IASB, die im Geschäftsjahr 2010 verabschiedet wurden, die aber für die Berichtsperiode noch nicht verpflichtend anzuwenden sind, werden im Geschäftsjahr 2010 nicht berücksichtigt:

| Standard                                                                                   | Veröffentlichung<br>durch das IASB | Anwendungs-<br>pflicht | Übernahme<br>durch die EU<br>zum 31.12.2010 | Voraussichtliche<br>Auswirkungen auf<br>die BMW Group |
|--------------------------------------------------------------------------------------------|------------------------------------|------------------------|---------------------------------------------|-------------------------------------------------------|
| IFRS 1 — Ausnahme von Vergleichsangaben nach IFRS 7                                        | 28.1.2010                          | 1.1.2011               | Ja                                          | Keine                                                 |
| IFRS 1 — Änderungen in Bezug auf feste Umstellungszeitpunkte und ausgeprägte Hochinflation | 20.12.2010                         | 1.1.2012               | Nein                                        | Keine                                                 |
| IFRS 7 — Finanzinstrumente: Angaben                                                        | 7.10.2010                          | 1.1.2012               | Nein                                        | Unbedeutend                                           |
| IFRS 9 — Bilanzierung finanzieller Verbindlichkeiten                                       | 28.10.2010                         | 1.1.2013               | Nein                                        | Unbedeutend                                           |
| IAS 12 — Rückgewinnung der zugrunde liegenden Vermögenswerte                               | 20.12.2010                         | 1.1.2012               | Nein                                        | Unbedeutend                                           |
| Jährliche Verbesserung an den IFRS*                                                        | 6.5.2010                           | 1.1.2011               | Nein                                        | Unbedeutend                                           |

\* Soweit im Einzelfall nichts anderes bestimmt ist, sind die Änderungen für Geschäftsjahre, die am oder nach dem 1.1.2011 beginnen, anzuwenden.

BMW Group  
Konzernanhang  
Erläuterungen zur Gewinn-und-Verlust-Rechnung

### 7 – Umsatzerlöse

Die Umsatzerlöse ergeben sich aus folgenden Tätigkeiten:

| in Mio. Euro                                             | 2010          | 2009          |
|----------------------------------------------------------|---------------|---------------|
| Verkauf von Produkten und damit verbundenen Erzeugnissen | 44.838        | 36.126        |
| Erlöse aus Leasingraten                                  | 5.181         | 5.641         |
| Verkaufserlöse aus Vermietvermögen                       | 6.139         | 5.294         |
| Zinserträge aus Kreditfinanzierung                       | 2.604         | 2.582         |
| Sonstige Erlöse                                          | 1.715         | 1.038         |
| <b>Umsatzerlöse</b>                                      | <b>60.477</b> | <b>50.681</b> |

Die Gliederung der Umsatzerlöse nach Segmenten und Regionen ist aus der Segmentberichterstattung auf den Seiten 133 ff. ersichtlich.

### 8 – Umsatzkosten

Die Umsatzkosten setzen sich wie folgt zusammen:

| in Mio. Euro                                                        | 2010          | 2009          |
|---------------------------------------------------------------------|---------------|---------------|
| Herstellungskosten                                                  | 29.173        | 24.930        |
| Forschungs- und Entwicklungskosten                                  | 3.082         | 2.587         |
| Gewährleistungsaufwendungen                                         | 928           | 996           |
| Finanzdienstleistungen direkt zuzurechnende Umsatzkosten            | 11.110        | 10.092        |
| Zinsaufwendungen des Finanzdienstleistungsgeschäfts                 | 2.112         | 2.879         |
| Aufwendungen für Risikovorsorgen des Finanzdienstleistungsgeschäfts | 893           | 1.310         |
| Sonstige Umsatzkosten                                               | 2.264         | 2.562         |
| <b>Umsatzkosten</b>                                                 | <b>49.562</b> | <b>45.356</b> |

Von den Umsatzkosten betreffen das Finanzdienstleistungsgeschäft 14.115 Mio. Euro (2009: 14.281 Mio. Euro).

In den Herstellungskosten sind wie im Vorjahr keine Wertminderungen auf das Anlagevermögen enthalten. Die Herstellungskosten werden durch öffentliche Beihilfen in Form von geringeren Substanz- und Verbrauch-

steuern in Höhe von 36 Mio. Euro (2009: 27 Mio. Euro) gemindert.

Die gesamten Forschungs- und Entwicklungsleistungen, die die Forschungs- und die nicht aktivierungsfähigen Entwicklungskosten sowie die Investitionen in aktivierungspflichtige Entwicklungskosten umfassen, haben sich wie folgt entwickelt:

| in Mio. Euro                                               | 2010         | 2009         |
|------------------------------------------------------------|--------------|--------------|
| Forschungs- und Entwicklungskosten                         | 3.082        | 2.587        |
| Abschreibungen                                             | -1.260       | -1.226       |
| Investitionen in aktivierungspflichtige Entwicklungskosten | 951          | 1.087        |
| <b>Forschungs- und Entwicklungsleistungen</b>              | <b>2.773</b> | <b>2.448</b> |

### 9 – Vertriebskosten und allgemeine Verwaltungskosten

Die Vertriebskosten betragen 4.020 Mio. Euro (2009: 3.647 Mio. Euro). Sie enthalten vor allem Aufwendungen für Marketing, Werbung und Vertriebspersonal.

Die allgemeinen Verwaltungskosten betragen 1.509 Mio. Euro (2009: 1.393 Mio. Euro). Sie enthalten Aufwendungen der Verwaltung, die weder der Entwicklung noch der Produktion oder dem Vertrieb zuzuordnen sind.

## 10 – Sonstige betriebliche Erträge und Aufwendungen

| in Mio. Euro                                          | 2010          | 2009        |
|-------------------------------------------------------|---------------|-------------|
| Erträge aus Währungsgeschäften                        | 547           | 455         |
| Erträge aus der Auflösung von Rückstellungen          | 69            | 84          |
| Erträge aus der Auflösung von Wertberichtigungen      | 38            | 16          |
| Erträge aus dem Abgang von Vermögenswerten            | 15            | 84          |
| Übrige betriebliche Erträge                           | 97            | 169         |
| <b>Sonstige betriebliche Erträge</b>                  | <b>766</b>    | <b>808</b>  |
| Aufwendungen aus Währungsgeschäften                   | -677          | -482        |
| Aufwendungen aus der Dotierung von Rückstellungen     | -186          | -78         |
| Aufwendungen aus Wertberichtigungen                   | -40           | -85         |
| Übrige betriebliche Aufwendungen                      | -155          | -159        |
| <b>Sonstige betriebliche Aufwendungen</b>             | <b>-1.058</b> | <b>-804</b> |
| <b>Sonstige betriebliche Erträge und Aufwendungen</b> | <b>-292</b>   | <b>4</b>    |

In den Übrigen betrieblichen Erträgen sind Aufwandszuschüsse öffentlicher Institutionen in Höhe von 30 Mio. Euro (2009: 14 Mio. Euro) enthalten.

### 74 – KONZERNABSCHLUSS

74 Gewinn-und-Verlust-Rechnungen

74 Gesamtergebnisrechnung

76 Bilanzen

78 Kapitalflussrechnungen

80 Entwicklung des

Konzernergebniskapitals

### 81 – Konzernanhang

81 Grundsätze

89 – Erläuterungen zur Gewinn-und-Verlust-Rechnung

95 Erläuterungen zur Gesamtergebnisrechnung

96 Erläuterungen zur Bilanz

117 Sonstige Angaben

133 Segmentinformationen

## 11 – Ergebnis aus Equity-Bewertung

Das Ergebnis aus Equity-Bewertung in Höhe von 98 Mio. Euro (2009: 36 Mio. Euro) enthält das Ergebnis aus dem Joint Venture BMW Brilliance Automotive Ltd., Shenyang, und der Beteiligung an der Cirquent GmbH, München.

Erstmals beinhaltet es auch das Ergebnis aus den Joint Ventures SGL Automotive Carbon Fibers GmbH & Co. KG, München, SGL Automotive Carbon Fibers Verwaltungs GmbH, München, und SGL Automotive Carbon Fibers LLC, Dover, DE.

## 12 – Zinsergebnis

| in Mio. Euro                                                           | 2010        | 2009          |
|------------------------------------------------------------------------|-------------|---------------|
| Erwarteter Vermögensertrag der Pensionsfonds                           | 476         | 379           |
| Sonstige Zinsen und ähnliche Erträge                                   | 209         | 477           |
| — davon aus verbundenen Unternehmen: 13 Mio. Euro (2009: 6 Mio. Euro)  |             |               |
| <b>Zinsen und ähnliche Erträge</b>                                     | <b>685</b>  | <b>856</b>    |
| Aufwendungen aus der Aufzinsung von Pensionsverpflichtungen            | -588        | -532          |
| Aufwendungen aus der Aufzinsung sonstiger langfristiger Rückstellungen | -124        | -115          |
| Abschreibungen auf Wertpapiere                                         | -3          | -3            |
| Sonstige Zinsen und ähnliche Aufwendungen                              | -251        | -364          |
| — davon an verbundene Unternehmen: – Mio. Euro (2009: – Mio. Euro)     |             |               |
| <b>Zinsen und ähnliche Aufwendungen</b>                                | <b>-966</b> | <b>-1.014</b> |
| <b>Zinsergebnis</b>                                                    | <b>-281</b> | <b>-158</b>   |

Der erwartete Vermögensertrag der Pensionsfonds enthält die erwarteten Erträge aus Vermögenswerten zur

Sicherung von Pensionsverpflichtungen sowie zur Sicherung von Verpflichtungen aus Altersteilzeitverhältnissen.

## 13 – Übriges Finanzergebnis

| in Mio. Euro                                                         | 2010        | 2009       |
|----------------------------------------------------------------------|-------------|------------|
| Erträge aus Beteiligungen                                            | 5           | 4          |
| — davon aus verbundenen Unternehmen: 5 Mio. Euro (2009: 4 Mio. Euro) |             |            |
| Abschreibungen auf Anteile an verbundenen Unternehmen                | -179        | -3         |
| Zuschreibungen auf Anteile an verbundenen Unternehmen                | 3           | -          |
| <b>Beteiligungsergebnis</b>                                          | <b>-171</b> | <b>1</b>   |
| Aufwendungen und Erträge aus Finanzinstrumenten                      | 96          | 245        |
| <b>Sonstiges Finanzergebnis</b>                                      | <b>96</b>   | <b>245</b> |
| <b>Übriges Finanzergebnis</b>                                        | <b>-75</b>  | <b>246</b> |

Das Beteiligungsergebnis des laufenden Geschäftsjahres ergibt sich insbesondere aus Abschreibungen auf Anteile an der Husqvarna Gruppe.

Das positive Sonstige Finanzergebnis resultiert im Wesentlichen aus gestiegenen Marktwerten von allein-stehenden Rohstoffderivaten.

## 14 – Ertragsteuern

Die Ertragsteuern der BMW Group gliedern sich nach ihrer Herkunft wie folgt:

| in Mio. Euro                        | 2010         | 2009       |
|-------------------------------------|--------------|------------|
| Laufende Steueraufwendungen         | 1.430        | 338        |
| Latente Steuererträge/-aufwendungen | 172          | -135       |
| <b>Ertragsteuern</b>                | <b>1.602</b> | <b>203</b> |

Latente Steuern werden bei temporären Bewertungsunterschieden zwischen den Steuer- und IFRS-Bilanzwerten angesetzt. In den latenten Steueraufwendungen in Höhe von 172 Mio. Euro (2009: latente Steuererträge von 135 Mio. Euro) sind latente Steuererträge, die auf das Entstehen oder die Auflösung temporärer Differenzen zurückzuführen sind, von 212 Mio. Euro (2009: latente Steueraufwendungen von 228 Mio. Euro) enthalten. Die Latenten Steuern werden auf Basis der Steuersätze ermittelt, die nach der derzeitigen Rechtslage in den einzelnen Ländern zum Realisationszeitpunkt gelten bzw. erwartet werden. In Deutschland gilt ein einheitlicher Körperschaftsteuersatz von 15,0%. Unter Berücksichtigung

eines durchschnittlichen Gewerbesteuer-Hebesatzes in Höhe von 410,0% sowie des Solidaritätszuschlags von 5,5% ermittelt sich für inländische Unternehmen wie im Vorjahr ein Ertragsteuersatz in Höhe von 30,2%. Die Steuersätze im Ausland liegen ebenfalls unverändert zwischen 12,5% und 46,9%. Eine Abwertung auf aktive Latente Steuern wird vorgenommen, wenn hinsichtlich der Realisierbarkeit Unsicherheiten bestehen. Zur Bestimmung dieser Abwertung werden alle positiven und negativen Einflussfaktoren auf die steuerlichen Ergebnisse der Zukunft berücksichtigt. Die dabei vorzunehmende Einschätzung kann in Abhängigkeit von künftigen Entwicklungen Änderungen unterliegen.

Der Bestand an aktiven und passiven Latenten Steuern nach Bilanzpositionen ergibt sich zum 31. Dezember aus der nachfolgenden Aufstellung:

| in Mio. Euro                 | Aktive Latente Steuern |               | Passive Latente Steuern |               |
|------------------------------|------------------------|---------------|-------------------------|---------------|
|                              | 2010                   | 2009          | 2010                    | 2009          |
| Immaterielle Vermögenswerte  | 2                      | 1             | 1.338                   | 1.490         |
| Sachanlagen                  | 33                     | 38            | 281                     | 410           |
| Vermietete Gegenstände       | 415                    | 443           | 4.651                   | 4.281         |
| Finanzanlagen                | 6                      | 5             | 3                       | 8             |
| Übrige Vermögenswerte        | 2.672                  | 2.175         | 4.007                   | 3.559         |
| Steuerliche Verlustvorträge  | 1.453                  | 1.838         | -                       | -             |
| Rückstellungen               | 1.950                  | 1.388         | 46                      | 47            |
| Verbindlichkeiten            | 3.113                  | 3.316         | 1.613                   | 1.444         |
| Konsolidierungen             | 1.870                  | 1.564         | 566                     | 482           |
|                              | <b>11.514</b>          | <b>10.768</b> | <b>12.505</b>           | <b>11.721</b> |
| Abwertung                    | -549                   | -550          | -                       | -             |
| Saldierung                   | -9.572                 | -8.952        | -9.572                  | -8.952        |
| <b>Latente Ertragsteuern</b> | <b>1.393</b>           | <b>1.266</b>  | <b>2.933</b>            | <b>2.769</b>  |
| Netto                        |                        |               | <b>1.540</b>            | <b>1.503</b>  |

|     |                                                |
|-----|------------------------------------------------|
| 74  | <b>KONZERNABSCHLUSS</b>                        |
| 74  | Gewinn- und Verlust-Rechnungen                 |
| 74  | Gesamtergebnisrechnung                         |
| 76  | Bilanzen                                       |
| 78  | Kapitalflussrechnungen                         |
| 80  | Entwicklung des Konzernkapitals                |
| 81  | <b>Konzernanhang</b>                           |
| 81  | Grundsätze                                     |
| 89  | Erläuterungen zur Gewinn- und Verlust-Rechnung |
| 95  | Erläuterungen zur Gesamtergebnisrechnung       |
| 96  | Erläuterungen zur Bilanz                       |
| 117 | Sonstige Angaben                               |
| 133 | Segmentinformationen                           |

Die Saldierung umfasst die aktiven und passiven Latenten Steuern der jeweiligen Gesellschaften bzw. der jeweiligen steuerlichen Einheiten.

Die aktiven Latenten Steuern auf Verlustvorträge und Veräußerungsverluste (capital losses) haben sich unter Berücksichtigung der ausgewiesenen Abwertung reduziert. Steuerliche Verlustvorträge, die im Wesentlichen unbegrenzt nutzbar sind, gingen vor allem infolge einer Betriebsprüfung bei der BMW AG auf 2,6 Mrd. Euro (2009: 5,2 Mrd. Euro) zurück. Aktive Latente Steuern, die für diese Verlustvorträge angesetzt sind, wurden im Berichtsjahr in Höhe von 33 Mio. Euro (2009: 31 Mio. Euro) wertberichtigt. In den betroffenen Gesellschaften wurden latente Steuerforderungen ausgewiesen, die die latenten Steuerverbindlichkeiten um 587 Mio. Euro (2009: 618 Mio. Euro) übersteigen. Veräußerungsverluste in Großbritannien betragen im Geschäftsjahr 2010 unverändert 1,9 Mrd. Euro. Die aktiven Latenten Steuern auf diese Verlustvorträge wurden, wie auch in den Vorjahren, vollständig in Höhe von 516 Mio. Euro (2009: 519 Mio.

Euro) abgewertet, da sie nur im Fall von Gewinnen aus Veräußerungen genutzt werden können. „Capital losses“ stehen nicht im Zusammenhang mit der operativen Geschäftstätigkeit.

Grundlage für den Ansatz der Latenten Steuern ist die Einschätzung des Managements, dass es wahrscheinlich ist, dass die jeweiligen Gesellschaften zu versteuernde Ergebnisse erzielen werden, mit denen die abzugsfähigen temporären Differenzen verrechnet werden können.

Die erfolgsneutral im Eigenkapital verrechneten Latenten Steuern belaufen sich auf 756 Mio. Euro (2009: 493 Mio. Euro). Dies entspricht einer Erhöhung von 263 Mio. Euro (2009: 190 Mio. Euro) im Vergleich zum Vorjahr. In dieser Veränderung ist eine Verminderung Latenter Steuern aus der Währungsumrechnung in Höhe von 6 Mio. Euro (2009: 12 Mio. Euro) bereits enthalten.

Zusammenfassend stellt sich die Veränderung der Bestände Latenter Steuern wie folgt dar:

| in Mio. Euro                                          | 2010         | 2009         |
|-------------------------------------------------------|--------------|--------------|
| Latente Steuern zum 1. Januar                         | 1.503        | 1.891        |
| Latente Steueraufwendungen erfolgswirksam             | 172          | -135         |
| Veränderung erfolgsneutral erfasster Latenter Steuern | -269         | -202         |
| Wechselkurseffekte und sonstige Änderungen*           | 134          | -51          |
| <b>Latente Steuern zum 31. Dezember</b>               | <b>1.540</b> | <b>1.503</b> |

\* einschließlich Effekten aus Erstkonsolidierungen

Latente Steuern auf einbehaltene Gewinne bei ausländischen Tochtergesellschaften in Höhe von 16,2 Mrd.

Euro (2009: 15,9 Mrd. Euro) werden nicht berechnet, da vorgesehen ist, diese Gewinne zum Zwecke der

Substanzerhaltung und Ausweitung des Geschäftsvolumens in den Unternehmen einzusetzen. Von einer Ermittlung der potenziellen steuerlichen Auswirkungen wurde wegen unverhältnismäßig hohen Aufwands abgesehen.

Die Steuererklärungen der Gesellschaften der BMW Group werden regelmäßig von inländischen und ausländischen Steuerbehörden geprüft. Unter Berücksichtigung einer Vielzahl von Faktoren – unter anderem der Auslegung, Kommentierung und Rechtsprechung zur jeweiligen Steuergesetzgebung sowie der Erfahrungen aus der Vergangenheit – sind, soweit ersichtlich, in ausreichendem

dem Umfang Vorsorgen für zukünftig mögliche Steuerpflichten gebildet.

Der ausgewiesene Ertragsteueraufwand im Geschäftsjahr 2010 in Höhe von 1.602 Mio. Euro (2009: 203 Mio. Euro) ist um 142 Mio. Euro höher (2009: 79 Mio. Euro höher) als der erwartete Ertragsteueraufwand in Höhe von 1.460 Mio. Euro (2009: 124 Mio. Euro), der sich theoretisch bei Anwendung des im Vergleich zum Vorjahr unveränderten inländischen Steuersatzes von 30,2% auf Konzernebene ergeben würde. Der Unterschied zwischen dem erwarteten und dem ausgewiesenen Ertragsteueraufwand ist auf folgende Ursachen zurückzuführen:

| in Mio. Euro                                                                                                                | 2010         | 2009       |
|-----------------------------------------------------------------------------------------------------------------------------|--------------|------------|
| <b>Erwarteter Ertragsteueraufwand</b>                                                                                       | <b>1.460</b> | <b>124</b> |
| Steuersatzbedingte Abweichungen                                                                                             | -50          | 38         |
| Steuererhöhungen (+)/Steuererminderungen (-) aufgrund steuerfreier Erträge bzw. steuerlich nicht abzugsfähiger Aufwendungen | 105          | 68         |
| Steueraufwand (+)/Steuerertrag (-) für Vorjahre                                                                             | 141          | -26        |
| Sonstige Abweichungen                                                                                                       | -54          | -1         |
| <b>Ausgewiesener Ertragsteueraufwand</b>                                                                                    | <b>1.602</b> | <b>203</b> |

Steuererhöhungen aufgrund steuerlich nicht abzugsfähiger Aufwendungen ergeben sich insbesondere durch Effekte aus nicht anrechenbaren Quellensteuern im Rahmen des konzerninternen Ausschüttungsprozesses. Ferner sind hierin die im Geschäftsjahr vorgenommenen Abwertungen auf Finanzanlagen enthalten. Die Position „Steueraufwand (+)/Steuerertrag (-) für Vorjahre“ basiert zum großen Teil auf Effekten aus Betriebsprüfungen im In- und Ausland.

Die Position „Sonstige Abweichungen“ beinhaltet unter anderem den Effekt aus der Minderung des Steueraufwands durch die Nutzung von Verlustvorträgen, für die bislang keine aktiven Latenten Steuern angesetzt wurden, sowie bisher unberücksichtigte Steuergutschriften in Höhe von 7 Mio. Euro (2009: 3 Mio. Euro). Der Steuerertrag aus der Abwertung von aktiven Latenten Steuern auf Verlustvorträge und temporäre Differenzen sowie deren Rücknahme beträgt 18 Mio. Euro (2009: 10 Mio. Euro).

## 15 – Ergebnis je Aktie

|                                                        | 2010              | 2009        |
|--------------------------------------------------------|-------------------|-------------|
| Jahresüberschuss nach Anteilen anderer Gesellschafter  | Mio. Euro 3.218,1 | 203,6       |
| Ergebnisanteil der Stammaktien                         | Mio. Euro 2.958,3 | 186,5       |
| Ergebnisanteil der Vorzugsaktien                       | Mio. Euro 259,8   | 17,1        |
| Durchschnittliche Anzahl der umlaufenden Stammaktien   | Stück 601.995.196 | 601.995.196 |
| Durchschnittliche Anzahl der umlaufenden Vorzugsaktien | Stück 52.663.822  | 51.833.937  |
| <b>Ergebnis je Stammaktie</b>                          | Euro 4,91         | 0,31        |
| <b>Ergebnis je Vorzugsaktie</b>                        | Euro 4,93         | 0,33        |
| <b>Dividende je Stammaktie</b>                         | Euro 1,30         | 0,30        |
| <b>Dividende je Vorzugsaktie</b>                       | Euro 1,32         | 0,32        |

Beim Ergebnis je Vorzugsaktie wurden nur die für das jeweilige Geschäftsjahr dividendenberechtigten Vorzugs-

aktien berücksichtigt. Das verwässerte Ergebnis je Aktie entspricht dem Ergebnis je Aktie.

## 16 – Sonstige Angaben zur Gewinn-und-Verlust-Rechnung

In den Kostenpositionen sind folgende Personalaufwendungen enthalten:

| in Mio. Euro                                                                                                                              | 2010         | 2009         |
|-------------------------------------------------------------------------------------------------------------------------------------------|--------------|--------------|
| Löhne und Gehälter                                                                                                                        | 6.109        | 5.299        |
| Soziale Abgaben, Aufwendungen für Altersversorgung und Unterstützung<br>— davon für Altersversorgung: 740 Mio. Euro (2009: 744 Mio. Euro) | 1.285        | 1.267        |
| <b>Personalaufwand</b>                                                                                                                    | <b>7.394</b> | <b>6.566</b> |

Der Personalaufwand beinhaltet 116 Mio. Euro (2009: 171 Mio. Euro) an Aufwendungen für den Personalabbau.

Die durchschnittliche Zahl der während des Geschäftsjahres beschäftigten Arbeitnehmer gliedert sich wie folgt:

|                                | 2010          | 2009          |
|--------------------------------|---------------|---------------|
| Mitarbeiter                    | 88.933        | 90.755        |
| Auszubildende und Praktikanten | 5.513         | 5.452         |
|                                | <b>94.446</b> | <b>96.207</b> |

Für die Mitarbeiterzahlen zum Jahresende wird auf die Seiten 27 ff. im Konzernlagebericht verwiesen.

Der im Geschäftsjahr 2010 für den Konzernabschlussprüfer erfasste Honoraraufwand nach § 314 Abs. 1 Nr. 9 HGB beträgt 19 Mio. Euro (2009: 20 Mio. Euro) und gliedert sich wie folgt:

| in Mio. Euro                  | 2010      | 2009      |
|-------------------------------|-----------|-----------|
| Abschlussprüfungsleistungen   | 11        | 10        |
| — davon KPMG Europe LLP       | 5         | 4         |
| Andere Bestätigungsleistungen | 1         | 1         |
| — davon KPMG Europe LLP       | -         | -         |
| Steuerberatungsleistungen     | 5         | 6         |
| — davon KPMG Europe LLP       | 4         | 4         |
| Sonstige Leistungen           | 2         | 3         |
| — davon KPMG Europe LLP       | 1         | 3         |
| <b>Honoraraufwand</b>         | <b>19</b> | <b>20</b> |
| — davon KPMG Europe LLP       | 10        | 11        |

Der gesamte Honoraraufwand umfasst die Aufwendungen der BMW AG sowie aller konsolidierten Tochtergesellschaften.

Die Honoraraufwendungen der KPMG Europe LLP umfassen Dienstleistungen der KPMG AG Wirtschafts-

prüfungsgesellschaft sowie derer verbundener Unternehmen in Großbritannien, der Schweiz, Spanien, Belgien, den GUS-Staaten und den Niederlanden. Die nicht wesentlichen Aufwendungen der Tochtergesellschaft in den GUS-Staaten wurden im Vorjahr nicht dargestellt.

|     |                                                      |
|-----|------------------------------------------------------|
| 74  | <b>KONZERNABSCHLUSS</b>                              |
| 74  | Gewinn-und-Verlust-Rechnungen                        |
| 74  | Gesamtergebnisrechnung                               |
| 76  | Bilanzen                                             |
| 78  | Kapitalflussrechnungen                               |
| 80  | Entwicklung des<br>Konzernkapitals                   |
| 81  | <b>Konzernanhang</b>                                 |
| 81  | Grundsätze                                           |
| 89  | Erläuterungen zur<br>Gewinn-und-Verlust-<br>Rechnung |
| 95  | Erläuterungen zur<br>Gesamtergebnisrechnung          |
| 96  | Erläuterungen zur Bilanz                             |
| 117 | Sonstige Angaben                                     |
| 133 | Segmentinformationen                                 |



BMW Group  
Konzernanhang  
Erläuterungen zur Gesamtergebnisrechnung

### 17 – Angaben zur Gesamtergebnisrechnung

Das Sonstige Ergebnis nach Steuern setzt sich wie folgt zusammen:

| in Mio. Euro                                                                                                        | 2010        | 2009        |
|---------------------------------------------------------------------------------------------------------------------|-------------|-------------|
| Zur Veräußerung verfügbare Wertpapiere                                                                              |             |             |
| In der laufenden Periode entstandene Gewinne/Verluste                                                               | -19         | 11          |
| Ergebniswirksame Umbuchungen in die Gewinn-und-Verlust-Rechnung                                                     | 3           | -7          |
|                                                                                                                     | <b>-16</b>  | <b>4</b>    |
| Zu Sicherungszwecken eingesetzte Finanzinstrumente                                                                  |             |             |
| In der laufenden Periode entstandene Gewinne/Verluste                                                               | -794        | 358         |
| Ergebniswirksame Umbuchungen in die Gewinn-und-Verlust-Rechnung                                                     | 274         | -63         |
|                                                                                                                     | <b>-520</b> | <b>295</b>  |
| Währungsumrechnung ausländischer Tochterunternehmen                                                                 | 683         | 318         |
| Versicherungsmathematische Gewinne/Verluste aus leistungsorientierten Pensionszusagen und ähnlichen Verpflichtungen | -277        | -1.198      |
| Latente Steuern auf die Bestandteile des Sonstigen Ergebnisses                                                      | 263         | 190         |
| <b>Sonstiges Ergebnis nach Steuern</b>                                                                              | <b>133</b>  | <b>-391</b> |

Die Latenten Steuern auf die Bestandteile des Sonstigen Ergebnisses stellen sich wie folgt dar:

| in Mio. Euro                                                                                                        | 2010        |                 |              | 2009        |                 |              |
|---------------------------------------------------------------------------------------------------------------------|-------------|-----------------|--------------|-------------|-----------------|--------------|
|                                                                                                                     | Vor Steuern | Latente Steuern | Nach Steuern | Vor Steuern | Latente Steuern | Nach Steuern |
| Zur Veräußerung verfügbare Wertpapiere                                                                              | -16         | 5               | -11          | 4           | -1              | 3            |
| Zu Sicherungszwecken eingesetzte Finanzinstrumente                                                                  | -520        | 184             | -336         | 295         | -131            | 164          |
| Währungsumrechnung ausländischer Tochterunternehmen                                                                 | 683         | -               | 683          | 318         | -               | 318          |
| Versicherungsmathematische Gewinne/Verluste aus leistungsorientierten Pensionszusagen und ähnlichen Verpflichtungen | -277        | 74              | -203         | -1.198      | 322             | -876         |
| <b>Sonstiges Ergebnis</b>                                                                                           | <b>-130</b> | <b>263</b>      | <b>133</b>   | <b>-581</b> | <b>190</b>      | <b>-391</b>  |

## 18 – Entwicklung des Konzernanlagevermögens 2010

| in Mio. Euro                                                                                         | 1. 1. 2010                | Anschaffungs- und Herstellungskosten |              |                 |               | – 31. 12. 2010 |
|------------------------------------------------------------------------------------------------------|---------------------------|--------------------------------------|--------------|-----------------|---------------|----------------|
|                                                                                                      |                           | Kurs-<br>differenzen                 | Zugänge      | Umb-<br>chungen | Abgänge       |                |
| Entwicklungskosten                                                                                   | 8.695                     | -                                    | 951          | -               | 499           | <b>9.147</b>   |
| Übrige Immaterielle Vermögenswerte                                                                   | 859                       | 12                                   | 77           | -               | 38            | <b>910</b>     |
| <b>Immaterielle Vermögenswerte</b>                                                                   | <b>9.554</b>              | <b>12</b>                            | <b>1.028</b> | <b>-</b>        | <b>537</b>    | <b>10.057</b>  |
| Grundstücke, grundstücksgleiche Rechte und Bauten einschließlich der Bauten auf fremden Grundstücken | 7.353                     | 118                                  | 94           | 52              | 46            | <b>7.571</b>   |
| Technische Anlagen und Maschinen                                                                     | 22.715                    | 221                                  | 1.422        | 430             | 622           | <b>24.166</b>  |
| Andere Anlagen, Betriebs- und Geschäftsausstattung                                                   | 2.056                     | 54                                   | 109          | 14              | 91            | <b>2.142</b>   |
| Geleistete Anzahlungen und Anlagen im Bau                                                            | 567                       | 21                                   | 610          | -496            | 2             | <b>700</b>     |
| <b>Sachanlagen</b>                                                                                   | <b>32.691<sup>1</sup></b> | <b>414</b>                           | <b>2.235</b> | <b>-</b>        | <b>761</b>    | <b>34.579</b>  |
| <b>Vermietete Gegenstände</b>                                                                        | <b>24.417</b>             | <b>982</b>                           | <b>9.334</b> | <b>-</b>        | <b>10.776</b> | <b>23.957</b>  |
| <b>At-Equity bewertete Beteiligungen</b>                                                             | <b>137</b>                | <b>-</b>                             | <b>103</b>   | <b>-</b>        | <b>28</b>     | <b>212</b>     |
| Anteile an verbundenen Unternehmen                                                                   | 307                       | 2                                    | 120          | -               | 178           | <b>251</b>     |
| Beteiligungen                                                                                        | 8                         | -                                    | 4            | -               | -             | <b>12</b>      |
| Wertpapiere des Anlagevermögens                                                                      | 4                         | -                                    | -            | -               | 4             | -              |
| <b>Sonstige Finanzanlagen</b>                                                                        | <b>319</b>                | <b>2</b>                             | <b>124</b>   | <b>-</b>        | <b>182</b>    | <b>263</b>     |

<sup>1</sup> einschließlich der Anschaffungskosten der Sachanlagen aus der Erstkonsolidierung der Husqvarna Gruppe in Höhe von 14 Mio. Euro

<sup>2</sup> darin enthalten Anlagen im Bau von 582 Mio. Euro

## Entwicklung des Konzernanlagevermögens 2009

| in Mio. Euro                                                                                         | 1. 1. 2009 <sup>1</sup> | Anschaffungs- und Herstellungskosten |              |                 |              | – 31. 12. 2009 |
|------------------------------------------------------------------------------------------------------|-------------------------|--------------------------------------|--------------|-----------------|--------------|----------------|
|                                                                                                      |                         | Kurs-<br>differenzen                 | Zugänge      | Umb-<br>chungen | Abgänge      |                |
| Entwicklungskosten                                                                                   | 8.855                   | -                                    | 1.087        | -               | 1.247        | <b>8.695</b>   |
| Übrige Immaterielle Vermögenswerte                                                                   | 972                     | 3                                    | 50           | -               | 166          | <b>859</b>     |
| <b>Immaterielle Vermögenswerte</b>                                                                   | <b>9.827</b>            | <b>3</b>                             | <b>1.137</b> | <b>-</b>        | <b>1.413</b> | <b>9.554</b>   |
| Grundstücke, grundstücksgleiche Rechte und Bauten einschließlich der Bauten auf fremden Grundstücken | 6.939                   | 36                                   | 154          | 287             | 76           | <b>7.340</b>   |
| Technische Anlagen und Maschinen                                                                     | 21.672                  | 85                                   | 1.662        | 676             | 1.380        | <b>22.715</b>  |
| Andere Anlagen, Betriebs- und Geschäftsausstattung                                                   | 2.075                   | 11                                   | 77           | 23              | 130          | <b>2.056</b>   |
| Geleistete Anzahlungen und Anlagen im Bau                                                            | 1.121                   | -4                                   | 441          | -986            | 6            | <b>566</b>     |
| <b>Sachanlagen</b>                                                                                   | <b>31.807</b>           | <b>128</b>                           | <b>2.334</b> | <b>-</b>        | <b>1.592</b> | <b>32.677</b>  |
| <b>Vermietete Gegenstände</b>                                                                        | <b>25.407</b>           | <b>3</b>                             | <b>8.646</b> | <b>-</b>        | <b>9.639</b> | <b>24.417</b>  |
| <b>At-Equity bewertete Beteiligungen</b>                                                             | <b>111</b>              | <b>-</b>                             | <b>41</b>    | <b>-</b>        | <b>15</b>    | <b>137</b>     |
| Anteile an verbundenen Unternehmen                                                                   | 375                     | -                                    | 38           | -               | 106          | <b>307</b>     |
| Beteiligungen                                                                                        | 8                       | -                                    | -            | -               | -            | <b>8</b>       |
| Wertpapiere des Anlagevermögens                                                                      | 23                      | -                                    | -            | -               | 19           | <b>4</b>       |
| <b>Sonstige Finanzanlagen</b>                                                                        | <b>406</b>              | <b>-</b>                             | <b>38</b>    | <b>-</b>        | <b>125</b>   | <b>319</b>     |

<sup>1</sup> einschließlich Brutto-Vorträge während des Geschäftsjahres erstmals konsolidierter Gesellschaften

<sup>2</sup> darin enthalten Anlagen im Bau von 418 Mio. Euro

|     |                                                |
|-----|------------------------------------------------|
| 74  | KONZERNABSCHLUSS                               |
| 74  | Gewinn- und Verlust-Rechnungen                 |
| 74  | Gesamtergebnisrechnung                         |
| 76  | Bilanzen                                       |
| 78  | Kapitalflussrechnungen                         |
| 80  | Entwicklung des Konzernkapitals                |
| 81  | Konzernanhang                                  |
| 81  | Grundsätze                                     |
| 89  | Erläuterungen zur Gewinn- und Verlust-Rechnung |
| 95  | Erläuterungen zur Gesamtergebnisrechnung       |
| 96  | Erläuterungen zur Bilanz                       |
| 117 | Sonstige Angaben                               |
| 133 | Segmentinformationen                           |

| 1. 1. 2010    | Abschreibungen       |              |              |                   | - 31. 12. 2010 | Buchwerte              |               |                                                                                                      |
|---------------|----------------------|--------------|--------------|-------------------|----------------|------------------------|---------------|------------------------------------------------------------------------------------------------------|
|               | Kurs-<br>differenzen | lfd. Jahr    | Abgänge      | Zuschrei-<br>bung |                | 31. 12. 2010           | 31. 12. 2009  |                                                                                                      |
| 3.761         | -                    | 1.260        | 499          | -                 | <b>4.522</b>   | <b>4.625</b>           | 4.934         | Entwicklungskosten                                                                                   |
| 414           | 7                    | 119          | 36           | -                 | <b>504</b>     | <b>406</b>             | 445           | Übrige Immaterielle Vermögenswerte                                                                   |
| <b>4.175</b>  | <b>7</b>             | <b>1.379</b> | <b>535</b>   | <b>-</b>          | <b>5.026</b>   | <b>5.031</b>           | <b>5.379</b>  | <b>Immaterielle Vermögenswerte</b>                                                                   |
| 2.936         | 47                   | 226          | 23           | -                 | <b>3.186</b>   | <b>4.385</b>           | 4.404         | Grundstücke, grundstücksgleiche Rechte und Bauten einschließlich der Bauten auf fremden Grundstücken |
| 16.732        | 165                  | 1.933        | 595          | -                 | <b>18.235</b>  | <b>5.931</b>           | 5.983         | Technische Anlagen und Maschinen                                                                     |
| 1.623         | 43                   | 144          | 80           | -                 | <b>1.730</b>   | <b>412</b>             | 433           | Andere Anlagen, Betriebs- und Geschäftsausstattung                                                   |
| 1             | -                    | -            | -            | -                 | <b>1</b>       | <b>699<sup>2</sup></b> | 565           | Geleistete Anzahlungen und Anlagen im Bau                                                            |
| <b>21.292</b> | <b>255</b>           | <b>2.303</b> | <b>698</b>   | <b>-</b>          | <b>23.152</b>  | <b>11.427</b>          | <b>11.385</b> | <b>Sachanlagen</b>                                                                                   |
| <b>6.444</b>  | <b>259</b>           | <b>2.817</b> | <b>3.354</b> | <b>-</b>          | <b>6.166</b>   | <b>17.791</b>          | <b>17.973</b> | <b>Vermietete Gegenstände</b>                                                                        |
| -             | -                    | -            | -            | -                 | -              | <b>212</b>             | <b>137</b>    | <b>At-Equity bewertete Beteiligungen</b>                                                             |
| 82            | 1                    | 179          | 177          | 3                 | <b>82</b>      | <b>169</b>             | 225           | Anteile an verbundenen Unternehmen                                                                   |
| 5             | -1                   | -            | -            | -                 | <b>4</b>       | <b>8</b>               | 3             | Beteiligungen                                                                                        |
| -             | -                    | -            | -            | -                 | -              | -                      | 4             | Wertpapiere des Anlagevermögens                                                                      |
| <b>87</b>     | <b>-</b>             | <b>179</b>   | <b>177</b>   | <b>3</b>          | <b>86</b>      | <b>177</b>             | <b>232</b>    | <b>Sonstige Finanzanlagen</b>                                                                        |

| 1. 1. 2009 <sup>1</sup> | Abschreibungen       |              |              |                   | - 31. 12. 2009 | Buchwerte              |               |                                                                                                      |
|-------------------------|----------------------|--------------|--------------|-------------------|----------------|------------------------|---------------|------------------------------------------------------------------------------------------------------|
|                         | Kurs-<br>differenzen | lfd. Jahr    | Abgänge      | Zuschrei-<br>bung |                | 31. 12. 2009           | 31. 12. 2008  |                                                                                                      |
| 3.782                   | -                    | 1.226        | 1.247        | -                 | <b>3.761</b>   | <b>4.934</b>           | 5.073         | Entwicklungskosten                                                                                   |
| 401                     | -                    | 114          | 101          | -                 | <b>414</b>     | <b>445</b>             | 568           | Übrige Immaterielle Vermögenswerte                                                                   |
| <b>4.183</b>            | <b>-</b>             | <b>1.340</b> | <b>1.348</b> | <b>-</b>          | <b>4.175</b>   | <b>5.379</b>           | <b>5.641</b>  | <b>Immaterielle Vermögenswerte</b>                                                                   |
| 2.745                   | 19                   | 213          | 41           | -                 | <b>2.936</b>   | <b>4.404</b>           | 4.157         | Grundstücke, grundstücksgleiche Rechte und Bauten einschließlich der Bauten auf fremden Grundstücken |
| 16.150                  | 58                   | 1.885        | 1.361        | -                 | <b>16.732</b>  | <b>5.983</b>           | 5.518         | Technische Anlagen und Maschinen                                                                     |
| 1.574                   | 10                   | 162          | 123          | -                 | <b>1.623</b>   | <b>433</b>             | 497           | Andere Anlagen, Betriebs- und Geschäftsausstattung                                                   |
| 1                       | -                    | -            | -            | -                 | <b>1</b>       | <b>565<sup>2</sup></b> | 1.120         | Geleistete Anzahlungen und Anlagen im Bau                                                            |
| <b>20.470</b>           | <b>87</b>            | <b>2.260</b> | <b>1.525</b> | <b>-</b>          | <b>21.292</b>  | <b>11.385</b>          | <b>11.292</b> | <b>Sachanlagen</b>                                                                                   |
| <b>5.883</b>            | <b>-5</b>            | <b>3.689</b> | <b>3.123</b> | <b>-</b>          | <b>6.444</b>   | <b>17.973</b>          | <b>19.524</b> | <b>Vermietete Gegenstände</b>                                                                        |
| -                       | -                    | -            | -            | -                 | -              | <b>137</b>             | <b>111</b>    | <b>At-Equity bewertete Beteiligungen</b>                                                             |
| 79                      | -                    | 3            | -            | -                 | <b>82</b>      | <b>225</b>             | 296           | Anteile an verbundenen Unternehmen                                                                   |
| 5                       | -                    | -            | -            | -                 | <b>5</b>       | <b>3</b>               | 3             | Beteiligungen                                                                                        |
| -                       | -                    | -            | -            | -                 | -              | <b>4</b>               | 23            | Wertpapiere des Anlagevermögens                                                                      |
| <b>84</b>               | <b>-</b>             | <b>3</b>     | <b>-</b>     | <b>-</b>          | <b>87</b>      | <b>232</b>             | <b>322</b>    | <b>Sonstige Finanzanlagen</b>                                                                        |

## 19 – Immaterielle Vermögenswerte

Unter den Immateriellen Vermögenswerten werden hauptsächlich die aktivierten Entwicklungskosten für Fahrzeug- und Motorenprojekte sowie Zuschüsse für Werkzeugkosten, Lizenzen, erworbene Entwicklungsleistungen und Software ausgewiesen. Abschreibungen auf Immaterielle Vermögenswerte sind unter den Umsatzkosten, den Vertriebskosten und den allgemeinen Verwaltungskosten ausgewiesen.

Des Weiteren sind in den Immateriellen Vermögenswerten ein Markenrecht in Höhe von 41 Mio. Euro (2009: 40 Mio. Euro) und ein zum Vorjahr unveränderter aktivierter Goodwill in Höhe von 111 Mio. Euro mit einer unbegrenzten Nutzungsdauer enthalten. Dieser besteht aus dem Erwerb der DEKRA SüdLeasing Services GmbH, Stuttgart, und deren Tochtergesellschaften sowie aus

dem Erwerb der SimeLease (Malaysia) Sdn Bhd, Kuala Lumpur, und deren Tochtergesellschaft SimeCredit (Malaysia) Sdn Bhd, Kuala Lumpur. Ein gesonderter Ausweis in der Bilanz der BMW Group wird nicht vorgenommen, da der Betrag sowohl in Relation zur Bilanzsumme als auch zur Summe der Immateriellen Vermögenswerte nicht wesentlich ist.

Wertaufholungen bei den Immateriellen Vermögenswerten sind wie im Vorjahr nicht vorgenommen worden.

Im abgelaufenen Geschäftsjahr wurden für Immaterielle Vermögenswerte keine Fremdkapitalkosten aktiviert.

Hinsichtlich der Entwicklung der Immateriellen Vermögenswerte wird auf den Anlagespiegel, der auf den Seiten 96 f. dargestellt ist, verwiesen.

## 20 – Sachanlagen

Im abgelaufenen Geschäftsjahr wurden für Sachanlagen keine Fremdkapitalkosten aktiviert.

Die Aufgliederung der in der Bilanz zusammengefassten Positionen des Sachanlagevermögens sowie ihre Entwicklung im Berichtsjahr sind im Anlagespiegel auf den Seiten 96 f. enthalten.

Im Sachanlagevermögen sind in Höhe von insgesamt 55 Mio. Euro (2009: 57 Mio. Euro) neben Betriebsgebäuden der BMW AG auch gemietete Technische Anlagen und Maschinen sowie Andere Anlagen, Betriebs- und Geschäftsausstattung im Wesentlichen für die Produktionsstätten in Oxford und Hams Hall enthalten, die wegen der Gestaltung der ihnen zugrunde liegenden Leasingverträge (finance leases) dem Konzern als wirtschaftlichem Eigentümer zuzurechnen sind. Die Leasingverträge bezüglich der Betriebsgebäude mit einem Restbuchwert in Höhe von

46 Mio. Euro (2009: 48 Mio. Euro) haben Laufzeiten bis maximal 2028. Für die Verträge bestehen teilweise Verlängerungs- und Kaufoptionen. Die Leasingverträge bezüglich Technischer Anlagen und Maschinen sowie Anderer Anlagen, Betriebs- und Geschäftsausstattung mit einem Restbuchwert in Höhe von 3 Mio. Euro (2009: 4 Mio. Euro) für die Produktionsstätte in Oxford haben Laufzeiten bis maximal 2011. Für jeden einzelnen Vertrag bestehen wiederkehrende Verlängerungsoptionen um jeweils ein Jahr. Eine Kaufoption wurde nicht vereinbart. Der Leasingvertrag bezüglich Technischer Anlagen und Maschinen sowie Anderer Anlagen, Betriebs- und Geschäftsausstattung mit einem Restbuchwert in Höhe von 3 Mio. Euro (2009: 1 Mio. Euro) für die Produktionsstätte in Hams Hall hat eine Laufzeit bis 2018. Eine Verlängerungs- oder Kaufoption wurde nicht vereinbart.

Die Details zu den Mindestleasingzahlungen der betreffenden Leasingverträge ergeben sich insgesamt wie folgt:

| in Mio. Euro                                                    | 31.12.2010 | 31.12.2009 |
|-----------------------------------------------------------------|------------|------------|
| Summe der künftigen Mindestleasingzahlungen                     |            |            |
| — Fällig innerhalb eines Jahres                                 | 89         | 75         |
| — Fällig zwischen einem und fünf Jahren                         | 116        | 166        |
| — Fällig nach mehr als fünf Jahren                              | 95         | 117        |
|                                                                 | <b>300</b> | <b>358</b> |
| In den künftigen Mindestleasingzahlungen enthaltener Zinsanteil |            |            |
| — Fällig innerhalb eines Jahres                                 | 5          | 7          |
| — Fällig zwischen einem und fünf Jahren                         | 25         | 25         |
| — Fällig nach mehr als fünf Jahren                              | 28         | 36         |
|                                                                 | <b>58</b>  | <b>68</b>  |
| Barwert der künftigen Mindestleasingzahlungen                   |            |            |
| — Fällig innerhalb eines Jahres                                 | 84         | 68         |
| — Fällig zwischen einem und fünf Jahren                         | 91         | 141        |
| — Fällig nach mehr als fünf Jahren                              | 67         | 81         |
|                                                                 | <b>242</b> | <b>290</b> |

### 74 — KONZERNABSCHLUSS

|     |                                                |
|-----|------------------------------------------------|
| 74  | Gewinn- und Verlust-Rechnungen                 |
| 74  | Gesamtergebnisrechnung                         |
| 76  | Bilanzen                                       |
| 78  | Kapitalflussrechnungen                         |
| 80  | Entwicklung des Konzerneigenkapitals           |
| 81  | Konzernanhang                                  |
| 81  | Grundsätze                                     |
| 89  | Erläuterungen zur Gewinn- und Verlust-Rechnung |
| 95  | Erläuterungen zur Gesamtergebnisrechnung       |
| 96  | Erläuterungen zur Bilanz                       |
| 117 | Sonstige Angaben                               |
| 133 | Segmentinformationen                           |

**21 – Vermietete Gegenstände**

Die BMW Group vermietet als Leasinggeber vor allem eigene Produkte im Rahmen des Finanzdienstleistungs-

geschäfts. Für die Mindestleasingzahlungen aus nicht kündbaren Operating Leases in Höhe von 8.070 Mio. Euro (2009: 7.686 Mio. Euro) ergeben sich folgende Fälligkeiten:

| in Mio. Euro                   | 31.12.2010   | 31.12.2009   |
|--------------------------------|--------------|--------------|
| Innerhalb eines Jahres         | 4.303        | 4.257        |
| Zwischen einem und fünf Jahren | 3.766        | 3.428        |
| Nach mehr als fünf Jahren      | 1            | 1            |
| <b>Vermietete Gegenstände</b>  | <b>8.070</b> | <b>7.686</b> |

An bedingten Leasingzahlungen, vor allem in Abhängigkeit von der Fahrleistung, wurden 47 Mio. Euro (2009: 39 Mio. Euro) vereinnahmt. Die Verträge beinhalten zum Teil Verlängerungs- und Kaufoptionen sowie Preisanpassungsklauseln.

Hinsichtlich der Entwicklung der Vermieteten Gegenstände wird auf den Anlagespiegel, der auf den Seiten 96 f. dargestellt ist, verwiesen.

**22 – At-Equity bewertete Beteiligungen und Sonstige Finanzanlagen**

Die At-Equity bewerteten Beteiligungen umfassen die Anteile an den Joint Ventures BMW Brilliance Automotive Ltd., Shenyang, SGL Automotive Carbon Fibers

GmbH & Co. KG, München, SGL Automotive Carbon Fibers Verwaltungs GmbH, München, und SGL Automotive Carbon Fibers LLC, Dover, DE, sowie die Beteiligung an der Cirquent GmbH, München. Kumuliert hat der Konzern folgende Anteile:

| in Mio. Euro                                   | 31.12.2010 | 31.12.2009 |
|------------------------------------------------|------------|------------|
| <b>Angaben zur Gewinn-und-Verlust-Rechnung</b> |            |            |
| Erträge                                        | 1.240      | 835        |
| Aufwendungen                                   | -1.142     | -797       |
| <b>Ergebnis</b>                                | <b>98</b>  | <b>38</b>  |
| <b>Angaben zur Bilanz</b>                      |            |            |
| Langfristige Vermögenswerte                    | 318        | 222        |
| Kurzfristige Vermögenswerte                    | 572        | 287        |
| Eigenkapital                                   | 271        | 164        |
| Langfristige Schulden                          | 36         | 15         |
| Kurzfristige Schulden                          | 583        | 330        |
| <b>Bilanzsumme</b>                             | <b>890</b> | <b>509</b> |

In den Sonstigen Finanzanlagen sind im Wesentlichen Anteile an nicht konsolidierten verbundenen Unternehmen, Beteiligungen sowie Wertpapiere des Anlagevermögens enthalten.

Die Zugänge bei den Anteilen an verbundenen Unternehmen betreffen im Wesentlichen die Gründung der BMW India Financial Services Pvt. Ltd., Neu Delhi, sowie die Kapitalerhöhung bei der Husqvarna Motorcycles S.r.l., Cassinetta di Biandronno.

Die Wertberichtigungen bei den Anteilen an verbundenen Unternehmen betreffen im Wesentlichen die Beteiligungen an der Husqvarna Gruppe. Aus der strategischen Neuausrichtung dieser Beteiligungen ergab sich insbesondere

im Segment Automobile ein Wertberichtigungsbedarf von insgesamt 178 Mio. Euro, da der erzielbare Betrag (Nutzungswert) unter dem Buchwert lag. Der beizulegende Zeitwert wird durch Diskontierung zukünftiger Zahlungsströme mit einem gegenüber dem Vorjahr unveränderten risikoangepassten Zinssatz in Höhe von 12,0% ermittelt.

Die Abgänge bei den Anteilen an verbundenen Unternehmen resultieren im Wesentlichen aus der Erstkonsolidierung der Husqvarna Gruppe.

Die Aufgliederung der in der Bilanz zusammengefassten Positionen der Sonstigen Finanzanlagen sowie ihre Entwicklung im Berichtsjahr sind im Anlagespiegel auf den Seiten 96f. enthalten.

## 23 – Forderungen aus Finanzdienstleistungen

Die Forderungen aus Finanzdienstleistungen in Höhe von 45.365 Mio. Euro (2009: 40.594 Mio. Euro) resultieren zum einen in Höhe von 35.460 Mio. Euro (2009:

31.971 Mio. Euro) aus Kreditfinanzierung für Kunden und Händler sowie zum anderen in Höhe von 9.905 Mio. Euro (2009: 8.623 Mio. Euro) aus Finance Leases. Den Finance Leases liegen folgende Details zugrunde:

| in Mio. Euro                                     | 31.12.2010    | 31.12.2009   |
|--------------------------------------------------|---------------|--------------|
| Bruttoinvestitionen in Finance Leases            |               |              |
| — Fällig innerhalb eines Jahres                  | 3.922         | 3.477        |
| — Fällig zwischen einem und fünf Jahren          | 7.185         | 6.269        |
| — Fällig nach mehr als fünf Jahren               | 56            | 28           |
|                                                  | <b>11.163</b> | <b>9.774</b> |
| Barwert der ausstehenden Mindestleasingzahlungen |               |              |
| — Fällig innerhalb eines Jahres                  | 3.409         | 3.056        |
| — Fällig zwischen einem und fünf Jahren          | 6.446         | 5.542        |
| — Fällig nach mehr als fünf Jahren               | 50            | 25           |
|                                                  | <b>9.905</b>  | <b>8.623</b> |
| <b>Noch nicht realisierter Finanzertrag</b>      | <b>1.258</b>  | <b>1.151</b> |

Die Höhe der vor allem von der Fahrleistung abhängigen bedingten Leasingzahlungen beträgt 3 Mio. Euro (2009: 3 Mio. Euro). Für Finance Leases wurden Wertminderungen, die sich nach dem individuellen Ausfallrisiko richten, in Höhe von 68 Mio. Euro (2009: 58 Mio. Euro) berücksichtigt. Es bestehen keine garantierten Restwerte, die

zugunsten des Leasinggebers anfallen (2009: 3 Mio. Euro).

Vom Gesamtbestand der Forderungen aus Finanzdienstleistungen entfällt ein Teilbetrag in Höhe von 27.126 Mio. Euro (2009: 23.478 Mio. Euro) auf eine Restlaufzeit von mehr als einem Jahr.

### Wertberichtigungen und Kreditrisiko

| in Mio. Euro         | 31.12.2010    | 31.12.2009    |
|----------------------|---------------|---------------|
| Bruttobuchwert       | 46.961        | 41.950        |
| Wertberichtigungen   | -1.596        | -1.356        |
| <b>Nettobuchwert</b> | <b>45.365</b> | <b>40.594</b> |

Die Wertberichtigungen auf Forderungen aus Finanzdienstleistungen entwickelten sich wie folgt:

| 2010<br>in Mio. Euro                       | Wertberichtigungen auf |              | Gesamt       |
|--------------------------------------------|------------------------|--------------|--------------|
|                                            | Einzelbasis            | Gruppenbasis |              |
| Anfangsbestand 1. Januar                   | 1.195                  | 161          | 1.356        |
| Zuführungen/Auflösungen                    | 489                    | 45           | 534          |
| Inanspruchnahme                            | -365                   | -15          | -380         |
| Wechselkurseffekte und sonstige Änderungen | 74                     | 12           | 86           |
| <b>Endbestand 31. Dezember</b>             | <b>1.393</b>           | <b>203</b>   | <b>1.596</b> |

| 2009<br>in Mio. Euro                       | Wertberichtigungen auf |              | Gesamt       |
|--------------------------------------------|------------------------|--------------|--------------|
|                                            | Einzelbasis            | Gruppenbasis |              |
| Anfangsbestand 1. Januar                   | 938                    | 115          | 1.053        |
| Zuführungen/Auflösungen                    | 682                    | 50           | 732          |
| Inanspruchnahme                            | -444                   | -10          | -454         |
| Wechselkurseffekte und sonstige Änderungen | 19                     | 6            | 25           |
| <b>Endbestand 31. Dezember</b>             | <b>1.195</b>           | <b>161</b>   | <b>1.356</b> |

|     |                                               |
|-----|-----------------------------------------------|
| 74  | <b>KONZERNABSCHLUSS</b>                       |
| 74  | Gewinn-und-Verlust-Rechnungen                 |
| 74  | Gesamtergebnisrechnung                        |
| 76  | Bilanzen                                      |
| 78  | Kapitalflussrechnungen                        |
| 80  | Entwicklung des Konzerneigenkapitals          |
| 81  | <b>Konzernanhang</b>                          |
| 81  | Grundsätze                                    |
| 89  | Erläuterungen zur Gewinn-und-Verlust-Rechnung |
| 95  | Erläuterungen zur Gesamtergebnisrechnung      |
| 96  | Erläuterungen zur Bilanz                      |
| 117 | Sonstige Angaben                              |
| 133 | Segmentinformationen                          |

Zum Bilanzstichtag bestehen 203 Mio. Euro (2009: 161 Mio. Euro) an Wertberichtigungen auf Gruppenbasis für Forderungen aus Finanzdienstleistungen mit einem Bruttobuchwert in Höhe von 24.477 Mio. Euro (2009: 19.509 Mio. Euro). Für Forderungen aus Finanzdienstleistungen in Höhe von 10.722 Mio. Euro (2009: 10.581 Mio. Euro) bestehen zum 31. Dezember 2010 Wertberichtigungen auf Einzelbasis in Höhe von 1.393 Mio. Euro (2009: 1.195 Mio. Euro).

Forderungen aus Finanzdienstleistungen in Höhe von 11.762 Mio. Euro (2009: 11.860 Mio. Euro) sind zum Bilanzstichtag weder überfällig noch wertberichtigt.

Der geschätzte Marktwert der Sicherheiten, die für wertberichtigte Forderungen gehalten werden, beträgt zum Bilanzstichtag 19.282 Mio. Euro (2009: 15.600 Mio. Euro). Dabei handelt es sich im Wesentlichen um Fahrzeuge. Der Bilanzansatz der Vermögenswerte, die als Sicherheiten gehalten und aufgrund eines Zahlungsausfalls in Anspruch genommen wurden, beträgt 35 Mio. Euro (2009: 40 Mio. Euro). Am Bilanzstichtag bestehen wie im Vorjahr keinerlei Forderungen aus Finanzdienstleistungen, die neu verhandelt wurden und andernfalls überfällig oder wertberichtigt wären.

## 24 – Finanzforderungen

Die Finanzforderungen setzen sich wie folgt zusammen:

| in Mio. Euro                             | 31.12.2010   | 31.12.2009   |
|------------------------------------------|--------------|--------------|
| Derivate                                 | 2.781        | 2.433        |
| Wertpapiere und Investmentanteile        | 1.566        | 1.648        |
| Ausleihungen an Dritte                   | 58           | 23           |
| Forderungen aus dem Kreditkartengeschäft | 262          | 266          |
| Sonstige                                 | 462          | 364          |
| <b>Finanzforderungen</b>                 | <b>5.129</b> | <b>4.734</b> |
| davon langfristig                        | 1.867        | 1.519        |
| davon kurzfristig                        | 3.262        | 3.215        |

Die Veränderung in der Position Derivate beruht im Wesentlichen auf der positiven Marktentwicklung der Rohstoffderivate.

Der Rückgang bei Wertpapieren und Investmentanteilen ergibt sich aus ausgelaufenen festverzinslichen Wertpapieren, die nicht vollumfänglich reinvestiert wurden.

Der Sicherung von Verpflichtungen aus Altersteilzeitverhältnissen dienen Investmentanteile, die im Rahmen

von Contractual Trust Arrangements (CTA) an den BMW Trust e.V., München, übertragen und deshalb mit dem Erfüllungsrückstand aus Altersteilzeitverpflichtungen saldiert werden. Der die Altersteilzeitverpflichtung (Erfüllungsrückstand) übersteigende Wert der Investmentanteile von 50 Mio. Euro (2009: 28 Mio. Euro) wird unter den Sonstigen Finanzforderungen ausgewiesen.

Die Wertpapiere und Investmentanteile umfassen kurzfristig zur Veräußerung verfügbare finanzielle Vermögenswerte und beinhalten:

| in Mio. Euro                             | 31.12.2010   | 31.12.2009   |
|------------------------------------------|--------------|--------------|
| Aktien                                   | 1            | -            |
| Festverzinsliche Wertpapiere             | 1.565        | 1.647        |
| Übrige Wertpapiere                       | -            | 1            |
| <b>Wertpapiere und Investmentanteile</b> | <b>1.566</b> | <b>1.648</b> |

Die vertraglichen Restlaufzeiten des Bestands an Schuldtiteln ergeben sich aus der nachfolgenden Tabelle:

| in Mio. Euro                        | 31.12.2010   | 31.12.2009   |
|-------------------------------------|--------------|--------------|
| Festverzinsliche Wertpapiere        |              |              |
| — Fällig innerhalb von drei Monaten | 282          | 302          |
| — Fällig nach mehr als drei Monaten | 1.283        | 1.345        |
| Übrige Wertpapiere                  |              |              |
| — Fällig innerhalb von drei Monaten | -            | -            |
| — Fällig nach mehr als drei Monaten | -            | 1            |
| <b>Schuldtitel</b>                  | <b>1.565</b> | <b>1.648</b> |

### Wertberichtigungen und Kreditrisiko

Die Forderungen aus dem Kreditkartengeschäft setzen sich wie folgt zusammen:

| in Mio. Euro         | 31.12.2010 | 31.12.2009 |
|----------------------|------------|------------|
| Bruttobuchwert       | 277        | 283        |
| Wertberichtigungen   | -15        | -17        |
| <b>Nettobuchwert</b> | <b>262</b> | <b>266</b> |

Die Wertberichtigungen auf Forderungen aus dem Kreditkartengeschäft entwickelten sich wie folgt:

| 2010                                       | Wertberichtigungen auf |              | Gesamt    |
|--------------------------------------------|------------------------|--------------|-----------|
| in Mio. Euro                               | Einzelbasis            | Gruppenbasis |           |
| Anfangsbestand 1. Januar                   | -17                    | -            | -17       |
| Zuführungen/Auflösungen                    | 27                     | -            | 27        |
| Inanspruchnahme                            | -30                    | -            | -30       |
| Wechselkurseffekte und sonstige Änderungen | -1                     | -            | -1        |
| <b>Endbestand 31. Dezember</b>             | <b>15</b>              | <b>-</b>     | <b>15</b> |

| 2009                                       | Wertberichtigungen auf |              | Gesamt    |
|--------------------------------------------|------------------------|--------------|-----------|
| in Mio. Euro                               | Einzelbasis            | Gruppenbasis |           |
| Anfangsbestand 1. Januar                   | 15                     | -            | 15        |
| Zuführungen/Auflösungen                    | 35                     | -            | 35        |
| Inanspruchnahme                            | -32                    | -            | -32       |
| Wechselkurseffekte und sonstige Änderungen | -1                     | -            | -1        |
| <b>Endbestand 31. Dezember</b>             | <b>17</b>              | <b>-</b>     | <b>17</b> |

|     |                                               |
|-----|-----------------------------------------------|
| 74  | <b>KONZERNABSCHLUSS</b>                       |
| 74  | Gewinn-und-Verlust-Rechnungen                 |
| 74  | Gesamtergebnisrechnung                        |
| 76  | Bilanzen                                      |
| 78  | Kapitalflussrechnungen                        |
| 80  | Entwicklung des Konzerneigenkapitals          |
| 81  | <b>Konzernanhang</b>                          |
| 81  | Grundsätze                                    |
| 89  | Erläuterungen zur Gewinn-und-Verlust-Rechnung |
| 95  | Erläuterungen zur Gesamtergebnisrechnung      |
| 96  | <b>Erläuterungen zur Bilanz</b>               |
| 117 | Sonstige Angaben                              |
| 133 | Segmentinformationen                          |



25 – **Ertragsteueransprüche**

Die Ertragsteueransprüche setzen sich wie folgt zusammen:

| 31. Dezember 2010<br>in Mio. Euro | Restlaufzeit<br>bis ein Jahr | Restlaufzeit<br>über ein Jahr | <b>Gesamt</b> |
|-----------------------------------|------------------------------|-------------------------------|---------------|
| Latente Ertragsteuern             | –                            | 1.393                         | <b>1.393</b>  |
| Laufende Ertragsteuern            | 302                          | 864                           | <b>1.166</b>  |
| <b>Ertragsteueransprüche</b>      | <b>302</b>                   | <b>2.257</b>                  | <b>2.559</b>  |

| 31. Dezember 2009<br>in Mio. Euro | Restlaufzeit<br>bis ein Jahr | Restlaufzeit<br>über ein Jahr | <b>Gesamt</b> |
|-----------------------------------|------------------------------|-------------------------------|---------------|
| Latente Ertragsteuern             | –                            | 1.266                         | <b>1.266</b>  |
| Laufende Ertragsteuern            | 452                          | 498                           | <b>950</b>    |
| <b>Ertragsteueransprüche</b>      | <b>452</b>                   | <b>1.764</b>                  | <b>2.216</b>  |

26 – **Sonstige Vermögenswerte**

Die Sonstigen Vermögenswerte setzen sich wie folgt zusammen:

| in Mio. Euro                                                                | <b>31.12.2010</b> | 31.12.2009   |
|-----------------------------------------------------------------------------|-------------------|--------------|
| Sonstige Steuern                                                            | <b>564</b>        | 445          |
| Forderungen gegen verbundene Unternehmen                                    | <b>688</b>        | 485          |
| Forderungen gegen Unternehmen, mit denen ein Beteiligungsverhältnis besteht | <b>258</b>        | 171          |
| Aktive Rechnungsabgrenzungen                                                | <b>847</b>        | 898          |
| Sicherheitsleistungen                                                       | <b>474</b>        | 507          |
| Übrige                                                                      | <b>818</b>        | 618          |
| <b>Sonstige Vermögenswerte</b>                                              | <b>3.649</b>      | <b>3.124</b> |
| davon langfristig                                                           | <b>692</b>        | 640          |
| davon kurzfristig                                                           | <b>2.957</b>      | 2.484        |

Die Forderungen gegen verbundene Unternehmen beinhalten in Höhe von 89 Mio. Euro (2009: 70 Mio. Euro) Forderungen aus Lieferungen und Leistungen sowie in Höhe von 599 Mio. Euro (2009: 415 Mio. Euro) Forderungen. Sie weisen mit einem Teilbetrag in Höhe von 259 Mio. Euro (2009: 145 Mio. Euro) eine Restlaufzeit von mehr als einem Jahr auf.

Die Forderungen gegen Unternehmen, mit denen ein Beteiligungsverhältnis besteht, sind in Höhe von 251 Mio. Euro (2009: 171 Mio. Euro) innerhalb eines Jahres fällig.

Aktive Rechnungsabgrenzungen in Höhe von 847 Mio. Euro (2009: 898 Mio. Euro) ergeben sich im Wesentlichen durch Vorauszahlungen für Zinsen und nicht aktivierungsfähige Entwicklungsleistungen sowie Versicherungsprämien und Mieten. Vom ausgewiesenen Betrag sind 542 Mio. Euro (2009: 568 Mio. Euro) innerhalb eines Jahres fällig.

Die Sicherheitsleistungen umfassen im Wesentlichen geschäftsübliche Sicherheiten für den Verkauf von Forderungen.

## 27 – Vorräte

Der ausgewiesene Vorratsbestand setzt sich wie folgt zusammen:

| in Mio. Euro                                | 31.12.2010   | 31.12.2009   |
|---------------------------------------------|--------------|--------------|
| Roh-, Hilfs- und Betriebsstoffe             | 663          | 536          |
| Unfertige Erzeugnisse, unfertige Leistungen | 683          | 542          |
| Fertige Erzeugnisse und Waren               | 6.420        | 5.477        |
| <b>Vorräte</b>                              | <b>7.766</b> | <b>6.555</b> |

Von dem Gesamtbetrag der zum 31. Dezember 2010 bilanzierten Vorräte in Höhe von 7.766 Mio. Euro (2009: 6.555 Mio. Euro) sind 416 Mio. Euro (2009: 355 Mio. Euro) zu ihrem Nettoveräußerungswert bilanziert. Die

im Geschäftsjahr 2010 erfassten Wertminderungen auf den Nettoveräußerungswert betragen 18 Mio. Euro (2009: 58 Mio. Euro).

## 28 – Forderungen aus Lieferungen und Leistungen

Von den Forderungen aus Lieferungen und Leistungen in Höhe von insgesamt 2.329 Mio. Euro (2009: 1.857 Mio.

Euro) entfällt ein Teilbetrag in Höhe von 41 Mio. Euro auf eine Restlaufzeit von mehr als einem Jahr (2009: 40 Mio. Euro).

### Wertberichtigungen und Kreditrisiko

| in Mio. Euro         | 31.12.2010   | 31.12.2009   |
|----------------------|--------------|--------------|
| Bruttobuchwert       | 2.424        | 1.942        |
| Wertberichtigungen   | -95          | -85          |
| <b>Nettobuchwert</b> | <b>2.329</b> | <b>1.857</b> |

Die Wertberichtigungen auf Forderungen aus Lieferungen und Leistungen entwickelten sich wie folgt:

| 2010                                       | Wertberichtigungen auf |              | Gesamt    |
|--------------------------------------------|------------------------|--------------|-----------|
| in Mio. Euro                               | Einzelbasis            | Gruppenbasis |           |
| Anfangsbestand 1. Januar                   | 76                     | 9            | 85        |
| Zuführungen/Auflösungen                    | 17                     | 3            | 20        |
| Inanspruchnahme                            | -12                    | -1           | -13       |
| Wechselkurseffekte und sonstige Änderungen | -2                     | 1            | 3         |
| <b>Endbestand 31. Dezember</b>             | <b>83</b>              | <b>12</b>    | <b>95</b> |

| 2009                                       | Wertberichtigungen auf |              | Gesamt    |
|--------------------------------------------|------------------------|--------------|-----------|
| in Mio. Euro                               | Einzelbasis            | Gruppenbasis |           |
| Anfangsbestand 1. Januar*                  | 62                     | 7            | 69        |
| Zuführungen/Auflösungen                    | 31                     | 3            | 34        |
| Inanspruchnahme                            | -17                    | -2           | -19       |
| Wechselkurseffekte und sonstige Änderungen | -                      | 1            | 1         |
| <b>Endbestand 31. Dezember</b>             | <b>76</b>              | <b>9</b>     | <b>85</b> |

\* einschließlich während des Geschäftsjahres erstmals konsolidierter Gesellschaften

Am Bilanzstichtag bestehen wie im Vorjahr keinerlei Forderungen aus Lieferungen und Leistungen, die neu ver-

handelt wurden und andernfalls überfällig oder wertberichtigt wären.

### 74 – KONZERNABSCHLUSS

74 Gewinn- und Verlust-Rechnungen

74 Gesamtergebnisrechnung

76 Bilanzen

78 Kapitalflussrechnungen

80 Entwicklung des Konzerneigenkapitals

### 81 – Konzernanhang

81 Grundsätze

89 Erläuterungen zur Gewinn- und Verlust-Rechnung

95 Erläuterungen zur Gesamtergebnisrechnung

96 – Erläuterungen zur Bilanz

117 Sonstige Angaben

133 Segmentinformationen

Des Weiteren bestehen Forderungen aus Lieferungen und Leistungen, die überfällig, aber nicht wertberichtigt

sind. Die Überfälligkeiten gliedern sich in die folgenden Zeitbänder:

| in Mio. Euro             | 31.12.2010 | 31.12.2009 |
|--------------------------|------------|------------|
| 1 – 30 Tage überfällig   | 148        | 149        |
| 31 – 60 Tage überfällig  | 41         | 49         |
| 61 – 90 Tage überfällig  | 15         | 26         |
| 91 – 120 Tage überfällig | 11         | 28         |
| Über 120 Tage überfällig | 39         | 69         |
|                          | <b>254</b> | <b>321</b> |

Bei den Forderungen, die im Zeitraum zwischen 1 und 30 Tagen überfällig sind, treten in der Regel keine Zahlungsausfälle ein, da die Überfälligkeiten im Wesentlichen auf zeitlichen Buchungsunterschieden beruhen. Für For-

derungen aus Lieferungen und Leistungen werden generell Sicherheiten in Form von einbehaltenen Fahrzeugdokumenten und Bankbürgschaften gehalten, sodass das Ausfallrisiko sehr begrenzt ist.

#### 29 – Zahlungsmittel und Zahlungsmitteläquivalente

Bei den Zahlungsmitteln und Zahlungsmitteläquivalenten in Höhe von 7.432 Mio. Euro (2009: 7.767 Mio. Euro)

handelt es sich um Kassenbestände sowie Guthaben bei Kreditinstituten mit einer Fälligkeit innerhalb von drei Monaten.

#### 30 – Eigenkapital

##### Zahl der ausgegebenen Aktien

Die Zahl der am 31. Dezember 2010 von der BMW AG ausgegebenen Stammaktien im Nennwert von einem Euro beträgt 601.995.196 Stück, die Zahl der Vorzugsaktien im Nennwert von einem Euro, die im Gegensatz zu den Stammaktien ohne Stimmrecht ausgestattet sind, beträgt 53.163.412 Stück. Sämtliche Aktien lauten auf den Inhaber. Die Vorzugsaktien sind mit einem Vorabgewinn (Mehrdividende) in Höhe von 0,02 Euro je Aktie ausgestattet.

Im Rahmen eines Belegschaftsaktienprogramms wurden im Jahr 2010 an die Mitarbeiter 499.590 Stück Vorzugsaktien zu einem Vorzugskurs von 26,99 Euro je Aktie veräußert. Diese sind erst für das Geschäftsjahr 2011 dividendenberechtigt. Für das Belegschaftsaktienprogramm wurden 1.540 Vorzugsaktien am Kapitalmarkt zurückgekauft.

Das Grundkapital stieg in Höhe von 0,5 Mio. Euro durch die Ausgabe von 498.050 Vorzugsaktien ohne Stimmrecht an die Belegschaft. Damit beträgt das Genehmigte Kapital der BMW AG, das befristet bis zum 13. Mai 2014 zur Ausgabe von stimmrechtslosen Vorzugsaktien in Höhe von nominal 5 Mio. Euro ermächtigt, am Bilanzstichtag noch 4 Mio. Euro. Das Aufgeld aus dieser Kapitalerhöhung, das der Kapitalrücklage zugeführt wurde, beträgt 18 Mio. Euro.

Die Auswirkungen der Anwendung von IFRS 2 (Share-Based Payments) auf das Belegschaftsaktienprogramm sind für den Konzern von untergeordneter Bedeutung.

##### Kapitalrücklage

Die Kapitalrücklage enthält Aufgelder aus der Ausgabe von Aktien und beträgt 1.939 Mio. Euro (2009: 1.921 Mio. Euro). Die Veränderung ergibt sich aus der Kapitalerhöhung zur Ausgabe von Vorzugsaktien an Mitarbeiter.

##### Gewinnrücklagen

Die Gewinnrücklagen enthalten die in der Vergangenheit erzielten Ergebnisse der in den Konzernabschluss einbezogenen Unternehmen, soweit sie nicht ausgeschüttet wurden. Des Weiteren erfolgten in den Gewinnrücklagen die Verrechnungen aktiver und passiver Unterschiedsbeträge aus der Kapitalkonsolidierung der bis zum 31. Dezember 1994 konsolidierten Tochtergesellschaften.

Die Gewinnrücklagen sind gegenüber Vorjahr auf 23.447 Mio. Euro gestiegen. Sie erhöhten sich im Geschäftsjahr 2010 um den Ergebnisanteil der Aktionäre der BMW AG in Höhe von 3.218 Mio. Euro und verminderten sich durch die Auszahlung der Dividende für 2009 in Höhe von 197 Mio. Euro.

Der der Hauptversammlung zur Ausschüttung vorgeschlagene Bilanzgewinn des Jahres 2010 der BMW AG

beträgt 852 Mio. Euro. Die vorgeschlagene Ausschüttung muss von den Aktionären auf der Hauptversammlung genehmigt werden. Sie wurde nicht als Verbindlichkeit im Konzernabschluss bilanziert.

#### Kumuliertes übriges Eigenkapital

Im Kumulierten übrigen Eigenkapital sind die Differenzen aus der erfolgsneutralen Währungsumrechnung von Abschlüssen ausländischer Tochterunternehmen, die Effekte aus der erfolgsneutralen Marktbewertung von derivativen Finanzinstrumenten und Wertpapieren, die versicherungsmathematischen Gewinne und Verluste aus leistungsorientierten Pensionszusagen und ähnlichen Verpflichtungen sowie erfolgsneutral erfasste Latente Steuern ausgewiesen.

#### Anteile anderer Gesellschafter am Kapital

Die Anteile anderer Gesellschafter am Kapital betragen 26 Mio. Euro (2009: 13 Mio. Euro). Darin enthalten ist das anteilige Periodenergebnis in Höhe von 16 Mio. Euro (2009: 6 Mio. Euro).

#### Angaben zum Kapitalmanagement

Das Kapitalmanagement der BMW Group verfolgt das Ziel, langfristig die Unternehmensfortführung zu sichern

| in Mio. Euro                           | 31.12.2010    | 31.12.2009    |
|----------------------------------------|---------------|---------------|
| Eigenkapital der Aktionäre der BMW AG  | 23.074        | 19.902        |
| — Anteil am Gesamtkapital              | 27,0%         | 24,5%         |
| — Langfristige Finanzverbindlichkeiten | 35.833        | 34.391        |
| — Kurzfristige Finanzverbindlichkeiten | 26.520        | 26.934        |
| Finanzverbindlichkeiten gesamt         | 62.353        | 61.325        |
| — Anteil am Gesamtkapital              | 73,0%         | 75,5%         |
| <b>Gesamtkapital</b>                   | <b>85.427</b> | <b>81.227</b> |

Der Eigenkapitalanteil der Aktionäre der BMW AG stieg im Geschäftsjahr um 2,5 Prozentpunkte. Diese Steigerung ist im Wesentlichen auf die gegenüber dem Vorjahr erhöhten Gewinnrücklagen zurückzuführen. Der Anteil der Finanzverbindlichkeiten sinkt insbesondere aufgrund des nur leicht gestiegenen Refinanzierungsbedarfs im Finanzdienstleistungsgeschäft.

Die BMW AG wird durch die international tätigen Rating-Agenturen Standard & Poor's (S & P) und Moody's offi-

und angemessene Renditen für die Anteilseigner zu erwirtschaften.

Die Kapitalstruktur wird dahingehend gesteuert, dass sie den Änderungen der gesamtwirtschaftlichen Rahmenbedingungen sowie Risiken aus den zugrunde liegenden Vermögenswerten Rechnung trägt.

Als Instrumente zur Kapitalsteuerung dienen unter anderem Dividendenzahlungen an Anteilseigner und Aktienrückkäufe.

Des Weiteren verfügt die BMW Group über ein aktives Fremdkapitalmanagement. Im Rahmen dessen wird die Fremdkapitalbeschaffung anhand einer Ziel-Fremdkapitalstruktur (Target Debt Ratio) gesteuert. Bei der Auswahl der Finanzinstrumente steht eine fristenkonforme Finanzierung im Vordergrund, die über die Steuerung der Laufzeiten erreicht wird. Um unsystematische Risiken zu reduzieren, verfügt die BMW Group über eine optimale Diversifikation von Finanzinstrumenten an den weltweiten Kapitalmärkten.

Die Kapitalstruktur stellt sich zum Bilanzstichtag wie folgt dar:

ziell bewertet und ihr wird eine hohe Bonität bescheinigt. Die BMW AG verfügt seit Jahren über solide Lang- und Kurzfrist-Ratings von Moody's und S & P.

Aufgrund der Erholung der Absatzmärkte und der verbesserten gesamtwirtschaftlichen Rahmenbedingungen haben die Ratingagenturen Moody's und S & P den mit den Ratings veröffentlichten Ausblick im September 2010 von negativ auf stabil angehoben.

|                                      | Moody's | Standard & Poor's |
|--------------------------------------|---------|-------------------|
| Langfristige Finanzverbindlichkeiten | A3      | A-                |
| Kurzfristige Finanzverbindlichkeiten | P-2     | A-2               |
| Ausblick                             | Stabil  | Stabil            |

#### 74 — KONZERNABSCHLUSS

- 74 Gewinn-und-Verlust-Rechnungen
- 74 Gesamtergebnisrechnung
- 76 Bilanzen
- 78 Kapitalflussrechnungen
- 80 Entwicklung des Konzerneigenkapitals
- 81 — Konzernanhang
  - 81 Grundsätze
  - 89 Erläuterungen zur Gewinn-und-Verlust-Rechnung
  - 95 Erläuterungen zur Gesamtergebnisrechnung
  - 96 — Erläuterungen zur Bilanz
  - 117 Sonstige Angaben
  - 133 Segmentinformationen

Mit den aktuellen Langfrist-Ratings A- bei S & P bzw. A3 bei Moody's bescheinigen die Agenturen der BMW AG weiterhin für die Fremdverbindlichkeiten mit einer Laufzeit von über einem Jahr eine solide Bonität. Auch im

Kurzfristbereich wird die BMW AG von den Ratingagenturen als Schuldner mit guter Bonität eingestuft. Dadurch können weiterhin wettbewerbsfähige Refinanzierungsbedingungen erreicht werden.

### 31 – Rückstellungen für Pensionen

Pensionsrückstellungen werden für Verpflichtungen aus Anwartschaften und aus laufenden Leistungen an berechnete aktive und ehemalige Mitarbeiter der BMW Group sowie deren Hinterbliebene gebildet. Je nach rechtlichen, wirtschaftlichen und steuerlichen Gegebenheiten des jeweiligen Landes bestehen dabei unterschiedliche Systeme der Alterssicherung, die in der Regel auf Beschäftigungsdauer sowie Vergütungshöhe und -struktur der Mitarbeiter basieren. Aufgrund ihres Versorgungscharakters werden die Verpflichtungen der US-Konzerngesellschaften und der BMW (South Africa) (Pty) Ltd., Pretoria, für die medizinische Versorgung der Mitarbeiter nach deren Eintritt in den Ruhestand ebenfalls unter den Pensionsrückstellungen ausgewiesen. Die Rückstellung für diese pensionsähnlichen Verpflichtungen in Höhe von 93 Mio. Euro (2009: 70 Mio. Euro) wird ebenso wie die für Pensionsverpflichtungen nach IAS 19 ermittelt. Für die medizinische Versorgung wird dabei eine langfristige Kostensteigerung von unverändert 6% p. a. berücksichtigt. Der Aufwand des laufenden Geschäftsjahres für die Verpflichtungen aus Gesundheitsfürsorge beläuft sich auf 10 Mio. Euro (2009: 7 Mio. Euro). Den Rückstellungen für die medizinische Versorgung der Mitarbeiter in den USA stehen Erstattungsansprüche nach IAS 19.104 A in Höhe von 8 Mio. Euro gegenüber.

Bei der betrieblichen Altersversorgung ist zwischen beitrags- und leistungsorientierten Versorgungssystemen zu differenzieren. Bei beitragsorientierten Versorgungssystemen (Defined Contribution Plans) geht das Unternehmen über die Entrichtung von Beitragszahlungen an zweckgebundene Fonds hinaus keine weiteren Verpflichtungen ein. Die Summe der beitragsorientierten Pen-

sionsaufwendungen beträgt 30 Mio. Euro (2009: 31 Mio. Euro). Die Arbeitgeberbeiträge zur gesetzlichen Rentenversicherung belaufen sich auf 406 Mio. Euro (2009: 356 Mio. Euro).

Bei leistungsorientierten Versorgungsplänen besteht die Verpflichtung des Unternehmens darin, die zugesagten Leistungen an aktive und ehemalige Mitarbeiter zu erfüllen (Defined Benefit Plans), wobei zwischen rückstellungs- und fondsgedeckten Versorgungssystemen unterschieden wird. In Deutschland betrifft der überwiegende Teil der Versorgungszusagen die BMW AG. Im Geschäftsjahr 2010 hat die BMW AG planmäßig einen weiteren Teil ihrer Pensionsverpflichtungen im Rahmen von Contractual Trust Arrangements (CTA) auf den BMW Trust e. V., München, ausfinanziert. Damit sind die Verpflichtungen nahezu vollständig durch das Fondsvermögen gedeckt. Verpflichtungen, die das ausfinanzierte Vermögen übersteigen, werden durch Dotierung von Rückstellungen gedeckt. Des Weiteren bestehen fondsgedeckte Versorgungspläne insbesondere in den Ländern Großbritannien, USA, Schweiz, Niederlande, Belgien, Südafrika und Japan.

Die Höhe der Pensionsverpflichtung (Anwartschaftsbarwert der Versorgungszusagen bzw. Defined Benefit Obligation) wird nach versicherungsmathematischen Methoden berechnet, für die Schätzungen unumgänglich sind. Dabei spielen neben den Annahmen zur Lebenserwartung die nachstehenden Prämissen eine Rolle, die von der wirtschaftlichen Situation des jeweiligen Landes abhängen. Für Deutschland, Großbritannien und die übrigen Länder sind hierfür folgende gewichtete Durchschnitte angegeben:

| 31. Dezember     | Deutschland |      | Großbritannien |      | Übrige |      |
|------------------|-------------|------|----------------|------|--------|------|
| in %             | 2010        | 2009 | 2010           | 2009 | 2010   | 2009 |
| Abzinsungsfaktor | 4,75        | 5,30 | 5,30           | 5,40 | 5,32   | 5,54 |
| Gehaltstrend     | 3,25        | 3,25 | 4,10           | 4,00 | 3,89   | 3,45 |
| Rententrend      | 2,25        | 2,30 | 3,60           | 3,38 | 2,12   | 1,96 |

Der Gehaltstrend umfasst erwartete zukünftige Gehaltssteigerungen, die unter anderem in Abhängigkeit von der Inflation und der Karriereentwicklung im Unternehmen jährlich geschätzt werden.

Die sich nach dem Anwartschaftsbarwertverfahren ergebende Pensionsverpflichtung wird bei einem fondsgedeckten Versorgungssystem mit dem zum beizulegenden Zeitwert bewerteten Fondsvermögen saldiert. Übersteigt das Fondsvermögen die Verpflichtung aus der Pensionszusage und hat das Unternehmen einen Anspruch auf Rückerstattung oder Minderung künftiger Beitragszahlungen an den Fonds, so wird nach IAS 19 ein Aktivposten unter den Sonstigen Finanzforderungen ausgewiesen. Ein Passivposten wird bei fondsgedeckten Versorgungssystemen durch Pensionsrückstellungen ausgewiesen, soweit die Verpflichtung aus der Pensionszusage das Fondsvermögen übersteigt.

Aus Erhöhungen oder Verminderungen entweder des Barwerts der leistungsorientierten Verpflichtung oder des beizulegenden Zeitwerts des Fondsvermögens können versicherungsmathematische Gewinne oder Verluste entstehen, deren Ursachen unter anderem Änderungen der Berechnungsparameter, Schätzungsänderungen bezüglich des Risikoverlaufs der Pensionsverpflichtungen und Abweichungen zwischen dem tatsächlichen und dem erwarteten Ertrag aus dem Fondsvermögen sein können. Nachzuverrechnender Dienstzeitaufwand entsteht, wenn ein Unternehmen der BMW Group einen leistungsorientierten Plan einführt oder Leistungen aus einem bestehenden Plan ändert.

Unter Berücksichtigung der Berechnungsgrundlagen nach IAS 19 resultiert folgender **Finanzierungsstatus** der Pensionszusagen:

|                                                                                | 31. Dezember |              | Deutschland  |              | Großbritannien |            | Übrige       |              | Gesamt |      |
|--------------------------------------------------------------------------------|--------------|--------------|--------------|--------------|----------------|------------|--------------|--------------|--------|------|
|                                                                                | 2010         | 2009         | 2010         | 2009         | 2010           | 2009       | 2010         | 2009         | 2010   | 2009 |
| in Mio. Euro                                                                   |              |              |              |              |                |            |              |              |        |      |
| Barwerte der rückstellungsfinanzierten Versorgungsansprüche                    | 3            | 3            | -            | -            | 86             | 70         | 89           | 73           |        |      |
| Barwerte der fondsfinanzierten Versorgungsansprüche                            | 5.289        | 4.616        | 6.014        | 5.743        | 616            | 499        | 11.919       | 10.858       |        |      |
| Anwartschaftsbarwerte der Versorgungszusagen (Defined Benefit Obligations)     | 5.292        | 4.619        | 6.014        | 5.743        | 702            | 569        | 12.008       | 10.931       |        |      |
| Fondsvermögen zu Marktwerten                                                   | 5.207        | 3.144        | 4.812        | 4.487        | 436            | 346        | 10.455       | 7.977        |        |      |
| Nettopflichtungen                                                              | 85           | 1.475        | 1.202        | 1.256        | 266            | 223        | 1.553        | 2.954        |        |      |
| Anpassungsbeträge aufgrund nachzuverrechnender Dienstzeitaufwendungen          | -            | -            | -            | -            | 6              | 4          | 6            | 4            |        |      |
| Aufgrund der Begrenzung von IAS 19.58 nicht als Vermögenswert erfasster Betrag | -            | -            | -            | 3            | 3              | 7          | 3            | 10           |        |      |
| <b>Bilanzwerte zum 31. Dezember</b>                                            | <b>85</b>    | <b>1.475</b> | <b>1.202</b> | <b>1.259</b> | <b>275</b>     | <b>234</b> | <b>1.562</b> | <b>2.968</b> |        |      |
| davon Pensionsrückstellungen                                                   | 85           | 1.475        | 1.202        | 1.259        | 276            | 238        | 1.563        | 2.972        |        |      |
| davon Vermögenswerte (-)                                                       | -            | -            | -            | -            | -1             | -4         | -1           | -4           |        |      |

Von den Pensionsrückstellungen der übrigen Länder in Höhe von 276 Mio. Euro (2009: 238 Mio. Euro) entfallen 190 Mio. Euro (2009: 168 Mio. Euro) auf fondsfinanzierte Versorgungspläne.

Der Anstieg der Anwartschaftsbarwerte der Versorgungszusagen ergibt sich im Wesentlichen aus der der ver-

sicherungsmathematischen Berechnung zugrunde liegenden Änderung des Abzinsungssatzes in Deutschland. Der daraus resultierende Effekt auf die Pensionsrückstellungen wird durch eine weitere Übertragung von Vermögenswerten auf den BMW Trust e. V., München, in Deutschland sowie durch die positive Marktwertentwicklung des Fondsvermögens überkompensiert.

|     |                                                |
|-----|------------------------------------------------|
| 74  | <b>KONZERNABSCHLUSS</b>                        |
| 74  | Gewinn- und Verlust-Rechnungen                 |
| 74  | Gesamtergebnisrechnung                         |
| 76  | Bilanzen                                       |
| 78  | Kapitalflussrechnungen                         |
| 80  | Entwicklung des Konzerneigenkapitals           |
| 81  | <b>Konzernanhang</b>                           |
| 81  | Grundsätze                                     |
| 89  | Erläuterungen zur Gewinn- und Verlust-Rechnung |
| 95  | Erläuterungen zur Gesamtergebnisrechnung       |
| 96  | <b>Erläuterungen zur Bilanz</b>                |
| 117 | Sonstige Angaben                               |
| 133 | Segmentinformationen                           |

Die bilanzielle **Entwicklung der Pensionsrückstellungen** und die als aktive Vermögenswerte ausgewiesenen Ansprüche auf Rückerstattung oder Minderung künftiger

Beitragszahlungen an den Fonds lassen sich wie folgt herleiten:

|                                                                                | Deutschland |              | Großbritannien |              | Übrige     |            | Gesamt       |              |
|--------------------------------------------------------------------------------|-------------|--------------|----------------|--------------|------------|------------|--------------|--------------|
| in Mio. Euro                                                                   | 2010        | 2009         | 2010           | 2009         | 2010       | 2009       | 2010         | 2009         |
| Bilanzwerte zum 1. Januar                                                      | 1.475       | -2.693       | -1.259         | 345          | 234        | -273       | -2.968       | -3.311       |
| Erstkonsolidierungseffekte                                                     | -           | -            | -              | -            | 1          | -          | 1            | -            |
| Aufwendungen aus Pensionsverpflichtungen                                       | 119         | 237          | 135            | 77           | 50         | 43         | 304          | 357          |
| Geleistete Rentenzahlungen bzw. Fondsdotierungen                               | -1.851      | -1.746       | -112           | -99          | -38        | -58        | -2.001       | -1.903       |
| Versicherungsmathematische Gewinne (-) und Verluste (+) auf Versorgungszusagen | 441         | 522          | -7             | 946          | 25         | -4         | 459          | -1.464       |
| Versicherungsmathematische Gewinne (-) und Verluste (+) auf Fondsvermögen      | -102        | -234         | -110           | -40          | -15        | -15        | -227         | -289         |
| Mitarbeiterbeiträge                                                            | 2           | 2            | -              | -            | -          | -          | 2            | 2            |
| Währungsdifferenzen und sonstige Bewegungen                                    | 1           | 1            | 37             | 30           | 18         | -5         | 56           | 26           |
| <b>Bilanzwerte zum 31. Dezember</b>                                            | <b>85</b>   | <b>1.475</b> | <b>1.202</b>   | <b>1.259</b> | <b>275</b> | <b>234</b> | <b>1.562</b> | <b>2.968</b> |
| davon Pensionsrückstellungen                                                   | 85          | -1.475       | -1.202         | -1.259       | 276        | 238        | -1.563       | -2.972       |
| davon Vermögenswerte (-)                                                       | -           | -            | -              | -            | -1         | -4         | -1           | -4           |

Aus den leistungsorientierten Versorgungssystemen ergaben sich in der BMW Group **Aufwendungen aus Pensionsverpflichtungen** in Höhe von 304 Mio. Euro (2009:

357 Mio. Euro), die sich aus folgenden Komponenten zusammensetzen:

|                                                             | Deutschland |            | Großbritannien |           | Übrige    |           | Gesamt     |            |
|-------------------------------------------------------------|-------------|------------|----------------|-----------|-----------|-----------|------------|------------|
| in Mio. Euro                                                | 2010        | 2009       | 2010           | 2009      | 2010      | 2009      | 2010       | 2009       |
| Aufwendungen für im Berichtsjahr erdiente Pensionsansprüche | 122         | 103        | 57             | 52        | 38        | 33        | 217        | 188        |
| Aufwendungen aus der Aufzinsung von Pensionsverpflichtungen | 241         | 228        | 315            | 275       | 32        | 29        | 588        | 532        |
| Nachzuverrechnende Dienstzeitaufwendungen                   | -42         | -          | 9              | 7         | -         | -         | -33        | -7         |
| Erwarteter Vermögensertrag der Pensionsfonds (-)            | -202        | -94        | -246           | -257      | -20       | -19       | -468       | -370       |
| <b>Aufwendungen aus Pensionsverpflichtungen</b>             | <b>119</b>  | <b>237</b> | <b>135</b>     | <b>77</b> | <b>50</b> | <b>43</b> | <b>304</b> | <b>357</b> |

Die Aufwendungen aus der Aufzinsung von Pensionsverpflichtungen sowie die erwarteten Vermögenserträge aus den Pensionsfonds werden im Finanzergebnis ausgewiesen. Alle übrigen Komponenten der Pensionsaufwendungen werden unter den Funktionskosten bilanziert.

Die Mittelanlage der Pensionsfonds orientiert sich an der Risikostruktur der Pensionsverpflichtungen und erfolgt

in verschiedenen Anlageklassen. Der überwiegende Teil des Vermögens ist in Schuldverschreibungen investiert. Ferner befinden sich im Anlageportfolio Eigenkapitalinstrumente, Immobilien und alternative Investments. Auf Basis der Anlagestrategien der jeweiligen Pensionsfonds ergibt sich der erwartete Vermögensertrag. Dieser wird durch die Renditen der einzelnen Anlageklassen unter Berücksichtigung von Kosten und ungeplanten Risiken

festgelegt. Diese Vorgehensweise führte zu den folgenden Renditeerwartungen für das Planvermögen, die jeweils als gewichteter Durchschnitt angegeben sind:

|                               | Deutschland |      | Großbritannien |      | Übrige |      |
|-------------------------------|-------------|------|----------------|------|--------|------|
| in %                          | 2010        | 2009 | 2010           | 2009 | 2010   | 2009 |
| Renditeerwartung Planvermögen | 5,30        | 6,12 | 5,40           | 6,03 | 5,51   | 6,55 |

Abweichend von den erwarteten Erträgen in Höhe von 468 Mio. Euro (2009: 370 Mio. Euro) ergab sich im Geschäftsjahr 2010 durch positive Kursentwicklungen eine tatsächliche Erhöhung des Fondsvermögens von 695 Mio. Euro (2009: Erhöhung des Fondsvermögens von 659 Mio. Euro). Hieraus resultieren versicherungsmathematische Gewinne auf Fondsvermögen in Höhe von 227 Mio. Euro (2009: versicherungsmathematische Gewinne in Höhe von 289 Mio. Euro). Diesen versicherungsmathematischen Gewinnen beim Fondsvermögen stehen versicherungsmathematische Verluste in Höhe von 459 Mio. Euro (2009: versicherungsmathematische Verluste in Höhe von 1.464 Mio. Euro) bei den Versorgungszusagen gegenüber. Diese beruhen im Wesentlichen auf dem gesunkenen Diskontierungssatz in Deutschland.

In Abhängigkeit von den Rentensystemen der einzelnen Länder sind die Pensionsverpflichtungen unterschiedlich hoch ausgeprägt. Da in Großbritannien nur eine minimale Grundversorgung auf Basis eines Festbetrags durch den Staat gewährleistet wird, erfolgt die Altersabsicherung weitgehend über eine betriebliche Rente sowie über Eigenvorsorge. Die Versorgungsansprüche in Großbritannien enthalten daher auch Eigenbeiträge der Arbeitnehmer.

Die **Nettoverpflichtung aus den Versorgungszusagen** in Deutschland, Großbritannien und den übrigen Ländern hat sich folgendermaßen entwickelt:

|     |                                                |
|-----|------------------------------------------------|
| 74  | <b>KONZERNABSCHLUSS</b>                        |
| 74  | Gewinn- und Verlust-Rechnungen                 |
| 74  | Gesamtergebnisrechnung                         |
| 76  | Bilanzen                                       |
| 78  | Kapitalflussrechnungen                         |
| 80  | Entwicklung des Konzerneigenkapitals           |
| 81  | <b>Konzernanhang</b>                           |
| 81  | Grundsätze                                     |
| 89  | Erläuterungen zur Gewinn- und Verlust-Rechnung |
| 95  | Erläuterungen zur Gesamtergebnisrechnung       |
| 96  | <b>Erläuterungen zur Bilanz</b>                |
| 117 | Sonstige Angaben                               |
| 133 | Segmentinformationen                           |

| <b>Deutschland</b>                                                       |                       |              |               |               |                    |              |  |
|--------------------------------------------------------------------------|-----------------------|--------------|---------------|---------------|--------------------|--------------|--|
|                                                                          | Anwartschaftsbarwerte |              | Fondsvermögen |               | Nettoverpflichtung |              |  |
| in Mio. Euro                                                             | 2010                  | 2009         | 2010          | 2009          | 2010               | 2009         |  |
| 1. Januar                                                                | 4.619                 | 3.848        | -3.144        | -1.155        | 1.475              | 2.693        |  |
| Aufwendungen aus Pensionsverpflichtungen bzw. erwarteter Vermögensertrag | 321                   | 331          | -202          | -94           | 119                | 237          |  |
| Geleistete Fondsdotierungen                                              | -                     | -            | -1.740        | -1.642        | -1.740             | -1.642       |  |
| Mitarbeiterbeiträge                                                      | 29                    | 27           | -27           | -25           | 2                  | 2            |  |
| Geleistete Auszahlungen und Rentenzahlungen                              | -119                  | -111         | 8             | 7             | -111               | -104         |  |
| Versicherungsmathematische Gewinne (-) und Verluste (+)                  | 441                   | 522          | -102          | -234          | 339                | 288          |  |
| Währungsdifferenzen und sonstige Bewegungen                              | 1                     | 2            | -             | -1            | 1                  | 1            |  |
| <b>31. Dezember</b>                                                      | <b>5.292</b>          | <b>4.619</b> | <b>-5.207</b> | <b>-3.144</b> | <b>85</b>          | <b>1.475</b> |  |

| <b>Großbritannien</b>                                                    |                       |              |               |               |                    |              |  |
|--------------------------------------------------------------------------|-----------------------|--------------|---------------|---------------|--------------------|--------------|--|
|                                                                          | Anwartschaftsbarwerte |              | Fondsvermögen |               | Nettoverpflichtung |              |  |
| in Mio. Euro                                                             | 2010                  | 2009         | 2010          | 2009          | 2010               | 2009         |  |
| 1. Januar                                                                | 5.743                 | 4.403        | -4.487        | -4.059        | 1.256              | 344          |  |
| Aufwendungen aus Pensionsverpflichtungen bzw. erwarteter Vermögensertrag | 381                   | 334          | -246          | -257          | 135                | 77           |  |
| Geleistete Fondsdotierungen                                              | -                     | -            | -112          | -99           | -112               | -99          |  |
| Mitarbeiterbeiträge                                                      | 1                     | 1            | -1            | -1            | -                  | -            |  |
| Geleistete Auszahlungen und Rentenzahlungen                              | -282                  | -264         | 282           | 264           | -                  | -            |  |
| Versicherungsmathematische Gewinne (-) und Verluste (+)                  | -7                    | 946          | -110          | -40           | -117               | 906          |  |
| Währungsdifferenzen und sonstige Bewegungen                              | 178                   | 323          | -138          | -295          | 40                 | 28           |  |
| <b>31. Dezember</b>                                                      | <b>6.014</b>          | <b>5.743</b> | <b>-4.812</b> | <b>-4.487</b> | <b>1.202</b>       | <b>1.256</b> |  |



| Übrige                                                                   | Anwartschaftsbarwerte |            | Fondsvermögen |             | Nettoverpflichtung |            |
|--------------------------------------------------------------------------|-----------------------|------------|---------------|-------------|--------------------|------------|
|                                                                          | 2010                  | 2009       | 2010          | 2009        | 2010               | 2009       |
| 1. Januar                                                                | 569                   | 537        | -346          | -277        | 223                | 260        |
| Erstkonsolidierungseffekte                                               | 1                     | -          | -             | -           | 1                  | -          |
| Aufwendungen aus Pensionsverpflichtungen bzw. erwarteter Vermögensertrag | 70                    | 62         | -20           | -19         | 50                 | 43         |
| Geleistete Fondsdotierungen                                              | -                     | -          | -35           | -54         | -35                | -54        |
| Mitarbeiterbeiträge                                                      | 2                     | 2          | -2            | -2          | -                  | -          |
| Geleistete Auszahlungen und Rentenzahlungen                              | -18                   | -19        | 15            | 15          | -3                 | -4         |
| Versicherungsmathematische Gewinne (-) und Verluste (+)                  | 25                    | -4         | -15           | -15         | 10                 | -19        |
| Währungsdifferenzen und sonstige Bewegungen                              | 53                    | -9         | -33           | 6           | 20                 | -3         |
| <b>31. Dezember</b>                                                      | <b>702</b>            | <b>569</b> | <b>-436</b>   | <b>-346</b> | <b>266</b>         | <b>223</b> |

Das **Fondsvermögen** in Deutschland, Großbritannien und den übrigen Ländern setzt sich wie folgt zusammen:

| Bestandteile des Fondsvermögens | Deutschland  |              | Großbritannien |              | Übrige     |            | Summe         |              |
|---------------------------------|--------------|--------------|----------------|--------------|------------|------------|---------------|--------------|
|                                 | 2010         | 2009         | 2010           | 2009         | 2010       | 2009       | 2010          | 2009         |
| Eigenkapitalinstrumente         | 1.368        | 1.020        | 1.082          | 823          | 197        | 165        | 2.647         | 2.008        |
| Schuldverschreibungen           | 3.167        | 1.835        | 2.843          | 2.951        | 153        | 142        | 6.163         | 4.928        |
| Immobilien                      | -            | -            | 430            | 315          | 26         | 20         | 456           | 335          |
| Übrige                          | 672          | 289          | 457            | 398          | 60         | 19         | 1.189         | 706          |
| <b>31. Dezember</b>             | <b>5.207</b> | <b>3.144</b> | <b>4.812</b>   | <b>4.487</b> | <b>436</b> | <b>346</b> | <b>10.455</b> | <b>7.977</b> |

Zur Reduzierung der Auswirkungen von Kapitalmarkt-schwankungen auf die Nettoverpflichtung ist ein wesentlicher Teil des Fondsvermögens in Schuldverschreibungen investiert. Andere Anlageklassen wie z. B. Aktien dienen der Erwirtschaftung höherer Renditen. Diese sind erforderlich, um in den versicherungsmathematischen Prämissen nicht berücksichtigte Risiken wie z. B. eine Änderung der aktuellen Sterbetafeln abdecken zu können. Darüber hinaus wurde das finanzielle Risiko durch even-

tuell über den kalkulierten Zeitraum hinaus fällig werdende Pensionszahlungen für Pensionäre in Großbritannien durch einen „Longevity Hedge“ abgesichert.

In den letzten fünf Jahren stellten sich die Entwicklung der Anwartschaftsbarwerte und des Fondsvermögens sowie die versicherungsmathematischen Anpassungen dieser beiden Größen wie folgt dar:

| in Mio. Euro                                                               | 2010   | 2009   | 2008  | 2007   | 2006   |
|----------------------------------------------------------------------------|--------|--------|-------|--------|--------|
| Anwartschaftsbarwert                                                       | 12.008 | 10.931 | 8.788 | 10.631 | 11.430 |
| Fondsvermögen zu Marktwerten                                               | 10.455 | 7.977  | 5.491 | 6.029  | 6.432  |
| Nettoverpflichtung                                                         | 1.553  | 2.954  | 3.297 | 4.602  | 4.998  |
| Versicherungsmathematische Gewinne (-)/Verluste (+) auf Versorgungszusagen | 459    | 1.464  | -919  | -557   | -400   |
| Versicherungsmathematische Gewinne (-)/Verluste (+) auf Fondsvermögen      | -227   | -289   | 868   | 44     | -117   |

Die versicherungsmathematischen Gewinne auf Versorgungsversprechen, die auf erfahrungsbedingte Anpassungen zurückzuführen sind, betragen im abgelaufenen Geschäftsjahr 76 Mio. Euro (2009: 22 Mio. Euro). Erfah-

rungsbedingte Anpassungen führten im gleichen Zeitraum zu versicherungsmathematischen Gewinnen auf das Fondsvermögen in Höhe von 221 Mio. Euro (2009: 289 Mio. Euro).

### 32 – Sonstige Rückstellungen

Die Sonstigen Rückstellungen entfallen auf folgende Positionen:

| in Mio. Euro                                        | 31.12.2010   |                                     | 31.12.2009   |                                     |
|-----------------------------------------------------|--------------|-------------------------------------|--------------|-------------------------------------|
|                                                     | Gesamt       | davon fällig innerhalb eines Jahres | Gesamt       | davon fällig innerhalb eines Jahres |
| Verpflichtungen aus dem Personal- und Sozialbereich | 1.392        | 941                                 | 960          | 445                                 |
| Verpflichtungen aus dem laufenden Geschäftsbetrieb  | 2.960        | 1.233                               | 2.816        | 1.031                               |
| Andere Verpflichtungen                              | 1.195        | 652                                 | 988          | 582                                 |
| <b>Sonstige Rückstellungen</b>                      | <b>5.547</b> | <b>2.826</b>                        | <b>4.764</b> | <b>2.058</b>                        |

In den Rückstellungen für Verpflichtungen aus dem Personal- und Sozialbereich sind im Wesentlichen Verpflichtungen für erfolgsabhängige Entgeltbestandteile, für Altersteilzeit sowie Jubiläumsaufwendungen enthalten. Die Rückstellungen für Verpflichtungen aus dem laufenden Geschäftsbetrieb enthalten überwiegend Vorsorgen

für Gewährleistungsverpflichtungen. Die Rückstellungen für Andere Verpflichtungen betreffen eine Vielzahl erkennbarer Einzelrisiken und ungewisser Verpflichtungen.

Die Sonstigen Rückstellungen haben sich wie folgt entwickelt:

| in Mio. Euro                                        | Stand 1.1.2010* | Kursdifferenzen | Zuführung    | Aufzinsung | Verbrauch    | Auflösung  | Stand        |
|-----------------------------------------------------|-----------------|-----------------|--------------|------------|--------------|------------|--------------|
|                                                     |                 |                 |              |            |              |            | 31.12.2010   |
| Verpflichtungen aus dem Personal- und Sozialbereich | 961             | 9               | 916          | 1          | 468          | 27         | 1.392        |
| Verpflichtungen aus dem laufenden Geschäftsbetrieb  | 2.826           | 59              | 944          | 108        | 874          | 103        | 2.960        |
| Andere Verpflichtungen                              | 991             | 34              | 605          | 8          | 336          | 107        | 1.195        |
| <b>Sonstige Rückstellungen</b>                      | <b>4.778</b>    | <b>102</b>      | <b>2.465</b> | <b>117</b> | <b>1.678</b> | <b>237</b> | <b>5.547</b> |

\* einschließlich während des Geschäftsjahres erstmals konsolidierter Gesellschaften

Von der Auflösung werden 168 Mio. Euro (2009: 509 Mio. Euro) in den Funktionskosten ausgewiesen.

### 33 – Ertragsteuerverpflichtungen

| 31. Dezember 2010                  | Restlaufzeit bis ein Jahr | Restlaufzeit über ein Jahr | Gesamt       |
|------------------------------------|---------------------------|----------------------------|--------------|
| in Mio. Euro                       |                           |                            |              |
| Latente Ertragsteuern              | -                         | 2.933                      | 2.933        |
| Laufende Ertragsteuern             | 649                       | 549                        | 1.198        |
| <b>Ertragsteuerverpflichtungen</b> | <b>649</b>                | <b>3.482</b>               | <b>4.131</b> |

| 31. Dezember 2009                  | Restlaufzeit bis ein Jahr | Restlaufzeit über ein Jahr | Gesamt       |
|------------------------------------|---------------------------|----------------------------|--------------|
| in Mio. Euro                       |                           |                            |              |
| Latente Ertragsteuern              | -                         | 2.769                      | 2.769        |
| Laufende Ertragsteuern             | 595                       | 241                        | 836          |
| <b>Ertragsteuerverpflichtungen</b> | <b>595</b>                | <b>3.010</b>               | <b>3.605</b> |

#### 74 – KONZERNABSCHLUSS

|     |                                                |
|-----|------------------------------------------------|
| 74  | Gewinn- und Verlust-Rechnungen                 |
| 74  | Gesamtergebnisrechnung                         |
| 76  | Bilanzen                                       |
| 78  | Kapitalflussrechnungen                         |
| 80  | Entwicklung des Konzerneigenkapitals           |
| 81  | Konzernanhang                                  |
| 81  | Grundsätze                                     |
| 89  | Erläuterungen zur Gewinn- und Verlust-Rechnung |
| 95  | Erläuterungen zur Gesamtergebnisrechnung       |
| 96  | Erläuterungen zur Bilanz                       |
| 117 | Sonstige Angaben                               |
| 133 | Segmentinformationen                           |

Von den Laufenden Ertragsteuern in Höhe von 1.198 Mio. Euro (2009: 836 Mio. Euro) entfallen 189 Mio. Euro (2009: 197 Mio. Euro) auf Verbindlichkeiten aus Ertragsteuern und 1.009 Mio. Euro (2009: 639 Mio. Euro) auf

Rückstellungen für Ertragsteuern. Im Berichtszeitraum wurden keine Rückstellungen für Ertragsteuern aufgelöst (2009: 60 Mio. Euro).

### 34 – Finanzverbindlichkeiten

Unter den Finanzverbindlichkeiten werden sämtliche Verpflichtungen der BMW Group aus dem Finanzverkehr

ausgewiesen, die zum jeweiligen Bilanzstichtag bestanden. Sie setzen sich wie folgt zusammen:

| <b>31. Dezember 2010</b><br>in Mio. Euro     | Restlaufzeit<br>bis ein Jahr | Restlaufzeit<br>über ein bis<br>fünf Jahre | Restlaufzeit<br>über<br>fünf Jahre | <b>Gesamt</b> |
|----------------------------------------------|------------------------------|--------------------------------------------|------------------------------------|---------------|
| Anleihen                                     | 6.681                        | 17.883                                     | 3.004                              | <b>27.568</b> |
| Verbindlichkeiten gegenüber Kreditinstituten | 3.514                        | 3.676                                      | 550                                | <b>7.740</b>  |
| Verbindlichkeiten aus dem Einlagengeschäft   | 7.590                        | 3.076                                      | 23                                 | <b>10.689</b> |
| Commercial Paper                             | 5.242                        | -                                          | -                                  | <b>5.242</b>  |
| Asset-Backed-Finanzierungen                  | 1.793                        | 5.713                                      | -                                  | <b>7.506</b>  |
| Derivate                                     | 944                          | 1.033                                      | 33                                 | <b>2.010</b>  |
| Sonstige                                     | 756                          | 454                                        | 388                                | <b>1.598</b>  |
| <b>Finanzverbindlichkeiten</b>               | <b>26.520</b>                | <b>31.835</b>                              | <b>3.998</b>                       | <b>62.353</b> |

| 31. Dezember 2009<br>in Mio. Euro            | Restlaufzeit<br>bis ein Jahr | Restlaufzeit<br>über ein bis<br>fünf Jahre | Restlaufzeit<br>über<br>fünf Jahre | <b>Gesamt</b> |
|----------------------------------------------|------------------------------|--------------------------------------------|------------------------------------|---------------|
| Anleihen                                     | 4.483                        | 18.320                                     | 4.214                              | <b>27.017</b> |
| Verbindlichkeiten gegenüber Kreditinstituten | 6.534                        | 1.840                                      | 800                                | <b>9.174</b>  |
| Verbindlichkeiten aus dem Einlagengeschäft   | 7.212                        | 2.700                                      | 21                                 | <b>9.933</b>  |
| Commercial Paper                             | 5.213                        | -                                          | -                                  | <b>5.213</b>  |
| Asset-Backed-Finanzierungen                  | 2.086                        | 5.726                                      | -                                  | <b>7.812</b>  |
| Derivate                                     | 549                          | 532                                        | 12                                 | <b>1.093</b>  |
| Sonstige                                     | 857                          | 145                                        | 81                                 | <b>1.083</b>  |
| <b>Finanzverbindlichkeiten</b>               | <b>26.934</b>                | <b>29.263</b>                              | <b>5.128</b>                       | <b>61.325</b> |

## Die Anleihen setzen sich wie folgt zusammen:

| Emittent                                        | Zinsen          | Emissionsvolumen<br>in jeweiliger Währung<br>(ISO-Code) | Durchschnittliche<br>gewichtete<br>Laufzeit (in Jahren) | Durchschnittlicher<br>gewichteter Effek-<br>tivzinssatz (in %) |
|-------------------------------------------------|-----------------|---------------------------------------------------------|---------------------------------------------------------|----------------------------------------------------------------|
| BMW Finance N. V., Den Haag                     | Variabel        | 874 Mio. EUR                                            | 1,9                                                     | 3,1                                                            |
|                                                 | Variabel        | 90 Mio. USD                                             | 2,1                                                     | 0,8                                                            |
|                                                 | Festverzinslich | 250 Mio. AUD                                            | 4,0                                                     | 7,3                                                            |
|                                                 | Festverzinslich | 12.820 Mio. EUR                                         | 5,8                                                     | 4,8                                                            |
|                                                 | Festverzinslich | 300 Mio. GBP                                            | 7,0                                                     | 5,3                                                            |
|                                                 | Festverzinslich | 450 Mio. NOK                                            | 4,0                                                     | 5,8                                                            |
|                                                 | Festverzinslich | 44 Mio. RON                                             | 3,0                                                     | 11,4                                                           |
|                                                 | Festverzinslich | 1.000 Mio. SEK                                          | 2,0                                                     | 5,0                                                            |
|                                                 | Festverzinslich | 1.250 Mio. USD                                          | 4,5                                                     | 4,9                                                            |
| BMW (UK) Capital plc, Bracknell                 | Variabel        | 1.080 Mio. CZK                                          | 3,0                                                     | 1,6                                                            |
|                                                 | Variabel        | 550 Mio. EUR                                            | 1,6                                                     | 1,0                                                            |
|                                                 | Variabel        | 33.900 Mio. JPY                                         | 4,1                                                     | 0,2                                                            |
|                                                 | Variabel        | 300 Mio. SEK                                            | 1,5                                                     | 2,0                                                            |
|                                                 | Variabel        | 100 Mio. USD                                            | 1,5                                                     | 0,3                                                            |
|                                                 | Festverzinslich | 500 Mio. CHF                                            | 5,0                                                     | 2,1                                                            |
|                                                 | Festverzinslich | 300 Mio. GBP                                            | 8,0                                                     | 5,0                                                            |
|                                                 | Festverzinslich | 27.000 Mio. JPY                                         | 4,7                                                     | 2,5                                                            |
| BMW US Capital, LLC, Wilmington, DE             | Variabel        | 75 Mio. EUR                                             | 1,0                                                     | 1,0                                                            |
|                                                 | Variabel        | 405 Mio. MXN                                            | 5,0                                                     | 4,9                                                            |
|                                                 | Variabel        | 633 Mio. USD                                            | 2,4                                                     | 0,3                                                            |
|                                                 | Festverzinslich | 700 Mio. CHF                                            | 4,9                                                     | 3,3                                                            |
|                                                 | Festverzinslich | 4.000 Mio. EUR                                          | 6,3                                                     | 5,5                                                            |
|                                                 | Festverzinslich | 1.725 Mio. MXN                                          | 4,4                                                     | 7,8                                                            |
|                                                 | Festverzinslich | 1.416 Mio. USD                                          | 7,0                                                     | 5,1                                                            |
| BMW Australia Finance Ltd., Melbourne, Victoria | Variabel        | 180 Mio. AUD                                            | 1,2                                                     | 5,8                                                            |
|                                                 | Variabel        | 285 Mio. EUR                                            | 1,5                                                     | 1,6                                                            |
|                                                 | Variabel        | 4.000 Mio. JPY                                          | 2,0                                                     | 0,7                                                            |
|                                                 | Variabel        | 2.600 Mio. SEK                                          | 1,5                                                     | 2,0                                                            |
|                                                 | Variabel        | 375 Mio. USD                                            | 1,9                                                     | 1,1                                                            |
|                                                 | Festverzinslich | 85 Mio. AUD                                             | 2,6                                                     | 5,8                                                            |
|                                                 | Festverzinslich | 450 Mio. CHF                                            | 4,1                                                     | 2,1                                                            |
|                                                 | Festverzinslich | 150 Mio. EUR                                            | 1,3                                                     | 1,5                                                            |
|                                                 | Festverzinslich | 8.000 Mio. JPY                                          | 2,0                                                     | 0,9                                                            |
|                                                 | Festverzinslich | 100 Mio. USD                                            | 2,5                                                     | 1,1                                                            |
| Sonstige                                        | Variabel        | 14.600 Mio. JPY                                         | 1,3                                                     | 0,2                                                            |
|                                                 | Variabel        | 200 Mio. USD                                            | 3,0                                                     | 1,8                                                            |
|                                                 | Variabel        | 2.500 Mio. ZAR                                          | 1,8                                                     | 6,7                                                            |
|                                                 | Festverzinslich | 750 Mio. CAD                                            | 3,0                                                     | 3,2                                                            |
|                                                 | Festverzinslich | 33.600 Mio. JPY                                         | 3,5                                                     | 1,1                                                            |

## 74 — KONZERNABSCHLUSS

74 Gewinn-und-Verlust-Rechnungen

74 Gesamtergebnisrechnung

76 Bilanzen

78 Kapitalflussrechnungen

80 Entwicklung des Konzerneigenkapitals

## 81 — Konzernanhang

81 Grundsätze

89 Erläuterungen zur Gewinn-und-Verlust-Rechnung

95 Erläuterungen zur Gesamtergebnisrechnung

96 — Erläuterungen zur Bilanz

117 Sonstige Angaben

133 Segmentinformationen

Den Commercial Paper liegen folgende Details zugrunde:

| Emittent                            | Emissionsvolumen<br>in jeweiliger Währung<br>(ISO-Code) | Durchschnittliche<br>gewichtete Rest-<br>laufzeit (in Tagen) | Durchschnittlicher<br>gewichteter Nomi-<br>nalzinssatz (in %) |
|-------------------------------------|---------------------------------------------------------|--------------------------------------------------------------|---------------------------------------------------------------|
| BMW AG, München                     | 40 Mio. EUR                                             | 26,0                                                         | 1,0                                                           |
|                                     | 30 Mio. GBP                                             | 108,0                                                        | 1,0                                                           |
|                                     | 5.100 Mio. JPY                                          | 62,5                                                         | 0,2                                                           |
|                                     | 97 Mio. USD                                             | 31,8                                                         | 0,5                                                           |
| BMW Finance N.V., Den Haag          | 3.009 Mio. EUR                                          | 47,0                                                         | 0,9                                                           |
| BMW Malta Finance Ltd., St. Julians | 505 Mio. EUR                                            | 42,1                                                         | 1,0                                                           |
| BMW US Capital, LLC, Wilmington, DE | 2.055 Mio. EUR                                          | 27,0                                                         | 0,4                                                           |

### 35 – Sonstige Verbindlichkeiten

Die Sonstigen Verbindlichkeiten beinhalten folgende Themen:

| 31. Dezember 2010<br>in Mio. Euro                                                        | Restlaufzeit<br>bis ein Jahr | Restlaufzeit<br>über ein bis<br>fünf Jahre | Restlaufzeit<br>über<br>fünf Jahre | Gesamt       |
|------------------------------------------------------------------------------------------|------------------------------|--------------------------------------------|------------------------------------|--------------|
| Sonstige Steuern                                                                         | 560                          | -                                          | -                                  | 560          |
| Soziale Sicherheit                                                                       | 40                           | 17                                         | 7                                  | 64           |
| Erhaltene Anzahlungen auf Bestellungen                                                   | 738                          | 35                                         | -                                  | 773          |
| Erhaltene Kauttionen                                                                     | 120                          | 82                                         | -                                  | 202          |
| Verbindlichkeiten gegenüber verbundenen Unternehmen                                      | 57                           | 1                                          | -                                  | 58           |
| Verbindlichkeiten gegenüber Unternehmen, mit denen ein<br>Beteiligungsverhältnis besteht | 4                            | -                                          | -                                  | 4            |
| Passive Rechnungsabgrenzungen                                                            | 1.130                        | 2.115                                      | 265                                | 3.510        |
| Übrige                                                                                   | 2.590                        | 54                                         | 7                                  | 2.651        |
| <b>Sonstige Verbindlichkeiten</b>                                                        | <b>5.239</b>                 | <b>2.304</b>                               | <b>279</b>                         | <b>7.822</b> |

| 31. Dezember 2009<br>in Mio. Euro                                                        | Restlaufzeit<br>bis ein Jahr | Restlaufzeit<br>über ein bis<br>fünf Jahre | Restlaufzeit<br>über<br>fünf Jahre | Gesamt       |
|------------------------------------------------------------------------------------------|------------------------------|--------------------------------------------|------------------------------------|--------------|
| Sonstige Steuern                                                                         | 473                          | 22                                         | -                                  | 495          |
| Soziale Sicherheit                                                                       | 44                           | 18                                         | 7                                  | 69           |
| Erhaltene Anzahlungen auf Bestellungen                                                   | 395                          | 22                                         | -                                  | 417          |
| Erhaltene Kauttionen                                                                     | 124                          | 78                                         | -                                  | 202          |
| Verbindlichkeiten gegenüber verbundenen Unternehmen                                      | 34                           | 1                                          | -                                  | 35           |
| Verbindlichkeiten gegenüber Unternehmen, mit denen ein<br>Beteiligungsverhältnis besteht | 11                           | -                                          | -                                  | 11           |
| Passive Rechnungsabgrenzungen                                                            | 1.109                        | 1.795                                      | 230                                | 3.134        |
| Übrige                                                                                   | 1.779                        | 101                                        | 7                                  | 1.887        |
| <b>Sonstige Verbindlichkeiten</b>                                                        | <b>3.969</b>                 | <b>2.037</b>                               | <b>244</b>                         | <b>6.250</b> |

Die Passiven Rechnungsabgrenzungen entfallen auf folgende Themen:

| in Mio. Euro                         | 31.12.2010   |                                     | 31.12.2009   |                                     |
|--------------------------------------|--------------|-------------------------------------|--------------|-------------------------------------|
|                                      | Gesamt       | davon fällig innerhalb eines Jahres | Gesamt       | davon fällig innerhalb eines Jahres |
| Abgrenzungen aus Leasingfinanzierung | 1.273        | 720                                 | 1.082        | 658                                 |
| Abgrenzungen aus Serviceverträgen    | 1.928        | 307                                 | 1.602        | 345                                 |
| Zuschüsse                            | 241          | 38                                  | 276          | 46                                  |
| Sonstige Abgrenzungen                | 68           | 65                                  | 174          | 60                                  |
| <b>Passive Rechnungsabgrenzungen</b> | <b>3.510</b> | <b>1.130</b>                        | <b>3.134</b> | <b>1.109</b>                        |

In den Abgrenzungen aus Serviceverträgen werden Service- und Reparaturleistungen, die bei dem Verkauf eines Fahrzeugs als Nebenleistung vereinbart werden, bilanziert (Mehrkomponentenverträge). Die Zuschüsse umfassen zum Großteil öffentliche Mittel zur Strukturförderung, die in die Produktionsstätte in Leipzig in-

vestiert sind. Sie werden in Anwendung von IAS 20 über die Nutzungsdauer der geförderten Anlagegegenstände ertragswirksam aufgelöst. In den sonstigen Abgrenzungen sind vor allem Effekte aus der Zugangsbewertung von Finanzinstrumenten enthalten.

|     |                                                |
|-----|------------------------------------------------|
| 74  | <b>KONZERNABSCHLUSS</b>                        |
| 74  | Gewinn- und Verlust-Rechnungen                 |
| 74  | Gesamtergebnisrechnung                         |
| 76  | Bilanzen                                       |
| 78  | Kapitalflussrechnungen                         |
| 80  | Entwicklung des Konzerneigenkapitals           |
| 81  | <b>Konzernanhang</b>                           |
| 81  | Grundsätze                                     |
| 89  | Erläuterungen zur Gewinn- und Verlust-Rechnung |
| 95  | Erläuterungen zur Gesamtergebnisrechnung       |
| 96  | Erläuterungen zur Bilanz                       |
| 117 | Sonstige Angaben                               |
| 133 | Segmentinformationen                           |

### 36 – Verbindlichkeiten aus Lieferungen und Leistungen

| 31. Dezember 2010                                | Restlaufzeit bis ein Jahr | Restlaufzeit über ein bis fünf Jahre | Restlaufzeit über fünf Jahre | Gesamt |
|--------------------------------------------------|---------------------------|--------------------------------------|------------------------------|--------|
| in Mio. Euro                                     |                           |                                      |                              |        |
| Verbindlichkeiten aus Lieferungen und Leistungen | 4.327                     | 24                                   | -                            | 4.351  |
| 31. Dezember 2009                                | Restlaufzeit bis ein Jahr | Restlaufzeit über ein bis fünf Jahre | Restlaufzeit über fünf Jahre | Gesamt |
| in Mio. Euro                                     |                           |                                      |                              |        |
| Verbindlichkeiten aus Lieferungen und Leistungen | 3.106                     | 16                                   | -                            | 3.122  |

Der Gesamtbetrag aus Finanzverbindlichkeiten, Sonstigen Verbindlichkeiten und Verbindlichkeiten aus Lieferun-

gen und Leistungen mit einer Restlaufzeit von über fünf Jahren beträgt 4.277 Mio. Euro (2009: 5.372 Mio. Euro).

**37 – Eventualverbindlichkeiten und Sonstige finanzielle Verpflichtungen****Haftungsverhältnisse**

Für die nachfolgenden, zu Nominalwerten angesetzten, Eventualverbindlichkeiten wurden keine Rückstellungen gebildet, weil der Eintritt des Risikos als wenig wahrscheinlich eingeschätzt wird:

| in Mio. Euro                     | 31.12.2010 | 31.12.2009 |
|----------------------------------|------------|------------|
| Bürgschaften                     | 13         | 158        |
| Gewährleistungen                 | 11         | 10         |
| Sonstige                         | 66         | 64         |
| <b>Eventualverbindlichkeiten</b> | <b>90</b>  | <b>232</b> |

Die Haftungsverhältnisse entfallen ausschließlich auf Dritte. Bei den Bürgschaften entfielen im Vorjahr 8 Mio. Euro auf verbundene, nicht konsolidierte Unternehmen.

Aus Beteiligungen an offenen Handelsgesellschaften besteht eine gesamtschuldnerische Haftung.

Für Verpflichtungen aus der Veräußerung der Rover Cars und Land Rover Aktivitäten bestehen handelsübliche Garantien.

**Sonstige finanzielle Verpflichtungen**

Neben Verbindlichkeiten, Rückstellungen und Haftungsverhältnissen bestehen Sonstige finanzielle Verpflichtungen, insbesondere aus Miet- und Leasingverträgen für Gebäude, Grundstücke, Maschinen, Werkzeuge, Büro- und sonstige Einrichtungen. Die Verträge haben Laufzeiten von einem bis zu 92 Jahren und beinhalten zum Teil Verlängerungs- und Kaufoptionen sowie Preisanpassungsklauseln. In 2010 wurde für Sonstige finanzielle Verpflichtungen ein Betrag in Höhe von 200 Mio. Euro (2009: 199 Mio. Euro) aufwandswirksam erfasst.

tungen, insbesondere aus Miet- und Leasingverträgen für Gebäude, Grundstücke, Maschinen, Werkzeuge, Büro- und sonstige Einrichtungen. Die Verträge haben Laufzeiten von einem bis zu 92 Jahren und beinhalten zum Teil Verlängerungs- und Kaufoptionen sowie Preisanpassungsklauseln. In 2010 wurde für Sonstige finanzielle Verpflichtungen ein Betrag in Höhe von 200 Mio. Euro (2009: 199 Mio. Euro) aufwandswirksam erfasst.

Die Summe der künftigen Mindestleasingzahlungen aus unkündbaren Mietverträgen und Operating Leases setzt sich nach Fälligkeiten wie folgt zusammen:

| in Mio. Euro                                         | 31.12.2010   | 31.12.2009   |
|------------------------------------------------------|--------------|--------------|
| Nominale Summe der künftigen Mindestleasingzahlungen |              |              |
| — Fällig innerhalb eines Jahres                      | 205          | 208          |
| — Fällig zwischen einem und fünf Jahren              | 609          | 598          |
| — Fällig nach mehr als fünf Jahren                   | 589          | 697          |
| <b>Sonstige finanzielle Verpflichtungen</b>          | <b>1.403</b> | <b>1.503</b> |

Hiervon entfallen auf verbundene Unternehmen 4 Mio. Euro (2009: 1 Mio. Euro) und auf durchgereichte Leasingverträge wie im Vorjahr 1 Mio. Euro.

Verpflichtungen zum Erwerb von Sachanlagen bestehen in Höhe von 1.193 Mio. Euro (2009: 1.697 Mio. Euro).

## 38 – Finanzinstrumente

Die Buch- und Marktwerte von Finanzinstrumenten sind in der nachfolgenden Darstellung den IAS 39 Kategorien und den Barmitteln zugeordnet<sup>1</sup>:

| 31. Dezember 2010<br>in Mio. Euro |                                                                                         | Barmittel    |              | Kredite und Forderungen |               | Bis zur Endfälligkeit<br>zu haltende<br>Finanzinvestitionen |          |
|-----------------------------------|-----------------------------------------------------------------------------------------|--------------|--------------|-------------------------|---------------|-------------------------------------------------------------|----------|
|                                   |                                                                                         | Marktwert    | Buchwert     | Marktwert               | Buchwert      | Marktwert                                                   | Buchwert |
| <b>Aktiva</b>                     |                                                                                         |              |              |                         |               |                                                             |          |
|                                   | Sonstige Finanzanlagen                                                                  | -            | -            | -                       | -             | -                                                           | -        |
|                                   | Forderungen aus Finanzdienstleistungen                                                  | -            | -            | 46.416                  | 45.365        | -                                                           | -        |
|                                   | Finanzforderungen                                                                       |              |              |                         |               |                                                             |          |
|                                   | — Derivate                                                                              |              |              |                         |               |                                                             |          |
|                                   | — Cash Flow Hedging                                                                     | -            | -            | -                       | -             | -                                                           | -        |
|                                   | — Fair Value Hedging                                                                    | -            | -            | -                       | -             | -                                                           | -        |
|                                   | — Sonstige Derivate                                                                     | -            | -            | -                       | -             | -                                                           | -        |
|                                   | Wertpapiere und Investmentanteile                                                       | -            | -            | -                       | -             | -                                                           | -        |
|                                   | — Ausleihungen an Dritte                                                                | -            | -            | 58                      | 58            | -                                                           | -        |
|                                   | — Forderungen aus dem Kreditkartengeschäft                                              | -            | -            | 262                     | 262           | -                                                           | -        |
|                                   | — Sonstige                                                                              | -            | -            | 462                     | 462           | -                                                           | -        |
|                                   | Zahlungsmittel und Zahlungsmitteläquivalente                                            | 7.432        | 7.432        | -                       | -             | -                                                           | -        |
|                                   | Forderungen aus Lieferungen und Leistungen                                              | -            | -            | 2.329                   | 2.329         | -                                                           | -        |
|                                   | Sonstige Vermögenswerte                                                                 |              |              |                         |               |                                                             |          |
|                                   | — Forderungen gegen verbundene Unternehmen                                              | -            | -            | 688                     | 688           | -                                                           | -        |
|                                   | — Forderungen gegen Unternehmen, mit denen ein Beteiligungsverhältnis besteht           | -            | -            | 258                     | 258           | -                                                           | -        |
|                                   | — Sicherheitsleistungen                                                                 | 474          | 474          | -                       | -             | -                                                           | -        |
|                                   | — Übrige                                                                                | -            | -            | 274                     | 274           | -                                                           | -        |
|                                   | <b>Summe</b>                                                                            | <b>7.906</b> | <b>7.906</b> | <b>50.747</b>           | <b>49.696</b> | <b>-</b>                                                    | <b>-</b> |
| <b>Passiva</b>                    |                                                                                         |              |              |                         |               |                                                             |          |
|                                   | Finanzverbindlichkeiten                                                                 |              |              |                         |               |                                                             |          |
|                                   | — Anleihen                                                                              | -            | -            | -                       | -             | -                                                           | -        |
|                                   | — Verbindlichkeiten gegenüber Kreditinstituten                                          | -            | -            | -                       | -             | -                                                           | -        |
|                                   | — Verbindlichkeiten aus dem Einlagengeschäft                                            | -            | -            | -                       | -             | -                                                           | -        |
|                                   | — Commercial Paper                                                                      | -            | -            | -                       | -             | -                                                           | -        |
|                                   | — Asset-Backed-Finanzierungen                                                           | -            | -            | -                       | -             | -                                                           | -        |
|                                   | — Derivate                                                                              |              |              |                         |               |                                                             |          |
|                                   | — Cash Flow Hedging                                                                     | -            | -            | -                       | -             | -                                                           | -        |
|                                   | — Fair Value Hedging                                                                    | -            | -            | -                       | -             | -                                                           | -        |
|                                   | — Sonstige Derivate                                                                     | -            | -            | -                       | -             | -                                                           | -        |
|                                   | — Sonstige                                                                              | -            | -            | -                       | -             | -                                                           | -        |
|                                   | Verbindlichkeiten aus Lieferungen und Leistungen                                        | -            | -            | -                       | -             | -                                                           | -        |
|                                   | Sonstige Verbindlichkeiten                                                              |              |              |                         |               |                                                             |          |
|                                   | — Verbindlichkeiten gegenüber verbundenen Unternehmen                                   | -            | -            | -                       | -             | -                                                           | -        |
|                                   | — Verbindlichkeiten gegenüber Unternehmen, mit denen ein Beteiligungsverhältnis besteht | -            | -            | -                       | -             | -                                                           | -        |
|                                   | — Übrige                                                                                | -            | -            | -                       | -             | -                                                           | -        |
|                                   | <b>Summe</b>                                                                            | <b>-</b>     | <b>-</b>     | <b>-</b>                | <b>-</b>      | <b>-</b>                                                    | <b>-</b> |

<sup>1</sup> Die Buchwerte der Cash Flow und Fair Value Hedges sind aus Übersichtlichkeitsgründen der Kategorie zu Handelszwecken gehalten zugeordnet.

<sup>2</sup> Der Buchwert entspricht dem Marktwert.

|     |                                                |
|-----|------------------------------------------------|
| 74  | <b>KONZERNABSCHLUSS</b>                        |
| 74  | Gewinn- und Verlust-Rechnungen                 |
| 74  | Gesamtergebnisrechnung                         |
| 76  | Bilanzen                                       |
| 78  | Kapitalflussrechnungen                         |
| 80  | Entwicklung des Konzerneigenkapitals           |
| 81  | <b>Konzernanhang</b>                           |
| 81  | Grundsätze                                     |
| 89  | Erläuterungen zur Gewinn- und Verlust-Rechnung |
| 95  | Erläuterungen zur Gesamtergebnisrechnung       |
| 96  | Erläuterungen zur Bilanz                       |
| 117 | <b>Sonstige Angaben</b>                        |
| 133 | Segmentinformationen                           |



| Sonstige Verbindlichkeiten |               | Zur Veräußerung verfügbar | Fair Value-Option     | Zu Handelszwecken gehalten |                                                                                       |
|----------------------------|---------------|---------------------------|-----------------------|----------------------------|---------------------------------------------------------------------------------------|
| Marktwert                  | Buchwert      | Buchwert <sup>2</sup>     | Buchwert <sup>2</sup> | Buchwert <sup>2</sup>      |                                                                                       |
| <b>Aktiva</b>              |               |                           |                       |                            |                                                                                       |
| -                          | -             | 177                       | -                     | -                          | Sonstige Finanzanlagen                                                                |
| -                          | -             | -                         | -                     | -                          | Forderungen aus Finanzdienstleistungen                                                |
| Finanzforderungen          |               |                           |                       |                            |                                                                                       |
| Derivate                   |               |                           |                       |                            |                                                                                       |
| -                          | -             | -                         | -                     | 900                        | Cash Flow Hedging                                                                     |
| -                          | -             | -                         | -                     | 1.102                      | Fair Value Hedging                                                                    |
| -                          | -             | -                         | -                     | 779                        | Sonstige Derivate                                                                     |
| -                          | -             | 1.566                     | -                     | -                          | Wertpapiere und Investmentanteile                                                     |
| -                          | -             | -                         | -                     | -                          | Ausleihungen an Dritte                                                                |
| -                          | -             | -                         | -                     | -                          | Forderungen aus dem Kreditkartengeschäft                                              |
| -                          | -             | -                         | -                     | -                          | Sonstige                                                                              |
| -                          | -             | -                         | -                     | -                          | Zahlungsmittel und Zahlungsmitteläquivalente                                          |
| -                          | -             | -                         | -                     | -                          | Forderungen aus Lieferungen und Leistungen                                            |
| Sonstige Vermögenswerte    |               |                           |                       |                            |                                                                                       |
| -                          | -             | -                         | -                     | -                          | Forderungen gegen verbundene Unternehmen                                              |
| -                          | -             | -                         | -                     | -                          | Forderungen gegen Unternehmen, mit denen ein Beteiligungsverhältnis besteht           |
| -                          | -             | -                         | -                     | -                          | Sicherheitsleistungen                                                                 |
| -                          | -             | -                         | -                     | -                          | Übrige                                                                                |
| -                          | -             | <b>1.743</b>              | -                     | <b>2.781</b>               | <b>Summe</b>                                                                          |
| <b>Passiva</b>             |               |                           |                       |                            |                                                                                       |
| Finanzverbindlichkeiten    |               |                           |                       |                            |                                                                                       |
| 27.655                     | 27.568        | -                         | -                     | -                          | Anleihen                                                                              |
| 7.726                      | 7.740         | -                         | -                     | -                          | Verbindlichkeiten gegenüber Kreditinstituten                                          |
| 10.723                     | 10.689        | -                         | -                     | -                          | Verbindlichkeiten aus dem Einlagengeschäft                                            |
| 5.240                      | 5.242         | -                         | -                     | -                          | Commercial Paper                                                                      |
| 7.464                      | 7.506         | -                         | -                     | -                          | Asset-Backed-Finanzierungen                                                           |
| Derivate                   |               |                           |                       |                            |                                                                                       |
| -                          | -             | -                         | -                     | 921                        | Cash Flow Hedging                                                                     |
| -                          | -             | -                         | -                     | 375                        | Fair Value Hedging                                                                    |
| -                          | -             | -                         | -                     | 714                        | Sonstige Derivate                                                                     |
| 1.598                      | 1.598         | -                         | -                     | -                          | Sonstige                                                                              |
| 4.351                      | 4.351         | -                         | -                     | -                          | Verbindlichkeiten aus Lieferungen und Leistungen                                      |
| Sonstige Verbindlichkeiten |               |                           |                       |                            |                                                                                       |
| -                          | -             | -                         | -                     | -                          | Verbindlichkeiten gegenüber verbundenen Unternehmen                                   |
| 58                         | 58            | -                         | -                     | -                          | Verbindlichkeiten gegenüber Unternehmen, mit denen ein Beteiligungsverhältnis besteht |
| 4                          | 4             | -                         | -                     | -                          | Übrige                                                                                |
| 3.137                      | 3.137         | -                         | -                     | -                          |                                                                                       |
| <b>67.956</b>              | <b>67.893</b> | -                         | -                     | <b>2.010</b>               | <b>Summe</b>                                                                          |

| 31. Dezember 2009<br>in Mio. Euro                                                          |  | Barmittel    |              | Kredite und Forderungen |               | Bis zur Endfälligkeit<br>zu haltende<br>Finanzinvestitionen |          |
|--------------------------------------------------------------------------------------------|--|--------------|--------------|-------------------------|---------------|-------------------------------------------------------------|----------|
|                                                                                            |  | Marktwert    | Buchwert     | Marktwert               | Buchwert      | Marktwert                                                   | Buchwert |
| <b>Aktiva</b>                                                                              |  |              |              |                         |               |                                                             |          |
| Sonstige Finanzanlagen                                                                     |  |              |              |                         |               |                                                             |          |
| Forderungen aus Finanzdienstleistungen                                                     |  |              |              |                         |               |                                                             |          |
| Finanzforderungen                                                                          |  |              |              |                         |               |                                                             |          |
| — Derivate                                                                                 |  |              |              |                         |               |                                                             |          |
| — Cash Flow Hedging                                                                        |  |              |              |                         |               |                                                             |          |
| — Fair Value Hedging                                                                       |  |              |              |                         |               |                                                             |          |
| — Sonstige Derivate                                                                        |  |              |              |                         |               |                                                             |          |
| — Wertpapiere und Investmentanteile                                                        |  |              |              |                         |               |                                                             |          |
| — Ausleihungen an Dritte                                                                   |  |              |              |                         |               |                                                             |          |
| — Forderungen aus dem Kreditkartengeschäft                                                 |  |              |              |                         |               |                                                             |          |
| — Sonstige                                                                                 |  |              |              |                         |               |                                                             |          |
| Zahlungsmittel und Zahlungsmitteläquivalente                                               |  |              |              |                         |               |                                                             |          |
| Forderungen aus Lieferungen und Leistungen                                                 |  |              |              |                         |               |                                                             |          |
| Sonstige Vermögenswerte                                                                    |  |              |              |                         |               |                                                             |          |
| — Forderungen gegen verbundene Unternehmen                                                 |  |              |              |                         |               |                                                             |          |
| — Forderungen gegen Unternehmen, mit denen<br>ein Beteiligungsverhältnis besteht           |  |              |              |                         |               |                                                             |          |
| — Sicherheitsleistungen                                                                    |  |              |              |                         |               |                                                             |          |
| — Übrige                                                                                   |  |              |              |                         |               |                                                             |          |
| <b>Summe</b>                                                                               |  | <b>8.274</b> | <b>8.274</b> | <b>44.668</b>           | <b>44.085</b> | <b>-</b>                                                    | <b>-</b> |
| <b>Passiva</b>                                                                             |  |              |              |                         |               |                                                             |          |
| Finanzverbindlichkeiten                                                                    |  |              |              |                         |               |                                                             |          |
| — Anleihen                                                                                 |  |              |              |                         |               |                                                             |          |
| — Verbindlichkeiten gegenüber Kreditinstituten                                             |  |              |              |                         |               |                                                             |          |
| — Verbindlichkeiten aus dem Einlagengeschäft                                               |  |              |              |                         |               |                                                             |          |
| — Commercial Paper                                                                         |  |              |              |                         |               |                                                             |          |
| — Asset-Backed-Finanzierungen                                                              |  |              |              |                         |               |                                                             |          |
| — Derivate                                                                                 |  |              |              |                         |               |                                                             |          |
| — Cash Flow Hedging                                                                        |  |              |              |                         |               |                                                             |          |
| — Fair Value Hedging                                                                       |  |              |              |                         |               |                                                             |          |
| — Sonstige Derivate                                                                        |  |              |              |                         |               |                                                             |          |
| — Sonstige                                                                                 |  |              |              |                         |               |                                                             |          |
| Verbindlichkeiten aus Lieferungen und Leistungen                                           |  |              |              |                         |               |                                                             |          |
| Sonstige Verbindlichkeiten                                                                 |  |              |              |                         |               |                                                             |          |
| — Verbindlichkeiten gegenüber verbundenen<br>Unternehmen                                   |  |              |              |                         |               |                                                             |          |
| — Verbindlichkeiten gegenüber Unternehmen, mit<br>denen ein Beteiligungsverhältnis besteht |  |              |              |                         |               |                                                             |          |
| — Übrige                                                                                   |  |              |              |                         |               |                                                             |          |
| <b>Summe</b>                                                                               |  | <b>-</b>     | <b>-</b>     | <b>-</b>                | <b>-</b>      | <b>-</b>                                                    | <b>-</b> |

\* Der Buchwert entspricht dem Marktwert.

|     |                                                       |
|-----|-------------------------------------------------------|
| 74  | <b>KONZERNABSCHLUSS</b>                               |
| 74  | Gewinn- und Verlust-<br>Rechnungen                    |
| 74  | Gesamtergebnisrechnung                                |
| 76  | Bilanzen                                              |
| 78  | Kapitalflussrechnungen                                |
| 80  | Entwicklung des<br>Konzerneigenkapitals               |
| 81  | <b>Konzernanhang</b>                                  |
| 81  | Grundsätze                                            |
| 89  | Erläuterungen zur<br>Gewinn- und Verlust-<br>Rechnung |
| 95  | Erläuterungen zur<br>Gesamtergebnisrechnung           |
| 96  | Erläuterungen zur Bilanz                              |
| 117 | <b>Sonstige Angaben</b>                               |
| 133 | Segmentinformationen                                  |

| Sonstige Verbindlichkeiten |               | Zur Veräußerung verfügbar | Fair Value-Option | Zu Handelszwecken gehalten |                                                                                       |
|----------------------------|---------------|---------------------------|-------------------|----------------------------|---------------------------------------------------------------------------------------|
| Marktwert                  | Buchwert      | Buchwert*                 | Buchwert*         | Buchwert*                  |                                                                                       |
| <b>Aktiva</b>              |               |                           |                   |                            |                                                                                       |
| -                          | -             | 232                       | -                 | -                          | Sonstige Finanzanlagen                                                                |
| -                          | -             | -                         | -                 | -                          | Forderungen aus Finanzdienstleistungen                                                |
| -                          | -             | -                         | -                 | -                          | Finanzforderungen                                                                     |
| -                          | -             | -                         | -                 | -                          | Derivate                                                                              |
| -                          | -             | -                         | -                 | 619                        | Cash Flow Hedging                                                                     |
| -                          | -             | -                         | -                 | 1.080                      | Fair Value Hedging                                                                    |
| -                          | -             | -                         | -                 | 734                        | Sonstige Derivate                                                                     |
| -                          | -             | 1.648                     | -                 | -                          | Wertpapiere und Investmentanteile                                                     |
| -                          | -             | -                         | -                 | -                          | Ausleihungen an Dritte                                                                |
| -                          | -             | -                         | -                 | -                          | Forderungen aus dem Kreditkartengeschäft                                              |
| -                          | -             | -                         | -                 | -                          | Sonstige                                                                              |
| -                          | -             | -                         | -                 | -                          | Zahlungsmittel und Zahlungsmitteläquivalente                                          |
| -                          | -             | -                         | -                 | -                          | Forderungen aus Lieferungen und Leistungen                                            |
| -                          | -             | -                         | -                 | -                          | Sonstige Vermögenswerte                                                               |
| -                          | -             | -                         | -                 | -                          | Forderungen gegen verbundene Unternehmen                                              |
| -                          | -             | -                         | -                 | -                          | Forderungen gegen Unternehmen, mit denen ein Beteiligungsverhältnis besteht           |
| -                          | -             | -                         | -                 | -                          | Sicherheitsleistungen                                                                 |
| -                          | -             | -                         | -                 | -                          | Übrige                                                                                |
| -                          | -             | <b>1.880</b>              | -                 | <b>2.433</b>               | <b>Summe</b>                                                                          |
| <b>Passiva</b>             |               |                           |                   |                            |                                                                                       |
| -                          | -             | -                         | -                 | -                          | Finanzverbindlichkeiten                                                               |
| 27.246                     | 27.017        | -                         | -                 | -                          | Anleihen                                                                              |
| 9.165                      | 9.174         | -                         | -                 | -                          | Verbindlichkeiten gegenüber Kreditinstituten                                          |
| 9.946                      | 9.933         | -                         | -                 | -                          | Verbindlichkeiten aus dem Einlagengeschäft                                            |
| 5.214                      | 5.213         | -                         | -                 | -                          | Commercial Paper                                                                      |
| 7.803                      | 7.812         | -                         | -                 | -                          | Asset-Backed-Finanzierungen                                                           |
| -                          | -             | -                         | -                 | -                          | Derivate                                                                              |
| -                          | -             | -                         | -                 | 321                        | Cash Flow Hedging                                                                     |
| -                          | -             | -                         | -                 | 282                        | Fair Value Hedging                                                                    |
| -                          | -             | -                         | -                 | 490                        | Sonstige Derivate                                                                     |
| 1.082                      | 1.083         | -                         | -                 | -                          | Sonstige                                                                              |
| 3.122                      | 3.122         | -                         | -                 | -                          | Verbindlichkeiten aus Lieferungen und Leistungen                                      |
| -                          | -             | -                         | -                 | -                          | Sonstige Verbindlichkeiten                                                            |
| -                          | -             | -                         | -                 | -                          | Verbindlichkeiten gegenüber verbundenen Unternehmen                                   |
| 35                         | 35            | -                         | -                 | -                          | Verbindlichkeiten gegenüber Unternehmen, mit denen ein Beteiligungsverhältnis besteht |
| 11                         | 11            | -                         | -                 | -                          | Übrige                                                                                |
| 2.081                      | 2.081         | -                         | -                 | -                          | Übrige                                                                                |
| <b>65.705</b>              | <b>65.481</b> | -                         | -                 | <b>1.093</b>               | <b>Summe</b>                                                                          |

### Marktwertbewertung von Finanzinstrumenten

Die dargestellten Marktwerte werden anhand der am Bilanzstichtag vorhandenen Marktinformationen, auf Basis quotierter Preise der Kontrahenten oder anhand

geeigneter Bewertungsverfahren, z. B. Discounted-Cash-flow-Methoden, ermittelt. Der Diskontierung zum 31. Dezember 2010 liegen folgende Zinsstrukturen zugrunde:

| ISO-Code<br>in %      | EUR  | USD  | GBP  | JPY  |
|-----------------------|------|------|------|------|
| Zins für sechs Monate | 0,85 | 0,31 | 0,63 | 0,23 |
| Zins für ein Jahr     | 0,94 | 0,39 | 0,71 | 0,30 |
| Zins für fünf Jahre   | 2,51 | 2,22 | 2,69 | 0,56 |
| Zins für zehn Jahre   | 3,39 | 3,55 | 3,69 | 1,18 |

Falls notwendig, wurden die Zinssätze der Zinsstrukturkurven entsprechend Bonität und Risiko des zugrunde liegenden Finanzinstruments angepasst.

Derivative Finanzinstrumente werden zum Fair Value angesetzt. Die Fair Values der derivativen Finanzinstrumente werden auf Basis von Bewertungsmodellen berechnet und unterliegen damit dem Risiko, dass sie von den durch Veräußerung erzielbaren Marktwerten abweichen. Die Modelldatenversorgung zur Berechnung der Fair Values wurde im Geschäftsjahr 2010 verfeinert. Am Finanzmarkt zu beobachtende Marktpreisspreads, beispielsweise aus Liquiditätsrisiken, werden in der Bewertung berücksichtigt. Damit ist sichergestellt, dass die Unterschiede zwischen den Bilanzwerten und den durch Veräußerung erzielbaren Werten auf dem Finanzmarkt minimiert werden.

Zum Fair Value bilanzierte Finanzinstrumente werden gemäß IFRS 7 in verschiedene Bewertungslevels eingeteilt. Hierbei handelt es sich um Finanzinstrumente, die

- 1 zu aktuellen Marktpreisen in einem aktiven Markt für identische Finanzinstrumente bewertet werden (Level 1),

- 2 zu aktuellen Marktpreisen in einem aktiven Markt für vergleichbare Finanzinstrumente oder mit Bewertungsmodellen, deren wesentliche Inputfaktoren auf beobachtbare Marktdaten zurückzuführen sind, bewertet werden (Level 2) oder

- 3 mithilfe von Inputfaktoren bewertet werden, die nicht auf beobachtbaren Marktpreisen basieren (Level 3).

Die Einteilung in Bewertungslevels stellt sich zum Bilanzstichtag wie folgt dar:

| 31. Dezember 2010<br>in Mio. Euro                             | Level 1 | Level 2 | Level 3 |
|---------------------------------------------------------------|---------|---------|---------|
| Wertpapiere und Investmentanteile – Zur Veräußerung verfügbar | 1.566   | -       | -       |
| Derivate (Aktiva)                                             |         |         |         |
| — Cash Flow Hedging                                           | -       | 900     | -       |
| — Fair Value Hedging                                          | -       | 1.102   | -       |
| — Sonstige Derivate                                           | -       | 779     | -       |
| Derivate (Passiva)                                            |         |         |         |
| — Cash Flow Hedging                                           | -       | 921     | -       |
| — Fair Value Hedging                                          | -       | 375     | -       |
| — Sonstige Derivate                                           | -       | 714     | -       |

| 31. Dezember 2009<br>in Mio. Euro                             | Level 1 | Level 2 | Level 3 |
|---------------------------------------------------------------|---------|---------|---------|
| Wertpapiere und Investmentanteile – Zur Veräußerung verfügbar | 543     | 1.105   | -       |
| Derivate (Aktiva)                                             |         |         |         |
| — Cash Flow Hedging                                           | -       | 619     | -       |
| — Fair Value Hedging                                          | -       | 1.080   | -       |
| — Sonstige Derivate                                           | -       | 734     | -       |
| Derivate (Passiva)                                            |         |         |         |
| — Cash Flow Hedging                                           | -       | 321     | -       |
| — Fair Value Hedging                                          | -       | 282     | -       |
| — Sonstige Derivate                                           | 1       | 489     | -       |

#### 74 — KONZERNABSCHLUSS

- 74 Gewinn-und-Verlust-Rechnungen
- 74 Gesamtergebnisrechnung
- 76 Bilanzen
- 78 Kapitalflussrechnungen
- 80 Entwicklung des Konzerneigenkapitals
- 81 — Konzernanhang
  - 81 Grundsätze
  - 89 Erläuterungen zur Gewinn-und-Verlust-Rechnung
  - 95 Erläuterungen zur Gesamtergebnisrechnung
  - 96 Erläuterungen zur Bilanz
  - 117 — Sonstige Angaben
  - 133 Segmentinformationen

Sonstige Finanzanlagen (zur Veräußerung verfügbar) in Höhe von 177 Mio. Euro (2009: 232 Mio. Euro) werden zu fortgeführten Anschaffungskosten bewertet, da notierte Marktpreise nicht verfügbar sind oder nicht verlässlich bestimmt werden können. Deshalb werden sie nicht in die Levelhierarchie eingeordnet.

Im Geschäftsjahr 2010 haben wie im Vorjahr keine bedeutenden Umgliederungen innerhalb der Levelhierarchie stattgefunden.

#### Gewinne und Verluste aus Finanzinstrumenten

Die folgende Tabelle enthält die aus den verwendeten Kategorien von Finanzinstrumenten gemäß IAS 39 resultierenden Nettogewinne und -verluste:

| in Mio. Euro                                                                                                                                                                               | 2010 | 2009 |
|--------------------------------------------------------------------------------------------------------------------------------------------------------------------------------------------|------|------|
| Zu Handelszwecken gehalten (Held for Trading)                                                                                                                                              |      |      |
| — Ergebnis aus dem Einsatz von Derivaten                                                                                                                                                   | 15   | 338  |
| Zur Veräußerung verfügbar (Available for Sale)                                                                                                                                             |      |      |
| — Veräußerungs- und Bewertungsergebnis aus dem zur Veräußerung verfügbaren Wertpapierbestand einschließlich der zu Anschaffungskosten bewerteten verbundenen Unternehmen und Beteiligungen | -175 | -23  |
| — Erträge aus Beteiligungen                                                                                                                                                                | 5    | 4    |
| — Kumuliertes übriges Eigenkapital                                                                                                                                                         |      |      |
| — Anfangsbestand 1. Januar                                                                                                                                                                 | 20   | 17   |
| — Gesamtveränderung in der Berichtsperiode                                                                                                                                                 | -11  | 3    |
| — davon in der Berichtsperiode erfolgswirksam realisiert                                                                                                                                   | 3    | -7   |
| — Endbestand 31. Dezember                                                                                                                                                                  | 9    | 20   |
| Kredite und Forderungen (Loans and Receivables)                                                                                                                                            |      |      |
| — Wertberichtigungen/Wertaufholungen                                                                                                                                                       | -581 | -801 |
| — Sonstige Erträge/Aufwendungen                                                                                                                                                            | -69  | -49  |
| Sonstige Verbindlichkeiten (Other Liabilities)                                                                                                                                             |      |      |
| — Erträge/Aufwendungen                                                                                                                                                                     | -90  | -113 |

Das Ergebnis aus dem Einsatz von Derivaten enthält im Wesentlichen Marktwertänderungen von alleinstehenden Derivaten.

Die Zinserträge und -aufwendungen aus Zins- und Zinswährungsswaps belaufen sich auf -178 Mio. Euro (2009: -294 Mio. Euro).

Aus erfolgsneutral abgegrenzten, zur Veräußerung verfügbaren Wertpapieren ergeben sich im Geschäftsjahr ergebniswirksame Abschreibungen auf Wertpapiere in Höhe von 3 Mio. Euro (2009: 3 Mio. Euro). Ergebnisneutrale Wertaufholungen auf Wertpapiere ergeben sich wie im Vorjahr keine.

Die Offenlegung von kalkulatorischen Zinserträgen aus der Aufzinsung zukünftig erwarteter Zahlungseingänge kommt lediglich zur Anwendung, wenn im Rahmen der Wertberichtigungsbildung der finanziellen Vermögenswerte abgezinst wurde. Aufgrund der Annahme, dass der Großteil der Verwertungserlöse in der Regel innerhalb eines Jahres realisiert wird, wird bei der Bemessung der Wertberichtigungen aus Wesentlichkeitsgründen auf die Abzinsung verzichtet.

#### Cash Flow Hedges

Die Effekte im Kumulierten übrigen Eigenkapital aus Cash Flow Hedges stellen sich wie folgt dar:

| in Mio. Euro                                             | 2010        | 2009       |
|----------------------------------------------------------|-------------|------------|
| Anfangsbestand 1. Januar                                 | 209         | 45         |
| Gesamtveränderung im Berichtszeitraum                    | -336        | 164        |
| — davon in der Berichtsperiode erfolgswirksam realisiert | 274         | -63        |
| <b>Endbestand 31. Dezember</b>                           | <b>-127</b> | <b>209</b> |

In der Berichtsperiode wurden Effekte aus „forecast errors“ und daraus resultierenden Währungsübersicherungen in Höhe von -24 Mio. Euro (2009: -44 Mio. Euro) in der Gewinn- und Verlust-Rechnung erfasst. Des Weiteren entstanden im Rahmen des Cash Flow

Hedgings Ineffektivitäten aus Rohstoffsicherungen in Höhe von 3 Mio. Euro (2009: - Mio. Euro).

Zum 31. Dezember 2010 hat die BMW Group derivative Instrumente mit einer maximalen Laufzeit von 60 Mona-

ten (2009: 46 Monaten) im Bestand, um Währungsrisiken aus zukünftigen Transaktionen abzusichern. Voraussichtlich werden während des nächsten Geschäftsjahres 110 Mio. Euro Nettoverluste, die zum Stichtag im Eigenkapital ausgewiesen werden, in die Gewinn-und-Verlust-Rechnung umgegliedert.

Zum 31. Dezember 2010 hat die BMW Group derivative Instrumente mit einer maximalen Laufzeit von 72 Monaten (2009: 84 Monaten) im Bestand, um Zinsrisiken abzusichern. Voraussichtlich werden während des nächsten Geschäftsjahres 42 Mio. Euro Nettoverluste, die zum Stichtag im Eigenkapital ausgewiesen werden, in die Gewinn-und-Verlust-Rechnung umgegliedert.

Zum 31. Dezember 2010 hat die BMW Group derivative Instrumente mit einer maximalen Laufzeit von 35 Mona-

in Mio. Euro

|                                                                         | 31.12.2010 | 31.12.2009 |
|-------------------------------------------------------------------------|------------|------------|
| Ergebnis aus Sicherungsinstrumenten in einer Fair-Value-Hedge-Beziehung | -808       | -398       |
| Ergebnis aus gesicherten Grundgeschäften                                | 763        | 446        |
|                                                                         | <u>-45</u> | <u>48</u>  |

Die Abweichungen zwischen den Ergebnissen aus Sicherungsinstrumenten und den Ergebnissen aus den gesicherten Grundgeschäften resultieren aus Ineffektivitäten im Rahmen des Fair Value Hedging.

Mit Fair Value Hedges werden im Wesentlichen die Marktwerte von Anleihen, sonstigen Finanzverbindlichkeiten sowie von Forderungen aus Finanzdienstleistungen abgesichert.

#### Ausfallrisiko

Ungeachtet bestehender Sicherheiten berücksichtigt die bilanzierte Höhe der finanziellen Vermögenswerte grundsätzlich das maximale Ausfallrisiko für den Fall, dass Kontrahenten ihren vertraglichen Zahlungsverpflichtungen nicht nachkommen können. Des Weiteren besteht ein maximales Ausfallrisiko aus unwiderruflichen Kreditzusagen in Höhe von 1.020 Mio. Euro (2009: 1.513 Mio. Euro), die aus dem Kreditkartengeschäft resultieren, sowie aus unwiderruflichen Kreditzusagen in Höhe von 14.388 Mio. Euro (2009: 12.634 Mio. Euro), die aus dem Bereich der Händlerfinanzierung resultieren.

Für alle den originären Finanzinstrumenten zugrunde liegenden Leistungsbeziehungen gilt, dass zur Minimierung des Ausfallrisikos in Abhängigkeit von Art und Höhe der jeweiligen Leistung Sicherheiten verlangt, Kreditauskünfte und Referenzen eingeholt oder historische Daten aus der bisherigen Geschäftsbeziehung, insbesondere dem Zahlungsverhalten, genutzt werden.

Im Finanzdienstleistungsgeschäft dienen im Einzelkunden- und Händlerbereich die finanzierten Gegenstände

ten (2009: 35 Monaten) im Bestand, um Rohstoffpreisschwankungen abzusichern. Voraussichtlich werden während des nächsten Geschäftsjahres 88 Mio. Euro Nettogewinne, die zum Stichtag im Eigenkapital ausgewiesen werden, in die Gewinn-und-Verlust-Rechnung umgegliedert.

Cash Flow Hedges werden im Wesentlichen zur Sicherung der Zahlungsströme aus Fahrzeuglieferungen an Tochtergesellschaften sowie zur Absicherung von Rohstoffpreisschwankungen eingesetzt.

#### Fair Value Hedges

Folgende Tabelle enthält die Ergebnisse aus Fair Value Hedge-Beziehungen für die Sicherungsinstrumente und die zugrunde liegenden Grundgeschäfte:

wie beispielsweise Fahrzeuge, Einrichtungen und Immobilien als erstrangige und werthaltige Sicherheiten. Des Weiteren erfolgen Sicherheitenstellungen per Sicherungsübertragung, Verpfändung und erstrangige Grundschulden, die gegebenenfalls um Bürgschaften und Garantien ergänzt werden. Wird ein vorher als Sicherheit gehaltener Vermögensgegenstand erworben, so durchläuft er einen mehrstufigen Prozess zur Sicherstellung und Verwertung in Abhängigkeit von den rechtlichen Rahmenbedingungen in den einzelnen Märkten. Da es sich bei diesen Vermögensgegenständen im Wesentlichen um Fahrzeuge handelt, sind sie über die Handelsorganisation jederzeit in Zahlungsmittel umwandelbar.

Soweit bei den einzelnen finanziellen Vermögenswerten Ausfallrisiken erkennbar sind, werden diese Risiken durch Wertminderungen erfasst. Dabei wird eine speziell entwickelte Wertberichtigungsmethodik angewendet. Für detaillierte Informationen zu dieser Methodik wird auf die Bilanzierungs- und Bewertungsgrundsätze verwiesen.

Durch die Anwendung umfassender Rating- und Scoringverfahren sowie Kreditmonitoringverfahren wird die Werthaltigkeit der weder überfälligen noch wertgeminderten Forderungen aus Finanzdienstleistungen sichergestellt.

Das im Zusammenhang mit derivativen Finanzinstrumenten bestehende Kreditrisiko wird dadurch minimiert, dass Geschäfte grundsätzlich nur mit Vertragspartnern erstklassiger Bonität abgeschlossen werden. Aus diesem Grund wird das allgemeine Kreditrisiko aus den eingesetzten derivativen Finanzinstrumenten nicht für wesentlich gehalten.

|     |                                               |
|-----|-----------------------------------------------|
| 74  | <b>KONZERNABSCHLUSS</b>                       |
| 74  | Gewinn-und-Verlust-Rechnungen                 |
| 74  | Gesamtergebnisrechnung                        |
| 76  | Bilanzen                                      |
| 78  | Kapitalflussrechnungen                        |
| 80  | Entwicklung des Konzerneigenkapitals          |
| 81  | <b>Konzernanhang</b>                          |
| 81  | Grundsätze                                    |
| 89  | Erläuterungen zur Gewinn-und-Verlust-Rechnung |
| 95  | Erläuterungen zur Gesamtergebnisrechnung      |
| 96  | Erläuterungen zur Bilanz                      |
| 117 | <b>Sonstige Angaben</b>                       |
| 133 | Segmentinformationen                          |

Grundsätzlich ist im Zusammenhang mit Finanzinstrumenten eine Konzentration von Ausfallrisiken aus Geschäftsbeziehungen zu einzelnen Schuldnern bzw. Schuldnergruppen nicht erkennbar.

Für weitere Angaben zum Ausfallrisiko, speziell im Hinblick auf vorgenommene Wertberichtigungen, wird auf

die Erläuterungen zu den entsprechenden Forderungen auf den Seiten 102 und 104 f. verwiesen.

#### Liquiditätsrisiko

Die folgende Tabelle zeigt die Fälligkeitsstruktur der vertraglichen, undiskontierten und erwarteten Zahlungsströme aus finanziellen Verbindlichkeiten:

| 31. Dezember 2010<br>in Mio. Euro                | Restlaufzeit<br>bis ein Jahr | Restlaufzeit<br>über ein bis<br>fünf Jahre | Restlaufzeit<br>über<br>fünf Jahre | Gesamt         |
|--------------------------------------------------|------------------------------|--------------------------------------------|------------------------------------|----------------|
| Anleihen                                         | -7.812                       | -19.567                                    | -3.197                             | <b>-30.576</b> |
| Verbindlichkeiten gegenüber Kreditinstituten     | -3.594                       | -4.029                                     | -587                               | <b>-8.210</b>  |
| Verbindlichkeiten aus dem Einlagengeschäft       | -8.089                       | -3.210                                     | -25                                | <b>-11.324</b> |
| Commercial Paper                                 | -5.246                       | -                                          | -                                  | <b>-5.246</b>  |
| Asset-Backed-Finanzierungen                      | -1.810                       | -5.811                                     | -                                  | <b>-7.621</b>  |
| Derivate                                         | -1.244                       | -1.375                                     | -35                                | <b>-2.654</b>  |
| Verbindlichkeiten aus Lieferungen und Leistungen | -4.327                       | -24                                        | -                                  | <b>-4.351</b>  |
| Sonstige Finanzverbindlichkeiten                 | -771                         | -532                                       | -525                               | <b>-1.828</b>  |
|                                                  | <b>-32.893</b>               | <b>-34.548</b>                             | <b>-4.369</b>                      | <b>-71.810</b> |

| 31. Dezember 2009<br>in Mio. Euro                | Restlaufzeit<br>bis ein Jahr | Restlaufzeit<br>über ein bis<br>fünf Jahre | Restlaufzeit<br>über<br>fünf Jahre | Gesamt         |
|--------------------------------------------------|------------------------------|--------------------------------------------|------------------------------------|----------------|
| Anleihen                                         | -5.694                       | -22.951                                    | -4.488                             | <b>-33.133</b> |
| Verbindlichkeiten gegenüber Kreditinstituten     | -6.882                       | -2.075                                     | -841                               | <b>-9.798</b>  |
| Verbindlichkeiten aus dem Einlagengeschäft       | -7.834                       | -2.759                                     | -24                                | <b>-10.617</b> |
| Commercial Paper                                 | -5.251                       | -                                          | -                                  | <b>-5.251</b>  |
| Asset-Backed-Finanzierungen                      | -2.246                       | -6.278                                     | -                                  | <b>-8.524</b>  |
| Derivate*                                        | -690                         | -447                                       | -240                               | <b>-1.377</b>  |
| Verbindlichkeiten aus Lieferungen und Leistungen | -3.106                       | -16                                        | -                                  | <b>-3.122</b>  |
| Sonstige Finanzverbindlichkeiten                 | -859                         | -162                                       | -118                               | <b>-1.139</b>  |
|                                                  | <b>-32.562</b>               | <b>-34.688</b>                             | <b>-5.711</b>                      | <b>-72.961</b> |

\* Ausweis des Vorjahres angepasst

Die Zahlungsströme bestehen aus den Tilgungszahlungen und den entsprechenden Zinsen. In der Position Derivate sind ausschließlich Zahlungsströme aus den Derivaten enthalten, die zum Bilanzstichtag einen negativen Marktwert aufweisen.

Zur Gewährleistung der jederzeitigen Zahlungsfähigkeit erfolgt die Steuerung und Überwachung der Liquiditätssituation im Rahmen einer rollierenden Kapitalbedarfsplanung. Der daraus resultierende Kapitalbedarf wird im Sinne der Risikominimierung überwiegend durch fristenkongruente Finanzierung und in Abhängigkeit einer dynamischen Ziel-Fremdkapitalstruktur über verschiedene Instrumente an den weltweiten Finanzmärkten sichergestellt. Die BMW Group verfügt über einen guten Zugang zum Kapitalmarkt durch eine anhaltend solide Finanzsituation sowie eine diversifizierte Refinan-

zierungsstrategie. Dies wird durch die seit Jahren soliden Lang- und Kurzfrustratings bei Moody's und S & P unterstützt.

Die kurzfristige Steuerung der Liquidität erfolgt vorzugsweise durch Emissionen von Geldmarktpapieren (Commercial Paper). Auch hier werden durch die von Moody's und S & P veröffentlichten soliden Kurzfrustratings von A-2 bzw. P-2 wettbewerbsfähige Refinanzierungskonditionen erreicht.

Darüber hinaus stehen der BMW Group zur weiteren Risikominimierung gesicherte und ungesicherte Kreditlinien bei erstklassigen internationalen Banken zur Verfügung. Konzerninterne Zahlungsstromschwankungen werden durch ein tägliches Cash Pooling ausgeglichen.

### Marktrisiken

Die wesentlichen Marktrisiken, denen die BMW Group ausgesetzt ist, sind das Währungsrisiko und das Zinsänderungsrisiko.

Eine Absicherung gegen die genannten Risiken ergibt sich zunächst aufgrund natürlich geschlossener Positionen, bei denen sich die Werte oder die Zahlungsströme originärer Finanzinstrumente zeitlich und betragsmäßig ausgleichen (Netting). Die nach dem Netting verbleibenden Risiken werden durch den Einsatz handelsüblicher derivativer Finanzinstrumente reduziert. Der Einsatz derivativer Finanzinstrumente erfolgt ausschließlich zur Absicherung bestehender Grundgeschäfte oder geplanter Transaktionen.

Der Handlungsrahmen, die Verantwortlichkeiten, die finanzwirtschaftliche Berichterstattung und die Kontrollmechanismen für Finanzinstrumente sind in konzerninternen Richtlinien detailliert festgelegt. Insbesondere gehört hierzu eine klare Funktionstrennung zwischen Handel und Abwicklung. Die Währungs- und Zinsänderungsrisiken der BMW Group werden zentral gesteuert.

Für weitere Angaben zum Risikomanagement wird auf die Ausführungen im Konzernlagebericht verwiesen.

in Mio. Euro

|                            | 31.12.2010 | 31.12.2009 |
|----------------------------|------------|------------|
| Euro/Chinesischer Renminbi | 6.256      | 3.119      |
| Euro/US-Dollar             | 3.888      | 3.696      |
| Euro/Britisches Pfund      | 3.056      | 2.446      |
| Euro/Japanischer Yen       | 1.086      | 902        |

Gegen diese Exposures werden alle getätigten Absicherungen gestellt. Der per Saldo verbleibende Netto-Cashflow stellt die noch offene Risikoposition dar. Im verwendeten Cashflow-at-Risk-Ansatz werden die Auswirkungen möglicher Währungsschwankungen auf die operativen Cashflows als Wahrscheinlichkeitsverteilungen dargestellt. Dabei dienen die Volatilitäten und Korrelationen als Inputfaktoren zur Schätzung der jeweiligen Wahrscheinlichkeitsverteilung.

Die potenziellen negativen Effekte auf das Ergebnis werden auf Basis der jeweiligen aktuellen Kurse und

in Mio. Euro

|                            | 31.12.2010 | 31.12.2009 |
|----------------------------|------------|------------|
| Euro/Chinesischer Renminbi | 265        | 201        |
| Euro/US-Dollar             | 103        | 174        |
| Euro/Britisches Pfund      | 184        | 188        |
| Euro/Japanischer Yen       | 30         | 17         |

### Währungsrisiko

Die BMW Group schließt als weltweit tätiger Konzern Geschäfte in verschiedenen Währungen ab, woraus sich Währungsrisiken ergeben. Da ein wesentlicher Anteil der Konzernumsätze außerhalb des Euro-Währungsraums anfällt und die Beschaffung des Produktionsmaterials und der Finanzmittel ebenfalls weltweit erfolgt, hat das Währungsrisiko eine erhebliche Bedeutung für das Unternehmensergebnis.

Zur Absicherung der Währungsrisiken bestehen zum 31. Dezember 2010 Derivatgeschäfte insbesondere für die Währungen chinesischer Renminbi, US-Dollar, britisches Pfund und japanischer Yen. Die Währungssicherungsverträge bestehen im Wesentlichen aus Options- und Devisentermingeschäften.

Das Management dieses Risikos wird im Konzernlagebericht auf den Seiten 63 f. beschrieben. Zur Messung der Währungsrisiken verwendet die BMW Group ein Cashflow-at-Risk-Modell.

Die Ausgangsbasis für die Analyse des Währungsrisikos in diesem Modell sind die geplanten Fremdwährungstransaktionen, die sogenannten Exposures. Die wesentlichen Exposures stellen sich zum Bilanzstichtag für das darauffolgende Geschäftsjahr wie folgt dar:

Exposures für die laufende Periode mit einem Konfidenzniveau von 95% und einer Haltedauer von bis zu einem Jahr für die Währungen ermittelt. Bei der anschließenden Aggregation entstehen risikomindernde Effekte, die auf Korrelationen zwischen den einzelnen Portfolios zurückzuführen sind.

Die nachfolgende Tabelle zeigt die mit dem Cashflow-at-Risk-Ansatz ermittelten möglichen negativen Effekte für die BMW Group aufgrund negativer Wechselkursbewegungen für die Hauptwährungen zum Bilanzstichtag:

#### 74 — KONZERNABSCHLUSS

- 74 Gewinn-und-Verlust-Rechnungen
- 74 Gesamtergebnisrechnung
- 76 Bilanzen
- 78 Kapitalflussrechnungen
- 80 Entwicklung des Konzerneigenkapitals
- 81 — Konzernanhang
  - 81 Grundsätze
  - 89 Erläuterungen zur Gewinn-und-Verlust-Rechnung
  - 95 Erläuterungen zur Gesamtergebnisrechnung
  - 96 Erläuterungen zur Bilanz
- 117 — Sonstige Angaben
- 133 Segmentinformationen



Auf die genannten Währungen konzentriert sich das Währungsrisiko der BMW Group.

#### Zinsrisiko

Im Rahmen des Finanzmanagements werden gängige originäre Finanzinstrumente, wie z. B. kurzfristige Geldanlagen, Anlagen in variable und festverzinsliche Wertpapiere sowie Wertpapierfonds genutzt. Damit ist die BMW Group auch Risiken aus der Änderung von Zinssätzen ausgesetzt.

| in Mio. Euro     | 31.12.2010 | 31.12.2009 |
|------------------|------------|------------|
| Euro             | 4.290      | 5.514      |
| US-Dollar        | 7.429      | 6.628      |
| Britisches Pfund | 2.599      | 2.031      |

Die Zinsrisiken lassen sich durch den Einsatz von Zinsderivaten steuern. Die zur Sicherung eingesetzten Zins-sicherungskontrakte enthalten im Wesentlichen Swap-geschäfte, die in Abhängigkeit vom Sicherungszweck als Fair Value Hedge oder Cash Flow Hedge bilanziert sind. Das Management des Zinsrisikos wird im Konzernlagebericht auf der Seite 67 beschrieben.

Wie bereits dort erwähnt, verwendet die BMW Group zur internen Berichterstattung und zum Management der Zinsrisiken einen Value-at-Risk-Ansatz, basierend auf einer Varianz-Kovarianz-Methode, bei der die potenziellen

| in Mio. Euro     | 31.12.2010 | 31.12.2009 |
|------------------|------------|------------|
| Euro             | 11         | 47         |
| US-Dollar        | 27         | 139        |
| Britisches Pfund | 4          | 10         |

#### Sonstige Risiken

Das Unternehmen ist Rohstoffpreisschwankungen ausgesetzt. Das Management dieses Risikos wird im Konzernlagebericht auf der Seite 64 beschrieben. Um diese Risiken zu reduzieren, werden derivative Finanzinstrumente eingesetzt, die dazu dienen, mit den Lieferanten vereinbarte Einkaufspreisschwankungen aus Rohstoffinhalten zu kompensieren. Aus den Änderungen der Marktwerte dieser Derivate, die sich in Abhängigkeit von den quotierten Marktpreisen für die gesicherten Rohstoffe entwickeln, resultiert für den Konzern ein Marktpreisrisiko.

Wenn die Marktpreise der gesicherten Rohstoffe am 31. Dezember 2010 um 10% höher (niedriger) gewe-

Zinsänderungsrisiken entstehen durch Geldaufnahmen und Geldanlagen mit unterschiedlichen Zinsbindungsfristen und unterschiedlichen Laufzeiten. Dem Zinsänderungsrisiko unterliegen bei der BMW Group sämtliche verzinsliche Positionen. Zinsänderungsrisiken sind nicht auf eine Bilanzseite beschränkt, sondern können sowohl die Aktiv- als auch die Passivseite betreffen.

Die Marktwerte der Zinsportfolios in den drei Hauptwährungen stellen sich zum Bilanzstichtag wie folgt dar:

künftigen Marktwertverluste der Zinsportfolios gegenüber dem Erwartungswert auf Basis einer Haltedauer von zehn Tagen und eines Konfidenzniveaus von 99% konzernweit gemessen werden. Bei dieser Aggregation werden risikomindernde Effekte identifiziert, die auf Korrelationen zwischen den einzelnen Portfolios zurückzuführen sind.

Die nachfolgende Tabelle zeigt die mit dem Value-at-Risk-Ansatz ermittelten möglichen Marktwertschwankungen gegenüber dem Erwartungswert für die zinsensitiven Positionen der BMW Group für die drei Hauptwährungen:

sen wären, so wäre das Konzernergebnis vor Steuern um 50 Mio. Euro höher (50 Mio. Euro niedriger) ausgefallen.

Des Weiteren ist das Unternehmen einem Restwertrisiko aus der Vermarktung der Fahrzeuge, die nach Ablauf des Finanzierungsleasingvertrags im Konzern verbleiben, ausgesetzt. Das hiervon aus Finanzinstrumenten resultierende Risiko ist zum Bilanzstichtag und war auch in der Vergangenheit für den Konzern nicht materiell. Das Management dieses Risikos wird im Konzernlagebericht auf der Seite 67 beschrieben. Für das Restwertrisiko aus Operating Leases wird auf die Bilanzierungs- und Bewertungsgrundsätze auf den Seiten 83 ff. verwiesen.

### 39 – Erläuterungen zu den Kapitalflussrechnungen

Die Kapitalflussrechnungen zeigen, wie sich die Zahlungsmittel und Zahlungsmitteläquivalente der BMW Group

und der Segmente Automobile und Finanzdienstleistungen durch Mittelzuflüsse und Mittelabflüsse im Laufe des Berichtsjahres verändert haben. Entsprechend IAS 7

(Statement of Cash Flows) wird zwischen Zahlungsströmen aus der betrieblichen Tätigkeit und aus Investitions- und Finanzierungstätigkeit unterschieden. Die Kapitalflussrechnungen der BMW Group sind auf den Seiten 78 f. dargestellt.

Der in den Kapitalflussrechnungen betrachtete Finanzmittelfonds umfasst alle in der Bilanz ausgewiesenen Zahlungsmittel und Zahlungsmitteläquivalente, d. h. Kassenbestände, Schecks und Guthaben bei Kreditinstituten, soweit sie innerhalb von drei Monaten ohne nennenswerte Wertschwankungen verfügbar sind. Die Einflüsse aus wechselkursbedingten Änderungen der Zahlungsmittel und Zahlungsmitteläquivalente betragen im Konzern 22 Mio. Euro (2009: 40 Mio. Euro).

Die Cashflows aus der Investitions- und Finanzierungstätigkeit werden zahlungsbezogen ermittelt. Der Cashflow aus der betrieblichen Tätigkeit wird demgegenüber ausgehend vom Jahresüberschuss/-fehlbetrag indirekt abgeleitet. Im Rahmen der indirekten Ermittlung werden die berücksichtigten Veränderungen von Bilanzpositionen im Zusammenhang mit der betrieblichen Tätigkeit um Effekte aus der Währungsumrechnung und aus Konsolidierungskreisänderungen bereinigt. Die Verände-

rungen der betreffenden Bilanzpositionen können daher nicht mit den entsprechenden Werten auf der Grundlage der veröffentlichten Konzern- und Segmentbilanzen abgestimmt werden.

Ist die BMW Group Leasinggeber bei einem Finance Lease, so wird dies in den Kapitalflussrechnungen innerhalb der Investitionstätigkeit gezeigt. Ist die BMW Group Leasingnehmer, so wird ein Finance Lease in der betrieblichen Tätigkeit und in der Investitionstätigkeit dargestellt.

Ein Operating-Lease-Geschäft, bei dem die BMW Group Leasinggeber ist, wird in den Kapitalflussrechnungen in der Investitionstätigkeit gezeigt. Die BMW Group als Leasingnehmer eines Operating Lease zeigt dies in den Kapitalflussrechnungen in der betrieblichen Tätigkeit.

Gemäß IAS 7.31 und IAS 7.35 werden Auszahlungen für Steuern und Einzahlungen aus Zinsen im Mittelzufluss aus betrieblicher Tätigkeit gezeigt. Auszahlungen für Zinsen werden als eigene Position im Mittelzufluss aus der Finanzierungstätigkeit dargestellt.

Die erhaltenen Ausschüttungen betragen 5 Mio. Euro (2009: 4 Mio. Euro).

beziehungen zu verbundenen, nicht konsolidierten Tochtergesellschaften, zu Joint Ventures und Beteiligungen sowie zu den Mitgliedern des Vorstands und des Aufsichtsrats der BMW AG betroffen.

Die BMW Group unterhält zu verbundenen, nicht konsolidierten Tochtergesellschaften geschäftsübliche Beziehungen. Die Transaktionen mit diesen Gesellschaften sind von geringem Umfang, resultieren aus dem normalen Geschäftsverkehr und wurden zu marktüblichen Bedingungen abgeschlossen.

Die Transaktionen der Konzernunternehmen mit dem Joint Venture BMW Brilliance Automotive Ltd., Shenyang, sind ausnahmslos der gewöhnlichen Geschäftstätigkeit der jeweils beteiligten Gesellschaften zuzurechnen und wurden zu marktüblichen Bedingungen abgeschlossen. Die von den Konzernunternehmen für BMW Brilliance Automotive Ltd., Shenyang, erbrachten Lieferungen und Leistungen betragen im Berichtsjahr 1.046 Mio. Euro (2009: 532 Mio. Euro). Zum 31. Dezember 2010 beträgt der offene Saldo der Forderungen der Konzernunternehmen gegenüber BMW Brilliance Automotive Ltd., Shenyang, 260 Mio. Euro (2009: 170 Mio. Euro).

Im Geschäftsjahr 2010 wurden von den Konzernunternehmen Darlehen an die Joint Ventures SGL Automotive Carbon Fibers GmbH & Co. KG, München, und SGL Automotive Carbon Fibers LLC, Dover, DE, gewährt. Daraus

|     |   |                                                 |
|-----|---|-------------------------------------------------|
| 74  | — | <b>KONZERNABSCHLUSS</b>                         |
| 74  |   | Gewinn- und -Verlust-Rechnungen                 |
| 74  |   | Gesamtergebnisrechnung                          |
| 76  |   | Bilanzen                                        |
| 78  |   | Kapitalflussrechnungen                          |
| 80  |   | Entwicklung des Konzerneigenkapitals            |
| 81  | — | <b>Konzernanhang</b>                            |
| 81  |   | Grundsätze                                      |
| 89  |   | Erläuterungen zur Gewinn- und -Verlust-Rechnung |
| 95  |   | Erläuterungen zur Gesamtergebnisrechnung        |
| 96  |   | Erläuterungen zur Bilanz                        |
| 117 | — | <b>Sonstige Angaben</b>                         |
| 133 |   | Segmentinformationen                            |

#### 40 — Beziehungen zu nahestehenden Personen

Nach IAS 24 (Related Party Disclosures) müssen Personen oder Unternehmen, die die BMW Group beherrschen oder von ihr beherrscht werden, angegeben werden, soweit sie nicht bereits als konsolidiertes Unternehmen in den Konzernabschluss der BMW Group einbezogen werden. Beherrschung liegt hierbei vor, wenn ein Aktionär mehr als die Hälfte der Stimmrechte an der BMW AG hält oder kraft Satzungsbestimmungen oder vertraglicher Vereinbarungen die Möglichkeit besitzt, die Finanz- und Geschäftspolitik des Managements der BMW Group zu steuern.

Darüber hinaus erstreckt sich die Angabepflicht nach IAS 24 auf Geschäfte mit Beteiligungen, Joint Ventures sowie mit Personen, die einen maßgeblichen Einfluss auf die Finanz- und Geschäftspolitik der BMW Group ausüben, einschließlich naher Familienangehöriger oder zwischengeschalteter Unternehmen. Ein maßgeblicher Einfluss auf die Finanz- und Geschäftspolitik der BMW Group wird bei einem Stimmrechtsanteil an der BMW AG von 20% oder mehr vermutet. Zusätzlich finden die Regelungen des IAS 24 auf alle Personen in Schlüsselpositionen des Unternehmens sowie deren nahe Familienangehörige oder zwischengeschaltete Unternehmen Anwendung. Für die BMW Group trifft dies auf die Mitglieder des Vorstands und des Aufsichtsrats zu.

Die BMW Group ist im Geschäftsjahr 2010 von den Angabepflichten des IAS 24 in Bezug auf die Geschäfts-

resultiert zum 31. Dezember 2010 ein offener Saldo an Forderungen der Konzernunternehmen gegenüber den Joint Ventures von 20 Mio. Euro (2009: – Mio. Euro). Die Darlehen wurden zu marktüblichen Bedingungen ausgereicht. Die weiteren Geschäftsbeziehungen mit den genannten Joint Ventures wurden zu marktüblichen Konditionen abgeschlossen und sind für die BMW Group von unwesentlichem Umfang.

Die Geschäftsbeziehungen der BMW Group mit Beteiligungen sind ausnahmslos der gewöhnlichen Geschäftstätigkeit der jeweils beteiligten Gesellschaften zuzurechnen und wurden zu marktüblichen Bedingungen abgeschlossen. Mit Ausnahme der Geschäftsbeziehungen zur Cirquent GmbH, München, sind diese von geringem Umfang. Die von den Konzernunternehmen empfangenen Lieferungen und Leistungen der Cirquent GmbH, München, betragen im abgelaufenen Geschäftsjahr 56 Mio. Euro (2009: 52 Mio. Euro). Zum 31. Dezember 2010 beträgt der offene Saldo an Verbindlichkeiten der Konzernunternehmen gegenüber der Cirquent GmbH, München, 4 Mio. Euro (2009: 10 Mio. Euro). Zum Bilanzstichtag bestehen keine Forderungen der Konzernunternehmen gegenüber der Cirquent GmbH, München (2009: 1 Mio. Euro).

Herr Stefan Quandt ist Aktionär und stellvertretender Vorsitzender des Aufsichtsrats der BMW AG. Er ist darüber hinaus alleiniger Gesellschafter und Vorsitzender des Aufsichtsrats der DELTON AG, Bad Homburg v. d. H., die im Geschäftsjahr 2010 gegenüber der BMW Group Dienstleistungen im Bereich der Logistik über ihre Tochtergesellschaften erbracht hat. Außerdem haben die Unternehmen der DELTON-Gruppe von der BMW Group Fahrzeuge vorwiegend im Wege des Leasings zu marktüblichen Bedingungen erhalten. Die vorbenannten Dienst-

leistungs- und Kaufverträge sind für die BMW Group von untergeordneter Bedeutung. Sie resultieren aus der gewöhnlichen Geschäftstätigkeit und wurden ausnahmslos zu marktüblichen Bedingungen abgeschlossen.

Frau Susanne Klatten ist Aktionärin und Mitglied des Aufsichtsrats der BMW AG sowie Aktionärin und stellvertretende Vorsitzende des Aufsichtsrats der Altana AG, Wesel. Die Altana AG, Wesel, hat im Geschäftsjahr 2010 von der BMW Group Fahrzeuge bezogen. Darüber hinaus ist Frau Susanne Klatten Anteilseignerin und Mitglied des Aufsichtsrats der SGL Carbon SE, Wiesbaden, deren Tochtergesellschaften im Geschäftsjahr 2010 Komponenten an die BMW Group geliefert haben. Daneben hält sie Anteile an der Nordex AG, Norderstedt. Die entsprechenden Kaufverträge sind für die BMW Group von untergeordneter Bedeutung, resultieren aus der gewöhnlichen Geschäftstätigkeit und wurden ausnahmslos zu marktüblichen Bedingungen abgeschlossen.

Darüber hinaus haben Unternehmen der BMW Group mit Mitgliedern des Vorstands oder des Aufsichtsrats der BMW AG keine wesentlichen Geschäfte vorgenommen. Dies gilt auch für nahe Familienangehörige dieses Personenkreises.

Der BMW Trust e.V., München, verwaltet treuhänderisch das Fondsvermögen zur Sicherung der Pensionsverpflichtungen und Verpflichtungen aus Altersteilzeit in Deutschland und ist dadurch eine nahestehende Person der BMW Group nach IAS 24. Der Verein besitzt kein eigenes Vermögen. Er hat im Berichtsjahr weder Einnahmen erzielt noch Ausgaben getätigt. Die BMW AG trägt Aufwendungen des BMW Trust e.V., München, in unwesentlichem Umfang und erbringt Serviceleistungen für diesen.

#### 41 – Wesentliche verbundene Unternehmen der BMW AG

|                                                                           | Eigenkapital<br>in Mio. Euro | Ergebnis<br>in Mio. Euro | Kapitalanteil<br>in % |
|---------------------------------------------------------------------------|------------------------------|--------------------------|-----------------------|
| <b>Inland<sup>1</sup></b>                                                 |                              |                          |                       |
| BMW INTEC Beteiligungs GmbH, München <sup>2</sup>                         | 3.554                        | –                        | 100                   |
| BMW Bank GmbH, München <sup>2</sup>                                       | 1.016                        | –                        | 100                   |
| BMW Finanz Verwaltungs GmbH, München                                      | 212                          | 1                        | 100                   |
| BMW Maschinenfabrik Spandau GmbH, Berlin                                  | 45                           | 1                        | 100                   |
| BMW Leasing GmbH, München <sup>2</sup>                                    | 16                           | –                        | 100                   |
| BMW Hams Hall Motoren GmbH, München <sup>3</sup>                          | 15                           | –                        | 100                   |
| BMW Fahrzeugtechnik GmbH, Eisenach <sup>2</sup>                           | 11                           | –                        | 100                   |
| BMW M GmbH Gesellschaft für individuelle Automobile, München <sup>2</sup> | – <sup>4</sup>               | –                        | 100                   |

<sup>1</sup> Die Werte bei den inländischen verbundenen Unternehmen entsprechen den nach HGB-Vorschriften aufgestellten Abschlüssen.

<sup>2</sup> Ergebnisübernahmevertrag mit der BMW AG

<sup>3</sup> Ergebnisübernahmevertrag mit einer Tochtergesellschaft der BMW AG

<sup>4</sup> unter 500.000 Euro

|                                                 | Eigenkapital<br>in Mio. Euro | Ergebnis<br>in Mio. Euro | Kapitalanteil<br>in % |
|-------------------------------------------------|------------------------------|--------------------------|-----------------------|
| <b>Ausland*</b>                                 |                              |                          |                       |
| BMW Österreich Holding GmbH, Steyr              | 1.168                        | 538                      | 100                   |
| BMW China Automotive Trading Ltd., Peking       | 1.051                        | 947                      | 100                   |
| BMW Motoren GmbH, Steyr                         | 764                          | 123                      | 100                   |
| BMW Russland Trading OOO, Moskau                | 199                          | 117                      | 100                   |
| BMW Austria Gesellschaft m.b.H., Salzburg       | 49                           | -1                       | 100                   |
| BMW Holding B.V., Den Haag                      | 6.072                        | 907                      | 100                   |
| BMW (South Africa) (Pty) Ltd., Pretoria         | 628                          | 144                      | 100                   |
| BMW Finance N.V., Den Haag                      | 398                          | 43                       | 100                   |
| — BMW Overseas Enterprises N.V., Willemstad     | 66                           | -                        | 100                   |
| BMW (Schweiz) AG, Dielsdorf                     | 364                          | 62                       | 100                   |
| BMW Japan Corp., Tokio                          | 362                          | 265                      | 100                   |
| — BMW Japan Finance Corp., Tokio                | 292                          | 31                       | 100                   |
| BMW Italia S.p.A., Mailand                      | 354                          | -36                      | 100                   |
| BMW Australia Finance Ltd., Melbourne, Victoria | 223                          | 35                       | 100                   |
| BMW Belgium Luxembourg S.A./N.V., Bornem        | 216                          | 5                        | 100                   |
| BMW Canada Inc., Whitby                         | 128                          | 67                       | 100                   |
| BMW France S.A., Montigny-le-Bretonneux         | 126                          | -65                      | 100                   |
| BMW Sverige AB, Stockholm                       | 52                           | 34                       | 100                   |
| BMW Korea Co., Ltd., Seoul                      | 44                           | 31                       | 100                   |
| BMW Portugal Lda., Lissabon                     | 44                           | 1                        | 100                   |
| BMW Automotive (Ireland) Ltd., Dublin           | 19                           | -2                       | 100                   |
| BMW Hellas Trade of Cars SA, Athen              | 13                           | -13                      | 100                   |
| BMW New Zealand Ltd., Auckland                  | 10                           | 1                        | 100                   |
| BMW Nederland B.V., Den Haag                    | -2                           | 4                        | 100                   |
| BMW Australia Ltd., Melbourne, Victoria         | -100                         | 17                       | 100                   |
| BMW (UK) Holdings Ltd., Bracknell               | 537                          | -30                      | 100                   |
| BMW (UK) Manufacturing Ltd., Bracknell          | 1.037                        | 24                       | 100                   |
| BMW (UK) Ltd., Bracknell                        | 738                          | 31                       | 100                   |
| BMW Financial Services (GB) Ltd., Hook          | 341                          | 107                      | 100                   |
| BMW (UK) Capital plc, Bracknell                 | 218                          | 61                       | 100                   |
| BMW Malta Ltd., St. Julians                     | 1.038                        | 84                       | 100                   |
| — BMW Malta Finance Ltd., St. Julians           | 882                          | 42                       | 100                   |
| — BMW Coordination Center V.o.F., Bornem        | 592                          | -                        | 100                   |
| BMW España Finance S.L., Madrid                 | 369                          | 4                        | 100                   |
| — BMW Ibérica S.A., Madrid                      | 305                          | 2                        | 100                   |
| — BMW de Mexico, S.A. de C.V., Mexico City      | 12                           | 16                       | 100                   |
| BMW (US) Holding Corporation, Wilmington, DE    | 1.264                        | -6                       | 100                   |
| BMW Financial Services NA, LLC, Wilmington, DE  | 732                          | 261                      | 100                   |
| BMW Manufacturing, LLC, Wilmington, DE          | 683                          | 63                       | 100                   |
| BMW of North America, LLC, Wilmington, DE       | 362                          | 25                       | 100                   |
| BMW US Capital, LLC, Wilmington, DE             | 309                          | 12                       | 100                   |

\* Die Werte bei den ausländischen verbundenen Unternehmen entsprechen den nach einheitlichen IFRSs aufgestellten Abschlüssen. Die Umrechnung der Auslandswerte erfolgt für Eigenkapital und Ergebnis mit dem Stichtagskurs.

## 74 — KONZERNABSCHLUSS

74 Gewinn-und-Verlust-Rechnungen

74 Gesamtergebnisrechnung

76 Bilanzen

78 Kapitalflussrechnungen

80 Entwicklung des

Konzernerneigenkapitals

## 81 — Konzernanhang

81 Grundsätze

89 Erläuterungen zur

Gewinn-und-Verlust-

Rechnung

95 Erläuterungen zur

Gesamtergebnisrechnung

96 Erläuterungen zur Bilanz

117 — Sonstige Angaben

133 Segmentinformationen

**42 – Erklärung zum Corporate Governance Kodex**

Der Vorstand und Aufsichtsrat der Bayerische Motoren Werke Aktiengesellschaft haben die nach § 161 AktG vorgeschriebene Entsprechenserklärung abgegeben. Sie ist

auf Seite 142 zu finden und wurde darüber hinaus den Aktionären auf der Homepage unter [www.bmwgroup.com/ir](http://www.bmwgroup.com/ir) dauerhaft zugänglich gemacht.

**43 – Aktienbesitz von Mitgliedern des Vorstands und des Aufsichtsrats**

Die Mitglieder des Aufsichtsrats der BMW AG halten in Summe 27,66% der Stamm- und Vorzugsaktien. Auf Herrn Stefan Quandt, Bad Homburg v. d. H., entfallen

16,10% und auf Frau Susanne Klatten, München, 11,56%. Der Aktienbesitz der Mitglieder des Vorstands der BMW AG beläuft sich insgesamt auf weniger als 1% der ausgegebenen Aktien.

**44 – Vergütung für Mitglieder des Vorstands und des Aufsichtsrats**

Die Vergütung für die aktiven Mitglieder des Vorstands und des Aufsichtsrats beträgt insgesamt 22,2 Mio. Euro (2009: 13,0 Mio. Euro) und gliedert sich wie folgt:

| in Mio. Euro                                        | 2010        | 2009        |
|-----------------------------------------------------|-------------|-------------|
| Kurzfristig fällige Leistungen                      | 21,3        | 12,3        |
| Leistungen nach Beendigung des Arbeitsverhältnisses | 0,9         | 0,7         |
| <b>Vergütung</b>                                    | <b>22,2</b> | <b>13,0</b> |

Die Bezüge für die Mitglieder des Vorstands betragen für das Geschäftsjahr 2010 18,2 Mio. Euro (2009: 10,7 Mio. Euro). Davon entfallen auf fixe Bestandteile 3,7 Mio. Euro (2009: 3,7 Mio. Euro) und auf variable Bestandteile 14,5 Mio. Euro (2009: 7,0 Mio. Euro).

Ferner sind für aktive Mitglieder des Vorstands Leistungen nach Beendigung des Arbeitsverhältnisses in Höhe von 0,9 Mio. Euro (2009: 0,7 Mio. Euro) angefallen. Hierbei handelt es sich um Aufwendungen für die Dotierung von Pensionsrückstellungen (service costs). Die Pensionsverpflichtungen gegenüber aktiven Mitgliedern des Vorstands sind nach IAS 19 mit 17,4 Mio. Euro (2009: 13,8 Mio. Euro) zurückgestellt.

Bezüge ehemaliger Vorstandsmitglieder und ihrer Hinterbliebenen betragen 3,7 Mio. Euro (2009: 3,8 Mio. Euro).

Die Pensionsverpflichtungen gegenüber früheren Mitgliedern des Vorstands und ihren Hinterbliebenen sind nach IAS 19 mit 49,7 Mio. Euro (2009: 46,7 Mio. Euro) zurückgestellt.

Die Vergütung für die Mitglieder des Aufsichtsrats beträgt für das Geschäftsjahr 2010 3,1 Mio. Euro (2009: 1,6 Mio. Euro). Davon entfallen auf fixe Bestandteile 1,6 Mio. Euro (2009: 1,6 Mio. Euro) und auf variable Bestandteile 1,5 Mio. Euro (2009: – Mio. Euro).

Die Vergütungssysteme für Mitglieder des Vorstands und des Aufsichtsrats enthalten keine Aktienoptionen, Wertzuwachsrechte, die Aktienoptionen nachgebildet sind, und keine anderen aktienbasierten Vergütungskomponenten.

Mitgliedern des Vorstands und des Aufsichtsrats wurden vom Unternehmen weder Kredite oder Vorschüsse gewährt noch wurden zu ihren Gunsten Haftungsverhältnisse eingegangen.

Weitere Einzelheiten zu den Bezügen der aktiven Mitglieder des Vorstands und des Aufsichtsrats finden sich im Vergütungsbericht auf den Seiten 154 bis 161. Der Vergütungsbericht stellt einen Teil des Lageberichts dar.

Die Mitglieder des Aufsichtsrats und des Vorstands sind auf den Seiten 143 bis 146 genannt.

#### 45 – Inanspruchnahme des § 264 Abs. 3 bzw. des § 264 b HGB

Einige Kapitalgesellschaften und Personenhandelsgesellschaften im Sinne des § 264 a HGB, die verbundene, konsolidierte Unternehmen der BMW AG sind und für die der Konzernabschluss der BMW AG der befreiende Konzernabschluss ist, nehmen die Befreiungsmöglichkeit des § 264 Abs. 3 bzw. des § 264 b HGB hinsichtlich der Erstellung eines Lageberichts in Anspruch:

- Bavaria Wirtschaftsagentur GmbH, München
- BMW Fahrzeugtechnik GmbH, Eisenach
- BMW Hams Hall Motoren GmbH, München
- BMW M GmbH Gesellschaft für individuelle Automobile, München
- BMW Vertriebs GmbH & Co. oHG, Dingolfing
- Rolls-Royce Motor Cars GmbH, München

Darüber hinaus nehmen die folgenden Gesellschaften die Befreiungsmöglichkeit des § 264 Abs. 3 bzw. des § 264 b HGB hinsichtlich der Offenlegung in Anspruch:

- Bavaria Wirtschaftsagentur GmbH, München
- BMW Fuhrparkmanagement Beteiligungs GmbH, München
- BMW Hams Hall Motoren GmbH, München
- BMW INTEC Beteiligungs GmbH, München
- BMW Vertriebs GmbH & Co. oHG, Dingolfing
- Rolls-Royce Motor Cars GmbH, München

#### 74 — KONZERNABSCHLUSS

74 Gewinn-und-Verlust-Rechnungen

74 Gesamtergebnisrechnung

76 Bilanzen

78 Kapitalflussrechnungen

80 Entwicklung des Konzerneigenkapitals

#### 81 — Konzernanhang

81 Grundsätze

89 Erläuterungen zur Gewinn-und-Verlust-Rechnung

95 Erläuterungen zur Gesamtergebnisrechnung

96 Erläuterungen zur Bilanz

117 — Sonstige Angaben

133 — Segmentinformationen

BMW Group  
Konzernanhang  
Segmentinformationen

#### 46 – Erläuterungen zur Segmentberichterstattung

##### Informationen zu den berichtspflichtigen Segmenten

Im Rahmen der Segmentberichterstattung werden die Aktivitäten der BMW Group gemäß IFRS 8 (Operating Segments) nach Geschäftssegmenten abgegrenzt. Diese Aufgliederung orientiert sich an der internen Steuerung sowie Berichterstattung und berücksichtigt die organisatorische Ausrichtung der BMW Group auf Basis unterschiedlicher Produkte und Dienstleistungen der berichtspflichtigen Segmente.

Die Aktivitäten der BMW Group werden in die Geschäftssegmente Automobile, Motorräder, Finanzdienstleistungen und Sonstige Gesellschaften aufgeteilt.

Im Segment Automobile entwickelt, fertigt, montiert und vertreibt die BMW Group unter den Marken BMW, MINI und Rolls-Royce Personenwagen einschließlich geländegängiger Fahrzeuge sowie Ersatzteile und Zubehör. Der Vertrieb von Produkten der Marken BMW und MINI erfolgt in Deutschland durch die Niederlassungen der BMW AG und rechtlich selbstständige Vertragshändler. Der Auslandsvertrieb wird überwiegend von Tochterunternehmen und in einigen Märkten von unabhängigen Importeuren besorgt. Der Vertrieb von Fahrzeugen der Marke Rolls-Royce erfolgt in den USA über ein Tochterunternehmen, in den übrigen Märkten durch selbstständige Vertragshändler.

Im Segment Motorräder sind die Entwicklung, Fertigung, Montage und der Vertrieb von Motorrädern der Marken BMW und Husqvarna einschließlich des Ersatzteil- und Zubehörgeschäfts ausgewiesen.

Dem Segment Finanzdienstleistungen sind im Wesentlichen das Leasing von Automobilen, das Flottengeschäft, die Kreditfinanzierung für Kunden und Händler, das Einlagengeschäft sowie das Versicherungsgeschäft zugeordnet.

Im Segment Sonstige Gesellschaften werden die Holding- und Konzernfinanzierungsgesellschaften ausgewiesen. Ferner sind in diesem Segment die operativen, nicht den übrigen Segmenten zugeordneten Gesellschaften BMW Services Ltd., Bracknell, BMW (UK) Investments Ltd., Bracknell, Bavaria Lloyd Reisebüro GmbH, München, und MITEC Mikroelektronik Mikrotechnik Informatik GmbH, Dingolfing, enthalten.

Die Konsolidierungen umfassen die Konsolidierungen der Geschäftsbeziehungen zwischen den Geschäftssegmenten.

##### Interne Steuerung und Berichterstattung

Den Segmentinformationen liegen grundsätzlich die gleichen Ausweis-, Bilanzierungs- und Bewertungsmethoden wie dem Konzernabschluss zugrunde. Es gibt keine Änderungen der Bewertungsmethoden im Vergleich zu früheren Perioden. Forderungen und Verbindlichkeiten, Rückstellungen, Erträge und Aufwendungen sowie Ergebnisse zwischen den Segmenten werden in den Konsolidierungen eliminiert. Konzerninterne Umsätze erfolgen zu marktüblichen Preisen.

Entscheidungsträger im Hinblick auf die Ressourcenallokation und die Bewertung der Ertragskraft der berichtspflichtigen Segmente ist der Gesamtvorstand. In den jeweiligen Geschäftssegmenten werden hierzu unterschiedliche Erfolgs- und Vermögensgrößen herangezogen.

Die Segmente Automobile und Motorräder werden auf Basis des Ergebnisses vor Finanzergebnis gesteuert. Als korrespondierende Vermögensgröße zur Beurteilung der Ressourcenallokation dient das eingesetzte Kapital. Das eingesetzte Kapital besteht aus dem eingesetzten Vermögen, das die operativen langfristigen und kurzfristigen Vermögenswerte beinhaltet, bereinigt um das Abzugskapital. Das Abzugskapital umfasst die Kapitalanteile, die dem operativen Geschäft zinslos zur Verfügung stehen, wie beispielsweise Verbindlichkeiten aus Lieferungen und Leistungen.

Im Segment Finanzdienstleistungen wird der Erfolg anhand des Ergebnisses vor Steuern gemessen. Basis für die Beurteilung der Ressourcenallokation stellt das Nettovermögen dar. Das Nettovermögen umfasst sämtliche Vermögenswerte abzüglich der Gesamtschulden.

Der Erfolg des Segments Sonstige Gesellschaften wird nach dem Ergebnis vor Steuern beurteilt. Der korrespondierende Vermögenswert zur Steuerung der Sonstigen Gesellschaften sind die Aktiva abzüglich der Steuerforderungen und der Finanzanlagen.

Die Segmentinformationen nach Geschäftsfeldern stellen sich wie folgt dar:

**Segmentinformationen nach Geschäftsfeldern**

|                                                | Automobile    |               | Motorräder   |              |
|------------------------------------------------|---------------|---------------|--------------|--------------|
| in Mio. Euro                                   | 2010          | 2009          | 2010         | 2009         |
| Umsätze mit Fremden                            | 44.221        | 35.613        | 1.291        | 1.059        |
| Umsätze mit anderen Segmenten                  | 9.916         | 8.124         | 13           | 10           |
| <b>Umsätze gesamt</b>                          | <b>54.137</b> | <b>43.737</b> | <b>1.304</b> | <b>1.069</b> |
| Segmentergebnis                                | 4.355         | -265          | 71           | 19           |
| Investitionen in langfristige Vermögenswerte   | 3.355         | 3.606         | 70           | 52           |
| Abschreibungen auf langfristige Vermögenswerte | 3.592         | 3.509         | 74           | 73           |

|                       | Automobile |            | Motorräder |            |
|-----------------------|------------|------------|------------|------------|
| in Mio. Euro          | 31.12.2010 | 31.12.2009 | 31.12.2010 | 31.12.2009 |
| Segmentvermögenswerte | 9.665      | 11.887     | 402        | 389        |

74 — **KONZERNABSCHLUSS**

74 Gewinn-und-Verlust-Rechnungen

74 Gesamtergebnisrechnung

76 Bilanzen

78 Kapitalflussrechnungen

80 Entwicklung des Konzerneigenkapitals

81 — **Konzernanhang**

81 Grundsätze

89 Erläuterungen zur Gewinn-und-Verlust-Rechnung

95 Erläuterungen zur Gesamtergebnisrechnung

96 Erläuterungen zur Bilanz

117 Sonstige Angaben

133 — **Segmentinformationen**



| Finanzdienstleistungen |               | Sonstige Gesellschaften |          | Überleitung auf Konzernwert |               | Konzern       |               |                                                |
|------------------------|---------------|-------------------------|----------|-----------------------------|---------------|---------------|---------------|------------------------------------------------|
| 2010                   | 2009          | 2010                    | 2009     | 2010                        | 2009          | 2010          | 2009          |                                                |
| <b>14.964</b>          | 14.008        | <b>1</b>                | 1        | -                           | -             | <b>60.477</b> | 50.681        | Umsätze mit Fremden                            |
| <b>1.653</b>           | 1.790         | <b>3</b>                | 2        | <b>-11.585</b>              | -9.926        | -             | -             | Umsätze mit anderen Segmenten                  |
| <b>16.617</b>          | <b>15.798</b> | <b>4</b>                | <b>3</b> | <b>-11.585</b>              | <b>-9.926</b> | <b>60.477</b> | <b>50.681</b> | <b>Umsätze gesamt</b>                          |
| <b>1.214</b>           | 365           | <b>45</b>               | 51       | <b>-849</b>                 | 243           | <b>4.836</b>  | 413           | Segmentergebnis                                |
| <b>11.736</b>          | 10.246        | -                       | -        | <b>-2.564</b>               | -1.787        | <b>12.597</b> | 12.117        | Investitionen in langfristige Vermögenswerte   |
| <b>4.845</b>           | 5.757         | -                       | -        | <b>-2.012</b>               | -2.050        | <b>6.499</b>  | 7.289         | Abschreibungen auf langfristige Vermögenswerte |

| Finanzdienstleistungen |            | Sonstige Gesellschaften |            | Überleitung auf Konzernwert |            | Konzern        |            |                       |
|------------------------|------------|-------------------------|------------|-----------------------------|------------|----------------|------------|-----------------------|
| 31.12.2010             | 31.12.2009 | 31.12.2010              | 31.12.2009 | 31.12.2010                  | 31.12.2009 | 31.12.2010     | 31.12.2009 |                       |
| <b>5.216</b>           | 4.268      | <b>44.985</b>           | 40.400     | <b>48.599</b>               | 45.009     | <b>108.867</b> | 101.953    | Segmentvermögenswerte |

Die Zinsen und ähnlichen Erträge des Segments Finanzdienstleistungen sind Bestandteil des Segmentergebnisses und betragen im abgelaufenen Geschäftsjahr 4 Mio. Euro (2009: 3 Mio. Euro). Die Zinsen und ähnlichen Aufwendungen des Segments Finanzdienstleistungen belaufen sich auf 7 Mio. Euro (2009: 8 Mio. Euro). Im Segmentergebnis des Segments Sonstige Gesellschaften sind Zinsen und ähnliche Erträge in Höhe von 1.984 Mio. Euro (2009: 1.778 Mio. Euro) und Zinsen und ähnliche Aufwendungen in Höhe von 2.058 Mio. Euro (2009: 1.852 Mio. Euro) enthalten.

Das Ergebnis aus Equity-Bewertung des Segments Sonstige Gesellschaften ist Bestandteil des Segmentergeb-

nisses und beläuft sich für das abgelaufene Geschäftsjahr auf 0 Mio. Euro (2009: -6 Mio. Euro).

Im Segmentvermögen des Segments Sonstige Gesellschaften sind At-Equity bewertete Beteiligungen in Höhe von 23 Mio. Euro enthalten (2009: 23 Mio. Euro).

Die Angaben zu den Investitionen und Abschreibungen beziehen sich auf die langfristigen Vermögenswerte Sachanlagen, Immaterielle Vermögenswerte und Vermietete Gegenstände.

Die Überleitungen der Summen der Segmentgrößen auf die entsprechenden Konzerngrößen stellen sich wie folgt dar:

| in Mio. Euro                                                  | 2010           | 2009           |
|---------------------------------------------------------------|----------------|----------------|
| Überleitung Segmentergebnis                                   |                |                |
| — Summe der Segmente                                          | 5.685          | 170            |
| — Finanzergebnis Automobile und Motorräder                    | -474           | -331           |
| — Segmentübergreifende Konsolidierungen                       | -375           | 574            |
| <b>Ergebnis vor Steuern Konzern</b>                           | <b>4.836</b>   | <b>413</b>     |
| Überleitung Investitionen in langfristige Vermögenswerte      |                |                |
| — Summe der Segmente                                          | 15.161         | 13.904         |
| — Segmentübergreifende Konsolidierungen                       | -2.564         | -1.787         |
| <b>Investitionen in langfristige Vermögenswerte Konzern</b>   | <b>12.597</b>  | <b>12.117</b>  |
| Überleitung Abschreibungen auf langfristige Vermögenswerte    |                |                |
| — Summe der Segmente                                          | 8.511          | 9.339          |
| — Segmentübergreifende Konsolidierungen                       | -2.012         | -2.050         |
| <b>Abschreibungen auf langfristige Vermögenswerte Konzern</b> | <b>6.499</b>   | <b>7.289</b>   |
| Überleitung Segmentvermögenswerte                             |                |                |
| — Summe der Segmente                                          | 60.268         | 56.944         |
| — Nicht operative Aktiva Sonstige Gesellschaften              | 5.414          | 5.797          |
| — Operative Schulden Finanzdienstleistungen                   | 68.487         | 67.008         |
| — Verzinsliche Aktiva Automobile und Motorräder               | 30.300         | 25.826         |
| — Abzugskapital Automobile und Motorräder                     | 18.971         | 15.541         |
| — Segmentübergreifende Konsolidierungen                       | -74.573        | -69.163        |
| <b>Summe Aktiva Konzern</b>                                   | <b>108.867</b> | <b>101.953</b> |

## 74 — KONZERNABSCHLUSS

74 Gewinn-und-Verlust-Rechnungen

74 Gesamtergebnisrechnung

76 Bilanzen

78 Kapitalflussrechnungen

80 Entwicklung des Konzerneigenkapitals

## 81 — Konzernanhang

81 Grundsätze

89 Erläuterungen zur Gewinn-und-Verlust-Rechnung

95 Erläuterungen zur Gesamtergebnisrechnung

96 Erläuterungen zur Bilanz

117 Sonstige Angaben

133 — Segmentinformationen

Bei den Informationen nach Regionen richten sich die Außenumsätze nach dem Sitz der Kunden. Umsätze mit Großkunden sind nicht wesentlich. Die Angaben zu den Langfristigen Vermögenswerten beziehen sich auf die

Sachanlagen, Immateriellen Vermögenswerte und Vermieteten Gegenstände. Konsolidierungen bei den Langfristigen Vermögenswerten betreffen die Vermieteten Gegenstände.

#### Informationen nach Regionen

| in Mio. Euro     | Außenumsätze  |               | Langfristige Vermögenswerte |               |
|------------------|---------------|---------------|-----------------------------|---------------|
|                  | 2010          | 2009          | 2010                        | 2009          |
| Deutschland      | 11.207        | 11.436        | 21.257                      | 21.136        |
| USA              | 11.638        | 10.628        | 9.380                       | 9.836         |
| China            | 8.444         | 4.039         | 9                           | 9             |
| Übriges Europa   | 18.581        | 16.989        | 4.784                       | 4.751         |
| Übriges Amerika  | 2.530         | 1.805         | 1.273                       | 1.246         |
| Sonstige         | 8.077         | 5.784         | 805                         | 581           |
| Konsolidierungen | -             | -             | -3.259                      | -2.822        |
| <b>Konzern</b>   | <b>60.477</b> | <b>50.681</b> | <b>34.249</b>               | <b>34.737</b> |

München, den 15. Februar 2011

**Bayerische Motoren Werke**  
Aktiengesellschaft

Der Vorstand

Dr.-Ing. Norbert Reithofer

Frank-Peter Arndt

Dr.-Ing. Herbert Diess

Dr.-Ing. Klaus Draeger

Dr. Friedrich Eichiner

Harald Krüger

Ian Robertson

**Erklärung gemäß § 37y Nr. 1 WpHG i. V. m. §§ 297 Abs. 2 Satz 4 und 315 Abs. 1 Satz 6 HGB**

„Nach bestem Wissen versichern wir, dass gemäß den anzuwendenden Rechnungslegungsgrundsätzen der Konzernabschluss ein den tatsächlichen Verhältnissen entsprechendes Bild der Vermögens-, Finanz- und Ertragslage des Konzerns vermittelt und im Konzernlagebericht der Geschäftsverlauf einschließlich des Geschäftsergebnisses und die Lage des Konzerns so dargestellt sind, dass ein den tatsächlichen Verhältnissen entsprechendes Bild vermittelt wird sowie die wesentlichen Chancen und Risiken der voraussichtlichen Entwicklung des Konzerns beschrieben sind.“

München, den 15. Februar 2011

**Bayerische Motoren Werke**  
Aktiengesellschaft

Der Vorstand

Dr.-Ing. Norbert Reithofer

Frank-Peter Arndt

Dr.-Ing. Herbert Diess

Dr.-Ing. Klaus Draeger

Dr. Friedrich Eichiner

Harald Krüger

Ian Robertson

74 — **KONZERNABSCHLUSS**

|     |                                               |
|-----|-----------------------------------------------|
| 74  | Gewinn-und-Verlust-Rechnungen                 |
| 74  | Gesamtergebnisrechnung                        |
| 76  | Bilanzen                                      |
| 78  | Kapitalflussrechnungen                        |
| 80  | Entwicklung des Konzerneigenkapitals          |
| 81  | Konzernanhang                                 |
| 81  | Grundsätze                                    |
| 89  | Erläuterungen zur Gewinn-und-Verlust-Rechnung |
| 95  | Erläuterungen zur Gesamtergebnisrechnung      |
| 96  | Erläuterungen zur Bilanz                      |
| 117 | Sonstige Angaben                              |
| 133 | Segmentinformationen                          |

BMW Group  
Bestätigungsvermerk des Abschlussprüfers

Wir haben den von der Bayerische Motoren Werke Aktiengesellschaft aufgestellten Konzernabschluss – bestehend aus Gewinn- und Verlustrechnung sowie Gesamtergebnisrechnung, Bilanz, Kapitalflussrechnung, Entwicklung des Konzerneigenkapitals und Konzernanhang – sowie ihren Bericht über die Lage der Gesellschaft und des Konzerns für das Geschäftsjahr vom 1. Januar bis zum 31. Dezember 2010 geprüft. Die Aufstellung von Konzernabschluss und Konzernlagebericht nach den IFRS, wie sie in der EU anzuwenden sind, und den ergänzend nach § 315 a Abs. 1 HGB anzuwendenden handelsrechtlichen Vorschriften liegt in der Verantwortung des Vorstands der Gesellschaft. Unsere Aufgabe ist es, auf der Grundlage der von uns durchgeführten Prüfung eine Beurteilung über den Konzernabschluss und den Konzernlagebericht abzugeben.

Wir haben unsere Konzernabschlussprüfung nach § 317 HGB unter Beachtung der vom Institut der Wirtschaftsprüfer (IDW) festgestellten deutschen Grundsätze ordnungsmäßiger Abschlussprüfung vorgenommen. Danach ist die Prüfung so zu planen und durchzuführen, dass Unrichtigkeiten und Verstöße, die sich auf die Darstellung des durch den Konzernabschluss unter Beachtung der anzuwendenden Rechnungslegungsvorschriften und durch den Konzernlagebericht vermittelten Bildes der Vermögens-, Finanz- und Ertragslage wesentlich auswirken, mit hinreichender Sicherheit erkannt werden. Bei der Festlegung der Prüfungshandlungen werden die Kenntnisse über die Geschäftstätigkeit und über das wirtschaftliche

und rechtliche Umfeld des Konzerns sowie die Erwartungen über mögliche Fehler berücksichtigt. Im Rahmen der Prüfung werden die Wirksamkeit des rechnungslegungsbezogenen internen Kontrollsystems sowie Nachweise für die Angaben im Konzernabschluss und Konzernlagebericht überwiegend auf der Basis von Stichproben beurteilt. Die Prüfung umfasst die Beurteilung der Jahresabschlüsse der in den Konzernabschluss einbezogenen Unternehmen, der Abgrenzung des Konsolidierungskreises, der angewandten Bilanzierungs- und Konsolidierungsgrundsätze und der wesentlichen Einschätzungen des Vorstands sowie die Würdigung der Gesamtdarstellung des Konzernabschlusses und des Konzernlageberichts. Wir sind der Auffassung, dass unsere Prüfung eine hinreichend sichere Grundlage für unsere Beurteilung bildet.

Unsere Prüfung hat zu keinen Einwendungen geführt.

Nach unserer Beurteilung auf Grund der bei der Prüfung gewonnenen Erkenntnisse entspricht der Konzernabschluss den IFRS, wie sie in der EU anzuwenden sind, und den ergänzend nach § 315 a Abs. 1 HGB anzuwendenden handelsrechtlichen Vorschriften und vermittelt unter Beachtung dieser Vorschriften ein den tatsächlichen Verhältnissen entsprechendes Bild der Vermögens-, Finanz- und Ertragslage des Konzerns. Der Konzernlagebericht steht in Einklang mit dem Konzernabschluss, vermittelt insgesamt ein zutreffendes Bild von der Lage des Konzerns und stellt die Chancen und Risiken der zukünftigen Entwicklung zutreffend dar.

München, den 25. Februar 2011

**KPMG AG**  
Wirtschaftsprüfungsgesellschaft

|                     |                   |
|---------------------|-------------------|
| Prof. Dr. Schindler | Pastor            |
| Wirtschaftsprüfer   | Wirtschaftsprüfer |

Corporate Governance, das Handeln nach den Prinzipien verantwortungsvoller, an nachhaltiger Wertschöpfung orientierter Unternehmensführung, ist für die BMW Group ein umfassender Anspruch, der alle Bereiche des Unternehmens einbezieht. Transparente Berichterstattung und Unternehmenskommunikation, eine an den Interessen aller Stakeholder ausgerichtete Unternehmensführung, die vertrauensvolle Zusammenarbeit sowohl von Vorstand und Aufsichtsrat als auch der Mitarbeiter untereinander sowie die Einhaltung geltenden Rechts sind wesentliche Eckpfeiler der Unternehmenskultur. Der Vorstand berichtet in dieser Erklärung, zugleich auch für den Aufsichtsrat, gemäß § 289 a HGB und gemäß Ziffer 3.10 Deutscher Corporate Governance Kodex („DCGK“) über wichtige Aspekte der Unternehmensführung.

#### Grundlegendes zur Unternehmensverfassung

Die Bezeichnung BMW Group umfasst die Bayerische Motoren Werke Aktiengesellschaft (BMW AG) und ihre Konzerngesellschaften. Die BMW AG ist eine Aktiengesellschaft gemäß deutschem Aktiengesetz. Sie hat drei Organe: Hauptversammlung, Aufsichtsrat und Vorstand. Deren Aufgaben und Befugnisse ergeben sich aus dem Aktiengesetz und der Satzung der BMW AG. Die Aktionäre als die Eigentümer des Unternehmens üben ihre Rechte in der Hauptversammlung aus. Die Hauptversammlung entscheidet insbesondere über die Verwendung des Bilanzgewinns, die Entlastung der Mitglieder des Vorstands und des Aufsichtsrats, die Bestellung des Abschlussprüfers, Satzungsänderungen sowie bestimmte Kapitalmaßnahmen und wählt Vertreter der Aktionäre in den Aufsichtsrat. Der Vorstand leitet das Unternehmen in eigener Verantwortung. Dabei wird er vom Aufsichtsrat überwacht und beraten. Der Aufsichtsrat bestellt die Mitglieder des Vorstands und kann sie – falls ein wichtiger Grund vorliegt – jederzeit abberufen. Der Vorstand informiert den Aufsichtsrat und berichtet ihm regelmäßig, zeitnah und umfassend entsprechend den Grundsätzen einer gewissenhaften und getreuen Rechenschaft nach Maßgabe des Gesetzes und der vom Aufsichtsrat festgelegten Berichtspflichten. Der Vorstand bedarf für bestimmte, wichtige Geschäfte der Zustimmung des Aufsichtsrats. Der Aufsichtsrat ist jedoch nicht befugt, Maßnahmen der Geschäftsführung zu ergreifen.

Gemäß den Regelungen des deutschen Mitbestimmungsgesetzes für Unternehmen mit in der Regel mehr als 20.000 Arbeitnehmern hat der Aufsichtsrat der BMW AG jeweils aus zehn von der Hauptversammlung gewählten Vertretern der Aktionäre („Aufsichtsratsmitglieder der

Anteilseigner oder Aktionäre“) und zehn Mitgliedern zu bestehen, die nach den Bestimmungen des Mitbestimmungsgesetzes von Arbeitnehmern gewählt werden („Aufsichtsratsmitglieder der Arbeitnehmer“). Die zehn Aufsichtsratsmitglieder der Arbeitnehmer setzen sich zusammen aus sieben unternehmensangehörigen Arbeitnehmern, einschließlich eines leitenden Angestellten, sowie drei Aufsichtsratsmitgliedern, die auf Vorschlag von Gewerkschaften gewählt werden.

Das enge Zusammenspiel zwischen Vorstand und Aufsichtsrat zum Wohl des Unternehmens wird auch als duales Führungssystem (Two-Tier Board Structure) bezeichnet.

Die Besetzung von Vorstand und Aufsichtsrat und der vom Aufsichtsrat gebildeten Ausschüsse ist auf den Seiten 143 ff. dieses Geschäftsberichts nachzulesen. Nähere Informationen zur Arbeitsweise von Vorstand und Aufsichtsrat sind auf den Seiten 147 ff. zu finden.

#### Entsprechenserklärung und BMW Group Corporate Governance Kodex

Vorstand und Aufsichtsrat einer in Deutschland börsennotierten Gesellschaft sind gesetzlich verpflichtet (§ 161 AktG), einmal jährlich zu erklären, ob den amtlich veröffentlichten und zum Erklärungszeitpunkt maßgeblichen Empfehlungen der Regierungskommission Deutscher Corporate Governance Kodex entsprochen wurde und wird. Die Unternehmen sind außerdem verpflichtet, zu erklären, welche Empfehlungen des Kodex nicht angewendet wurden oder werden und warum nicht.

In ihrer gemeinsamen Sitzung im Dezember 2010 haben Vorstand und Aufsichtsrat der BMW AG die jährliche Entsprechenserklärung abgegeben und auf der Internetseite des Unternehmens zugänglich gemacht. Demnach wird die BMW AG den am 2. Juli 2010 im elektronischen Bundesanzeiger bekannt gemachten Empfehlungen (Kodexfassung vom 26. Mai 2010) künftig ohne Ausnahme entsprechen.

Vorstand und Aufsichtsrat haben auf der Basis des DCGK bereits in den vergangenen Jahren einen eigenen Corporate Governance Kodex für die BMW Group verabschiedet, um allen Interessierten ein umfassendes und abgeschlossenes Dokument zu der bei der BMW Group praktizierten Corporate Governance zur Verfügung zu stellen. Im Zusammenhang mit der Neufassung des DCGK wurde auch der Corporate Governance Kodex für die BMW Group überarbeitet. Ein Koordinator für alle

|     |   |                                                                                           |
|-----|---|-------------------------------------------------------------------------------------------|
| 140 | — | <b>ERKLÄRUNG ZUR UNTERNEHMENSFÜHRUNG, CORPORATE GOVERNANCE</b><br>(Teil des Lageberichts) |
| 140 | — | Grundlegendes zur Unternehmensverfassung                                                  |
| 142 | — | Erklärung des Vorstands und des Aufsichtsrats gemäß § 161 AktG                            |
| 143 | — | Mitglieder des Vorstands                                                                  |
| 144 | — | Mitglieder des Aufsichtsrats                                                              |
| 147 | — | Zur Arbeitsweise von Vorstand und Aufsichtsrat                                            |
| 154 | — | Vergütungsbericht                                                                         |
| 162 | — | Angaben zu Unternehmensführungspraktiken                                                  |
| 163 | — | Compliance in der BMW Group                                                               |

mit dem Thema Corporate Governance zusammenhängenden Fragen berichtet direkt und regelmäßig an Vorstand und Aufsichtsrat.

Der Corporate Governance Kodex für die BMW Group ist zusammen mit der Entsprechenserklärung, der Satzung und weiteren Informationen auf der Internetseite der BMW Group unter [www.bmwgroup.com/ir](http://www.bmwgroup.com/ir) unter den Menüpunkten „Fakten zum Unternehmen“ und „Corporate Governance“ abrufbar.

Die Entsprechenserklärung ist im Volltext mit Erläuterungen nochmals auf Seite 142 dieses Geschäftsberichts abgedruckt.

Erklärung des Vorstands und des Aufsichtsrats der Bayerische Motoren Werke Aktiengesellschaft zu den Empfehlungen der „Regierungskommission Deutscher Corporate Governance Kodex“ gemäß § 161 AktG

Vorstand und Aufsichtsrat der Bayerische Motoren Werke Aktiengesellschaft („BMW AG“) erklären zu den Empfehlungen der „Regierungskommission Deutscher Corporate Governance Kodex“:

1. Die BMW AG wird künftig sämtlichen am 2. Juli 2010 im elektronischen Bundesanzeiger bekannt gemachten Empfehlungen (Kodexfassung vom 26. Mai 2010) entsprechen.
2. Seit Abgabe der letzten Erklärung im Dezember 2009 hat die BMW AG sämtlichen am 5. August 2009 im elektronischen Bundesanzeiger bekannt gemachten Empfehlungen (Kodexfassung vom 18. Juni 2009) entsprochen, wie angekündigt mit Ausnahme von Ziffer 3.8 Abs. 3 DCGK: Der für die Mitglieder des Aufsichtsrats vereinbarte Selbstbehalt bei einer D & O Versicherung wurde mit Rücksicht auf unterschiedliche Vermögens- und Einkommensverhältnisse innerhalb des Aufsichtsrats zunächst nicht verändert.

Künftig wird auch dieser Empfehlung entsprochen.

München, im Dezember 2010

**Bayerische Motoren Werke**  
Aktiengesellschaft

Für den Aufsichtsrat

Für den Vorstand

Prof. Dr.-Ing. Joachim Milberg  
Vorsitzender

Dr.-Ing. Norbert Reithofer  
Vorsitzender

|     |   |                                                                                                   |
|-----|---|---------------------------------------------------------------------------------------------------|
| 140 | — | <b>ERKLÄRUNG ZUR<br/>UNTERNEHMENSFÜHRUNG,<br/>CORPORATE GOVERNANCE</b><br>(Teil des Lageberichts) |
| 140 |   | Grundlegendes zur<br>Unternehmensverfassung                                                       |
| 142 | — | <b>Erklärung des Vorstands und des<br/>Aufsichtsrats gemäß § 161 AktG</b>                         |
| 143 | — | <b>Mitglieder des Vorstands</b>                                                                   |
| 144 |   | Mitglieder des Aufsichtsrats                                                                      |
| 147 |   | Zur Arbeitsweise von Vorstand<br>und Aufsichtsrat                                                 |
| 154 |   | Vergütungsbericht                                                                                 |
| 162 |   | Angaben zu Unternehmens-<br>führungspraktiken                                                     |
| 163 |   | Compliance in der BMW Group                                                                       |



## Mitglieder des Vorstands

**Dr.-Ing. Norbert Reithofer** (\*1956)  
Vorsitzender

**Frank-Peter Arndt** (\*1956)  
Produktion

Mandate

- BMW Motoren GmbH (Vorsitzender)
- TÜV Süd AG (seit 16.04.2010)
- BMW (South Africa) (Pty) Ltd. (Vorsitzender)
- Leipziger Messe GmbH

**Dr.-Ing. Herbert Diess** (\*1958)  
Einkauf und Lieferantennetzwerk

**Dr.-Ing. Klaus Draeger** (\*1956)  
Entwicklung

**Dr. Friedrich Eichiner** (\*1955)  
Finanzen

Mandate

- Allianz Deutschland AG
- BMW Brilliance Automotive Ltd. (stellv. Vorsitzender)

**Harald Krüger** (\*1965)  
Personal- und Sozialwesen, Arbeitsdirektor

**Ian Robertson** (\*1958)  
Vertrieb und Marketing

Mandate

- Rolls-Royce Motor Cars Limited (Vorsitzender)

Chefsyndikus:  
**Dr. Dieter Löchelt**

## Mitglieder des Aufsichtsrats

**Prof. Dr.-Ing. Dr. h. c. Dr.-Ing. E. h.****Joachim Milberg** (\*1943)

Vorsitzender

ehem. Vorsitzender des Vorstands der BMW AG

Vorsitzender des Präsidiums sowie des Personal- und Nominierungsausschusses,

Mitglied des Prüfungs- und Vermittlungsausschusses

**Mandate**

- Bertelsmann AG
- FESTO AG
- SAP AG
- ZF Friedrichshafen AG
- Deere & Company

**Manfred Schoch**<sup>1</sup> (\*1955)

stellv. Vorsitzender

Vorsitzender des Euro- und des Gesamtbetriebsrats

Dipl.-Wirtschaftsingenieur

Mitglied des Präsidiums sowie des Personal-, Prüfungs- und Vermittlungsausschusses

**Stefan Quandt** (\*1966)

stellv. Vorsitzender

Unternehmer

Mitglied des Präsidiums sowie des Personal-, Prüfungs-, Nominierungs- und Vermittlungsausschusses

**Mandate**

- DELTON AG (Vorsitzender)
- Karlsruher Institut für Technologie (KIT)
- AQTON SE (Vorsitzender)
- DataCard Corp.

**Stefan Schmid**<sup>1</sup> (\*1965)

stellv. Vorsitzender

Vorsitzender des Betriebsrats Standort Dingolfing

Mitglied des Präsidiums sowie des Personal-, Prüfungs- und Vermittlungsausschusses

**Dr. jur. Karl-Ludwig Kley** (\*1951)

stellv. Vorsitzender (seit 18.05.2010)

Vorsitzender der Geschäftsleitung der Merck KGaA

Vorsitzender des Prüfungsausschusses und unabhängiger Finanzexperte,  
Mitglied des Präsidiums sowie des Personal- und Nominierungsausschusses (jeweils seit 18.05.2010)**Mandate**

- Bertelsmann AG
- 1. FC Köln GmbH & Co. KGaA (Vorsitzender)

**Prof. Dr. Jürgen Strube** (\*1939)

(bis 18.05.2010)

stellv. Vorsitzender

ehem. Vorsitzender des Aufsichtsrats der BASF SE

Vorsitzender des Prüfungsausschusses und unabhängiger Finanzexperte,  
Mitglied des Präsidiums sowie des Personal- und Nominierungsausschusses**Mandate**

- Bertelsmann AG (stellv. Vorsitzender)
- Fuchs Petrolub AG (Vorsitzender)

**Bertin Eichler**<sup>2</sup> (\*1952)

geschäftsführendes Vorstandsmitglied der IG Metall

**Mandate**

- BGAG Beteiligungsgesellschaft der Gewerkschaften GmbH (Vorsitzender)
- ThyssenKrupp AG (stellv. Vorsitzender)

|     |                                                                                   |
|-----|-----------------------------------------------------------------------------------|
| 140 | — ERKLÄRUNG ZUR UNTERNEHMENSFÜHRUNG, CORPORATE GOVERNANCE (Teil des Lageberichts) |
| 140 | Grundlegendes zur Unternehmensverfassung                                          |
| 142 | Erklärung des Vorstands und des Aufsichtsrats gemäß § 161 AktG                    |
| 143 | Mitglieder des Vorstands                                                          |
| 144 | — Mitglieder des Aufsichtsrats                                                    |
| 147 | Zur Arbeitsweise von Vorstand und Aufsichtsrat                                    |
| 154 | Vergütungsbericht                                                                 |
| 162 | Angaben zu Unternehmensführungspraktiken                                          |
| 163 | Compliance in der BMW Group                                                       |

<sup>1</sup>Arbeitnehmersvertreter, die Arbeitnehmer des Unternehmens sind.<sup>2</sup>Arbeitnehmersvertreter, die Vertreter von Gewerkschaften sind.<sup>3</sup>Arbeitnehmersvertreter, der leitender Angestellter des Unternehmens ist.

— Mitgliedschaften in anderen gesetzlich zu bildenden Aufsichtsräten

— Mitgliedschaften in vergleichbaren in- und ausländischen Kontrollgremien von Wirtschaftsunternehmen

**Franz Haniel** (\*1955)

Dipl.-Ingenieur, MBA

Mandate

- DELTON AG (stellv. Vorsitzender)
- Franz Haniel & Cie. GmbH (Vorsitzender)
- Heraeus Holding GmbH
- Metro AG (Vorsitzender) (bis 15.05.2010)
- secunet Security Networks AG
- Giesecke & Devrient GmbH
- TBG Limited

**Prof. Dr. rer. nat. Dr. h. c. E. h. Reinhard Hüttl** (\*1957)

Vorsitzender des Vorstands des Helmholtz-Zentrum  
Potsdam Deutsches GeoForschungsZentrum – GFZ  
Universitätsprofessor

**Prof. Dr. rer. nat. Dr.-Ing. E. h.**

**Henning Kagermann** (\*1947)

(seit 18.05.2010)

Präsident acatech – Deutsche Akademie der  
Technikwissenschaften e. V.

Mandate

- Deutsche Bank AG
- Deutsche Post AG
- Münchener Rückversicherungs-Gesellschaft  
Aktiengesellschaft in München
- Nokia Corporation
- Wipro Limited

**Susanne Klatten** (\*1962)

Unternehmerin

Mandate

- ALTANA AG (stellv. Vorsitzende)
- SGL Carbon SE
- UnternehmerTUM GmbH (Vorsitzende)

**Prof. Dr. rer. pol. Renate Köcher** (\*1952)

Geschäftsführerin des Instituts für Demoskopie  
Allensbach Gesellschaft zum Studium der  
öffentlichen Meinung mbH

Mandate

- Allianz SE
- Infineon Technologies AG
- MAN SE

**Dr. h. c. Robert W. Lane** (\*1949)

ehem. Chairman und Chief Executive Officer der  
Deere & Company

Mandate

- Deere & Company (Vorsitzender) (bis 24.02.2010)
- General Electric Company
- Northern Trust Corporation
- Verizon Communications Inc.

**Horst Lischka**<sup>2</sup> (\*1963)

1. Bevollmächtigter der IG Metall München

Mandate

- KraussMaffei AG
- MAN Nutzfahrzeuge AG

**Willibald Löw**<sup>1</sup> (\*1956)

Vorsitzender des Betriebsrats Standort Landshut

**Wolfgang Mayrhuber** (\*1947)  
Vorsitzender des Vorstands der  
Deutsche Lufthansa AG (bis 31. 12. 2010)

Mandate

- Fraport AG (bis 30.06.2010)
- Lufthansa Technik AG
- Münchener Rückversicherungs-Gesellschaft  
Aktiengesellschaft in München
- Austrian Airlines AG
- HEICO Corporation
- SN Airholding NV (bis 31. 12. 2010)
- UBS AG (seit 14.04.2010)

**Werner Neugebauer**<sup>2</sup> (\*1950)  
(bis 31. 12. 2010)  
Beauftragter des Vorstands der IG Metall Bayern

Mandate

- ZF Sachs AG

**Franz Oberländer**<sup>1</sup> (\*1952)  
Mitglied des Betriebsrats Standort München

**Anton Ruf**<sup>3</sup> (\*1953)  
Bereichsleiter Entwicklung „Kleine Modellreihe“

**Maria Schmidt**<sup>1</sup> (\*1954)  
Mitglied des Betriebsrats Standort Dingolfing

**Jürgen Wechsler**<sup>2</sup> (\*1955)  
(seit 10.02.2011)  
Bezirksleiter der IG Metall Bezirk Bayern

Mandate

- Schaeffler GmbH (stellv. Vorsitzender)

**Werner Zierer**<sup>1</sup> (\*1959)  
Vorsitzender des Betriebsrats Standort Regensburg

140 — **ERKLÄRUNG ZUR  
UNTERNEHMENSFÜHRUNG,  
CORPORATE GOVERNANCE**  
(Teil des Lageberichts)

140 Grundlegendes zur  
Unternehmensverfassung

142 Erklärung des Vorstands und des  
Aufsichtsrats gemäß § 161 AktG

143 Mitglieder des Vorstands

144 — **Mitglieder des Aufsichtsrats**

147 — Zur Arbeitsweise von Vorstand  
und Aufsichtsrat

154 Vergütungsbericht

162 Angaben zu Unternehmens-  
führungspraktiken

163 Compliance in der BMW Group

<sup>1</sup>Arbeitnehmersvertreter, die Arbeitnehmer des Unternehmens sind.

<sup>2</sup>Arbeitnehmersvertreter, die Vertreter von Gewerkschaften sind.

<sup>3</sup>Arbeitnehmersvertreter, der leitender Angestellter des Unternehmens ist.

— Mitgliedschaften in anderen gesetzlich zu bildenden Aufsichtsräten

— Mitgliedschaften in vergleichbaren in- und ausländischen Kontrollgremien von Wirtschaftsunternehmen

### **Zur Arbeitsweise von Vorstand und Aufsichtsrat und der Zusammensetzung und Arbeitsweise von deren Ausschüssen**

#### **Der Vorstand der BMW AG**

Eine Übersicht zu den sieben Mitgliedern des Vorstands und ihren Ressorts findet sich auf Seite 143.

Der Vorstand leitet das Unternehmen in eigener Verantwortung und im Unternehmensinteresse mit dem Ziel nachhaltiger Wertschöpfung. Dies beinhaltet die Berücksichtigung der Belange der Aktionäre, der Arbeitnehmer und der sonstigen dem Unternehmen verbundenen Gruppen (Stakeholder).

Der Vorstand legt die strategische Ausrichtung des Unternehmens fest, stimmt sie mit dem Aufsichtsrat ab und setzt sie um. Der Vorstand sorgt auch für die Einhaltung der gesetzlichen Bestimmungen und der unternehmensinternen Richtlinien. Näheres zur Compliance bei der BMW Group finden Sie auf den Seiten 163 ff. Der Vorstand trägt auch für ein angemessenes Risikomanagement und Risikocontrolling im Unternehmen Sorge.

Vorstandsmitglieder der BMW AG unterliegen während ihrer Tätigkeit für die BMW Group einem umfassenden Wettbewerbsverbot. Sie sind dem Unternehmensinteresse verpflichtet und dürfen bei ihren Entscheidungen keine persönlichen Interessen verfolgen, insbesondere nicht Geschäftschancen, die dem Unternehmen zustehen, für sich nutzen. Sie dürfen Nebentätigkeiten, insbesondere Aufsichtsratsmandate außerhalb der BMW Group, nur mit Zustimmung des Personalausschusses des Aufsichtsrats übernehmen. Jedes Vorstandsmitglied der BMW AG ist verpflichtet, Interessenkonflikte dem Aufsichtsrat gegenüber unverzüglich offenzulegen und die anderen Vorstandsmitglieder hierüber zu informieren.

Im Zusammenhang mit der Bestellung eines Vorstandsmitglieds informiert der Corporate-Governance-Beauftragte das neue Vorstandsmitglied über wesentliche Rahmenbedingungen der Amtsführung, insbesondere den BMW Group Corporate Governance Kodex und persönliche Mitwirkungspflichten im Fall von Sachverhalten, die Meldepflichten auslösen oder der Zustimmung des Aufsichtsrats unterliegen.

Die Beratung und Entscheidungsfindung des Vorstands als Kollegialorgan erfolgt in der allgemeinen Vorstandssitzung, der speziellen Vorstandssitzung Produkte, im Nachhaltigkeitsboard, im Vorstands-ausschuss Operations sowie im Vorstands-ausschuss Führungskräfte. Dabei definiert die allgemeine Vorstandssitzung den Strategie- und Ressourcenrahmen und entscheidet alle Maßnahmen

zur Strategieumsetzung und Themen mit besonderer Bedeutung für die BMW Group, die nicht direkt einem automobilen Produkt oder einer Produktlinie zuzuordnen sind. Bedarfsorientiert und themenbezogen können der Vorstand und seine Ausschüsse weitere beratende, nicht stimmberechtigte Teilnehmer zu ihren Sitzungen hinzuziehen.

Die vom Vorstand verabschiedete Geschäftsordnung enthält einen Geschäftsverteilungsplan über die Ressortaufteilung zwischen den einzelnen Mitgliedern des Vorstands. Ferner ist der Grundsatz der gemeinsamen Verantwortung des Gesamtvorstands und seiner Zuständigkeit für alle Angelegenheiten von besonderer Bedeutung und Tragweite niedergelegt. Im Übrigen führt jedes Mitglied des Vorstands das ihm zugewiesene Ressort eigenverantwortlich, wobei für ressortübergreifende Projekte Einzelfallregelungen getroffen werden können. Die Vorstandsmitglieder unterrichten den Vorstandsvorsitzenden laufend über alle wesentlichen Vorgänge und den Gang der Geschäfte in ihren Ressorts. Der Vorstandsvorsitzende koordiniert die ressortbezogenen Vorgänge mit den Gesamtzielen und -plänen der Gesellschaft; er schaltet die anderen Vorstandsmitglieder ein, soweit deren Ressorts betroffen sind.

Der Vorstand fasst seine Beschlüsse in üblicherweise wöchentlich stattfindenden Vorstandssitzungen, die vom Vorsitzenden des Vorstands einberufen, koordiniert und geleitet werden. Auf Anordnung des Vorsitzenden können Beschlüsse auch außerhalb von Sitzungen gefasst werden, wenn kein Mitglied diesem Verfahren widerspricht. Der Vorstand ist beschlussfähig, wenn alle Mitglieder rechtzeitig eingeladen sind. Auch abwesende Mitglieder können ihre Stimme schriftlich, fernschriftlich oder fernmündlich abgeben. Fernmündliche Stimmabgaben sind schriftlich zu bestätigen. Über Angelegenheiten aus dem Ressort eines nicht anwesenden Mitglieds wird – außer in dringenden Fällen – nur mit seiner Zustimmung verhandelt und beschlossen.

Der Vorstand beschließt, soweit nicht durch Gesetz oder Satzung andere Mehrheiten vorgeschrieben sind, in Sitzungen mit einfacher Mehrheit der abgegebenen Stimmen, außerhalb von Sitzungen mit einfacher Mehrheit seiner Mitglieder. Bei Stimmgleichheit gibt die Stimme des Vorstandsvorsitzenden den Ausschlag. Änderungen der Geschäftsordnung bedürfen der Einstimmigkeit. Eine Sitzung findet nur statt, wenn mehr als die Hälfte der Mitglieder anwesend sind.

Im Fall der Abwesenheit oder Verhinderung des Vorstandsvorsitzenden wird dieser durch das für das Finanzressort zuständige Vorstandsmitglied vertreten.

Über Sitzungen und Beschlüsse des Vorstands werden Niederschriften angefertigt, die vom Vorsitzenden unterzeichnet werden. Entscheidungen des Vorstands sind verbindliche Vorgaben zur Umsetzung für alle Mitarbeiter.

Die Regelungen zu Sitzungen und Beschlussfassung des Gesamtvorstands gelten für Ausschüsse entsprechend.

Die nicht in einem Ausschuss vertretenen Mitglieder des Vorstands werden durch die Tagesordnung und Sitzungsprotokolle über die Ausschusssitzungen informiert. In der Vorstandssitzung werden Ausschussangelegenheiten behandelt, wenn der Ausschuss es für zweckmäßig hält oder ein Vorstandsmitglied dies verlangt.

Zur Unterstützung des Vorsitzenden und der übrigen Mitglieder des Vorstands bei der Vor- und Nachbereitung der Sitzungen ist ein Büro für Vorstandsangelegenheiten eingerichtet.

In der regelmäßig zweimal pro Monat stattfindenden Vorstandssitzung Produkte entscheidet der Gesamtvorstand markenübergreifend über die automobilen Produktstrategie und alle Produktprojekte im Grundsatzstadium. Die Vorstandssitzung Produkte genehmigt Ressourcen und gibt sie entsprechend frei.

Der in der Regel zweimal pro Monat tagende Vorstandsausschuss Operations entscheidet konzernweit über automobilen Produktprojekte auf Basis der von der Vorstandssitzung Produkte vorgegebenen strategischen Ausrichtung und innerhalb des durch die Vorstandssitzung Produkte festgelegten Entscheidungsrahmens. Mitglieder des Vorstandsausschusses Operations sind das für das Ressort Entwicklung zuständige Mitglied des Vorstands Dr.-Ing. Klaus Draeger, der zugleich den Vorsitz innehat, das für Einkauf und Lieferantennetzwerk zuständige Mitglied des Vorstands Dr.-Ing. Herbert Diess, das für Produktion zuständige Mitglied des Vorstands Frank-Peter Arndt und das für Vertrieb und Marketing zuständige Mitglied des Vorstands Ian Robertson. Im Fall der Abwesenheit oder Verhinderung des Vorsitzenden wird dieser durch das für das Ressort Produktion zuständige Mitglied des Vorstands vertreten. In den Sitzungen des Vorstandsausschusses Operations werden alle Beschlüsse online verabschiedet.

Als Nachhaltigkeitsboard tritt der Gesamtvorstand in der Regel zweimal pro Jahr zusammen, um den Strategie- und Ressourcenrahmen zur Nachhaltigkeit zu definieren und Maßnahmen zur Strategieumsetzung zu entscheiden. An diesen Sitzungen nehmen beratend der Bereichs-

leiter Konzernkommunikation und der Leiter der Hauptabteilung Nachhaltigkeit und Umweltschutz teil.

Der Vorstandsausschuss Führungskräfte beschäftigt sich gesamthaft mit unternehmensweit relevanten Themen, die die Führungskräfte der BMW Group insgesamt oder individuell betreffen (wie etwa mit der Führungskräftestruktur, der Potenzialsituation, der Ernennung zu oder der Beförderung von Oberen Führungskräften). Der Vorstandsausschuss Führungskräfte hat dabei sowohl eine beratende, vorbereitende Rolle (z. B. bei Vorschlägen an die Vorstandssitzung für Beförderungen in die beiden Entgeltgruppen unterhalb der Vorstandsebene und der Vorbereitung von Entscheidungen der Vorstandssitzung zu Grundsätzen der Personalpolitik mit dem Schwerpunkt Führungskräfte) als auch die Funktion eines Entscheidungsgremiums (wie z. B. bei Ernennungen zu Oberen Führungskräften und Beförderungen in die nächsthöhere Entgeltgruppe oder der Ausgestaltung der vom Gesamtvorstand beschlossenen Grundsätze der Personalpolitik). Stimmberechtigte Mitglieder des Ausschusses sind der Vorsitzende des Vorstands Dr.-Ing. Norbert Reithofer, der auch den Ausschussvorsitz innehat, und das für Personal- und Sozialwesen zuständige Mitglied des Vorstands Harald Krüger. Darüber hinaus nehmen an den Sitzungen die Bereichsleiterin Personalwesen, Personalnetzwerk und Human Resources International sowie der Bereichsleiter Personalwesen Obere Führungskräfte mit beratender Funktion teil. Auf Anordnung des Vorsitzenden können Beschlüsse auch außerhalb von Sitzungen durch schriftliche, fernschriftliche oder fernmündliche Stimmabgabe gefasst werden, wenn das andere stimmberechtigte Mitglied nicht unverzüglich widerspricht. In der Regel finden jährlich fünf bis zehn Sitzungen statt.

Gegenüber dem Aufsichtsrat wird der Vorstand durch den Vorsitzenden des Vorstands vertreten. Dieser steht in regelmäßigem Kontakt mit dem Vorsitzenden des Aufsichtsrats und berichtet ihm unverzüglich in allen Angelegenheiten von besonderem Gewicht. Der Aufsichtsrat hat die Informations- und Berichtspflichten des Vorstands durch Beschluss näher festgelegt. Die gesetzlichen Berichte des Vorstands an den Aufsichtsrat werden in der Regel in Textform erstattet. Entscheidungsnotwendige Unterlagen werden den Mitgliedern des Aufsichtsrats möglichst rechtzeitig vor der Sitzung zugeleitet. Für Geschäfte von grundlegender Bedeutung hat der Aufsichtsrat durch Beschluss Zustimmungsvorbehalte zugunsten des Aufsichtsrats festgelegt. Der Vorstandsvorsitzende holt, soweit erforderlich, die Zustimmung des Aufsichtsrats ein und trägt für die Erfüllung der Berichtspflichten gegenüber dem Aufsichtsrat Sorge. Bei der Erfüllung dieser Aufgaben wird der Vorstandsvorsitzende von allen

|     |                                                                                                   |
|-----|---------------------------------------------------------------------------------------------------|
| 140 | <b>ERKLÄRUNG ZUR<br/>UNTERNEHMENSFÜHRUNG,<br/>CORPORATE GOVERNANCE</b><br>(Teil des Lageberichts) |
| 140 | Grundlegendes zur<br>Unternehmensverfassung                                                       |
| 142 | Erklärung des Vorstands und des<br>Aufsichtsrats gemäß § 161 AktG                                 |
| 143 | Mitglieder des Vorstands                                                                          |
| 144 | Mitglieder des Aufsichtsrats                                                                      |
| 147 | <b>Zur Arbeitsweise von Vorstand<br/>und Aufsichtsrat</b>                                         |
| 154 | Vergütungsbericht                                                                                 |
| 162 | Angaben zu Unternehmens-<br>führungspraktiken                                                     |
| 163 | Compliance in der BMW Group                                                                       |

Vorstandsmitgliedern unterstützt. Bei der Berichterstattung an den Aufsichtsrat lässt sich der Vorstand von dem Grundgedanken leiten, dass der Aufsichtsrat regelmäßig, zeitnah und umfassend über alle für das Unternehmen relevanten Fragen der Planung, der Geschäftsentwicklung, der Risikolage, des Risikomanagements und der Compliance und auch über eventuelle Abweichungen des Geschäftsverlaufs von den aufgestellten Plänen und Zielen und die Gründe dafür informiert sein soll.

#### **Der Aufsichtsrat der BMW AG**

Übersichten zu den Mitgliedern des Aufsichtsrats, des Präsidiums und der Ausschüsse finden sich auf den Seiten 144 ff. (Mitglieder des Aufsichtsrats und Mandate der Aufsichtsratsmitglieder) sowie Seite 152 (Gremien des Aufsichtsrats, Sitzungen).

Der aus jeweils zehn von der Hauptversammlung gewählten Vertretern der Aktionäre und zehn nach dem Mitbestimmungsgesetz gewählten Vertretern der Arbeitnehmer bestehende Aufsichtsrat der BMW AG hat die Aufgabe, den Vorstand bei der Leitung der BMW Group regelmäßig zu beraten und zu überwachen. Er wird in Entscheidungen von grundlegender Bedeutung für die BMW Group eingebunden. Der Aufsichtsrat bestellt die Mitglieder des Vorstands und setzt ihre Vergütung fest. Der Aufsichtsrat kann die Bestellung zum Vorstandsmitglied widerrufen, wenn ein wichtiger Grund vorliegt. Gemeinsam mit dem Personalausschuss und dem Vorstand sorgt er für eine langfristige Nachfolgeplanung. Zu den Kriterien vgl. Seiten 08 f.

Der Aufsichtsrat hält mindestens zwei Sitzungen im Kalenderhalbjahr ab. In der Regel finden fünf Plenarsitzungen pro Kalenderjahr statt, so auch im Jahr 2010. Eine Sitzung pro Jahr ist mehrtägig ausgerichtet und dient u. a. einem vertieften Austausch zu strategischen und technischen Themen. Die Schwerpunkte der Sitzungen im Jahr 2010 sind im Bericht des Aufsichtsrats (Seiten 06 ff.) zusammengefasst.

Gemäß der Anregung des Deutschen Corporate Governance Kodex bereiten die Vertreter der Aktionäre und die Vertreter der Arbeitnehmer die Sitzungen des Aufsichtsrats jeweils gesondert vor, ggf. mit Mitgliedern des Vorstands.

Der Aufsichtsratsvorsitzende koordiniert die Arbeit im Aufsichtsrat, beruft dessen Sitzungen ein und leitet sie; er nimmt die Belange des Aufsichtsrats nach außen wahr und vertritt den Aufsichtsrat gegenüber dem Vorstand.

Der Aufsichtsrat ist beschlussfähig, wenn alle Mitglieder eingeladen wurden und mindestens die Hälfte der Mit-

glieder, aus denen er insgesamt zu bestehen hat, an der Beschlussfassung teilnimmt. Die Beschlussfassung über einen Gegenstand der Tagesordnung, der in der Einladung nicht enthalten war, ist nur zulässig, wenn kein anwesendes Mitglied des Aufsichtsrats der Beschlussfassung widerspricht und mindestens zwei Drittel der Mitglieder anwesend sind.

Beschlüsse des Aufsichtsrats werden grundsätzlich mit einfacher Mehrheit gefasst. Besondere gesetzliche Mehrheitserfordernisse und Verfahrensbestimmungen bestehen im Mitbestimmungsgesetz insbesondere für Fälle der Bestellung und Abberufung von Vorstandsmitgliedern sowie für die Wahl eines Aufsichtsratsvorsitzenden und stellvertretenden Aufsichtsratsvorsitzenden. Ergibt eine Abstimmung im Aufsichtsrat Stimmgleichheit, so hat bei einer erneuten Abstimmung im Aufsichtsrat, wenn auch sie Stimmgleichheit ergibt, der Aufsichtsratsvorsitzende zwei Stimmen.

In der Praxis werden die Beschlüsse des Aufsichtsrats und der Ausschüsse regelmäßig in den Sitzungen gefasst. Ein abwesendes Aufsichtsratsmitglied kann seine Stimme auch schriftlich, per Telefax oder in elektronischer Form durch ein anderes Aufsichtsratsmitglied überreichen lassen. Dies gilt auch für die Abgabe der zweiten Stimme des Aufsichtsratsvorsitzenden. Der Aufsichtsratsvorsitzende kann binnen einer von ihm gesetzten Frist auch eine nachträgliche Stimmabgabe für alle abwesenden Mitglieder zulassen. Möglich ist in besonderen Fällen auch eine Beschlussfassung außerhalb von Sitzungen, insbesondere schriftlich, per Telefax oder mittels elektronischer Medien. Über jede Sitzung und jeden Beschluss wird eine Niederschrift angefertigt und vom Vorsitzenden des Aufsichtsrats unterzeichnet.

Im Anschluss an seine Sitzungen lässt sich der Aufsichtsrat meistens im Rahmen einer Kurzpräsentation neue Fahrzeugmodelle zeigen und erläutern.

Bei Übernahme eines Aufsichtsratsmandats informiert der Corporate-Governance-Beauftragte das neue Aufsichtsratsmitglied über wesentliche Rahmenbedingungen der Amtsführung, insbesondere den BMW Group Corporate Governance Kodex und persönliche Mitwirkungspflichten im Fall von Sachverhalten, die Meldepflichten auslösen oder der Zustimmung des Aufsichtsrats unterliegen. Ferner erhalten neue Aufsichtsratsmitglieder die Gelegenheit, das Unternehmen außerhalb der Aufsichtsratssitzungen im Rahmen eines Informationsprogramms besser kennenzulernen.

Jedes Aufsichtsratsmitglied der BMW AG achtet darauf, dass ihm für die Wahrnehmung seines Mandats genü-

gend Zeit zur Verfügung steht. Sofern Mitglieder des Aufsichtsrats der BMW AG dem Vorstand einer börsennotierten Gesellschaft angehören, nehmen sie insgesamt nicht mehr als drei weitere konzernexterne Aufsichtsratsmandate in börsennotierten Gesellschaften oder in Aufsichtsgremien mit vergleichbaren Anforderungen wahr.

Der Aufsichtsrat überprüft regelmäßig die Effizienz seiner Tätigkeit. Zu diesem Zweck findet auch eine gemeinsame Aussprache im Plenum statt, die anhand eines vorab verteilten, vom Aufsichtsrat erarbeiteten Fragebogens vorbereitet wird. Verbesserungsvorschläge nimmt der Aufsichtsratsvorsitzende auch fortlaufend entgegen.

Jedes Mitglied des Aufsichtsrats der BMW AG ist dem Unternehmensinteresse verpflichtet. Es darf bei seinen Entscheidungen weder persönliche Interessen verfolgen noch Geschäftschancen, die dem Unternehmen zustehen, für sich nutzen.

Die Mitglieder des Aufsichtsrats sind verpflichtet, Interessenkonflikte, insbesondere solche, die aufgrund einer Beratung oder Organfunktion bei Kunden, Lieferanten, Kreditgebern oder sonstigen Geschäftspartnern entstehen können, dem Aufsichtsrat gegenüber offenzulegen, damit dieser in seinem Bericht an die Hauptversammlung über ihre Behandlung informieren kann. Wesentliche und nicht nur vorübergehende Interessenkonflikte eines Aufsichtsratsmitglieds führen zur Beendigung des Mandats.

Bei Vorschlägen zur Wahl von Aufsichtsratsmitgliedern wird darauf geachtet, dass der Aufsichtsrat insgesamt über die zur ordnungsgemäßen Wahrnehmung der Aufgaben erforderlichen Kenntnisse, Fähigkeiten und fachlichen Erfahrungen verfügt.

Der Aufsichtsrat hat für seine Zusammensetzung konkrete Ziele benannt. Näheres zu den Besetzungszielen und dem Stand der Umsetzung ist auf der Seite 153 zu finden.

Die Mitglieder des Aufsichtsrats nehmen die für ihre Aufgaben erforderlichen Aus- und Fortbildungsmaßnahmen eigenverantwortlich wahr. Dabei unterstützt sie die Gesellschaft in angemessener Weise.

Eine unabhängige Beratung und Überwachung des Vorstands durch den Aufsichtsrat wird auch dadurch ermöglicht, dass dem Aufsichtsrat der BMW AG eine nach seiner Einschätzung ausreichende Anzahl unabhängiger Mitglieder angehören. Dem Aufsichtsrat gehört mit Prof. Dr.-Ing. Dr. h. c. Dr.-Ing. E. h. Joachim Milberg ledig-

lich ein ehemaliges Mitglied des Vorstands an, das jedoch bereits 2002 aus dem Vorstand ausgeschieden ist. Aufsichtsratsmitglieder üben keine Organfunktionen oder Beratungsaufgaben bei wesentlichen Wettbewerbern der BMW Group aus.

Unter Berücksichtigung der spezifischen Gegebenheiten der BMW Group und der Anzahl seiner Mitglieder hat der Aufsichtsrat der BMW AG ein Präsidium und vier Ausschüsse gebildet, nämlich einen Personal-, Prüfungs-, Nominierungs- und Vermittlungsausschuss (vgl. die Übersicht auf Seite 152). Diese dienen der Steigerung der Effizienz der Aufsichtsratsarbeit und der Behandlung komplexer Sachverhalte. Die Bildung und Funktion eines Vermittlungsausschusses ist gesetzlich vorgesehen. Die Ausschussvorsitzenden berichten in jeder Plenarsitzung des Aufsichtsrats ausführlich über die Ausschussarbeit.

Die Besetzung von Präsidium und Ausschüssen erfolgt nach Maßgabe von Gesetz, Satzung und Geschäftsordnung sowie Corporate-Governance-Grundsätzen, insbesondere unter Berücksichtigung der fachlichen Qualifikation der Mitglieder.

Der Aufsichtsratsvorsitzende ist kraft dieser Funktion gemäß der Geschäftsordnung Mitglied und Vorsitzender des Präsidiums, des Personalausschusses und des Nominierungsausschusses.

Die Anzahl der Sitzungen von Präsidium und Ausschüssen ist bedarfsabhängig. Präsidium, Personal- und Prüfungsausschuss kommen in der Regel zu mehreren Sitzungen jährlich zusammen (zur Zahl der Sitzungen 2010 s. Seite 152 sowie im Bericht des Aufsichtsrats Seite 06).

Für die Arbeit des Präsidiums und der Ausschüsse hat der Aufsichtsrat in Anlehnung an die Regularien für die Tätigkeit des Plenums Regelungen zur Geschäftsordnung getroffen. Die Ausschüsse sind nur beschlussfähig, wenn alle Mitglieder mitwirken. Beschlüsse der Ausschüsse werden mit einfacher Stimmenmehrheit gefasst, soweit gesetzlich nichts anderes vorgesehen ist. Auch über die Sitzungen und Beschlüsse der Ausschüsse und des Präsidiums werden Niederschriften angefertigt, die von dem jeweiligen Vorsitzenden unterzeichnet werden. Dieser vertritt auch das jeweilige Gremium gegenüber dem Vorstand und Dritten.

Die Aufsichtsratsmitglieder können ihre Aufgaben nicht durch andere wahrnehmen lassen. Zur Beratung über einzelne Gegenstände können Aufsichtsrat, Präsidium und Ausschüsse Sachverständige und Auskunftspersonen zu ihren Sitzungen hinzuziehen.

|     |   |                                                                                                   |
|-----|---|---------------------------------------------------------------------------------------------------|
| 140 | — | <b>ERKLÄRUNG ZUR<br/>UNTERNEHMENSFÜHRUNG,<br/>CORPORATE GOVERNANCE</b><br>(Teil des Lageberichts) |
| 140 |   | Grundlegendes zur<br>Unternehmensverfassung                                                       |
| 142 |   | Erklärung des Vorstands und des<br>Aufsichtsrats gemäß § 161 AktG                                 |
| 143 |   | Mitglieder des Vorstands                                                                          |
| 144 |   | Mitglieder des Aufsichtsrats                                                                      |
| 147 | — | <b>Zur Arbeitsweise von Vorstand<br/>und Aufsichtsrat</b>                                         |
| 154 |   | Vergütungsbericht                                                                                 |
| 162 |   | Angaben zu Unternehmens-<br>führungspraktiken                                                     |
| 163 |   | Compliance in der BMW Group                                                                       |



Aufsichtsrat, Präsidium und Ausschüsse tagen bei Bedarf auch ohne den Vorstand.

Die Gesellschaft sorgt dafür, dass der Aufsichtsrat und seine Gremien mit ausreichenden Mitteln ausgestattet sind, um ihre Aufgaben wahrnehmen zu können. Dazu gehört auch die Einrichtung eines zentralen Aufsichtsratsbüros zur Unterstützung der Vorsitzenden bei ihren Koordinationsaufgaben.

Das Präsidium des Aufsichtsrats setzt sich gemäß der Geschäftsordnung aus dem Vorsitzenden des Aufsichtsrats und seinen Stellvertretern zusammen. Das Präsidium bereitet die Aufsichtsratssitzungen vor, soweit die Themen nicht in den Aufgabenbereich eines Ausschusses fallen. Dies betrifft z. B. die Vorbereitung der jährlichen Entsprechenserklärung zum Deutschen Corporate Governance Kodex sowie der Effizienzprüfung des Aufsichtsrats.

Der Personalausschuss bereitet die Entscheidungen des Aufsichtsrats über die Bestellung und ggf. Abberufung von Vorstandsmitgliedern vor und sorgt gemeinsam mit dem Aufsichtsratsplenium und dem Vorstand für eine langfristige Nachfolgeplanung. Zu den Kriterien vgl. Seiten 08 f. Darüber hinaus bereitet der Personalausschuss die Entscheidungen des Aufsichtsrats über die Vergütung sowie die regelmäßige Überprüfung des Vergütungssystems für den Vorstand vor. Im Rahmen der Festsetzungen des Aufsichtsrats zur Vergütung von Vorstandsmitgliedern ist der Personalausschuss beauftragt, Anstellungsverträge mit Mitgliedern des Vorstands abzuschließen, zu ändern und aufzuheben und ggf. sonstige Verträge mit Mitgliedern des Vorstands vorzubereiten und abzuschließen. Ferner ist dem Personalausschuss die Befugnis übertragen, in bestimmten Fällen anstelle des Aufsichtsrats über die erforderliche Zustimmung zu einem bestimmten Geschäft zu entscheiden. Dazu gehören insbesondere Fälle der Kreditgewährung an Vorstands- oder Aufsichtsratsmitglieder, bestimmte Vertragsabschlüsse mit Mitgliedern des Aufsichtsrats, jeweils auch unter Berücksichtigung nahestehender Personen/Unternehmen, sowie Nebentätigkeiten von Vorstandsmitgliedern, insbesondere die Übernahme von Aufsichtsratsmandaten außerhalb des Unternehmens.

Der Prüfungsausschuss befasst sich insbesondere mit der Überwachung des Rechnungslegungsprozesses, der Wirksamkeit des internen Kontrollsystems, des Risikomanagementsystems, des Revisionssystems und der Compliance. Ferner überwacht er die Abschlussprüfung, die Unabhängigkeit des Abschlussprüfers und die vom Abschlussprüfer zusätzlich erbrachten Leistungen. Er bereitet den Vorschlag zur Wahl des Abschlussprüfers

an die Hauptversammlung vor und gibt dazu eine Empfehlung ab, erteilt den Prüfungsauftrag, vereinbart Prüfungsschwerpunkte sowie das Honorar des Abschlussprüfers. Der Prüfungsausschuss bereitet die Beschlussfassung des Aufsichtsrats über den Jahres- und den Konzernabschluss vor und erörtert mit dem Vorstand die Zwischenberichte vor ihrer Veröffentlichung. Darüber hinaus entscheidet der Prüfungsausschuss über die Zustimmung des Aufsichtsrats zur Ausnutzung des Genehmigten Kapitals 2009 (§ 4 Ziffer 5 der Satzung) sowie über Änderungen der Satzung, die nur die Fassung betreffen.

In Einklang mit den Regelungen des Deutschen Corporate Governance Kodex ist der Vorsitzende des Prüfungsausschusses unabhängig und kein ehemaliges Vorstandsmitglied der Gesellschaft; er verfügt über besondere Kenntnisse und Erfahrungen in der Anwendung von Rechnungslegungsgrundsätzen und internen Kontrollverfahren. Er erfüllt zugleich, neben weiteren Mitgliedern des Aufsichtsrats, die Anforderungen an einen unabhängigen Finanzexperten i. S. d. §§ 100 Abs. 5, 107 Abs. 4 AktG.

Der Nominierungsausschuss hat die Aufgabe, geeignete Kandidaten für die Wahl in den Aufsichtsrat als Vertreter der Aktionäre zu ermitteln und dem Aufsichtsrat für dessen Wahlvorschläge an die Hauptversammlung vorzuschlagen. Gemäß der Empfehlung des Deutschen Corporate Governance Kodex ist der Nominierungsausschuss ausschließlich mit Vertretern der Aktionäre besetzt.

Die Bildung und Besetzung eines Vermittlungsausschusses ist im deutschen Mitbestimmungsgesetz vorgesehen. Der Vermittlungsausschuss hat die Aufgabe, dem Aufsichtsrat einen Vorschlag zu unterbreiten, wenn ein Beschluss über die Bestellung eines Vorstandsmitglieds nicht die erforderliche Mehrheit von zwei Dritteln der Stimmen der Mitglieder erreicht hat. Dem Vermittlungsausschuss gehören gemäß den gesetzlichen Bestimmungen der Vorsitzende und der stellvertretende Vorsitzende des Aufsichtsrats sowie je ein von den Vertretern der Aktionäre und den Vertretern der Arbeitnehmer gewähltes Mitglied an.

## Gremien des Aufsichtsrats im Überblick, Sitzungen

| Wesentliche Aufgaben, Grundlage                                                                                                                                                                                                                                                                                                                                                                                                                                                                                                                                                                                                                                                                                                                                                                                                                                                                                                                                                                                                                                                                                          | Mitglieder                                                                                                                                                                                                                                                                                                                         | Anzahl der Sitzungen 2010               | Durchschnittliche Teilnehmerquote |
|--------------------------------------------------------------------------------------------------------------------------------------------------------------------------------------------------------------------------------------------------------------------------------------------------------------------------------------------------------------------------------------------------------------------------------------------------------------------------------------------------------------------------------------------------------------------------------------------------------------------------------------------------------------------------------------------------------------------------------------------------------------------------------------------------------------------------------------------------------------------------------------------------------------------------------------------------------------------------------------------------------------------------------------------------------------------------------------------------------------------------|------------------------------------------------------------------------------------------------------------------------------------------------------------------------------------------------------------------------------------------------------------------------------------------------------------------------------------|-----------------------------------------|-----------------------------------|
| <b>Präsidium</b>                                                                                                                                                                                                                                                                                                                                                                                                                                                                                                                                                                                                                                                                                                                                                                                                                                                                                                                                                                                                                                                                                                         |                                                                                                                                                                                                                                                                                                                                    |                                         |                                   |
| <ul style="list-style-type: none"> <li>– Vorbereitung der Aufsichtsratssitzungen, soweit die Themen nicht in den Aufgabenbereich eines Ausschusses fallen</li> <li>– Grundlage ist Geschäftsordnung</li> </ul>                                                                                                                                                                                                                                                                                                                                                                                                                                                                                                                                                                                                                                                                                                                                                                                                                                                                                                           | Joachim Milberg <sup>1</sup><br>Manfred Schoch<br>Stefan Quandt<br>Stefan Schmid<br>Karl-Ludwig Kley                                                                                                                                                                                                                               | 4                                       | 100 %                             |
| <b>Personalausschuss</b>                                                                                                                                                                                                                                                                                                                                                                                                                                                                                                                                                                                                                                                                                                                                                                                                                                                                                                                                                                                                                                                                                                 |                                                                                                                                                                                                                                                                                                                                    |                                         |                                   |
| <ul style="list-style-type: none"> <li>– Vorbereitung der Entscheidungen über die Bestellung und ggf. Abberufung von Vorstandsmitgliedern, über die Vergütung sowie die regelmäßige Überprüfung des Vergütungssystems für den Vorstand</li> <li>– Abschluss, Änderung und Aufhebung von Anstellungsverträgen (im Rahmen der Festsetzungen des Aufsichtsrats zur Vergütung) und sonstigen Verträgen mit den Mitgliedern des Vorstands</li> <li>– Entscheidung über die Zustimmung zu Nebentätigkeiten von Vorstandsmitgliedern, insbesondere zur Übernahme von Aufsichtsratsmandaten außerhalb des Unternehmens, sowie über die Zustimmung zu bestimmten kraft Gesetzes der Zustimmung des Aufsichtsrats unterliegenden Geschäften (z. B. Kreditgewährung an Vorstands- oder Aufsichtsratsmitglieder)</li> <li>– Einrichtung entspricht Empfehlung des Deutschen Corporate Governance Kodex, Grundlage ist Geschäftsordnung</li> </ul>                                                                                                                                                                                    | Joachim Milberg <sup>1</sup><br>Manfred Schoch<br>Stefan Quandt<br>Stefan Schmid<br>Karl-Ludwig Kley                                                                                                                                                                                                                               | 4                                       | 100 %                             |
| <b>Prüfungsausschuss</b>                                                                                                                                                                                                                                                                                                                                                                                                                                                                                                                                                                                                                                                                                                                                                                                                                                                                                                                                                                                                                                                                                                 |                                                                                                                                                                                                                                                                                                                                    |                                         |                                   |
| <ul style="list-style-type: none"> <li>– Überwachung des Rechnungslegungsprozesses, der Wirksamkeit des internen Kontrollsystems, des Risikomanagementsystems, des Revisionsystems und der Compliance</li> <li>– Überwachung der Abschlussprüfung, insbesondere der Unabhängigkeit des Abschlussprüfers und der vom Abschlussprüfer zusätzlich erbrachten Leistungen</li> <li>– Vorbereitung des Vorschlags zur Wahl eines Abschlussprüfers an die Hauptversammlung, Erteilung (Empfehlung) des Prüfungsauftrags an den Abschlussprüfer, Bestimmung von Prüfungsschwerpunkten und Honorarvereinbarung mit dem Abschlussprüfer</li> <li>– Vorbereitung der Beschlussfassung des Aufsichtsrats über den Jahres- und den Konzernabschluss</li> <li>– Erörterung der Zwischenberichte mit dem Vorstand vor ihrer Veröffentlichung</li> <li>– Entscheidung über die Zustimmung zur Ausnutzung des Genehmigten Kapitals 2009</li> <li>– Änderungen der Satzung, die nur die Fassung betreffen</li> <li>– Einrichtung entspricht Empfehlung des Deutschen Corporate Governance Kodex, Grundlage ist Geschäftsordnung</li> </ul> | Karl-Ludwig Kley <sup>1,2</sup><br>Joachim Milberg<br>Manfred Schoch<br>Stefan Quandt<br>Stefan Schmid                                                                                                                                                                                                                             | 4<br>sowie<br>3 Telefon-<br>konferenzen | 100 %                             |
| <b>Nominierungsausschuss</b>                                                                                                                                                                                                                                                                                                                                                                                                                                                                                                                                                                                                                                                                                                                                                                                                                                                                                                                                                                                                                                                                                             |                                                                                                                                                                                                                                                                                                                                    |                                         |                                   |
| <ul style="list-style-type: none"> <li>– Ermittlung geeigneter Kandidaten (m/w) für die Wahl in den Aufsichtsrat als Vertreter der Aktionäre, die dem Aufsichtsrat für dessen Wahlvorschläge an die Hauptversammlung vorgeschlagen werden sollen</li> <li>– Einrichtung entspricht Empfehlung des Deutschen Corporate Governance Kodex, Grundlage ist Geschäftsordnung</li> </ul>                                                                                                                                                                                                                                                                                                                                                                                                                                                                                                                                                                                                                                                                                                                                        | Joachim Milberg <sup>1</sup><br>Stefan Quandt<br>Karl-Ludwig Kley<br><br>(Gemäß der Empfehlung des Deutschen Corporate Governance Kodex ist der Nominierungsausschuss ausschließlich mit Vertretern der Aktionäre besetzt.)                                                                                                        | 1                                       | 100 %                             |
| <b>Vermittlungsausschuss</b>                                                                                                                                                                                                                                                                                                                                                                                                                                                                                                                                                                                                                                                                                                                                                                                                                                                                                                                                                                                                                                                                                             |                                                                                                                                                                                                                                                                                                                                    |                                         |                                   |
| <ul style="list-style-type: none"> <li>– Vorschlag an den Aufsichtsrat, wenn ein Beschluss über die Bestellung eines Vorstandsmitglieds nicht die erforderliche Mehrheit von zwei Dritteln der Stimmen der Mitglieder des Aufsichtsrats erreicht hat</li> <li>– Einrichtung ist gesetzlich vorgesehen</li> </ul>                                                                                                                                                                                                                                                                                                                                                                                                                                                                                                                                                                                                                                                                                                                                                                                                         | Joachim Milberg<br>Manfred Schoch<br>Stefan Quandt<br>Stefan Schmid<br><br>(Gemäß den gesetzlichen Bestimmungen gehören dem Vermittlungsausschuss der Vorsitzende und der stellvertretende Vorsitzende des Aufsichtsrats sowie je ein von den Vertretern der Aktionäre und den Vertretern der Arbeitnehmer gewähltes Mitglied an.) | –                                       | –                                 |

140 — ERKLÄRUNG ZUR  
UNTERNEHMENSFÜHRUNG,  
CORPORATE GOVERNANCE  
(Teil des Lageberichts)

140 Grundlegendes zur  
Unternehmensverfassung  
142 Erklärung des Vorstands und des  
Aufsichtsrats gemäß § 161 AktG  
143 Mitglieder des Vorstands  
144 Mitglieder des Aufsichtsrats  
147 — Zur Arbeitsweise von Vorstand  
und Aufsichtsrat  
154 Vergütungsbericht  
162 Angaben zu Unternehmens-  
führungspraktiken  
163 Compliance in der BMW Group

<sup>1</sup> Vorsitz

<sup>2</sup> unabhängiger Finanzexperte i. S. d. §§ 100 Abs. 5, 107 Abs. 4 AktG

### Besetzungsziele des Aufsichtsrats

Der Aufsichtsrat ist so zusammenzusetzen, dass seine Mitglieder insgesamt über die zur ordnungsgemäßen Wahrnehmung der Aufgaben erforderlichen Kenntnisse, Fähigkeiten und Erfahrungen verfügen.

Zu diesem Zweck hat der Aufsichtsrat der BMW AG durch Beschluss die nachfolgenden konkreten Besetzungsziele verabschiedet:

- Dem Aufsichtsrat sollen insgesamt möglichst vier Mitglieder angehören, die über internationale Erfahrung oder besonderen Sachverstand in einem oder mehreren für das Unternehmen wichtigen Märkten außerhalb Deutschlands verfügen.
- Dem Aufsichtsrat sollen insgesamt möglichst sieben Mitglieder angehören, die über vertiefte Kenntnisse und Erfahrungen aus dem Unternehmen selbst verfügen, jedoch nicht mehr als zwei ehemalige Mitglieder des Vorstands.
- Dem Aufsichtsrat sollen als Vertreter der Anteilseigner möglichst drei Unternehmer oder Persönlichkeiten angehören, die bereits Erfahrung in der Führung oder Überwachung eines anderen mittelgroßen oder großen Unternehmens erworben haben.
- Dem Aufsichtsrat sollen insgesamt möglichst drei Persönlichkeiten aus Wirtschaft, Wissenschaft oder Forschung angehören, die Erfahrung in Branchen erworben haben, die für die BMW Group bedeutsam sind, wie z. B. Chemie, Energieversorgung, Informationstechnologie, oder die über Sachverstand auf für die BMW Group zukunftsrelevanten Themenfeldern verfügen, wie z. B. Kundenbedürfnisse, Mobilität, Ressourcen und Nachhaltigkeit.
- Bei der Suche nach qualifizierten Persönlichkeiten für den Aufsichtsrat, die das Gremium in seiner Gesamtheit mit Fach- und Führungskompetenzen bestmöglich verstärken würden, soll auch auf Vielfalt (Diversity) geachtet werden. Bei der Vorbereitung von Besetzungsvorschlägen soll im Einzelfall gewürdigt werden, inwiefern unterschiedliche, sich gegenseitig ergänzende fachliche Profile, Berufs- und Lebenserfahrungen, auch im internationalen Bereich, und eine angemessene Vertretung beider Geschlechter im Gremium der Aufsichtsratsarbeit zugutekommen. Unter Berücksichtigung des Frauenanteils an der Belegschaft der BMW AG (13,2% zum 31. Dezember 2010) hält der Aufsichtsrat den derzeitigen Frauenanteil im Aufsichtsrat von drei von 20 Mitgliedern (15%) unter dem Gesichtspunkt der Geschlechtervielfalt für angemessen, eine Erhöhung jedoch für wünschenswert. Im Rahmen der kommenden Besetzungsverfahren soll bis zur Hauptversammlung 2015 daher eine Besetzung mit möglichst vier Frauen (20%) angestrebt werden.
- Dem Aufsichtsrat sollen insgesamt möglichst sieben unabhängige Mitglieder angehören, davon zwei unab-

hängige Persönlichkeiten mit Sachverstand auf den Gebieten Rechnungslegung oder Abschlussprüfung.

- Dem Aufsichtsrat soll keine Person angehören, die eine Organfunktion oder Beratungsaufgabe bei wesentlichen Wettbewerbern des Unternehmens ausübt. Die Aufsichtsratsmitglieder werden sich unter Beachtung des geltenden Rechts darüber hinaus dafür einsetzen, dass keine Persönlichkeiten zur Wahl vorgeschlagen werden, die aufgrund ihrer sonstigen Tätigkeiten und Funktionen außerhalb der BMW Group, insbesondere Beratungstätigkeiten oder Organfunktionen bei Kunden, Lieferanten, Kreditgebern oder sonstigen Geschäftspartnern, voraussichtlich nicht nur vorübergehend in einen wesentlichen Interessenkonflikt geraten werden.
- Es soll für die Mitglieder des Aufsichtsrats im Regelfall eine Altersgrenze von 70 Jahren berücksichtigt werden. Einzelfallausnahmen sollen bis zur ordentlichen Hauptversammlung nach Vollendung des 73. Lebensjahres zur Erfüllung gesetzlicher Erfordernisse oder zur Unterstützung einer geordneten Nachfolgeplanung bei Schlüsselfunktionen oder -qualifikationen zulässig sein.

Der Aufsichtsrat hat für die obigen Besetzungsziele einen Zeitrahmen bis zur Hauptversammlung 2015 zugrunde gelegt, da bis zu diesem Zeitpunkt für alle Sitze im Aufsichtsrat eine Wahl stattgefunden haben wird.

Künftige Wahlvorschläge des Aufsichtsrats an die Hauptversammlung sollen diese Ziele, soweit sie Aufsichtsratsmitglieder der Anteilseigner betreffen, in der Weise berücksichtigen, dass eine Umsetzung durch entsprechende Wahlbeschlüsse der Hauptversammlung unterstützt wird. Die Hauptversammlung ist jedoch an Wahlvorschläge nicht gebunden. Auch die Wahlfreiheit der Arbeitnehmer bei der Wahl der Aufsichtsratsmitglieder der Arbeitnehmer ist geschützt (zu den gesetzlichen Rahmenbedingungen bei der Zusammensetzung des Aufsichtsrats s. Seite 140). Im Verfahren nach dem Mitbestimmungsgesetz zur Wahl von Arbeitnehmervertretern hat der Aufsichtsrat kein Vorschlagsrecht. Die Besetzungsziele, die sich der Aufsichtsrat gibt, verstehen sich daher nicht als Vorgaben an die Wahlberechtigten oder Beschränkungen ihrer Wahlfreiheit. Sie bringen vielmehr zum Ausdruck, welche Zusammensetzung nach Einschätzung des amtierenden Aufsichtsrats im Hinblick auf die Anforderungen an die Beratungs- und Überwachungstätigkeit gerade des Aufsichtsrats der BMW AG zukünftig von den Vorschlags- und Wahlberechtigten angestrebt werden sollte.

Die derzeitige Besetzung des Aufsichtsrats (vgl. Seite 144ff.) entspricht bereits, bis auf die erwünschte Erhöhung der Zahl weiblicher Aufsichtsratsmitglieder, den o.g. Besetzungszielen.

## Vergütungsbericht

Im Folgenden werden die Prinzipien beschrieben, die für die Vergütung des Vorstands gelten, sowie die Festlegungen der Satzung für die Vergütung des Aufsichtsrats. Neben dem System der Vergütung wird auch das Verhältnis der Vergütungsbestandteile in Zahlen erläutert. Darüber hinaus wird die Vergütung jedes Vorstands- und Aufsichtsratsmitglieds für das Geschäftsjahr 2010 individualisiert und nach Bestandteilen aufgliedert ausgewiesen.

### 1. Vergütung des Vorstands

#### Zuständigkeit; Billigung durch die Aktionäre 2010

Die Festlegung und regelmäßige Überprüfung der Vorstandsvergütung ist eine Aufgabe des Aufsichtsratsplenums. Der Personalausschuss des Aufsichtsrats übernimmt bei der Festlegung und Überprüfung der Vorstandsvergütung eine vorbereitende Funktion.

Das für das abgelaufene Geschäftsjahr maßgebliche Vergütungssystem für den Vorstand wurde von der Hauptversammlung 2010 im Rahmen einer Konsultativabstimmung („Say on Pay“) mit einer Mehrheit von 97,66% gebilligt.

#### Grundsätze der Vergütung

Die Vergütungsstruktur soll eine nachhaltige Unternehmensentwicklung fördern. Gleichzeitig soll das Vergütungsmodell für den Vorstand im Wettbewerb um hoch qualifizierte Führungspersonlichkeiten attraktiv sein. Sämtliche Vergütungsbestandteile sollen für sich und insgesamt angemessen sein und den Vorstand nicht zum Eingehen unangemessener Risiken für das Unternehmen verleiten.

Die Vergütung der Vorstandsmitglieder wird vom Aufsichtsratsplenum unter Einbeziehung etwaiger Bezüge bei Konzerngesellschaften aufgrund von Leistungskriterien festgelegt. Der Aufsichtsrat legt für die variablen Vergütungsteile anspruchsvolle, relevante Parameter zugrunde. Kriterien für die Angemessenheit der Vergütung bilden insbesondere die Aufgaben des Vorstandsmitglieds, die Bewertung seiner Mandatsausübung, die wirtschaftliche Lage, der Erfolg und die Zukunftsaussichten der BMW Group sowie die Üblichkeit der Vergütung unter Berücksichtigung des Vergleichsumfelds und der Vergütungsstruktur, die ansonsten in der Gesellschaft gilt.

Der Festsetzung der variablen Vergütung in Form einer Ergebnis- und einer Leistungstantieme liegt jeweils ein mehrjähriger Betrachtungszeitraum zugrunde, innerhalb dessen positive wie auch negative Entwicklungen berücksichtigt werden.

Personalausschuss und Aufsichtsrat hatten das System der Vorstandsvergütung 2009 von externen Experten auf seine Vereinbarkeit mit dem Gesetz zur Angemessenheit

der Vorstandsvergütung überprüfen lassen. Daraus abgeleitete Erkenntnisse wurden im Rahmen einer einvernehmlichen Anpassung aller Vorstandsdiensverträge zum 1. Januar 2010 berücksichtigt.

In regelmäßigen Abständen überprüft der Aufsichtsrat das Vergütungssystem hinsichtlich Struktur und Höhe der Vorstandsvergütung. Zur Vorbereitung zieht der Personalausschuss des Aufsichtsrats auch Vergütungsstudien hinzu. Auch Empfehlungen eines unabhängigen externen Vergütungsexperten sowie Anregungen aus Kreisen der Investoren und Analysten werden in die Beratung einbezogen. Ferner berücksichtigt der Aufsichtsrat die Entwicklung der Vergütungsstruktur und der Vergütungshöhe der Führungskräfte und Mitarbeiter bei der BMW Group.

#### Vergütungssystem, Vergütungselemente

Die Vergütung des Vorstands enthält feste und variable Bezüge. Für die Gesamtvergütung der aktiven Vorstandsmitglieder legt der Aufsichtsrat unter Berücksichtigung der Situation und der Planungen der BMW Group eine Zielvergütung und einen Vergütungsrahmen mit einem hohen variablen Anteil fest. Ferner ist bei Vorstandsverträgen, die vor dem 1. Januar 2010 geschlossen wurden, ein Altersruhegeld in Form eines leistungsorientierten Festbetrags (Defined Benefit) zugesagt. Unter bestimmten Voraussetzungen ist gemäß Verträgen, die vor dem 1. Januar 2010 geschlossen wurden, Vorstandsmitgliedern bis zum Eintritt in den Ruhestand ein Übergangsgeld zugesagt.

Die festen Bezüge setzen sich aus einer Grundvergütung, die monatlich als Gehalt ausgezahlt wird, sowie aus sonstigen Bezügen zusammen. Die sonstigen Bezüge bestehen im Wesentlichen aus der Nutzung von Dienstfahrzeugen, Versicherungsprämien, Zuschüssen zu Sicherheitseinrichtungen und einer jährlichen medizinischen Vorsorge.

Das Gehalt eines Vorstandsmitglieds beträgt 420.000 Euro p. a. während der ersten Bestellperiode und ab dem Beginn der zweiten Bestellperiode 480.000 Euro p. a. Das Gehalt des Vorstandsvorsitzenden beläuft sich auf 840.000 Euro p. a.

Die variable Vergütung des Vorstands (Tantieme) setzt sich in der Zielausprägung hälftig aus zwei Komponenten zusammen, einer Ergebnistantieme und einer Leistungstantieme. In begründeten Fällen kann der Aufsichtsrat auf freiwilliger Basis neben der Tantieme eine Sonderzuwendung festsetzen. Die Zieltantieme (100%) eines Vorstandsmitglieds liegt für beide Komponenten der variablen Vergütung in Summe bei 1,5 Mio. Euro p. a., ab der zweiten Bestellperiode bei 1,75 Mio. Euro p. a.

|     |   |                                                                                                   |
|-----|---|---------------------------------------------------------------------------------------------------|
| 140 | — | <b>ERKLÄRUNG ZUR<br/>UNTERNEHMENSFÜHRUNG,<br/>CORPORATE GOVERNANCE</b><br>(Teil des Lageberichts) |
| 140 |   | Grundlegendes zur<br>Unternehmensverfassung                                                       |
| 142 |   | Erklärung des Vorstands und des<br>Aufsichtsrats gemäß § 161 AktG                                 |
| 143 |   | Mitglieder des Vorstands                                                                          |
| 144 |   | Mitglieder des Aufsichtsrats                                                                      |
| 147 |   | Zur Arbeitsweise von Vorstand<br>und Aufsichtsrat                                                 |
| 154 | — | <b>Vergütungsbericht</b>                                                                          |
| 162 |   | Angaben zu Unternehmens-<br>führungspraktiken                                                     |
| 163 |   | Compliance in der BMW Group                                                                       |

Für den Vorsitzenden des Vorstands liegt sie bei 3 Mio. Euro p. a. Für alle Mitglieder des Vorstands sind Obergrenzen der Tantieme festgelegt. Diese liegen bei 150% der jeweiligen Zieltantieme. Die Gesamtzielvergütung als Summe von Gehalt und Zieltantieme liegt für ein Mitglied des Vorstands somit bei 1,92 Mio. Euro p. a., ab der zweiten Bestellperiode bei 2,23 Mio. Euro p. a. Für den Vorsitzenden des Vorstands liegt die Gesamtzielvergütung bei 3,84 Mio. Euro p. a.

Bei 100%iger Zielerreichung ergibt sich ein Verhältnis zwischen Gehalt und variabler Vergütung (Tantieme) von ca. 20% zu 80%.

Als Messgrößen für die Berechnung der Ergebnistantieme dienen einerseits der Konzernjahresüberschuss der BMW Group und die Konzernumsatzrendite nach Steuern, die gemeinsam in einen Ergebnisfaktor einfließen, sowie andererseits die Dividende (Stammaktie). Die Ergebnistantieme ergibt sich aus einem für jedes Vorstandsmitglied festgelegten Zielwert, multipliziert mit dem Ergebnisfaktor und dem Dividendenfaktor. Bei außergewöhnlichen Umständen, wie z. B. wesentlichen Zu- oder Verkäufen, kann der Aufsichtsrat eine Anpassung der Ergebnistantieme vornehmen.

Bei einem Ergebnis- und einem Dividendenfaktor von 1,00 ergibt sich eine Ergebnistantieme i. H. v. 0,75 Mio. Euro für ein Vorstandsmitglied in der ersten Bestellperiode, eine Ergebnistantieme i. H. v. 0,875 Mio. Euro in der zweiten Bestellperiode und für den Vorstandsvorsitzenden eine entsprechende Tantieme von 1,5 Mio. Euro. Der Ergebnisfaktor nimmt den Wert 1,00 bei einem Konzernjahresüberschuss von 3,1 Mrd. Euro und einer Konzernumsatzrendite nach Steuern von 5,6% an. Der Dividendenfaktor liegt bei 1,00, wenn die ausgezahlte Dividende für die Stammaktie zwischen 100 und 110 Cent beträgt.

Bei einem Konzernjahresüberschuss unter 1 Mrd. Euro oder einer Konzernumsatzrendite nach Steuern kleiner als 2% beträgt der Ergebnisfaktor 0. Somit ist in diesen Fällen keine Ergebnistantieme zahlbar. Diese Regelung findet nach dem Prinzip der Durchgängigkeit auch Anwendung in der vom Unternehmenserfolg abhängigen variablen Vergütungskomponente aller Führungskräfte und Mitarbeiter der BMW AG.

Die Leistungstantieme ergibt sich aus einem für jedes Vorstandsmitglied festgelegten Zielwert, multipliziert mit einem Performance-Faktor. Den Performance-Faktor legt der Aufsichtsrat anhand einer Bewertung des Beitrags des Vorstands zur nachhaltigen und langfristigen Entwicklung des Unternehmens fest. Dabei werden Leistungen und Entscheidungen in den vorangegangenen Planungszeiträumen ebenso berücksichtigt wie Weichen-

stellungen für die zukünftige Entwicklung des Unternehmens, die Effektivität und Effizienz von Anpassungsmaßnahmen, die als Reaktion auf sich verändernde externe Rahmenbedingungen getroffen wurden, sowie sonstige Aktivitäten zur Sicherung der Zukunftsfähigkeit des Unternehmens, die sich nicht unmittelbar in Messwerten abbilden.

Die Zieltantiemen und die der Ergebnistantieme zugrunde liegenden Kennzahlen werden jeweils für den Zeitraum von drei Geschäftsjahren festgeschrieben. Eine nachträgliche Änderung der Zieltantiemen oder der zugrunde liegenden Kennzahlen ist innerhalb dieses Zeitraums ausgeschlossen.

Das Vergütungssystem für 2010 enthält wie in den Vorjahren keine Aktienoptionen, keine Wertzuwachsrechte, die Aktienoptionen nachgebildet sind, und keine anderen aktienbasierten Komponenten mit langfristiger Anreizwirkung. Der Aufsichtsrat hat jedoch im Dezember 2010 beschlossen, das Vergütungssystem für Geschäftsjahre ab dem 1. Januar 2011 um eine Komponente zu ergänzen, die eine Verpflichtung der Vorstandsmitglieder beinhaltet, jeweils den Gegenwert von 20% ihrer Gesamtantiemen nach Steuern für Geschäftsjahre ab 2011 in Stammaktien der Gesellschaft zu investieren und diese Stammaktien über mindestens vier Jahre zu halten. Die Hälfte des aufzubringenden Finanzierungsbetrages wird vom Unternehmen gewährt. Im Rahmen eines Matching Plans erhält das Vorstandsmitglied von der Gesellschaft nach Ablauf der Haltefrist für jeweils drei gehaltene Stammaktien nach Wahl der Gesellschaft entweder eine zusätzliche Stammaktie oder den Gegenwert in Geld. Dadurch sollen im Sinne einer nachhaltigen Unternehmensführung weitere langfristige Verhaltensanreize gesetzt werden.

Der Aufsichtsrat überprüft die Üblichkeit der Gesamtvergütung des Vorstands jährlich in horizontaler Hinsicht anhand eines Vergütungsvergleichs insbesondere innerhalb der DAX-30-Unternehmen sowie in vertikaler Hinsicht anhand eines Vergleichs einerseits mit den Bezügen der ersten Führungsebene unterhalb des Vorstands sowie anhand eines Vergleichs mit den durchschnittlichen Mitarbeiterbezügen.

Mit Wirkung für Geschäftsjahre ab dem 1. Januar 2010 wurde die Alters- und Hinterbliebenenversorgung der amtierenden und künftigen Mitglieder des Vorstands analog der für mittlere und obere Führungskräfte 2009 erfolgten Umstellung in ein beitragsorientiertes System mit garantierter Mindestrendite überführt, wobei im Hinblick auf bereits erteilte Zusagen Bestandsschutz besteht und amtierenden Vorstandsmitgliedern diesbezüglich ein Wahlrecht zwischen dem alten und dem neuen

System eingeräumt wird. Während des abgelaufenen Geschäftsjahres wurden keine Änderungen dieser Zusagen vereinbart.

Für den Fall der Beendigung des Mandatsverhältnisses bestehen gegenüber den amtierenden Vorstandsmitgliedern nach dem alten Altersvorsorgemodell Ruhegeldzusagen in Form einer leistungsorientierten Zusage (Defined Benefit). Ruhegelder werden entsprechend der bisherigen Zusage an frühere Vorstandsmitglieder gezahlt, die entweder das 65. Lebensjahr oder, sofern ihr Mandat früher geendet hat und nicht verlängert wurde, das 60. Lebensjahr vollendet haben, die dauerhaft infolge Krankheit oder Unfall dienstunfähig geworden sind oder die aufgrund einer besonderen Vereinbarung vorzeitig in den Ruhestand getreten sind. Die Höhe des Ruhegelds setzt sich unverändert zum Vorjahr aus einem monatlichen Grundbetrag von 10.000 Euro bzw. 15.000 Euro (Vorstandsvorsitzender) und einem Festbetrag zusammen. Der Festbetrag beträgt für jedes volle Jahr der Betriebszugehörigkeit vor der Vorstandstätigkeit rund 75 Euro und für jedes volle Jahr bis maximal 15. Jahr der Vorstandstätigkeit 400 bis 600 Euro. Die laufenden Ruhegeldzahlungen werden in Anlehnung an die Anpassung der Beamtenpensionen bei Veränderungen der Besoldungsstufe B6 (ohne Zuschläge) um mehr als 5% bzw. entsprechend dem Betriebsrentengesetz angepasst.

Kommt es zu einer vorzeitigen Beendigung des Mandatsverhältnisses, bevor das Vorstandsmitglied das 60. Lebensjahr vollendet hat, so kann ein Übergangsgeld i. H. v. zwei Dritteln des bis dato erdienten fiktiven Ruhegelds bis zum Beginn der Ruhegeldberechtigung zahlbar werden, wenn dies nach einer mindestens dreijährigen Tätigkeit als Vorstand unter Berücksichtigung aller Umstände objektiv angemessen ist. Es bestehen Vereinbarungen über die Anrechnung anderweitiger Einkünfte auf Ruhe- und Übergangsgelder.

Für den Fall der Beendigung des Mandatsverhältnisses nach dem 1. Januar 2010 bestehen nach dem neu eingeführten System Zusagen, die (a) im Todes- oder Invaliditätsfall als Einmalzahlung oder in maximal zehn Jahresraten zur Auszahlung kommen können oder (b) nach Eintritt in den Ruhestand wahlweise in Form eines Altersruhegelds als lebenslange monatliche Rente, als Einmalzahlung, in maximal zehn Jahresraten oder in Mischformen (z. B. Kombination von Einmalzahlung und anteilig reduziertem lebenslangem Ruhegeld) zur Auszahlung gelangen können. Altersruhegelder werden an frühere Vorstandsmitglieder gezahlt, die entweder die Regelaltersgrenze in der gesetzlichen Rentenversicherung erreicht haben oder, sofern ihr Mandat früher geendet hat und nicht verlängert wurde, das 60. Lebensjahr

vollendet haben oder die dauerhaft erwerbsunfähig geworden sind oder die aufgrund einer besonderen Vereinbarung vorzeitig in den Ruhestand getreten sind. Ferner wird im Fall des Todes eines Vorstandsmitglieds nach dem Eintritt in den Ruhestand bei Wahl einer lebenslangen Rente ein Ruhegeld in Höhe von 60% als Witwen- oder Witwerrente gezahlt.

Die Höhe der Altersleistung richtet sich nach der Höhe des individuellen Ansparkontos des jeweiligen Vorstandsmitglieds. Dieses ergibt sich aus den jährlich eingebrachten Beiträgen sowie einer jährlichen Verzinsung in Abhängigkeit von der Kapitalanlageform.

Der von der Gesellschaft zugesagte Jahresbeitrag beträgt für ein Mitglied des Vorstands (für den Vorstandsvorsitzenden) für 2010 240.000 Euro (425.000 Euro), für 2011 270.000 Euro (475.000 Euro) und ab 2012 300.000 Euro (525.000 Euro). Die Gutschrift der Beiträge auf dem persönlichen Ansparkonto des Vorstandsmitglieds erfolgt ebenso wie die Zinsgutschrift in monatlichen Teilbeträgen. Die garantierte Mindestverzinsung p. a. entspricht dem in der Deckungsrückstellungsverordnung festgelegten Höchstzinssatz für die Berechnung der Deckungsrückstellungen für Kapitallebensversicherungen (Garanzieins für Kapitallebensversicherungen).

Für den Todes- oder Invaliditätsfall ist eine Mindestleistung i. H. v. 60% der bis zum 60. Lebensjahr möglichen jährlichen Beiträge zugesagt. Für die amtierenden Vorstandsmitglieder wurde beim Übergang auf das neue System als wertgleicher Ersatz für die bisher erdiente Anwartschaft ein entsprechender Startbaustein bereitgestellt.

Der Startbaustein und alle einbezahlten Beiträge des neuen Altersvorsorgemodells für den Vorstand wurden im Rahmen eines auch für Pensionsverbindlichkeiten gegenüber Mitarbeitern bestehenden Treuhandmodells ausfinanziert.

Die laufenden Ruhegeldzahlungen werden jährlich um mindestens 1% angepasst.

Einkünfte aus selbstständiger und nicht selbstständiger Arbeit, die vor Vollendung des 63. Lebensjahres erzielt werden, werden auf das Ruhegeld angerechnet. Es sind ferner bestimmte Tatbestände vereinbart, in denen die Leistungspflicht der Gesellschaft ganz entfallen kann. Ein Übergangsgeld wird nicht mehr gewährt.

Vorstandsmitglieder im Ruhestand sind berechtigt, Dienst- und Mietfahrzeuge aus dem Fuhrpark der Gesellschaft entsprechend den Richtlinien zu beziehen, die für Bereichsleiter der obersten Einstufung gelten.

|     |                                                                                                   |
|-----|---------------------------------------------------------------------------------------------------|
| 140 | <b>ERKLÄRUNG ZUR<br/>UNTERNEHMENSFÜHRUNG,<br/>CORPORATE GOVERNANCE</b><br>(Teil des Lageberichts) |
| 140 | Grundlegendes zur<br>Unternehmensverfassung                                                       |
| 142 | Erklärung des Vorstands und des<br>Aufsichtsrats gemäß § 161 AktG                                 |
| 143 | Mitglieder des Vorstands                                                                          |
| 144 | Mitglieder des Aufsichtsrats                                                                      |
| 147 | Zur Arbeitsweise von Vorstand<br>und Aufsichtsrat                                                 |
| 154 | <b>Vergütungsbericht</b>                                                                          |
| 162 | Angaben zu Unternehmens-<br>führungspraktiken                                                     |
| 163 | Compliance in der BMW Group                                                                       |

Es bestehen weder vertragliche Abfindungszusagen für den Fall der vorzeitigen Beendigung der Vorstandstätigkeit ohne wichtigen Grund noch Zusagen für den Fall einer vorzeitigen Beendigung der Vorstandstätigkeit in Folge eines Kontrollwechsels (change of control) noch Entschädigungsvereinbarungen für den Fall eines Übernahmeangebots.

Auch hat kein Mitglied des Vorstands im abgelaufenen Geschäftsjahr Leistungen oder entsprechende Zusagen von Dritten im Hinblick auf seine Tätigkeit als Vorstandsmitglied erhalten.

### Vergütungssystem und Vergütungselemente im Überblick

| Bestandteil                                                                                                                                                                                                    | Parameter/Bemessungsgrundlage                                                                                                                                                                                                                                                                                                                                                                                                                                                                                                                                                                                                                                                                       |
|----------------------------------------------------------------------------------------------------------------------------------------------------------------------------------------------------------------|-----------------------------------------------------------------------------------------------------------------------------------------------------------------------------------------------------------------------------------------------------------------------------------------------------------------------------------------------------------------------------------------------------------------------------------------------------------------------------------------------------------------------------------------------------------------------------------------------------------------------------------------------------------------------------------------------------|
| <b>Gehalt</b>                                                                                                                                                                                                  | <p>Mitglied des Vorstands:</p> <ul style="list-style-type: none"> <li>- 420.000 Euro p.a. (1. Bestellperiode)</li> <li>- 480.000 Euro p.a. (ab 2. Bestellperiode)</li> </ul> <p>Vorstandsvorsitzender:</p> <ul style="list-style-type: none"> <li>- 840.000 Euro p.a.</li> </ul>                                                                                                                                                                                                                                                                                                                                                                                                                    |
| <b>Variable Vergütung</b>                                                                                                                                                                                      |                                                                                                                                                                                                                                                                                                                                                                                                                                                                                                                                                                                                                                                                                                     |
| <b>Tantieme</b><br>(bei 100% Zielerreichung ergibt sich ein Verhältnis von Gehalt und Tantieme von ca. 20% : 80%)                                                                                              | <p>Zieltantiemen (bei 100% Zielerreichung):</p> <ul style="list-style-type: none"> <li>- 1,5 Mio. Euro (1. Bestellperiode)</li> <li>- 1,75 Mio. Euro (ab 2. Bestellperiode)</li> <li>- 3,00 Mio. Euro (Vorstandsvorsitzender)</li> </ul>                                                                                                                                                                                                                                                                                                                                                                                                                                                            |
| a) Ergebnistantieme<br>(entspricht bei 100% Zielerreichung 50% der Zieltantieme)                                                                                                                               | <ul style="list-style-type: none"> <li>- Quantitative Kriterien, die jeweils für drei Geschäftsjahre im Voraus festgelegt werden</li> <li>- Formel: 50% Zieltantieme x Ergebnisfaktor x Dividendenfaktor (Stammaktie)</li> <li>- Ergebnisfaktor wird abgeleitet aus Konzernjahresüberschuss und Konzernumsatzrendite nach Steuern</li> <li>- Korridor: 0–150%* (feste Obergrenze)</li> </ul>                                                                                                                                                                                                                                                                                                        |
| b) Leistungstantieme<br>(entspricht bei 100% Zielerreichung 50% der Zieltantieme)                                                                                                                              | <ul style="list-style-type: none"> <li>- Vorwiegend qualitative Kriterien, ausgedrückt in einem Performance-Faktor, mit dem der Beitrag des Vorstands zur nachhaltigen und langfristigen Entwicklung sowie zur Zukunftsfähigkeit des Unternehmens bewertet wird</li> <li>- Formel: 50% Zieltantieme x Performance-Faktor</li> <li>- Kriterien für den Performance-Faktor sind auch: Innovationsleistung (ökonomisch und ökologisch, z. B. bei der Reduzierung der CO<sub>2</sub>-Emissionen), Führungsleistung und Attraktivität als Arbeitgeber, Corporate Social Responsibility, Fortschritte bei der Umsetzung des Diversity-Konzepts</li> <li>- Korridor: 0–150%* (feste Obergrenze)</li> </ul> |
| <b>Aktienorientierte Vergütungskomponente</b>                                                                                                                                                                  | <ul style="list-style-type: none"> <li>- Einführung für Geschäftsjahre ab dem 1. Januar 2011 geplant</li> <li>- Verpflichtung des Vorstandsmitglieds, im Umfang von jeweils 20% der Gesamt-tantiemen nach Steuern für Geschäftsjahre ab 2011 in Stammaktien der Gesellschaft zu investieren</li> <li>- Die Hälfte des aufzubringenden Finanzierungsbetrags wird vom Unternehmen gewährt</li> <li>- Haltedauer mindestens vier Jahre</li> <li>- Nach Ablauf der Haltedauer erhält Vorstandsmitglied für drei gehaltene Stammaktien nach Wahl der Gesellschaft entweder eine weitere oder den Gegenwert in Geld</li> </ul>                                                                            |
| <b>Möglichkeit der Sonderzahlung</b>                                                                                                                                                                           | In begründeten Fällen im Rahmen der Angemessenheit, kein Anspruch                                                                                                                                                                                                                                                                                                                                                                                                                                                                                                                                                                                                                                   |
| <b>Sonstige Bezüge</b>                                                                                                                                                                                         | Vertragliche Vereinbarung, im Wesentlichen: Nutzung von Dienstfahrzeugen, Versicherungsprämien, Zuschüsse zu Sicherheitseinrichtungen, Gesundheitscheck                                                                                                                                                                                                                                                                                                                                                                                                                                                                                                                                             |
| <b>Abfindungszusagen, Zusagen für den Fall eines Change of Control oder Übernahmeangebots</b>                                                                                                                  | Keine vertraglichen Zusagen                                                                                                                                                                                                                                                                                                                                                                                                                                                                                                                                                                                                                                                                         |
| <b>Alters- und Hinterbliebenenversorgung</b>                                                                                                                                                                   |                                                                                                                                                                                                                                                                                                                                                                                                                                                                                                                                                                                                                                                                                                     |
| <b>Modell</b>                                                                                                                                                                                                  | Wesentliche Merkmale                                                                                                                                                                                                                                                                                                                                                                                                                                                                                                                                                                                                                                                                                |
| a) Leistungsorientierte Zusage (Defined Benefit)<br>(nur noch für erstmals vor dem 1. Januar 2010 bestellte Vorstandsmitglieder, die im Rahmen einer Bestandschutzregelung zwischen (a) und (b) wählen können) | Ruhegeld i.H. eines Grundbetrags i.H.v. 10.000 Euro (Vorstandsvorsitzender: 15.000 Euro) zzgl. von der Dauer der Betriebszugehörigkeit und den Dienstjahren im Vorstand abhängiger Festbeträge, u.U. Übergangsgeld                                                                                                                                                                                                                                                                                                                                                                                                                                                                                  |
| b) Seit 1. Januar 2010 beitragsorientiertes System mit garantierter Mindestrendite                                                                                                                             | <p>Höhe der Leistung richtet sich nach den auf dem individuellen Ansparkonto gutgeschriebenen Versorgungsbeiträgen und Zinsen</p> <p>Zugesagte Jahresbeiträge für ein Mitglied des Vorstands (Vorstandsvorsitzender)</p> <ul style="list-style-type: none"> <li>für 2010: 240.000 Euro (425.000 Euro)</li> <li>für 2011: 270.000 Euro (475.000 Euro)</li> <li>für Geschäftsjahre ab 2012: 300.000 Euro (525.000 Euro)</li> </ul> <p>Unterschiedliche Auszahlungsformen</p> <p>Kein Übergangsgeld</p>                                                                                                                                                                                                |

\* Die Obergrenze wird für Geschäftsjahre ab 1. Januar 2011 auf 250% ansteigen.

### Vorstandsvergütung für das Geschäftsjahr 2010 insgesamt

Die Bezüge für die aktiven Mitglieder des Vorstands der BMW AG betragen insgesamt 18,2 Mio. Euro (2009: 10,7 Mio. Euro). Davon entfallen auf fixe Bestandteile einschließlich der sonstigen Bezüge 3,7 Mio. Euro (2009: 3,7 Mio. Euro) und auf variable Bestandteile 14,5 Mio. Euro (2009: 7,0 Mio. Euro). Im abgelaufenen Geschäftsjahr blieb die Zusammensetzung des Vorstands gegenüber dem Vorjahr unverändert. Die Regelungen zur Höhe der Gehälter der Mitglieder des Vorstands wurden im Geschäftsjahr 2010 nicht geändert; Unterschiede bei den Gehältern gegenüber dem Vorjahr ergeben sich aus unterjährig wirksam gewordenen Wechseln in der Bestellperiode. Die sonstigen Bezüge sind zurückgegangen, da Nebenleistungen in geringerem Umfang in Anspruch genommen wurden als im Vorjahr. In den variablen Bezügen ist eine Sonderzahlung i. H. v. insgesamt 770.000 Euro (2009: – Euro) enthalten (100.000 Euro pro Vorstandsmitglied, 170.000 Euro für den Vorstandsvorsitzenden). Diese hat der Aufsichtsrat im Anschluss an die den Mitarbeitern der BMW AG gewährte Sonderzahlung nach dem Prinzip der Durchgängigkeit und unter

Berücksichtigung der Vergütung der ersten Ebene unterhalb des Vorstands bewilligt. Damit drückte der Aufsichtsrat seine besondere Anerkennung dafür aus, dass der Vorstand frühzeitig strukturelle Maßnahmen ergriffen hat, die der BMW Group die Bewältigung der Wirtschafts- und Finanzkrise erleichtert haben.

| in Mio. Euro    | 2010        |              | 2009        |              |
|-----------------|-------------|--------------|-------------|--------------|
|                 | Höhe        | Anteil in %  | Höhe        | Anteil in %  |
| Feste Bezüge    | 3,7         | 20,3         | 3,7         | 34,6         |
| Variable Bezüge | 14,5        | 79,7         | 7,0         | 65,4         |
| <b>Bezüge</b>   | <b>18,2</b> | <b>100,0</b> | <b>10,7</b> | <b>100,0</b> |

Für aktive Mitglieder des Vorstands sind im Geschäftsjahr 2010 Leistungen nach Beendigung des Dienstverhältnisses in Höhe von 0,9 Mio. Euro (2009: 0,7 Mio. Euro) angefallen. Hierbei handelt es sich um Aufwendungen für die Dotierung von Pensionsrückstellungen (service cost).

### Vorstandsvergütung für das Geschäftsjahr 2010 (2009), individualisiert

| in Euro            | Gehalt                          | Feste Bezüge                |                                 | Variable Bezüge*                 | Bezüge gesamt                     |
|--------------------|---------------------------------|-----------------------------|---------------------------------|----------------------------------|-----------------------------------|
|                    |                                 | Sonstige Bezüge             | Gesamt                          |                                  |                                   |
| Norbert Reithofer  | 840.000<br>(840.000)            | 17.716<br>(16.215)          | 857.716<br>(856.215)            | 3.438.500<br>(1.725.000)         | 4.296.216<br>(2.581.215)          |
| Frank-Peter Arndt  | 480.000<br>(440.000)            | 21.529<br>(23.591)          | 501.529<br>(463.591)            | 2.006.625<br>(910.417)           | 2.508.154<br>(1.374.008)          |
| Herbert Diess      | 435.000<br>(420.000)            | 18.944<br>(13.773)          | 453.944<br>(433.773)            | 1.802.344<br>(862.500)           | 2.256.288<br>(1.296.273)          |
| Klaus Draeger      | 480.000<br>(430.000)            | 20.016<br>(74.237)          | 500.016<br>(504.237)            | 2.006.625<br>(886.458)           | 2.506.641<br>(1.390.695)          |
| Friedrich Eichiner | 435.000<br>(420.000)            | 24.747<br>(93.785)          | 459.747<br>(513.785)            | 1.802.344<br>(862.500)           | 2.262.091<br>(1.376.285)          |
| Harald Krüger      | 420.000<br>(420.000)            | 20.473<br>(78.028)          | 440.473<br>(498.028)            | 1.734.250<br>(862.500)           | 2.174.723<br>(1.360.528)          |
| Ian Robertson      | 420.000<br>(420.000)            | 13.987<br>(54.993)          | 433.987<br>(474.993)            | 1.734.250<br>(862.500)           | 2.168.237<br>(1.337.493)          |
| <b>Gesamt</b>      | <b>3.510.000</b><br>(3.390.000) | <b>137.412</b><br>(354.622) | <b>3.647.412</b><br>(3.744.622) | <b>14.524.938</b><br>(6.971.875) | <b>18.172.350</b><br>(10.716.497) |

\* Die variablen Bezüge für das Geschäftsjahr 2010 enthalten eine Sonderzahlung in Höhe von jeweils 100.000 Euro (Vorstandsvorsitzender: 170.000 Euro).

140 — ERKLÄRUNG ZUR  
UNTERNEHMENSFÜHRUNG,  
CORPORATE GOVERNANCE  
(Teil des Lageberichts)  
140 Grundlegendes zur  
Unternehmensverfassung  
142 Erklärung des Vorstands und des  
Aufsichtsrats gemäß § 161 AktG  
143 Mitglieder des Vorstands  
144 Mitglieder des Aufsichtsrats  
147 Zur Arbeitsweise von Vorstand  
und Aufsichtsrat  
154 — Vergütungsbericht  
162 Angaben zu Unternehmens-  
führungspraktiken  
163 Compliance in der BMW Group



## Versorgungszusagen

| in Euro                   | Zuführung zu den Pensionsrückstellungen im Geschäftsjahr 2010 <sup>1</sup> | Anwartschaftsbarwert der Ruhegeldzusage (leistungsorientierte Zusage) nach IFRS <sup>2,3</sup> | Anwartschaftsbarwert der Ruhegeldzusage (leistungsorientierte Zusage) nach HGB <sup>2</sup> | Stand des Versorgungskontos zum 31.12. 2010 (beitragsorientierte Zusage) <sup>2</sup> |
|---------------------------|----------------------------------------------------------------------------|------------------------------------------------------------------------------------------------|---------------------------------------------------------------------------------------------|---------------------------------------------------------------------------------------|
| Norbert Reithofer         | 168.018<br>(131.815)                                                       | 4.393.600<br>(3.583.214)                                                                       | 4.092.763<br>(3.583.214)                                                                    | 3.493.226<br>(-)                                                                      |
| Frank-Peter Arndt         | 94.937<br>(73.233)                                                         | 2.972.820<br>(2.440.806)                                                                       | 2.769.243<br>(2.440.806)                                                                    | 2.389.511<br>(-)                                                                      |
| Herbert Diess             | 123.733<br>(93.685)                                                        | 2.079.474<br>(1.619.404)                                                                       | 1.915.385<br>(1.619.404)                                                                    | 1.646.141<br>(-)                                                                      |
| Klaus Draeger             | 95.435<br>(74.495)                                                         | 2.736.323<br>(2.223.687)                                                                       | 2.539.567<br>(2.223.687)                                                                    | 2.226.217<br>(-)                                                                      |
| Friedrich Eichiner        | 109.474<br>(86.612)                                                        | 2.931.281<br>(2.406.328)                                                                       | 2.741.092<br>(2.406.328)                                                                    | 2.340.081<br>(-)                                                                      |
| Harald Krüger             | 70.062<br>(51.300)                                                         | 1.570.426<br>(1.187.492)                                                                       | 1.408.702<br>(1.187.492)                                                                    | 1.213.803<br>(-)                                                                      |
| Ian Robertson             | 238.584<br>(189.682)                                                       | 714.664<br>(381.011)                                                                           | 660.951<br>(381.011)                                                                        | 532.713<br>(-)                                                                        |
| <b>Gesamt<sup>2</sup></b> | <b>900.243</b><br>(700.822)                                                | <b>17.398.588</b><br>(13.841.942)                                                              | <b>16.127.703</b><br>(13.841.942)                                                           | <b>13.841.692</b><br>(-)                                                              |

<sup>1</sup> Entspricht den sogenannten Dienstzeitaufwendungen (service cost) nach IFRS.

<sup>2</sup> Im Rahmen einer Bestandsschutzregelung wurde den amtierenden Vorstandsmitgliedern bei der Umstellung des Vorsorgesystems von leistungsorientierten zu beitragsorientierten Zusagen ein Wahlrecht zwischen dem alten und dem neuen Modell eingeräumt.

<sup>3</sup> Defined Benefit Obligations

Die laufenden Zahlungen an frühere Mitglieder des Vorstands und deren Hinterbliebene betragen insgesamt 3,7 Mio. Euro (2009: 3,8 Mio. Euro). Die Pensionsverpflichtungen gegenüber früheren Mitgliedern des Vorstands und deren Hinterbliebenen sind nach IAS 19 mit 49,7 Mio. Euro (2009: 46,7 Mio. Euro) zurückgestellt.

## 2. Vergütung des Aufsichtsrats Zuständigkeit, Satzungsregelung

Die Vergütung des Aufsichtsrats wird durch Beschluss der Aktionäre in der Hauptversammlung bestimmt. Die für das Geschäftsjahr 2010 anwendbare Vergütungsregelung wurde von der Hauptversammlung am 8. Mai 2008 beschlossen und ist in § 15 der Satzung niedergelegt. Die Satzung der BMW AG ist unter [www.bmwgroup.com/ir](http://www.bmwgroup.com/ir) unter den Menüpunkten „Fakten zum Unternehmen“ und „Corporate Governance“ verfügbar.

### Vergütungsgrundsätze, Vergütungselemente

Die Vergütung des Aufsichtsrats der BMW AG enthält feste Bezüge und einen variablen, am Unternehmenserfolg orientierten Bestandteil. Für den erfolgsorientierten Bestandteil ist das Ergebnis je Stammaktie maßgeblich.

Jedes Aufsichtsratsmitglied der BMW AG erhält neben dem Ersatz seiner Auslagen eine feste, nach Ablauf des Geschäftsjahres zahlbare Vergütung von 55.000 Euro sowie eine nach der ordentlichen Hauptversammlung des Folgejahres zahlbare erfolgsorientierte Vergütung von 220 Euro je volle 0,01 Euro, um die das im Konzern-

abschluss für das jeweilige Geschäftsjahr (Vergütungsjahr) ausgewiesene Ergebnis je Stammaktie (Earnings per Share, EPS) einen Mindestbetrag von 2,30 Euro (Mindest-EPS) übersteigt. Für die erfolgsorientierte Vergütung ist eine Obergrenze in Höhe von 110.000 Euro vorgesehen.

Mit festen Vergütungselementen und einem erfolgsorientierten Vergütungsbestandteil entspricht die Vergütungsstruktur für den Aufsichtsrat der BMW AG der Empfehlung in Ziffer 5.4.6 des Deutschen Corporate Governance Kodex. Der Deutsche Corporate Governance Kodex empfiehlt außerdem, den Vorsitz und stellvertretenden Vorsitz im Aufsichtsrat sowie den Vorsitz und die Mitgliedschaft in den Ausschüssen bei der Vergütung zu berücksichtigen.

Dementsprechend sieht die Satzung der BMW AG vor, dass der Vorsitzende des Aufsichtsrats das Dreifache und jeder Stellvertreter des Vorsitzenden des Aufsichtsrats das Doppelte der Vergütung eines Aufsichtsratsmitglieds erhält. Der Vorsitzende eines Ausschusses des Aufsichtsrats erhält das Doppelte und jedes Mitglied eines Ausschusses das Eineinhalbfache der Vergütung eines Aufsichtsratsmitglieds, sofern der Ausschuss an mindestens drei Tagen des Geschäftsjahres zu einer Sitzung zusammengekommen ist. Soweit ein Mitglied des Aufsichtsrats jedoch mehrere der vorgenannten Funktionen ausübt, bemisst sich seine Vergütung ausschließlich nach der Funktion, die unter diesen am höchsten vergütet wird.

Darüber hinaus erhält jedes Mitglied des Aufsichtsrats für jede Sitzung des Aufsichtsrats (Plenum), an der es teilgenommen hat, ein nach Ablauf des Geschäftsjahres zahlbares Sitzungsgeld von 2.000 Euro pro Sitzung. Mehrere Sitzungen am selben Tag werden nicht separat vergütet.

Ferner erstattet die Gesellschaft jedem Aufsichtsratsmitglied die auf seine Bezüge entfallende Umsatzsteuer. Die im Folgenden ausgewiesenen Beträge sind Nettobeträge.

Dem Vorsitzenden des Aufsichtsrats stehen für die Wahrnehmung seiner Aufgaben ein Büro mit Assistenz und die BMW Fahrbereitschaft zur Verfügung.

#### Aufsichtsratsvergütung im Geschäftsjahr 2010 insgesamt

Gemäß § 15 der Satzung erhält der Aufsichtsrat für seine Tätigkeit im Geschäftsjahr 2010 insgesamt 3,1 Mio. Euro (2009: 1,6 Mio. Euro). Davon sind 1,6 Mio. Euro feste Bezüge (2009: 1,6 Mio. Euro) und 1,5 Mio. Euro variable Bezüge (2009: – Mio. Euro), da erstmals seit zwei Jahren die hierfür in der Satzung festgelegten Voraussetzungen wieder erfüllt wurden.

| in Mio. Euro    | 2010       |              | 2009       |              |
|-----------------|------------|--------------|------------|--------------|
|                 | Höhe       | Anteil in %  | Höhe       | Anteil in %  |
| Feste Bezüge    | 1,6        | 51,6         | 1,6        | 100,0        |
| Variable Bezüge | 1,5        | 48,4         | -          | -            |
| <b>Bezüge</b>   | <b>3,1</b> | <b>100,0</b> | <b>1,6</b> | <b>100,0</b> |

Aufsichtsratsmitglieder haben vom Unternehmen im Berichtsjahr keine weiteren Vergütungen bzw. Vorteile für persönlich erbrachte Leistungen, insbesondere Beratungs- und Vermittlungsleistungen, erhalten. Die im Geschäftsjahr 2009 beim Institut für Demoskopie Allensbach in Auftrag gegebene Marktforschung zum Premiumsegment Automobile im Markt Deutschland wurde im Geschäftsjahr 2010 vereinbarungsgemäß abgeschlossen. Von dem Gesamthonorar i. H. v. 79.600 Euro wurde 2010 der letzte Teilbetrag i. H. v. 26.533 Euro erbracht. Da das Mitglied des Aufsichtsrats Frau Prof. Dr. Renate Köcher eine alleinvertretungsbefugte Geschäftsführerin der Gesellschaft ist, hatte der Vorstand vor Vertragsabschluss 2009 die Zustimmung des Personalausschusses des Aufsichtsrats eingeholt.

|     |                                                                                                   |
|-----|---------------------------------------------------------------------------------------------------|
| 140 | <b>ERKLÄRUNG ZUR<br/>UNTERNEHMENSFÜHRUNG,<br/>CORPORATE GOVERNANCE</b><br>(Teil des Lageberichts) |
| 140 | Grundlegendes zur<br>Unternehmensverfassung                                                       |
| 142 | Erklärung des Vorstands und des<br>Aufsichtsrats gemäß § 161 AktG                                 |
| 143 | Mitglieder des Vorstands                                                                          |
| 144 | Mitglieder des Aufsichtsrats                                                                      |
| 147 | Zur Arbeitsweise von Vorstand<br>und Aufsichtsrat                                                 |
| 154 | <b>Vergütungsbericht</b>                                                                          |
| 162 | Angaben zu Unternehmens-<br>führungspraktiken                                                     |
| 163 | Compliance in der BMW Group                                                                       |

## Aufsichtsratsvergütung für das Geschäftsjahr 2010 (2009), individualisiert

| in Euro                                       | Feste Vergütung                 | Sitzungsgeld                | Variable Vergütung      | Gesamt <sup>4</sup>             |
|-----------------------------------------------|---------------------------------|-----------------------------|-------------------------|---------------------------------|
| Joachim Milberg (Vors.)                       | 165.000<br>(165.000)            | 10.000<br>(10.000)          | 172.260<br>(-)          | <b>347.260</b><br>(175.000)     |
| Manfred Schoch (stellv. Vors.)                | 110.000<br>(110.000)            | 10.000<br>(10.000)          | 114.840<br>(-)          | <b>234.840</b><br>(120.000)     |
| Stefan Quandt (stellv. Vors.)                 | 110.000<br>(110.000)            | 10.000<br>(10.000)          | 114.840<br>(-)          | <b>234.840</b><br>(120.000)     |
| Stefan Schmid (stellv. Vors.)                 | 110.000<br>(110.000)            | 10.000<br>(10.000)          | 114.840<br>(-)          | <b>234.840</b><br>(120.000)     |
| Jürgen Strube (stellv. Vors.) <sup>1</sup>    | 41.589<br>(110.000)             | 2.000<br>(10.000)           | 43.419<br>(-)           | <b>87.008</b><br>(120.000)      |
| Karl-Ludwig Kley (stellv. Vors.) <sup>2</sup> | 89.356<br>(55.000)              | 10.000<br>(8.000)           | 93.288<br>(-)           | <b>192.644</b><br>(63.000)      |
| Bertin Eichler                                | 55.000<br>(55.000)              | 10.000<br>(10.000)          | 57.420<br>(-)           | <b>122.420</b><br>(65.000)      |
| Franz Haniel                                  | 55.000<br>(55.000)              | 10.000<br>(8.000)           | 57.420<br>(-)           | <b>122.420</b><br>(63.000)      |
| Reinhard Hüttl                                | 55.000<br>(55.000)              | 8.000<br>(10.000)           | 57.420<br>(-)           | <b>120.420</b><br>(65.000)      |
| Henning Kagermann <sup>3</sup>                | 34.356<br>(-)                   | 6.000<br>(-)                | 35.868<br>(-)           | <b>76.224</b><br>(-)            |
| Susanne Klatten                               | 55.000<br>(55.000)              | 10.000<br>(10.000)          | 57.420<br>(-)           | <b>122.420</b><br>(65.000)      |
| Renate Köcher                                 | 55.000<br>(55.000)              | 10.000<br>(10.000)          | 57.420<br>(-)           | <b>122.420</b><br>(65.000)      |
| Robert W. Lane                                | 55.000<br>(34.959)              | 10.000<br>(6.000)           | 57.420<br>(-)           | <b>122.420</b><br>(40.959)      |
| Horst Lischka                                 | 55.000<br>(34.959)              | 10.000<br>(8.000)           | 57.420<br>(-)           | <b>122.420</b><br>(42.959)      |
| Willibald Löw                                 | 55.000<br>(55.000)              | 10.000<br>(10.000)          | 57.420<br>(-)           | <b>122.420</b><br>(65.000)      |
| Wolfgang Mayrhuber                            | 55.000<br>(55.000)              | 6.000<br>(8.000)            | 57.420<br>(-)           | <b>118.420</b><br>(63.000)      |
| Werner Neugebauer                             | 55.000<br>(55.000)              | 4.000<br>(8.000)            | 57.420<br>(-)           | <b>116.420</b><br>(63.000)      |
| Franz Oberländer                              | 55.000<br>(55.000)              | 8.000<br>(4.000)            | 57.420<br>(-)           | <b>120.420</b><br>(59.000)      |
| Anton Ruf                                     | 55.000<br>(55.000)              | 10.000<br>(10.000)          | 57.420<br>(-)           | <b>122.420</b><br>(65.000)      |
| Maria Schmidt                                 | 55.000<br>(55.000)              | 10.000<br>(10.000)          | 57.420<br>(-)           | <b>122.420</b><br>(65.000)      |
| Werner Zierer                                 | 55.000<br>(55.000)              | 10.000<br>(10.000)          | 57.420<br>(-)           | <b>122.420</b><br>(65.000)      |
| <b>Gesamt</b>                                 | <b>1.430.301</b><br>(1.430.302) | <b>184.000</b><br>(184.000) | <b>1.493.235</b><br>(-) | <b>3.107.536</b><br>(1.614.302) |

<sup>1</sup> Mitglied und stellv. Vorsitzender des Aufsichtsrats bis 18.05.2010<sup>2</sup> Stellvertretender Vorsitzender des Aufsichtsrats seit 18.05.2010<sup>3</sup> Mitglied des Aufsichtsrats seit 18.05.2010<sup>4</sup> Die Vorjahresangaben beinhalten die Vergütung bereits im Geschäftsjahr 2009 ausgeschiedener Mitglieder des Aufsichtsrats.

### 3. Sonstiges

Mitgliedern des Vorstands und des Aufsichtsrats wurden vom Unternehmen weder Kredite oder Vorschüsse gewährt noch wurden zu ihren Gunsten Haftungsverhältnisse eingegangen.

#### **Meldepflichtige Wertpapiergeschäfte (Directors' Dealings)**

Gemäß § 15 a Wertpapierhandelsgesetz müssen insbesondere Mitglieder des Vorstands und des Aufsichtsrats und Personen, die mit ihnen in einer engen Beziehung stehen, Geschäfte mit BMW Aktien oder sich darauf beziehenden Finanzinstrumenten der BMW AG und der Bundesanstalt für Finanzdienstleistungsaufsicht melden, wenn die Gesamtsumme der Geschäfte in einem Kalenderjahr einen Betrag von 5.000 Euro erreicht oder übersteigt. Die BMW AG veröffentlicht die ihr gemeldeten Geschäfte auf ihrer Internetseite unter [www.bmwgroup.com/ir](http://www.bmwgroup.com/ir) und in ihrem jährlichen Dokument nach § 10 Abs. 1 Wertpapierprospektgesetz. Im Geschäftsjahr 2010 wurden von Herrn Dr. Karl-Ludwig Kley Verkaufsgeschäfte im Umfang von 1.320 Stammaktien zum durchschnittlichen Verkaufspreis von 62,94 Euro gemeldet.

#### **Aktienbesitz von Vorstand und Aufsichtsrat**

Die Mitglieder des Aufsichtsrats der BMW AG halten in Summe 27,66 % der Stamm- und Vorzugsaktien der Gesellschaft. Auf Herrn Stefan Quandt, Bad Homburg v. d. H., entfallen 16,10 % und auf Frau Susanne Klatten, München, 11,56 %. Der Aktienbesitz der Mitglieder des Vorstands beläuft sich auf insgesamt weniger als 1 % der Aktien.

#### **Belegschaftsaktienprogramm**

Seit 1989 beteiligt die BMW AG ihre Mitarbeiterinnen und Mitarbeiter auch im Rahmen eines Belegschaftsaktienprogramms am Unternehmenserfolg. Im Berichtsjahr 2010 konnten Mitarbeiter nach ihrer Wahl Pakete zwischen fünf und 25 Vorzugsaktien ohne Stimmrecht rabattiert erwerben. Teilnahmeberechtigt waren alle Mitarbeiter der BMW AG und Mitarbeiter inländischer 100%iger Tochtergesellschaften, soweit deren Geschäftsführung entschieden hat, an dem Programm teilzunehmen. Die Mitarbeiter mussten zum Zeitpunkt der Bekanntgabe des Programms mindestens seit einem Jahr ununterbrochen in einem gegenwärtigen Arbeitsverhältnis zur BMW AG oder der jeweiligen Tochtergesellschaft stehen. Die im Rahmen des Belegschaftsaktienprogramms erworbenen Vorzugsaktien unterliegen einer Sperrfrist von vier Jahren, gerechnet vom 1. Januar des Jahres, in dem die Vorzugsaktien erworben wurden. Im Jahr 2010 wurden insgesamt 499.590 Stück Vorzugsaktien an die Mitarbeiter weitergegeben; davon stammten 498.050 aus dem Genehmigten Kapital 2009, die übrigen waren über die Börse zurückgekauft worden. Über eine Fortsetzung des

Programms entscheidet der Vorstand der BMW AG jährlich neu.

#### **Angaben zu Unternehmensführungspraktiken, die über die gesetzlichen Anforderungen hinaus angewandt werden**

##### **Grundüberzeugungen**

Innerhalb der BMW Group richten Vorstand, Aufsichtsrat und Mitarbeiter ihr Handeln an zwölf Grundüberzeugungen aus, in denen die Basis für den Erfolg der BMW Group liegt:

##### **Kundenorientierung**

Unsere Kunden entscheiden über den Erfolg unseres Unternehmens. Bei all unserem Handeln steht der Kunde im Zentrum, und die Ergebnisse unseres Handelns müssen unter dem Blickwinkel des Kundennutzens bewertet werden.

##### **Höchstleistung**

Unser Ziel ist es, die Besten zu sein. Diesem Anspruch muss sich jeder stellen, und dies bedeutet, dass jeder Mitarbeiter und jede Mitarbeiterin bereit ist, Höchstleistung zu bringen. Wir streben an, zu einer Elite zu gehören, ohne dabei arrogant zu sein. Denn das Unternehmen und seine Produkte stehen im Vordergrund, niemand sonst.

##### **Verantwortung**

Jeder Mitarbeiter und jede Mitarbeiterin in der BMW Group trägt persönliche Verantwortung für den Erfolg des Unternehmens. Dies gilt auch im Team, wo jeder Einzelne zu seiner Verantwortung stehen muss. Hierbei sind wir uns bewusst, dass wir alle gemeinsam an den Unternehmenszielen arbeiten. Daher stehen wir auch im Interesse des Unternehmens füreinander ein.

##### **Wirksamkeit**

Für das Unternehmen zählen nur nachhaltig wirksame Ergebnisse. Bei der Beurteilung von Führung zählt die Wirksamkeit der Leistung auf die Ergebnisse.

##### **Wandlungsfähigkeit**

Um dauerhaft erfolgreich zu sein, müssen wir uns schnell und flexibel an neue Anforderungen anpassen. Veränderung verstehen wir daher als Chance und Veränderungsfähigkeit als Voraussetzung, diese Chance zu nutzen.

##### **Dissens**

Im Wettstreit um die beste Lösung hat jeder die Pflicht, einen Dissens offenzulegen. Die gefundenen Lösungen werden von allen Beteiligten konsequent umgesetzt.

- 140 — ERKLÄRUNG ZUR  
UNTERNEHMENSFÜHRUNG,  
CORPORATE GOVERNANCE  
(Teil des Lageberichts)
- 140 — Grundlegendes zur  
Unternehmensverfassung
- 142 — Erklärung des Vorstands und des  
Aufsichtsrats gemäß § 161 AktG
- 143 — Mitglieder des Vorstands
- 144 — Mitglieder des Aufsichtsrats
- 147 — Zur Arbeitsweise von Vorstand  
und Aufsichtsrat
- 154 — Vergütungsbericht
- 162 — Angaben zu Unternehmens-  
führungspraktiken
- 163 — Compliance in der BMW Group

**Respekt, Vertrauen, Fairness**

Wir begegnen einander mit Respekt. Führung basiert auf gegenseitigem Vertrauen, Vertrauen basiert auf Berechenbarkeit und Fairness.

**Mitarbeiter**

Unternehmen werden von Menschen gemacht. Mitarbeiter sind unser stärkster Erfolgsfaktor. Deshalb gehören Personalentscheidungen zu den wichtigsten Entscheidungen.

**Vorbildfunktion**

Jede Führungskraft hat eine Vorbildfunktion.

**Nachhaltigkeit**

Nachhaltigkeit bedeutet für uns einen dauerhaft positiven Beitrag zum ökonomischen Erfolg des Unternehmens. Sie ist die Basis für die Wahrnehmung der ökologischen und sozialen Verantwortung.

**Gesellschaft**

Die Wahrnehmung gesellschaftlicher Verantwortung gehört für uns untrennbar zu unserem unternehmerischen Selbstverständnis.

**Unabhängigkeit**

Die unternehmerische Unabhängigkeit der BMW Group gewährleisten wir durch nachhaltiges profitables Wachstum.

Die Grundüberzeugungen sind auch unter [www.bmwgroup.com](http://www.bmwgroup.com) unter den Menüpunkten „Verantwortung“ und „Mitarbeiter“ veröffentlicht.

**Soziale Verantwortung gegenüber den Mitarbeitern und in der Lieferantenkette**

Die BMW Group stellt sich ihrer gesellschaftlichen Verantwortung. Unsere Unternehmenskultur verbindet Erfolgsorientierung mit Weltoffenheit, Vertrauen und Transparenz. Dabei sind wir uns der sozialen Verantwortung bewusst. Als Leitplanken für den sozial nachhaltigen Umgang mit den Mitarbeitern und die generelle Sicherstellung sozialer Standards dienen verschiedene international anerkannte Richtlinien. So bekennt sich die BMW Group zu den Leitsätzen für multinationale Unternehmen der Organisation für wirtschaftliche Zusammenarbeit und Entwicklung (OECD) und zu den Inhalten der ICC Business Charter for Sustainable Development. Die Inhalte dieser Richtlinien und weitere Informationen hierzu können unter [www.oecd.org](http://www.oecd.org) und [www.iccwbo.org](http://www.iccwbo.org) abgerufen werden. Mit Unterzeichnung des UN Global Compact durch den Vorstand der BMW Group im Jahr 2001 und der Verabschiedung der Gemeinsamen Erklärung über Menschenrechte und Arbeitsbedingungen

in der BMW Group durch Vorstand und Arbeitnehmervertretungen im Jahr 2005 haben wir uns ebenfalls zur weltweiten Einhaltung der Kernarbeitsnormen und zu den grundlegenden Prinzipien und Rechten bei der Arbeit der International Labour Organization (ILO) verpflichtet. Hierzu gehören insbesondere die freie Wahl der Beschäftigung, das Diskriminierungsverbot, das Verbot von Kinderarbeit, eine angemessene Bezahlung, regelkonforme Arbeitszeiten sowie der Arbeits- und Gesundheitsschutz. Die Inhalte des UN Global Compact und die Vorgaben der ILO sowie weitere Informationen zu dem Thema sind unter [www.unglobalcompact.org](http://www.unglobalcompact.org) und [www.ilo.org](http://www.ilo.org) zu finden. Die Gemeinsame Erklärung über Menschenrechte und Arbeitsbedingungen in der BMW Group ist unter [www.bmwgroup.com](http://www.bmwgroup.com) unter dem Menüpunkt „Verantwortung“ verfügbar.

Die weltweite Einhaltung dieser grundlegenden Prinzipien und Rechte ist für uns eine Selbstverständlichkeit. Nachhaltiges Wirtschaften kann jedoch nur dann wirken, wenn es die gesamte Wertschöpfungskette umfasst. Daher stellt die BMW Group nicht nur höchste Anforderungen an sich selbst, sondern fordert ökologische und soziale Standards auch von ihren Lieferanten und Partnern. Entsprechende Nachhaltigkeitskriterien sind daher durchgängig in unseren Einkaufsbedingungen sowie in der Lieferantenbewertung verankert. Im Nachhaltigkeitsfragebogen, der fester Bestandteil für die Aufnahme in das Lieferantennetzwerk der BMW Group ist, erteilt der potenzielle Lieferant eine vollständige Selbstauskunft. Hier fordern wir darüber hinaus, dass unsere Zulieferer die Einhaltung dieser Standards auch durch ihre Unterlieferanten sicherstellen. Die Einkaufsbedingungen sowie weitere Informationen zum Thema Einkauf finden sich im öffentlichen Bereich des Partner Portals der BMW Group unter <https://b2b.bmw.com>.

**Compliance in der BMW Group**

Verantwortungsvolles und rechtmäßiges Handeln ist eine der Grundvoraussetzungen für den unternehmerischen Erfolg der BMW Group. Dies ist fester Bestandteil unserer Unternehmenskultur und bildet die Basis für das Vertrauen, das uns Kunden, Aktionäre, Geschäftspartner und auch die Öffentlichkeit entgegenbringen. Der Vorstand und alle Mitarbeiter der BMW Group sind zu verantwortungsbewusstem Verhalten und zur Einhaltung geltender Vorschriften verpflichtet.

Dieses Prinzip ist bereits seit vielen Jahren in den BMW internen Verhaltensregeln verankert. Um die Vermeidung von Rechts- und Reputationsrisiken abzusichern, hat der Vorstand im Jahr 2007 ein Compliance Committee eingerichtet und die Einführung einer Compliance-Organisation in der BMW Group veranlasst.

Das BMW Group Compliance Committee besteht aus den Leitern der Bereiche Recht und Patente, Konzernkommunikation und Politik, Konzernrevision, Konzernberichtswesen, Organisationsentwicklung sowie Konzernpersonalwesen. Es steuert und überwacht die erforderlichen Aktivitäten zur Vermeidung von Rechtsverstößen (Legal Compliance). Hierzu gehören Trainings-, Informations- und Kommunikationsmaßnahmen, die Verfolgung von Rechtsverstößen und die Umsetzung von Compliance-Anforderungen.

Das Compliance Committee berichtet dem Vorstand regelmäßig über alle Compliance-relevanten Themen. Neben den Fortschritten beim Aufbau und der Weiterentwicklung der Compliance-Organisation gehören hierzu etwa durchgeführte Untersuchungen, bekannt gewordene Verstöße und deren Sanktion sowie Korrektur- und Präventionsmaßnahmen. Das BMW Group Compliance Committee wird durch das Compliance Committee Office tätig, das organisatorisch dem Ressort des Vorstandsvorsitzenden zugeordnet ist.

Der Vorsitzende des Compliance Committee berichtet dem Prüfungsausschuss des Aufsichtsrats regelmäßig und auch fallbezogen über den aktuellen Stand der Compliance-Aktivitäten in der BMW Group.

Die Implementierung der BMW Group Compliance-Organisation begann im Jahr 2008 und konnte im November 2009 abgeschlossen werden. Die BMW Group Compliance-Organisation beinhaltet die Gesamtheit aller Maßnahmen, um rechtmäßiges Handeln der BMW Group, ihrer Organe, Führungskräfte und Mitarbeiter sicherzustellen. Sie wird ergänzt durch eine Regelungslandschaft aus internen Grundsätzen, Richtlinien und Anweisungen, die teilweise die geltenden rechtlichen Vorschriften konkretisieren.

Die einzelnen Bestandteile der BMW Group Compliance-Organisation sind in der nebenstehenden Grafik dargestellt und gelten weltweit für alle Einheiten der BMW Group. Soweit in einzelnen Ländern oder Geschäftsbereichen zusätzliche Compliance-Anforderungen bestehen, wird diesen durch ergänzende Compliance-Maßnahmen Rechnung getragen.

Kernstück der Compliance-Organisation ist der BMW Group Verhaltenskodex – Grundsätze für rechtmäßiges Handeln. Der Verhaltenskodex erläutert die Bedeutung von Legal Compliance und gibt einen Überblick über die für die BMW Group relevanten rechtlichen Themenbereiche. Er steht in Deutsch und Englisch als Broschüre und zum Download zur Verfügung. Seit 2009 werden darüber hinaus Übersetzungen in neun weiteren Sprachen angeboten (Französisch, Spanisch, Italienisch,

Portugiesisch, Russisch, Mandarin, Japanisch, Thai und Koreanisch).

Bei der Vermeidung von Rechtsverstößen kommt den Führungskräften eine besondere Verantwortung und Vorbildfunktion zu. Jede Führungskraft ist verpflichtet, ihre Mitarbeiter über Inhalt und Bedeutung des Verhaltenskodex zu informieren und für Rechtsrisiken zu sensibilisieren. Führungskräfte haben aus eigener Initiative regelmäßig die Beachtung des geltenden Rechts zu überprüfen und suchen hierzu das Gespräch mit ihren Mitarbeitern. Falls es Anhaltspunkte für Rechtsverstöße gibt, ist diesen konsequent nachzugehen.

Seit der Einführung der BMW Group Compliance-Organisation wurden weltweit über 11.000 Führungskräfte und Mitarbeiter über die Grundlagen von Compliance geschult. Die Schulung wird auf einer internetbasierten Trainingsplattform in Deutsch und Englisch angeboten und enthält einen Abschlusstest. Die erfolgreiche Teilnahme an dem Training wird mit einem Zertifikat bestätigt und ist für alle Führungskräfte der BMW Group verpflichtend. Durch geeignete Personalprozesse wird sichergestellt, dass bei allen Neueinstellungen von Führungskräften und bei entsprechenden Beförderungen ein Compliance-Training absolviert wird.

|     |   |                                                                                        |
|-----|---|----------------------------------------------------------------------------------------|
| 140 | — | <b>ERKLÄRUNG ZUR UNTERNEHMENSFÜHRUNG, CORPORATE GOVERNANCE</b> (Teil des Lageberichts) |
| 140 |   | Grundlegendes zur Unternehmensverfassung                                               |
| 142 |   | Erklärung des Vorstands und des Aufsichtsrats gemäß § 161 AktG                         |
| 143 |   | Mitglieder des Vorstands                                                               |
| 144 |   | Mitglieder des Aufsichtsrats                                                           |
| 147 |   | Zur Arbeitsweise von Vorstand und Aufsichtsrat                                         |
| 154 |   | Vergütungsbericht                                                                      |
| 162 |   | Angaben zu Unternehmensführungspraktiken                                               |
| 163 | — | Compliance in der BMW Group                                                            |

#### Compliance Committee

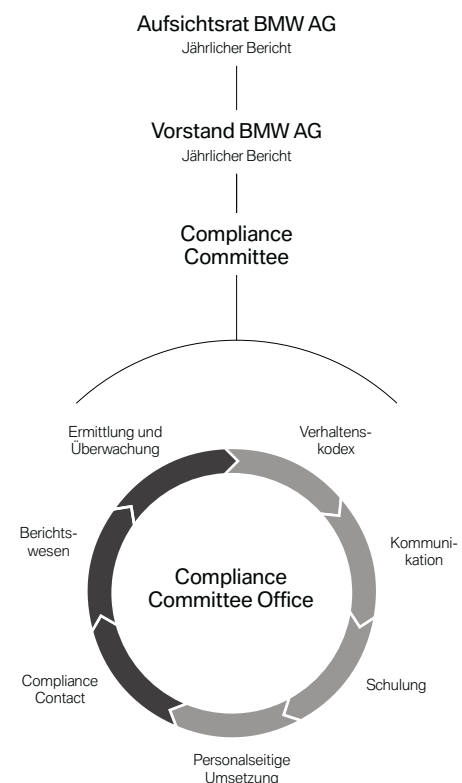

Ergänzend zu dieser Grundlagenschulung werden zielgruppenspezifische Trainingsmaßnahmen zu bestimmten Compliance-Themen durchgeführt. Dazu wurde 2010 für den Bereich der Europäischen Union ein Training „Compliance-Aufbauwissen – Wettbewerbs- und Kartellrecht“ erstellt, das sich an Mitarbeiter richtet, die aufgrund ihrer Funktion im Vertrieb oder Einkauf mit kartellrechtlichen Fragen in Berührung kommen.

Um Rechtsrisiken zu vermeiden, können sich alle Mitarbeiter mit ihren Fragen an ihre Führungskräfte und an die zuständigen Fachstellen der BMW Group wenden, insbesondere an die Rechtsabteilung, die Konzernrevision und die Konzernsicherheit. Ergänzend hierzu gibt es den BMW Group Compliance Contact als weitere Anlaufstelle, an die sich Mitarbeiter und Externe telefonisch oder per E-Mail mit Compliance-relevanten Fragen wenden können. Das Gleiche gilt, wenn Schwachstellen oder sonstige Umstände bemerkt werden, die zu Rechtsverstößen führen können. Auf Wunsch kann dies auch anonym mitgeteilt werden.

Compliance-Anfragen und -Hinweise werden im Büro des BMW Group Compliance Committee mithilfe eines elektronischen Case-Management-Systems dokumentiert und bearbeitet. Erforderlichenfalls werden für die Fallbearbeitung die Konzernrevision, die Konzernsicherheit und die rechtsberatenden Fachstellen zur Unterstützung herangezogen.

Als Teil der Compliance-Organisation wurde ein Berichtswesen aufgebaut, in dem alle Unternehmensbereiche das Compliance Committee regelmäßig und erforderlichenfalls ad hoc über Compliance-relevante Themen informieren. Die Berichterstattung erfolgt durch insgesamt 132 Compliance-Verantwortliche, die alle Teile der BMW Group abdecken (Stand 31. Dezember 2010). Im Jahr 2010 wurde der erste Compliance-Berichtslauf durchgeführt. Gegenstand der Berichte waren der Compliance-Status der jeweiligen Einheiten, möglicherweise festgestellte Rechtsrisiken oder -verstöße sowie ergriffene Korrektur- oder Präventivmaßnahmen.

Die Beachtung und Umsetzung des Verhaltenskodex ist Gegenstand regelmäßiger Prüfungen der Konzernrevision und der Konzernsicherheit. Hierzu führt die Konzernrevision vor Ort Prüfungen durch und befragt die verantwortlichen Mitarbeiter.

Auf der Grundlage der Compliance-Berichterstattung und der Beratung durch das BMW Group Compliance Committee verfolgt und analysiert der Vorstand laufend Compliance-relevante Entwicklungen und Trends. Vor dem Hintergrund der fortschreitend ausgeprägten Erwartungen an die Systematik und Wirksamkeit von Compliance-

Organisationen hat der Vorstand im Herbst 2010 entschieden, das in der BMW Group bestehende Compliance-Instrumentarium durch zusätzliche Maßnahmen zu ergänzen. Einen Schwerpunkt bilden dabei zusätzliche Maßnahmen zur Vermeidung von Korruptionsdelikten, die Verstärkung von Kontrollen sowie die Einführung eines regional strukturierten Compliance-Managements.

Für die Compliance der BMW Group ist es unerlässlich, dass ihre Mitarbeiter die für sie relevanten Rechtspflichten kennen und einhalten. Die BMW Group ist nicht bereit, etwaige Rechtsverstöße ihrer Mitarbeiter hinzunehmen. Schuldhaftige Rechtsverletzungen ziehen arbeitsrechtliche Sanktionen nach sich und können eine persönliche Haftung des Mitarbeiters zur Folge haben.

Um dies zu vermeiden, werden die Mitarbeiter der BMW Group über verschiedene interne Medien umfassend über die Instrumente und Maßnahmen der Compliance-Organisation informiert. Zentrales Kommunikationsmittel ist die Compliance Homepage im BMW Group Intranet, wo die Mitarbeiter der BMW Group alle Informationen und Trainingsangebote in Deutsch und Englisch finden. Dort können die Mitarbeiter auch auf die häufigsten Fragen und dazugehörigen Antworten zum Thema Compliance zugreifen. Auf der Homepage befindet sich auch ein spezieller Servicebereich, in dem den Mitarbeitern verschiedene praktische Werkzeuge und Hilfsmittel für typische Situationen mit Compliance-Relevanz angeboten werden. Seit 2010 haben die Mitarbeiter dort auch Zugang zu einem elektronisch unterstützten Genehmigungsprozess für Einladungen im Verhältnis zu Geschäftspartnern.

Compliance ist auch ein wesentlicher Faktor für die Zukunftssicherung der Beschäftigten der BMW Group. Aus diesem Grund hat die Unternehmensleitung 2009 mit den nationalen und internationalen Arbeitnehmervertretungen der BMW Group die Gemeinsamen Grundsätze für rechtmäßiges Handeln unterzeichnet. Darin bekennen sich die Beteiligten zu den Prinzipien des BMW Group Verhaltenskodex und zur vertrauensvollen Zusammenarbeit in Sachen Compliance.

Zum Schutz der Anleger und um unternehmensintern einen gesetzeskonformen Umgang mit möglichen Insiderinformationen zu gewährleisten, wurde bereits 1994 durch den Vorstand ein Ad-hoc-Gremium eingesetzt, in dem Vertreter verschiedener Fachbereiche Sachverhalte auf ihre Ad-hoc-Relevanz überprüfen. Sämtliche Personen, die für das Unternehmen tätig sind und bestimmungsgemäß Zugang zu Insiderinformationen haben, wurden und werden in ein regelmäßig aktualisiertes Insiderverzeichnis aufgenommen und über die sich aus dem Insiderrecht ergebenden Pflichten belehrt.

## WEITERE INFORMATIONEN

## BMW Group im Zehn-Jahres-Vergleich

|                                                   |           | 2010      | 2009      | 2008      | 2007      |
|---------------------------------------------------|-----------|-----------|-----------|-----------|-----------|
| <b>Auslieferungen</b>                             |           |           |           |           |           |
| Automobile                                        | Einheiten | 1.461.166 | 1.286.310 | 1.435.876 | 1.500.678 |
| Motorräder <sup>3</sup>                           | Einheiten | 110.113   | 100.358   | 115.196   | 102.467   |
| <b>Produktion</b>                                 |           |           |           |           |           |
| Automobile                                        | Einheiten | 1.481.253 | 1.258.417 | 1.439.918 | 1.541.503 |
| Motorräder <sup>4</sup>                           | Einheiten | 112.271   | 93.243    | 118.452   | 104.396   |
| <b>Finanzdienstleistungen</b>                     |           |           |           |           |           |
| Vertragsbestand                                   | Verträge  | 3.190.353 | 3.085.946 | 3.031.935 | 2.629.949 |
| Bilanzielles Geschäftsvolumen <sup>5</sup>        | Mio. Euro | 66.233    | 61.202    | 60.653    | 51.257    |
| <b>Gewinn-und-Verlust-Rechnung</b>                |           |           |           |           |           |
| Umsatz                                            | Mio. Euro | 60.477    | 50.681    | 53.197    | 56.018    |
| Bruttomarge Konzern <sup>6</sup>                  | in %      | 18,0      | 10,5      | 11,4      | 21,8      |
| Ergebnis vor Finanzergebnis                       | Mio. Euro | 5.094     | 289       | 921       | 4.212     |
| Ergebnis vor Steuern                              | Mio. Euro | 4.836     | 413       | 351       | 3.873     |
| Umsatzrendite (Ergebnis vor Steuern/Umsatz)       | in %      | 8,0       | 0,8       | 0,7       | 6,9       |
| Ertragsteuern                                     | Mio. Euro | 1.602     | 203       | 21        | 739       |
| Steuerlastquote                                   | in %      | 33,1      | 49,2      | 6,0       | 19,1      |
| Jahresüberschuss                                  | Mio. Euro | 3.234     | 210       | 330       | 3.134     |
| <b>Bilanz</b>                                     |           |           |           |           |           |
| Langfristige Vermögenswerte                       | Mio. Euro | 65.716    | 62.009    | 62.416    | 56.619    |
| Kurzfristige Vermögenswerte                       | Mio. Euro | 43.151    | 39.944    | 38.670    | 32.378    |
| Eigenkapital                                      | Mio. Euro | 23.100    | 19.915    | 20.273    | 21.744    |
| Eigenkapitalquote Konzern                         | in %      | 21,2      | 19,5      | 20,1      | 24,4      |
| Langfristige Rückstellungen und Verbindlichkeiten | Mio. Euro | 45.633    | 45.119    | 41.526    | 33.469    |
| Kurzfristige Rückstellungen und Verbindlichkeiten | Mio. Euro | 40.134    | 36.919    | 39.287    | 33.784    |
| Bilanzsumme                                       | Mio. Euro | 108.867   | 101.953   | 101.086   | 88.997    |
| <b>Kapitalflussrechnung</b>                       |           |           |           |           |           |
| Zahlungsmittel und Zahlungsmitteläquivalente      | Mio. Euro | 7.432     | 7.767     | 7.454     | 2.393     |
| Operativer Cashflow <sup>7</sup>                  | Mio. Euro | 8.150     | 4.921     | 4.471     | 6.246     |
| Investitionen                                     | Mio. Euro | 3.263     | 3.471     | 4.204     | 4.267     |
| Investitionsquote (Investitionen/Umsatz)          | in %      | 5,4       | 6,8       | 7,9       | 7,6       |
| <b>Personal</b>                                   |           |           |           |           |           |
| Mitarbeiter am Jahresende <sup>8</sup>            |           | 95.453    | 96.230    | 100.041   | 107.539   |
| Personalaufwand je Mitarbeiter                    | Euro      | 83.141    | 72.349    | 75.612    | 76.704    |
| <b>Dividende</b>                                  |           |           |           |           |           |
| Dividendensumme                                   | Mio. Euro | 852       | 197       | 197       | 694       |
| Dividende je Stammaktie/Vorzugsaktie              | Euro      | 1,30/1,32 | 0,30/0,32 | 0,30/0,32 | 1,06/1,08 |

<sup>1</sup> angepasst nach Neubehandlung der Bilanzierung von Pensionsverpflichtungen<sup>2</sup> angepasst nach Harmonisierung der internen und externen Rechnungslegung<sup>3</sup> ohne C1, Auslieferungen bis 2003: 32.859 Einheiten, inklusive Husqvarna Motorcycles<sup>4</sup> ohne C1 Fertigung bei Bertone, Produktion C1 bis 2002: 33.489 Einheiten, inklusive Husqvarna Motorcycles<sup>5</sup> Wert ermittelt aus der Bilanz: bis 2007 aus der Konzernbilanz, ab 2008 der Segmentbilanz Finanzdienstleistungen<sup>6</sup> Seit 2008 sind die Forschungs- und Entwicklungskosten in den Umsatzkosten enthalten.<sup>7</sup> in der Kapitalflussrechnung aufgeführter Mittelzufluss aus der betrieblichen Tätigkeit: bis 2006 des Industriegeschäfts, ab 2007 des Segments Automobile<sup>8</sup> Werte ohne ruhende Arbeitsverhältnisse, ohne Mitarbeiter in Freizeithase der Altersteilzeit, ohne Geringverdiener<sup>9</sup> Anpassung Ausschüttung wegen Erwerbs eigener Anteile



|                                    | 2006      | 2005             | 2004 <sup>1</sup> | 2003      | 2002 <sup>2</sup> | 2001      |                                                   |
|------------------------------------|-----------|------------------|-------------------|-----------|-------------------|-----------|---------------------------------------------------|
| <b>Auslieferungen</b>              |           |                  |                   |           |                   |           |                                                   |
|                                    | 1.373.970 | 1.327.992        | 1.208.732         | 1.104.916 | 1.057.344         | 905.657   | Automobile                                        |
|                                    | 100.064   | 97.474           | 92.266            | 92.962    | 92.599            | 84.713    | Motorräder <sup>3</sup>                           |
| <b>Produktion</b>                  |           |                  |                   |           |                   |           |                                                   |
|                                    | 1.366.838 | 1.323.119        | 1.250.345         | 1.118.940 | 1.090.258         | 946.730   | Automobile                                        |
|                                    | 103.759   | 92.012           | 93.836            | 89.745    | 93.010            | 90.478    | Motorräder <sup>4</sup>                           |
| <b>Finanzdienstleistungen</b>      |           |                  |                   |           |                   |           |                                                   |
|                                    | 2.270.528 | 2.087.368        | 1.843.399         | 1.623.425 | 1.443.236         | 1.297.702 | Vertragsbestand                                   |
|                                    | 44.010    | 40.428           | 32.556            | 28.647    | 26.505            | 25.306    | Bilanzielles Geschäftsvolumen <sup>5</sup>        |
| <b>Gewinn-und-Verlust-Rechnung</b> |           |                  |                   |           |                   |           |                                                   |
|                                    | 48.999    | 46.656           | 44.335            | 41.525    | 42.411            | 38.463    | Umsatz                                            |
|                                    | 23,1      | 22,9             | 23,2              | 22,7      | 22,8              | 25,3      | Bruttomarge Konzern <sup>6</sup>                  |
|                                    | 4.050     | 3.793            | 3.774             | 3.353     | 3.505             | 3.356     | Ergebnis vor Finanzergebnis                       |
|                                    | 4.124     | 3.287            | 3.583             | 3.205     | 3.297             | 3.242     | Ergebnis vor Steuern                              |
|                                    | 8,4       | 7,0              | 8,1               | 7,7       | 7,8               | 8,4       | Umsatzrendite (Ergebnis vor Steuern/Umsatz)       |
|                                    | 1.250     | 1.048            | 1.341             | 1.258     | 1.277             | 1.376     | Ertragsteuern                                     |
|                                    | 30,3      | 31,9             | 37,4              | 39,3      | 38,7              | 42,4      | Steuerlastquote                                   |
|                                    | 2.874     | 2.239            | 2.242             | 1.947     | 2.020             | 1.866     | Jahresüberschuss                                  |
| <b>Bilanz</b>                      |           |                  |                   |           |                   |           |                                                   |
|                                    | 50.514    | 47.556           | 40.822            | 36.921    | 34.667            | 31.282    | Langfristige Vermögenswerte                       |
|                                    | 28.543    | 27.010           | 26.812            | 24.554    | 20.844            | 19.977    | Kurzfristige Vermögenswerte                       |
|                                    | 19.130    | 16.973           | 16.534            | 16.150    | 13.871            | 10.770    | Eigenkapital                                      |
|                                    | 24,2      | 22,8             | 24,4              | 26,3      | 25,0              | 21,0      | Eigenkapitalquote Konzern                         |
|                                    | 31.372    | 29.509           | 26.517            | 22.090    | 20.028            | 19.223    | Langfristige Rückstellungen und Verbindlichkeiten |
|                                    | 28.555    | 28.084           | 24.583            | 23.235    | 21.612            | 21.266    | Kurzfristige Rückstellungen und Verbindlichkeiten |
|                                    | 79.057    | 74.566           | 67.634            | 61.475    | 55.511            | 51.259    | Bilanzsumme                                       |
| <b>Kapitalflussrechnung</b>        |           |                  |                   |           |                   |           |                                                   |
|                                    | 1.336     | 1.621            | 2.128             | 1.659     | 2.333             | 2.437     | Zahlungsmittel und Zahlungsmitteläquivalente      |
|                                    | 5.373     | 6.184            | 6.157             | 4.970     | 4.553             | 4.304     | Operativer Cashflow <sup>7</sup>                  |
|                                    | 4.313     | 3.993            | 4.347             | 4.245     | 4.042             | 3.516     | Investitionen                                     |
|                                    | 8,8       | 8,6              | 9,8               | 10,2      | 9,5               | 9,1       | Investitionsquote (Investitionen/Umsatz)          |
| <b>Personal</b>                    |           |                  |                   |           |                   |           |                                                   |
|                                    | 106.575   | 105.798          | 105.972           | 104.342   | 101.395           | 97.275    | Mitarbeiter am Jahresende <sup>8</sup>            |
|                                    | 76.621    | 75.238           | 73.241            | 73.499    | 69.560            | 66.711    | Personalaufwand je Mitarbeiter                    |
| <b>Dividende</b>                   |           |                  |                   |           |                   |           |                                                   |
|                                    | 458       | 419 <sup>9</sup> | 419               | 392       | 351               | 350       | Dividendensumme                                   |
|                                    | 0,70/0,72 | 0,64/0,66        | 0,62/0,64         | 0,58/0,60 | 0,52/0,54         | 0,52/0,54 | Dividende je Stammaktie/Vorzugsaktie              |

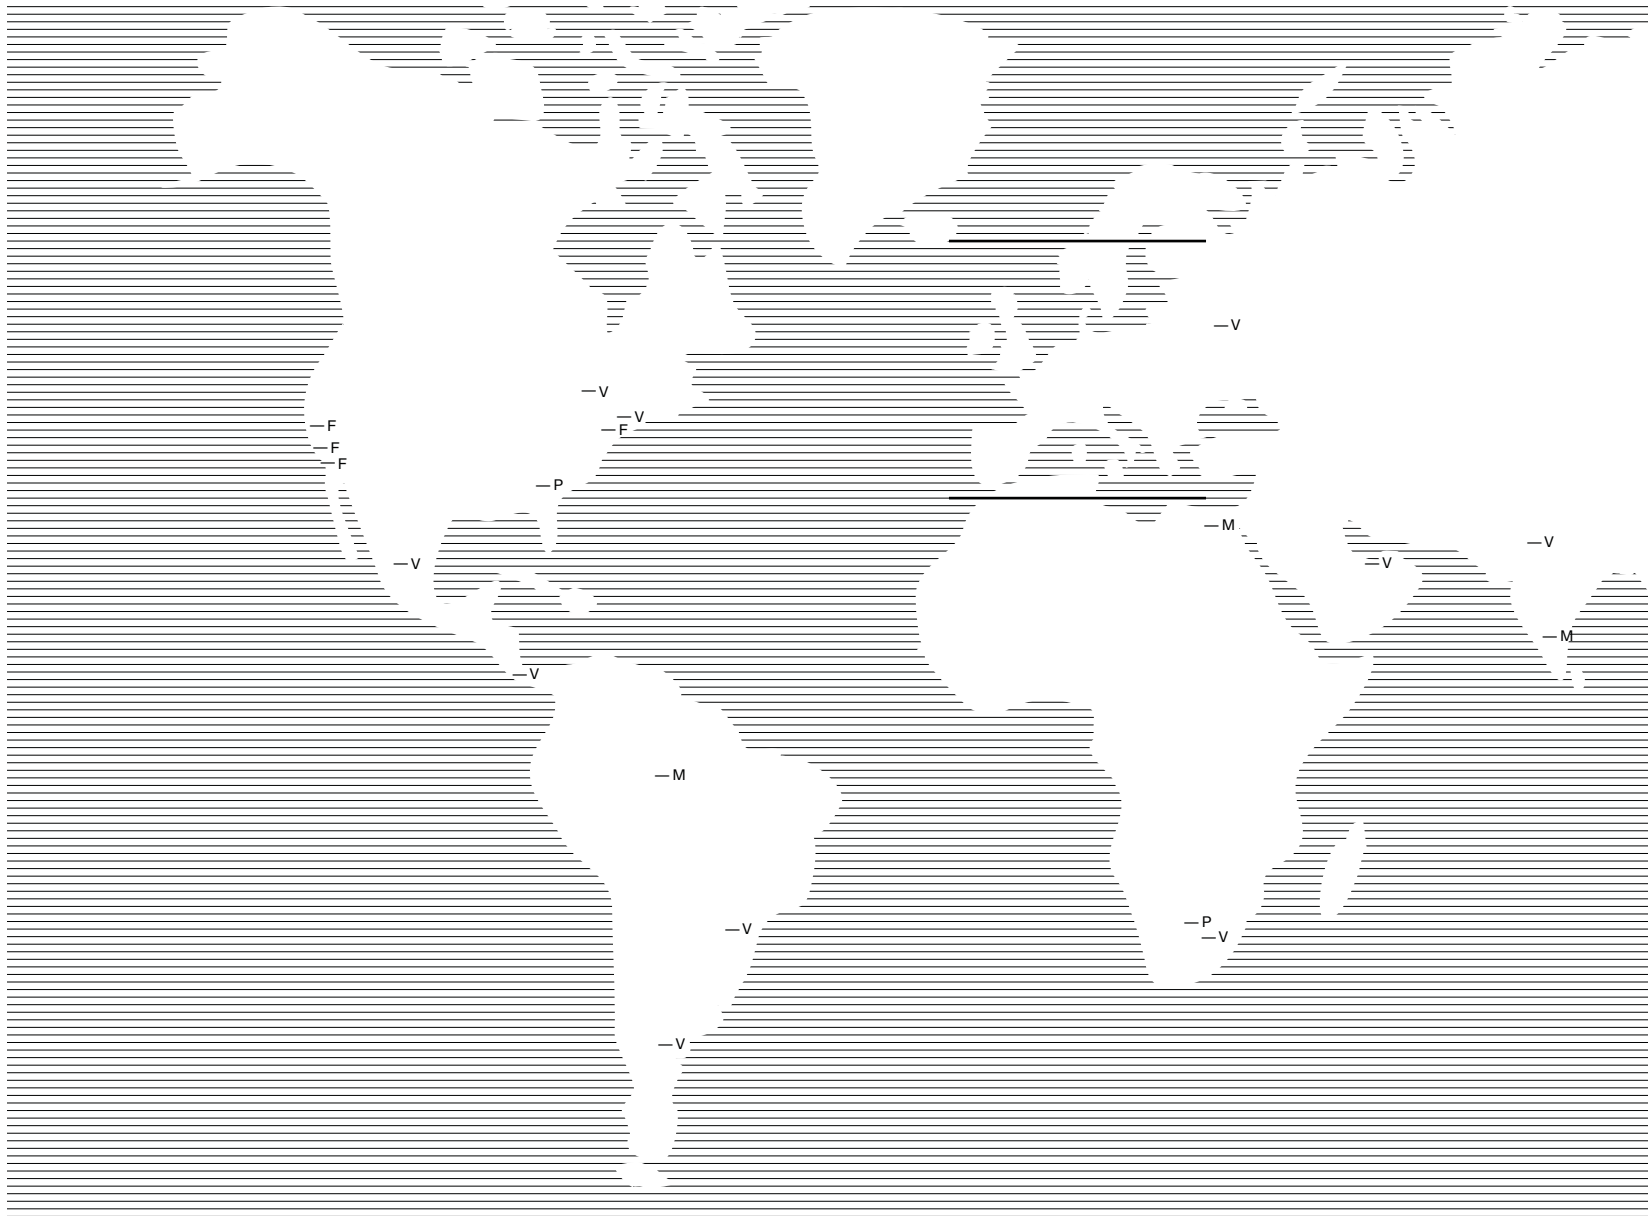

**Mit 25 Produktionsstätten und 43 eigenen Vertriebsstandorten sowie dem Forschungs- und Entwicklungsverbund ist die BMW Group weltweit präsent.**

**— Z Zentrale**

**— F** Forschung und Entwicklung

BMW Group Forschungs- und Innovationszentrum (FIZ), München  
 BMW Group Forschung und Technik, München  
 BMW Car IT, München  
 BMW Innovations- und Technologiezentrum für Leichtbau, Landshut  
 BMW Entwicklungszentrum für Dieselmotoren, Steyr, Österreich  
 BMW Group Designworks, Newbury Park, USA  
 BMW Group Technology Office Palo Alto, USA  
 BMW Group Engineering and Emission Test Center, Oxnard, USA  
 BMW Group Entwicklung Japan, Tokio, Japan  
 BMW Group Entwicklung China, Peking, China  
 BMW Group Entwicklung USA, Woodcliff Lake, USA

**166 — WEITERE INFORMATIONEN**

166 BMW Group Zehn-Jahres-Vergleich  
 168 — BMW Group Standorte  
 170 Glossar  
 172 Index  
 174 Grafik-Index  
 175 Finanzkalender  
 176 Kontakte

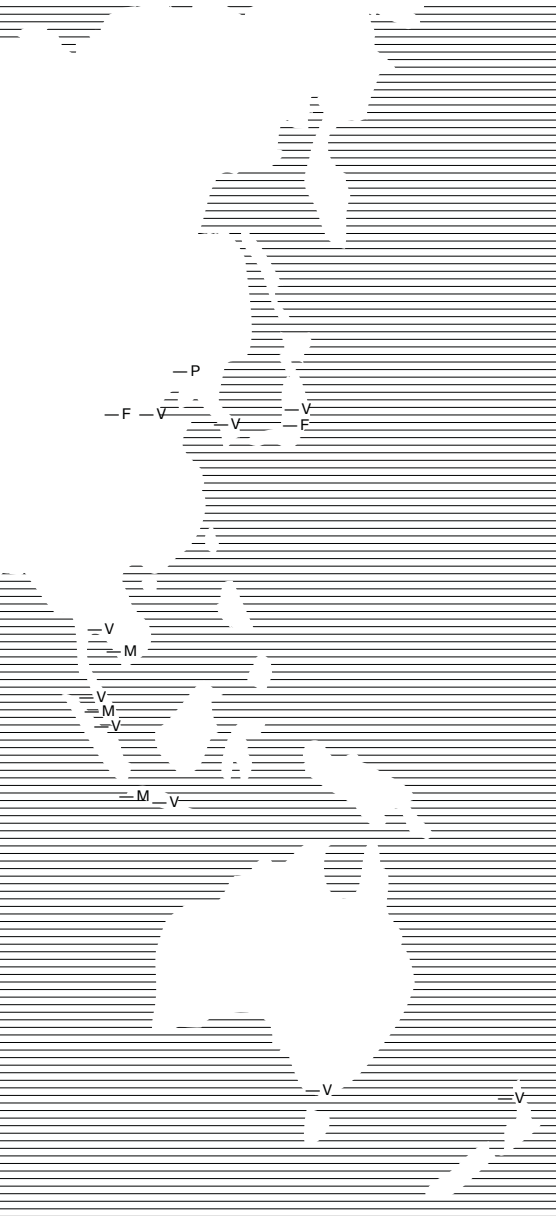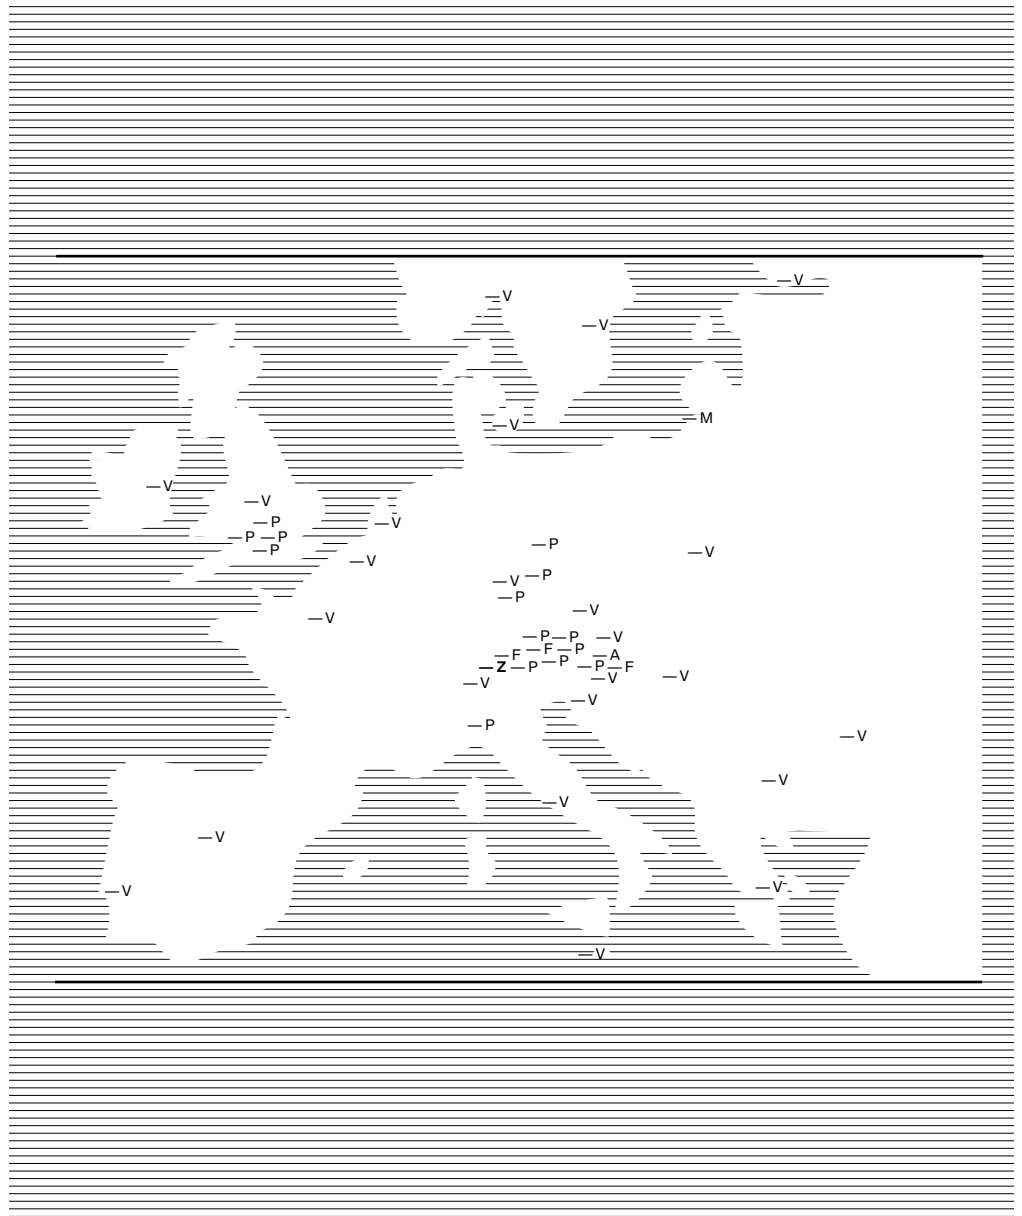

— P Produktion

- Werk Berlin
- Werk Dingolfing
- Werk Eisenach
- Werk Goodwood, GB (Unternehmenssitz Rolls-Royce Motor Cars Limited)
- Werk Hams Hall, GB
- Werk Landshut
- Werk Leipzig
- Werk München
- Werk Oxford, GB
- Werk Regensburg
- Werk Rosslyn, Südafrika
- BMW Brilliance Automotive Ltd., Shenyang, China (Gemeinschaftsunternehmen mit Brilliance China Automotive Holdings)
- Werk Spartanburg, USA
- Werk Steyr, Österreich
- Werk Swindon, GB
- Werk Wackersdorf
- Husqvarna Motorcycles S.r.l., Cassinetta di Biadronno, Italien

— A Auftragsfertigung

- Magna Steyr Fahrzeugtechnik, Österreich

— M Montagewerke

- Fertigung Chennai, Indien
- Fertigung Jakarta, Indonesien
- Fertigung Kairo, Ägypten
- Fertigung Kaliningrad, Russland
- Fertigung Kulim, Malaysia
- Fertigung Manaus, Brasilien
- Fertigung Rayong, Thailand

— V Vertriebsstandorte/Standorte Finanzdienstleistungen

- |                |             |                       |
|----------------|-------------|-----------------------|
| Argentinien    | Japan       | Slowakei              |
| Australien     | Kanada      | Slowenien             |
| Belgien        | Malaysia    | Spanien               |
| Brasilien      | Malta*      | Südafrika             |
| Bulgarien      | Mexiko      | Südkorea              |
| China          | Neuseeland  | Thailand              |
| Dänemark       | Niederlande | Tschechische Republik |
| Deutschland    | Norwegen    | Ungarn                |
| Dubai*         | Österreich  | USA                   |
| Finnland       | Panama*     |                       |
| Frankreich     | Polen       |                       |
| Griechenland   | Portugal    |                       |
| Großbritannien | Rumänien    |                       |
| Indien         | Russland    |                       |
| Indonesien*    | Schweden    |                       |
| Irland         | Schweiz     |                       |
| Italien        | Singapur    |                       |

\* nur Vertriebsstandort

**ACEA**

Abkürzung für „Association des Constructeurs Européens d'Automobiles“, Verband europäischer Automobilhersteller.

**Bruttomarge**

Anteil des Bruttoergebnisses vom Umsatz an den Umsatzerlösen.

**CFK**

Abkürzung für kohlenstofffaserverstärkter Kunststoff. CFK ist ein Verbundwerkstoff und besteht aus einer Kohlenstofffaser, die von einer Kunststoffmatrix (Harz) umgeben ist. Bei mindestens gleicher Funktion ist CFK rund 50 Prozent leichter als Stahl und immerhin 30 Prozent leichter als Aluminium.

**Connected Drive**

Unter dem Begriff Connected Drive vereint die BMW Group ein einzigartiges Portfolio an innovativen Funktionen, die den Komfort erhöhen, Infotainment in einer neuen Dimension erlebbar machen und die Sicherheit in den Fahrzeugen der BMW Group signifikant steigern.

**DAX**

Abkürzung für „Deutscher Aktienindex“ – Berechnungsgrundlage sind die gewichteten Kurse der 30 größten (nach Börsenkapitalisierung) deutschen Aktiengesellschaften.

**Derivate**

Finanzprodukte, deren Bewertung sich überwiegend vom Preis, von den Preisschwankungen und Preiserwartungen des zugrunde liegenden Basisinstruments (beispielsweise Index, Aktie oder Anleihe) ableitet.

**DJSI World**

Abkürzung für Dow Jones Sustainability Index World. Gemeinsam von Dow Jones und der Schweizer Anlageagentur SAM geschaffene Indexfamilie für Unternehmen, die ihre Strategie am Konzept der Nachhaltigkeit ausgerichtet haben. Die BMW Group ist seit 1999 in den Dow Jones Sustainability Indizes an führender Stelle vertreten.

**EBIT**

Abkürzung für „earnings before interest and taxes“. Ergebnis vor Steuern, Anteilen anderer Gesellschafter und Finanzergebnis.

**EBITDA**

Abkürzung für „earnings before interest, taxes, depreciation and amortisation“. Ergebnis vor Steuern, Anteilen anderer Gesellschafter, Finanzergebnis und Abschreibungen.

**Effektivität**

Die Effektivität oder Wirksamkeit eines Sicherungsgeschäfts bezeichnet den Grad, mit dem die einem gesicherten Risiko zurechenbaren Änderungen des beizulegenden Zeitwerts oder der Cashflows durch das Sicherungsinstrument kompensiert werden.

**Efficient Dynamics**

Ziel von Efficient Dynamics ist die weitere Senkung des Verbrauchs und der Emissionen bei gleichzeitigem Zugewinn an Dynamik und Leistungsfähigkeit. Dabei werden die Optimierungspotenziale am gesamten Fahrzeug betrachtet – von effizienten Motorentchnologien über Leichtbaumaßnahmen bis hin zu umfassendem Energie- und Wärmemanagement im Fahrzeug.

**Eigenkapitalquote**

Anteil des Eigenkapitals (= Gezeichnetes Kapital, Rücklagen, Kumuliertes übriges Eigenkapital und Anteile anderer Gesellschafter) an der Bilanzsumme.

**Free Cashflow**

Der Free Cashflow ergibt sich aus dem Mittelzufluss aus der betrieblichen Tätigkeit des Segments Automobile abzüglich des Mittelabflusses aus der Investitionstätigkeit des Segments Automobile bereinigt um die Nettoinvestitionen in Wertpapiere.

**IFRSs**

Abkürzung für „International Financial Reporting Standards“. Rechnungslegungsnormen, die eine international vergleichbare Bilanzierung und Publizität gewährleisten sollen. Sie werden von einem internationalen Gremium, dem „International Accounting Standards Board“, erstellt. Die IFRSs umfassen auch die noch gültigen International Accounting Standards (IASs).

**ISO 14001**

Ein weltweit anerkannter Standard für Umweltmanagementsysteme.

**Latente Steuern**

Latente Steuern dienen dem periodengerechten Ausweis des Ertragsteueraufwands in der Handelsbilanz.

**Materialaufwand**

Fasst alle Aufwendungen zusammen, die für den Kauf von Rohmaterialien und Hilfsstoffen zur eigenen Verarbeitung benötigt werden.

**Nachhaltigkeit**

Vgl. Sustainability.

**Operativer Cashflow**

Mittelzufluss aus der betrieblichen Tätigkeit des Segments Automobile.

**Produktionsnetzwerk**

Das BMW Group Produktionsnetzwerk besteht weltweit aus 17 Werken, sieben Montagewerken sowie einer Auftragsfertigung. Die gegenseitige Belieferung mit Systemen und Komponenten sowie die hohe Produktivität, Agilität und Flexibilität zeichnen das Netzwerk aus.

**Rating**

Das Rating ist eine auf den internationalen Kapitalmärkten anerkannte Einstufung der Kreditwürdigkeit eines Unternehmens. Es wird von unabhängigen Ratingagenturen wie beispielsweise Standard & Poor's oder Moody's auf Basis einer Unternehmensanalyse publiziert.

**Risikomanagement**

Integraler Bestandteil sämtlicher Geschäftsprozesse. Durch das Gesetz zur Kontrolle und Transparenz im Unternehmensbereich (KonTraG) wird ein Risikomanagementsystem für börsennotierte Aktiengesellschaften in Deutschland vorgeschrieben. Damit sollen frühzeitig Gefahren erkannt werden, die sich auf die Vermögens-, Finanz- und Ertragslage des Unternehmens wesentlich auswirken und den Fortbestand der Gesellschaft gefährden könnten. Dies betrifft insbesondere risikobehaftete Geschäfte, fehlerhafte Rechnungslegung und Verstöße gegen gesetzliche Vorschriften. Der Vorstand ist zur Einrichtung eines derartigen Systems verpflichtet, er hat dies zu dokumentieren und einer ständigen Kontrolle durch die interne Revision zu unterziehen.

**Stammaktie**

Aktie mit Stimmrecht (vgl. Vorzugsaktie).

**Supplier Relationship Management**

Das Supplier Relationship Management (SRM) organisiert die vernetzten Zulieferbeziehungen durch fokussierte Beschaffungsstrategien, optimale Lieferantenqualifizierungs- und -auswahlprozesse, unternehmensweite Standards sowie den effizienten Sourcing- und Beschaffungsprozess entlang der gesamten Wertschöpfungskette.

**Sustainability**

Nachhaltigkeit oder nachhaltige Entwicklung berücksichtigt gleichberechtigt die ökologische, soziale und wirtschaftliche Entwicklung. Die Weltkommission für Umwelt und Entwicklung der Vereinten Nationen definierte Nachhaltigkeit 1987 als eine Entwicklung, die die Bedürfnisse

der jetzigen Generation befriedigt, ohne die Lebensgrundlagen künftiger Generationen zu gefährden. Die wirtschaftliche Relevanz nachhaltigen Handelns zeigt sich für die BMW Group an den drei Aspekten Ressourcen, Reputation und Risiko.

**Umsatzrendite**

Vor Steuern: Anteil des Ergebnisses vor Steuern an den Umsatzerlösen.

Nach Steuern: Anteil des Jahresüberschusses an den Umsatzerlösen.

**Verbundene Unternehmen**

Verbundene Unternehmen sind solche, die direkt oder indirekt unter einheitlicher Leitung der BMW AG stehen oder bei denen der BMW AG direkt oder indirekt

- die Mehrheit der Stimmrechte zusteht,
- das Recht zusteht, die Mehrheit der Mitglieder des Verwaltungs-, Leitungs- oder Aufsichtsorgans zu bestellen oder abzurufen, und sie gleichzeitig (direkt oder indirekt) Anteilseigner ist,
- das Recht zusteht, (direkt oder indirekt) einen beherrschenden Einfluss aufgrund eines mit diesem Unternehmen abgeschlossenen Beherrschungsvertrags oder aufgrund einer Satzungsbestimmung auf dieses Unternehmen auszuüben.

**Vertriebsstandorte**

In den Vertriebsstandorten enthalten sind sowohl rechtlich eigenständige als auch rechtlich nicht eigenständige Einheiten sowie Regionalbüros. Darüber hinaus werden 105 Märkte über 97 Importeure bedient.

**Vorzugsaktie**

Im Vergleich zur Stammaktie mit höherer Dividende, aber nicht mit Stimmrecht ausgestattet.

**A**

Absatz — 12, 18 ff., 24, 71 ff.  
 Aktie — 41 f., 44 f., 84, 93 f., 105, 162, 171  
 Aktienbesitz von Mitgliedern des Vorstands und des Aufsichtsrats — 131  
 Anlagevermögen — 59, 85  
 Anleihen — 41, 51, 55, 78 f., 114  
 Anteilsbesitz — 82  
 At-Equity bewertete Beteiligungen — 85, 99  
 Aufsichtsrat — 06 ff., 45, 128 f., 131, 140 ff., 159 ff.  
 Auslieferungen — 04, 18 ff., 24, 50 f., 166 f.  
 Auszubildende — 27 f., 94

**B**

Bericht des Aufsichtsrats — 06 ff.  
 Beziehungen zu nahestehenden Personen — 128 f.  
 Bilanzierungs- und Bewertungsgrundsätze — 83 ff.  
 Bilanzstruktur — 54

**C**

Cashflow — 13, 52, 127 f., 170 f.  
 CFK — 22, 38, 170  
 CO<sub>2</sub>-Emissionen — 31, 33, 35, 65  
 Compliance — 09 f., 163 ff.  
 Connected Drive — 36, 170  
 Corporate Governance — 07 ff., 131, 140 ff., 147, 149 ff.

**D**

DAX — 41, 170  
 Dividende — 13, 42, 52  
 Dow Jones Sustainability Index World — 31, 42, 170

**E**

Efficient Dynamics — 33, 36, 65, 72, 170  
 Eigenkapital — 47 f., 53 ff., 58, 76 f., 80, 105 ff., 170  
 Einkauf — 38 f., 163  
 Ergebnis aus Equity-Bewertung — 90, 136  
 Ergebnis je Aktie — 84, 93 f.  
 Ergebnis vor Finanzergebnis — 04 f., 12, 47 ff., 74 f., 166 f.  
 Ergebnis vor Steuern — 04 f., 12 f., 47 ff., 74 f., 127, 133, 136, 166 f., 170  
 Erklärung zum Corporate Governance Kodex — 131, 142  
 Erläuterungen zu den Kapitalflussrechnungen — 127 f.  
 Ertragsteuern — 13, 49 f., 74 f., 87, 91 f., 103, 112 f., 166 f.  
 Eventualverbindlichkeiten — 117

**F**

Finanzergebnis — 50, 91  
 Finanzforderungen — 53 f., 86, 101, 103  
 Finanzinstrumente — 46, 86 ff., 106, 118 ff., 122 f., 126 f.  
 Finanzverbindlichkeiten — 52 f., 55, 87, 106, 113 ff.  
 Flottenverbrauch — 35  
 Forderungen aus Finanzdienstleistungen — 51 ff., 86, 100 f., 124  
 Forderungen aus Lieferungen und Leistungen — 53, 103 ff.  
 Forschung und Entwicklung — 36 f., 41, 50, 72, 84, 89 f., 168

**G**

Gesamtergebnisrechnung — 74, 81, 95  
 Gewinnrücklagen — 58, 105 f.  
 Gewinn- und -Verlust-Rechnung — 49, 60, 74 f., 81, 89 ff., 166 f.  
 Gezeichnetes Kapital — 44, 55

**H**

Handelsorganisation — 26, 40  
 Hauptversammlung — 09 f., 13, 44 f., 140, 149 ff., 159 f.

**I**

Immaterielle Vermögenswerte — 13, 50 f., 84, 98, 136  
 Inanspruchnahme des § 264 Abs. 3 bzw. des § 264 b HGB — 132  
 Investitionen — 05, 13, 50 ff., 89, 136

**J**

Jahresüberschuss — 05, 13, 49 ff., 58, 128, 155

**K**

Kapitalflussrechnung — 51 f., 81, 78 f.  
 Kennzahlen je Aktie — 42  
 Konsolidierungsgrundsätze — 83  
 Konsolidierungskreis — 82  
 Konzernanlagevermögen — 96 f.  
 Kurzfristige Rückstellungen und Verbindlichkeiten — 54  
 Kurzfristige Vermögenswerte — 54

**L**

Langfristige Rückstellungen und Verbindlichkeiten — 54  
 Langfristige Vermögenswerte — 54  
 Leasinggeschäft — 25 f., 64, 67  
 Lieferanten — 31, 33, 38 f., 65, 163

**M** 

---

Mandate des Aufsichtsrats — 144 ff.  
 Mandate des Vorstands — 143  
 Materialaufwand — 55, 170  
 Mitarbeiter — 27 ff., 36, 41, 55, 58, 62, 68 f., 105, 107, 148, 162 ff.

**N** 

---

Nachhaltigkeit — 22, 31 ff., 39, 42 f., 72, 147 f., 163, 171  
 Neue Rechnungslegungsvorschriften — 88

**P** 

---

Personalaufwand — 30, 94  
 Produktion — 05, 21 ff., 31 f., 58  
 Produktionsnetzwerk — 21 ff., 65, 71, 171  
 Prognosebericht — 70 ff.

**R** 

---

Rating — 42, 64, 106 f., 125, 171  
 Risikomanagement — 62 ff., 147, 171  
 Rückstellungen für Pensionen — 53, 55, 58, 87, 107 ff.

**S** 

---

Sachanlagen — 13, 50 ff., 58, 98, 117  
 Segment Automobile — 18 ff.  
 Segment Finanzdienstleistungen — 25 ff.  
 Segment Motorräder — 24  
 Segmentberichterstattung — 81, 89, 133 ff.  
 Sonstige betriebliche Erträge und Aufwendungen — 90  
 Sonstige Finanzanlagen — 99, 123  
 Sonstige Rückstellungen — 112  
 Standorte — 168 f.

**U** 

---

Übriges Finanzergebnis — 91  
 Umsatzerlöse — 12, 49 ff., 58, 83, 89  
 Umsatzkosten — 50, 84, 98  
 Umsatzrendite — 49 f., 155, 171  
 Unternehmensführung — 140 ff., 162

**V** 

---

Verbindlichkeiten aus Lieferungen und Leistungen — 53, 55, 116  
 Vergütungsbericht — 55, 131, 154 ff.  
 Vergütungssystem — 154 ff.  
 Vermietete Gegenstände — 51 f., 99  
 Vertriebskosten und allgemeine Verwaltungskosten — 89  
 Vorräte — 53, 84, 87, 104  
 Vorstand — 45 f., 82, 131, 140 ff., 147 ff., 156 ff., 162 ff.

**W** 

---

Währung — 14, 54, 83  
 Wertpapiere — 51 ff., 81, 85 f., 99, 101, 123  
 Wesentliche verbundene Unternehmen — 129 f.

**Z** 

---

Zahlungsmittel und Zahlungsmitteläquivalente — 52, 54 f., 105, 127 f.

**Finanzen**

- Ergebnis vor Finanzergebnis — 04
- Ergebnis vor Steuern — 04
- Umsatz — 04
- BMW Group Umsatzerlöse nach Regionen — 12
- BMW Group Investitionen und Operativer Cashflow — 13
- Wechselkurse im Vergleich zum Euro — 14
- Ölpreisentwicklung — 15
- Preisentwicklung der Edelmetalle — 15
- Stahlpreisentwicklung — 15
- BMW Group Neufahrzeuge durch Segment Finanzdienstleistungen finanziert — 25
- Vertragsbestand des Segments Finanzdienstleistungen — 25
- Vertragsbestand Kundenfinanzierung des Segments Finanzdienstleistungen 2010 — 26
- Entwicklung der Verlustquote für das Kreditportfolio — 27
- Regionale Verteilung des Einkaufsvolumens der BMW Group im Jahr 2010 — 38
- Veränderung der Zahlungsmittel und Zahlungsmitteläquivalente — 52
- Bilanzstruktur Konzern — 54
- Bilanzstruktur Segment Automobile — 54
- BMW Group Wertschöpfung 2010 — 56

**Produktion und Absatz**

- Auslieferungen Automobile — 04
- BMW Group Auslieferungen Automobile nach Regionen und Märkten — 18
- BMW Group – wichtigste Automobilmärkte 2010 — 18
- Auslieferungen von BMW Dieselfahrzeugen — 20
- MINI Automobile – Anteil der Motorvarianten 2010 — 21
- Automobilproduktion der BMW Group nach Werken im Jahr 2010 — 22
- Auslieferungen von BMW Group Motorrädern — 24
- BMW Group – wichtigste Motorradmärkte 2010 — 24

**Mitarbeiter**

- Auszubildende der BMW Group am 31. Dezember — 28
- Frauenanteil im außertariflichen Bereich der BMW AG — 28
- Fluktuationsquote der BMW AG — 29
- Compliance Committee — 164

**Umwelt**

- Emissionen CO<sub>2</sub> je produziertes Fahrzeug — 32
- Energieverbrauch je produziertes Fahrzeug — 32
- Prozessabwasser je produziertes Fahrzeug — 33
- Wasserverbrauch je produziertes Fahrzeug — 33
- Abfall zur Beseitigung je produziertes Fahrzeug — 34
- Emissionen VOC (flüchtige organische Lösungsmittel) je produziertes Fahrzeug — 34
- Entwicklung der CO<sub>2</sub>-Emissionen der BMW Group Automobile in Europa — 35

**Aktie**

- Entwicklung der BMW Aktien im Vergleich zu Börsenindizes — 41

166 — **WEITERE INFORMATIONEN**

- 166 BMW Group Zehn-Jahres-Vergleich
- 168 BMW Group Standorte
- 170 Glossar
- 172 Index
- 174 — Grafik-Index
- 175 — Finanzkalender
- 176 Kontakte



## Finanzkalender

|                                        |                  |
|----------------------------------------|------------------|
| Bilanzpressekonferenz                  | 15. März 2011    |
| Finanzanalyistentag                    | 16. März 2011    |
| Quartalsbericht zum 31. März 2011      | 4. Mai 2011      |
| Hauptversammlung                       | 12. Mai 2011     |
| Quartalsbericht zum 30. Juni 2011      | 2. August 2011   |
| Quartalsbericht zum 30. September 2011 | 3. November 2011 |
|                                        |                  |
| Geschäftsbericht 2011                  | 13. März 2012    |
| Bilanzpressekonferenz                  | 13. März 2012    |
| Finanzanalyistentag                    | 14. März 2012    |
| Quartalsbericht zum 31. März 2012      | 3. Mai 2012      |
| Hauptversammlung                       | 16. Mai 2012     |
| Quartalsbericht zum 30. Juni 2012      | 1. August 2012   |
| Quartalsbericht zum 30. September 2012 | 6. November 2012 |

**Wirtschaftspresse**


---

|         |                     |
|---------|---------------------|
| Telefon | + 49 89 382-2 23 32 |
|         | + 49 89 382-2 41 18 |
| Telefax | + 49 89 382-2 44 18 |
| E-Mail  | presse@bmwgroup.com |

**Investor Relations**


---

|         |                     |
|---------|---------------------|
| Telefon | + 49 89 382-2 42 72 |
|         | + 49 89 382-2 53 87 |
| Telefax | + 49 89 382-1 46 61 |
| E-Mail  | ir@bmwgroup.com     |

**Die BMW Group im Internet**


---

Weitere Informationen über die BMW Group erhalten Sie im Internet unter der Adresse [www.bmwgroup.com](http://www.bmwgroup.com). Die Rubrik Investor Relations können Sie unter der Adresse [www.bmwgroup.com/ir](http://www.bmwgroup.com/ir) direkt erreichen. Informationen zu den Marken der BMW Group finden Sie unter [www.bmw.com](http://www.bmw.com), [www.mini.com](http://www.mini.com) und [www.rolls-roycemotorcars.com](http://www.rolls-roycemotorcars.com)

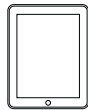

> **Geschäftsbericht 2010 als iPad App**

# NUMBER ONE

ZUKUNFT — Rohstoff für die Mobilität von morgen

WACHSTUM — Vom ersten BMW 5er zur weltweit überzeugenden Modellfamilie

KUNDEN — Intelligente Kommunikation für eine individuelle Mobilität

PROFITABILITÄT — Stabile Ergebnisse im Zeitalter globaler Marktschwankungen

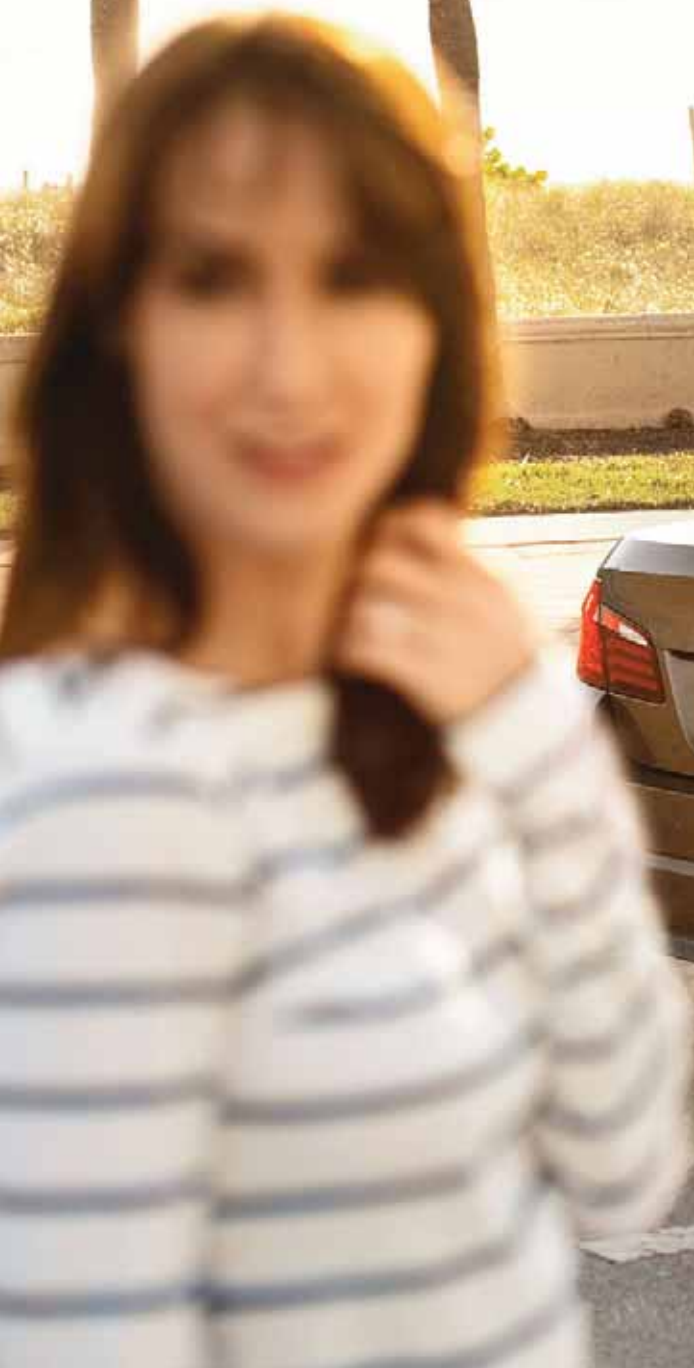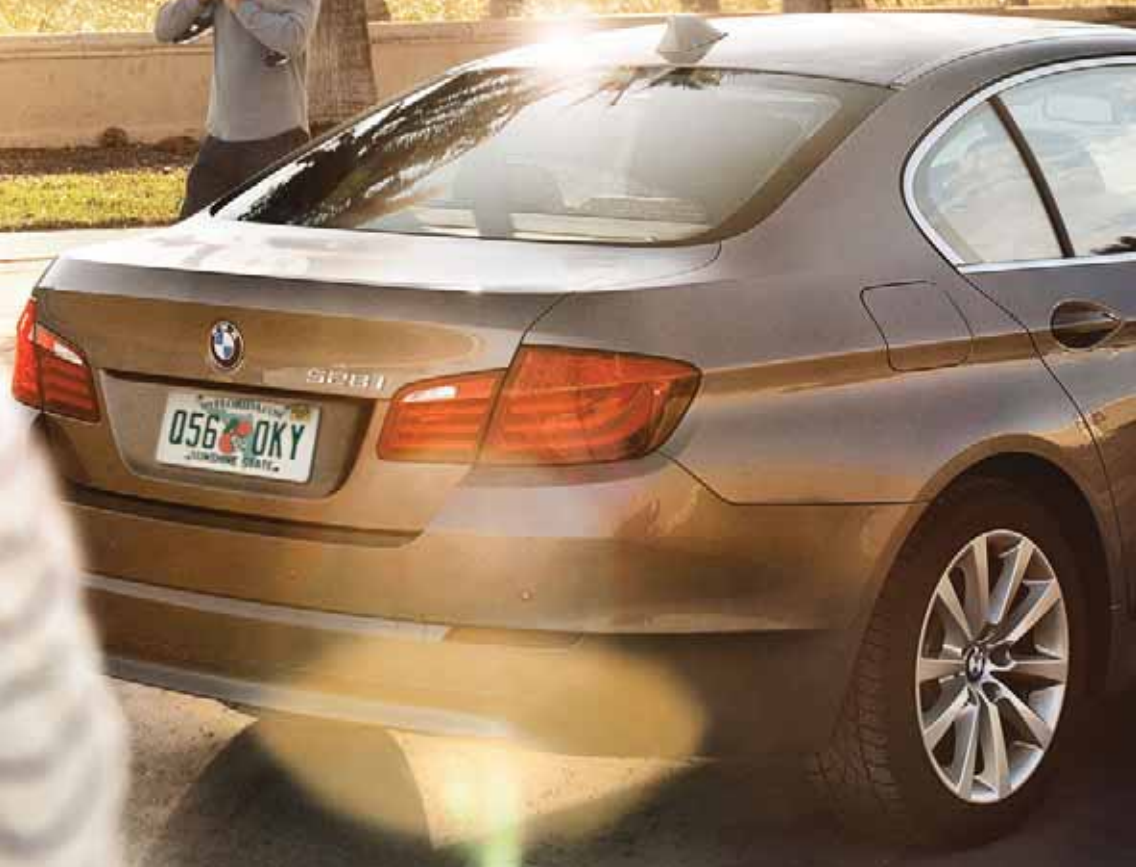

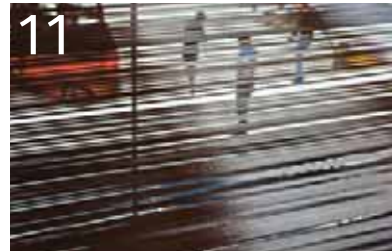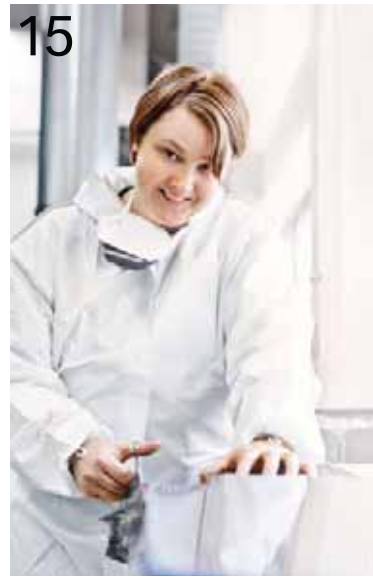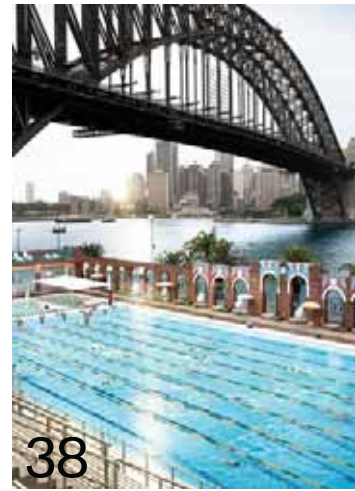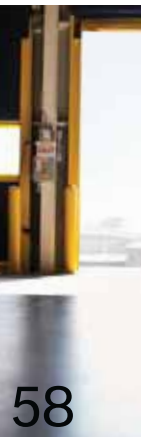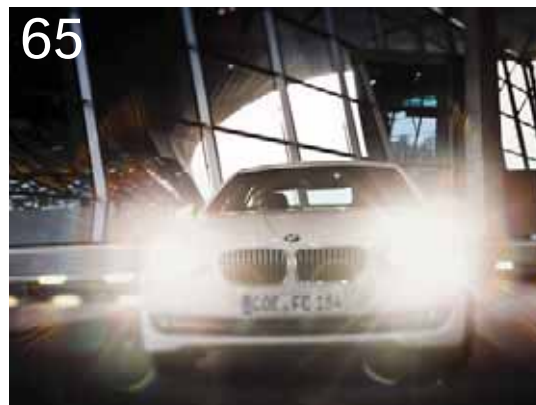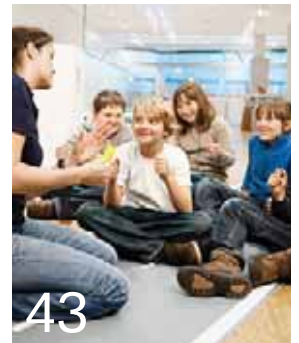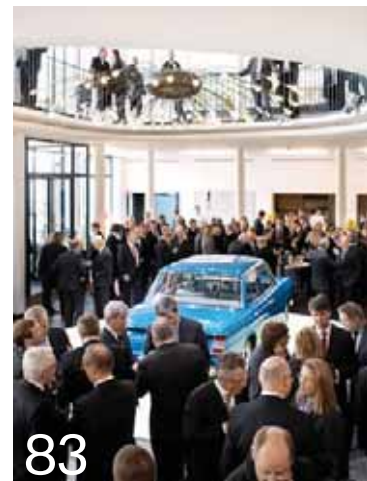

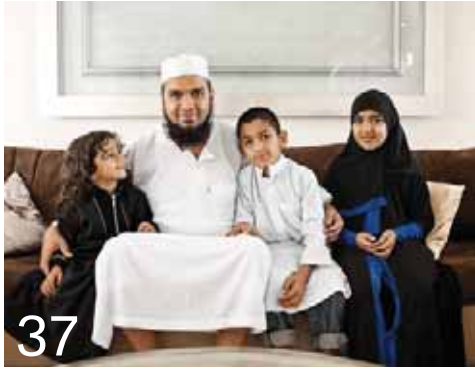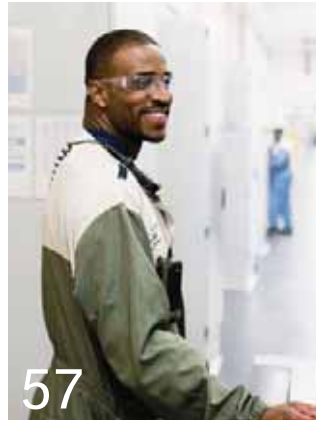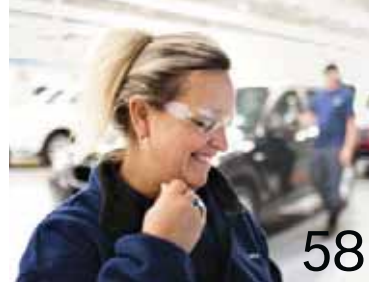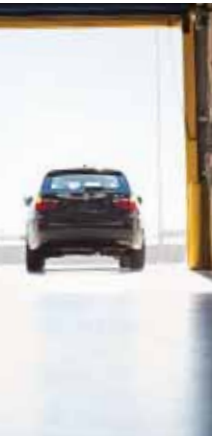

NUMBER ONE \_\_\_\_\_

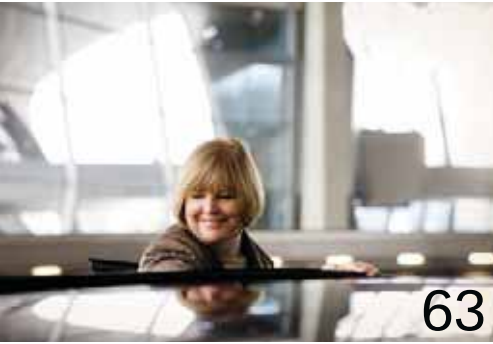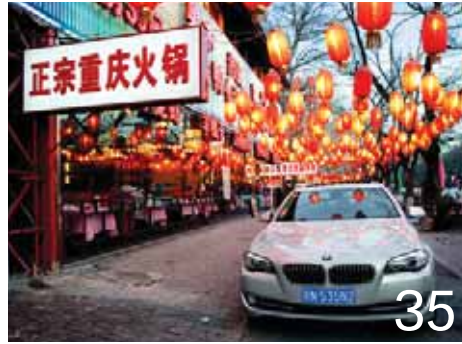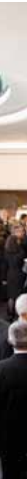

## NUMBER ONE —————

Mit der Unternehmensstrategie Number ONE erschließen wir uns Schritt für Schritt die Zukunft. Sie eröffnet uns den Zugang zu neuen Kunden, neuen Technologien und neuen Märkten. Sie steht für dynamisches Wachstum und eine starke Profitabilität gleichermaßen.

Wofür steht Premium? Was bedeutet der Begriff wirklich? Und wie übersetzt er sich in Denken, Handeln und nicht zuletzt Produkte?

Für uns heißt Premium auch, führend in der Entwicklung nachhaltiger Mobilität zu sein. Wir erschließen sie mit engagierten Mitarbeitern und einem Produktionsnetz, das weltweit Maßstäbe setzt. Wir definieren nachhaltige Mobilität mit Fahrzeugen und Mobilitätskonzepten, die wegweisend sind. Wir erfinden die Zukunft, indem wir sie selbst definieren.

Ein Beispiel dafür ist der Hightech-Werkstoff Karbon, den wir künftig in großem Umfang für neue Fahrzeugkonzepte einsetzen. Eine neue Dimension der individuellen Mobilität. Ein anderes Beispiel ist die intelligente Vernetzung von Fahrern, Fahrzeugen und Umwelt. Auch Natural Hedging und die Diversifikation des weltweit erfolgreichen BMW 5er sind weitere Belege für Premium, wie wir es verstehen.

Premium setzt innovative Maßstäbe.  
Premium ist ein Anspruch.  
Premium verpflichtet.

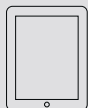

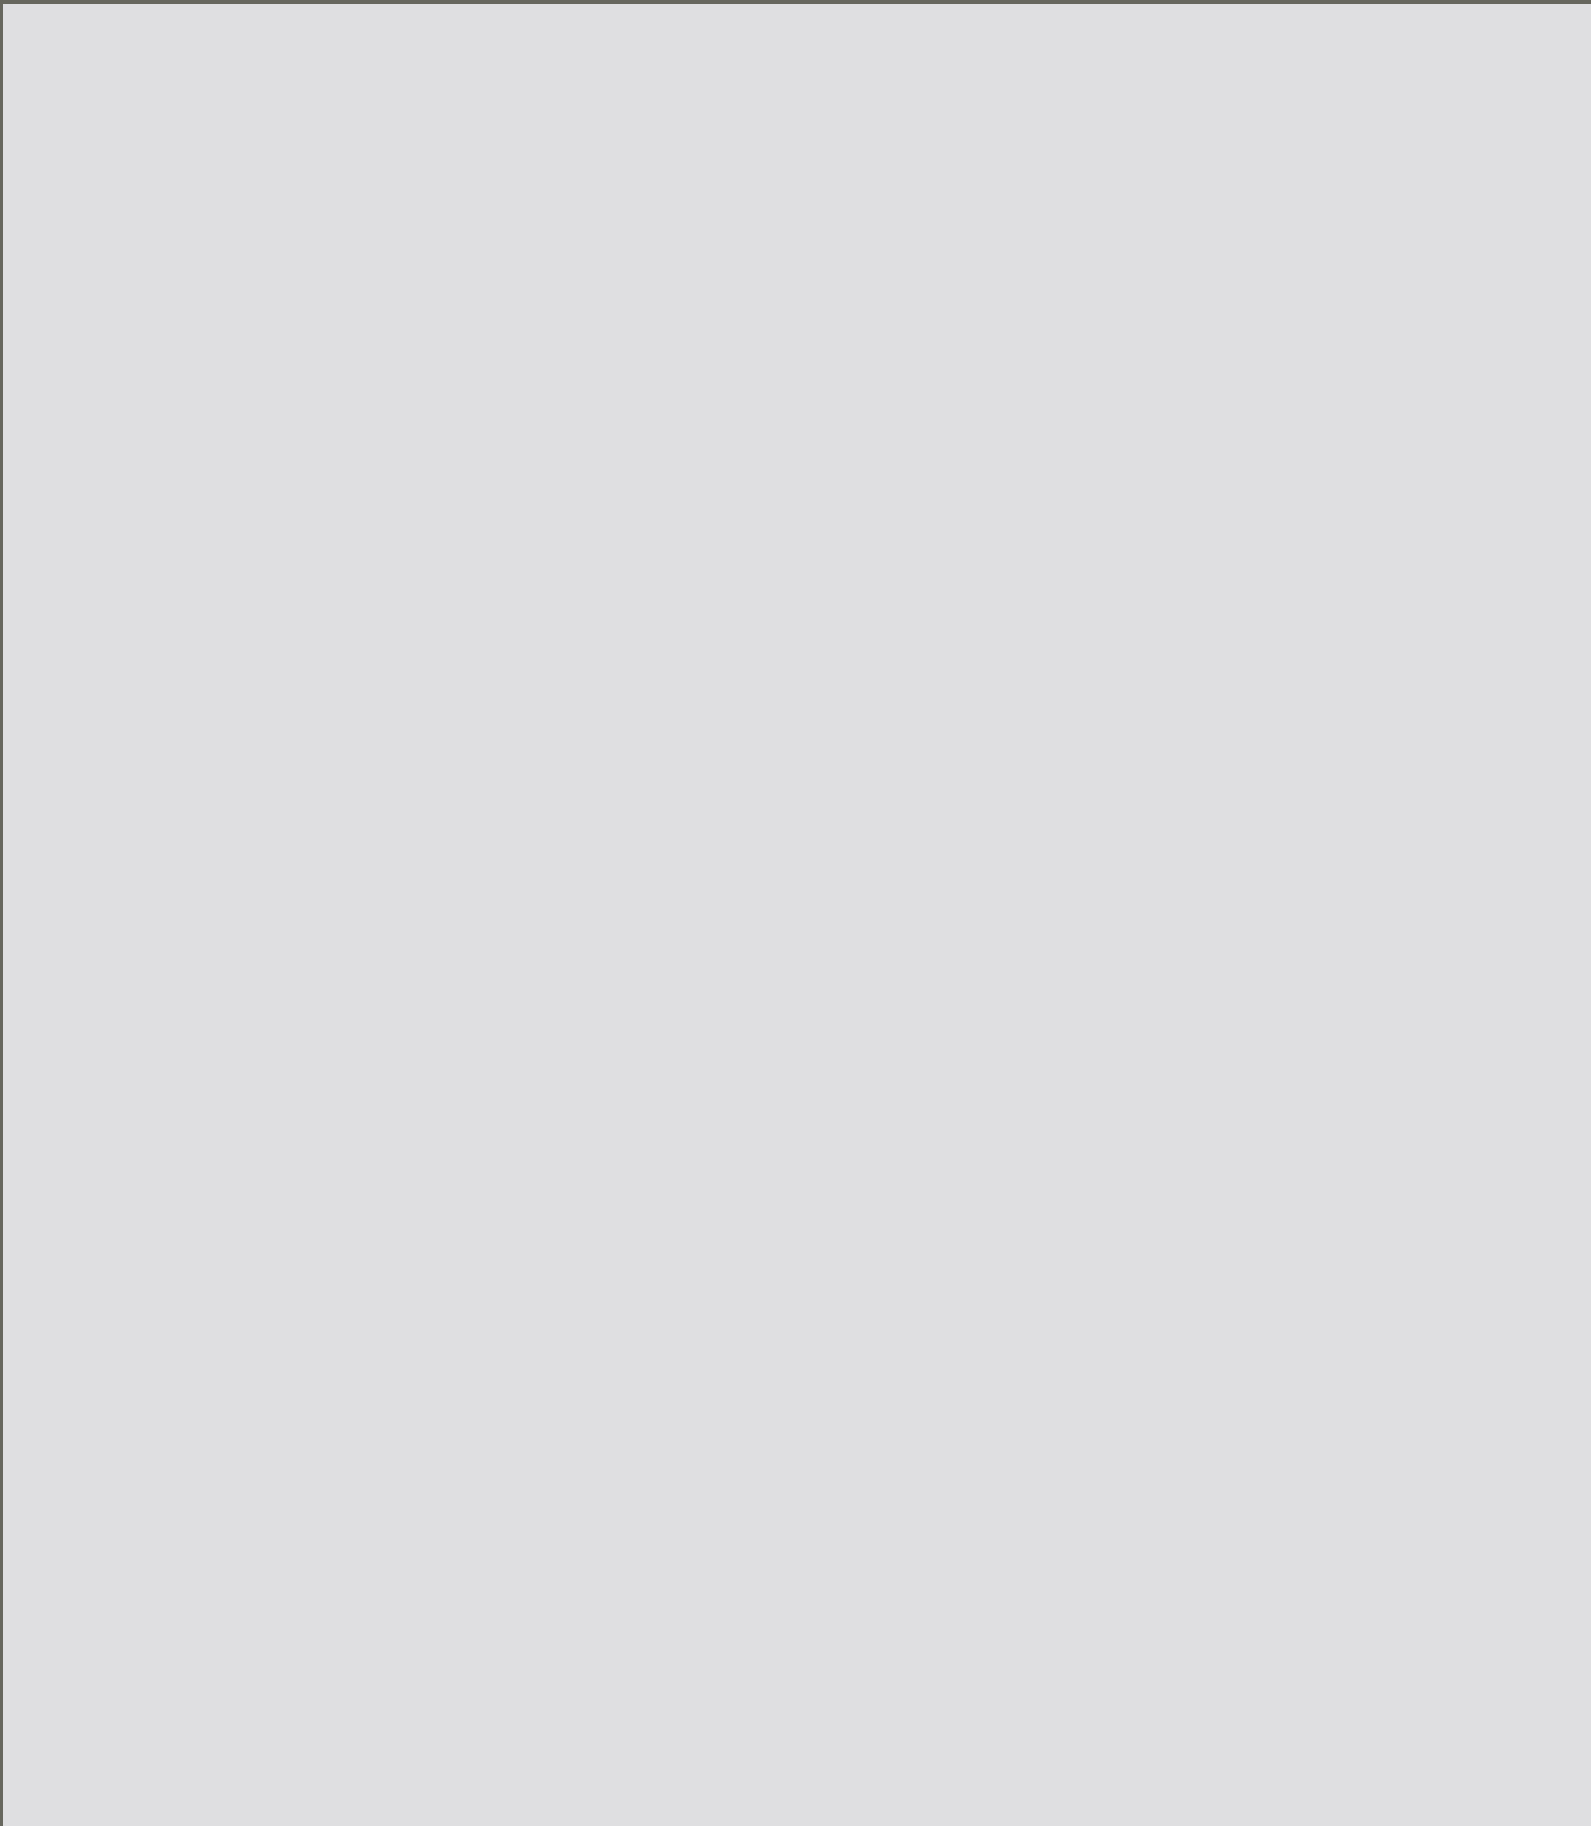



# INHALT

---

|                         |                           |           |
|-------------------------|---------------------------|-----------|
| Vorwort                 | ————— Norbert Reithofer   | ————— 04  |
| Thema eins              | > Zukunft                 |           |
| <b>MEGACITY VEHICLE</b> | —————                     | <b>09</b> |
| Thema zwei              | > Wachstum                |           |
| <b>ERFOLGSMODELL</b>    | —————                     | <b>23</b> |
| Thema drei              | > Kunden                  |           |
| <b>CONNECTED DRIVE</b>  | —————                     | <b>41</b> |
| Thema vier              | > Profitabilität          |           |
| <b>GLOBALE BALANCE</b>  | —————                     | <b>51</b> |
| <b>HIGHLIGHTS 2010</b>  | —————                     | <b>61</b> |
|                         | Glücksmomente             | ————— 62  |
|                         | Auto China 2010, Peking   | ————— 80  |
|                         | Wir bauen die Zukunft     | ————— 81  |
|                         | 50 Jahre Eigenständigkeit | ————— 82  |

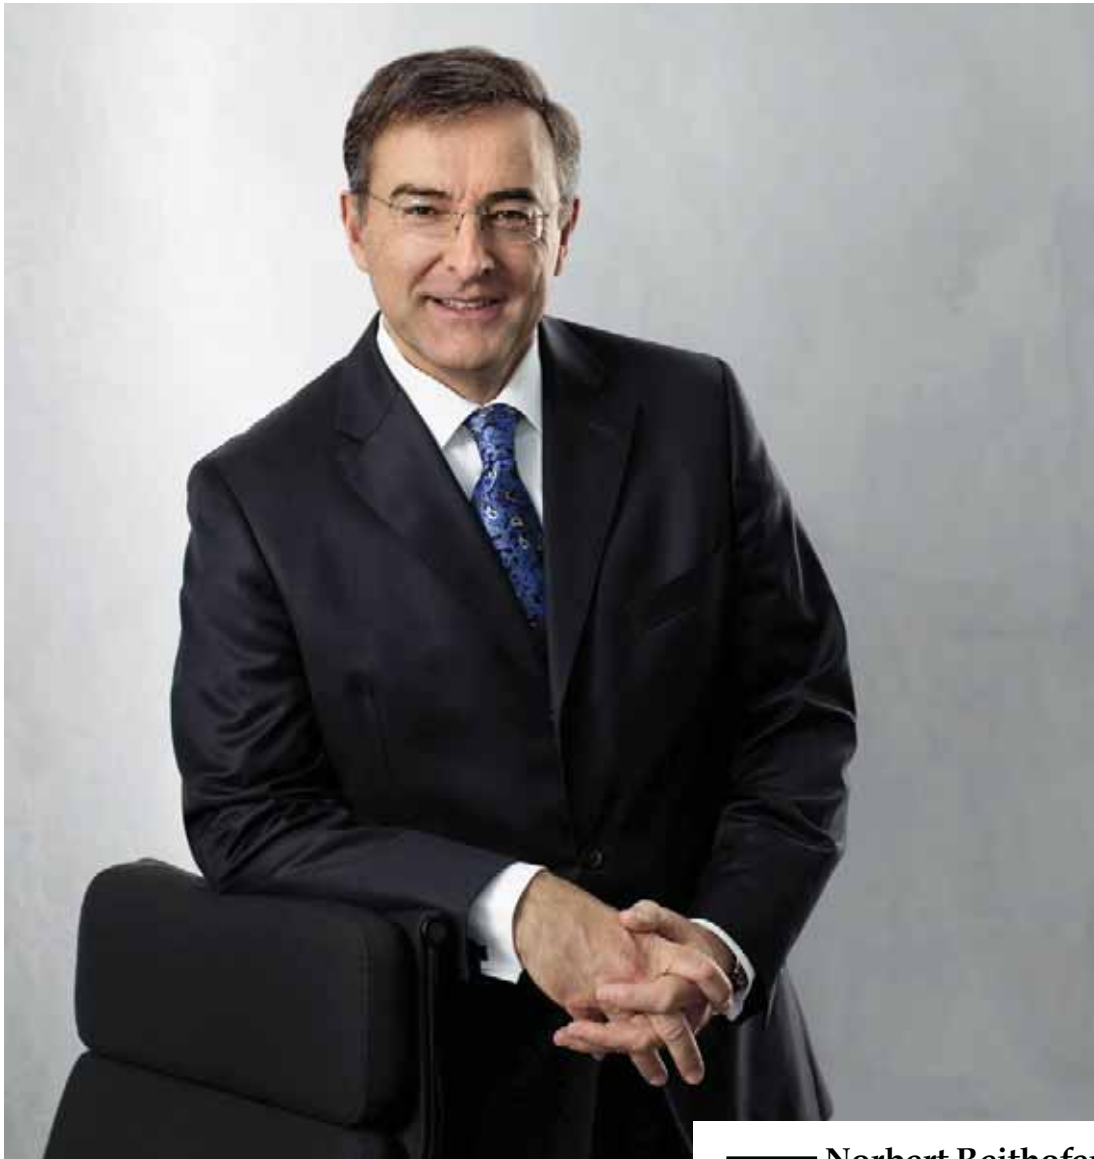

— **Norbert Reithofer**  
Vorsitzender des Vorstands

## Sehr geehrte Damen und Herren,

das Jahr des Aufbruchs – so könnte man das Geschäftsjahr 2010 aus Sicht der BMW Group bezeichnen. Nur ein Jahr nach der globalen Wirtschafts- und Finanzkrise haben wir das beste Konzernergebnis unserer Unternehmensgeschichte erzielt. Die BMW Group ist unverändert der absatzstärkste Hersteller von Premiumautomobilen in der Welt. Dabei handeln wir nachhaltiger als jeder andere Hersteller unserer Branche. Das hat der Dow Jones Sustainability Index bestätigt und die BMW Group bereits das sechste Jahr in Folge auf Platz 1 gesetzt. Auch das verstehen wir unter dem Begriff Premium. Wir übernehmen Verantwortung – für die Umwelt, die Gesellschaft und unsere Mitarbeiter an allen Standorten.

2010 war ein erfolgreiches Jahr für die BMW Group. Möglich gemacht haben dies unsere Kunden rund um den Globus. Über 1,46 Millionen Kunden haben sich für einen BMW, MINI oder Rolls-Royce entschieden. Hinzu kommen über 110.000 ausgelieferte Motorräder der Marken BMW und Husqvarna. Dies zeigt: Die Kunden vertrauen der BMW Group und unseren Marken, unserer Leistungskraft und innovativen Stärke. Dafür möchte ich allen Kunden danken!

Wir denken und handeln langfristig. Das steckt tief in unseren Genen. Bereits 2007 haben wir mit unserer Strategie Number ONE die richtigen Weichen gestellt. Wir haben klare Profitabilitätsziele für das Jahr 2012 festgelegt und eine Vision entwickelt, die wir bis zum Jahr 2020 verwirklichen wollen.

Begleiten Sie uns auf einem Streifzug, wie wir die vier Säulen unserer Strategie „Wachstum“, „Zukunft gestalten“, „Profitabilität“, „Zugang zu Technologien und Kunden“ mit Maßnahmen füllen. Erleben Sie in vier Bildstrecken Menschen und deren Geschichten aus unserem Alltag.

**Das Megacity Vehicle – Wir schaffen nachhaltige Mobilität für urbane Ballungsräume.** Wer Mobilität zur Verfügung stellt, der muss selbst beweglich und innovativ sein. Unser Weg zur Elektromobilität ist klar definiert.

Schritt eins: Kunden haben für uns den MINI E getestet. Schritt zwei: Im Jahr 2011 testen sie auch den BMW ActiveE. So sammeln sie weitere wertvolle Erfahrungen im Umgang mit Elektromobilität. Schritt drei: 2013 bringen wir das Megacity Vehicle auf den Markt. Kein anderer Hersteller konzipiert so wie wir ein ganzes Fahrzeug speziell für den Elektroantrieb. Mit seiner völlig neuen Architektur aus Life- und Drive-Modul wird es das erste Großserienfahrzeug mit einer Fahrgastzelle aus Karbon sein. Dieses hochinnovative Fahrzeug fertigen wir in Deutschland im Verbund mit einem internationalen Netzwerk zur Herstellung von Karbonfasern und kompetenten Partnern wie der SGL Group. Gemeinsam mit der Bundeskanzlerin haben wir im Herbst 2010 in Leipzig den Startschuss für die erste Produktionsstätte von Elektroautos in Deutschland gegeben.

Das Megacity Vehicle bleibt kein Einzelgänger. Es wird Teil einer neuen BMW Familie unter der Submarke BMW i. So wie BMW M besondere Performance und Individualität bietet, so steht BMW i für höchst effiziente und nachhaltige Mobilität. Freude am Fahren wird künftig noch vielfältiger sein.

**Die neue BMW 5er Reihe – Wir setzen Standards.** Wie fortschrittliche Premiummobilität der Gegenwart aussieht, zeigt die sechste Generation der BMW 5er Reihe. Die neue 5er Limousine ist ein voller Erfolg und hat weltweit viele Preise erhalten. Beim Euro NCAP Crash Test, dem europaweit bedeutendsten Crashtestverfahren, erhielt ihr ganzheitliches Sicherheitskonzept genauso fünf Sterne wie beim amerikanischen Pendant, dem US NCAP Crash Test. Von den Lesern der ADAC-Zeitung wurde die neue BMW 5er Limousine Anfang 2011 zum „Lieblingsauto der Deutschen“ gekürt.

Der neue BMW 5er ist das erste große Serienmodell, das wir konsequent nach der Baukastenstrategie entwickelt haben. Darüber hinaus zeigt er, wie wir Efficient Dynamics immer weiter vorantreiben. Denn auch in der Zukunft setzen wir uns ambitionierte Ziele: Von 2008 bis 2020 wollen wir die CO<sub>2</sub>-Emissionen unserer Fahrzeugflotte um mindestens weitere 25 Prozent verringern.

**BMW ConnectedDrive – Wir gehen neue Wege in der Vernetzung.**

Digitalisierung und Vernetzung gehören für uns alle immer mehr zum Alltag, das Auto inklusive. Mit BMW ConnectedDrive bieten wir schon heute intelligente Fahrerassistenzsysteme wie den erweiterten Notruf, Night Vision mit Fußgängererkennung, E-Mail- und Internetzugang. Dieses Angebot bauen wir konsequent aus, um Fahrer, Insassen, Auto und Außenwelt noch stärker miteinander zu verknüpfen. Lesen Sie, was passiert oder besser nicht passiert, wenn der Nothalteassistent eingreift. Lesen Sie auch, wie Kinder Mobilität entdecken und erleben. In unserem Junior Campus haben wir sie gefragt: Wie würdet ihr die komplexe Welt von BMW ConnectedDrive in euren eigenen Worten beschreiben? Lassen Sie sich überraschen.

**Globale Märkte – Wir streben ein ausbalanciertes Wachstum an.**

Die Wirtschaftskrise hat deutlich gemacht, wie volatil die Märkte und schwer kalkulierbar wirtschaftliche Entwicklungen sind. Wir streben bei unseren Geschäfts- und Vertriebsaktivitäten ein ausbalanciertes Verhältnis zwischen Europa, Asien und Amerika an. Das entspricht unserer langfristigen Ausrichtung. Und das macht uns robuster gegenüber Markt- und Wechselkurschwankungen. Vor diesem Hintergrund haben wir auch 2010 in unsere Standorte investiert – speziell in Deutschland, China, Indien und den USA. Als ein Beispiel stellen wir Ihnen unser US-Werk in Spartanburg vor.

Entscheidend ist: Egal, wo unsere Mitarbeiter im internationalen Produktionsnetzwerk tätig sind, sie alle verbindet die Leidenschaft für Mobilität und die Identifikation mit unserem Unternehmen. Zusammenhalt ist Teil unserer

Kultur. Für ihren Einsatz und ihre Leistung im Jahr 2010 möchte ich allen Mitarbeiterinnen und Mitarbeitern weltweit herzlich danken – auch im Namen meiner Vorstandskollegen. In diesen Dank beziehe ich die gesamte Handelsorganisation, unsere Zulieferer und Partner mit ein.

**2011 – Wir nutzen es als Jahr der Chancen für langfristigen Erfolg.**

Wir gehen weiter unseren eigenen Weg. Wir schaffen neue, innovative Lösungen für unsere Kunden. BMW, MINI und Rolls-Royce – das sind nicht nur Automobile. Viele Menschen verbinden damit ein Lebensgefühl. Lesen Sie, was unsere Kunden empfunden haben, als sie ihren BMW, ihren MINI, ihren Rolls-Royce oder ihr BMW Motorrad in Empfang genommen haben. Solche „Glücksmomente“ sind die beste Anerkennung, die wir uns für unsere Arbeit vorstellen können.

Mobilität neu zu denken und auf die Straße zu bringen, ist ein unglaublich spannender Prozess, der uns jeden Tag ebenso fordert wie begeistert. Dazu wollen wir auch künftig die besten Fach- und Führungskräfte aus aller Welt, Frauen wie Männer für unser Unternehmen gewinnen.

In das Geschäftsjahr 2011 starten wir mit Schwung und Zuversicht. Wir sehen es als „Jahr der Chancen“. Wir nutzen diese, um den Erfolg der BMW Group langfristig auszubauen. Vielen Dank an unsere Aktionäre und Investoren für ihr Vertrauen. Ihr Unternehmen ist gut aufgestellt. Ihr Unternehmen hat Zukunft und gestaltet sie.



Norbert Reithofer

ZUKUNFT

# MEGACITY VEHICLE

>>

PROFITABILITÄT

KUNDEN

WACHSTUM

Rohstoff für die  
Mobilität von morgen

» Je schwerer ein Fahrzeug ist, umso mehr Bewegungsenergie verbraucht es. Je höher jedoch sein Energieverbrauch, umso größer müssen seine Energiespeicher ausgelegt sein. Größere Energiespeicher wiederum erhöhen das Fahrzeuggewicht – ein Dilemma, das die Entwicklung von Fahrzeugen mit elektrischen Batterien und Antrieben bislang spürbar bremste. Die BMW Group geht hier nun völlig neue Wege: Bereits seit rund zehn Jahren beschäftigt sich das Unternehmen mit kohlenstofffaserverstärktem Kunststoff (CFK), durch den Fahrzeuge zukünftig deutlich leichter werden, ohne Kompromisse bei der Sicherheit machen zu müssen. Damit gewinnt die nachhaltige Mobilität enorm an Fahrt.



# NEUSTART FÜR DAS AUTO

- 
- > Moses Lake
  - > Wackersdorf
  - > Landshut
  - > Leipzig

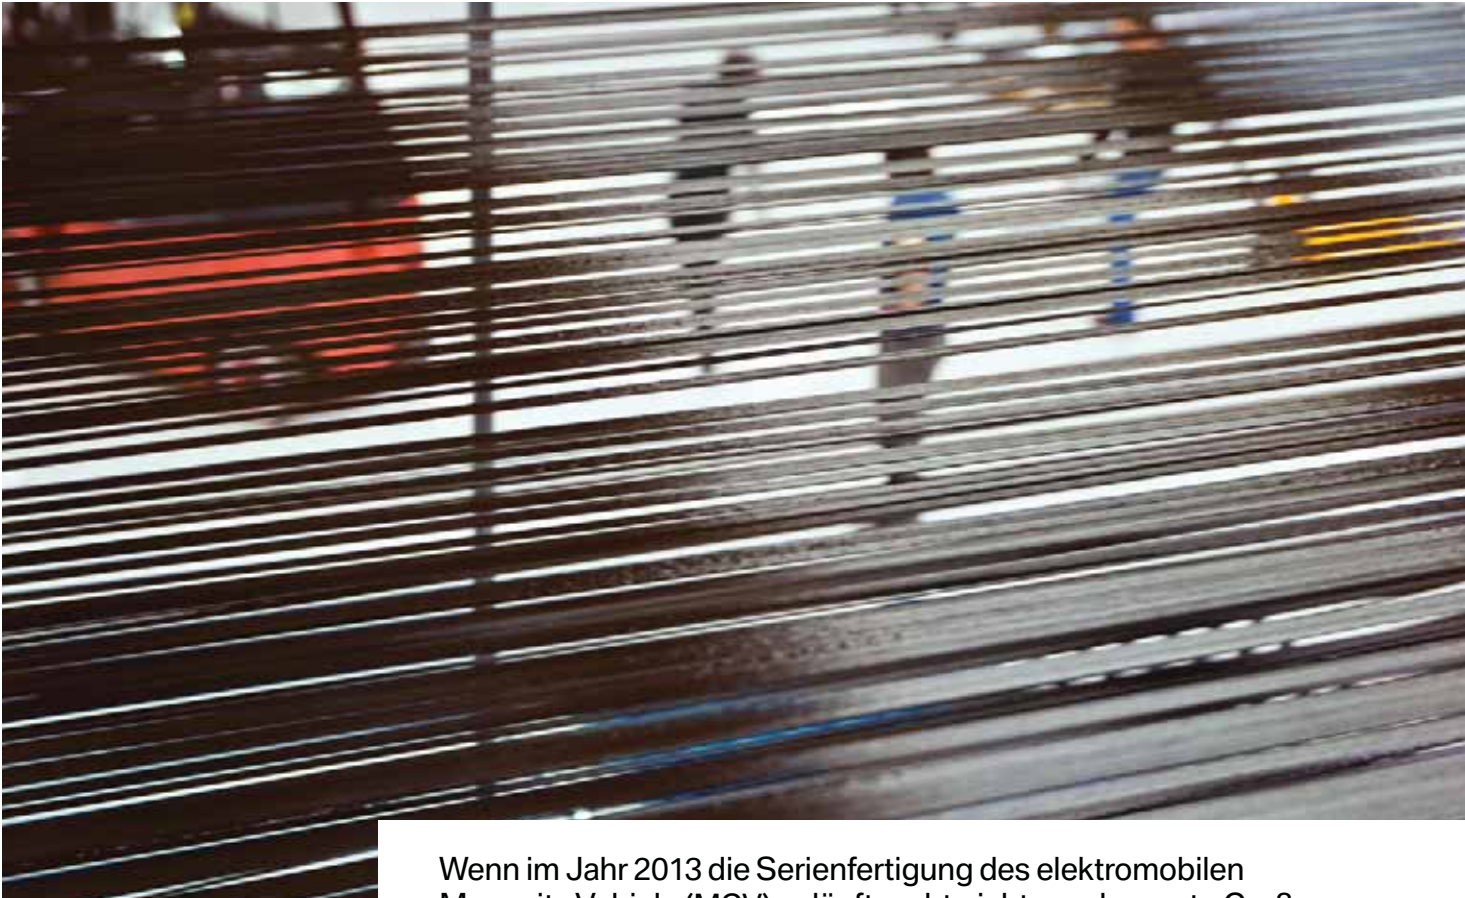

Wenn im Jahr 2013 die Serienfertigung des elektromobilen Megacity Vehicle (MCV) anlauft, geht nicht nur das erste Groserienfahrzeug mit einer Fahrgastzelle aus CFK in Produktion. Der Hightech-Werkstoff ffnet gleichzeitig ganz neue Dimensionen in der Konstruktion und Fertigung von Fahrzeugen.

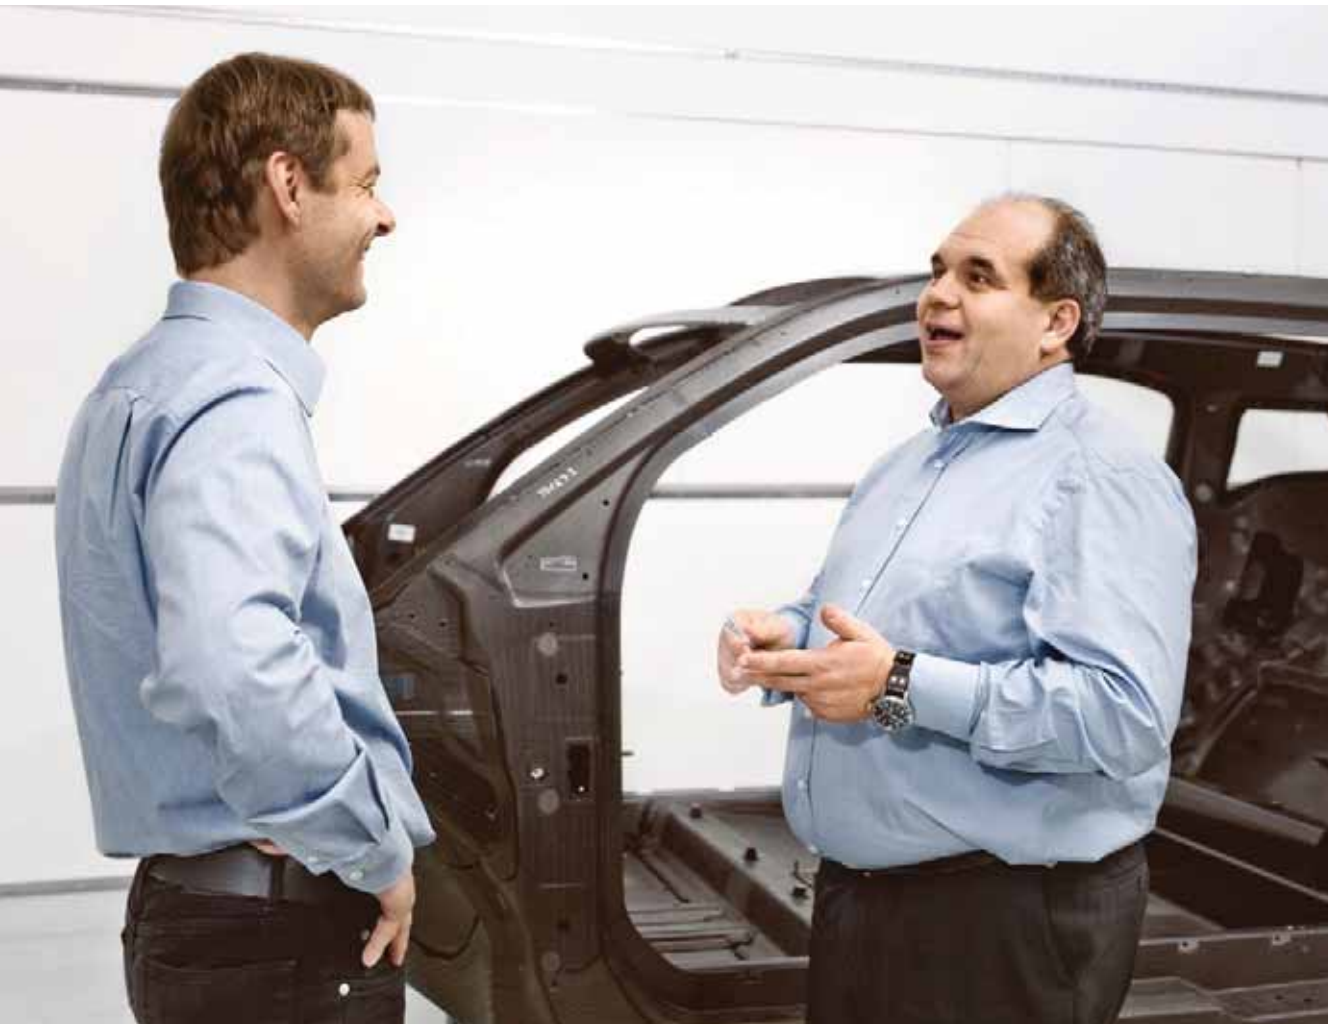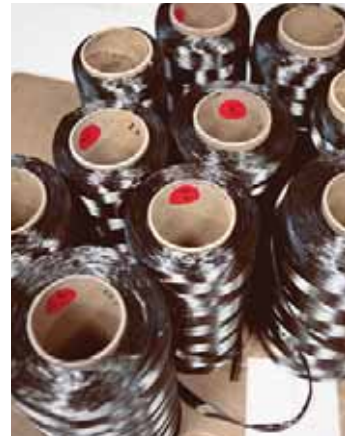

**Johann Wolf** — Technologieleiter CFK und Exterieur

Als Technologieleiter Kunststoff steuert Johann Wolf, 50, unter anderem Materialbeschaffung und Produktion der Fahrgastzelle des Megacity Vehicle – und damit einige jener Schlüsselemente, die dieses Fahrzeug von allen anderen E-Mobilen unterscheiden wird.

## JOHANN WOLF ÜBER DEN COUNTDOWN FÜR DAS MEGACITY VEHICLE

**Bereits in wenigen Monaten läuft die Testproduktion einiger CFK-Komponenten des Megacity Vehicle an. Nervös?** Keineswegs. Die neuartigen Produktionsprozesse, die wir ab nächstem Jahr im Serienmaßstab starten, werden von uns seit Langem in kleinerem Maßstab erprobt, eingesetzt und kontinuierlich optimiert. Die Taktzeiten für CFK-Komponenten haben wir beispielsweise von Stunden auf wenige Minuten reduziert. Der Charme besteht unter anderem darin, dass sich ein MCV auf vergleichsweise geringem Raum fertigen lässt. Wir sind sicher, dass mit Serienstart diese auch für uns neuartigen Prozesse reibungslos anlaufen werden.

**Konzepte für Elektromobilität gibt es mittlerweile einige. Was ist so neu am Megacity Vehicle?** Alles. Unser Ziel ist, die nachhaltige Mobilität in allen ihren ökonomischen, ökologischen und sozialen Aspekten weiterzuentwickeln. Das bedeutet, dass wir bei der Konzeption des Megacity Vehicle nicht nur die ökologische Fertigung, sondern im besonderen Maße auch seine Wiederverwertbarkeit im Blick haben. Wir denken stets in geschlossenen Kreisläufen. Das Ergebnis ist ein Fahrzeug, das in Details wie im großen Ganzen schlicht unvergleichlich ist.

**Welche Rolle spielt dabei der Hightech-Werkstoff CFK?** Eine essenzielle, denn ein entscheidender Faktor für die breite Akzeptanz von Elektromobilität wird die Reichweite sein. Klar ist: Fahrzeuge mit klassischer Aluminium- oder Stahlkarosserie, bei denen lediglich der Verbrennungsmotor gegen einen Elektroantrieb ausgetauscht wird, bieten da keine Lösung. Wir haben uns deshalb für ein völlig neues Konzept entschieden. Das Megacity Vehicle ist das weltweit erste Elektroauto, das speziell für diesen Antrieb konstruiert wurde. Mit der LifeDrive-Architektur und seiner Fahrgastzelle aus CFK verfügt es über zwei einzigartige Komponenten, die die Leistungsfähigkeit des Megacity Vehicle enorm verbessern.

**Dennoch wird das MCV wie alle Fahrzeuge mit Elektroantrieb lautlos und schaltfrei unterwegs sein. Wo bleibt da die BMW typische Freude am Fahren?** Keine Sorge, auch unser MCV wird ein echter BMW mit der markentypischen Freude am Fahren sein. Bei Elektromotoren steht das gesamte Drehmoment sofort zur Verfügung. Zusammen mit innovativem Leichtbau sorgt das für hohe Agilität und einen hohen Spaßfaktor. Zudem beschleunigt das Fahrzeug unterbrechungsfrei bis zur Höchstgeschwindigkeit durch. Das Megacity Vehicle ist also keine rollende Verzichtserklärung, sondern eine packende Neuinterpretation von Freude am Fahren.

## » Karbon benötigt viel Energie. In Moses Lake stellt die Natur sie uns im Überfluss zur Verfügung.«

Mitunter sind es gerade die kleinen Dinge, die einen großen Unterschied machen. Dieses Detail ist sogar so winzig, dass sein Veränderungspotenzial gewaltig sein dürfte. Ganze 0,007 Millimeter beträgt der Durchmesser einer Karbonfaser, das entspricht lediglich einem Siebtel des Durchmessers menschlicher Haare und steht im radikalen Gegensatz zur Fülle seiner Möglichkeiten. Denn der hochmoderne Verbundwerkstoff, der aus einer Verbindung von Kohlenstofffasern mit Kunstharz besteht, verfügt über bestechende Eigenschaften. **CFK ist robuster als Stahl, aber nicht einmal halb so schwer, widerstandsfähig und zugleich höchst formbar, flexibel im Einsatz und vergleichsweise anspruchslos in der Verarbeitung.** Bislang kam CFK vor allem in Luft- und Raumfahrt, bei Rennwagen und in Windrotoren zum Einsatz – überall dort, wo stark belastbare und zugleich leichte Materialien mit hoher Steifigkeit und Festigkeit gefragt sind. CFK ist damit auch ein ideales Material für die Karosserie des Megacity Vehicle, das ein ganz neues Kapitel nachhaltiger Automobilkonstruktion und -fertigung aufschlagen wird.

Das mag zunächst erstaunlich klingen, denn die ersten Schritte im Leben eines CFK sind ziemlich aufwändig. Um den karbonfaserverstärkten Kunststoff herstellen zu können, müssen Fasern aus Polyacrylnitril unter verschiedenen Temperaturverhältnissen zu einer stabilen Faser aus nahezu reinem Kohlenstoff chemisch „umgebaut“ werden. Dieser Prozess ist relativ energieintensiv. Bereits früh im Entwicklungsprozess des Megacity Vehicle machte sich das Projektteam deshalb auf die Suche nach einem Produktionsstandort mit einem kontinuierlichen, wettbewerbsfähigen Angebot an nachhaltiger Energie – und fand ihn in **»» Moses Lake** im US-Bundesstaat Washington. Hier stellen die Wasserkraftwerke des Columbia River nahezu unerschöpfliche Mengen

### Größenverhältnis Karbonfaser

Durchmesser in mm

0,007 ————— Karbonfaser

0,050 ————— Menschliches Haar

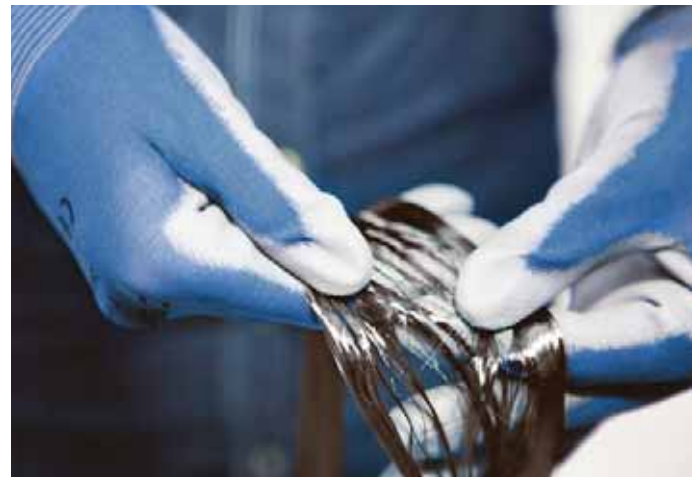

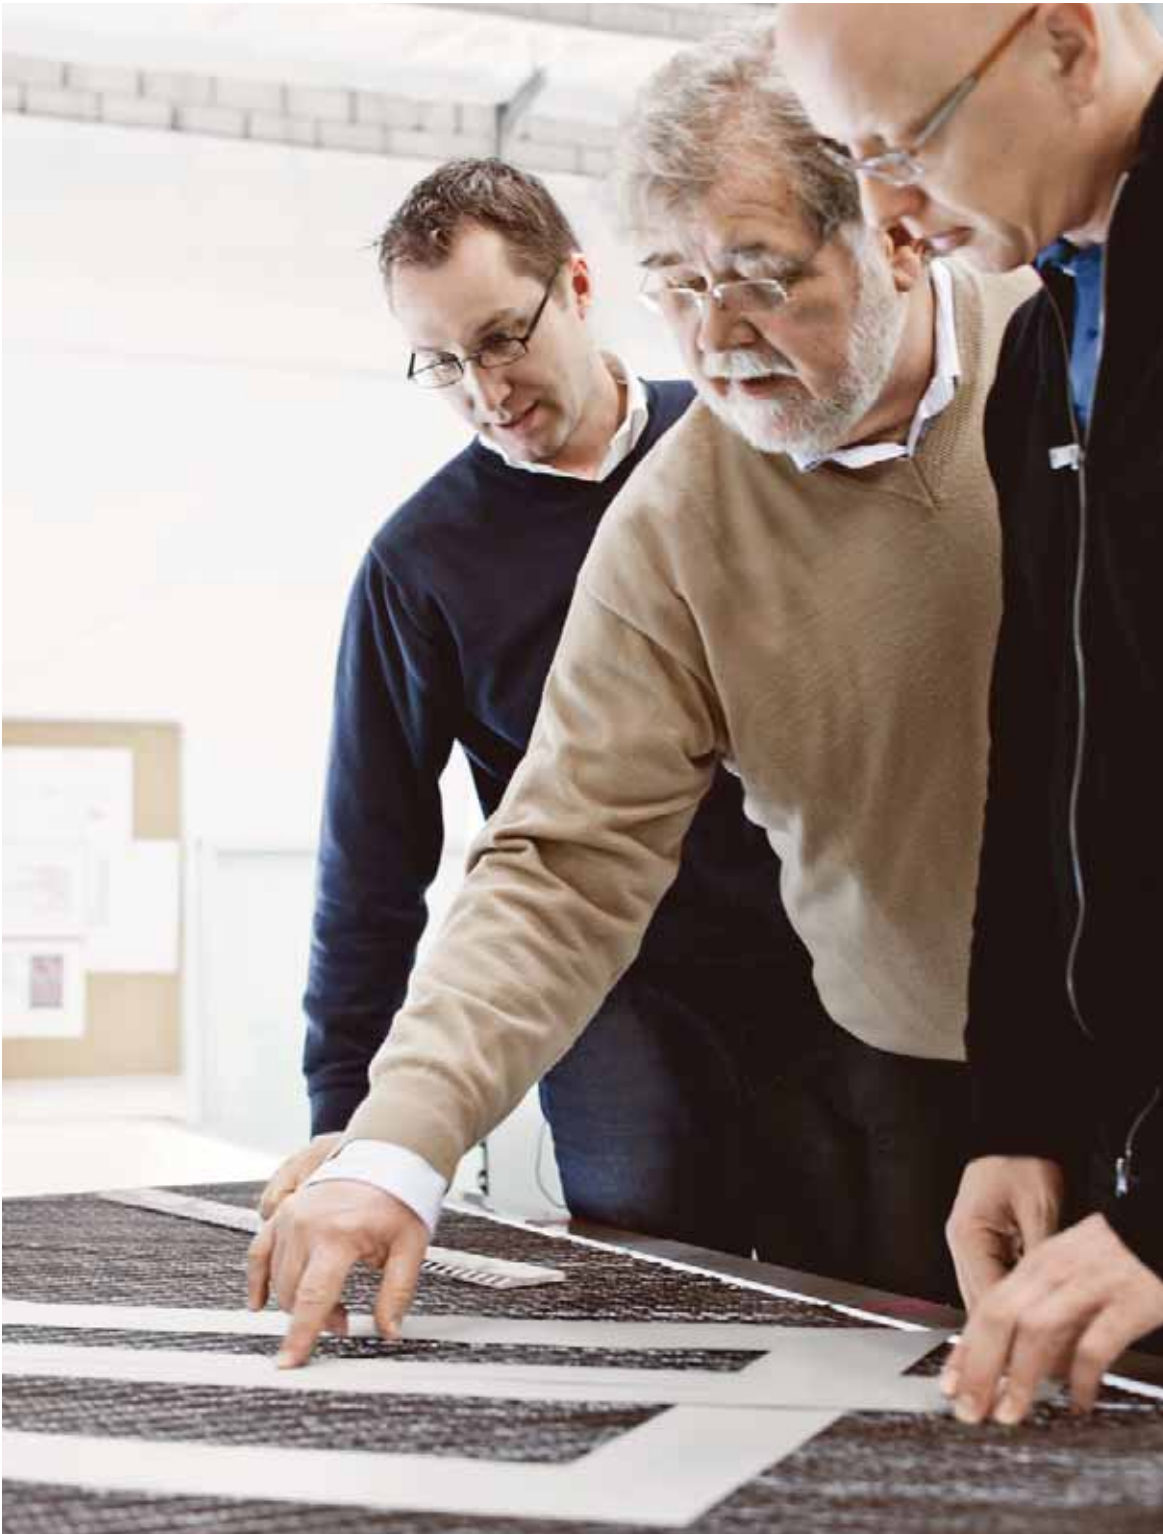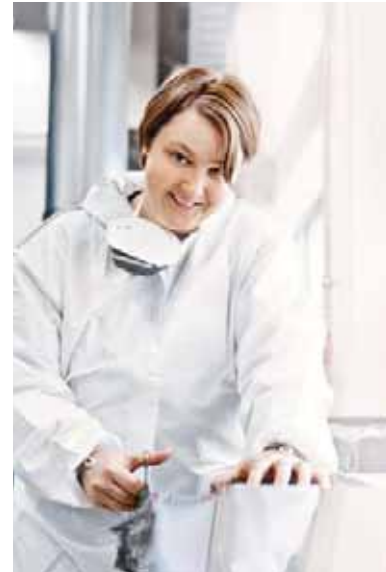

— 2

— 1

- 1 — Sieht aus wie eine Schneiderei, ist aber Hightech: Werkstoffprüfung in der CFK-Fertigung Wackersdorf.
- 2 — CFK-Produktionsreste lassen sich sogar wiederverwenden. Hier werden sie zur Laborprüfung vorbereitet.
- 3 — Vier Wirkmaschinen von den Ausmaßen eines Eisenbahnwaggons fertigen im Werk Wackersdorf den Karosseriegrundstoff CFK.

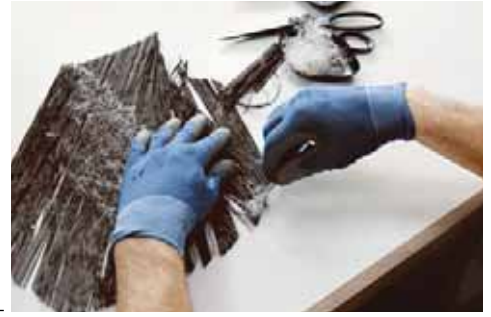

2—

1—

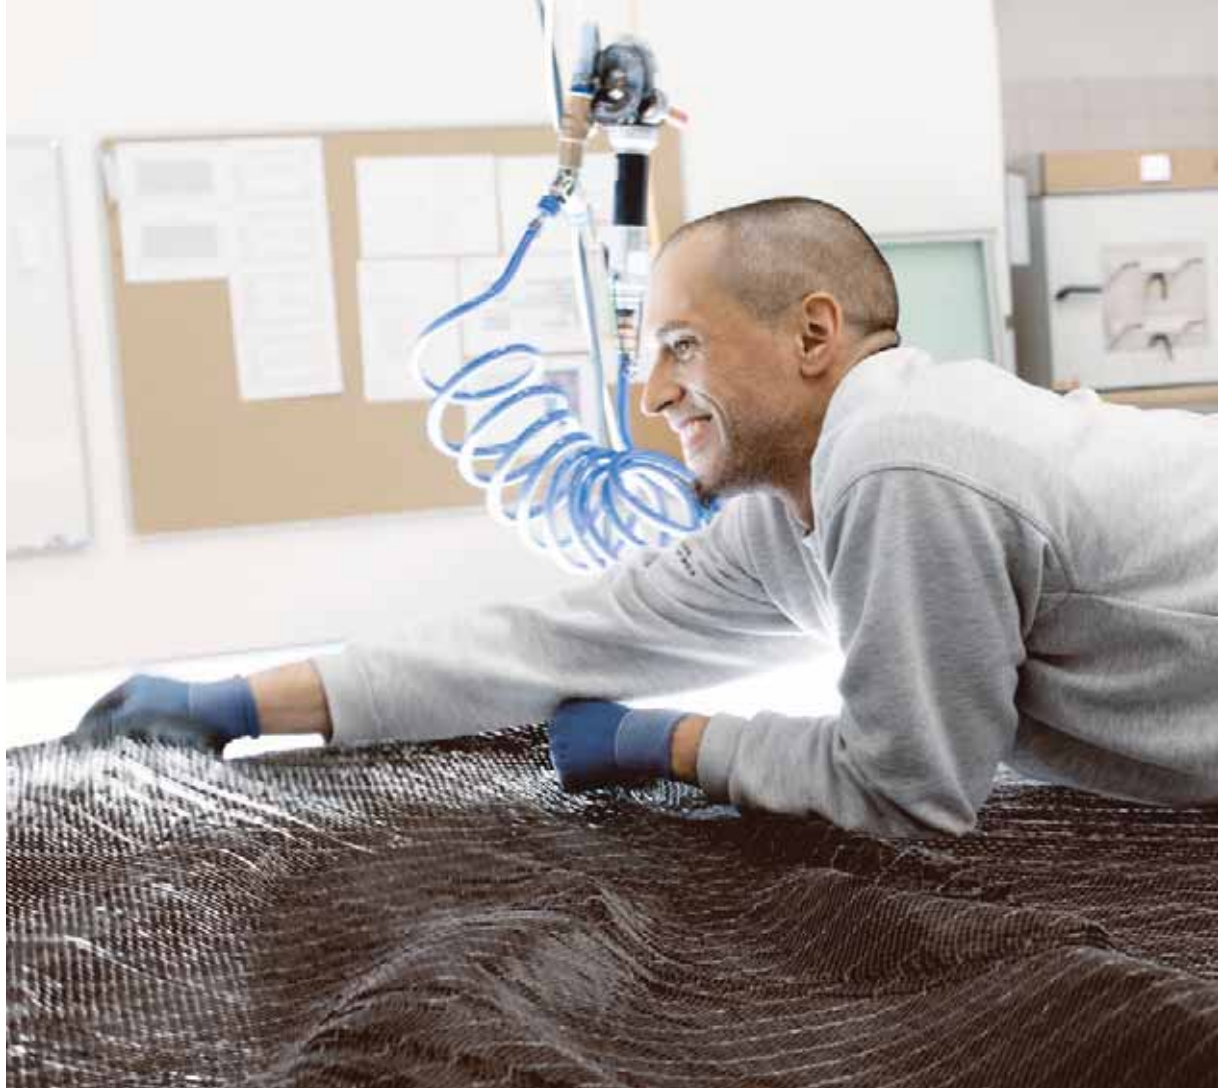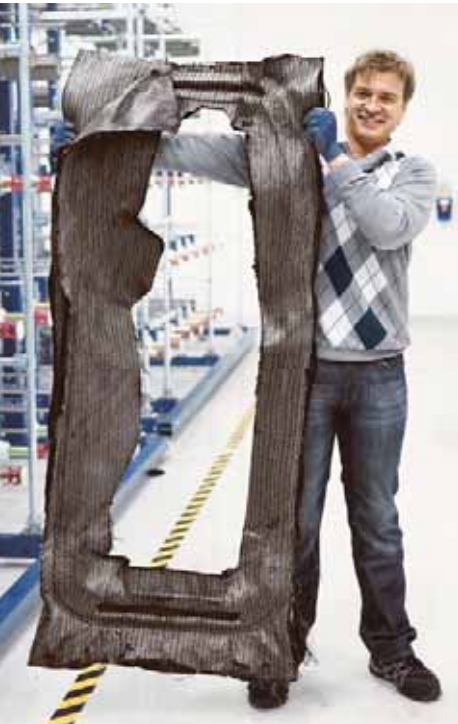

—3

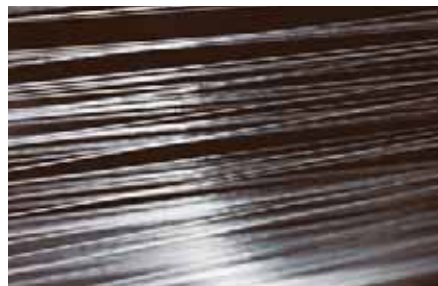

4—

- 1— Zerlegung von Faserkomponenten im Messlabor
- 2— Die Prüfung der Fasermatten ist noch Handarbeit.
- 3— Reste der Karbonfasergelege lassen sich erneut in die Produktionskette einfädeln.
- 4— Der Karosseriewerkstoff der Zukunft aus nächster Nähe

## » Die Karosserien von morgen fertigen wir auf hocheffizienten Wirkmaschinen.«

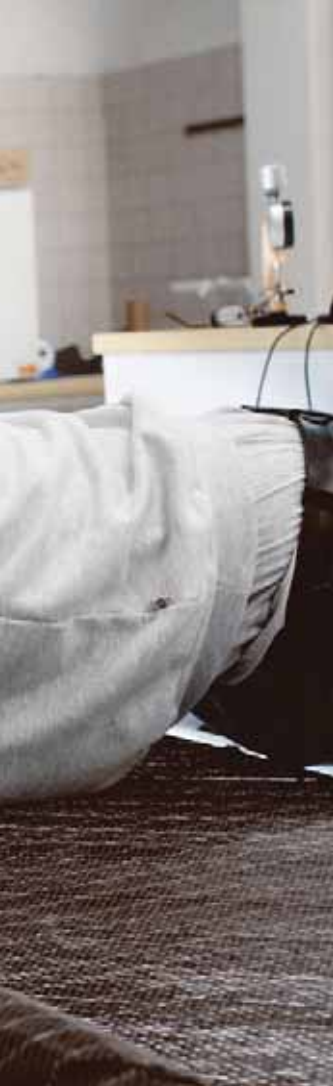

regenerativen Stroms bereit. Im neuen Karbonfaserwerk von SGL Automotive Carbon Fibers, einem Gemeinschaftsunternehmen der BMW Group und der SGL Group, werden Textil- zu Karbonfasern veredelt. Jeweils 50.000 dieser Einzelfilamente werden in Moses Lake zu Faserbündeln zusammengefasst, auf Spulen gewickelt und ins bayerische >>> **Wackersdorf** verschifft.

In der Oberpfalz, wo die BMW Group zusammen mit ihrem Joint-Venture-Partner SGL Group eine beispiellose Textilfabrik im Dienste des Karosseriebaus errichtet hat, werden die Faserbündel zu flächigen Textilien (sogenannten Gelegen) gewirkt und zu Rollen aufgewickelt. Indem man anschließend verschie-

dene Gelege mit unterschiedlicher Faserausrichtung zusammenfügt, lassen sich hochintegrierte, großflächige Karosseriebauteile mit ganz unterschiedlichen Festigkeiten und Wandstärken maßschneidern. **Hier zeigt sich bereits eine der überragenden Eigenschaften des Werkstoffs CFK, da ein Maßschneiden der Bauteileigenschaften mit Aluminium oder Stahlblech nur mit großem Aufwand zu realisieren wäre.** Die Karosserie des Megacity Vehicle wird daher im Vergleich zu Stahlkarosserien mit deutlich weniger Komponenten auskommen, was nicht nur die Komplexität ihrer Fertigung, sondern auch die Fahrzeugmasse spürbar verringert. Mit niedrigerem Gewicht wiederum erweitert sich gleichzeitig die potenzielle Reichweite eines Fahrzeugs mit Elektroantrieb – damit wird der Einsatz von CFK zu einer wichtigen Starthilfe für Elektromobilität.

Dass der Hightech-Werkstoff bisher dennoch nahezu ausschließlich in Kleinserien und beim Prototypenbau zum Einsatz kam, hat mehrere Gründe. Zum einen werden CFK-Bauteile für Rennsport und Raumfahrt bislang überwiegend in Handarbeit und mit

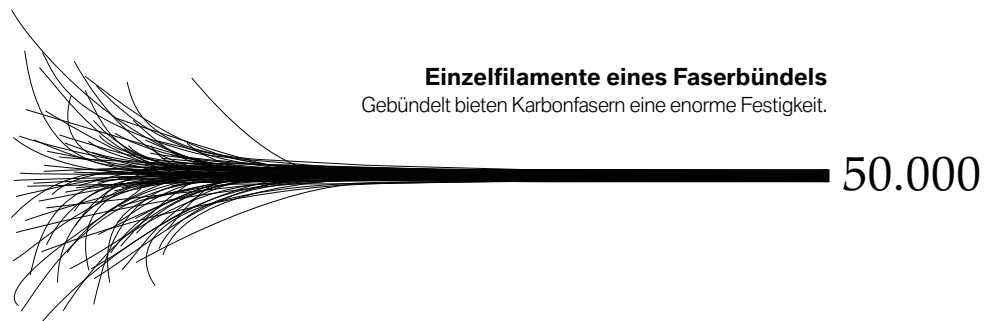

**Einzelfilamente eines Faserbündels**

Gebündelt bieten Karbonfasern eine enorme Festigkeit.

50.000

2—

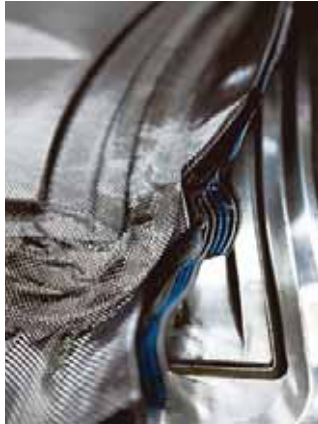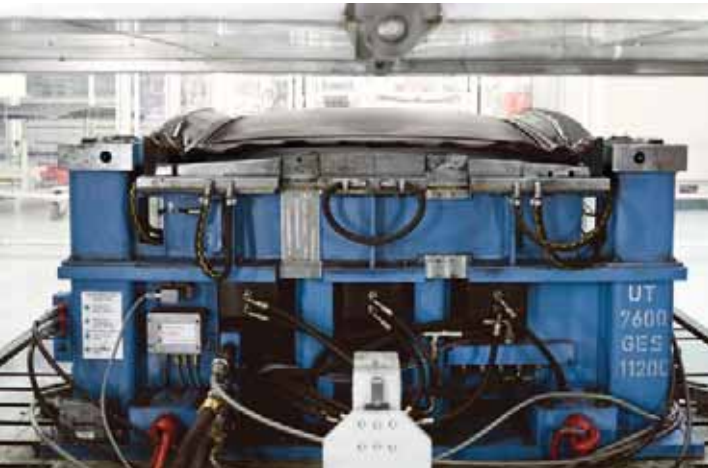

—3

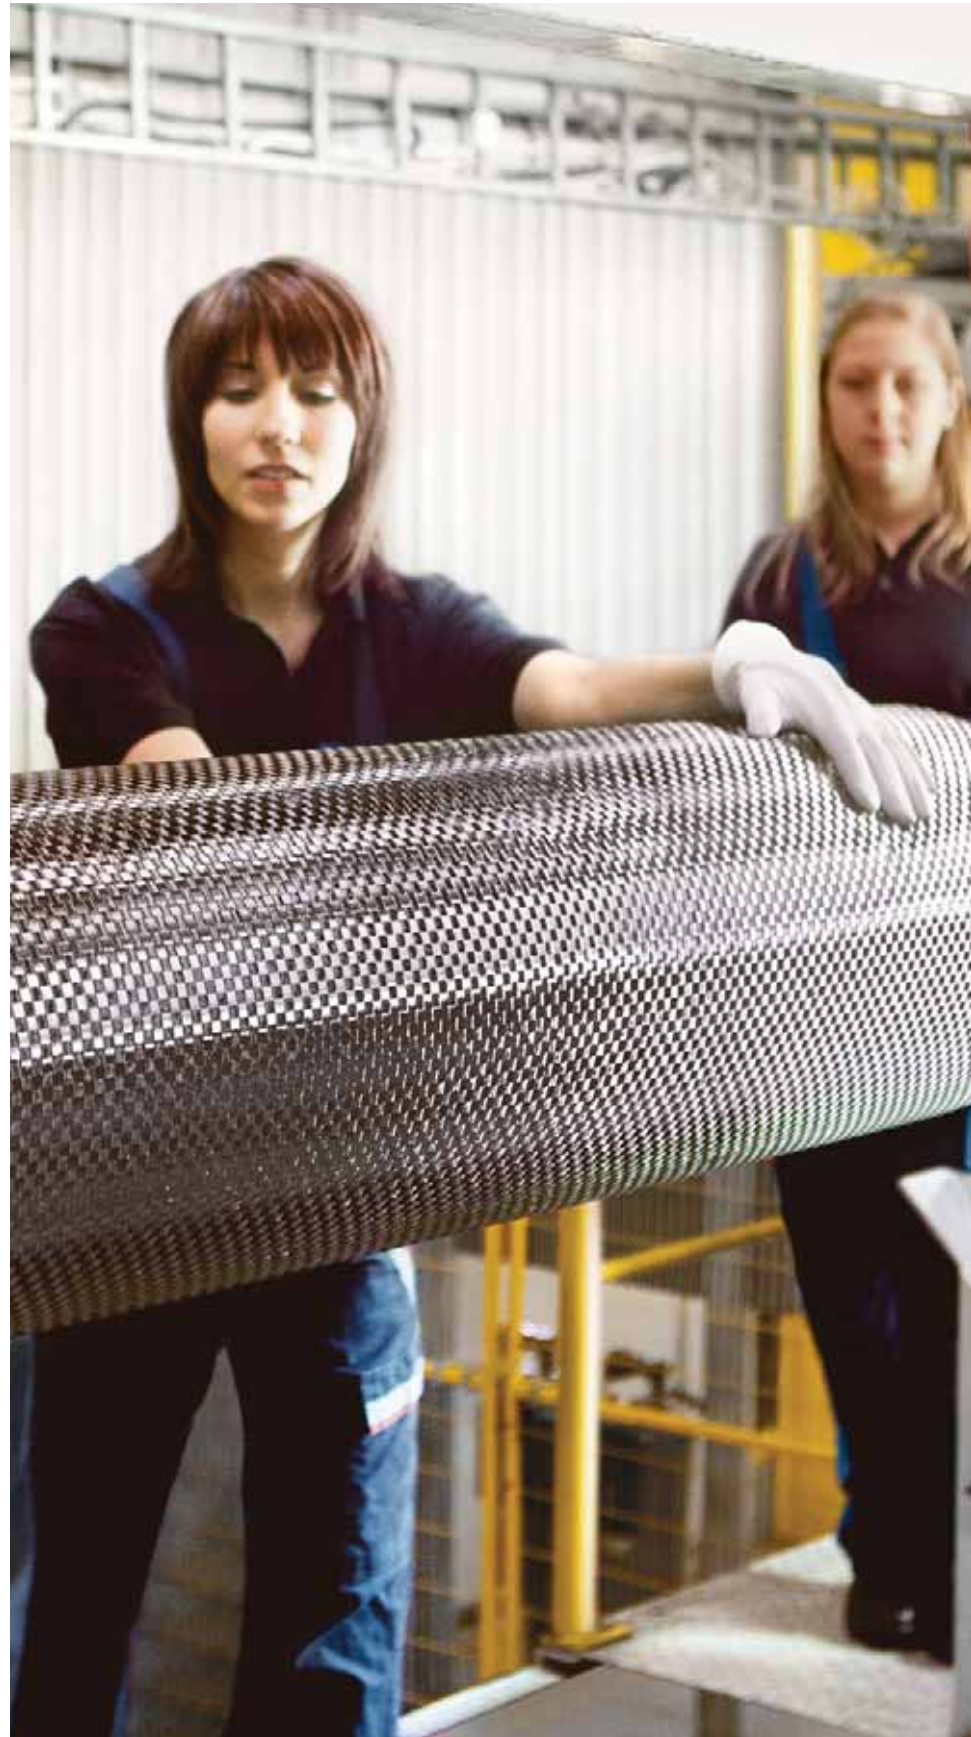

1—



## »CFK gilt als Werkstoff der Zukunft. Hier in Landshut verarbeiten wir ihn bereits seit Jahren.«

hohem Zeit- und Kostenaufwand gefertigt. Nach dem Tränken mit Harz lässt man sie dort in geschlossenen Öfen und bei Temperaturen von über 100 Grad Celsius über mehrere Stunden hinweg aushärten. Dieses aufwändige Verfahren ist der Hauptgrund dafür, dass der Materialpreis um ein Vielfaches über dem von Stahl liegt.

Anders ist es bei der BMW Group, die bereits seit 2003 CFK-Bauteile in industrialisierter Serienproduktion mit stetig steigenden Stückzahlen herstellt. Im Werk >>> **Landshut**, der nächsten Station im CFK-Produktionsprozess, werden heute schon die Dächer für die BMW Modelle M3 und M6 gefertigt. Dabei hat die

BMW Group in den letzten Jahren Prozesse, Anlagen, Materialien und Werkzeuge so weit entwickelt, dass nun eine wirtschaftliche und qualitativ hochwertige Großserienfertigung von CFK-Karosseriekomponenten möglich ist. Ein Beispiel dafür sind die eigens entwickelten Presswerkzeuge, die im Landshuter Werk zum Einsatz kommen: Anstelle des „Ausbackens“ bei über 100 Grad Celsius lassen sie die mit Harz getränkten Karbongelege binnen weniger Minuten und bei lediglich 100 Grad Celsius aushärten. Ein anderes Beispiel ist das weltweit einzigartige Recyclingkonzept der BMW Group, das die Wiederverwendung von CFK-Abfällen im Produktionsprozess erlaubt.

**„Wir steuern und optimieren heute von der Textilfaser bis zur fertigen Karosserie jeden einzelnen Fertigungsschritt“**, sagt Jochen Töpker, CFK-Experte bei der BMW Group. „Übertragen auf den klassischen Fahrzeugbau wäre das etwa so, als würde sich ein Automobilhersteller neben dem Fahrzeugbau auch noch in der Stahlgewinnung und -wiederverwertung engagieren. In der Großserienproduktion von CFK sichern wir uns damit aber einen einzigartigen Vorsprung.“

- 1 — Rollenwechsel in der CFK-Fertigung
- 2 — Karbonfasergelege werden zu hochintegrierten Karosseriebauteilen mit ganz unterschiedlichen Festigkeiten und Wandstärken kombiniert.
- 3 — In neuartigen Presswerkzeugen härten die mit Harz getränkten Karbongelege bei 100 Grad Celsius binnen weniger Minuten aus.

## »Kein Karosseriewerkstoff ist derart leicht und gleichzeitig stabil.«

Tatsächlich steckt in dieser vollständigen Durchdringung der Wertschöpfungskette der Schlüssel zur ökonomischen und ökologischen CFK-Großserienfertigung. Sie erklärt, warum die BMW Group heute das Potenzial eines Werkstoffs ausschöpfen kann, der vielen als zwar einzigartig und überlegen, aber gleichzeitig als zu aufwändig und zu teuer für den serienmäßigen Einsatz gilt.

CFK ist nicht nur resistent gegen Temperaturschwankungen, Säuren und Korrosion und daher deutlich langlebiger als Metall, es ist auch 30 Prozent leichter als Aluminium beziehungsweise 50 Prozent leichter als Stahl. „CFK ist das leichteste Material, das sich ohne Sicherheitseinbußen im Automobilbau einsetzen lässt“, sagt Nils Borchers vom MCV-Entwicklungsteam. Crashtests belegen, dass das Megacity Vehicle eine Kollision mindestens genauso sicher übersteht wie Fahrzeuge mit herkömmlicher Stahlkarosserie. Dafür sorgt vor allem die LifeDrive-Architektur, die revolutionäre Kombination einer Fahrgastzelle aus CFK mit einem Chassis aus Aluminium. Während der Drive-Modul genannte Aluminiumrahmen im Falle eines Crashes die Kollisionsenergie aufnimmt, schützt das hochfeste, kohlenstofffaserverstärkte Life-Modul die Passagiere eines Megacity Vehicle auf denkbar umfassendste Weise.

Weil im crashsicheren Drive-Modul alle Antriebseinheiten konzentriert sind, kann gleichzeitig der Kardantunnel entfallen, durch den klassischerweise die Kraft des Motors an die Hinterräder geleitet wird. Damit bietet das Megacity Vehicle seinen Passagieren deutlich mehr Platz – und den Fahrzeugarchitekten der BMW Group neue Freiheiten bei der Innenraumgestaltung. Und nicht zuletzt wirkt sich die geniale Zweikomponentenbauweise auch auf die Produktion des Fahrzeugs aus. Im Werk >>> **Leipzig**, wo das Megacity Vehicle montiert werden wird, kann aufgrund der Rahmenbauweise aufwändige Fördertechnik entfallen. Damit ist der Bau eines Megacity Vehicle investitionsärmer, sozial verträglicher und flexibler als herkömmliche Produktionsprozesse. „Wir können die MCV-Fertigung mit relativ geringem Aufwand und binnen kurzer Zeit aufsetzen“, sagt Martin Arlt vom Entwicklerteam. Dabei wird die Produktion im Vergleich zum bisherigen Werkedurchschnitt der BMW Group mit 70 Prozent weniger Wasser und 50 Prozent weniger Energie auskommen. **Zudem soll der Energiebedarf komplett aus regenerativen Quellen gedeckt werden.**

### Karosseriegewichte im Vergleich

in Prozent

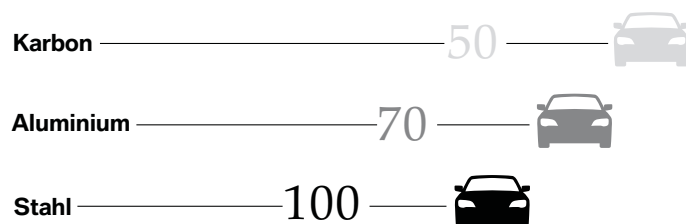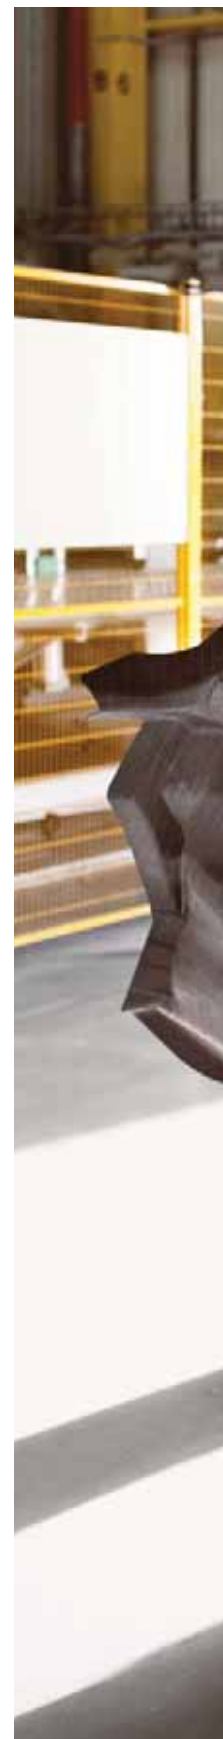

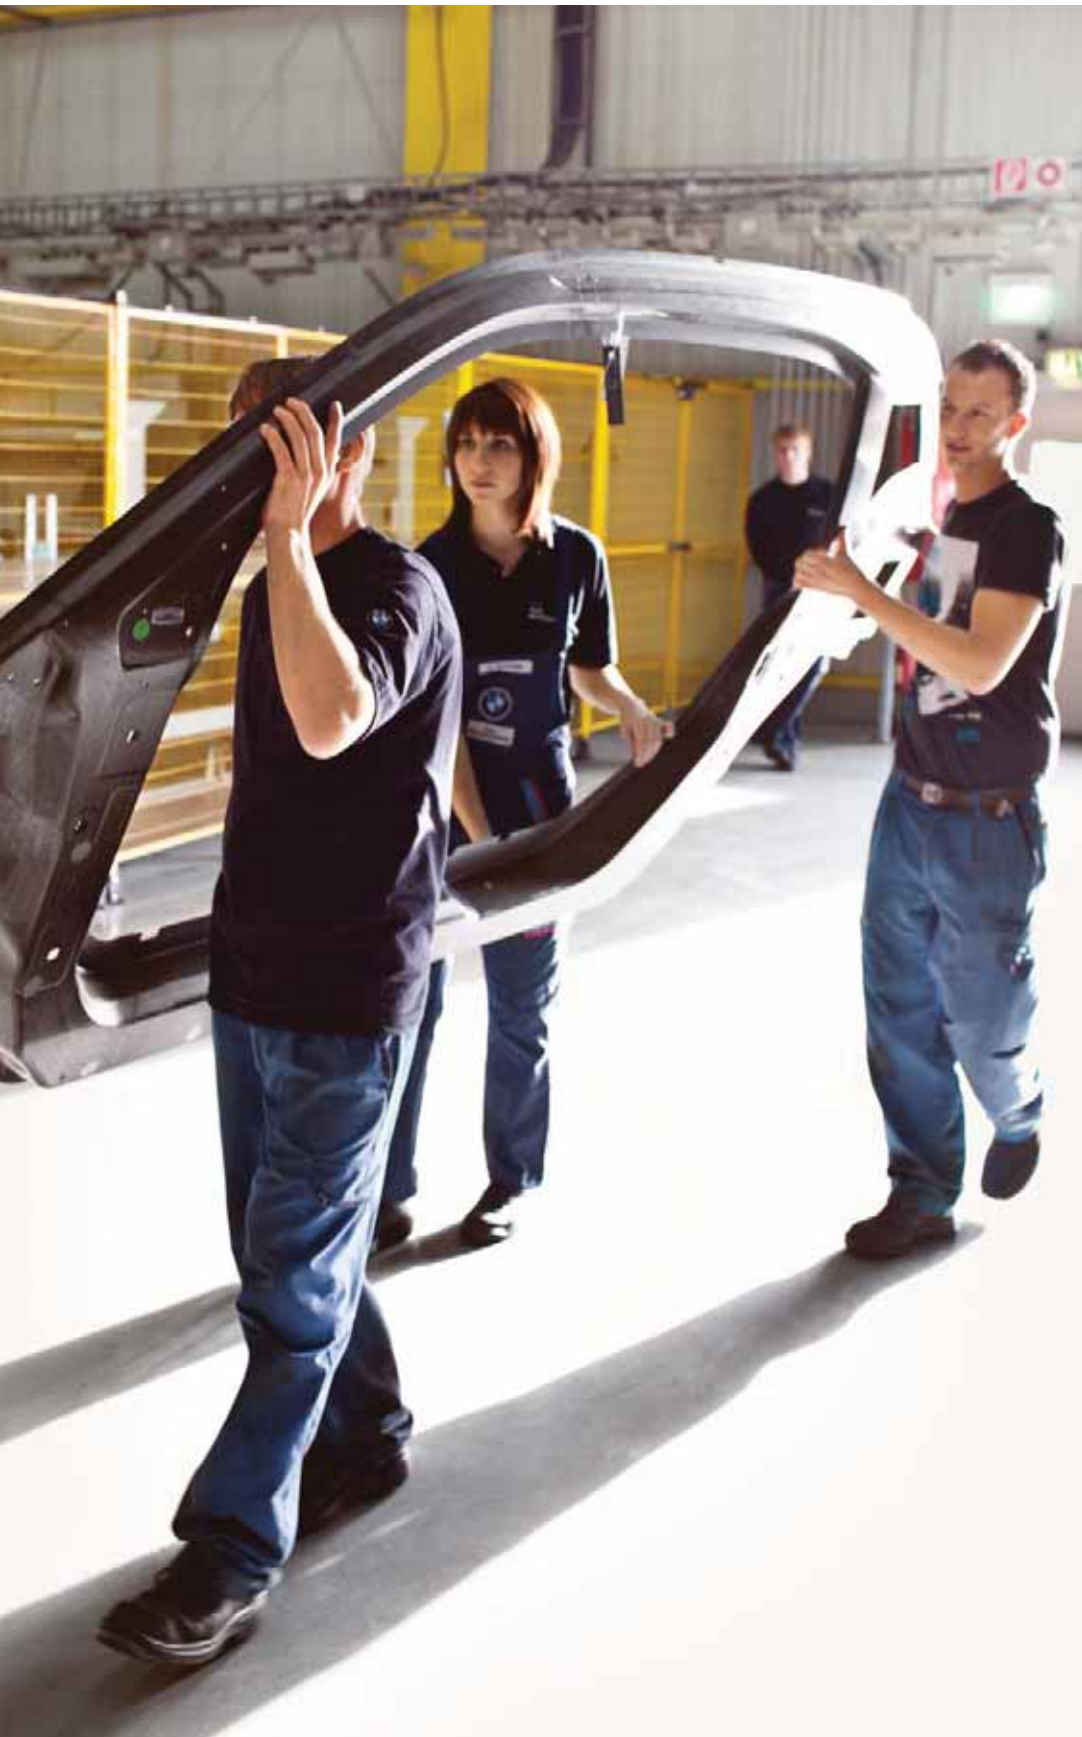

-1

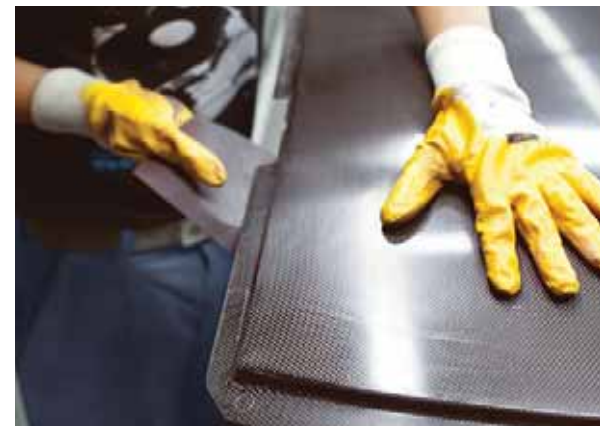

2-

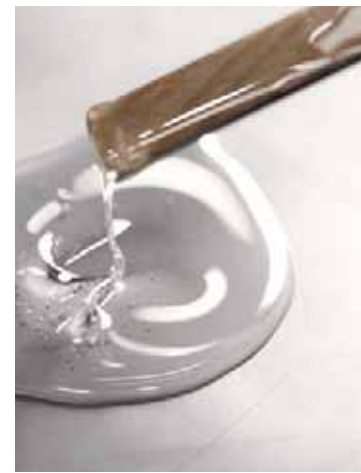

-3

- 1— Für drei Träger eigentlich viel zu leicht: Karosserie-Seitenteil aus Karbon.
- 2— Eine der wenigen Handarbeiten: Finishing fertiger CFK-Komponenten
- 3— Gibt Karbonfasern die nötige Härte: Kunstharz

## » Die Zukunft des Fahrzeugbaus.«

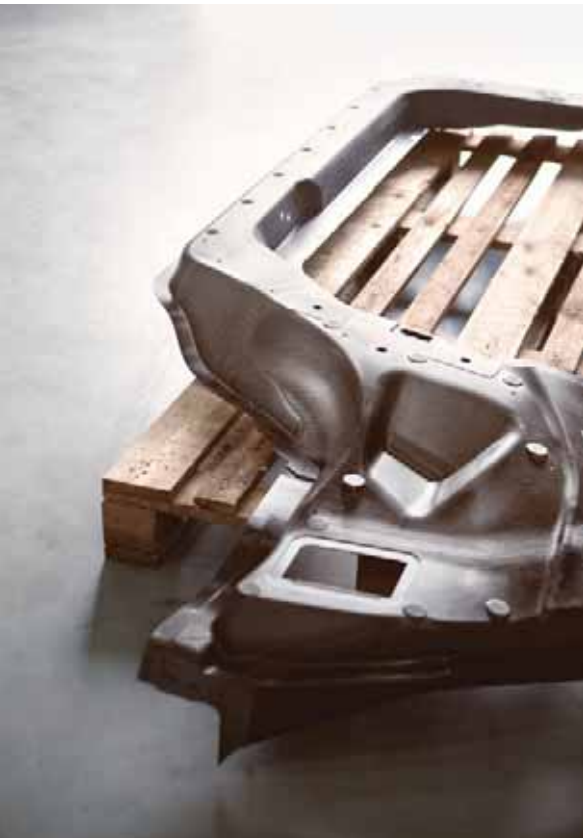

Der Einsatz der mikroskopisch feinen CFK-Faser steht für weit mehr als einen einfachen Materialersatz. Sie erlaubt der BMW Group vielmehr vollkommen neue Herangehensweisen, neuartige Konstruktionskonzepte und eine neue Art der Automobilproduktion. Einiges davon wird sich in den kommenden Jahren und Jahrzehnten nicht nur im Megacity Vehicle, sondern auch in anderen Modellen der BMW Group wiederfinden.

Mit dem serienmäßigen Einsatz von CFK beginnt eine ganz neue Ära in der Fahrzeugentwicklung und -produktion. Für die Automobilentwickler bedeutet das die denkbar spannendste Herausforderung. Für die BMW Group wiederum heißt das vor allem eines: faszinierende Perspektiven.

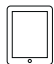

WACHSTUM

# ERFOLGSMODELL

>>

PROFITABILITÄT

KUNDEN

ZUKUNFT

Vom ersten BMW 5er zur weltweit  
überzeugenden Modellfamilie

» Am Anfang steht immer eine Idee. Aus der Idee wächst ein Konzept, aus dem Konzept ein völlig neuartiges Automobil, aus dem Automobil eine Klasse für sich: Immer wieder hat die BMW Group neue Fahrzeugkonzepte wie den BMW 5er zu Modellfamilien mit einer Vielzahl populärer Varianten diversifiziert. Jetzt ist die sechste Generation des Erfolgsmodells auf der Straße – und setzt erneut weltweit Maßstäbe.

# ERFOLGSGESCHICHTE BMW 5er

---

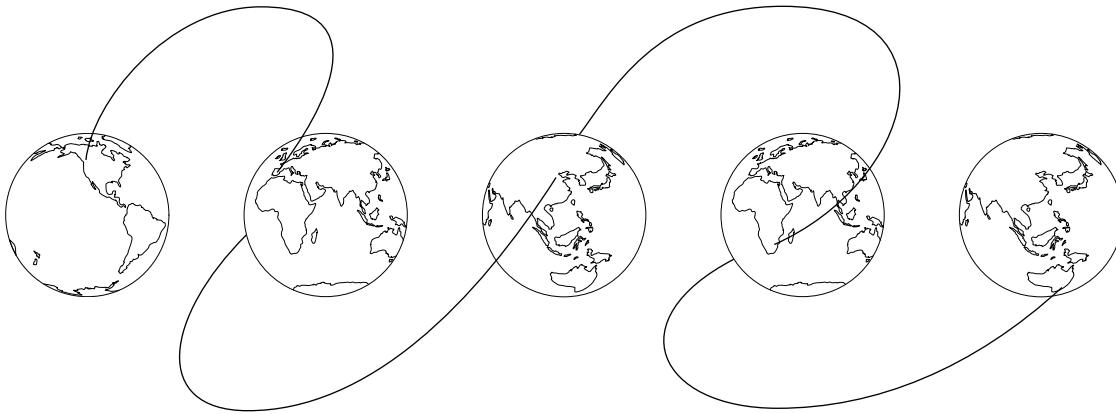

Seit nahezu 40 Jahren steht die Zahl 5 für unverwechselbare Fahrfreude in der oberen Mittelklasse. In diesen vier Jahrzehnten hat die 5er Reihe fünf Kontinente mit über 5,5 Millionen verkauften Fahrzeugen erobert.

>>

1970

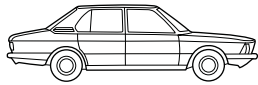

Limousine

1980

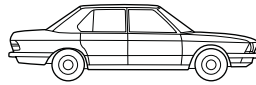

Limousine

1990

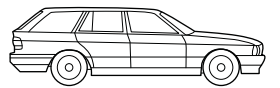

Touring

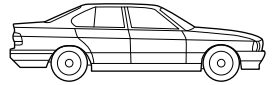

Limousine

**1972 – 1981**  
1. Generation

**1981 – 1988**  
2. Generation

**1987 – 1996**  
3. Generation



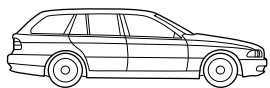

**Touring**

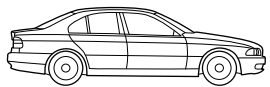

**Limousine**

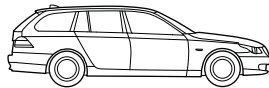

**Touring**

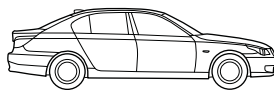

**Limousine Langversion, China**

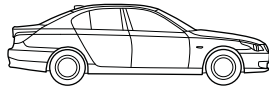

**Limousine**

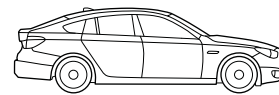

**Gran Turismo**

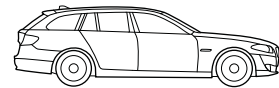

**Touring**

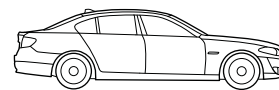

**Limousine Langversion, China**

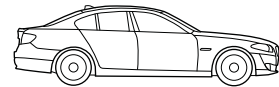

**Limousine**

2000

2010

**Seit 2009**  
6. Generation

**2003 – 2010**  
5. Generation

**1995 – 2004**  
4. Generation

## **Diversifikation**

Wie ein Ausnahmefahrzeug zur populären Modellfamilie wuchs

### **Der Anfang einer weltumspannenden Erfolgsstory.**

Mit der Vorstellung der Modelle BMW 520 und BMW 520i auf der Internationalen Automobil-Ausstellung (IAA) des Jahres 1972 begann eine neue Ära in der oberen Mittelklasse. Die Nachfolger der sogenannten „Neuen Klasse“ von BMW avancierten binnen kurzer Zeit zu Synonymen für die ausgewogene Balance zwischen Sportlichkeit und Eleganz in ihrem Segment. Schon ein Jahr später wurde die Modellpalette um den BMW 525 erweitert, einen kräftigen Sechszylinder, der dem Kundenwunsch nach zusätzlicher Leistung Rechnung trug. Mit nahezu 700.000 verkauften Fahrzeugen war bereits die erste Generation des BMW 5er ein spektakulärer Erfolg, der als Inbegriff für Ästhetik und Fahrfreude die obere Mittelklasse prägte.

---

## **Innovation**

Wie eine Fahrzeugserie mit immer neuen Ideen Kunden auf allen Kontinenten gewinnt

**Die Geschichte geht weiter.** Die zweite Generation der 5er Familie umfasste mit dem BMW M5 den Inbegriff einer dynamischen Sportlimousine sowie das erste 5er Modell mit Dieselantrieb. Die dritte Generation brachte unter anderem ein gänzlich neues Design, die ersten Achtzylinder-Modelle sowie den ersten BMW 5er Touring. Der BMW 5er der vierten Generation wiederum war als erstes Großserienautomobil mit einem Leichtmetallfahrwerk ausgestattet. Während die Modellpalette stetig erweitert und neue Märkte erschlossen wurden, übertraf jede neue Generation des BMW 5er zuverlässig die Erfolge ihrer Vorgängergeneration.

**Amerika** S. 30  
Ron Yaworsky

**Europa** S. 32  
Dr. Jesus Rodriguez

**Asien** S. 34  
He Xialong

**5 von über 5,5 Millionen begeisterten Kunden. Auf 5 Kontinenten.**

**Start** >>

**Afrika** S. 36  
Abdul Tayob

**Australien** S. 38  
Martin Carolan

**Das nächste Kapitel.** Die fünfte Generation der BMW 5er Reihe beeindruckte erneut mit progressivem Design und innovativer Technik. Serienmäßig wurden ab 2007 sämtliche Varianten mit Efficient Dynamics Maßnahmen wie Bremsenergieerückgewinnung und aktiver Luftklappensteuerung ausgestattet, die eine unübertroffen günstige Relation zwischen Fahrleistung und Kraftstoffverbrauch ermöglichen.

- A Totempfähle im Stanley Park, Vancouver, Kanada
- B BMW 5er und Bewunderer auf dem Fähranleger Granville Island
- C Ron Yaworsky in seinem Haus – von ihm selbst entworfen

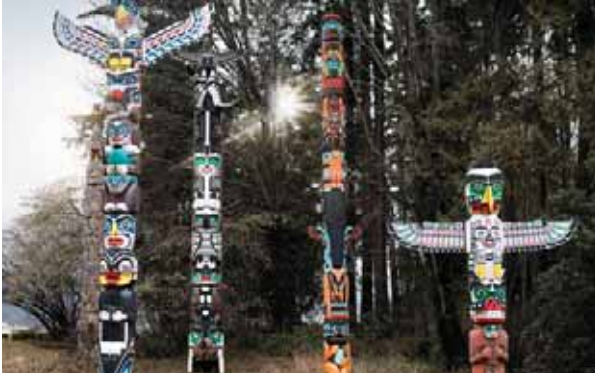

A

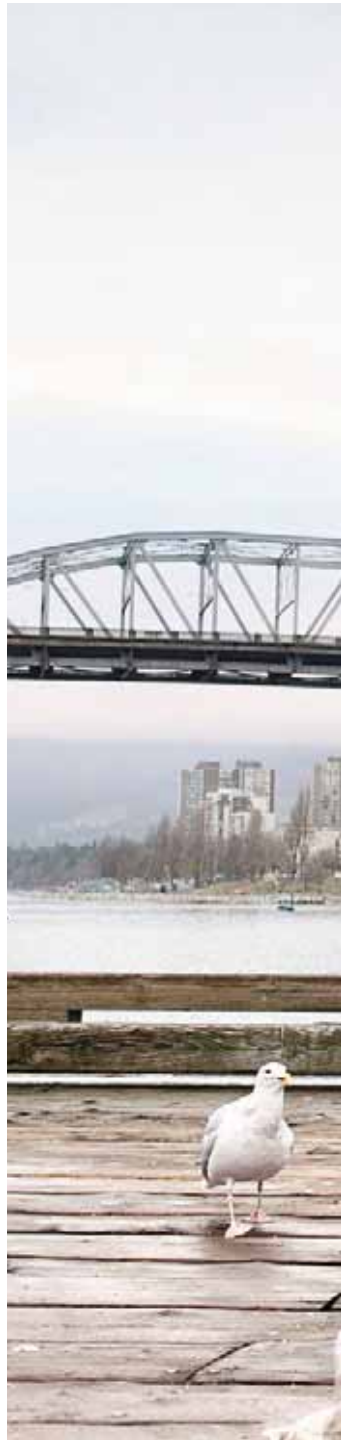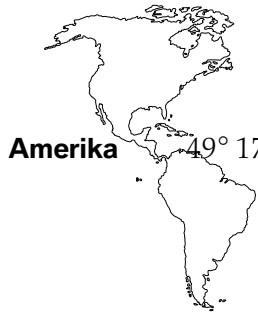

Amerika

49° 17' N, 123° 7' W

&gt;&gt;

Vancouver

BMW 5er Limousine

&gt;&gt;

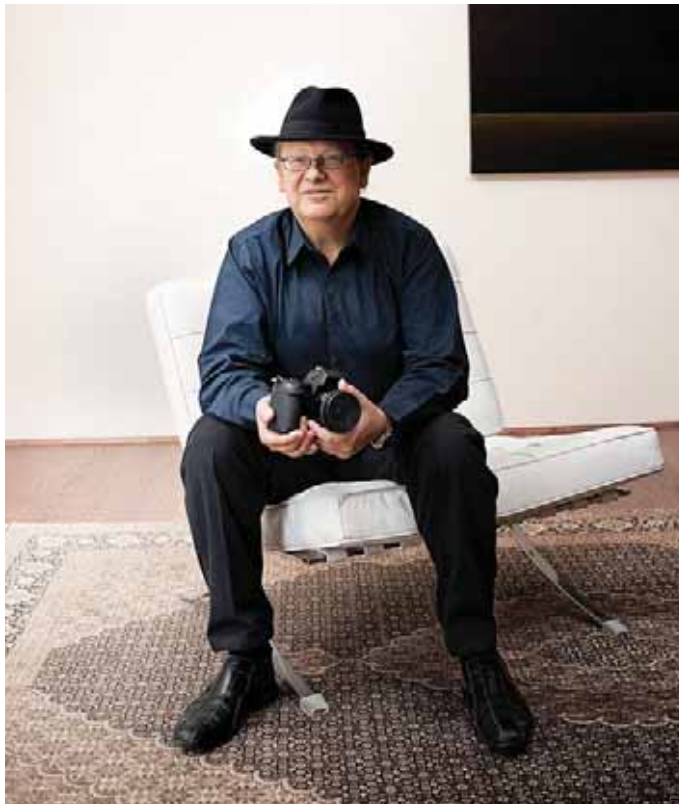

C

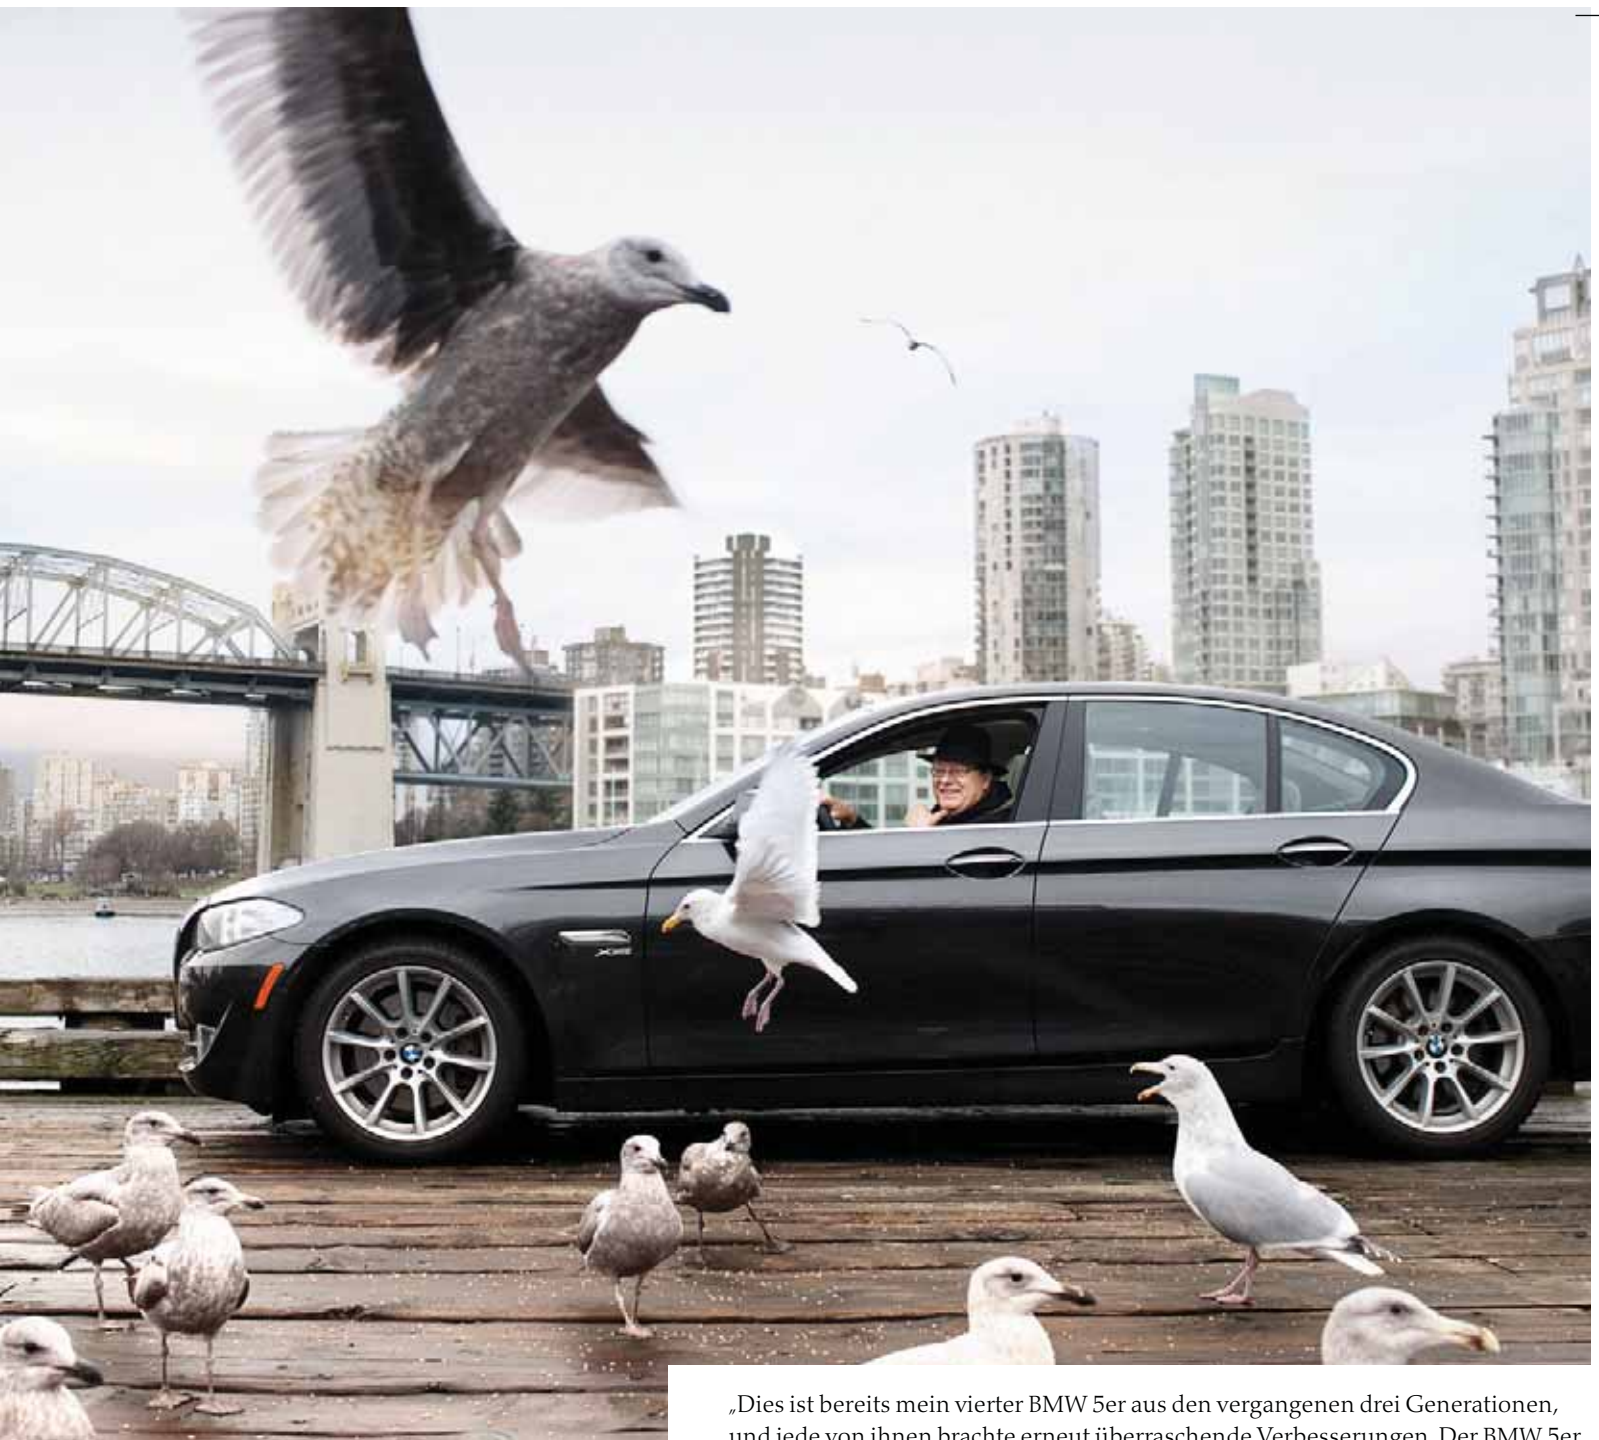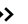

„Dies ist bereits mein vierter BMW 5er aus den vergangenen drei Generationen, und jede von ihnen brachte erneut überraschende Verbesserungen. Der BMW 5er offeriert eine perfekte Kombination aus Luxus, adäquater Größe, exzellenter Performance, vernünftigen Verbrauchswerten und der beruhigenden Allwettertauglichkeit eines xDrive!“ Ron Yaworsky, Vancouver

„Generation für Generation immer wieder neu.“

## „Reine Dynamik. Unerreicht.“

„Jeden Arbeitstag 60 Kilometer auf dem Weg zur und von der Arbeit. An den Wochenenden raus ins Umland. Einmal im Monat zur Familie nach Asturien, was lange Fahrten über kurvige Bergstraßen bedeutet: Dafür braucht es ein Fahrzeug, das komfortabel, dynamisch und effizient in einem ist. Letztlich kam dafür nur eines infrage.“ Dr. Jesus Rodriguez, Madrid

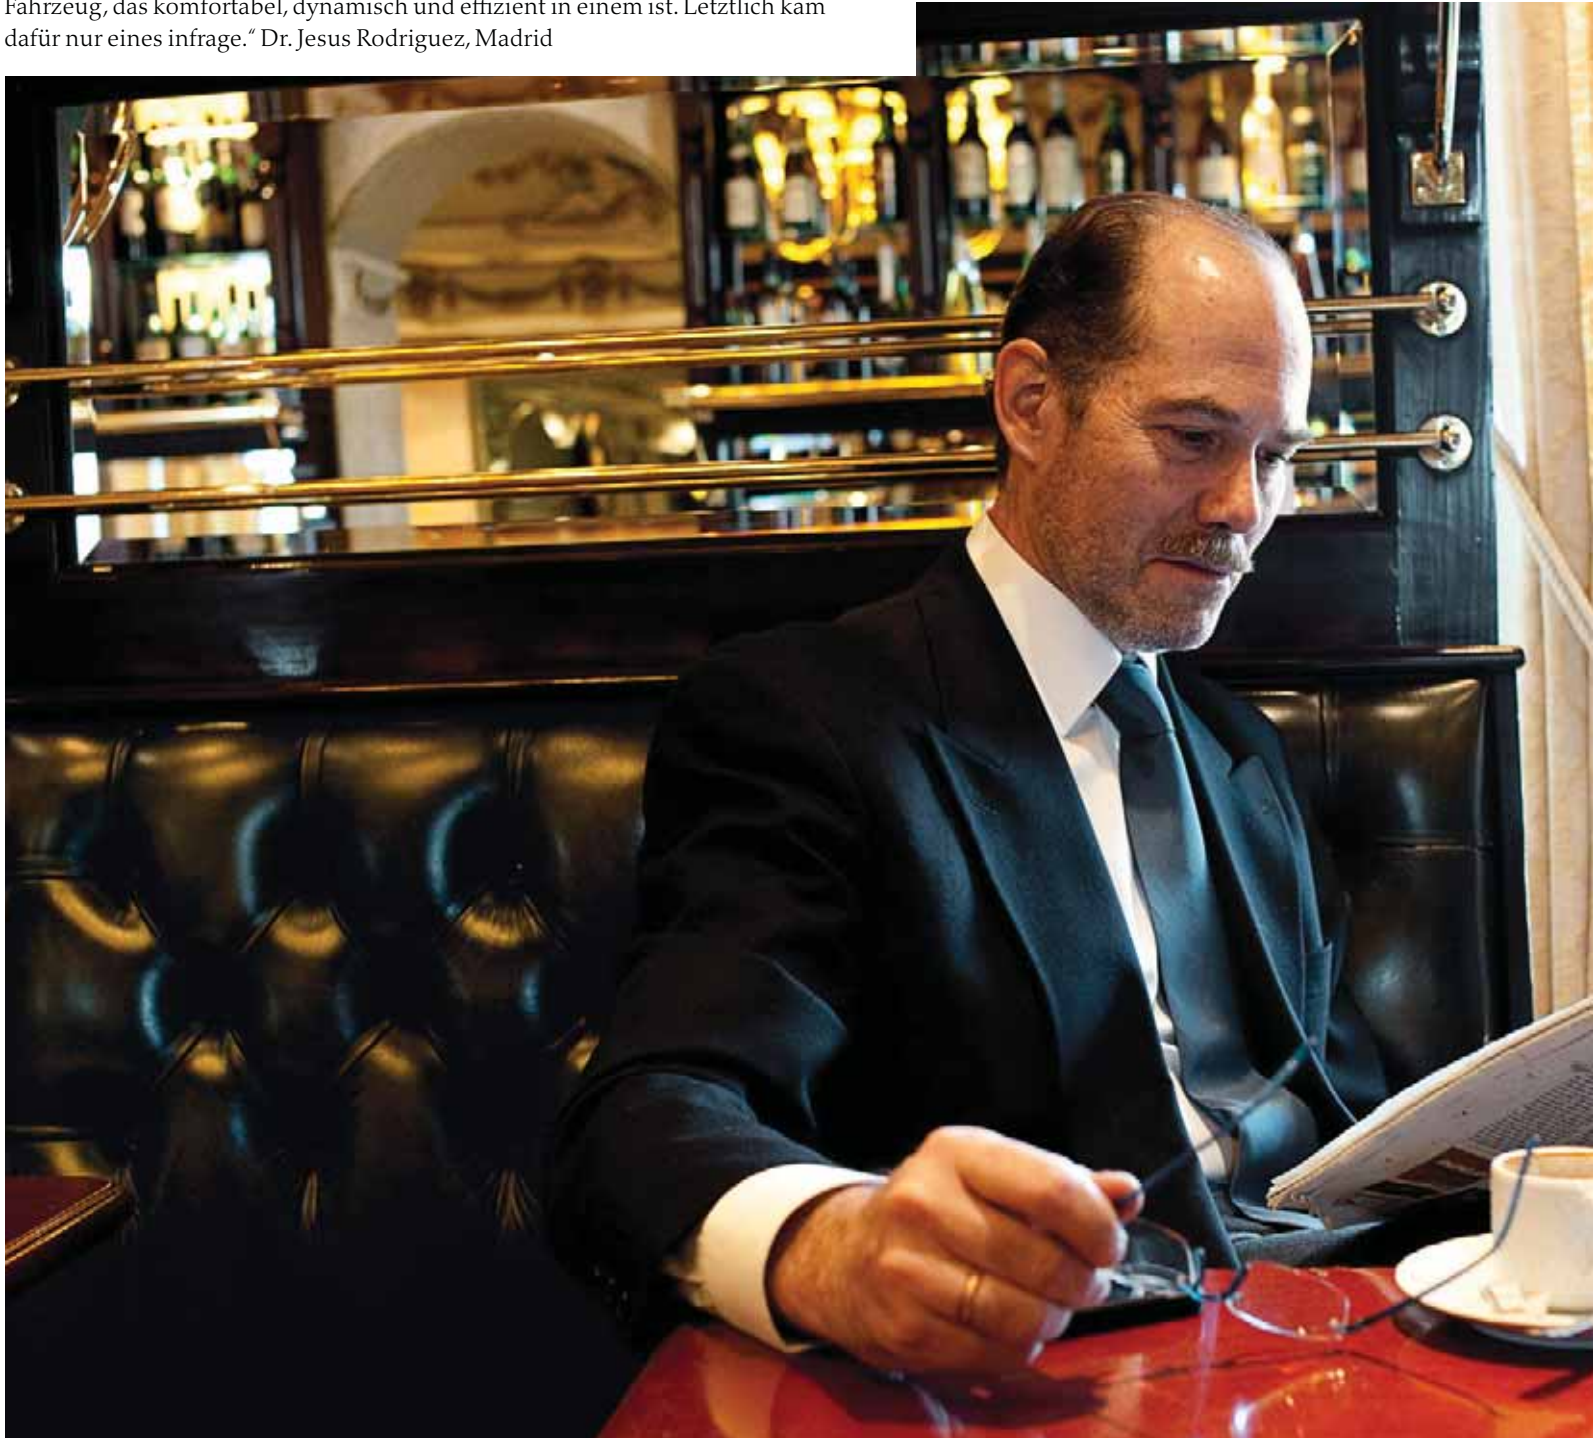

&gt;&gt;

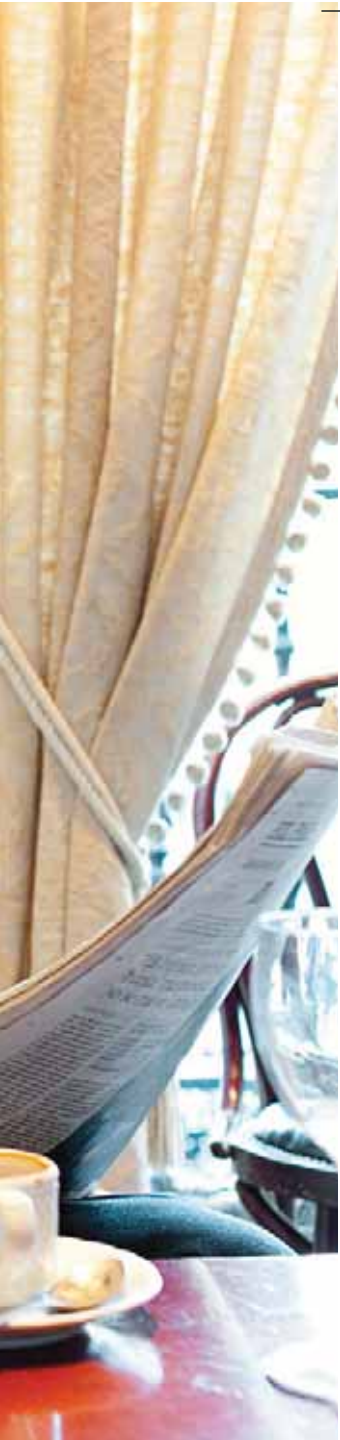

—A

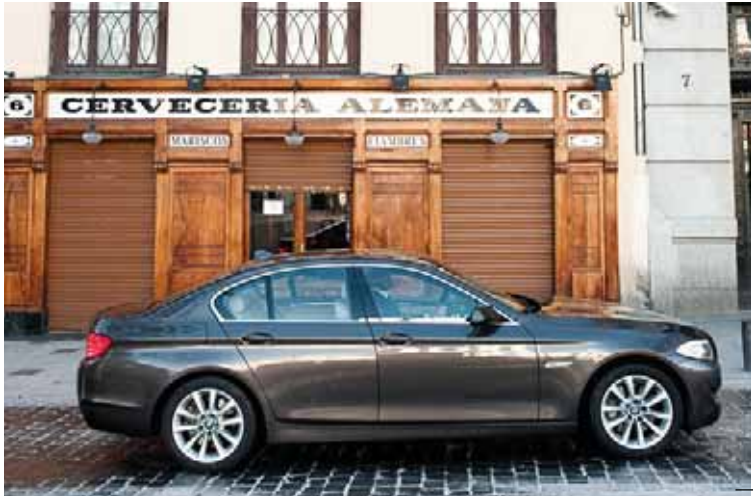

—B

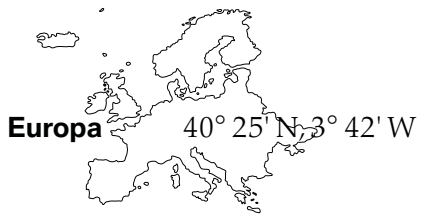

Europa

40° 25' N, 3° 42' W

Madrid

>>

BMW 5er Limousine

>>

- A Dr. Jesus Rodriguez im „Café de Oriente“ unweit der Madrider Oper
- B BMW 5er auf der Plaza Santa Ana
- C Traditionelle Werbetafel einer Madrider Bar

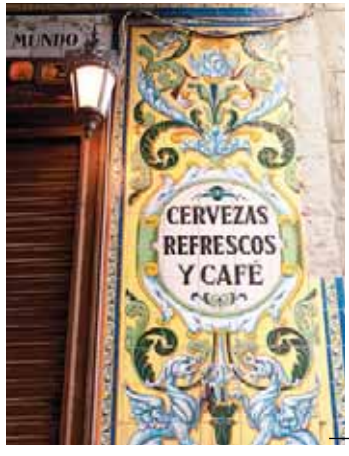

—C

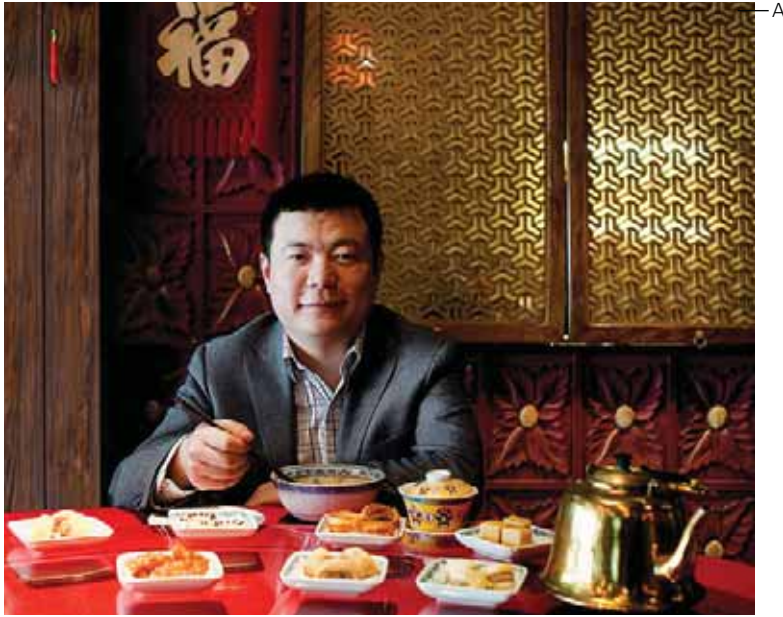

—A

BMW 5er Limousine Langversion, China >> 39° 56' N, 116° 23' O

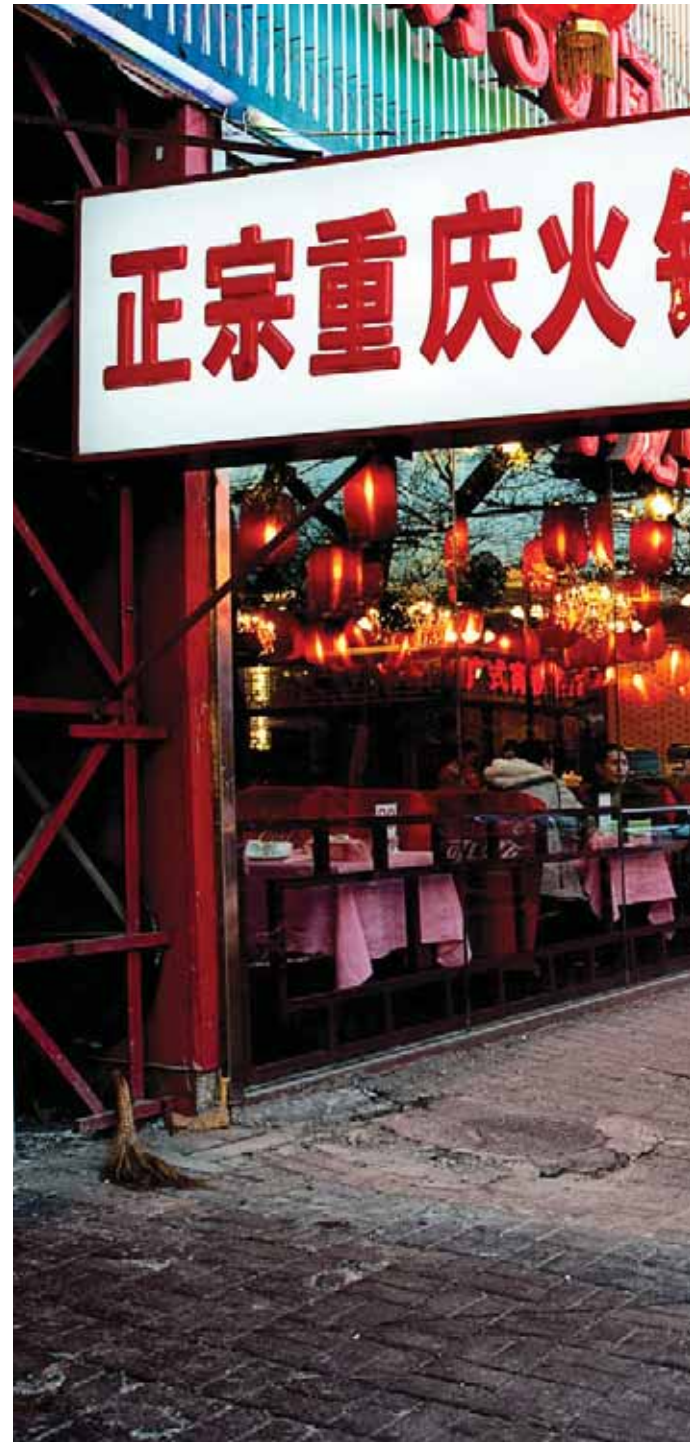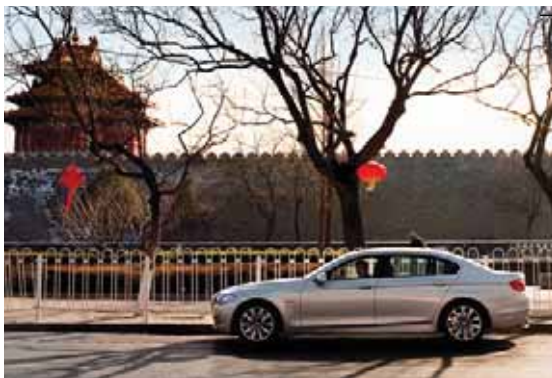

—C

- A Begeisterter BMW 5er Fahrer: He Xialong
- B Erleuchtung im Gui-Jie-Distrikt unweit der Verbotenen Stadt
- C BMW 5er Langversion und Neujahrsdekoration vor der Verbotenen Stadt



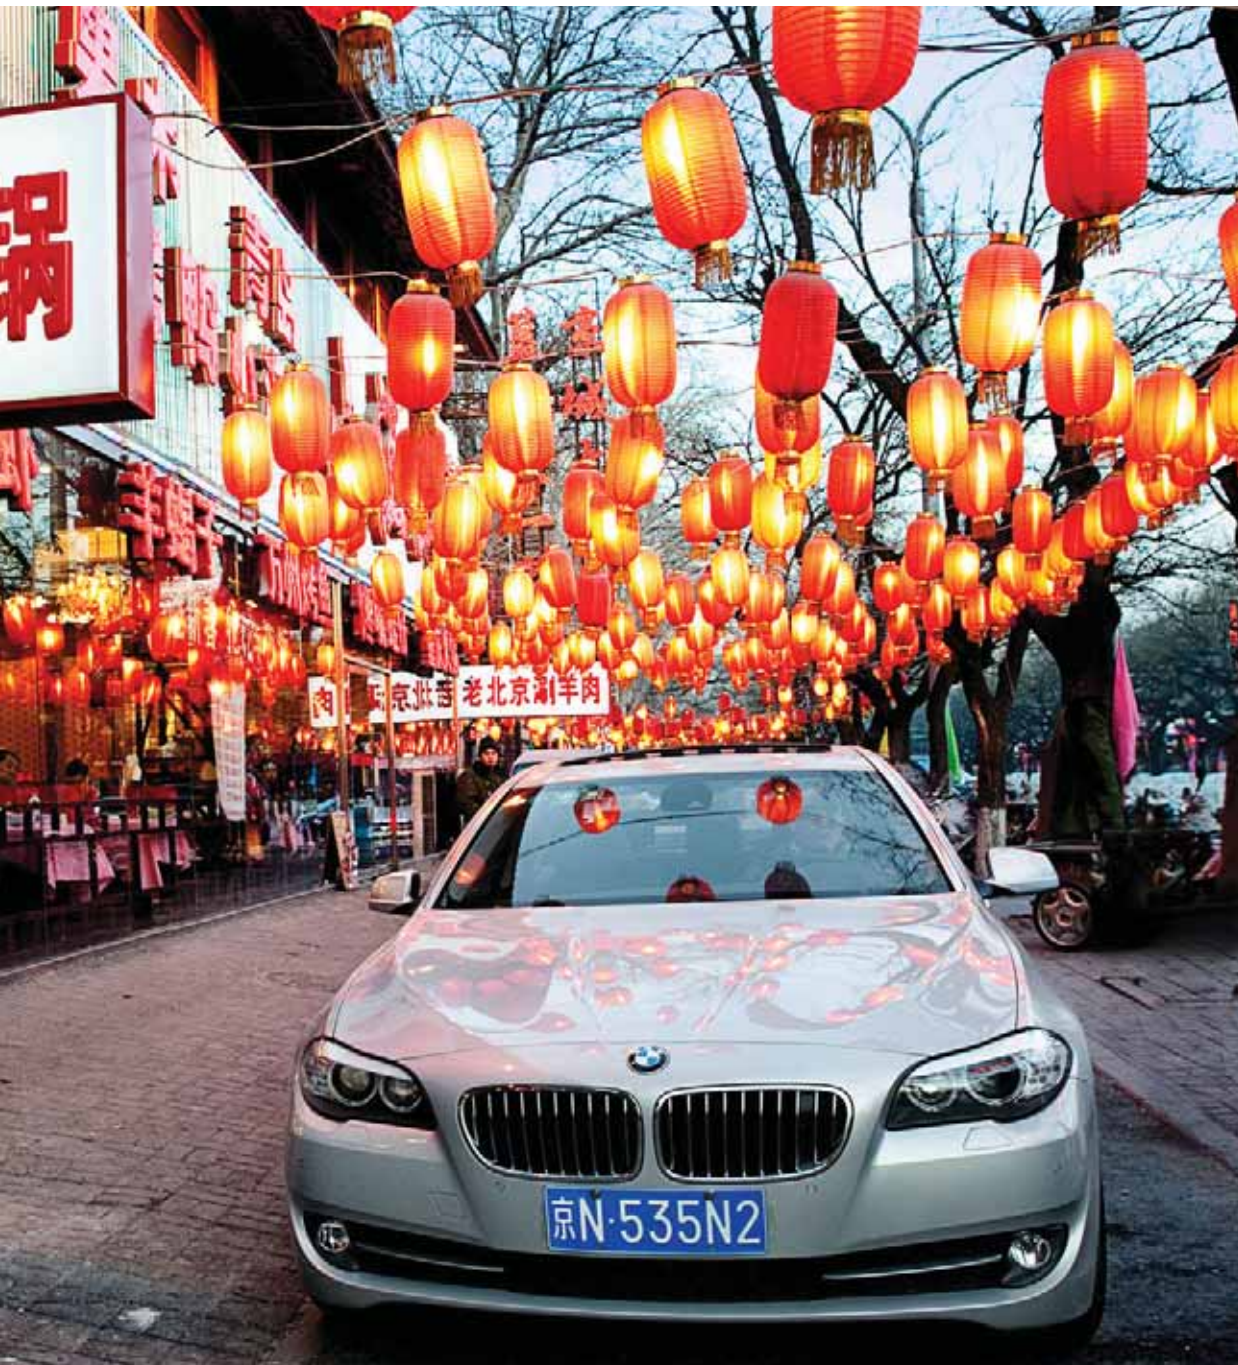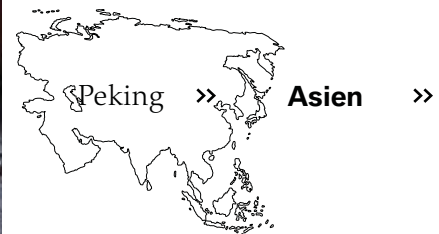

„Was erwartet ein Geschäftsmann von einem Premiumfahrzeug? Neben Exklusivität, Komfort und ausgezeichneter Performance ist es vor allem der Platz, den das Fahrzeug bietet. Einen Platz also, wie ihn die BMW 5er Langversion äußerst komfortabel einräumt. Was übrigens nicht nur ich, sondern auch meine Geschäftsfreunde enorm zu schätzen wissen.“ He Xialong, Peking

„Business in Bewegung.“

## „Kühne Performance und entspanntes Reisen.“

„Der BMW 5er steht für die perfekte Symbiose aus agiler Leistung und bequemem Reisen. Mit ihm genieße ich sowohl die Ausflüge ins Hüggelland KwaZulu-Natal als auch das coole Reisen in einer professionellen Business-Limousine.“ Abdul Tayob, Pietermaritzburg

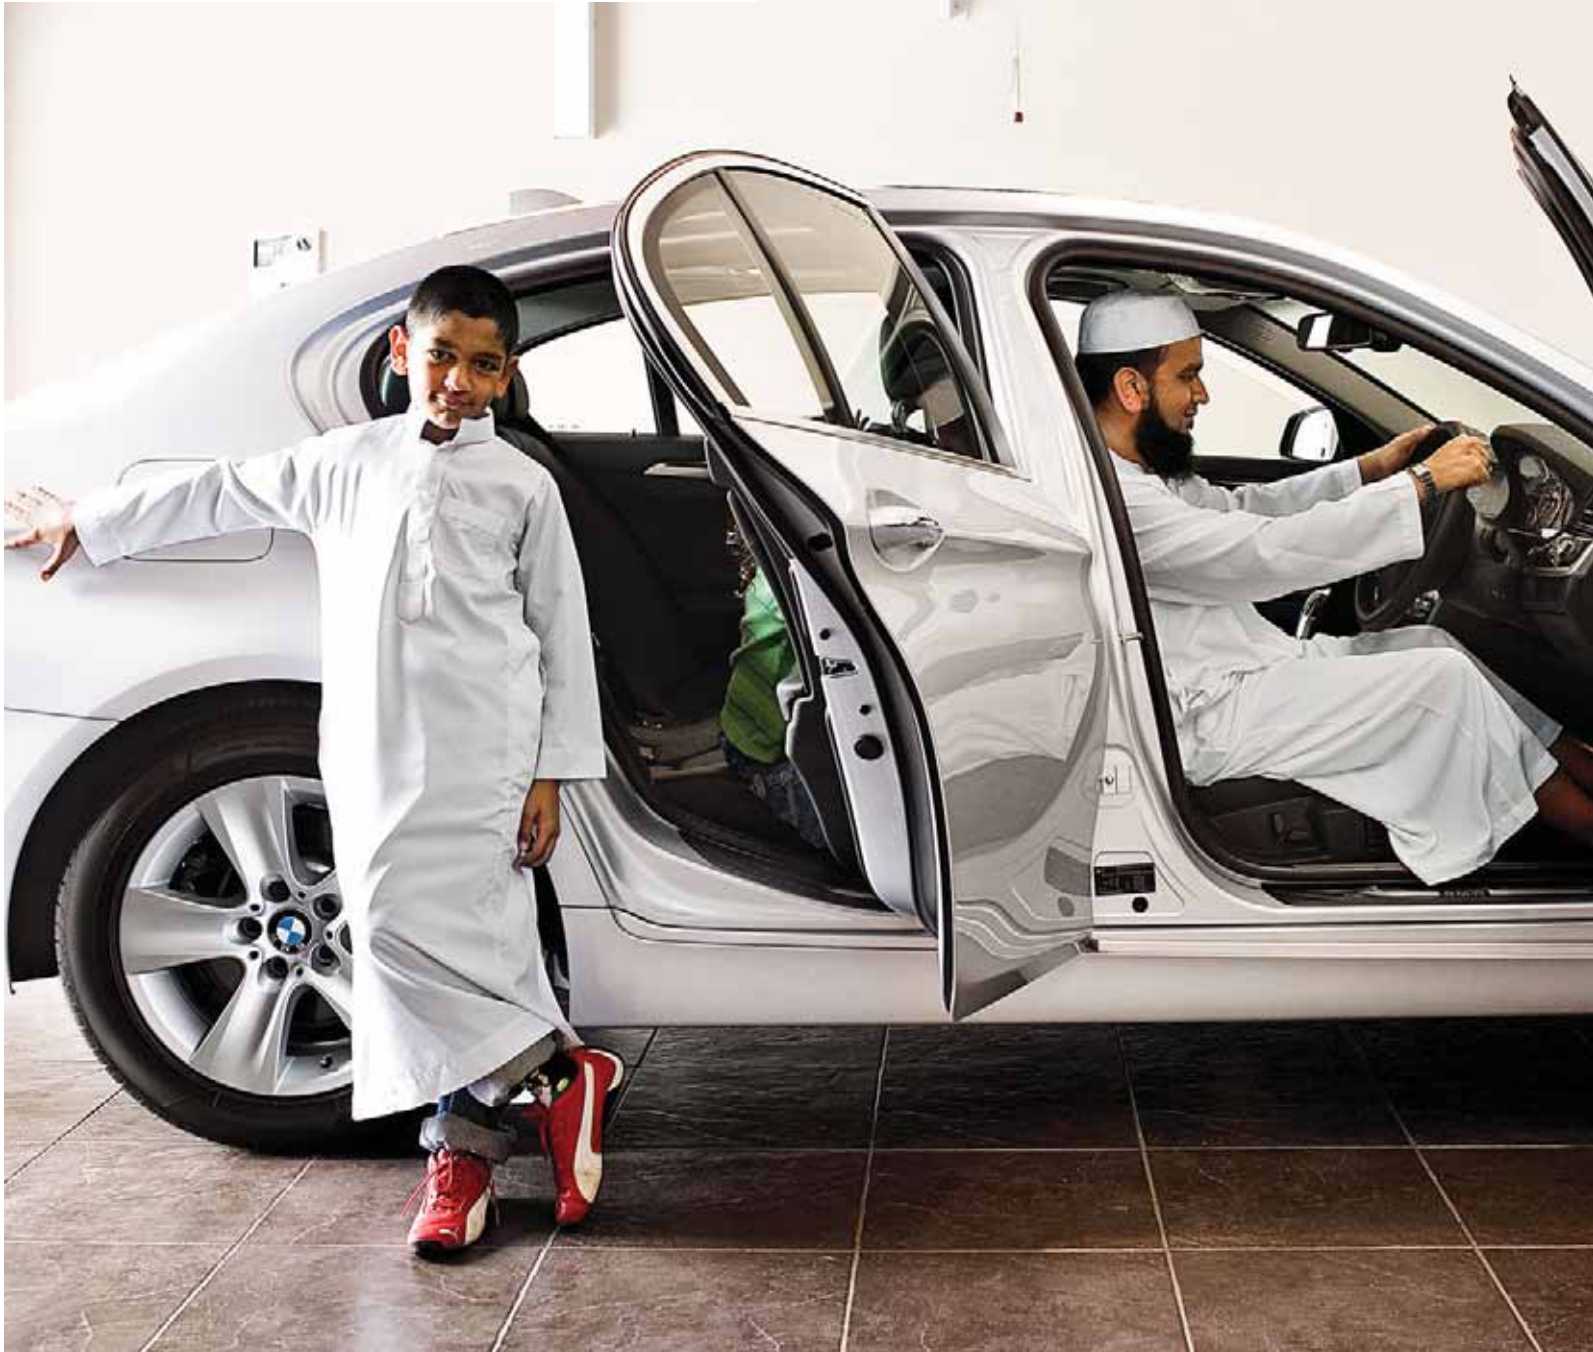

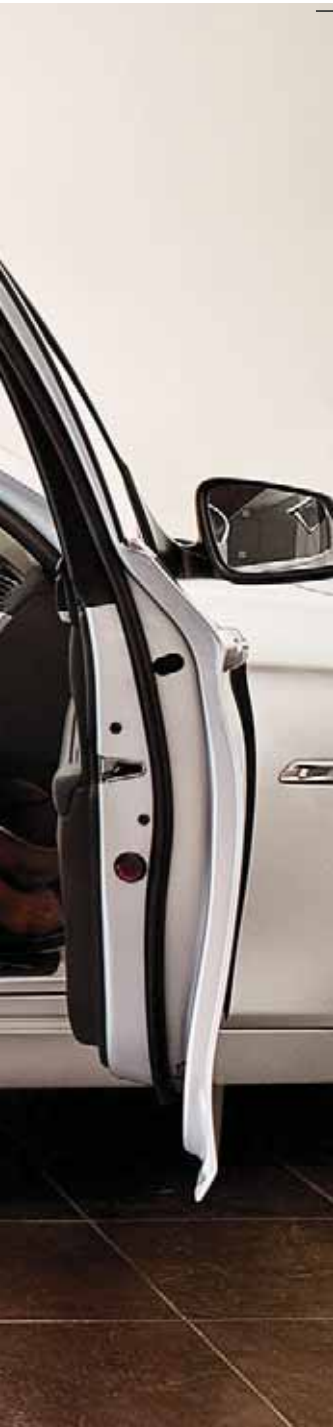

—A

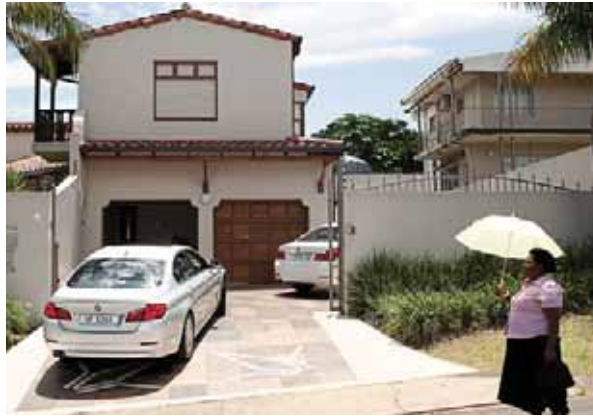

—B

- A Startklar: Abdul Tayob und Sohn Mas'ood
- B Das Zuhause der Tayobs im Stadtteil Mountain Rise
- C Abdul Tayob mit drei seiner vier Kinder

» 29° 36' S, 30° 23' O  **Afrika** Pietermaritzburg » BMW 5er Limousine »

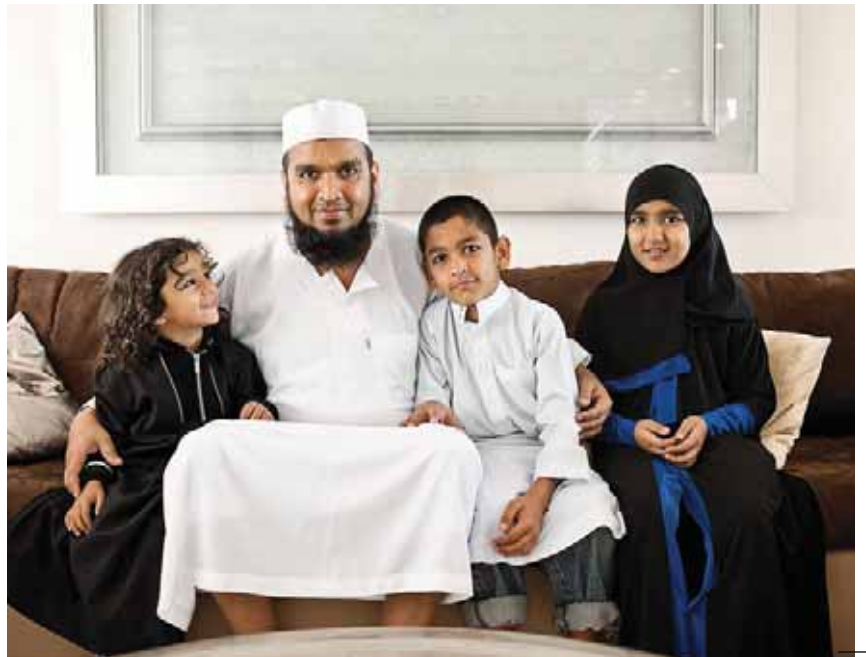

—C

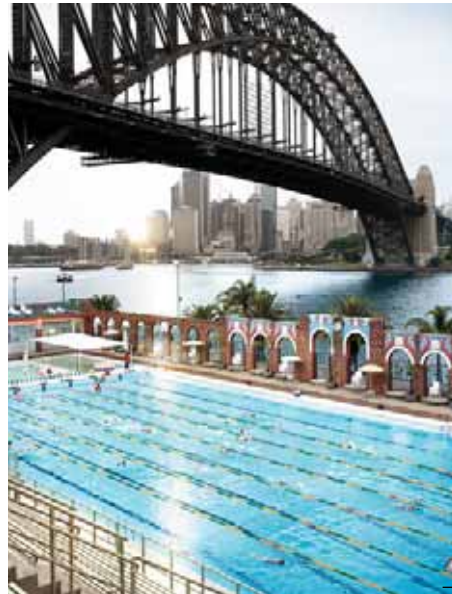

—A

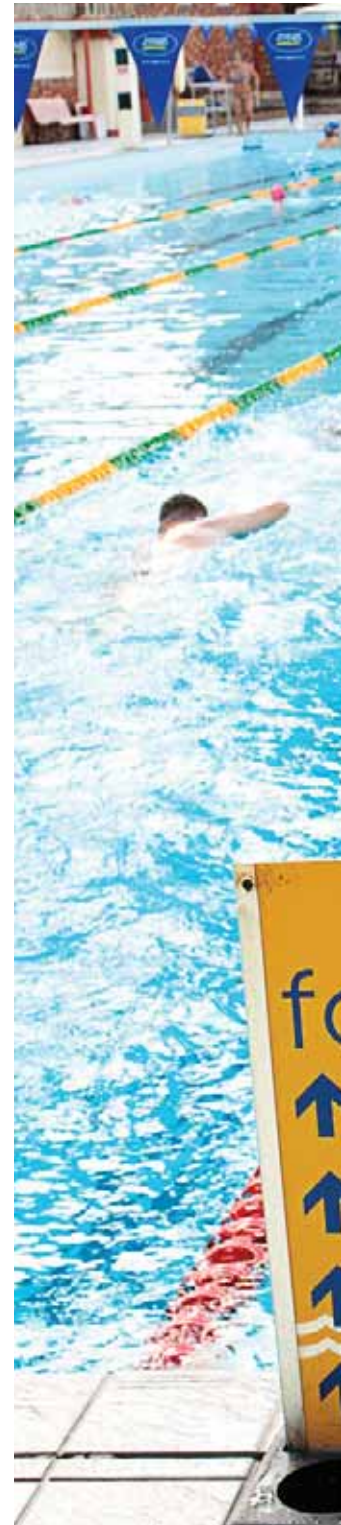

&gt;&gt;

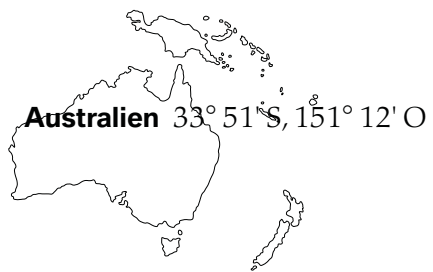**Australien** 33° 51' S, 151° 12' O

&gt;&gt; Sydney

&gt;&gt; BMW 5er Limousine

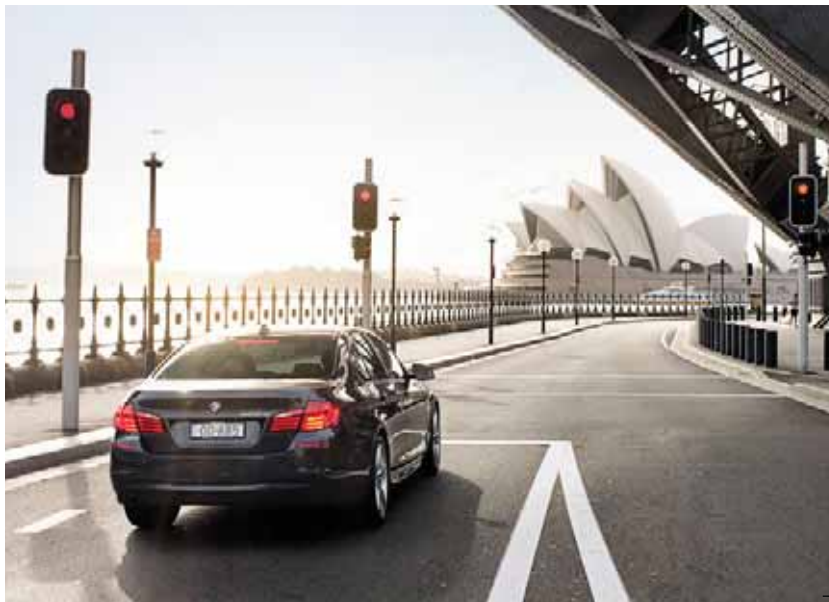

—C

- A Der Olympic Swimming Pool unter Sydneys Harbour Bridge ...
- B ... wo Martin Carolan vor der Arbeit regelmäßig trainiert
- C Carolans BMW 5er unterwegs in Richtung Sydney Opera

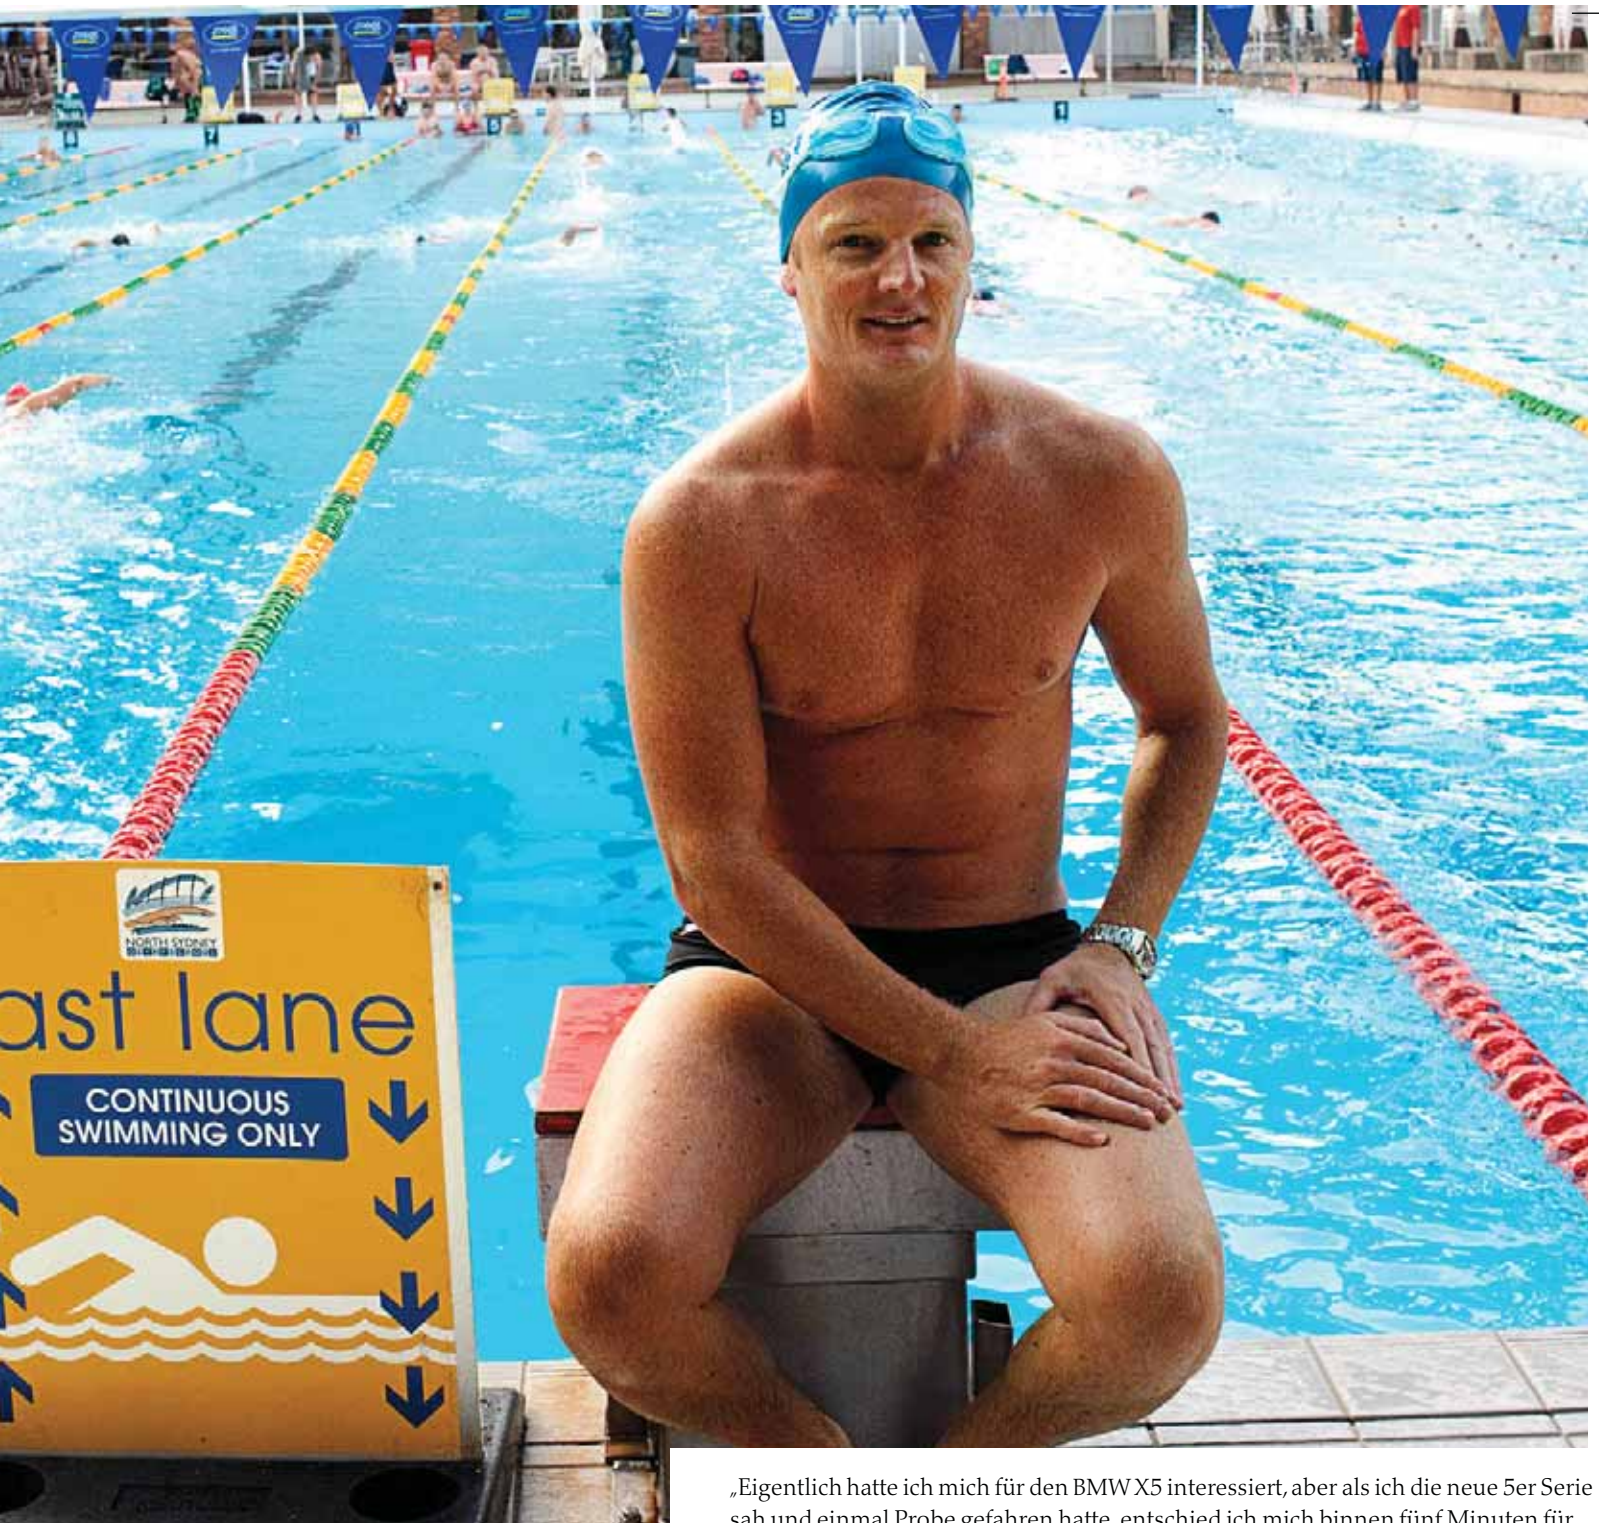

„Eigentlich hatte ich mich für den BMW X5 interessiert, aber als ich die neue 5er Serie sah und einmal Probe gefahren hatte, entschied ich mich binnen fünf Minuten für einen BMW 5er in der M-Sport Version und mit Dieselmotoren. Mein Wagen zieht eine Menge Blicke auf sich und es ist ein Vergnügen, 900 Kilometer mit einer einzigen Tankfüllung zu fahren.“ Martin Carolan, Sydney

„Jede Menge Blicke. Und sportliche Ausdauer.“

**Fortsetzung folgt.** Mit sportlich-elegantem Design, markentypischer Fahrdynamik und Effizienz sowie innovativen Komfort- und Sicherheitsmerkmalen spiegelt die sechste Generation der Business-Limousine die Entwicklungskompetenz des weltweit erfolgreichsten Premiumautomobilherstellers in allen Facetten wider. Gleichzeitig definiert die BMW Group mit dem BMW 5er Gran Turismo einmal mehr ein vollkommen neues Fahrzeugsegment – und schreibt damit die jüngste Episode einer Geschichte voller faszinierender Höhepunkte.

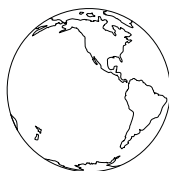

&gt;&gt;

---

**Aus Fahrfreude wird Vorfreude – auch in Zukunft.**

Wie alle Erfolgsgeschichten lebt auch diese von ihrem überzeugenden Kern. Im Falle der BMW 5er Baureihe steckt er in der einzigartigen Kombination von Ästhetik und Fahrfreude, die dem BMW 5er mit jeder Generation und jeder Modellvariante weitere begeisterte Kunden beschert.

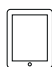

Geschäftsbericht 2010 als iPad App

KUNDEN

# CONNECTED DRIVE

>>

PROFITABILITÄT

ZUKUNFT

WACHSTUM

Intelligente Kommunikation  
für eine individuelle Mobilität

» Nie zuvor waren Menschen so mobil wie heute. Und nie zuvor konnten sie unterwegs auf derart umfassende digitale Dienstleistungen zugreifen, wie BMW ConnectedDrive sie über alle Baureihen hinweg bietet. Mit ihrem Portfolio intelligenter Kommunikationstechnologien gestaltet die BMW Group das Autofahren immer effizienter, komfortabler und sicherer – und das Unterwegssein mit ihren Fahrzeugen immer attraktiver.



# INTELLIGENTE MOBILITÄT [01] — [02] — [03]

---

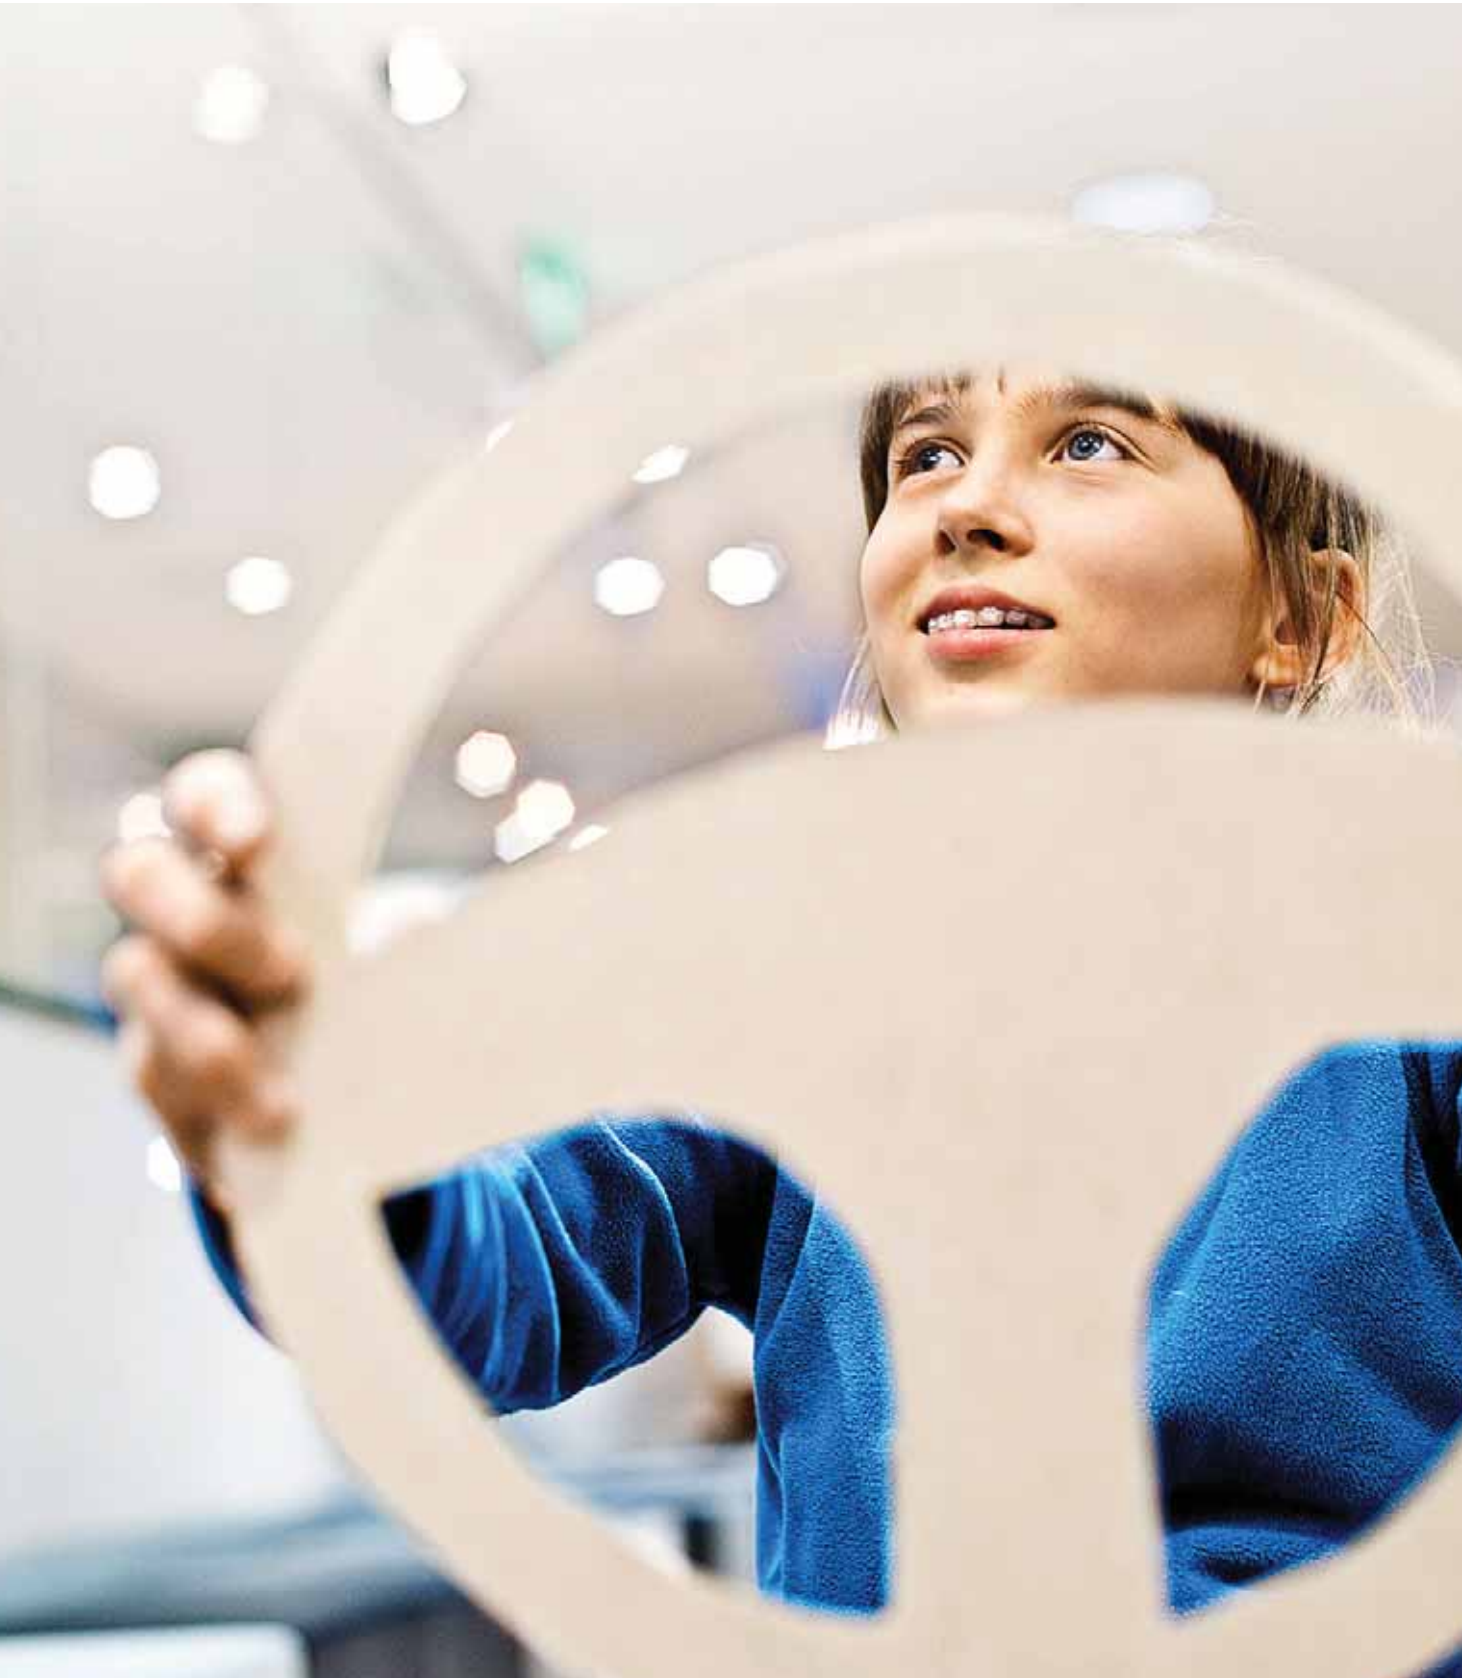

» Nie zuvor waren Menschen so mobil wie

heute  
auf der  
gen zu  
sie über  
ihrem  
techn  
Autof  
und s  
ihren

Sie werden Verkehrsströme lenken und Staus vermeiden helfen. Sie werden das Autofahren sicherer und komfortabler machen. Sie werden Treibstoff einsparen und das Klima schonen. Klar ist: Die intelligenten Technologien für die Vernetzung von Fahrer, Fahrzeug und Umwelt haben ihre größte Zukunft noch vor sich.

Und genau so ist es mit den Verkehrsteilnehmern von morgen. Im Junior Campus der Münchener BMW Welt, wo Kinder Mobilität mit allen Sinnen entdecken lernen, haben wir drei von ihnen gebeten, Funktionen des Connected Drive-Portfolios in ihren Worten zu beschreiben. Hier sind ihre Antworten.

Junior Campus BMW Welt München, 26. Januar 2011

# INTELLIGENTE MOBILITÄT [01] — [02] — [03]

---

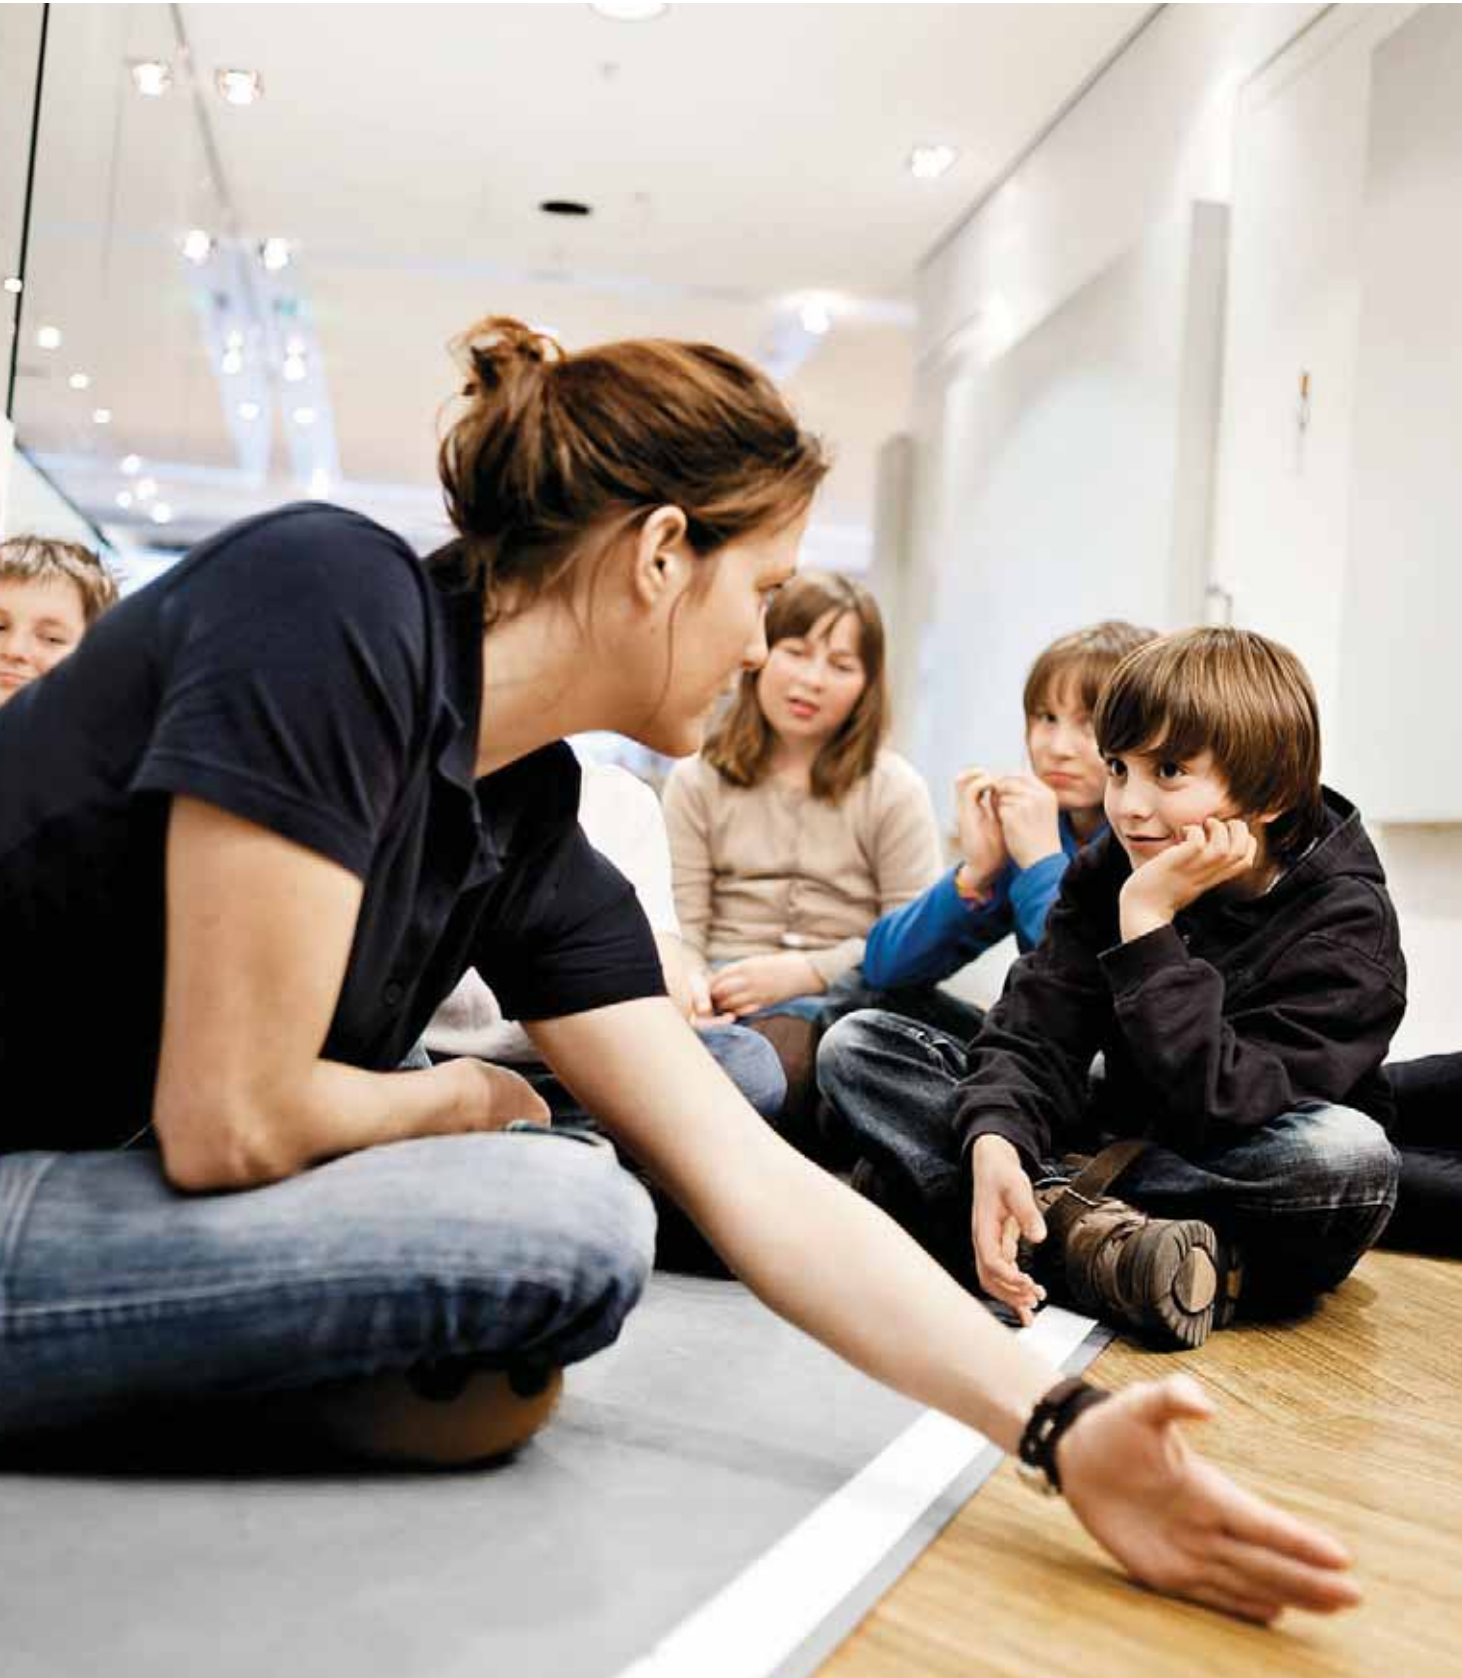

» Nie zuvor waren Menschen so mobil wie

heute  
auf der  
gen zu  
sie über  
ihrem  
techn  
Autof  
und s  
ihren

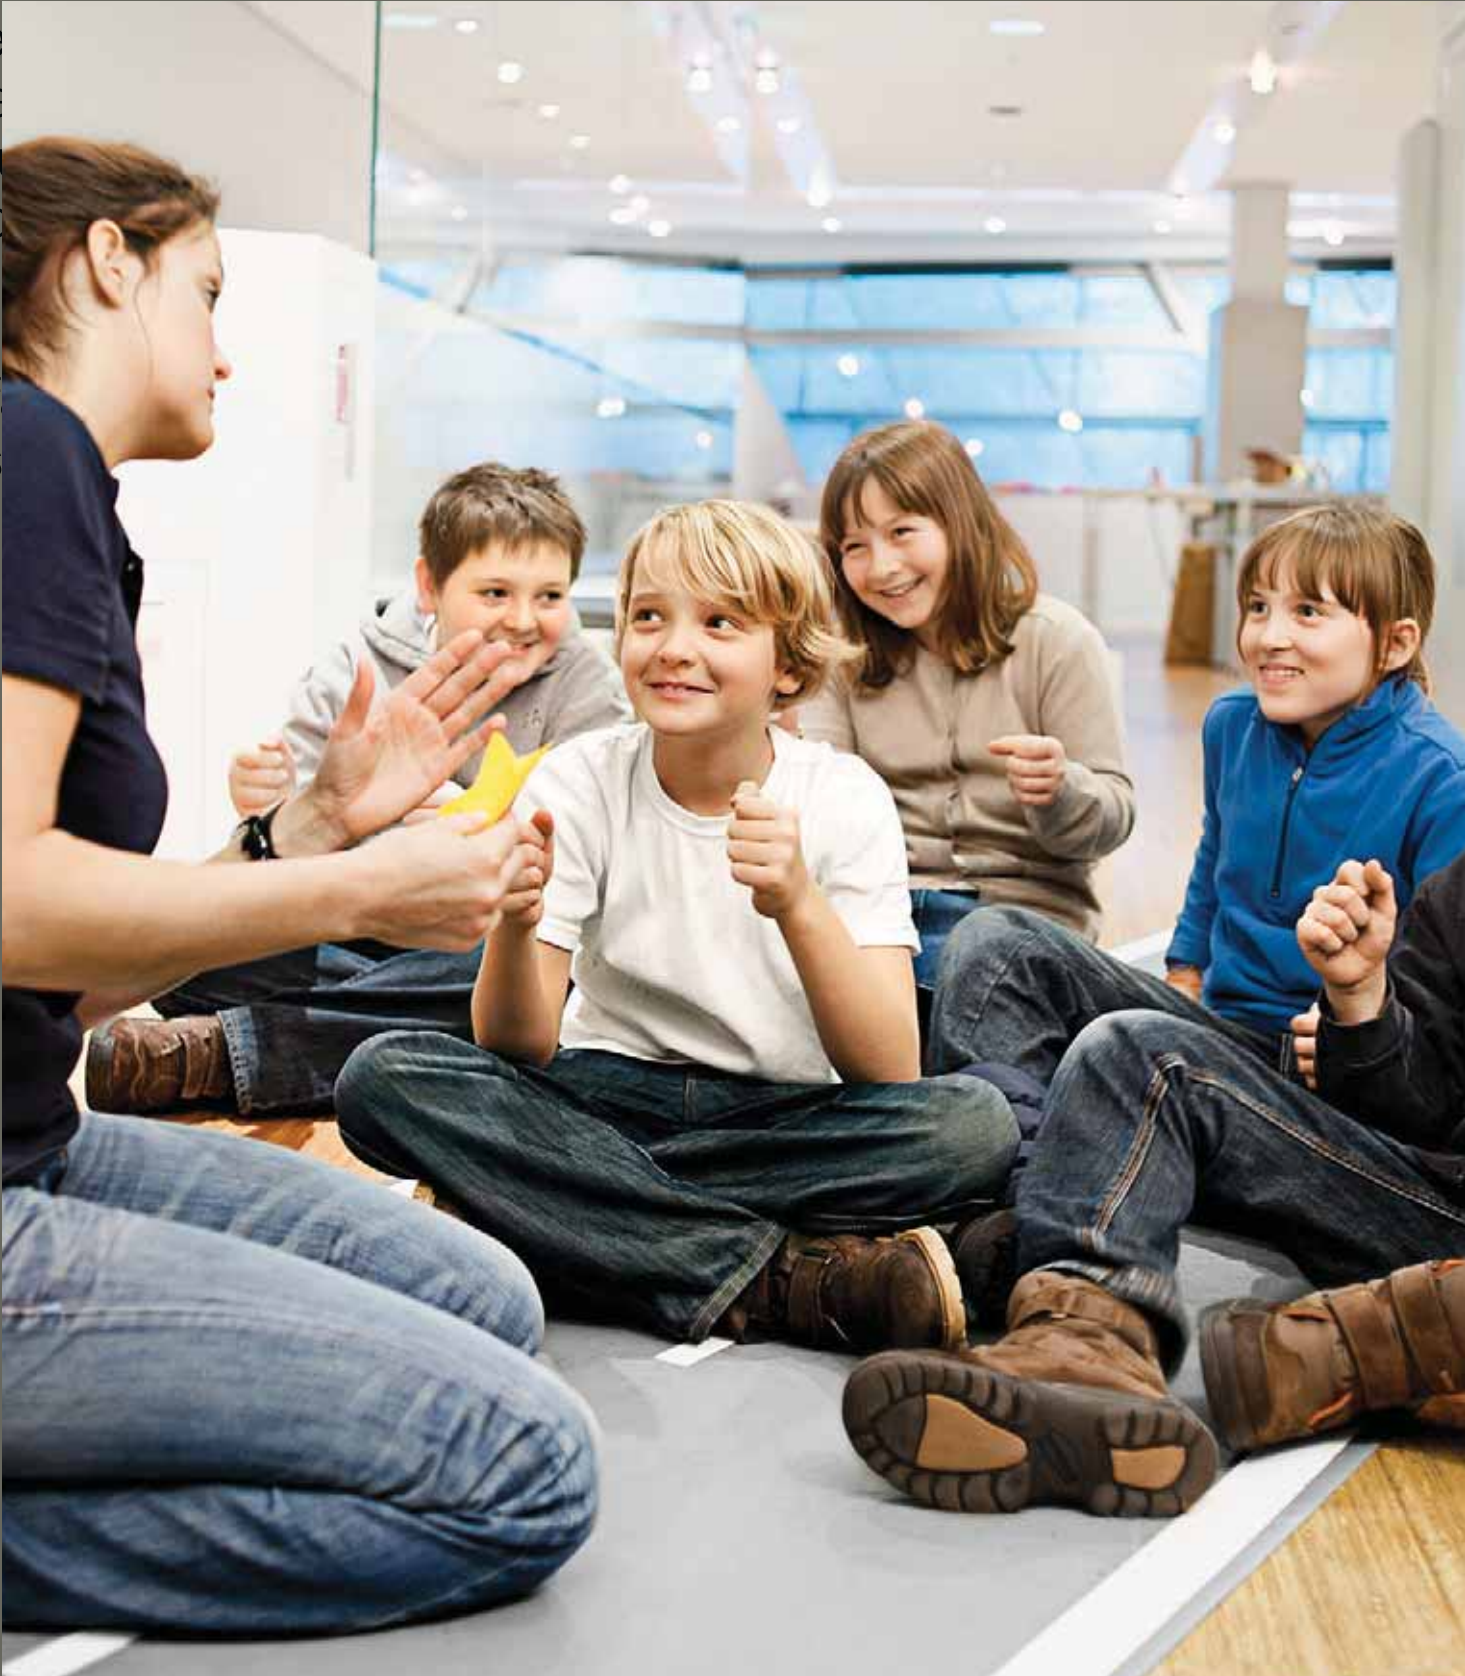

# INTELLIGENTE MOBILITÄT [01] — [02] — [03]

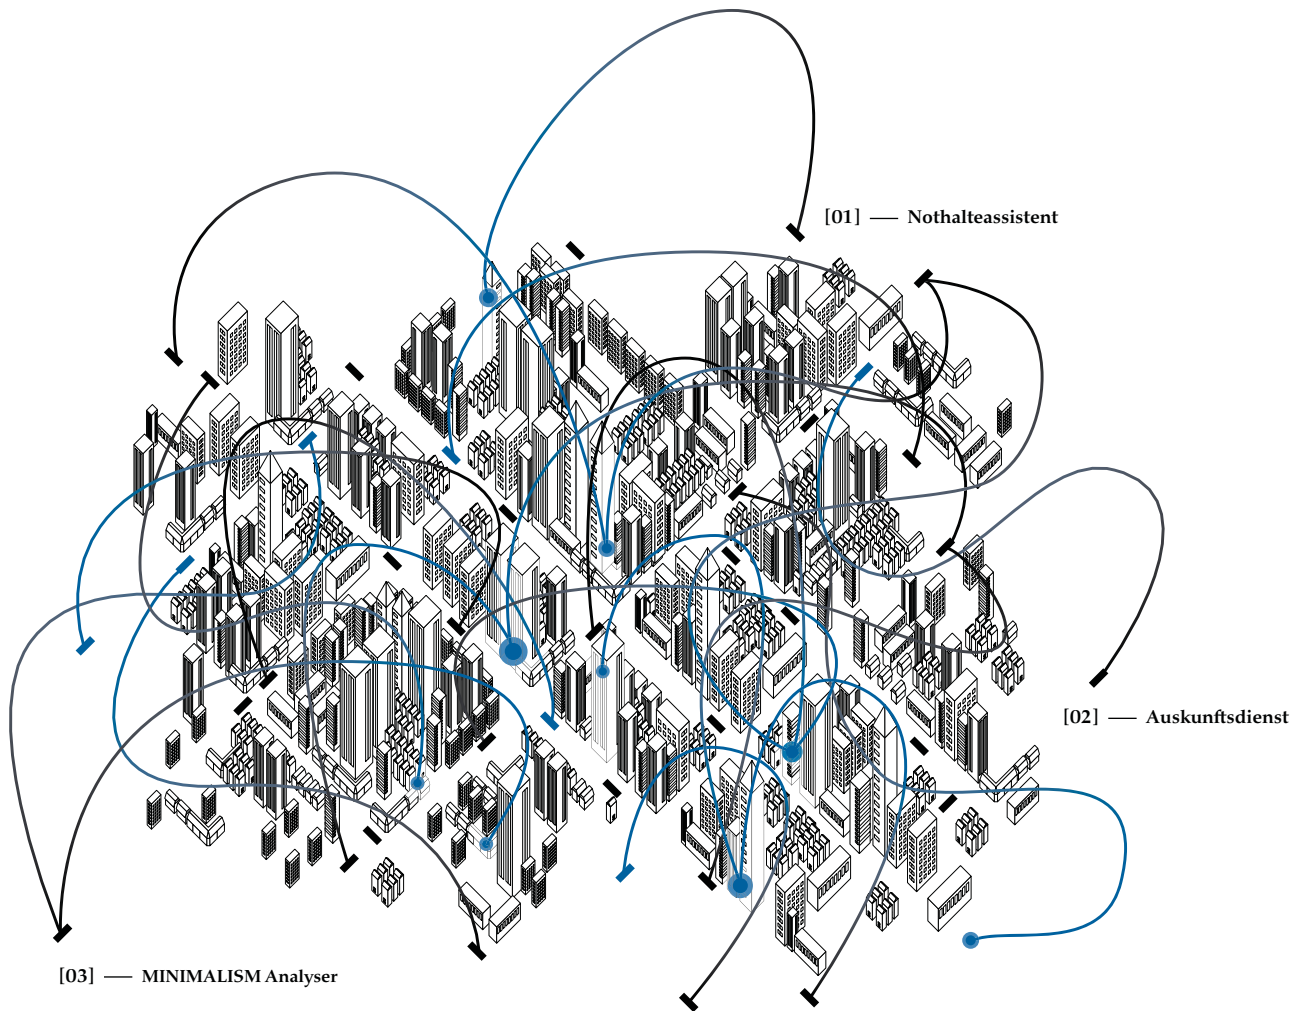

Es begann vor über 30 Jahren mit einem Bordcomputer, der die Außentemperatur anzeigte. Es steht für Meilensteine wie die weltweit erste Parkdistanzanzeige und das erste fest integrierte mobile Navigationssystem. Heute setzt die BMW Group in der intelligenten Vernetzung von Fahrer, Fahrzeug und Außenwelt erneut Maßstäbe. Und dabei ist all das erst der Anfang.

## IM NOTFALL SICHER ANKOMMEN

Der BMW 528i war gerade mit 130 km/h auf der Überholspur unterwegs, als er zunächst auf 80 km/h verlangsamte, um dann vorsichtig von der Überholspur zwischen zwei Fahrzeugen auf der rechten Fahrbahn einzufädeln. Dort verlangsamte der Wagen weiter, blinkte, wechselte erneut die Spur und rollte schließlich langsam auf dem Pannestreifen aus. Vom Überholmanöver bei 130 km/h bis zum kontrollierten Stillstand des Fahrzeugs vergingen keine eineinhalb Minuten.

Bemerkenswert war dieses Fahrmanöver vor allem deshalb, weil es völlig ohne Mitwirkung eines Fahrers zustande kam. Denn der Mann am Steuer des BMW 5er hatte einen Herzinfarkt erlitten und mitten im Überholmanöver das Bewusstsein verloren – jedenfalls wurde ein solcher Notfall, wie er im echten Straßenverkehr immer wieder und mit häufig katastrophalen Konsequenzen eintritt, bei dieser Testfahrt simuliert, die im Oktober 2010 auf der Hochgeschwindigkeitsstrecke des BMW Testgeländes in Aschheim stattfand. **Intelligente Technologien wie der Nothalteassistent werden die Zahl und Schwere von Verkehrsunfällen kontinuierlich weiter reduzieren. — [01]**

Damit bietet der Prototyp des Nothalteassistenten einen faszinierenden Ausblick auf die enormen Möglichkeiten, die sich mit Connected Drive eröffnen. Auf diesem Gebiet gilt die BMW Group seit Jahren als Taktgeber der Automobilbranche. Von der ersten radarbasierten Abstandsregelung, die das Unternehmen in den 70er-Jahren in einem Konzeptfahrzeug realisierte, über Innovationen wie Park Distance Control (PDC) und das erste integrierte Navigationssystem hat die BMW Group immer wieder wegweisende Technologien für die Vernetzung von Fahrer, Wagen und Außenwelt in Serie gebracht. Heute bietet Connected Drive das weltweit vielfältigste und fortschrittlichste Angebot vernetzter Dienste im Automobil.

^

**Connected Drive** steht für ein Paket intelligenter Technologien, die Fahrer, Insassen, Fahrzeug und Außenwelt miteinander verbinden und einen enormen Mehrwert in puncto Sicherheit, Infotainment und Komfort eröffnen. Eine Übersicht über die aktuellen Optionen findet sich unter <http://bmw.connecteddrive.info>

[01] — „Der Nothalteassistent bringt mich in Sicherheit.“

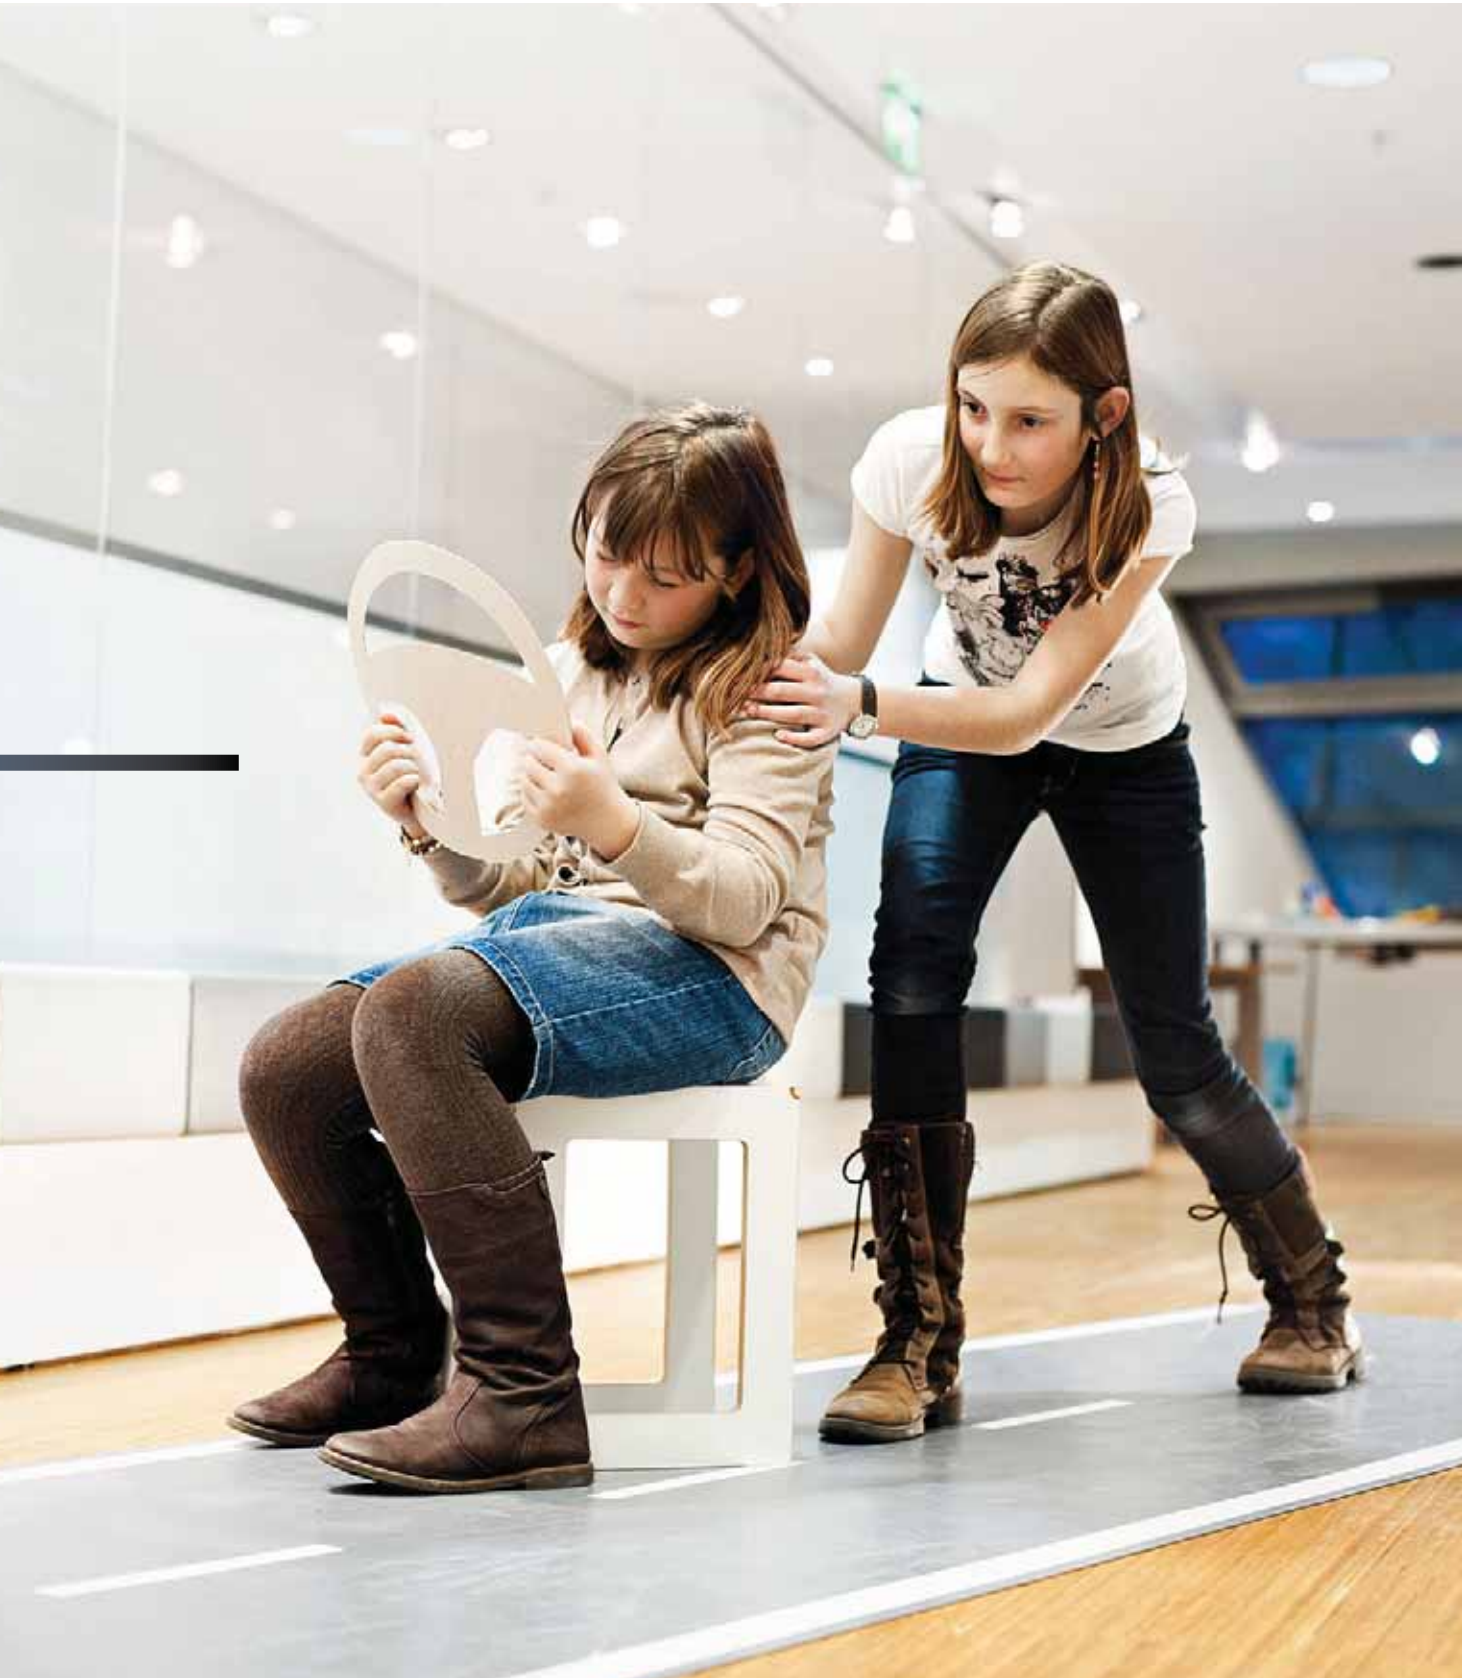

„Manche Autos können sozusagen sehen. Wenn man in einem solchen Auto einen Herzinfarkt oder so hat, fährt das Auto von ganz allein an den Straßenrand und parkt. Und dann ruft es auch noch den Krankenwagen.“

Vanessa Meyer, 9 Jahre, erklärt den Nothalteassistenten.



[01] — „Der Nothalteassistent bringt mich in Sicherheit.“

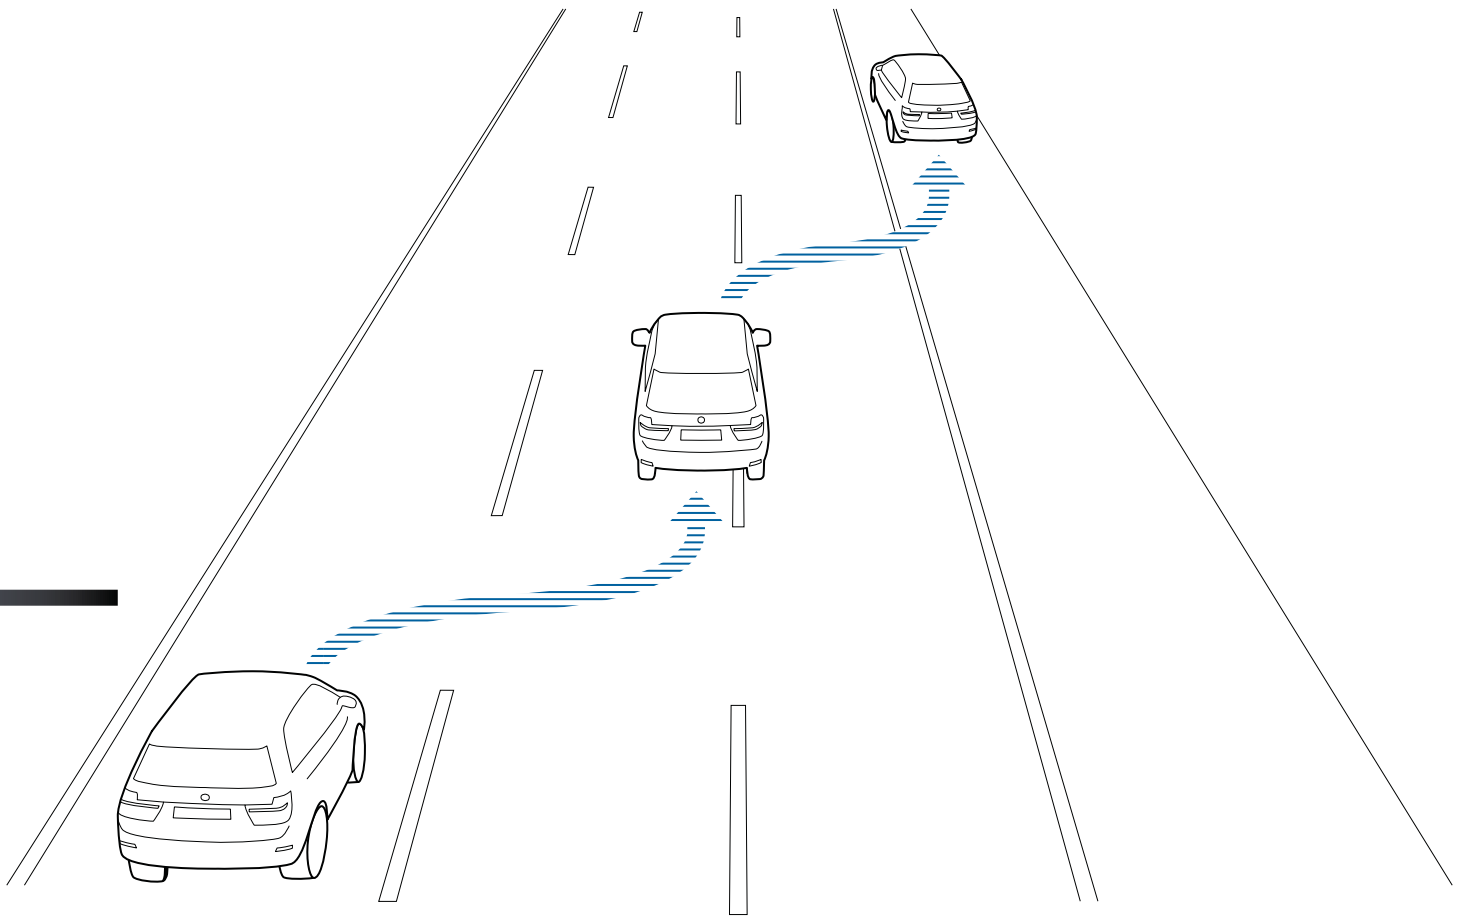

Hinter dem Nothalteassistenten steht ein komplexes System aus Sensoren, satellitengestütztem hochgenauem Navigationssystem und speziellen Algorithmen, die im Notfall die sichere Kontrolle über ein Fahrzeug übernehmen. Dabei analysiert der Nothalteassistent selbsttätig Fahr- und Verkehrssituation und berechnet das optimale Fahrmanöver, um ein Fahrzeug ungefährdet zum Halt zu bringen. Anschließend schaltet er selbsttätig die Warnblinkanlage ein und sendet einen Notruf an das BMW ConnectedDrive Callcenter.

## UNTERWEGS RUNDUM INFORMIERT SEIN

Während bis zur Serienreife des Nothalteassistenten noch einige Jahre Entwicklungszeit vergehen werden, erweitern heute bereits Fahrerassistenzsysteme den Spielraum des Fahrers.

So lassen sich mit Connected Drive Fahrtzeiten weitaus effektiver nutzen. Dabei genießt die Sicherheit von Fahrer und Verkehr stets höchste Priorität. Mit der integrierten Mailfunktion beispielsweise kann der Fahrer bereits auf dem Weg Termine verwalten, Tagesaufgaben strukturieren und E-Mails bearbeiten. Dabei können nicht nur eingehende E-Mails oder SMS in Echtzeit angezeigt und vorgelesen, sondern mit der zukünftigen Message-Dictation-Funktion auch Nachrichten diktiert und versendet werden, ohne die Hände vom Lenkrad oder den Blick von der Straße nehmen zu müssen. Der BMW Auskunftsdienst wiederum spielt alle benötigten Telefonnummern, Adressen und Reiseinformationen zu. „Das Fahrzeug wird zunehmend zum mobilen Office, die Fahrtzeit zur effizient nutzbaren Arbeitszeit“, sagt Eckhard Steinmeier, Leiter Connected Drive. „Aus unseren Marktforschungen wissen wir, dass besonders Geschäftsleute und Führungskräfte diesen Zusatznutzen enorm zu schätzen wissen.“ **Suchen war gestern. Mit dem Connected Drive Auskunftsdienst finden Autofahrer jederzeit alle Informationen, die sie unterwegs benötigen. — [02]**

Noch einmal interessanter wird die Mailfunktion durch die Kombination mit anderen Funktionen wie beispielsweise dem Navigationssystem und dem stationären Computer. Adressen aus Google Maps oder Hotelbuchungen lassen sich per Connected Drive direkt vom Schreibtisch-PC ins Fahrzeug einspeisen, Routen entlang anstehender Termine planen oder Adressen des Outlook-Adressbuches ins Navigationssystem übernehmen. Die Schnittstelle Mensch, die Daten vom PC manuell ins Bordsystem übertragen muss, wird damit zeitsparend überbrückt.

^

**Fahrerassistenzsysteme** sorgen für zusätzliche Souveränität und Sicherheit beim Fahren. Das modellspezifische Angebot reicht vom Adaptiven Kurvenlicht über die Systeme Spurwechselwarnung, Spurverlassenswarnung, BMW Night Vision mit Personenerkennung und Speed Limit Info bis zur Aktiven Geschwindigkeitsregelung mit Stop-and-go-Funktion einschließlich Auffahrwarnung mit Anbremsfunktion.

[02] — „Der Auskunftsdienst weiß  
den Weg zur nächsten Pizzeria.“

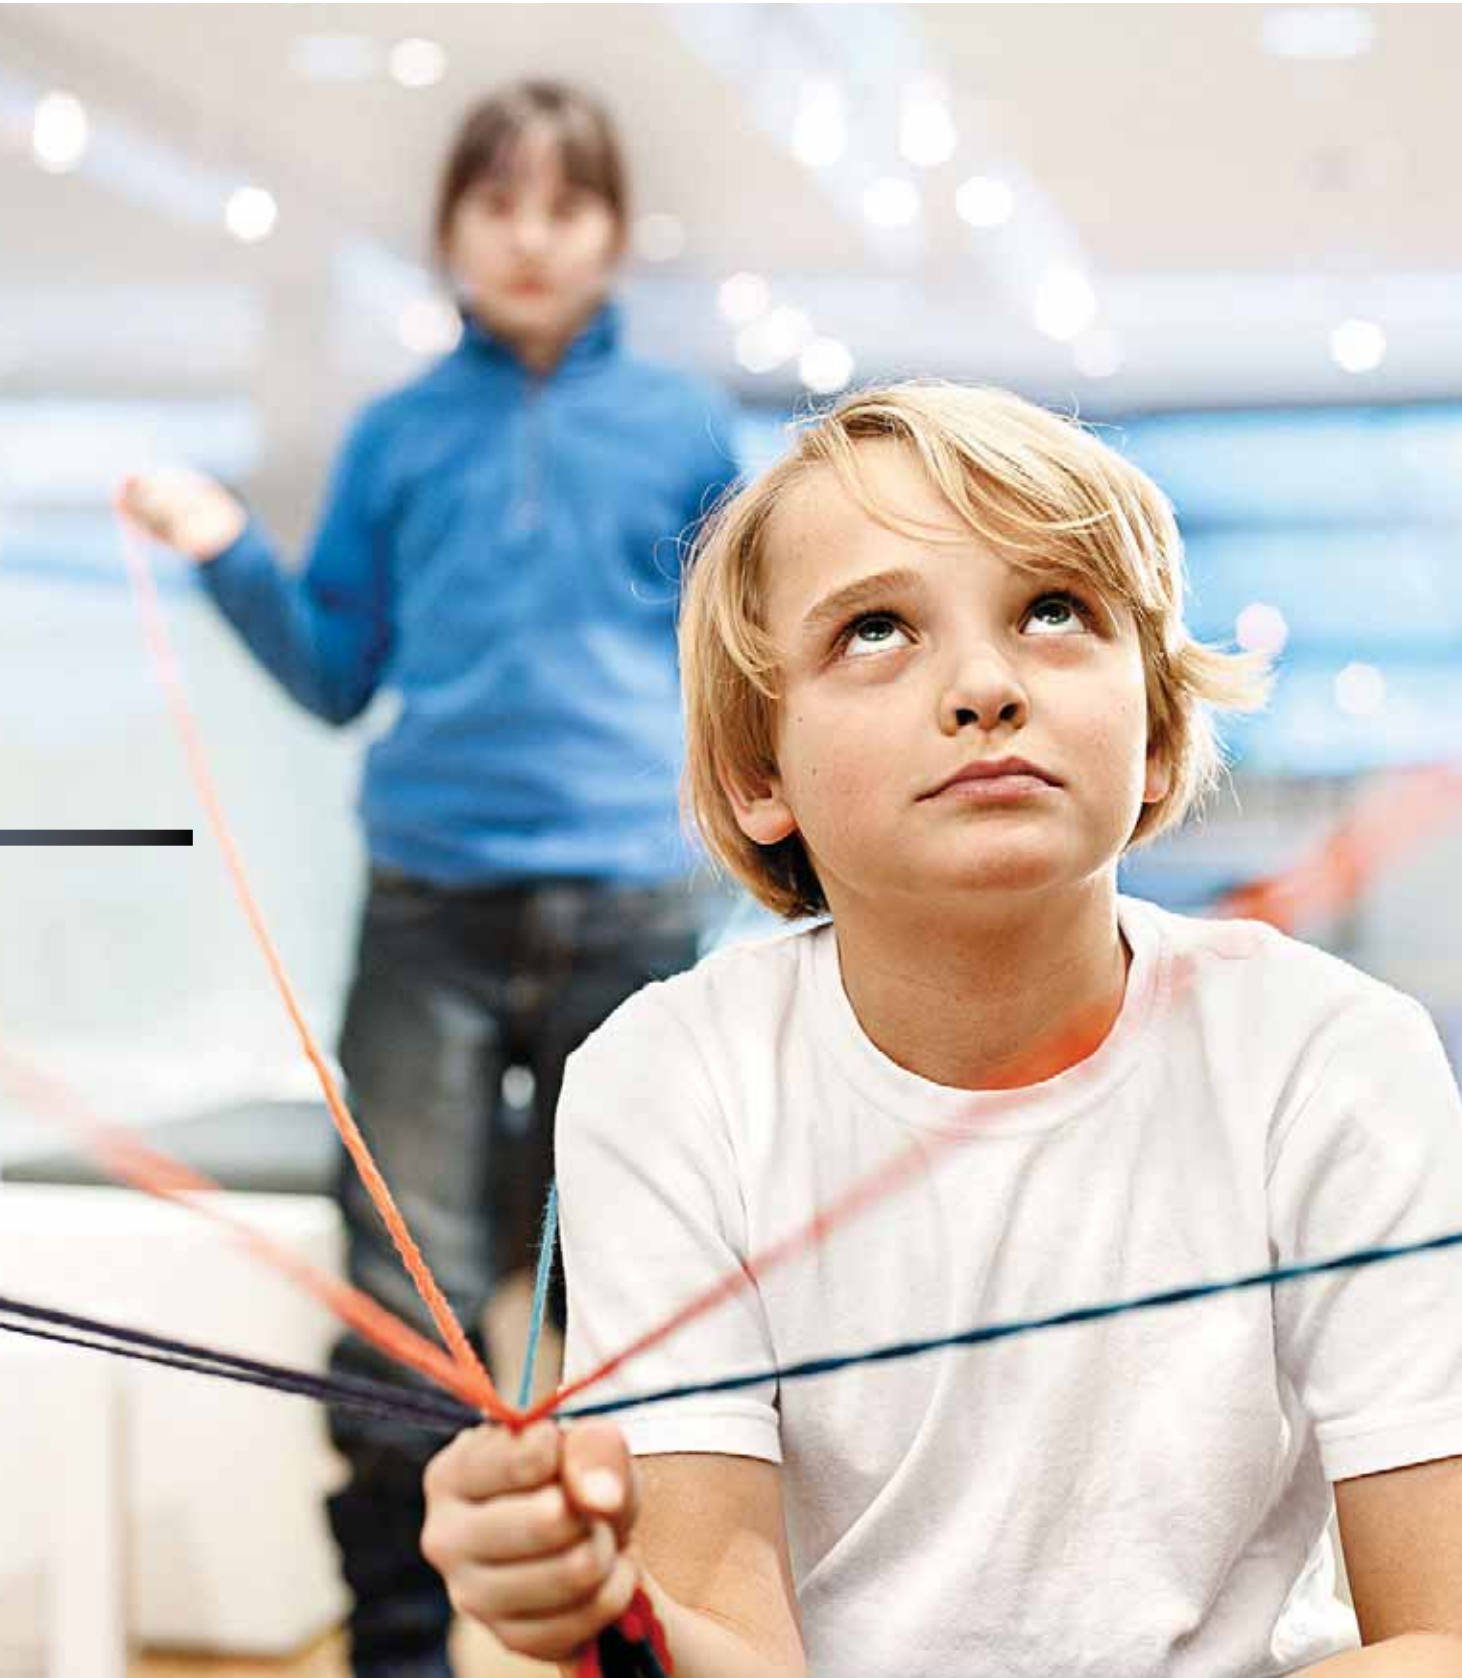

„Wenn man irgendwo fährt, wo man sich nicht richtig auskennt, kann man den BMW Auskunftsdienst fragen. Der weiß zum Beispiel genau, wo die nächste Pizzeria ist. Und wenn du mal Hilfe brauchst, ist der auch da.“

Flynn Traenckner, 10 Jahre, erklärt den BMW Auskunftsdienst.

[02] — „Der Auskunftsdienst weiß  
den Weg zur nächsten Pizzeria.“

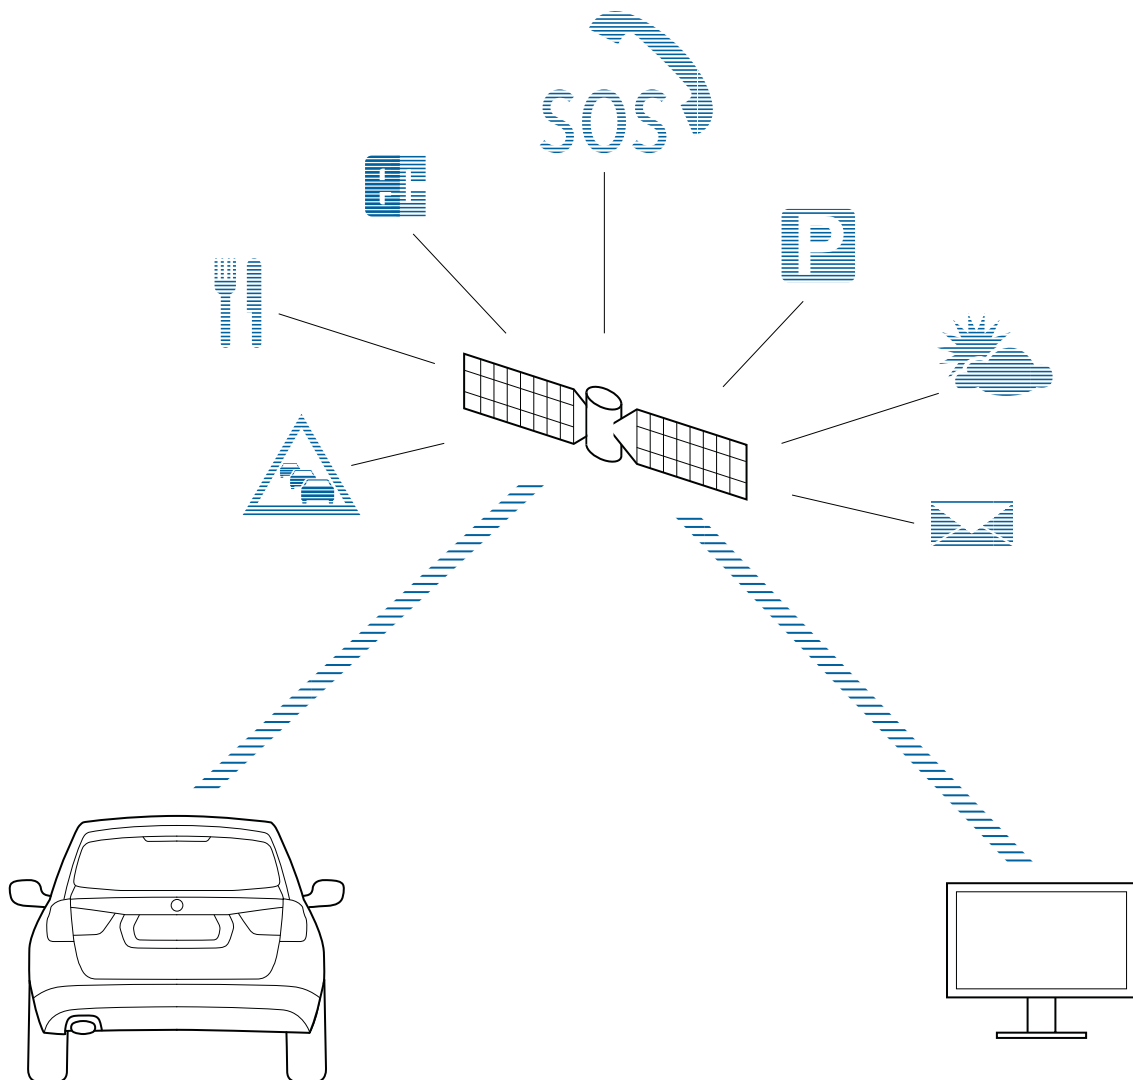

Die Operatoren des BMW Auskunftsdienstes helfen unter anderem bei der Suche nach Notfallapotheken, Geldautomaten oder Golfplätzen, reservieren einen Tisch beim besten Italiener oder eine Übernachtung im Hotel am Zielort, und das bei bis zu 30 Prozent günstigeren Konditionen als bei einer Online-Buchung. Dabei wird die Adresse direkt ins Fahrzeug geschickt. Der Fahrer muss nichts mehr eingeben und folgt ganz bequem seinem Navigationssystem. Besonderer Clou: Der BMW Auskunftsdienst ist an 365 Tagen im Jahr rund um die Uhr und selbst im europäischen Ausland in der Muttersprache des Fahrers einsatzbereit.

## EFFIZIENT UND VERNETZT REISEN

Nachdem die BMW Group bereits als erster Automobilhersteller die Integration von Internet, iPod und iPhone im Fahrzeug ermöglicht hat, setzt sie aktuell mit dem Aufbau des visionären Concept BMW Application Store ein weiteres innovatives Highlight. Künftig können individuelle Apps jederzeit von unterwegs aus dem Fahrzeug oder am heimischen PC nachgeladen und gespeichert werden. Schon heute lassen sich per iPhone Hupe und Standlicht aktivieren, die Standheizung vorab einschalten und der Wagen öffnen. **Mit der iPhone Application MINI Connected verwandelt sich jeder MINI in ein fahrendes soziales Netzwerk mit Internetanschluss und Webradio – übrigens ebenfalls eine Innovation der BMW Group. — [03]**

Genauso wird es in Zukunft möglich sein, immer wieder Software-Updates herunterzuladen, mit denen sich beispielsweise Motoren noch spritsparender steuern lassen. „Connected Drive ist bei uns ein vollumfänglicher Ansatz, um den großen Mehrwert auszuschöpfen, den die Vernetzung von Fahrer, Fahrzeug und Außenwelt bietet“, sagt Dr. Klaus Draeger, Entwicklungsvorstand der BMW Group. „Wir glauben, dass Vernetzung – neben Antriebstechnologien und neuen Werkstoffen – zum Kerntreiber zukünftiger Innovationen in der Automobilindustrie wird.“

Vom intelligenten Datenaustausch profitieren aber nicht nur einzelne Fahrer, sondern auch Umwelt und Verkehr insgesamt. „Kooperative Verkehrssysteme werden in Zukunft eine immer wichtigere Rolle spielen“, sagt der Verkehrswissenschaftler Dr. Klaus Bogenberger vom Münchener Forschungsinstitut Transver, „bereits Anfang des kommenden Jahrzehnts werden sich vernetzte Fahrzeuge und Verkehrsinfrastruktur automatisch vor Staus, Glatteis oder Verkehrshindernissen warnen und mit all ihren Daten helfen, den Verkehr sicherer und effizienter zu lenken als heute.“

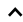

**Concept BMW Application Store.** Die Vision fahrzeugkompatibler Application Stores hat die BMW Group als weltweit erster Fahrzeughersteller präsentiert. Damit könnten Automobile künftig analog zu einem Mobiltelefon an aktuelle Bedürfnisse angepasst und nahezu grenzenlos individualisiert werden.

[03] — „Mit dem MINIMALISM Analyser  
fahre ich umweltfreundlicher.“

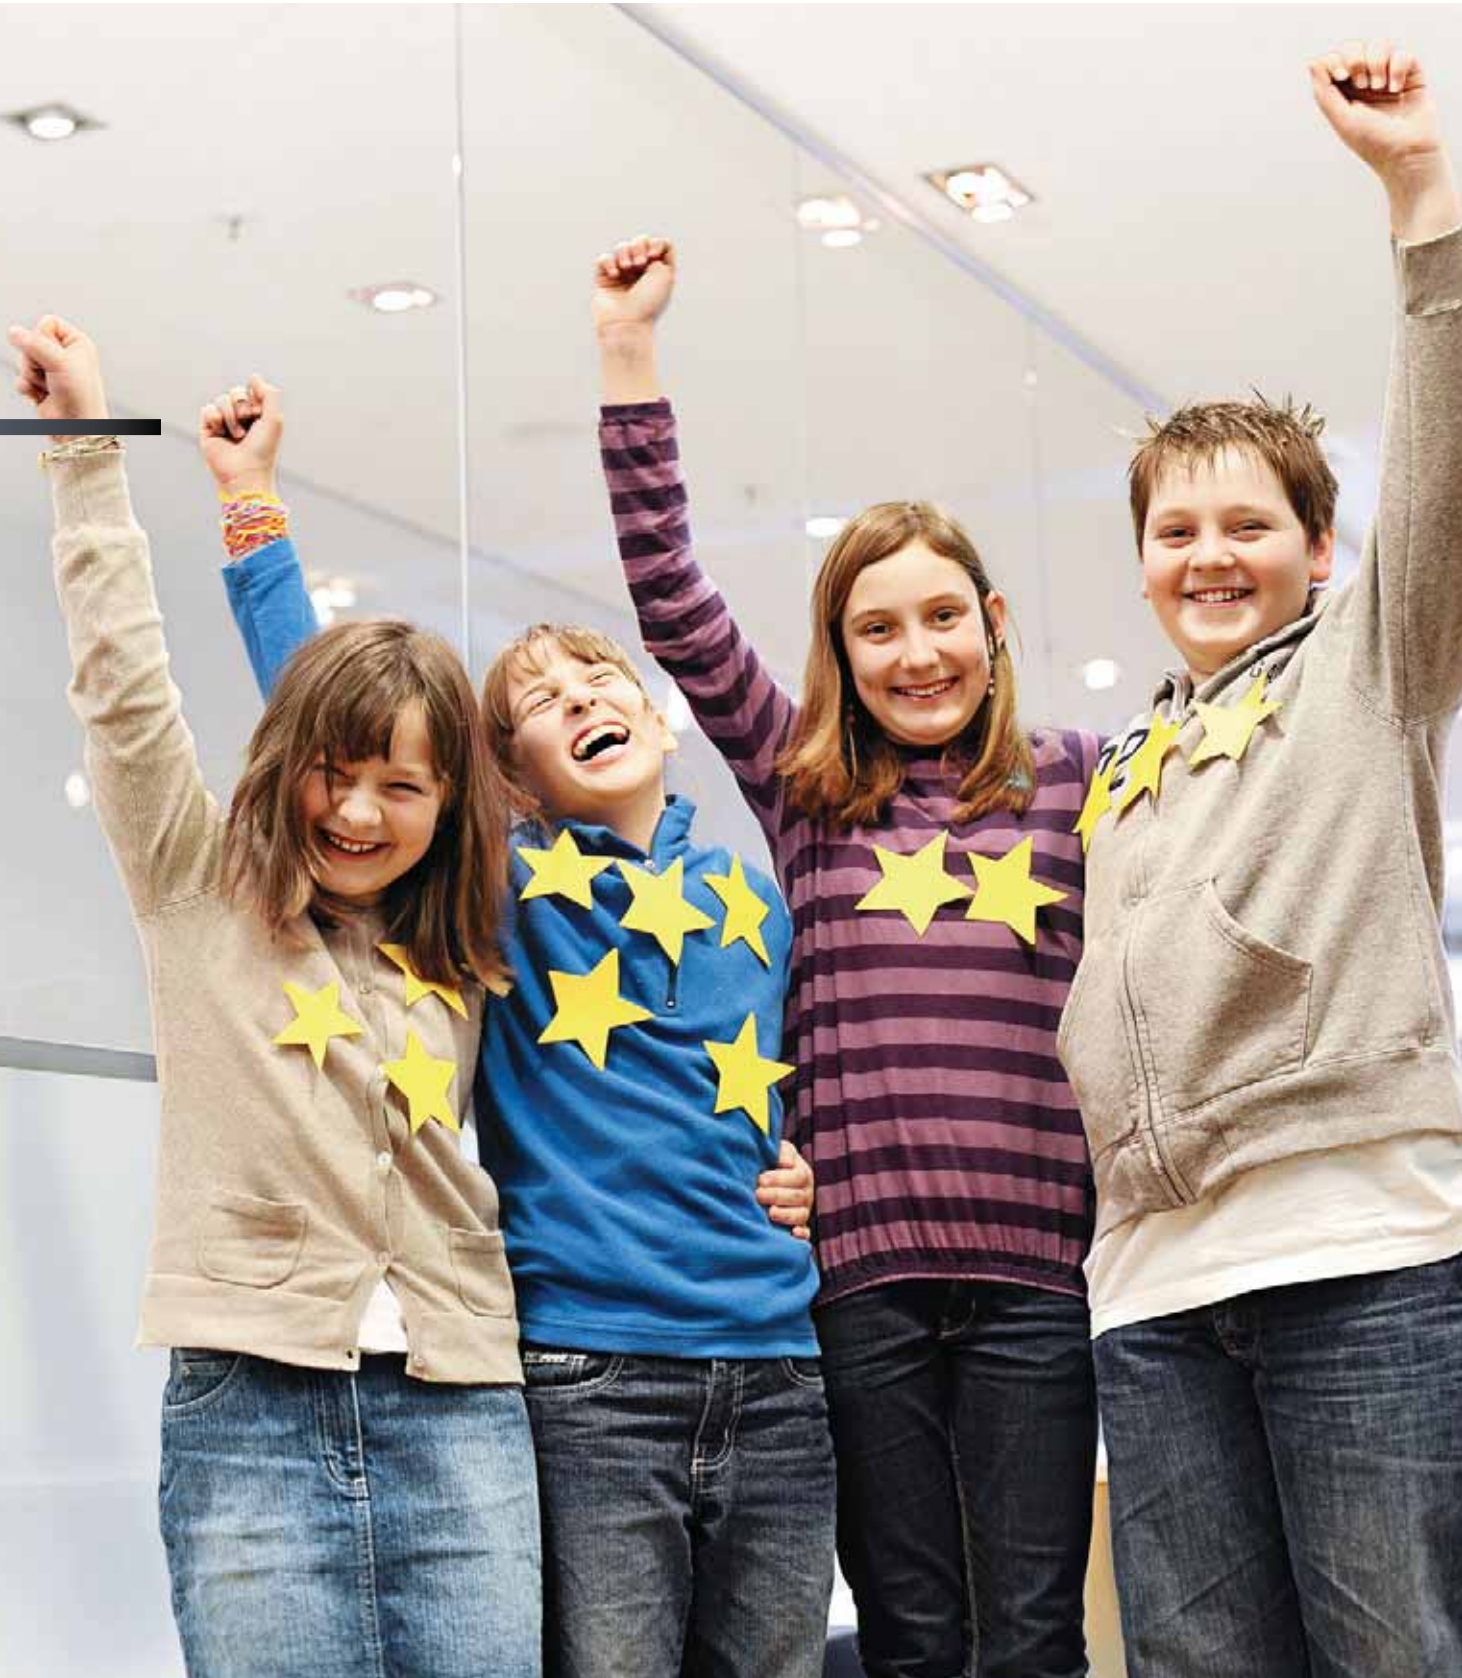

„Es gibt eine App fürs iPhone, die zeigt an, wie umweltfreundlich man fährt. Dafür kriegt man so Sterne. Und wenn man supergut umweltfreundlich fährt und wenig Benzin verbraucht, kriegt man richtig viele Sterne.“

Dominik Meyer, 11 Jahre, erklärt den MINIMALISM Analyser.



[03] — „Mit dem MINIMALISM Analyser fahre ich umweltfreundlicher.“

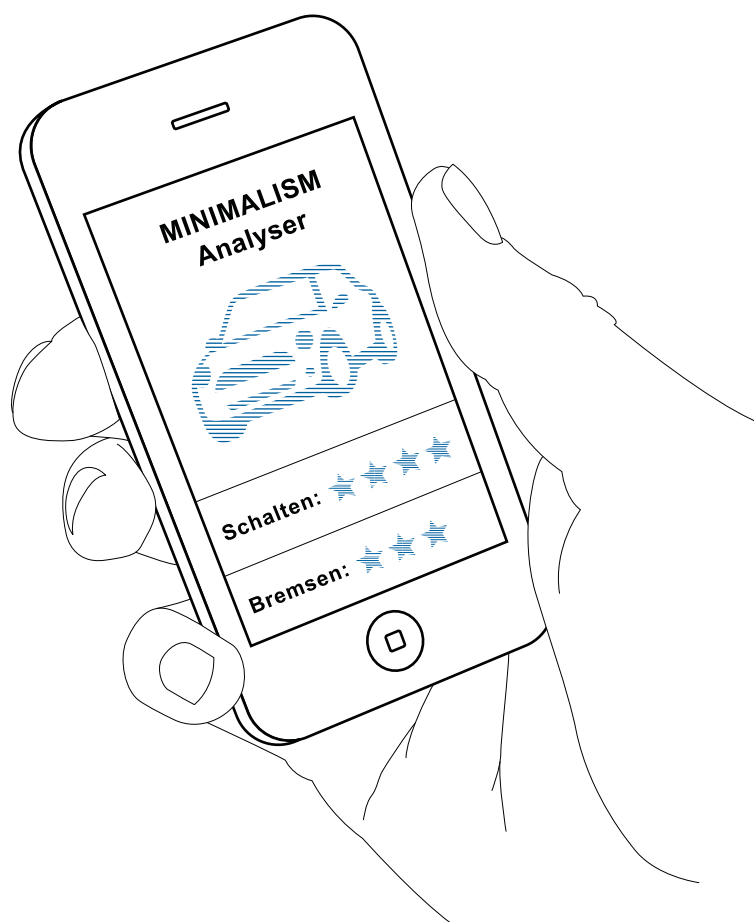

Mit dem MINIMALISM Analyser erfährt der Fahrer kontinuierlich, wie effizient er gerade unterwegs ist und wie viel Energie er verbraucht. MINI Connected speichert die Verbrauchsdaten, analysiert am Ende der Fahrt, auf welchen Streckenabschnitten der MINI Fahrer wie effizient gefahren ist, und gibt Tipps, wie eine noch effizientere Fahrweise möglich wird. Für eine besonders kraftstoffsparende Fahrweise lassen sich Punkte sammeln und über das iPhone mit Mitgliedern der MINI Community teilen.

## FÜHREND BEI INTELLIGENTER AUTOMOBILITÄT

Die Kommunikation zwischen Fahrer, Fahrzeug und Umwelt ist damit nicht mehr nur eine angenehme Zusatzfunktion, sondern ein Technologiepaket mit enormem aktuellem wie zukünftigem Mehrwert. So bilden die Sensordaten und Informationen von Connected Drive eine perfekte Ergänzung zu den kraftstoffsparenden Maßnahmen des Efficient Dynamics Technologiepakets. Connected Drive hilft mit diesen und vielen weiteren Applikationen Zeit und Treibstoff zu sparen, Verkehrsströme intelligenter zu steuern, Mobilität effizienter, angenehmer und unterhaltender zu gestalten und sogar Leben zu retten. Es wird die Automobilität vermutlich ähnlich verändern wie die Einführung der Elektroantriebe.

^

**Efficient Dynamics.** Beispielsweise gibt der „Green Driving Assistent“ des Navigationssystems den zu erwartenden Kraftstoffverbrauch für verschiedene Routen an. Damit lässt sich für jedes Ziel eine individuelle, zeit- und verbrauchoptimierte Route finden.

All diese Vorteile lernen Autofahrer zunehmend schätzen. Connected Drive sorgt daher gleichzeitig für eine immer stärkere Vernetzung des Unternehmens mit bestehenden wie potenziellen Kunden.

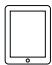

Geschäftsbericht 2010 als iPad App

PROFITABILITÄT

# Globale Balance

>>

ZUKUNFT

KUNDEN

WACHSTUM

Stabile Ergebnisse im Zeitalter  
globaler Marktschwankungen

» Für einen weltweit erfolgreichen Automobilhersteller wie die BMW Group haben Kursschwankungen naturgemäß beträchtlichen Einfluss auf das Ergebnis. Um die Wertschöpfung dennoch weitestmöglich von Markt- und Kurszyklen zu entkoppeln, setzen wir neben Financial Hedging unter anderem auch auf Natural Hedging. So gesehen ist die Erweiterung des BMW Werks im US-amerikanischen Spartanburg ein strategisch wichtiger Schritt im Sinne von Wertschöpfung und Profitabilität.

## WERKSERWEITERUNG SPARTANBURG

---

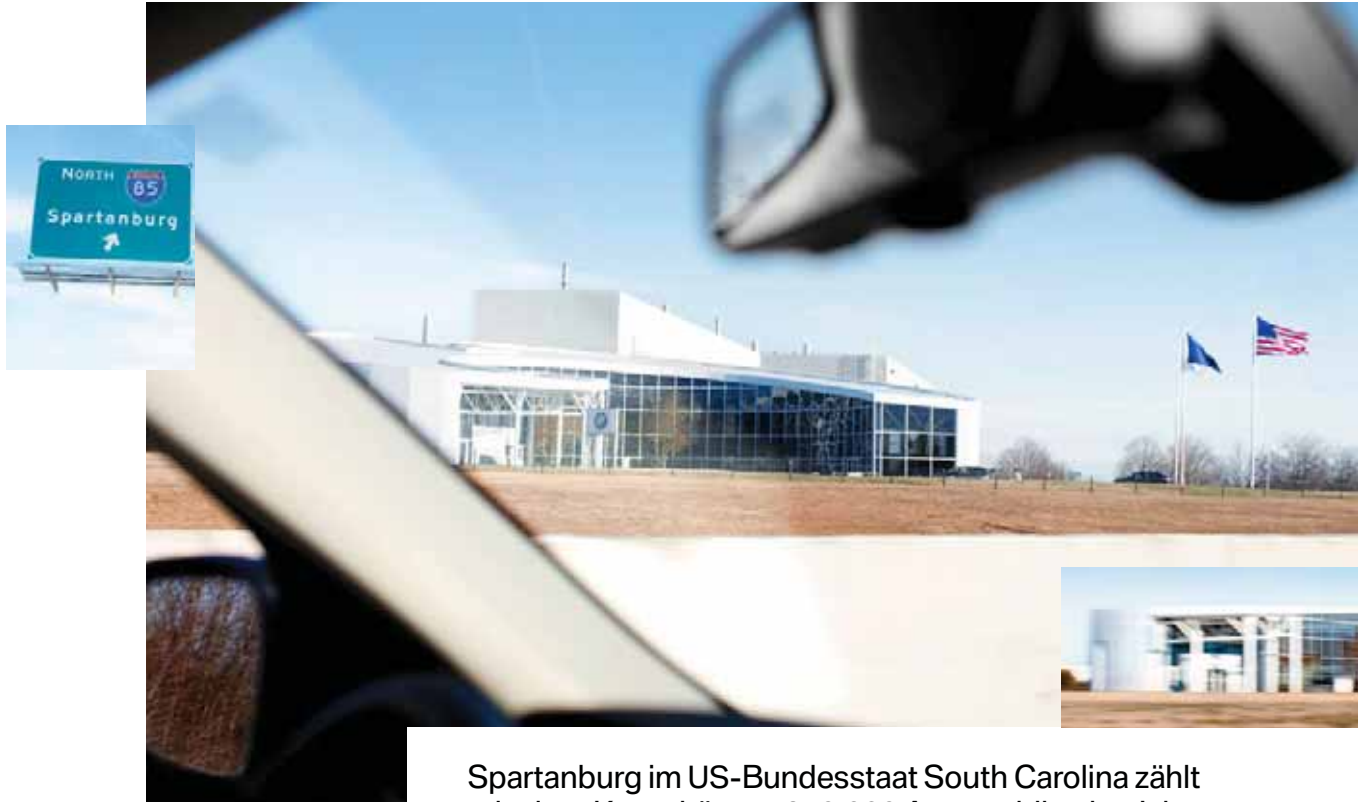

Spartanburg im US-Bundesstaat South Carolina zählt mit einer Kapazität von 240.000 Automobilen im Jahr zu den wichtigsten Standorten im Produktionsnetz der BMW Group. Für die Fertigung des neuen BMW X3 wurde das Werk in den vergangenen Jahren für etwa 750 Millionen US-Dollar erweitert. Damit schützt sich die BMW Group durch Natural Hedging noch stärker vor Wechselkursrisiken.

2 Grad Celsius am Morgen

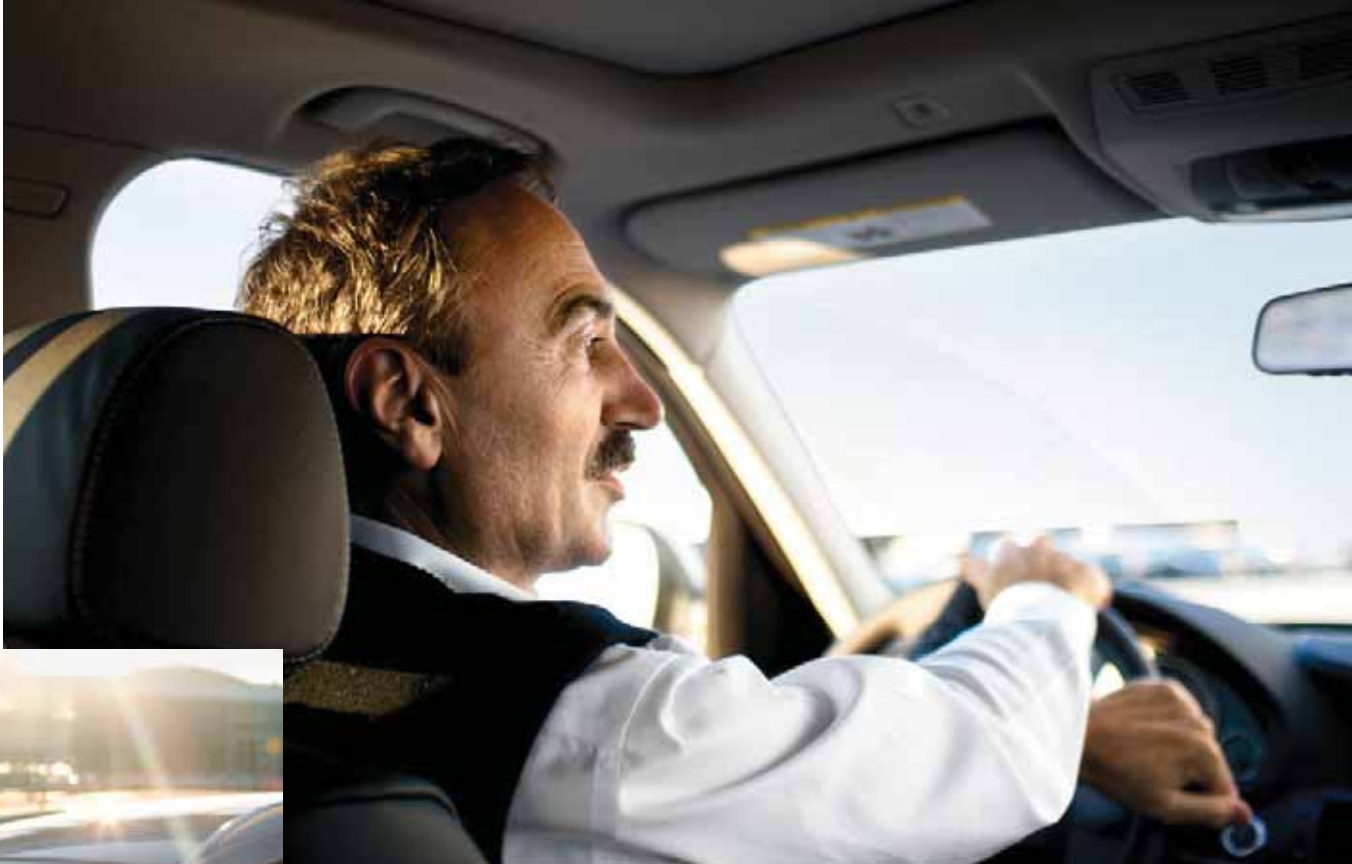

10:21 — BMW Werk Spartanburg, Eingang West

Während in der neuen, 1,6 Kilometer langen Werkshalle noch die letzten Maschinen installiert werden, läuft die Produktion des neuen BMW X3 bereits auf Hochtouren. Mit insgesamt 1.000 Fahrzeugen pro Tag einschließlich BMW X5 und X6 arbeitet das Werk Spartanburg bereits an der Grenze seiner erweiterten Kapazitäten. Und Josef Kerscher, der Werksleiter, hat alle Hände voll zu tun.

### Spartanburg, South Carolina, USA, 20. Januar 2011

10:33 — Einlasskontrolle am Werkstor

„Nirgendwo sonst ist das Auf und Ab von Kursen, Märkten und ganzen Volkswirtschaften in den vergangenen Jahren derart spürbar gewesen wie in den Vereinigten Staaten. Fast jeder hat hier Freunde oder Verwandte, die in der Wirtschaftskrise ihren Arbeitsplatz, ihr Haus, nicht selten sogar beides verloren haben. Den Druckwellen der weltweiten Rezession konnte sich natürlich auch die BMW Group nicht vollständig entziehen. Aber wir verfügen über Mittel und Möglichkeiten, ihre Auswirkungen wirksam zu dämpfen. Eines entsteht gerade hier, vor unseren Augen.“

Hier kommt's auf jeden Millimeter an.

Maßarbeit à la BMW

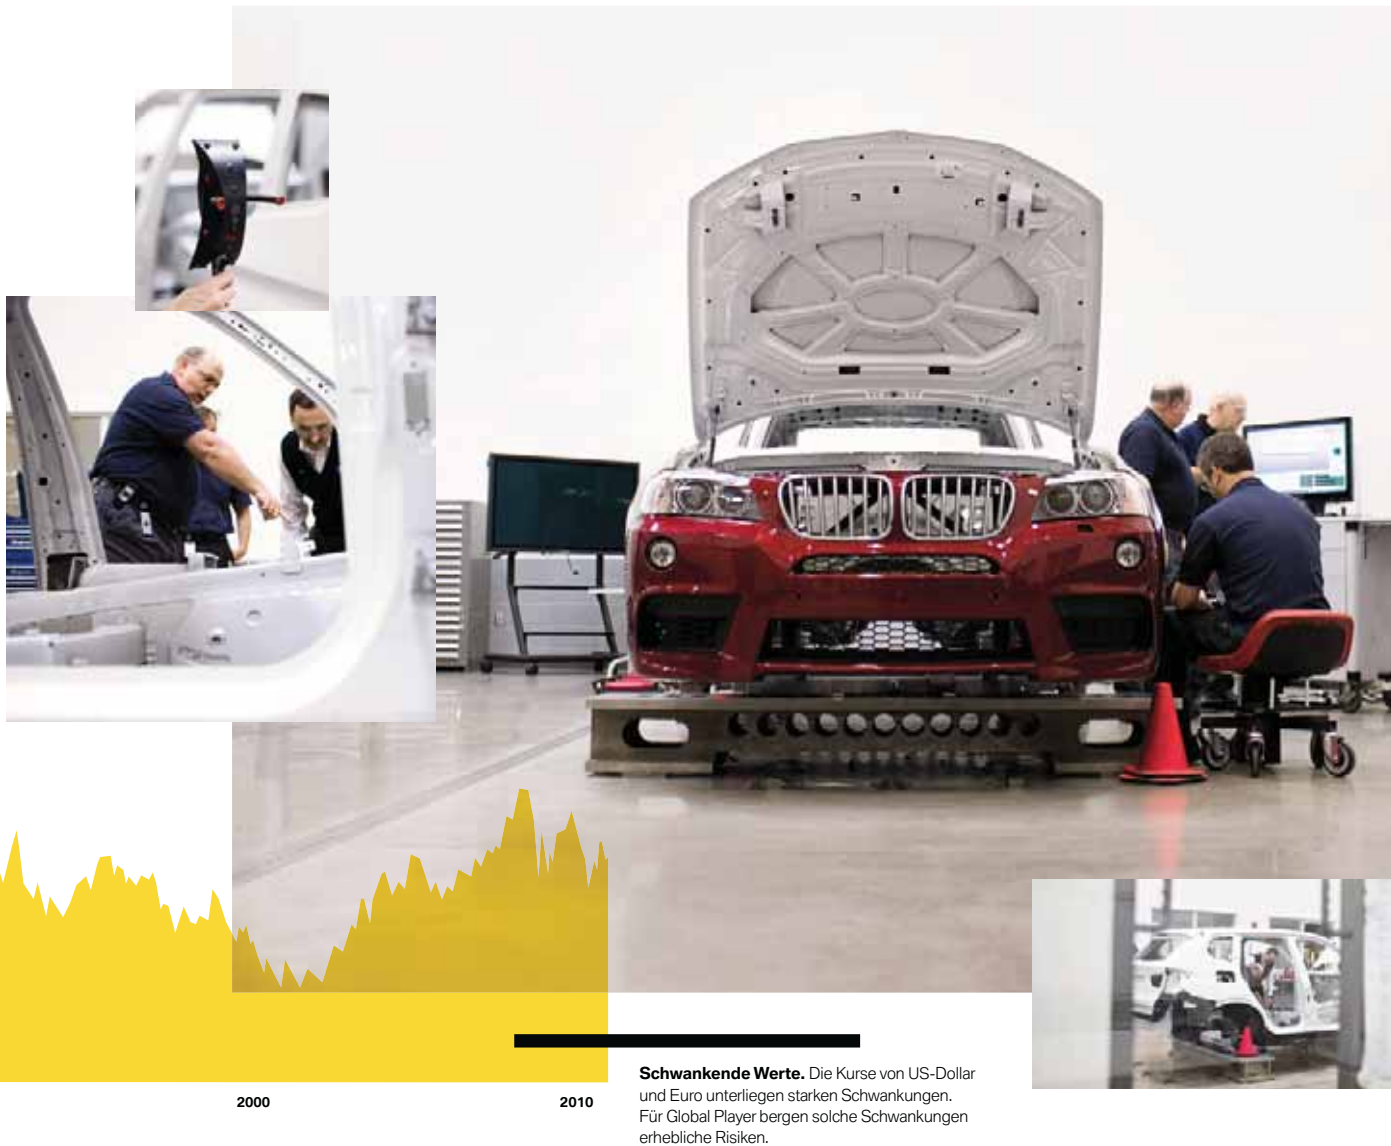

#### 11:14 ——— Komponentenprüfung im Prüfcubing-Center

„Seit 1994 bauen wir in Spartanburg Automobile. Dies war bereits ein bedeutender Beitrag zur Optimierung unserer globalen Wertschöpfung. Die Entscheidung zur Verlagerung der BMW X3 Produktion, der Ausbau unserer Kapazitäten von 150.000 auf 240.000 Fahrzeuge pro Jahr und die Investition von 750 Millionen US-Dollar sind ein weiterer wichtiger Schritt.“

Wir haben die Werkserweiterung genutzt, um in den letzten zwei Jahren unsere Produktionskapazitäten zu modernisieren. Mit Innovationen wie einer extrem emissionsarmen Lackierstraße, einer der größten Wasserstoff-Gabelstaplerflotten, Energiegewinnung aus dem Methangas einer Mülldeponie und seiner äußerst flexiblen Montagearchitektur zählt Spartanburg heute zu den nachhaltigsten Automobilwerken und setzt weltweit Maßstäbe.“

Hochbetrieb im Material-Bahnhof

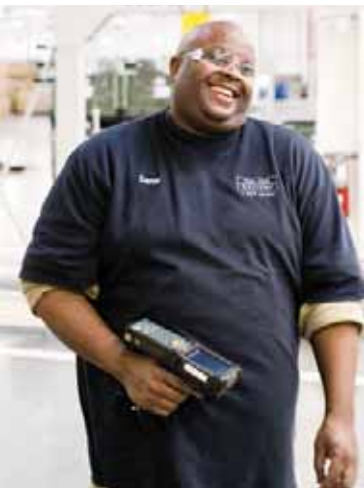

Rund  
**70%**

US-Dollar

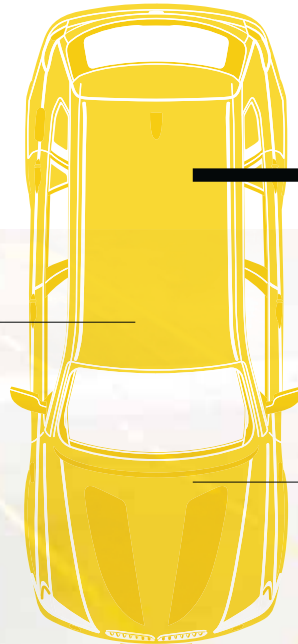

**Lokale Wertschöpfung.** Die Modelle der X Familie im BMW Werk Spartanburg werden mit einem hohen Anteil an lokaler Wertschöpfung gefertigt. Dazu gehören sowohl der Einkauf in den NAFTA-Ländern USA, Kanada und Mexiko als auch die Lohn- und Produktionskosten in lokaler Währung.

Rund  
**30%**

Euro  
(und andere Währungen)

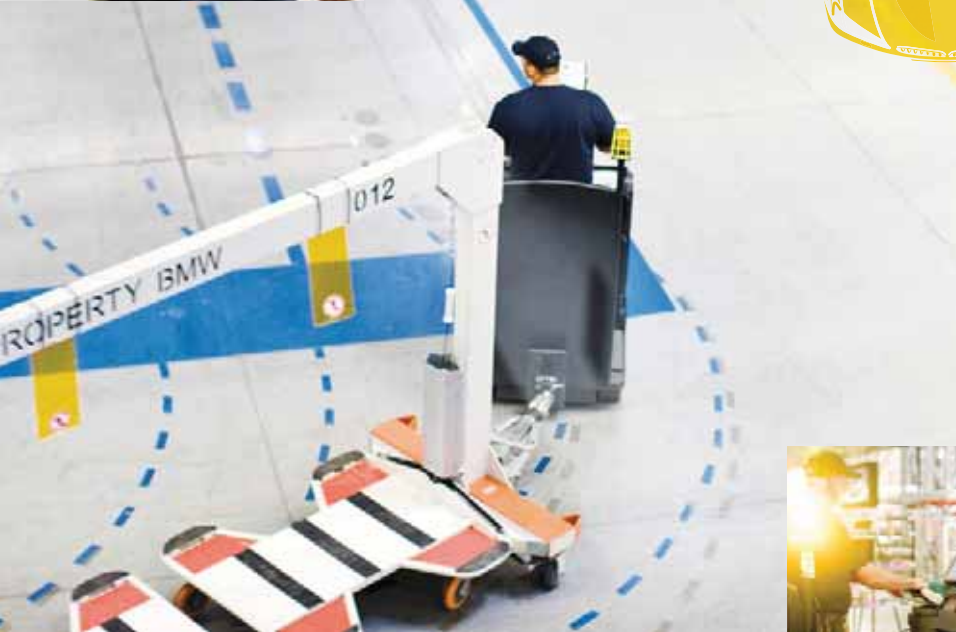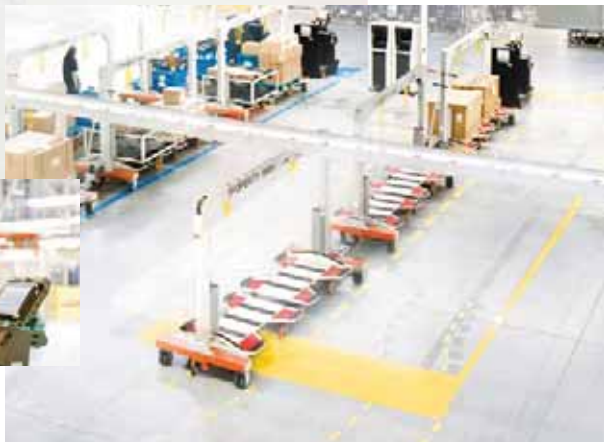

12:14 — Komponentenauslieferung mit der Material-Train-Flotte

„Zu den Dingen, die wir perfekt beherrschen, gehört der Bau von ausgezeichneten Premiumfahrzeugen. Es gibt andere Dinge, auf die wir naturgemäß wenig Einfluss haben. Dazu gehören Konjunkturzyklen und schwankende Devisenkurse, die aber dennoch unser Ergebnis spürbar beeinflussen. Was liegt näher, als den Einfluss des einen zu minimieren, um Ressourcen und Kräfte ganz auf das andere, Entscheidende konzentrieren zu können?“



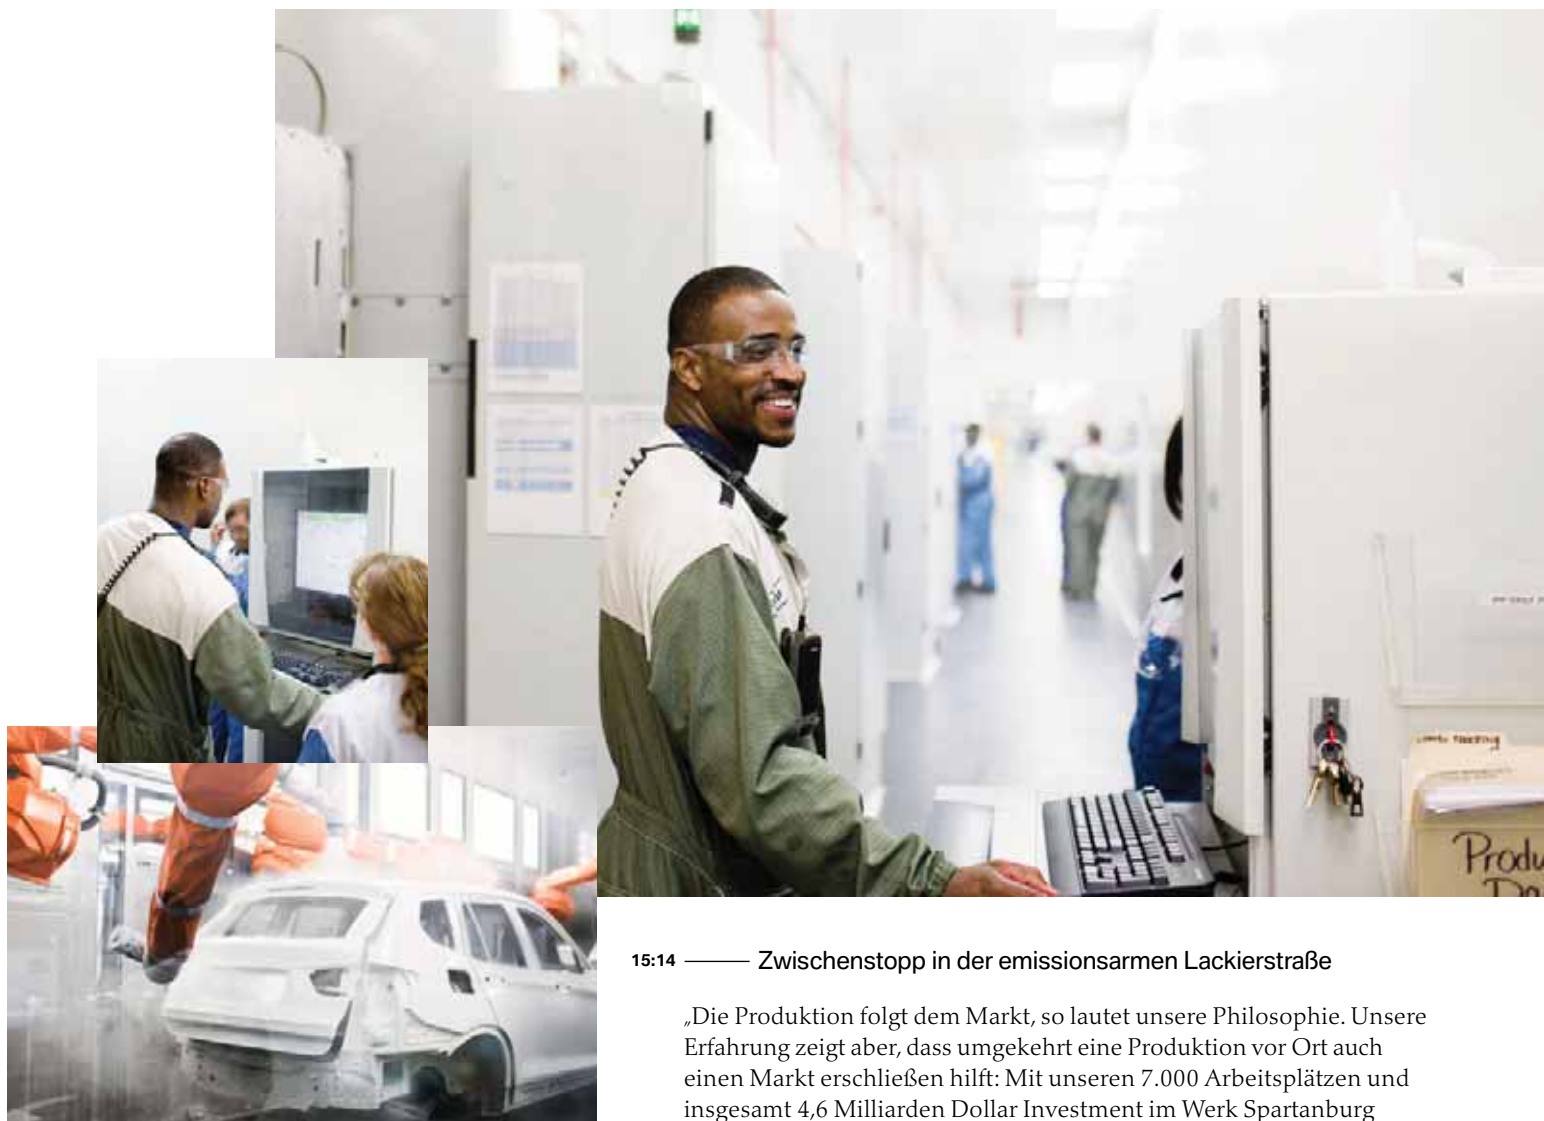

#### 15:14 — Zwischenstopp in der emissionsarmen Lackierstraße

„Die Produktion folgt dem Markt, so lautet unsere Philosophie. Unsere Erfahrung zeigt aber, dass umgekehrt eine Produktion vor Ort auch einen Markt erschließen hilft: Mit unseren 7.000 Arbeitsplätzen und insgesamt 4,6 Milliarden Dollar Investment im Werk Spartanburg gelten wir mittlerweile als amerikanisches Unternehmen, das von Amerikanern enorm wertgeschätzt wird. Ein Drittel der Fahrzeuge, die wir in Spartanburg fertigen, verkaufen wir daher gleich hier im Lande. BMW ist heute die meistverkaufte europäische Premiummarke in den USA. Und nach all dem, was wir an Begeisterung für den neuen BMW X3 verspüren, dürfte dieser Vorsprung in Zukunft noch wachsen.“

#### 16:12 — Fahrwerk- und Bremsenprüfstand

„Einige Mitarbeiter aus Spartanburg unterstützen derzeit beim Ausbau des Werks in Shenyang, andere stehen den Kollegen im indischen Chennai zur Seite, wo die Nachfrage nach Automobilen der BMW Group ebenfalls kontinuierlich wächst. Natürlich sind die Herausforderungen, Produktionsbedingungen und Märkte lokal sehr unterschiedlich. Überall aber arbeiten wir letztlich am gleichen Projekt: der Optimierung unserer globalen Wertschöpfung.“

Ein Lächeln heißt: Dieser Wagen ist okay.

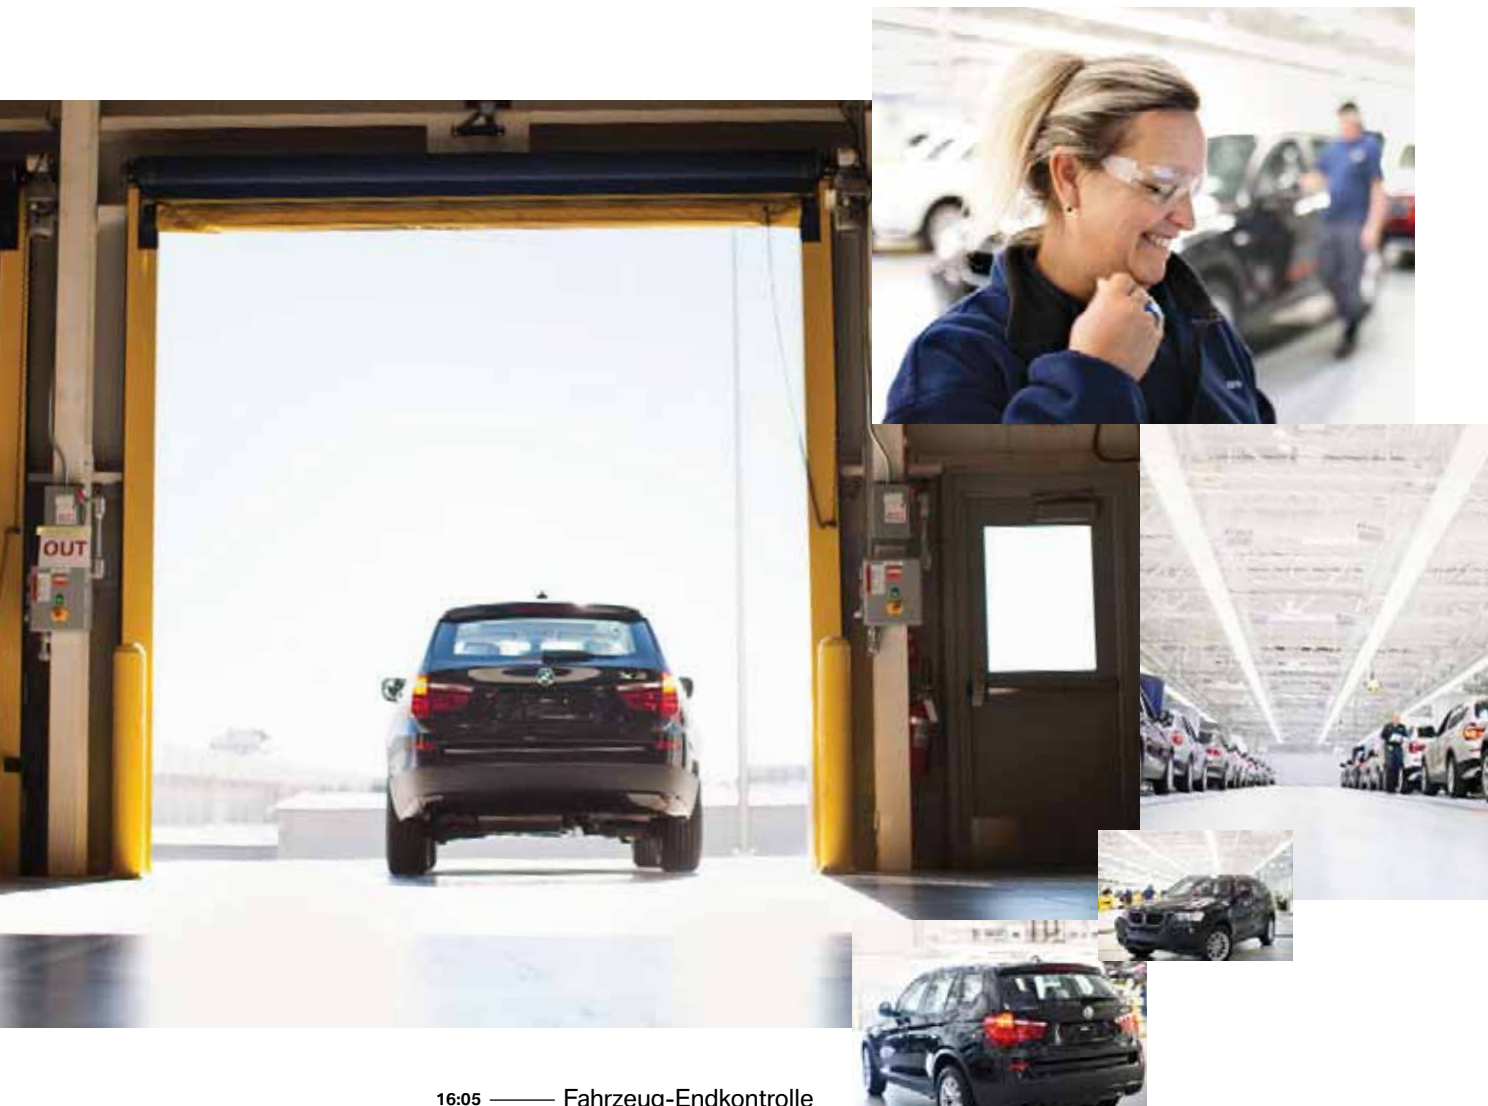

16:05 — Fahrzeug-Endkontrolle

„Vor gut vier Jahren, als ich die Leitung des Werks in Spartanburg übernahm, lag der Eurokurs bei etwa 1,30 US-Dollar. Seither ist er mal auf rund 1,60 geklettert, um zwischenzeitlich auf 1,20 Dollar abzusacken. Historisch gesehen sind das eher moderate Kursschwankungen. Aber für unsere Profitabilität machen sie einen enormen Unterschied.“

Wintersonne auf dem Verladeplatz

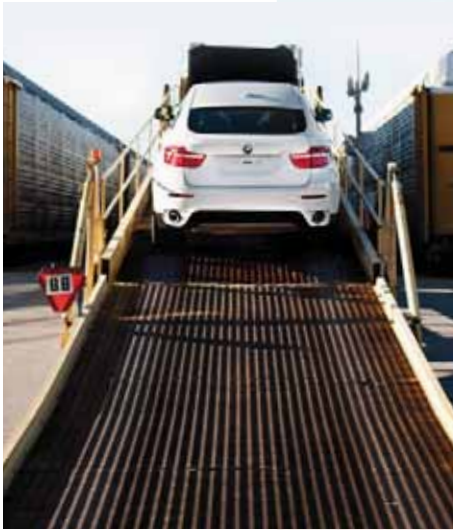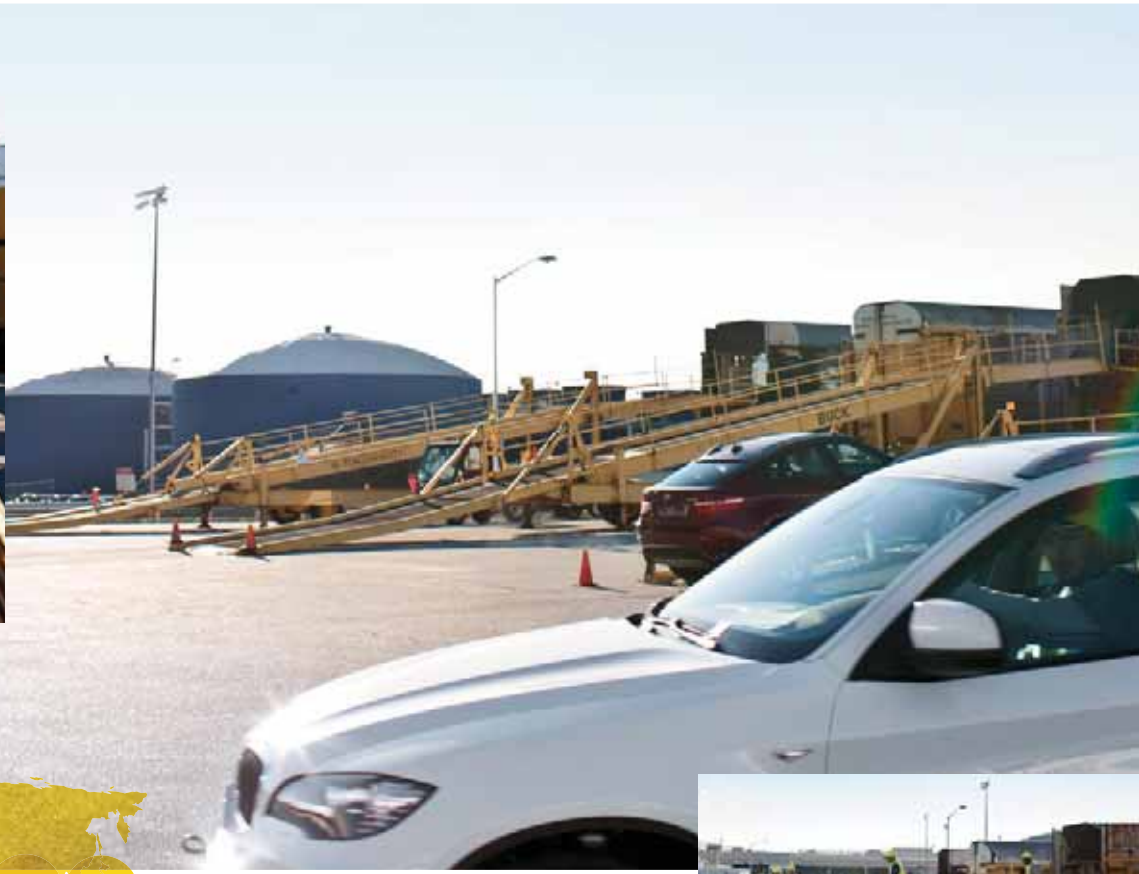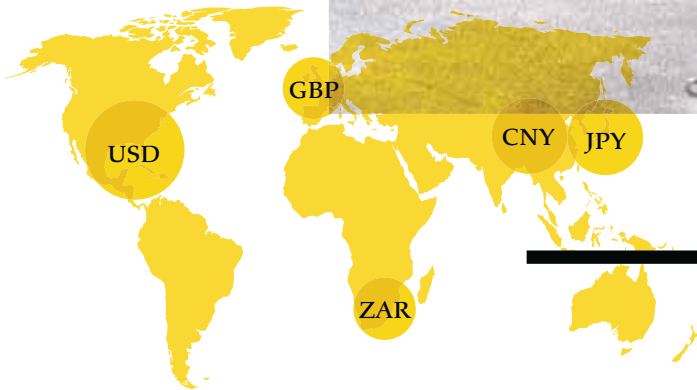

**Globales Gleichgewicht.** Mit ihrem weltweiten Produktions- und Einkaufsnetzwerk vermag die BMW Group Währungs- und Konjunkturschwankungen auszubalancieren.

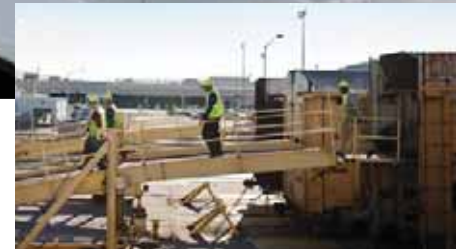

#### 17:35 — BMWs auf dem Weg zum Markt

„Schallisierungen aus South Carolina, Spritzgussteile aus Tennessee, Tanksysteme aus Georgia, Kabelbäume, Steuerungseinheiten und Scheinwerfer aus Mexiko – die Liste der Bauteile, die irgendwo in Nordamerika gefertigt und per LKW direkt an unsere Montagebänder geliefert werden, ist sehr lang. Rund zwei Drittel unserer Komponenten kommen aus Staaten der NAFTA-Region und werden von uns in US-Dollar bezahlt. Für uns bedeutet das, dass wir – egal wie sich das Verhältnis von US-Dollar zu Euro entwickelt – in Nordamerika immer wettbewerbsfähig agieren können.“

Mit dem Produktionsstart des BMW X3 haben wir unser Gesamt-Einkaufsvolumen in der NAFTA-Region noch einmal um 60 Prozent gesteigert. Und unser Einkaufsbüro in Mexiko-Stadt arbeitet stetig daran, den Anteil der lokalen Wertschöpfung weiter auszubauen.“

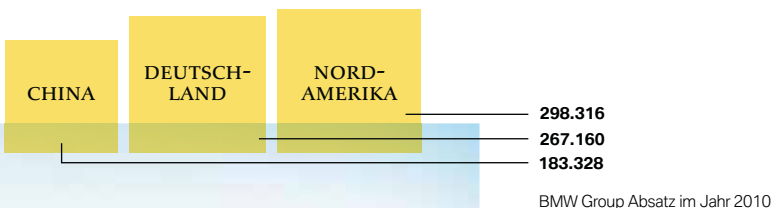

**Wichtigste Absatzmärkte.** In den USA gilt BMW unter allen europäischen Premiummarken als die beliebteste. Für die BMW Group wiederum sind die USA nach Deutschland der weltweit zweitwichtigste Absatzmarkt. Weltweit hat das Unternehmen im vergangenen Jahr fast 1,5 Mio. Fahrzeuge verkauft.

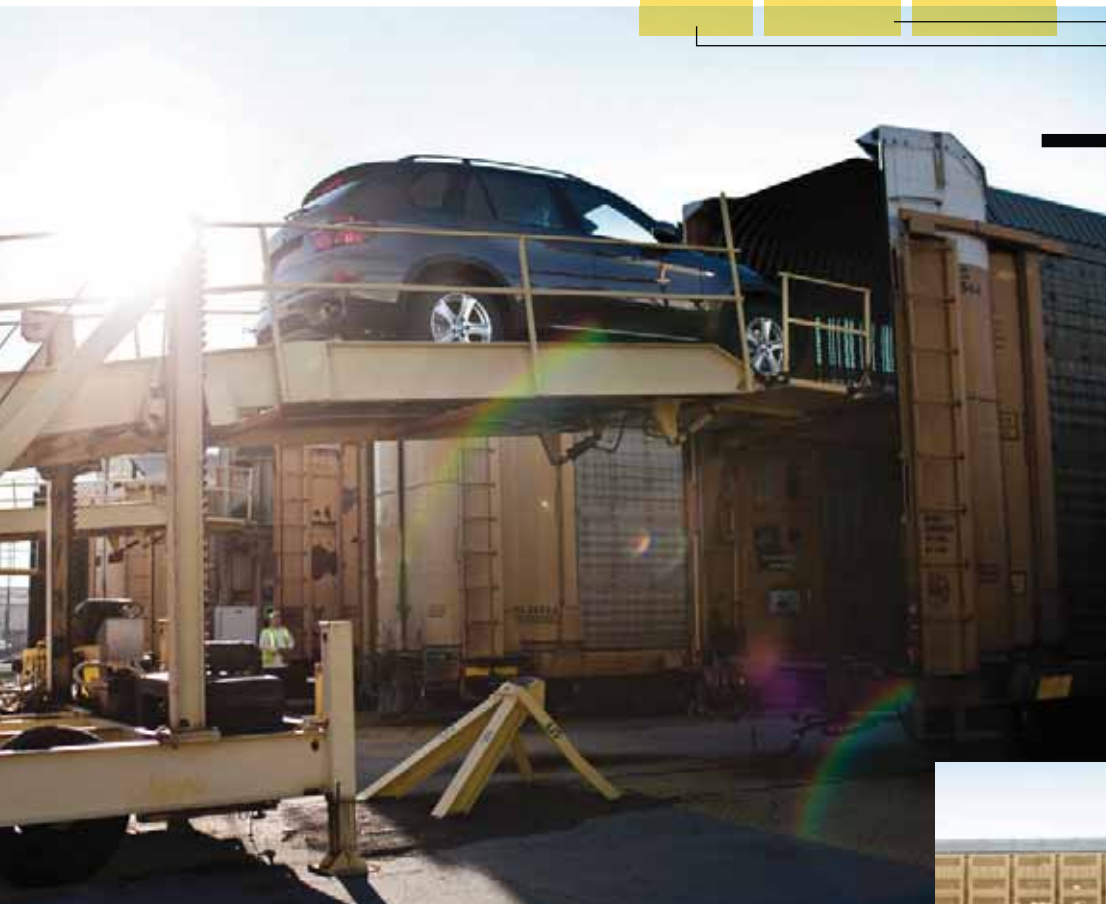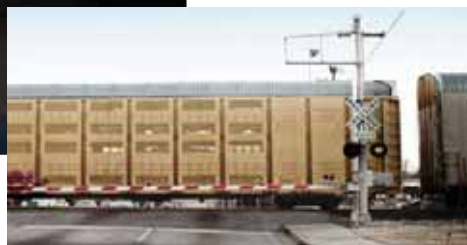

Wie alle Instrumente des Natural Hedging entfaltet das Werk Spartanburg seine volle Wirkung erst im Laufe der Zeit. Dann aber bietet es für die BMW Group einen ebenso langfristigen wie spürbar stärkeren Schutz vor Währungsrisiken.

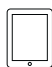

Geschäftsbericht 2010 als iPad App

# HIGHLIGHTS 2010 >>

Von der Freude,  
auf eigenen Wegen unterwegs zu sein

## » **GLÜCKSMOMENTE**

Mehr als 1,46 Millionen Kunden haben im vergangenen Jahr von uns ein neues Fahrzeug in Empfang genommen.

BMW 5er Limousine

BMW X3

BMW 5er Touring

MINI Countryman

BMW ActiveHybrid 7

BMW Motorrad R1200 RT

## » **AUTO CHINA 2010, PEKING**

## » **WIR BAUEN DIE ZUKUNFT**

## » **50 JAHRE EIGENSTÄNDIGKEIT**

# GLÜCKSMOMENTE

---

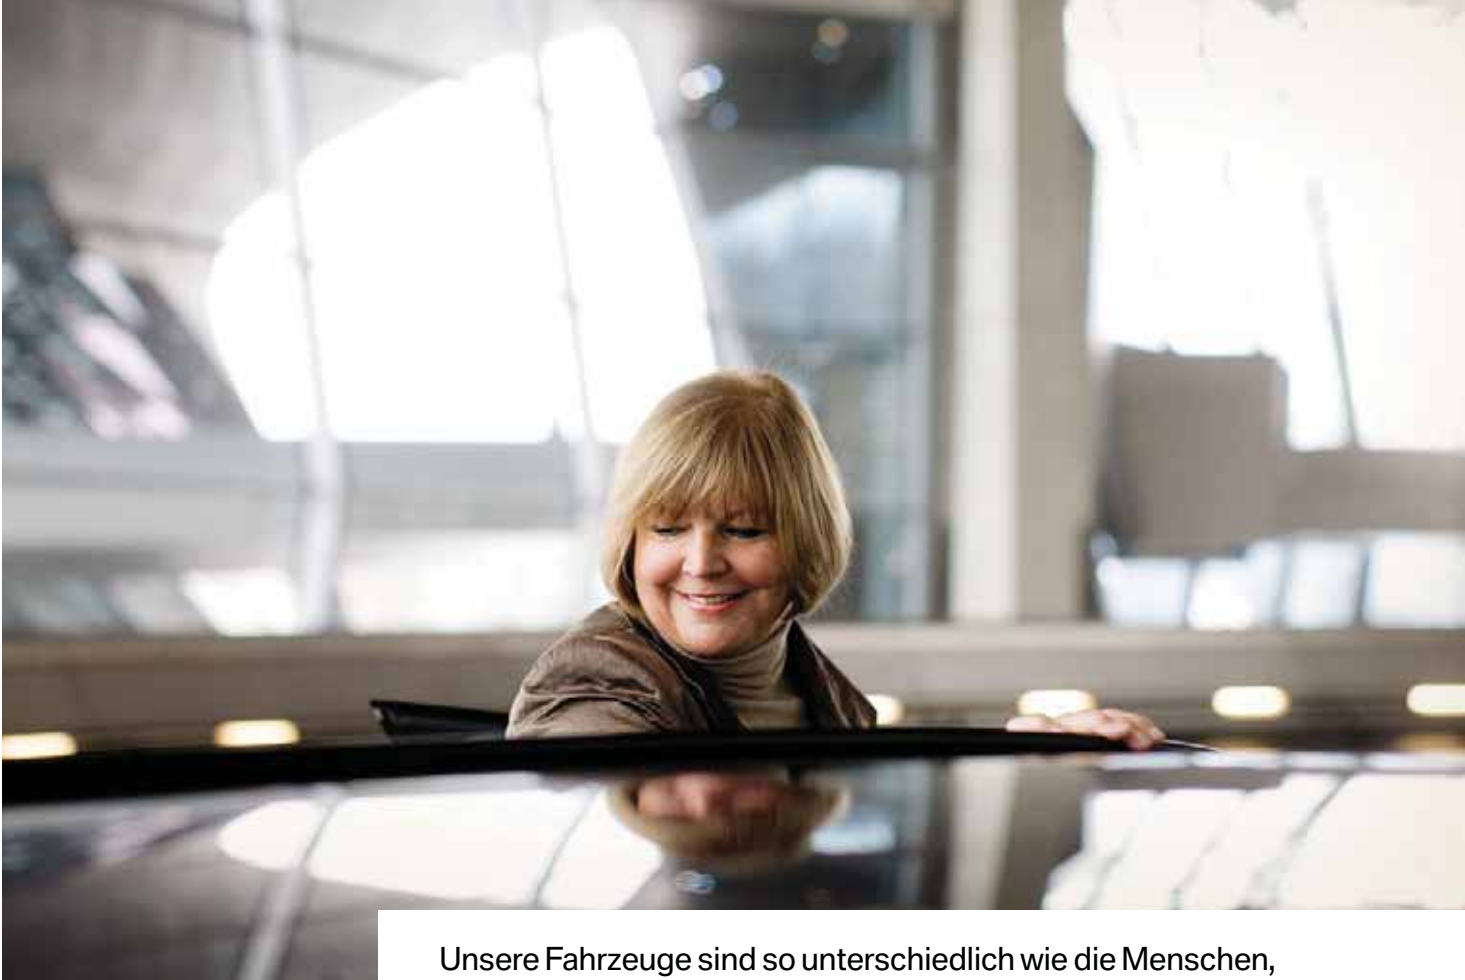

Unsere Fahrzeuge sind so unterschiedlich wie die Menschen, die damit unterwegs sind. Für jeden von ihnen aber gibt es einen speziellen Moment voller Glück und Freude: jenen, in dem er sein Fahrzeug das erste Mal erfährt.

Worauf freuen Sie sich am meisten?

„Auf das perfekte Design des neuen BMW 5er. Auf erfreuliche Details wie das BMW ConnectedDrive Paket. Auf die Gewissheit, genau die richtige Wahl getroffen zu haben.“ Florian Körner und Christina Middrup, 14. Dezember 2010, BMW Welt München

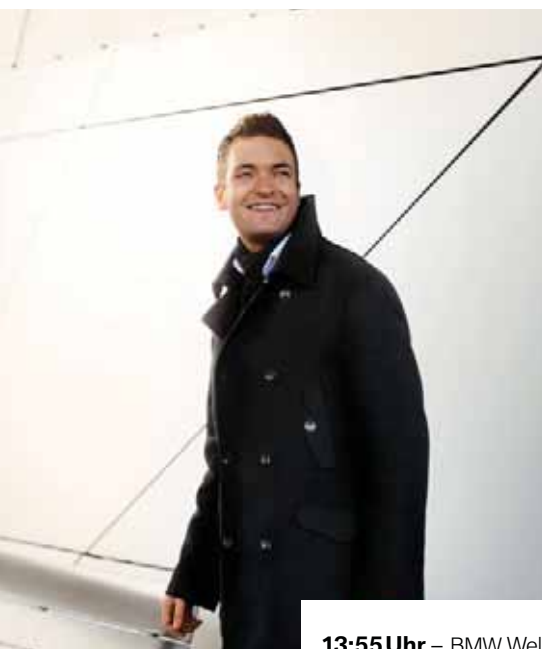

13:55 Uhr – BMW Welt München: Vorfreude

## BMW 5er Limousine

Freude am Fahren kennt viele Ausprägungen. In der neuen BMW 5er Limousine, Inbegriff für Ästhetik und Dynamik in der oberen Mittelklasse, findet sie sich in Reinstform.



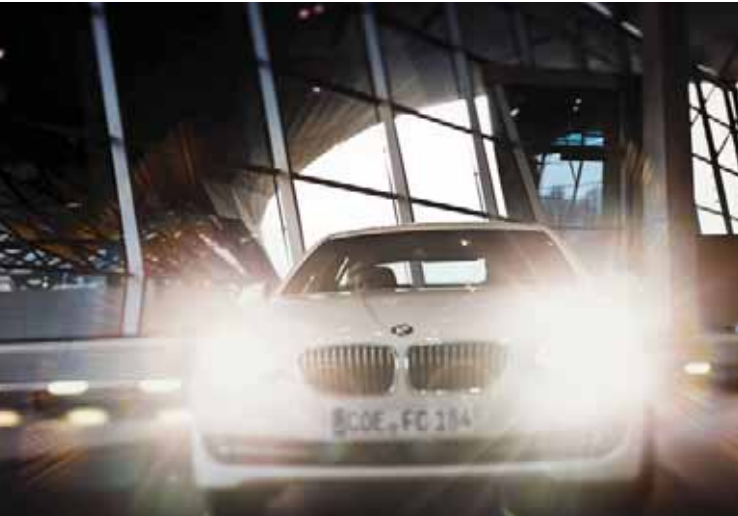

**14:53 Uhr** – BMW Welt München: Fahrfreude

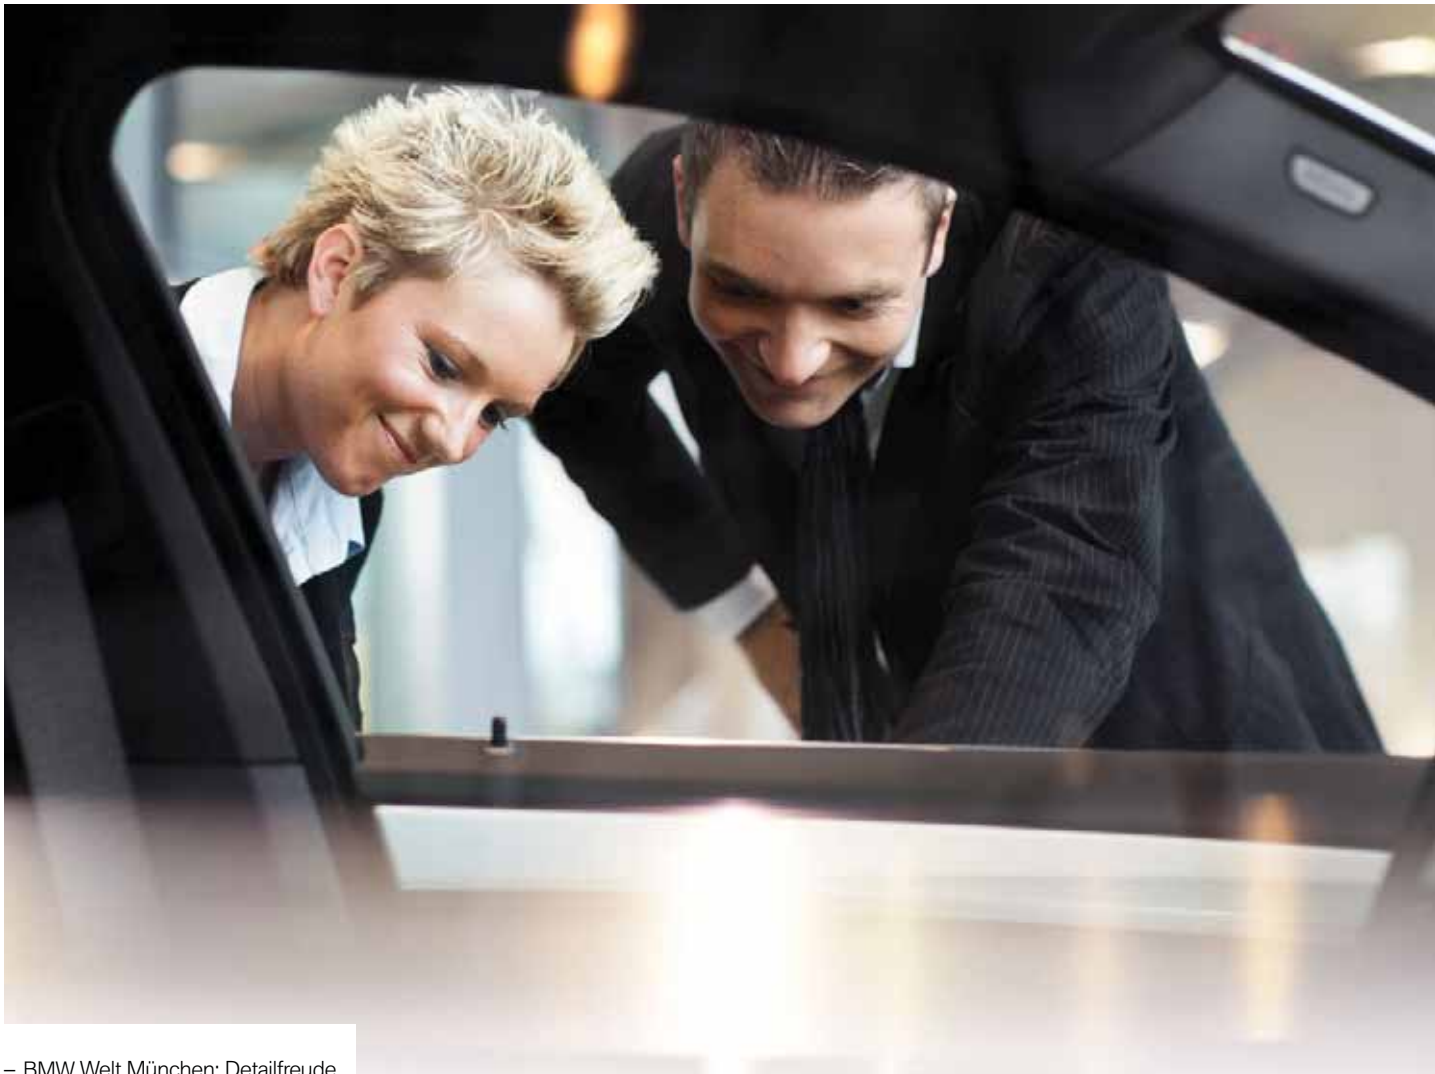

**14:22 Uhr** – BMW Welt München: Detailfreude

**9:55 Uhr** – BMW Welt München: beste Aussichten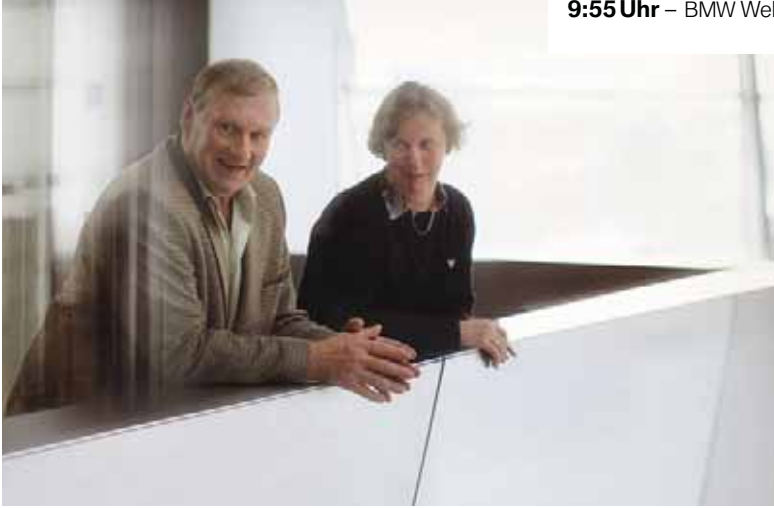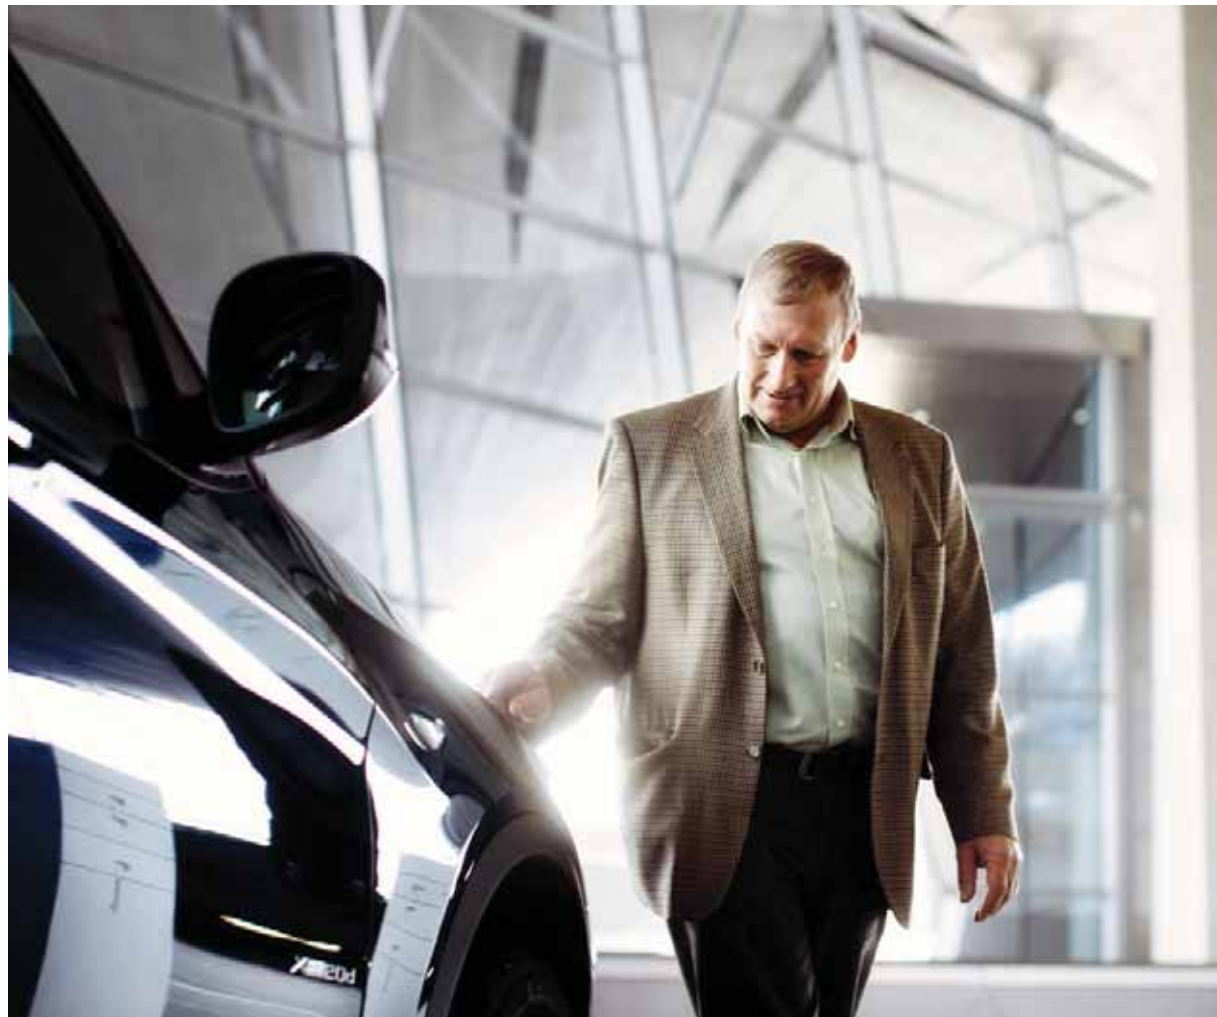

Worauf freuen Sie sich am meisten?

„Auf Verlässlichkeit bei jedem Wind und Wetter. Auf den xDrive-Antrieb, den keine Witterung aus der Ruhe bringen kann.“

Reiner und Heike Haselhorst, 14. Dezember 2010, BMW Welt München

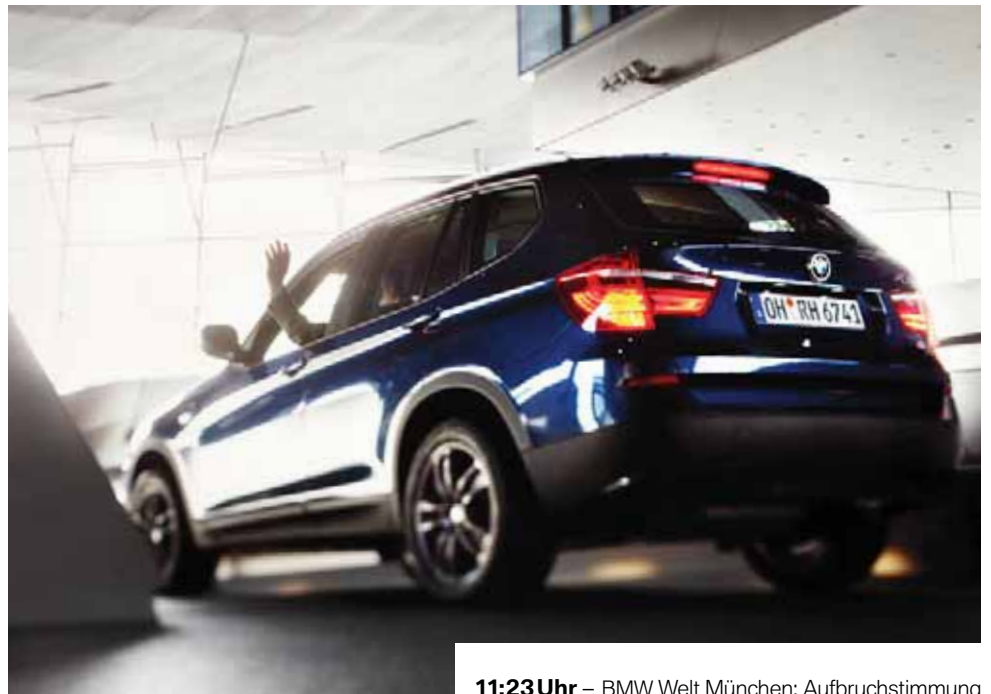

11:23 Uhr – BMW Welt München: Aufbruchstimmung

## BMW X3

Wohin auch immer der Weg führt: Mit seinem xDrive meistert der BMW X3 auch unwirtlichste Straßen- und Witterungsverhältnisse. Und definiert gleichzeitig das Verhältnis von Kraft und Eleganz auf völlig neue Art.

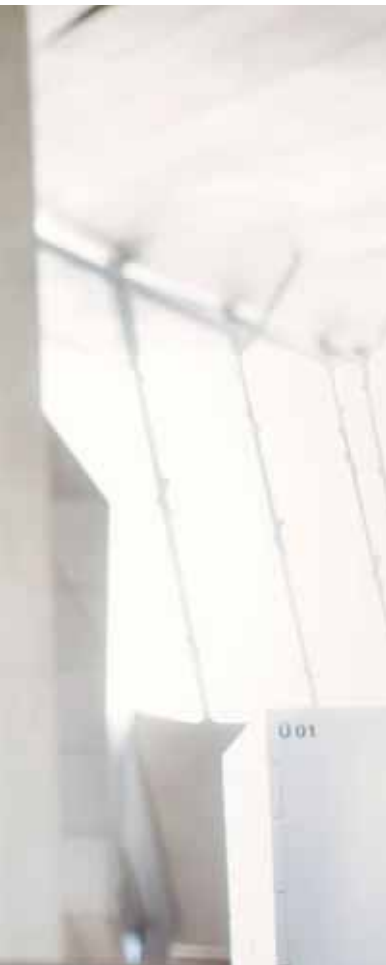

10:45 Uhr – BMW Welt München: Besitzerstolz

Worauf freuen Sie sich am meisten?

„Auf das Reisen mit einem Auto, das nicht nur elegant, sondern auch geräumig genug für Mitfahrer, Gepäck und meinen Labrador ist.“ Ute Kleine und Klaus Trompeter, 15. Dezember 2010, BMW Welt München

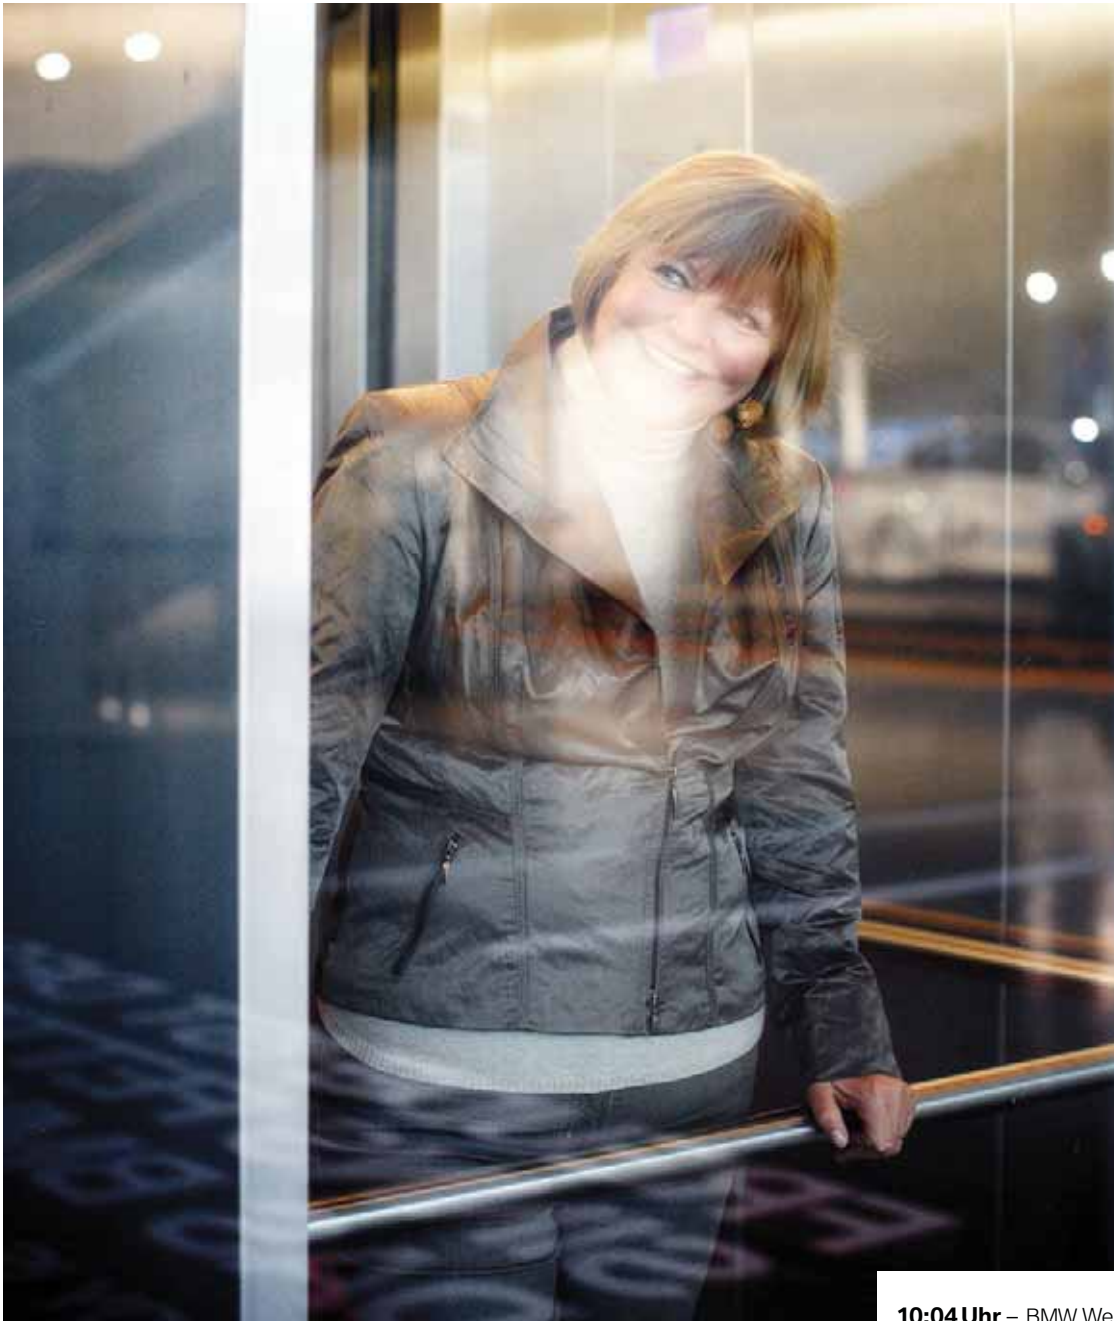

10:04 Uhr – BMW Welt München: optimistischer Ausblick

10:55 Uhr – BMW Welt München: geräumiger Einblick

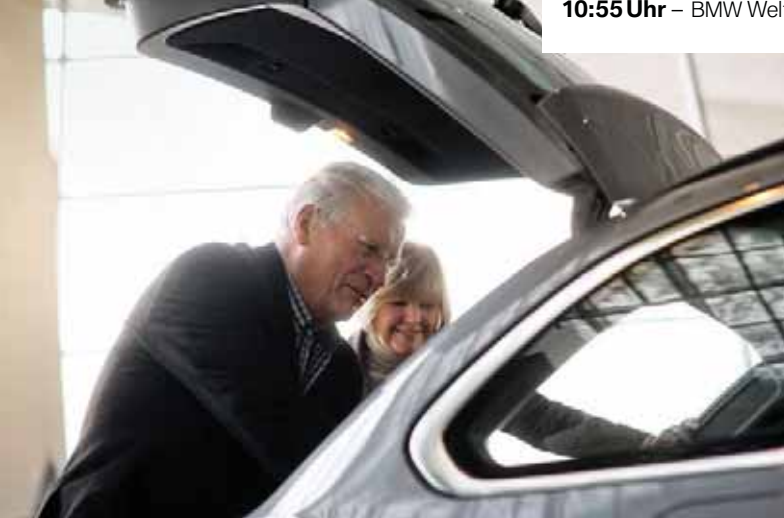

## BMW 5er Touring

Komfortable Mobilität heißt: genau so unterwegs sein können, wie es die Situation verlangt. Mit viel Gepäck auf der Langstrecke oder genügend Raum für den Einkauf zwischendurch, mit zwei- oder vierbeinigen Mitreisenden, immer aber elegant, flexibel und mit jenem Maximum an Freiheit, das dem BMW 5er Touring quasi eingebaut ist.

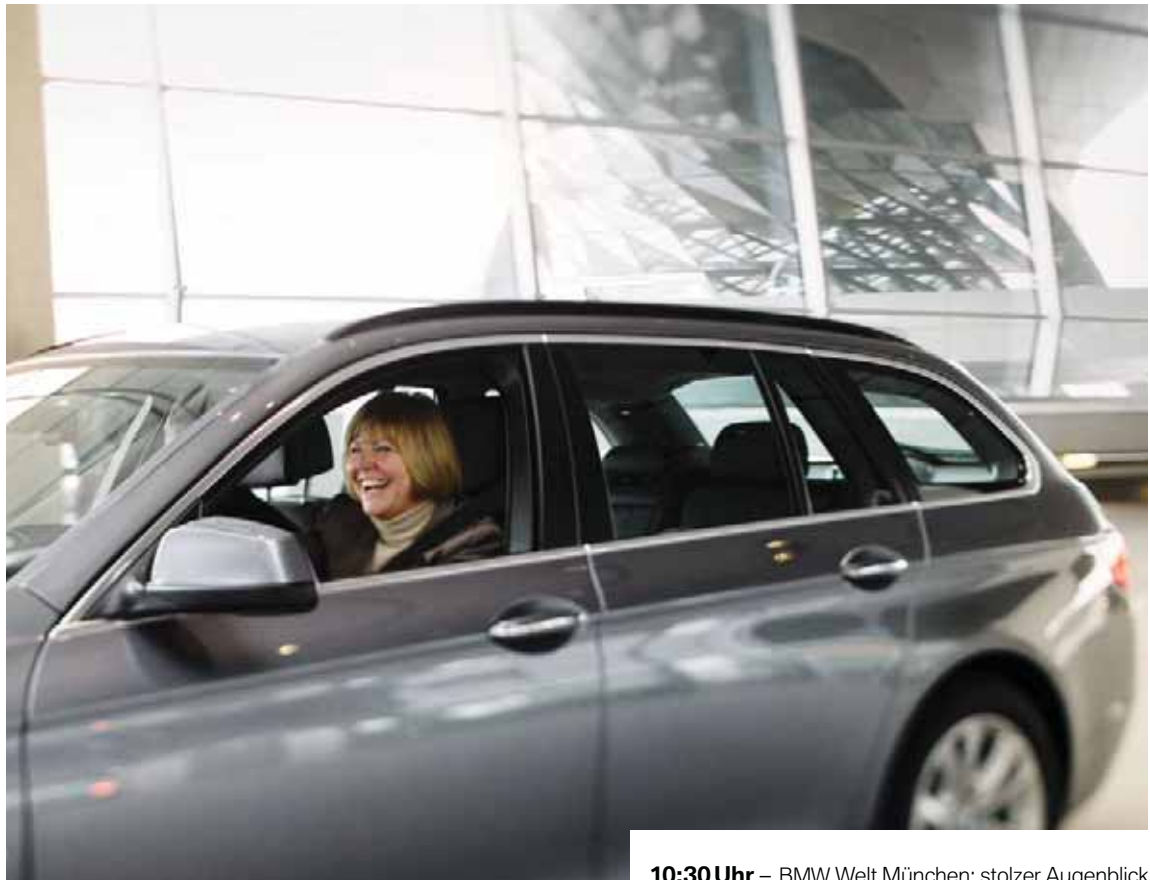

10:30 Uhr – BMW Welt München: stolzer Augenblick

Worauf freuen Sie sich am meisten?

„Auf einen Wagen, der nicht nur mein Equipment, sondern genauso mein Lebensgefühl als Profisportler transportiert: jung, dynamisch und mit viel Spaß an Bewegung.“

Michi Halilovic, 12. November 2010, MINI München

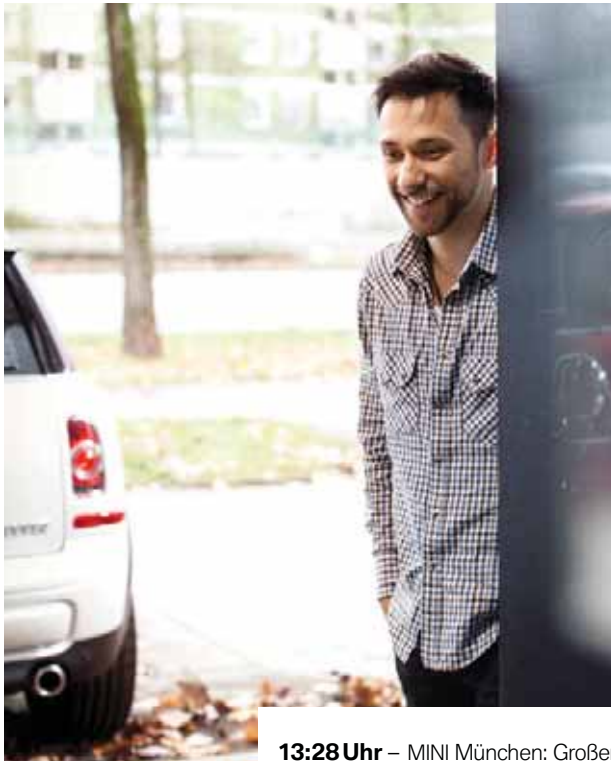

**13:28 Uhr** – MINI München: Großer Moment

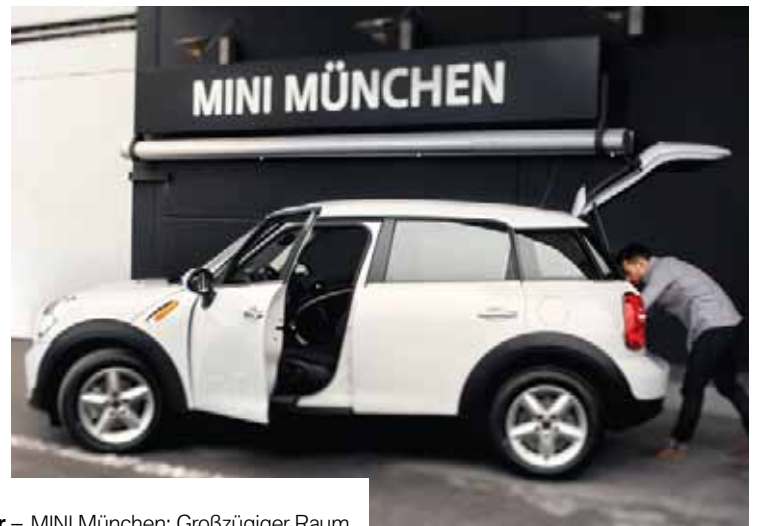

**15:25 Uhr** – MINI München: Großzügiger Raum

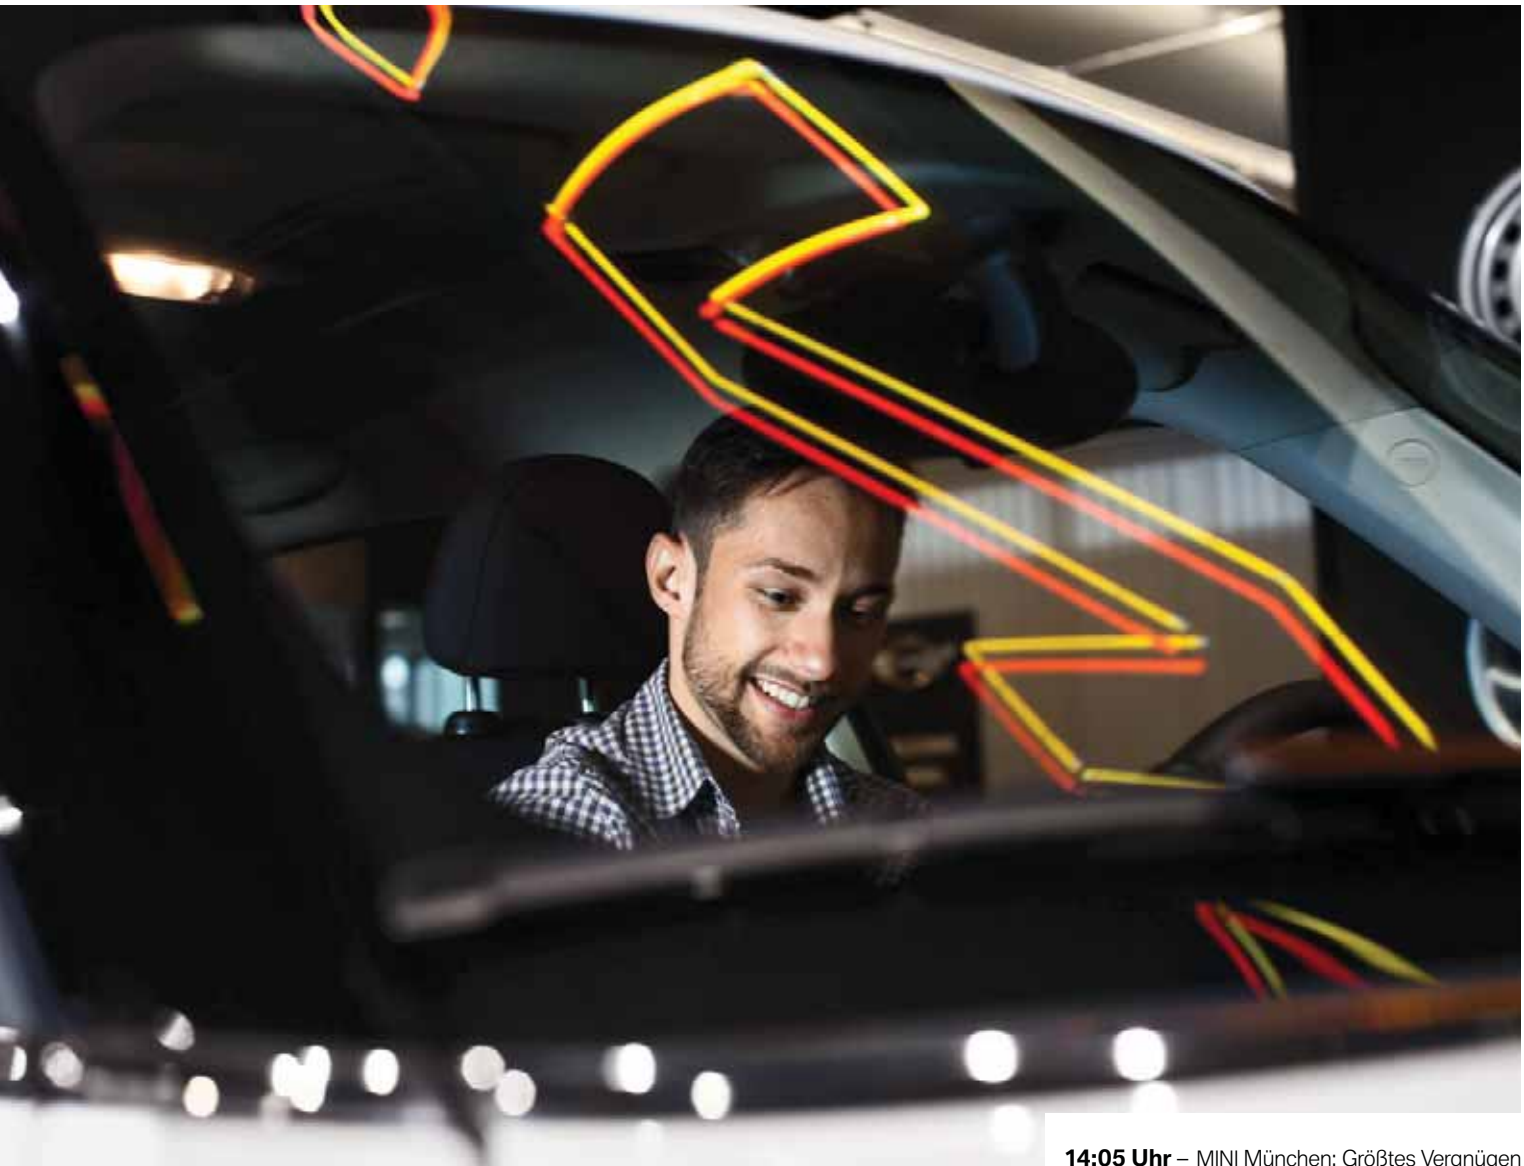

14:05 Uhr – MINI München: Größtes Vergnügen

## MINI Countryman

Der erste MINI mit vier Türen und mehr als vier Meter Länge – und dennoch unverkennbar MINI.

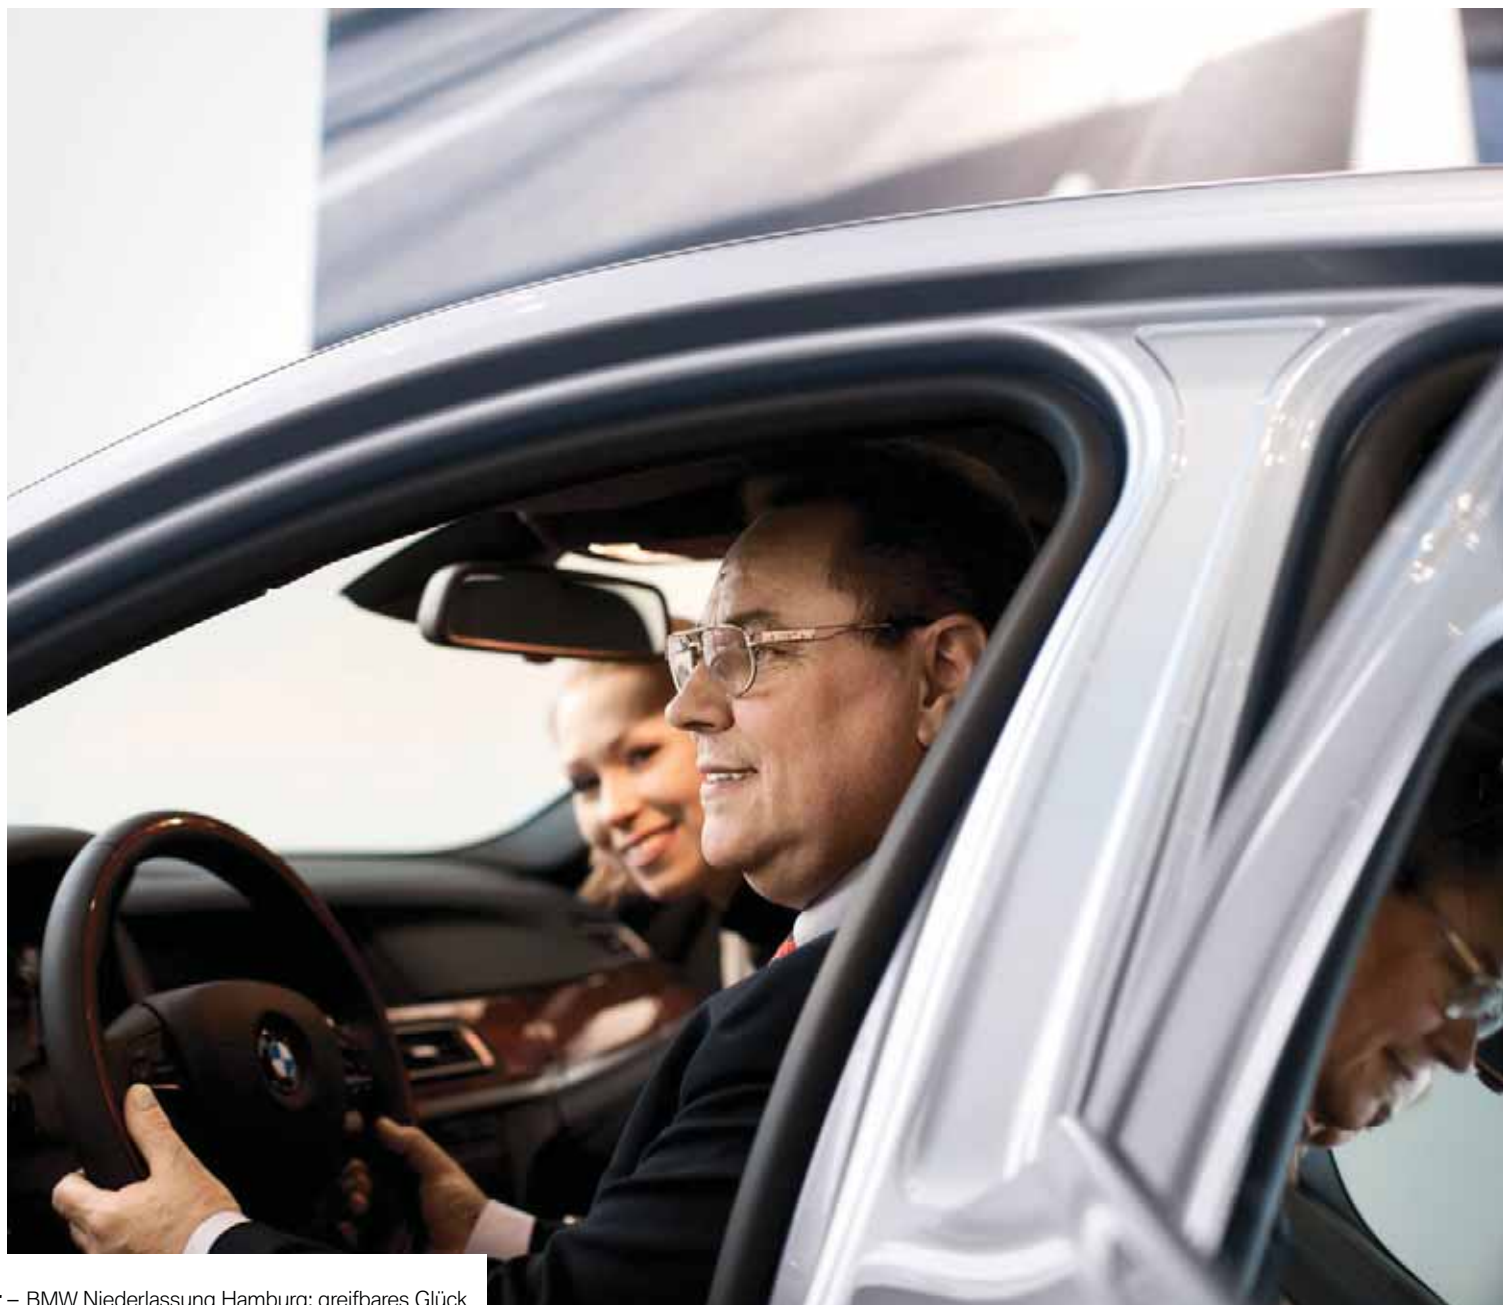

13:24 Uhr – BMW Niederlassung Hamburg: greifbares Glück

## BMW ActiveHybrid 7

Der BMW ActiveHybrid 7 geht eigene Wege – in Design, Dynamik, Komfort, Sicherheit und Effizienz. Mit seinem leistungsstarken ActiveHybrid-Antrieb bringt er Luxus in seiner bewusstesten Form auf die Straße.



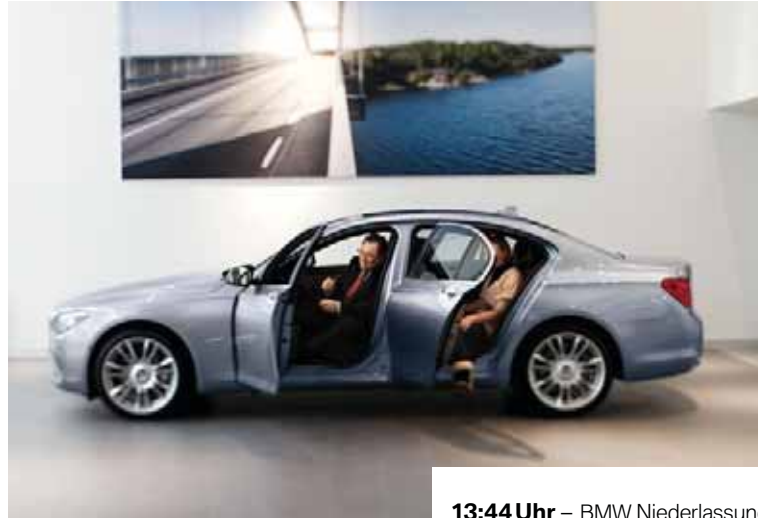

**13:44 Uhr** – BMW Niederlassung Hamburg: erfolgreiche Sitzprobe

Worauf freuen Sie sich am meisten?

„Auf jenes komfortable Unterwegssein, wie ich es bereits seit vielen Jahren von BMW Fahrzeugen kenne und schätze. Und auf die Chance, jetzt mit einem innovativen ActiveHybrid-Antrieb bewusst sparsamer zu fahren.“

Bernd Schymetzki und Janine Klitz-Schymetzki,  
17. Dezember 2010, BMW Niederlassung Hamburg

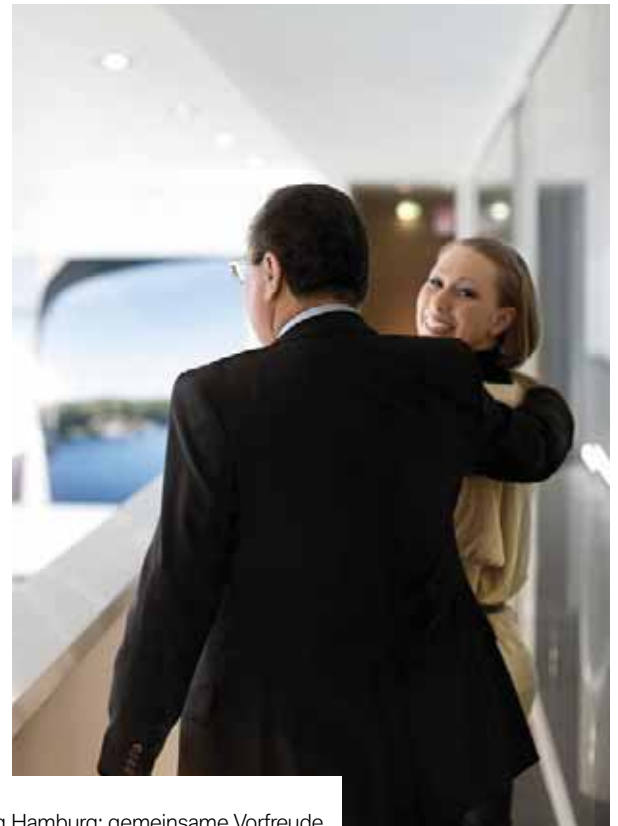

**13:10 Uhr** – BMW Niederlassung Hamburg: gemeinsame Vorfreude

Worauf freuen Sie sich am meisten?

„Auf vollen Fahrspaß mit 211 PS. Auf das offene Dach im Sommer. Auf Ausflüge über die Alpen, bis an den Gardasee.“

Birgit Kahnes, 24. Februar 2011, MINI München

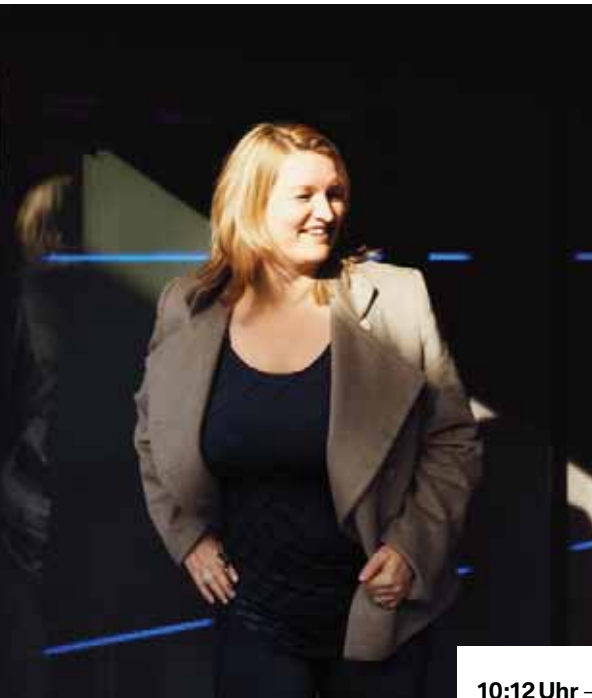

10:12 Uhr – MINI München: Erster Eindruck

## MINI John Cooper Works Cabrio

Es ist wendig. Es ist schnell. Es steht für sportlichen Fahrspaß mit modifiziertem Sechsganggetriebe und Hochleistungsantrieb. Mit anderen Worten: Das MINI John Cooper Works Cabrio ist der ideale Begleiter für alle, die dynamisch und elegant zugleich unterwegs sein wollen.

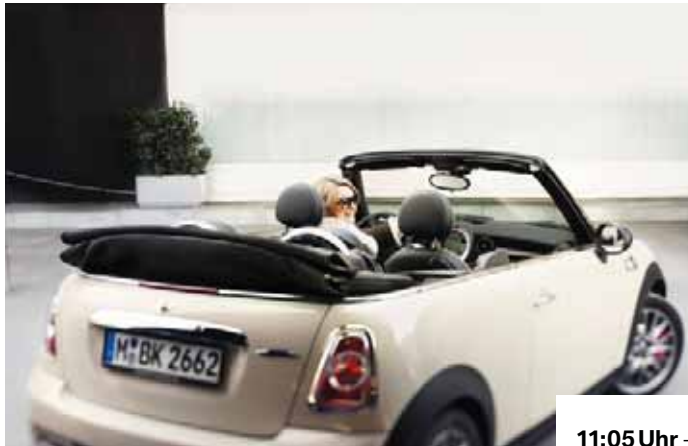

**11:05 Uhr** – MINI München: Voller Fahrspaß!

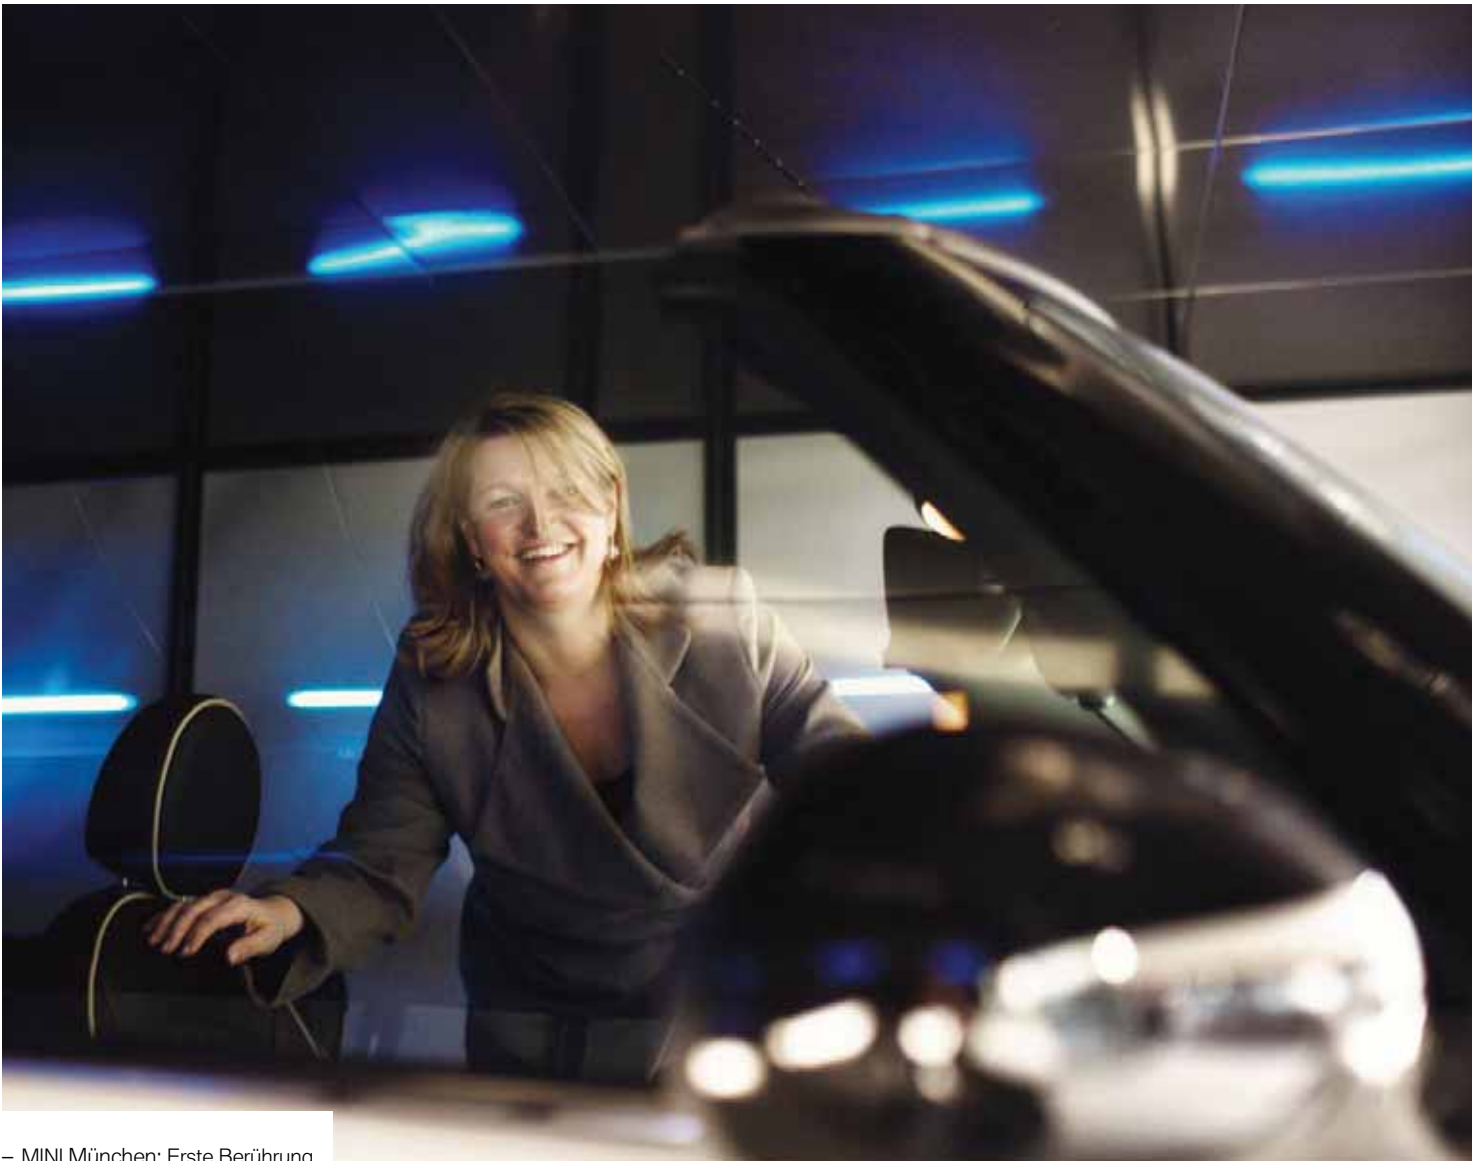

**10:21 Uhr** – MINI München: Erste Berührung

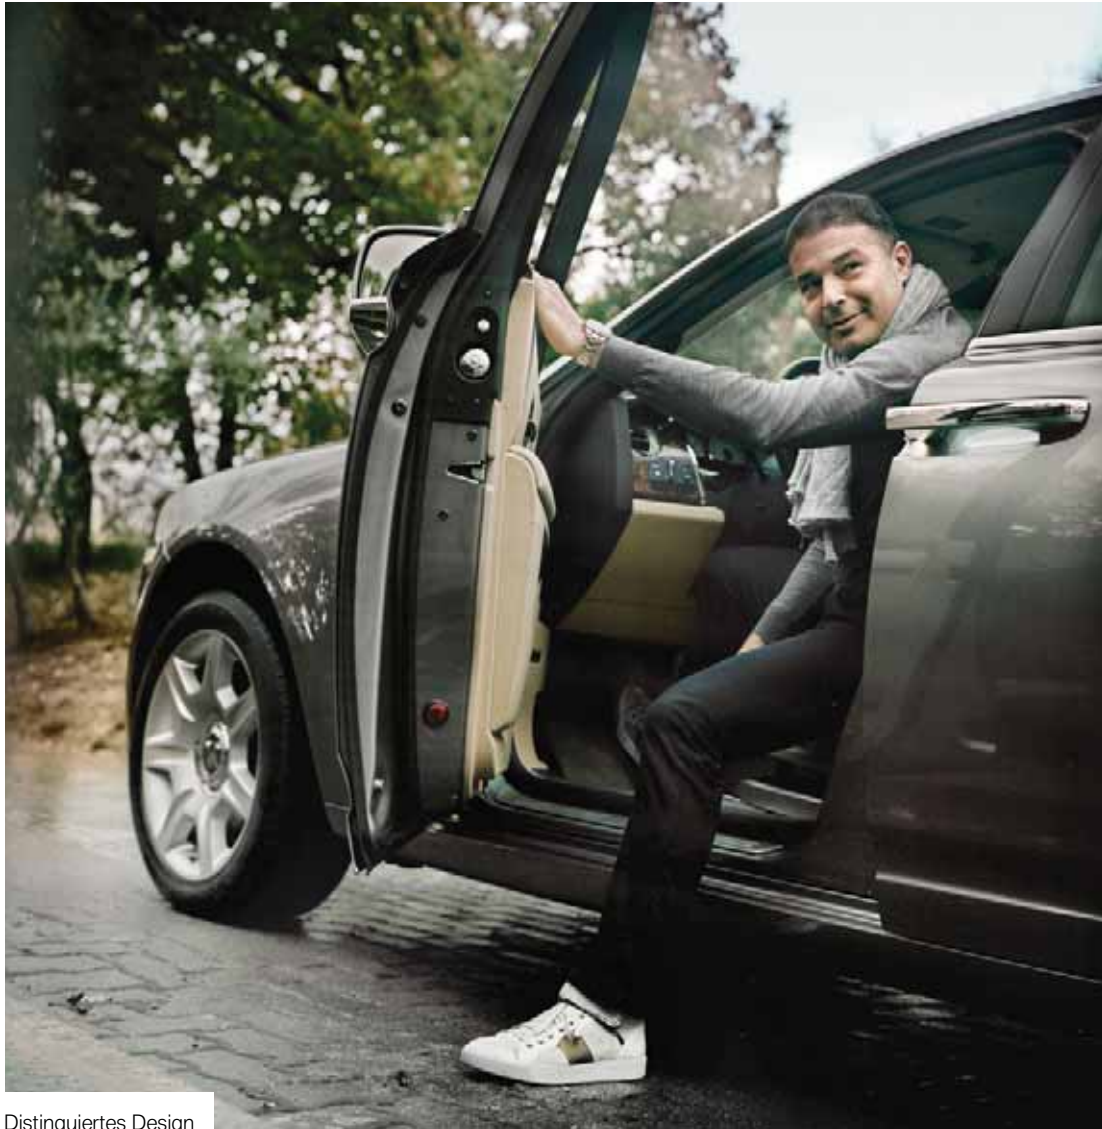

Distinguiertes Design

## Rolls-Royce Ghost

Ein Rolls-Royce hat eine besondere Faszination und ist in seiner Klasse der Beste. Alles ist gut zu handhaben. So stelle ich mir zeitgemäßes Autofahren vor.

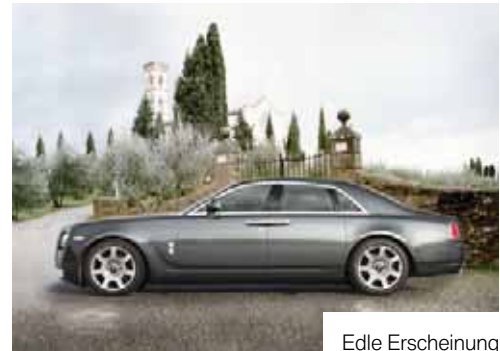

Edle Erscheinung

Warum haben Sie sich für einen Rolls-Royce entschieden?  
„Wenn ich mit meinem Ghost unterwegs bin,  
fühle ich mich wie zu Hause.“

Simone Ceruti, Florenz, Italien

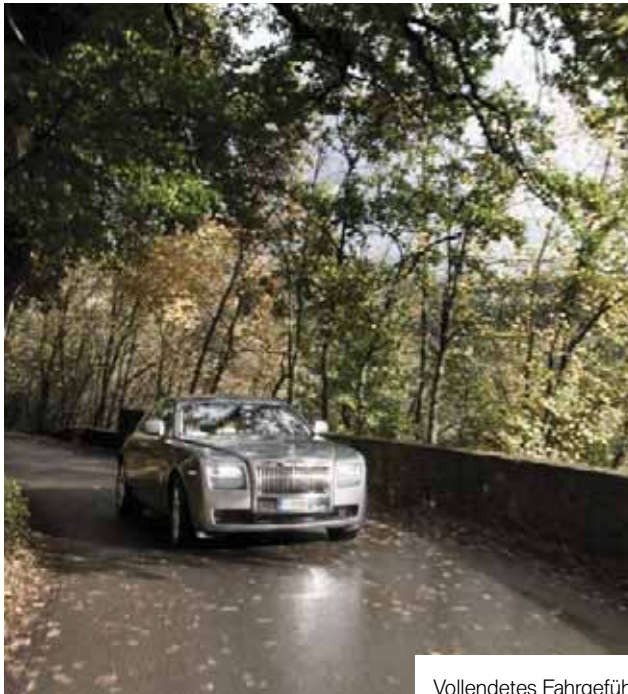

Vollendetes Fahrgefühl

15:02 Uhr – BMW Motorrad Zentrum München: vorfreudig

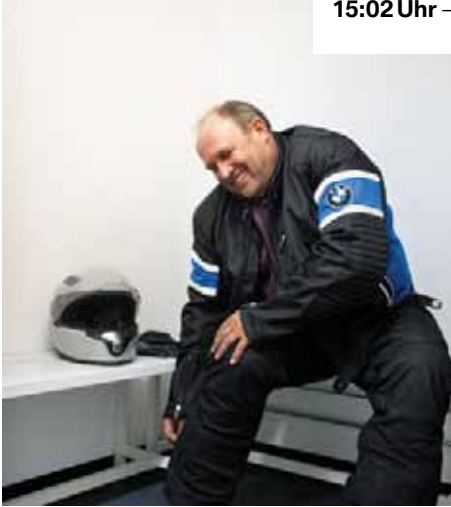

## BMW Motorrad R 1200 RT

Als sportlich-komfortable Tourenmaschine trägt die R1200 RT über zigtausende Kilometer. Und ist doch bereits ab dem ersten faszinierend.

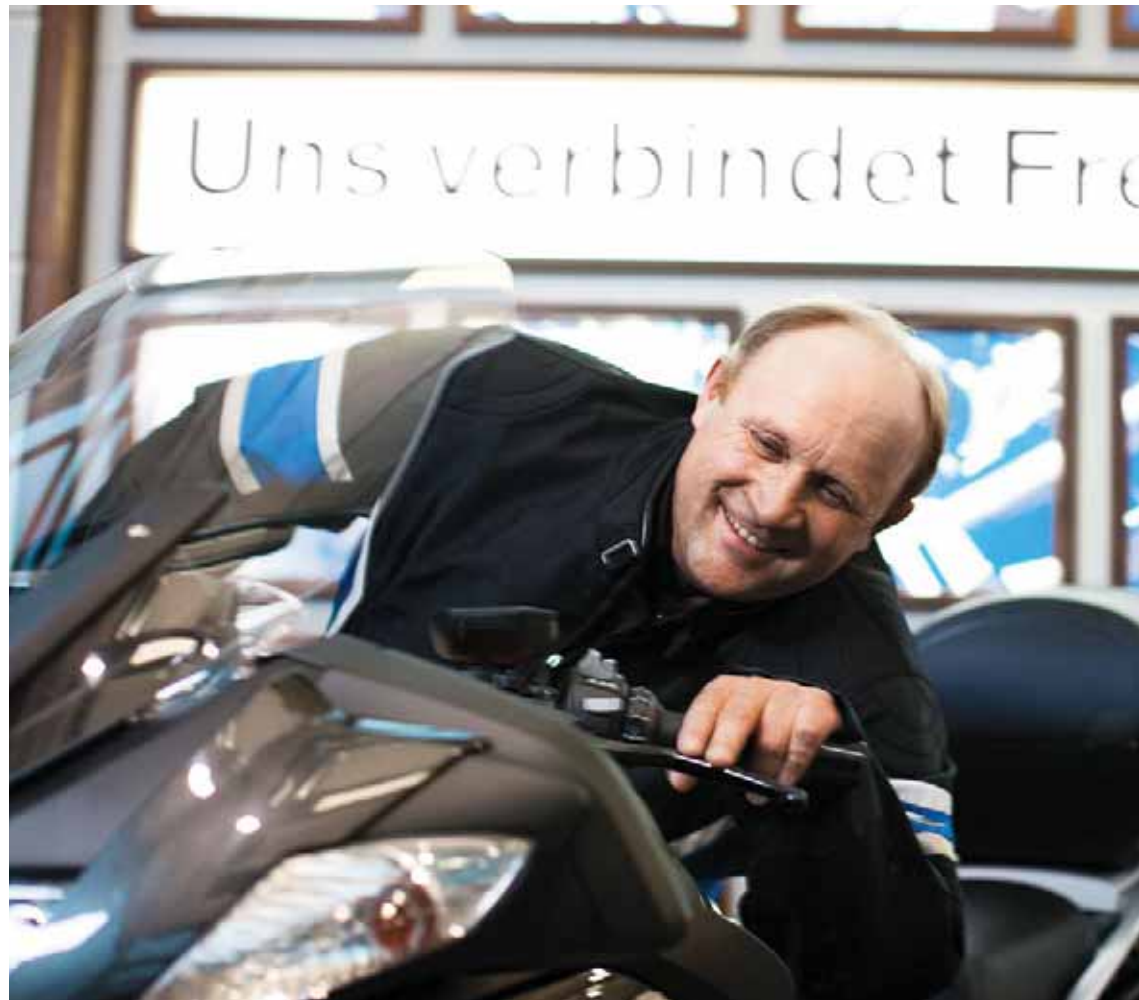

Worauf freuen Sie sich am meisten?

„Auf eine Maschine mit sportlichem Design, kraftvollem Boxermotor und optimalem Wind- und Wetterschutz – damit geht die Motorradsaison automatisch in die Verlängerung.“

Paul Sedlmaier, 26. November 2010, BMW Motorrad Zentrum München

15:55 Uhr – BMW Motorrad Zentrum München: endlich!

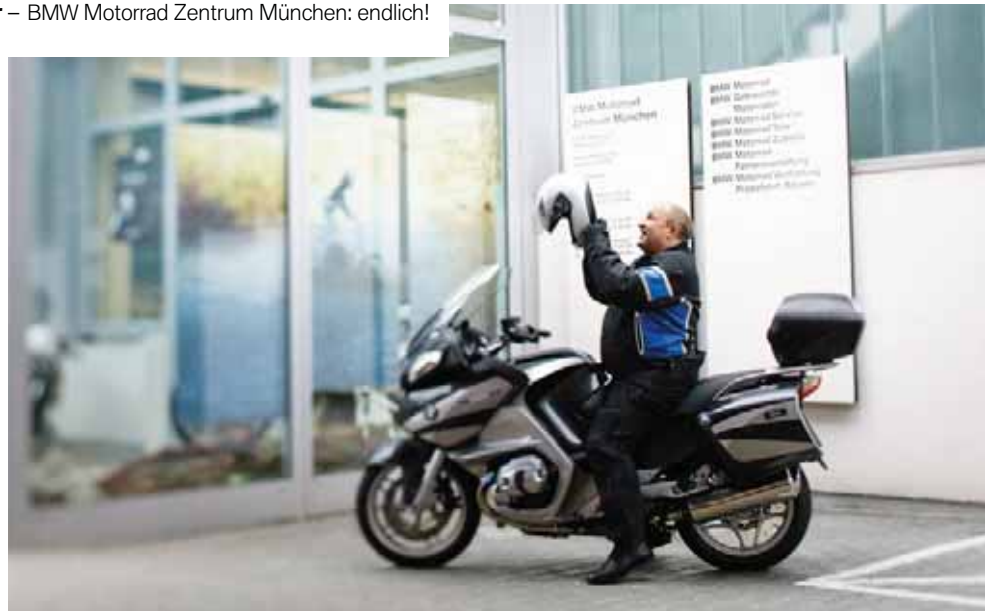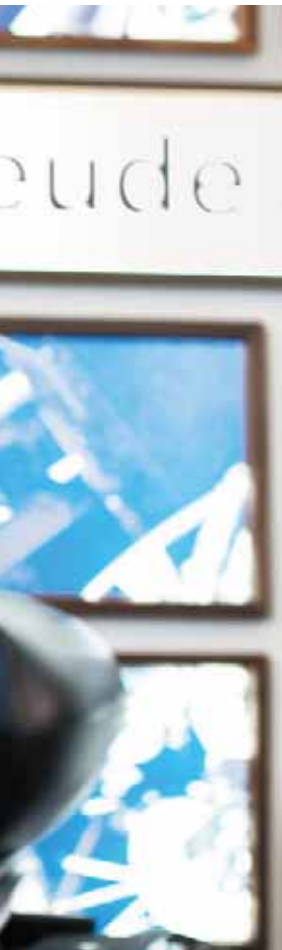

15:28 Uhr – BMW Motorrad Zentrum München: feinfühlig

# AUTO CHINA 2010, PEKING

23. April–2. Mai 2010 China International Exhibition Center, Peking

1

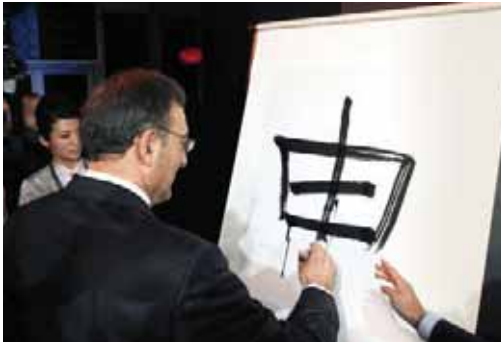

- 1 Norbert Reithofer zeichnet gemeinsam mit den chinesischen Partnern des MINI E Projekts das Symbol für Strom.
- 2 Präsentation des mit der Tongji Universität und lokalen Partnern entwickelten BMW 5er Langversion mit Elektroantrieb am Vorabend der Messe

2

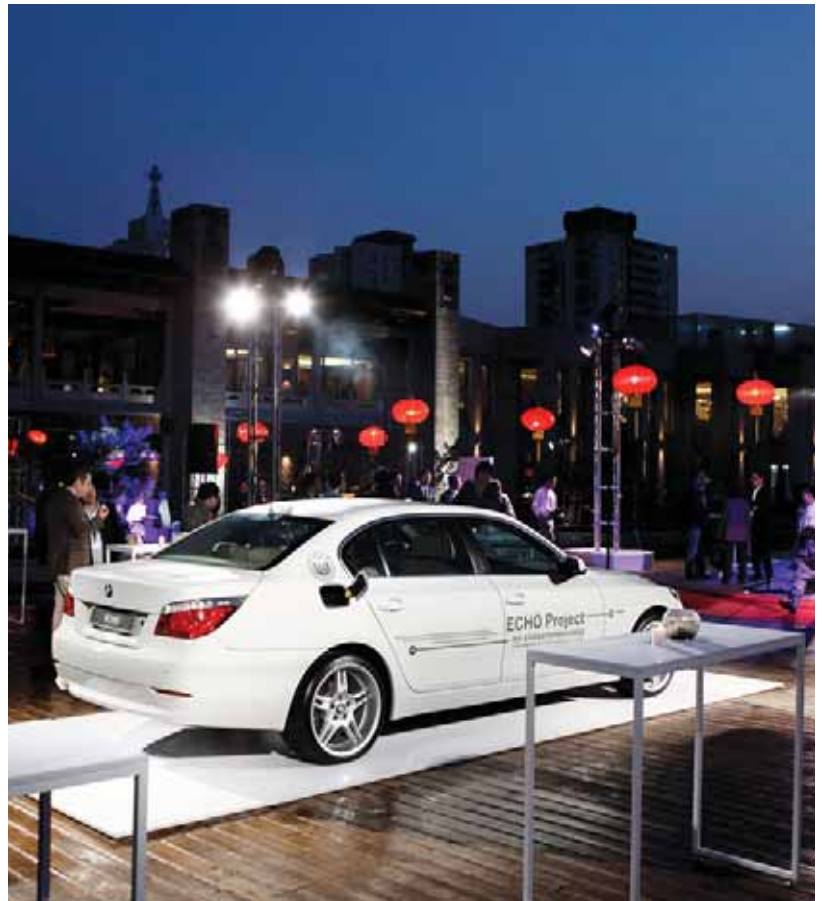

**Aus China für China.** Anlässlich des ECHO Projekts entwickelte die BMW Group gemeinsam mit der Tongji Universität zu Forschungszwecken einen elektrisch betriebenen BMW 5er Langversion. Die wesentlichen Komponenten der ersten chinesisch-deutschen Entwicklungskooperation für batteriebetriebene Elektrofahrzeuge entstanden in Zusammenarbeit mit chinesischen Zulieferern und zeigen das dort vorhandene Technologiepotenzial. Darüber hinaus hat die BMW Group mit den chinesischen Energiepartnern State Grid und Southern Grid sowie mit China Automotive Technology and Research Center (CATARC) eine Flotte von MINI E nach China gebracht und kündigte an, 2011 den BMW ActiveE dort an Nutzer zu übergeben.



# WIR BAUEN DIE ZUKUNFT

5. November 2010 BMW Werk, Leipzig

- 1 Bundeskanzlerin Angela Merkel und Norbert Reithofer geben den Startschuss für die Werksweiterung.
- 2 Bundeskanzlerin Angela Merkel im Gespräch mit Klaus Draeger, Entwicklungsvorstand der BMW Group

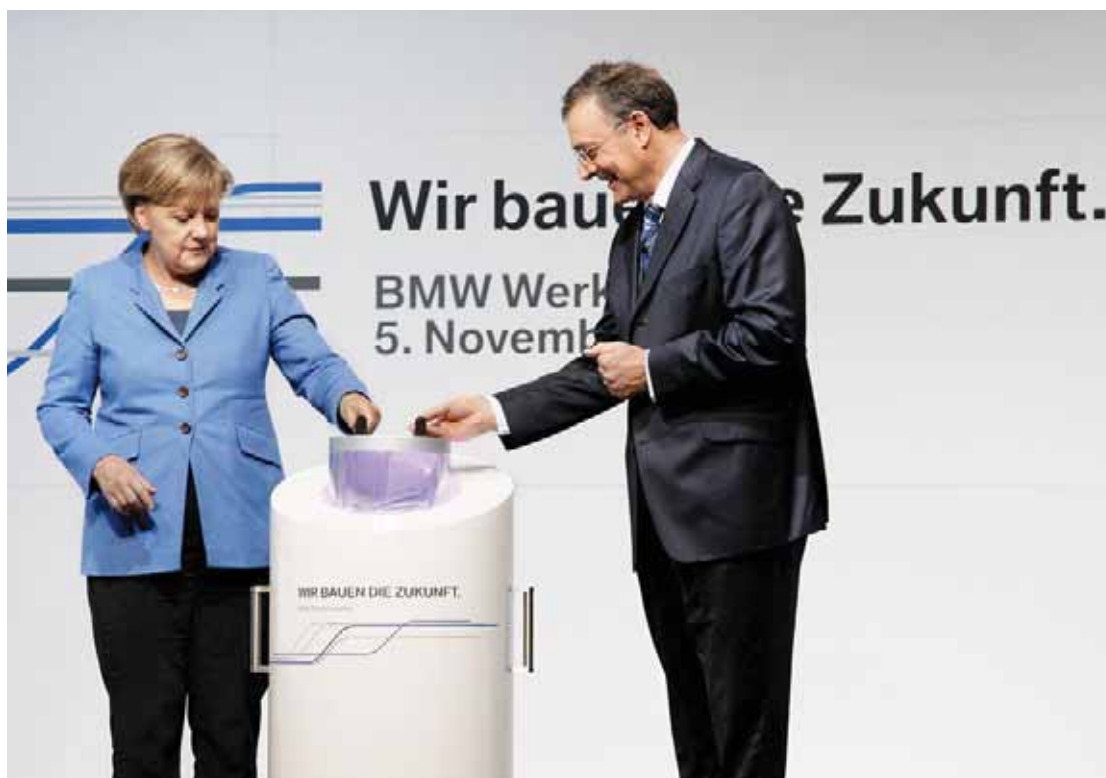

1

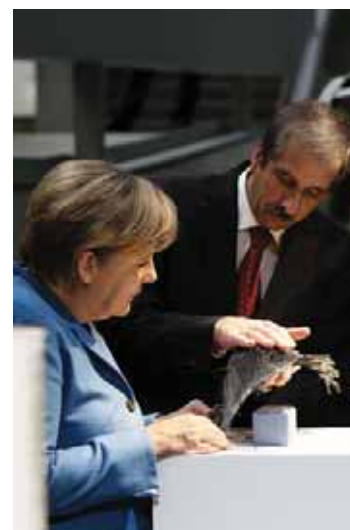

2

**Die Mobilität der Zukunft kommt aus Leipzig.** Die BMW Group baut ihr Werk in Leipzig zum ersten Standort für die Großserienfertigung von emissionsfreien Elektroautos in Deutschland aus. Bis 2013 werden dort rund 400 Mio. Euro in neue Gebäude und Anlagen investiert. Dabei werden rund 800 Arbeitsplätze geschaffen.

# 50 JAHRE EIGENSTÄNDIGKEIT

30. November 2010, Festakt Kongresshalle Theresienhöhe, München

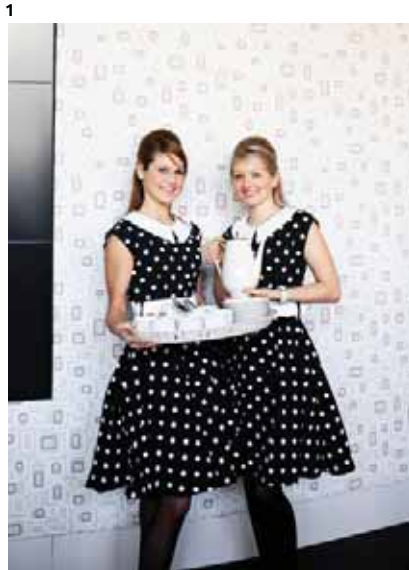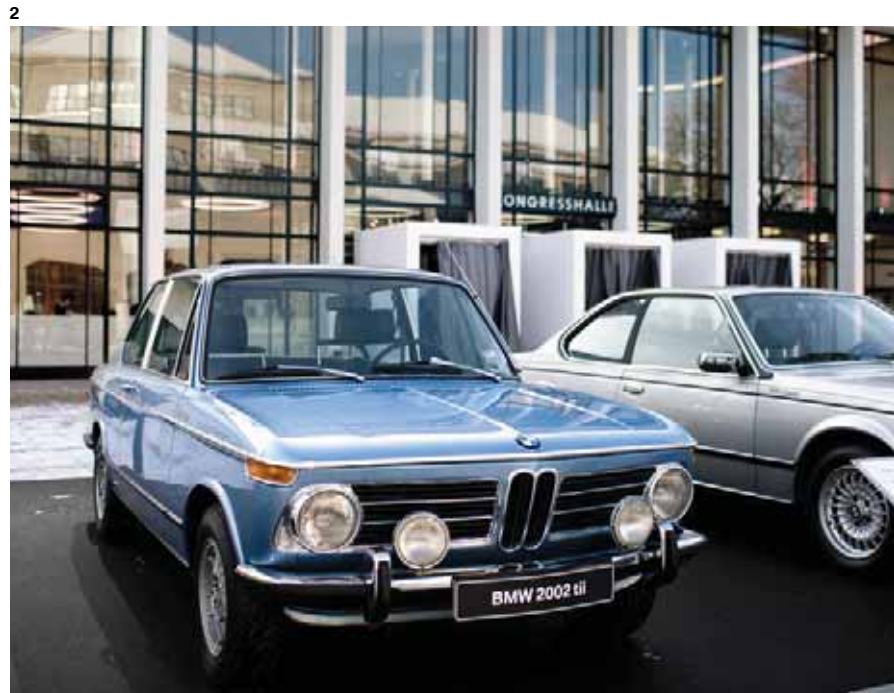

**Unabhängigkeitserklärung.** 50 Jahre ist es her, dass sich die BMW AG auf einer legendären Hauptversammlung für ihre unternehmerische Eigenständigkeit entschied. 50 Jahre später wurde diese historische Entscheidung mit einem Festakt gefeiert.

## Gelebte Eigenständigkeit

Stimmen zu BMW

BMW Kunde aus den USA

„Ich glaube, wer einmal einen BMW gefahren hat, will nie wieder ein anderes Auto fahren.“

- 1+2 Hostessen in Petticoats, historische BMW Fahrzeuge und das Motto „Meilensteine der Freude“ begrüßten die Teilnehmer des außergewöhnlichen Festakts in der Kongresshalle Theresienhöhe.
- 3 Vor 50 Jahren trafen BMW Aktionäre hier eine historische Entscheidung – heute wurde sie am selben Ort gefeiert.
- 4 BMW Vorstandsvorsitzender Norbert Reithofer, Gesamtbetriebsratsvorsitzender Manfred Schoch, Aufsichtsratsvorsitzender Joachim Milberg und Aufsichtsratsmitglied Stefan Quandt

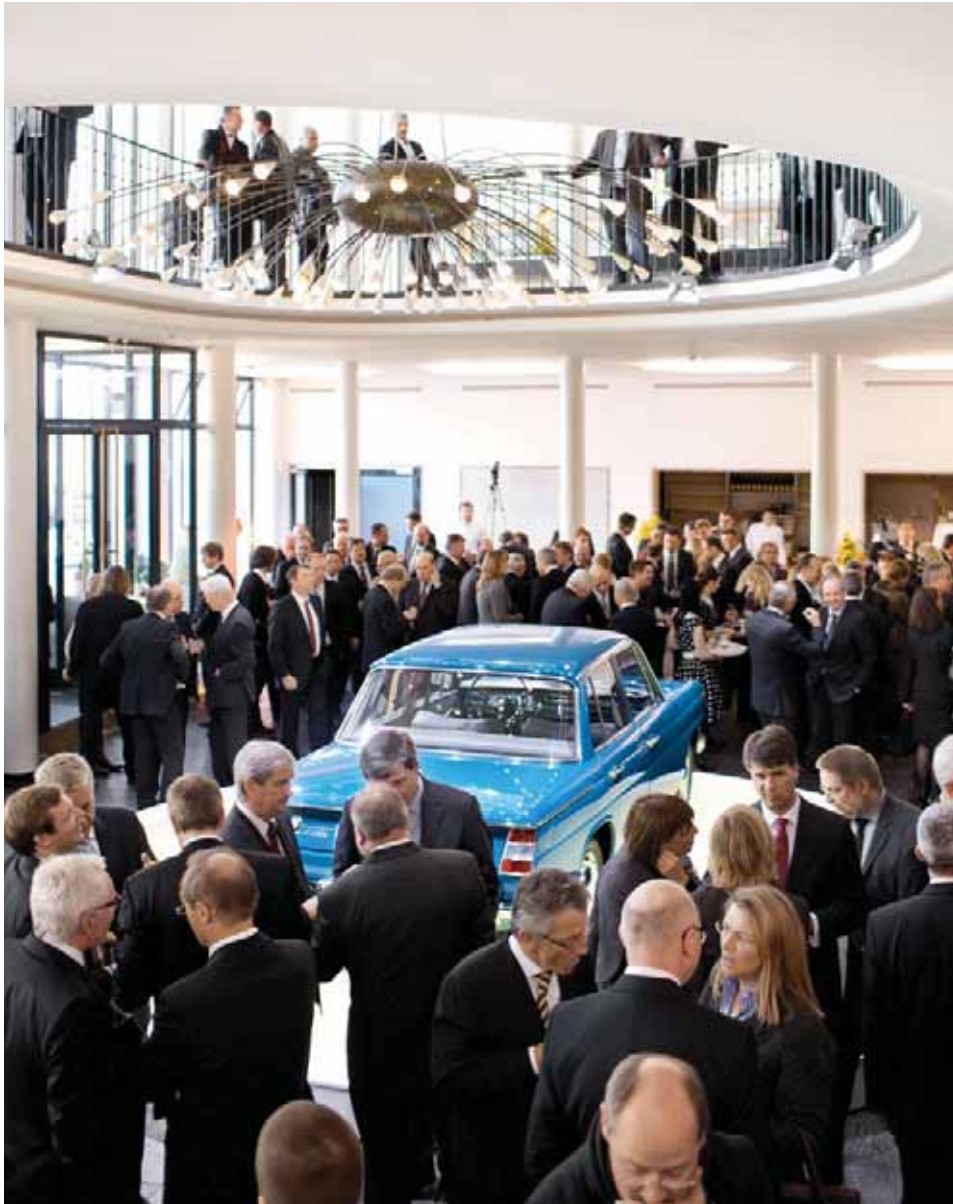

3

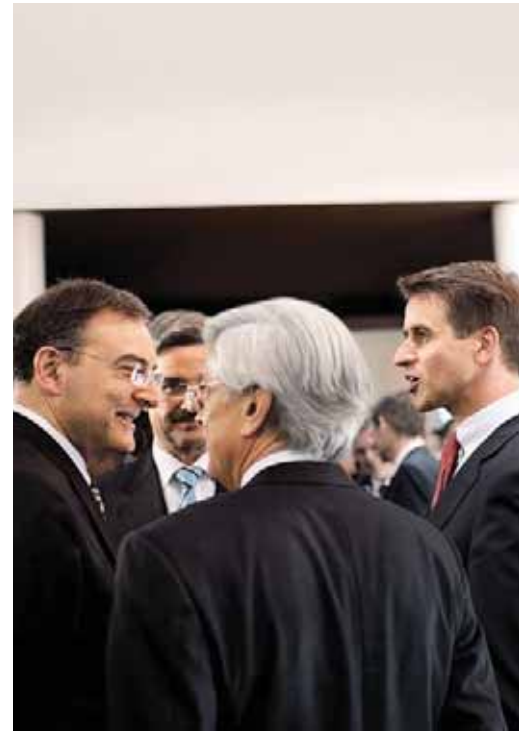

4

BMW Mitarbeiter aus München

„BMW ist für mich mehr als ein Arbeitgeber, BMW ist für mich Heimat.“

Unabhängigkeit heißt, konsequent die Zukunft erobern zu können. Einen Ausblick auf die automobile Zukunft à la BMW eröffnete der Prototyp des BMW Vision EfficientDynamics.

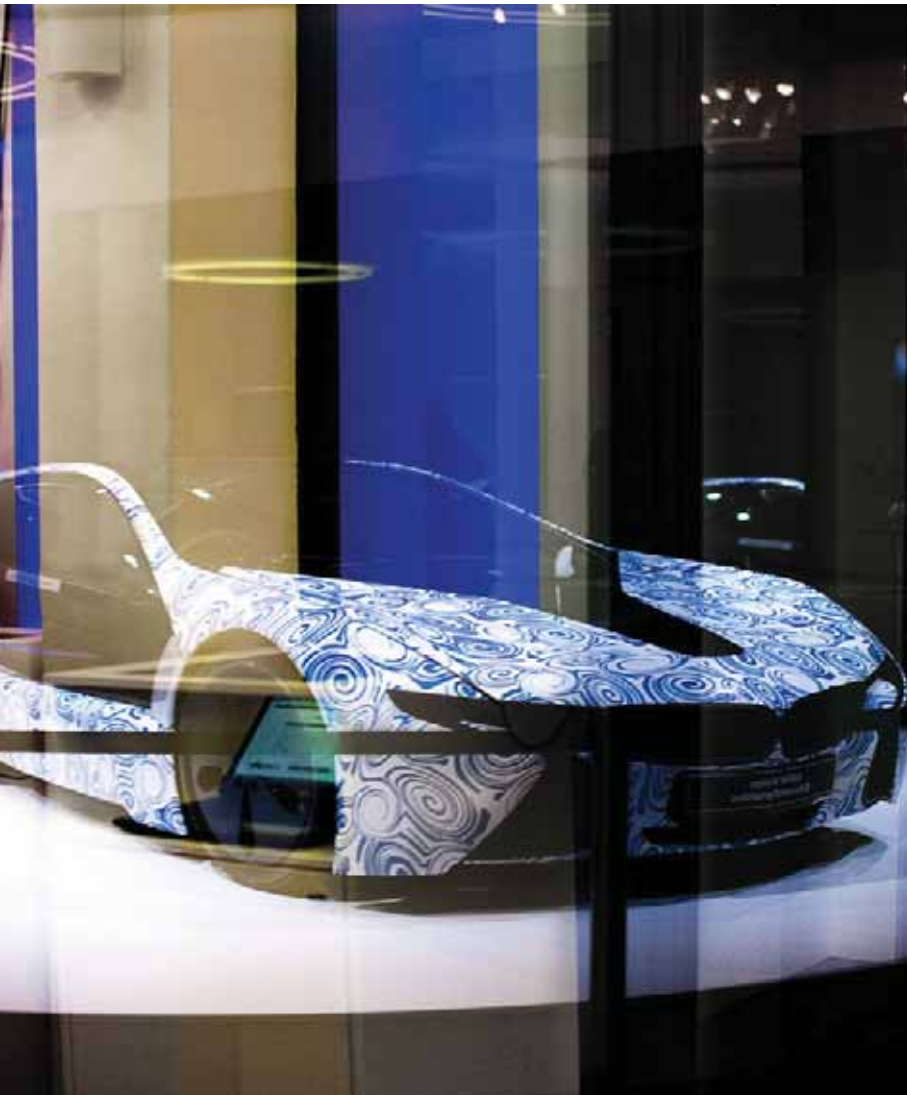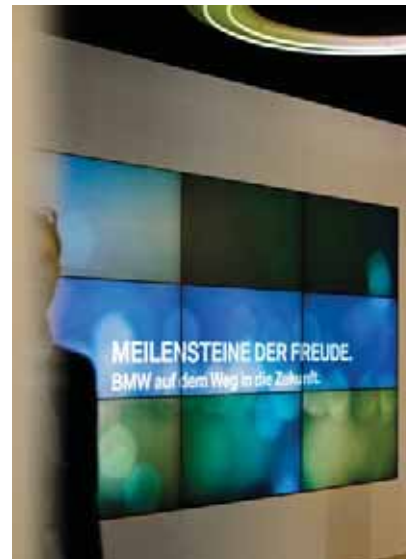

**Richtungsentscheidung.** Die konsequente Entscheidung für Eigenständigkeit prägt und bewegt das Unternehmen bis heute. Das verdeutlichte dieser Festakt in der Münchener Theresienhalle: Die BMW Group bleibt sich treu, indem sie sich seit ihrer Gründung immer wieder verändert.

Auszubildende aus dem Werk Landshut

„... Fahrzeuge, die der Zukunft voraus sind.“

Die BMW Group hat Zukunft. Unsere drei Marken BMW, MINI und Rolls-Royce gehören zu den stärksten und begehrtesten Premiummarken weltweit. Wir verfolgen unverändert unsere Strategie Number ONE. Unsere Vision ist: der führende Anbieter von Premium-Produkten und Premium-Dienstleistungen für individuelle Mobilität zu sein.

Im kommenden Jahr werden wir auf diesem Weg konsequent weitergehen. Wir entwickeln innovative Technologien, erschließen neue Kundengruppen und gestalten aktiv die Zukunft der individuellen Mobilität. Damit schaffen wir die Basis, um langfristig profitabel zu wachsen. Wir haben den Anspruch, die Besten zu sein. Das ist unser Antrieb – Tag für Tag.

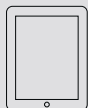

> Geschäftsbericht 2010 als iPad App



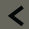

## EIN ZUSÄTZLICHER BEITRAG, RESSOURCEN ZU SCHONEN

---

Der BMW Group Geschäftsbericht 2010 ist ausgezeichnet mit dem Blauen Engel. Die verwendeten Recyclingpapiere (Enviro Top und Nanoo Color) wurden klimaneutral und ohne Zusatz von optischen Aufhellern und Chlorbleiche aus Altpapier hergestellt. Alle weiteren verwendeten Produktionsmaterialien entsprechen ebenfalls den Anforderungen des Umweltzeichens Blauer Engel (RAL-UZ 14). Der Blaue Engel gilt als eines der weltweit strengsten Umweltzeichen.

Die bei der Herstellung für diesen Bericht entstandenen CO<sub>2</sub>-Emissionen bei Druck und Produktion hat die BMW Group neutralisiert. Dazu wurde am 4. März 2011 mit der Transaktionskennung DE-102771 die entsprechende Menge an Emissionsrechten (EU-Allowance) gelöscht.

Print  kompensiert

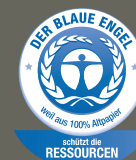

# FAHRZEUGFLOTTE — Verbrauch- und Emissionsdaten der BMW Group

Werte ermittelt nach Neuem Europäischem Fahrzyklus (EU-Richtlinie: 80/1268/EWG in der jeweils gültigen Fassung). Gültig für Fahrzeuge mit europäischer Länderspezifizierung. Fahrzeuge mit durchschnittlichen CO<sub>2</sub>-Emissionen von unter bzw. maximal 140 Gramm CO<sub>2</sub>/km sind hervorgehoben.

| Modell                         | Innerorts<br>(l/100 km) | Außerorts<br>(l/100 km) | Kombiniert<br>(l/100 km) | CO <sub>2</sub> -Emissionen<br>(g/km) | Modell                             | Innerorts<br>(l/100 km) | Außerorts<br>(l/100 km) | Kombiniert<br>(l/100 km) | CO <sub>2</sub> -Emissionen<br>(g/km) |
|--------------------------------|-------------------------|-------------------------|--------------------------|---------------------------------------|------------------------------------|-------------------------|-------------------------|--------------------------|---------------------------------------|
| <b>BMW</b>                     |                         |                         |                          |                                       | <b>BMW</b>                         |                         |                         |                          |                                       |
| 116i 3-türig                   | 7,9 (8,7)               | 5,1 (5,4)               | 6,1 (6,6)                | 143 (154)                             | 325i xDrive Touring                | 11,1 (11,2)             | 6,5 (6,6)               | 8,2 (8,3)                | 190 (194)                             |
| 116i 3-türig <sup>3</sup>      | 8,1 (8,9)               | 5,3 (5,5)               | 6,3 (6,8)                | 147 (158)                             | 330i Touring                       | 10,2 (10,7)             | 6,1 (6,2)               | 7,6 (7,9)                | 177 (184)                             |
| 118i 3-türig                   | 7,9 (8,7)               | 5,1 (5,4)               | 6,1 (6,6)                | 143 (154)                             | 330i xDrive Touring                | 11,2 (11,3)             | 6,6 (6,7)               | 8,3 (8,4)                | 193 (195)                             |
| 120i 3-türig                   | 8,6 (8,9)               | 5,4 (5,3)               | 6,6 (6,6)                | 153 (155)                             | 335i Touring                       | 12,1 (12,6)             | 6,4 (6,5)               | 8,5 (8,7)                | 199 (203)                             |
| 130i 3-türig                   | 12,4 (12,5)             | 6,3 (6,2)               | 8,5 (8,5)                | 199 (199)                             | 335i xDrive Touring                | 12,4 (13,2)             | 6,7 (6,9)               | 8,8 (9,2)                | 206 (215)                             |
| 116d 3-türig <sup>1</sup>      | 5,4                     | 4,0                     | 4,5                      | 118                                   | 316d Touring <sup>1</sup>          | 5,4                     | 4,0                     | 4,5                      | 119                                   |
| 118d 3-türig                   | 5,4 (6,7)               | 4,0 (4,5)               | 4,5 (5,3)                | 119 (140)                             | 318d Touring                       | 5,4 (6,9)               | 4,0 (4,5)               | 4,5 (5,4)                | 120 (142)                             |
| 120d 3-türig                   | 5,9 (6,7)               | 4,1 (4,5)               | 4,7 (5,3)                | 125 (140)                             | 320d Touring                       | 6,0 (6,9)               | 4,1 (4,5)               | 4,8 (5,4)                | 128 (142)                             |
| 123d 3-türig                   | 6,4 (6,9)               | 4,4 (4,7)               | 5,1 (5,5)                | 135 (145)                             | 320d xDrive Touring                | 6,5 (7,3)               | 4,6 (4,9)               | 5,3 (5,8)                | 140 (153)                             |
|                                |                         |                         |                          |                                       | <b>320d EfficientDynamics</b>      |                         |                         |                          |                                       |
| 116i 5-türig                   | 7,9 (8,7)               | 5,1 (5,4)               | 6,1 (6,6)                | 143 (154)                             | Edition Touring <sup>1</sup>       | 5,2                     | 3,8                     | 4,3                      | 114                                   |
| 116i 5-türig <sup>3</sup>      | 8,1 (8,9)               | 5,3 (5,5)               | 6,3 (6,8)                | 147 (158)                             | 325d Touring                       | 7,4 (8,0)               | 4,9 (5,2)               | 5,8 (6,2)                | 153 (163)                             |
| 118i 5-türig                   | 7,9 (8,7)               | 5,1 (5,4)               | 6,1 (6,6)                | 143 (154)                             | 330d Touring                       | 7,5 (8,1)               | 5,0 (5,3)               | 5,9 (6,3)                | 155 (165)                             |
| 120i 5-türig                   | 8,6 (8,9)               | 5,4 (5,3)               | 6,6 (6,6)                | 153 (155)                             | 330d xDrive Touring                | 8,4 (8,9)               | 5,6 (5,8)               | 6,6 (6,9)                | 174 (181)                             |
| 130i 5-türig                   | 12,4 (12,5)             | 6,3 (6,2)               | 8,5 (8,5)                | 199 (199)                             | 335d Touring <sup>2</sup>          | 9,1                     | 5,3                     | 6,7                      | 176                                   |
| 116d 5-türig <sup>1</sup>      | 5,4                     | 4,0                     | 4,5                      | 118                                   |                                    |                         |                         |                          |                                       |
| 118d 5-türig                   | 5,4 (6,7)               | 4,0 (4,5)               | 4,5 (5,3)                | 119 (140)                             | 316i Coupé <sup>1,4</sup>          | 8,1                     | 5,3                     | 6,3                      | 146                                   |
| 120d 5-türig                   | 5,9 (6,7)               | 4,1 (4,5)               | 4,7 (5,3)                | 125 (140)                             | 318i Coupé <sup>1</sup>            | 8,1                     | 5,3                     | 6,3                      | 146                                   |
| 123d 5-türig                   | 6,4 (6,9)               | 4,4 (4,7)               | 5,1 (5,5)                | 135 (145)                             | 320i Coupé                         | 8,6 (9,3)               | 5,4 (5,3)               | 6,6 (6,8)                | 154 (159)                             |
|                                |                         |                         |                          |                                       | 325i Coupé                         | 9,8 (10,0)              | 5,7 (5,9)               | 7,2 (7,4)                | 168 (174)                             |
| 120i Coupé                     | 8,5 (8,9)               | 5,3 (5,3)               | 6,5 (6,6)                | 152 (154)                             | 325i xDrive Coupé                  | 11,0 (11,1)             | 6,4 (6,5)               | 8,1 (8,2)                | 188 (192)                             |
| 125i Coupé                     | 11,8 (11,6)             | 5,9 (6,1)               | 8,1 (8,1)                | 189 (189)                             | 330i Coupé                         | 10,0 (10,2)             | 5,9 (5,9)               | 7,4 (7,5)                | 173 (175)                             |
| 135i Coupé                     | 12,1 (11,7)             | 6,4 (6,7)               | 8,5 (8,5)                | 198 (198)                             | 330i xDrive Coupé                  | 11,1 (11,2)             | 6,5 (6,6)               | 8,2 (8,3)                | 191 (193)                             |
| 118d Coupé                     | 5,3 (6,7)               | 4,0 (4,5)               | 4,5 (5,3)                | 118 (140)                             | 335i Coupé                         | 12,0 (11,8)             | 6,3 (6,4)               | 8,4 (8,4)                | 196 (196)                             |
| 120d Coupé                     | 5,9 (6,7)               | 4,0 (4,5)               | 4,7 (5,3)                | 124 (140)                             | 335i xDrive Coupé                  | 12,4 (13,1)             | 6,7 (6,8)               | 8,8 (9,1)                | 205 (212)                             |
| 123d Coupé                     | 6,4 (6,9)               | 4,3 (4,7)               | 5,1 (5,5)                | 134 (145)                             | 320d Coupé                         | 5,9 (6,8)               | 4,0 (4,4)               | 4,7 (5,3)                | 125 (140)                             |
| 1er M Coupé <sup>1</sup>       | 13,6                    | 7,3                     | 9,6                      | 224                                   | 320d xDrive Coupé                  | 6,4 (7,2)               | 4,5 (4,8)               | 5,2 (5,7)                | 137 (150)                             |
|                                |                         |                         |                          |                                       | 325d Coupé                         | 7,3 (7,9)               | 4,8 (5,1)               | 5,7 (6,1)                | 151 (160)                             |
| 118i Cabrio                    | 8,4 (9,1)               | 5,4 (5,6)               | 6,5 (6,9)                | 152 (162)                             | 330d Coupé                         | 7,3 (8,0)               | 4,8 (5,2)               | 5,7 (6,2)                | 152 (164)                             |
| 120i Cabrio                    | 8,8 (9,4)               | 5,6 (5,6)               | 6,8 (7,0)                | 158 (163)                             | 330d xDrive Coupé                  | 8,3 (8,8)               | 5,5 (5,7)               | 6,5 (6,8)                | 171 (178)                             |
| 125i Cabrio                    | 12,0 (11,8)             | 6,2 (6,3)               | 8,3 (8,3)                | 194 (194)                             | 335d Coupé <sup>2</sup>            | 9,0                     | 5,2                     | 6,6                      | 174                                   |
| 135i Cabrio                    | 12,2 (11,8)             | 6,5 (6,8)               | 8,6 (8,6)                | 200 (200)                             | M3 Coupé                           | 17,7 (15,9)             | 9,3 (8,5)               | 12,4 (11,2)              | 290 (263)                             |
| 118d Cabrio                    | 5,7 (6,9)               | 4,3 (4,7)               | 4,8 (5,5)                | 127 (145)                             | M3 GTS Coupé                       | 18,4                    | 9,3                     | 12,7                     | 295                                   |
| 120d Cabrio                    | 6,2 (6,9)               | 4,3 (4,7)               | 5,0 (5,5)                | 132 (145)                             |                                    |                         |                         |                          |                                       |
| 123d Cabrio                    | 6,6 (7,1)               | 4,5 (4,8)               | 5,3 (5,7)                | 139 (149)                             | 318i Cabrio <sup>1</sup>           | 8,4                     | 5,6                     | 6,6                      | 154                                   |
|                                |                         |                         |                          |                                       | 320i Cabrio                        | 8,8 (9,8)               | 5,6 (5,8)               | 6,8 (7,3)                | 159 (169)                             |
| 316i Limousine <sup>4</sup>    | 8,1 (8,9)               | 5,3 (5,5)               | 6,3 (6,8)                | 146 (159)                             | 325i Cabrio                        | 10,2 (10,6)             | 5,9 (6,3)               | 7,5 (7,9)                | 176 (185)                             |
| 318i Limousine                 | 8,1 (8,7)               | 5,3 (5,4)               | 6,3 (6,6)                | 146 (155)                             | 330i Cabrio                        | 10,5 (11,1)             | 6,2 (6,5)               | 7,8 (8,2)                | 182 (190)                             |
| 320i Limousine                 | 8,3 (9,3)               | 5,3 (5,3)               | 6,4 (6,8)                | 148 (159)                             | 335i Cabrio                        | 12,4 (12,2)             | 6,7 (6,8)               | 8,8 (8,8)                | 205 (205)                             |
| 325i Limousine                 | 9,8 (10,0)              | 5,7 (5,9)               | 7,2 (7,4)                | 168 (174)                             | 320d Cabrio                        | 6,3 (7,1)               | 4,4 (4,7)               | 5,1 (5,6)                | 135 (149)                             |
| 325i xDrive Limousine          | 11,0 (11,1)             | 6,4 (6,5)               | 8,1 (8,2)                | 188 (192)                             | 325d Cabrio                        | 7,7 (8,2)               | 5,2 (5,4)               | 6,1 (6,4)                | 160 (168)                             |
| 330i Limousine                 | 10,0 (10,2)             | 5,9 (5,9)               | 7,4 (7,5)                | 173 (175)                             | 330d Cabrio                        | 7,7 (8,2)               | 5,2 (5,4)               | 6,1 (6,4)                | 162 (170)                             |
| 330i xDrive Limousine          | 11,1 (11,2)             | 6,5 (6,6)               | 8,2 (8,3)                | 191 (193)                             | M3 Cabrio                          | 18,0 (16,0)             | 9,6 (8,9)               | 12,7 (11,5)              | 297 (269)                             |
| 335i Limousine                 | 12,0 (12,6)             | 6,3 (6,5)               | 8,4 (8,7)                | 196 (202)                             |                                    |                         |                         |                          |                                       |
| 335i xDrive Limousine          | 12,4 (13,1)             | 6,7 (6,8)               | 8,8 (9,1)                | 205 (212)                             | 523i Limousine                     | 10,5 (10,5)             | 5,9 (5,9)               | 7,6 (7,6)                | 177 (178)                             |
| 316d Limousine <sup>1</sup>    | 5,4                     | 4,0                     | 4,5                      | 118                                   | 528i Limousine                     | 10,4 (10,4)             | 6,3 (6,0)               | 7,8 (7,6)                | 182 (178)                             |
| 318d Limousine                 | 5,4 (6,8)               | 4,0 (4,4)               | 4,5 (5,3)                | 119 (140)                             | 535i Limousine                     | 11,8 (11,9)             | 6,6 (6,4)               | 8,5 (8,4)                | 199 (195)                             |
| 320d Limousine                 | 5,9 (6,8)               | 4,0 (4,4)               | 4,7 (5,3)                | 125 (140)                             | 535i xDrive Limousine <sup>2</sup> | 10,9                    | 6,5                     | 8,1                      | 189                                   |
| 320d xDrive Limousine          | 6,4 (7,2)               | 4,5 (4,8)               | 5,2 (5,7)                | 137 (150)                             | 550i Limousine <sup>2</sup>        | 15,4                    | 7,5                     | 10,4                     | 243                                   |
| <b>320d EfficientDynamics</b>  |                         |                         |                          |                                       | 550i xDrive Limousine <sup>2</sup> | 16,4                    | 7,9                     | 11,0                     | 257                                   |
| Edition Limousine <sup>1</sup> | 5,0                     | 3,6                     | 4,1                      | 109                                   | 520d Limousine                     | 5,9 (6,4)               | 4,3 (4,5)               | 4,9 (5,2)                | 129 (137)                             |
| 325d Limousine                 | 7,3 (7,9)               | 4,8 (5,1)               | 5,7 (6,1)                | 151 (160)                             | 525d Limousine                     | 8,1 (7,7)               | 5,1 (5,1)               | 6,2 (6,1)                | 162 (160)                             |
| 330d Limousine                 | 7,3 (8,0)               | 4,8 (5,2)               | 5,7 (6,2)                | 152 (164)                             | 530d Limousine                     | 8,0 (7,7)               | 5,3 (5,2)               | 6,3 (6,1)                | 166 (160)                             |
| 330d xDrive Limousine          | 8,3 (8,8)               | 5,5 (5,7)               | 6,5 (6,8)                | 171 (178)                             | 530d xDrive Limousine <sup>2</sup> | 6,6                     | 5,2                     | 5,7                      | 150                                   |
| 335d Limousine <sup>2</sup>    | 9,0                     | 5,2                     | 6,6                      | 174                                   | 535d Limousine <sup>2</sup>        | 7,9                     | 5,1                     | 6,1                      | 162                                   |
| M3 Limousine                   | 17,7 (15,9)             | 9,3 (8,5)               | 12,4 (11,2)              | 290 (263)                             |                                    |                         |                         |                          |                                       |
|                                |                         |                         |                          |                                       | 523i Touring                       | 10,9 (10,8)             | 6,2 (6,1)               | 7,9 (7,8)                | 185 (182)                             |
| 316i Touring <sup>1,4</sup>    | 8,1                     | 5,3                     | 6,3                      | 147                                   | 528i Touring                       | 10,8 (10,6)             | 6,4 (6,2)               | 8,0 (7,8)                | 188 (182)                             |
| 318i Touring                   | 8,1 (8,9)               | 5,3 (5,6)               | 6,3 (6,8)                | 147 (159)                             | 535i Touring                       | 11,9 (11,9)             | 6,7 (6,5)               | 8,6 (8,5)                | 201 (197)                             |
| 320i Touring                   | 8,3 (9,5)               | 5,3 (5,5)               | 6,4 (7,0)                | 149 (164)                             | 520d Touring                       | 6,2 (6,5)               | 4,5 (4,6)               | 5,1 (5,3)                | 135 (139)                             |
| 325i Touring                   | 9,9 (10,2)              | 5,8 (6,1)               | 7,3 (7,6)                | 170 (178)                             | 525d Touring                       | 8,0 (7,8)               | 5,3 (5,2)               | 6,3 (6,2)                | 164 (162)                             |



| Modell                                | Innerorts<br>(l/l 100 km) | Außerorts<br>(l/l 100 km) | Kombiniert<br>(l/l 100 km) | CO <sub>2</sub> -Emissionen<br>(g/km) |
|---------------------------------------|---------------------------|---------------------------|----------------------------|---------------------------------------|
| <b>BMW</b>                            |                           |                           |                            |                                       |
| 530d Touring                          | 8,1 (8,0)                 | 5,4 (5,3)                 | 6,4 (6,3)                  | 169 (165)                             |
| 530d xDrive Touring <sup>2</sup>      | 6,8                       | 5,3                       | 5,8                        | 154                                   |
| 535d Touring <sup>2</sup>             | 8,1                       | 5,3                       | 6,3                        | 165                                   |
| 535i Gran Turismo <sup>2</sup>        | 12,3                      | 6,9                       | 8,9                        | 209                                   |
| 535i xDrive Gran Turismo <sup>2</sup> | 12,8                      | 7,2                       | 9,3                        | 216                                   |
| 550i Gran Turismo <sup>2</sup>        | 16,2                      | 8,3                       | 11,2                       | 263                                   |
| 550i xDrive Gran Turismo <sup>2</sup> | 16,9                      | 8,8                       | 11,8                       | 275                                   |
| 530d Gran Turismo <sup>2</sup>        | 8,1                       | 5,6                       | 6,5                        | 173                                   |
| 530d xDrive Gran Turismo <sup>2</sup> | 8,5                       | 6,0                       | 6,9                        | 183                                   |
| 535d Gran Turismo <sup>2</sup>        | 8,3                       | 5,8                       | 6,7                        | 175                                   |
| 535d xDrive Gran Turismo <sup>2</sup> | 8,9                       | 6,1                       | 7,1                        | 187                                   |
| 640i Cabrio <sup>2</sup>              | 10,9                      | 6,2                       | 7,9                        | 185                                   |
| 650i Cabrio <sup>2</sup>              | 15,5                      | 7,9                       | 10,7                       | 249                                   |
| 740i <sup>2</sup>                     | 13,8                      | 7,6                       | 9,9                        | 232                                   |
| 740Li <sup>2</sup>                    | 14,0                      | 7,7                       | 10,0                       | 235                                   |
| 750i <sup>2</sup>                     | 16,4                      | 8,5                       | 11,4                       | 266                                   |
| 750i xDrive <sup>2</sup>              | 17,1                      | 8,9                       | 11,9                       | 278                                   |
| 750Li <sup>2</sup>                    | 16,4                      | 8,5                       | 11,4                       | 266                                   |
| 750Li xDrive <sup>2</sup>             | 17,1                      | 8,9                       | 11,9                       | 278                                   |
| 760i <sup>2</sup>                     | 18,8                      | 9,5                       | 12,9                       | 299                                   |
| 760Li <sup>2</sup>                    | 18,9                      | 9,6                       | 13,0                       | 303                                   |
| 730d <sup>2</sup>                     | 9,0                       | 5,5                       | 6,8                        | 178                                   |
| 730Li <sup>2</sup>                    | 9,1                       | 5,6                       | 6,9                        | 180                                   |
| 740d <sup>2</sup>                     | 9,0                       | 5,7                       | 6,9                        | 181                                   |
| 740d xDrive <sup>2</sup>              | 8,8                       | 5,9                       | 7,0                        | 183                                   |
| ActiveHybrid 7 <sup>2</sup>           | 12,6                      | 7,6                       | 9,4                        | 219                                   |
| ActiveHybrid 7L <sup>2</sup>          | 12,6                      | 7,6                       | 9,4                        | 219                                   |
| X1 sDrive18i                          | 11,3 (11,5)               | 6,4 (6,6)                 | 8,2 (8,4)                  | 191 (195)                             |
| X1 xDrive28i                          | 9,9 (10,4)                | 6,7 (6,4)                 | 7,9 (7,9)                  | 183 (183)                             |
| X1 sDrive18d                          | 6,1 (7,1)                 | 4,7 (5,2)                 | 5,2 (5,9)                  | 136 (155)                             |
| X1 xDrive18d                          | 6,7 (7,7)                 | 5,1 (5,4)                 | 5,7 (6,2)                  | 150 (164)                             |
| X1 sDrive20d                          | 6,4 (7,1)                 | 4,7 (5,2)                 | 5,3 (5,9)                  | 139 (155)                             |
| X1 xDrive20d                          | 7,0 (7,7)                 | 5,1 (5,4)                 | 5,8 (6,2)                  | 153 (164)                             |
| X1 xDrive23d                          | 7,3 (7,8)                 | 5,2 (5,5)                 | 6,0 (6,3)                  | 158 (167)                             |
| X3 xDrive28i <sup>2</sup>             | 12,3                      | 7,1                       | 9,0                        | 210                                   |
| X3 xDrive35i <sup>2</sup>             | 11,2                      | 7,4                       | 8,8                        | 204                                   |
| X3 xDrive20d                          | 6,7 (6,1)                 | 5,0 (5,3)                 | 5,6 (5,6)                  | 149 (147)                             |
| X3 xDrive30d <sup>2</sup>             | 6,8                       | 5,6                       | 6,0                        | 159                                   |
| X5 xDrive35i <sup>2</sup>             | 13,2                      | 8,3                       | 10,1                       | 236                                   |
| X5 xDrive50i <sup>2</sup>             | 17,5                      | 9,6                       | 12,5                       | 292                                   |
| X5 xDrive30d <sup>2</sup>             | 8,7                       | 6,7                       | 7,4                        | 195                                   |
| X5 xDrive40d <sup>2</sup>             | 8,8                       | 6,8                       | 7,5                        | 198                                   |
| X5 M <sup>5</sup>                     | 19,3                      | 10,8                      | 13,9                       | 325                                   |
| X6 xDrive35i <sup>2</sup>             | 13,2                      | 8,3                       | 10,1                       | 236                                   |
| X6 xDrive50i <sup>2</sup>             | 17,5                      | 9,6                       | 12,5                       | 292                                   |
| X6 xDrive30d <sup>2</sup>             | 8,7                       | 6,7                       | 7,4                        | 195                                   |
| X6 xDrive40d <sup>2</sup>             | 8,8                       | 6,8                       | 7,5                        | 198                                   |
| ActiveHybrid X6 <sup>2</sup>          | 10,8                      | 9,4                       | 9,9                        | 231                                   |
| X6 M <sup>5</sup>                     | 19,3                      | 10,8                      | 13,9                       | 325                                   |
| Z4 sDrive23i                          | 12,4 (11,8)               | 6,2 (6,1)                 | 8,5 (8,2)                  | 199 (192)                             |
| Z4 sDrive30i                          | 12,4 (11,9)               | 6,2 (6,2)                 | 8,5 (8,3)                  | 199 (195)                             |
| Z4 sDrive35i                          | 13,5 (12,6)               | 7,0 (6,9)                 | 9,4 (9,0)                  | 219 (210)                             |
| Z4 sDrive35is <sup>2</sup>            | 12,6                      | 6,9                       | 9,0                        | 210                                   |

| Modell                                          | Innerorts<br>(l/l 100 km) | Außerorts<br>(l/l 100 km) | Kombiniert<br>(l/l 100 km) | CO <sub>2</sub> -Emissionen<br>(g/km) |
|-------------------------------------------------|---------------------------|---------------------------|----------------------------|---------------------------------------|
| <b>MINI</b>                                     |                           |                           |                            |                                       |
| MINI One                                        | 7,2 (8,7)                 | 4,4 (5,1)                 | 5,4 (6,4)                  | 127 (150)                             |
| MINI One MINIMALIST <sup>1</sup>                | 6,5                       | 4,3                       | 5,1                        | 119                                   |
| MINI Cooper                                     | 6,9 (8,7)                 | 4,6 (5,1)                 | 5,4 (6,4)                  | 127 (150)                             |
| MINI Cooper S                                   | 7,3 (8,9)                 | 5,0 (5,0)                 | 5,8 (6,4)                  | 136 (149)                             |
| MINI One D <sup>1</sup>                         | 4,2                       | 3,5                       | 3,8                        | 99                                    |
| MINI Cooper D                                   | 4,2 (6,8)                 | 3,5 (4,1)                 | 3,8 (5,1)                  | 99 (135)                              |
| MINI Cooper SD                                  | 5,1 (6,9)                 | 3,9 (4,3)                 | 4,3 (5,3)                  | 114 (139)                             |
| MINI John Cooper Works <sup>1</sup>             | 9,4                       | 5,8                       | 7,1                        | 165                                   |
| MINI One Cabrio                                 | 7,6 (8,9)                 | 4,6 (5,3)                 | 5,7 (6,6)                  | 133 (154)                             |
| MINI Cooper Cabrio                              | 7,2 (8,9)                 | 4,9 (5,3)                 | 5,7 (6,6)                  | 133 (154)                             |
| MINI Cooper S Cabrio                            | 7,5 (9,1)                 | 5,1 (5,1)                 | 6,0 (6,6)                  | 139 (153)                             |
| MINI Cooper D Cabrio                            | 4,5 (7,0)                 | 3,7 (4,3)                 | 4,0 (5,3)                  | 105 (140)                             |
| MINI Cooper SD Cabrio                           | 5,3 (7,1)                 | 4,0 (4,4)                 | 4,5 (5,4)                  | 118 (143)                             |
| MINI John Cooper Works Cabrio <sup>1</sup>      | 9,6                       | 5,9                       | 7,3                        | 169                                   |
| MINI One Clubman                                | 7,3 (8,8)                 | 4,5 (5,2)                 | 5,5 (6,5)                  | 129 (152)                             |
| MINI Cooper Clubman                             | 7,0 (8,8)                 | 4,7 (5,2)                 | 5,5 (6,5)                  | 129 (152)                             |
| MINI Cooper S Clubman                           | 7,4 (8,9)                 | 5,0 (5,0)                 | 5,9 (6,4)                  | 137 (150)                             |
| MINI One D Clubman <sup>1</sup>                 | 4,4                       | 3,6                       | 3,9                        | 103                                   |
| MINI Cooper D Clubman                           | 4,4 (6,9)                 | 3,6 (4,2)                 | 3,9 (5,2)                  | 103 (138)                             |
| MINI Cooper SD Clubman                          | 5,2 (7,0)                 | 3,9 (4,3)                 | 4,4 (5,3)                  | 115 (141)                             |
| MINI John Cooper Works Clubman <sup>1</sup>     | 9,5                       | 5,8                       | 7,2                        | 167                                   |
| MINI One Countryman                             | 7,4 (9,3)                 | 5,2 (6,0)                 | 6,0 (7,2)                  | 139 (168)                             |
| MINI Cooper Countryman                          | 7,4 (9,3)                 | 5,2 (6,0)                 | 6,0 (7,2)                  | 140 (168)                             |
| MINI Cooper S Countryman                        | 7,5 (9,5)                 | 5,4 (5,7)                 | 6,1 (7,1)                  | 143 (166)                             |
| MINI Cooper S Countryman ALL 4                  | 8,2 (10,3)                | 5,8 (6,2)                 | 6,7 (7,7)                  | 157 (180)                             |
| MINI One D Countryman <sup>1</sup>              | 4,7                       | 4,2                       | 4,4                        | 115                                   |
| MINI Cooper D Countryman                        | 4,7 (7,2)                 | 4,2 (4,7)                 | 4,4 (5,6)                  | 115 (149)                             |
| MINI Cooper SD Countryman                       | 5,2 (7,3)                 | 4,3 (4,8)                 | 4,6 (5,7)                  | 122 (150)                             |
| MINI Cooper D Countryman ALL 4                  | 5,3 (7,6)                 | 4,7 (5,0)                 | 4,9 (6,0)                  | 129 (158)                             |
| MINI Cooper SD Countryman ALL 4                 | 5,3 (7,7)                 | 4,7 (5,1)                 | 4,9 (6,1)                  | 130 (160)                             |
| <b>Rolls-Royce</b>                              |                           |                           |                            |                                       |
| Rolls-Royce Ghost <sup>2</sup>                  | 20,5                      | 9,6                       | 13,6                       | 317                                   |
| Rolls-Royce Phantom <sup>2</sup>                | 25,0                      | 11,5                      | 16,5                       | 385                                   |
| Rolls-Royce Phantom EWB <sup>2</sup>            | 25,1                      | 11,7                      | 16,6                       | 388                                   |
| Rolls-Royce Phantom Coupé <sup>2</sup>          | 25,0                      | 11,5                      | 16,5                       | 385                                   |
| Rolls-Royce Phantom Drophead Coupé <sup>2</sup> | 25,0                      | 11,5                      | 16,5                       | 385                                   |

Werte in Klammern gelten für Automatikgetriebe.

<sup>1</sup> nur mit manuellem Getriebe erhältlich  
<sup>2</sup> nur mit Automatikgetriebe erhältlich  
<sup>3</sup> Variante mit 1,6 Litern Hubraum  
<sup>4</sup> nur in ausgewählten Ländern der EU verfügbar  
<sup>5</sup> serienmäßig mit 6-Gang M Sport-Automatik Getriebe

Weitere Informationen und ständig aktualisierte Daten zu den Fahrzeugen erhalten Sie im Internet unter den Adressen [www.bmw.com](http://www.bmw.com), [www.mini.com](http://www.mini.com) und [www.rolls-roycemotocars.com](http://www.rolls-roycemotocars.com).

Stand: Modelljahr 2011

**Herausgeber**  
Bayerische Motoren Werke  
Aktiengesellschaft  
80788 München  
Telefon +49 89 382-0
