# Supplementary material
Source: publisher site journal article supplement (https://www.degruyterbrill.com/publication/isbn/9783110432879/downloadAsset/9783110432879_Elektronischer_Anhang_2.zip)
Supplement: Supplementary file 14 [file Bayer GB 2010.pdf › Korpustexte/Korpustexte pdf/Bayer/Bayer GB 2010.pdf]

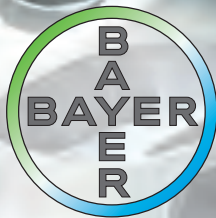

Science For A Better Life

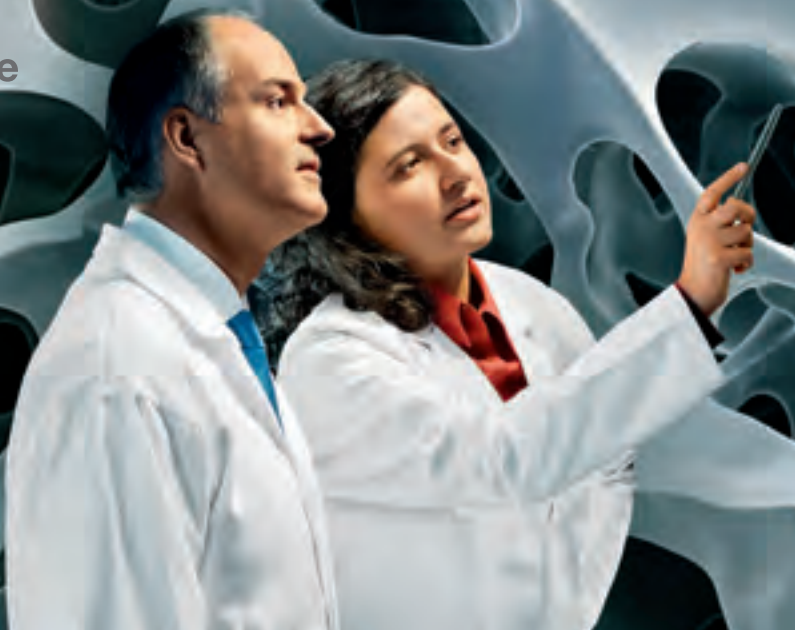

## GESCHÄFTSBERICHT

# 2010

### ZUM TITELBILD

#### DIALOG MIT PARTNERN

Die Bayer-Forscher befinden sich im ständigen Austausch mit Wissenschaftlern renommierter Hochschulen, mit Kunden und Kooperationspartnern. Im Mittelpunkt stehen Fragen zu den Herausforderungen der Zukunft, auf die wir gemeinsam nach Antworten suchen – ganz im Sinne von „Bayer: Science For A Better Life“.

So diskutieren auf dem Titelbild unseres Geschäftsberichts der Chemiker Dr. Christoph Gürtler, Projektleiter bei Bayer MaterialScience, und die Wissenschaftlerin Daniela d' Elia von der RWTH Aachen University, wie der Klimasünder Kohlendioxid als wertvoller Rohstoff für nachhaltiges Wirtschaften in der Industrie genutzt werden kann. Das ist das Ziel des Projektes „Dream Production“ von Bayer mit Partnern aus Wissenschaft und Unternehmen. Dabei soll CO<sub>2</sub> chemisch gebunden werden, als Rohstoff Verwendung bei der Herstellung von Polymer-Materialien finden und damit einen Teil der herkömmlichen fossilen Rohstoffe ersetzen. Unser Titel zeigt die beiden Forscher vor der Rasterelektronenmikroskop-Aufnahme einer Polyurethan-Schaumstruktur.

|                             |    |
|-----------------------------|----|
| » Kennzahlen                |    |
| » Bayer-Leitbild            |    |
| » Brief an die Aktionäre    | 4  |
| » Der Vorstand              | 8  |
| » Bericht des Aufsichtsrats | 10 |

#### BAYER AM KAPITALMARKT

|                             |    |
|-----------------------------|----|
| » Bayer-Aktie und -Anleihen | 14 |
|-----------------------------|----|

#### BAYER MAGAZIN

|                                |    |
|--------------------------------|----|
| » Für eine bessere Gesundheit  | 20 |
| » Für eine gesündere Ernährung | 26 |
| » Für nachhaltige Produkte     | 32 |
| » Highlights 2010              | 38 |

#### » ZUSAMMENGEFASSTER LAGEBERICHT VON BAYER-KONZERN UND BAYER AG

|  |    |
|--|----|
|  | 44 |
|--|----|

#### » KONZERNABSCHLUSS

#### WEITERE INFORMATIONEN

|                                    |     |
|------------------------------------|-----|
| » Organe der Gesellschaft          | 256 |
| » Organisationsübersicht           | 259 |
| » Glossar                          | 260 |
| » Stichwortverzeichnis             | 264 |
| » Nachhaltiges Engagement weltweit | 266 |

|                                                 |  |
|-------------------------------------------------|--|
| » Der Bayer-Konzern                             |  |
| » In aller Welt zu Hause                        |  |
| » Fünfjahresübersicht                           |  |
| » Finanzkalender, Impressum, Haftungsausschluss |  |

# Kennzahlen

[Tabelle 1.1]

|                                                | 2009     | 2010     | Veränderung |
|------------------------------------------------|----------|----------|-------------|
|                                                | in Mio € | in Mio € | in %        |
| <b>Bayer-Konzern</b>                           |          |          |             |
| Umsatzerlöse                                   | 31.168   | 35.088   | 12,6        |
| EBIT <sup>1</sup>                              | 3.006    | 2.730    | -9,2        |
| EBIT vor Sondereinflüssen <sup>2</sup>         | 3.772    | 4.452    | 18,0        |
| EBITDA <sup>3</sup>                            | 5.815    | 6.286    | 8,1         |
| EBITDA vor Sondereinflüssen <sup>2</sup>       | 6.472    | 7.101    | 9,7         |
| EBITDA-Marge vor Sondereinflüssen <sup>4</sup> | 20,8 %   | 20,2 %   |             |
| Ergebnis vor Ertragsteuern                     | 1.870    | 1.721    | -8,0        |
| Konzernergebnis                                | 1.359    | 1.301    | -4,3        |
| Ergebnis je Aktie (€) <sup>5</sup>             | 1,70     | 1,57     | -7,6        |
| Bereinigtes Ergebnis je Aktie (€) <sup>6</sup> | 3,64     | 4,19     | 15,1        |
| Brutto-Cashflow <sup>7</sup>                   | 4.658    | 4.771    | 2,4         |
| Netto-Cashflow <sup>8</sup>                    | 5.375    | 5.773    | 7,4         |
| Nettofinanzverschuldung                        | 9.691    | 7.917    | -18,3       |
| Investitionen (gemäß Segmenttabelle)           | 1.669    | 1.621    | -2,9        |
| Forschungs- und Entwicklungskosten             | 2.746    | 3.053    | 11,2        |
| Dividende pro Aktie der Bayer AG in €          | 1,40     | 1,50     | 7,1         |
| <b>HealthCare</b>                              |          |          |             |
| Umsatzerlöse                                   | 15.988   | 16.913   | 5,8         |
| EBIT                                           | 2.640    | 1.861    | -29,5       |
| EBIT vor Sondereinflüssen <sup>2</sup>         | 3.012    | 3.030    | 0,6         |
| EBITDA <sup>3</sup>                            | 4.148    | 4.116    | -0,8        |
| EBITDA vor Sondereinflüssen <sup>2</sup>       | 4.468    | 4.405    | -1,4        |
| EBITDA-Marge vor Sondereinflüssen <sup>4</sup> | 27,9 %   | 26,0 %   |             |
| Brutto-Cashflow <sup>7</sup>                   | 3.153    | 2.948    | -6,5        |
| Netto-Cashflow <sup>8</sup>                    | 3.431    | 3.320    | -3,2        |
| <b>CropScience</b>                             |          |          |             |
| Umsatzerlöse                                   | 6.510    | 6.830    | 4,9         |
| EBIT                                           | 798      | 261      | -67,3       |
| EBIT vor Sondereinflüssen <sup>2</sup>         | 1.017    | 787      | -22,6       |
| EBITDA <sup>3</sup>                            | 1.311    | 767      | -41,5       |
| EBITDA vor Sondereinflüssen <sup>2</sup>       | 1.508    | 1.293    | -14,3       |
| EBITDA-Marge vor Sondereinflüssen <sup>4</sup> | 23,2 %   | 19,0 %   |             |
| Brutto-Cashflow <sup>7</sup>                   | 1.043    | 546      | -47,7       |
| Netto-Cashflow <sup>8</sup>                    | 745      | 1.399    | 87,8        |
| <b>MaterialScience</b>                         |          |          |             |
| Umsatzerlöse                                   | 7.520    | 10.154   | 35,0        |
| EBIT                                           | -266     | 780      | •           |
| EBIT vor Sondereinflüssen <sup>2</sup>         | -126     | 780      | •           |
| EBITDA <sup>3</sup>                            | 341      | 1.356    | •           |
| EBITDA vor Sondereinflüssen <sup>2</sup>       | 446      | 1.356    | •           |
| EBITDA-Marge vor Sondereinflüssen <sup>4</sup> | 5,9 %    | 13,4 %   |             |
| Brutto-Cashflow <sup>7</sup>                   | 319      | 1.058    | •           |
| Netto-Cashflow <sup>8</sup>                    | 849      | 763      | -10,1       |

Rundungen können in Einzelfällen dazu führen, dass sich Werte in diesem Bericht nicht exakt zur angegebenen Summe aufaddieren und dass Prozentangaben sich nicht exakt aus den dargestellten Werten ergeben.

<sup>1</sup> EBIT: operatives Ergebnis gemäß Gewinn- und Verlustrechnung.

<sup>2</sup> EBIT(DA) vor Sondereinflüssen stellen Kennzahlen dar, die nach den internationalen Rechnungslegungsvorschriften nicht definiert sind. Daher sollten sie nur als ergänzende Information angesehen werden. Das Unternehmen geht davon aus, dass das EBITDA vor Sondereinflüssen eine geeignetere Kennzahl für die Beurteilung der operativen Geschäftstätigkeit darstellt, da es weder durch Abschreibungen auf immaterielle Vermögenswerte und Sachanlagen noch durch Sondereinflüsse belastet ist. Das Unternehmen möchte dem Leser mit dieser Kennzahl ein Bild der Ertragslage vermitteln, das im Zeitablauf vergleichbarer und zutreffender informiert. Siehe auch Zusammengefasster Lagebericht, Kapitel 4.2 „Ermittlung des EBIT(DA) vor Sondereinflüssen“.

<sup>3</sup> EBITDA: EBIT zuzüglich Abschreibungen auf immaterielle Vermögenswerte und Sachanlagen.

<sup>4</sup> Die EBITDA-Marge vor Sondereinflüssen berechnet sich aus der Division von EBITDA vor Sondereinflüssen und den Umsatzerlösen.

<sup>5</sup> Ergebnis je Aktie: Berechnung nach IAS 33 (Earnings per Share): Division angepasstes Konzernergebnis durch durchschnittliche Anzahl der Aktien. Details siehe Konzernabschluss, Anhangangabe [16].

<sup>6</sup> Das bereinigte Ergebnis je Aktie stellt eine Kennzahl dar, die nach den internationalen Rechnungslegungsvorschriften nicht definiert ist. Das Unternehmen geht davon aus, dass der Leser mit dieser Kennzahl ein Bild der Ertragslage zu vermitteln, das im Zeitablauf vergleichbarer und zutreffender informiert. Zur Ermittlung des bereinigten Ergebnisses je Aktie siehe Zusammengefasster Lagebericht, Kapitel 4.3.

<sup>7</sup> Brutto-Cashflow: Ergebnis nach Steuern zuzüglich Ertragsteueraufwand zuzüglich Finanzergebnis abzüglich gezahlter bzw. geschuldeter Ertragsteuern zuzüglich Abschreibungen zuzüglich bzw. abzüglich Veränderungen der Pensionsrückstellungen abzüglich Gewinne bzw. zuzüglich Verluste aus dem Abgang von langfristigen Vermögenswerten abzüglich Gewinne aus der Neubewertung bisheriger Vermögenswerte bei stufenweisem Unternehmenserwerb. Die Position Veränderung der Pensionsrückstellungen umfasst sowohl die Korrektur nicht zahlungswirksamer Effekte im operativen Ergebnis (EBIT) als auch Auszahlungen aufgrund unserer Pensionsverpflichtungen. Details siehe Zusammengefasster Lagebericht, Kapitel 4.5 „Finanzlage und Investitionen Bayer-Konzern“.

<sup>8</sup> Netto-Cashflow: Entspricht dem Cashflow aus der betrieblichen Tätigkeit nach IAS 7.

# Bayer: Science For A Better Life

Bayer ist ein weltweit tätiges Unternehmen mit Kernkompetenzen auf den Gebieten Gesundheit, Ernährung und hochwertige Materialien.

Als Erfinder-Unternehmen setzen wir Zeichen in forschungsintensiven Bereichen. Mit unseren Produkten und Dienstleistungen möchten wir den Menschen nützen und zur Verbesserung der Lebensqualität beitragen. Gleichzeitig wollen wir Werte schaffen durch Innovation, Wachstum und eine hohe Ertragskraft.

Wir bekennen uns zu den Prinzipien der Nachhaltigkeit und handeln als „Corporate Citizen“ sozial und ethisch verantwortlich.

# Unsere Werte.

---

Die Unternehmenskultur ist eine wichtige Voraussetzung für den Erfolg von Bayer. Eine zentrale Rolle spielen dabei unsere Werte Leadership (Führung), Integrität, Flexibilität und Effizienz. Wir haben sie unter dem Begriff LIFE zusammengefasst. An ihnen richtet sich unser tägliches Handeln aus, um zur Lösung der großen Herausforderungen unserer Zeit beizutragen – getreu unserer Mission „Bayer: Science For A Better Life“.

---

# LIFE

---

## L

### LEADERSHIP

- Sich für Mitarbeiter engagieren und Leistung fördern
- Eigeninitiative zeigen, andere inspirieren und motivieren
- Verantwortung übernehmen für Aufgaben und Ergebnisse, Erfolge und Misserfolge
- Andere fair und mit Respekt behandeln
- Klar, ehrlich und zügig Feedback geben
- Konflikte konstruktiv lösen
- Werte schaffen für unsere Aktionäre, Kunden, Mitarbeiter und die Gesellschaft

## I

### INTEGRITY

- Vorbild sein
- Gesetze, Richtlinien und Regeln einhalten
- Anderen vertrauen und vertrauensvolle Beziehungen aufbauen
- Ehrlich und zuverlässig sein
- Aufmerksam zuhören und angemessen kommunizieren
- Nachhaltig handeln: kurzfristige Ergebnisse mit langfristigen Anforderungen in Einklang bringen
- Menschen und Umwelt schützen, Sicherheit gewährleisten

## F

### FLEXIBILITY

- Veränderungen aktiv vorantreiben
- Trends frühzeitig aufgreifen und sich auf Anforderungen der Zukunft einstellen
- Den Ist-Zustand hinterfragen
- Kundenorientiert denken und handeln
- Chancen erkennen und kalkulierte Risiken eingehen
- Offen für Neues sein
- Bereit sein, das ganze Leben lang zu lernen

## E

### EFFICIENCY

- Ressourcen optimal einsetzen
  - Sich auf Aktivitäten konzentrieren, die Wert schaffen
  - Aufgaben einfach und effektiv erledigen
  - Die erforderliche Qualität rechtzeitig und zu angemessenen Kosten bereitstellen
  - Schneller zu überlegten Entscheidungen kommen
  - Entscheidungen konsequent umsetzen
  - Gemeinsam bessere Lösungen finden
-

# Unsere Marke.

---

Die Marke Bayer besitzt eine besondere Strahlkraft und zählt zu den bekanntesten weltweit. Rund um den Globus steht Bayer für innovative und hochwertige Produkte. Gleichzeitig symbolisiert unsere Marke Vertrauen und Zuverlässigkeit und steigert somit die Wettbewerbsfähigkeit des Unternehmens. Deshalb haben wir unser Markenprofil weiter geschärft, indem unsere Dachmarke noch klarer und konsistenter genutzt wird.

---

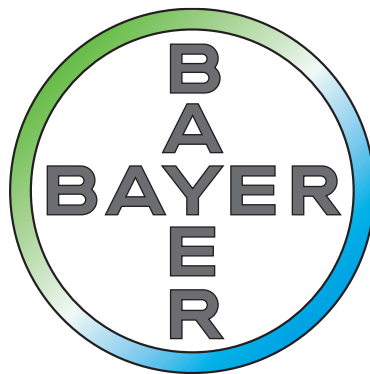

Das Bayer-Kreuz genießt international einen sehr guten Ruf. Wir sind überzeugt, dass auch unsere Markenarchitektur nachhaltig zum Wert der Marke beitragen kann. Deshalb haben wir nach eingehender Analyse unser Markenportfolio optimiert. In Zukunft wollen wir die Zahl der Markenauftritte im Konzern kontinuierlich reduzieren. Das stärkt unsere Dachmarke und verbessert deren Wahrnehmung. So werden auch die Produkte von Bayer schneller, klarer und eindeutiger wahrgenommen.

Wir verzichten auf selbstständige Markenauftritte einzelner Geschäftseinheiten innerhalb der Teilkonzerne und Servicegesellschaften. Das Pharma-Geschäft firmiert zum Beispiel nicht

mehr unter „Bayer Schering Pharma“, sondern unter „Bayer HealthCare Pharmaceuticals“.

Auch bei der Suche nach hoch qualifizierten Nachwuchskräften bedienen wir uns zukünftig verstärkt der Marke Bayer und erhöhen auf diese Art und Weise die Attraktivität des Unternehmens für neue Mitarbeiter. Und unsere rund 111.000 Mitarbeiter weltweit können noch überzeugender als Markenbotschafter agieren.

Die wertschöpfende Kraft des Bayer-Kreuzes kommt somit Aktionären, Kunden und Mitarbeitern in zunehmendem Maße zugute und steigert Markenstärke, Markenwert und die Wettbewerbsfähigkeit von Bayer.

# Gute Wachstumschancen für unsere Geschäfte

*Sehr geehrte Aktionäre,*

es ist mir eine große Freude, Ihnen als neuer Vorsitzender des Vorstands den Geschäftsbericht für das Jahr 2010 präsentieren zu können. Aus diesem Anlass möchte ich eine persönliche Aussage voranstellen: Bayer ist ein starkes Unternehmen von Weltrang – und ich bin sehr stolz darauf, nun ein Teil von Bayer zu sein.

Wir alle wissen, dass sich mein Vorgänger, Werner Wenning, um Bayer sehr verdient gemacht hat. Bis zum Stabwechsel am 1. Oktober 2010 konnte ich eng mit ihm zusammenarbeiten – und für diese Unterstützung bin ich ihm persönlich sehr dankbar.

Auch die weiteren neuen Mitglieder in unserem Führungskreis haben die Arbeit engagiert aufgenommen. Das gilt für Sandra Peterson an der Spitze von Bayer CropScience ebenso wie für Jörg Reinhardt bei Bayer HealthCare. Und natürlich auch für Werner Baumann, unseren neuen Finanzvorstand in der Holding. Wir sind zuversichtlich, dass wir gemeinsam mit Wolfgang Plischke und Richard Pott als den etablierten Kollegen im Vorstand der Bayer AG sowie mit Patrick Thomas als CEO von Bayer MaterialScience zu einem starken Team zusammenwachsen werden.

Schauen wir nun auf das abgelaufene Geschäftsjahr: Obwohl die Auswirkungen der Krise weiterhin spürbar waren, hat sich die Weltwirtschaft von der tiefen Rezession überraschend schnell erholt. Auch in der zweiten Jahreshälfte 2010 stieg – bei nachlassender Dynamik – die gesamtwirtschaftliche Produktion weiter an.

In diesem Umfeld steigerten wir den Umsatz im Konzern um 12,6 Prozent auf 35,1 Milliarden Euro – das ist ein neuer Rekord in der Unternehmensgeschichte. Bereinigt um Währungs- und Portfolioeffekte ist dies ein Plus von 8,0 Prozent. Mit einem EBITDA vor Sonderinflüssen von 7,1 Milliarden Euro konnten wir das operative Ergebnis um 9,7 Prozent steigern. Und das bereinigte Ergebnis je Aktie verzeichnet einen Anstieg um 15,1 Prozent. Wir haben damit unsere kommunizierten Ziele für das Jahr 2010 erreicht. Zudem konnten wir die Netto-Finanzverschuldung durch einen nochmals verbesserten operativen Cashflow um 1,8 Milliarden Euro auf 7,9 Milliarden Euro senken.

Dies ist nicht zuletzt das Verdienst unserer Mitarbeiterinnen und Mitarbeiter. Ohne ihre hohe fachliche Kompetenz und ihren großen Einsatz wäre ein solcher Erfolg nicht denkbar. Dafür bedanke ich mich – auch im Namen des gesamten Vorstands – ganz ausdrücklich.



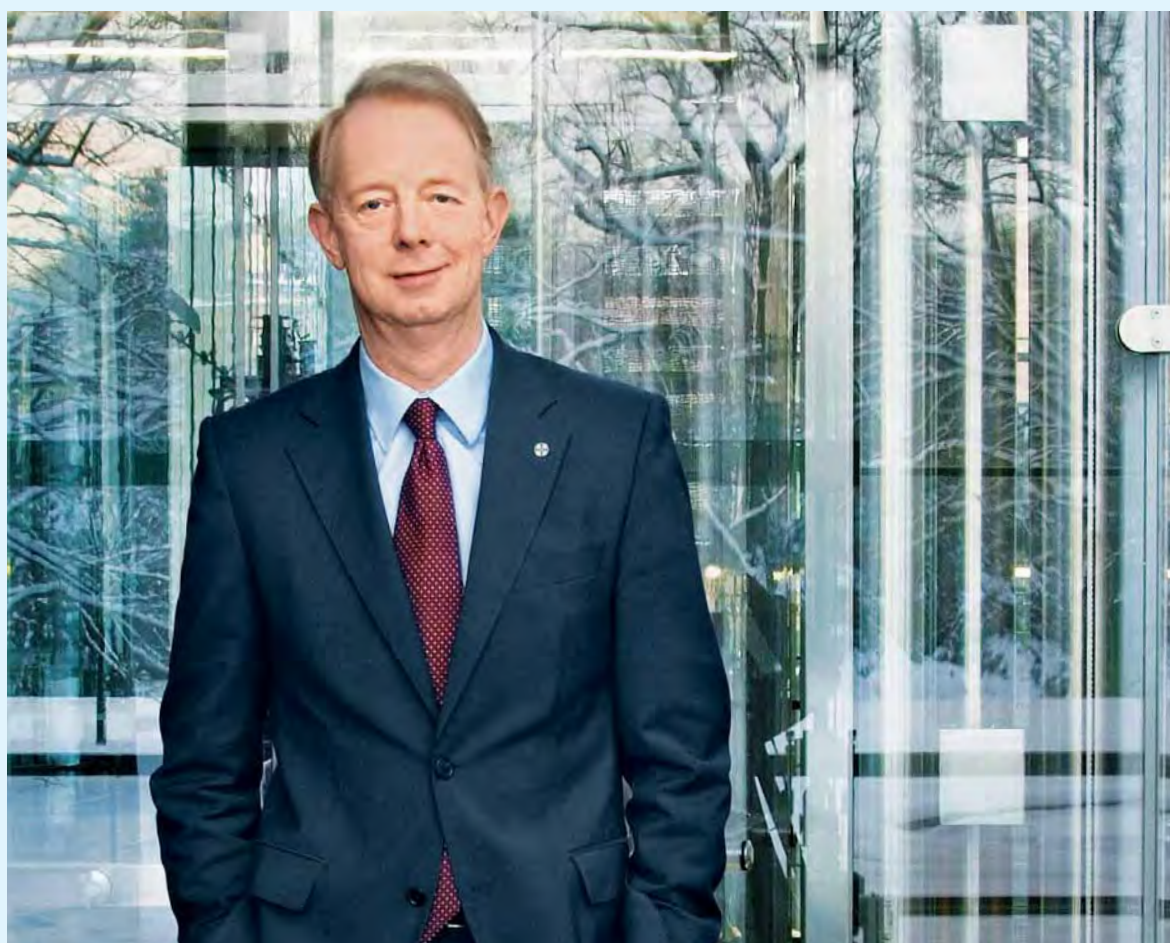

Im Geschäftsjahr 2011 und darüber hinaus stehen wir jedoch vor erneuten Herausforderungen. Denn das Ergebnis 2010 war teilweise von Faktoren geprägt, die nicht vorherzusehen waren. So konnte zwar unser Teilkonzern MaterialScience schneller als gedacht wieder an das Vorkrisenniveau herankommen. Und auch Währungseffekte fielen spürbar zu unseren Gunsten aus. Der Geschäftsverlauf bei unseren Teilkonzernen CropScience und HealthCare hingegen blieb hinter unseren Erwartungen zurück. Bei HealthCare machte sich die Generikakonkurrenz deutlich bemerkbar. Negativ ist insbesondere der Druck auf die YAZ®/Yasmin®-Familie, den größten Umsatzträger für unser Pharmageschäft. Auch die preisrelevanten Gesundheitsreformen in vielen Ländern belasten unseren Umsatz und vor allem auch unser Ergebnis erheblich. Zudem erhöhten wir unsere Aufwendungen für Vertrieb sowie Forschung und Entwicklung. Für den Teilkonzern CropScience führte die starke Konkurrenz durch Generika vor allem bei Herbiziden zu einem deutlichen Preisverfall. Das Jahr 2010 war zudem von nachteiligen Witterungsbedingungen in fast allen wichtigen Absatzmärkten des Teilkonzerns gekennzeichnet.

Neben diesen Herausforderungen sehen wir aber auch sehr gute Wachstumschancen für unsere Geschäfte. Denn jeder unserer drei Teilkonzerne adressiert mit seinen Produkten und Lösungen

einige der wichtigsten aktuellen globalen Trends in den Bereichen Gesundheit, Ernährung und hochwertige Materialien. Um diese Chancen auf Wachstum wahrzunehmen, müssen wir uns weiter auf unsere Kernkompetenz konzentrieren: das Hervorbringen von innovativen Produkten. Unsere Mission „Bayer: Science For A Better Life“ bringt dies auf den Punkt.

Das bedeutet konkret: Bei HealthCare gilt es, weiter in unsere gute Pipeline innovativer Wirkstoffe zu investieren und unsere neuen Produkte zukünftig noch besser zu vermarkten. Hier haben wir unter anderem mit unserem Gerinnungshemmer Xarelto® einen großen Hoffnungsträger. Anfang des Jahres 2011 wurde für Xarelto® sowohl in Europa als auch in den USA der Zulassungsantrag für die Indikation der Schlaganfallprophylaxe bei Patienten mit Vorhofflimmern gestellt. Wir halten an unserer Aussage fest, dass wir Xarelto® in Zukunft insgesamt ein Spitzenumsatzpotenzial von über zwei Milliarden Euro zutrauen. Weitere Beispiele für unsere gute Pipeline sind VEGF Trap-Eye (Ophthalmologie), Qlaira® und YAZ® Plus (Gynäkologie), Alpharadin™ und neue Indikationen bei Nexavar® (jeweils Onkologie) sowie schließlich Riociguat im Bereich der Kardiologie.

Auch bei CropScience wollen wir unsere fortgeschrittenen Entwicklungen optimal vermarkten. Hier haben wir im klassischen Pflanzenschutz-Segment eine der besten Forschungs- und Entwicklungspipelines weltweit, in die wir weiter investieren. Wir planen, bis 2012 sechs neue Produkte auf den Markt zu bringen. Zudem wollen wir im Bereich Saatgut und Pflanzeigenschaften schneller vorankommen, was ebenfalls weitere Mittel erfordert. Denn in Zukunft werden die Landwirte, unsere Kunden, mehr und mehr die klassischen Pflanzenschutzprodukte im Paket mit den neuen Technologien, also Saatgut und Pflanzeigenschaften, kaufen wollen.

Bayer MaterialScience entwickelt zahlreiche neue Produkte sowie Anwendungen, die wichtige Beiträge für Ressourcen-Effizienz und Klimaschutz leisten. Als Erfolg sehen wir dort mehr als 20 Prozent des Umsatzes mit Produkten, die seit 2005 auf den Markt gekommen sind. Allerdings werden Teile des Portfolios immer mehr zu Massenware. Daher gibt es für MaterialScience einen klaren Fokus: die Kosten- und Technologieführerschaft, die allerdings nur über fortlaufend hohe Investitionen, vor allem in Sachanlagen, zu erreichen ist.

Für alle drei Teilkonzerne gilt schließlich, dass wir unsere Präsenz in den Schwellenländern – den sogenannten Emerging Markets – weiter ausbauen müssen, denn dort entwickeln sich unsere Abnehmermärkte besonders dynamisch. Das bedeutet hohe Ausgaben für Produktions- und Forschungsanlagen vor Ort und vor allem auch den Aufbau und die Förderung von Mitarbeitern in den betreffenden Ländern.

Wir stehen also in einem Spannungsverhältnis zwischen den Herausforderungen in unserem Geschäft und den notwendigen Investitionen in unsere Innovationskraft sowie in regionale Wachstumsmärkte, die der Schlüssel für weiteres Wachstum und Erfolg im Wettbewerb sind. Entscheidend ist, dass wir heute die Weichen stellen müssen, um unsere Chancen in Zukunft auch zu nutzen.

Unsere Aufwendungen für Forschung und Entwicklung haben wir daher schon im Jahr 2010 um 11,2 Prozent auf einen neuen Rekord von 3,1 Milliarden Euro gesteigert. In absoluten

Zahlen bedeutet das eine Steigerung um rund 300 Millionen Euro gegenüber dem Vorjahr. Für 2011 erwarten wir Aufwendungen auf demselben Niveau. Außerdem werden wir unsere Investitionen in den Emerging Markets weiter steigern.

Gleichzeitig müssen wir unseren finanziellen Spielraum erhöhen, um diese Investitionen trotz der geschilderten Herausforderungen auch umsetzen zu können. Wie im November des vergangenen Jahres kommuniziert, werden wir die notwendigen Mittel durch eine gezielte Umschichtung von Ressourcen aufbringen, unterstützt durch Effizienz- und Sparmaßnahmen. Hier gilt: mehr Innovation und weniger Administration.

Dieser ambitionierte Kurs setzt voraus, dass wir unsere Mitarbeiterinnen und Mitarbeiter weltweit noch sorgfältiger entwickeln und dafür sorgen, dass sie genau verstehen, an welchen Werten sich unser Unternehmen orientiert. Schon bislang stand unser Konzern für gute, für richtige Werte. Um diese jedoch in der Praxis als echte Rahmenbedingungen für unser Handeln nutzen zu können, haben wir sie vereinfacht. Das Ergebnis ist das Wort „LIFE“. Es basiert unmittelbar auf unserer Mission „Science For A Better Life“. „Science“ steht für uns als Erfinderunternehmen und unser klares Bekenntnis zu Forschung und Innovation, „Life“ hingegen umschreibt unsere Verhaltensweise gegenüber unseren Stakeholdern.

Das „L“ in LIFE steht für „Leadership“ – also Führung. Wir meinen damit die Bereitschaft, Leistung zu bringen, eine Richtung vorzugeben und Verantwortung zu übernehmen. „I“ wie „Integrität“ bedeutet, dass wir die Erwartungen aller Interessengruppen zum Ausgleich bringen und ausnahmslos Regeln und Gesetze befolgen. Denn nur so hat unser Geschäft eine solide und glaubwürdige Basis. Das „F“ in LIFE steht für die „Flexibilität“, Veränderungen anzunehmen, sie als Chance zu begreifen und die notwendigen Anpassungen vorzunehmen. Der letzte Buchstabe ist ein „E“ für „Effizienz“. Wir wollen intelligent mit Ressourcen umgehen. Und Dinge so einfach und effektiv wie möglich machen.

Zusammengefasst: Wir verfolgen ein evolutionäres Ziel. Wir werden unsere Mitarbeiterinnen und Mitarbeiter noch besser entwickeln, und durch die angekündigten Effizienzmaßnahmen gewinnen wir den finanziellen Spielraum, um fokussiert in unsere Zukunft zu investieren.

Sehr geehrte Aktionäre, ein solides Jahr nach der Krise liegt hinter uns, und wir haben die Voraussetzungen dafür geschaffen, unsere zukünftigen Chancen im globalen Wettbewerb optimal zu nutzen. Ich bedanke mich im Namen des Vorstands und des gesamten Unternehmens für Ihr Vertrauen und würde mich sehr freuen, wenn Sie uns auch zukünftig in unserem Engagement für Bayer unterstützen.

Mit freundlichen Grüßen



DR. MARIJN DEKKERS  
Vorstandsvorsitzender der Bayer AG



# Vorstand

## DR. MARIJN DEKKERS Vorstandsvorsitzender (seit Oktober 2010)

1957 in Tilburg, Niederlande, geboren, studierte Marijn Dekkers Chemie und Chemieingenieurwesen in Nijmegen und Eindhoven. Nach seiner Promotion begann er eine Laufbahn als Forscher bei General Electric in den USA. 1995 wechselte er zu Honeywell. 2000 wurde er Chief Operating Officer von Thermo Electron Corporation und zwei Jahre später CEO und President. Nach dem Erwerb von Fisher Scientific erhielt das Unternehmen den Namen Thermo Fisher Scientific Inc. Zum 1. Oktober 2010 trat Dekkers die Nachfolge von Werner Wenning an. Marijn Dekkers ist verheiratet und hat drei Töchter.

## DR. WOLFGANG PLISCHKE Technologie · Innovation · Umwelt · Region Asien/Pazifik

1951 in Stuttgart geboren, studierte Wolfgang Plischke Biologie an der Universität Hohenheim. Nach seiner Promotion begann er seine Laufbahn im Konzern 1980 bei der Bayer-Tochtergesellschaft Miles. Nach verschiedenen Stationen im In- und Ausland leitete Plischke ab 2000 den Geschäftsbereich Pharma in Nordamerika, zwei Jahre später übernahm er die Leitung des Geschäftsbereichs Pharma der Bayer AG. Im März 2006 wurde er in den Vorstand berufen. Seit Dezember 2007 ist Plischke Vorsitzender des Verbandes Forschender Arzneimittelhersteller in Deutschland. Wolfgang Plischke ist verheiratet und hat zwei Söhne.

## WERNER BAUMANN Finanzen · Region Europa (seit Mai 2010)

1962 in Krefeld geboren, studierte Werner Baumann Wirtschaftswissenschaften in Aachen und Köln. Er trat 1988 in die Bayer AG ein und übernahm erste Aufgaben im Ressort Konzernfinanzen. Nach Stationen in Spanien und den USA kehrte Baumann 2002 nach Deutschland zurück und wurde Mitglied des Executive Committee von Bayer HealthCare und ein Jahr später Vorstandsmitglied und Arbeitsdirektor im neu gegründeten Teilkonzern. Am 1. Mai 2010 trat er die Nachfolge von Klaus Kühn an. Werner Baumann ist verheiratet und hat vier Kinder.

## DR. RICHARD POTT Strategie · Personal · Arbeits- direktor · Region Amerika, Afrika und Naher Osten

1953 in Leverkusen geboren, studierte Richard Pott Physik an der Universität Köln, wo er auch promovierte. 1984 trat Pott in die Zentrale Forschung der Bayer AG ein. Nach verschiedenen Stationen in der Konzernverwaltung wurde er 1997 zum Leiter des Konzernbereichs Konzernplanung und Controlling ernannt, bevor ihm 1999 die Leitung des Geschäftsbereichs Spezialprodukte übertragen wurde. Im Mai 2002 wurde er in den Vorstand berufen. Richard Pott ist verheiratet und hat drei Kinder.

Von links: Dr. Wolfgang Plischke, Dr. Marijn Dekkers, Dr. Richard Pott, Werner Baumann

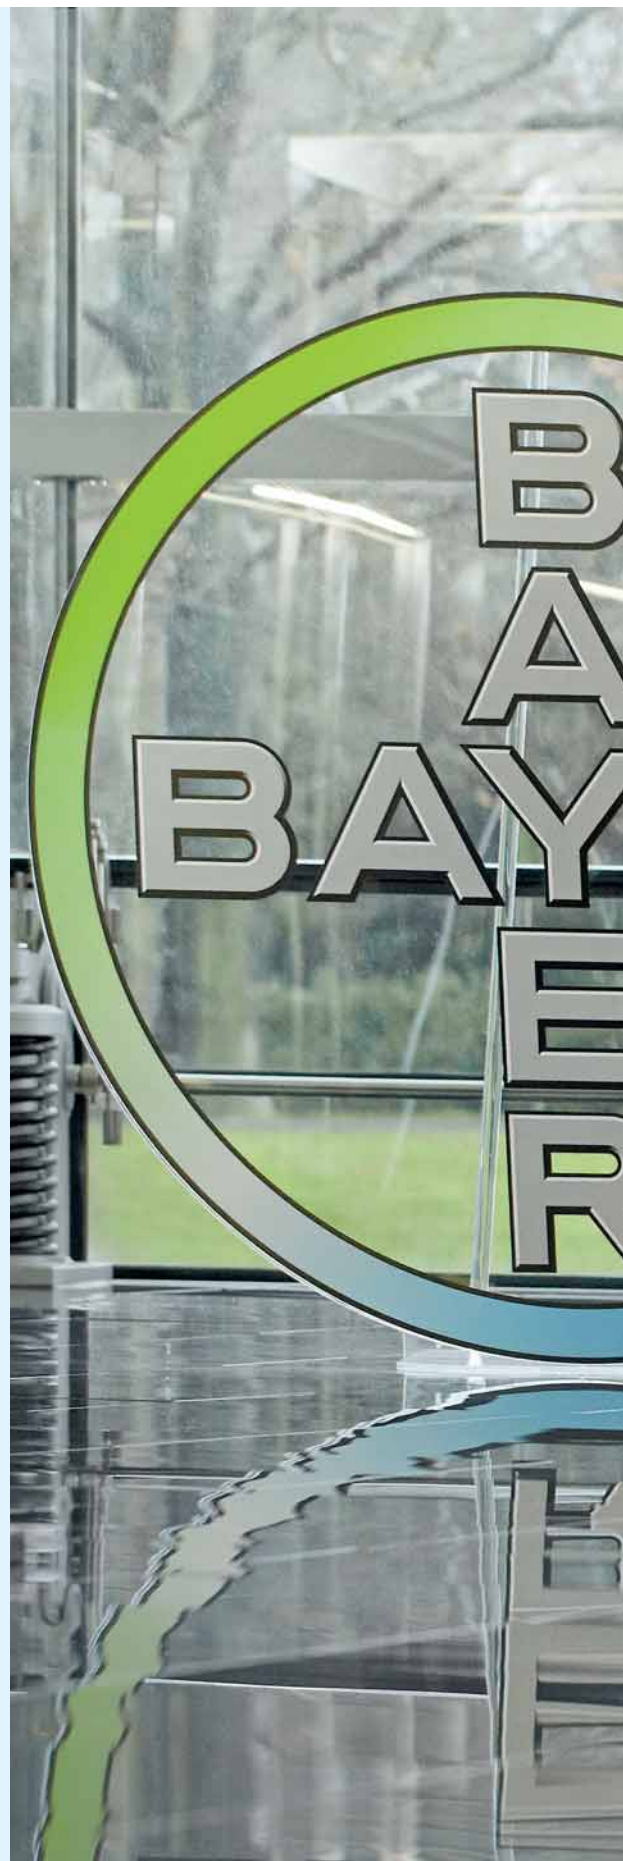

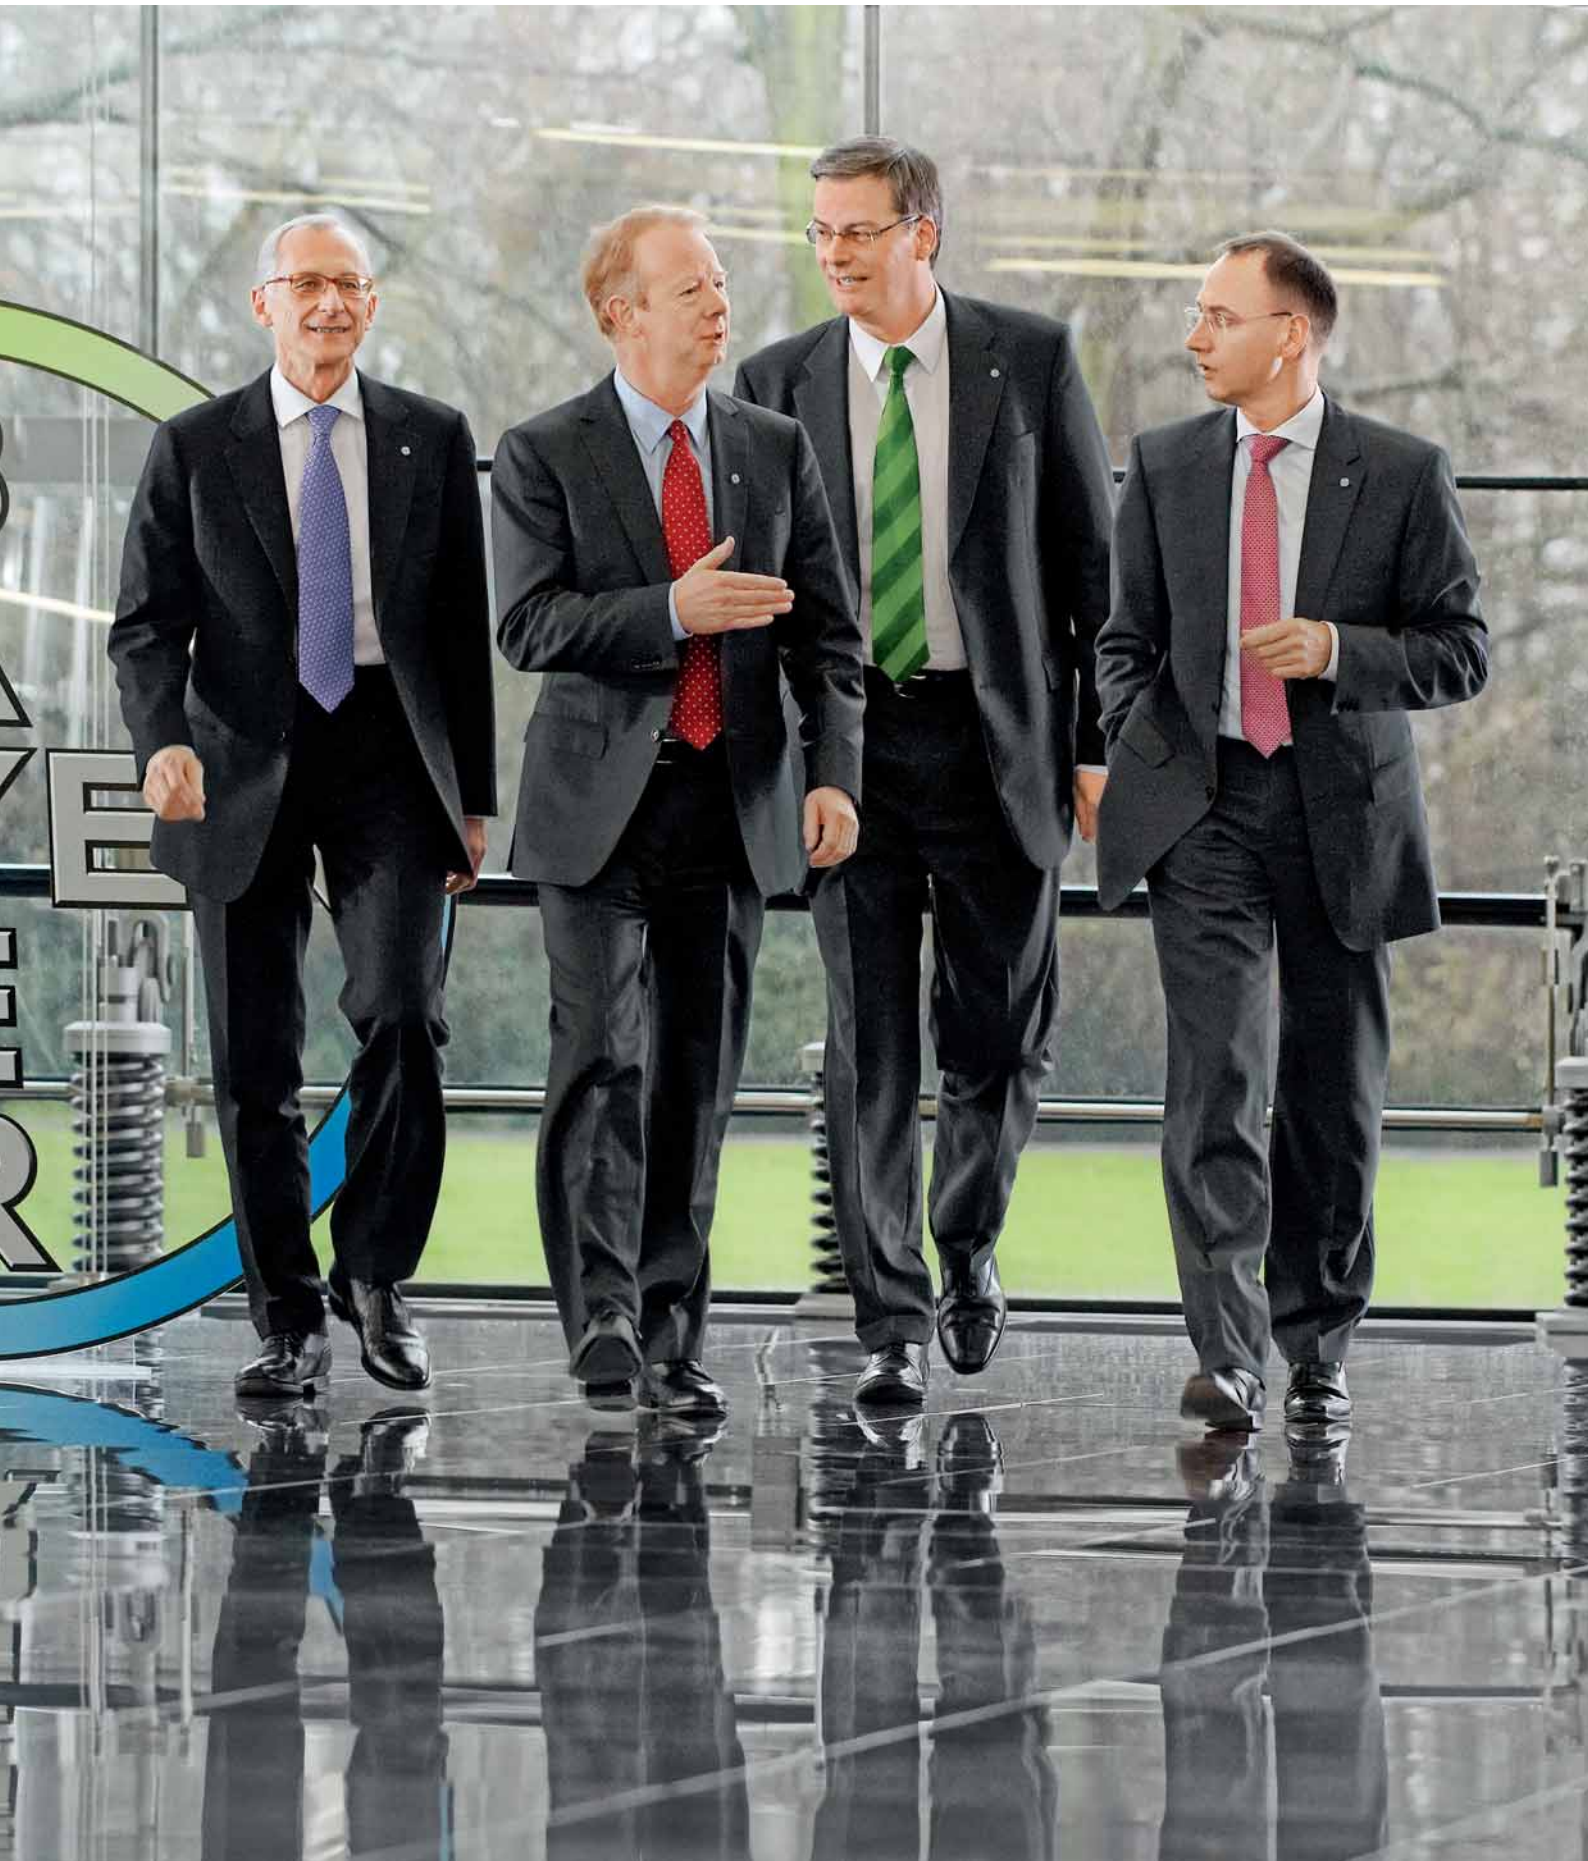



# Bericht des Aufsichtsrats

*Sehr geehrte Aktionäre,*

der Aufsichtsrat hat die Arbeit des Vorstands im Geschäftsjahr 2010 auf Grundlage der ausführlichen, in schriftlicher und mündlicher Form erstatteten Berichte des Vorstands regelmäßig überwacht und beratend begleitet. Darüber hinaus fand ein regelmäßiger Informationsaustausch zwischen dem Aufsichtsratsvorsitzenden und dem Vorsitzenden des Vorstands statt, sowohl mit dem bis zum 30. September 2010 amtierenden Vorstandsvorsitzenden als auch mit seinem Nachfolger. Auf diese Weise war der Aufsichtsrat stets informiert über die beabsichtigte Geschäftspolitik, die Unternehmensplanung einschließlich Finanz-, Investitions- und Personalplanung, die Rentabilität der Gesellschaft und den Gang der Geschäfte sowie die Lage der Gesellschaft und des Konzerns insgesamt.

Soweit für Entscheidungen oder Maßnahmen der Geschäftsführung aufgrund Gesetzes, Satzung oder Geschäftsordnung eine Zustimmung erforderlich war, prüften die Mitglieder des Aufsichtsrats – u. a. vorbereitet durch die Ausschüsse – die Beschlussvorlagen in den Sitzungen oder verabschiedeten sie aufgrund von schriftlichen Informationen. In Entscheidungen von wesentlicher Bedeutung für das Unternehmen war der Aufsichtsrat eingebunden. Die in den Berichten des Vorstands geschilderte wirtschaftliche Lage und die Entwicklungsperspektiven des Konzerns, der einzelnen Bereiche und der wichtigen Beteiligungsgesellschaften im In- und Ausland waren Gegenstand sorgfältiger Erörterung.

Der Aufsichtsrat trat im Jahr 2010 zu vier Sitzungen zusammen. Kein Mitglied des Aufsichtsrats nahm an weniger als der Hälfte der Sitzungen teil. Die Mitglieder des Vorstands nahmen an allen Sitzungen des Aufsichtsrats teil.

## **Schwerpunkte der Beratungen im Aufsichtsrat**

Im Vordergrund der Beratungen des Aufsichtsrats standen Fragen der Strategie und der Geschäftstätigkeit des Gesamtkonzerns und der Teilkonzerne. Der Aufsichtsrat beschäftigte sich in seinen einzelnen Sitzungen schwerpunktmäßig mit folgenden Themen: In seiner Sitzung im Februar behandelte der Aufsichtsrat den Geschäftsbericht 2009 sowie die Tagesordnung für die Hauptversammlung 2010. Weiter hat sich der Aufsichtsrat ausführlich mit dem Risiko-Managementsystem des Bayer-Konzerns sowie Fragen der Vorstandsvergütung befasst. In seiner September-Sitzung erörterte der Aufsichtsrat schwerpunktmäßig die Lage des Unternehmens und strategische Fragestellungen. Außerdem wurden die neuen Empfehlungen des Deutschen Corporate Governance Kodex behandelt. In der Sitzung im Dezember 2010 stellte der Vorstand seine operative Planung sowie die Finanz- und Bilanzplanung für die Jahre 2011 bis 2013 vor. Des Weiteren hat der

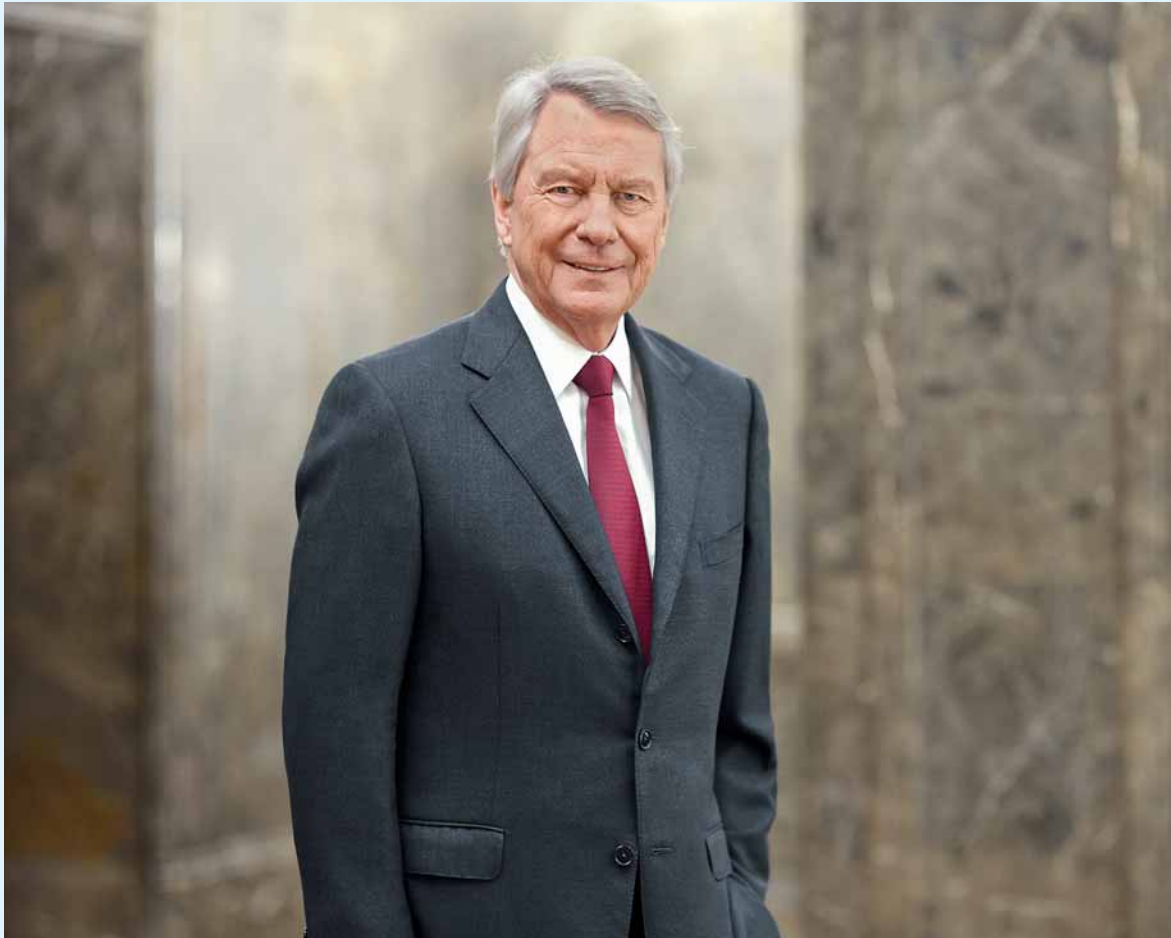

Aufsichtsrat in dieser Sitzung entsprechend der neuen Empfehlung des Corporate Governance Kodex zur angemessenen Berücksichtigung von Frauen im Aufsichtsrat und im Vorstand Maßnahmen zur Erhöhung des Frauenanteils in den beiden Organen sowie die im Corporate Governance Bericht wiedergegebene Zielsetzung zur Zusammensetzung des Aufsichtsrats beschlossen. Darüber hinaus wurden die Ergebnisse der Effizienzprüfung des Aufsichtsrats diskutiert und Anpassungen der Geschäftsordnung des Aufsichtsrats vorgenommen. Im Anschluss an die Dezember-Sitzung wurde eine Informations- und Diskussionsveranstaltung zu den rechtlichen Grundlagen der Aufsichtsrats-tätigkeit durchgeführt.

#### **Ausschüsse des Aufsichtsrats**

Als Ausschüsse des Aufsichtsrats bestehen ein Präsidium, ein Prüfungsausschuss, ein Personalausschuss und ein Nominierungsausschuss.\*

\* Zur Beschreibung der Zuständigkeit und der Besetzung der Ausschüsse, die Teil des Berichts des Aufsichtsrats ist, siehe Corporate-Governance-Bericht auf S. 88 dieses Geschäftsberichts. Sie wird hier zur Vermeidung von Dopplungen nicht erneut wiedergegeben.

### Arbeit der Ausschüsse

Das Präsidium des Aufsichtsrats musste in seiner Eigenschaft als Vermittlungsausschuss nach § 27 Abs. 3 Mitbestimmungsgesetz nicht zusammentreten und auch im Übrigen keine Beschlüsse fassen.

Der Prüfungsausschuss tagte im Berichtsjahr in vier Sitzungen. Er befasste sich insbesondere mit der Rechnungslegung der Gesellschaft und des Konzerns, dem Risiko-Management im Konzern, dem Internen Kontrollsystem und der Internen Revision sowie mit Fragen der Compliance. Weiterhin legte der Prüfungsausschuss das Budget für Leistungen des Abschlussprüfers fest und erörterte mit dem Abschlussprüfer Prüfungsschwerpunkte für das Geschäftsjahr 2010. Der Vorstandsvorsitzende und der Finanzvorstand nahmen an den Ausschusssitzungen regelmäßig teil. Der Abschlussprüfer nahm an allen Sitzungen des Prüfungsausschusses teil und berichtete ausführlich über die Prüfungstätigkeit und die prüferische Durchsicht der Quartalsabschlüsse.

Bei den Sitzungen des Prüfungsausschusses wurden darüber hinaus folgende Themen schwerpunktmäßig behandelt: In seiner Sitzung im Februar befasste sich der Prüfungsausschuss intensiv mit dem Risikobericht, der das Risiko-Managementsystem, Planungs- und Marktrisiken, Rechtsrisiken und Compliance, den Bericht über Prozess- und Organisationsrisiken und das Interne Kontrollsystem sowie den Bericht der Konzernrevision umfasste. Des Weiteren unterbreitete er in dieser Sitzung dem Aufsichtsrat eine Empfehlung zur Wahl des Abschlussprüfers durch die Hauptversammlung. Schwerpunkte der April-Sitzung waren das Finanzmanagementsystem des Bayer-Konzerns und der Jahresbericht des Compliance-Officer.

Der Personalausschuss trat zu zwei Sitzungen zusammen und fasste einen Beschluss im schriftlichen Verfahren. Gegenstand der Sitzungen sowie des schriftlichen Beschlusses waren Fragen der Vorstandsvergütung und der Vorstandsverträge.

Die Mitglieder des Nominierungsausschusses erörterten im Berichtsjahr entsprechend ihrer Zuständigkeit bei einer Sitzung mögliche Kandidaten für zukünftige Wahlen der Anteilseignervertreter im Aufsichtsrat der Bayer AG und entwickelten die vom Aufsichtsrat beschlossene Zielsetzung für die Zusammensetzung des Aufsichtsrats.

Die Sitzungen und Entscheidungen der Ausschüsse, insbesondere die Sitzungen des Prüfungsausschusses, wurden durch Berichte und andere Informationen des Vorstands vorbereitet. Aus den Sitzungen der Ausschüsse wurde im Plenum berichtet.

### Corporate Governance

Der Aufsichtsrat beschäftigte sich mit der Weiterentwicklung der Corporate-Governance-Grundsätze im Unternehmen und berücksichtigte dabei die Änderungen des Deutschen Corporate Governance Kodex vom Mai 2010. Zur Umsetzung neuer Kodexempfehlungen und zur Anpassung an neue Gesetzesbestimmungen änderte der Aufsichtsrat in seiner Sitzung im Dezember seine Geschäftsordnung. Im Dezember wurde von Vorstand und Aufsichtsrat eine neue Entsprechenserklärung abgegeben, die auf Seite 88 abgedruckt ist.



### Besetzung des Aufsichtsrats

Zum 30. Juni 2010 schied Herr Karl-Josef Ellrich aus dem Aufsichtsrat aus. Als gewähltes Ersatzmitglied trat Frau Roswitha Süßelbeck zum 1. Juli 2010 in den Aufsichtsrat ein. Zum Nachfolger von Herrn Ellrich als Mitglied des Personalausschusses wählte der Aufsichtsrat Herrn Willy Beumann.

### Jahres- und Konzernabschluss, Abschlussprüfung

Der Jahresabschluss der Bayer AG wurde nach den Regeln des Handelsgesetzbuches (HGB) und des Aktiengesetzes (AktG) aufgestellt, der Konzernabschluss nach HGB sowie entsprechend den Grundsätzen der International Financial Reporting Standards (IFRS) und der zusammengefasste Lagebericht nach den Regeln des HGB. Der Abschlussprüfer, die PricewaterhouseCoopers Aktiengesellschaft, Wirtschaftsprüfungsgesellschaft, Essen, hat den Jahresabschluss der Bayer AG, den Konzernabschluss und den zusammengefassten Lagebericht geprüft. In seinen Prüfungsberichten erläutert der Abschlussprüfer die Prüfungsgrundsätze. Als Ergebnis ist festzuhalten, dass Bayer die Regeln des HGB, AktG bzw. die International Financial Reporting Standards, wie sie in der EU anzuwenden sind, eingehalten hat. Der Jahres- und Konzernabschluss haben den uneingeschränkten Bestätigungsvermerk erhalten. Jahresabschluss, Konzernabschluss und zusammengefasster Lagebericht sowie die Prüfungsberichte des Abschlussprüfers haben allen Mitgliedern des Aufsichtsrats vorgelegen. Die Abschlussunterlagen wurden im Prüfungsausschuss und in der Bilanzsitzung des Aufsichtsrats – in beiden Gremien in Gegenwart und nach einem Bericht des Abschlussprüfers – ausführlich besprochen.

Den Jahresabschluss, den Vorschlag für die Verwendung des Bilanzgewinns sowie den Konzernabschluss und den zusammengefassten Lagebericht haben wir geprüft. Es bestanden keine Einwände. Wir stimmen daher dem Ergebnis der Abschlussprüfung zu. Den vom Vorstand aufgestellten Jahresabschluss und den Konzernabschluss billigen wir. Der Jahresabschluss ist damit festgestellt. Mit dem zusammengefassten Lagebericht und insbesondere der Beurteilung zur weiteren Entwicklung des Unternehmens sind wir einverstanden. Dies gilt auch für die Dividendenpolitik und die Entscheidungen zu den Rücklagen in der Gesellschaft. Dem Gewinnverwendungsvorschlag, der eine Dividende von 1,50 Euro pro Aktie vorsieht, schließen wir uns an.

Der Aufsichtsrat dankt der Unternehmensleitung und allen Mitarbeiterinnen und Mitarbeitern für ihre engagierten Leistungen im Geschäftsjahr 2010.

Leverkusen, 24. Februar 2011

Für den Aufsichtsrat



DR. MANFRED SCHNEIDER  
Vorsitzender

# Bayer am Kapitalmarkt

Performance der Bayer-Aktie 2010

[Grafik 2.1]

indexiert; 100 = Schlusskurs am 31.12.2009

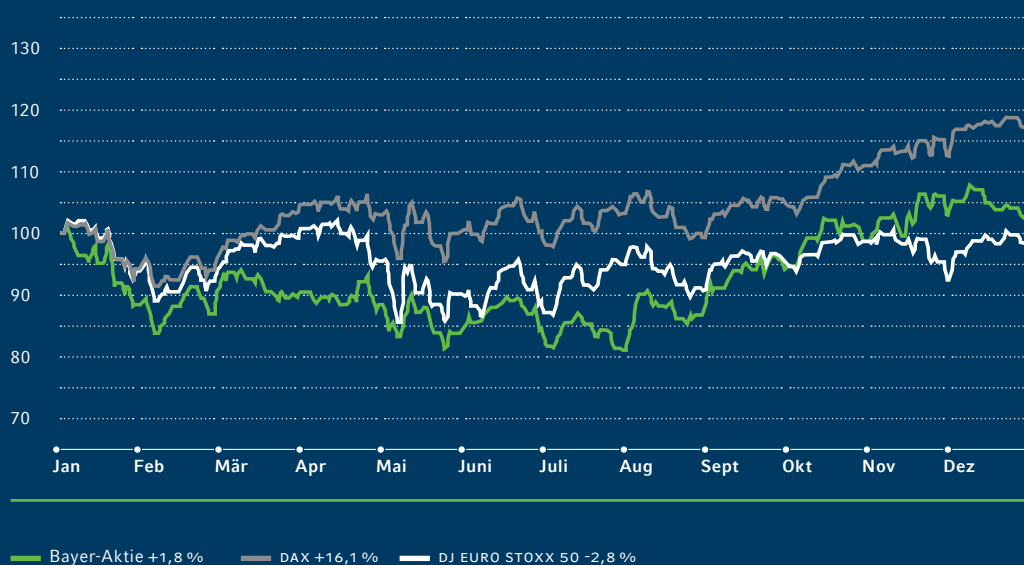

- 
- Rendite der Bayer-Aktie 2010: ca. 2 Prozent
  - 5-Jahres-Rendite: ca. 12 Prozent pro Jahr
  - Für das vergangene Geschäftsjahr schlagen Vorstand und Aufsichtsrat eine Erhöhung der Dividende auf 1,50 Euro pro Aktie vor.
-

## Das Börsenjahr 2010

### DEUTLICHE MARKTERHOLUNG

Die Diskussion über die Verschuldungskrise einiger europäischer Mitgliedsstaaten bestimmte seit dem Frühjahr das Marktgeschehen. Unter dem Eindruck einer robusten Konjunkturerholung konnte der DAX jedoch im Jahresverlauf 2010 seinen Aufwärtstrend von 2009 weiter fortsetzen und bis zum Jahresende um 16 Prozent zulegen. Nach einer schwankungsintensiven Seitwärtsbewegung im ersten Dreivierteljahr legte der DAX im letzten Quartal deutlich zu, überschritt Anfang Dezember die 7.000er Punkte-Marke und schloss am Jahresende bei 6.914 Punkten.

Der europäische Aktienindex EURO STOXX 50 (Performance Index) verlor – auch vor dem Hintergrund der Probleme einiger Mitgliedsstaaten in Europa – rund 3 Prozent. Die Aktienkurse in den USA und Japan entwickelten sich unterschiedlich. So stieg der S&P 500 um rund 13 Prozent, während der Nikkei 225 rund 3 Prozent verlor.

### LEICHTES PLUS DER BAYER-AKTIE

Die Bayer-Aktie gewann im Jahresverlauf – unter Einbeziehung der im Mai 2010 gezahlten Dividende von 1,40 Euro pro Aktie – knapp 2 Prozent. Am Jahresende schloss die Bayer-Aktie mit 55,30 Euro, nach einem kurz zuvor erreichten Jahreshoch von 58,62 Euro. Damit lag die Rendite der Bayer-Aktie im vierten Jahr in Folge über der des EURO STOXX 50 (Performance Index).

Die Umsätze in unserer Aktie verringerten sich gegenüber dem Vorjahr um ca. 16 Prozent auf durchschnittlich 3,6 Millionen Aktien pro Tag.

### GUTE UND STABILE BONITÄTSBEURTEILUNG VON BAYER AM ANLEIHEMARKT

Die von Anleiheinvestoren geforderte Risikoprämie für Unternehmen mit guter Bonitätsbeurteilung ist im Jahr 2010 leicht gestiegen. Aufgrund des im Jahresverlauf gesunkenen langfristigen Zinsniveaus sind die Refinanzierungskonditionen für Bayer am Kapitalmarkt günstig geblieben.

Zur Veranschaulichung der Entwicklung der Risikoaufschläge im Jahresverlauf kann die Entwicklung der Credit Default Swaps (CDS) beispielhaft herangezogen werden (siehe Grafik 2.2). CDS sind handelbare Kreditversicherungen gegen Zahlungsausfall eines Emittenten. Am Kapitalmarkt wird die Höhe des CDS von der Kreditwürdigkeit eines Unternehmens abgeleitet und dient daher als ein Indikator für die Bestimmung der Kreditmarge bei der Aufnahme von Fremdkapital.

Der Bayer CDS zeigte im Jahresverlauf nur einen relativ moderaten Anstieg. Bayer nutzte den vorteilhaften Unternehmensanleihemarkt für eine Privatplatzierung in Japan in Höhe von 10 Milliarden Japanischen Yen. Weiterer Refinanzierungsbedarf bestand in 2010 nicht. Vielmehr wurde die gute Liquiditätsausstattung zur vorzeitigen Rückzahlung der noch ausstehenden 885 Millionen Euro des im Rahmen der Schering-Akquisition aufgenommenen syndizierten Kredits genutzt.

Eine Auflistung aller von Bayer emittierten Anleihen befindet sich im Konzernabschluss, Anhangangabe [27].

### LANGFRISTIGE RENDITE DER BAYER-AKTIE WEITERHIN ÜBER MARKTENTWICKLUNG

Ein langfristig orientierter Anleger, der vor fünf Jahren 10.000 Euro in Bayer-Aktien investierte und die Dividenden reinvestierte, verfügte am 31. Dezember 2010 über ein Vermögen von 17.965 Euro. Dies entspricht einer durchschnittlichen jährlichen Rendite von 12,4 Prozent.

Langfristrenditen der Bayer-Aktie p.a. in % (Dividenden-Reinvestment)

[Tabelle 2.1]

| Rendite p.a.     | 1 Jahr 2010 | 3 Jahre 2008–10 | 5 Jahre 2006–10 |
|------------------|-------------|-----------------|-----------------|
|                  | in %        | in %            | in %            |
| Bayer            | +1,8        | -1,1            | +12,4           |
| DAX              | +16,1       | -5,0            | +5,0            |
| DJ EURO STOXX 50 | -2,8        | -11,1           | -1,9            |

### INTERNET

Weitere Informationen zu Bayer am Kapitalmarkt finden Sie unter [WWW.INVESTOR.BAYER.DE](http://WWW.INVESTOR.BAYER.DE)

Kennzahlen zur Bayer-Aktie

[Tabelle 2.2]

|                                               |          | 2009   | 2010   |
|-----------------------------------------------|----------|--------|--------|
| Konzernergebnis je Aktie                      | in €     | 1,70   | 1,57   |
| Bereinigtes Konzernergebnis je Aktie*         | in €     | 3,64   | 4,19   |
| Brutto-Cashflow je Aktie                      | in €     | 5,63   | 5,77   |
| Eigenkapital je Aktie                         | in €     | 22,92  | 22,85  |
| Dividende je Aktie                            | in €     | 1,40   | 1,50   |
| Börsenkurs zum Jahresende**                   | in €     | 55,96  | 55,30  |
| Höchstkurs**                                  | in €     | 56,45  | 58,62  |
| Tiefstkurs**                                  | in €     | 32,69  | 44,12  |
| Ausschüttungssumme                            | in Mio € | 1.158  | 1.240  |
| Anzahl dividendenberechtigter Aktien (31.12.) | in Mio   | 826,95 | 826,95 |
| Marktkapitalisierung (31.12.)                 | in Mrd € | 46,3   | 45,8   |
| Durchschnittliche tägliche Umsätze            | in Mio   | 4,3    | 3,6    |
| Kurs-Gewinn-Verhältnis**                      |          | 32,9   | 35,2   |
| Bereinigtes Kurs-Gewinn-Verhältnis**          |          | 15,4   | 13,2   |
| Kurs-Cashflow-Verhältnis**                    |          | 9,9    | 9,6    |
| Dividendenrendite                             | in %     | 2,5    | 2,7    |

\* Zur Berechnung des bereinigten Ergebnisses je Aktie siehe Zusammengefasster Lagebericht, Kapitel 4.3.

\*\* Xetra-Schlusskurse; Quelle: Bloomberg

Entwicklung der Credit Default Swaps (CDS) 2010

[Grafik 2.2]

mit fünfjähriger Laufzeit in Basispunkten<sup>1</sup>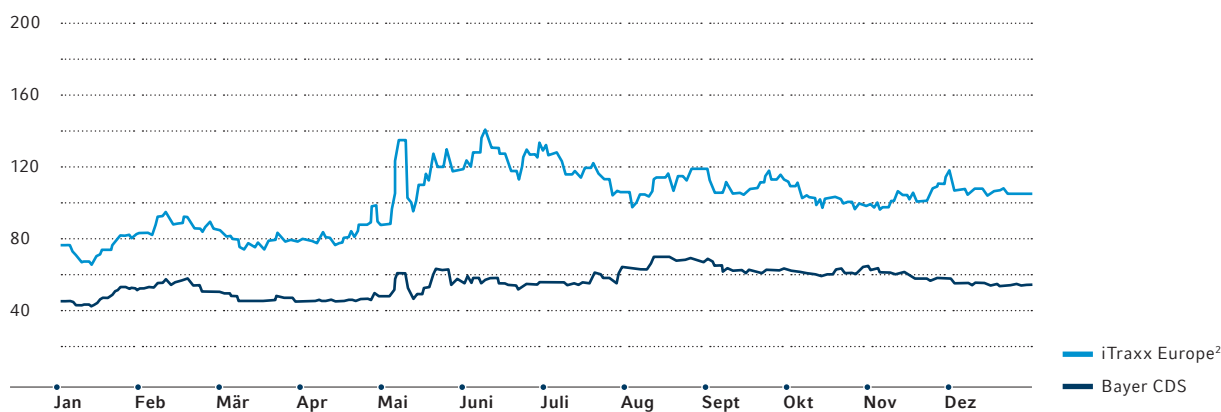<sup>1</sup> Quelle: Bloomberg<sup>2</sup> Der iTraxx Europe ist ein CDS-Index bestehend aus den CDS von 125 Unternehmen (inklusive Finanzinstitute) mit guter Bonitätseinstufung (Investment Grade Rating).

## NACHHALTIGES INVESTMENT

Die Bayer-Aktie ist in zahlreichen Aktienindizes und -fonds vertreten, die Unternehmen mit nachhaltiger und verantwortungsbewusster Unternehmenspolitik auszeichnen – u. a. in den „Dow Jones Sustainability Indices World und Europe“, in den „FTSE4Good Global und Europe Indizes“, dem „Advanced Sustainable Performance Indices“-Eurozone-Index oder dem „NYSE Euronext Low Carbon Europe Index“. Von Storebrand, einem norwegischen Finanzdienstleister mit Fokus auf nachhaltigem Investment, wird Bayer als sogenanntes „Best-in-Class-Unternehmen“ im Sektor Pharma geführt.

2010 wurde unser Unternehmen von der „Carbon Disclosure Project“-Initiative (CDP) im sechsten Jahr in Folge in den „Carbon Disclosure Leadership Index“ (CDLI) aufgenommen. In diesem Jahr ist Bayer außerdem in dem erstmals aufgelegten „Carbon Performance Leadership Index“ (CPLI) vertreten. Gewürdigt wurden die fundierte Berichterstattung zu Klimazielen und -strategie sowie konkrete Maßnahmen und Leistungen zur Emissions-Reduktion.

Unsere Nachhaltigkeitsberichterstattung orientiert sich an den Leitlinien der „Global Reporting Initiative“. Investoren und Analysten wurden in zahlreichen Einzelgesprächen über das Engagement von Bayer im Bereich Nachhaltigkeit informiert.

### DIVIDENDE ERHÖHT AUF 1,50 EURO PRO AKTIE

Vorstand und Aufsichtsrat schlagen der Hauptversammlung in diesem Jahr eine Dividende in Höhe von 1,50 Euro pro Aktie vor. Bezogen auf das bereinigte Ergebnis pro Aktie (Core EPS, vgl. zusammengefasster Lagebericht, Kapitel 4.3) entspricht dies einer Ausschüttungsquote von 36 Prozent und liegt damit im angestrebten Zielkorridor von 30 bis 40 Prozent.

Legt man den Jahresschlusskurs von 2010 (55,30 Euro) zugrunde, so errechnet sich eine Dividendenrendite von 2,7 Prozent. Die Ausschüttungssumme beträgt 1.240 Millionen Euro.

Dividende pro Aktie

[Grafik 2.3]

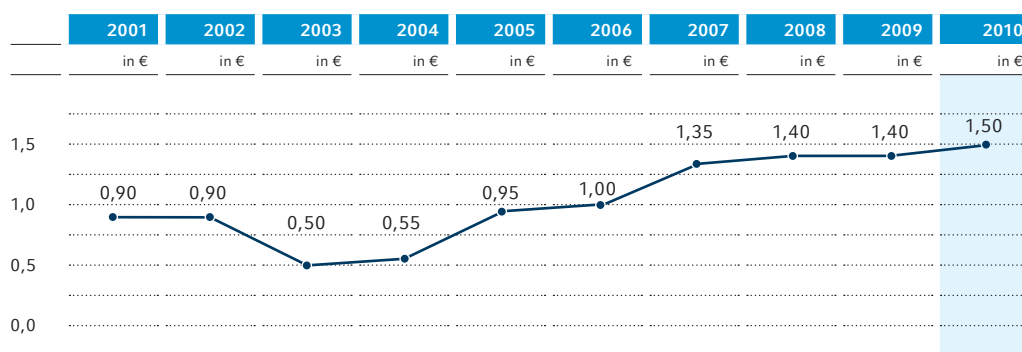

Ausschüttungssumme

[Grafik 2.4]

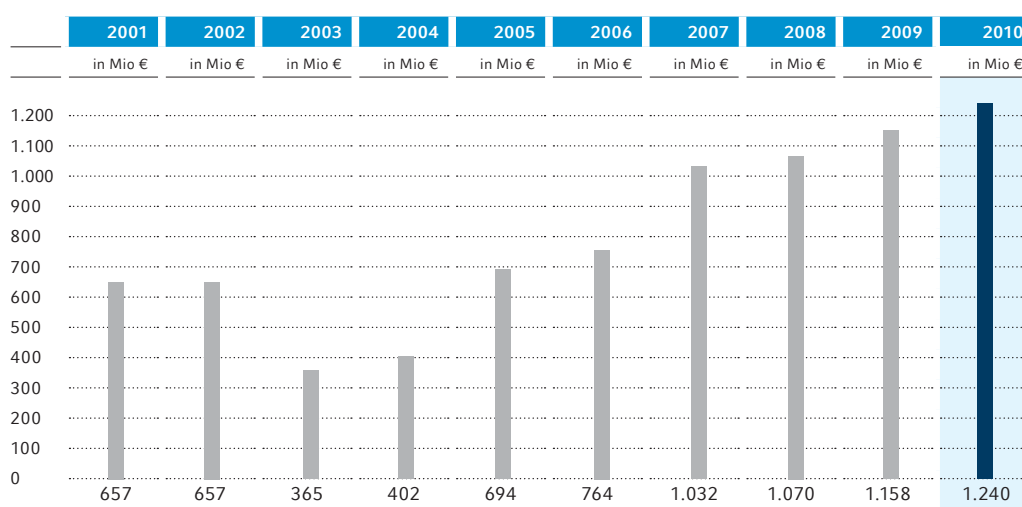

### AKTIONÄRSPORTAL WIRD VON ANTEILSEIGNERN GENUTZT

Seit der Hauptversammlung 2010 bieten wir auf unserer IR-Webseite ein Online-Aktionärsportal an. Hier können Aktionäre ganzjährig ihren Eintrag im Aktienregister einsehen, Adressdaten ändern und sich für den zukünftigen Versand der Hauptversammlungs-Einladung per E-Mail registrieren. Das Angebot wird von unseren Anteilseignern genutzt und bereits für den kommenden Einladungsversand unserer Hauptversammlung zu einer Einsparung von Druck- und Versandkosten führen.

Darüber hinaus haben Aktionäre im Vorfeld unserer Hauptversammlung im Online-Aktionärsportal die Möglichkeit, sich zur Hauptversammlung anzumelden, Eintrittskarten für sich oder einen Bevollmächtigten zu bestellen sowie Vollmacht und Weisung an die Stimmrechtsvertreter der Bayer AG zu erteilen. Zu unserer kommenden Hauptversammlung werden unsere Aktionäre erstmals ihr Stimmrecht auch per Briefwahl ausüben können. Auch diese Funktion steht über das Online-Aktionärsportal zur Verfügung.

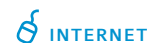

Unser Online-Aktionärsportal finden Sie unter  
[WWW.INVESTOR.BAYER.DE/DE/AKTIE/AKTIONAERSPORTAL](http://WWW.INVESTOR.BAYER.DE/DE/AKTIE/AKTIONAERSPORTAL)

## INTERNATIONALE AKTIONÄRSSTRUKTUR

Ende 2010 waren ca. 306.000 Aktionäre in unserem Aktienregister eingetragen. In der folgenden Grafik ist die geografische Verteilung unserer Aktien dargestellt, die auf den Ergebnissen einer internationalen Erhebung vom November 2010 basiert:

Aktionärsstruktur nach Ländern

[Grafik 2.5]

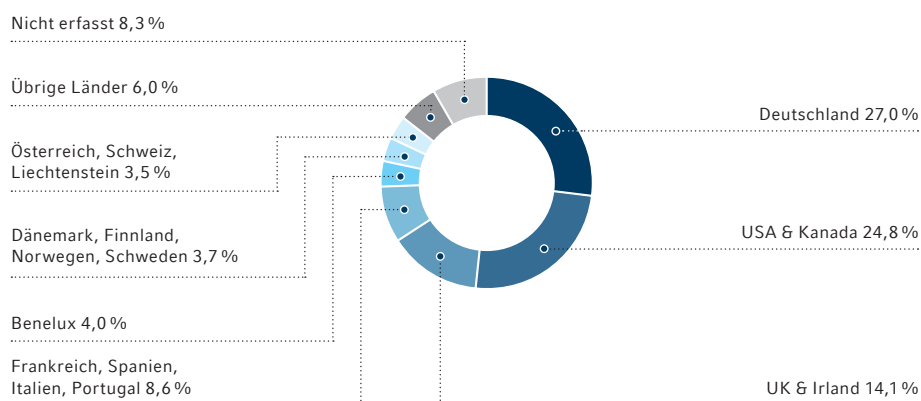

## KOMMUNIKATION MIT DEM KAPITALMARKT

Der intensive Dialog mit dem Kapitalmarkt hat traditionell einen hohen Stellenwert für unser Unternehmen. In 2010 waren wir mit unserem Investor-Relations-Team – meist in Begleitung des Vorstandsvorsitzenden oder des Finanzvorstandes – in 26 Finanzzentren unterwegs und führten mehr als 400 Einzelgespräche.

Neben den regelmäßigen Quartals-, Halbjahres- und Jahresberichterstattungen informierten wir unsere Anteilseigner auch über die Entwicklungsfortschritte zu Rivaroxaban in Form von IR-Telefonkonferenzen.

Bereits zum fünften Mal fand im vergangenen Jahr unsere jährliche „Meet Management“-Konferenz statt, die inzwischen vom Kapitalmarkt als fester Bestandteil unseres IR-Programms eingeplant wird. In kleinen Gesprächsrunden diskutieren hier unsere Investoren und Analysten mit den Vorständen der Holding und der Teilkonzerne intensiv über die Entwicklung und die Zukunftsaussichten unseres Unternehmens.

## PREISE FÜR INVESTOR RELATIONS

Nach einer Studie des Deutschen Investor Relations Verbands (DIRK) und des deutschen Magazins „WirtschaftsWoche“ leistet Bayer die beste Investor-Relations-Arbeit der DAX-Unternehmen. Dafür erhielten wir den „Deutschen Investor Relations Preis 2010“.

Zudem erreichte Bayer beim „Capital Investor Relations Preis 2010“ den zweiten Platz im EURO STOXX 50. Wir freuen uns über diese Wertschätzungen des Kapitalmarktes für unsere IR-Arbeit im vergangenen Jahr (siehe auch „Highlights 2010“, Seite 41).

Darüber hinaus wurde die Bayer-IR-Webseite bei den „IR Global Rankings“ (M&Z-Consult, USA) als beste im Sektor „Health Care“ bewertet und erreichte in der Region „Europe“ den 3. Platz. Insgesamt hatten sich mehr als 500 Unternehmen aus 35 Ländern beteiligt.



Bayer HealthCare

FÜR EINE BESSERE GESUNDHEIT

# „Wie können wir Patienten mit Vorhofflimmern besser helfen?“

PROF. DR. ROBERT M. CALIFF (links im Bild),  
Direktor am Translational Research Institute der Duke University in Durham, North Carolina, usa



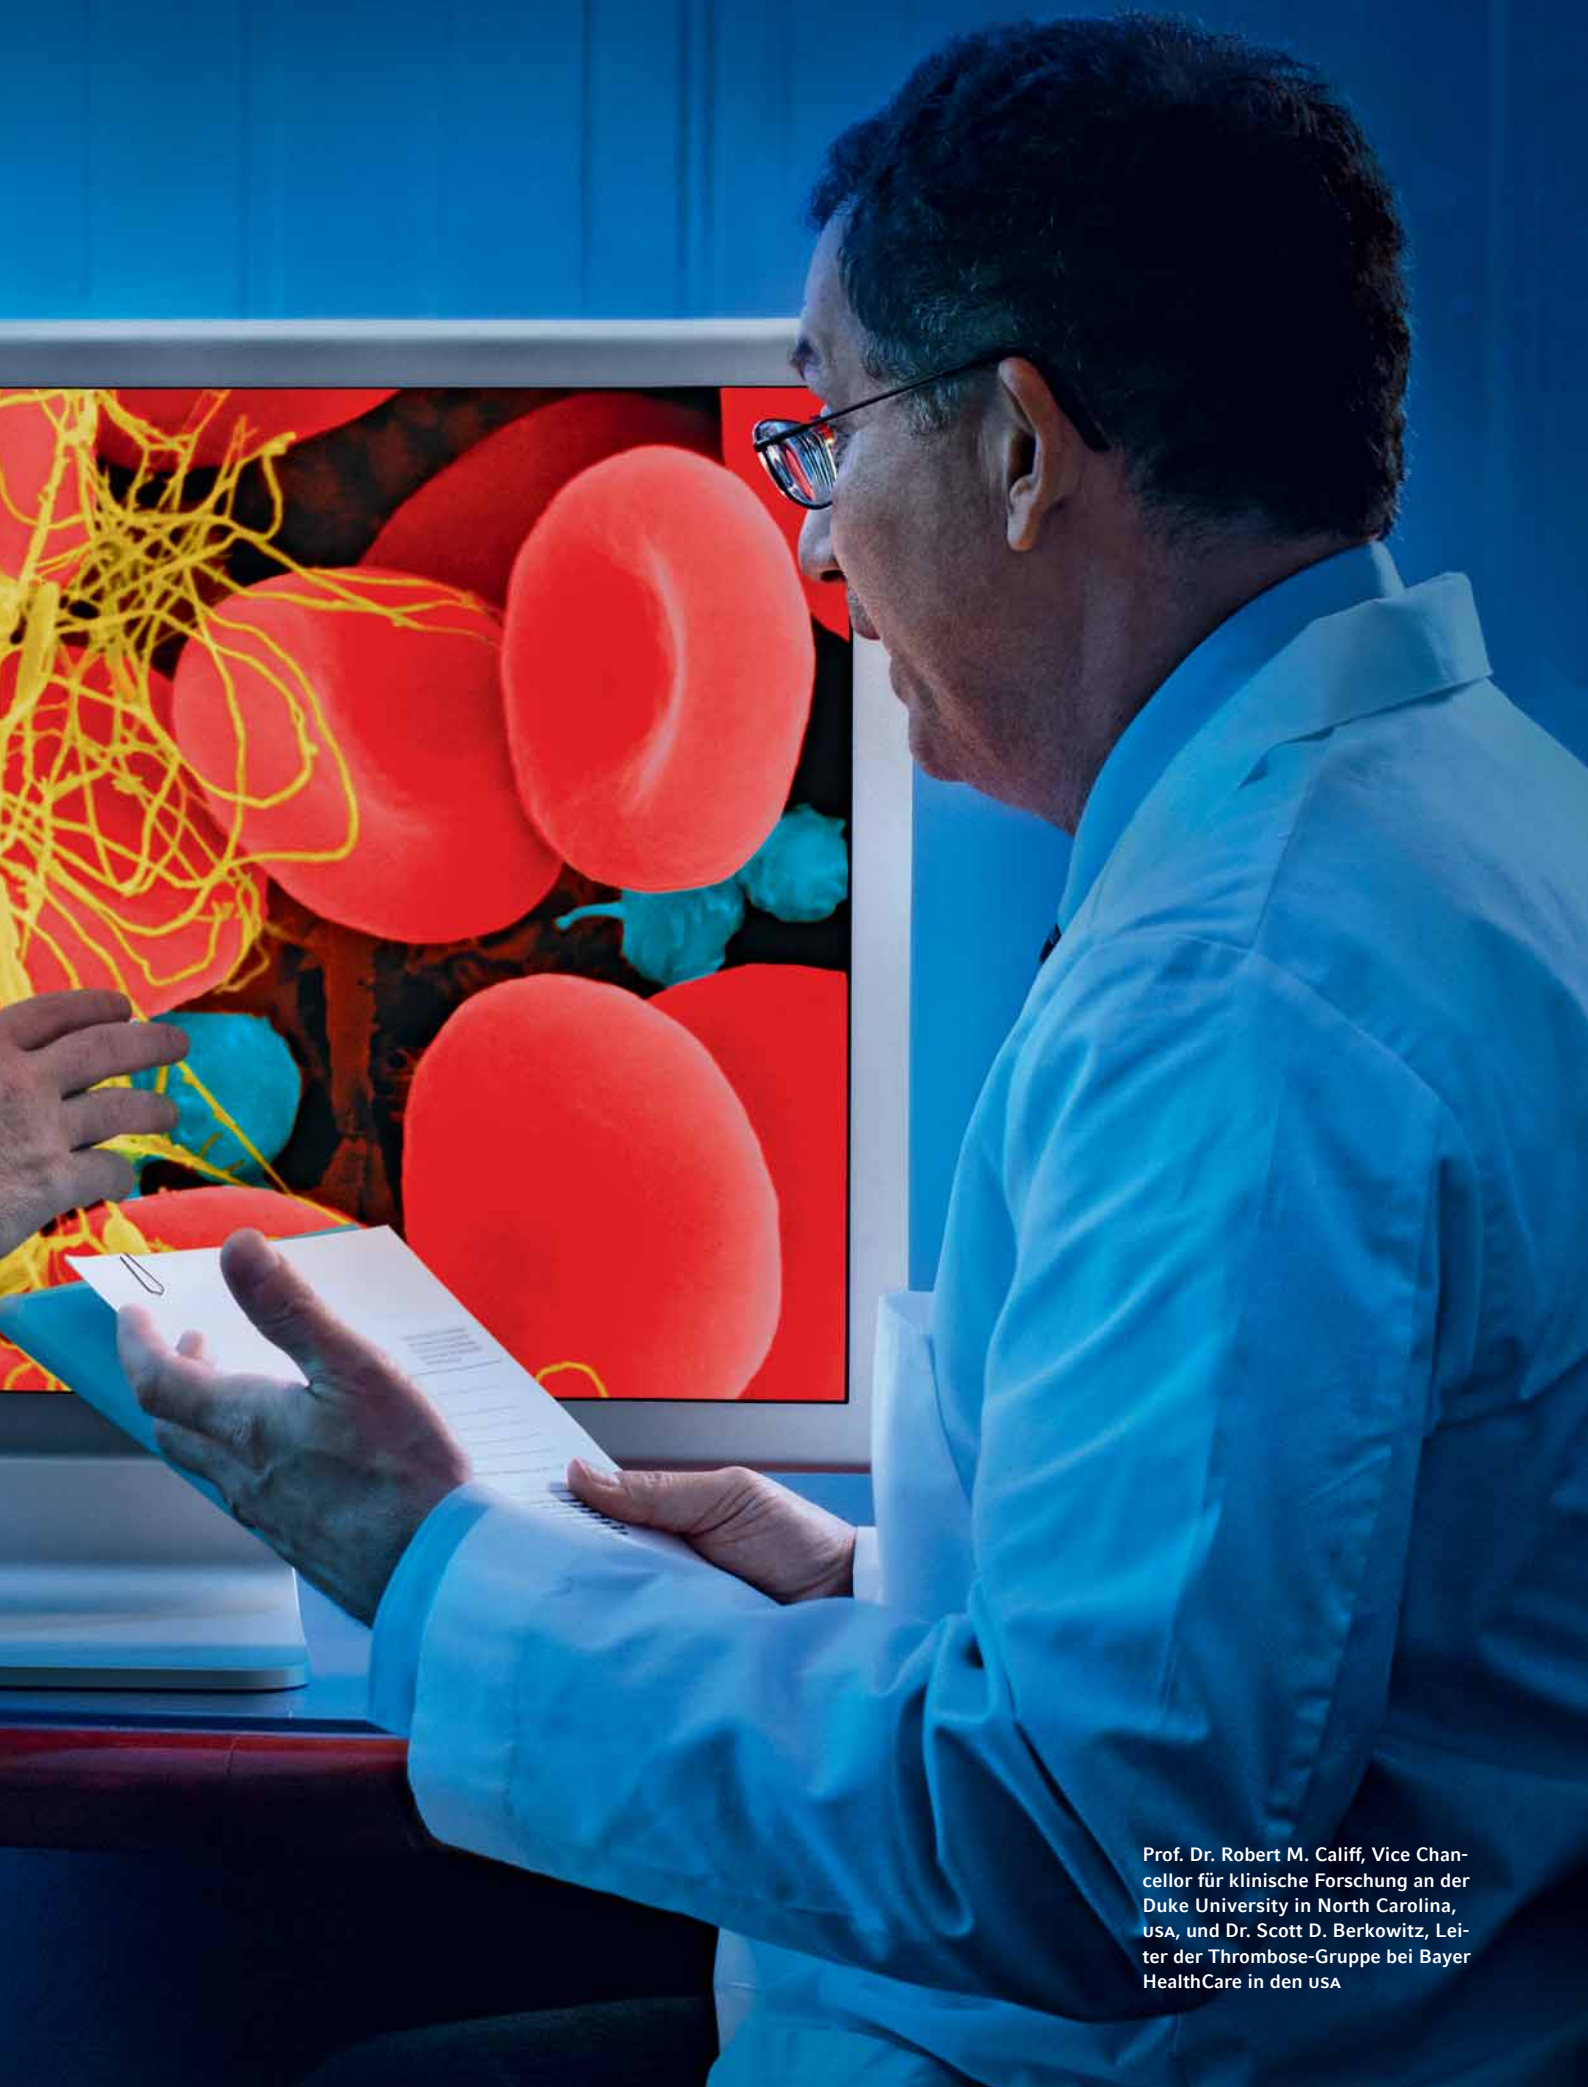

Prof. Dr. Robert M. Califf, Vice Chancellor für klinische Forschung an der Duke University in North Carolina, USA, und Dr. Scott D. Berkowitz, Leiter der Thrombose-Gruppe bei Bayer HealthCare in den USA

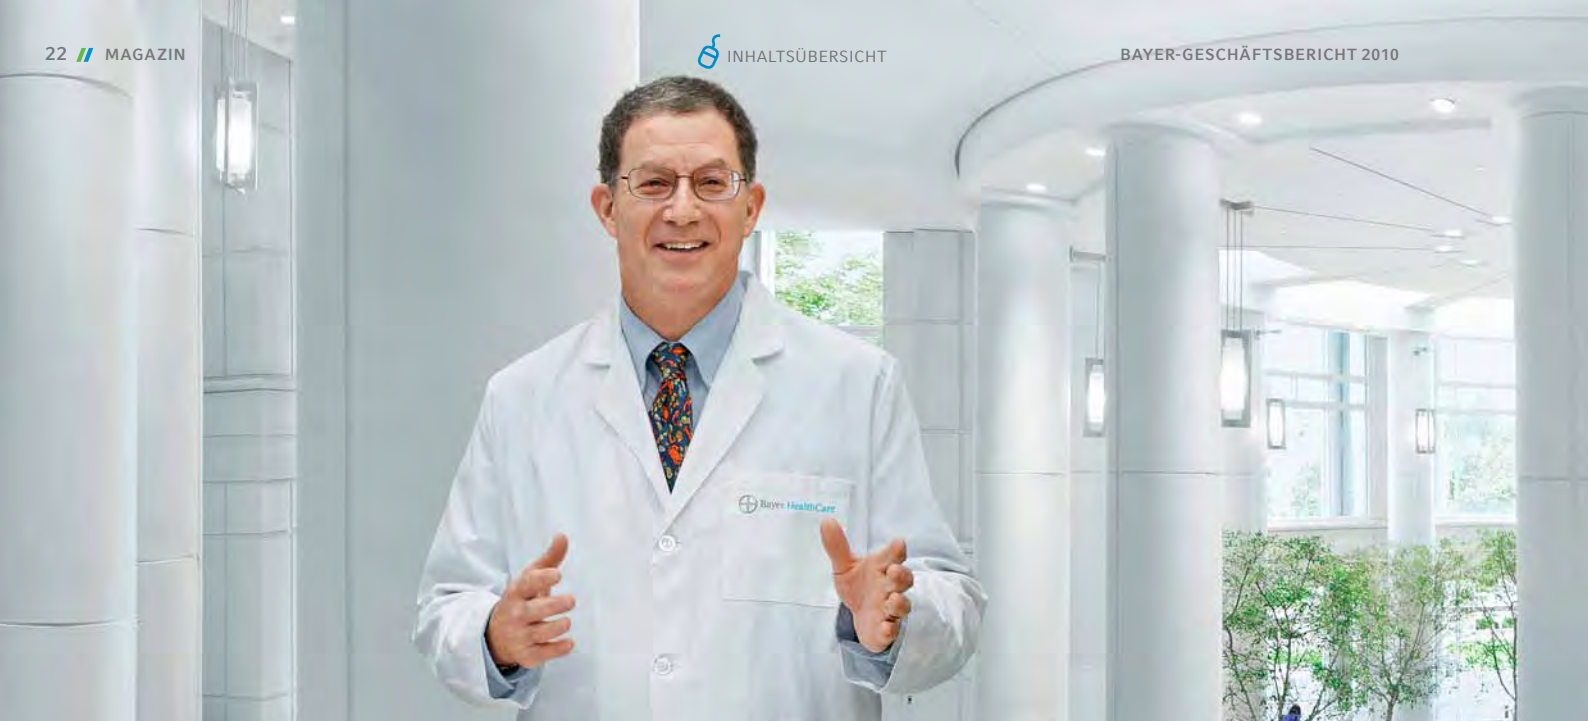

## Schutz vor Thrombosen

Eine Thrombose kann ohne Vorwarnung eintreten – und ist lebensgefährlich. Schlaganfall, Herzinfarkt oder Lungenembolie können die Folge sein, wenn ein Blutgerinnsel ein Gefäß im Gehirn, im Herzen oder in der Lunge blockiert. Deshalb forschen Bayer-Wissenschaftler an neuen Substanzen, um Thrombosen vorzubeugen und zu behandeln.

6 Mio

Günter Wiewinner führt akribisch Buch: Er notiert, an welchen Tagen er eine halbe Tablette zur Gerinnungshemmung einnehmen muss und an welchen Tagen eine ganze. Er vermerkt die Termine für die regelmäßig notwendige Blutabnahme, und er hält fest, ob seine Blutgerinnungswerte im gewünschten Bereich liegen. Dahinter steckt keine Pedanterie, sondern pure Notwendigkeit. Wiewinner leidet an Vorhofflimmern, und die Tabletten schützen ihn vor einem Schlaganfall. Doch damit die gewünschte Wirkung erreicht wird, muss er bei der Einnahme einen komplizierten Rhythmus beachten. „An vier Tagen in Folge nehme ich eine ganze Tablette, dann eine halbe, an den nächsten drei Tagen wieder eine ganze, am neunten Tag noch einmal eine halbe, und dann geht das Ganze wieder von vorne los“, erklärt der 84-jährige Pensionär aus Münster in Nordrhein-Westfalen, Deutschland.

Wiewinner ist kein Einzelfall. Vorhofflimmern ist eine der häufigsten Herzrhythmusstörungen weltweit – sie betrifft mehr als 2,3 Millionen US-Amerikaner und nahezu sechs Millionen Europäer. Rund zehn Prozent der über 80-Jährigen sind davon betroffen. Das Vorhofflimmern selbst ist zwar nicht lebensbedrohlich. Doch bei Patienten mit dieser Herzrhythmusstörung

ist das Risiko, einen Schlaganfall zu erleiden, um das Fünffache erhöht. Der Grund: Bei Vorhofflimmern schlagen die beiden oberen Herzkammern – der Vorhof – unkontrolliert statt regelmäßig. Dadurch kann sich dort Blut ansammeln, und es besteht die Gefahr, dass sich Blutgerinnsel bilden. Gelangt ein solcher Thrombus in eine Hirnarterie, kann ein Schlaganfall die Folge sein.

„Schlaganfälle aufgrund von Vorhofflimmern haben jedes Jahr weltweit verheerende Auswirkungen auf das Leben von Millionen Menschen und ihrer Familien“, erklärt Professor Dr. Werner Hacke, Ärztlicher Direktor der Neurologischen Universitätsklinik Heidelberg. Eine vorbeugende Gabe gerinnungshemmender Medikamente kann das Schlaganfallrisiko zwar reduzieren, doch Studien kommen zu dem Ergebnis, dass bisher nur rund 25 Prozent der Patienten mit Vorhofflimmern angemessen behandelt werden.

Hauptgrund sind die Grenzen der seit Langem etablierten Gerinnungshemmer aus der Klasse der Vitamin-K-Antagonisten, deren Einschränkungen auch Wiewinner mit seinem aufwendigen Einnahmerhythmus zu spüren bekommt. Wie jeder Patient, der zum Schutz vor Throm-

2,3 Mio

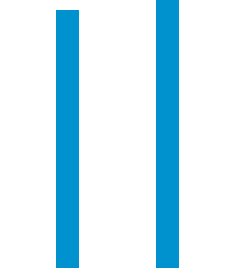

Mehr als 2,3 Mio US-Amerikaner und nahezu 6 Mio Europäer sind von Vorhofflimmern betroffen.



## „Wir suchen nach einer Alternative zur Standard-Therapie – zum Wohle der Patienten.“

DR. SCOTT D. BERKOWITZ,

Leiter der Thrombose-Gruppe und verantwortlich für die klinische Entwicklung von Rivaroxaban bei Bayer HealthCare in den USA

Wenn man dauerhaft Gerinnungshemmer aus der Klasse der Vitamin-K-Antagonisten einnehmen muss, erhält er eine individuell angepasste Dosis, abhängig von Gewicht, Alter und anderen Faktoren. Denn nur auf diese Weise ist der gewünschte Medikamentenspiegel im therapeutischen Zielbereich zu erreichen, da sich die Wirkung der Vitamin-K-Antagonisten schwer vorhersagen lässt. Ist der Spiegel zu niedrig, dann ist auch die Wirkung unzureichend. Ist er zu hoch, steigt das Blutungsrisiko. Dann hat der Patient häufig Zahnfleischbluten, und selbst kleine Stöße führen zu blauen Flecken. In seltenen Fällen kommt es zu inneren Blutungen.

Um die optimale Dosis zu finden, muss der Patient anfangs täglich zur Blutabnahme. Bei Wiewinner dauerte es sogar mehrere Wochen, bis er richtig eingestellt war. Doch auch danach zählt die regelmäßige Untersuchung des Ge-

rinnungswertes zum Alltag der Patienten. Die Überwachung ist wichtig, da andere Medikamente die Wirkung der Vitamin-K-Antagonisten verstärken oder verringern können. Ähnliches gilt für bestimmte Nahrungsmittel. Zum Beispiel Spinat, Brokkoli und andere grüne Gemüse dürfen nur in kleinen Mengen auf den Teller, auch Alkohol ist mit besonderer Vorsicht zu genießen.

Wiewinner hat das alles gut im Griff. Dank einer Liste, die der pensionierte Berufsschullehrer am Computer entworfen hat, behält er den Überblick über die Dosis, seine Blutgerinnungswerte und Arzttermine. Auch für andere Patienten mit Vorhofflimmern hat er gelegentlich Listen nach seinem System erarbeitet. „Für manche ist das alles sehr kompliziert.“ Das weiß Wiewinner aus den Gesprächen in der Münsteraner Selbsthilfegruppe „Herzrhythmusstörungen“.

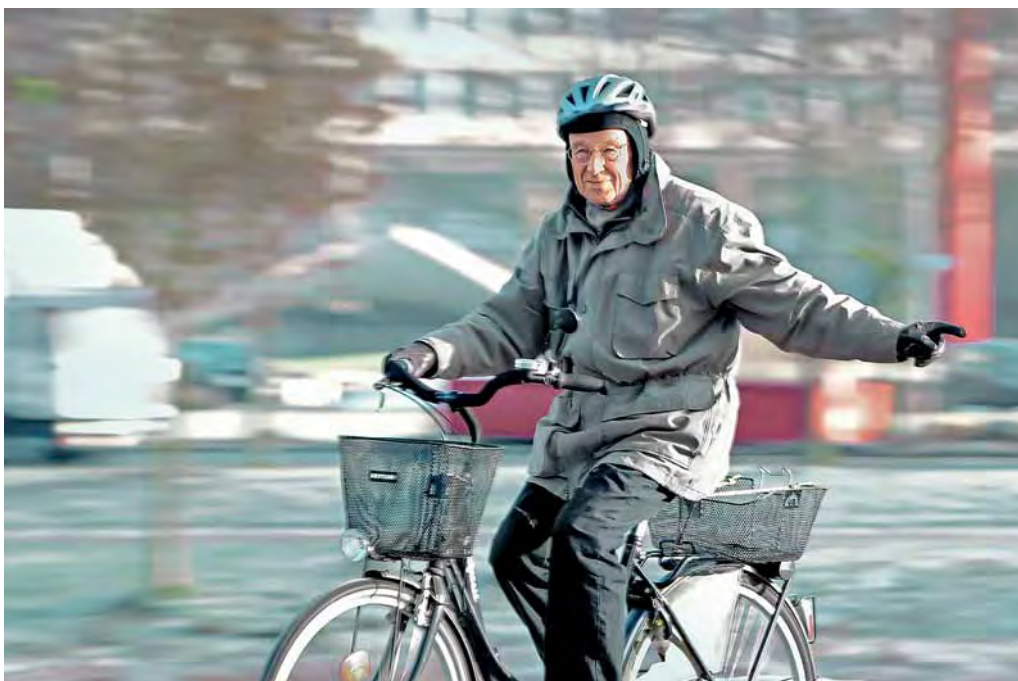

Günter Wiewinner aus Münster, Deutschland, leidet an Vorhofflimmern. Vor einem Schlaganfall schützen ihn Tabletten. Damit sie wie gewünscht wirken, muss der Pensionär einen komplizierten Einnahme-Rhythmus beachten.

### Neue Klasse von Gerinnungshemmern

Mediziner kennen die Nachteile der etablierten Therapien zum Schutz vor Thrombosen und hoffen auf eine neue Klasse von Gerinnungshemmern. „Die gegenwärtige Standard-Therapie ist zwar wirksam, aber für Ärzte wie Patienten alles andere als ideal in der Anwendung“, betont Hacke. Neuartige Medikamente mit anderem Wirkmechanismus könnten dies ändern. Zum Beispiel Rivaroxaban aus der Bayer-Forschung. Der Wirkstoff soll den Gerinnungsfaktor Xa hemmen – eine zentrale Schaltstelle in der komplexen Blutgerinnungskaskade.

„Bei Rivaroxaban sind regelmäßige Blutuntersuchungen zur Überwachung des Gerinnungswertes nicht erforderlich“, sagt Dr. Scott D. Berkowitz, Leiter der Thrombose-Gruppe und verantwortlich für die klinische Entwicklung von Rivaroxaban bei Bayer HealthCare in den USA.

## 65.000

Patienten nehmen am Programm für Rivaroxaban teil. Es ist damit der am intensivsten erforschte orale, direkte Faktor-Xa-Hemmer weltweit.

„Eine wirksame Thrombose-Prophylaxe ohne das Erfordernis regelmäßiger Überwachung ist daher in aller Interesse. Die jüngsten Ergebnisse der ROCKET-AF-Studie lassen die Hoffnung zu, dass wir mit Rivaroxaban eine solche Therapiealternative zur Schlaganfallprävention bei Vor-

hofflimmern anbieten können“, so Berkowitz. Dem stimmt Prof. Dr. Robert M. Califf, Co-Chairman des Executive Committee der ROCKET-AF-Studie und Vice Chancellor für klinische Forschung an der Duke University in Durham, North Carolina, USA, zu: „Es ist sehr erfreulich, mit Rivaroxaban die Aussicht auf eine neue Behandlungsoption zu haben.“ An der Studie waren mehr als 14.000 Patienten an rund 1.100 Studienzentren in 45 Ländern beteiligt.

### Umfassendes Entwicklungsprogramm

Die ROCKET-AF-Studie ist Teil des umfangreichen klinischen Entwicklungsprogramms für Rivaroxaban, in dem Bayer und Johnson & Johnson das Potenzial des Präparats in der Prävention und Therapie eines breiten Spektrums akuter und chronischer thromboembolischer Erkrankungen untersuchen. Mit insgesamt mehr als 65.000 an dem Programm teilnehmenden Patienten ist Rivaroxaban der zurzeit am intensivsten erforschte orale, direkte Faktor-Xa-Hemmer weltweit. Der Wirkstoff ist unter dem Markennamen Xarelto® für die Thromboseprophylaxe nach geplanten Knie- und Hüftgelenkersatzoperationen in mehr als 100 Ländern zugelassen. Xarelto® ist der einzige Gerinnungshemmer der neuen Generation, der in Studien in dieser Indikation übereinstimmend eine überlegene Wirksamkeit gegenüber der bisherigen Standardtherapie Enoxaparin zeigen konnte. Zur Prävention von Schlaganfällen bei Patienten mit Vorhofflimmern haben Bayer bei der europäischen Arzneimittelbehörde EMA und Johnson & Johnson bei der us-amerikanischen Gesundheits-

Rivaroxaban-Forschung in Wuppertal: Bayer-Mitarbeiterin Astrid Hübner untersucht neue Testverbindungen.

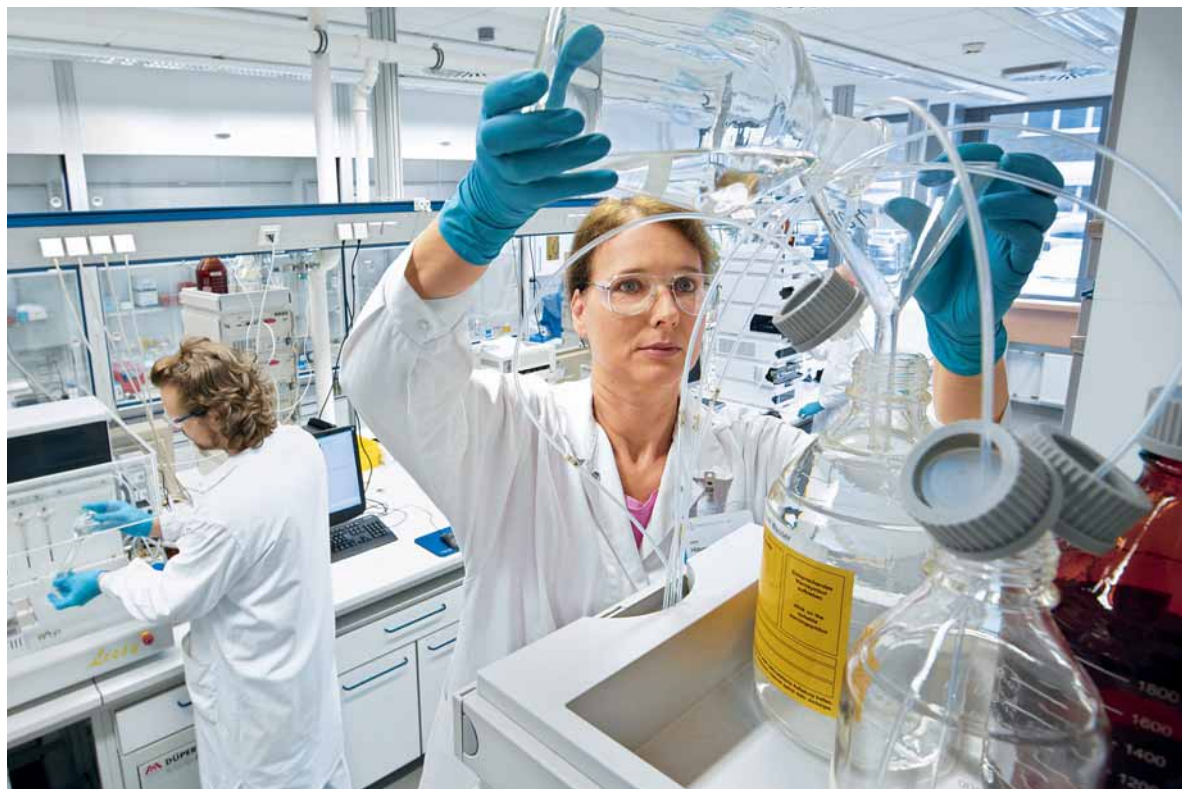



### VORHOFFLIMMERN KANN SCHLAGANFÄLLE AUSLÖSEN

Ein gesundes Herz schlägt pro Minute 60 bis 100 Mal. Bei Vorhofflimmern ist der Rhythmus des Herzens gestört. Die beiden oberen Herzkammern – die Vorhöfe – schlagen unkontrolliert statt regelmäßig. Das beeinflusst die Pumpleistung des Herzens. Die Folge: In den Vorhöfen sammelt sich Blut an. Dadurch steigt die Gefahr, dass sich kleine Blutgerinnsel bilden, die mit dem Herzschlag in den Körper gepresst werden können. Gelangt ein solcher Thrombus über die Hauptschlagader ins Gehirn und blockiert dort eine Arterie, kann das Gewebe nicht mehr ausreichend mit Sauerstoff versorgt werden. Die Folge ist ein Schlaganfall. Durch die Einnahme gerinnungshemmender Medikamente können die Bildung von Blutgerinnseln verhindert und das Risiko für Schlaganfälle drastisch gesenkt werden.

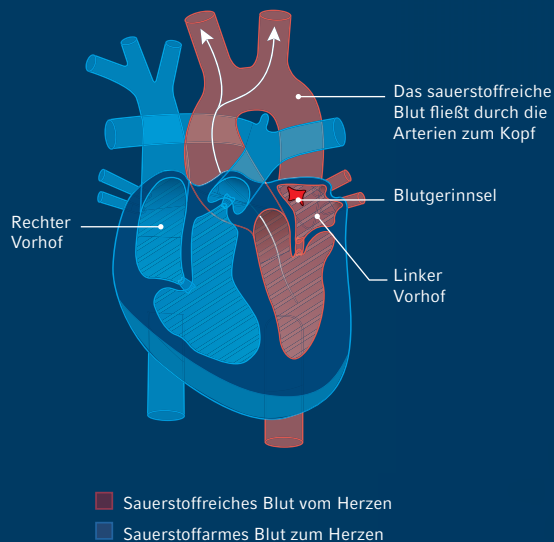

Im Gehirn können Blutgerinnsel einen Schlaganfall auslösen.

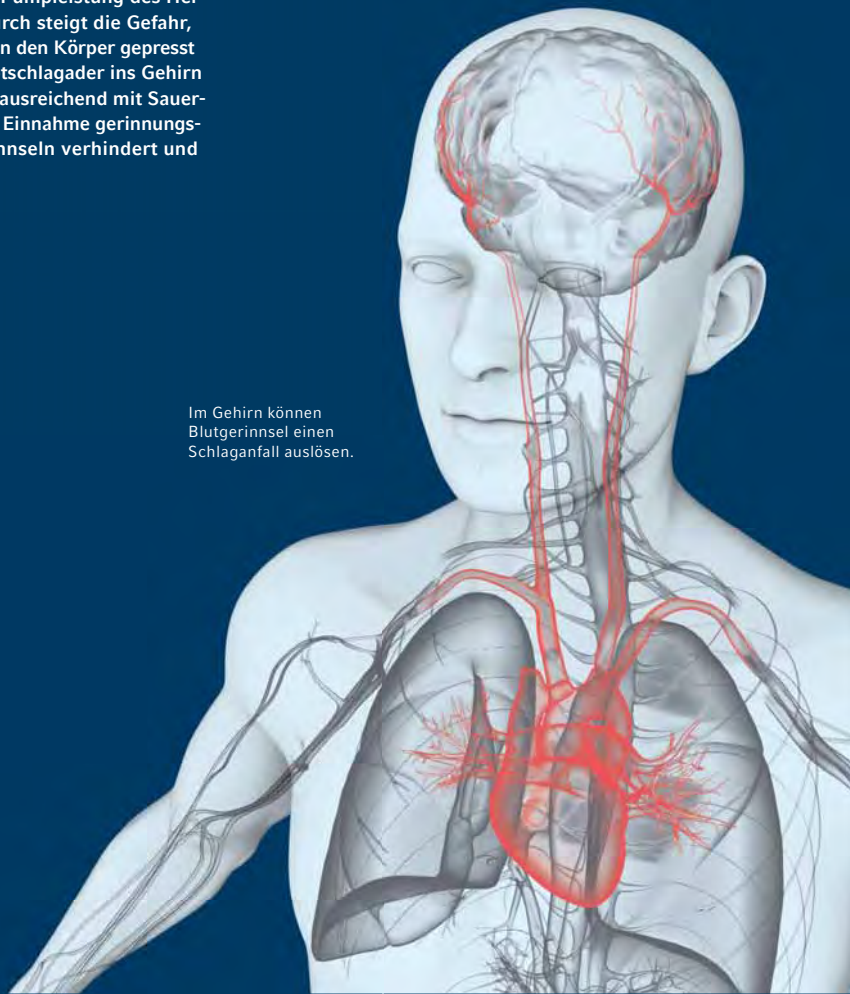

behörde Food and Drug Administration (FDA) Zulassungsanträge gestellt.

Auch für die Langzeitbehandlung tiefer Venenthrombosen bietet Rivaroxaban eine mögliche Therapieoption. Auf dem Jahreskongress der European Society of Cardiology im August in Stockholm, Schweden, wurde dazu das Ergebnis der großen klinischen EINSTEIN-DVT-Studie Phase III präsentiert. Demnach ist der Gerinnungshemmer der bisherigen Standardtherapie in Sachen Wirksamkeit gleichwertig. Bayer hat auf Basis der Ergebnisse einen Zulassungsantrag in dieser Indikation für Europa gestellt. Bei der bisherigen Standardtherapie wird zuerst Enoxaparin gespritzt und anschließend mit einem Vitamin-K-Antagonisten weitertherapiert, der die bereits beschriebene regelmäßige Blutüberwachung verlangt.

Und in Zukunft könnte Rivaroxaban Ärzten als Behandlungsoption zur Schlaganfallprophylaxe bei Vorhofflimmern zur Verfügung stehen. Pensionär Wiewinner aus Münster würde sich über eine Therapie-Alternative freuen: „Keine Blutabnahmen mehr und an jedem Tag immer nur eine Tablette einnehmen zu müssen, das wäre schon eine Erleichterung.“

### Hohe Auszeichnung

Rivaroxaban kann einen zentralen Faktor der menschlichen Gerinnungskaskade blockieren und soll damit ungewollte Thromben verhindern, die in den Blutstrom wandern und in der Folge Gefäße verstopfen können. Bayer hat für die Entwicklung des Blut-Gerinnungshemmers Xarelto® (Rivaroxaban) unter anderem den „Prix Galien International 2010“ für die beste pharmakologische Innovation erhalten, das Äquivalent zum Nobelpreis in der pharmazeutischen Forschung.

Bereits im Dezember 2009 waren die Bayer-Wissenschaftler Dr. Elisabeth Perzborn, Dr. Dagmar Kubitzka und Dr. Frank Misselwitz mit dem Deutschen Zukunftspreis, dem Preis des Bundespräsidenten für Technik und Innovation, ausgezeichnet worden. Das Preisgeld in Höhe von 250.000 Euro stifteten die Geehrten für einen neuen Forscherpreis. Bayer verdoppelte das Kapital des Preises auf 500.000 Euro. Der neue Preis soll mit 30.000 Euro dotiert sein und dauerhaft alle zwei Jahre verliehen werden – erstmals 2011.





Bayer CropScience

FÜR EINE GESÜNDERE ERNÄHRUNG

## „Wie können wir Obst und Gemüse verbessern?“

NIKOLA RICHTER (links im Bild),  
Produktentwicklerin beim Salatproduzenten Bauer Funken in Kempen am Niederrhein



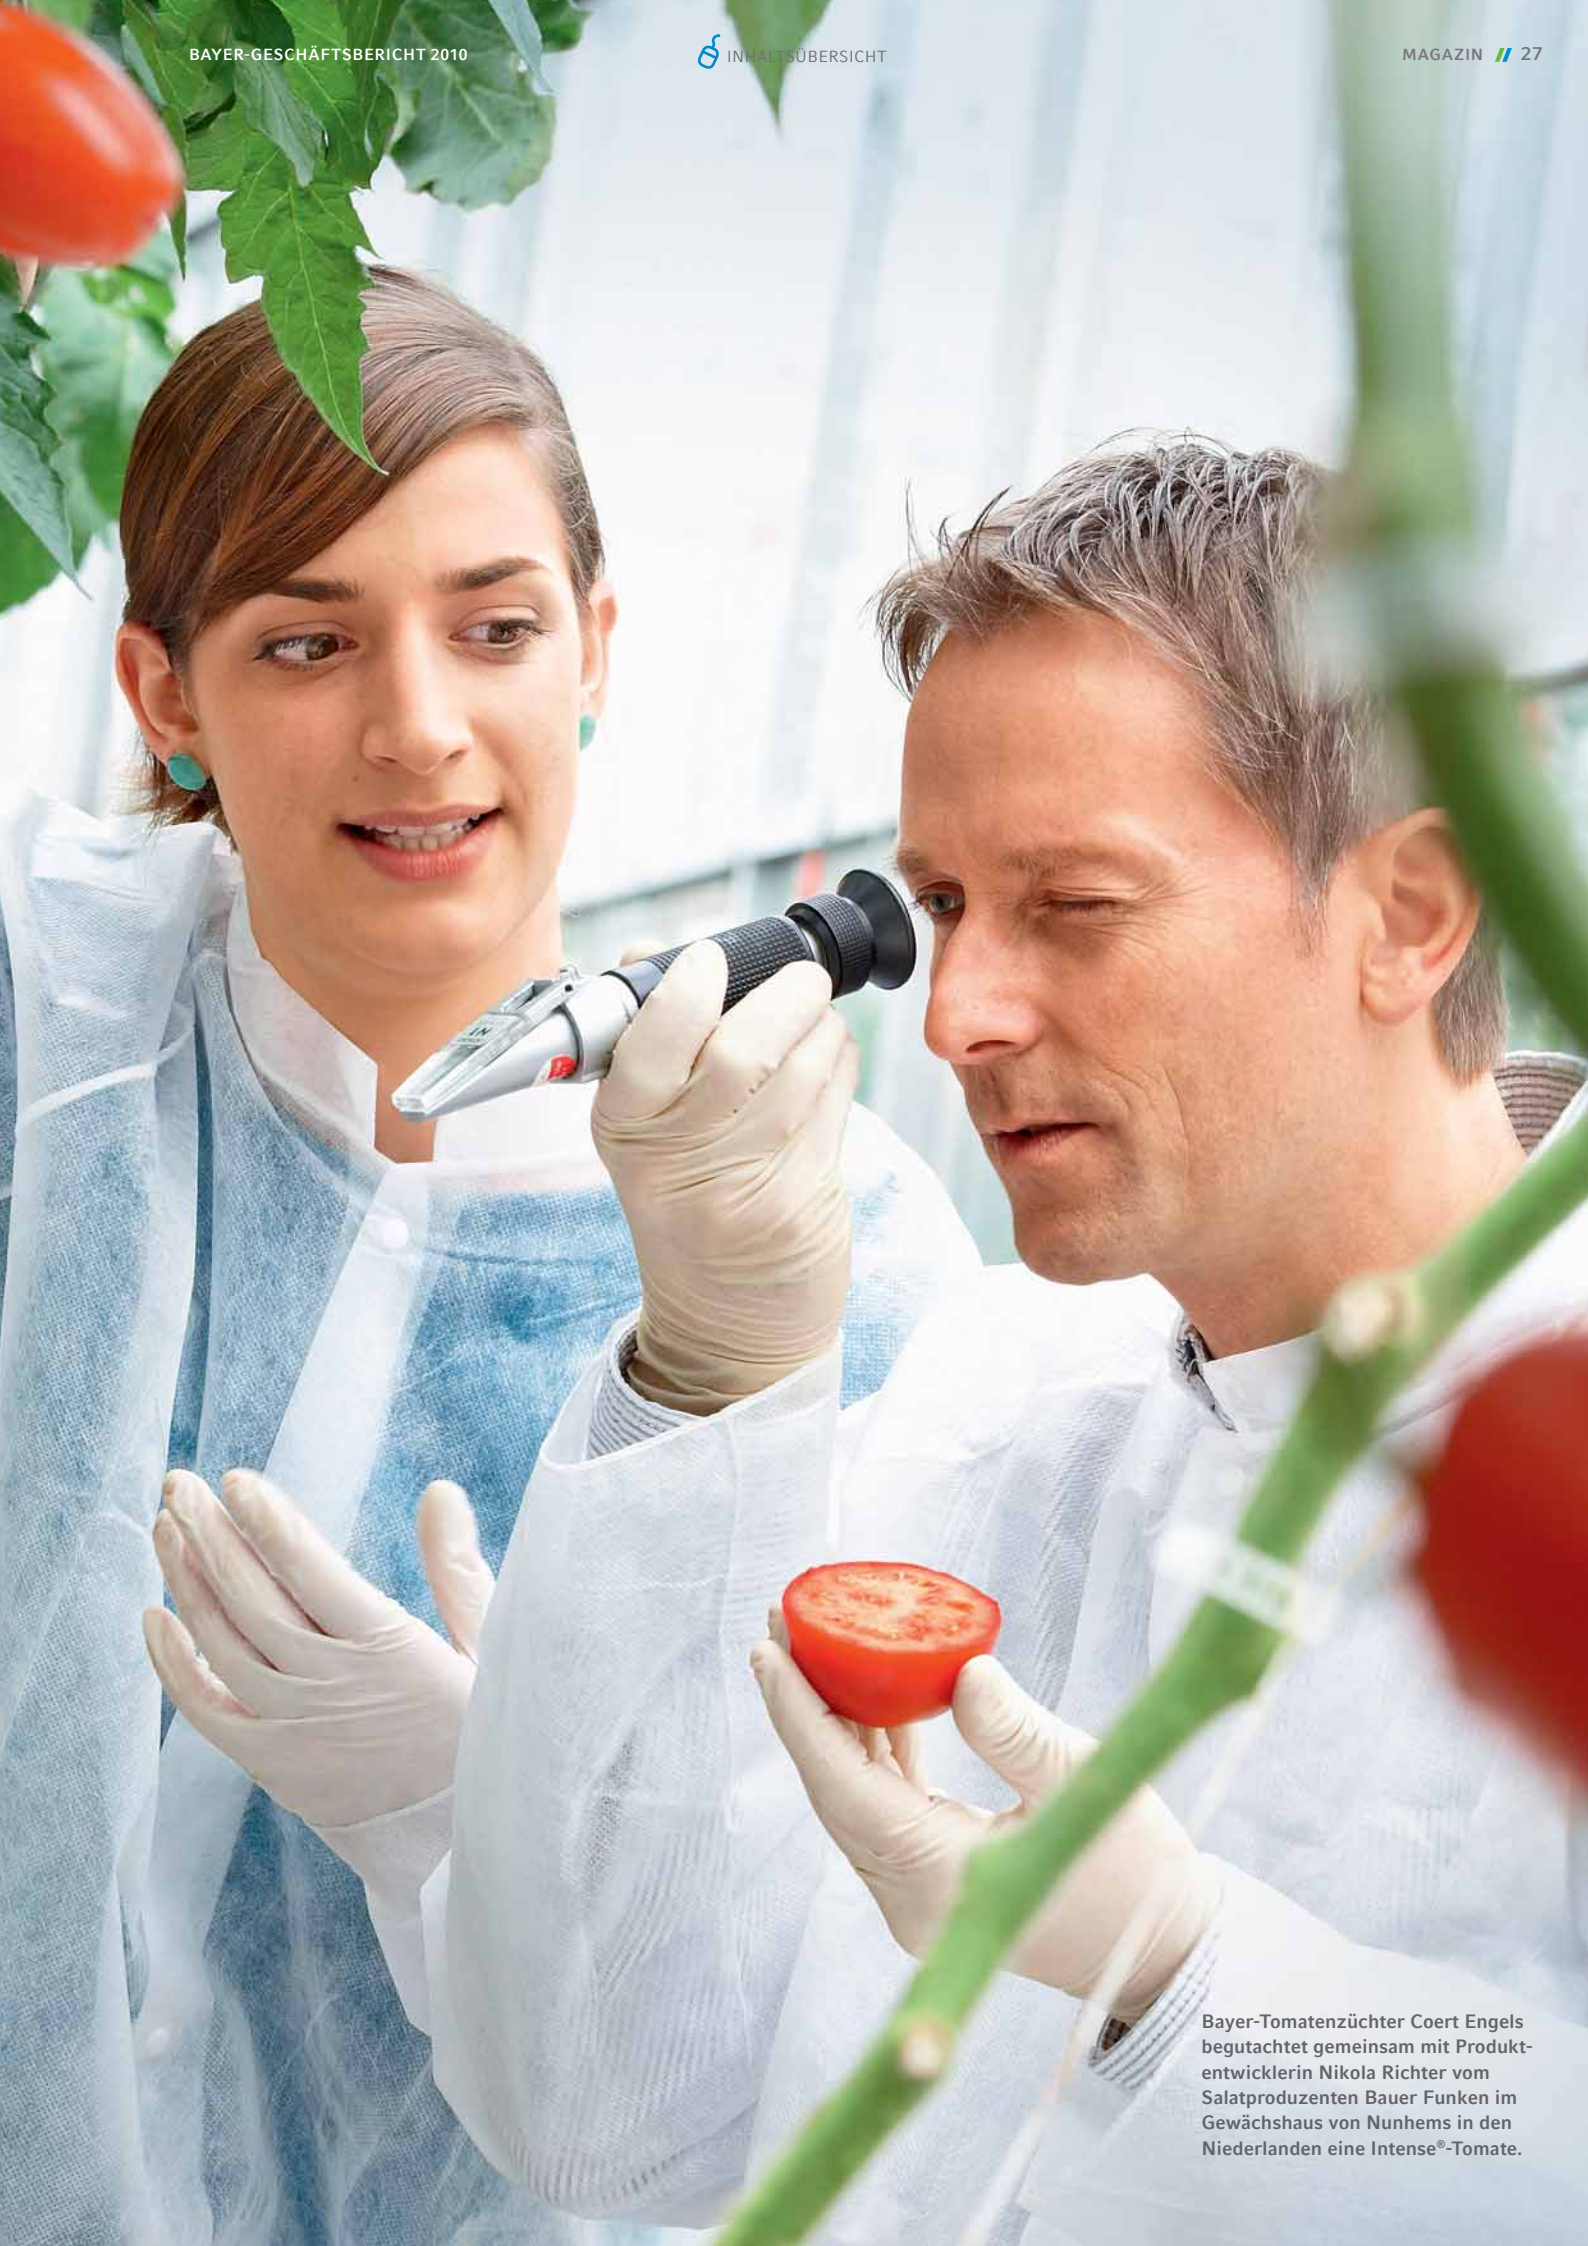

Bayer-Tomatenzüchter Coert Engels begutachtet gemeinsam mit Produktentwicklerin Nikola Richter vom Salatproduzenten Bauer Funken im Gewächshaus von Nunhems in den Niederlanden eine Intense®-Tomate.



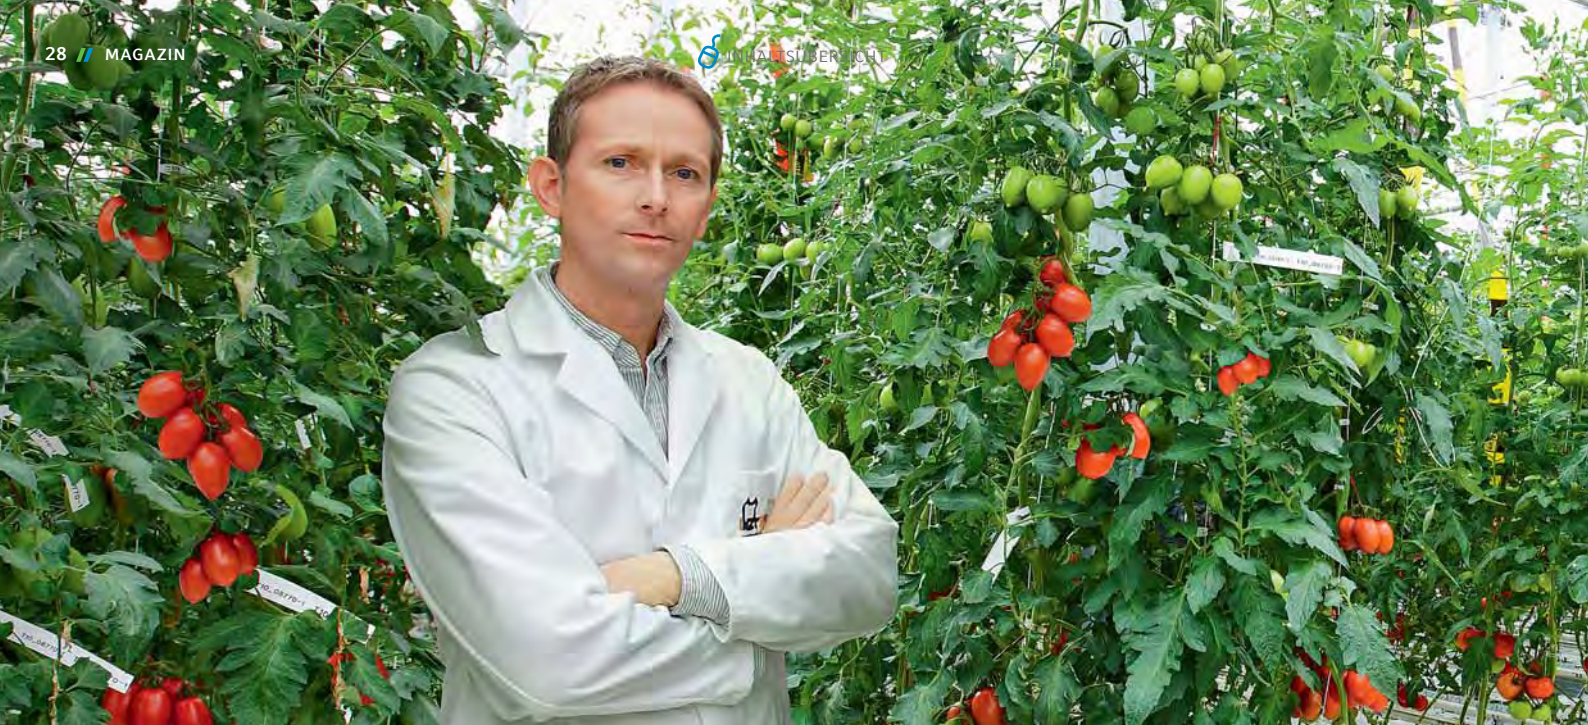

## Von der Saat bis zum Verzehr

Die Nachfrage nach hochwertigem Obst und Gemüse steigt weltweit. Immer mehr Menschen auch in Schwellenländern wollen Tomaten, Melonen und Paprika frisch kaufen. Mit innovativen Lösungen von der Züchtung über den Anbau bis hin zum Handel trägt Bayer CropScience dazu bei, dass einer wachsenden Weltbevölkerung auch in Zukunft vitaminreiches und hochwertiges Obst und Gemüse für eine gesunde Ernährung zur Verfügung stehen.

112 EURO

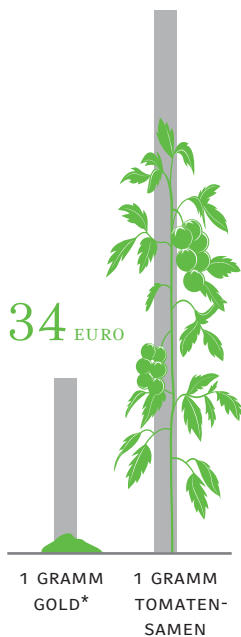

Mancher Tomatensamen ist wertvoller als Gold. Ein Gramm des Edelmetalls kostete im Dezember 34€, während ein Gramm Tomatensamen 112€ wert sein kann.

\*Stand 31.12.2010

Es war Liebe auf den ersten Biss. Veronica Castaneda Muñoz, Ernährungswissenschaftlerin in Mexiko, gerät ins Schwärmen, wenn sie die Begegnung mit einer besonderen Tomate schildert: „Einmal anbeißen hat genügt. Nichts hat gespritzt, und sie schmeckt ausgezeichnet.“ Die junge Mexikanerin arbeitet im Gemüseanbaubetrieb ihres Vaters im mexikanischen Camalu und spricht über eine Innovation aus der Bayer-Forschung: die Intense®-Tomate von Nunhems, dem Gemüsesaatgutgeschäft von Bayer CropScience.

Die Frucht besitzt ein volles und festes Fleisch mit sehr dichter Struktur und verliert keinen Saft. „Dadurch ist sie zum Beispiel ideal für ein Sandwich geeignet, das ansonsten nach wenigen Stunden völlig durchweicht wäre. Auch bei Produzenten von Fertigsalaten wird Intense ein großer Erfolg werden“, erklärt die junge Managerin über rund 83 Hektar Tomatenplantagen. Seit zwei Jahren arbeitet die Familie Castaneda mit der Vertriebsgesellschaft „The Produce Exchange“ zusammen. Ziel der Partnerschaft ist, die steigende Nachfrage nach Intense®-Tomaten in den USA zu decken. Dabei nutzt „The Produce Exchange“ die Erfahrungen aus der Kooperation mit Nunhems-Experten in Spanien und Mexiko, um sich optimal auf

die Bedürfnisse des US-Marktes einzustellen. „Wir testen zurzeit den Verkauf der Intense-Tomate unter dem Handelsnamen Tesoro™ in den Raley's Supermärkten im Norden Kaliforniens. Dabei übertrifft der Umsatz unsere Erwartungen deutlich“, sagt Steve Rainey von „The Produce Exchange“.

Die Intense® wurde speziell entwickelt, um die Tomatenverarbeitung in Hotel, Gastronomie und Catering zu vereinfachen. Sie wird bereits mit Erfolg in Europa vermarktet: in Großbritannien, Frankreich, Deutschland, Italien, Spanien, Belgien ebenso wie in den Niederlanden. Mittlerweile konnte sich die Bayer-Tomate auch in der Türkei und bei großen Supermarktketten in Australien behaupten. Nun setzt sie ihren Siegeszug in den USA fort – geliefert unter anderem durch den Anbau auf den Plantagen der Familie Castaneda.

„Tomaten führen die globale Rangliste der Gemüseerzeugung an. Der weltweite Umsatz wird auf rund 13 Milliarden US-Dollar pro Jahr geschätzt“, erklärt Albert Schirring, Global Crop Manager Gemüse bei Bayer CropScience. Rund 130 Millionen Tonnen werden jährlich rund um den Globus geerntet. Spitzenreiter mit einem Viertel der Weltproduktion ist China, gefolgt von den USA und der Türkei.



## „Wir suchen nach den besten Lösungen für eine optimale Ernährung.“

COERT ENGELS,

Tomatenzüchter bei Nunhems in den Niederlanden, dem Gemüsesaatgutgeschäft von Bayer CropScience

### Intensive Forschung und Entwicklung

Das Saatgut ist wertvoller als Gold, und dies nicht nur aufgrund der hohen Erträge: Um die Intense®-Tomate auf den Markt zu bringen, war intensive Forschungs- und Entwicklungsarbeit nötig. „Wir nutzen dabei klassische Züchtungsmethoden – allerdings sehr viel schneller“, erklärt Coert Engels, Tomatenzüchter bei Nunhems. Im Rahmen der „Integrierten Züchtung“ macht er sich die Ergebnisse seiner Kollegen aus dem Forschungslabor zunutze. Die Wissenschaftler entnehmen Blattproben von neuen Setzlingen und extrahieren das Erbgut für eine DNA-Analyse. Sie suchen vor allem nach Genen, die verantwortlich sind für Qualität, Krankheitsresistenz, Süße, Form oder Farbe einer Frucht.

Aus Tausenden von Setzlingen selektieren sie dann diejenigen mit den gesuchten Eigenschaften, ohne sie erst zur Reife wachsen lassen zu müssen. „Anhand der Ergebnisse können wir gezielt Tomaten mit bestimmten Eigenschaften züchten und sparen so mehrere Jahre an

Entwicklungsarbeit. Wir schleusen dabei keine artfremden Gene ins Erbgut ein“, so Engels. Neben Intense® haben die Nunhems-Züchter auch kernlose Wassermelonen entwickelt, besonders ertragreiche Gurkensorten oder Salate mit längerer Haltbarkeit.

### Verbesserte Pflanzeigenschaften

Neben dem klassischen Pflanzenschutz nimmt die Biotechnologie eine wichtige Rolle in der Strategie von Bayer CropScience ein. Rund 1.000 Wissenschaftler und Züchter arbeiten im weltweiten BioScience-Netzwerk von Bayer. Dazu gehört das Saatgutgeschäft von Nunhems mit rund 2.500 konventionell gezüchteten Sorten in 28 Gemüsekulturen sowie Aktivitäten in Großkulturen wie Soja, Raps, Weizen, Baumwolle, Reis, Mais und Zuckerrohr. Künftig will das Unternehmen die Biotechnologie weiter ausbauen. Bis 2018 soll der Umsatz im Geschäftsbereich BioScience von 687 Millionen Euro (2010) auf rund 1,4 Milliarden Euro verdoppelt werden. Im Mittelpunkt steht die Verbesserung

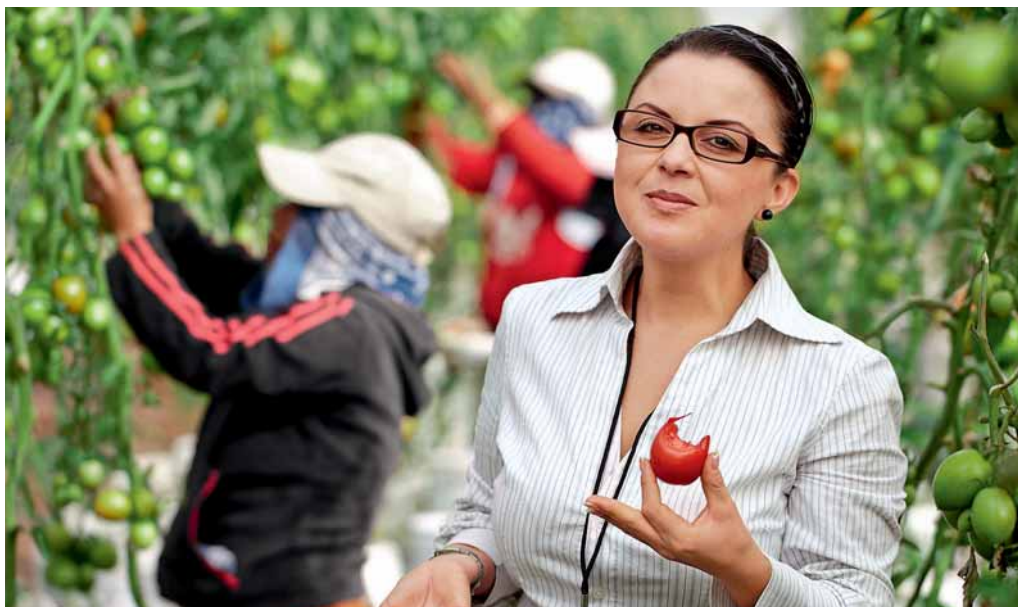

Es war Liebe auf den ersten Biss: Die Ernährungswissenschaftlerin Veronica Castaneda Muñoz baut in ihrem Betrieb „Berry Veg de Baja“ in Mexiko die Tomate Intense® für den us-amerikanischen Markt an.



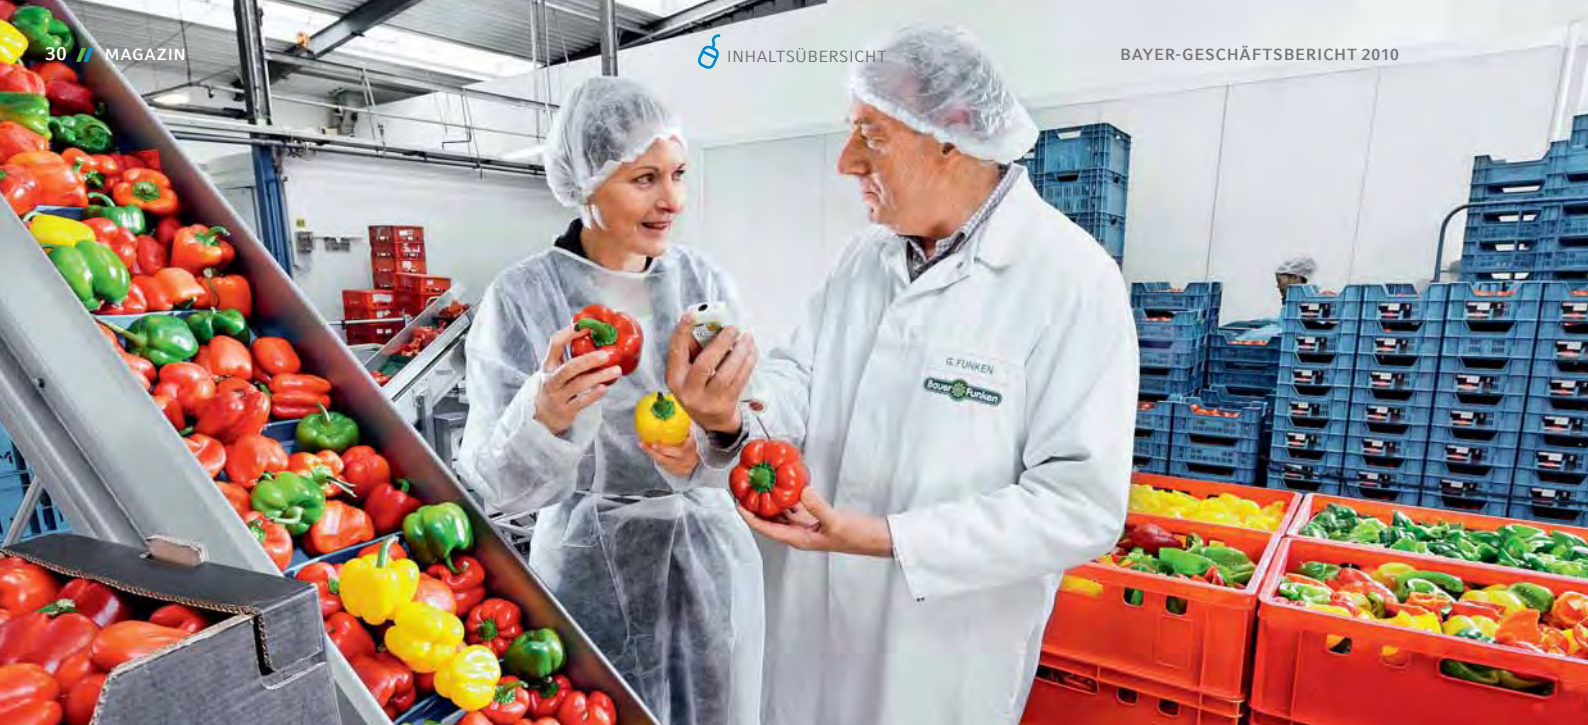

Dr. Birgitt Walz-Tylla, Leiterin Food Chain Management bei Bayer CropScience, mit Inhaber Georg Funken in seinem Rohkost-Verarbeitungsbetrieb in Kempen am Niederrhein

#### PODCAST CENTER

Nunhems, das Gemüsesaatgut-geschäft von Bayer CropScience, baut seine Forschungsaktivitäten weiter aus. Einen Audio-Podcast über die Stärkung der Forschung für neue Gemüsesorten finden Sie unter [www.podcast.bayer.de](http://www.podcast.bayer.de)

der Pflanzeigenschaften. Die Forscher wollen Pflanzen in die Lage versetzen, langfristig stabile Erträge auf einem hohen Niveau zu liefern. Die Gemüsezüchter und -forscher bei Nunhems arbeiten kontinuierlich daran, Anbaueigenschaften und Fruchtqualität ihrer Gemüsesorten durch klassische Züchtung – in Kombination mit modernen Forschungstechnologien – zu verbessern.

In der Genomforschung sind allerdings die großen Feldkulturen am weitesten entwickelt. So konnten die Bayer-Forscher bei Raps bereits wichtige Erfolge erzielen: Gemeinsam mit mehreren Partnern entschlüsselte ein Team um Dr. Bart Lambert, Manager Produktforschung für Ölsaaten bei Bayer CropScience in Gent, das Rapsgenom. Die Basis aus 30.000 Pflanzengenomen nutzt Lambert zur Züchtung neuer Sorten, die unter anderem höhere Erträge liefern.

#### Pflanzenschutz sichert Ernten

Um möglichst gute Ernten zu erzielen, kommt es nicht allein auf das richtige Saatgut an. Farmer müssen ihre Felder und Plantagen auch vor Schädlingen, Pilzen und Unkräutern schützen. Denn diese können zu großen Ausfällen führen. Nachhaltiger und innovativer Pflanzenschutz ist deshalb ein zentraler Baustein in der Komplettstrategie von Bayer CropScience für die landwirtschaftliche Wertschöpfungskette. Die neueste Innovation: Luna® – eine Produktfamilie gegen problematische Pilzerreger, die sich im Feld und besonders kurz vor Ende der Anbausaison in zahlreichen Kulturen wie Steinobst, Beeren oder Gurken ausbreiten. „Obst-, Gemüsebauern und Handelsgesellschaften erleiden jährlich Einbußen in Milliardenhöhe und zudem Verluste während der Lagerung und des Transports“, erklärt Dr. Heiko Rieck, Projektleiter bei Bayer CropScience in Monheim.

Abhilfe schafft jetzt der Luna®-Wirkstoff Fluo-pyram: Er bekämpft die gefährlichen Mikroorganismen nicht nur effektiv, sondern erhöht zudem die Lagerfähigkeit von Obst und Gemüse. Das reduziert die Verluste nach der Ernte. Außerdem schützt der Wirkstoff im Ackerbau auch Raps und Sojabohnen sicher vor der Ausbreitung von Pilzen und hilft so, die Ernten weltweit zu sichern sowie Erträge zu steigern.

#### Unterstützung für die Landwirte weltweit

An diesem Punkt setzt das „Food Chain Partnership Program“ an und komplettiert das Angebot innovativer Lösungen von Bayer CropScience für die gesamte landwirtschaftliche Wertschöpfungskette: „Wir unterstützen Landwirte weltweit auch bei der internationalen Vermarktung ihrer Produkte. Denn die Ansprüche der Verbraucher an eine nachhaltige landwirtschaftliche Produktion sowie die Qualität beispielsweise von Obst und Gemüse sind weltweit

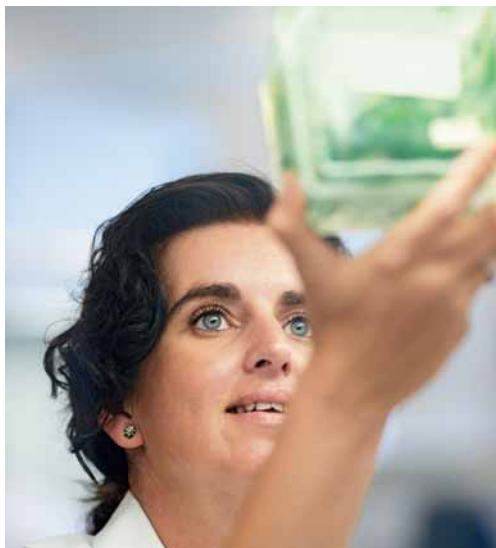

Bayer-Mitarbeiterin Sandra Briels bei der Aufzucht von Pflanzen im Nunhems-Labor in den Niederlanden

gestiegen. Sie wollen wissen, wo und wie es angebaut wurde“, erklärt Dr. Birgitt Walz-Tylla, bei Bayer CropScience Leiterin Food Chain Management. Das Programm wurde ins Leben gerufen, um die partnerschaftliche Zusammenarbeit vom Erzeuger bis zum Lebensmittelhändler zu fördern und so für jeden Partner der Lebensmittelkette Vorteile zu schaffen.

Denn nicht nur Saatgut, Boden, Wasser, Biodiversität, Klima und Pflanzenschutz sind wichtige Themen für die Landwirte, auch eine nachhaltige und richtige Strategie nach der Ernte – also für die Vermarktung von Möhren, Porree, Gurken oder Melonen – ist entscheidend. Mit bislang mehr als 200 Projekten weltweit unterstützt Bayer CropScience eine nachhaltige Produktion qualitativ hochwertiger Lebensmittel.

In einem Projekt in der indischen Provinz Punjab optimierten die Food Chain Manager beispielsweise die komplette Lebensmittelkette vom Anbau bis zum Verkauf: In Kooperation mit dem Joint Venture Bharti-Walmart überprüften sie sämtliche Schritte von der richtigen Saatgut- und Düngerauswahl über nachhaltige Pflanzenschutzlösungen bis zum Transport und Verkauf der Waren. „In Indien hat sich eine völlig neue Art von Handel etabliert.

Große heimische Lebensmittelhändler, die hohe Qualität anbieten wollen, suchen nach Landwirten, die diese liefern können“, so Walz-Tylla. Nach Abschluss des Projekts in Punjab erzielten die Landwirte 35 Prozent mehr Einkommen – und die Kunden der Bharti-Walmart-Lebensmittelmärkte konnten frischeres und gesünderes Gemüse kaufen.

Das „Food Chain Partnership Program“ kommt auch bei Gemüseexperten in Mexiko gut an. Denn Qualität und Sicherheit in der Nahrungsmittelerzeugung spielen in Mittelamerika eine immer größere Rolle. Seit mehr als zwei Jahren widmet sich beispielsweise Mauricio Castaneda Castro – der Vater von Veronica Castaneda Muñoz – fast ausschließlich der Arbeit als Präsident des Komitees für Food Quality and Food Safety im mexikanischen Bundesstaat Baja California. Um seinen insgesamt 150 Hektar großen Betrieb „Berry Veg de Baja“ kümmert sich die Tochter. Und die neuesten Nunhems-Züchtungserfolge machen die Ernährungswissenschaftlerin neugierig: Denn „Multileaf“ – ein Salatkopf, der mit einem einzigen Schnitt in viele gleichgroße Blätter zerfällt – und knackige Gurkensorten wecken großes Interesse, auch bei Großhändlern und Hobby-Köchen in den USA.

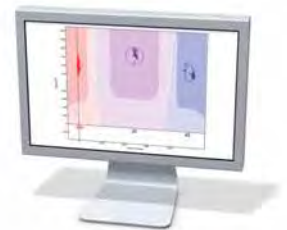

**4 Fingerabdruck im Computer**  
Bestimmte Abschnitte – sogenannte SNPs – im Erbgut der Setzlinge markieren das Gen zum Beispiel für intensive rote Farbe oder für die Resistenz gegen schädliche Viren. Die Computeranalyse identifiziert ihre genaue Verteilung.

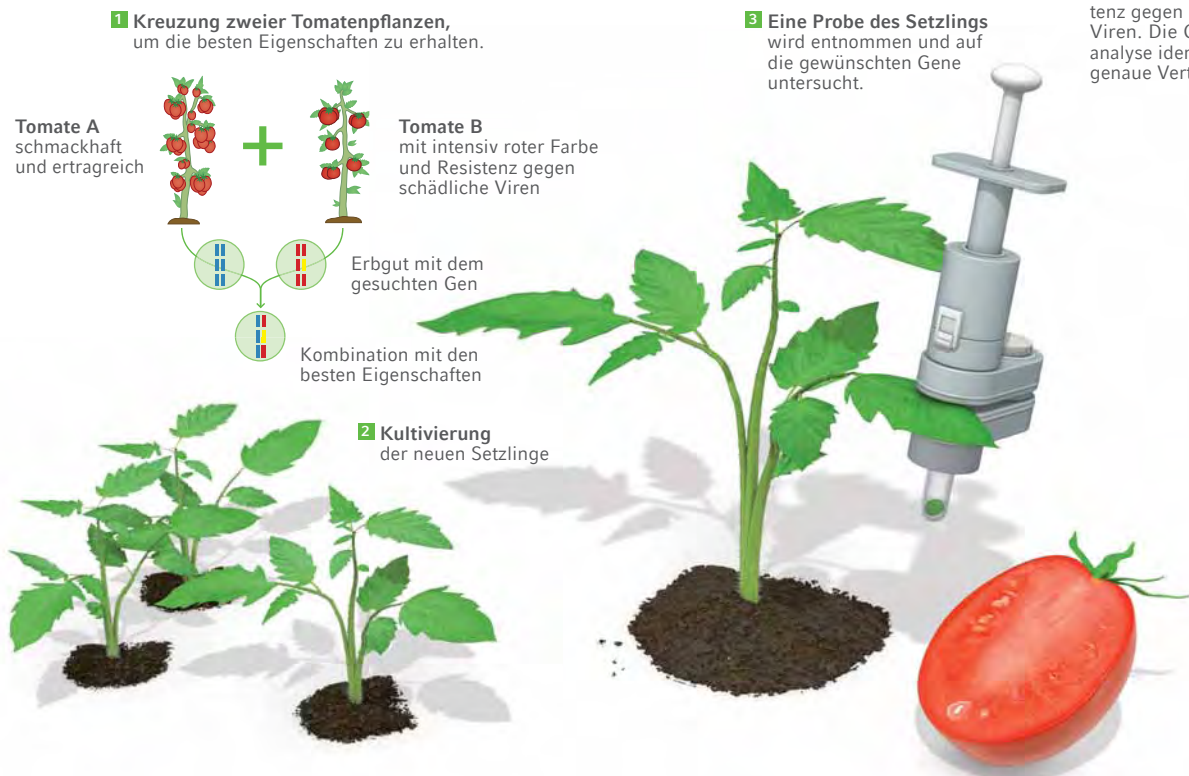

#### DIE PERFEKTE TOMATE

Eigenschaften wie Farbe, Ertrag, Form oder Geschmack einer Tomatensorte sind von verschiedenen Genen abhängig. Mit speziellen Markern können Biotechnologen die entsprechenden Schnipsel im Erbgut identifizieren und einen genetischen Fingerabdruck der Pflanze herstellen. So erkennen sie bereits bei Tomatensetzlingen, ob zum Beispiel das gewünschte Gen für intensiv rote Farbe oder die Resistenz gegen schädliche Viren in der Neuzüchtung enthalten sind. Das spart Zeit und Geld.



# Bayer MaterialScience

FÜR NACHHALTIGE PRODUKTE

## „Wie können wir den Klimakiller CO<sub>2</sub> sinnvoll nutzen?“

PROF. DR. WALTER LEITNER (rechts im Bild),  
Wissenschaftlicher Leiter des Katalysezentrums an der RWTH Aachen University



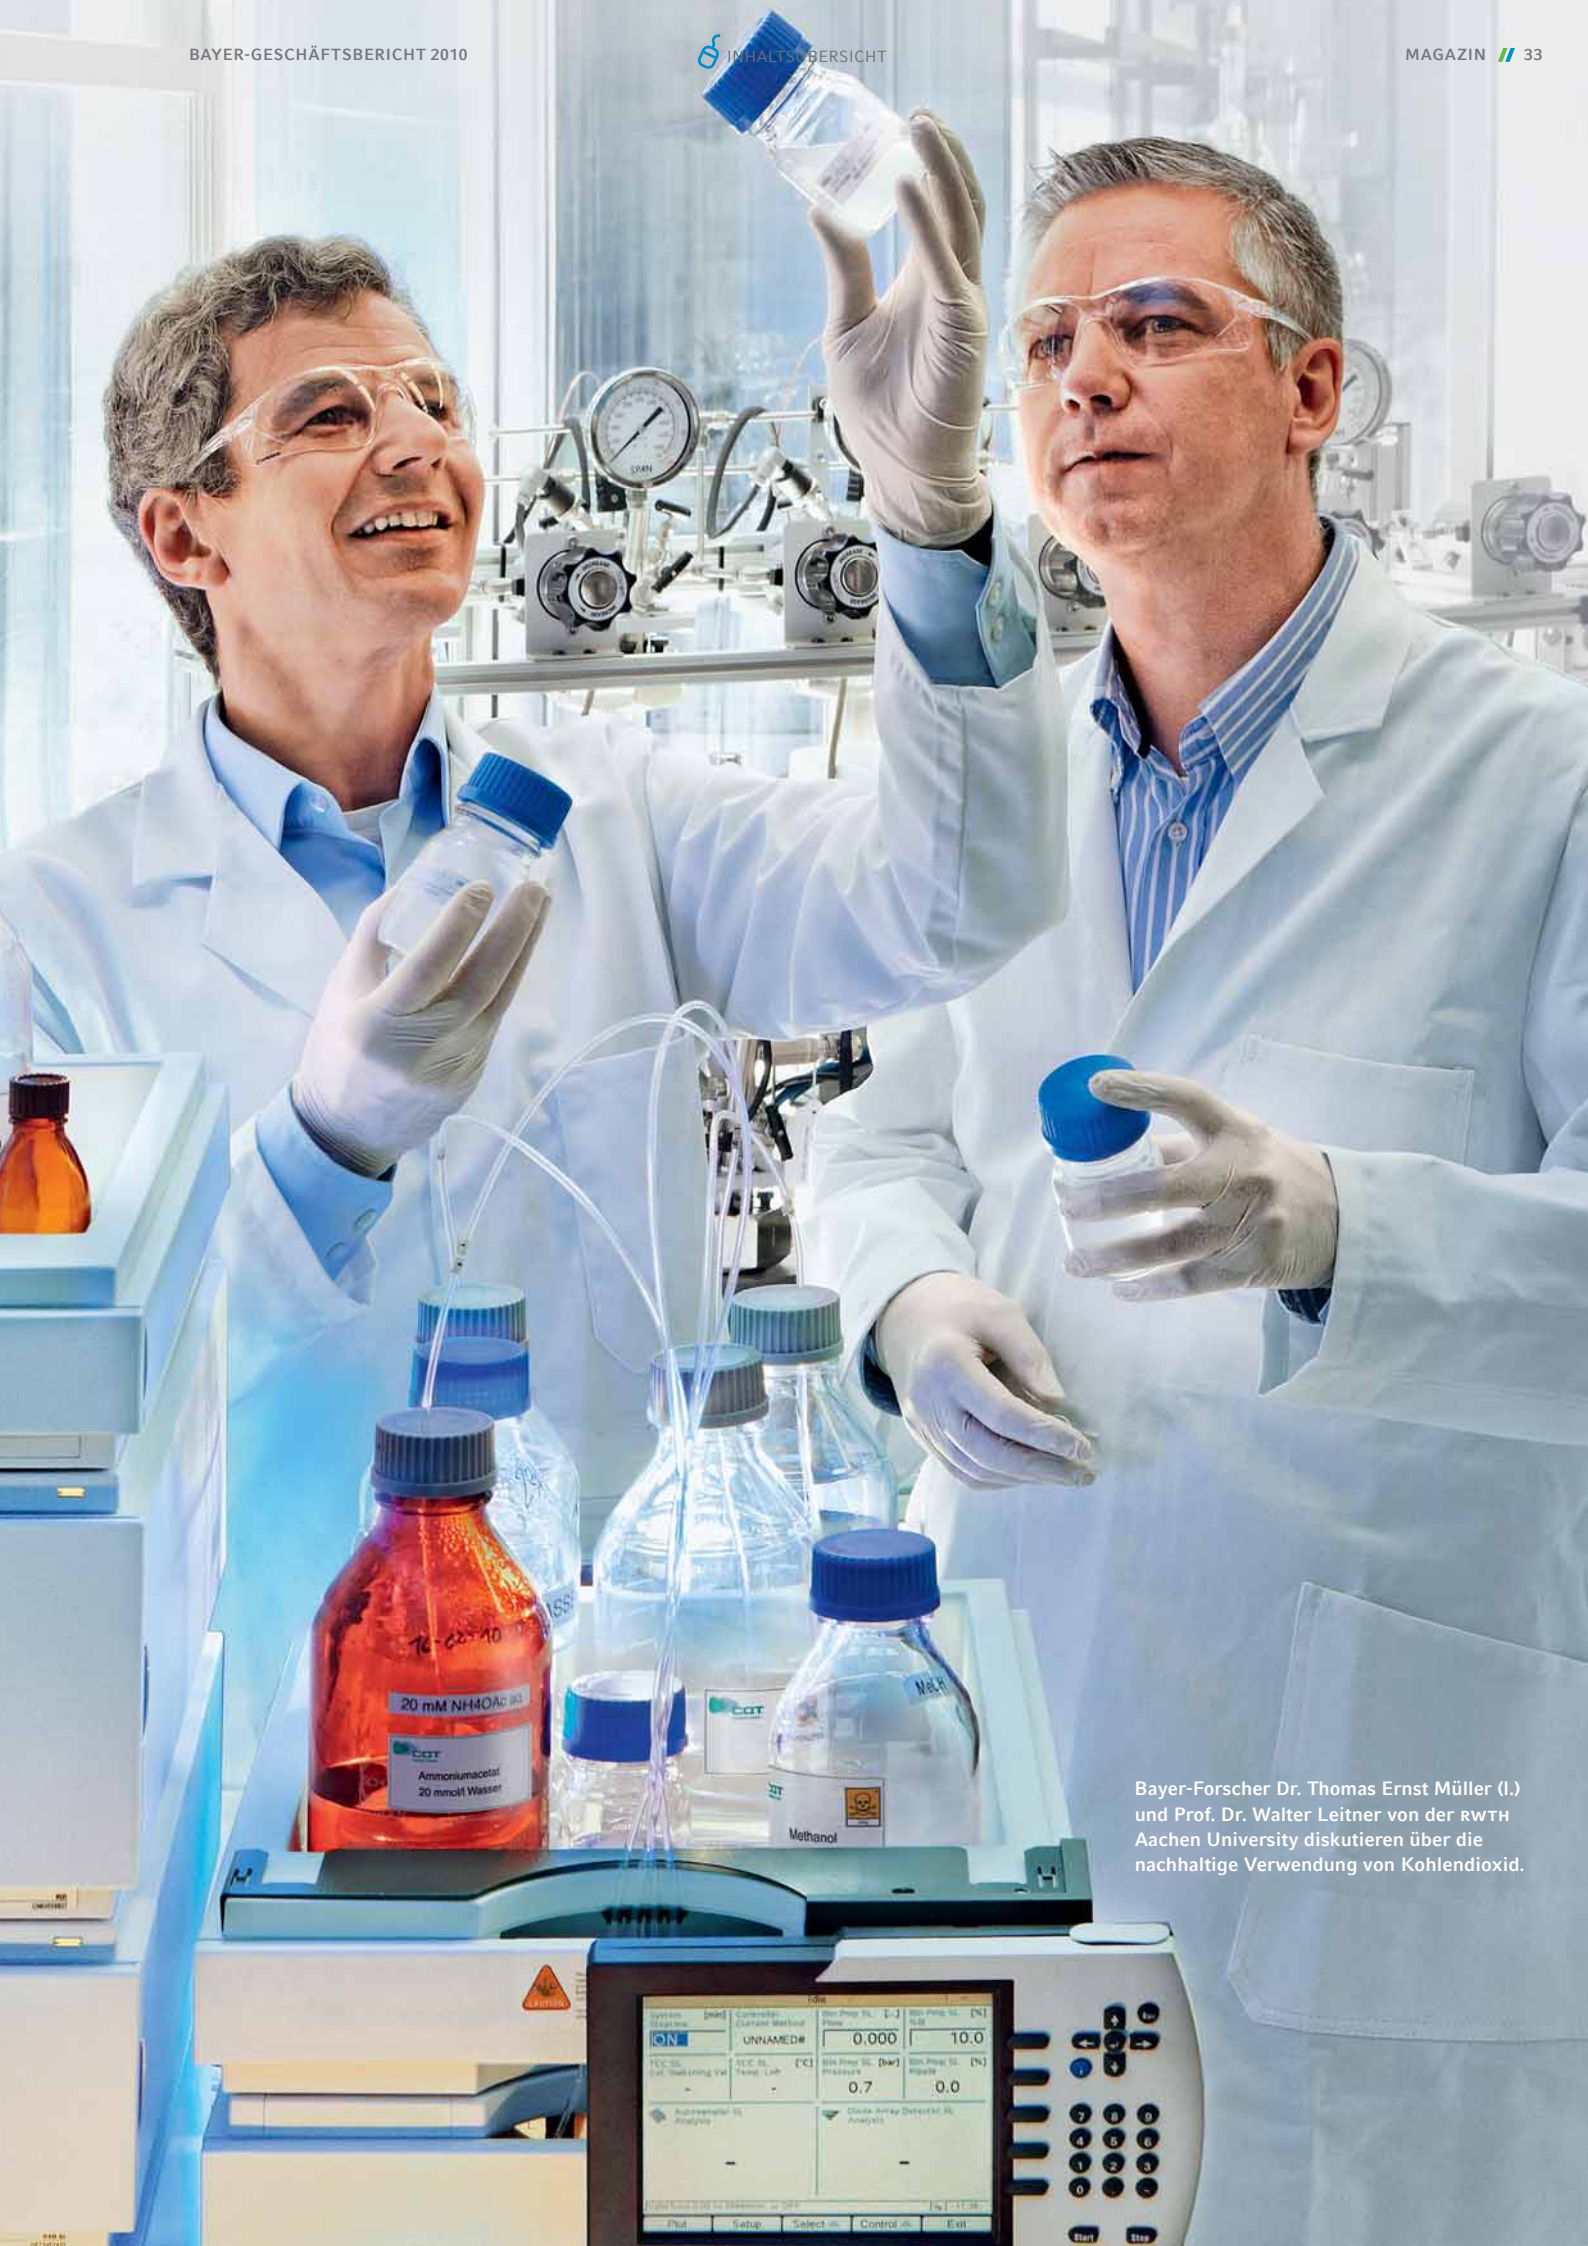

Bayer-Forscher Dr. Thomas Ernst Müller (l.) und Prof. Dr. Walter Leitner von der RWTH Aachen University diskutieren über die nachhaltige Verwendung von Kohlendioxid.

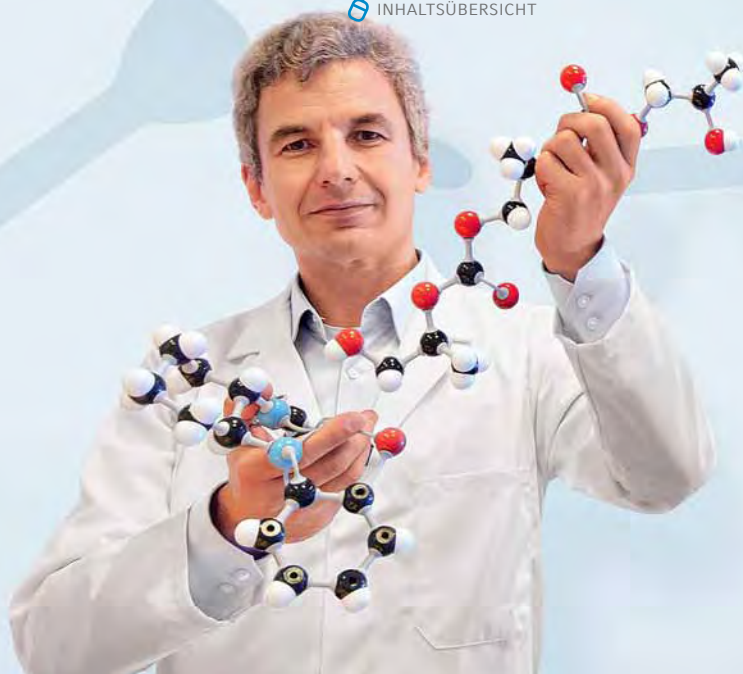

## Hightech für den Klimaschutz

Das vergangene Jahr war global gesehen das wärmste seit Beginn der Wetteraufzeichnungen. Die Welt braucht Klimaschutz. Mit innovativen Technologien und hochwertigen Materialien leistet Bayer einen nachhaltigen Beitrag zur Bewältigung der globalen Herausforderungen – für mehr Energieeffizienz, Klimaschutz und zur Schonung der Ressourcen.

107 T€

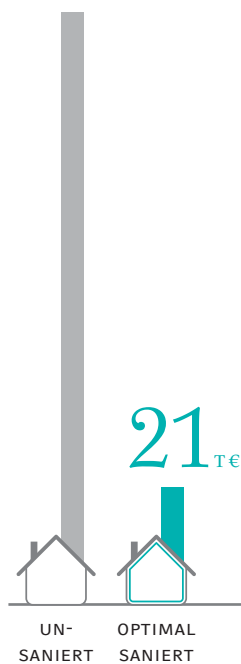

Summe der Heizkosten im Einfamilienhaus innerhalb von 20 Jahren: im unsanierten Haus 107.000€, im optimal sanierten Haus 21.000€

Quelle: Deutsche Energie-Agentur

Öko-Systeme und Tierarten verschwinden. Gletscher schmelzen. Der Meeresspiegel steigt. Der jüngste Sommer bescherte uns sintflutartige Überschwemmungen und extreme Hitzeperioden. Umso mehr steht für die Experten von Bayer MaterialScience das Thema Klimaschutz ganz oben auf der Agenda.

Öl wird immer knapper und Kohlendioxid heizt das Klima auf. „Deshalb suchen wir nach Alternativen für fossile Rohstoffe und wollen gleichzeitig schädliche Treibhausgase sinnvoll einsetzen“, sagt der Chemiker und Leiter des Katalyseprogramms von Bayer MaterialScience, Dr. Christoph Gürtler. Der Klimasünder  $\text{CO}_2$  soll als wertvoller Rohstoff für nachhaltiges Wirtschaften in der Industrie genutzt werden. Das ist das Ziel des Projektes „Dream Production“. Dabei haben Forscher von Bayer MaterialScience, Bayer Technology Services, der RWTH Aachen University und von der rwe Power AG ein innovatives Katalyseverfahren entwickelt, um Kohlendioxid für die Herstellung umweltfreundlicher Kunststoffe zu nutzen.

Besonders sinnvoll ist das bei Polyurethan. Denn weltweit werden jährlich mehr als zwölf Millionen Tonnen davon verarbeitet. Als energiesparende Wärmedämmplatte isoliert

85%

Die Katalysetechnologie wird derzeit bei der Herstellung von mehr als 85 Prozent aller chemischen Produkte eingesetzt.

Polyurethan Gebäude und Kühlschränke und trägt zur Gewichtsverringerung beim Auto bei. Die Produktion von Polyurethan mit Kohlendioxid ist dabei besonders nachhaltig. „Wir schonen wertvolle Rohstoffe. Zudem spart der Kunststoff als organisches Dämmmaterial während seiner Nutzung rund 70 Mal mehr Energie ein, als zur Herstellung benötigt wird“, erläutert Gürtler.

### Gute Umweltbilanz

Noch besser wäre die Umweltbilanz, wenn Energie zur Produktion von Polyurethan auch aus regenerativen Quellen stammen würde. Strom aus Windkraft steht aufgrund der natürlichen Gegebenheiten nicht gleichmäßig zur Verfügung. Daraus resultieren zeitweise Überschüsse, die unter anderem für die Polyurethan-Produktion genutzt werden könnten. Das ist die Hauptzielsetzung des Verbundprojektes



## „Wir verwenden das Abfallprodukt CO<sub>2</sub> zur Herstellung hochwertiger Kunststoffe.“

DR. THOMAS ERNST MÜLLER,  
Chemiker bei Bayer MaterialScience und Leiter des Katalysezentrums

CO<sub>2</sub>RRECT (CO<sub>2</sub>-Reaction using Regenerative Energies and Catalytic Technologies) von Bayer Technology Services, Bayer MaterialScience, RWE, Siemens sowie zehn Partnern aus Hochschule und Wissenschaft.

„Wir sind bei chemischen Prozessen auf eine konstante Energieversorgung angewiesen“, erläutert Dr. Alexandra Große Böwing, Projektleiterin bei Bayer Technology Services. Stromspitzen könnten genutzt werden, um aus Wasser per Elektrolyse den Energieträger Wasserstoff herzustellen. „Dieser regenerativ gewonnene Wasserstoff wird in dem geplanten Produktionsprozess mit CO<sub>2</sub> zu Grundchemikalien für die Polymerherstellung umgewandelt“, so Große Böwing.

### Nichts als Sonne im Tank

Polyurethan und weitere Hightech-Werkstoffe von Bayer helfen auch an anderer Stelle beim Klimaschutz. „Solar Impulse“, das Solarflugzeug des Abenteurers Bertrand Piccard, soll in einigen Jahren um die Welt fliegen – allein mit der Kraft der Sonne. Beim Prototyp des Sonnenfliegers produzierten mehr als 11.500 Solarzellen Strom, der – in Lithium-Ionen-Batterien gespeichert – das Flugzeug auch nachts antreibt.

Mit an Bord des Hightech-Fliegers befand sich eine breite Produktpalette von Bayer MaterialScience. Unter anderem steckten leichte Polyurethanschäume in Kanzel- und Motorenverkleidungen und in den Flügeln. Auch Folien und Polster Elemente, die aus Bayer-Rohstoffen bestehen, flogen mit. „Damit wollen wir zeigen, wie unsere innovativen Werkstoffe die Nutzung regenerativer Energien voranbringen – und so auch neue Technologien als Treiber für eine klimaschonende Mobilität testen“, sagt Johannes Seesing, Projektleiter bei Bayer

MaterialScience. Im zweiten Solarflieger könnte der Anteil der Bayer-Materialien noch einmal deutlich steigen.

„Wir rechnen damit, das Gewicht des Flugzeugs zu senken – dank der Hightech-Werkstoffe und energiesparenden Leichtbauprodukte von Bayer MaterialScience“, sagt Luftfahrtpionier Piccard. Sollte die erste Weltumrundung mit einem Solarflieger gelingen, wäre dies ein Riesenerfolg für Solar Impulse und Bayer MaterialScience. Und ein Ereignis, das Mut macht: für eine Zukunft mit regenerativen Energien und mehr Klimaschutz.

### Klimagerecht bauen

Dazu wollen Bayer-Experten auch mit Lösungen für nachhaltiges Bauen beitragen. Denn rund 40 Prozent des weltweiten Energieverbrauchs gehen auf Bau und Betrieb von Immobilien zurück. Die Basis des Programms „EcoCommercial

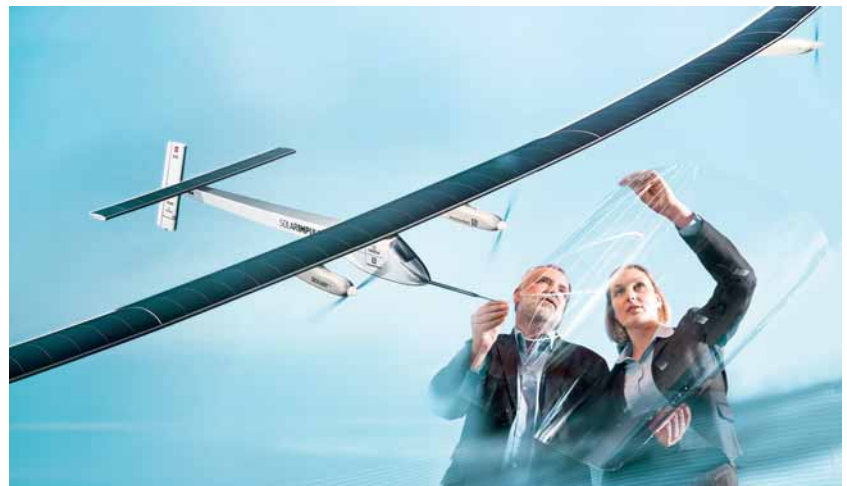

Vor dem Modell des Solarflugzeugs: Johannes Seesing und Dr. Stephanie Vogel von Bayer MaterialScience präsentieren eine dünne Folie aus Makrofol® für die Cockpit-Scheibe.

Building“ (ECB) von Bayer MaterialScience lautet deshalb: Klimagerecht bauen – ökologisch und ökonomisch sinnvoll. Es gibt ein großes Potenzial, um energiesparende und klimaschonende Konstruktionen zu realisieren. „Bürogebäude, Industriehallen, Krankenhäuser und Supermärkte brauchen Baulösungen und Dienstleistungen, die langfristig die Energieeffizienz und Klimaverträglichkeit von Gebäuden verbessern und so auch die Rentabilität von Unternehmen steigern“, sagt Dr. Thomas Braig, ECB-Leiter für die Region Europa, Naher Osten, Afrika.

„Grüne Gebäude“ stoßen bei Bauunternehmern und Investoren weltweit auf wachsendes Interesse. Aber Umweltschutz muss sich für Investoren lohnen. Deshalb vereint das ECB ökologische und wirtschaftliche Aspekte und bietet eine kosteneffektive Umsetzungsmethode, die nachhaltiges Bauen zum neuen Standard macht. „Das Konzept ist zwar erst ein Jahr alt, aber bereits weltweit verankert“, erklärt Peter Vanacker, Mitglied des Executive Committee von Bayer MaterialScience und globaler Schirmherr des ECB-Programms. Neben Europa ist es bereits in Nord- und Mittelamerika, im Nahen Osten, in Indien, China, Südostasien und Japan eingeführt. Das Bayer-Netzwerk basiert auf der lokalen Expertise und der Innovationskraft

seiner Mitgliedsunternehmen. „Mehrinvestitionen für nachhaltige Gebäude amortisieren sich in der Regel innerhalb von sechs bis zehn Jahren“, so Vanacker.

Mitglied im Netzwerk ist zum Beispiel die Ed. Züblin AG, die mit Bayer beim Bau schlüsselfertiger energieeffizienter Gewerbegebäude kooperiert. Im September 2010 wurde eine Kooperation mit dem Green-Hospital-Programm von Asklepios – dem größten privatwirtschaftlichen Klinikbetreiber Europas – vereinbart. Auch beim Bau der Ökostadt Masdar City in den Vereinigten Arabischen Emiraten will Bayer MaterialScience mit seinem EcoCommercial-Building-Programm einen wichtigen Beitrag leisten.

### Fußball-Stadion als Kraftwerk

Auf dem Weg zum klimagerechten Bauen spielt auch die Integration von Photovoltaik in der Architektur eine wichtige Rolle. Dabei hilft der Kunststoff Makrolon®. Mit Platten aus dem Bayer-Polycarbonat lassen sich Solarmodule optimal in Dachkonstruktionen integrieren. „So wird zum Beispiel aus einem Fußball-Stadion ein Kraftwerk“, sagt Dr. Volker Benz, Projektmanager im Bereich Polycarbonat-Platten bei Bayer MaterialScience. Eine Photovoltaikanlage auf dem Dach des Bremer Weser-

#### AUFBAU DES SOLARMODULS

Deckplatte aus Makrolon®  
Solarzellen  
Trennschichten  
Dauerelastisches Gel  
Verbindertechnik  
Trägerplatte aus Makrolon®

#### SONNENKRAFT AUF DEM STADION-DACH

Der transparente Innenring am neuen Weser-Stadion in Bremen schützt nicht nur Fußballfans vor Wind und Regen. Er lässt auch Sonnenlicht durch und produziert gleichzeitig Energie. Dafür sorgen Leichtbausolarmodule der Sunovation GmbH. Basis ist ein Sandwichverbund, dessen leichte Träger- und Deckplatten aus Makrolon® von Bayer bestehen.

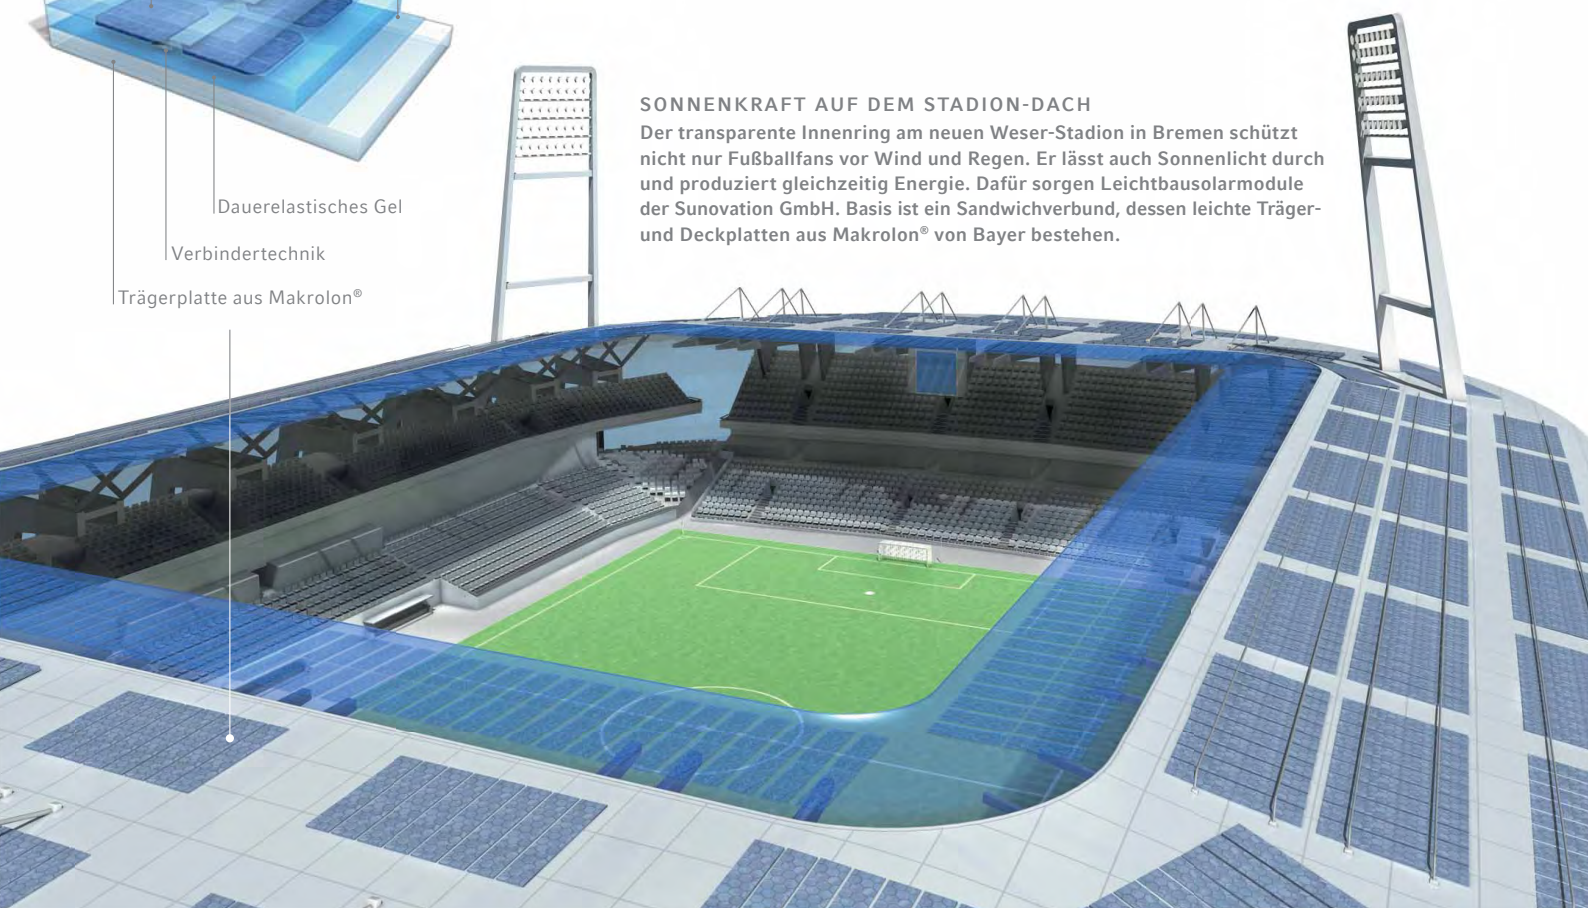



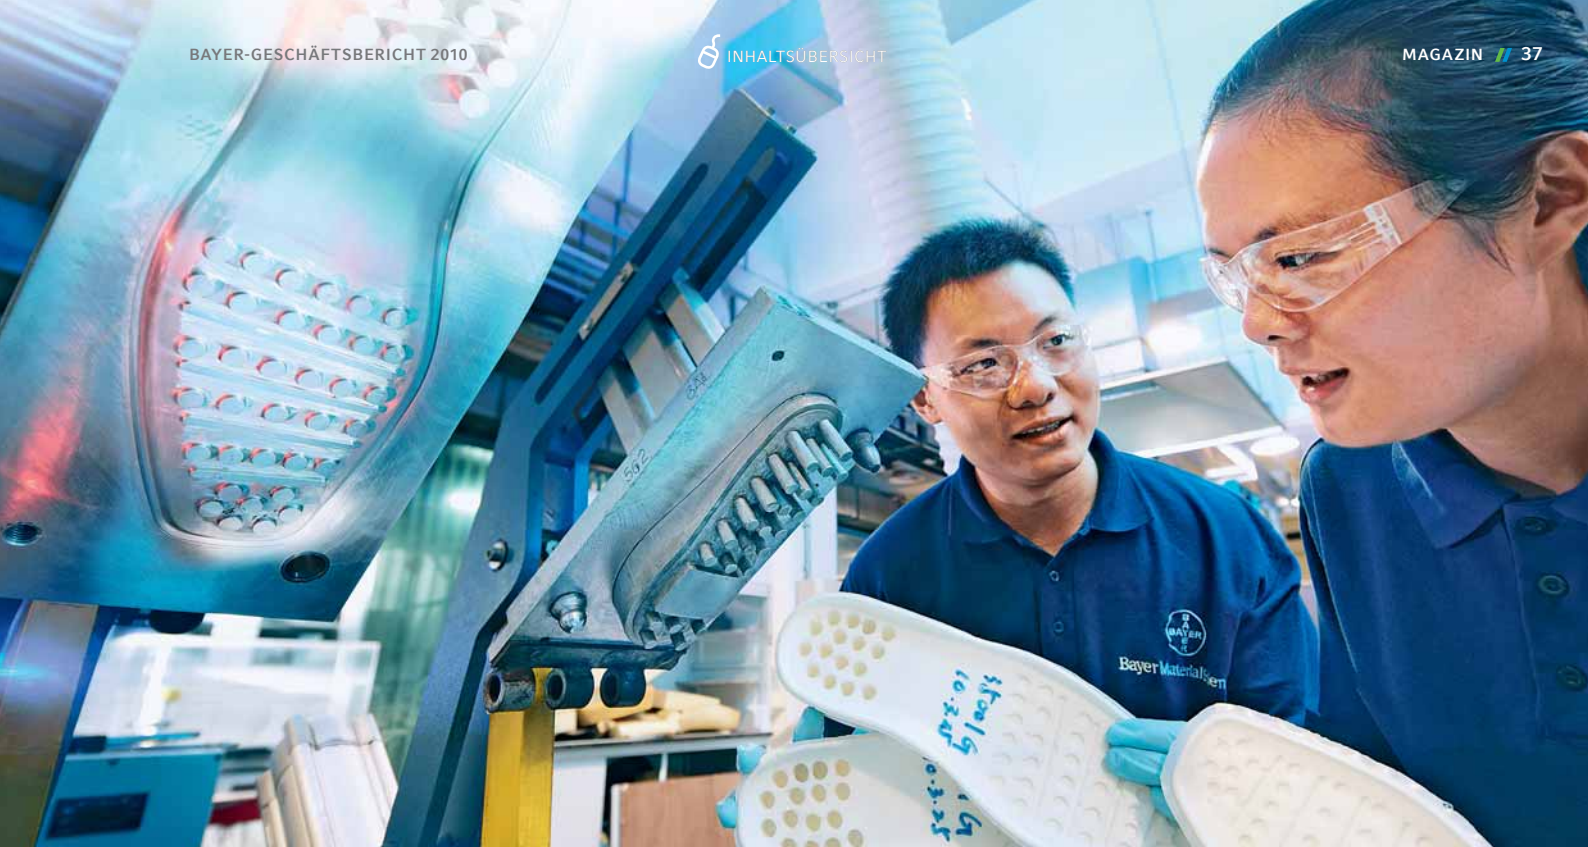

Bayer-Mitarbeiter Xiang Liu (l.) und Entwicklungs-Ingenieurin Erika Zhu im Global Footwear Competence Center in Shanghai, in dem das Konzept für einen „grünen Schuh“ entwickelt wurde.

Stadions (siehe Grafik) mit 200.000 Solarzellen soll so viel Strom produzieren, dass sich damit jährlich etwa 300 Haushalte versorgen ließen. „500 Tonnen Kohlendioxid werden pro Jahr damit gespart“, so Benz.

Eine weitere Innovation von Bayer MaterialScience in Sachen Klimaschutz macht sich von Shanghai aus auf den Weg rund um den Globus. Dort haben Bayer-Werkstoffexperten ein einzigartiges Konzept für einen „grünen Schuh“ entwickelt, bei dem eine ganze Reihe nachhaltiger Materialien und Technologien zum Einsatz kommen: den „Ecotrekker“. Allein in der Schaumschicht für die Schuhsohlen liegt der Anteil erneuerbarer Rohstoffe bei bis zu 70 Prozent. „Von diesem Konzept profitieren Hersteller, Verbraucher und die Umwelt gleichermaßen“, erklärt Dr. John Zhang, Leiter des Global Footwear Competence Center in Shanghai. Zur Zielgruppe für nachhaltige Schuhkonzepte wie beim „Ecotrekker“ zählen führende Schuhhersteller wie adidas, PUMA, Nike, Timberland und UVEA.

### Wachstumsmarkt Asien

Mit dem Global Footwear Competence Center ist Bayer MaterialScience im wichtigsten Schuhproduktionsland der Welt vertreten. Allein 2010 wurden in China mehr als neun Milliarden Paar Schuhe hergestellt und damit knapp die Hälfte der Weltproduktion. Dass das Ecotrekker-Konzept seinen Ausgang in China genommen hat, ist nur ein Beleg dafür, wie sich Forschung, Produktion und Absatzmärkte noch stärker als bisher global ausrichten. Dabei wächst die Kunststoffindustrie Asiens enorm.

Die Nachfrage im Baubereich, bei Konsumgütern und Elektronikartikeln, aber auch im Fahrzeug- und Elektrobereich steigt – angetrieben durch umfangreiche Konjunkturprogramme der chinesischen Regierung.

„Das starke Wirtschaftswachstum in China wie in der gesamten Region bietet uns herausragende Chancen, die wir bestmöglich nutzen wollen“, sagt Patrick Thomas, Vorstandsvorsitzender von Bayer MaterialScience. Bis zum Jahr 2016 will Bayer seine Kapazitäten zur Produktion hochwertiger Materialien in China erheblich ausbauen. Dazu sind am Standort Shanghai Investitionen von rund einer Milliarde Euro geplant. Außerdem ist vorgesehen, die Forschungs- und Entwicklungsaktivitäten dort deutlich zu stärken.

Zudem wird die Hauptverwaltung des Geschäftsbereichs Polycarbonates vom Stammsitz in Leverkusen nach Shanghai umziehen. Ziel ist es dabei, eine noch größere Nähe zum speziell in Asien boomenden Polycarbonat-Markt zu erreichen. Und bis 2012 will Bayer fünf neue kundennahe Einrichtungen in Shanghai und drei anderen chinesischen Städten für insgesamt 110 Millionen Euro bauen.

Damit will Bayer MaterialScience seine Präsenz in Asien deutlich stärken. Denn die Märkte sind längst global orientiert. Und auch der Klimawandel betrifft die ganze Welt. Forscher und Entwickler von Bayer MaterialScience kombinieren beide Herausforderungen und bieten Lösungen: mit effizienten Helfern beim Klimaschutz weltweit.

### PODCAST CENTER

Bayer will seine Kapazitäten zur Produktion hochwertiger Materialien in China weiter ausbauen. Damit richtet das Unternehmen seinen Fokus noch stärker auf den asiatisch-pazifischen Raum. Unter [WWW.PODCAST.BAYER.DE](http://WWW.PODCAST.BAYER.DE) finden Sie einen Audio-Podcast zu diesem Thema.

# Highlights 2010

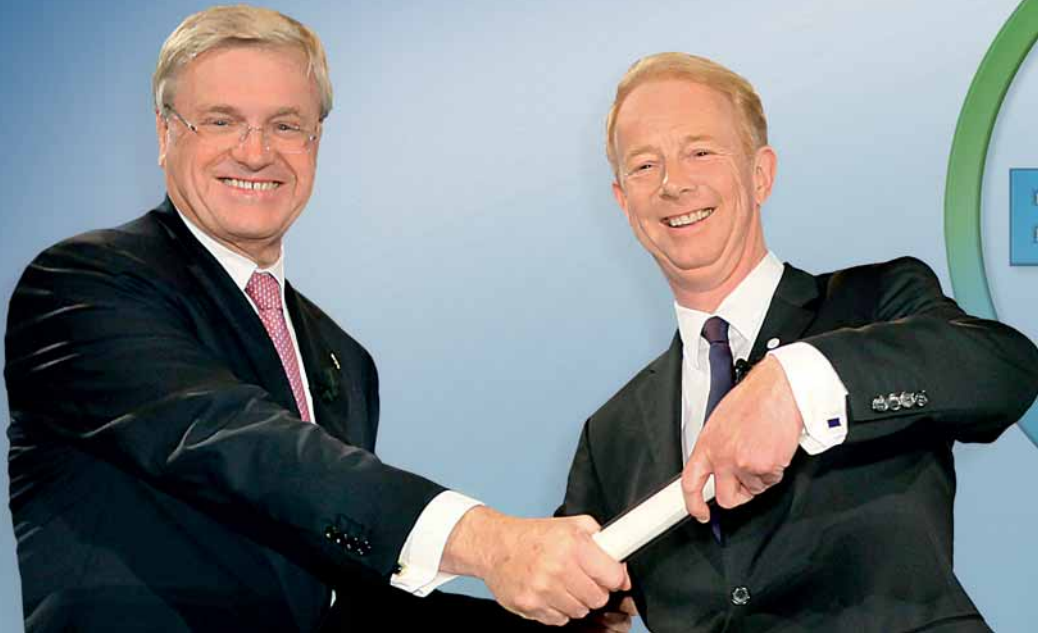

Werner Wenning (l.) übergibt seinem Nachfolger Dr. Marijn Dekkers den Staffelstab aus Makrolon®, in dem sich alle Zettel befinden, auf die die Vorgänger traditionell ihren Nachfolgern ein Motto geschrieben haben.

## Stabwechsel an der Konzern-Spitze

### Werner Wenning übergab Vorstandsvorsitz an Dr. Marijn Dekkers

Ein weiterer Meilenstein in der Geschichte des Bayer-Konzerns: Werner Wenning hat am 1. Oktober den Vorstandsvorsitz an Dr. Marijn Dekkers übergeben. „Bayer – das war, das ist mein Unternehmen. Und dafür wird mein Herz auch weiterhin schlagen“, bekannte Wenning bei einem Festakt vor rund 300 Teilnehmern aus Wirtschaft, Politik, Sport und Gesellschaft. Dekkers betonte: „Mein Ziel ist dasselbe wie das aller meiner Vorgänger: Wir wollen das Beste für Bayer und die Stakeholder von Bayer.“

Die Gäste erlebten bewegende Momente im Leverkusener Kasino. Rückblickend auf die fast 45 Jahre, die Werner Wenning für Bayer gearbeitet hat, sagte er: „Mich hat vieles begeistert und fasziniert.“ Die Internationalität, die Menschen und die Forschung machten für ihn die Faszination Bayer aus. „Bayer ist und bleibt ein Erfinder-Unternehmen. Darauf können wir alle stolz sein.“

Wenning dankte dem Aufsichtsrat und seinem Vorsitzenden für die effektive Zusammenarbeit, den Vorstandskollegen für die Geschlossenheit bei allen Entscheidungen und den Betriebsräten, die faire und verlässliche Partner waren. „Ich danke allen Mitar-

beiterinnen und Mitarbeitern weltweit, ohne deren aktive Unterstützung wir die gesteckten Ziele nicht erreicht hätten“, betonte er.

Traditionsgemäß überreichte der scheidende Chef dem neuen Mann an der Spitze einen Staffelstab mit allen Zetteln, auf die die Vorgänger ihren Nachfolgern ein Motto geschrieben haben. Wenning's Botschaft an seinen Nachfolger: „Um wirklich glücklich zu sein, braucht man drei Dinge: einen Menschen, den man liebt, eine anspruchsvolle Aufgabe und eine große Hoffnung. Ich denke, Sie haben alles – Ihr Vorläufer Werner Wenning.“

Der Aufsichtsratsvorsitzende Dr. Manfred Schneider würdigte Wenning als einen Mann, „der sich um die Fortentwicklung von Bayer sehr verdient gemacht hat. Umso mehr gilt es, ihm für seine überaus erfolgreiche Arbeit für den gesamten Konzern unseren Dank und unsere Anerkennung auszusprechen.“ Wenning habe das Unternehmen strategisch neu ausgerichtet, es auf die eigene Innovationskraft fokussiert und zur Nachhaltigkeit verpflichtet. Schneider: „Heute erleben wir Bayer als gesundes, gut aufgestelltes Unternehmen, das uns allen Grund gibt, mit Zuversicht nach vorn zu schauen.“

#### PODCAST CENTER

Einen Video-Podcast zum Stabwechsel finden Sie unter [WWW.PODCAST.BAYER.DE](http://WWW.PODCAST.BAYER.DE)



## Bayer HealthCare baut Kompetenzen im Biologika-Bereich aus

Ein wichtiger Schritt im Kampf gegen schwere Krankheiten wie Krebs: Bayer HealthCare errichtet am Standort Wuppertal auf gut 1.000 Quadratmetern Grundfläche ein neues Technikum zur biotechnologischen Produktion von Arzneimittelwirkstoffen, die in klinischen Studien eingesetzt werden. Die Investitionen hierfür betragen 35 Millionen Euro. Bayer baut damit die Kompetenzen im Biologika-Bereich weiter aus.

„Für ein forschendes Pharma- und Chemieunternehmen wie Bayer sind Innovationen der Schlüsselfaktor für zukünftiges Wachstum. Das neue Zellbiologie-Technikum ist eine Investition in unseren langfristigen Erfolg. Wuppertal bietet uns hierfür die richtigen Rahmenbedingungen“, sagte Dr. Wolfgang Plischke, im Vorstand der Bayer AG verantwortlich für Technologie, Innovation und Umwelt, bei der Grundsteinlegung des Technikums im Pharma- und Chemiapark. Die neue Anlage soll Ende 2012 in Betrieb gehen.

Biologika sind mittels biotechnologischer Verfahren hergestellte Arzneimittel. Bayer HealthCare konzentriert

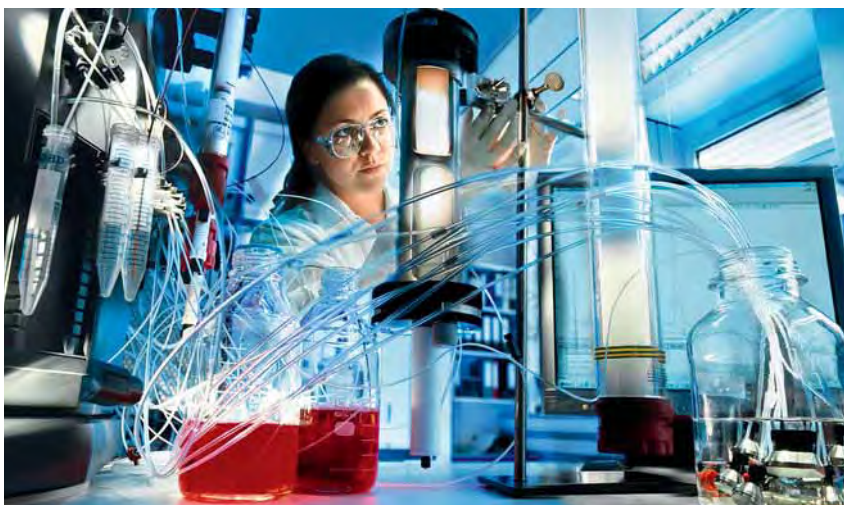

Entwicklungslabor für biologische Wirkstoffe bei Bayer HealthCare in Wuppertal

sich dabei in erster Linie auf Antikörper, Gerinnungsfaktoren und andere therapeutische Proteine. „Damit vergrößern wir unsere Möglichkeiten, neue Medikamente zur Bekämpfung schwerer Erkrankungen wie Krebs anbieten zu können“, sagte Professor Dr. Andreas Busch, Mitglied im Executive Committee von Bayer HealthCare. In den ver-

gangenen Jahren hat das Unternehmen seine Kompetenz in der Biologika-Forschung kontinuierlich ausgebaut. Busch: „Mit dem neuen Technikum erweitern wir unsere Produktionskapazitäten, um für eine gestiegene Anzahl an potenziellen Wirkstoffen auch für die späten Phasen der klinischen Entwicklung ausreichend Material herstellen zu können.“

## Unterstützung für nachhaltige Entwicklungen im Nahen Osten

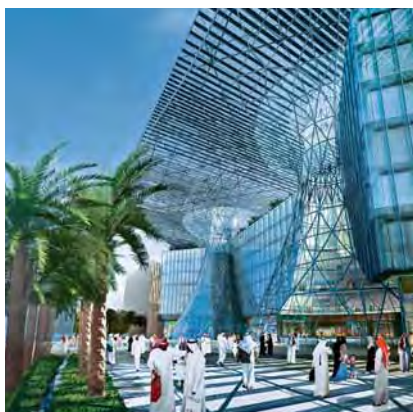

Masdar City in den Vereinigten Arabischen Emiraten soll die erste klimaneutrale Stadt werden.

Das „EcoCommercial Building Program“ von Bayer ist nun auch im Nahen Osten gestartet. Das gab Bayer MaterialScience auf der Baufachmesse BIG 5 in Dubai bekannt. Dieses Netzwerk für nachhaltiges Bauen ist bereits

erfolgreich in den Schlüsselmärkten Europa, USA und China eingeführt. Es unterstützt Entscheider bei der Umsetzung von umweltfreundlichen und energiesparenden Projekten vom Passivhaus bis zum Nullemissionsgebäude mit erhöhtem Komfort und reduzierten Lebenszyklus-Kosten. Die Initiative stellt eine Ergänzung zu den Bemühungen der regionalen Regierungen dar, für die der Schwerpunkt einer nachhaltigen Entwicklung auf energieeffizienten Gebäuden liegt (vgl. S. 35 f.).

„Die Energieeffizienz bei Gebäuden ist einer der wichtigsten Hebel, um Treibhausgas-Emissionen zu reduzieren und den Verbrauch knapper Ressourcen von fossilen Treibstoffen bis hin zu Wasser nachhaltiger zu gestalten“, sagte Stephan Rosenthal, Geschäftsführer von Bayer Middle East, zum Start des „EcoCommercial Building Program“ im Nahen Osten.

## Bahnbrechender Wirkstoff gegen Unkräuter

Bayer CropScience hat weltweit die erste Registrierung für seinen neuen Herbizidwirkstoff Indaziflam in den USA erhalten. Indaziflam soll 2011 zunächst für professionelle Anwender im Markt für Rasenpflege unter dem Markennamen Specticle™ angeboten werden. Später ist die Einführung in den Segmenten Zierpflanzen und Industrielles Vegetationsmanagement geplant.

Zudem will Bayer CropScience Hobbygärtnern ein Sortiment auf Basis von Indaziflam unter der Marke Bayer Advanced™ anbieten. „Die Registrierung in den USA ebnet den Weg für den weltweiten Einsatz von Indaziflam als neues Basisherbizid Alion in Kulturen wie Obst und Weinreben, Nüssen, Zitrusfrüchten, Oliven und Zuckerrohr“, sagt Vorstandsmitglied Dr. Rüdiger Scheitza. Das Unternehmen erwartet für Produkte auf Basis von Indaziflam ein weltweites jährliches Umsatzpotenzial von mehr als 150 Millionen Euro.

## UNEP-Partnerschaft im Bereich Jugend und Umwelt verlängert

Die globale Partnerschaft zwischen dem Umweltprogramm der Vereinten Nationen (UNEP) und Bayer im Bereich Jugend und Umwelt wird bis Ende 2013 verlängert. Seit der Gründung im Jahr 2004 konnten bereits Millionen junger Menschen von den zahlreichen Projekten profitieren. Sie reichen von Baumpflanzaktionen über die Bereitstellung von Bildungsmaterialien und Kreativwettbewerben bis hin zur Veranstaltung großer Jugend- und Kinderkonferenzen und der Einbindung Jugendlicher in bedeutende globale Events. Bayer unterstützt die gemeinsamen Aktivitäten finanziell mit 1,2 Millionen Euro pro Jahr.

„Über 37 Prozent der Weltbevölkerung sind Jugendliche und Kinder. Ihre Zukunft wird bestimmt durch unser Han-

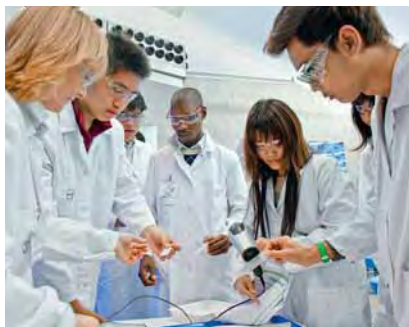

Junge „Umweltbotschafter“ zu Besuch im BayKomm in Leverkusen

deln zum Schutz des Planeten“, sagt Achim Steiner, Untergeneralsekretär der Vereinten Nationen und UNEP-Exekutivdirektor. „Ziel der Partnerschaft mit Bayer ist es, jungen Menschen verstärkt

Zugang zu grundlegenden Informationen über den Zustand des Planeten zu verschaffen, ihre Initiativen zu unterstützen und sicherzustellen, dass ihre Stimme auf internationaler Ebene Gehör findet.“

„Wir freuen uns auf die Fortsetzung unserer erfolgreichen Zusammenarbeit mit UNEP, die weltweit auf so große Resonanz bei jungen Menschen stößt“, sagt Dr. Marijn Dekkers, Vorsitzender des Vorstands der Bayer AG. „Uns ist sehr an einem konstruktiven Dialog und an der Unterstützung umwelt-engagierter Jugendlicher gelegen. Denn sie haben eine Menge einzubringen – an berechtigtem Interesse und kritischem Bewusstsein ebenso wie an Engagement und Leidenschaft für den Umweltschutz.“

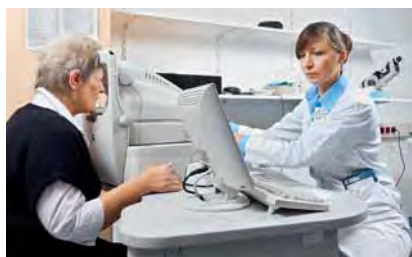

Elvira Allakhbarova untersucht eine Patientin.

### Hilfe für das kranke Auge

Zwei parallel vorgenommene Phase-III-Studien mit VEGF Trap-Eye bei feuchter altersbedingter Makula-Degeneration haben positive Ergebnisse erzielt. VEGF Trap-Eye erreichte den primären Endpunkt in allen Dosierungen. Der primäre Endpunkt war der Anteil der Patienten, die nach 52 Wochen Behandlung ihre Sehkraft erhalten oder verbessert hatten. Das Medikament ist ein Entwicklungsprodukt von Bayer HealthCare und Regeneron Pharmaceuticals. Auf Basis der positiven Studien-Ergebnisse planen die Unternehmen einen Antrag auf Zulassung in Europa und den USA in der ersten Hälfte 2011.

Auch bei einer weiteren Indikation zeigte VEGF Trap-Eye positive Ergebnisse. In der ersten Phase-III-Studie an Patienten mit Zentralvenen-Verschluss des Auges erreichte das Präparat den primären Endpunkt, also eine Verbesserung des Sehvermögens gegenüber dem Ausgangswert.

## Bestätigung für Erfolg der Klima-Strategie

Bayer bestätigt seine Top-Position bei Klimaschutz und Nachhaltigkeit. Der Konzern ist 2010 erneut in den „Carbon Disclosure Leadership Index (CDLI)“ aufgenommen worden – als bestes Unternehmen seiner Branche. Dies gab die Investorengruppe des „Carbon Disclosure Project (CDP)“ in New York, USA, bekannt. Damit ist Bayer als einziges europäisches Unternehmen der chemisch-pharmazeutischen Industrie das sechste Mal in Folge in dem ersten weltweiten Klimaindex vertreten. Im CDLI sind 51 der 500 größten börsennotierten Unternehmen der Welt (Global 500 Index) mit der höchsten Transparenz in der Berichterstattung zu den Treibhausgas-Emissionen und der Klima-Strategie gelistet.

Bayer ist ebenfalls in dem neu eingeführten „Carbon Performance Leadership Index (CPLI)“ vertreten und hier mit dem Prädikat „A“ ausgezeichnet worden. Der CPLI bewertet die konkreten Maßnahmen und Leistungen der Unternehmen beim Klimaschutz sowie im Umgang mit den Folgen des Klimawandels. Aus dem Global 500 Index sind 48 Unternehmen in den CPLI aufgenommen worden. Sowohl der CDLI als auch der CPLI sind das Ergebnis einer detaillierten Recherche und Bewertung von klima-

relevanten Unternehmensdaten, welche die Wirtschaftsprüfungsgesellschaft PricewaterhouseCoopers (PwC) im Auftrag des CDP vorgenommen hat. Diese Datensammlung ist die weltweit größte ihrer Art. Das CDP ist eine Initiative von mittlerweile 534 institutionellen Anlegern. Sie stehen für ein Anlagevolumen von insgesamt 64 Billionen US-Dollar. Diese Investoren erwarten von Unternehmen umfassende klimarelevante Informationen, um bei Anlageentscheidungen berücksichtigen zu können, was die Unternehmen zum Klimaschutz beitragen und wie sie den Herausforderungen des Klimawandels begegnen.

„Wir freuen uns sehr über die erneute Aufnahme in den CDLI und die Listung im neuen CPLI – beides sehen wir als Bestätigung für den Erfolg unserer Klima-Strategie“, sagt Dr. Wolfgang Plischke, im Vorstand der Bayer AG verantwortlich für Technologie, Innovation und Umwelt.

Die Bayer-Aktie ist auch bei der Neuauflage 2010 im „Dow Jones Sustainability World Index (DJSI World)“ gelistet und in den „Dow Jones Sustainability Europe Index (DJSI Europe)“ zurückgekehrt – ein erneuter Beleg für die international herausgehobene Position des Unternehmens auf dem Gebiet der Nachhaltigkeit.



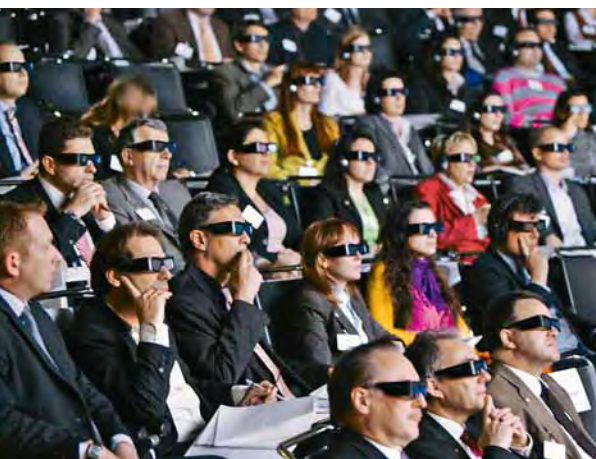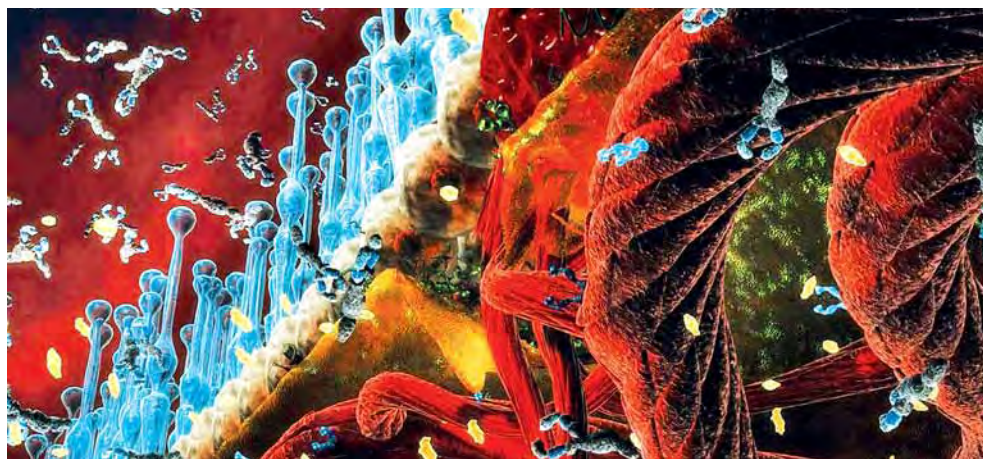

3-D-Filme entführten die Besucher in die Welt der Forschung – hier die Animation einer Makula als Teil der Netzhaut eines Auges.

## Produktpipeline von Bayer ist gut gefüllt

Spitzenforschung zum Greifen nah: Zum ersten Mal hat Bayer seine Innovationskraft durch 3-D-Filme beim internationalen Presseforum „Innovationsperspektive 2010“ erlebbar gemacht. Vor rund 140 Journalisten präsentierte der Vorstandsvorsitzende Dr. Marijn Dekkers und Forschungsvorstand Dr. Wolfgang Plischke im Leverkusener BayKomm das Forschungspotenzial des Unternehmens.

„Wir haben eine echte Erfolgsbilanz bei Innovationen“, betonte Dekkers. Mit seinen Produkten helfe Bayer Patienten, Landwirten und weiteren Kunden überall auf der Welt. „Auch wir als Unternehmen brauchen diese

Innovationen. Sie sind unsere Lebensader. Von ihrer Entwicklung und ihrer Vermarktung hängt unser Erfolg im Wettbewerb ab“, so Dekkers.

Allerdings gebe es auch Entwicklungen, die Anlass zur Sorge seien. So stelle sich die Frage, ob die Gesellschaft auch in Zukunft bereit sei, für Innovationen einen angemessenen Preis zu zahlen. Das gelte vor allem für den Bereich HealthCare. Problematisch sei auch die mangelnde Akzeptanz für neue Technologien. Dekkers appellierte an Politik und Behörden, Sachlichkeit und Transparenz für neue Entwicklungen sicherzustellen.

Forschungsvorstand Plischke präsentierte erfolgreiche Forschungs-

projekte aus der Pipeline der drei Teilkonzerne. So gehört zu den herausragenden Entwicklungen bei HealthCare unter anderem der Gerinnungshemmer Xarelto®. Bayer CropScience plant, bis 2012 sechs weitere Wirkstoffe für den Pflanzenschutz mit einem Umsatzpotenzial von insgesamt mehr als einer Milliarde Euro auf den Markt zu bringen. Und Bayer MaterialScience entwickelt neue Produkte und Anwendungen sowie modernste Technologien und Produktionsverfahren – bei gleichzeitig geringerem Energieverbrauch und unter Einsatz alternativer Rohstoffquellen.

## Bestnoten für Investor Relations

Doppelte Auszeichnung: Nach einer Studie des Deutschen Investor Relations Verbands (DIRK) und der „WirtschaftsWoche“ leistet Bayer die beste Investor-Relations-Arbeit der DAX-Unternehmen. Dafür erhielt das Unternehmen den „Deutschen Investor Relations Preis 2010“. Zudem erreichte Bayer beim „Capital-Investor-Relations-Preis 2010“ den zweiten Platz im EURO STOXX 50.

Der DIRK hatte zusammen mit den Londoner Marktforschern von Thomson Reuters-Extel mehr als 800 Fondsmanager und Analysten aus 17 europäischen Ländern befragt. Die Finanzmarktprofis verteilten Punkte an die Investor-

Relations-Abteilungen und -Manager, etwa für Transparenz und Genauigkeit der Jahres- und Quartalsberichte, Verlässlichkeit der Prognosen, Fach- und Branchenwissen. Bei Bayer lobten sie das „stets gut informierte Team und die inhaltliche Qualität der Berichte“.

Mit dem „Capital-Investor-Relations-Preis“ bewerteten die Zeitschrift „Capital“ und die „Deutsche Vereinigung für Finanzanalyse und Asset Management“ die Qualität der Kapitalmarkt-Kommunikation der wichtigsten deutschen und europäischen Unternehmen. Dafür wurden rund 400 Analysten und Fondsmanager internationaler Finanzinstitute befragt.

## Ausbau der Forschung für Gemüsesorten

Neue Anlagen für eine schnellere und effizientere Entwicklung von Gemüsesorten: Die Bayer-CropScience-Tochter Nunhems, zuständig für das Gemüse-saatgutgeschäft des Unternehmens, investiert zwölf Millionen Euro in den Ausbau und die Modernisierung ihres Forschungszentrums in Leudal in den Niederlanden. Die Anlagen sollen Ende 2011 in Betrieb genommen werden. Und am US-Standort Parma hat Nunhems rund 30 Millionen US-Dollar in eine neue Gemüsesaatgut-Aufbereitungsanlage und in die Modernisierung bestehender Kapazitäten für Saatgut-aufbereitung und -lagerung investiert.



## Verstärkung des Getreide-Produktportfolios

Weitere Verstärkung des Getreide-Produktportfolios von Bayer CropScience: Das Unternehmen hat für das neue Getreidefungizid Bixafen erste Zulassungen in Großbritannien und Deutschland erhalten. Landwirte beider Länder können somit ab der Anbausaison 2011 die Vorteile des neuen Fungizids bei der Bekämpfung von Pilzkrankheiten in Weizen und Gerste nutzen. Bayer CropScience startete die Vermarktung unter der Hauptmarke Aviator® Xpro® und rechnet mit einem weltweiten jährlichen Spitzenumsatzpotenzial von rund 300 Millionen Euro. Registrierungen für Produkte auf Basis des neuen Wirkstoffs werden in Kürze in weiteren Ländern Europas erwartet.

Zudem setzt das Unternehmen beträchtliche Ressourcen in Forschung und Entwicklung ein, um die Produktivität des Weizenanbaus zu steigern und herausragende neue Sorten zu entwickeln. So hat Bayer CropScience mit dem israelischen Unternehmen Evogene eine auf fünf Jahre angelegte Zusammenarbeit vereinbart, um die Entwicklung und Markteinführung verbesserter

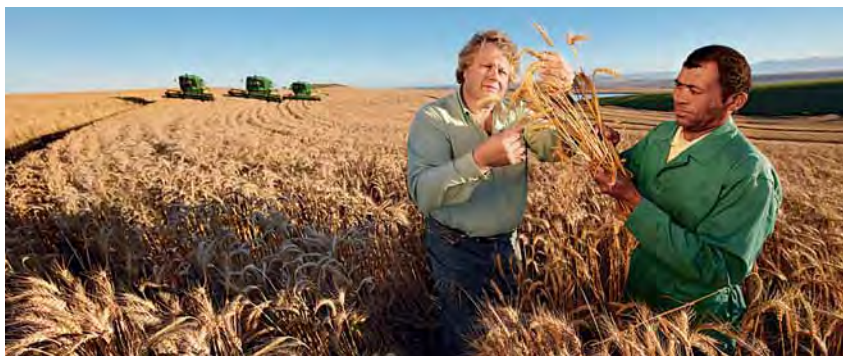

Farmer Neels Neethling (l.) prüft mit seinem Mitarbeiter Tol Kapstein die Qualität von Weizen.

Weizensorten zu beschleunigen. Angestrebt werden Ertragssteigerungen, Toleranz gegen Trockenheit und eine effizientere Verwertung von Düngemitteln.

Außerdem hat Bayer die Weizen-zuchtprogramme der ukrainischen Zuchtunternehmen SORT und EUROSORT übernommen, die in Mironiwka nahe der Hauptstadt Kiew ansässig sind. Durch diese Vereinbarung wird Bayer CropScience Zugang zu herausragenden Weizen-Linien mit ausgezeichneter Winterhärte und Trockentoleranz er-

halten. Bayer CropScience hat bereits Weizenzüchtprogramme auf dem Gelände des renommierten Mironiwka-Instituts eingerichtet.

Zur Verbesserung der Weizenzüchtung und zur Entwicklung neuer Weizensorten hat Bayer mit der Universität von Nebraska-Lincoln eine nicht-exklusive Vereinbarung unterzeichnet. Diese öffentlich-private Kooperation ermöglicht den Partnern, ihre Weizenzüchtprogramme auszubauen und innovative Lösungen zur Verfügung zu stellen.

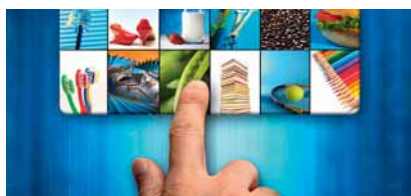

Bildschirme geben eine Rückmeldung.

## Touchscreens werden „fühlbare“

Bayer MaterialScience hat die im kalifornischen Sunnyvale ansässige Artificial Muscle Inc. übernommen – einen Technologieführer auf dem Gebiet der elektroaktiven Polymerfolien. Diese Folien werden unter dem Touchscreen von z. B. Smartphones angebracht. Sie erzeugen eine Vibration, die als eine taktile Rückmeldung beim Berühren des Displays vom Benutzer wahrgenommen wird. Diese innovative Technologie wird unter dem Namen Bayfol Reflex™ vermarktet.

## Neue Produkte für die Tiergesundheit

Mit der Übernahme der neuseeländischen Unternehmensgruppe Bomac, einem Hersteller von Tierarzneimitteln, und einem Abkommen mit dem amerikanischen Spezialpharma-Unternehmen Piedmont Pharmaceuticals LLC in North Carolina, USA, entwickelt Bayer sein weltweites Tiergesundheitsgeschäft weiter.

Bomac verfügt mit 290 Produkten über ein breites Angebot für den Nutztier-Sektor. Der Schwerpunkt liegt auf der Behandlung von Mastitis (Milchdrüsen-Entzündung) bei Milchvieh sowie auf Parasitiziden für Schafe. Bayer will die Forschungs- und Entwicklungskompetenz von Bomac speziell im Bereich Mastitis-Management und Parasitenbekämpfung nutzen und mit den Produkten seine Präsenz im Asien-Pazifik-Raum sowie in Lateinamerika stärken.

Von Piedmont Pharmaceuticals hat Bayer eine neuartige orale Verabrei-

chungstechnologie für Tierarzneimittel erworben. Zudem erhält der Konzern durch das Abkommen Zugriff auf zwei zusätzliche Produkte, die sich bei Piedmont in der späten Entwicklungsphase befinden.

„Durch das Abkommen mit Piedmont ergänzen wir unsere internen Forschungs- und Entwicklungsanstrengungen und weiten unser Angebotsspektrum für Veterinäre und Tierbesitzer aus“, sagt Animal-Health-Leiter Dr. Jean-Luc Lowinski. „Die neuartige Technologie ermöglicht uns, eine Reihe neuer Produkte zur Verbesserung der Gesundheit von Haustieren anbieten zu können.“

Die innovative Form der Anwendung als Kautablette wird von Katzen und Hunden gut angenommen und vertragen. Mit dieser Formulierungstechnologie können Tieren auf einfache Art und Weise unterschiedliche Wirkstoffe verabreicht werden.

## Chancen im asiatisch-pazifischen Raum bestmöglich nutzen

Bayer will seine Kapazitäten zur Produktion hochwertiger Materialien in China bis zum Jahr 2016 erheblich ausbauen. Dazu sind am Standort Shanghai Investitionen von rund einer Milliarde Euro geplant. Bayer richtet seinen Fokus damit noch stärker auf den asiatisch-pazifischen Raum, in dem das Unternehmen ein anhaltendes Wachstum seiner Abnehmerbranchen erwartet.

So sollen die Kapazitäten für den Polyurethan-Rohstoff MDI auf eine Million Jahrestonnen und für den Hochleistungskunststoff Polycarbonat auf 500.000 Jahrestonnen mehr als verdoppelt werden. Außerdem ist vorgesehen, die Forschungs- und Entwicklungsaktivitäten dort deutlich zu stärken. Zudem wird die Hauptverwaltung des Geschäftsbereichs Polycarbonates vom Stammsitz in Leverkusen nach Shanghai umziehen. Ziel ist es dabei, eine noch größere Nähe zum speziell in Asien boomenden Polycarbonat-Markt zu erreichen (vgl. S. 37).

„Die Erweiterung unserer Kapazitäten in China ist ein wichtiger Schritt, um unsere Präsenz in den Schwellenländern deutlich auszubauen“, erklärte der Vorstandsvorsitzende der Bayer AG, Dr. Marijn Dekkers. „Bis zum Jahr

2015 wollen wir den Konzernumsatz in Greater China auf etwa fünf Milliarden Euro steigern. Hierzu soll MaterialScience gut die Hälfte beitragen.“ Im Geschäftsjahr 2009 erzielte der Bayer-Konzern in Greater China einen Umsatz von 2,1 Milliarden Euro, davon entfielen 1,2 Milliarden Euro auf MaterialScience. „Das starke Wirtschafts-

wachstum in China wie in der gesamten Region bietet uns herausragende Chancen, die wir bestmöglich nutzen wollen“, ergänzte Patrick Thomas, Vorstandsvorsitzender von Bayer MaterialScience. „Es ist für uns von strategischer Bedeutung, in Asien/Pazifik die nötigen Kapazitäten zu haben, um eine steigende Nachfrage zu bedienen.“

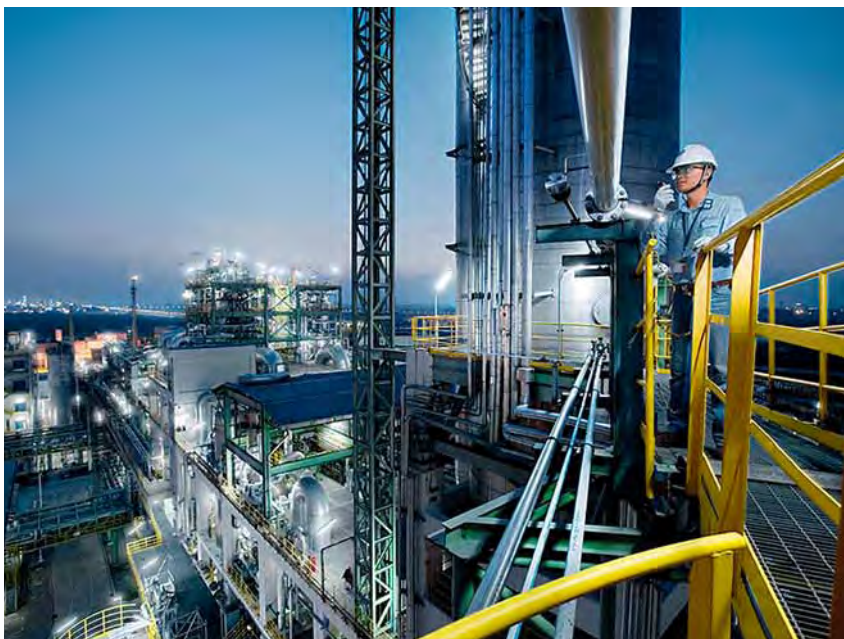

Bayer-Mitarbeiter Gary Xi in der Anlage zur Herstellung von Polycarbonat in Shanghai

## Malaria-Mücken „an der Nase packen“

Neue Wege bei der Bekämpfung von Malaria: Bayer CropScience und das Unternehmen SentiSearch Inc. wollen gemeinsam mit führenden US-Wissenschaftlern Insekten „an der Nase packen“. Im Rahmen einer zweijährigen Forschungskooperation sollen neue Moleküle gefunden werden, die die Geruchsrezeptoren der Insekten beeinflussen. Die Folge: Die Krankheitsüberträger können Menschen „nicht mehr riechen“.

Millionen olfaktorische Rezeptorneuronen, das sind die Geruchszellen in den Riechorganen, helfen den Tieren nicht nur bei der Ortung von Nahrung. Damit ausgestattet, verfügen sie auch über die Fähigkeit, zielsicher einen Wirt für ihre Eiablage zu finden. Dabei sind die Insekten dem Menschen nicht nur lästig, sondern können ihm auch sehr gefährlich werden. Beispiel „Anopheles-Mücke“:

Die auch als Malaria- oder Fiebertmücke bekannten Tiere finden ihre Wirte unter anderem anhand des CO<sub>2</sub>-Gehalts in deren Atemluft. Die neuen Moleküle sollen die entsprechenden Rezeptoren blockieren – menschliche Gerüche sind dann für das Insekt nicht mehr wahrnehmbar.

„Bayer CropScience ist Marktführer auf dem Gebiet der Insektenbekämpfung in der Landwirtschaft, einschließlich der Tiergesundheit sowie im Gesundheitswesen. Im Rahmen unserer Aktivitäten spielen wir auch bei der Vorbeugung gegen Malaria eine bedeutende Rolle“, sagt Dr. Alexander Klausener, Forschungsleiter bei Bayer CropScience. Die neue Kooperation mit führenden Wissenschaftlern der Columbia und der Rockefeller University, New York, verschaffe dem Unternehmen Zugang zu einem innovativen Ansatz zur Insektenbekämpfung.

## US-Zulassung für Verhütungspillen

Die US-amerikanische Arzneimittelbehörde FDA hat die neuen Verhütungspillen Safyral™, Beyaz® und Natazia™ von Bayer HealthCare zugelassen.

Safyral™ kombiniert die Hormonbestandteile der Pille Yasmin® und Beyaz® die der Pille YAZ® mit Metafolin, einer stabilen Form des B-Vitamins Folat, das auch in der Nahrung vorkommt. Bei Frauen, die Safyral™ oder Beyaz® einnehmen, erhöht sich der Folatspiegel. So soll nach Absetzen der Verhütungspille bei einer kurz darauf folgenden Schwangerschaft das Risiko eines Neuralrohrdefekts verringert werden.

Natazia™ ist in vielen Ländern außerhalb der USA als Qlaira® erhältlich. Es ist der erste Vertreter einer neuen Klasse von oralen Kontrazeptiva, die auf dem Östrogen Estradiol basieren, das der weibliche Körper produziert.

# Zusammengefasster Lagebericht

## von Bayer-Konzern und Bayer AG

### zum 31. Dezember 2010

|                                                                                |           |                                                                                                             |            |
|--------------------------------------------------------------------------------|-----------|-------------------------------------------------------------------------------------------------------------|------------|
| <b>1. Umsatz, Ertrags- und Finanzlage im Überblick.....</b>                    | <b>45</b> | <b>6. Übernahmerelevante Angaben.....</b>                                                                   | <b>85</b>  |
| <b>2. Geschäft und Rahmenbedingungen .....</b>                                 | <b>49</b> | <b>7. Corporate-Governance-Bericht.....</b>                                                                 | <b>88</b>  |
| 2.1 Konzernstruktur .....                                                      | 49        | 7.1 Erklärung zur Unternehmensführung .....                                                                 | 88         |
| 2.2 Wirtschaftliches Umfeld .....                                              | 51        | 7.2 Vergütungsbericht .....                                                                                 | 95         |
| 2.3 Beschaffung und Produktion .....                                           | 53        | <b>8. Forschung und Entwicklung .....</b>                                                                   | <b>101</b> |
| 2.4 Produkte, Vertrieb und Märkte .....                                        | 55        | <b>9. Nachhaltigkeit .....</b>                                                                              | <b>111</b> |
| <b>3. Geschäftsentwicklung nach Teilkonzernen, Segmenten und Regionen.....</b> | <b>58</b> | 9.1 Nachhaltigkeitsstrategie .....                                                                          | 111        |
| 3.1 HealthCare .....                                                           | 58        | 9.2 Mitarbeiter .....                                                                                       | 112        |
| 3.2 CropScience.....                                                           | 64        | 9.3 Umweltschutz, Klimaschutz und Sicherheit.....                                                           | 116        |
| 3.3 MaterialScience.....                                                       | 69        | 9.4 Gesellschaftliches Engagement .....                                                                     | 118        |
| 3.4 Geschäftsentwicklung nach Regionen.....                                    | 72        | <b>10. Nachtragsbericht.....</b>                                                                            | <b>121</b> |
| <b>4. Ertrags-, Finanz- und Vermögenslage Bayer-Konzern .....</b>              | <b>72</b> | <b>11. Prognosebericht.....</b>                                                                             | <b>122</b> |
| 4.1 Ertragslage Bayer-Konzern .....                                            | 72        | 11.1 Chancen- und Risikobericht.....                                                                        | 122        |
| 4.2 Ermittlung des EBIT(DA) vor Sondereinflüssen.....                          | 74        | 11.1.1 Chancen- und Risikomanagement .....                                                                  | 122        |
| 4.3 Bereinigtes Ergebnis je Aktie.....                                         | 75        | 11.1.2 Internes Kontroll- und Risikomanagementsystem bezogen auf den (Konzern-)Rechnungslegungsprozess..... | 123        |
| 4.4 Wertorientierte Konzernsteuerung.....                                      | 76        | 11.1.3 Chancen .....                                                                                        | 124        |
| 4.5 Finanzlage und Investitionen Bayer-Konzern .....                           | 78        | 11.1.4 Risiken .....                                                                                        | 125        |
| 4.6 Vermögenslage und Kapitalstruktur Bayer-Konzern .....                      | 81        | 11.2 Strategie.....                                                                                         | 131        |
| <b>5. Ertrags-, Finanz- und Vermögenslage Bayer AG.....</b>                    | <b>83</b> | 11.3 Konjunkturausblick .....                                                                               | 136        |
| 5.1 Ertragslage Bayer AG .....                                                 | 83        | 11.4 Umsatz- und Ergebnisprognose .....                                                                     | 138        |
| 5.2 Finanz- und Vermögenslage Bayer AG .....                                   | 84        |                                                                                                             |            |

 Mit einem Mausklick auf einen der Begriffe gelangen Sie in das jeweilige Kapitel.

---

Geschäftsjahr 2010:

## Bayer operativ auf Kurs

Forschungs- und Entwicklungsfortschritte stimmen optimistisch

- Konzernziele erreicht
  - MaterialScience stark – HealthCare und CropScience unter den Erwartungen
  - Mehr als 3 MRD € für Forschung und Entwicklung
  - Hohe Sondereinflüsse belasten Konzernergebnis
  - Starker operativer Cashflow – Netto-Finanzverschuldung unter 8 MRD €
  - Zuversichtlich für 2011: Anstieg des bereinigten Ergebnisses je Aktie um ca. 10 % erwartet
-



# 1. Umsatz, Ertrags- und Finanzlage im Überblick

## GESAMTJAHR 2010

Im Geschäftsjahr 2010 haben wir unsere Konzernziele erreicht. Den Umsatz konnten wir um 12,6 % bzw. währungs- und portfoliobereinigt (wpb.) um 8,0 % auf den Rekordwert von 35,1 MRD € steigern. Das EBITDA vor Sondereinflüssen verbesserten wir um 9,7 % auf 7,1 MRD €. Das bereinigte Ergebnis je Aktie konnten wir um 15,1 % auf 4,19 € erhöhen. Diese Steigerungen sind auf die starke Erholung des MaterialScience-Geschäfts sowie positive Währungseffekte zurückzuführen. Hingegen blieb HealthCare insgesamt leicht hinter unseren Erwartungen zurück, das CropScience-Geschäft – vor allem im 1. Halbjahr – sogar deutlich. Um HealthCare und CropScience nachhaltig zu stärken und die Innovationskraft zu erhöhen, haben wir ein gezieltes Maßnahmenprogramm eingeleitet. Zugleich haben wir – zur Unterstützung unserer sich weiterhin positiv entwickelnden Forschungs- und Entwicklungspipeline – die Forschungs- und Entwicklungsaufwendungen im Jahr 2010 signifikant auf 3,1 MRD € (Vorjahr: 2,7 MRD €) gesteigert.

Das Konzernergebnis war im Geschäftsjahr 2010 jedoch durch Sonderaufwendungen in Höhe von 1,7 MRD €, die im Wesentlichen aus außerplanmäßigen Abwertungen und Rechtsfällen resultierten, erheblich belastet und ging um 4,3 % auf 1.301 MIO € (Vorjahr: 1.359 MIO €) zurück. Damit betrug das Ergebnis je Aktie lediglich 1,57 € (Vorjahr: 1,70 €).

Die Netto-Finanzverschuldung konnten wir durch einen nochmals verbesserten operativen Cash-flow um 1,8 MRD € auf 7,9 MRD € senken.

## Umsatzveränderung

[Tabelle 3.1]

|               | 2009        | 2010        |
|---------------|-------------|-------------|
|               | in %        | in %        |
| Menge         | -2,9        | 6,7         |
| Preis         | -2,8        | 1,3         |
| Währung       | 0,6         | 4,9         |
| Portfolio     | -0,2        | -0,3        |
| <b>Gesamt</b> | <b>-5,3</b> | <b>12,6</b> |

Der Konzernumsatz stieg auf 35.088 MIO € (Vorjahr: 31.168 MIO €). Währungs- und portfoliobereinigt verzeichnete HealthCare einen leichten Anstieg von 1,7 %. Der CropScience-Umsatz ging aufgrund des schwachen 1. Halbjahres etwas zurück (-1,3 % wpb.). Bei MaterialScience erzielten wir hingegen im Zuge der konjunkturellen Erholung ein deutliches Wachstum von 30,1 % (wpb.). Dabei erreichten wir bereits im 2. Quartal wieder das Volumen des Jahres 2008.

## Umsatzerlöse Bayer-Konzern pro Quartal

[Grafik 3.1]

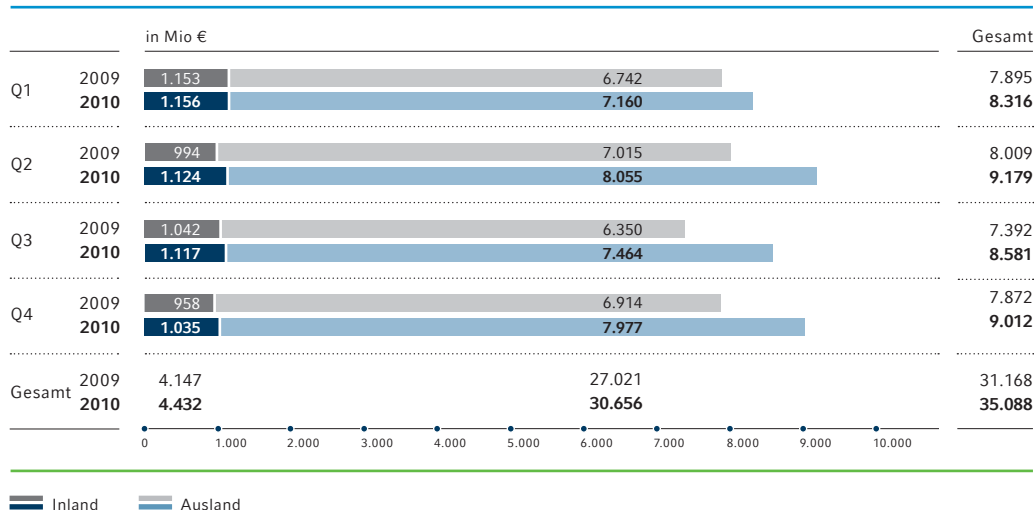



Das **EBIT** des Bayer-Konzerns sank trotz der positiven Geschäftsentwicklung bei MaterialScience um 9,2 % auf 2.730 Mio € (Vorjahr: 3.006 Mio €). Ergebnisbelastend wirkten sich Sonderaufwendungen in Höhe von 1.722 Mio € (Vorjahr: 766 Mio €) aus. Diese wurden im Geschäftsjahr 2010 in Höhe von 957 Mio € für außerplanmäßige Abwertungen, 703 Mio € für Rechtsfälle und 62 Mio € für Restrukturierungen berücksichtigt. Das EBIT vor Sondereinflüssen betrug 4.452 Mio € (Vorjahr: 3.772 Mio €). Das **EBITDA** vor Sondereinflüssen stieg um 9,7 % auf 7.101 Mio € (Vorjahr: 6.472 Mio €). Dabei profitierten wir auch von positiven Währungseffekten in Höhe von rund 0,4 Mrd €. MaterialScience konnte das EBITDA vor Sondereinflüssen insbesondere aufgrund der deutlichen Mengen- und Preissteigerungen auf 1.356 Mio € verdreifachen. Hingegen verzeichnete CropScience in einem schwachen Marktumfeld mit aggressivem Wettbewerb einen Rückgang des EBITDA vor Sondereinflüssen um 14,3 % auf 1.293 Mio € (Vorjahr: 1.508 Mio €). Bei HealthCare sank das EBITDA vor Sondereinflüssen leicht auf 4.405 Mio € (Vorjahr: 4.468 Mio €). Dies beruhte vor allem auf höheren Aufwendungen für Vertrieb, Forschung und Entwicklung, Belastungen aus Gesundheitsreformen verschiedener Länder sowie den Auswirkungen der vorzeitigen Generisierung von YAZ® in den USA.

**EBIT**  
Bayer-Konzern pro Quartal

[Grafik 3.2]

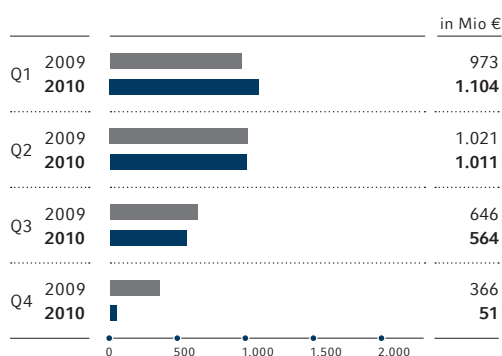

Vorquartale 2010 angepasst

**EBITDA vor Sondereinflüssen**  
Bayer-Konzern pro Quartal

[Grafik 3.3]

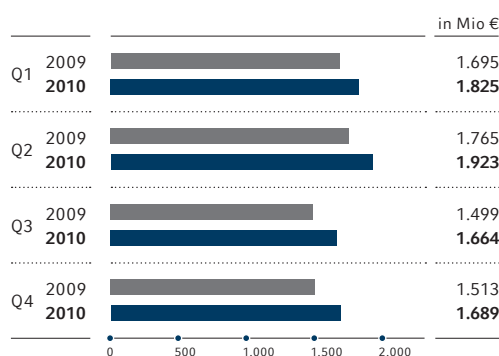

Vorquartale 2010 angepasst

Unter Berücksichtigung eines **Finanzergebnisses** von -1.009 Mio € (Vorjahr: -1.136 Mio €), welches ein Zinsergebnis von -499 Mio € (Vorjahr: -548 Mio €) beinhaltete, betrug das **Ergebnis vor Ertragsteuern** 1.721 Mio € (Vorjahr: 1.870 Mio €). Nach Abzug eines Steueraufwands von 411 Mio € (Vorjahr: 511 Mio €) sowie nach Anteilen anderer Gesellschafter ergab sich für das Jahr 2010 ein **Konzernergebnis** von 1.301 Mio € (Vorjahr: 1.359 Mio €). Das Ergebnis je Aktie betrug 1,57 € (Vorjahr: 1,70 €). Das bereinigte Konzernergebnis je Aktie erhöhte sich um 15,1 % auf 4,19 € (Vorjahr: 3,64 €); zur Berechnung siehe Kapitel 4.3 „Bereinigtes Ergebnis je Aktie“.

**Brutto-Cashflow pro Quartal**

[Grafik 3.4]

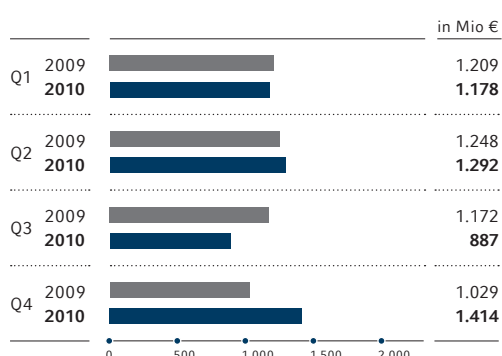

Vorquartale 2010 angepasst

**Netto-Cashflow pro Quartal**

[Grafik 3.5]

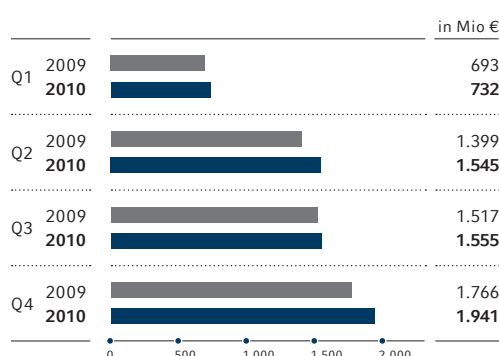

Den Brutto-Cashflow steigerten wir im Jahr 2010 um 2,4 % auf 4.771 Mio € (Vorjahr: 4.658 Mio €). Eine weitere Optimierung des Working-Capital-Managements hat zu einer deutlichen Senkung der Mittelbindung beigetragen. Der Netto-Cashflow stieg um 7,4 % auf 5.773 Mio € (Vorjahr: 5.375 Mio €). Die Nettofinanzverschuldung konnten wir im Vergleich zum 31. Dezember 2009 um 1,8 MRD € auf 7,9 MRD € verringern. Die Nettopensionsverpflichtungen als Saldo von Pensionsverpflichtungen und Planvermögen stiegen im Vergleich zum 31. Dezember 2009 vor allem aufgrund gesunkener langfristiger Kapitalmarktzinsen um 0,8 MRD € auf 7,2 MRD €.

#### 4. QUARTAL 2010

Im 4. Quartal 2010 erzielte der Bayer-Konzern ein deutliches Plus bei Umsatz und bereinigtem Ergebnis, während das EBIT vor allem durch hohe außerplanmäßige Abwertungen stark belastet war. Insbesondere die weitere Erholung des MaterialScience-Geschäfts hat zu der Verbesserung im operativen Geschäft beigetragen. CropScience erhöhte den Umsatz und das EBITDA vor Sondereinflüssen. HealthCare blieb bei leicht gesteigertem Umsatz geringfügig hinter dem EBITDA vor Sondereinflüssen des Vorjahres zurück.

Der Konzernumsatz wuchs um 14,5 % auf 9.012 Mio € (Vorjahr: 7.872 Mio €). Bereinigt um Währungs- und Portfolioeffekte (wpb.) verzeichneten wir ein Plus von 8,1 %. Der Umsatz von HealthCare erhöhte sich um 7,3 % (wpb. +1,4 %). Dabei konnten wir den währungs- und portfoliobereinigten Umsatz im Pharma-Geschäft – trotz rückläufiger Umsätze in Nordamerika – leicht steigern. Bei Consumer Health verzeichneten wir einen währungsbereinigten Umsatz auf Vorjahresniveau. Die Umsatzeinbußen bei den Blutzuckermessgeräten in den USA aufgrund der schwierigen Marktsituation wurden durch die positive Entwicklung in den anderen Divisionen ausgeglichen. CropScience hatte ein starkes 4. Quartal. In einem positiven Marktumfeld stieg der Umsatz um 18,2 % (wpb. +9,7 %). Der Umsatz von MaterialScience stieg im Vergleich zu dem konjunkturbedingt niedrigen Vorjahreswert deutlich um 28,2 % (wpb. +21,6 %).

Das EBIT des Bayer-Konzerns fiel um 86,1 % auf 51 Mio € (Vorjahr: 366 Mio €). Das 4. Quartal 2010 war durch hohe Sonderaufwendungen in Höhe von insgesamt 954 Mio € belastet (Vorjahr: 451 Mio €). Diese resultierten vor allem aus außerplanmäßigen Abwertungen in Höhe von 825 Mio €. Daneben haben wir für Rechtsfälle in den USA zusätzlich 67 Mio € berücksichtigt. Davon entfielen 41 Mio € auf HealthCare für Rechtsfälle bei YAZ®/ Yasmin® sowie 26 Mio € auf CropScience – im Wesentlichen für ein angestrebtes Vergleichsprogramm im Zusammenhang mit Verfahren wegen gentechnisch veränderter Reispflanzen (LL RICE). Des Weiteren haben wir Sonderaufwendungen für Restrukturierungen bei HealthCare in Höhe von 62 Mio € berücksichtigt. Das EBIT vor Sondereinflüssen verbesserte sich um 23,0 % auf 1.005 Mio € (Vorjahr: 817 Mio €).

Das EBITDA vor Sondereinflüssen des Bayer-Konzerns verbesserten wir um 11,6 % auf 1.689 Mio € (Vorjahr: 1.513 Mio €). Hierzu haben insbesondere der kräftige Ergebnisanstieg bei MaterialScience sowie positive Währungseffekte beigetragen. HealthCare erwirtschaftete ein EBITDA vor Sondereinflüssen von 1.138 Mio € (Vorjahr: 1.154 Mio €). Darin ist ein Ertrag in Höhe von 68 Mio € aus der Beilegung eines Patentstreits im Zusammenhang mit YAZ® enthalten, der einen Teil der im Jahresverlauf verloren gegangenen Marge ausgleicht. CropScience steigerte das um Sondereinflüsse bereinigte EBITDA auf 270 Mio € (Vorjahr: 166 Mio €). Hierin wurden Einmalerträge von 44 Mio € aus dem Verkauf älterer Wirkstoffe und einer getroffenen Lizenz-Vereinbarung berücksichtigt. MaterialScience erreichte ein EBITDA vor Sondereinflüssen von 297 Mio € (Vorjahr: 203 Mio €).

Unter Berücksichtigung eines Finanzergebnisses von -237 Mio € (Vorjahr: -248 Mio €) betrug das Ergebnis vor Ertragsteuern -186 Mio € (Vorjahr: 118 Mio €). Der Steuerertrag belief sich – bedingt durch das negative Vorsteuerergebnis im 4. Quartal – auf 45 Mio € (Vorjahr: 38 Mio €). Nach Anteilen anderer Gesellschafter ergibt sich ein Konzernergebnis von -145 Mio € (Vorjahr: 153 Mio €). Das Ergebnis je Aktie betrug -0,18 € (Vorjahr: 0,18 €). Das bereinigte Ergebnis je Aktie stieg auf 0,95 € (Vorjahr: 0,90 €); zur Berechnung siehe Kapitel 4.3 „Bereinigtes Ergebnis je Aktie“.

Der Brutto-Cashflow des Konzerns lag mit 1.414 Mio € (Vorjahr: 1.029 Mio €) um 37,4 % über dem des Vorjahres. Ursächlich für diesen Anstieg war die Verbesserung im operativen Geschäft. Der Netto-Cashflow erhöhte sich um 9,9 % auf 1.941 Mio € (Vorjahr: 1.766 Mio €). Die Nettofinanzverschuldung konnten wir im 4. Quartal 2010 deutlich auf 7,9 MRD € senken (30. September 2010: 9,1 MRD €).

Kennzahlen nach Teilkonzernen und Segmenten im Überblick, 4. Quartal

[Tabelle 3.2]

|                                      | Umsatzerlöse    |                 | EBIT            |                 | EBITDA vor Sondereinflüssen* |                 |
|--------------------------------------|-----------------|-----------------|-----------------|-----------------|------------------------------|-----------------|
|                                      | 4. Quartal 2009 | 4. Quartal 2010 | 4. Quartal 2009 | 4. Quartal 2010 | 4. Quartal 2009              | 4. Quartal 2010 |
|                                      | in Mio €                     | in Mio €        |
| <b>HealthCare</b>                    | <b>4.164</b>    | <b>4.468</b>    | <b>463</b>      | <b>-129</b>     | <b>1.154</b>                 | <b>1.138</b>    |
| Pharma                               | 2.698           | 2.897           | 234             | -307            | 789                          | 830             |
| Consumer Health                      | 1.466           | 1.571           | 229             | 178             | 365                          | 308             |
| <b>CropScience</b>                   | <b>1.398</b>    | <b>1.653</b>    | <b>-56</b>      | <b>118</b>      | <b>166</b>                   | <b>270</b>      |
| Crop Protection                      | 1.177           | 1.367           | -42             | 160             | 149                          | 266             |
| Environmental Science/<br>BioScience | 221             | 286             | -14             | -42             | 17                           | 4               |
| <b>MaterialScience</b>               | <b>2.016</b>    | <b>2.584</b>    | <b>14</b>       | <b>156</b>      | <b>203</b>                   | <b>297</b>      |
| Überleitung                          | 294             | 307             | -55             | -94             | -10                          | -16             |
| <b>Konzern</b>                       | <b>7.872</b>    | <b>9.012</b>    | <b>366</b>      | <b>51</b>       | <b>1.513</b>                 | <b>1.689</b>    |

\* Zur Definition siehe Kapitel 4.2 „Ermittlung des EBIT(DA) vor Sondereinflüssen“.

## 2. Geschäft und Rahmenbedingungen

### 2.1 Konzernstruktur

Im Bayer-Konzern fungiert die Bayer AG mit Sitz in Leverkusen als strategische Management-Holding. Das operative Geschäft wird in den drei Teilkonzernen HealthCare, CropScience und MaterialScience geführt.

Struktur des Bayer-Konzerns

[Grafik 3.6]

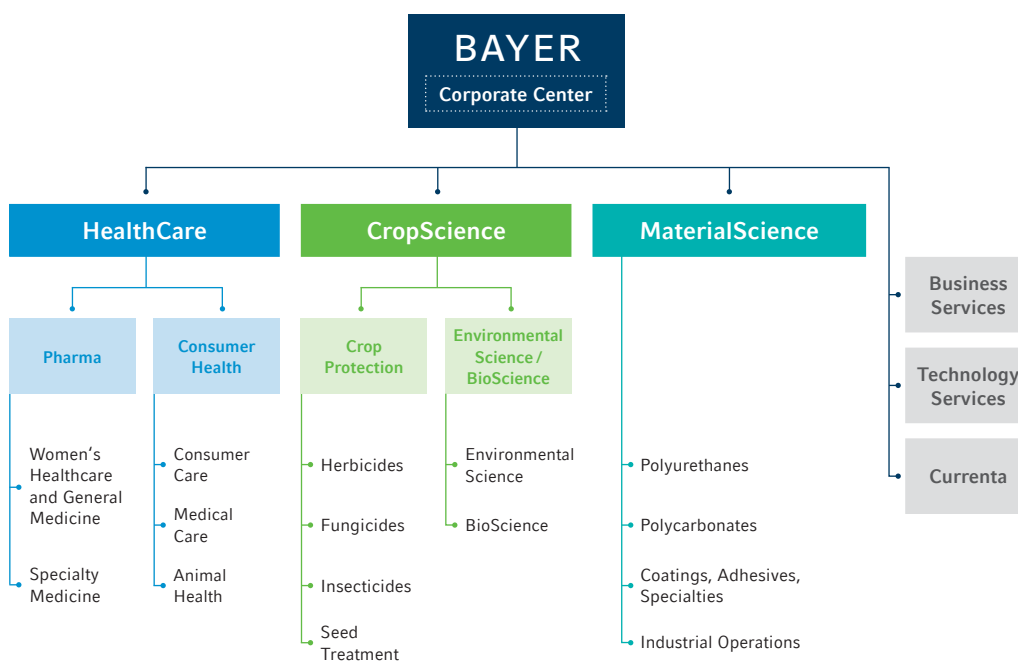



Im Teilkonzern **HealthCare** führen wir unser weltweites Gesundheitsgeschäft, das in die Segmente Pharma und Consumer Health unterteilt ist. Im Segment Pharma mit den zwei Geschäftseinheiten Women's Healthcare and General Medicine sowie Specialty Medicine konzentrieren wir uns auf verschreibungspflichtige Produkte in den Gebieten Frauengesundheit (Women's Healthcare), Allgemeinmedizin (General Medicine) und Spezialpharmazeutika (Specialty Medicine). Das Segment Consumer Health besteht aus den Divisionen Consumer Care, Medical Care und Animal Health. In der Division Consumer Care liegt der Fokus auf verschreibungsfreien Arzneimitteln und Nahrungsergänzungsmitteln. Medical Care umfasst zum einen das Geschäft mit Blutzuckermesssystemen und zum anderen das mit Medizingeräten zum Einsatz in der kontrastmittelunterstützten diagnostischen Bildgebung sowie mit mechanischen Systemen zur Behandlung verengter oder blockierter Gefäße. Unsere Produkte für Nutz- und Haustiere führen wir in der Division Animal Health.

**CropScience** ist auf dem Gebiet des chemischen Pflanzenschutzes, der Schädlings- und Unkrautbekämpfung außerhalb der Landwirtschaft sowie im Bereich Saatgutzüchtung und verbesserte Pflanzeigenschaften (Traits) tätig. Organisatorisch ist unser CropScience-Geschäft in die Segmente Crop Protection und Environmental Science/BioScience unterteilt. Dabei besteht das Segment Crop Protection entsprechend seinem Produktangebot aus den Geschäftsfeldern Herbizide (Herbicides), Fungizide (Fungicides), Insektizide (Insecticides) sowie Saatgutbehandlungsmittel (Seed Treatment). Das Segment Environmental Science/BioScience beinhaltet im Geschäftsbereich Environmental Science unsere Produkte zur Schädlings- und Unkrautbekämpfung in nicht-landwirtschaftlichen Anwendungen und im Geschäftsbereich BioScience unsere Aktivitäten auf den Gebieten Saatgut und Pflanzeigenschaften (Traits).

**MaterialScience** entwickelt, produziert und vermarktet hochwertige Produkte im Bereich Polyurethane, Polycarbonate, Lack- und Klebstoffrohstoffe sowie funktionale Folien. Ferner produziert und vermarktet MaterialScience ausgewählte anorganische Grundchemikalien. MaterialScience ist in die Business Units Polyurethanes, Polycarbonates und Coatings, Adhesives, Specialties sowie den Bereich Industrial Operations unterteilt.

Umsatzanteil der Segmente 2010 (Vorjahreswerte in Klammern)

[Grafik 3.7]

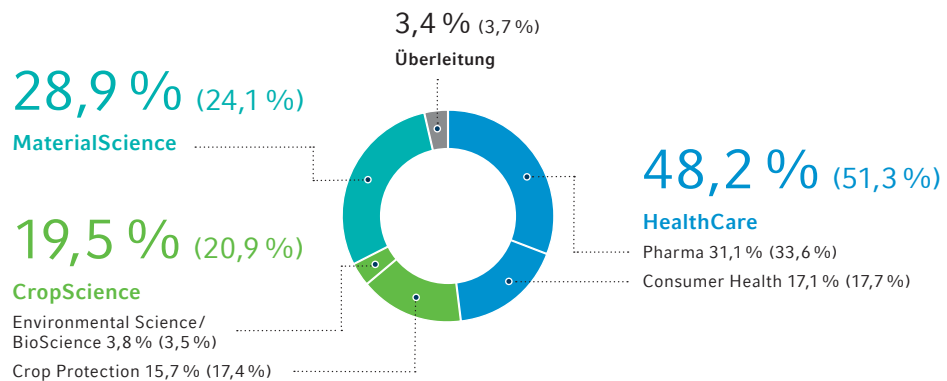

Unsere Teilkonzerne werden durch Servicegesellschaften unterstützt. Die Servicegesellschaften Business Services, Technology Services und Currenta werden als „Alle sonstigen Segmente“ zusammen mit dem Corporate Center und den Konsolidierungseffekten in der Überleitung ausgewiesen.

#### KONZERNSTRUKTURÄNDERUNGEN

Seit dem 01. Januar 2010 haben wir innerhalb des Segments Pharma des Teilkonzerns HealthCare einige Produkte aus dem Geschäftsfeld Specialty Medicine in das Geschäftsfeld General Medicine umgegliedert. Darüber hinaus wurden im 2. Quartal 2010 aufgrund organisatorischer Veränderungen die Geschäftsfelder General Medicine und Women's Healthcare zusammengeführt sowie das Geschäftsfeld Diagnostic Imaging in das Geschäftsfeld Specialty Medicine integriert. Die Vorjahreswerte wurden entsprechend angepasst. Zum 01. Januar 2011 haben wir das Geschäftsfeld „Women's Healthcare and General Medicine“ in „General Medicine“ umbenannt.

Kennzahlen nach Teilkonzernen und Segmenten im Überblick

[Tabelle 3.3]

|                                      | Umsatzerlöse  |               | EBIT         |              | EBITDA vor Sondereinflüssen* |              |
|--------------------------------------|---------------|---------------|--------------|--------------|------------------------------|--------------|
|                                      | 2009          | 2010          | 2009         | 2010         | 2009                         | 2010         |
|                                      | in Mio €      | in Mio €      | in Mio €     | in Mio €     | in Mio €                     | in Mio €     |
| <b>HealthCare</b>                    | <b>15.988</b> | <b>16.913</b> | <b>2.640</b> | <b>1.861</b> | <b>4.468</b>                 | <b>4.405</b> |
| Pharma                               | 10.467        | 10.908        | 1.696        | 884          | 3.193                        | 3.100        |
| Consumer Health                      | 5.521         | 6.005         | 944          | 977          | 1.275                        | 1.305        |
| <b>CropScience</b>                   | <b>6.510</b>  | <b>6.830</b>  | <b>798</b>   | <b>261</b>   | <b>1.508</b>                 | <b>1.293</b> |
| Crop Protection                      | 5.424         | 5.493         | 713          | 600          | 1.301                        | 1.025        |
| Environmental Science/<br>BioScience | 1.086         | 1.337         | 85           | -339         | 207                          | 268          |
| <b>MaterialScience</b>               | <b>7.520</b>  | <b>10.154</b> | <b>-266</b>  | <b>780</b>   | <b>446</b>                   | <b>1.356</b> |
| <b>Überleitung</b>                   | <b>1.150</b>  | <b>1.191</b>  | <b>-166</b>  | <b>-172</b>  | <b>50</b>                    | <b>47</b>    |
| <b>Konzern</b>                       | <b>31.168</b> | <b>35.088</b> | <b>3.006</b> | <b>2.730</b> | <b>6.472</b>                 | <b>7.101</b> |

\* Zur Definition siehe Kapitel 4.2 „Ermittlung des EBIT(DA) vor Sondereinflüssen“.

## 2.2 Wirtschaftliches Umfeld

### GESAMTWIRTSCHAFT

Die Weltwirtschaft hat sich im Jahr 2010 von der tiefen Rezession schneller als zunächst erwartet erholt. Die gesamtwirtschaftliche Produktion lag im Jahr 2010 deutlich über der des Vorjahres, wobei nach einem kräftigen Wachstum in der 1. Jahreshälfte die wirtschaftliche Dynamik in der 2. Jahreshälfte nachließ. Dies war vor allem die Folge auslaufender Konjunkturprogramme sowie erhöhter Sparbemühungen der hoch verschuldeten privaten und öffentlichen Haushalte in einer Reihe von Industrieländern. Zudem verharrte die Arbeitslosigkeit in vielen Ländern auf hohem Niveau. Die Auswirkungen der noch nicht vollständig überwundenen Finanzkrise haben die Wirtschaft weiterhin belastet, während die anhaltend expansiv ausgerichtete Geldpolitik die Konjunktur in vielen Ländern weiter gestützt hat.

Die konjunkturelle Entwicklung verlief im Jahr 2010 regional sehr unterschiedlich, wobei sich die Wachstumsraten in den letzten Monaten des Jahres 2010 in fast allen Regionen verringert haben. Relativ dynamisch war das Wirtschaftswachstum in den Schwellenländern Asiens und Lateinamerikas. Sie blieben ein wesentlicher Treiber der globalen wirtschaftlichen Erholung. Auch die Industriestaaten haben sich im Vergleich zu 2009 deutlich erholt, dennoch waren die Folgen der Wirtschafts- und Finanzkrise in einigen Ländern auch 2010 noch zu spüren. Der Anstieg der Wachstumsraten in den USA und Japan hat sich bereits im Frühjahr 2010 verlangsamt. Der Produktionszuwachs in der EU ließ in der 2. Jahreshälfte nach. Insgesamt konnte hier dank des kräftigen Wachstums in Deutschland noch ein moderates Wachstum erzielt werden.

### HEALTHCARE

Der **Markt für verschreibungspflichtige Arzneimittel** erreichte im Jahr 2010 ein Wachstum im mittleren einstelligen Bereich. In den USA sowie in den großen europäischen Ländern verlangsamt sich das Wachstum. Ursächlich hierfür waren u. a. die restriktiveren gesundheitspolitischen Rahmenbedingungen, die eine stärkere Kostenkontrolle forcieren, den Zugang zu bestimmten Behandlungen einschränken, aber auch zum Teil Zwangsrabatte zur Folge hatten. In den Schwellenländern war ein anhaltendes Wachstum zu beobachten, da dort die Gesundheitsdienste für immer größere Teile der Bevölkerung verfügbar werden und somit der Bedarf an verschreibungspflichtigen Arzneimitteln steigt.

Das weltweite Wachstum des **Consumer-Care-Marktes** hat sich gegenüber dem Vorjahr leicht abgeschwächt. Die schwache Grippezeit in Europa und Nordamerika war trotz der starken Nachfrage nach Consumer-Care-Produkten in China und Indien die Hauptursache für die Verringerung des globalen Marktwachstums. Der **Diabetes-Care-Markt** erzielte wegen des hohen Preisdrucks in den USA trotz der guten Entwicklung in Lateinamerika und Asien insgesamt kein spürbares Wachstum. Der **Animal-Health-Markt** konnte mit einem Zuwachs im mittleren einstelligen Bereich wieder an das langfristige Durchschnittswachstum anknüpfen.

### CROPSCIENCE

Der globale **Saatgut- und Pflanzenschutzmarkt** entwickelte sich im Jahr 2010 sehr unterschiedlich. Während die Nachfrage der Landwirte nach hochwertigem Saatgut insgesamt weiter spürbar angestiegen ist, wurde für den globalen Pflanzenschutzmarkt nur ein sehr geringes Wachstum verzeichnet.

Der relativ lange Winter und ein in weiten Teilen zu feuchtes Frühjahr reduzierten die Nachfrage nach Pflanzenschutzprodukten in Nordamerika und in Europa insbesondere in der 1. Jahreshälfte. Mit der gesamtwirtschaftlichen Erholung verbesserten sich ab der Jahresmitte die wirtschaftlichen Rahmenbedingungen für die Landwirte. Eine wachsende Nachfrage, in Kombination mit witterungsbedingten Ernteaussfällen, beispielsweise in Russland oder Zentralasien, ließen die Erzeugerpreise für die wichtigsten landwirtschaftlichen Kulturen ansteigen. Diese Effekte kamen aber zu spät, um die rückläufige Marktentwicklung in der nördlichen Hemisphäre zu kompensieren, jedoch rechtzeitig, um den Einsatz von Pflanzenschutzmitteln mit Beginn der Hauptsaison in Lateinamerika positiv zu beeinflussen. Ebenso entspannten sich dort die im Zuge der Finanzkrise entstandenen Liquiditätsengpässe vieler Agrarbetriebe deutlich. Der Markt in Asien/Pazifik stagnierte im abgelaufenen Jahr, allerdings war die Entwicklung innerhalb der Region uneinheitlich. Während Japan und China insbesondere aufgrund ungünstiger Witterung einen Rückgang bzw. stabilen Markt verzeichneten, profitierte der Pflanzenschutzmarkt in Indien von günstigen Monsun-Bedingungen und in Australien von der Erholung der Landwirtschaft nach jahrelang anhaltender Trockenheit.

### MATERIALSCIENCE

Die für MaterialScience relevanten Abnehmerbranchen konnten sich im Jahr 2010 von den deutlichen Umsatzeinbrüchen des Jahres 2009 erholen. Trotz einer leichten konjunkturellen Abkühlung in der 2. Jahreshälfte 2010 erwies sich die internationale Nachfrage als stabil.

Die **Automobilindustrie** hat im Geschäftsjahr 2010 die Absatzkrise des Vorjahres schneller als erwartet überwunden. Insbesondere in den asiatischen Märkten und in Russland entwickelte sich das Neuwagengeschäft positiv. Auch in den USA legten die Verkaufszahlen wieder stärker zu. In Westeuropa blieb die Pkw-Nachfrage hingegen erwartungsgemäß noch unter den prämiengestützten hohen Vorjahreswerten. Jedoch zeichnete sich auch hier eine Verlangsamung der Absatzrückgänge ab.

Nach dem Schrumpfen des **Elektromarktes** im vergangenen Krisenjahr wurde im Jahr 2010 wieder ein kräftiges Wachstum erzielt. Während die Industriestaaten von regionalen Förderprogrammen profitierten, z. B. im Bereich Infrastruktur und E-Mobility, setzte sich das starke Wachstum in den Schwellenländern aufgrund steigender Nachfrage nach elektronischen Konsumgütern weiter fort.

Die globale **Bauwirtschaft** stagnierte 2010 bei unterschiedlicher regionaler Entwicklung. Während in Westeuropa, USA und Japan weiterhin eine Schrumpfung zu verzeichnen war, erzielten die Schwellenländer – insbesondere China, Indien und Brasilien – robuste Wachstumsraten.

Die wirtschaftliche Situation der **Möbelindustrie** hellte sich im Laufe des Jahres 2010 mehr und mehr auf. Der Grad der Erholung verlief allerdings regional sehr unterschiedlich. Während die Möbelproduktion in Nordamerika und in einzelnen Ländern Westeuropas weiterhin mit Absatzproblemen zu kämpfen hatte und hier nur verhalten zunahm, profitierte sie in Asien u. a. von der robusten Binnennachfrage in China und der sich allmählich wieder belebenden globalen Nachfrage nach preiswerten Möbeln.



## 2.3 Beschaffung und Produktion

Im Bereich Beschaffung sind einheitliche Konzernrichtlinien implementiert. Aufgrund der unterschiedlichen Geschäftsaktivitäten sind die produktionsspezifische Beschaffung und die Produktion dezentral organisiert. Dagegen ist die Beschaffung indirekter, nicht produktionsrelevanter Güter und Dienstleistungen, wie Beratungsleistungen, Geschäftsreisen und Flottenmanagement, Hard-/Software oder Labor-, Werkstatt-, Sicherheits- und Bürobedarf in unseren Service-Gesellschaften zentral organisiert.

### HEALTHCARE

In einem weltweiten Produktionsnetzwerk aus eigenen Standorten und Lohnherstellern steuert die Organisationseinheit „Product Supply“ des Teilkonzerns HealthCare die gesamte Versorgungskette: vom Einkauf der Rohstoffe über die Herstellung bis hin zur Auslieferung der Produkte. Dadurch wollen wir kontinuierliche Verbesserungen hinsichtlich unserer Kosten, der Flexibilität und der Liefertreue erzielen und unseren Anspruch erfüllen, weltweit die hohen Anforderungen an Qualität, Sicherheit und Umweltschutz einzuhalten. Für die Herstellung von Arzneimitteln gelten außerordentlich strenge Qualitätsanforderungen. Sie werden unter dem Begriff „Good Manufacturing Practices“ (GMP) zusammengefasst. Ihre Einhaltung wird in regelmäßigen Abständen von internen Fachleuten, aber auch von Aufsichtsbehörden und externen Gutachtern geprüft.

Produktions-  
netzwerk  
schafft Vorteile

Im Segment Pharma werden die Ausgangsstoffe für die Herstellung der Wirkstoffe für verschreibungspflichtige Arzneimittel in der Regel von externen Lieferanten bezogen. Zur Vermeidung von Lieferengpässen und um größere Preisschwankungen abzumildern, kaufen wir diese Ausgangsstoffe sowie Zwischenprodukte, die wir nicht selbst herstellen, in der Regel auf Basis globaler Verträge und/oder von mehreren durch uns auditierte und genehmigte Lieferanten.

Die Herstellung unserer Wirkstoffe für verschreibungspflichtige Medikamente erfolgt vor allem an den Produktionsstandorten Wuppertal und Bergkamen (Deutschland) sowie Berkeley und Emeryville (USA). Die Wirkstoffe werden weltweit zu fertigen Arzneimitteln verarbeitet und verpackt. Dabei decken wir ein breites Spektrum verschiedener Arzneiformen ab: feste Darreichungsformen wie Tabletten, Dragees oder Pulver, halbfeste Salben und Cremes sowie flüssige Arzneimittel, z. B. zur Anwendung in Injektionen oder Infusionen. Die hormonalen Verhütungsmittel werden außer zu Dragees oder Filmtabletten z. B. auch in Intrauterin-Systemen (Spiralen) verarbeitet. Diese Formulierungs- und Verpackungsaktivitäten erfolgen u. a. in Berlin, Leverkusen und Weimar (Deutschland), Garbagnate (Italien), Peking (China), São Paulo (Brasilien), Turku (Finnland) sowie an verschiedenen weiteren Standorten in Europa, Asien und Lateinamerika. In Berkeley (USA) wird Kogenate®, das Medikament zur Behandlung der Bluterkrankheit, in einem biotechnologischen Verfahren produziert. In Emeryville (USA) wird Betaferon®/Betaseron® zur Therapie von Multipler Sklerose hergestellt.

Für die Division Consumer Care des Segments Consumer Health stellen wir bestimmte Wirkstoffe wie Acetylsalicylsäure und Clotrimazol in La Felguera (Spanien) konzernintern her. Die wichtigsten extern zugekauften Rohstoffe sind Naproxen, Zitronensäure, Ascorbinsäure und weitere Vitamine sowie Paracetamol. Zur Minimierung von geschäftlichen Risiken diversifizieren wir unsere Rohstoff-Bezugsquellen weltweit und schließen langfristige Lieferverträge ab. Die größten Produktionsstätten der Division befinden sich u. a. in Myerstown (USA), Cimanggis (Indonesien), Gailard (Frankreich), Bitterfeld-Wolfen und Grenzach-Wyhlen (Deutschland) sowie Madrid (Spanien).

Ungefähr vier Fünftel der Diabetes-Care-Produkte (z. B. Blutzucker-Messgeräte) unserer Division Medical Care werden von Original-Equipment-Manufacturer-(OEM-)Lieferanten gefertigt. Preise und Verfügbarkeiten der Materialien sind überwiegend durch langfristige Verträge abgesichert und unterliegen daher keinen größeren Schwankungen. Um unsere Kunden konstant und zuverlässig beliefern zu können, halten wir strategische Reserven bestimmter Materialien und Fertigerzeugnisse vor. Unser Produktionsstandort für Diabetes-Care-Produkte befindet sich in Mishawaka (USA). Auch für unser Medizingerätegeschäft wird der Hauptanteil der verarbeiteten Materialien von externen Lieferanten bezogen und die Verfügbarkeit, Qualität und Preisstabilität durch langfristige Verträge, eine sorgfältige Lieferantenauswahl sowie aktives Lieferantenmanagement gesichert. Unsere Medizingeräte stellen wir hauptsächlich in den Produktionsstätten bei Pittsburgh und in Coon Rapids (USA) her.

Die Division Animal Health bezieht die pharmazeutischen Wirkstoffe für ihre Tierarzneimittel sowohl konzernintern als auch weltweit von externen Lieferanten. Die Herstellung unserer weltweit vermarkteten Produkte aus dem Bereich Tiergesundheit erfolgt hauptsächlich an den Standorten Kiel (Deutschland) und Shawnee (USA).

### CROPSCIENCE

CropScience bezieht den Großteil seiner Rohstoffe zur Fertigung von Pflanzenschutzmitteln extern. Dazu gehören vor allem Grundchemikalien wie Chlor, Natronlauge oder Schwefelsäure sowie Synthesebausteine. Für bedeutende Einsatzstoffe erfolgt die Versorgung vorrangig über langfristige Lieferverträge. Die Diversifizierung von Rohstoffbezugsquellen und das Vorhalten strategischer Reserven für wichtige Rohstoffe reduzieren das Ausfallrisiko. Die bevorzugte Nutzung von zertifizierten Lieferanten mit definierten Qualitätsstandards für deren Produktion und die zu beschaffenden Rohstoffe ist ein weiteres wichtiges Auswahlkriterium.

Weltweites  
Produktionsnetzwerk  
für Agrarchemie-  
Produkte und Saatgut  
bei CropScience

CropScience verfügt weltweit über 36 eigene Produktions- und Formulierungsstandorte zur Herstellung seiner Pflanzenschutz- und Environmental-Science-Produkte. Zu den größten Standorten gehören Dormagen und Frankfurt a. M. (Deutschland), Kansas City (USA) sowie Vapi (Indien). Neben einigen zentralen Standorten für die Wirkstoffherstellung ermöglichen zahlreiche dezentrale Formulierungs- und Abfüllstandorte ein schnelles Reagieren auf die Bedürfnisse der lokalen Märkte. Dort werden die Wirkstoffe entsprechend den lokalen Anforderungen und der Anwendungsgebiete zu Herbiziden, Fungiziden, Insektiziden, Saatgutbehandlungsmitteln und Environmental-Science-Produkten weiterverarbeitet, konfektioniert und verpackt. In unser weltweites Produktionsnetzwerk haben wir im Jahr 2010 weiter investiert und gezielt unsere Kapazitäten für wichtige Produkte erweitert.

Im Geschäftsbereich BioScience produzieren wir das Saatgut kundennah in Europa, Asien, Nord- und Südamerika. Die Saatgutproduktion für Raps, Baumwolle, Reis und Gemüse erfolgt in eigenen Zuchtzentren oder über Vertragsanbau auf einer Fläche von mehr als 100.000 Hektar.

### MATERIALSCIENCE

Mix aus Einkauf und  
Eigenerzeugung  
von Energien zur  
Minimierung des  
Preisänderungsrisikos

Wesentliche Grundrohstoffe unserer MaterialScience-Produkte sind petrochemische Rohstoffe wie beispielsweise Benzol, Toluol und Phenol. Diese erwerben wir auf den Beschaffungsmärkten in der Regel im Rahmen langfristiger Verträge. Ferner wird zum Betrieb unserer Produktionsanlagen in größerem Umfang Energie benötigt, größtenteils in Form von Strom und Dampf. Um das Preisänderungsrisiko zu minimieren, setzen wir bei der Dampferzeugung auf eine ausbalancierte Diversifikation der Brennstoffe und ebenso wie beim Strom auf einen Mix von externem Einkauf und Eigenerzeugung.

Die bedeutendsten Produktionsstandorte von MaterialScience sind in Europa Dormagen (Deutschland), Antwerpen (Belgien), Krefeld (Deutschland), Brunsbüttel (Deutschland), Tarragona (Spanien) und in Nordamerika Baytown (USA) sowie im asiatisch-pazifischen Raum Shanghai (China) und Map Ta Phut (Thailand). Im Bereich der Commodities (Standard-Produkte mit großem Absatzvolumen) setzen wir dabei zur Kostensenkung auf Produktionsanlagen mit einer großen Fertigungskapazität, die eine länderübergreifende Marktversorgung ermöglichen. Darüber hinaus betreiben wir im Rahmen unserer differenzierten Geschäfte eine größere Anzahl von Produktionsanlagen marktnah in 20 Ländern. In diesen Anlagen erfolgt die Abmischung und Bereitstellung von kundenindividuellen Polyurethan-Systemen („Systemhäuser“), die kundennahe Compoundierung von Polycarbonat-Granulaten und die Herstellung von Halbzeugen (Polycarbonat-Platten). Ferner gibt es regionale Produktionsstätten für funktionale Folien aus Polycarbonat und thermoplastischen Polyurethanen.

## 2.4 Produkte, Vertrieb und Märkte

Die Vertriebsaktivitäten innerhalb des Bayer-Konzerns sind aufgrund des diversifizierten Geschäftsportfolios dezentral organisiert.

### HEALTHCARE

Um den Bedürfnissen von Patienten und Verbrauchern in den verschiedenen Märkten gerecht zu werden, stellt HealthCare mehr als 20.000 Artikel bereit. Die hohe Anzahl beruht auf der Breite des Sortiments sowie auf verschiedenen Darreichungsformen, Dosierungen, Packungsgrößen und unterschiedlichen Sprachversionen einzelner Produkte und ihrer Verpackungen.

Mehr als  
20.000 Artikel  
weltweit

In unserem Segment Pharma bieten wir verschreibungspflichtige Arzneimittel in den Gebieten Frauengesundheit und Allgemeinmedizin sowie Spezialpharmazeutika an. Im Bereich der Produkte, die hauptsächlich von Allgemeinmediziner\*innen verordnet werden (General Medicine), führen wir Arzneimittel wie Adalat® gegen Bluthochdruck und koronare Herzkrankheiten und Avalox®/Avelox® gegen bestimmte Infektionskrankheiten. Das Produktportfolio umfasst im Bereich der Frauengesundheit (Women's Healthcare) Produkte zur Empfängnisverhütung, z. B. YAZ®/Yasmin®/Yasminelle® und Mirena®, sowie zur Hormonersatztherapie wie Angeliq®. Unser Produktportfolio im Bereich der Spezialpharmazeutika (Specialty Medicine), die vorwiegend von Fachärzt\*innen verordnet werden, umfasst u. a. Betaferon®/Betaseron® zur Behandlung der Multiplen Sklerose, Kogenate® zur Behandlung von Patienten mit Hämophilie A und Nexavar® gegen bestimmte Krebserkrankungen. Kontrastmittel, die in der diagnostischen Bildgebung eingesetzt werden, sind z. B. Ultravist®, Magnevist® und Gadovist®. Im Pharma-Markt belegen wir gemessen am Umsatz global einen Rang unter den größten 15 Unternehmen.

Unsere Pharma-Produkte vertreiben wir primär über Großhändler, Apotheken und Krankenhäuser. Co-Promotion- und Co-Marketing-Vereinbarungen dienen der Optimierung unseres Vertriebs. So sichert das Abkommen über die gemeinsame Weiterentwicklung und Vermarktung des Blutgerinnungshemmers Xarelto® mit der Johnson & Johnson-Tochter Ortho-McNeil die optimale Entwicklung und bietet beiden Partnern die Chance, durch regionale Vermarktungsrechte am erwarteten Erfolg teilzuhaben. Ein weiteres Beispiel ist die strategische Allianz mit Merck & Co., Inc., USA (vormals Schering-Plough). In deren Rahmen erfolgt der Vertrieb ausgewählter Produkte, die vorwiegend von Allgemeinmediziner\*innen verschrieben werden, durch Merck & Co., Inc. in den USA. Andererseits vermarkten wir Zetia®, ein Produkt von Merck & Co., Inc., in Japan gemeinsam.

Das Angebot unseres Segments Consumer Health umfasst im Wesentlichen verschreibungsfreie Produkte. Die Division Consumer Care ist auf rezeptfreie Medikamente, auch als „over the counter“ (OTC) bekannt, spezialisiert. Wir bieten Produkte in den meisten OTC-Bereichen an, z. B. Aspirin® und Aleve® als Schmerzmittel, sowie Canesten® oder Bepanthen®/Bepanthol® im Bereich der Dermatologie-Produkte. Das Produktsortiment umfasst ferner Nahrungsergänzungsmittel, z. B. Supradyn®, One A Day®, Berocca® und Redoxon®, Antacida gegen Magenübersäuerung sowie Erkältungsmittel. Wir gehören zu den führenden Anbietern im OTC-Markt. Darüber hinaus bieten wir auch verschreibungspflichtige Dermatologieprodukte an. Die Verkaufs- und Vertriebskanäle der Division Consumer Care außerhalb Europas sind in der Regel Supermarktketten, Drogerien und andere Großanbieter. In Europa erfolgt der Vertrieb vor allem über Apotheken.

Segment  
Consumer Health:  
verschreibungsfreie  
Produkte im Fokus

In der Division Medical Care vermarkten wir anwenderfreundliche Blutzucker-Messsysteme wie Contour® mit Einmal-Teststreifen und Breeze® mit Multi-Teststreifen. Außerdem führen wir Contour® USB mit einer integrierten Diabetes-Management-Software und möglicher Direktverbindung (plug & play) mit dem PC sowie das A1CNow™-System, mit dem der Langzeit-Blutzuckerwert (A1c) bestimmt wird. Diese Produkte vertreiben wir außerhalb Europas in der Regel über Apotheken, Drogerien, Handelsketten, Krankenhäuser und Großhändler. In Europa erfolgt der Vertrieb vor allem über Apotheken. Im Markt für Blutzucker-Messsysteme gehören wir zu den führenden Unternehmen. Darüber hinaus sind wir globaler Marktführer bei Kontrastmittel-Injektionssystemen für



die Diagnose und Therapie in der Computertomographie, der Magnetresonanztomographie und der molekularen Bildgebung sowie von mechanischen Systemen zur Entfernung von Thromben aus Blutgefäßen. Für diese Geräte bieten wir auch Serviceleistungen an. Wir vermarkten unsere Produkte über eine weltweite Direktvertriebsorganisation an Kardiologen, Radiologen sowie Gefäßchirurgen in Krankenhäusern und ambulanten Versorgungszentren. Teilweise ergänzen wir den Vertrieb durch lokale Distributoren.

Die Division Animal Health ist im Bereich der Gesundheit von Haus- und Nutztieren, für die wir Arzneimittel und Pflegeprodukte im Sortiment haben, tätig. Die größte Produktfamilie umfasst die Präparate von Advantix® und Advantage® zur Vorbeugung und Behandlung von Flohbefall bei Hunden und Katzen, gefolgt von Baytril® gegen Infektionskrankheiten, Drontal® und Drontal® Plus als Entwurmungsmittel sowie Baycox® zur Behandlung der Kokzidiose bei Schweinen. Wir nehmen führende Positionen in einzelnen Ländern und Produktsegmenten ein und sind gemessen am Umsatz weltweit das viertgrößte Unternehmen im Bereich der Tiergesundheit. Je nach nationalen Rechtsvorschriften sind Tierarzneimittel für die Endanwender auf tierärztliche Verordnung oder rezeptfrei bei Veterinären, in Apotheken oder im Einzelhandel erhältlich.

### CROPSCIENCE

Integriertes,  
nachhaltiges  
Produktportfolio  
bei CropScience

CropScience bietet ein starkes Portfolio an Produkten und Dienstleistungen im Bereich des chemischen Pflanzenschutzes, der Schädlings- und Unkrautbekämpfung außerhalb der Landwirtschaft sowie im Bereich der Saatgutzüchtung sowie verbesserter Pflanzeigenschaften. Diese vermarkten wir in Abhängigkeit von den lokalen Marktbedingungen. Unser Geschäft unterliegt der Saisonalität der verschiedenen Anbaukulturen und den daraus resultierenden Absatzzyklen.

Das Pflanzenschutz-Geschäft (Crop Protection) stützt sich auf ein breites Portfolio an hochwirksamen Herbiziden, Fungiziden, Insektiziden und Saatgutbehandlungsmitteln. Unsere Innovationsstärke und unsere langjährige Erfahrung mit Produkten gegen Schädlinge begründen unsere weltweit führende Stellung im Insektizidmarkt. Fungizide verhindern oder beseitigen durch Pilzbefall hervorgerufene Krankheiten, die die Ernteerträge und -qualität erheblich beeinträchtigen können. Im globalen Fungizidmarkt ist CropScience auf dem dritten Platz positioniert. Im weltweiten Markt der Unkrautbekämpfungsmittel (Herbizide) einschließlich der Wachstumsregulatoren nehmen wir die zweite Position ein. Der Bereich Seed Treatment umfasst die Anwendung von Pflanzenschutzsubstanzen, die speziell auf den Schutz von Saatgut und Keimlingen abgestimmt sind. Mit unseren Insektiziden, Fungiziden und Kombinationsprodukten sind wir weiterhin eines der umsatzstärksten Unternehmen auf dem Gebiet der Saatgutbehandlung. Unsere Pflanzenschutz-Produkte vermarkten wir in Abhängigkeit von den lokalen Marktbedingungen über ein zwei- oder dreistufiges Vertriebssystem. Der Vertrieb erfolgt entweder über Großhändler oder direkt über den Einzelhandel.

Die Produkte unseres Geschäftsbereichs Environmental Science basieren sowohl auf eigenen wie auch auf einlizenzierten Pflanzenschutzwirkstoffen und sind speziell auf den Einsatz außerhalb der Landwirtschaft ausgerichtet. Hier vermarkten wir Produkte zur Pflanzenpflege und Mittel für Haus und Garten speziell an private Kunden sowie Lösungen für den professionellen Anwender in den Gebieten Landschaftspflege, Schädlingsbekämpfung und zur Kontrolle von Krankheitsüberträgern (Vektorenkontrolle). Bayer zählt gemessen am Umsatz zu den weltweit führenden Anbietern von Pflanzenschutzmitteln in nicht-landwirtschaftlichen Anwendungen. Die Environmental-Science-Produkte werden über verschiedene Vertriebskanäle vermarktet. Produkte für Haus und Garten vertreiben wir über Großhändler und den Facheinzelhandel an den Endverbraucher. Erzeugnisse für professionelle Anwender verkaufen wir über Großhändler. Im Bereich Vektorenkontrolle erfolgt ein Großteil des Geschäfts über Ausschreibungen von Regierungs- und nichtstaatlichen Organisationen.

Im Geschäftsbereich BioScience konzentrieren sich unsere Vertriebsaktivitäten auf Saatgut in den vier Kernkulturen Baumwolle, Raps, Reis und Gemüse. Hier vertreiben wir hochwertiges Saatgut aus unserer eigenen Forschung und Züchtung. In diesen vier Kulturen haben wir starke

Marktpositionen erreicht und sind weltweit vertreten. Unsere wichtigsten Märkte sind für Raps-  
saatgut Nordamerika, für Baumwollsaatgut Nord- und Lateinamerika, Indien und Südeuropa so-  
wie für Hybridreissaatgut Asien. Mit unseren Gemüsesorten sind wir in mehr als 100 Ländern  
weltweit präsent. Der Vertrieb unseres Saatguts erfolgt an Landwirte, Züchter, Fachhändler und  
die verarbeitende Industrie. Die mithilfe moderner Züchtungsmethoden entwickelten Pflanzen-  
eigenschaften („Traits“) integrieren wir entweder in unsere eigenen Saatgutsorten oder vermarkten  
diese durch Auslizenzierung an Saatgutunternehmen, die sie in ihr Saatgut einbringen.

### MATERIALSCIENCE

MaterialScience zählt zu den weltweit größten Unternehmen der chemischen Industrie und ist ein  
führender Hersteller und Anbieter von Vorprodukten für harten und weichen Schaumstoff, Kunst-  
stoff-Granulaten sowie Rohstoffen für Lacke und Klebstoffe. In diesen Produktgruppen nimmt  
MaterialScience in allen regionalen Märkten führende Wettbewerbspositionen ein. Darüber hi-  
naus produzieren und vermarkten wir Kunststoffplatten und funktionale Folien sowie ausgewählte  
anorganische Grundchemikalien wie Chlor, Natronlauge, Wasserstoff, Salzsäure und Salpeter-  
säure. Letztere dienen entweder als Einsatzstoffe (beispielsweise Chlor) zur Herstellung unse-  
rer Produkte oder entstehen als Nebenprodukte der Kuppelproduktion (wie etwa Natronlauge)  
und werden an externe Kunden verkauft.

Führende  
Wettbewerbsposition  
in allen Regionen  
bei MaterialScience

Unsere Produkte finden hauptsächlich Anwendung in der Möbel- und Holzindustrie, der Bau-, der  
Automobil- und der Elektroindustrie, der Datentechnik, der chemischen Industrie, der Textil-  
sowie der Sport- und Freizeitindustrie und der Medizintechnik. Unsere Polyurethanrohstoffe wie  
Diphenylmethan-Diisocyanat (MDI), Toluylendiisocyanat (TDI) und Polyether bzw. die aus ihnen  
bestehenden, am Markt angebotenen Polyurethan-Systeme werden z. B. bei der Produktion von  
Matratzen, Kühltischisolationen, Stoßfängern und Schuhsohlen verarbeitet. Unsere Polycarbo-  
nate, die wir u. a. unter den Marken Makrolon®, Bayblend® oder Makroblend® vertreiben, kommen  
z. B. bei Gehäusen für Elektrogeräte, CDs/DVDs und Autoscheinwerfern zum Einsatz. Die Business  
Unit Coatings, Adhesives, Specialties produziert Rohstoffe für Lacke, die z. B. für Automobil- und  
Großfahrzeuglacke verwendet werden, und Klebstoffe, die z. B. für Schuhe benutzt werden. Darü-  
ber hinaus stellt diese Business Unit Folien her, die z. B. zur Herstellung von Tachoscheiben in  
Fahrzeugen und Computergehäusen genutzt werden.

Die Vermarktung unserer Produkte erfolgt meist über regionale und lokale Vertriebskanäle. Dabei  
setzen wir im Bereich der Auftragsabwicklung zunehmend auf E-Commerce-Plattformen. Darü-  
ber hinaus arbeiten wir mit Handelshäusern und lokalen, für das Geschäft mit Kleinabnehmern  
zuständigen Distributoren zusammen. Weltweit operierende Großkunden werden von unseren  
Key Account Managern direkt betreut.

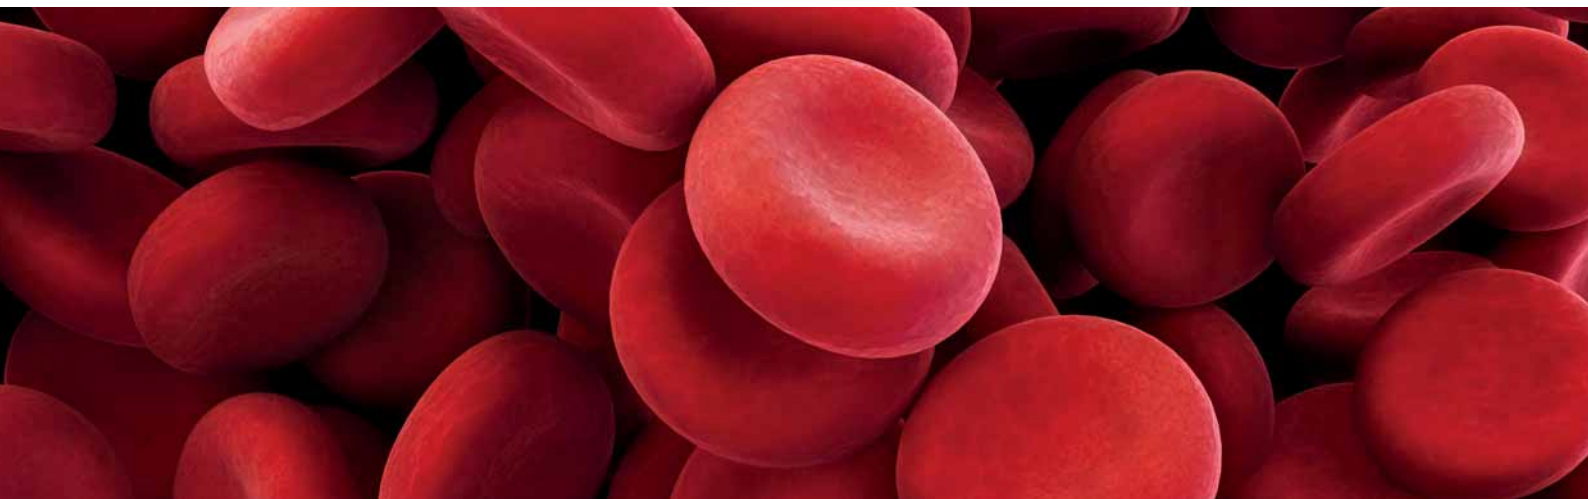

## 3. Geschäftsentwicklung nach Teilkonzernen, Segmenten und Regionen

### 3.1 HealthCare

Kennzahlen HealthCare

[Tabelle 3.4]

|                                     | 2009          | 2010          | Veränderung  |              |
|-------------------------------------|---------------|---------------|--------------|--------------|
|                                     | in Mio €      | in Mio €      | in %         | wpb.<br>in % |
| <b>Umsatzerlöse</b>                 | <b>15.988</b> | <b>16.913</b> | <b>5,8</b>   | <b>1,7</b>   |
| <b>Umsatzveränderungen</b>          |               |               |              |              |
| Menge                               | 1,9 %         | 1,9 %         |              |              |
| Preis                               | 1,9 %         | -0,2 %        |              |              |
| Währung                             | 0,6 %         | 4,7 %         |              |              |
| Portfolio                           | -0,6 %        | -0,6 %        |              |              |
| <b>Umsatzerlöse nach Segmenten</b>  |               |               |              |              |
| Pharma                              | 10.467        | 10.908        | 4,2          | 0,9          |
| Consumer Health                     | 5.521         | 6.005         | 8,8          | 3,4          |
| <b>Umsatzerlöse nach Regionen</b>   |               |               |              |              |
| Europa                              | 6.344         | 6.375         | 0,5          |              |
| Nordamerika                         | 4.634         | 4.666         | 0,7          |              |
| Asien/Pazifik                       | 2.677         | 3.269         | 22,1         |              |
| Lateinamerika/Afrika/Nahost         | 2.333         | 2.603         | 11,6         |              |
| <b>EBIT</b>                         | <b>2.640</b>  | <b>1.861</b>  | <b>-29,5</b> |              |
| Sondereinflüsse                     | -372          | -1.169        |              |              |
| <b>EBIT vor Sondereinflüssen*</b>   | <b>3.012</b>  | <b>3.030</b>  | <b>0,6</b>   |              |
| <b>EBITDA*</b>                      | <b>4.148</b>  | <b>4.116</b>  | <b>-0,8</b>  |              |
| Sondereinflüsse                     | -320          | -289          |              |              |
| <b>EBITDA vor Sondereinflüssen*</b> | <b>4.468</b>  | <b>4.405</b>  | <b>-1,4</b>  |              |
| EBITDA-Marge vor Sondereinflüssen*  | 27,9 %        | 26,0 %        |              |              |
| <b>Brutto-Cashflow**</b>            | <b>3.153</b>  | <b>2.948</b>  | <b>-6,5</b>  |              |
| <b>Netto-Cashflow**</b>             | <b>3.431</b>  | <b>3.320</b>  | <b>-3,2</b>  |              |

Das Bild oben zeigt eine Illustration von Blutzellen.

wpb. = währungs- und portfoliobereinigt

\* Zur Definition siehe Kapitel 4.2 „Ermittlung des EBIT(DA) vor Sondereinflüssen“.

\*\* Zur Definition siehe Kapitel 4.5 „Finanzlage und Investitionen Bayer-Konzern“.



Der **Umsatz** des Teilkonzerns HealthCare stieg im Berichtsjahr 2010 um 5,8 % auf 16.913 Mio € (Vorjahr: 15.988 Mio €). Währungs- und portfoliobereinigt entspricht dies einem Zuwachs von 1,7 %. Diese Steigerung beruhte vor allem auf der positiven Entwicklung im Segment Consumer Health.

Umsatzerlöse HealthCare pro Quartal

[Grafik 3.8]

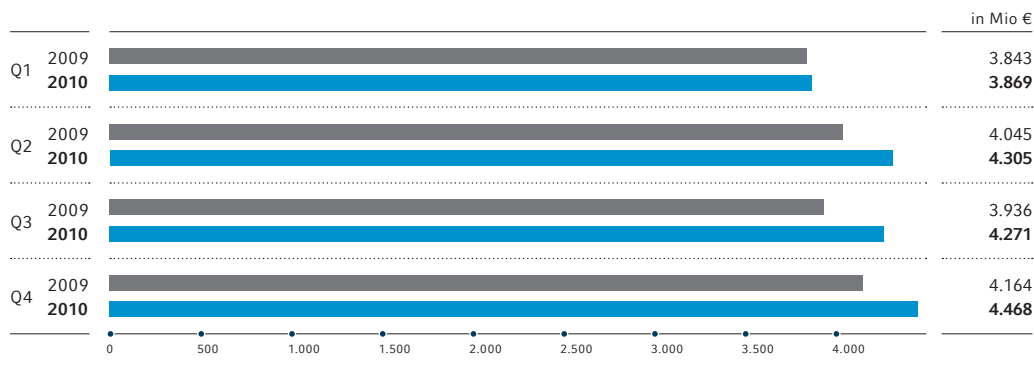

Das **EBIT** des Teilkonzerns HealthCare sank im Berichtsjahr 2010 deutlich um 29,5 % auf 1.861 Mio € (Vorjahr: 2.640 Mio €). Die Sondereinflüsse betrugen -1.169 Mio € (Vorjahr: -372 Mio €); zur Erläuterung siehe unten. Das EBIT vor Sondereinflüssen lag mit 3.030 Mio € (Vorjahr: 3.012 Mio €) auf Vorjahresniveau (+0,6 %). Das **EBITDA** vor Sondereinflüssen ging hingegen um 1,4 % auf 4.405 Mio € (Vorjahr: 4.468 Mio €) zurück. Ursächlich hierfür waren vor allem die Auswirkungen von Gesundheitsreformen in verschiedenen Ländern, die vorzeitige Generisierung von YAZ® in den USA und höhere Vertriebskosten in beiden Segmenten. Zudem haben wir unsere Aufwendungen für Forschung und Entwicklung gesteigert. Gegenläufig wirkten positive Währungseffekte.

EBIT  
HealthCare pro Quartal

[Grafik 3.9]

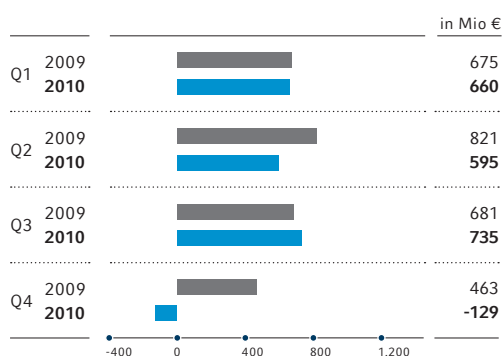

Vorquartale 2010 angepasst

EBITDA vor Sondereinflüssen  
HealthCare pro Quartal

[Grafik 3.10]

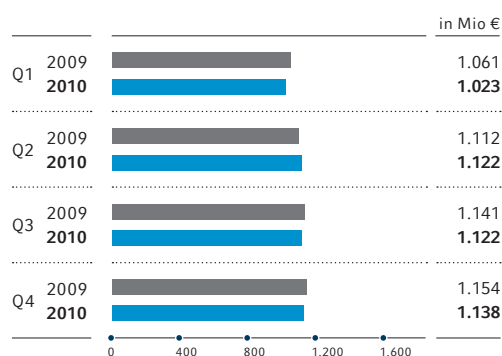

Vorquartale 2010 angepasst

## PHARMA

## Kennzahlen Pharma

[Tabelle 3.5]

|                                         | 2009          | 2010          | Veränderung  |              |
|-----------------------------------------|---------------|---------------|--------------|--------------|
|                                         | in Mio €      | in Mio €      | in %         | wpb.<br>in % |
| <b>Umsatzerlöse</b>                     | <b>10.467</b> | <b>10.908</b> | <b>4,2</b>   | <b>0,9</b>   |
| Women's Healthcare and General Medicine | 6.532         | 6.816         | 4,3          | 0,0          |
| Specialty Medicine                      | 3.935         | 4.092         | 4,0          | 2,2          |
| <b>Umsatzerlöse nach Regionen</b>       |               |               |              |              |
| Europa                                  | 4.107         | 4.082         | -0,6         |              |
| Nordamerika                             | 2.712         | 2.531         | -6,7         |              |
| Asien/Pazifik                           | 2.136         | 2.629         | 23,1         |              |
| Lateinamerika/Afrika/Nahost             | 1.512         | 1.666         | 10,2         |              |
| <b>EBIT</b>                             | <b>1.696</b>  | <b>884</b>    | <b>-47,9</b> |              |
| Sondereinflüsse                         | -322          | -1.140        |              |              |
| <b>EBIT vor Sondereinflüssen*</b>       | <b>2.018</b>  | <b>2.024</b>  | <b>0,3</b>   |              |
| <b>EBITDA*</b>                          | <b>2.912</b>  | <b>2.834</b>  | <b>-2,7</b>  |              |
| Sondereinflüsse                         | -281          | -266          |              |              |
| <b>EBITDA vor Sondereinflüssen*</b>     | <b>3.193</b>  | <b>3.100</b>  | <b>-2,9</b>  |              |
| EBITDA-Marge vor Sondereinflüssen*      | 30,5 %        | 28,4 %        |              |              |
| <b>Brutto-Cashflow**</b>                | <b>2.186</b>  | <b>1.983</b>  | <b>-9,3</b>  |              |
| <b>Netto-Cashflow**</b>                 | <b>2.280</b>  | <b>2.272</b>  | <b>-0,4</b>  |              |

Vorjahreswerte angepasst

wpb. = währungs- und portfoliobereinigt

\* Zur Definition siehe Kapitel 4.2 „Ermittlung des EBIT(DA) vor Sondereinflüssen“.

\*\* Zur Definition siehe Kapitel 4.5 „Finanzlage und Investitionen Bayer-Konzern“.

Im Segment **Pharma** wuchs der **Umsatz** im Jahr 2010 um 4,2 % auf 10.908 Mio € (Vorjahr: 10.467 Mio €). Währungs- und portfoliobereinigt betrug die Steigerung 0,9 %. Dabei konnten wir unser Geschäft in den Regionen Asien/Pazifik und Lateinamerika/Afrika/Nahost deutlich ausweiten. Dem standen jedoch rückläufige Umsätze in Nordamerika gegenüber, die im Wesentlichen aus Umsatzeinbußen bei yaz® in den USA resultierten. Zusätzlich wirkten sich Reformen in den staatlichen Gesundheitssystemen verschiedener Länder belastend aus.

## Umsatzstärkste Pharma-Produkte

[Tabelle 3.6]

|                                                                       | 2009         | 2010         | Veränderung |             |
|-----------------------------------------------------------------------|--------------|--------------|-------------|-------------|
|                                                                       | in Mio €     | in Mio €     | in %        | wb.<br>in % |
| Betaferon®/Betaseron® (Specialty Medicine)                            | 1.214        | 1.206        | -0,7        | -5,0        |
| YAZ®/Yasmin®/Yasminelle®<br>(Women's Healthcare and General Medicine) | 1.278        | 1.111        | -13,1       | -15,8       |
| Kogenate® (Specialty Medicine)                                        | 888          | 1.004        | 13,1        | 10,3        |
| Nexavar® (Specialty Medicine)                                         | 604          | 705          | 16,7        | 11,7        |
| Adalat® (Women's Healthcare and General Medicine)                     | 633          | 664          | 4,9         | -2,3        |
| Mirena® (Women's Healthcare and General Medicine)                     | 490          | 539          | 10,0        | 4,6         |
| Avalox®/Avelox® (Women's Healthcare and General Medicine)             | 460          | 497          | 8,0         | 4,2         |
| Levitra® (Women's Healthcare and General Medicine)                    | 360          | 429          | 19,2        | 13,1        |
| Aspirin® Cardio (Women's Healthcare and General Medicine)             | 315          | 358          | 13,7        | 10,0        |
| Glucobay® (Women's Healthcare and General Medicine)                   | 315          | 347          | 10,2        | 2,9         |
| Ultravist® (Specialty Medicine)                                       | 262          | 313          | 19,5        | 12,7        |
| Cipro®/Ciprobay® (Women's Healthcare and General Medicine)            | 331          | 262          | -20,8       | -22,5       |
| Magnevist® (Specialty Medicine)                                       | 219          | 215          | -1,8        | -7,3        |
| Iopamiron® (Specialty Medicine)                                       | 199          | 185          | -7,0        | -17,2       |
| Kinzal®/Pritor® (Women's Healthcare and General Medicine)             | 164          | 178          | 8,5         | 8,0         |
| <b>Summe</b>                                                          | <b>7.732</b> | <b>8.013</b> | <b>3,6</b>  | <b>-0,8</b> |
| Anteil am Pharma-Umsatz                                               | 74 %         | 73 %         |             |             |

wb. = währungsbereinigt

Unser Geschäftsfeld **Women's Healthcare and General Medicine** erzielte ein Umsatzwachstum von 4,3 % auf 6.816 Mio € (Vorjahr: 6.532 Mio €). Bereinigt um Währungseinflüsse erreichten wir das Vorjahresniveau (+0,0 %). Die Umsätze der oralen Kontrazeptiva YAZ®/Yasmin®/Yasminelle® (wb. -15,8 %) verzeichneten einen deutlichen Rückgang. Maßgeblich dafür war vor allem der Markteintritt eines generischen Wettbewerbers in den USA im Juni 2010. Außerhalb der USA verzeichneten wir eine positive Umsatzentwicklung von YAZ®/Yasmin®/Yasminelle®, die überwiegend auf Mengensteigerungen bei YAZ® beruhte. Der Umsatz der Hormonspirale Mirena® (wb. +4,6 %) wuchs in allen Regionen.

Das Geschäft mit Levitra® (wb. +13,1 %), unserem Mittel gegen erektile Dysfunktion, erzielte eine deutliche Steigerung in den USA. Dort profitierten wir von einem Vertragsabschluss unseres Vertriebspartners mit einem Großabnehmer. Der Umsatz mit Aspirin® Cardio (wb. +10,0 %) zur Herzinfarktprävention stieg mengenbedingt deutlich, insbesondere in den Regionen Asien/Pazifik und Lateinamerika/Afrika/Nahost. Der Umsatzzuwachs bei unserem Bluthochdrucksenker Kinzal®/Pritor® (wb. +8,0 %) war im Wesentlichen auf die im Oktober 2009 erfolgte Indikationserweiterung zur Vorbeugung von Herz-Kreislauf-Erkrankungen zurückzuführen. Unser Antibiotikum Avalox®/Avelox® stieg vor allem dank der guten Entwicklung in der Region Asien/Pazifik um +4,2 % (wb.). Der Umsatz unseres oralen Antidiabetikums Glucobay® (wb. +2,9 %) erhöhte sich aufgrund von kontinuierlichen Zuwächsen in China, während das Geschäft insbesondere in den europäischen Ländern aufgrund des generischen Wettbewerbs zurückging. Die Umsätze mit Adalat® gegen Bluthochdruck (wb. -2,3 %) verringerten sich aufgrund des generischen Wettbewerbs besonders in Europa und aufgrund staatlicher Preissenkungen in Japan. In China konnten dagegen Zuwächse erzielt werden. Bei unserem Antibiotikum Cipro®/Ciprobay® verzeichneten wir deutlich niedrigere Umsätze (wb. -22,5 %), im Wesentlichen weil ein Vertrag mit der US-amerikanischen Regierung im 1. Quartal 2010 auslief.

In unserem Geschäftsfeld **Specialty Medicine** wuchs der Umsatz um 4,0 % auf 4.092 Mio € (Vorjahr: 3.935 Mio €). Währungs- und portfoliobereinigt entspricht dies einem Anstieg um 2,2 %. Den Umsatz des Krebsmedikaments Nexavar® (wb. +11,7 %) konnten wir erneut in allen Regionen steigern. Besonders positiv entwickelten sich die Umsätze in Asien/Pazifik. Dies ist vor allem auf Zuwächse in Japan zurückzuführen. Das Geschäft mit unserem Blutgerinnungsmittel Kogenate® konnten wir durch das Mengenwachstum in allen Regionen um +10,3 % (wb.) ausweiten. Der Umsatz des Multiple-Sklerose-Medikaments Betaferon®/Betaseron® sank insgesamt um 5,0 % (wb.). Erfreulichen Zuwächsen in den Regionen Asien/Pazifik und Lateinamerika/Afrika/Nahost standen Rückgänge durch verstärkten Wettbewerb insbesondere in Deutschland, den USA und Russland gegenüber. Der Umsatz des Röntgenkontrastmittels Ultravist® (wb. +12,7 %) entwickelte sich besonders in Lateinamerika positiv, wo es das ältere Röntgenkontrastmittel Iopamiron® ersetzte. Neben dem daraus resultierenden Absatzrückgang sank der Iopamiron®-Umsatz (wb. -17,2 %) vor allem aufgrund von Preissenkungen in Japan. Bei unseren Kontrastmitteln für die Magnetresonanztomographie (MRT) ging der Umsatz von Magnevist® (wb. -7,3 %) kontinuierlich zurück. Dies war teilweise auf die Umstellung auf Gadovist® (wb. +14,7 %) zurückzuführen, dessen Umsatz besonders in Europa deutlich wuchs.

Das **EBIT** unseres Segments Pharma verringerte sich im Berichtsjahr 2010 deutlich um 47,9 % auf 884 Mio € (Vorjahr: 1.696 Mio €). Hierin enthalten sind Sonderaufwendungen von 1.140 Mio € (Vorjahr: 322 Mio €). Davon entfielen 874 Mio € auf außerplanmäßige Abschreibungen von immateriellen Vermögenswerten, 177 Mio € auf Rechtsfälle, 56 Mio € auf Wertberichtigungen auf eine nachträgliche Kaufpreisforderung und 33 Mio € auf Restrukturierungsmaßnahmen. Die außerplanmäßigen Abschreibungen resultierten aus der Abschreibung des Firmennamens „Schering“ in Höhe von 405 Mio € aufgrund der neuen Markenstrategie. Darüber hinaus haben wir im Zuge der regelmäßigen Überprüfung unserer Forschungs- und Entwicklungspipeline Abschreibungen auf die Forschungsprojekte Sagopilone und Bonefos® in Höhe von 202 Mio € vorgenommen. Hinzu kommen Wertminderungen auf unser Krebsmedikament Zevalin® und verschiedene Women's-Healthcare-Produkte in Höhe von 267 Mio €. Das EBIT vor Sondereinflüssen lag mit 2.024 Mio € auf Vorjahresniveau (+0,3 %). Das **EBITDA** vor Sondereinflüssen sank um 2,9 % auf 3.100 Mio € (Vorjahr: 3.193 Mio €). Hierin enthalten sind positive Währungseffekte und ein Ertrag in Höhe von 68 Mio € aus der Beilegung eines Patentstreits im Zusammenhang mit YAZ®, der einen Teil der im Jahresverlauf verloren gegangenen Marge ausglich. Demgegenüber fielen höhe-



re Forschungs- und Entwicklungsaufwendungen – vor allem zur Unterstützung unserer Phase-III-Projekte – an. Zudem wirkten sich die Geschäftseinbußen mit YAZ® in den USA und der Margendruck aus den Gesundheitsreformen ergebnisbelastend aus. Darüber hinaus verzeichneten wir einen Anstieg der Vertriebskosten, insbesondere im Zusammenhang mit der Einführung neuer Produkte und der Verstärkung unserer Marketingaktivitäten im Zuge der Geschäftsausweitung in China.

## CONSUMER HEALTH

Kennzahlen Consumer Health

[Tabelle 3.7]

|                                     | 2009         | 2010         | Veränderung |              |
|-------------------------------------|--------------|--------------|-------------|--------------|
|                                     | in Mio €     | in Mio €     | in %        | wpb.<br>in % |
| <b>Umsatzerlöse</b>                 | <b>5.521</b> | <b>6.005</b> | <b>8,8</b>  | <b>3,4</b>   |
| Consumer Care                       | 3.080        | 3.371        | 9,4         | 4,2          |
| Medical Care                        | 1.464        | 1.514        | 3,4         | -1,3         |
| Animal Health                       | 977          | 1.120        | 14,6        | 7,7          |
| <b>Umsatzerlöse nach Regionen</b>   |              |              |             |              |
| Europa                              | 2.237        | 2.293        | 2,5         |              |
| Nordamerika                         | 1.922        | 2.135        | 11,1        |              |
| Asien/Pazifik                       | 541          | 640          | 18,3        |              |
| Lateinamerika/Afrika/Nahost         | 821          | 937          | 14,1        |              |
| <b>EBIT</b>                         | <b>944</b>   | <b>977</b>   | <b>3,5</b>  |              |
| Sondereinflüsse                     | -50          | -29          |             |              |
| <b>EBIT vor Sondereinflüssen*</b>   | <b>994</b>   | <b>1.006</b> | <b>1,2</b>  |              |
| <b>EBITDA*</b>                      | <b>1.236</b> | <b>1.282</b> | <b>3,7</b>  |              |
| Sondereinflüsse                     | -39          | -23          |             |              |
| <b>EBITDA vor Sondereinflüssen*</b> | <b>1.275</b> | <b>1.305</b> | <b>2,4</b>  |              |
| EBITDA-Marge vor Sondereinflüssen*  | 23,1 %       | 21,7 %       |             |              |
| <b>Brutto-Cashflow**</b>            | <b>967</b>   | <b>965</b>   | <b>-0,2</b> |              |
| <b>Netto-Cashflow**</b>             | <b>1.151</b> | <b>1.048</b> | <b>-8,9</b> |              |

wpb. = währungs- und portfoliobereinigt

\* Zur Definition siehe Kapitel 4.2 „Ermittlung des EBIT(DA) vor Sondereinflüssen“.

\*\* Zur Definition siehe Kapitel 4.5 „Finanzlage und Investitionen Bayer-Konzern“.

Den **Umsatz** unseres Segments **Consumer Health** konnten wir im Berichtsjahr 2010 um 8,8 % auf 6.005 Mio € steigern (Vorjahr: 5.521 Mio €). Währungs- und portfoliobereinigt wuchs das Geschäft um 3,4 %. Zu dieser Entwicklung trugen alle Regionen bei, insbesondere Nordamerika.

Umsatzstärkste Consumer-Health-Produkte

[Tabelle 3.8]

|                                         | 2009         | 2010         | Veränderung |             |
|-----------------------------------------|--------------|--------------|-------------|-------------|
|                                         | in Mio €     | in Mio €     | in %        | wb.<br>in % |
| Contour® (Medical Care)                 | 601          | 602          | 0,2         | -4,5        |
| Aspirin® * (Consumer Care)              | 400          | 418          | 4,5         | 0,2         |
| Advantage®-Produktlinie (Animal Health) | 336          | 408          | 21,4        | 14,6        |
| Aleve®/Naproxen (Consumer Care)         | 217          | 273          | 25,8        | 18,7        |
| Bepanthen®/Bepanthol® (Consumer Care)   | 186          | 212          | 14,0        | 12,0        |
| Canesten® (Consumer Care)               | 188          | 210          | 11,7        | 7,7         |
| One A Day® (Consumer Care)              | 153          | 178          | 16,3        | 10,0        |
| Baytril® (Animal Health)                | 149          | 166          | 11,4        | 5,8         |
| Supradyn® (Consumer Care)               | 136          | 138          | 1,5         | 0,7         |
| Breeze® (Medical Care)                  | 138          | 125          | -9,4        | -13,6       |
| <b>Summe</b>                            | <b>2.504</b> | <b>2.730</b> | <b>9,0</b>  | <b>4,2</b>  |
| Anteil am Consumer-Health-Umsatz        | 45 %         | 45 %         |             |             |

wb. = währungsbereinigt

\* Der Aspirin®-Umsatzerlös inklusive der bei Pharma ausgewiesenen Umsatzerlöse mit Aspirin® Cardio betrug im Gesamtjahr 776 Mio € (Vorjahr: 715 Mio €).

In unserer Division **Consumer Care** legte der Umsatz um 9,4 % auf 3.371 Mio € (Vorjahr: 3.080 Mio €) zu. Währungs- und portfoliobereinigt entspricht dies einem Wachstum von 4,2 %. Besonders hervorzuheben ist dabei die gestiegene Nachfrage in den USA nach unseren Produkten. Hiervon profitierten insbesondere unser Analgetikum Aleve® (wb. +18,7 %) sowie die Nahrungsergänzungsmittel der One A Day®-Familie (wb. +10,0 %). Der Umsatz von Aspirin® lag auf Vorjahresniveau (wb. +0,2 %). Der Umsatz mit unserem Hautpflegemittel Bepanthen®/Bepanthol® (wb. +12,0 %) entwickelte sich aufgrund von Mengen- und Preissteigerungen insbesondere in Europa und Lateinamerika positiv. Die Absatzzahlen unseres Antimykotikums Canesten® (wb. +7,7 %) konnten wir vor allem durch Neuausbietungen in Kanada erhöhen. Der Umsatz mit dem Vitaminpräparat Supradyn® erreichte Vorjahresniveau (wb. +0,7 %).

In der Division **Medical Care** erhöhten wir den Umsatz um 3,4 % auf 1.514 Mio € (Vorjahr: 1.464 Mio €). Währungsbereinigt entspricht dies einem Rückgang um 1,3 %. Dies ist überwiegend auf die negative Entwicklung im us-amerikanischen Diabetes-Care-Markt zurückzuführen. Hier gingen sowohl Preise als auch Mengen zurück. Dies wirkte sich insbesondere auf den Umsatz unserer Blutzucker-Messsysteme der Produktlinien Breeze® (wb. -13,6 %) und Contour® (wb. -4,5 %) aus. Dagegen entwickelte sich das Contour®-Geschäft in Europa u.a. aufgrund von Neuausbietungen positiv. Den Umsatz unseres Medizingerätegeschäfts konnten wir vor allem in den USA verbessern; insgesamt erreichten wir ein Plus von 7,2 % (wb.).

Die Division **Animal Health** erzielte aufgrund der positiven Entwicklung in allen Regionen ein erfreuliches Umsatzwachstum von 14,6 % und erreichte 1.120 Mio € (Vorjahr: 977 Mio €). Bereinigt um Währungseffekte betrug die Steigerung 7,7 %. Die größten Zuwächse verzeichneten wir dabei in Nordamerika. Unsere Advantage®-Produktlinie mit Floh-, Zecken- und Entwurmungsmitteln (wb. +14,6 %) legte vor allem in den USA signifikant zu. Dort profitierte das Geschäft u.a. von der Erstbelieferung und dem weiteren Ausbau eines neuen Vertriebswegs über Fachmärkte für Tierbedarf. Den Umsatz unseres Antibiotikums Baytril® (wb. +5,8 %) konnten wir in den USA steigern, während das Geschäft in Europa bedingt durch den zunehmenden Generika-Wettbewerb rückläufig war.

Das **EBIT** unseres Segments **Consumer Health** verbesserte sich im Berichtsjahr 2010 um 3,5 % auf 977 Mio € (Vorjahr: 944 Mio €). Darin enthalten waren Sondereinflüsse von -29 Mio € (Vorjahr: -50 Mio €), die im Geschäftsjahr 2010 im Zusammenhang mit Restrukturierungsmaßnahmen standen. Das EBIT vor Sondereinflüssen stieg um 1,2 % auf 1.006 Mio € (Vorjahr: 994 Mio €). Das um Sondereinflüsse bereinigte **EBITDA** erhöhte sich um 2,4 % auf 1.305 Mio € (Vorjahr: 1.275 Mio €). Dies ist vor allem auf die positive Geschäftsentwicklung bei Consumer Care und Animal Health sowie positive Währungseffekte zurückzuführen. Dem stand eine Steigerung der Vertriebskosten gegenüber, die insbesondere aus der Normalisierung der im Vorjahr krisenbedingt reduzierten Marketing- und Vertriebskosten bei Consumer Care resultierte.

### 3. Geschäftsentwicklung nach Teilkonzernen, Segmenten und Regionen

#### 3.2 CropScience

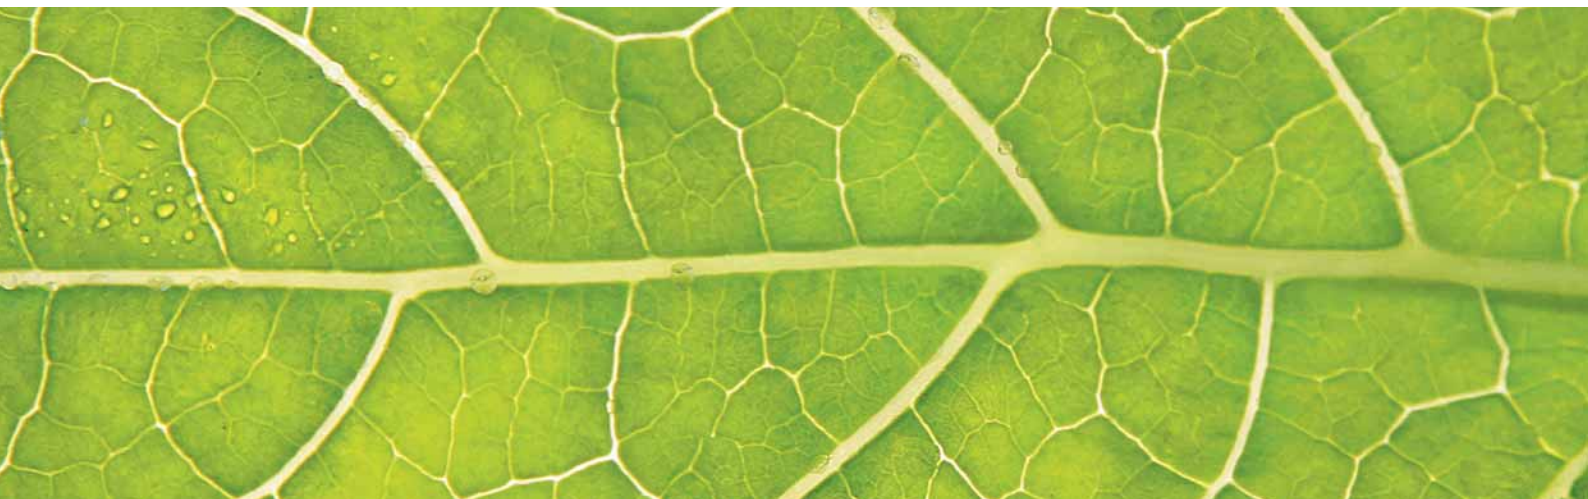

## 3.2 CropScience

Kennzahlen CropScience

[Tabelle 3.9]

|                                     | 2009         | 2010         | Veränderung  |              |
|-------------------------------------|--------------|--------------|--------------|--------------|
|                                     | in Mio €     | in Mio €     | in %         | wpb.<br>in % |
| <b>Umsatzerlöse</b>                 | <b>6.510</b> | <b>6.830</b> | <b>4,9</b>   | <b>-1,3</b>  |
| <b>Umsatzveränderungen</b>          |              |              |              |              |
| Menge                               | 1,2 %        | -0,7 %       |              |              |
| Preis                               | 1,3 %        | -0,6 %       |              |              |
| Währung                             | -0,6 %       | 6,0 %        |              |              |
| Portfolio                           | 0,1 %        | 0,2 %        |              |              |
| <b>Umsatzerlöse nach Segmenten</b>  |              |              |              |              |
| Crop Protection                     | 5.424        | 5.493        | 1,3          | -4,7         |
| Environmental Science/BioScience    | 1.086        | 1.337        | 23,1         | 15,6         |
| <b>Umsatzerlöse nach Regionen</b>   |              |              |              |              |
| Europa                              | 2.540        | 2.381        | -6,3         |              |
| Nordamerika                         | 1.529        | 1.535        | 0,4          |              |
| Asien/Pazifik                       | 1.028        | 1.229        | 19,6         |              |
| Lateinamerika/Afrika/Nahost         | 1.413        | 1.685        | 19,2         |              |
| <b>EBIT</b>                         | <b>798</b>   | <b>261</b>   | <b>-67,3</b> |              |
| <i>Sondereinflüsse</i>              | <i>-219</i>  | <i>-526</i>  |              |              |
| <b>EBIT vor Sondereinflüssen*</b>   | <b>1.017</b> | <b>787</b>   | <b>-22,6</b> |              |
| <b>EBITDA*</b>                      | <b>1.311</b> | <b>767</b>   | <b>-41,5</b> |              |
| <i>Sondereinflüsse</i>              | <i>-197</i>  | <i>-526</i>  |              |              |
| <b>EBITDA vor Sondereinflüssen*</b> | <b>1.508</b> | <b>1.293</b> | <b>-14,3</b> |              |
| EBITDA-Marge vor Sondereinflüssen*  | 23,2 %       | 19,0 %       |              |              |
| <b>Brutto-Cashflow**</b>            | <b>1.043</b> | <b>546</b>   | <b>-47,7</b> |              |
| <b>Netto-Cashflow**</b>             | <b>745</b>   | <b>1.399</b> | <b>87,8</b>  |              |

wpb. = währungs- und portfoliobereinigt

\* Zur Definition siehe Kapitel 4.2 „Ermittlung des EBIT(DA) vor Sondereinflüssen“.

\*\* Zur Definition siehe Kapitel 4.5 „Finanzlage und Investitionen Bayer-Konzern“.

Das Bild oben zeigt die Detailaufnahme eines Rapsblattes.



CropScience konnte seinen **Umsatz** im Geschäftsjahr 2010 um 4,9 % auf 6.830 Mio € (Vorjahr: 6.510 Mio €) steigern. Währungs- und portfoliobereinigt entspricht dies jedoch einem leichten Rückgang von 1,3 %. Dies ist auf ein schwächeres Crop-Protection-Geschäft zurückzuführen, während Environmental Science/BioScience eine positive Geschäftsentwicklung verzeichnete.

Umsatzerlöse CropScience pro Quartal

[Grafik 3.11]

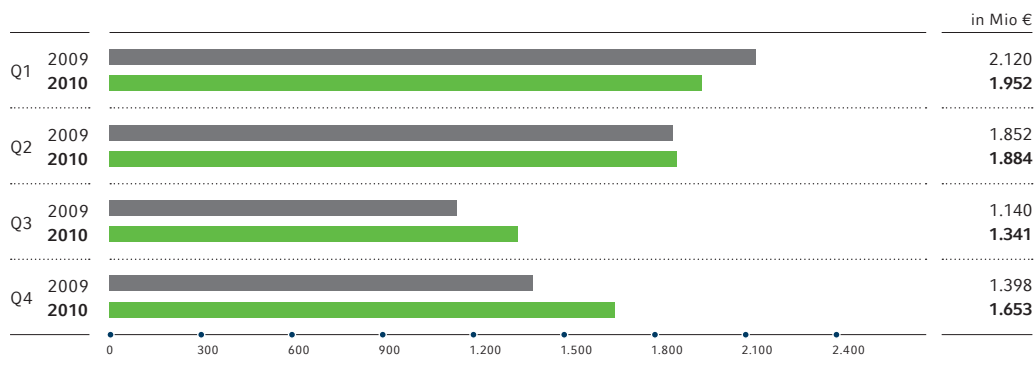

Im Geschäftsjahr sank das **EBIT** von CropScience deutlich von 798 Mio € auf 261 Mio €. Sonderaufwendungen in Höhe von 526 Mio € (Vorjahr: 219 Mio €), die im Geschäftsjahr 2010 für ein angestrebtes Vergleichsprogramm sowie Rechts- und Verteidigungskosten im Zusammenhang mit Verfahren wegen gentechnisch veränderter Reispflanzen (LL RICE) in den USA berücksichtigt wurden, wirkten sich ergebnisbelastend aus. Das EBIT vor Sondereinflüssen sank um 22,6 % auf 787 Mio € (Vorjahr: 1.017 Mio €). Das **EBITDA** vor Sondereinflüssen verringerte sich um 14,3 % auf 1.293 Mio € (Vorjahr: 1.508 Mio €). Dieser Rückgang beruhte vor allem auf den deutlich gesunkenen Absatzmengen und rückläufigen Preisen bei Crop Protection sowie erhöhten Aufwendungen für Forschung und Entwicklung im Geschäftsbereich BioScience.

EBIT  
CropScience pro Quartal

[Grafik 3.12]

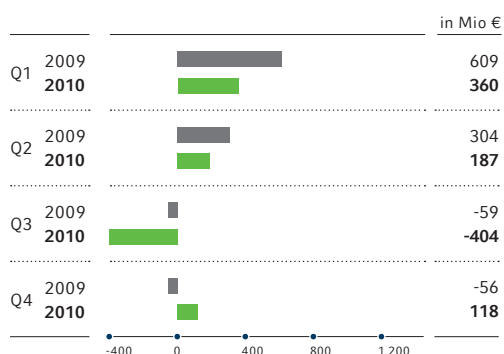

Vorquartale 2010 angepasst

EBITDA vor Sondereinflüssen  
CropScience pro Quartal

[Grafik 3.13]

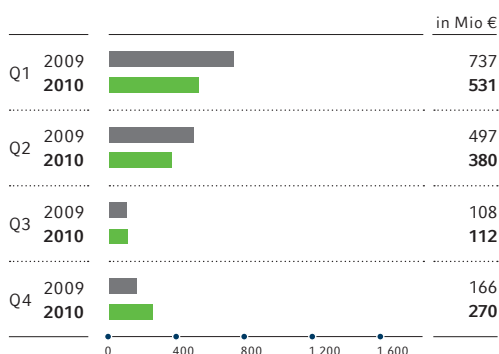

Vorquartale 2010 angepasst

### 3. Geschäftsentwicklung nach Teilkonzernen, Segmenten und Regionen

#### 3.2 CropScience

Umsatzstärkste CropScience-Produkte\*

[Tabelle 3.10]

|                                                                                         | 2009         | 2010         | Veränderung |             |
|-----------------------------------------------------------------------------------------|--------------|--------------|-------------|-------------|
|                                                                                         | in Mio €     | in Mio €     | in %        | wb.<br>in % |
| Confidor®/Gaucho®/Admire®/Merit®<br>(Insecticides/Seed Treatment/Environmental Science) | 606          | 597          | -1,5        | -7,0        |
| Flint®/Stratego®/Sphere®/Nativo® (Fungicides)                                           | 400          | 453          | 13,3        | 6,6         |
| Basta®/Liberty®/Rely®/Ignite® (Herbicides)                                              | 323          | 270          | -16,4       | -24,6       |
| Proline®/Input®/Prosaro® (Fungicides)                                                   | 267          | 259          | -3,0        | -7,0        |
| Atlantis® (Herbicides)                                                                  | 231          | 210          | -9,1        | -10,7       |
| Folicur®/Raxil® (Fungicides/Seed Treatment)                                             | 210          | 206          | -1,9        | -8,3        |
| Poncho® (Seed Treatment)                                                                | 183          | 192          | 4,9         | -2,1        |
| Decis®/K-Othrine® (Insecticides/Environmental Science)                                  | 170          | 184          | 8,2         | 1,2         |
| Fandango® (Fungicides)                                                                  | 146          | 140          | -4,1        | -4,9        |
| Puma® (Herbicides)                                                                      | 167          | 139          | -16,8       | -24,0       |
| <b>Summe</b>                                                                            | <b>2.703</b> | <b>2.650</b> | <b>-2,0</b> | <b>-7,6</b> |
| Anteil am CropScience-Umsatz                                                            | 42 %         | 39 %         |             |             |

wb. = währungsbereinigt

\* Die Angaben beziehen sich jeweils auf die Hauptwirkstoffgruppe. Aus Gründen der Übersichtlichkeit führen wir nur die Hauptmarken der Geschäftsfelder Crop Protection und Environmental Science auf.

## CROP PROTECTION

Kennzahlen Crop Protection

[Tabelle 3.11]

|                                     | 2009         | 2010         | Veränderung  |              |
|-------------------------------------|--------------|--------------|--------------|--------------|
|                                     | in Mio €     | in Mio €     | in %         | wpb.<br>in % |
| <b>Umsatzerlöse</b>                 | <b>5.424</b> | <b>5.493</b> | <b>1,3</b>   | <b>-4,7</b>  |
| Herbicides                          | 1.986        | 1.944        | -2,1         | -8,3         |
| Fungicides                          | 1.564        | 1.570        | 0,4          | -5,0         |
| Insecticides                        | 1.234        | 1.370        | 11,0         | 4,2          |
| Seed Treatment                      | 640          | 609          | -4,8         | -10,2        |
| <b>Umsatzerlöse nach Regionen</b>   |              |              |              |              |
| Europa                              | 2.206        | 2.030        | -8,0         |              |
| Nordamerika                         | 1.081        | 956          | -11,6        |              |
| Asien/Pazifik                       | 862          | 1.021        | 18,4         |              |
| Lateinamerika/Afrika/Nahost         | 1.275        | 1.486        | 16,5         |              |
| <b>EBIT</b>                         | <b>713</b>   | <b>600</b>   | <b>-15,8</b> |              |
| Sondereinflüsse                     | -162         | 0            |              |              |
| <b>EBIT vor Sondereinflüssen*</b>   | <b>875</b>   | <b>600</b>   | <b>-31,4</b> |              |
| <b>EBITDA*</b>                      | <b>1.161</b> | <b>1.025</b> | <b>-11,7</b> |              |
| Sondereinflüsse                     | -140         | 0            |              |              |
| <b>EBITDA vor Sondereinflüssen*</b> | <b>1.301</b> | <b>1.025</b> | <b>-21,2</b> |              |
| EBITDA-Marge vor Sondereinflüssen*  | 24,0 %       | 18,7 %       |              |              |
| <b>Brutto-Cashflow**</b>            | <b>924</b>   | <b>743</b>   | <b>-19,6</b> |              |
| <b>Netto-Cashflow**</b>             | <b>591</b>   | <b>1.079</b> | <b>82,6</b>  |              |

wpb. = währungs- und portfoliobereinigt

\* Zur Definition siehe Kapitel 4.2 „Ermittlung des EBIT(DA) vor Sondereinflüssen“.

\*\* Zur Definition siehe Kapitel 4.5 „Finanzlage und Investitionen Bayer-Konzern“.

Der **Umsatz** im Segment **Crop Protection** stieg im Jahr 2010 um 1,3 % auf 5.493 Mio € (Vorjahr: 5.424 Mio €). Bereinigt um Währungseffekte sank der Umsatz um 4,7 %. In einem rückläufigen Markt verzeichneten wir bei der Saatgutbehandlung, im Herbizid- sowie im Fungizidgeschäft Umsatzrückgänge. Demgegenüber konnten wir unser Insektizidgeschäft ausbauen.

In der Region **Europa** sank der Umsatz um 8,0 % auf 2.030 Mio € (Vorjahr: 2.206 Mio €). Währungsbereinigt entspricht dies einem Rückgang von 9,6 %. Die negative Entwicklung in Europa betrifft alle Geschäftsfelder und ist hauptsächlich auf die außergewöhnlich schwache Geschäftsentwicklung in Frankreich zurückzuführen. Ursache hierfür war vor allem ein starker Marktrückgang durch ein sehr intensives Wettbewerbsumfeld und schlechte Witterungsbedingungen.

Die Umsatzerlöse unseres Pflanzenschutzgeschäfts in **Nordamerika** sanken um 11,6 % auf 956 Mio € (Vorjahr: 1.081 Mio €). Bereinigt um Wechselkurseffekte entspricht dies einem Rückgang von 18,4 %. Die Verschlechterung resultierte vor allem aus der enttäuschenden Entwicklung unseres Herbizidgeschäfts mit Preisrückgängen bei unseren Hauptprodukten im 1. Halbjahr. Hoher Wettbewerbsdruck durch Generikahersteller sowie hohe Bestände in den Distributionskanälen führten zu einem ebenfalls stark rückläufigen Fungizidgeschäft in den USA und zu sinkenden Verkaufsmengen unserer Produkte Prosaro® und Stratego®. Den us-Umsatz im Bereich Seed Treatment konnten wir allerdings steigern. Dies beruhte vor allem auf der erfolgreichen Markteinführung von Poncho®/Votivo™. Das neue Produkt enthält das Bakterium *Bacillus firmus*, eine biologische Komponente zum verbesserten Schutz vor im Boden lebenden Fadenwürmern (Nematoden).

In der Region **Asien/Pazifik** stieg der Umsatz um 18,4 % auf 1.021 Mio € (Vorjahr: 862 Mio €). Währungsbereinigt entspricht dies einer Erhöhung um 5,3 %. Die Marktentwicklung in dieser Region war geprägt von extremen Witterungseinflüssen. So war unser Geschäft in Japan witterungsbedingt stark rückläufig. Dies konnte allerdings durch eine gute Geschäftsentwicklung vor allem in Indien, Australien und China mehr als ausgeglichen werden. Getrieben von einer positiven Preisentwicklung für Agrarrohstoffe und günstigen Monsun-Bedingungen verbesserte sich das Insektizid-, Fungizid- und Herbizidgeschäft in Indien deutlich mit jeweils zweistelligen Zuwachsraten. In Australien trug vor allem das Herbizid Balance® in der Anwendung für Zuckerrohr und in China das Insektizid Belt® zur positiven Entwicklung bei.

Der Umsatz in der Region **Lateinamerika/Afrika/Nahost** wuchs um 16,5 % auf 1.486 Mio € (Vorjahr: 1.275 Mio €). Bereinigt um Währungseffekte entspricht dies einem Anstieg von 8,8 %. In Lateinamerika verzeichneten wir eine sehr gute Umsatzentwicklung, insbesondere im Fungizid-, Herbizid- und Insektizidgeschäft. Wachstumstreiber bei den Fungiziden war unser innovatives Fungizid Sphere® Max in Brasilien und Argentinien. Bei den Insektiziden erzielten wir vor allem in Brasilien ein eindrucksvolles Wachstum mit dem neuen Produkt Belt®, das bereits eine hervorragende Marktakzeptanz aufweist, und dem Insektizid Connect®. Die Herbizidumsätze konnten wir vor allem durch die erfreuliche Absatzentwicklung in Brasilien mit dem Produkt Finale® und dem Maisherbizid Soberan® weiter steigern. Bei den Saatgutbehandlungsmitteln blieben wir dagegen aufgrund eines schwachen Brasiliengeschäfts deutlich unter dem Vorjahr. In der Region Nahost wuchs unser Geschäft u. a. aufgrund einer besonders guten Entwicklung in der Türkei erfreulich. In Afrika erzielten wir ein moderates Umsatzplus.

Im Segment **Crop Protection** verringerte sich das **EBIT** um 15,8 % auf 600 Mio € (Vorjahr: 713 Mio €). Sondereinflüsse fielen im Geschäftsjahr 2010 nicht an (Vorjahr: -162 Mio €). Somit lag das EBIT vor Sondereinflüssen um 31,4 % unter dem Vorjahreswert von 875 Mio €. Das **EBITDA** vor Sondereinflüssen im Segment Crop Protection sank um 21,2 % auf 1.025 Mio € (Vorjahr: 1.301 Mio €). Die niedrigeren Absatzmengen sowie die damit einhergehende geringere Auslastung unserer Produktionsanlagen im 1. Halbjahr wirkten sich ergebnisbelastend aus. Zudem waren Preisrückgänge in Nordamerika zu verkräften.

#### ENVIRONMENTAL SCIENCE/BIOSCIENCE

Im Geschäftsbereich **Environmental Science/BioScience** konnten wir im Jahr 2010 den Umsatz um 23,1 % auf 1.337 Mio € (Vorjahr: 1.086 Mio €) steigern. Währungs- und portfoliobereinigt entspricht dies einem deutlichen Anstieg um 15,6 %.



### 3. Geschäftsentwicklung nach Teilkonzernen, Segmenten und Regionen

#### 3.2 CropScience

Kennzahlen Environmental Science/BioScience

[Tabelle 3.12]

|                                     | 2009         | 2010         | Veränderung |              |
|-------------------------------------|--------------|--------------|-------------|--------------|
|                                     | in Mio €     | in Mio €     | in %        | wpb.<br>in % |
| <b>Umsatzerlöse</b>                 | <b>1.086</b> | <b>1.337</b> | <b>23,1</b> | <b>15,6</b>  |
| Environmental Science               | 583          | 650          | 11,5        | 5,4          |
| BioScience                          | 503          | 687          | 36,6        | 27,4         |
| <b>Umsatzerlöse nach Regionen</b>   |              |              |             |              |
| Europa                              | 334          | 351          | 5,1         |              |
| Nordamerika                         | 448          | 579          | 29,2        |              |
| Asien/Pazifik                       | 166          | 208          | 25,3        |              |
| Lateinamerika/Afrika/Nahost         | 138          | 199          | 44,2        |              |
| <b>EBIT</b>                         | <b>85</b>    | <b>-339</b>  |             |              |
| Sondereinflüsse                     | -57          | -526         |             |              |
| <b>EBIT vor Sondereinflüssen*</b>   | <b>142</b>   | <b>187</b>   | <b>31,7</b> |              |
| <b>EBITDA*</b>                      | <b>150</b>   | <b>-258</b>  |             |              |
| Sondereinflüsse                     | -57          | -526         |             |              |
| <b>EBITDA vor Sondereinflüssen*</b> | <b>207</b>   | <b>268</b>   | <b>29,5</b> |              |
| EBITDA-Marge vor Sondereinflüssen*  | 19,1 %       | 20,0 %       |             |              |
| <b>Brutto-Cashflow**</b>            | <b>119</b>   | <b>-197</b>  |             |              |
| <b>Netto-Cashflow**</b>             | <b>154</b>   | <b>320</b>   |             |              |

wpb. = währungs- und portfoliobereinigt

\* Zur Definition siehe Kapitel 4.2 „Ermittlung des EBIT(DA) vor Sondereinflüssen“.

\*\* Zur Definition siehe Kapitel 4.5 „Finanzlage und Investitionen Bayer-Konzern“.

Der Umsatz im Geschäftsbereich **Environmental Science** wuchs um 11,5 % auf 650 Mio € (Vorjahr: 583 Mio €). Währungsbereinigt bedeutet das eine Verbesserung um 5,4 %, zu der alle Regionen mit einer positiven Geschäftsentwicklung beitrugen. Unser Geschäft mit Produkten für private Konsumenten konnten wir deutlich steigern. Hierzu hat vor allem die gute Entwicklung in Deutschland beigetragen. Auch die Umsätze mit Produkten für professionelle Anwender konnten wir ausbauen, besonders in Afrika u. a. mit dem Insektizid Ficam® und in den USA mit dem neuen Insektizid Temprid®. Wegen der ungünstigen Veränderung der Rahmenbedingungen in Frankreich blieb der Umsatz dort jedoch klar unter den Vorjahreswerten.

Im Geschäftsbereich **BioScience** steigerten wir unseren Umsatz um 36,6 % auf 687 Mio € (Vorjahr: 503 Mio €). Bereinigt um Währungs- und Portfolioeffekte erzielten wir einen kräftigen Umsatzzuwachs von 27,4 %. In den Hauptkulturen Baumwolle, Raps, Reis und Gemüse realisierten wir jeweils ein zweistelliges Umsatzwachstum. Die größte Steigerung verzeichneten wir in unserem Baumwollsaatgutgeschäft in Nordamerika durch unsere Produktinnovationen und eine Erholung des Baumwollmarktes. Auch unser Rapssaatgutgeschäft unter der Marke InVigor® konnten wir in Nordamerika weiter ausbauen. Zum einen haben wir unsere Saatgutpreise erhöht, während wir bei den entsprechenden Raps-Herbiziden die Preise senkten. Zum anderen war die Entwicklung auf größere Absatzmengen als Folge ausgeweiteter Anbauflächen zurückzuführen. Der Umsatz mit Reissaatgut unter der Marke Arize® wuchs besonders in Asien – trotz widriger Witterungsbedingungen. Das Geschäft mit Gemüsesaatgut konnten wir in allen Regionen ausbauen, besonders deutlich in Lateinamerika/Afrika/Nahost und Asien/Pazifik.

Das **EBIT** bei Environmental Science/BioScience sank um 424 Mio € auf -339 Mio € (Vorjahr: 85 Mio €). Hierin sind Sonderaufwendungen in Höhe von insgesamt 526 Mio € (Vorjahr: 57 Mio €) für ein angestrebtes Vergleichsprogramm sowie Rechts- und Verteidigungskosten im Zusammenhang mit Verfahren wegen gentechnisch veränderter Reispflanzen (LL RICE) in den USA enthalten. Das **EBIT vor Sondereinflüssen** stieg um 31,7 % auf 187 Mio € (Vorjahr: 142 Mio €). Das **EBITDA** vor Sondereinflüssen im Segment Environmental Science/BioScience lag mit 268 Mio € um 29,5 % über dem Vorjahreswert von 207 Mio €. Hierzu trug insbesondere ein Mengenwachstum in beiden Geschäftsfeldern bei. Darüber hinaus konnten wir bei BioScience insgesamt höhere Verkaufspreise und dadurch verbesserte Margen verzeichnen, sodass wir die gesteigerten Aufwendungen für den Ausbau unserer Forschungs- und Entwicklungsaktivitäten mehr als ausgleichen konnten.

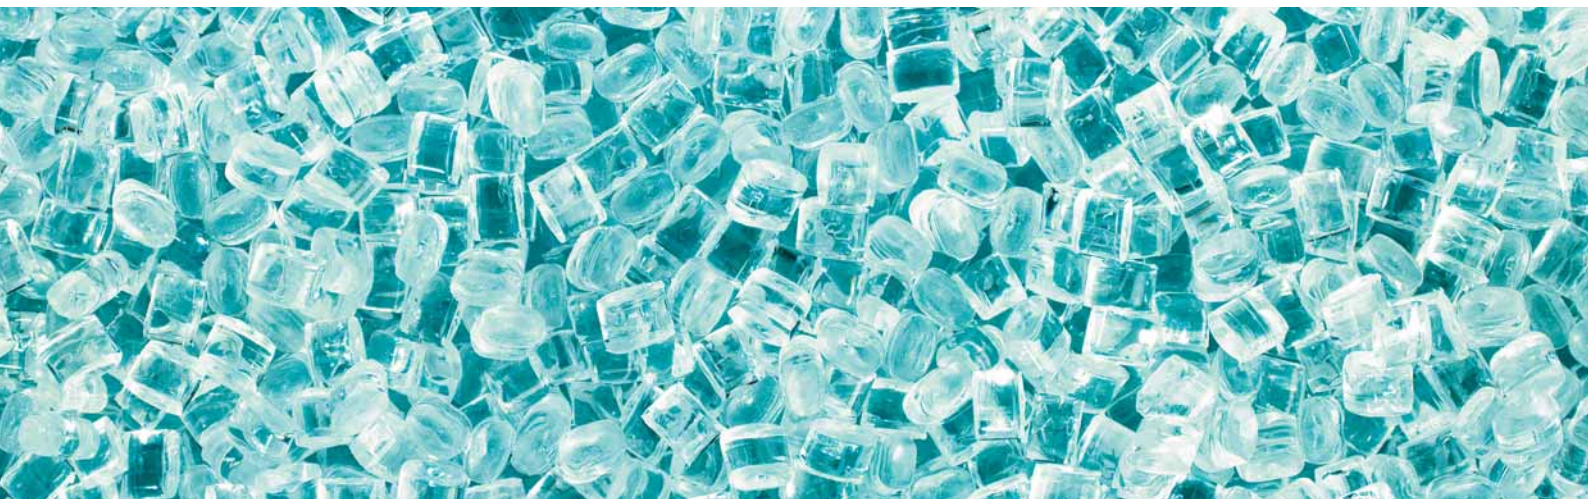

### 3.3 MaterialScience

Kennzahlen MaterialScience

[Tabelle 3.13]

|                                         | 2009         | 2010          | Veränderung  |              |
|-----------------------------------------|--------------|---------------|--------------|--------------|
|                                         | in Mio €     | in Mio €      | in %         | wpb.<br>in % |
| <b>Umsatzerlöse</b>                     | <b>7.520</b> | <b>10.154</b> | <b>35,0</b>  | <b>30,1</b>  |
| <b>Umsatzveränderungen</b>              |              |               |              |              |
| Menge                                   | -12,4 %      | 23,8 %        |              |              |
| Preis                                   | -12,3 %      | 6,3 %         |              |              |
| Währung                                 | 1,6 %        | 4,9 %         |              |              |
| Portfolio                               | 0,3 %        | 0,0 %         |              |              |
| <b>Umsatzerlöse nach Business Units</b> |              |               |              |              |
| Polyurethanes                           | 3.783        | 5.024         | 32,8         | 27,8         |
| Polycarbonates                          | 1.873        | 2.791         | 49,0         | 42,9         |
| Coatings, Adhesives, Specialties        | 1.364        | 1.791         | 31,3         | 27,2         |
| Industrial Operations                   | 500          | 548           | 9,6          | 7,7          |
| <b>Umsatzerlöse nach Regionen</b>       |              |               |              |              |
| Europa                                  | 3.054        | 3.950         | 29,3         |              |
| Nordamerika                             | 1.536        | 2.022         | 31,6         |              |
| Asien/Pazifik                           | 1.951        | 2.907         | 49,0         |              |
| Lateinamerika/Afrika/Nahost             | 979          | 1.275         | 30,2         |              |
| <b>EBIT</b>                             | <b>-266</b>  | <b>780</b>    |              |              |
| <i>Sondereinflüsse</i>                  | <i>-140</i>  | <i>0</i>      |              |              |
| <b>EBIT vor Sondereinflüssen*</b>       | <b>-126</b>  | <b>780</b>    |              |              |
| <b>EBITDA*</b>                          | <b>341</b>   | <b>1.356</b>  |              |              |
| <i>Sondereinflüsse</i>                  | <i>-105</i>  | <i>0</i>      |              |              |
| <b>EBITDA vor Sondereinflüssen*</b>     | <b>446</b>   | <b>1.356</b>  |              |              |
| EBITDA-Marge vor Sondereinflüssen*      | 5,9 %        | 13,4 %        |              |              |
| <b>Brutto-Cashflow**</b>                | <b>319</b>   | <b>1.058</b>  |              |              |
| <b>Netto-Cashflow**</b>                 | <b>849</b>   | <b>763</b>    | <b>-10,1</b> |              |

wpb. = währungs- und portfoliobereinigt

\* Zur Definition siehe Kapitel 4.2 „Ermittlung des EBIT(DA) vor Sondereinflüssen“.

\*\* Zur Definition siehe Kapitel 4.5 „Finanzlage und Investitionen Bayer-Konzern“.

Das Bild oben zeigt Granulat  
des Hochleistungskunststoffs  
Makrolon®.

Die positive Geschäftsentwicklung von MaterialScience im Jahr 2010 war durch die deutliche konjunkturelle Erholung von der globalen Finanz- und Wirtschaftskrise geprägt. Während das Geschäft zu Jahresbeginn noch beeinträchtigt war, erreichten die Umsätze der vergangenen drei Quartale wieder das Vorkrisenniveau. Im Jahr 2010 stieg der **Umsatz** auf 10.154 Mio € und lag damit um 35,0 % (wpb. +30,1 %) über dem Vorjahreswert von 7.520 Mio €. Dieser erhebliche Zuwachs resultierte aus der signifikant gestiegenen Nachfrage in allen unseren Hauptabnehmerbranchen, die in sämtlichen Business Units und Regionen zu Mengenausweitungen im zweistelligen Prozentbereich führten. Dadurch stiegen die Absatzmengen wieder auf das Vorkrisenniveau. Darüber hinaus erzielten wir im Vergleich zum Vorjahr insgesamt höhere Absatzpreise. Deutliche Preisanhebungen konnten wir in den Regionen Asien/Pazifik, Europa und Lateinamerika/Afrika/Nahost durchsetzen. In Nordamerika lagen die Preise auf dem Vorjahresniveau.

Umsatzerlöse MaterialScience pro Quartal

[Grafik 3.14]

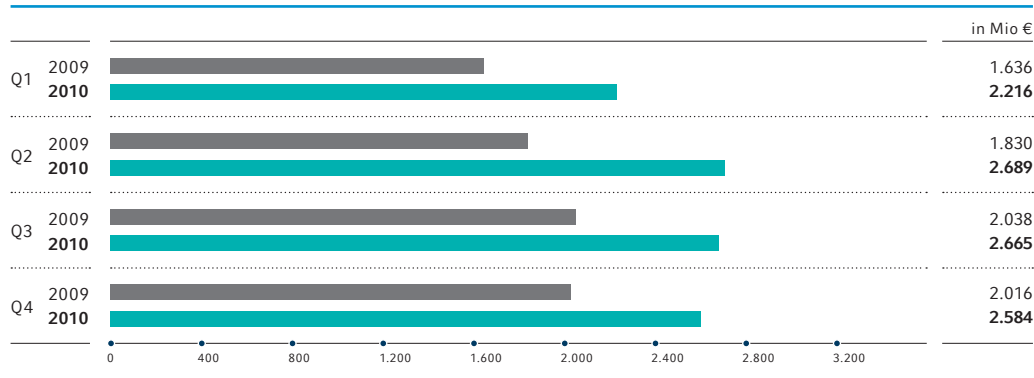

Der Umsatz der Business Unit **Polyurethanes** erhöhte sich um 32,8 % auf 5.024 Mio € (Vorjahr: 3.783 Mio €). Währungs- und portfoliobereinigt entspricht dies einem Wachstum von 27,8 %. Hierzu trugen vor allem die wesentlich höheren Absatzmengen bei, die wir in allen Produktgruppen – Diphenylmethan-Diisocyanat (MDI), Toluylen-Diisocyanat (TDI) sowie Polyether – und in allen Regionen erreichten. Die höchsten absoluten Steigerungsraten registrierten wir dabei in Europa und Asien/Pazifik. In diesen beiden Regionen haben wir darüber hinaus auch die Verkaufspreise signifikant angehoben. Dadurch konnten wir – bei stagnierenden Preisen in Lateinamerika/Afrika/Nahost und Nordamerika – insgesamt einen positiven Preiseffekt erzielen.



In der Business Unit **Polycarbonates** stieg der Umsatz um 49,0 % (wb. +42,9 %) auf 2.791 Mio € (Vorjahr: 1.873 Mio €). Ausschlaggebend hierfür war insbesondere die erfreuliche Geschäftsentwicklung unserer Produktgruppe Granulate mit erheblichen Mengen- und Preissteigerungen in allen Regionen. Auch unsere Produktgruppe Platten/Halbzeuge konnte den Umsatz erhöhen. Dabei profitierten wir von Mengenausweitungen in sämtlichen Regionen, die den Effekt aus insgesamt niedrigeren Preisen überkompensierten.

Die Business Unit **Coatings, Adhesives, Specialties** erzielte einen Umsatz von 1.791 Mio € und übertraf damit den Vorjahreswert von 1.364 Mio € um 31,3 % (wb. +27,2 %). Dies war auf die signifikante Zunahme der Absatzmengen in allen Produktgruppen und Regionen zurückzuführen. Dabei wirkte sich der Nachfrageanstieg in Asien/Pazifik und Europa besonders positiv aus. Die niedrigen Verkaufspreise des 1. Quartals konnten wir im Jahresverlauf wieder anheben. Sie erreichten auf Jahresbasis das Niveau von 2009.

Der Umsatz im Bereich **Industrial Operations** wuchs um 9,6 % (wb. +7,7 %) auf 548 Mio € (Vorjahr: 500 Mio €). In den beiden Hauptabsatzregionen Europa und Nordamerika verzeichneten wir dabei deutliche Mengensteigerungen, die die Preisrückgänge mehr als ausgleichen konnten.

#### EBIT MaterialScience pro Quartal

[Grafik 3.15]

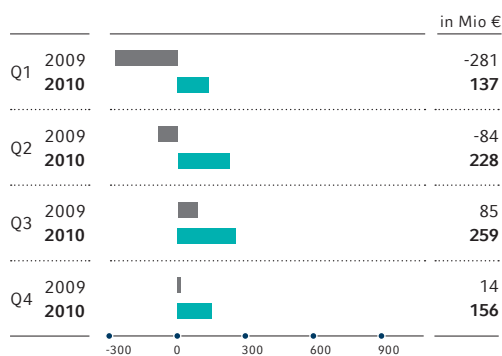

Vorquartale 2010 angepasst

#### EBITDA vor Sondereinflüssen MaterialScience pro Quartal

[Grafik 3.16]

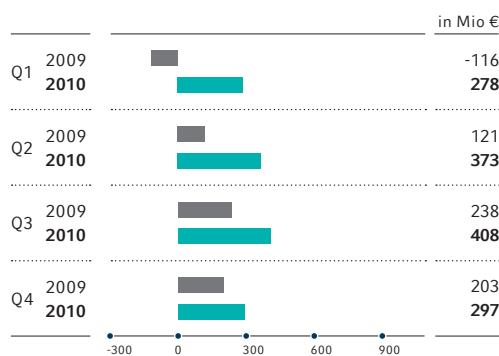

Vorquartale 2010 angepasst

Die deutlich verbesserte Geschäftssituation schlug sich auch im Ergebnis nieder. Das **EBIT** erhöhte sich auf 780 Mio € (Vorjahr: -266 Mio €). Sonderaufwendungen fielen nicht an (Vorjahr: -140 Mio €). Mit 1.356 Mio € lag das **EBITDA** vor Sondereinflüssen erheblich über Vorjahr (446 Mio €). Hierzu trugen vor allem die wesentlich größeren Absatzmengen bei. Zudem profitierten wir von den erhöhten Absatzpreisen unserer Produkte, die den Effekt aus gestiegenen Einkaufspreisen auf den Rohstoffmärkten überkompensieren konnten. Ferner wirkten sich Effizienzverbesserungen positiv aus.

3. Geschäftsentwicklung nach Teilkonzernen, Segmenten und Regionen  
 3.4 Geschäftsentwicklung nach Regionen

## 3.4 Geschäftsentwicklung nach Regionen

Umsatzerlöse nach Regionen und Segmenten (nach Verbleib)

|                                    | Europa        |               |             |              | Nordamerika  |              |             |              |
|------------------------------------|---------------|---------------|-------------|--------------|--------------|--------------|-------------|--------------|
|                                    | 2009          | 2010          |             |              | 2009         | 2010         |             |              |
|                                    | in Mio €      | in Mio €      | % Vj.       | wb.<br>% Vj. | in Mio €     | in Mio €     | % Vj.       | wb.<br>% Vj. |
| <b>HealthCare</b>                  | <b>6.344</b>  | <b>6.375</b>  | <b>0,5</b>  | <b>-1,1</b>  | <b>4.634</b> | <b>4.666</b> | <b>0,7</b>  | <b>-4,9</b>  |
| Pharma                             | 4.107         | 4.082         | -0,6        | -2,0         | 2.712        | 2.531        | -6,7        | -11,5        |
| Consumer Health                    | 2.237         | 2.293         | 2,5         | 0,8          | 1.922        | 2.135        | 11,1        | 4,4          |
| <b>CropScience</b>                 | <b>2.540</b>  | <b>2.381</b>  | <b>-6,3</b> | <b>-7,7</b>  | <b>1.529</b> | <b>1.535</b> | <b>0,4</b>  | <b>-6,4</b>  |
| Crop Protection                    | 2.206         | 2.030         | -8,0        | -9,6         | 1.081        | 956          | -11,6       | -18,4        |
| Environmental Science/BioScience   | 334           | 351           | 5,1         | 4,5          | 448          | 579          | 29,2        | 22,7         |
| <b>MaterialScience</b>             | <b>3.054</b>  | <b>3.950</b>  | <b>29,3</b> | <b>29,2</b>  | <b>1.536</b> | <b>2.022</b> | <b>31,6</b> | <b>24,5</b>  |
| <b>Konzern (inkl. Überleitung)</b> | <b>12.968</b> | <b>13.751</b> | <b>6,0</b>  | <b>5,0</b>   | <b>7.705</b> | <b>8.228</b> | <b>6,8</b>  | <b>0,7</b>   |

Vj. = Veränderung zum Vorjahr; wb. = währungsbereinigt

## 4. Ertrags-, Finanz- und Vermögenslage Bayer-Konzern

### 4.1 Ertragslage Bayer-Konzern

Gewinn- und Verlustrechnung Bayer-Konzern (Kurzfassung)

[Tabelle 3.15]

|                                                                   | 2009          | 2010          | Veränderung |
|-------------------------------------------------------------------|---------------|---------------|-------------|
|                                                                   | in Mio €      | in Mio €      | in %        |
| <b>Umsatzerlöse</b>                                               | <b>31.168</b> | <b>35.088</b> | <b>12,6</b> |
| Herstellungskosten                                                | 15.135        | 17.103        | 13,0        |
| Vertriebskosten                                                   | 7.923         | 8.803         | 11,1        |
| Forschungs- und Entwicklungskosten                                | 2.746         | 3.053         | 11,2        |
| Allgemeine Verwaltungskosten                                      | 1.623         | 1.647         | 1,5         |
| Sonstige betriebliche Aufwendungen und Erträge                    | -735          | -1.752        | .           |
| <b>EBIT (Operatives Ergebnis)</b>                                 | <b>3.006</b>  | <b>2.730</b>  | <b>-9,2</b> |
| <b>Finanzergebnis</b>                                             | <b>-1.136</b> | <b>-1.009</b> | <b>11,2</b> |
| <b>Ergebnis vor Ertragsteuern</b>                                 | <b>1.870</b>  | <b>1.721</b>  | <b>-8,0</b> |
| Ertragsteuern                                                     | -511          | -411          | -19,6       |
| <b>Ergebnis nach Steuern</b>                                      | <b>1.359</b>  | <b>1.310</b>  | <b>-3,6</b> |
| davon auf andere Gesellschafter entfallend                        | 0             | 9             | .           |
| davon auf die Aktionäre der Bayer AG entfallend (Konzernergebnis) | 1.359         | 1.301         | -4,3        |

Der Umsatz des Bayer-Konzerns stieg – insbesondere aufgrund der Erholung des MaterialScience-Geschäfts – gegenüber dem Vorjahr um 12,6 % auf 35.088 Mio € (Vorjahr: 31.168 Mio €). Bereinigt um Währungs- und Portfolioeffekte entspricht dies einem Wachstum von 8,0 %.

[Tabelle 3.14]

|  | Asien/Pazifik |          |       |              | Lateinamerika/Afrika/Nahost |          |       |              | Gesamt   |          |       |              |
|--|---------------|----------|-------|--------------|-----------------------------|----------|-------|--------------|----------|----------|-------|--------------|
|  | 2009          | 2010     |       |              | 2009                        | 2010     |       |              | 2009     | 2010     |       |              |
|  | in Mio €      | in Mio € | % Vj. | wb.<br>% Vj. | in Mio €                    | in Mio € | % Vj. | wb.<br>% Vj. | in Mio € | in Mio € | % Vj. | wb.<br>% Vj. |
|  | 2.677         | 3.269    | 22,1  | 9,7          | 2.333                       | 2.603    | 11,6  | 8,9          | 15.988   | 16.913   | 5,8   | 1,1          |
|  | 2.136         | 2.629    | 23,1  | 10,8         | 1.512                       | 1.666    | 10,2  | 9,3          | 10.467   | 10.908   | 4,2   | -0,2         |
|  | 541           | 640      | 18,3  | 4,9          | 821                         | 937      | 14,1  | 8,3          | 5.521    | 6.005    | 8,8   | 3,5          |
|  | 1.028         | 1.229    | 19,6  | 6,4          | 1.413                       | 1.685    | 19,2  | 10,9         | 6.510    | 6.830    | 4,9   | -1,1         |
|  | 862           | 1.021    | 18,4  | 5,3          | 1.275                       | 1.486    | 16,5  | 8,8          | 5.424    | 5.493    | 1,3   | -4,7         |
|  | 166           | 208      | 25,3  | 12,3         | 138                         | 199      | 44,2  | 30,4         | 1.086    | 1.337    | 23,1  | 16,5         |
|  | 1.951         | 2.907    | 49,0  | 39,3         | 979                         | 1.275    | 30,2  | 23,6         | 7.520    | 10.154   | 35,0  | 30,1         |
|  | 5.712         | 7.481    | 31,0  | 19,3         | 4.783                       | 5.628    | 17,7  | 12,5         | 31.168   | 35.088   | 12,6  | 7,7          |

Die Herstellungskosten stiegen um 13,0 % auf 17.103 Mio €. Ursächlich hierfür waren vor allem die deutlich höheren Herstellungskosten bei MaterialScience, die im Wesentlichen aus den gestiegenen Absatzmengen sowie den im Jahresdurchschnitt höheren Rohstoffpreisen resultierten. Der Anteil der Herstellungskosten am Gesamtumsatz betrug 48,7 % (Vorjahr: 48,6 %). Unsere Vertriebskosten stiegen gegenüber dem Vorjahr um 11,1 % auf 8.803 Mio € (Vorjahr: 7.923 Mio €). Dies entspricht einem Vertriebskostenanteil von 25,1 % (Vorjahr: 25,4 %). Der Anstieg ist im Wesentlichen auf höhere Vertriebskosten bei HealthCare zurückzuführen. Die Aufwendungen für Forschung und Entwicklung haben wir im Jahr 2010 weiter gesteigert. Sie wuchsen um 11,2 % auf 3.053 Mio € (Vorjahr: 2.746 Mio €). Bezogen auf den Umsatz ergibt sich daraus eine Quote von 8,7 % (Vorjahr: 8,8 %). Bei den allgemeinen Verwaltungskosten verzeichneten wir lediglich einen leichten Anstieg von 1,5 % auf 1.647 Mio € (Vorjahr: 1.623 Mio €). Der negative Saldo aus sonstigen betrieblichen Aufwendungen und Erträgen in Höhe von 1.752 Mio € resultierte im Wesentlichen aus Sonderaufwendungen im Zusammenhang mit außerplanmäßigen Abwertungen, Rechtsfällen und Restrukturierungen (siehe dazu auch Kapitel 4.2 „Ermittlung des EBIT(DA) vor Sonderinflüssen“).

Das EBIT des Jahres 2010 betrug 2.730 Mio € (Vorjahr: 3.006 Mio €).

Das Finanzergebnis verbesserte sich um 127 Mio € auf -1.009 Mio € (Vorjahr: -1.136 Mio €). Darin waren u. a. ein verbessertes Zinsergebnis von -499 Mio € (Vorjahr: -548 Mio €), Aufwendungen für die Aufzinsung von Pensions- und sonstigen Rückstellungen von 372 Mio € (Vorjahr: 436 Mio €), ein Beteiligungsergebnis von -59 Mio € (Vorjahr: -59 Mio €) sowie ein Kursergebnis von -70 Mio € (Vorjahr: -92 Mio €) enthalten. Die Veränderung im Zinsergebnis ist im Wesentlichen auf den Abbau der Finanzverschuldung zurückzuführen. Die Verringerung des Zinsaufwandes im Zusammenhang mit Pensionen und sonstigen Rückstellungen beruht insbesondere auf einem Anstieg der Erträge aus dem Pensionsvermögen, die mit den Aufwendungen aus der Aufzinsung der Versorgungszusagen saldiert ausgewiesen werden.

Für das Jahr 2010 haben wir einen Steueraufwand von 411 Mio € (Vorjahr: 511 Mio €) berücksichtigt. Das Ergebnis nach Steuern betrug 1.310 Mio € (Vorjahr: 1.359 Mio €). Der Anteil anderer Gesellschafter am Ergebnis belief sich auf 9 Mio € (Vorjahr: 0 Mio €). Im Geschäftsjahr 2010 erwirtschaftete Bayer ein Konzernergebnis von 1.301 Mio € (Vorjahr: 1.359 Mio €).



## 4.2 Ermittlung des EBIT(DA) vor Sondereinflüssen

Für den Bayer-Konzern bedeutende Kennzahlen sind das EBIT vor Sondereinflüssen und das EBITDA vor Sondereinflüssen. Um eine bessere Beurteilung der operativen Geschäftstätigkeit zu ermöglichen, wurden die Kennzahlen EBIT und EBITDA – wie in der nachfolgenden Tabelle dargestellt – um Sondereinflüsse bereinigt. Sondereinflüsse sind einmalige bzw. in ihrer Art oder Höhe nicht regelmäßig wiederkehrende Effekte. „EBITDA“, „EBITDA vor Sondereinflüssen“ und „EBIT vor Sondereinflüssen“ stellen Kennzahlen dar, die nach den internationalen Rechnungslegungsvorschriften nicht definiert sind. Daher sollten sie nur als ergänzende Informationen angesehen werden. Das Unternehmen geht davon aus, dass das EBITDA vor Sondereinflüssen eine geeignetere Kennzahl für die Beurteilung der operativen Geschäftstätigkeit darstellt, da es weder durch Abschreibungen auf immaterielle Vermögenswerte und Sachanlagen noch durch Sondereinflüsse belastet ist. Das Unternehmen möchte dem Leser mit dieser Kennzahl ein Bild der Ertragslage vermitteln, das im Zeitablauf vergleichbarer und zutreffender informiert. Die EBITDA-Marge vor Sondereinflüssen, die sich aus der Relation von EBITDA vor Sondereinflüssen zu Umsatzerlösen ergibt, dient als relative Kennzahl zum internen und externen Vergleich der operativen Ertragskraft.

Die Abschreibungen stiegen im Geschäftsjahr 2010 um 26,6 % auf 3.556 Mio € (Vorjahr: 2.809 Mio €). Diese setzen sich zusammen aus Abschreibungen auf immaterielle Vermögenswerte von 2.308 Mio € (Vorjahr: 1.537 Mio €) und aus Abschreibungen auf Sachanlagen von 1.248 Mio € (Vorjahr: 1.272 Mio €). In den Abschreibungen waren außerplanmäßige Abschreibungen in Höhe von 985 Mio € enthalten, von denen 78 Mio € nicht als Sondereinflüsse berücksichtigt wurden. Die außerplanmäßigen Abwertungen beinhalten zudem 56 Mio € für eine Wertberichtigung auf sonstige Forderungen.

Überleitung Sondereinflüsse

[Tabelle 3.16]

|                                           | EBIT*<br>2009 | EBIT*<br>2010 | EBITDA**<br>2009 | EBITDA**<br>2010 |
|-------------------------------------------|---------------|---------------|------------------|------------------|
|                                           | in Mio €      | in Mio €      | in Mio €         | in Mio €         |
| <b>Nach Sondereinflüssen</b>              | <b>3.006</b>  | <b>2.730</b>  | <b>5.815</b>     | <b>6.286</b>     |
| <b>HealthCare</b>                         | <b>372</b>    | <b>1.169</b>  | <b>320</b>       | <b>289</b>       |
| Schering-Integration                      | 87            | 0             | 79               | 0                |
| davon Veräußerungsertrag                  | -114          | 0             | -114             | 0                |
| Außerplanmäßige Abwertungen               | 32            | 930           | 0                | 56               |
| Restrukturierung                          | 47            | 62            | 35               | 56               |
| Rechtsfälle                               | 180           | 177           | 180              | 177              |
| Erhöhter Beitrag Pensionssicherungsverein | 26            | 0             | 26               | 0                |
| <b>CropScience</b>                        | <b>219</b>    | <b>526</b>    | <b>197</b>       | <b>526</b>       |
| Restrukturierung                          | 177           | 0             | 155              | 0                |
| Rechtsfälle                               | 35            | 526           | 35               | 526              |
| Erhöhter Beitrag Pensionssicherungsverein | 7             | 0             | 7                | 0                |
| <b>MaterialScience</b>                    | <b>140</b>    | <b>0</b>      | <b>105</b>       | <b>0</b>         |
| Restrukturierung                          | 130           | 0             | 95               | 0                |
| Erhöhter Beitrag Pensionssicherungsverein | 10            | 0             | 10               | 0                |
| <b>Überleitung</b>                        | <b>35</b>     | <b>27</b>     | <b>35</b>        | <b>0</b>         |
| Rechtsfälle                               | 10            | 0             | 10               | 0                |
| Erhöhter Beitrag Pensionssicherungsverein | 25            | 0             | 25               | 0                |
| Außerplanmäßige Abwertungen               | 0             | 27            | 0                | 0                |
| <b>Summe Sondereinflüsse</b>              | <b>766</b>    | <b>1.722</b>  | <b>657</b>       | <b>815</b>       |
| <b>Vor Sondereinflüssen</b>               | <b>3.772</b>  | <b>4.452</b>  | <b>6.472</b>     | <b>7.101</b>     |

\* EBIT: operatives Ergebnis gemäß Gewinn- und Verlustrechnung.

\*\* EBITDA: EBIT zuzüglich Abschreibungen auf immaterielle Vermögenswerte und Sachanlagen.

## 4.3 Bereinigtes Ergebnis je Aktie

Das Ergebnis je Aktie gemäß IFRS wird sowohl durch Effekte aus der Kaufpreisaufteilung für Akquisitionen als auch durch weitere Sondersachverhalte beeinflusst. Um die Vergleichbarkeit unserer Performance im Zeitablauf zu erhöhen, ermitteln wir ein „Bereinigtes Konzernergebnis“, das um sämtliche Abschreibungen auf immaterielle Vermögenswerte, außerplanmäßige Abschreibungen auf Sachanlagen und Sondereinflüsse auf das EBITDA sowie der darauf bezogenen Steuereffekte bereinigt ist.

Basierend auf diesem bereinigten Konzernergebnis weisen wir analog zum Ergebnis je Aktie ein bereinigtes Ergebnis je Aktie aus, das wir als Basis für unsere Dividendenpolitik verwenden. Im Geschäftsjahr 2010 erzielten wir ein bereinigtes Ergebnis je Aktie von 4,19 € (Vorjahr: 3,64 €).

Bereinigtes Ergebnis je Aktie „Core EPS“

[Tabelle 3.17]

|                                                                                                      | 2009               | 2010               |
|------------------------------------------------------------------------------------------------------|--------------------|--------------------|
|                                                                                                      | in Mio €           | in Mio €           |
| <b>EBIT gemäß Gewinn- und Verlustrechnung</b>                                                        | <b>3.006</b>       | <b>2.730</b>       |
| Abschreibungen auf immaterielle Vermögenswerte                                                       | 1.537              | 2.308              |
| Außerplanmäßige Abschreibungen auf Sachanlagen                                                       | 88                 | 53                 |
| Sondereinflüsse (ohne Abschreibungen)                                                                | 657                | 815                |
| <b>„Core EBIT“</b>                                                                                   | <b>5.288</b>       | <b>5.906</b>       |
| Finanzergebnis (gemäß Gewinn- und Verlustrechnung)                                                   | -1.136             | -1.009             |
| Ertragsteuern (gemäß Gewinn- und Verlustrechnung)                                                    | -511               | -411               |
| Steuereffekte bezogen auf Abschreibungen und Sondereinflüsse                                         | -685               | -1.012             |
| Ergebnis nach Steuern auf andere Gesellschafter entfallend (gemäß Gewinn- und Verlustrechnung)       | 0                  | -9                 |
| <b>Bereinigtes Konzernergebnis</b>                                                                   | <b>2.956</b>       | <b>3.465</b>       |
| Finanzierungsaufwendungen im Zusammenhang mit der Pflichtwandelanleihe bereinigt um den Steuereffekt | 47                 | 0                  |
| <b>Angepasstes bereinigtes Konzernergebnis</b>                                                       | <b>3.003</b>       | <b>3.465</b>       |
|                                                                                                      | in Stück           | in Stück           |
| <b>Gewichtete durchschnittliche Anzahl der ausgegebenen Stammaktien</b>                              | <b>801.050.237</b> | <b>826.947.808</b> |
| Effekt aus der (potenziellen) Wandlung der Pflichtwandelanleihe                                      | 24.955.936         | 0                  |
| <b>Angepasste gewichtete durchschnittliche Anzahl der ausstehenden Stammaktien</b>                   | <b>826.006.173</b> | <b>826.947.808</b> |
| <b>Bereinigtes Ergebnis je Aktie „Core EPS“ (in €)</b>                                               | <b>3,64</b>        | <b>4,19</b>        |

Die Berechnung des Ergebnisses je Aktie gemäß IFRS stellen wir im Konzernabschluss, Anhangangabe [16] dar. Das (angepasste) bereinigte Konzernergebnis, das bereinigte Ergebnis je Aktie („Core EPS“) sowie das „Core EBIT“ stellen Kennzahlen dar, die nach den internationalen Rechnungslegungsvorschriften nicht definiert sind.

## 4.4 Wertorientierte Konzernsteuerung

### CASH VALUE ADDED ALS GRUNDKONZEPT

Ein vorrangiges Ziel des Bayer-Konzerns ist die nachhaltige Steigerung des Unternehmenswerts. Zur Planung, Steuerung und Kontrolle unserer Geschäfte verwenden wir daher ein konzernweites Wertmanagementsystem. Eine wichtige wertorientierte Steuerungsgröße ist der Cash Value Added (CVA). Der CVA gibt an, inwieweit sowohl die Eigen- und Fremdkapitalkosten als auch der Werteverzehr, d. h. die Abnutzung der Anlagen, verdient werden konnten. Ist er positiv, so hat das Unternehmen bzw. die jeweilige Geschäftseinheit die Mindestanforderungen übertroffen. Ist er negativ, konnten die erwarteten Kapitalkosten sowie der Werteverzehr nicht erwirtschaftet werden. Der CVA ist eine einperiodische Kennziffer. Für eine dynamische, d. h. mehrperiodische Betrachtung setzen wir daher den Delta Cash Value Added (Delta CVA) ein. Der Delta CVA gibt die Veränderung des CVA gegenüber der Vorperiode an und stellt die zweite zentrale Steuerungsgröße im Wertmanagement dar. Ist er positiv, so konnte der Wert des Unternehmens gesteigert werden.

Die wertorientierten Kennzahlen unterstützen das Management in erster Linie bei strategischen Entscheidungen im Hinblick auf die Optimierung des Portfolios sowie bei der Ressourcenallokation für Akquisitionen und Investitionen. Auf operativer Ebene stehen Werttreiber mit Fokus auf Wachstum (Umsatz), Kosteneffizienz (EBITDA) und Kapitaleffizienz (Working Capital, Investitionsausgaben) im Mittelpunkt, da diese die Wertschaffung unmittelbar beeinflussen.

### KAPITALKOSTENBESTIMMUNG

Die Kapitalkosten werden bei Bayer als gewichteter Durchschnitt der Eigen- und Fremdkapitalkosten zum Jahresbeginn berechnet ( $wacc = \text{Weighted Average Cost of Capital}$ ). Die Eigenkapitalkosten werden als Renditeerwartung der Aktionäre aus Kapitalmarktinformationen abgeleitet. Als Fremdkapitalkosten legen wir die Finanzierungskonditionen einer zehnjährigen Euro-Anleihe von Industrieunternehmen mit einem Kreditrating „A-“ zugrunde.

Kapitalkostensatz  
für den Konzern

**7,8 %**

Um den unterschiedlichen Rendite-/Risikoprofilen unserer Tätigkeitsschwerpunkte Rechnung zu tragen, berechnen wir für unsere Teilkonzerne individuelle Kapitalkostensätze nach Ertragsteuern. Sie betrugen für HealthCare 8,1 % (Vorjahr: 8,0 %), für CropScience 7,5 % (Vorjahr: 7,5 %) sowie für MaterialScience 7,1 % (Vorjahr: 7,0 %). Für den Konzern ergab sich für das Jahr 2010 ein Verzinsungsanspruch von insgesamt 7,8 % (Vorjahr: 7,7 %).

### BRUTTO-CASHFLOW, CASH VALUE ADDED UND CASH FLOW RETURN ON INVESTMENT ALS ERFOLGSMASSTÄBE

Der Brutto-Cashflow ist das Maß für unsere Innenfinanzierungskraft und leitet sich direkt aus der Kapitalflussrechnung ab. Bayer hat sich für den Einsatz einer Cashflow-Größe entschieden, da auf diese Weise bilanzielle Einflüsse reduziert werden und sich so die Aussagekraft der Kennzahl zur Performance-Messung erhöht.

Unter Berücksichtigung der Kapitalkosten und der Reproduktion des abnutzbaren Anlagevermögens ermitteln wir die Brutto-Cashflow-Hurdle. Wird die Brutto-Cashflow-Hurdle erreicht oder übertroffen, ist der CVA positiv und damit die Verzinsung von Eigen- und Fremdkapital sowie die Anlagen-Reproduktion sichergestellt.

Bei der Berechnung der Hurdle haben wir im Vergleich zum Vorjahr methodische Änderungen vorgenommen, die im Wesentlichen die Reproduktionsanforderungen für immaterielle Vermögenswerte betreffen. Darüber hinaus werden seit 2010 wesentliche Beteiligungen, die einen direkten Bezug zum operativen Geschäft aufweisen, im Investitionswert berücksichtigt. Die Werte für 2009 wurden entsprechend angepasst.

Die Rentabilität des Konzerns bzw. der einzelnen Geschäftseinheiten wird anhand des Cash Flow Return on Investment (CFROI) gemessen. Er berechnet sich als Verhältnis des Brutto-Cashflow zum eingesetzten Kapital, dem sogenannten Investitionswert. Der Investitionswert ist aus der Bilanz abgeleitet und setzt sich grundsätzlich aus unseren betriebsnotwendigen Sachanlagen und immateriellen Vermögenswerten zu Anschaffungs- und Herstellungskosten sowie unserem Working



Capital nach Abzug von zinslosem Fremdkapital (z. B. kurzfristigen Rückstellungen) zusammen. Um Schwankungen des Investitionswerts zu reduzieren, ermitteln wir für unsere Renditeberechnung einen Durchschnittswert für das jeweilige Jahr.

Für das Geschäftsjahr 2010 lag die CFRol-Mindestverzinsung bei 10,0 % (Vorjahr: 9,9 %), die entsprechende Brutto-Cashflow-Hurdle bei 4.384 Mio € (Vorjahr: 4.280 Mio €).

Mit einem Brutto-Cashflow von 4.771 Mio € haben wir die Brutto-Cashflow-Hurdle um 8,8 % übertroffen. Die Kapitalkosten und die Reproduktion konnten wir somit im abgelaufenen Jahr vollständig verdienen. Der positive CVA von 387 Mio € besagt darüber hinaus, dass Bayer im abgelaufenen Geschäftsjahr die Mindestanforderungen an Verzinsung und Reproduktion übertroffen hat und darüber hinaus eine Prämie auf das eingesetzte Kapital verdient hat. Bei einem CVA im Geschäftsjahr 2009 von 378 Mio € ergibt sich im Konzern ein positiver Delta Cash Value Added von 9 Mio €, damit konnte die Wertschaffung im Vorjahresvergleich leicht erhöht werden. Die Konzernrendite (CFRol) erreichte im Jahr 2010 10,9 % (Vorjahr: 10,7 %).

positiver  
Delta CVA  
=  
Wertsteigerung

HealthCare und MaterialScience haben den Verzinsungsanspruch einschließlich Reproduktion übertroffen. CropScience hingegen lag um 335 Mio € unter der Brutto-Cashflow-Hurdle. Der CFRol von HealthCare betrug 12,8 % (Vorjahr: 13,6 %). CropScience lag mit einem CFRol von 5,9 % unter Vorjahr (11,6 %). MaterialScience erzielte einen CFRol von 11,0 % (Vorjahr: 3,4 %).

Wertmanagement-Kennzahlen pro Teilkonzern

[Tabelle 3.18]

|                                        | HealthCare |          | CropScience |          | MaterialScience |          | Konzern  |          |
|----------------------------------------|------------|----------|-------------|----------|-----------------|----------|----------|----------|
|                                        | 2009       | 2010     | 2009        | 2010     | 2009            | 2010     | 2009     | 2010     |
|                                        | in Mio €   | in Mio € | in Mio €    | in Mio € | in Mio €        | in Mio € | in Mio € | in Mio € |
| Brutto-Cashflow-Hurdle                 | 2.258      | 2.291    | 822         | 881      | 960             | 973      | 4.280    | 4.384    |
| Brutto-Cashflow* (BCF)                 | 3.153      | 2.948    | 1.043       | 546      | 319             | 1.058    | 4.658    | 4.771    |
| Cash Value Added (CVA)                 | 895        | 657      | 221         | -335     | -641            | 85       | 378      | 387      |
| Delta Cash Value Added (Delta CVA)     | -13        | -238     | -150        | -556     | -582            | 726      | -836     | 9        |
| CFRol-Hurdle                           | 9,7 %      | 9,9 %    | 9,6 %       | 9,4 %    | 9,9 %           | 10,6 %   | 9,9 %    | 10,0 %   |
| Cash Flow Return on Investment (CFRoi) | 13,6 %     | 12,8 %   | 11,6 %      | 5,9 %    | 3,4 %           | 11,0 %   | 10,7 %   | 10,9 %   |
| Ø Investitionswert (Ø IW)              | 23.261     | 23.022   | 8.967       | 9.189    | 9.442           | 9.589    | 43.566   | 43.622   |

Vorjahreswerte angepasst

\* Zur Definition siehe Kapitel 4.5 „Finanzlage und Investitionen Bayer-Konzern“.

## 4.5 Finanzlage und Investitionen Bayer-Konzern

Kapitalflussrechnung Bayer-Konzern (Kurzfassung)

[Tabelle 3.19]

|                                                                       | 2009          | 2010          |
|-----------------------------------------------------------------------|---------------|---------------|
|                                                                       | in Mio €      | in Mio €      |
| <b>Brutto-Cashflow*</b>                                               | <b>4.658</b>  | <b>4.771</b>  |
| Veränderung Working Capital/Sonstige nicht zahlungswirksame Vorgänge  | 717           | 1.002         |
| <b>Zu-/Abfluss aus operativer Geschäftstätigkeit (Netto-Cashflow)</b> | <b>5.375</b>  | <b>5.773</b>  |
| <b>Zu-/Abfluss aus investiver Tätigkeit</b>                           | <b>-1.501</b> | <b>-2.414</b> |
| <b>Zu-/Abfluss aus Finanzierungstätigkeit</b>                         | <b>-3.246</b> | <b>-3.230</b> |
| <b>Zahlungswirksame Veränderung aus Geschäftstätigkeit</b>            | <b>628</b>    | <b>129</b>    |
| <b>Zahlungsmittel und Zahlungsmitteläquivalente am Periodenanfang</b> | <b>2.094</b>  | <b>2.725</b>  |
| Veränderung aus Wechselkurs-/Konzernkreisänderungen                   | 3             | -14           |
| <b>Zahlungsmittel und Zahlungsmitteläquivalente am Periodenende</b>   | <b>2.725</b>  | <b>2.840</b>  |

Vorjahreswerte angepasst

\* Brutto-Cashflow: Ergebnis nach Steuern zuzüglich Ertragsteueraufwand zuzüglich Finanzergebnis abzüglich gezahlter bzw. geschuldeter Ertragsteuern zuzüglich Abschreibungen zuzüglich bzw. abzüglich Veränderungen der Pensionsrückstellungen abzüglich Gewinne bzw. zuzüglich Verluste aus dem Abgang von langfristigen Vermögenswerten abzüglich Gewinne aus der Neubewertung bisheriger Vermögenswerte bei stufenweisem Unternehmenserwerb. Die Position Veränderung der Pensionsrückstellungen umfasst sowohl die Korrektur nicht zahlungswirksamer Effekte im operativen Ergebnis (EBIT) als auch Auszahlungen aufgrund unserer Pensionsverpflichtungen.

### ZUFLUSS AUS OPERATIVER GESCHÄFTSTÄTIGKEIT (NETTO-CASHFLOW)

Der Brutto-Cashflow des Jahres 2010 stieg im Vergleich zum Vorjahr um 2,4 % auf 4.771 Mio € (Vorjahr: 4.658 Mio €). MaterialScience konnte den Brutto-Cashflow geschäftsbedingt signifikant verbessern. Hingegen verzeichneten HealthCare und CropScience einen deutlich geringeren Brutto-Cashflow auch aufgrund höherer Belastungen im Zusammenhang mit Rechtsfällen. Die Mittelbindung im Working Capital konnten wir um 1,0 Mrd € deutlich abbauen. Der Netto-Cashflow des Konzerns stieg um 7,4 % auf 5.773 Mio € (Vorjahr: 5.375 Mio €). Im Netto-Cashflow waren Ertragsteuerzahlungen in Höhe von 838 Mio € (Vorjahr: 500 Mio €) enthalten.

### ZU-/ABFLUSS AUS INVESTIVER TÄTIGKEIT

Im Jahr 2010 sind im Rahmen der investiven Tätigkeit insgesamt 2.414 Mio € abgeflossen (Vorjahr: 1.501 Mio €). Die Ausgaben für Sachanlagen und immaterielle Vermögenswerte sanken um 3,9 % auf 1.514 Mio € (Vorjahr: 1.575 Mio €). Davon entfielen auf HealthCare 573 Mio € (Vorjahr: 528 Mio €), auf CropScience 302 Mio € (Vorjahr: 341 Mio €) und auf MaterialScience 498 Mio € (Vorjahr: 504 Mio €). In diesen Ausgaben sind u. a. Beträge für den Ausbau unseres chinesischen Standorts in Shanghai für die Herstellung von Polymer-Produkten, für die Erweiterung der Produktionskapazitäten in Berkeley, USA, sowie Ausgaben im Rahmen einer Lizenz- und Entwicklungsvereinbarung im Bereich der ästhetisch-dermatologischen Medizin und für eine strategische Allianz im Bereich der Krebsforschung enthalten. Die Ausgaben für Akquisitionen in Höhe von 31 Mio € entfielen u. a. auf den Erwerb der Artificial Muscle, Inc., USA, im März 2010 durch MaterialScience. Im Vorjahr beliefen sich die Ausgaben für Akquisitionen auf 308 Mio €. Zugeflossen sind im Geschäftsjahr 2010 u. a. Einnahmen aus Desinvestitionen in Höhe von 101 Mio € (Vorjahr: 70 Mio €) sowie Zins- und Dividendeneinnahmen in Höhe von 53 Mio € (Vorjahr: 56 Mio €). Die Ausgaben für kurzfristige finanzielle Vermögenswerte erhöhten sich im Wesentlichen aufgrund von Geldanlagen am Kapitalmarkt auf 623 Mio € (Vorjahr: 11 Mio €).

Die wesentlichen, strategisch relevanten Investitionen in Sachanlagen der operativen Segmente des Bayer-Konzerns der vergangenen zwei Jahre sind in folgender Tabelle dargestellt:

## Investitionen in Sachanlagen

[Tabelle 3.20]

| Segment                              | Beschreibung                                                                                                                                                                                                                                                                                                                                                                                                                                                                       |
|--------------------------------------|------------------------------------------------------------------------------------------------------------------------------------------------------------------------------------------------------------------------------------------------------------------------------------------------------------------------------------------------------------------------------------------------------------------------------------------------------------------------------------|
| <b>Investitionen 2010</b>            |                                                                                                                                                                                                                                                                                                                                                                                                                                                                                    |
| Pharma                               | Erweiterung der Produktionskapazitäten für neue Kogenate®-Formulierungen in Berkeley, USA<br>Schaffung von Verpackungskapazitäten für die YAZ®-Familie, Berlin, Deutschland<br>Kapazitätserweiterung Kontrastmittel, Bergkamen, Deutschland                                                                                                                                                                                                                                        |
| Consumer Health                      | Erweiterung der Vitamintablettenherstellung und -verpackung, Myerstown, USA                                                                                                                                                                                                                                                                                                                                                                                                        |
| Crop Protection                      | Erweiterung der Produktionskapazitäten für Fungizide in Kansas City, USA, und Dormagen, Deutschland<br>Kapazitätserweiterung für insektizide Wirkstoffe in Dormagen, Deutschland                                                                                                                                                                                                                                                                                                   |
| Environmental Science/<br>BioScience | Ausbau der Forschungseinrichtungen in Nunhem, Niederlande<br>Erweiterung eines Forschungslabors in Gent, Belgien<br>Kapazitätserweiterung für die Produktion von Gemüsesaatgut in Parma, USA                                                                                                                                                                                                                                                                                       |
| MaterialScience                      | Errichtung eines „world-scale“-TDI-Produktionskomplexes in Shanghai, China<br>MakroColor-Produktionsstätte in Noida, Indien<br>Errichtung eines Polyurethan-Systemhauses in Moskau, Russland<br>Errichtung eines Demonstrations-NaCl-Elektrolyseurs mit Sauerstoffverzehrkathode in Uerdingen, Deutschland                                                                                                                                                                         |
| <b>Investitionen 2009</b>            |                                                                                                                                                                                                                                                                                                                                                                                                                                                                                    |
| Pharma                               | Erweiterung der Kontrastmittel-Produktion in Bergkamen, Deutschland<br>Erweiterung/Modernisierung der Kogenate®-Produktion in Berkeley, USA<br>Erweiterung der Produktionskapazität für Produkte der YAZ®-Familie in Berlin, Deutschland<br>Erweiterung der Produktionskapazität in Jakarta, Indonesien                                                                                                                                                                            |
| Consumer Health                      | Erweiterung der Produktion von Vitamin-Produkten in Myerstown, USA<br>Neubau Distributionslager zur Konsolidierung der auf Mexiko verteilten Lagerkapazitäten in Lerma, Mexiko                                                                                                                                                                                                                                                                                                     |
| Crop Protection                      | Ausbau der Herbizid-Produktionskapazität in Frankfurt a. M. und Knapsack, Deutschland, und Muskegon, USA<br>Erweiterung der Fungizid-Produktionskapazität in Dormagen, Deutschland, und Kansas City, USA<br>Ausbau der Produktionskapazität für hochaktive Herbizide in Kansas City, USA<br>Erweiterung der Formulierkapazität für Nicht-Herbizide in Belford Roxo, Brasilien<br>Ausbau der Fungizid-Produktionskapazität in Muttenz, Schweiz                                      |
| Environmental Science/<br>BioScience | Kapazitätsausbau der Produktion von Gemüsesaatgut in Parma, USA<br>Erweiterung des BioScience-Forschungslabors in Gent, Belgien                                                                                                                                                                                                                                                                                                                                                    |
| MaterialScience                      | Errichtung eines „world-scale“-TDI-Produktionskomplexes in Shanghai, China<br>Polyisocyanat-Produktionsanlage in Ankleshwar, Indien<br>Roll-to-Roll Coating Line in Leverkusen, Deutschland<br>Errichtung eines Systemhauses in Guangzhou, China<br>Lachgas-Reduktion bei der Salpetersäure-Produktion in Dormagen, Deutschland<br>Errichtung einer Pilotanlage zur Herstellung von Kohlenstoff-Nanoröhrchen in Leverkusen, Deutschland<br>EcoCommercial Building in Noida, Indien |



## ZU-/ABFLUSS AUS FINANZIERUNGSTÄTIGKEIT

Im Rahmen der Finanzierungstätigkeit sind im Geschäftsjahr 2010 Mittel in Höhe von 3.230 Mio € abgeflossen (Vorjahr: 3.246 Mio €). Hierin sind Netto-Kreditrückzahlungen in Höhe von 1.544 Mio € (Vorjahr: 1.442 Mio €) enthalten. Die Netto-Zinsausgaben sanken um 34,1 % auf 517 Mio € (Vorjahr: 785 Mio €). Dies ist u. a. auf den Abbau der Finanzverschuldung zurückzuführen. Die Auszahlungen für „Gezahlte Dividenden und Kapitalertragsteuer“ lagen bei 1.160 Mio € (Vorjahr: 973 Mio €).

## FLÜSSIGE MITTEL UND NETTOFINANZVERSCHULDUNG

### Nettofinanzverschuldung

[Tabelle 3.21]

|                                                              | 31.12.2009    | 31.12.2010    |
|--------------------------------------------------------------|---------------|---------------|
|                                                              | in Mio €      | in Mio €      |
| Anleihen/Schuldscheindarlehen                                | 8.301         | 8.209         |
| davon Hybridanleihe                                          | 1.267         | 1.303         |
| Verbindlichkeiten gegenüber Kreditinstituten                 | 3.251         | 2.271         |
| Leasingverbindlichkeiten                                     | 550           | 562           |
| Verbindlichkeiten aus derivativen Finanzinstrumenten         | 578           | 529           |
| Sonstige Finanzverbindlichkeiten                             | 178           | 196           |
| - Positive Marktwerte aus der Sicherung bilanzieller Risiken | 426           | 331           |
| <b>Finanzverschuldung</b>                                    | <b>12.432</b> | <b>11.436</b> |
| - Zahlungsmittel und Zahlungsmitteläquivalente               | 2.725         | 2.840         |
| - Kurzfristige finanzielle Vermögenswerte                    | 16            | 679           |
| <b>Nettofinanzverschuldung</b>                               | <b>9.691</b>  | <b>7.917</b>  |

Die Nettofinanzverschuldung des Bayer-Konzerns konnten wir im Geschäftsjahr 2010 deutlich von 9,7 MRD € auf 7,9 MRD € verringern (-18,3 %). Dies basiert auf Mittelzuflüssen aus der operativen Geschäftstätigkeit, während negative Währungseffekte in Höhe von 0,5 MRD € gegenläufig wirkten. Der Konzern verfügte zum 31. Dezember 2010 über Zahlungsmittel und Zahlungsmitteläquivalente in Höhe von 2,8 MRD € (Vorjahr: 2,7 MRD €). Am Bilanzstichtag belief sich unsere Finanzverschuldung auf 11,4 MRD € (Vorjahr: 12,4 MRD €). Darin enthalten ist die im Juli 2005 begebene nachrangige Hybridanleihe mit 1,3 MRD €. Bei der Beurteilung der Nettofinanzverschuldung ist zu berücksichtigen, dass die Hybridanleihe von Moody's zu 75 % und von Standard & Poor's zu 50 % als Eigenkapital bewertet wird. Verglichen mit klassischem Fremdkapital werden die rating-spezifischen Verschuldungskennziffern des Konzerns daher mit der Hybridanleihe deutlich entlastet. Im Geschäftsjahr 2010 verringerten sich unsere langfristigen Finanzverbindlichkeiten von 11,5 MRD € auf 9,9 MRD €. Gleichzeitig stiegen die kurzfristigen Finanzverbindlichkeiten von 1,5 MRD € auf 1,9 MRD €.

## 4.6 Vermögenslage und Kapitalstruktur Bayer-Konzern

Bilanz Bayer-Konzern (Kurzfassung)

[Tabelle 3.22]

|                                    | 31.12.2009    | 31.12.2010    | Veränderung |
|------------------------------------|---------------|---------------|-------------|
|                                    | in Mio €      | in Mio €      | in %        |
| <b>Langfristige Vermögenswerte</b> | <b>34.049</b> | <b>33.188</b> | <b>-2,5</b> |
| <b>Kurzfristige Vermögenswerte</b> | <b>16.993</b> | <b>18.318</b> | <b>7,8</b>  |
| <b>Gesamtvermögen</b>              | <b>51.042</b> | <b>51.506</b> | <b>0,9</b>  |
| <b>Eigenkapital</b>                | <b>18.951</b> | <b>18.896</b> | <b>-0,3</b> |
| <b>Langfristiges Fremdkapital</b>  | <b>23.118</b> | <b>21.775</b> | <b>-5,8</b> |
| <b>Kurzfristiges Fremdkapital</b>  | <b>8.973</b>  | <b>10.835</b> | <b>20,8</b> |
| <b>Fremdkapital</b>                | <b>32.091</b> | <b>32.610</b> | <b>1,6</b>  |
| <b>Gesamtkapital</b>               | <b>51.042</b> | <b>51.506</b> | <b>0,9</b>  |

Die Bilanzsumme erhöhte sich im Geschäftsjahr 2010 um 0,9 % auf 51,5 MRD €. Die langfristigen Vermögenswerte reduzierten sich um 0,9 MRD € auf 33,2 MRD €. Dies ist vor allem auf die planmäßigen und außerplanmäßigen Wertminderungen von immateriellen Vermögenswerten zurückzuführen. In den langfristigen Vermögenswerten sind Geschäfts- oder Firmenwerte von 9,0 MRD € (Vorjahr 8,7 MRD €) enthalten. Die Erhöhung beruhte im Wesentlichen auf Wechselkursänderungen. Der Bilanzwert der kurzfristigen Vermögenswerte erhöhte sich gegenüber dem Vorjahr um 1,3 MRD € auf 18,3 MRD €.

Das Eigenkapital blieb mit 18,9 MRD € im Vergleich zum Vorjahr nahezu konstant. Erhöhend wirkten dabei insbesondere das Konzernergebnis von 1,3 MRD € sowie positive Währungseffekte von 0,6 MRD €. Gegenläufig wirkten u. a. die Dividendenausschüttung in Höhe von 1,2 MRD € sowie der Effekt aus der ergebnisneutralen Erhöhung der Pensionsverpflichtungen in Höhe von 0,7 MRD €. Unsere Eigenkapitalquote lag zum 31. Dezember 2010 bei 36,7 % (Vorjahr: 37,1 %).

Das Fremdkapital erhöhte sich gegenüber dem 31. Dezember 2009 um 0,5 MRD € auf 32,6 MRD €. Dies ist im Wesentlichen auf die Erhöhung der Pensionsverpflichtungen sowie die Zuführungen zu den Rückstellungen für Rechtsstreitigkeiten zurückzuführen. Die kurz- und langfristigen Finanzverbindlichkeiten konnten wir um 1,1 MRD € auf 11,8 MRD € verringern.

Netto-Pensionsverpflichtungen

[Tabelle 3.23]

|                                                           | 31.12.2009   | 31.12.2010   |
|-----------------------------------------------------------|--------------|--------------|
|                                                           | in Mio €     | in Mio €     |
| Rückstellungen für Pensionen und ähnliche Verpflichtungen | 6.517        | 7.305        |
| - Forderungen im Zusammenhang mit Pensionsverpflichtungen | 100          | 76           |
| <b>Netto-Pensionsverpflichtungen</b>                      | <b>6.417</b> | <b>7.229</b> |

Im Geschäftsjahr 2010 erhöhten sich die Netto-Pensionsverpflichtungen insbesondere aufgrund gesunkener langfristiger Kapitalmarktzinsen von 6,4 MRD € auf 7,2 MRD €. Dabei stiegen die Rückstellungen für Pensions- und ähnliche Verpflichtungen von 6,5 MRD € auf 7,3 MRD €. Die Forderungen im Zusammenhang mit Pensionsverpflichtungen, die in der Bilanz unter der Position „Sonstige Forderungen“ ausgewiesen werden, betrugen 0,1 MRD € (Vorjahr: 0,1 MRD €).

4. Ertrags-, Finanz- und Vermögenslage Bayer-Konzern  
 4.6 Vermögenslage und Kapitalstruktur Bayer-Konzern

Bilanz- und Finanzkennzahlen

[Tabelle 3.24]

|                                              |                                                                              | 2009  | 2010  |
|----------------------------------------------|------------------------------------------------------------------------------|-------|-------|
| Herstellungskostenquote (%)                  | Herstellungskosten<br>Umsatzerlöse                                           | 48,6  | 48,7  |
| Forschungskostenquote (%)                    | Forschungs- und Entwicklungskosten<br>Umsatzerlöse                           | 8,8   | 8,7   |
| Umsatzrendite (%)                            | Ergebnis nach Steuern<br>Umsatzerlöse                                        | 4,4   | 3,7   |
| EBIT-Marge (%)                               | EBIT<br>Umsatzerlöse                                                         | 9,6   | 7,8   |
| EBITDA-Marge vor<br>Sondereinflüssen (%)     | EBITDA vor Sondereinflüssen<br>Umsatzerlöse                                  | 20,8  | 20,2  |
| Anlagenintensität (%)                        | Sachanlagen + immaterielle<br>Vermögenswerte<br>Gesamtvermögen               | 60,6  | 58,2  |
| Finanzierungsquote (%)                       | Planmäßige Abschreibungen*<br>Investitionen*                                 | 159,4 | 156,8 |
| Fremdkapitalstruktur (%)                     | Kurzfristiges Fremdkapital<br>Fremdkapital                                   | 28,0  | 33,2  |
| Gearing                                      | Nettoverschuldung +<br>Pensionsrückstellungen<br>Eigenkapital                | 0,9   | 0,8   |
| Free-Operating-Cashflow (in Mio €)           | Netto-Cashflow – Ausgaben für Sachanlagen<br>und immaterielle Vermögenswerte | 3.800 | 4.259 |
| Umschlagshäufigkeit der Vorräte              | Herstellungskosten<br>Vorräte                                                | 2,5   | 2,8   |
| Umschlagshäufigkeit der<br>Forderungen       | Umsatzerlöse<br>Forderungen aus Lieferungen<br>und Leistungen                | 5,1   | 5,3   |
| Umschlagshäufigkeit der<br>Verbindlichkeiten | Herstellungskosten<br>Verbindlichkeiten aus Lieferungen<br>und Leistungen    | 5,5   | 4,9   |
| Eigenkapitalquote (%)                        | Eigenkapital<br>Gesamtkapital                                                | 37,1  | 36,7  |
| Eigenkapitalrendite (%)                      | Ergebnis nach Steuern<br>Ø Eigenkapital                                      | 7,7   | 6,9   |
| Gesamtkapitalrendite (%)                     | Ergebnis vor Steuern und<br>Zinsaufwendungen<br>Ø Vermögen                   | 6,1   | 5,1   |

\* Sachanlagevermögen + immaterielle Vermögenswerte



## 5. Ertrags-, Finanz- und Vermögenslage Bayer AG

Die Bayer AG ist Mutterunternehmen und strategische Management-Holding des Bayer-Konzerns. Die wesentlichen Leitungsfunktionen des Gesamtunternehmens liegen in der Verantwortung des Holding-Vorstands. Hierzu gehören vor allem die Festlegung der Konzernstrategie und der Ressourcenverteilung sowie das Führungskräfte- und das Finanz-Management. Die Lage der Bayer AG wird im Wesentlichen durch den geschäftlichen Erfolg des Konzerns bestimmt.

Der Jahresabschluss der Bayer AG ist nach den Vorschriften des deutschen Handelsgesetzbuches (HGB) und des Aktiengesetzes (AktG) aufgestellt. Wie im Vorjahr wurden die 2009 in Kraft getretenen Bestimmungen des Bilanzrechtsmodernisierungsgesetzes (BilMoG) angewendet.

### 5.1 Ertragslage Bayer AG

Gewinn- und Verlustrechnung Bayer AG nach HGB

[Tabelle 3.25]

|                                                                              | 2009         | 2010         |
|------------------------------------------------------------------------------|--------------|--------------|
|                                                                              | in Mio €     | in Mio €     |
| Beteiligungsergebnis                                                         | 2.984        | 2.045        |
| Zinsergebnis                                                                 | -683         | -516         |
| Übriges finanzielles Ergebnis                                                | 276          | 128          |
| Sonstige betriebliche Erträge                                                | 169          | 165          |
| Allgemeine Verwaltungskosten                                                 | 177          | 200          |
| Sonstige betriebliche Aufwendungen                                           | 142          | 173          |
| <b>Ergebnis der gewöhnlichen Geschäftstätigkeit/Gewinn vor Ertragsteuern</b> | <b>2.427</b> | <b>1.449</b> |
| Steuern vom Einkommen und vom Ertrag                                         | -201         | -204         |
| <b>Jahresüberschuss</b>                                                      | <b>2.226</b> | <b>1.245</b> |
| Einstellung in andere Gewinnrücklagen                                        | -1.068       | -5           |
| <b>Bilanzgewinn</b>                                                          | <b>1.158</b> | <b>1.240</b> |

Die Ertragslage der Bayer AG wird maßgeblich von den Ergebnissen der Tochtergesellschaften sowie von Aufwendungen und Erträgen aus Maßnahmen der Konzernfinanzierung bestimmt.

Im Geschäftsjahr 2010 wurde ein Beteiligungsergebnis von 2.045 Mio € (Vorjahr: 2.984 Mio €) erzielt. Hierzu beigetragen haben insbesondere die Bayer Schering Pharma AG mit 1.163 Mio € (Vorjahr: 2.349 Mio €), die Bayer CropScience AG mit 569 Mio € (Vorjahr: 604 Mio €) und die Bayer MaterialScience AG mit 30 Mio € (Vorjahr: -234 Mio €). Der Rückgang bei der Bayer Schering Pharma AG ist darauf zurückzuführen, dass im Vorjahr ein Gewinn in Höhe von 608 Mio € aus der Vereinbarung mit Genzyme über den Verkauf immaterieller Werte enthalten war. Zudem resultierten aus dem operativen Geschäft im Jahr 2010 um 154 Mio € bzw. um 230 Mio € höhere Aufwendungen für Vertrieb sowie Forschung und Entwicklung. Einmalige Belastungen aus der Übertragung von Altersversorgungsverpflichtungen belasteten das Ergebnis mit 80 Mio €. Bei der Bayer CropScience AG konnten Ergebniseinbußen aus dem operativen Geschäft durch ein verbessertes Finanzergebnis weitgehend ausgeglichen werden. Die Bayer MaterialScience AG führte infolge der verbesserten wirtschaftlichen Situation ein höheres Ergebnis ab. Nennenswerte Ergebnisbeiträge kamen darüber hinaus von der Bayer Gesellschaft für Beteiligungen mbH, unserer Holdinggesellschaft für Auslandsbeteiligungen, mit 266 Mio € (Vorjahr: 219 Mio €), von der im Bereich Tiergesundheit tätigen Bayer Animal Health GmbH mit 177 Mio € (Vorjahr: 107 Mio €) sowie der Bayer HealthCare AG als Holding für das weltweite HealthCare-Geschäft mit -135 Mio € (Vorjahr: -135 Mio €).

Das Zinsergebnis von -516 Mio € ist gegenüber dem Vorjahr um 167 Mio € verbessert. Maßgeblich hierfür war neben einer rückläufigen Nettoverschuldung im Wesentlichen das weiter gesunkene Zinsniveau. Der Zinssaldo wurde in Höhe von -382 Mio € (Vorjahr: -459 Mio €) mit Dritten und in Höhe von -134 Mio € (Vorjahr: -224 Mio €) mit Gesellschaften des Konzerns erzielt.

Der positive Saldo aus übrigen finanziellen Aufwendungen und Erträgen ist von 276 Mio € im Vorjahr auf 128 Mio € zurückgegangen. Zu dieser Entwicklung trug im Wesentlichen das um 136 Mio € rückläufige Ergebnis aus der Umrechnung von Forderungen und Verbindlichkeiten in Fremdwährung sowie aus Währungsderivaten bei.

In Wahrnehmung ihrer Aufgaben als Holdinggesellschaft fielen sonstige betriebliche Erträge und Aufwendungen von per saldo -8 Mio € (Vorjahr: 27 Mio €) sowie allgemeine Verwaltungskosten von 200 Mio € (Vorjahr: 177 Mio €) an. Während der Anstieg der Verwaltungskosten auf höhere Kosten der Altersversorgung sowie auf gestiegene Personalkosten infolge der vorübergehend höheren Zahl der Vorstandsmitglieder zurückzuführen war, wirkte sich bei den sonstigen Posten eine Sonderabschreibung auf Gebäude aus.

Das Ergebnis der gewöhnlichen Geschäftstätigkeit ging um 978 Mio € auf 1.449 Mio € zurück. Der Steueraufwand betrug 204 Mio € (Vorjahr: 201 Mio €). Nach Abzug der Steuern verblieb ein Jahresüberschuss von 1.245 Mio €, der mit 5 Mio € den anderen Gewinnrücklagen zugeführt wurde und mit 1.240 Mio € als Bilanzgewinn ausgewiesen wird.

Vorstand und Aufsichtsrat schlagen der Hauptversammlung am 29. April 2011 vor, den Bilanzgewinn zur Ausschüttung einer Dividende von 1,50 € je Aktie (826.947.808 Stück) auf das dividendenberechtigte Grundkapital von 2.117 Mio € zu verwenden.

Dividendenvorschlag

**1,50 €**

je Aktie

## 5.2 Finanz- und Vermögenslage Bayer AG

Bilanz Bayer AG nach HGB (Kurzfassung)

[Tabelle 3.26]

|                                                                              | 31.12.2009    | 31.12.2010    |
|------------------------------------------------------------------------------|---------------|---------------|
|                                                                              | in Mio €      | in Mio €      |
| <b>AKTIVA</b>                                                                |               |               |
| <b>Anlagevermögen</b>                                                        |               |               |
| Immaterielle Vermögensgegenstände, Sachanlagen                               | 395           | 347           |
| Finanzanlagen                                                                | 34.594        | 34.267        |
|                                                                              | <b>34.989</b> | <b>34.614</b> |
| <b>Umlaufvermögen</b>                                                        |               |               |
| Forderungen gegen verbundene Unternehmen                                     | 1.928         | 2.040         |
| Übrige Forderungen, sonstige Vermögensgegenstände                            | 400           | 464           |
| Kassenbestände, Bankguthaben, Wertpapiere                                    | 1.862         | 2.131         |
|                                                                              | <b>4.190</b>  | <b>4.635</b>  |
| <b>Gesamtvermögen</b>                                                        | <b>39.179</b> | <b>39.249</b> |
| <b>PASSIVA</b>                                                               |               |               |
| <b>Eigenkapital</b>                                                          | <b>14.391</b> | <b>14.478</b> |
| <b>Rückstellungen</b>                                                        | <b>3.258</b>  | <b>3.328</b>  |
| <b>Verbindlichkeiten</b>                                                     |               |               |
| Anleihen, Schuldscheindarlehen, Verbindlichkeiten gegenüber Kreditinstituten | 7.029         | 5.842         |
| Verbindlichkeiten gegenüber verbundenen Unternehmen                          | 13.965        | 15.149        |
| Übrige Verbindlichkeiten                                                     | 536           | 452           |
|                                                                              | <b>21.530</b> | <b>21.443</b> |
| <b>Gesamtkapital</b>                                                         | <b>39.179</b> | <b>39.249</b> |

Die Vermögenssituation der Bayer AG ist maßgeblich geprägt durch ihre Holdingfunktion, d. h. durch das Management von Beteiligungen sowie die Finanzierung der Konzernaktivitäten. Dies drückt sich vor allem in der Höhe des Beteiligungsbesitzes sowie der gegenüber Konzerngesellschaften bestehenden Forderungen und Verbindlichkeiten aus.

Das Gesamtvermögen der Bayer AG liegt mit 39,2 MRD € auf dem Niveau des Vorjahres. Einem Rückgang des Anlagevermögens um 0,4 MRD € steht ein gleich hoher Anstieg des Umlaufvermögens gegenüber.

Bei in der Höhe nahezu unveränderten Sachanlagen und immateriellen Vermögensgegenständen haben sich die Finanzanlagen leicht um 0,3 MRD € auf 34,3 MRD € verringert. Sie enthalten Anteile an verbundenen Unternehmen in Höhe von 33,7 MRD € (Vorjahr: 34,1 MRD €). Dies entspricht einem Anteil am Gesamtvermögen von 85,9 % (Vorjahr 87,1 %).

Forderungen und Verbindlichkeiten gegenüber verbundenen Unternehmen beliefen sich auf 2,0 MRD € (Vorjahr: 1,9 MRD €) bzw. 15,1 MRD € (Vorjahr: 14,0 MRD €). Ihr Anteil an der Bilanzsumme beträgt 5,2 % bzw. 38,6 %.

Das gegenüber dem Vorjahr unveränderte Gesamtvermögen von 39,2 MRD € ist in Höhe von 14,5 MRD € (Vorjahr 14,4 MRD €) durch Eigenkapital finanziert. Die Eigenkapitalquote stieg von 36,7 % auf 36,9 %. Der Erhöhung des Eigenkapitals durch den Jahresüberschuss von 1.245 MIO € steht ein Abgang aufgrund der Dividendenzahlung für 2009 von 1.158 MIO € gegenüber.

Die Rückstellungen sind gegenüber dem Stand zu Jahresbeginn aufgrund höherer Steuerrückstellungen um 0,1 MRD € auf 3,3 MRD € angestiegen.

Mit einem Betrag von 21,4 MRD € (Nettobetrag nach Saldierung mit aufrechenbaren Forderungen; Vorjahr: 21,5 MRD €) sind die Verbindlichkeiten insgesamt in der Höhe praktisch unverändert. Allerdings hat sich die hierin enthaltene Finanzverschuldung um 1,3 MRD € auf 23,0 MRD € verringert. Der Rückgang betrifft mit 1,2 MRD € insbesondere externe Finanzschulden. Bankverbindlichkeiten wurden in Höhe von 0,9 MRD € zurückgeführt. Weitere 0,3 MRD € entfallen auf die planmäßige Rückzahlung einer Anleihe aus dem Jahr 2007.

## 6. Übernahmerelevante Angaben

### BERICHT GEMÄSS §§ 289 ABSATZ 4, 315 ABSATZ 4 HGB

Das Grundkapital der Bayer AG zum 31. Dezember 2010 betrug 2.117 MIO € und war eingeteilt in 826.947.808 nennbetragslose Stückaktien, die auf den Namen lauten. Damit blieben Grundkapital und Zahl der Aktien gegenüber dem Ende des Vorjahres unverändert. Jede Aktie hat ein Stimmrecht.

Im Rahmen der Mitarbeiterbeteiligungsprogramme bestehen teilweise zeitliche Verfügungsbeschränkungen für eine geringe Zahl von Aktien, z. B. im Fall von Haltefristen.

Der Bayer AG sind im Geschäftsjahr 2010 keine Meldungen hinsichtlich direkter und indirekter Beteiligungen zugegangen, die 10 % der Stimmrechte übersteigen. Damit liegt der Gesellschaft keine Meldung zu einer Beteiligung über 10 % der Stimmrechte vor.

Gemäß § 84 Absatz 1 AktG werden die Mitglieder des Vorstands durch den Aufsichtsrat bestellt bzw. abberufen. Da die Bayer AG in den Anwendungsbereich des Mitbestimmungsgesetzes fällt, hat die Bestellung bzw. Abberufung von Vorstandsmitgliedern in einer ersten Abstimmung mit einer Mehrheit von zwei Dritteln der Stimmen der Mitglieder zu erfolgen. Kommt eine solche Mehrheit nicht zustande, kann die Bestellung gemäß § 31 Absatz 3 MitbestG in einer zweiten Abstimmung mit der einfachen Mehrheit der Stimmen der Mitglieder erfolgen. Wird auch hierbei die erforderliche Mehrheit nicht erreicht, erfolgt eine dritte Abstimmung, in der ebenfalls die einfache Stimmenmehrheit maßgeblich ist. Dem Vorsitzenden des Aufsichtsrats stehen in dieser Abstimmung

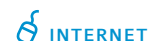

Stimmrechtsmitteilungen  
veröffentlichen wir unter  
[WWW.INVESTOR.BAYER.DE/](http://WWW.INVESTOR.BAYER.DE/)  
AKTIE/AKTIONÄRSSTRUKTUR/  
STIMMRECHTSANTEILE

mung gemäß § 31 Absatz 4 MitbestG dann jedoch zwei Stimmen zu. Gemäß § 6 Absatz 1 der Satzung der Bayer AG hat der Vorstand aus mindestens zwei Personen zu bestehen. Werden mehrere Personen zu Vorstandsmitgliedern bestellt, kann der Aufsichtsrat gemäß § 84 Absatz 2 AktG bzw. § 6 Absatz 1 der Satzung ein Mitglied zum Vorsitzenden ernennen.

Änderungen der Satzung bedürfen gemäß § 179 Absatz 1 AktG eines Beschlusses der Hauptversammlung, der, soweit die Satzung keine andere Mehrheit vorsieht, gemäß § 179 Absatz 2 AktG eine Mehrheit von Dreivierteln des bei der Abstimmung vertretenen Grundkapitals erfordert. Soweit die Änderung des Unternehmensgegenstands betroffen ist, darf die Satzung jedoch nur eine größere Mehrheit vorsehen. Die Satzung der Bayer AG macht in § 17 Absatz 2 von der Möglichkeit der Abweichung gemäß § 179 Absatz 2 AktG Gebrauch und sieht vor, dass Beschlüsse grundsätzlich mit einfacher Stimmenmehrheit und, soweit eine Kapitalmehrheit erforderlich ist, mit einfacher Kapitalmehrheit gefasst werden können.

Im Handelsregister der Bayer AG sind Satzungsbestimmungen zu einem Genehmigten Kapital I und einem Genehmigten Kapital II eingetragen. Durch das Genehmigte Kapital I ist der Vorstand bis zum 29. April 2015 berechtigt, mit Zustimmung des Aufsichtsrats das Grundkapital um bis zu 530 Mio € zu erhöhen. Die Ausgabe neuer Aktien kann dabei gegen Bar- und/oder Sacheinlagen erfolgen, wobei Kapitalerhöhungen gegen Sacheinlagen insgesamt nur um bis zu 423 Mio € erfolgen dürfen. Bei einer Kapitalerhöhung gegen Bareinlagen unter Verwendung des Genehmigten Kapitals I ist den Aktionären grundsätzlich ein Bezugsrecht zu gewähren. Von einer Ermächtigung zum Ausschluss des Bezugsrechts bei Ausgabe von Aktien aus dem Genehmigten Kapital I darf der Vorstand maximal in einem Umfang von 20 % des Grundkapitals Gebrauch machen. Vorbehaltlich eines neuen Beschlusses zum Bezugsrechtsausschluss darf der Vorstand auch unter weiteren Ermächtigungen zu Kapitalmaßnahmen (Genehmigtes Kapital II, Options- oder Wandelanleihen, Erwerb und Veräußerung eigener Aktien) insgesamt nur maximal in einem Umfang von 20 % des Grundkapitals ein Bezugsrecht der Aktionäre ausschließen.

Durch das Genehmigte Kapital II ist der Vorstand bis zum 29. April 2015 ermächtigt, mit Zustimmung des Aufsichtsrats das Grundkapital einmal oder mehrmals gegen Bareinlage um bis zu 212 Mio € zu erhöhen. Den Aktionären ist dabei ein Bezugsrecht zu gewähren, das der Vorstand jedoch mit Zustimmung des Aufsichtsrats ausschließen kann, soweit die Ausnutzung des Genehmigten Kapitals II im Rahmen einer Kapitalerhöhung erfolgt, die 10 % des zum Zeitpunkt des Wirksamwerdens dieser Ermächtigung und des zum Zeitpunkt der Ausnutzung dieser Ermächtigung bestehenden Grundkapitals nicht überschreitet und der Ausgabebetrag der neuen Aktien den Börsenpreis der bereits börsennotierten Aktien nicht wesentlich unterschreitet.

Die Hauptversammlung hat im Jahr 2010 im Zusammenhang mit einer Ermächtigung zur Ausgabe von Options- oder Wandelanleihen, Genussrechten oder Gewinnschuldverschreibungen (zusammen „Schuldverschreibungen“) in Höhe eines Nennbetrags von insgesamt 6 Mrd € ein bedingtes Kapital von 212 Mio € beschlossen. Das den Aktionären grundsätzlich eingeräumte Recht zum Bezug der Schuldverschreibungen kann vom Vorstand mit Zustimmung des Aufsichtsrats ausgeschlossen werden, sofern u. a. der anteilige Betrag der zur Bedienung vorgesehenen Aktien 10 % des Grundkapitals nicht übersteigt; auf diese Grenze von 10 % sind andere Ausgaben von Aktien unter Ausschluss des Bezugsrechts in direkter oder sinngemäßer Anwendung von § 186 Absatz 3 Satz 4 AktG anzurechnen. Außerdem hat der Vorstand in der Hauptversammlung im Jahr 2010 die Ermächtigung zum Erwerb und zur Veräußerung eigener Aktien bis zu einer Höhe von 10 % des Grundkapitals erhalten. Die Ermächtigung ist bis zum 29. April 2015 befristet.



Als wesentliche Vereinbarung, welche unter der Bedingung eines Kontrollwechsels (Change of Control) steht, ist die am 31. März 2005 mit der Bayer AG und deren us-Tochtergesellschaft Bayer Corporation vereinbarte syndizierte Kreditlinie über 3,5 MRD € mit einer Laufzeit bis 2012 zu nennen. Bayer hat diesen Kredit bislang nicht in Anspruch genommen. Die kreditgewährenden Banken könnten die Kreditlinie im Falle eines Kontrollwechsels bei Bayer kündigen und alle bis dahin unter dieser Kreditlinie gegebenenfalls in Anspruch genommenen Darlehen fällig stellen.

Weiterhin sehen auch die Anleihebedingungen der in den Jahren 2006 bis 2010 unter dem bestehenden Multi-Currency-Euro-Medium-Term-Notes-Programm von Bayer begebenen Schuldverschreibungen in Höhe von 3,8 MRD € (Stand: 31. Dezember 2010) eine Change-of-Control-Klausel vor. Gläubigern dieser Schuldverschreibungen steht für den Fall eines Kontrollwechsels und einer sich innerhalb von 120 Tagen nach dem Eintritt des Kontrollwechsels anschließenden Verschlechterung des Kreditratings der Bayer AG das Recht zu, von der Bayer AG den Rückkauf der Schuldverschreibungen zu verlangen.

Für Mitglieder des Vorstands bestehen für den Fall eines Übernahmeangebots für die Bayer AG Vereinbarungen, die mit den Bestimmungen der Ziffer 4.2.3 des Deutschen Corporate Governance Kodex in Einklang stehen. Danach soll eine Zusage für Leistungen aus Anlass der vorzeitigen Beendigung der Vorstandstätigkeit infolge eines Kontrollwechsels maximal drei Jahresvergütungen betragen und die Vergütung für die Restlaufzeit des Anstellungsvertrags nicht überschreiten.

Die vorstehend beschriebene Regelung gilt nicht für den Anstellungsvertrag eines Vorstandsmitglieds, der vor Inkrafttreten der entsprechenden Änderungen des Deutschen Corporate Kodex im Jahre 2008 geschlossen wurde. In diesem Fall sind bei Kontrollwechsel vor Vollendung des 60. Lebensjahrs des betreffenden Vorstandsmitglieds Zahlungen in Höhe der Absicherungsklausel zu leisten, die in Kapitel 7.2 „Vergütungsbericht“ dargestellt ist.

## 7. Corporate-Governance-Bericht

ZUGLEICH BERICHT GEMÄSS ZIFFER 3.10 DEUTSCHER CORPORATE GOVERNANCE KODEX

### 7.1 Erklärung zur Unternehmensführung\*

\* nicht Teil des geprüften Lageberichts

#### ERKLÄRUNG DES VORSTANDS UND DES AUFSICHTSRATS DER BAYER AG zum Deutschen Corporate Governance Kodex in der Fassung vom 26. Mai 2010 gemäß § 161 AktG

§ 161 AktG verpflichtet den Vorstand und den Aufsichtsrat der Bayer AG jährlich zu erklären, dass den vom Bundesministerium der Justiz im amtlichen Teil des elektronischen Bundesanzeigers bekannt gemachten Empfehlungen der „Regierungskommission Deutscher Corporate Governance Kodex“ (Kodex) entsprochen wurde und wird oder welche Empfehlungen nicht angewendet wurden oder werden und warum nicht. Die letzte jährliche Erklärung wurde im Dezember 2009 abgegeben.

Für die Vergangenheit bezieht sich die nachfolgende Erklärung auf die Kodex-Fassung vom 18. Juni 2009. Für die gegenwärtige und künftige Corporate Governance Praxis der Bayer AG bezieht sich die nachfolgende Erklärung auf die Empfehlungen des Kodex in seiner Fassung vom 26. Mai 2010.

Der Vorstand und der Aufsichtsrat der Bayer AG erklären gemäß § 161 AktG:

1. Den Empfehlungen des Kodex wurde seit Abgabe der letzten jährlichen Entsprechenserklärung im Dezember 2009 mit der in der Entsprechenserklärung vom Dezember 2009 angegebenen vorübergehenden Ausnahme entsprochen: Bis zum 31. März 2010 entsprach die Höhe des Selbstbehalts bei der D&O-Versicherung für die Mitglieder des Aufsichtsrats nicht der Empfehlung in Kodex Ziff. 3.8 Absatz 2, da es sich bei der D&O-Versicherung um eine Gruppenversicherung handelt, für die erst mit der turnusmäßigen Erneuerung zum 1. April 2010 ein Selbstbehalt in empfohlener Höhe vereinbart wurde.
2. Mit Ausnahme der Empfehlung in Kodex Ziff. 5.4.5, der vorübergehend nicht uneingeschränkt entsprochen wird, wird den Empfehlungen entsprochen.

Die Abweichung von der Empfehlung in Kodex Ziff. 5.4.5 ergibt sich daraus, dass das Aufsichtsratsmitglied Dr.-Ing. Ekkehard D. Schulz, Vorsitzender des Vorstands der ThyssenKrupp AG, mehr als drei Aufsichtsräten börsennotierter Gesellschaften und Gesellschaften mit vergleichbaren Anforderungen angehört (Bayer AG, MAN SE, RWE AG sowie AXA Konzern AG). Herr Dr.-Ing. Ekkehard D. Schulz wird mit Ablauf der Hauptversammlung der ThyssenKrupp AG am 21. Januar 2011 aus dem Vorstand der ThyssenKrupp AG ausscheiden. Ab diesem Zeitpunkt werden alle Vorstandsmitglieder und Aufsichtsratsmitglieder der Empfehlung in Kodex Ziff. 5.4.5 entsprechen. Mit Hinblick auf die langjährige Mitgliedschaft von Herrn Dr. Schulz in den genannten drei weiteren Aufsichtsgremien und die nur noch limitierte Zeit seiner Zugehörigkeit zum Vorstand einer börsennotierten Gesellschaft wird die zeitlich befristete Abweichung von der Kodex-Empfehlung in Ziff. 5.4.5 für angemessen erachtet.

Leverkusen, im Dezember 2010

Für den Vorstand

  
DR. DEKKERS

  
BAUMANN

Für den Aufsichtsrat

  
DR. SCHNEIDER

**BAYER IM EINKLANG MIT KODEX-EMPFEHLUNGEN**

Die verantwortungsvolle Unternehmensführung (Corporate Governance) hat bei Bayer seit jeher einen hohen Stellenwert. Das wird auch in Zukunft so sein. So hat das Unternehmen im Jahr 2010 die Erklärung abgeben können, mit einer vorübergehenden Ausnahme den Empfehlungen des Deutschen Corporate Governance Kodex in der Vergangenheit entsprochen zu haben und ihnen vorbehaltlich einer vorübergehenden Ausnahme in Zukunft wieder voll entsprechen zu wollen.

Vorstand und Aufsichtsrat haben sich im Berichtsjahr erneut mit der Erfüllung der Vorgaben des Kodex befasst, insbesondere auch mit den durch die Kodex-Änderung vom 26. Mai 2010 neu aufgenommenen Empfehlungen. Als Ergebnis konnte die oben wiedergegebene Entsprechenserklärung vom Dezember 2010 abgegeben werden. Sie ist auf der Internetseite von Bayer ebenso veröffentlicht wie vorhergehende Erklärungen.

**ARBEITSWEISE DES VORSTANDS**

Der Vorstand leitet das Unternehmen, eine strategische Holdinggesellschaft, in eigener Verantwortung mit der Zielsetzung, den Unternehmenswert nachhaltig zu steigern und die festgelegten Unternehmensziele zu erreichen. Er führt die Geschäfte nach Maßgabe der gesetzlichen Bestimmungen, der Satzung und der Geschäftsordnung für den Vorstand und arbeitet vertrauensvoll mit den übrigen Organen der Gesellschaft zusammen.

Für den Konzern, seine Teilkonzerne und Servicegesellschaften legt der Vorstand die langfristigen Ziele sowie die Strategien fest und bestimmt die Richtlinien sowie die Grundsätze für die daraus abgeleitete Unternehmenspolitik. Er koordiniert und kontrolliert die bedeutsamen Aktivitäten. Er legt das Portfolio fest, entwickelt und setzt Führungskräfte ein, verteilt die Ressourcen und entscheidet über die finanzielle Steuerung und Berichterstattung des Konzerns.

Die Mitglieder des Vorstands tragen gemeinsam die Verantwortung für die gesamte Geschäftsführung. Unbeschadet der Gesamtverantwortung aller Vorstandsmitglieder führen die einzelnen Mitglieder die ihnen zugeordneten Bereiche im Rahmen der Vorstandsbeschlüsse in eigener Verantwortung. Die Verteilung der Aufgaben auf die Mitglieder des Vorstands ergibt sich aus einem schriftlich fixierten Aufgabenverteilungsplan.

Der Vorstand in seiner Gesamtheit entscheidet in allen Angelegenheiten von grundsätzlicher und wesentlicher Bedeutung sowie in gesetzlich oder anderweitig verbindlich festgelegten Fällen. Die Geschäftsordnung des Vorstands sieht einen Katalog von Maßnahmen vor, die einer Behandlung und Entscheidung im Gesamtvorstand bedürfen.

Vorstandssitzungen finden regelmäßig statt. Sie werden durch den Vorstandsvorsitzenden einberufen. Darüber hinaus kann jedes Mitglied die Einberufung einer Sitzung verlangen. Sofern nicht Einstimmigkeit gesetzlich erforderlich ist, beschließt der Vorstand mit einfacher Mehrheit der abgegebenen Stimmen. Bei Stimmengleichheit gibt die Stimme des Vorsitzenden den Ausschlag.

Gemäß Geschäftsordnung und Aufgabenverteilungsplan des Vorstands obliegt dem Vorstandsvorsitzenden insbesondere die Führung und Koordinierung des Konzernvorstands. Er repräsentiert Gesellschaft und Konzern gegenüber Dritten und der Belegschaft in Angelegenheiten, die nicht nur Unternehmens- oder Konzernteile betreffen. Darüber hinaus hat er eine besondere Verantwortlichkeit für bestimmte Corporate-Center-Bereiche und deren Tätigkeitsgebiete.

Auch den weiteren im Jahr 2010 amtierenden Mitgliedern des Vorstands sind über den Ressortverteilungsplan besondere fachliche Aufgabengebiete und Zuständigkeiten zugewiesen. In Ergänzung hierzu betreut jedes dieser Mitglieder des Vorstands bestimmte Regionen. Im Geschäftsjahr 2010 sind der bisherige Vorstandsvorsitzende und das bisherige Vorstandsmitglied für Finanzen aus dem Vorstand ausgeschieden. Die jeweiligen Nachfolger haben sich beide in einer mehrmonatigen Übergangsfrist mit Unterstützung der bisherigen Amtsinhaber auf ihre Tätigkeit vorbereitet.

Angesichts der geringen Anzahl von Vorstandsmitgliedern und der Funktion der Gesellschaft als strategische Holding sind keine Ausschüsse des Vorstands eingerichtet.

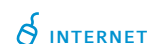

INTERNET

WWW.BAYER.DE/DE/  
CORPORATE-GOVERNANCE.ASPX

Unternehmens-  
leitung durch  
den Vorstand

Überwachung  
der Unternehmens-  
leitung durch  
den Aufsichtsrat

## AUFSICHTSRAT: FÜHRUNGS- UND KONTROLLARBEIT

Der Aufsichtsrat hat die Aufgabe, den Vorstand zu überwachen und ihn zu beraten. Er besteht aus 20 Mitgliedern, die gemäß dem Mitbestimmungsgesetz jeweils zur Hälfte aus Kreisen der Aktionäre und der Arbeitnehmer stammen. In Entscheidungen von grundlegender Bedeutung für das Unternehmen ist der Aufsichtsrat unmittelbar eingebunden; er stimmt mit dem Vorstand auch die strategische Ausrichtung der Gesellschaft ab und erörtert mit ihm regelmäßig den Stand der Umsetzung der Geschäftsstrategie.

Der Aufsichtsratsvorsitzende koordiniert die Arbeit des Gremiums und leitet die Sitzungen. Im regelmäßigen Gedankenaustausch mit dem Vorstand ist der Aufsichtsrat stets über die Geschäftspolitik, die Unternehmensplanung und die Strategie informiert. Der Aufsichtsrat stimmt der Jahresplanung und dem Finanzierungsrahmen zu und billigt die Jahresabschlüsse der Bayer AG und des Bayer-Konzerns sowie den zusammengefassten Lagebericht unter Berücksichtigung der Berichte des Abschlussprüfers.

## AUSSCHÜSSE DES AUFSICHTSRATS

Es bestehen derzeit folgende Ausschüsse des Aufsichtsrats:

**Präsidium:** Diesem Ausschuss des Aufsichtsrats gehören neben dem Vorsitzenden des Aufsichtsrats und seinem Stellvertreter je ein weiterer Vertreter der Anteilseigner und der Arbeitnehmer an. Das Präsidium hat insbesondere die Aufgabe, als Schlichtungsausschuss gemäß Mitbestimmungsgesetz tätig zu werden. Dabei soll es dem Aufsichtsrat Vorschläge für die Bestellung von Vorstandsmitgliedern unterbreiten, wenn im ersten Wahlgang die erforderliche Mehrheit von zwei Dritteln der Aufsichtsratsstimmen nicht erreicht wurde. Daneben sind dem Präsidium bestimmte Entscheidungsbefugnisse im Zusammenhang mit Kapitalmaßnahmen übertragen, einschließlich einer Anpassung der Satzung in diesem Zusammenhang.

**Prüfungsausschuss:** Der Prüfungsausschuss besteht aus drei Vertretern der Anteilseigner und drei Arbeitnehmervertretern. Der im Berichtsjahr amtierende Vorsitzende des Prüfungsausschusses, Dr. Klaus Sturany, erfüllt die gesetzlichen Anforderungen an Unabhängigkeit und Sachverstand auf den Gebieten Rechnungslegung oder Abschlussprüfung, die bei einem Mitglied des Aufsichtsrats und des Prüfungsausschusses vorliegen müssen. Der Prüfungsausschuss tagt regelmäßig vier Mal im Jahr. Zu seinen Aufgaben gehören u. a. die Prüfung der Rechnungslegung des Unternehmens sowie des vom Vorstand aufgestellten Jahres- und Konzernabschlusses, zusammengefassten Lageberichts und des Vorschlags zur Verwendung des Bilanzgewinns der Bayer AG sowie der Quartalsabschlüsse und Zwischenlageberichte des Bayer-Konzerns. Auf der Grundlage des Berichts des Abschlussprüfers über die Prüfung des Jahresabschlusses von Bayer AG und Bayer-Konzern sowie des zusammengefassten Lageberichts erarbeitet der Prüfungsausschuss Vorschläge für die Billigung der Jahresabschlüsse durch den Aufsichtsrat. Der Prüfungsausschuss ist auch für die Beziehungen der Gesellschaft zum Abschlussprüfer zuständig. Der Ausschuss unterbreitet dem Aufsichtsrat einen Vorschlag zur Wahl des Abschlussprüfers, bereitet die Erteilung des Prüfungsauftrags an den von der Hauptversammlung gewählten Abschlussprüfer vor, regt Prüfungsschwerpunkte an und legt die Vergütung des Abschlussprüfers fest. Ferner überwacht der Ausschuss die Unabhängigkeit, Qualifikation, Rotation und Effizienz des Abschlussprüfers.

Darüber hinaus befasst sich der Prüfungsausschuss mit dem internen Kontrollsystem des Unternehmens sowie mit den Verfahren zur Risikoerfassung, zur Risikokontrolle und zum Risikomanagement sowie mit dem internen Revisionssystem. Weiterhin ist der Prüfungsausschuss auch für Fragen der Compliance zuständig und behandelt bei jeder seiner Sitzungen neue Entwicklungen in diesem Bereich.

**Personalausschuss:** Auch der Personalausschuss ist paritätisch besetzt und besteht aus dem Vorsitzenden des Aufsichtsrats und drei weiteren Aufsichtsratsmitgliedern. Der Personalausschuss bereitet die Personalentscheidungen des Aufsichtsratsplenums vor, das über Bestellung und Widerruf der Bestellung von Vorstandsmitgliedern entscheidet. Der Personalausschuss beschließt anstelle des Aufsichtsrats über die Anstellungsverträge der Mitglieder des Vorstands. Die Beschlussfassung über die Gesamtvergütung der einzelnen Vorstandsmitglieder sowie die einzelnen Vergütungsbestandteile und die regelmäßige Überprüfung des Vergütungssystems liegt jedoch beim Aufsichtsratsplenum, dem der Personalausschuss entsprechende Beschlussempfehlungen unterbreitet. Zudem berät er über die langfristige Nachfolgeplanung für den Vorstand.



**Nominierungsausschuss:** Der Nominierungsausschuss wird vorbereitend bei Wahlen der Vertreter der Anteilseigner zum Aufsichtsrat tätig. Er schlägt dem Aufsichtsrat für dessen Wahlvorschlag an die Hauptversammlung geeignete Kandidaten für die Wahl der Aufsichtsratsmitglieder der Anteilseigner vor. Der Ausschuss besteht aus dem Vorsitzenden des Aufsichtsrats und dem weiteren Vertreter der Anteilseigner im Präsidium.

Der Bericht des Aufsichtsrats auf Seite 10 ff. dieses Geschäftsberichts informiert über die Einzelheiten der Tätigkeit des Aufsichtsrats und seiner Ausschüsse.

## ZIELE FÜR DIE ZUSAMMENSETZUNG DES AUFSICHTSRATS

Der Aufsichtsrat ist so zusammenzusetzen, dass seine Mitglieder insgesamt über die zur ordnungsgemäßen Wahrnehmung der Aufgaben erforderlichen Kenntnisse, Fähigkeiten und fachlichen Erfahrungen verfügen. Dabei strebt der Aufsichtsrat in Hinblick auf die internationale Tätigkeit der Bayer AG an, stets mehrere Aufsichtsratsmitglieder mit internationaler Geschäftserfahrung oder sonstigem internationalen Bezug zu haben. Ziel für die Zusammensetzung des Aufsichtsrats ist es weiterhin, dass Aufsichtsratsmitglieder vorbehaltlich besonderer Gründe nicht länger amtierenden als bis zum Ende der Hauptversammlung, die auf die Vollendung ihres zweiundsiebzigsten Lebensjahres folgt, und dass mindestens 75 % der Aufsichtsratsmitglieder unabhängig sind. Die Unabhängigkeit seiner Mitglieder beurteilt der Aufsichtsrat entsprechend der Empfehlung in Ziffer 5.4.2 des Deutschen Corporate Governance Kodex; in seine Beurteilung der Unabhängigkeit bezieht der Aufsichtsrat die in der Empfehlung der Europäischen Kommission vom 15. Februar 2005 genannten Kriterien mit ein.<sup>1</sup>

Weiteres Ziel für die Zusammensetzung des Aufsichtsrats ist eine schrittweise Erhöhung des Gesamtanteils von Frauen im Aufsichtsrat auf mittelfristig mindestens 20 %. Bei der im Jahr 2012 bevorstehenden Aufsichtsratswahl wird dabei ein Frauenanteil von mindestens 15 % angestrebt. Die mittelfristige Zielsetzung soll bei der voraussichtlich im Jahr 2017 stattfindenden nächsten Aufsichtsratswahl erreicht werden. Die Zielsetzung bezieht sich auf den Aufsichtsrat insgesamt und sollte möglichst gleichmäßig auf Anteilseignerseite und auf Arbeitnehmerseite erfüllt werden. Da der Aufsichtsrat aber nur für die Besetzung der Anteilseignerseite Wahlvorschläge unterbreiten kann, kann die Zielsetzung nur bei den Wahlvorschlägen für die Zusammensetzung der Anteilseignerseite berücksichtigt werden. Voraussetzung dafür ist, dass geeignete weibliche Persönlichkeiten gefunden werden können, die bereit sind, als Anteilseignervertreterin zu kandidieren.

## STAND DER UMSETZUNG DER ZIELE

Dem Aufsichtsrat gehören mehrere Aufsichtsratsmitglieder mit internationaler Geschäftserfahrung und sonstigem internationalen Bezug an. Kein Aufsichtsratsmitglied überschreitet das angestrebte Höchstalter. Ein Aufsichtsratsmitglied, Herr Hubertus Schmoldt, gehört dem Aufsichtsrat seit 1995 und damit für mehr als drei Amtsperioden an. Es bestehen aber keine geschäftlichen Beziehungen von Herrn Schmoldt zu der Gesellschaft oder deren Vorstand, die nach Auffassung des Aufsichtsrats einen Interessenkonflikt begründen. Derzeit sind 10 % der Aufsichtsratsmitglieder Frauen. Eine Erhöhung des Frauenanteils wird mit den nächsten turnusmäßigen Aufsichtsratswahlen bei der Hauptversammlung 2012 angestrebt.

## PERSÖNLICHE VERPFLICHTUNGEN STATT SELBSTBEHALT

Die im Deutschen Corporate Governance Kodex definierte Empfehlung hinsichtlich des Selbstbehalts bei einer Directors & Officers-Versicherung (D & O) hat die Gesellschaft bis zum 31. März 2010 in der Weise eingehalten, dass Bayer persönliche Verpflichtungserklärungen der Vorstands- und Aufsichtsratsmitglieder eingeholt hat. Diesen zufolge tragen Vorstandsmitglieder, die der Gesellschaft oder Dritten durch ihre Tätigkeit nach Maßstäben des deutschen Rechts grob fahrlässig Schaden zufügen, diesen Schaden bis zur Höhe der Hälfte ihrer jeweiligen Gesamtvergütung im Jahr der Verursachung des Schadens. Für Mitglieder des Aufsichtsrats galt bis zum 31. März 2010, dass diese einen nach Maßstäben des deutschen Rechts grob fahrlässig verursachten Schaden aufgrund ihrer Tätigkeit selbst bis zur Höhe des variablen Anteils ihrer jeweiligen Vergütung als Aufsichtsrat im Jahr der Schadensverursachung zu tragen hatten.

<sup>1</sup> Anhang 2 zur Empfehlung der Kommission vom 15. Februar 2005 zu den Aufgaben von nicht geschäftsführenden Direktoren/ Aufsichtsratsmitgliedern/börsennotierter Gesellschaften sowie zu den Ausschüssen des Verwaltungs-/Aufsichtsrats (2005/162/EG).

Bei der am 01. April 2010 erfolgten Verlängerung der D&O-Versicherung für die Mitglieder des Vorstands hat die Gesellschaft einen Selbstbehalt in der gesetzlich vorgeschriebenen Höhe vorgesehen. Für die Mitglieder des Aufsichtsrats wurde ebenfalls ab dem 01. April 2010 ein Selbstbehalt in der vom Deutschen Corporate Governance Kodex empfohlenen Höhe vorgesehen. Damit wurden die vorstehend beschriebenen Selbstverpflichtungserklärungen ab dem 01. April 2010 hinfällig.

#### AKTIENGESCHÄFTE VON VORSTAND UND AUFSICHTSRAT

Mitglieder des Vorstands und des Aufsichtsrats sowie ihnen nahe stehende Personen sind gesetzlich verpflichtet, den Erwerb oder die Veräußerung von Wertpapieren der Bayer AG offenzulegen, sofern der Wert der Geschäfte im Kalenderjahr 5.000 € erreicht oder übersteigt. Bayer veröffentlicht Angaben zu den Geschäften unverzüglich auf der Internetseite und übersendet der Bundesanstalt für Finanzdienstleistungsaufsicht einen entsprechenden Beleg; die Information wird dem Unternehmensregister zur Speicherung übermittelt.

Der Bayer AG wurde für das Geschäftsjahr 2010 das folgende Geschäft gemeldet:

Aktiengeschäfte von Vorstand und Aufsichtsrat

[Tabelle 3.27]

| Werner Baumann, Mitglied des Vorstands |                  |              |              |               |           |               |
|----------------------------------------|------------------|--------------|--------------|---------------|-----------|---------------|
| Datum/Ort                              | Wertpapier/Recht | ISIN         | Geschäftsart | Preis/Währung | Stückzahl | Gesamtvolumen |
| 04.01.2010/Xetra                       | Aktie            | DE000BAY0017 | Verkauf      | 56,30 €       | 8.000     | 450.400,00 €  |

Nach Mitteilung der Mitglieder des Vorstands und des Aufsichtsrats an die Gesellschaft ist deren Gesamtbesitz an Aktien der Bayer AG oder sich darauf beziehender Finanzinstrumente am Abschlussstichtag kleiner als 1 % der ausgegebenen Aktien.

#### SYSTEMATISCHE KONTROLLE VON TRANSAKTIONEN

Mittels eines speziellen Managementsystems ist das Unternehmen in der Lage, etwaige geschäftliche und finanzielle Risiken frühzeitig zu erkennen, um entsprechende Gegensteuerungsmaßnahmen ergreifen zu können. Dieses Kontrollsystem ist so konzipiert, dass eine zeitnahe und korrekte Bilanzierung aller geschäftlichen Transaktionen gewährleistet ist und dass kontinuierlich zuverlässige Daten über die finanzielle Situation des Unternehmens vorliegen.

Bei Akquisitionen ist vorgesehen, die internen Kontrollprozeduren der erworbenen Einheiten zügig an die im Bayer-Konzern geltenden Standards anzupassen.

Das Kontroll- und Risikomanagementsystem kann jedoch keinen absoluten Schutz gegen Verluste aus geschäftlichen Wagnissen oder gegen betrügerische Handlungen bieten.

#### CORPORATE COMPLIANCE

Unser unternehmerisches Handeln orientiert sich an den Rechtsordnungen der verschiedenen Länder und Regionen, aus denen sich für den Bayer-Konzern und seine Mitarbeiter im In- und Ausland vielfältige Pflichten ergeben. Bayer führt das Geschäft verantwortungsvoll und in Übereinstimmung mit den gesetzlichen Vorschriften und behördlichen Regeln der Länder, in denen das Unternehmen tätig ist.

Bayer erwartet von allen Mitarbeitern rechtlich und ethisch einwandfreies Handeln im geschäftlichen Alltag. Denn jeder Mitarbeiter beeinflusst durch sein berufliches Verhalten das Ansehen des Unternehmens. Im regelmäßigen Dialog mit den Vorgesetzten sowie in Schulungen unter Mitwirkung der zuständigen Compliance Officer sollen die Mitarbeiter mit den vielfältigen gesetzlichen Vorschriften und behördlichen Regeln der Länder, in denen die Mitarbeiter tätig sind und die für sie relevant sind, vertraut gemacht werden. Hierdurch wird die Grundlage gelegt, das Geschäft verantwortungsvoll und in Übereinstimmung mit dem jeweils geltenden Recht zu führen.

Der Konzernvorstand hat das uneingeschränkte Bekenntnis zu Corporate Compliance, den Verzicht auf jegliches diesen Grundsätzen entgegenstehendes Geschäft, organisatorische Rahmenbedingungen sowie Themenbereiche, bei denen die Verletzung des geltenden Rechts für das Unternehmen als Ganzes, aber auch für den einzelnen Mitarbeiter im besonderen Maße erhebliche negative Folgen haben kann, in der „Corporate Compliance Policy“ zusammengefasst. Die dort verankerten Prinzipien sollen die Mitarbeiter bei ihrem geschäftlichen Handeln leiten und sie vor möglichem Fehlverhalten schützen. Kernbotschaften der „Corporate Compliance Policy“ sind u. a.:

- die Einhaltung der kartellrechtlichen Regelungen,
- das Gebot der Integrität im Geschäftsverkehr, insbesondere ein Verbot jeglicher unzulässiger Einflussnahme,
- die Beachtung der Produktverantwortung und das Bekenntnis zum Prinzip der Nachhaltigkeit,
- die strikte Trennung der beruflichen von den privaten Interessen sowie
- die Verpflichtung zu fairen und respektvollen Arbeitsbedingungen im Unternehmen.

Zur Unterstützung und Beratung bei Fragen zum rechtlich korrekten Verhalten in bestimmten geschäftlichen Situationen stehen jedem Mitarbeiter sowohl sein Vorgesetzter als auch ein lokaler Compliance Officer zur Verfügung.

Jede operativ tätige Konzerngesellschaft hat mindestens einen zuständigen Compliance Officer; in ausländischen Gesellschaften gibt es teilweise mehrere lokale Compliance Officer mit klar zugewiesenen Verantwortlichkeiten für bestimmte Geschäftseinheiten innerhalb der jeweiligen Gesellschaft. Zu den Hauptverantwortlichkeiten jedes lokalen Compliance Officer gehören u. a.:

- Beratung der operativen Geschäftseinheiten,
- Risikoeinschätzung,
- Durchführung bzw. Organisation von Compliance-Schulungsmaßnahmen,
- Untersuchung von gemeldeten potenziellen Compliance-Verstößen inklusive Einleitung angemessener Korrekturmaßnahmen sowie
- Erfüllung der konzernintern festgelegten Berichtspflichten gegenüber den Chief Subgroup Compliance Officers der Konzernführungsgesellschaften.

Diese berichten ihrerseits an den vom Konzernvorstand AG ernannten Group Compliance Officer. Dieser stellt gemeinsam mit dem Leiter der Konzernrevision mindestens einmal jährlich dem Prüfungsausschuss des Aufsichtsrats eine Übersicht über festgestellte Compliance-Verstöße zur Verfügung.

Das Thema „Compliance“ ist in den Zielvereinbarungen mit den Konzernführungskräften fest verankert. Aufgrund ihrer Stellung im Unternehmen sind diese besonders verpflichtet, Vorbild für ihre Mitarbeiter zu sein, die Compliance-Botschaft verstärkt in die Organisation zu tragen sowie deren Durchsetzung durch geeignete organisatorische Maßnahmen sicherzustellen. Seit dem Berichtsjahr kann eine Konzernführungskraft die Verpflichtung zur Rückzahlung des variablen Vergütungsanteils für maximal fünf zurückliegende Jahre treffen. Das ist dann der Fall, wenn es in einem oder mehreren Jahren systematische Verstöße gegen das geltende Gesetzesrecht mit finanziellem Schaden für Bayer gegeben hat, die durch Mitarbeiter begangen wurden, die der betreffenden Konzernführungskraft direkt unterstellt waren. Weiterhin ist Voraussetzung, dass die aufgedeckten systematischen Gesetzesverstöße durch angemessene Präventivmaßnahmen hätten verhindert werden können.

#### GEMEINSAME WERTE UND FÜHRUNGSPRINZIPIEN

In Ergänzung der „Corporate Compliance Policy“ hat sich Bayer auf bestimmte Werte verpflichtet. Diese Werte – Leadership (Führung), Integrität, Flexibilität, Effizienz, kurz „LIFE“ – stellen für alle Bayer-Mitarbeiter eine Richtschnur sowohl für das geschäftliche Verhalten als auch für die Zusammenarbeit innerhalb des Unternehmens dar. Die Ausrichtung ihres Handelns an den LIFE-Werten ist für alle Mitarbeiter verbindlich und wird auch in der Personalentwicklung und den regelmäßigen Leistungsbeurteilungen berücksichtigt.

## AUSFÜHRLICHE BERICHTERSTATTUNG

Um eine größtmögliche Transparenz zu gewährleisten, unterrichten wir unsere Aktionäre, die Finanzanalysten, die Aktionärsvereinigungen, die Medien und die interessierte Öffentlichkeit regelmäßig und zeitnah über die Lage des Unternehmens sowie über wesentliche geschäftliche Veränderungen. Damit entspricht die Berichterstattung unseres Unternehmens den im Kodex definierten Regelungen: Bayer informiert seine Aktionäre vier Mal pro Jahr über die Geschäftsentwicklung, die Vermögens-, Finanz- und Ertragslage des Unternehmens sowie über dessen Risiken.

Gemäß der gesetzlichen Verpflichtung versichern die Mitglieder des Vorstands der Gesellschaft, dass nach bestem Wissen der Jahresabschluss, der Konzernabschluss und der zusammengefasste Lagebericht ein den tatsächlichen Verhältnissen entsprechendes Bild vermitteln.

Der Jahresabschluss der Bayer AG, der Konzernabschluss für den Bayer-Konzern und der zusammengefasste Lagebericht werden innerhalb von 90 Tagen nach Ende des jeweiligen Geschäftsjahres veröffentlicht. Während des Geschäftsjahres werden Anteilseigner und Dritte zusätzlich durch den Halbjahresfinanzbericht sowie im 1. und 3. Quartal durch Quartalsfinanzberichte unterrichtet. Der Halbjahresfinanzbericht wird freiwillig einer prüferischen Durchsicht durch den auch für diesen Zweck durch die Hauptversammlung gewählten Abschlussprüfer unterzogen.

Ausführliche  
Informationen zum  
Unternehmen unter  
[WWW.BAYER.DE](http://WWW.BAYER.DE)

Darüber hinaus veröffentlicht Bayer Informationen auch in den Presse- und Analystenkonferenzen. Als stets aktuelle Veröffentlichungsplattform nutzt Bayer auch das Internet. Auf der Internetseite des Konzerns besteht Zugriff auf die Termine der wesentlichen Veröffentlichungen und Veranstaltungen wie Geschäftsbericht, quartalsweise Finanzberichte (Aktionärsbriefe) oder Hauptversammlung.

Dem Prinzip des „Fair Disclosure“ folgend, behandeln wir alle Aktionäre und wesentliche Zielgruppen bei bewertungsrelevanten Informationen gleich. Informationen zu wichtigen neuen Umständen stellen wir unverzüglich der breiten Öffentlichkeit zur Verfügung. Diesen zeitnahen Zugriff haben Aktionäre auch auf Informationen, die Bayer im Ausland aufgrund der jeweiligen kapitalmarktrechtlichen Vorschriften veröffentlicht.

Neben der regelmäßigen Berichterstattung informieren wir in Ad-hoc-Mitteilungen über nichtöffentlich bekannte Umstände, die geeignet sind, im Falle ihres Bekanntwerdens den Börsenpreis der Bayer-Aktie erheblich zu beeinflussen.



## 7.2 Vergütungsbericht

### VERGÜTUNG DES VORSTANDS

Die Gesamtvergütung des Vorstands setzte sich im Jahr 2010 im Wesentlichen aus fünf Komponenten zusammen: einem jährlichen Festeinkommen, einer kurzfristigen variablen Vergütung, die sich als Zielvergütung auf ein Geschäftsjahr bezieht, einer langfristigen variablen Vergütung, die sich als Zielvergütung auf vier Geschäftsjahre bezieht, einer weiteren, seit 2010 gewährten langfristigen variablen Vergütung, die aus virtuellen Bayer-Aktien mit einer Sperrfrist von drei Jahren besteht, sowie einer betrieblichen Altersversorgung mit nach Dienstjahren wachsenden Pensionsansparungen. Hinzu kommen Sachbezüge und sonstige Leistungen wie z. B. Firmenfahrzeug mit Privatnutzung oder Kostenerstattung einer Gesundheitsvorsorgeuntersuchung.

Die kurzfristige variable Vergütung („Short-term Incentive“ = STI) für das Jahr 2010 bemisst sich an der um Sondereinflüsse bereinigten EBITDA-Marge für den Konzern und am gewichteten Durchschnitt der Zielerreichung der Teilkonzerne HealthCare, CropScience und MaterialScience. Die so ermittelte variable Vergütung kann der Aufsichtsrat in Abhängigkeit von der individuellen Leistung anpassen. Die Zielerreichung der Teilkonzerne ist im Wesentlichen gekoppelt an die Planerreichung in Bezug auf das um Sondereinflüsse bereinigte EBITDA. Zudem fließt eine qualitative Bewertung gegenüber Markt und Wettbewerb ein. Den am Bilanzstichtag aktiven Vorständen werden 50 % der kurzfristigen variablen Vergütung direkt ausgezahlt, die andere Hälfte erhalten sie in Form der neuen langfristigen variablen Vergütung.

Die kurzfristige variable Vergütung für Herrn Wenning wurde für das Berichtsjahr in das Ermessen des Aufsichtsrats gestellt. Dieser setzte unter Berücksichtigung der Tätigkeit von Herrn Wenning im Berichtsjahr und insbesondere der erfolgreichen Überleitung der Amtsgeschäfte auf Herrn Dr. Dekkers einen Betrag von 1.863 T € fest, der vereinbarungsgemäß im Januar 2011 zur Auszahlung gelangte. Die kurzfristige variable Vergütung für Herrn Kühn wurde mit der Beendigung seiner Vorstandstätigkeit abschließend geregelt und bereits im Mai 2010 ausgezahlt.

Im Jahr 2010 betrug die für die aktive Vorstandstätigkeit direkt geleistete Vergütung für alle Vorstandsmitglieder zusammen 10.019 T € (Vorjahr: 8.830 T €), davon entfielen 3.936 T € (Vorjahr: 3.223 T €) auf das Festeinkommen und 4.928 T € (Vorjahr: 5.442 T €) auf den Teil der kurzfristigen variablen Vergütung, der bei den zum Bilanzstichtag aktiven Vorständen 2011 zur Auszahlung kommen wird. In der Summe enthalten sind zudem Sachbezüge und sonstige Leistungen in Höhe von 1.155 T € (Vorjahr: 165 T €), die im Wesentlichen aus den nach steuerlichen Richtlinien zu berücksichtigenden Werten für Sachleistungen und Sonstiges bestehen.

Die langfristige Vergütung der zum 31. Dezember 2010 amtierenden Vorstandsmitglieder besteht seit 2010 aus zwei Komponenten, zum einen aus virtuellen Bayer-Aktien, für die Teile der bisher in voller Höhe kurzfristig zur Auszahlung gekommenen variablen Vergütung verwendet werden, und zum anderen aus dem langfristigen aktienbasierten Vergütungsprogramm Aspire.

Die Hauptversammlung 2010 hat das auch gegenwärtig noch bestehende System der Vorstandsvergütung in einem Konsultativbeschluss gebilligt.

Gemäß den im Dezember 2009 vom Aufsichtsrat beschlossenen und von der Hauptversammlung bestätigten Änderungen wurden 50 % der STI in Form virtueller Bayer-Aktien gewährt, die einer 3-jährigen Sperrfrist unterliegen, und damit eine neue langfristige Vergütungskomponente geschaffen. Der Wert dieser Aktien hängt von der Entwicklung der Bayer-Aktie während der Sperrfrist ab. Für die Umwandlung der STI-Auszahlung in virtuelle Aktien wurde der Durchschnitt der offiziellen Schlusskurse der Bayer-Aktie herangezogen, die an den letzten 30 Handelstagen des Geschäftsjahres (18. November – 30. Dezember 2010) im Xetra-Handel an der Frankfurter Börse festgestellt wurden; dieser Durchschnittskurs betrug 56,95 €. Zusätzlich zu den umgewandelten Aktien erhalten die Herren Plischke und Pott – als Ausgleich für die Systemumstellung der kurzfristigen variablen Vergütung – eine weitere virtuelle Bayer-Aktie für je zwanzig der aus der STI-Auszahlung gewährten. Sie unterliegen der gleichen Haltefrist und Wertentwicklung.

Als weitere Vergütungskomponente nehmen die Vorstandsmitglieder an dem langfristigen aktienbasierten Vergütungsprogramm Aspire I (jährliche Tranchen 2008 bis 2010) teil. Im Rahmen dieses Programms werden Beträge ausgezahlt, sofern die Kursentwicklung der Bayer-Aktie (absolut und relativ zum EURO STOXX 50 als Vergleichsindex) in einem Zeitraum von drei bzw. – ab der im Jahr 2010 aufgelegten Tranche – vier Jahren definierte Performance-Kriterien erfüllt. Weitere Einzelheiten zu diesem Programm sind im Konzernabschluss, Anhangangabe [26.6] aufgeführt. Der beizulegende Zeitwert der im Jahr 2010 gewährten Programme zum Zeitpunkt seiner Gewährung wird – wie aus der folgenden Tabelle ersichtlich – in die Berechnung der Gesamtbezüge einbezogen, obwohl dieser zum Bilanzstichtag noch nicht verdient war.

Die Vergütung der einzelnen im Jahr 2010 tätigen Vorstandsmitglieder ist der nachfolgenden Tabelle zu entnehmen:

Vorstandsvergütung/Gesamtbezüge

[Tabelle 3.28]

|                                                                                                                 |      | Amtierende Vorstandsmitglieder |                |                   |              | Ehemalige Vorstandsmitglieder |            | Gesamt |
|-----------------------------------------------------------------------------------------------------------------|------|--------------------------------|----------------|-------------------|--------------|-------------------------------|------------|--------|
|                                                                                                                 |      | Marijn Dekkers (Vorsitzender)  | Werner Baumann | Wolfgang Plischke | Richard Pott | Werner Wenning                | Klaus Kühn |        |
|                                                                                                                 |      | in T €                         | in T €         | in T €            | in T €       | in T €                        | in T €     | in T € |
| Festeinkommen                                                                                                   | 2010 | 900                            | 633            | 633               | 633          | 873                           | 264        | 3.936  |
|                                                                                                                 | 2009 | -                              | -              | 633               | 633          | 1.165                         | 792        | 3.223  |
| Sachbezüge/Sonstige Leistungen                                                                                  | 2010 | 1.010*                         | 42             | 35                | 30           | 27                            | 11         | 1.155  |
|                                                                                                                 | 2009 | -                              | -              | 49                | 39           | 36                            | 41         | 165    |
| <b>Summe erfolgsunabhängige Vergütung</b>                                                                       | 2010 | 1.910                          | 675            | 668               | 663          | 900                           | 275        | 5.091  |
|                                                                                                                 | 2009 | -                              | -              | 682               | 672          | 1.201                         | 833        | 3.388  |
| Kurzfristige variable Vergütung                                                                                 | 2010 | 903                            | 554            | 554               | 554          | 1.863                         | 500        | 4.928  |
|                                                                                                                 | 2009 | -                              | -              | 1.010             | 1.010        | 2.158                         | 1.264      | 5.442  |
| <b>Summe direkt geleisteter Vergütung</b>                                                                       | 2010 | 2.813                          | 1.229          | 1.222             | 1.217        | 2.763                         | 775        | 10.019 |
|                                                                                                                 | 2009 | -                              | -              | 1.692             | 1.682        | 3.359                         | 2.097      | 8.830  |
| Beizulegender Zeitwert der auf der kurzfristigen variablen Vergütung basierten, aktienkursindizierten Vergütung | 2010 | 903                            | 554            | 582               | 582          | -                             | -          | 2.621  |
|                                                                                                                 | 2009 | -                              | -              | -                 | -            | -                             | -          | -      |
| Beizulegender Zeitwert der neu gewährten aktienbasierten Vergütung zum Zeitpunkt der Gewährung                  | 2010 | 261                            | 206            | 291               | 291          | 184                           | 33         | 1.266  |
|                                                                                                                 | 2009 | -                              | -              | 151               | 151          | 208                           | 84         | 594    |
| <b>Gesamtbezüge (nach HGB)</b>                                                                                  | 2010 | 3.977                          | 1.989          | 2.095             | 2.090        | 2.947                         | 808        | 13.906 |
|                                                                                                                 | 2009 | -                              | -              | 1.843             | 1.833        | 3.567                         | 2.181      | 9.424  |

\* einschließlich umzugsbedingter Einmalaufwendungen

Die im Jahr 2010 erdienten Ansprüche – sowohl aus dem im Jahr 2010 neu gewährten Programm als auch aus den noch laufenden Vorjahresprogrammen, die in Teilen noch nicht verdient waren – sind in folgender Tabelle separat ausgewiesen. Die Wertänderungen von bisher bestehenden Ansprüchen aus den langfristigen aktienbasierten Programmen, die vor 2010 erworben wurden, sind hier ebenfalls gesondert gezeigt. Sie ergeben sich im Wesentlichen aus der Entwicklung des Kurses der Bayer-Aktie im Jahr 2010. Die Beurteilung erfolgt auf Basis des Durchschnitts der offiziellen Schlusskurse der Bayer-Aktie, die an den letzten 30 Handelstagen des Geschäftsjahres (18. November – 30. Dezember 2010) im Xetra-Handel an der Frankfurter Börse festgestellt wurden; dieser Durchschnittskurs betrug 56,95 €. In Höhe des im Jahr 2010 bereits erdienten Anteils ist der beizulegende Zeitwert der neu gewährten aktienbasierten Vergütung in der Zeile „Langfristige variable Vergütung“ enthalten. Durch die teilweise Berücksichtigung ein und desselben Anspruchs in den verschiedenen Darstellungen können die Werte der folgenden Tabelle nicht zu den Gesamtbezügen hinzugerechnet werden.

## Vorstandsvergütung/aktienbasierte Vergütung

[Tabelle 3.29]

|                                                                                          |      | Amtierende<br>Vorstandsmitglieder        |                   |                      |                 | Ehemalige<br>Vorstandsmitglieder |               | Gesamt |
|------------------------------------------------------------------------------------------|------|------------------------------------------|-------------------|----------------------|-----------------|----------------------------------|---------------|--------|
|                                                                                          |      | Marijn<br>Dekkers<br>(Vorsit-<br>zender) | Werner<br>Baumann | Wolfgang<br>Plischke | Richard<br>Pott | Werner<br>Wenning                | Klaus<br>Kühn |        |
|                                                                                          |      | in T €                                   | in T €            | in T €               | in T €          | in T €                           | in T €        | in T € |
| Langfristige variable Vergütung (im laufenden Jahr<br>erdiente aktienbasierte Vergütung) | 2010 | 67                                       | 124               | 234                  | 234             | 322                              | 98            | 1.079  |
|                                                                                          | 2009 | -                                        | -                 | 319                  | 319             | 587                              | 398           | 1.623  |
| Wertänderung bisheriger Ansprüche aus aktien-<br>basierter Vergütung                     | 2010 | -                                        | -21               | -44                  | -44             | -61                              | -56           | -226   |
|                                                                                          | 2009 | -                                        | -                 | 212                  | 212             | 390                              | 265           | 1.079  |

Die derzeit tätigen Mitglieder des Vorstands sind grundsätzlich berechtigt, nach Ausscheiden aus dem Bayer-Konzern Pensionsleistungen zu beziehen, jedoch nicht vor Erreichen des 60. Lebensjahres. Der jährliche Pensionsanspruch beträgt mindestens 30 % des letzten Festeinkommens. Dieser Prozentsatz wächst über die Zeit in Abhängigkeit von der Anzahl der Dienstjahre als Mitglied des Vorstands auf maximal 60 % mit Ausnahme des vor 2006 bestellten Vorstandsmitglieds, bei dem der Pensionsanspruch auf maximal 80 % steigen kann. Die sich hieraus ergebende Hinterbliebenenversorgung beträgt 60 % dieses Pensionsniveaus.

Die auf die einzelnen Vorstandsmitglieder entfallenden Aufwendungen für Pensionszusagen ergeben sich aus der nachstehenden Übersicht. Als Aufwendungen für im laufenden Jahr erdiente Pensionszusagen (HGB) werden laufender Dienstzeitaufwand sowie ggf. aus Neuzusagen oder der Änderung bestehender Zusagen resultierender nachzuverrechnender Dienstzeitaufwand erfasst. Daneben haben sich in der Veränderung des Barwerts der Pensionszusagen die Aufzinsung von in Vorjahren bereits erworbenen Ansprüchen sowie versicherungsmathematische Gewinne und Verluste ausgewirkt. Aufwendungen aus den Pensionszusagen für die im Geschäftsjahr ausgeschiedenen Vorstandsmitglieder sind jeweils bis zum Zeitpunkt ihres Ausscheidens berücksichtigt. Da die Berechnung der Pensionsrückstellungen nach den Rechnungslegungsvorschriften von HGB und IFRSs unterschiedlich vorzunehmen ist, finden sich in der folgenden Tabelle sowohl die Werte, die im nach HGB erstellten Jahresabschluss der Bayer AG, als auch die Werte, die im nach IFRSs erstellten Konzernabschluss berücksichtigt wurden. Dabei handelt es sich um unterschiedliche Darstellungen jeweils ein und derselben Pensionszusage.

## Pensionszusagen

[Tabelle 3.30]

|                                                                             |      | Amtierende<br>Vorstandsmitglieder        |                   |                      |                 | Ehemalige<br>Vorstandsmitglieder |               | Gesamt |
|-----------------------------------------------------------------------------|------|------------------------------------------|-------------------|----------------------|-----------------|----------------------------------|---------------|--------|
|                                                                             |      | Marijn<br>Dekkers<br>(Vorsit-<br>zender) | Werner<br>Baumann | Wolfgang<br>Plischke | Richard<br>Pott | Werner<br>Wenning                | Klaus<br>Kühn |        |
|                                                                             |      | in T €                                   | in T €            | in T €               | in T €          | in T €                           | in T €        | in T € |
| Veränderung des Barwerts der Pensionszusagen<br>(IFRS)                      | 2010 | 2.612                                    | 621               | 1.017                | 1.074           | 823                              | 426           | 6.573  |
|                                                                             | 2009 | -                                        | -                 | 834                  | 707             | 405                              | 1.433         | 3.379  |
| davon Aufwendungen für im laufenden Jahr<br>erdiente Pensionszusagen (IFRS) | 2010 | 2.175                                    | 111               | 203                  | 217             | -                                | 141           | 2.847  |
|                                                                             | 2009 | -                                        | -                 | 181                  | 198             | -                                | 985           | 1.364  |
| Barwert der Pensionszusagen zum Bilanzstichtag<br>(IFRS)*                   | 2010 | 2.612                                    | 2.868             | 6.594                | 6.552           | -                                | -             | 18.626 |
|                                                                             | 2009 | -                                        | -                 | 5.577                | 5.478           | 14.675                           | 6.335         | 32.065 |
| Veränderung des Barwerts der Pensionszusagen<br>(HGB)                       | 2010 | 2.481                                    | 298               | 602                  | 577             | 187                              | 255           | 4.400  |
|                                                                             | 2009 | -                                        | -                 | 482                  | 279             | -452                             | 1.048         | 1.357  |
| davon Aufwendungen für im laufenden Jahr<br>erdiente Pensionszusagen (HGB)  | 2010 | 2.292                                    | 117               | 209                  | 225             | 3                                | 148           | 2.994  |
|                                                                             | 2009 | -                                        | -                 | 200                  | 223             | 4                                | 1.090         | 1.517  |
| Barwert der Pensionszusagen zum Bilanzstichtag<br>(HGB)                     | 2010 | 2.481                                    | 2.690             | 6.392                | 6.301           | -                                | -             | 17.864 |
|                                                                             | 2009 | -                                        | -                 | 5.794                | 5.728           | 15.128                           | 6.597         | 33.247 |

\* nach Abzug von Planvermögen

Die Gesamtvergütung nach IFRS umfasst im Gegensatz zu den Gesamtbezügen nach HGB nicht den beizulegenden Zeitwert der neu gewährten aktienorientierten Entlohnung, sondern die im laufenden Jahr erdiente aktienbasierte Vergütung zuzüglich der Wertänderung bisheriger noch nicht ausgezahlter Ansprüche aus aktienorientierter Entlohnung. Darüber hinaus sind die Aufwendungen für im laufenden Jahr erdiente Pensionszusagen hinzuzurechnen.

Die nachfolgende Tabelle fasst die Komponenten der Vorstandsvergütung zusammen:

Vorstandsvergütung nach IFRS

[Tabelle 3.31]

|                                                                                                                 | 2009          | 2010          |
|-----------------------------------------------------------------------------------------------------------------|---------------|---------------|
|                                                                                                                 | in T €        | in T €        |
| Summe direkt geleisteter Vergütung                                                                              | 8.830         | 10.019        |
| Beizulegender Zeitwert der auf der kurzfristigen variablen Vergütung basierten, aktienkursindizierten Vergütung | -             | 2.621         |
| Langfristige variable Vergütung (im laufenden Jahr erdiente aktienbasierte Vergütung)                           | 1.623         | 1.079         |
| Wertänderung bisheriger Ansprüche aus aktienbasierter Vergütung                                                 | 1.079         | -226          |
| Aufwendungen für im laufenden Jahr erdiente Pensionszusagen                                                     | 1.364         | 2.847         |
| <b>Gesamtvergütung (nach IFRS)</b>                                                                              | <b>12.896</b> | <b>16.340</b> |

Für das einzige Vorstandsmitglied, dessen Dienstvertrag vor Inkrafttreten der Änderungen des Deutschen Corporate Governance Kodex im Juni 2008 abgeschlossen wurde, gilt eine generelle Absicherungsklausel bei einer unternehmensseitig veranlassten Vertragsbeendigung vor Vollendung des 60. Lebensjahres mit folgenden Grundprinzipien:

Falls einem Vorstand bei Auslaufen seines bestehenden Vertrags nicht die Verlängerung seines Dienstvertrags angeboten wird, weil er nicht als Vorstand wieder berufen wurde, oder falls seine Bestellung zum Mitglied des Vorstands während der Vertragslaufzeit vorzeitig widerrufen wurde, ohne dass ein Grund für eine fristlose Kündigung bestand, erhält er (im letzteren Fall neben einer „Auszahlung“ der Restlaufzeit, allerdings reduziert auf die Höhe des jährlichen Festeinkommens und die Zielgröße für die kurzfristige variable Zahlung, wenigstens für 12 Monate) monatliche Überbrückungsbezüge in Höhe von 80 % des letzten Festeinkommens für einen maximalen Zeitraum von 60 Monaten abzüglich der Monate, für die er als Vorstand bezahlt freigestellt war oder entschädigt wurde. Anderweitiger Verdienst aus einer neuen Tätigkeit wird angerechnet. Bei unternehmensseitig veranlasstem vorzeitigem Ausscheiden können in bestimmten Situationen weitere Dienstjahre, maximal bis zur Vollendung des 60. Lebensjahres, bei der Vorstandspension berücksichtigt werden.

Der Aufsichtsrat hat beschlossen, der Empfehlung des im Juni 2008 geänderten Deutschen Corporate Governance Kodex zur Begrenzung von Abfindungszahlungen bei neuen Vertragsabschlüssen zu folgen. Nur noch bei einem bestehenden Vorstandsvertrag kann die Klausel zum Tragen kommen. Bei den übrigen Verträgen wurde vertraglich vereinbart, dass Zahlungsansprüche nur für den Fall einer vorzeitigen Vertragsbeendigung durch die Gesellschaft ohne wichtigen Grund entstehen können und der Höhe nach begrenzt sind. Die Zahlungen einschließlich Nebenleistungen sind in diesem Fall auf den Wert von zwei Jahresvergütungen limitiert (Abfindungs-Cap) und dürfen nicht mehr als die Restlaufzeit des Vorstandsvertrags vergüten. Für die Berechnung des Abfindungs-Caps ist auf die Gesamtvergütung (Festeinkommen zuzüglich Zielwert der kurzfristigen variablen Vergütung) für das abgelaufene Geschäftsjahr und gegebenenfalls auch auf die voraussichtliche Gesamtvergütung für das laufende Jahr abzustellen.



Mit den Mitgliedern des Vorstands sind nachvertragliche Wettbewerbsverbote vereinbart, die eine von der Gesellschaft zu zahlende Entschädigung für die Dauer des Bestehens des nachvertraglichen Wettbewerbsverbots von zwei Jahren vorsehen. Diese Entschädigung beträgt für die vor 2010 bestellten Vorstandsmitglieder 50 % der durchschnittlichen vertraglichen Leistung der letzten 3 Jahre. Für die zum 01. Januar 2010 neu bestellten Vorstandsmitglieder beträgt diese Entschädigung 100 % des durchschnittlichen Festeinkommens der letzten 12 Monate vor dem Ausscheiden. Die Entschädigung wird auf etwaige Abfindungszahlungen angerechnet.

Seit seinem Ausscheiden aus dem Vorstand erhält Herr Kühn regelmäßige Zahlungen als Entschädigung für ein solches Wettbewerbsverbot. Die Summe der hierfür im Jahr 2010 an ihn geleisteten Zahlungen beträgt 764.780 €.

Darüber hinaus bestehen Regelungen für den Fall eines Kontrollwechsels, siehe dazu Kapitel 6 „Übernahmerelevante Angaben“.

Vorstandsmitgliedern, die vor dem 01. Januar 1979 in das Unternehmen eingetreten sind, steht – wie allen angestellten Mitarbeitern mit einem vor diesem Stichtag liegenden Eintrittsdatum – ein 6-monatiger Pensionsurlaub zu, der unter bestimmten Bedingungen abgegolten werden kann. Diese Regelung betraf im Geschäftsjahr 2010 nur Herrn Wenning. Ihm wurde der bestehende Anspruch auf Pensionsurlaub in Höhe von 1.850 T € abgegolten. Dieser Betrag ist in dem unten genannten Betrag der Vorstandspensionsbezüge enthalten.

Zum 31. Dezember 2010 bestanden keine Kredite an Mitglieder des Vorstands. Im Berichtsjahr erfolgten keine Darlehensablösungen.

Aktuell erhalten pensionierte Mitglieder des Vorstands monatliche Pensionsleistungen auf Basis eines 80-prozentigen Versorgungsgrads. Pensionsleistungen an frühere Vorstände bzw. ihre Hinterbliebenen werden seit dem 01. Januar 2009 jährlich überprüft und unter Berücksichtigung der Entwicklung der Verbraucherpreise angepasst. Diese Pensionsleistungen werden in Ergänzung zu Ansprüchen aus früheren Arbeitnehmerpensionszusagen gezahlt. Die Vorstandspensionsbezüge der früheren Vorstandsmitglieder und ihrer Hinterbliebenen betrugen 13.351 T € (Vorjahr: 11.273 T €). Die Pensionsrückstellungen für diese Personengruppe betrugen nach IFRS 131.599 T € (Vorjahr: 107.223 T €) und nach HGB 129.121 T € (Vorjahr: 110.069 T €).

## VERGÜTUNG DES AUFSICHTSRATS

Die Vergütung des Aufsichtsrats richtet sich nach den entsprechenden Satzungsbestimmungen, die seit dem Beschluss der Hauptversammlung vom 29. April 2005 nicht mehr geändert wurden. Danach erhalten die Mitglieder des Aufsichtsrats neben dem Ersatz ihrer Aufwendungen eine feste und eine variable Vergütung. Die jährliche feste Vergütung beträgt 60.000 €. Die variable Vergütung ist erfolgsabhängig und richtet sich nach dem Brutto-Cashflow des Geschäftsjahres, der im Konzernabschluss ausgewiesen ist. Für je angefangene 50 Mio €, um die der Brutto-Cashflow den Betrag von 3,1 Mrd € übersteigt, beträgt der variable Teil 2.000 €, insgesamt jedoch höchstens 30.000 €.

Gemäß den Empfehlungen des Deutschen Corporate Governance Kodex werden Vorsitz und stellvertretender Vorsitz im Aufsichtsrat sowie Vorsitz und Mitgliedschaft in Ausschüssen gesondert berücksichtigt. Der Vorsitzende des Aufsichtsrats erhält das Dreifache, sein Stellvertreter das Eineinhalbfache des sogenannten einfachen Satzes. Mitgliedern von Ausschüssen steht ein zusätzliches Viertel und Ausschussvorsitzenden ein weiteres Viertel des einfachen Satzes zu. Insgesamt ist die Vergütung jedoch auf das Dreifache des einfachen Satzes begrenzt. Für die Mitgliedschaft im Nominierungsausschuss wird einvernehmlich keine zusätzliche Vergütung gewährt. Veränderungen im Aufsichtsrat und seinen Ausschüssen während des Geschäftsjahres führen zu einer zeitanteiligen Vergütung. Vergütungen oder Vorteile für persönlich erbrachte Leistungen, insbesondere Beratungs- und Vermittlungsleistungen, wurden nicht gewährt. Daneben hat die Gesellschaft zugunsten der Aufsichtsratsmitglieder eine Haftpflichtversicherung abgeschlossen, welche die gesetzliche Haftpflicht aus der Aufsichtsrats Tätigkeit abdeckt.

Über die Aufsichtsratsvergütung hinaus erhalten die Arbeitnehmervertreter, die Arbeitnehmer im Bayer-Konzern sind, Entgeltleistungen, die nicht in Zusammenhang mit ihrer Tätigkeit für den Aufsichtsrat stehen. In Summe erhielten die Arbeitnehmervertreter aus solchen Tätigkeiten 603 T € (Vorjahr: 605 T €).

Zum 31. Dezember 2010 bestanden keine Kredite an Mitglieder des Aufsichtsrats. Im Berichtsjahr erfolgten keine Darlehensablösungen.

Aufsichtsratsvergütung 2010 der Bayer AG

[Tabelle 3.32]

|                                           | Feste Vergütung | Variable Vergütung | Gesamt |
|-------------------------------------------|-----------------|--------------------|--------|
|                                           | in T €          | in T €             | in T € |
| Dr. Paul Achleitner                       | 75              | 38                 | 113    |
| André Aich                                | 60              | 30                 | 90     |
| Willy Beumann                             | 64              | 32                 | 96     |
| Dr. Clemens Börsig                        | 60              | 30                 | 90     |
| Karl-Josef Ellrich <sup>1</sup>           | 37              | 19                 | 56     |
| Dr.-Ing. Thomas Fischer                   | 75              | 38                 | 113    |
| Peter Hausmann                            | 75              | 38                 | 113    |
| Prof. Dr.-Ing. e.h. Hans-Olaf Henkel      | 75              | 38                 | 113    |
| Reiner Hoffmann                           | 60              | 30                 | 90     |
| Dr. rer. pol. Klaus Kleinfeld             | 60              | 30                 | 90     |
| Petra Kronen                              | 75              | 38                 | 113    |
| Dr. rer. nat. Helmut Panke                | 60              | 30                 | 90     |
| Hubertus Schmoldt                         | 75              | 38                 | 113    |
| Dr. Manfred Schneider (Vorsitzender)      | 180             | 90                 | 270    |
| Dr.-Ing. Ekkehard D. Schulz               | 60              | 30                 | 90     |
| Roswitha Süßelbeck <sup>2</sup>           | 30              | 15                 | 45     |
| Dr. Klaus Sturany                         | 90              | 45                 | 135    |
| Dipl.-Ing. Dr.-Ing. e.h. Jürgen Weber     | 75              | 38                 | 113    |
| Thomas de Win                             | 120             | 60                 | 180    |
| Prof. Dr. Dr. h.c. Ernst-Ludwig Winnacker | 60              | 30                 | 90     |
| Oliver Zühlke                             | 60              | 30                 | 90     |

<sup>1</sup> Aufsichtsratsmitglied bis 30.06.2010

<sup>2</sup> Aufsichtsratsmitglied seit 01.07.2010

## 8. Forschung und Entwicklung

Unsere Mission „Bayer: Science For A Better Life“ unterstreicht die Überzeugung des Bayer-Konzerns: Innovationen leisten wichtige Beiträge, um die globalen Herausforderungen in den Bereichen Gesundheit, Ernährung der wachsenden Weltbevölkerung sowie Schonung der knappen werdenden Ressourcen zu bewältigen. Damit sind Innovationen wesentliche Treiber für das zukünftige Wachstum unseres Unternehmens. Bayer verfügt über die notwendigen Ressourcen, um durch Forschung und Entwicklung das Produktportfolio stetig zu erneuern und zu erweitern sowie Produktionsprozesse zu optimieren. Im Jahr 2010 wurden 3.053 Mio € (Vorjahr: 2.746 Mio €) für Forschung und Entwicklung aufgewendet, ein Rekord in der Firmengeschichte. Dies entspricht einer Forschungskostenquote von 8,7 % bezogen auf den Umsatz. Unsere Forschungs- und Entwicklungsaktivitäten orientieren sich eng an den Marktbedürfnissen und unterliegen dem Anspruch, sich kontinuierlich zu verbessern. Unsere eigenen Aktivitäten werden ergänzt durch ein internationales Netzwerk von führenden Hochschulen, öffentlichen Forschungseinrichtungen und Partnerfirmen, das wir entlang unserer Forschungs- und Entwicklungsschwerpunkte kontinuierlich ausbauen. Dieses Netzwerk hilft uns, durch Bündelung von Know-how neue Geschäftsideen zügig in Produkterfolge umzusetzen. Die gezielte Förderung der konzernweit 13.200 Mitarbeiter in den Forschungs- und Entwicklungsbereichen ist ein weiteres Kernelement unserer Aktivitäten.

**3,1 Mrd €**

für Forschung und  
Entwicklung

Forschungs- und Entwicklungskostenanteil der Segmente (Vorjahreswerte in Klammern)

[Grafik 3.17]

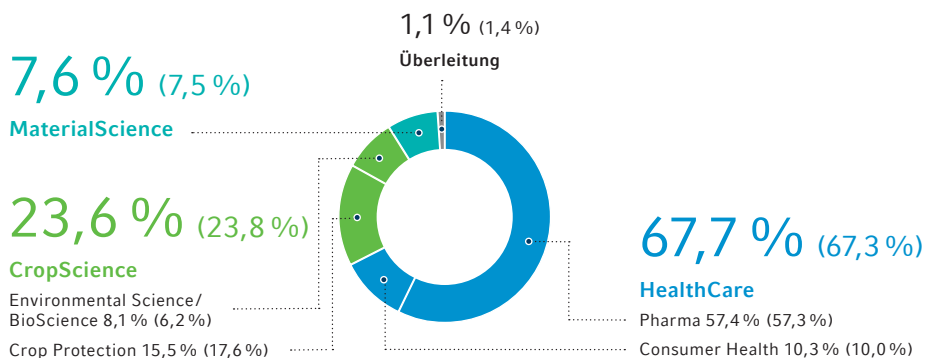

### HEALTHCARE

In die Forschung und Entwicklung (F&E) der beiden Segmente Pharma und Consumer Health haben wir im Jahr 2010 2.066 Mio € (Vorjahr: 1.847 Mio €) investiert. Dies entspricht 67,7 % der gesamten Forschungsaufwendungen des Konzerns und einer Forschungskostenquote von 12,2 %. Im Bereich der Forschung und Entwicklung des Teilkonzerns HealthCare waren zum Abschlussstichtag 7.700 Mitarbeiter beschäftigt.

**2.066 Mio €**

für Forschung  
und Entwicklung  
bei HealthCare

Im Segment Pharma haben wir unsere Aufwendungen für Forschung und Entwicklung auf 1.751 Mio € (Vorjahr: 1.572 Mio €) gesteigert, dies entspricht einer Forschungskostenquote von 16,1 % (Vorjahr: 15,0 %). Bei der Wirkstofffindung im Segment Pharma konzentrieren wir uns auf die Bereiche Diagnostische Bildgebung, Frauengesundheit, Kardiologie und Onkologie. Die Forschungsaktivitäten und -kapazitäten sind an den drei Hauptstandorten Berlin und Wuppertal (Deutschland) sowie Berkeley (USA) gebündelt. An den Standorten Berlin und Wuppertal konzentrieren wir uns im Wesentlichen auf die Identifizierung von molekularen Zielstrukturen, um Leitsubstanzen zu entwickeln und zu optimieren. Außerdem werden hier Untersuchungen zum Arzneimittelstoffwechsel, zur Pharmakokinetik, Toxikologie und klinischen Pharmakologie unternommen. Berkeley ist ein wichtiges Forschungs- und Entwicklungszentrum, in dem die proteinbasierte biologische Wirkstoffforschung von Kogenate® erfolgt. Das globale Forschungsnetzwerk wurde im Berichtsjahr durch ein Innovationszentrum bei San Francisco (USA) gestärkt, um auf dem Gebiet der Hämatologie zu forschen und neuartige biologische Wirkstoffe zu entwickeln. Universitäre Forschungsinstitute und junge, biotechnologisch tätige Unternehmen werden hier eng mit unseren

Wissenschaftlern zusammenarbeiten. Zusätzlich gründeten wir ein neues internationales Forschungs- und Entwicklungszentrum in Peking (China), um einen Beitrag zur Erforschung und Entwicklung von Arzneimitteln für China und weitere asiatische Länder zu leisten. Für beide Zentren streben wir strategische Allianzen mit ausgesuchten Forschungs- und Entwicklungspartnern an.

Zur Entwicklung neuer Wirkstoffe für Erkrankungen mit hohem medizinischen Bedarf haben wir im Verlauf des Jahres 2010 mit mehreren Arzneimittelkandidaten aus unserer Forschungs- und Entwicklungspipeline klinische Studien durchgeführt. Zudem stellten wir für einige dieser Arzneimittelkandidaten nach Abschluss aller notwendigen Studien Anträge auf Zulassung bzw. auf Erweiterung der bestehenden Zulassung bei einer oder mehreren Behörden. Die wichtigsten noch im Zulassungsprozess befindlichen Arzneimittelkandidaten sind:

**Einreichungen**

[Tabelle 3.33]

|                            | Indikation                                                                                        |
|----------------------------|---------------------------------------------------------------------------------------------------|
| Gadovist®                  | USA, Magnetresonanztomographie, Zentrales Nervensystem                                            |
| Qlaira®/Natazia™ (E2V/DNG) | USA, Behandlung von starken und/oder verlängerten Regelblutungen                                  |
| Valette® Plus              | EU, Orale Empfängnisverhütung, kombiniertes Kontrazeptivum mit Folat                              |
| Xarelto®                   | Schlaganfall-Prophylaxe bei Vorhofflimmern                                                        |
| Xarelto®                   | EU, Behandlung und Sekundärprophylaxe tiefer Venenthrombosen                                      |
| Xarelto®                   | USA, Prävention von venösen Thromboembolien nach geplanten Hüft- und Kniegelenkersatz-Operationen |
| YAZ® Flex                  | EU, Orale Empfängnisverhütung mit flexiblen Einnahme-Regimen                                      |

In der nachfolgenden Tabelle sind unsere wichtigsten Arzneimittelkandidaten der klinischen Prüfungsphasen III und II dargestellt:

**Forschungs- und Entwicklungsprojekte (Phase III und II)\***

[Tabelle 3.34]

|                                    | Indikation                                                                             | Status    |
|------------------------------------|----------------------------------------------------------------------------------------|-----------|
| Alemtuzumab                        | Multiple Sklerose                                                                      | Phase III |
| Alpharadin™                        | Behandlung von Knochenmetastasen bei hormon-resistentem Prostatakrebs                  | Phase III |
| ATX-101                            | Auflösung von submentalem Fett                                                         | Phase III |
| FC Patch low                       | Empfängnisverhütung                                                                    | Phase III |
| Florbetaben                        | Alzheimer-PET-Diagnostik                                                               | Phase III |
| Gadovist®                          | Magnetresonanztomographie                                                              | Phase III |
| LCS (ULD LNG Contraceptive System) | Empfängnisverhütung                                                                    | Phase III |
| Nexavar®                           | Brustkrebs                                                                             | Phase III |
| Nexavar®                           | Schilddrüsenkrebs                                                                      | Phase III |
| Nexavar®                           | Nicht kleinzelliger Lungenkrebs                                                        | Phase III |
| Regorafenib (DAST Inhibitor)       | Behandlung metastasierter oder inoperabler Stromatumore im Gastrointestinalbereich     | Phase III |
| Regorafenib (DAST Inhibitor)       | Dickdarmkrebs                                                                          | Phase III |
| Riociguat (sGC Stimulator)         | Pulmonale Hypertonie (CTEPH)                                                           | Phase III |
| Riociguat (sGC Stimulator)         | Pulmonale Hypertonie (PAH)                                                             | Phase III |
| Xarelto®                           | Thromboseprophylaxe bei immobilisierten Patienten aufgrund medizinischer Indikationen  | Phase III |
| Xarelto®                           | Behandlung und Sekundärprophylaxe von venösen Thromboembolien                          | Phase III |
| Xarelto®                           | Sekundärprophylaxe des akuten koronaren Syndroms/Herzinfarkt                           | Phase III |
| Vaginorm®                          | Vulvovaginale Atrophie und weibliche sexuelle Dysfunktion FSD (female sexual disorder) | Phase III |
| VEGF Trap-Eye                      | Altersabhängige Makula-Degeneration                                                    | Phase III |
| VEGF Trap-Eye                      | Gefäßneubildungen der Netzhaut nach pathologischer Myopie                              | Phase III |
| VEGF Trap-Eye                      | Verschluss der zentralen Netzhautvene                                                  | Phase III |



## Forschungs- und Entwicklungsprojekte (Phase III und II)\*

[Fortsetzung von Tabelle 3.34]

|                               | Indikation                                      | Status   |
|-------------------------------|-------------------------------------------------|----------|
| Alpharadin™                   | Behandlung von Knochenmetastasen bei Brustkrebs | Phase II |
| Amikacin Inhale               | Lungeninfektion                                 | Phase II |
| BAY 60-4552/Vardenafil        | Erektile Dysfunktion                            | Phase II |
| Cinaciguat (sGC Aktivator)    | Akute Herzinsuffizienz                          | Phase II |
| Ciprofloxacin Inhale          | Lungeninfektion                                 | Phase II |
| Mapracorat (ZK 245186, SEGRA) | Atopische Dermatitis                            | Phase II |
| MEK-Inhibitor                 | Krebs                                           | Phase II |
| Nexavar®                      | Brustkrebs                                      | Phase II |
| Nexavar®                      | Dickdarmkrebs, Kombinationstherapie             | Phase II |
| Nexavar®                      | Eierstockkrebs                                  | Phase II |
| Nexavar®                      | Weitere Indikationen                            | Phase II |
| Regorafenib (DAST Inhibitor)  | Krebs                                           | Phase II |
| Riociguat (sGC Stimulator)    | Pulmonale Hypertension (COPD)                   | Phase II |
| Riociguat (sGC Stimulator)    | Pulmonale Hypertension (ILD)                    | Phase II |
| Riociguat (sGC Stimulator)    | Pulmonale Hypertension (LHD)                    | Phase II |
| VEGF Trap-Eye                 | Diabetisches Makula-Ödem                        | Phase II |

\* Stand: 15. Februar 2011

PAH = pulmonale arterielle Hypertonie; CTEPH = chronisch thromboembolische pulmonale Hypertonie

COPD = chronisch obstruktive Lungenerkrankung; ILD = interstitielle Lungenerkrankung; PET = Positronen-Emissionstomographie

LHD = left heart disease

Das Wesen der Arzneimittelforschung und -entwicklung bedingt, dass nicht alle Wirkstoffe das jeweils festgelegte Projektziel erreichen werden. Es besteht die Möglichkeit, dass einige oder alle der hier aufgeführten Projekte aufgrund wissenschaftlicher und/oder wirtschaftlicher Erwägungen abgebrochen werden und somit nicht zu einem marktfähigen Produkt führen. Zudem ist es möglich, dass die für diese Wirkstoffe erforderliche Zulassung als Arzneimittel durch die Food and Drug Administration (FDA), die European Medicines Agency (EMA) oder eine andere Zulassungsbehörde nicht erteilt wird.

Wir überprüfen unsere Forschungs- und Entwicklungspipeline regelmäßig, um die aussichtsreichsten Pharma-Projekte mit Priorität voranzutreiben.

Unser neuartiger Gerinnungshemmer Xarelto®, ein als Tablette einzunehmender direkter Faktor-Xa-Inhibitor, kam im September 2008 zur Prophylaxe von venösen Thromboembolien bei erwachsenen Patienten nach geplanten Hüft- oder Kniegelenkersatzoperationen auf den Markt. Zulassungen für diese Indikation wurden von den Gesundheitsbehörden in mehr als 100 Ländern weltweit erteilt, darunter die Mitgliedsstaaten der Europäischen Union, Australien, China, Kanada und Mexiko. Xarelto® wird inzwischen in mehr als 75 Ländern vermarktet. Ein neuartiger, vereinfachter Therapieansatz mit Xarelto® als Mono-Therapeutikum hat in der entsprechenden Phase-III-Studie zur langfristigen Behandlung und Sekundärprophylaxe der tiefen Venenthrombose gegenüber der derzeitigen Standardtherapie eine vergleichbare Wirksamkeit und damit den primären Wirksamkeitseindpunkt erreicht. Im Januar 2011 erfolgte der Zulassungsantrag bei der europäischen Zulassungsbehörde European Medicines Agency (EMA) zur Schlaganfall-Prävention bei Patienten mit Vorhofflimmern sowie zur Behandlung und Sekundärprophylaxe tiefer Venenthrombosen und – durch unseren Kooperationspartner Johnson & Johnson – bei der us-amerikanischen Gesundheitsbehörde Food and Drug Administration (FDA) zur Schlaganfall-Prävention bei Patienten mit Vorhofflimmern auf Basis der positiven Ergebnisse der zulassungsrelevanten, doppelblinden Phase-III-Studie ROCKET AF. Aufgrund des umfangreichen klinischen Studienprogramms ist der Wirkstoff der wohl am intensivsten untersuchte orale, direkte Faktor-Xa-Inhibitor weltweit. Insgesamt werden mehr als 65.000 Patienten an dem Entwicklungsprogramm teilnehmen, in dem der Wirkstoff für die Thromboseprophylaxe und -therapie in einem breiten Spektrum von Indikationen geprüft wird (siehe auch Tabelle 3.34).

Xarelto®:  
Zulassungsanträge  
für neue Indikationen  
eingereicht

Aufgrund vielversprechender Phase-II-Ergebnisse mit Riociguat (sGC Stimulator) haben wir im Dezember 2008 ein Phase-III-Programm gestartet. Riociguat ist das erste Präparat einer neuen Klasse von gefäßerweiternden Substanzen – den Stimulatoren der löslichen Guanylatcyclase (sGC). Der als Tablette einzunehmende Wirkstoff wird derzeit als neuer Therapieansatz bei verschiedenen Formen des Lungenhochdrucks untersucht.

Zu unseren weiteren Entwicklungsprojekten zählt u. a. unser innovatives Krebsmedikament Nexavar®, das wir zusammen mit Onyx Pharmaceuticals, Inc., USA, weiterentwickeln. Der vielversprechende Wirkstoff Sorafenib, der sowohl die Krebszellen als auch das Gefäßsystem des Tumors angreift, wird bereits weltweit in den Indikationen des fortgeschrittenen Nierenzellkarzinoms und des Leberzellkarzinoms vermarktet. Die Untersuchungen zum Einsatz bei weiteren Tumorarten befinden sich derzeit in unterschiedlichen Phasen der klinischen Entwicklung. Eine Phase-III-Studie mit Nexavar® in Kombination mit zwei in Europa gebräuchlichen Chemotherapeutika im Vergleich zur Chemotherapie allein hat bei Patienten mit fortgeschrittenem nicht-kleinzelligen Lungenkarzinom ihren primären Endpunkt – die Verlängerung der Gesamtüberlebenszeit – nicht erreicht. Nexavar® wird von uns und Onyx sowie unabhängigen Wissenschaftlern weiter in einer Vielzahl von Behandlungsschemata bei Lungenkrebs untersucht (siehe auch Tabelle 3.34).

Mit Regorafenib haben wir im April 2010 ein Phase-III-Programm zur Behandlung von fortgeschrittenem Dickdarmkrebs gestartet. Regorafenib ist ein neuartiger, oral wirksamer Multi-Kinase-Inhibitor, der verschiedene Signalwege hemmt, die für das Tumorwachstum verantwortlich sind. In die Studie werden Patienten mit metastasiertem Kolorektalkarzinom aufgenommen, deren Erkrankung trotz vorheriger Standardbehandlungen weiter fortschreitet.

Auf dem Gebiet der Frauengesundheit forschen wir im Bereich gynäkologischer Therapien sowie daran, das Spektrum an Möglichkeiten zur Verhütung auszuweiten. Im April 2009 wurden Phase-III-Studien zur klinischen Prüfung eines Verhütungspflasters gestartet. Es soll das einzige transparente sowie das kleinste und am niedrigsten dosierte Verhütungspflaster auf dem Markt werden. Zur Therapie der vaginalen Atrophie und der weiblichen sexuellen Dysfunktion soll Vaginorm®, das Entwicklungsprodukt aus unserer neuen Kooperation mit EndoCeutics, eingesetzt werden. Vaginorm® wird derzeit in Kanada und den USA in einem Phase-III-Studienprogramm untersucht. Es enthält Dehydroepiandrosteron (DHEA), eine Vorläufersubstanz weiblicher und männlicher Sexualhormone. Ebenfalls in der klinischen Phase III befindet sich die neue Hormonspirale LCS. Sie ist kleiner als Mirena®, hat eine niedrigere Hormondosis und eine Wirkdauer von bis zu drei Jahren.

Unter dem Handelsnamen Beyaz® bzw. Safyral™ wurden in den USA die Verhütungsmittel Yaz® Plus bzw. Yasmin® Plus, die beide neben den Hormonbestandteilen zusätzlich Folat enthalten, zugelassen. Unser neues, in Europa bereits seit Mai 2009 unter dem Namen Qlaira® vermarktetes, orales Verhütungsmittel wurde im 2. Quartal 2010 in den USA unter dem Namen Natazia™ zugelassen. Die Zusatzindikation zur Behandlung von starken und/oder verlängerten Regelblutungen wurde in Europa im Oktober zugelassen und ist in den USA ebenfalls zur Zulassung eingereicht. Qlaira®/Natazia™ ist das erste Präparat einer neuen Klasse von oralen Verhütungsmitteln, deren Östrogenbestandteil auf Estradiol basiert – dem gleichen Östrogen, das der weibliche Körper produziert.

Die Forschungsaktivitäten im Bereich der Diagnostischen Bildgebung fokussieren sich auf die Entwicklung von Positronen-Emissionstomographie (PET)-Markern (Tracer), die in Zukunft eine frühere und präzisere Diagnose von Erkrankungen ermöglichen könnten. Dies geschieht in den drei Indikationsfeldern Erkrankungen des zentralen Nervensystems, Onkologie und Herz-Kreislauf-Erkrankungen. Mit der Entwicklung des PET-Markers Florbetaben möchten wir zukünftig zu einer früheren und präziseren Diagnose der Alzheimer-Erkrankung beitragen. Im November 2009 startete das globale Phase-III-Programm von Florbetaben.

Wir ergänzen unser Entwicklungsprodukt-Portfolio aus eigener Forschung und Entwicklung durch gezielte Einlizenzierungen.

Einlizenzierungen  
ergänzen unser  
Entwicklungsportfolio

Im Juni 2010 haben wir eine strategische Allianz mit OncoMed Pharmaceuticals, Inc., USA, zur Erforschung, Entwicklung und Vermarktung neuartiger Therapeutika gegen Krebsstammzellen vereinbart. Den Krebsstammzellen wird eine bedeutende Rolle bei der Entstehung, Metastasierung und dem Wiederauftreten von Krebs zugesprochen.

Die Entwicklung einer diagnostischen Plattform in der Krebstherapie ist Zielsetzung unserer im März 2010 begonnenen Zusammenarbeit mit dem Spezialpharma- und Diagnostikunternehmen Prometheus Laboratories Inc., USA. Sie soll Patienten passenden Arzneimittelkandidaten zuordnen und könnte damit in Zukunft neuartige Methoden der personalisierten Medizin in der Krebstherapie ermöglichen.

In Kooperation mit der Genzyme Corp., USA, entwickeln wir den humanisierten monoklonalen Antikörper Alemtuzumab, der derzeit in zwei globalen Phase-III-Studien in der Indikation Multiple Sklerose (MS) getestet wird.

Das gemeinsame Entwicklungsprojekt VEGF Trap-Eye mit Regeneron Pharmaceuticals, Inc., USA, hat positive Ergebnisse bei zwei parallel durchgeführten Phase-III-Studien bei feuchter altersbedingter Makula-Degeneration (AMD) erzielt. Auf Basis dieser Daten planen wir, gemeinsam mit Regeneron eine Zulassung in Europa und den USA in der 1. Hälfte des Jahres 2011 zu beantragen. VEGF Trap-Eye befindet sich noch für eine weitere Indikation in der Phase III der klinischen Entwicklung: die Behandlung des Zentralvenen-Verschlusses der Netzhaut (CRVO), auch dies eine häufige Erblindungsursache. Außerdem wird eine Phase-II-Studie zur Behandlung des diabetischen Makula-Ödems (DME) durchgeführt. VEGF (Vascular Endothelial Growth Factor) ist ein natürlicher Wachstumsfaktor, der die Bildung neuer Blutgefäße (Angiogenese) anregt. VEGF Trap-Eye blockiert diesen Wachstumsfaktor spezifisch und mit hoher Wirksamkeit, wodurch die abnorme Bildung neuer Blutgefäße, die zu Blutungen neigen, verhindert wird. Das Präparat wird lokal ins Auge appliziert. Nach erfolgter Zulassung wird Bayer das Präparat außerhalb der USA vermarkten. In den USA hält Regeneron Pharmaceuticals, Inc., USA, die alleinigen Rechte an VEGF Trap-Eye.

Mit Alpharadin™, einem Alpha-Strahlung freisetzenden radiopharmazeutischen Wirkstoff, wurde im September 2009 ein potenzielles Krebstherapeutikum von Algeta ASA, Norwegen, zur gemeinsamen Entwicklung und Vermarktung einlizenziert. Derzeit befindet sich die Substanz in einer weltweiten Phase-III-Studie bei Patienten mit Prostatakrebs, die auf eine Hormonbehandlung nicht mehr ansprechen und bei denen sich Knochenmetastasen gebildet haben. In 2010 wurde das Entwicklungsprogramm für Alpharadin™ um eine Phase-II-Studie mit Patientinnen mit Brustkrebs, bei denen sich Knochenmetastasen gebildet haben, ergänzt.

Um das Spektrum möglicher Anwendungsbereiche von bereits vermarkteten Produkten zu erweitern, investieren wir in ein kontinuierliches Lebenszyklus-Management. Wir wollen so neue Indikationen identifizieren und verbesserte Darreichungsformen entwickeln. So hat die US-amerikanische Gesundheitsbehörde FDA (Food and Drug Administration) die Marktzulassung für STAXYN™, einer neuen Formulierung unseres Medikaments Levitra®, erteilt. Bei dem Medikament handelt es sich um eine Schmelztablette, die somit ohne Flüssigkeitszufuhr eingenommen werden kann. Auch in Europa haben wir die Zulassung unter dem Markennamen Levitra® erhalten.

Lebenszyklus-  
Management  
für vermarktete  
Produkte

Im Segment Consumer Health haben wir unsere Aufwendungen für Forschung und Entwicklung auf 315 Mio € (Vorjahr: 275 Mio €) gesteigert, dies entspricht einer Forschungskostenquote von 5,2 % (Vorjahr: 5,0 %). Die Forschungs- und Entwicklungsaktivitäten der Division Consumer Care konzentrieren sich in den Zentren für Produktentwicklung in Morristown (USA) und Gaillard (Frankreich) darauf, rezeptfreie Produkte zu entwickeln und auf den Markt zu bringen. Im Vordergrund steht dabei die Unterstützung sowohl bestehender als auch neuer Marken durch die Umsetzung produktbezogener, klinischer und regulatorischer Entwicklungsstrategien. Diese bieten die Möglichkeit, neue Technologien zu nutzen, die Indikationen für bestehende Arzneimittel zu erweitern und die Neueinstufung von bislang verschreibungspflichtigen Medikamenten als rezeptfreie Produkte erfolgreich umzusetzen. Im Jahr 2010 konnte eine Reihe neuer Produktlinien-erweiterungen in verschiedenen Märkten eingeführt werden wie z. B. Bayer® AM (Kombinationspräparat mit den Wirkstoffen Acetylsalicylsäure und Coffein) und neue Nahrungsergänzungsmittel der Marke One A Day® (speziell für Frauen in den Wechseljahren sowie für leistungsorientierte Männer) in den USA oder das Antacidum Mopralpro® in Frankreich. Darüber hinaus schlossen wir im Bereich unserer verschreibungspflichtigen Dermatologieprodukte eine Lizenz- und Entwicklungsvereinbarung mit der US-amerikanischen KYTHERA Biopharmaceuticals, Inc. ab. Gemeinsam wollen wir eine Substanz zum Einsatz in der ästhetisch-dermatologischen Medizin entwickeln.

In der Division Medical Care forschen wir insbesondere auf den Gebieten der Blutzuckermessung als auch an der Weiterentwicklung medizinischer Geräte, die in der Diagnose und Therapie diverser Erkrankungen eingesetzt werden. In unseren vier US-amerikanischen Forschungs- und Entwicklungszentren im Bereich Diabetes Care, von denen das größte in Tarrytown liegt, arbeiten wir daran, unsere Produktlinien zu stärken und weitere attraktive Segmente des Diabetesmarkts für uns zu erschließen. Im Geschäftsjahr 2010 haben wir wieder verschiedene innovative Produkte

in wichtigen Ländern auf den Markt gebracht, die den individuellen Bedürfnissen von Menschen mit Diabetes gerecht werden – darunter Contour® USB mit einer integrierten Diabetes-Management-Software und möglicher Direktverbindung (plug & play) mit dem PC sowie die Diabetes-Management-Software Glucofacts® Deluxe und A1CNow™ SelfCheck, mit dem der Langzeit-Blutzuckerwert (A1c) bestimmt wird. Im Bereich unseres Medizingerätegeschäfts fokussieren wir unsere Forschungs- und Entwicklungsaktivitäten auf die kontinuierliche Verbesserung der Kontrastmittel-Injektionsgeräte sowie auf Systeme zur Entfernung von Thromben aus Blutgefäßen und für andere Gefäßeingriffe. Darüber hinaus wollen wir z. B. medizinische Datenmanagementsysteme für Kontrastmittel-Injektoren sowie Medikamente freisetzen Ballonkatheter zur Behandlung von Gefäßerkrankungen entwickeln. Unsere entsprechenden Forschungs- und Entwicklungszentren befinden sich in der Nähe von Pittsburgh und in Minneapolis (USA) sowie in Sydney (Australien).

Die Forschungs- und Entwicklungsaktivitäten der Division Animal Health am Standort Monheim (Deutschland) konzentrieren sich auf die Bereiche Antibiotika und Parasitizide sowie Wirkstoffe zur Behandlung nicht-infektiöser Krankheiten bei Tieren. Neben der Entwicklung neuer Produkte gegen Parasiten bei Haus- und Nutztieren bauen wir das Produktportfolio im Bereich chronischer Nieren-, Herz-Kreislauf- und Krebserkrankungen bei Hunden und Katzen weiter aus. Darüber hinaus wurden verschiedene Produktlinienerweiterungen in unterschiedlichen Märkten zugelassen, so z. B. in den USA für unser Advantage® zur Vorbeugung und Behandlung des Floh- und Zeckenbefalls bei Hunden.

**722 Mio €**

für Forschung  
und Entwicklung  
bei CropScience

### CROPSCIENCE

Mit Forschungs- und Entwicklungskosten in Höhe von 722 Mio € (Vorjahr: 653 Mio €) entfielen 23,6 % der Aufwendungen des Bayer-Konzerns für Forschung und Entwicklung im Jahr 2010 auf CropScience. Dies entspricht einer Forschungskostenquote von 10,6 % des erzielten Umsatzes des Teilkonzerns.

CropScience verfügt über ein weltweites Netz von Forschungs- und Entwicklungseinrichtungen, in denen 4.300 Mitarbeiter tätig sind. Unsere größten Standorte zur Erforschung und Entwicklung von Pflanzenschutzmitteln sind Monheim und Frankfurt a. M. (Deutschland) sowie Lyon (Frankreich). In Gent (Belgien), Haelen (Niederlande) sowie Morrisville (USA) befinden sich unsere bedeutendsten Forschungszentren im Bereich BioScience, der sich auf die Saatguttechnologie und -züchtung konzentriert.

Während die Forschungstätigkeiten auf einige zentrale Standorte konzentriert sind, finden die Entwicklungsaktivitäten sowie die Saatgutzüchtung sowohl in zentralen Einrichtungen als auch in zahlreichen Feldversuchsstationen weltweit statt, um die Prüfung der zukünftigen Wirkstoffe und Sorten gemäß den spezifischen regionalen Erfordernissen zu gewährleisten.

Im Rahmen eines integrierten Forschungsansatzes arbeiten unsere Wissenschaftler aus den Bereichen Agrarchemie und Saatguttechnologie zunehmend enger zusammen, um die Fachkompetenzen aus der chemischen, biologischen und genetischen Forschung und Feldentwicklung optimal zu bündeln und auf unsere langfristigen Forschungsziele und Geschäftsstrategien in den einzelnen Anbaukulturen auszurichten.

Im Segment Crop Protection haben wir im Berichtszeitraum 476 Mio € (Vorjahr: 482 Mio €) für Forschung und Entwicklung aufgewandt. Im Bereich Crop Protection erforschen und entwickeln wir innovative, sichere und nachhaltige Produkte für den Einsatz als Insektizide, Fungizide, Herbizide und Saatgutbehandlungsmittel in der Landwirtschaft. Darüber hinaus arbeiten wir indikationsübergreifend in neuen zukunftsweisenden Forschungsprojekten, beispielsweise auf den Gebieten Pflanzengesundheit und Stresstoleranz. Hierbei stehen uns zusätzlich zur klassischen Chemie, Biologie und Biochemie moderne Technologien wie Genomik, Hochdurchsatz-Screening und Bioinformatik für die Identifizierung neuer chemischer Leitstrukturen zur Verfügung. Kooperationen mit externen Partnern ergänzen unsere eigenen Aktivitäten.

Wir erweitern den Einsatzbereich unserer Wirkstoffe durch neue Mischungen oder die Entwicklung innovativer Formulierungen für bereits vermarktete Produkte, um deren Anwendbarkeit auf andere Kulturpflanzen zu ermöglichen oder um deren Handhabung zu verbessern.



Die Wirkstoffpipeline von Crop Protection enthält derzeit 13 Entwicklungsprojekte; davon sind neun Projekte in der fortgeschrittenen Entwicklung und vier Projekte in einem früheren Entwicklungsstadium. Rund 38 weitere Projekte befinden sich in der frühen Forschungsphase.

Im Jahr 2010 haben wir erfolgreich mit der Vermarktung unseres neuen Reisfungizids Isotianil (Hauptmarke: Routine®) aus der chemischen Klasse der Isothiazole in Korea und Japan begonnen – es wird unser Portfolio in Asien verstärken. Der Wirkstoff aus unserer Forschungspipeline wurde in einer Partnerschaft mit dem japanischen Unternehmen Sumitomo Chemical Co., Ltd. weiterentwickelt. Isotianil schützt Reis gegen den Pilz *Pyricularia oryzae*, den Verursacher der Reisbräune, indem auch die natürlichen Abwehrmechanismen der Pflanzen stimuliert werden.

Zudem haben wir mit *Bacillus firmus* (Hauptmarke: Votivo™) ein Mittel zur biologischen Schädlingsbekämpfung in der Saatgutbehandlung erfolgreich in den us-amerikanischen Markt eingeführt. Mit ihm haben wir unser klassisches Portfolio im Saatgutbehandlungsmarkt gegen Nematoden – im Boden lebende Fadenwürmer – erweitert.

Im Zeitraum 2011 bis 2012 stehen, die erfolgreiche Registrierung vorausgesetzt, vier weitere vielversprechende neue Wirkstoffe zur Markteinführung an:

Geplante Markteinführungen

[Tabelle 3.35]

| Wirkstoff  | Indikation                     | Geplante Markteinführung |
|------------|--------------------------------|--------------------------|
| Bixafen    | Fungizid                       | 2011                     |
| Fluopyram  | Fungizid                       | 2011                     |
| Indaziflam | Herbizid                       | 2011                     |
| Penflufen  | Fungizid zur Saatgutbehandlung | 2012                     |

Für Isotianil und *Bacillus firmus* sowie die Gruppe der vorgenannten vier Substanzen, die bis zum Jahr 2012 in den Markt eingeführt werden sollen, erwartet CropScience ein Spitzenumsatzpotenzial von insgesamt mehr als 1 MRD €.

Fluopyram (Hauptmarke: Luna®) wurde zur effektiven Bekämpfung von verschiedenen hartnäckigen Pflanzenkrankheiten entwickelt, die durch Pilzerreger hervorgerufen werden. Der Wirkstoff aus der neuen Substanzklasse der Pyridinylethylbenzamide soll weltweit in der Blattapplikation und Saatgutbehandlung in mehr als 70 Kulturen zum Einsatz kommen. Wichtige Vorteile sind die verbesserte Lagerfähigkeit und die längere Haltbarkeit der Erntegüter.

Bixafen (Hauptmarke: Aviator®, Xpro®) ist ein neues Getreidefungizid mit einem ertragssteigernden Effekt aufgrund seiner positiven Auswirkungen auf die Pflanzenphysiologie. Der Wirkstoff aus der Gruppe der Pyrazole ist speziell für die Blattanwendung gegen Blattdürre (*Septoria tritici*) und Braunrost (*Puccinia recondita*) entwickelt worden. Als Vertreter einer neuen Wirkstoffgruppe eignet sich Bixafen sehr gut als Baustein im Resistenzmanagement.

Indaziflam (Alion®, Specticle®) ist ein neues Alkylazin-Herbizid. Der Wirkstoff zeichnet sich durch seine lang anhaltende Wirkungsdauer aus und erfasst ein breites Spektrum schwer bekämpfbarer Ungräser und Unkräuter. Indaziflam ist für den Einsatz in landwirtschaftlichen Spezialkulturen – beispielsweise im Obst- und Weinbau – wie auch in einer großen Anzahl nicht-landwirtschaftlicher Märkte vorgesehen, u. a. zur Unkrautkontrolle auf Wegen und Plätzen.

Penflufen (Emesto®, Emerion®) ist ein neues Pyrazolfungizid zur Saatgutbehandlung in vielen unterschiedlichen Kulturen, z. B. Kartoffeln, Raps, Sojabohnen, Mais und Baumwolle. Neben der Wirkung gegen verschiedene samenbürtige Krankheitserreger zeichnet sich diese Substanz durch besondere Stärke und Wirkungsbreite gegenüber der Pilzgattung *Rhizoctonia* aus. Aufgrund seiner guten Saatgutverträglichkeit trägt Penflufen zur besonders kräftigen Jungpflanzenentwicklung bei.

Im Segment Environmental Science/BioScience steigerten wir unsere Forschungs- und Entwicklungsaufwendungen deutlich auf 246 Mio € (Vorjahr: 171 Mio €), was auf dem Ausbau unserer Forschungs- und Entwicklungsaktivitäten bei BioScience beruht.

Der Bereich Environmental Science testet und beurteilt die bei Crop Protection entwickelten Substanzen für eine mögliche Anwendung außerhalb der Landwirtschaft. Gleichzeitig werden Wirkstoffe von Fremdfirmen geprüft und im Erfolgsfall zugekauft. Zu den aktuellen Entwicklungsprojekten gehören Gele und Köder gegen Schadinsekten, neue Herbizide und Fungizid-Wirkstoffmischungen, biologische Lösungen sowie Mittel gegen krankheitsübertragende Insekten.

2010 wurde die Natria™-Produktlinie erfolgreich in den USA und in Deutschland eingeführt. „Bayer Advanced“ in den USA bzw. „Bayer Garten“ in Deutschland bieten damit eine neue Produktlinie an, die auf natürlichen bzw. der Natur entlehnten Wirkstoffen beruht. Für 2011 planen wir die Erweiterung der Produktlinie sowie deren Einführung in Frankreich und weiteren europäischen Märkten. Für das Moskitonetz Lifenet® planen wir nach der Einreichung im Jahr 2010 bei dem Pesticide Evaluation Scheme der Weltgesundheitsorganisation (WHOPEs) die Markteinführung in den ersten Ländern noch im Jahr 2011. Eine neue Insektizidformulierung mit Langzeitwirkung zur Bekämpfung von Malaria-Mücken wurde ebenfalls im Jahr 2010 bei der WHO eingereicht. Im Rahmen einer weiteren Forschungs Kooperation zwischen CropScience und dem Innovative Vector Control Consortium (IVCC) in Liverpool, Großbritannien, wurden eine neue Insektizid-Forschungsplattform erfolgreich aufgebaut sowie erste konkrete Ergebnisse erzielt.

Im Bereich BioScience forschen wir an der Optimierung von Pflanzeigenschaften und entwickeln neue Sorten in unseren bisherigen Kernkulturen Baumwolle, Raps und Reis sowie im Gemüse-saatgutbereich. Mittlerweile haben wir unsere Forschungsaktivitäten auch auf Getreide und Sojabohnen als neue Kernkulturen ausgedehnt; zudem forschen wir an Zuckerrohr mit erhöhtem Zuckergehalt. Im Fokus unserer Forschungs- und Entwicklungsaktivitäten stehen die agronomischen Eigenschaften dieser Kulturen. Unsere Forscher arbeiten u. a. an der Entwicklung von Pflanzen, die eine hohe Toleranz gegenüber Stressfaktoren wie extreme Temperaturen und Trockenheit aufweisen. Darüber hinaus wollen wir die Ertragskraft von Nutzpflanzen steigern und die Pflanzenqualität erhöhen – z. B. durch veränderte Rapsölprofile oder optimierte Baumwoll-Faserqualitäten. Weitere Schwerpunkte bestehen darin, neue Herbizidtoleranzen auf der Basis alternativer Wirkmechanismen zu entwickeln sowie die Resistenz gegenüber Insekten und Pflanzenkrankheiten zu verbessern. Die verwendeten Technologien umfassen alle modernen Züchtungsverfahren, auch die Pflanzenbiotechnologie. Unsere Forschungs- und Entwicklungspipeline im Bereich BioScience umfasst gegenwärtig mehr als 60 vielversprechende Leitprojekte und wird durch rund 80 laufende Forschungsvereinbarungen mit öffentlichen und privaten Partnern ergänzt.

Das Geschäftswachstum im Bereich BioScience wird durch die Einführung neuer Sorten unterstützt. Beispielsweise vermarkten wir gemeinsam mit namhaften Saatgutherstellern in den USA unsere LibertyLink®-Herbizidtoleranz-Technologie in Sojabohnensaatgut. Im Jahr 2011 ist die Markteinführung von mehreren Saatgutinnovationen vorgesehen, darunter z. B. Baumwollsaatgut mit unserer eigenen Glyphosat-Herbizidtoleranz-Technologie.

#### MATERIALSCIENCE

**231 Mio €**

für Forschung und  
Entwicklung bei  
MaterialScience

MaterialScience wandte im vergangenen Jahr für Forschung und Entwicklung (ohne Entwicklungsprojekte mit Kunden) 231 Mio € (Vorjahr: 207 Mio €) auf. Damit entfielen rund 7,6 % der konzernweiten Forschungs- und Entwicklungskosten auf MaterialScience. Für den Teilkonzern selbst lag die Forschungskostenquote bei 2,3 % vom Umsatz. 1.000 Mitarbeiter waren mit Forschungs- und Entwicklungsaufgaben betraut.

Im Bereich der Polyurethane konzentrieren wir uns darauf, die Anwendungsgebiete unserer Produkte zu erweitern und deren Eigenschaften zu verbessern. Ein wichtiges Einsatzgebiet ist die Bauindustrie, wo Hartschaum auf Basis von Polyurethanen (PU) als hocheffizienter Dämmstoff dient und damit einen aktiven Beitrag zur Senkung des Energieverbrauchs und zum Schutz des Klimas leistet. Da viele Länder ihre Vorschriften zur Energiesenkung bei Gebäuden verschärfen, rechnen wir in allen Klimazonen mit einer steigenden Nachfrage nach solchen PU-Hartschäumen, zumal sich mit ihnen im Vergleich zu konventionellen Dämmstoffen deutlich bessere Wärmedämmungen erzielen lassen.

Ein weiteres Beispiel zukunftsweisender Anwendungen sind Rahmen aus Polyurethan für Photovoltaikanlagen. In enger Zusammenarbeit mit der Firma Puren GmbH in Überlingen (Deutschland) haben wir ein System zur Energiegewinnung aus Sonnenstrahlung entwickelt, das mit einer hocheffizienten Wärmedämmung kombiniert ist und so zwei wichtige Anforderungen im modernen Hausbau miteinander vereint.

Auch die Verwendung nachwachsender Rohstoffe spielt eine wichtige Rolle bei den Forschungs- und Entwicklungsaktivitäten. So wurde ein Konzept für einen „grünen Schuh“ entwickelt, der bis zu 90 % aus Komponenten besteht, die mit besonders umweltschonenden Verfahren oder unter Einsatz von erneuerbaren Rohstoffen hergestellt werden. Die Schuhsohle beispielsweise besteht aus Polyurethan, das vor allem aus Sojaöl gefertigt wurde. Bei der vorderen Schuhkappe wurde eine auch auf pflanzlicher Stärke basierende Polycarbonat-Mischung verwendet.

Der Innovationsschwerpunkt im Bereich Prozessentwicklung fokussiert sich auf die Herstellung neuer und verbesserter Rohstoffe und Rezepturen. Konkret geht es hier um moderne Alternativen zur Produktion von Polyetherpolycarbonatpolyolen (PPP), einem Ausgangsstoff für Polyurethane. MaterialScience arbeitet zusammen mit internen und externen Partnern daran, klimaschädliches Kohlendioxid als Rohstoff für die PPPs nutzbar zu machen. Diese intelligente Verwertung von CO<sub>2</sub> reduziert unseren Bedarf an fossilen Rohstoffen und trägt so zum Schutz der Umwelt bei. Möglich macht dies ein Durchbruch in der Katalyseforschung, der auf Ergebnissen aus der intensiven Zusammenarbeit mit der Rheinisch-Westfälischen Technischen Hochschule Aachen und dem gemeinsam von MaterialScience und Bayer Technology Services geführten CAT Catalytic Center in Aachen beruht.

Im Bereich der Polycarbonate konzentrieren sich Forschung und Innovation u. a. auf die Entwicklung neuer Produkte, die gewichtsreduzierte Anwendungen ermöglichen, neue Maßstäbe für Energieeffizienz und Sicherheit setzen sowie eine höhere Designfreiheit erlauben.

Unter der Bezeichnung „Focused Innovation“ (fokussierte Innovation) konzentrieren wir unsere Ressourcen auf klar umrissene Wachstumsbereiche, in denen Bedürfnisse von Kunden noch nicht befriedigt werden konnten. Unter der Bezeichnung „Open Innovation“ (Offenheit) entwickeln wir neue Lösungen in aktiver Kooperation mit externen Partnern. Ein Beispiel ist das gemeinsame Projekt zur Entwicklung modernster Technologien für die Automobilbeleuchtung auf LED-Basis, welche die Energieeffizienz moderner Scheinwerfer-Systeme entscheidend verbessern können. Wir arbeiten hier eng mit einem großen Automobilzulieferer, einem Hersteller von Spritzgusswerkzeugen und der Fraunhofer-Gesellschaft als Europas größter Organisation für anwendungsorientierte Forschung zusammen. Bei „Global Innovation“ werden unsere Entwicklungsaktivitäten in der ganzen Welt (globale Ausrichtung) intensiv durch unser Zentrum für Polycarbonat-Produkt- und -Anwendungsentwicklung in Leverkusen (Deutschland) unterstützt.

Innovationen  
fokussieren sich  
auf Wachstums-  
bereiche

Mit dieser Strategie konzentrieren wir uns auf ausgewählte Entwicklungsgebiete. Dazu gehören Polycarbonat-Verscheibungen und andere Leichtbau-Lösungen für den Verkehrssektor, LED-Beleuchtungsmanagement (z. B. Straßenbeleuchtung), Sicherheitsanwendungen (z. B. Sicherheitsverscheibungen) sowie die Verbesserung der Kosteneffizienz bei Fertigungsprozessen. Wichtig ist uns auch die Weiterentwicklung besonders umweltfreundlicher Produkttypen, z. B. Polycarbonat-Mischungen, die wiederaufbereitete Altkunststoffe oder biobasierte Stoffe enthalten. So möchten wir unsere Kunden bei der Erreichung ihrer Nachhaltigkeitsziele unterstützen.

Die Forschungs- und Entwicklungsbereiche der Business Unit Coatings, Adhesives, Specialties treiben Entwicklungen von Polyurethan-Rohstoffen für hochwertige Lack-, Kleb- und Dichtstoffe voran. Zudem geht es darum, neue technologiegetriebene Märkte für unser Geschäft mit kosmetischen und medizinischen Anwendungen, funktionalen Folien und Nanotechnologie zu erschließen. Dabei setzen wir auch auf strategische Allianzen mit Partnern aus Wissenschaft und Wirtschaft.

Im Kerngeschäft der klassischen Lack-, Kleb- und Dichtrohstoffe liegt der Schwerpunkt auf der kontinuierlichen Weiterentwicklung von umweltfreundlichen Systemen, die wasser- statt lösemittelbasiert sind oder mittels UV-Strahlung effizient ausgehärtet werden können. Ein Beispiel für die Erschließung neuer Marktsegmente stellen hier unsere hochwertigen Lackrohstoffe für die Windkraftanlagen dar, welche die Wetterfestigkeit von Rotorblättern deutlich verbessern können.

Um maßgeschneiderte Anwendungen geht es auch in der Medizintechnik. Unser Angebot an Beschichtungen und Klebstoffen in diesem Segment ist seit 2010 unter dem Vertriebsnamen Baymedix® gebündelt. Es reicht von hochfunktionalen Beschichtungen über spezielle Rohstoffe für Klebstoffe und Pflaster in der Wundversorgung bis zu thermoplastischen Kunststoffen für chirurgische und diagnostische Geräte. Auf dem Gebiet der Kosmetik, wo wir Vorprodukte für Gesichts- und Körperpflege, Haar-Styling oder Sonnenschutz entwickeln, erfüllt die neue Produktlinie Baycusan® C wichtige Anforderungen an „grüne“ Rohstoffe wie den Verzicht auf Konservierungsmittel.

Im Bereich der funktionalen Folien strafften wir unser Forschungs-Portfolio. Im Zentrum stehen künftig zum einen Folien auf Basis von Polycarbonat bzw. thermoplastischem Polyurethan. Durch Kombination mit zusätzlichen Technologien oder speziellen Eigenschaftsprofilen eröffnen sich z. B. durch multifunktionale oder holographische Folien neue Anwendungsfelder in unterschiedlichsten Industrien. Dazu wurde in Leverkusen eine moderne Beschichtungsanlage in Betrieb genommen. Zum anderen konzentrieren wir uns auf das Thema elektroaktive Polymere und haben mit der Übernahme des us-Unternehmens Artificial Muscle, Inc. unsere Aktivitäten auf diesem Gebiet weiter gestärkt. Außerdem wurde 2010 ein neues Forschungszentrum für funktionale Folien in Singapur eröffnet, um besonders die wachsende Nachfrage in der Region Asien/Pazifik nach innovativen folienbasierten Produkten für den Elektronikmarkt zu bedienen.

Technology Services unterstützt alle Teilkonzerne mit Technologieplattformen

#### BAYER TECHNOLOGY SERVICES

Bei technologischen Lösungen, insbesondere in den Bereichen der Prozesstechnologie, dem Anlagenbau, der Automatisierung und der Produktentwicklung, arbeiten alle Teilkonzerne weltweit eng mit unserer Servicegesellschaft Bayer Technology Services zusammen. Die Servicegesellschaft entwickelt z. B. zusammen mit MaterialScience neue, energie- und rohstoffeffiziente Produktionsverfahren und unterstützt somit den Teilkonzern, seine Technologie- und Kostenführerschaft zu sichern. Beispiele sind das neue Produktionsverfahren zur Herstellung von TDI, das erstmals am MaterialScience-Standort in Shanghai eingesetzt werden wird, oder die katalysierte Umsetzung von Kohlendioxid zu Polymeren. Die zentrale Weiterentwicklung von teilkonzernübergreifenden Querschnittstechnologien – wie z. B. der Nano- und Biotechnologie oder des Know-hows auf dem Gebiet der mathematischen Simulation und der statistischen Datenanalyse – hilft HealthCare und CropScience, die Entwicklungszeiten für neue Produkte zu verkürzen. Dazu gehören auch völlig neue Produktionskonzepte, die zukünftig z. B. in dem in Bau befindlichen Forschungszentrum INVITE, einer Kooperation von Bayer Technology Services und der Technischen Universität Dortmund, entwickelt werden. Ein weiteres strategisches Kernelement ist dabei die internationale Beschaffung von Know-how. Es reicht von landesspezifischem Wissen bei der Abwicklung von Investitionsprojekten bis zur weltweiten Erschließung von Innovationen.

Bayer Innovation erarbeitet neue Geschäfte am Rande der Kernaktivitäten der Teilkonzerne

#### BAYER INNOVATION

Innovationsthemen, die am Rande der Kernaktivitäten der Teilkonzerne liegen, werden von der Bayer Innovation erarbeitet, bewertet und zu tragfähigen neuen Geschäften für den Konzern weiterentwickelt. Ein Arbeitsgebiet ist die Herstellung von Medikamenten in Pflanzen. Im Jahr 2010 wurde mit der klinischen Studie (Phase I) eines personalisierten Krebsimpfstoffs zur Therapie des Non-Hodgkin-Lymphoms begonnen. Im Gebiet Landwirtschaft sind neuartige Hybrid-Konzepte basierend auf Polymertechnologien und Pflanzenschutzmitteln in der Entwicklung. Das volle Potenzial dieser Technologien wird in enger Kooperation mit den Teilkonzernen sowie mit externen Partnern evaluiert.

#### TRIPLE-I: INSPIRATIONEN, IDEEN, INNOVATIONEN

Die Innovationsoffensive „Triple-i: Inspiration, Ideen, Innovationen“ motiviert alle Bayer-Mitarbeiterinnen und -Mitarbeiter weltweit, Ideen für neue Produkte einzureichen und somit einen Beitrag zur Stärkung der Innovationskraft des Unternehmens zu leisten. Seit Beginn der Initiative wurden über 11.000 Ideen eingereicht. Erste Produkte konnten bereits erfolgreich im Markt eingeführt werden. Im Jahr 2010 setzte Triple-i zwei Schwerpunkte: Die „Your Heart“-Kampagne, die neue Chancen im Bereich der Herz-Kreislauf-Medizin identifizieren soll, und die Triple-i-Vietnam-Kampagne für neue Anwendungen von MaterialScience-Materialien in Vietnam.



## 9. Nachhaltigkeit

### 9.1 Nachhaltigkeitsstrategie

Sich von langfristigen Werten leiten zu lassen, ist das übergreifende Ziel unserer Nachhaltigkeitsstrategie. Wir sind davon überzeugt, dass wir unternehmerisch auf Dauer nur erfolgreich sein können, wenn wir wirtschaftliches Wachstum mit ökologischer und gesellschaftlicher Verantwortung in Einklang bringen. Neben den klaren Aussagen zur Nachhaltigkeit in unserem Leitbild „Bayer: Science For A Better Life“ unterstreicht unser Bekenntnis zu den zehn Prinzipien des UN Global Compact und zur „Responsible Care“-Initiative der Chemischen Industrie unser Nachhaltigkeits-Engagement.

Wir wollen Nachhaltigkeit auf drei Ebenen verwirklichen:

1. **Produkte und Innovationen:** Unsere Produkte sind die Basis unserer Wertschöpfung und Innovationen dienen uns als Motor der Nachhaltigkeit.
2. **Geschäftsaktivitäten:** Unser Umgang mit Stakeholdern, vor allem Mitarbeitern, Lieferanten, und Kunden, ist auf nachhaltiges Handeln ausgerichtet. Kernpunkte sind dabei Compliance, eine verantwortungsbewusste Personalpolitik, Produktverantwortung und ein nachhaltiges Beschaffungsmanagement.
3. **Gesellschaftliches Engagement:** Wir engagieren uns durch unsere Stiftungen und freiwilligen sozialen Initiativen gezielt für Aufgaben mit besonderer gesellschaftlicher Relevanz und mit Bezug zu unserem Unternehmen.

Nachhaltigkeit bedeutet im Kern Zukunftsfähigkeit und ist deshalb integraler Teil unserer Geschäftsstrategie (siehe Kapitel 11.2). Mit innovativen Lösungen adressieren wir Marktchancen und wollen zur Lösung globaler Herausforderungen beitragen. Dies steht im Fokus unserer Nachhaltigkeitsstrategie. Auf deren Basis haben wir 2009 ein Nachhaltigkeitsprogramm entwickelt. Schwerpunkte bilden die Allianzen für nachhaltige Gesundheitsversorgung, innovative Partnerschaften für mehr hochwertige Nahrungsmittel sowie neue Lösungen für Klimaschutz und Ressourcennutzung. Zur Verdeutlichung unserer Nachhaltigkeitsstrategie wurden exemplarisch acht Leuchtturm-Projekte ausgewählt, die den Kern unserer Strategie besonders gut verdeutlichen.

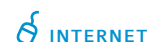

Mehr über das Bayer-Nachhaltigkeits-Programm erfahren Sie unter:  
[WWW.NACHHALTIGKEITS-PROGRAMM.BAYER.DE](http://WWW.NACHHALTIGKEITS-PROGRAMM.BAYER.DE)

Bayer-Nachhaltigkeitsprogramm

[Grafik 3.18]

| Herausforderung | Globaler Zugang zu Gesundheitsversorgung                                                               | Ernährung für eine wachsende Weltbevölkerung                                                                      | Klima- und Umweltschutz                                                                                                                              |
|-----------------|--------------------------------------------------------------------------------------------------------|-------------------------------------------------------------------------------------------------------------------|------------------------------------------------------------------------------------------------------------------------------------------------------|
| Fokus           | Allianzen für nachhaltige Gesundheitsversorgung                                                        | Mehr hochwertige Nahrungsmittel                                                                                   | Lösungen für Klimaschutz und Ressourcennutzung                                                                                                       |
| Projekte        | <ul style="list-style-type: none"> <li>Familienplanung</li> <li>Vernachlässigte Krankheiten</li> </ul> | <ul style="list-style-type: none"> <li>„Food Chain Partnership“ Gemüse</li> <li>Direktaussaat von Reis</li> </ul> | <ul style="list-style-type: none"> <li>EcoCommercial Building Program</li> <li>Energieeffizienz (2 Projekte)</li> <li>Ressourceneffizienz</li> </ul> |

Verantwortlich für die Ausrichtung und Steuerung unserer konzernweiten Nachhaltigkeitsstrategie ist ein Konzerngremium unter der Leitung des Vorstandes für Innovation, Technologie und Umwelt. Dieses Gremium definiert Ziele und Initiativen, beschließt korrespondierende Konzern-Regelungen und überwacht deren Umsetzung.

Nachhaltigkeit erwarten wir auch von unseren Lieferanten. Im Rahmen der Strategie „Nachhaltigkeit im Einkauf“ wurde daher Ende 2009 unser „Supplier Code of Conduct“ verabschiedet und kommuniziert. Die darin gebündelten grundlegenden Nachhaltigkeitsstandards und Anforderungen werden im Rahmen eines Bewertungsverfahrens zur Lieferantenauswahl und -evaluierung eingesetzt. 2010 wurden global 147 Lieferanten unter Risikogesichtspunkten ausgewählt und bewertet. Darüber hinaus gibt es länder- und teilkonzernspezifische Projekte, in denen zusätzliche Lieferanten bewertet werden.

2010 hat Bayer eine konzernweite Initiative zur Verfahrens- und Anlagensicherheit gestartet, um unser klares Bekenntnis und Engagement für Sicherheit noch stärker und fokussierter voranzutreiben. In der Konzern-Regelung „Verfahrens- und Anlagensicherheit“ wurden dazu die wichtigsten Grundsätze und Organisationsstrukturen festgelegt. 2010 erfolgten dazu organisatorische Anpassungen und die Umsetzung erster Maßnahmen im Bereich Qualifizierung, u. a. durch spezielle Schulungen.

Mithilfe von Zielen und Indikatoren operationalisieren wir unser Nachhaltigkeitsengagement. 2006 haben wir für die Handlungsfelder Innovation, Produktverantwortung, exzellente Unternehmensführung, gesellschaftliche Verantwortung und Verantwortung für die Umwelt konkrete Ziele bis 2010 formuliert. In unserem Nachhaltigkeitsbericht 2010 werden wir einen Abschlussbericht zu diesem Zieleprogramm veröffentlichen, neue Ziele publizieren und ausführlich über unsere Nachhaltigkeitsleistungen berichten. In einer Fortschrittsmitteilung stellen wir dort auch unsere Maßnahmen, Managementsysteme und Leistungen zur Umsetzung der zehn Prinzipien des UN Global Compact dar. Unser aktueller Bericht erfüllt laut Prüfung durch die Global Reporting Initiative (GRI) die derzeitigen GRI-Richtlinien (G3) entsprechend dem höchsten Standard (Level A+).

### INTERNET

Den Nachhaltigkeitsbericht finden Sie unter:  
[WWW.BAYER.DE/DE/NACHHALTIGKEITSBERICHT.ASPX](http://WWW.BAYER.DE/DE/NACHHALTIGKEITSBERICHT.ASPX)

## 9.2 Mitarbeiter

Mitarbeiter-Kennzahlen

[Tabelle 3.36]

|                                                                                                                                         | 31.12.2009     | 31.12.2010     |
|-----------------------------------------------------------------------------------------------------------------------------------------|----------------|----------------|
|                                                                                                                                         | in FTE         | in FTE         |
| <b>Mitarbeiter pro Region</b>                                                                                                           |                |                |
| Europa                                                                                                                                  | 54.600         | 54.300         |
| Nordamerika                                                                                                                             | 16.600         | 16.400         |
| Asien/Pazifik                                                                                                                           | 23.000         | 24.600         |
| Lateinamerika/Nahost/Afrika                                                                                                             | 16.800         | 16.100         |
| <b>Mitarbeiter nach Funktion</b>                                                                                                        |                |                |
| Produktion                                                                                                                              | 48.400         | 47.200         |
| Vertrieb                                                                                                                                | 40.200         | 41.100         |
| Forschung und Entwicklung                                                                                                               | 12.800         | 13.200         |
| Verwaltung                                                                                                                              | 9.600          | 9.900          |
| <b>Gesamt</b>                                                                                                                           | <b>111.000</b> | <b>111.400</b> |
| Auszubildende                                                                                                                           | 2.700          | 2.600          |
|                                                                                                                                         | in %           | in %           |
| Prozentsatz an Frauen im Konzernführungskreis                                                                                           | 5,5            | 6,5            |
| Anzahl der Nationalitäten im Konzernführungskreis                                                                                       | 22             | 21             |
| Anteil Vollzeitmitarbeiter mit vertraglich festgelegter Arbeitszeit von maximal 48 h/Woche                                              | 100            | 100            |
| Anteil Mitarbeiter mit Krankenversicherung                                                                                              | 95             | 94             |
| Anteil Mitarbeiter mit Zugangsberechtigung zu einer betrieblichen Altersversorgung oder einer unternehmensfinanzierten Altersversorgung | 74             | 73             |
| Anteil Mitarbeiter, die durch Kollektivvereinbarungen erfasst werden, insbesondere hinsichtlich Löhnen und Arbeitsbedingungen           | 56             | 55             |

Vorjahreswerte angepasst

Die Anzahl der Mitarbeiter (Festanstellungen und befristete Arbeitsverhältnisse) wird in Vollzeitbeschäftigte (FTE) umgerechnet dargestellt. Teilzeitbeschäftigte werden dabei gemäß ihrer vertraglichen Arbeitszeit proportional berücksichtigt. Im Gegensatz zum Vorjahr sind statt der Auszubildenden die befristeten Arbeitsverhältnisse enthalten.

## BELEGSCHAFTSENTWICKLUNG

Am 31. Dezember 2010 beschäftigte der Bayer-Konzern weltweit 111.400 Mitarbeiter (Vorjahr: 111.000). Damit ist die Mitarbeiterzahl im Geschäftsjahr 2010 nahezu konstant geblieben (+0,4 %). In Deutschland hatten wir 36.200 Mitarbeiter (Vorjahr: 36.000), dies entspricht einem Anteil von 32,5 % am Gesamtkonzern. Die Beschäftigtenzahl von HealthCare lag bei 55.700 (Vorjahr: 55.800). CropScience beschäftigte 20.700 (Vorjahr: 20.500) Mitarbeiter und MaterialScience 14.700 (Vorjahr: 14.600). Die weiteren 20.300 Mitarbeiter (Vorjahr: 20.100) sind überwiegend in den Service-Gesellschaften sowie 700 (Vorjahr: 700) davon in der Bayer AG beschäftigt. Darüber hinaus belief sich die Zahl der Auszubildenden, die nicht in der Gesamtsumme enthalten sind, am Bilanzstichtag auf 2.600 (Vorjahr: 2.700).

Der Personalaufwand erhöhte sich im Jahr 2010 um 4,2 % auf 8.099 Mio € (Vorjahr: 7.776 Mio €). Der Anstieg ist im Wesentlichen auf Währungseffekte und regelmäßige Gehaltsanpassungen zurückzuführen.

Mitarbeiter nach Segmenten (Vorjahreswerte in Klammern)

[Grafik 3.19]

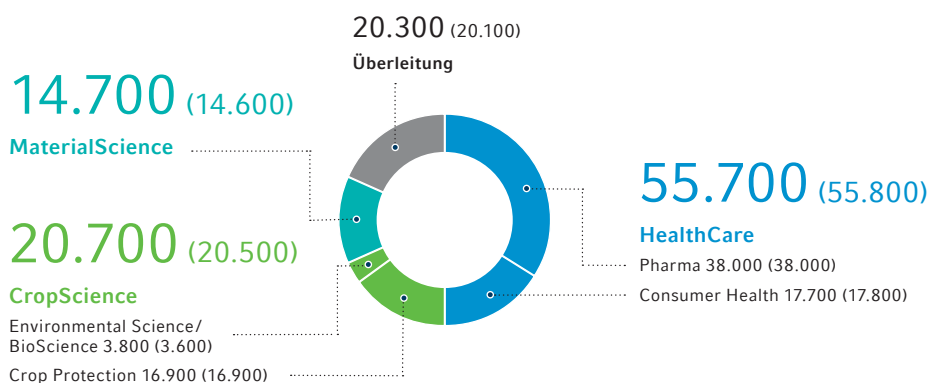

Vorjahreswerte angepasst

## VERGÜTUNG UND MITARBEITERBETEILIGUNG

Die Vergütung im Bayer-Konzern folgt einer weltweit einheitlichen Systematik, die konzernweit eine transparente und leistungsgerechte Bezahlung und Incentivierung unserer Beschäftigten gewährleistet. Auf der Grundlage regelmäßiger Wettbewerbsanalysen bieten wir unseren Mitarbeiterinnen und Mitarbeitern ein leistungs- und verantwortungsbezogenes Grundgehalt, das durch attraktive erfolgsabhängige Vergütungsbestandteile sowie umfangreiche Nebenleistungen ergänzt wird.

So sind für das Geschäftsjahr 2010 allein im Rahmen des konzernweiten Short-Term-Incentive-Programms über 500 Mio € an variablen Einmalzahlungen an unsere Beschäftigten vorgesehen. Verschiedene Aktienbeteiligungsprogramme ermöglichen unseren Mitarbeitern zudem den vergünstigten Erwerb von Unternehmensanteilen. Sie sind in zahlreichen Ländern Bestandteil unserer umfangreichen Zusatzleistungen und bieten den Beschäftigten eine weitere Möglichkeit, am Unternehmen und seinem wirtschaftlichen Erfolg teilzuhaben. Für das obere und mittlere Management bestehen mit den „Aspire“-Programmen (siehe dazu auch Bayer-Konzernabschluss, Anhangangabe [26.6]) bereits seit 2005 konzernweit einheitliche aktienbasierte Vergütungsprogramme, die sich durch anspruchsvolle Renditeziele und – soweit die Konzernführungskräfte betroffen sind – ein angemessenes Eigeninvestment auszeichnen.

Mitarbeiter-  
beteiligung über

500 Mio €

## ENGAGIERTE UND LOYALE MITARBEITER

Die Strategie des Bayer-Konzerns lebt vom Engagement unserer Mitarbeiterinnen und Mitarbeiter. Die Leistungsbereitschaft und die Fähigkeiten der Beschäftigten kontinuierlich zu fördern und weiterzuentwickeln ist daher ein zentrales Ziel unserer Personalpolitik. Wertvolle Erkenntnisse und Ansatzpunkte dazu lieferte uns im Berichtsjahr die erstmals weltweit durchgeführte Mit-

arbeiterbefragung. Fast 70 % der Beschäftigten aller Länder und Konzernbereiche äußerten sich in der anonymen Umfrage zu ihrer Wahrnehmung von Strategie, Kultur und Arbeitsbedingungen im Unternehmen.

Die Ergebnisse der Mitarbeiterbefragung zeigen, dass sich die überwiegende Mehrheit der Beschäftigten – deutlich mehr als 80 % – in einem hohen Maße mit Bayer verbunden fühlt und das Unternehmen insgesamt als attraktiven Arbeitgeber schätzt. Knapp 85 % der Mitarbeiterinnen und Mitarbeiter sind hoch motiviert und engagieren sich überdurchschnittlich stark für das Unternehmen und seinen Erfolg. Bestätigt werden diese Ergebnisse durch die geringe Zahl von freiwilligen Austritten von Mitarbeitern aus dem Unternehmen. Ihre Quote betrug in den großen Konzerngesellschaften in Deutschland lediglich 0,4 %. Die Fluktuationsrate, die auch Pensionierungen und weitere Austrittsgründe umfasst, betrug im Berichtsjahr konzernweit rund 9 %. In den Bereichen, in denen uns die Rückmeldungen der Beschäftigten auf Verbesserungsbedarf aufmerksam gemacht haben, werden wir zielgerichtete Maßnahmen einleiten.

Die Grundlage dafür bilden die überarbeiteten Werte und Führungsprinzipien des Bayer-Konzerns. Diese erhielten mit dem einprägsamen Kürzel „LIFE“ eine neue, prägnante Form. Ziel ist es, die Unternehmensleitlinien noch besser im beruflichen Alltag zu verankern und anzuwenden. LIFE steht für Leadership (Führung), Integrität, Flexibilität und Effizienz.

#### VERANTWORTUNGSBEWUSSTE PERSONALPOLITIK

Nachhaltigkeit und soziale Verantwortung sind weitere Bestandteile unserer Unternehmenspolitik – eine Einschätzung, die von über 80 % unserer Mitarbeiter weltweit bestätigt wird. Nahezu sämtliche unserer Beschäftigten sind entweder gesetzlich krankenversichert oder können entsprechende Angebote des Unternehmens nutzen. Konzernweit haben 73 % der Belegschaft Zugang zu einer Form der betrieblichen Altersvorsorge. Die Beteiligung von Arbeitnehmervertretern ist Teil unseres Anspruchs als partnerschaftlich und verantwortlich handelndes Unternehmen. Kollektive Regelungen wie Tarifverträge oder betriebliche Vereinbarungen bestimmen die Arbeitsbedingungen von 55 % (Vorjahr: 56 %) unserer Mitarbeiter. Auch in China haben die Mitarbeiter unserer Konzerngesellschaften bereits an sechs Standorten gewerkschaftliche Arbeitnehmervertreter gewählt, drei weitere sollen in Kürze folgen. Der im November 2010 angekündigte konzernweite Stellenabbau soll weitgehend sozialverträglich gestaltet werden. In Deutschland, dem mit 36.200 Mitarbeitern weiterhin größten Standort des Unternehmens, sind betriebsbedingte Kündigungen durch eine Vereinbarung mit den Arbeitnehmervertretern bis Ende 2012 ausgeschlossen.

#### VIelfalt und Internationalität

Bayer strebt als weltweit tätiges Unternehmen eine möglichst vielfältige und internationale Zusammensetzung seiner Belegschaft an. So gehören dem Konzernführungskreis, der obersten Managementebene des Unternehmens, Angehörige von 21 verschiedenen Nationen an. Fast 70 % dieser Führungskräfte stammen aus den Ländern, in denen sie tätig sind. Ein weiterer Schwerpunkt unserer Anstrengungen für eine größere personelle Vielfalt ist die langfristige Erhöhung des Frauenanteils im Unternehmen und besonders in Führungspositionen. Insgesamt betrug der Anteil unserer weiblichen Beschäftigten im Berichtsjahr konzernweit 35 %. Um den Frauenanteil in Führungspositionen mittelfristig weiter zu steigern, hat der Konzernvorstand eine sogenannte Zielgröße beschlossen. Danach wollen wir den Anteil von Frauen in Führungspositionen bis 2015 konzernweit in Richtung 30 % entwickeln.

Mitarbeiterstruktur des Bayer-Konzerns 2010

[Tabelle 3.37]

|                                                  | Frauen        | Männer        | Gesamt         |
|--------------------------------------------------|---------------|---------------|----------------|
| Außertariflich Beschäftigte inkl. Führungskräfte | 10.200        | 22.100        | 32.300         |
| Fachkräfte                                       | 29.100        | 50.000        | 79.100         |
| <b>Gesamt</b>                                    | <b>39.300</b> | <b>72.100</b> | <b>111.400</b> |
| Auszubildende                                    | 800           | 1.800         | 2.600          |



## AUSBILDUNG UND NACHWUCHSGEWINNUNG

Vielfalt, internationale Karrierechancen, ein modernes Arbeitsumfeld sowie soziales Engagement machen Bayer weltweit zu einem attraktiven Arbeitgeber. Wir konnten daher im Berichtsjahr konzernweit insgesamt mehr als 4.000 akademisch qualifizierte Fach- und Führungskräfte als Mitarbeiter für unser Unternehmen gewinnen. Allein in Indien rekrutierten wir mehr als 750 Hochschulabsolventen, in Deutschland waren es rund 700 und in den USA über 350. Um Schulabgänger und Studenten schon früh von den beruflichen Möglichkeiten bei Bayer zu überzeugen, haben wir die Aktivitäten unseres Hochschulmarketings im Jahr 2010 um Unternehmensauftritte in sozialen Netzwerken erweitert. Ergänzt werden diese Kommunikationsmaßnahmen durch die mehr als 2.700 anspruchsvollen Berufspraktika, die wir im Berichtsjahr weltweit an Studierende unterschiedlicher Fachrichtungen vergeben haben.

Neben der Einstellung von Hochschulabsolventen gehört die eigene Ausbildung von jungen Menschen zu den wichtigsten Maßnahmen, um einem möglichen Fachkräftemangel aufgrund des demographischen Wandels zu begegnen. Auch im Jahr 2010 begannen daher allein in Deutschland wieder mehr als 900 Jugendliche bei uns eine Ausbildung in einem von über 20 Berufen.

Mitarbeiter nach Altersgruppen in %

[Grafik 3.20]

| Alter in Jahren |  | in % |
|-----------------|--|------|
| < 20            |  | 0,2  |
| 20-29           |  | 15,6 |
| 30-39           |  | 29,9 |
| 40-49           |  | 31,1 |
| 50-59           |  | 21,0 |
| > 60            |  | 2,2  |

## WEITERBILDUNG UND WISSENSERHALT

Auf den demographischen Wandel, der in vielen Industrienationen eine Herausforderung darstellt, reagieren wir mit einer Vielzahl von Maßnahmen. Mit unseren umfangreichen Weiterbildungsangeboten fördern wir das Wissen unserer Mitarbeiter und passen es an veränderte Anforderungen an. Mit dem 2010 gestarteten „Bayer Senior Experts Network“ (BaySEN) möchten wir die langjährige Erfahrung pensionierter Führungskräfte für das Unternehmen erhalten und gezielt an die nachfolgende Generation weitergeben.

Ein weiterer Schwerpunkt unserer Maßnahmen zur Begegnung des demographischen Wandels ist der kontinuierliche Ausbau des betrieblichen Gesundheitsmanagements. Mit zahlreichen Angeboten wollen wir in vielen Ländern die Gesundheit und die berufliche Leistungsfähigkeit unserer Mitarbeiter auch angesichts einer verlängerten Lebensarbeitszeit fördern und erhalten. So wurden im Rahmen des Tarifvertrags „Lebensarbeitszeit und Demographie“ für die Tarifbeschäftigten in Deutschland die Möglichkeit geschaffen, eine umfangreiche medizinische Vorsorgeuntersuchung in Anspruch zu nehmen und das individuelle Arbeitspensum von besonders beanspruchten Mitarbeitern in den Jahren vor der Pensionierung deutlich zu verringern.

## 9.3 Umweltschutz, Klimaschutz und Sicherheit

Bayer misst dem Schutz der Umwelt und dem verantwortungsbewussten Umgang mit Ressourcen traditionell eine große Bedeutung zu. Dabei setzen wir unsere Kompetenzen und Erfahrungen sowohl bei der Optimierung von Technologien und Prozessen als auch bei der Entwicklung innovativer Produkte zum Schutz der Umwelt, der Natur und des Klimas ein. Wir entwickeln neue Lösungen, um den Ressourceneinsatz zu optimieren, den Ausstoß von Emissionen zu verringern und die Erzeugung von Abfällen zu vermeiden. Um den Einsatz von Ressourcen wie Energie, Wasser und Rohstoffen ganzheitlich zu analysieren und Maßnahmen zur Minimierung des Verbrauchs ableiten zu können, hat Bayer eine Methodik, den Ressourceneffizienz-Check, entwickelt. Dieser wird zurzeit in Pilotprojekten (in den Teilkonzernen MaterialScience und CropScience) getestet.

Key-Performance-Indikatoren

[Tabelle 3.38]

| Kategorie                 | Key-Performance-Indikatoren Gesundheit, Sicherheit und Umwelt               | 2009  | 2010  |
|---------------------------|-----------------------------------------------------------------------------|-------|-------|
| Gesundheit und Sicherheit | Arbeitsunfälle von Bayer-Mitarbeitern mit Ausfalltagen (MAQ*-Wert)          | 2,0   | 1,7   |
|                           | Berichtspflichtige Arbeitsunfälle von Bayer-Mitarbeitern (MAQ*-Wert)        | 3,1   | 3,1   |
|                           | Umweltereignisse                                                            | 13    | 7     |
|                           | Transportunfälle                                                            | 10    | 8     |
| Emissionen                | Direkte Treibhausgas-Emissionen (CO <sub>2</sub> -Äquivalente in Mio t)**   | 4,57  | 4,80  |
|                           | Indirekte Treibhausgas-Emissionen (CO <sub>2</sub> -Äquivalente in Mio t)** | 3,53  | 3,70  |
|                           | Flüchtige organische Verbindungen in 1.000 t/a                              | 2,59  | 2,54  |
|                           | Gesamt-Phosphor im Abwasser in 1.000 t/a                                    | 0,74  | 0,09  |
|                           | Gesamt-Stickstoff im Abwasser in 1.000 t/a                                  | 0,64  | 0,49  |
|                           | Gesamter organisch gebundener Kohlenstoff in 1.000 t/a                      | 1,35  | 1,42  |
| Abfälle                   | Erzeugter gefährlicher Abfall in Mio t/a                                    | 0,38  | 0,35  |
|                           | Deponierter gefährlicher Abfall in Mio t/a                                  | 0,09  | 0,06  |
| Ressourceneinsatz         | Wassereinsatz in Mio m <sup>3</sup> /a                                      | 407   | 474   |
|                           | Energieeinsatz in Petajoule (10 <sup>15</sup> Joule)/a                      | 77,33 | 85,71 |

Vorjahreswerte angepasst

a = Jahr

\* MAQ = Millionen-Arbeitsstunden-Quote, d. h. Anzahl der Unfälle pro einer Million Arbeitsstunden

\*\* Nach Greenhouse Gas Protocol

Arbeitsunfall-  
quote erneut  
gesenkt

Unsere Performance in den Bereichen Gesundheit, Sicherheit und Umweltschutz überprüfen wir regelmäßig anhand von Key-Performance-Indikatoren. Diese konnten 2010 fast alle verbessert werden, obwohl wir unsere produzierte Verkaufsmenge um rund 20 % gesteigert haben. Als Folge erhöhte sich im Berichtsjahr der Wasser- und Energieeinsatz, aber auch die Menge des organisch gebundenen Kohlenstoffs (TOC). Die Arbeitsunfallquote reduzierte sich erneut. Damit haben wir unser Ziel einer Quote von < 2,0 deutlich unterschritten.

Wir konnten im Jahr 2010 auch einen Rückgang der Umwelt- und Transportereignisse verzeichnen. Hierbei berichten wir gemäß unserer internen Selbstverpflichtung bereits geringe Produktaustritte: bei Stoffen mit einem hohen Gefährdungspotenzial schon ab 100 kg. Umweltereignisse und Transportunfälle lassen sich trotz unserer umfangreichen Sicherheitsvorkehrungen und -trainings leider nicht völlig verhindern. Ereignisse und Unfälle werden detailliert analysiert und bewertet, um adäquate Maßnahmen zu ihrer künftigen Vermeidung einleiten zu können.

Ziel von Bayer ist es, innerhalb des Konzerns weltweit ein angemessenes und gleiches Niveau an HSEQ-(Health, Safety, Environment and Quality – Gesundheit, Sicherheit, Umweltschutz und Qualität) Leistung zu erreichen und kontinuierlich zu verbessern. Zur Erfüllung dieses Ziels hat Bayer in allen Teilkonzernen und Servicegesellschaften entsprechende HSEQ-Managementsysteme eingerichtet, die sich an anerkannten internationalen Standards orientieren und regelmäßig überprüft und aktualisiert werden. Rund 90 % aller Bayer-Produktionsstandorte verfügten 2010 über ein durch Bayer auditiertes HSE-Managementsystem. Mehr als 60 % unserer Geschäftstätigkeit (in Bezug auf Produktionsmenge bzw. Energieeinsatz) erfolgt an Standorten, die extern nach international anerkannten Regelwerken, wie z. B. ISO 14001, EMAS, OHSAS 18001, zertifiziert bzw.

validiert sind. Alle Teilkonzerne und Servicegesellschaften verfügen über branchenspezifische Qualitätsmanagementsysteme, wie ISO 9001 oder GMP (Good Manufacturing Practice). Hinzu kommen Systeme und Regeln der Teilkonzerne, die produktspezifische Anforderungen aufgreifen.

Die Gesundheit und Sicherheit aller, die mit unseren Produkten umgehen, und der Schutz unserer Umwelt haben für uns höchste Priorität. Produktverantwortung beinhaltet für uns eine umfassende Bewertung der Gesundheits- und Umweltrisiken von der Produktforschung und -entwicklung bis hin zur Produktion und schließt verantwortliches Handeln bei der Produktvermarktung, -anwendung und -entsorgung mit ein. Nahezu alle von Bayer hergestellten Produkte unterliegen umfassenden gesetzlichen Informationspflichten wie z. B. der EU-weiten Chemikalienverordnung „REACH“. Die vorgeschriebene Vorregistrierung bei der Chemikalienagentur (ECHA) haben wir 2009 abgeschlossen. 2010 wurden von uns fristgerecht Registrierungsdossiers für 125 derjenigen Stoffe eingereicht, die Bayer in sehr großer Menge (> 1.000 t/a) herstellt oder importiert oder die besonders gefährlich sind. Bayer hat für die Registrierung vieler dieser Stoffe Konsortien mit Wettbewerbern gebildet, um den Datenaustausch zu fördern und zusätzliche Tierversuche zu vermeiden.

## KLIMASCHUTZ

Mit dem 2007 veröffentlichten „Bayer-Klimaprogramm“, einer wesentlichen Säule des Bayer-Nachhaltigkeits-Programms, stellt sich Bayer einer der großen globalen Herausforderungen: dem Klimawandel. Wir überprüfen die Energieeffizienz unserer Prozesse, bieten Lösungen für den Klimaschutz und die Bewältigung der Folgen des Klimawandels. Auch 2010 wurden wir aufgrund unserer transparenten Berichterstattung über Klimastrategie und Treibhausgas-Emissionen erneut in den Carbon Disclosure Leadership Index aufgenommen, als weltweit bestes Unternehmen unserer Branche. Bayer ist außerdem in den neu eingeführten „Carbon Performance Leadership Index“ (CPLI) mit dem Prädikat „A“ aufgenommen worden. Der CPLI bewertet die konkreten Maßnahmen und Leistungen der Unternehmen beim Klimaschutz sowie den Umgang mit den Folgen des Klimawandels.

Eine wichtige Maßnahme zur Verminderung der eigenen Treibhausgas-Emissionen ist die Verbesserung der Energieeffizienz. Mit dem Analyseinstrument „Bayer Climate Check“ wurden konzernweit insgesamt über 140 Produktionsanlagen und Gebäude (ca. 85 % des produktionsbedingten CO<sub>2</sub>-Ausstoßes) hinsichtlich ihrer Energie- und CO<sub>2</sub>-Einsparpotenziale untersucht. Wir erwarten bis 2013 ein realisierbares Energie-Reduktionspotenzial von bis zu 10 %. Die Ergebnisse des 2010 abgeschlossenen Climate Check werden in das Managementsystem STRUCTese® (Structured Efficiency System for Energy) integriert, das die nachhaltige Umsetzung der Potenziale und die kontinuierliche Effizienzsteigerung unserer Produktionsprozesse sicherstellt. STRUCTese® soll bis Ende 2012 in 60 unserer energieintensivsten Produktionsbetriebe etabliert werden, um die Realisierung der Einsparziele zu unterstützen.

Bayer Climate Check  
abgeschlossen

Ein weiterer Schwerpunkt zur Verminderung der Treibhausgas-Emissionen sind Prozess-Innovationen. Ein Beispiel ist ein von Bayer mit Partnern entwickeltes neuartiges klimafreundliches Verfahren zur Chlorherstellung. Die Sauerstoffverzehrkathoden-Technologie auf Kochsalzbasis macht zukünftig eine Energiereduzierung um 30 % in der Chlorproduktion möglich. Bayer plant, 2011 in Deutschland eine Anlage mit einer Kapazität von zunächst 20.000 Jahrestonnen in Betrieb zu nehmen. 2010 wurden auch unsere verfahrenstechnischen Maßnahmen zur weiteren Reduktion von Lachgasemissionen fortgeführt.

Mit Maßnahmen zur Reduktion der durch Dienstfahrzeuge verursachten CO<sub>2</sub>-Emissionen (Programm „Eco-Fleet“), dem Einsatz neuer Telekommunikationstechniken zur Verminderung von Geschäftsreisen sowie der Steigerung der Energieeffizienz im IT-Umfeld setzt Bayer im Klimaprogramm zusätzliche Akzente. Die Maßnahmen des Eco-Fleet-Programms führten von 2007 bis Ende 2010 bereits zu einer CO<sub>2</sub>-Reduktion von 15 %.

Bei der Berichterstattung der Treibhausgas-Emissionen richtet sich Bayer nach dem internationalen Standard des Greenhouse Gas (GHG) Protocol. Bayer strebt an, die Emissionen des Konzerns bis 2020 trotz Produktionswachstums auf dem Niveau von 2007 zu halten. Trotz der im Berichtszeitraum 2010 deutlich gestiegenen produzierten Verkaufsmenge (rund 20 %), insbesondere bei MaterialScience, konnte die Erhöhung der direkten Treibhausgas-Emissionen auf 5,0 % begrenzt

werden. Im Wesentlichen trugen dazu Verfahrensverbesserungen sowie Energieeffizienzmaßnahmen bei. Die energiebedingten indirekten Treibhausgas-Emissionen stiegen ebenfalls um 4,8 %. Die Summe der direkten und indirekten Treibhausgas-Emissionen erhöhte sich um 4,9 %.

Um die Transparenz bei der Verfolgung der Zielerreichung zu erhöhen, berichten wir in unserem Nachhaltigkeitsbericht ausführlich über die Emissionsentwicklung.

Darüber hinaus stellt Bayer Lösungen für den Klimaschutz bereit. Weltweit verursacht der Energieverbrauch in Gebäuden rund 30 % der weltweiten CO<sub>2</sub>-Emissionen. Mit dem Bayer „EcoCommercial Building (ECB) Program“ ist Klimaschutz im Bausektor heute schon realisierbar. Mithilfe eines Partnerschaftsnetzwerkes, das Zulieferer, Baufirmen, Architekten und Bauherren umfasst, generiert Bayer mit seinen Partnern maßgeschneiderte Lösungen zum Bau energieoptimierter kommerzieller und öffentlicher Gebäude bis hin zu Null-Emissions-Gebäuden. Neben unserem Angebot an Kunden setzen wir auch im eigenen Unternehmen das ECB-Programm um: Ende 2010 z. B. wurde in Greater Noida, Indien, ein Bayergebäude als EcoCommercial Building fertig gestellt.

#### INTERNET

Detaillierte Informationen  
finden sich unter:  
[WWW.KLIMA.BAYER.DE](http://WWW.KLIMA.BAYER.DE)

## 9.4 Gesellschaftliches Engagement

57 Mio €

für gemeinnützige  
Zwecke

Gesellschaftliches Engagement ist ein fester Bestandteil der Nachhaltigkeitsstrategie und der Unternehmenspolitik von Bayer. Das Unternehmen versteht sich als Teil der Gesellschaft und begreift sein Engagement im Sinne eines „Good Corporate Citizen“ als langfristige Investition in die Zukunftsfähigkeit der Gesellschaft und als nachhaltigen Beitrag für positive unternehmerische Rahmenbedingungen. Das gesellschaftliche Engagement von Bayer wird dokumentiert in zahlreichen Projekten, die das Unternehmen zum Teil seit Jahren in vielen Regionen der Welt organisiert oder unterstützt. Dafür stellte der Konzern im Jahr 2010 rund 57 Mio € (Vorjahr: 44 Mio €) in den vier Schwerpunktbereichen zur Verfügung.

Ausgaben für gesellschaftliche Initiativen

[Tabelle 3.39]

| Förderschwerpunkte      | 2009     | 2010     |
|-------------------------|----------|----------|
|                         | in Mio € | in Mio € |
| Bildung und Forschung   | 5        | 7        |
| Umwelt und Natur        | 3        | 3        |
| Gesundheit und Soziales | 15       | 26       |
| Sport und Kultur        | 21       | 21       |

Wir entwickeln unsere Förderstrategie stetig weiter. Dabei legen wir besonderes Augenmerk auf Projekte zu gesamtgesellschaftlichen Aufgaben von hoher Relevanz und mit konkretem Bedarf, in die wir gezielt unser technologisches und ökonomisches Know-how einbringen können.

### BILDUNG UND FORSCHUNG

Bayer legt traditionell großen Wert auf die Förderung von Bildung und Forschung. Denn als forschungsorientiertes Unternehmen sind wir im Besonderen auf sehr gut ausgebildete Nachwuchskräfte und auf Technikakzeptanz in der Gesellschaft angewiesen.

Unterstützung für  
junge Talente und  
Top-Wissenschaftler

Die „Bayer Science & Education Foundation“ deckt mit ihren Förderprogrammen den kompletten wissenschaftlichen Ausbildungs- und Karriereweg ab. So vergab die Stiftung im Jahr 2010 Fördergelder in der Gesamthöhe von rund 1 Mio € sowohl an engagierte Schüler und Auszubildende und innovative Schulprojekte als auch an exzellente Studierende, Nachwuchswissenschaftler und Spitzen-Forscher. Der thematische Förderfokus liegt jeweils auf den Naturwissenschaften und Medizin.



2010 eröffnete mit dem „Baylab“ am Konzern-Stammsitz in Leverkusen das vierte Bayer-Schülerlabor. Rund 3.400 Schülerinnen und Schüler machten im ersten Jahr vom Unterrichtsangebot zu den Themen Gesundheit, Ernährung und Kunststoffe Gebrauch. Insgesamt profitierten ca. 11.500 Schüler und Lehrer von den Angeboten der „Baylabs“ – dazu zählen neben dem themenübergreifenden Schülerlabor die themenspezifischen „Baylab health“, „Baylab plants“ und „Baylab plastics“. Für dieses Bildungsangebot erhielt Bayer den „Unternehmenspreis 2010“ des deutschen Bundeslandes Nordrhein-Westfalen.

Das „Humboldt Bayer Mobil“, ein Forschungslabor auf Rädern, macht seit 2010 Station an Schulen. Die Bayer-Stiftung unterstützt dieses gemeinsam mit der Humboldt-Universität zu Berlin gestartete und zunächst auf drei Jahre angelegte naturwissenschaftliche Bildungsprojekt mit 300.000 €. Die internationale Bayer-Bildungsinitiative „Making Science Make Sense“ wurde auch im Jahr 2010 wieder in 12 Ländern umgesetzt. Zielgruppe sind Grundschüler, denen Bayer-Mitarbeiter in anschaulichen Experimenten die Faszination der Naturwissenschaften vermitteln.

Im Rahmen unseres Engagements gegen Kinderarbeit in unserer Lieferkette in Indien setzen wir mit dem Programm „Learning for Life“ ein integriertes Maßnahmenpaket um. Es ermöglicht Kindern bzw. Jugendlichen den Zugang zu Schulbildung und Ausbildung und soll verhindern, dass Baumwollsaatgut-Zulieferer sie als Arbeitskräfte einsetzen. Gegenwärtig liegt der Fokus auf der berufsqualifizierenden Ausbildung. Im Bundesstaat Karnataka nahmen beispielsweise im Schuljahr 2009/2010 und im Schuljahr 2010/2011 insgesamt über 1.900 Auszubildende am regelmäßigen berufsbezogenen Unterricht teil, den wir zusammen mit lokalen Nicht-Regierungsorganisationen an zunächst fünf Regierungsschulen einführen.

## UMWELT UND NATUR

Ein weiterer Schwerpunkt unseres gesellschaftlichen Engagements ist die Bildung von Jugendlichen in Umweltfragen.

Auch im Jahr 2010 organisierten Bayer und das Umweltprogramm der Vereinten Nationen (UNEP) wieder ein Dutzend Umweltprojekte für Jugendliche und Kinder im Rahmen ihrer globalen Partnerschaft. Im Mittelpunkt stand die internationale Kinderkonferenz in Nagoya, Japan, zum Thema „Artenvielfalt“ mit rund 250 Teilnehmern aus 40 Ländern. Der jedes Jahr gemeinsam organisierte Kinder-Malwettbewerb verzeichnete wiederum dank einer besonders starken Beteiligung in China eine erneute Rekordmarke von 3,2 Millionen Einreichungen aus 95 Ländern. Im Rahmen des Bayer-Umweltbildungsprogramms „Junge Umweltbotschafter“ nahmen insgesamt rund 50 Jugendliche aus 18 Ländern an der einwöchigen Studienreise zum Thema Umweltschutz nach Deutschland teil – dem Höhepunkt der jährlichen Aktivitäten. Bayer und UNEP verlängerten 2010 ihre Partnerschaft um drei weitere Jahre bis Ende 2013. Bayer wird die gemeinsamen Projekte finanziell weiterhin mit 1,2 Mio € pro Jahr unterstützen.

Am „Bayer-Tongji Chair for Sustainable Development“ an der Tongji-Universität in Shanghai, China, setzte die Forschungsgruppe von Prof. Dr. Jianfu Zhao im Jahr 2010 u. a. vier Forschungsprojekte – beispielsweise zum Zusammenhang von effizienter Energie- und Wasser-Nutzung – um. Die Forschungs- und Lehrtätigkeiten der Stiftungsprofessur wurden von der „Bayer Science & Education Foundation“ im Berichtsjahr mit insgesamt 150.000 € unterstützt.

Junge Menschen  
in Angelegenheiten  
des Umweltschutzes  
einbinden

## GESUNDHEIT UND SOZIALES

Bayer engagiert sich weltweit für die Verbesserung der sozialen Verhältnisse und der Gesundheitsversorgung. Dadurch wollen wir zu einem sozial stabilen Umfeld an unseren Unternehmensstandorten beitragen und helfen, globale Gesundheitsaufgaben zu lösen.

Wir unterstützten in unseren laufenden Hilfsprogrammen auch 2010 die Weltgesundheitsorganisation who im Kampf gegen vernachlässigte tropische Krankheiten. Das Unternehmen stellte dazu kostenfrei Medikamente zur Verfügung, die auf der „who Essential Drug List“ stehen – beispielsweise gegen die in Lateinamerika weit verbreitete Chagas-Krankheit, eine Infektionskrankheit, die durch den Biss von Raubwanzen übertragen wird.

Stiftungswesen

[Grafik 3.21]

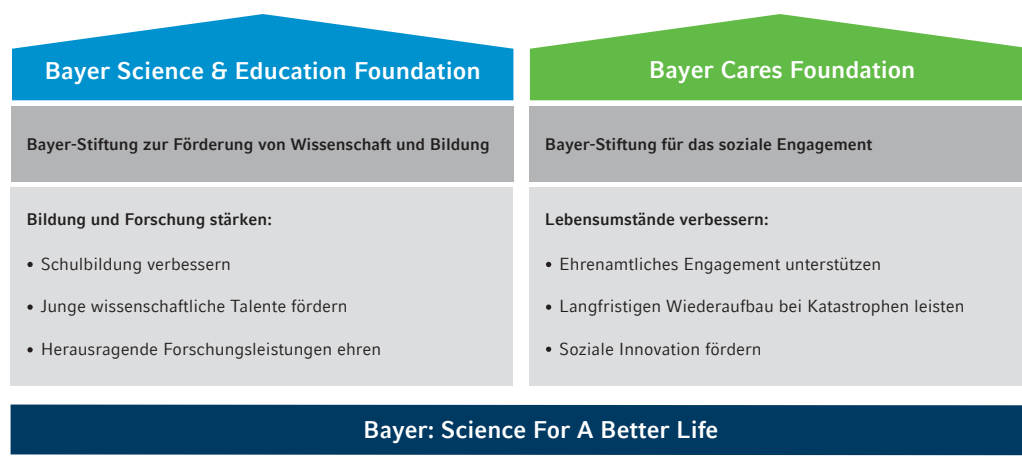

Die „Bayer Cares Foundation“, unsere Stiftung für das soziale Engagement, unterstützte im Berichtsjahr 54 gemeinnützige Ehrenamtsprojekte im Umfeld der Unternehmensstandorte in Deutschland und Lateinamerika mit insgesamt über 140.000 €. Damit honorierte die Bayer-Stiftung das ehrenamtliche Engagement von Mitarbeitern und Bürgern, die sich in konkreten Projekten aktiv für die sozialen Belange der Gesellschaft einsetzen.

Zudem vergab die Stiftung 2010 erstmals den mit insgesamt 35.000 € dotierten „Aspirin Sozialpreis“ für innovative Hilfs- und Beratungsangebote im Gesundheitsbereich.

Für die Erdbebenopfer in Haiti finanzierte die „Bayer Cares Foundation“ gemeinsam mit „Caritas international“ ein Gesundheitszentrum, das 30.000 Menschen medizinisch versorgen wird. Ermöglicht wurde dies durch die Bayer-Mitarbeiter, die in 34 Ländern einem weltweiten Spendenaufruf des Unternehmens gefolgt sind und 250.000 € spendeten. Die Bayer AG stockte diesen Betrag um 100.000 € auf insgesamt 350.000 € auf. Unmittelbar nach dem Erdbeben hatte der Konzern eine Soforthilfe in Form von Antibiotika und Schmerzmitteln im Wert von mehr als 650.000 € geleistet – die Bayer-Hilfe für Haiti belief sich somit auf einen Gesamtwert von über 1 Mio €.

**SPORT UND KULTUR**

In der Sport- und Kulturförderung engagieren wir uns bereits seit über 100 Jahren.

Im Breiten-, Jugend- und Behindertensport sind wir mit einer vielfältigen Vereinslandschaft aktiv. „Einfach Fußball“ ist eine neue Initiative für Schülerinnen und Schüler mit geistiger und Lern-Behinderung. Gemeinsam mit dem Deutschen Fußball-Bund (DFB) initiiert und unterstützt Bayer Partnerschaften zwischen Förderschulen und Fußballvereinen. Ziel ist es, mehr Kindern und Jugendlichen mit Behinderung den Zugang zum Vereinsfußball zu ermöglichen und das gegenseitige Lernen zwischen Menschen mit und ohne Behinderung zu fördern.

Über das Angebot der Bayer-Kulturabteilung sowie unserer Vereine und Ensembles leisten wir einen traditionellen Beitrag zum kulturellen Leben an den Unternehmensstandorten und damit zu deren Attraktivität für Mitarbeiter und Bürger.

## 10. Nachtragsbericht

Seit dem 01. Januar 2011 sind keine Vorgänge von besonderer Bedeutung eingetreten, von denen wir einen wesentlichen Einfluss auf die Vermögens-, Finanz- und Ertragslage des Bayer-Konzerns erwarten.

# 11. Prognosebericht

## 11.1 Chancen- und Risikobericht

### 11.1.1 Chancen- und Risikomanagement

Jedes unternehmerische Handeln ist untrennbar mit Chancen und Risiken verbunden. Aus diesem Grund ist ein wirksames Management von Chancen und Risiken ein bedeutender Erfolgsfaktor zur nachhaltigen Sicherung des Unternehmenswerts.

Chancen- und Risikomanagement: integraler Bestandteil der Unternehmensführung

Im Bayer-Konzern ist die Steuerung von Chancen und Risiken integraler Bestandteil des konzernweiten Systems der Unternehmensführung und nicht Aufgabe einer bestimmten organisatorischen Einheit. Dadurch ergibt sich eine enge Verknüpfung mit anderen Unternehmensbereichen. Zentrale Bestandteile des Chancen- und Risikomanagementsystems sind der Planungs- und Controllingprozess, das konzerninterne Regelwerk und das Berichtswesen.

In regelmäßigen Konferenzen zur Geschäftsentwicklung werden die Chancen und Risiken, die in den Strategien der strategischen Geschäftseinheiten und der Regionen qualitativ und quantitativ bewertet werden, aktualisiert und Ziele und Steuerungsmaßnahmen vereinbart.

Grundlage des Chancenmanagements des Bayer-Konzerns ist die detaillierte Beobachtung und Analyse der individuellen Märkte sowie die frühzeitige Erkennung und Bewertung von Trends, aus denen sich die Identifikation der Chancen ableitet. Dabei werden sowohl gesamtwirtschaftliche, branchenspezifische als auch regionale oder lokale Entwicklungen einbezogen. Zu den Aufgaben der Teilkonzerne und strategischen Geschäftseinheiten gehört es, strategische Chancen auf den Märkten wahrzunehmen, in denen sie tätig sind. Auf Konzernebene wird hierfür der strategische Rahmen gesetzt und die Finanzierung sowie die Liquidität gesichert. Zudem werden chancenorientierte Projekte, die mehrere Teilkonzerne betreffen, zentral koordiniert und verantwortet.

Die Grundsätze des Risikomanagements des Bayer-Konzerns sind in einer Richtlinie dokumentiert und im konzernweiten Intranet veröffentlicht. Die Richtlinie enthält grundlegende Prinzipien zum Risikomanagement gemäß den Anforderungen des KonTraG. Sie umfasst die Grundsätze zur Früherkennung, Kommunikation und Behandlung von Risiken. Dies sind im Wesentlichen: gesetzliche Anforderungen, die Handhabung des Risikomanagements bei Bayer sowie Risikomanagementaktivitäten.

Risikobewertung nach Schadensausmaß und Eintrittswahrscheinlichkeit

Risiken werden im Bayer-Konzern systematisch und fortlaufend identifiziert, analysiert und in einer Datenbank erfasst. Als Risiko gelten Ereignisse und mögliche Entwicklungen innerhalb oder außerhalb des Unternehmens, die eine nachhaltige Steigerung des Unternehmenswerts gefährden. Risikorelevante Informationen werden mindestens quartärllich sowie bei Bedarf ad hoc erhoben.

Die Dokumentation umfasst neben der Beschreibung des Risikos eine Bewertung nach Schadensausmaß und Eintrittswahrscheinlichkeit sowie Maßnahmen zur Überwachung und Gegensteuerung.

Auf Ebene der Teilkonzerne und Servicegesellschaften werden vom Konzern abgestimmte Wesentlichkeitsgrenzen definiert. Um risikobehaftete Sachverhalte früh transparent darzustellen und dem potenziellen Risiko entsprechend zeitig begegnen zu können, existieren im Rahmen der Risikodokumentation Aufgreifgrenzen, die deutlich unter der Wesentlichkeitsgrenze liegen.

Die Mitglieder des Konzernführungskreises haben jederzeit Zugriff auf die Risikodatenbank, die im Managementinformationssystem abgebildet ist.

Das Risikomanagement ist auf Konzernebene dem Finanzvorstand zugeordnet. In den Teilkonzernen, den Servicegesellschaften und den Einheiten der Holding wurden Risikoverantwortliche auf Leitungsebene und Risikomanagementkoordinatoren benannt, um ein effizientes Risikomanagementsystem zu gewährleisten. Die Risikomanagementkoordinatoren und Fachverantwortlichen in den Unternehmensbereichen sind für die Risikoinventur inklusive der Identifikation, Bewertung



und Dokumentation der Risiken sowie der Darstellung der Risikostrategie verantwortlich. Der jährliche Risikobericht an den Aufsichtsrat umfasst das Risiko-Managementsystem, Rechtsrisiken, Compliance-Themen sowie die Berichte der Konzernrevision und den Bericht über das interne Kontrollsystem.

Klare Aufbauorganisation des Risikomanagements

Die Konzernrevision ist verantwortlich für die Koordination der konzernweiten Erfassung und Dokumentation von Risikofeldern und für die Weiterentwicklung des Risikomanagementsystems.

Die Wirksamkeit des Risikomanagementsystems wird in regelmäßigen Abständen von der Konzernrevision geprüft. Dabei folgt die Prüfungsplanung der Konzernrevision einem risikobasierten Ansatz. Darüber hinaus beurteilt der Abschlussprüfer im Rahmen seiner Jahresabschlussprüfung das Risikofrüherkennungssystem und erstattet Konzernvorstand und Aufsichtsrat regelmäßig hierüber Bericht. Die Erkenntnisse aus diesen Prüfungen finden im kontinuierlichen Prozess zur Verbesserung unseres Risikomanagementsystems Berücksichtigung. Der Aufsichtsrat, insbesondere der Prüfungsausschuss, überwacht das Risikomanagementsystem.

## 11.1.2 Internes Kontroll- und Risikomanagementsystem bezogen auf den (Konzern-) Rechnungslegungsprozess

(Bericht gemäß § 289 Absatz 5, 315 Absatz 2 Nr. 5 HGB)

Bayer verfügt über ein internes Kontroll- und Risikomanagementsystem im Hinblick auf den (Konzern-) Rechnungslegungsprozess, in dem geeignete Strukturen sowie Prozesse definiert und in der Organisation umgesetzt sind. Dies ist so konzipiert, dass eine zeitnahe, einheitliche und korrekte buchhalterische Erfassung aller geschäftlichen Prozesse bzw. Transaktionen gewährleistet ist. Es stellt die Einhaltung der gesetzlichen Normen, der Rechnungslegungsvorschriften und der internen Konzernrichtlinie zur Rechnungslegung sicher, die für alle in den Konzernabschluss einbezogenen Unternehmen verbindlich ist. Änderungen der Gesetze, Rechnungslegungsstandards und andere Verlautbarungen werden fortlaufend bezüglich der Relevanz und Auswirkungen auf den Konzernabschluss analysiert und die daraus resultierenden Änderungen in den konzern-internen Richtlinien und Systemen angepasst.

Grundlagen des internen Kontrollsystems sind neben definierten Kontrollmechanismen, z. B. systemtechnische und manuelle Abstimmprozesse, die Funktionstrennung sowie die Einhaltung von Richtlinien und Arbeitsanweisungen. Die Steuerung des Prozesses der Konzernrechnungslegung erfolgt bei der Bayer AG durch den Zentralbereich Group Accounting and Controlling.

Die Konzerngesellschaften erstellen ihre Abschlüsse lokal bzw. unter Nutzung konzerneigener Shared Service Center und übermitteln sie über ein konzernweit einheitlich definiertes Datenmodell, das der Konzernrichtlinie zur Rechnungslegung unterliegt. Die Konzerngesellschaften sind für die Einhaltung der konzernweit gültigen Richtlinien und Verfahren sowie den ordnungsgemäßen und zeitgerechten Ablauf ihrer rechnungslegungsbezogenen Prozesse und Systeme verantwortlich. Die in den Rechnungslegungsprozess von Konzern- und Jahresabschluss der Bayer AG involvierten Mitarbeiter werden dazu regelmäßig geschult. Im gesamten Rechnungslegungsprozess werden die lokalen Gesellschaften durch zentrale Ansprechpartner unterstützt. Im Rahmen des Rechnungslegungsprozesses sind Maßnahmen implementiert, die die Regelungskonformität des Konzernabschlusses sicherstellen sollen. Dabei dienen die Maßnahmen der Identifikation und Bewertung der Risiken sowie der Begrenzung erkannter Risiken und deren Überprüfung. Beispielsweise werden wesentliche neu eingegangene Vertragsbeziehungen systematisch erfasst und analysiert.

Auf Basis der Daten der in den Konsolidierungskreis einbezogenen Tochterunternehmen werden die konsolidierten Rechenwerke zentral erstellt. Die Konsolidierungsmaßnahmen, bestimmte Abstimmarbeiten und die Überwachung der zeitlichen und prozessualen Vorgaben erfolgen durch eine spezielle Konzernabschlussabteilung. Systemtechnische Kontrollen werden durch die Mitarbeiter überwacht und durch manuelle Prüfungen ergänzt. Grundsätzlich gibt es auf jeder Ebene zumindest ein Vier-Augenprinzip. Im gesamten Rechnungslegungsprozess müssen bestimmte Freigabeprozesse durchlaufen werden. Für spezielle fachliche Fragestellungen und komplexe Sachverhalte besteht darüber hinaus eine vom Erstellungsprozess getrennte Grundsatzabteilung.

Das interne Kontrollsystem der Finanzberichterstattung des Bayer-Konzerns basiert auf dem coso (Committee of the Sponsoring Organisations of the Treadway Commission)-Rahmenwerk. Für die IT-Prozesse wurde eine Überleitung zum COBIT (Control Objectives for Information and related Technology)-Rahmenwerk hergestellt. Die konzernweit verbindlichen Internal-Control-System- (ICS-) Standards wurden daraus abgeleitet, zentral vorgegeben und in den Konzerngesellschaften umgesetzt. Das Management in den Gesellschaften des Konzerns trägt die Verantwortung für die Umsetzung und Überwachung des lokalen ICS. In einem konzernweit genutzten System werden alle ICS-relevanten Geschäftsprozesse sowie deren Risiken und Kontrollen einheitlich und prüfungssicher dokumentiert und in einem zentralen IT-System auf Konzernebene transparent dargestellt.

Die Interne Revision als zentrale Einheit prüft u. a. die Zuverlässigkeit des Rechnungswesens der in- und ausländischen Gesellschaften. Dabei werden insbesondere folgende Aspekte berücksichtigt:

- Einhaltung der gesetzlichen Auflagen sowie von Vorstandsdirektiven, sonstigen Richtlinien und internen Anweisungen,
- formelle und materielle Ordnungsmäßigkeit der Rechnungslegung und der darauf aufbauenden Berichterstattung,
- Funktionsfähigkeit und Wirksamkeit interner Kontrollsysteme zur Vermeidung von Vermögensverlusten,
- Ordnungsmäßigkeit der Aufgabenerfüllung und Einhaltung wirtschaftlicher Grundsätze.

Die Bayer AG verfügt über ein konzernweit standardisiertes Verfahren zur Überwachung der Wirksamkeit des rechnungslegungsbezogenen internen Kontrollsystems. Dieses Verfahren ist konsequent an den Risiken einer möglichen Fehlberichterstattung im Konzernabschluss ausgerichtet und basiert auf den strengen us-amerikanischen Kapitalmarktanforderungen der Section 404 des Sarbanes-Oxley-Acts.

Die Wirksamkeitsbeurteilung des rechnungslegungsbezogenen ICS erfolgt auf Grundlage von kaskadierten Selbstbeurteilungen beginnend bei den Prozessbeteiligten über die wesentlichen Verantwortungsträger im Rechnungslegungsprozess bis zum Konzernvorstand. Die Interne Revision nimmt eine unabhängige, stichprobenhafte Prüfung der Selbstbeurteilungen vor.

Rechnungslegungs-  
bezogenes internes  
Kontrollsystem auf  
Basis des coso-  
Rahmenwerks

Der Vorstand der Bayer AG hat die Wirksamkeit des rechnungslegungsbezogenen internen Kontrollsystems auf Grundlage des coso-Rahmenwerks und dessen Kriterien beurteilt. Diese Beurteilung ergab, dass das rechnungslegungsbezogene interne Kontrollsystem für das Geschäftsjahr 2010 funktionsfähig ist. Die Wirksamkeit des internen Kontrollsystems wird vom Prüfungsausschuss der Bayer AG gemäß den Anforderungen des im Mai 2009 in Kraft getretenen Bilanzrechtsmodernisierungsgesetzes überwacht. Grundsätzlich ist zu berücksichtigen, dass ein internes Kontrollsystem, unabhängig von der Ausgestaltung, keine absolute Sicherheit liefert, dass wesentliche Fehlaussagen in der Rechnungslegung vermieden oder aufgedeckt werden.

### 11.1.3 Chancen

Bayer als internationaler Konzern ist mit seinen drei Tätigkeitsfeldern verschiedensten Entwicklungen auf den unterschiedlichen nationalen und internationalen Märkten unterworfen. Auf der Basis der in diesem Bericht beschriebenen Geschäftsentwicklung und der Unternehmenslage ergeben sich innerhalb der vorliegenden Rahmenbedingungen verschiedene Risiko- und Chancenpotenziale.

In den unterschiedlichen Tätigkeitsfeldern wollen wir auch in Zukunft die sich uns eröffnenden Chancen optimal nutzen. Die Evaluierung weiterer Chancenpotenziale erfolgt kontinuierlich in allen Bereichen und ist ein elementarer Teil unserer Strategie, die wir im Kapitel 11.2 „Strategie“ ausführlich darstellen.

Wesentliche Chancenpotenziale bietet der Bereich Forschung und Entwicklung. Besonders hier arbeiten wir kontinuierlich daran, neue Produkte zu finden sowie bestehende Produkte weiterzuentwickeln. Unsere diesbezüglichen Aktivitäten sind ausführlich im Kapitel 8 „Forschung und Entwicklung“ dargestellt.

Verschiedenen – insbesondere finanzwirtschaftlichen – Risiken, die wir im folgenden Abschnitt als Risiken beschrieben haben, stehen bei einer positiven Entwicklung entsprechende Chancen gegenüber.

## 11.1.4 Risiken

### RISIKOLAGE

Als international tätiges Unternehmen mit heterogenem Portfolio ist der Bayer-Konzern einer Vielzahl von Risiken ausgesetzt. Um die finanziellen Auswirkungen eines möglichen Schadens gering zu halten, werden – soweit verfügbar und wirtschaftlich vertretbar – Versicherungen abgeschlossen. Umfang und Höhe dieser Versicherungen werden laufend überprüft.

Für den Bayer-Konzern wesentliche Risiken werden in den folgenden Abschnitten beschrieben, wobei deren Reihenfolge keine Wertigkeit der Eintrittswahrscheinlichkeit oder des potenziellen Schadensausmaßes impliziert.

### RECHTLICHE RISIKEN

Wir sind zahlreichen Risiken aus Rechtsstreitigkeiten oder -verfahren ausgesetzt, an denen wir aktuell beteiligt sind oder die sich in der Zukunft ergeben könnten. Dazu gehören insbesondere Risiken aus den Bereichen Produkthaftung, Wettbewerbs- und Kartellrecht, Patentrecht, Steuerrecht sowie Umweltschutz. Die Ergebnisse von gegenwärtig anhängigen bzw. künftigen Verfahren sind nicht vorhersagbar, sodass aufgrund von gerichtlichen oder behördlichen Entscheidungen oder der Vereinbarung von Vergleichen Aufwendungen entstehen können, die nicht oder nicht in vollem Umfang durch Versicherungsleistungen abgedeckt sind und wesentliche Auswirkungen auf unser Geschäft und seine Ergebnisse haben können.

Eine Beschreibung der aus heutiger Sicht wesentlichen Rechtsrisiken befindet sich im Konzernabschluss, Anhangangabe [32].

### BRANCHENRISIKEN

Die Preise pharmazeutischer Produkte sind auf vielen Märkten staatlicher Kontrolle und Regulierung ausgesetzt, einige Regierungen nehmen sogar direkt Einfluss auf die Preisbildung. Des Weiteren sind große Anbieter im Gesundheitswesen in einigen Absatzmärkten in der Lage, erheblichen Druck auf die Marktpreise auszuüben. Preisregulierungen und Preisdruck durch Generika-Anbieter, induziert durch staatliche Erstattungssysteme, die preisgünstigere Generika Markenprodukten vorziehen, schmälern die Renditen unserer pharmazeutischen Produkte und könnten im Einzelfall die Markteinführung eines neuen Produkts unrentabel machen. Wir gehen davon aus, dass das jetzige Ausmaß der Preisregulierung und des Preisdrucks weiter bestehen oder sich sogar vergrößern wird.

Veränderungen des regulatorischen Umfelds in unseren Hauptabsatzmärkten werden fortlaufend analysiert. Je nach Ausmaß der staatlichen Regulierung kann es notwendig sein, unser Geschäftsmodell anzupassen.

Die Umsatzerlöse des Bayer-Konzerns unterliegen saisonalen Schwankungen. Insbesondere gilt dies für unser CropScience-Geschäft, welches darüber hinaus auch witterungsbedingten Einflüssen unterliegt. Die Konjunkturzyklen der Abnehmerbranchen beeinflussen die Umsatz- und Ergebnisentwicklung des Teilkonzerns MaterialScience. Ein konjunktureller Abschwung, gekennzeichnet durch schwache Nachfrage und Überkapazitäten, führt zu erhöhtem Preisdruck und intensiverem Wettbewerb.

Ganzheitliches  
Portfolio-  
management

Das frühzeitige Erkennen sich abzeichnender Entwicklungen im gesetzlichen und wirtschaftlichen Umfeld sowie ein aktives Portfoliomanagement sind wichtige Bestandteile der Geschäftssteuerung. Sowohl die gegenwärtige weltweite Konjunkturlage als auch die mittelfristigen Wirtschaftsentwicklungen werden quartalsweise analysiert und zur operativen Geschäftsplanung herangezogen. Allerdings bieten auch unsere detaillierten Analysen keine Gewähr dafür, dass ein massiver konjunktureller Abschwung wie in den vergangenen Jahren 2008 und 2009 vorhergesehen werden kann.

Eine Kurzfassung unserer Einschätzung ist im Kapitel 11.3 „Konjunkturausblick“ verfügbar.

Wenn es uns unter strategischen Gesichtspunkten vorteilhaft erscheint, akquirieren wir Unternehmensteile oder auch ganze Unternehmen. Der Anteil des Goodwill und der sonstigen immateriellen Vermögenswerte im Bayer-Konzernabschluss hat durch die Akquisitionen der vergangenen Jahre deutlich zugenommen. Eine nicht erfolgreiche Geschäftsintegration bzw. unerwartet hohe Integrationskosten können die Realisierung der geplanten quantitativen und qualitativen Ziele wie beispielsweise Synergien gefährden und das Ergebnis negativ beeinflussen.

Unsere Akquisitionen werden von Integrationsteams begleitet. Für die Steuerung der Integrationsprozesse werden entsprechende Ressourcen bereitgestellt.

**PRODUKTENTWICKLUNGSRISIKEN**

Da die Wettbewerbsposition sowie die Umsatz- und Ergebnisentwicklung des Bayer-Konzerns in signifikanter Weise von der Entwicklung kommerziell erfolgreicher Produkte und Produktionstechnologien abhängen, investiert der Bayer-Konzern beträchtliche finanzielle Mittel in die Forschung und Entwicklung. Aufgrund langwieriger Entwicklungsprozesse, technologischer Herausforderungen, regulatorischer Vorgaben und starken Wettbewerbs ist jedoch nicht sichergestellt, dass alle Produkte, die sich zukünftig oder derzeit in unserer Entwicklungspipeline befinden, ihre geplante Marktreife erreichen und sich auf dem Markt kommerziell erfolgreich behaupten werden.

Darüber hinaus können mögliche Nebenwirkungen unserer Produkte, die trotz vorheriger intensiver Prüfungen erst nach der Zulassung bzw. Registrierung entdeckt werden, zu einer teilweisen oder kompletten Rücknahme vom Markt führen. Ein solcher Vertriebsstopp kann freiwillig oder aber auch durch rechtliche und behördliche Schritte begründet sein. Auch Gerichtsverfahren und damit verbundene Schadenersatzforderungen wegen möglicher Nebenwirkungen unserer Produkte können das Ergebnis erheblich belasten.

Um eine effektive und effiziente Verwendung der in die Forschung und Entwicklung investierten Mittel zu gewährleisten, hat der Bayer-Konzern eine entsprechende Aufbau- und Ablauforganisation mit Fachabteilungen, Arbeitskreisen und Reportingstrukturen zur Überwachung von Entwicklungsprojekten implementiert.

**REGULATORISCHE RISIKEN**

Insbesondere der Life-Science-Bereich ist strengen behördlichen Vorgaben hinsichtlich der durchzuführenden Studien sowie der Herstellung und Vermarktung einer Vielzahl seiner Produkte unterworfen. In einigen Ländern hat das Ausmaß an regulatorischen Kontrollen stark zugenommen. Wir erwarten, dass sich dieser Trend besonders in den USA und der EU fortsetzt. Steigende Prüfanforderungen, z.B. an klinische oder (öko-) toxikologische Studien, können die Produktentwicklungskosten erhöhen und die Zeit bis zur (Re-) Registrierung verlängern.

Potenziellen Risiken aus gesetzlichen und sonstigen Vorgaben wird dadurch Rechnung getragen, dass wir unsere Entscheidungen und die Gestaltung unserer Geschäftsprozesse auf eine umfassende rechtliche Beratung durch interne und externe Fachleute stützen. In eigens aufgesetzten Projekten wird die Umsetzung neuer Regularien koordiniert und versucht, eventuelle Nachteile für die Geschäftstätigkeit zu verringern.

**PATENTRISIKEN**

Ein Großteil unserer Produkte, insbesondere im Life-Science-Bereich, unterliegt dem Patentschutz. Wir sind derzeit in Gerichtsverfahren involviert, um den Patentschutz für unsere Produkte durchzusetzen. Insbesondere Generika-Anbieter versuchen, Patente vor ihrem Ablauf anzugreifen. Teilweise wird sogar die generische Version eines Produkts auf den Markt gebracht – eine sogenannte „at-risk“-Markteinführung – bevor ein rechtskräftiges Patenturteil vorliegt.

Erhöhter Wettbewerbs-  
druck nach abgelau-  
fenem Patentschutz



Läuft ein Patent aus oder können wir ein Patent nicht erfolgreich verteidigen, ist in der Regel mit verstärktem Wettbewerb und dem damit verbundenen Preisdruck durch den Markteintritt von Generika-Anbietern zu rechnen. Hinsichtlich der in diesem Zusammenhang stehenden Rechtsstreitigkeiten verweisen wir auf die Beschreibung der Rechtsrisiken im Konzernabschluss, Anhangangabe [32].

In einzelnen Bereichen müssen wir uns des Weiteren gegen Klagen Dritter aufgrund von Verletzung von Patenten oder sonstiger Schutzrechte verteidigen. Dies könnte die Entwicklung oder Herstellung bestimmter Produkte behindern oder gar stoppen und uns zu Schadenersatz- oder Lizenzzahlungen an Dritte verpflichten.

Insbesondere unsere Life-Science-Bereiche verfügen über ein umfassendes Produkt-Lebenszyklus-Management. Darüber hinaus prüft unsere Patentabteilung in Zusammenarbeit mit den jeweiligen operativen Abteilungen regelmäßig die aktuelle Patentlage und beobachtet mögliche Patentverletzungsversuche, um bei Bedarf rechtliche Schritte einzuleiten.

### PRODUKTIONS-, BESCHAFFUNGSMARKT- UND UMWELTSCHUTZRISIKEN

Die Produktionskapazitäten an einigen unserer Standorte könnten z. B. durch technisches Versagen, Naturkatastrophen, regulatorische Rahmenbedingungen oder Lieferunterbrechungen bei Hauptrohstoffen oder Zwischenprodukten, z. B. durch die Abhängigkeit von einem Lieferanten, beeinträchtigt werden. Wegen des sehr komplexen Herstellungsverfahrens gilt dies in besonderem Maße für unsere biotechnologischen Produkte. Gelingt es uns in diesen Fällen nicht, mit der Produktion auf andere Standorte auszuweichen oder die Nachfrage aus Vorräten zu bedienen, wird es zu einem Umsatzrückgang kommen.

Die Versorgung mit strategisch wichtigen Rohstoffen wird – soweit möglich – über langfristige Verträge und/oder mit verschiedenen Lieferanten gesichert. Zusätzlich unterliegen sämtliche Schritte der Produktionskette sowie die verwendeten Materialien einer ständigen Kontrolle durch die entsprechenden Fachfunktionen.

Die Herstellung von chemischen Produkten birgt Risiken, die mit der Produktion, der Abfüllung, der Lagerung und dem Transport von Rohstoffen, Erzeugnissen und Abfällen verbunden sind. Diese Risiken können Personen-, Sach- und Umweltschäden, Produktionsausfälle und Betriebsunterbrechungen sowie die Verpflichtung zu Schadenersatzzahlungen zur Folge haben.

Darüber hinaus kann das Auftreten von ungewollten Kreuz-Kontaminationen unserer Pflanzenschutzmittel untereinander und von Spuren unerwünschter gentechnisch modifizierter Organismen in landwirtschaftlichen Erzeugnissen oder Lebensmitteln nicht vollständig ausgeschlossen werden.

Produkt- und Umweltschutzrisiken begegnen wir mit entsprechenden Qualitätssicherungsmaßnahmen. So gewährleisten wir Prozesssicherheit durch ein integriertes Qualitäts-, Gesundheits-, Umwelt- und Sicherheitsmanagement. Weiterhin engagieren wir uns im Rahmen der internationalen Initiative „Responsible Care“ der chemischen Industrie, treiben unser Nachhaltigkeits- und Klimaprogramm voran und berichten regelmäßig über unser Nachhaltigkeitsmanagement, welches auch die Themen Umwelt und Sicherheit einschließt.

### IT-RISIKEN

Die Geschäfts- und Produktionsprozesse sowie die interne bzw. externe Kommunikation des Bayer-Konzerns basieren zunehmend auf Informationstechnologien. Eine wesentliche Störung oder gar ein Ausfall der globalen und regionalen Geschäftssysteme kann zu einem Datenverlust und einer Beeinträchtigung der Geschäfts- und Produktionsprozesse führen.

Mit der Etablierung einer umfassenden Organisation für das IT-Risikomanagement, der Verabschiedung eines Regelwerks mit der Festlegung entsprechender Rollen und Verantwortlichkeiten sowie der Implementierung eines periodischen Berichtssystems wurden die Grundlagen für ein kontinuierliches und nachhaltiges Risikomanagement-System für diesen Bereich gelegt. Dazu wurde ein konzernübergreifendes Gremium eingerichtet, das die grundsätzliche Strategie, Architektur und Sicherheitsmaßnahmen für den Konzern beschließt. Diese werden durch die Teilkonzerne und Servicegesellschaften in Abstimmung mit dieser zentralen Organisation entsprechend umgesetzt. In Zusammenarbeit mit unserem internen IT-Dienstleister wurden technische Vorkehrungen, wie beispielsweise Datenwiederherstellungs- und Kontinuitätspläne, entwickelt.

Absicherung der  
Rohstoffpreissrisiken  
über langfristige  
Lieferverträge

**KAPITALMARKTENTWICKLUNGEN ALS RISIKO FÜR PENSIONSVERPFLICHTUNGEN**

Der Bayer-Konzern hat Verpflichtungen gegenüber jetzigen und früheren Mitarbeitern aus Pensions- und anderen pensionsähnlichen Leistungszusagen. Veränderungen relevanter Bewertungsparameter, z. B. Zinssatz, Sterbewahrscheinlichkeiten und Gehaltssteigerungsraten, können eine Erhöhung des Barwerts der Pensionsverpflichtungen bedingen, was zusätzliche Aufwendungen für Pensionspläne erforderlich macht oder infolge der unmittelbar erfolgsneutral mit dem Eigenkapital zu verrechnenden versicherungsmathematischen Verluste zu einem niedrigeren Eigenkapital führen kann. Ein Großteil der Pensionsverpflichtungen ist durch das Planvermögen gedeckt, welches aus festverzinslichen Wertpapieren, Aktien, Immobilien und anderen Vermögensanlagen besteht. Rückläufige oder gar negative Erträge aus diesen Anlagen können sich ungünstig auf den zukünftig beizulegenden Zeitwert des Planvermögens auswirken und somit die Entwicklung des Eigenkapitals negativ beeinflussen und/oder zusätzliche Beiträge des Unternehmens notwendig machen. Einzelheiten hierzu werden im Konzernabschluss, Anhangangabe [25] erläutert.

Dem Risiko von Marktwertschwankungen des Planvermögens begegnen wir durch eine ausgewogene strategische Anlagenallokation und eine ständige Analyse der Anlagerisiken im Hinblick auf unsere weltweiten Pensionsverpflichtungen.

**FINANZWIRTSCHAFTLICHE RISIKEN****Management von Finanz- und Rohstoffpreisisiken**

Als weltweit agierender Konzern ist Bayer im Rahmen seiner gewöhnlichen Geschäftstätigkeit Kreditrisiken, Liquiditätsrisiken sowie verschiedenen Marktpreisisiken ausgesetzt, die einen wesentlichen Einfluss auf die Vermögens-, Finanz- und Ertragslage haben könnten.

Unternehmenspolitik ist es, die aus dem operativen Geschäft sowie den daraus resultierenden Finanzierungserfordernissen entstehenden Marktpreisisiken durch den Einsatz derivativer Finanzinstrumente zu eliminieren bzw. zu begrenzen. Derivative Finanzinstrumente werden dabei fast ausschließlich zur Absicherung von gebuchten und geplanten Transaktionen abgeschlossen. Der Einsatz von derivativen Finanzinstrumenten unterliegt strengen internen Kontrollen, die im Rahmen zentral festgelegter Mechanismen und einheitlicher Richtlinien erfolgen. Es werden vor allem außerhalb der Börse (d. h. OTC) gehandelte Devisentermin- und -optionsgeschäfte, Zinsswaps sowie Zins-/Währungsswaps, Warenswaps und Warenoptionen mit Banken, denen wir bonitätsabhängige Kontrahentenlimite zuteilen, abgeschlossen.

Im Folgenden wird auf die einzelnen Risiken im Zusammenhang mit Finanzinstrumenten sowie deren Management eingegangen.

**Kreditrisiken**

Die Werthaltigkeit von Forderungen und anderen finanziellen Vermögenswerten kann beeinträchtigt werden, wenn Transaktionspartner ihren Verpflichtungen zur Bezahlung oder sonstigen Erfüllung nicht nachkommen. Da der Bayer-Konzern mit seinen Kunden keine Master-Netting-Vereinbarungen abschließt, stellt der Gesamtbetrag der finanziellen Vermögenswerte das maximale Ausfallrisiko dar.

Zur effektiven Steuerung der Kreditrisiken aus offenen Handelsforderungen hat Bayer einen einheitlichen Risikomanagementprozess etabliert und eine entsprechende konzernweite Richtlinie verfasst. Es erfolgen regelmäßig Bonitätsanalysen der Kunden; Sicherheiten liegen für einen Teil dieser Forderungen vor. Für alle Kunden werden Kreditlimite festgelegt. Darüber hinaus werden alle Limite für Schuldner mit einem Gesamtrisikoe Exposure von 10 Mio € und mehr sowohl vom operativen Kreditmanagement beurteilt als auch dem konzernweiten Risiko-Komitee Finanzen vorgelegt.

Zur Minimierung der Kreditrisiken werden Finanztransaktionen nur im Rahmen festgelegter Limite mit Banken und Partnern, die eine erstklassige Bonität aufweisen, getätigt. Die Risikolimits werden auf Basis von methodischen Modellen entwickelt und deren Einhaltung laufend beobachtet.

Die Länderrisiken aus Warenlieferungen und Konzernkrediten werden kontinuierlich beobachtet, methodisch bewertet und zentral gesteuert.

### Liquiditätsrisiken

Das Liquiditätsrisiko, d. h. das Risiko, aufgrund einer unzureichenden Verfügbarkeit von Zahlungsmitteln bestehende oder zukünftige Zahlungsverpflichtungen nicht erfüllen zu können, wird im Bayer-Konzern zentral gesteuert. Zur Sicherstellung der jederzeitigen Zahlungsfähigkeit werden liquide Mittel bereitgehalten, um konzernweit sämtliche geplanten Zahlungsverpflichtungen zur jeweiligen Fälligkeit erfüllen zu können. Diese bestehen sowohl in operativen Zahlungsströmen als auch in der Veränderung kurzfristiger Finanzverbindlichkeiten. Darüber hinaus wird eine Reserve für ungeplante Mindereingänge oder Mehrausgänge vorgehalten. Hierfür werden auf Basis historischer Zeitreihen, adjustiert um Veränderungen in der Geschäftsstruktur, Plan-Ist-Abweichungsanalysen durchgeführt. Daraus wird die Liquiditätsreserve ermittelt, die mit einer festgelegten Wahrscheinlichkeit eine negative Abweichung von den geplanten Zahlungsströmen abdecken kann. Die Höhe dieser Reserve wird regelmäßig überprüft und bei Bedarf den aktuellen Gegebenheiten angepasst. Die Liquidität wird hauptsächlich in Form von Tages- und Termingeldanlagen vorgehalten. Darüber hinaus stehen Bankkreditlinien, insbesondere eine nicht in Anspruch genommene syndizierte Kreditlinie in Höhe von 3,5 MRD €, zur Verfügung.

Die im Jahr 2011 fälligen Anleihen wollen wir aus der Liquidität und dem Free-Operating-Cashflow bedienen.

### Marktrisiken

Das Marktrisiko besteht darin, dass der beizulegende Zeitwert oder künftige Zahlungsströme eines Finanzinstruments aufgrund von Änderungen der Marktpreise schwanken. Zum Marktrisiko zählen das Währungsrisiko, das Zinsrisiko und das sonstige Preisrisiko (insbesondere das Rohstoffpreisrisiko).

Die Sensitivitätsanalyse ist ein weitverbreitetes Verfahren zur Risikomessung. Sie ermöglicht die Abschätzung potenzieller Verluste künftiger Erträge, beizulegender Zeitwerte oder von Cashflows marktrisiko-sensitiver Instrumente, die sich aus einer oder mehreren ausgewählten hypothetischen Veränderungen der Zinssätze, Wechselkurse, Rohstoffpreise und sonstiger relevanter Marktsätze oder Preise in einem bestimmten Zeitraum ergeben. Wir nutzen die Sensitivitätsanalyse, da sie angemessene Risikoschätzungen auf der Grundlage direkter Annahmen (z. B. einer Zinserhöhung) gestattet. Bei den nachfolgenden Risikoschätzungen wird Folgendes zugrunde gelegt:

- eine gleichzeitige, parallele Veränderung der Wechselkurse in Form einer Abwertung des Euro gegenüber sämtlichen Fremdwährungen um 10 %;
- eine Parallelverschiebung der Zinsstrukturkurven aller Währungen um 100 Basispunkte; und
- ein gleichzeitiger Rückgang der Preise aller relevanten Rohstoffe, auf die wir Derivate halten, um 20 %.

Wir nutzen Marktinformationen und zusätzliche Analysedaten, um unsere Risiken zu steuern und die Einschränkungen unserer Sensitivitätsanalyse abzuschwächen. Die Sensitivitätsanalyse hat sich als nützliches Instrument zum Erreichen einiger unserer risikospezifischen Managementziele erwiesen. Sie bietet eine leicht verständliche Risikoschätzung und vermittelt damit einen ungefähren Eindruck davon, welche Auswirkungen eine Veränderung der Marktbedingungen auf unser Geschäft haben könnte. Zudem gestattet die Sensitivitätsanalyse unserem Management, auf dieser Basis die erforderlichen Schritte einzuleiten, um derartigen Risiken zu begegnen.

Wir verfeinern unsere Verfahren zur Risikomessung und -berichterstattung kontinuierlich; dies beinhaltet u. a. eine regelmäßige Überprüfung der zugrundeliegenden Annahmen und verwendeten Parameter.

Die in den folgenden Abschnitten beschriebenen Sensitivitätsanalysen stellen den hypothetischen Verlust von Cashflows aus Finanzinstrumenten und derivativen Finanzinstrumenten dar, die wir zum 31. Dezember 2010 sowie zum 31. Dezember 2009 gehalten haben. Das Spektrum der Sensitivitäten, das wir für diese Analysen ausgewählt haben, spiegelt unsere Sicht der Veränderungen von Wechselkursen, Rohstoffpreisen und Zinssätzen wider, die in einem Zeitraum von einem Jahr und unter Zugrundelegung angemessener Maßstäbe möglich sind.

### Währungsrisiken

Da der Bayer-Konzern einen signifikanten Anteil seines Geschäfts außerhalb der Euroländer tätigt, können Währungsschwankungen das Ergebnis wesentlich beeinflussen. Währungsrisiken aus Finanzinstrumenten bestehen bei Forderungen, Verbindlichkeiten, Zahlungsmitteln und Zahlungsmitteläquivalenten, die nicht in der funktionalen Währung einer Gesellschaft bestehen. Das Währungsrisiko aus Finanzinstrumenten ist im Bayer-Konzern insbesondere für den us-Dollar, den japanischen Yen, den kanadischen Dollar und den chinesischen Renminbi bedeutsam.

Die Währungsrisiken werden systematisch zentral erfasst, analysiert und gesteuert. Der Umfang der Absicherung wird regelmäßig evaluiert und im Rahmen einer Richtlinie festgelegt. Dabei wird das gebuchte Fremdwährungsexposure aus operativer Geschäftstätigkeit und aus finanziellen Positionen, d. h. aus Forderungen und Verbindlichkeiten resultierend, in der Regel in voller Höhe währungskursgesichert.

Das in den nächsten 12 Monaten zu erwartende Fremdwährungsexposure aus geplanten Geschäften wird gemäß den zwischen Holdingvorstand, Konzernfinanzen und operativen Einheiten abgestimmten Vorgaben gesichert. Die Absicherung für einen wesentlichen Teil der vertraglichen und vorhersehbaren Währungsrisiken erfolgt vor allem durch die Nutzung von Devisentermingeschäften und Devisenoptionen.

Der Vorstand hat klare Leitlinien festgelegt, wie die Cashflow-Risiken, die aus diesem Ansatz resultieren, zu begrenzen und zu überwachen sind.

Zur Ermittlung der Sensitivitäten haben wir eine hypothetische ungünstige Veränderung der Wechselkurse um 10 % zugrunde gelegt und sind dabei von einer gleichzeitigen Abwertung des Euros gegenüber allen Währungen, basierend auf den Jahresendkursen dieser Währungen, ausgegangen. Der geschätzte hypothetische Verlust von Cashflows aus derivativen und nicht-derivativen Finanzinstrumenten würde zum 31. Dezember 2010 279 Mio € betragen (2009: 188 Mio €). Von diesen 279 Mio € beziehen sich 120 Mio € auf den us-Dollar, 41 Mio € auf den japanischen Yen, 30 Mio € auf den kanadischen Dollar, 34 Mio € auf den chinesischen Renminbi und 54 Mio € auf andere Währungen. 296 Mio € des geschätzten hypothetischen Verlusts in Höhe von 279 Mio € stammen aus Derivaten, die zur Absicherung unseres antizipierten Exposures aus geplanten Umsätzen in Fremdwährung eingesetzt wurden. Diese Transaktionen erfüllen die Voraussetzungen für das Hedge-Accounting, die entsprechenden Wertveränderungen werden im Eigenkapital (Other Comprehensive Income) ausgewiesen. Die Gegenposition von 17 Mio € ist im Wesentlichen Kontensalden in Fremdwährung und nicht abgesicherten, eingebetteten Währungsderivaten aus Lieferverträgen zuzuordnen. Die Auswirkungen von Währungsschwankungen auf unsere geplanten Umsätze in Fremdwährung sind in dieser Berechnung nicht berücksichtigt.

### Zinsrisiken

Ein Zinsrisiko liegt für den Bayer-Konzern vor allem bei finanziellen Vermögenswerten und Verbindlichkeiten mit Laufzeiten von über einem Jahr vor. Aus dem Risiko sich verändernder Kapitalmarktzinsen resultiert bei festverzinslichen Finanzinstrumenten (z. B. festverzinsliche Anleihen) ein Fair-Value-Risiko, da die beizulegenden Zeitwerte in Abhängigkeit von Zinssätzen schwanken. Bei variabel verzinslichen Finanzinstrumenten besteht ein Cashflow-Risiko, da die Zinszahlungen zukünftig zunehmen könnten.

Das Zinsrisiko des Bayer-Konzerns wird zentral analysiert und durch den Konzernbereich Finanzen gesteuert. Maßgabe hierfür ist die vom Management festgelegte Duration, die implizit auch das Verhältnis zwischen festverzinslicher und variabel verzinslicher Verschuldung beinhaltet. Die Duration unterliegt einer regelmäßigen Überprüfung. Um die angestrebte Zielstruktur des Portfolios zu erhalten, werden Derivate abgeschlossen, bei denen es sich vorwiegend um Zins- bzw. Zinswährungsswaps sowie Zinsoptionen handelt.

Die Finanzverbindlichkeiten einschließlich Derivaten beliefen sich zum 31. Dezember 2010 auf 11.767 Mio € (31. Dezember 2009: 12.858 Mio €). Die Sensitivitätsanalyse wurde auf Basis unserer variabel verzinslichen Verbindlichkeiten zum Jahresende 2010 sowie unter Berücksichtigung der Zinssätze, die für unsere Verbindlichkeiten in allen wesentlichen Währungen relevant sind, durchgeführt. Eine hypothetische Erhöhung dieser Zinssätze ab 1. Januar 2010 um 100 Basispunkte bzw. 1 Prozentpunkt pro Jahr (bei konstanten Wechselkursen) hätte zu einer Erhöhung unserer

Zinsaufwendungen zum 31. Dezember 2010 in Höhe von 45 Mio € geführt (2009 auf Basis der variabel verzinslichen Verbindlichkeiten zum Jahresende 2009: 58 Mio €).

#### Sonstige Preisrisiken (insbesondere Rohstoffpreisrisiken)

Der Bayer-Konzern benötigt signifikante Mengen an petrochemischen Rohstoffen und Energien für die verschiedenen Produktionsprozesse. Die Einkaufspreise für Rohstoffe und Energien können je nach Marktsituation erheblich schwanken. Wie schon in der Vergangenheit kann es Zeiten geben, in denen wir gestiegene Rohstoffkosten nicht über Preisanpassungen an unsere Kunden weitergeben können. Dies trifft in besonderem Maße für das MaterialScience-Geschäft zu.

Zur Sicherung der Rohstoffpreise haben wir langfristige Verträge mit verschiedenen Lieferanten abgeschlossen. Das operative Management der Rohstoffpreisrisiken liegt in der Verantwortung der Einkaufsabteilungen der Teilkonzerne und erfolgt im Rahmen von internen, zentral festgelegten Richtlinien und Limits, die einer ständigen Überprüfung unterliegen. Zum Betrieb unserer Produktionsanlagen wird in größerem Umfang Energie benötigt, größtenteils in Form von Strom und Dampf. Um das Preisänderungsrisiko bei Energien zu minimieren, setzen wir bei der Dampferzeugung auf eine ausbalancierte Diversifikation der Brennstoffe sowie beim Strom auf einen Mix von externem Einkauf und Eigenerzeugung.

Wir haben eine hypothetische nachteilige Veränderung der Rohstoff- und Energiepreise um 20 % zugrunde gelegt, die einen gleichzeitigen Rückgang aller Rohstoff- und Energiepreise unterstellt. Der geschätzte hypothetische Verlust von Cashflows aus Derivaten würde zum 31. Dezember 2010 8 Mio € betragen (Vorjahr: 31 Mio €). Von diesen 8 Mio € würden 0 Mio € direkt in der Gewinn- und Verlustrechnung ausgewiesen und 8 Mio € aufgrund von Hedge Accounting als entsprechende Wertänderung im Eigenkapital (sonstiges Gesamtergebnis (OCI)) gezeigt. Bei der Sensitivität für Warentermin- und Warenaptionsgeschäfte haben wir im geringen Umfang berücksichtigt, dass die Terminpreise nicht so volatil sind wie die Kassapreise. Für die Vertragsmengen im langfristigen Bereich haben wir daher eine etwas geringere Preisänderung unterstellt. Derivative Finanzinstrumente, die im Bayer-Konzern zur Reduzierung des Währungs-, Zins- und Rohstoffpreisänderungsrisikos eingesetzt werden, sind im Konzernabschluss, Anhangangabe [30.3] erläutert.

#### Gesamtbeurteilung der Risiken

Die Risikolandschaft des Bayer-Konzerns hat sich im Berichtszeitraum nicht wesentlich gegenüber dem Vorjahr verändert. Die Einschätzung der Gesamtrisikosituation ist das Ergebnis der konsolidierten Betrachtung aller wesentlichen Einzelrisiken. Aus heutiger Sicht zeichnen sich keine den Fortbestand des Bayer-Konzerns gefährdenden Risiken, auch in Verbindung mit anderen Risiken, ab.

Keine bestandsgefährdenden Risiken

## 11.2 Strategie

### GESCHÄFTSSTRATEGIE

Der Bayer-Konzern fokussiert sich unter seinem Leitbild „Bayer: Science For A Better Life“ auf die wachstumsstarken und innovationsgetriebenen Bereiche Gesundheit, Ernährung und hochwertige Materialien. Die strategische Ausrichtung auf diese attraktiven Märkte und die Konzentration auf unsere Kernkompetenzen ermöglichen uns Investitionen in Wachstumsfelder und innovative Technologien. Wir wollen auch weiterhin führende Rollen einnehmen und die vorhandenen starken Marktpositionen konsequent ausbauen. Zusätzlich setzen wir unsere Anstrengungen zur Kosteneinsparung und Effizienzverbesserung fort, um den Unternehmenswert von Bayer weiter zu steigern. Dabei verfolgen wir eine langfristige Wachstumsstrategie mit dem Bekenntnis zur Nachhaltigkeit unseres Wirtschaftens.

Zur Stärkung der Investitionen in weiteres Wachstum ist geplant, 800 Mio € pro Jahr ab 2013 einzusparen. Davon soll rund die Hälfte reinvestiert werden. Bis Ende 2012 fallen voraussichtlich Einmalkosten in der Größenordnung von 1 Mrd € an – ein Teil davon bereits im 4. Quartal 2010. Im Rahmen dieses Programms sollen bis Ende 2012 per saldo rund 2.000 der weltweit 111.400 Arbeitsplätze entfallen. Einem Abbau in einer Größenordnung von 4.500 Stellen – davon rund 1.700 in Deutschland – steht im selben Zeitraum ein Aufbau von rund 2.500 Arbeitsplätzen – vor allem in den Schwellenländern – gegenüber.



**HEALTHCARE**

Ziel von HealthCare ist es auch weiterhin, in allen Segmenten mit oder über dem Markt zu wachsen. HealthCare soll dabei weiter gestärkt und zu einem weltweit führenden diversifizierten Health-care-Unternehmen ausgebaut werden. So wollen wir langfristig den Umsatz in den Consumer-Health-Bereichen weiter stärken und den Fokus im Segment Pharma noch stärker auf Spezialpharmazeutika legen, insgesamt die Produktivität von Forschung und Entwicklung weiter erhöhen und den Schwellenländern ein noch stärkeres Gewicht beimessen. Dadurch entsteht in den kommenden Jahren ein hoher Investitionsbedarf. Die notwendigen finanziellen Mittel sollen u. a. durch gezielte Umschichtung von Ressourcen sowie durch Effizienz- und Sparmaßnahmen aufgebracht werden. So planen wir, bis zum Ende des Jahres 2012 bei HealthCare rund 1.800 Arbeitsplätze abzubauen – hauptsächlich in unserem Pharmabereich und dem Medical-Care-Geschäft in den USA sowie in den gemeinsam genutzten Verwaltungsfunktionen innerhalb von HealthCare. Im Gegenzug werden wir rund 1.500 neue Arbeitsplätze in den Schwellenländern und für Produkteinführungen schaffen.

Unser umsatzstärkstes Segment – Pharma – fokussiert seine Aktivitäten auf Medikamente, die vorwiegend von Fachärzten verschrieben werden aus den Bereichen Frauengesundheit, Kardiologie, Onkologie, Hämatologie und Diagnostische Bildgebung sowie auf Spezialtherapeutika beispielsweise gegen Multiple Sklerose. Darüber hinaus umfasst unser Portfolio Arzneimittel, die vorwiegend von Allgemeinärzten verschrieben werden.

Wir wollen uns auch in Zukunft verstärkt Krankheiten mit hohem medizinischen Bedarf zuwenden, bei denen große Chancen zur Verbesserung von Diagnose und Therapie bestehen. Ein wichtiger Wachstumsmotor für unser Segment Pharma ist daher Forschung und Entwicklung (F&E). Aus diesem Grund entfällt der größte Teil des F&E-Budgets auf das Segment Pharma. Einlizenzierungen sowie Allianzen und Kooperationen sollen dabei unser Portfolio zusätzlich stärken und unsere eigenen Forschungs- und Entwicklungsaktivitäten ergänzen. Ein Beispiel aus dem Jahr 2010 ist das Forschungs-, Entwicklungs- und Vermarktungsabkommen für neuartige Therapeutika gegen Krebsstammzellen mit dem kalifornischen Unternehmen OncoMed Pharmaceuticals, Inc., USA.

Im Pharmamarkt nehmen wir in vielen Schwellenländern, insbesondere in China und Russland, bereits heute eine führende Stellung ein. Ein wesentliches Element der Pharma-Strategie ist der gezielte Ausbau unseres Geschäfts in den Schwellenländern. So konnten wir z. B. 2010 in China mit der Vermarktung von Betaferon® zur Behandlung der schubförmig verlaufenden Form der Multiplen Sklerose (MS) beginnen.

In unserem Segment Consumer Health konzentrieren wir uns auf verschreibungsfreie Medikamente, Dermatologie-Produkte, Produkte zur Blutzuckermessung, das Medizingerätegeschäft sowie auf den Bereich Tiergesundheit.

Expansions-  
kurs in Wach-  
stumsregionen

Ziel der Division Consumer Care ist es, unsere Position im weltweiten Markt für rezeptfreie Medikamente (OTC) weiter auszubauen. Dabei zielt die Strategie von Consumer Care darauf ab, das Wachstumspotenzial bewährter Marken, wie z. B. Aspirin®, zu nutzen. Wir verfolgen einen klaren Expansionskurs in Wachstumsregionen wie Zentral- und Osteuropa sowie Asien/Pazifik und wollen unser Geschäft in Bereichen mit Wachstumspotenzial weiter stärken. Auch in Zukunft beabsichtigen wir, durch strategisch relevante Übernahmen und Einlizenzierungen externe Wachstumschancen zu verfolgen. Das exklusive Lizenzabkommen mit AstraZeneca PLC über die Vermarktung von Omeprazol als rezeptfreies Arzneimittel zur Behandlung von Sodbrennen unter den Handelsnamen Losec® Pro, Antra® oder Mopralpro® stellt eine derartige Wachstumschance dar. Wir vermarkten das Arzneimittel derzeit in sieben Ländern und weitere Markteinführungen sind geplant.

Strategie der Division Medical Care ist es, die Wettbewerbsposition in den Bereichen Blutzuckermessung, Diabetes-Management und Injektionssysteme für Kontrastmittel sowie Systeme zur Behandlung verengter oder verschlossener Gefäße (Thrombektomie) auszubauen. Darüber hinaus streben wir auch in Zukunft an, unser Portfolio durch Investitionen in zusätzliche Geschäftsfelder und geographische Regionen weiter zu verstärken und uns durch strategische Partnerschaften zu ergänzen. Wir beabsichtigen, neben einer kontinuierlichen Verbesserung unserer Produkte auch Kostensenkungen und einen noch effizienteren Ressourcen-Einsatz zu erreichen. Unser Produktangebot wollen wir durch die Entwicklung neuer Blutzucker-Messsysteme sowie

innovativer Lösungen weiter ausbauen, um Menschen mit Diabetes ein verbessertes Management ihrer Krankheit zu ermöglichen. In unserem Medizingeräte-Geschäft mit Injektionssystemen für Kontrastmittel und Thrombektomie-Systemen setzen wir im Bereich der Radiologie die Entwicklung unserer Basisprodukte fort. Darüber hinaus entwickeln wir neue Software-Produkte und IT-basierte Service-Lösungen zur Verbesserung der Kontrastmitteldosierung sowie der klinischen Arbeitsabläufe in der Verarbeitung von Diagnosedaten und -bildern.

In der Division Animal Health wollen wir unsere starke Position im Haus- und Nutztiermarkt weiter ausbauen. Unsere Strategie zielt darauf, organisches Wachstum durch eine Fokussierung auf Länder und Märkte mit nachhaltigem Umsatzpotenzial und ein erfolgreiches Lebenszyklus-Management vorhandener Kernmarken zu erreichen. Zusätzlich verfolgen wir externe Wachstumschancen durch Akquisitionen und Einlizenzierungen. So haben wir z. B. im Geschäftsjahr 2010 eine innovative, orale Verabreichungstechnologie für Tierarzneimittel von der amerikanischen Firma Piedmont Pharmaceuticals, LLC. erworben. Die Akquisition der neuseeländischen Bomac Group, einem innovativen Hersteller von Tierarzneimitteln vor allem im Nutztierbereich, soll unser Geschäft insbesondere in der Region Asien/Pazifik stärken. Um einen langfristigen Erfolg sicherzustellen, wollen wir verstärkt auf eigene Neuentwicklungen von Produkten setzen.

### CROPSCIENCE

CropScience richtet seine Unternehmensplanung an den langfristigen Trends der Agrarmärkte aus und verfolgt das Ziel, als ein führendes innovationsorientiertes Unternehmen Produkte und kundenorientierte Lösungen für die Erzeugung kostengünstiger und qualitativ hochwertiger Nahrungs- und Futtermittel, Pflanzenfasern und Energiepflanzen anzubieten. Vor dem Hintergrund begrenzter Anbauflächen, des voranschreitenden Klimawandels und einer stetig wachsenden Weltbevölkerung gilt es, die Ernteerträge zu sichern und weiter zu steigern. Wir führen unser Geschäft verantwortungsbewusst im Sinne unseres Bekenntnisses zur nachhaltigen Entwicklung und mit dem Ziel, langfristig Wachstum mit attraktiven Renditen zu erzielen.

Wir sind bestrebt, unseren Kunden umfangreiche Komplettlösungen anzubieten und entwickeln aus diesem Grund aufeinander abgestimmte, nachhaltige Konzepte für einzelne Anbaukulturen in den unterschiedlichen Regionen, die von der Aussaat bis zur Ernte reichen. Unser kundenorientierter Ansatz umfasst dabei sowohl Saatgut, optimierte Pflanzeigenschaften und Pflanzenschutzmittel als auch begleitende Serviceleistungen und Partnerschaften entlang der Lebensmittelwertschöpfungskette.

Innovation ist die Basis für die Wertschöpfung von CropScience. Die Entwicklung neuer Wirkstoffe und Formulierungen sowie von qualitativ hochwertigem Saatgut bietet die Möglichkeit, Produkte mit verbessertem Leistungsspektrum, besserer Umweltverträglichkeit und Anwendersicherheit sowie höherem Mehrwert für den Kunden im Markt zu platzieren und ältere Produkte und Technologien zu ersetzen. Darüber hinaus tragen unsere neuen Produkte wesentlich zum Umsatzwachstum bei und bilden eine wichtige Voraussetzung für die Erzielung attraktiver Margen. Um notwendige Mittel für weitere Investitionen verfügbar zu machen sowie zur Optimierung unserer Kostenstrukturen haben wir im November 2010 ein Maßnahmenprogramm angekündigt. Dieses soll bis 2012 im Wesentlichen umgesetzt sein. Wir planen bis zum Jahr 2012 per saldo rund 600 Stellen abzubauen – überwiegend in Deutschland und den USA. Damit wollen wir CropScience in allen Bereichen noch effizienter gestalten sowie die frei werdenden Mittel in den Bereich BioScience, in die Vermarktung der neuen Produkte und in den Ausbau strategischer Wachstumsmärkte investieren, während wir weiterhin in den gut entwickelten Märkten unsere Position verteidigen wollen.

Innovation als  
Basis für die  
Wertschöpfung

Im Segment Crop Protection will CropScience seine führenden Positionen in den Geschäftsfeldern Herbizide, Fungizide, Insektizide sowie Saatgutbehandlungsmittel durch eine breite regionale Präsenz und innovative, hochwirksame Produkte behaupten und ausbauen. Dieses strategische Ziel versuchen wir durch die stetige Verbesserung unseres Produktmix zu erreichen. Dazu zählen neben der Markteinführung neuer Wirkstoffe und Produkte aus unserer Forschungs- und Entwicklungspipeline und einem erfolgreichen Lebenszyklus-Management auch die Ergänzung durch einen komplementären Forschungsansatz mit den Bereichen Züchtung und Pflanzeigenschaften (Traits) sowie die Verfolgung von Forschungsaktivitäten in neuen Wachstumsbereichen. So arbeiten wir derzeit in zukunftsorientierten Forschungsfeldern an neuen integrierten Methoden und Lösungen in den Bereichen Pflanzengesundheit und -qualität, Stresstoleranz sowie Nährstoffaufnahme, Diagnostik und biologische Schädlingskontrolle.

Unser Bereich Environmental Science greift primär auf die Entwicklungs- und Produktionskapazitäten sowie Wirkstoffinnovationen von Crop Protection zurück. Unsere Strategie ist es, unsere führende Marktstellung weiter auszubauen, indem wir Lösungen entwickeln und vermarkten, die speziell auf die individuellen Bedürfnisse von privaten Konsumenten und professionellen Anwendern zugeschnitten sind. Diese Lösungen sollen ein hohes Maß an Anwenderfreundlichkeit und sicherer Handhabung bieten. Wachstumspotenziale bieten sich für den Bereich Environmental Science vor allem in den Märkten der sogenannten Schwellenländer. Weitere Schwerpunkte der strategischen Ausrichtung sind die konsequente Kundenorientierung mit einem Ausbau der Marketingaktivitäten und die weitere Erschließung spezifischer Marktsegmente wie der Forstwirtschaft oder des industriellen Vegetationsmanagements.

Der Bereich BioScience umfasst die Forschung, Entwicklung und Vermarktung von Saatgut und Technologie, die auf modernen Züchtungsmethoden basieren. Wir wollen die Aktivitäten im Bereich Saatgut und Pflanzeigenschaften weiter ausbauen. So streben wir an, den Umsatz von BioScience bis zum Jahr 2018 auf rund 1,4 MRD € zu steigern und den BioScience-Anteil der Forschungs- und Entwicklungsaufwendungen zu erhöhen. In unserem Saatgutgeschäft haben wir uns bisher auf die vier wachstumsstarken Kernkulturen Baumwolle, Gemüse, Raps und Reis konzentriert. Unsere starken Marktpositionen in diesen Kulturen wollen wir durch die Einführung neuer Sorten und regionale Expansion weiter stärken. Darüber hinaus haben wir bereits im Jahr 2009 die Forschung an verbesserten Getreidesorten begonnen und die Sojabohne als weiteren Forschungsschwerpunkt etabliert. Ziele der BioScience-Forschung sind u. a. eine Erhöhung der Erträge, eine verbesserte Widerstandsfähigkeit gegen ungünstige Witterungsbedingungen und Resistenz gegen bestimmte Schadinsekten. Geforscht wird zudem an Zuckerrohr mit höherem Zuckergehalt. Unsere Technologien vermarkten wir nicht nur im eigenen Saatgut, sondern bieten diese verstärkt auch über Auslizenzierungen für weitere Kulturpflanzen an.

CropScience vermarktet seine Produkte weltweit in mehr als 120 Ländern. Insbesondere in den schnell wachsenden Märkten wie Brasilien, Indien, China, Russland und Osteuropa soll das Geschäft in den kommenden Jahren weiter ausgebaut werden. In diesen Märkten birgt die Landwirtschaft noch großes Potenzial, durch den Einsatz von innovativen Spitzentechnologien die weltweit steigende Nachfrage nach qualitativ hochwertigen Nahrungs- und Futtermitteln decken zu können. Wir wollen in diesem Umfeld unser Geschäft kontinuierlich ausbauen und die Landwirte mit umfassenden Lösungen von der Aussaat bis zur Ernte bei der Produktivitätssteigerung unterstützen.

## MATERIALSCIENCE

Steigerung des Unternehmenswerts als Hauptziel bei MaterialScience

Die Kernelemente der Strategie von MaterialScience sind, die bestehenden Wettbewerbspositionen in den angestammten Märkten zu sichern, das Portfolio mit innovativen neuen Geschäften zu ergänzen und ein profitables, nachhaltiges Wachstum in den Schwellenländern zu erreichen. Damit wollen wir eine hohe Profitabilität sicherstellen und zur langfristigen Steigerung des Unternehmenswerts beitragen. Mit unseren Produkten streben wir an, nachhaltige Lösungen zur Schonung globaler Energie-Ressourcen und unseres Klimas bereitzustellen und einen Beitrag zur Verbesserung der Lebensqualität möglichst vieler Menschen zu leisten. Das überproportionale Wachstum der Märkte in Asien stellt hierbei eine große Herausforderung dar und bietet zugleich ein Geschäftspotenzial, das wir aktiv erschließen wollen. Unsere Investitionspolitik, die an den mittel- und langfristigen Marktentwicklungen ausgerichtet ist, trägt dieser Entwicklung auch weiterhin Rechnung. In unseren Produktionsprozessen setzen wir zudem auf ständige Effizienzsteigerungen.

In der Business Unit Polyurethanes (PUR) beabsichtigen wir, die globale Marktführerschaft bei den Isocyanaten – einem zentralen Vorprodukt vor allem für harten und weichen Schaumstoff – auszubauen. In diesen Bereichen bleibt es unser Ziel, die Kostenführerschaft langfristig zu sichern. Darüber hinaus wollen wir unsere Vertriebskanäle und globalen Kompetenz-Netzwerke ausbauen.

Eine nachhaltige Unterstützung des Wachstums in Asien erwarten wir von einer neuen Großanlage für Toluylen-Diisocyanat (TDI) im chinesischen Shanghai mit einer Jahreskapazität von 250.000 Tonnen, die im 1. Quartal 2011 abschnittsweise mechanisch fertiggestellt wird und im 2. Halbjahr 2011 mit der kommerziellen Produktion beginnen soll. In Europa plant MaterialScience eine neue TDI-Produktionsanlage im Weltmaßstab in Dormagen, die eine genehmigte Kapazität von 300.000

Jahrestonnen haben wird und 2014 in Betrieb gehen soll. In Dormagen soll dann die europäische Herstellung von TDI konzentriert werden. Die innovative, patentierte TDI-Verfahrenstechnologie von MaterialScience, die in beiden Anlagen zum Einsatz kommen wird, setzt global neue Maßstäbe in der effizienten und klimaschonenden Produktion: Im Vergleich zu einer konventionellen Anlage gleicher Größe spart die neue Verfahrenstechnik erhebliche Mengen an Energie und Lösungsmitteln sowie 60.000 Jahrestonnen CO<sub>2</sub>-Emissionen. Sie senkt zudem die Investitionskosten für eine derartige Großanlage um rund 15 %.

In der Produktgruppe der Diphenylmethan-Diisocyanate (MDI) zielen wir auf ein nachhaltiges Wachstum durch den zunehmenden Bedarf an Dämmstoffen in wichtigen Abnehmerbranchen ab. U. a. im Bausektor dürfte die energetische Gebäudeisolierung für Nachfrage sorgen. Um die steigende Nachfrage bedienen zu können, soll die MDI-Produktion am chinesischen Standort Shanghai auf eine Jahreskapazität von 1.000.000 Tonnen ausgeweitet werden.

Als komplementärer Teil unserer Systemlösungen werden die Polyether-Polyole vorrangig das Wachstum im Isocyanatgeschäft stärken. Unsere Systemhäuser unterstützen unser Wachstum bei den Isocyanaten als ein wichtiger Vertriebskanal, um spezifische Kundenbedürfnisse zu bedienen.

Eine hohe Nachfrage auf dem Weltmarkt erlebt derzeit die Business Unit Polycarbonates (PCS). Mehr als 60 % des Polycarbonat-Weltmarktes befinden sich derzeit im asiatischen Raum. Dort und besonders in China besteht ein erheblicher Bedarf. Wir reagieren auf diese Entwicklung mit einem Ausbau der Polycarbonat-Kapazitäten. So soll in Shanghai die Jahreskapazität auf 500.000 Tonnen erhöht werden. Dabei setzen wir auch weiterhin auf die Effizienz unserer World-Scale-Anlagen. Darüber hinaus planen wir die Verlagerung des Hauptsitzes der Business Unit von Leverkusen nach Shanghai, um der wachsenden Bedeutung der Region durch eine marktnahe Geschäftssteuerung Rechnung zu tragen. Gleichzeitig stellen wir als führender Entwicklungs- und Technologiepartner unseren Kunden spezielle Lösungen rund um Polycarbonat-Anwendungen bereit. U. a. wollen wir unser Netzwerk an „Color Competence and Design Center“, in denen die maßgeschneiderte Kunststoff-Aufbereitung erfolgt, ausbauen.

Verlagerung des  
PCS-Hauptsitzes nach  
Shanghai (China)

Bei den Halbfertig-Erzeugnissen für Polycarbonat-Platten bietet die Verwendung von Polycarbonat für LCD-Streuscheiben (Diffusor Sheets) bei großformatigen Flachbildschirmen ein besonderes Marktpotenzial. Zudem sorgt in der Automobilindustrie der Trend zum Leichtbau für eine zunehmende Nachfrage nach Polycarbonat – etwa bei der Automobil-Verscheibung.

Die Business Unit Coatings, Adhesives, Specialties (CAS) strebt an, ihre heutige Marktposition im Bereich der Basis- und modifizierten Isocyanate zu verteidigen und selektiv auszubauen. In Europa und in der Wachstumsregion Asien/Pazifik werden wir daher auf die steigende Nachfrage mit einer Erweiterung unserer Produktionskapazitäten antworten. Zum einen ist in Shanghai ein Ausbau der Produktion von Hexamethylen-Diisocyanat (HDI) geplant; dort soll u. a. eine zusätzliche Anlage mit einer Kapazität von 50.000 Jahrestonnen entstehen. Zum anderen wollen wir in Leverkusen eine Mehrzweckanlage für die Herstellung von HDI und Isophoron-Diisocyanat (IPDI) errichten. Unsere Profitabilität wollen wir zudem durch eine stärkere Fokussierung des Portfolios auf moderne Lack- und Klebstoffsysteme steigern.

Mit Blick auf neue Geschäftsmöglichkeiten entwickeln wir funktionale Folien, Kohlenstoff-Nanoröhrchen und Produkte für medizinische Anwendungen, in denen wir uns als fokussierter Technologieführer positionieren wollen.

Innovative Geschäftsideen generieren wir auch durch eine verstärkte anwendungstechnische Sicht auf unsere Materialien. So können heute etwa mit dem sogenannten „DirectSkinning“-Verfahren hochwertige Spritzgussteile aus PUR und PCS in einem einzigen Prozessschritt gefertigt werden.

Auch in der eigenen Produktion wendet MaterialScience neuartige Verfahren und Prozesse an. Mit der Sauerstoffverzehrkathode etwa lässt sich die Effizienz der Chlorherstellung deutlich steigern. Im Vergleich zu einem Membranverfahren ermöglicht diese Technologie Energieeinsparungen von rund 30 % bei entsprechender indirekter Reduktion des Treibhausgas-Ausstoßes.

**FINANZSTRATEGIE**

Die finanzielle Steuerung des Konzerns erfolgt durch die strategische Management-Holding Bayer AG. Finanzmittel werden in der Regel als globale Ressource zentral beschafft und konzern-intern verteilt. Eine nachhaltige Steigerung des Unternehmenswerts und die Sicherung der Liquidität sowie der Kreditwürdigkeit des Konzerns sind die wichtigsten Ziele des Finanzmanagements. Hierzu tragen die Optimierung der Kapitalstruktur und ein effektives Risikomanagement bei. Die Steuerung von Währungs-, Zins-, Rohstoffpreis- und Ausfallrisiken sorgt dabei für die Reduzierung der Ergebnisvolatilität.

Die von uns beauftragten Ratingagenturen stufen Bayer wie folgt ein:

| Rating            |                  | [Tabelle 3.40] |                  |
|-------------------|------------------|----------------|------------------|
|                   | Langfrist-Rating | Ausblick       | Kurzfrist-Rating |
| Standard & Poor's | A-               | negativ        | A-2              |
| Moody's           | A3               | stabil         | P-2              |

Diese Bonitätseinstufung spiegelt die gute Zahlungsfähigkeit des Unternehmens wider und gewährleistet den Zugang zu einer breiten Investorenbasis für die Finanzierung. Zum Erhalt der finanziellen Flexibilität bleibt das Erreichen und Bewahren von Finanzkennzahlen, die ein Rating in der A-Kategorie unterstützen, unser Ziel. Dementsprechend sollen Cashflows aus dem operativen Geschäft auch zur Reduzierung der Nettofinanzverschuldung beitragen.

Wir verfolgen eine konservative und auf Flexibilität ausgerichtete Verschuldungspolitik mit einem ausgewogen gestalteten Finanzierungsportfolio. Dieses basiert im Kern auf einem Multi-Currency-Euro-Medium-Term-Notes-Programm, syndizierten Kreditfazilitäten, bilateralen Kreditverträgen sowie einem Global-Commercial-Paper-Programm.

Risiken aus dem operativen Geschäft und aus Finanztransaktionen sichern wir durch Finanzderivate ab. Dabei werden grundsätzlich keine Kontrakte ohne zugrundeliegendes Basisgeschäft eingegangen. Grundsätzlich wird durch die Auswahl erstklassiger Handelspartner das Ausfallrisiko reduziert. Sämtliche Transaktionen werden nach konzernweiten Richtlinien vorgenommen und zeitnah überwacht.

Für eine genauere Darstellung unserer Risikomanagementziele und -methoden zur Absicherung aller wichtigen Arten von Transaktionen, die im Rahmen der Bilanzierung von Sicherungsgeschäften erfasst werden, sowie der Preisänderungs-, Ausfall- und Liquiditätsrisiken, jeweils in Bezug auf die Verwendung von Finanzinstrumenten, verweisen wir auf die Erläuterung im Kapitel 11.1 „Chancen- und Risikobericht“.

## 11.3 Konjunkturausblick

**GESAMTWIRTSCHAFT**

Für das Jahr 2011 rechnen wir mit einer Fortsetzung der weltweiten wirtschaftlichen Erholung. Das Tempo der wirtschaftlichen Expansion dürfte sich aber gegenüber dem Vorjahr verlangsamen. In vielen Ländern wird der expansiv ausgerichtete geldpolitische Kurs noch beibehalten werden und somit die Konjunktur stützen; vonseiten der Fiskalpolitik jedoch sind in den meisten Ländern keine Wachstumsimpulse mehr zu erwarten. Es ist zu bedenken, dass erneute Spannungen an den Finanzmärkten sowie kräftige Preissteigerungen bei Erdöl und Rohstoffen die Konjunktorentwicklung im Jahr 2011 gefährden könnten. Diese Abwärtsrisiken sind zum Jahresende 2010 jedoch eher als gering einzuschätzen.



Die Schwellenländer dürften auch im kommenden Jahr starke Impulse für die Konjunkturbelebung geben. Wir rechnen damit, dass sich die Wachstumsraten in den Schwellenländern zwar in den kommenden Monaten verringern, grundsätzlich aber ein hohes Niveau halten werden. Hauptsächlich die großen Schwellenländer, allen voran China, sollten auch 2011 der Wachstumsmotor der Weltwirtschaft bleiben. Für die Industriestaaten erwarten wir, dass sich die wirtschaftliche Erholung bei geringer Dynamik insgesamt fortsetzen wird, jedoch mit einer sehr heterogenen Entwicklung in den einzelnen Ländern. Die Aussichten für die us-Wirtschaft haben sich zum Jahreswechsel 2010/2011 deutlich verbessert. Die zu erwartende Konjunkturdynamik dürfte aber zunächst noch keine durchgreifende Verbesserung des Arbeitsmarktes zur Folge haben. Für Japan sind die Wachstumsperspektiven eher mäßig einzuschätzen. Die Wirtschaft im Euroraum dürfte durch die Schuldenkrise in einigen Ländern auch im Jahr 2011 noch stark belastet sein. Wir rechnen deshalb insgesamt nur mit einem moderaten Wachstum. Dabei sollte sich in den dynamischen Staaten der EU, insbesondere in Deutschland, die Konjunktur durch eine sich erholende Binnennachfrage festigen, während in anderen Euroländern der durch die Staatsschuldenkrise ausgelöste Konsolidierungskurs die Binnennachfrage weiterhin deutlich schwächen wird.

## HEALTHCARE

Für den **Pharmamarkt** erwarten wir im Jahr 2011 ein Wachstum im mittleren einstelligen Bereich. Dieses Wachstum dürfte zunehmend von Ländern wie China, Brasilien, Mexiko, Südkorea, Indien und Russland ausgehen. In den klassischen Märkten wie den USA und den großen europäischen Ländern hingegen rechnen wir aufgrund der Patentabläufe führender Produkte verschiedener Pharmaunternehmen, des Rückgangs an Neueinführungen und des zunehmenden Kostendrucks vonseiten der Gesundheitsinstitutionen lediglich mit einem Wachstum im unteren einstelligen Bereich.

Für das Jahr 2011 erwarten wir für den **Consumer-Care-Markt** wieder ein höheres Marktwachstum als in 2010, ausgelöst hauptsächlich durch die stärkere Marktdurchdringung in Osteuropa und Nordamerika. Der **Diabetes-Care-Markt** dürfte wegen des anhaltenden Preisdrucks in den USA in 2011 nur ein sehr geringes Wachstum aufweisen. Für den **Animal-Health-Markt** erwarten wir hingegen für 2011 erneut ein überdurchschnittliches Wachstum.

## CROPSCIENCE

Für den globalen **Saatgut- und Pflanzenschutzmarkt** sehen wir für das Jahr 2011 eine positive Entwicklung voraus. Basierend auf der Annahme eines normalen Witterungsverlaufs erwarten wir ein robustes Marktwachstum für Agrarchemikalien sowie für Saatgut und Pflanzeigenschaften (Traits). Wir gehen davon aus, dass dieser Zuwachs vorrangig auf positiven Mengeneffekten basieren wird.

Trotz der beobachteten Schwankungen auf den Weltagarmärkten bewegen wir uns aufgrund der deutlich angestiegenen Preise für Agrarrohstoffe in einem zunehmend freundlicheren Marktumfeld. Dies ist, vor dem Hintergrund begrenzter Anbauflächen, hauptsächlich auf eine stetig steigende Nachfrage nach Nahrungs- und Futtermitteln sowie pflanzlichen Energierohstoffen zurückzuführen.

Die insgesamt positiven Rahmenbedingungen dürften die Nachfrage nach höherwertigem Saatgut und damit einhergehend nach Pflanzenschutzmitteln stimulieren und die Landwirte zu einer Intensivierung der Produktion anregen.

Regional betrachtet erwarten wir den größten Impuls in Lateinamerika, wo vor allem der Anbau von Sojabohnen gegenüber dem Vorjahr weiter steigen dürfte. Auch in der Region Asien/Pazifik wird mit einer Ausweitung der Pflanzenproduktion gerechnet. Dies betrifft vor allem Reis, Getreide und Baumwolle, aber auch Spezialkulturen wie Obst und Gemüse. Für die Märkte in den industrialisierten Regionen der nördlichen Hemisphäre prognostizieren wir für 2011 hingegen ein nach wie vor geringes Wachstumspotenzial.

## MATERIALSCIENCE

Für 2011 rechnet MaterialScience mit einer weiteren Festigung der globalen Hauptabnehmerbranchen. Unser besonderes Augenmerk wird sich auf die dynamischen Märkte in Asien (z. B. China, Indien) richten. Wir setzen aber auch auf eine fortschreitende Nachfragebelebung in Nordamerika und Europa.

Die **Automobilindustrie** wird ihren Erholungskurs fortsetzen. 2011 dürfte mit etwa 60 Millionen verkauften Autos ein neuer Rekordwert erzielt werden. Auf nahezu allen Märkten, mit Ausnahme Westeuropas, sollten Nachfrage und Produktion deutlich schneller anziehen als noch vor wenigen Monaten von Experten erwartet. China wird weltweit der wichtigste Produktionsstandort bleiben, die Hersteller planen ihre Kapazitäten auf 17 Millionen Fahrzeuge – mehr als in der gesamten EU – im Jahr 2012 weiter auszubauen.

Für die globale **Elektroindustrie** erwarten wir ein robustes Wachstum, wobei China und Indien auch im Jahr 2011 die wichtigsten Wachstumstreiber bleiben. Jedoch werden auch die Industriestaaten weiterhin von der globalen wirtschaftlichen Erholung profitieren und einen Teil des hohen Auftragsbestandes von 2010 mit in das Jahr 2011 nehmen.

In der **Bauindustrie** rechnen wir für das Jahr 2011 mit einer spürbaren Erholung. Die anhaltend robuste Entwicklung in den aufstrebenden Märkten, gepaart mit der Rückkehr zu positiven Wachstumsraten in den gesättigten Märkten wie Europa und Nordamerika, dürfte insgesamt zu einer erfreulichen globalen Entwicklung führen.

Für die **Möbelindustrie** erwarten wir im kommenden Jahr eine Fortsetzung der bereits 2010 erkennbaren Marktaufhellung. Weiterhin erfreulich dürften sich die großen Wachstumsregionen in Asien entwickeln, die nicht nur von ihrer steigenden Binnennachfrage, sondern auch von der zunehmenden Erholung des internationalen Konsums profitieren werden. Aber auch in den aufstrebenden Märkten in Osteuropa, Nahost und Lateinamerika sollte eine positive Einkommensentwicklung weiteres Absatzpotenzial für die Möbelindustrie erschließen.

## 11.4 Umsatz- und Ergebnisprognose

Auf der Basis der in diesem Bericht beschriebenen Geschäftsentwicklung ergeben sich unter Abwägung der Risiko- und Chancenpotenziale die folgenden Prognosen.

### BAYER-KONZERN

Der Bayer-Konzern blickt zuversichtlich in das Jahr 2011. In allen Teilkonzernen erwarten wir – eine stetige wirtschaftliche Entwicklung vorausgesetzt – für 2011 Zuwächse bei Umsatz und EBITDA vor Sondereinflüssen. Für das Gesamtjahr planen wir auf währungs- und portfoliobereinigter Basis einen Umsatzanstieg von 4-6 %. Unter den getroffenen Währungsannahmen, z. B. eines Euro-US-Dollar-Kurses von 1,40 (Durchschnitt 2010: 1,32), entspricht dies einem Konzernumsatz von 35 - 36 MRD €.

Wir planen, das EBITDA vor Sondereinflüssen in Richtung 7,5 MRD € zu steigern. Für das bereinigte Ergebnis je Aktie (Core EPS; zur Berechnung siehe Kapitel 4.3) erwarten wir eine Verbesserung um etwa 10 %. Wir rechnen mit Sonderaufwendungen aus laufenden Restrukturierungsprogrammen in der Größenordnung von 0,5 MRD €.

Für Sachanlageinvestitionen haben wir ein Budget von 1,5 MRD € vorgesehen und für Investitionen in immaterielle Vermögenswerte 0,3 MRD €. Die planmäßigen Abschreibungen beziffern wir auf etwa 2,5 MRD €, davon 1,3 MRD € auf immaterielle Vermögenswerte. Für Forschung und Entwicklung erwarten wir Aufwendungen auf dem Rekordniveau des Jahres 2010 (3,1 MRD €).

Unsere Zielsetzung für 2012 können wir bestätigen: Für den Bayer-Konzern gehen wir – bei einem weiterhin positiven wirtschaftlichen Umfeld – nach wie vor von einem währungs- und portfoliobereinigten Umsatzwachstum von ca. 5 % aus. Wir planen für 2012 ein EBITDA vor Sondereinflüssen in der Größenordnung von 8 MRD € und ein bereinigtes Ergebnis pro Aktie von etwa 5 €.

## HEALTHCARE

Insgesamt plant HealthCare für 2011 ein währungs- und portfoliobereinigtes Umsatzplus im unteren bis mittleren einstelligen Prozentbereich und eine leichte Verbesserung des EBITDA vor Sondereinflüssen.

Im Segment Pharma erwarten wir, im Jahr 2011 noch nicht wieder mit dem Markt zu wachsen. Den Umsatz planen wir währungs- und portfoliobereinigt im unteren bis mittleren einstelligen Prozentbereich zu steigern und dabei die EBITDA-Marge vor Sondereinflüssen zu verbessern.

Im Segment Consumer Health rechnen wir mit einem währungs- und portfoliobereinigten Wachstum über dem Markt. Für Umsatz und EBITDA vor Sondereinflüssen erwarten wir ein Wachstum im mittleren einstelligen Prozentbereich.

Im Jahr 2012 wollen wir insbesondere bei Pharma durch unsere neuen Produkte an Wachstumsdynamik gewinnen und in beiden HealthCare-Segmenten das EBITDA vor Sondereinflüssen verbessern.

## CROPSCIENCE

Nach einem schwierigen Jahr 2010 gehen wir für das laufende Jahr von besseren Marktbedingungen für CropScience aus und sind somit optimistisch für das Jahr 2011. Bei CropScience erwarten wir in beiden Segmenten, den Umsatz währungs- und portfoliobereinigt zu verbessern und insgesamt zumindest im mittleren einstelligen Prozentbereich zu wachsen. Wir wollen unsere Marktposition bei Environmental Science/BioScience weiter stärken und unsere Position bei Crop Protection mindestens halten. Das EBITDA vor Sondereinflüssen planen wir überproportional zu steigern.

Auch 2012 wollen wir zumindest mit dem Markt wachsen und das um Sondereinflüsse bereinigte EBITDA weiter verbessern.

## MATERIALSCIENCE

Für unser MaterialScience-Geschäft gehen wir von einer weiteren konjunkturellen Erholung aus. Vor diesem Hintergrund planen wir für 2011, den währungs- und portfoliobereinigten Umsatz im mittleren einstelligen Prozentbereich und das EBITDA vor Sondereinflüssen im Vergleich dazu überproportional zu steigern.

Im 1. Quartal 2011 erwarten wir gegenüber dem 4. Quartal 2010 währungs- und portfoliobereinigte Umsätze in gleicher Größenordnung. Das EBITDA vor Sondereinflüssen im 1. Quartal 2011 erwarten wir trotz gestiegener Rohstoffkosten über dem des 4. Quartals 2010.

2012 planen wir – ein weiterhin positives Marktumfeld vorausgesetzt – den Umsatz und das um Sondereinflüsse bereinigte EBITDA weiter zu erhöhen.

## BAYER AG

Als Obergesellschaft des Konzerns erhält die Bayer AG Erträge insbesondere von ihren Beteiligungsgesellschaften. Durch die Anbindung der großen operativen Tochtergesellschaften in Deutschland über Gewinnabführungsverträge werden deren Ergebnisse direkt bei der Bayer AG vereinnahmt. Die zuvor beschriebene positive Erwartung in Bezug auf die Geschäftsentwicklung im Konzern dürfte sich auch auf das Ergebnis der Bayer AG auswirken. Zudem sollte sich das Zinsergebnis aufgrund der gesunkenen Finanzverschuldung weiter verbessern. Wir gehen somit davon aus, auch zukünftig einen Jahresüberschuss zu erzielen, der eine angemessene Dividendenausschüttung zulässt.

# Konzernabschluss

|                                                                                |            |                                                                                   |     |
|--------------------------------------------------------------------------------|------------|-----------------------------------------------------------------------------------|-----|
| <b>Gewinn- und Verlustrechnung</b>                                             |            | <b>Erläuterungen zur Bilanz</b>                                                   |     |
| Bayer-Konzern.....                                                             | 142        | 17. Geschäfts- oder Firmenwerte sowie sonstige immaterielle Vermögenswerte.....   | 196 |
| Gesamtergebnisrechnung Bayer-Konzern .....                                     | 143        | 18. Sachanlagen .....                                                             | 203 |
| Bilanz Bayer-Konzern .....                                                     | 144        | 19. Anteile an at-equity bewerteten Beteiligungen.....                            | 206 |
| Kapitalflussrechnung Bayer-Konzern.....                                        | 145        | 20. Sonstige finanzielle Vermögenswerte .....                                     | 207 |
| <b>Eigenkapitalveränderungsrechnung</b>                                        |            | 21. Vorräte.....                                                                  | 208 |
| Bayer-Konzern.....                                                             | 146        | 22. Forderungen aus Lieferungen und Leistungen .....                              | 208 |
| <b>Anhang Bayer-Konzern .....</b>                                              | <b>148</b> | 23. Sonstige Forderungen .....                                                    | 209 |
| 1. Kennzahlen nach Segmenten und Regionen.....                                 | 148        | 24. Eigenkapital .....                                                            | 210 |
| 2. Allgemeine Angaben .....                                                    | 150        | 25. Pensionsrückstellungen und ähnliche Verpflichtungen .....                     | 213 |
| 3. Auswirkungen von neuen Rechnungslegungsstandards .....                      | 150        | 26. Andere Rückstellungen .....                                                   | 222 |
| 4. Grundlagen und Methoden sowie Unsicherheiten aufgrund von Schätzungen ..... | 153        | 26.1 Steuern.....                                                                 | 223 |
| 5. Erläuterungen zur Segmentberichterstattung.....                             | 169        | 26.2 Umweltschutz.....                                                            | 223 |
| 6. Konsolidierungskreis und Beteiligungen.....                                 | 172        | 26.3 Restrukturierungen.....                                                      | 223 |
| 6.1 Entwicklung des Konsolidierungskreises .....                               | 172        | 26.4 Kunden- und Lieferantenverkehr.....                                          | 224 |
| 6.2 Akquisitionen und sonstige Erwerbe .....                                   | 183        | 26.5 Rechtsstreitigkeiten .....                                                   | 224 |
| 6.3 Desinvestitionen.....                                                      | 186        | 26.6 Personal.....                                                                | 224 |
| <b>Erläuterungen zur Gewinn- und Verlustrechnung</b>                           |            | 26.7 Sonstige .....                                                               | 226 |
| 7. Umsatzerlöse .....                                                          | 187        | 27. Finanzverbindlichkeiten.....                                                  | 227 |
| 8. Vertriebskosten .....                                                       | 187        | 28. Verbindlichkeiten aus Lieferungen und Leistungen .....                        | 230 |
| 9. Forschungs- und Entwicklungskosten .....                                    | 187        | 29. Sonstige Verbindlichkeiten .....                                              | 230 |
| 10. Sonstige betriebliche Erträge.....                                         | 188        | 30. Berichterstattung zu Finanzinstrumenten.....                                  | 231 |
| 11. Sonstige betriebliche Aufwendungen .....                                   | 188        | 30.1 Informationen zu Finanzinstrumenten nach Kategorien .....                    | 231 |
| 12. Personalaufwand und Mitarbeiter .....                                      | 189        | 30.2 Fälligkeitsanalyse .....                                                     | 235 |
| 13. Finanzergebnis .....                                                       | 190        | 30.3 Informationen zu Derivaten .....                                             | 238 |
| 13.1 Beteiligungsergebnis.....                                                 | 190        | 31. Haftungsverhältnisse und sonstige finanzielle Verpflichtungen .....           | 240 |
| 13.2 Zinsergebnis .....                                                        | 191        | 32. Rechtliche Risiken.....                                                       | 241 |
| 13.3 Sonstige finanzielle Aufwendungen und Erträge .....                       | 191        | <b>Erläuterungen zur Kapitalflussrechnung</b>                                     |     |
| 14. Ertragsteuern .....                                                        | 192        | 33. Zu-/Abfluss aus operativer Geschäftstätigkeit .....                           | 248 |
| 15. Auf andere Gesellschafter entfallendes Ergebnis .....                      | 195        | 34. Zu-/Abfluss aus investiver Tätigkeit .....                                    | 248 |
| 16. Ergebnis je Aktie .....                                                    | 195        | 35. Zu-/Abfluss aus Finanzierungstätigkeit .....                                  | 249 |
|                                                                                |            | 36. Zahlungsmittel und Zahlungsmitteläquivalente .....                            | 249 |
|                                                                                |            | <b>Sonstige Erläuterungen</b>                                                     |     |
|                                                                                |            | 37. Honorare des Abschlussprüfers .....                                           | 250 |
|                                                                                |            | 38. Beziehungen zu nahe stehenden Unternehmen und Personen.....                   | 250 |
|                                                                                |            | 39. Gesamtbezüge des Vorstands und des Aufsichtsrats sowie gewährte Kredite ..... | 251 |

# Gewinn- und Verlustrechnung Bayer-Konzern

[Tabelle 4.1]

|                                                                          | Anhang | 2009          | 2010          |
|--------------------------------------------------------------------------|--------|---------------|---------------|
|                                                                          |        | in Mio €      | in Mio €      |
| <b>Umsatzerlöse</b>                                                      | [7]    | <b>31.168</b> | <b>35.088</b> |
| Herstellungskosten                                                       |        | -15.135       | -17.103       |
| <b>Bruttoergebnis vom Umsatz</b>                                         |        | <b>16.033</b> | <b>17.985</b> |
| Vertriebskosten                                                          | [8]    | -7.923        | -8.803        |
| Forschungs- und Entwicklungskosten                                       | [9]    | -2.746        | -3.053        |
| Allgemeine Verwaltungskosten                                             |        | -1.623        | -1.647        |
| Sonstige betriebliche Erträge                                            | [10]   | 922           | 714           |
| Sonstige betriebliche Aufwendungen                                       | [11]   | -1.657        | -2.466        |
| <b>Operatives Ergebnis (EBIT)</b>                                        |        | <b>3.006</b>  | <b>2.730</b>  |
| Ergebnis aus at-equity bewerteten Beteiligungen                          | [13.1] | -48           | -56           |
| Finanzielle Erträge                                                      |        | 789           | 384           |
| Finanzielle Aufwendungen                                                 |        | -1.877        | -1.337        |
| <b>Finanzergebnis</b>                                                    | [13]   | <b>-1.136</b> | <b>-1.009</b> |
| <b>Ergebnis vor Ertragsteuern*</b>                                       |        | <b>1.870</b>  | <b>1.721</b>  |
| Ertragsteuern                                                            | [14]   | -511          | -411          |
| <b>Ergebnis nach Steuern</b>                                             |        | <b>1.359</b>  | <b>1.310</b>  |
| davon auf andere Gesellschafter entfallend                               | [15]   | -             | 9             |
| <b>davon auf die Aktionäre der Bayer AG entfallend (Konzernergebnis)</b> |        | <b>1.359</b>  | <b>1.301</b>  |
|                                                                          |        | in €          | in €          |
| <b>Ergebnis je Aktie</b>                                                 | [16]   |               |               |
| unverwässert**                                                           |        | 1,70          | 1,57          |
| verwässert**                                                             |        | 1,70          | 1,57          |

\* Entspricht dem Ergebnis der gewöhnlichen Geschäftstätigkeit.

\*\* Die sich bei der Wandlung der Pflichtwandelanleihe ergebenden Stammaktien wurden seit der Ausgabe der Pflichtwandelanleihe wie ausgegebene Aktien behandelt.



# Gesamtergebnisrechnung Bayer-Konzern

[Tabelle 4.2]

|                                                                                                                                                                                                                        | Anhang | 2009         | 2010         |
|------------------------------------------------------------------------------------------------------------------------------------------------------------------------------------------------------------------------|--------|--------------|--------------|
|                                                                                                                                                                                                                        |        | in Mio €     | in Mio €     |
| <b>Ergebnis nach Steuern</b>                                                                                                                                                                                           |        | <b>1.359</b> | <b>1.310</b> |
| davon auf andere Gesellschafter entfallend                                                                                                                                                                             | [15]   | -            | 9            |
| davon auf die Aktionäre der Bayer AG entfallend                                                                                                                                                                        |        | 1.359        | 1.301        |
| Veränderung des beizulegenden Zeitwerts von zu Sicherungszwecken eingesetzten Derivaten                                                                                                                                | [30.3] | 89           | -108         |
| In die Gewinn- und Verlustrechnung umgebuchter Betrag                                                                                                                                                                  |        | 10           | 18           |
| Ertragsteuern                                                                                                                                                                                                          | [14]   | -38          | 27           |
| <b>Veränderung des im Eigenkapital erfassten Betrags (Cashflow-Hedges)</b>                                                                                                                                             |        | <b>61</b>    | <b>-63</b>   |
| Veränderung des beizulegenden Zeitwerts von zur Veräußerung verfügbaren finanziellen Vermögenswerten                                                                                                                   | [20]   | 11           | 8            |
| In die Gewinn- und Verlustrechnung umgebuchter Betrag                                                                                                                                                                  |        | -            | -2           |
| Ertragsteuern                                                                                                                                                                                                          | [14]   | -2           | -3           |
| <b>Veränderung des im Eigenkapital erfassten Betrags (Zur Veräußerung verfügbare finanzielle Vermögenswerte)</b>                                                                                                       |        | <b>9</b>     | <b>3</b>     |
| Veränderung der versicherungsmathematischen Gewinne (+)/ Verluste (-) aus leistungsorientierten Pensionszusagen und ähnlichen Verpflichtungen sowie Effekte aus der Berücksichtigung der Obergrenze für Vermögenswerte | [25]   | -437         | -966         |
| Ertragsteuern                                                                                                                                                                                                          | [14]   | 117          | 258          |
| <b>Veränderung des im Eigenkapital erfassten Betrags (Versicherungsmathematische Gewinne (+)/Verluste (-), Berücksichtigung der Obergrenze für Vermögenswerte)</b>                                                     |        | <b>-320</b>  | <b>-708</b>  |
| Veränderung des Ausgleichspostens aus der Währungsumrechnung ausländischer Tochtergesellschaften                                                                                                                       |        | 284          | 627          |
| In die Gewinn- und Verlustrechnung umgebuchter Betrag                                                                                                                                                                  |        | -            | 3            |
| <b>Veränderung des im Eigenkapital erfassten Betrags (Währungsumrechnung)</b>                                                                                                                                          |        | <b>284</b>   | <b>630</b>   |
| Veränderung der als Verbindlichkeit ausgewiesenen Minderheitsanteile an Personengesellschaften in Bezug auf im Eigenkapital erfasste Wertänderungen                                                                    | [29]   | 15           | 18           |
| Veränderung aus Konzernkreisänderungen                                                                                                                                                                                 |        | -1           | -            |
| <b>Summe der im Eigenkapital erfassten Wertänderungen</b>                                                                                                                                                              |        | <b>48</b>    | <b>-120</b>  |
| davon auf andere Gesellschafter entfallend                                                                                                                                                                             |        | 2            | 6            |
| davon auf die Aktionäre der Bayer AG entfallend                                                                                                                                                                        |        | 46           | -126         |
| <b>Summe aus Ergebnis nach Steuern und der im Eigenkapital erfassten Wertänderungen</b>                                                                                                                                |        | <b>1.407</b> | <b>1.190</b> |
| davon auf andere Gesellschafter entfallend                                                                                                                                                                             |        | 2            | 15           |
| davon auf die Aktionäre der Bayer AG entfallend                                                                                                                                                                        |        | 1.405        | 1.175        |

# Bilanz Bayer-Konzern

[Tabelle 4.3]

|                                                                     | Anhang | 31.12.2009    | 31.12.2010    |
|---------------------------------------------------------------------|--------|---------------|---------------|
|                                                                     |        | in Mio €      | in Mio €      |
| <b>Langfristige Vermögenswerte</b>                                  |        |               |               |
| Geschäfts- oder Firmenwerte                                         | [17]   | 8.704         | 9.002         |
| Sonstige immaterielle Vermögenswerte                                | [17]   | 12.842        | 11.161        |
| Sachanlagen                                                         | [18]   | 9.409         | 9.835         |
| Anteile an at-equity bewerteten Beteiligungen                       | [19]   | 395           | 354           |
| Sonstige finanzielle Vermögenswerte                                 | [20]   | 1.200         | 1.164         |
| Sonstige Forderungen                                                | [23]   | 549           | 498           |
| Latente Steuern                                                     | [14]   | 950           | 1.174         |
|                                                                     |        | <b>34.049</b> | <b>33.188</b> |
| <b>Kurzfristige Vermögenswerte</b>                                  |        |               |               |
| Vorräte                                                             | [21]   | 6.091         | 6.104         |
| Forderungen aus Lieferungen und Leistungen                          | [22]   | 6.106         | 6.668         |
| Sonstige finanzielle Vermögenswerte                                 | [20]   | 367           | 1.008         |
| Sonstige Forderungen                                                | [23]   | 1.357         | 1.336         |
| Ertragsteuererstattungsansprüche                                    |        | 347           | 362           |
| Zahlungsmittel und Zahlungsmitteläquivalente                        | [36]   | 2.725         | 2.840         |
|                                                                     |        | <b>16.993</b> | <b>18.318</b> |
| <b>Gesamtvermögen</b>                                               |        | <b>51.042</b> | <b>51.506</b> |
| <b>Eigenkapital</b>                                                 | [24]   |               |               |
| Gezeichnetes Kapital der Bayer AG                                   |        | 2.117         | 2.117         |
| Kapitalrücklage der Bayer AG                                        |        | 6.167         | 6.167         |
| Sonstige Rücklagen                                                  |        | 10.613        | 10.549        |
| <b>Aktionären der Bayer AG zurechenbarer Anteil am Eigenkapital</b> |        | <b>18.897</b> | <b>18.833</b> |
| Anteile anderer Gesellschafter                                      |        | 54            | 63            |
|                                                                     |        | <b>18.951</b> | <b>18.896</b> |
| <b>Langfristiges Fremdkapital</b>                                   |        |               |               |
| Pensionsrückstellungen und ähnliche Verpflichtungen                 | [25]   | 6.517         | 7.305         |
| Andere Rückstellungen                                               | [26]   | 1.516         | 1.478         |
| Finanzverbindlichkeiten                                             | [27]   | 11.460        | 9.944         |
| Sonstige Verbindlichkeiten                                          | [29]   | 415           | 471           |
| Latente Steuern                                                     | [14]   | 3.210         | 2.577         |
|                                                                     |        | <b>23.118</b> | <b>21.775</b> |
| <b>Kurzfristiges Fremdkapital</b>                                   |        |               |               |
| Andere Rückstellungen                                               | [26]   | 3.089         | 3.870         |
| Finanzverbindlichkeiten                                             | [27]   | 1.489         | 1.889         |
| Verbindlichkeiten aus Lieferungen und Leistungen                    | [28]   | 2.735         | 3.497         |
| Ertragsteuerverbindlichkeiten                                       | [26.1] | 93            | 62            |
| Sonstige Verbindlichkeiten                                          | [29]   | 1.567         | 1.517         |
|                                                                     |        | <b>8.973</b>  | <b>10.835</b> |
| <b>Gesamtkapital</b>                                                |        | <b>51.042</b> | <b>51.506</b> |

Bilanz 01.01.2010 angepasst, siehe Anhangangabe [4]

# Kapitalflussrechnung Bayer-Konzern

[Tabelle 4.4]

|                                                                            | Anhang | 2009          | 2010          |
|----------------------------------------------------------------------------|--------|---------------|---------------|
|                                                                            |        | in Mio €      | in Mio €      |
| Ergebnis nach Steuern                                                      |        | 1.359         | 1.310         |
| Ertragsteuern                                                              |        | 511           | 411           |
| Finanzergebnis                                                             |        | 1.136         | 1.009         |
| Gezahlte bzw. geschuldete Ertragsteuern                                    |        | -636          | -897          |
| Abschreibungen auf Sachanlagen und immaterielle Vermögenswerte             |        | 2.809         | 3.556         |
| Veränderung Pensionsrückstellungen                                         |        | -366          | -590          |
| Gewinne (-)/Verluste (+) aus dem Abgang von langfristigen Vermögenswerten  |        | -155          | -28           |
| <b>Brutto-Cashflow</b>                                                     |        | <b>4.658</b>  | <b>4.771</b>  |
| Zu-/Abnahme Vorräte                                                        |        | 604           | 211           |
| Zu-/Abnahme Forderungen aus Lieferungen und Leistungen                     |        | -28           | -153          |
| Zu-/Abnahme Verbindlichkeiten aus Lieferungen und Leistungen               |        | 235           | 566           |
| Veränderung übriges Nettovermögen/Sonstige nicht zahlungswirksame Vorgänge |        | -94           | 378           |
| <b>Zu-/Abfluss aus operativer Geschäftstätigkeit (Netto-Cashflow)</b>      | [33]   | <b>5.375</b>  | <b>5.773</b>  |
| Ausgaben für Sachanlagen und immaterielle Vermögenswerte                   |        | -1.575        | -1.514        |
| Einnahmen aus dem Verkauf von Sachanlagen und anderen Vermögenswerten      |        | 98            | 61            |
| Einnahmen/Ausgaben aus Desinvestitionen                                    |        | 70            | 101           |
| Einnahmen/Ausgaben aus langfristigen finanziellen Vermögenswerten          |        | 169           | -461          |
| Ausgaben für Akquisitionen abzüglich übernommener Zahlungsmittel           |        | -308          | -31           |
| Zins- und Dividendeneinnahmen                                              |        | 56            | 53            |
| Einnahmen/Ausgaben aus kurzfristigen finanziellen Vermögenswerten          |        | -11           | -623          |
| <b>Zu-/Abfluss aus investiver Tätigkeit</b>                                | [34]   | <b>-1.501</b> | <b>-2.414</b> |
| Gezahlte Dividenden und Kapitalertragsteuer                                |        | -973          | -1.160        |
| Kreditaufnahme                                                             |        | 2.798         | 965           |
| Schuldentilgung                                                            |        | -4.240        | -2.509        |
| Zinsausgaben einschließlich Zinssicherungsgeschäften                       |        | -1.206        | -915          |
| Zinseinnahmen aus Zinssicherungsgeschäften                                 |        | 421           | 398           |
| Ausgaben für den Erwerb von zusätzlichen Anteilen an Tochterunternehmen    |        | -46           | -9            |
| <b>Zu-/Abfluss aus Finanzierungstätigkeit</b>                              | [35]   | <b>-3.246</b> | <b>-3.230</b> |
| <b>Zahlungswirksame Veränderung aus Geschäftstätigkeit</b>                 |        | <b>628</b>    | <b>129</b>    |
| <b>Zahlungsmittel und Zahlungsmitteläquivalente am 1.1.</b>                |        | <b>2.094</b>  | <b>2.725</b>  |
| Veränderung aus Konzernkreisänderungen                                     |        | 3             | -             |
| Veränderung aus Wechselkursänderungen                                      |        | -             | -14           |
| <b>Zahlungsmittel und Zahlungsmitteläquivalente am 31.12.</b>              | [36]   | <b>2.725</b>  | <b>2.840</b>  |

Vorjahreswerte angepasst

# Eigenkapitalveränderungsrechnung

## Bayer-Konzern

|                                                  | Gezeichnetes<br>Kapital der<br>Bayer AG | Kapitalrücklage<br>der Bayer AG | Gewinnrücklagen<br>inkl. Konzern-<br>ergebnis | Währungs-<br>änderungen |  |
|--------------------------------------------------|-----------------------------------------|---------------------------------|-----------------------------------------------|-------------------------|--|
|                                                  | in Mio €                                | in Mio €                        | in Mio €                                      | in Mio €                |  |
| <b>31.12.2008</b>                                | <b>1.957</b>                            | <b>4.028</b>                    | <b>13.014</b>                                 | <b>-2.733</b>           |  |
| Eigenkapital-Transaktionen mit<br>Anteilseignern |                                         |                                 |                                               |                         |  |
| Kapitalerhöhung/-herabsetzung                    | 160                                     | 2.139                           |                                               |                         |  |
| Dividendenausschüttung                           |                                         |                                 | -1.070                                        |                         |  |
| Sonstige Veränderungen                           |                                         |                                 | 6                                             |                         |  |
| Erfolgsneutral erfasste<br>Veränderungen***      |                                         |                                 | -306                                          | 282                     |  |
| <b>Konzernergebnis 2009</b>                      |                                         |                                 | <b>1.359</b>                                  |                         |  |
| <b>31.12.2009</b>                                | <b>2.117</b>                            | <b>6.167</b>                    | <b>13.003</b>                                 | <b>-2.451</b>           |  |
| Anpassung**                                      |                                         |                                 | -77                                           |                         |  |
| Eigenkapital-Transaktionen mit<br>Anteilseignern |                                         |                                 |                                               |                         |  |
| Kapitalerhöhung/-herabsetzung                    |                                         |                                 |                                               |                         |  |
| Dividendenausschüttung                           |                                         |                                 | -1.158                                        |                         |  |
| Sonstige Veränderungen                           |                                         |                                 | -34                                           |                         |  |
| Erfolgsneutral erfasste<br>Veränderungen***      |                                         |                                 | -690                                          | 624                     |  |
| <b>Konzernergebnis 2010</b>                      |                                         |                                 | <b>1.301</b>                                  |                         |  |
| <b>31.12.2010</b>                                | <b>2.117</b>                            | <b>6.167</b>                    | <b>12.345</b>                                 | <b>-1.827</b>           |  |

\* OCI (Other Comprehensive Income) = sonstiges Gesamtergebnis

\*\* Eigenkapital 01.01.2010 angepasst, siehe Anhangangabe [4]

\*\*\* nach Steuern

[Tabelle 4.5]

| Kumuliertes übriges Comprehensive Income |                 |                       |                                                              |                                                           |              |
|------------------------------------------|-----------------|-----------------------|--------------------------------------------------------------|-----------------------------------------------------------|--------------|
| Marktbewertung Wertpapiere               | Cashflow-Hedges | Neubewertungsrücklage | Aktionären der Bayer AG zurechenbarer Anteil am Eigenkapital | Anteile anderer Gesellschafter am Eigenkapital inkl. OCI* | Eigenkapital |
| in Mio €                                 | in Mio €        | in Mio €              | in Mio €                                                     | in Mio €                                                  | in Mio €     |
| 10                                       | -71             | 58                    | 16.263                                                       | 77                                                        | 16.340       |
|                                          |                 |                       | 2.299                                                        |                                                           | 2.299        |
|                                          |                 |                       | -1.070                                                       | -4                                                        | -1.074       |
|                                          |                 | -6                    | -                                                            | -21                                                       | -21          |
| 9                                        | 61              |                       | 46                                                           | 2                                                         | 48           |
|                                          |                 |                       | 1.359                                                        |                                                           | 1.359        |
| 19                                       | -10             | 52                    | 18.897                                                       | 54                                                        | 18.951       |
|                                          |                 |                       | -77                                                          |                                                           | -77          |
|                                          |                 |                       | -1.158                                                       | -3                                                        | -1.161       |
|                                          | 35              | -5                    | -4                                                           | -3                                                        | -7           |
| 3                                        | -63             |                       | -126                                                         | 6                                                         | -120         |
|                                          |                 |                       | 1.301                                                        | 9                                                         | 1.310        |
| 22                                       | -38             | 47                    | 18.833                                                       | 63                                                        | 18.896       |



# Anhang Bayer-Konzern

## 1. Kennzahlen nach Segmenten und Regionen

### Kennzahlen nach Segmenten

|                                                        | HealthCare |          |                 |          |  |
|--------------------------------------------------------|------------|----------|-----------------|----------|--|
|                                                        | Pharma     |          | Consumer Health |          |  |
|                                                        | 2009       | 2010     | 2009            | 2010     |  |
|                                                        | in Mio €   | in Mio € | in Mio €        | in Mio € |  |
| Außenumsatzerlöse                                      | 10.467     | 10.908   | 5.521           | 6.005    |  |
| Veränderung                                            | 4,4 %      | 4,2 %    | 2,7 %           | 8,8 %    |  |
| Veränderung währungsbereinigt                          | 3,3 %      | -0,2 %   | 3,2 %           | 3,5 %    |  |
| Intersegment-Umsatzerlöse                              | 149        | 71       | 17              | 8        |  |
| Umsatzerlöse                                           | 10.616     | 10.979   | 5.538           | 6.013    |  |
| Sonstige betriebliche Erträge                          | 400        | 226      | 41              | 55       |  |
| Operatives Ergebnis (EBIT)                             | 1.696      | 884      | 944             | 977      |  |
| EBIT vor Sondereinflüssen                              | 2.018      | 2.024    | 994             | 1.006    |  |
| EBITDA vor Sondereinflüssen                            | 3.193      | 3.100    | 1.275           | 1.305    |  |
| Brutto-Cashflow                                        | 2.186      | 1.983    | 967             | 965      |  |
| Investitionswert                                       | 17.379     | 16.654   | 5.870           | 6.140    |  |
| CFRoI                                                  | 12,6 %     | 11,7 %   | 16,5 %          | 16,1 %   |  |
| Netto-Cashflow                                         | 2.280      | 2.272    | 1.151           | 1.048    |  |
| Equity-Ergebnis                                        | -          | -        | -               | -        |  |
| Equity-Buchwerte                                       | -          | -        | -               | -        |  |
| Vermögen                                               | 20.844     | 19.365   | 6.432           | 6.586    |  |
| Investitionen                                          | 428        | 413      | 137             | 192      |  |
| Zugänge langfristiger Vermögenswerte aus Akquisitionen | 5          | -        | 55              | -        |  |
| Abschreibungen                                         | 1.216      | 1.950    | 292             | 305      |  |
| davon außerplanmäßige Abschreibungen                   | 48         | 905      | 36              | 44       |  |
| Verbindlichkeiten                                      | 3.839      | 4.314    | 1.554           | 1.774    |  |
| Forschungs- und Entwicklungskosten                     | 1.572      | 1.751    | 275             | 315      |  |
| Mitarbeiter (Stand 31.12.)                             | 38.000     | 38.000   | 17.800          | 17.700   |  |
| Vorjahreswerte angepasst                               |            |          |                 |          |  |

### Kennzahlen nach Regionen

|                                             | Europa   |          | Nordamerika |          |  |
|---------------------------------------------|----------|----------|-------------|----------|--|
|                                             | 2009     | 2010     | 2009        | 2010     |  |
|                                             | in Mio € | in Mio € | in Mio €    | in Mio € |  |
| Außenumsatzerlöse nach Verbleib             | 12.968   | 13.751   | 7.705       | 8.228    |  |
| Veränderung                                 | -10,9 %  | 6,0 %    | -4,0 %      | 6,8 %    |  |
| Veränderung währungsbereinigt               | -8,8 %   | 5,0 %    | -8,1 %      | 0,7 %    |  |
| Außenumsatzerlöse – Sitz der Gesellschaften | 14.189   | 15.303   | 7.638       | 8.241    |  |
| Veränderung                                 | -10,5 %  | 7,9 %    | -4,3 %      | 7,9 %    |  |
| Veränderung währungsbereinigt               | -8,6 %   | 6,9 %    | -8,6 %      | 1,6 %    |  |
| Interregionen-Umsatzerlöse                  | 5.756    | 6.524    | 2.372       | 3.015    |  |
| Sonstige betriebliche Erträge               | 545      | 350      | 193         | 75       |  |
| Operatives Ergebnis (EBIT)                  | 1.981    | 1.410    | 583         | 337      |  |
| Vermögen                                    | 32.450   | 30.224   | 8.934       | 9.778    |  |
| Investitionen                               | 894      | 840      | 295         | 319      |  |
| Abschreibungen                              | 1.943    | 2.677    | 460         | 427      |  |
| Verbindlichkeiten                           | 19.906   | 19.649   | 4.449       | 5.321    |  |
| Forschungs- und Entwicklungskosten          | 2.080    | 2.246    | 507         | 612      |  |
| Mitarbeiter (Stand 31.12.)                  | 54.600   | 54.300   | 16.600      | 16.400   |  |
| Vorjahreswerte angepasst                    |          |          |             |          |  |

[Tabelle 4.6]

|  | CropScience     |          |                                  |          | MaterialScience |          | Überleitung             |          |                                     |          |          |          |
|--|-----------------|----------|----------------------------------|----------|-----------------|----------|-------------------------|----------|-------------------------------------|----------|----------|----------|
|  | Crop Protection |          | Environmental Science/BioScience |          | MaterialScience |          | Alle sonstigen Segmente |          | Corporate Center und Konsolidierung |          | Konzern  |          |
|  | 2009            | 2010     | 2009                             | 2010     | 2009            | 2010     | 2009                    | 2010     | 2009                                | 2010     | 2009     | 2010     |
|  | in Mio €        | in Mio € | in Mio €                         | in Mio € | in Mio €        | in Mio € | in Mio €                | in Mio € | in Mio €                            | in Mio € | in Mio € | in Mio € |
|  | 5.424           | 5.493    | 1.086                            | 1.337    | 7.520           | 10.154   | 1.139                   | 1.180    | 11                                  | 11       | 31.168   | 35.088   |
|  | 1,6 %           | 1,3 %    | 4,1 %                            | 23,1 %   | -22,8 %         | 35,0 %   | -17,5 %                 | 3,6 %    | -                                   | -        | -5,3 %   | 12,6 %   |
|  | 2,3 %           | -4,7 %   | 4,1 %                            | 16,5 %   | -24,4 %         | 30,1 %   | -17,4 %                 | 2,5 %    | -                                   | -        | -5,9 %   | 7,7 %    |
|  | 40              | 44       | 12                               | 10       | 55              | 64       | 1.647                   | 1.730    | -1.920                              | -1.927   | -        | -        |
|  | 5.464           | 5.537    | 1.098                            | 1.347    | 7.575           | 10.218   | 2.786                   | 2.910    | -1.909                              | -1.916   | 31.168   | 35.088   |
|  | 187             | 239      | 19                               | 36       | 88              | 101      | 37                      | 23       | 150                                 | 34       | 922      | 714      |
|  | 713             | 600      | 85                               | -339     | -266            | 780      | 32                      | 47       | -198                                | -219     | 3.006    | 2.730    |
|  | 875             | 600      | 142                              | 187      | -126            | 780      | 63                      | 47       | -194                                | -192     | 3.772    | 4.452    |
|  | 1.301           | 1.025    | 207                              | 268      | 446             | 1.356    | 189                     | 188      | -139                                | -141     | 6.472    | 7.101    |
|  | 924             | 743      | 119                              | -197     | 319             | 1.058    | 241                     | 307      | -98                                 | -88      | 4.658    | 4.771    |
|  | 7.633           | 7.395    | 1.754                            | 1.595    | 9.202           | 9.976    | 587                     | 623      | 1.269                               | 1.167    | 43.694   | 43.550   |
|  | 12,6 %          | 9,9 %    | 7,2 %                            | -11,8 %  | 3,4 %           | 11,0 %   | -                       | -        | -                                   | -        | 10,7 %   | 10,9 %   |
|  | 591             | 1.079    | 154                              | 320      | 849             | 763      | 261                     | 356      | 89                                  | -65      | 5.375    | 5.773    |
|  | -               | -        | -                                | -        | -48             | -56      | -                       | -        | -                                   | -        | -48      | -56      |
|  | -               | -        | -                                | -        | 395             | 354      | -                       | -        | -                                   | -        | 395      | 354      |
|  | 7.383           | 7.220    | 1.978                            | 2.183    | 7.291           | 8.005    | 1.170                   | 1.156    | 5.944                               | 6.991    | 51.042   | 51.506   |
|  | 282             | 274      | 64                               | 92       | 512             | 505      | 206                     | 140      | 40                                  | 5        | 1.669    | 1.621    |
|  | 12              | -        | 351                              | 2        | 28              | 31       | 4                       | 1        | -                                   | -        | 455      | 34       |
|  | 448             | 425      | 65                               | 81       | 607             | 576      | 126                     | 141      | 55                                  | 78       | 2.809    | 3.556    |
|  | 21              | 1        | 1                                | -        | 41              | 7        | 2                       | 1        | -                                   | 27       | 149      | 985      |
|  | 2.388           | 2.675    | 598                              | 1.111    | 1.947           | 2.285    | 1.969                   | 2.214    | 19.796                              | 18.237   | 32.091   | 32.610   |
|  | 482             | 476      | 171                              | 246      | 207             | 231      | 34                      | 34       | 5                                   | -        | 2.746    | 3.053    |
|  | 16.900          | 16.900   | 3.600                            | 3.800    | 14.600          | 14.700   | 19.400                  | 19.600   | 700                                 | 700      | 111.000  | 111.400  |

[Tabelle 4.7]

|  | Asien/<br>Pazifik |          | Lateinamerika/<br>Afrika/Nahost |          | Überleitung |          | Gesamt   |          |
|--|-------------------|----------|---------------------------------|----------|-------------|----------|----------|----------|
|  | 2009              | 2010     | 2009                            | 2010     | 2009        | 2010     | 2009     | 2010     |
|  | in Mio €          | in Mio € | in Mio €                        | in Mio € | in Mio €    | in Mio € | in Mio € | in Mio € |
|  | 5.712             | 7.481    | 4.783                           | 5.628    | -           | -        | 31.168   | 35.088   |
|  | 6,1 %             | 31,0 %   | -3,5 %                          | 17,7 %   | -           | -        | -5,3 %   | 12,6 %   |
|  | 0,3 %             | 19,3 %   | -0,6 %                          | 12,5 %   | -           | -        | -5,9 %   | 7,7 %    |
|  | 5.486             | 7.118    | 3.855                           | 4.426    | -           | -        | 31.168   | 35.088   |
|  | 5,8 %             | 29,7 %   | -1,3 %                          | 14,8 %   | -           | -        | -5,3 %   | 12,6 %   |
|  | -0,1 %            | 17,6 %   | 2,6 %                           | 8,6 %    | -           | -        | -5,9 %   | 7,7 %    |
|  | 334               | 462      | 360                             | 414      | -8.822      | -10.415  | -        | -        |
|  | 53                | 79       | 131                             | 210      | -           | -        | 922      | 714      |
|  | 367               | 807      | 273                             | 395      | -198        | -219     | 3.006    | 2.730    |
|  | 5.255             | 6.367    | 3.246                           | 3.729    | 1.157       | 1.408    | 51.042   | 51.506   |
|  | 357               | 336      | 123                             | 126      | -           | -        | 1.669    | 1.621    |
|  | 268               | 294      | 83                              | 80       | 55          | 78       | 2.809    | 3.556    |
|  | 3.288             | 3.655    | 1.239                           | 1.390    | 3.209       | 2.595    | 32.091   | 32.610   |
|  | 131               | 160      | 28                              | 35       | -           | -        | 2.746    | 3.053    |
|  | 23.000            | 24.600   | 16.800                          | 16.100   | -           | -        | 111.000  | 111.400  |

## 2. Allgemeine Angaben

Der von der Bayer AG aufgestellte Konzernabschluss zum 31. Dezember 2010 ist nach den Vorschriften der am Abschlussstichtag gültigen und von der Europäischen Union anerkannten International Financial Reporting Standards (IFRS) des International Accounting Standards Board (IASB), London, den Interpretationen des IFRS Interpretations Committee sowie den zusätzlich nach § 315 a HGB anzuwendenden handelsrechtlichen Vorschriften erstellt worden.

Die Bayer Aktiengesellschaft (Bayer AG) ist ein in Deutschland ansässiges, international aufgestelltes Unternehmen mit Sitz in der Kaiser-Wilhelm-Allee 1, 51368 Leverkusen. Die wesentlichen Geschäftsaktivitäten in den Bereichen Gesundheit, Ernährung und hochwertige Materialien erfolgen in den drei Teilkonzernen HealthCare, CropScience und MaterialScience. Die Aktivitäten der einzelnen Segmente sind in Anhangangabe [5] erläutert.

Die nach § 161 des Aktiengesetzes vorgeschriebene Erklärung zum Deutschen Corporate Governance Kodex ist abgegeben und den Aktionären zugänglich gemacht worden.

Der Vorstand der Bayer AG stellte den Konzernabschluss am 15. Februar 2011 auf. In seiner Sitzung vom 24. Februar 2011 befasste sich der Prüfungsausschuss des Aufsichtsrats der Bayer AG mit dem Konzernabschluss. Der Aufsichtsrat billigte den Konzernabschluss in seiner Sitzung vom 24. Februar 2011.

In der Gewinn- und Verlustrechnung und der Gesamtergebnisrechnung, der Bilanz, der Kapitalflussrechnung sowie in der Eigenkapitalveränderungsrechnung des Bayer-Konzerns werden einzelne Posten zur Verbesserung der Klarheit zusammengefasst. Sie werden im Anhang erläutert. Die Gewinn- und Verlustrechnung ist nach dem Umsatzkostenverfahren erstellt worden. Die Bilanzgliederung erfolgt nach der Fristigkeit der Vermögenswerte und Schulden. Als kurzfristig werden Vermögenswerte und Schulden angesehen, wenn sie innerhalb eines Jahres oder aber innerhalb des normalen Geschäftszyklus des Unternehmens bzw. Konzerns – beginnend mit der Beschaffung der für den Leistungserstellungsprozess notwendigen Ressourcen bis zum Erhalt der Zahlungsmittel bzw. Zahlungsmitteläquivalente als Gegenleistung für die Veräußerung der in diesem Prozess erstellten Produkte oder Dienstleistungen – fällig sind oder veräußert werden sollen. Forderungen und Verbindlichkeiten aus Lieferungen und Leistungen sowie Vorräte werden grundsätzlich als kurzfristige Posten ausgewiesen. Latente Steueransprüche bzw. -verbindlichkeiten werden ebenso wie Pensionsrückstellungen grundsätzlich als langfristig dargestellt.

Der Konzernabschluss wurde in Euro aufgestellt. Soweit nicht anders vermerkt, werden alle Beträge in Millionen Euro (Mio €) angegeben. Rundungen können in Einzelfällen dazu führen, dass sich Werte in diesem Bericht nicht exakt zur angegebenen Summe aufaddieren und dass sich Prozentangaben nicht exakt aus den dargestellten Werten ergeben.

Die Einzelabschlüsse der konsolidierten Unternehmen sind auf den Stichtag des Konzernabschlusses aufgestellt.

## 3. Auswirkungen von neuen Rechnungslegungsstandards

### IM LAUFENDEN GESCHÄFTSJAHR ERSTMALS ANGEWENDETE RECHNUNGSLEGUNGSVORSCHRIFTEN

Im Geschäftsjahr 2010 fanden die folgenden Rechnungslegungsstandards und Interpretationen erstmals Anwendung. Diese neuen Rechnungslegungsvorschriften hatten keinen bzw. keinen wesentlichen Einfluss auf die Darstellung der Vermögens-, Finanz- und Ertragslage oder auf das Ergebnis je Aktie.

Im Januar 2008 veröffentlichte das IASB die überarbeiteten Standards IFRS 3 (Business Combinations) und IAS 27 (Consolidated and Separate Financial Statements). Wesentliche Änderungen des IFRS 3 (revised 2008) sind insbesondere:

- Bei der Bilanzierung des Anteils anderer Gesellschafter besteht zukünftig ein Wahlrecht, ob dieser mit dem beizulegenden Zeitwert (d. h. inkl. Geschäfts- oder Firmenwert) oder dem anteiligen identifizierbaren Nettovermögen angesetzt wird.
- Bei sukzessivem Unternehmenserwerb sind die bisher gehaltenen Unternehmensanteile im Zeitpunkt der Erlangung der Beherrschung erfolgswirksam zum beizulegenden Zeitwert neu zu bewerten. Die Differenz zwischen dem (neu bewerteten) Beteiligungsbuchwert am Tochterunternehmen und dem anteiligen neu bewerteten Nettovermögen des Tochterunternehmens ist als Geschäfts- oder Firmenwert auszuweisen.
- Im Erwerbszeitpunkt erfasste Verbindlichkeiten für zukünftige Kaufpreisanpassungen aufgrund von künftigen Ereignissen können in Folgeperioden nicht mehr erfolgsneutral gegen den Geschäfts- oder Firmenwert angepasst werden.
- Die Anschaffungsnebenkosten sind aufwandswirksam zu erfassen.

Die wesentlichen Änderungen, die sich aus IAS 27 (revised 2008) ergeben, sind:

- Eine Verminderung der Beteiligungsquote an Tochterunternehmen ist zukünftig als erfolgsneutrale Eigenkapitaltransaktion darzustellen, solange die Muttergesellschaft weiterhin über eine Beherrschungsmöglichkeit verfügt.
- Bei Verminderung der Beteiligungsquote mit gleichzeitigem Verlust der Beherrschung über das Tochterunternehmen gehen die Vermögenswerte und Schulden des Tochterunternehmens vollständig ab. Verbleibende Unternehmensanteile sind mit ihrem beizulegenden Zeitwert zu bilanzieren. Die Differenz zwischen den verbleibenden Buchwerten und den beizulegenden Zeitwerten ist erfolgswirksam zu erfassen.
- Anteile anderer Gesellschafter, die aufgrund entstandener Verluste negativ werden, sind mit ihrem Negativsaldo auszuweisen.

Die Änderungen zu IAS 39 (Financial Instruments: Recognition and Measurement), die im Juli 2008 veröffentlicht wurden, thematisieren die einseitige Absicherung von Risiken durch Optionen sowie die Inflation als abzusicherndes Risiko. Die Änderungen dienen der Klarstellung, unter welchen Umständen ein gesichertes Risiko oder ein Teil von Zahlungsflüssen für ein bilanzielles Sicherungsgeschäft (Hedge Accounting) designed werden kann.

Im April 2009 veröffentlichte das IASB im Rahmen des jährlichen „Improvement“-Projekts Änderungen diverser IFRSs. Die Änderungen präzisieren den Ansatz, die Bewertung und den Ausweis von Geschäftsvorfällen, vereinheitlichen Terminologien und sind im Wesentlichen als redaktionelle Korrekturen zu bestehenden Standards zu verstehen. Im Rahmen des Projekts wurde IAS 17 (Leases) dahingehend geändert, dass Grundstücksnutzungsverträge (z. B. Erbbaurechtsverträge) nach den allgemeinen Leasingkriterien beurteilt werden müssen und ggf. vom Leasingnehmer zu aktivieren sind. Die bisherige Ausnahme, dass ein Grundstücksnutzungsvertrag in der Regel als Operating Leasing zu klassifizieren ist, wurde abgeschafft.

Im Juni 2009 wurden Änderungen des IFRS 2 (Share-based Payment) herausgegeben, die die Bilanzierung von in bar erfüllten anteilsbasierten Vergütungen im Konzern betreffen. Die Änderungen regeln, wie eine einzelne Tochtergesellschaft in einem Konzern bestimmte anteilsbasierte Vergütungsvereinbarungen in ihrem eigenen Abschluss bilanzieren muss. Im Zusammenhang mit der Überarbeitung wurden die Regeln des IFRIC 8 (Scope of IFRS 2) und des IFRIC 11 (IFRS 2 – Group and Treasury Share Transactions) in IFRS 2 übernommen.

Die Interpretation IFRIC 17 (Distributions of Non-cash Assets to Owners) wurde im November 2008 veröffentlicht und regelt den Ansatz und die Bewertung von Verbindlichkeiten im Zusammenhang mit Sachdividenden. IFRIC 17 legt fest, wann eine Sachdividendenverpflichtung zu passivieren ist, dass eine Verpflichtung zur Ausschüttung einer Sachdividende mit dem beizulegenden Zeitwert zu bilanzieren ist und dass die Differenz zwischen dem Buchwert des auszuschüttenden Vermögenswerts und der Dividendenverpflichtung im Zeitpunkt der Ausschüttung erfolgswirksam zu vereinnahmen ist.

### VERÖFFENTLICHTE, ABER NOCH NICHT ANGEWENDETE RECHNUNGSLEGUNGSVORSCHRIFTEN

Das IASB bzw. IFRS Interpretations Committee hat nachfolgende Standards, Änderungen von Standards bzw. Interpretationen herausgegeben, deren Anwendung jedoch bislang nicht verpflichtend ist. Die Anwendung dieser IFRSs bzw. Interpretationen setzt voraus, dass sie im Rahmen des IFRS-Übernahmeverfahrens (Endorsement) durch die EU angenommen werden.

Im Oktober 2009 wurde eine Änderung des IAS 32 (Financial Instruments: Presentation) herausgegeben. Damit wird neu geregelt, dass bestimmte Bezugsrechte sowie Optionen und Optionscheine in einer anderen als der funktionalen Währung beim Emittenten, auf dessen Eigenkapitalinstrumente sich diese Rechte beziehen, bilanziell als Eigenkapital auszuweisen sind. Zuvor wurden solche Rechte als Verbindlichkeiten bilanziert. Die Änderung umfasst nur solche Bezugsrechte, bei denen die Anzahl der zu beziehenden Instrumente und der Fremdwährungsbetrag zuvor fixiert sind und allen bisherigen Inhabern von Eigenkapitaltiteln derselben Klasse dieses Recht anteilig gewährt wird. Die Änderung gilt für Geschäftsjahre, die am oder nach dem 1. Februar 2010 beginnen. Diese Änderung wird keine wesentlichen Auswirkungen auf die Darstellung der Vermögens-, Finanz- und Ertragslage haben.

Im November 2009 veröffentlichte das IASB den überarbeiteten Standard IAS 24 (Related Party Disclosures). Durch die Überarbeitung werden die Berichtspflichten von Unternehmen, an denen der Staat beteiligt ist, vereinfacht. Bestimmte related-party-Beziehungen, die sich aus einer Beteiligung des Staates an Privatunternehmen ergeben, sind von einigen im geänderten Standard genannten Angabepflichten nach IAS 24 ausgenommen. Des Weiteren wurde die Definition der nahe stehenden Unternehmen und Personen grundlegend überarbeitet. Die Änderungen gelten für Geschäftsjahre, die am oder nach dem 1. Januar 2011 beginnen. Diese Änderungen werden keine wesentlichen Auswirkungen auf die Darstellung der Vermögens-, Finanz- und Ertragslage haben.

Im November 2009 veröffentlichte das IASB IFRS 9 (Financial Instruments) zur Kategorisierung und Bewertung finanzieller Vermögenswerte. Die Veröffentlichung stellt den Abschluss des ersten Teils eines dreiphasigen Projekts zur vollständigen Überarbeitung der Bilanzierung von Finanzinstrumenten dar. IFRS 9 definiert zwei anstatt vier Bewertungskategorien für aktivische Finanzinstrumente. Die Kategorisierung basiert zum einen auf dem Geschäftsmodell des Unternehmens, zum anderen auf den Eigenschaften der vertraglichen Zahlungsströme des jeweiligen finanziellen Vermögenswerts. Hinsichtlich strukturierter Produkte mit eingebetteten Derivaten ist die Prüfung auf Trennungspflicht und eine eventuell getrennte Bilanzierung nur noch für nicht-finanzielle Basisverträge vorgesehen. Strukturierte Produkte mit finanziellen Basisverträgen sind als Ganzes zu kategorisieren und zu bewerten. Die Erstanwendung des IFRS 9 ist für Geschäftsjahre, die am oder nach dem 1. Januar 2013 beginnen, verpflichtend vorzunehmen. Die Übernahme in europäisches Recht steht noch aus. Diese Änderung wird keine wesentlichen Auswirkungen auf die Darstellung der Vermögens-, Finanz- und Ertragslage haben.

Im Mai 2010 veröffentlichte das IASB im Rahmen des jährlichen „Improvement“-Projekts den dritten Sammelstandard „Improvements to IFRSs“. Die Änderungen präzisieren den Ansatz, die Bewertung und den Ausweis von Geschäftsvorfällen, vereinheitlichen Terminologien und sind im Wesentlichen als redaktionelle Korrekturen zu bestehenden Standards zu verstehen. Einzelne Änderungen sind für Geschäftsjahre, die am oder nach dem 1. Januar 2011 beginnen, anzuwenden und andere für Geschäftsjahre, die am oder nach dem 1. Juli 2011 beginnen. Die Übernahme in europäisches Recht steht noch aus. Diese Änderungen werden voraussichtlich keine wesentlichen Auswirkungen auf die Darstellung der Vermögens-, Finanz- und Ertragslage haben.

Im Oktober 2010 veröffentlichte das IASB Änderungen an IFRS 7 (Financial Instruments: Disclosures). Diese Änderungen fordern zusätzliche Angaben zu Transaktionen zum Zwecke der Übertragung von Vermögenswerten einschließlich eines Einblicks in mögliche Auswirkungen der noch beim abgebenden Unternehmen verbliebenen Risiken. Außerdem werden zusätzliche Angaben gefordert, wenn ein unverhältnismäßig großer Anteil von Übertragungen rund um das Ende einer Berichtsperiode auftritt. Unternehmen haben die Änderungen für Geschäftsjahre, die am oder nach dem 1. Juli 2011 beginnen, verpflichtend anzuwenden. Die Übernahme in europäisches



Recht steht noch aus. Diese Änderungen werden keine wesentlichen Auswirkungen auf die Darstellung der Vermögens-, Finanz- und Ertragslage haben.

Im Dezember 2010 hat das IASB eine Änderung an IAS 12 (Income Taxes) veröffentlicht, durch die widerlegbar vermutet wird, dass der Buchwert eines Vermögenswerts im Normalfall durch Veräußerung realisiert wird und nicht durch Nutzung des Vermögenswerts. Diese Festlegung ist insbesondere in Ländern relevant, in denen unterschiedliche Ertragsteuersätze auf Gewinne aus Veräußerungen und z. B. auf laufende Mieteinnahmen anzuwenden sind. In diesem Zusammenhang wurde SIC 21 (Income Taxes – Recovery of Revalued Non-Depreciable Assets) in IAS 12 (Income Taxes) integriert – soweit er sich nicht auf als Finanzinvestitionen gehaltene Immobilien bezog. Der geänderte Standard ist rückwirkend auf Geschäftsjahre, die am oder nach dem 1. Januar 2012 beginnen, anzuwenden. Die Übernahme in europäisches Recht durch die Europäische Union steht noch aus. Die Auswirkungen der Änderung auf die Darstellung der Vermögens-, Finanz- und Ertragslage werden zurzeit geprüft.

Im November 2009 wurde IFRIC 19 (Extinguishing Financial Liabilities with Equity Instruments) veröffentlicht. Die Interpretation ist anzuwenden, wenn ein Kreditnehmer eine finanzielle Verbindlichkeit vollständig oder partiell durch Ausgabe von Eigenkapitalinstrumenten an den Kreditgeber tilgt. Die Interpretation tritt für Geschäftsjahre in Kraft, die am oder nach dem 1. Juli 2010 beginnen. Die Auswirkungen auf die Darstellung der zukünftigen Vermögens-, Finanz- und Ertragslage sind davon abhängig, inwieweit zukünftig finanzielle Verbindlichkeiten durch Eigenkapitalinstrumente getilgt werden.

Im November 2009 wurde eine Änderung des IFRIC 14 (IAS 19 – The Limit on a Defined Benefit Asset, Minimum Funding Requirements and their Interaction), einer Interpretation des IAS 19 (Employee Benefits), veröffentlicht. Die Änderung ist von Relevanz, wenn ein Unternehmen, das im Zusammenhang mit seinen Pensionsplänen Mindestdotierungsverpflichtungen zu erfüllen hat, Vorauszahlungen auf diese leistet. Die Änderung gestattet, dass ein Unternehmen den Nutzen aus einer solchen Vorauszahlung als Vermögenswert darstellt. Sie ist auf Geschäftsjahre anzuwenden, die am oder nach dem 1. Januar 2011 beginnen. Diese Änderung wird keine wesentlichen Auswirkungen auf die Darstellung der Vermögens-, Finanz- und Ertragslage haben.

## 4. Grundlagen und Methoden sowie Unsicherheiten aufgrund von Schätzungen

Den Jahresabschlüssen der in den Konzernabschluss einbezogenen Unternehmen liegen einheitliche Bilanzierungs- und Bewertungsgrundsätze zugrunde.

Der Konzernabschluss basiert auf dem Grundsatz historischer Anschaffungs- und Herstellungskosten, mit Ausnahme der Positionen, die mit ihrem beizulegenden Zeitwert ausgewiesen werden, wie zur Veräußerung verfügbare finanzielle Vermögenswerte und Derivate.

Im Konzernabschluss müssen durch das Management in einem bestimmten Umfang Annahmen getroffen und Schätzungen vorgenommen werden, die einen erheblichen Einfluss auf die Darstellung der Vermögens-, Finanz- und Ertragslage des Konzerns haben können.

Hauptanwendungsbereiche für Annahmen, Schätzungen sowie die Ausübung von Ermessensspielräumen liegen in der Festlegung der Nutzungsdauer von langfristigen Vermögenswerten, der Ermittlung abgezinster Cashflows im Rahmen von Werthaltigkeitstests und Kaufpreisallokationen, der Bildung von Rückstellungen beispielsweise für Rechtsverfahren, Versorgungsleistungen für Arbeitnehmer und entsprechende Leistungen, Steuern, Umweltschutz, Preisnachlässe, Produkthaftungen sowie Garantien. In den weiteren Abschnitten dieses Kapitels werden jeweils schätz- und prämissensensitive Bilanzierungsgrundsätze und deren Auswirkungen zu den einzelnen Bereichen thematisiert. Schätzungen beruhen auf Erfahrungswerten und anderen Annahmen, die unter den gegebenen Umständen als angemessen erachtet werden. Sie werden laufend überprüft, können aber von den tatsächlichen Werten abweichen.

Änderungen der Bilanzierungs- und Bewertungsmethoden aufgrund von überarbeiteten und neuen Standards erfolgen rückwirkend, sofern für einen Standard keine abweichende Regelung vorgesehen ist. Die Gewinn- und Verlustrechnung des Vorjahres und die Eröffnungsbilanz dieser Vergleichsperiode werden so angepasst, als ob die neuen Bilanzierungs- und Bewertungsmethoden schon immer angewandt worden wären.

Aus der Einführung einer neuen, genaueren Systematik zur Eliminierung von Zwischengewinnen aus konzerninternen Lieferungen ergaben sich einmalige Effekte auf die Konzernvorräte. Gemäß IAS 8 (Accounting Policies, Changes in Accounting Estimates and Errors) wurde die Bilanz zum 1. Januar 2010 rückwirkend angepasst. Die durchgeführte Änderung wirkte sich auch auf latente Steuern und das Eigenkapital aus. Die rückwirkende Anpassung der Gewinn- und Verlustrechnung sowie der Kapitalflussrechnung für das Jahr 2009 war aufgrund der Datenlage vor dem 31. Dezember 2009 nicht möglich. Daher hat die Anpassung keine Auswirkung auf das Ergebnis je Aktie in 2009.

Auf die Bilanz zum 1. Januar 2010 ergaben sich aus der Umstellung folgende Auswirkungen auf die betroffenen Bilanzpositionen:

#### Rückwirkende Anpassung

[Tabelle 4.8]

|                                  | 01.01.2010 |
|----------------------------------|------------|
|                                  | in Mio €   |
| <b>Vermögenswerte</b>            |            |
| Vorräte                          | -111       |
| Latente Steuerforderungen        | 34         |
| <b>Eigenkapital und Schulden</b> |            |
| Sonstige Rücklagen               | -77        |

In der Kapitalflussrechnung werden die Zinseinnahmen aus Zinssicherungsgeschäften sowie die Ausgaben für den Erwerb von zusätzlichen Anteilen an Tochterunternehmen seit 2010 unter Zu- / Abfluss aus Finanzierungstätigkeit ausgewiesen. Die Vorjahreswerte wurden entsprechend angepasst.

#### KONSOLIDIERUNG

Der Konzernabschluss beinhaltet Tochtergesellschaften, Gemeinschafts- und assoziierte Unternehmen.

**Tochtergesellschaften** sind diejenigen Gesellschaften, bei denen die Bayer AG unmittelbar oder mittelbar über die Mehrheit der Stimmrechte verfügt oder aufgrund ihrer wirtschaftlichen Verfügungsmacht aus der Tätigkeit der betreffenden Gesellschaften mehrheitlich den wirtschaftlichen Nutzen ziehen kann bzw. die Risiken tragen muss. In der Regel manifestiert sich dies durch einen Anteilsbesitz von mehr als 50 %. Tochterunternehmen und sogenannte Zweckgesellschaften, bei denen der Bayer-Konzern einen Stimmrechtsanteil bzw. einen Anteilsbesitz von 50 % oder weniger hält, werden konsolidiert, wenn aus der Art der wirtschaftlichen Beziehung eine Beherrschung hervorgeht. Die Einbeziehung beginnt zu dem Zeitpunkt, ab dem die Möglichkeit der Beherrschung besteht. Sie endet, wenn die Möglichkeit der Beherrschung nicht mehr besteht.

Die Beteiligungsbuchwerte an den Tochterunternehmen werden mit dem anteiligen Eigenkapital der Tochterunternehmen verrechnet. Dabei wird nach der Erwerbsmethode das Eigenkapital der erworbenen Tochterunternehmen zum Erwerbszeitpunkt unter Berücksichtigung der beizulegenden Zeitwerte der identifizierbaren Vermögenswerte, Schulden und Eventualverbindlichkeiten, latenter Steuern und eines eventuellen Geschäfts- oder Firmenwerts zu diesem Zeitpunkt ermittelt. Die Anschaffungskosten von erworbenen ausländischen Gesellschaften werden zum Erwerbszeitpunkt mit dem jeweiligen Kurs in Euro umgerechnet.

Werden Anteile von nicht-kontrollierenden Gesellschaftern erworben, wird dies als Eigenkapitaltransaktion dargestellt. D. h., ein das anteilige Eigenkapital von nicht-kontrollierenden Gesellschaftern übersteigender Kaufpreis für hinzuerworbene Anteile wird als Eigenkapitalreduzierung erfasst.

**Gemeinschaftsunternehmen** sind Unternehmen, bei denen der Bayer-Konzern zusammen mit einem Dritten eine gemeinsame Führung ausübt. Gemeinschaftsunternehmen liegen in der Regel bei einer paritätischen Stimmrechtsverteilung zwischen zwei Gesellschaftern oder aufgrund einer gesellschaftsrechtlichen Vereinbarung vor. Die Konsolidierung von Gemeinschaftsunternehmen geschieht anteilig nach denselben Grundsätzen wie bei Tochterunternehmen.

Nach der Equity-Methode werden **assoziierte Unternehmen** bewertet, bei denen die Bayer AG in der Regel aufgrund eines Anteilsbesitzes zwischen 20 und 50 % einen maßgeblichen Einfluss ausübt. Bei Beteiligungen, die at-equity in den Konzernabschluss einbezogen sind, werden die Anschaffungskosten jährlich um die dem Bayer-Kapitalanteil entsprechenden Eigenkapitalveränderungen erhöht bzw. vermindert. Bei der erstmaligen Einbeziehung von Beteiligungen nach der Equity-Methode werden Unterschiedsbeträge aus der Erstkonsolidierung entsprechend den Grundsätzen der Vollkonsolidierung behandelt. Die erfolgswirksamen Veränderungen des anteiligen Eigenkapitals werden einschließlich außerplanmäßiger Abschreibungen eines Geschäfts- oder Firmenwerts im Finanzergebnis berücksichtigt. Zwischengesellschaftliche Gewinne und Verluste waren bei diesen Gesellschaften in den Jahren 2010 und 2009 unbedeutend.

Beteiligungen, deren Einfluss auf die Vermögens-, Finanz- und Ertragslage im Einzelnen und insgesamt unwesentlich ist, werden zu fortgeführten Anschaffungskosten in den Konzernabschluss einbezogen.

Gewinne und Verluste, Umsätze und Aufwendungen und Erträge, die durch Transaktionen innerhalb des Konsolidierungskreises begründet sind, sowie die zwischen konsolidierten Gesellschaften bestehenden Forderungen und Verbindlichkeiten werden eliminiert. Bei den Konsolidierungsvorgängen werden die latenten ertragsteuerlichen Auswirkungen berücksichtigt.

#### WÄHRUNGSUMRECHNUNG

Die in den Konzernabschluss einbezogenen Abschlüsse der konsolidierten Gesellschaften werden in deren funktionaler Währung aufgestellt. Die funktionale Währung ist die Währung, in der überwiegend Zahlungsmittel erwirtschaftet bzw. verwendet werden. Bei der Mehrzahl der Beteiligungen ist die funktionale Währung die jeweilige Landeswährung, da diese Gesellschaften ihr Geschäft in finanzieller, wirtschaftlicher und organisatorischer Hinsicht selbstständig betreiben.

Forderungen und Verbindlichkeiten in einer Währung, die nicht die funktionale Währung darstellt, werden im Einzelabschluss der Konzerngesellschaften mit dem Kurs am Bilanzstichtag bewertet, unabhängig davon, ob sie kursgesichert sind oder nicht. Aus der Bewertung von Fremdwährungspositionen resultierende Kursdifferenzen werden ergebniswirksam erfasst.

Im Konzernabschluss werden Vermögenswerte und Schulden der Auslandsgesellschaften zum Jahresbeginn und zum Jahresende mit den jeweiligen Stichtagskursen, sämtliche Veränderungen während des Jahres sowie Aufwendungen, Erträge und Zahlungsflüsse mit Monatsdurchschnittskursen in Euro umgerechnet. Eigenkapitalbestandteile werden zu historischen Kursen zu den Zeitpunkten ihrer jeweiligen aus Konzernsicht erfolgten Zugänge umgerechnet.

Die sich gegenüber der Umrechnung zu Stichtagskursen ergebenden Unterschiedsbeträge werden im Eigenkapital sowie in den Anhangtabellen gesondert als „Ausgleichsposten aus der Währungsumrechnung ausländischer Tochtergesellschaften“ bzw. als „Währungsänderungen“ ausgewiesen. Im Eigenkapital während der Konzernzugehörigkeit erfasste Währungsumrechnungsdifferenzen werden beim Ausscheiden von Konzernunternehmen aus dem Konsolidierungskreis erfolgswirksam aufgelöst.

Die Wechselkurse wichtiger Währungen zum Euro veränderten sich wie folgt:

Wechselkurse wichtiger Währungen

[Tabelle 4.9]

| 1 €/ |                | Stichtagskurs |        | Durchschnittskurs |        |
|------|----------------|---------------|--------|-------------------|--------|
|      |                | 2009          | 2010   | 2009              | 2010   |
| ARS  | Argentinien    | 5,47          | 5,31   | 5,20              | 5,18   |
| BRL  | Brasilien      | 2,51          | 2,23   | 2,77              | 2,33   |
| CAD  | Kanada         | 1,51          | 1,33   | 1,59              | 1,36   |
| CHF  | Schweiz        | 1,48          | 1,25   | 1,51              | 1,38   |
| CNY  | China          | 9,84          | 8,82   | 9,52              | 8,96   |
| GBP  | Großbritannien | 0,89          | 0,86   | 0,89              | 0,86   |
| JPY  | Japan          | 133,16        | 108,65 | 130,31            | 116,04 |
| MXN  | Mexiko         | 18,92         | 16,55  | 18,79             | 16,72  |
| USD  | USA            | 1,44          | 1,34   | 1,39              | 1,32   |

Tochtergesellschaften, deren funktionale Währung in den vergangenen drei Jahren in Summe eine Inflationsrate von 100 % überschritten hat, wendeten die Vorschriften gemäß IAS 29 (Financial Reporting in Hyperinflationary Economies) zur Inflationsbilanzierung an.

#### UMSATZERLÖSE BZW. SONSTIGE BETRIEBLICHE ERTRÄGE

Als Umsatzerlöse werden alle Erträge im Zusammenhang mit Produktverkäufen, erbrachten Dienstleistungen und Lizenzannahmen erfasst. Andere operative Erträge werden als sonstige betriebliche Erträge erfasst. Umsatzerlöse werden ertragswirksam erfasst, wenn die maßgeblichen Risiken und Chancen aus dem Eigentum an den Gütern auf den Kunden übertragen wurden, dem Unternehmen weder ein weiter bestehendes Verfügungsrecht, wie es gewöhnlich mit dem Eigentum verbunden ist, noch eine wirksame Verfügungsmacht über die verkauften Waren und Erzeugnisse verbleibt, die Höhe der Erträge und angefallenen bzw. noch anfallenden Kosten verlässlich bestimmt werden kann und es hinreichend wahrscheinlich ist, dass dem Unternehmen der wirtschaftliche Nutzen aus dem Geschäft zufließen wird.

Umsatzerlöse werden nach Abzug von Umsatzsteuern und anderen Steuern sowie nach Abzug von Erlösminderungen zum beizulegenden Zeitwert der erhaltenen bzw. zu erhaltenden Gegenleistung ausgewiesen. So werden zum Zeitpunkt der Umsatzrealisierung auch geschätzte Beträge für Rabatte, Skonti und Produktrückgaben umsatzmindernd erfasst und zurückgestellt. Schätzungen bezüglich der Erlösminderungen basieren vor allem auf Erfahrungen aus der Vergangenheit, spezifischen Vertragsbedingungen und Erwartungen hinsichtlich der künftigen Umsatzentwicklung. Es ist nicht wahrscheinlich, dass andere als die angeführten Faktoren eine wesentliche Auswirkung auf Erlösminderungen des Bayer-Konzerns haben. Anpassungen der in vorherigen Perioden gebildeten Rückstellungen für Rabatte, Skonti und Produktrückgaben waren für das Ergebnis vor Steuern der berichteten Geschäftsjahre von untergeordneter Bedeutung.

Die Rückstellungen für Rabatte beliefen sich im Geschäftsjahr 2010 auf 1,9 % der gesamten Umsatzerlöse (2009: 1,8 %). Neben Rabatten wurden in einigen Ländern Skonti für sofortige Bezahlung gewährt. Unsere Rückstellungen für Skonti betrugen zum 31. Dezember 2010 und zum 31. Dezember 2009 weniger als 0,1 % der gesamten Umsatzerlöse.

Umsatzerlöse werden um die bilanzielle Vorsorge für zu erwartende Retouren fehlerhafter Ware oder in Verbindung mit vertraglichen Vereinbarungen über die Rückgabe verkaufsfähiger Produkte zum Zeitpunkt des Verkaufs oder zum Zeitpunkt, an dem die Höhe künftiger Rückgaben verlässlich bestimmt werden kann, gekürzt. Die Rückstellungen für Produktrückgaben beliefen sich für das Geschäftsjahr 2010 wie im Vorjahr auf 0,2 % der gesamten Umsatzerlöse. Können künftige Produktrückgaben nicht verlässlich bestimmt werden und sind sie wesentlich für die Verkaufstransaktion, werden sowohl die Umsatzerlöse als auch die damit verbundenen Umsatzkosten bis zu dem Zeitpunkt abgegrenzt, an dem eine zuverlässige Schätzung vorgenommen werden kann oder das Rückgaberecht für die Waren abgelaufen ist.

Ein Teil der Erlöse im Bayer-Konzern wird aufgrund von Lizenzverträgen erzielt, in denen Dritten Rechte an einigen Produkten und Technologien übertragen werden. Erhaltene oder erwartete Zahlungen, die sich auf den Verkauf oder die Auslizenzierung von Technologien oder technologischem Wissen beziehen, werden, sobald die entsprechenden Vereinbarungen in Kraft treten, ergebniswirksam, wenn aufgrund der vertraglichen Regelungen sämtliche Rechte und Pflichten in Bezug auf die betreffenden Technologien aufgegeben werden. Bestehen dagegen weiterhin Rechte an der Technologie fort oder sind noch Pflichten aus dem Vertragsverhältnis zu erfüllen, werden die ggf. erhaltenen Zahlungen sachgerecht abgegrenzt. Vertraglich vereinbarte Vorabzahlungen und andere ähnliche nicht rückzahlbare Zahlungen werden als sonstige Verbindlichkeiten passiviert und über den geschätzten Zeitraum der Erbringung der vertraglich vereinbarten Gegenleistung ergebniswirksam aufgelöst.

Lizenzverträge und Forschungs- und Entwicklungskooperationsverträge können aus verschiedenen Teilvereinbarungen bestehen und unterschiedliche Vergütungsregelungen wie Vorab- und Meilensteinzahlungen oder ähnliche Zahlungen enthalten, sodass zu prüfen ist, ob ggf. mehrere separate Realisationszeitpunkte für (Teil-)Umsätze von sogenannten Rechnungslegungseinheiten zu berücksichtigen sind. Das Geschäft wird separiert, wenn die gelieferte Komponente einen selbstständigen Nutzen hat und der Marktwert der noch nicht gelieferten Waren oder nicht erbrachten Leistung objektiv und zuverlässig nachgewiesen werden kann und falls die Vereinbarung bezüglich der gelieferten Komponente ein allgemeines Rückgaberecht für den Kunden vorsieht, die Lieferung und Leistung der noch ausstehenden Komponenten trotzdem wahrscheinlich ist und im Wesentlichen in unserem Einflussbereich liegt. Sofern alle drei Kriterien erfüllt sind, wird die für die jeweilige separate Rechnungslegungseinheit maßgebliche Vorschrift zur Umsatz- bzw. Ertragsrealisierung angewendet.

Sonstige betriebliche Erträge können auch beim Tausch von immateriellen Vermögenswerten entstehen. Bemessungsgrundlage ist in der Regel der beizulegende Zeitwert des abgegebenen Vermögenswerts. Dieser wird in der Regel nach der Discounted-Cashflow-Methode ermittelt. Sollten die abgegebenen Vermögenswerte selbst erstellt sein, so entspricht normalerweise der Gewinn aus dem Tausch dem beizulegenden Zeitwert des abgegebenen Vermögenswerts.

#### **FORSCHUNGS- UND ENTWICKLUNGSKOSTEN**

Der Bayer-Konzern investiert einen beträchtlichen Anteil seiner finanziellen Ressourcen in Forschungs- und Entwicklungsleistungen. Neben internen Forschungs- und Entwicklungstätigkeiten, vor allem bei HealthCare, unterhalten wir zahlreiche Forschungs- und Entwicklungskooperationen und Partnerschaften mit Dritten.

Für die Zwecke der Rechnungslegung werden Forschungsaufwendungen als Kosten im Zusammenhang mit laufenden oder geplanten Untersuchungen definiert, die neue wissenschaftliche oder technische Erkenntnisse und Einsichten liefern sollen. Entwicklungsaufwendungen werden als Kosten im Zusammenhang mit der Anwendung von Forschungsergebnissen oder Fachkenntnissen in der Produktion, den Produktionsverfahren, den Leistungen oder Waren vor Beginn der kommerziellen Produktion oder Verwendung definiert.

Forschungskosten sind nicht aktivierungsfähig und Entwicklungskosten nur bei Vorliegen bestimmter, genau bezeichneter Voraussetzungen aktivierungspflichtig. Eine Aktivierung ist demnach immer dann erforderlich, wenn die Entwicklungstätigkeit mit hinreichender Sicherheit zu künftigen Finanzmittelzuflüssen führt, die auch die entsprechenden Entwicklungskosten abdecken. Da eigene Entwicklungsprojekte häufig behördlichen Genehmigungsverfahren und anderen Unwägbarkeiten unterliegen, sind die Bedingungen für eine Aktivierung der vor der Genehmigung entstandenen Kosten in der Regel nicht erfüllt.

Die Forschungs- und Entwicklungskosten betreffen im Wesentlichen die Kosten für die Wirkstofffindung, die Kosten für klinische Studien, wie auch für anwendungs- und ingenieurtechnische Forschungs- und Entwicklungstätigkeiten. Darüber hinaus zählen dazu auch die nicht zurechenbaren Kosten für behördliche Zulassungen und Zulassungserweiterungen sowie für Feldversuche.



Bei Forschungs- und Entwicklungskooperationen wird geprüft, ob Zahlungen bei Vertragsabschluss, Vorauszahlungen, Zahlungen beim Erreichen bestimmter Entwicklungsstufen (sogenannte Meilensteinzahlungen) oder Lizenzzahlungen als Finanzierung der Forschungs- und Entwicklungsarbeit zu betrachten sind oder ob durch die Zahlungen jeweils Vermögenswerte erworben werden. Faktoren zur Entscheidung dieser Frage sind der Grund der Zahlung, z. B. ob sie in Verbindung mit einer behördlichen Genehmigung, dem Erreichen eines Umsatzziels oder ausgelagerten Forschungs- und Entwicklungsaktivitäten steht, und der relative beizulegende Zeitwert der geplanten Forschungs- und Entwicklungsaktivitäten im Vergleich zur Gesamthöhe der Zahlung.

Im Falle des Erwerbs eines immateriellen Vermögenswerts sind gemäß IAS 38 (Intangible Assets) die geleisteten Zahlungen zu aktivieren, selbst wenn Unsicherheiten darüber bestehen, ob die Forschung und Entwicklung letztlich zur Produktion eines verkaufsfähigen Produkts führen wird.

#### **GESCHÄFTS- ODER FIRMENWERTE SOWIE SONSTIGE IMMATERIELLE VERMÖGENSWERTE**

Immaterielle Vermögenswerte werden mit den Anschaffungs- bzw. Herstellungskosten angesetzt. Soweit sie eine bestimmbare Nutzungsdauer haben, werden sie dieser entsprechend über einen Zeitraum von bis zu 30 Jahren linear abgeschrieben, sofern nicht durch den tatsächlichen Werteverzehr ein anderer Abschreibungsverlauf geboten ist. Die Festlegung der voraussichtlichen Nutzungsdauern und der Abschreibungsverläufe beruht auf Schätzungen des Zeitraums der Mittelzuflüsse aus den immateriellen Vermögenswerten und deren zeitlicher Verteilung innerhalb dieses Zeitraums.

Geschäfts- oder Firmenwerte, immaterielle Vermögenswerte mit einer unbestimmten Nutzungsdauer sowie immaterielle Vermögenswerte, die noch nicht nutzungsbereit sind (z. B. Forschungs- und Entwicklungsprojekte), werden jährlich auf Wertminderung geprüft. Andere immaterielle Vermögenswerte werden auf Wertminderung geprüft, falls ein Anhaltspunkt für eine Wertminderung vorliegt. Details zu den jährlichen Impairmenttests werden im Abschnitt zur Vorgehensweise und den Auswirkungen der weltweiten Werthaltigkeitsprüfungen erläutert.

Soweit eine Wertminderung festgestellt wurde, wird diese durch eine außerplanmäßige Abschreibung berücksichtigt. Bei Fortfall der Gründe für die außerplanmäßige Abschreibung wird eine entsprechende Zuschreibung vorgenommen, welche die fortgeführten Anschaffungskosten nicht übersteigt. Bei einem einmal abgeschriebenem Goodwill erfolgt keine Zuschreibung mehr in den Folgeperioden.

#### **SACHANLAGEN**

Die Bilanzierung der Sachanlagen erfolgt zu Anschaffungs- bzw. Herstellungskosten, vermindert um planmäßige, nutzungsbedingte Abschreibungen sowie gegebenenfalls außerplanmäßige Wertminderungen.

Die Anschaffungskosten setzen sich aus dem Anschaffungspreis, den Anschaffungsnebenkosten und nachträglichen Anschaffungskosten abzüglich erhaltener Anschaffungspreisminderungen zusammen. Die Herstellungskosten der selbst erstellten Anlagen enthalten neben den Einzelkosten angemessene Teile der notwendigen Material- und Fertigungsgemeinkosten. Besteht eine Verpflichtung, einen Vermögenswert des Sachanlagevermögens zum Ende der Nutzungsdauer stillzulegen oder rückzubauen oder einen Standort wiederherzustellen, wird bei Fertigstellung der Barwert der hierfür anfallenden zukünftigen Zahlungen zusammen mit den Herstellungs- bzw. Anschaffungskosten aktiviert und in gleicher Höhe die Verpflichtung passiviert.

Erstreckt sich die Bauphase von Vermögenswerten des Sachanlagevermögens über einen längeren Zeitraum, werden die bis zur Fertigstellung anfallenden Fremdkapitalzinsen als Bestandteil der Anschaffungs- oder Herstellungskosten in Übereinstimmung mit den Bedingungen des IAS 23 (Borrowing Costs) aktiviert.

Kosten für die Reparatur von Sachanlagen, wie z. B. laufende Unterhaltungsaufwendungen, werden grundsätzlich erfolgswirksam erfasst. Eine Aktivierung nachträglicher Anschaffungs- oder Herstellungskosten erfolgt dann, wenn durch die Maßnahme (z. B. Generalüberholung einer technischen Anlage) künftig wirtschaftlicher Nutzen zufließen wird.

Planmäßige Abschreibungen auf Sachanlagen werden nach der linearen Methode vorgenommen, sofern nicht durch den tatsächlichen Werteverzehr ein nutzungsbedingter Abschreibungsverlauf geboten ist. Wesentliche Komponenten einer Sachanlage, die unterschiedliche Nutzungsdauern haben, werden separat bilanziert und abgeschrieben.

Den planmäßigen Abschreibungen auf Sachanlagen liegen die folgenden konzerneinheitlichen Nutzungsdauern zugrunde:

**Nutzungsdauer Sachanlagen**

[Tabelle 4.10]

|                                    |                 |
|------------------------------------|-----------------|
| Gebäude                            | 20 bis 50 Jahre |
| Andere Baulichkeiten               | 10 bis 20 Jahre |
| Tank- und Verteilungsanlagen       | 10 bis 20 Jahre |
| Technische Anlagen                 | 6 bis 20 Jahre  |
| Maschinen und Apparate             | 6 bis 12 Jahre  |
| Betriebs- und Geschäftsausstattung | 4 bis 10 Jahre  |
| Fahrzeuge                          | 4 bis 8 Jahre   |
| EDV-Anlagen                        | 3 bis 5 Jahre   |
| Labor- und Forschungseinrichtungen | 3 bis 5 Jahre   |

Wertminderungen, die über den nutzungsbedingten Werteverzehr hinausgehen, werden durch außerplanmäßige Abschreibungen berücksichtigt. Bei Fortfall der Gründe für außerplanmäßige Abschreibungen werden entsprechende Zuschreibungen vorgenommen, welche die fortgeführten Anschaffungskosten nicht übersteigen dürfen.

Wenn Sachanlagen verkauft, stillgelegt oder verschrottet werden, wird der Gewinn bzw. Verlust als Differenz zwischen dem Nettoverkaufserlös und dem Restbuchwert unter den sonstigen betrieblichen Erträgen bzw. Aufwendungen erfasst.

## LEASING

Als Leasingverhältnis gilt eine Vereinbarung, bei der der Leasinggeber dem Leasingnehmer gegen eine Zahlung oder eine Reihe von Zahlungen das Recht auf Nutzung eines Vermögenswerts für einen vereinbarten Zeitraum überträgt. Es wird zwischen Finanzierungsleasing und Operating Leasing unterschieden. Als Finanzierungsleasing werden Leasingtransaktionen behandelt, bei denen der Leasingnehmer im Wesentlichen alle mit dem Eigentum eines Vermögenswerts verbundenen Risiken und Chancen trägt. Alle anderen Leasingverhältnisse werden als Operating Leasing bezeichnet.

Ist der Bayer-Konzern Leasingnehmer in einem Finanzierungsleasing, wird in der Bilanz der niedrigere Wert aus beizulegendem Zeitwert und dem Barwert der Mindestleasingzahlungen zu Beginn des Leasingverhältnisses aktiviert und gleichzeitig unter den Finanzverbindlichkeiten passiviert. Die Mindestleasingzahlungen setzen sich im Wesentlichen aus Finanzierungskosten und dem Tilgungsanteil der Restschuld, die nach der Effektivzinsmethode ermittelt werden, zusammen. Der Leasinggegenstand wird linear über die geschätzte Nutzungsdauer oder die kürzere Vertragslaufzeit abgeschrieben.

Ist der Bayer-Konzern Leasinggeber in einem Finanzierungsleasing, werden in Höhe des Nettoinvestitionswerts Umsatzerlöse erfasst und eine Leasingforderung angesetzt. Die erhaltenen Leasingraten werden ebenfalls nach der Effektivzinsmethode in einen Tilgungs- und einen Zinsertragsanteil aufgeteilt.

Bei einem Operating Leasing erfasst der Bayer-Konzern die als Leasingnehmer zu zahlende Leasingrate als Aufwand bzw. die als Leasinggeber erhaltene Leasingrate als Ertrag. Der verleaste Vermögenswert wird weiterhin in der Bilanz des Leasinggebers als Sachanlage erfasst.

## FINANZIELLE VERMÖGENSWERTE

Die finanziellen Vermögenswerte setzen sich aus gegebenen Krediten und Forderungen, erworbenen Eigenkapital- und Schuldtiteln, Zahlungsmitteln bzw. Zahlungsmitteläquivalenten und Derivaten mit positiven beizulegenden Zeitwerten zusammen.

Die Bilanzierung und Bewertung der finanziellen Vermögenswerte erfolgt nach IAS 39 (Financial Instruments: Recognition and Measurement). Demnach werden finanzielle Vermögenswerte in der Konzernbilanz angesetzt, wenn dem Bayer-Konzern ein vertragliches Recht zusteht, Zahlungsmittel oder andere finanzielle Vermögenswerte von einer anderen Partei zu erhalten. Marktübliche Käufe und Verkäufe von finanziellen Vermögenswerten werden grundsätzlich zum Erfüllungstag bilanziert. Der erstmalige Ansatz eines finanziellen Vermögenswerts erfolgt zum beizulegenden Zeitwert zuzüglich der Transaktionskosten. Transaktionskosten, die beim Erwerb von erfolgswirksam zum beizulegenden Zeitwert bewerteten finanziellen Vermögenswerten anfallen, werden unmittelbar aufwandswirksam erfasst. Unverzinsliche oder unterverzinsliche Forderungen werden bei ihrem erstmaligen Ansatz mit dem Barwert der erwarteten zukünftigen Cashflows angesetzt. Die Folgebewertung erfolgt gemäß der Zuordnung der finanziellen Vermögenswerte zu den nachstehenden Kategorien nach IAS 39, für die jeweils unterschiedliche Bewertungsregeln gelten:

*Erfolgswirksam zum beizulegenden Zeitwert bewertete finanzielle Vermögenswerte* umfassen die zu Handelszwecken gehaltenen finanziellen Vermögenswerte. Dieser Bewertungskategorie werden zudem die in den sonstigen finanziellen Vermögenswerten enthaltenen Forderungen aus Warendermingeschäften und Forderungen aus sonstigen Derivaten zugeordnet, die nicht in einer bilanziellen Sicherungsbeziehung stehen. Änderungen des beizulegenden Zeitwerts finanzieller Vermögenswerte dieser Kategorie werden zum Zeitpunkt der Wertsteigerung bzw. Wertminderung erfolgswirksam erfasst.

*Kredite und Forderungen* sind nicht derivative finanzielle Vermögenswerte, die nicht in einem aktiven Markt notiert sind. Sie werden unter Anwendung der Effektivzinsmethode mit den fortgeführten Anschaffungskosten bewertet. Dieser Bewertungskategorie werden die Forderungen aus Lieferungen und Leistungen, die in den sonstigen finanziellen Vermögenswerten enthaltenen finanziellen Forderungen und Ausleihungen, die in den sonstigen Forderungen ausgewiesenen weiteren finanziellen Forderungen und Darlehen sowie die Zahlungsmittel und Zahlungsmitteläquivalente zugeordnet. Der Zinsertrag aus Positionen dieser Kategorie wird unter Anwendung der Effektivzinsmethode ermittelt, soweit es sich nicht um kurzfristige Forderungen handelt und der Effekt aus der Aufzinsung unwesentlich ist.

*Bis zur Endfälligkeit zu haltende Finanzinvestitionen* sind nicht derivative finanzielle Vermögenswerte mit festen oder bestimmbareren Zahlungen und einer festen Endfälligkeit, bis zu der sie gehalten werden. Diese werden – unter Anwendung der Effektivzinsmethode – mit den fortgeführten Anschaffungskosten bewertet. Die bis zur Endfälligkeit zu haltenden Finanzinvestitionen sind Teil der sonstigen finanziellen Vermögenswerte.

*Zur Veräußerung verfügbare finanzielle Vermögenswerte* umfassen diejenigen nicht derivativen finanziellen Vermögenswerte, die nicht einer der zuvor genannten Kategorien zugeordnet wurden. Dies sind insbesondere Eigenkapitaltitel (z. B. Aktien) und nicht bis zur Endfälligkeit zu haltende Schuldtitel, welche in den sonstigen finanziellen Vermögenswerten enthalten sind. Änderungen des beizulegenden Zeitwerts von zur Veräußerung verfügbaren finanziellen Vermögenswerten werden erfolgsneutral im Eigenkapital abgegrenzt. Eine erfolgswirksame Erfassung einer Änderung des beizulegenden Zeitwerts erfolgt erst bei Veräußerung. Liegt der beizulegende Zeitwert über einen längeren Zeitraum bzw. wesentlich unter den fortgeführten Anschaffungskosten, wird eine Wertminderung erfolgswirksam erfasst. In Fällen, in denen der Marktwert von Eigenkapital- und Schuldtiteln bestimmt werden kann, wird dieser als beizulegender Zeitwert angesetzt. Existiert kein notierter Marktpreis und kann keine verlässliche Schätzung des beizulegenden Zeitwerts vorgenommen werden, werden diese finanziellen Vermögenswerte zu Anschaffungskosten abzüglich Wertminderungsaufwendungen erfasst.

Liegen bei finanziellen Vermögenswerten der Kategorien Kredite und Forderungen, bis zur Endfälligkeit zu haltende Finanzinvestitionen und zur Veräußerung verfügbare finanzielle Vermögenswerte objektive, substantielle Anzeichen für eine Wertminderung vor, erfolgt eine Prüfung, ob der Buchwert den Barwert der erwarteten künftigen Zahlungsmittelflüsse, die mit der aktuellen Markttrendite eines vergleichbaren finanziellen Vermögenswerts abgezinst werden, übersteigt. Sollte dies der Fall sein, wird eine erfolgswirksame Wertberichtigung in Höhe der Differenz vorgenommen. Hinweise auf Wertminderung sind u. a. ein mehrjähriger operativer Verlust in einer Gesellschaft, eine Minderung des Marktwerts, eine wesentliche Verschlechterung der Bonität, eine besondere Vertragsverletzung, die hohe Wahrscheinlichkeit einer Insolvenz oder einer anderen Form der finanziellen Restrukturierung des Schuldners oder das Verschwinden eines aktiven Markts.

Bei Wegfall der Gründe für zuvor vorgenommene außerplanmäßige Abschreibungen werden entsprechende Zuschreibungen, nicht jedoch über die fortgeführten Anschaffungskosten hinaus, getätigt. Lediglich auf zur Veräußerung verfügbare Eigenkapitaltitel werden keine Zuschreibungen vorgenommen.

Finanzielle Vermögenswerte werden ausgebucht, wenn die vertraglichen Rechte auf Zahlungen aus den finanziellen Vermögenswerten nicht mehr bestehen oder die finanziellen Vermögenswerte mit allen wesentlichen Risiken und Chancen übertragen werden.

#### DERIVATE

Derivate werden im Bayer-Konzern zur Reduzierung des Währungs-, Zins- und Rohstoffpreisrisikos eingesetzt. Soweit dies zweckmäßig ist, werden diese Derivate als eine bilanzielle Sicherungsbeziehung designiert.

Verträge, die für Zwecke des Empfangs oder der Lieferung nicht finanzieller Güter entsprechend dem eigenen Bedarf abgeschlossen werden, werden nicht als Derivate bilanziert, sondern als schwebende Geschäfte behandelt. Sofern eingebettete separierungspflichtige Derivate in solchen Geschäften identifiziert werden, werden diese losgelöst von den schwebenden Geschäften bilanziert. In geringem Umfang können – um Marktchancen zu nutzen bzw. potenzielle Bedarfsspitzen zu decken – Geschäfte getätigt werden, bei denen die unmittelbare Weiterveräußerung nicht ausgeschlossen werden kann. Diese Geschäfte werden mit dem Erwerb gesonderten Portfolios zugeordnet und entsprechend nach IAS 39 als Derivate bilanziert. Die Veränderungen der beizulegenden Zeitwerte dieser Derivate werden direkt erfolgswirksam in der Gewinn- und Verlustrechnung berücksichtigt.

Wertänderungen von Devisentermingeschäften und -optionen zur Absicherung bilanzieller Risiken werden im Kursergebnis ausgewiesen, während Wertänderungen von Zinsswaps und Zinsoptionen Bestandteil des Zinsergebnisses sind. Veränderungen beizulegender Zeitwerte von Warentermingeschäften und -optionen sowie von Devisentermingeschäften zur Sicherung von geplanten Umsätzen in Fremdwährung werden im sonstigen betrieblichen Ergebnis erfasst.

Die beizulegenden Zeitwerte der Derivate entsprechen entweder den Marktdaten oder sie werden mit marktüblichen Bewertungsmethoden unter Berücksichtigung der am Bewertungsstichtag vorliegenden Marktdaten ermittelt. Die Bewertung von Devisen- und Warentermingeschäften erfolgt einzelfallbezogen und mit dem jeweiligen Terminkurs bzw. -preis am Bilanzstichtag. Die Terminkurse bzw. -preise richten sich nach den Kassakursen und -preisen unter Berücksichtigung von Terminauf- und -abschlägen. Die beizulegenden Zeitwerte von Instrumenten zur Sicherung von Zinsrisiken ergeben sich durch Diskontierung der zukünftigen Zahlungsmittelzu- und -abflüsse. Zur Abzinsung dienen marktübliche Zinssätze, die über die Restlaufzeit der Instrumente angewendet werden. Für jede einzelne Transaktion von Zins- und Zins-/Währungsswaps wird zum Bilanzstichtag jeweils der Barwert ermittelt. Die Erfassung der Zinserträge erfolgt erfolgswirksam im Zahlungszeitpunkt bzw. bei der Abgrenzung zum Stichtag.

Marktwertänderungen der als Fair-Value-Hedges designierten Derivate werden ebenso wie die Buchwertanpassung der dazugehörigen Grundgeschäfte ergebniswirksam erfasst. Der Ausweis von Marktwertänderungen des effektiven Teils von als Cashflow-Hedges designierten Derivaten erfolgt zunächst erfolgsneutral im Eigenkapital („kumuliertes übriges Comprehensive Income“). Erst zum Zeitpunkt der Realisierung des Grundgeschäfts wird der Erfolgsbeitrag des Sicherungs-

geschäfts in der Gewinn- und Verlustrechnung ausgewiesen. Wird ein entsprechendes Derivat veräußert oder sind die Voraussetzungen für eine bilanzielle Sicherungsbeziehung nicht mehr erfüllt, verbleibt dessen Wertänderung bis zum Eintreten der geplanten Transaktion im kumulierten übrigen Comprehensive Income. Ist das Eintreten der geplanten Transaktion nicht mehr wahrscheinlich, wird das bisher im kumulierten übrigen Comprehensive Income ausgewiesene Ergebnis ergebniswirksam in der Gewinn- und Verlustrechnung erfasst.

Die im Finanzergebnis ausgewiesenen Aufwendungen bzw. Erträge aus den entsprechenden Grundgeschäften und aus den zugrunde liegenden Derivaten werden separat gezeigt. Eine Verrechnung der entsprechenden Aufwendungen und Erträge erfolgt nicht.

### VORRÄTE

Unter den Vorräten werden gemäß IAS 2 (Inventories) diejenigen Vermögenswerte ausgewiesen, die zum Verkauf im normalen Geschäftsgang gehalten werden (fertige Erzeugnisse und Waren), die sich in der Herstellung für den Verkauf befinden (unfertige Erzeugnisse) oder die im Rahmen der Produktion oder bei der Erbringung von Dienstleistungen verbraucht werden (Roh-, Hilfs- und Betriebsstoffe). Die Bewertung der Vorräte erfolgt zum niedrigeren Wert aus auf Basis der Durchschnittsmethode ermittelten Anschaffungs- bzw. Herstellungskosten (produktionsbezogener Vollkosten) und ihrem Nettoveräußerungswert, d.h. dem im normalen Geschäftsgang erzielbaren Verkaufserlös abzüglich der geschätzten Fertigstellungs- und Vertriebskosten.

### STEUERN

Als Ertragsteuern werden die in den einzelnen Ländern erhobenen Steuern auf den steuerpflichtigen Gewinn sowie die Veränderung der latenten Steuerabgrenzungen ausgewiesen. Die ausgewiesenen Ertragsteuern werden auf Basis der am Bilanzstichtag gültigen bzw. verabschiedeten gesetzlichen Regelungen in der Höhe erfasst, wie sie voraussichtlich bezahlt werden müssen.

Die sonstigen Steuern, wie z. B. vermögensabhängige Steuern sowie Strom- und Energiesteuern, sind in den jeweiligen Funktionskosten enthalten.

Gemäß IAS 12 (Income Taxes) werden latente Steuern auf zeitlich begrenzte Unterschiede zwischen den Wertansätzen von Vermögenswerten und Schulden in der IFRS-Bilanz und der Steuerbilanz, aus Konsolidierungsvorgängen sowie auf wahrscheinlich realisierbare Verlustvorräte ermittelt.

Aktive latente Steuern auf abzugsfähige temporäre Differenzen, Steuergutschriften und steuerliche Verlustvorräte werden insoweit aktiviert, als es wahrscheinlich ist, dass hierfür ein zu versteuerndes Ergebnis zukünftig verfügbar sein wird und die Verlustvorräte genutzt werden können. Passive latente Steuern werden gebildet auf zukünftig noch zu versteuernde temporäre Differenzen. Der Berechnung liegen die in den einzelnen Ländern zum Realisierungszeitpunkt erwarteten Steuersätze zugrunde. Diese basieren grundsätzlich auf den am Bilanzstichtag gültigen bzw. verabschiedeten gesetzlichen Regelungen. Latente Steueransprüche und -schulden werden saldiert, sofern diese gegenüber der gleichen Steuerbehörde bestehen. Die Auswirkungen von Steuersatz- oder Steuergesetzänderungen auf die aktiven und passiven latenten Steuern werden grundsätzlich in der Periode, in der das materielle Gesetzgebungsverfahren abgeschlossen ist, berücksichtigt. Im Regelfall erfolgt dies ergebniswirksam. Eine Erfassung über das Eigenkapital erfolgt bei latenten Steuern, die vormals über das übrige Comprehensive Income gebildet wurden.

Werden Gewinne und Verluste direkt im Eigenkapital erfasst, so gilt dies ebenfalls für die darauf abgegrenzten aktiven und passiven latenten Steuern.

Die Beurteilung der Werthaltigkeit aktiver latenter Steuern, die aus zeitlichen Unterschieden und Verlustvorräten resultieren, unterliegt unternehmensindividuellen Prognosen, u.a. über die zukünftige Ertragssituation in der betreffenden Konzerngesellschaft.

Auf geplante Dividendenausschüttungen von Tochterunternehmen werden passive latente Steuern angesetzt. Soweit langfristig keine Dividendenausschüttung geplant ist, wird auf den Unterschiedsbetrag zwischen anteiligem IFRS-Eigenkapital und dem steuerlichen Beteiligungswert keine passive latente Steuer gebildet.



## PENSIONS-RÜCKSTELLUNGEN UND ÄHNLICHE VERPFLICHTUNGEN

Für die meisten Mitarbeiter wird für die Zeit nach der Pensionierung durch den Konzern direkt oder durch Beitragszahlungen an private und öffentliche Einrichtungen Vorsorge getroffen. Die Leistungen des Konzerns variieren je nach rechtlichen, steuerlichen und wirtschaftlichen Gegebenheiten des jeweiligen Landes und basieren in der Regel auf Beschäftigungsdauer und Entgelt der Mitarbeiter. Die Verpflichtungen umfassen sowohl solche aus bereits laufenden Pensionen als auch aus Anwartschaften auf künftig zu zahlende Pensionen.

Die betriebliche Altersversorgung erfolgt im Konzern sowohl beitrags- als auch leistungsorientiert. Bei den beitragsorientierten Altersversorgungssystemen zahlt das Unternehmen aufgrund gesetzlicher oder vertraglicher Bestimmungen bzw. auf freiwilliger Basis Beiträge an staatliche oder private Rentenversicherungsträger. Mit Zahlung der Beiträge bestehen für das Unternehmen keine weiteren Leistungsverpflichtungen. Die laufenden Beitragszahlungen sind als Aufwand des jeweiligen Jahres in den Funktionsbereichen und damit im operativen Ergebnis (EBIT) ausgewiesen. Alle übrigen Altersversorgungssysteme sind leistungsorientiert, wobei zwischen rückstellungs- und fondsfinanzierten Versorgungssystemen unterschieden wird. Im Rahmen der Bilanzierung der leistungsorientierten Pensionspläne im Bayer-Konzernabschluss werden, mit Ausnahme der Zinskomponente und der erwarteten Erträge aus dem Planvermögen, sämtliche Aufwendungen und Erträge per saldo im operativen Ergebnis (EBIT) erfasst. Die Zinskomponente wird, ebenso wie die erwarteten Erträge aus Planvermögen, in den übrigen finanziellen Aufwendungen und Erträgen im Finanzergebnis gezeigt. Versicherungsmathematische Gewinne und Verluste aus leistungsorientierten Pensionsverpflichtungen sowie Kürzungsbeträge aus der Berücksichtigung der Obergrenze für Vermögenswerte werden unter Berücksichtigung latenter Steuern erfolgsneutral über die Eigenkapitalveränderungsrechnung bzw. Gesamtergebnisrechnung erfasst sowie vollständig in der Pensionsrückstellung ausgewiesen. Vorruhestandsleistungen bzw. sonstige Altersversorgungsleistungen aus Anlass der Beendigung des Arbeitsverhältnisses, die den Charakter einer pensionsähnlichen Verpflichtung aufweisen, sind ebenfalls Bestandteil der Pensionsrückstellungen.

Der Barwert der Versorgungsverpflichtungen für die leistungsorientierten Altersversorgungssysteme sowie der daraus resultierende Aufwand wird gemäß IAS 19 (Employee Benefits) nach der Projected-Unit-Credit-Methode ermittelt. Dabei werden die zukünftigen Verpflichtungen unter Anwendung versicherungsmathematischer Verfahren bewertet. Hier sind spezifische Annahmen, die die Berechtigtenstruktur und das ökonomische Umfeld abbilden, zu treffen. Dies sind im Wesentlichen der Abzinsungssatz, die erwarteten Erträge aus dem Planvermögen, die zukünftige Lohn- und Gehaltsentwicklung, die Entwicklung der Krankheitskosten sowie Fluktuations- und Sterberaten.

Die Bestimmung der Abzinsungssätze basiert auf währungsspezifischen, hochwertigen Anleiheportfolios, deren Zahlungsströme den erwarteten Zahlungsabflüssen aus den Pensionsplänen näherungsweise entsprechen. Der aus dieser Zinsstruktur abgeleitete einheitliche Abzinsungssatz orientiert sich somit an den Stichtagsrenditen entsprechender AA-gerateter Unternehmensanleihen. Als Richtgröße für den einheitlichen Abzinsungssatz gilt die Rendite solcher Anleihen, deren gewichtete Restlaufzeit der Duration des entsprechenden Portfolios zur Abdeckung der gesamten Verpflichtung in etwa entspricht. Liegen AA-geratete Unternehmensanleihen gleicher Duration nicht vor, wird hilfsweise die Stichtagsrendite von Staatsanleihen bzw. Zinsswaps angesetzt. Diese wird entsprechend dem Credit Spread von Unternehmensanleihen angepasst.

Der erwartete langfristige Ertrag aus der Vermögensanlage wird auf der Grundlage von öffentlich zugänglichen und internen Kapitalmarktstudien und -voraussagen für jede Kategorie von Vermögenswerten bestimmt. Die erwartete Rendite wird jeweils zum Jahresende auf den beizulegenden Zeitwert des Planvermögens angewandt.

Die Auswirkungen von Änderungen wesentlicher Parameter sind in Anhangangabe [25] dargestellt.

Der Aufwand für die leistungsorientierten Versorgungsverpflichtungen wird über die Projected-Unit-Credit-Methode über die gesamte Beschäftigungszeit der Mitarbeiter verteilt, wobei auch schon zukünftig erwartete Lohn- und Gehaltserhöhungen berücksichtigt werden.

Von dem Barwert der Versorgungsverpflichtungen wird der beizulegende Zeitwert des Planvermögens abgezogen. Die Verpflichtungen und das Planvermögen werden in regelmäßigen Abständen bewertet. Ein Zeitraum von drei Jahren wird dabei nicht überschritten. Für alle bedeutenden Versorgungspläne werden jährlich umfassende versicherungsmathematische Berechnungen zum 31. Dezember erstellt. Der Anwartschaftsbarwert – nach Abzug des Fondsvermögens – weicht von der Rückstellung in Höhe des noch nicht ertragswirksam erfassten nachzuverrechnenden Dienstzeitaufwands ab. Überschreitet das Fondsvermögen die entsprechende Versorgungsverpflichtung, wird der überschießende Betrag unter Berücksichtigung der in IAS 19 (Employee Benefits) vorgegebenen Obergrenze als sonstige Forderung in die Bilanz eingestellt.

Die tatsächlich zukünftig entstehenden Aufwendungen und Verpflichtungen können aufgrund veränderter Markt- und Wirtschaftsbedingungen wesentlich von den Schätzungen abweichen, die auf der Basis versicherungsmathematischer Annahmen getroffen worden sind. Das Planvermögen besteht überwiegend aus Aktien und festverzinslichen Wertpapieren. Deshalb kann es bei sinkenden Renditen auf den Aktien- und Rentenmärkten erforderlich sein, zusätzliche Beiträge zu den Versorgungsplänen zu leisten, um laufenden und künftigen Pensionsverpflichtungen nachkommen zu können. Eine höhere oder niedrigere Mitarbeiterfluktuation oder eine längere oder kürzere Lebensdauer der Teilnehmer können ebenfalls einen Einfluss auf die Höhe der Erträge aus den Versorgungssystemen und die entsprechenden Aufwendungen haben.

#### ANDERE RÜCKSTELLUNGEN

Andere Rückstellungen werden für gegenwärtige, rechtliche oder faktische Verpflichtungen gebildet, die aus Ereignissen der Vergangenheit resultieren, die wahrscheinlich zu einer künftigen wirtschaftlichen Belastung führen werden und deren Höhe verlässlich geschätzt werden kann.

Die Bewertung der anderen Rückstellungen erfolgt nach IAS 37 (Provisions, Contingent Liabilities and Contingent Assets) oder ggf. auch nach IAS 19 (Employee Benefits). Soweit bei Verpflichtungen erst nach mehr als einem Jahr mit Mittelabflüssen gerechnet wird, werden die Rückstellungen mit dem Barwert der voraussichtlichen Mittelabflüsse angesetzt. Erstattungsansprüche gegenüber Dritten werden getrennt von den Rückstellungen aktiviert, wenn ihre Realisation nahezu sicher ist.

Resultiert aus einer geänderten Einschätzung eine Reduzierung des Verpflichtungsumfangs, wird die Rückstellung anteilig aufgelöst und der Ertrag in den Funktionsbereichen erfasst, die ursprünglich bei der Bildung der Rückstellung mit dem Aufwand belastet waren.

Um die Aussagekraft im Bereich der Schätzungsergebnisse zu erhöhen, werden für bestimmte Rückstellungen, die wesentliche Auswirkungen auf die Vermögens-, Finanz- und Ertragslage des Konzerns haben könnten, die Folgen von Parameteränderungen auf die bilanzierten Rückstellungsbeträge untersucht. Zur Untersuchung der Unsicherheit hinsichtlich der Eintrittswahrscheinlichkeiten wurden die Auswirkungen von jeweils fünfprozentigen Änderungen der individuell angesetzten Eintrittswahrscheinlichkeiten analysiert. Wesentliche Abweichungen der anderen Rückstellungen zu den bereits im Bayer-Konzern berücksichtigten Werten haben sich im Rahmen dieser Sensitivitätsanalyse nicht ergeben.

Es bestehen Unsicherheiten hinsichtlich der Auslegung komplexer Steuervorschriften sowie der Höhe und des Zeitpunkts künftiger zu versteuernder Einkünfte. Insbesondere vor dem Hintergrund der vielfältigen internationalen Verflechtungen sowie der Langfristigkeit und Komplexität bestehender Vertragsbeziehungen können Unterschiede zwischen den tatsächlichen Ergebnissen und unseren Annahmen oder künftige Änderungen dieser Annahmen Auswirkungen auf zukünftige Steueraufwendungen und -erstattungen haben. Für in ihrer Höhe und der Wahrscheinlichkeit ihres Eintretens nach nicht sicheren Verpflichtungen gegenüber den jeweiligen nationalen Finanzbehörden werden **Steuerrückstellungen** auf Basis angemessener Schätzungen gebildet. Berücksichtigt werden dabei Faktoren wie Erfahrungen aus früheren Betriebsprüfungen sowie unterschiedliche Rechtsauslegungen zwischen Steuerpflichtigen und Finanzverwaltungen im Hinblick auf den jeweiligen Sachverhalt.

**Rückstellungen für Umweltschutz** werden gebildet, wenn zukünftige Mittelabflüsse zur Erfüllung von Umweltauflagen oder für Sanierungsmaßnahmen wahrscheinlich sind, die Kosten hinreichend zuverlässig geschätzt werden können und die Maßnahmen keinen künftigen Nutzenzufluss erwarten lassen.

Die Schätzung der künftigen Kosten für Umweltschutz- und Sanierungsmaßnahmen ist mit vielen Unsicherheiten behaftet, insbesondere mit rechtlichen Unsicherheiten, die sich auf Gesetze und Verordnungen beziehen, sowie mit Unsicherheiten über die tatsächlichen Verhältnisse in den verschiedenen Ländern und Standorten. Die Schätzung der Kosten stützt sich insbesondere auf frühere Erfahrungen in ähnlichen Fällen, Schlussfolgerungen aus von uns zu unseren Umweltprogrammen eingeholten Gutachten, laufende Kosten und neue Entwicklungen mit Einfluss auf die Kosten, die Auslegung der geltenden Umweltgesetze und -vorschriften durch die Unternehmensleitung, die Anzahl und die Finanzlage Dritter, die verpflichtet sein könnten, sich gesamtschuldnerisch an eventuellen Sanierungskosten zu beteiligen, und auf die wahrscheinlich zur Anwendung kommenden Sanierungsmethoden. Änderungen dieser Annahmen können sich auf das künftige Ergebnis des Unternehmens auswirken.

Unter Berücksichtigung der bisherigen Erfahrungen mit ähnlichen Umweltschutzsituationen geht der Konzern davon aus, dass die vorhandenen Rückstellungen – auf der Grundlage der heute vorhandenen Informationen – ausreichend sind. Es gab keine wesentlichen Änderungen der Schätzungen und Annahmen, welche die Gewinn- und Verlustrechnung in den Vorjahren beeinflusst hätten. Angesichts der den Geschäften, in denen der Konzern tätig ist, inhärenten Schwierigkeiten, Umweltschutzverpflichtungen zutreffend abzuschätzen – was vor allem für die Bereiche gilt, in denen das Risiko von Umweltschäden relativ betrachtet höher ist (CropScience und MaterialScience) –, können unter Umständen wesentliche zusätzliche Kosten über die zurückgestellten Beträge hinaus anfallen. So ist es möglich, dass während einer Sanierungsmaßnahme über die bereits bestehenden Rückstellungen hinaus zusätzliche Aufwendungen über einen längeren Zeitraum und in einem Ausmaß erforderlich werden, die nicht vernünftig abgeschätzt werden können. Die Unternehmensleitung geht jedoch davon aus, dass solche zusätzlichen Beträge, wenn sie überhaupt anfallen, keine wesentlichen Auswirkungen auf die Vermögens-, Finanz- und Ertragslage des Konzerns hätten.

Die **Rückstellungen für Restrukturierung** beinhalten nur die den Restrukturierungsmaßnahmen direkt zuordenbaren Aufwendungen, die notwendig für die Restrukturierung sind und nicht mit dem zukünftigen operativen Geschäft in Verbindung stehen. Dies sind z. B. Aufwendungen für Abfindungszahlungen an Mitarbeiter und Zahlungen für nicht mehr genutzte angemietete Immobilien.

Zu Restrukturierungsmaßnahmen gehören u. a. der Verkauf oder die Beendigung eines Geschäftsbereichs, die Stilllegung von Standorten, die Verlegung von Geschäftsaktivitäten an einen anderen Ort, Änderungen in der Managementstruktur oder die grundsätzliche Umorganisation von Geschäftsbereichen.

Rückstellungen werden hierfür zu dem Zeitpunkt gebildet, in dem ein detaillierter Restrukturierungsplan vorliegt, der von der jeweils entscheidungsbefugten Managementebene beschlossen und den Mitarbeitern bzw. deren Vertretern kommuniziert wurde. Rückstellungen für Restrukturierungsmaßnahmen werden mit dem Barwert der zukünftigen Mittelabflüsse angesetzt.

Zu den **Rückstellungen, die den Kunden- und Lieferantenverkehr** betreffen, gehören insbesondere Verpflichtungen für Rabatte und Skonti, Produktretouren sowie erhaltene Dienstleistungen und Waren, die noch nicht in Rechnung gestellt wurden.

Als international tätiges Unternehmen mit heterogenen Geschäftsfeldern ist der Bayer-Konzern einer Vielzahl von rechtlichen Risiken ausgesetzt. Hierzu können insbesondere Risiken aus den Bereichen Produkthaftung, Wettbewerbs- und Kartellrecht, Patentrecht, Steuerrecht sowie Umweltschutz gehören. Für anhängige bzw. künftige juristische Verfahren wird, vorbehaltlich einer entsprechenden Einzelfallprüfung, durch den Ansatz von **Rückstellungen für Rechtsstreitigkeiten** bilanzielle Vorsorge getroffen. Die wahrscheinlichen Ergebnisse solcher Rechtsstreitigkeiten werden anhand der vorliegenden Informationen und in Rücksprache mit den für den Bayer-Konzern

tätigen Rechtsanwälten bewertet. Soweit nach vernünftigem Ermessen eine Verpflichtung aus einem Verfahren wahrscheinlich zu zukünftigen Mittelabflüssen führen wird, wird der Barwert der erwarteten Mittelabflüsse, soweit diese als verlässlich messbar betrachtet werden, passiviert. Diese Rückstellungen decken die geschätzten Zahlungen an Kläger, die Gerichtskosten, die Kosten für Rechtsanwälte sowie eventuelle Vergleichskosten ab. Zu jedem Bilanzstichtag wird der aktuelle Stand der Rechtsstreitigkeiten bei der Beurteilung zugrunde gelegt, wobei geprüft wird, ob die Ansatzkriterien für eine Rückstellung erfüllt sind und in welcher Höhe eine Rückstellung zu bilden ist.

Rechtsstreitigkeiten und andere rechtliche Verfahren werfen grundsätzlich komplexe Fragen auf und sind mit zahlreichen Unwägbarkeiten und Schwierigkeiten verbunden, u.a. aufgrund des Sachverhalts und der Umstände jedes einzelnen Falls, des Gerichts, bei dem die Klage anhängig ist sowie aufgrund von Unterschieden im anwendbaren Recht. Somit sind die Ergebnisse von gegenwärtig anhängigen bzw. künftigen Verfahren nicht vorhersagbar. Durch das Urteil in einem Gerichtsverfahren oder durch einen Vergleich können dem Bayer-Konzern Kosten entstehen, die über die hierfür vorgesehene Rückstellung und Versicherungsdeckung hinausgehen.

In den **Personalarückstellungen** wird bilanzielle Vorsorge vor allem für Jahressonderzahlungen, variable und individuelle Einmalzahlungen, Zahlungen aufgrund von Mitarbeiterjubiläen, Überschüsse auf Langzeitkonten sowie sonstige Personalkosten getroffen. Ferner sind hier die Verpflichtungen aus aktienbasierten Vergütungen mit Barausgleich ausgewiesen.

#### FINANZIELLE VERBINDLICHKEITEN

Die finanziellen Verbindlichkeiten setzen sich aus originären Verbindlichkeiten und den negativen beizulegenden Zeitwerten von Derivaten zusammen.

Originäre Verbindlichkeiten werden in der Konzernbilanz angesetzt, wenn der Bayer-Konzern eine vertragliche Pflicht hat, Zahlungsmittel oder andere finanzielle Vermögenswerte auf eine andere Partei zu übertragen. Der erstmalige Ansatz einer originären Verbindlichkeit erfolgt zum beizulegenden Zeitwert der erhaltenen Gegenleistung bzw. zum Wert der erhaltenen Zahlungsmittel abzüglich ggf. angefallener Transaktionskosten. Die Folgebewertung erfolgt bei den originären Verbindlichkeiten zu fortgeführten Anschaffungskosten unter Anwendung der Effektivzinsmethode.

Finanzielle Verbindlichkeiten werden ausgebucht, wenn die vertraglichen Verpflichtungen beglichen, aufgehoben oder ausgelaufen sind.

IAS 32 (Financial Instruments: Presentation) regelt, dass von Gesellschaftern kündbares Kapital nur unter bestimmten Bedingungen als Eigenkapital klassifiziert werden darf. Rückzahlungsverpflichtungen aus dem Gesellschaftsvermögen können bestehen, wenn anderen Gesellschaftern von Tochterunternehmen ein Kündigungsrecht zusteht und gleichzeitig die Ausübung dieses Rechts einen Abfindungsanspruch gegen die Gesellschaft begründet. Solches von anderen Gesellschaftern zur Verfügung gestelltes Kapital wird als Verbindlichkeit ausgewiesen, auch wenn es nach landesrechtlichen Vorschriften als Eigenkapital angesehen wird. Das rückzahlbare Kapital von anderen Gesellschaftern wird mit dem anteiligen Nettovermögen der Gesellschaft angesetzt.

#### SONSTIGE FORDERUNGEN UND VERBINDLICHKEITEN

Rechnungsabgrenzungen und andere nicht finanzielle Vermögenswerte und Verbindlichkeiten werden mit den fortgeführten Anschaffungskosten angesetzt. Ihre Auflösung erfolgt linear bzw. entsprechend der Leistungserbringung.

Von Dritten gewährte Zuwendungen, die der Investitionsförderung dienen, werden in Anwendung von IAS 20 (Accounting for Government Grants and Disclosure of Government Assistance) unter den sonstigen Verbindlichkeiten ausgewiesen und über die Nutzungsdauer der betreffenden Anlagegegenstände ertragswirksam aufgelöst.

#### UNTERNEHMENSERWERBE

Die Bilanzierung eines Unternehmenserwerbs erfolgt mithilfe der Erwerbsmethode, die eine Bewertung der übernommenen Vermögenswerte und Schulden zum beizulegenden Zeitwert zum Zeitpunkt der erstmaligen Beherrschung vorsieht.

Die Anwendung der Erwerbsmethode erfordert bestimmte Schätzungen und Beurteilungen, vor allem in Bezug auf die Bestimmung des beizulegenden Zeitwerts der erworbenen immateriellen Vermögenswerte und Sachanlagen, der übernommenen Verbindlichkeiten zum Zeitpunkt des Erwerbs sowie der Nutzungsdauern der erworbenen immateriellen Vermögenswerte und Sachanlagen.

Die Bewertung basiert in großem Umfang auf antizipierten Zahlungsmittelzu- und -abflüssen. Abweichungen zwischen den tatsächlichen und den bei der Ermittlung der beizulegenden Zeitwerte zugrunde gelegten Zahlungsmittelzu- und -abflüssen können die zukünftigen Konzernergebnisse wesentlich beeinflussen. Insbesondere der Schätzung der abgezinsten Zahlungsmittelzu- und -abflüsse aus in Entwicklung befindlichen immateriellen Vermögenswerten, patentierten und nicht patentierten Technologien sowie Markennamen liegen Annahmen z.B. in Bezug auf die folgenden Aspekte zugrunde:

- Ergebnisse der Forschungs- und Entwicklungsaktivitäten in Bezug auf die Wirksamkeit eines Präparats, Ergebnisse der klinischen Studien usw.
- Wahrscheinlichkeit der Erlangung der behördlichen Zulassung in einzelnen Ländern
- Langfristige Verkaufsvorhersagen
- Antizipation des Verfalls von Verkaufspreisen nach Patentablauf im Zuge eines entsprechenden Generika-Angebots auf dem Markt
- Allgemeines Wettbewerbsverhalten (Einführung von Konkurrenzprodukten, Marketing-Initiativen usw.)

Die Kaufpreisaufteilung wesentlicher Akquisitionen erfolgt unter der Mithilfe externer unabhängiger Gutachter. Die damit zusammenhängenden Bewertungen basieren auf dem Kenntnisstand zum Erwerbszeitpunkt.

Gemäß IFRS 3 (Business Combinations) ist bei sukzessiven Unternehmenskäufen, bei denen ein Unternehmen in mehreren Tranchen erworben wird, zum Zeitpunkt der Erlangung der Kontrolle über das betreffende Unternehmen eine vollständige Neubewertung des bisherigen Gesellschaftsanteils mit den entsprechenden beizulegenden Zeitwerten des Unternehmens notwendig. Für diesen Geschäftsanteil, der sich bereits im Besitz des erwerbenden Unternehmens befindet und deren neu ermittelter beizulegender Zeitwert höher oder niedriger als der bilanzierte Buchwert ist, muss eine Buchwertanpassung auf den beizulegenden Zeitwert vorgenommen werden. Die entsprechende Wertanpassung wird erfolgswirksam über die Gewinn- und Verlustrechnung vorgenommen.

## VORGEHENSWEISE UND AUSWIRKUNGEN DER WELTWEITEN WERTHALTIGKEITSPRÜFUNGEN

Neben den Werthaltigkeitsprüfungen bei einzelnen Sachanlagevermögenswerten und immateriellen Vermögenswerten werden Werthaltigkeitsprüfungen auf Ebene von zahlungsmittelgenerierenden Einheiten (sogenannten cash generating units – „CGU“) durchgeführt. Eine zahlungsmittelgenerierende Einheit stellt die kleinste identifizierbare Gruppe von Vermögenswerten dar, die weitestgehend unabhängig von anderen Vermögenswerten oder Gruppen von Vermögenswerten Mittelzuflüsse erzeugt. Im Bayer-Konzern werden die strategischen Geschäftseinheiten wie auch einzelne Produktfamilien als zahlungsmittelgenerierende Einheiten angesehen und unterliegen weltweiten Werthaltigkeitsprüfungen. Die strategischen Geschäftseinheiten stellen die **zweite** Berichtsebene unterhalb der Berichtssegmente dar.

Eine weltweite Werthaltigkeitsprüfung für eine zahlungsmittelgenerierende Einheit wird entweder bei Vorliegen eines Anhaltspunktes für eine Wertminderung vorgenommen oder mindestens jährlich, wenn einer strategischen Geschäftseinheit ein Goodwill zugeordnet ist.

Bei einer Werthaltigkeitsprüfung werden die Restbuchwerte der einzelnen zahlungsmittelgenerierenden Einheiten bzw. der zu testenden Sachanlagen bzw. immateriellen Vermögenswerte mit ihrem jeweiligen erzielbaren Betrag, d.h. dem höheren Wert aus beizulegendem Zeitwert abzüglich Veräußerungskosten und Nutzungswert, verglichen. In den Fällen, in denen der Buchwert höher als ihr erzielbarer Betrag ist, liegt in der Höhe der Differenz ein Wertminderungsaufwand vor. Im Falle eines Wertberichtigungsbedarfs bei einer strategischen Geschäftseinheit wird im ersten Schritt der Geschäfts- oder Firmenwert abgeschrieben. Ein eventuell verbleibender Rest-



betrag wird buchwertproportional auf die anderen Vermögenswerte der jeweiligen strategischen Geschäftseinheit verteilt. Die Wertberichtigung wird in der Gewinn- und Verlustrechnung zumeist unter den sonstigen betrieblichen Aufwendungen ausgewiesen.

Bei der Ermittlung des erzielbaren Betrags wird sowohl für den beizulegenden Zeitwert abzüglich der Veräußerungskosten als auch für den Nutzungswert der Barwert der künftigen Netto-Zahlungsmittelzuflüsse (Cashflows) zugrunde gelegt. Die Prognose der künftigen Netto-Zahlungsmittelzuflüsse zur Ermittlung des erzielbaren Betrags stützt sich auf die aktuellen Planungen des Bayer-Konzerns, im Regelfall innerhalb eines Planungshorizonts von drei bis fünf Jahren, wobei Annahmen, vor allem über künftige Verkaufspreise bzw. -mengen und Kosten, getroffen werden müssen. Beim Ansatz des beizulegenden Zeitwerts abzüglich der Veräußerungskosten wird die Bewertung der zahlungsmittelgenerierenden Einheit aus Sicht eines unabhängigen Marktteilnehmers vorgenommen. Beim Ansatz des Nutzungswerts wird die zahlungsmittelgenerierende Einheit bzw. der Einzelvermögenswert in ihrer bzw. seiner bisherigen Nutzung bewertet. Netto-Zahlungsmittelzuflüsse jenseits der Planungsperiode werden für beide Methoden unter Anwendung individueller, aus jeweiligen Marktinformationen abgeleiteten Wachstumsraten auf Basis langfristiger Geschäftserwartungen bestimmt.

Die Netto-Zahlungsmittelzuflüsse werden mit den Kapitalkostensätzen abgezinst. Die Kapitalkostensätze werden bei Bayer als gewichteter Durchschnitt der Eigen- und Fremdkapitalkostensätze berechnet. Um den unterschiedlichen Rendite-/Risikoprofilen der Tätigkeitsschwerpunkte des Bayer-Konzerns Rechnung zu tragen, werden für die Teilkonzerne individuelle Kapitalkostensätze nach Ertragsteuern sowie eine teilkonzernspezifische Kapitalstruktur anhand von Vergleichsunternehmen derselben Branche festgelegt. Die Eigenkapitalkostensätze entsprechen den Renditeerwartungen der Aktionäre. Die verwendeten Fremdkapitalkostensätze stellen die langfristigen Finanzierungskonditionen der Vergleichsunternehmen dar. Beide Komponenten werden aus Kapitalmarktinformationen abgeleitet.

Die für die Werthaltigkeitsprüfungen in 2010 und 2009 verwendeten Wachstumsraten und die zur Diskontierung der prognostizierten Cashflows herangezogenen Kapitalkostensätze können der nachfolgenden Tabelle entnommen werden:

Parameter Werthaltigkeitsprüfung

[Tabelle 4.11]

|                              | HealthCare |          | CropScience |          | MaterialScience |          |
|------------------------------|------------|----------|-------------|----------|-----------------|----------|
|                              | 2009       | 2010     | 2009        | 2010     | 2009            | 2010     |
|                              | in %       | in %     | in %        | in %     | in %            | in %     |
| Wachstumsrate                | 0-1,8      | -2,0-0,0 | 1,4-4,0     | 1,5-4,0  | 0,5             | 0,5      |
| Nachsteuer-Kapitalkostensatz | 6,9        | 5,7      | 7,0         | 6,5      | 6,7             | 6,3      |
| Vorsteuer-Kapitalkostensatz  | 8,5-9,9    | 7,3-9,0  | 8,5-12,0    | 7,6-11,7 | 8,4-9,7         | 8,0-10,0 |

Für die innerhalb des Berichtssegments Environmental Science/BioScience zugeordnete strategische Geschäftseinheit Crop Improvement wurde wie im Vorjahr ein Risikozuschlag von 3,5 Prozentpunkten auf den Kapitalkostensatz veranschlagt.

Im Rahmen einer Sensitivitätsanalyse für zahlungsmittelgenerierende Einheiten, denen ein Geschäfts- oder Firmenwert zugeordnet ist, wurde eine Minderung der zukünftigen Cashflows und eine Erhöhung der gewichteten Kapitalkosten um jeweils 10 % angenommen, da eine Veränderung bis zu dieser Höhe nach vernünftigem Ermessen besonders auf langfristige Sicht möglich ist. Größere Veränderungen wurden aufgrund der weltweiten Wirtschafts- und Finanzkrise im Vorjahr beobachtet, jedoch sind diese aus unserer Sicht nicht nachhaltig und somit nur kurzfristig wahrscheinlich. Auf dieser Grundlage kamen wir zu dem Ergebnis, dass es kein Anzeichen für eine potenzielle Wertminderung des Geschäfts- oder Firmenwerts in allen zahlungsmittelgenerierenden Einheiten gibt. Aufgrund der jährlichen weltweiten Werthaltigkeitsprüfungen der zahlungsmittelgenerierenden Einheiten wurden im Berichtsjahr wie auch im Vorjahr keine Wertminderungsaufwendungen erfasst. Wertberichtigungen auf immaterielle Vermögenswerte sowie Sachanlagevermögen betrugen 989 Mio € (Vorjahr: 149 Mio €) und sind in den Anhangangaben [17] und [18] erläutert.

Die vorgenommenen Schätzungen werden in Bezug auf die voraussichtliche Nutzungsdauer bestimmter Vermögenswerte, die Annahmen über makroökonomische Rahmenbedingungen und Entwicklungen in den Branchen, in denen der Bayer-Konzern tätig ist, und die Schätzung der Barwerte künftiger Cashflows für angemessen erachtet. Gleichwohl können geänderte Annahmen oder veränderte Umstände Korrekturen notwendig machen, die zu zusätzlichen außerplanmäßigen Abschreibungen oder, falls sich die erwarteten Entwicklungen umkehren sollten, zu Zuschreibungen führen können, sofern es sich nicht um Geschäfts- oder Firmenwert handelt.

## 5. Erläuterungen zur Segmentberichterstattung

Die Ressourcenallokation und die Bewertung der Ertragskraft der Geschäftssegmente werden bei Bayer durch den Vorstand als Hauptentscheidungsträger wahrgenommen. Die Segment- und Regionenabgrenzung sowie die Auswahl der dargestellten Kennzahlen erfolgen in Übereinstimmung mit den internen Steuerungs- und Berichtssystemen („Management Approach“). Es werden dieselben Rechnungslegungsvorschriften zugrunde gelegt, wie sie für den Konzern in Anhangangabe [4] beschrieben sind.

Der Bayer-Konzern wird über strategische Geschäftseinheiten in Form von Divisionen (Health-Care), Geschäftsbereichen (CropScience) und Business Units (MaterialScience) gesteuert, die aufgrund der wirtschaftlichen Merkmale des Geschäfts, der Art der Produkte und Produktionsprozesse, der Art der Kundenbeziehung sowie der Charakteristika der Vertriebsorganisation und des regulatorischen Umfelds in berichtspflichtige Segmente zusammengefasst werden. Zum 31. Dezember 2010 besteht der Konzern aus drei Teilkonzernen, die sich in fünf berichtspflichtige Segmente aufteilen.

Die Segmente umfassen die folgenden Aktivitäten:

Aktivitäten je Segment

[Tabelle 4.12]

| Teilkonzern/Segment              | Aktivitäten                                                                                                                                                                                                                                                                                           |
|----------------------------------|-------------------------------------------------------------------------------------------------------------------------------------------------------------------------------------------------------------------------------------------------------------------------------------------------------|
| <b>HealthCare</b>                |                                                                                                                                                                                                                                                                                                       |
| Pharma                           | Entwicklung, Produktion und Vertrieb verschreibungspflichtiger Arzneimittel, wie z.B. zur Behandlung von Bluthochdruck, Herz-Kreislauf-Erkrankungen, Infektionen, Krebserkrankungen, Multipler Sklerose und zur Empfängnisverhütung sowie von Kontrastmitteln für die diagnostische Bildgebung        |
| Consumer Health                  | Entwicklung, Produktion und Vertrieb von rezeptfreien Arzneimitteln, Dermatologieprodukten, Nahrungsergänzungsmitteln für Menschen und Tiere, Tierarzneimitteln und Tierpflegeprodukten sowie Diagnosetechnik wie Blutzuckermessgeräte und Medizinprodukte wie Injektionsgeräte für Diagnoseverfahren |
| <b>CropScience</b>               |                                                                                                                                                                                                                                                                                                       |
| Crop Protection                  | Entwicklung, Produktion und Vertrieb eines umfassenden Produktportfolios aus Fungiziden, Herbiziden, Insektiziden und Saatgutbehandlungsmitteln für die unterschiedlichsten regionalen Ansprüche                                                                                                      |
| Environmental Science/BioScience | Entwicklung, Produktion und Vertrieb einer Vielzahl von Produkten für die Garten- und Landschaftspflege, von nicht landwirtschaftlichen Schädlingsbekämpfungsmitteln sowie von Saatgut und Pflanzeigenschaften                                                                                        |
| <b>MaterialScience</b>           |                                                                                                                                                                                                                                                                                                       |
| MaterialScience                  | Entwicklung, Produktion und Vertrieb von hochwertigen Produkten im Bereich Polyurethane, Polycarbonate, Lack- und Klebstoffrohstoffe sowie funktionaler Folien; Produktion und Vertrieb von ausgewählten anorganischen Grundchemikalien                                                               |

Geschäftsaktivitäten, die keinem anderen Segment zugeordnet werden können, sind unter „Alle sonstigen Segmente“ ausgewiesen. Hierzu zählen vor allem die Dienstleistungen der Servicegesellschaften: Business Services, Technology Services und Currenta.

Die Bayer-Holding Gesellschaften und die Eliminierung der Intersegment-Umsätze werden in der Segmentberichterstattung als „Corporate Center und Konsolidierung“ dargestellt.

In der Überleitung der Regionentabelle werden konzerninterne Posten und Transaktionen eliminiert (Interregionen-Umsatzerlöse) sowie Erträge, Aufwendungen, Vermögenswerte und Schulden, die den Segmenten nicht direkt zuzuordnen sind, ausgewiesen. Hierzu gehört insbesondere das Corporate Center.

Die Segmentdaten wurden auf folgende Weise ermittelt:

- Die Intersegment-Umsätze zeigen die Umsatzerlöse, die zwischen den Segmenten getätigt wurden. Die Verrechnungspreise für konzerninterne Umsatzerlöse werden marktorientiert festgelegt (Arm's-Length-Prinzip).
- Das EBIT vor Sondereinflüssen und das EBITDA vor Sondereinflüssen sind Kennzahlen, die nach den internationalen Rechnungslegungsvorschriften nicht definiert sind, für den Bayer-Konzern jedoch wichtige Steuerungsgrößen bedeuten. Sondereinflüsse sind einmalige bzw. in ihrer Art oder Höhe nicht regelmäßig wiederkehrende Effekte. Das EBITDA entspricht dem EBIT gemäß Gewinn- und Verlustrechnung zuzüglich Abschreibungen auf immaterielle Vermögenswerte und Sachanlagen.
- Der Brutto-Cashflow entspricht dem Ergebnis nach Steuern zuzüglich Ertragsteueraufwand zuzüglich Finanzergebnis abzüglich gezahlter bzw. geschuldeter Ertragsteuern zuzüglich Abschreibungen zuzüglich bzw. abzüglich Veränderungen der Pensionsrückstellungen abzüglich Gewinne bzw. zuzüglich Verluste aus dem Abgang von langfristigen Vermögenswerten abzüglich Gewinne aus der Neubewertung bisheriger Vermögenswerte bei stufenweisem Unternehmenserwerb. Die Position „Veränderung Pensionsrückstellungen“ umfasst sowohl die Korrektur nicht zahlungswirksamer Effekte im operativen Ergebnis (EBIT) als auch Auszahlungen aufgrund unserer Pensionsverpflichtungen.
- Der Netto-Cashflow entspricht dem Cashflow aus der betrieblichen Tätigkeit nach IAS 7 (Statement of Cash Flows).
- Im Investitionswert sowie im Vermögen sind sämtliche Vermögenswerte enthalten, die einem Segment dienen und deren Anschaffungsausgaben eine Verzinsung erfordern. Seit 2010 werden wesentliche Beteiligungen, die einen direkten Bezug zum operativen Geschäft aufweisen, ebenfalls berücksichtigt. Die Werte für 2009 wurden entsprechend angepasst. Sachanlagen und immaterielle Vermögenswerte werden im Investitionswert während der bilanziellen Nutzungsdauer zu Anschaffungs- und Herstellungskosten angesetzt, da bei der Berechnung der Steuerungsgröße „Cash Flow Return on Investment“ (CFRoI) eine Betrachtung vor Abschreibungen erfolgt. Unverzinsliches Fremdkapital wird abgezogen; angegeben ist der Stichtagswert zum 31. Dezember des jeweiligen Jahres.
- Der CFRoI drückt das Verhältnis des Brutto-Cashflows zum durchschnittlichen Investitionswert des jeweiligen Jahres aus und ist ein Maßstab für die Verzinsung des eingesetzten Kapitals.
- Die Equity-Positionen betreffen die Ergebnisse und Buchwerte der at-equity bewerteten Beteiligungen.
- Da die finanzielle Steuerung unserer Konzerngesellschaften zentral über die Bayer AG erfolgt, werden Finanzverbindlichkeiten nicht direkt den einzelnen Segmenten zugeordnet. Grundsätzlich enthalten die in der Position Verbindlichkeiten ausgewiesenen Segmentschulden daher keine Finanzverbindlichkeiten. Diese sind in der Überleitung enthalten.
- Die Anzahl der Mitarbeiter (Festanstellungen und befristete Arbeitsverhältnisse) wird in Vollzeitbeschäftigte (FTE) umgerechnet dargestellt. Teilzeitbeschäftigte werden dabei gemäß ihrer vertraglichen Arbeitszeit proportional berücksichtigt. Im Gegensatz zum Vorjahr sind statt der Auszubildenden die befristeten Arbeitsverhältnisse enthalten. Die Werte für 2009 wurden entsprechend angepasst.

Die nachfolgenden Tabellen enthalten die Überleitungsrechnungen des operativen Ergebnisses (EBIT), des Vermögens und der Verbindlichkeiten der Segmente zum Ergebnis vor Ertragsteuern des Konzerns, zum Konzernvermögen bzw. zu den Konzernverbindlichkeiten.

Überleitung vom operativen Ergebnis der Segmente zum Ergebnis vor Ertragsteuern des Konzerns

[Tabelle 4.13]

|                                      | 2009         | 2010         |
|--------------------------------------|--------------|--------------|
|                                      | in Mio €     | in Mio €     |
| Operatives Ergebnis der Segmente     | 3.204        | 2.949        |
| Operatives Ergebnis Corporate Center | -198         | -219         |
| <b>Operatives Ergebnis (EBIT)</b>    | <b>3.006</b> | <b>2.730</b> |
| Finanzergebnis                       | -1.136       | -1.009       |
| <b>Ergebnis vor Ertragsteuern</b>    | <b>1.870</b> | <b>1.721</b> |

Überleitung vom Segment- zum Konzernvermögen

[Tabelle 4.14]

|                                         | 2009          | 2010          |
|-----------------------------------------|---------------|---------------|
|                                         | in Mio €      | in Mio €      |
| <b>Vermögen der operativen Segmente</b> | <b>45.098</b> | <b>44.515</b> |
| Vermögen Corporate Center               | 1.222         | 1.016         |
| Nicht verteilte Vermögenswerte          | 4.722         | 5.975         |
| <b>Gesamtvermögen</b>                   | <b>51.042</b> | <b>51.506</b> |

Vorjahreswerte angepasst

Überleitung von Segment- zu Konzernverbindlichkeiten

[Tabelle 4.15]

|                                                  | 2009          | 2010          |
|--------------------------------------------------|---------------|---------------|
|                                                  | in Mio €      | in Mio €      |
| <b>Verbindlichkeiten der operativen Segmente</b> | <b>12.295</b> | <b>14.373</b> |
| Verbindlichkeiten Corporate Center               | 3.204         | 3.382         |
| Nicht verteilte Verbindlichkeiten                | 16.592        | 14.855        |
| <b>Verbindlichkeiten Gesamt</b>                  | <b>32.091</b> | <b>32.610</b> |

Hinsichtlich der Überleitungsrechnung der Segmentumsätze zu den Konzernumsätzen wird auf die Darstellung innerhalb der Kennzahlen nach Segmenten verwiesen (Anhangangabe [1]).

## INFORMATIONEN ÜBER GEOGRAFISCHE GEBIETE

Die Außenumsätze nach Verbleib sowie die immateriellen Vermögenswerte und Sachanlagen teilten sich regional wie folgt auf:

Informationen über geografische Gebiete

[Tabelle 4.16]

|               | Außenumsatz nach Verbleib |               | Immaterielle Vermögenswerte und Sachanlagen |               |
|---------------|---------------------------|---------------|---------------------------------------------|---------------|
|               | 2009                      | 2010          | 2009                                        | 2010          |
|               | in Mio €                  | in Mio €      | in Mio €                                    | in Mio €      |
| Deutschland   | 4.147                     | 4.432         | 15.944                                      | 14.425        |
| USA           | 6.753                     | 7.109         | 5.333                                       | 5.633         |
| China         | 1.741                     | 2.418         | 1.966                                       | 2.230         |
| Sonstige      | 18.527                    | 21.129        | 7.712                                       | 7.710         |
| <b>Gesamt</b> | <b>31.168</b>             | <b>35.088</b> | <b>30.955</b>                               | <b>29.998</b> |

## INFORMATIONEN ÜBER WICHTIGE KUNDEN

Im Geschäftsjahr 2010 und im Vorjahr wurden mit keinem Kunden mehr als 10 % der Umsatzerlöse des Bayer-Konzerns getätigt.

## 6. Konsolidierungskreis und Beteiligungen

### 6.1 Entwicklung des Konsolidierungskreises

Der Konsolidierungskreis entwickelte sich im Geschäftsjahr 2010 wie folgt:

Veränderung der Anzahl konsolidierter Unternehmen

[Tabelle 4.17]

|                                               | Inland | Ausland | Gesamt |
|-----------------------------------------------|--------|---------|--------|
| <b>Bayer AG und konsolidierte Unternehmen</b> |        |         |        |
| 31.12.2009                                    | 59     | 243     | 302    |
| Konzernkreisänderungen                        | 0      | 1       | 1      |
| Zugänge                                       | 1      | 6       | 7      |
| Abgänge                                       | 0      | -19     | -19    |
| 31.12.2010                                    | 60     | 231     | 291    |

Der Rückgang der Anzahl der konsolidierten Gesellschaften in 2010 ist im Wesentlichen auf konzerninterne Zusammenlegungen von Gesellschaften zurückzuführen.

In der obigen Tabelle sind zum 31. Dezember 2010 drei Gemeinschaftsunternehmen enthalten, welche entsprechend IAS 31 (Interests in Joint Ventures) anteilmäßig konsolidiert wurden (Vorjahr: vier Gemeinschaftsunternehmen). Die verbleibenden Gesellschaftsanteile eines in 2009 noch anteilmäßig einbezogenen Unternehmens wurden in 2010 vollständig übernommen. Die Gemeinschaftsunternehmen hatten auf Vermögen und Schulden sowie auf Erträge und Aufwendungen des Konzerns folgenden Einfluss:

Vermögen, Schulden und Ergebnis der Gemeinschaftsunternehmen

[Tabelle 4.18]

|                             | 2010      |                              | 2010     |
|-----------------------------|-----------|------------------------------|----------|
|                             | in Mio €  |                              | in Mio € |
| Kurzfristige Vermögenswerte | 28        | Erträge                      | 54       |
| Langfristige Vermögenswerte | 77        | Aufwendungen                 | -52      |
| Kurzfristige Schulden       | -22       |                              |          |
| Langfristige Schulden       | -14       |                              |          |
| <b>Nettovermögen</b>        | <b>69</b> | <b>Ergebnis nach Steuern</b> | <b>2</b> |

Zusätzlich wurden fünf assoziierte Unternehmen im Konzernabschluss nach der Equity-Methode berücksichtigt. Ihre Anzahl ist gegenüber 2009 konstant geblieben. Entsprechende Ergebnis- und Bilanzdaten sind in Anhangangabe [19] dargestellt.

78 Tochterunternehmen und 18 assoziierte und Gemeinschaftsunternehmen von insgesamt untergeordneter Bedeutung für die Vermögens-, Finanz- und Ertragslage des Konzerns wurden nicht konsolidiert, sondern stattdessen zu fortgeführten Anschaffungskosten angesetzt. Die Finanzdaten der unwesentlichen Tochterunternehmen machten weniger als 0,2 % des Konzernumsatzes, weniger als 0,4 % des Eigenkapitals und weniger als 0,3 % der Bilanzsumme aus.

Die folgenden Angaben zum Beteiligungsbesitz entsprechen den Anforderungen des § 313 HGB.



In der folgenden Tabelle sind die vollkonsolidierten Beteiligungsgesellschaften aufgeführt:

Vollkonsolidierte Beteiligungsgesellschaften

[Tabelle 4.19]

| Name der Gesellschaft                                          | Sitz der Gesellschaft          | Kapitalanteil |
|----------------------------------------------------------------|--------------------------------|---------------|
|                                                                |                                | in %          |
| <b>Europa</b>                                                  |                                |               |
| Alcafleu Management GmbH & Co. KG                              | Schönefeld, Deutschland        | 99,9          |
| Bayer (Schweiz) AG                                             | Zürich, Schweiz                | 100           |
| Bayer 04 Immobilien GmbH                                       | Leverkusen, Deutschland        | 100           |
| Bayer 04 Leverkusen Fußball GmbH                               | Leverkusen, Deutschland        | 100           |
| Bayer A/S                                                      | Lyngby, Dänemark               | 100           |
| Bayer AB                                                       | Stockholm, Schweden            | 100           |
| Bayer AEH Limited                                              | Cambridge, Großbritannien      | 100           |
| Bayer AGCO Limited                                             | Cambridge, Großbritannien      | 100           |
| Bayer Agriculture Limited                                      | Cambridge, Großbritannien      | 100           |
| Bayer Altersversorgung GmbH                                    | Leverkusen, Deutschland        | 100           |
| Bayer Animal Health GmbH                                       | Leverkusen, Deutschland        | 100           |
| Bayer Antwerpen N. V.                                          | Antwerpen, Belgien             | 100           |
| Bayer AS                                                       | Oslo, Norwegen                 | 100           |
| Bayer Austria Gesellschaft m. b. H.                            | Wien, Österreich               | 100           |
| Bayer B. V.                                                    | Mijdrecht, Niederlande         | 100           |
| Bayer Beteiligungsverwaltung Goslar GmbH                       | Leverkusen, Deutschland        | 100           |
| Bayer Beteiligungsverwaltungsgesellschaft mbH                  | Leverkusen, Deutschland        | 100           |
| Bayer BioScience N. V.                                         | Gent, Belgien                  | 100           |
| Bayer Bitterfeld GmbH                                          | Bitterfeld-Wolfen, Deutschland | 100           |
| Bayer Bulgaria EOOD                                            | Sofia, Bulgarien               | 100           |
| Bayer Business Services GmbH                                   | Leverkusen, Deutschland        | 100           |
| Bayer Capital Corporation B.V.                                 | Mijdrecht, Niederlande         | 100           |
| Bayer Chemicals AG                                             | Leverkusen, Deutschland        | 100           |
| Bayer Consumer Care AG                                         | Basel, Schweiz                 | 100           |
| Bayer CropScience (Portugal)-Produtos para a Agricultura, Lda. | Carnaxide, Portugal            | 100           |
| Bayer CropScience 1272                                         | Lyon, Frankreich               | 100           |
| Bayer CropScience AG                                           | Monheim, Deutschland           | 100           |
| Bayer CropScience B. V.                                        | Mijdrecht, Niederlande         | 100           |
| Bayer CropScience Beteiligungsgesellschaft mbH                 | Frankfurt am Main, Deutschland | 100           |
| Bayer CropScience Deutschland GmbH                             | Langenfeld, Deutschland        | 100           |
| Bayer CropScience Holding SA                                   | Lyon, Frankreich               | 100           |
| Bayer CropScience Holdings Limited                             | Cambridge, Großbritannien      | 100           |
| Bayer CropScience Investments B. V.                            | Mijdrecht, Niederlande         | 100           |
| Bayer CropScience Limited                                      | Cambridge, Großbritannien      | 100           |
| Bayer CropScience Norwich Limited                              | Cambridge, Großbritannien      | 100           |
| Bayer CropScience S. r. l.                                     | Mailand, Italien               | 100           |
| Bayer CropScience SA-NV                                        | Diegem, Belgien                | 100           |
| Bayer CropScience, S. L.                                       | Valencia, Spanien              | 100           |
| Bayer CropScience Vermögensverwaltungs-gesellschaft mbH        | Leverkusen, Deutschland        | 100           |
| Bayer d. o. o.                                                 | Belgrad, Serbien               | 100           |
| Bayer d. o. o.                                                 | Ljubljana, Slowenien           | 100           |
| Bayer d. o. o.                                                 | Zagreb, Kroatien               | 100           |
| Bayer Direct Services GmbH                                     | Leverkusen, Deutschland        | 100           |
| Bayer Foreign Investments B. V.                                | Mijdrecht, Niederlande         | 100           |
| Bayer Gastronomie GmbH                                         | Leverkusen, Deutschland        | 100           |
| Bayer Gesellschaft für Beteiligungen mbH                       | Leverkusen, Deutschland        | 100           |
| Bayer Global Investments B. V.                                 | Mijdrecht, Niederlande         | 100           |

## Vollkonsolidierte Beteiligungsgesellschaften

[Fortsetzung von Tabelle 4.19]

| Name der Gesellschaft                                   | Sitz der Gesellschaft       | Kapitalanteil |
|---------------------------------------------------------|-----------------------------|---------------|
|                                                         |                             | in %          |
| Bayer HealthCare AG                                     | Leverkusen, Deutschland     | 100           |
| Bayer HealthCare Manufacturing S.r.l.                   | Mailand, Italien            | 100           |
| Bayer Hellas AG                                         | Athen, Griechenland         | 100           |
| Bayer Hispania, S. L.                                   | Sant Joan Despi, Spanien    | 100           |
| Bayer Hungaria Kft.                                     | Budapest, Ungarn            | 100           |
| Bayer Innovation GmbH                                   | Düsseldorf, Deutschland     | 100           |
| Bayer International Investments B.V.                    | Mijdrecht, Niederlande      | 100           |
| Bayer International S.A.                                | Fribourg, Schweiz           | 100           |
| Bayer Limited                                           | Dublin, Irland              | 100           |
| Bayer Ltd.                                              | Kiew, Ukraine               | 100           |
| Bayer MaterialScience AG                                | Leverkusen, Deutschland     | 100           |
| Bayer MaterialScience Customer Services GmbH            | Leverkusen, Deutschland     | 100           |
| Bayer MaterialScience S.r.l.                            | Mailand, Italien            | 100           |
| Bayer MaterialScience, S. L.                            | Sant Joan Despi, Spanien    | 100           |
| Bayer Oy                                                | Turku, Finnland             | 100           |
| Bayer Pharma Investments B.V.                           | Mijdrecht, Niederlande      | 100           |
| Bayer Polyols S. N. C.                                  | Puteaux, Frankreich         | 100           |
| Bayer Polyurethanes B. V.                               | Mijdrecht, Niederlande      | 100           |
| Bayer Portugal S.A.                                     | Lissabon, Portugal          | 100           |
| Bayer Public Limited Company                            | Newbury, Großbritannien     | 100           |
| Bayer Real Estate GmbH                                  | Leverkusen, Deutschland     | 100           |
| Bayer S. A. S.                                          | Puteaux, Frankreich         | 100           |
| Bayer S. p. A.                                          | Mailand, Italien            | 100           |
| Bayer s. r. o.                                          | Prag, Tschechische Republik | 100           |
| Bayer Santé Familiale SAS                               | Gaillard, Frankreich        | 100           |
| Bayer Santé SAS                                         | Loos, Frankreich            | 100           |
| Bayer SA-NV                                             | Diegem, Belgien             | 100           |
| Bayer Schering Pharma AG                                | Berlin, Deutschland         | 100           |
| Bayer Sheet Europe GmbH                                 | Darmstadt, Deutschland      | 100           |
| Bayer Sheet Europe N. V.                                | Tielt, Belgien              | 100           |
| Bayer Sheet Europe S. p. A.                             | Mailand, Italien            | 90            |
| Bayer Sp. z o. o.                                       | Warschau, Polen             | 100           |
| Bayer, spol. s r. o.                                    | Bratislava, Slowakei        | 100           |
| Bayer Technology Services GmbH                          | Leverkusen, Deutschland     | 100           |
| Bayer Verwaltungsgesellschaft für Anlagevermögen m.b.H. | Leverkusen, Deutschland     | 100           |
| Bayer Vital GmbH                                        | Leverkusen, Deutschland     | 100           |
| Bayer-Handelsgesellschaft mit beschränkter Haftung      | Leverkusen, Deutschland     | 100           |
| Bayfin GmbH                                             | Leverkusen, Deutschland     | 100           |
| BaySystems B. V.                                        | Foxhol, Niederlande         | 100           |
| BaySystems GmbH & Co. KG                                | Oldenburg, Deutschland      | 100           |
| Berlimed, S. A.                                         | Madrid, Spanien             | 100           |
| Berlis AG                                               | Zürich, Schweiz             | 100           |
| Biogenetic Technologies B. V.                           | Rotterdam, Niederlande      | 100           |
| Chemie-Beteiligungsaktiengesellschaft                   | Glarus, Schweiz             | 100           |
| Chemion Logistik GmbH                                   | Leverkusen, Deutschland     | 100           |
| Currenta GmbH & Co. OHG                                 | Leverkusen, Deutschland     | 60            |
| Drugofa GmbH                                            | Köln, Deutschland           | 100           |
| Dyvevo GmbH                                             | Leverkusen, Deutschland     | 100           |
| Epurex Films GmbH & Co. KG                              | Bomlitz, Deutschland        | 100           |
| Erste K-W-A Beteiligungsgesellschaft mbH                | Leverkusen, Deutschland     | 100           |
| Euroservices Bayer GmbH                                 | Leverkusen, Deutschland     | 100           |
| Euroservices Bayer S. L.                                | Sant Joan Despi, Spanien    | 100           |

## Vollkonsolidierte Beteiligungsgesellschaften

[Fortsetzung von Tabelle 4.19]

| Name der Gesellschaft                                           | Sitz der Gesellschaft          | Kapitalanteil |
|-----------------------------------------------------------------|--------------------------------|---------------|
|                                                                 |                                | in %          |
| Generics Holding GmbH                                           | Leverkusen, Deutschland        | 100           |
| GP Grenzach Produktions GmbH                                    | Grenzach-Wyhlen, Deutschland   | 100           |
| Hild Samen GmbH                                                 | Marbach am Neckar, Deutschland | 100           |
| Icon Genetics GmbH                                              | München, Deutschland           | 100           |
| Intendis Austria Handels GesmbH                                 | Wien, Österreich               | 100           |
| Intendis GmbH                                                   | Berlin, Deutschland            | 100           |
| Intendis Manufacturing S. p. A.                                 | Mailand, Italien               | 100           |
| Intendis S. p. A.                                               | Mailand, Italien               | 100           |
| Intraserv GmbH & Co. KG                                         | Schönefeld, Deutschland        | 100           |
| Jenapharm GmbH & Co. KG                                         | Jena, Deutschland              | 100           |
| KOSINUS Grundstücks-Verwaltungsgesellschaft mbH & Co. Gamma OHG | Berlin, Deutschland            | 100           |
| KVP Pharma+Veterinär Produkte GmbH                              | Kiel, Deutschland              | 100           |
| Marotrast GmbH                                                  | Jena, Deutschland              | 100           |
| Mediwest Norway AS                                              | Oslo, Norwegen                 | 100           |
| Medrad Belgium BVBA                                             | Antwerpen, Belgien             | 100           |
| Medrad Denmark ApS                                              | Glostrup, Dänemark             | 100           |
| Medrad Europe B. V.                                             | Maastricht, Niederlande        | 100           |
| Medrad France S. A. R. L.                                       | Rungis Cedex, Frankreich       | 100           |
| Medrad Italia S. r. l.                                          | Cava Manara, Italien           | 100           |
| Medrad Medizinische Systeme GmbH                                | Volkmach, Deutschland          | 100           |
| Medrad Sweden AB                                                | Mölnådal, Schweden             | 100           |
| Medrad UK Limited                                               | Ely, Großbritannien            | 100           |
| MENADIER Heilmittel GmbH                                        | Berlin, Deutschland            | 100           |
| Nunhems B. V.                                                   | Nunhem, Niederlande            | 100           |
| Nunhems France S. A. R. L.                                      | Soucelles, Frankreich          | 100           |
| Nunhems Hungary Kft.                                            | Szolnok, Ungarn                | 100           |
| Nunhems Italy S. r. l.                                          | St. Agata Bolognes, Italien    | 100           |
| Nunhems Netherlands B. V.                                       | Nunhem, Niederlande            | 100           |
| Nunhems Poland Sp. z o. o.                                      | Poznan, Polen                  | 100           |
| Nunhems Spain, S. A.                                            | Valencia, Spanien              | 100           |
| Pallas Versicherung AG                                          | Leverkusen, Deutschland        | 100           |
| pbi Home & Garden Limited                                       | Cambridge, Großbritannien      | 100           |
| PGS International N. V.                                         | Den Haag, Niederlande          | 100           |
| Pharma-Verlagsbuchhandlung GmbH                                 | Berlin, Deutschland            | 100           |
| SC Bayer SRL                                                    | Bukarest, Rumänien             | 100           |
| Schering AG                                                     | Berlin, Deutschland            | 100           |
| Schering Agrochemicals Holdings                                 | Burgess Hill, Großbritannien   | 100           |
| Schering GmbH und Co. Produktions KG                            | Weimar, Deutschland            | 100           |
| Schering Health Care Limited                                    | Burgess Hill, Großbritannien   | 100           |
| Schering Holdings Ltd.                                          | Burgess Hill, Großbritannien   | 100           |
| Schering Industrial Products                                    | Burgess Hill, Großbritannien   | 100           |
| Schering International Holding GmbH                             | Berlin, Deutschland            | 100           |
| Schering-Kahlbaum Gesellschaft mit beschränkter Haftung         | Berlin, Deutschland            | 100           |
| TECTRION GmbH                                                   | Leverkusen, Deutschland        | 100           |
| TOO Bayer KAZ                                                   | Astana, Kasachstan             | 100           |
| TravelBoard GmbH                                                | Leverkusen, Deutschland        | 100           |
| UAB Bayer                                                       | Vilnius, Litauen               | 100           |
| Viverso GmbH                                                    | Bitterfeld-Wolfen, Deutschland | 100           |
| ZAO Bayer                                                       | Moskau, Russische Föderation   | 100           |
| Zweite K-W-A Beteiligungsgesellschaft mbH                       | Leverkusen, Deutschland        | 100           |

## Vollkonsolidierte Beteiligungsgesellschaften

[Fortsetzung von Tabelle 4.19]

| Name der Gesellschaft                        | Sitz der Gesellschaft       | Kapitalanteil<br>in % |
|----------------------------------------------|-----------------------------|-----------------------|
| <b>Nordamerika</b>                           |                             |                       |
| Athenix Corp.                                | Research Triangle Park, USA | 100                   |
| Bayer Business and Technology Services LLC   | Pittsburgh, USA             | 100                   |
| Bayer Canadian Holdings Inc.                 | Toronto, Kanada             | 100                   |
| Bayer Corporation                            | Pittsburgh, USA             | 100                   |
| Bayer Cotton Seed International Inc.         | Research Triangle Park, USA | 51                    |
| Bayer CropScience Holding Inc.               | Research Triangle Park, USA | 100                   |
| Bayer CropScience Holdings Inc.              | Calgary, Kanada             | 100                   |
| Bayer CropScience Inc.                       | Calgary, Kanada             | 100                   |
| Bayer CropScience Inc.                       | Research Triangle Park, USA | 100                   |
| Bayer CropScience LLC                        | Research Triangle Park, USA | 100                   |
| Bayer CropScience LP                         | Research Triangle Park, USA | 100                   |
| Bayer HealthCare LLC                         | Tarrytown, USA              | 100                   |
| Bayer HealthCare Pharmaceuticals Inc.        | Pine Brook, USA             | 100                   |
| Bayer HealthCare Pharmaceuticals LLC         | Seattle, USA                | 100                   |
| Bayer Inc.                                   | Toronto, Kanada             | 100                   |
| Bayer MaterialScience LLC                    | Pittsburgh, USA             | 100                   |
| Bayer Pharma Chemicals Inc.                  | Pine Brook, USA             | 100                   |
| Bayer Puerto Rico Inc.                       | San Juan, Puerto Rico       | 100                   |
| BayOne Urethane Systems LLC                  | St. Louis, USA              | 100                   |
| Baypo I LLC                                  | New Martinsville, USA       | 100                   |
| Baypo II LLC                                 | New Martinsville, USA       | 100                   |
| BAYPO Limited Partnership                    | New Martinsville, USA       | 100                   |
| BIPPO Corporation                            | New Martinsville, USA       | 100                   |
| Collateral Therapeutics Inc.                 | San Diego, USA              | 100                   |
| Cooper Land Company of New Jersey Inc.       | Tarrytown, USA              | 100                   |
| Guidance Interactive Healthcare Inc.         | Tarrytown, USA              | 100                   |
| Intendis Inc.                                | Morristown, USA             | 100                   |
| iSense Corporation                           | Wilsonville, USA            | 100                   |
| iSense Development Corporation               | Wilsonville, USA            | 100                   |
| Medrad, Inc.                                 | Indianola, USA              | 100                   |
| MTFP Inc.                                    | Wilmington, USA             | 100                   |
| NippoNex Inc.                                | Springfield, USA            | 100                   |
| NOR-AM Agro LLC                              | Pine Brook, USA             | 100                   |
| NOR-AM Land Company                          | Pine Brook, USA             | 100                   |
| Nunhems USA, Inc.                            | Morgan Hill, USA            | 100                   |
| Pallas North America Insurance Company, Inc. | Burlington, USA             | 100                   |
| SB Capital Corporation                       | Pine Brook, USA             | 100                   |
| Schering Berlin Inc.                         | Pine Brook, USA             | 100                   |
| Schering Berlin Venture Corporation          | Pine Brook, USA             | 100                   |
| Stoneville Pedigreed Seed Company            | St. Louis, USA              | 100                   |
| STWB Inc.                                    | Pittsburgh, USA             | 100                   |
| Texas Brine Company LLC                      | Houston, USA                | 0*                    |
| <b>Asien/Pazifik</b>                         |                             |                       |
| Bayer (Beijing) Sheet Company Limited        | Peking, China               | 100                   |
| Bayer (China) Limited                        | Peking, China               | 100                   |
| Bayer (Malaysia) Sdn. Bhd.                   | Petaling Jaya, Malaysia     | 100                   |
| Bayer (Sichuan) Animal Health Co., Ltd.      | Chengdu, China              | 100                   |
| Bayer (South East Asia) Pte Ltd.             | Singapur                    | 100                   |
| Bayer Australia Limited                      | Pymble, Australien          | 100                   |
| Bayer BioScience Pvt. Ltd.                   | Hyderabad, Indien           | 100                   |
| Bayer Co. (Malaysia) Sdn Bhd.                | Petaling Jaya, Malaysia     | 100                   |

\* Gemäß IAS 27 i. V. m. SIC 12 voll zu konsolidierende Zweckgesellschaft.

## Vollkonsolidierte Beteiligungsgesellschaften

[Fortsetzung von Tabelle 4.19]

| Name der Gesellschaft                                       | Sitz der Gesellschaft             | Kapitalanteil |
|-------------------------------------------------------------|-----------------------------------|---------------|
|                                                             |                                   | in %          |
| Bayer CropScience (China) Company Ltd.                      | Hangzhou, China                   | 100           |
| Bayer CropScience (Private) Limited                         | Karachi, Pakistan                 | 100           |
| Bayer CropScience Holdings Pty Ltd.                         | East Hawthorn, Australien         | 100           |
| Bayer CropScience K. K.                                     | Tokio, Japan                      | 100           |
| Bayer CropScience Limited                                   | Mumbai, Indien                    | 71,1          |
| Bayer CropScience Ltd.                                      | Seoul, Südkorea                   | 100           |
| Bayer CropScience Pty Limited                               | East Hawthorn, Australien         | 100           |
| Bayer CropScience, Inc.                                     | Laguna, Philippinen               | 100           |
| Bayer Far East Service Co. Ltd.                             | Hong Kong, China                  | 100           |
| Bayer Healthcare Co. Ltd.                                   | Peking, China                     | 100           |
| Bayer HealthCare Limited                                    | Hong Kong, China                  | 100           |
| Bayer Holding Ltd.                                          | Tokio, Japan                      | 100           |
| Bayer Jinling Polyurethane Co., Ltd.                        | Nanjing, China                    | 55            |
| Bayer Korea Ltd.                                            | Seoul, Südkorea                   | 100           |
| Bayer MaterialScience (China) Company Limited               | Shanghai, China                   | 100           |
| Bayer MaterialScience Limited                               | Hong Kong, China                  | 100           |
| Bayer MaterialScience Ltd.                                  | Tokio, Japan                      | 100           |
| Bayer MaterialScience Private Limited                       | Mumbai, Indien                    | 100           |
| Bayer MaterialScience Pty Ltd.                              | Pymble, Australien                | 100           |
| Bayer New Zealand Limited                                   | Auckland, Neuseeland              | 100           |
| Bayer Pakistan (Private) Limited                            | Karachi, Pakistan                 | 100           |
| Bayer Pharmaceuticals Private Limited                       | Mumbai, Indien                    | 100           |
| Bayer Philippines, Inc.                                     | Makati City, Philippinen          | 100           |
| Bayer Polyurethanes Taiwan Ltd.                             | Taipei, Taiwan                    | 94,9          |
| Bayer Sheet Korea Ltd.                                      | Kimhae-City, Südkorea             | 100           |
| Bayer Taiwan Company Ltd.                                   | Taipei, Taiwan                    | 100           |
| Bayer Technology and Engineering (Shanghai) Company Limited | Shanghai, China                   | 100           |
| Bayer Thai Co., Ltd.                                        | Bangkok, Thailand                 | 100           |
| Bayer TPU (Shenzhen) Co. Ltd.                               | Shenzhen, China                   | 100           |
| Bayer Uretech Ltd.                                          | Yu Pu Village, Taiwan             | 100           |
| Bayer Vietnam Ltd.                                          | Bien Hoa City (Amata), Vietnam    | 100           |
| Bayer Yakuhin Ltd.                                          | Osaka, Japan                      | 100           |
| Bilag Industries Private Ltd.                               | Vapi, Indien                      | 100           |
| Guangzhou Bayer MaterialScience Company Limited             | Guangzhou, China                  | 100           |
| Imaxeon Pty. Ltd.                                           | Rydalmere, Australien             | 100           |
| Medipharm (Pvt) Ltd.                                        | Lahore, Pakistan                  | 100           |
| Medrad Asia Pte. Ltd.                                       | Singapur                          | 100           |
| Medrad Medical Equipment Trading Company                    | Peking, China                     | 100           |
| Nihon Medrad K. K.                                          | Osaka, Japan                      | 100           |
| Nunhems Beijing Seeds Co. Ltd.                              | Peking, China                     | 95            |
| Nunhems India Private Limited                               | Haryana, Indien                   | 100           |
| PT. Bayer Indonesia                                         | Jakarta, Indonesien               | 99,8          |
| PT. Bayer MaterialScience Indonesia                         | Jakarta, Indonesien               | 99,9          |
| Sumika Bayer Urethane Co., Ltd.                             | Osaka, Japan                      | 60            |
| UIM Agrochemicals (Aust) Pty Ltd.                           | East Hawthorn, Australien         | 100           |
| <b>Lateinamerika / Afrika / Nahost</b>                      |                                   |               |
| AgrEvo South Africa (Pty) Ltd.                              | Isando, Südafrika                 | 100           |
| Alimtec S. A.                                               | Santiago, Chile                   | 40*           |
| Bayer (Proprietary) Limited                                 | Isando, Südafrika                 | 100           |
| Bayer Boliviana Ltda.                                       | Santa Cruz De La Sierra, Bolivien | 100           |
| Bayer Central America Sociedad Anonima                      | San Jose, Costa Rica              | 100           |
| Bayer Cropscience S.A.                                      | Bogota, Kolumbien                 | 100           |

\* Gemäß IAS 27 i. V. m. SIC 12 voll zu konsolidierende Zweckgesellschaft.



## Vollkonsolidierte Beteiligungsgesellschaften

[Fortsetzung von Tabelle 4.19]

| Name der Gesellschaft                               | Sitz der Gesellschaft               | Kapitalanteil |
|-----------------------------------------------------|-------------------------------------|---------------|
|                                                     |                                     | in %          |
| Bayer de Mexico, S.A. de C.V.                       | Mexiko City, Mexiko                 | 100           |
| Bayer East Africa Ltd.                              | Nairobi, Kenia                      | 55            |
| Bayer Israel Ltd.                                   | Hod Hasharon, Israel                | 100           |
| Bayer Middle East FZE                               | Dubai, Vereinigte Arabische Emirate | 100           |
| Bayer S.A.                                          | Asuncion, Paraguay                  | 100           |
| Bayer S.A.                                          | Bogota, Kolumbien                   | 100           |
| Bayer S.A.                                          | Buenos Aires, Argentinien           | 100           |
| Bayer S.A.                                          | Caracas, Venezuela                  | 100           |
| Bayer S.A.                                          | Casablanca, Marokko                 | 100           |
| Bayer S.A.                                          | Colón, Panama                       | 100           |
| Bayer S.A.                                          | Guatemala City, Guatemala           | 100           |
| Bayer S.A.                                          | Lima, Peru                          | 89,3          |
| Bayer S.A.                                          | Managua, Nicaragua                  | 100           |
| Bayer S.A.                                          | Quito, Ecuador                      | 100           |
| Bayer S.A.                                          | San Jose, Costa Rica                | 100           |
| Bayer S.A.                                          | Santiago, Chile                     | 100           |
| Bayer S.A.                                          | Santo Domingo, Dom. Republik        | 100           |
| Bayer S.A.                                          | Sao Paulo, Brasilien                | 100           |
| Bayer S.A. de C.V.                                  | Tegucigalpa, Honduras               | 100           |
| Bayer S.A.                                          | Montevideo, Uruguay                 | 100           |
| Bayer, S.A.                                         | San Salvador, El Salvador           | 100           |
| Bayer Türk Kimya Sanayi Limited Sirketi             | Istanbul, Türkei                    | 100           |
| BaySystems Pearl FZCO                               | Dubai, Vereinigte Arabische Emirate | 51            |
| BaySystems Pearl Limited Liability Company          | Dubai, Vereinigte Arabische Emirate | 49*           |
| Corporación Bonima S.A. de C.V.                     | Ilopango, El Salvador               | 99,8          |
| CROPSA S.A. C.                                      | Lima, Peru                          | 100           |
| Intendis Ilac Ticaret Limited Sirketi               | Istanbul, Türkei                    | 100           |
| Mediterranean Seeds Ltd.                            | Einat, Israel                       | 100           |
| Medrad do Brasil Ltda.                              | Sao Paulo, Brasilien                | 100           |
| Medrad Mexicana S. de R.L. de CV                    | Mexiko City, Mexiko                 | 100           |
| Nunhems Chile S.A.                                  | Santiago, Chile                     | 100           |
| Nunhems do Brasil Comercio de Sementes Ltda.        | Campinas, Brasilien                 | 100           |
| Nunhems Mexico S.A. de C.V.                         | Queretaro, Mexiko                   | 100           |
| Nunhems Tohumculuk Limited Sirketi                  | Antalya, Türkei                     | 100           |
| PROQUINA Productos Quimicos Naturales, S.A. de C.V. | Orizaba, Mexiko                     | 100           |
| Schering (Pty) Ltd.                                 | Midrand, Südafrika                  | 100           |
| Schering do Brasil Quimica e Farmaceutica Ltda.     | Sao Paulo, Brasilien                | 100           |

\* Gemäß IAS 27.4 i. V. m. IAS 27.13 voll zu konsolidierendes Tochterunternehmen.

Außerdem wurden die folgenden drei Gemeinschaftsunternehmen anteilmäßig in den Konzernabschluss einbezogen:

**Gemeinschaftsunternehmen**

[Tabelle 4.20]

| Name der Gesellschaft        | Sitz der Gesellschaft        | Kapitalanteil |
|------------------------------|------------------------------|---------------|
|                              |                              | in %          |
| Baulé S.A.S.                 | Romans-sur-Isere, Frankreich | 50            |
| Bayer IMSA, S.A. de C.V.     | Nuevo Leon, Mexiko           | 50            |
| Indurisk Rückversicherung AG | Luxemburg, Luxemburg         | 50            |

Assoziierte Unternehmen, die im Konzernabschluss nach der Equity-Methode berücksichtigt wurden, sind die Folgenden:

**Assoziierte Unternehmen**

[Tabelle 4.21]

| Name der Gesellschaft                       | Sitz der Gesellschaft          | Kapitalanteil |
|---------------------------------------------|--------------------------------|---------------|
|                                             |                                | in %          |
| DIC Bayer Polymer Ltd.                      | Tokio, Japan                   | 50            |
| Lyondell Bayer Manufacturing Maasvlakte VOF | Rotterdam, Niederlande         | 50            |
| Paltough Industries (1998) Ltd.             | Kibbutz Ramat Yochanan, Israel | 25            |
| PO JV, LP                                   | Wilmington, USA                | 41,3          |
| Polygal Plastics Industries Ltd.            | Kibbutz Ramat Yochanan, Israel | 25,8          |

Folgende Tochterunternehmen wurden aufgrund ihrer untergeordneten Bedeutung zu fortgeführten Anschaffungskosten in den Konzernabschluss einbezogen:

**Tochterunternehmen von untergeordneter Bedeutung**

[Tabelle 4.22]

| Name der Gesellschaft                                               | Sitz der Gesellschaft           | Kapitalanteil |
|---------------------------------------------------------------------|---------------------------------|---------------|
|                                                                     |                                 | in %          |
| <b>Europa</b>                                                       |                                 |               |
| 1. BCrsV GmbH                                                       | Leverkusen, Deutschland         | 100           |
| Agreva GmbH                                                         | Frankfurt am Main, Deutschland  | 100           |
| AgrEvo Verwaltungsgesellschaft mbH                                  | Frankfurt am Main, Deutschland  | 100           |
| Ausbildungsinitiative Rheinland GmbH                                | Leverkusen, Deutschland         | 100           |
| Bayer 04 Leverkusen Sportförderung gGmbH                            | Leverkusen, Deutschland         | 100           |
| Bayer 04 Marketing GmbH                                             | Leverkusen, Deutschland         | 100           |
| Bayer Animal Health Studies GmbH                                    | Leverkusen, Deutschland         | 100           |
| Bayer BioScience GmbH                                               | Monheim, Deutschland            | 100           |
| Bayer d.o.o. Sarajevo                                               | Sarajevo, Bosnien & Herzegowina | 100           |
| Bayer Healthcare S.r.l.                                             | Mailand, Italien                | 100           |
| Bayer Immobilier SAS                                                | Puteaux, Frankreich             | 100           |
| Bayer Innovation Ventures GmbH                                      | Düsseldorf, Deutschland         | 100           |
| Bayer OÜ                                                            | Tallinn, Estland                | 100           |
| Bayer UK Limited                                                    | Newbury, Großbritannien         | 100           |
| Bayer-Unterstützungskasse GmbH                                      | Leverkusen, Deutschland         | 100           |
| Bayhealth Comercializacao de Produtos Farmaceuticos Unipessoal Lda. | Lissabon, Portugal              | 100           |
| Bayhealth, S.L.                                                     | Sant Joan Despi, Spanien        | 100           |
| BayInvest GmbH                                                      | Leverkusen, Deutschland         | 100           |
| BaySystems a.s.                                                     | Prag, Tschechische Republik     | 100           |
| BaySystems Northern Europe A/S                                      | Otterup, Dänemark               | 100           |

## Tochterunternehmen von untergeordneter Bedeutung

[Fortsetzung von Tabelle 4.22]

| Name der Gesellschaft                                         | Sitz der Gesellschaft        | Kapitalanteil |
|---------------------------------------------------------------|------------------------------|---------------|
|                                                               |                              | in %          |
| BaySystems Verwaltungs-GmbH                                   | Oldenburg, Deutschland       | 100           |
| Berlex Especialidades Farmaceuticas Lda.                      | Carnaxide, Portugal          | 100*          |
| Berlifarma Lda.                                               | Carnaxide, Portugal          | 100*          |
| Berlimed-Especialidades Farmaceuticas Lda.                    | Carnaxide, Portugal          | 100*          |
| Berlipharm B. V.                                              | Weesp, Niederlande           | 100           |
| CENTROFARMA-Industria e Comercio de Prod. Farmaceuticos, Lda. | Coimbra, Portugal            | 100           |
| CIS (U.K.) Limited                                            | Burgess Hill, Großbritannien | 100           |
| Currenta Geschäftsführungs-GmbH                               | Leverkusen, Deutschland      | 100           |
| Ehrfeld Mikrotechnik BTS GmbH                                 | Wendelsheim, Deutschland     | 100           |
| Epurex Films Geschäftsführungs-GmbH                           | Bomlitz, Deutschland         | 100           |
| GENUS Grundstücks-Vermietungsgesellschaft mbH & Co. KG        | Düsseldorf, Deutschland      | 100           |
| HTV Gesellschaft für Hochtemperaturverbrennung mbH            | Bergkamen, Deutschland       | 100           |
| Intendis Derma, S. L.                                         | Sant Joan Despi, Spanien     | 100           |
| Intraserv Verwaltungs-GmbH                                    | Schönefeld, Deutschland      | 100           |
| KOSINUS Grundstücks-Verwaltungsgesellschaft mbH               | Berlin, Deutschland          | 100           |
| Lilienthalstraße Nr. 4 GmbH                                   | Schönefeld, Deutschland      | 100           |
| Lusal Producao Quimico Farmaceutica Luso-Alema, Lda.          | Carnaxide, Portugal          | 100           |
| Lusalfarma-Especialidades Farmaceuticas, Lda.                 | Carnaxide, Portugal          | 100*          |
| Schering Industrial Products Holdings                         | Burgess Hill, Großbritannien | 100           |
| Schering Verwaltungsgesellschaft mbH                          | Weimar, Deutschland          | 100           |
| Sechste Bayer VV GmbH                                         | Leverkusen, Deutschland      | 100           |
| SIA Bayer                                                     | Riga, Lettland               | 100           |
| Siebte Bayer VV GmbH                                          | Leverkusen, Deutschland      | 100           |
| Sportrechte Vermarktungs- und Verwertungs-GmbH & Co. oHG      | Leverkusen, Deutschland      | 100           |
| TecArena+ GmbH                                                | Leverkusen, Deutschland      | 100           |
| ZAO Rhone-Poulenc AO                                          | Moskau, Russische Föderation | 100           |
| <b>Nordamerika</b>                                            |                              |               |
| Artificial Muscle, Inc.                                       | Sunnyvale, USA               | 100           |
| Bayer International Trade Services Corporation                | Weirton, USA                 | 100           |
| BayOne Canada, Inc.                                           | Niagara Falls, Kanada        | 100           |
| Berlex Canada, Inc.                                           | Pointe-Claire, Kanada        | 100           |
| BHCP Holdings LLC                                             | Wilmington, USA              | 100           |
| Delinting and Seed Treating Company                           | Maricopa, USA                | 100           |
| ICON Genetics, Inc.                                           | Montmouth Junction, USA      | 100           |
| NippoNex Holdings LLC                                         | Pittsburgh, USA              | 100           |
| The SDI Divestiture Corporation                               | Cincinnati, USA              | 100           |
| Viterion TeleHealthcare LLC                                   | Tarrytown, USA               | 100           |
| <b>Asien / Pazifik</b>                                        |                              |               |
| Bayer Business Services Private Limited                       | Powai, Indien                | 100           |
| Bayer CropScience (OHQ) (Malaysia) Sdn Bhd.                   | Kuala Lumpur, Malaysia       | 100           |
| Bayer CropScience (Thailand) Company Limited                  | Bangkok, Thailand            | 100           |
| Bayer CropScience Ltd.                                        | Dhaka, Bangladesch           | 60            |
| Bayer Malibu Polymers Private Limited                         | Mumbai, Indien               | 51            |
| Bayer MaterialScience (Qingdao) Co. Ltd.                      | Qingdao, China               | 100           |
| Chemdyes Pakistan (Private) Limited                           | Karachi, Pakistan            | 100           |
| Myanmar Aventis CropScience Ltd.                              | Yangon, Myanmar              | 100           |
| Schering Pty. Limited                                         | Alexandria, Australien       | 100           |

\* Inklusive Kapitalanteil in Höhe von 10 %, der von einem nicht einbezogenen Tochterunternehmen gehalten wird.

## Tochterunternehmen von untergeordneter Bedeutung

[Fortsetzung von Tabelle 4.22]

| Name der Gesellschaft                                          | Sitz der Gesellschaft     | Kapitalanteil<br>in % |
|----------------------------------------------------------------|---------------------------|-----------------------|
| <b>Lateinamerika / Afrika / Nahost</b>                         |                           |                       |
| Bayer Algerie S. P. A.                                         | Algier, Algerien          | 100                   |
| Bayer Distribuidora de Produtos Quimicos e Farmaceuticos Ltda. | Sao Paulo, Brasilien      | 100                   |
| Bayer Parsian AG                                               | Teheran, Iran             | 100                   |
| Bayer Schering Pharma Mocambique, Lda.                         | Maputo, Mosambik          | 100*                  |
| Bayer Zimbabwe (Private) Limited                               | Harare, Simbabwe          | 100                   |
| Centro Estrategico Canada Latinoamerica S. A. de C. V.         | Mexiko City, Mexiko       | 100                   |
| Comercial Interamericana, S. A.                                | Guatemala City, Guatemala | 100                   |
| Farmaco Ltda.                                                  | Sao Paulo, Brasilien      | 100                   |
| Industrias Gustafson, S. A. de C. V.                           | Mexiko City, Mexiko       | 100                   |
| Laboratorio Berlimed S. A.                                     | Santiago, Chile           | 100                   |
| Miles, S. A. Guatemala Branch                                  | Guatemala City, Guatemala | 100                   |
| Quimicas Unidas S. A.                                          | Havanna, Kuba             | 100                   |
| Schering Peruana S. A.                                         | Lima, Peru                | 100                   |

\* Inklusive Kapitalanteil in Höhe von 10 %, der von einem nicht einbezogenen Tochterunternehmen gehalten wird.

Die folgenden assoziierten und Gemeinschaftsunternehmen wurden aufgrund ihrer untergeordneten Bedeutung zu fortgeführten Anschaffungskosten angesetzt:

## Assoziierte oder Gemeinschaftsunternehmen von untergeordneter Bedeutung

[Tabelle 4.23]

| Name der Gesellschaft                                  | Sitz der Gesellschaft               | Kapitalanteil<br>in % |
|--------------------------------------------------------|-------------------------------------|-----------------------|
| <b>Europa</b>                                          |                                     |                       |
| Axxam S. p. A.                                         | Mailand, Italien                    | 24,5                  |
| BaySecur GmbH                                          | Leverkusen, Deutschland             | 49                    |
| BaySports-Travel GmbH                                  | Leverkusen, Deutschland             | 50                    |
| BBB Management GmbH Campus Berlin-Buch                 | Berlin, Deutschland                 | 20                    |
| Disalfarm, S. A.                                       | Barcelona, Spanien                  | 33,3                  |
| EMP-Estrusione Materiali Plastici S. A.                | Stabio, Schweiz                     | 42,1                  |
| Faserwerke Hüls GmbH                                   | Marl, Deutschland                   | 50                    |
| INVITE GmbH                                            | Leverkusen, Deutschland             | 50                    |
| PYCO SA                                                | Mont de Marsan, Frankreich          | 47                    |
| Sauerstoff- und Stickstoffrohrleitungsgesellschaft mbH | Krefeld, Deutschland                | 50                    |
| <b>Nordamerika</b>                                     |                                     |                       |
| Schein Pharmaceutical Canada, Inc.                     | Toronto, Kanada                     | 50                    |
| Technology JV, L. P.                                   | Wilmington, USA                     | 33,3                  |
| <b>Asien / Pazifik</b>                                 |                                     |                       |
| Cotton Growers Services Pty. Limited                   | Wee Waa, Australien                 | 50                    |
| Teijin-Bayer Polytec Ltd.                              | Tokio, Japan                        | 50                    |
| <b>Lateinamerika / Afrika / Nahost</b>                 |                                     |                       |
| Bayer Middle East Limited Liability Company            | Dubai, Vereinigte Arabische Emirate | 49                    |
| Coopers Environmental Health Pty Ltd.                  | Pomona Gardens, Südafrika           | 26                    |
| Polygal (Management) 1998 Ltd.                         | Megiddo, Israel                     | 25,7                  |
| Polygal (Marketing) Ltd. Limited Partnership           | Megiddo, Israel                     | 25                    |

An den folgenden gemäß § 267 Absatz 3 HGB großen Kapitalgesellschaften hielt der Bayer-Konzern zwischen 5 % und 20 % der Stimmrechte:

#### Übrige Beteiligungen an großen Kapitalgesellschaften

[Tabelle 4.24]

| Name der Gesellschaft                             | Sitz der Gesellschaft | Kapitalanteil |
|---------------------------------------------------|-----------------------|---------------|
|                                                   |                       | in %          |
| Hokusan Co. Ltd.                                  | Tokio, Japan          | 19,8          |
| Salzgewinnungsgesellschaft Westfalen mbH & Co. KG | Ahaus, Deutschland    | 10            |

Folgende inländische Tochtergesellschaften machten im Geschäftsjahr 2010 von der Befreiungsvorschrift des § 264 Absatz 3 HGB bzw. § 264 b HGB Gebrauch:

#### Befreite inländische Tochterunternehmen

[Tabelle 4.25]

| Name der Gesellschaft                                     | Sitz der Gesellschaft          | Kapitalanteil |
|-----------------------------------------------------------|--------------------------------|---------------|
|                                                           |                                | in %          |
| Bayer 04 Immobilien GmbH                                  | Leverkusen, Deutschland        | 100           |
| Bayer 04 Leverkusen Fußball GmbH                          | Leverkusen, Deutschland        | 100           |
| Bayer Altersversorgung GmbH                               | Leverkusen, Deutschland        | 100           |
| Bayer Animal Health GmbH                                  | Leverkusen, Deutschland        | 100           |
| Bayer Beteiligungsverwaltungsgesellschaft mbH             | Leverkusen, Deutschland        | 100           |
| Bayer Bitterfeld GmbH                                     | Bitterfeld-Wolfen, Deutschland | 100           |
| Bayer Business Services GmbH                              | Leverkusen, Deutschland        | 100           |
| Bayer Chemicals AG                                        | Leverkusen, Deutschland        | 100           |
| Bayer CropScience AG                                      | Monheim, Deutschland           | 100           |
| Bayer Direct Services GmbH                                | Leverkusen, Deutschland        | 100           |
| Bayer Gastronomie GmbH                                    | Leverkusen, Deutschland        | 100           |
| Bayer Gesellschaft für Beteiligungen mbH                  | Leverkusen, Deutschland        | 100           |
| Bayer HealthCare AG                                       | Leverkusen, Deutschland        | 100           |
| Bayer Innovation GmbH                                     | Düsseldorf, Deutschland        | 100           |
| Bayer MaterialScience AG                                  | Leverkusen, Deutschland        | 100           |
| Bayer MaterialScience Customer Services GmbH              | Leverkusen, Deutschland        | 100           |
| Bayer Real Estate GmbH                                    | Leverkusen, Deutschland        | 100           |
| Bayer Schering Pharma AG                                  | Berlin, Deutschland            | 100           |
| Bayer Technology Services GmbH                            | Leverkusen, Deutschland        | 100           |
| Bayer Verwaltungsgesellschaft für Anlagevermögen m. b. H. | Leverkusen, Deutschland        | 100           |
| Bayer Vital GmbH                                          | Leverkusen, Deutschland        | 100           |
| Bayer-Handelsgesellschaft mit beschränkter Haftung        | Leverkusen, Deutschland        | 100           |
| Bayfin GmbH                                               | Leverkusen, Deutschland        | 100           |
| BaySystems GmbH & Co. KG                                  | Oldenburg, Deutschland         | 100           |
| Chemion Logistik GmbH                                     | Leverkusen, Deutschland        | 100           |
| Currenta GmbH & Co. OHG                                   | Leverkusen, Deutschland        | 60            |
| Drugofa GmbH                                              | Köln, Deutschland              | 100           |
| Dynevo GmbH                                               | Leverkusen, Deutschland        | 100           |
| Epurex Films GmbH & Co. KG                                | Bomlitz, Deutschland           | 100           |
| Erste K-W-A Beteiligungsgesellschaft mbH                  | Leverkusen, Deutschland        | 100           |
| Euroservices Bayer GmbH                                   | Leverkusen, Deutschland        | 100           |
| Generics Holding GmbH                                     | Leverkusen, Deutschland        | 100           |
| GP Grenzach Produktions GmbH                              | Grenzach-Wyhlen, Deutschland   | 100           |
| Hild Samen GmbH                                           | Marbach am Neckar, Deutschland | 100           |
| Icon Genetics GmbH                                        | München, Deutschland           | 100           |
| Intendis GmbH                                             | Berlin, Deutschland            | 100           |
| Intraserv GmbH & Co. KG                                   | Schönefeld, Deutschland        | 100           |



## Befreite inländische Tochterunternehmen

[Fortsetzung von Tabelle 4.25]

| Name der Gesellschaft                                           | Sitz der Gesellschaft          | Kapitalanteil |
|-----------------------------------------------------------------|--------------------------------|---------------|
|                                                                 |                                | in %          |
| Jenapharm GmbH & Co. KG                                         | Jena, Deutschland              | 100           |
| KOSINUS Grundstücks-Verwaltungsgesellschaft mbH & Co. Gamma OHG | Berlin, Deutschland            | 100           |
| KVP Pharma+Veterinär Produkte GmbH                              | Kiel, Deutschland              | 100           |
| Marotrast GmbH                                                  | Jena, Deutschland              | 100           |
| MENADIER Heilmittel GmbH                                        | Berlin, Deutschland            | 100           |
| Pharma-Verlagsbuchhandlung GmbH                                 | Berlin, Deutschland            | 100           |
| Schering AG                                                     | Berlin, Deutschland            | 100           |
| Schering GmbH und Co. Produktions KG                            | Weimar, Deutschland            | 100           |
| Schering International Holding GmbH                             | Berlin, Deutschland            | 100           |
| Schering-Kahlbaum Gesellschaft mit beschränkter Haftung         | Berlin, Deutschland            | 100           |
| TECTRION GmbH                                                   | Leverkusen, Deutschland        | 100           |
| TravelBoard GmbH                                                | Leverkusen, Deutschland        | 100           |
| Viverso GmbH                                                    | Bitterfeld-Wolfen, Deutschland | 100           |
| Zweite K-W-A Beteiligungsgesellschaft mbH                       | Leverkusen, Deutschland        | 100           |

## 6.2 Akquisitionen und sonstige Erwerbe

Akquisitionen wurden nach der Erwerbsmethode ausgewiesen, wonach die Ergebnisse der erworbenen Unternehmen vom jeweiligen Erwerbszeitpunkt an in den Konzernabschluss einbezogen werden. Die Anschaffungskosten von erworbenen ausländischen Gesellschaften wurden zum Erwerbszeitpunkt mit dem jeweiligen Kurs in Euro umgerechnet. Der im Januar 2008 überarbeitete Standard IFRS 3 fand im Geschäftsjahr 2010 erstmalig Anwendung. Wesentliche Änderungen des Standards sind in der Anhangangabe [3] enthalten.

Die Erwerbskosten der im Jahr 2010 getätigten Akquisitionen betrugen 43 Mio € (Vorjahr: 404 Mio €). Die Kaufpreise der erworbenen Gesellschaften bzw. Geschäfte wurden im Wesentlichen durch die Übertragung von Zahlungsmitteln beglichen. Insgesamt entstand dabei ein Geschäfts- oder Firmenwert von 12 Mio € (Vorjahr: 177 Mio €). Dieser resultierte im Wesentlichen aus folgenden Transaktionen:

Am 9. März 2010 wurde die im kalifornischen Sunnyvale ansässige Artificial Muscle, Inc., USA, erworben. Artificial Muscle, Inc. ist ein Technologieführer auf dem Gebiet der elektroaktiven Polymere für die Consumer-Elektronik-Industrie. Der Kaufpreis in Höhe von 21 Mio € entfiel im Wesentlichen auf patentierte Technologien und einen Geschäfts- oder Firmenwert.

Am 30. November 2010 wurde der restliche 50 %-Anteil der BayOne Urethane Systems LLC erworben. Die BayOne war bisher ein Marketing Joint-Venture zwischen Bayer MaterialScience LLC und PolyOne Corp. mit Hauptsitz in St. Louis, Missouri, USA, das sich auf die benutzerdefinierte Formulierung von Polyurethan-Schaumstoffen und Elastomeren konzentriert. Der Kaufpreis in Höhe von 15 Mio € entfiel im Wesentlichen auf Kundenbeziehungen, die unter den sonstigen Rechten ausgewiesen werden, sowie einen Geschäfts- oder Firmenwert. Durch Neubewertung der bereits gehaltenen Eigenkapitalanteile in Höhe von 50 % zum beizulegenden Zeitwert wurde ein Ertrag in Höhe von 12 Mio € erzielt, welcher in den sonstigen betrieblichen Erträgen erfasst wurde. Die Neubewertung verteilte sich auf sonstige Rechte (6 Mio €), Produktionsrechte (2 Mio €) sowie einen Geschäfts- oder Firmenwert (4 Mio €). Der beizulegende Zeitwert des bereits gehaltenen Anteils betrug zum Akquisitionszeitpunkt 14 Mio €. Die Kaufpreisallokation ist derzeit noch nicht abgeschlossen. Änderungen in der Zuordnung des Kaufpreises auf die einzelnen Vermögenswerte können sich daher noch ergeben.

Im Berichtsjahr trugen die oben genannten erworbenen Geschäfte in Höhe von 1 Mio € zum Umsatz des Bayer-Konzerns bei. Diese Portfolioänderungen führten zu einem operativen Ergebnis (EBIT) von 6 Mio € im Geschäftsjahr 2010. Das seit dem Erstkonsolidierungszeitpunkt erwirtschaftete Ergebnis der erworbenen Geschäfte nach Steuern betrug 5 Mio €. Hierin enthalten sind die seit dem Zeitpunkt der Akquisition angefallenen Finanzierungskosten sowie der oben beschriebene Gewinn aus der Neubewertung.

Wären die erläuterten Akquisitionen bereits zum 1. Januar 2010 erfolgt, so wiese der Bayer-Konzern im Berichtsjahr Umsatzerlöse in Höhe von 35.108 Mio € aus. Das Ergebnis nach Steuern würde 1.308 Mio € betragen. Hierin sind Ergebniseffekte aus der Neubewertung übernommener Vermögenswerte sowie Finanzierungskosten für das Gesamtjahr enthalten. Ein Erwerb der genannten Geschäfte zum Jahresbeginn 2010 hätte das Ergebnis pro Aktie unwesentlich beeinflusst.

Die genannten sowie weitere kleinere Transaktionen und Kaufpreisanpassungen aus Transaktionen aus dem Vorjahr wirkten sich zum jeweiligen Erwerbszeitpunkt auf Vermögen und Schulden des Konzerns wie folgt aus und führten unter Berücksichtigung der übernommenen Zahlungsmittel und Zahlungsmitteläquivalente zu folgendem Mittelabfluss:

Erworbenene Vermögenswerte und Schulden

[Tabelle 4.26]

|                                                          | Buchwerte vor<br>Übernahme | Anpassungs-<br>betrag | Beizulegende<br>Zeitwerte zum<br>Akquisitions-<br>zeitpunkt |
|----------------------------------------------------------|----------------------------|-----------------------|-------------------------------------------------------------|
|                                                          | in Mio €                   | in Mio €              | in Mio €                                                    |
| Geschäfts- oder Firmenwert                               | -                          | 12                    | 12                                                          |
| Patente                                                  | -                          | 11                    | 11                                                          |
| Forschungs- und Entwicklungsprojekte                     | -                          | 1                     | 1                                                           |
| Produktionsrechte                                        | -                          | 2                     | 2                                                           |
| Sonstige Rechte                                          | -                          | 5                     | 5                                                           |
| Sonstige langfristige Vermögenswerte                     | -                          | 3                     | 3                                                           |
| Sonstige kurzfristige Vermögenswerte                     | 3                          | -                     | 3                                                           |
| Zahlungsmittel und Zahlungsmitteläquivalente             | 1                          | -                     | 1                                                           |
| Sonstige Verbindlichkeiten                               | -2                         | -                     | -2                                                          |
| Latente Steuern                                          | -                          | 1                     | 1                                                           |
| <b>Nettovermögen</b>                                     | <b>2</b>                   | <b>35</b>             | <b>37</b>                                                   |
| Anteile anderer Gesellschafter                           | -                          | -                     | 3                                                           |
| Veränderungen in den Anteilen anderer Gesellschafter     | -                          | -                     | 3                                                           |
| <b>Kaufpreis</b>                                         |                            |                       | <b>43</b>                                                   |
| Übernommene Zahlungsmittel und Zahlungsmitteläquivalente |                            |                       | 1                                                           |
| Verbindlichkeiten für zukünftige Zahlungen               |                            |                       | 2                                                           |
| <b>Nettoabfluss aus Akquisitionen</b>                    |                            |                       | <b>40</b>                                                   |

Mit dem Anpassungsbetrag wurden die Differenzen zwischen den bilanzierten Restbuchwerten der Vermögenswerte und Schulden vor deren Übernahme und den beizulegenden Zeitwerten zum Erwerbszeitpunkt berücksichtigt.

Im Vorjahr wurden folgende Akquisitionen nach den Vorschriften des IFRS 3 ausgewiesen:

Am 25. Juni 2009 wurde der restliche 10 %-Anteil der Bayer Polymers (Shanghai) Co. Ltd., China, für 24 Mio € erworben. Die Differenz zwischen dem Buchwert der übernommenen Anteile anderer Gesellschafter und dem Kaufpreis wurde als Geschäfts- oder Firmenwert erfasst.

Am 1. Oktober 2009 wurden zwei Produktlinien aus dem Bereich Dermatologie von der us-amerikanischen SkinMedica, Inc. mit Sitz in Carlsbad, USA, für 43 Mio € erworben. Die verschreibungspflichtigen Arzneimittel Desonate® und NeoBenz® Micro werden in den USA vermarktet. Die Differenz zwischen dem Buchwert des übernommenen Vermögens und dem Kaufpreis entfiel im Wesentlichen auf Produktionsrechte und Marken der genannten Produktlinien in Höhe von 37 Mio € sowie einen Geschäfts- oder Firmenwert von 5 Mio €.

Am 2. November 2009 wurde die Athenix Corp., USA, ein nicht-börsennotiertes Biotech-Unternehmen mit Sitz im Research Triangle Park, USA, für 286 Mio € erworben. In dem Kaufpreis waren zukünftige Meilensteinzahlungen von ca. 24 Mio € enthalten, die bei Erreichung bestimmter Entwicklungsziele anfallen werden. Athenix hat eine umfangreiche Entwicklungs-Plattform von Pflanzeigenschaften (Traits) aus den Bereichen Herbizidtoleranz und Insektenresistenz vor allem für Mais und Sojabohnen. Die Differenz zwischen dem Buchwert des übernommenen Vermögens und dem Kaufpreis entfiel im Wesentlichen auf Entwicklungstechnologien in Höhe von 217 Mio €, die als sonstige Rechte ausgewiesen wurden, latente Steuern von 69 Mio € sowie einen Geschäfts- oder Firmenwert von 132 Mio €. Der Geschäfts- oder Firmenwert lässt sich insbesondere den erwarteten Synergien aus der Erweiterung der Möglichkeiten, Landwirten weltweit neue Technologien und komplette Agrarlösungen von der Aussaat bis zur Ernte zur Verfügung zu stellen, zurechnen.

Im Vorjahr wirkten sich die genannten sowie weitere kleinere Akquisitionen zum jeweiligen Erwerbszeitpunkt auf Vermögen und Schulden des Konzerns wie folgt aus und führten unter Berücksichtigung der übernommenen Zahlungsmittel und Zahlungsmitteläquivalente zu folgendem Mittelabfluss:

Erworbene Vermögenswerte und Schulden (Vorjahr)

[Tabelle 4.27]

|                                                          | Buchwerte vor<br>Übernahme | Anpassungs-<br>betrag | Beizulegende<br>Zeitwerte zum<br>Akquisitions-<br>zeitpunkt |
|----------------------------------------------------------|----------------------------|-----------------------|-------------------------------------------------------------|
|                                                          | in Mio €                   | in Mio €              | in Mio €                                                    |
| Geschäfts- oder Firmenwert                               | -                          | 177                   | 177                                                         |
| Patente                                                  | -                          | 1                     | 1                                                           |
| Marken                                                   | -                          | 3                     | 3                                                           |
| Forschungs- und Entwicklungsprojekte                     | -                          | 4                     | 4                                                           |
| Vermarktungs- und Verkaufsrechte                         | -                          | 2                     | 2                                                           |
| Produktionsrechte                                        | -                          | 34                    | 34                                                          |
| Sonstige Rechte                                          | 3                          | 226                   | 229                                                         |
| Sachanlagen                                              | 5                          | -                     | 5                                                           |
| Vorräte                                                  | -                          | 1                     | 1                                                           |
| Zahlungsmittel und Zahlungsmitteläquivalente             | 12                         | -                     | 12                                                          |
| Finanzverbindlichkeiten                                  | -1                         | -                     | -1                                                          |
| Sonstige Verbindlichkeiten                               | -7                         | -                     | -7                                                          |
| Latente Steuern                                          | -                          | -71                   | -71                                                         |
| <b>Nettovermögen</b>                                     | <b>12</b>                  | <b>377</b>            | <b>389</b>                                                  |
| Anteile anderer Gesellschafter                           | -                          | -                     | 15                                                          |
| <b>Kaufpreis</b>                                         |                            |                       | <b>404</b>                                                  |
| darin enthaltene Anschaffungsnebenkosten                 |                            |                       | 2                                                           |
| Übernommene Zahlungsmittel und Zahlungsmitteläquivalente |                            |                       | 12                                                          |
| Verbindlichkeiten für zukünftige Zahlungen               |                            |                       | 38                                                          |
| <b>Nettoabfluss aus Akquisitionen</b>                    |                            |                       | <b>354</b>                                                  |

**AKQUISITIONEN NACH DEM BILANZSTICHTAG**

Am 7. Januar 2011 wurde das Tiergesundheitsunternehmen Bomac, mit Sitz in Neuseeland, erworben. Die Unternehmensgruppe verfügt über ein breites Arzneimittelangebot für den Nutztiersektor. Der Schwerpunkt liegt auf der Behandlung von Mastitis (Milchdrüsenentzündung) bei Milchvieh sowie Parasitizide für Schafe. Der Kaufpreis in Höhe von 85 Mio € entfällt im Wesentlichen auf Kundenbeziehungen und einen Geschäfts- oder Firmenwert.

Am 28. Januar 2011 wurde der Vertrag mit dem indischen Pharmaunternehmen Zydus Cadila zur Gründung eines Gemeinschaftsunternehmens unterzeichnet. Die neue Marketing- und Vertriebsgesellschaft mit Sitz in Mumbai dient der stärkeren Präsenz auf dem wachsenden Pharmamarkt in Indien. Der Abschluss der Transaktion soll bis Mitte 2011 erfolgen.

**6.3 Desinvestitionen**

Im Geschäftsjahr 2010 wurden keine Desinvestitionen getätigt. Die Desinvestitionen des Vorjahres wirkten sich wie folgt aus:

Ende Mai 2009 setzten wir die am 31. März 2009 bekannt gegebene strategische Allianz mit Genzyme Corp., USA, um. Entsprechend der Vereinbarung wurden die Produkte des hämatologischen Onkologieportfolios auf Genzyme übertragen. Im Geschäftsjahr 2010 flossen Bayer hieraus netto 93 Mio € zu, die aus umsatzabhängigen Zahlungen von Genzyme sowie gegenläufigen Steuerzahlungen resultierten. Nach einer Wertberichtigung in Höhe von 56 Mio € belief sich die Forderung in Höhe des Barwerts der erwarteten, zukünftigen, umsatzabhängigen Zahlungen zum 31. Dezember 2010 auf 228 Mio €.

Im Mai 2009 verkaufte Bayer den 51 %-Anteil an der spanischen Justesa Imagen, S.A. für 16 Mio € an Juste S.A. Química Farmacéutica. Bis Ende 2009 erfolgte eine Zahlung in Höhe von 3 Mio €, sodass in Höhe der Restzahlung eine Forderung in der Bilanz ausgewiesen wurde. Von dieser Forderung wurden in 2010 weitere 8 Mio € vereinnahmt.

Die genannten Desinvestitionen haben sich in 2010 wie folgt ausgewirkt:

**Desinvestitionen**

[Tabelle 4.28]

|                                                    | 2010       |
|----------------------------------------------------|------------|
|                                                    | in Mio €   |
| Veräußerte Vermögenswerte und Schulden             | -          |
| Nettozuflüsse aus Veräußerungen                    | 101        |
| Reduktion Forderungen für zukünftige Nettozuflüsse | -181       |
| Reduktion Steuerrückstellungen                     | 24         |
| Realisierung abgegrenzter Gewinn                   | 8          |
| <b>Verlust aus Veräußerungen (vor Steuern)</b>     | <b>-48</b> |

# Erläuterungen zur Gewinn- und Verlustrechnung

## 7. Umsatzerlöse

Umsätze werden im Wesentlichen aus Produktlieferungen erzielt. Die Umsatzerlöse stiegen gegenüber 2009 um 3.920 Mio € bzw. 12,6 % auf 35.088 Mio €. Der Anstieg resultierte aus den folgenden Faktoren:

Faktoren der Umsatzveränderung

[Tabelle 4.29]

|               | 2010         |              |
|---------------|--------------|--------------|
|               | in Mio €     | in %         |
| Menge         | 2.073        | +6,7         |
| Preis         | 413          | +1,3         |
| Portfolio     | -92          | -0,3         |
| Währung       | 1.526        | +4,9         |
| <b>Gesamt</b> | <b>3.920</b> | <b>+12,6</b> |

Die Umsätze und ihre Entwicklung nach Segmenten und Regionen sind aus der Übersicht in der Anhangangabe [1] ersichtlich.

## 8. Vertriebskosten

Zu den Vertriebskosten zählen alle Aufwendungen in der Berichtsperiode, die durch Verkauf, Lagerhaltung und Transport verkaufsfähiger Produkte, durch Werbung und Beratung der Abnehmer sowie durch Marktforschung verursacht werden. Die Vertriebskosten enthielten im Wesentlichen Aufwendungen für den Vertriebsinnen- und -außendienst in Höhe von 4.063 Mio € (Vorjahr: 3.755 Mio €), Werbung und Kundenberatung in Höhe von 2.032 Mio € (Vorjahr: 1.860 Mio €) sowie physische Distribution und Lagerhaltung der Fertigprodukte in Höhe von 1.119 Mio € (Vorjahr: 952 Mio €). Provisions- und Lizenzaufwendungen betrugen 566 Mio € (Vorjahr: 514 Mio €), sonstige Vertriebskosten 1.023 Mio € (Vorjahr: 842 Mio €).

## 9. Forschungs- und Entwicklungskosten

Die Anhangangabe [4] enthält eine ausführliche Beschreibung der Zusammensetzung der Forschungs- und Entwicklungskosten. Die Aufteilung der Forschungs- und Entwicklungskosten auf die Segmente und Regionen ist der Anhangangabe [1] zu entnehmen.



## 10. Sonstige betriebliche Erträge

Die sonstigen betrieblichen Erträge setzten sich wie folgt zusammen:

Sonstige betriebliche Erträge

[Tabelle 4.30]

|                                                                                                     | 2009       | 2010       |
|-----------------------------------------------------------------------------------------------------|------------|------------|
|                                                                                                     | in Mio €   | in Mio €   |
| Gewinne aus dem Abgang von immateriellen Vermögenswerten und Sachanlagen sowie aus Desinvestitionen | 181        | 100        |
| Erträge aus der Auflösung von Wertberichtigungen auf Forderungen                                    | 61         | 53         |
| Erträge aus der Auflösung von Rückstellungen                                                        | 65         | 45         |
| Erträge aus derivativen Sicherungsgeschäften                                                        | 174        | 63         |
| Übrige betriebliche Erträge                                                                         | 441        | 453        |
| <b>Gesamt</b>                                                                                       | <b>922</b> | <b>714</b> |
| davon Sondereinflüsse                                                                               | 138        | -          |

In den Gewinnen aus dem Abgang von immateriellen Vermögenswerten und Sachanlagen sowie aus Desinvestitionen ist ein Ertrag im Teilkonzern CropScience aus dem Tausch von Lizenzrechten mit der BASF SE sowie mit der Syngenta AG in Höhe von insgesamt 40 Mio € enthalten. Darüber hinaus wurden 23 Mio € Gewinn durch den Verkauf der Insektizidwirkstoffe Fenamiphos, Ethoprophos und Tebupirimphos an die Amvac Chemical Corp. im Segment Crop Protection erzielt.

In den übrigen betrieblichen Erträgen ist ein Betrag in Höhe von 68 Mio € aus der Beilegung eines Patentstreits im Zusammenhang mit YAZ® enthalten. Weiterhin entfielen 12 Mio € auf den Gewinn aus der Neubewertung unserer Anteile an der BayOne Urethane Systems LLC im Rahmen des Erwerbs des restlichen 50 %-Anteils. Der übrige Betrag setzte sich aus einer Vielzahl im Einzelnen unwesentlicher Sachverhalte in den Tochtergesellschaften zusammen.

## 11. Sonstige betriebliche Aufwendungen

Die sonstigen betrieblichen Aufwendungen setzten sich wie folgt zusammen:

Sonstige betriebliche Aufwendungen

[Tabelle 4.31]

|                                                                                                      | 2009          | 2010          |
|------------------------------------------------------------------------------------------------------|---------------|---------------|
|                                                                                                      | in Mio €      | in Mio €      |
| Verluste aus dem Abgang von immateriellen Vermögenswerten und Sachanlagen sowie aus Desinvestitionen | -26           | -83           |
| Wertberichtigungen auf Forderungen                                                                   | -106          | -85           |
| Aufwendungen für wesentliche rechtliche Risiken                                                      | -225          | -703          |
| Aufwendungen aus derivativen Sicherungsgeschäften                                                    | -212          | -239          |
| Übrige betriebliche Aufwendungen                                                                     | -1.088        | -1.356        |
| <b>Gesamt</b>                                                                                        | <b>-1.657</b> | <b>-2.466</b> |
| davon Sondereinflüsse                                                                                | -904          | -1.722        |

Detailinformationen zu den Sondereinflüssen, die überwiegend aus Aufwendungen für wesentliche rechtliche Risiken und aus übrigen betrieblichen Aufwendungen bestanden, werden saldiert mit den Erträgen aus Sondereinflüssen im Lagebericht in Tabelle 3.16 dargestellt.

Einzelheiten der darin ausgewiesenen Restrukturierungsmaßnahmen sind in der Anhangangabe [26.3] aufgeführt.

Die folgende Tabelle zeigt den Funktionskostenbezug der als Sondereinfluss ausgewiesenen sonstigen betrieblichen Aufwendungen:

Funktionskostenbezug Sondereinflüsse

[Tabelle 4.32]

|                                     | 2009        | 2010          |
|-------------------------------------|-------------|---------------|
|                                     | in Mio €    | in Mio €      |
| Herstellungsbezogen                 | -305        | -250          |
| Vertriebsbezogen                    | -148        | -24           |
| Forschungs- und entwicklungsbezogen | -37         | -231          |
| Verwaltungsbezogen                  | -125        | -20           |
| Sonstige                            | -289        | -1.197        |
| <b>Gesamt</b>                       | <b>-904</b> | <b>-1.722</b> |

## 12. Personalaufwand und Mitarbeiter

Der Personalaufwand erhöhte sich im Jahr 2010 um 323 Mio € auf 8.099 Mio € (Vorjahr: 7.776 Mio €). Die Veränderungen der Währungskurse erhöhten den Personalaufwand um 254 Mio €.

Personalaufwand

[Tabelle 4.33]

|                                                                         | 2009         | 2010         |
|-------------------------------------------------------------------------|--------------|--------------|
|                                                                         | in Mio €     | in Mio €     |
| Löhne und Gehälter                                                      | 6.286        | 6.476        |
| Soziale Abgaben und Aufwendungen für Altersversorgung und Unterstützung | 1.490        | 1.623        |
| davon für beitragsorientierte Altersversorgungssysteme                  | 495          | 462          |
| davon für leistungsorientierte Altersversorgungssysteme                 | 164          | 228          |
| <b>Gesamt</b>                                                           | <b>7.776</b> | <b>8.099</b> |

Nicht als Personalaufwand erfasst sind Beträge, die sich aus der Aufzinsung der Personalrückstellungen, insbesondere der Pensionsrückstellungen, ergeben. Sie sind als Bestandteil des Finanzergebnisses unter den sonstigen finanziellen Aufwendungen ausgewiesen (Anhangangabe [13.3]).

Die durchschnittliche Anzahl der Beschäftigten teilte sich wie folgt auf die Funktionsbereiche auf:

#### Mitarbeiter

[Tabelle 4.34]

|                           | 2009           | 2010           |
|---------------------------|----------------|----------------|
| Produktion                | 49.485         | 47.728         |
| Vertrieb                  | 39.949         | 40.827         |
| Forschung und Entwicklung | 12.539         | 13.110         |
| Verwaltung                | 9.681          | 9.649          |
| <b>Gesamt</b>             | <b>111.654</b> | <b>111.314</b> |
| Auszubildende             | 2.665          | 2.540          |

Vorjahreswerte angepasst

In der Gesamtzahl sind die Mitarbeiter von Gemeinschaftsunternehmen entsprechend dem jeweiligen Beteiligungsanteil enthalten. Insgesamt waren dort 57 Personen beschäftigt (Vorjahr: 55 Personen).

Die Anzahl der Mitarbeiter (Festanstellungen und befristete Arbeitsverhältnisse) wird in Vollzeitbeschäftigte (FTE) umgerechnet dargestellt. Teilzeitbeschäftigte werden dabei gemäß ihrer vertraglichen Arbeitszeit proportional berücksichtigt. Im Gegensatz zum Vorjahr sind statt der Auszubildenden die befristeten Arbeitsverhältnisse enthalten.

## 13. Finanzergebnis

Das Finanzergebnis belief sich im Geschäftsjahr 2010 auf -1.009 Mio € (Vorjahr: -1.136 Mio €) und setzte sich aus -56 Mio € at-equity-Ergebnis (Vorjahr: -48 Mio €), 1.337 Mio € finanziellen Aufwendungen (Vorjahr: 1.877 Mio €) und 384 Mio € finanziellen Erträgen (Vorjahr: 789 Mio €) zusammen. Details zu den einzelnen Kategorien des Finanzergebnisses sind im Folgenden erörtert.

### 13.1 Beteiligungsergebnis

Das Beteiligungsergebnis setzte sich wie folgt zusammen:

#### Beteiligungsergebnis

[Tabelle 4.35]

|                                                                 | 2009       | 2010       |
|-----------------------------------------------------------------|------------|------------|
|                                                                 | in Mio €   | in Mio €   |
| Ergebnis aus at-equity bewerteten Beteiligungen                 | -48        | -56        |
| <b>Aufwendungen</b>                                             |            |            |
| Wertberichtigungen auf Beteiligungen                            | -15        | -11        |
| Verluste aus der Veräußerung von Beteiligungen                  | -11        | -2         |
| <b>Erträge</b>                                                  |            |            |
| Erträge aus Beteiligungen und Gewinnabführungsverträgen (netto) | 5          | 6          |
| Gewinne aus der Veräußerung von Beteiligungen                   | 10         | 4          |
| <b>Gesamt</b>                                                   | <b>-59</b> | <b>-59</b> |

Das Beteiligungsergebnis beinhaltetete im Wesentlichen das at-equity-Ergebnis von zwei Produktionsgesellschaften mit Lyondell in Höhe von -49 Mio € (Vorjahr: -49 Mio €).

Weitere Erläuterungen zu den at-equity bewerteten Beteiligungen finden sich in der Anhangangabe [19].

## 13.2 Zinsergebnis

Das Zinsergebnis setzte sich wie folgt zusammen:

Zinsergebnis

[Tabelle 4.36]

|                                                             | 2009        | 2010        |
|-------------------------------------------------------------|-------------|-------------|
|                                                             | in Mio €    | in Mio €    |
| <b>Aufwendungen</b>                                         |             |             |
| Zinsen und ähnliche Aufwendungen                            | -815        | -690        |
| Zinsaufwendungen aus Derivaten (zu Handelszwecken gehalten) | -490        | -180        |
| <b>Erträge</b>                                              |             |             |
| Zinsen und ähnliche Erträge                                 | 267         | 219         |
| Zinserträge aus Derivaten (zu Handelszwecken gehalten)      | 490         | 152         |
| <b>Gesamt</b>                                               | <b>-548</b> | <b>-499</b> |

In den Aufwendungen waren Zinsaufwendungen aus nicht finanziellen Verbindlichkeiten in Höhe von 54 Mio € (Vorjahr: 20 Mio €) enthalten. In den Erträgen waren Zinserträge aus nicht finanziellen Vermögenswerten in Höhe von 40 Mio € (Vorjahr: 77 Mio €) enthalten.

Für andere Gesellschafter, denen gegenüber eine Rückzahlungsverpflichtung aus dem Gesamtvermögen besteht, wird der Betrag des auf sie entfallenden anteiligen Jahresergebnisses im Zinsergebnis ausgewiesen. Im laufenden Jahr wurden in diesem Zusammenhang anteilige Gewinne in Höhe von 15 Mio € als Zinsaufwand erfasst (Vorjahr: 14 Mio €).

## 13.3 Sonstige finanzielle Aufwendungen und Erträge

Die sonstigen finanziellen Aufwendungen und Erträge setzten sich wie folgt zusammen:

Sonstige finanzielle Aufwendungen und Erträge

[Tabelle 4.37]

|                                         | 2009        | 2010        |
|-----------------------------------------|-------------|-------------|
|                                         | in Mio €    | in Mio €    |
| <b>Aufwendungen</b>                     |             |             |
| Aufzinsung verzinslicher Rückstellungen | -436        | -372        |
| Kursergebnis                            | -92         | -70         |
| Übrige finanzielle Aufwendungen         | -16         | -11         |
| <b>Erträge</b>                          |             |             |
| Übrige finanzielle Erträge              | 15          | 2           |
| <b>Gesamt</b>                           | <b>-529</b> | <b>-451</b> |

Die Zinsaufwendungen aus der Aufzinsung langfristiger Rückstellungen betrafen im Wesentlichen die Pensionsrückstellungen.

## 14. Ertragsteuern

Die Ertragsteueraufwendungen gliederten sich nach ihrer Herkunft wie folgt:

Ertragsteueraufwendungen nach Herkunft

[Tabelle 4.38]

|                                         | 2009        | 2010        |
|-----------------------------------------|-------------|-------------|
|                                         | in Mio €    | in Mio €    |
| Gezahlte bzw. geschuldete Ertragsteuern |             |             |
| Deutschland                             | -186        | -118        |
| Übrige Länder                           | -476        | -779        |
|                                         | <b>-662</b> | <b>-897</b> |
| Latente Steuern                         |             |             |
| aus temporären Unterschieden            | 430         | 534         |
| aus Zinsvorträgen                       | -11         | -           |
| aus Verlustvorträgen                    | -291        | -33         |
| aus Steuergutschriften                  | 23          | -15         |
|                                         | <b>151</b>  | <b>486</b>  |
| <b>Gesamt</b>                           | <b>-511</b> | <b>-411</b> |

Die latenten Steuerabgrenzungen resultierten aus den folgenden Bilanzpositionen:

Latente Steuerforderungen und -verbindlichkeiten

[Tabelle 4.39]

|                                              | 31.12.2009             |                         | 31.12.2010             |                         |
|----------------------------------------------|------------------------|-------------------------|------------------------|-------------------------|
|                                              | Aktive latente Steuern | Passive latente Steuern | Aktive latente Steuern | Passive latente Steuern |
|                                              | in Mio €               | in Mio €                | in Mio €               | in Mio €                |
| Immaterielle Vermögenswerte                  | 459                    | 3.645                   | 386                    | 3.080                   |
| Sachanlagen                                  | 59                     | 793                     | 48                     | 800                     |
| Finanzielle Vermögenswerte                   | 48                     | 226                     | 55                     | 193                     |
| Vorräte                                      | 357                    | 51                      | 470                    | 45                      |
| Forderungen                                  | 42                     | 301                     | 54                     | 322                     |
| Sonstige Vermögenswerte                      | 101                    | 36                      | 51                     | 9                       |
| Pensionsrückstellungen u. ä. Verpflichtungen | 1.229                  | 570                     | 1.468                  | 775                     |
| Andere Rückstellungen                        | 464                    | 36                      | 669                    | 48                      |
| Verbindlichkeiten                            | 408                    | 37                      | 468                    | 45                      |
| Verlustvorträge                              | 156                    | -                       | 139                    | -                       |
| Steuergutschriften                           | 112                    | -                       | 106                    | -                       |
|                                              | <b>3.435</b>           | <b>5.695</b>            | <b>3.914</b>           | <b>5.317</b>            |
| davon langfristig                            | 2.573                  | 5.218                   | 2.762                  | 4.667                   |
| Saldierung                                   | -2.485                 | -2.485                  | -2.740                 | -2.740                  |
| <b>Gesamt</b>                                | <b>950</b>             | <b>3.210</b>            | <b>1.174</b>           | <b>2.577</b>            |



Latente Steueransprüche aus erfolgsneutral erfassten versicherungsmathematischen Gewinnen und Verlusten aus leistungsorientierten Pensionszusagen und ähnlichen Verpflichtungen führten zu einem eigenkapitalerhöhenden Effekt in Höhe von 258 Mio € (Vorjahr: 117 Mio €). Erfolgsneutrale Veränderungen beizulegender Zeitwerte von zur Veräußerung verfügbaren finanziellen Vermögenswerten sowie von zu Sicherungszwecken eingesetzten Derivaten hatten einen eigenkapitalerhöhenden Effekt aus latenten Steuerforderungen in Höhe von 25 Mio € (Vorjahr: eigenkapitalreduzierenden Effekt aus latenten Steuerverbindlichkeiten in Höhe von 36 Mio €). Die genannten Eigenkapitaleffekte sind in der Gesamtergebnisrechnung enthalten.

Die Nutzung steuerlicher Verlustvorträge führte im Jahr 2010 zu einer Minderung der gezahlten bzw. geschuldeten Ertragsteuern um 102 Mio € (Vorjahr: 260 Mio €). Durch die Nutzung von Steuergutschriften konnten die gezahlten bzw. geschuldeten Ertragsteuern um 12 Mio € (Vorjahr: 6 Mio €) reduziert werden.

Von den gesamten Verlustvorträgen in Höhe von 929 Mio € (Vorjahr: 1.047 Mio €) können voraussichtlich Beträge von 670 Mio € (Vorjahr: 579 Mio €) innerhalb eines angemessenen Zeitraums genutzt werden. Deshalb wurden hierauf aktive latente Steuern in Höhe von 139 Mio € (Vorjahr: 156 Mio €) gebildet, davon im Berichtsjahr 6 Mio € (Vorjahr: 13 Mio €) erfolgsneutral aus Kaufpreisallokationen.

Für Verlustvorträge in Höhe von 259 Mio € (Vorjahr: 468 Mio €) bestanden gesetzliche oder wirtschaftliche Einschränkungen hinsichtlich ihrer Nutzbarkeit. Deshalb wurden hierfür keine aktiven latenten Steuern angesetzt. Wäre eine Nutzbarkeit der Verlustvorträge in voller Höhe möglich gewesen, hätten theoretisch aktive latente Steuern in Höhe von 67 Mio € (Vorjahr: 137 Mio €) angesetzt werden müssen.

Steuergutschriften in Höhe von 106 Mio € (Vorjahr: 112 Mio €) wurden als aktive latente Steuern ausgewiesen, davon 0 Mio € (Vorjahr: 1 Mio €) im Berichtsjahr erfolgsneutral gebildet. Für Steuergutschriften in Höhe von 51 Mio € (Vorjahr: 32 Mio €) bestanden gesetzliche oder wirtschaftliche Einschränkungen hinsichtlich ihrer Nutzbarkeit, weshalb hierfür keine aktiven latenten Steuern angesetzt wurden.

Die Verfallbarkeit der nicht nutzbaren Steuergutschriften und steuerlichen Verlustvorträge stellte sich wie folgt dar:

Verfallbarkeit nicht nutzbarer Steuergutschriften und steuerlicher Verlustvorträge

[Tabelle 4.40]

|                           | Steuergutschriften |            | Steuerliche Verlustvorträge |            |
|---------------------------|--------------------|------------|-----------------------------|------------|
|                           | 31.12.2009         | 31.12.2010 | 31.12.2009                  | 31.12.2010 |
|                           | in Mio €           | in Mio €   | in Mio €                    | in Mio €   |
| Innerhalb von einem Jahr  | -                  | -          | -                           | -          |
| Innerhalb von zwei Jahren | -                  | 2          | 23                          | -          |
| Innerhalb von drei Jahren | -                  | 22         | 28                          | -          |
| Innerhalb von vier Jahren | -                  | -          | 39                          | -          |
| Innerhalb von fünf Jahren | -                  | -          | 123                         | 10         |
| Später                    | 32                 | 27         | 255                         | 249        |
| <b>Gesamt</b>             | <b>32</b>          | <b>51</b>  | <b>468</b>                  | <b>259</b> |

Im Jahr 2010 bestanden in Tochtergesellschaften, die im abgelaufenen Jahr oder im Vorjahr Verluste erwirtschafteten, latente Steuerforderungsüberhänge auf temporäre Differenzen und auf Verlustvorträge in Höhe von 268 Mio € (Vorjahr: 40 Mio €). Diese wurden als werthaltig angesehen, da für diese Gesellschaften von zukünftigen steuerlichen Gewinnen ausgegangen wird.

Auf geplante Dividendenausschüttungen von Tochterunternehmen wurden im Berichtsjahr 14 Mio € (Vorjahr: 14 Mio €) passive latente Steuern angesetzt. Für temporäre Differenzen aus thesaurierten Ergebnissen von Tochterunternehmen und assoziierten Unternehmen in Höhe von 9.687 Mio € (Vorjahr: 8.054 Mio €) wurden keine passiven latenten Steuern gebildet, da der Bayer-Konzern in der Lage ist, den zeitlichen Verlauf der Umkehrung zu steuern und sich die temporären Differenzen in absehbarer Zeit nicht umkehren.

Der ausgewiesene Steueraufwand des Jahres 2010 von 411 Mio € (Vorjahr: 511 Mio €) wich um 32 Mio € (Vorjahr: 36 Mio €) von dem erwarteten Steueraufwand von 443 Mio € (Vorjahr: 547 Mio €) ab, der sich bei Anwendung eines gewichteten erwarteten Durchschnittssteuersatzes auf das Vorsteuerergebnis des Konzerns ergeben hätte. Dieser Durchschnittssatz wurde aus den erwarteten Steuersätzen der einzelnen Konzerngesellschaften ermittelt und lag 2010 bei 25,7 % (Vorjahr: 29,3 %). Der effektive Steuersatz betrug 23,9 % (Vorjahr: 27,3 %).

Die Ursachen für den Unterschied zwischen dem erwarteten und dem ausgewiesenen Steueraufwand sowie dem erwarteten und dem effektiven Steuersatz im Konzern stellten sich wie folgt dar:

## Steuerüberleitungsrechnung

[Tabelle 4.41]

|                                                                                                                       | 2009       |             | 2010       |             |
|-----------------------------------------------------------------------------------------------------------------------|------------|-------------|------------|-------------|
|                                                                                                                       | in Mio €   | in %        | in Mio €   | in %        |
| <b>Erwarteter Steueraufwand(+)/-ertrag(-) und erwarteter Steuersatz</b>                                               | <b>547</b> | <b>29,3</b> | <b>443</b> | <b>25,7</b> |
| Steuerminderungen aufgrund steuerfreier Erträge                                                                       |            |             |            |             |
| Beteiligungserträge und Veräußerungserlöse                                                                            | -9         | -0,5        | -10        | -0,6        |
| Übrige                                                                                                                | -41        | -2,2        | -41        | -2,4        |
| Erstmaliger Ansatz bisher nicht angesetzter aktiver latenter Steuern auf Verlustvorträge                              | -2         | -0,1        | -27        | -1,6        |
| Nutzung von Verlustvorträgen, auf die zuvor keine latenten Steuern gebildet worden sind                               | -1         | -0,1        | -13        | -0,8        |
| Steuermehrungen aufgrund steuerlich nicht abzugsfähiger Aufwendungen                                                  |            |             |            |             |
| Abschreibungen auf Beteiligungen                                                                                      | 5          | 0,3         | 1          | 0,1         |
| Aufwendungen im Zusammenhang mit Rechtsstreitigkeiten                                                                 | 1          | 0,1         | 2          | 0,1         |
| Übrige                                                                                                                | 103        | 5,5         | 80         | 4,7         |
| Voraussichtlich nicht nutzbare neue Verlustvorträge                                                                   | 10         | 0,5         | 43         | 2,5         |
| Voraussichtlich nicht nutzbare bereits bestehende Verlustvorträge, auf die zuvor latente Steuern gebildet worden sind | 23         | 1,2         | 4          | 0,2         |
| Periodenfremde Steueraufwendungen und -erträge                                                                        | -129       | -6,9        | 3          | 0,2         |
| Steuereffekt aus Steuersatzänderungen                                                                                 | -18        | -1,0        | -2         | -0,1        |
| Sonstige Steuereffekte                                                                                                | 22         | 1,2         | -72        | -4,1        |
| <b>Ausgewiesener Steueraufwand(+)/-ertrag(-) und effektiver Steuersatz</b>                                            | <b>511</b> | <b>27,3</b> | <b>411</b> | <b>23,9</b> |

## 15. Auf andere Gesellschafter entfallendes Ergebnis

Die den anderen Gesellschaftern zustehenden Gewinne beliefen sich auf 11 Mio € (Vorjahr: 11 Mio €), die entsprechenden Verluste auf 2 Mio € (Vorjahr: 11 Mio €).

## 16. Ergebnis je Aktie

Das Ergebnis je Aktie wird nach IAS 33 (Earnings per Share) mittels Division des Konzernergebnisses durch die gewichtete durchschnittliche Zahl der Aktien innerhalb des abgelaufenen Geschäftsjahres errechnet.

Die Anzahl der ausstehenden Stammaktien beträgt 826.947.808.

Bis zum Wandlungstermin der im April 2006 begebenen Pflichtwandelanleihe, dem 1. Juni 2009, wurde die Anzahl der ausstehenden Stammaktien um die potenziellen Aktien, die sich bei der tatsächlichen Wandlung der Pflichtwandelanleihe ergeben hätten, erhöht. Die bei der Wandlung der Pflichtwandelanleihe zu begebenden Stammaktien waren in diesem Zeitraum wie bereits ausgegebene Aktien zu behandeln, sodass sich das unverwässerte und das verwässerte Ergebnis je Aktie entsprachen. Außerdem wurden die mit der Pflichtwandelanleihe zusammenhängenden Finanzierungsaufwendungen dem Konzernergebnis wieder hinzugerechnet.

Ergebnis je Aktie

[Tabelle 4.42]

|                                                                                       | 2009        | 2010        |
|---------------------------------------------------------------------------------------|-------------|-------------|
|                                                                                       | in Mio €    | in Mio €    |
| Ergebnis nach Steuern                                                                 | 1.359       | 1.310       |
| davon auf andere Gesellschafter entfallend                                            | -           | 9           |
| davon auf die Aktionäre der Bayer AG entfallend (Konzernergebnis)                     | 1.359       | 1.301       |
| Finanzierungsaufwendungen für die Pflichtwandelanleihe, bereinigt um den Steuereffekt | 47          | -           |
| Angepasstes Konzernergebnis                                                           | 1.406       | 1.301       |
|                                                                                       | in Stück    | in Stück    |
| Gewichtete durchschnittliche Anzahl der Stammaktien                                   | 801.050.237 | 826.947.808 |
| Effekt aus der (potenziellen) Wandlung der Pflichtwandelanleihe                       | 24.955.936  | -           |
| Angepasste gewichtete durchschnittliche Anzahl der Stammaktien                        | 826.006.173 | 826.947.808 |
|                                                                                       | in €        | in €        |
| Unverwässertes Ergebnis je Aktie                                                      | 1,70        | 1,57        |
| Verwässertes Ergebnis je Aktie                                                        | 1,70        | 1,57        |

## Erläuterungen zur Bilanz

### 17. Geschäfts- oder Firmenwerte sowie sonstige immaterielle Vermögenswerte

Die immateriellen Vermögenswerte entwickelten sich im Geschäftsjahr 2010 wie folgt:

Entwicklung immaterielle Vermögenswerte

[Tabelle 4.43]

|                                             | Erworbener<br>Geschäfts-<br>oder<br>Firmenwert | Techno-<br>logien | Marken       | Vermark-<br>tungs-<br>und<br>Verkaufs-<br>rechte | Produk-<br>tions-<br>rechte | Forschungs-<br>und<br>Entwick-<br>lungs-<br>projekte | Sonstige<br>Rechte und<br>geleistete<br>An-<br>zahlungen | Summe         |
|---------------------------------------------|------------------------------------------------|-------------------|--------------|--------------------------------------------------|-----------------------------|------------------------------------------------------|----------------------------------------------------------|---------------|
|                                             | in Mio €                                       | in Mio €          | in Mio €     | in Mio €                                         | in Mio €                    | in Mio €                                             | in Mio €                                                 | in Mio €      |
| <b>Anschaffungs- und Herstellungskosten</b> |                                                |                   |              |                                                  |                             |                                                      |                                                          |               |
| Stand: 31.12.2009                           | 8.704                                          | 10.240            | 3.966        | 966                                              | 2.169                       | 1.138                                                | 2.296                                                    | 29.479        |
| Konzernkreisänderungen                      | -                                              | -                 | -            | -                                                | -                           | -                                                    | -1                                                       | -1            |
| Akquisitionen                               | 12                                             | 11                | -            | -                                                | 2                           | 1                                                    | 5                                                        | 31            |
| Investitionen                               | -                                              | 17                | 2            | 58                                               | -                           | 127                                                  | 205                                                      | 409           |
| Abgänge                                     | -                                              | -13               | -5           | -2                                               | -11                         | -5                                                   | -79                                                      | -115          |
| Umbuchungen                                 | -                                              | 81                | -            | -9                                               | 1                           | -115                                                 | 45                                                       | 3             |
| Umbuchungen gemäß IFRS 5                    | -                                              | -                 | -            | -                                                | -                           | -                                                    | -                                                        | -             |
| Inflationsanpassung gemäß IAS 29            | 7                                              | -                 | -            | 1                                                | -                           | -                                                    | -                                                        | 8             |
| Neubewertung gemäß IFRS 3                   | 4                                              | -                 | -            | -                                                | 2                           | -                                                    | 5                                                        | 11            |
| Währungsänderungen                          | 275                                            | 40                | 65           | 46                                               | 6                           | 25                                                   | 136                                                      | 593           |
| Stand: 31.12.2010                           | 9.002                                          | 10.376            | 4.028        | 1.060                                            | 2.169                       | 1.171                                                | 2.612                                                    | 30.418        |
| <b>Kumulierte Abschreibungen</b>            |                                                |                   |              |                                                  |                             |                                                      |                                                          |               |
| Stand: 31.12.2009                           | -                                              | 3.615             | 1.004        | 455                                              | 1.315                       | 1                                                    | 1.543                                                    | 7.933         |
| Konzernkreisänderungen                      | -                                              | -                 | -            | -                                                | -                           | -                                                    | -1                                                       | -1            |
| Abgänge                                     | -                                              | -11               | -3           | -2                                               | -7                          | -5                                                   | -78                                                      | -106          |
| Abschreibungen 2010                         | -                                              | 1.010             | 592          | 90                                               | 182                         | 237                                                  | 168                                                      | 2.279         |
| planmäßig                                   | -                                              | 797               | 163          | 80                                               | 151                         | -                                                    | 156                                                      | 1.347         |
| außerplanmäßig                              | -                                              | 213               | 429          | 10                                               | 31                          | 237                                                  | 12                                                       | 932           |
| Wertaufholungen                             | -                                              | -                 | -            | -                                                | -                           | -                                                    | -                                                        | -             |
| Umbuchungen                                 | -                                              | -                 | -            | 4                                                | -                           | -                                                    | -4                                                       | -             |
| Umbuchungen gemäß IFRS 5                    | -                                              | -                 | -            | -                                                | -                           | -                                                    | -                                                        | -             |
| Währungsänderungen                          | -                                              | 17                | 15           | 19                                               | 3                           | -                                                    | 96                                                       | 150           |
| Stand: 31.12.2010                           | -                                              | 4.631             | 1.608        | 566                                              | 1.493                       | 233                                                  | 1.724                                                    | 10.255        |
| <b>Buchwerte 31.12.2010</b>                 | <b>9.002</b>                                   | <b>5.745</b>      | <b>2.420</b> | <b>494</b>                                       | <b>676</b>                  | <b>938</b>                                           | <b>888</b>                                               | <b>20.163</b> |
| <b>Buchwerte 31.12.2009</b>                 | <b>8.704</b>                                   | <b>6.625</b>      | <b>2.962</b> | <b>511</b>                                       | <b>854</b>                  | <b>1.137</b>                                         | <b>753</b>                                               | <b>21.546</b> |

Innerhalb der sonstigen Rechte und geleisteten Anzahlungen werden u. a. eigene Softwareentwicklungen ausgewiesen. Im abgelaufenen Geschäftsjahr wurden Kosten für intern entwickelte Software, die in der Phase der Anwendungsentwicklung anfallen, in Höhe von 31 Mio € (Vorjahr: 56 Mio €) aktiviert. Der Buchwert der intern entwickelten Software beträgt 93 Mio € (Vorjahr: 79 Mio €).

Die Forschungs- und Entwicklungsprojekte enthalten 94 Mio € für den Wirkstoff Alemtuzumab gegen Multiple Sklerose, für den Bayer die Lizenz für die weltweite Vermarktung nach Zulassung an Genzyme Corp., USA, zurückgegeben hat. Bayer beteiligt sich weiterhin an der gemeinsamen Entwicklung und hat bei erfolgreichem Abschluss die Möglichkeit einer weltweiten Co-Promotion sowie Anspruch auf Lizenzgebühren und umsatzabhängige Meilensteinzahlungen.

Insgesamt wurden bei den immateriellen Vermögenswerten außerplanmäßige Abschreibungen in Höhe von 932 Mio € vorgenommen. Durch die Schering-Akquisition im Jahre 2006 wurde u. a. der Markenname Schering in Höhe von 405 Mio € aktiviert. Im Zuge der neuen Markenstrategie wollen wir uns verstärkt auf die Dachmarke „Bayer“ konzentrieren. Daher wurde der aktivierte Markenname in Höhe von 405 Mio € außerplanmäßig abgeschrieben. Das Forschungs- und Entwicklungsprojekt Sagopilone zur Behandlung von Lungenkrebs wurde aufgrund eines negativen Nebenwirkungsprofils eingestellt. Ein weiteres Entwicklungsprojekt, im Bereich der Krebsbehandlung, Bonefos®, wurde bedingt durch starken Wettbewerbsdruck ebenfalls als nicht mehr werthaltig betrachtet. Die beiden Vermögenswerte wurden in Höhe von insgesamt 202 Mio € außerplanmäßig abgeschrieben. Aufgrund der derzeitigen Einschätzung des Absatzmarktes für das Krebsmedikament Zevalin® wurde eine Wertminderung in Höhe von 132 Mio € vorgenommen. Weitere außerplanmäßige Wertminderungen wurden auf drei Produktfamilien im Geschäftsfeld Women's Healthcare and General Medicine auf Marken- und Produktionsrechte in Höhe von 135 Mio € vorgenommen. Außerdem entfallen weitere außerplanmäßige Abschreibungen auf immaterielle Vermögenswerte in den Berichtssegmenten Pharma (14 Mio €), Consumer Health (39 Mio €), MaterialScience (4 Mio €) und sonstige Segmente (1 Mio €).

Detaillierte Erläuterungen zu Akquisitionen und Desinvestitionen sind in den Anhangangaben [6.2] und [6.3] enthalten. Einzelheiten zur Vorgehensweise bei der Werthaltigkeitsprüfung der Geschäfts- oder Firmenwerte sowie der immateriellen Vermögenswerte sind in der Anhangangabe [4] erläutert.

Die immateriellen Vermögenswerte entwickelten sich im Geschäftsjahr 2009 wie folgt:

Entwicklung immaterielle Vermögenswerte (Vorjahr)

[Tabelle 4.44]

|                                             | Erworbener Geschäfts- oder Firmenwert | Technologien  | Marken       | Vermarktungs- und Verkaufsrechte | Produktionsrechte | Forschungs- und Entwicklungsprojekte | Sonstige Rechte und geleistete Anzahlungen | Summe         |
|---------------------------------------------|---------------------------------------|---------------|--------------|----------------------------------|-------------------|--------------------------------------|--------------------------------------------|---------------|
|                                             | in Mio €                              | in Mio €      | in Mio €     | in Mio €                         | in Mio €          | in Mio €                             | in Mio €                                   | in Mio €      |
| <b>Anschaffungs- und Herstellungskosten</b> |                                       |               |              |                                  |                   |                                      |                                            |               |
| <b>Stand: 31.12.2008</b>                    | <b>8.647</b>                          | <b>10.265</b> | <b>3.985</b> | <b>1.004</b>                     | <b>2.142</b>      | <b>1.359</b>                         | <b>1.925</b>                               | <b>29.327</b> |
| Konzernkreisänderungen                      | -                                     | -             | -            | -                                | -                 | -                                    | 1                                          | 1             |
| Akquisitionen                               | 177                                   | 1             | 3            | 2                                | 34                | 4                                    | 229                                        | 450           |
| Investitionen                               | -                                     | 14            | -            | 13                               | 6                 | 162                                  | 132                                        | 327           |
| Abgänge                                     | -                                     | -5            | -            | -2                               | -                 | -172                                 | -41                                        | -220          |
| Umbuchungen                                 | -                                     | 201           | 2            | -53                              | 7                 | -201                                 | 44                                         | -             |
| Umbuchungen gemäß IFRS 5                    | -92                                   | -225          | -            | -                                | -20               | -5                                   | -2                                         | -344          |
| Inflationsanpassung gemäß IAS 29            | -                                     | -             | -            | -                                | -                 | -                                    | -                                          | -             |
| Neubewertung gemäß IFRS 3                   | -                                     | -             | -            | -                                | -                 | -                                    | -                                          | -             |
| Währungsänderungen                          | -28                                   | -11           | -24          | 2                                | -                 | -9                                   | 8                                          | -62           |
| <b>Stand: 31.12.2009</b>                    | <b>8.704</b>                          | <b>10.240</b> | <b>3.966</b> | <b>966</b>                       | <b>2.169</b>      | <b>1.138</b>                         | <b>2.296</b>                               | <b>29.479</b> |
| <b>Kumulierte Abschreibungen</b>            |                                       |               |              |                                  |                   |                                      |                                            |               |
| <b>Stand: 31.12.2008</b>                    | <b>-</b>                              | <b>2.766</b>  | <b>833</b>   | <b>386</b>                       | <b>1.166</b>      | <b>173</b>                           | <b>1.405</b>                               | <b>6.729</b>  |
| Konzernkreisänderungen                      | -                                     | -             | -            | -                                | -                 | -                                    | -                                          | -             |
| Abgänge                                     | -                                     | -5            | -            | -                                | -                 | -172                                 | -39                                        | -216          |
| Abschreibungen 2009                         | -                                     | 938           | 171          | 121                              | 151               | -                                    | 156                                        | 1.537         |
| planmäßig                                   | -                                     | 938           | 167          | 88                               | 151               | -                                    | 132                                        | 1.476         |
| außerplanmäßig                              | -                                     | -             | 4            | 33                               | -                 | -                                    | 24                                         | 61            |
| Wertaufholungen                             | -                                     | -             | -            | -                                | -                 | -                                    | -                                          | -             |
| Umbuchungen                                 | -                                     | -5            | 4            | -53                              | -                 | -                                    | 54                                         | -             |
| Umbuchungen gemäß IFRS 5                    | -                                     | -75           | -            | -                                | -2                | -                                    | -                                          | -77           |
| Währungsänderungen                          | -                                     | -4            | -4           | 1                                | -                 | -                                    | -33                                        | -40           |
| <b>Stand: 31.12.2009</b>                    | <b>-</b>                              | <b>3.615</b>  | <b>1.004</b> | <b>455</b>                       | <b>1.315</b>      | <b>1</b>                             | <b>1.543</b>                               | <b>7.933</b>  |
| <b>Buchwerte 31.12.2009</b>                 | <b>8.704</b>                          | <b>6.625</b>  | <b>2.962</b> | <b>511</b>                       | <b>854</b>        | <b>1.137</b>                         | <b>753</b>                                 | <b>21.546</b> |
| <b>Buchwerte 31.12.2008</b>                 | <b>8.647</b>                          | <b>7.499</b>  | <b>3.152</b> | <b>618</b>                       | <b>976</b>        | <b>1.186</b>                         | <b>520</b>                                 | <b>22.598</b> |



Die Geschäfts- oder Firmenwerte der operativen Berichtssegmente entwickelten sich im Geschäftsjahr 2010 bzw. im Vorjahr wie folgt:

Geschäfts- oder Firmenwerte nach Berichtssegmenten

[Tabelle 4.45]

|                                  | Pharma       | Consumer Health | HealthCare   | Crop Protection | Environmental Science/<br>BioScience | Crop-Science |
|----------------------------------|--------------|-----------------|--------------|-----------------|--------------------------------------|--------------|
|                                  | in Mio €     | in Mio €        | in Mio €     | in Mio €        | in Mio €                             | in Mio €     |
| <b>Buchwerte 1.1. 2009</b>       | <b>5.553</b> | <b>1.323</b>    | <b>6.876</b> | <b>1.088</b>    | <b>506</b>                           | <b>1.594</b> |
| Konzernkreisänderungen           | -            | -               | -            | -               | -                                    | -            |
| Akquisitionen                    | 4            | 17              | 21           | -               | 132                                  | 132          |
| Investitionen                    | -            | -               | -            | -               | -                                    | -            |
| Abgänge                          | -            | -               | -            | -               | -                                    | -            |
| Abschreibungen 2009              | -            | -               | -            | -               | -                                    | -            |
| Umbuchungen                      | -            | -               | -            | -               | -                                    | -            |
| Umbuchung gemäß IFRS 5           | -92          | -               | -92          | -               | -                                    | -            |
| Inflationsanpassung gemäß IAS 29 | -            | -               | -            | -               | -                                    | -            |
| Neubewertung gemäß IFRS 3        | -            | -               | -            | -               | -                                    | -            |
| Währungsänderungen               | -5           | -12             | -17          | 9               | -13                                  | -4           |
| <b>Buchwerte 31.12.2009</b>      | <b>5.460</b> | <b>1.328</b>    | <b>6.788</b> | <b>1.097</b>    | <b>625</b>                           | <b>1.722</b> |
| Konzernkreisänderungen           | -            | -               | -            | -               | -                                    | -            |
| Akquisitionen                    | -            | -               | -            | -               | 2                                    | 2            |
| Investitionen                    | -            | -               | -            | -               | -                                    | -            |
| Abgänge                          | -            | -               | -            | -               | -                                    | -            |
| Abschreibungen 2010              | -            | -               | -            | -               | -                                    | -            |
| Umbuchungen                      | 1            | -               | 1            | -3              | 2                                    | -1           |
| Umbuchungen gemäß IFRS 5         | -            | -               | -            | -               | -                                    | -            |
| Inflationsanpassung gemäß IAS 29 | -            | 7               | 7            | -               | -                                    | -            |
| Neubewertung gemäß IFRS 3        | -            | -               | -            | -               | -                                    | -            |
| Währungsänderungen               | 122          | 80              | 202          | 27              | 41                                   | 68           |
| <b>Buchwerte 31.12.2010</b>      | <b>5.583</b> | <b>1.415</b>    | <b>6.998</b> | <b>1.121</b>    | <b>670</b>                           | <b>1.791</b> |

Geschäfts- oder Firmenwerte nach Berichtssegmenten

[Tabelle 4.45]

|                                  | Material-<br>Science | Überleitung | Konzern      |
|----------------------------------|----------------------|-------------|--------------|
|                                  | in Mio €             | in Mio €    | in Mio €     |
| <b>Buchwerte 1.1.2009</b>        | <b>177</b>           | <b>-</b>    | <b>8.647</b> |
| Konzernkreisänderungen           | -                    | -           | -            |
| Akquisitionen                    | 24                   | -           | 177          |
| Investitionen                    | -                    | -           | -            |
| Abgänge                          | -                    | -           | -            |
| Abschreibungen 2009              | -                    | -           | -            |
| Umbuchungen                      | -                    | -           | -            |
| Umbuchungen gemäß IFRS 5         | -                    | -           | -92          |
| Inflationsanpassung gemäß IAS 29 | -                    | -           | -            |
| Neubewertung gemäß IFRS 3        | -                    | -           | -            |
| Währungsänderungen               | -7                   | -           | -28          |
| <b>Buchwerte 31.12.2009</b>      | <b>194</b>           | <b>-</b>    | <b>8.704</b> |
| Konzernkreisänderungen           | -                    | -           | -            |
| Akquisitionen                    | 10                   | -           | 12           |
| Investitionen                    | -                    | -           | -            |
| Abgänge                          | -                    | -           | -            |
| Abschreibungen 2010              | -                    | -           | -            |
| Umbuchungen                      | -                    | -           | -            |
| Umbuchungen gemäß IFRS 5         | -                    | -           | -            |
| Inflationsanpassung gemäß IAS 29 | -                    | -           | 7            |
| Neubewertung gemäß IFRS 3        | 4                    | -           | 4            |
| Währungsänderungen               | 5                    | -           | 275          |
| <b>Buchwerte 31.12.2010</b>      | <b>213</b>           | <b>-</b>    | <b>9.002</b> |

Für den Bayer-Konzern wesentliche Geschäfts- oder Firmenwerte oder immaterielle Vermögenswerte mit einer unbestimmten Nutzungsdauer sind den folgenden strategischen Geschäftseinheiten bzw. zahlungsmittelgenerierenden Einheiten zugeordnet:

Immaterielle Vermögenswerte mit unbestimmter Nutzungsdauer

[Tabelle 4.46]

| Berichtssegment | Zahlungsmittel-<br>generierende<br>Einheit | Geschäfts- oder<br>Firmenwert | Immaterielle<br>Vermögenswerte mit<br>einer unbestimmten<br>Nutzungsdauer |
|-----------------|--------------------------------------------|-------------------------------|---------------------------------------------------------------------------|
|                 |                                            | in Mio €                      | in Mio €                                                                  |
| Pharma          | Women's Healthcare                         | 2.890                         | 156                                                                       |
| Pharma          | Specialized<br>Therapeutics                | 1.229                         | 198                                                                       |
| Consumer Health | OTC                                        | 982                           | 22                                                                        |
| Pharma          | Diagnostic Imaging                         | 939                           | 16                                                                        |
| Pharma          | Oncology                                   | 378                           | 115                                                                       |
| Consumer Health | Medrad Business                            | 302                           | 523                                                                       |

Da Unsicherheit darüber besteht, ob akquirierte oder einlizenzierte Forschungs- und Entwicklungsprojekte letztlich zur Produktion verkaufsfähiger Produkte führen, ist der Zeitraum, über den ein daraus resultierender aktivierter Vermögenswert erwartungsgemäß einen Nutzenzufluss an das Unternehmen generieren wird, nicht bestimmbar. Zum Ende des Geschäftsjahres 2010 waren in Entwicklung befindliche Projekte mit einem Betrag von 938 Mio € (Vorjahr: 1.137 Mio €) aktiviert.

Als immaterieller Vermögenswert mit unbestimmter Nutzungsdauer wird das im Jahr 1994 für die Region Nordamerika zurückerworbene „Bayer-Kreuz“, das infolge von Reparationsleistungen nach dem Ersten Weltkrieg an die USA und Kanada fiel, berücksichtigt. Zudem hat der Firmenname „Medrad“, der im Rahmen des Schering-Erwerbs im Jahr 2006 akquiriert wurde, eine unbestimmte Nutzungsdauer. Der Zeitraum, über den dieser Firmenname ökonomischen Nutzen stiftet, ist nicht bestimmbar, da dessen fortwährende Nutzung durch den Bayer-Konzern beabsichtigt ist. Das „Bayer-Kreuz“ ist mit einem Buchwert von 107 Mio € aktiviert, der Name „Medrad“ mit einem Buchwert von 305 Mio €.

## TECHNOLOGIEN

Der Bayer-Konzern strebt in den bedeutenden Märkten Patentschutz für seine Produkte und Technologien an. In Abhängigkeit von der Rechtsordnung des jeweiligen Landes kann Patentschutz beispielsweise erlangt werden für:

- einzelne Wirkstoffe,
- bestimmte Formulierungen und Kombinationen, die Wirkstoffe enthalten,
- Herstellverfahren,
- Arbeitsverfahren,
- Vorrichtungen,
- Zwischenprodukte für die Herstellung von Wirkstoffen und Produkten,
- isolierte Gene oder Proteine,
- neue Verwendungen bekannter Wirkstoffe und Produkte,
- Materialzusammensetzungen und
- Halbzeuge.

Der Schutz, den ein Patent bietet, ist von Land zu Land unterschiedlich und hängt von Art und Umfang des erteilten Patentanspruchs sowie von den jeweils bestehenden Möglichkeiten zur Geltendmachung unserer Rechte ab.

Der Bayer-Konzern verfügt gegenwärtig über rund 78.000 Patente und Patentanmeldungen. Obwohl in unserem Pharma-Segment insbesondere die Patente für Avalox®/Avelox®, Betaferon®/Betaseron®, Kogenate®, Levitra®, Magnevist®, Mirena®, Nexavar®, Xarelto®, yaz®, Yasmin® und Yasminelle® für unser Geschäft wichtig sind, sind wir der Auffassung, dass kein einzelnes Patent (oder eine Gruppe zusammengehöriger Patente) für unser Geschäft insgesamt entscheidend ist.

## LAUFZEIT UND ABLAUF VON PATENTEN

Patentlaufzeiten unterscheiden sich in Abhängigkeit von den Gesetzen des Landes, das das Patent erteilt hat. In einigen Ländern bestimmt sich die Dauer des Patentschutzes nach dem Zeitpunkt, zu dem die Patentanmeldung eingereicht wurde, in anderen bestimmt sie sich nach dem Zeitpunkt der Patenterteilung.

Die Mitgliedsstaaten der Europäischen Gemeinschaft, die USA, Japan und einige weitere Länder verlängern die Patentlaufzeit oder gewähren ergänzende Schutzzertifikate zur Kompensation eines Verlusts von Patentlaufzeit aufgrund der arzneimittelrechtlichen Zulassungsverfahren und der erheblichen Investitionen in Produktforschung und -entwicklung. Wir streben eine derartige Verlängerung überall dort an, wo dies möglich ist. Neben Stoff- und Erzeugnispatenten verfolgen wir weiterhin:

- Patente auf Verfahren und Zwischenprodukte, die bei der Herstellung eines Wirkstoffs verwendet werden,
- Patente betreffend spezifische Verwendungen eines Wirkstoffs,
- Patente betreffend neue Zusammensetzungen und Formulierungen sowie
- Marktexklusivität in denjenigen Märkten, die eine solche vorsehen (wie z. B. die USA).

Die folgende Tabelle enthält die Ablaufdaten in unseren wesentlichen Märkten für die bedeutendsten Patente zu Avalox®/Avelox®, Betaferon®/Betaseron®, Kogenate®, Levitra®, Magnevist®, Mirena®, Nexavar®, Xarelto®, YAZ®, Yasmin® und Yasminelle®:

Patentablaufdaten

[Tabelle 4.47]

|                              | Deutschland       | Frankreich        | UK                | Italien        | Spanien           | Japan             | USA            | Markt<br>Kanada   |
|------------------------------|-------------------|-------------------|-------------------|----------------|-------------------|-------------------|----------------|-------------------|
| <b>Produkte</b>              |                   |                   |                   |                |                   |                   |                |                   |
| <b>Avalox®/Avelox®</b>       |                   |                   |                   |                |                   |                   |                |                   |
| Wirkstoff                    | 2014              | 2014              | 2014              | 2014           | 2014              | 2014              | 2014           | 2015              |
| Wirkstoff-Monohydrat         | 2016              | 2016              | 2016              | 2016           | 2016              | 2016              | 2016           | 2016              |
| Tablettenformulierung        | 2019              | 2019              | 2019              | 2019           | 2019              | 2019              | 2019           | 2019              |
| <b>Betaferon®/Betaseron®</b> |                   |                   |                   |                |                   |                   |                |                   |
| Wirkstoff                    | -                 | -                 | -                 | -              | -                 | -                 | -              | 2016              |
| <b>Kogenate®</b>             |                   |                   |                   |                |                   |                   |                |                   |
| Wirkstoff                    | -                 | -                 | -                 | -              | -                 | -                 | 2014           | 2019              |
| Formulierung                 | 2017              | 2017              | 2017              | 2017           | 2017              | 2017              | 2017           | 2017              |
| <b>Levitra®</b>              |                   |                   |                   |                |                   |                   |                |                   |
| Wirkstoff                    | 2018              | 2018              | 2018              | 2018           | 2018              | 2020              | 2018           | 2018              |
| <b>Magnevist®</b>            |                   |                   |                   |                |                   |                   |                |                   |
| Wirkstoff                    | -                 | -                 | -                 | -              | -                 | -                 | 2011           | -                 |
| Formulierung                 | -                 | -                 | -                 | -              | -                 | -                 | -              | 2010              |
| Verfahren                    | -                 | -                 | -                 | -              | -                 | -                 | 2013           | -                 |
| <b>Mirena®</b>               |                   |                   |                   |                |                   |                   |                |                   |
| Applikator                   | 2015              | 2015              | 2015              | 2015           | 2015              | -                 | 2015           | 2015              |
| Verfahren                    | 2013              | 2013              | 2013              | 2013           | 2013              | 2013              | 2013           | 2013              |
| <b>Nexavar®</b>              |                   |                   |                   |                |                   |                   |                |                   |
| Wirkstoff                    | 2020 <sup>a</sup> | 2021              | 2021              | 2021           | 2021              | 2020 <sup>a</sup> | 2020           | 2020              |
| <b>Xarelto®</b>              |                   |                   |                   |                |                   |                   |                |                   |
| Wirkstoff                    | 2020 <sup>a</sup> | 2023              | 2020 <sup>e</sup> | 2023           | 2023 <sup>d</sup> | 2020              | 2021           | 2020              |
| <b>YAZ®</b>                  |                   |                   |                   |                |                   |                   |                |                   |
| Formulierung                 | 2020 <sup>a</sup> | 2020 <sup>a</sup> | 2020 <sup>a</sup> | 2022           | 2023 <sup>d</sup> | 2020 <sup>e</sup> | - <sup>c</sup> | 2020              |
| Einnahmeregime               | - <sup>f</sup>    | - <sup>f</sup>    | - <sup>f</sup>    | - <sup>f</sup> | - <sup>f</sup>    | 2014 <sup>b</sup> | 2014           | 2014              |
| Herstellungsverfahren        | 2025              | 2025              | 2025              | 2025           | 2025              | 2026 <sup>b</sup> | 2025           | 2026 <sup>b</sup> |
| <b>Yasmin®</b>               |                   |                   |                   |                |                   |                   |                |                   |
| Formulierung                 | 2020              | 2020              | 2020              | 2020           | 2020              | 2020              | - <sup>c</sup> | 2020              |
| Herstellungsverfahren        | 2025              | 2025              | 2025              | 2025           | 2025              | 2026 <sup>b</sup> | 2025           | 2026 <sup>b</sup> |
| <b>Yasminelle®</b>           |                   |                   |                   |                |                   |                   |                |                   |
| Formulierung                 | 2020              | 2020              | 2020              | 2020           | 2020              | 2020              | - <sup>c</sup> | 2020              |
| Herstellungsverfahren        | 2025              | 2025              | 2025              | 2025           | 2025              | 2026 <sup>b</sup> | 2025           | 2026 <sup>b</sup> |

a Derzeitiger Patentablauf. Patentlaufzeitverlängerung bis 2021 beantragt.

b Patentanmeldung anhängig.

c Das Patent wurde im März 2008 erstinstanzlich für ungültig erklärt. Dieses Urteil hat das zuständige US-Berufungsgericht im August 2009 bestätigt. Bayer hat beim U.S. Supreme Court ein Rechtsmittel eingelegt. Der U.S. Supreme Court hat im Mai 2010 Bayers Rechtsmittel zurückgewiesen.

d Patentlaufzeit aktualisiert.

e Derzeitiger Patentablauf. Patentlaufzeitverlängerung beantragt.

f Das Patent wurde im Oktober 2010 durch eine technische Beschwerdekammer des Europäischen Patentamts widerrufen.

Ausgewählte patentbezogene Rechtsstreitigkeiten sind in Anhangangabe [32] beschrieben.

## MARKEN

Grundsätzlich streben wir umfassenden markenrechtlichen Schutz für unsere Produkte in allen Ländern an, in denen diese Produkte vermarktet werden oder in naher Zukunft vermarktet werden sollen. Dabei werden insbesondere Produktnamen, daneben aber auch Slogans sowie Logos, grafische Elemente und Aufmachungen als Marken weltweit geschützt, soweit diese im Einzelfall über besondere Kennzeichnungskraft verfügen.

Die Registrierung von Marken erfolgt – soweit möglich – über supranationale Markenschutzsysteme wie europäische Gemeinschaftsmarken und internationale Marken, daneben auch über die nationalen Markenämter. Der konkrete Schutzbereich einer Marke kann im Einzelfall von Land zu Land variieren, abhängig von der Kennzeichnungskraft der jeweiligen Marke.

Zu unseren Produktmarken gehören u. a.:

**HealthCare:** Adalat®, Advantage®, Aleve®/Flanax®/Apronax®, Alka-Seltzer®, Aspirin®, Avalox®/Avelox®, Baytril®, Bepanthen®/Bepanthol®, Berocca®, Betaferon®/Betaseron®, Canesten®, Cipro-bay®/Ciproxin®/Baycip®/Cipro®, Contour®, Kogenate®, Levitra®, Magnevist®, Mirena®, Nexavar®, One A Day®, Redoxon®, Rennie®, Supradyn®, Ultravist®, Xarelto®, YAZ®, Yasmin® und Yasminelle®.

**CropScience:** Basta®/Liberty®/Ignite®, Confidor®/Gaucho®/Admire®/Merit®, Flint®/Stratego®/Sphere®/Nativo®, Invigor® und Proline®/Input®/Prosaro®.

**MaterialScience:** Bayblend®, BaySystems®, Desmodur®, Desmopan®, Desmophen®, Makrolon® und Vulkollan®.

Gegenwärtig halten wir über 63.000 nationale Markenregistrierungen und -anmeldungen. Hinzu kommen über 750 europäische Gemeinschaftsmarken (mit Schutz in allen Mitgliedsstaaten der EU) sowie annähernd 2.000 internationale Marken (mit Schutz in diversen Ländern). Besondere Bedeutung entfalten unsere Marken gerade auch bei patentfreien Produkten, die einem hohen Wettbewerbsdruck durch generische Produkte ausgesetzt sind. Allerdings gehen wir nicht davon aus, dass mit Ausnahme unserer Unternehmenskennzeichen „Bayer“ und „Bayer-Kreuz“ einzelne Marken für unser Geschäft insgesamt entscheidend sind.



## 18. Sachanlagen

Die Sachanlagen entwickelten sich im Geschäftsjahr 2010 wie folgt:

Entwicklung Sachanlagen

[Tabelle 4.48]

|                                             | Grundstücke, grundstücksgleiche Rechte und Bauten einschließlich der Bauten auf fremden Grundstücken | Technische Anlagen und Maschinen | Andere Anlagen, Betriebs- und Geschäftsausstattung | Geleistete Anzahlungen und Anlagen im Bau | Summe         |
|---------------------------------------------|------------------------------------------------------------------------------------------------------|----------------------------------|----------------------------------------------------|-------------------------------------------|---------------|
|                                             | in Mio €                                                                                             | in Mio €                         | in Mio €                                           | in Mio €                                  | in Mio €      |
| <b>Anschaffungs- und Herstellungskosten</b> |                                                                                                      |                                  |                                                    |                                           |               |
| <b>Stand: 31.12.2009</b>                    | <b>7.747</b>                                                                                         | <b>14.163</b>                    | <b>1.583</b>                                       | <b>1.042</b>                              | <b>24.535</b> |
| Konzernkreisänderungen                      | 3                                                                                                    | -1                               | -2                                                 | -                                         | -             |
| Akquisitionen                               | -                                                                                                    | -                                | -                                                  | -                                         | -             |
| Investitionen                               | 70                                                                                                   | 262                              | 140                                                | 740                                       | 1.212         |
| Abgänge                                     | -79                                                                                                  | -337                             | -118                                               | -3                                        | -537          |
| Umbuchungen                                 | 144                                                                                                  | 393                              | 18                                                 | -558                                      | -3            |
| Umbuchungen gemäß IFRS 5                    | -                                                                                                    | -                                | -                                                  | -                                         | -             |
| Inflationsanpassung gemäß IAS 29            | 6                                                                                                    | 1                                | -                                                  | -                                         | 7             |
| Neubewertung gemäß IFRS 3                   | -                                                                                                    | -                                | -                                                  | -                                         | -             |
| Währungsänderungen                          | 301                                                                                                  | 598                              | 79                                                 | 70                                        | 1.048         |
| <b>Stand: 31.12.2010</b>                    | <b>8.192</b>                                                                                         | <b>15.079</b>                    | <b>1.700</b>                                       | <b>1.291</b>                              | <b>26.262</b> |
| <b>Kumulierte Abschreibungen</b>            |                                                                                                      |                                  |                                                    |                                           |               |
| <b>Stand: 31.12.2009</b>                    | <b>3.969</b>                                                                                         | <b>10.015</b>                    | <b>1.114</b>                                       | <b>28</b>                                 | <b>15.126</b> |
| Konzernkreisänderungen                      | 3                                                                                                    | -1                               | -2                                                 | -                                         | -             |
| Abgänge                                     | -57                                                                                                  | -317                             | -109                                               | -3                                        | -486          |
| Abschreibungen 2010                         | 293                                                                                                  | 774                              | 185                                                | -                                         | 1.252         |
| planmäßig                                   | 247                                                                                                  | 763                              | 185                                                | -                                         | 1.195         |
| außerplanmäßig                              | 46                                                                                                   | 11                               | -                                                  | -                                         | 57            |
| Wertaufholungen                             | -3                                                                                                   | -1                               | -                                                  | -                                         | -4            |
| Umbuchungen                                 | 1                                                                                                    | 16                               | -6                                                 | -11                                       | -             |
| Umbuchungen gemäß IFRS 5                    | -                                                                                                    | -                                | -                                                  | -                                         | -             |
| Währungsänderungen                          | 127                                                                                                  | 358                              | 53                                                 | 1                                         | 539           |
| <b>Stand: 31.12.2010</b>                    | <b>4.333</b>                                                                                         | <b>10.844</b>                    | <b>1.235</b>                                       | <b>15</b>                                 | <b>16.427</b> |
| <b>Buchwerte 31.12.2010</b>                 | <b>3.859</b>                                                                                         | <b>4.235</b>                     | <b>465</b>                                         | <b>1.276</b>                              | <b>9.835</b>  |
| <b>Buchwerte 31.12.2009</b>                 | <b>3.778</b>                                                                                         | <b>4.148</b>                     | <b>469</b>                                         | <b>1.014</b>                              | <b>9.409</b>  |

Unter Berücksichtigung der Wertaufholung in Höhe von 4 Mio € ergibt sich netto eine außerplanmäßige Abschreibung bei den Sachanlagen von 53 Mio €. Davon entfielen 27 Mio € auf Vermögenswerte des Corporate Centers.

Im Rahmen des Ausbaus der Produktionskapazitäten in China wurden weitere Investitionen vorgenommen. Von den Gesamtinvestitionen in Höhe von 1.212 Mio € entfielen auf China 224 Mio €.

Im Berichtsjahr wurden Fremdkapitalkosten in Höhe von 31 Mio € als Teil der Anschaffungs- oder Herstellungskosten von qualifizierten Vermögenswerten in den Sachanlagen aktiviert (Vorjahr: 14 Mio €). Der dabei angewandte Finanzierungskostensatz betrug im Durchschnitt 4,5 % (Vorjahr: 4,9 %).

Vermögenswerte, die im Wege von Finanzierungsleasingverträgen genutzt werden, sind in den bilanzierten Sachanlagen mit 464 Mio € (Vorjahr: 469 Mio €) enthalten. Ihre Anschaffungs- und Herstellungskosten betragen zum Bilanzstichtag 1.128 Mio € (Vorjahr: 1.038 Mio €). Hierbei handelt

es sich um technische Anlagen und Maschinen mit einem Buchwert von 232 Mio € (Vorjahr: 240 Mio €), Gebäude mit einem Buchwert von 139 Mio € (Vorjahr: 143 Mio €) sowie sonstige Vermögenswerte mit einem Buchwert von 93 Mio € (Vorjahr: 86 Mio €). Zu den aus dem Finanzierungsleasing entstandenen Verbindlichkeiten siehe Anhangangabe [27].

Für gemietete Sachanlagen, bei denen ein Operating-Leasing im Sinne von IAS 17 (Leases) vorliegt, wurden im Jahr 2010 Mietzahlungen von 216 Mio € (Vorjahr: 203 Mio €) geleistet.

Aus Operating-Leasing-Verträgen im Sinne von IAS 17 (Leases) werden im Folgejahr Leasingzahlungen für vermietete Sachanlagen in Höhe von 5 Mio € erwartet.

Bayer hat im Jahr 2008 ein Nutzungsrecht in Form eines im Grundbuch eingetragenen Nießbrauchs an Immobilien, die einen Restbuchwert von 153 Mio € (Vorjahr: 159 Mio €) haben, an eine Leasinggesellschaft verkauft und – unter Vereinbarung eines Rückkaufsrechts am Ende der Laufzeit – unmittelbar zurückgeleast. Diese Transaktion, die als besicherte Darlehensaufnahme bilanziert worden ist, führt zu keiner Einschränkung in der operativen Nutzung der Immobilien.

Die Sachanlagen entwickelten sich im Geschäftsjahr 2009 wie folgt:

Entwicklung Sachanlagen (Vorjahr)

[Tabelle 4.49]

|                                                 | Grundstücke,<br>grundstücks-<br>gleiche Rechte<br>und Bauten<br>einschließlich<br>der Bauten auf<br>fremden<br>Grundstücken | Technische<br>Anlagen und<br>Maschinen | Andere<br>Anlagen,<br>Betriebs- und<br>Geschäfts-<br>ausstattung | Geleistete<br>Anzahlungen<br>und Anlagen<br>im Bau | Summe         |
|-------------------------------------------------|-----------------------------------------------------------------------------------------------------------------------------|----------------------------------------|------------------------------------------------------------------|----------------------------------------------------|---------------|
|                                                 | in Mio €                                                                                                                    | in Mio €                               | in Mio €                                                         | in Mio €                                           | in Mio €      |
| <b>Anschaffungs- und<br/>Herstellungskosten</b> |                                                                                                                             |                                        |                                                                  |                                                    |               |
| <b>Stand: 31.12.2008</b>                        | <b>7.471</b>                                                                                                                | <b>13.612</b>                          | <b>1.534</b>                                                     | <b>1.310</b>                                       | <b>23.927</b> |
| Konzernkreisänderungen                          | 1                                                                                                                           | -2                                     | -4                                                               | 1                                                  | -4            |
| Akquisitionen                                   | 1                                                                                                                           | 1                                      | 3                                                                | -                                                  | 5             |
| Investitionen                                   | 203                                                                                                                         | 357                                    | 147                                                              | 635                                                | 1.342         |
| Abgänge                                         | -144                                                                                                                        | -324                                   | -153                                                             | -10                                                | -631          |
| Umbuchungen                                     | 233                                                                                                                         | 607                                    | 47                                                               | -887                                               | -             |
| Umbuchungen gemäß IFRS 5                        | 8                                                                                                                           | -                                      | -                                                                | -                                                  | 8             |
| Inflationsanpassung gemäß<br>IAS 29             | -                                                                                                                           | -                                      | -                                                                | -                                                  | -             |
| Neubewertung gemäß IFRS 3                       | -                                                                                                                           | -                                      | -                                                                | -                                                  | -             |
| Währungsänderungen                              | -26                                                                                                                         | -88                                    | 9                                                                | -7                                                 | -112          |
| <b>Stand: 31.12.2009</b>                        | <b>7.747</b>                                                                                                                | <b>14.163</b>                          | <b>1.583</b>                                                     | <b>1.042</b>                                       | <b>24.535</b> |
| <b>Kumulierte Abschreibungen</b>                |                                                                                                                             |                                        |                                                                  |                                                    |               |
| <b>Stand: 31.12.2008</b>                        | <b>3.809</b>                                                                                                                | <b>9.538</b>                           | <b>1.069</b>                                                     | <b>19</b>                                          | <b>14.435</b> |
| Konzernkreisänderungen                          | 2                                                                                                                           | -1                                     | -4                                                               | -                                                  | -3            |
| Abgänge                                         | -98                                                                                                                         | -305                                   | -141                                                             | -2                                                 | -546          |
| Abschreibungen 2009                             | 253                                                                                                                         | 812                                    | 184                                                              | 23                                                 | 1.272         |
| planmäßig                                       | 238                                                                                                                         | 764                                    | 182                                                              | -                                                  | 1.184         |
| außerplanmäßig                                  | 15                                                                                                                          | 48                                     | 2                                                                | 23                                                 | 88            |
| Wertaufholungen                                 | -                                                                                                                           | -                                      | -                                                                | -                                                  | -             |
| Umbuchungen                                     | 3                                                                                                                           | 9                                      | -                                                                | -12                                                | -             |
| Umbuchungen gemäß IFRS 5                        | 4                                                                                                                           | -                                      | -                                                                | -                                                  | 4             |
| Währungsänderungen                              | -4                                                                                                                          | -38                                    | 6                                                                | -                                                  | -36           |
| <b>Stand: 31.12.2009</b>                        | <b>3.969</b>                                                                                                                | <b>10.015</b>                          | <b>1.114</b>                                                     | <b>28</b>                                          | <b>15.126</b> |
| <b>Buchwerte 31.12.2009</b>                     | <b>3.778</b>                                                                                                                | <b>4.148</b>                           | <b>469</b>                                                       | <b>1.014</b>                                       | <b>9.409</b>  |
| <b>Buchwerte 31.12.2008</b>                     | <b>3.662</b>                                                                                                                | <b>4.074</b>                           | <b>465</b>                                                       | <b>1.291</b>                                       | <b>9.492</b>  |

Die folgende Tabelle gibt einen Überblick über die bedeutendsten Standorte je Teilkonzern:

Bedeutendste Standorte je Teilkonzern

[Tabelle 4.50]

| Standort                       | Primäre Nutzung                                                                                                                                                                              |
|--------------------------------|----------------------------------------------------------------------------------------------------------------------------------------------------------------------------------------------|
| <b>HealthCare</b>              |                                                                                                                                                                                              |
| Leverkusen, Deutschland        | Unternehmenszentrale HealthCare, Administration, Formulierung und Verpackung pharmazeutischer Produkte                                                                                       |
| Bergkamen, Deutschland         | Wirkstoffproduktion                                                                                                                                                                          |
| Berlin, Deutschland            | Produktion und Verpackung von Kontrastmitteln, Feststoffverpackung, Forschung und Entwicklung, Administration                                                                                |
| Bitterfeld-Wolfen, Deutschland | Formulierung und Verpackung von Consumer-Care-Produkten                                                                                                                                      |
| Wuppertal, Deutschland         | Wirkstoffproduktion für pharmazeutische Produkte, Forschung und Entwicklung                                                                                                                  |
| Turku, Finnland                | Produktion von gynäkologischen und andrologischen Produkten, Feststoffen (Onkologie), Forschung und Entwicklung                                                                              |
| Berkeley, USA                  | Produktion, Formulierung und Verpackung Recombinant Faktor VIII                                                                                                                              |
| Emeryville, USA                | Produktion und Formulierung Betaferon®/Betaseron®                                                                                                                                            |
| Mishawaka, USA                 | Produktion von Instrumenten und Teststreifen (Medical Care Division)                                                                                                                         |
| Myerstown, USA                 | Formulierung und Verpackung von Consumer-Care-Produkten                                                                                                                                      |
| <b>CropScience</b>             |                                                                                                                                                                                              |
| Monheim, Deutschland           | Unternehmenszentrale CropScience, Administration, Forschung und Entwicklung von Fungiziden und Insektiziden                                                                                  |
| Dormagen, Deutschland          | Entwicklung neuer Herstellverfahren und Produktion von Pflanzenschutz- und Environmental-Science-Erzeugnissen                                                                                |
| Frankfurt a. M., Deutschland   | Forschung und Entwicklung von Herbiziden, Produktion von Pflanzenschutz- und Environmental-Science-Erzeugnissen                                                                              |
| Gent, Belgien                  | Forschung und Entwicklung von Saatgut und Pflanzeigenschaften für landwirtschaftliche Kulturen                                                                                               |
| Haelen, Niederlande            | Forschung und Entwicklung sowie Produktion von Gemüse-Saatgut im Bereich BioScience                                                                                                          |
| Institute, USA                 | Produktion von Pflanzenschutz- und Environmental-Science-Erzeugnissen                                                                                                                        |
| Kansas City, USA               | Produktion von Pflanzenschutz- und Environmental-Science-Erzeugnissen                                                                                                                        |
| Research Triangle Park, USA    | Zentrale CropScience Nordamerika, Forschung und Entwicklung von Saatgut und Pflanzeigenschaften für landwirtschaftliche Kulturen                                                             |
| Vapi, Indien                   | Entwicklung neuer Herstellverfahren und Produktion von Pflanzenschutz- und Environmental-Science-Erzeugnissen                                                                                |
| <b>MaterialScience</b>         |                                                                                                                                                                                              |
| Leverkusen, Deutschland        | Unternehmenszentrale MaterialScience, Administration, Produktion von Basis- und modifizierten Isocyanaten, Chlor, Natronlauge, Wasserstoff und Salzsäure                                     |
| Brunsbüttel, Deutschland       | Produktion von Diphenylmethan-Diisocyanat, Toluylen-Diisocyanat, Chlor, Wasserstoff und Salzsäure                                                                                            |
| Dormagen, Deutschland          | Produktion von modifizierten Isocyanaten, Lackharzen, Polycarbonat-Folien, Toluylen-Diisocyanaten, Polyether, thermoplastischen Polyurethanen, Chlor, Natronlauge, Wasserstoff und Salzsäure |
| Krefeld, Deutschland           | Produktion von Polycarbonaten, Diphenylmethan-Diisocyanat, Chlor, Natronlauge, Salzsäure und Wasserstoff                                                                                     |
| Antwerpen, Belgien             | Produktion von Polycarbonaten, Polyether, Anilin und Nitrobenzol                                                                                                                             |
| Tarragona, Spanien             | Produktion von Diphenylmethan-Diisocyanat und Salzsäure                                                                                                                                      |
| Baytown, USA                   | Produktion von Basis- und modifizierten Isocyanaten, Polycarbonaten, Diphenylmethan-Diisocyanat, Toluylen-Diisocyanaten, Chlor, Natronlauge, Salzsäure und Wasserstoff                       |
| Map Ta Phut, Thailand          | Produktion von Polycarbonaten, Polycarbonat-Folien                                                                                                                                           |
| Shanghai, China                | Produktion von Basis- und modifizierten Isocyanaten, Polycarbonaten, Diphenylmethan-Diisocyanat, Toluylen-Diisocyanat (im Bau), Chlor und Salzsäure                                          |

## 19. Anteile an at-equity bewerteten Beteiligungen

Die Buchwerte der at-equity bewerteten Beteiligungen des Konzerns an assoziierten Gesellschaften veränderten sich folgendermaßen:

Buchwerte at-equity bewertete Beteiligungen

[Tabelle 4.51]

|                                  | 2009       | 2010       |
|----------------------------------|------------|------------|
|                                  | in Mio €   | in Mio €   |
| <b>Buchwerte 1.1.</b>            | <b>450</b> | <b>395</b> |
| Akquisitionen                    | -          | -          |
| Sonstige Zugänge                 | 1          | -          |
| Desinvestitionen                 | -          | -          |
| Sonstige Abgänge                 | -          | -3         |
| Anteiliges Ergebnis nach Steuern | -48        | -56        |
| Währungsänderungen               | -8         | 18         |
| <b>Buchwerte 31.12.</b>          | <b>395</b> | <b>354</b> |

Die Beteiligungen betreffen ausschließlich den Teilkonzern MaterialScience, der diese aus strategischen Motiven hält.

Im Jahr 2000 wurden das Polyol-Geschäft sowie Anteile der Produktion von Propylenoxid (PO) von Lyondell Chemicals mit dem Ziel übernommen, den Zugang zu patentgeschützten Technologien sowie eine langfristige wirtschaftliche Versorgung mit PO als Vorprodukt zu Polyurethanen zu sichern. Im Zuge dieser strategischen Entwicklung wurden zwei Joint-Ventures zur gemeinschaftlichen Produktion von PO gegründet (PO JV Delaware, USA, Bayer-Anteil 41 %, sowie Lyondell Bayer Manufacturing Maasvlakte vof, Niederlande, Bayer-Anteil 50 %). Beide Anlagen werden von Lyondell betrieben. Bayer stehen aus diesen Betrieben langfristig feste Abnahmequoten bzw. Mengen von PO bei fixierten Preiskomponenten zu.

Die folgenden Tabellen zeigen eine Zusammenfassung der aggregierten Gewinn- und Verlustrechnungen sowie der Bilanzen der at-equity bewerteten Beteiligungen im Bayer-Konzernabschluss.

Aggregierte Ergebnisdaten at-equity bewertete Beteiligungen

[Tabelle 4.52]

|                                                                              | 2009       | 2010       |
|------------------------------------------------------------------------------|------------|------------|
|                                                                              | in Mio €   | in Mio €   |
| Umsatzerlöse                                                                 | 648        | 1.133      |
| Bruttoergebnis vom Umsatz                                                    | -27        | -16        |
| Jahresergebnis                                                               | -95        | -93        |
| Anteiliges Ergebnis vor Steuern                                              | -48        | -45        |
| <b>Laufendes Ergebnis vor Steuern aus at-equity bewerteten Beteiligungen</b> | <b>-48</b> | <b>-45</b> |
| Ergebnis aus Wertminderungen/sonstigen Abgängen von Anteilen vor Steuern     | -          | -11        |
| <b>Ergebnis vor Steuern aus at-equity bewerteten Beteiligungen</b>           | <b>-48</b> | <b>-56</b> |

Aggregierte Bilanzdaten at-equity bewertete Beteiligungen

[Tabelle 4.53]

|                                                        | 31.12.2009 | 31.12.2010 |
|--------------------------------------------------------|------------|------------|
|                                                        | in Mio €   | in Mio €   |
| Langfristige Vermögenswerte                            | 863        | 765        |
| Kurzfristige Vermögenswerte                            | 193        | 237        |
| Langfristige Schulden                                  | 10         | 13         |
| Kurzfristige Schulden                                  | 171        | 165        |
| Eigenkapital                                           | 875        | 824        |
| Anteiliges Eigenkapital                                | 377        | 348        |
| Sonstige                                               | 18         | 6          |
| <b>Buchwert aus at-equity bewerteten Beteiligungen</b> | <b>395</b> | <b>354</b> |

Unter Sonstige werden überwiegend Anpassungen an die einheitlichen Bilanzierungsgrundsätze von Bayer, Unterschiedsbeträge im Rahmen einer Kaufpreisaufteilung und deren ergebniswirksame Fortschreibung ausgewiesen.

## 20. Sonstige finanzielle Vermögenswerte

Die sonstigen finanziellen Vermögenswerte setzten sich wie folgt zusammen:

Sonstige finanzielle Vermögenswerte

[Tabelle 4.54]

|                                                       | 31.12.2009   |                   | 31.12.2010   |                   |
|-------------------------------------------------------|--------------|-------------------|--------------|-------------------|
|                                                       | Gesamt       | davon kurzfristig | Gesamt       | davon kurzfristig |
|                                                       | in Mio €     | in Mio €          | in Mio €     | in Mio €          |
| Ausleihungen und Forderungen                          | 603          | 95                | 783          | 129               |
| Zur Veräußerung verfügbare finanzielle Vermögenswerte | 212          | 14                | 758          | 577               |
| davon Schuldtitel                                     | 63           | 13                | 629          | 577               |
| davon Eigenkapitaltitel                               | 149          | 1                 | 129          | -                 |
| Bis zur Endfälligkeit zu haltende Finanzinvestitionen | 107          | 13                | 101          | 8                 |
| Forderungen aus Warentermingeschäften                 | 36           | 34                | 21           | 19                |
| Forderungen aus sonstigen Derivaten                   | 584          | 210               | 476          | 274               |
| Leasingforderungen                                    | 25           | 1                 | 33           | 1                 |
| <b>Gesamt</b>                                         | <b>1.567</b> | <b>367</b>        | <b>2.172</b> | <b>1.008</b>      |

In den Ausleihungen waren im Wesentlichen ein an die Bayer-Pensionskasse VVaG (Bayer-Pensionskasse) gewährtes Gründungsstockdarlehen in Höhe von 410 Mio € (Vorjahr: 310 Mio €) sowie ein Genussrechtskapital in Höhe von 150 Mio € (Vorjahr: 150 Mio €) enthalten.

In den Schuldtiteln der Kategorie „zur Veräußerung verfügbare finanzielle Vermögenswerte“ waren im Wesentlichen Anlagen in Geldmarktfonds in Höhe von 300 Mio € (Vorjahr: 0 Mio €) sowie us-Schuldverschreibungen in Höhe von 224 Mio € (Vorjahr: 0 Mio €) enthalten.

In den Eigenkapitaltiteln der Kategorie „zur Veräußerung verfügbare finanzielle Vermögenswerte“ waren Eigenkapitaltitel in Höhe von 54 Mio € (Vorjahr: 58 Mio €) enthalten, deren beizulegender Zeitwert weder aus einem Börsen- oder Marktpreis noch durch Diskontierung zuverlässig ermittelbarer zukünftiger Cashflows abgeleitet werden konnte. Diese Eigenkapitaltitel wurden zu fortgeführten Anschaffungskosten bewertet.

Im Jahr 2010 wurden bei den Ausleihungen und Forderungen 0 Mio € (Vorjahr: 1 Mio €) und bei den zur Veräußerung verfügbaren finanziellen Vermögenswerten 11 Mio € (Vorjahr: 15 Mio €) als Wertminderung ergebniswirksam erfasst. Zum Bilanzstichtag waren 4 Mio € (Vorjahr: 13 Mio €) der nicht wertgeminderten sonstigen finanziellen Vermögenswerte überfällig.

Nähere Erläuterungen der Forderungen aus Derivaten werden in Anhangangabe [30] gegeben.

Bei den Leasingforderungen handelt es sich um Finanzierungsleasingverträge, bei denen Bayer der Leasinggeber und der Kunde der wirtschaftliche Eigentümer der Leasinggegenstände ist. Den Leasingforderungen liegen erwartete Leasingzahlungen von 77 Mio € (Vorjahr: 30 Mio €) und ein darin enthaltener Zinsanteil von 44 Mio € (Vorjahr: 5 Mio €) zugrunde. 3 Mio € der erwarteten Leasingzahlungen sind innerhalb eines Jahres fällig (Vorjahr: 2 Mio €), 30 Mio € innerhalb der nachfolgenden vier Jahre (Vorjahr: 28 Mio €) und 44 Mio € in den Folgejahren (Vorjahr: 0 Mio €).



## 21. Vorräte

Die Vorräte setzten sich wie folgt zusammen:

Vorräte

[Tabelle 4.55]

|                                 | 31.12.2009   | 31.12.2010   |
|---------------------------------|--------------|--------------|
|                                 | in Mio €     | in Mio €     |
| Roh-, Hilfs- und Betriebsstoffe | 1.130        | 1.064        |
| Erzeugnisse und Handelswaren    | 4.953        | 5.033        |
| Geleistete Anzahlungen          | 8            | 7            |
| <b>Gesamt</b>                   | <b>6.091</b> | <b>6.104</b> |

Die Wertberichtigungen auf Vorräte, die in den Herstellungskosten und im Jahr 2009 zu einem Teil als Sondereinfluss in den sonstigen betrieblichen Aufwendungen ausgewiesen wurden, entwickelten sich folgendermaßen:

Wertberichtigungen auf Vorräte

[Tabelle 4.56]

|                                                 | 2009        | 2010        |
|-------------------------------------------------|-------------|-------------|
|                                                 | in Mio €    | in Mio €    |
| <b>Kumulierte Wertberichtigungen zum 1.1.</b>   | <b>-368</b> | <b>-331</b> |
| Konzernkreisänderungen                          | -           | -           |
| Aufwand in der Berichtsperiode                  | -150        | -136        |
| Wertaufholung/Inanspruchnahme                   | 193         | 112         |
| Währungsänderungen                              | -6          | -19         |
| <b>Kumulierte Wertberichtigungen zum 31.12.</b> | <b>-331</b> | <b>-374</b> |

## 22. Forderungen aus Lieferungen und Leistungen

Die Forderungen aus Lieferungen und Leistungen abzüglich Wertminderungen betrugen zum Bilanzstichtag 6.668 Mio € (Vorjahr: 6.106 Mio €). Von diesen Forderungen waren 6.655 Mio € (Vorjahr: 6.098 Mio €) innerhalb eines Jahres und 13 Mio € (Vorjahr: 8 Mio €) nach einem Jahr fällig.

Die Wertberichtigungen auf Forderungen aus Lieferungen und Leistungen entwickelten sich folgendermaßen:

Wertberichtigungen auf Forderungen aus Lieferungen und Leistungen

[Tabelle 4.57]

|                                                 | 2009        | 2010        |
|-------------------------------------------------|-------------|-------------|
|                                                 | in Mio €    | in Mio €    |
| <b>Kumulierte Wertberichtigungen zum 1.1.</b>   | <b>-256</b> | <b>-271</b> |
| Konzernkreisänderungen                          | -           | -           |
| Aufwand in der Berichtsperiode                  | -85         | -76         |
| Wertaufholung/Inanspruchnahme                   | 96          | 94          |
| Währungsänderungen                              | -26         | -25         |
| <b>Kumulierte Wertberichtigungen zum 31.12.</b> | <b>-271</b> | <b>-278</b> |

Forderungen aus Lieferungen und Leistungen in Höhe von 6.541 Mio € (Vorjahr: 5.938 Mio €) waren nicht einzelwertgemindert. Für diese nicht wertgeminderten Forderungen aus Lieferungen und Leistungen bestanden zum Bilanzstichtag Überfälligkeiten bzw. sofortige Fälligkeiten in Höhe von 920 Mio € (Vorjahr: 1.057 Mio €).

Die folgende Tabelle zeigt zusammenfassend die Aufteilung der Forderungen aus Lieferungen und Leistungen nach den Kriterien der Wertminderung und der Überfälligkeiten.

Wertminderung und Überfälligkeiten Forderungen aus Lieferungen und Leistungen

[Tabelle 4.58]

|            | Buchwert | davon: zum Bilanzstichtag weder wertgemindert noch überfällig | davon: zum Bilanzstichtag nicht wertgemindert, aber überfällig |            |             |                  | davon: zum Bilanzstichtag wertgemindert |
|------------|----------|---------------------------------------------------------------|----------------------------------------------------------------|------------|-------------|------------------|-----------------------------------------|
|            |          |                                                               | bis zu 3 Monate*                                               | 3–6 Monate | 6–12 Monate | länger 12 Monate |                                         |
|            | in Mio € | in Mio €                                                      | in Mio €                                                       | in Mio €   | in Mio €    | in Mio €         | in Mio €                                |
| 31.12.2010 | 6.668    | 5.621                                                         | 583                                                            | 108        | 101         | 128              | 127                                     |
| 31.12.2009 | 6.106    | 4.881                                                         | 617                                                            | 136        | 137         | 167              | 168                                     |

\* Die Spalte „bis zu 3 Monate“ beinhaltet auch sofort fällige Forderungen.

Der nicht wertgeminderte Forderungsbestand wurde aufgrund etablierter Kreditmanagementprozesse und individueller Beurteilung der einzelnen Kundenrisiken als werthaltig erachtet. Das künftige Ausfallrisiko der bestehenden Forderungen wurde in den Wertberichtigungen angemessen berücksichtigt. Für ausgewählte Kreditportfolios waren Absicherungen durch Kreditversicherer vorhanden. Darüber hinaus waren in geringem Umfang Forderungen durch Pfandrechte auf Grundstücke und Gebäude besichert.

## 23. Sonstige Forderungen

Die sonstigen Forderungen abzüglich Wertberichtigungen in Höhe von 64 Mio € (Vorjahr: 11 Mio €) setzten sich folgendermaßen zusammen:

Sonstige Forderungen

[Tabelle 4.59]

|                                                  | 31.12.2009   |                   | 31.12.2010   |                   |
|--------------------------------------------------|--------------|-------------------|--------------|-------------------|
|                                                  | Gesamt       | davon kurzfristig | Gesamt       | davon kurzfristig |
|                                                  | in Mio €     | in Mio €          | in Mio €     | in Mio €          |
| Vermögenswerte aus überdotierten Pensionszusagen | 100          | -                 | 76           | -                 |
| Forderungen gegenüber Mitarbeitern               | 42           | 41                | 55           | 54                |
| Forderungen aus sonstigen Steuern                | 354          | 352               | 422          | 355               |
| Rechnungsabgrenzungen                            | 200          | 171               | 233          | 202               |
| Übrige Forderungen                               | 1.210        | 793               | 1.048        | 725               |
| <b>Gesamt</b>                                    | <b>1.906</b> | <b>1.357</b>      | <b>1.834</b> | <b>1.336</b>      |

In den übrigen Forderungen waren Versicherungsansprüche in Höhe von 159 Mio € (Vorjahr: 181 Mio €) enthalten. Darüber hinaus bestand aus dem Verkauf des hämatologischen Onkologieportfolios Campath®/MabCampath®, Fludara® und Leukine® an die Genzyme Corp., USA, eine übrige Forderung in Höhe von 228 Mio € (Vorjahr: 363 Mio €). Der Rückgang dieses Forderungsbetrags beruhte vor allem auf den während des Jahres erhaltenen vom Umsatz abhängigen Zahlungen und auf einer Wertberichtigung in Höhe von 56 Mio €.

Von den in den sonstigen Forderungen enthaltenen finanziellen Forderungen mit dem Betrag von 823 Mio € (Vorjahr: 970 Mio €) waren Forderungen in Höhe von 588 Mio € (Vorjahr: 958 Mio €) nicht wertgemindert. Für diese nicht wertgeminderten Forderungen bestanden zum Bilanzstichtag Überfälligkeiten bzw. sofortige Fälligkeiten in Höhe von 138 Mio € (Vorjahr: 130 Mio €).

Die Tabelle zeigt zusammenfassend die Aufteilung der in den sonstigen Forderungen enthaltenen finanziellen Forderungen nach den Kriterien der Wertminderung und der Überfälligkeiten.

Wertminderung und Überfälligkeiten finanzielle sonstige Forderungen

[Tabelle 4.60]

|            | Buchwert | davon: zum Bilanzstichtag weder wertgemindert noch überfällig | davon: zum Bilanzstichtag nicht wertgemindert, aber überfällig |            |             |                  | davon: zum Bilanzstichtag wertgemindert |
|------------|----------|---------------------------------------------------------------|----------------------------------------------------------------|------------|-------------|------------------|-----------------------------------------|
|            |          |                                                               | bis zu 3 Monate*                                               | 3–6 Monate | 6–12 Monate | länger 12 Monate |                                         |
|            | in Mio € | in Mio €                                                      | in Mio €                                                       | in Mio €   | in Mio €    | in Mio €         | in Mio €                                |
| 31.12.2010 | 823      | 450                                                           | 100                                                            | 8          | 11          | 19               | 235                                     |
| 31.12.2009 | 970      | 828                                                           | 88                                                             | 10         | 12          | 20               | 12                                      |

\* Die Spalte „bis zu 3 Monate“ beinhaltet auch sofort fällige Forderungen.

## 24. Eigenkapital

Eine nachhaltige Steigerung des Unternehmenswerts, die allen Anspruchsgruppen des Unternehmens zugute kommt, die Sicherung der Liquidität sowie der Kreditwürdigkeit des Bayer-Konzerns sind die wichtigsten Ziele des Finanzmanagements. Die Reduzierung der Kapitalkosten trägt hierzu ebenso bei wie die Optimierung der Kapitalstruktur und der Zahlungsmittelzu- und -abflüsse aus Finanzierungstätigkeit sowie ein effektives Risikomanagement.

In Bezug auf die finanzwirtschaftlichen Risiken beurteilen die beauftragten Ratingagenturen den Bayer-Konzern wie folgt:

Rating

[Tabelle 4.61]

|                   | Langfrist-Rating | Ausblick | Kurzfrist-Rating |
|-------------------|------------------|----------|------------------|
| Standard & Poor's | A-               | negativ  | A-2              |
| Moody's           | A3               | stabil   | P-2              |

Diese Investment Grade Ratings spiegeln eine gute Zahlungsfähigkeit des Unternehmens wider und gewährleisten den Zugang zu einer breiten Investorenbasis für die Finanzierung. Das Kapitalmanagement des Konzerns basiert auf den von Ratingagenturen veröffentlichten Verschuldungskennziffern, die (mit unterschiedlicher Ausgestaltung) die Zahlungsmittelzu- und -abflüsse einer Periode in Relation zur Verschuldung setzen. Die Finanzstrategie des Bayer-Konzerns zielt auf eine A-Ratingkategorie und den Erhalt der finanziellen Flexibilität ab. Neben der Reduzierung der Nettofinanzverschuldung durch Zahlungsmittelzuflüsse aus dem operativen Geschäft dienen zur Umsetzung der Finanzstrategie u. a. die im Juli 2005 begebene nachrangige Hybridanleihe sowie das durch die Hauptversammlungsbeschlüsse bereits genehmigte und das bedingte Kapital bzw. ein mögliches Aktienrückkaufprogramm. Bayer unterliegt keinen satzungsmäßigen Kapitalerfordernissen.

Die einzelnen Bestandteile des Eigenkapitals sowie ihre Entwicklung in den Jahren 2009 und 2010 ergeben sich aus der Eigenkapitalveränderungsrechnung des Bayer-Konzerns.

### GEZEICHNETES KAPITAL

Das gezeichnete Kapital der Bayer AG belief sich am 31. Dezember 2010 auf 2.117 Mio € (Vorjahr: 2.117 Mio €), eingeteilt in 826.947.808 Stück (Vorjahr: 826.947.808 Stück) auf den Namen lautende Aktien, und war voll eingezahlt. Jede Aktie gewährt ein Stimmrecht.

### GENEHMIGTES KAPITAL

Das bis zum 27. April 2011 befristete Genehmigte Kapital I in Höhe von 465 Mio € wurde aufgehoben, da es vor der für 2011 geplanten Hauptversammlung auslaufen würde.

Durch die Hauptversammlung vom 30. April 2010 ist ein neues genehmigtes Kapital in Höhe von 530 Mio € beschlossen worden, das bis zum 29. April 2015 befristet ist. Es kann zur Erhöhung des gezeichneten Kapitals durch Ausgabe neuer nennbetragsloser Namensaktien gegen Bar- und/oder

Sacheinlagen verwendet werden, wobei Kapitalerhöhungen gegen Sacheinlagen auf einen Betrag von insgesamt 423 Mio € begrenzt sind (Genehmigtes Kapital I). Den Aktionären steht grundsätzlich ein Bezugsrecht zu. Der Vorstand ist jedoch ermächtigt, mit Zustimmung des Aufsichtsrats Spitzenbeträge von diesem Bezugsrecht auszunehmen und es auch insoweit auszuschließen, wie es erforderlich ist, um den Gläubigern der von der Bayer AG oder ihren Konzerngesellschaften ausgegebenen Schuldverschreibungen mit Options- oder Wandlungsrechten bzw. -pflichten ein Bezugsrecht auf neue Aktien einzuräumen, wie es ihnen nach Ausübung ihres Options- oder Wandlungsrechts bzw. nach Erfüllung einer Options- oder Wandlungspflicht zustünde. Weiterhin ist der Vorstand ermächtigt, mit Zustimmung des Aufsichtsrats das Bezugsrecht der Aktionäre auszuschließen, sofern die Kapitalerhöhung gegen Sacheinlagen zum Zwecke des Erwerbs von Unternehmen, Unternehmensteilen oder von Beteiligungen an Unternehmen oder sonstiger Vermögensgegenstände erfolgt. Der anteilige Betrag am Grundkapital, der auf Aktien entfällt, die in den vorgenannten Fällen unter Ausschluss des Bezugsrechts der Aktionäre gegen Bar- oder Sacheinlagen ausgegeben werden, darf insgesamt 20 % des im Zeitpunkt der Beschlussfassung der Hauptversammlung bestehenden Grundkapitals der Gesellschaft nicht übersteigen.

Das bis zum 26. April 2012 befristete Genehmigte Kapital II in Höhe von 195 Mio € wurde aufgehoben, da es, nach der Erhöhung des Grundkapitals infolge der Ausgabe neuer Aktien, nicht mehr die in § 186 Abs. 3 Satz 4 AktG genannten 10 % des Grundkapitals erreicht, für die bei Ausgabe neuer Aktien nicht wesentlich unterhalb des Börsenpreises ein Ausschluss des Bezugsrechts der Aktionäre möglich ist.

Es wurde durch Beschluss der Hauptversammlung vom 30. April 2010 durch ein weiteres genehmigtes Kapital ersetzt. Der Vorstand ist ermächtigt, mit Zustimmung des Aufsichtsrats das Grundkapital bis zum 29. April 2015 durch Ausgabe neuer nennbetragsloser Namensaktien gegen Bareinlagen um bis zu insgesamt 212 Mio € zu erhöhen (Genehmigtes Kapital II). Der Beschluss der Hauptversammlung sieht vor, dass den Aktionären grundsätzlich ein Bezugsrecht zu gewähren ist. Der Vorstand ist jedoch ermächtigt, mit Zustimmung des Aufsichtsrats das Bezugsrecht der Aktionäre bei ein- oder mehrmaliger Ausnutzung des Genehmigten Kapitals II bis zu einem Kapitalerhöhungsbetrag auszuschließen, der 10 % des zum Zeitpunkt des Wirksamwerdens der Ermächtigung und des zum Zeitpunkt der Ausnutzung der Ermächtigung bestehenden Grundkapitals nicht überschreitet, um die neuen Aktien gegen Bareinlagen zu einem Ausgabebetrag auszugeben, der den Börsenpreis der bereits börsennotierten Aktien der Gesellschaft derselben Ausstattung zum Zeitpunkt der endgültigen Festlegung des Ausgabebetrags nicht wesentlich unterschreitet. Auf die vorgenannte 10 %-Grenze werden alle eigenen Aktien angerechnet, die aufgrund einer Ermächtigung der Hauptversammlung erworben und gemäß § 71 Absatz 1 Nr. 8 Satz 5 AktG i. V. m. § 186 Absatz 3 Satz 4 AktG während der Laufzeit dieser Ermächtigung veräußert werden. Ferner sind auf diese Begrenzung diejenigen Aktien anzurechnen, die zur Bedienung von Schuldverschreibungen mit Options- oder Wandlungsrechten bzw. -pflichten ausgegeben wurden bzw. auszugeben sind, sofern die Schuldverschreibung während der Laufzeit dieser Ermächtigung unter Ausschluss des Bezugsrechts in entsprechender Anwendung des § 186 Absatz 3 Satz 4 AktG ausgegeben wurden.

Beide zuvor beschriebenen genehmigten Kapitalia wurden bislang nicht in Anspruch genommen.

### **BEDINGTES KAPITAL**

Die durch die Hauptversammlung vom 28. April 2006 bzw. 27. April 2007 genehmigten bedingten Kapitalia wurden aufgehoben.

Die Hauptversammlung vom 30. April 2010 fasste Beschlüsse zu einem Bedingten Kapital 2010 und erhöhte das Grundkapital bedingt um bis zu 212 Mio € durch Ausgabe von bis zu 82.694.750 Aktien. Die bedingte Kapitalerhöhung dient der Gewährung von auf den Namen lautenden Aktien an die Inhaber von Options- oder Wandelanleihen, Genussrechten oder Gewinnschuldverschreibungen (bzw. Kombinationen dieser Instrumente) jeweils mit Options-/Wandlungsrechten/-pflichten, die aufgrund von Ermächtigungen der Hauptversammlung vom 30. April 2010 bis zum 29. April 2015 von der Bayer AG oder einer Konzerngesellschaft ausgegeben werden, an der die Bayer AG unmittelbar oder mittelbar zu mindestens 90 % beteiligt ist. Diese Ermächtigungen zur Ausgabe der Instrumente sind auf einen Gesamtnennbetrag von insgesamt 6 Mrd € begrenzt. Den Aktionären steht grundsätzlich das gesetzliche Bezugsrecht auf die Instrumente zu. Der Vorstand ist jedoch ermächtigt, mit Zustimmung des Aufsichtsrats das Bezugsrecht auszuschließen, wenn die Ausgabe der Instrumente zu einem Kurs erfolgt, der den Marktwert der Instrumente nicht wesentlich unterschreitet. Die nach § 186 Absatz 3 Satz 4 AktG sinngemäß geltende Grenze für Bezugsrechtsausschlüsse von 10 % des Grundkapitals darf nicht überschritten werden. Auf diese Grenze

werden sowohl Aktien als auch solche Instrumente angerechnet, die in direkter oder sinngemäßer Anwendung des § 186 Absatz 3 Satz 4 AktG unter Ausschluss des Bezugsrechts ausgegeben werden.

Insgesamt wird der Vorstand – vorbehaltlich einer erneuten Ermächtigung zum Bezugsrechtsausschluss durch die Hauptversammlung – die bestehenden Ermächtigungen zur Erhöhung des Grundkapitals unter Bezugsrechtsausschluss aus dem Genehmigten Kapital und aus dem Bedingten Kapital nur zu Kapitalerhöhungen um maximal 20 % des im Zeitpunkt der Beschlussfassung der Hauptversammlung vom 30. April 2010 bestehenden Grundkapitals der Gesellschaft nutzen. Auf diese 20 %-Grenze sind alle Ausgaben bzw. Veräußerungen von Aktien oder von Schuldverschreibungen mit Options- oder Wandlungsrechten bzw. -pflichten, die unter Ausschluss des Bezugsrechts der Aktionäre erfolgen, anzurechnen.

### GEWINNRÜCKLAGEN

Die Gewinnrücklagen enthalten die in der Vergangenheit erzielten Ergebnisse der in den Konzernabschluss einbezogenen Unternehmen, soweit sie nicht ausgeschüttet wurden. Die Gewinnrücklagen beinhalten zudem sämtliche nicht ergebniswirksam erfassten versicherungsmathematischen Gewinne und Verluste aus leistungsorientierten Pensionsplänen.

### KUMULIERTES ÜBRIGES COMPREHENSIVE INCOME

Im kumulierten übrigen Comprehensive Income werden die Währungsänderungen, die Veränderungen der beizulegenden Zeitwerte von zu Sicherungszwecken eingesetzten Finanzinstrumenten (Cash-flow-Hedges) sowie von zur Veräußerung verfügbaren finanziellen Vermögenswerten und die Neubewertungsrücklage erfasst. Diese resultiert aus der in 2005 erfolgten Übernahme des restlichen 50-prozentigen Roche-Anteils des im Geschäftsjahr 1996 gegründeten oTC-Joint-Ventures in der USA sowie aus der Übernahme des restlichen 50-prozentigen Anteils an der BaySystems GmbH & Co. KG, Oldenburg, im Geschäftsjahr 2008. Im Berichtsjahr erfolgte zudem in Höhe von 5 Mio € (Vorjahr: 6 Mio €) eine Umbuchung von der Neubewertungsrücklage in die Gewinnrücklage für den Teil, der ergebniswirksam im Rahmen der planmäßigen Abschreibung der entsprechenden Vermögenswerte berücksichtigt wurde.

### DIVIDENDE

Nach dem deutschen Aktiengesetz bemisst sich die ausschüttungsfähige Dividende nach dem Bilanzgewinn, der in dem gemäß Vorschriften des deutschen Handelsgesetzbuches aufgestellten Jahresabschluss der Bayer AG ausgewiesen wird. Aus dem Konzernergebnis wurde für das Geschäftsjahr 2009 pro Aktie eine Dividende von 1,40 € gezahlt. Die vorgeschlagene Dividende für das Geschäftsjahr 2010 beträgt 1,50 € pro Aktie, was einem Ausschüttungsvolumen von 1.240 Mio € entspricht. Die vorgeschlagene Dividende ist abhängig von der Genehmigung durch die Aktionäre auf der Hauptversammlung und wurde nicht als Verbindlichkeit im Konzernabschluss erfasst.

### ANTEILE ANDERER GESELLSCHAFTER

Die Entwicklung des Anteils anderer Gesellschafter am Eigenkapital in den Jahren 2010 und 2009 ergibt sich aus der nachfolgenden Aufstellung.

Entwicklung Anteile anderer Gesellschafter am Eigenkapital

[Tabelle 4.62]

|                                                                                                                                      | 2009      | 2010      |
|--------------------------------------------------------------------------------------------------------------------------------------|-----------|-----------|
|                                                                                                                                      | in Mio €  | in Mio €  |
| <b>1.1.</b>                                                                                                                          | <b>77</b> | <b>54</b> |
| <b>Nicht ergebniswirksame Eigenkapitalveränderungen</b>                                                                              |           |           |
| Veränderung des beizulegenden Zeitwerts aus der Marktbewertung von Wertpapieren und Cashflow-Hedges                                  | -         | -         |
| Veränderung der versicherungsmathematischen Gewinne/Verluste aus leistungsorientierten Pensionszusagen und ähnlichen Verpflichtungen | -         | -         |
| Ausgleichsposten aus der Währungsumrechnung ausländischer Tochtergesellschaften                                                      | 2         | 6         |
| Latente Steuern auf direkt im Eigenkapital verrechnete Wertänderungen                                                                | -         | -         |
| Sonstige Eigenkapitalveränderungen                                                                                                   | -21       | -3        |
| Dividendenzahlungen                                                                                                                  | -4        | -3        |
| <b>Ergebniswirksame Eigenkapitalveränderungen</b>                                                                                    | <b>-</b>  | <b>9</b>  |
| <b>31.12.</b>                                                                                                                        | <b>54</b> | <b>63</b> |



Die Anteile anderer Gesellschafter betreffen im Wesentlichen das Eigenkapital der Bayer Crop Science Limited, Indien, Sumika Bayer Urethane Co. Ltd., Japan, Bayer East Africa Ltd., Kenia, Bayer Jinling Polyurethane Co. Ltd., China, BaySystems Pearl FZCO, Vereinigte Arabische Emirate, und der Bayer S.A., Peru.

## 25. Pensionsrückstellungen und ähnliche Verpflichtungen

Für Pensionen und ähnliche Verpflichtungen wurde zum Bilanzstichtag im In- und Ausland gemäß folgender Aufstellung bilanzielle Vorsorge getroffen:

Pensionen und ähnliche Verpflichtungen

[Tabelle 4.63]

|               | Pensionen    |              | Andere Leistungszusagen |            | Gesamt       |              |
|---------------|--------------|--------------|-------------------------|------------|--------------|--------------|
|               | 31.12.2009   | 31.12.2010   | 31.12.2009              | 31.12.2010 | 31.12.2009   | 31.12.2010   |
|               | in Mio €     | in Mio €     | in Mio €                | in Mio €   | in Mio €     | in Mio €     |
| Inland        | 4.866        | 5.632        | 71                      | 67         | 4.937        | 5.699        |
| Ausland       | 1.130        | 1.143        | 450                     | 463        | 1.580        | 1.606        |
| <b>Gesamt</b> | <b>5.996</b> | <b>6.775</b> | <b>521</b>              | <b>530</b> | <b>6.517</b> | <b>7.305</b> |

Die Aufwendungen für leistungsorientierte Pensionspläne sowie für andere Leistungszusagen enthielten die folgenden Bestandteile:

Aufwendungen für leistungsorientierte Pensionspläne

[Tabelle 4.64]

|                                     | Inland     |            | Ausland   |           | Gesamt     |            |
|-------------------------------------|------------|------------|-----------|-----------|------------|------------|
|                                     | 2009       | 2010       | 2009      | 2010      | 2009       | 2010       |
|                                     | in Mio €   | in Mio €   | in Mio €  | in Mio €  | in Mio €   | in Mio €   |
| Laufender Dienstzeitaufwand         | 108        | 144        | 47        | 49        | 155        | 193        |
| Dienstzeitaufwand für frühere Jahre | -14        | -2         | -2        | -         | -16        | -2         |
| Aufzinsung der Versorgungsansprüche | 611        | 593        | 240       | 257       | 851        | 850        |
| Erwartete Erträge aus Planvermögen  | -300       | -305       | -200      | -248      | -500       | -553       |
| Plankürzungen                       | -          | -          | 2         | 2         | 2          | 2          |
| Planabgeltungen                     | -          | -          | -1        | -         | -1         | -          |
| <b>Gesamt</b>                       | <b>405</b> | <b>430</b> | <b>86</b> | <b>60</b> | <b>491</b> | <b>490</b> |

Aufwendungen für andere Leistungszusagen

[Tabelle 4.65]

|                                     | Inland   |           | Ausland   |           | Gesamt    |           |
|-------------------------------------|----------|-----------|-----------|-----------|-----------|-----------|
|                                     | 2009     | 2010      | 2009      | 2010      | 2009      | 2010      |
|                                     | in Mio € | in Mio €  | in Mio €  | in Mio €  | in Mio €  | in Mio €  |
| Laufender Dienstzeitaufwand         | 6        | 11        | 18        | 22        | 24        | 33        |
| Dienstzeitaufwand für frühere Jahre | -        | -         | 1         | -         | 1         | -         |
| Aufzinsung der Versorgungsansprüche | 3        | 8         | 47        | 49        | 50        | 57        |
| Erwartete Erträge aus Planvermögen  | -        | -         | -21       | -26       | -21       | -26       |
| Plankürzungen                       | -        | -         | -1        | 2         | -1        | 2         |
| Planabgeltungen                     | -        | -         | -         | -         | -         | -         |
| <b>Gesamt</b>                       | <b>9</b> | <b>19</b> | <b>44</b> | <b>47</b> | <b>53</b> | <b>66</b> |

Die Entwicklung der rückstellungs- und fondsfinanzierten Versorgungsverpflichtungen stellte sich wie folgt dar:

#### Entwicklung rückstellungs- und fondsfinanzierte Versorgungsverpflichtungen

|                                                                                     | Leistungszusagen Pensionen |               | Inland<br>Leistungszusagen andere |            |  |
|-------------------------------------------------------------------------------------|----------------------------|---------------|-----------------------------------|------------|--|
|                                                                                     | 2009                       | 2010          | 2009                              | 2010       |  |
|                                                                                     | in Mio €                   | in Mio €      | in Mio €                          | in Mio €   |  |
| <b>Anwartschaftsbarwert der Versorgungszusagen zum 1.1.</b>                         | <b>10.319</b>              | <b>10.937</b> | <b>109</b>                        | <b>71</b>  |  |
| Desinvestitionen/Konzernkreisänderungen                                             | 25                         | -2            | -                                 | -          |  |
| Laufender Dienstzeitaufwand                                                         | 108                        | 144           | 6                                 | 11         |  |
| Aufzinsung der Versorgungsansprüche                                                 | 611                        | 593           | 3                                 | 8          |  |
| Arbeitnehmerbeiträge                                                                | 25                         | 34            | -                                 | -          |  |
| Dienstzeitaufwand für frühere Jahre                                                 | -14                        | -2            | -                                 | -          |  |
| Planabgeltungen                                                                     | -                          | -             | -                                 | -          |  |
| Versicherungsmathematische Gewinne (-)/Verluste (+)                                 | 432                        | 834           | -                                 | -          |  |
| Gezahlte Versorgungsleistungen                                                      | -569                       | -585          | -47                               | -23        |  |
| Plankürzungen                                                                       | -                          | -             | -                                 | -          |  |
| Währungsänderungen                                                                  | -                          | -             | -                                 | -          |  |
| <b>Anwartschaftsbarwert der Versorgungszusagen zum 31.12.</b>                       | <b>10.937</b>              | <b>11.953</b> | <b>71</b>                         | <b>67</b>  |  |
| <b>Beizulegender Zeitwert des Planvermögens zum 1.1.</b>                            | <b>6.032</b>               | <b>6.092</b>  | -                                 | -          |  |
| Desinvestitionen/Konzernkreisänderungen                                             | 15                         | -             | -                                 | -          |  |
| Erwartete Erträge aus dem Planvermögen                                              | 300                        | 305           | -                                 | -          |  |
| Versicherungsmathematische Gewinne (+)/Verluste (-)                                 | -14                        | -14           | -                                 | -          |  |
| Planabgeltungen                                                                     | -                          | -             | -                                 | -          |  |
| Arbeitgeberbeiträge                                                                 | 303                        | 510           | 47                                | 23         |  |
| Arbeitnehmerbeiträge                                                                | 25                         | 34            | -                                 | -          |  |
| Gezahlte Versorgungsleistungen                                                      | -569                       | -585          | -47                               | -23        |  |
| Währungsänderungen                                                                  | -                          | -             | -                                 | -          |  |
| <b>Beizulegender Zeitwert des Planvermögens zum 31.12.</b>                          | <b>6.092</b>               | <b>6.342</b>  | -                                 | -          |  |
| <b>Nettoverpflichtung zum 31.12.</b>                                                | <b>-4.845</b>              | <b>-5.611</b> | <b>-71</b>                        | <b>-67</b> |  |
| Anpassungsbetrag aufgrund nicht realisierten nachzuverrechnenden Dienstzeitaufwands | -                          | -             | -                                 | -          |  |
| Berücksichtigung der Obergrenze für Vermögenswerte                                  | -                          | -             | -                                 | -          |  |
| <b>Bilanzielle Nettoverpflichtung zum 31.12.</b>                                    | <b>-4.845</b>              | <b>-5.611</b> | <b>-71</b>                        | <b>-67</b> |  |
| <b>In der Bilanz ausgewiesene Beträge</b>                                           |                            |               |                                   |            |  |
| Vermögenswerte aus überdotierten Pensionsplänen                                     | 21                         | 21            | -                                 | -          |  |
| Rückstellungen für Pensionen und ähnliche Verpflichtungen                           | -4.866                     | -5.632        | -71                               | -67        |  |
| <b>Ausgewiesener Nettobetrag zum 31.12.</b>                                         | <b>-4.845</b>              | <b>-5.611</b> | <b>-71</b>                        | <b>-67</b> |  |

[Tabelle 4.66]

|  | Ausland                    |          |                         |          | Gesamt                     |          |                         |          |
|--|----------------------------|----------|-------------------------|----------|----------------------------|----------|-------------------------|----------|
|  | Leistungszusagen Pensionen |          | Leistungszusagen andere |          | Leistungszusagen Pensionen |          | Leistungszusagen andere |          |
|  | 2009                       | 2010     | 2009                    | 2010     | 2009                       | 2010     | 2009                    | 2010     |
|  | in Mio €                   | in Mio € | in Mio €                | in Mio € | in Mio €                   | in Mio € | in Mio €                | in Mio € |
|  | 3.752                      | 4.173    | 730                     | 750      | 14.071                     | 15.110   | 839                     | 821      |
|  | -                          | -        | -                       | -        | 25                         | -2       | -                       | -        |
|  | 47                         | 49       | 18                      | 22       | 155                        | 193      | 24                      | 33       |
|  | 240                        | 257      | 47                      | 49       | 851                        | 850      | 50                      | 57       |
|  | 4                          | 5        | -                       | -        | 29                         | 39       | -                       | -        |
|  | -2                         | 4        | 1                       | -        | -16                        | 2        | 1                       | -        |
|  | -1                         | -2       | -                       | -        | -1                         | -2       | -                       | -        |
|  | 309                        | 335      | 4                       | -48      | 741                        | 1.169    | 4                       | -48      |
|  | -209                       | -224     | -42                     | -39      | -778                       | -809     | -89                     | -62      |
|  | 2                          | 2        | -1                      | 2        | 2                          | 2        | -1                      | 2        |
|  | 31                         | 281      | -7                      | 63       | 31                         | 281      | -7                      | 63       |
|  | 4.173                      | 4.880    | 750                     | 799      | 15.110                     | 16.833   | 821                     | 866      |
|  | 2.651                      | 3.137    | 251                     | 304      | 8.683                      | 9.229    | 251                     | 304      |
|  | -                          | -        | -                       | -        | 15                         | -        | -                       | -        |
|  | 200                        | 248      | 21                      | 26       | 500                        | 553      | 21                      | 26       |
|  | 280                        | 153      | 38                      | 15       | 266                        | 139      | 38                      | 15       |
|  | -2                         | -2       | -                       | -        | -2                         | -2       | -                       | -        |
|  | 141                        | 276      | 45                      | 9        | 444                        | 786      | 92                      | 32       |
|  | 4                          | 5        | -                       | -        | 29                         | 39       | -                       | -        |
|  | -209                       | -224     | -42                     | -39      | -778                       | -809     | -89                     | -62      |
|  | 72                         | 212      | -9                      | 24       | 72                         | 212      | -9                      | 24       |
|  | 3.137                      | 3.805    | 304                     | 339      | 9.229                      | 10.147   | 304                     | 339      |
|  | -1.036                     | -1.075   | -446                    | -460     | -5.881                     | -6.686   | -517                    | -527     |
|  | -1                         | 2        | -4                      | -3       | -1                         | 2        | -4                      | -3       |
|  | -14                        | -15      | -                       | -        | -14                        | -15      | -                       | -        |
|  | -1.051                     | -1.088   | -450                    | -463     | -5.896                     | -6.699   | -521                    | -530     |
|  | 79                         | 55       | -                       | -        | 100                        | 76       | -                       | -        |
|  | -1.130                     | -1.143   | -450                    | -463     | -5.996                     | -6.775   | -521                    | -530     |
|  | -1.051                     | -1.088   | -450                    | -463     | -5.896                     | -6.699   | -521                    | -530     |

Der Anwartschaftsbarwert der Versorgungszusagen für Pensionen entfiel mit 5.487 Mio € (Vorjahr: 5.006 Mio €) auf rückstellungsfinanzierte und mit 11.346 Mio € (Vorjahr: 10.104 Mio €) auf fondsfinanzierte Versorgungsverpflichtungen. Der Anwartschaftsbarwert der anderen pensionsähnlichen Leistungszusagen betraf mit 190 Mio € (Vorjahr: 176 Mio €) rückstellungsfinanzierte und mit 676 Mio € (Vorjahr: 645 Mio €) fondsfinanzierte Verpflichtungen.

Die fondsfinanzierten Pensionsverpflichtungen wiesen mit 92 Mio € (Vorjahr: 111 Mio €) eine Überdeckung, mit 1.291 Mio € (Vorjahr: 986 Mio €) eine Unterdeckung auf. Bei den übrigen fondsfinanzierten pensionsähnlichen Verpflichtungen waren die einzelnen Pläne mit 337 Mio € (Vorjahr: 341 Mio €) unterfinanziert. Die rückstellungsfinanzierten pensionsähnlichen Leistungszusagen betrafen vor allem Vor- und Frühruhestandsleistungen in Deutschland.

Der Bayer-Konzern hat für die Mitarbeiter in vielen Ländern fondsfinanzierte Versorgungspläne eingerichtet. Da sich die rechtlichen und steuerlichen Anforderungen sowie die wirtschaftlichen Gegebenheiten zwischen den einzelnen Ländern stark unterscheiden können, hat das Vermögensmanagement individuellen landesspezifischen Grundsätzen zu folgen. Für das Planvermögen werden mithilfe von Risikomanagementsystemen Stress-Szenarien simuliert sowie weitere Risikoanalysen (z. B. Value at Risk) durchgeführt. Des Weiteren sind Risikostreuung, Portfolio-Effizienz und ein angemessenes Chancen-Risiken-Verhältnis (sowohl landesspezifisch als auch im weltweiten Zusammenhang), das insbesondere die Zahlung sämtlicher zukünftiger Versorgungsleistungen gewährleisten soll, relevante Determinanten der verwendeten Anlagestrategien.

Den mit Abstand bedeutendsten Versorgungsplan stellt die Bayer-Pensionskasse VVaG (Bayer-Pensionskasse) dar. Die rechtlich selbstständige Bayer-Pensionskasse ist eine private Versicherungsgesellschaft und unterliegt daher dem Versicherungsaufsichtsgesetz. Bayer garantiert nach deutschem Recht im Rahmen der Subsidiärhaftung die vertraglichen Verpflichtungen aus Pensionszusagen in Deutschland. Für die Bilanzierung nach IFRS wird die Bayer-Pensionskasse als leistungsorientiertes Altersversorgungssystem eingestuft.

Die Kapitalanlagepolitik der Bayer-Pensionskasse richtet sich neben der Einhaltung aufsichtsrechtlicher Rahmenvorgaben an der aus den eingegangenen Verpflichtungen resultierenden Risikostruktur aus. Hierauf basierend hat die Bayer-Pensionskasse vor dem Hintergrund der Kapitalmarktentwicklung ein risikoadäquates strategisches Zielfortfolio entwickelt. Der Schwerpunkt dieser Anlagestrategie liegt in erster Linie in einem stringenten Downside-Risikomanagement und weniger in einer absoluten Renditemaximierung. Es ist zu erwarten, dass die so definierte Anlagepolitik in der Lage ist, eine Kapitalverzinsung zu erwirtschaften, welche langfristig die dauerhafte Erfüllung der Verpflichtungen gewährleistet.

Die Versorgungsverpflichtungen der im Geschäftsjahr 2006 erworbenen Bayer Schering Pharma AG, Berlin, werden zu einem erheblichen Teil durch den Schering Altersversorgung Treuhand Verein gedeckt. Auch hier orientiert sich die Anlagestrategie an der Struktur der korrespondierenden Verpflichtungen. Sie gestattet auch den Einsatz von Derivaten. Währungsrisiken werden annähernd vollständig abgesichert.

Für das Planvermögen im Ausland bilden ebenfalls insbesondere die Struktur der Versorgungszusagen und das Risikoprofil die wesentlichen Entscheidungskriterien für die Entwicklung der zugrunde liegenden Anlagestrategie.

Die gewichtete Zusammensetzung des Planvermögens zur Deckung der Pensionsverpflichtungen sowie zur Deckung der anderen Leistungszusagen stellte sich zum jeweiligen Bilanzstichtag wie folgt dar:

Planvermögen zur Deckung der Pensionsverpflichtungen zum 31. Dezember

[Tabelle 4.67]

|                                | Inland        |               | Ausland       |               |
|--------------------------------|---------------|---------------|---------------|---------------|
|                                | 2009          | 2010          | 2009          | 2010          |
|                                | in %          | in %          | in %          | in %          |
| Aktien                         | 19,54         | 19,42         | 42,60         | 39,11         |
| Festverzinsliche Wertpapiere   | 59,97         | 59,82         | 46,61         | 48,97         |
| Immobilien und Immobilienfonds | 9,08          | 8,29          | 1,43          | 1,74          |
| Sonstiges                      | 11,41         | 12,47         | 9,36          | 10,18         |
| <b>Gesamt</b>                  | <b>100,00</b> | <b>100,00</b> | <b>100,00</b> | <b>100,00</b> |

Planvermögen zur Deckung anderer Leistungszusagen zum 31. Dezember

[Tabelle 4.68]

|                                | Inland |      | Ausland       |               |
|--------------------------------|--------|------|---------------|---------------|
|                                | 2009   | 2010 | 2009          | 2010          |
|                                | in %   | in % | in %          | in %          |
| Aktien                         | -      | -    | 45,20         | 36,60         |
| Festverzinsliche Wertpapiere   | -      | -    | 35,18         | 40,03         |
| Immobilien und Immobilienfonds | -      | -    | -             | -             |
| Sonstiges                      | -      | -    | 19,62         | 23,37         |
| <b>Gesamt</b>                  | -      | -    | <b>100,00</b> | <b>100,00</b> |

In dem beizulegenden Zeitwert des inländischen Planvermögens waren von Bayer gemietete Immobilien mit ihren Marktwerten in Höhe von 74 Mio € (Vorjahr: 78 Mio €) sowie über Fonds gehaltene Bayer-Aktien mit einem Marktwert in Höhe von 24 Mio € (Vorjahr: 30 Mio €) enthalten. Unter dem sonstigen Planvermögen sind insbesondere begebene Baudarlehen, sonstige Forderungen, Festgeldguthaben sowie Zahlungsmittel und Zahlungsmitteläquivalente ausgewiesen.

Die folgenden gewichteten Parameter wurden zur Bewertung der Versorgungsverpflichtungen zum 31. Dezember des jeweiligen Jahres sowie zur Bewertung des Versorgungsaufwands im jeweiligen Berichtsjahr zugrunde gelegt:

Parameter Versorgungsverpflichtungen

[Tabelle 4.69]

|                                   | Inland |      | Ausland |      | Gesamt |      |
|-----------------------------------|--------|------|---------|------|--------|------|
|                                   | 2009   | 2010 | 2009    | 2010 | 2009   | 2010 |
|                                   | in %   | in % | in %    | in % | in %   | in % |
| <b>Leistungszusagen Pensionen</b> |        |      |         |      |        |      |
| Abzinsungssatz                    | 5,50   | 4,90 | 5,90    | 5,40 | 5,60   | 5,05 |
| Erwartete Einkommensentwicklung   | 2,50   | 3,00 | 4,15    | 4,25 | 2,95   | 3,35 |
| Erwartete Rentenentwicklung       | 1,75   | 1,75 | 3,50    | 3,50 | 2,25   | 2,25 |
| <b>Andere Leistungszusagen</b>    |        |      |         |      |        |      |
| Abzinsungssatz                    | 3,10   | 3,10 | 6,20    | 5,70 | 5,95   | 5,50 |

Parameter Versorgungsaufwand

[Tabelle 4.70]

|                                   | Inland |      | Ausland |      | Gesamt |      |
|-----------------------------------|--------|------|---------|------|--------|------|
|                                   | 2009   | 2010 | 2009    | 2010 | 2009   | 2010 |
|                                   | in %   | in % | in %    | in % | in %   | in % |
| <b>Leistungszusagen Pensionen</b> |        |      |         |      |        |      |
| Abzinsungssatz                    | 6,00   | 5,50 | 6,30    | 5,90 | 6,10   | 5,60 |
| Erwartete Einkommensentwicklung   | 3,00   | 2,50 | 4,00    | 4,15 | 3,25   | 2,95 |
| Erwartete Rentenentwicklung       | 2,00   | 1,75 | 2,95    | 3,50 | 2,25   | 2,25 |
| Erwarteter Vermögensertrag        | 5,00   | 4,60 | 7,50    | 7,25 | 5,85   | 5,60 |
| <b>Andere Leistungszusagen</b>    |        |      |         |      |        |      |
| Abzinsungssatz                    | 6,40   | 3,10 | 6,45    | 6,20 | 6,45   | 5,95 |
| Erwarteter Vermögensertrag        | -      | -    | 8,25    | 7,95 | 8,25   | 7,95 |



Der Abzinsungssatz für Leistungszusagen Pensionen im Ausland wurde im Wesentlichen beeinflusst vom Abzinsungssatz in den USA von 5,2 % (Vorjahr: 5,8 %) und in Großbritannien von 5,5 % (Vorjahr: 5,7 %).

Eine Änderung der einzelnen Parameter um 0,5 Prozentpunkte hätte bei ansonsten konstant gehaltenen Annahmen folgende Auswirkungen auf die Versorgungsverpflichtungen zum Ende des laufenden Geschäftsjahres:

Sensitivitäten Versorgungsverpflichtungen

[Tabelle 4.71]

|                                               | Inland                         |                                | Ausland                        |                                | Gesamt                         |                                |
|-----------------------------------------------|--------------------------------|--------------------------------|--------------------------------|--------------------------------|--------------------------------|--------------------------------|
|                                               | Zunahme<br>um 0,5 %-<br>Punkte | Abnahme<br>um 0,5 %-<br>Punkte | Zunahme<br>um 0,5 %-<br>Punkte | Abnahme<br>um 0,5 %-<br>Punkte | Zunahme<br>um 0,5 %-<br>Punkte | Abnahme<br>um 0,5 %-<br>Punkte |
|                                               | in Mio €                       |
| <b>Leistungszusagen Pensionen</b>             |                                |                                |                                |                                |                                |                                |
| Änderung des Abzinsungssatzes                 | -787                           | 885                            | -299                           | 333                            | -1.086                         | 1.218                          |
| Änderung der erwarteten Einkommensentwicklung | 57                             | -55                            | 39                             | -37                            | 96                             | -92                            |
| Änderung der erwarteten Rentenentwicklung     | 568                            | -524                           | 93                             | -77                            | 661                            | -601                           |
| <b>Andere Leistungszusagen</b>                |                                |                                |                                |                                |                                |                                |
| Änderung des Abzinsungssatzes                 | -1                             | 1                              | -43                            | 47                             | -44                            | 48                             |

Eine Änderung der einzelnen Parameter um 0,5 Prozentpunkte hätte bei ansonsten konstant gehaltenen Annahmen folgende Auswirkungen auf den Versorgungsaufwand des nachfolgenden Jahres:

Sensitivitäten Versorgungsaufwand

[Tabelle 4.72]

|                                               | Inland                         |                                | Ausland                        |                                | Gesamt                         |                                |
|-----------------------------------------------|--------------------------------|--------------------------------|--------------------------------|--------------------------------|--------------------------------|--------------------------------|
|                                               | Zunahme<br>um 0,5 %-<br>Punkte | Abnahme<br>um 0,5 %-<br>Punkte | Zunahme<br>um 0,5 %-<br>Punkte | Abnahme<br>um 0,5 %-<br>Punkte | Zunahme<br>um 0,5 %-<br>Punkte | Abnahme<br>um 0,5 %-<br>Punkte |
|                                               | in Mio €                       |
| <b>Leistungszusagen Pensionen</b>             |                                |                                |                                |                                |                                |                                |
| Änderung des Abzinsungssatzes                 | -4                             | 4                              | -14                            | 14                             | -18                            | 18                             |
| Änderung der erwarteten Einkommensentwicklung | 6                              | -6                             | 5                              | -4                             | 11                             | -10                            |
| Änderung der erwarteten Rentenentwicklung     | 35                             | -32                            | 4                              | -2                             | 39                             | -34                            |
| Änderung des erwarteten Vermögensertrags      | -31                            | 31                             | -19                            | 19                             | -50                            | 50                             |
| <b>Andere Leistungszusagen</b>                |                                |                                |                                |                                |                                |                                |
| Änderung des Abzinsungssatzes                 | -                              | -                              | -                              | -                              | -                              | -                              |
| Änderung des erwarteten Vermögensertrags      | -                              | -                              | -2                             | 2                              | -2                             | 2                              |

Wegen ihres Versorgungscharakters werden insbesondere die Verpflichtungen der us-Tochtergesellschaften für die Krankheitskosten der Mitarbeiter nach deren Eintritt in den Ruhestand ebenfalls unter den pensionsähnlichen Verpflichtungen ausgewiesen. Für die Krankheitskosten wurde dabei eine Kostensteigerungsrate von 9 % (Vorjahr: 10 %) unterstellt, die sich bis zum Jahr 2018 (Vorjahr: 2017) schrittweise auf 5 % (Vorjahr: 5 %) reduziert. Eine Änderung der zugrunde gelegten Kostensteigerungsrate der Krankheitskosten um einen Prozentpunkt hätte folgende Auswirkungen:

Sensitivität Krankheitskosten

[Tabelle 4.73]

|                                                           | Zunahme<br>um einen<br>Prozent-<br>punkt | Abnahme<br>um einen<br>Prozent-<br>punkt |
|-----------------------------------------------------------|------------------------------------------|------------------------------------------|
|                                                           | in Mio €                                 | in Mio €                                 |
| Auswirkungen auf die sonstigen Versorgungsverpflichtungen | 86                                       | -73                                      |
| Auswirkungen auf den Versorgungsaufwand                   | 8                                        | -7                                       |

Folgende Auszahlungen sind für Arbeitgeberbeiträge bei fondsfinanzierten und rückerstattungsfinanzierten Versorgungsplänen im laufenden Geschäftsjahr sowie im Vorjahr für Pensions- und pensionsähnliche Verpflichtungen getätigt worden bzw. werden für das kommende Jahr erwartet:

Gezahlte und erwartete Arbeitgeberbeiträge

[Tabelle 4.74]

|                            | Inland     |            |                  | Ausland    |            |                  |
|----------------------------|------------|------------|------------------|------------|------------|------------------|
|                            | 2009       | 2010       | 2011<br>erwartet | 2009       | 2010       | 2011<br>erwartet |
|                            | in Mio €   | in Mio €   | in Mio €         | in Mio €   | in Mio €   | in Mio €         |
| Leistungszusagen Pensionen | 303        | 510        | 395              | 141        | 276        | 412              |
| Andere Leistungszusagen    | 47         | 23         | 24               | 45         | 9          | 19               |
| <b>Gesamt</b>              | <b>350</b> | <b>533</b> | <b>419</b>       | <b>186</b> | <b>285</b> | <b>431</b>       |

Die zukünftig zu zahlenden Versorgungsleistungen werden wie folgt geschätzt:

Zukünftige Versorgungsleistungen

[Tabelle 4.75]

|           | Inland                             |                                 | Ausland                            |                                 | Gesamt                             |                                 |
|-----------|------------------------------------|---------------------------------|------------------------------------|---------------------------------|------------------------------------|---------------------------------|
|           | Leistungs-<br>zusagen<br>Pensionen | Leistungs-<br>zusagen<br>andere | Leistungs-<br>zusagen<br>Pensionen | Leistungs-<br>zusagen<br>andere | Leistungs-<br>zusagen<br>Pensionen | Leistungs-<br>zusagen<br>andere |
|           | in Mio €                           | in Mio €                        | in Mio €                           | in Mio €                        | in Mio €                           | in Mio €                        |
| 2011      | 627                                | 24                              | 238                                | 44                              | 865                                | 68                              |
| 2012      | 640                                | 17                              | 235                                | 45                              | 875                                | 62                              |
| 2013      | 643                                | 8                               | 238                                | 47                              | 881                                | 55                              |
| 2014      | 649                                | 6                               | 248                                | 50                              | 897                                | 56                              |
| 2015      | 657                                | 4                               | 257                                | 52                              | 914                                | 56                              |
| 2016-2020 | 3.499                              | 8                               | 1.468                              | 292                             | 4.967                              | 300                             |

Die außerhalb der Gewinn- und Verlustrechnung in der Eigenkapitalveränderungsrechnung bzw. Gesamtergebnisrechnung erfassten versicherungsmathematischen Gewinne und Verluste in Bezug auf die Versorgungsverpflichtungen und das Planvermögen stellten sich wie folgt dar:

#### Entwicklung versicherungsmathematische Gewinne und Verluste in Bezug auf Versorgungsverpflichtungen und Planvermögen

|                                                                                                                         | Leistungszusagen Pensionen Inland |               |               |               |               | Leistungszusagen Pensionen Ausland |             |               |               |               |  |
|-------------------------------------------------------------------------------------------------------------------------|-----------------------------------|---------------|---------------|---------------|---------------|------------------------------------|-------------|---------------|---------------|---------------|--|
|                                                                                                                         | 2006                              | 2007          | 2008          | 2009          | 2010          | 2006                               | 2007        | 2008          | 2009          | 2010          |  |
|                                                                                                                         | in Mio €                          | in Mio €      | in Mio €      | in Mio €      | in Mio €      | in Mio €                           | in Mio €    | in Mio €      | in Mio €      | in Mio €      |  |
| Anwartschaftsbarwert der Versorgungszusagen                                                                             | 11.357                            | 10.458        | 10.319        | 10.937        | 11.953        | 4.348                              | 3.705       | 3.752         | 4.173         | 4.880         |  |
| Beizulegender Zeitwert des Planvermögens                                                                                | 6.053                             | 6.165         | 6.032         | 6.092         | 6.342         | 3.804                              | 3.568       | 2.651         | 3.137         | 3.805         |  |
| <b>Nettovermögen/-verpflichtung</b>                                                                                     | <b>-5.304</b>                     | <b>-4.293</b> | <b>-4.287</b> | <b>-4.845</b> | <b>-5.611</b> | <b>-544</b>                        | <b>-137</b> | <b>-1.101</b> | <b>-1.036</b> | <b>-1.075</b> |  |
| <b>Entwicklung der versicherungsmathematischen Gewinne (+)/Verluste (-) in Bezug auf die Versorgungsverpflichtungen</b> |                                   |               |               |               |               |                                    |             |               |               |               |  |
| <b>1.1.</b>                                                                                                             | <b>-2.842</b>                     | <b>-2.293</b> | <b>-1.197</b> | <b>-910</b>   | <b>-1.342</b> | <b>-692</b>                        | <b>-657</b> | <b>-403</b>   | <b>-513</b>   | <b>-822</b>   |  |
| Veränderungen aufgrund von Desinvestitionen und Konzernkreisänderungen                                                  | 1                                 | 1             | -             | -             | -             | -                                  | -           | -             | -             | -             |  |
| Neu entstanden aufgrund veränderter versicherungsmathematischer Parameter                                               | 441                               | 1.097         | 450           | -396          | -892          | 46                                 | 299         | 40            | -368          | -311          |  |
| Neu entstanden aufgrund von Erfahrungsanpassungen                                                                       | 46                                | -2            | -163          | -36           | 58            | -45                                | -29         | -178          | 59            | -24           |  |
| Zuordnung zu den zur Veräußerung gehaltenen Geschäften                                                                  | 61                                | -             | -             | -             | -             | 34                                 | -           | -             | -             | -             |  |
| Währungsänderungen                                                                                                      | -                                 | -             | -             | -             | -             | -                                  | -16         | 28            | -             | -             |  |
| <b>31.12.</b>                                                                                                           | <b>-2.293</b>                     | <b>-1.197</b> | <b>-910</b>   | <b>-1.342</b> | <b>-2.176</b> | <b>-657</b>                        | <b>-403</b> | <b>-513</b>   | <b>-822</b>   | <b>-1.157</b> |  |
| <b>Entwicklung der versicherungsmathematischen Gewinne (+)/Verluste (-) in Bezug auf das Planvermögen</b>               |                                   |               |               |               |               |                                    |             |               |               |               |  |
| <b>1.1.</b>                                                                                                             | <b>-693</b>                       | <b>-846</b>   | <b>-920</b>   | <b>-1.133</b> | <b>-1.147</b> | <b>-125</b>                        | <b>15</b>   | <b>7</b>      | <b>-886</b>   | <b>-606</b>   |  |
| Veränderungen aufgrund von Desinvestitionen und Konzernkreisänderungen                                                  | -                                 | 4             | -             | -             | -             | -                                  | -           | -             | -             | -             |  |
| Neu entstanden                                                                                                          | -154                              | -78           | -213          | -14           | -14           | 159                                | -9          | -893          | 280           | 153           |  |
| Zuordnung zu den zur Veräußerung gehaltenen Geschäften                                                                  | 1                                 | -             | -             | -             | -             | -19                                | -           | -             | -             | -             |  |
| Währungsänderungen                                                                                                      | -                                 | -             | -             | -             | -             | -                                  | 1           | -             | -             | -             |  |
| <b>31.12.</b>                                                                                                           | <b>-846</b>                       | <b>-920</b>   | <b>-1.133</b> | <b>-1.147</b> | <b>-1.161</b> | <b>15</b>                          | <b>7</b>    | <b>-886</b>   | <b>-606</b>   | <b>-453</b>   |  |

Bei den anderen Leistungszusagen in Deutschland bestanden bislang keine nicht realisierten versicherungsmathematischen Gewinne/Verluste.

[Tabelle 4.76]

|  | Leistungszusagen andere Ausland |          |          |          |          | Leistungszusagen Pensionen Gesamt |          |          |          |          | Leistungszusagen andere Gesamt |          |          |          |          |
|--|---------------------------------|----------|----------|----------|----------|-----------------------------------|----------|----------|----------|----------|--------------------------------|----------|----------|----------|----------|
|  | 2006                            | 2007     | 2008     | 2009     | 2010     | 2006                              | 2007     | 2008     | 2009     | 2010     | 2006                           | 2007     | 2008     | 2009     | 2010     |
|  | in Mio €                        | in Mio € | in Mio € | in Mio € | in Mio € | in Mio €                          | in Mio € | in Mio € | in Mio € | in Mio € | in Mio €                       | in Mio € | in Mio € | in Mio € | in Mio € |
|  | 864                             | 718      | 730      | 750      | 799      | 15.705                            | 14.163   | 14.071   | 15.110   | 16.833   | 1.003                          | 859      | 839      | 821      | 866      |
|  | 357                             | 339      | 251      | 304      | 339      | 9.857                             | 9.733    | 8.683    | 9.229    | 10.147   | 357                            | 339      | 251      | 304      | 339      |
|  | -507                            | -379     | -479     | -446     | -460     | -5.848                            | -4.430   | -5.388   | -5.881   | -6.686   | -646                           | -520     | -588     | -517     | -527     |
|  |                                 |          |          |          |          |                                   |          |          |          |          |                                |          |          |          |          |
|  | -259                            | -311     | -221     | -195     | -199     | -3.534                            | -2.950   | -1.600   | -1.423   | -2.164   | -259                           | -311     | -221     | -195     | -199     |
|  | -                               | -        | -        | -        | -        | 1                                 | 1        | -        | -        | -        | -                              | -        | -        | -        | -        |
|  | -71                             | 33       | -10      | -8       | 19       | 487                               | 1.396    | 490      | -764     | -1.203   | -71                            | 33       | -10      | -8       | 19       |
|  | 17                              | 64       | 36       | 4        | 29       | 1                                 | -31      | -341     | 23       | 34       | 17                             | 64       | 36       | 4        | 29       |
|  | -                               | -        | -        | -        | -        | 95                                | -        | -        | -        | -        | -                              | -        | -        | -        | -        |
|  | 2                               | -7       | -        | -        | -        | -                                 | -16      | 28       | -        | -        | 2                              | -7       | -        | -        | -        |
|  | -311                            | -221     | -195     | -199     | -151     | -2.950                            | -1.600   | -1.423   | -2.164   | -3.333   | -311                           | -221     | -195     | -199     | -151     |
|  |                                 |          |          |          |          |                                   |          |          |          |          |                                |          |          |          |          |
|  | -41                             | -24      | -25      | -162     | -124     | -818                              | -831     | -913     | -2.019   | -1.753   | -41                            | -24      | -25      | -162     | -124     |
|  | -                               | -        | -        | -        | -        | -                                 | 4        | -        | -        | -        | -                              | -        | -        | -        | -        |
|  | 17                              | -1       | -137     | 38       | 15       | 5                                 | -87      | -1.106   | 266      | 139      | 17                             | -1       | -137     | 38       | 15       |
|  | -                               | -        | -        | -        | -        | -18                               | -        | -        | -        | -        | -                              | -        | -        | -        | -        |
|  | -                               | -        | -        | -        | -        | -                                 | 1        | -        | -        | -        | -                              | -        | -        | -        | -        |
|  | -24                             | -25      | -162     | -124     | -109     | -831                              | -913     | -2.019   | -1.753   | -1.614   | -24                            | -25      | -162     | -124     | -109     |

## 26. Andere Rückstellungen

Die einzelnen Rückstellungskategorien entwickelten sich im Geschäftsjahr 2010 wie folgt:

Entwicklung Andere Rückstellungen

[Tabelle 4.77]

|                         | Steuern    | Umwelt-schutz | Restruk-turierung | Kunden-und Liefe-ranten-verkehr | Rechts-streitig-keiten | Personal     | Sonstige   | Summe        |
|-------------------------|------------|---------------|-------------------|---------------------------------|------------------------|--------------|------------|--------------|
|                         | in Mio €   | in Mio €      | in Mio €          | in Mio €                        | in Mio €               | in Mio €     | in Mio €   | in Mio €     |
| <b>31.12.2009</b>       | <b>812</b> | <b>285</b>    | <b>203</b>        | <b>829</b>                      | <b>439</b>             | <b>1.646</b> | <b>391</b> | <b>4.605</b> |
| Konzernkreis-änderungen | -24        | -             | -5                | -                               | -                      | -            | 4          | -25          |
| Zuführung               | 454        | 25            | 60                | 844                             | 760                    | 1.138        | 165        | 3.446        |
| Inanspruchnahme         | -306       | -32           | -95               | -654                            | -282                   | -1.064       | -175       | -2.608       |
| Auflösung               | -61        | -16           | -41               | -52                             | -30                    | -78          | -37        | -315         |
| Aufzinsung              | -          | 2             | -                 | -                               | 3                      | 37           | -          | 42           |
| Währungs-änderungen     | 28         | 17            | 7                 | 61                              | 17                     | 50           | 23         | 203          |
| <b>31.12.2010</b>       | <b>903</b> | <b>281</b>    | <b>129</b>        | <b>1.028</b>                    | <b>907</b>             | <b>1.729</b> | <b>371</b> | <b>5.348</b> |

Für die im Geschäftsjahr 2010 bilanzierten Rückstellungen werden die folgenden Mittelabflüsse erwartet:

Erwartete Mittelabflüsse Andere Rückstellungen

[Tabelle 4.78]

|                 | Steuern    | Umwelt-schutz | Restruk-turierung | Kunden-und Liefe-ranten-verkehr | Rechts-streitig-keiten | Personal     | Sonstige   | Summe        |
|-----------------|------------|---------------|-------------------|---------------------------------|------------------------|--------------|------------|--------------|
|                 | in Mio €   | in Mio €      | in Mio €          | in Mio €                        | in Mio €               | in Mio €     | in Mio €   | in Mio €     |
| 2011            | 611        | 86            | 76                | 1.024                           | 655                    | 1.170        | 248        | 3.870        |
| 2012            | 2          | 18            | 21                | 4                               | 106                    | 106          | 26         | 283          |
| 2013            | 44         | 32            | 11                | -                               | 18                     | 75           | 4          | 184          |
| 2014            | -          | 4             | 4                 | -                               | -                      | 75           | -          | 83           |
| 2015            | 92         | 2             | 4                 | -                               | 3                      | 98           | 20         | 219          |
| 2016 und später | 154        | 139           | 13                | -                               | 125                    | 205          | 73         | 709          |
| <b>Gesamt</b>   | <b>903</b> | <b>281</b>    | <b>129</b>        | <b>1.028</b>                    | <b>907</b>             | <b>1.729</b> | <b>371</b> | <b>5.348</b> |

Den Rückstellungen standen Erstattungsansprüche in Höhe von 137 Mio € (Vorjahr: 135 Mio €) gegenüber, die als Forderung aktiviert wurden. Sie bezogen sich im Wesentlichen auf Erstattungsansprüche aus Produkthaftung sowie auf Umweltschutzmaßnahmen.



## 26.1 Steuern

Die Rückstellungen für Steuern umfassten Rückstellungen für Ertragsteuern in Höhe von 772 Mio € (Vorjahr: 686 Mio €) sowie Rückstellungen für sonstige Steuerarten in Höhe von 130 Mio € (Vorjahr: 126 Mio €).

Weitere Ertragsteuerverpflichtungen gemäß IAS 12 bestanden zum Ende des Berichtsjahres in Höhe der bilanzierten Ertragsteuerverbindlichkeiten von 62 Mio € (Vorjahr: 93 Mio €).

## 26.2 Umweltschutz

Die Rückstellungen für Umweltschutz betreffen im Wesentlichen die Sanierung von kontaminierten Standorten, die Nachrüstung von Deponien sowie Rekultivierungs- und Wasserschutzmaßnahmen.

## 26.3 Restrukturierungen

Von den Rückstellungen für Restrukturierungen entfielen 109 Mio € (Vorjahr: 166 Mio €) auf Abfindungen und 20 Mio € (Vorjahr: 37 Mio €) auf sonstige Kosten, die sich im Wesentlichen aus Abrisskosten sowie sonstigen mit der Aufgabe von Produktionseinrichtungen verbundenen Kosten zusammensetzten.

Im Teilkonzern HealthCare wurde im November 2010 ein Restrukturierungsprogramm begonnen, das zur nachhaltigen Steigerung der Effizienz des Teilkonzerns führen soll. Die Maßnahmen betreffen alle Funktionsbereiche und sollen neben einer langfristigen Kostenentlastung auch zu einer Verschiebung von Aktivitäten aus den gesättigten Märkten in die Wachstumsländer führen. Darüber hinaus führten die im Rahmen der Schering-Integration beschlossenen Restrukturierungsmaßnahmen zu weiteren Auszahlungen im Jahr 2010. Wesentliche Einzelmaßnahmen fanden in den USA und in Deutschland statt. Für die genannten und weitere Maßnahmen bestanden zum 31. Dezember 2010 Restrukturierungsrückstellungen in Höhe von 77 Mio €. Davon entfielen 68 Mio € auf Abfindungen und 9 Mio € auf sonstige Restrukturierungsaufwendungen.

Im Teilkonzern CropScience fanden Restrukturierungsmaßnahmen insbesondere in Frankreich statt. Dort wurden mehrere Gesellschaften verschmolzen, um die Voraussetzung für optimierte Kostenstrukturen sowie für Effizienzsteigerungen im Verwaltungsbereich zu schaffen. Es bestanden zum 31. Dezember 2010 Restrukturierungsrückstellungen in Höhe von 26 Mio €. Hiervon entfielen 21 Mio € auf Abfindungen und 5 Mio € auf sonstige Restrukturierungsaufwendungen.

Die im Teilkonzern MaterialScience durchgeführten Restrukturierungsmaßnahmen betrafen im Wesentlichen die Optimierung des Produktionsstandortes in New Martinsville in den USA. Die Restrukturierungsrückstellungen betrugen zum 31. Dezember 2010 14 Mio €. Davon entfielen 9 Mio € auf Abfindungen und 5 Mio € auf sonstige Restrukturierungsaufwendungen.

## 26.4 Kunden- und Lieferantenverkehr

Die Rückstellungen für Kunden- und Lieferantenverkehr umfassen Rückstellungen für Rabatte, Skonti und andere Verkaufspreisanpassungen, Produktrücknahmen, ausstehende Eingangsrechnungen sowie drohende Verluste bzw. belastende Verträge.

## 26.5 Rechtsstreitigkeiten

Die aus heutiger Sicht wesentlichen Rechtsrisiken werden in Anhangangabe [32] dargestellt.

## 26.6 Personal

Mit den Personalarückstellungen wird bilanzielle Vorsorge vor allem für variable und individuelle Einmalzahlungen, Überschüsse auf Langzeitkonten, Zahlungen aufgrund von Mitarbeiterjubiläen, Vorruhestandsregelungen und Altersteilzeitvereinbarungen sowie sonstige Personalkosten getroffen. Ferner sind hier die Verpflichtungen aus aktienbasierter Entlohnung ausgewiesen.

Die Aktienprogramme des Bayer-Konzerns sind nach Mitarbeitergruppen differenzierte Kollektivzusagen. Grundsätzlich werden – wie für Vergütungssysteme mit Barausgleich gemäß IFRS 2 (Share-based Payment) vorgesehen – alle Verpflichtungen, die aus den aktienbasierten Programmen hervorgehen, durch Rückstellungen berücksichtigt, deren Höhe zum Bilanzstichtag dem beizulegenden Zeitwert der jeweils verdienten Anteile der jeweiligen Zusagen an die Mitarbeitergruppen entspricht. Alle daraus resultierenden Wertänderungen werden aufwandswirksam erfasst.

Die nachfolgende Tabelle zeigt die Entwicklung der für die jeweiligen Programme gebildeten Rückstellungen:

Entwicklung Rückstellungen für aktienbasierte Programme

[Tabelle 4.79]

|                    | Aktien-Incentive-programm | Aktien-Beteiligungs-programm | Aspire I dreijähriges Programm | Aspire II dreijähriges Programm | Aspire I vierjähriges Programm | Aspire II vierjähriges Programm | Summe      |
|--------------------|---------------------------|------------------------------|--------------------------------|---------------------------------|--------------------------------|---------------------------------|------------|
|                    | in Mio €                  | in Mio €                     | in Mio €                       | in Mio €                        | in Mio €                       | in Mio €                        | in Mio €   |
| <b>31.12.2009</b>  | <b>4</b>                  | <b>15</b>                    | <b>59</b>                      | <b>60</b>                       | <b>-</b>                       | <b>-</b>                        | <b>138</b> |
| Zuführung          | -                         | 3                            | 14                             | 13                              | 5                              | 7                               | 42         |
| Inanspruchnahme    | -1                        | -6                           | -36                            | -40                             | -                              | -                               | -83        |
| Auflösung          | -1                        | -2                           | -9                             | -5                              | -                              | -                               | -17        |
| Währungsänderungen | -                         | -                            | 1                              | 2                               | -                              | -                               | 3          |
| <b>31.12.2010</b>  | <b>2</b>                  | <b>10</b>                    | <b>29</b>                      | <b>30</b>                       | <b>5</b>                       | <b>7</b>                        | <b>83</b>  |

Der Gesamtperiodenaufwand für alle aktienbasierten Vergütungsprogramme betrug 42 Mio € (Vorjahr: 124 Mio €).

Die Höhe des beizulegenden Zeitwerts der Verpflichtungen aus den aktienbasierten Programmen wurde auf der Grundlage einer Monte-Carlo-Simulation ermittelt, die auf folgenden wesentlichen Parametern basierte:

Parameter Monte-Carlo-Simulation

[Tabelle 4.80]

|                                                                 | 2009    | 2010    |
|-----------------------------------------------------------------|---------|---------|
| Dividendenrendite                                               | 2,49 %  | 2,69 %  |
| Risikoloser Zinssatz                                            | 1,57 %  | 1,12 %  |
| Volatilität Bayer-Aktie                                         | 34,93 % | 34,43 % |
| Volatilität EURO STOXX 50                                       | 29,46 % | 31,09 % |
| Korrelation zwischen dem Bayer-Aktienkurs und dem EURO STOXX 50 | 0,68    | 0,69    |

### LANGFRISTIGES VERGÜTUNGSPROGRAMM FÜR MITGLIEDER DES VORSTANDS SOWIE FÜR DIE OBERE FÜHRUNGSEBENE (ASPIRE I)

Mitglieder des Vorstands und Mitarbeiter der oberen Führungsebene sind seit dem Jahr 2005 zur Teilnahme an Aspire I berechtigt, soweit sie nach vorgegebenen Richtlinien eine individuell festgelegte Anzahl an Bayer-Aktien erwerben und dieses Eigeninvestment über die Programmlaufzeit halten. Bemessungsbasis für Aspire I ist ein individueller, positionsabhängiger Prozentwert vom jährlichen Grundgehalt (Aspire-Zielbetrag). In Abhängigkeit von der absoluten Kursentwicklung der Bayer-Aktie sowie von der relativen Performance im Vergleich zum Aktienindex Dow Jones EURO STOXX 50, jeweils bezogen auf eine dreijährige bzw. – ab der im Jahr 2010 aufgelegten regulären Tranche – vierjährige Performance-Periode, wird nach Ablauf des Programms an die Teilnehmer ein Betrag von maximal 300 % des Aspire-Zielbetrags für vierjährige Tranchen bzw. 200 % für dreijährige Tranchen ausgezahlt. Im Jahr 2010 wurde zusätzlich letztmalig eine Tranche mit dreijähriger Performance-Periode aufgelegt.

### LANGFRISTIGES VERGÜTUNGSPROGRAMM FÜR DAS MITTLERE MANAGEMENT (ASPIRE II)

Für die übrigen Führungskräfte und für das mittlere Management wird seit dem Jahr 2005 Aspire II angeboten. Es entspricht in seinen Grundzügen Aspire I. Im Gegensatz zu diesem ist ein Eigeninvestment in Bayer-Aktien allerdings nicht erforderlich. Zudem wird die Performance ausschließlich an der absoluten Kursentwicklung der Bayer-Aktie gemessen. Der maximal erreichbare Ertrag ist auf 250 % des Aspire-Zielbetrags für vierjährige Tranchen bzw. auf 150 % für dreijährige Tranchen begrenzt.

### BAYSHARE 2010

Allen Managementebenen und Tarifmitarbeitern wird jährlich unter dem Namen „BayShare“ ein Aktien-Beteiligungsprogramm angeboten, bei dem Bayer einen Zuschuss zu einem Eigeninvestment in Bayer-Aktien gewährt. Die Höhe des Zuschusses, der jährlich neu festgelegt wird, belief sich auf 20 % (Vorjahr: 20 %) des Zeichnungsbetrags. Die Mitarbeiter gaben einen festen Betrag an, für den sie Aktien zeichnen wollten. Je nach Position des Mitarbeiters war der Gesamtbetrag für den Aktienerwerb auf 2.500 € (Vorjahr: 2.500 €) bzw. 5.000 € (Vorjahr: 5.000 €) begrenzt. Die erworbenen Aktien werden in gesonderten Depots verwahrt und unterliegen einer Veräußerungssperre. Diese endet jeweils am 31. Dezember des Jahres, das dem Jahr des Aktienerwerbs folgt.

Im Jahr 2010 wurden im Rahmen des BayShare-Programms insgesamt rund 405.000 Aktien (Vorjahr: 395.000 Aktien) durch die Mitarbeiter erworben.

**AKTIENPROGRAMME DER JAHRE 2000 - 2004**

Die in den Jahren 2000 bis 2004 aufgelegten Aktienprogramme basieren jeweils auf ähnlichen Grundstrukturen für die jeweilige Mitarbeitergruppe. Veränderungen der entsprechenden Verpflichtungen werden erfolgswirksam zum beizulegenden Zeitwert im Abschluss berücksichtigt. Der Anspruch auf Ausschüttungen aus diesen Programmen ist an die Bedingung geknüpft, dass die Bayer-Aktien über die Programmlaufzeit gehalten werden. Die Tranchen aus dem Jahr 2000 liefen im Geschäftsjahr 2010 ab und führten zu Auszahlungen.

Die bis 2004 ausgegebenen noch laufenden Programme sind in der folgenden Übersicht zusammengefasst:

**Aktienprogramme der Jahre 2001–2004**

[Tabelle 4.81]

|                                                        | Aktien-Incentive-programm | Aktien-Beteiligungs-programm |
|--------------------------------------------------------|---------------------------|------------------------------|
| Ausgabejahr                                            | 2001–2004                 | 2001–2004                    |
| Ursprüngliche Laufzeit in Jahren                       | 10                        | 10                           |
| Sperrfrist bzw. Zuteilungstermine ab Ausgabe in Jahren | 2/6/10                    | 2/6/10                       |
| Basiskurs                                              | 0                         | 0                            |
| Performance-Kriterium                                  | ja                        | nein                         |

**AKTIEN-INCENTIVEPROGRAMM AIP**

Für das mittlere Management wurde bis 2004 ein Aktien-Incentiveprogramm begeben. Die Teilnehmer erhalten zu definierten Zeitpunkten während der jeweils zehnjährigen Programmlaufzeit den Gegenwert einer bestimmten Anzahl von Bayer-Aktien. Für je zehn Aktien, die die Mitarbeiter als Eigeninvestment in das Programm eingebracht haben, sind dies nach zwei Jahren zwei Aktien, nach sechs und zehn Jahren jeweils vier weitere Aktien. Die Bedingung für die Incentivierung ist, dass die Programmteilnehmer die eingebrachten Aktien am betreffenden Incentivierungszeitpunkt in einem hierfür eingerichteten Mitarbeiter-Depot halten und der seit Programmauflegung erzielte prozentuale Kursanstieg der Bayer-Aktie über dem des Aktienindex Dow Jones EURO STOXX 50 liegt. Die durch die Mitarbeiter eingebrachten Aktien können während der Programmlaufzeit verkauft werden, wobei die verkauften Aktien vom folgenden Incentivierungstermin an nicht mehr incentivierungsberechtigt sind. Die Zahl der Aktien, die vom einzelnen Mitarbeiter in das Programm eingebracht werden konnten, war wertmäßig auf die Hälfte seiner leistungsabhängigen Bonuszahlung für das jeweilige vorangegangene Geschäftsjahr begrenzt.

**AKTIEN-BETEILIGUNGSPROGRAMM ABP**

Das bis einschließlich 2004 geltende Aktien-Beteiligungsprogramm für die weiteren Mitarbeitergruppen entspricht in seiner Struktur dem Aktien-Incentiveprogramm, wobei sich die Incentivierung ausschließlich an der Haltedauer der als Eigeninvestment der Mitarbeiter in das Programm eingebrachten Bayer-Aktien orientiert. Die Incentivierungsleistung ist gegenüber dem Aktien-Incentiveprogramm halbiert. Nach zwei Jahren Haltedauer wird je zehn Aktien Eigeninvestment der Gegenwert einer Bayer-Aktie gewährt, nach sechs bzw. zehn Jahren der Gegenwert jeweils zwei weiterer Aktien.

**26.7 Sonstige**

Die sonstigen Rückstellungen enthalten Rückstellungen für Gewährleistungen, Produkthaftung, Entsorgungsverpflichtungen – sofern nicht als Rückstellung für Umweltschutz erfasst –, Eventualverbindlichkeiten aus Akquisitionen sowie Rückstellungen für sonstige Verbindlichkeiten.

## 27. Finanzverbindlichkeiten

Insgesamt setzten sich die Finanzverbindlichkeiten wie folgt zusammen:

Finanzverbindlichkeiten

[Tabelle 4.82]

|                                              | 31.12.2009    |                   | 31.12.2010    |                   |
|----------------------------------------------|---------------|-------------------|---------------|-------------------|
|                                              | Gesamt        | davon kurzfristig | Gesamt        | davon kurzfristig |
|                                              | in Mio €      | in Mio €          | in Mio €      | in Mio €          |
| Anleihen/Schuldscheindarlehen                | 8.301         | 375               | 8.209         | 650               |
| Verbindlichkeiten gegenüber Kreditinstituten | 3.251         | 807               | 2.271         | 760               |
| Leasingverbindlichkeiten                     | 550           | 44                | 562           | 50                |
| Verbindlichkeiten aus Waretermingeschäften   | 91            | 46                | 66            | 55                |
| Verbindlichkeiten aus sonstigen Derivaten    | 578           | 113               | 529           | 240               |
| Sonstige Finanzverbindlichkeiten             | 178           | 104               | 196           | 134               |
| <b>Gesamt</b>                                | <b>12.949</b> | <b>1.489</b>      | <b>11.833</b> | <b>1.889</b>      |

Die Finanzverbindlichkeiten haben insgesamt die folgenden Fälligkeiten:

Fälligkeiten der Finanzverbindlichkeiten

[Tabelle 4.83]

| Fälligkeit      | 31.12.2009    | Fälligkeit      | 31.12.2010    |
|-----------------|---------------|-----------------|---------------|
|                 | in Mio €      |                 | in Mio €      |
| 2010            | 1.489         | 2011            | 1.889         |
| 2011            | 1.867         | 2012            | 2.893         |
| 2012            | 2.793         | 2013            | 1.513         |
| 2013            | 1.430         | 2014            | 1.770         |
| 2014            | 1.785         | 2015            | 815           |
| 2015 und später | 3.585         | 2016 und später | 2.953         |
| <b>Gesamt</b>   | <b>12.949</b> | <b>Gesamt</b>   | <b>11.833</b> |

Die Finanzverbindlichkeiten des Bayer-Konzerns sind im Wesentlichen ungesichert und – mit Ausnahme der nachrangigen Hybridanleihe in Höhe von 1.300 Mio € – von gleichem Rang.

Neben Schuldscheinen in Höhe von 620 Mio € (Vorjahr: 620 Mio €) sind die folgenden Anleihen durch den Bayer-Konzern begeben worden:

Anleihen

[Tabelle 4.84]

| Effektiv-<br>zins                     | Nominal-<br>zins |                                      | Nominalvolumen | 31.12.2009   | 31.12.2010   |
|---------------------------------------|------------------|--------------------------------------|----------------|--------------|--------------|
|                                       |                  |                                      |                | in Mio €     | in Mio €     |
| <b>Bayer AG</b>                       |                  |                                      |                |              |              |
| 6,075 %                               | 6,000 %          | EMTN-Anleihe 2002/2012               | 2.000 Mio EUR  | 2.044        | 2.030        |
| 5,155 %                               | 5,000 %          | Hybridanleihe 2005/2105 (2015)       | 1.300 Mio EUR  | 1.267        | 1.303        |
| 4,621 %                               | 4,500 %          | EMTN-Anleihe 2006/2013               | 1.000 Mio EUR  | 996          | 1.003        |
| 5,774 %                               | 5,625 %          | EMTN-Anleihe 2006/2018               | 250 Mio GBP    | 277          | 287          |
| 5,541 %                               | 5,625 %          | EMTN-Anleihe 2006/2018 (Aufstockung) | 100 Mio GBP    | 113          | 117          |
| Variabel                              | Variabel         | EMTN-Anleihe 2007/2010               | 300 Mio EUR    | 300          | -            |
| 4,464 %                               | 4,375 %          | EMTN-Anleihe 2007/2011               | 200 Mio EUR    | 200          | 200          |
| 4,038 %                               | 4,000 %          | EMTN-Anleihe 2008/2011               | 200 Mio EUR    | 200          | 200          |
| <b>Bayer Capital Corporation B.V.</b> |                  |                                      |                |              |              |
| 4,750 %                               | 4,625 %          | EMTN-Anleihe 2009/2014               | 1.300 Mio EUR  | 1.291        | 1.293        |
| <b>Bayer Corporation</b>              |                  |                                      |                |              |              |
| 7,180 %                               | 7,125 %          | Anleihe 1995/2015                    | 200 Mio US\$   | 153          | 162          |
| 6,670 %                               | 6,650 %          | Anleihe 1998/2028                    | 350 Mio US\$   | 241          | 260          |
| <b>Bayer Holding Ltd.</b>             |                  |                                      |                |              |              |
| 1,654 %                               | 1,585 %          | EMTN-Anleihe 2007/2010               | 10 Mrd JPY     | 75           | -            |
| 2,006 %                               | 1,955 %          | EMTN-Anleihe 2007/2012               | 15 Mrd JPY     | 112          | 138          |
| Variabel                              | Variabel         | EMTN-Anleihe 2007/2012               | 30 Mrd JPY     | 225          | 275          |
| Variabel                              | Variabel         | EMTN-Anleihe 2008/2013               | 10 Mrd JPY     | 75           | 92           |
| 3,654 %                               | 3,575 %          | EMTN-Anleihe 2008/2018               | 15 Mrd JPY     | 112          | 137          |
| 1,459 %                               | 1,459 %          | EMTN-Anleihe 2010/2017               | 10 Mrd JPY     | -            | 92           |
| <b>Gesamt</b>                         |                  |                                      |                | <b>7.681</b> | <b>7.589</b> |

Im Juni 2010 legte die Bayer Holding Ltd. unter dem Multi-Currency-Euro-Medium-Term-Notes-Programm (EMTN-Programm) eine Anleihe mit einer Laufzeit von sieben Jahren im Nominalvolumen von 10 MRD JPY und einem Kupon von 1,459 % auf.

Die Bayer Capital Corporation B.V. emittierte unter dem EMTN-Programm im März 2009 eine Unternehmensanleihe mit einem Nominalvolumen in Höhe von 1.300 Mio € und einer Laufzeit von fünfeinhalb Jahren. Diese ist mit einem Kupon von 4,625 % ausgestattet.

Im Dezember 2008 legte die Bayer AG unter dem EMTN-Programm eine Anleihe im Nominalwert von 200 Mio €, einem Kupon von 4 % und einer Laufzeit bis zum 27. Januar 2011 auf. Die Anleihe wurde planmäßig getilgt.

Die Bayer Holding Ltd. hat im Juni 2008 unter dem EMTN-Programm eine variabel verzinsliche Anleihe im Nominalwert von 10 MRD JPY und einer fünfjährigen Laufzeit begeben. Die Anleihe trägt einen variabel verzinslichen Kupon von Drei-Monats-JPY-LIBOR plus 56 Basispunkten. Unter dem gleichen Programm hat die Bayer Holding Ltd. im Dezember 2008 eine Anleihe im Nominalwert von 15 MRD JPY mit einem Kupon von 3,575 % und einer Laufzeit bis zum 19. Dezember 2018 aufgelegt.

Im Juni 2007 emittierte die Bayer Holding Ltd. unter dem EMTN-Programm eine Anleihe mit einer Laufzeit von fünf Jahren im Nominalvolumen von 15 MRD JPY und einem Kupon von 1,955 %, eine variabel verzinsliche Anleihe im Nominalvolumen von 30 MRD JPY mit einer Laufzeit von fünf Jahren und einem Kupon von Drei-Monats-JPY-LIBOR plus 26 Basispunkten sowie eine Anleihe mit einer Laufzeit von drei Jahren im Nominalvolumen von 10 MRD JPY und einem Kupon von 1,585 %, die im Juni 2010 planmäßig getilgt wurde.



Im April 2007 begab die Bayer AG unter dem EMTN-Programm eine Anleihe mit einem Nominalvolumen von 200 Mio €, einer Laufzeit von vier Jahren und einem Kupon von 4,375 % sowie eine variabel verzinsliche Anleihe mit einer Laufzeit von drei Jahren im Nominalvolumen von 300 Mio € und einem Kupon in Höhe des Drei-Monats-EURIBOR plus 10 Basispunkten, die im April 2010 planmäßig getilgt wurde.

Im Mai 2006 emittierte die Bayer AG zur teilweisen Finanzierung der Schering-Akquisition unter dem EMTN-Programm eine Anleihe mit einem Nominalvolumen von 1.000 Mio €, einer Laufzeit von sieben Jahren und einem Kupon von 4,5 %. Darüber hinaus wurde eine Anleihe in britischen Pfund (GBP) in einer Höhe von 250 Mio GBP begeben. Diese Anleihe wurde im selben Jahr um 100 Mio GBP erhöht. Die Anleihe hat einen Kupon von 5,625 %, eine Laufzeit bis 2018 und wurde vollständig in Euro gewapt.

Die Bayer AG emittierte im Juli 2005 eine 100-jährige, nachrangige Hybridanleihe im Volumen von 1.300 Mio €. Die Anleihe wird im Jahr 2105 fällig und verzinst sich in den ersten zehn Jahren mit einem festen Kupon von 5 %. Danach schließt sich für die weitere Laufzeit eine variable, vierteljährliche Verzinsung an (Drei-Monats-EURIBOR plus 280 Basispunkte). Die Bayer AG hat nach den ersten zehn Jahren vierteljährlich die Möglichkeit, die Anleihe zum Nominalwert zu kündigen. Die Kuponzahlungen sind jeweils nachträglich fällig. Die Anleihe wird von Moody's zu 75 % und von Standard & Poor's zu 50 % als Eigenkapital bewertet und verbessert dadurch die rating-relevanten Verschuldungskennziffern des Konzerns.

Im April 2002 emittierte die Bayer AG unter dem EMTN-Programm eine Anleihe im Nominalvolumen von 2.000 Mio € mit einer Laufzeit von zehn Jahren und einem festen Kupon von 6 %. Die Zinszahlungen erfolgen nachträglich jährlich.

Im Februar 1998 legte die Bayer Corporation eine Anleihe im Volumen von 350 Mio US-Dollar für zeichnungsberechtigte institutionelle Anleger mit einer Laufzeit von 30 Jahren, einem Kupon von 6,65 % und halbjährlichen Zinsen auf. Darüber hinaus wurde im September 1995 eine 7,125-prozentige Anleihe über 200 Mio US-Dollar aufgelegt. Die Anleihe hat eine Laufzeit von 20 Jahren und wird im Oktober 2015 fällig. Die Zinszahlungen erfolgen halbjährlich im April und Oktober.

Alle durch die Tochtergesellschaften begebenen Anleihen werden von der Bayer AG garantiert.

Die langfristigen Verbindlichkeiten gegenüber Kreditinstituten beinhalteten im Wesentlichen Bankkredite ausländischer Tochtergesellschaften. Der zum 31. Dezember 2009 ausstehende Betrag des in 2006 im Rahmen der Schering-Akquisition aufgenommenen Konsortialkredits in Höhe von 0,9 Mrd € wurde im September 2010 vollständig getilgt.

Am 31. Dezember 2010 standen dem Konzern insgesamt Kreditlinien über 6,6 Mrd € (Vorjahr: 7,2 Mrd €) zur Verfügung. Genutzt wurden davon 2,3 Mrd € (Vorjahr: 3,3 Mrd €), während 4,3 Mrd € (Vorjahr: 3,9 Mrd €) ungenutzt sind und damit für ungesicherte Kreditaufnahmen zur Verfügung stehen.

In den Folgejahren sind aus Finanzierungsleasing an die jeweiligen Leasinggeber 704 Mio € (Vorjahr: 704 Mio €) Leasingraten zu zahlen; der hierin enthaltene Zinsanteil beläuft sich auf 142 Mio € (Vorjahr: 154 Mio €).

Nach Fälligkeit gliedern sich die Leasingverbindlichkeiten wie folgt:

Leasingverbindlichkeiten

[Tabelle 4.85]

| Fälligkeit      | 31.12.2009        |                                          |                                    | Fälligkeit      | 31.12.2010        |                                          |                                    |
|-----------------|-------------------|------------------------------------------|------------------------------------|-----------------|-------------------|------------------------------------------|------------------------------------|
|                 | Leasing-<br>raten | Hierin<br>ent-<br>haltener<br>Zinsanteil | Leasing-<br>verbind-<br>lichkeiten |                 | Leasing-<br>raten | Hierin<br>ent-<br>haltener<br>Zinsanteil | Leasing-<br>verbind-<br>lichkeiten |
|                 | in Mio €          | in Mio €                                 | in Mio €                           |                 | in Mio €          | in Mio €                                 | in Mio €                           |
| 2010            | 71                | 27                                       | 44                                 | 2011            | 79                | 29                                       | 50                                 |
| 2011            | 67                | 25                                       | 42                                 | 2012            | 66                | 25                                       | 41                                 |
| 2012            | 58                | 23                                       | 35                                 | 2013            | 236               | 20                                       | 216                                |
| 2013            | 217               | 18                                       | 199                                | 2014            | 40                | 12                                       | 28                                 |
| 2014            | 36                | 11                                       | 25                                 | 2015            | 34                | 11                                       | 23                                 |
| 2015 und später | 255               | 50                                       | 205                                | 2016 und später | 249               | 45                                       | 204                                |
| <b>Gesamt</b>   | <b>704</b>        | <b>154</b>                               | <b>550</b>                         | <b>Gesamt</b>   | <b>704</b>        | <b>142</b>                               | <b>562</b>                         |

Nähere Erläuterungen zu den Verbindlichkeiten aus Derivaten werden in Anhangangabe [30] gegeben.

## 28. Verbindlichkeiten aus Lieferungen und Leistungen

Verbindlichkeiten aus Lieferungen und Leistungen bestanden überwiegend gegenüber Dritten. Von dem Gesamtbetrag waren 3.461 Mio € (Vorjahr: 2.720 Mio €) innerhalb eines Jahres und 36 Mio € (Vorjahr: 15 Mio €) nach mehr als einem Jahr fällig.

## 29. Sonstige Verbindlichkeiten

Die sonstigen Verbindlichkeiten teilten sich wie folgt auf:

Sonstige Verbindlichkeiten

[Tabelle 4.86]

|                                                     | 31.12.2009   |                           | 31.12.2010   |                           |
|-----------------------------------------------------|--------------|---------------------------|--------------|---------------------------|
|                                                     | Gesamt       | davon<br>kurz-<br>fristig | Gesamt       | davon<br>kurz-<br>fristig |
|                                                     | in Mio €     | in Mio €                  | in Mio €     | in Mio €                  |
| Verbindlichkeiten aus Zinsabgrenzung                | 255          | 242                       | 257          | 246                       |
| Verbindlichkeiten gegenüber Mitarbeitern            | 160          | 132                       | 143          | 120                       |
| Verbindlichkeiten im Rahmen der sozialen Sicherheit | 214          | 191                       | 174          | 152                       |
| Verbindlichkeiten aus sonstigen Steuern             | 271          | 271                       | 264          | 264                       |
| Verbindlichkeiten gegenüber anderen Gesellschaftern | 78           | -                         | 67           | -                         |
| Rechnungsabgrenzungen                               | 345          | 172                       | 341          | 103                       |
| Übrige Verbindlichkeiten                            | 659          | 559                       | 742          | 632                       |
| <b>Gesamt</b>                                       | <b>1.982</b> | <b>1.567</b>              | <b>1.988</b> | <b>1.517</b>              |

Als Verbindlichkeiten im Rahmen der sozialen Sicherheit waren insbesondere die noch abzuführenden Beiträge an Sozialversicherungsträger ausgewiesen.

Die Verbindlichkeiten gegenüber anderen Gesellschaftern in Höhe von 67 Mio € (Vorjahr: 78 Mio €) enthielten das auf Fremddanteile entfallende anteilige Eigenkapital der Currenta GmbH & Co. OHG und ihrer Tochtergesellschaften Chemion Logistik GmbH und TECTRION GmbH.

Die Rechnungsabgrenzungen enthielten Zuwendungen der öffentlichen Hand von 77 Mio € (Vorjahr: 63 Mio €), von denen im Geschäftsjahr 9 Mio € (Vorjahr: 12 Mio €) ertragswirksam aufgelöst wurden.

## 30. Berichterstattung zu Finanzinstrumenten

Das Risikomanagementsystem des Bayer-Konzerns für das Kreditrisiko, das Liquiditätsrisiko und die einzelnen Marktrisiken (Zinsrisiken, Währungsrisiken und sonstige Preisrisiken) wird einschließlich seiner Ziele, Methoden und Prozesse im Risikobericht des Lageberichts dargestellt.

### 30.1 Informationen zu Finanzinstrumenten nach Kategorien

Die nachfolgende Tabelle stellt die Buchwerte und die beizulegenden Zeitwerte der einzelnen finanziellen Vermögenswerte und Verbindlichkeiten für jede einzelne Kategorie von Finanzinstrumenten dar und leitet diese auf die entsprechenden Bilanzpositionen über. Da die Bilanzpositionen Sonstige Forderungen, Verbindlichkeiten aus Lieferungen und Leistungen und Sonstige Verbindlichkeiten sowohl Finanzinstrumente als auch nicht finanzielle Vermögenswerte bzw. nicht finanzielle Verbindlichkeiten (z. B. sonstige Steuerforderungen oder Vorauszahlungen für zukünftig zu erhaltende Leistungen) enthalten, dient die Spalte „Nicht finanzielle Vermögenswerte/Verbindlichkeiten“ einer entsprechenden Überleitung.

## Buchwerte und beizulegende Zeitwerte der Finanzinstrumente

|                                                       | 31.12.2009                                   |                                       |                                            |                                                |                                             |                                                     |                        |
|-------------------------------------------------------|----------------------------------------------|---------------------------------------|--------------------------------------------|------------------------------------------------|---------------------------------------------|-----------------------------------------------------|------------------------|
|                                                       | Zu fortgeführten Anschaffungskosten bewertet |                                       | Zum beizulegenden Zeitwert bewertet        |                                                |                                             | Nicht finanzielle Vermögenswerte/ Verbindlichkeiten |                        |
|                                                       |                                              |                                       | Auf Basis öffentlich notierter Marktpreise | Auf Basis marktnaher, direkt ableitbarer Werte | Auf Basis individueller Bewertungsparameter |                                                     |                        |
|                                                       | Buchwert 31.12.2009                          | Nachrichtlich: beizulegender Zeitwert | Buchwert                                   | Buchwert                                       | Buchwert                                    | Buchwert                                            | Buchwert in der Bilanz |
|                                                       | in Mio €                                     | in Mio €                              | in Mio €                                   | in Mio €                                       | in Mio €                                    | in Mio €                                            | in Mio €               |
| Forderungen aus Lieferungen und Leistungen            | 6.106                                        |                                       |                                            |                                                |                                             |                                                     | 6.106                  |
| Ausleihungen und Forderungen                          | 6.106                                        | 6.106                                 |                                            |                                                |                                             |                                                     | 6.106                  |
| Sonstige finanzielle Vermögenswerte                   | 793                                          |                                       | 127                                        | 605                                            | 42                                          |                                                     | 1.567                  |
| Ausleihungen und Forderungen                          | 628                                          | 700                                   |                                            |                                                |                                             |                                                     | 628                    |
| Zur Veräußerung verfügbare finanzielle Vermögenswerte | 58                                           |                                       | 127                                        |                                                | 27                                          |                                                     | 212                    |
| Bis zur Endfälligkeit zu haltende Finanzinvestitionen | 107                                          | 111                                   |                                            |                                                |                                             |                                                     | 107                    |
| Derivate mit bilanzieller Sicherungsbeziehung         |                                              |                                       |                                            | 218                                            |                                             |                                                     | 218                    |
| Derivate ohne bilanzielle Sicherungsbeziehung         |                                              |                                       |                                            | 387                                            | 15                                          |                                                     | 402                    |
| Sonstige Forderungen                                  | 970                                          |                                       |                                            |                                                |                                             | 936                                                 | 1.906                  |
| Ausleihungen und Forderungen                          | 970                                          | 971                                   |                                            |                                                |                                             |                                                     | 970                    |
| Nicht finanzielle Vermögenswerte                      |                                              |                                       |                                            |                                                |                                             | 936                                                 | 936                    |
| Zahlungsmittel und Zahlungsmitteläquivalente          | 2.725                                        |                                       |                                            |                                                |                                             |                                                     | 2.725                  |
| Ausleihungen und Forderungen                          | 2.725                                        | 2.725                                 |                                            |                                                |                                             |                                                     | 2.725                  |
| <b>Finanzielle Vermögenswerte gesamt</b>              | <b>10.594</b>                                |                                       | <b>127</b>                                 | <b>605</b>                                     | <b>42</b>                                   |                                                     | <b>11.368</b>          |
| davon: Ausleihungen und Forderungen                   | 10.429                                       |                                       |                                            |                                                |                                             |                                                     | 10.429                 |
| Finanzverbindlichkeiten                               | 12.280                                       |                                       |                                            | 669                                            |                                             |                                                     | 12.949                 |
| Zu fortgeführten Anschaffungskosten bewertet          | 12.280                                       | 13.072                                |                                            |                                                |                                             |                                                     | 12.280                 |
| Derivate mit bilanzieller Sicherungsbeziehung         |                                              |                                       |                                            | 235                                            |                                             |                                                     | 235                    |
| Derivate ohne bilanzielle Sicherungsbeziehung         |                                              |                                       |                                            | 434                                            |                                             |                                                     | 434                    |
| Verbindlichkeiten aus Lieferungen und Leistungen      | 2.571                                        |                                       |                                            |                                                |                                             | 164                                                 | 2.735                  |
| Zu fortgeführten Anschaffungskosten bewertet          | 2.571                                        | 2.571                                 |                                            |                                                |                                             |                                                     | 2.571                  |
| Nicht finanzielle Verbindlichkeiten                   |                                              |                                       |                                            |                                                |                                             | 164                                                 | 164                    |
| Sonstige Verbindlichkeiten                            | 1.033                                        |                                       |                                            | 45                                             | 4                                           | 900                                                 | 1.982                  |
| Zu fortgeführten Anschaffungskosten bewertet          | 1.033                                        | 1.033                                 |                                            |                                                |                                             |                                                     | 1.033                  |
| Derivate mit bilanzieller Sicherungsbeziehung         |                                              |                                       |                                            | 37                                             |                                             |                                                     | 37                     |
| Derivate ohne bilanzielle Sicherungsbeziehung         |                                              |                                       |                                            | 8                                              | 4                                           |                                                     | 12                     |
| Nicht finanzielle Verbindlichkeiten                   |                                              |                                       |                                            |                                                |                                             | 900                                                 | 900                    |
| <b>Finanzielle Verbindlichkeiten gesamt</b>           | <b>15.884</b>                                |                                       |                                            | <b>714</b>                                     | <b>4</b>                                    |                                                     | <b>16.602</b>          |
| davon: Zu fortgeführten Anschaffungskosten bewertet   | 15.884                                       |                                       |                                            |                                                |                                             |                                                     | 15.884                 |
| davon: Derivate mit bilanzieller Sicherungsbeziehung  |                                              |                                       |                                            | 272                                            |                                             |                                                     | 272                    |
| davon: Derivate ohne bilanzielle Sicherungsbeziehung  |                                              |                                       |                                            | 442                                            | 4                                           |                                                     | 446                    |

[Tabelle 4.87]

|  | 31.12.2010                                   |                                       |                                            |                                                |                                             |                                                     |                        |
|--|----------------------------------------------|---------------------------------------|--------------------------------------------|------------------------------------------------|---------------------------------------------|-----------------------------------------------------|------------------------|
|  | Zu fortgeführten Anschaffungskosten bewertet |                                       | Zum beizulegenden Zeitwert bewertet        |                                                |                                             | Nicht finanzielle Vermögenswerte/ Verbindlichkeiten | Buchwert in der Bilanz |
|  | Buchwert 31.12.2010                          | Nachrichtlich: beizulegender Zeitwert | Auf Basis öffentlich notierter Marktpreise | Auf Basis marktnaher, direkt ableitbarer Werte | Auf Basis individueller Bewertungsparameter | Buchwert                                            |                        |
|  |                                              |                                       | Buchwert                                   | Buchwert                                       | Buchwert                                    |                                                     |                        |
|  | in Mio €                                     | in Mio €                              | in Mio €                                   | in Mio €                                       | in Mio €                                    | in Mio €                                            | in Mio €               |
|  | 6.668                                        |                                       |                                            |                                                |                                             |                                                     | 6.668                  |
|  | 6.668                                        | 6.668                                 |                                            |                                                |                                             |                                                     | 6.668                  |
|  | 971                                          |                                       | 701                                        | 476                                            | 24                                          |                                                     | 2.172                  |
|  | 816                                          | 821                                   |                                            |                                                |                                             |                                                     | 816                    |
|  | 54                                           |                                       | 701                                        |                                                | 3                                           |                                                     | 758                    |
|  | 101                                          | 105                                   |                                            |                                                |                                             |                                                     | 101                    |
|  |                                              |                                       |                                            | 201                                            |                                             |                                                     | 201                    |
|  |                                              |                                       |                                            | 275                                            | 21                                          |                                                     | 296                    |
|  | 823                                          |                                       |                                            |                                                |                                             | 1.011                                               | 1.834                  |
|  | 823                                          | 823                                   |                                            |                                                |                                             |                                                     | 823                    |
|  |                                              |                                       |                                            |                                                |                                             | 1.011                                               | 1.011                  |
|  | 2.840                                        |                                       |                                            |                                                |                                             |                                                     | 2.840                  |
|  | 2.840                                        | 2.840                                 |                                            |                                                |                                             |                                                     | 2.840                  |
|  | 11.302                                       |                                       | 701                                        | 476                                            | 24                                          |                                                     | 12.503                 |
|  | 11.147                                       |                                       |                                            |                                                |                                             |                                                     | 11.147                 |
|  | 11.238                                       |                                       |                                            | 595                                            |                                             |                                                     | 11.833                 |
|  | 11.238                                       | 12.061                                |                                            |                                                |                                             |                                                     | 11.238                 |
|  |                                              |                                       |                                            | 252                                            |                                             |                                                     | 252                    |
|  |                                              |                                       |                                            | 343                                            |                                             |                                                     | 343                    |
|  | 3.165                                        |                                       |                                            |                                                |                                             | 332                                                 | 3.497                  |
|  | 3.165                                        | 3.165                                 |                                            |                                                |                                             |                                                     | 3.165                  |
|  |                                              |                                       |                                            |                                                |                                             | 332                                                 | 332                    |
|  | 1.029                                        |                                       |                                            | 111                                            | 5                                           | 843                                                 | 1.988                  |
|  | 1.029                                        | 1.029                                 |                                            |                                                |                                             |                                                     | 1.029                  |
|  |                                              |                                       |                                            | 86                                             |                                             |                                                     | 86                     |
|  |                                              |                                       |                                            | 25                                             | 5                                           |                                                     | 30                     |
|  |                                              |                                       |                                            |                                                |                                             | 843                                                 | 843                    |
|  | 15.432                                       |                                       |                                            | 706                                            | 5                                           |                                                     | 16.143                 |
|  | 15.432                                       |                                       |                                            |                                                |                                             |                                                     | 15.432                 |
|  |                                              |                                       |                                            | 338                                            |                                             |                                                     | 338                    |
|  |                                              |                                       |                                            | 368                                            | 5                                           |                                                     | 373                    |

In Ausleihungen und Forderungen sowie in Verbindlichkeiten zu fortgeführten Anschaffungskosten sind auch Finanzierungs-Leasingforderungen bzw. Finanzierungs-Leasingverbindlichkeiten enthalten, bei denen Bayer der Leasinggeber bzw. Leasingnehmer ist, und die folglich nach IAS 17 bewertet werden.

Der beizulegende Zeitwert von Forderungen, Ausleihungen, bis zur Endfälligkeit zu haltenden Finanzinvestitionen oder originären Verbindlichkeiten wird als Barwert der zukünftigen Zahlungsmittelzu- oder -abflüsse ermittelt. Die Abzinsung erfolgt unter Anwendung des zum Bilanzstichtag aktuellen laufzeitadäquaten Zinssatzes unter Berücksichtigung der Bonität des Kontrahenten. Sollte ein börsennotierter Preis vorhanden sein, wird dieser als beizulegender Zeitwert angesetzt.

Aufgrund der überwiegend kurzfristigen Laufzeiten für Forderungen und Verbindlichkeiten aus Lieferungen und Leistungen, sonstigen Forderungen und Verbindlichkeiten und Zahlungsmitteln und Zahlungsmitteläquivalenten weichen die Buchwerte am Bilanzstichtag nicht signifikant von den beizulegenden Zeitwerten ab.

Die Aufwendungen, Erträge, Verluste und Gewinne aus Finanzinstrumenten lassen sich den folgenden Kategorien zuordnen:

Aufwendungen, Erträge, Verluste und Gewinne aus Finanzinstrumenten

[Tabelle 4.88]

|                                               | 2010                         |                                                       |                                                       |                                           |                                                                 |             |
|-----------------------------------------------|------------------------------|-------------------------------------------------------|-------------------------------------------------------|-------------------------------------------|-----------------------------------------------------------------|-------------|
|                                               | Ausleihungen und Forderungen | Bis zur Endfälligkeit zu haltende Finanzinvestitionen | Zur Veräußerung verfügbare finanzielle Vermögenswerte | Zu Handelszwecken gehalten (nur Derivate) | Zu fortgeführten Anschaffungskosten bewertete Verbindlichkeiten | Gesamt      |
|                                               | in Mio €                     | in Mio €                                              | in Mio €                                              | in Mio €                                  | in Mio €                                                        | in Mio €    |
| Zinserträge                                   | 56                           | 3                                                     | 1                                                     | 152                                       | 119                                                             | 331         |
| Zinsaufwendungen                              | -                            | -                                                     | -                                                     | -180                                      | -636                                                            | -816        |
| Beteiligungserträge                           | -                            | -                                                     | 6                                                     | -                                         | -                                                               | 6           |
| Fair-Value-Änderungen                         | -                            | -                                                     | -                                                     | -16                                       | -                                                               | -16         |
| Aufwendungen aus Wertminderungen              | -141                         | -                                                     | -11                                                   | -                                         | -                                                               | -152        |
| Erträge aus Zuschreibungen                    | 53                           | -                                                     | -                                                     | -                                         | -                                                               | 53          |
| Gewinne/Verluste aus Abgängen                 | -                            | -                                                     | 2                                                     | -                                         | -                                                               | 2           |
| Sonstige finanzielle Aufwendungen und Erträge | -1                           | -                                                     | -                                                     | -                                         | -3                                                              | -4          |
| <b>Nettoergebnis</b>                          | <b>-33</b>                   | <b>3</b>                                              | <b>-2</b>                                             | <b>-44</b>                                | <b>-520</b>                                                     | <b>-596</b> |



Aufwendungen, Erträge, Verluste und Gewinne aus Finanzinstrumenten (Vorjahr)

[Tabelle 4.89]

|                                               | 2009                         |                                                       |                                                       |                                           |                                                                 | Gesamt      |
|-----------------------------------------------|------------------------------|-------------------------------------------------------|-------------------------------------------------------|-------------------------------------------|-----------------------------------------------------------------|-------------|
|                                               | Ausleihungen und Forderungen | Bis zur Endfälligkeit zu haltende Finanzinvestitionen | Zur Veräußerung verfügbare finanzielle Vermögenswerte | Zu Handelszwecken gehalten (nur Derivate) | Zu fortgeführten Anschaffungskosten bewertete Verbindlichkeiten |             |
|                                               | in Mio €                     | in Mio €                                              | in Mio €                                              | in Mio €                                  | in Mio €                                                        | in Mio €    |
| Zinserträge                                   | 58                           | 3                                                     | 1                                                     | 490                                       | 128                                                             | 680         |
| Zinsaufwendungen                              | -                            | -                                                     | -                                                     | -490                                      | -795                                                            | -1.285      |
| Beteiligungserträge                           | -                            | -                                                     | 5                                                     | -                                         | -                                                               | 5           |
| Fair-Value-Änderungen                         | -                            | -                                                     | -                                                     | -62                                       | -                                                               | -62         |
| Aufwendungen aus Wertminderungen              | -107                         | -                                                     | -15                                                   | -                                         | -                                                               | -122        |
| Erträge aus Zuschreibungen                    | 63                           | -                                                     | -                                                     | -                                         | -                                                               | 63          |
| Gewinne/Verluste aus Abgängen                 | -                            | -                                                     | -1                                                    | -                                         | -                                                               | -1          |
| Sonstige finanzielle Aufwendungen und Erträge | 2                            | -                                                     | -2                                                    | -                                         | -5                                                              | -5          |
| <b>Nettoergebnis</b>                          | <b>16</b>                    | <b>3</b>                                              | <b>-12</b>                                            | <b>-62</b>                                | <b>-672</b>                                                     | <b>-727</b> |

In der Spalte „Zu Handelszwecken gehalten“ werden fast ausschließlich Zinsaufwendungen und Zinserträge aus Zins- und Zinswährungssicherungen, die nicht in einer bilanziellen Sicherungsbeziehung stehen, ausgewiesen.

Die auf individuellen Bewertungsparametern basierenden und zum beizulegenden Zeitwert bilanzierten finanziellen Vermögenswerte und Verbindlichkeiten betrugen am Jahresanfang 2010 per saldo 38 Mio € (Vorjahr: 56 Mio €). Ergebniswirksame Veränderungen des beizulegenden Zeitwerts in Höhe von 5 Mio € (Vorjahr: 1 Mio €), Abgänge in Höhe von 28 Mio € (Vorjahr: 18 Mio €) sowie ergebnisneutrale Wertänderungen in Höhe von 4 Mio € (Vorjahr: -1 Mio €) führten zu einem Nettobilanzwert am Ende des Berichtsjahres von 19 Mio € (Vorjahr: 38 Mio €). Von den ergebniswirksamen Wertänderungen entfielen 6 Mio € (Vorjahr: 10 Mio €) auf noch bilanzierte sowie -1 Mio € (Vorjahr: -9 Mio €) auf bereits abgegangene Vermögenswerte und Verbindlichkeiten. Darüber hinaus fielen Veräußerungsgewinne in Höhe von 2 Mio € (Vorjahr: 4 Mio €) an.

## 30.2 Fälligkeitsanalyse

Das Liquiditätsrisiko, welchem der Bayer-Konzern aus seinen Finanzinstrumenten ausgesetzt ist, setzt sich aus Verpflichtungen aus zukünftigen Zins- und Tilgungszahlungen für finanzielle Verbindlichkeiten und dem Liquiditätsrisiko aus Derivaten zum Bilanzstichtag – wie in der Tabelle in Anhangangabe [30.3] dargestellt – zusammen.

Daneben bestand ein Liquiditätsrisiko aus einem noch nicht eingezahlten Teil des Gründungsstocks bei der Bayer-Pensionskasse in Höhe von 390 Mio € (Vorjahr: 490 Mio €), der in den Folgejahren zu weiteren Auszahlungen bei der Bayer AG führen kann. Dieser Betrag wurde unter Darlehenszusagen ausgewiesen.

## Fälligkeitsanalyse der Finanzinstrumente

|                                                         | 31.12.2010 | Cashflows Jan – März 2011 |          | Cashflows Apr – Dez 2011 |          |  |
|---------------------------------------------------------|------------|---------------------------|----------|--------------------------|----------|--|
|                                                         | Buchwert   | Zinsen                    | Tilgung  | Zinsen                   | Tilgung  |  |
|                                                         | in Mio €   | in Mio €                  | in Mio € | in Mio €                 | in Mio € |  |
| <b>Finanzverbindlichkeiten</b>                          |            |                           |          |                          |          |  |
| Anleihen/Schuldscheindarlehen*                          | 8.209      | 4                         | 200      | 176                      | 450      |  |
| Verbindlichkeiten gegenüber Kreditinstituten            | 2.271      | 9                         | 254      | 40                       | 506      |  |
| Restliche Verbindlichkeiten                             | 758        | 13                        | 140      | 20                       | 44       |  |
| <b>Verbindlichkeiten aus Lieferungen und Leistungen</b> | 3.165      | -                         | 2.984    | -                        | 162      |  |
| <b>Sonstige Verbindlichkeiten</b>                       |            |                           |          |                          |          |  |
| Verbindlichkeiten aus Zinsabgrenzung                    | 257        | 60                        | -        | 186                      | -        |  |
| Restliche Verbindlichkeiten                             | 772        | 7                         | 576      | 1                        | 64       |  |
| <b>Verbindlichkeiten aus Derivaten</b>                  |            |                           |          |                          |          |  |
| Derivate mit bilanzieller Sicherungsbeziehung           | 338        | -                         | 53       | 13                       | 73       |  |
| Derivate ohne bilanzielle Sicherungsbeziehung           | 373        | -8                        | 146      | 76                       | 47       |  |
| <b>Forderungen aus Derivaten</b>                        |            |                           |          |                          |          |  |
| Derivate mit bilanzieller Sicherungsbeziehung           | 201        | -10                       | 13       | 74                       | 52       |  |
| Derivate ohne bilanzielle Sicherungsbeziehung           | 296        | -7                        | 33       | 67                       | 75       |  |
| Darlehenszusagen                                        | -          | -                         | -        | -                        | 390      |  |
| Finanzgarantien                                         | -          | -                         | 12       | -                        | 103      |  |

\* Die Tilgung der 100-jährigen Hybridanleihe in Höhe von 1.300 Mio € ist zum ersten möglichen Rückzahlungszeitpunkt im Jahr 2015 ausgewiesen.

|                                                         | 31.12.2009 | Cashflows Jan – März 2010 |          | Cashflows Apr – Dez 2010 |          |  |
|---------------------------------------------------------|------------|---------------------------|----------|--------------------------|----------|--|
|                                                         | Buchwert   | Zinsen                    | Tilgung  | Zinsen                   | Tilgung  |  |
|                                                         | in Mio €   | in Mio €                  | in Mio € | in Mio €                 | in Mio € |  |
| <b>Finanzverbindlichkeiten</b>                          |            |                           |          |                          |          |  |
| Anleihen/Schuldscheindarlehen                           | 8.301      | 4                         | -        | 171                      | 375      |  |
| Verbindlichkeiten gegenüber Kreditinstituten            | 3.251      | 24                        | 367      | 76                       | 439      |  |
| Restliche Verbindlichkeiten                             | 728        | 9                         | 107      | 18                       | 41       |  |
| <b>Verbindlichkeiten aus Lieferungen und Leistungen</b> | 2.571      | -                         | 2.435    | -                        | 122      |  |
| <b>Sonstige Verbindlichkeiten</b>                       |            |                           |          |                          |          |  |
| Verbindlichkeiten aus Zinsabgrenzung                    | 255        | 57                        | -        | 186                      | -        |  |
| Restliche Verbindlichkeiten                             | 778        | 2                         | 540      | 2                        | 73       |  |
| <b>Verbindlichkeiten aus Derivaten</b>                  |            |                           |          |                          |          |  |
| Derivate mit bilanzieller Sicherungsbeziehung           | 272        | 37                        | 23       | 1                        | 12       |  |
| Derivate ohne bilanzielle Sicherungsbeziehung           | 446        | 14                        | 50       | 29                       | 50       |  |
| <b>Forderungen aus Derivaten</b>                        |            |                           |          |                          |          |  |
| Derivate mit bilanzieller Sicherungsbeziehung           | 218        | -9                        | 38       | 93                       | 68       |  |
| Derivate ohne bilanzielle Sicherungsbeziehung           | 402        | -9                        | 22       | 23                       | 27       |  |
| Darlehenszusagen                                        | -          | -                         | -        | -                        | 490      |  |
| Finanzgarantien                                         | -          | -                         | 12       | -                        | -        |  |

Vorjahreswerte angepasst

[Tabelle 4.90]

[illegible][illegible]

### 30.3 Informationen zu Derivaten

Zur Eliminierung des Risikos von Marktwertschwankungen werden teilweise bei festverzinslichen Finanzschulden Zinsswaps eingesetzt, um einen variablen Zinssatz zu erhalten. Im Wesentlichen handelt es sich hierbei um die 2 MRD €-Anleihe aus dem Jahr 2002, die 1,3 MRD €-Anleihe aus dem Jahr 2005 und die 1 MRD €-Anleihe aus dem Jahr 2006. Die entsprechenden Finanzschulden und Sicherungsgeschäfte stehen in einer bilanziellen Sicherungsbeziehung (Fair-Value-Hedge).

In Bezug auf Fair-Value-Hedges sind hinsichtlich des Sicherungsinstruments im Berichtszeitraum 25 MIO € Gewinn (Vorjahr: 45 MIO €) angefallen. Dem gesicherten Grundgeschäft sind 25 MIO € Verlust (Vorjahr: 44 MIO €) zuzuordnen.

Schwankungen künftiger Zahlungsmittelzu- und -abflüsse durch nicht-bilanzielle Fremdwährungsrisiken werden teilweise durch den Abschluss von Derivaten, die zum Großteil im Rahmen von Hedge Accounting als Cashflow-Hedges designiert sind, vermieden. Auch für Preisänderungsrisiken von Beschaffungsgeschäften erfolgt eine teilweise Begrenzung von Schwankungen künftiger Zahlungsmittelzu- und -abflüsse durch den Abschluss von Sicherungsgeschäften, die zum Teil als Cashflow-Hedges designiert werden. Dabei handelt es sich bei den nicht-bilanziellen Fremdwährungsrisiken bzw. den Preisänderungsrisiken von Beschaffungsgeschäften um Nominalvolumina von 4.399 MIO € bzw. 173 MIO € (Vorjahr: 3.523 MIO € bzw. 323 MIO €).

Das kumulierte übrige Comprehensive Income hat sich nach Steuern durch negative Veränderungen der beizulegenden Marktwerte von Derivaten, die als Cashflow-Hedges designiert sind, in 2010 um einen Betrag von 75 MIO € vermindert (Vorjahr: 55 MIO € Erhöhung). Im Berichtsjahr sind zunächst erfolgsneutral im kumulierten übrigen Comprehensive Income erfasste Marktwertänderungen von Derivaten, die als Cashflow-Hedges designiert waren, in Höhe von 18 MIO € als Aufwand (Vorjahr: 10 MIO €) realisiert worden. Analog wurden entsprechende anteilige latente Steuern von 6 MIO € als Steuerertrag (Vorjahr: 4 MIO €) und nicht mehr im kumulierten übrigen Comprehensive Income erfasst. Es sind im Berichtsjahr ebenso wie im Vorjahr keine wesentlichen ineffektiven Teile der Sicherungsbeziehungen ergebniswirksam geworden.

Zum Jahresende bestanden die folgenden nach wesentlichen Kategorien geordneten Geschäfte mit den angegebenen Marktwerten:

Marktwerte der Derivate

[Tabelle 4.91]

|                                                     | 31.12.2009    |                     |                     | 31.12.2010    |                     |                     |
|-----------------------------------------------------|---------------|---------------------|---------------------|---------------|---------------------|---------------------|
|                                                     | Nominalwert*  | Marktwerte          |                     | Nominalwert*  | Marktwerte          |                     |
|                                                     |               | Positiver Marktwert | Negativer Marktwert |               | Positiver Marktwert | Negativer Marktwert |
|                                                     | in Mio €      | in Mio €            | in Mio €            | in Mio €      | in Mio €            | in Mio €            |
| <b>Währungssicherung bilanzieller Risiken</b>       | <b>7.652</b>  | <b>58</b>           | <b>-294</b>         | <b>8.759</b>  | <b>56</b>           | <b>-363</b>         |
| Devisentermingeschäfte                              | 5.868         | 43                  | -88                 | 6.251         | 47                  | -107                |
| davon Fair-Value-Hedges                             | -             | -                   | -                   | -             | -                   | -                   |
| davon Cashflow-Hedges                               | 384           | -                   | -5                  | 371           | 7                   | -                   |
| Zinswährungsswaps                                   | 1.784         | 15                  | -206                | 2.508         | 9                   | -256                |
| davon Fair-Value-Hedges                             | -             | -                   | -                   | -             | -                   | -                   |
| davon Cashflow-Hedges                               | 1.512         | 15                  | -175                | 2.173         | 9                   | -240                |
| <b>Währungssicherung nicht-bilanzieller Risiken</b> | <b>3.523</b>  | <b>136</b>          | <b>-45</b>          | <b>4.399</b>  | <b>68</b>           | <b>-93</b>          |
| Devisentermingeschäfte                              | 3.245         | 129                 | -44                 | 3.631         | 59                  | -86                 |
| davon Fair-Value-Hedges                             | -             | -                   | -                   | -             | -                   | -                   |
| davon Cashflow-Hedges                               | 2.451         | 104                 | -37                 | 3.631         | 59                  | -86                 |
| Devisenoptionen                                     | 278           | 7                   | -1                  | 768           | 9                   | -7                  |
| davon Fair-Value-Hedges                             | -             | -                   | -                   | -             | -                   | -                   |
| davon Cashflow-Hedges                               | 239           | 7                   | -                   | -             | -                   | -                   |
| <b>Zinssicherung bilanzieller Risiken</b>           | <b>12.612</b> | <b>368</b>          | <b>-284</b>         | <b>8.169</b>  | <b>275</b>          | <b>-166</b>         |
| Zinsswaps                                           | 10.612        | 368                 | -284                | 8.169         | 275                 | -166                |
| davon Fair-Value-Hedges                             | 2.467         | 92                  | -                   | 3.467         | 126                 | -                   |
| davon Cashflow-Hedges                               | -             | -                   | -                   | 1             | -                   | -                   |
| Zinsoptionen                                        | 2.000         | -                   | -                   | -             | -                   | -                   |
| davon Fair-Value-Hedges                             | -             | -                   | -                   | -             | -                   | -                   |
| davon Cashflow-Hedges                               | -             | -                   | -                   | -             | -                   | -                   |
| <b>Rohstoffpreissicherung</b>                       | <b>323</b>    | <b>36</b>           | <b>-91</b>          | <b>173</b>    | <b>21</b>           | <b>-66</b>          |
| Warentermingeschäfte                                | 167           | 13                  | -68                 | 138           | 4                   | -52                 |
| davon Fair-Value-Hedges                             | -             | -                   | -                   | -             | -                   | -                   |
| davon Cashflow-Hedges                               | 85            | -                   | -55                 | 19            | -                   | -12                 |
| Warenoptionsgeschäfte                               | 156           | 23                  | -23                 | 35            | 17                  | -14                 |
| davon Fair-Value-Hedges                             | -             | -                   | -                   | -             | -                   | -                   |
| davon Cashflow-Hedges                               | -             | -                   | -                   | -             | -                   | -                   |
| <b>Gesamt</b>                                       | <b>24.110</b> | <b>598</b>          | <b>-714</b>         | <b>21.500</b> | <b>420</b>          | <b>-688</b>         |
| davon kurzfristige Derivate                         | 10.922        | 239                 | -204                | 11.072        | 237                 | -380                |
| für Währungssicherung                               | 8.259         | 179                 | -126                | 10.906        | 105                 | -258                |
| für Zinssicherung**                                 | 2.400         | 26                  | -32                 | -             | 113                 | -67                 |
| für Warensicherung                                  | 263           | 34                  | -46                 | 166           | 19                  | -55                 |

\* Der Nominalwert wird als Brutto-Volumen ausgewiesen, welches auch wirtschaftlich geschlossene Positionen beinhaltet.

\*\* Zum 31.12.2010 waren die Zinsswaps als langfristig einzustufen. Der Marktwert, der aus den kurzfristigen Zinszahlungen resultierte, wurde als kurzfristig ausgewiesen.

## 31. Haftungsverhältnisse und sonstige finanzielle Verpflichtungen

Haftungsverhältnisse betreffen potenzielle zukünftige Ereignisse, deren Eintritt zu einer Verpflichtung führen würde. Zum Bilanzstichtag werden diese als unwahrscheinlich angesehen, können aber nicht ausgeschlossen werden.

Haftungsverhältnisse resultieren ausschließlich aus Verpflichtungen, die gegenüber Dritten übernommen wurden, und entfielen auf:

Haftungsverhältnisse

[Tabelle 4.92]

|                                                                     | 31.12.2009 | 31.12.2010 |
|---------------------------------------------------------------------|------------|------------|
|                                                                     | in Mio €   | in Mio €   |
| Gewährleistungsverträge                                             | 74         | 53         |
| Nicht eingezahlter Teil des Gründungsstocks der Bayer-Pensionskasse | 490        | 390        |
| Sonstige                                                            | 111        | 247        |
| <b>Gesamt</b>                                                       | <b>675</b> | <b>690</b> |

Neben den Rückstellungen, Verbindlichkeiten und Haftungsverhältnissen bestehen sonstige finanzielle Verpflichtungen. Diese resultieren insbesondere aus Leasing- und langfristigen Mietverträgen.

Die nicht abgezinsten künftigen Mindestleasing- und -mietzahlungen aus Operating-Leasing beliefen sich auf 595 Mio € (Vorjahr: 606 Mio €). Die entsprechenden Zahlungsverpflichtungen sind folgendermaßen fällig:

Operating-Leasing

[Tabelle 4.93]

| Fälligkeiten im Jahr | 31.12.2009 | Fälligkeiten im Jahr | 31.12.2010 |
|----------------------|------------|----------------------|------------|
|                      | in Mio €   |                      | in Mio €   |
| 2010                 | 166        | 2011                 | 182        |
| 2011                 | 132        | 2012                 | 132        |
| 2012                 | 99         | 2013                 | 94         |
| 2013                 | 72         | 2014                 | 71         |
| 2014                 | 59         | 2015                 | 49         |
| 2015 und später      | 78         | 2016 und später      | 67         |
| <b>Gesamt</b>        | <b>606</b> | <b>Gesamt</b>        | <b>595</b> |

Aus bereits erteilten Aufträgen für begonnene oder geplante Investitionsvorhaben (Bestellobligo) bestanden Verpflichtungen in Höhe von 231 Mio € (Vorjahr: 441 Mio €).



Darüber hinaus hat der Konzern mehrere Kooperationen mit externen Partnern vereinbart, im Rahmen derer verschiedene Forschungsprojekte finanziert werden oder – in Abhängigkeit vom Erreichen bestimmter Meilensteine oder anderer fest vereinbarter Bedingungen – andere Zahlungsverpflichtungen im Wert von 1.132 Mio € (Vorjahr: 661 Mio €) übernommen wurden. Zum 31. Dezember 2010 wird erwartet, dass die entsprechenden Zahlungen folgendermaßen zu leisten sind, vorausgesetzt, die Meilensteine sind erreicht oder die anderen vereinbarten Bedingungen sind erfüllt:

**Andere Verpflichtungen**

[Tabelle 4.94]

| Fälligkeiten im Jahr | 31.12.2009 | Fälligkeiten im Jahr | 31.12.2010   |
|----------------------|------------|----------------------|--------------|
|                      | in Mio €   |                      | in Mio €     |
| 2010                 | 154        | 2011                 | 119          |
| 2011                 | 114        | 2012                 | 235          |
| 2012                 | 83         | 2013                 | 154          |
| 2013                 | 39         | 2014                 | 200          |
| 2014                 | 43         | 2015                 | 120          |
| 2015 und später      | 228        | 2016 und später      | 304          |
| <b>Gesamt</b>        | <b>661</b> | <b>Gesamt</b>        | <b>1.132</b> |

## 32. Rechtliche Risiken

Als international tätiges Unternehmen mit einem heterogenen Portfolio ist der Bayer-Konzern einer Vielzahl von rechtlichen Risiken ausgesetzt. Hierzu können insbesondere Risiken aus den Bereichen Produkthaftung, Wettbewerbs- und Kartellrecht, Patentrecht, Steuerrecht sowie Umweltschutz gehören. Die Ergebnisse von gegenwärtig anhängigen bzw. künftigen Verfahren sind nicht vorhersagbar, sodass aufgrund von gerichtlichen oder behördlichen Entscheidungen oder der Vereinbarung von Vergleichen Aufwendungen entstehen können, die nicht oder nicht in vollem Umfang durch Versicherungsleistungen abgedeckt sind und wesentliche Auswirkungen auf unser Geschäft und seine Ergebnisse haben können.

Die nachfolgend beschriebenen Rechtsverfahren stellen die aus heutiger Sicht wesentlichen Rechtsrisiken dar und sind nicht als abschließende Auflistung zu verstehen.

### HealthCare

#### PRODUKTBEZOGENE AUSEINANDERSETZUNGEN

**Magnevist®:** Am 1. Februar 2011 waren in den USA ca. 230 Klagen bezüglich des gadoliniumhaltigen Kontrastmittels Magnevist® anhängig und Bayer zugestellt. Diese oder gleichgelagerte Klagen wurden auch gegen drei weitere Hersteller von gadoliniumhaltigen Kontrastmitteln in den USA erhoben.

Die Kläger machen geltend, dass Patienten infolge der Anwendung von Magnevist® bei bildgebenden diagnostischen Verfahren an nephrogener systemischer Fibrose (NSF) erkrankt seien. NSF ist eine seltene, schwere Erkrankung, die zu Lähmungen führen und in manchen Fällen auch tödlich verlaufen kann. Die Kläger behaupten insbesondere, das Produkt sei fehlerhaft, Bayer habe die mit Magnevist® verbundenen Risiken gekannt oder hätte sie kennen müssen und habe nicht angemessen vor diesen gewarnt. Sie verlangen Schaden- und Strafschadenersatz und begründen dies u. a. mit einer Haftung unabhängig vom Vorliegen eines konkreten Verschuldens, aus Fahrlässigkeit sowie Gewährleistungsbruch.

Sämtliche vor Bundesgerichten anhängige Verfahren wurden im Rahmen einer sogenannten Multidistrict Litigation (MDL) zur gemeinsamen vorprozessualen Koordinierung zusammengeführt. Am 1. Februar 2011 hatte Bayer mit ca. 220 Klägern ohne Anerkennung einer Haftung Vergleiche

erzielt. Von Fall zu Fall wird Bayer eine vergleichsweise Beilegung von einzelnen Rechtsstreitigkeiten weiterhin in Betracht ziehen. Bayer ist jedoch überzeugt, gute Argumente zur Verteidigung gegen die erhobenen Ansprüche zu haben, und wird sich weiterhin entschieden gegen alle Ansprüche zur Wehr setzen, für die ein Vergleich nicht in Frage kommt. Bayer hat angemessene bilanzielle Vorsorgemaßnahmen getroffen.

**Trasylol®** (Aprotinin) ist ein Medikament zur Kontrolle des Blutverlustes bei koronaren Bypass-Operationen. Am 1. Februar 2011 waren insgesamt ca. 1.100 in den USA erhobene Klagen sowie drei Sammelklagen aus Kanada zugestellt und anhängig. Die Kläger machen insbesondere geltend, die Verabreichung von Trasylol® habe zu Gesundheitsbeeinträchtigungen wie Nierenversagen oder zum Tode und zu wirtschaftlichen Schäden geführt. Die Kläger verlangen Schaden- und Strafschadenersatz und behaupten u. a., Bayer habe diese Risiken gekannt oder hätte sie kennen müssen. Bayer hafte, da vor den Risiken bei der Verwendung von Trasylol® nicht angemessen gewarnt worden sei. Sämtliche vor US-Bundesgerichten anhängige Verfahren wurden im Rahmen einer sogenannten Multidistrict Litigation (MDL) zur gemeinsamen vorprozessualen Koordinierung zusammengeführt.

Ohne Anerkennung einer Haftung hat Bayer bis zum 1. Februar 2011 mit ca. 440 Klägern Vergleichsvereinbarungen geschlossen. Von Fall zu Fall wird Bayer eine vergleichsweise Beilegung von einzelnen Rechtsstreitigkeiten auch zukünftig in Betracht ziehen. Bayer ist jedoch überzeugt, gute Argumente zur Verteidigung gegen die erhobenen Ansprüche zu haben, und wird sich weiterhin entschieden gegen alle Ansprüche zur Wehr setzen, für die ein Vergleich nicht in Frage kommt. Bayer hat angemessene bilanzielle Vorsorgemaßnahmen getroffen.

**Yasmin®/YAZ®:** Bis zum 1. Februar 2011 wurden Bayer ca. 6.850 in den USA anhängige Klagen bezüglich Bayers oraler Kontrazeptiva Yasmin® und YAZ® zugestellt. In den Klagen wird geltend gemacht, Yasmin® und/oder YAZ® bzw. Ocella® und/oder Gianvi®, von Barr Laboratories Inc. in den USA vermarktete generische Versionen von Yasmin® bzw. YAZ®, hätten bei Anwenderinnen zu Gesundheitsschäden geführt, in Einzelfällen auch mit Todesfolge (Einzelheiten zu den generischen Versionen von Yasmin® und YAZ® nachfolgend unter „Patentrechtliche Auseinandersetzungen“). Nach Vereinbarungen von 2008 und 2010 betreibt Bayer die Produkthaftungsverfahren für Ocella® und Gianvi®, Bayer behält mit bestimmten Ausnahmen die Produkthaftung für das von Bayer gelieferte Ocella®-Medikament, und die Parteien haben die potenzielle künftige Produkthaftung hinsichtlich des von Bayer gelieferten Gianvi®-Medikaments aufgeteilt. Die Kläger verlangen Schaden- und Strafschadenersatz und behaupten insbesondere, dass Bayer die angeblichen Risiken kannte oder hätte kennen müssen, und dass Bayer hafte, da Bayer die Risiken bei der Verwendung von Yasmin® und/oder YAZ® nicht offengelegt oder nicht angemessen vor diesen Risiken gewarnt habe. Außerdem wurden Bayer drei Sammelklagen zugestellt. In diesen Klagen, die vom Gericht noch nicht als Sammelklagen zugelassen wurden, werden wirtschaftliche Schäden, in einer Klage auch körperliche Schäden, geltend gemacht. Eine dieser Sammelklagen wurde im Namen der privaten Krankenversicherer in den USA erhoben und von einem Bundesgericht rechtskräftig abgewiesen. Sämtliche vor Bundesgerichten in den USA anhängige Verfahren wurden im Rahmen einer sogenannten Multidistrict Litigation (MDL) zur gemeinsamen vorprozessualen Koordinierung zusammengeführt. 13 weitere Sammelklagen wurden Bayer bis zum 1. Februar 2011 in Kanada zugestellt. Mit zusätzlichen Verfahren ist zu rechnen. Bayer ist überzeugt, gute Argumente zur Verteidigung gegen die erhobenen Ansprüche zu haben, und beabsichtigt, sich entschieden zur Wehr zu setzen. Für erwartete Verteidigungskosten hat Bayer auf der Grundlage der vorliegenden Informationen bilanzielle Vorsorgemaßnahmen getroffen.

Im Zusammenhang mit den oben genannten Angelegenheiten zu Magnevist®, Trasylol® und Yasmin®/YAZ® ist Bayer in industrieüblichem Umfang gegen Produkthaftungsrisiken versichert.

#### WETTBEWERBSRECHTLICHE VERFAHREN

**Cipro®:** Gegen Bayer sind seit 2000 in den USA etwa 40 Sammelklagen und eine Einzelklage im Zusammenhang mit Cipro® anhängig gemacht worden, einem Medikament zur Behandlung von Infektionskrankheiten. Die Kläger werfen Bayer und anderen ebenfalls beklagten Unternehmen vor, dass ein zwischen Bayer und der Firma Barr Laboratories, Inc. im Jahr 1997 geschlossener Vergleich zur Beendigung eines Patentrechtsstreits wettbewerbswidrig gewesen sei. Damit sei ab

1997 die Vermarktung von generischem Ciprofloxacin verhindert worden. Die Kläger beanspruchen insbesondere entsprechenden Schadenersatz, der nach amerikanischem Recht verdreifacht werden solle. Das betreffende Patent wurde nach dem Vergleich mit Barr durch das us-Patentamt nochmals überprüft und bestätigt und anschließend mehrfach erfolgreich in Verfahren vor us-Bundesgerichten verteidigt. Es ist inzwischen abgelaufen.

Sämtliche vor Bundesgerichten anhängige Verfahren wurden zur vorprozessualen Koordination an ein Bundesgericht in New York übertragen und von diesem 2005 abgewiesen. Die Abweisung der von indirekten Käufern von Cipro<sup>®</sup> erhobenen Klagen wurde von einem Berufungsgericht in Washington D.C. rechtskräftig bestätigt. Ein New Yorker Berufungsgericht hat 2010 auch die Abweisung der Klagen direkter Käufer von Cipro<sup>®</sup> bestätigt. Ein Antrag der Kläger auf eine erneute Verhandlung wurde abgelehnt. Die Kläger haben sich mit einem Rechtsmittel an den u.s. Supreme Court gewendet. Vor einigen bundesstaatlichen Gerichten sind weitere Klagen anhängig. Bayer ist überzeugt, gute Argumente zur Verteidigung gegen die erhobenen Ansprüche zu haben, und beabsichtigt, sich in diesen Verfahren entschieden zur Wehr zu setzen.

#### PATENTRECHTLICHE AUSEINANDERSETZUNGEN

**Yasmin<sup>®</sup>:** 2005 hat Bayer vor einem us-Bundesgericht eine Patentverletzungsklage gegen Barr Pharmaceuticals, Inc. und Barr Laboratories, Inc. eingereicht. Darin wird Barr wegen seiner angestrebten generischen us-Version des oralen Verhütungsmittels Yasmin<sup>®</sup> von Bayer Patentverletzung vorgeworfen. 2008 hat das us-Bundesgericht Bayers Patent '531 für Yasmin<sup>®</sup> für ungültig erklärt. Dieses Urteil hat das zuständige us-Berufungsgericht 2009 bestätigt. Im Mai 2010 hat der u.s. Supreme Court Bayers Rechtsmittel zurückgewiesen.

Bayer und Barr Laboratories, Inc. haben 2008 eine Liefer- und Lizenzvereinbarung über eine generische Version von Yasmin<sup>®</sup> unterzeichnet, die Barr unter der Marke Ocella<sup>®</sup> ausschließlich in den USA vermarktet. Bayer erhält für die Produktlieferung einen feststehenden Prozent-Anteil an den hiermit von Barr erzielten Umsätzen. Die Vereinbarung wird von der amerikanischen Wettbewerbsaufsicht (Federal Trade Commission – „FTC“) untersucht.

2008 hat Bayer zwei und 2010 drei weitere Mitteilungen über einen abgekürzten Zulassungsantrag für ein neues Arzneimittel (Abbreviated New Drug Application – „ANDA“) erhalten, mit dem die Firmen Watson Laboratories Inc., Sandoz Inc., Lupin Ltd., Famy Care Ltd. und Sun Pharma Global FZE jeweils die Genehmigung zur Vermarktung einer generischen Version von Bayers oralem Kontrazeptivum Yasmin<sup>®</sup> in den Vereinigten Staaten verfolgen. Bayer hat deswegen vor einem us-Bundesgericht Patentverletzungsklage gegen Watson, Sandoz und Lupin eingereicht. In ihren Klageerwiderungen behaupten Watson und Sandoz u. a., verschiedene Bayer-Patente seien unwirksam. Sandoz behauptet außerdem, dass Bayer und Barr Vereinbarungen getroffen haben, die wettbewerbswidrig seien und gegen us-amerikanisches Kartell- und Wettbewerbsrecht verstoßen würden. Im September 2010 hat das us-Bundesgericht Bayers Patentverletzungsklage gegen Watson und Sandoz abgewiesen. Bayer wird Berufung einlegen.

**YAZ<sup>®</sup>:** 2007 und 2008 erhielt Bayer Mitteilungen, dass Barr Laboratories, Inc., Watson Laboratories Inc. und Sandoz Inc., 2010 auch Lupin Ltd. und Sun Pharma Global FZE jeweils ein ANDA-Zulassungsverfahren hinsichtlich einer generischen Version des oralen Verhütungsmittels YAZ<sup>®</sup> von Bayer in den USA eingeleitet haben. Bayer hat vor us-Bundesgerichten Patentverletzungsklagen gegen Watson, Sandoz, Lupin und Sun Pharma Global eingereicht, die die Verletzung bestimmter Bayer-Patente geltend machen. In der Klageerwiderung behauptet Sandoz u. a., dass Bayer und Barr Vereinbarungen getroffen haben, die wettbewerbswidrig seien und gegen us-amerikanisches Kartell- und Wettbewerbsrecht verstoßen würden.

2008 haben Bayer und Barr vereinbart, dass Bayer Barr die Lizenz erteilt, ab Juli 2011 in den USA eine generische Version von YAZ<sup>®</sup> vermarkten zu können. Bayer wird dafür das Medikament liefern. Bayer erhält festgelegte Prozent-Anteile an den hiermit von Barr erzielten Umsätzen. Im Dezember 2008 wurde Barr von Teva Pharmaceutical Industries Ltd. übernommen. Im Juni 2010 verkündete Teva den Beginn der Vermarktung von Gianvi<sup>®</sup> in den USA, einer generischen Version von YAZ<sup>®</sup>. Rechtsstreitigkeiten zwischen Bayer und Teva/Barr vor mehreren Bundesgerichten in den USA wegen Verletzung bestimmter Bayer-Patente durch den Vertrieb von Gianvi<sup>®</sup> wurden im

Dezember 2010 verglichen. Bayer und Barr haben die o. a. – derzeit ebenfalls von der FTC untersucht – Lizenz- und Belieferungsvereinbarung von 2008 ergänzt, und Bayer beliefert Barr seit Dezember 2010 mit dem Medikament für Gianvi®.

**Blutzuckermessgeräte:** Abbott Laboratories hat in den USA im Jahr 2005 u. a. gegen Bayer wegen angeblicher Verletzung zweier Abbott-Patente durch Blutzuckermessgeräte Klage erhoben. Betroffen sind Geräte, die Bayer als Teil seines Ascensia®-Contour®-Systems bzw. seines dex®- und Autodisc®-Systems verkauft. Das Ascensia®-Contour®-System wird an Bayer von einem japanischen Hersteller geliefert, der das Produkt ursprünglich entworfen hatte. Der Hersteller ist vertraglich gegenüber Bayer zu einer Freistellung verpflichtet. Abbott erhob 2006 einen weiteren Anspruch wegen Patentverletzung durch die Geräte, die Bayer als Teil seines dex®- und Autodisc®-Systems verkauft. Insoweit hat Bayer keinen Freistellungsanspruch. Das Gericht und danach ein Berufungsgericht haben zugunsten von Bayer entschieden, aber hinsichtlich eines Aspektes der Entscheidung zu einem der Patente hat das Berufungsgericht eine erneute Verhandlung zugelassen, die im November 2010 stattfand. Die Entscheidung des Berufungsgerichts steht noch aus.

2007 haben Roche Diagnostics Operations und Corange International in den USA u. a. gegen Bayer wegen angeblicher Verletzung zweier Roche-Patente durch Blutzuckermessgeräte Klage erhoben. Zwei der von den Vorwürfen betroffenen Geräte verkauft Bayer als Teil seiner Breeze®-2- und Contour®-Systeme. Nach Auffassung von Bayer sind diese Patente Bestandteil einer Lizenzvereinbarung zwischen den Parteien. Die Klagen wurden nach dieser früheren Lizenzvereinbarung an ein Schiedsgericht verwiesen. Roche hat vier weitere Patente in das Schiedsgerichtsverfahren eingeführt und behauptet, Contour®-Systeme von Bayer würden diese Patente verletzen. Die Entscheidung des Schiedsgerichts steht noch aus.

**Betaferon®/Betaseron®:** Im Mai 2010 hat Bayer eine Klage bei einem Bundesgericht in den USA gegen Biogen Idec MA Inc. eingereicht. Bayer beantragt die gerichtliche Feststellung, dass ein im Jahr 2009 der Firma Biogen erteiltes Patent unwirksam ist und mit Bayers Produktion und Vermarktung von Betaseron®, ein Bayer-Medikament zur Behandlung von Multipler Sklerose, nicht verletzt wird. Biogen behauptet, Bayer verletze das Patent mit der Produktion und dem Vertrieb von Betaseron® und Extavia®, und hat Bayer entsprechend verklagt. Betaseron® wird in den USA von Bayer hergestellt und vertrieben. Extavia® ist ebenfalls ein Medikament zur Behandlung von Multipler Sklerose und wird von Bayer hergestellt, aber in den USA von Novartis Pharmaceuticals Corporation vertrieben, einer weiteren Beklagten in diesem Verfahren.

**Levitra®:** 2009 reichte Bayer bei einem US-Bundesgericht eine Patentverletzungsklage gegen Teva Pharmaceuticals USA Inc. und Teva Pharmaceutical Industries Ltd. ein. Zuvor hatte Bayer 2009 eine Mitteilung über einen ANDA-Antrag erhalten, mit dem Teva die Genehmigung zur Vermarktung einer generischen Version von Levitra® vor Auslaufen des Patents in den Vereinigten Staaten verfolgt. Levitra® ist Bayers Arzneimittel zur Behandlung erektiler Dysfunktion. Bayer beabsichtigt, seine Rechte mit Nachdruck zu verfolgen.

In den oben genannten patentrechtlichen Auseinandersetzungen ist Bayer überzeugt, gute Argumente zu haben, und beabsichtigt, sich entschieden zur Wehr zu setzen.

#### WEITERE RECHTLICHE VERFAHREN

**Großhandelspreise in den USA:** Bayer ist wie eine Reihe anderer Pharma-Gesellschaften in den USA in mehreren Verfahren auf Schadenersatz, Strafschadenersatz und Herausgabe von Gewinn verklagt worden. Die Klagen werden mit der angeblichen Manipulation bei der Angabe von Großhandelspreisen bzw. dem günstigsten Preis für verschreibungspflichtige pharmazeutische Produkte begründet. Kläger sind u. a. auch Bundesstaaten. Bayer ist überzeugt, gute Argumente zu haben, und beabsichtigt, sich entschieden zur Wehr zu setzen. In geeigneten Fällen hat Bayer Vergleiche geschlossen und wird diese Möglichkeit auch künftig in Betracht ziehen.

**Verfahren mit ehemaligen Aktionären der Bayer Schering Pharma AG:** 2008 wurde der Squeeze-out der ehemaligen Minderheitsaktionäre der Bayer Schering Pharma AG wirksam. Wie in solchen Fällen üblich, haben mehrere Aktionäre Spruchverfahren eingeleitet, um die Angemessenheit der von Bayer für die Übertragung der Aktien im Rahmen des Squeeze-out geleisteten Barabfindung

gerichtlich prüfen zu lassen. Die Angemessenheit von Barabfindung und Ausgleich, die Bayer im Zusammenhang mit dem Beherrschungs- und Gewinnabführungsvertrag der Bayer Schering Pharma AG aus dem Jahr 2006 gezahlt hat, wird ebenfalls gerichtlich geprüft.

**Regorafenib:** 2009 hat die Firma Onyx Pharmaceuticals, Inc. vor einem Bezirksgericht in Kalifornien Klage eingereicht und behauptet, dass Onyx aus einem 1994 abgeschlossenen Kooperationsvertrag Rechte an einem bestimmten Wirkstoff (Regorafenib) habe, welchen Bayer in Krebs-Indikationen entwickelt. Unter der Vereinbarung von 1994 haben die Parteien gemeinsam Nexavar® entwickelt, ein Medikament gegen Nieren- und Leberkrebs. Onyx macht auch Schadenersatz hinsichtlich Nexavar® geltend. Bayer ist überzeugt, gute Argumente zu haben, und beabsichtigt, sich entschieden zur Wehr zu setzen. Eine mündliche Verhandlung soll im Juni 2011 beginnen.

**Compliance-Untersuchung:** Bayer untersucht intern, ob eine frühere operative Einheit einer us-Tochtergesellschaft dem us-Gesetz gegen korrupte Praktiken im Ausland (Foreign Corrupt Practices Act) entsprochen hat. Dieses Gesetz verbietet u. a. Korruptionszahlungen von in den USA ansässigen Personen an Regierungsbeamte außerhalb der Vereinigten Staaten. Die Einheit, die Bayers Geschäft mit Plasmaderivaten betrieben hatte, wurde 2005 verkauft. Ursprünglich lag der Schwerpunkt der internen Untersuchung auf Verkäufen dieser Einheit an bestimmte Länder in Osteuropa und im Mittleren Osten. Um die Compliance-Bemühungen von Bayer zu bewerten, prüft Bayer auch Verkaufspraktiken in anderen Einheiten und Ländern. Bayer hat die us-Regierung freiwillig über die interne Untersuchung informiert. Die us-Regierung hat nicht mitgeteilt, ob und ggf. welche Maßnahmen sie gegen Bayer oder einzelne Personen ergreifen oder ob sie ihre eigene Untersuchung einleiten will. Da die interne Untersuchung noch andauert, können noch keine Aussagen über die Ergebnisse und daraus eventuell für Bayer erwachsende Belastungen getroffen werden.

## CropScience

**Verfahren wegen gentechnisch veränderter Reispflanzen:** Insgesamt waren Bayer am 1. Februar 2011 ca. 570 Klagen mit insgesamt rund 11.300 Klägern bekannt, die gegen verschiedene Bayer-Gesellschaften im Zusammenhang mit gentechnisch verändertem Reis in den USA anhängig sind. Die Zahl der Kläger wurde anhand der Gesamtzahl der in den Schriftsätzen als Kläger genannten Personen berechnet. Die Zahl der Kläger erlaubt jedoch keine Rückschlüsse auf die Zahl der betroffenen landwirtschaftlichen Betriebe. Reisfarmen in den Vereinigten Staaten bestehen oft aus mehreren rechtlichen Einheiten. In einigen Fällen hat nur eine einzelne Person geklagt, in anderen treten sämtliche dieser rechtlichen Einheiten als Kläger auf. Außerdem werden sowohl Personengesellschaften als auch deren einzelne Gesellschafter gezählt, wenn sie als Kläger in den Klageschriften aufgeführt werden.

Die Kläger bringen vor, sie hätten wirtschaftliche Verluste erlitten, nachdem Spuren von gentechnisch verändertem Reis in Stichproben von konventionellem, in den USA angebautem Langkornreis festgestellt wurden. Sämtliche vor Bundesgerichten anhängige Verfahren sind 2006 im Rahmen einer Multidistrict Litigation (MDL) zur Koordination an ein Bundesgericht in St. Louis, Missouri, verwiesen worden. Der Antrag der Kläger auf Zulassung einer Sammelklage wurde 2008 von diesem Gericht abgelehnt und eine Zwischenberufung der Kläger hiergegen vom Berufungsgericht nicht zugelassen.

Bei der Entwicklung des gentechnisch veränderten Reises wurden von 1998 bis 2001 in Zusammenarbeit mit Dritten in den USA Freilandversuche durchgeführt. Der gentechnisch veränderte Reis wurde nie vermarktet. Das us-Landwirtschaftsministerium usda und die us-Lebens- und Arzneimittelbehörde fda haben bestätigt, dass der gentechnisch veränderte Reis sicher für die Gesundheit, für den Einsatz in Nahrungs- und Futtermitteln wie auch für die Umwelt ist. Außerdem hat die usda 2007 einen Bericht über ihre Untersuchung darüber veröffentlicht, wie der gentechnisch veränderte Reis in die kommerzielle Reisversorgung gelangt sein könnte. Die usda konnte keine Ursache ermitteln und hat entschieden, dass sie keine rechtlichen Maßnahmen gegen Bayer oder andere Personen ergreifen werde.

Zwischen Dezember 2009 und Juli 2010 hat Bayer sechs Verfahren vor amerikanischen Geschworenengerichten verhandelt, drei in dem oben erwähnten MDL-Verfahren und drei in verschiedenen Gerichten im US-Bundesstaat Arkansas. Diese sechs Fälle umfassten insgesamt 23 landwirtschaftliche Betriebe mit 91 Klägern aus Missouri, Louisiana, Mississippi und Arkansas und wurden nach dem jeweils anwendbaren Recht dieser vier Bundesstaaten beurteilt. Die Kläger machten Schadenersatz wegen verschiedener wirtschaftlicher Nachteile, einschließlich des Verfalls der Preise für Langkornreis, Kosten aufgrund von Ein- und Ausfuhrbeschränkungen sowie Kosten aufgrund der Sicherstellung einer anderweitigen Belieferung geltend. Die Jurys haben Bayer zur Zahlung von insgesamt ca. 11,5 Mio US-Dollar an kompensatorischem Schadenersatz verurteilt. In zwei der Verfahren an Gerichten in Arkansas wurde außerdem von den Jurys Strafschadenersatz festgesetzt (rund 0,5 Mio US-Dollar in einem Verfahren und rund 42 Mio US-Dollar in dem anderen). Bei einem Geschworenen-Verfahren im Rahmen der MDL im Juli 2010, das Kläger aus Louisiana betraf, sah das in diesem Fall anwendbare Recht von Louisiana einen Strafschadenersatz nicht vor. Die übrigen drei Jurys haben Ansprüche der Landwirte auf Strafschadenersatz zurückgewiesen.

Bayer hält die bisherigen Entscheidungen hinsichtlich des Haftungsgrundes und des zuerkannten Schadenersatzes und Strafschadenersatzes für falsch und wird, soweit nicht bereits geschehen, Rechtsmittel einlegen.

Ein ursprünglich für September 2010 angesetztes Verfahren an einem Gericht in Arkansas wurde aus prozessualen Gründen auf unbestimmte Zeit vertagt. Ein weiteres für 2010 im Rahmen der MDL angesetztes Geschworenen-Verfahren mit drei klagenden landwirtschaftlichen Betrieben, die acht Kläger aus Texas umfassten, wurde im Oktober 2010 verglichen. Nach dem Vergleich erhalten die Kläger insgesamt 290.000 US-Dollar. Das erste für 2011 im Rahmen der MDL angesetzte Geschworenen-Verfahren, das vier klagende landwirtschaftliche Betriebe mit 18 Klägern aus Mississippi umfasste, wurde ebenfalls verglichen. Nach dem Vergleich erhalten die Kläger insgesamt 873.000 US-Dollar. Im Februar 2011 hat sich Bayer außerdem mit mehreren klagenden landwirtschaftlichen Betrieben und/oder Verpächtern von Anbauflächen aus Arkansas, insgesamt 33 Kläger, auf Zahlung einer Gesamtsumme von ca. 4 Mio US-Dollar geeinigt. Dieses Geschworenungsverfahren wird allerdings fortgesetzt hinsichtlich der Klage der Riceland Foods, Inc., einer Reismühle aus Arkansas. Weitere Verfahren sind für das Jahr 2011 sowohl in der MDL als auch an einzelstaatlichen Gerichten terminiert.

Die Fakten und die Art und Höhe des verlangten Schadenersatzes unterscheiden sich von Fall zu Fall erheblich. Das Ergebnis der ersten verhandelten Fälle erlaubt nach Auffassung des Unternehmens keine unmittelbaren Rückschlüsse auf den Ausgang der weiteren Verfahren. Das Unternehmen ist bereit, ohne Anerkennung einer Haftung mit Reisfarmern und sonstigen Klägern über angemessenen Schadenersatz für wirtschaftliche Schäden im Zusammenhang mit seinem gentechnisch veränderten Reis zu sprechen, wird sich aber weiterhin in allen Fällen entschieden zur Wehr setzen, in denen einvernehmliche Lösungen auf dieser Grundlage nicht möglich sind.

Ohne Anerkennung einer Rechtspflicht hat Bayer ferner die Ansprüche von fünf europäischen Reisimporteuren, einem US-Reisexporteur und einer US-Reismühle zu einem Gesamtbetrag von rund 51,6 Mio US-Dollar verglichen.

Das Unternehmen hat angemessene bilanzielle Maßnahmen insbesondere für Rechts- und Verteidigungskosten sowie ein angestrebtes Vergleichsprogramm ergriffen.

**Asbest:** Ein weiteres Risiko kann aus Asbest-Klagen in den USA erwachsen. In vielen Fällen behaupten die Kläger, Bayer und andere Beklagte hätten Dritte in zurückliegenden Jahrzehnten auf dem eigenen Werksgelände beschäftigt, ohne vor den bekannten Gefahren von Asbest hinreichend gewarnt oder geschützt zu haben. Außerdem ist eine Bayer-Beteiligungsgesellschaft in den USA Rechtsnachfolgerin von Gesellschaften, die bis 1976 Asbest-Produkte verkauften. Im Falle einer Haftung besteht insoweit eine vollständige Freistellung durch Union Carbide. Bayer ist überzeugt, gute Argumente zur Verteidigung gegen die erhobenen Ansprüche zu haben, und beabsichtigt, sich in diesen Verfahren entschieden zur Wehr zu setzen.



## MaterialScience

### KARTELLVERFAHREN KAUTSCHUKPRODUKTE

Gegen Gesellschaften des Bayer-Konzerns sind zivilrechtliche Schadenersatzklagen in Europa und Australien wegen angeblicher kartellrechtlicher Verstöße auf dem Gebiet verschiedener Kautschukprodukte anhängig. Die zugrunde liegenden Sachverhalte waren im Wesentlichen Gegenstand mittlerweile beendeter behördlicher Untersuchungen.

Seit 2008 hat eine vorwiegend aus Reifenherstellern bestehende Klägergruppe bei dem High Court of Justice in London Schadenersatzklagen gegen Bayer und andere Hersteller von Butadien-Kautschuk und Emulsionsstyrol-Butadien-Kautschuk erhoben. Die Kläger verlangen Schadenersatz aufgrund angeblicher Verstöße gegen europäisches Wettbewerbsrecht auf den Märkten für Butadien-Kautschuk und Emulsionsstyrol-Butadien-Kautschuk. In einem Verfahren vor einem Mailänder Gericht, dem Bayer als Nebenintervenient beigetreten war, sollte das Fehlen einer Haftung festgestellt werden. Das Gericht hat den Antrag abgewiesen, Bayer hat Berufung eingelegt. Der englische High Court hat sich hinsichtlich der Klagen für zuständig erklärt, und das Hauptverfahren befindet sich in einer frühen Phase der Sachverhaltsermittlung.

Bayer hatte über einen Anspruch der The Goodyear Tire & Rubber Company wegen angeblicher Kartellrechtsverstöße im Bereich Butadien-Kautschuk und Styrol-Butadien-Kautschuk berichtet. Diesen Fall hat Bayer im März 2010 ohne Anerkennung einer Haftung verglichen.

In Australien wurde gegen Bayer im Jahr 2007 eine Sammelklage wegen angeblicher Kartellrechtsverstöße bei Kautschukchemikalien eingereicht. Das Verfahren befindet sich in einer frühen Phase der Sachverhaltsermittlung.

Bayer verteidigt sich gegen die in Europa und in Australien anhängigen Klagen. Das finanzielle Risiko aus diesen Verfahren ist derzeit nicht bezifferbar, sodass insoweit eine bilanzielle Vorsorge nicht getroffen werden konnte.

Es kann nicht ausgeschlossen werden, dass weitere zivilrechtliche Schadenersatzklagen im Zusammenhang mit früher berichteten, mittlerweile beendeten behördlichen Kartellverfahren erhoben werden.

### VERFAHREN WEGEN BEHAUPTETER PERSONENSCHÄDEN

**MDI:** In den USA wurde Bayer zusammen mit anderen Herstellern, Großhändlern und Anwendern in mehreren Fällen verklagt. Die Kläger verlangen Schadenersatz für körperliche Schäden, die angeblich durch Berührung mit MDI-basierten und im Bergbau eingesetzten Erzeugnissen verursacht wurden. In einem Fall behaupten die Kläger, sie seien auch mit TDI- und HDI-basierten Produkten in Berührung gekommen. Im August 2010 haben sich die Parteien – ohne Anerkennung einer Haftung durch Bayer – mit Ausnahme von einem Fall im Grundsatz auf einen Vergleich geeinigt. Die finalen Vereinbarungen sind noch nicht vollständig unterzeichnet. Bayer hat angemessene bilanzielle Maßnahmen ergriffen. Den verbliebenen Fall betrachtet Bayer nicht mehr als wesentlich.

## Erläuterungen zur Kapitalflussrechnung

Die Kapitalflussrechnung zeigt, wie sich die Zahlungsmittel und Zahlungsmitteläquivalente (Liquidität) des Bayer-Konzerns im Laufe des Berichtsjahres durch Mittelzu- und -abflüsse veränderten. Die Auswirkungen der Veränderung des Konsolidierungskreises sind dabei gesondert ausgewiesen. In Übereinstimmung mit IAS 7 (Statement of Cash Flows) wird zwischen Zahlungsströmen aus operativer und investiver Tätigkeit sowie aus Finanzierungstätigkeit unterschieden.

Die von den ausländischen Beteiligungsgesellschaften ausgewiesenen Beträge werden grundsätzlich zu Monatsdurchschnittskursen umgerechnet. Hiervon abweichend wird die Liquidität wie in der Bilanz zum Stichtagskurs angesetzt. Der Einfluss von Wechselkursänderungen auf die Zahlungsmittel wird gesondert gezeigt.

Die zum Cashflow aus operativer Tätigkeit (Netto-Cashflow) korrespondierenden Größen werden sowohl in der Bilanz als auch in der Gewinn- und Verlustrechnung detailliert ausgewiesen. Dies betrifft z. B. die Zu- und Abflüsse im Working Capital und den Ausweis der korrespondierenden Vorräte, Forderungen und Verbindlichkeiten in der Bilanz. Das Ergebnis nach Steuern stellt den Aufsattpunkt für die Kapitalflussrechnung dar.

### 33. Zu-/Abfluss aus operativer Geschäftstätigkeit

Der Brutto-Cashflow in Höhe von 4.771 Mio € (Vorjahr: 4.658 Mio €) zeigt den betrieblichen Einnahmenüberschuss vor jeglicher Mittelbindung. Er wird in der Anhangangabe [1] nach Segmenten gegliedert.

Im Zufluss aus operativer Geschäftstätigkeit (Netto-Cashflow) von 5.773 Mio € (Vorjahr: 5.375 Mio €) wurden die Veränderungen im Working Capital und im übrigen Nettovermögen sowie sonstige nicht zahlungswirksame Vorgänge berücksichtigt.

Im Geschäftsjahr 2010 wurden ertragsteuerlich bedingte Zahlungsmittelabflüsse in Höhe von 838 Mio € im Netto-Cashflow erfasst (Vorjahr: 500 Mio €). Die Veränderungen der Ertragsteuerverbindlichkeiten, -rückstellungen und -erstattungsansprüche werden in der Zeile „Veränderung übriges Nettovermögen/Sonstige nicht zahlungswirksame Vorgänge“ ausgewiesen.

### 34. Zu-/Abfluss aus investiver Tätigkeit

Im Rahmen der investiven Tätigkeit sind im Jahr 2010 Mittel in Höhe von 2.414 Mio € abgeflossen (Vorjahr: 1.501 Mio €).

Für den Erwerb von Sachanlagen und immateriellen Vermögenswerten wurde im Jahr 2010 ein Betrag von 1.514 Mio € (Vorjahr: 1.575 Mio €) aufgewendet. In den Ausgaben für Sachanlagen und immaterielle Vermögenswerte sind u. a. Ausgaben im Zusammenhang mit dem Ausbau des chinesischen Standorts in Shanghai, China, für die Herstellung von Polymer-Produkten sowie für Vermarktungsrechte im Pharmabereich enthalten. Diesen Ausgaben standen Einnahmen aus dem Verkauf von Sachanlagen und anderen Vermögenswerten in Höhe von 61 Mio € (Vorjahr: 98 Mio €) gegenüber.

Des Weiteren wurden Auszahlungen für Akquisitionen in Höhe von 31 Mio € (Vorjahr: 308 Mio €) vorgenommen. Dies betraf u. a. den Erwerb der Artificial Muscle, Inc., USA, für den einschließlich übernommener Zahlungsmittel 16 Mio € abgeflossen sind. Der Vorjahreswert umfasste im Wesentlichen den Erwerb der Athenix Corp., USA, für den einschließlich übernommener Zahlungsmittel 247 Mio € abgeflossen sind. Weitere Erläuterungen zu Akquisitionen und Desinvestitionen erfolgen in der Anhangangabe [6.2/6.3].

## 35. Zu-/Abfluss aus Finanzierungstätigkeit

Aus Finanzierungstätigkeit sind 3.230 Mio € abgeflossen (Vorjahr: 3.246 Mio €). Die Netto-Kreditrückzahlung belief sich auf 1.544 Mio € (Vorjahr: 1.442 Mio €).

Für Dividendenzahlungen sind 1.160 Mio € (Vorjahr: 973 Mio €) abgeflossen. Im Vorjahreswert sind 101 Mio € erstattete Kapitalertragsteuer für konzerninterne Dividendenausschüttungen enthalten. Die Zinsausgaben einschließlich Zinssicherungsgeschäften sanken auf 915 Mio € (Vorjahr: 1.206 Mio €), während die Zinseinnahmen aus Zinssicherungsgeschäften 398 Mio € (Vorjahr: 421 Mio €) betrugen.

## 36. Zahlungsmittel und Zahlungsmitteläquivalente

Die Zahlungsmittel und Zahlungsmitteläquivalente umfassen Kassenbestand, Schecks und Guthaben bei Kreditinstituten. Wegen ihrer hohen Liquidität sind gemäß IAS 7 (Statement of Cash Flows) ebenfalls Finanztitel mit einer Restlaufzeit von nicht mehr als drei Monaten gerechnet vom Erwerbszeitpunkt in dieser Position enthalten. Zahlungsmittel und Zahlungsmitteläquivalente betrugen zum 31. Dezember 2010 2.840 Mio € (Vorjahr: 2.725 Mio €).

## Sonstige Erläuterungen

### 37. Honorare des Abschlussprüfers

Für die erbrachten Dienstleistungen der PricewaterhouseCoopers Aktiengesellschaft Wirtschaftsprüfungsgesellschaft sind folgende Honorare als Aufwand erfasst worden:

Honorare des Abschlussprüfers

[Tabelle 4.95]

|                               | 2009     | 2010     |
|-------------------------------|----------|----------|
|                               | in Mio € | in Mio € |
| Abschlussprüfungsleistungen   | 5        | 5        |
| Andere Bestätigungsleistungen | 2        | 2        |
| Steuerberatungsleistungen     | -        | -        |
| Sonstige Leistungen           | -        | 1        |
| <b>Gesamt</b>                 | <b>7</b> | <b>8</b> |

Die Honorare für Abschlussprüfungsleistungen umfassen vor allem Vergütungen für die Konzernabschlussprüfung sowie für die Prüfung der Abschlüsse der Bayer AG und ihrer inländischen Tochterunternehmen. Honorare für andere Bestätigungsleistungen beziehen sich in erster Linie auf Prüfungen des internen Kontrollsystems einschließlich projektbegleitender Prüfungen im Zusammenhang mit der Einführung neuer EDV-Systeme sowie die prüferische Durchsicht von Zwischenabschlüssen.

### 38. Beziehungen zu nahe stehenden Unternehmen und Personen

Nahe stehende Unternehmen und Personen im Sinne des IAS 24 (Related Party Disclosures) sind juristische oder natürliche Personen, die auf die Bayer AG und deren Tochterunternehmen Einfluss nehmen können oder der Kontrolle oder einem maßgeblichen Einfluss durch die Bayer AG bzw. deren Tochterunternehmen unterliegen. Dazu gehören insbesondere nicht konsolidierte Tochtergesellschaften, Gemeinschafts- und assoziierte Unternehmen sowie Versorgungspläne und ferner die Organmitglieder der Bayer AG, deren Bezüge der Anhangangabe [39] sowie dem Vergütungsbericht im Lagebericht zu entnehmen sind.

Geschäfte mit nicht konsolidierten Tochtergesellschaften, Gemeinschafts- und assoziierten Unternehmen sowie Versorgungsplänen werden zu Bedingungen durchgeführt, wie sie zwischen fremden Dritten üblich sind.

Die folgende Tabelle stellt das Lieferungs- und Leistungsvolumen mit nahe stehenden Unternehmen, die im Bayer-Konzernabschluss anteilmäßig oder at-equity einbezogen oder zu fortgeführten Anschaffungskosten bilanziert wurden, sowie mit Versorgungsplänen dar:

Beziehungen zu nahe stehenden Unternehmen und Personen

[Tabelle 4.96]

|                                        | 2009     |             |                   | 2010     |             |                   |
|----------------------------------------|----------|-------------|-------------------|----------|-------------|-------------------|
|                                        | Erträge  | Forderungen | Verbindlichkeiten | Erträge  | Forderungen | Verbindlichkeiten |
|                                        | in Mio € | in Mio €    | in Mio €          | in Mio € | in Mio €    | in Mio €          |
| Nicht konsolidierte Tochterunternehmen | 19       | 13          | -33               | 12       | 8           | -37               |
| Gemeinschaftsunternehmen               | 32       | 3           | -1                | 35       | 2           | -                 |
| Assoziierte Unternehmen                | 24       | 10          | -25               | 31       | 10          | -37               |
| Versorgungspläne                       | -        | 460         | -89               | -        | 560         | -84               |

Gegenüber der Bayer-Pensionskasse hat sich die Bayer AG zur Bereitstellung eines Genussrechtskapitals in Höhe von 150 Mio € verpflichtet, das zum 31. Dezember 2010 weiterhin in voller Höhe begeben war. Das der Bayer-Pensionskasse im Jahr 2008 erstmals gewährte Gründungsstockdarlehen betrug zum 31. Dezember 2010 410 Mio € (Vorjahr: 310 Mio €).

Im Geschäftsjahr 2010 wurden wie im Vorjahr keine Wertberichtigungen auf Forderungen gegenüber nahe stehenden Unternehmen und Personen erfasst.

## 39. Gesamtbezüge des Vorstands und des Aufsichtsrats sowie gewährte Kredite

Die nachfolgende Tabelle zeigt die Vorstandsvergütung gemäß IFRS. Diese umfasst neben der direkt geleisteten Vergütung den beizulegenden Zeitwert der auf der kurzfristigen variablen Vergütung basierten, aktienkursindizierten Vergütung, der 50 % der kurzfristigen variablen Vergütung für das Jahr 2010 entspricht. Die Gesamtvergütung gemäß IFRS umfasst im Gegensatz zu den Gesamtbezügen nach HGB nicht den beizulegenden Zeitwert der neu gewährten aktienorientierten Entlohnung, sondern die im laufenden Jahr erdiente aktienbasierte Vergütung zuzüglich der Wertänderung bisheriger noch nicht ausgezahlter Ansprüche aus aktienorientierter Entlohnung. Darüber hinaus sind die Aufwendungen für im laufenden Jahr erdiente Pensionszusagen hinzuzurechnen.

Vorstandsvergütung (nach IFRS)

[Tabelle 4.97]

|                                                                                                                 | 2009          | 2010          |
|-----------------------------------------------------------------------------------------------------------------|---------------|---------------|
|                                                                                                                 | in T €        | in T €        |
| Summe direkt geleisteter Vergütung                                                                              | 8.830         | 10.019        |
| Beizulegender Zeitwert der auf der kurzfristigen variablen Vergütung basierten, aktienkursindizierten Vergütung | -             | 2.621         |
| Langfristige variable Vergütung (im laufenden Jahr erdiente aktienbasierte Vergütung)                           | 1.623         | 1.079         |
| Wertänderung bisheriger Ansprüche aus aktienbasierter Vergütung                                                 | 1.079         | -226          |
| Aufwendungen für im laufenden Jahr erdiente Pensionszusagen                                                     | 1.364         | 2.847         |
| <b>Gesamtvergütung (nach IFRS)</b>                                                                              | <b>12.896</b> | <b>16.340</b> |

Zur näheren Erläuterung siehe Vergütungsbericht im Lagebericht.

Die Vorstandspensionsbezüge der früheren Vorstandsmitglieder und ihrer Hinterbliebenen betrugen 13.351 T € (Vorjahr: 11.273 T €). Der Betrag für 2010 enthielt Aufwendungen aus Ansprüchen auf Pensionsurlaub eines ehemaligen Vorstandsmitglieds in Höhe von 1.850 T €. Die Pensionsrückstellungen für die früheren Vorstandsmitglieder und ihre Hinterbliebenen betrugen 131.599 T € (Vorjahr: 107.223 T €).

Die Bezüge des Aufsichtsrats betrugen 2.290 T € (Vorjahr: 2.295 T €). Hiervon entfielen auf variable Vergütungsbestandteile 763 T € (Vorjahr: 765 T €).

Zum 31. Dezember 2010 bestanden keine Kredite an Mitglieder des Vorstands bzw. des Aufsichtsrats. Im Berichtsjahr erfolgten keine Darlehensablösungen.

Leverkusen, 15. Februar 2011  
Bayer Aktiengesellschaft

Der Vorstand

# Bericht der Unternehmensleitung

Der Jahresabschluss des Bayer-Konzerns wurde von der Unternehmensleitung aufgestellt, die für Inhalt und Objektivität der dort vermittelten Informationen verantwortlich ist. Dies gilt in gleicher Weise für den mit dem Konzernabschluss in Übereinstimmung stehenden Konzernlagebericht, der mit dem Lagebericht der Bayer AG zusammengefasst ist.

Die Berichterstattung erfolgt unter Beachtung der vom International Accounting Standards Board, London, veröffentlichten und von der Europäischen Union in europäisches Recht übernommenen Regeln.

Durch die seitens der Konzernleitung veranlasste Einrichtung wirksamer interner Kontrollsysteme bei den in den Konzernabschluss einbezogenen Unternehmen sowie durch Maßnahmen zur entsprechenden Aus- und Weiterbildung der Mitarbeiter werden die Ordnungsmäßigkeit sowie die Übereinstimmung der Unternehmensberichterstattung mit den gesetzlichen Vorschriften gewährleistet. Integrität und gesellschaftliche Verantwortung bilden die Grundlage für die Unternehmensgrundsätze und ihre Anwendung in Bereichen wie Umweltschutz, Qualität, Produkt- und Verfahrenssicherheit sowie Einhaltung von lokalen Gesetzen und Vorschriften. Die Umsetzung dieser Grundsätze sowie die Zuverlässigkeit und Funktionsfähigkeit der Kontrollsysteme werden kontinuierlich von der Konzernrevision weltweit geprüft.

Der Vorstand führt den Konzern im Interesse der Aktionäre und im Bewusstsein seiner Verantwortung gegenüber Mitarbeitern, Gesellschaft und Umwelt in allen Ländern, in denen wir tätig sind. Unser erklärtes Ziel ist es, die uns anvertrauten Ressourcen so einzusetzen, dass der Wert des gesamten Bayer-Konzerns gesteigert wird.

Dem Beschluss der Hauptversammlung folgend, hat der Aufsichtsrat die PricewaterhouseCoopers Aktiengesellschaft Wirtschaftsprüfungsgesellschaft als unabhängigen Abschlussprüfer mit der Prüfung des gemäß § 315a HGB nach den International Financial Reporting Standards, wie sie in der EU anzuwenden sind, aufgestellten Konzernabschlusses sowie der zusätzlichen handelsrechtlichen Angaben und des zusammengefassten Lageberichts beauftragt. Im Hinblick auf die Vorschriften des Gesetzes zur Kontrolle und Transparenz im Unternehmensbereich (KonTraG) hat die Wirtschaftsprüfungsgesellschaft außerdem das vorhandene Risikomanagementsystem geprüft und insgesamt den uneingeschränkten Bestätigungsvermerk erteilt. In Anwesenheit des Abschlussprüfers ist der Konzernabschluss einschließlich des zusammengefassten Lageberichts und des Prüfungsberichts im Prüfungsausschuss und in der Bilanzsitzung des Aufsichtsrats eingehend erörtert worden. Darüber berichtet der Aufsichtsrat gesondert im Bericht des Aufsichtsrats im Bayer-Geschäftsbericht 2010.

Der Vorstand



# Versicherung der gesetzlichen Vertreter

Wir versichern nach bestem Wissen, dass gemäß den anzuwendenden Rechnungslegungsgrundsätzen der Konzernabschluss ein den tatsächlichen Verhältnissen entsprechendes Bild der Vermögens-, Finanz- und Ertragslage des Konzerns vermittelt und im zusammengefassten Lagebericht der Geschäftsverlauf einschließlich des Geschäftsergebnisses und die Lage des Bayer-Konzerns sowie der Bayer AG so dargestellt sind, dass ein den tatsächlichen Verhältnissen entsprechendes Bild vermittelt wird, sowie die wesentlichen Chancen und Risiken der voraussichtlichen Entwicklung des Bayer-Konzerns bzw. der Bayer AG beschrieben sind.

Leverkusen, 15. Februar 2011  
Bayer Aktiengesellschaft

Der Vorstand



Dr. Marijn Dekkers  
Vorsitzender

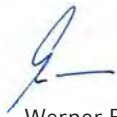

Werner Baumann

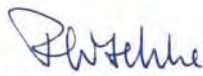

Dr. Wolfgang Plischke



Dr. Richard Pott

# Bestätigungsvermerk des Konzernabschlussprüfers

Wir haben den von der Bayer Aktiengesellschaft, Leverkusen, aufgestellten Konzernabschluss – bestehend aus Gewinn- und Verlustrechnung und Gesamtergebnisrechnung, Bilanz, Kapitalflussrechnung, Eigenkapitalveränderungsrechnung und Anhang – sowie den Konzernlagebericht der Bayer Aktiengesellschaft, der mit dem Lagebericht der Gesellschaft zusammengefasst ist, für das Geschäftsjahr vom 1. Januar bis 31. Dezember 2010 geprüft. Die Aufstellung von Konzernabschluss und zusammengefasstem Lagebericht nach den IFRS, wie sie in der EU anzuwenden sind, und den ergänzend nach § 315a Absatz 1 HGB anzuwendenden handelsrechtlichen Vorschriften liegt in der Verantwortung des Vorstands der Gesellschaft. Unsere Aufgabe ist es, auf der Grundlage der von uns durchgeführten Prüfung eine Beurteilung über den Konzernabschluss und den zusammengefassten Lagebericht abzugeben.

Wir haben unsere Konzernabschlussprüfung nach § 317 HGB unter Beachtung der vom Institut der Wirtschaftsprüfer (IDW) festgestellten deutschen Grundsätze ordnungsmäßiger Abschlussprüfung unter ergänzender Beachtung der International Standards on Auditing (ISA) vorgenommen. Danach ist die Prüfung so zu planen und durchzuführen, dass Unrichtigkeiten und Verstöße, die sich auf die Darstellung des durch den Konzernabschluss unter Beachtung der anzuwendenden Rechnungslegungsvorschriften und durch den zusammengefassten Lagebericht vermittelten Bildes der Vermögens-, Finanz- und Ertragslage wesentlich auswirken, mit hinreichender Sicherheit erkannt werden. Bei der Festlegung der Prüfungshandlungen werden die Kenntnisse über die Geschäftstätigkeit und über das wirtschaftliche und rechtliche Umfeld des Konzerns sowie die Erwartungen über mögliche Fehler berücksichtigt. Im Rahmen der Prüfung werden die Wirksamkeit des rechnungslegungsbezogenen internen Kontrollsystems sowie Nachweise für die Angaben im Konzernabschluss und im zusammengefassten Lagebericht überwiegend auf der Basis von Stichproben beurteilt. Die Prüfung umfasst die Beurteilung der Jahresabschlüsse der in den Konzernabschluss einbezogenen Unternehmen, der Abgrenzung des Konsolidierungskreises, der angewandten Bilanzierungs- und Konsolidierungsgrundsätze und der wesentlichen Einschätzungen des Vorstands sowie die Würdigung der Gesamtdarstellung des Konzernabschlusses und des zusammengefassten Lageberichts. Wir sind der Auffassung, dass unsere Prüfung eine hinreichend sichere Grundlage für unsere Beurteilung bildet.

Unsere Prüfung hat zu keinen Einwendungen geführt.

Nach unserer Beurteilung aufgrund der bei der Prüfung gewonnenen Erkenntnisse entspricht der Konzernabschluss den IFRS, wie sie in der EU anzuwenden sind, und den ergänzend nach § 315a Absatz 1 HGB anzuwendenden handelsrechtlichen Vorschriften und vermittelt unter Beachtung dieser Vorschriften ein den tatsächlichen Verhältnissen entsprechendes Bild der Vermögens-, Finanz- und Ertragslage des Konzerns. Der zusammengefasste Lagebericht steht in Einklang mit dem Konzernabschluss, vermittelt insgesamt ein zutreffendes Bild von der Lage des Konzerns und stellt die Chancen und Risiken der zukünftigen Entwicklung zutreffend dar.

Essen, 24. Februar 2011

PricewaterhouseCoopers  
Aktiengesellschaft  
Wirtschaftsprüfungsgesellschaft

Armin Slotta  
Wirtschaftsprüfer

Anne Böcker  
Wirtschaftsprüferin

# Weitere Informationen

---

|                                  |     |
|----------------------------------|-----|
| Organe der Gesellschaft          | 256 |
| Organisationsübersicht           | 259 |
| Glossar                          | 260 |
| Stichwortverzeichnis             | 264 |
| Nachhaltiges Engagement weltweit | 266 |

---

# Organe der Gesellschaft

## HERMANN JOSEF STRENGER

Ehrenvorsitzender des Aufsichtsrats der Bayer AG, Leverkusen

## Aufsichtsrat

Mitglieder des Aufsichtsrats bekleiden die nachstehend genannten Mandate in gesetzlich zu bildenden Aufsichtsräten und vergleichbaren Kontrollgremien von Wirtschaftsunternehmen (Stand: 31.12.2010; bei Ausscheiden aus dem Aufsichtsrat während eines Geschäftsjahres beziehen sich die Angaben auf das Datum des Ausscheidens):

### DR. MANFRED SCHNEIDER

Köln  
geb. 21.12.1938

Vorsitzender des Aufsichtsrats  
seit April 2002

- Daimler AG
- Linde AG (Vorsitz)
- RWE AG (Vorsitz)
- TUI AG

### THOMAS DE WIN

Köln  
geb. 21.11.1958

Stellvertretender Vorsitzender des Aufsichtsrats, Mitglied des Aufsichtsrats seit April 2002

Vorsitzender des Konzernbetriebsrats Bayer  
Vorsitzender des Gesamtbetriebsrats Bayer

- Bayer MaterialScience AG

### DR. PAUL ACHLEITNER

München  
geb. 28.9.1956

Mitglied des Aufsichtsrats seit April 2002  
Mitglied des Vorstands der Allianz SE

- Allianz Deutschland AG (bis Ende Juni 2010)
- Allianz Global Investors AG
- Allianz Investment Management SE, Vorsitzender des Verwaltungsrats
- Daimler AG (seit April 2010)
- RWE AG
- Henkel AG & Co. KGaA, Gesellschafterausschuss

### ANDRÉ AICH

Berlin  
geb. 17.2.1969

Mitglied des Aufsichtsrats seit April 2007

Mitglied des Betriebsrats der Bayer Schering Pharma AG\*

### WILLY BEUMANN

Wuppertal  
geb. 12.4.1956

Mitglied des Aufsichtsrats seit Februar 2007

Vorsitzender des Betriebsrats Bayer – Standort Wuppertal

- Bayer Schering Pharma AG\*

### DR. CLEMENS BÖRSIG

Frankfurt am Main  
geb. 27.7.1948

Mitglied des Aufsichtsrats seit April 2007

Vorsitzender des Aufsichtsrats der Deutsche Bank AG

- Daimler AG
- Deutsche Bank AG (Vorsitz)
- Emerson Electric Co.
- Linde AG

### DR.-ING. THOMAS FISCHER

Krefeld  
geb. 27.8.1955

Mitglied des Aufsichtsrats seit Oktober 2005

Vorsitzender des Konzernsprecher-ausschusses Bayer

- Bayer MaterialScience AG

### PETER HAUSMANN

Winsen/Aller  
geb. 13.2.1954

Mitglied des Aufsichtsrats seit April 2006

Mitglied des geschäftsführenden Hauptvorstands der IG Bergbau, Chemie, Energie

- Evonik Services GmbH

### PROF. DR.-ING. E.H. HANS-OLAF HENKEL

Berlin  
geb. 14.3.1940

Mitglied des Aufsichtsrats seit April 2002

Honorarprofessor an der Universität Mannheim

- Continental AG
- Daimler Luft- und Raumfahrt Holding AG
- Heliad Equity Partners GmbH & Co. KGaA
- Ringier AG
- SMS GmbH

### REINER HOFFMANN

Brüssel, Belgien  
geb. 30.5.1955

Mitglied des Aufsichtsrats seit Oktober 2006

Landesbezirksleiter der IG Bergbau, Chemie, Energie Nordrhein

- Evonik Services GmbH (seit September 2010)
- SASOL Germany GmbH

### DR. RER. POL. KLAUS KLEINFELD

New York, USA  
geb. 6.11.1957

Mitglied des Aufsichtsrats seit April 2005

Chairman und Chief Executive Officer der ALCOA Inc.

### PETRA KRONEN

Krefeld  
geb. 22.8.1964

Mitglied des Aufsichtsrats seit Juli 2000

Vorsitzende des Betriebsrats Bayer – Standort Uerdingen

- Bayer MaterialScience AG (stellv. Vorsitz)

\* Umfirmierung in Bayer Pharma AG beschlossen.

**DR. RER. NAT. HELMUT PANKE**

München

geb. 31.8.1946

Mitglied des Aufsichtsrats seit April 2007

Mitglied verschiedener Aufsichtsräte

- Microsoft Corporation
- Singapore Airlines Limited
- UBS AG

**HUBERTUS SCHMOLDT**

Soltau

geb. 14.1.1945

Mitglied des Aufsichtsrats seit Januar 1995

Mitglied verschiedener Aufsichtsräte

- BP Europe SE (vorm. Deutsche BP AG) (stellv. Vorsitz bis Mai 2010)
- Dow Olefinverbund GmbH (stellv. Vorsitz)
- E.ON AG
- RAG AG (stellv. Vorsitz)
- RAG Deutsche Steinkohle AG (stellv. Vorsitz)

**DR.-ING. EKKEHARD D. SCHULZ**

Krefeld

geb. 24.7.1941

Mitglied des Aufsichtsrats seit April 2005

Vorsitzender des Vorstands der Thyssen-Krupp AG

- AXA Konzern AG
- MAN SE (stellv. Vorsitz)
- RWE AG
- ThyssenKrupp Elevator AG (Vorsitz)
- ThyssenKrupp Steel Europe AG (Vorsitz)

**DR. KLAUS STURANY\*\***

Dortmund

geb. 23.10.1946

Mitglied des Aufsichtsrats seit April 2007

Mitglied verschiedener Aufsichtsräte

- Hannover Rückversicherung AG
- Heidelberger Druckmaschinen AG
- Österreichische Industrieholding AG
- Sulzer AG

**ROSWITHA SÜSSELBECK**

Leichlingen

geb. 19.3.1954

Mitglied des Aufsichtsrats seit Juli 2010

Stellvertretende Vorsitzende des Betriebsrats Bayer – Standort Leverkusen

- Bayer CropScience AG (stellv. Vorsitz seit Dezember 2010)

**DIPL.-ING. DR.-ING. E.H. JÜRGEN WEBER**

Hamburg

geb. 17.10.1941

Mitglied des Aufsichtsrats seit April 2003

Vorsitzender des Aufsichtsrats Deutsche Lufthansa AG

- Allianz Lebensversicherungs-AG
- Deutsche Lufthansa AG (Vorsitz)
- Loyalty Partner GmbH (Vorsitz)
- Tetra Laval Group
- Voith GmbH
- Willy Bogner GmbH & Co. KGaA (Vorsitz)

**PROF. DR. DR. H.C. ERNST-LUDWIG WINNACKER**

München

geb. 26.7.1941

Mitglied des Aufsichtsrats seit April 1997

Generalsekretär des Human Frontier Science Program (Straßburg)

- Medigene AG (Vorsitz)
- Wacker Chemie AG

**OLIVER ZÜHLKE**

Solingen

geb. 11.12.1968

Mitglied des Aufsichtsrats seit April 2007

Vorsitzender des Betriebsrats Bayer – Standort Leverkusen

Vorsitzender Bayer Europa-Forum

**KARL-JOSEF ELLRICH**

Dormagen

geb. 5.10.1949

Mitglied des Aufsichtsrats bis Ende Juni 2010

Vorsitzender des Konzernbetriebsrats Bayer (bis Ende Mai 2010)

Vorsitzender des Betriebsrats Bayer – Standort Dormagen (bis Januar 2010)

- Bayer CropScience AG (stellv. Vorsitz bis Ende Juni 2010)

Ständige Ausschüsse des Aufsichtsrats der Bayer AG (Stand: 31.12.2010)

**PRÄSIDIUM/VERMITTLUNGS-AUSSCHUSS**

Schneider (Vorsitz), Achleitner, Schmoldt, de Win

**PRÜFUNGS-AUSSCHUSS**

Sturany (Vorsitz), Fischer, Hausmann, Henkel, Schneider, de Win

**PERSONAL-AUSSCHUSS**

Schneider (Vorsitz), Beumann, Kronen, Weber

**NOMINIERUNGS-AUSSCHUSS**

Schneider (Vorsitz), Achleitner

\*\* Unabhängiges und sachverständiges Mitglied im Sinne von § 100 Abs. 5 AktG.

## Vorstand

Mitglieder des Vorstands bekleiden die nachstehend genannten Mandate in gesetzlich zu bildenden Aufsichtsräten und vergleichbaren Kontrollgremien von Wirtschaftsunternehmen (Stand: 31.12.2010, bei Ausscheiden aus dem Vorstand während eines Geschäftsjahres beziehen sich die Angaben auf das Datum des Ausscheidens):

### DR. MARIJN DEKKERS

geb. 22.9.1957

Vorsitzender (seit 1.10.2010)

Mitglied des Vorstands seit 1.1.2010,  
bestellt bis 31.12.2014

### WERNER BAUMANN

geb. 6.10.1962

Mitglied des Vorstands seit 1.1.2010,  
bestellt bis 31.12.2012

- Bayer Business Services GmbH  
(Vorsitz seit 1.5.2010)
- Bayer CropScience AG  
(Vorsitz seit 1.5.2010)

### DR. WOLFGANG PLISCHKE

geb. 15.9.1951

Mitglied des Vorstands seit 1.3.2006,  
bestellt bis 28.2.2014

- ARK Therapeutics, Non-Executive  
Director (bis 16.8.2010)
- Bayer MaterialScience AG (Vorsitz)
- Bayer Technology Services GmbH  
(Vorsitz)
- Bayer Innovation GmbH,  
Gesellschafterausschuss (Vorsitz)
- Bayer Real Estate GmbH,  
Gesellschafterausschuss (Vorsitz)

### DR. RICHARD POTT

geb. 11.5.1953

Mitglied des Vorstands seit 1.5.2002,  
bestellt bis 30.4.2012

Arbeitsdirektor

- Bayer Chemicals AG (Vorsitz)
- Bayer HealthCare AG (Vorsitz)
- Bayer Schering Pharma AG\* (Vorsitz)
- Currenta Geschäftsführungs-GmbH  
(Vorsitz)
- Bayer Innovation GmbH,  
Gesellschafterausschuss

### KLAUS KÜHN

geb. 11.2.1952

Mitglied des Vorstands bis 30.4.2010

- Bayer Business Services GmbH  
(Vorsitz bis 30.4.2010)
- Bayer CropScience AG  
(Vorsitz bis 30.4.2010)

### WERNER WENNING

geb. 21.10.1946

Mitglied des Vorstands (Vorsitz) bis  
30.9.2010

- Deutsche Bank AG
- E.ON AG
- HDI V.a.G
- Talanx AG
- Henkel AG & Co. KGaA,  
Gesellschafterausschuss

\* Umfirmierung in Bayer Pharma AG beschlossen



# Organisationsübersicht

Stand: 1. März 2011

[Grafik 5.1]

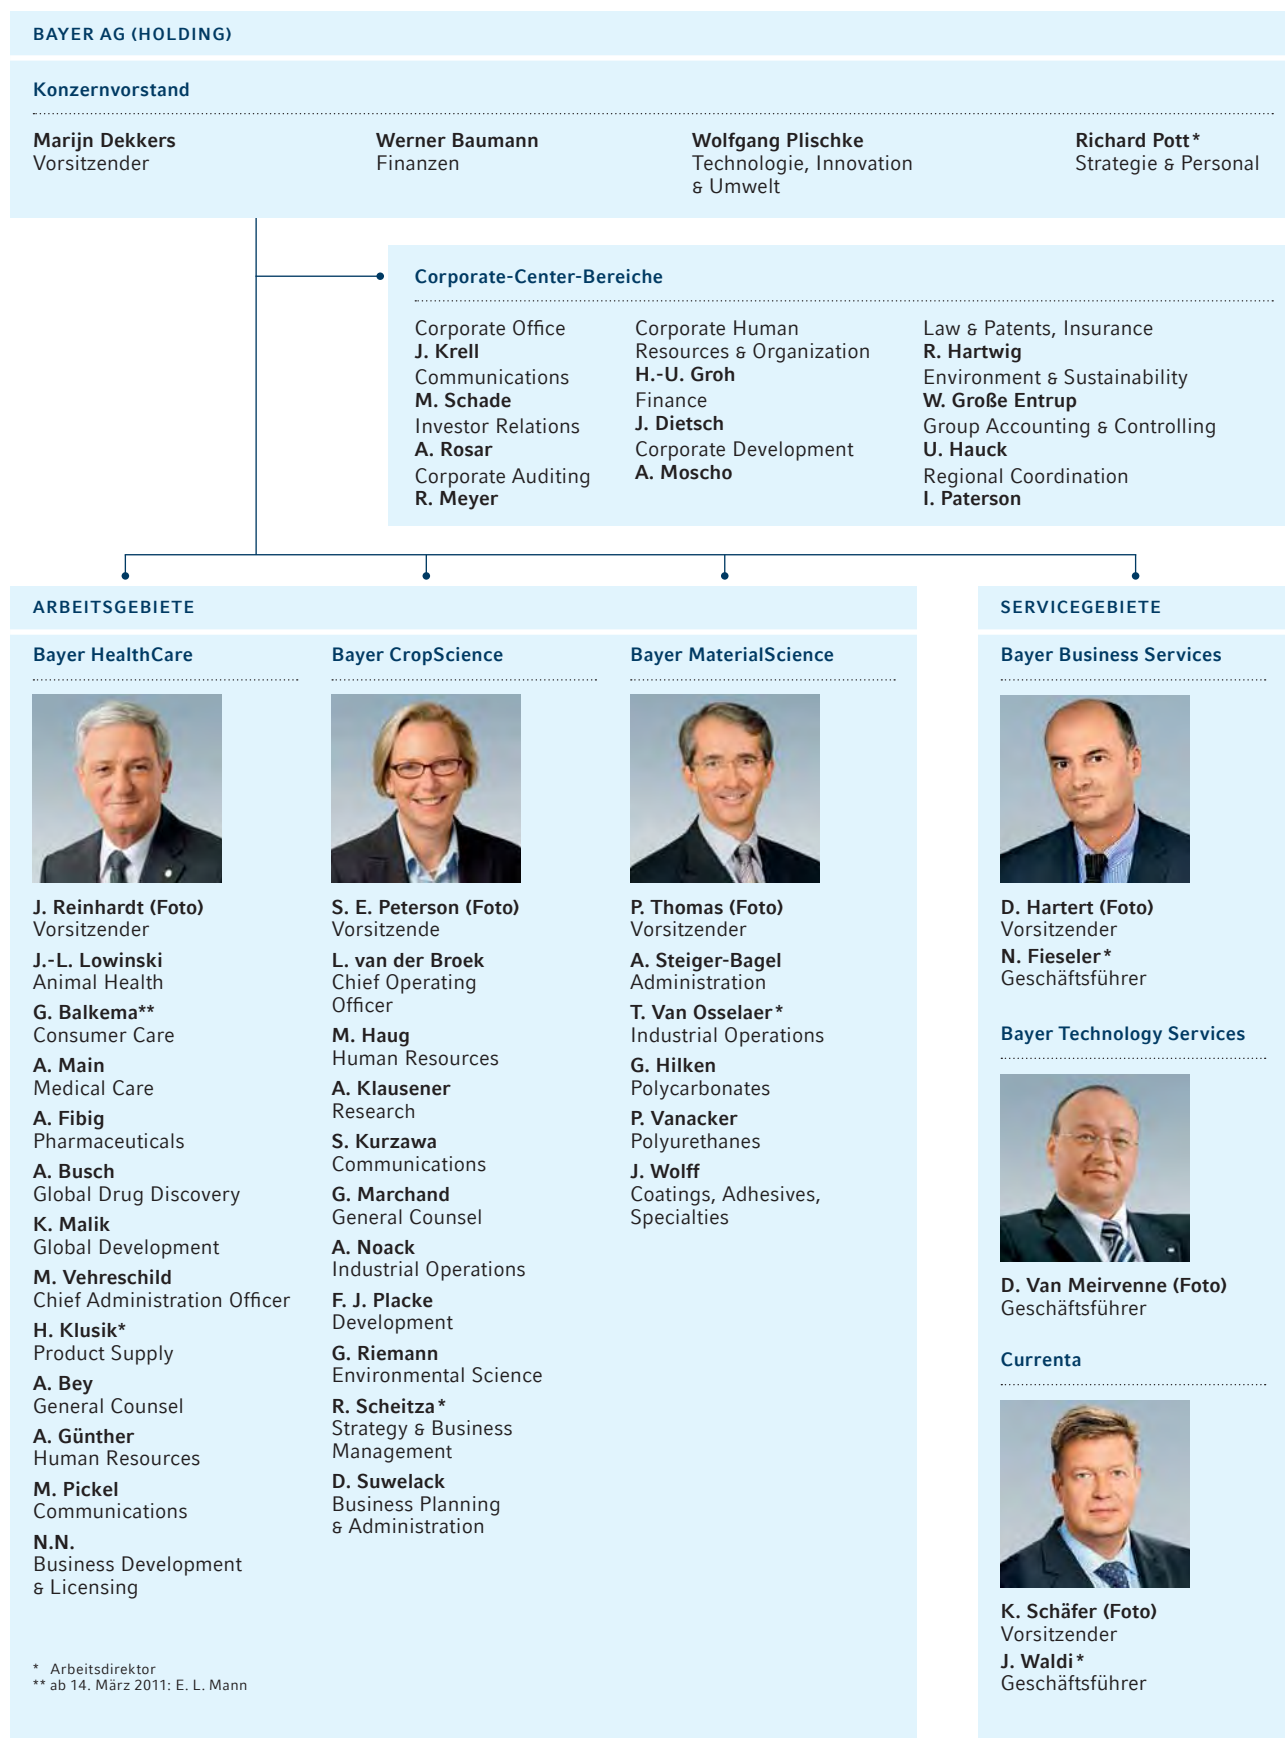

# Glossar

## A

**A1CNow™** handliches Gerät zur Messung des sogenannten Langzeitblutzuckerwerts A1c für die Arztpraxis und Diabetesberatungsstellen

**Adalat®** Medikament zur Behandlung des Bluthochdrucks, Wirkstoff: Nifedipin

**Admire®** Insektizid, Wirkstoff: Imidacloprid, Haupteinsatzgebiete: Gemüse, Reis, Obst, Kartoffeln

**Advantage®-Produktfamilie** (u. a. Advantix®) Antifloh- und Zeckenmittel für Hunde und Katzen, Wirkstoff: Imidacloprid

**Alemtuzumab** humanisierter monoklonaler Antikörper, der derzeit in der Indikation Multiple Sklerose (MS) getestet wird

**Aleve®/Apronax®/Flanax®** Schmerzmittel, Wirkstoff: Naproxen

**Alion®** Herbizid, Wirkstoff: Indaziflam, Haupteinsatzgebiete: Plantagenkulturen, Zuckerrohr

**Alka-Seltzer®** Medikament zur Bindung überschüssiger Magensäure, gegen Schmerzen und Fieber

**Alpharadin™** neuartiges Radiopharmazeutikum mit Alpha-Strahlung in der klinischen Entwicklung zur Behandlung von Knochenmetastasen, Wirkstoff: Radium-223-Chlorid

**Angeliq®** Medikament zur Behandlung von Wechseljahresbeschwerden, Wirkstoffe: Drospirenon, Estradiol

**Antacida** Medikamente gegen Sodbrennen und säurebedingte Magenbeschwerden

**Antra®** Medikament zur Bindung überschüssiger Magensäure, Wirkstoff: Omeprazol

**Arize®** Saatgut für Hybridreis

**Aspirin®** weltbekanntes Schmerzmittel, Wirkstoff: Acetylsalicylsäure

**Aspirin® Cardio** Medikament zur Herzinfarktprophylaxe, Wirkstoff: Acetylsalicylsäure

**Atlantis®** Herbizid, Wirkstoffe: Mesosulfuron-methyl, Iodosulfuron-methyl-sodium, Mefenpyr-diethyl, Haupteinsatzgebiete: Weizen, Triticale, Roggen

**Avalox®/Avelox®** Medikament zur Behandlung von Infektionen der Atemwege, Wirkstoff: Moxifloxacin

**Aviator® Xpro®** Fungizid, Wirkstoffe: Bixafen, Prothioconazol, Haupteinsatzgebiet: Getreide

## B

**Balance®** Herbizid, Wirkstoff: Isoxaflutol, Haupteinsatzgebiete: Mais, Zuckerrohr

**Basta®** Herbizid, Wirkstoff: Glufosinate-Ammonium, Haupteinsatzgebiete: Plantagenkulturen, Kartoffeln, Gemüse

**Bayblend®** Markenname für Polymerblends auf Basis von Polycarbonat und Acrylnitril-Butadien-Styrol

**Baycox®** Medikament zur Kontrolle von Kokzidiose, einer parasitären Infektionskrankheit bei jungen Nutztieren, Wirkstoff: Toltrazuril

**Baycusan® C** Markenname für Polyurethan-Dispersionen für Kosmetik-Formulierungen

**Bayfol Reflex™** Technologie der Bayer-Tochter Artificial Muscle, Inc., für die Herstellung elektronischer Geräte mit haptischer Rückmeldung

**Baymedix®** Markenname für innovative Biomaterialien für die Medizintechnik

**Baytril®** Medikament zur therapeutischen Behandlung schwerer Infektionskrankheiten bei Tieren, Wirkstoff: Enrofloxacin

**Belt®** Insektizid, Wirkstoff: Flubendiamid, Haupteinsatzgebiete: Gemüse, Sojabohnen, Baumwolle, Reis

**Bepanthen®** Pflegelinie zum Schutz der Haut und zur Wundheilung, Wirkstoff: Dexpanthenol

**Bepanthol®** Pflegelinie gegen trockene und gereizte Haut, Wirkstoff: Panthenol

**Bereinigtes Ergebnis je Aktie (Core Earnings per Share – Core EPS)** Das bereinigte Ergebnis je Aktie entspricht dem angepassten bereinigten Konzernergebnis dividiert durch die gewichtete durchschnittliche Anzahl der ausstehenden Stammaktien (unter Berücksichtigung des Effekts aus der potenziellen Wandlung der Pflichtwandelanleihe). Das angepasste bereinigte Konzernergebnis berechnet sich aus dem EBIT zuzüglich Abschreibung auf immaterielle Vermögenswerte zuzüglich außerplanmäßige Abschreibung auf Sachanlagen abzüglich bzw. zuzüglich Sonderinflüsse abzüglich Finanzergebnis abzüglich bzw. zuzüglich Ertragsteuer abzüglich bzw. zuzüglich Ergebnis nach Steuern auf andere Gesellschafter entfallend zuzüglich Finanzierungsaufwendungen im Zusammenhang mit der Pflichtwandelanleihe bereinigt um den Steuereffekt. Das bereinigte Ergebnis je Aktie stellt eine Kennzahl dar, die nach den internationalen Rechnungslegungsvorschriften nicht definiert ist. Das Unternehmen geht davon aus, dem Leser mit dieser Kennzahl ein Bild der Ertragslage zu vermitteln, das im Zeitablauf vergleichbarer und zutreffender informiert.

**Berocca®** Nahrungsergänzungsmittel (Vitamine der B-Gruppe, Vitamin C, Calcium, Magnesium, Zink)

**Betaferon®/Betaseron®** Medikament zur Behandlung der Multiplen Sklerose (MS), Wirkstoff: Interferon beta-1b

**Beyaz®** orales Kontrazeptivum mit Zusatz von Folat, Wirkstoffe: Ethinylestradiol, Drospirenon, Levomefolate Calcium

**Breeze® 2** Blutzuckermessgerät für Menschen mit Diabetes zur einfachen, sicheren und schnellen Anwendung für zu Hause und unterwegs

**Brutto-Cashflow (BCF)** Der Brutto-Cashflow errechnet sich aus dem Ergebnis nach Steuern zuzüglich Ertragsteueraufwand zuzüglich Finanzergebnis abzüglich gezahlter bzw. geschuldeter Ertragsteuern zuzüglich Abschreibungen zuzüglich bzw. abzüglich Veränderungen der Pensionsrückstellungen abzüglich Gewinne bzw. zuzüglich Verluste aus dem Abgang von langfristigen Vermögenswerten abzüglich Gewinne aus der Neubewertung bisheriger Vermögenswerte bei stufenweisem Unternehmenserwerb. Die Position Veränderung der Pensionsrückstellungen umfasst sowohl die Korrektur nicht zahlungswirksamer Effekte im operativen Ergebnis als auch Auszahlungen aufgrund unserer Pensionsverpflichtungen.

**Brutto-Cashflow-Hurdle** Die BCF-Hurdle ist der Betrag, der unter Berücksichtigung der jeweiligen Vermögensausstattung aus dem Mittelzufluss erwirtschaftet werden muss, damit die Reproduktions- und Verzinsungsansprüche der Kapitalgeber erfüllt werden können.

## C

**Canesten®** Medikament gegen Pilzkrankungen der Haut, Wirkstoff: Clotrimazol oder Bifonazol

**Cash Flow Return on Investment (CFRoI)** Der Cashflow-Return-on-Investment bildet das Verhältnis der in der Periode erwirtschafteten Zahlungsmittelüberschüsse (Brutto-Cashflow) zum eingesetzten Kapital (Investitionswert) ab und stellt somit die Kapitalrentabilität der Periode dar.

## D

**Cash Value Added (CVA)** Diese Kennzahl ergibt sich aus der Differenz von Brutto-Cashflow und der Brutto-Cashflow-Hurdle und ist somit der Teil des Brutto-Cashflows, der über die Verzinsungs- und Reproduktionsansprüche hinausgeht. Ist der Cash Value Added positiv, so konnten die Reproduktions- und Verzinsungsansprüche der Kapitalgeber erfüllt werden.

**Cipro®/Ciprobay®/Ciproxin®/Baycip®** Medikament zur Behandlung von Infektionskrankheiten, Wirkstoff: Ciprofloxacin

**Confidor®** Insektizid, Wirkstoff: Imidacloprid, Haupteinsatzgebiete: Gemüse, Reis, Obst, Kartoffeln

**Connect®** Insektizid, Wirkstoffe: Imidacloprid, Beta-cyfluthrin, Haupteinsatzgebiete: Sojabohnen, Mais, Baumwolle

**Contour® USB** Blutzuckermessgerät für Menschen mit Diabetes mit USB-Funktion und integrierter Diabetes-Management-Software

**Corporate Compliance** Corporate Compliance umfasst gesetzliche und unternehmensspezifische Regelungen zum verantwortungsbewussten und gesetzmäßigen Handeln des Unternehmens, der Mitarbeiter sowie der Aufsichts- und Leitungsorgane.

**Corporate Governance** Corporate Governance bezeichnet die langfristig ausgerichtete, verantwortungsvolle und transparente Leitung und Kontrolle eines Unternehmens. In Deutschland enthält der Deutsche Corporate Governance Kodex die wesentlichen Grundsätze zur Leitung und Überwachung börsennotierter Gesellschaften.

**Credit Default Swaps (CDS)** CDS erlauben den Handel mit Kreditrisiken. Sie ähneln Versicherungen gegen Ausfälle von Unternehmensanleihen oder ähnlichen Kreditpapieren.

**Decis®** Insektizid, Wirkstoff: Deltamethrin, Haupteinsatzgebiete: Gemüse, Obst, Getreide, Raps

**Delta Cash Value Added (Delta CVA)** Diese Kennzahl gibt die Veränderung des Cash Value Added von einer Periode zur nächsten wieder. Ein positiver Delta CVA bedeutet, dass die Geschäftseinheit im Vergleich zur Vorperiode Wert geschaffen bzw. weniger Wert vernichtet hat.

**Desmodur®** Produktmarke für verschiedene Isocyanate

**Desmopan®** Produktmarke für thermoplastische Polyurethane

**Desmophen®** Produktmarke für verschiedene Polyester und Polyole für die Herstellung von Polyurethanen

**Desonate®** topisches Glucocorticoid zur Behandlung atopischer Dermatitis, Wirkstoff: Desonid

**Drontal®-Produktlinie** Entwurfmittel für Hunde und Katzen, Wirkstoffe: Kombinationen von Praziquantel, Pyrantel und Febantel

## E

**Earnings before Interest and Taxes (EBIT)** Das EBIT bezeichnet den operativen Gewinn des Unternehmens vor Abzug von Finanzergebnis und Steuern. Im Bayer-Geschäftsbericht bezeichnet der Begriff EBIT das operative Ergebnis gemäß Gewinn- und Verlustrechnung.

**Earnings before Interest, Taxes, Depreciation & Amortization (EBITDA)** EBIT zuzüglich Abschreibungen auf immaterielle Vermögenswerte und Sachanlagen. Das EBITDA, das um Sondereinflüsse bereinigte EBITDA sowie die bereinigte EBITDA-Marge stellen Kennzahlen dar, die nach den internationalen Rechnungslegungsvorschriften nicht definiert sind. Das Unternehmen geht davon aus, dass das EBITDA vor Sondereinflüssen eine geeignetere Kennzahl für

die Beurteilung der operativen Geschäftstätigkeit darstellt, da es weder durch Abschreibungen auf immaterielle Vermögenswerte und Sachanlagen noch durch Sondereinflüsse belastet ist. Das Unternehmen möchte dem Leser mit dieser Kennzahl ein Bild der Ertragslage vermitteln, das im Zeitablauf vergleichbarer und zutreffender informiert.

**EBITDA-Marge vor Sondereinflüssen** Die EBITDA-Marge vor Sondereinflüssen berechnet sich aus der Division vom EBITDA vor Sondereinflüssen durch die Umsatzerlöse.

**EcoCommercial Building** innovatives Geschäftsmodell für integrierte Energie- und Materiallösungen bis hin zum Nullemissionsgebäude mit globaler Ausrichtung. Es wurde in die UNEP-Initiative „Sustainable Buildings & Climate“ (SBCI) aufgenommen.

**Emerion®** Fungizid, Wirkstoff: Penflufen, Haupteinsatzgebiete: Saatgutbehandlung bei Sojabohnen, Mais, Getreide, Raps, Baumwolle, Reis

**Emesto®** Fungizid, Wirkstoff: Penflufen, Haupteinsatzgebiet: Saatgutbehandlung bei Kartoffeln

**EMTN und Multi-Currency-EMTN-Programm** Beim Euro-Medium-Term-Notes (EMTN)-Programm handelt es sich um eine Dokumentationsplattform, die es Bayer ermöglicht, innerhalb kürzester Zeit Wertpapiere auf dem europäischen Kapitalmarkt zur Beschaffung von Fremdkapital zu begeben. Diese können in Luxemburg gelistet oder ungelistet sein. Auch Laufzeit, Währung und Ausstattung können erheblich variieren.

**Ergebnis je Aktie (Earnings per Share – EPS)** Das Ergebnis je Aktie ergibt sich aus der Division des Konzernergebnisses durch die gewichtete durchschnittliche Anzahl der Aktien. Die Berechnung erfolgt nach IAS 33.

**Extavia®** Medikament zur Behandlung der Multiplen Sklerose (MS), Wirkstoff: Interferon beta-1b

## F

**Fandango®** Fungizid, Wirkstoffe: Fluoxastrobin, Prothioconazol, Haupteinsatzgebiet: Getreide

**Ficam®** Insektizid, Bendiocarb, Haupteinsatzgebiet: professionelle Schädlingsbekämpfung außerhalb der Landwirtschaft

**Finale®** Herbizid, Wirkstoff: Glufosinate-Ammonium, Haupteinsatzgebiete: Plantagenkulturen, Kartoffeln, Gemüse

**Flint®** Fungizid, Wirkstoff: Trifloxystrobin, Haupteinsatzgebiete: Obst, Weintrauben, Gemüse

**Florbetaben** neuartiger F18-markierter Tracer in der klinischen Entwicklung zum Nachweis von beta-Amyloid-Ablagerungen im Gehirn mittels Positronenemissionstomographie (PET), Wirkstoff: Florbetaben

**Folicur®** Fungizid, Wirkstoff: Tebuconazol, Haupteinsatzgebiete: Getreide, Sojabohnen, Raps, Erdnüsse, Gemüse, Obst, Weintrauben

## G

**Gadovist®** Kontrastmittel für die MRT des Zentralnervensystems, mit dem u. a. Anzahl und Lokalisation von Läsionen bei Gehirnmastasen oder Multipler Sklerose (MS) aufgezeigt werden können, Wirkstoff: Gadobutrol

**Gaucht®** Insektizid, Wirkstoff: Imidacloprid, Haupteinsatzgebiete: Saatgutbehandlung bei Zuckerrüben, Mais, Getreide, Baumwolle, Raps

**Global-Commercial-Paper-Programm** Commercial Paper (CP) sind unbesicherte, kurzfristige Schuldverschreibungen, die in der Regel auf abgezinsten Basis

ausgegeben und zum Nennwert zurückbezahlt werden. Sie dienen der flexiblen und kurzfristigen Finanzierung am Kapitalmarkt. Das Bayer-Commercial-Paper-Programm ermöglicht eine Emission sowohl am US-amerikanischen als auch am europäischen Commercial-Paper-Markt.

**Glucobay®** Medikament zur Behandlung der Zuckerkrankheit, Wirkstoff: Acarbose

**Glucofacts® Deluxe** Diabetes-Management-Software

## H

**HDI** Hexamethylen-Diisocyanat, ein in Polyurethan-Beschichtungen eingesetzter Lackrohstoff

**Hybridanleihe** Eine Hybridanleihe ist eine eigenkapitalähnliche Unternehmensanleihe mit meist keiner oder sehr langer Fälligkeit, die durch ihre Nachrangigkeit im Insolvenzfall des Emittenten zum Totalausfall führen kann.

## I

**Ignite®** Herbizid, Wirkstoff: Glufosinate-Ammonium, Haupteinsatzgebiete: gentechnisch veränderte Kulturen (Baumwolle, Raps, Sojabohnen, Mais)

**Input®** Fungizid, Wirkstoffe: Prothioconazol, Spiroxamine, Haupteinsatzgebiet: Getreide

**Intense®** Saatgut für Tomaten

**Investitionswert (Iw)** Der Investitionswert umfasst das Vermögen, das vom Unternehmen im Betriebsprozess durch die Erwirtschaftung entsprechender Mittelzuflüsse zu verzinsen sowie teilweise auch zu reproduzieren ist.

**InVigor®** Saatgut für Sommeraps

**Iopamiron®** Nicht-ionisches, intravasculäres Kontrastmittel für alle gängigen Röntgenuntersuchungen

## K

### Kapitalkostensatz/Weighted Average Cost of Capital (wacc)

Der Kapitalkostensatz (wacc) repräsentiert den Verzinsungsanspruch der Kapitalgeber in Bezug auf das im Unternehmen gebundene Kapital. Er bestimmt sich als gewichteter Durchschnitt der Eigen- und Fremdkapitalkosten, wobei die Eigenkapitalkosten mit den Renditeerwartungen der Aktionäre korrelieren und die Fremdkapitalkosten die langfristigen Finanzierungskonditionen des Unternehmens darstellen.

**Key-Performance-Indikatoren (KPI)** Wichtige Kennzahlen zur Beurteilung der Erreichung von Zielen im Unternehmen

**Kinzal®** Medikament zur Behandlung von Bluthochdruck, Wirkstoff: Telmisartan

**κ-Othrine®** Insektizid, Wirkstoff: Deltamethrin, Haupteinsatzgebiete: Insekten, die Malaria, die Schlafkrankheit und Chagas übertragen

**Kogenate®** Medikament zur Behandlung der Bluterkrankheit, Wirkstoff: gentechnisch hergestellter Faktor VIII

**Kurs-Cashflow-Verhältnis** Das Kurs-Cashflow-Verhältnis ergibt sich aus dem Verhältnis des Aktienkurses zum Brutto-Cashflow je Aktie. Diese Kennzahl beschreibt, wie lange es dauert, den Aktienkurs aus dem Zahlungsstrom des Unternehmens zu bezahlen.

**Kurs-Gewinn-Verhältnis (kgv)** Das kgv ergibt sich aus dem Verhältnis vom aktuellen Aktienkurs zum Ergebnis pro Aktie. Ein hohes kgv deutet an, dass der Markt die Aktie hoch bewertet in Erwartung zukünftiger Gewinnsteigerungen.

## L

**Levitra®** Medikament zur Behandlung der erektilen Dysfunktion, Wirkstoff: Vardenafil

**Liberty®** Herbizid, Wirkstoff: Glufosinate-Ammonium, Haupteinsatzgebiete: gentechnisch veränderte Kulturen (Baumwolle, Raps, Sojabohnen, Mais)

**LibertyLink®** Pflanzeigenschaft: Herbizidtoleranz, Haupteinsatzgebiete: Baumwolle, Raps, Sojabohnen, Mais

**Lifenet®** Moskitonetze zur Malariaprävention auf Basis einer Textilfaser, in die der Wirkstoff Deltamethrin eingearbeitet wurde

**Life Sciences** umfassen insbesondere die Bereiche Ernährung und Gesundheit; bei Bayer sind das die Tätigkeitsfelder der Tochterkonzerne Bayer HealthCare und Bayer CropScience.

**Luna®** Fungizid, Wirkstoff: Flupyrim, Haupteinsatzgebiete: Wein- und Tafeltrauben, Obst, Gemüse

## M

**Magnevist®** Kontrastmittel für Diagnosen im Zentralnervensystem und im Ganzkörperbereich, Wirkstoff: Dimeglumindopentetat

**Makroblend®** Markenname für Polymerblends aus Polycarbonat und Polybutylenterephthalat bzw. Polyethylenterephthalat

**Makrofol®** Markenname für Folien aus Makrolon®

**Makrolon®** Markenname für Polycarbonat

**MDI** Diphenylmethan-Diisocyanat, ein wichtiger Rohstoff für Polyurethan-Hartschaum, der für die thermische Isolierung eingesetzt wird

**Merit®** Insektizid, Wirkstoff: Imidacloprid, Haupteinsatzgebiet: Insektizid für nicht-landwirtschaftlich genutzte Rasenflächen

**Mirena®** Intrauterin-System zur Empfängnisverhütung, Wirkstoff: Levonorgestrel

## N

**Nativo®** Fungizid, Wirkstoffe: Trifloxystrobin, Tebuconazol, Haupteinsatzgebiete: Getreide, Sojabohnen, Mais, Reis

**Natazia™** orales Kontrazeptivum auf Basis des körpereigenen Östrogens Estradiol, Wirkstoffe: Estradiolvalerat, Dienogest

**Natria™** Produktlinie innerhalb der Bayer-Garten-Produktpalette für Endverbraucher, die auf natürlichen bzw. der Natur entlehnten Wirkstoffen beruht

**NeoBenz® Micro** Medikament zur Behandlung von Akne, Wirkstoff: Benzoylperoxid

**Netto-Cashflow** Der Netto-Cashflow entspricht dem Cashflow aus der betrieblichen Tätigkeit nach IAS 7.

**Nexavar®** Krebsmedikament zur Behandlung von Leberzellkarzinomen und für die Behandlung von Patienten mit fortgeschrittenem Nierenzellkarzinom, Wirkstoff: Sorafenib

## O

**One A Day®** Multivitamin-Präparat

**Over the Counter (OTC)** Ein außerbörslicher Markt für den Handel von Wertpapieren. Die Transaktionen unterliegen aber weiterhin den gesetzlichen Bestimmungen für den Wertpapierhandel. Im HealthCare-Geschäft steht OTC für das Geschäft mit nicht-verschreibungspflichtigen Arzneimitteln.

## P

**Poncho®** Insektizid, Wirkstoff: Clothianidin, Haupteinsatzgebiete: Saatgutbehandlung bei Mais, Raps, Zuckerrüben, Getreide

**Purchase Price Allocation (PPA)** englisch für Kaufpreisaufteilung

**Pritor®** Medikament zur Behandlung von Bluthochdruck, Wirkstoff: Telmisartan



**Proline®** Fungizid, Wirkstoff: Prothioconazol, Haupteinsatzgebiete: Getreide, Raps

**Prosaro®** Fungizid, Wirkstoffe: Prothioconazol, Tebuconazol, Haupteinsatzgebiete: Getreide, Raps

**Puma®** Herbizid, Wirkstoff: Fenoxaprop-P-Ethyl, Haupteinsatzgebiete: Getreide, Reis, Sojabohnen

## Q

**Qlaira®** orales Kontrazeptivum auf Basis des körperidentischen Östrogens Estradiol, Wirkstoffe: Estradiolvalerat, Dienogest

## R

**Raxil®** Fungizid, Wirkstoff: Tebuconazol, Haupteinsatzgebiet: Saatgutbehandlungsmittel in Weizen und Gerste

**Redoxon®** Vitaminpräparat (Vitamin C und Zink)

**Regorafenib** neuartiger oraler Multi-Kinase-Inhibitor zur Behandlung von gastrointestinalen Stroma-Tumoren (GIST)

**Rely®** Herbizid, Wirkstoff: Glufosinate-Ammonium, Haupteinsatzgebiete: Plantagenkulturen, Kartoffeln

**Rennie®** Medikament bei Sodbrennen und säurebedingten Magenbeschwerden, Wirkstoffe: Calcium-, Magnesiumcarbonat

**Riociguat** Wirkstoff einer neuen Klasse gefäßerweiternder Substanzen. Er gehört zu den Stimulatoren des Enzyms lösliche Guanylatcyclase und wird derzeit in einem Phase-III-Programm auf Wirksamkeit und Sicherheit bei chronisch thromboembolischer pulmonaler Hypertonie sowie pulmonaler arterieller Hypertonie untersucht.

**Routine®** Fungizid, Wirkstoff: Isotianil, Haupteinsatzgebiet: Reis

## S

**Safyral™** orales Kontrazeptivum mit Zusatz von Folat, Wirkstoffe: Ethinylestradiol, Drospirenone, Levomefolate Calcium

**Soberan®** Herbizid, Wirkstoffe: Tembotrione, Isoxadifen, Haupteinsatzgebiet: Mais

**Specticle®** Herbizid, Wirkstoff: Indaziflam, Haupteinsatzgebiet: Rasenpflege für professionelle Anwender

**Sphere®/Sphere® Max** Fungizid, Wirkstoffe: Trifloxystrobin, Cyproconazol, Haupteinsatzgebiete: Sojabohnen, Getreide, Zuckerrüben, Kaffee

**Squeeze-out** Übertragung der Aktien der Minderheitsaktionäre einer Aktiengesellschaft auf den Hauptaktionär gegen Gewährung einer Abfindung. In Deutschland kann ein Hauptaktionär ab einer Beteiligung von 95 % die Durchführung eines Squeeze-out verlangen.

**STAXYN™** neue Formulierung des Medikaments Levitra® zur Behandlung der erektilen Dysfunktion, Wirkstoff: Vardenafil

**Stratego®** Fungizid, Wirkstoffe: Trifloxystrobin, Propiconazol, Haupteinsatzgebiete: Mais, Sojabohnen, Getreide, Reis

**Supradyn®** Vitamin- und Mineralstoffpräparat mit Spurenelementen

**Syndizierte Kreditfazilität** Vereinbarung über eine Kreditlinie mit einer Gruppe von Banken meist für umfangreiche Finanzierungen wie Akquisitionen, zur Erweiterung der zur Verfügung stehenden Liquiditätsreserven oder als Sicherung für ausgegebene Schuldverschreibungen. Die Kreditlinie kann flexibel innerhalb der Laufzeit in Teilen oder ganz gezogen werden und auch wieder zurückgeführt werden.

## T

**TDI** Toluylendiisocyanat, ein wichtiger Rohstoff für Polyurethan-Weichschaum, der in Polstermöbeln, Matratzen und Autositzen eingesetzt wird

**Temprid®** Insektizid, Wirkstoffe: Imidacloprid, Betafluthrin, Haupteinsatzgebiet: professionelle Schädlingsbekämpfung außerhalb der Landwirtschaft

## U

**Ultravist®** Kontrastmittel für Röntgenuntersuchungen inklusive Computertomographie, Wirkstoff: Iopromid

## V

**Valette® Plus** Orale Kontrazeptiva mit Zusatz von Folat (Vitamin B), Wirkstoffe: Dienogest, Ethinylestradiol, Levomefolate Calcium

**VEGF Trap-Eye** VEGF (Vascular Endothelial Growth Factor) ist ein natürlicher Wachstumsfaktor, der auch an der krankhaften Neubildung von Gefäßen im Auge beteiligt ist, die zur Entstehung der feuchten altersabhängigen Makula-Degeneration (AMD) führen. VEGF Trap-Eye blockiert diesen und andere Wachstumsfaktoren spezifisch und befindet sich derzeit in der klinischen Phase III.

**Votivo™** biologisches Mittel zum Schutz vor Nematoden auf Basis von *Bacillus firmus*, Haupteinsatzgebiete: Saatgutbehandlung in Kombination mit Poncho® in Mais, Sojabohnen und Baumwolle

**Vulkollan®** Produktmarke für sehr leistungsfähige Polyurethan-Elastomere

## W

**World-Scale-Anlage** besonders wirtschaftlich arbeitende Produktionsanlage mit sehr großer Kapazität

## X

**Xarelto®** neuartiger, als Tablette zu verabreichender, direkter Faktor-Xa-Inhibitor. Der Wirkstoff Rivaroxaban wird zur Thromboseprävention und -therapie in einem breiten Spektrum von Indikationen entwickelt und ist unter anderem in der EU als Xarelto® zur Prophylaxe venöser Thromboembolien (VTE) bei erwachsenen Patienten nach elektiven (geplanten) Hüft- und Kniegelenkersatz-Operationen zugelassen.

**Xpro®** Fungizid, Wirkstoffe: Biaxafen, Prothioconazol, Haupteinsatzgebiet: Getreide

## Y

**YAZ®/Yasmin®/Yasminelle®** orale Kontrazeptiva, Wirkstoffe: Ethinylestradiol und Drospirennon

## Z

**Zetia®** Cholesterinsenker von Merck & Co., der in Japan gemeinsam mit Bayer vertrieben wird, Wirkstoff: Ezetimib

## INTERNET

Erklärungen weiterer Fachbegriffe unter: [WWW.INVESTOR.BAYER.DE](http://WWW.INVESTOR.BAYER.DE)  
> AKTIE  
> GLOSSAR

# Stichwortverzeichnis

## A

**Abschlussprüfer**  
13, 250

**Akquisitionen**  
183

**Aktie**  
14, 17

**Aktienprogramme**  
97, 113

**Anhang Bayer-Konzern**  
148

**Anleihen**  
228

**Anteile an at-equity  
bewerteten Beteiligungen**  
206

**Aufsichtsrat**  
10, 90, 251, 256

## B

**Bayer Business Services**  
Klappe vorne, 49, 50

**Bayer Innovation GmbH**  
110

**Bayer Technology Services**  
Klappe vorne, 49, 50, 110

**Bereinigtes Ergebnis je Aktie**  
75

**Bericht der Unternehmens-  
leitung**  
252

**Beschaffung**  
53

**Beschaffungsmarktrisiko**  
127

**Bestätigungsvermerk**  
254

**Beteiligungen**  
172

**Beteiligungsergebnis**  
83, 190

**Bilanz (Bayer AG)**  
84

**Bilanz (Konzern)**  
81, 144, 196

**Bilanzierungs- und  
Bewertungsgrundsätze**  
153

**Brutto-Cashflow**  
Klappe vorne und hinten,  
47, 76, 145, 148, 248

## C

**Chancen**  
122, 124

**Compliance Officer**  
92

**Corporate Citizen**  
118

**Corporate Compliance**  
92

**Corporate Governance**  
12, 88

**Corporate Governance Kodex**  
12, 88

**CropScience**  
Klappe vorne, 50, 52, 54, 56,  
64, 77, 106, 133, 137, 139, 245

**Currenta**  
Klappe vorne, 49, 50, 231

## D

**Derivative Finanzinstrumente**  
161, 238

**Desinvestitionen**  
78, 186

**Dividende**  
18, 212

## E

**Eigenkapital**  
210

**Eigenkapitalentwicklung**  
82, 146, 212

**Ergebnis je Aktie**  
17, 195

**Ertragslage (Bayer AG)**  
83

**Ertragslage (Konzern)**  
72

**Ertragsteuern**  
72, 192

## F

**Finanzergebnis**  
73, 190

**Finanzinstrumente**  
231

**Finanzlage (Bayer AG)**  
84

**Finanzlage (Konzern)**  
78

**Finanzrisiken**  
128

**Finanzstrategie**  
136

**Finanzverbindlichkeiten**  
166, 227

**Forderungen aus Lieferungen  
und Leistungen**  
208

**Forschung und Entwicklung**  
101

**Forschungs- und  
Entwicklungskosten**  
101, 157, 187

**Fünfjahresübersicht**  
Klappe hinten

## G

**Gehälter**  
(s. Vergütung)

**Gesamtergebnisrechnung**  
143

**Geschäftsentwicklung  
der Teilkonzerne**  
58

**Geschäftsstrategie**  
131

**Geschäfts- oder Firmenwerte**  
158, 196

**Gesellschaftliches Engagement**  
118

**Gewinn- und Verlustrechnung  
(Bayer AG)**  
83

**Gewinn- und Verlustrechnung  
(Konzern)**  
72, 142, 187

**Gewinnverwendung**  
84

**Glossar**  
260

## H

**Haftungsverhältnisse**  
240

**Hauptversammlung**  
Klappe hinten

**Hedge Accounting**  
130, 131, 151, 238

**HealthCare**  
Klappe vorne, 50, 51, 53, 55,  
58, 77, 101, 132, 137, 139, 241

**Highlights**  
38

## I

**Immaterielle Vermögenswerte**  
158, 196, 199

**Impairment**  
158

**Indizes**  
17, 266

**Investitionen**  
78, 138, 196

**Investor Relations**  
19

## J

**Jahresabschluss**  
140

## K

**Kapitalflussrechnung**  
145, 248

**Kapitalstruktur**  
81

**Kennzahlen der Aktie**  
14, 17

**Kennzahlen der Teilkonzerne**  
Klappe vorne, 49, 51, 58



**Kennzahlen nach Segmenten und Regionen**  
72

**Konjunkturausblick**  
136

**Konsolidierungskreis**  
172

**Kontakt**  
Klappe hinten

**Konzernabschluss**  
13, 140

**Konzernergebnis**  
Klappe vorne, 46, 48, 142

**Konzernstruktur**  
Klappe vorne, 49

## L

**Lagebericht (zusammengefasster Lagebericht von Bayer AG und Bayer-Konzern)**  
44

**Leasing**  
159, 207, 227

**Leitbild**  
111, 131

## M

**Mandate des Aufsichtsrats**  
256

**Mandate des Vorstands**  
258

**Marktwert**  
239

**Märkte**  
55

**MaterialScience**  
Klappe vorne, 50, 52, 54, 57, 69, 77, 108, 134, 138, 139, 247

**Minderheitsgesellschaftern zustehende Gewinne**  
195

**Mitarbeiter**  
112, 189

## N

**Nachhaltiges Engagement**  
266

**Nachhaltiges Investment**  
17

**Nachhaltigkeit**  
111

**Nachtragsbericht**  
121

**Netto-Cashflow**  
Klappe vorne, 78, 145, 148, 248

**Nettoverschuldung**  
80

**Nominierungsausschuss**  
11, 12, 91

## O

**Organe der Gesellschaft**  
256

**Organigramm**  
259

## P

**Pensionsrückstellungen und ähnliche Verpflichtungen**  
163, 213

**Personalaufwand**  
113, 189

**Personalausschuss**  
11, 12, 90

**Präsidium**  
11, 12, 90

**Produkte**  
55

**Produktion**  
53

**Prognosebericht**  
122

**Prüfungsausschuss**  
11, 12, 90

## R

**Rechnungslegungsstandards**  
150

**Rechtliche Risiken**  
125, 241

**Regionen**  
72, 148

**Responsible Care**  
266

**Restrukturierungen**  
165, 223

**Risikobericht**  
122

**Risikomanagement**  
122

**Rohwaren- und Rohstoffpreisrisiko**  
128, 131

**Rückstellungen**  
164, 222

## S

**Sachanlagen**  
79, 158, 203

**Schätzungsunsicherheiten**  
153

**Segmentberichterstattung**  
148, 169

**Segmente**  
49, 72, 148, 149, 169

**Sonstige betriebliche Aufwendungen**  
188

**Sonstige betriebliche Erträge**  
156, 188

**Sonstige finanzielle Aufwendungen und Erträge**  
191

**Sonstige finanzielle Vermögenswerte**  
207

**Sonstige finanzielle Verpflichtungen**  
240

**Sonstige Forderungen**  
166, 209

**Steuern**  
162, 192, 223

**Strategie**  
131

## T

**Termine**  
Klappe hinten

## U

**Übernahmerelevante Angaben**  
85

**Umsatzerlöse**  
46, 48, 58

**Umweltschutz**  
116, 223

**UNEP**  
119, 266

**Unternehmenserwerbe**  
166

## V

**Verbindlichkeiten aus Lieferungen und Leistungen**  
230

**Vergütung Abschlussprüfer**  
250

**Vergütung Aufsichtsrat**  
99, 251

**Vergütung Vorstand**  
95, 251

**Vermögenslage (Bayer AG)**  
84

**Vermögenslage (Konzern)**  
81

**Versicherung der gesetzlichen Vertreter**  
253

**Vertrieb**  
55, 187

**Vorräte**  
162, 208

**Vorstand**  
8, 89, 251, 258

## W

**Währungsrisiko**  
130

**Währungsumrechnung**  
155

**Wechselkursveränderungen**  
156

**Werthaltigkeitsprüfungen**  
167

**Wertmanagement**  
77

**Wertorientierte Konzernsteuerung**  
76

**Wirtschaftliches Umfeld**  
51

## Z

**Zielsetzung**  
138

**Zinsergebnis**  
191

**Zinsrisiko**  
130

## Nachhaltiges Engagement weltweit

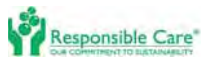

Nachhaltigkeit ist bei Bayer fester Bestandteil einer auf langfristigen Erfolg und innovative Lösungen ausgerichteten Unternehmenspolitik. Belegt wird dieses Engagement auch durch Beteiligung an zahlreichen Initiativen und Projekten rund um den Globus. In der Randspalte finden Sie eine Auswahl von Logos zu den Aktivitäten, nachfolgend die entsprechenden Beschreibungen von oben nach unten.

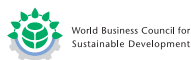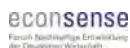

Der Responsible-Care-Gedanke hat bei Bayer eine lange Tradition. Um kontinuierliche Verbesserungen in den Bereichen Gesundheit, Sicherheit und Umwelt zu erreichen, orientiert sich das Unternehmen seit 1994 an der freiwilligen Responsible-Care-Initiative der chemisch-pharmazeutischen Industrie sowie an ihrer 2006 überarbeiteten Global Charter.

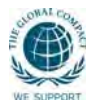

Seit 1997 ist Bayer Mitglied des „World Business Council for Sustainable Development“, „econsense“, das „Forum Nachhaltige Entwicklung der Deutschen Wirtschaft“, wurde 2000 von Bayer mit ins Leben gerufen.

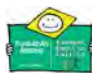

Bayer ist Gründungsmitglied der ebenfalls 2000 entstandenen „Global Compact Initiative“ der Vereinten Nationen (UNGC). Das Unternehmen fördert die zehn Prinzipien der UNGC durch Unterstützung der Initiativen LEAD, „Caring for Climate“ und „CEO Water Mandate“ sowie mit zahlreichen Maßnahmen – u. a. in Brasilien durch die Unterstützung der Abrinq-Stiftung im Kampf gegen Kinderarbeit und in Indien z. B. durch die „Learning for Life“-Initiative zum Schutz und zur Förderung von Kindern durch Schule und Ausbildung.

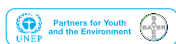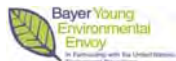

Die seit 2004 bestehende Zusammenarbeit mit dem Umweltprogramm der Vereinten Nationen (UNEP) hat exemplarischen Charakter für Kooperationen zwischen Politik und Privatwirtschaft, sogenannten „Public Private Partnerships“. Eine der langjährigen gemeinsamen Aktivitäten ist das Programm „Bayer Young Environmental Envoy in Partnership with UNEP“ mit 18 Teilnehmerländern aus drei Kontinenten.

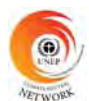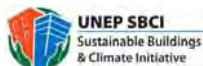

Bayer ist 2009 dem UNEP „Climate Neutral Network“ zur Förderung von Wirtschaftsstrukturen und Gesellschaften mit niedrigen CO<sub>2</sub>-Emissionen beigetreten. Um weltweit die Senkung der Treibhausgas-Emissionen im relevanten Gebäude-Sektor voranzutreiben, unterstützt Bayer im Rahmen seines „EcoCommercial Building Program“ auch „UNEP SBCI“, die „Sustainable Buildings and Climate Initiative“ des UN-Umweltprogramms.

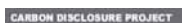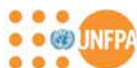

Der Konzern misst dem Klimaschutz höchste Bedeutung bei. Seit sechs Jahren ist Bayer dadurch ununterbrochen im „Carbon Disclosure Leadership Index (CDL)“ und 2010 im erstmals aufgelegten „Carbon Performance Leadership Index (CPLI)“ der Investorengruppe des „Carbon Disclosure Project“ vertreten.

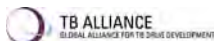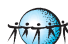

Deutsche Stiftung **WELTBEOVÖLKERUNG**

Seit über 50 Jahren unterstützt Bayer Familienplanungsprogramme in mehr als 130 Ländern. Dabei setzt das Unternehmen auf die Zusammenarbeit mit privaten und öffentlichen Hilfsorganisationen wie z. B. der UNFPA (United Nations Population Fund). Im Kampf gegen Tuberkulose kooperiert Bayer mit der „Global Alliance for TB Drug Development“, einer us-amerikanischen Non-Profit-Organisation, bei der Entwicklung eines Medikaments, das die Behandlungszeit reduzieren soll. Im Rahmen seines Nachhaltigkeitsprogramms bietet Bayer Verhütungsmittel zu reduzierten Preisen in Entwicklungsländern an. Zu den Familienplanungs-Aktivitäten gehört auch die Aufklärung von Teenagern zum Thema Sexualität und Gesundheit. In Uganda kooperiert Bayer hierzu mit der „Deutsche Stiftung Weltbevölkerung (DSW)“.

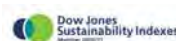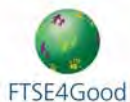

Bayer ist in wichtigen Aktienindizes und -fonds vertreten, die Unternehmen mit nachhaltiger und verantwortungsbewusster Firmenpolitik auszeichnen – u. a. in den „Dow Jones Sustainability“-Indizes „Europe“ und „World“ und in der FTSE4Good-Index-Reihe sowie dem „ASPI (Advanced Sustainable Performance Indices)-Eurozone-Index“ – und hat sich mit dem „Best in class“-Prädikat für die Aufnahme in die „Storebrand SRI Funds“ qualifiziert.

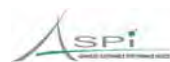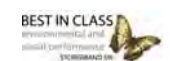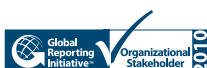

Unsere Nachhaltigkeitsberichterstattung orientiert sich an den Leitlinien der „Global Reporting Initiative (GRI)“, die Bayer aktiv als Organizational Stakeholder unterstützt.

# Der Bayer-Konzern

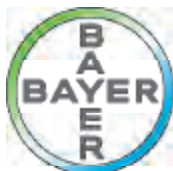

## Bayer

Die Bayer AG definiert die gemeinsamen Werte, Ziele und Strategien des gesamten Konzerns. Die Teilkonzerne und Servicegesellschaften arbeiten eigenverantwortlich unter der Führung der Management-Holding. Der Konzernvorstand wird bei der strategischen Führung des Unternehmens vom Corporate Center unterstützt.

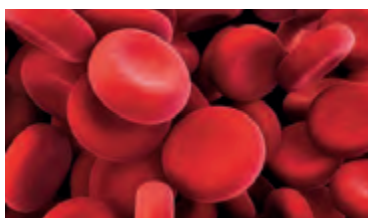

## Bayer HealthCare

Bayer HealthCare gehört zu den weltweit führenden innovativen Unternehmen in der Gesundheitsversorgung mit Arzneimitteln und medizinischen Produkten. Ziel des Teilkonzerns ist es, innovative Produkte zu erforschen, zu entwickeln, zu produzieren und zu vertreiben, um die Gesundheit von Mensch und Tier weltweit zu verbessern. Lesen Sie mehr dazu auf Seite 58 ff.

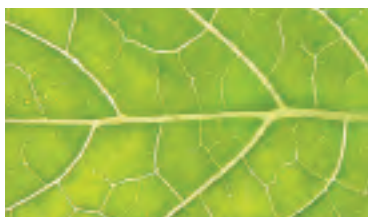

## Bayer CropScience

Bayer CropScience nimmt mit leistungsfähigen Produkten, zukunftsweisenden Innovationen und starker Kundenorientierung weltweit Spitzenpositionen im Pflanzenschutz und bei der Schädlingsbekämpfung im nicht-landwirtschaftlichen Bereich ein. Ein weiterer Schwerpunkt liegt beim Geschäft mit Saatgut und Pflanzeigenschaften. Lesen Sie mehr dazu auf Seite 64 ff.

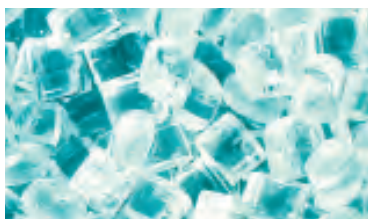

## Bayer MaterialScience

Bayer MaterialScience ist ein führender Hersteller von Hightech-Polymerwerkstoffen und Entwickler innovativer Lösungen für Produkte, die in vielen Bereichen des täglichen Lebens Anwendung finden. Einen Großteil des Umsatzes erwirtschaftet das Unternehmen mit Produkten, die auf dem Weltmarkt Spitzenpositionen einnehmen. Lesen Sie mehr dazu auf Seite 69 ff.

## SERVICEGESELLSCHAFTEN

**Bayer Business Services** ist das globale Kompetenz-Zentrum des Bayer-Konzerns für IT- und Business Services. Das Angebot konzentriert sich auf Dienstleistungen in den Kernbereichen IT-Infrastruktur und -Anwendungen, Einkauf und Logistik, Personal- und Managementdienste sowie Finanz- und Rechnungswesen.

**Bayer Technology Services** ist das weltweite technologische Rückgrat und ein wichtiger Innovationsmotor des Bayer-Konzerns, wenn es um die Entwicklung und die Planung sowie den Bau und die Optimierung von Prozessen und Anlagen geht.

**Currenta** bietet Dienstleistungen im chemisch-technischen Bereich an. Dazu zählen u. a. Energieversorgung, Entsorgung, Infrastruktur, Sicherheit, Analytik sowie Ausbildung.

# In aller Welt zu Hause

IN ALLER WELT ZU HAUSE · FÜNFJAHRESÜBERSICHT

## NORDAMERIKA

In Nordamerika (USA und Kanada) ist Bayer in allen strategischen Geschäftsbereichen vertreten. 16.400 Mitarbeiter erwirtschafteten im Jahr 2010 in dieser Region 8,2 MRD € und damit 23,5 % des Konzernumsatzes.

## EUROPA

Bayer erzielte 2010 13,8 MRD € auf dem europäischen Markt. Das sind 39,2 % des Konzernumsatzes. Zahlreiche große Produktionsanlagen und insgesamt 54.300 Mitarbeiter (davon 36.200 in Deutschland) geben dem Unternehmen eine breite Präsenz in dieser Region.

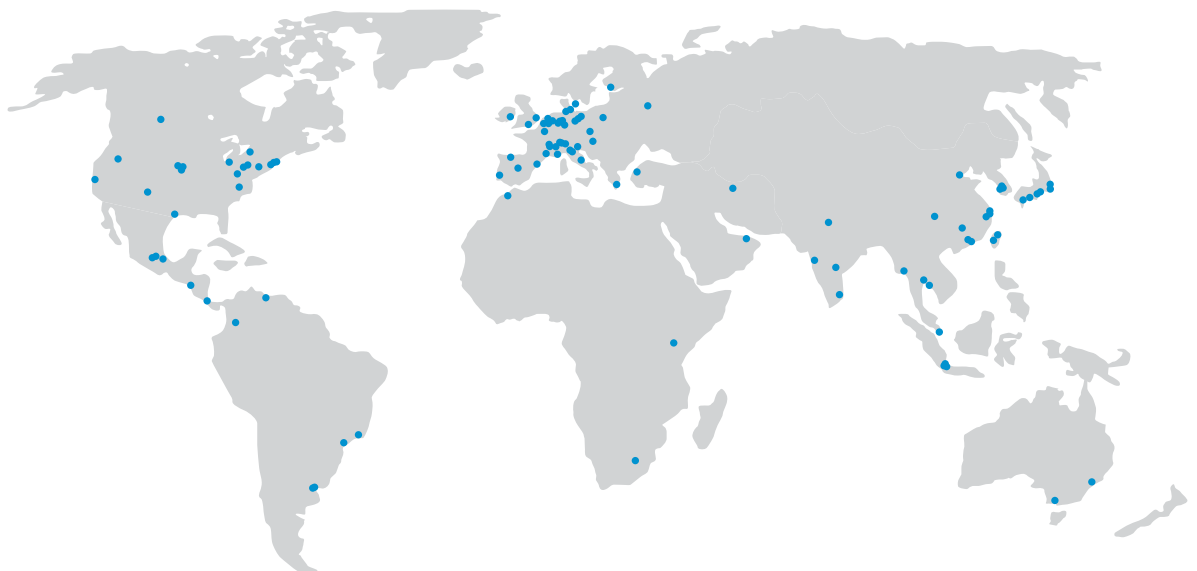

## LATEINAMERIKA/AFRIKA/NAHOST

In Lateinamerika ist Bayer seit über 110 Jahren vertreten. In der Region Lateinamerika, Afrika und Nahost erwirtschafteten im Jahr 2010 insgesamt 16.100 Mitarbeiter 5,6 MRD € und damit 16,0 % des Konzernumsatzes.

## ASIEN/PAZIFIK

Dieser Wirtschaftsraum stellt mit seinem großen Wachstumspotenzial einen der wichtigsten Zukunftsmärkte dar. Im Jahr 2010 setzte Bayer mit 24.600 Mitarbeitern 7,5 MRD € um. Das entspricht 21,3 % des Konzernumsatzes.

# Fünffjahresübersicht

[Tabelle 1.2]

|                                                                           | 2006          | 2007          | 2008          | 2009          | 2010          |
|---------------------------------------------------------------------------|---------------|---------------|---------------|---------------|---------------|
|                                                                           | in Mio €      |
| <b>Bayer-Konzern</b>                                                      |               |               |               |               |               |
| Umsatzerlöse                                                              | 28.956        | 32.385        | 32.918        | 31.168        | 35.088        |
| Auslandsgeschäft                                                          | 84,4 %        | 85,1 %        | 85,4 %        | 86,7 %        | 87,4 %        |
| EBIT (Operatives Ergebnis)                                                | 2.762         | 3.154         | 3.544         | 3.006         | 2.730         |
| EBIT vor Sondereinflüssen <sup>1</sup>                                    | 3.479         | 4.287         | 4.342         | 3.772         | 4.452         |
| EBITDA <sup>1</sup>                                                       | 4.675         | 5.866         | 6.266         | 5.815         | 6.286         |
| EBITDA vor Sondereinflüssen <sup>1</sup>                                  | 5.584         | 6.777         | 6.931         | 6.472         | 7.101         |
| Ergebnis vor Ertragsteuern <sup>2</sup>                                   | 1.980         | 2.234         | 2.356         | 1.870         | 1.721         |
| Ergebnis nach Steuern                                                     | 1.695         | 4.716         | 1.724         | 1.359         | 1.310         |
| Ergebnis je Aktie (€) <sup>3</sup>                                        | 2,22          | 5,84          | 2,22          | 1,70          | 1,57          |
| <b>Langfristige Vermögenswerte</b>                                        | <b>35.897</b> | <b>34.712</b> | <b>35.351</b> | <b>34.049</b> | <b>33.188</b> |
| davon immaterielle Vermögenswerte inkl. Goodwill                          | 24.034        | 22.770        | 22.598        | 21.546        | 20.163        |
| davon Sachanlagen                                                         | 8.867         | 8.819         | 9.492         | 9.409         | 9.835         |
| <b>Kurzfristige Vermögenswerte</b>                                        | <b>17.069</b> | <b>16.582</b> | <b>17.152</b> | <b>16.993</b> | <b>18.318</b> |
| Vorräte                                                                   | 6.153         | 6.217         | 6.681         | 6.091         | 6.104         |
| Forderungen und sonstige kurzfristige Vermögenswerte                      | 8.001         | 7.834         | 8.377         | 8.177         | 9.374         |
| Zahlungsmittel und Zahlungsmittel-äquivalente                             | 2.915         | 2.531         | 2.094         | 2.725         | 2.840         |
| <b>Finanzverbindlichkeiten</b>                                            | <b>19.801</b> | <b>14.417</b> | <b>16.870</b> | <b>12.949</b> | <b>11.833</b> |
| Langfristig                                                               | 14.723        | 13.081        | 10.614        | 11.460        | 9.944         |
| Kurzfristig                                                               | 5.078         | 1.336         | 6.256         | 1.489         | 1.889         |
| Zinsergebnis                                                              | -728          | -701          | -702          | -548          | -499          |
| Eigenkapitalrendite                                                       | 14,1 %        | 31,8 %        | 10,4 %        | 7,7 %         | 6,9 %         |
| Brutto-Cashflow <sup>4</sup>                                              | 3.913         | 4.784         | 5.295         | 4.658         | 4.771         |
| Investitionen (Gesamt)                                                    | 1.939         | 1.905         | 1.982         | 1.669         | 1.621         |
| Planmäßige Abschreibungen auf Sachanlagen und immaterielle Vermögenswerte | 2.086         | 2.478         | 2.570         | 2.660         | 2.571         |
| Personalaufwand (einschl. Altersversorgung)                               | 6.630         | 7.571         | 7.491         | 7.776         | 8.099         |
| Mitarbeiter <sup>5</sup> (Stand 31.12.)                                   | 106.000       | 106.200       | 108.600       | 111.000       | 111.400       |
| Forschungs- und Entwicklungskosten                                        | 2.297         | 2.578         | 2.653         | 2.746         | 3.053         |
| <b>Eigenkapital inkl. Anteile anderer Gesellschafter (Gesamt)</b>         | <b>12.851</b> | <b>16.821</b> | <b>16.340</b> | <b>18.951</b> | <b>18.896</b> |
| Gezeichnetes Kapital                                                      | 1.957         | 1.957         | 1.957         | 2.117         | 2.117         |
| Rücklagen                                                                 | 10.894        | 14.864        | 14.383        | 16.834        | 16.779        |
| Konzernergebnis                                                           | 1.683         | 4.711         | 1.719         | 1.359         | 1.301         |
| Anteile anderer Gesellschafter                                            | 84            | 87            | 77            | 54            | 63            |
| <b>Fremdkapital (Gesamt)</b>                                              | <b>43.040</b> | <b>34.557</b> | <b>36.171</b> | <b>32.091</b> | <b>32.610</b> |
| <b>Bilanzsumme (Gesamt)</b>                                               | <b>55.891</b> | <b>51.378</b> | <b>52.511</b> | <b>51.042</b> | <b>51.506</b> |
| <b>Eigenkapitalquote</b>                                                  | <b>23,0 %</b> | <b>32,7 %</b> | <b>31,1 %</b> | <b>37,1 %</b> | <b>36,7 %</b> |
| <b>Bayer AG</b>                                                           |               |               |               |               |               |
| Ergebnis nach Steuern                                                     | 1.250         | 1.928         | 1.161         | 2.226         | 1.245         |
| Rücklagenzuweisung/-entnahme                                              | 486           | 896           | 91            | 1.068         | 5             |
| Ausschüttung                                                              | 764           | 1.032         | 1.070         | 1.158         | 1.240         |
| Dividende pro Aktie in €                                                  | 1,00          | 1,35          | 1,40          | 1,40          | 1,50          |

Vorjahreswerte angepasst. Werte 2006–2008 wie zuletzt berichtet.

<sup>1</sup> Zur Definition siehe Zusammengefasster Lagebericht, Kapitel 4.2 „Ermittlung des EBIT(DA) vor Sondereinflüssen“.

<sup>2</sup> Entspricht dem Ergebnis der gewöhnlichen Geschäftstätigkeit.

<sup>3</sup> Ergebnis je Aktie: Berechnung nach IAS 33 (Earnings per Share): Division angepasstes Konzernergebnis durch durchschnittliche Anzahl der Aktien. Details siehe Konzernabschluss, Anhangangabe I16f.

<sup>4</sup> Zur Definition siehe Zusammengefasster Lagebericht, Kapitel 4.5 „Finanzlage und Investitionen Bayer-Konzern“.

<sup>5</sup> Mitarbeiter auf Vollzeitkräfte umgerechnet.

# Finanzkalender

|                                 |                         |
|---------------------------------|-------------------------|
| Zwischenbericht 1. Quartal 2011 | <b>28. APRIL 2011</b>   |
| Hauptversammlung 2011           | <b>29. APRIL 2011</b>   |
| Auszahlung der Dividende        | <b>02. MAI 2011</b>     |
| Zwischenbericht 2. Quartal 2011 | <b>28. JULI 2011</b>    |
| Zwischenbericht 3. Quartal 2011 | <b>27. OKTOBER 2011</b> |
| Berichterstattung 2011          | <b>28. FEBRUAR 2012</b> |
| Zwischenbericht 1. Quartal 2012 | <b>26. APRIL 2012</b>   |
| Hauptversammlung 2012           | <b>27. APRIL 2012</b>   |

---

## IMPRESSUM

### Herausgeber

Bayer AG, 51368 Leverkusen,  
Bundesrepublik Deutschland

### Redaktion

Jörg Schäfer, Tel. +49/214/30-39136  
E-Mail: joerg.schaefer@bayer.com

### Investor Relations

Peter Dahlhoff, Tel. +49/214/30-33022  
E-Mail: peter.dahlhoff@bayer.com

### Veröffentlichungstag

Montag, 28. Februar 2011

### Bayer im Internet

[WWW.BAYER.DE](http://WWW.BAYER.DE)

ISSN 0343/1975

---

### Zukunftsgerichtete Aussagen:

Dieser Geschäftsbericht enthält in die Zukunft gerichtete Aussagen, die auf den gegenwärtigen Annahmen und Prognosen der Unternehmensleitung des Bayer-Konzerns bzw. seiner Teilkonzerne beruhen. Verschiedene bekannte wie auch unbekannte Risiken, Ungewissheiten und andere Faktoren können dazu führen, dass die tatsächlichen Ergebnisse, die Finanzlage, die Entwicklung oder die Performance der Gesellschaft wesentlich von den hier gegebenen Einschätzungen abweichen. Diese Faktoren schließen diejenigen ein, die Bayer in veröffentlichten Berichten beschrieben hat. Diese Berichte stehen auf der Bayer-Website [www.bayer.de](http://www.bayer.de) zur Verfügung. Die Gesellschaft übernimmt keinerlei Verpflichtung, solche zukunftsgerichteten Aussagen fortzuschreiben und an zukünftige Ereignisse oder Entwicklungen anzupassen.

### Wichtige Information:

Die Namen „Bayer Schering Pharma“ oder „Schering“ stehen in dieser Publikation immer gleichbedeutend für die Bayer Schering Pharma AG, Berlin, Deutschland, oder für deren Vorgängerin, die Schering AG, Berlin, Deutschland.

### Markenrechtshinweis:

Die mit © gekennzeichneten Produktnamen sind nicht notwendigerweise in allen Rechtsordnungen als Marke eingetragen. Markenschutz besteht jedoch für die so bezeichneten Produktnamen zumindest in den gegenwärtigen Hauptvertriebsländern.
