# Supplementary material
Source: publisher site journal article supplement (https://www.degruyterbrill.com/publication/isbn/9783110432879/downloadAsset/9783110432879_Elektronischer_Anhang_2.zip)
Supplement: Supplementary file 15 [file Bayer Leitbild.pdf › Korpustexte/Korpustexte pdf/Bayer/Bayer Leitbild.pdf]

# Bayer: Science For A Better Life

Bayer ist ein weltweit tätiges Unternehmen mit Kernkompetenzen auf den Gebieten Gesundheit, Ernährung und hochwertige Materialien.

Als Erfinder-Unternehmen setzen wir Zeichen in forschungsintensiven Bereichen. Mit unseren Produkten und Dienstleistungen möchten wir den Menschen nützen und zur Verbesserung der Lebensqualität beitragen. Gleichzeitig wollen wir Werte schaffen durch Innovation, Wachstum und eine hohe Ertragskraft.

Wir bekennen uns zu den Prinzipien der Nachhaltigkeit und handeln als „Corporate Citizen“ sozial und ethisch verantwortlich.

# Unsere Werte.

---

Die Unternehmenskultur ist eine wichtige Voraussetzung für den Erfolg von Bayer. Eine zentrale Rolle spielen dabei unsere Werte Leadership (Führung), Integrität, Flexibilität und Effizienz. Wir haben sie unter dem Begriff LIFE zusammengefasst. An ihnen richtet sich unser tägliches Handeln aus, um zur Lösung der großen Herausforderungen unserer Zeit beizutragen – getreu unserer Mission „Bayer: Science For A Better Life“.

---

# LIFE

---

## L

### LEADERSHIP

- Sich für Mitarbeiter engagieren und Leistung fördern
- Eigeninitiative zeigen, andere inspirieren und motivieren
- Verantwortung übernehmen für Aufgaben und Ergebnisse, Erfolge und Misserfolge
- Andere fair und mit Respekt behandeln
- Klar, ehrlich und zügig Feedback geben
- Konflikte konstruktiv lösen
- Werte schaffen für unsere Aktionäre, Kunden, Mitarbeiter und die Gesellschaft

## I

### INTEGRITY

- Vorbild sein
- Gesetze, Richtlinien und Regeln einhalten
- Anderen vertrauen und vertrauensvolle Beziehungen aufbauen
- Ehrlich und zuverlässig sein
- Aufmerksam zuhören und angemessen kommunizieren
- Nachhaltig handeln: kurzfristige Ergebnisse mit langfristigen Anforderungen in Einklang bringen
- Menschen und Umwelt schützen, Sicherheit gewährleisten

## F

### FLEXIBILITY

- Veränderungen aktiv vorantreiben
- Trends frühzeitig aufgreifen und sich auf Anforderungen der Zukunft einstellen
- Den Ist-Zustand hinterfragen
- Kundenorientiert denken und handeln
- Chancen erkennen und kalkulierte Risiken eingehen
- Offen für Neues sein
- Bereit sein, das ganze Leben lang zu lernen

## E

### EFFICIENCY

- Ressourcen optimal einsetzen
  - Sich auf Aktivitäten konzentrieren, die Wert schaffen
  - Aufgaben einfach und effektiv erledigen
  - Die erforderliche Qualität rechtzeitig und zu angemessenen Kosten bereitstellen
  - Schneller zu überlegten Entscheidungen kommen
  - Entscheidungen konsequent umsetzen
  - Gemeinsam bessere Lösungen finden
-

# Unsere Marke.

---

Die Marke Bayer besitzt eine besondere Strahlkraft und zählt zu den bekanntesten weltweit. Rund um den Globus steht Bayer für innovative und hochwertige Produkte. Gleichzeitig symbolisiert unsere Marke Vertrauen und Zuverlässigkeit und steigert somit die Wettbewerbsfähigkeit des Unternehmens. Deshalb haben wir unser Markenprofil weiter geschärft, indem unsere Dachmarke noch klarer und konsistenter genutzt wird.

---

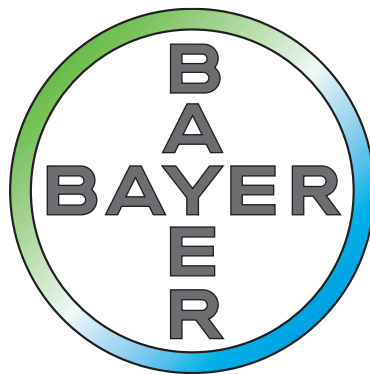

Das Bayer-Kreuz genießt international einen sehr guten Ruf. Wir sind überzeugt, dass auch unsere Markenarchitektur nachhaltig zum Wert der Marke beitragen kann. Deshalb haben wir nach eingehender Analyse unser Markenportfolio optimiert. In Zukunft wollen wir die Zahl der Markenauftritte im Konzern kontinuierlich reduzieren. Das stärkt unsere Dachmarke und verbessert deren Wahrnehmung. So werden auch die Produkte von Bayer schneller, klarer und eindeutiger wahrgenommen.

Wir verzichten auf selbstständige Markenauftritte einzelner Geschäftseinheiten innerhalb der Teilkonzerne und Servicegesellschaften. Das Pharma-Geschäft firmiert zum Beispiel nicht

mehr unter „Bayer Schering Pharma“, sondern unter „Bayer HealthCare Pharmaceuticals“.

Auch bei der Suche nach hoch qualifizierten Nachwuchskräften bedienen wir uns zukünftig verstärkt der Marke Bayer und erhöhen auf diese Art und Weise die Attraktivität des Unternehmens für neue Mitarbeiter. Und unsere rund 111.000 Mitarbeiter weltweit können noch überzeugender als Markenbotschafter agieren.

Die wertschöpfende Kraft des Bayer-Kreuzes kommt somit Aktionären, Kunden und Mitarbeitern in zunehmendem Maße zugute und steigert Markenstärke, Markenwert und die Wettbewerbsfähigkeit von Bayer.

---
