# Supplementary material
Source: publisher site journal article supplement (https://www.degruyterbrill.com/publication/isbn/9783110432879/downloadAsset/9783110432879_Elektronischer_Anhang_2.zip)
Supplement: Supplementary file 16 [file Bayer Mission & Werte.pdf › Korpustexte/Korpustexte pdf/Bayer/Bayer Mission & Werte.pdf]

# Bayer: Science For A Better Life

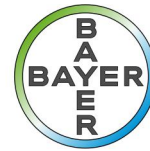

Home › Über Bayer › Mission & Werte

## Mission & Werte

### Unsere Mission „Bayer: Science For A Better Life“

**Bayer ist ein weltweit tätiges Unternehmen mit Kernkompetenzen auf den Gebieten Gesundheit, Agrarwirtschaft und hochwertige Polymer-Werkstoffe. Als Innovations-Unternehmen setzen wir Zeichen in forschungsintensiven Bereichen. Mit unseren Produkten und Dienstleistungen möchten wir den Menschen nützen und zur Verbesserung der Lebensqualität beitragen. Gleichzeitig wollen wir Werte schaffen durch Innovation, Wachstum und eine hohe Ertragskraft.**

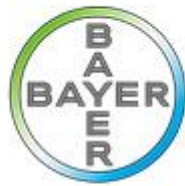

Science For A Better Life

- Wir helfen Patienten überall auf der Welt, indem wir Krankheiten verhindern, lindern und heilen sowie die Diagnose-Methoden verbessern.
- Wir tragen zu einer ausreichenden Versorgung mit qualitativ hochwertigen Nahrungs- und Futtermitteln sowie nachwachsenden pflanzlichen Rohstoffen bei.
- Und wir leisten mit unseren hochwertigen Polymer-Werkstoffen bedeutende Beiträge auf den Gebieten Energie- und Ressourceneffizienz, Mobilität, Bauen und Wohnen – um nur einige zu nennen.

Wir haben dafür über viele Jahrzehnte hinweg die Grundlagen geschaffen und vereinen als einziges globales Unternehmen Expertise rund um die Gesundheit von Mensch, Tier und Pflanzen sowie für hochqualitative Polymer-Werkstoffe. Unser Fokus auf Innovation ist der Schlüssel dafür, dass wir auf allen unseren Arbeitsgebieten eine führende Position einnehmen oder erreichen können. Dabei geht es uns um die Schaffung von Wert – und zwar für unsere Kunden, Aktionäre und Mitarbeiter. Daneben berücksichtigen wir auch die Belange weiterer Interessengruppen in der Gesellschaft.

## Unsere Werte

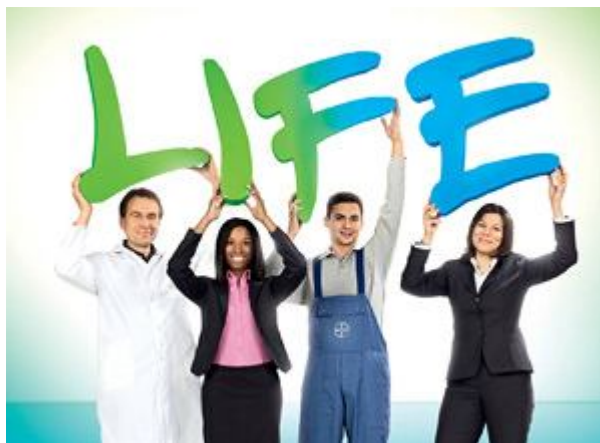

Wir arbeiten nachhaltig und stellen uns unserer Verantwortung als sozial und ethisch handelndes Unternehmen. Unsere Bayer-Werte „Führung“ („Leadership“), „Integrität“, „Flexibilität“ und „Effizienz“, zusammengefasst unter dem Begriff LIFE, sind dabei unsere Richtschnur in der Umsetzung unserer Mission „Bayer: Science For A Better Life“.

### Führung (Leadership)

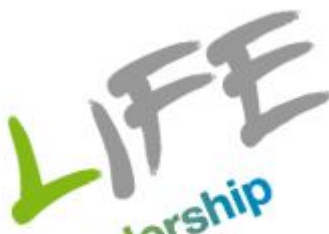

- Sich für Mitarbeiter engagieren und Leistung fördern
- Eigeninitiative zeigen, andere inspirieren und motivieren
- Verantwortung übernehmen für Aufgaben und Ergebnisse, Erfolge und Misserfolge
- Andere fair und mit Respekt behandeln
- Klar, ehrlich und zügig Feedback geben
- Konflikte konstruktiv lösen
- Werte schaffen für unsere Aktionäre, Kunden, Mitarbeiter

## Zusätzliche Beispiele für Führungskräfte mit Personalverantwortung

- Für Klarheit sorgen und Orientierung geben
- Strategisch denken und handeln
- Leistung einfordern und anerkennen
- Einsatzfähigkeit der Mitarbeiter durch Entwicklungsgespräche und -maßnahmen sicherstellen
- Eine solide und vielfältige Basis an Talenten aufbauen

## Integrität (Integrity)

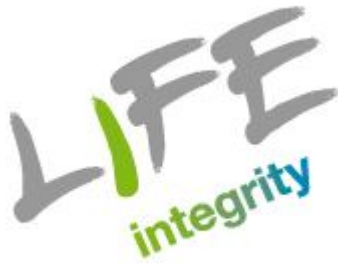

- Vorbild sein
- Gesetze, Richtlinien und Regeln einhalten
- Anderen vertrauen und vertrauensvolle Beziehungen aufbauen
- Ehrlich und zuverlässig sein
- Aufmerksam zuhören und angemessen kommunizieren
- Nachhaltig handeln: kurzfristige Ergebnisse mit langfristigen Anforderungen in Einklang bringen
- Menschen und Umwelt schützen, Sicherheit gewährleisten

## Flexibilität (Flexibility)

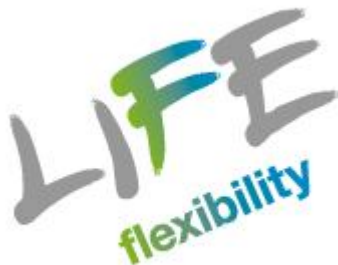

- Veränderungen aktiv vorantreiben
- Trends frühzeitig aufgreifen und sich auf Anforderungen der Zukunft einstellen
- Den Ist-Zustand hinterfragen
- Kundenorientiert denken und handeln
- Chancen erkennen und kalkulierte Risiken eingehen
- Offen für Neues sein
- Bereit sein, das ganze Leben lang zu lernen

## Effizienz (Efficiency)

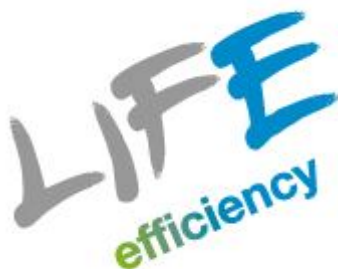

- Ressourcen optimal einsetzen
- Sich auf Aktivitäten konzentrieren, die Wert schaffen
- Aufgaben einfach und effektiv erledigen
- Die erforderliche Qualität rechtzeitig und zu angemessenen Kosten bereitstellen
- Schneller zu überlegten Entscheidungen kommen
- Entscheidungen konsequent umsetzen
- Gemeinsam bessere Lösungen finden
