# Supplementary material
Source: publisher site journal article supplement (https://www.degruyterbrill.com/publication/isbn/9783110432879/downloadAsset/9783110432879_Elektronischer_Anhang_2.zip)
Supplement: Supplementary file 17 [file Bayer Namen Zahlen Fakten 2010_2011.pdf › Korpustexte/Korpustexte pdf/Bayer/Bayer Namen Zahlen Fakten 2010_2011.pdf]

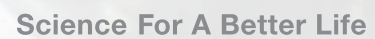

## NAMEN | ZAHLEN | FAKTEN

# 2010 | 2011

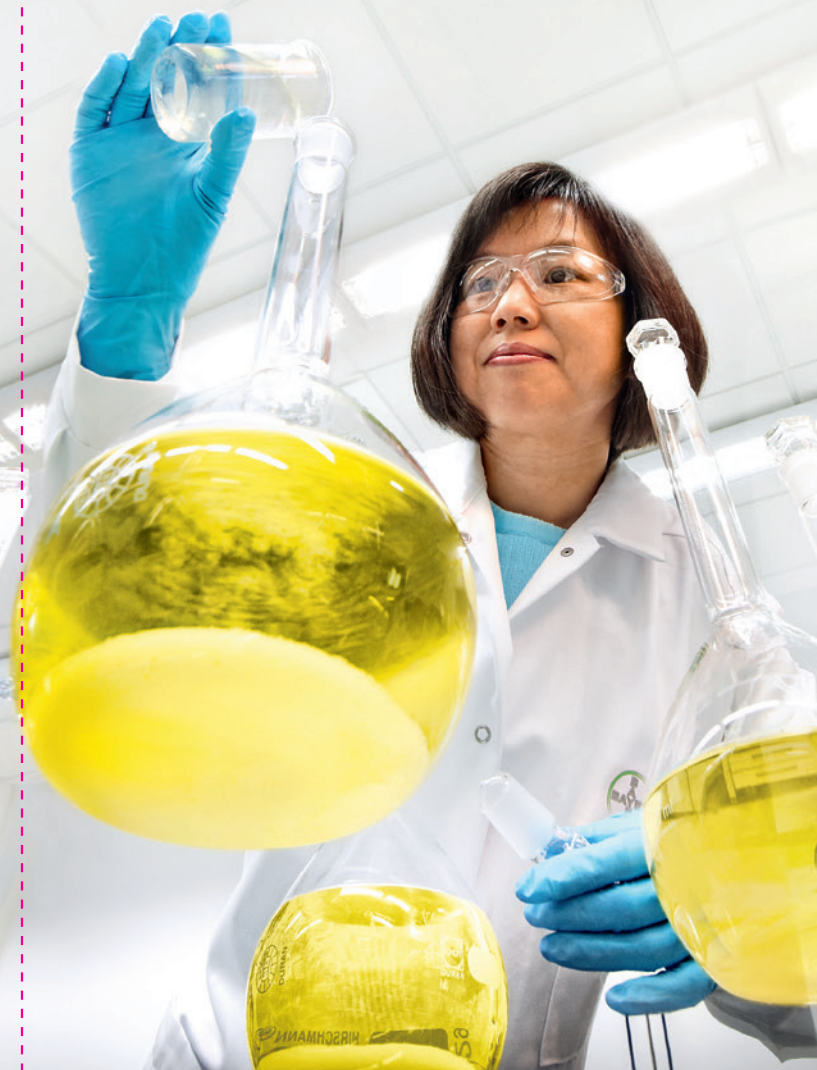

Ausgabe 2010/2011 • D 910 967 092

Bitte in Druckschrift ausfüllen

Name

Vorname

Straße/Hausnummer

PLZ/Ort

Land

E-Mail

Telefon

Bitte  
einmachen

Antwort

Bayer AG  
c/o Finger Marketing Services  
Postfach 100 538  
41405 Neuss  
Germany

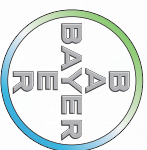

**Science For A Better Life**



## IMPRESSUM

## Herausgeber

Bayer AG, Konzernkommunikation, 51368 Leverkusen

## Redaktion

Dr. Katrin Schneider, Tel. +49 (0)2 14/30-4 88 25

E-Mail: katrin.schneider.ks@bayer-ag.de

## Bayer im Internet

www.bayer.de

Juli 2010

## ZUM TITELBILD

Das Erfinder-Unternehmen Bayer setzt auf Innovationen. Dafür sorgen rund 12.400 Forscher und Entwickler weltweit. Eine von ihnen ist die Chinesin Dr. Xin Ma, Leiterin des neuen Global Drug Discovery Innovation Center China in Peking. Das Foto zeigt die Wissenschaftlerin bei der Vorbereitung eines Versuchs für die Medikamenten-Entwicklung.

## Zukunftsgerichtete Aussagen:

Diese Publikation enthält in die Zukunft gerichtete Aussagen, die auf den gegenwärtigen Annahmen und Prognosen der Unternehmensleitung des Bayer-Konzerns bzw. seiner Teilkonzerne beruhen. Verschiedene bekannte wie auch unbekannte Risiken, Ungewissheiten und andere Faktoren können dazu führen, dass die tatsächlichen Ergebnisse, die Finanzlage, die Entwicklung oder die Performance der Gesellschaft wesentlich von den hier gegebenen Einschätzungen abweichen. Diese Faktoren schließen diejenigen ein, die Bayer in veröffentlichten Berichten beschrieben hat. Diese Berichte stehen auf der Bayer-Website www.bayer.de zur Verfügung. Die Gesellschaft übernimmt keinerlei Verpflichtung, solche zukunftsgerichteten Aussagen fortzuschreiben und an zukünftige Ereignisse oder Entwicklungen anzupassen.

## Wichtige Information:

Die Namen „Bayer Schering Pharma“ oder „Schering“ stehen in dieser Publikation immer gleichbedeutend für die Bayer Schering Pharma AG, Berlin, Deutschland, oder für deren Vorgängerin, die Schering AG, Berlin, Deutschland.

## Finanzkalender

|                                 |                         |
|---------------------------------|-------------------------|
| Zwischenbericht 2. Quartal 2010 | <b>29. JULI 2010</b>    |
| Zwischenbericht 3. Quartal 2010 | <b>28. OKTOBER 2010</b> |
| Berichterstattung 2010          | <b>28. FEBRUAR 2011</b> |
| Zwischenbericht 1. Quartal 2011 | <b>28. APRIL 2011</b>   |
| Hauptversammlung 2011           | <b>29. APRIL 2011</b>   |
| Auszahlung der Dividende        | <b>2. MAI 2011</b>      |
| Zwischenbericht 2. Quartal 2011 | <b>28. JULI 2011</b>    |
| Zwischenbericht 3. Quartal 2011 | <b>27. OKTOBER 2011</b> |

## BITTE SENDEN SIE MIR FOLGENDE KONZERN-PUBLIKATIONEN:

## Geschäftsbericht

- ☐ Deutsch  
☐ Englisch

## Aktionärsbrief

- ☐ Deutsch  
☐ Englisch

## Nachhaltigkeitsbericht

- ☐ Deutsch  
☐ Englisch  
☐ Spanisch

## Unternehmensmagazin „report“

- ☐ Deutsch  
☐ Englisch

## Forschungsmagazin „research“

- ☐ Deutsch  
☐ Englisch

## „Das Bayer-Klimaprogramm“

- ☐ Deutsch  
☐ Englisch  
☐ Spanisch

## Namen | Zahlen | Fakten

- ☐ Deutsch  
☐ Englisch

## „direkt“, Zeitung für Mitarbeiter und Pensionäre der Bayer AG

- ☐ Deutsch

## „direkt“, Zeitung für die Nachbarn der Bayer AG

- ☐ Deutsch

- ☐ Bitte schicken Sie mir die angeforderten Publikationen einmalig zu.

- ☐ Bitte nehmen Sie mich für die angeforderten Publikationen in den Verteiler auf.

# Inhalt

## KONZERN

---

|                                       |    |
|---------------------------------------|----|
| Credo                                 | 2  |
| Organisation                          | 4  |
| Standorte und Regionen                | 6  |
| Vorstand                              | 8  |
| Aufsichtsrat und Corporate Governance | 10 |
| Geschäftsentwicklung                  | 12 |
| Die Bayer-Aktie                       | 14 |

## TEILKONZERNE UND SERVICEGESELLSCHAFTEN

---

|                       |    |
|-----------------------|----|
| Bayer HealthCare      | 16 |
| Bayer CropScience     | 20 |
| Bayer MaterialScience | 24 |
| Servicegesellschaften | 28 |

## WEITERE THEMEN

---

|                           |    |
|---------------------------|----|
| Forschung und Entwicklung | 30 |
| Mitarbeiter               | 32 |
| Nachhaltigkeit            | 34 |
| Historie                  | 38 |
| Dialog                    | 42 |
| Impressum                 | 45 |

# Werte schaffen durch Innovation und Wachstum

Bayer ist ein weltweit tätiges Unternehmen mit Kernkompetenzen auf den Gebieten Gesundheit, Ernährung und hochwertige Materialien. Mit unseren Produkten und Dienstleistungen wollen wir den Menschen nützen und zur Verbesserung der Lebensqualität beitragen. Gleichzeitig wollen wir Werte schaffen durch Innovation, Wachstum und eine hohe Ertragskraft.

Mit der Ausrichtung auf unser Leitbild „Bayer: Science For A Better Life“ und der konsequenten Fortsetzung der Portfolio-Optimierung konzentrieren wir unsere Aktivitäten in drei leistungsstarken und weitgehend eigenständig operierenden Teilkonzernen: Bayer HealthCare, Bayer CropScience und Bayer MaterialScience. Sie bieten Zugang zu wichtigen globalen Wachstumsmärkten und werden von unseren Servicegesellschaften unterstützt.

Wir untermauern unseren Anspruch, als Erfinder-Unternehmen in forschungsintensiven Bereichen Zeichen zu setzen. Denn Innovationen schaffen die Basis für Wettbewerbsfähigkeit und Wachstum und damit für den Erfolg des Unternehmens in der Zukunft.

Unsere Kenntnisse und Produkte können helfen, Krankheiten zu diagnostizieren, zu lindern und zu heilen. Sie dienen dazu, die Qualität von Nahrungsmitteln zu verbessern und für eine ausreichende Ernährung der Weltbevölkerung zu sorgen. Außerdem leisten sie einen bedeutenden Beitrag für ein aktives Leben im modernen Alltag. Dank unseres Know-hows und unserer Innovationskraft können wir nicht zuletzt Lösungen für den Klimaschutz und den Umgang mit den Folgen des Klimawandels bieten.

Wir bekennen uns zu den Prinzipien des Sustainable Development und zur Rolle eines sozial und ethisch verantwortlich handelnden „Corporate Citizen“. Unsere technische und wirtschaftliche Kompetenz ist für uns mit der Verantwortung verbunden, zum Nutzen der Menschen zu arbeiten, uns sozial zu engagieren und einen nachhaltigen Beitrag für eine dauerhafte

und umweltgerechte Entwicklung zu leisten. Denn Ökonomie, Ökologie und soziales Engagement sind für uns gleichrangige Ziele innerhalb unserer Unternehmenspolitik.

Wir wollen durch Leistungsfähigkeit, Flexibilität und einen offenen Dialog überzeugen. Es gilt, den Unternehmenswert nachhaltig zu steigern und eine hohe Wertschöpfung zu erwirtschaften – im Interesse unserer Aktionäre, unserer Mitarbeiterinnen und Mitarbeiter und der gesamten Gesellschaft in allen Ländern, in denen wir tätig sind.

Die Konzernzentrale der Bayer AG in Leverkusen

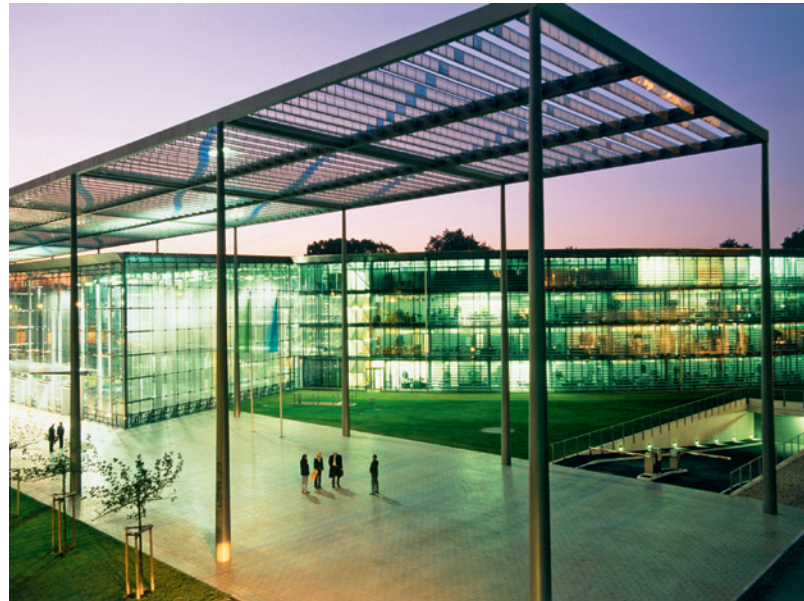



# Standorte und Regionen

| NORDAMERIKA           |                                 |
|-----------------------|---------------------------------|
| Umsatz                | 7.705 Millionen Euro (-4,0 %) * |
| Mitarbeiter           | 16.300                          |
| F+E-Ausgaben          | 507 Millionen Euro              |
| Anzahl Gesellschaften | 44 **                           |

| EUROPA                |                                   |
|-----------------------|-----------------------------------|
| Umsatz                | 12.968 Millionen Euro (-10,9 %) * |
| Mitarbeiter           | 54.500                            |
| F+E-Ausgaben          | 2.080 Millionen Euro              |
| Anzahl Gesellschaften | 156 **                            |

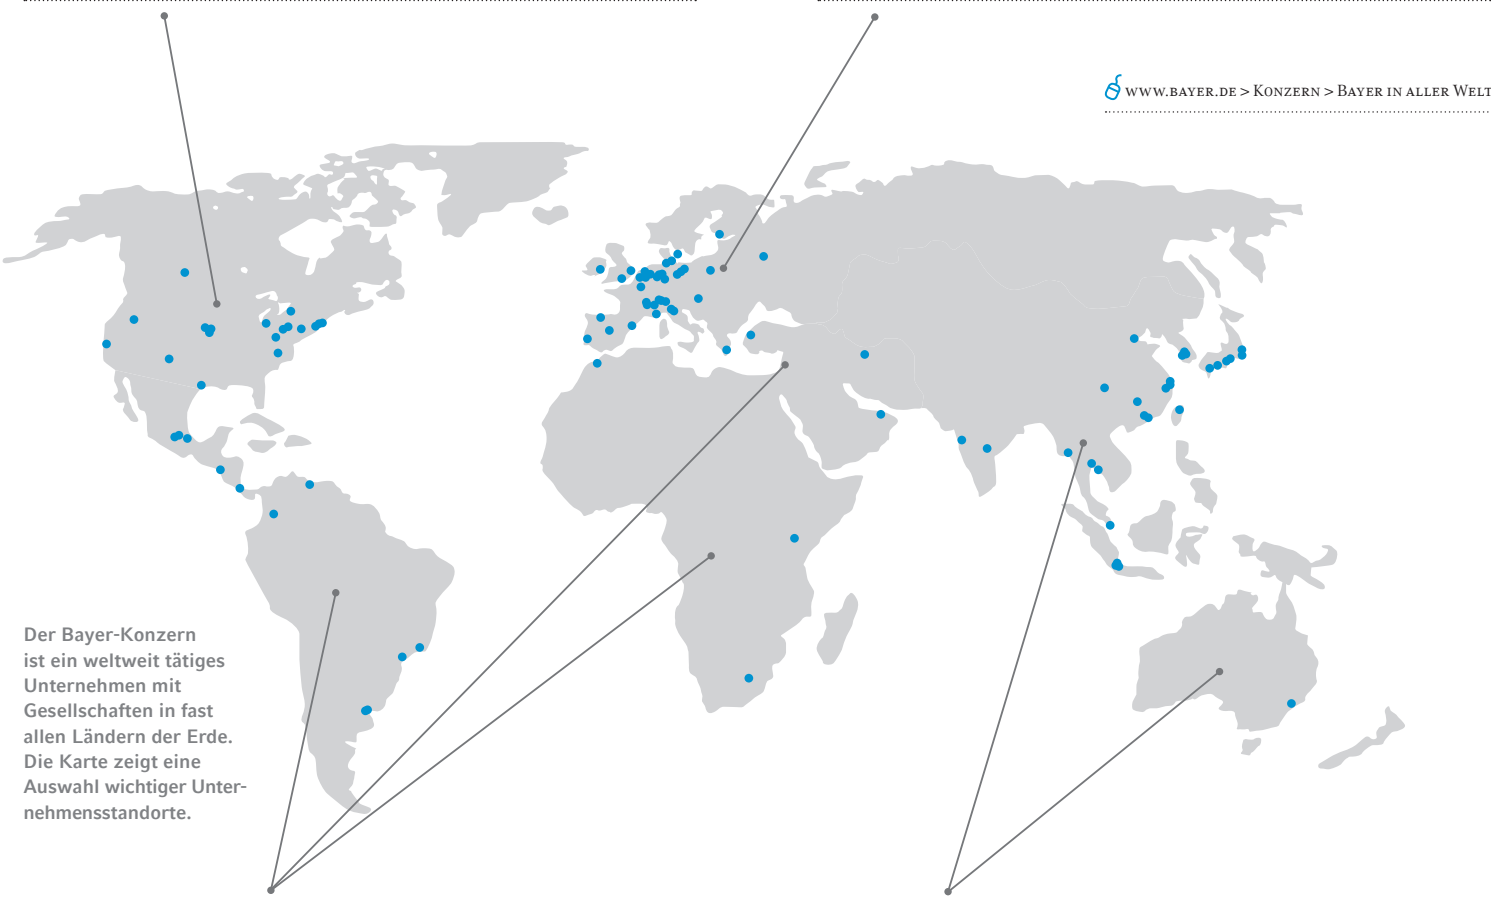

 [www.bayer.de](http://www.bayer.de) > KONZERN > BAYER IN ALLER WELT

| LATEINAMERIKA/AFRIKA/NAHOST |                                 |
|-----------------------------|---------------------------------|
| Umsatz                      | 4.783 Millionen Euro (-3,5 %) * |
| Mitarbeiter                 | 16.000                          |
| F+E-Ausgaben                | 28 Millionen Euro               |
| Anzahl Gesellschaften       | 45 **                           |

| ASIEN/PAZIFIK         |                                 |
|-----------------------|---------------------------------|
| Umsatz                | 5.712 Millionen Euro (+6,1 %) * |
| Mitarbeiter           | 21.600                          |
| F+E-Ausgaben          | 131 Millionen Euro              |
| Anzahl Gesellschaften | 57 **                           |

\* Umsatzveränderung gegenüber dem Vorjahr in Prozent und nach Verleib (Stand 31.12.2009)  
\*\* Vollkonsolidierte Beteiligungsgesellschaften (Stand 31.12.2009)



# Vorstand der Bayer AG

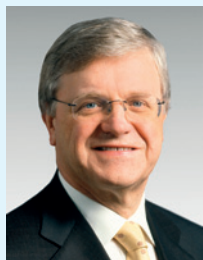

**WERNER WENNING**  
Vorstandsvorsitzender (bis 30.9.2010)

Seit April 2002 ist Werner Wenning Vorstandsvorsitzender des Unternehmens. 1946 in Leverkusen geboren, trat Wenning 1966 in die Bayer AG ein und absolvierte zunächst eine Lehre zum Industriekaufmann. Nach verschiedenen Stationen im In- und Ausland, u. a. als Geschäftsführer von Bayer in Peru und Spanien sowie als Leiter des Konzernbereichs Konzernplanung und Controlling, wurde Wenning im Februar 1997 zum Finanzvorstand der Bayer AG berufen. Er ist Vizepräsident des Verbandes der Chemischen Industrie in Deutschland.

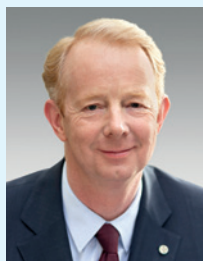

**DR. MARIJN DEKKERS**  
Vorstandsvorsitzender ab 1.10.2010

1957 in Tilburg (Niederlande) geboren, studierte Marijn Dekkers Chemie und Chemieingenieurwesen in Nijmegen und Eindhoven. Nach seiner Promotion begann er eine Laufbahn als Forscher bei General Electric in den USA. 1995 wechselte er zu Honeywell. 2000 wurde er Chief Operating Officer von Thermo Electron Corporation und zwei Jahre später Chief Executive Officer und President. Nach dem Erwerb von Fisher Scientific erhielt das Unternehmen den Namen Thermo Fisher Scientific Inc. Dekkers ist seit dem 1. Januar 2010 Mitglied des Vorstands und wird zum 1. Oktober 2010 die Nachfolge von Werner Wenning antreten.

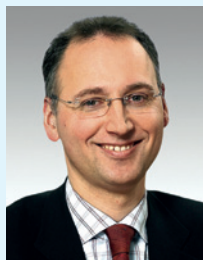

**WERNER BAUMANN**  
Finanzen · Region Europa

1962 in Krefeld geboren, studierte Werner Baumann Wirtschaftswissenschaften in Aachen und Köln. Er trat 1988 in die Bayer AG ein und übernahm erste Aufgaben im Ressort Konzernfinanzen. Nach Stationen in Spanien und den USA kehrte Baumann 2002 nach Deutschland zurück und wurde Mitglied des Executive Committee von Bayer HealthCare und ein Jahr später Vorstandsmitglied und Arbeitsdirektor im neu gegründeten Teilkonzern. Seit dem 1. Januar 2010 ist er Mitglied des Vorstands und hat am 1. Mai 2010 die Nachfolge von Klaus Kühn als Finanzvorstand angetreten.

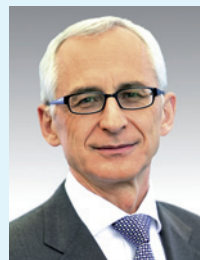

**DR. WOLFGANG PLISCHKE**  
Innovation · Technologie · Umwelt ·  
Region Asien/Pazifik

1951 in Stuttgart geboren, studierte Wolfgang Plischke Biologie an der Universität Hohenheim. Nach seiner Promotion begann er seine Laufbahn im Konzern 1980 bei der Bayer-Tochtergesellschaft Miles. Nach verschiedenen Stationen im In- und Ausland leitete Plischke ab 2000 den Geschäftsbereich Pharma in Nordamerika, zwei Jahre später übernahm er die Leitung des Geschäftsbereichs Pharma der Bayer AG. Im März 2006 wurde er in den Vorstand berufen. Seit Dezember 2007 ist Plischke Vorsitzender des Verbandes Forschender Arzneimittelhersteller in Deutschland.

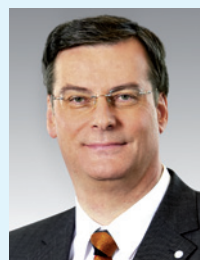

**DR. RICHARD POTT**  
Strategie · Personal · Arbeitsdirektor ·  
Region Amerika, Afrika und Naher Osten

1953 in Leverkusen geboren, studierte Richard Pott Physik an der Universität Köln, wo er auch promovierte. 1984 trat Pott in die Zentrale Forschung der Bayer AG ein. Nach verschiedenen Stationen in der Konzernverwaltung wurde er 1997 zum Leiter des Konzernbereichs Konzernplanung und Controlling ernannt, bevor ihm 1999 die Leitung des Geschäftsbereichs Spezialprodukte übertragen wurde. Im Mai 2002 wurde er in den Vorstand berufen.

# Aufsichtsrat und Corporate Governance

Der Aufsichtsrat der Bayer AG hat die Aufgabe, den Vorstand zu überwachen und ihn zu beraten. Er besteht aus 20 Mitgliedern, die gemäß dem deutschen Mitbestimmungsgesetz jeweils zur Hälfte aus Kreisen der Aktionäre und der Arbeitnehmer stammen. In Entscheidungen von grundlegender Bedeutung für das Unternehmen ist der Aufsichtsrat unmittelbar eingebunden. Er stimmt mit dem Vorstand auch die strategische Ausrichtung der Gesellschaft ab und erörtert mit ihm regelmäßig den Stand der Umsetzung dieser Geschäftsstrategie.

Der Aufsichtsrat hat vier Ausschüsse gebildet – Präsidium, Prüfungsausschuss, Personalausschuss und Nominierungsausschuss – und hat sie im Einklang mit den Anforderungen des Aktiengesetzes und des Deutschen Corporate Governance Kodex mit der Wahrnehmung bestimmter Aufgaben betraut.

## CORPORATE GOVERNANCE

Die verantwortungsvolle Unternehmensführung (Corporate Governance) hat bei Bayer seit jeher einen hohen Stellenwert. So hat das Unternehmen im vergangenen Jahr wieder die Erklärung abgeben können, den Empfehlungen des Deutschen Corporate Governance Kodex in vollem Umfang zu entsprechen.

 [www.bayer.de](http://www.bayer.de) > KONZERN > CORPORATE GOVERNANCE  
[www.bayer.de](http://www.bayer.de) > KONZERN > AUFSICHTSRAT

### ORGANE DER GESELLSCHAFT

#### Vorsitzender des Aufsichtsrats

**Dr. Manfred Schneider**

#### Stellvertretender Vorsitzender des Aufsichtsrats

**Thomas de Win**  
Vorsitzender des Gesamt- und Konzernbetriebsrats

### Weitere Aufsichtsratsmitglieder

**Dr. Paul Achleitner**  
Mitglied des Vorstands der Allianz SE

**André Aich**  
Mitglied des Betriebsrats der Bayer Schering Pharma AG

**Willy Beumann**  
Vorsitzender des Betriebsrats Bayer, Standort Wuppertal

**Dr. Clemens Börsig**  
Vorsitzender des Aufsichtsrats der Deutsche Bank AG

**Dr.-Ing. Thomas Fischer**  
Vorsitzender des Konzernsprecherausschusses Bayer

**Peter Hausmann**  
Mitglied des geschäftsführenden Hauptvorstands der IG Bergbau, Chemie, Energie

**Prof. Dr.-Ing. e.h. Hans-Olaf Henkel**  
Honorarprofessor an der Universität Mannheim

**Reiner Hoffmann**  
Stellv. Generalsekretär des Europäischen Gewerkschaftsbundes (EGB)

**Dr. rer. pol. Klaus Kleinfeld**  
Chief Executive Officer der ALCOA Inc.

**Petra Kronen**  
Vorsitzende des Betriebsrats Bayer, Standort Uerdingen

**Dr. rer. nat. Helmut Panke**  
Mitglied verschiedener Aufsichtsräte

**Hubertus Schmoldt**  
Vorsitzender der IG Bergbau, Chemie, Energie (bis 13.10.2009)

**Dr.-Ing. Ekkehard D. Schulz**  
Vorsitzender des Vorstands der ThyssenKrupp AG

**Dr. Klaus Sturany**  
Mitglied verschiedener Aufsichtsräte

**Roswitha Süßelbeck**  
Stellv. Vorsitzende des Betriebsrats Bayer, Standort Leverkusen

**Dipl.-Ing. Dr.-Ing. e.h. Jürgen Weber**  
Vorsitzender des Aufsichtsrats Deutsche Lufthansa AG

**Prof. Dr. Dr. h.c. Ernst-Ludwig Winnacker**  
Generalsekretär des Human Frontier Science Program

**Oliver Zühlke**  
Vorsitzender des Betriebsrats Bayer, Standort Leverkusen

### Ehrenvorsitzender

**Hermann Josef Strenger**



# Geschäftsentwicklung

Im 1. Quartal 2010 erzielte der Bayer-Konzern ein kräftiges Umsatz- und Ergebnisplus. Bayer MaterialScience zeigte sich deutlich erholt und konnte sein Geschäft in einem sich zunehmend stabilisierenden Marktumfeld gegenüber dem sehr schwachen Vorjahresquartal stärker als erwartet steigern. Bayer HealthCare verbesserte Umsatz und Ergebnis leicht. Hingegen schwächte sich das Bayer-CropScience-Geschäft im 1. Quartal 2010 vor allem markt- und witterungsbedingt im Vergleich zum Rekordquartal 2009 deutlich ab.

## KONZERNUMSATZ

Der Konzernumsatz wuchs um 5,3 Prozent auf 8.316 Millionen Euro (Vorjahr: 7.895 Millionen Euro). Bereinigt um Währungs- und Portfolioeffekte verzeichnete der Konzern ein Plus von 6,2 Prozent. Der Umsatz von Bayer HealthCare erhöhte sich um 0,7 Prozent. Im Bayer-CropScience-Geschäft sank der Umsatz um 7,9 Prozent. Der Umsatz von Bayer MaterialScience stieg deutlich um 35,5 Prozent.

## ERGEBNIS

Das EBITDA vor Sondereinflüssen des Bayer-Konzerns erhöhte sich um 13,2 Prozent auf 1.918 Millionen Euro (Vorjahr: 1.695 Millionen Euro). Zu diesem Ergebnisanstieg trug die deutliche Verbesserung bei Bayer MaterialScience wesentlich bei. Die EBITDA-Marge vor Sondereinflüssen stieg auf 23,1 Prozent (Vorjahr: 21,5 Prozent). Das EBIT vor Sondereinflüssen verbesserte sich um 25,3 Prozent auf 1.274 Millionen Euro (Vorjahr: 1.017 Millionen Euro). Das EBIT wuchs um 23,0 Prozent auf 1.197 Millionen Euro (Vorjahr: 973 Millionen Euro). Im 1. Quartal 2010 erzielte Bayer ein Konzernergebnis von 693 Millionen Euro (Vorjahr: 425 Millionen Euro). Das Ergebnis je Aktie betrug 0,84 Euro (Vorjahr: 0,55 Euro).

## Kennzahlen Bayer-Konzern

|                                              | 1. Quartal<br>2009 | 1. Quartal<br>2010 | Gesamtjahr<br>2009 |
|----------------------------------------------|--------------------|--------------------|--------------------|
|                                              | in Mio €           | in Mio €           | in Mio €           |
| Umsatzerlöse                                 | 7.895              | 8.316              | 31.168             |
| EBITDA <sup>1</sup>                          | 1.661              | 1.841              | 5.815              |
| EBITDA vor Sondereinflüssen                  | 1.695              | 1.918              | 6.472              |
| EBIT <sup>2</sup>                            | 973                | 1.197              | 3.006              |
| EBIT vor Sondereinflüssen                    | 1.017              | 1.274              | 3.772              |
| Ergebnis vor Ertragsteuern                   | 639                | 953                | 1.870              |
| Konzernergebnis                              | 425                | 693                | 1.359              |
| Konzernergebnis je Aktie (in €) <sup>3</sup> | 0,55               | 0,84               | 1,70               |
| Brutto-Cashflow <sup>4</sup>                 | 1.209              | 1.271              | 4.658              |
| Netto-Cashflow <sup>5</sup>                  | 693                | 732                | 5.375              |
| Investitionen*                               | 290                | 230                | 1.575              |
| Forschungs- und Entwicklungskosten           | 657                | 717                | 2.746              |
| Dividende pro Aktie der Bayer AG (in €)      | -                  | -                  | 1,40               |

\* Ausgaben für Sachanlagen und immaterielle Vermögenswerte laut Kapitalflussrechnung

Erläuterung der Fußnoten siehe Seite 44

## Umsatzanteil der Segmente, 1. Quartal 2010 (Vorjahreswerte in Klammern)

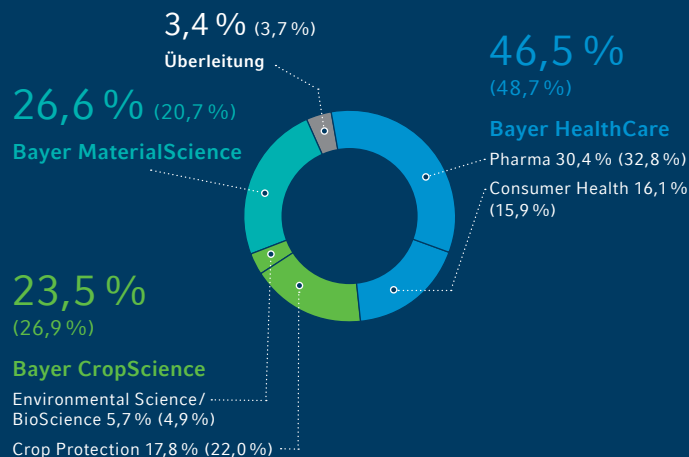

# Die Bayer-Aktie

Das Jahr 2009 war von starken Kursbewegungen an den internationalen Börsenplätzen geprägt. Unter dem Eindruck der Finanz- und Wirtschaftskrise verlor der Deutsche Aktienindex (DAX) bis Anfang März rund 24 Prozent und markierte mit 3.666 Punkten den Jahrestiefststand. Dies war zugleich der niedrigste Stand seit fünf Jahren. In den Folgemonaten setzte jedoch eine deutliche Erholung ein. Dabei erreichte der DAX am Jahresende 5.957 Punkte und konnte somit insgesamt ca. 24 Prozent gegenüber dem Vorjahr zulegen. Im 1. Quartal 2010 gewann der DAX 3,3 Prozent und schloss bei 6.154 Punkten. Der europäische Vergleichsindex EURO STOXX 50 (Performance-Index) fiel seit Jahresbeginn um 1,0 Prozent und beendete das 1. Quartal bei 4.653 Punkten.

## BAYER-AKTIE WIEDER DEUTLICH BESSER ALS DER DAX

Auch 2009 entwickelte sich die Bayer-Aktie im dritten Jahr in Folge besser als der DAX und der EURO STOXX 50. Sie gewann im Jahresverlauf 2009 34,7 Prozent. Unter Einbeziehung der im Mai 2009 gezahlten Dividende von 1,40 Euro pro Aktie errechnet sich eine Performance von 39,8 Prozent. Die Bayer-Aktie schloss am Jahresende 2009 mit 55,96 Euro, nahezu am Jahreshöchstkurs. Der Bayer-Aktienkurs ging jedoch im 1. Quartal 2010 in eine Konsolidierungsphase über. Bei einer Bandbreite zwischen 56,40 € Anfang Januar und 46,82 € im Februar schloss die Bayer-Aktie am 31. März schließlich mit 50,08 €. Dies entspricht einem Kursrückgang von 10,5 Prozent gegenüber dem Schlusskurs 2009.

## UMSTELLUNG AUF NAMENSAKTIE

Im September 2009 stellte die Bayer AG den gesamten Aktienbestand von 826.947.808 Inhaberaktien im Verhältnis 1:1 auf Namensaktien um. Durch die Umstellung und Erfassung der Anteilseigner im Aktienregister soll die Kontaktaufnahme mit den Aktionären erleichtert und die Transparenz erhöht werden.

## DIVIDENDE PRO AKTIE BLEIBT KONSTANT

Für das Geschäftsjahr 2009 wurde eine Dividende von 1,40 Euro pro Aktie gezahlt. Dies entspricht einer Ausschüttungssumme von 1.158 Millionen Euro. Bezogen auf den Jahresschlusskurs 2009 errechnet sich eine Dividendenrendite von 2,5 Prozent.

## Performance der Bayer-Aktie (April 2009 – März 2010)

indexiert; 100 = Xetra-Schlusskurs am 31.3.2010, Quelle: Bloomberg

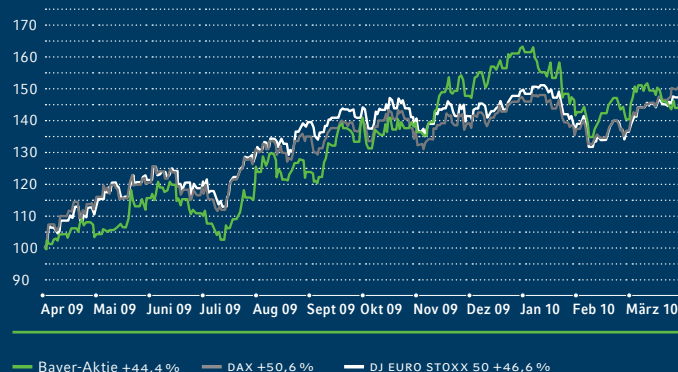

## Dividende pro Aktie (Euro)

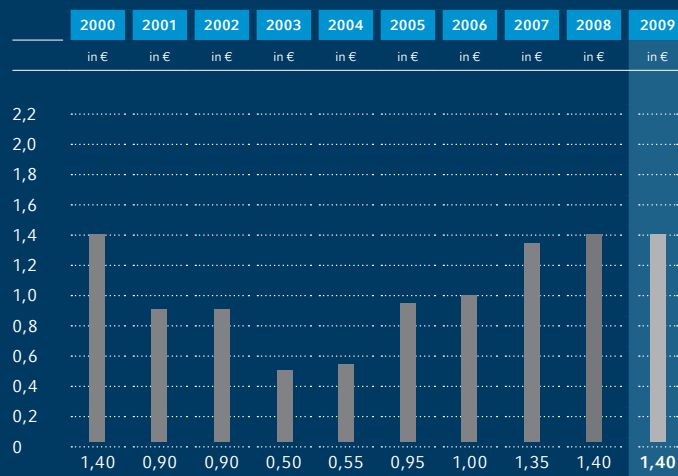

## Ausschüttungssumme

| 2000     | 2001     | 2002     | 2003     | 2004     | 2005     | 2006     | 2007     | 2008     | 2009     |
|----------|----------|----------|----------|----------|----------|----------|----------|----------|----------|
| in Mio € |
| 1.022    | 657      | 657      | 365      | 402      | 694      | 764      | 1.032    | 1.070    | 1.158    |

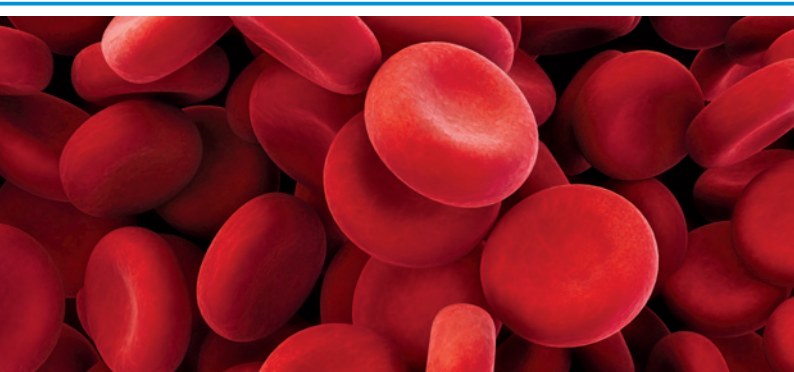

# Bayer HealthCare

## Unternehmensdaten

|                              |                                                                         |
|------------------------------|-------------------------------------------------------------------------|
| Unternehmen                  | Bayer HealthCare                                                        |
| Sitz                         | Leverkusen, Deutschland                                                 |
| Leitung                      | Marijn Dekkers <sup>1</sup>                                             |
| Divisionen                   | Animal Health<br>Bayer Schering Pharma<br>Consumer Care<br>Medical Care |
| Umsatz                       | 15.988 Millionen Euro                                                   |
| EBITDA vor Sondereinflüssen* | 4.468 Millionen Euro                                                    |
| F+E-Investitionen            | 1.847 Millionen Euro                                                    |
| Mitarbeiter                  | 53.400                                                                  |

Stand 31.12.2009

\* Erläuterung der Fußnote siehe Seite 44

<sup>1</sup> bis 30.4.2010 Arthur Higgins, vom 1.5. bis 14.8.2010 Marijn Dekkers,  
ab 15.8.2010 Jörg Reinhardt

 [WWW.BAYERHEALTHCARE.COM](http://WWW.BAYERHEALTHCARE.COM)

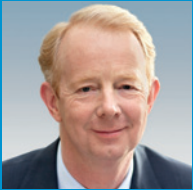

Marijn Dekkers<sup>1</sup>  
Leitung

Das Bild oben zeigt eine  
Illustration von Blutzellen.

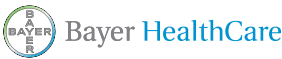

Bayer HealthCare gehört zu den weltweit führenden innovativen Unternehmen in der Gesundheitsversorgung mit Arzneimitteln und medizinischen Produkten. Ziel des Teilkonzerns ist es, innovative Produkte zu erforschen, zu entwickeln, zu produzieren und zu vertreiben, um die Gesundheit von Mensch und Tier weltweit zu verbessern.

Das operative Geschäft des Teilkonzerns ist in vier Divisionen aufgeteilt:

- **Animal Health** (Tierarzneimittel und -pflegeprodukte);
- **Bayer Schering Pharma** (verschreibungspflichtige Arzneimittel);
- **Consumer Care** (verschreibungsfreie Arznei- und Nahrungsergänzungsmittel);
- **Medical Care** (Blutzucker-Messgeräte sowie Geräte für die diagnostische Bildgebung und medizinische Therapie).

## WIRTSCHAFTLICHE ENTWICKLUNG

Bayer HealthCare steigerte 2009 seinen Umsatz um 3,8 Prozent auf rund 16 Milliarden Euro. Das um Sondereinflüsse bereinigte EBITDA stieg um 7,5 Prozent auf 4,5 Milliarden Euro. In der Division Bayer Schering Pharma erhöhten sich die Umsätze um 4,4 Prozent auf 10,5 Milliarden Euro. Die Division Consumer Care verzeichnete 2009 einen Zuwachs von 2,0 Prozent und steigerte ihren Umsatz auf 3,1 Milliarden Euro. Ein Plus von 5,0 Prozent gelang auch der Division Medical Care, die 2009 einen Umsatz von 1,5 Milliarden Euro erwirtschaftete. Die Erlöse der Division Animal Health erhöhten sich um 1,5 Prozent auf 977 Millionen Euro.

## Zahlen | Fakten

| Umsatzentwicklung |                                                                                      | in Mio € |
|-------------------|--------------------------------------------------------------------------------------|----------|
| 2008              |  | 15.407   |
| 2009              |  | 15.988   |

| Mitarbeiterzahlen |                                                                                      | Mitarbeiter |
|-------------------|--------------------------------------------------------------------------------------|-------------|
| 2008              |  | 53.100      |
| 2009              |  | 53.400      |

| Forschungs- und Entwicklungskosten |                                                                                      | in Mio € |
|------------------------------------|--------------------------------------------------------------------------------------|----------|
| 2008                               |  | 1.742    |
| 2009                               |  | 1.847    |

## FORSCHUNGSAKTIVITÄTEN

Der Fokus der Forschung und Entwicklung bei Bayer HealthCare liegt auf der Identifizierung und Entwicklung neuer Wirkstoffe für Erkrankungen mit einem hohen medizinischen Bedarf. Mit 1,8 Milliarden Euro entfielen 2009 allein rund 67 Prozent der gesamten Forschungsaufwendungen des Bayer-Konzerns auf Bayer HealthCare.

Die Division Bayer Schering Pharma forscht und entwickelt schwerpunktmäßig in den Gebieten Kardiologie und Hämatologie, Onkologie, Frauengesundheit und Diagnostische Bildgebung. Aktuelle Beispiele für Wirkstoffe aus der Pharmaforschung sind:

- **Xarelto®**: Medikament zur Prävention und Therapie thromboembolischer Erkrankungen (Venenthrombosen);
- **Nexavar®**: Antikrebs-Medikament, das das Tumorwachstum durch die Kombination zweier spezieller Wirkmechanismen verhindern soll;
- **Visanne®**: Medikament für die Behandlung der Endometriose;
- **Cinaciguat**: Wirkstoff zur Therapie akuter Herzinsuffizienz oder Herzschwäche;
- **Riociguat**: Wirkstoff zur Therapie verschiedener Formen des Lungenhochdrucks.

Die Forschungs- und Entwicklungsaktivitäten der Division Consumer Care richten sich auf die Identifizierung, Entwicklung und Markteinführung von rezeptfreien Produkten.

Forschungsschwerpunkte der Division Medical Care liegen auf den Gebieten der Blutzuckermessung sowie in der Weiterentwicklung medizinischer Geräte, die in der Diagnose und Therapie verschiedener Erkrankungen eingesetzt werden. Des Weiteren wird in eine Ausweitung in weitere Segmente wie z. B. medizinische Datenmanagementsysteme investiert.

Die Forschungs- und Entwicklungsschwerpunkte in der Division Animal Health konzentrieren sich auf die Bereiche Antibiotika und Parasitizide sowie Wirkstoffe für die Behandlung von nicht-infektiösen Krankheiten bei Tieren.

## Umsatzstärkste Produkte\*

- Adalat®** (Medikament zur Behandlung des Bluthochdrucks)
- Advantage®** (Produktlinie für Antiflohmittel für Hunde und Katzen)
- Aspirin®** (Schmerzmittel auf Basis des Wirkstoffs Acetylsalicylsäure)
- Avalox®/Avelox®** (Medikament zur Behandlung von Infektionen der Atemwege)
- Betaferon®/Betaseron®** (Spezialtherapeutikum zur Behandlung der Multiplen Sklerose)
- Cipro®/Ciprobay®** (Medikament zur Behandlung von Infektionskrankheiten)
- Contour®** (Dachmarke für Systeme und Serviceleistungen im Bereich der Blutzuckermessung)
- Kogenate®** (Medikament zur Behandlung der Bluterkrankheit)
- Levitra®** (Medikament zur Behandlung der erektilen Dysfunktion)
- Mirena®** (hormonelles Verhütungsmittel)
- Nexavar®** (Medikament gegen Nieren- und Leberkrebs)
- YAZ®/Yasmin®/Yasminelle®** (hormonelle Verhütungsmittel)

Stand 31.12.2009

\* in alphabetischer Reihenfolge

Der Bayer-Forscher Dr. Johannes-Peter Stasch (l.) und Professor Hossein Ardeschir Ghofrani vom Universitätsklinikum Gießen am Modell der Lunge.

## Gesunder Kreislauf

Mit steigendem Lebensalter wächst das Risiko für Herz- und Kreislauf-Leiden. Doch die derzeit verfügbaren Medikamente setzen einer erfolgreichen Behandlung deutliche Grenzen. Das wollen Bayer-Forscher ändern. Sie konzentrieren sich auf neuartige Substanzen zur Behandlung schwerer Herz- und Lungenkrankheiten. Mit Erfolg: Erste vielversprechende Wirkstoffe zur Therapie von Lungenhochdruck und Herzinsuffizienz sind in der fortgeschrittenen klinischen Entwicklung.

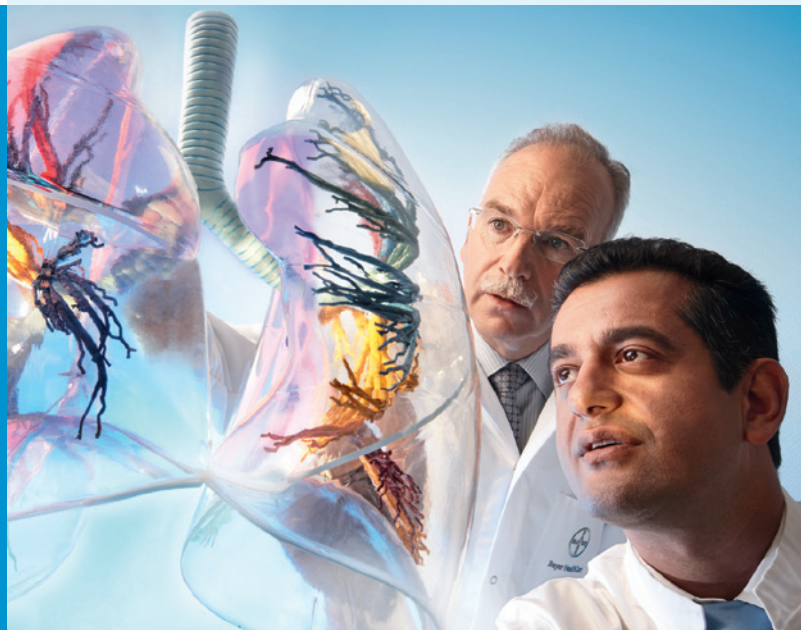



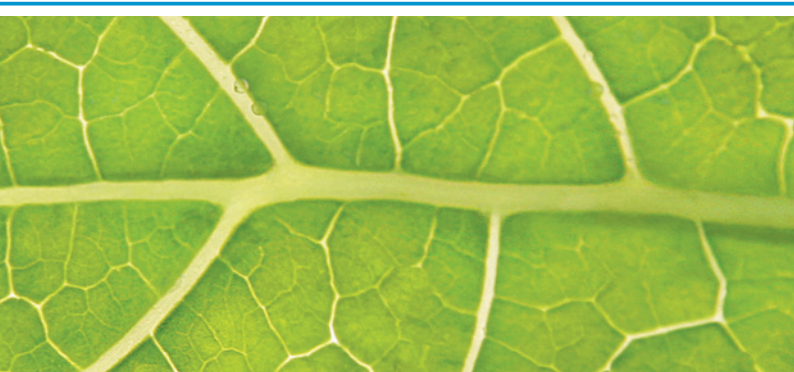

# Bayer CropScience

Unternehmensdaten

|                              |                                                        |
|------------------------------|--------------------------------------------------------|
| Unternehmen                  | Bayer CropScience                                      |
| Sitz                         | Monheim, Deutschland                                   |
| Leitung                      | Friedrich Berschauer <sup>1</sup>                      |
| Geschäftsbereiche            | Crop Protection<br>Environmental Science<br>BioScience |
| Umsatz                       | 6.510 Millionen Euro                                   |
| EBITDA vor Sondereinflüssen* | 1.508 Millionen Euro                                   |
| F+E-Investitionen            | 653 Millionen Euro                                     |
| Mitarbeiter                  | 18.700                                                 |

Stand 31.12.2009

\* Erläuterung der Fußnote siehe Seite 44

<sup>1</sup> bis 30.9.2010, ab 1.10.2010 Sandra E. Peterson

 [WWW.BAYERCROPSCIENCE.COM](http://WWW.BAYERCROPSCIENCE.COM)

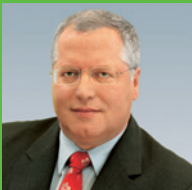

Friedrich Berschauer<sup>1</sup>  
Leitung

Das Bild oben zeigt die Detailaufnahme eines Rapsblattes.

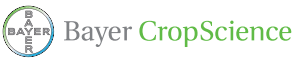

Bayer CropScience nimmt mit leistungsfähigen Produkten, zukunftsweisenden Innovationen und starker Kundenorientierung weltweit Spitzenpositionen im Pflanzenschutz und bei der Schädlingsbekämpfung im nicht-landwirtschaftlichen Bereich ein. Ein weiterer Schwerpunkt liegt beim Geschäft mit Saatgut und Pflanzeigenschaften.

Das Unternehmen ist in sechs operative Geschäftseinheiten organisiert: vier Einheiten für das regionale Pflanzenschutzgeschäft (**Crop Protection**) und die beiden Einheiten **Environmental Science** und **BioScience**.

WIRTSCHAFTLICHE ENTWICKLUNG

Bayer CropScience konnte trotz eines abschwächenden Marktumsfelds den Umsatz im Geschäftsjahr 2009 um 2,0 Prozent auf 6,5 Milliarden Euro steigern. Nach der positiven Entwicklung im Jahr 2008 trübten sich die Marktbedingungen im globalen Saatgut- und Pflanzenschutzmarkt im Laufe des Jahres 2009 deutlich ein. Rückläufige Preise für die wichtigsten landwirtschaftlichen Kulturen, ein geringerer Befallsdruck durch Insekten und Pflanzenkrankheiten und ungünstige Witterungsbedingungen führten insbesondere im 2. Halbjahr 2009 zu einem spürbaren Nachfragerückgang nach Pflanzenschutzmitteln.

Der Umsatz bei Crop Protection stieg 2009 um 1,6 Prozent auf 5,4 Milliarden Euro. Der Bereich Environmental Science verbuchte einen Umsatzrückgang von 1,4 Prozent auf 583 Millionen Euro, während BioScience eine deutliche Umsatzsteigerung um 11,3 Prozent auf 503 Millionen Euro erreichte.

Zahlen | Fakten

| Umsatzentwicklung |             | in Mio € |
|-------------------|-------------|----------|
| 2008              | <div></div> | 6.382    |
| 2009              | <div></div> | 6.510    |

| Mitarbeiterzahlen |             | Mitarbeiter |
|-------------------|-------------|-------------|
| 2008              | <div></div> | 18.300      |
| 2009              | <div></div> | 18.700      |

| Forschungs- und Entwicklungskosten |             | in Mio € |
|------------------------------------|-------------|----------|
| 2008                               | <div></div> | 649      |
| 2009                               | <div></div> | 653      |

Das EBITDA vor Sondereinflüssen des Teilkonzerns verringerte sich um 5,9 Prozent auf 1,5 Milliarden Euro. Dieser Ergebnisrückgang beruhte vor allem auf höheren Rohstoffpreisen.

## FORSCHUNGSAKTIVITÄTEN

Im Jahr 2009 entfielen mit 653 Millionen Euro rund 24 Prozent der Aufwendungen des Bayer-Konzerns für Forschung und Entwicklung auf Bayer CropScience.

Wichtige Schwerpunkte liegen neben der klassischen Pflanzenschutzforschung auch im Bereich Saatgut und Pflanzeigenschaften. Hier sind Forschung und Entwicklung auf die Verbesserung der agronomischen und qualitativen Eigenschaften von Nutzpflanzen ausgerichtet. Die dazu verwendeten Technologien umfassen von der Identifizierung des gesuchten Gens bis zur Entwicklung der fertigen Pflanzen alle relevanten Werkzeuge, um wichtige Nutzpflanzen wie Baumwolle, Raps und Reis für Erzeuger und Partner in der Industrie zu verbessern. Aktuelle Beispiele aus der Wirkstoffforschung bei Bayer CropScience sind:

- **Isotianil** (Hauptmarke: Routine®): schützt Reis gegen Pilzerreger, der die Reisbräune verursacht, indem es die natürlichen Abwehrmechanismen der Pflanzen stimuliert;
- **Indaziflam**: Herbizid, dessen Wirkstoff sich durch seine langanhaltende Wirkungsdauer auszeichnet;
- **Bacillus firmus** (Hauptmarke: Votivo®): Mittel zur biologischen Schädlingsbekämpfung in der Saatgutbehandlung;
- **Thiencarbazone-methyl** (Hauptmarken: Adengo®, Corvus®): Wirkstoff zur Bekämpfung von Unkräutern im Mais- und Getreideanbau.

Um die Innovationskraft von Bayer CropScience weiter zu stärken, wird das Unternehmen die Forschungs- und Entwicklungsaktivitäten vor allem in den Bereichen Saatgut und Pflanzenmerkmale sukzessive erhöhen.

## Pflanzen der Zukunft

Die Ernährung der wachsenden Weltbevölkerung zählt zu den großen Herausforderungen unserer Zeit. Dafür müssen die Erträge der weltweiten Agrarproduktion in Zukunft erheblich gesteigert werden. Neue Technologien wie die Pflanzenbiotechnologie und moderne Zuchtverfahren können helfen, die Probleme zu lösen. Bayer CropScience hat die Weichen gestellt: durch einen massiven Ausbau der Forschung in seinem Geschäft mit Saatgut und Pflanzeigenschaften.

## Umsatzstärkste Produkte\*

**Atlantis®** (Mittel gegen Unkräuter)

**Basta®/Liberty®/Rely®/Ignite®** (Mittel gegen Unkräuter)

**Confidor®/Gaucho®/Admire®/Merit®** (Mittel gegen Insekten)

**Decis®/K-Othrine®** (Mittel gegen Insekten)

**Fandango®** (Mittel gegen pilzliche Krankheiten)

**Flint®/Stratego®/Sphere®/Nativo®** (Mittel gegen pilzliche Krankheiten)

**Folicur®/Raxil®** (Mittel gegen pilzliche Krankheiten)

**Poncho®** (Mittel zur Behandlung des Saatguts)

**Proline®/Input®/Prosaro®** (Mittel gegen pilzliche Krankheiten)

**Puma®** (Mittel gegen Unkräuter)

Stand 31.12.2009

\* in alphabetischer Reihenfolge

Im neuen Forschungszentrum in Lubbock in Texas begutachten Vivian Oliver (l.) und Gary Henniger von Bayer CropScience Baumwollpflanzen.

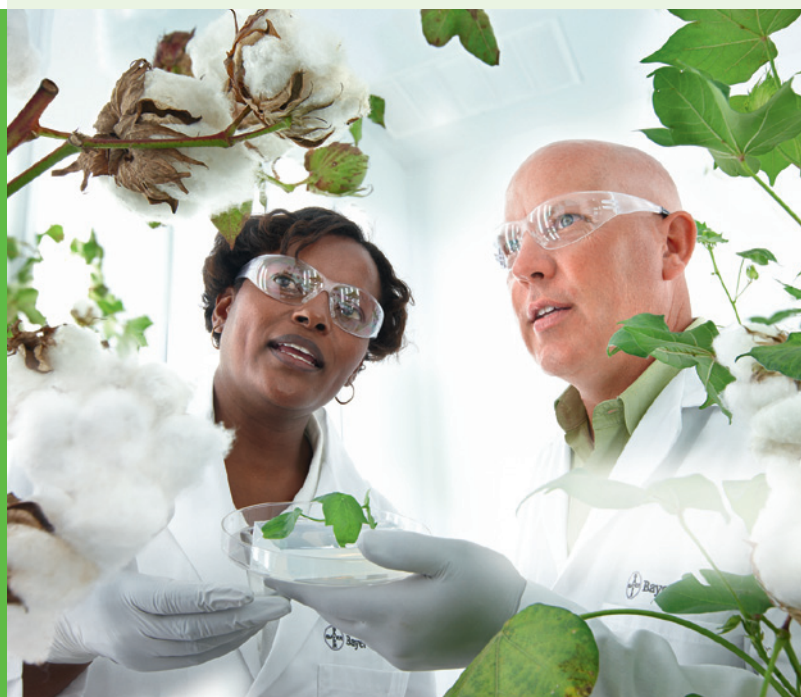

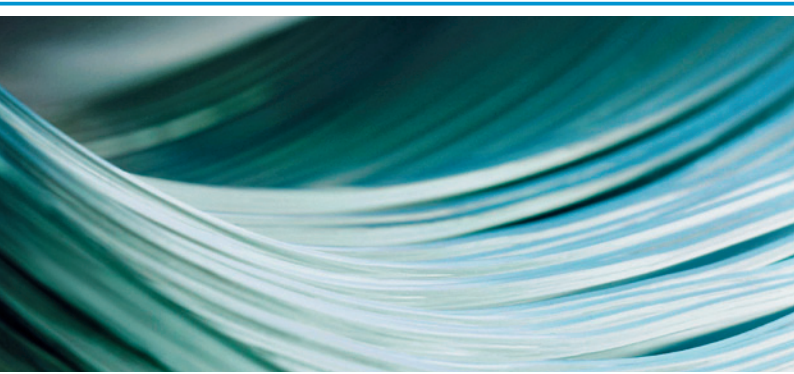

# Bayer MaterialScience

## Unternehmensdaten

|                               |                                                                     |
|-------------------------------|---------------------------------------------------------------------|
| Unternehmen                   | Bayer MaterialScience                                               |
| Sitz                          | Leverkusen, Deutschland                                             |
| Leitung                       | Patrick Thomas                                                      |
| Business Units                | Polyurethanes<br>Polycarbonates<br>Coatings, Adhesives, Specialties |
| Umsatz                        | 7.520 Millionen Euro                                                |
| EBITDA vor Sondereinflüssen * | 446 Millionen Euro                                                  |
| F+E-Investitionen             | 207 Millionen Euro                                                  |
| Mitarbeiter                   | 14.300                                                              |

Stand 31.12.2009

\* Erläuterung der Fußnote siehe Seite 44

 [WWW.BAYERMATERIALSCIENCE.DE](http://WWW.BAYERMATERIALSCIENCE.DE)

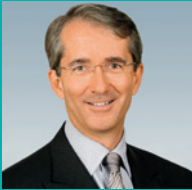

Patrick Thomas  
Leitung

Das Bild oben zeigt eine Folie, die aus thermoplastischen Polyurethanen besteht.

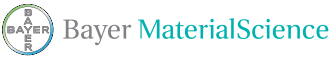

Bayer MaterialScience ist ein führender Hersteller von hochwertigen Werkstoffen, z. B. Polycarbonat und Polyurethan, sowie innovativen Systemlösungen, die in zahlreichen Produkten des täglichen Lebens Anwendung finden. Einen Großteil des Umsatzes erwirtschaftet das Unternehmen mit Produkten, die auf dem Weltmarkt Spitzenpositionen einnehmen.

Das Portfolio des Teilkonzerns besteht aus den drei Business Units

- Polyurethanes,
  - Polycarbonates,
  - Coatings, Adhesives, Specialties
- sowie dem Bereich **Industrial Operations**.

## WIRTSCHAFTLICHE ENTWICKLUNG

Der Geschäftsverlauf des Jahres 2009 von Bayer MaterialScience war durch die Auswirkungen der globalen Finanz- und Wirtschaftskrise geprägt. Während zu Jahresbeginn weltweit extreme Umsatzeinbußen zu verzeichnen waren, erholte sich das Geschäft im Jahresverlauf deutlich. Nach einem sehr schwachen 1. Quartal hat sich die Ergebnislage sukzessive wieder deutlich verbessert. Der Umsatz von Bayer MaterialScience lag im Geschäftsjahr 2009 mit 7,5 Milliarden Euro um 22,8 Prozent unter dem Vorjahreswert. Die Business Unit Polyurethanes erzielte einen Umsatz von 3,8 Milliarden Euro (-25,4 Prozent). Dieser Rückgang resultierte sowohl aus gesunkenen Verkaufspreisen wie aus verringerten Absatzmengen. Bei Polycarbonates sanken die Erlöse auf 1,9 Milliarden Euro (-21,0 Prozent). Auch in der Business Unit Coatings, Adhesives, Specialties ging der Umsatz zurück, und zwar um 17,2 Prozent auf 1,4 Milliarden Euro. Dies war bei leichten Preisverlusten zum Großteil auf rückläufige Absatzmengen zurückzuführen, die alle Produktgruppen sowie Absatzregionen betrafen. Der Bereich Industrial Operations verzeich-

## Zahlen | Fakten

| Umsatzentwicklung |                                                                                      | in Mio € |
|-------------------|--------------------------------------------------------------------------------------|----------|
| 2008              |  | 9.738    |
| 2009              |  | 7.520    |

| Mitarbeiterzahlen |                                                                                      | Mitarbeiter |
|-------------------|--------------------------------------------------------------------------------------|-------------|
| 2008              |  | 15.100      |
| 2009              |  | 14.300      |

| Forschungs- und Entwicklungskosten |                                                                                      | in Mio € |
|------------------------------------|--------------------------------------------------------------------------------------|----------|
| 2008                               |  | 221      |
| 2009                               |  | 207      |

nete ebenfalls einen Umsatzrückgang von 23,0 Prozent auf 500 Millionen Euro. Das EBITDA vor Sondereinflüssen in Höhe von 446 Millionen Euro lag 2009 deutlich unter dem Vorjahr.

## FORSCHUNGSAKTIVITÄTEN

Bayer MaterialScience wendete im Jahr 2009 207 Millionen Euro für Forschung und Entwicklung (ohne Einbeziehung von gemeinsamen Entwicklungsprojekten mit Kunden) auf. Dies entspricht rund acht Prozent der gesamten Forschungs- und Entwicklungsinvestitionen des Bayer-Konzerns. Der Teilkonzern will damit als globaler Anbieter von hochwertigen, maßgeschneiderten Material- und Systemlösungen seine führende Position im Markt und in der Prozesstechnik weiter ausbauen. In den Business Units Polycarbonates; Polyurethanes und Coatings, Adhesives, Specialties werden modernste Technologien und Produktionsverfahren eingesetzt, um in Kooperation mit den Kunden und anderen externen Partnern neue Produkte und neue Anwendungen zu realisieren.

In der Business Unit Polyurethanes richten sich die Aktivitäten in der Produktentwicklung auf die Erweiterung der Anwendungsgebiete sowie die Eigenschaftsoptimierung der Polyurethan-Systeme. Beispielsweise dient Polyurethan-Hartschaum auf Basis von Produkten von Bayer MaterialScience in der Bauindustrie als Basis für hocheffizientes Dämmmaterial und leistet dort einen aktiven Beitrag zum Klimaschutz. Weitere Beispiele aus der Forschung sind:

- gewichtsreduzierte Materialien für den Transportbereich (wie etwa Autoscheiben aus Polycarbonat);
- Hologramme als Sicherheitsmerkmal, z. B. auf Scheckkarten und Ausweisdokumenten;
- Erweiterung der Anwendungsgebiete sowie Eigenschaftsoptimierung der Polyurethan-Systeme.

Im Bereich New Business werden bei Bayer MaterialScience ständig neue Technologie- und Markttrends aufgespürt und bewertet. Die aussichtsreichsten Ideen werden in neue Forschungs- und Entwicklungsprojekte überführt.

## Visionen mit Folien

Faltbare elektronische Zeitungen, Mobiltelefone so dünn wie Visitenkarten, leuchtende Tapes – ein Blick in die Zukunft von Spezialfolien ist ein Blick in eine Welt ungeahnter technischer Möglichkeiten. Mit innovativen Ideen auf Basis bewährter Materialien will der neue Bereich Functional Films bei Bayer MaterialScience Visionen zum Leben erwecken und in Produkte für den Bedarf von morgen umsetzen.

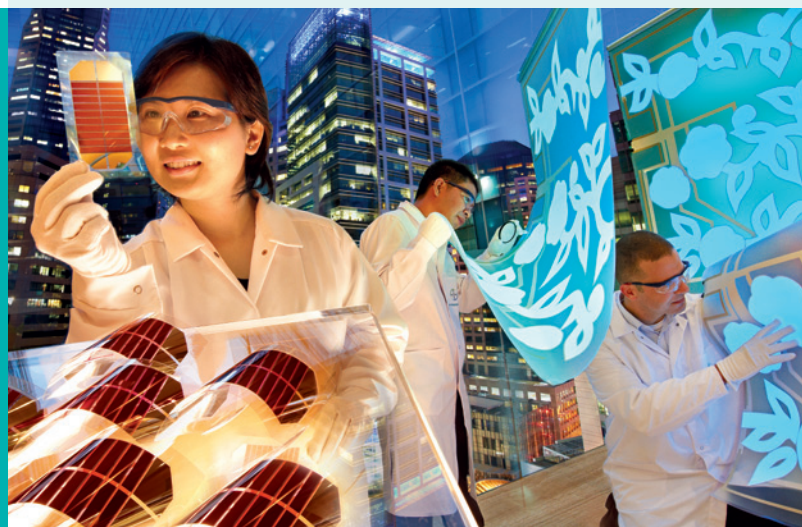

## Wichtigste Produkte\*

**Bayblend®** (Markenname für Polymerblends auf der Basis von Polycarbonat und Acrylnitril-Butadien-Styrol)

**Baydur®** (Polyurethan-Integralschaum für technische Gehäuse, Medizin, Sport, Sanitär, Möbel)

**Bayflex®** (Familie elastischer Polyurethan-Systeme mit maßgeschneidert einstellbaren Eigenschaften für verschiedene Anwendungen)

**BaySystems®** (weltweite Dachmarke für das Polyurethan-Systemgeschäft)

**Baytubes®** (Produktname für mehrwandige Kohlenstoff-Nanoröhrchen)

**Desmodur®/Desmophen®** (Lackrohstoffe für Fahrzeug- und Industrielackierung, Korrosionsschutz)

**Desmopan®** (thermoplastische Polyurethane für eine Vielzahl von Hightech-Anwendungen)

**Makrolon®** (Polycarbonat (transparenter, schlagzäher Kunststoff) u. a. für CD, DVD, Automobilanwendungen, Gebäudeverschiebung, Elektrik-/Elektronikanwendungen)

**Multitec®** (innovatives Polyurethan-Sprühsystem für die Herstellung großformatiger Formteile)

Stand 31.12.2009

\* in alphabetischer Reihenfolge

Cally Lim (l.) mit hauchdünnen Solarzellen sowie Wilfredo Aguilar und Dr. Stefan Bahnmüller (r.) mit leuchtenden Folien von Functional Films am Bayer-Standort in Singapur.



# Servicegesellschaften

Die zentralen Servicefunktionen für das operative Geschäft der Bayer-Teilkonzerne sind in drei Dienstleistungsgesellschaften zusammengefasst:

## BAYER BUSINESS SERVICES

Bayer Business Services ist das globale Kompetenz-Zentrum des Bayer-Konzerns für IT- und Business Services. Das Angebot konzentriert sich auf Dienstleistungen in den Kernbereichen IT-Infrastruktur und -Anwendungen, Einkauf und Logistik, Personal- und Managementdienste sowie Finanz- und Rechnungswesen.

 [WWW.BAYERBBS.DE](http://WWW.BAYERBBS.DE)

## BAYER TECHNOLOGY SERVICES

Bayer Technology Services bildet das weltweite technologische Rückgrat und ist ein wichtiger Innovationsmotor für den Bayer-Konzern. Zu den Leistungen zählen Entwicklung, Planung, Bau und Optimierung von Prozessen, Verfahren und Anlagen. Hier bietet die Servicegesellschaft ganzheitliche Lösungen entlang des gesamten Lebenszyklus von Prozessen und Produkten.

 [WWW.BAYERTECHNOLOGY.COM](http://WWW.BAYERTECHNOLOGY.COM)

## CURRENTA

Currenta bietet Dienstleistungen im chemisch-technischen Bereich an. Dazu zählen u. a. Energieversorgung, Entsorgung, Infrastruktur, Sicherheit, Analytik sowie Ausbildung. Die Servicegesellschaft – ein gemeinsames Unternehmen von Bayer und Lanxess – betreibt den Chempark an den Standorten Leverkusen, Dormagen und Krefeld-Uerdingen.

 [WWW.CURRENTA.DE](http://WWW.CURRENTA.DE)

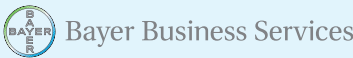

### Unternehmensdaten

|                     |                              |
|---------------------|------------------------------|
| <b>Unternehmen</b>  | Bayer Business Services GmbH |
| <b>Sitz</b>         | Leverkusen, Deutschland      |
| <b>Vorsitzender</b> | Daniel Hartert               |
| <b>Mitarbeiter</b>  | 5.600*                       |
| <b>Services</b>     | IT- und Business-Services    |

(Stand 31.12.2009)

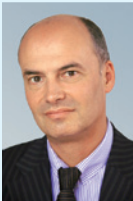

**Daniel Hartert**  
Vorsitzender

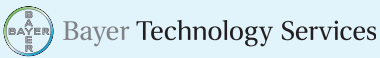

### Unternehmensdaten

|                        |                                                                    |
|------------------------|--------------------------------------------------------------------|
| <b>Unternehmen</b>     | Bayer Technology Services GmbH                                     |
| <b>Sitz</b>            | Leverkusen, Deutschland                                            |
| <b>Geschäftsführer</b> | Dirk Van Meirvenne                                                 |
| <b>Mitarbeiter</b>     | 2.600**                                                            |
| <b>Services</b>        | technologische Lösungen im Bereich Verfahren, Anlagen und Produkte |

(Stand 31.12.2009)

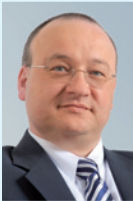

**Dirk Van Meirvenne<sup>1</sup>**  
Geschäftsführer

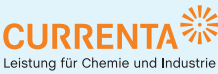

### Unternehmensdaten

|                     |                                                                                           |
|---------------------|-------------------------------------------------------------------------------------------|
| <b>Unternehmen</b>  | Currenta GmbH & Co. OHG                                                                   |
| <b>Sitz</b>         | Leverkusen, Deutschland                                                                   |
| <b>Vorsitzender</b> | Klaus Schäfer                                                                             |
| <b>Mitarbeiter</b>  | 5.400***                                                                                  |
| <b>Services</b>     | Dienstleistungen im chemisch-technischen Bereich sowie Manager und Betreiber des Chempark |

(Stand 31.12.2009)

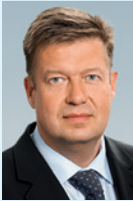

**Klaus Schäfer**  
Vorsitzender

<sup>1</sup> bis 31.5.2010 Achim Noack

\* Mitarbeiter auf Vollzeitkräfte umgerechnet; ohne Local Services und Ausgebildetenpool

\*\* Mitarbeiter auf Vollzeitkräfte umgerechnet

\*\*\* Mitarbeiter auf Vollzeitkräfte umgerechnet, inklusive Mitarbeiter von Beteiligungen; ohne Auszubildende

# Forschung und Entwicklung

Innovationen leisten wichtige Beiträge, um die globalen Herausforderungen zu bewältigen, und sie sind wesentlicher Treiber für das künftige Wachstum von Bayer.

Im Jahr 2009 wurden 2.746 Millionen Euro für Forschung und Entwicklung aufgewendet. Dies entspricht einer Forschungsquote von 8,8 Prozent bezogen auf den Umsatz. Eine besondere Bedeutung hat die fokussierte Entwicklung von neuen, das Kerngeschäft stärkenden Produkten. Um das angestrebte Wachstum zu ermöglichen, arbeitet das Unternehmen an einer stetigen Erneuerung und Erweiterung des Produktportfolios sowie an einer Optimierung der Produktionsprozesse. Die Forschungs- und Entwicklungsaktivitäten orientieren sich eng an den Marktbedürfnissen und unterliegen dementsprechend einem kontinuierlichen Anpassungsprozess. Die Aktivitäten des Konzerns werden durch ein internationales Netzwerk von führenden Hochschulen, öffentlichen Forschungseinrichtungen und Partnerfirmen ergänzt. Bayer will durch Bündelung von Know-how neue Geschäftsideen zügig in Produkterfolge umsetzen. Die gezielte Förderung von Mitarbeitern in den Forschungs- und Entwicklungsbereichen ist eine weitere Maßnahme zur Unterstützung dieser Aktivitäten.

## FORSCHUNG IN DEN DREI TEILKONZERNEN

Von den gesamten Forschungsaufwendungen des Konzerns entfielen 67,3 Prozent auf Bayer HealthCare, 23,8 Prozent auf Bayer CropScience und 7,5 Prozent auf Bayer MaterialScience. Weitere Informationen zu den Forschungsaktivitäten der Teilkonzerne finden sich in den jeweiligen Kapiteln dieser Broschüre.

## BAYER TECHNOLOGY SERVICES

Bei technologischen Lösungen, insbesondere in den Bereichen der Prozesstechnologie, dem Anlagenbau, der Automatisierung und der Produktentwicklung, arbeiten alle Bayer-Teilkonzerne weltweit eng mit Bayer Technology Services zusammen. Die Servicegesellschaft entwickelt z. B. zusammen mit Bayer MaterialScience neue, energie- und rohstoffeffiziente Produktionsverfahren und unterstützt somit den Teilkonzern, seine Technologie- und Kostenführerschaft zu sichern. Die zentrale Weiterentwicklung von teilkonzernübergreifenden Querschnittstechnologien – wie z. B. der Nano- und Biotechnologie oder des Know-hows auf dem Gebiet der mathematischen Simulation und der statistischen Datenanalyse – helfen Bayer HealthCare und Bayer CropScience, die Entwicklungszeiten für neue Produkte zu verkürzen. Ein weiteres strategisches Kernele-

ment ist dabei die internationale Beschaffung von Know-how. Es reicht von landesspezifischem Wissen bei der Abwicklung von Investitionsprojekten bis zur weltweiten Erschließung von Innovationen.

## BAYER INNOVATION

Innovationsthemen, die am Rande der Kernaktivitäten der Teilkonzerne liegen, werden von der Bayer Innovation erarbeitet, bewertet und zu tragfähigen neuen Geschäften für den Bayer-Konzern weiterentwickelt. Ein Arbeitsgebiet ist die Herstellung von Medikamenten in Pflanzen. Im Jahr 2009 wurde der Antrag für eine klinische Studie eines personalisierten Krebsimpfstoffs zur Therapie des Non-Hodgkin-Lymphoms von der amerikanischen Zulassungsbehörde FDA genehmigt. Im Bereich Medizintechnik befindet sich eine innovative Wundauflage aus bioresorbierbaren Kieselgelfasern zur Behandlung von chronischen Wunden in der klinischen Erprobung. Im Gebiet Landwirtschaft sind neuartige Hybridkonzepte basierend auf Polymertechnologien und Pflanzenschutzmitteln in der Entwicklung. Das volle Potenzial dieser Technologien wird in enger Kooperation mit den Teilkonzernen sowie mit externen Partnern evaluiert.

**Forschungs- und Entwicklungskosten nach Teilkonzernen**  
(Vorjahreswerte in Klammern)

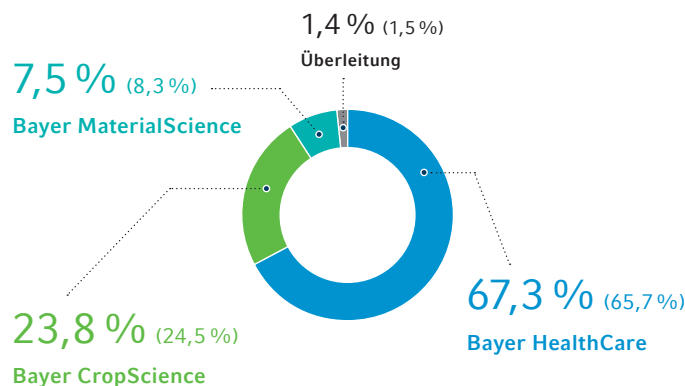

(Stand 31.12.2009)

# Mitarbeiter

Der Bayer-Konzern beschäftigte am 31.12.2009 weltweit 108.400 Mitarbeiterinnen und Mitarbeiter (Vorjahr: 108.600). In Deutschland hatte das Unternehmen 36.700 Mitarbeiterinnen und Mitarbeiter (Vorjahr: 37.400), dies entspricht einem Anteil von 33,9 Prozent am Gesamtkonzern. Der Personalaufwand erhöhte sich um 3,8 Prozent auf 7,8 Milliarden Euro.

## AUS- UND WEITERBILDUNG

Ausbildung und Nachwuchsförderung besitzen angesichts des demografischen Wandels und eines vielerorts erwarteten Fachkräftemangels für die Zukunftsfähigkeit des Unternehmens entscheidende Bedeutung. Bayer bekräftigt daher sein traditionell großes Engagement für die Berufsausbildung junger Menschen. Allein an den deutschen Standorten starteten im Jahr 2009 mehr als 900 Jugendliche ihre Ausbildung in einem von über 20 Berufen; 156 davon erhielten in dem Bayer-Starthilfe-Programm die Chance, schulische Defizite auszugleichen und einen Einstieg ins Berufsleben zu finden. Auch in vielen anderen Ländern bietet der Konzern jungen Menschen eine qualifizierte Berufsausbildung an – in Mexiko beispielsweise begannen im Jahr 2009 16, in Argentinien 30 und in China 35 Jugendliche bei Bayer eine duale Berufsausbildung.

Im Jahr 2009 waren die Beschäftigten bei Bayer weltweit im Durchschnitt 41 Jahre alt. Die Mitarbeiter aller Altersgruppen kontinuierlich fortzubilden, ist ein zentrales Element innerhalb der Strategie des Unternehmens zur Begegnung des demografischen Wandels. So wurden im Jahr 2009 allein in Deutschland mehr als 60 Millionen Euro investiert, um die beruflichen Fähigkeiten der Mitarbeiter zu erweitern und an veränderte Anforderungen anzupassen.

## BETEILIGUNG AM UNTERNEHMENSERFOLG

Eine weitgehend einheitliche Vergütungssystematik für alle Mitarbeitergruppen und die regelmäßige Beteiligung der Beschäftigten am Unternehmenserfolg sind seit Langem feste Bestandteile der Bayer-Personalpolitik. Allein im Rahmen des konzernweiten Short-Term-Incentive-Programms zahlt das Unternehmen für das Geschäftsjahr 2009 über 460 Millionen Euro an variablen Einmalzahlungen an die Beschäftigten. Hinzu kommen in vielen Ländern und Unternehmensbereichen weitere Ausschüttungen aus lokalen Bonusprogrammen.

## NEUAUSRICHTUNG DER PERSONALFUNKTION

Bayer setzte im Jahr 2009 die weltweite Neuausrichtung seiner Personalfunktion im Zuge des Projekts „Transforming Human

Resources“ fort. Ziel der Neuorganisation ist es, den Wertbeitrag der Personalfunktion zum operativen Geschäft zu erhöhen sowie die Qualität und Effizienz der konzernweiten Personalprozesse zu verbessern. Nach dem erfolgreichen Abschluss der Transformation in Deutschland zu Jahresbeginn führten im weiteren Verlauf des Jahres 2009 die Landesorganisationen in Spanien, Belgien, Mexiko und Brasilien das neue Funktionsmodell ein.

Mitarbeiter-Kennzahlen

|                                                                                                                                         | 31.12.2008     | 31.12.2009     |
|-----------------------------------------------------------------------------------------------------------------------------------------|----------------|----------------|
|                                                                                                                                         | in FTE         | in FTE         |
| <b>Mitarbeiter pro Region</b>                                                                                                           |                |                |
| Europa                                                                                                                                  | 55.500         | 54.500         |
| Nordamerika                                                                                                                             | 17.000         | 16.300         |
| Asien/Pazifik                                                                                                                           | 20.800         | 21.600         |
| Lateinamerika/Nahost/Afrika                                                                                                             | 15.300         | 16.000         |
| <b>Mitarbeiter nach Funktion</b>                                                                                                        |                |                |
| Produktion                                                                                                                              | 49.100         | 47.800         |
| Vertrieb                                                                                                                                | 38.000         | 38.900         |
| Forschung und Entwicklung                                                                                                               | 12.300         | 12.400         |
| Verwaltung                                                                                                                              | 9.200          | 9.300          |
| <b>Gesamt</b>                                                                                                                           | <b>108.600</b> | <b>108.400</b> |
| davon Auszubildende                                                                                                                     | 2.900          | 2.700          |
|                                                                                                                                         | in %           | in %           |
| Prozentsatz an Frauen im oberen Management des Bayer-Konzerns                                                                           | 4,7            | 5,5            |
| Anzahl der Nationalitäten im oberen Management des Bayer-Konzerns                                                                       | 23             | 22             |
| Anteil Vollzeitmitarbeiter mit vertraglich festgelegter Arbeitszeit von maximal 48 h/Woche                                              | 100            | 100            |
| Anteil Mitarbeiter mit Krankenversicherung                                                                                              | 97             | 95             |
| Anteil Mitarbeiter mit Zugangsberechtigung zu einer betrieblichen Altersversorgung oder einer unternehmensfinanzierten Altersversorgung | 76             | 74             |
| Anteil Mitarbeiter, die durch Kollektivvereinbarungen erfasst werden, insbesondere hinsichtlich Löhnen und Arbeitsbedingungen           | 57             | 56             |

Die Anzahl der Mitarbeiter (Festanstellungen und befristete Arbeitsverhältnisse) wird in Vollzeitbeschäftigte (FTE) umgerechnet dargestellt.

Teilzeitbeschäftigte werden dabei gemäß ihrer vertraglichen Arbeitszeit proportional berücksichtigt.  
(Stand 31.12.2009)

# Nachhaltigkeit

Nachhaltigkeit ist ein wesentlicher Bestandteil der Werte und Führungsprinzipien des Bayer-Konzerns. Entsprechend unserem Leitbild „Science For A Better Life“ steht dabei das Ziel im Vordergrund, wirtschaftliches Wachstum in Einklang zu bringen mit ökologischer und gesellschaftlicher Verantwortung. Dieses Ziel wird durch unsere Selbstverpflichtung zu internationalen Nachhaltigkeitsinitiativen wie dem „UN Global Compact“ und der „Responsible Care Global Charter“ unterstrichen.

Die Umsetzung erfolgt auf drei Ebenen: Durch unsere Produkte und Innovationen, die den Menschen nützen und zur Verbesserung der Lebensqualität beitragen sollen. Durch unsere Geschäftsaktivitäten, indem wir uns gegenüber unseren Stakeholdern verantwortungsbewusst verhalten, sowie durch unser gesellschaftliches Engagement.

## NACHHALTIGKEITSPROGRAMM

Mit unserer Strategie orientieren wir uns an den globalen Megatrends und den damit verbundenen Herausforderungen, zu denen wir Beiträge leisten können: Gesundheitsversorgung, Ernährungssicherheit sowie Ressourceneffizienz und Klimaschutz. An diesen Zukunftsthemen wollen wir verstärkt unser Produktportfolio und unser Nachhaltigkeitsengagement ausrichten. Daher haben wir 2009 unsere Nachhaltigkeitsstrategie neu fokussiert und ein Nachhaltigkeitsprogramm mit drei Schwerpunkten erstellt: Allianzen für nachhaltige Gesundheitsversorgung, Partnerschaften für mehr hochwertige Nahrungsmittel und Lösungen für Klimaschutz und Ressourcennutzung.

## LEISTUNGEN UND KENNZAHLEN

Ein zentrales Element des Bayer-Nachhaltigkeitsmanagements ist die Steuerung durch Leistungskennzahlen, die transparent und überprüfbar Rechenschaft über Nachhaltigkeitsleistungen, aber auch Herausforderungen des Unternehmens ablegen. Im Jahr 2009 konnte Bayer bei den meisten Nachhaltigkeitskennzahlen den Stand halten oder sich verbessern. Ein Anstieg erfolgte bei den Umweltereignissen. Sie werden detailliert analysiert und bewertet, um Schritte zur künftigen Vermeidung einzuleiten. Im Rahmen unseres Engagements in den Bereichen Gesundheitsschutz und Sicherheit haben wir 2009 eine neue Konzernregelung zur Transportsicherheit implementiert und die Konzernregelungen zur Arbeitssicherheit, Gesundheit am Arbeitsplatz sowie Verfahrens- und Anlagensicherheit aktualisiert. Die Umsetzung korrespondierender Maßnahmen erfolgt 2010.

### Bayer-Nachhaltigkeitsprogramm

|                     |                                                    |                                                          |                                                                                  |
|---------------------|----------------------------------------------------|----------------------------------------------------------|----------------------------------------------------------------------------------|
| Herausforderung     | Globaler Zugang zu Gesundheitsversorgung           | Ernährung für eine wachsende Weltbevölkerung             | Klima- und Umweltschutz                                                          |
| Fokus               | Allianzen für nachhaltige Gesundheitsversorgung    | Mehr hochwertige Nahrungsmittel                          | Lösungen für Klimaschutz und Ressourcennutzung                                   |
| Leuchtturm-Projekte | • Familienplanung<br>• Vernachlässigte Krankheiten | • Food Chain Partnership Gemüse<br>• Direktsaat von Reis | • EcoCommercial-Building-Programm<br>• Energieeffizienz<br>• Ressourceneffizienz |

### Leistungskennzahlen

| Kategorie                 | Leistungskennzahlen                                                         | 2008  | 2009  |
|---------------------------|-----------------------------------------------------------------------------|-------|-------|
| Gesundheit und Sicherheit | Arbeitsunfälle von Bayer-Mitarbeitern mit Ausfalltagen (MAQ*-Wert)          | 2,2   | 2,0   |
|                           | Berichtspflichtige Arbeitsunfälle von Bayer-Mitarbeitern (MAQ*-Wert)        | 3,6   | 3,1   |
|                           | Umweltereignisse                                                            | 9     | 13    |
|                           | Transportunfälle                                                            | 10    | 10    |
| Emissionen                | Direkte Treibhausgas-Emissionen (CO <sub>2</sub> -Äquivalente in Mio t)**   | 5,09  | 4,57  |
|                           | Indirekte Treibhausgas-Emissionen (CO <sub>2</sub> -Äquivalente in Mio t)** | 3,57  | 3,53  |
|                           | Flüchtige organische Verbindungen in 1.000 t/a                              | 3,16  | 2,59  |
|                           | Gesamt-Phosphor im Abwasser in 1.000 t/a                                    | 0,78  | 0,74  |
|                           | Gesamt-Stickstoff im Abwasser in 1.000 t/a                                  | 0,67  | 0,64  |
|                           | Gesamter organisch gebundener Kohlenstoff in 1.000 t/a                      | 1,59  | 1,35  |
| Abfälle                   | Erzeugter gefährlicher Abfall in Mio t/a                                    | 0,37  | 0,38  |
|                           | Deponierter gefährlicher Abfall in Mio t/a                                  | 0,08  | 0,09  |
| Ressourceneinsatz         | Wassereinsatz in Mio m <sup>3</sup> /d                                      | 1,20  | 1,11  |
|                           | Energieeinsatz in Petajoule (10 <sup>15</sup> Joule)/a                      | 82,79 | 77,33 |

Vorjahreswerte angepasst, d = Tag; a = Jahr

\* MAQ = Millionen-Arbeitsstunden-Quote, d.h. Anzahl der Unfälle pro einer Million Arbeitsstunden

\*\* Nach Greenhouse Gas Protocol



## NACHHALTIGES INVESTMENT

Bayer ist seit Jahren in zahlreichen, wichtigen Nachhaltigkeitsindizes und -fonds gelistet, die sich auf Unternehmen mit nachhaltiger und verantwortungsbewusster Unternehmenspolitik konzentrieren – u. a. im „Dow Jones Sustainability Index World“, in der FTSE4Good-Index-Reihe, den „Storebrand SRI Funds“ und dem „ASPI (Advanced Sustainable Performance Indices)“-Eurozone-Index. 2009 wurde der Konzern als weltweit bestes Unternehmen in den „Carbon Disclosure Leadership Index (CDLI)“ der „Carbon Disclosure Project“-Initiative (CDP) aufgenommen. Ausschlaggebend für die gute Bewertung war die fundierte und transparente Berichterstattung unseres Unternehmens über seine Klimastrategien und Treibhausgas-Emissionen.

## GESELLSCHAFTLICHE VERANTWORTUNG

Gesellschaftliche Verantwortung ist ein integraler Bestandteil der Unternehmensphilosophie und Unternehmenspolitik von Bayer. Das Unternehmen versteht sich als Teil der Gesellschaft und fühlt sich verpflichtet, verantwortungsbewusst als „Good Corporate Citizen“ zu handeln. Das „Corporate Social Responsibility“ (CSR)-Engagement von Bayer wird dokumentiert in zahlreichen Projekten, die das Unternehmen zum Teil seit Jahren in vielen Regionen der Welt organisiert oder unterstützt. Dafür stellte der Konzern im Jahr 2009 rund 44 Millionen Euro zur Verfügung. Schwerpunkte setzt Bayer in den Bereichen Bildung und Forschung, Umwelt und Natur, Soziales und Gesundheit sowie Sport und Kultur. Bayer legt traditionell großen Wert auf die Förderung von Bildung und Forschung. Als Erfinder-Unternehmen ist der Konzern auf sehr gut ausgebildete Nachwuchskräfte angewiesen. Mit insgesamt 151.000 Euro unterstützte die „Bayer Science & Education Foundation“ 2009 insgesamt 34 begabte und engagierte Studierende im Bereich der Naturwissenschaften und der Medizin mit Stipendien bei der Umsetzung besonderer Studienvorhaben. Mit insgesamt rund 491.000 Euro nahm die Stiftung 51 neue Projekte an Schulen und weiteren Bildungsinstitutionen in das Bayer-Schulförderprogramm auf. In diesem Programm werden Bildungsprojekte im Einzugsgebiet der Standorte unterstützt, die das Ziel haben, den naturwissenschaftlich-technischen Unterricht innovativer und attraktiver zu gestalten. Zusätzlich vergab die Stiftung im Rahmen des Bayer-Klimaprogramms sieben Schüler-Stipendien für die Teilnahme an einem internationalen Nachhaltigkeits-Seminar in Pittsburgh, USA.

## Ausgewählte Mitgliedschaften

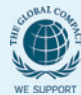

### Global-Compact

Gründungsmitglied der UN-Unternehmensinitiative für Nachhaltigkeit

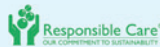

### Responsible Care Global Charter

Erstunterzeichner der weltweiten Charter für verantwortliches Handeln in der chemischen Industrie

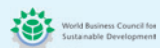

### World Business Council for Sustainable Development

aktive Mitgliedschaft seit 1997

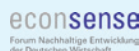

### econsense Forum Nachhaltige Entwicklung der Deutschen Wirtschaft

Gründungsmitglied der branchenübergreifenden Initiative für Nachhaltige Entwicklung

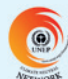

### UNEP „Climate Neutral Network“

Förderung von Wirtschaftsstrukturen und Gesellschaften mit niedrigen CO<sub>2</sub>-Emissionen. Beitritt 2009

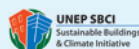

### UNEP SBCL

Unterstützung von SBCL im Rahmen des „EcoCommercial Building Program“

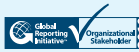

### Global Reporting Initiative

aktive Unterstützung als Organizational Stakeholder

## Ausgewählte Projekte

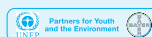

### UNEP

Die Zusammenarbeit mit dem Umweltprogramm der Vereinten Nationen (UNEP) hat mittlerweile exemplarischen Charakter für Kooperationen zwischen Politik und Privatwirtschaft, sogenannten „Public Private Partnerships“. Eine der langjährigen gemeinsamen Aktivitäten ist das Programm „Bayer Young Environmental Envoy in Partnership with UNEP“ mit 19 Teilnehmerländern aus vier Kontinenten.

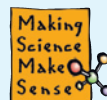

### Making Science Make Sense

Das Bildungsprogramm „Making Science Make Sense“ wurde auch im Jahr 2009 wieder auf ein weiteres Land – Brasilien – ausgedehnt. So profitieren mittlerweile Schüler in insgesamt zwölf Ländern vom freiwilligen Einsatz der Bayer-Mitarbeiter, die in Schulen den Sinn und Nutzen der Naturwissenschaften in anschaulichen Experimenten demonstrieren.

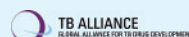

### TB Alliance

Im Kampf gegen Tuberkulose kooperiert Bayer mit der „Global Alliance for TB Drug Development“, einer us-amerikanischen Non-Profit-Organisation, bei der Entwicklung eines Medikaments, das die Behandlungszeit reduzieren soll.

# Historie

## 19. JAHRHUNDERT

1863

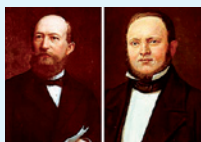

Am 1. August gründen der Kaufmann Friedrich Bayer und der Färbermeister Johann Friedrich Weskott einen Farbstoffbetrieb in Barmen (heute ein Stadtteil von Wuppertal).

1865

Die Firmengründer beteiligen sich an einer Teerfarbenfabrik in den USA und liefern Zwischenprodukte nach Übersee.

1876

Eine Fabrikfiliale wird in Moskau eröffnet.

1881

Am 1. Juli gründen die Nachkommen Bayers und Weskotts die Aktiengesellschaft Farbenfabriken vorm. Friedr. Bayer & Co.

1884

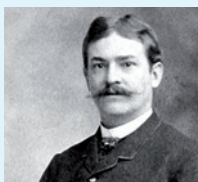

Der Chemiker Carl Duisberg beginnt seine Arbeit bei Bayer. Unter seiner Leitung gelangen den Wissenschaftlern bahnbrechende Erfindungen.

1888

Der Aufbau einer pharmazeutischen Abteilung beginnt.

1891

Das Gelände in Leverkusen wird angekauft.

1897

Dem Bayer-Forscher Dr. Felix Hoffmann gelingt die Synthese des Wirkstoffs von Aspirin®, Acetylsalicylsäure, in chemisch reiner und haltbarer Form.

1899

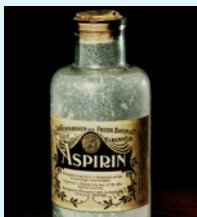

Aspirin® wird als Warenzeichen eingetragen und erobert als Schmerzmittel die Welt.

1939

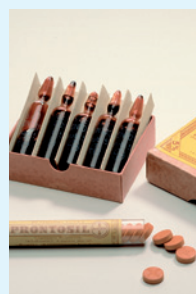

Dem Bayer-Forscher Gerhard Domagk wird der Medizinnobelpreis für die Entdeckung der antibakteriellen Wirkung der Sulfonamide (Prontosil) zugesprochen.

1973

In diesem Jahr erfolgt die Grundsteinlegung für das Bayer-Werk in Brunsbüttel, sechs Jahre später, 1979, für das Pflanzenschutz-zentrum (heute Unternehmenszentrale von Bayer CropScience) in Monheim.

1986

In Pittsburgh wird die Bayer USA Inc. als Management- und Holdinggesellschaft der Bayer-Firmen in den USA gegründet.

1991

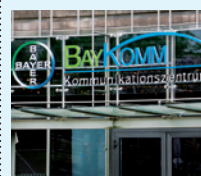

In Leverkusen wird das Bayer-Kommunikationszentrum (BayKomm) eingeweiht.

1994

Der erste Betrieb der Bayer Bitterfeld GmbH nimmt die Produktion auf. Im selben Jahr erwirbt Bayer das nord-amerikanische Selbstmedikationsgeschäft von Sterling Winthrop

und erhält damit endgültig seine vollen – nach dem Ersten Weltkrieg beschlagnahmten – Namensrechte für alle Produkte und das Firmenzeichen in den USA und Kanada zurück.

1999

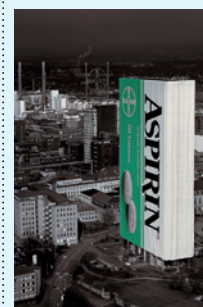

Anlässlich des 100. Geburtstags von Aspirin® am 6. März wird das Bayer-Verwaltungshochhaus in Leverkusen in die größte Aspirin®-Schachtel der Welt verwandelt – eine Leistung, die drei Einträge ins Guinness-Buch der Rekorde erhält.

## 20. JAHRHUNDERT

1912

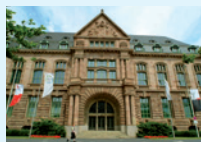

Der Firmensitz wird nach Leverkusen verlegt.

1925

Die Farbenfabriken vorm. Friedr. Bayer & Co. gehen in der I.G. Farbenindustrie AG auf. Leverkusen wird Hauptwerk der Betriebsgemeinschaft Niederrhein der I.G. Als das bedeutendste Chemieunternehmen Deutschlands wird die I.G. Farben auch in die Entwicklung des Dritten Reichs verstrickt. Nach dem Zweiten Weltkrieg wird die I.G. Farben auf alliierten Befehl beschlagnahmt und später entflochten.

## 21. JAHRHUNDERT

2000

Mit der Übernahme des Polyol-Geschäfts des us-Unternehmens Lyondell Chemical Company avanciert Bayer zum weltgrößten Hersteller von Polyurethan-Rohstoffen.

2001

Am 6. Dezember beschließt die Konzernleitung die Gründung eigenständiger Geschäftseinheiten, die unter dem Dach einer strategischen Holding strukturell verbunden bleiben.

## 21. JAHRHUNDERT

2002

Bayer erwirbt im Juni Aventis CropScience und schließt damit im Pflanzenschutz zur Weltspitze auf. ✓

2002

Im Oktober startet die Bayer CropScience AG als erster rechtlich selbstständiger Teilkonzern. ✓

2003

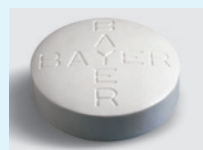

Im Februar nimmt die Weltgesundheitsorganisation WHO den Aspirin®-Wirkstoff Acetylsalicylsäure in die „Liste der unentbehrlichen Arzneimittel“ auf. ✓

2003

Im Oktober werden im Rahmen der Neustrukturierung die Teilkonzerne Bayer Chemicals AG und Bayer HealthCare AG sowie die Servicegesellschaft Bayer Technology Services GmbH zu rechtlich selbstständigen Unternehmen. Der Teilkonzern Bayer MaterialScience AG und die Servicegesellschaften Bayer Business Services GmbH und Bayer Industry Services GmbH & Co. OHG (heute Currenta GmbH & Co. OHG) folgen im Dezember. ✓

2004

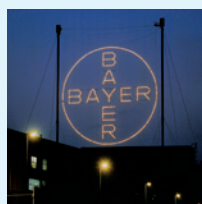

100 Jahre Bayer-Kreuz: Im Januar feiert das weltweit bekannte Markenzeichen des Bayer-Konzerns Geburtstag. ✓

2004

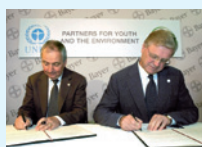

Bayer wird im Juni als erstes Wirtschaftsunternehmen Partner des Umweltprogramms der Vereinten Nationen im Bereich Jugend und Umwelt. ✓

2005

Im Januar schließt Bayer die Übernahme des Consumer-Health-Geschäfts von Roche ab und steigt damit in die Gruppe der drei weltweit führenden Anbieter für verschreibungsfreie Arzneimittel auf. ✓

2005

Die Trennung der Lanxess AG vom ... > ✓

Bayer-Konzern wird am 28. Januar vollzogen. Das Unternehmen führt die Chemieaktivitäten und Teile des Polymergeschäfts von Bayer weiter. ✓

2005

Im Dezember erfolgt die US-Zulassung für den gemeinsam von Bayer HealthCare und Onyx Pharmaceuticals Inc. entwickelten Wirkstoff Sorafenib (Handelsname Nexavar®) für die Therapie des fortgeschrittenen Nierenzellkarzinoms. ✓

2006

Im März kündigt Bayer ein Übernahmeangebot für die Schering AG an. Im Juli erlangt der Konzern die Kontrolle über 92,4 Prozent der rund 191 Millionen ausstehenden Schering-Aktien. Im Dezember wird die Schering AG offiziell in Bayer Schering Pharma AG umbenannt. Sitz der Gesellschaft ist Berlin. ✓

2007

Der Bayer-Konzern verkauft im Januar die Division Diagnostika von Bayer HealthCare für 4,2 Milliarden Euro an die Siemens AG, München. ✓

2007

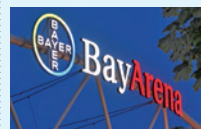

Im März gibt der Konzern bekannt, dass die BayArena, das Stadion des Fußball-Bundesligisten Bayer 04 Leverkusen, modernisiert, ausgebaut und auf eine Zuschauerkapazität von über 30.000 Besuchern erweitert wird. ✓

2007

100 Jahre Bayer-Archiv: Seit März 1907 ist das Archiv das Gedächtnis des Unternehmens. ✓

2007

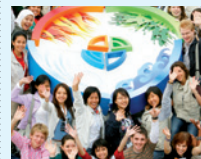

Bayer ist im August Gastgeber der internationalen „Tunza-Jugend-Umweltkonferenz“ in Leverkusen. Der Jugend-Umweltgipfel findet erstmals in Mitteleuropa statt. 180 junge Menschen aus 85 Ländern diskutieren über globale Umweltthemen. ✓

2007

100 Jahre Bayer-Kultur: Im September findet die Eröffnung der 100. Spielzeit der Bayer-Kulturabteilung statt. ✓

2007

Im November wird das integrierte konzernweite „Bayer Climate Program“ gestartet, mit dem das Unternehmen u. a. die CO<sub>2</sub>-Emissionen reduziert. ✓

2008

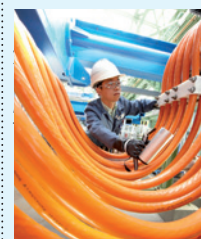

Der Einsatz der neuen Sauerstoffverzehrkathode spart Energie und reduziert CO<sub>2</sub>-Emissionen. ✓

2008

Im September erfolgt das Squeeze-out der Minderheitsaktionäre der Bayer Schering Pharma AG. Die Pharma-Geschäfte von Bayer und Bayer Schering Pharma werden zur Jahreswende 2008/2009 in Deutschland zusammengeführt. ✓

2008

Im Oktober wird die weltweit größte Anlage zur Herstellung von MDI in Shanghai in Betrieb genommen. MDI ist ein wichtiger Rohstoff für Polyurethan-Hartschaum. ✓

2008

Im November vereinbaren Bayer und das Deutsche Krebsforschungszentrum eine zunächst auf zwei Jahre angelegte strategische Forschungsallianz. ✓

2009

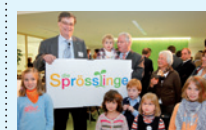

Im November setzt Bayer mit der Eröffnung der Kindertagesstätte in Monheim erstmals sein Konzept für Null-Emissionsgebäude weltweit um. ✓

2009

Bayer CropScience hat die Akquisition der Athenix Corp., eines nicht börsennotierten us-Biotech-Unternehmens, im November abgeschlossen. ✓

2009

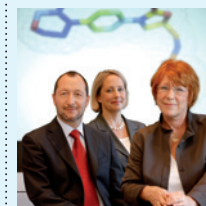

Im Dezember gewinnt das Bayer-Team den Deutschen Zukunftspreis für die Entwicklung des neuen Blutgerinnungshemmers Rivaroxaban (Xarelto®). ✓

# Dialog

Für Bayer hat die Kommunikation einen hohen Stellenwert. Sie ist Anliegen und Verpflichtung gleichermaßen, denn sie prägt das Bild des Unternehmens in der Öffentlichkeit. Bayer möchte im offenen Dialog auf die Fragen und Probleme der Menschen eingehen. Das Unternehmen bemüht sich dabei um Glaubwürdigkeit, Vertrauen und Akzeptanz.

## PUBLIKATIONEN UND INTERNET

Die Bayer AG gibt verschiedene Publikationen für die breite Öffentlichkeit sowie zur regelmäßigen Information von Mitarbeitern und Aktionären heraus:

- **Geschäftsbericht**
- **Aktionärsbrief**
- **Nachhaltigkeitsbericht**
- **research** (Forschungsmagazin)
- **report** (Unternehmensmagazin)
- **direkt** (Zeitung für die Mitarbeiter/Nachbarn)

Einen Überblick über den Konzern und seine globalen Aktivitäten bietet darüber hinaus das Internetportal [www.BAYER.DE](http://www.BAYER.DE), auf dem auch ein innovatives Podcast Center mit zahlreichen Audio- und Videobeiträgen zu finden ist. Weitere Informationen geben die Teilkonzerne und Servicegesellschaften auf ihren jeweiligen Internetseiten.

## DAS BAYKOMM

Einen weiteren Schwerpunkt des Informationsangebots bildet das 1991 eröffnete Bayer-Kommunikationszentrum in Leverkusen, kurz BayKomm. Hier können Besucher in verschiedenen Themenräumen und Veranstaltungen Hintergründe zu den Aktivitäten des Unternehmens erfahren und naturwissenschaftliche Phänomene kennenlernen – von der Entwicklung neuer Arzneimittel über die Sicherung der Welternährung bis zu modernen Werkstoffen für den Klimaschutz. Zum Angebot zählen u. a. Führungen zu den rund 300 Ausstellungsexponaten, Experimentalvorträge sowie Schülerprojekte.

Im Februar 2010 wurde im BayKomm ein weiteres Schülerlabor – Baylab – eröffnet. Es ist das vierte Baylab des Konzerns und soll Kinder und Jugendliche für die Welt der Naturwissenschaften begeistern. Die jungen Besucher werden dabei für einen Tag selbst zu Forschern.

## Ansprechpartner

|                                  |                                                                                                      |
|----------------------------------|------------------------------------------------------------------------------------------------------|
| <b>Bayer AG</b>                  |                                                                                                      |
| Dr. Katrin Schneider             | <a href="mailto:katrin.schneider.ks@bayer-ag.de">katrin.schneider.ks@bayer-ag.de</a>                 |
| <b>Bayer HealthCare</b>          |                                                                                                      |
| Dr. Markus Pickel                | <a href="mailto:markus.pickel@bayerhealthcare.com">markus.pickel@bayerhealthcare.com</a>             |
| <b>Bayer CropScience</b>         |                                                                                                      |
| Steffen Kurzawa                  | <a href="mailto:steffen.kurzawa@bayercropscience.com">steffen.kurzawa@bayercropscience.com</a>       |
| <b>Bayer MaterialScience</b>     |                                                                                                      |
| Harald Liedtke                   | <a href="mailto:harald.liedtke@bayermaterialscience.com">harald.liedtke@bayermaterialscience.com</a> |
| <b>Bayer Business Services</b>   |                                                                                                      |
| Oliver Günther                   | <a href="mailto:oliver.guenther@bayerbbs.com">oliver.guenther@bayerbbs.com</a>                       |
| <b>Bayer Technology Services</b> |                                                                                                      |
| Dr. Arnold Rajathurai            | <a href="mailto:arnold.rajathurai@bayertechnology.com">arnold.rajathurai@bayertechnology.com</a>     |
| <b>Currenta</b>                  |                                                                                                      |
| Jürgen Gemke                     | <a href="mailto:juergen.gemke@currenta.de">juergen.gemke@currenta.de</a>                             |

## Wichtige Internet-Adressen

|                            |                                                                                            |
|----------------------------|--------------------------------------------------------------------------------------------|
| Homepage                   | <a href="http://www.bayer.de">www.bayer.de</a>                                             |
| BayKomm                    | <a href="http://www.baykomm.bayer.de">www.baykomm.bayer.de</a>                             |
| Geschäftsbericht           | <a href="http://www.geschaeftsbericht.bayer.de">www.geschaeftsbericht.bayer.de</a>         |
| Aktionärsbrief             | <a href="http://www.aktionaersbrief.bayer.de">www.aktionaersbrief.bayer.de</a>             |
| Nachhaltigkeitsbericht     | <a href="http://www.nb.bayer.de">www.nb.bayer.de</a>                                       |
| Forschungsmagazin research | <a href="http://www.research.bayer.de">www.research.bayer.de</a>                           |
| Publikationen              | <a href="http://www.bayer.de/de/publikationen.aspx">www.bayer.de/de/publikationen.aspx</a> |
| Presse-Informationen       | <a href="http://www.presse.bayer.de">www.presse.bayer.de</a>                               |
| Podcast Center             | <a href="http://www.podcast.bayer.de">www.podcast.bayer.de</a>                             |

## Publikationen bestellen

|        |                                                                      |
|--------|----------------------------------------------------------------------|
| E-Mail | <a href="mailto:serviceline@bayer-ag.de">serviceline@bayer-ag.de</a> |
| Post   | Nutzen Sie die Bestellkarte in dieser Broschüre.                     |

## Kommunikationszentrum BayKomm

|                                                                                                                                                       |  |
|-------------------------------------------------------------------------------------------------------------------------------------------------------|--|
| <b>Kaiser-Wilhelm-Allee 16, 51373 Leverkusen</b>                                                                                                      |  |
| Öffnungszeiten ohne Voranmeldung:<br>Montag bis Freitag von 12.00 bis 18.00 Uhr, Sonntag von 12.00 bis 17.00 Uhr<br>(zusätzliche Termine auf Anfrage) |  |
| <b>BayKomm Service Infoline:</b>                                                                                                                      |  |
| Tel. +49/214/30-50100                                                                                                                                 |  |



- 1 **EBITDA:** EBIT zuzüglich Abschreibungen auf immaterielle Vermögenswerte und Sachanlagen. Das EBITDA, das um Sondereinflüsse bereinigte EBITDA sowie die bereinigte EBITDA-Marge stellen Kennzahlen dar, die nach den internationalen Rechnungslegungsvorschriften nicht definiert sind. Daher sollten sie nur als ergänzende Information angesehen werden. Das Unternehmen geht davon aus, dass das bereinigte EBITDA eine geeignetere Kennzahl für die Beurteilung der operativen Geschäftstätigkeit darstellt, da es weder durch Abschreibungen auf immaterielle Vermögenswerte und Sachanlagen noch durch Sondereinflüsse belastet ist. Das Unternehmen glaubt, dem Leser mit dieser Kennzahl ein Bild der Ertragslage zu vermitteln, das im Zeitablauf vergleichbarer und zutreffender informiert. Die bereinigte EBITDA-Marge berechnet sich aus der Division vom bereinigten EBITDA und den Umsatzerlösen.
- 2 **EBIT** gemäß Gewinn- und Verlustrechnung
- 3 **Konzernergebnis je Aktie:** Berechnung nach IAS 33 (Earnings per Share):  
Division Konzernergebnis durch durchschnittliche Anzahl der Aktien
- 4 **Brutto-Cashflow:** Ergebnis nach Steuern aus fortzuführendem Geschäft zuzüglich Ertragsteueraufwand zuzüglich Finanzergebnis abzüglich gezahlter Ertragsteuern zuzüglich Abschreibungen zuzüglich bzw. abzüglich Veränderungen der Pensionsrückstellungen abzüglich Gewinne bzw. zuzüglich Verluste aus dem Abgang von Anlagevermögen sowie zuzüglich nicht zahlungswirksamer Effekte aus der Neubewertung übernommener Vermögenswerte. Die Position Veränderung der Pensionsrückstellungen umfasst sowohl die Korrektur nicht zahlungswirksamer Effekte im operativen Ergebnis als auch Auszahlungen aufgrund unserer Pensionsverpflichtungen.
- 5 **Netto-Cashflow:** entspricht Cashflow aus der betrieblichen Tätigkeit nach IAS 7
