# Supplementary material
Source: publisher site journal article supplement (https://www.degruyterbrill.com/publication/isbn/9783110432879/downloadAsset/9783110432879_Elektronischer_Anhang_2.zip)
Supplement: Supplementary file 19 [file Beiersdorf Der Beiersdorf-Konzern.pdf › Korpustexte/Korpustexte pdf/Beiersdorf/Beiersdorf Der Beiersdorf-Konzern.pdf]

## Der Beiersdorf-Konzern

- **Seit rund 130 Jahren ein Global Player in der Hautpflege**
- **Konzernumsatz im Jahr 2010: 6,194 Mrd. Euro**
- **Mit NIVEA und Eucerin auf Wachstumskurs**

Die Beiersdorf AG ist eine global agierende Unternehmensgruppe mit dem Fokus auf die Entwicklung, die Herstellung und den weltweiten Vertrieb von hochwertigen Hautpflegeprodukten. Beiersdorf ist Deutschlands größtes Kosmetikunternehmen. Basis dieses Erfolgs ist die Fokussierung auf international erfolgreiche Marken, auf Regionen mit überdurchschnittlichem Wachstumspotenzial, die konsequente Orientierung an den regional unterschiedlichen Wünschen der Verbraucher sowie eine weltweit optimal ausgerichtete Lieferkette.

Mit NIVEA führt Beiersdorf die global größte Marke im Bereich der Hautpflege\*. Daneben gehören unter anderem Eucerin sowie La Prairie, Labello, 8x4 und Hansaplast zum international erfolgreichen Markenportfolio. Ein eigenständiger Unternehmensbereich innerhalb des Konzerns ist tesa – ein weltweit führender Hersteller von selbstklebenden Produkt- und Systemlösungen für Industrie, Gewerbe und Konsumenten. 2001 wurde die tesa AG als eigenständige Aktiengesellschaft innerhalb der Beiersdorf Gruppe gegründet und 2009 zur Soci t  Europ enne (SE) umfirmiert.

### Global – von Anfang an international t tig

Seit den Anf ngen des Konzerns wird bei Beiersdorf international gedacht und agiert. So bestehen bereits 1893 – elf Jahre nach Gr ndung des Unternehmens durch den Apotheker Paul C. Beiersdorf in Hamburg – erste Handelsbeziehungen in die USA. 1911 bringt das Unternehmen die NIVEA Creme auf den Markt, die erste stabile und damit f r die Massenproduktion geeignete Fett- und Feuchtigkeitscreme der Welt. NIVEA entwickelt sich in k rtester Zeit zu einem internationalen Verkaufsschlager. Bereits 1914 erzielte Beiersdorf mit NIVEA und den anderen Marken 42 Prozent des Gesamtumsatzes im Ausland. Daf r sorgten Vertr ge mit Vertretungen in 34 L ndern – darunter auch Lizenzproduktionen in Buenos Aires, Kopenhagen, Mexiko City, New York, Paris, Sydney und Moskau. Wenig sp ter gelang der Markteintritt in China. 1929 betreibt Beiersdorf bereits  ber 20 Produktionsstellen weltweit. Heute ist das Unternehmen mit  ber 150 Tochtergesellschaften und rund 19.000 Mitarbeitern weltweit pr sent. Die regionale Fokussierung erm glicht auch die konsequente Umsetzung regional unterschiedlicher Verbraucherw nsche.

Thomas-B. Quaas, Vorstandsvorsitzender der Beiersdorf AG, fasst die Strategie der globalen Verbrauchern he zusammen: „Wir haben es schon immer als unsere Aufgabe verstanden, aus der Perspektive einzelner M rkte heraus zu handeln. Dabei profitieren wir vom Know-how unserer Tochtergesellschaften, die mit ihrem Wissen  ber die Menschen, die kulturellen Gegebenheiten und klimatischen Bedingungen Ideen f r neue, ma geschneiderte Produkte liefern. Im Kern geht es darum, zu wissen, was die Verbraucher bewegt, ihren Anspr chen gerecht zu werden und gleichzeitig mit Innovationen – die Einf hrung der M nnernpflege-Serie NIVEA FOR MEN ist hier ein gutes Beispiel – den W nschen der Verbraucher vorzugreifen.“

\* Quelle: Euromonitor, „Haut- und Sch nheitspflegeprodukte ohne Parfums und Haarfarben nach Umsatz, 2009“

Nähe ist auch das Prinzip in der Zusammenarbeit mit Lieferanten und der intensiven und direkten Betreuung von Handelspartnern auf der ganzen Welt. Um die Verbraucher weltweit optimal zu erreichen, sind die Handelspartner auch in die Produktions- und Logistikstruktur des Unternehmens partnerschaftlich eingebunden.

Dank optimierter Prozesse und Strukturen ist die Beiersdorf-Lieferkette schnell, flexibel, kostengünstig und umweltfreundlich – und so zu einem entscheidenden Vorteil im globalen Wettbewerb geworden. Trotz seiner internationalen Ausrichtung ist Beiersdorf fest in Hamburg verankert: Hier befinden sich die Beiersdorf-Konzernzentrale und das Beiersdorf-Forschungszentrum.

### **Innovationen – angepasst an die Wünsche regionaler Märkte**

Beiersdorf steht für rund 130 Jahre Hautforschungskompetenz. Über 550 Mitarbeiter sind in diesem Bereich weltweit tätig. Das Beiersdorf-Hautforschungszentrum in Hamburg ist eines der größten und modernsten in Europa und gehört international zu den führenden Instituten in diesem Bereich. Seit 2005 verfügt der Konzern über ein Asien-Labor am Stammsitz in Hamburg, in dem Pflegeprodukte für die speziellen Bedürfnisse asiatischer Verbraucher und die Anforderungen dortiger klimatischer Verhältnisse entwickelt werden. 2007 wurde hier zusätzlich ein Labor für Lateinamerika eingerichtet, in dem die Produktentwicklung für Brasilien und andere lateinamerikanische Länder erfolgt. Die intensive Beschäftigung und das Wissen um die spezifischen, regional unterschiedlichen Verbraucher-Bedürfnisse ist ein wesentlicher Erfolgsfaktor von Beiersdorf-Produkten weltweit.

### **Verantwortung – weltweit ökonomisch, ökologisch und sozial aktiv**

Unternehmerische Verantwortung zählt bereits seit der Gründung von Beiersdorf zu den Kernwerten des Unternehmens. Gleichberechtigt neben der ökonomischen Verantwortung stehen die soziale Verantwortung gegenüber Mitarbeitern und der Gesellschaft sowie die ökologische Verantwortung. Alle drei Bereiche sind im Unternehmen unter dem Oberbegriff der „Nachhaltigkeit“ zusammengefasst. Ein Lenkungsausschuss sorgt bei Beiersdorf dafür, dass das Unternehmen und seine Mitarbeiter weltweit ökologischen Aspekten, ökonomischen Belangen und gesellschaftlicher Verantwortung Rechnung tragen.

Kontakt:  
Thomas Schönen  
Beiersdorf AG  
Leiter Konzernkommunikation  
Tel: 040 - 4909 5869  
E-Mail: [Thomas.Schönen@Beiersdorf.com](mailto:Thomas.Schönen@Beiersdorf.com)

März 2011
