# Supplementary material
Source: publisher site journal article supplement (https://www.degruyterbrill.com/publication/isbn/9783110432879/downloadAsset/9783110432879_Elektronischer_Anhang_2.zip)
Supplement: Supplementary file 20 [file Beiersdorf GB 2010.pdf › Korpustexte/Korpustexte pdf/Beiersdorf/Beiersdorf GB 2010.pdf]

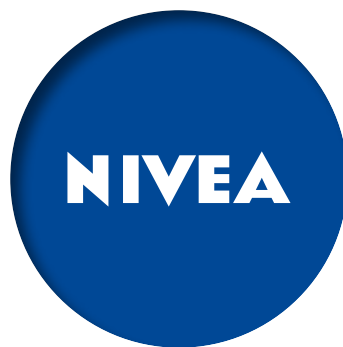

Geschäftsbericht 2010

Facing Markets

BDF ●●●●

Beiersdorf

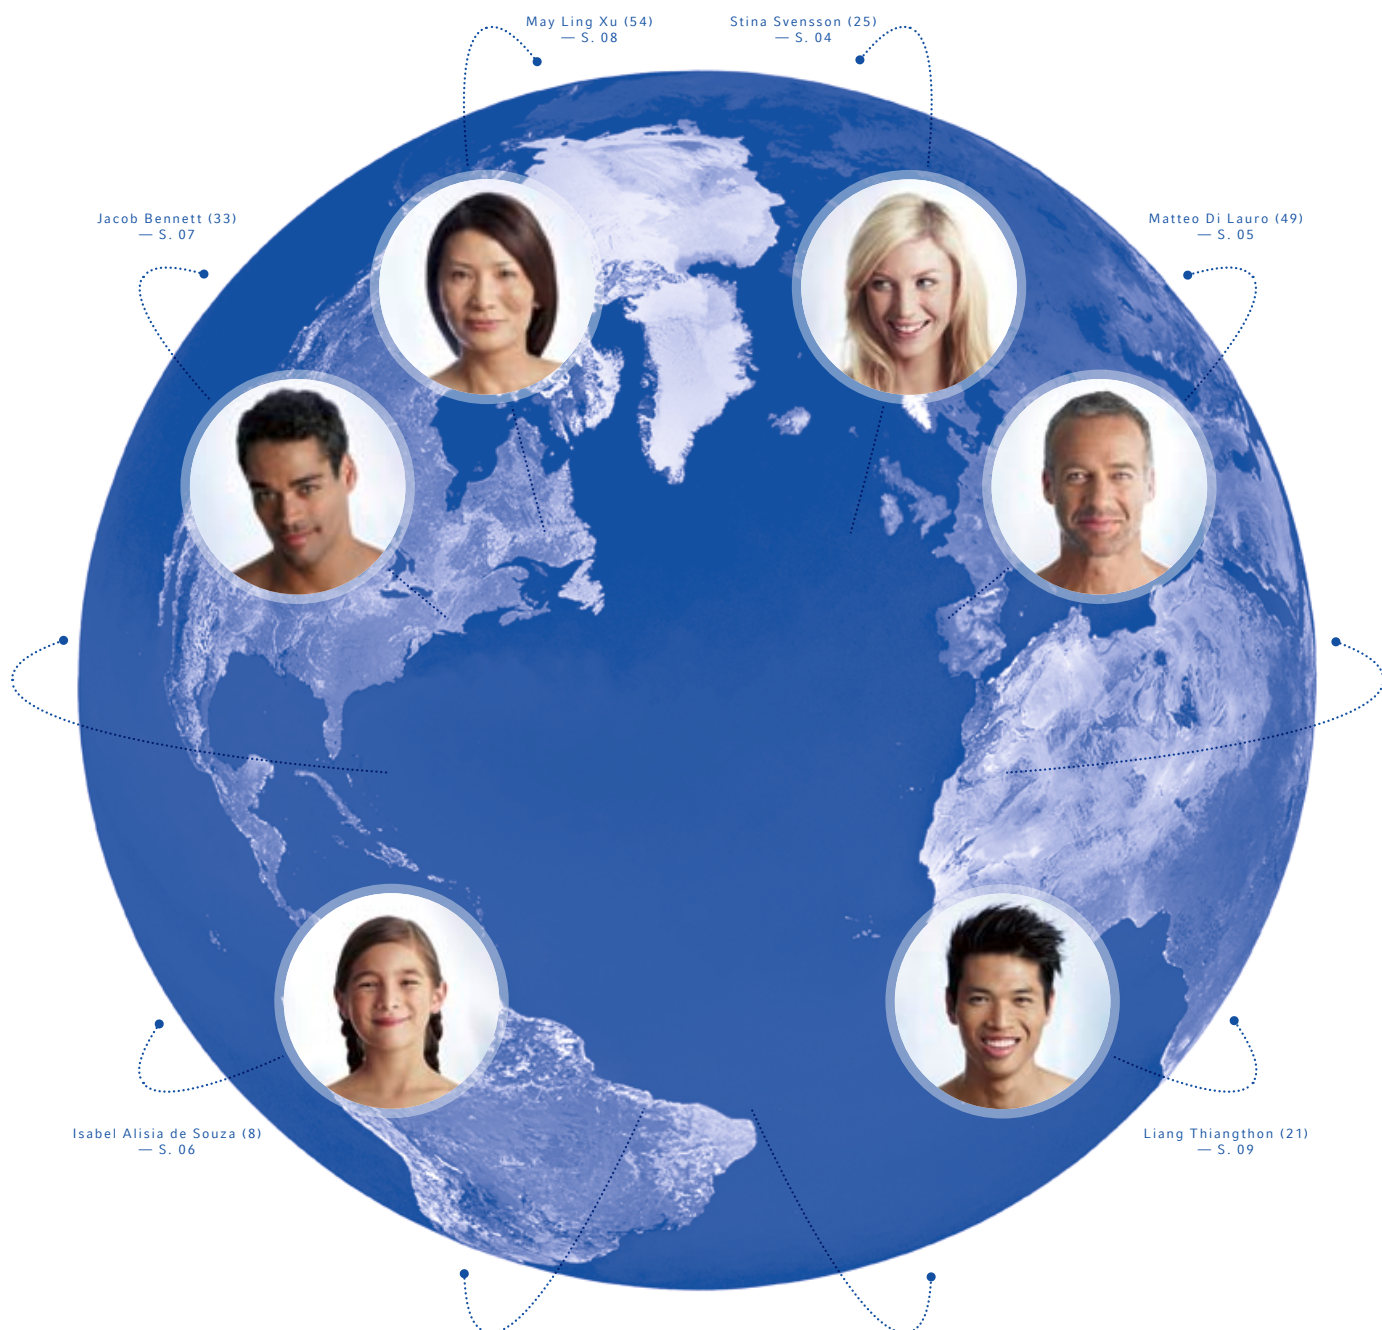

## 2010: Facing Markets

— Auf der Erde leben rund 6,9 Milliarden Menschen, und ständig werden es mehr. Keiner von ihnen gleicht dem anderen. Jeder ist einzigartig, hat seine eigenen Wünsche, Bedürfnisse und Besonderheiten – auch wenn es um die Hautpflege geht. — Beiersdorf ist sich dessen bewusst und reagiert seit über 125 Jahren auf diese vielschichtigen Anforderungen mit einem individuellen, auf die Verbraucher zugeschnittenen Produktportfolio, das wir kontinuierlich ausbauen. Dazu gehören weltweit erfolgreiche Hautpflegemarken wie NIVEA, Eucerin und La Prairie. — Ein Höchstmaß an Verbrauchernähe, globale Präsenz und die Orientierung an marktspezifischen Entwicklungen sowie den Besonderheiten der

Haut in den jeweiligen Regionen gehören zu den Eckpfeilern unseres nachhaltigen Erfolgs. — Als wachstumsorientiertes Unternehmen fokussiert sich Beiersdorf besonders auf Europa, Asien und Amerika und in allen Regionen insbesondere auf die Wachstumsmärkte. — Auf den folgenden Seiten präsentieren wir Ihnen einige der Menschen, für die wir unsere innovativen Hautpflegeprodukte entwickeln und immer weiter optimieren. Um unsere Verbraucher weiterhin überall auf der Welt mit Produkten von hoher Qualität zu fairen Preisen zu begeistern, hat Beiersdorf die Consumer Business Strategie weiterentwickelt. Sie definiert seit Anfang 2010 unser Handeln und heißt:

„Focus on Skin Care. Closer to Markets.“

Mit ihr fokussieren wir uns auf Hautpflege und rücken noch näher an die Märkte heran.

I

S. 03-16

Facing Markets

II

S. 17-88

01 An die Aktionäre

|       |                                         |
|-------|-----------------------------------------|
| S. 19 | Brief des Vorstandsvorsitzenden         |
| S. 22 | Der Vorstand der Beiersdorf AG          |
| S. 24 | Beiersdorf Aktie und Investor Relations |
| S. 26 | Bericht des Aufsichtsrats               |

02 Corporate Governance

|       |                                      |
|-------|--------------------------------------|
| S. 31 | Entsprechenserklärung                |
| S. 33 | Allgemeines zur Führungsstruktur     |
| S. 37 | Vergütungsbericht                    |
| S. 46 | Wertpapiergeschäfte und Aktienbesitz |
| S. 46 | Unternehmensführungspraktiken        |
| S. 48 | Weitere Informationen                |

03 Konzernlagebericht

|       |                                                                       |
|-------|-----------------------------------------------------------------------|
| S. 51 | Die Marken der Beiersdorf AG                                          |
| S. 52 | Geschäft und Strategie                                                |
| S. 56 | Wirtschaftliches Umfeld                                               |
| S. 58 | Ertrags-, Vermögens- und Finanzlage                                   |
| S. 70 | Forschung und Entwicklung                                             |
| S. 74 | Nachhaltigkeit                                                        |
| S. 77 | Mitarbeiterinnen und Mitarbeiter                                      |
| S. 81 | Risikobericht                                                         |
| S. 84 | Bericht des Vorstands über die Beziehungen zu verbundenen Unternehmen |
| S. 84 | Nachtragsbericht                                                      |
| S. 84 | Übernahmerechtliche Angaben                                           |
| S. 86 | Ausweisänderung der Umsatzerlöse und Marketingkosten ab 2011          |
| S. 87 | Prognosebericht                                                       |

III

S. 89-146

04 Konzernabschluss

|                      |                                                     |
|----------------------|-----------------------------------------------------|
| S. 91                | Gewinn- und Verlustrechnung Konzern                 |
| S. 92                | Gesamtergebnisrechnung Konzern                      |
| S. 93                | Bilanz Konzern                                      |
| S. 94                | Kapitalflussrechnung Konzern                        |
| S. 95                | Eigenkapitalveränderungsrechnung Konzern            |
| <b>Konzernanhang</b> |                                                     |
| S. 96                | Segmentberichterstattung Konzern                    |
| S. 98                | Grundlagen und Methoden                             |
| S. 105               | Konsolidierungskreis, Akquisitionen und Divestments |
| S. 110               | Erläuterungen zur Gewinn- und Verlustrechnung       |
| S. 113               | Erläuterungen zur Bilanz                            |
| S. 127               | Sonstige Angaben                                    |
| S. 131               | Organe der Beiersdorf AG                            |

05 Bestätigungen

|        |                            |
|--------|----------------------------|
| S. 135 | Bestätigungsvermerk        |
| S. 136 | Versicherung des Vorstands |

06 Weitere Informationen

|        |                                                          |
|--------|----------------------------------------------------------|
| S. 139 | Jahresabschluss der Beiersdorf AG nach HGB (Kurzfassung) |
| S. 140 | Glossar                                                  |
| S. 141 | Stichwortverzeichnis                                     |
| S. 144 | Zehnjahresübersicht                                      |
| S. 145 | Finanzkalender                                           |
| S. 146 | Impressum                                                |

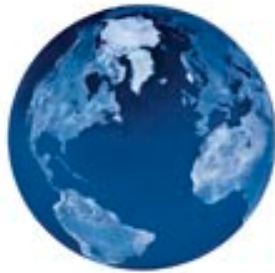

# Facing Markets

- 
- S. 04 **Fokus-Markt:** Europa
  - S. 06 **Fokus-Markt:** Amerika
  - S. 08 **Fokus-Markt:** Asien
  - S. 10 **Schwerpunkt:** Unsere Mitarbeiter
  - S. 12 **Schwerpunkt:** 100 Jahre NIVEA
  
  - S. 16 **Höhepunkte 2010**



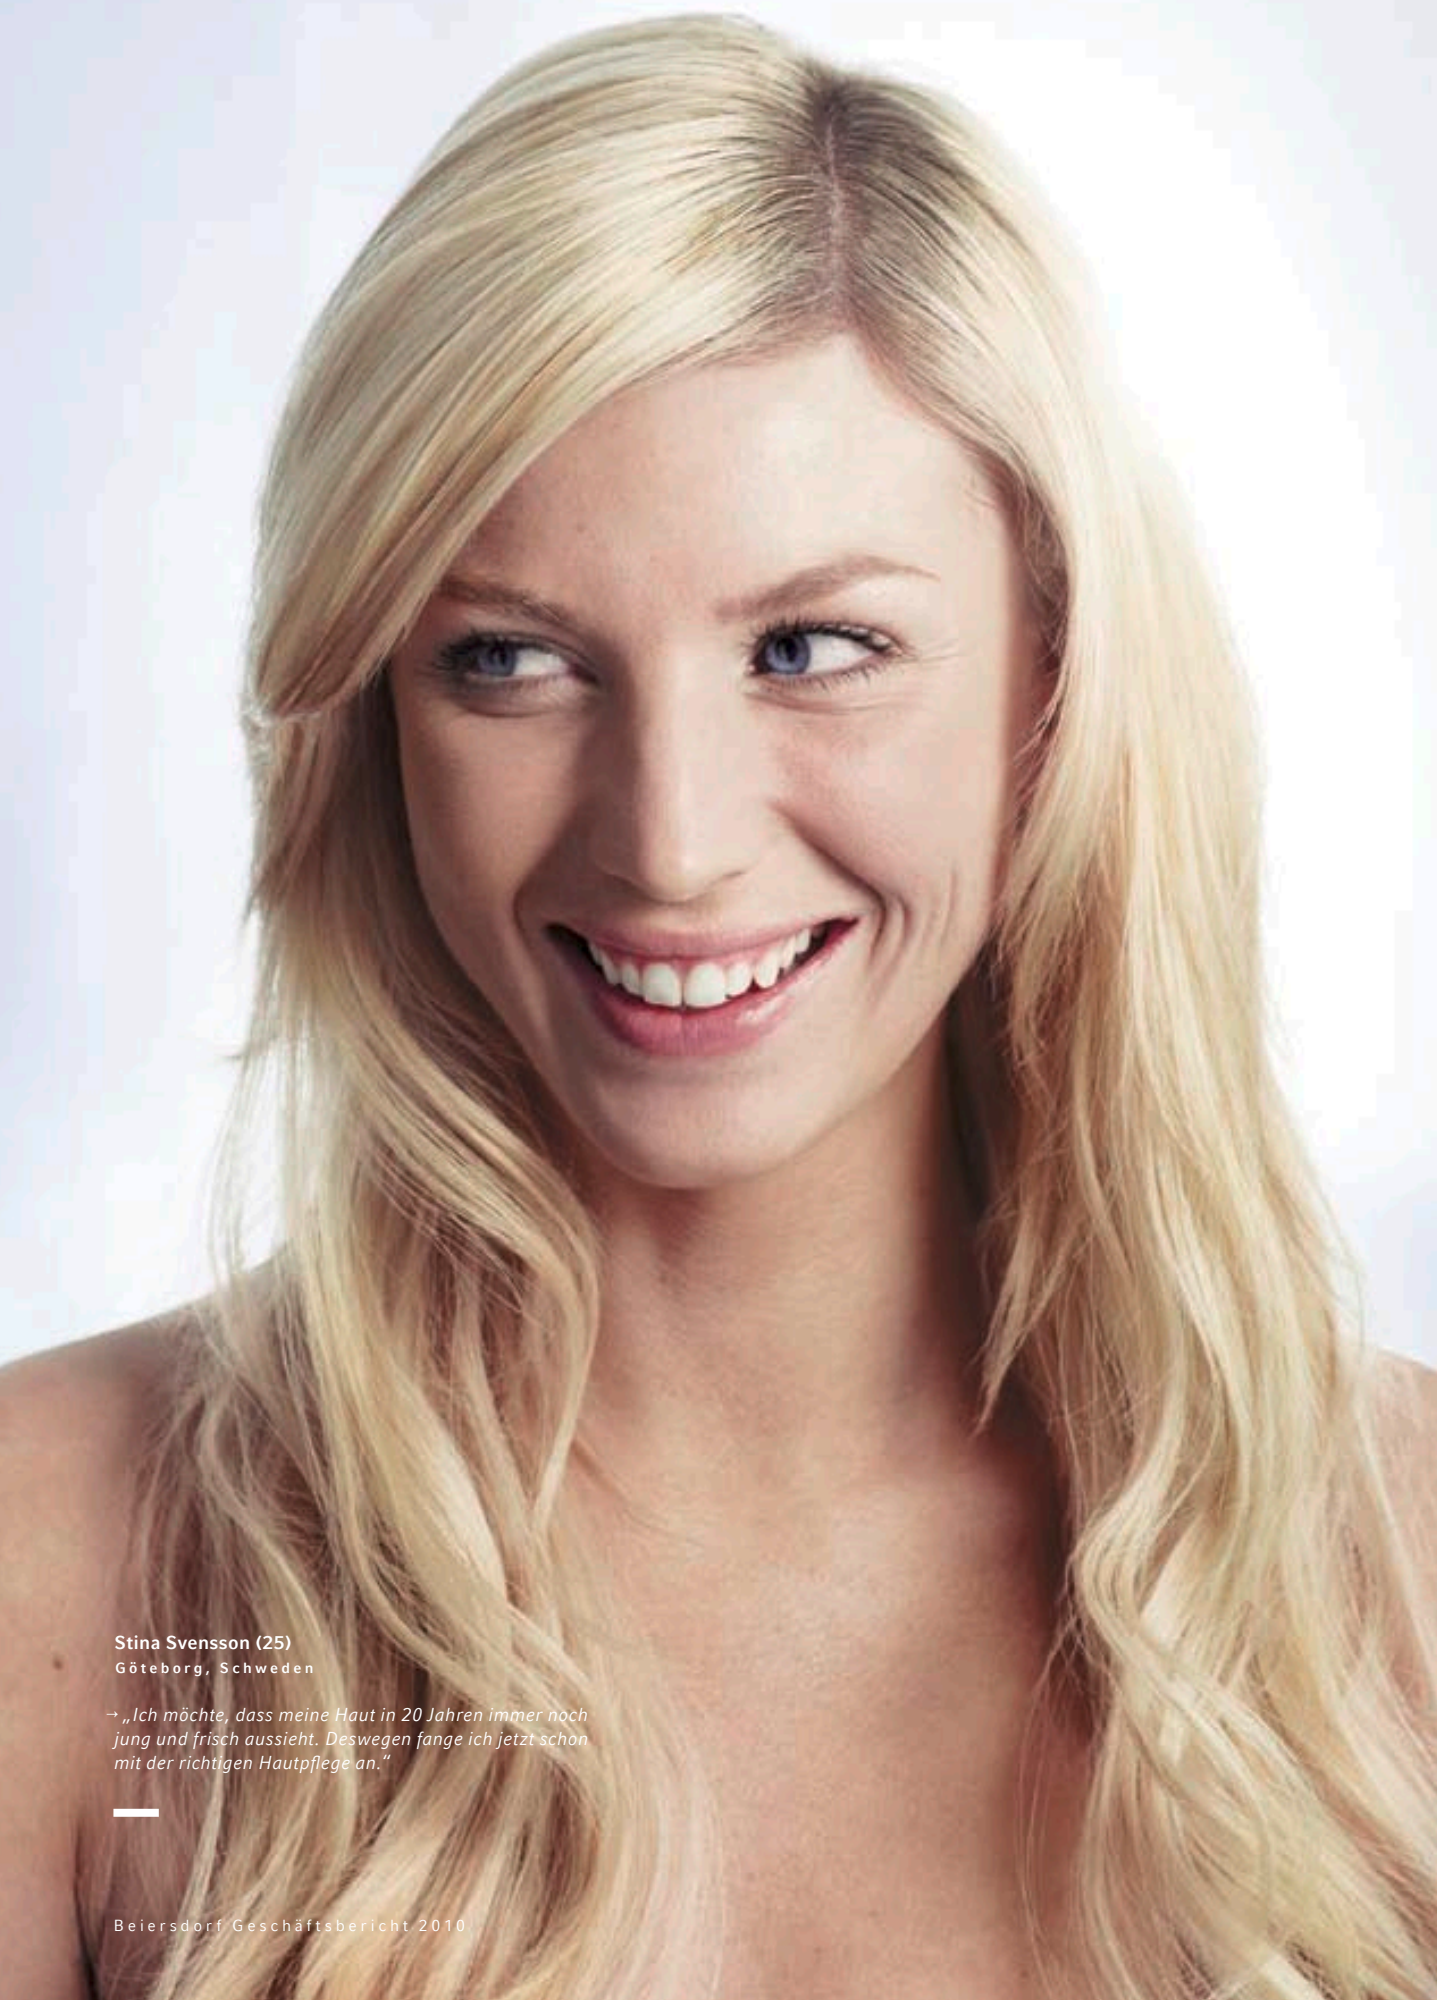

**Stina Svensson (25)**  
Göteborg, Schweden

→ „Ich möchte, dass meine Haut in 20 Jahren immer noch jung und frisch aussieht. Deswegen fange ich jetzt schon mit der richtigen Hautpflege an.“

---

# Europa

Grafik:

Anteil der Bevölkerung über 65 Jahre.

---

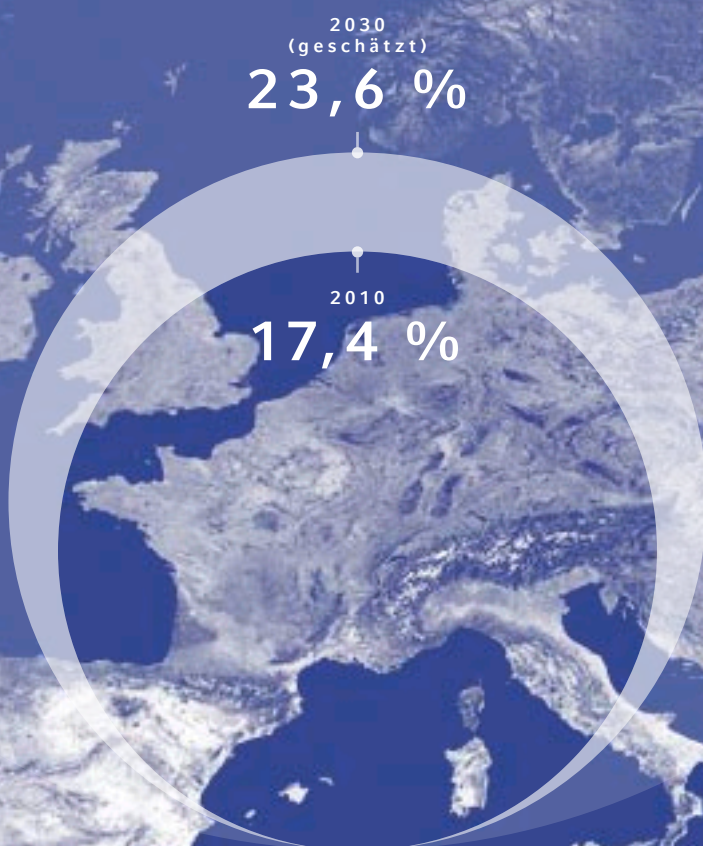

Beiersdorf Berichtsregion:  
Europa

---

102 \_\_\_\_\_ Tochtergesellschaften

10.523 \_\_\_\_\_ Mitarbeiter

3.843 Mio. € \_\_\_\_\_ Umsatz

62,1 % \_\_\_\_\_ Anteil am Konzernumsatz

---

# Europa

---

---

## **Immer mehr Produkte für die reifere Haut: Der demografische Wandel wirkt sich auf die Produktentwicklung für Europa aus.**

Die Europäer werden immer älter. Die Lebenserwartung der nahezu 500 Millionen Einwohner der EU-Staaten hat sich in den vergangenen vier Jahrzehnten um durchschnittlich acht Jahre verlängert. Schon heute liegt der Anteil der Bürger, die 65 Jahre und älter sind, bei 17 Prozent. Dieser Wert wird bis zum Jahr 2030 voraussichtlich auf etwa 23 Prozent steigen. Beiersdorf muss sich deshalb verstärkt auf die speziellen Anforderungen älterer Haut einstellen.

---

## **Unterschiede machen uns besonders: Die „Focus on Skin Care. Closer to Markets.“- Strategie differenziert Beiersdorf vom Wettbewerb.**

Europa ist nach wie vor unsere umsatzstärkste Region. Wir tun alles, um die herausragende Marktposition der Beiersdorf Produkte zu festigen und auszubauen. Deshalb erweitern wir auch kontinuierlich unser Angebot an individuellen Hautpflegeprodukten für die ältere Generation. Bei der Produktentwicklung profitieren wir von unserer weit überdurchschnittlichen Verbrauchernähe und der Schnelligkeit im Markt. Im Geschäftsjahr 2010 haben wir als Relaunch der bekannten Q10 Produkte sehr erfolgreich die NIVEA Q10 Plus Gesichtspflegeserie eingeführt. Und mit Eucerin Aquaporin Active haben wir nobelpreisgewürdigte Forschungsergebnisse in der Entwicklung einer Feuchtigkeitspflege aufgegriffen. Mit Produktentwicklungen wie diesen überzeugen wir seit vielen Jahren unsere Verbraucher – immer wieder aufs Neue.



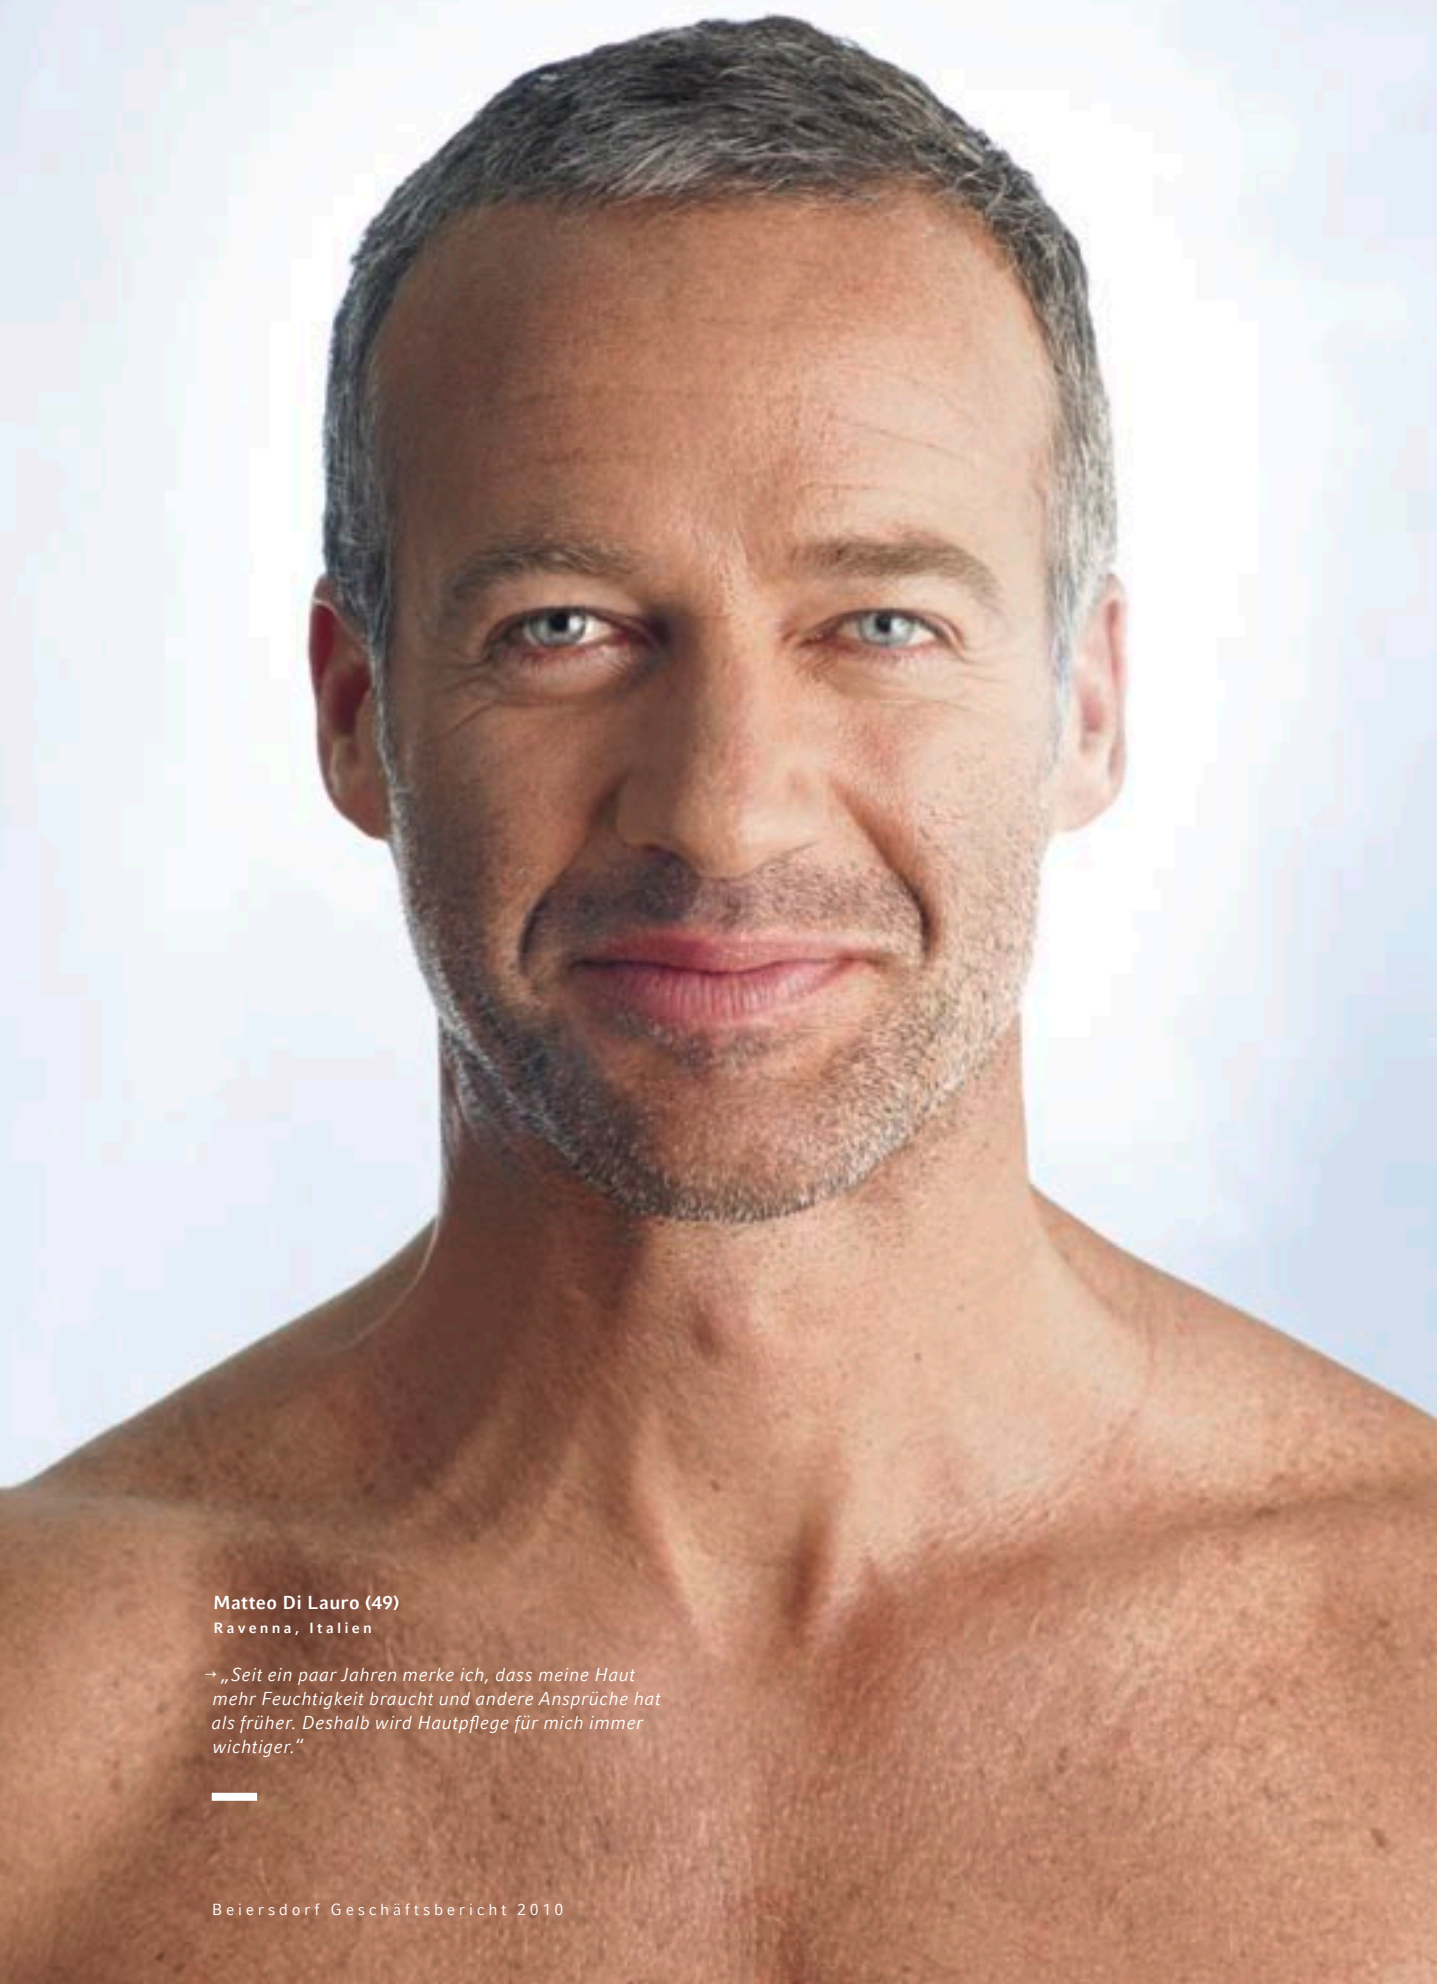

**Matteo Di Lauro (49)**  
Ravenna, Italien

→ „Seit ein paar Jahren merke ich, dass meine Haut mehr Feuchtigkeit braucht und andere Ansprüche hat als früher. Deshalb wird Hautpflege für mich immer wichtiger.“

---



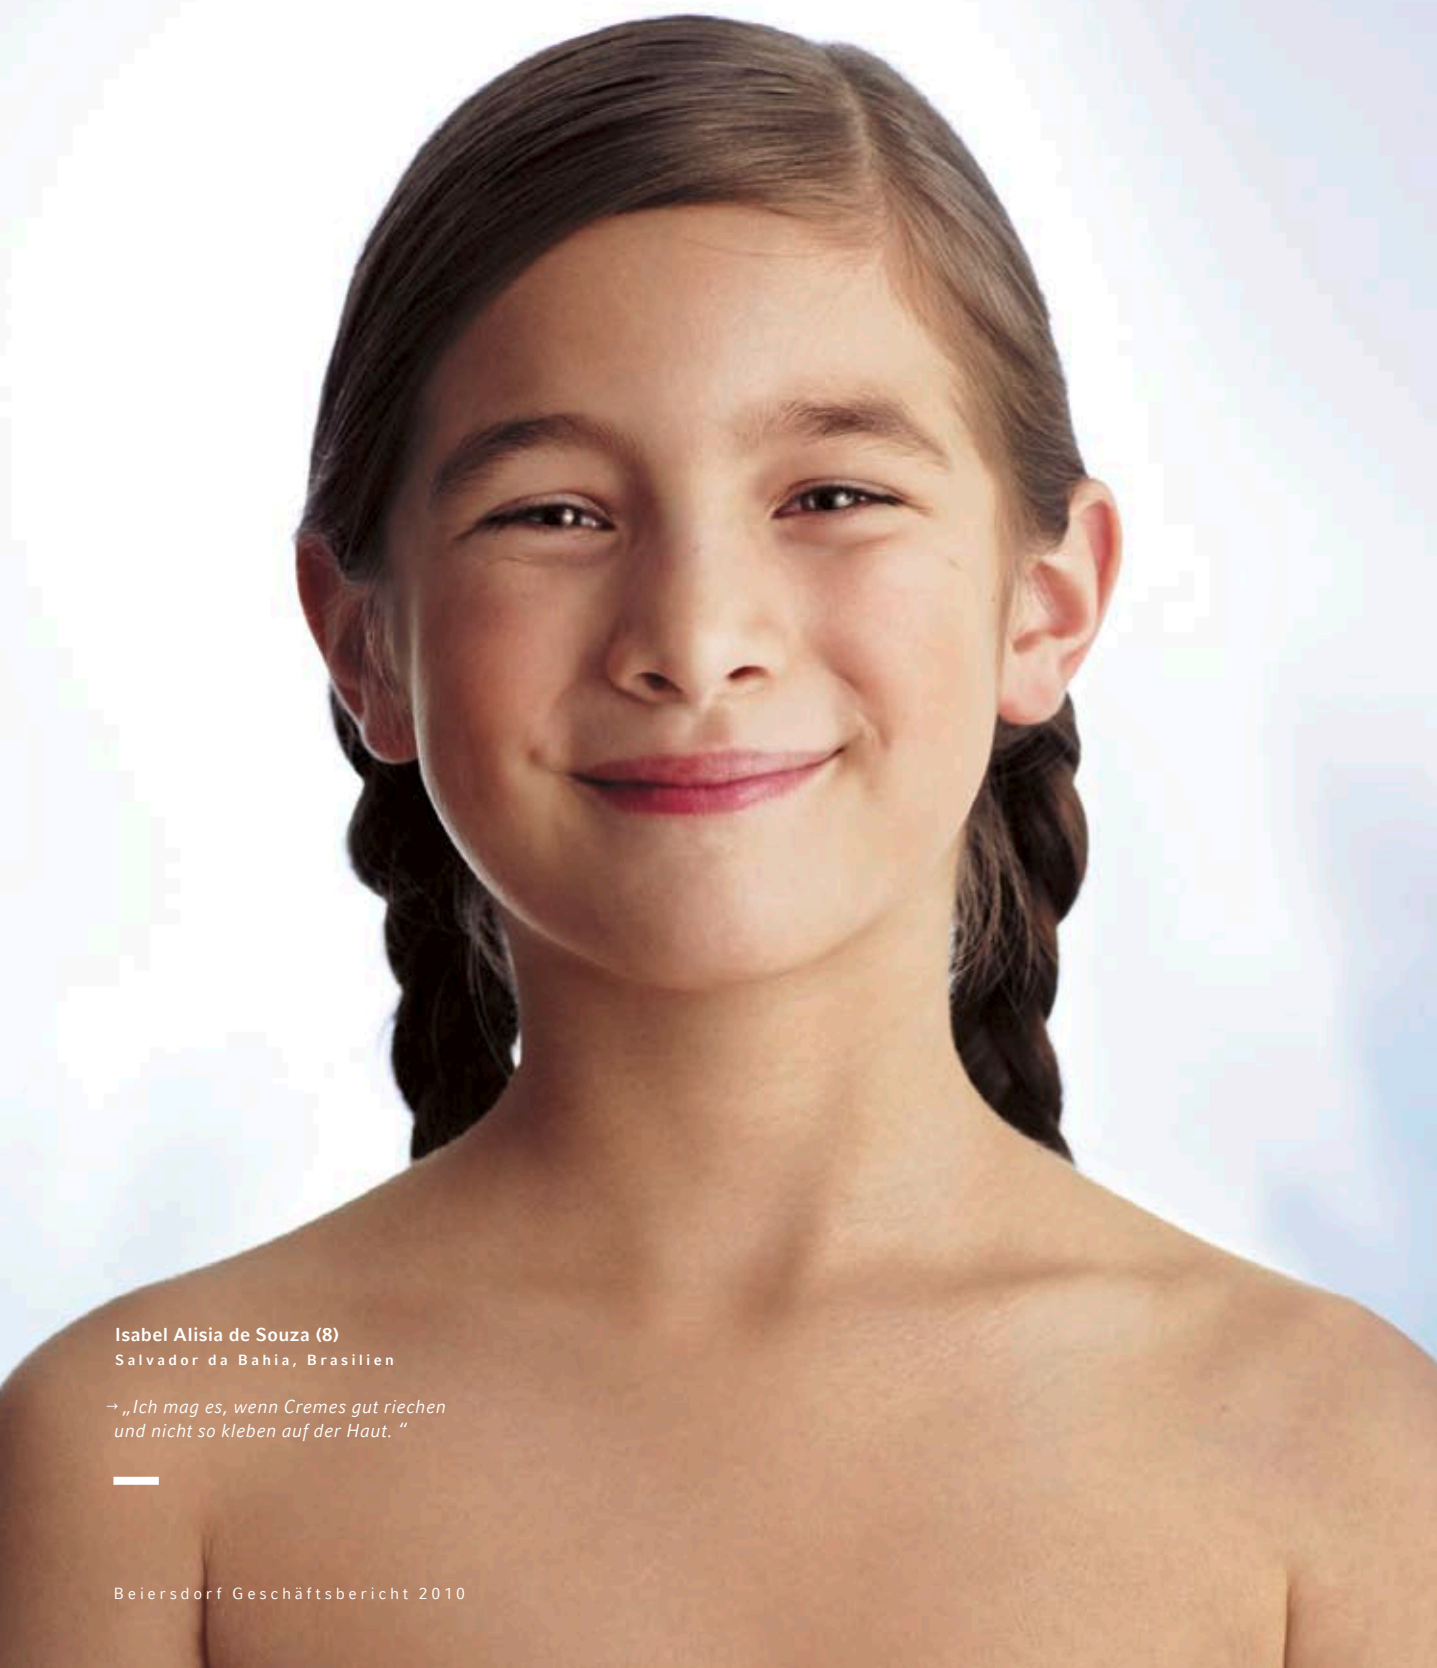

Isabel Alisia de Souza (8)  
Salvador da Bahia, Brasilien

→ „Ich mag es, wenn Cremes gut riechen  
und nicht so kleben auf der Haut.“

---

# Amerika

Grafik:

Pro-Kopf-Ausgaben für Kosmetikartikel  
in Nord- und Lateinamerika.

---

ca. 85 €

Nordamerika

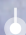

Lateinamerika

ca. 41 €

Beiersdorf Berichtsregion:  
Amerika

---

33

Tochtergesellschaften

2.086

Mitarbeiter

1.030 Mio. €

Umsatz

16,6 %

Anteil am Konzernumsatz

---

# Amerika

---

---

## **Ein Kontinent mit unterschiedlichen Märkten: Trotz großer Diversität bleibt die Strategie von Beiersdorf überall gleich.**

Nirgendwo wird mehr Kosmetik verkauft als in Nordamerika. Daher ist die Region auch von besonderer Bedeutung für uns. Der Kosmetikmarkt in Nordamerika ist allerdings bereits sehr weit entwickelt. In Latein- und Südamerika bietet sich hingegen ein völlig anderes Bild und damit hohes Wachstumspotenzial. Hier leben 545 Millionen Menschen, zirka 60 Prozent mehr als in Nordamerika. Die Einwohner haben ein so großes Körperpflegebewusstsein wie kaum irgendwo auf der Welt. Diesen unterschiedlichen Marktanforderungen wird Beiersdorf durch innovative Produkte gerecht, die auf Basis unserer Nähe zu Märkten und Konsumenten entstehen.

---

## **Unterschiede machen uns besonders: Das LATAM-Labor entwickelt ausschließlich Produkte für Latein- und Südamerika.**

Während wir in Nordamerika ähnliche Produkte wie in Europa verkaufen, haben die Verbraucher in Latein- und Südamerika andere Wünsche und Bedürfnisse. Deshalb hat Beiersdorf für Lateinamerika das LATAM-Labor eingerichtet. Dort entstehen spezielle Produkte für diese Regionen. Das Labor nutzt für seine Arbeit die Erkenntnisse unserer Consumer Insights Abteilung. Sie ermittelt, was die Verbraucher denken und fühlen und welche Erwartungen sie an innovative Hautpflege haben. Durch die enge Zusammenarbeit mit unseren lokalen Tochtergesellschaften erhalten wir zusätzliche Informationen über den Markt und die Verbraucher. Zudem unterscheiden sich Wachstumsmärkte erheblich von gesättigten Märkten wie Westeuropa oder Nordamerika. Daher verantwortet ein eigener Vorstand die Emerging Markets, zu denen auch Lateinamerika gehört.



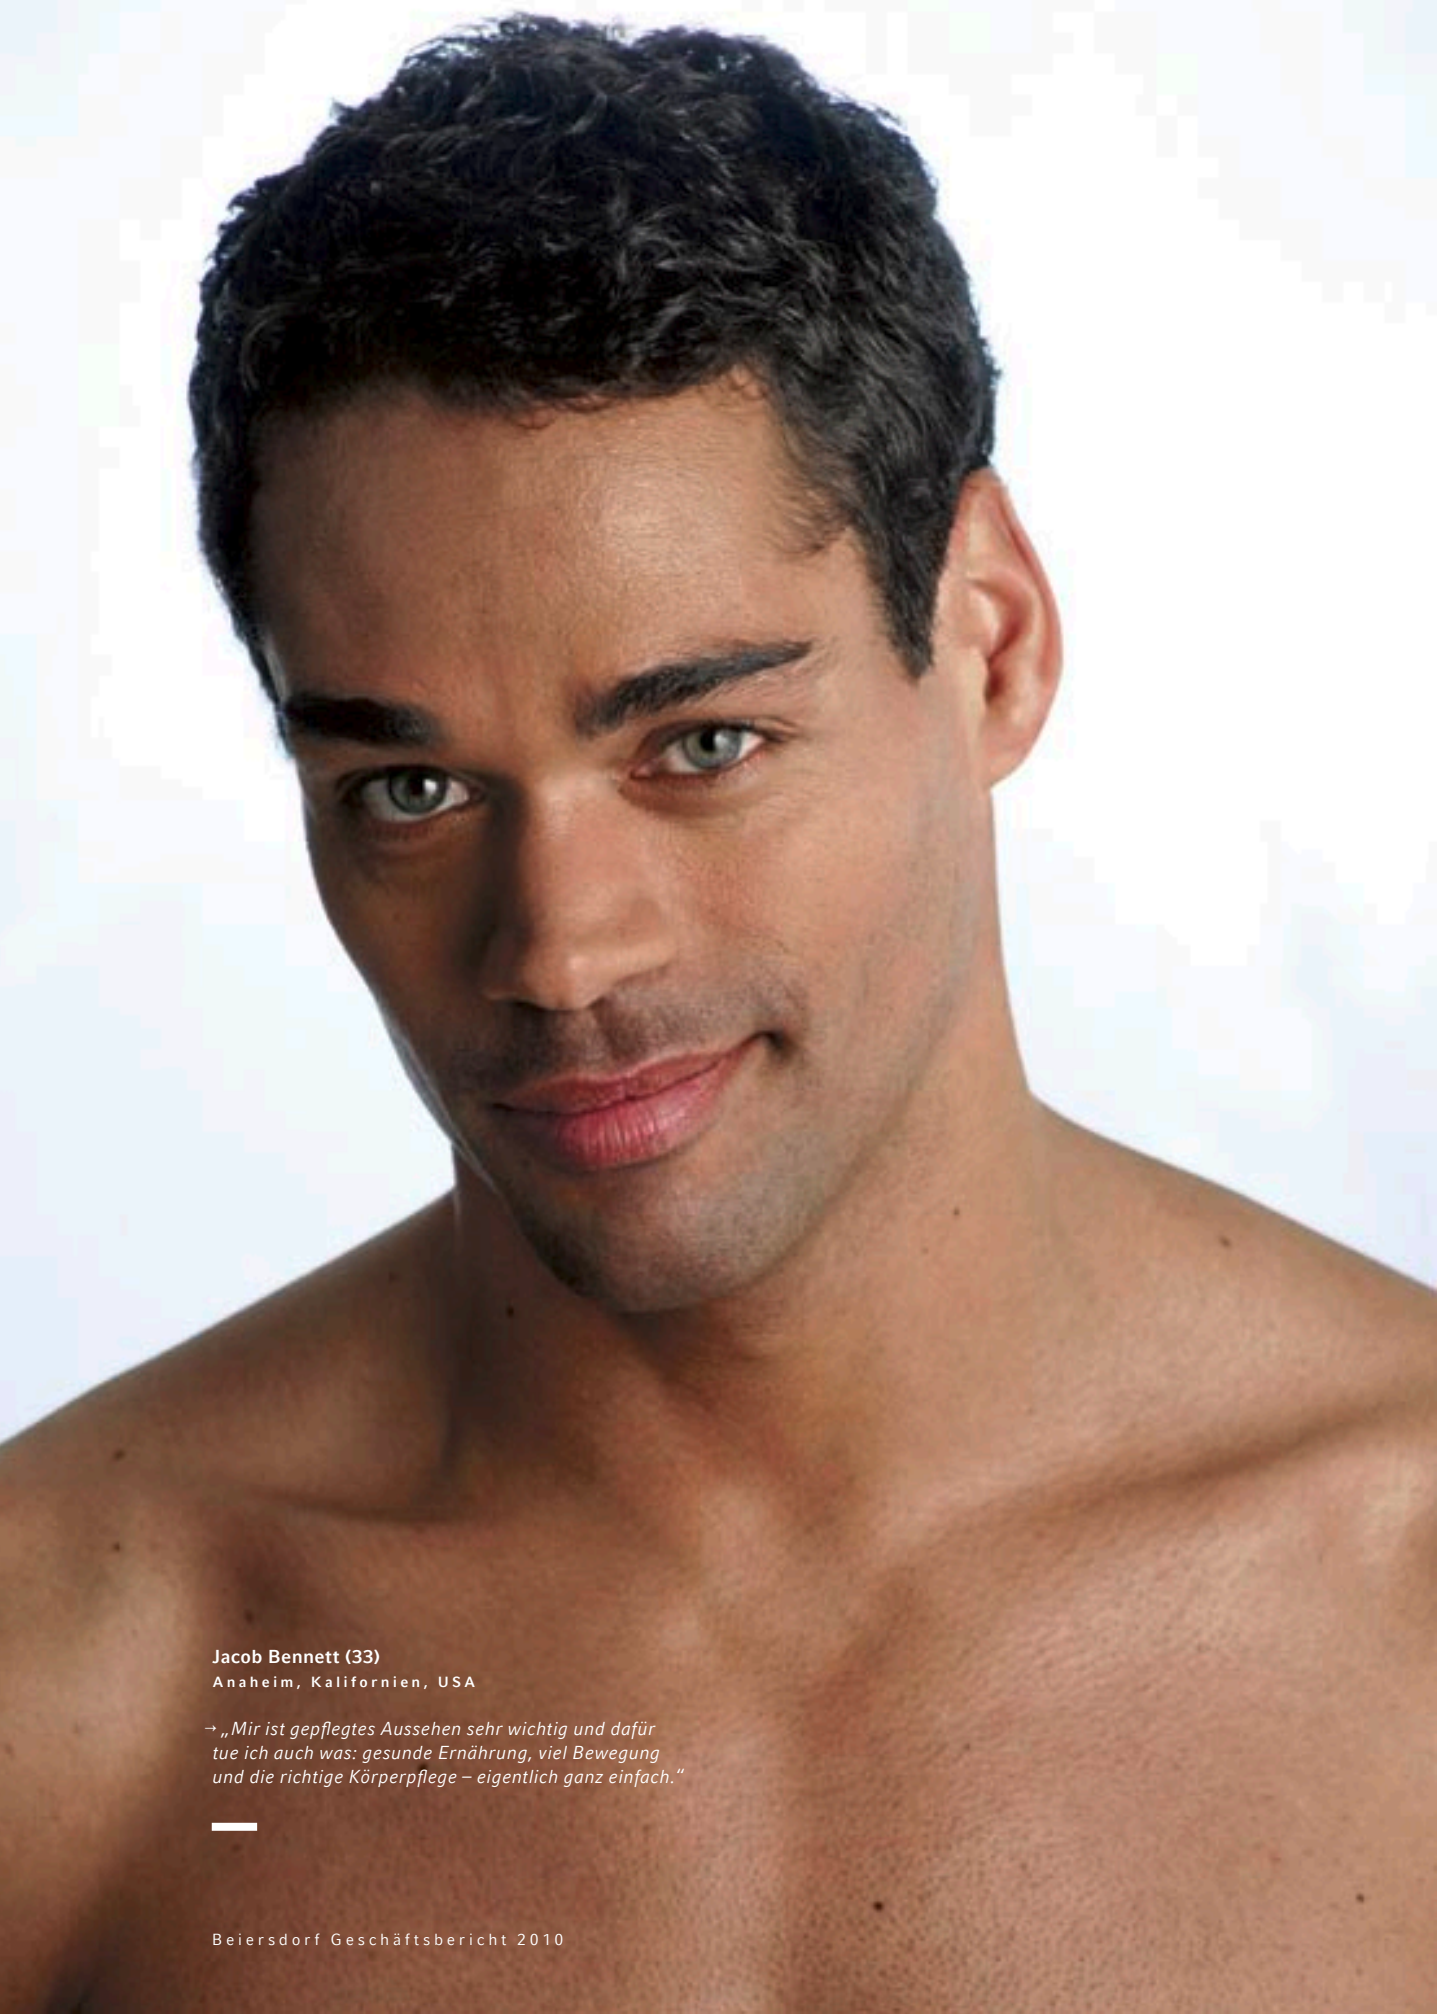

**Jacob Bennett (33)**  
Anaheim, Kalifornien, USA

→ „Mir ist gepflegtes Aussehen sehr wichtig und dafür tue ich auch was: gesunde Ernährung, viel Bewegung und die richtige Körperpflege – eigentlich ganz einfach.“



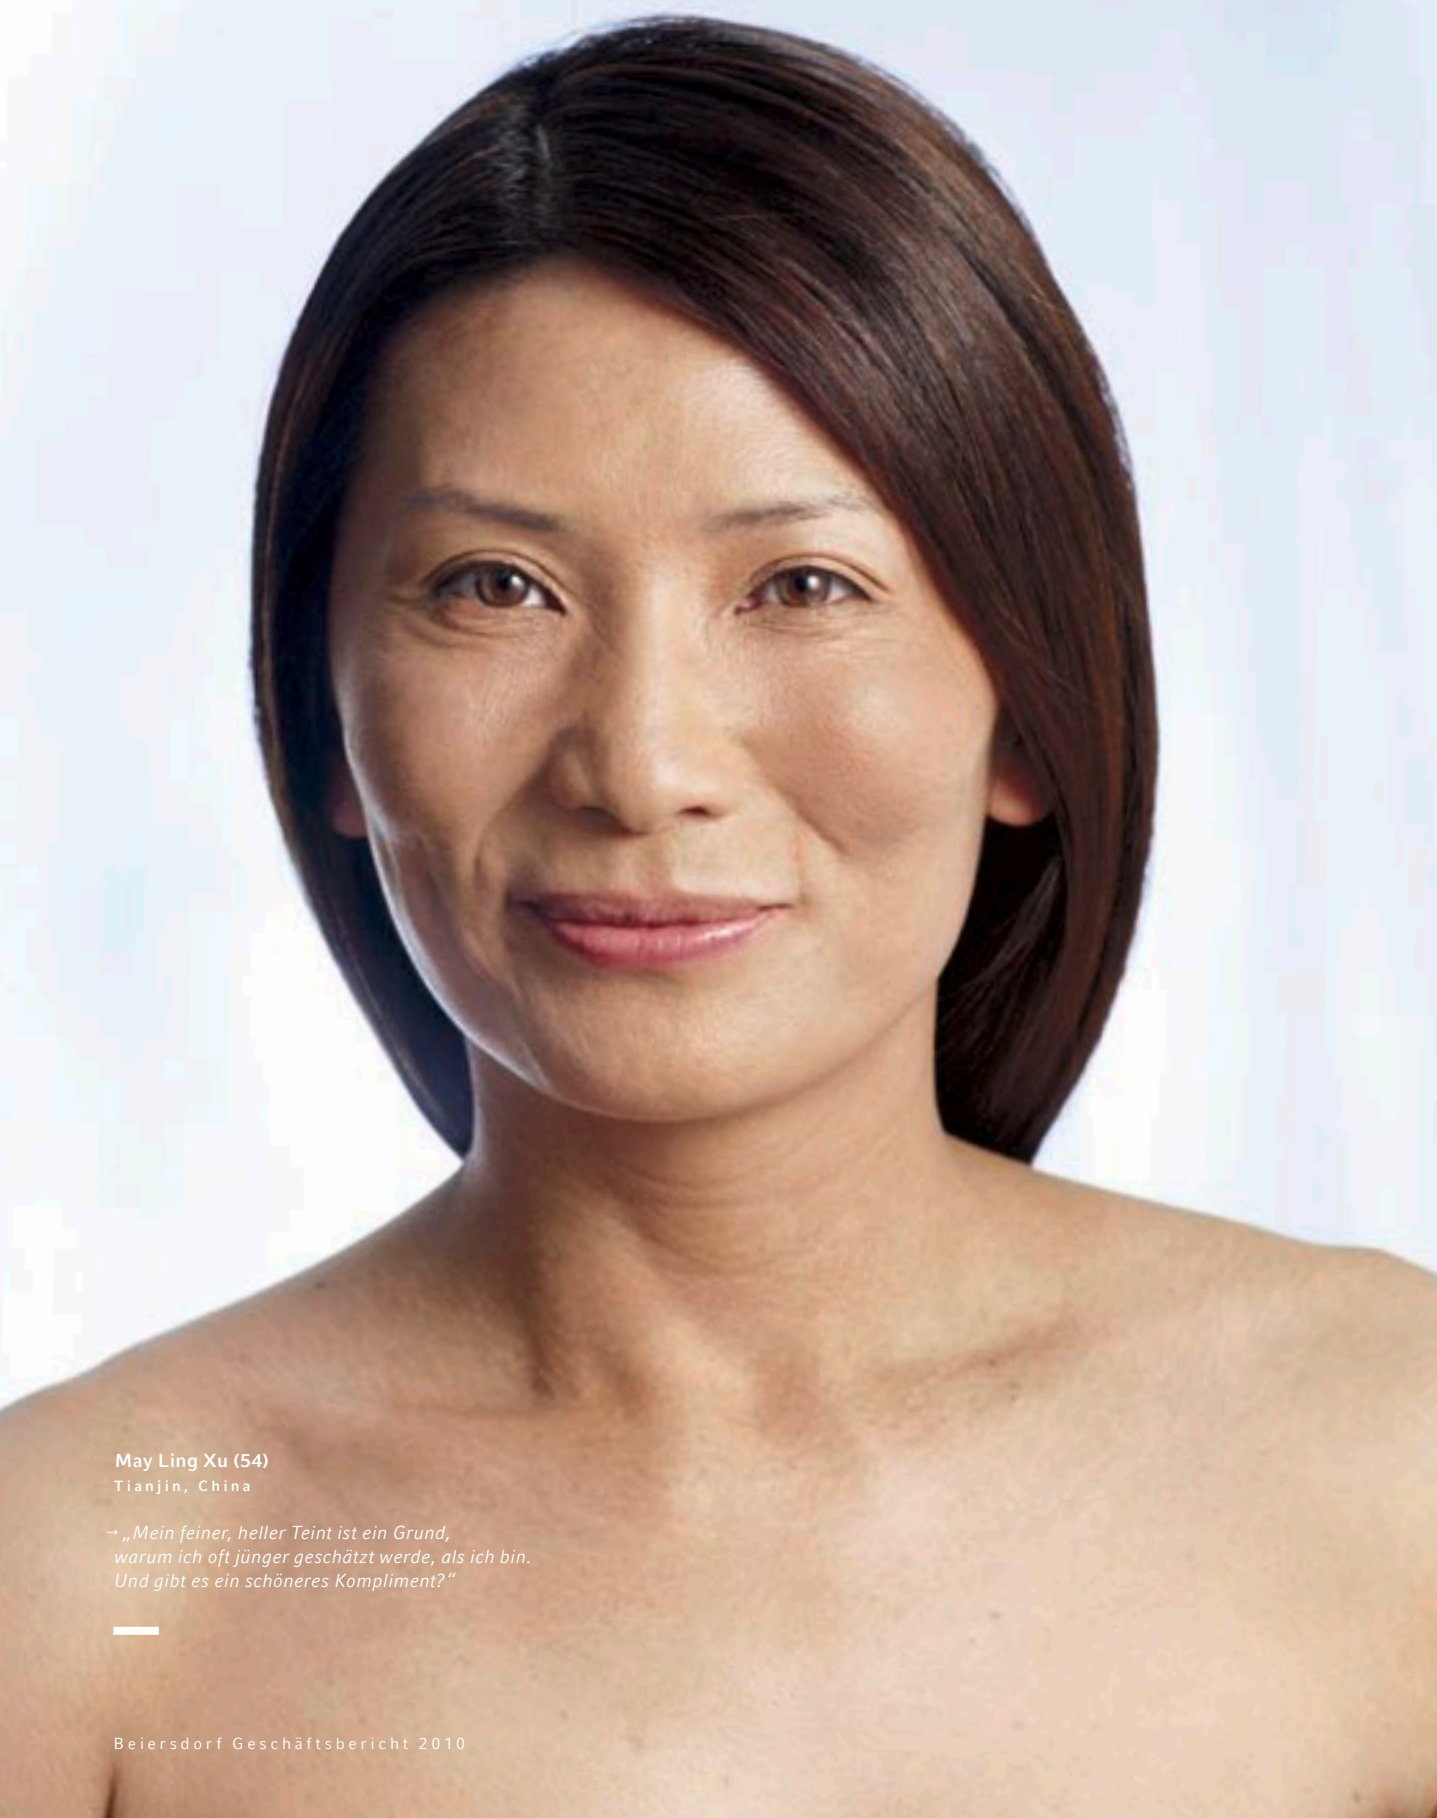

May Ling Xu (54)  
Tianjin, China

→ „Mein feiner, heller Teint ist ein Grund,  
warum ich oft jünger geschätzt werde, als ich bin.  
Und gibt es ein schöneres Kompliment?“

# Asien

Grafik:

Bevölkerungswachstum in Asien 1900 – 2010.

---

4.157 Mio.

2010

1.402 Mio.

1950

1900

947 Mio.

Beiersdorf Berichtsregion:  
Afrika / Asien / Australien

---

41 Tochtergesellschaften

6.519 Mitarbeiter

1.321 Mio. € Umsatz

21,3 % Anteil am Konzernumsatz

---

# Asien

---

---

## **Riesiges Potenzial für lokale Produkte: Die Bevölkerung wächst und mit ihr der Markt für Hautpflege.**

Über vier Milliarden Menschen leben heute auf dem asiatischen Kontinent. Ihre Zahl nimmt weiterhin rasant zu, genauso wie ihre Kaufkraft. Um von dieser Entwicklung nachhaltig zu profitieren, muss Beiersdorf ganz spezielle Wünsche erfüllen, die sich deutlich von denen in unserem deutschen Heimatmarkt unterscheiden. So gilt zum Beispiel in Asien eine blasse Haut als Schönheitsideal. Spezielle Whitening-Produkte sind deshalb sehr gefragt. Deutliche Unterschiede, die Beiersdorf bei der Produktentwicklung konsequent berücksichtigt, gibt es auch bei der Struktur von Haut und Haar.

---

## **Unterschiede machen uns besonders: Das Asien-Labor fokussiert sich auf die Bedürfnisse der asiatischen Verbraucher.**

Wir haben auf die individuellen Bedürfnisse der asiatischen Verbraucher schon früh reagiert und bereits im Jahr 2005 ein Asien-Labor eingerichtet, das Produkte für die lokalen Absatzgebiete entwickelt. Die enge Kooperation mit den Kollegen vor Ort ermöglicht uns den notwendigen, direkten Einblick in die jeweiligen Märkte. Eigene Vorstände für Asien und Emerging Markets entwickeln Strategien, um alle Menschen auf dem Kontinent zu erreichen. Während NIVEA-Produkte bisher im mittleren und oberen Preissegment positioniert waren, wurde jetzt eine neue Basisgesichtspflege für den Massenmarkt herausgebracht, die wirklich alle Asiaten erreicht – in den Städten wie auf dem Land.



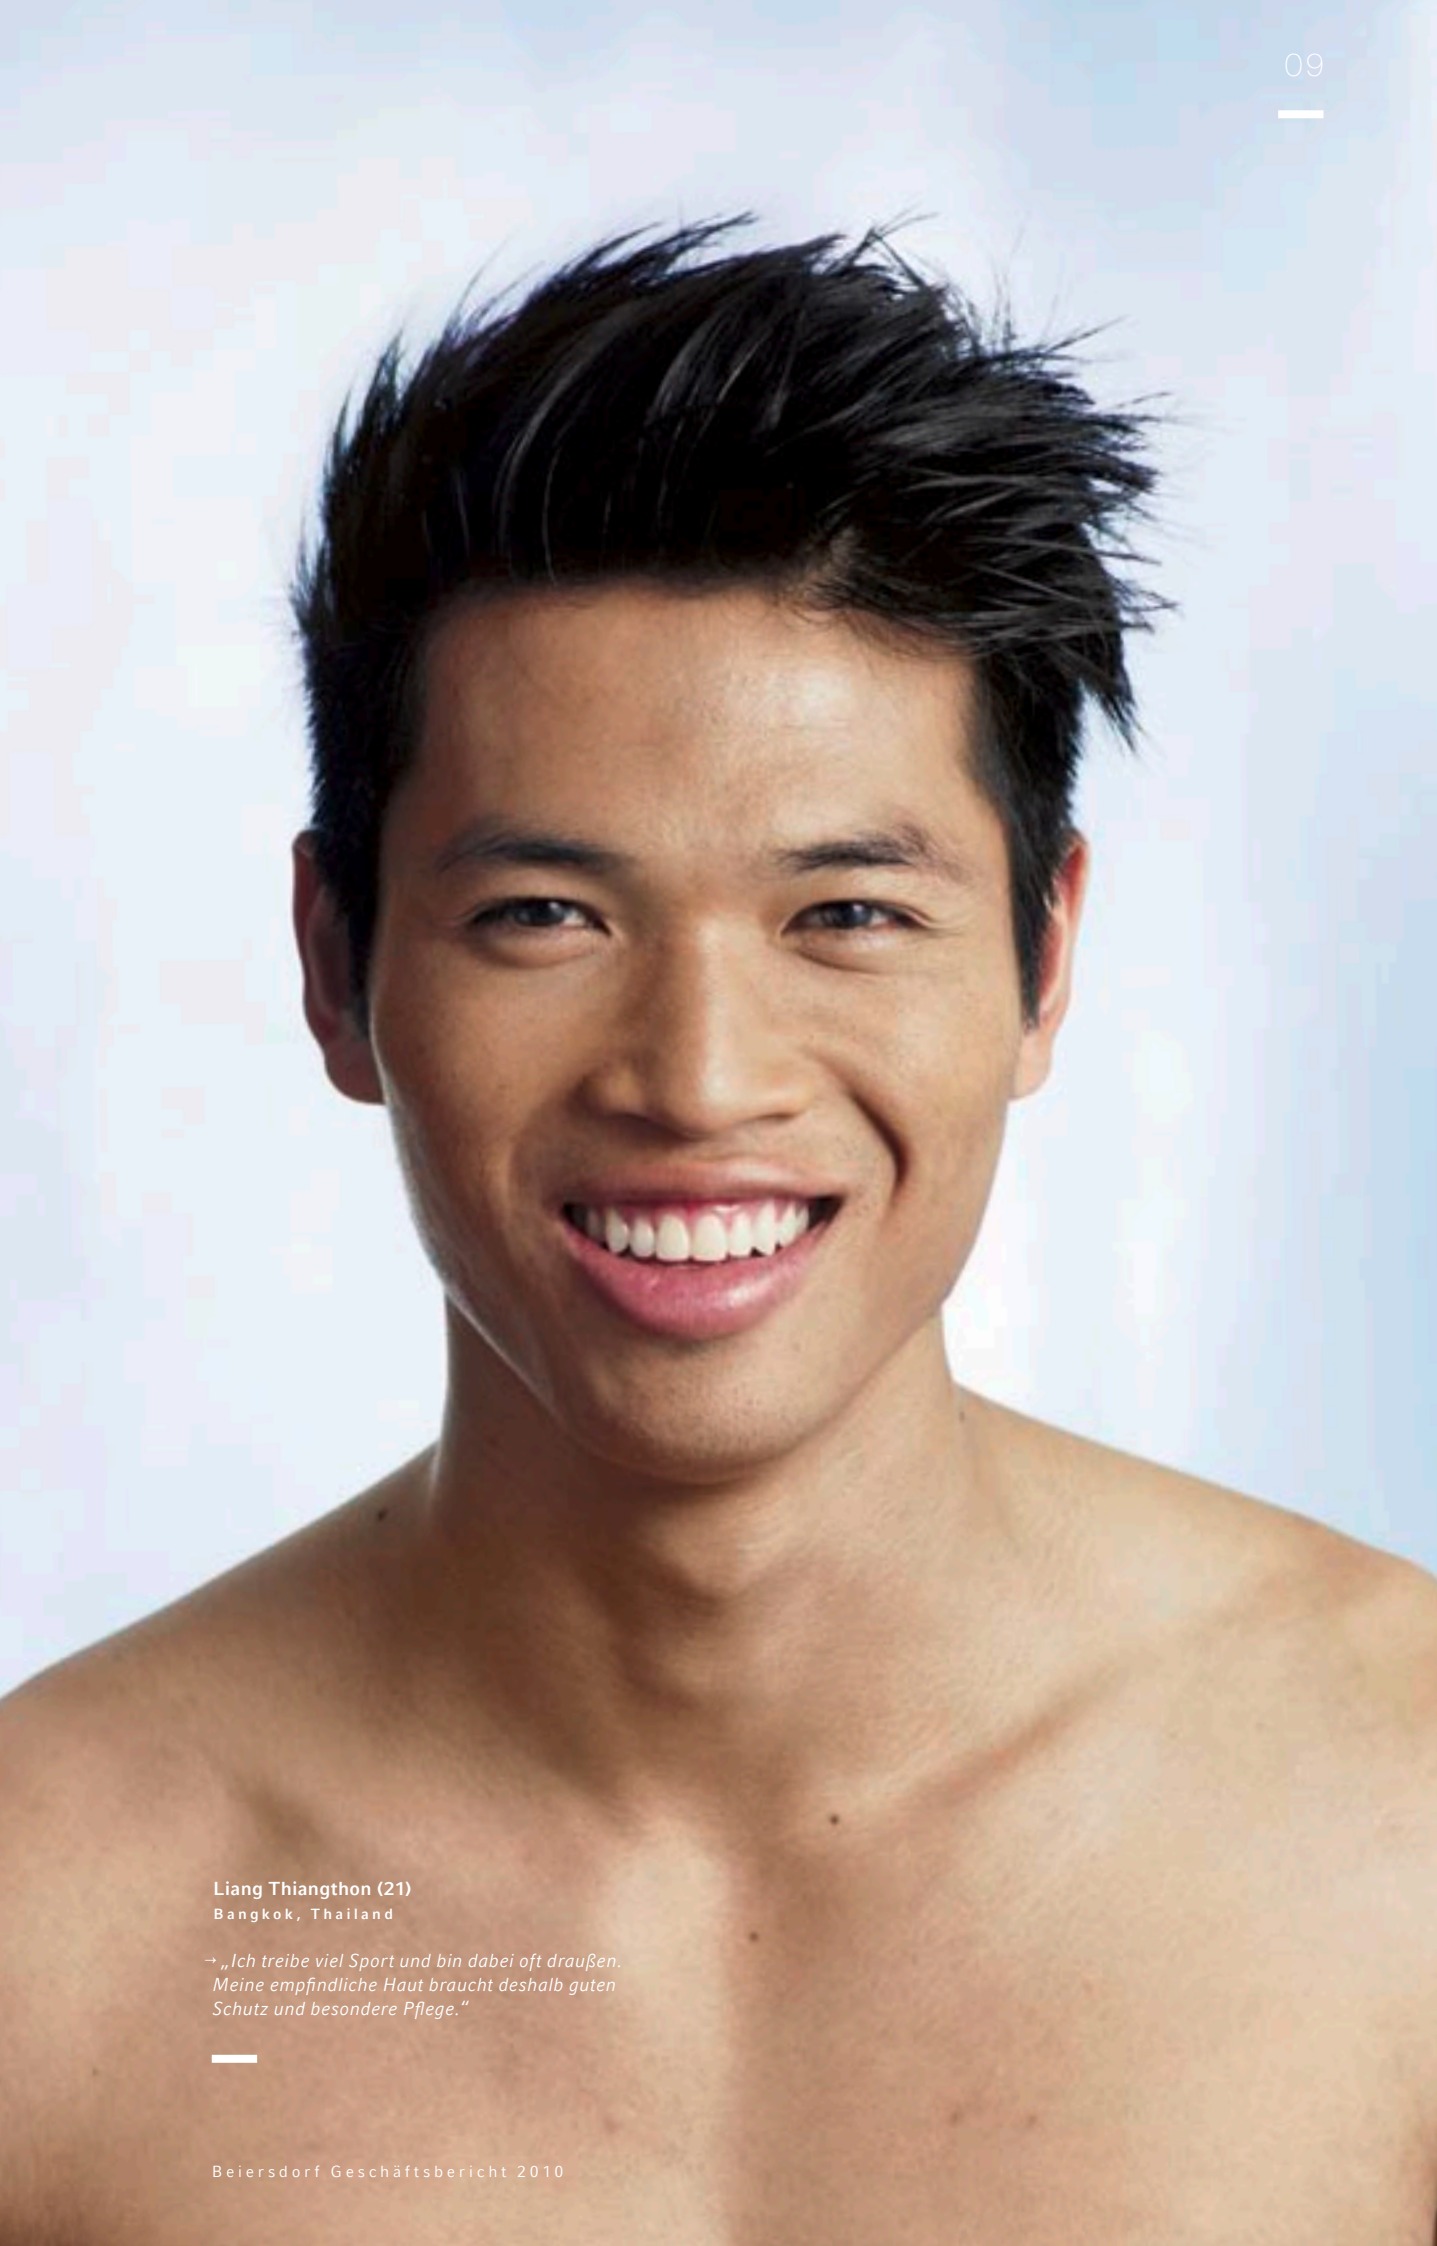

**Liang Thiangthon (21)**  
Bangkok, Thailand

→ „Ich treibe viel Sport und bin dabei oft draußen.  
Meine empfindliche Haut braucht deshalb guten  
Schutz und besondere Pflege.“

---



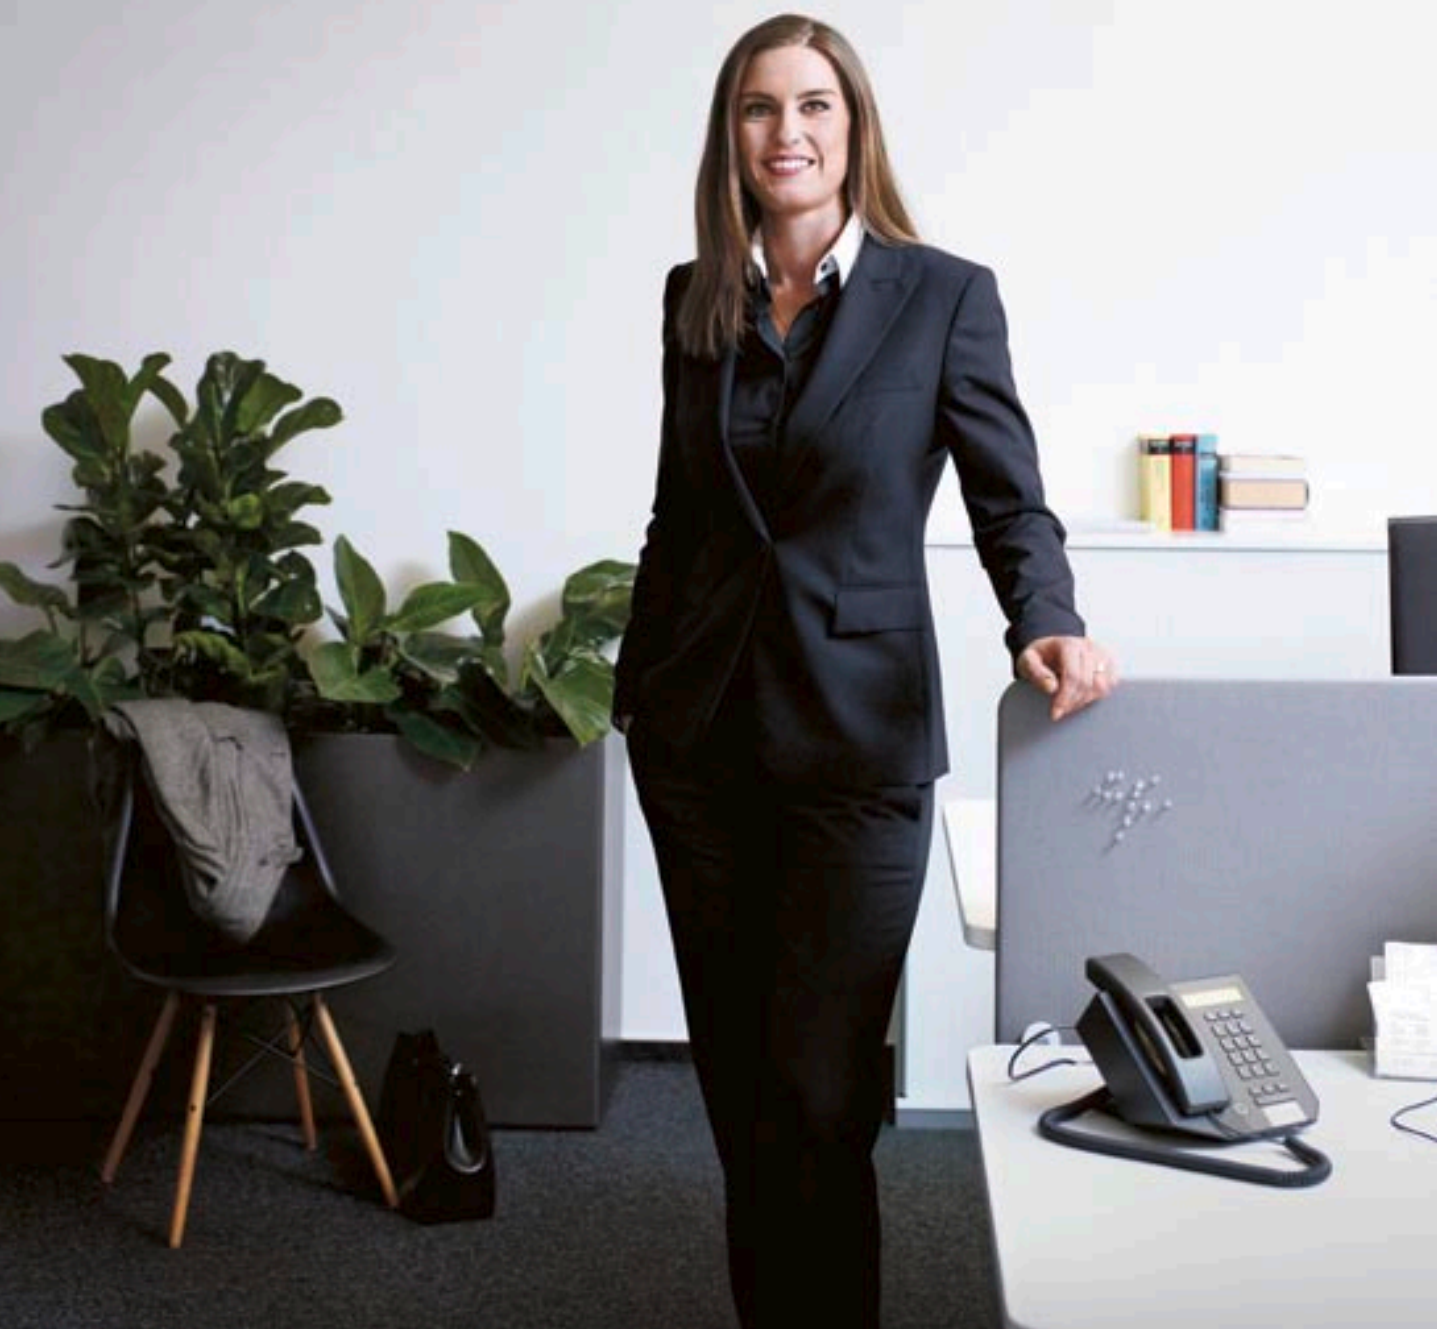

**Julia Frankenberger**  
Senior International Brand Manager

→ „Ich bin jetzt seit fast zehn Jahren bei Beiersdorf. Begonnen habe ich im lokalen Marketing und wechselte dann für zwei Jahre nach Wuhan in China. Mit dieser Erfahrung im Gepäck entwickle ich heute die globale langfristige Ausrichtung von Deodorants – angepasst an die gesamte NIVEA-Strategie. Die Produkt- und Kommunikationskonzepte müssen maximal konsumentenorientiert sein, deshalb stehe ich in engem Austausch mit den Regionen. In Korea beispielsweise ist es für einen Konsumenten deutlich unangenehmer, die Benutzung eines Deodorants auch vor Freunden zuzugeben, als in Europa. Die jeweiligen regionalen und lokalen Markterfordernisse und die kulturellen Besonderheiten werden entsprechend in der Forschung & Entwicklung, in der Verpackung und natürlich in der Kommunikation berücksichtigt. Dieses Kooperationsmodell gilt es weiterzuführen und wie bereits im Jahr 2010 mindestens zweistellig weltweit weiterzuwachsen.“

# Unsere Mitarbeiter

Grafik:

Anteil Mitarbeiter nach Beiersdorf Berichtsregionen.

---

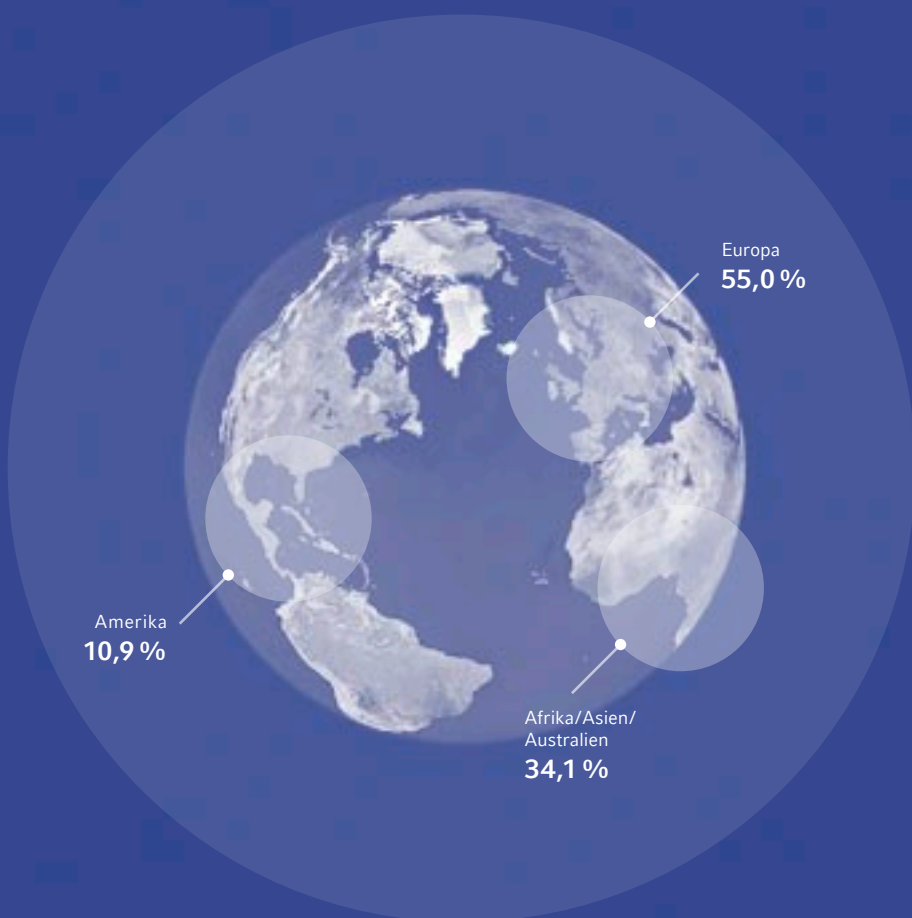

Daten & Fakten:

Mitarbeiterkennzahlen 31.12.2010

---

|        |                                       |
|--------|---------------------------------------|
| 6.180  | Mitarbeiter in der Produktion         |
| 8.607  | Mitarbeiter in Marketing und Vertrieb |
| 4.341  | Mitarbeiter in anderen Funktionen     |
| 19.128 | Mitarbeiter gesamt                    |

---

# Unsere Mitarbeiter

---

## **Das breite Fundament für unseren anhaltenden Erfolg: Ein Team, das für die Verbraucher Höchstleistungen erbringt.**

Für Beiersdorf arbeiten rund um den Globus mehr als 19.000 Menschen in den unterschiedlichsten Bereichen. Trotzdem verstehen sie sich als ein Team, das gemeinsam das Ziel verfolgt, die Verbraucher überall auf der Welt mit innovativen Produkten von hoher Qualität zu fairen Preisen zu begeistern. Unsere Mitarbeiter sind stolz auf das Unternehmen, seine Marken und seine Werte. Diese Einstellung ist nicht selbstverständlich und wird deshalb von uns intensiv gefördert – zum Beispiel durch offene Kommunikation in einer flachen Hierarchie, viel Verantwortung und immer neue Herausforderungen.

---

## **Unterschiede machen uns besonders: Unsere starken Marken und unsere optimierte Supply Chain sind wesentliche Gründe für das große Vertrauen unserer Konsumenten und Kunden.**

Beiersdorf gehört mit seinen starken Marken zu den weltweit führenden Unternehmen im Bereich Hautpflege. Darauf sind wir stolz. Uns ist aber bewusst, dass der anhaltende Erfolg einer Marke von vielen Faktoren abhängt. Mit unseren engagierten Mitarbeitern, vorbildlicher Forschung und Entwicklung sowie innovativen Produkten arbeiten wir kontinuierlich daran, das Vertrauen unserer Verbraucher in unsere Marken weiter zu stärken. Durch die Bündelung der Bereiche Brands und Supply Chain in einem Vorstandsressort können wir alle Prozesse von der Entwicklung eines Produkts bis zu seiner Produktion, Vermarktung und Auslieferung erfolgreich und noch effizienter steuern. Das ermöglicht uns unter anderem, die Innovationsgeschwindigkeit zu erhöhen sowie die Produkt- und Servicequalität weiter zu steigern.

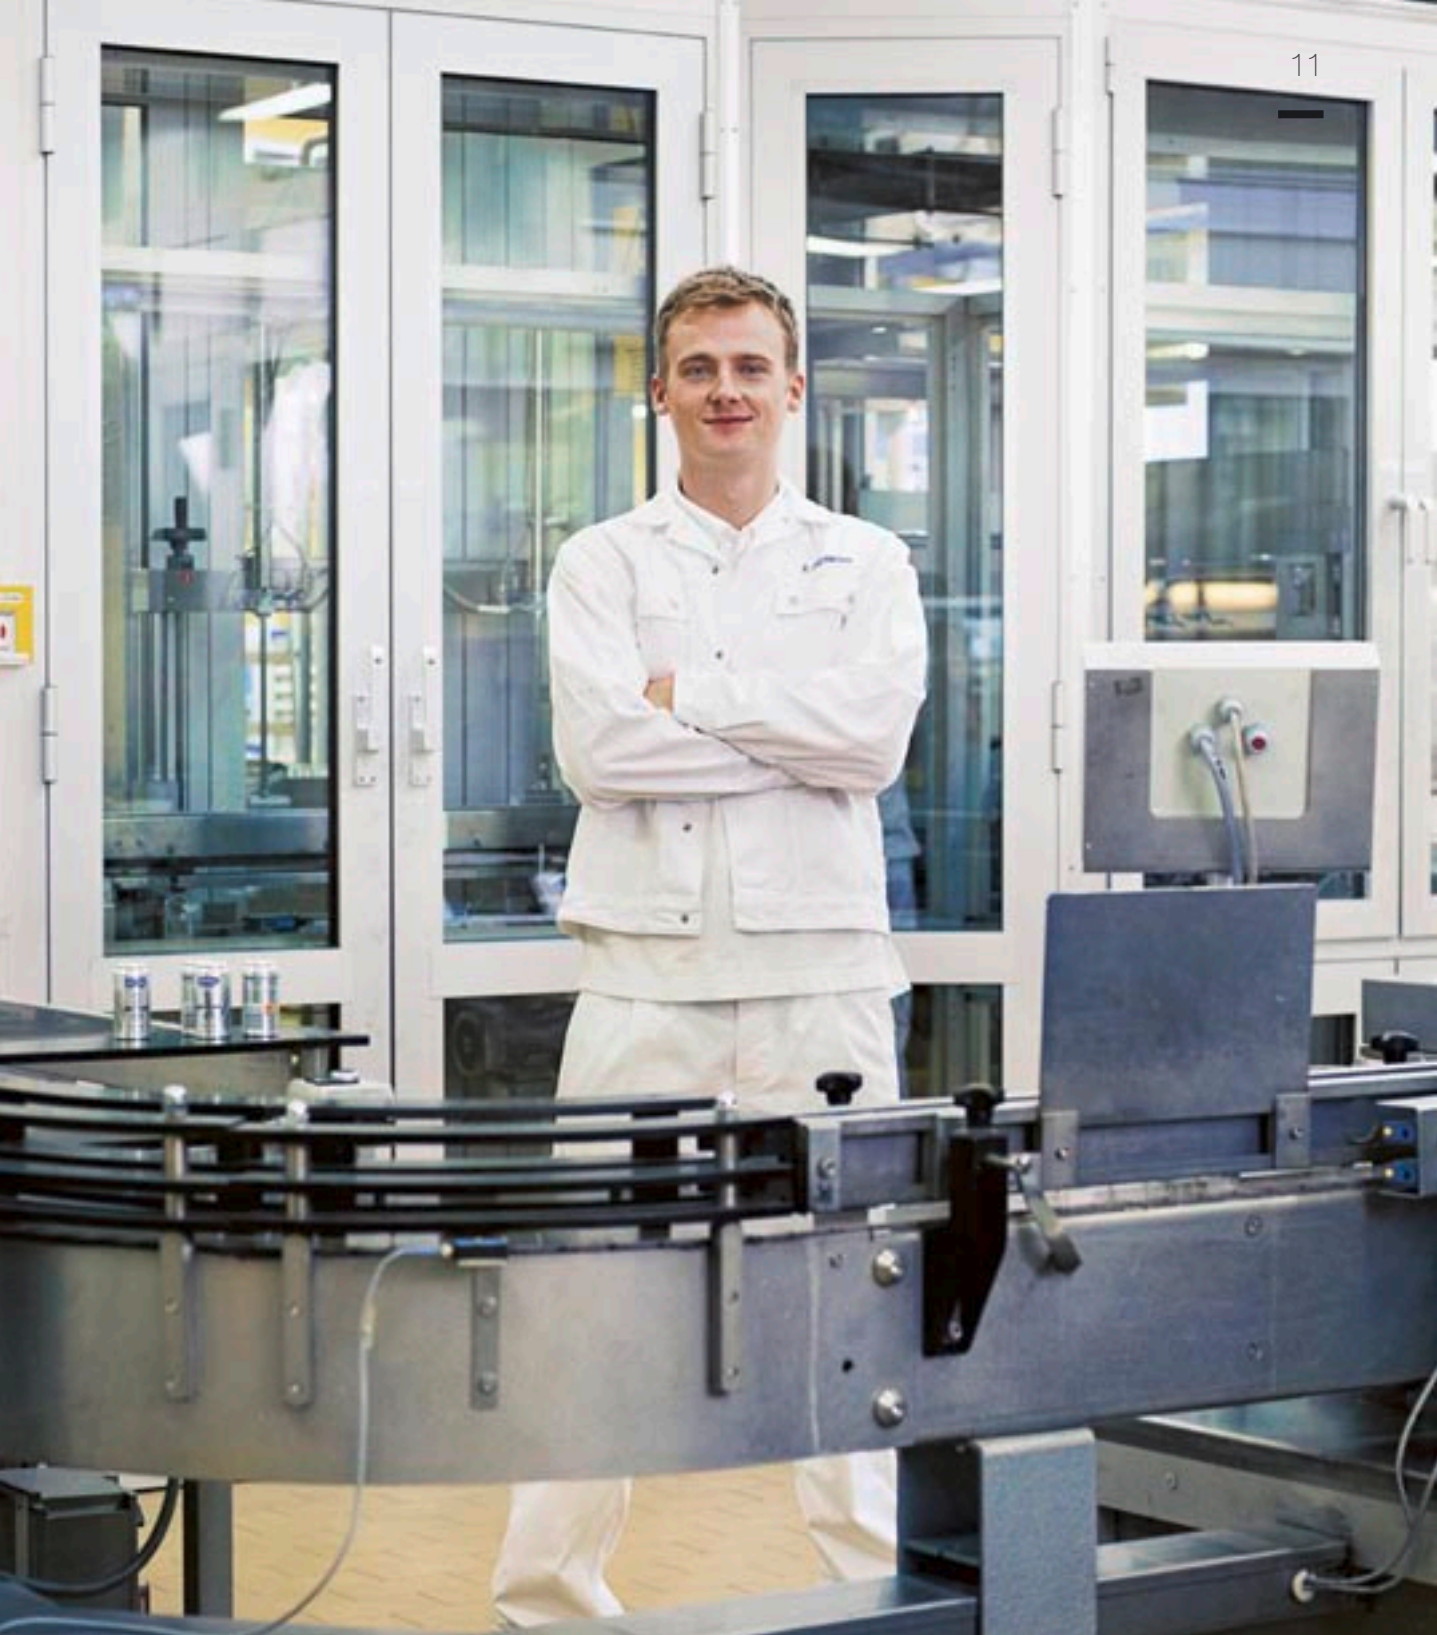

**Eugen Obermann**  
Mitarbeiter Produktion

→ „Ohne Verantwortung macht mir eine Aufgabe einfach keinen Spaß, auch wenn es manchmal anstrengend sein kann. Nach sechs Jahren bei Beiersdorf betreue ich heute alle Stationen in der Deodorant-Aerosol-Produktion – von der Anlieferung der Chargen über die Kontrolle bis hin zum Verschließen, Verpacken und Verschicken der Produkte. Und das im Drei-Schicht-Betrieb. Ohne ein eingespieltes Team ist das überhaupt nicht zu schaffen. Wir können uns aufeinander verlassen. Und das müssen wir auch, denn pro Schicht werden durchschnittlich 250.000 Dosen abgefüllt und alle zwei bis drei Schichten müssen wir die gesamte Anlage reinigen.“



**NIVEA**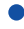

## 100 Jahre NIVEA: Erfolg einer Markenfamilie

- Begleiter durchs Leben

Die Haut ist nicht nur das größte Organ des Menschen, sondern auch der Spiegel seiner Seele. Wenn wir uns wohl fühlen in unserer Haut, dann sind wir mit uns selbst und anderen im Reinen. Die richtige Pflege ist deshalb essenziell, für Frauen und Männer, für Jung und Alt, für alle Hautfarben und -typen – für jeden. NIVEA begleitet die Menschen durchs Leben und hilft ihnen, sich gut zu fühlen in und mit ihrer Haut. Den Produkten mit dem weltberühmten Namen bringen die Konsumenten das größte Vertrauen entgegen, sie stehen für Qualität, Zuverlässigkeit, Tradition und Ehrlichkeit. NIVEA ist heute die weltweit größte Marke in der Haut- und Körperpflege.

- Ein perfekter Schutzmantel

Begonnen hat die einzigartige Erfolgsgeschichte 1911, als es dem jungen Apotheker Dr. Oscar Troplowitz und dem Erfinder der modernen Dermatologie, Prof. Paul Gerson Unna, zum ersten Mal gelang, mithilfe des gerade von dem Chemiker Isaac Lifschütz entdeckten Emulgators Eucerit eine stabile Emulsion aus Wasser und Öl herzustellen. Sie nannten ihre Hautcreme NIVEA, die Schneeweiße, nach dem lateinischen Wort „*nix, nivis*“ für Schnee. Etwas Vergleichbares hatte es bis dahin nicht gegeben. Weil der perfekte Schutzmantel auf der Haut die Konsumenten bis heute überzeugt, wird NIVEA Creme inzwischen rund 150 Millionen Mal im Jahr gekauft. Vor allem aber: Sie ist mittlerweile das Zentrum einer großen und überaus erfolgreichen Markenfamilie, auf die wir unsere Hautpflegekompetenz konsequent übertragen haben.

- Gespür für Konsumentenwünsche

Mit großem Gespür für gesellschaftliche Veränderungen und die Wünsche der Konsumenten erfanden die Forscher von Beiersdorf in den vergangenen 100 Jahren regelmäßig erfolgreiche Innovationen. Schon Anfang der 1920er Jahre erkannten sie das Bedürfnis der Männer nach einer speziellen Hautpflege bei der Rasur und entwickelten eine Rasierseife – Ursprung des heutigen NIVEA FOR MEN Sortiments. Als in den 1930er Jahren immer mehr Menschen das Sonnenbad genießen wollten und viele Städte Freibäder bauten, kamen NIVEA-Sonnenschutzprodukte auf den Markt. In den 1960er Jahren revolutionierte die NIVEA Milk die Kosmetik: sie war leicht anwendbar, wurde schnell von der Haut aufgenommen und machte sie schön und geschmeidig. Ende der 1970er Jahre kamen wir mit dem ersten NIVEA Duschgel auf den Markt, Anfang der 1990er mit NIVEA Deodorant, das hervorragende Wirkung mit einzigartiger Pflege verbindet, und Ende der 1990er Jahre mit der innovativen Hautpflege NIVEA Q10, die heute weltweit alle zwei Sekunden gekauft wird.

- Vertrauen seit 100 Jahren

Mit unserer Innovationsführerschaft bieten wir nun seit 100 Jahren Produkte von hoher Qualität zu fairen Preisen an und gewinnen so Jahr für Jahr das Vertrauen unserer Konsumenten. Unsere NIVEA-Produkte sind inzwischen in mehr als 200 Ländern auf dem Markt. Die einzigartige Mischung von traditionellen Werten und ständiger Innovation garantiert, dass die Erfolgsgeschichte von NIVEA in den kommenden Jahren fortgeschrieben wird.

# 100 Jahre NIVEA

Grafik:  
Weltweite Produktionszahlen  
der Cremedose von NIVEA.

---

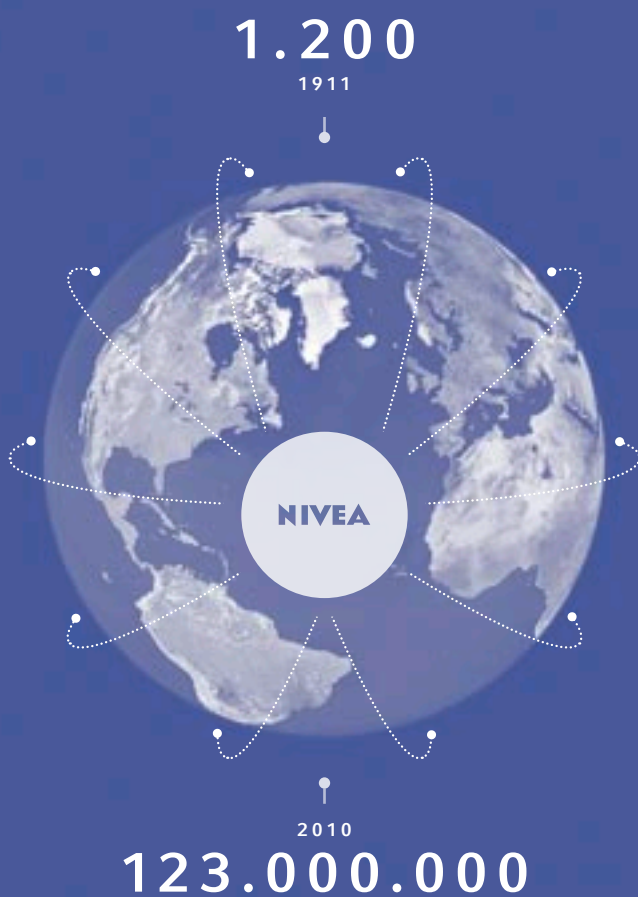

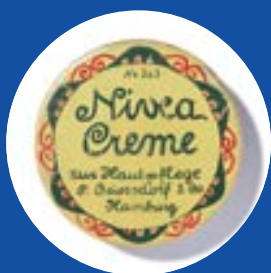

1911

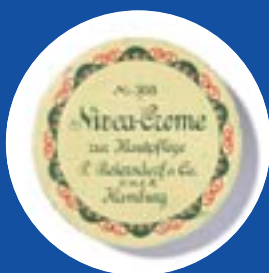

1920

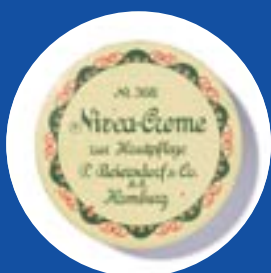

1924

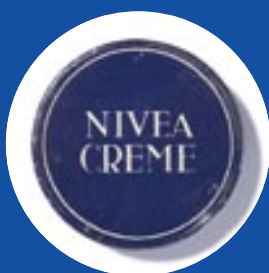

1925

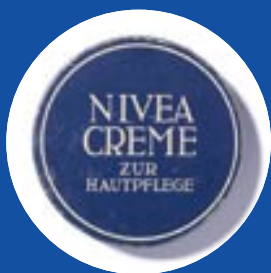

1928

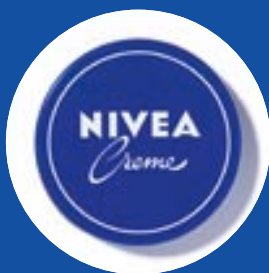

1959

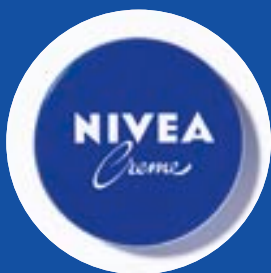

1970

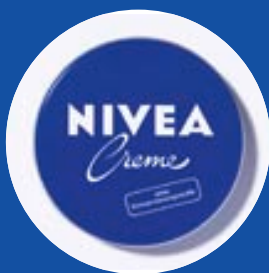

1988

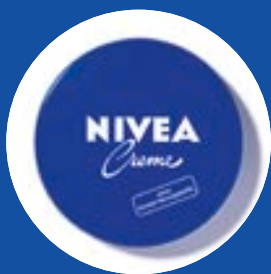

1993

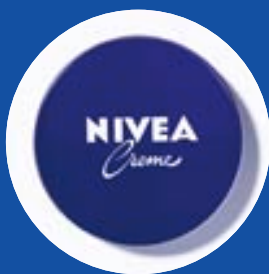

2007



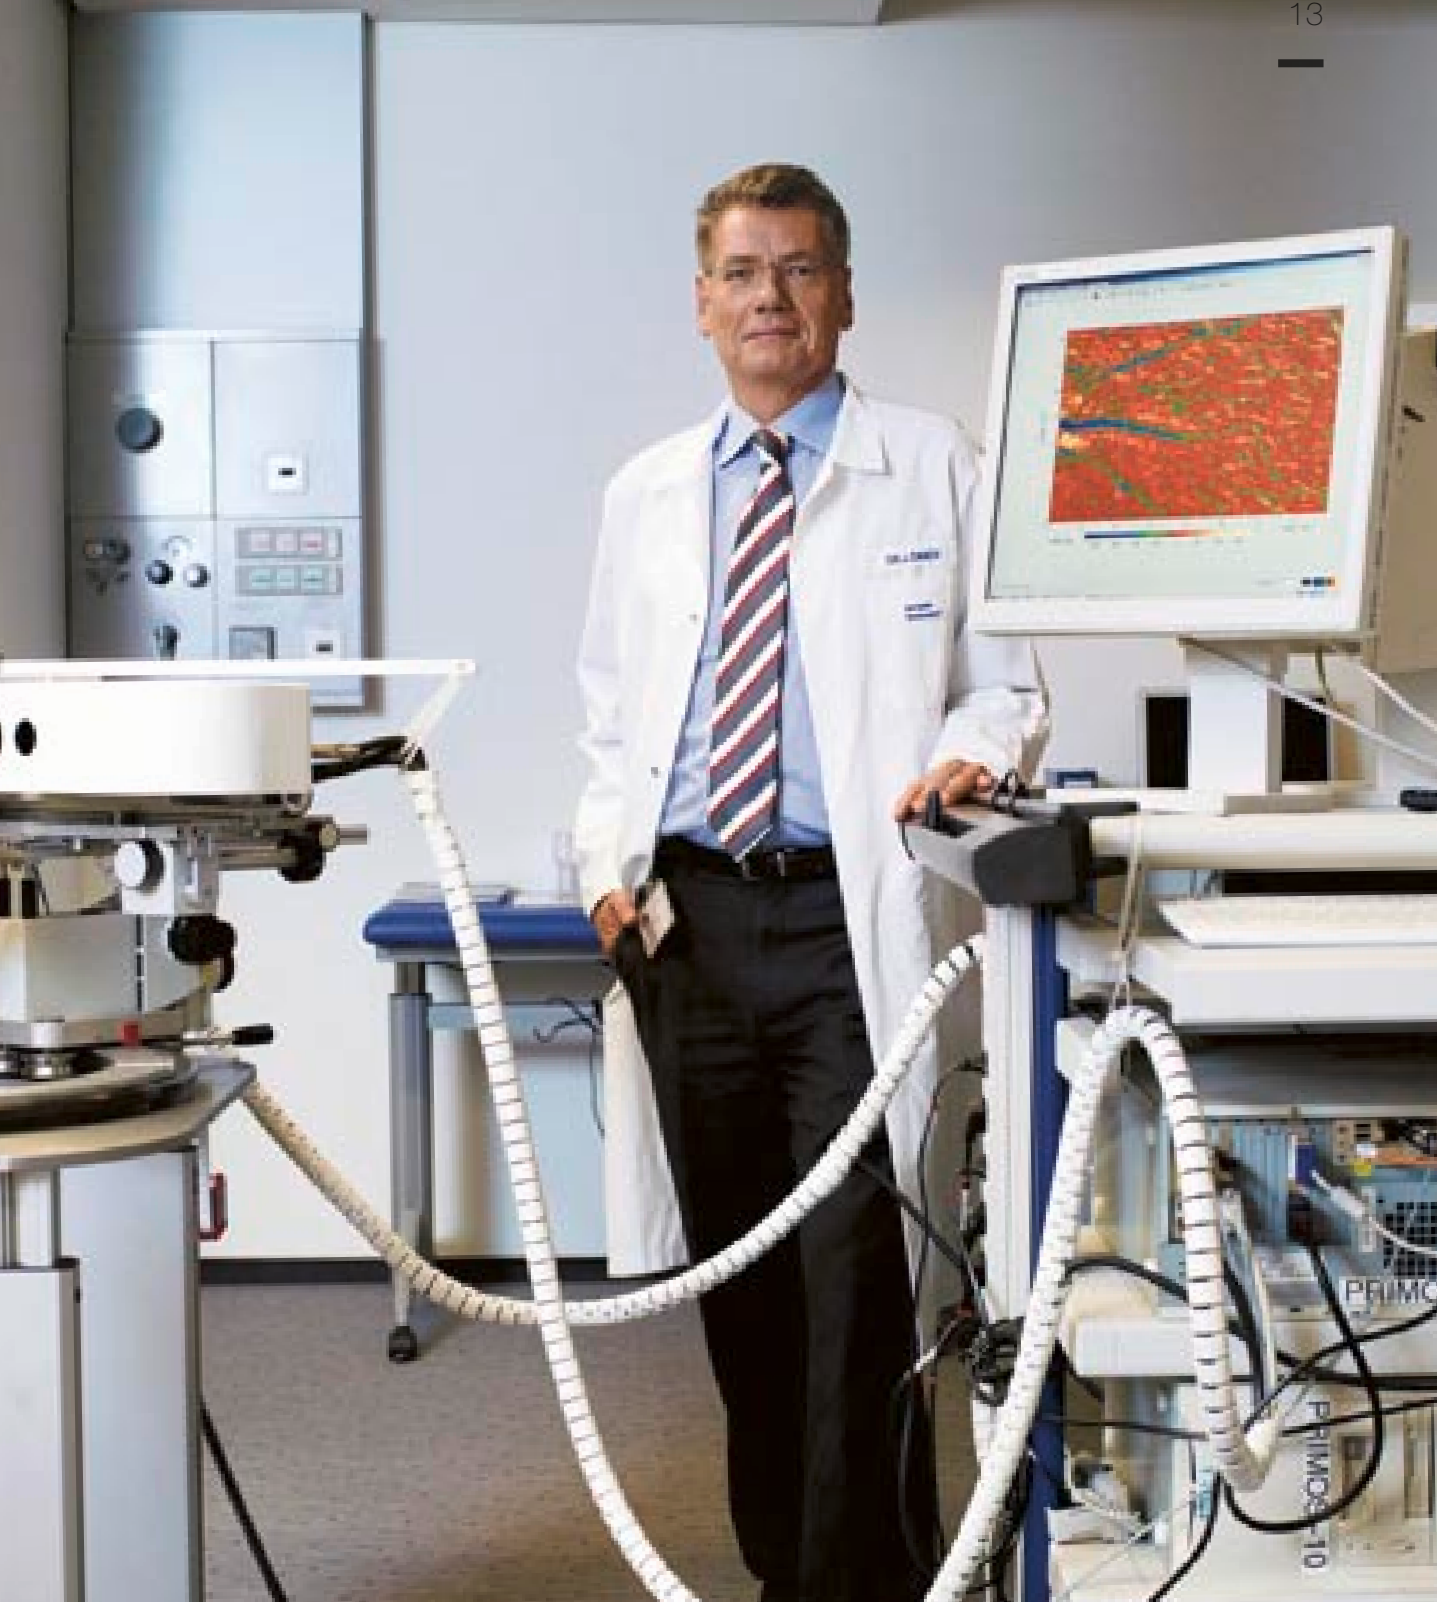

**Dr. Joachim Ennen**  
Leiter des Beiersdorf Testzentrums

→ „Ich bin Biologe mit Spezialisierung auf Messtechnik. Von den 17 Jahren, die ich bei Beiersdorf arbeite, leite ich jetzt zehn Jahre unser Testzentrum. Hier testen wir unsere Produkte auf Wirksamkeit und Verträglichkeit. Für die Tests können wir auf eine Datenbank mit 11.000 Testpersonen unterschiedlicher Zielgruppen zurückgreifen. Unser Testzentrum gehört zu den bestausgestatteten der Welt. Das Gerät neben mir haben wir zum Beispiel gemeinsam mit dem Gerätehersteller selbst entwickelt. Es misst die Faltentiefe im Augenbereich und setzt heute weltweit technologische Maßstäbe. Es ist sehr spannend, für den Innovationsführer und Trendsetter im Hauptpflegebereich zu arbeiten.“

# 100 Jahre NIVEA.

Von Hamburg ...

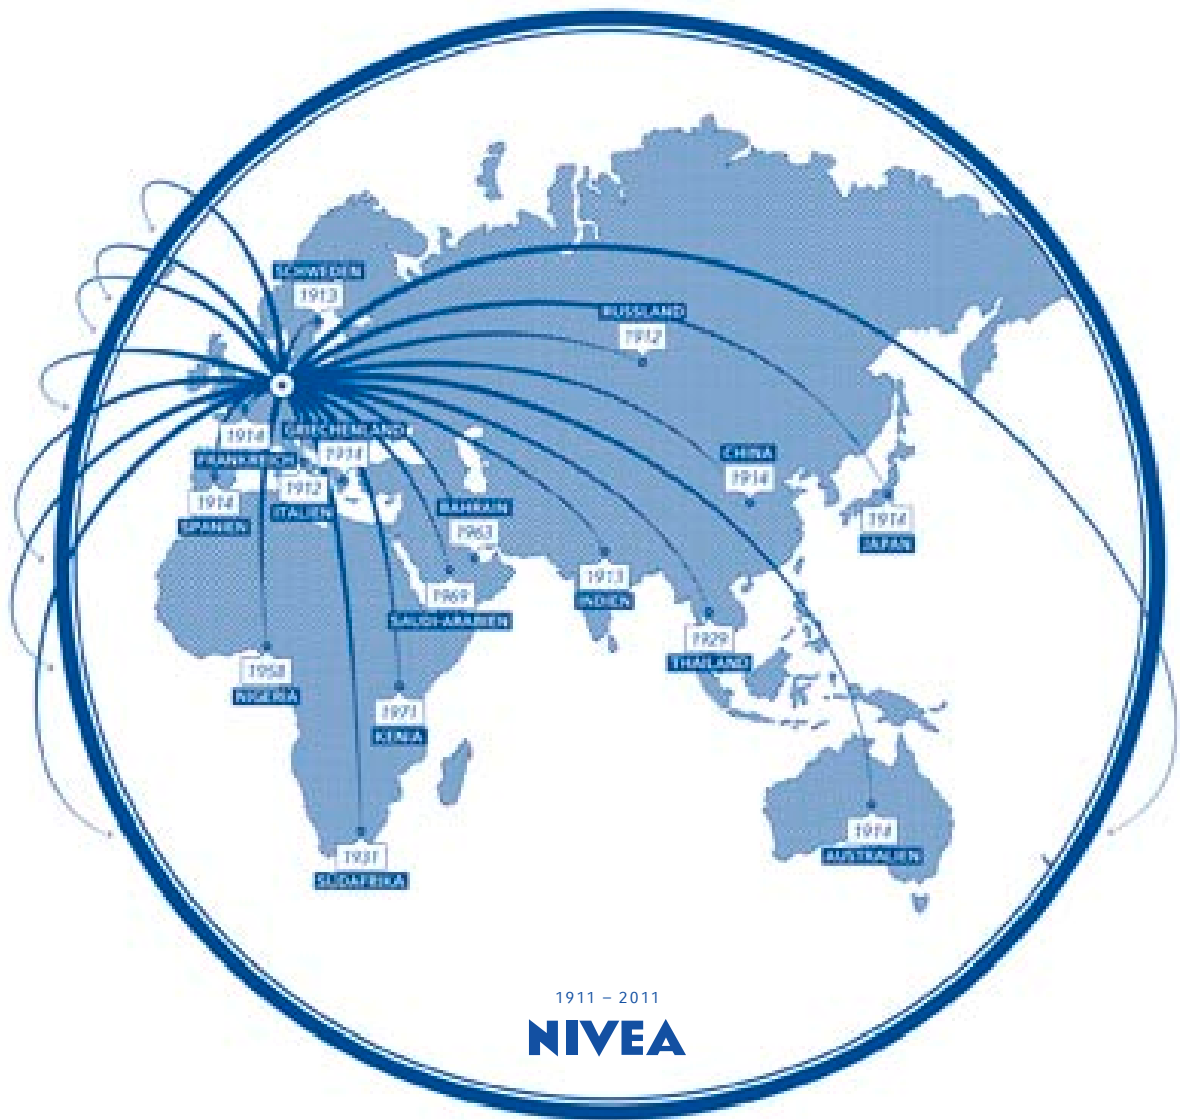

— 1911 —

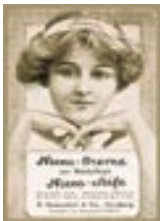

— 1937 —

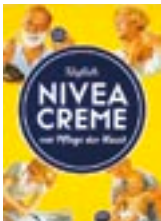

— 1958 —

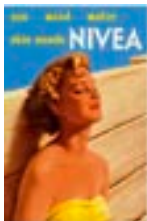

— 1967 —

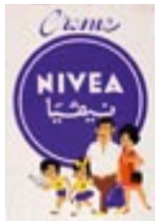

# 100 Jahre NIVEA.

... in die Welt.

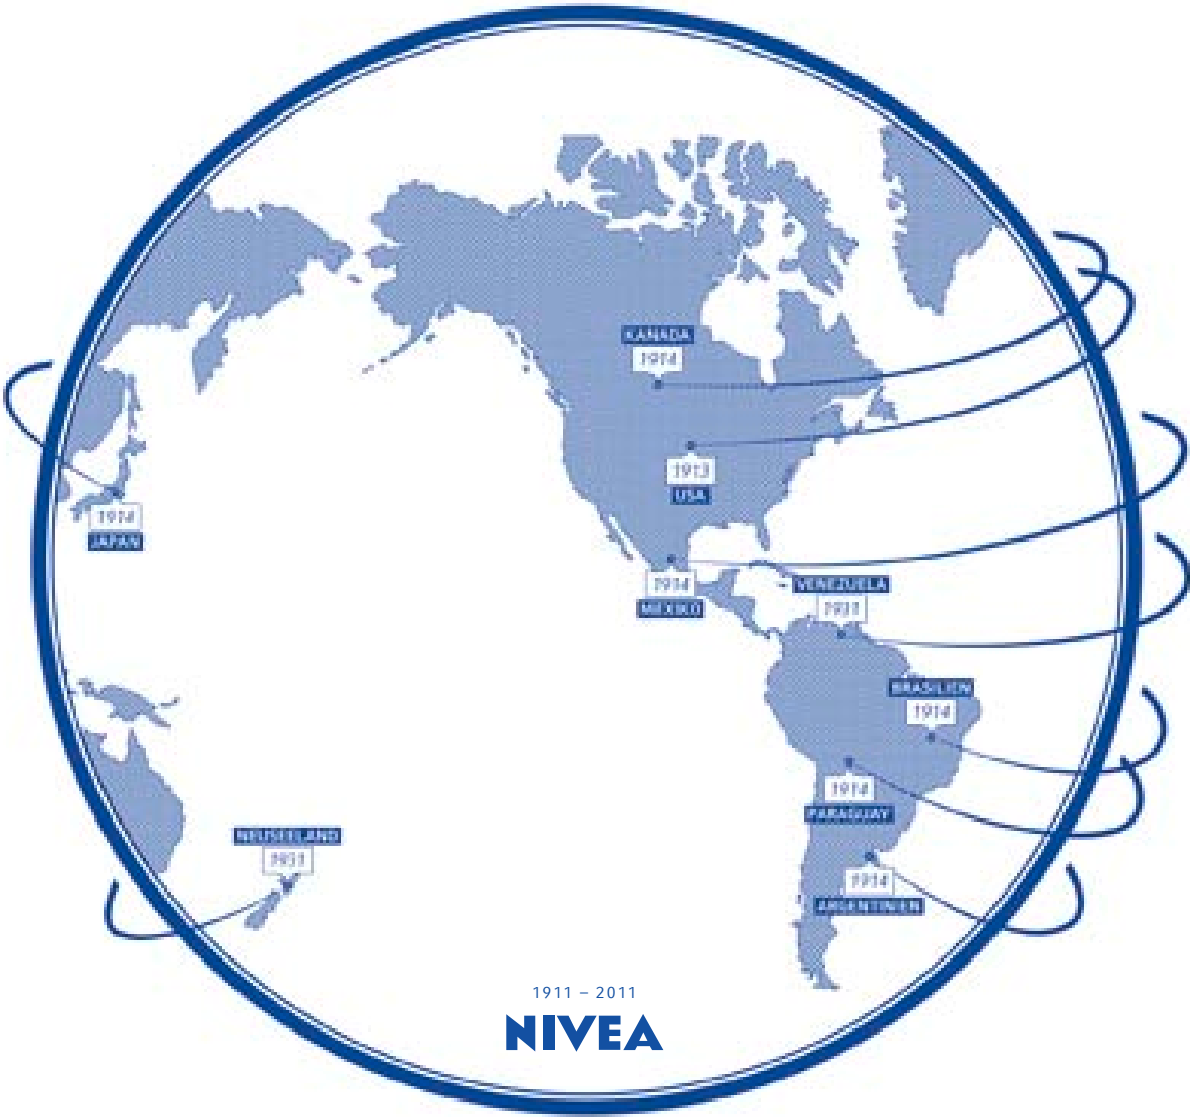

— 1967 —

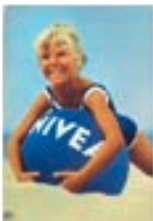

— 1986 —

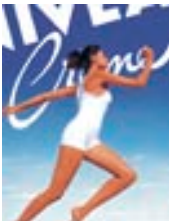

— 1994 —

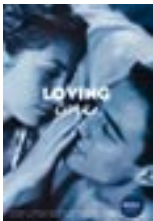

— 2011 —

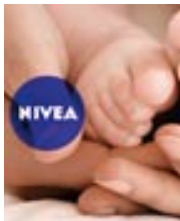



## Höhepunkte 2010

### Januar 2010

#### NIVEA Q10 macht sich fit für die Zukunft.

Seit mehr als zehn Jahren sind die Q10-Produkte von NIVEA Visage und NIVEA Body Care Bestseller auf der ganzen Welt. Um die starke Position zu sichern, hat Beiersdorf zu Beginn des Jahres die NIVEA Q10-Produktlinie einem großen internationalen Relaunch unterzogen. Zugleich wurde die Erweiterung der Produktrange vorangetrieben und kommunikativ begleitet.

### Februar 2010

#### NIVEA wieder zur vertrauenswürdigsten Marke gewählt.

Der Markenklassiker von Beiersdorf wurde zum 6. Mal in Folge zur „Most Trusted Brand“ im Hautpflegesortiment gekürt. Dies belegte die renommierte Verbraucherstudie des Magazins „Reader's Digest“. Die Verbraucher der 16 teilnehmenden europäischen Länder vergaben in den Kriterien Preis-Leistungs-Verhältnis, Qualität und Image Bestnoten. In Polen wurde NIVEA sogar gleich in drei Kategorien zur vertrauenswürdigsten Marke gewählt.

### April 2010

#### „Jogis 11“: erfolgreiche Kommunikationsoffensive von NIVEA FOR MEN und Fußball-Bundestrainer Jogi Löw.

Pünktlich zur Fußball-WM starteten NIVEA FOR MEN und Kooperationspartner Jogi Löw verschiedene Werbe- und Handelsaktionen. Ab dem 22. April wurde der neue NIVEA FOR MEN Fernseh-Spot mit Jogi Löw ausgestrahlt und für die Kampagne „Jogis 11“ geworben. Bei dem Kauf von NIVEA FOR MEN Produkten im Wert von 11 € bekam der Verbraucher ein offizielles DFB-Shirt geschenkt.

### August 2010

#### Neue Produktlinie Eucerin Men Silver Shave.

Eucerin stellte im August erstmalig eine Serie für Männer vor, die Hautirritationen nach der Rasur selbst bei problematischer Haut verhindern hilft. Die neue Eucerin Men Silver Shave Produktlinie wurde ab August in Thailand, Italien und der CEE-Region eingeführt und umfasst zwei klassische Rasierprodukte, ein Aftershave-Balsam und zwei Pflegeprodukte. Seit 2011 ist die Produktsérie auch in vielen anderen Ländern Europas, in Lateinamerika und in Südafrika erhältlich. Die Produkteinführung wird durch intensive Marketing-Aktivitäten begleitet und soll die Bekanntheit der Produkte bei Ärzten, Apothekern und Konsumenten steigern.

### Oktober 2010

#### NIVEA mit globaler Travel-Retail-Strategie.

Bei der weltgrößten Travel-Retail Messe in Cannes hat Beiersdorf seine Travel-Retail-Strategie für die Marke NIVEA vorgestellt. Fortan wird diese mit 65 Produkten und diversen Travel Sets in den sogenannten Border Shops in verschiedenen europäischen Flughäfen verkauft. Auch in Asien und Amerika sollen die Produkte von NIVEA Visage, NIVEA FOR MEN, NIVEA Body und auch Deodorant, Duschgel, NIVEA Sun und NIVEA Lipcare bald für Reisende erhältlich sein.

### November 2010

#### Eigene Tochtergesellschaft in Vietnam.

Am 11. November gründete Beiersdorf eine neue Tochtergesellschaft in Vietnam. Die Gesellschaft wird vom NIVEA-Werk in Thailand beliefert. In Ho-Chi-Minh-Stadt (Saigon, Vietnam) sind 30 Mitarbeiter in der Zentrale beschäftigt und von nun an für den Verkauf von NIVEA-Produkten in über 40.000 vietnamesischen Geschäften zuständig. So soll schneller und besser auf die lokale Marktentwicklung in Asien reagiert und das bestehende Markenvertrauen in NIVEA weiter ausgebaut werden.

### Dezember 2010

#### Neuausrichtung des Vorstands.

Im Rahmen der Strategie „Focus on Skin Care. Closer to Markets.“ hat sich der Beiersdorf Vorstand seit März 2010 neu aufgestellt und dabei neben dem Verantwortungsbereich des CEO zwei funktionale (Finance & Human Resources und Brands & Supply Chain) und drei regionale Verantwortungsbereiche (Europa/Nordamerika, Asien/Australien und Emerging Markets) geschaffen. Zum 1. August 2010 hat Peter Feld das Vorstandsressort Europa/Nordamerika übernommen. Das Ressort Brands & Supply Chain steht seit dem 1. Juli unter der Leitung von Markus Pinger. Für die Region Emerging Markets wurde Ümit Subaşı mit Wirkung zum 1. März 2011 als neues Vorstandsmitglied bestellt. Die Region Asien/Australien liegt in der Verantwortung des Vorstandsmitglieds James Wei. Dr. Bernhard Düttmann, verantwortlich für die Bereiche Finance & Human Resources, hat das Unternehmen nach Aufstellung des Jahres- und Konzernabschlusses 2010 verlassen. Sein Nachfolger ist Dr. Ulrich Schmidt.

#### Maßnahmen- und Investitionspaket verabschiedet.

Zur Umsetzung der weiterentwickelten Consumer Business Strategie „Fokus on Skin Care. Closer to Markets.“ hat Beiersdorf ein Maßnahmen- und Investitionspaket verabschiedet. Das Paket umfasst unter anderem Investitionen in die globalen Haut- und Körperpflegemarken, eine Sortimentsstraffung sowie eine Anpassung des Produkt-Portfolios. So wird Beiersdorf aus der dekorativen Kosmetik in Deutschland aussteigen, hat die regionalen Marken Juvena und Marlies Möller verkauft und wird weniger starken Fokus auf den Bereich Haarpflege legen. Es werden dafür verstärkt Produktinnovationen im Bereich der Haut- und Körperpflegemarken eingeführt.

0.70

---

(Vorschlag für die Dividende je Aktie in €)  
– 2010 –

Kapitel

---

01  
An die Aktionäre

---

# 01 An die Aktionäre

Beiersdorf Geschäftsbericht 2010

Als Aktionär wird ein Inhaber von Aktien einer Aktiengesellschaft bezeichnet. Beiersdorf hat sich von jeher seinen Aktionären verpflichtet gefühlt. Die Rechte und Pflichten eines Aktionärs regelt vor allem das Aktiengesetz (AktG).

## Inhalt

|       |                                         |
|-------|-----------------------------------------|
| S. 19 | Brief des Vorstandsvorsitzenden         |
| S. 22 | Der Vorstand der Beiersdorf AG          |
| S. 24 | Beiersdorf Aktie und Investor Relations |
| S. 26 | Bericht des Aufsichtsrats               |



## Brief des Vorstandsvorsitzenden

*liebe Herren, liebe Damen,*

das Jahr 2010 war für Beiersdorf eine Periode der Neuausrichtung, tief greifende Veränderungen prägten das Unternehmen. Im Geschäftsjahr 2010 entwickelten sich die Unternehmensbereiche von Beiersdorf sehr unterschiedlich. Während tesa nach der Wirtschaftskrise zu alter Stärke zurückfand und einen hervorragenden Umsatz erzielte, verzeichnete der Unternehmensbereich Consumer nur einen leichten Umsatzanstieg. Insgesamt verlief das Geschäft 2010 besser als in dem von der Wirtschaftskrise geprägten Vorjahr, blieb aber im Bereich Consumer hinter unseren Ansprüchen und der gewohnten Wachstumsdynamik zurück. Für den Konzern erhöhte sich der Umsatz auf vergleichbarer Basis um 3,1 % gegenüber dem Vorjahr. Nominal stieg der Umsatz um 7,8 % auf 6.194 Mio. €.

Das im Dezember beschlossene Maßnahmen- und Investitionspaket für den Unternehmensbereich Consumer belastete bereits das Ergebnis 2010. Das um Sondereffekte bereinigte EBIT belief sich auf 699 Mio. € (Vorjahr: 587 Mio. €), der entsprechende Jahresüberschuss betrug 425 Mio. € (Vorjahr: 380 Mio. €). Vorstand und Aufsichtsrat werden den Aktionären auf der Hauptversammlung eine Dividende von 0,70 € (Vorjahr: 0,70 €) je dividendenberechtigte Stückaktie vorschlagen.

Sehr erfreulich verlief das Geschäft im Unternehmensbereich tesa, der 2009 erheblich von der rückläufigen Entwicklung seiner Absatzmärkte betroffen war. Der Umsatz wuchs in allen Regionen zweistellig, insbesondere der Geschäftsbereich Industrie erreichte deutliche Zuwächse in der Automobil- und der Elektronikindustrie. tesa erzielte bereinigt um Wechselkurseffekte ein Umsatzwachstum von 13,3 %, der Umsatz lag damit über dem des Vorkrisenjahres 2008.

Die Entwicklung des Ergebnisses zeigt, dass die getätigten Restrukturierungsmaßnahmen richtig waren und in vollem Umfang greifen. Sie haben wesentlich dazu beigetragen, tesa nachhaltig zu stärken. Das EBIT stieg auf 100 Mio. €. Die EBIT-Umsatzrendite lag erstmals über 11 %. Mit der Entwicklung zukunftsweisender Innovationen, die tesa auch in der schwierigen Phase fortgeführt hat, schaffte der Unternehmensbereich den Einstieg in völlig neue und attraktive Geschäftsfelder. Sie stärken die Basis für weiterhin dynamisches Wachstum.

Die Entwicklung in den weltweiten Consumer-Märkten war sehr unterschiedlich. In Nord- und Lateinamerika ist das Geschäft deutlich zweistellig gewachsen. In der Region Afrika/Asien/Australien lag der Umsatz nur leicht über dem Vorjahr. In Europa konnte Beiersdorf nur in Großbritannien und Russland ein gutes Wachstum vorweisen. In den anderen Ländern blieb das Wachstum hinter den Erwartungen zurück. Wir haben es vor allem in Westeuropa mit Märkten zu tun, die in der Wirtschaftskrise nicht nur rückläufig waren, sondern sich auch fundamental gewandelt haben. Damit sind wir mit der generellen Geschäftsentwicklung im Unternehmensbereich Consumer 2010 nicht zufrieden. Im Rahmen der weiterentwickelten Strategie haben wir für Consumer im Dezember signifikante Investitionen in den Markt und Restrukturierungsmaßnahmen beschlossen. In einer Übergangsphase belasten ihre Auswirkungen zwar unser Ergebnis, werden uns aber konsequent zur früheren Dynamik zurückbringen.

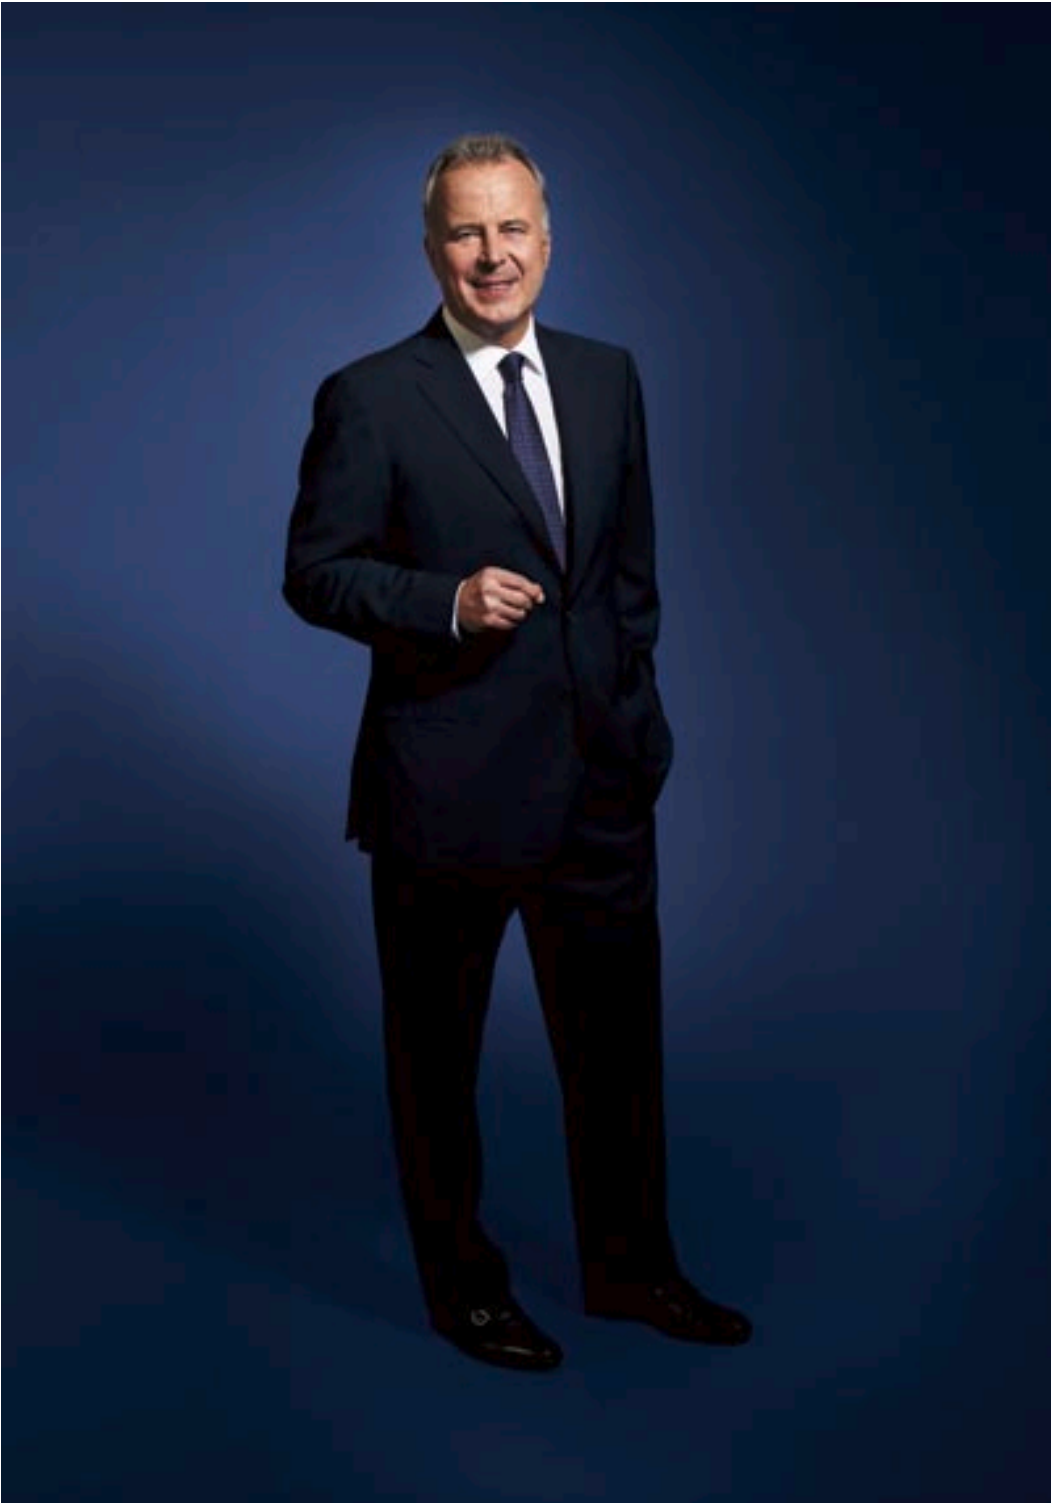

Im Frühjahr des vergangenen Jahres haben wir unsere Consumer Business Strategie weiterentwickelt und unsere Strukturen den veränderten Rahmenbedingungen angepasst. Unter „Focus on Skin Care. Closer to Markets.“ stellen wir jetzt wieder unsere Kernkompetenz, die Haut- und Körperpflege, in das Zentrum unserer Strategie. Um sie effizient umsetzen zu können, wurden die Verantwortlichkeiten im Vorstand neu definiert und klar getrennte funktionale sowie regionale Zuständigkeiten geschaffen. In zwei funktionalen Vorstandsbereichen bündeln wir jetzt Finanzen und Personal sowie alle produktbezogenen Bereiche. Dadurch wird ein effektiver Innovationsprozess deutlich beschleunigt. Außerdem konzentrieren wir die Regionen bei jeweils einem Vorstand: Das sind Europa und Nordamerika, Asien und Australien sowie die so genannten Emerging Markets. Mit dem neuen Ressort Emerging Markets unterstreichen wir die Bedeutung der weltweiten Wachstumsmärkte für unser Unternehmen. Mit der regionalen Ausrichtung sind wir noch näher am Verbraucher und an unseren direkten Kunden, dem Handel. So erfahren wir mehr und vor allem schneller über die Anforderungen und Wünsche unserer Konsumenten und Kunden.

Wir haben das gesamte Haut- und Körperpflege-Sortiment vor dem Hintergrund unserer weiterentwickelten Strategie analysiert. Im Rahmen des Investitions- und Maßnahmenpakets straffen wir unser globales Produktportfolio, steigen aus dem Geschäft der dekorativen Kosmetik in Deutschland aus und trennen uns von den nur regional vertriebenen Marken Juvena und Marlies Möller. Zusätzlich werden wir signifikant in unsere Marken der Haut- und Körperpflege investieren. Auch 2011 wird daher noch ein Jahr des Übergangs sein, in dem wir die weiterentwickelte Strategie mit Hilfe des Investitions- und Maßnahmenpakets im Unternehmen und auf den Märkten konsequent umsetzen werden.

Meine Vorstandskollegen und ich sind sicher, dass wir mit der Neuausrichtung von Beiersdorf den Anforderungen der Märkte schnell und effizient begegnen können. Wir werden damit wieder auf einen dynamischen Wachstumskurs zurückkehren.

Im Namen des gesamten Vorstands möchte ich mich ganz besonders bei allen Mitarbeiterinnen und Mitarbeitern weltweit dafür bedanken, dass sie mit ihrem Einsatz den Erfolg von Beiersdorf auch in diesen schwierigen Zeiten ermöglicht haben. Ihre große Veränderungsbereitschaft und ihre hohe Identifikation mit dem Unternehmen garantieren auch weiterhin eine positive Entwicklung. Unser Dank gilt aber auch den Handels- und Geschäftspartnern, mit denen wir eng zusammenarbeiten. Und nicht zuletzt danken wir den Aktionären und den Verbrauchern für ihr Vertrauen in unser Unternehmen und unsere Produkte.

Ihr

**Thomas-B. Quaas**  
Vorsitzender des Vorstands



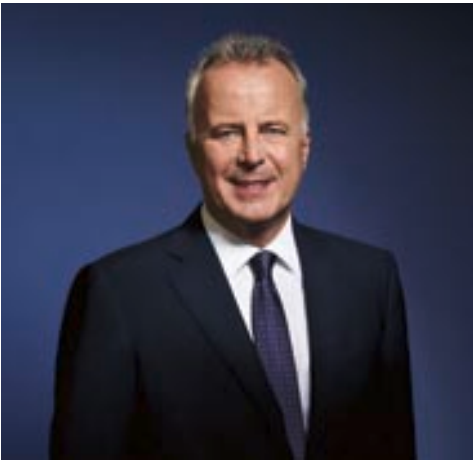

Thomas-B. Quaas

Geboren 1952 in Glauchau (D)  
**Mitglied des Vorstands seit 1999,**  
**Vorsitzender des Vorstands seit 2005**

Verantwortlich für:

- › Strategische Unternehmensentwicklung
- › Konzernkommunikation, Interne Revision
- › Nachhaltigkeit

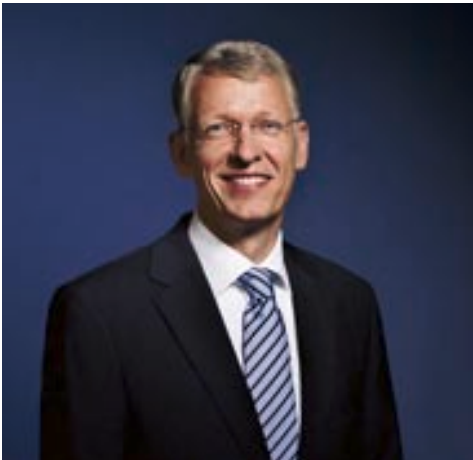

Dr. Bernhard Düttmann

Geboren 1959 in Düsseldorf (D)  
**Mitglied des Vorstands seit 2006**

Verantwortlich für Finance/Human Resources:

- › Finanzen/Controlling (bis 09.02.2011)
- › Recht/IT (bis 09.02.2011)
- › Personal (bis 31.12.2010)

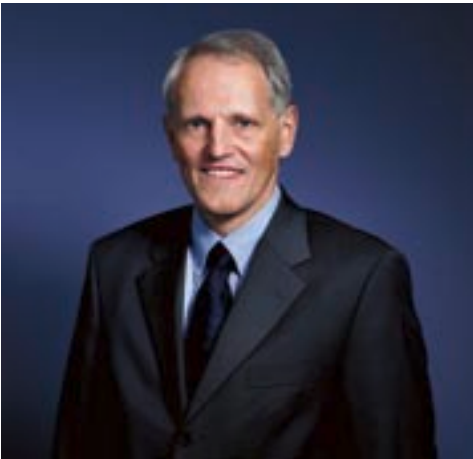

Dr. Ulrich Schmidt

Geboren 1953 in Bad Bevensen (D)  
**Mitglied des Vorstands seit 01.01.2011**

Verantwortlich für Finance/Human Resources:

- › Finanzen/Controlling (seit 10.02.2011)
- › Recht/IT (seit 10.02.2011)
- › Personal (seit 01.01.2011)

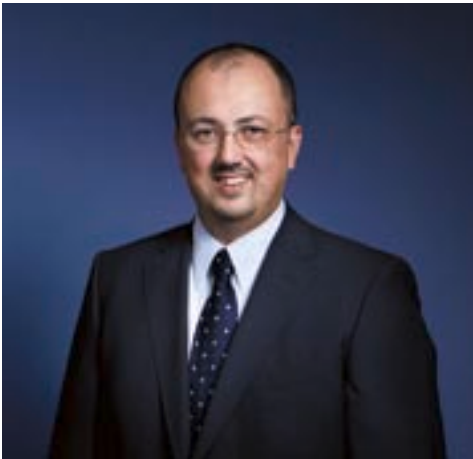

Ümit Subaşı

Geboren 1967 in Istanbul (TR)  
**Mitglied des Vorstands seit 01.03.2011**

Verantwortlich für:

- › Emerging Markets

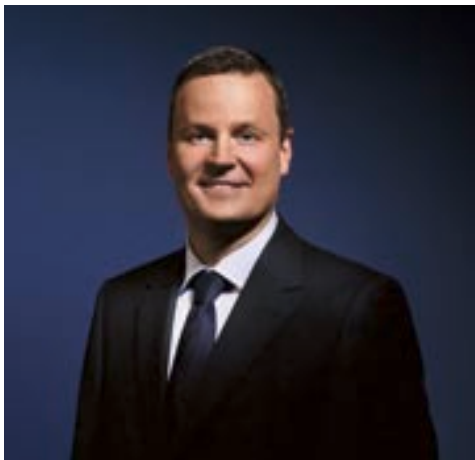

## Peter Feld

Geboren 1965 in Gummersbach (D)  
**Mitglied des Vorstands seit 01.08.2010**

Verantwortlich für:  
 › Europa/Nordamerika

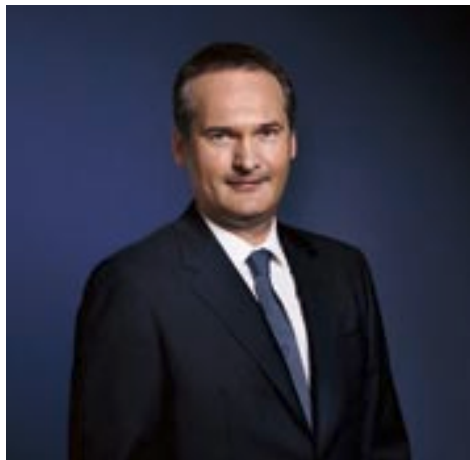

## Markus Pinger

Geboren 1963 in Leverkusen (D)  
**Mitglied des Vorstands seit 2005**

Verantwortlich für Brands/Supply Chain:  
 › Marketing/Vertrieb/Forschung & Entwicklung  
 › Einkauf/Produktion/Logistik  
 › Qualitätsmanagement

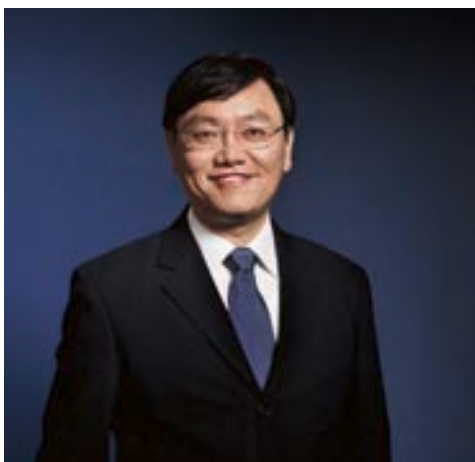

## James C. Wei

Geboren 1957 in Kao-Hsiung (TW)  
**Mitglied des Vorstands seit 2009**

Verantwortlich für:  
 › Asien (ohne Indien und Japan)  
 › Australien

## Vorstandswechsel.

**Der Aufsichtsrat der Beiersdorf AG dankt den Herren Peter Kleinschmidt, Pieter Nota und Dr. Bernhard Düttmann für ihr langjähriges Engagement im Unternehmen.**

→ Herr Peter Kleinschmidt war bis zum 30. April 2010 für den Bereich Human Resources zuständig. Herr Pieter Nota verantwortete bis zum 31. Mai 2010 den Bereich Brands. Herr Dr. Bernhard Düttmann leitete bis zur Aufstellung des Jahres- und Konzernabschlusses 2010 das Ressort Finance.

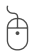

Beiersdorf.de/  
Aktie

Beiersdorf.de/  
IR

## Beiersdorf Aktie und Investor Relations

Die Beiersdorf Aktie zeigte im Verlauf des Jahres 2010 einen wechselhaften Verlauf, über weite Strecken losgelöst vom deutschen Leitindex DAX. Im ersten Quartal reflektierte dies unter anderem die unterschiedlichen Einschätzungen der Beobachter und Investoren hinsichtlich der zukünftigen Entwicklung des HPC-Sektors (Household and Personal Care), dem auch Beiersdorf angehört. In der Kommunikation mit dem Kapitalmarkt nahm in diesem Zeitraum noch der Geschäftsverlauf des vorangegangenen Jahres den größten Raum ein und hierbei insbesondere die Verbesserung der Umsatz- und EBIT-Entwicklung im Ablauf der Quartale.

Im zweiten Quartal stand der aktuelle Geschäftsverlauf im Zentrum der Gespräche, gleichzeitig war großes Interesse der Marktteilnehmer an der neuen Strategie von Beiersdorf und der organisatorischen Neuaufstellung des Vorstands nach Funktionen und Regionen erkennbar. Unsere Aktie konnte in diesem Zeitraum deutliche Kursgewinne verzeichnen und zeigte bis zum Quartalsende eine stärkere Performance als der Vergleichsindex.

Die Entwicklung der Beiersdorf Aktie war im dritten Quartal uneinheitlich; als ein wichtiger Grund hierfür wurde einerseits die anhaltende Skepsis des Kapitalmarkts gegenüber der Erholung des HPC-Sektors gesehen, andererseits führten die im August veröffentlichten Geschäftszahlen des ersten Halbjahres zu einem gemischten Echo an der Börse. Beiersdorf befindet sich seit der Einführung des neuen Geschäftsmodells in einer Übergangsphase, und die Kursentwicklung reflektierte dies. Zusätzlich beeinflussten auch spekulative Elemente den Verlauf unseres Aktienkurses und führten zum Ende des Quartals zu einem abrupten Anstieg, der sich über mehrere Wochen und stärker als der Vergleichsindex fortsetzte.

Die Umsetzung der weiterentwickelten Strategie für Beiersdorfs Consumer-Geschäft zielt mittelfristig auf die Stärkung des Umsatzwachstums sowie des operativen Gewinns ab. Kurzfristig erfordert diese Neuausrichtung erhebliche Investitionen in unser Geschäft und in den Markt; über diese finanziellen Auswirkungen informierte das Management den Kapitalmarkt im vierten Quartal. Die Entwicklung unseres Aktienkurses gegen Quartalsende reflektierte die Neubewertung des mittelfristigen Geschäftsverlaufs von Beiersdorf durch den Kapitalmarkt. Einige Marktteilnehmer nutzten diese Phase zum Einstieg oder Ausbau ihres Bestandes, so dass unsere Aktie zum Jahresende mit einem stabilen Trend bei einem Kurs von 41,53 € schloss.

01 Entwicklung der Beiersdorf Aktie im Jahr 2010  
01.01. – 31.12.2010 / relative Veränderung in %

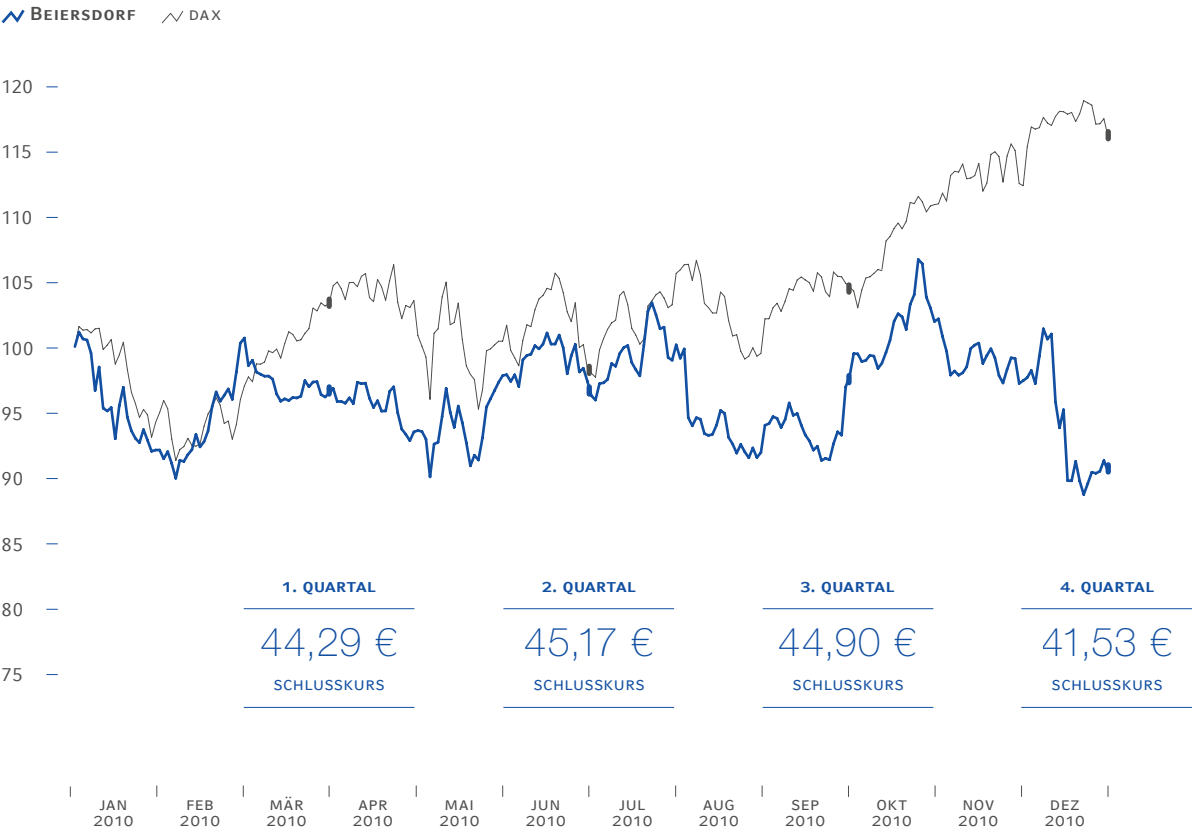

02 Aktienstammdaten

|                    |                                                                                                                                                 |
|--------------------|-------------------------------------------------------------------------------------------------------------------------------------------------|
| Firmenname         | Beiersdorf Aktiengesellschaft                                                                                                                   |
| WKN                | 520000                                                                                                                                          |
| ISIN               | DE 0005200000                                                                                                                                   |
| Börsenplätze       | <b>Amtlicher Markt:</b><br>Frankfurt und Hamburg<br><br><b>Freiverkehr:</b><br>Berlin-Bremen,<br>Düsseldorf, Hannover,<br>München und Stuttgart |
| Anzahl der Aktien  | 252.000.000                                                                                                                                     |
| Grundkapital in €  | 252.000.000                                                                                                                                     |
| Gattung            | Nennwertlose Inhaberstammaktien                                                                                                                 |
| Marktsegment/Index | Prime Standard/DAX                                                                                                                              |
| Börsenkürzel       | BEI                                                                                                                                             |
| Reuters            | BEIG.DE                                                                                                                                         |
| Bloomberg          | BEI:GR                                                                                                                                          |

03 Aktionärsstruktur (in %)  
Stand: 31.12.2010

|                                       |
|---------------------------------------|
| Beiersdorf AG (eigene Aktien)<br>9,99 |
| Free Float<br>39,54                   |
| maxingvest ag<br>50,47                |



## Bericht des Aufsichtsrats

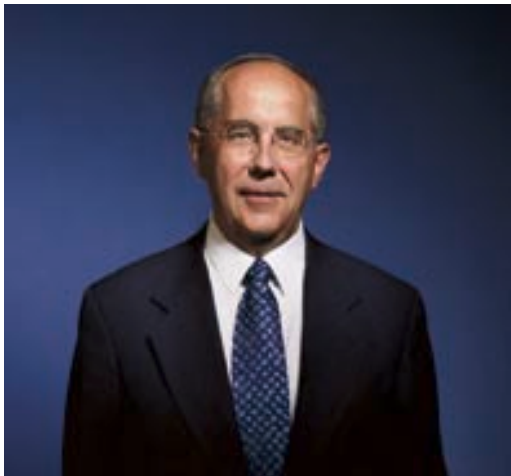

### Reinhard Pöllath

Vorsitzender  
des Aufsichtsrats

Der Aufsichtsrat nahm seine Aufgaben gemäß Gesetz, Satzung, Deutschem Corporate Governance Kodex und Geschäftsordnung wahr. Insbesondere berieten und überwachten wir den Vorstand bei der Führung der Geschäfte der Gesellschaft. Der Vorstand berichtete uns schriftlich und mündlich über die Geschäftspolitik, die Unternehmensplanung, den Gang der Geschäfte, das Risikomanagement und die Lage und Geschäftsaussichten der Gesellschaft. Anhand

der Berichte diskutierten und prüften wir im Aufsichtsrat und in seinen Ausschüssen bedeutende Geschäftsvorgänge und Abweichungen der tatsächlichen von der geplanten Entwicklung. Zwischen den Sitzungen unterrichtete der Vorstand insbesondere den Aufsichtsratsvorsitzenden über alle wesentlichen Themen und beriet mit diesem vor allem die strategische Ausrichtung der Gesellschaft, die Geschäftsentwicklung und das Risikomanagement. Alle Aufsichtsratsmitglieder erhielten darüber hinaus schriftliche und mündliche Informationen, auch zur Vorbereitung von Sitzungen.

Es fanden vier turnusgemäße und zwei außerordentliche **Aufsichtsratssitzungen** statt. Regelmäßige Tagesordnungspunkte waren die Berichte aus den Ausschüssen, die aktuelle Geschäftsentwicklung, wichtige geschäftliche Einzelvorgänge und zustimmungspflichtige Maßnahmen des Vorstands in den Unternehmensbereichen Consumer und tesa. Die erforderlichen Zustimmungen erteilten wir nach intensiver Prüfung und Beratung.

In der Sitzung am **8. Februar 2010** berichtete der Vorstand über die vorläufigen Geschäftsergebnisse 2009. Zudem legten wir die Zielerreichung und die Gesamtvergütung des Vorstands für 2009 sowie die Ziele des Vorstands für 2010 fest und berieten über die strategische Ausrichtung der Gesellschaft, insbesondere über mögliche Prozess- und Strukturoptimierungen zur Reduzierung von Fixkosten.

In der Sitzung am **25. Februar 2010** stellte der Vorstand die Eckpunkte seiner weiterentwickelten Consumer Business Strategie vor. Die Schwerpunkte lagen dabei in einer Fokussierung auf Hautpflege und auf regional unterschiedliche Verbraucherverwünsche („Focus on Skin Care. Closer to Markets.“). Daraus ergab sich eine Anpassung der Zuständigkeiten im Vorstand: Drei Vorstände haben nunmehr eine funktionale und drei eine regionale Zuständigkeit. Zudem befassten wir uns eingehend mit dem Jahresabschluss und dem Konzernabschluss 2009, dem Bericht des Aufsichtsrats, der Erklärung zur Unternehmensführung einschließlich des Corporate Governance- und des Vergütungsberichts sowie den Beschlussvorschlägen an die Hauptversammlung.

In der Sitzung am **29. April 2010** ging es vor allem um den Zwischenabschluss des Konzerns zum 31. März 2010, Fragen der Compliance im Bereich Kartellrecht, die Vorstandsvergütung und die Vorbereitung der Hauptversammlung. Der Vorstand berichtete ferner über die Konkretisierung seiner Strategie. Wir nahmen das zuvor angekündigte Angebot von Herrn Peter Kleinschmidt an, seine Bestellung zum Vorstand altersbedingt zum 30. April 2010 aufzuheben; das Personalressort übernahm ab dem 1. Mai 2010 der Finanzvorstand.

In der Sitzung am **27. Mai 2010** bestellten wir Herrn Peter Feld zum Vorstand für die Region Europe; er trat sein Amt am 1. August 2010 an. Gleichzeitig nahmen wir das Angebot von Herrn Pieter Nota an, zum 31. Mai 2010 aus dem Vorstand auszuscheiden. Wir verlängerten die Bestellung von Herrn Markus Pinger bis zum 31. Dezember 2014 und übertrugen ihm die Verantwortung für die Bereiche Brands & Supply Chain.

In der Sitzung am **2. September 2010** behandelten wir den Zwischenabschluss des Konzerns zum 30. Juni 2010, die Umsetzung der weiterentwickelten Consumer Business Strategie, die anstehende Effizienzprüfung des Aufsichtsrats und die Vorstandsvergütung. Wir befassten uns darüber hinaus mit den Änderungen des Deutschen Corporate Governance Kodex, insbesondere mit den Zielen bei der Zusammensetzung des Aufsichtsrats, dem Thema Vielfalt (Diversity) und einer angemessenen Berücksichtigung von Frauen in Vorstand und Aufsichtsrat.

In der Sitzung am **10. Dezember 2010** ging es um den Zwischenabschluss des Konzerns zum 30. September 2010 und die Neuausrichtung der Produktion und Logistik in Nordamerika. Wir beschlossen die Entsprechenserklärung zu den Empfehlungen des Deutschen Corporate Governance Kodex, Ziele für die Zusammensetzung des Aufsichtsrats und Anpassungen unserer Geschäftsordnung. Dazu bestellten wir Frau Prof. Dr. Eberhartinger und Frau Professorin Rousseau als unsere Diversity-Beauftragten. Den bisherigen Prüfungs- und Finanzausschuss trennten wir mit Wirkung ab 2011 in einen Prüfungsausschuss und einen Finanzausschuss unter dem Vorsitz von Frau Prof. Dr. Eberhartinger bzw. Herrn Holzgreve. Von den Aufgaben des bisherigen Ausschusses nimmt der Prüfungsausschuss diejenigen zur Rechnungslegung und Abschlussprüfung wahr und der Finanzausschuss alle übrigen Aufgaben. Nach ausführlicher Beratung stimmten wir dem Maßnahmen- und Investitionspaket des Vorstands zur Verbesserung der Wettbewerbsfähigkeit der Gesellschaft zu, ebenso der Unternehmensplanung 2011. Wir befassten uns ferner mit der aktuellen und zukünftigen Entwicklung des Geschäfts in China. Das Angebot von Herrn Dr. Bernhard Düttmann, seine Bestellung als Vorstand mit Wirkung zum 9. Februar 2011 aufzuheben, nahmen wir an. Mit Wirkung ab 1. Januar 2011 bestellten wir Herrn Dr. Ulrich Schmidt zum Vorstand; er ist zunächst für den Personalbereich verantwortlich und ab 10. Februar 2011 auch für das Finanz-Ressort. Herrn Ümit Subaşı bestellten wir ab 1. März 2011 zum Vorstand für Emerging Markets.

**Vier Ausschüsse** bereiteten die Beschlüsse des Aufsichtsrats vor und entscheiden, soweit zulässig, in Einzelfällen an dessen Stelle. Die Ausschussvorsitzenden berichteten dem Aufsichtsrat regelmäßig über die Arbeit in den Ausschüssen.

Der **Präsidialausschuss** kam im Berichtsjahr zu acht Sitzungen zusammen. Schwerpunkte der Beratungen waren die Geschäftsentwicklung, die Unternehmensplanung und die strategische Ausrichtung der Gesellschaft. Zudem befasste sich der Ausschuss mit der Vergütung und der Zusammensetzung des Vorstands. Er bereitete die Sitzungen und Beschlüsse des Aufsichtsrats vor.

Der **Prüfungs- und Finanzausschuss** hielt vier Sitzungen und zwei Telefonkonferenzen ab. In den ersten Sitzungen des Jahres beschäftigte sich der Ausschuss vornehmlich mit der Vorprüfung der Abschlüsse und Lageberichte sowie mit Tätigkeit und Honorar des Abschlussprüfers einschließlich dessen Unabhängigkeit. Der Ausschuss erörterte mit dem Vorstand die Zwischenberichte vor deren Veröffentlichung. Zudem überwachte er das konzernweite Risikomanagementsystem und das rechnungslegungsbezogene interne Kontrollsystem. Der Ausschuss bewertete die Ergebnisse der Prüfungen der Internen Revision in 2010 und den Prüfungsplan der Internen Revision für 2011. Er befasste sich ferner mit Fragen der Compliance, vor allem dem Compliance Management System und dem Code of Conduct sowie den Ermittlungen von Kartellbehörden. Gegen Jahresende erörterte der Ausschuss die Anlagepolitik für liquide Mittel, aktuelle Steuerthemen und Bewertungsfragen für den Jahresabschluss.

Der **Nominierungs-** und der **Vermittlungsausschuss** traten nicht zusammen.

Der **Abschlussprüfer**, die Ernst & Young GmbH Wirtschaftsprüfungsgesellschaft, prüfte den vom Vorstand vorgelegten Jahresabschluss und den Konzernabschluss nebst den Lageberichten für die AG und den Konzern und erteilte uneingeschränkte Bestätigungsvermerke. Dem Bericht des Vorstands aufgrund der Mehrheitsbeteiligung der maxingvest ag, Hamburg, über die Beziehungen zu verbundenen Unternehmen (§ 312 AktG) erteilte der Abschlussprüfer den uneingeschränkten Bestätigungsvermerk: „Nach unserer pflichtmäßigen Prüfung und Beurteilung bestätigen wir, dass 1. die tatsächlichen Angaben des Berichts richtig sind, 2. bei den im Bericht aufgeführten Rechtsgeschäften die Leistung der Gesellschaft nicht unangemessen hoch war und 3. bei den im Bericht aufgeführten Maßnahmen keine Umstände für eine wesentlich andere Beurteilung als die durch den Vorstand sprechen.“

Die Mitglieder des Aufsichtsrats erhielten unmittelbar nach Aufstellung den **Jahresabschluss** der Beiersdorf AG und den **Konzernabschluss 2010**, die Berichte über die Lage der AG und des Konzerns, den Bericht über die Beziehungen zu verbundenen Unternehmen sowie die Prüfungsberichte des Abschlussprüfers. Der Prüfungsausschuss beschäftigte sich am 7. Februar 2011 mit abschlussrelevanten Themen und prüfte am 23. Februar 2011 die Abschlüsse und Berichte sowie den Gewinnverwendungsvorschlag des Vorstands. Der Aufsichtsrat beriet und prüfte diese ausführlich in seiner Bilanzsitzung am 24. Februar 2011. Im Ausschuss und im Plenum stellte der Abschlussprüfer die wesentlichen Ergebnisse seiner Prüfung vor. Nach dem abschließenden Ergebnis unserer Prüfung erhoben wir keine Einwendungen gegen den Jahresabschluss und den Konzernabschluss, die Berichte über die Lage der AG und des Konzerns, den Bericht über die Beziehungen zu verbundenen Unternehmen einschließlich der hierin enthaltenen Schlusserklärung des Vorstands sowie die Prüfungsberichte des Abschlussprüfers. Dem Ergebnis der Abschlussprüfung schlossen wir uns an und billigten die Abschlüsse der Beiersdorf AG und des Konzerns zum 31. Dezember 2010. Damit ist der Jahresabschluss der Beiersdorf AG **festgestellt**. Dem Gewinnverwendungsvorschlag des Vorstands stimmten wir zu.

In **2011** beschloss der Aufsichtsrat nach Vorbereitung durch den Präsidialausschuss über die Zielerreichung und die Gesamtbezüge des Vorstands für 2010 sowie über Vergütungsfragen und die Ziele des Vorstands für 2011.

Den ausgeschiedenen Vorstandsmitgliedern, den Herren Kleinschmidt, Nota und Dr. Düttmann, danken wir für ihre Leistungen und wünschen ihnen alles Gute für ihre Zukunft. Den Mitarbeiterinnen und Mitarbeitern, den Arbeitnehmervertretungen und dem Vorstand danken wir für den großen Einsatz und für die Konzentration aller Kräfte in der Neuausrichtung zur Bewältigung der Herausforderungen, die das Geschäftsjahr 2010 prägten. Diese Herausforderungen und Veränderungen werden uns in den Unternehmen weiterhin begleiten. Mit gemeinsamen, entschiedenen Anstrengungen aller werden wir sie erfolgreich meistern.

Den Aktionären, den Handels- und Industriepartnern und den Verbrauchern danken wir für das der Gesellschaft entgegengebrachte Vertrauen.

*Hamburg, 24. Februar 2011*

Für den Aufsichtsrat

**Reinhard Pöllath**  
Vorsitzender des Aufsichtsrats



# § 161 AktG

---

(Entsprechenserklärung gemäß § 161 AktG)  
– 2010 –

Kapitel

---

## 02 Corporate Governance

---



## 02 Corporate Governance

Beiersdorf Geschäftsbericht 2010

Gute Unternehmensführung hat einen Namen: Corporate Governance. Beiersdorf begrüßt den Deutschen Corporate Governance Kodex, auch in seiner zuletzt im Mai 2010 aktualisierten Fassung.

### Inhalt

|       |                                      |
|-------|--------------------------------------|
| S. 31 | Entsprechenserklärung                |
| S. 33 | Allgemeines zur Führungsstruktur     |
| S. 37 | Vergütungsbericht                    |
| S. 46 | Wertpapiergeschäfte und Aktienbesitz |
| S. 46 | Unternehmensführungspraktiken        |
| S. 48 | Weitere Informationen                |

## Corporate Governance-Bericht 2010

### Gute Unternehmensführung hat einen Namen: Corporate Governance

Gute und verantwortungsbewusste Unternehmensleitung und -kontrolle haben für Beiersdorf seit jeher eine hohe Bedeutung. Erfolgsgrundlage sind eine enge und effiziente Zusammenarbeit von Vorstand und Aufsichtsrat, die Achtung der Aktionärsinteressen, eine offene Unternehmenskommunikation, die ordnungsgemäße Rechnungslegung und Abschlussprüfung, die Einhaltung gesetzlicher Bestimmungen und unternehmensinterner Richtlinien sowie ein verantwortungsbewusster Umgang mit Risiken. Der Deutsche Corporate Governance Kodex und seine Anpassungen erforderten keine grundlegenden Änderungen bei Beiersdorf. Wir verstehen Corporate Governance als einen fortlaufenden Prozess und werden die Entwicklung auch weiterhin aufmerksam verfolgen.

### I. Entsprechenserklärung

Ende Dezember 2010 haben Vorstand und Aufsichtsrat die Entsprechenserklärung für das Geschäftsjahr 2010 zu den Empfehlungen des Kodex' gemäß § 161 AktG abgegeben. Die Beiersdorf AG erfüllt mit einer Ausnahme alle Empfehlungen sowie viele Anregungen des Kodex'.

Die nachfolgende Erklärung wurde den Aktionären auf der Internetseite der Gesellschaft unter [www.Beiersdorf.de/Entsprechenserklaerung](http://www.Beiersdorf.de/Entsprechenserklaerung) dauerhaft zugänglich gemacht:

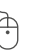

**Beiersdorf.de/**  
Entsprechens-  
erklärung

**Erklärung des Vorstands und des Aufsichtsrats der Beiersdorf Aktiengesellschaft zu den Empfehlungen der „Regierungskommission Deutscher Corporate Governance Kodex“ gemäß § 161 AktG**

Die Beiersdorf Aktiengesellschaft entsprach im Geschäftsjahr 2010 und entspricht sämtlichen Empfehlungen der „Regierungskommission Deutscher Corporate Governance Kodex“ in ihrer jeweils geltenden Fassung vom 18. Juni 2009 bzw. 26. Mai 2010 mit folgender Ausnahme:

Gemäß Ziffer 4.2.3 Abs. 4 soll beim Abschluss von Vorstandsverträgen darauf geachtet werden, dass Zahlungen an ein Vorstandsmitglied bei vorzeitiger Beendigung der Vorstandstätigkeit ohne wichtigen Grund einschließlich Nebenleistungen den Wert von zwei Jahresvergütungen nicht überschreiten (Abfindungs-Cap) und nicht mehr als die Restlaufzeit des Anstellungsvertrags vergüten. Dieser Empfehlung wurde beim Abschluss von Anstellungsverträgen mit neuen Vorstandsmitgliedern ab dem Geschäftsjahr 2009 entsprochen. Bei der Anpassung oder Verlängerung von bestehenden Verträgen wurde dieser Empfehlung teilweise entsprochen. Damit enthält die Mehrzahl der Vorstandsverträge einen kodexkonformen Abfindungs-Cap. In den übrigen Fällen ist eine Anpassung alsbald vorgesehen.

*Hamburg, im Dezember 2010*

Für den Aufsichtsrat

Für den Vorstand



**Prof. Dr. Reinhard Pöllath**  
Vorsitzender  
des Aufsichtsrats

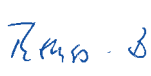

**Thomas-B. Quaas**  
Vorsitzender  
des Vorstands

**Dr. Bernhard Düttmann**  
Mitglied  
des Vorstands

## II. Allgemeines zur Führungsstruktur

Als international tätige Aktiengesellschaft mit Sitz in Hamburg, Deutschland, unterliegt die Beiersdorf AG unter anderem den Vorschriften des deutschen Aktien-, Kapitalmarkt- und Mitbestimmungsrechts sowie der eigenen Satzung. Mit Vorstand und Aufsichtsrat hat Beiersdorf die in Deutschland übliche dualistische Leitungs- und Überwachungsstruktur. Die Hauptversammlung als Organ der Willensbildung der Aktionäre ist für grundlegende Entscheidungen des Unternehmens zuständig. Gemeinsam sind diese drei Organe gleichermaßen den Interessen der Aktionäre und dem Wohl des Unternehmens verpflichtet.

### 1. Der Aufsichtsrat

Der Aufsichtsrat der Beiersdorf AG besteht aus zwölf Mitgliedern; sechs werden durch die Hauptversammlung nach den Vorschriften des Aktiengesetzes und sechs durch die Arbeitnehmer nach den Vorschriften des Mitbestimmungsgesetzes für jeweils fünf Jahre gewählt. Die Amtszeit des derzeitigen Aufsichtsrats endet mit Ablauf der Hauptversammlung 2014.

Der Aufsichtsrat bestellt den Vorstand, berät diesen bei der Leitung des Unternehmens und überwacht dessen Geschäftsführung nach Gesetz, Satzung und Geschäftsordnung. Er arbeitet mit dem Vorstand zum Wohle der Gesellschaft und mit dem gemeinsamen Ziel nachhaltiger Wertschöpfung eng zusammen und ist in Entscheidungen von grundlegender Bedeutung eingebunden; bestimmte Entscheidungen bedürfen seiner Zustimmung gemäß Gesetz sowie Geschäftsordnung für den Aufsichtsrat.

Er trifft seine Entscheidungen in regelmäßigen Sitzungen sowie in Einzelfällen außerhalb von Sitzungen auf der Basis ausführlicher Unterlagen. Er wird vom Vorstand regelmäßig, zeitnah und umfassend über alle relevanten Fragestellungen informiert. Der Vorsitzende des Vorstands unterrichtet daneben den Vorsitzenden des Aufsichtsrats regelmäßig und zeitnah über wichtige Geschäftsvorfälle und stimmt mit diesem wesentliche Entscheidungen ab.

Der Aufsichtsrat evaluiert seine Arbeit in regelmäßigen Abständen in einem standardisierten Verfahren. Die Ergebnisse werden im Plenum diskutiert und eventuelle Verbesserungsmaßnahmen beschlossen. Die letzte Effizienzprüfung im Aufsichtsrat hat im Herbst 2010 mit externen Beratern stattgefunden. Die Mitglieder des Aufsichtsrats nehmen die erforderlichen Aus- und Fortbildungsmaßnahmen eigenverantwortlich wahr; die Gesellschaft wird sie hierbei in angemessener Form unterstützen.

Die Gesellschaft hat auch für die Mitglieder des Aufsichtsrats eine D&O-Versicherung abgeschlossen. Diese enthält einen Selbstbehalt, der den gesetzlichen Anforderungen an einen Selbstbehalt für Vorstandsmitglieder entspricht. Der Selbstbehalt beträgt 10 % des Schadens bis zur Höhe des Eineinhalbfachen der festen jährlichen Vergütung des jeweiligen Aufsichtsratsmitglieds.

Nach der letztjährigen Anpassung des Kodex' soll der Aufsichtsrat für seine Zusammensetzung konkrete Ziele benennen, die unter Beachtung der unternehmensspezifischen Situation die internationale Tätigkeit des Unternehmens, potenzielle Interessenkonflikte, eine festzulegende Altersgrenze für Aufsichtsratsmitglieder und Vielfalt (*Diversity*) berücksichtigen. Diese konkreten Ziele sollen insbesondere eine angemessene Beteiligung von Frauen vorsehen.



Neben der ausgewogenen fachlichen Qualifikation des Gesamtaufsichtsrats ist Vielfalt ein wichtiges Kriterium für die Auswahl der Aufsichtsrats- und Ausschussmitglieder. Vielfalt liegt im Unternehmensinteresse. So wurde dieses Kriterium auch vom Aufsichtsrat und dem vorbereitenden Nominierungsausschuss bei den Wahlvorschlägen für die Anteilseignervertreter an die Hauptversammlung 2009 berücksichtigt. Seit den letzten Aufsichtsratswahlen im April 2009 hat der Aufsichtsrat einen Frauenanteil von 25 %; mit Frau Prof. Dr. Eberhartinger auf Anteilseignerseite und Frau Gabriel und Frau Professorin Rousseau auf Arbeitnehmerseite sind drei Frauen im Aufsichtsrat vertreten. Dem Aufsichtsrat gehören mit Frau Prof. Dr. Eberhartinger, Herrn Dr. Kunisch und Herrn Prof. Dr. Pöllath auch drei Mitglieder an, die neben ihrer besonderen fachlichen Qualifikation das Merkmal der Internationalität aufgrund besonderer internationaler Erfahrungen verkörpern. Als Ersatzmitglied für alle Aufsichtsratsmitglieder auf Anteilseignerseite wurde mit Frau Dreyfus ebenfalls eine Frau gewählt. Mit Wirkung zum 1. Januar 2011 hat Frau Prof. Dr. Eberhartinger auch den Vorsitz im Prüfungsausschuss des Aufsichtsrats übernommen.

Zur Wahrung und Förderung von Vielfalt hat der Aufsichtsrat in seinen Sitzungen am 2. September und 10. Dezember 2010 unter Berücksichtigung der unternehmensspezifischen Situation konkrete Ziele für seine Zusammensetzung beschlossen, die zunächst bis zum Ende des Geschäftsjahres 2014 beachtet werden sollen. Diese Ziele werden auch vom Nominierungsausschuss bei der Entwicklung von Wahlvorschlägen berücksichtigt. Bei der Zusammensetzung des Aufsichtsrats ist daneben stets darauf zu achten, dass seine Mitglieder insgesamt über die zur ordnungsgemäßen Wahrnehmung der Aufgaben erforderlichen Kenntnisse, Fähigkeiten und fachlichen Erfahrungen verfügen.

#### *Internationalität*

Jedes Mitglied des Aufsichtsrats muss der internationalen Ausrichtung der Gesellschaft offen gegenüberstehen. Zumindest einige Mitglieder müssen die internationale Ausrichtung konkret verkörpern. Mindestens zwei Mitglieder des Aufsichtsrats sollen daher über besondere internationale Erfahrungen verfügen, die sie zum Beispiel aufgrund ihrer Tätigkeit im Ausland oder ihrer Herkunft erworben haben. Jedenfalls ein Mitglied mit dieser internationalen Erfahrung soll ein Vertreter der Anteilseigner sein. Eine weitere Erhöhung der Internationalität im Aufsichtsrat wird angestrebt.

#### *Angemessene Beteiligung von Frauen*

Eine vielfältige Zusammensetzung verlangt eine angemessene Vertretung von Frauen im Aufsichtsrat. Der Aufsichtsrat strebt daher an, Anzahl und Stellung von Frauen im Aufsichtsrat weiter zu stärken und zumindest den derzeitigen Anteil von drei Frauen aufrechtzuerhalten. Jedenfalls eine Frau soll Anteilseignervertreterin sein. Eine Erhöhung der Beteiligung von Frauen im Aufsichtsrat wird im Zusammenhang mit konkreten Veränderungen im Aufsichtsrat regelmäßig im Unternehmensinteresse angestrebt.

#### *Altersgrenze und Interessenkonflikte*

- Der Aufsichtsrat hat in seiner Geschäftsordnung festgelegt, dass Aufsichtsratsmitglieder nicht älter als 72 Jahre sein sollen.
- Darüber hinaus soll dem Aufsichtsrat eine nach seiner Einschätzung ausreichende Anzahl unabhängiger Mitglieder angehören. Ein Aufsichtsratsmitglied ist als unabhängig anzusehen, wenn es in keiner geschäftlichen oder persönlichen Beziehung zu der Gesellschaft oder deren Vorstand steht, die einen Interessenkonflikt begründet.
- Jedes Aufsichtsratsmitglied hat Interessenkonflikte, insbesondere solche, die aufgrund einer Beratungs- oder Organfunktion bei Kunden, Lieferanten, Kreditgebern oder sonstigen Geschäftspartnern oder Wettbewerbern der Gesellschaft entstehen können, gegenüber dem Aufsichtsratsvorsitzenden offenzulegen. Bei wesentlichen und nicht vorübergehenden Interessenkonflikten hat das Aufsichtsratsmitglied sein Amt niederzulegen.

Zur Weiterentwicklung und zur weiteren Förderung dieser Ziele wurden zusätzlich zwei Diversity-Beauftragte aus dem Kreis der Aufsichtsratsmitglieder benannt (Frau Prof. Dr. Eberhartinger und Frau Professorin Rousseau). Die Diversity-Beauftragten sollen den Aufsichtsrat bei jeder beabsichtigten Wahl eines Aufsichtsratsmitglieds der Anteilseigner oder eines Ausschussmitglieds unterstützen und gemeinsam mit dem Vorsitzenden des Aufsichtsrats nach Konsultation mit den übrigen Aufsichtsratsmitgliedern eine Stellungnahme zu den Wahlvorschlägen des zuständigen Nominierungsausschusses abgeben.

Die Arbeit des Aufsichtsrats findet innerhalb und außerhalb des Plenums sowie in den Ausschüssen statt. Der Aufsichtsrat hat aus seiner Mitte folgende Ausschüsse gebildet:

Der **Präsidialausschuss** bereitet die Aufsichtsratssitzungen und die Personalentscheidungen des Aufsichtsrats vor, beschließt – vorbehaltlich der Beschlussfassung des Aufsichtsratsplenums über die Festsetzung der Gesamtvergütung – anstelle des Aufsichtsrats über die Anstellungs- und Pensionsverträge von Vorstandsmitgliedern sowie weitere Vorstandsangelegenheiten. Er überprüft regelmäßig die Effizienz der Tätigkeit des Aufsichtsrats. Außerdem berät er regelmäßig über die langfristige Nachfolgeplanung für den Vorstand. Schließlich hat der **Präsidialausschuss** eine Eilentscheidungskompetenz für zustimmungsbedürftige Geschäfte, soweit ein Beschluss des Aufsichtsrats nicht rechtzeitig gefasst werden kann.

Der **Prüfungs- und Finanzausschuss** bereitet die Entscheidungen des Aufsichtsrats über die Billigung des Jahres- und Konzernabschlusses, den Vorschlag an die Hauptversammlung zur Wahl des Abschlussprüfers sowie die Vereinbarung mit dem Abschlussprüfer vor, überprüft dessen Unabhängigkeit und stimmt der Erbringung von weiteren Leistungen durch diesen zu. Ferner beriet und überwachte er den Vorstand bezüglich Fragen der Rechnungslegung, des Controllings, des Risikomanagements und der Compliance sowie der Internen Revision. Außerdem überwachte er die Unternehmenspolitik in den Bereichen Finanzen, Steuern und Versicherungen. Er entschied anstelle des Aufsichtsrats über Kreditaufnahmen und -gewährungen, Haftungen für fremde Verbindlichkeiten und Finanzanlagegeschäfte. Schließlich beriet der Ausschuss die Zwischenberichte vor deren Erscheinen mit dem Vorstand.

Die Aufgaben des **Prüfungs- und Finanzausschusses** wurden zum 1. Januar 2011 aufgeteilt und werden nun von zwei Ausschüssen, einem **Prüfungsausschuss** und einem **Finanzausschuss**, wahrgenommen. Der **Prüfungsausschuss** ist zuständig für die abschlussorientierten Themen. Der **Finanzausschuss** übernimmt die übrigen Themen wie Risikomanagement, internes Kontrollsystem, Compliance, Interne Revision sowie Finanzierungsfragestellungen. Beide Ausschüsse sind personengleich besetzt, haben aber unterschiedliche Vorsitzende.

Der nach den Vorschriften des Mitbestimmungsgesetzes gebildete **Vermittlungsausschuss** unterbreitet dem Aufsichtsrat Vorschläge zur Bestellung von Vorstandsmitgliedern, falls im ersten Wahlgang nicht die erforderliche Zweidrittelmehrheit erreicht worden sein sollte.

Der **Nominierungsausschuss** ist mit Vertretern der Anteilseigner besetzt; er schlägt dem Aufsichtsrat für dessen Wahlvorschläge an die Hauptversammlung geeignete Kandidaten vor.

Die Zusammensetzung des Aufsichtsrats und seiner Ausschüsse ist auf [www.Beiersdorf.de/Organe](http://www.Beiersdorf.de/Organe) sowie auf Seite 131 dieses Geschäftsberichts zu finden.

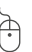

Beiersdorf.de/  
Organe

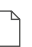

siehe  
Seite 131

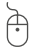

Beiersdorf.de/  
Vorstand

## 2. Der Vorstand

Der Vorstand leitet das Unternehmen konzernweit in eigener Verantwortung und führt dessen Geschäfte. Er ist an das Unternehmensinteresse gebunden und der Steigerung des nachhaltigen Unternehmenswerts verpflichtet. Er nimmt seine Leitungsaufgabe als Kollegialorgan mit gemeinsamer Verantwortung für die Geschäftsführung wahr.

Die Mitglieder des Vorstands werden vom Aufsichtsrat bestellt. Der Vorstand der Gesellschaft besteht aus sechs Mitgliedern. Die Vorstandsaufgaben sind nach funktionalen und regionalen Gesichtspunkten verteilt (drei funktionale und drei regional zuständige Vorstände). Die Verteilung der Ressorts auf die einzelnen Mitglieder des Vorstands ergibt sich aus einem Geschäftsverteilungsplan und ist auf der Internetseite unter [www.Beiersdorf.de/Vorstand](http://www.Beiersdorf.de/Vorstand) veröffentlicht.

Der Vorstand entwickelt die Unternehmensziele und die strategische Ausrichtung des Konzerns, stimmt diese mit dem Aufsichtsrat ab, sorgt für deren Umsetzung und erörtert mit dem Aufsichtsrat in regelmäßigen Abständen den Stand der Implementierung. Er ist verantwortlich für die Steuerung und Überwachung des Konzerns, die Unternehmensplanung mit Jahres- und Mehrjahresplanung sowie für die Aufstellung der Quartals-, Jahres- und Konzernabschlüsse sowie die Konzernfinanzierung. Er trägt ferner Sorge für ein angemessenes Risikomanagement und Risikocontrolling sowie eine regelmäßige, zeitnahe und umfassende Berichterstattung über alle für das Unternehmen relevanten Fragestellungen an den Aufsichtsrat unter Erläuterung und Begründung von Abweichungen des Geschäftsverlaufs von Plänen und Zielen. Bestimmte Maßnahmen und Geschäfte des Vorstands von besonderem Gewicht bedürfen der Zustimmung des Aufsichtsrats.

Der Vorstand beschließt in Sitzungen, die in der Regel zweimal im Monat stattfinden und vom Vorsitzenden des Vorstands geleitet werden. Die Mitglieder des Vorstands arbeiten kollegial zusammen und unterrichten sich gegenseitig laufend über wichtige Maßnahmen und Vorgänge in ihren Ressorts.

Vorstandsmitglieder legen möglicherweise auftretende Interessenkonflikte unverzüglich dem Aufsichtsrat offen und informieren ihre Vorstandskollegen darüber. Wesentliche Geschäfte von Vorstandsmitgliedern sowie ihnen nahestehenden Personen mit der Gesellschaft bedürfen der Zustimmung des Aufsichtsrats; solche Geschäfte haben branchenüblichen Standards zu entsprechen. Auch die Übernahme von Nebentätigkeiten bedarf der Zustimmung des Aufsichtsrats. Die Gesellschaft hat für die Mitglieder des Vorstands eine D&O-Versicherung abgeschlossen, die einen Selbstbehalt in Höhe von 10 % des Schadens bis zur Höhe des Eineinhalbfachen der festen jährlichen Vergütung des Vorstandsmitglieds vorsieht.

## 3. Die Hauptversammlung

Die Aktionäre nehmen ihre Rechte in der Hauptversammlung wahr und üben dort ihre Stimmrechte aus. Jede Aktie gewährt eine Stimme.

Die ordentliche Hauptversammlung findet jährlich statt, in der Regel innerhalb der ersten sechs Monate eines jeden Geschäftsjahres. Die Tagesordnung für die Hauptversammlung (einschließlich der für die Hauptversammlung verlangten Berichte und Unterlagen) wird auch auf der Internetseite der Gesellschaft veröffentlicht. Die Einberufung der Hauptversammlung kann mitsamt den Einberufungsunterlagen im Einverständnis mit dem einzelnen Aktionär auch auf elektronischem

Wege übermittelt werden. Zur Erleichterung der persönlichen Wahrnehmung ihrer Rechte stellt die Beiersdorf AG ihren Aktionären einen weisungsgebundenen Stimmrechtsvertreter zur Verfügung. In der Einladung wird erklärt, wie diese Weisungen zur Stimmrechtsausübung erteilt werden können. Daneben bleibt es den Aktionären unbenommen, sich durch einen Bevollmächtigten ihrer Wahl auf der Hauptversammlung vertreten zu lassen. Auch können die Aktionäre zur Hauptversammlung 2011 erstmals ihr Stimmrecht per Briefwahl ausüben.

### III. Vergütungsbericht

Der Vergütungsbericht erläutert Struktur und Höhe der Vergütung von Vorstand und Aufsichtsrat. Er berücksichtigt die gesetzlichen Vorgaben sowie die Empfehlungen des Deutschen Corporate Governance Kodex. Er ist Bestandteil des Jahresabschlusses der Beiersdorf AG und des Konzernabschlusses sowie der Lageberichte der Beiersdorf AG und des Konzerns.

#### 1. Vergütung des Vorstands

##### *a) Zuständigkeit und Beschlussfassungen des Aufsichtsrats*

Die Festsetzung der Vorstandsvergütung obliegt dem Aufsichtsratsplenum. Der Präsidialausschuss des Aufsichtsrats berät und überprüft regelmäßig das Vergütungssystem für den Vorstand und bereitet die Beschlussfassungen des Aufsichtsrats zur Vorstandsvergütung vor.

Der Aufsichtsrat befasste sich in all seinen Sitzungen (am 8. und 25. Februar, 29. April, 27. Mai, 2. September, 10. Dezember 2010 sowie 7. Februar 2011) mit der Vergütungsstruktur des Vorstands, deren Angemessenheit und/oder individuellen Vergütungsfragen. Nach der letztjährigen Anpassung des Vergütungssystems an die neuen gesetzlichen Vorgaben erörterte der Aufsichtsrat in seinen Sitzungen am 10. Dezember 2010 und 7. Februar 2011 die Neuordnung des Vorstandsvergütungssystems ab dem Geschäftsjahr 2011. Bei der Erarbeitung des neuen Vergütungssystems wurden unabhängige Berater konsultiert. Des Weiteren stellte der Aufsichtsrat in seiner Sitzung am 7. Februar 2011 die Vergütung des Vorstands für das Geschäftsjahr 2010 fest.

##### *b) Überblick über die Vorstandsvergütung*

Das Vergütungssystem für den Vorstand berücksichtigt die Aufgaben und die Leistung des einzelnen Vorstandsmitglieds und des Vorstands insgesamt, die wirtschaftliche und finanzielle Lage, den Erfolg und die Zukunftsaussichten des Unternehmens sowie die Üblichkeit der Vergütung im Vergleichsumfeld.

Die Vergütung des Vorstands setzte sich im Geschäftsjahr 2010 aus folgenden Komponenten zusammen:

- einer fixen Grundvergütung,
- variablen, an die Erreichung von Zielvorgaben geknüpften Boni, bestehend aus
  - einer kurzfristigen, jahresbezogenen Komponente (Tantieme),
  - einer mehrjährigen Komponente, die über insgesamt vier Geschäftsjahre zur Auszahlung gelangt (Langfristiger Bonus), und
  - einer zusätzlichen mittelfristigen variablen Vergütungskomponente für die Jahre 2009 und 2010, die vom Erreichen bestimmter Weltmarktanteile zum Ende des Jahres 2010 abhängig war (Mid-Term-Incentive, MTI),
- üblichen Nebenleistungen und einer Pensionszusage.



### *c) Vorstandsvergütung für das Geschäftsjahr 2010 im Einzelnen*

#### *aa) Fixum*

Die fixe jährliche Vergütung wird in zwölf gleichen Teilen ausgezahlt. Sie wird turnusmäßig alle zwei Jahre auf ihre Angemessenheit überprüft.

#### *bb) Variabler Bonus 2010*

Die Vorstandsmitglieder erhalten ferner für das Geschäftsjahr 2010 eine erfolgsabhängige Vergütungskomponente („Variabler Bonus 2010“). Diese soll die nachhaltige Unternehmensentwicklung unterstützen und beruht überwiegend (zu 60 %) auf einer mehrjährigen Bemessungsgrundlage. Die Höhe des Variablen Bonus 2010 hängt ab vom Erreichen einer bestimmten EBIT-Marge („EBIT-Komponente“, zu 40 %) sowie bestimmter, für jedes Vorstandsmitglied festgelegter persönlicher Ziele („Persönliche Komponente“, zu 60 %).

Die EBIT-Komponente bestimmt sich anhand der Umsatzrendite („Return on Sales“) bezogen auf den Unternehmensbereich Consumer des Beiersdorf Konzerns im Geschäftsjahr 2010 (errechnet aus EBIT geteilt durch Umsatz). Bei der Ermittlung des EBIT kann der Aufsichtsrat etwaige Sonderinflüsse ebenso wie Änderungen bei den Aufwendungen für Marketing und Forschung & Entwicklung im Geschäftsjahr 2010 berücksichtigen. Der Aufsichtsrat legt für die EBIT-Komponente jeweils Zielwerte für eine 70 %ige, 80 %ige und 200 %ige Zielerreichung fest, wobei Zwischenwerte linear interpoliert werden. Bei einer Zielerreichung von 70 % fällt die EBIT-Komponente des Zielbonus lediglich in Höhe von 50 % an, bei einer Zielerreichung von 80 % in Höhe von 80 % und bei einer Zielerreichung von 200 % in Höhe von 200 %.

Die Persönliche Komponente besteht aus mehreren, vom Aufsichtsrat für jedes Vorstandsmitglied jährlich festgelegten persönlichen Zielen. Der Aufsichtsrat legt für die Persönliche Komponente jeweils Zielwerte für eine 80 %ige und 200 %ige Zielerreichung fest. Zwischenwerte werden linear interpoliert.

Die EBIT-Komponente entfällt unterhalb einer Zielerreichung von 70 % (Knock-Out), die Persönliche Komponente entfällt in Höhe des an dem jeweiligen Ziel zu bemessenden Anteils unterhalb einer Zielerreichung von 80 % je Ziel. Oberhalb einer Zielerreichung von 200 % erfolgt jeweils keine weitere Steigerung (Cap).

Der Variable Bonus 2010 wird zu 40 % nach der Entlastung des Vorstands durch die Hauptversammlung im Jahr 2011 fällig („Tantieme 2010“). Der verbleibende Betrag („Langfristiger Bonus 2010“) entwickelt sich in Abhängigkeit der Unternehmenswertentwicklung über einen Zeitraum von vier Jahren. Der Unternehmenswert wird errechnet aus der Summe von Nettoumsatz und EBIT mal EBIT-Faktor des Unternehmensbereichs Consumer des Beiersdorf Konzerns gemäß dem Konzernabschluss. Sofern der Unternehmenswert des Geschäftsjahres 2010 in den Folgegeschäftsjahren erreicht oder überschritten wird, wird der Langfristige Bonus 2010 in vier gleichen Teilbeträgen nach Entlastung des jeweiligen Vorstandsmitglieds durch die ordentlichen Hauptversammlungen in den Jahren 2012 bis 2015 ausgezahlt. Wird der Unternehmenswert des Geschäftsjahres 2010 in einem Geschäftsjahr nicht erreicht, entfällt der jeweilige Teilbetrag, es sei denn, der Unternehmenswert erreicht im Durchschnitt der Geschäftsjahre 2011 bis 2014 mindestens den Unternehmenswert des Geschäftsjahres 2010; in diesem Fall wird der ausgefallene Teilbetrag mit dem letzten Teilbetrag nach der ordentlichen Hauptversammlung 2015 gezahlt. Der letzte Teilbetrag erhöht oder reduziert sich um den Betrag, welcher der prozentualen Veränderung des Unternehmenswertes zum Ende des Geschäftsjahres 2014 gegenüber dem Geschäftsjahr 2010 entspricht; der Betrag kann nicht

unter 0 € sinken und nicht über 200 % steigen (Cap). Zur Berücksichtigung besonderer Entwicklungen kann der Aufsichtsrat die Tantieme 2010 sowie den Langfristigen Bonus 2010 um bis zu 20 % herauf- oder herabsetzen. Die Herabsetzungsmöglichkeit gemäß § 87 Abs. 2 AktG bleibt hiervon unberührt.

cc) MTI

Zusätzlich stand den Vorstandsmitgliedern ein weiteres mittelfristiges variables Vergütungselement für die Geschäftsjahre 2009 und 2010 (MTI) zu, bezogen auf die Weltmarktanteilsziele des Vorstands. Nach derzeitiger Einschätzung wird die erforderliche Mindestschwelle zum Ende des Geschäftsjahres 2010 nicht erreicht;<sup>1</sup> daher wurde die für den MTI gebildete Rückstellung aufgelöst.

dd) STI/LTI

Bis zum Ablauf des Geschäftsjahres 2009 wurde den Vorstandsmitgliedern eine variable Vergütung gewährt, die ebenfalls vom Erreichen unternehmensbezogener und persönlicher Ziele abhängig war. Die persönlichen und unternehmensbezogenen Ziele bezogen sich auf den Unternehmensbereich Consumer; die unternehmensbezogenen Ziele orientierten sich zuletzt an relativem Umsatzwachstum und Umsatzrendite. Der so ermittelte Ausgangsbetrag wurde teilweise nach Ablauf eines Geschäftsjahres ausgezahlt (Short Term Incentive, STI) und im Übrigen einem Bonustopf mit jeweils fünfjähriger Laufzeit zugeführt (Long Term Incentive, LTI).

Für das Geschäftsjahr 2010 wurden STI und LTI infolge der Umstellung des Vergütungssystems nicht mehr gewährt. Die für die Geschäftsjahre 2006 bis 2009 gebildeten LTI-Töpfe wurden zum 31. Dezember 2010 abgerechnet und wurden bzw. werden in den Geschäftsjahren 2010 bis 2012 jeweils nach der ordentlichen Hauptversammlung in drei Teilen ausgezahlt. Die LTI-Töpfe erhöhten oder reduzierten sich bis zum Ablauf des Geschäftsjahres 2010 entsprechend der Veränderung des Unternehmenswerts seit ihrer jeweiligen Bildung.

ee) Sonstiges

Die Vergütung des Vorstands im Geschäftsjahr 2010 enthält kein Aktienoptionsprogramm oder vergleichbare wertpapierorientierte Anreize. Auch erhalten die Mitglieder des Vorstands für Mandate in Kontrollgremien von Konzern- und Beteiligungsgesellschaften keine zusätzliche Vergütung.

Jedem Vorstandsmitglied steht ein Dienstwagen zur Verfügung. Außerdem hat die Beiersdorf AG zu Gunsten der Vorstandsmitglieder eine Unfallversicherung abgeschlossen. Diese Sachbezüge werden als geldwerter Vorteil versteuert.

Zudem bestehen für die im Geschäftsjahr 2010 tätigen Vorstandsmitglieder (mit Ausnahme der Herren Wei und Nota) Pensionszusagen. Die Versorgungsbezüge bestimmen sich nach einem prozentualen Anteil der jeweiligen fixen Grundvergütung. Der prozentuale Anteil steigt mit der Dauer der Vorstandszugehörigkeit auf höchstens 50 %. Die Zuführungen zu den Pensionsrückstellungen setzen sich aus den laufenden Dienstzeitaufwendungen (*current service cost*) und den Zinsaufwendungen (*interest expense*) zusammen. Für ein Vorstandsmitglied wird anstelle einer prozentual an der fixen Grundvergütung ausgerichteten Leistungszusage jährlich eine beitragsorientierte Pensionsleistung gewährt, die dem Vorstandsmitglied über ein zu seinen Gunsten geführtes Beitragskonto gutgeschrieben wird. Der Aufsichtsrat prüft, ob ein vergleichbares System auch für die übrigen Vorstandsmitglieder eingeführt werden soll.

<sup>1</sup> Die endgültigen Marktanteilszahlen liegen erst im späten Frühjahr 2011 vor.

Nach Ausscheiden aus dem Vorstand zum 30. April 2010 erhält Herr Kleinschmidt für die restliche Dauer des Anstellungsverhältnisses bis zum 30. April 2011 seine vertraglich vereinbarte Vergütung mit der Maßgabe, dass seine variable Vergütung für das Jahr 2010 nach der ordentlichen Hauptversammlung 2011 pauschaliert wird (416 T€ = 80 % des Zielbonus) und die fixe Grundvergütung ab dem 1. Januar 2011 280 T€ p.a. beträgt. Eine Abfindung wurde Herrn Kleinschmidt nicht gewährt. Herr Dr. Düttmann erhält bis zum 28. Februar 2011 seine vertragsgemäßen Bezüge, wobei der Variable Bonus 2010 vollständig nach der Hauptversammlung 2011 ausgezahlt und für die Monate Januar und Februar 2011 der Variable Bonus 2011 pauschaliert in Höhe von 80 % des Zielbonus zeitanteilig fortgezahlt wird. Nach Ausscheiden aus dem Vorstand werden ihm aus dienstvertraglichen und wettbewerbsrechtlichen Gründen bis zu 6 Monate nach Auflösung seines Dienstvertrags sein jährliches Grundgehalt sowie ein pauschalierter jährlicher Bonus in Höhe von 80 % des Zielbonus zeitanteilig monatlich gewährt. Danach reduzieren sich die vorgenannten Bezüge bis Ende 2012 um 50%. Der LTI wird unverändert entsprechend der für die aktiven Vorstandsmitglieder bestehenden Regelungen ausbezahlt. Weitergehende vertragliche Ansprüche wurden pauschal mit einem Betrag von 160 T€ abgefunden. Herr Nota erhielt im Zusammenhang mit seinem Ausscheiden aus dem Vorstand zum 31. Mai 2010 eine Abfindung seines Pensionsanspruchs in Höhe von 167 T€ sowie eine am 1. Februar 2011 erfolgte Auszahlung in Höhe von 80 % des zum 31. Dezember 2010 festgestellten LTI (abzüglich der bereits nach der Hauptversammlung im Geschäftsjahr 2010 gewährten Abschlagszahlung). Der Variable Bonus 2010 wird Herrn Nota in Höhe von 50 % nach der ordentlichen Hauptversammlung im Geschäftsjahr 2011 ausbezahlt, wobei als Zielerreichung das Mittel aus 80 % und der Zielerreichung des Jahres 2009 unterstellt wird.

ff) Übersichten zur individualisierten Vorstandsvergütung

| 04 Gesamtvergütung des Vorstands für die Tätigkeit im Geschäftsjahr 2010 (in T€) |                     |                       |                  |                         |                   |
|----------------------------------------------------------------------------------|---------------------|-----------------------|------------------|-------------------------|-------------------|
|                                                                                  | Variable Vergütung  |                       |                  |                         |                   |
|                                                                                  | Fixe Grundvergütung | Tantieme <sup>3</sup> |                  | Langfristiger Bonus     |                   |
|                                                                                  |                     | 2009 (STI)            | 2010             | 2009 <sup>4</sup> (LTI) | 2010 <sup>5</sup> |
| Thomas-B. Quaas (Vorsitzender)                                                   | 435                 | 550                   | 259              | 138                     | 388               |
| Dr. Bernhard Düttmann                                                            | 250                 | 335                   | 420 <sup>6</sup> | 112                     | – <sup>6</sup>    |
| Peter Feld (ab 1. August 2010)                                                   | –                   | –                     | 67               | –                       | 100               |
| Peter Kleinschmidt (bis 30. April 2010) <sup>7</sup>                             | 260                 | 354                   | 139              | 88                      | –                 |
| Pieter Nota (bis 31. Mai 2010) <sup>8</sup>                                      | 325                 | 306                   | 220              | 131                     | –                 |
| Markus Pinger                                                                    | 260                 | 409                   | 204              | 102                     | 305               |
| James C. Wei                                                                     | 163                 | 227                   | 249 <sup>9</sup> | 56                      | 250               |
| Gesamt                                                                           | 1.693               | 2.181                 | 1.558            | 627                     | 1.043             |

<sup>2</sup> Thomas-B. Quaas: 500 T€ p.a., Dr. Bernhard Düttmann: 416 T€ p.a., Peter Feld: 320 T€ p.a., Peter Kleinschmidt: 416 T€ p.a., Pieter Nota: 444 T€ p.a., Markus Pinger: 452 T€ p.a., James Wei: 448 T€.  
<sup>3</sup> 2009: STI; 2010: Tantieme 2010.  
<sup>4</sup> Die hier angegebenen Werte für den bisherigen LTI entsprechen der im Geschäftsjahr 2009 in den LTI eingestellten Vergütung.  
<sup>5</sup> Die hier angegebenen Werte entsprechen der im Geschäftsjahr 2010 in den Langfristigen Bonus eingestellten Vergütung.  
<sup>6</sup> Herrn Dr. Düttmann wird im Zusammenhang mit seinem Ausscheiden aus dem Vorstand zum 9. Februar 2011 der Variable Bonus 2010 vollständig nach der Hauptversammlung 2011 ausbezahlt.  
<sup>7</sup> Zu den Bedingungen des Ausscheidens von Herrn Kleinschmidt siehe auch vorstehend lit. ee) „Sonstiges“.  
<sup>8</sup> Zu den Bedingungen des Ausscheidens von Herrn Nota siehe auch vorstehend lit. ee) „Sonstiges“.  
<sup>9</sup> Darin enthalten ist eine Bonuszahlung zum Ende des Geschäftsjahres 2010 in Höhe von 83 T€ für die Tätigkeit von Herrn Wei bei Konzerngesellschaften.  
<sup>10</sup> Hiervon wurden Herrn Wei 679 T€ (388 T€ im Vorjahr) als Vergütung für seine Tätigkeit bei Konzerngesellschaften gezahlt.

Die Anstellungsverträge der seit dem Geschäftsjahr 2009 erstmalig bestellten Vorstandsmitglieder enthalten für den Fall des vorzeitigen Ausscheidens aus Gründen, die das jeweilige Vorstandsmitglied nicht zu vertreten hat, eine Begrenzung der Abfindung auf zwei Jahres- bzw. Jahresfixvergütungen (Abfindungs-Cap); auch bei der Anpassung oder Verlängerung von bestehenden Verträgen wurde der Empfehlung des Deutschen Corporate Governance Kodex zum Abfindungs-Cap teilweise entsprochen. Damit enthält die Mehrzahl der Vorstandsverträge einen kodexkonformen Abfindungs-Cap, jedoch wurde die Abfindung des Vorstandsvorsitzenden für den Fall einer vorzeitigen einvernehmlichen Auflösung seines Anstellungsvertrags aus Gründen, die er nicht zu vertreten hat, auf die Höhe der bis zum Vertragsende ausstehenden fixen Vergütung sowie einen Festbetrag für die variable Vergütung für die Restlaufzeit des Vertrags in Höhe von 500 T€ pro Jahr festgelegt. Jedes Mitglied des Vorstands erhält bei vorzeitiger Beendigung der Vorstandstätigkeit ohne Vorliegen eines wichtigen Grundes, den das jeweilige Vorstandsmitglied zu vertreten hat, eine pauschalierte Auszahlung des Variablen Bonus 2010<sup>2</sup>. Weitere Zusagen für den Fall der vorzeitigen Beendigung der Vorstandstätigkeit bestehen nicht.

Mitglieder des Vorstands erhielten von der Gesellschaft weder Kredite oder Vorschüsse, noch wurden zu ihren Gunsten Haftungen eingegangen.

| Variable Gesamt |       | Sonstiges (geldwerte Vorteile aus Überlassung von Dienstwagen und Zahlung von Versicherungsbeiträgen, Umzugskosten) |      | Gesamt            |                   | Zuführung zu den Pensionsrückstellungen |      | Zuführung zu bzw. Auflösung von Rückstellungen für den MTI |        |
|-----------------|-------|---------------------------------------------------------------------------------------------------------------------|------|-------------------|-------------------|-----------------------------------------|------|------------------------------------------------------------|--------|
| 2009            | 2010  | 2009                                                                                                                | 2010 | 2009              | 2010              | 2009                                    | 2010 | 2009                                                       | 2010   |
| 688             | 647   | 15                                                                                                                  | 19   | 1.138             | 1.101             | 162                                     | 227  | 679                                                        | -679   |
| 447             | 420   | 9                                                                                                                   | 10   | 706               | 690               | 89                                      | 96   | 424                                                        | -424   |
| -               | 167   | -                                                                                                                   | 136  | -                 | 449               | -                                       | 21   | -                                                          | -      |
| 442             | 139   | 14                                                                                                                  | 7    | 716               | 236               | 99                                      | 37   | 424                                                        | -424   |
| 437             | 220   | 14                                                                                                                  | 7    | 776               | 390               | 82                                      | -    | 448                                                        | -448   |
| 511             | 509   | 10                                                                                                                  | 10   | 781               | 812               | 78                                      | 87   | 422                                                        | -422   |
| 283             | 499   | 3                                                                                                                   | 9    | 449 <sup>10</sup> | 788 <sup>10</sup> | -                                       | -    | 224                                                        | -224   |
| 2.808           | 2.601 | 65                                                                                                                  | 198  | 4.566             | 4.466             | 510                                     | 468  | 2.621                                                      | -2.621 |

Die LTI-Töpfe wurden zum Ende des Geschäftsjahres 2010 abgerechnet und werden (außer bei Herrn Nota) nach den ordentlichen Hauptversammlungen in den Jahren 2010 (hier erfolgte eine Abschlagszahlung) bis 2012 in drei Teilen ausgezahlt. Aus der nachfolgenden Tabelle ergeben sich die Werte der LTI-Töpfe zum Abrechnungstichtag 31. Dezember 2010, die Beträge der im Geschäftsjahr 2010 geleisteten Abschlagszahlungen sowie der nach der Hauptversammlung 2011 bzw. 2012 zu zahlende Teilbetrag:

05 (in T€)

|                                         | Gesamtwert der LTI-Töpfe zum 31.12.2010 | Abschlagszahlung im Geschäftsjahr 2010 | Auszahlung nach der HV 2011 | Auszahlungen nach der HV 2012 |
|-----------------------------------------|-----------------------------------------|----------------------------------------|-----------------------------|-------------------------------|
| Thomas-B. Quaas                         | 2.018                                   | 648                                    | 685                         | 685                           |
| Dr. Bernhard Düttmann                   | 777                                     | 249                                    | 264                         | 264                           |
| Peter Kleinschmidt (bis 30. April 2010) | 1.032                                   | 331                                    | 701 <sup>11</sup>           | –                             |
| Pieter Nota (bis 31. Mai 2010)          | 1.541 <sup>12</sup>                     | 495                                    | 837 <sup>12</sup>           | –                             |
| Markus Pinger                           | 1.227                                   | 394                                    | 417                         | 416                           |
| James C. Wei                            | 61                                      | 19                                     | 21                          | 21                            |
| Gesamt                                  | 6.656                                   | 2.136                                  | 2.925                       | 1.386                         |

<sup>11</sup> Mit dieser Auszahlung sind verbleibende Ansprüche aus dem LTI für die Folgejahre abgegolten.  
<sup>12</sup> Herr Nota erhielt am 1. Februar 2011 pauschaliert 80 % des zum 31. Dezember 2010 festgestellten Restbetrags.

Die Barwerte der bis zum Geschäftsjahr 2009 gewährten LTI-Töpfe vor Abzug der im Geschäftsjahr 2010 erfolgten Ausschüttungen ergeben sich aus der nachfolgenden Tabelle:

06 Barwerte der LTI-Töpfe (in T€)

|                                         | LTI Geschäftsjahr 2006 |       | LTI Geschäftsjahr 2007 |       | LTI Geschäftsjahr 2008 |       | LTI Geschäftsjahr 2009 |      | Gesamt |                     |
|-----------------------------------------|------------------------|-------|------------------------|-------|------------------------|-------|------------------------|------|--------|---------------------|
|                                         | 2009                   | 2010  | 2009                   | 2010  | 2009                   | 2010  | 2009                   | 2010 | 2009   | 2010                |
| Thomas-B. Quaas                         | 920                    | 1.018 | 519                    | 591   | 214                    | 241   | 124                    | 143  | 1.777  | 1.993               |
| Dr. Bernhard Düttmann                   | –                      | –     | 385                    | 421   | 205                    | 230   | 101                    | 116  | 691    | 767                 |
| Peter Kleinschmidt (bis 30. April 2010) | 390                    | 428   | 295                    | 337   | 147                    | 172   | 79                     | 95   | 911    | 1.032               |
| Pieter Nota (bis 31. Mai 2010)          | 619                    | 682   | 396                    | 453   | 227                    | 266   | 118                    | 140  | 1.360  | 1.541 <sup>13</sup> |
| Markus Pinger                           | 547                    | 606   | 329                    | 374   | 112                    | 126   | 92                     | 106  | 1.080  | 1.212               |
| James C. Wei                            | –                      | –     | –                      | –     | –                      | –     | 54                     | 61   | 54     | 61                  |
| Gesamt                                  | 2.476                  | 2.734 | 1.924                  | 2.176 | 905                    | 1.035 | 568                    | 661  | 5.873  | 6.606               |

<sup>13</sup> Auszahlung in Höhe von 837 T€ am 1. Februar 2011 – weitere Ansprüche aus dem LTI bestehen nicht (siehe hierzu auch vorstehend lit. ee).



gg) Ehemalige Vorstandsmitglieder und Hinterbliebene

Frühere Vorstandsmitglieder und ihre Hinterbliebenen erhielten Gesamtbezüge in Höhe von 2.274 T€ (Vorjahr: 2.274 T€). Für die Pensionsverpflichtungen gegenüber früheren Mitgliedern des Vorstands und ihren Hinterbliebenen sind insgesamt 23.600 T€ (Vorjahr: 22.373 T€) zurückgestellt.

d) Anpassung des Vergütungs- und Pensionssystems ab 2011

Der Aufsichtsrat hat in seinen Sitzungen am 10. Dezember 2010 und 7. Februar 2011 beschlossen, das vorstehend beschriebene Vergütungs- und Pensionssystem ab dem Geschäftsjahr 2011 fortzuentwickeln. Die Änderungen betreffen zum einen den Variablen Bonus 2010, der insbesondere um eine am Umsatz des Unternehmensbereichs Consumer orientierte Komponente („Sales-Komponente“) ergänzt und in der Laufzeit angepasst wird (siehe aa)). Zum anderen erhalten die Vorstandsmitglieder künftig eine langfristige, am Unternehmenswertwachstum ausgerichtete variable Vergütungskomponente (LTI), die jeweils für die Dauer der Bestellung gewährt wird (siehe bb)). Der bislang zugesagte MTI lief im Geschäftsjahr 2010 aus. Die Pensionszusagen werden künftig beitragsorientiert anstatt wie bisher als Leistungszusage ausgestaltet. Das gilt ab dem Geschäftsjahr 2011 jedenfalls für alle neu in den Vorstand eintretende Vorstandsmitglieder.

aa) Variabler Bonus ab 2011

Der variable Bonus ist künftig auch vom Umsatzwachstum des Unternehmensbereichs Consumer abhängig. Er enthält daher ab dem Geschäftsjahr 2011 eine Sales-Komponente und wie bisher eine EBIT-Komponente und eine Persönliche Komponente. Vorbehaltlich einer abweichenden Festlegung durch den Aufsichtsrat bemessen sich 50 % des Bonus nach der Persönlichen Komponente und je 25 % nach der Sales-Komponente und der EBIT-Komponente. Die Sales-Komponente und die Persönliche Komponente entfallen unterhalb einer Zielerreichung von 80 % (Knock-Out), die EBIT-Komponente unterhalb von 70 %. Für die Festlegung der Ziele und die Feststellung der Zielerreichung gelten die Regelungen des Variablen Bonus 2010 (siehe Ziffer c) bb)).

Von dem aus Persönlicher Komponente, EBIT-Komponente und Sales-Komponente ermittelten Bonusbetrag für das jeweilige Geschäftsjahr („Ausgangsgeschäftsjahr“) werden wie bisher 40 % nach Entlastung des Vorstandsmitglieds durch die folgende ordentliche Hauptversammlung ausgezahlt („Tantieme“).

Der verbleibende Betrag („Mehrjahres-Bonus“) richtet sich wie bislang nach der Unternehmenswertentwicklung während eines mehrjährigen Zeitraums. Wegen der Einführung des LTI wird der maßgebliche Zeitraum auf drei (zuvor: vier) Jahre festgelegt (gemeinsam mit dem Ausgangsgeschäftsjahr die „Bonusperiode“). Der Unternehmenswert des Mehrjahres-Bonus berechnet sich aus der Summe Umsatz und EBIT x EBIT-Faktor des Unternehmensbereichs Consumer des Beiersdorf-Konzerns gemäß dem Konzernabschluss, wobei der Aufsichtsrat den Unternehmenswert um Sondereinflüsse bereinigen kann. Der Aufsichtsrat bleibt berechtigt, die Höhe der Tantieme und des Mehrjahres-Bonus nach pflichtgemäßem Ermessen um bis zu 20 % zu erhöhen oder zu reduzieren sowie an Veränderungen der Inflationsrate anzupassen.

Bei vom Vorstandsmitglied unverschuldeter vorzeitiger Beendigung der Vorstandstätigkeit wird der Variable Bonus (ggf. zeiteilig) mit 80 % des Zielbonus für die Restlaufzeit des Vertrags, höchstens jedoch in Höhe von zwei Jahresvergütungen pauschaliert.

#### *bb) Langfristiger Bonus (Unternehmenswertbeteiligung) ab 2011*

Anstelle des ausgelaufenen MTI 2009/2010 erhalten die Vorstandsmitglieder ab dem Geschäftsjahr 2011 eine Beteiligung am Anstieg des Unternehmenswerts des Unternehmensbereichs Consumer der Beiersdorf AG (Virtual Investment Programme). Dazu wird jedem Vorstandsmitglied zu Beginn seiner Bestellungsperiode (bei laufenden Bestellungen zum 1. Januar 2011) ein fiktiver Anteil am Unternehmenswert zugeteilt (sog. „LTI-Ausgangsbetrag“). Nach Ablauf der jeweiligen Bestellungsperiode und einer Haltefrist von weiteren zwei Jahren (gemeinsam die „Bonusperiode“) wird dem Vorstandsmitglied der Betrag ausgezahlt, um den die Unternehmenswertbeteiligung gestiegen ist.

Die Wertsteigerung ist der Anstieg des Unternehmenswerts vom Beginn („Ausgangsunternehmenswert“) bis zum Ende der Bonusperiode („Schlußunternehmenswert“). Der Unternehmenswert berechnet sich aus der Summe Umsatz und EBIT x EBIT-Faktor des Unternehmensbereichs Consumer des Beiersdorf-Konzerns gemäß dem Konzernabschluss als gewichteter Durchschnitt von je drei Jahren, wobei der Aufsichtsrat den Unternehmenswert um Sondereinflüsse bereinigen kann.

Die so ermittelte prozentuale Unternehmenswertsteigerung entspricht im Grundsatz dem prozentualen Anteil, der dem Vorstandsmitglied von seiner Unternehmenswertbeteiligung ausgezahlt wird, sofern ihm die Hauptversammlung während und nach Ablauf der Bonusperiode Entlastung erteilt (oder zu erteilen) hat, und zwar zeitanteilig im Verhältnis der Bestellperiode zur Bonusperiode. Der Aufsichtsrat ist zu Anpassungen nach pflichtgemäßem Ermessen berechtigt, insbesondere indem er die Kennzahlen um Sondereffekte und die Inflation bereinigen oder die Unternehmenswertbeteiligung aus sachlichen Gründen um bis zu 20 % erhöhen oder reduzieren kann.

Der Höhe nach ist der LTI für jedes Vorstandsmitglied auf jährlich 10 % der Unternehmenswertbeteiligung begrenzt (Cap). Ist ein Vorstandsmitglied weniger als seine Bestellperiode aktiv tätig, soll der Aufsichtsrat den LTI zeitanteilig kürzen. Bei einem vorzeitigen Ausscheiden besteht kein Rechtsanspruch auf Zahlung des LTI (außer bei Tod, Berufsunfähigkeit oder Beendigung durch die Gesellschaft ohne wichtigen Grund oder durch das Vorstandsmitglied aus wichtigem Grund).

## **2. Vergütung des Aufsichtsrats für das Geschäftsjahr 2010**

Die Grundsätze der Vergütung des Aufsichtsrats wurden durch die Hauptversammlung in § 15 der Satzung festgelegt. Die Vergütung des Aufsichtsrats orientiert sich an der Verantwortung und dem Aufgabenbereich der einzelnen Aufsichtsratsmitglieder sowie an der wirtschaftlichen Situation der Gesellschaft. Neben der Erstattung ihrer Barauslagen erhalten die Mitglieder des Aufsichtsrats einen fixen und einen an der Dividende orientierten, variablen Vergütungsbestandteil.

Der feste Bestandteil je Aufsichtsratsmitglied beträgt 25.000 € für jedes volle Geschäftsjahr und der variable Bestandteil 1.200 € je Cent, um den die ausgeschüttete Dividende pro Aktie den Betrag von 15 Cent übersteigt. Sitzungsgelder werden nicht gezahlt. Der Vorsitzende des Aufsichtsrats und seine beiden Stellvertreter erhalten jeweils das Zweieinhalbfache bzw. das Eineinhalbfache der einfachen Aufsichtsratsvergütung. Mitglieder des Präsidial- sowie des Prüfungs- und Finanzausschusses werden für ihre Tätigkeit in diesen Ausschüssen gesondert vergütet. Wenn ein Mitglied des Aufsichtsrats zur gleichen Zeit mehrere Ämter innehat, für die eine erhöhte Vergütung gewährt wird, erhält es nur die Vergütung für das am höchsten vergütete Amt.

Der Aufsichtsrat prüft eine Anpassung der Aufsichtsratsvergütung und wird der ordentlichen Hauptversammlung am 21. April 2011 einen Vorschlag dazu machen.

Mitglieder des Aufsichtsrats erhielten von der Gesellschaft weder Kredite oder Vorschüsse, noch wurden zu ihren Gunsten Haftungsverhältnisse eingegangen. Auch haben Mitglieder des Aufsichtsrats keine Vergütungen oder Vorteile für persönlich erbrachte Leistungen wie Beratungs- oder Vermittlungsleistungen erhalten. Vorbehaltlich der Beschlussfassung der Hauptversammlung am 21. April 2011 über die für 2010 auszuschüttende Dividende<sup>14</sup> steht den Mitgliedern des Aufsichtsrats für ihre Tätigkeit im Geschäftsjahr 2010 die in der Tabelle dargestellte Vergütung<sup>15</sup> zu:

07 Gesamtvergütung des Aufsichtsrats für die Tätigkeit im Geschäftsjahr 2010 (in €)

|                                                      | Fix <sup>16</sup>     |         | Variabel              |         | Gesamt                  |           |
|------------------------------------------------------|-----------------------|---------|-----------------------|---------|-------------------------|-----------|
|                                                      | 2009                  | 2010    | 2009                  | 2010    | 2009                    | 2010      |
| Dr. Walter Diembeck                                  | 40.000                | 40.000  | 66.000                | 66.000  | 106.000                 | 106.000   |
| Prof. Dr. Eva Eberhartinger                          | 26.959                | 40.000  | 44.482                | 66.000  | 71.441                  | 106.000   |
| Elke Gabriel                                         | 16.849                | 25.000  | 44.482                | 66.000  | 61.331                  | 91.000    |
| Michael Herz                                         | 50.000                | 50.000  | 66.000                | 66.000  | 116.000                 | 116.000   |
| Thomas Holzgreve<br>(Stellvertretender Vorsitzender) | 25.274                | 37.500  | 66.723                | 99.000  | 91.997                  | 136.500   |
| Thorsten Irtz<br>(Stellvertretender Vorsitzender)    | 37.500                | 37.500  | 99.000                | 99.000  | 136.500                 | 136.500   |
| Dr. Rolf Kunisch                                     | 25.000                | 25.000  | 66.000                | 66.000  | 91.000                  | 91.000    |
| Tomas Nieber                                         | 25.000                | 25.000  | 66.000                | 66.000  | 91.000                  | 91.000    |
| Reinhard Pöllath<br>(Vorsitzender)                   | 62.500                | 62.500  | 165.000               | 165.000 | 227.500                 | 227.500   |
| Prof. Manuela Rousseau                               | 25.000                | 25.000  | 66.000                | 66.000  | 91.000                  | 91.000    |
| Volker Schopnie                                      | 26.959                | 40.000  | 44.482                | 66.000  | 71.441                  | 106.000   |
| Thomas Siemsen                                       | 16.849                | 25.000  | 44.482                | 66.000  | 61.331                  | 91.000    |
| Gesamt                                               | 428.027 <sup>17</sup> | 432.500 | 957.994 <sup>17</sup> | 957.000 | 1.386.021 <sup>17</sup> | 1.389.500 |

<sup>14</sup> Grundlage: der der Hauptversammlung vorliegende Dividendenvorschlag von 70 Cent je Aktie.  
<sup>15</sup> Ausweis ohne Mehrwertsteuer.  
<sup>16</sup> Fixer Vergütungsbestandteil und Vergütung für die Mitgliedschaft in Aufsichtsratsausschüssen.  
<sup>17</sup> In der Gesamtsumme der Aufsichtsratsvergütung 2009 ist auch die Vergütung der im Jahr 2009 ausgeschiedenen Herren Ammer (Fix: 13.151 €, Variabel: 21.698 €, Gesamt: 34.849 €), Ganschow (Fix: 8.219 €, Variabel: 21.699 €, Gesamt: 29.918 €), Mahlert (Fix: 12.329 €, Variabel: 32.548 €, Gesamt: 44.877 €), Pfänder (Fix: 8.219 €, Variabel: 21.699 €, Gesamt: 29.918 €) und Plechinger (Fix: 8.219 €, Variabel: 21.699 €, Gesamt: 29.918 €) enthalten.

## IV. Meldepflichtige Wertpapiergeschäfte und Aktienbesitz von Vorstand und Aufsichtsrat

### 1. Meldepflichtige Wertpapiergeschäfte nach § 15a WpHG

Die Mitglieder des Vorstands und des Aufsichtsrats der Gesellschaft sind nach § 15a WpHG verpflichtet, den Erwerb bzw. die Veräußerung von Aktien der Beiersdorf AG (*Directors' Dealings*) unverzüglich der Gesellschaft mitzuteilen. Dies gilt auch für Personen, die mit einer solchen Person in einer engen Beziehung stehen. Der Beiersdorf AG sind im abgelaufenen Geschäftsjahr keine Mitteilungen gemäß § 15a WpHG zugegangen. Am 12. Januar 2011 erwarb die Herrn Prof. Dr. Pöllath nahestehende JJMR GbR 12.100 Aktien der Gesellschaft (Preis pro Stück: 41,3016 €, Gesamtvolumen: 499.749,36 €) und am 13. Januar 2011 weitere 12.050 Aktien (Preis pro Stück: 41,489 €, Gesamtvolumen: 499.942,45 €).

### 2. Aktienbesitz von Vorstand und Aufsichtsrat nach Ziffer 6.6 des Deutschen Corporate Governance Kodex

Nach Ziffer 6.6 des Deutschen Corporate Governance Kodex sollen Angaben zum direkten und indirekten Aktienbesitz der Mitglieder des Vorstands und des Aufsichtsrats der Beiersdorf AG gemacht werden. Die Mitglieder des Vorstands hielten zum 31. Dezember 2010 keine Aktien der Gesellschaft. Herr Michael Herz, Mitglied des Aufsichtsrats der Beiersdorf AG, hat der Gesellschaft mitgeteilt, dass ihm 50,48 % der Stimmrechte an der Gesellschaft zustehen; unter Berücksichtigung der von der Gesellschaft gehaltenen 9,99 % eigenen Aktien, die gemäß § 71b AktG weder stimm- noch dividendenberechtigt sind, beläuft sich sein Anteilsbesitz auf 60,47 % am Grundkapital der Gesellschaft. Die übrigen Mitglieder des Aufsichtsrats hielten zum 31. Dezember 2010 keine Aktien der Gesellschaft.

## V. Unternehmensführungspraktiken

Zur Umsetzung der Strategie verfolgt die Beiersdorf Aktiengesellschaft folgende wesentliche Unternehmensführungspraktiken:

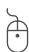

Beiersdorf.de/  
Compliance\_  
Leitlinien

### Compliance

Die Einhaltung der Gesetze und internen Richtlinien (*Compliance*) ist für Beiersdorf eine unverzichtbare Grundlage erfolgreichen und nachhaltigen Wirtschaftens. Um dieser Unverzichtbarkeit Ausdruck zu verleihen, hat der Vorstand Compliance-Leitlinien erlassen, die unter [www.Beiersdorf.de/Compliance\\_Leitlinien](http://www.Beiersdorf.de/Compliance_Leitlinien) zu finden sind. Daneben wurde in den letzten Jahren unter anderem ein umfangreiches Kartellrechts-Compliance-Programm aufgebaut. Die betroffenen Mitarbeiter werden intensiv geschult und zahlreiche interne Richtlinien zu kartellrechtskonformen Verhalten erlassen. Ein weiterer inhaltlicher Schwerpunkt ist die Korruptionsprävention.

Zur Steuerung des Compliance Management-Systems besteht eine Funktion Compliance Management. Diese Funktion soll die Führungskräfte dabei unterstützen, Compliance sicherzustellen, geeignete interne Richtlinien zu erlassen und durchzusetzen sowie Mitarbeiter zu schulen.

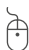

Beiersdorf.de/  
Code\_of Conduct

### Code of Conduct

Der Erfolg von Beiersdorf basiert auf dem Vertrauen von Konsumenten, Kunden, Investoren und Mitarbeitern. Deswegen werden hohe Maßstäbe in Sachen Verantwortung gesetzt – sowohl an das Unternehmen als auch an jeden Einzelnen. Der Verhaltenskodex von Beiersdorf (*Code of Conduct*) hält diese Maßstäbe verbindlich fest und ist ein Leitfaden, den jeder überall auf der Welt anwenden kann. Er soll den Mitarbeitern helfen, die zentralen Unternehmensgrundsätze im Arbeitsalltag umzusetzen, und zeigen, wie sie mit möglichen Fragen oder schwierigen Situationen umgehen, die das Verhalten im geschäftlichen Umfeld oder den Umgang miteinander betreffen.

Der *Code of Conduct* steht unter [www.Beiersdorf.de/Code\\_of\\_Conduct](http://www.Beiersdorf.de/Code_of_Conduct) auf der Internetseite zur Verfügung.

## Nachhaltigkeit

Nachhaltigkeit ist für Beiersdorf die Verknüpfung von ökonomischem Erfolg mit ökologisch verträglichem und sozial ausgewogenem Handeln. Diese drei Bereiche stehen gleichberechtigt nebeneinander und sind integraler Bestandteil der Unternehmensstrategie. Daher ist dieses Thema beim Vorstandsvorsitzenden verankert. Die neu geschaffene Funktion Corporate Sustainability steuert unternehmensweit alle Aktivitäten in den Bereichen nachhaltiges Wirtschaften, Umwelt- und Arbeitsschutz sowie das gesellschaftliche Engagement. Die Nachhaltigkeitsleitlinien nehmen Stellung zu den Werten sowie zu der ökonomischen, ökologischen und sozialen Verantwortung. Nähere Informationen hierzu finden sich im Nachhaltigkeitsbericht und unter [www.Nachhaltigkeit.Beiersdorf.de/Nachhaltigkeitsleitlinien](http://www.Nachhaltigkeit.Beiersdorf.de/Nachhaltigkeitsleitlinien).

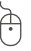

Nachhaltigkeit.  
Beiersdorf.de/  
Nachhaltigkeits-  
leitlinien

## Personalpolitik

Bei der Auswahl der Mitarbeiter wird Wert auf Führungsstärke und Teamgeist gelegt. „Herausragende Führungskompetenz in effizienten Strukturen“ ist einer der Eckpfeiler der Consumer Business Strategie. Diese steht für Leistung, Veränderung und Innovation auf allen Ebenen des Unternehmens. Im Rahmen der Personalaktivitäten liegt der Fokus darauf, unternehmensweit Talente zu identifizieren, Führungskompetenzen zu fördern und zu entwickeln. In die Qualifikation und die Weiterentwicklung der Mitarbeiter wird gezielt investiert. Die Personalpolitik von Beiersdorf wird von fünf Bereichen geprägt:

- **Personalentwicklung:** Wir unterstützen die individuelle Karriereplanung unserer Mitarbeiter – sei es durch die stetige Weiterentwicklung ihrer Fähigkeiten oder durch angemessene Würdigung ihrer besonderen Leistungen.
- **Organisation:** Wir setzen auf eine schlanke und transparente Organisationsstruktur.
- **Entgelt:** Unsere Entgeltpolitik ist transparent. Das Gehalt bemisst sich nach Funktion, Erfahrung und Leistung des Mitarbeiters und orientiert sich am Arbeitsmarkt.
- **Soziale Einbindung:** Wir fördern einen partnerschaftlichen Umgang. Dies gilt für unsere Mitarbeiter untereinander genauso wie die Kontakte des Unternehmens mit gesellschaftlichen Gruppen.
- **Kommunikation und Führung:** Wir pflegen einen offenen und konstruktiven Dialog. Für jeden Mitarbeiter werden unter dessen Beteiligung verbindliche Leistungsziele vereinbart. Die Führungskräfte stellen eine transparente und faire Bewertung der Leistungsbeiträge sicher.

Die Personalpolitik ist ausdrücklich in die Gesamtunternehmenspolitik integriert, da sie eng verknüpft ist mit dem unternehmerischen Erfolg. Die Personalpolitik im Wortlaut ist zu finden unter [www.Nachhaltigkeit.Beiersdorf.de/Personalpolitik](http://www.Nachhaltigkeit.Beiersdorf.de/Personalpolitik).

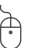

Nachhaltigkeit.  
Beiersdorf.de/  
Personalpolitik

Fünf Leitlinien geben den Führungskräften eine Orientierung. Sie sind eine Herausforderung und zugleich eine Verpflichtung für ihre wichtigste tägliche Aufgabe: als Führungskraft mit Beispiel voranzugehen. Sie sind zu finden unter [www.Nachhaltigkeit.Beiersdorf.de/Fuehrungsleitlinien](http://www.Nachhaltigkeit.Beiersdorf.de/Fuehrungsleitlinien).

Nachhaltigkeit.  
Beiersdorf.de/  
Fuehrungs-  
leitlinien

## Risikomanagement

Das Risikomanagement ist ein integraler Bestandteil der zentralen und dezentralen Planungs-, Steuerungs- und Kontrollprozesse und folgt konzerneinheitlichen Standards. Eine offene Kommunikation, die periodisch vorgenommene Risikoinventur sowie das Planungs- und Steuerungssystem schaffen Transparenz über unsere Risikosituation.

Nähere Informationen hierzu finden Sie im Risikobericht und in der Onlineversion unter [www.Geschaeftsbericht.Beiersdorf.de/Risikobericht](http://www.Geschaeftsbericht.Beiersdorf.de/Risikobericht).

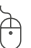

Geschaeftsbericht.  
Beiersdorf.de/  
Risikobericht



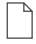

siehe  
Seite 31 ff.

## VI. Weitere Informationen zur Corporate Governance bei Beiersdorf

Ausführliche Informationen zur Tätigkeit des Aufsichtsrats und seiner Ausschüsse sowie zur Zusammenarbeit von Aufsichtsrat und Vorstand finden Sie auch im Bericht des Aufsichtsrats auf den Seiten 31 ff.

Der Beiersdorf Konzernabschluss und die Zwischenberichte werden nach den Grundsätzen der *International Financial Reporting Standards* (IFRS), der Jahresabschluss der Beiersdorf AG wird nach den Vorschriften des Handelsgesetzbuchs erstellt. Die Hauptversammlung hat am 29. April 2010 die Ernst & Young GmbH Wirtschaftsprüfungsgesellschaft, Stuttgart, zum Abschlussprüfer für die Beiersdorf AG und den Beiersdorf Konzern für das Geschäftsjahr 2010 gewählt.

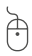

Beiersdorf.de

Transparenz und der Anspruch, unsere Aktionäre und die Öffentlichkeit schnell, umfassend und gleichzeitig zu informieren, haben für uns hohe Priorität. Daher werden aktuelle Entwicklungen und wichtige Unternehmensinformationen zeitnah auf unserer Internetseite ([www.Beiersdorf.de](http://www.Beiersdorf.de)) zur Verfügung gestellt. Neben detaillierten Erläuterungen zur Corporate Governance bei Beiersdorf werden dort weitergehende Informationen zu Vorstand, Aufsichtsrat und Hauptversammlung, die Berichte des Unternehmens (Jahresabschlüsse, Lageberichte und Zwischenberichte), ein Finanzkalender zu allen wesentlichen Terminen und Veröffentlichungen, Ad-hoc-Meldungen und meldepflichtige Wertpapiergeschäfte (*Directors' Dealings*) veröffentlicht.

Hamburg, 24. Februar 2011

Beiersdorf Aktiengesellschaft

Der Aufsichtsrat

Der Vorstand

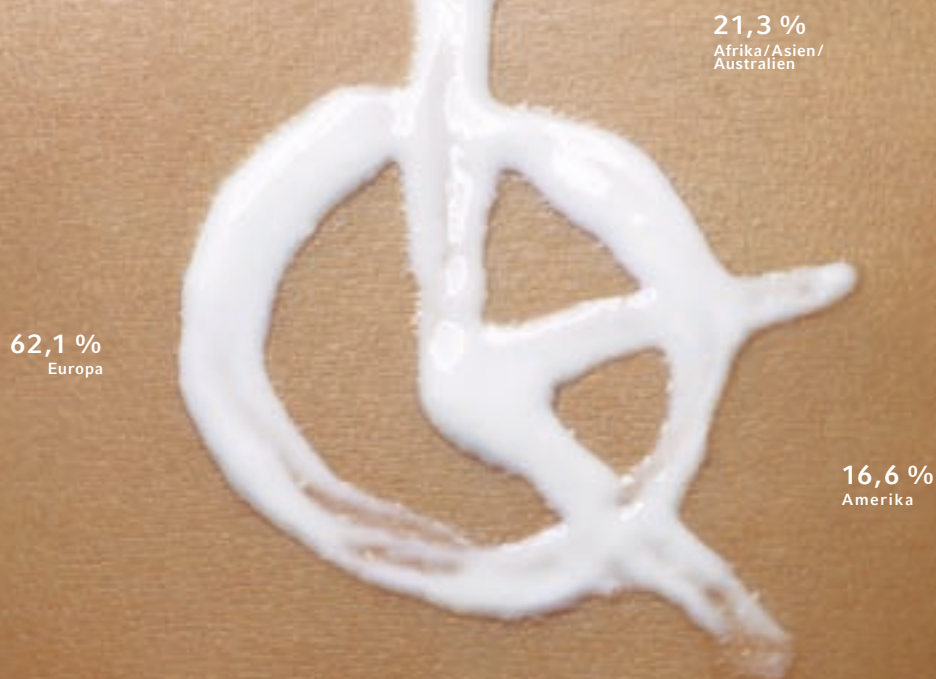

---

(Umsatz nach Beiersdorf Berichtsregionen)  
– Konzern –

## 03 Konzernlagebericht

Beiersdorf Geschäftsbericht 2010

Im Konzernlagebericht sind Geschäftsverlauf und die Lage des Konzerns so darzustellen, dass ein den tatsächlichen Verhältnissen entsprechendes Bild vermittelt wird. Dabei ist auch auf die Risiken der künftigen Entwicklung einzugehen.

### Inhalt

|       |                                                                       |
|-------|-----------------------------------------------------------------------|
| S. 51 | Die Marken der Beiersdorf AG                                          |
| S. 52 | Geschäft und Strategie                                                |
| S. 56 | Wirtschaftliches Umfeld                                               |
| S. 58 | Ertrags-, Vermögens- und Finanzlage                                   |
| S. 70 | Forschung und Entwicklung                                             |
| S. 74 | Nachhaltigkeit                                                        |
| S. 77 | Mitarbeiterinnen und Mitarbeiter                                      |
| S. 81 | Risikobericht                                                         |
| S. 84 | Bericht des Vorstands über die Beziehungen zu verbundenen Unternehmen |
| S. 84 | Nachtragsbericht                                                      |
| S. 84 | Übernahmerechtliche Angaben                                           |
| S. 86 | Ausweisänderung der Umsatzerlöse und Marketingkosten ab 2011          |
| S. 87 | Prognosebericht                                                       |

# Die Marken der Beiersdorf AG

08 Unser Markenportfolio

|                                                                                                |                                                                                                 |
|------------------------------------------------------------------------------------------------|-------------------------------------------------------------------------------------------------|
| <div><div>BDF ●●●●</div><div>Beiersdorf</div></div>                                            |                                                                                                 |
| NIVEA                                                                                          | Eucerin                                                                                         |
| <div></div>   | <div></div>   |
| La Prairie                                                                                     | SBT                                                                                             |
| <div></div> | <div></div> |
| SLEK                                                                                           | Florena                                                                                         |
| <div></div> | <div></div> |
| Labello                                                                                        | 8x4                                                                                             |
| <div></div> | <div></div> |
| Hansaplast                                                                                     | tesa                                                                                            |
| <div></div> | <div></div> |

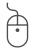

Beiersdorf.de

## Geschäft und Strategie

Beiersdorf ist ein global agierendes Unternehmen mit mehr als 150 Tochtergesellschaften weltweit und über 19.000 Beschäftigten. Das Geschäft betreiben zwei getrennte Unternehmensbereiche in ihren jeweiligen Branchen: Den Schwerpunkt bildet der Unternehmensbereich Consumer, der sich mit seinen starken Marken auf die internationalen Märkte der Haut- und Körperpflege konzentriert. Der Unternehmensbereich tesa ist mit innovativen Angeboten einer der weltweit führenden Hersteller von selbstklebenden Produkten und Lösungen für Industrie, Gewerbe und Konsumenten.

### Unternehmensbereich Consumer: Mit weiterentwickelter Strategie zum Erfolg

Seit mehr als 125 Jahren setzt Beiersdorf Maßstäbe in der Haut- und Körperpflege. Eine hervorragende technische Grundlage sowie Forschungs- und Entwicklungskompetenz auf hohem Niveau sorgen dafür, dass Beiersdorf mit innovativen Produkten höchste Ansprüche an Qualität erfüllt. Mit der Marke NIVEA, die 2011 ihr 100-jähriges Bestehen feiert, verfügen wir im Massenmarkt über die größte Haut- und Körperpflegemarke der Welt. Eucerin im Pharmaziebereich ist global erfolgreich und gewinnt jedes Jahr Marktanteile hinzu. Mit der Marke La Prairie im Luxussegment erfüllen wir auf der ganzen Welt höchste Ansprüche an Anti-Aging-Pflege. Mit diesen globalen Marken ist Beiersdorf in allen relevanten Marktsegmenten der Haut- und Körperpflege vertreten. Hinzu kommen weitere regional starke Marken wie Labello, 8x4, Hansaplast oder SLEK.

Unter der Strategie „Passion for Success“ haben wir in den vergangenen Jahren unser breites Produktangebot weiterentwickelt und in vielen Ländern und Segmenten Spitzenstellungen erreichen können. Indem wir die Wünsche und Bedürfnisse unserer Verbraucher auf der ganzen Welt in den Mittelpunkt unseres Handelns gestellt haben, konnten wir das hohe Vertrauen und die Sympathie für unsere Marken weiter stärken. Doch mit der Krise der Weltwirtschaft haben sich die Marktbedingungen grundlegend gewandelt. Sowohl das Verhalten der Verbraucher hat sich verändert als auch unsere Zusammenarbeit mit den Kunden. Als Reaktion darauf konzentrieren wir uns auf unsere Stärken und Kernkompetenzen. Durch eine größere Nähe zu unseren Kunden und Konsumenten sowie die Konzentration auf Haut- und Körperpflege wollen wir in Zukunft wieder schneller wachsen als der Markt und unsere Ertragskraft wieder stärken. Deshalb hat der Vorstand auf diese Entwicklung schnell und konsequent reagiert und die Consumer Business Strategie entsprechend weiterentwickelt.

#### Focus on Skin Care. Closer to Markets.

Im März 2010 wurde die weiterentwickelte Strategie „Focus on Skin Care. Closer to Markets.“ veröffentlicht. Damit konzentrieren wir das Unternehmen klar auf die Produktsegmente, in denen wir unbestrittene Experten sind. Beiersdorf ist das Synonym für Hautpflege, sie ist seit 1882 unser Kerngeschäft. Darauf basiert der große internationale Markenwert von NIVEA. Außerdem steht dieses Segment nach Berechnung einschlägiger Studien für rund 45 % des Wachstums der Märkte bis 2015. Mit unseren starken Marken haben wir exzellente Wachstumschancen, wenn wir die Wünsche und Bedürfnisse der Verbraucher noch deutlicher als bisher in den Vordergrund rücken. Daher ist auch der regionale Fokus ein wichtiger Teil unserer Strategie.



### **Vorstandsstruktur und Organisation**

Im Rahmen der Strategie wurden die Verantwortlichkeiten im Vorstand neu definiert und eine neue Organisation realisiert. Es wurden klar getrennte, funktionale und regionale Zuständigkeiten geschaffen. So wurden Finanzen und Personal zu einem Bereich zusammengefasst und alle produktverwandten Themen – von der kreativen Idee über die technische Entwicklung bis hin zur Auslieferung – in der Funktion Brands & Supply Chain gebündelt. Dadurch können alle Prozesse von der Entwicklung eines Produkts bis zu seiner Produktion, Vermarktung und Auslieferung erfolgreich und noch effizienter gesteuert werden. Außerdem konzentrieren wir die Regionen bei jeweils einem Vorstand: diese Vorstandsregionen sind Europa und Nordamerika, Asien und Australien sowie Emerging Markets. Mit dem neuen Ressort Emerging Markets unterstreichen wir die Bedeutung der weltweiten Wachstumsmärkte und deren Entwicklung für den Konzern.

### **Straffung des Produktportfolios und Investitionen in die Kernmarken**

Im Rahmen der weiterentwickelten Strategie beschlossen Vorstand und Aufsichtsrat zum Ende des Geschäftsjahres 2010 ein Gesamtpaket, das substanzielle Investitionen in die Kernmarken vorsieht. Zusätzlich straffen und harmonisieren wir unser globales Produktportfolio, steigen aus dem Geschäft der dekorativen Kosmetik in Deutschland und einigen anderen Ländern aus und trennen uns von weniger bedeutenden, regionalen Marken wie Juvena und Marlies Möller. Gleichzeitig werden wir in den kommenden Jahren mit unseren Marken in der Haut- und Körperpflege viele neue, für die Verbraucher innovative Produkte auf den Markt bringen.

Der Vorstand von Beiersdorf ist sicher, mit dieser Neuausrichtung des Unternehmensbereichs Consumer den Anforderungen der Märkte weltweit künftig schnell und effizient gerecht werden zu können. Nach einer Übergangsphase in den Jahren 2010 und 2011 wollen wir wieder schneller wachsen als der Markt. 2011 werden wir dafür auch die Investitionen in das Marketing signifikant erhöhen, um eine neue NIVEA-Plattform einzuführen und das Wachstum in den Emerging Markets zu forcieren.

Mit der weiterentwickelten Strategie und dem neuen Geschäftsmodell konzentrieren wir uns künftig noch stärker auf die lokalen Ansprüche unserer Kunden und Verbraucher sowie auf unsere Kernkompetenz. Die Veränderungen werden unsere Position als eines der führenden globalen Kosmetikunternehmen sichern und frühere, überdurchschnittliche Wachstumsraten ermöglichen. Die Entscheidungen des Jahres 2010 entsprechen im Übrigen der ältesten Erfolgsstrategie des Unternehmens: Beiersdorf war schon immer ein von Veränderungen geprägtes Unternehmen, nur so konnte es sich in seiner mehr als 125-jährigen Geschichte als erstklassiger Anbieter im Bereich Hautpflege positionieren.

## Unternehmensbereich tesa: Innovative Produktlösungen

Der Unternehmensbereich tesa ist in mehr als 100 Ländern aktiv und als internationale Nummer zwei einer der weltweit führenden Hersteller von selbstklebenden Systemlösungen und Produkten für Industrie, Gewerbe und Konsumenten. Zuverlässige Qualität, hohe Innovationsfähigkeit und die Nutzung überlegener Technologien sind Kernelemente unserer Markenphilosophie und Strategie. Im Vordergrund stehen für uns die Kunden, für die tesa effektive Problemlösungen entwickelt.

Im Industriesegment, das etwa drei Viertel des Umsatzes ausmacht, bietet tesa vor allem Systemlösungen für die Industriebranchen Elektronik, Druck, Papier, Verpackung und Automobil an. Strategisch liegt der Fokus dabei insbesondere auf dem Auf- und Ausbau ertragreicher Geschäftsfelder in technologisch anspruchsvollen Anwendungsbereichen.

Darüber hinaus wollen wir uns mit unserem neuen Geschäftsfeld Pharma in einem weiteren wachstumsstarken Segment etablieren. In diesem Bereich entwickeln und produzieren wir innovative Darreichungsformen von Medikamenten für die Pharmaindustrie. Einen Schwerpunkt bilden so genannte transdermale therapeutische Systeme, arzneimittelhaltige Pflaster für die Pharmaindustrie, sowie sogenannte orale Filme – arzneimittelhaltige Folien, die sich ohne die Zugabe von Flüssigkeit im Mund auflösen.

Im industriellen Handelsgeschäft versorgen wir den technischen Handel mit zeitgemäßen Produktsortimenten für professionelle Handwerker und gewerbliche Kunden.

Knapp ein Viertel des tesa-Umsatzes entfällt auf innovative Produktlösungen, die für den täglichen Gebrauch in Büro, Haushalt und Garten bestimmt sind. Unter der Dachmarke tesa finden Endverbraucher in Europa und Lateinamerika ein breites Sortiment, das neben Arbeitshilfen für den Einsatz im Büro, wie den Klassiker tesaFilm, auch individuelle Lösungen für die Anwendungen Wärmeisolation, Malen und Abdecken, Reparieren, Verpacken sowie temporäres und dauerhaftes Befestigen umfasst. Außerdem bietet tesa Produkte für den Insektenschutz im Haushalt an.

Das fundierte Wissen über Produktionsprozesse, Marktanforderungen und Industrietrends versetzt uns in die Lage, überlegene, marktgerechte Produkte zu erarbeiten. Die Qualifikation unserer Mitarbeiterinnen und Mitarbeiter und die kontinuierlich verbesserten Geschäftsprozesse machen es möglich, gefundene Lösungen schnell und effizient umzusetzen. Zuverlässige Qualität, hohe Innovationsleistung und die Nutzung zukunftsweisender Technologien sind Kernelemente unserer Markenphilosophie und unseres Erfolges. Bei der Steuerung der internationalen Geschäftsaktivitäten konzentriert sich tesa auf folgende Faktoren:

- den Ausbau des Industriegeschäfts mit dem Ziel, unseren Kunden homogene Lösungsansätze in gleichbleibend hoher Qualität zu bieten.
- den Ausbau des Endverbrauchergeschäfts mit besonderem Fokus auf Europa, speziell Osteuropa, um unseren Handelspartnern marktgerechte Sortimente liefern zu können.
- die Absicherung weltweit einheitlicher Qualitätsstandards bei gleichzeitiger Anwendung umweltfreundlicher Technologien.

## Leitung und Kontrolle

Der Vorstand leitet das Unternehmen und ist der Steigerung des nachhaltigen Unternehmenswerts verpflichtet. Es gibt die beiden funktionalen Vorstandsressorts Finance & Human Resources und Brands & Supply Chain sowie die drei regionalen Vorstandsressorts: Europa und Nordamerika, Asien und Australien sowie Emerging Markets. Insbesondere durch die regionale Verantwortlichkeit ist der Vorstand eng mit dem operativen Geschäft verbunden. Der Vorstandsvorsitzende ist übergreifend für die Unternehmensentwicklung, die Unternehmenskommunikation, die Interne Revision und den Bereich Nachhaltigkeit verantwortlich.

Der Unternehmensbereich tesa wird als unabhängiger Teilkonzern geführt.

Über die Vergütung von Vorstand und Aufsichtsrat sowie Anreiz- und Bonussysteme berichten wir im Kapitel „Corporate Governance“ im Vergütungsbericht, der Bestandteil des Konzernlageberichts und des Konzernabschlusses ist. Die Erklärung zur Unternehmensführung nach § 289a HGB ist auf der Internetseite der Gesellschaft unter [www.Beiersdorf.de/Erklaerung\\_Unternehmensfuehrung](http://www.Beiersdorf.de/Erklaerung_Unternehmensfuehrung) öffentlich zugänglich gemacht. Weitere Informationen zu Leitung und Kontrolle, der allgemeinen Führungsstruktur sowie zur Entsprechenserklärung gemäß § 161 AktG sind ebenfalls im Corporate Governance-Bericht aufgeführt.

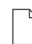

siehe  
Seite 65 ff.

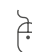

**Beiersdorf.de/**  
Erklaerung\_Unter-  
nehmensfuehrung

## Wertmanagement und Steuerungssystem

Ziel unseres unternehmerischen Handelns ist es, unsere Marktanteile im Sinne eines qualitativen Wachstums nachhaltig zu steigern und gleichzeitig unsere Ertragsbasis auszubauen. Daraus leiten sich unsere langfristigen Hauptsteuerungsgrößen ab. Neben dem Umsatzwachstum und der Erhöhung der Marktanteile wollen wir die Ertragskraft des Konzerns steigern. Als Messgröße dient uns dabei das betriebliche Ergebnis (EBIT) in Verbindung mit der EBIT-Umsatzrendite (Relation von EBIT zu Umsatz). Durch aktives Kostenmanagement und hohe Effizienz beim Einsatz der Ressourcen wollen wir international wettbewerbsfähige Renditen erwirtschaften. Zusätzlich wollen wir durch die kontinuierliche Optimierung unseres operativen Netto-Vermögens die Kapitalrendite (Relation von EBIT zu operativem Netto-Vermögen) steigern.

Um unsere strategischen Ziele zu erreichen, haben wir ein effizientes Steuerungssystem eingerichtet. Die Unternehmensführung leitet die Vorgaben für die Unternehmensplanung der einzelnen Einheiten im Konzern aus diesen strategischen Zielen für die geschäftliche Entwicklung des kommenden Jahres ab. Diese Planung umfasst sämtliche Bereiche und alle Tochtergesellschaften. Die Planung des Konzerns wird in der Regel im Herbst von Vorstand und Aufsichtsrat verabschiedet. Im laufenden Geschäftsjahr erfolgt ein monatlicher Abgleich der aktuellen Entwicklung der Hauptsteuerungsgrößen mit den erwarteten Werten und der aktuellen Prognose für das Gesamtjahr. Daraus abgeleitet erfolgt eine zielgerichtete Steuerung des Geschäfts.

Der Unternehmensbereich tesa bildet im Konzern eine eigenständige, unabhängige Einheit. Er wird ebenfalls auf Basis der Kennzahlen Umsatzwachstum und EBIT bzw. EBIT-Umsatzrendite sowie der Kapitalrendite gesteuert.

## Wirtschaftliches Umfeld

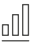

siehe  
Grafik 09  
Grafik 10  
Grafik 11

### Allgemeine wirtschaftliche Lage

Die Weltwirtschaft hat die Auswirkungen der Wirtschafts- und Finanzkrise weitgehend überstanden und einen Erholungskurs eingeschlagen. Im Vergleich mit der wirtschaftlichen Entwicklung nach früheren konjunkturellen Einbrüchen war das Wirtschaftswachstum in den Industrieländern allerdings unterdurchschnittlich; lediglich Asien erzielte eine überdurchschnittliche Wachstumsdynamik.

Im Euroraum ist die Staatsschuldenkrise in einigen Ländern eskaliert. Es wurden Rettungsprogramme der Euro-Staatengemeinschaft aufgelegt, um zunächst Griechenland und später Irland finanziell zu unterstützen. Im Gegenzug mussten die Regierungen harte Sparmaßnahmen und strukturelle Reformen auf den Weg bringen. Dies wirkte sich negativ auf die Inlandsnachfrage aus. Die von der Schuldenkrise am stärksten betroffenen Länder befanden sich weiterhin in einer Rezession.

Die deutsche Wirtschaft konnte sich hingegen überraschend kräftig erholen und deutlich stärker wachsen als die übrige Euro-Wirtschaft. In Deutschland gab es keine Immobilienkrise, die Exportwirtschaft ist sehr gut aufgestellt. Das günstige Zinsumfeld zusammen mit einer positiven Geschäftseinschätzung stimuliert die Investitionen. Die wirtschaftliche Erholung wird auch auf dem Arbeitsmarkt spürbar, eine moderate Belebung des privaten Verbrauchs wird erwartet.

In den USA bremste insbesondere die hohe Arbeitslosigkeit die wirtschaftliche Aufwärtsbewegung. Zwar lag die Wachstumsrate für das Bruttoinlandsprodukt in 2010 nah an den Raten der letzten Jahre, aber unterhalb der möglichen Wachstumsraten. Die US-amerikanische Zentralbank unterstützte die Konjunktur daher weiterhin mit unkonventionellen Liquiditätserhöhenden Maßnahmen, wie dem Kauf von Staatsanleihen.

Die Wachstumsdynamik der chinesischen Wirtschaft hat nach dem kräftigen Wachstum am Anfang des vergangenen Jahres im weiteren Jahresverlauf etwas an Schwung verloren. Dies war eine Folge der Maßnahmen der chinesischen Regierung, um eine Überhitzung zu vermeiden und die Inflationsgefahr zu verringern. Viele der anderen asiatischen Volkswirtschaften konnten an der positiven wirtschaftlichen Entwicklung in China partizipieren und zur Wachstumsdynamik zurückfinden.

09 **Bruttoinlandsprodukt 2010 (in %)**  
Veränderung zum Vorjahr

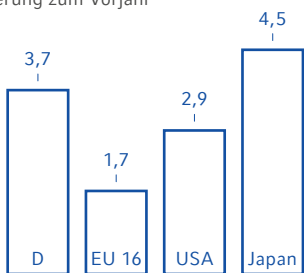

10 **Privater Konsum (in %)**  
Veränderung zum Vorjahr

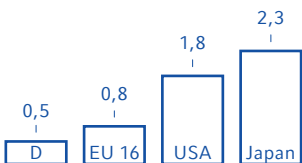

Absatzmarktentwicklung

Der Kosmetikmarkt zeigte 2010 weltweit eine deutliche Erholung mit Wachstumsraten auf dem Niveau vor dem Krisenjahr 2009. Wachstumsmotoren sind nach wie vor die Regionen Asien und Lateinamerika. Auch die Mehrzahl der Länder in Osteuropa verzeichnet deutliche Zuwächse. Im Vergleich hierzu blieb das Wachstum in den saturierten Märkten Europas und in Nordamerika verhalten, war in beiden Regionen aber deutlich positiv.

Die bereits Ende 2009 einsetzende Wiederbelebung der Klebebandmärkte hat sich in 2010 fortgesetzt. Die industriellen Absatzmärkte konnten in allen Regionen stark wachsen, erreichten aber noch nicht vollständig das Niveau von 2008. Wesentlicher Treiber war das Geschäft mit der Automobilindustrie. Einen weiteren wesentlichen Beitrag leistete der auf Asien fokussierte Elektronikmarkt.

Beschaffungsmarkt

Die Entwicklung in den Beschaffungsmärkten war im Jahr 2010 geprägt von Engpässen, die sich aus der kontinuierlich anziehenden gesamtwirtschaftlichen Entwicklung und dadurch gestiegener Rohstoffnachfrage einerseits, und knappem Angebot andererseits ergaben. Die relevanten Rohmaterialindizes sind im Jahresverlauf kontinuierlich gestiegen. In Erwartung erhöhter Preisforderungen durch Rohstofflieferanten wurde in 2010 besonderer Wert auf den Aufbau von Wettbewerb zwischen konkurrierenden Rohstoffanbietern gelegt. In Single Source Situationen wurde gemeinsam mit den Bereichen Forschung & Entwicklung und Qualitätsmanagement durch konsequentes Beziehungsmanagement zu strategischen Schlüssellieferanten die Exposition von Preis- und Verfügbarkeitsrisiken deutlich verringert. Die daraus resultierenden Beschaffungsstrategien trugen maßgeblich zu einer Stabilisierung der Materialkosten und Vermeidung von Lieferausfällen bei.

Gesamtaussage zu den Rahmenbedingungen

Durch die Erholung insbesondere der industriellen Märkte konnte der Unternehmensbereich tesa seine Umsätze deutlich steigern. Bei den Kosmetikmärkten wirkte sich aufgrund des hohen Umsatzanteils vor allem das verhaltene Wachstum des saturierten Markts Europas negativ auf die Entwicklung unseres Consumer-Umsatzes aus. In den stark wachsenden Märkten haben wir überwiegend gute Umsatzentwicklungen gezeigt.

11 Inflationsrate 2010 (in %)  
Veränderung zum Vorjahr

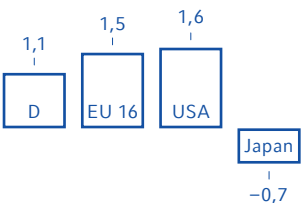



# Ertrags-, Vermögens- und Finanzlage

## Ertragslage Konzern

12 Gewinn- und Verlustrechnung (in Mio. €)  
01.01. – 31.12.

|                                                             | 2009   | 2010   | Entw. in % |
|-------------------------------------------------------------|--------|--------|------------|
| Umsatzerlöse                                                | 5.748  | 6.194  | 7,8        |
| Kosten der umgesetzten Leistungen                           | -1.882 | -2.016 | 7,1        |
| Brutto-Ergebnis vom Umsatz                                  | 3.866  | 4.178  | 8,1        |
| Marketing- und Vertriebskosten                              | -2.766 | -2.959 | 7,0        |
| Forschungs- und Entwicklungskosten                          | -149   | -152   | 2,0        |
| Allgemeine Verwaltungskosten                                | -283   | -278   | -1,8       |
| Sonstiges betriebliches Ergebnis (ohne Sondereffekte)       | -81    | -90    | 12,3       |
| Betriebliches Ergebnis (EBIT, ohne Sondereffekte)           | 587    | 699    | 19,1       |
| Sondereffekte infolge des Maßnahmen- und Investitionspakets | -      | -116   | -          |
| Betriebliches Ergebnis (EBIT)                               | 587    | 583    | -0,8       |
| Finanzergebnis                                              | -4     | -30    | -          |
| Ergebnis vor Steuern                                        | 583    | 553    | -5,1       |
| Ertragsteuern                                               | -203   | -227   | 11,4       |
| Jahresüberschuss                                            | 380    | 326    | -14,0      |

Die prozentualen Veränderungen beziehen sich auf Werte in T€.

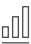

siehe  
Grafik 13  
Grafik 14

### Umsatz

Der Konzernumsatz lag 2010 organisch um 3,1 % über dem Vorjahreswert. Der Unternehmensbereich Consumer zeigte ein organisches Wachstum von 1,6 % gegenüber dem Vorjahr. tesa konnte sich deutlich erholen und erzielte einen Umsatzanstieg von 13,3 %. Zu aktuellen Kursen erhöhte sich der Konzernumsatz um 7,8 % und erreichte 6.194 Mio. € (Vorjahr: 5.748 Mio. €).

In Europa lag der Umsatz organisch um 0,2 % unter Vorjahr. Zu aktuellen Kursen lag der Umsatz bei 3.843 Mio. € (Vorjahr: 3.767 Mio. €) und damit um 2,0 % über dem Vorjahr.

In Amerika erreichte der Umsatz sowohl in Nord- als auch in Lateinamerika zweistellige Wachstumsraten. Das Wachstum in Amerika insgesamt betrug 15,4 % (organisch). Zu aktuellen Kursen stieg der Umsatz um 21,0 % auf 1.030 Mio. € (Vorjahr: 851 Mio. €).

Die Region Afrika/Asien/Australien zeigte ein Wachstum von 4,7 % (organisch). Zu aktuellen Kursen erreichten wir ein Wachstum von 16,9 % auf 1.321 Mio. € (Vorjahr: 1.130 Mio. €).

13 Umsatz Konzern (in Mio. €)

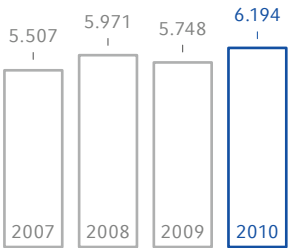

14 Umsatz Konzern nach Regionen (in %)

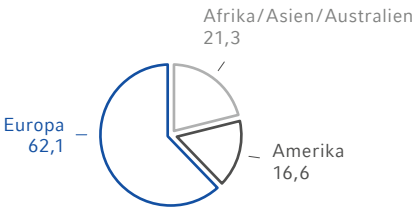

Aufwand/Sonstiges betriebliches Ergebnis

Der Anstieg der Kosten der umgesetzten Leistungen lag mit 7,1 % etwas unter der Umsatzentwicklung. Die Marketing- und Vertriebskosten entwickelten sich leicht unterproportional zum Umsatz auf 2.959 Mio. € (Vorjahr: 2.766 Mio. €). Die in dieser Position enthaltenen Aufwendungen für Werbung, Handelsmarketing und ähnliche Positionen lagen bei 1.955 Mio. € (Vorjahr: 1.842 Mio. €). Die Aufwendungen für Forschung und Entwicklung wurden um 2,0 % auf 152 Mio. € gesteigert (Vorjahr: 149 Mio. €). Die allgemeinen Verwaltungskosten wurden auf 278 Mio. € gesenkt (Vorjahr: 283 Mio. €). Das sonstige betriebliche Ergebnis (ohne Sondereffekte) betrug –90 Mio. € (Vorjahr: –81 Mio. €).

Betriebliches Ergebnis (EBIT, ohne Sondereffekte)

Das EBIT ohne Sondereffekte wurde auf 699 Mio. € gesteigert (Vorjahr: 587 Mio. €), die EBIT-Umsatzrendite lag bei 11,3 % (Vorjahr: 10,2 %). Der Unternehmensbereich Consumer konnte sein EBIT ohne Sondereffekte auf 599 Mio. € erhöhen (Vorjahr: 558 Mio. €), die Umsatzrendite erreichte 11,3 % (Vorjahr: 11,1 %). tesa erzielte eine Steigerung des EBIT von 29 Mio. € im Jahr 2009 auf 100 Mio. € im abgelaufenen Geschäftsjahr und eine Umsatzrendite von 11,4 % (Vorjahr: 3,9 %).

In Europa verzeichnete der Konzern ein Ergebnis vor Sondereffekten von 589 Mio. € (Vorjahr: 535 Mio. €). Die EBIT-Umsatzrendite stieg auf 15,3 % (Vorjahr: 14,2 %). Das Ergebnis vor Sondereffekten in Amerika lag bei 78 Mio. € (Vorjahr: 20 Mio. €). Die Umsatzrendite lag bei 7,6 % (Vorjahr: 2,4 %). In Afrika/Asien/Australien betrug das EBIT ohne Sondereffekte 32 Mio. € (Vorjahr: 32 Mio. €). Die EBIT-Umsatzrendite lag bei 2,4 % (Vorjahr: 2,8 %).

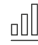

siehe  
Grafik 15

Sondereffekte

Die Sondereffekte betreffen im Wesentlichen Wertminderungen auf immaterielle Vermögenswerte in Höhe von 79 Mio. €, die dem chinesischen Geschäft zuzuordnen sind. Die übrigen Sondereffekte entfallen primär auf Sortimentsstraffungen im Rahmen des im Dezember beschlossenen Maßnahmen- und Investitionspakets für den Unternehmensbereich Consumer.

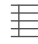

siehe  
Tab. 16

Betriebliches Ergebnis (EBIT)

Das EBIT betrug 583 Mio. € (Vorjahr: 587 Mio. €). Die EBIT-Umsatzrendite lag bei 9,4 % (Vorjahr: 10,2 %).

Finanzergebnis

Das Finanzergebnis betrug –30 Mio. € (Vorjahr: –4 Mio. €). Die Entwicklung wurde im Wesentlichen beeinflusst durch erhöhte Zinsaufwendungen, das deutlich gesunkene Zinsniveau für die Anlagezinsen sowie durch Währungsverluste.

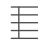

siehe  
Tab. 12

15 EBIT Konzern (in Mio. €)  
Ohne Sondereffekte

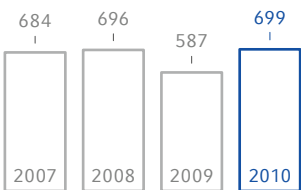

siehe  
Grafik 17

Ertragsteuern

Der Ertragsteueraufwand lag bei 227 Mio. € (Vorjahr: 203 Mio. €). Die Steuerquote erhöhte sich auf 41,0 % (Vorjahr: 34,9 %). Der Anstieg ist im Wesentlichen auf die steuerliche Nicht-Anrechenbarkeit der Wertminderung des Geschäfts- oder Firmenwerts der China Gruppe zurückzuführen.

Jahresüberschuss

Der Jahresüberschuss betrug 326 Mio. € (Vorjahr: 380 Mio. €), die Umsatzrendite nach Steuern lag bei 5,3 % (Vorjahr: 6,6 %). Ohne Sondereffekte stieg der Jahresüberschuss auf 425 Mio. €, die entsprechende Umsatzrendite nach Steuern erhöhte sich auf 6,9 %.

Ergebnis je Aktie – Dividende

Das Ergebnis je Aktie lag bei 1,40 € (Vorjahr: 1,65 €). Ohne Sondereffekte betrug es 1,84 €. Berechnet wurden diese Werte auf Basis der gewichteten Anzahl der dividendenberechtigten Aktien von 226.818.984 Stück. Vorstand und Aufsichtsrat werden der Hauptversammlung eine Dividende in Höhe von 0,70 € (Vorjahr: 0,70 €) je dividendenberechtigte Stückaktie vorschlagen.

16 Überleitung auf EBIT ohne Sondereffekte  
01.01. – 31.12.

|                                                        | in Mio. € | in % vom Umsatz |
|--------------------------------------------------------|-----------|-----------------|
| <b>Konzern</b>                                         |           |                 |
| Betriebliches Ergebnis (EBIT) 2010                     | 583       | 9,4             |
| Sondereffekte im sonstigen betrieblichen Ergebnis      | 116       | –               |
| Betriebliches Ergebnis (EBIT, ohne Sondereffekte) 2010 | 699       | 11,3            |
| Betriebliches Ergebnis (EBIT) 2009                     | 587       | 10,2            |
| <b>Consumer</b>                                        |           |                 |
| Betriebliches Ergebnis (EBIT) 2010                     | 483       | 9,1             |
| Sondereffekte im sonstigen betrieblichen Ergebnis      | 116       | –               |
| Betriebliches Ergebnis (EBIT, ohne Sondereffekte) 2010 | 599       | 11,3            |
| Betriebliches Ergebnis (EBIT) 2009                     | 558       | 11,1            |

Die Beurteilung der operativen Ertragslage des Beiersdorf Konzerns erfolgt anhand des betrieblichen Ergebnisses (EBIT) ohne Sondereffekte. Diese Kennzahl ist nicht Bestandteil der IFRS und nur als freiwillige Zusatzinformation zu betrachten. Die Sondereffekte sind einmalige, nicht operative Geschäftsvorfälle, die ausschließlich den Unternehmensbereich Consumer betreffen. Die Sondereffekte setzen sich zusammen aus einer Wertminderung des Geschäfts- oder Firmenwerts der zahlungsmittelgenerierenden Einheit China-Gruppe in Höhe von 56 Mio. €, einer Wertminderung der chinesischen Haarpflegemarken von 23 Mio. € sowie Aufwendungen bezüglich der Sortimentsstraffung im Rahmen des im Dezember beschlossenen Maßnahmen- und Investitionspakets.

17 Jahresüberschuss Konzern (in Mio. €)  
Ohne Sondereffekte

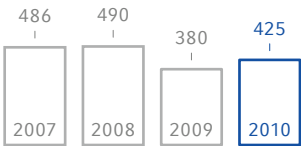

Ertragslage Unternehmensbereiche  
Consumer

18 Kennzahlen Unternehmensbereich Consumer

|                                       |             | Europa | Amerika | Afrika/Asien/<br>Australien | Gesamt |
|---------------------------------------|-------------|--------|---------|-----------------------------|--------|
| Umsatz 2010                           | (in Mio. €) | 3.248  | 922     | 1.151                       | 5.321  |
| Veränderungen (organisch)             | (in %)      | -1,8   | 14,9    | 2,5                         | 1,6    |
| Veränderungen (wechsellkursbereinigt) | (in %)      | -1,8   | 14,9    | 2,5                         | 1,6    |
| Veränderungen (nominal)               | (in %)      | 0,4    | 19,7    | 14,5                        | 6,2    |
| EBIT 2010*                            | (in Mio. €) | 548    | 61      | -10                         | 599    |
| EBIT-Umsatzrendite 2010*              | (in %)      | 16,9   | 6,6     | -0,8                        | 11,3   |
| EBIT 2009                             | (in Mio. €) | 533    | 14      | 11                          | 558    |
| EBIT-Umsatzrendite 2009               | (in %)      | 16,5   | 1,9     | 1,1                         | 11,1   |

\* Ohne Sondereffekte (siehe Überleitung EBIT ohne Sondereffekte auf Seite 60).

Unser Unternehmensbereich Consumer erreichte 2010 ein organisches Umsatzwachstum von 1,6 %. Nominal betrug der Umsatz 5.321 Mio. € und lag damit um 6,2 % über dem Vorjahr (5.011 Mio. €). Das EBIT ohne Sondereffekte lag bei 599 Mio. € (Vorjahr: 558 Mio. €), die entsprechende EBIT-Umsatzrendite betrug 11,3 % (Vorjahr: 11,1 %).

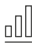

siehe  
Grafik 19  
Grafik 20

Mit erfolgreichen Innovationen und internationalen Relaunches bestehender, an neueste Forschungserkenntnisse angepasster Produkte konnten wir in einzelnen Kategorien gute Wachstumsraten erzielen. In anderen Kategorien war die Umsatzentwicklung in einigen Ländern schwierig. In Deutschland und in einigen weiteren Ländern wurde daher unter anderem beschlossen, das NIVEA Make-up-Geschäft aufzugeben. In anderen Ländern wurde das Geschäft mit NIVEA Hair Care und Styling neu geordnet.

NIVEA wuchs 2010 weltweit organisch um 1,8 %. Zum Wachstum trugen vor allem NIVEA Deodorant, NIVEA FOR MEN und NIVEA Sun bei. Besonders erfolgreich waren in diesen Kategorien NIVEA Deodorant Calm & Care, die NIVEA FOR MEN Silver Protect Serie und NIVEA Sun Protect & Bronze. Insbesondere NIVEA Hair Care und NIVEA Hair Styling verzeichneten eine rückläufige Entwicklung.

Unsere Marke Eucerin konnte eine sehr gute Wachstumsrate von 9,0 % vorweisen. Besonders gut entwickelten sich die Umsätze in den USA, in Thailand und in Chile.

19 Umsatz Consumer (in Mio. €)

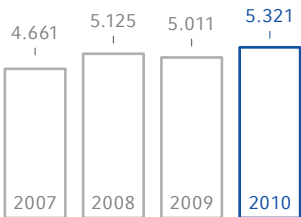

20 EBIT Consumer (in Mio. €)  
Ohne Sondereffekte

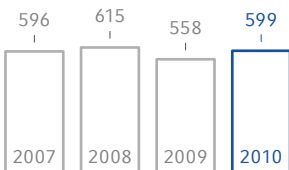

Im Bereich der selektiven Kosmetik zeigte La Prairie nach der weltweiten Wirtschaftskrise des Vorjahres klare Erholungstendenzen und erreichte einen Umsatzanstieg von 7,5 %. Besonders gut entwickelten sich das neue La Prairie Platinum Rare Serum und die neu eingeführte Serie La Prairie White Caviar Illuminating Système.

Die Pflastermarken standen insbesondere durch das starke Wachstum von Handelsmarken unter Druck, konnten jedoch einen Umsatz leicht über Vorjahr erreichen. Während das Geschäft mit Wundversorgung wuchs, verzeichnete das übrige Geschäft, zum Beispiel Wärmepflaster und Fußprodukte, Umsatzrückgänge. Umsatzsteigerungen konnten insbesondere in der Region Afrika/Asien/Australien erzielt werden.

Europa

21 Consumer Umsatzentwicklung Europa

|                                         |             | Deutschland | Westeuropa<br>(ohne Deutschland) | Osteuropa | Gesamt |
|-----------------------------------------|-------------|-------------|----------------------------------|-----------|--------|
| Umsatz 2010                             | (in Mio. €) | 912         | 1.751                            | 585       | 3.248  |
| Veränderungen (organisch)               | (in %)      | -2,3        | -1,4                             | -2,2      | -1,8   |
| Veränderungen<br>(wechselkursbereinigt) | (in %)      | -2,3        | -1,4                             | -2,2      | -1,8   |
| Veränderungen (nominal)                 | (in %)      | -2,3        | 0,9                              | 3,2       | 0,4    |

Der Consumer-Umsatz in der Region **Europa** blieb auf vergleichbarer Basis (organisch) um -1,8 % unter dem Vorjahreswert. Zu aktuellen Kursen erhöhte sich der Umsatz leicht um 0,4 % auf 3.248 Mio. € (Vorjahr: 3.236 Mio. €). Das Consumer-EBIT ohne Sondereffekte betrug 548 Mio. € (Vorjahr: 533 Mio. €), die entsprechende EBIT-Umsatzrendite lag bei 16,9 % (Vorjahr: 16,5 %).

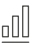

siehe  
Grafik 22  
Grafik 23

Der Unternehmensbereich Consumer verzeichnete in **Deutschland** einen Umsatzrückgang von 2,3 %. Wesentliche Umsatzbeiträge leisteten NIVEA Sun und NIVEA FOR MEN. Starke Umsatzrückgänge waren insbesondere bei NIVEA Hair Care, NIVEA Hair Styling, NIVEA Make-up und NIVEA Body Care festzustellen. Auch der Umsatz mit der Marke Florena lag unter Vorjahr.

22 Umsatz Consumer in Europa (in Mio. €)

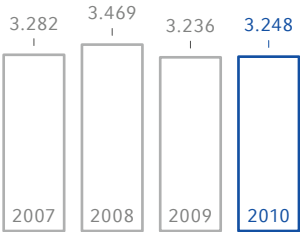

23 EBIT Consumer in Europa (in Mio. €)  
Ohne Sondereffekte

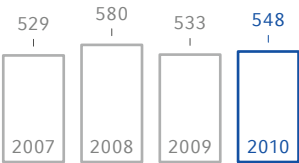



In **Westeuropa** (ohne Deutschland) lag der Umsatz mit einer organischen Entwicklung von –1,4 % unter dem des Vorjahrs. Umsatzsteigerungen zeigten die UK/Irland-Gruppe, die Schweiz und die La Prairie Gruppe. Umsatzeinbußen waren vor allem in Italien und der Portugal/Spanien-Gruppe zu verzeichnen. Die Benelux/Frankreich-Gruppe zeigte einen leichteren Umsatzrückgang. Deutlich positiv entwickelte sich NIVEA Sun. Eucerin erreichte eine erfreuliche Wachstumsrate von 5,9 %. Die Umsätze mit NIVEA Hair Care, NIVEA Make-up und NIVEA Body Care waren rückläufig.

In **Osteuropa** verzeichneten wir einen Umsatzrückgang von 2,2 %. In der Region erreichten NIVEA FOR MEN und NIVEA Deodorant einen Umsatzanstieg, NIVEA Visage und NIVEA Baby zeigten in dieser Region Umsatzrückgänge. Die Russland/Ukraine-Gruppe zeigte ein erfreuliches Wachstum. In Russland sorgten hauptsächlich NIVEA FOR MEN und NIVEA Deodorant für Wachstumsimpulse. In Polen konnte der Umsatz des Vorjahres nicht erreicht werden.

Amerika

24 Consumer Umsatzentwicklung Amerika

|                                       |             | Nordamerika | Lateinamerika | Gesamt |
|---------------------------------------|-------------|-------------|---------------|--------|
| Umsatz 2010                           | (in Mio. €) | 364         | 558           | 922    |
| Veränderungen (organisch)             | (in %)      | 14,2        | 15,3          | 14,9   |
| Veränderungen (wechsellkursbereinigt) | (in %)      | 14,2        | 15,3          | 14,9   |
| Veränderungen (nominal)               | (in %)      | 22,3        | 18,1          | 19,7   |

Unser Umsatz wuchs in der Region Amerika organisch um 14,9 %. Nominal stieg der Umsatz um 19,7 % auf 922 Mio. € (Vorjahr: 770 Mio. €). Das EBIT lag bei 61 Mio. € (Vorjahr: 14 Mio. €). Die EBIT-Umsatzrendite betrug 6,6 % (Vorjahr: 1,9 %).

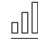

siehe  
Grafik 25  
Grafik 26

Die organische Umsatzentwicklung in **Nordamerika** lag um 14,2 % über dem Vorjahr. NIVEA Body Care, NIVEA Shower und NIVEA FOR MEN setzten deutliche Wachstumsimpulse. La Prairie zeigte nach den erheblichen Umsatzeinbußen durch die Wirtschaftskrise in den USA im Vorjahr wieder deutliches Wachstum. Eucerin konnte erneut die hohe Wachstumsrate halten.

In **Lateinamerika** wurde ein zweistelliges organisches Wachstum von 15,3 % erreicht. Neben den wichtigen Märkten Mexiko und Brasilien trugen besonders die Anden-Gruppe und Argentinien zum Wachstum bei. NIVEA Seife, NIVEA Deodorant, NIVEA Sun und NIVEA Visage erlangten in dieser Region die höchsten Zuwachsraten. Auch Eucerin zeigte ein hohes zweistelliges Wachstum.

25 Umsatz Consumer in Amerika (in Mio. €)

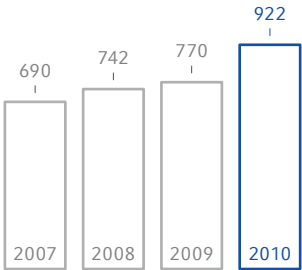

26 EBIT Consumer in Amerika (in Mio. €)  
Ohne Sondereffekte

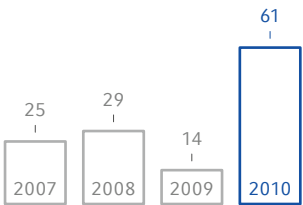

Afrika/Asien/Australien

27 Consumer Umsatzentwicklung Afrika/Asien/Australien

|                                      |             | Gesamt |
|--------------------------------------|-------------|--------|
| Umsatz 2010                          | (in Mio. €) | 1.151  |
| Veränderungen (organisch)            | (in %)      | 2,5    |
| Veränderungen (wechselkursbereinigt) | (in %)      | 2,5    |
| Veränderungen (nominal)              | (in %)      | 14,5   |

siehe  
Grafik 28  
Grafik 29

Die Region **Afrika/Asien/Australien** erreichte auf vergleichbarer Basis (organisch) ein Umsatzwachstum von 2,5 %. Zu aktuellen Wechselkursen erreichte der Umsatz 1.151 Mio. € und lag damit um 14,5 % über dem Vorjahr (1.005 Mio. €). Das EBIT ohne Sondereffekte betrug hier –10 Mio. € (Vorjahr: 11 Mio. €), die EBIT-Umsatzrendite lag bei –0,8 % (Vorjahr: 1,1 %).

In dieser Region entwickelten sich NIVEA Deodorant, NIVEA FOR MEN und NIVEA Sun sehr gut. Eucerin und La Prairie erreichten ein zweistelliges Wachstum. Unsere Gesellschaften im Mittleren Osten und in Thailand zeigten in der Region gute Entwicklungen. Bei beiden Unternehmen waren insbesondere NIVEA Deodorant und NIVEA FOR MEN sehr stark. Auch in Japan lag der Umsatz über dem Vorjahr. Sehr erfreulich entwickelte sich hier NIVEA Sun. 8x4 konnte seine Marktführerschaft behaupten. Der Umsatz der China-Gruppe lag unter dem Vorjahr. Umsatzsteigerungen bei NIVEA FOR MEN und NIVEA Deodorant konnten Umsatzrückgänge bei NIVEA Body Care und unseren chinesischen Haarpflegemarken nicht ausgleichen. Diese Entwicklung ist im Wesentlichen begründet durch gezielte Bestandsreduktion bei unseren Handelspartnern. Der Umsatz der Handelspartner mit unseren Produkten im Markt entwickelte sich weiterhin gut.

28 Umsatz Consumer in Afrika/Asien/Australien (in Mio. €)

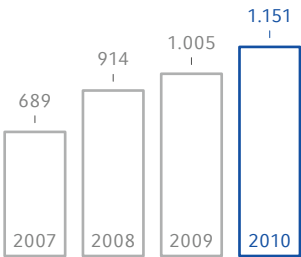

29 EBIT Consumer in Afrika/Asien/Australien (in Mio. €) Ohne Sondereffekte

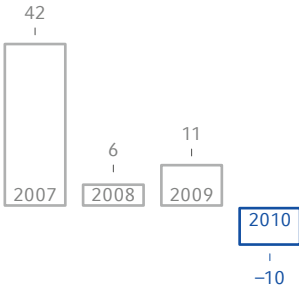

tesa

30 Kennzahlen Unternehmensbereich tesa

|                                       |             | Europa | Amerika | Afrika/Asien/<br>Australien | Gesamt |
|---------------------------------------|-------------|--------|---------|-----------------------------|--------|
| Umsatz 2010                           | (in Mio. €) | 595    | 108     | 170                         | 873    |
| Veränderungen (organisch)             | (in %)      | 9,8    | 20,9    | 23,0                        | 13,3   |
| Veränderungen (wechsellkursbereinigt) | (in %)      | 9,8    | 20,9    | 23,0                        | 13,3   |
| Veränderungen (nominal)               | (in %)      | 12,0   | 32,6    | 36,5                        | 18,4   |
| EBIT 2010                             | (in Mio. €) | 41     | 17      | 42                          | 100    |
| EBIT-Umsatzrendite 2010               | (in %)      | 6,9    | 15,3    | 24,7                        | 11,4   |
| EBIT 2009                             | (in Mio. €) | 2      | 6       | 21                          | 29     |
| EBIT-Umsatzrendite 2009               | (in %)      | 0,3    | 7,6     | 16,9                        | 3,9    |

Der Umsatz im Unternehmensbereich tesa erhöhte sich, bereinigt um Wechselkursveränderungen, um 13,3 % gegenüber dem Vorjahr. Zu aktuellen Kursen stieg der Umsatz um 18,4 % auf 873 Mio. € (Vorjahr: 737 Mio. €). Das EBIT erhöhte sich auf 100 Mio. € (Vorjahr: 29 Mio. €). Die EBIT-Umsatzrendite lag bei 11,4 % (Vorjahr: 3,9 %).

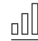

siehe  
Grafik 31  
Grafik 32

tesa Industrie

Der Unternehmensbereich Industrie, der mit 73,3 % (Vorjahr: 70,7 %) zum Umsatz beitrug, verzeichnete 2010 ein deutliches Umsatzwachstum um 22,4 % auf 647 Mio. € (Vorjahr: 529 Mio. €). Zu der positiven Entwicklung trugen sowohl das Direkt- als auch das Handelsgeschäft in allen Regionen bei. Besonders dynamisch entwickelte sich das Geschäft in Asien und in den USA. Wachstumstreiber war dort insbesondere die schnelle Erholung der Automobil- und Elektronikindustrie.

Im Geschäft mit der Elektronikindustrie haben wir mit neuen Produkten den wichtigen Trend zur Verwendung wiederverarbeitbarer Klebebänder bei der Montage elektronischer Geräte aufgenommen. Insbesondere die Systemzulieferer Asiens setzen zunehmend auf Produkte, mit denen sich die Bauteile im Herstellungsprozess demontieren und anders positionieren, reparieren oder recyceln lassen. Im Automobilbereich traf eine optimierte Oberflächenschutzfolie auf große Resonanz. Sie haftet noch fester auf der Karosserie, lässt sich dennoch rückstandsfrei entfernen und schützt so die empfindliche Lackschicht von Neuwagen auf dem Transport zum Händler vor Schäden und Verschmutzung. Für die Druckindustrie führten wir eine neue Variante unseres erfolgreichen Splicing-Klebebands für die Ansatzverklebung bei Folienrollen im Verpackungsdruck ein. Es ermöglicht das Laminieren der bedruckten Kunststoffolie auf Aluminiumfolie auch bei hoher Druckgeschwindigkeit und steigert so die Effizienz bei der Herstellung anspruchsvoller Tütenverpackungen. Für den neuen Geschäftsbereich Pharma stellten wir erfolgreich erste klinische Muster sogenannter

31 Umsatz tesa (in Mio. €)

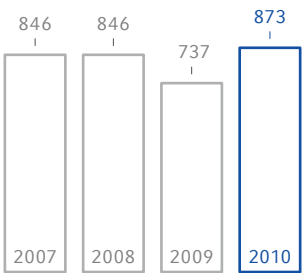

32 EBIT tesa (in Mio. €)

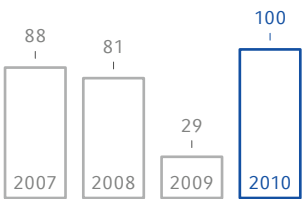

oralen Filme her. Diese arzneimittelhaltigen Filme zerfallen ohne die Zugabe zusätzlicher Flüssigkeit im Mund und erleichtern so die Einnahme der Wirkstoffe. Nach Fertigstellung des Ausbaus der Reinraumanlage im tesa Werk Hamburg ist dort die Produktion der innovativen Medikamente für die Pharmaindustrie geplant. Der bei unserer Tochtergesellschaft Labtec entwickelte orale Film Ondansetron hat sowohl in Europa als auch in den USA als weltweit erstes verschreibungspflichtiges Medikament in dieser Form die Zulassung erhalten. Zudem hat Labtec ein neuartiges topisches Pflaster zur Behandlung von Lippenherpes entwickelt. Dazu schlossen wir mit GlaxoSmithKline eine Lizenzvereinbarung. Der globale Pharmakonzern wird das Produkt zukünftig vermarkten. Im Handelsgeschäft haben wir unsere Kompetenz durch neue, auf spezielle Einsatzbereiche abgestimmte Sortimente gestärkt und dadurch weitere Kundengruppen erschlossen. Wichtige Impulse gaben Produkte für die stark wachsende Unterhaltungsbranche. Die Klebebänder werden unter anderem für den Bühnenbau, das Verlegen von Kabeln sowie das Markieren und Kennzeichnen im Bühnenbereich verwendet. Jüngste Innovation ist ein Spezialklebeband mit schwarzer Klebmasse, das die Lichtreflexion so stark reduziert, dass es sich für die nahezu unsichtbare Verklebung beispielsweise von Tanzböden verwenden lässt.

tesa Konsumenten

Ebenfalls sehr erfreulich entwickelte sich das Geschäft mit Produkten für private Konsumenten, das mit 21,2 % (Vorjahr: 23,6 %) zum Umsatz beitrug. Zu aktuellen Kursen wuchs der Umsatz von 176 Mio. € im Vorjahr um 6,3 % auf 187 Mio. €. Beide strategische Geschäftsfelder – sowohl Lösungen für Heimwerker als auch Produkte für den Büro- und Schreibwarenbereich – trugen zu der dynamischen Entwicklung bei. Das zum Jahresende 2008 unter der Submarke EcoLogo erfolgreich beim Handel eingeführte Sortiment besonders umweltfreundlicher Produkte ergänzten wir um weitere Innovationen. Die Produkte aus vorwiegend recycelten und biobasierten Rohstoffen für den Büro- und Schreibwarenbereich trafen auch bei den Konsumenten auf sehr große Resonanz. Mit der Einführung der Clean-Air-Filter gegen Feinstaub aus Laserdruckern haben wir erfolgreich eine neue, attraktive Produktkategorie aufgebaut, die den starken Trend zu Nachhaltigkeit und einem gesunden Arbeitsumfeld aufgreift. Mit umfassenden Kommunikationsmaßnahmen unterstützten wir die neuen Absatzkanäle und verankerten sowohl Feinstaubproblematik als auch Produktlösung insbesondere bei den in Büros von Unternehmen und Institutionen tätigen Käufergruppen. Im Baumarkt- und Heimwerkerbereich setzten Neupositionierungen der Malerabdeck- und der Reparaturklebebänder neue Akzente. Beide Sortimente erweiterten wir um innovative Produkte, insbesondere im Premiumbereich. Auf Basis einer umfassenden Studie über das Kaufverhalten in Baumärkten optimierten wir unsere Warenpräsentationssysteme. Der neue Auftritt ermöglicht dem Konsumenten eine gezieltere Information sowie bessere Orientierung und führt ihn so schneller zum geeigneten Produkt. Erste Einsätze bei unseren Handelspartnern führten zu deutlichen Umsatzsteigerungen.

33 Umsatz Consumer nach Regionen (in %)

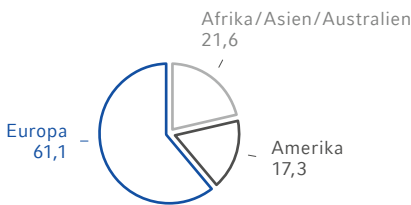

34 Umsatz tesa nach Regionen (in %)

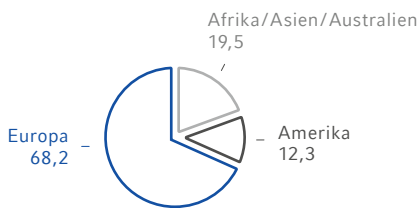

Vermögenslage Konzern

35 Bilanz Konzern (in Mio. €)

| Aktiva                                       | 31.12.2009 | 31.12.2010 |
|----------------------------------------------|------------|------------|
| Langfristige Vermögenswerte                  | 1.177      | 1.110      |
| Vorräte                                      | 561        | 632        |
| Übrige kurzfristige Vermögenswerte           | 2.089      | 2.380      |
| Zahlungsmittel und Zahlungsmitteläquivalente | 767        | 973        |
|                                              | 4.594      | 5.095      |
| Passiva                                      | 31.12.2009 | 31.12.2010 |
| Eigenkapital                                 | 2.636      | 2.920      |
| Langfristige Rückstellungen                  | 359        | 326        |
| Langfristige Verbindlichkeiten               | 173        | 168        |
| Kurzfristige Rückstellungen                  | 391        | 486        |
| Kurzfristige Verbindlichkeiten               | 1.035      | 1.195      |
|                                              | 4.594      | 5.095      |

Die langfristigen Vermögenswerte sind leicht auf 1.110 Mio. € gesunken. Von den Investitionen in Höhe von 96 Mio. € entfielen 63 Mio. € auf den Unternehmensbereich Consumer und 33 Mio. € auf tesa. Die Abschreibungen lagen bei 142 Mio. € (Vorjahr: 135 Mio. €). Darüber hinaus wurden Wertminderungen der immateriellen Vermögenswerte in Höhe von 79 Mio. € erfasst. Die Vorräte stiegen auf 632 Mio. €. Die sonstigen kurzfristigen Vermögenswerte erhöhten sich leicht auf 2.380 Mio. €. Darin enthalten sind Wertpapiere in Höhe von 1.132 Mio. € (Vorjahr: 955 Mio. €). Die Zahlungsmittel und Zahlungsmitteläquivalente stiegen auf 973 Mio. €. Die Nettoliquidität (Zahlungsmittel, Zahlungsmitteläquivalente und kurzfristige Wertpapiere minus kurzfristige Finanzverbindlichkeiten) lag bei 1.970 Mio. € (Vorjahr: 1.564 Mio. €).

Der Eigenkapitalanteil betrug 57 % (Vorjahr: 57 %). Der Anteil des langfristigen Fremdkapitals lag bei 10 % (Vorjahr: 12 %), der Anteil des kurzfristigen Fremdkapitals bei 33 % (Vorjahr: 31 %).

 siehe Grafik 36

36 Finanzierungsstruktur (in %)

|      |    |    |    |
|------|----|----|----|
| 2009 | 57 | 12 | 31 |
| 2010 | 57 | 10 | 33 |

 Eigenkapital  Langfristiges Fremdkapital  Kurzfristiges Fremdkapital



Finanzlage Konzern

37 Kapitalflussrechnung Konzern (in Mio. €)

|                                                              | 2009 | 2010 |
|--------------------------------------------------------------|------|------|
| Brutto-Cashflow                                              | 507  | 518  |
| Mittelveränderung Nettoumlaufvermögen                        | 59   | 102  |
| Cashflow aus operativer Geschäftstätigkeit                   | 566  | 620  |
| Cashflow aus investiver Tätigkeit                            | -130 | -228 |
| Free-Cashflow                                                | 436  | 392  |
| Cashflow aus Finanzierungstätigkeit                          | -285 | -212 |
| Sonstige Veränderungen                                       | 3    | 26   |
| Veränderung der Zahlungsmittel und Zahlungsmitteläquivalente | 154  | 206  |
| Zahlungsmittel und Zahlungsmitteläquivalente am 01.01.       | 613  | 767  |
| Zahlungsmittel und Zahlungsmitteläquivalente am 31.12.       | 767  | 973  |

Der Brutto-Cashflow betrug im Berichtsjahr 518 Mio. € und lag damit um 11 Mio. € über dem Wert des Vorjahrs.

Aus der Veränderung des Nettoumlaufvermögens ergab sich ein Mittelzufluss in Höhe von 102 Mio. € (Vorjahr: 59 Mio. €). Ursache hierfür war im Wesentlichen der Anstieg der Verbindlichkeiten aus Lieferungen und Leistungen um 164 Mio. €. Der Mittelzufluss aus operativer Geschäftstätigkeit betrug insgesamt 620 Mio. € und lag damit um 54 Mio. € über dem Wert des Vorjahrs.

Der Mittelabfluss aus investiver Tätigkeit betrug im Berichtsjahr 228 Mio. € (Vorjahr: 130 Mio. €). Den Ausgaben für Investitionen in Höhe von 96 Mio. € sowie für die Nettoauszahlung für Wertpapiere in Höhe von 180 Mio. € standen Einnahmen aus dem Verkauf von Anlagevermögen in Höhe von 12 Mio. € sowie aus Zinsen und sonstigen Finanzeinzahlungen in Höhe von 36 Mio. € gegenüber.

Der Free-Cashflow reduzierte sich gegenüber dem Vorjahreszeitraum um 44 Mio. € und erreichte 392 Mio. €. Bedingt durch die Auszahlung der Dividende in Höhe von 159 Mio. €, die Rückführung von Finanzverbindlichkeiten um netto 9 Mio. € sowie durch Zins- und sonstige Finanzauszahlungen in Höhe von 45 Mio. € lag der Mittelabfluss aus Finanzierungstätigkeit mit 212 Mio. € um 73 Mio. € unter dem Vorjahresniveau. Die Zahlungsmittel und Zahlungsmitteläquivalente erreichten 973 Mio. €.

Finanzierung und Liquiditätsvorsorge

Die Sicherung der Liquidität ist vorrangiges Ziel des Finanzmanagements bei Beiersdorf. Art und Umfang der Transaktionen orientieren sich am operativen und finanziellen Grundgeschäft des Konzerns. Zur Ermittlung des Liquiditätsbedarfs werden Szenariorechnungen und rollierende 12-Monats-Cashflow-Planungen eingesetzt.

## Gesamtaussage zur wirtschaftlichen Lage des Konzerns

2010 war für Beiersdorf insbesondere im Unternehmensbereich Consumer ein Jahr des Umbruchs und des Neuanfangs. Die Unternehmensbereiche entwickelten sich sehr unterschiedlich. Während tesa einen sehr erfreulichen Umsatzanstieg zeigte, lag der Umsatz im Unternehmensbereich Consumer nur leicht über dem des Vorjahrs. Im Konzern erreichten wir einen Umsatz von 6.194 Mio. € (Vorjahr: 5.748 Mio. €). Wechselkursbereinigt und auf vergleichbarer Basis lagen wir um 3,1 % über dem Umsatz von 2009.

Der Bereich Consumer musste sich im Geschäftsjahr auf eine neue Realität einstellen. Im Februar des Jahres verkündete Beiersdorf seine weiterentwickelte Strategie „Focus on Skin Care. Closer to Markets.“. Diese soll das Unternehmen mittelfristig wieder zu den gewohnten Wachstumsraten führen. Mit der geschäftlichen Entwicklung im Jahr 2010 waren wir im Vorstand nicht zufrieden. Die Umsatzentwicklung lag unter unseren Erwartungen, zudem belasteten Einmalaufwendungen aus dem Maßnahmen- und Investitionspaket Ende des Geschäftsjahres unser Ergebnis. Der Unternehmensbereich Consumer erzielte insgesamt ein Umsatzwachstum von 1,6 %.

Der Unternehmensbereich tesa konnte sich nach der wirtschaftlichen Krise des Vorjahrs wieder spürbar erholen und erreichte ein Umsatzwachstum von 13,3 %. tesa konnte damit seine Marktposition weiter ausbauen.

Das EBIT im Konzern belief sich auf 583 Mio. € (Vorjahr: 587 Mio. €). Bereinigt um Sondereffekte betrug das EBIT 699 Mio. €. Die EBIT-Umsatzrendite ohne Sondereffekte betrug 11,3 % (Vorjahr: 10,2 %).

## Bilanzielle Ermessensentscheidungen

Im Konzernabschluss sind keine Bilanzierungs- und Bewertungsmethoden sowie damit verbundene Wahlrechte angewandt worden, die von den Vorjahren abweichen und bei einer anderen Anwendung einen wesentlichen Einfluss auf die Ertrags-, Vermögens- und Finanzlage gehabt hätten. Angaben zum Einfluss der Verwendung von Schätzungen, zu den getroffenen Annahmen und Ermessensentscheidungen finden sich im Konzernanhang.

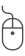

Beiersdorf.de/  
Forschung

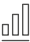

siehe  
Grafik 38

# Forschung und Entwicklung

Intensive Forschung ist eine wichtige Bedingung für den Erfolg von Beiersdorf. Mit wegweisenden Innovationen haben wir uns eine starke internationale Position geschaffen. Im Unternehmensbereich Consumer stellen wir uns auf die jeweiligen Märkte ein und entwickeln zukunftsweisende Produkte, die auf die unterschiedlichen Wünsche der Verbraucher zugeschnitten sind und durch ausgezeichnete Qualität sowie hervorragende Verträglichkeit überzeugen. Bei tesa ist die Entwicklung von umweltfreundlichen, lösemittelfreien Produkten und Verfahren ein Schwerpunkt der Arbeit.

Weltweit waren in diesem Bereich 940 Mitarbeiter beschäftigt (Vorjahr: 868), davon 575 (Vorjahr: 551) im Unternehmensbereich Consumer und 365 (Vorjahr: 317) bei tesa.

## Consumer

### Konzentration auf das Kernthema Haut

Um die Arbeit optimal auf die Anforderungen auszurichten, die sich aus der weiterentwickelten Strategie von Beiersdorf ergeben, wurde der Bereich reorganisiert. Das wichtigste Ziel dabei war, eine klare Struktur der verschiedenen Forschungseinrichtungen und den Funktionen des Bereichs zu schaffen. Hauptaufgabe der neu geschaffenen Funktion Corporate Development ist es, einen konsistenten Produkt- und Markenauftritt aller Produkte zu gewährleisten.

Im Geschäftsjahr 2010 konzentrierte sich die Forschung im Unternehmensbereich Consumer weiter auf das Kernthema Haut. Mit einem besseren Verständnis von hautbiologischen Vorgängen sind die Forscherinnen und Forscher von Beiersdorf in der Lage, Produkte gezielt zu entwickeln. So haben neueste Erkenntnisse die Voraussetzungen dafür geschaffen, erstmals Beiersdorf Produkte auf den Markt zu bringen, die Gluco-Glycerol enthalten. In-vitro-Daten zeigen, dass Gluco-Glycerol eine Neubildung der Aquaporin-Wasserkanäle der Haut stimuliert, die für den Wassertransport zwischen den Zellen sorgen.

Zukunftsweisende Forschungsergebnisse erzielte Beiersdorf auch im noch recht neuen Gebiet der Chronobiologie. Unsere Forscher zeigten erstmals den Tag-Nacht-Rhythmus der Genexpression in Hautzellen. Internationale Anerkennung fand weiterhin unsere Arbeit auf dem Gebiet der Deodorants. Die Erkenntnisse über die genetischen Ursachen des unterschiedlichen Körpergeruchs von Asiaten, Kaukasiern und Afrikanern wurden vielfach in der Presse diskutiert. Sie bilden die Grundlage für die Entwicklung regional unterschiedlicher Deodorants.

38 Aufwand F&E (in Mio. €)  
(F&E = Forschung & Entwicklung)

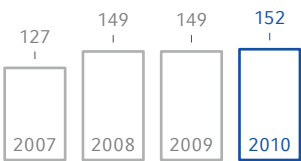

### Gemeinsam auf der Spur des Alterns

Zellbasierte Alterungsprozesse sind ein Schwerpunkt der Forschung bei Beiersdorf. Ein Team von Wissenschaftlern aus Industrie und Universitäten will diese in einem neuen Forschungsverbund unter dem Titel „AgeScreen“ weiter untersuchen, der vom Bundesministerium für Bildung und Forschung gefördert wird. Beiersdorf koordiniert dieses Projekt der vierten Förderphase aus dem Forschungsschwerpunkt Biophotonik, an dem unter anderem Biophysiker, Biologen, Chemiker und Ingenieure teilnehmen. Ziel der Entwicklung ist eine neue optische Technik zum schnelleren, systematischen und automatisierten Testen lebender Zellen. Dabei prüft ein so genannter „optischer Strecker“ völlig berührungsfrei die Elastizität der Zellen, indem zwei gegenläufige Laserstrahlen einzelne lebende Zellen deformieren. So können ihre viskoelastischen Eigenschaften mit hoher Präzision bestimmt werden. Das System soll in der klinischen Diagnostik und bei der Suche nach pharmazeutischen Wirkstoffen angewendet werden, aber auch eine effektivere Entwicklung von Anti-Aging-Produkten ermöglichen.

### Erfolgreiche Suche nach „Perlen“

Im Januar 2010 startete Beiersdorf erfolgreich die „Open Innovation“-Initiative „Pearlfinder“. Damit öffnet sich das Unternehmen für innovative Ideen von außen und schafft noch mehr Raum für einen wissenschaftlich orientierten Austausch. Mit „Pearlfinder“ ermöglicht Beiersdorf die frühe Einbindung externer Partner in die Forschung und Entwicklung von Produkten und Verpackungen. Auf der dazugehörenden Internetplattform können sich Unternehmen, Institute und Hochschulen ebenso registrieren wie einzelne Wissenschaftler und Erfinder, um neue Forschungsansätze und Ideen sicher auszutauschen. Zu dem geschützten Bereich hat nur ein kleiner Kreis von Forschern und Entwicklern aus dem Unternehmen Zugang. „Pearlfinder“ versetzt Beiersdorf in die Lage, bisher ungenutzte Potenziale und neueste Erfindungen möglichst schnell zu erkennen. Dadurch wird die Innovationskraft weiter gestärkt. In der Testphase 2010 wurden bereits erste Initiativen mit externen Partnern gestartet, die zum Teil auch in Forschungskooperationen mündeten. Die Partner bewerten die neuartige Initiative sehr positiv. Nähere Informationen über „Pearlfinder“ finden Sie unter <http://pearlfinder.Beiersdorf.de>.



[http://pearlfinder.  
Beiersdorf.de](http://pearlfinder.Beiersdorf.de)

### Große Palette neuer Produkte

Im Geschäftsjahr 2010 haben wir 77 Innovationen zum Patent angemeldet (Vorjahr: 50). Zu den besonders hervorzuhebenden Neueinführungen im Berichtsjahr gehörten:

- **Eucerin Aquaporin Active** wurde entwickelt, um die Haut optimal mit Feuchtigkeit zu versorgen. Inspiriert von einer Nobelpreis-Entdeckung ist es der Eucerin Hautforschung gelungen, das hauteigene Feuchtigkeitsnetzwerk zu aktivieren. Die innovative Formel mit naturidentischem Gluco-Glycerol versorgt die Haut selbst in tieferen epidermalen Hautschichten optimal mit Feuchtigkeit und sorgt so für ein frisches, glattes und sichtbar verbessertes Hautbild. Gluco-Glycerol enthält ein Glycerol-Derivat, das die Bildung neuer Aquaporine stimulieren kann. Diese natürlichen Kanäle erhöhen den Wasseraustausch durch die Membranen der Hautzellen und tragen so wesentlich zu einem verbesserten Feuchtigkeitstransport bei. Für die Entdeckung der Aquaporine wurde der amerikanische Wissenschaftler Peter Agre im Jahr 2003 mit dem Nobelpreis ausgezeichnet.
- **NIVEA FOR MEN Arctic Freeze** besteht aus drei schnell einziehenden Gesichtspflegeprodukten mit dem Untertitel „Cool Kick“, die nach der Rasur ein lange anhaltendes Frischegefühl vermitteln. Sie enthalten eine neuartige Cooling-Technologie, die in den vergangenen zwei Jahren zusammen mit Kooperationspartnern in den Forschungslaboren von Beiersdorf weiterentwickelt wurde. Neuartige Wirkstoffe aktivieren Rezeptoren in der Haut, die als Thermosensoren kalte Außenreize wahrnehmen. So entsteht nach der Rasur eine angenehme Kühlwirkung auf der Haut.

- **NIVEA FOR MEN DNAge Lift** wurde entwickelt als Gesichtspflege für den reiferen Mann. Die leichte Textur der Gelcreme enthält Creatin zur Stärkung der Collagenstrukturen sowie Guarana-Extrakt. Diese Wirkstoffkombination strafft die Gesichtskonturen und verleiht der Haut ein vitales Aussehen.
- **NIVEA Deodorant Pure & Natural Action** ist ein Deo mit Bio-Florinen, einem innovativen antibakteriellen Wirkstoff, der naturidentisch ist und Bakterien wirkungsvoll bekämpft. Ohne Aluminiumsalze und Konservierungsmittel bietet es hundertprozentigen Schutz für 24 Stunden. NIVEA Deodorant Pure & Natural Action lässt mit seiner milden und doch hochwirksamen Formel die Haut frei atmen, denn es verstopft die Poren nicht und hinterlässt keine Rückstände. Den zuverlässigen Schutz gegen Körpergeruch gibt es in zwei Varianten: mit Lotus- und mit Jasmin-Duft.
- **NIVEA Silver Protect Deo-Shower** garantiert eine extralange Frische, denn die im Deo-Bereich eingesetzte Silber-Technologie wurde für die Dusch Anwendung weiterentwickelt. Mit einem modernen, maskulinen Duft und einem angenehmen Schaum ist NIVEA Silver Protect Deo-Shower ein optimales Duschgel für Männer.
- **NIVEA Hair Care Anti Schuppen Shampoos** bieten bereits nach der ersten Anwendung eine effektive Anti-Schuppen-Wirkung und gleichzeitig eine verwöhnende Pflege für individuelle Ansprüche. Alle sechs Shampoos enthalten das innovative, zum Patent angemeldete Liquid Clear System. Während das Wirkstoffduo Pirocton Olamin und Climbazol die häufigste Ursache von Schuppen – den Hefepilz Malassezia – hoch effektiv bekämpft, stoppt der Aktivwirkstoff Polidocanol den Juckreiz. Die komplett löslichen Wirkstoffe des NIVEA Liquid Clear Systems gelangen so schnell und gezielt zu den Schuppen, ohne dabei belastende Rückstände zu hinterlassen.

Im Entwicklungszentrum der La Prairie Gruppe in Zürich (Schweiz) entstand im Jahr 2010 zudem eine Vielzahl an Produktinnovationen für unsere selektiven Marken La Prairie und SBT Skin Biology Therapy. Zu den bedeutendsten Produkteinführungen gehören insbesondere die La Prairie White Caviar Illuminating Système Serie sowie die SBT Age Care Firming Creme.

Die La Prairie White Caviar Illuminating Système Serie verbindet die Straffungswirkung von Kaviar mit aufhellenden Inhaltsstoffen. Im Mittelpunkt der neuen Serie stehen zwei herausragende Innovationen:

- **Golden Imperial Caviar Extrakte**, besonders reich an Omega-3-Fettsäuren und gewonnen aus sorgfältig regulierten umweltschonenden Beständen.
- **La Prairie's Clarifying Whitening Complex.**

Die SBT Age Care Firming Creme verbindet die Einzigartigkeit zweier weiterer Innovationen:

- **CCP, Cell Culture Phase**, einzigartige Nährphase der SBT Pflegeprodukte.
- **IDP-2**, ein innovatives Peptid der neuesten Generation, welches die Haut strafft und den Anzeichen der Hautalterung entgegen wirkt.

## tesa

### Kleben ohne Lösemittel

Die Entwicklung umweltfreundlicher, lösemittelfreier Klebmassen und Produktionsverfahren steht weiterhin im Zentrum der Forschung und Entwicklung bei tesa. Im Geschäftsjahr 2010 haben wir eine neuartige Anlage in Betrieb genommen, die eine lösemittelfreie Beschichtung von besonders leistungsstarken, doppelseitigen Klebebändern ermöglicht. Das Verfahren eröffnet uns den Zugang zu attraktiven Anwendungen in verschiedenen industriellen Bereichen. So stellen wir auf der Basis der neuen Technologie doppelseitige Klebebänder für die Verklebung im Außenbereich her, zum Beispiel bei der Montage von Schildern, von Bauteilen bei Solarmodulen, von Emblemen und Zierleisten von Automobilen. Eingesetzt wird das neue Verfahren auch für Produkte, die in der Elektronikindustrie eingesetzt werden, etwa bei der Montage der Rahmen von LCD-Fernsehgeräten. Erste Produkte wurden bereits im Markt eingeführt, weitere befinden sich bei Kunden weltweit in der Testphase.

### Spezialprodukte höchster Präzision

Ein weiterer Schwerpunkt der Forschung und Entwicklung sind neue Verfahren zur Herstellung von Spezialprodukten mit höchsten Anforderungen an Präzision, Transparenz und Partikelfreiheit. In der Reinraumanlage im Werk Hamburg haben wir neue Verfahren zur Herstellung von Klebmassen und zur Beschichtung entwickelt, mit denen sich beispielsweise optisch reine Klebefolien herstellen lassen. Darüber hinaus arbeiteten wir an besonderen Verfahren für sehr präzise Beschichtungen mit Klebmassen, die unter anderem in Diagnosestreifen angewendet werden.

Des Weiteren hat tesa leistungsfähige Klebmassen entwickelt und in die großtechnische Produktion übertragen, mit denen sich Klischeeklebebänder für die Papier- und Druckindustrie noch besser auf die spezifischen Anforderungen von Druckern abstimmen lassen.

Nachwachsende und recycelte Rohstoffe in Produkten für den Einsatz bei privaten Konsumenten ermöglichen es, die zunehmenden Anforderungen an Nachhaltigkeit in der industriellen Fertigung von Klebebändern zu erfüllen.



## Nachhaltigkeit

Nachhaltigkeit ist für Beiersdorf die Verknüpfung von ökonomischem Erfolg mit ökologisch verträglichem und sozial ausgewogenem Handeln. Diese drei Kriterien stehen gleichberechtigt nebeneinander und sind integraler Bestandteil der Unternehmensstrategie – sowohl im Unternehmensbereich Consumer als auch bei tesa. Nachhaltigkeit ist somit ein fester Bestandteil in allen Geschäftsprozessen. Verantwortung für unsere Mitarbeiter ebenso wie für die Gesellschaft und eine intakte Umwelt zu übernehmen, gehört schon lange zu unseren Leitprinzipien. Wir übernehmen damit auch Verantwortung für heutige und künftige Generationen und schaffen durch effizientes Wirtschaften die Grundlage für einen langfristigen geschäftlichen Erfolg.

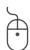

Nachhaltigkeit.  
Beiersdorf.de

### Consumer

#### Neuer Bereich steuert alle Aktivitäten

Beiersdorf pflegt einen intensiven Dialog mit unterschiedlichen Interessengruppen. Dazu gehören unsere Mitarbeiterinnen und Mitarbeiter, Verbraucher, Geschäftspartner, Nichtregierungsorganisationen (NGOs), der Kapitalmarkt sowie Vertreter aus Wissenschaft, Politik und Medien. Bei unseren Aktivitäten legen wir großen Wert auf Transparenz. Deshalb veröffentlichen wir jährlich einen Nachhaltigkeitsbericht, der unter [www.Nachhaltigkeit.Beiersdorf.de](http://www.Nachhaltigkeit.Beiersdorf.de) verfügbar ist. Er orientiert sich am Leitfaden der „Global Reporting Initiative“ und stellt sämtliche Aktivitäten von Beiersdorf in den Bereichen Produkte, Umwelt- und Arbeitsschutz, Mitarbeiter, Gesellschaft und Ökonomie detailliert dar. Außerdem informiert der Bericht über die erreichten Ziele und geplante Maßnahmen.

Das Thema Nachhaltigkeit gewinnt zunehmend an Bedeutung und ist ein unverzichtbarer Teil der Unternehmensstrategie. Der Bereich Corporate Sustainability steuert unternehmensweit alle Aktivitäten zum nachhaltigen Wirtschaften, zum Umwelt- und Arbeitsschutz sowie unser gesellschaftliches Engagement. Die Bereichsleitung berichtet direkt an den Vorstandsvorsitzenden.

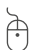

Nachhaltigkeit.  
Beiersdorf.de/  
Umweltschutz

#### Erfolgreich im Umwelt- und Arbeitsschutz

Die Verbraucher erwarten von Beiersdorf nachhaltiges Handeln, unsere Produkte sollen gut verträglich sein – für die Menschen genauso wie für die Umwelt. Diesen Anforderungen müssen wir täglich gerecht werden, um das große Vertrauen in unsere Marken zu erhalten. Deshalb arbeiten wir konsequent daran, den Verbrauch von Ressourcen zu verringern und Abfallmengen sowie die Kosten der Entsorgung in der Produktion zu reduzieren. Gleichzeitig organisieren wir einen regelmäßigen globalen Erfahrungsaustausch zwischen unseren Standorten, um ein einheitliches Niveau auf diesem Gebiet zu sichern.

Im Geschäftsjahr 2010 hat Beiersdorf sein internes ESMAS-Programm (Environmental Protection and Safety Management Audit Scheme) für Umwelt- und Arbeitsschutz-Audits weiter ausgebaut. Es wurde von der Deutschen Gesellschaft zur Zertifizierung von Managementsystemen (DQS) nach den weltweiten Standards ISO 14001 und OHSAS 18001 abgenommen. 2010 waren insgesamt 13 Produktionsstandorte des Unternehmensbereichs Consumer nach ESMAS zertifiziert. Das neue Werk in Shanghai (China) wurde das erste Mal, unser Standort im polnischen Poznan zum zweiten Mal geprüft. Das Urteil lautete jeweils: hohe Standards in der Praxis und ein effizientes Management von Umwelt-, Arbeits- und Gesundheitsschutz.

Die hervorragenden Ergebnisse unterstreichen, dass wir unser ehrgeiziges Managementsystem für Umwelt- und Arbeitsschutz in der Praxis erfolgreich umsetzen. Es ist in alle Geschäftsabläufe, von der Entwicklung über die Produktion bis zur schonenden Entsorgung der Produkte, eingebunden und entspricht den Prinzipien der internationalen Initiative „Responsible Care“. Um noch effizienter zu sein, haben wir unser „Global Sustainability Management System“ um ein Modul erweitert, mit dem Prozesse vereinheitlicht und Auditierungsprogramme intensiviert werden können. Auch in Zukunft wird Beiersdorf aktiv daran arbeiten, den Energieverbrauch noch effizienter zu gestalten und mit den Ressourcen noch verantwortungsvoller umzugehen.

### Weniger Varianten und weniger Verpackung

Beiersdorf hat im Geschäftsjahr 2010 die Initiative ergriffen, um die unterschiedlichen Anforderungen für die Kennzeichnung von Produkten, die den Gefahrgutvorschriften unterliegen, zu harmonisieren. Damit soll die Belieferung der Märkte vereinfacht und Verpackungsmaterial eingespart werden. Eine einheitliche Kennzeichnung reduziert die Zahl der Produktvarianten, vereinfacht die Schulung der Mitarbeiter, spart Ressourcen und senkt damit die Kosten. Für die Umsetzung der neuen Regeln in Europa wurde eine Übergangsfrist bis Mitte 2015 festgesetzt. Änderungen können also im normalen Lieferprozess vorgenommen werden, bereits ausgelieferte Ware darf noch verkauft werden.

### Schutz vor Risiken verbessert

Im Rahmen einer umfassenden Risikovorsorge wurden diverse Maßnahmen zum Schutz von Mitarbeitern vor kriminellen Aktivitäten in Ländern mit besonderen Sicherheitsrisiken durchgeführt. Neben dem Corporate Crisis Management Team war daran auch ein weltweit tätiger Security Consultant beteiligt, um internationale Standards zu gewährleisten. Verbessert haben sie unter anderem den Schutz von Mitarbeiterinnen und Mitarbeitern in Bangkok (Thailand), die von den lokalen Unruhen in der Stadt bedroht waren. Vorsorglich wurden Büros von einem Standort zeitweise in ein anderes Gebäude außerhalb der gefährdeten Gegend verlegt.

Ferner wurden die Sicherheitsinstruktionen für Mitarbeiter und deren Familien überarbeitet, die in das Ausland entsandt werden. Der Sicherheitsberater veranstaltete in Risikoländern Sicherheits-Audits. Zur Vermeidung von doppelten Prüfungen des gleichen Sachverhaltes bei unterschiedlichen Audits wurde der Security Audit-Prozess mit dem des ESMAS-Audits vernetzt.

### Engagement als Hilfe zur Selbsthilfe

Bei unserem gesellschaftlichen Engagement konzentrieren wir uns auf die Handlungsfelder Bildung, Familie und Kultur. Der Leitgedanke ist dabei, „Hilfe zur Selbsthilfe“ zu leisten. Alle Aktivitäten orientieren sich an fünf Kriterien: Langfristigkeit, lokale Bedeutung, Messbarkeit, Erzielung eines gegenseitigen Nutzens sowie stetige Verbesserung.

Als Teil der „Corporate Citizenship“-Strategie wurde Plan International als globaler sozialer Sponsoring Partner identifiziert. Unter dem Motto „We care & connect.“ hat diese Partnerschaft das Ziel, eine globale Bewegung zu schaffen, die Lern- und Bildungsprogramme für in Armut lebende Kinder unterstützen, fördern und entwickeln soll. Zahlreiche Tochtergesellschaften unterstützen bereits Bildungsprogramme von Plan, zum Beispiel Indien, Südafrika und die Niederlande. Weitere Länderkooperationen sind in Vorbereitung.

Zudem unterstützt Beiersdorf seit vielen Jahren SOS Familienfeste in Österreich und Rumänien. In ganz Österreich finden seit zehn Jahren unter anderem durch die Mitwirkung von Beiersdorf Mitarbeitern die NIVEA Familienfeste statt. Durch Losverkäufe wurde allein in den letzten vier Jahren 1 Million € für das SOS-Kinderdorf gesammelt. In den kommenden Jahren wird somit das gesamte soziale Engagement „NIVEA schenkt Kindern eine Zukunft“ in die Familienstärkungsprogramme des SOS-Kinderdorfes in Österreich investiert. Ziel der Familienstärkung der SOS-Kinderdörfer ist es, Kindern ein stabiles und liebevolles Umfeld innerhalb der eigenen Familie zu sichern. In Rumänien ist die Kampagne „Eine schöne Kindheit“ der erste Schritt einer Partnerschaft von NIVEA und den SOS-Kinderdörfern. Hier wurden im Jahr 2010 zwei Arten von Aktivitäten ins Leben gerufen: finanzielles und Produktsponsoring sowie Bildungsmaßnahmen in Bezug auf körperliche Hygiene. Zudem haben die Mitarbeiter unserer rumänischen Gesellschaft 2 % ihrer Einkommensteuer gespendet, um einen Kindergartenspielplatz renovieren zu lassen.

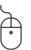

Nachhaltigkeit.  
Beiersdorf.de/  
Gesellschaft

## tesa

### Deutliche Fortschritte im Umweltschutz

Im Geschäftsjahr 2010 haben wir bei der Umsetzung unseres Umweltprogramms erneut deutliche Fortschritte erzielt. Seit dem Start 2007 konnten wir zum Beispiel den Ausstoß flüchtiger organischer Substanzen, so genannter VOC-Emissionen, deutlich senken. Um noch mehr Energie einzusparen, haben wir im Gebäude unserer zentralen Forschung & Entwicklung in Hamburg ein neues, hocheffizientes Belüftungssystem installiert, das von der Stadt Hamburg im Rahmen der Umweltpartnerschaft unterstützt wurde. Damit reduzieren wir den CO<sub>2</sub>-Ausstoß erheblich.

Im Arbeitsschutz gelang es uns, den positiven Trend der vergangenen Jahre fortzuführen und die Zahl der Ausfalltage nach Arbeitsunfällen weiter zu senken. Dazu trug die konsequente Umsetzung unseres globalen Arbeitsschutzmanagements bei. Dessen wichtigste Maßnahmen sind die regelmäßige Inspektion der Standorte weltweit, die Harmonisierung der Sicherheitsstandards auf hohem Niveau sowie Schulungen zu speziellen Sicherheitsthemen vor Ort. Das im Juni eröffnete Converting Center im indischen Chennai haben wir von Beginn an erfolgreich in diesen Prozess eingebunden.

### Intensives soziales Engagement

Auch 2010 engagierte sich der Unternehmensbereich tesa in zahlreichen Projekten, die im Einklang mit der „tesa Corporate Giving-Policy“ stehen. Mit Spenden, Patenschaften und ehrenamtlicher Mitarbeit haben wir uns insbesondere für benachteiligte Kinder und Jugendliche eingesetzt. Im Interesse einer nachhaltigen Wirkung führten wir die Aktivitäten aus dem Vorjahr fort und bauten sie aus. So gewannen wir weitere Mitarbeiter, die sich nun als Mentoren für Schüler im Rahmen der Initiative „MENTOR – die Leselernhelfer Hamburg e.V.“ engagieren. Der Verein, den unser Unternehmen seit 2009 unterstützt, wurde im Berichtsjahr mit dem Deutschen Vorlese-Preis der Stiftung Lesen ausgezeichnet.

Zusätzlich engagierten wir uns in der Initiative „Das macht Schule e.V.“. Der Verein bringt Schulen und Unternehmen bei Projekten zur Renovierung und Gestaltung in Schulen zusammen, die dann Schüler und Lehrer gemeinsam mit Mitarbeitern der beteiligten Firmen umsetzen. In fünf Gemeinschaftsaktionen halfen tesa Mitarbeiter bei der Renovierung von Hamburger Klassenzimmern.

Des Weiteren engagierten sich Mitarbeiter unserer polnischen Tochtergesellschaft in Projekten einer Schule für taubstumme Kinder. Sie organisierten unter anderem einen Sportwettbewerb, ein Fest zum Schuljahresbeginn und halfen bei der Errichtung eines Spezialspielplatzes. Die Tochtergesellschaft unterstützt die Institution außerdem mit Spenden und Unterrichtsförderung. Sämtliche Aktivitäten von tesa dokumentieren wir in einem jährlichen Bericht, der unter [www.tesa.de/Verantwortung](http://www.tesa.de/Verantwortung) abgerufen werden kann.

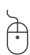

tesa.de/  
Verantwortung

## Mitarbeiterinnen und Mitarbeiter

### Beschäftigung auf hohem Niveau

Am 31. Dezember 2010 beschäftigte der Beiersdorf Konzern weltweit 19.128 Mitarbeiterinnen und Mitarbeiter (Vorjahr: 20.346). Auf Deutschland entfielen davon 5.966 Beschäftigte, das ist ein Anteil von 31,2 %. Im Unternehmensbereich Consumer arbeiteten am Ende des Geschäftsjahres 15.506 Personen (Vorjahr: 16.648). Auf den Unternehmensbereich tesa entfielen 3.622 Mitarbeiter (Vorjahr: 3.698).

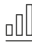

siehe  
Grafik 39  
Grafik 40

### Consumer

#### Neue Struktur effektiv umgesetzt

Die neue Ausrichtung des Unternehmensbereichs Consumer und die Umsetzung der neuen Struktur waren 2010 auch eine besondere Herausforderung für die Personalarbeit von Beiersdorf. Unser Geschäftserfolg als weltweit operierendes Unternehmen hängt wesentlich davon ab, dass die Mitarbeiterinnen und Mitarbeiter optimal zu ihren Fähigkeiten und den Anforderungen des Arbeitsplatzes eingesetzt werden. Um dies auch unter den neuen Bedingungen zu gewährleisten, wurden große Teile des Unternehmensbereiches Consumer reorganisiert.

Eine solche Reorganisation erfordert eine gründliche und weitsichtige Planung sowie eine exzellente Umsetzung. Zudem stellt sie eine große Herausforderung dar. Es entstehen Arbeitsplätze mit veränderten Profilen im Unternehmen. An die Mitarbeiter werden neue Anforderungen gestellt. Die Arbeitsplätze müssen so besetzt werden, dass Fähigkeiten und Profile sich optimal entsprechen, und die Schnittstellen der Zusammenarbeit müssen neu definiert werden. Diesen tief greifenden Veränderungsprozess unterstützt der Personalbereich.

Neben der Reorganisation des Consumer-Bereichs von Beiersdorf rückten 2010 zwei weitere Themen noch stärker als bisher in den Mittelpunkt der Personalarbeit: die Optimierung der leistungsgerechten Entlohnung sowie die Förderung von Nachwuchskräften.

#### Vergütung stärker an Leistung orientiert

Eine faire, leistungsfördernde Bezahlung der Mitarbeiterinnen und Mitarbeiter und deren Beteiligung am Unternehmenserfolg ist ein wichtiger Bestandteil der Personalpolitik bei Beiersdorf, denn sie trägt wesentlich dazu bei, Engagement und Motivation zu stärken. Im Zuge der Umsetzung der weiterentwickelten Consumer Business Strategie wurde auch das Vergütungssystem des Topmanagements modifiziert. Die langfristig ausgerichtete Variable (Long Term Incentive, LTI) der Bezahlung berücksichtigt die Entwicklung des Unternehmens im Vergleich zum Wettbewerb über eine Periode von jeweils drei aufeinander folgenden Kalenderjahren.

39 Anzahl Mitarbeiter Konzern  
Stand 31.12.

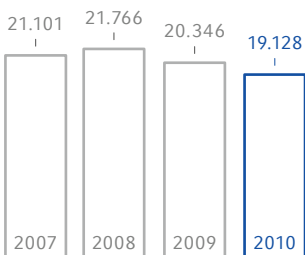

40 Anteil Mitarbeiter nach Regionen (in %)  
Stand 31.12.2010; insgesamt 19.128 Mitarbeiter

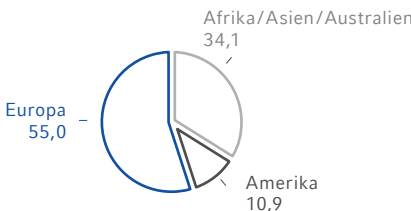

Außerdem wurden im Geschäftsjahr 2010 wieder mehrere Projekte durchgeführt, um in den Regionen eine marktgerechte Bezahlung zu gewährleisten (Total Remuneration-Projekte). Dabei wird das Vergütungssystem der regionalen Gesellschaften nach den jeweiligen Marktstrukturen ausgerichtet, um ein attraktiver Arbeitgeber für die Beschäftigten vor Ort zu sein.

### **Vielfalt ermöglicht weltweit Erfolg**

Ein international agierendes Unternehmen wie Beiersdorf kann nur dann erfolgreich sein, wenn es die Vielfalt seiner Mitarbeiterinnen und Mitarbeiter fördert. Nur so können wir innovative Produkte für unterschiedliche Märkte entwickeln und unsere Chancen überall auf der Welt nutzen. Wenn wir in Zukunft noch individueller auf die Nachfrage reagieren wollen, sind wir auf Menschen mit unterschiedlichen Fähigkeiten, Begabungen, Zielen und Interessen angewiesen. Eine der besten Möglichkeiten, diese Vielfalt langfristig sicherzustellen, ist die gezielte Rekrutierung und Förderung von internationalen Nachwuchskräften. Besonders erfolgreich hat sich dabei das Traineeprogramm „BEYOND BORDERS“ erwiesen, mit dem qualifizierte Hochschulabsolventen angesprochen werden. Im Geschäftsjahr 2010 kamen 41 % der eingestellten Trainees nicht aus Deutschland.

Von Anfang an werden in diesem Programm nicht nur die fachlichen, sondern auch die persönlichen Fähigkeiten gefördert. Die Trainees lernen gezielt die wichtigsten operativen und strategischen Bereiche kennen. Sie sollen verstehen, wie die verschiedenen Abteilungen des Unternehmens zusammenarbeiten und dabei die Denkweise der Zentrale genauso kennen lernen wie die lokale Perspektive der Tochtergesellschaften. Auslandserfahrung und die Zusammenarbeit mit Kolleginnen und Kollegen aus vielen Ländern schärfen den Blick für kulturelle Besonderheiten. Das ist eine wichtige Voraussetzung für die Arbeit in einem Unternehmen, das mit seinen Produkten die verschiedenen Wünsche der Konsumenten überall auf der Welt erfüllen will.

Weil sich das Unternehmen gleichzeitig auch auf die absehbaren Folgen der demografischen Entwicklung einstellt, spielen langfristige Bindung an das Unternehmen und Weiterentwicklung unserer Mitarbeiterinnen und Mitarbeiter sowie die Vereinbarkeit von Familie und Beruf eine große Rolle. Wir bieten unseren Mitarbeiterinnen und Mitarbeitern ein attraktives Umfeld, indem wir den Bedürfnissen der Beschäftigten mit geeigneten Angeboten entgegenkommen. Insbesondere Teilzeitmodelle ermöglichen eine weitgehend flexibel gestaltete Tätigkeit, die den individuellen Bedürfnissen so weit wie möglich entspricht.

### **Nachwuchs gezielt im Visier**

Gut ausgebildete und motivierte Nachwuchskräfte sind auch eine entscheidende Voraussetzung für den langfristigen Erfolg eines Unternehmens. Weil Beiersdorf sich ebenso seiner gesellschaftlichen Verantwortung bewusst ist, wurden im Geschäftsjahr 2010 erneut mehr junge Menschen ausgebildet, als es unserem Bedarf entspricht. Insgesamt waren am 31. Dezember 2010 519 Auszubildende weltweit bei Beiersdorf beschäftigt.

Neben dem Traineeprogramm „BEYOND BORDERS“ pflegt Beiersdorf Kooperationen mit Universitäten, um frühzeitig und kontinuierlich Kontakt zu hoch qualifiziertem akademischen Nachwuchs zu bekommen. Im Rahmen weltweiten Arbeitgeber-Marketings, des „Employer Brandings“, sprechen wir mit gezielten Aktivitäten an ausgewählten Hochschulen genauso viel versprechende Kandidaten an wie mit unserem Studenten-Partnerprogramm „CLOSE2B“. Die Erfolge der intensiven Nachwuchsarbeit sind deutlich zu erkennen: 2010 war Beiersdorf das einzige Konsumgüterunternehmen, das in der renommierten Umfrage des Instituts Trendence bei den besten Studierenden der Wirtschaftswissenschaften in Deutschland unter die Top Ten kam.

Die Aktivitäten und Konzepte des „Employer Branding“ werden kontinuierlich erweitert. Dazu gehören auch Maßnahmen, um die Bindung qualifizierter Mitarbeiterinnen und Mitarbeiter an das Unternehmen zu verstärken. Bereits 2009 startete das Programm in den 16 wichtigsten Gesellschaften. In Brasilien und Mexiko wurden die dortigen Tochtergesellschaften 2010 von den Beschäftigten in unabhängigen Umfragen als exzellente Arbeitgeber bewertet.

### **Wissen macht wettbewerbsfähig**

Die ständige Weiterbildung und die Verbesserung des vorhandenen Wissens aller Mitarbeiterinnen und Mitarbeiter sind für Beiersdorf eine Selbstverständlichkeit. Darüber hinaus sehen wir Weiterbildung auch als eine Maßnahme im Zusammenhang mit der demografischen Entwicklung, um unsere Belegschaft fit zu halten für die sich ändernden Anforderungen an ihre Arbeitstätigkeit. Das Unternehmen bietet ein vielfältiges und umfangreiches Programm an, um eine kontinuierliche Fortbildung zu gewährleisten. Dazu gehören „Training on the Job“-Aktivitäten genauso wie spezielle Weiterbildungen außerhalb des Arbeitsplatzes. Um die Schulung vor Ort in den internationalen Märkten zu optimieren, hat Beiersdorf so genannte „Ready-to-go“-Konzepte entwickelt mit weitgehend standardisierten, fertigen Inhalten. Dies stellt eine effektive, kostengünstige Möglichkeit für kleinere Tochtergesellschaften dar, ihre Mitarbeiterinnen und Mitarbeiter ganz gezielt in wichtigen geschäftsrelevanten Themen zu schulen.

Unser Ziel ist es, klare Karrierewege und Entwicklungsmöglichkeiten für alle Mitarbeiterinnen und Mitarbeiter zu definieren und sie zu motivieren. Das Spektrum der Fortbildung reicht von Angeboten für neue Mitarbeiterinnen und Mitarbeiter bis zum Training für Führungskräfte. So erhalten zum Beispiel Beschäftigte mit internationalen Aufgaben, die kürzer als ein Jahr im Unternehmen sind, in einem dreitägigen Kurs in der Hamburger Zentrale einen intensiven Einblick in die Strategie des Unternehmens und die Arbeitsweise wesentlicher Bereiche wie Marketing oder Supply Chain. Außerdem besuchen die Teilnehmer die Produktion und Forschungseinrichtungen vor Ort.

Das Angebot zur Fortbildung enthält auch vielfältige fachspezifische Trainingskurse. Ob Vertrieb, Marketing oder Präsentation der Marken im Geschäft, ob Finanzen, Projektmanagement oder Verhandlungsführung, ob Change Management oder Human Resources, in allen Bereichen, die für das Geschäft wichtig sind, werden die Beschäftigten von Beiersdorf laufend und intensiv geschult. Dazu gehört selbstverständlich auch das Erlernen von neuen Tätigkeiten und Inhalten.

### **Fortbildung für Führungskräfte**

Der Anspruch von Beiersdorf, mit seinen Produkten eine führende Position in den Märkten zu haben, wird auch im Fortbildungsprogramm für Führungskräfte besonders deutlich. „Passion to Win“ heißt ein Angebot für Angehörige und Kandidaten der ersten Führungsebene, die eine Tochtergesellschaft oder eine große Einheit in der Zentrale führen. In dem Programm erhalten die Teilnehmer die Chance, sich mit neuen Herausforderungen auseinanderzusetzen und sich weiterzuentwickeln. Sie werden dabei von erfahrenen Topmanagement Trainern angeleitet und unterstützt.

Eine weitere Fortbildung mit dem Titel „Courage to Lead“ wendet sich an mittlere Führungskräfte, die zum ersten Mal ein Team führen. Dabei werden ihnen die Kompetenzen vermittelt, um in ihrer neuen Rolle erfolgreich arbeiten zu können.

„Learn to lead“ ist schließlich ein Angebot an Beschäftigte weltweit, die zum ersten Mal eine Führungsrolle im Unternehmen übernehmen und eine internationale Karriere vor sich haben. Sie lernen dabei grundlegende Führungsmethoden und praktische Verhaltensregeln.



## tesa

### Kapazitäten schnell angepasst

Die zügige Erholung der Konjunktur in fast allen Ländern prägte 2010 die Personalarbeit des Unternehmensbereichs tesa. Nachdem Kurzarbeit und Arbeitszeitverkürzungen bereits Ende 2009 ausgelaufen waren, haben wir im Berichtsjahr dafür gesorgt, dass die Kapazitäten schnell an die zunehmende Auslastung der Produktionsstätten angepasst werden konnten.

### Qualifikation hat hohen Stellenwert

Die Qualifikationsprogramme für unsere Belegschaft haben wir nicht nur in vollem Umfang durchgeführt, sondern auch weiterentwickelt. So wurde die Fortbildung der Vertriebsmitarbeiter um neue Funktionen erweitert und in allen Ländern intensiviert. Weitere Module befinden sich in der Planung. Nachdem in den vergangenen vier Jahren viele Mitarbeiterinnen und Mitarbeiter des Vertriebs an verschiedenen Kursen teilgenommen haben, verlagert sich der Schwerpunkt der Weiterbildung inzwischen immer stärker auf die Umsetzung der Inhalte in der täglichen Vertriebspraxis.

Gemeinsam mit der Rotterdam School of Management an der Erasmus Universität von Rotterdam (Niederlande) haben wir ein auf tesa zugeschnittenes internationales „Management Development Program“ gestartet. Es bietet Führungskräften die Möglichkeit, sich mit modernen Managementmethoden auseinanderzusetzen, und zwar sowohl theoretisch als auch praktisch in Projekten. Dabei werden sie sowohl von Fakultätsmitgliedern als auch von erfahrenen Führungskräften unseres Unternehmens begleitet.

## Dank an die Mitarbeiterinnen und Mitarbeiter.

*Der Vorstand dankt allen Mitarbeiterinnen und Mitarbeitern im Unternehmensbereich Consumer und bei tesa für ihre Flexibilität und ihre Leistung.*

*Das Geschäftsjahr 2010 war geprägt von erheblichen Umstrukturierungen im Unternehmen, die Bereitschaft zur Veränderung erforderten und auch Unsicherheiten verursacht haben. Ohne die Leistungsbereitschaft der Beschäftigten wäre es sehr viel schwieriger geworden. Die Motivation der Mitarbeiterinnen und Mitarbeiter ist die Voraussetzung dafür, dass Beiersdorf sich in Zukunft wieder erfolgreich entwickeln wird.*

## Risikobericht

### Integriertes Risiko- und Chancenmanagement

Unternehmerischer Erfolg erfordert das bewusste Eingehen von Risiken. Das Risikomanagement unterstützt uns, die mit der strategischen Ausrichtung verbundenen Risiken zu bewältigen und strategische Potenziale optimal auszuschöpfen. Durch einen regelmäßigen Strategieabgleich sorgen wir dafür, dass Chancen und Risiken in einem sinnvollen Verhältnis zueinander stehen. Wir gehen Risiken nur dann ein, wenn ihnen die Chance auf eine angemessene Wertsteigerung entgegensteht und sie mit anerkannten Methoden und Maßnahmen innerhalb unserer Organisation handhabbar sind.

Das Risikomanagement ist ein integraler Bestandteil der zentralen sowie dezentralen Planungs-, Steuerungs- und Kontrollprozesse und folgt konzerneinheitlichen Standards. Eine offene Kommunikation, die periodisch vorgenommene Risikoinventur sowie das Planungs- und Steuerungssystem schaffen Transparenz über unsere Risikosituation. Das Risikomanagement wird in der Konzernzentrale koordiniert.

### Rechnungslegungsbezogenes internes Kontrollsystem

Zur Sicherung der Ordnungsmäßigkeit der Buchführung und Rechnungslegung sowie der Verlässlichkeit der finanziellen Berichterstattung in Konzernabschluss und Konzernlagebericht besteht ein rechnungslegungsbezogenes internes Kontrollsystem. Als integraler Bestandteil des Konzernrechnungslegungsprozesses umfasst es präventive, überwachende und aufdeckende Sicherungs- und Kontrollmaßnahmen im Rechnungswesen und in operativen Funktionen. Die in die Aufbau- wie auch Ablauforganisation integrierten Sicherungsmaßnahmen sollen Fehler verhindern. Durch die Kontrollen sollen die Wahrscheinlichkeit des Auftretens von Fehlern in Arbeitsabläufen vermindert und Fehler aufgedeckt werden. Zu den Maßnahmen zählen unter anderem Funktionstrennungen, manuelle und IT-gestützte Genehmigungsprozesse wie das Vier-Augen-Prinzip, IT-Kontrollen, Zugriffsbeschränkungen und Berechtigungskonzepte im IT-System sowie systemgestützte Verfahren zur Verarbeitung konzernrechnungslegungsbezogener Daten. Verfahrensanweisungen, standardisierte Meldeformate und IT-gestützte Berichts- und Konsolidierungsprozesse unterstützen die Konzernrechnungslegung und die rechnungslegungsbezogene Berichterstattung der in den Konzernabschluss einbezogenen Tochtergesellschaften.

Die wesentlichen Rechnungslegungsprozesse der Beiersdorf AG und eines Großteils der europäischen Tochtergesellschaften werden durch die Beiersdorf Shared Services GmbH einheitlich abgedeckt. Grundsätze, Prozesse und Berichtsorganisation der Konzernrechnungslegung sind in einem Accounting & Controlling Manual und einem Risikomanagementhandbuch dokumentiert. Gesetze, Rechnungslegungsstandards und Verlautbarungen werden hinsichtlich Relevanz und Auswirkungen analysiert und entsprechend berücksichtigt.

### Unabhängige Überwachung

Die Interne Revision überwacht durch systematische Prüfungen das Risikomanagement und die Einhaltung des internen Kontrollsystems. Als prozessunabhängige Instanz gewährleistet sie die Integrität der Geschäftsabläufe sowie die Wirksamkeit der installierten Systeme und Kontrollen. Des Weiteren prüft der Abschlussprüfer das Risikofrüherkennungs- und Überwachungssystem. Er berichtet das Prüfungsergebnis an den Vorstand sowie den Aufsichtsrat und insbesondere dessen Prüfungs- und Finanzausschuss, der sich regelmäßig mit diesen Themen befasst.

### Unser Risikoprofil

#### Strategische und branchenspezifische Risiken

Erhalt und Ausbau des Werts unserer großen verbrauchernahen Marken mit ihrer breiten Tragfähigkeit sind für die wirtschaftliche Entwicklung von Beiersdorf von zentraler Bedeutung. Wir haben unser Risikomanagementsystem darauf ausgerichtet, den Wert unserer Marken zu schützen.

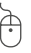

Geschäftsbericht.  
Beiersdorf.de

Die Einhaltung hoher Standards hinsichtlich Qualität und Sicherheit unserer Produkte bildet die Basis für das nachhaltige Vertrauen der Kunden in unsere Marken. Bei der Neuentwicklung von Produkten führen wir daher eine intensive Sicherheitsbewertung durch, die Verbraucherrückmeldungen zu früheren Produkten berücksichtigt. Über den gesamten Beschaffungs-, Herstellungs- und Distributionsprozess hinweg unterliegen unsere Produkte durchgängig den hohen Anforderungen unseres Qualitätsmanagementsystems.

Innovationen auf Basis einer starken Forschung und Entwicklung sind Voraussetzung für Akzeptanz und Attraktivität unserer Produkte beim Verbraucher. Eine sorgfältige Markenführung nimmt Trends beim Verbraucher sowie die Ergebnisse intensiver Markt- und Wettbewerbsanalysen auf und sorgt zugleich dafür, dass der Markenkern erhalten bleibt und behutsam weiterentwickelt wird.

Starke Marken mit ihrer Balance von Innovation und Kontinuität sind unsere Antwort auf den weltweit intensiven Preis-, Qualitäts- und Innovationswettbewerb. Mit der Entwicklung und Implementierung des „Consumer Insights“-Prozesses haben wir die Voraussetzungen dafür geschaffen, Verbrauchervünsche noch schneller aufzunehmen und in unsere Produktentwicklungen einfließen zu lassen. Dies wirkt zugleich einer zunehmenden Konzentration im Handel sowie dem regionalen Aufkommen von Handelsmarken entgegen.

Kompetenzbasierte Marken erfordern hohe Vorleistungen in den Bereichen Innovation und Marketing. Daher kommt dem kontinuierlichen Ausbau unseres Marken- und Patentrechtsportfolios eine zentrale Bedeutung zu. Insbesondere die Unterbindung von Nachahmungen durch gezielte Anmeldung und Durchsetzung von Schutzrechten trägt dazu bei, die zuvor geschaffenen Ertragspotenziale abzusichern und weiter auszubauen.

#### **Leistungswirtschaftliche und informationstechnische Risiken**

Ein detailliertes Monitoring unserer Kundenbeziehungen, ein aktives Forderungsmanagement sowie der selektive Einsatz von Warenkreditversicherungen wirken Risiken durch Forderungsausfälle entgegen.

Risiken in der Beschaffung bezüglich Liefertreue und Kosten bei Rohstoffen und Waren sowie der Inanspruchnahme von Dienstleistungen begegnen wir durch ein kontinuierliches Monitoring unserer Märkte und Lieferanten, eine aktive Steuerung unseres Lieferantenportfolios sowie ein adäquates Vertragsmanagement. Die Einkaufsstrategien werden regelmäßig überprüft und den internen und externen Erfordernissen angepasst.

Durch Kooperationen und Kontakte mit Universitäten bauen wir frühzeitig Verbindungen zu qualifizierten Nachwuchskräften auf, die wir durch spezielle Einstiegsprogramme auf eine Karriere bei Beiersdorf vorbereiten. Unser weltweit einheitlicher Talent-Management-Prozess identifiziert und fördert talentierte Fach- und Führungskräfte auf allen Ebenen und unterstützt die qualifizierte Nachbesetzung von wichtigen Positionen im ganzen Unternehmen.

Durch klare Führungsstrukturen sowie durch effiziente organisatorische Maßnahmen begegnen wir Compliance-Risiken. Prozessbegleitende Kontrollen und standortbezogene Audits begrenzen Arbeitssicherheits-, Umwelt- und Unterbrechungsrisiken bei Produktions- und Logistikaktivitäten. Risiken im Hinblick auf Verfügbarkeit, Zuverlässigkeit und Effizienz unserer IT-Systeme begrenzen wir durch laufende Überwachung, Anpassungsmaßnahmen wie auch durch die Etablierung eines in den IT-Betrieb integrierten Continuity Managements. Ausgewählten Risiken begegnen wir durch einen Transfer auf Versicherungsunternehmen.

### Finanzwirtschaftliche Risiken

Währungs-, Zins- und Liquiditätsrisiken unterliegen einem aktiven Treasury Management auf der Basis weltweit geltender Richtlinien. Sie werden überwiegend zentral gesteuert und gesichert. Dabei werden die spezifischen Anforderungen an die organisatorische Trennung der Funktionsbereiche Handel, Abwicklung und Kontrolle beachtet. Derivative Finanzinstrumente dienen primär der Sicherung operativer Grundgeschäfte und betriebsnotwendiger Finanztransaktionen. Dem Konzern entstehen daraus keine wesentlichen zusätzlichen Risiken.

Währungsrisiken aus konzerninternen Warenlieferungen und Leistungen begrenzen wir durch Devisentermingeschäfte. Dabei werden grundsätzlich 75 % der geplanten Nettoszahlungsströme eines Jahres gesichert (cashflow hedges on forecasted transactions). Währungsrisiken aus konzerninternen grenzüberschreitenden Finanzierungen werden grundsätzlich von der zentralen Treasuryabteilung durch Devisentermingeschäfte vollständig am Markt gesichert.

Potenzielle Ausfallrisiken im Zusammenhang mit der Anlage der Konzernliquidität werden dadurch begrenzt, dass nur kurzfristige und mittelfristige Anlagen bei erstklassigen Kontrahenten erfolgen. Das Kontrahentenrisiko überwachen wir anhand von Ratings und haftendem Eigenkapital der Kontrahenten sowie der eigenen Risikotragfähigkeit. Darüber hinaus beobachten wir die relative Bonität der Kontrahenten anhand von Methoden, die eine sehr kurzfristige Indikation zur Einschätzung eines Marktteilnehmers liefern. Mit Hilfe dieser Parameter werden Höchstbeträge für Anlagen bei jeder Partnerbank ermittelt (Kontrahentenlimits), denen wir regelmäßig die tatsächlich getätigten konzernweiten Anlagen gegenüberstellen. Angesichts der Entwicklungen auf den Kapitalmärkten haben wir mehr als die Hälfte unserer Liquidität in risikoarme Anlagen angelegt (wie z.B. Staats- und Industriebanleihen).

Zur optimalen Steuerung unserer Anlagen setzen wir Methoden und Instrumente zur Konzentration der Liquidität der Tochtergesellschaften ein. Durch angemessene Systeme stellen wir Transparenz über die in den Tochtergesellschaften verbleibenden Mittel her. Positive Salden sind im zentralen Kontrahentenrisikomanagement erfasst.

Klare Zuordnungen von Verantwortlichkeiten, zentrale Regeln zur grundlegenden Begrenzung finanzieller Risiken und die bewusste Ausrichtung der eingesetzten Instrumente auf die Erfordernisse unserer Geschäftstätigkeit sind Ausdruck des finanzbezogenen Risikomanagements.

Neben anderen Unternehmen sind Gesellschaften des Beiersdorf Konzerns in Belgien, Deutschland, Frankreich, den Niederlanden, der Schweiz und Italien in Kartellverfahren im Bereich Kosmetikartikel auf nationaler Ebene involviert. In Deutschland, den Niederlanden und der Schweiz liegen Beschuldigungsschreiben vor. Das Verfahren in Großbritannien wurde eingestellt. Unsere italienische Gesellschaft hat im Dezember einen Bußgeldbescheid erhalten. Wir rechnen in den nächsten Monaten mit weiteren Entscheidungen. Sofern der Abfluss von wirtschaftlichen Ressourcen zur Erfüllung dieser Verpflichtungen wahrscheinlich ist, sind Rückstellungen für die anhängenden Kartellverfahren in Höhe der bestmöglichen Schätzung des Erfüllungsbetrags gebildet worden. Eine abschließende Einschätzung des Risikos aus Konzernsicht ist zurzeit jedoch noch nicht möglich.

### Gesamtaussage zur Risikosituation des Konzerns

Nach unserer heutigen Einschätzung sind für den Beiersdorf Konzern keine bestandsgefährdenden Risiken vorhanden.

## Bericht des Vorstands über die Beziehungen zu verbundenen Unternehmen

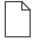

siehe  
Seite 127 ff.

Der Vorstand hat gemäß § 312 AktG einen Bericht über die Beziehungen zu verbundenen Unternehmen erstellt, der folgende Schlussfolgerung enthält: „Die Beiersdorf Aktiengesellschaft hat nach den Umständen, die uns in dem Zeitpunkt bekannt waren, in dem Rechtsgeschäfte vorgenommen oder Maßnahmen getroffen oder unterlassen wurden, bei jedem Rechtsgeschäft eine angemessene Gegenleistung erhalten und ist dadurch, dass Maßnahmen getroffen oder unterlassen wurden, nicht benachteiligt worden.“

## Nachtragsbericht

Vorgänge von besonderer Bedeutung sind nach dem Schluss des Geschäftsjahrs nicht eingetreten.

## Übernahmerechtliche Angaben

Im Folgenden sind die gemäß § 315 Abs. 4 HGB erforderlichen übernahmerechtlichen Angaben dargestellt.

Im Hinblick auf die Angaben zur Zusammensetzung des gezeichneten Kapitals und die Angaben zu direkten oder indirekten Beteiligungen am Kapital, die 10 % der Stimmrechte überschreiten, wird auf den Anhang verwiesen. Ergänzend dazu hat Herr Michael Herz, Deutschland, dem Vorstand mitgeteilt, dass ihm weitere Anteile an der Beiersdorf Aktiengesellschaft zuzurechnen sind und er direkt Anteile an der Beiersdorf Aktiengesellschaft hält. Für Herrn Michael Herz ergibt sich damit insgesamt ein Stimmrechtsanteil von 60,47 % an der Beiersdorf Aktiengesellschaft (einschließlich 9,99 % nicht stimm- und dividendenberechtigter eigener Aktien der Beiersdorf Aktiengesellschaft).

Die Ernennung und Abberufung der Mitglieder des Vorstands sind in den §§ 84, 85 AktG, § 31 MitbestG und § 7 der Satzung geregelt. Gemäß § 7 der Satzung besteht der Vorstand aus mindestens drei Personen; im Übrigen bestimmt der Aufsichtsrat die Anzahl der Vorstandsmitglieder. Die Änderung der Satzung erfolgt nach den §§ 179, 133 AktG sowie § 16 der Satzung. Nach § 16 der Satzung ist der Aufsichtsrat ermächtigt, Änderungen und Ergänzungen der Satzung zu beschließen, die nur die Fassung betreffen. Gemäß § 5 Abs. 6 der Satzung ist der Aufsichtsrat insbesondere ermächtigt, § 5 der Satzung (Grundkapital) jeweils nach Ausnutzung von genehmigtem oder bedingtem Kapital entsprechend zu ändern und neu zu fassen.

Die Hauptversammlung hat am 29. April 2010 den Vorstand ermächtigt, das Grundkapital in der Zeit bis zum 28. April 2015 mit Zustimmung des Aufsichtsrats um bis zu insgesamt 92 Mio. € (genehmigtes Kapital I: 42 Mio. €; genehmigtes Kapital II: 25 Mio. €; genehmigtes Kapital III: 25 Mio. €) durch einmalige oder mehrmalige Ausgabe neuer auf den Inhaber lautender Stückaktien zu erhöhen. Dabei kann die Gewinnberechtigung neuer Aktien abweichend von § 60 Abs. 2 AktG bestimmt werden.

Den Aktionären ist ein Bezugsrecht einzuräumen. Das Bezugsrecht kann jedoch durch den Vorstand in folgenden Fällen mit Zustimmung des Aufsichtsrats ausgeschlossen werden:

1. zum Ausgleich von infolge einer Kapitalerhöhung gegen Bareinlagen entstehenden Spitzenbeiträgen (genehmigte Kapitalien I, II, III);

2. soweit dies erforderlich ist, um Inhabern/Gläubigern der von der Beiersdorf Aktiengesellschaft oder ihren unmittelbaren oder mittelbaren Mehrheitsbeteiligungsgesellschaften ausgegebenen Wandel- bzw. Optionsschuldverschreibungen ein Bezugsrecht auf neue Aktien in dem Umfang zu gewähren, wie es ihnen nach Ausübung der Wandlungs- oder Optionsrechte bzw. nach Erfüllung der Wandlungspflicht zustehen würde (genehmigte Kapitalien I, II, III);
3. wenn der auf die neuen Aktien, für die das Bezugsrecht ausgeschlossen wird, insgesamt entfallende anteilige Betrag des Grundkapitals zehn von Hundert des im Zeitpunkt des Wirksamwerdens dieser Ermächtigung bzw. – falls dieser Wert niedriger ist – im Zeitpunkt der Ausgabe der neuen Aktien vorhandenen Grundkapitals nicht übersteigt und der Ausgabebetrag der neuen Aktien den Börsenpreis der bereits börsennotierten Aktien zum Zeitpunkt der endgültigen Festlegung des Ausgabebetrags, welche möglichst zeitnah zur Platzierung der Aktien erfolgen soll, nicht wesentlich unterschreitet. Im Rahmen der Beschränkung dieser Ermächtigung auf insgesamt zehn von hundert des Grundkapitals sind diejenigen Aktien anzurechnen, für die seit dem 29. April 2010 das Bezugsrecht der Aktionäre in Anwendung des § 186 Abs. 3 Satz 4 AktG bei Ausnutzung der Ermächtigung zur Veräußerung eigener Aktien und/oder bei Ausnutzung der Ermächtigung zur Ausgabe von Wandel- bzw. Optionsschuldverschreibungen ausgeschlossen wird (genehmigtes Kapital II);
4. bei Kapitalerhöhungen gegen Sacheinlagen zum Zwecke des Erwerbs von Unternehmen, Unternehmensteilen oder von Beteiligungen an Unternehmen (genehmigtes Kapital III).

Der Vorstand wurde ferner ermächtigt, die weiteren Einzelheiten der Kapitalerhöhung und ihrer Durchführung mit Zustimmung des Aufsichtsrats festzulegen.

Darüber hinaus hat die Hauptversammlung am 29. April 2010 beschlossen, das Grundkapital um bis zu insgesamt 42 Mio. €, eingeteilt in bis zu 42 Mio. auf den Inhaber lautende Stückaktien, bedingt zu erhöhen. Die bedingte Kapitalerhöhung wird nur insoweit durchgeführt, wie

1. die Inhaber bzw. Gläubiger von Wandlungs- und/oder Optionsrechten, die mit den von der Beiersdorf Aktiengesellschaft oder deren unmittelbaren oder mittelbaren Mehrheitsbeteiligungsgesellschaften bis zum 28. April 2015 auszugebenden Wandel- und/oder Optionsschuldverschreibungen verbunden sind, von ihrem Wandlungs- bzw. Optionsrecht Gebrauch machen oder wie
2. die zur Wandlung verpflichteten Inhaber bzw. Gläubiger der von der Beiersdorf Aktiengesellschaft oder deren unmittelbaren oder mittelbaren Mehrheitsbeteiligungsgesellschaften bis zum 28. April 2015 auszugebenden Wandelschuldverschreibungen ihre Pflicht zur Wandlung erfüllen und das bedingte Kapital nach Maßgabe der Anleihebedingungen dafür benötigt wird.

Die neuen Aktien nehmen vom Beginn des Geschäftsjahres an, in dem sie durch Ausübung von Wandlungs- bzw. Optionsrechten oder durch Erfüllung von Wandlungspflichten entstehen, am Gewinn teil.

Der Vorstand wurde ermächtigt, die weiteren Einzelheiten der Durchführung einer bedingten Kapitalerhöhung festzusetzen.

Außerdem hat die Hauptversammlung am 29. April 2010 die Gesellschaft ermächtigt, gemäß § 71 Abs. 1 Nr. 8 AktG in der Zeit bis zum 28. April 2015 eigene Aktien im Umfang von insgesamt bis zu zehn von hundert des derzeitigen Grundkapitals zu erwerben. Der Erwerb erfolgt über die Börse oder mittels eines an alle Aktionäre gerichteten öffentlichen Kaufangebots. Der Vorstand wurde ermächtigt, die aufgrund der vorstehenden oder einer vorhergehenden Ermächtigung erworbenen



eigenen Aktien mit Zustimmung des Aufsichtsrats ganz oder teilweise unter Ausschluss des Bezugsrechts der Aktionäre auch in anderer Weise als über die Börse oder durch Angebot an alle Aktionäre zu veräußern, soweit diese Aktien gegen Barzahlung zu einem Preis veräußert werden, der den Börsenkurs von Aktien der Gesellschaft gleicher Ausstattung zum Zeitpunkt der Veräußerung nicht wesentlich unterschreitet. Der Vorstand wurde ferner ermächtigt, die vorstehend beschriebenen eigenen Aktien mit Zustimmung des Aufsichtsrats ganz oder teilweise unter Ausschluss des Bezugsrechts der Aktionäre als Gegen- oder Teilgegenleistung im Rahmen von Unternehmenszusammenschlüssen oder zum Erwerb von Unternehmen, Beteiligungen an Unternehmen (einschließlich der Erhöhung von Beteiligungen) oder Unternehmensteilen zu verwenden. Zudem kann der Vorstand diese eigenen Aktien mit Zustimmung des Aufsichtsrats ganz oder teilweise unter Ausschluss des Bezugsrechts der Aktionäre verwenden, um die Bezugs- und/oder Umtauschrechte aus von der Gesellschaft oder deren unmittelbaren oder mittelbaren Mehrheitsbeteiligungsgesellschaften ausgegebenen Wandel- bzw. Optionsschuldverschreibungen zu erfüllen. Schließlich ist der Vorstand ermächtigt worden, mit Zustimmung des Aufsichtsrats die vorstehend beschriebenen eigenen Aktien ohne weiteren Hauptversammlungsbeschluss einzuziehen.

Durch die Schaffung des genehmigten und bedingten Kapitals soll die Gesellschaft in die Lage versetzt werden, schnell und flexibel auf Wachstumsmöglichkeiten und Möglichkeiten am Kapitalmarkt reagieren zu können. Die Ermächtigung zum Erwerb und zur Verwendung eigener Aktien ermöglicht es der Gesellschaft, insbesondere auch institutionellen oder anderen Investoren, Aktien der Gesellschaft anzubieten und/oder den Aktionärskreis der Gesellschaft zu erweitern sowie die erworbenen eigenen Aktien als Gegenleistung für den Erwerb von Unternehmen, Unternehmensbeteiligungen (einschließlich der Erhöhung von Beteiligungen) oder im Rahmen von Unternehmenszusammenschlüssen, das heißt gegen Sachleistung, zu begeben.

## Ausweisänderung der Umsatzerlöse und Marketingkosten ab 2011

Gemäß den IFRS bestehen derzeit noch keine konkreten Regeln zum Ausweis von Aufwendungen für Leistungen an Handelspartner für erbrachte Dienstleistungen. Eine einheitliche Bilanzierungspraxis zur Abbildung dieser Aufwendungen in der Gewinn- und Verlustrechnung hat sich daher bislang nicht herausgebildet. In der Konsumgüterindustrie ist jedoch ein Trend zu beobachten, diese Aufwendungen von den Umsatzerlösen abzusetzen. Im Juni 2010 wurde vom International Accounting Standards Board (IASB) und dem Financial Accounting Standards Board (FASB) ein gemeinsamer Standardentwurf „Revenue from Contracts with Customers“ veröffentlicht. Dieser behandelt die Erfassung von Umsätzen und soll unter anderem den Ausweis von Aufwendungen für Leistungen an Handelspartner für erbrachte Dienstleistungen regeln. Im Hinblick auf diese Entwicklungen und Konkretisierungen des Ausweises wird der Beiersdorf Konzern beginnend mit dem 01.01.2011 eine freiwillige Änderung der Bilanzierungsmethode vornehmen und ab diesem Zeitpunkt Aufwendungen für Leistungen an Handelspartner nicht mehr in den Marketing- und Vertriebskosten zeigen, sondern sie von den Umsatzerlösen absetzen, soweit ihnen nicht eindeutig identifizierbare Gegenleistungen gegenüberstehen, deren beizulegender Zeitwert sich verlässlich schätzen lässt.

Für die Berichterstattung in 2011 werden die Vorjahreswerte (2010) angepasst. Dadurch werden die Umsatzerlöse 2010 um etwa 10 % und die Marketing- und Vertriebskosten um den gleichen absoluten Betrag niedriger ausgewiesen. Diese Änderung wirkt sich nur auf die Umsatzerlöse und die Marketing- und Vertriebskosten aus. Sie hat keinen Einfluss auf das operative betriebliche Ergebnis (EBIT), den Jahresüberschuss, das Ergebnis je Aktie, die Bilanz und die Kapitalflussrechnung. Gleichwohl ändern sich alle auf die Umsatzerlöse bezogenen Kennzahlen.

## Prognosebericht

### Entwicklung der wirtschaftlichen Rahmenfaktoren

Die globale wirtschaftliche Entwicklung wird unserer Einschätzung nach in den nächsten Jahren regional erneut sehr unterschiedlich verlaufen. Die Industrieländer dürften 2011 den Erholungsprozess aus der Krise fortsetzen, während wir in den Entwicklungs- sowie Schwellenländern eine anhaltend überdurchschnittliche Wachstumsdynamik erwarten.

Die konjunkturelle Entwicklung in Europa wird weiterhin äußerst heterogen verlaufen. Volkswirtschaften mit einer ausgeprägten Exportorientierung werden von der weltwirtschaftlichen Erholung stärker profitieren. In den europäischen Staaten, die von der Finanzkrise stärker betroffen sind, erwarten wir eine unterdurchschnittliche Entwicklung der Märkte.

Für die US-Wirtschaft gehen wir von einer Wachstumsrate des BIP aus, die nur marginal über der im Jahr 2010 liegen wird. Die gesamtwirtschaftliche Nachfrage wird weiterhin nicht die Dynamik entfalten, die vor der Finanz- und Wirtschaftskrise zu beobachten war. Im Wesentlichen wird der Konsum durch eine hohe Arbeitslosigkeit sowie das veränderte Sparverhalten gebremst.

Im asiatischen Raum rechnen wir weiterhin mit einem überdurchschnittlichen Wachstum, das maßgeblich durch China getrieben wird. Die fiskal- sowie geldpolitischen Maßnahmen der chinesischen Politik, die inflationäre Tendenzen eindämmen sollen, werden voraussichtlich das Wachstum nicht behindern.

Aufgrund der anhaltend starken Nachfrage in den relevanten Beschaffungsmärkten ist mit weiter steigenden Preisen zu rechnen. In Materialkategorien mit knappen Kapazitäten auf der Anbieterseite sowie natürlicher Knappheit von Rohstoffen sind zudem Verfügbarkeitsengpässe zu erwarten.

### Branchenentwicklung

Die Wachstumsrate des weltweiten Kosmetikmarkts wird sich nach unserer Einschätzung wieder auf dem Niveau der Jahre vor der Krise einpendeln. In den großen Märkten Westeuropas und in Nordamerika rechnen wir weiterhin mit einem verhaltenen Marktwachstum. Asien und Lateinamerika werden mit zweistelligen Zuwachsraten weiterhin deutlich zur positiven Gesamtentwicklung beitragen.

Für die weltweite Entwicklung des Klebebandmarkts gehen wir davon aus, dass sich der positive Trend, allerdings in abgeschwächter Form, fortsetzt. Asien, Lateinamerika und Osteuropa werden weiterhin die größte Dynamik aufweisen. Während wir in Westeuropa mit insgesamt moderatem Wachstum rechnen, bleibt in Nordamerika die Automobilindustrie starker Wachstumstreiber mit zugleich höherem Unsicherheitsfaktor.

### Unsere Chancen im Markt

Die Märkte entwickelten sich auch im Jahr 2010 heterogen und die Wettbewerbssituation hat sich weiterhin verschärft. Wir haben unsere Strategie und Organisation an diese Marktsituation angepasst. Obwohl wir besondere Chancen in unserer verstärkt regional ausgerichteten Geschäftssteuerung und der Bündelung der Ressourcen auf die Wachstumsmärkte sehen, werden die eingeleiteten Maßnahmen erst mittelfristig umfänglich wirksam. Auf dieser Einschätzung basiert auch unsere konservative Planung für das kommende Geschäftsjahr.

Basierend auf einer soliden Finanzstruktur und einer starken Ertragsposition in Verbindung mit unseren engagierten und qualifizierten Mitarbeitern werden wir mit unserem Markenportfolio auch zukünftig die Chancen nutzen, die sich uns bieten. Umfangreiche Forschungs- und Entwicklungsaktivitäten unterstützt von gezielten Marketingmaßnahmen stärken unseren Markenkern und schaffen nachhaltiges Vertrauen bei unseren Verbrauchern.

## Geschäftsentwicklung

Die Einschätzung der Geschäftsentwicklung der nächsten Jahre basiert auf den oben geschilderten Annahmen. In den Ausblick einbezogen ist das im Dezember 2010 für den Unternehmensbereich Consumer verabschiedete Maßnahmen- und Investitionspaket. Es wurden substanzielle Marketinginvestitionen in die Haut- und Körperpflegemarken beschlossen, eine globale Straffung und Harmonisierung des Produkt-Portfolios sowie die Neuausrichtung von regionalen Strukturen. Diese Entscheidungen werden die Jahre 2011 und 2012 noch mit etwa 150 Mio. € Aufwand belasten, davon entfällt der größte Teil auf das Jahr 2011. Die positiven Effekte dieser Maßnahmen erwarten wir in voller Höhe erst ab dem Jahr 2012.

Für den **Konzern** soll in 2011 das Umsatzniveau des Jahres 2010 wieder erreicht werden, für 2012 erwarten wir wieder ein Umsatzwachstum. Die operative EBIT-Umsatzrendite des Konzerns wird 2011 die Vorjahresrendite nicht ganz erreichen, für das Folgejahr gehen wir wieder von einer Verbesserung der Rendite aus.

Im Unternehmensbereich **Consumer** wird die Entwicklung des Umsatzes durch die Auswirkungen der geplanten Sortimentsstraffung stark beeinflusst. Das Umsatzwachstum in unseren Kernbereichen soll dabei aber die Effekte der Sortimentsbereinigung in etwa ausgleichen. Der Unternehmensbereich soll somit wieder das Umsatzniveau von 2010 halten. Die operative EBIT-Umsatzrendite wird den Vorjahreswert nicht erreichen. Im Jahr 2012 soll die operative EBIT-Umsatzrendite jedoch wieder steigen.

**tesa** geht für die kommenden Jahre in beiden Kundensegmenten von leicht über dem Marktwachstum liegenden Umsatzentwicklungen aus. Die anhaltend hohe Innovationsrate in Verbindung mit fortgesetzten Investitionen in die Bereiche Forschung & Entwicklung, Marketing und Vertrieb stärkt die allgemeine Marktposition von tesa nachhaltig. Die in 2009 eingeleiteten Maßnahmen sind inzwischen abgeschlossen und zeigen nun in vollem Umfang ihre Wirkung. Auf dieser Basis rechnen wir mit einer sich gegenüber 2010 leicht verbessernden Ergebnisentwicklung.

Wir sind davon überzeugt, dass wir mit unseren starken Marken, innovativen Produkten, den Prozessoptimierungen und unserer überarbeiteten strategischen Ausrichtung für die zukünftige Entwicklung gut aufgestellt sind.

*Hamburg, 8. Februar 2011*

Beiersdorf AG

Der Vorstand

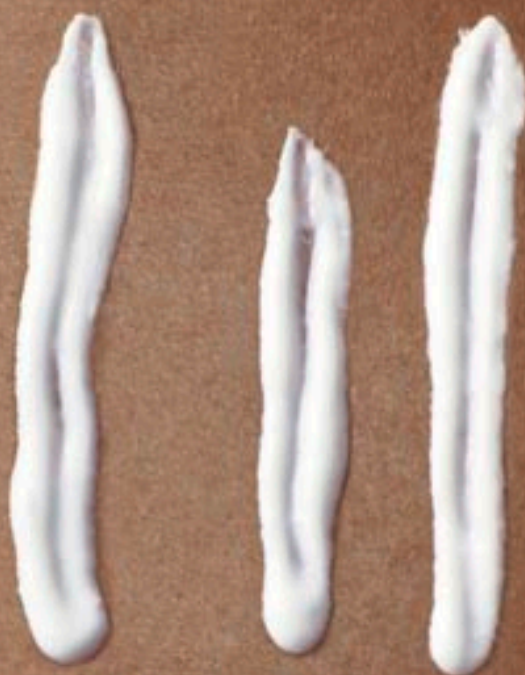

|            |            |            |
|------------|------------|------------|
| 696 Mio. € | 587 Mio. € | 699 Mio. € |
| 2008       | 2009       | 2010       |

---

(Betriebliches Ergebnis / EBIT ohne Sondereffekte)  
– 2008 – 2010 –



## 04 Konzernabschluss

Beiersdorf Geschäftsbericht 2010

Ein Konzernabschluss ist der Jahresabschluss eines Konzerns. Der Konzernabschluss wird durch die Konsolidierung der nach einheitlichen Methoden erstellten Jahresabschlüsse der in den Konzernabschluss einbezogenen Unternehmen erstellt.

### Inhalt

|        |                                                     |
|--------|-----------------------------------------------------|
| S. 91  | Gewinn- und Verlustrechnung Konzern                 |
| S. 92  | Gesamtergebnisrechnung Konzern                      |
| S. 93  | Bilanz Konzern                                      |
| S. 94  | Kapitalflussrechnung Konzern                        |
| S. 95  | Eigenkapitalveränderungsrechnung Konzern            |
|        | <b>Konzernanhang</b>                                |
| S. 96  | Segmentberichterstattung Konzern                    |
| S. 98  | Grundlagen und Methoden                             |
| S. 105 | Konsolidierungskreis, Akquisitionen und Divestments |
| S. 110 | Erläuterungen zur Gewinn- und Verlustrechnung       |
| S. 113 | Erläuterungen zur Bilanz                            |
| S. 127 | Sonstige Angaben                                    |
| S. 131 | Organe der Beiersdorf AG                            |

## Gewinn- und Verlustrechnung Konzern

(in Mio. €)

|                                                             | Anhang    | 2009         | 2010         |
|-------------------------------------------------------------|-----------|--------------|--------------|
| <b>Umsatzerlöse</b>                                         | <b>01</b> | <b>5.748</b> | <b>6.194</b> |
| Kosten der umgesetzten Leistungen                           |           | -1.882       | -2.016       |
| <b>Brutto-Ergebnis vom Umsatz</b>                           |           | <b>3.866</b> | <b>4.178</b> |
| Marketing- und Vertriebskosten                              | 02        | -2.766       | -2.959       |
| Forschungs- und Entwicklungskosten                          |           | -149         | -152         |
| Allgemeine Verwaltungskosten                                | 03        | -283         | -278         |
| Sonstige betriebliche Erträge                               | 04        | 94           | 86           |
| Sonstige betriebliche Aufwendungen                          | 05        | -175         | -292         |
| <b>Betriebliches Ergebnis (EBIT)</b>                        |           | <b>587</b>   | <b>583</b>   |
| Zinserträge                                                 | 06        | 21           | 19           |
| Zinsaufwendungen                                            | 06        | -15          | -13          |
| Pensionsergebnis                                            | 06        | -2           | -6           |
| Übriges Finanzergebnis                                      | 06        | -8           | -30          |
| <b>Finanzergebnis</b>                                       | <b>06</b> | <b>-4</b>    | <b>-30</b>   |
| <b>Ergebnis vor Steuern</b>                                 |           | <b>583</b>   | <b>553</b>   |
| Ertragsteuern                                               | 07        | -203         | -227         |
| <b>Jahresüberschuss</b>                                     |           | <b>380</b>   | <b>326</b>   |
| Ergebnis der Anteilseigner der Beiersdorf AG                |           | 374          | 318          |
| Ergebnis der nicht beherrschenden Anteile                   | 08        | 6            | 8            |
| <b>Unverwässertes/verwässertes Ergebnis je Aktie (in €)</b> | <b>09</b> | <b>1,65</b>  | <b>1,40</b>  |



## Gesamtergebnisrechnung Konzern

(in Mio. €)

|                                                                                                                                       | 2009       | 2010       |
|---------------------------------------------------------------------------------------------------------------------------------------|------------|------------|
| <b>Jahresüberschuss</b>                                                                                                               | <b>380</b> | <b>326</b> |
| Veränderung der Marktbewertung von Cashflow Hedges                                                                                    | -38        | -6         |
| Latente Steuern auf die Veränderung der Marktbewertung von Cashflow Hedges                                                            | 16         | 2          |
| Veränderung des im Eigenkapital erfassten Betrags aus der Marktbewertung von Cashflow Hedges                                          | -22        | -4         |
| Veränderung der Marktbewertung von zur Veräußerung verfügbaren finanziellen Vermögenswerten                                           | 2          | -          |
| Latente Steuern auf die Veränderung der Marktbewertung von zur Veräußerung verfügbaren finanziellen Vermögenswerten                   | -1         | -          |
| Veränderung des im Eigenkapital erfassten Betrags aus der Marktbewertung von zur Veräußerung verfügbaren finanziellen Vermögenswerten | 1          | -          |
| Unterschiede aus der Währungsumrechnung                                                                                               | 27         | 128        |
| <b>Sonstiges Ergebnis nach Steuern</b>                                                                                                | <b>6</b>   | <b>124</b> |
| <b>Gesamtergebnis</b>                                                                                                                 | <b>386</b> | <b>450</b> |
| Davon entfallen auf                                                                                                                   |            |            |
| – Anteilseigner der Beiersdorf AG                                                                                                     | 380        | 440        |
| – Nicht beherrschende Anteile                                                                                                         | 6          | 10         |

## Bilanz Konzern

(in Mio. €)

|                                                           | Anhang    | 31.12.2009   | 31.12.2010   |
|-----------------------------------------------------------|-----------|--------------|--------------|
| <b>Aktiva</b>                                             |           |              |              |
| Immaterielle Vermögenswerte                               | 11        | 382          | 306          |
| Sachanlagen                                               | 12        | 725          | 716          |
| Langfristige finanzielle Vermögenswerte                   |           | 10           | 10           |
| Sonstige langfristige Vermögenswerte                      |           | 2            | 2            |
| Latente Steueransprüche                                   |           | 58           | 76           |
| <b>Langfristige Vermögenswerte</b>                        |           | <b>1.177</b> | <b>1.110</b> |
| Vorräte                                                   | 13        | 561          | 632          |
| Forderungen aus Lieferungen und Leistungen                | 14        | 906          | 1.001        |
| Sonstige kurzfristige finanzielle Vermögenswerte          |           | 91           | 72           |
| Ertragsteuerforderungen                                   |           | 41           | 63           |
| Sonstige kurzfristige Vermögenswerte                      |           | 96           | 112          |
| Wertpapiere                                               | 15        | 955          | 1.132        |
| Zahlungsmittel und Zahlungsmitteläquivalente              | 16        | 767          | 973          |
| <b>Kurzfristige Vermögenswerte</b>                        |           | <b>3.417</b> | <b>3.985</b> |
|                                                           |           | <b>4.594</b> | <b>5.095</b> |
| <b>Passiva</b>                                            |           |              |              |
| Gezeichnetes Kapital                                      | 18        | 252          | 252          |
| Kapitalrücklage                                           | 21        | 47           | 47           |
| Gewinnrücklagen                                           | 22        | 2.450        | 2.609        |
| Kumuliertes sonstiges Konzernergebnis                     |           | -123         | -1           |
| <b>Anteile der Anteilseigner der Beiersdorf AG</b>        |           | <b>2.626</b> | <b>2.907</b> |
| Nicht beherrschende Anteile                               |           | 10           | 13           |
| <b>Eigenkapital</b>                                       | <b>28</b> | <b>2.636</b> | <b>2.920</b> |
| Rückstellungen für Pensionen und ähnliche Verpflichtungen | 25        | 221          | 209          |
| Sonstige langfristige Rückstellungen                      | 26        | 138          | 117          |
| Langfristige finanzielle Verbindlichkeiten                | 27        | 7            | 8            |
| Sonstige langfristige Verbindlichkeiten                   | 27        | 5            | 5            |
| Latente Steuerverbindlichkeiten                           | 07        | 161          | 155          |
| <b>Langfristiges Fremdkapital</b>                         |           | <b>532</b>   | <b>494</b>   |
| Sonstige kurzfristige Rückstellungen                      | 26        | 391          | 486          |
| Ertragsteuerverbindlichkeiten                             |           | 107          | 126          |
| Verbindlichkeiten aus Lieferungen und Leistungen          | 27        | 699          | 863          |
| Sonstige kurzfristige finanzielle Verbindlichkeiten       | 27        | 158          | 135          |
| Sonstige kurzfristige Verbindlichkeiten                   | 27        | 71           | 71           |
| <b>Kurzfristiges Fremdkapital</b>                         |           | <b>1.426</b> | <b>1.681</b> |
|                                                           |           | <b>4.594</b> | <b>5.095</b> |

## Kapitalflussrechnung Konzern

(in Mio. €)

|                                                                       | 2009        | 2010        |
|-----------------------------------------------------------------------|-------------|-------------|
| <b>Betriebliches Ergebnis (EBIT)</b>                                  | <b>587</b>  | <b>583</b>  |
| Auszahlungen für Ertragsteuern                                        | -205        | -247        |
| Abschreibungen auf das immaterielle und Sachanlagevermögen            | 135         | 221         |
| Veränderung der langfristigen Rückstellungen (ohne Zinsanteil)        | -9          | -38         |
| Ergebnis aus dem Abgang von immateriellem und Sachanlagevermögen      | -1          | -1          |
| <b>Brutto-Cashflow</b>                                                | <b>507</b>  | <b>518</b>  |
| Veränderung der Vorräte                                               | 73          | -71         |
| Veränderung der Forderungen und sonstigen Vermögenswerte              | -2          | -52         |
| Veränderung der Verbindlichkeiten und kurzfristigen Rückstellungen    | -12         | 225         |
| <b>Cashflow aus operativer Geschäftstätigkeit</b>                     | <b>566</b>  | <b>620</b>  |
| Auszahlungen für Investitionen                                        | -125        | -96         |
| Einzahlungen aus Divestments und dem Verkauf von Anlagevermögen       | 12          | 12          |
| Auszahlungen für den Erwerb von Wertpapieren                          | -804        | -814        |
| Einzahlungen aus dem Verkauf von Wertpapieren                         | 751         | 634         |
| Zinseinzahlungen                                                      | 18          | 20          |
| Dividenden- und sonstige Finanzeinzahlungen                           | 18          | 16          |
| <b>Cashflow aus investiver Tätigkeit</b>                              | <b>-130</b> | <b>-228</b> |
| <b>Free-Cashflow</b>                                                  | <b>436</b>  | <b>392</b>  |
| Einzahlungen aus der Aufnahme von Krediten                            | 75          | 143         |
| Auszahlungen aus der Tilgung von Krediten                             | -109        | -152        |
| Zinsauszahlungen                                                      | -15         | -6          |
| Sonstige Finanzauszahlungen                                           | -26         | -31         |
| Auszahlung Dividende Beiersdorf AG                                    | -204        | -159        |
| Auszahlung Dividende an nicht beherrschende Anteilseigner             | -6          | -7          |
| <b>Cashflow aus Finanzierungstätigkeit</b>                            | <b>-285</b> | <b>-212</b> |
| Wechselkursbedingte Veränderung des Finanzmittelbestands              | 3           | 26          |
| <b>Veränderungen der Zahlungsmittel und Zahlungsmitteläquivalente</b> | <b>154</b>  | <b>206</b>  |
| <b>Zahlungsmittel und Zahlungsmitteläquivalente am 01.01.</b>         | <b>613</b>  | <b>767</b>  |
| <b>Zahlungsmittel und Zahlungsmitteläquivalente am 31.12.</b>         | <b>767</b>  | <b>973</b>  |

## Eigenkapitalveränderungsrechnung Konzern

(in Mio. €)

|                                                                         | Gezeichnetes<br>Kapital | Kapital-<br>rücklage | Gewinn-<br>rücklagen* | Kumuliertes sonstiges<br>Konzernergebnis          |                                                                                  |                                                                        | Summe der<br>Anteilseigner | Nicht<br>beherr-<br>schende<br>Anteile | Gesamt       |
|-------------------------------------------------------------------------|-------------------------|----------------------|-----------------------|---------------------------------------------------|----------------------------------------------------------------------------------|------------------------------------------------------------------------|----------------------------|----------------------------------------|--------------|
|                                                                         |                         |                      |                       | Unterschied<br>aus der<br>Währungs-<br>umrechnung | Sicherungs-<br>instrumente<br>aus der<br>Absicherung<br>von Zahlungs-<br>strömen | Zur<br>Veräußerung<br>verfügbare<br>finanzielle<br>Vermögens-<br>werte |                            |                                        |              |
| <b>01.01.2009</b>                                                       | <b>252</b>              | <b>47</b>            | <b>2.280</b>          | <b>-154</b>                                       | <b>21</b>                                                                        | <b>4</b>                                                               | <b>2.450</b>               | <b>10</b>                              | <b>2.460</b> |
| Gesamtergebnis<br>der Periode                                           | –                       | –                    | 374                   | 27                                                | –22                                                                              | 1                                                                      | 380                        | 6                                      | 386          |
| Dividende<br>Beiersdorf AG<br>für das Vorjahr                           | –                       | –                    | –204                  | –                                                 | –                                                                                | –                                                                      | –204                       | –                                      | –204         |
| Dividende an nicht<br>beherrschende<br>Anteilseigner<br>für das Vorjahr | –                       | –                    | –                     | –                                                 | –                                                                                | –                                                                      | –                          | –6                                     | –6           |
| <b>31.12.2009</b>                                                       | <b>252</b>              | <b>47</b>            | <b>2.450</b>          | <b>-127</b>                                       | <b>-1</b>                                                                        | <b>5</b>                                                               | <b>2.626</b>               | <b>10</b>                              | <b>2.636</b> |
| <b>01.01.2010</b>                                                       | <b>252</b>              | <b>47</b>            | <b>2.450</b>          | <b>-127</b>                                       | <b>-1</b>                                                                        | <b>5</b>                                                               | <b>2.626</b>               | <b>10</b>                              | <b>2.636</b> |
| Gesamtergebnis<br>der Periode                                           | –                       | –                    | 318                   | 126                                               | –4                                                                               | –                                                                      | 440                        | 10                                     | 450          |
| Dividende<br>Beiersdorf AG<br>für das Vorjahr                           | –                       | –                    | –159                  | –                                                 | –                                                                                | –                                                                      | –159                       | –                                      | –159         |
| Dividende an nicht<br>beherrschende<br>Anteilseigner<br>für das Vorjahr | –                       | –                    | –                     | –                                                 | –                                                                                | –                                                                      | –                          | –7                                     | –7           |
| <b>31.12.2010</b>                                                       | <b>252</b>              | <b>47</b>            | <b>2.609</b>          | <b>-1</b>                                         | <b>-5</b>                                                                        | <b>5</b>                                                               | <b>2.907</b>               | <b>13</b>                              | <b>2.920</b> |

\* Die Gewinnrücklagen beinhalten eine Kürzung um die Anschaffungskosten eigener Anteile von 955 Mio. €.

## Segmentberichterstattung Konzern

(in Mio. €)

| Unternehmensbereiche 2010                                                 | Consumer      | tesa         | Konzern       |
|---------------------------------------------------------------------------|---------------|--------------|---------------|
| <b>Außenumsatz</b>                                                        | <b>5.321</b>  | <b>873</b>   | <b>6.194</b>  |
| Veränderung zum Vorjahr (nominal) (in %)                                  | 6,2           | 18,4         | 7,8           |
| Veränderung zum Vorjahr (wechsellkursbereinigt) (in %)                    | 1,6           | 13,3         | 3,1           |
| <b>Anteil am Konzernumsatz</b> (in %)                                     | <b>85,9</b>   | <b>14,1</b>  | <b>100,0</b>  |
| <b>EBITDA</b>                                                             | <b>668</b>    | <b>136</b>   | <b>804</b>    |
| <b>Betriebliches Ergebnis (EBIT)</b>                                      | <b>483</b>    | <b>100</b>   | <b>583</b>    |
| In % vom Umsatz                                                           | 9,1           | 11,4         | 9,4           |
| <b>Betriebliches Ergebnis (EBIT, ohne Sondereffekte)*</b>                 | <b>599</b>    | <b>100</b>   | <b>699</b>    |
| In % vom Umsatz                                                           | 11,3          | 11,4         | 11,3          |
| <b>Operatives Brutto-Vermögen</b>                                         | <b>2.262</b>  | <b>513</b>   | <b>2.775</b>  |
| <b>Operative Verbindlichkeiten</b>                                        | <b>1.383</b>  | <b>177</b>   | <b>1.560</b>  |
| <b>EBIT-Rendite auf das operative Netto-Vermögen</b> (in %)               | <b>54,9</b>   | <b>29,5</b>  | <b>47,9</b>   |
| <b>Brutto-Cashflow</b>                                                    | <b>424</b>    | <b>94</b>    | <b>518</b>    |
| <b>Investitionen</b>                                                      | <b>63</b>     | <b>33</b>    | <b>96</b>     |
| <b>Abschreibungen</b>                                                     | <b>106</b>    | <b>36</b>    | <b>142</b>    |
| <b>Wertminderungen auf Markenrechte sowie Geschäfts- oder Firmenwerte</b> | <b>79</b>     | <b>–</b>     | <b>79</b>     |
| <b>Forschungs- und Entwicklungskosten</b>                                 | <b>114</b>    | <b>38</b>    | <b>152</b>    |
| <b>Mitarbeiter</b> (Anzahl am 31.12.2010)                                 | <b>15.506</b> | <b>3.622</b> | <b>19.128</b> |

\* Ohne Sondereffekte (bitte siehe S. 60)

| Unternehmensbereiche 2009                                   | Consumer      | tesa         | Konzern       |
|-------------------------------------------------------------|---------------|--------------|---------------|
| <b>Außenumsatz</b>                                          | <b>5.011</b>  | <b>737</b>   | <b>5.748</b>  |
| Veränderung zum Vorjahr (nominal) (in %)                    | –2,2          | –12,8        | –3,7          |
| Veränderung zum Vorjahr (wechsellkursbereinigt) (in %)      | –1,0          | –12,2        | –2,6          |
| <b>Anteil am Konzernumsatz</b> (in %)                       | <b>87,2</b>   | <b>12,8</b>  | <b>100,0</b>  |
| <b>EBITDA</b>                                               | <b>654</b>    | <b>68</b>    | <b>722</b>    |
| <b>Betriebliches Ergebnis (EBIT)</b>                        | <b>558</b>    | <b>29</b>    | <b>587</b>    |
| In % vom Umsatz                                             | 11,1          | 3,9          | 10,2          |
| <b>Operatives Brutto-Vermögen</b>                           | <b>2.237</b>  | <b>477</b>   | <b>2.714</b>  |
| <b>Operative Verbindlichkeiten</b>                          | <b>1.175</b>  | <b>160</b>   | <b>1.335</b>  |
| <b>EBIT-Rendite auf das operative Netto-Vermögen</b> (in %) | <b>52,6</b>   | <b>9,1</b>   | <b>42,6</b>   |
| <b>Brutto-Cashflow</b>                                      | <b>440</b>    | <b>67</b>    | <b>507</b>    |
| <b>Investitionen</b>                                        | <b>84</b>     | <b>41</b>    | <b>125</b>    |
| <b>Abschreibungen</b>                                       | <b>96</b>     | <b>39</b>    | <b>135</b>    |
| <b>Forschungs- und Entwicklungskosten</b>                   | <b>116</b>    | <b>33</b>    | <b>149</b>    |
| <b>Mitarbeiter</b> (Anzahl am 31.12.2009)                   | <b>16.648</b> | <b>3.698</b> | <b>20.346</b> |

(in Mio. €)

| Regionen 2010                                                                 | Europa        | Amerika      | Afrika/Asien/<br>Australien | Konzern       |
|-------------------------------------------------------------------------------|---------------|--------------|-----------------------------|---------------|
| <b>Außenumsatz</b>                                                            | <b>3.843</b>  | <b>1.030</b> | <b>1.321</b>                | <b>6.194</b>  |
| Veränderung zum Vorjahr (nominal) (in %)                                      | 2,0           | 21,0         | 16,9                        | 7,8           |
| Veränderung zum Vorjahr (wechsellkursbereinigt) (in %)                        | -0,2          | 15,4         | 4,7                         | 3,1           |
| <b>Anteil am Konzernumsatz</b> (in %)                                         | <b>62,1</b>   | <b>16,6</b>  | <b>21,3</b>                 | <b>100,0</b>  |
| <b>EBITDA</b>                                                                 | <b>661</b>    | <b>90</b>    | <b>53</b>                   | <b>804</b>    |
| <b>Betriebliches Ergebnis (EBIT)</b>                                          | <b>555</b>    | <b>78</b>    | <b>-50</b>                  | <b>583</b>    |
| In % vom Umsatz                                                               | 14,4          | 7,6          | -3,8                        | 9,4           |
| <b>Betriebliches Ergebnis (EBIT, ohne Sondereffekte)*</b>                     | <b>589</b>    | <b>78</b>    | <b>32</b>                   | <b>699</b>    |
| In % vom Umsatz                                                               | 15,3          | 7,6          | 2,4                         | 11,3          |
| <b>Operatives Brutto-Vermögen</b>                                             | <b>1.746</b>  | <b>427</b>   | <b>602</b>                  | <b>2.775</b>  |
| <b>Operative Verbindlichkeiten</b>                                            | <b>1.053</b>  | <b>187</b>   | <b>320</b>                  | <b>1.560</b>  |
| <b>EBIT-Rendite auf das operative Netto-Vermögen</b> (in %)                   | <b>78,0</b>   | <b>32,2</b>  | <b>-13,0</b>                | <b>47,9</b>   |
| <b>Brutto-Cashflow</b>                                                        | <b>432</b>    | <b>62</b>    | <b>24</b>                   | <b>518</b>    |
| <b>Investitionen</b>                                                          | <b>72</b>     | <b>8</b>     | <b>16</b>                   | <b>96</b>     |
| <b>Abschreibungen</b>                                                         | <b>106</b>    | <b>12</b>    | <b>24</b>                   | <b>142</b>    |
| <b>Wertminderungen auf Markenrechte sowie<br/>Geschäfts- oder Firmenwerte</b> | <b>-</b>      | <b>-</b>     | <b>79</b>                   | <b>79</b>     |
| <b>Forschungs- und Entwicklungskosten</b>                                     | <b>148</b>    | <b>1</b>     | <b>3</b>                    | <b>152</b>    |
| <b>Mitarbeiter</b> (Anzahl am 31.12.2010)                                     | <b>10.523</b> | <b>2.086</b> | <b>6.519</b>                | <b>19.128</b> |

\* Ohne Sondereffekte (bitte siehe S. 60).

| Regionen 2009                                               | Europa        | Amerika      | Afrika/Asien/<br>Australien | Konzern       |
|-------------------------------------------------------------|---------------|--------------|-----------------------------|---------------|
| <b>Außenumsatz</b>                                          | <b>3.767</b>  | <b>851</b>   | <b>1.130</b>                | <b>5.748</b>  |
| Veränderung zum Vorjahr (nominal) (in %)                    | -7,9          | 2,3          | 7,6                         | -3,7          |
| Veränderung zum Vorjahr (wechsellkursbereinigt) (in %)      | -4,9          | 2,6          | 2,4                         | -2,6          |
| <b>Anteil am Konzernumsatz</b> (in %)                       | <b>65,5</b>   | <b>14,8</b>  | <b>19,7</b>                 | <b>100,0</b>  |
| <b>EBITDA</b>                                               | <b>640</b>    | <b>31</b>    | <b>51</b>                   | <b>722</b>    |
| <b>Betriebliches Ergebnis (EBIT)</b>                        | <b>535</b>    | <b>20</b>    | <b>32</b>                   | <b>587</b>    |
| In % vom Umsatz                                             | 14,2          | 2,4          | 2,8                         | 10,2          |
| <b>Operatives Brutto-Vermögen</b>                           | <b>1.765</b>  | <b>358</b>   | <b>591</b>                  | <b>2.714</b>  |
| <b>Operative Verbindlichkeiten</b>                          | <b>910</b>    | <b>152</b>   | <b>273</b>                  | <b>1.335</b>  |
| <b>EBIT-Rendite auf das operative Netto-Vermögen</b> (in %) | <b>62,6</b>   | <b>10,0</b>  | <b>9,9</b>                  | <b>42,6</b>   |
| <b>Brutto-Cashflow</b>                                      | <b>477</b>    | <b>10</b>    | <b>20</b>                   | <b>507</b>    |
| <b>Investitionen</b>                                        | <b>93</b>     | <b>13</b>    | <b>19</b>                   | <b>125</b>    |
| <b>Abschreibungen</b>                                       | <b>105</b>    | <b>11</b>    | <b>19</b>                   | <b>135</b>    |
| <b>Forschungs- und Entwicklungskosten</b>                   | <b>146</b>    | <b>1</b>     | <b>2</b>                    | <b>149</b>    |
| <b>Mitarbeiter</b> (Anzahl am 31.12.2009)                   | <b>10.741</b> | <b>2.152</b> | <b>7.453</b>                | <b>20.346</b> |



## Grundlagen und Methoden

### Informationen zur Gesellschaft und zum Konzern

Die Beiersdorf AG hat ihren Firmensitz in der Unnastraße 48 in Hamburg (Deutschland) und ist beim Amtsgericht Hamburg im Handelsregister unter HRB 1787 eingetragen. Das oberste Mutterunternehmen der Gesellschaft ist die maxingvest ag, Hamburg (Deutschland).

Die Aktivitäten der Beiersdorf AG und ihrer Tochtergesellschaften („Beiersdorf Konzern“) umfassen im Wesentlichen die Herstellung und den Vertrieb von Markenartikelprodukten in den Bereichen Haut- und Körperpflege sowie die Herstellung und den Vertrieb von technischen Klebebändern.

Der Konzernabschluss der Beiersdorf AG für das Geschäftsjahr vom 1. Januar bis zum 31. Dezember 2010 wurde am 8. Februar 2011 durch den Vorstand aufgestellt und anschließend zur Prüfung und Billigung an den Aufsichtsrat weitergeleitet.

### Allgemeine Grundsätze

Der Konzernabschluss der Beiersdorf AG wurde in Übereinstimmung mit den International Financial Reporting Standards (IFRS) des International Accounting Standards Board (IASB) einschließlich der Interpretationen des International Financial Reporting Interpretations Committee zu den IFRS (IFRIC) und den ergänzend nach § 315a Abs. 1 HGB anzuwendenden handelsrechtlichen Vorschriften aufgestellt. Es wurden alle IFRS und IFRIC beachtet, die zum 31. Dezember 2010 von der EU-Kommission übernommen wurden und verpflichtend anzuwenden sind.

Die Erstellung des Konzernabschlusses erfolgt grundsätzlich unter Anwendung des Anschaffungskostenprinzips. Hiervon ausgenommen sind Finanzinstrumente der Kategorie „zur Veräußerung verfügbar“ und „erfolgswirksam zum beizulegenden Zeitwert bewertet“ sowie derivative Finanzinstrumente, die jeweils zu beizulegenden Zeitwerten bewertet werden, sofern diese verlässlich bestimmbar sind.

Die Konzern-Gewinn- und Verlustrechnung wurde nach dem Umsatzkostenverfahren erstellt. Um die Klarheit der Darstellung in der Gewinn- und Verlustrechnung sowie in der Bilanz zu verbessern, wurden einzelne Posten zusammengefasst. Diese Posten werden im Anhang gesondert ausgewiesen und erläutert.

### Schätzungen und Annahmen

Im Konzernabschluss müssen in einem begrenzten Umfang Schätzungen vorgenommen und Annahmen getroffen werden, die Auswirkungen auf Höhe und Ausweis der bilanzierten Vermögenswerte und Schulden, der Erträge und Aufwendungen sowie der Eventualverbindlichkeiten haben. Dabei werden sämtliche aktuell verfügbaren Erkenntnisse berücksichtigt. Wesentliche Schätzungen und Annahmen wurden insbesondere bei den nachfolgend dargestellten Bilanzierungs- und Bewertungsmethoden vorgenommen: der Wertminderung von Geschäfts- oder Firmenwerten und immateriellen Vermögenswerten mit unbestimmter Nutzungsdauer (Abschnitt 11 „Immaterielle Vermögenswerte“), der Wertberichtigung zweifelhafter Forderungen (Abschnitt 14 „Forderungen aus Lieferungen und Leistungen“), den versicherungsmathematischen Parametern bei der Berechnung des Aufwands aus leistungsorientierten Plänen sowie der Barwert von Pensionsverpflichtungen (Abschnitt 25 „Rückstellungen für Pensionen und ähnliche Verpflichtungen“), der Ermittlung der Höhe der aktivierungsfähigen latenten Steueransprüche (Abschnitt 7 „Ertragsteuern“) und der Berechnung der sonstigen Rückstellungen (Abschnitt 26 „Sonstige Rückstellungen“). Darüber hinaus werden Schätzungen und Annahmen insbesondere bei der Bestimmung von Nutzungsdauern von immateriellen Vermögenswerten und Sachanlagen, die einer jährlichen Überprüfung unterliegen, und der Bewertung der Vorräte vorgenommen.

Die tatsächlichen Werte können von den Schätzungen abweichen. Änderungen werden zum Zeitpunkt einer besseren Kenntnis erfolgswirksam berücksichtigt.

### Konsolidierungsgrundsätze

Die Kapitalkonsolidierung erfolgt nach der Erwerbsmethode. Danach werden die Anschaffungskosten des Unternehmenszusammenschlusses auf die erworbenen identifizierbaren Vermögenswerte und die übernommenen identifizierbaren Schulden und Eventualschulden entsprechend ihrer beizulegenden Zeitwerte zum Erwerbszeitpunkt verteilt. Ein Überschuss der Anschaffungskosten der Beteiligung über die anteiligen Nettozeitwerte der identifizierbaren Vermögenswerte, Schulden und Eventualschulden wird als Geschäfts- oder Firmenwert bilanziert.

Anteile ohne beherrschenden Einfluss am Ergebnis und Eigenkapital von Tochterunternehmen werden gesondert in der Konzern-Gewinn- und Verlustrechnung und innerhalb des Eigenkapitals in der Konzernbilanz ausgewiesen. Verluste eines Tochterunternehmens werden den Anteilen

ohne beherrschenden Einfluss auch dann zugeordnet, wenn dies zu einem negativen Saldo führt. Beim Erwerb weiterer Anteile von Tochterunternehmen wird der Unterschiedsbetrag zwischen den Anschaffungskosten dieser Anteile und dem zuvor im Konzern für diese Anteile ausgewiesenen Anteil ohne beherrschenden Einfluss erfolgsneutral im Eigenkapital erfasst. Bei sukzessiven Unternehmenserwerben erfolgt eine erfolgswirksame Neubewertung von zum Zeitpunkt des Beherrschungsübergangs bereits gehaltener Anteile. Eine Anpassung bedingter Kaufpreisbestandteile wird erfolgswirksam erfasst.

Alle konzerninternen Salden, Transaktionen, Erträge und Aufwendungen sowie Gewinne und Verluste aus konzerninternen Transaktionen, die im Buchwert von Vermögenswerten enthalten sind, werden in voller Höhe eliminiert.

### Währungsumrechnung

Der Konzernabschluss wird in Euro aufgestellt. Der Euro entspricht der funktionalen und der Darstellungswährung der Beiersdorf AG. Sofern nichts anderes angegeben ist, werden sämtliche Werte auf Millionen (Mio. €) gerundet. Jedes Unternehmen innerhalb des Konzerns legt seine eigene funktionale Währung fest. Aufgrund finanzieller, wirtschaftlicher und organisatorischer Selbständigkeit der ausländischen Tochtergesellschaften, entspricht die funktionale Währung jeweils der Landeswährung. Die im Abschluss des jeweiligen Unternehmens enthaltenen Posten werden unter Verwendung dieser funktionalen Währung bewertet. Fremdwährungstransaktionen werden zunächst zum am Tag des Geschäftsvorfalles gültigen Kassakurs zwischen der funktionalen Währung und der Fremdwährung umgerechnet. Nicht monetäre Posten, die zu historischen Anschaffungs- oder Herstellungskosten in einer Fremdwährung bewertet wurden, werden mit dem Kurs am Tag des Geschäftsvorfalles umgerechnet. Währungsdifferenzen aus der Umrechnung monetärer Posten werden erfolgswirksam erfasst. Monetäre Vermögenswerte und Schulden in einer Fremdwährung werden zum Stichtagskurs in die funktionale Währung umgerechnet.

Zum Bilanzstichtag werden bei ausländischen Tochterunternehmen mit nicht auf den Euro lautender funktionaler Währung die Vermögenswerte und Schulden zum Stichtagskurs in Euro umgerechnet. Erträge und Aufwendungen werden zum Durchschnittskurs des Geschäftsjahres umgerechnet. Die hieraus entstehenden Umrechnungsdifferenzen werden als separater Bestandteil des Eigenkapitals erfasst.

Die Entwicklungen der Wechselkurse der für den Konzernabschluss wesentlichen Währungen sind in den nachfolgend stehenden Tabellen aufgeführt:

#### Entwicklung der Wechselkurse (1 € =)

|                   | ISO-Code | Durchschnittskurse |          |
|-------------------|----------|--------------------|----------|
|                   |          | 2009               | 2010     |
| Schweizer Franken | CHF      | 1,5076             | 1,3700   |
| Chinesischer Yuan | CNY      | 9,5370             | 8,9277   |
| Britisches Pfund  | GBP      | 0,8900             | 0,8560   |
| Japanischer Yen   | JPY      | 130,6283           | 115,2592 |
| Polnischer Zloty  | PLN      | 4,3469             | 4,0049   |
| US-Dollar         | USD      | 1,3963             | 1,3207   |

#### Entwicklung der Wechselkurse (1 € =)

|                   | ISO-Code | Stichtagskurse |          |
|-------------------|----------|----------------|----------|
|                   |          | 2009           | 2010     |
| Schweizer Franken | CHF      | 1,4836         | 1,2504   |
| Chinesischer Yuan | CNY      | 9,8350         | 8,8220   |
| Britisches Pfund  | GBP      | 0,8881         | 0,8608   |
| Japanischer Yen   | JPY      | 133,1600       | 108,6500 |
| Polnischer Zloty  | PLN      | 4,1045         | 3,9750   |
| US-Dollar         | USD      | 1,4406         | 1,3362   |

### Änderungen der Bilanzierungs- und Bewertungsmethoden

Die Bilanzierungs- und Bewertungsmethoden entsprechen grundsätzlich den im Vorjahr angewandten Methoden. Die folgenden Standards waren im Geschäftsjahr erstmalig anzuwenden:

- IAS 27 „Konzern- und separate Einzelabschlüsse“ und IFRS 3 „Unternehmenszusammenschlüsse“ (ab/nach 01.07.2009)

Die neuen Standards sehen bei der bilanziellen Behandlung von Minderheitenanteilen ein Wahlrecht zur Bewertung zum beizulegenden Zeitwert oder dem anteiligen identifizierbaren Nettovermögen vor. Weiterhin sind Änderungen der Beteiligungsquote ohne Verlust der Beherrschung erfolgsneutral im Eigenkapital und mit Verlust der Beherrschung erfolgswirksam zu erfassen. Anschaffungsnebenkosten stellen Aufwand dar.

- „Verbesserungen von IFRS 2009“ (ab/nach 01.01. bzw. 01.07.2010)  
Hierdurch erfolgten 15 Änderungen an zwölf bestehenden IFRS. Gegenstand des jährlichen Verbesserungskonzepts sind notwendige, aber nicht dringende Änderungen an bestehenden IFRS, welche nicht im Rahmen anderer großer Projekte durchgeführt werden.

Aus der erstmalig verpflichtenden Anwendung der überarbeiteten Standards im Geschäftsjahr 2010 ergaben sich keine wesentlichen Auswirkungen auf den Konzernabschluss. Weitere geänderte bzw. neue Standards und Interpretationen, die ebenfalls im Geschäftsjahr 2010 erstmals verpflichtend anzuwenden waren, hatten keine Auswirkungen auf den Konzernabschluss.

Folgende für die Geschäftstätigkeit des Konzerns relevante Standards und Interpretationen sind zum 31. Dezember 2010 veröffentlicht, aber zu diesem Stichtag noch nicht verpflichtend anzuwenden:

- IFRS 9 „Finanzinstrumente: Klassifizierung und Bewertung“ (ab/nach 01.01.2013)  
Der Standard beinhaltet im Wesentlichen Regelungen zur Kategorisierung von finanziellen Vermögenswerten (künftig nur noch zwei anstatt vier Bewertungskategorien) sowie von finanziellen Verbindlichkeiten.
- IFRS 7 „Finanzinstrumente: Angaben“ (ab/nach 01.07.2011)  
Durch erweiterte Vorschriften sollen die Angaben über Art und Risiken von Transaktionen zum Zwecke der Übertragung von Vermögenswerten verbessert werden.
- „Verbesserungen von IFRS 2010“ (ab/nach 01.01. bzw. 01.07.2011)  
Hierdurch erfolgt die Änderung von sechs IFRS und einer Interpretation des IFRIC. Gegenstand des jährlichen Verbesserungskonzepts sind notwendige, aber nicht dringende Änderungen an bestehenden IFRS, welche nicht im Rahmen anderer großer Projekte durchgeführt werden.

Die Umsetzung erfolgt spätestens im Jahr der erstmalig verpflichtenden Anwendung. Die Auswirkungen des IFRS 9 werden derzeit noch analysiert. Für die Änderungen des IFRS 7 sowie die „Verbesserungen von IFRS 2010“ erwarten wir mit der Ausnahme zusätzlicher bzw. modifizierter Anhangangaben bei der erstmaligen Anwendung keine wesentlichen Auswirkungen auf den Konzernabschluss.

## Wesentliche Bilanzierungs- und Bewertungsgrundsätze

Die **Umsatzerlöse** werden realisiert, wenn die Waren und Erzeugnisse geliefert und die mit dem Eigentum verbundenen maßgeblichen Risiken und Chancen auf den Käufer übergegangen sind. Skonti, Kundenboni und Rabatte werden von den Umsatzerlösen abgesetzt. Die Existenz von Rücklieferrechten wird bei der Realisierung und Bemessung der Umsatzerlöse berücksichtigt.

Die **Kosten der umgesetzten Leistungen** umfassen die Kosten der umgesetzten, selbst erstellten Erzeugnisse und die Einstandskosten der verkauften Handelswaren. Die Kosten der selbst erstellten Erzeugnisse beinhalten neben den direkt zurechenbaren Kosten wie Material-, Personal- und Energiekosten auch die herstellungsbezogenen Gemeinkosten einschließlich der Abschreibungen auf Produktionsanlagen. In den Kosten der umgesetzten Leistungen sind die Abwertungen auf Vorräte enthalten.

Die **Marketing- und Vertriebskosten** enthalten die Kosten für Marketing, Vertriebsorganisation sowie Vertriebslogistik. In den Marketingkosten sind unter anderem die Aufwendungen für Leistungen an Handelspartner für erbrachte Dienstleistungen erfasst. Diese Position enthält auch die Wertberichtigungen auf Forderungen aus Lieferungen und Leistungen.

**Forschungskosten** werden im laufenden Jahr im Periodenergebnis erfasst. Entwicklungskosten für neue Produkte werden nicht aktiviert, da der erwartete zukünftige Nutzen nicht verlässlich bestimmt werden kann. Solange die Produkte noch keine Marktreife erlangt haben, besteht kein belastbarer Beweis, dass positive Zahlungsströme erreicht werden können. Sonstige Entwicklungskosten (insbesondere für Informationssysteme) werden unter der Bedingung aktiviert, dass ein Vermögenswert identifiziert werden kann, der künftig in Form von Einsparungen oder Synergien Nutzenzuflüsse generiert.

Entgeltlich erworbene **immaterielle Vermögenswerte** wie Schutzrechte, Markenrechte und Software werden zu Anschaffungskosten angesetzt. Immaterielle Vermögenswerte mit bestimmter Nutzungsdauer werden über ihre geschätzte Nutzungsdauer linear abgeschrieben. Die Nutzungsdauern, Restwerte und Abschreibungsmethoden werden regelmäßig überprüft. Geschäfts- oder Firmenwerte sowie immaterielle Vermögenswerte mit unbestimmter Nutzungsdauer unterliegen keiner planmäßigen Abschreibung.

Die **Sachanlagen** werden zu Anschaffungs- oder Herstellungskosten aktiviert und planmäßig entsprechend der voraussichtlichen wirtschaftlichen Nutzungsdauer linear abgeschrieben. Die Nutzungsdauern, Restwerte und Abschreibungsmethoden werden jährlich überprüft. Den planmäßigen Abschreibungen auf Sachanlagen liegen im Wesentlichen folgende Nutzungsdauern zu Grunde:

#### Nutzungsdauer Sachanlagen

|                                    |                 |
|------------------------------------|-----------------|
| Produktionsgebäude                 | 25 bis 33 Jahre |
| Übrige Gebäude                     | 10 bis 25 Jahre |
| Technische Anlagen und Maschinen   | 5 bis 15 Jahre  |
| Fahrzeuge                          | 4 Jahre         |
| Betriebs- und Geschäftsausstattung | 3 bis 15 Jahre  |

Die Herstellungskosten selbst erstellter Sachanlagen werden anhand direkt zurechenbarer Einzelkosten sowie der anteiligen herstellungsbezogenen Gemeinkosten ermittelt. Zinsen für Fremdkapital werden als laufender Aufwand erfasst, soweit es sich nicht um die Herstellung qualifizierter Vermögenswerte handelt. Kosten für die Reparatur und Wartung von Sachanlagen stellen ebenso Periodenaufwand dar. Umfangreiche Erneuerungen oder Verbesserungen, die die Produktionskapazität wesentlich erhöhen oder die Lebensdauer eines Vermögenswerts deutlich verlängern, werden aktiviert. Komponenten, die auf diese Weise zuvor aktiviert und durch neu zu aktivierende Maßnahmen ersetzt wurden, werden entsprechend als Abgänge berücksichtigt. Zuwendungen der öffentlichen Hand mindern die Anschaffungs- bzw. Herstellungskosten.

Eine **Überprüfung der Werthaltigkeit** erfolgt bei Geschäfts- oder Firmenwerten sowie immateriellen Vermögenswerten mit unbestimmter Nutzungsdauer mindestens jährlich, bei sonstigen immateriellen Vermögenswerten mit begrenzter Nutzungsdauer sowie bei Sachanlagen nur bei Vorliegen konkreter Anhaltspunkte. Eine Wertminderung wird ergebniswirksam erfasst, soweit der erzielbare Betrag des Vermögenswerts den Buchwert unterschreitet. Der erzielbare Betrag wird für jeden Vermögenswert grundsätzlich einzeln ermittelt. Sofern ein Vermögenswert keine weitgehend von anderen Vermögenswerten unabhängigen Mittelzuflüsse erzeugt, erfolgt die Ermittlung auf Basis einer Gruppe von Vermögenswerten, die als zahlungsmittelgenerierende Einheit bestimmt ist. Der erzielbare Betrag ist der höhere Betrag aus Nettoveräußerungswert und Nutzungswert. Der Nettoveräußerungswert entspricht

dem Betrag, der aus einem Verkauf eines Vermögenswerts zu marktüblichen Bedingungen erzielbar ist, abzüglich seiner Veräußerungskosten. Der Nutzungswert wird grundsätzlich auf Basis der geschätzten künftigen Cashflows aus der Nutzung und dem Abgang eines Vermögenswerts mit Hilfe des Discounted-Cashflow-Verfahrens ermittelt. Die Cashflows werden aus der Unternehmensplanung abgeleitet, aktuelle Entwicklungen werden berücksichtigt. Sie werden unter Anwendung risikoäquivalenter Kapitalisierungssinssätze auf den Zeitpunkt der Überprüfung der Werthaltigkeit abgezinst.

Bei Entfall des Grundes für eine in Vorjahren erfasste Wertminderung erfolgt, mit Ausnahme des Geschäfts- oder Firmenwerts, eine Wertaufholung bis höchstens auf die fortgeführten Anschaffungskosten.

Die Bewertung der **Vorräte** erfolgt zu Anschaffungs- bzw. Herstellungskosten oder zu dem niedrigeren Nettoveräußerungswert. Der Nettoveräußerungswert ist der geschätzte, im normalen Geschäftsgang erzielbare Verkaufserlös abzüglich der geschätzten Kosten bis zur Fertigstellung und der geschätzten notwendigen Vertriebskosten. Die Anschaffungs- oder Herstellungskosten der Vorräte werden nach der Durchschnittsmethode bewertet. Die Herstellungskosten enthalten neben den Einzelkosten anteilige Material- und Fertigungsgemeinkosten sowie fertigungsbedingte Abschreibungen. Darüber hinaus werden die anteiligen Kosten für die betriebliche Altersversorgung und für freiwillige soziale Leistungen des Unternehmens sowie produktionsbezogene Verwaltungskosten einbezogen.

**Finanzinstrumente** sind Verträge, die bei einem Unternehmen zu einem finanziellen Vermögenswert und bei einem anderen Unternehmen zu einer finanziellen Verbindlichkeit führen. Bei dem erstmaligen Ansatz von finanziellen Vermögenswerten und finanziellen Verbindlichkeiten werden diese zu ihrem beizulegenden Zeitwert bewertet. Die Finanzinstrumente im Beiersdorf Konzern sind den Kategorien „Kredite und Forderungen“ (KuF), „Zur Veräußerung verfügbar“ (zVv), „bis zur Endfälligkeit zu halten“ (zEh), „Andere finanzielle Verbindlichkeiten“ (AfV) bzw. „erfolgswirksam zum beizulegenden Zeitwert“ (ebZ) zugeordnet. Derivative Finanzinstrumente mit Hedge Beziehung sind gemäß IAS 39 keiner separaten Kategorie zuzuordnen, im Beiersdorf Konzern werden diese unter „Derivative Finanzinstrumente“ (DF) subsumiert.

**Kredite und Forderungen** sind nicht derivative Finanzinstrumente mit festen oder bestimmbaren Zahlungen, die nicht an einem aktiven Markt notiert sind. Sie werden nach ihrer erstmaligen Erfassung grundsätzlich zu fortgeführten Anschaffungskosten unter Anwendung der Effektivzinsmethode bilanziert.

**Zur Veräußerung verfügbare finanzielle Vermögenswerte** sind jene nicht derivativen finanziellen Vermögenswerte, die nicht in eine andere Kategorie fallen und als „Zur Veräußerung verfügbar“ klassifiziert wurden. Sie werden grundsätzlich mit dem beizulegenden Zeitwert bewertet. Die daraus resultierenden Gewinne und Verluste werden erfolgsneutral im Eigenkapital erfasst. Mit Abgang oder bei Wertberichtigung dieser finanziellen Vermögenswerte werden die kumulierten, im Eigenkapital erfassten Gewinne und Verluste erfolgswirksam in der Gewinn- und Verlustrechnung erfasst. Die Bewertung erfolgt auf Basis entsprechender Marktwerte oder durch Anwendung geeigneter Bewertungsmethoden. Finanzinvestitionen in Eigenkapitalinstrumente, für die kein aktiver Markt existiert und deren Zeitwert nicht verlässlich ermittelt werden kann, sind zu ihren Anschaffungskosten bewertet.

**Bis zur Endfälligkeit zu haltende Finanzinvestitionen** sind nicht derivative finanzielle Vermögenswerte mit festen oder bestimmbaren Zahlungen und einer festen Laufzeit. Sie werden mit den fortgeführten Anschaffungskosten unter Anwendung der Effektivzinsmethode bewertet.

**Erfolgswirksam zum beizulegenden Zeitwert bewertete Vermögenswerte** sind strukturierte Finanzinstrumente, für die der Beiersdorf Konzern von der Nutzung des Wahlrechts der „Fair Value Option“ Gebrauch gemacht hat. Die Ausübung der Option führt zu relevanteren Informationen und reduziert die Komplexität der Bewertung.

Das **Vorliegen einer Wertminderung** wird bei finanziellen Vermögenswerten zu jedem Bilanzstichtag ermittelt. Ein Wertminderungsaufwand sowie mögliche Wertaufholungen in nachfolgenden Perioden werden grundsätzlich sofort erfolgswirksam erfasst. Für zur Veräußerung verfügbare finanzielle Vermögenswerte wird eine Wertberichtigung nur bei signifikanter oder dauerhafter Wertminderung erfasst. Wertaufholungen werden für entsprechende Eigenkapitalinstrumente direkt im sonstigen Ergebnis erfasst. Bei Forderungen aus Lieferungen und Leistungen und sonstigen finanziellen Vermögenswerten, die als „Kredite und Forderungen“ klassifiziert sind, werden erkennbare Risiken durch angemessene Wertminderungen

berücksichtigt. Die Schätzung der Wertminderung bei Forderungen basiert hauptsächlich auf den Ergebnissen des bisherigen Zahlungsverhaltens, der Berücksichtigung der Altersstruktur, einer substanziellen Verschlechterung der Kreditwürdigkeit oder einer hohen Wahrscheinlichkeit für die Insolvenz eines Schuldners und der Veränderungen politischer und makroökonomischer Rahmenbedingungen.

**Andere finanzielle Verbindlichkeiten** werden nach ihrer erstmaligen Erfassung unter Anwendung der Effektivzinsmethode zu fortgeführten Anschaffungskosten bewertet. Gewinne und Verluste werden im Rahmen der Amortisation mittels der Effektivzinsmethode sowie bei Ausbuchung der Verbindlichkeiten erfolgswirksam erfasst. Als langfristig werden Verbindlichkeiten mit Restlaufzeiten über zwölf Monaten eingestuft.

**Ausbuchungen finanzieller Vermögenswerte und finanzieller Verbindlichkeiten** erfolgen, wenn die Verfügungsmacht über die vertraglichen Rechte verloren bzw. die zu Grunde liegende Verpflichtung erfüllt, gekündigt oder erloschen ist.

**Derivative Finanzinstrumente** werden im Beiersdorf Konzern zur Steuerung von gegenwärtigen und zukünftigen Währungsrisiken eingesetzt. Dabei handelt es sich im Wesentlichen um Devisentermingeschäfte. Der Ansatz der derivativen Finanzinstrumente erfolgt dabei zum Zeitwert. Derivative Finanzinstrumente werden in der Bilanz unter den sonstigen finanziellen Vermögenswerten bzw. unter den sonstigen finanziellen Verbindlichkeiten ausgewiesen.

Die Bilanzierung von Zeitwertänderungen der derivativen Finanzinstrumente hängt davon ab, ob diese Instrumente als Sicherungsinstrumente eingesetzt werden und die Voraussetzungen zur Bilanzierung von Sicherungsbeziehungen gemäß IAS 39 erfüllen. Sind diese Voraussetzungen trotz Vorliegens eines wirtschaftlichen Sicherungszusammenhangs nicht gegeben, werden die Zeitwertänderungen der derivativen Finanzinstrumente unmittelbar erfolgswirksam erfasst.

Derivative Finanzinstrumente, die als Sicherungsgeschäft für den beizulegenden Zeitwert klassifiziert werden (Fair Value Hedges), werden zum beizulegenden Zeitwert bewertet. Die entsprechende Änderung des beizulegenden Zeitwertes wird in der Gewinn- und Verlustrechnung ausgewiesen. Der Buchwert des gesicherten Vermögenswertes oder der Schuld wird um die dem abgesicherten

Risiko zuzurechnenden Änderungen des beizulegenden Zeitwertes berichtigt. Die aus den Änderungen resultierenden Gewinne oder Verluste werden im Periodenergebnis erfasst.

Für derivative Finanzinstrumente, die als Sicherungsinstrumente bestimmt wurden und die Voraussetzungen für die Bilanzierung einer Sicherungsbeziehung für die Absicherung von Zahlungsströmen erfüllen (Cashflow Hedge), wird der effektive Teil der Zeitwertänderung unter Berücksichtigung des darauf entfallenden steuerlichen Effekts unmittelbar im Eigenkapital erfasst. Der ineffektive Teil wird ergebniswirksam erfasst. Mit Eintritt des Grundgeschäfts wird der effektive Teil ebenfalls ergebniswirksam erfasst.

Die **beizulegenden Zeitwerte der Finanzinstrumente** werden auf Basis entsprechender Marktwerte oder durch Anwendung geeigneter Bewertungsmethoden bestimmt. Bei mit fortgeführten Anschaffungskosten bilanzierten Finanzinstrumenten erfolgt die Bestimmung des Zeitwerts auf Grundlage der erwarteten Zahlungsströme unter Anwendung der zum Bilanzstichtag herrschenden risiko- und laufzeitkongruenten Referenzzinssätze. Die Zeitwerte der derivativen Finanzinstrumente werden auf Grundlage der zum Bilanzstichtag bestehenden Fremdwährungsterminkurse unter Berücksichtigung von risiko- und laufzeitkongruenten Referenzzinssätzen ermittelt.

**Zur Veräußerung gehaltene Vermögenswerte und Veräußerungsgruppen** und damit in Verbindung stehende Rückstellungen und Verbindlichkeiten werden als gesonderte Posten in der Bilanz ausgewiesen, wenn deren Veräußerung wahrscheinlich ist und die Vermögenswerte in ihrem jetzigen Zustand zur sofortigen Veräußerung verfügbar sind. Zur Veräußerung gehaltene Vermögenswerte werden mit dem niedrigeren Wert aus Buchwert und beizulegendem Zeitwert abzüglich Veräußerungskosten angesetzt.

Die **Pensionsrückstellungen** für die beitragsorientierten Altersversorgungspläne werden ergebniswirksam erfasst. Für die leistungsorientierten Altersversorgungspläne werden sie nach dem Anwartschaftsbarwertverfahren berechnet. Die zu erwartenden Versorgungsleistungen werden über die gesamte Beschäftigungszeit der Mitarbeiter verteilt. Die versicherungsmathematische Berechnung der Pensionsrückstellungen berücksichtigt Marktzinssätze sowie Lohn-/Gehalts-, Renten- und Fluktuationstrends.

Die Bewertung richtet sich nach den landesspezifischen Bedingungen. Der als Rückstellung erfasste Betrag umfasst die Summe des Barwerts der leistungsorientierten Verpflichtung und der nicht ergebniswirksam erfassten versicherungsmathematischen Gewinne und Verluste abzüglich des noch nicht erfassten nachzuverrechnenden Dienstzeitaufwands und des beizulegenden Zeitwerts des zur unmittelbaren Erfüllung von Verpflichtungen vorhandenen Planvermögens.

Versicherungsmathematische Gewinne und Verluste werden, soweit sie 10 % des Barwerts der Verpflichtungen und des Zeitwerts des Planvermögens nicht übersteigen, grundsätzlich nicht bilanziert. Der 10 % übersteigende Betrag wird ab dem Folgejahr über die durchschnittliche Restdienstzeit der Mitarbeiter amortisiert. Nachzuverrechnender Dienstzeitaufwand wird linear über den durchschnittlichen Zeitraum bis zum Eintritt der Unverfallbarkeit der Anwartschaft amortisiert.

Die **sonstigen Rückstellungen** berücksichtigen alle erkennbaren zukünftigen Zahlungsverpflichtungen, Risiken und ungewissen Verpflichtungen des Konzerns, die auf gegenwärtigen gesetzlichen oder faktischen Verpflichtungen aufgrund vergangener Ereignisse basieren und bei denen eine verlässliche Schätzung der Höhe der Verpflichtung möglich ist. Sie haben überwiegend eine Restlaufzeit von bis zu einem Jahr. Die langfristigen Rückstellungen mit einer Restlaufzeit von mehr als einem Jahr werden abgezinst, soweit der Zinseffekt wesentlich ist.

Rückstellungen für Altersteilzeitvereinbarungen werden im Konzernabschluss als Verpflichtungen aus Anlass der Beendigung des Arbeitsverhältnisses behandelt und in Höhe des Barwerts der erwarteten zukünftigen zusätzlichen Zahlungen angesetzt. Bei der Bemessung der Rückstellungen werden die bereits mit den Arbeitnehmern abgeschlossenen Altersteilzeitverhältnisse berücksichtigt.

Für Restrukturierungsmaßnahmen werden Rückstellungen gebildet, wenn ein detaillierter, formaler Restrukturierungsplan besteht und bei den Betroffenen eine gerechtfertigte Erwartung geweckt wurde, dass die Restrukturierungsmaßnahmen durchgeführt werden. Bei der Bewertung der Restrukturierungsrückstellungen werden nur die Aufwendungen berücksichtigt, die unmittelbar im Rahmen der Restrukturierung entstehen und nicht mit den laufenden Aktivitäten des Unternehmens im Zusammenhang stehen.



Tatsächliche Erstattungsansprüche und -schulden für **Ertragsteuern** für laufende und frühere Perioden werden mit dem erwarteten Betrag angesetzt. Zur Berechnung des Betrags werden die Steuersätze und Steuergesetze zu Grunde gelegt, die am Bilanzstichtag gelten.

**Latente Steuern** resultieren aus zeitlich abweichenden Wertansätzen zwischen den steuerbilanziellen und den im IFRS-Abschluss berücksichtigten Wertansätzen von Vermögenswerten und Schulden sowie aus steuerlichen Verlustvorträgen. Die Ermittlung erfolgt nach der bilanzorientierten Verbindlichkeitsmethode und beruht auf der Anwendung der in den einzelnen Ländern zum Realisationszeitpunkt erwarteten Steuersätze. Diese basieren grundsätzlich auf den am Bilanzstichtag gültigen gesetzlichen Regelungen. Für Unterschiede aus der erstmaligen Bilanzierung von Vermögenswerten oder Schulden, die nicht aus Unternehmenserwerben resultieren und weder den Konzerngewinn noch den steuerlichen Gewinn berühren, werden keine latenten Steuern gebildet.

Latente Steuern auf temporäre Differenzen, Verlustvorträge und Steuergutschriften werden in dem Umfang aktiviert, in dem es wahrscheinlich ist, dass künftig ausreichend zu versteuerndes Einkommen zur Nutzung dieser Steueransprüche verfügbar sein wird. Die aktivierten latenten Steuern werden jährlich auf ihre Realisierbarkeit überprüft. Ertragsteuern, die sich auf Posten beziehen, die direkt im Eigenkapital erfasst werden, werden nicht in der Gewinn- und Verlustrechnung erfasst. Latente Steuerforderungen und latente Steuerverbindlichkeiten werden saldiert, wenn sie gegenüber derselben Steuerbehörde bestehen und dieselbe Fristigkeit besitzen.

Bei den vom Konzern als **Leasingnehmer** abgeschlossenen Leasingverträgen verbleiben im Wesentlichen alle mit dem Eigentum verbundenen Risiken und Chancen beim Leasinggeber. Sie werden daher als Operating-Leasingverhältnisse klassifiziert. Leasingzahlungen hierfür werden linear über die Laufzeit des Leasingverhältnisses als Aufwand der Periode in der Konzern-Gewinn- und Verlustrechnung erfasst.

## Zusammenfassung ausgewählter Bewertungsmethoden

| Bilanzposten                                              | Bewertungsmethode                                                 |
|-----------------------------------------------------------|-------------------------------------------------------------------|
| <b>Aktiva</b>                                             |                                                                   |
| Geschäfts- oder Firmenwerte                               | Niedrigerer Wert aus Anschaffungskosten und erzielbarem Betrag    |
| Sonstige immaterielle Vermögenswerte                      |                                                                   |
| mit unbestimmter Nutzungsdauer                            | Niedrigerer Wert aus Anschaffungskosten und erzielbarem Betrag    |
| mit bestimmter Nutzungsdauer                              | (Fortgeführte) Anschaffungskosten                                 |
| Sachanlagen                                               | (Fortgeführte) Anschaffungskosten                                 |
| Finanzielle Vermögenswerte                                |                                                                   |
| „Kredite und Forderungen“                                 | (Fortgeführte) Anschaffungskosten                                 |
| „bis zur Endfälligkeit zu halten“                         | (Fortgeführte) Anschaffungskosten                                 |
| „zur Veräußerung verfügbar“                               | Erfolgsneutral zum beizulegenden Zeitwert                         |
| „erfolgswirksam zum beizulegenden Zeitwert bewertet“      | Erfolgswirksam zum beizulegenden Zeitwert                         |
| Vorräte                                                   | Niedrigerer Wert aus Anschaffungskosten und Nettoveräußerungswert |
| Forderungen aus Lieferungen und Leistungen                | (Fortgeführte) Anschaffungskosten                                 |
| Zahlungsmittel und Zahlungsmitteläquivalente              | Nennwert                                                          |
| <b>Passiva</b>                                            |                                                                   |
| Rückstellungen                                            |                                                                   |
| Rückstellungen für Pensionen und ähnliche Verpflichtungen | Anwartschaftsbarwertmethode                                       |
| Sonstige Rückstellungen                                   | Erfüllungsbetrag (mit höchster Eintrittswahrscheinlichkeit)       |
| Finanzielle Verbindlichkeiten                             | (Fortgeführte) Anschaffungskosten                                 |
| Verbindlichkeiten aus Lieferungen und Leistungen          | (Fortgeführte) Anschaffungskosten                                 |
| Sonstige Verbindlichkeiten                                | Erfüllungsbetrag                                                  |

## Konsolidierungskreis, Akquisitionen und Divestments

### Konsolidierungskreis

In den Konzernabschluss werden neben der Beiersdorf AG 19 deutsche und 145 internationale Gesellschaften einbezogen, bei denen die Beiersdorf AG mittelbar oder unmittelbar die Möglichkeit hat, die Finanz- und Geschäftspolitik zu bestimmen und wirtschaftlichen Nutzen aus deren Tätigkeit zu ziehen.

Im Geschäftsjahr wurden sechs Gesellschaften, die in den Konzernabschluss der Beiersdorf AG einbezogen werden, neu gegründet.

### Anteilsbesitzliste der Beiersdorf AG

#### Deutschland

| Name der Gesellschaft                                                | Sitz        | Kapitalanteil<br>(in %) |
|----------------------------------------------------------------------|-------------|-------------------------|
| Allgemeine Immobilien- und Verwaltungsgesellschaft m.b.H.            | Baden-Baden | 100,00                  |
| Juvena La Prairie GmbH                                               | Baden-Baden | 100,00                  |
| Juvena Produits de Beauté GmbH                                       | Baden-Baden | 100,00                  |
| La Prairie Group Deutschland GmbH                                    | Baden-Baden | 100,00                  |
| Beiersdorf Manufacturing Berlin GmbH                                 | Berlin      | 100,00                  |
| Beiersdorf Beteiligungs GmbH                                         | Gallin      | 100,00                  |
| GUHL IKEBANA GmbH                                                    | Griesheim   | 10,00                   |
| tesa Converting Center GmbH                                          | Hamburg     | 100,00                  |
| Beiersdorf Customer Supply GmbH                                      | Hamburg     | 100,00                  |
| Beiersdorf Manufacturing Hamburg GmbH                                | Hamburg     | 100,00                  |
| Beiersdorf Shared Services GmbH                                      | Hamburg     | 100,00                  |
| IKEBANA-Kosmetik GmbH                                                | Hamburg     | 100,00                  |
| Nivea Haus GmbH                                                      | Hamburg     | 100,00                  |
| Phanex Handelsgesellschaft mbH                                       | Hamburg     | 100,00                  |
| Tape International GmbH                                              | Hamburg     | 100,00                  |
| tesa Grundstücksverwaltungsges. mbH & Co. KG Hamburg                 | Hamburg     | 100,00                  |
| tesa SE                                                              | Hamburg     | 100,00                  |
| tesa Werk Hamburg GmbH                                               | Hamburg     | 100,00                  |
| TRADICA Pharmazeutische GmbH                                         | Hamburg     | 100,00                  |
| Ultra Kosmetik GmbH                                                  | Hamburg     | 100,00                  |
| tWH GmbH                                                             | Harrislee   | 100,00                  |
| tesa scribos GmbH                                                    | Heidelberg  | 100,00                  |
| Labtec Gesellschaft für technologische Forschung und Entwicklung mbH | Langenfeld  | 100,00                  |
| tesa-Werk Offenburg GmbH                                             | Offenburg   | 100,00                  |
| tesa Etikettendruckerei GmbH                                         | Stuttgart   | 100,00                  |
| Decenta Vertriebs GmbH                                               | Waldheim    | 100,00                  |
| Florena Cosmetic GmbH                                                | Waldheim    | 100,00                  |

## Westeuropa

| Name der Gesellschaft                    | Sitz                  | Kapitalanteil<br>(in %) |
|------------------------------------------|-----------------------|-------------------------|
| BEIERSDORF FINANCE SCS                   | BE, Brüssel           | 100,00                  |
| SA Beiersdorf NV                         | BE, Brüssel           | 100,00                  |
| SA tesa                                  | BE, Brüssel           | 100,00                  |
| tesa A/S                                 | DK, Birkerød          | 100,00                  |
| Beiersdorf A/S                           | DK, Kopenhagen        | 100,00                  |
| Beiersdorf Oy                            | FI, Kaarina           | 100,00                  |
| tesa Oy                                  | FI, Turku             | 100,00                  |
| SODICOS S.A.S.                           | FR, Boulogne Cedex    | 100,00                  |
| Beiersdorf Holding France Sarl           | FR, Paris             | 100,00                  |
| Beiersdorf s.a.s.                        | FR, Paris             | 99,89                   |
| tesa s.a.s.                              | FR, Savigny-le-Temple | 100,00                  |
| Beiersdorf Hellas AE                     | GR, Gerakas/Attikis   | 100,00                  |
| tesa tape A.E.                           | GR, Gerakas/Attikis   | 100,00                  |
| Beiersdorf UK Ltd.                       | GB, Birmingham        | 100,00                  |
| tesa UK Ltd.                             | GB, Milton Keynes     | 100,00                  |
| Tuck Tape Ltd.                           | GB, Milton Keynes     | 100,00                  |
| Beiersdorf Ireland Ltd.                  | IRL, Dublin           | 100,00                  |
| Beiersdorf ehf                           | IS, Reykjavik         | 100,00                  |
| Comet SpA                                | IT, Concagno Solbiate | 100,00                  |
| Beiersdorf SpA                           | IT, Mailand           | 100,00                  |
| La Prairie S.p.A.                        | IT, Mailand           | 100,00                  |
| tesa SpA                                 | IT, Vimodrone         | 100,00                  |
| tesa BV                                  | NL, Almere            | 100,00                  |
| Guhl Ikebana Cosmetics B.V.              | NL, Amsterdam         | 10,00                   |
| Beiersdorf Holding B.V.                  | NL, Baarn             | 100,00                  |
| Beiersdorf NV                            | NL, K.J. Baarn        | 100,00                  |
| Beiersdorf AS                            | NO, Oslo              | 100,00                  |
| tesa AS                                  | NO, Oslo              | 100,00                  |
| Beiersdorf CEE Holding GmbH              | AT, Wien              | 100,00                  |
| Beiersdorf Ges mbH                       | AT, Wien              | 100,00                  |
| Juvena Produits de Beauté GmbH           | AT, Wien              | 100,00                  |
| tesa GmbH                                | AT, Wien              | 100,00                  |
| Beiersdorf Portuguesa, Limitada          | PT, Queluz            | 100,00                  |
| tesa Portugal - Produtos Adhesivos, Lda. | PT, Queluz            | 100,00                  |
| Beiersdorf Aktiebolag                    | SE, Göteborg          | 100,00                  |
| Beiersdorf Nordic Holding AB             | SE, Göteborg          | 100,00                  |
| tesa AB                                  | SE, Kungsbacka        | 100,00                  |
| tesa Bandfix AG                          | CH, Bergdietikon      | 100,00                  |
| Beiersdorf AG                            | CH, Münchenstein      | 100,00                  |
| Juvena (International) AG                | CH, Volketswil-Zürich | 100,00                  |
| Laboratoires La Prairie AG               | CH, Volketswil-Zürich | 100,00                  |
| Beiersdorf S.A.                          | ES, Argentona         | 100,00                  |
| tesa tape S.A.                           | ES, Argentona         | 100,00                  |
| BDF Nivea S.A.                           | ES, Madrid            | 100,00                  |
| Produits de Beauté Juvena SA             | ES, Madrid            | 100,00                  |

|                                                                   |                        |        |
|-------------------------------------------------------------------|------------------------|--------|
| Beiersdorf Manufacturing Tres Cantos SL                           | ES, Tres Cantos/Madrid | 100,00 |
| Beiersdorf Holding SL                                             | ES, Tres Cantos/Madrid | 100,00 |
| Beiersdorf Manufacturing Argentona, S.L.                          | ES, Argentona          | 100,00 |
| EBC Eczacibasi-Beiersdorf Kozmetik Ürünler Sanayi ve Ticaret A.S. | TR, Levent-Istanbul    | 50,00  |
| tesa Bant Sanayi ve Ticaret A.S.                                  | TR, Maslak-Istanbul    | 100,00 |

*Osteuropa*

| Name der Gesellschaft                                 | Sitz             | Kapitalanteil<br>(in %) |
|-------------------------------------------------------|------------------|-------------------------|
| Beiersdorf Bulgaria EOOD                              | BG, Sofia        | 100,00                  |
| Beiersdorf OÜ                                         | EE, Tallinn      | 100,00                  |
| Beiersdorf d.o.o.                                     | HR, Zagreb       | 100,00                  |
| SIA Beiersdorf                                        | LV, Riga         | 100,00                  |
| Beiersdorf UAB                                        | LT, Vilnius      | 100,00                  |
| Beiersdorf Macedonia DOOEL                            | MK, Skopje       | 100,00                  |
| BDF-Nieruchomosci Spółka z.o.o.                       | PL, Poznań       | 100,00                  |
| Beiersdorf Manufacturing Poznań Sp. z o.o.            | PL, Poznań       | 100,00                  |
| NIVEA Polska sp. z o.o.                               | PL, Poznań       | 100,00                  |
| tesa tape sp. z o.o.                                  | PL, Poznań       | 100,00                  |
| NIVEA Polska Sp.z.o.o.s.k.                            | PL, Poznań       | 100,00                  |
| Beiersdorf Romania SRL                                | RO, Bucuresti    | 100,00                  |
| tesa tape s.r.l.                                      | RO, Cluj-Napoca  | 100,00                  |
| Beiersdorf OOO                                        | RU, Moskau       | 100,00                  |
| tesa tape OOO                                         | RU, Moskau       | 100,00                  |
| Beiersdorf d.o.o. Beograd                             | RS, Novi Beograd | 100,00                  |
| Beiersdorf Slovakia, s.r.o.                           | SK, Bratislava   | 100,00                  |
| Beiersdorf d.o.o.                                     | SI, Ljubljana    | 100,00                  |
| tesa tape posrednistvo in trgovina d.o.o.             | SI, Ljubljana    | 100,00                  |
| tesa tape s.r.o.                                      | CZ, Prag         | 100,00                  |
| Beiersdorf spol. s r.o.                               | CZ, Prag         | 100,00                  |
| Beiersdorf Ukraine LLC                                | UA, Kiew         | 100,00                  |
| Beiersdorf Kft.                                       | HU, Budapest     | 100,00                  |
| Tartsay Beruházó Kft.                                 | HU, Budapest     | 99,66                   |
| tesa tape Ragasztószalag Termelő és Kereskedelmi Kft. | HU, Budapest     | 100,00                  |

*Nordamerika*

| Name der Gesellschaft         | Sitz                     | Kapitalanteil<br>(in %) |
|-------------------------------|--------------------------|-------------------------|
| Beiersdorf Canada Inc.        | CA, St. Laurent (Quebec) | 100,00                  |
| tesa tape inc.                | US, Charlotte, NC.       | 100,00                  |
| LaPrairie.com LLC             | US, Edison               | 100,00                  |
| La Prairie, Inc.              | US, New York             | 100,00                  |
| Beiersdorf North America Inc. | US, Wilton, CT.          | 100,00                  |
| Beiersdorf, Inc.              | US, Wilton, CT.          | 100,00                  |

## Lateinamerika

| Name der Gesellschaft                 | Sitz                        | Kapitalanteil<br>(in %) |
|---------------------------------------|-----------------------------|-------------------------|
| Beiersdorf S.A.                       | AR, Buenos Aires            | 100,00                  |
| tesa tape Argentina S.R.L.            | AR, Buenos Aires            | 99,75                   |
| Beiersdorf S.R.L.                     | BO, Santa Cruz de la Sierra | 100,00                  |
| tesa Brasil Limitada                  | BR, Curitiba, Parana        | 100,00                  |
| Beiersdorf Industria e Comercio Ltda. | BR, Itatiba - São Paulo     | 100,00                  |
| BDF NIVEA LTDA.                       | BR, São Paulo               | 100,00                  |
| Beiersdorf China Ltd.                 | VG, Tortola                 | 100,00                  |
| Beiersdorf S.A.                       | CL, Santiago de Chile       | 100,00                  |
| tesa tape Chile S.A.                  | CL, Santiago de Chile       | 100,00                  |
| BDF Costa Rica, S.A.                  | CR, San José                | 100,00                  |
| Beiersdorf, S.R.L.                    | DO, Santo Domingo           | 100,00                  |
| Beiersdorf S.A.                       | EC, Quito                   | 100,00                  |
| BDF El Salvador, S.A. de C.V.         | SV, San Salvador            | 100,00                  |
| BDF Centroamérica, S.A.               | GT, Guatemala Stadt         | 100,00                  |
| tesa tape Centro América S.A.         | GT, Guatemala Stadt         | 100,00                  |
| Beiersdorf S.A.                       | CO, Bogota D.C.             | 100,00                  |
| tesa Tape Colombia Ltda.              | CO, Cali - Valle            | 100,00                  |
| BDF México, S.A. de C.V.              | MX, Mexiko Stadt            | 100,00                  |
| BDF Corporativo, S.A. de C.V.         | MX, Mexiko Stadt            | 100,00                  |
| Technical Tape Mexico SA de CV        | MX, Mexiko Stadt            | 100,00                  |
| tesa tape Mexico SRL de CV            | MX, Vallejo                 | 100,00                  |
| BDF Panamá S.A.                       | PA, Panamá Stadt            | 100,00                  |
| HUB LIMITED S.A.                      | PA, Panamá Stadt            | 100,00                  |
| Beiersdorf S.A.                       | PY, Asunción                | 100,00                  |
| Beiersdorf S.A.C.                     | PE, Lima                    | 99,81                   |
| Beiersdorf S.A.                       | UY, Montevideo              | 100,00                  |
| Beiersdorf S.A.                       | VE, Caracas                 | 100,00                  |

## Afrika / Asien / Australien

| Name der Gesellschaft                        | Sitz                 | Kapitalanteil<br>(in %) |
|----------------------------------------------|----------------------|-------------------------|
| tesa tape Australia Pty. Ltd                 | AU, Sydney           | 100,00                  |
| Beiersdorf Australia Ltd                     | AU, North Ryde, NSW  | 100,00                  |
| La Prairie Group Australia Pty. Ltd.         | AU, North Ryde, NSW  | 100,00                  |
| Guangzhou C-BONS Chemical Commodity Co. Ltd. | CN, Guangzhou        | 100,00                  |
| tesa tape (Hong Kong) Ltd.                   | CN, Hongkong         | 100,00                  |
| tesa tape (Shanghai) Co., Ltd.               | CN, Shanghai         | 100,00                  |
| Eucerin International Trading Company        | CN, Shanghai         | 100,00                  |
| La Prairie (Shanghai) Co. Ltd.               | CN, Shanghai         | 100,00                  |
| NIVEA (Shanghai) Company Limited             | CN, Shanghai         | 100,00                  |
| tesa (Shanghai) Trd. Co. Ltd.                | CN, Shanghai         | 100,00                  |
| tesa plant (Suzhou) Co., Ltd.                | CN, Suzhou           | 100,00                  |
| C-BONS Cosmetics Chemical (Wuhan) Co. Ltd.   | CN, Wuhan            | 100,00                  |
| Hubei C-BONS Daily Chemical Co., Ltd.        | CN, Xiangtao City    | 100,00                  |
| Beiersdorf India Pvt. Limited                | IN, Mumbai           | 51,00                   |
| Nivea India Pvt. Ltd.                        | IN, Mumbai           | 100,00                  |
| tesa Tapes (India) Private Limited           | IN, Navi Mumbai      | 100,00                  |
| PT. Beiersdorf Indonesia                     | ID, Jakarta          | 80,00                   |
| Beiersdorf Holding Japan Yugen Kaisha        | JP, Tokyo            | 100,00                  |
| La Prairie Japan K.K.                        | JP, Tokyo            | 100,00                  |
| Nivea-Kao Co., Ltd.                          | JP, Tokyo            | 60,00                   |
| tesa tape K.K.                               | JP, Tokyo            | 100,00                  |
| Beiersdorf East Africa Limited               | KE, Nairobi          | 100,00                  |
| La Prairie Korea Ltd                         | KR, Seoul            | 100,00                  |
| NIVEA Seoul Ltd.                             | KR, Seoul            | 100,00                  |
| tesa tape Korea Ltd.                         | KR, Seoul            | 100,00                  |
| tesa tape (Malaysia) Sdn. Bhd.               | MY, Kajang, Selangor | 100,00                  |
| tesa tape Industries (Malaysia) Sdn. Bhd.    | MY, Kajang, Selangor | 99,99                   |
| Beiersdorf (Malaysia) SDN. BHD.              | MY, Senai, Johor     | 100,00                  |
| Medical-Latex (DUA) SDN. BHD.                | MY, Senai, Johor     | 100,00                  |
| Beiersdorf S.A.                              | MA, Casablanca       | 100,00                  |
| tesa tape New Zealand Limited                | NZ, Auckland         | 100,00                  |
| Beiersdorf Singapore Private Limited         | SG, Singapur         | 100,00                  |
| tesa tape Asia Pacific Pte. Ltd.             | SG, Singapur         | 100,00                  |
| Singapore Plastic Products Pte. Ltd.         | SG, Singapur         | 100,00                  |
| tesa Plant (Singapore) Pte. Ltd.             | SG, Singapur         | 100,00                  |
| Beiersdorf Consumer Products (Pty.) Ltd.     | SA, Westville        | 100,00                  |
| NIVEA (Taiwan) Ltd.                          | TW, Taipeh           | 100,00                  |
| Beiersdorf (Thailand) Co., Ltd.              | TH, Bangkok          | 100,00                  |
| tesa tape (Thailand) Ltd.                    | TH, Bangkok          | 90,10                   |
| Beiersdorf Middle East FZCO                  | AE, Dubai            | 100,00                  |
| Beiersdorf Vietnam LLC                       | VN, Ho Chi Minh City | 100,00                  |

## Wesentliche Akquisitionen/ Divestments 2010

Im Berichtsjahr wurden im Beiersdorf Konzern keine wesentlichen Akquisitionen oder Divestments durchgeführt.

## Wesentliche Akquisitionen/ Divestments 2009

Im Vorjahr wurden im Beiersdorf Konzern keine wesentlichen Akquisitionen oder Divestments durchgeführt.



## Erläuterungen zur Gewinn- und Verlustrechnung

### 01 • Umsatzerlöse

Die Umsatzerlöse lagen im Geschäftsjahr 2010 bei 6.194 Mio. € (Vorjahr: 5.748 Mio. €). Eine Unterteilung der Umsätze und ihre Entwicklung nach Unternehmensbereichen und Regionen ist in der Segmentberichterstattung aufgeführt.

### 02 • Marketing- und Vertriebskosten

Die Marketing- und Vertriebskosten betrugen 2.959 Mio. € (Vorjahr: 2.766 Mio. €). In den Marketing- und Vertriebskosten sind Aufwendungen für Werbung, Handelsmarketing und ähnliche Positionen in Höhe von 1.955 Mio. € (Vorjahr: 1.842 Mio. €) enthalten.

### 03 • Allgemeine Verwaltungskosten

Die allgemeinen Verwaltungskosten lagen im abgelaufenen Geschäftsjahr bei 278 Mio. € (Vorjahr: 283 Mio. €) und haben sich damit um 1,8 % im Vergleich zum Vorjahr reduziert. In dieser Position werden die Personal- und Sachkosten der Verwaltung sowie die Kosten für externe Dienstleistungen ausgewiesen, soweit sie nicht anderen Funktionsbereichen zugeordnet werden.

### 04 • Sonstige betriebliche Erträge

(in Mio. €)

|                                              | 2009      | 2010      |
|----------------------------------------------|-----------|-----------|
| Erträge aus der Auflösung von Rückstellungen | 43        | 32        |
| Gewinne aus Anlagenabgängen                  | 3         | 3         |
| Sonstige Erträge                             | 48        | 51        |
|                                              | <b>94</b> | <b>86</b> |

Die sonstigen Erträge enthalten unter anderem aperiodische Erträge sowie Erträge aus der Auflösung von Wertberichtigungen zu Forderungen.

### 05 • Sonstige betriebliche Aufwendungen

(in Mio. €)

|                                                | 2009       | 2010       |
|------------------------------------------------|------------|------------|
| Abschreibungen auf immaterielle Vermögenswerte | 11         | 92         |
| Währungsverluste aus dem operativen Geschäft   | 15         | 37         |
| Restrukturierungsaufwendungen                  | 52         | 36         |
| Verluste aus Anlagenabgängen                   | 2          | 2          |
| Sonstige Aufwendungen                          | 95         | 125        |
|                                                | <b>175</b> | <b>292</b> |

Die Restrukturierungsaufwendungen betreffen im Wesentlichen personenbezogene Aufwendungen. Die Abschreibungen auf immaterielle Vermögenswerte beinhalten Wertminderungen in Höhe von 79 Mio. € (Vorjahr: 5 Mio.). Die sonstigen Aufwendungen enthalten Zuführungen zu Rückstellungen für rechtliche und sonstige Risiken und andere betriebliche Aufwendungen.

### 06 • Finanzergebnis

(in Mio. €)

|                          | 2009      | 2010       |
|--------------------------|-----------|------------|
| Zinserträge              | 21        | 19         |
| Zinsaufwendungen         | -15       | -13        |
| Pensionsergebnis         | -2        | -6         |
| Sonstiges Finanzergebnis | -8        | -30        |
|                          | <b>-4</b> | <b>-30</b> |

Die Zinserträge resultieren hauptsächlich aus den Positionen „Zahlungsmittel und Zahlungsmitteläquivalente“ sowie „Wertpapiere“. Die Zinsaufwendungen resultieren im Wesentlichen aus finanziellen Verbindlichkeiten. Im Pensionsergebnis werden Aufwendungen aus der Aufzinsung der in den Vorjahren erworbenen Pensions- und sonstigen Versorgungsansprüche mit Erträgen aus dem Planvermögen sowie der Amortisation nicht bilanzierter versicherungsmathematischer Gewinne und Verluste zusammengefasst.

Das sonstige Finanzergebnis enthält insbesondere Währungsgewinne und -verluste. Zudem ist ein Verlust in Höhe von 2 Mio. € (Vorjahr: Gewinn von 36 Mio. €) des zuvor erfolgsneutral im Eigenkapital ausgewiesenen Netto-Ergebnisses aus der Marktbewertung von derivativen Finanzinstrumenten enthalten.

Im Berichtsjahr sind keine Gewinne oder Verluste aus der Änderung des beizulegenden Zeitwerts von Finanzinstrumenten der Kategorie „zur Veräußerung verfügbar“ ergebnisneutral im Eigenkapital erfasst (Vorjahr: 8 Mio. €). In der Kategorie „erfolgswirksam zum beizulegenden Zeitwert bewertet“ sind Verluste in Höhe von 1 Mio. € angefallen (Vorjahr: unwesentlich). Die Nettogewinne aus bis zur Endfälligkeit gehaltenen Finanzinvestitionen betrugen 9 Mio. € (Vorjahr: 12 Mio. €).

## 07 • Ertragsteuern

Der Ertragsteueraufwand einschließlich der latenten Steuern setzt sich wie folgt zusammen:

(in Mio. €)

|                                   | 2009       | 2010       |
|-----------------------------------|------------|------------|
| <b>Tatsächliche Ertragsteuern</b> |            |            |
| Deutschland                       | 72         | 88         |
| International                     | 141        | 157        |
|                                   | <b>213</b> | <b>245</b> |
| <b>Latente Steuern</b>            | <b>-10</b> | <b>-18</b> |
|                                   | <b>203</b> | <b>227</b> |

Von den in der Bilanz enthaltenen passiven latenten Steuern wurden 0 Mio. € (Vorjahr: 2 Mio. €) im Geschäftsjahr 2010 erfolgsneutral im Eigenkapital erfasst.

Es bestehen steuerliche Verlustvorträge und noch nicht genutzte Steuergutschriften in Höhe von 186 Mio. € (Vorjahr: 107 Mio. €), für die keine aktiven latenten Steuern bilanziert worden sind. Hiervon sind 56 Mio. € (Vorjahr: 56 Mio. €) unbegrenzt vortragsfähig, der Rest ist begrenzt vortragsfähig, größtenteils länger als fünf Jahre.

Auf thesaurierte Gewinne ausländischer Tochtergesellschaften werden grundsätzlich keine latenten Steuern gebildet, da diese Gewinne aus heutiger Sicht in den Unternehmen permanent investiert bleiben sollen. In Fällen, in denen Ausschüttungen geplant sind, werden die steuerlichen Konsequenzen solcher Ausschüttungen abgegrenzt. Für die Berechnung wird der jeweils anzuwendende Quellensteuersatz, gegebenenfalls unter der Berücksichtigung der deutschen Besteuerung von ausgeschütteten Dividenden, herangezogen. Im Berichtsjahr sind 7 Mio. € (Vorjahr: 4 Mio. €) passive latente Steuern angesetzt worden.

Bei der Ermittlung der Höhe der latenten Steueransprüche, die aktiviert werden können, ist eine wesentliche Ermessensausübung des Managements bezüglich des erwarteten Eintrittszeitpunkts und der Höhe des künftig zu versteuernden Einkommens erforderlich.

Die latenten Steuern betreffen die folgenden Bilanzpositionen und Sachverhalte:

### Zuordnung der latenten Steuern (in Mio. €)

|                                                           | Latente Steueransprüche |            | Latente Steuerverbindlichkeit |            |
|-----------------------------------------------------------|-------------------------|------------|-------------------------------|------------|
|                                                           | 31.12.2009              | 31.12.2010 | 31.12.2009                    | 31.12.2010 |
| Langfristige Vermögenswerte                               | 22                      | 43         | 74                            | 73         |
| Vorräte                                                   | 22                      | 21         | –                             | –          |
| Forderungen und sonstige kurzfristige Vermögenswerte      | 11                      | 10         | 17                            | 17         |
| Rückstellungen für Pensionen und ähnliche Verpflichtungen | 3                       | 3          | 106                           | 105        |
| Übrige Rückstellungen                                     | 27                      | 36         | 7                             | 14         |
| Verbindlichkeiten                                         | 32                      | 36         | 17                            | 17         |
| Thesaurierte Gewinne                                      | –                       | –          | 4                             | 7          |
| Verlustvorträge                                           | 5                       | 5          | –                             | –          |
|                                                           | <b>122</b>              | <b>154</b> | <b>225</b>                    | <b>233</b> |
| Saldierungen                                              | –64                     | –78        | –64                           | –78        |
| <b>Latente Steuern in der Bilanz</b>                      | <b>58</b>               | <b>76</b>  | <b>161</b>                    | <b>155</b> |

### Überleitung des tatsächlichen Steueraufwands

Der tatsächliche Steueraufwand liegt bei einer effektiven Steuerquote von 41,0 % um 69 Mio. € über dem erwarteten Steueraufwand. Der erwartete Steuersatz wird als gewichteter Durchschnitt aus den Steuersätzen der einzelnen Konzerngesellschaften ermittelt und beträgt 28,5 % (Vorjahr: 29,2 %). Die Überleitung vom erwarteten zum tatsächlichen Steueraufwand zeigt die folgende Tabelle:

#### Tatsächlicher Steueraufwand (in Mio. €)

|                                                                            | 2009       | 2010       |
|----------------------------------------------------------------------------|------------|------------|
| Erwarteter Steueraufwand bei einem Steuersatz von 28,5 % (Vorjahr: 29,2 %) | 170        | 158        |
| Steuererminderungen aufgrund steuerfreier Erträge                          | -1         | -1         |
| Steuererminderungen aufgrund steuerlich nicht abzugsfähiger Aufwendungen   | 24         | 48         |
| Steuern Vorjahre                                                           | 1          | 18         |
| Sonstige Steuereffekte                                                     | 9          | 4          |
| <b>Tatsächlicher Steueraufwand</b>                                         | <b>203</b> | <b>227</b> |

### 08 • Ergebnis der nicht beherrschenden Anteile

Vom Jahresüberschuss stehen nicht beherrschenden Anteilseignern 8 Mio. € zu (Vorjahr: 6 Mio. €). Nicht beherrschende Anteilseigner sind am Bilanzstichtag im Wesentlichen an Nivea-Kao Co. Ltd., Japan, PT. Beiersdorf Indonesia sowie Beiersdorf India Limited beteiligt.

### 09 • Unverwässertes/Verwässertes Ergebnis je Aktie

Das Ergebnis je Aktie liegt für 2010 bei 1,40 € (Vorjahr: 1,65 €). Basis für die Berechnung ist das Ergebnis nach Steuern ohne das Ergebnis nicht beherrschender Anteilseigner. Die Beiersdorf AG hält unverändert 25.181.016 eigene Aktien. Diese wurden für die Berechnung des Ergebnisses je Aktie von den insgesamt bestehenden 252.000.000 Stück in Abzug gebracht, so dass das Ergebnis unverändert bezogen auf 226.818.984 Stück errechnet wurde. Da keine Finanzinstrumente ausstehen, die in Aktien umgetauscht werden können, ergibt sich kein abweichendes verwässertes Ergebnis je Aktie.

### 10 • Sonstige Angaben

#### Materialaufwand

Die Aufwendungen für Roh-, Hilfs- und Betriebsstoffe, bezogene Waren sowie bezogene Leistungen betrugen 1.370 Mio. € (Vorjahr: 1.199 Mio. €).

#### Personalaufwand

(in Mio. €)

|                                                     | 2009       | 2010       |
|-----------------------------------------------------|------------|------------|
| Löhne und Gehälter                                  | 762        | 794        |
| Sonstige finanzielle Aufwendungen für Unterstützung | 114        | 106        |
| Aufwendungen für Altersversorgung                   | 71         | 74         |
|                                                     | <b>947</b> | <b>974</b> |

#### Mitarbeiter

Die Beschäftigten sind in folgenden betrieblichen Funktionsbereichen tätig:

#### Anzahl Mitarbeiter am 31.12.

|                        | 2009          | 2010          |
|------------------------|---------------|---------------|
| Produktion             | 6.584         | 6.180         |
| Marketing und Vertrieb | 9.406         | 8.607         |
| Andere Funktionen      | 4.356         | 4.341         |
|                        | <b>20.346</b> | <b>19.128</b> |

#### Jahresdurchschnitt Mitarbeiter

|                        | 2009          | 2010          |
|------------------------|---------------|---------------|
| Produktion             | 6.849         | 6.424         |
| Marketing und Vertrieb | 10.041        | 9.734         |
| Andere Funktionen      | 4.447         | 4.361         |
|                        | <b>21.337</b> | <b>20.519</b> |

Die Aufteilung der Beschäftigten nach den Segmenten des Beiersdorf Konzerns ist in der Segmentberichterstattung dargestellt.

## Erläuterungen zur Bilanz

### 11 • Immaterielle Vermögenswerte

(in Mio. €)

|                                | Immaterielle<br>Vermögenswerte<br>mit bestimmter<br>Nutzungsdauer | Immaterielle<br>Vermögenswerte<br>mit unbestimmter<br>Nutzungsdauer | Geschäfts- oder<br>Firmenwerte | Gesamt     |
|--------------------------------|-------------------------------------------------------------------|---------------------------------------------------------------------|--------------------------------|------------|
| <b>Anschaffungskosten</b>      |                                                                   |                                                                     |                                |            |
| <b>Anfangsstand 01.01.2009</b> | <b>376</b>                                                        | <b>151</b>                                                          | <b>193</b>                     | <b>720</b> |
| Währungsänderungen             | 1                                                                 | –                                                                   | –3                             | –2         |
| Zugänge                        | 9                                                                 | –                                                                   | –                              | 9          |
| Abgänge                        | –22                                                               | –                                                                   | –                              | –22        |
| Umbuchungen                    | 4                                                                 | –                                                                   | –                              | 4          |
| <b>Endstand 31.12.2009</b>     | <b>368</b>                                                        | <b>151</b>                                                          | <b>190</b>                     | <b>709</b> |
| <b>Abschreibungen</b>          |                                                                   |                                                                     |                                |            |
| <b>Anfangsstand 01.01.2009</b> | <b>318</b>                                                        | <b>–</b>                                                            | <b>4</b>                       | <b>322</b> |
| Währungsänderungen             | 1                                                                 | –                                                                   | 1                              | 2          |
| Zugänge                        | 24                                                                | –                                                                   | 1                              | 25         |
| Abgänge                        | –22                                                               | –                                                                   | –                              | –22        |
| Umbuchungen                    | –                                                                 | –                                                                   | –                              | –          |
| <b>Endstand 31.12.2009</b>     | <b>321</b>                                                        | <b>–</b>                                                            | <b>6</b>                       | <b>327</b> |
| <b>Buchwert 31.12.2009</b>     | <b>47</b>                                                         | <b>151</b>                                                          | <b>184</b>                     | <b>382</b> |
| <b>Anschaffungskosten</b>      |                                                                   |                                                                     |                                |            |
| <b>Anfangsstand 01.01.2010</b> | <b>368</b>                                                        | <b>151</b>                                                          | <b>190</b>                     | <b>709</b> |
| Währungsänderungen             | 8                                                                 | –                                                                   | 16                             | 24         |
| Zugänge                        | 5                                                                 | –                                                                   | –                              | 5          |
| Abgänge                        | –2                                                                | –                                                                   | –                              | –2         |
| Umbuchungen                    | 2                                                                 | –                                                                   | –                              | 2          |
| <b>Endstand 31.12.2010</b>     | <b>381</b>                                                        | <b>151</b>                                                          | <b>206</b>                     | <b>738</b> |
| <b>Abschreibungen</b>          |                                                                   |                                                                     |                                |            |
| <b>Anfangsstand 01.01.2010</b> | <b>321</b>                                                        | <b>–</b>                                                            | <b>6</b>                       | <b>327</b> |
| Währungsänderungen             | 5                                                                 | –                                                                   | 1                              | 6          |
| Zugänge                        | 22                                                                | 23                                                                  | 56                             | 101        |
| Abgänge                        | –2                                                                | –                                                                   | –                              | –2         |
| Umbuchungen                    | –                                                                 | –                                                                   | –                              | –          |
| <b>Endstand 31.12.2010</b>     | <b>346</b>                                                        | <b>23</b>                                                           | <b>63</b>                      | <b>432</b> |
| <b>Buchwert 31.12.2010</b>     | <b>35</b>                                                         | <b>128</b>                                                          | <b>143</b>                     | <b>306</b> |

Die Buchwerte der immateriellen Vermögenswerte haben sich im Vergleich zum Vorjahr um 76 Mio. € auf 306 Mio. € (Vorjahr: 382 Mio. €) reduziert. Der Rückgang ist im Wesentlichen auf die Wertminderungen der C-BONS Hair Care Marken sowie des Geschäfts- und Firmenwerts der China-Gruppe zurückzuführen.

Die immateriellen Vermögenswerte mit unbestimmter Nutzungsdauer enthalten die beim Erwerb der Anteile an C-BONS Hair Care mit übernommenen chinesischen Haarpflegemarken. Aufgrund der geplanten dauerhaften Fortführung der Markenrechte sind diese mit unbestimmter Nutzungsdauer angesetzt. Die jährliche Werthaltigkeitsüberprüfung führte zu einer Anpassung des Buchwerts in Höhe von 23 Mio. € auf 128 Mio. € (Vorjahr: 151 Mio. €). Die Erfassung der Wertminderung der C-BONS Hair Care Marken erfolgt auf Grundlage des nach der Lizenzpreis-analogiemethode ermittelten Nettoveräußerungswerts. Die Veräußerungskosten wurden mit 1 % des Markenwerts angenommen. Der Kalkulation liegen ein Abzinsungssatz von 8,0 % (Vorjahr: 9,4 %) und eine Wachstumsrate jenseits des Planungshorizonts von 2,5 % (Vorjahr: 2,5 %) zu Grunde. Der Planungshorizont wurde mit zwölf Jahren festgelegt, da es sich hier um einen Wachstumsmarkt handelt.

Unverändert zum Vorjahr wurden im Geschäftsjahr keine selbst geschaffenen immateriellen Vermögenswerte aktiviert, da bei den Entwicklungsprojekten die Voraussetzungen für eine Aktivierung gemäß IAS 38 „Immaterielle Vermögenswerte“ nicht erfüllt waren.

Die Geschäfts- oder Firmenwerte resultieren im Wesentlichen aus der Akquisition von C-BONS Hair Care und dem Erwerb der damals noch in Fremdbesitz befindlichen Anteile an der Beiersdorf AG (Schweiz). Zum Stichtag reduzierte sich der Geschäfts- oder Firmenwert aus dem Erwerb von C-BONS Hair Care infolge einer Wertminderung von 56 Mio. € sowie eines gegenläufigen Wechselkurseffekts in Höhe von 8 Mio. € auf 93 Mio. € (Vorjahr: 141 Mio. €), für die Beiersdorf AG (Schweiz) erhöhte er sich aufgrund von Wechselkursschwankungen auf 46 Mio. € (Vorjahr: 39 Mio. €).

Zum Zweck des Wertminderungstests wird der im Rahmen eines Unternehmenszusammenschlusses erworbene Geschäfts- oder Firmenwert ab dem Erwerbszeitpunkt den zahlungsmittelgenerierenden Einheiten des Konzerns zugeordnet, die von den Synergieeffekten aus dem Unternehmenszusammenschluss profitieren sollen. Im Beiersdorf Konzern sind dies im Wesentlichen die China-

Gruppe (NIVEA Shanghai und C-BONS Hair Care) sowie die Beiersdorf AG (Schweiz). Die erzielbaren Beträge der zahlungsmittelgenerierenden Einheiten wurden auf Basis der Berechnung eines Nutzungswerts (Beiersdorf AG Schweiz) bzw. des im Vergleich zum Nutzungswert höheren Nettoveräußerungswerts (China-Gruppe) unter Verwendung von Cashflow-Prognosen ermittelt. Die Veräußerungskosten wurden mit 1 % des Unternehmenswerts angesetzt. Die den Werthaltigkeitstests zu Grunde liegenden geschätzten zukünftigen Cashflows basieren auf der Finanzplanung mit einem Planungshorizont von drei Jahren (Beiersdorf AG Schweiz) bzw. zwölf Jahren (China-Gruppe). Cashflows jenseits der Planungsperiode werden unter Anwendung individueller Wachstumsraten unter Berücksichtigung relevanter Marktinformationen extrapoliert. Für die China-Gruppe liegt der Wachstumsrate ein Prozentsatz von 2,5 % (Vorjahr: 2,5 %) zu Grunde, für die Beiersdorf AG (Schweiz) von 1,0 % (Vorjahr: 1,0 %). Der zur Diskontierung der geschätzten Cashflows herangezogene gewichtete Nach-Steuer-Kapitalkostensatz liegt für die China-Gruppe bei 8,0 % (Vorjahr: 9,4 %). Der Vorsteuer-Diskontierungssatz für die Beiersdorf AG (Schweiz) betrug 8,0 % (Vorjahr: 11,1 %).

Die Planungen für die zahlungsmittelgenerierenden Einheiten basieren auf Annahmen für die wesentlichen Schätzparameter. Schätzparameter waren unter anderem Bruttogewinnmargen, Abzinsungssätze, Preisentwicklungen bei Rohstoffen, Marktanteile sowie Wachstumsraten. Für die Beiersdorf AG (Schweiz) geht der Konzern davon aus, dass auch bei nach vernünftigem Ermessen grundsätzlich möglichen Änderungen dieser Parameter der erzielbare Betrag den Buchwert des Geschäfts- oder Firmenwertes übertrifft. Sollte die tatsächliche Entwicklung des chinesischen Geschäfts unterhalb der oben beschriebenen liegen, können in Zukunft weitere Wertminderungen des Geschäfts- oder Firmenwerts der China-Gruppe sowie der C-BONS Hair Care Markenrechte notwendig werden.

## 12 • Sachanlagen

(in Mio. €)

|                                | Grundstücke,<br>grundstücks-<br>gleiche Rechte<br>und Bauten | Technische<br>Anlagen und<br>Maschinen | Betriebs-<br>und Geschäfts-<br>ausstattung | Geleistete<br>Anzahlungen und<br>Anlagen im Bau | Gesamt       |
|--------------------------------|--------------------------------------------------------------|----------------------------------------|--------------------------------------------|-------------------------------------------------|--------------|
| <b>Anschaffungskosten</b>      |                                                              |                                        |                                            |                                                 |              |
| <b>Anfangsstand 01.01.2009</b> | <b>627</b>                                                   | <b>735</b>                             | <b>474</b>                                 | <b>59</b>                                       | <b>1.895</b> |
| Währungsänderungen             | 4                                                            | 2                                      | 3                                          | –                                               | 9            |
| Zugänge                        | 11                                                           | 29                                     | 41                                         | 35                                              | 116          |
| Abgänge                        | –8                                                           | –59                                    | –60                                        | –1                                              | –128         |
| Umbuchungen                    | 17                                                           | 17                                     | 16                                         | –54                                             | –4           |
| <b>Endstand 31.12.2009</b>     | <b>651</b>                                                   | <b>724</b>                             | <b>474</b>                                 | <b>39</b>                                       | <b>1.888</b> |
| <b>Abschreibungen</b>          |                                                              |                                        |                                            |                                                 |              |
| <b>Anfangsstand 01.01.2009</b> | <b>319</b>                                                   | <b>502</b>                             | <b>347</b>                                 | <b>–</b>                                        | <b>1.168</b> |
| Währungsänderungen             | 1                                                            | –                                      | 3                                          | –                                               | 4            |
| Zugänge                        | 20                                                           | 45                                     | 45                                         | –                                               | 110          |
| Abgänge                        | –5                                                           | –60                                    | –54                                        | –                                               | –119         |
| Umbuchungen                    | –                                                            | –                                      | –                                          | –                                               | –            |
| <b>Endstand 31.12.2009</b>     | <b>335</b>                                                   | <b>487</b>                             | <b>341</b>                                 | <b>–</b>                                        | <b>1.163</b> |
| <b>Buchwert 31.12.2009</b>     | <b>316</b>                                                   | <b>237</b>                             | <b>133</b>                                 | <b>39</b>                                       | <b>725</b>   |
| <b>Anschaffungskosten</b>      |                                                              |                                        |                                            |                                                 |              |
| <b>Anfangsstand 01.01.2010</b> | <b>651</b>                                                   | <b>724</b>                             | <b>474</b>                                 | <b>39</b>                                       | <b>1.888</b> |
| Währungsänderungen             | 26                                                           | 16                                     | 16                                         | 1                                               | 59           |
| Zugänge                        | 7                                                            | 27                                     | 37                                         | 20                                              | 91           |
| Abgänge                        | –6                                                           | –18                                    | –28                                        | –2                                              | –54          |
| Umbuchungen                    | 7                                                            | 29                                     | –2                                         | –36                                             | –2           |
| <b>Endstand 31.12.2010</b>     | <b>685</b>                                                   | <b>778</b>                             | <b>497</b>                                 | <b>22</b>                                       | <b>1.982</b> |
| <b>Abschreibungen</b>          |                                                              |                                        |                                            |                                                 |              |
| <b>Anfangsstand 01.01.2010</b> | <b>335</b>                                                   | <b>487</b>                             | <b>341</b>                                 | <b>–</b>                                        | <b>1.163</b> |
| Währungsänderungen             | 10                                                           | 7                                      | 11                                         | –                                               | 28           |
| Zugänge                        | 21                                                           | 48                                     | 51                                         | –                                               | 120          |
| Abgänge                        | –3                                                           | –13                                    | –29                                        | –                                               | –45          |
| Umbuchungen                    | –                                                            | –                                      | –                                          | –                                               | –            |
| <b>Endstand 31.12.2010</b>     | <b>363</b>                                                   | <b>529</b>                             | <b>374</b>                                 | <b>–</b>                                        | <b>1.266</b> |
| <b>Buchwert 31.12.2010</b>     | <b>322</b>                                                   | <b>249</b>                             | <b>123</b>                                 | <b>22</b>                                       | <b>716</b>   |

Der Buchwert der Sachanlagen betrug 716 Mio. € (Vorjahr: 725 Mio. €). Die Investitionen in das Sachanlagevermögen betrugen 91 Mio. € (Vorjahr: 116 Mio. €). Die Abschreibungen lagen bei 120 Mio. € (Vorjahr: 110 Mio. €). Im Berichtsjahr erfolgten keine Wertaufholungen.



### 13 • Vorräte

(in Mio. €)

|                                   | 2009       | 2010       |
|-----------------------------------|------------|------------|
| Roh-, Hilfs- und Betriebsstoffe   | 108        | 124        |
| Unfertige Erzeugnisse             | 34         | 36         |
| Fertige Erzeugnisse, Handelswaren | 415        | 467        |
| Anzahlungen                       | 4          | 5          |
|                                   | <b>561</b> | <b>632</b> |

Die Vorräte erhöhten sich im Vergleich zum Vorjahr um 71 Mio. € auf 632 Mio. €, davon waren 108 Mio. € (Vorjahr: 145 Mio. €) zu ihrem Nettoveräußerungswert bilanziert. Die Wertberichtigungen auf Vorräte betrugen zum Bilanzstichtag 54 Mio. € (Vorjahr: 61 Mio. €).

### 14 • Forderungen aus Lieferungen und Leistungen

(in Mio. €)

| 2009                                       | Buchwert     | Davon weder einzelwertberichtigt, noch überfällig | Davon nicht einzelwertberichtigt und in den folgenden Zeitbändern überfällig |                          |                          |                           |                   |
|--------------------------------------------|--------------|---------------------------------------------------|------------------------------------------------------------------------------|--------------------------|--------------------------|---------------------------|-------------------|
|                                            |              |                                                   | Weniger als 30 Tage                                                          | Zwischen 30 und 60 Tagen | Zwischen 61 und 90 Tagen | Zwischen 91 und 120 Tagen | Mehr als 120 Tage |
| Forderungen aus Lieferungen und Leistungen | 906          | 810                                               | 49                                                                           | 10                       | 1                        | –                         | 1                 |
| <b>2010</b>                                |              |                                                   |                                                                              |                          |                          |                           |                   |
| Forderungen aus Lieferungen und Leistungen | <b>1.001</b> | <b>895</b>                                        | <b>49</b>                                                                    | <b>7</b>                 | <b>–</b>                 | <b>1</b>                  | <b>5</b>          |

Die Forderungen aus Lieferungen und Leistungen sind gemäß IAS 39 als Kategorie „Kredite und Forderungen“ klassifiziert. Die Einzelwertberichtigungen auf Forderungen aus Lieferungen und Leistungen entwickelten sich wie folgt:

(in Mio. €)

|                    | 2009      | 2010      |
|--------------------|-----------|-----------|
| Stand 01.01.       | 10        | 14        |
| Zuführungen        | 5         | 8         |
| Inanspruchnahmen   | –1        | –2        |
| Auflösungen        | –1        | –5        |
| Währungsänderungen | 1         | 1         |
| Stand zum 31.12.   | <b>14</b> | <b>16</b> |

sowie die Commercial Papers sind der Kategorie „bis zur Endfälligkeit zu halten“ (zEh) zugeordnet, die geldmarktnahen Publikumsfonds sind in der Kategorie „zur Veräußerung verfügbar“ (zVv) ausgewiesen. Wir verweisen auf Abschnitt 28 „Zusätzliche Angaben zu Finanzinstrumenten“.

### 16 • Zahlungsmittel und Zahlungsmitteläquivalente

(in Mio. €)

|                           | 2009       | 2010       |
|---------------------------|------------|------------|
| Zahlungsmittel            | 745        | 936        |
| Zahlungsmitteläquivalente | 22         | 37         |
|                           | <b>767</b> | <b>973</b> |

### 15 • Wertpapiere

Beiersdorf hält insgesamt 1.132 Mio. € (Vorjahr: 955 Mio. €) an Staats- und Industrianleihen, Commercial Papers sowie geldmarktnahen Publikumsfonds. Alle Anleihen sind börsennotiert und haben eine Restlaufzeit von bis zu drei Jahren. Die Staats- und Industrianleihen

Die Zahlungsmittel umfassen Guthaben bei Kreditinstituten, Kassenbestände und Schecks. Bei den Zahlungsmitteläquivalenten handelt es sich um kurzfristige, liquide Anlagen wie Tagesgelder, die jederzeit in bestimmte Zahlungsmittelbeträge umgewandelt werden können und nur unwesentlichen Wertschwankungsrisiken unterliegen.

Zahlungsmittel und Zahlungsmitteläquivalente sind gemäß IAS 39 der Kategorie „Kredite und Forderungen“ zugeordnet.

## 17 • Angaben zum Kapitalmanagement

Beiersdorf verfolgt das Ziel, die Eigenkapitalbasis nachhaltig zu sichern und eine angemessene Rendite auf das eingesetzte Kapital zu erwirtschaften. Zum 31. Dezember 2010 liegt die Eigenkapitalquote bei 57 % (Vorjahr: 57 %) und die EBIT-Rendite auf das durchschnittliche operative Netto-Vermögen bei 48 % (Vorjahr: 43 %). Die ausgeschütteten Dividenden im Geschäftsjahr 2010 betrugen 166 Mio. € (Vorjahr: 210 Mio. €). Für die Dividende der Beiersdorf AG von 159 Mio € (Vorjahr: 204 Mio. €) entspricht das einer Ausschüttung von 0,70 € (Vorjahr: 0,90 €) pro dividendenberechtigter Stückaktie.

## 18 • Gezeichnetes Kapital

Das Grundkapital beträgt 252 Mio. € und ist in 252 Mio. Stückaktien eingeteilt. Die Beiersdorf Aktiengesellschaft hält seit Abwicklung des Aktienrückkerwerbs am 3. Februar 2004 und nach Durchführung des Aktiensplits im Jahr 2006 25.181.016 Stückaktien. Dies entspricht 9,99 % des Grundkapitals der Gesellschaft.

## 19 • Genehmigtes Kapital

Die Hauptversammlung hat am 29. April 2010 den Vorstand ermächtigt, das Grundkapital in der Zeit bis zum 28. April 2015 mit Zustimmung des Aufsichtsrats um bis zu insgesamt 92 Mio. € (genehmigtes Kapital I: 42 Mio. €; genehmigtes Kapital II: 25 Mio. €; genehmigtes Kapital III: 25 Mio. €) durch einmalige oder mehrmalige Ausgabe neuer auf den Inhaber lautender Stückaktien zu erhöhen. Dabei kann die Gewinnberechtigung neuer Aktien abweichend von § 60 Abs. 2 AktG bestimmt werden.

Den Aktionären ist ein Bezugsrecht einzuräumen. Das Bezugsrecht kann jedoch durch den Vorstand in folgenden Fällen mit Zustimmung des Aufsichtsrats ausgeschlossen werden:

1. zum Ausgleich von infolge einer Kapitalerhöhung gegen Bareinlagen entstehenden Spitzenbeträgen (genehmigte Kapitalien I, II, III);
2. soweit dies erforderlich ist, um Inhabern/Gläubigern der von der Beiersdorf Aktiengesellschaft oder ihren unmittelbaren oder mittelbaren Mehrheitsbeteiligungsgesellschaften ausgegebenen Wandel- bzw. Optionsschuldverschreibungen ein Bezugsrecht auf neue Aktien in dem Umfang zu gewähren, wie es ihnen

nach Ausübung der Wandlungs- oder Optionsrechte bzw. nach Erfüllung der Wandlungspflicht zustehen würde (genehmigte Kapitalien I, II, III);

3. wenn der auf die neuen Aktien, für die das Bezugsrecht ausgeschlossen wird, insgesamt entfallende anteilige Betrag des Grundkapitals zehn von Hundert des im Zeitpunkt des Wirksamwerdens dieser Ermächtigung bzw. – falls dieser Wert niedriger ist – im Zeitpunkt der Ausgabe der neuen Aktien vorhandenen Grundkapitals nicht übersteigt und der Ausgabebetrag der neuen Aktien den Börsenpreis der bereits börsennotierten Aktien zum Zeitpunkt der endgültigen Festlegung des Ausgabetrags, welche möglichst zeitnah zur Platzierung der Aktien erfolgen soll, nicht wesentlich unterschreitet. Im Rahmen der Beschränkung dieser Ermächtigung auf insgesamt zehn von Hundert des Grundkapitals sind diejenigen Aktien anzurechnen, für die seit dem 29. April 2010 das Bezugsrecht der Aktionäre in Anwendung des § 186 Abs. 3 Satz 4 AktG bei Ausnutzung der Ermächtigung zur Veräußerung eigener Aktien und/oder bei Ausnutzung der Ermächtigung zur Ausgabe von Wandel- bzw. Optionsschuldverschreibungen ausgeschlossen wird (genehmigtes Kapital II);
4. bei Kapitalerhöhungen gegen Sacheinlagen zum Zwecke des Erwerbs von Unternehmen, Unternehmensteilen oder von Beteiligungen an Unternehmen (genehmigtes Kapital III).

Der Vorstand wurde ferner ermächtigt, die weiteren Einzelheiten der Kapitalerhöhung und ihrer Durchführung mit Zustimmung des Aufsichtsrats festzulegen.

## 20 • Bedingtes Kapital

Die Hauptversammlung hat am 29. April 2010 ferner beschlossen, das Grundkapital um bis zu insgesamt 42 Mio. €, eingeteilt in bis zu 42 Mio. auf den Inhaber lautende Stückaktien, bedingt zu erhöhen. Die bedingte Kapitalerhöhung wird nur insoweit durchgeführt, wie

1. die Inhaber bzw. Gläubiger von Wandlungs- und/oder Optionsrechten, die mit den von der Beiersdorf Aktiengesellschaft oder deren unmittelbaren oder mittelbaren Mehrheitsbeteiligungsgesellschaften bis zum 28. April 2015 auszugebenden Wandel- und/oder Optionsschuldverschreibungen verbunden sind, von ihrem Wandlungs- bzw. Optionsrecht Gebrauch machen oder wie

2. die zur Wandlung verpflichteten Inhaber bzw. Gläubiger der von der Beiersdorf Aktiengesellschaft oder deren unmittelbaren oder mittelbaren Mehrheitsbeteiligungsgesellschaften bis zum 28. April 2015 auszugebenden Wandelschuldverschreibungen ihre Pflicht zur Wandlung erfüllen und das bedingte Kapital nach Maßgabe der Anleihebedingungen dafür benötigt wird.

Die neuen Aktien nehmen vom Beginn des Geschäftsjahres an, in dem sie durch Ausübung von Wandlungs- bzw. Optionsrechten oder durch Erfüllung von Wandlungspflichten entstehen, am Gewinn teil.

Der Vorstand wurde ermächtigt, die weiteren Einzelheiten der Durchführung einer bedingten Kapitalerhöhung festzusetzen.

## 21 • Kapitalrücklage

Die Kapitalrücklage enthält das Aufgeld aus der Ausgabe von Aktien durch die Beiersdorf AG.

## 22 • Gewinnrücklagen

Die Gewinnrücklagen enthalten das Netto-Ergebnis des Geschäftsjahres sowie die in der Vergangenheit erzielten Ergebnisse der in den Konzernabschluss einbezogenen Unternehmen, soweit sie nicht ausgeschüttet wurden. Die Gewinnrücklagen beinhalten eine Kürzung um die Anschaffungskosten der 25.181.016 eigenen Aktien der Beiersdorf AG von 955 Mio. €.

## 23 • Kumuliertes sonstiges Konzernergebnis

### Unterschied aus der Währungsumrechnung

Der Eigenkapitalposten für Währungsumrechnung dient der Erfassung von Differenzen aus der Umrechnung der Abschlüsse von nicht in Euro bilanzierenden Tochtergesellschaften.

### Unterschied aus der Marktbewertung von Finanzinstrumenten

Der Eigenkapitalposten für die Marktbewertung von Finanzinstrumenten beinhaltet die nach Abzug latenter Steuern direkt im Eigenkapital erfassten Änderungen der beizulegenden Zeitwerte von als Sicherungsinstrument designierten derivativen Finanzinstrumenten in Höhe von –5 Mio. € (Vorjahr: –1 Mio. €) und von zur Veräußerung verfügbaren Finanzinstrumenten in Höhe von 5 Mio. € (Vorjahr: 5 Mio. €).

## 24 • Nicht beherrschende Anteile

Die nicht beherrschenden Anteile bestehen im Wesentlichen bei Nivea-Kao Co., Ltd., Japan, PT. Beiersdorf Indonesia sowie Beiersdorf India Limited.

## 25 • Rückstellungen für Pensionen und ähnliche Verpflichtungen

Der Konzern trifft Vorsorge für die Zeit nach der Pensionierung der anspruchsberechtigten Mitarbeiter direkt oder durch rechtlich selbstständige Pensions- und Unterstützungseinrichtungen. Die betriebliche Altersversorgung erfolgt im Konzern beitrags- oder leistungsorientiert. Die Ausgestaltung variiert dabei je nach den rechtlichen, wirtschaftlichen und steuerlichen Gegebenheiten des jeweiligen Landes und basiert in der Regel auf Beschäftigungsdauer, Entgelt und der eingenommenen Position im Unternehmen sowie auf Eigenleistung der Mitarbeiter. Die unmittelbaren und mittelbaren Verpflichtungen umfassen solche aus bereits laufenden Pensionen und Anwartschaften für zukünftig zu zahlende Pensionen und Altersruhegelder.

In Deutschland liegen der Kalkulation die Heubeck'schen Richttafeln von 2005 zu Grunde, international die jeweils lokal anerkannten Richttafeln. Der Abzinsungssatz für Deutschland wurde am Jahresende aufgrund der zu diesem Zeitpunkt vorhandenen Informationen mit 5,25 % (Vorjahr: 5,75 %) festgelegt. Bei Verwendung eines um 0,50 Prozentpunkte niedrigeren (höheren) Abzinsungssatzes würden sich aufgrund der Anwendung der Korridormethode keine Auswirkungen auf die Konzernbilanz zum Bilanzstichtag sowie nur geringfügige Auswirkungen auf die Gewinn- und Verlustrechnung des Folgejahres ergeben. Aufgrund der Komplexität der Bewertung, der zugrunde liegenden Annahmen und ihrer Langfristigkeit reagieren leistungsorientierte Verpflichtungen höchst sensibel auf Änderungen dieser Annahmen. Alle Annahmen werden zu jedem Abschlussstichtag überprüft. Außergewöhnliche Aufwendungen und Erträge infolge der Beendigung von Versorgungsplänen oder wegen der Kürzung und Übertragung der Versorgungsleistungen haben sich im Berichtsjahr nicht ergeben.

Der Bewertung liegen folgende Annahmen zu Grunde:

#### Versicherungsmathematische Annahmen (in %)

|                                         | 2009        |               | 2010        |               |
|-----------------------------------------|-------------|---------------|-------------|---------------|
|                                         | Deutschland | Andere Länder | Deutschland | Andere Länder |
| Abzinsungssätze                         | 5,75        | 2,00–10,00    | 5,25        | 2,00–10,00    |
| Erwartete Renditen auf Planvermögen     | 5,00        | 4,00–9,00     | 5,00        | 2,40–8,10     |
| Erwartete Lohn- und Gehaltssteigerungen | 3,00        | 2,00–10,00    | 3,00–3,50   | 2,00–10,00    |
| Erwartete Rentensteigerungen            | 1,75–2,00   | 0,50–3,30     | 1,75–2,00   | 0,25–3,30     |
| Erwartete Fluktuation                   | 2,00–4,50   | 0,30–10,00    | 2,00–4,50   | 0,30–10,00    |

Diese Parameter gelten auch im Folgejahr für die Berechnung der Kosten für die im Berichtsjahr erworbenen Versorgungsansprüche, für die Aufzinsung der in den Vorjahren erworbenen Versorgungsansprüche und die Berechnung der erwarteten Erträge aus den Vermögensanlagen.

Die erwartete Rendite aus dem Planvermögen wurde aus den in der Vergangenheit erzielten und für die Zukunft langfristig erwarteten Renditen der im Planvermögen enthaltenen Vermögenswerte abgeleitet.

#### Aufwendungen für Versorgungsleistungen (in Mio. €)

|                                                                           | 2009        |               |           | 2010        |               |           |
|---------------------------------------------------------------------------|-------------|---------------|-----------|-------------|---------------|-----------|
|                                                                           | Deutschland | Andere Länder | Konzern   | Deutschland | Andere Länder | Konzern   |
| Laufender Dienstaufwand                                                   | 13          | 6             | 19        | 13          | 9             | 22        |
| Nachzuverrechnender Dienstaufwand                                         | 3           | –             | 3         | –           | –             | –         |
| Auswirkungen aus Planabgeltungen                                          | –1          | –             | –1        | –           | –             | –         |
| <b>Aufwendungen für leistungsorientierte Versorgungsleistungen (EBIT)</b> | <b>15</b>   | <b>6</b>      | <b>21</b> | <b>13</b>   | <b>9</b>      | <b>22</b> |
| Zinsaufwand                                                               | 38          | 9             | 47        | 37          | 9             | 46        |
| Erwartete Erträge aus Planvermögen                                        | –30         | –8            | –38       | –30         | –10           | –40       |
| Amortisation versicherungsmathematischer Gewinne (–) und Verluste (+)     | –8          | 1             | –7        | –6          | 6             | –         |
| <b>Zinsergebnis für leistungsorientierte Versorgungsleistungen</b>        | <b>–</b>    | <b>2</b>      | <b>2</b>  | <b>1</b>    | <b>5</b>      | <b>6</b>  |
| <b>Gesamtaufwendungen für leistungsorientierte Versorgungsleistungen</b>  | <b>15</b>   | <b>8</b>      | <b>23</b> | <b>14</b>   | <b>14</b>     | <b>28</b> |
| Aufwendungen für beitragsorientierte Versorgungsleistungen (EBIT)         | 29          | 21            | 50        | 32          | 20            | 52        |
| <b>Gesamtaufwendungen für Versorgungsleistungen</b>                       | <b>44</b>   | <b>29</b>     | <b>73</b> | <b>46</b>   | <b>34</b>     | <b>80</b> |

Die Aufwendungen für die leistungsorientierten und beitragsorientierten Versorgungszusagen sind in den Kosten der Funktionsbereiche enthalten. Die beitragsorientierten Versorgungszusagen enthalten auch die Beiträge zu gesetzlichen bzw. staatlichen Rentenversicherungsplänen.

Die Aufzinsung der in den Vorjahren erworbenen Versorgungsansprüche, die Erträge aus Vermögensanlagen sowie die Amortisation nicht realisierter versicherungsmathematischer Gewinne/Verluste werden im Zinsergebnis ausgewiesen. Planeinzahlungen in Höhe von 9 Mio. € werden für das kommende Geschäftsjahr erwartet.

### Entwicklung des Barwerts der Leistungsorientierten Verpflichtung (in Mio. €)

|                                                                           | 2009        |               |            | 2010        |               |            |
|---------------------------------------------------------------------------|-------------|---------------|------------|-------------|---------------|------------|
|                                                                           | Deutschland | Andere Länder | Konzern    | Deutschland | Andere Länder | Konzern    |
| Eröffnungssaldo des Barwerts der leistungsorientierten Verpflichtung      | 630         | 172           | 802        | 669         | 192           | 861        |
| Laufender Dienstzeitaufwand                                               | 13          | 6             | 19         | 13          | 9             | 22         |
| Zinsaufwand                                                               | 38          | 9             | 47         | 37          | 9             | 46         |
| Versicherungsmathematische Gewinne (-) und Verluste (+)                   | 20          | 13            | 33         | 48          | 11            | 59         |
| Beiträge der Teilnehmer des Plans                                         | 3           | 2             | 5          | 3           | 3             | 6          |
| Gezahlte Versorgungsleistungen                                            | -35         | -11           | -46        | -36         | -17           | -53        |
| Unterschied aus Währungsumrechnung                                        | -           | 2             | 2          | -           | 15            | 15         |
| Sonstige Veränderungen                                                    | -           | -1            | -1         | 2           | -3            | 1          |
| <b>Schlussaldo des Barwerts der leistungsorientierten Verpflichtungen</b> | <b>669</b>  | <b>192</b>    | <b>861</b> | <b>736</b>  | <b>219</b>    | <b>955</b> |

### Finanzierungsstatus des Barwerts der Leistungsorientierten Verpflichtung (in Mio. €)

|                                                                                | 2009        |               |            | 2010        |               |            |
|--------------------------------------------------------------------------------|-------------|---------------|------------|-------------|---------------|------------|
|                                                                                | Deutschland | Andere Länder | Konzern    | Deutschland | Andere Länder | Konzern    |
| Ganz oder teilweise aus Fonds finanzierte leistungsorientierte Verpflichtungen | 663         | 172           | 835        | 730         | 198           | 928        |
| Nicht aus Fonds finanzierte leistungsorientierte Verpflichtungen               | 6           | 20            | 26         | 6           | 21            | 27         |
| <b>Barwert der leistungsorientierten Verpflichtungen</b>                       | <b>669</b>  | <b>192</b>    | <b>861</b> | <b>736</b>  | <b>219</b>    | <b>955</b> |

### Entwicklung des beizulegenden Zeitwerts des Planvermögens (in Mio. €)

|                                                                  | 2009        |               |            | 2010        |               |            |
|------------------------------------------------------------------|-------------|---------------|------------|-------------|---------------|------------|
|                                                                  | Deutschland | Andere Länder | Konzern    | Deutschland | Andere Länder | Konzern    |
| Eröffnungssaldo des beizulegenden Zeitwerts des Planvermögens    | 600         | 155           | 755        | 613         | 167           | 780        |
| Erwartete Erträge aus Planvermögen                               | 30          | 8             | 38         | 30          | 10            | 40         |
| Versicherungsmathematische Gewinne (+) und Verluste (-)          | -15         | 3             | -12        | -7          | 5             | -2         |
| <b>Tatsächliche Erträge aus Planvermögen</b>                     | <b>15</b>   | <b>11</b>     | <b>26</b>  | <b>23</b>   | <b>15</b>     | <b>38</b>  |
| Beiträge des Arbeitgebers                                        | 4           | 7             | 11         | 1           | 11            | 12         |
| Beiträge der Teilnehmer des Plans                                | -           | 3             | 3          | -           | 3             | 3          |
| Gezahlte Versorgungsleistungen                                   | -6          | -11           | -17        | -7          | -16           | -23        |
| Unterschied aus Währungsumrechnung                               | -           | 2             | 2          | -           | 14            | 14         |
| Sonstige Veränderungen                                           | -           | -             | -          | 4           | -             | 4          |
| <b>Schlussaldo des beizulegenden Zeitwerts des Planvermögens</b> | <b>613</b>  | <b>167</b>    | <b>780</b> | <b>634</b>  | <b>194</b>    | <b>828</b> |

## Kategorien des beizulegenden Zeitwerts des Planvermögens (in Mio. €)

|                                                 | 2009        |               |            | 2010        |               |            |
|-------------------------------------------------|-------------|---------------|------------|-------------|---------------|------------|
|                                                 | Deutschland | Andere Länder | Konzern    | Deutschland | Andere Länder | Konzern    |
| Eigenkapitalinstrumente                         | 217         | 89            | 306        | 248         | 87            | 335        |
| Fremdkapitalinstrumente                         | 355         | 63            | 418        | 355         | 86            | 441        |
| Immobilien                                      | 31          | –             | 31         | 26          | 9             | 35         |
| Zahlungsmittel und Zahlungsmitteläquivalente    | 10          | 10            | 20         | 5           | 10            | 15         |
| Sonstiges                                       | –           | 5             | 5          | 0           | 2             | 2          |
| <b>Beizulegender Zeitwert des Planvermögens</b> | <b>613</b>  | <b>167</b>    | <b>780</b> | <b>634</b>  | <b>194</b>    | <b>828</b> |

## Rückstellungen für die Pensionen und ähnliche Verpflichtungen in der Bilanz (in Mio. €)

|                                                                                                         | 2006       | 2007       | 2008       | 2009       | 2010       |
|---------------------------------------------------------------------------------------------------------|------------|------------|------------|------------|------------|
| Barwert der leistungsorientierten Verpflichtungen                                                       | 940        | 835        | 802        | 861        | 955        |
| Beizulegender Zeitwert des Planvermögens                                                                | –767       | –793       | –755       | –780       | –828       |
| <b>Nettoverpflichtung</b>                                                                               | <b>173</b> | <b>42</b>  | <b>47</b>  | <b>81</b>  | <b>127</b> |
| Saldo der noch nicht in der Bilanz angesetzten versicherungsmathematischen Gewinne (+) und Verluste (–) | 107        | 222        | 178        | 130        | 73         |
| Andere in der Bilanz angesetzte Beträge                                                                 | 8          | 11         | 10         | 10         | 9          |
| <b>Rückstellungen für Pensionen und ähnliche Verpflichtungen in der Bilanz</b>                          | <b>288</b> | <b>275</b> | <b>235</b> | <b>221</b> | <b>209</b> |

## 26 • Sonstige Rückstellungen

(in Mio. €)

|                                | Personal-<br>aufwendungen | Marketing- und<br>Vertriebs-<br>aufwendungen | Restruk-<br>turierung | Übrige     | Gesamt     |
|--------------------------------|---------------------------|----------------------------------------------|-----------------------|------------|------------|
| <b>Anfangsstand 01.01.2010</b> | <b>185</b>                | <b>122</b>                                   | <b>43</b>             | <b>179</b> | <b>529</b> |
| Davon langfristig              | 69                        | 1                                            | 4                     | 64         | 138        |
| Währungsänderungen             | 7                         | 8                                            | –1                    | 8          | 22         |
| Zuführung                      | 127                       | 131                                          | 20                    | 146        | 424        |
| Verbrauch                      | 142                       | 107                                          | 7                     | 84         | 340        |
| Auflösung                      | 16                        | 4                                            | 1                     | 11         | 32         |
| <b>Endstand 31.12.2010</b>     | <b>161</b>                | <b>150</b>                                   | <b>54</b>             | <b>238</b> | <b>603</b> |
| Davon langfristig              | 38                        | 1                                            | 1                     | 77         | 117        |

Rückstellungen für Personalaufwendungen beinhalten vor allem Rückstellungen für Altersteilzeit, Jahressonderzahlungen, Urlaubsgelder sowie Trennungsvereinbarungen und Jubiläumsverpflichtungen. Die Rückstellungen für Marketing- und Vertriebsaufwendungen betreffen insbesondere Werbekostenzuschüsse und Kundenrabatte sowie Retouren. Die Zuführungen zu den

Restrukturierungsrückstellungen umfassen im Wesentlichen Rückstellungen im Zusammenhang mit dem Investitions- und Maßnahmenpaket im Unternehmensbereich Consumer. Die übrigen Rückstellungen betreffen unter anderem Prozessrisiken.



## 27 • Verbindlichkeiten

Die vertraglich vereinbarten undiskontierten Zins- und Tilgungszahlungen der langfristigen Verbindlichkeiten (ohne latente Steuern) stellen sich wie folgt dar:

(in Mio. €)

|                                            | 2009            |                                            |           | 2010            |                                            |           |
|--------------------------------------------|-----------------|--------------------------------------------|-----------|-----------------|--------------------------------------------|-----------|
|                                            | Buchwert 31.12. | Vertraglich vereinbarte Fälligkeitstermine |           | Buchwert 31.12. | Vertraglich vereinbarte Fälligkeitstermine |           |
|                                            |                 | 2011–2014                                  | Nach 2014 |                 | 2012–2015                                  | Nach 2015 |
| Langfristige finanzielle Verbindlichkeiten | 7               | 6                                          | 2         | 6               | 6                                          | 2         |
| Langfristige derivative Finanzinstrumente  | –               | –                                          | –         | 2               | 2                                          | –         |
| Sonstige langfristige Verbindlichkeiten    | 5               | 3                                          | 3         | 5               | 3                                          | 3         |
|                                            | <b>12</b>       | <b>9</b>                                   | <b>5</b>  | <b>13</b>       | <b>11</b>                                  | <b>5</b>  |

Die langfristigen finanziellen Verbindlichkeiten sind in Höhe von 6 Mio. € (Vorjahr: 7 Mio. €) der Kategorie „Andere finanzielle Verbindlichkeiten“ (AfV) und in Höhe von 2 Mio. € (Vorjahr: 0 Mio. €) der Kategorie „Derivative Finanzinstrumente“ (DF) zugeordnet.

Die Zusammensetzung der kurzfristigen Verbindlichkeiten ist der folgenden Tabelle zu entnehmen:

(in Mio. €)

|                                                               | 2009       | 2010         |
|---------------------------------------------------------------|------------|--------------|
| <b>Verbindlichkeiten aus Lieferungen und Leistungen (AfV)</b> | <b>699</b> | <b>863</b>   |
| <b>Sonstige kurzfristige finanzielle Verbindlichkeiten</b>    | <b>158</b> | <b>135</b>   |
| Andere finanzielle Verbindlichkeiten (AfV)                    | 148        | 115          |
| Negative Zeitwerte von Derivaten (DF)                         | 10         | 20           |
| <b>Sonstige kurzfristige Verbindlichkeiten</b>                | <b>71</b>  | <b>71</b>    |
| Verbindlichkeiten aus sonstigen Steuern                       | 57         | 57           |
| Verbindlichkeiten im Rahmen der sozialen Sicherheit           | 11         | 10           |
| Erhaltene Anzahlungen                                         | 3          | 4            |
|                                                               | <b>928</b> | <b>1.069</b> |

Die anderen finanziellen Verbindlichkeiten enthalten im Wesentlichen kurzfristige Darlehen gegenüber Banken in Höhe von 67 Mio. € (Vorjahr: 75 Mio. €) sowie andere finanzielle Verpflichtungen in Höhe von 48 Mio. € (Vorjahr: 45 Mio. €). Im Vorjahr beinhaltete diese Position die zweite Tranche der Option für die letztes Jahr noch in Fremdbesitz befindlichen Anteile an der C-BONS Hair Care Gruppe in Höhe von 26 Mio. €. Da die vertraglich vereinbarten Fälligkeitstermine für die kurzfristigen Verbindlichkeiten innerhalb von zwölf Monaten nach dem Bilanzstichtag liegen, entsprechen deren Buchwerte zum Abschlussstichtag näherungsweise dem beizulegenden Zeitwert.

## 28 • Zusätzliche Angaben zu Finanzinstrumenten

(in Mio. €)

|                                                                          |                    | Wertansatz Bilanz nach IAS 39           |                                              |                                              |                                     |
|--------------------------------------------------------------------------|--------------------|-----------------------------------------|----------------------------------------------|----------------------------------------------|-------------------------------------|
|                                                                          | Buchwert<br>31.12. | Fortgeführte<br>Anschaffungs-<br>kosten | Beizulegender<br>Zeitwert,<br>erfolgsneutral | Beizulegender<br>Zeitwert,<br>erfolgswirksam | Beizulegender<br>Zeitwert<br>31.12. |
| 2009                                                                     |                    |                                         |                                              |                                              |                                     |
| Aktiva                                                                   |                    |                                         |                                              |                                              |                                     |
| Kredite und Forderungen (KuF)                                            | 1.761              | 1.761                                   | –                                            | –                                            | 1.761                               |
| Langfristige finanzielle Vermögenswerte                                  | 5                  | 5                                       | –                                            | –                                            | 5                                   |
| Forderungen aus Lieferungen und Leistungen                               | 906                | 906                                     | –                                            | –                                            | 906                                 |
| Sonstige kurzfristige finanzielle Vermögenswerte                         | 83                 | 83                                      | –                                            | –                                            | 83                                  |
| Zahlungsmittel und Zahlungsmitteläquivalente                             | 767                | 767                                     | –                                            | –                                            | 767                                 |
| Zur Veräußerung verfügbare finanzielle Vermögenswerte (zVv)              | 241                | 5                                       | 236                                          | –                                            | 241                                 |
| Langfristige finanzielle Vermögenswerte                                  | 5                  | 5                                       | –                                            | –                                            | 5                                   |
| Wertpapiere                                                              | 236                | –                                       | 236                                          | –                                            | 236                                 |
| Bis zur Endfälligkeit gehaltene Finanzinvestitionen (zEh)                | 699                | 699                                     | –                                            | –                                            | 701                                 |
| Wertpapiere                                                              | 699                | 699                                     | –                                            | –                                            | 701                                 |
| Erfolgswirksam zum beizulegenden Zeitwert bewertete Vermögenswerte (ebZ) | 20                 | –                                       | –                                            | 20                                           | 20                                  |
| Wertpapiere                                                              | 20                 | –                                       | –                                            | 20                                           | 20                                  |
| Derivative Finanzinstrumente mit Hedge-Beziehung (DF)                    | 8                  | –                                       | 8                                            | –                                            | 8                                   |
| Passiva                                                                  |                    |                                         |                                              |                                              |                                     |
| Andere finanzielle Verbindlichkeiten (AfV)                               | 854                | 854                                     | –                                            | –                                            | 854                                 |
| Langfristige finanzielle Verbindlichkeiten                               | 7                  | 7                                       | –                                            | –                                            | 7                                   |
| Verbindlichkeiten aus Lieferungen und Leistungen                         | 699                | 699                                     | –                                            | –                                            | 699                                 |
| Sonstige kurzfristige finanzielle Verbindlichkeiten                      | 148                | 148                                     | –                                            | –                                            | 148                                 |
| Derivative Finanzinstrumente mit Hedge-Beziehung (DF)                    | 10                 | –                                       | 10                                           | –                                            | 10                                  |
| 2010                                                                     |                    |                                         |                                              |                                              |                                     |
| Aktiva                                                                   |                    |                                         |                                              |                                              |                                     |
| Kredite und Forderungen (KuF)                                            | 2.036              | 2.036                                   | –                                            | –                                            | 2.036                               |
| Langfristige finanzielle Vermögenswerte                                  | 5                  | 5                                       | –                                            | –                                            | 5                                   |
| Forderungen aus Lieferungen und Leistungen                               | 1.001              | 1.001                                   | –                                            | –                                            | 1.001                               |
| Sonstige kurzfristige finanzielle Vermögenswerte                         | 57                 | 57                                      | –                                            | –                                            | 57                                  |
| Zahlungsmittel und Zahlungsmitteläquivalente                             | 973                | 973                                     | –                                            | –                                            | 973                                 |
| Zur Veräußerung verfügbare finanzielle Vermögenswerte (zVv)              | 241                | 5                                       | 236                                          | –                                            | 241                                 |
| Langfristige finanzielle Vermögenswerte                                  | 5                  | 5                                       | –                                            | –                                            | 5                                   |
| Wertpapiere                                                              | 236                | –                                       | 236                                          | –                                            | 236                                 |
| Bis zur Endfälligkeit gehaltene Finanzinvestitionen (zEh)                | 896                | 896                                     | –                                            | –                                            | 896                                 |
| Wertpapiere                                                              | 896                | 896                                     | –                                            | –                                            | 896                                 |
| Derivative Finanzinstrumente mit Hedge-Beziehung (DF)                    | 15                 | –                                       | 9                                            | 6                                            | 15                                  |
| Passiva                                                                  |                    |                                         |                                              |                                              |                                     |
| Andere finanzielle Verbindlichkeiten (AfV)                               | 984                | 984                                     | 17                                           | 5                                            | 984                                 |
| Langfristige finanzielle Verbindlichkeiten                               | 6                  | 6                                       | –                                            | –                                            | 6                                   |
| Verbindlichkeiten aus Lieferungen und Leistungen                         | 863                | 863                                     | –                                            | –                                            | 863                                 |
| Sonstige kurzfristige finanzielle Verbindlichkeiten                      | 115                | 115                                     | –                                            | –                                            | 115                                 |
| Derivative Finanzinstrumente mit Hedge-Beziehung (DF)                    | 22                 | –                                       | 17                                           | 5                                            | 22                                  |

Für die vorhandenen Finanzinstrumente liegen die vertraglich vereinbarten Fälligkeitstermine überwiegend innerhalb von zwölf Monaten nach dem Bilanzstichtag. Daher entsprechen deren Buchwerte zum Abschlussstichtag näherungsweise dem beizulegenden Zeitwert. Die folgende Hierarchie wird verwendet, um den Zeitwert von Finanzinstrumenten zu bestimmen und auszuweisen:

- **Stufe 1:** Beizulegende Zeitwerte, die mit Hilfe von in aktiven Märkten notierten Preisen bestimmt werden.
- **Stufe 2:** Beizulegende Zeitwerte, die mit Hilfe von Bewertungsmethoden bestimmt werden, bei denen die Inputfaktoren, die für den beizulegenden Zeitwert bedeutend sind, auf beobachtbaren Marktdaten basieren.
- **Stufe 3:** Beizulegende Zeitwerte, die mit Hilfe von Bewertungsmethoden bestimmt werden, bei denen die Inputfaktoren, die für den beizulegenden Zeitwert bedeutend sind, nicht auf beobachtbaren Marktdaten basieren.

Die im Beiersdorf Konzern zum beizulegenden Zeitwert bewerteten Wertpapiere fallen unter die Fair-Value-Hierarchiestufe 1, derivative Finanzinstrumente unter die Fair-Value-Hierarchiestufe 2.

## 29 • Haftungsverhältnisse und sonstige finanzielle Verpflichtungen

(in Mio. €)

|                                                 | 2009 | 2010 |
|-------------------------------------------------|------|------|
| <b>Haftungsverhältnisse</b>                     |      |      |
| Wechselobligo                                   | –    | 1    |
| Verbindlichkeiten aus Bürgschaften              | 1    | 1    |
| <b>Sonstige finanzielle Verpflichtungen</b>     |      |      |
| Verpflichtungen aus Miet- und Leasingverträgen: | 124  | 95   |
| – davon fällig im Folgejahr                     | 45   | 41   |
| – davon fällig in 2 bis 5 Jahren                | 71   | 50   |
| – davon fällig in > 5 Jahren                    | 8    | 4    |
| Verpflichtungen aus Bestellobligo:              | 130  | 25   |
| – davon fällig im Folgejahr                     | 62   | 17   |
| – davon fällig in 2 bis 5 Jahren                | 68   | 8    |

Der Gesamtbetrag der Nominalwerte der sonstigen finanziellen Verpflichtungen beträgt 120 Mio. € (Vorjahr: 254 Mio. €).

Beiersdorf unterliegt möglichen Verpflichtungen, unter anderem aus Untersuchungen zum Kartellrecht. Sofern der Abfluss von wirtschaftlichen Ressourcen zur Erfüllung dieser Verpflichtungen wahrscheinlich ist, sind Rückstellungen für die anhängenden Kartellverfahren gebildet worden. Eine abschließende Einschätzung des Risikos aus Konzernsicht ist zurzeit jedoch noch nicht möglich.

## 30 • Finanzrisikomanagement und derivative Finanzinstrumente

### Grundsätze des Risikomanagements

Der Beiersdorf Konzern ist durch seine Geschäftstätigkeit verschiedenen Risiken wie Währungs-, Zinsänderungs- und Ausfallrisiken ausgesetzt.

Zur Sicherung des operativen Grundgeschäfts und wesentlicher unternehmensnotwendiger Finanztransaktionen werden derivative Finanzinstrumente eingesetzt. Daraus entstehen dem Konzern keine zusätzlichen Risiken. Die Transaktionen werden ausschließlich mit marktgängigen Instrumenten durchgeführt. Zur Darstellung von Marktrisiken verlangt IFRS 7 Sensitivitätsanalysen, die die Auswirkungen hypothetischer Änderungen von relevanten Risikovariablen auf Ergebnis und Eigenkapital zeigen. Für den Beiersdorf Konzern sind dies im Wesentlichen Währungsrisiken. Die Auswirkungen werden ermittelt, indem die hypothetischen Änderungen der Risikovariablen auf den Bestand der Finanzinstrumente zum Abschlussstichtag bezogen werden. Dabei wird unterstellt, dass der Bestand zum Abschlussstichtag repräsentativ für das Gesamtjahr ist.

### Währungsrisiken

Unter dem Währungsrisiko versteht man das Risiko, dass der Zeitwert oder zukünftige Zahlungsströme eines Finanzinstruments aufgrund von Wechselkursänderungen schwanken.

Währungsrisiken im Sinne von IFRS 7 entstehen durch monetäre Finanzinstrumente, die in einer von der funktionalen Währung abweichenden Währung bilanziert sind. Wechselkursbedingte Differenzen aus der Umrechnung von Abschlüssen der Tochtergesellschaften in die Konzernwährung bleiben unberücksichtigt. Relevante Risikovariablen sind daher grundsätzlich alle nicht funktionalen Währungen, in denen im Beiersdorf Konzern Finanzinstrumente gehalten werden. Durch die internationale Ausrichtung des

Beiersdorf Konzerns mit Dominanz im Euroraum fungiert der Euro als Leitwährung. Risiken entstehen für Beiersdorf demnach aus Finanzierungsmaßnahmen und operativen Tätigkeiten, wenn andere Währungen gegenüber dem Euro schwanken.

Bei konzerninternen grenzüberschreitenden Finanzierungen werden Währungsrisiken grundsätzlich zentral durch Devisentermingeschäfte fristenkongruent und vollständig gesichert (Fair Value Hedges). Aufgrund dieser Sicherungsaktivitäten ist Beiersdorf zum Abschlussstichtag keinen wesentlichen Währungsrisiken im Finanzierungsbereich ausgesetzt. Den Ergebniseffekten aus den Devisentermingeschäften stehen in gleicher Höhe Wertschwankungen der abgesicherten Grundgeschäfte gegenüber.

Für den operativen Bereich werden im Beiersdorf Konzern Zahlungsströme in nicht funktionaler Währung bis zu 36 Monate im Voraus durch Standarddevisentermingeschäfte gesichert. Diese Transaktionen werden zentral im Treasury Management System erfasst, bewertet und gesteuert. Daher ist Beiersdorf zum Abschlussstichtag keinen wesentlichen Währungsrisiken im operativen Bereich ausgesetzt.

Da wesentliche originäre Finanzinstrumente entweder unmittelbar in funktionaler Währung denominiert oder durch den Einsatz von Derivaten in die funktionale Währung transformiert sind, haben Währungskursänderungen keine wesentlichen Auswirkungen auf Ergebnis oder Eigenkapital. Der Beiersdorf Konzern ist demzufolge im Wesentlichen nur Währungsrisiken aus Devisentermingeschäften ausgesetzt, die als Sicherungsinstrument bestimmt sind und die Voraussetzungen für die Bilanzierung einer Sicherungsbeziehung für die Absicherung von erwarteten bzw. geplanten Zahlungsströmen erfüllen (Cashflow Hedges on Forecasted Transactions). Kursänderungen wirken sich auf die Sicherungsrücklage im Eigenkapital und die Zeitwerte der Sicherungsgeschäfte aus.

Die Marktwerte der Devisentermingeschäfte betrugen zum Stichtag –7 Mio. € (Vorjahr: –2 Mio. €), die Nominalwerte lagen bei 892 Mio. € (Vorjahr: 927 Mio. €). Hiervon haben 858 Mio. € (Vorjahr: 886 Mio. €) Restlaufzeiten bis zu einem Jahr und 34 Mio. € (Vorjahr: 41 Mio. €) Restlaufzeiten zwischen einem und zwei Jahren. Die Nominalwerte zeigen die Summe aller Kauf- und Verkaufsbeträge derivativer Finanzgeschäfte. Bei den ausgewiesenen Nominalwerten werden Beträge nicht saldiert.

Wenn der Euro gegenüber sämtlichen Währungen zum 31. Dezember 2010 um 10 % aufgewertet gewesen wäre, wären die Sicherungsrücklage im Eigenkapital und die Marktwerte der Devisentermingeschäfte um 24 Mio. € (Vorjahr: 22 Mio. €) höher gewesen. Bei einer entsprechenden Abwertung von 10 % wären die Sicherungsrücklage im Eigenkapital und die Marktwerte der Devisentermingeschäfte um 29 Mio. € (Vorjahr: 27 Mio. €) niedriger gewesen.

### Zinsrisiken

Unter dem Zinsänderungsrisiko versteht man das Risiko, dass der Zeitwert oder zukünftige Zahlungsströme eines Finanzinstruments aufgrund von Änderungen des Marktzinssatzes schwanken.

Zeitwertänderungen sind für den Beiersdorf Konzern aufgrund des niedrigen Bestands an langfristigen Finanzinstrumenten sowie keinem Bestand an Zinsderivaten nur von untergeordneter Bedeutung. Es werden derzeit Finanzinstrumente mit Laufzeiten von bis zu zwei Jahren gehalten. Sie unterliegen, bezogen auf das gesamte Geschäftsjahr, Zinsänderungsrisiken im Sinne von IFRS 7.

Wäre das Zinsniveau zu den Quartalsenden des Geschäftsjahres parallel zur Zinsstrukturkurve jeweils 100 Basispunkte höher (niedriger) gewesen, wäre das Finanzergebnis um 12 Mio. € (Vorjahr: 10 Mio. €) höher (niedriger) ausgefallen.

### Ausfallrisiken

Beiersdorf unterliegt im Rahmen von Finanzierungstätigkeiten und im operativen Bereich Ausfallrisiken. Um diese Risiken weitestgehend zu reduzieren, werden im Finanzierungsbereich Geschäfte grundsätzlich nur mit Vertragspartnern erstklassiger Bonität abgeschlossen. Außenstände im operativen Geschäft werden kontinuierlich überwacht, möglichen Ausfällen wird durch Einzel- und pauschalierte Einzelwertberichtigungen Rechnung getragen. Das maximale Ausfallrisiko ist durch den in der Bilanz angesetzten Buchwert jedes finanziellen Vermögenswerts ersichtlich. Die Buchwerte der finanziellen Vermögenswerte betragen zum 31. Dezember 2010 3.188 Mio. € (Vorjahr: 2.729 Mio. €). Im Bereich der Forderungen aus Lieferungen und Leistungen sind Ausfallrisiken zum Teil durch entsprechende Versicherungen abgedeckt.

### Liquiditätsrisiken

Als Liquiditätsrisiko wird das Risiko verstanden, dass ein Unternehmen Schwierigkeiten bei der Erfüllung seiner sich aus den finanziellen Verbindlichkeiten ergebenden

Verpflichtungen hat. Aufgrund des hohen Bestands an Zahlungsmitteln und Zahlungsmitteläquivalenten sowie Wertpapieren zum Stichtag ist Beiersdorf derzeit keinem Liquiditätsrisiko ausgesetzt. Um die Zahlungsfähigkeit und finanzielle Flexibilität des Beiersdorf Konzerns jederzeit sicherzustellen, werden zudem Liquiditätsreserven in Form von Kreditlinien vorgehalten.

## Erläuterungen zur Kapitalflussrechnung

Die Kapitalflussrechnung ist entsprechend den Regelungen des IAS 7 aufgestellt und gliedert sich nach Zahlungsströmen aus der laufenden Geschäfts-, Investitions- und Finanzierungstätigkeit.

Die Darstellung des Cashflows aus laufender Geschäftstätigkeit erfolgt nach der indirekten Methode, während der Ausweis des Cashflows aus der Investitions- und aus der Finanzierungstätigkeit nach der direkten Methode erfolgt.

Der Finanzmittelfonds umfasst Zahlungsmittel und Zahlungsmitteläquivalente, die jederzeit in Zahlungsmittel umgewandelt werden können und nur unwesentlichen Wertschwankungen unterliegen.

## Erläuterungen zur Segmentberichterstattung

Im Beiersdorf Konzern ergibt sich die Segmentberichterstattung in erster Linie aus den in den Unternehmensbereichen erstellten und vertriebenen Produkten. Die Aufteilung in die Unternehmensbereiche Consumer und tesa entspricht auch der internen Organisationsstruktur und der Berichterstattung an den Vorstand. Um die internationale Aufteilung der geschäftlichen Aktivitäten im Beiersdorf Konzern zu zeigen, werden über die operativen Segmente hinaus noch geografische Informationen präsentiert.

Die Außenumsätze in den Regionen zeigen die Umsatzentwicklung nach Sitz der Gesellschaften.

Konzerngesellschaften mit Sitz in Deutschland erzielten 2010 einen **Umsatz** in Höhe von 1.416 Mio. € (Vorjahr: 1.389 Mio. €) und bilanzierten **langfristige Vermögenswerte** (nicht enthalten sind Finanzinstrumente, latente Steuern und Planvermögen) in Höhe von 540 Mio. € (Vorjahr: 524 Mio. €).

Das **EBIT ohne Sondereffekte** zeigt das betriebliche Ergebnis, bereinigt um einmalige nicht operative Geschäftsvorfälle.

Das **EBITDA** zeigt das betriebliche Ergebnis (EBIT) vor Abschreibungen, Amortisation und Wertberichtigungen.

Die **EBIT-Rendite auf das operative Netto-Vermögen** zeigt das Verhältnis von betrieblichem Ergebnis (EBIT) zu operativem Netto-Vermögen.

Der **Brutto-Cashflow** stellt den Überschuss der operativen Einnahmen über die operativen Ausgaben vor weiterer Mittelverwendung dar.

Das **operative Netto-Vermögen** in Höhe von 1.215 Mio. € (Vorjahr: 1.379 Mio. €) ergibt sich aus operativem Brutto-Vermögen abzüglich der operativen Verbindlichkeiten.

Die Überleitung des operativen Netto-Vermögens zu den Bilanzpositionen zeigt die folgende Tabelle:

(in Mio. €)

|                                                                               | 2009         | 2010         |
|-------------------------------------------------------------------------------|--------------|--------------|
| <b>Aktiva</b>                                                                 |              |              |
| Immaterielle Vermögenswerte                                                   | 382          | 306          |
| Sachanlagen                                                                   | 725          | 716          |
| Vorräte                                                                       | 561          | 632          |
| Forderungen aus Lieferungen und Leistungen                                    | 906          | 1.001        |
| Übrige Forderungen und sonstige Vermögenswerte (operativer Teil) <sup>1</sup> | 140          | 120          |
| <b>Operatives Brutto-Vermögen</b>                                             | <b>2.714</b> | <b>2.775</b> |
| Nicht operatives Brutto-Vermögen                                              | 1.880        | 2.320        |
| <b>Gesamt Aktiva laut Bilanz</b>                                              | <b>4.594</b> | <b>5.095</b> |
| <b>Passiva</b>                                                                |              |              |
| Übrige Rückstellungen (operativer Teil) <sup>2</sup>                          | 529          | 604          |
| Verbindlichkeiten aus Lieferungen und Leistungen                              | 699          | 863          |
| Übrige Verbindlichkeiten (operativer Teil) <sup>3</sup>                       | 107          | 93           |
| <b>Operative Verbindlichkeiten</b>                                            | <b>1.335</b> | <b>1.560</b> |
| Eigenkapital                                                                  | 2.636        | 2.920        |
| Nicht operative Verbindlichkeiten                                             | 623          | 615          |
| <b>Gesamt Passiva laut Bilanz</b>                                             | <b>4.594</b> | <b>5.095</b> |

<sup>1</sup> Nicht enthalten sind Steuerforderungen.

<sup>2</sup> Nicht enthalten sind Steuerrückstellungen.

<sup>3</sup> Nicht enthalten sind Steuerverbindlichkeiten.

## Sonstige Angaben

### Angaben zur Vergütung von Vorstand und Aufsichtsrat

Für das Geschäftsjahr 2010 beläuft sich die Gesamtvergütung der Mitglieder des Aufsichtsrats auf 1.390 T€ (Vorjahr: 1.159 T€) und die Gesamtbezüge der Mitglieder des Vorstands auf 4.466 T€ (Vorjahr: 4.556 T€). Von den Gesamtbezügen der Mitglieder des Vorstands entfallen 1.403 T€ (Vorjahr: 627 T€) auf langfristig fällige Leistungen. Die Zuführungen zu Leistungen nach Beendigung des Arbeitsverhältnisses betrugen 468 T€ (Vorjahr: 510 T€). Hinsichtlich der Angaben zu den Grundzügen der Vorstands- und Aufsichtsratsvergütung sowie der Höhe der individualisierten Bezüge wird auf den Vergütungsbericht im Corporate Governance-Bericht ab S. 31 verwiesen. Der Vergütungsbericht ist Bestandteil des Konzernabschlusses und -lageberichts. Frühere Vorstandsmitglieder und ihre Hinterbliebenen erhielten Gesamtbezüge in Höhe von 2.274 T€ (Vorjahr: 2.274 T€). Für die Pensionsverpflichtungen gegenüber früheren Mitgliedern des Vorstands und ihren Hinterbliebenen wurden insgesamt 23.600 T€ (Vorjahr: 22.373 T€) zurückgestellt.

### Angaben über Beziehungen zu nahe stehenden Unternehmen nach IAS 24

Die maxingvest ag hält seit dem 30. März 2004 mehr als 50 % des Grundkapitals der Beiersdorf AG. Die Beiersdorf AG ist demnach eine abhängige Gesellschaft i.S.v. § 312 Abs. 1 Satz 1 i.V.m. § 17 Abs. 2 AktG. Da kein Beherrschungsvertrag zwischen der Beiersdorf AG und der maxingvest ag besteht, stellt der Vorstand der Beiersdorf AG einen Bericht über die Beziehungen zu verbundenen Unternehmen gemäß § 312 Abs. 1 Satz 1 AktG auf. Im Geschäftsjahr 2010 haben die Beiersdorf AG bzw. ihre verbundenen Unternehmen und die maxingvest ag bzw. deren verbundene Unternehmen wie im Vorjahr Einkaufskontingente zur Erzielung von Kostenvorteilen zusammengefasst sowie gegenseitig Produkte zu marktüblichen Bedingungen in nicht wesentlichem Umfang bezogen. Weiterhin erfolgte in geringem Umfang eine weitere Zusammenarbeit insbesondere bei Marketingaktionen sowie im Bereich von Marktrecherchen und Qualitätskontrollen.

### Inanspruchnahme von Befreiungsvorschriften

Folgende in den Konzernabschluss der Beiersdorf AG einbezogene deutsche Tochtergesellschaften machten im Geschäftsjahr 2010 von der Befreiungsvorschrift des § 264 Abs. 3 HGB Gebrauch:

- Beiersdorf Manufacturing Hamburg GmbH, Hamburg
- Beiersdorf Manufacturing Berlin GmbH, Berlin
- Florena Cosmetic GmbH, Waldheim
- La Prairie Group Deutschland GmbH, Baden-Baden
- Juvena Produits de Beauté GmbH, Baden-Baden
- Juvena La Prairie GmbH, Baden-Baden
- Beiersdorf Shared Services GmbH, Hamburg
- Allgemeine Immobilien- und Verwaltungsgesellschaft m.b.H., Baden-Baden
- Phanex Handelsgesellschaft m.b.H., Hamburg

### Entsprechenserklärung zum Deutschen Corporate Governance Kodex

Vorstand und Aufsichtsrat der Beiersdorf AG haben im Dezember 2010 die Entsprechenserklärung für das Geschäftsjahr 2010 zu den Empfehlungen der „Regierungskommission Deutscher Corporate Governance Kodex“ gemäß § 161 AktG abgegeben. Die Entsprechenserklärung wurde den Aktionären auf der Internetseite der Gesellschaft unter [www.Beiersdorf.de/Entsprechenserklärung](http://www.Beiersdorf.de/Entsprechenserklärung) dauerhaft zugänglich gemacht.

### Abschlussprüfung

Die Hauptversammlung hat am 29. April 2010 die Ernst & Young GmbH Wirtschaftsprüfungsgesellschaft zum Abschlussprüfer und Konzernabschlussprüfer für das Geschäftsjahr 2010 gewählt.

Die nachfolgende Tabelle gibt einen Überblick über die im Geschäftsjahr als Aufwand erfassten Honorare des Konzernabschlussprüfers Ernst & Young GmbH Wirtschaftsprüfungsgesellschaft:

#### Konzernabschlussprüfer Honorar (in T€)

|                              | 2009       | 2010         |
|------------------------------|------------|--------------|
| Abschlussprüfungsleistungen  | 817        | 975          |
| Andere Betätigungsleistungen | 115        | 102          |
| Steuerberatungsleistungen    | 67         | 87           |
| Sonstige Leistungen          | –          | –            |
| <b>Gesamt</b>                | <b>999</b> | <b>1.164</b> |

## Anteilsbesitzliste

Die Anteilsbesitzliste gemäß § 313 Abs. 2 HGB ist unter Konzerngesellschaften ab Seite 105 abgedruckt.

## Anteilsbesitz an der Beiersdorf AG

Der Beiersdorf AG gingen bis zum Tag der Aufstellung der Bilanz (8. Februar 2011) folgende Mitteilungen von Anteilseignern der Gesellschaft nach den Vorschriften des Wertpapierhandelsgesetzes (WpHG) zu:

1. Die Capital Research and Management Company, Los Angeles, USA, hat uns gemäß § 21 Abs. 1 WpHG mitgeteilt, dass ihr Stimmrechtsanteil an unserem Unternehmen am 29. September 2010 die Schwelle von 3 % unterschritten hat und zu diesem Tag 2,75 % (6.939.012 Stimmrechte) beträgt. Diese 2,75 % der Stimmrechte (Stimmrechte aus 6.939.012 Stammaktien) wurden der Capital Research and Management Company gemäß § 22 Abs. 1 Satz 1 Nr. 6 WpHG zugerechnet.
2. Ferner wurde uns Folgendes mitgeteilt:
  - a) Stimmrechtsmitteilungen gemäß § 21 Abs. 1 WpHG vom 2. April 2004, 14. April 2004 sowie 16. April 2004  
 Mit den Stimmrechtsmitteilungen der nachstehend in der Tabelle als meldepflichtig aufgeführten Personen (die „Meldepflichtigen“) gemäß § 21 Abs. 1 WpHG vom 2. April 2004, 14. April 2004 sowie 16. April 2004 wurde das erstmalige Überschreiten der 50 %-Schwelle und das Halten von 50,46 % (42.386.400 Stimmrechte) an der Beiersdorf Aktiengesellschaft zum 30. März 2004 angezeigt.

Unter Berücksichtigung des am 3. Februar 2004 vollzogenen Aktienrückkaufprogramms der Beiersdorf Aktiengesellschaft und der nunmehr vorgenommenen Zurechnung der von der Beiersdorf Aktiengesellschaft gehaltenen 9,99 % (8.393.672 eigene Aktien) nach § 22 Abs. 1 S. 1 Nr. 1 i. V. m. S. 3 WpHG haben die Meldepflichtigen gemäß § 21 Abs. 1 WpHG jeweils erstmals zum 3. Februar 2004 die 50 %-Schwelle überschritten und hielten zu diesem Zeitpunkt jeweils einen Stimmrechtsanteil von 59,95 % (50.360.072 Stimmrechte) an der Beiersdorf Aktiengesellschaft. Diese Erhöhung resultiert ausschließlich aus der Zurechnung der von der Beiersdorf Aktiengesellschaft gehaltenen eigenen Aktien gemäß § 22 Abs. 1 S. 1 Nr. 1 i. V. m. S. 3 WpHG.

Der Gesamtstimmrechtsanteil der Meldepflichtigen betrug zum 30. März 2004 jeweils 60,45 % (50.780.072 Stimmrechte), anstelle von 50,46 % (42.386.400 Stimmrechte).

Sämtliche Stimmrechtsanteile sind den Meldepflichtigen mit Ausnahme der maxingvest ag hierbei gemäß § 22 Abs. 1 S. 1 Nr. 1 i. V. m. S. 3 WpHG zuzurechnen. Der maxingvest ag (damals firmierend unter Tchibo Holding AG) sind 30,36 % (25.500.805 Stimmrechte) gemäß § 22 Abs. 1 S. 1 Nr. 1 i. V. m. S. 3 WpHG zuzurechnen; 20,10 % (16.884.000 Stimmrechte) hielt sie zum damaligen Zeitpunkt direkt.



Die Ketten der kontrollierten Unternehmen lauten wie folgt:

| Meldepflichtiger                                                                                                                                                                           | Sitz und Staat, in dem sich der Wohnort oder der Sitz des Meldepflichtigen befindet | Angaben gemäß § 17 Abs. 2 Verordnung zur Konkretisierung von Anzeige, Mitteilungs- und Veröffentlichungspflichten sowie der Pflicht zur Führung von Insiderverzeichnissen nach dem Wertpapierhandelsgesetz, WpAIV (kontrollierte Unternehmen, über die Stimmrechte tatsächlich gehalten werden und deren zugerechneter Stimmrechtsanteil jeweils 3 % oder mehr beträgt) zum Zeitpunkt des § 17 Abs. 1 Nr. 6 WpAIV |
|--------------------------------------------------------------------------------------------------------------------------------------------------------------------------------------------|-------------------------------------------------------------------------------------|-------------------------------------------------------------------------------------------------------------------------------------------------------------------------------------------------------------------------------------------------------------------------------------------------------------------------------------------------------------------------------------------------------------------|
| <b>SPM Beteiligungs- und Verwaltungs GmbH</b>                                                                                                                                              | Norderstedt, Deutschland                                                            | Trivium Vermögensverwaltungs GmbH, Tchibo Holding AG, Tchibo Beteiligungsgesellschaft mbH, Vanguard Grundbesitz GmbH, Beiersdorf Aktiengesellschaft                                                                                                                                                                                                                                                               |
| <b>EH Real Grundstücksgesellschaft mbH &amp; Co. KG</b><br>(mit Meldung vom 12. März 2008 zum 15. Januar 2007 heruntergemeldet auf 0 %, 0 Stimmrechte)                                     | Norderstedt, Deutschland                                                            | Tchibo Holding AG, Tchibo Beteiligungsgesellschaft mbH, Vanguard Grundbesitz GmbH, Beiersdorf Aktiengesellschaft                                                                                                                                                                                                                                                                                                  |
| <b>EH Real Grundstücksverwaltungsgesellschaft mbH</b>                                                                                                                                      | Norderstedt, Deutschland                                                            | Scintia Vermögensverwaltungs GmbH, EH Real Grundstücksgesellschaft mbH & Co. KG, Tchibo Holding AG, Tchibo Beteiligungsgesellschaft mbH, Vanguard Grundbesitz GmbH, Beiersdorf Aktiengesellschaft                                                                                                                                                                                                                 |
| <b>Scintia Vermögensverwaltungs GmbH</b>                                                                                                                                                   | Norderstedt, Deutschland                                                            | Tchibo Holding AG, Tchibo Beteiligungsgesellschaft mbH, Vanguard Grundbesitz GmbH, Beiersdorf Aktiengesellschaft                                                                                                                                                                                                                                                                                                  |
| <b>Trivium Vermögensverwaltungs GmbH</b>                                                                                                                                                   | Norderstedt, Deutschland                                                            | Tchibo Holding AG, Tchibo Beteiligungsgesellschaft mbH, Vanguard Grundbesitz GmbH, Beiersdorf Aktiengesellschaft                                                                                                                                                                                                                                                                                                  |
| <b>Herr Michael Herz</b>                                                                                                                                                                   | Deutschland                                                                         | SPM Beteiligungs- und Verwaltungs GmbH, Trivium Vermögensverwaltungs GmbH, Tchibo Holding AG, Tchibo Beteiligungsgesellschaft mbH, Vanguard Grundbesitz GmbH, Beiersdorf Aktiengesellschaft                                                                                                                                                                                                                       |
| <b>Herr Wolfgang Herz</b>                                                                                                                                                                  | Deutschland                                                                         | EH Real Grundstücksverwaltungsgesellschaft mbH, EH Real Grundstücksgesellschaft mbH & Co. KG, Scintia Vermögensverwaltungs GmbH, Tchibo Holding AG, Tchibo Beteiligungsgesellschaft mbH, Vanguard Grundbesitz GmbH, Beiersdorf Aktiengesellschaft                                                                                                                                                                 |
| <b>Frau Agneta Peleback-Herz</b><br>(mit Meldung vom 11. März 2008 zum 15. Januar 2007 heruntergemeldet auf 0 %, 0 Stimmrechte)                                                            | Deutschland                                                                         | EH Real Grundstücksgesellschaft mbH & Co. KG, Tchibo Holding AG, Tchibo Beteiligungsgesellschaft mbH, Vanguard Grundbesitz GmbH, Beiersdorf Aktiengesellschaft                                                                                                                                                                                                                                                    |
| <b>Ingeburg Herz GbR</b>                                                                                                                                                                   | Norderstedt, Deutschland                                                            | Tchibo Holding AG, Tchibo Beteiligungsgesellschaft mbH, Vanguard Grundbesitz GmbH, Beiersdorf Aktiengesellschaft                                                                                                                                                                                                                                                                                                  |
| <b>Max und Ingeburg Herz Stiftung</b>                                                                                                                                                      | Norderstedt, Deutschland                                                            | Tchibo Holding AG, Tchibo Beteiligungsgesellschaft mbH, Vanguard Grundbesitz GmbH, Beiersdorf Aktiengesellschaft                                                                                                                                                                                                                                                                                                  |
| <b>Frau Ingeburg Herz</b>                                                                                                                                                                  | Deutschland                                                                         | Ingeburg Herz GbR, Max und Ingeburg Herz Stiftung, Tchibo Holding AG, Tchibo Beteiligungsgesellschaft mbH, Vanguard Grundbesitz GmbH, Beiersdorf Aktiengesellschaft                                                                                                                                                                                                                                               |
| <b>Herr Joachim Herz, vertreten durch die Joachim Herz Stiftung als Rechtsnachfolgerin</b><br>(mit Meldung vom 30. August 2007 zum 1. Januar 2005 heruntergemeldet auf 0 %, 0 Stimmrechte) | Hamburg, Deutschland                                                                | Coro Vermögensverwaltungsgesellschaft mbH, Tchibo Holding AG, Tchibo Beteiligungsgesellschaft mbH, Vanguard Grundbesitz GmbH, Beiersdorf Aktiengesellschaft                                                                                                                                                                                                                                                       |
| <b>Coro Vermögensverwaltungsgesellschaft mbH</b><br>(mit Meldung vom 30. August 2007 zum 1. Januar 2005 heruntergemeldet auf 0 %, 0 Stimmrechte)                                           | Hamburg, Deutschland                                                                | Tchibo Holding AG, Tchibo Beteiligungsgesellschaft mbH, Vanguard Grundbesitz GmbH, Beiersdorf Aktiengesellschaft                                                                                                                                                                                                                                                                                                  |
| <b>maxingvest ag</b><br>(bis 12. September 2007 firmierend unter Tchibo Holding AG)                                                                                                        | Hamburg, Deutschland                                                                | Tchibo Beteiligungsgesellschaft mbH, Vanguard Grundbesitz GmbH, Beiersdorf Aktiengesellschaft                                                                                                                                                                                                                                                                                                                     |

Zur Klarstellung: Die von der Beiersdorf Aktiengesellschaft gehaltenen eigenen Aktien sind gemäß § 71b AktG weder stimm- noch dividendenberechtigt.

- b) Stimmrechtsmitteilung gemäß § 21 Abs. 1 WpHG vom 29. Dezember 2004

Mit der am 29. Dezember 2004 abgegebenen Stimmrechtsmitteilung gemäß § 21 Abs. 1 WpHG hat die maxingvest ag (damals firmierend unter Tchibo Holding AG) mitgeteilt, dass die Tchibo Beteiligungsgesellschaft mbH mit dem Erwerb von 20,10 % der Stimmrechte an der Beiersdorf Aktiengesellschaft von der Tchibo Holding AG erstmalig die 50 %-Schwelle überschritten und zum 22. Dezember 2004 50,46 % (42.386.400 Stimmrechte) an der Beiersdorf Aktiengesellschaft gehalten hat.

Unter Berücksichtigung des am 3. Februar 2004 vollzogenen Aktienrückkaufprogramms der Beiersdorf Aktiengesellschaft und der nunmehr vorgenommenen Zurechnung nach § 22 Abs. 1 S. 1 Nr. 1 i. V. m. S. 3 WpHG der im Rahmen des Rückkaufprogramms erworbenen 9,99 % (8.393.672 eigene Aktien) hat die Tchibo Beteiligungsgesellschaft mbH gemäß § 21 Abs. 1 WpHG erstmals zum 22. Dezember 2004 die 50 %-Schwelle überschritten und hielt zu diesem Zeitpunkt einen Stimmrechtsanteil von 60,45 % (50.780.072 Stimmrechte) an der Beiersdorf Aktiengesellschaft. Davon waren der Tchibo Beteiligungsgesellschaft mbH insgesamt 40,35 % (33.894.477 Stimmrechte) zuzurechnen. Die Kette der kontrollierten Unternehmen lautet wie folgt: Vanguard Grundbesitz GmbH, Beiersdorf Aktiengesellschaft. Die Erhöhung resultiert ausschließlich aus der Zurechnung der von der Beiersdorf Aktiengesellschaft gehaltenen eigenen Aktien gemäß § 22 Abs. 1 S. 1 Nr. 1 i. V. m. S. 3 WpHG.

- c) Stimmrechtsmitteilung gemäß § 21 Abs. 1 WpHG vom 11. März 2008

Die Stimmrechtsmitteilung der E.H. Real Grundstücksverwaltungsgesellschaft mbH vom 11. März 2008 wird hiermit zurückgenommen.

Der Stimmrechtsanteil der E.H. Grundstücksverwaltungsgesellschaft mbH hat auch am 15. Januar 2007 und danach weiterhin die Schwellen von 3, 5, 10, 15, 20, 25, 30 und 50 % überschritten und beträgt unter Hinzurechnung der von der Beiersdorf Aktiengesellschaft gehaltenen 9,99 % (25.181.016 eigene Aktien unter Berücksichtigung der Erhöhung des Grundkapitals aus Gesellschaftsmitteln ohne Ausgabe neuer Aktien und der Neueinteilung des Grundkapitals (Aktiensplit) im Verhältnis 1 : 3 im Jahr 2006) gemäß § 22 Abs. 1 S. 1 Nr. 1 i. V. m. S. 3 WpHG weiterhin ebenfalls 60,45 % (152.340.216 Stimmrechte unter Berücksichtigung der Erhöhung des Grundkapitals aus Gesellschaftsmitteln ohne Ausgabe neuer Aktien und der Neueinteilung des Grundkapitals (Aktiensplit) im Verhältnis 1 : 3 im Jahr 2006).

3. Darüber hinaus hat die Beiersdorf AG gemäß § 25 Abs. 1 Satz 3 i. V. m. § 21 Abs. 1 Satz 1 WpHG (a.F.) veröffentlicht, dass sie am 3. Februar 2004 die Schwelle von 5 % der Stimmrechte an der eigenen Gesellschaft überschritten hat und ihr seit diesem Zeitpunkt ein Anteil von 9,99 % zusteht. Die von der Gesellschaft gehaltenen eigenen Aktien sind gemäß § 71b AktG weder stimm- noch dividendenberechtigt.

## Organe der Beiersdorf AG

**Ehrenvorsitzender der Gesellschaft: Georg W. Claussen**

### Aufsichtsrat

| Name                                                      | Wohnort                 | ausgeübter Beruf                                                                                                 | Mitgliedschaften                                                                                                                                                                                  |
|-----------------------------------------------------------|-------------------------|------------------------------------------------------------------------------------------------------------------|---------------------------------------------------------------------------------------------------------------------------------------------------------------------------------------------------|
| <b>Prof. Dr. Reinhard Pöllath</b><br>Vorsitzender         | München                 | Rechtsanwalt<br>P+P Pöllath + Partner                                                                            | Vorsitzender des Aufsichtsrats:<br>– maxingvest ag<br>– EDOB Abwicklungs AG (bis 13.12.2010)<br>– Wanzl GmbH & Co.<br>Mitglied des Aufsichtsrats:<br>– Tchibo GmbH                                |
| <b>Thorsten Irtz</b><br>Stellvertretender Vorsitzender    | Stapelfeld              | Vorsitzender des Betriebsrats<br>der Beiersdorf AG                                                               |                                                                                                                                                                                                   |
| <b>Thomas Holzgreve</b><br>Stellvertretender Vorsitzender | Bad Oldesloe            | Mitglied des Vorstands<br>der maxingvest ag                                                                      | Mitglied des Aufsichtsrats:<br>– Tchibo GmbH                                                                                                                                                      |
| <b>Dr. Walter Diembeck</b>                                | Hamburg                 | Chemiker in der Forschung<br>der Beiersdorf AG                                                                   |                                                                                                                                                                                                   |
| <b>Prof. Dr. Eva Eberhartinger</b>                        | Wien/<br>Österreich     | Universitätsprofessorin und<br>Vizerektorin für Finanzen<br>an der Wirtschaftsuniversität<br>Wien/Österreich     |                                                                                                                                                                                                   |
| <b>Elke Gabriel (vormals Bruns)</b>                       | Rosengarten<br>GT Emsen | Mitglied des Betriebsrats der<br>Beiersdorf AG                                                                   |                                                                                                                                                                                                   |
| <b>Michael Herz</b>                                       | Hamburg                 | Mitglied des Vorstands<br>der maxingvest ag                                                                      | Vorsitzender des Aufsichtsrats:<br>– Tchibo GmbH<br>Mitglied des Aufsichtsrats:<br>– tesa SE (konzernintern)                                                                                      |
| <b>Dr. Rolf Kunisch</b>                                   | Überlingen              | Ehemaliger Vorstandsvorsitzender<br>der Beiersdorf AG                                                            | Mitglied des Aufsichtsrats:<br>– maxingvest ag<br>Mitglied des Beirats:<br>– Dr. August Oetker Nahrungsmittel KG                                                                                  |
| <b>Thomas Nieber</b>                                      | Bad Münster             | Abteilungsleiter Wirtschafts- und<br>Industriepolitik der Industrie-<br>gewerkschaft Bergbau, Chemie,<br>Energie | Mitglied des Aufsichtsrats:<br>– Evonik Degussa GmbH<br>– maxingvest ag<br>Mitglied des Beirats:<br>– Qualifizierungsförderwerk Chemie GmbH                                                       |
| <b>Prof. Manuela Rousseau</b>                             | Rellingen               | Leiterin Corporate Social<br>Responsibility der Beiersdorf AG                                                    | Professorin der Hochschule<br>für Musik und Theater, Hamburg<br>Mitglied des Aufsichtsrats:<br>– maxingvest ag                                                                                    |
| <b>Volker Schopnie</b>                                    | Halstenbek              | Stellvertretender Vorsitzender<br>des Betriebsrats der Beiersdorf AG                                             | Mitglied des Aufsichtsrats:<br>– maxingvest ag                                                                                                                                                    |
| <b>Thomas Siemsen</b>                                     | Hamburg                 | Steuerberater/SES Siemsen Eder<br>Steuerberatungsgesellschaft mbH                                                | Stellvertretender Vorsitzender des Aufsichtsrats:<br>– TROST Auto Service Technik SE<br>(bis 30.11.2010)<br>Member of the Board:<br>– Joachim Herz Holding Inc., Atlanta, USA<br>(bis 30.11.2010) |

## Ausschüsse des Aufsichtsrats\*

| Mitglieder des<br>Präsidialausschusses            | Mitglieder des<br>Prüfungsausschusses*            | Mitglieder des<br>Finanzausschusses* | Mitglieder des<br>Nominierungsausschusses         | Mitglieder des<br>Vermittlungsausschusses         |
|---------------------------------------------------|---------------------------------------------------|--------------------------------------|---------------------------------------------------|---------------------------------------------------|
| – Prof. Dr.<br>Reinhard Pöllath<br>(Vorsitzender) | – Prof. Dr.<br>Eva Eberhartinger<br>(Vorsitzende) | – Thomas Holzgreve<br>(Vorsitzender) | – Prof. Dr.<br>Reinhard Pöllath<br>(Vorsitzender) | – Prof. Dr.<br>Reinhard Pöllath<br>(Vorsitzender) |
| – Michael Herz                                    | – Dr. Walter Diembeck                             | – Dr. Walter Diembeck                | – Prof. Dr.<br>Eva Eberhartinger                  | – Elke Gabriel<br>(vormals Bruns)                 |
| – Thomas Holzgreve                                | – Thomas Holzgreve                                | – Prof. Dr.<br>Eva Eberhartinger     | – Thomas Holzgreve                                | – Thomas Holzgreve                                |
| – Thorsten Irtz                                   | – Prof. Dr.<br>Reinhard Pöllath                   | – Prof. Dr.<br>Reinhard Pöllath      | – Dr. Rolf Kunisch                                | – Thorsten Irtz                                   |
|                                                   | – Volker Schopnie                                 | – Volker Schopnie                    |                                                   |                                                   |

\* Bis zum 31.12.2010 gab es einen gemeinsamen Prüfungs- und Finanzausschuss. Mit Wirkung zum 01.01.2011 wurde dieser in einen Prüfungsausschuss und einen Finanzausschuss getrennt. Die Mitglieder des ehemaligen Prüfungs- und Finanzausschusses waren identisch mit den Mitgliedern des derzeitigen Prüfungsausschusses und des derzeitigen Finanzausschusses. Vorsitzender des ehemaligen Prüfungs- und Finanzausschusses war Thomas Holzgreve.

## Vorstand \*

| Name                                          | Funktion/Verantwortlichkeiten                                                         |                                                                                                      | Mitgliedschaften                                                                                                                                                                                             |
|-----------------------------------------------|---------------------------------------------------------------------------------------|------------------------------------------------------------------------------------------------------|--------------------------------------------------------------------------------------------------------------------------------------------------------------------------------------------------------------|
| <b>Thomas-B. Quaas</b>                        | Vorsitzender/CEO                                                                      | Unternehmensentwicklung/Konzernkommunikation/Interne Revision<br>Japan, La Prairie Group             | Vorsitzender des Aufsichtsrats:<br>– tesa SE (konzernintern)<br>Mitglied des Aufsichtsrats:<br>– Euler Hermes SA, Frankreich<br>(ab 21.05.2010)<br>– Euler Hermes Kreditversicherungs-AG<br>(bis 05.10.2010) |
| <b>Dr. Bernhard Düttmann</b>                  | Finance/CFO/<br>Human Resources<br>(Human Resources<br>vom 01.05.2010 bis 31.12.2010) | Finanzen/Controlling/Recht/IT<br>Afrika, Mittlerer Osten, Türkei                                     | Mitglied des Aufsichtsrats:<br>– tesa SE (konzernintern)                                                                                                                                                     |
| <b>Peter Feld</b><br>(ab 01.08.2010)          | Europe                                                                                |                                                                                                      |                                                                                                                                                                                                              |
| <b>Peter Kleinschmidt</b><br>(bis 30.04.2010) | Human Resources                                                                       | Personal/Nachhaltigkeit/<br>Arbeitsdirektor                                                          |                                                                                                                                                                                                              |
| <b>Pieter Nota</b><br>(bis 31.05.2010)        | Brands                                                                                | Marketing/Forschung &<br>Entwicklung/Vertrieb                                                        | Mitglied des Verwaltungsrats:<br>– GfK e.V.                                                                                                                                                                  |
| <b>Markus Pinger</b>                          | Brands/Supply Chain<br>(Brands ab 01.06.2010)                                         | Markenführung/Innovationen/Forschung & Entwicklung/Vertriebskoordination/Einkauf/Produktion/Logistik |                                                                                                                                                                                                              |
| <b>Dr. Ulrich Schmidt</b><br>(ab 01.01.2011)  | Human Resources/CHRO                                                                  | Personal/Arbeitsdirektor                                                                             |                                                                                                                                                                                                              |
| <b>James C. Wei</b>                           | Asia<br>(außer Japan)                                                                 |                                                                                                      | Member of the Board:<br>– Li Ning Company Limited, VR China                                                                                                                                                  |

\* Die Mitglieder des Vorstands der Beiersdorf AG nehmen im Zusammenhang mit ihrer Aufgabe der Konzernsteuerung und -überwachung auch Mandate in vergleichbaren Kontrollgremien bei Konzern- und Beteiligungsgesellschaften wahr.

Hamburg, 8. Februar 2011

Beiersdorf AG

Der Vorstand



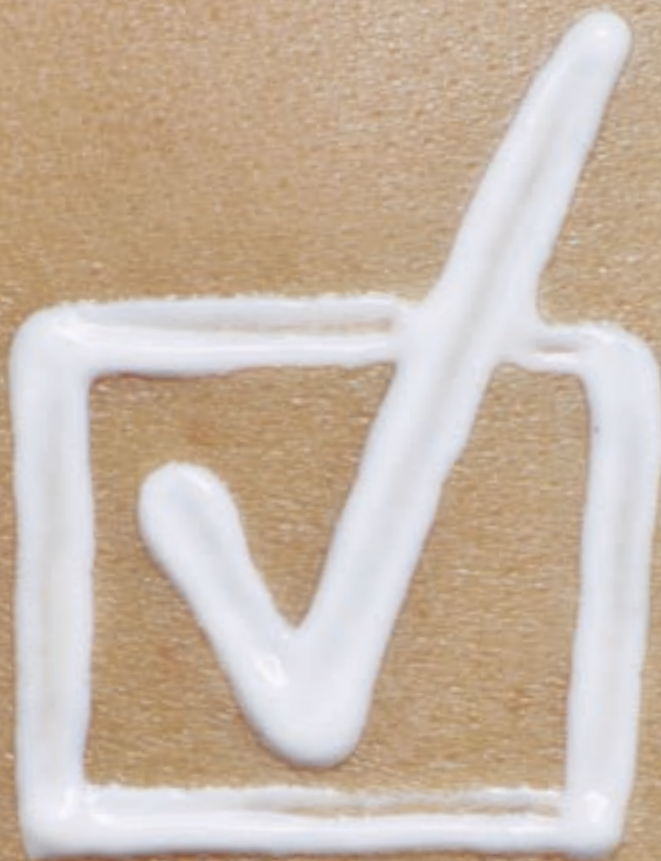

---

(Die Prüfung hat zu keinen  
Einwendungen geführt)  
– 2010 –

## 05 Bestätigungen

Beiersdorf Geschäftsbericht 2010

Der Wirtschaftsprüfer testiert nach einwandfreier Prüfung den Konzernabschluss und -lagebericht. Zudem versichert der Vorstand die richtige Darstellung der Vermögens-, Finanz- und Ertragslage in Konzernabschluss und Konzernlagebericht.

### Inhalt

|        |                            |
|--------|----------------------------|
| S. 135 | Bestätigungsvermerk        |
| S. 136 | Versicherung des Vorstands |

## Bestätigungsvermerk

Wir haben den von der Beiersdorf Aktiengesellschaft, Hamburg, aufgestellten Konzernabschluss – bestehend aus Bilanz, Gewinn- und Verlustrechnung, Gesamtergebnisrechnung, Eigenkapitalveränderungsrechnung, Kapitalflussrechnung und Anhang – sowie den Konzernlagebericht für das Geschäftsjahr vom 1. Januar bis zum 31. Dezember 2010 geprüft. Die Aufstellung von Konzernabschluss und Konzernlagebericht nach den IFRS, wie sie in der EU anzuwenden sind, und den ergänzend nach § 315a Abs. 1 HGB anzuwendenden handelsrechtlichen Vorschriften liegt in der Verantwortung der gesetzlichen Vertreter der Gesellschaft. Unsere Aufgabe ist es, auf der Grundlage der von uns durchgeführten Prüfung eine Beurteilung über den Konzernabschluss und über den Konzernlagebericht abzugeben.

Wir haben unsere Konzernabschlussprüfung nach § 317 HGB unter Beachtung der vom Institut der Wirtschaftsprüfer (IDW) festgestellten deutschen Grundsätze ordnungsmäßiger Abschlussprüfung vorgenommen. Danach ist die Prüfung so zu planen und durchzuführen, dass Unrichtigkeiten und Verstöße, die sich auf die Darstellung des durch den Konzernabschluss unter Beachtung der anzuwendenden Rechnungslegungsvorschriften und durch den Konzernlagebericht vermittelten Bildes der Vermögens-, Finanz- und Ertragslage wesentlich auswirken, mit hinreichender Sicherheit erkannt werden.

Bei der Festlegung der Prüfungshandlungen werden die Kenntnisse über die Geschäftstätigkeit und über das wirtschaftliche und rechtliche Umfeld des Konzerns sowie die Erwartungen über mögliche Fehler berücksichtigt. Im Rahmen der Prüfung werden die Wirksamkeit des rechnungslegungsbezogenen internen Kontrollsystems sowie Nachweise für die Angaben in Konzernabschluss und Konzernlagebericht überwiegend auf der Basis von Stichproben beurteilt.

Die Prüfung umfasst die Beurteilung der Jahresabschlüsse der in den Konzernabschluss einbezogenen Unternehmen, der Abgrenzung des Konsolidierungskreises, der angewandten Bilanzierungs- und Konsolidierungsgrundsätze und der wesentlichen Einschätzungen der gesetzlichen Vertreter sowie die Würdigung der Gesamtdarstellung des Konzernabschlusses und des Konzernlageberichts. Wir sind der Auffassung, dass unsere Prüfung eine hinreichend sichere Grundlage für unsere Beurteilung bildet.

Unsere Prüfung hat zu keinen Einwendungen geführt.

Nach unserer Beurteilung aufgrund der bei der Prüfung gewonnenen Erkenntnisse entspricht der Konzernabschluss den IFRS, wie sie in der EU anzuwenden sind, und den ergänzend nach § 315a Abs. 1 HGB anzuwendenden handelsrechtlichen Vorschriften und vermittelt unter Beachtung dieser Vorschriften ein den tatsächlichen Verhältnissen entsprechendes Bild der Vermögens-, Finanz- und Ertragslage des Konzerns. Der Konzernlagebericht steht in Einklang mit dem Konzernabschluss, vermittelt insgesamt ein zutreffendes Bild von der Lage des Konzerns und stellt die Chancen und Risiken der zukünftigen Entwicklung zutreffend dar.

*Hamburg, 9. Februar 2011*

Ernst & Young GmbH  
Wirtschaftsprüfungsgesellschaft

**Ludwig**  
Wirtschaftsprüfer

**Opaschowski**  
Wirtschaftsprüfer



## Versicherung des Vorstands

Wir versichern nach bestem Wissen, dass gemäß den anzuwendenden Rechnungslegungsgrundsätzen der Konzernabschluss ein den tatsächlichen Verhältnissen entsprechendes Bild der Vermögens-, Finanz- und Ertragslage des Konzerns vermittelt und im Konzernlagebericht der Geschäftsverlauf einschließlich des Geschäftsergebnisses und die Lage des Konzerns so dargestellt sind, dass ein den tatsächlichen Verhältnissen entsprechendes Bild vermittelt wird, sowie die wesentlichen Chancen und Risiken der voraussichtlichen Entwicklung des Konzerns beschrieben sind.

Hamburg, 8. Februar 2011

Der Vorstand



**Thomas-B. Quaas**  
Vorsitzender  
des Vorstands



**Dr. Bernhard Düttmann**  
Mitglied  
des Vorstands



**Markus Pinger**  
Mitglied  
des Vorstands



**Peter Feld**  
Mitglied  
des Vorstands



**James C. Wei**  
Mitglied  
des Vorstands



**Dr. Ulrich Schmidt**  
Mitglied  
des Vorstands

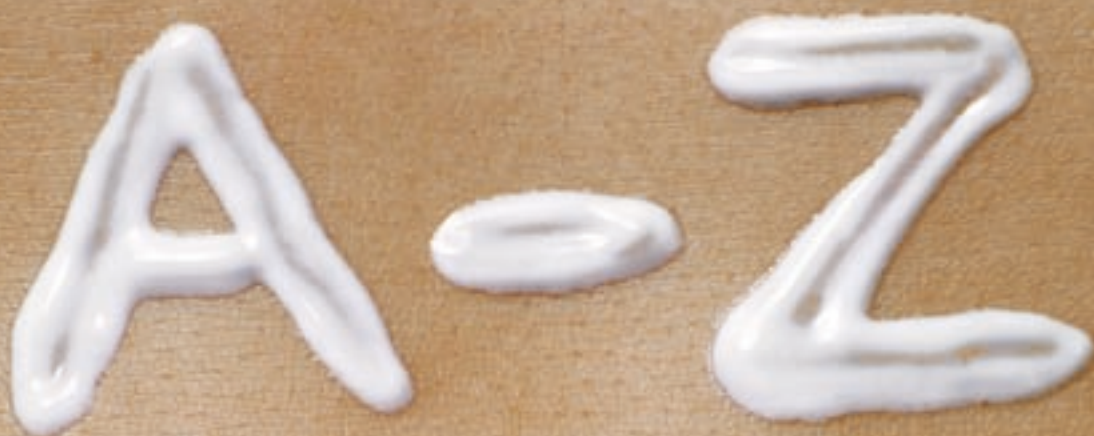

---

(Das Wichtigste in Kürze)  
– 2010 –

Kapitel

---

06  
Weitere Informationen

---

## 06 Weitere Informationen

Beiersdorf Geschäftsbericht 2010

Konzerne veröffentlichen über die gesetzlichen Rahmendaten hinaus kontinuierlich weitere Information und Daten. Bei Beiersdorf finden Sie an dieser Stelle den HGB-Einzelabschluss, ein Glossar sowie ein Stichwortverzeichnis, die Zehnjahresübersicht und den Finanzkalender.

### Inhalt

|        |                                                             |
|--------|-------------------------------------------------------------|
| S. 139 | Jahresabschluss der Beiersdorf AG<br>nach HGB (Kurzfassung) |
| S. 140 | Glossar                                                     |
| S. 141 | Stichwortverzeichnis                                        |
| S. 144 | Zehnjahresübersicht                                         |
| S. 145 | Finanzkalender                                              |
| S. 146 | Impressum                                                   |

## Jahresabschluss der Beiersdorf AG nach HGB (Kurzfassung)\*

## Gewinn- und Verlustrechnung der Beiersdorf AG (in Mio. €)

|                                                                      | 2009       | 2010       |
|----------------------------------------------------------------------|------------|------------|
| Umsatzerlöse                                                         | 1.054      | 1.059      |
| Sonstige betriebliche Erträge                                        | 169        | 87         |
| Materialaufwand                                                      | -270       | -264       |
| Personalaufwand                                                      | -229       | -201       |
| Abschreibungen auf immaterielle Vermögensgegenstände und Sachanlagen | -46        | -50        |
| Sonstige betriebliche Aufwendungen                                   | -504       | -503       |
| <b>Betriebsergebnis</b>                                              | <b>174</b> | <b>128</b> |
| Finanzergebnis                                                       | 272        | 235        |
| <b>Ergebnis der gewöhnlichen Geschäftstätigkeit</b>                  | <b>446</b> | <b>363</b> |
| Steuern von Einkommen und Ertrag                                     | -65        | -74        |
| Jahresüberschuss                                                     | 381        | 289        |

## Bilanz der Beiersdorf AG (in Mio. €)

|                                                           | 31.12.2009   | 31.12.2010   |
|-----------------------------------------------------------|--------------|--------------|
| <b>Aktiva</b>                                             |              |              |
| Immaterielle Vermögensgegenstände                         | 81           | 110          |
| Sachanlagen                                               | 66           | 56           |
| Finanzanlagen                                             | 1.204        | 1.302        |
| <b>Anlagevermögen</b>                                     | <b>1.351</b> | <b>1.468</b> |
| Vorräte                                                   | 2            | 2            |
| Forderungen aus Lieferungen und Leistungen                | 65           | 73           |
| Übrige Forderungen und Sonstige Vermögensgegenstände      | 241          | 293          |
| Wertpapiere                                               | 1.894        | 1.117        |
| Flüssige Mittel                                           | 268          | 246          |
| <b>Umlaufvermögen</b>                                     | <b>2.470</b> | <b>1.731</b> |
|                                                           | <b>3.821</b> | <b>3.199</b> |
| <b>Passiva</b>                                            |              |              |
|                                                           | 31.12.2009   | 31.12.2010   |
| <b>Eigenkapital</b>                                       | <b>2.233</b> | <b>1.505</b> |
| Sonderposten mit Rücklagenanteil                          | 42           | -            |
| Rückstellungen für Pensionen und ähnliche Verpflichtungen | 452          | 405          |
| Übrige Rückstellungen                                     | 259          | 258          |
| <b>Rückstellungen</b>                                     | <b>711</b>   | <b>663</b>   |
| Verbindlichkeiten aus Lieferungen und Leistungen          | 31           | 43           |
| Übrige Verbindlichkeiten                                  | 804          | 988          |
| <b>Verbindlichkeiten</b>                                  | <b>835</b>   | <b>1.031</b> |
|                                                           | <b>3.821</b> | <b>3.199</b> |

\* Der vollständige, mit dem uneingeschränkten Bestätigungsvermerk des Abschlussprüfers versehene Jahresabschluss und Lagebericht der Beiersdorf AG wird im Bundesanzeiger veröffentlicht und beim Unternehmensregister hinterlegt. Der Jahresabschluss und Lagebericht der Beiersdorf AG stehen im Internet unter [www.beiersdorf.de](http://www.beiersdorf.de) zur Verfügung.

# Glossar

## {B}

### Bilanzgewinn

Saldo aus Jahresüberschuss des Geschäftsjahrs, Gewinn- oder Verlustvortrag und Ergebnisverwendung.

## {C}

### Cashflow

Kennzahl zur Beurteilung der Finanz- und Ertragskraft eines Unternehmens. Der Cashflow wird ermittelt aus dem Zufluss und Abfluss von Zahlungsmitteln und Zahlungsmitteläquivalenten aus der laufenden Geschäftstätigkeit, investiver Tätigkeit und Finanzierungstätigkeit.

### Consumer Insights

Erkenntnisse über die Wünsche und Bedürfnisse von Verbrauchern. Sie bilden eine wichtige Grundlage für die Entwicklung neuer Ideen und Produkte.

### CSR – Corporate Social Responsibility

Sammelbegriff für die von Unternehmen wahrgenommene gesellschaftliche Verantwortung, die ökonomische, ökologische und soziale Aspekte einbezieht.

## {D}

### DAX – Deutscher Aktienindex

Zusammengestellt von der Deutschen Börse. Der Index bildet die Wertentwicklung der 30 wichtigsten deutschen Aktienwerte, darunter auch der Beiersdorf AG, ab.

### Divestments

Veräußerte Tochtergesellschaften oder Geschäftsteile.

### Dividende

Die Dividende ist der auf eine einzelne Aktie entfallende Anteil des ausgeschütteten Gewinns einer Aktiengesellschaft.

## {E}

### EBIT

Ergebnis vor Zinsen und Steuern (Earnings before Interest and Taxes).

### EBIT-Umsatzrendite

Die EBIT-Umsatzrendite, auch EBIT-Marge, berechnet sich aus der Relation von EBIT zu Umsatz.

### EBITDA

Ergebnis vor Steuern, Zinsen und Abschreibungen (Earnings before Interest, Taxes, Depreciation and Amortization).

## {E}

### Eigenkapital

Das Eigenkapital eines Unternehmens gibt die Differenz zwischen dem Wert des Vermögens und der Schulden an.

### Eigenkapitalquote

Anteil des Eigenkapitals am Gesamtkapital (Bilanzsumme). Gibt Auskunft über die Kapitalkraft und somit über die wirtschaftliche Stabilität eines Unternehmens.

## {F}

### Free Float

Bezeichnet den Streubesitz einer Aktiengesellschaft. Es handelt sich hierbei um den Anteil der ausgegebenen Aktien eines Unternehmens, der im Prinzip für den Börsenhandel zur Verfügung steht.

## {G}

### Gesamtergebnisrechnung

Überleitung von in der Gewinn- und Verlustrechnung erfassten Aufwendungen und Erträgen sowie der direkt im Eigenkapital unter Berücksichtigung von latenten Steuern erfassten Veränderungen zum Gesamtergebnis einer Periode.

## {I}

### IAS – International Accounting Standards/IFRS – International Financial Reporting Standards

Internationale Rechnungslegungsvorschriften, die vom International Accounting Standards Board (IASB) erstellt wurden. Nach EU-Verordnung müssen börsennotierte Unternehmen in Europa nach diesen Regeln bilanzieren und berichten.

### In Vitro

In der Forschung bezieht sich „in vitro“ auf Experimente, die in einer kontrollierten künstlichen Umgebung außerhalb eines lebenden Organismus durchgeführt werden, zum Beispiel im Reagenzglas.

## {K}

### Konsolidierungskreis

Muttergesellschaft und Gruppe der Tochtergesellschaften, die in den Konzernabschluss einbezogen werden.

## {L}

### Latente Steuern

Bilanzposten für latente Steuern zum Ausgleich des Unterschieds aus zeitlich abweichenden Wertansätzen zwischen den steuerbilanziellen und den im IFRS-Abschluss berücksichtigten Wertansätzen von Vermögenswerten und Schulden sowie aus steuerlichen Verlustvorträgen.

## {M}

### Marktkapitalisierung

Börsenwert einer Aktiengesellschaft. Die Marktkapitalisierung ergibt sich, indem der aktuelle Aktienkurs mit der Anzahl der ausgegebenen Aktien multipliziert wird.

## {O}

### Organisch

Umsatzentwicklung auf vergleichbarer Basis (d. h. ohne etwa Vorjahresumsätze von Divestments, neu hinzugekommene Umsätze von Akquisitionen) und Wechselkursbereinigt.

## {P}

### POS – Point of Sale

Ort des Einkaufs (aus Sicht des Konsumenten) bzw. Ort des Verkaufs (aus Sicht des Händlers).

## {S}

### Sondereffekte

Einmalaufwendungen oder -erträge, die das Ergebnis des Beiersdorf Konzerns insgesamt wesentlich beeinflusst haben. Darunter fielen Impairment-Abschreibungen sowie Aufwendungen im Zusammenhang mit dem Maßnahmen- und Investitionspaket im Unternehmensbereich Consumer.

### Supply Chain-Management

Management des Warenverkehrs und des Informationsflusses zwischen einem Unternehmen und seinen Zulieferern und Kunden zur Erreichung strategischer Vorteile. Es umfasst die Prozesse der Materialwirtschaft, der Logistik, des Managements der physischen Distribution, des Einkaufs und des Informationsmanagements.



Stichwortverzeichnis <sup>(1/3)</sup>

## {A}

|                              |                                                                               |
|------------------------------|-------------------------------------------------------------------------------|
| Abschreibungen               | 67, 94, 96f., 100f., 110, 113, 115, 126, 139, 140                             |
| Afrika/Asien/Australien      | 19, 58ff., 77, 97, 109, 144                                                   |
| Aktie                        | 19, 24f., 36, 45f., 60, 84ff., 91, 112, 117f., 128ff., 140, 144               |
| Aktienrückwerb               | 117                                                                           |
| Akquisitionen                | 105, 109, 140                                                                 |
| Allgemeine Verwaltungskosten | 58, 91, 110                                                                   |
| Anteilsbesitz                | 46, 105, 128                                                                  |
| Arbeitsschutz                | 47, 74, 76                                                                    |
| Asien                        | 1, 3, 16, 19, 21, 23, 53, 55ff., 77, 87, 97, 109, 144                         |
| Aufsichtsrat                 | 19, 23, 26ff., 31f., 33ff., 43ff., 53, 55, 60, 81, 84ff., 98, 117, 127, 131f. |

## {B}

|                               |                                                                            |
|-------------------------------|----------------------------------------------------------------------------|
| Bedingtes Kapital             | 117                                                                        |
| Bestätigungsvermerk           | 28, 135, 139                                                               |
| Betriebliches Ergebnis (EBIT) | 58ff., 91, 94, 96f., 144                                                   |
| Bewertungsmethoden            | 69, 98f., 102ff., 124                                                      |
| Bilanz                        | 67, 86, 93, 98, 102f., 111, 113, 118, 121, 123, 125ff., 128, 135, 139, 141 |
| Bilanzgewinn                  | 140                                                                        |

## {C}

|                             |                                                 |
|-----------------------------|-------------------------------------------------|
| Cashflow                    | 68, 83, 92, 94, 96f., 101, 103, 114, 125f., 140 |
| C-BONS Hair Care            | 109, 114, 122                                   |
| Chancen                     | 78, 81, 87, 100, 104, 135f.                     |
| Compliance                  | 26f., 35, 46, 82                                |
| Consumer Business Strategie | 1, 16, 21, 26f., 47, 52, 77                     |
| Consumer Insights           | 82, 140                                         |
| Consumer Supply Chain       | 140                                             |
| Corporate Governance        | 26f., 31f., 37, 41, 46, 48, 55, 127             |

## {D}

|             |                                                          |
|-------------|----------------------------------------------------------|
| DAX         | 24f., 140                                                |
| Divestments | 94, 105, 109, 140                                        |
| Dividende   | 19, 44ff., 60, 68, 84, 94f., 111, 117, 129f., 140, 144f. |

## {E}

|                                               |                                                                                      |
|-----------------------------------------------|--------------------------------------------------------------------------------------|
| EBIT                                          | 19, 24, 38, 34f., 55, 58ff., 64f., 69, 86, 88, 91, 94, 96f., 117, 119, 126, 140, 144 |
| EBIT-Rendite                                  | 96f., 117, 126                                                                       |
| EBITDA                                        | 96f., 126, 140, 144                                                                  |
| Eigenkapital                                  | 67, 83, 92f., 98f., 102f., 104, 110f., 118, 124ff., 139f., 144                       |
| Eigenkapitalquote                             | 117, 140, 144                                                                        |
| Eigenkapitalveränderungsrechnung              | 95, 135                                                                              |
| Entsprechenserklärung                         | 27, 31, 55, 127                                                                      |
| Ergebnis je Aktie                             | 60, 86, 91, 112, 144                                                                 |
| Erläuterungen zur Bilanz                      | 113                                                                                  |
| Erläuterungen zur Gewinn- und Verlustrechnung | 110                                                                                  |
| Ertragslage                                   | 58, 60f., 134, 136                                                                   |
| Europa                                        | 10, 16, 19, 21, 23, 53ff., 57, 58f., 61ff., 65f., 75, 77, 87, 97, 140, 144           |
| Eucerin                                       | 1, 16, 51f., 61, 63f., 71, 109                                                       |

## {F}

|                                        |                                                         |
|----------------------------------------|---------------------------------------------------------|
| Finanzergebnis                         | 58f., 91, 110, 125, 139                                 |
| Finanzinstrumente                      | 83, 98, 100ff., 110, 112, 116, 118, 122ff.              |
| Finanzkalender                         | 48, 145                                                 |
| Florena                                | 51, 62, 105, 127                                        |
| Focus on Skin Care. Closer to Markets. | 1, 16, 21, 26, 52, 69                                   |
| Forschung und Entwicklung              | 10, 23, 38, 57, 59, 70f., 73, 76, 82, 88, 105, 132, 144 |
| Free Float                             | 25, 140                                                 |
| Fremdkapital                           | 67, 93, 101, 144                                        |



Stichwortverzeichnis <sup>(2/3)</sup>**{G}**

|                                 |                                           |
|---------------------------------|-------------------------------------------|
| Gesamtergebnisrechnung          | 92, 135, 140                              |
| Geschäftsentwicklung            | 19, 26f., 88                              |
| Gesellschaftliche Verantwortung | 140                                       |
| Gewinn- und Verlustrechnung     | 58, 86, 91, 98, 102, 104, 118, 135, 139f. |
| Glossar                         | 140                                       |
| Grundkapital                    | 25, 46, 84f., 117, 127, 130               |

**{H}**

|                  |                                                           |
|------------------|-----------------------------------------------------------|
| Hansaplast       | 51f.                                                      |
| Hauptversammlung | 19, 26, 33ff., 37ff., 42ff., 48, 60, 84ff., 117, 127, 145 |
| Hautpflege       | 1, 4f., 12f., 16, 26, 52f.                                |

**{I-J}**

|                             |                                                   |
|-----------------------------|---------------------------------------------------|
| IFRS                        | 48, 60, 86, 98ff., 104, 124f., 135, 140           |
| Immaterielle Vermögenswerte | 59, 93, 98, 100, 104, 113, 126, 144               |
| Impressum                   | 146                                               |
| Innovationen                | 12, 16, 19, 61, 66, 70ff., 82, 132                |
| Investitionen               | 19, 24, 53, 56, 67f., 88, 94, 96f., 102, 110, 115 |
| Investor Relations          | 24, 146                                           |
| Jahresüberschuss            | 19, 58, 60, 86, 91f., 112, 139, 140, 142, 144     |
| JUVENA                      | 16, 21, 53, 105f., 127                            |

**{K}**

|                           |                                                                                      |
|---------------------------|--------------------------------------------------------------------------------------|
| Kapitalflussrechnung      | 68, 86, 94, 126, 135                                                                 |
| Kapitalrendite            | 55                                                                                   |
| Konsolidierungsgrundsätze | 98, 135                                                                              |
| Konsolidierungskreis      | 105, 135, 140                                                                        |
| Konzernabschluss          | 16, 23, 26, 28, 35, 37f., 43f., 48, 55, 69, 81, 98f., 103, 105, 118, 127, 135f., 140 |
| Konzerngesellschaften     | 40, 112, 126, 128                                                                    |
| Konzernlagebericht        | 55, 81, 135f.                                                                        |

**{L}**

|                 |                                           |
|-----------------|-------------------------------------------|
| Labello         | 51f.                                      |
| Labtec          | 66, 105                                   |
| La Prairie      | 1, 51f., 62ff., 72, 105ff., 109, 127, 132 |
| Latente Steuern | 92, 104, 111, 122, 126, 140               |
| Logistik        | 23, 27, 100, 132, 140                     |

**{M}**

|                      |                                                                       |
|----------------------|-----------------------------------------------------------------------|
| Marken               | 12, 16, 21, 51ff., 72, 74, 79, 81f., 88, 96ff., 100, 114, 132         |
| Marktanteil          | 52, 55, 66, 114                                                       |
| Marktkapitalisierung | 141, 144                                                              |
| Mitarbeiter          | 11, 16, 21, 28, 46f., 54, 70, 74ff., 80, 87, 96f., 103, 112, 118, 144 |

**{N}**

|                |                                          |
|----------------|------------------------------------------|
| Nachhaltigkeit | 22, 35, 47, 55, 66, 73ff., 132           |
| NIVEA          | 1, 10, 12, 14ff., 51f., 61ff. 71f., 75f. |
| NIVEA FOR MEN  | 12, 16, 61ff., 71f.                      |
| NIVEA Haus     | 105                                      |

**{O-P-Q}**

|                               |                                 |
|-------------------------------|---------------------------------|
| Organe                        | 33, 35, 131                     |
| Passion for Success           | 52                              |
| Pensionen                     | 93, 98, 104, 111, 118, 121, 139 |
| Präsidialausschuss            | 27f., 35, 37, 132               |
| Prognosebericht               | 87                              |
| Prüfungs- und Finanzausschuss | 27, 35, 45, 81, 132             |
| Qualität                      | 1, 12, 16, 52, 54, 70, 82       |

## Stichwortverzeichnis (3/3)

## {R}

|                  |                                                               |
|------------------|---------------------------------------------------------------|
| Risikobericht    | 47, 81                                                        |
| Risikomanagement | 26f., 35f., 47, 81, 83, 124                                   |
| Rücklagen        | 93, 118, 139                                                  |
| Rückstellungen   | 39, 41, 67, 83, 93f., 98, 103f., 118, 121, 124, 126, 139, 144 |

## {S}

|                          |                                                                |
|--------------------------|----------------------------------------------------------------|
| Sachanlagen              | 93, 98, 101, 104, 115, 126, 139, 144                           |
| Satzung                  | 26, 33, 44, 84                                                 |
| Segmentberichterstattung | 96, 110, 112, 126                                              |
| Sicherheit               | 82, 122, 135                                                   |
| SLEK                     | 51f.                                                           |
| Sondereffekte            | 19, 44, 58ff., 69, 96f., 126, 140, 144                         |
| Steuern                  | 35, 58, 60, 91f., 104, 111f., 118, 122, 126, 139f., 144        |
| Strategie                | 1, 10, 16, 19, 21, 24, 26f., 46f., 52ff., 69f., 75, 77, 79, 87 |
| Supply Chain             | 16, 23, 27, 53, 55, 79, 132, 140                               |

## {T}

|                       |                                                                              |
|-----------------------|------------------------------------------------------------------------------|
| tesa                  | 19, 26, 51f., 54f., 57ff., 65ff., 73f., 76f., 80, 88, 96, 105ff., 126, 131f. |
| Tochtergesellschaften | 14f., 52, 55, 75, 78f., 81, 83, 93f., 111, 118, 124, 127, 140, 143           |

## {U}

|                              |                                                    |
|------------------------------|----------------------------------------------------|
| Umsatz                       | 19, 24, 38, 43f., 55, 58ff., 91, 96, 126, 140, 144 |
| Umsatzrendite                | 19, 38f., 55, 59ff., 88, 140, 144                  |
| Umsatzwachstum               | 19, 39, 43, 55, 61, 64f., 69, 88                   |
| Umwelt- und Arbeitsschutz    | 47, 74                                             |
| Unternehmensbereich Consumer | 19, 38f., 52, 58ff., 67, 70, 74, 77, 80, 88, 121   |

## {V}

|                                       |                                                                          |
|---------------------------------------|--------------------------------------------------------------------------|
| Verbindlichkeiten                     | 35, 67f., 93f., 96f., 100ff., 110f., 122ff., 139, 144                    |
| Verbraucher                           | 1, 16, 21, 52f., 70, 74, 82                                              |
| Vergütung                             | 27, 33, 36ff., 44f., 55, 77                                              |
| Vermögenswerte                        | 59, 67, 93f., 95, 98, 110f., 113f., 119, 123, 125f., 144,                |
| Versicherung des Vorstands            | 136                                                                      |
| Versorgungsleistungen                 | 103, 120, 118f.                                                          |
| Vorräte                               | 67, 93f., 98, 100f., 104, 111, 116, 126, 139, 144                        |
| Vorstand                              | 16, 19, 21, 26f., 31ff., 55, 60, 69, 81, 84ff., 98, 117f., 126, 132, 136 |
| Vorstands- und Aufsichtsratsvergütung | 127                                                                      |

## {W}

|                    |                                     |
|--------------------|-------------------------------------|
| Währungsumrechnung | 92, 95, 99, 118, 120                |
| Wertminderung      | 60, 98, 101f., 114                  |
| Wertpapiere        | 67f., 93, 110, 116, 123f., 139, 143 |

## {X-Y-Z}

|                                              |                                       |
|----------------------------------------------|---------------------------------------|
| Zahlungsmittel und Zahlungsmitteläquivalente | 67f., 93f., 104, 110, 116f., 123, 126 |
| Zahlungsmittelgenerierende Einheit           | 101                                   |
| Zehnjahresübersicht                          | 144                                   |
| Zeitwerte                                    | 98, 103, 118, 122, 124f.              |
| Zinsergebnis                                 | 119                                   |
| Zukunft                                      | 16, 28, 52, 74f., 78, 80, 114, 119    |

## Zehnjahresübersicht

### Zehnjahresübersicht (in Mio. €)

(sofern nicht anders angegeben)

|                                                           | 2001          | 2002          | 2003 <sup>1</sup> | 2004          | 2005          | 2006 <sup>2</sup> | 2007 <sup>2</sup> | 2008 <sup>2</sup> | 2009 <sup>2</sup> | 2010          |
|-----------------------------------------------------------|---------------|---------------|-------------------|---------------|---------------|-------------------|-------------------|-------------------|-------------------|---------------|
| <b>Umsatz</b>                                             | <b>4.542</b>  | <b>4.742</b>  | <b>4.435</b>      | <b>4.546</b>  | <b>4.776</b>  | <b>5.120</b>      | <b>5.507</b>      | <b>5.971</b>      | <b>5.748</b>      | <b>6.194</b>  |
| Veränderungen zum Vorjahr in %)                           | 10,3          | 4,4           | -1,3              | 2,5           | 5,1           | 7,2               | 7,6               | 8,4               | -3,7              | 7,8           |
| Consumer <sup>6</sup>                                     | 3.870         | 4.049         | 3.739             | 3.840         | 4.041         | 4.327             | 4.661             | 5.125             | 5.011             | 5.321         |
| tesa                                                      | 672           | 693           | 696               | 706           | 735           | 793               | 846               | 846               | 737               | 873           |
| Europa                                                    | 3.183         | 3.410         | 3.329             | 3.388         | 3.498         | 3.717             | 3.909             | 4.090             | 3.767             | 3.843         |
| Amerika                                                   | 903           | 819           | 638               | 635           | 687           | 738               | 782               | 832               | 851               | 1.030         |
| Afrika/Asien/Australien                                   | 456           | 513           | 468               | 523           | 591           | 665               | 816               | 1.049             | 1.130             | 1.321         |
| <b>EBITDA</b>                                             | <b>620</b>    | <b>633</b>    | <b>614</b>        | <b>656</b>    | <b>693</b>    | <b>660</b>        | <b>738</b>        | <b>911</b>        | <b>722</b>        | <b>804</b>    |
| <b>Betriebliches Ergebnis (EBIT)</b>                      | <b>466</b>    | <b>472</b>    | <b>455</b>        | <b>483</b>    | <b>531</b>    | <b>477</b>        | <b>616</b>        | <b>797</b>        | <b>587</b>        | <b>583</b>    |
| <b>Ergebnis vor Steuern</b>                               | <b>468</b>    | <b>478</b>    | <b>491</b>        | <b>492</b>    | <b>535</b>    | <b>851</b>        | <b>644</b>        | <b>822</b>        | <b>583</b>        | <b>553</b>    |
| <b>Jahresüberschuss</b>                                   | <b>285</b>    | <b>290</b>    | <b>301</b>        | <b>302</b>    | <b>335</b>    | <b>668</b>        | <b>442</b>        | <b>567</b>        | <b>380</b>        | <b>326</b>    |
| Umsatzrendite nach Steuern (in %)                         | 6,3           | 6,1           | 6,4               | 6,6           | 7,0           | 13,0              | 8,0               | 9,5               | 6,6               | 5,3           |
| Ergebnis je Aktie (in €)                                  | 1,11          | 1,12          | 1,17              | 1,29          | 1,45          | 2,93              | 1,93              | 2,48              | 1,65              | 1,40          |
| Dividendensumme Anteilseigner                             | 109           | 118           | 121               | 121           | 129           | 136               | 159               | 204               | 159               | 159           |
| Dividende je Aktie (in €)                                 | 0,43          | 0,47          | 0,53              | 0,53          | 0,57          | 0,60              | 0,70              | 0,90              | 0,70              | 0,70          |
| <b>Beiersdorf Aktie<br/>Jahresschlusskurs<sup>5</sup></b> | <b>42,50</b>  | <b>35,37</b>  | <b>32,07</b>      | <b>28,53</b>  | <b>34,64</b>  | <b>49,12</b>      | <b>53,00</b>      | <b>42,00</b>      | <b>45,93</b>      | <b>41,53</b>  |
| Marktkapitalisierung am 31.12.                            | 10.710        | 8.912         | 8.081             | 7.190         | 8.736         | 12.378            | 13.356            | 10.584            | 11.574            | 10.466        |
| <b>Materialaufwand</b>                                    | <b>1.196</b>  | <b>1.205</b>  | <b>1.149</b>      | <b>1.113</b>  | <b>1.147</b>  | <b>1.229</b>      | <b>1.285</b>      | <b>1.453</b>      | <b>1.199</b>      | <b>1.369</b>  |
| <b>Personalaufwand</b>                                    | <b>817</b>    | <b>863</b>    | <b>808</b>        | <b>804</b>    | <b>840</b>    | <b>889</b>        | <b>889</b>        | <b>922</b>        | <b>947</b>        | <b>974</b>    |
| <b>Aufwendungen für<br/>Forschung und Entwicklung</b>     | <b>92</b>     | <b>93</b>     | <b>97</b>         | <b>101</b>    | <b>109</b>    | <b>118</b>        | <b>127</b>        | <b>149</b>        | <b>149</b>        | <b>152</b>    |
| In % vom Umsatz                                           | 2,0           | 2,0           | 2,2               | 2,2           | 2,3           | 2,3               | 2,3               | 2,5               | 2,6               | 2,4           |
| <b>Mitarbeiter 31.12.</b>                                 | <b>17.749</b> | <b>18.183</b> | <b>18.664</b>     | <b>16.492</b> | <b>16.769</b> | <b>17.172</b>     | <b>21.101</b>     | <b>21.766</b>     | <b>20.346</b>     | <b>19.128</b> |
| Immaterielle Vermögenswerte                               | 138           | 128           | 94                | 58            | 34            | 30                | 357               | 398               | 382               | 306           |
| Sachanlagen                                               | 871           | 917           | 876               | 887           | 882           | 740               | 699               | 727               | 725               | 716           |
| Langfristige finanzielle Vermögenswerte                   | 18            | 22            | 94                | 93            | 5             | 8                 | 7                 | 11                | 10                | 10            |
| Vorräte                                                   | 695           | 677           | 629               | 558           | 536           | 548               | 598               | 634               | 561               | 632           |
| Forderungen und sonstige Vermögenswerte <sup>3</sup>      | 811           | 832           | 789               | 815           | 967           | 940               | 1.123             | 2.085             | 2.149             | 2.458         |
| Zahlungsmittel und Zahlungsmitteläquivalente              | 714           | 722           | 828               | 290           | 483           | 1.230             | 1.117             | 613               | 767               | 973           |
| <b>Eigenkapital</b>                                       | <b>1.636</b>  | <b>1.727</b>  | <b>1.831</b>      | <b>1.033</b>  | <b>1.293</b>  | <b>1.790</b>      | <b>2.070</b>      | <b>2.460</b>      | <b>2.636</b>      | <b>2.920</b>  |
| <b>Fremdkapital</b>                                       | <b>1.611</b>  | <b>1.571</b>  | <b>1.479</b>      | <b>1.668</b>  | <b>1.614</b>  | <b>1.706</b>      | <b>1.831</b>      | <b>2.008</b>      | <b>1.958</b>      | <b>2.175</b>  |
| Rückstellungen                                            | 761           | 808           | 790               | 776           | 752           | 809               | 781               | 729               | 750               | 812           |
| Verbindlichkeiten aus Lieferungen und Leistungen          | 337           | 293           | 293               | 308           | 369           | 485               | 573               | 690               | 699               | 863           |
| Sonstige finanzielle Verbindlichkeiten                    | 237           | 191           | 157               | 300           | 197           | 137               | 220               | 246               | 165               | 143           |
| Sonstige Verbindlichkeiten <sup>4</sup>                   | 276           | 279           | 239               | 284           | 296           | 275               | 257               | 343               | 344               | 357           |
| <b>Bilanzsumme</b>                                        | <b>3.247</b>  | <b>3.298</b>  | <b>3.310</b>      | <b>2.701</b>  | <b>2.907</b>  | <b>3.496</b>      | <b>3.901</b>      | <b>4.468</b>      | <b>4.594</b>      | <b>5.095</b>  |
| Eigenkapitalquote (in %)                                  | 50            | 52            | 55                | 38            | 44            | 51                | 53                | 55                | 57                | 57            |

<sup>1</sup> Angepasst an neue Berichtsstruktur (BSN medical at equity).

<sup>2</sup> Werte enthalten auch Sondereffekte. Wir verweisen auf unsere Anhangangaben auf Seite 60.

<sup>3</sup> Einschließlich zur Veräußerung gehaltener langfristiger Vermögenswerte und Veräußerungsgruppen.

<sup>4</sup> Einschließlich zur Veräußerung bestimmten Fremdkapitals.

<sup>5</sup> Werte 2001 bis 2005 angepasst auf Aktienstückzahl nach Aktiensplit.

<sup>6</sup> Consumer-Werte 2001 bis 2002 enthalten die Umsätze der ehemaligen Segmente cosmed und medical.

## Finanzkalender

|                                                                                                                     |                                                                                                       |                                                                          |
|---------------------------------------------------------------------------------------------------------------------|-------------------------------------------------------------------------------------------------------|--------------------------------------------------------------------------|
| 21. April<br>2011<br>↓<br>Hauptversammlung                                                                          | 26. April<br>2011<br>↓<br>Dividendenzahlung                                                           | 5. Mai<br>2011<br>↓<br>Zwischenbericht<br>Januar bis März 2011           |
| 4. August<br>2011<br>↓<br>Zwischenbericht<br>Januar bis Juni 2011                                                   | 3. November<br>2011<br>↓<br>Zwischenbericht<br>Januar bis September 2011,<br>Finanzanalystenkonferenz | Januar<br>2012<br>↓<br>Veröffentlichung vorläufiger<br>Unternehmensdaten |
| Februar / März<br>2012<br>↓<br>Veröffentlichung Bericht 2011,<br>Bilanzpressekonferenz,<br>Finanzanalystenkonferenz | Mai<br>2012<br>↓<br>Zwischenbericht<br>Januar bis März 2012                                           | 10. Mai<br>2012<br>↓<br>Hauptversammlung                                 |
| August<br>2012<br>↓<br>Zwischenbericht<br>Januar bis Juni 2012                                                      | November<br>2012<br>↓<br>Zwischenbericht<br>Januar bis September 2012,<br>Finanzanalystenkonferenz    | Januar<br>2013<br>↓<br>Veröffentlichung vorläufiger<br>Unternehmensdaten |

## Impressum

### → Herausgeber

**Beiersdorf Aktiengesellschaft**  
Unnastraße 48  
20245 Hamburg  
Deutschland

### → Redaktion und Konzept

**Corporate Communications**  
Telefon: +49 40 4909-2102  
E-Mail: [CorporateCommunications@Beiersdorf.com](mailto:CorporateCommunications@Beiersdorf.com)

### → Weitere Informationen

**Corporate Communications**  
Telefon: +49 40 4909-2102  
E-Mail: [CorporateCommunications@Beiersdorf.com](mailto:CorporateCommunications@Beiersdorf.com)

**Investor Relations**  
Telefon: +49 40 4909-5000  
E-Mail: [Investor.Relations@Beiersdorf.com](mailto:Investor.Relations@Beiersdorf.com)

**Beiersdorf im Internet**  
[www.Beiersdorf.de](http://www.Beiersdorf.de)

### → Mitarbeit

**Gestaltung/Realisierung:**  
Strichpunkt GmbH, Stuttgart  
[www.Strichpunkt-Design.de](http://www.Strichpunkt-Design.de)

**Lithografie:**  
recom, Stuttgart

**Druck:**  
Eberl print GmbH, Immenstadt i. Allgäu

**Fotografie:**  
Bernd Opitz, Hamburg  
Götz Wrage, Hamburg  
GettyImages/Stone  
NASA <http://visibleearth.nasa.gov/>

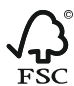

**Mixed Sources**  
Product group from well-managed  
forests, controlled sources and  
recycled wood or fibre  
Cert no. GFA-COC-001674  
[www.fsc.org](http://www.fsc.org)  
© 1996 Forest Stewardship Council

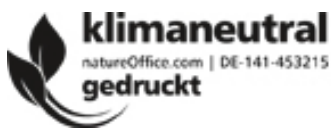

Der Geschäftsbericht liegt auch in englischer Sprache vor.  
Die Onlineversion des Geschäftsberichts sowie der Jahresabschluss und Lagebericht  
der Beiersdorf AG stehen unter [www.Beiersdorf.de/Geschaeftsbericht](http://www.Beiersdorf.de/Geschaeftsbericht) zur Verfügung.  
Die Zwischenberichte finden Sie unter [www.Beiersdorf.de/Zwischenbericht](http://www.Beiersdorf.de/Zwischenbericht).
