# Supplementary material
Source: publisher site journal article supplement (https://www.degruyterbrill.com/publication/isbn/9783110432879/downloadAsset/9783110432879_Elektronischer_Anhang_2.zip)
Supplement: Supplementary file 21 [file Beiersdorf Nachhaltigkeitsbericht.pdf › Korpustexte/Korpustexte pdf/Beiersdorf/Beiersdorf Nachhaltigkeitsbericht.pdf]

Beiersdorf Nachhaltigkeitsbericht

Es sind die kleinen Dinge,  
die eine große Wirkung haben

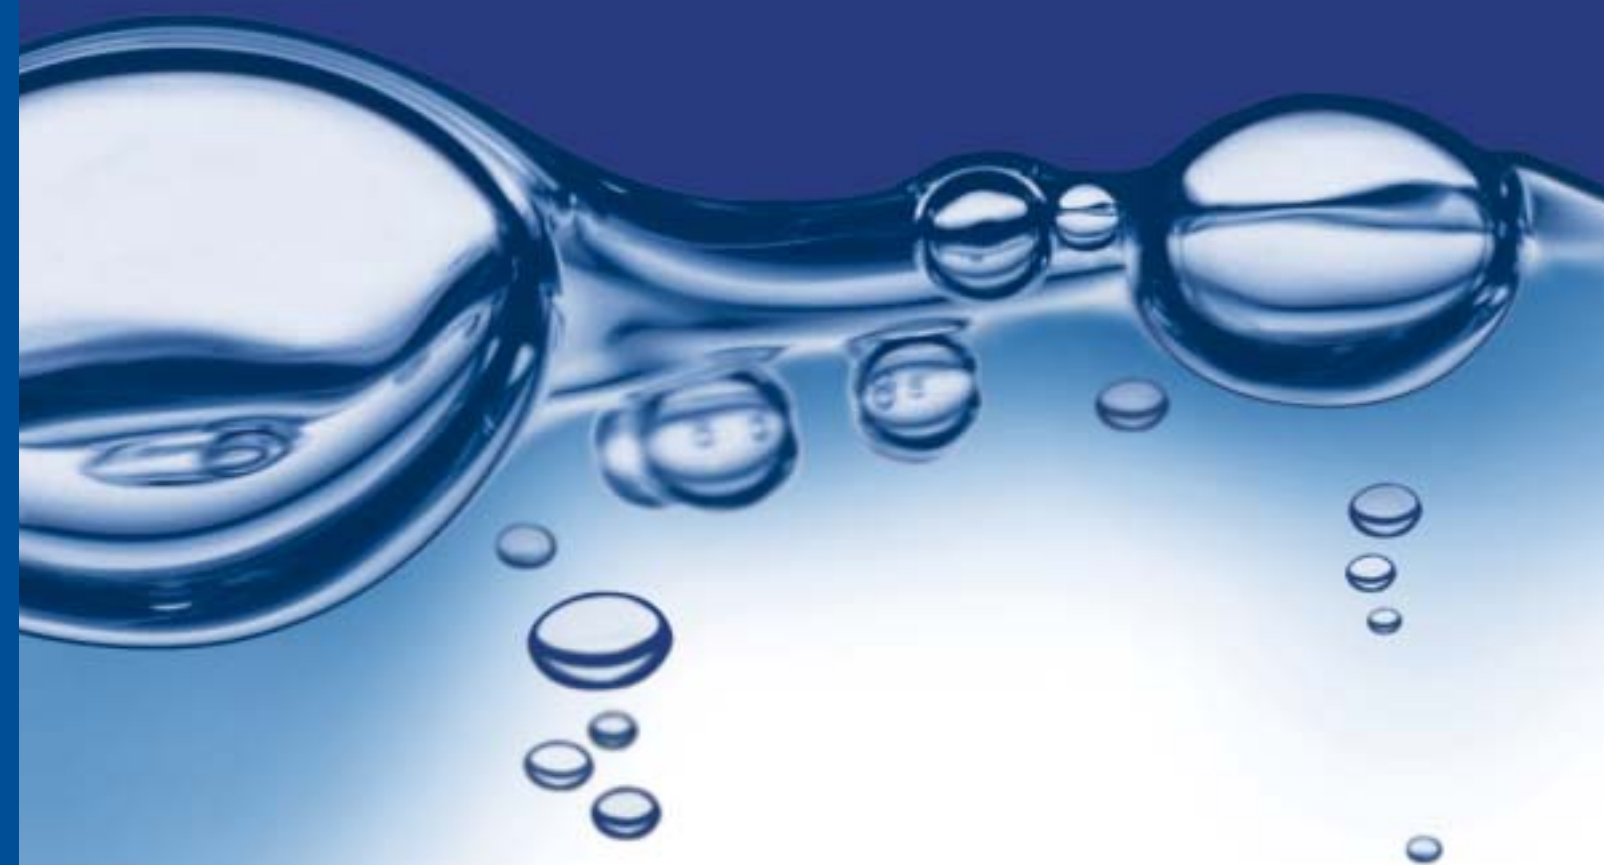

# Unser Erfolgs-Profil

Beiersdorf ist ein international führendes Konsumgüterunternehmen, das mit seinen Marken die Wünsche und Ansprüche der Verbraucher in den Mittelpunkt stellt. Wir konzentrieren uns voll und ganz auf die Pflege und Entwicklung unserer international starken Marken NIVEA, 8x4, arix, Eucerin, Labello, la prairie, JUVENA, FUTURO, Florena, tesa, Hansaplast und Elastoplast. Dabei wachsen wir kontinuierlich in strategisch ausgewählten Märkten.

Wir sind seit über 120 Jahren erfolgreich, weil wir ständig Innovationen auf den Markt bringen. Unermüdlich forschen wir, entwickeln neue Produkte, verbessern unser Angebot. So überzeugen wir immer wieder unsere Verbraucher mit Marken, die ihren Preis wert sind.

Beiersdorf ist auf der ganzen Welt zu Hause. Unsere internationale Stärke gewinnen wir aus lokaler Kraft. Das Erfolgsrezept: eine international einheitliche Vermarktungsstrategie, in lokaler Verantwortung perfekt von unseren Tochtergesellschaften umgesetzt.

Beiersdorf – das sind weltweit mehr als 18.000 Mitarbeiter. Ihr Engagement und ihr Know-how tragen dazu bei, dass Beiersdorf auch in Zukunft sein Wachstumspotenzial voll ausschöpfen wird.

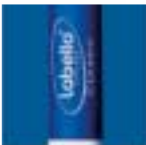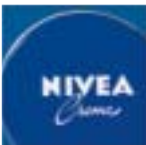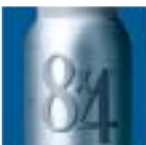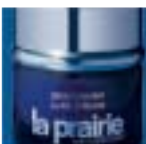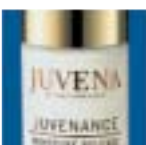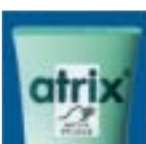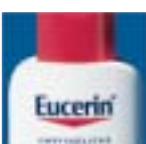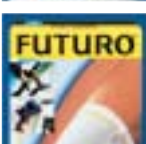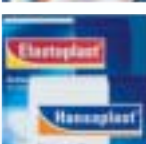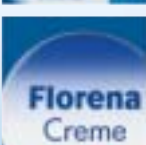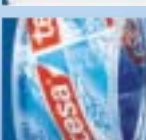

# Inhaltsverzeichnis

|                                                                                       |    |                                                                                                         |
|---------------------------------------------------------------------------------------|----|---------------------------------------------------------------------------------------------------------|
|                                                                                       | 2  | Impressum                                                                                               |
|                                                                                       | 3  | Vorwort                                                                                                 |
|                                                                                       | 4  | Unser Erfolgs-Profil                                                                                    |
|    | 7  | Verantwortung tragen<br>Seit gestern denkt Beiersdorf heute schon an morgen                             |
|                                                                                       | 8  | Beiersdorf Unternehmens-Grundsätze<br>„Responsible Care“                                                |
|                                                                                       | 9  | Internationale Verbandsarbeit                                                                           |
|                                                                                       | 10 | Soziales Engagement – vier Beispiele                                                                    |
|    | 12 | Mitarbeiter fördern und fordern<br>Der größte Wert eines Unternehmens sind seine Mitarbeiter            |
|                                                                                       | 14 | Betriebliches Vorschlagswesen bei Beiersdorf                                                            |
|                                                                                       | 15 | 1953: Das Betriebliche Vorschlagswesen startet<br>Informieren und unterhalten                           |
|  | 16 | Umweltschutz und Sicherheit<br>Eine gute Organisation ist nicht alles. Aber die beste Grundlage         |
|                                                                                       | 18 | Beraten, motivieren, kontrollieren                                                                      |
|                                                                                       | 20 | Interne Betriebsprüfung                                                                                 |
|                                                                                       | 21 | 1995: ESMAS startet<br>Kontinuierlicher Prozess                                                         |
|                                                                                       | 22 | Erstes Audit in Malaysia                                                                                |
|                                                                                       | 23 | 5 Tage volles Programm<br>Vier Module, ein Ziel                                                         |
|  | 25 | Beiersdorf Umweltschutz<br>Die Umwelt zu schonen liegt in unserer Natur                                 |
|                                                                                       | 26 | Beiersdorf Umweltschutz-Leitlinien                                                                      |
|                                                                                       | 27 | Im Fokus: Pflegeprodukte                                                                                |
|                                                                                       | 28 | Über 6 % weniger Aluminium                                                                              |
|                                                                                       | 29 | Lösemittelfreie Produktion<br>Verbrauch drastisch reduziert                                             |
|  | 30 | Beiersdorf Arbeitssicherheit<br>Für unsere Mitarbeiter tun wir alles. Mit Sicherheit                    |
|                                                                                       | 32 | Beiersdorf Sicherheits-Leitlinien<br>Arbeitsschutz-Anerkennung                                          |
|                                                                                       | 33 | Gefahrgut-Schulung in Wien                                                                              |
|                                                                                       | 34 | Mitarbeiterbefragung im Werk Hamburg-Lokstedt<br>Kapselungen und Lichtschranken                         |
|                                                                                       | 35 | Messung mit modernster Technik<br>Übersichtlicher Handschuh-Plan<br>Individuell angepasster Gehörschutz |

IMPRESSUM  
Herausgeber:  
Beiersdorf AG, Umweltschutz und Sicherheit,  
Unnastraße 48, D-20245 Hamburg,  
Telefon: 040 4909-0, Telefax: 040 4909-3434  
Weitere Informationen:  
Umweltschutz und Sicherheit: Telefon: 040 4909-5057  
E-Mail: Nachhaltigkeit@Beiersdorf.com  
Presse & PR: Telefon: 040 4909-2001  
E-Mail: Info@Beiersdorf.com  
Beiersdorf im Internet: www.Beiersdorf.de  
Der Nachhaltigkeitsbericht liegt auch in englischer Sprache vor.  
Ausgabe 2003

## Vorwort

# Schritt für Schritt zu mehr Nachhaltigkeit

Seit 1989 veröffentlicht Beiersdorf Berichte zu Umweltschutz und Arbeitssicherheit – zwei Themen, die in unserem Unternehmen schon immer einen hohen Stellenwert eingenommen haben. Aus einem einfachen Grund: Wir sind uns der Verantwortung bewusst, die wir gegenüber der Umwelt und unseren Mitarbeitern haben. Deshalb tun wir alles dafür, die Sicherheit unserer Mitarbeiter zu gewährleisten, mit Ressourcen schonend umzugehen und unsere Umwelt nicht unnötig zu belasten.

Aber Umweltschutz und Arbeitssicherheit sind nur zwei Elemente des nachhaltigen Wirtschaftens.

Nachhaltigkeit ist und wird immer mehr zum Beurteilungsmaßstab für Unternehmen. Dabei wird üblicherweise die Frage betrachtet, wie Unternehmen nicht nur Verantwortung gegenüber der jetzigen, sondern insbesondere gegenüber allen nachfolgenden Generationen übernehmen. Dieser Frage stellen wir uns: ökonomisch, ökologisch und sozial.

Deshalb werden wir unsere bisherige Berichterstattung ausweiten und stärker als bisher den Nachhaltigkeits-Gedanken integrieren. Die vorliegende Broschüre stellt dabei die Basis dar und informiert vielfältig und anschaulich über die verschiedenen Aspekte der nachhaltigen Unternehmenspolitik von Beiersdorf.

Weitere detaillierte Informationen, z.B. aktuelle Kennzahlen, geben wir Ihnen im Internet unter [www.Beiersdorf.de](http://www.Beiersdorf.de). Darauf weisen wir Sie in der Broschüre beim jeweiligen Thema mit einem Link hin. Dieser Nachhaltigkeitsbericht ergänzt unseren jährlichen Geschäftsbericht, der sich den ökonomischen Belangen unseres Unternehmens widmet.

Nachhaltigkeit ist nicht irgendwann erreicht und fertig, sondern eine kontinuierliche Aufgabe, bei der sich ständig neue Ziele, Perspektiven und Maßnahmen ergeben. Vor allem ist Nachhaltigkeit eine grundlegende Überzeugung, die durch Lernprozesse positiv gefördert wird. Dabei können alle Beteiligten voneinander profitieren.

In diesem Sinne möchten wir diesen Bericht auch als Ausgangspunkt für einen kritischen Dialog sehen. Ihre Anregungen und Anmerkungen helfen uns dabei, stets noch besser zu werden. Und damit die Welt ein wenig lebenswerter zu machen – heute und morgen.

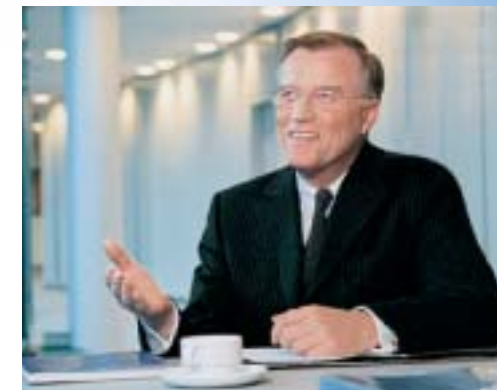

A handwritten signature in black ink, appearing to read 'W. Opgenoorth'.

Dr. Werner Opgenoorth  
Mitglied des Vorstands  
Personal/Verwaltung/Umweltschutz



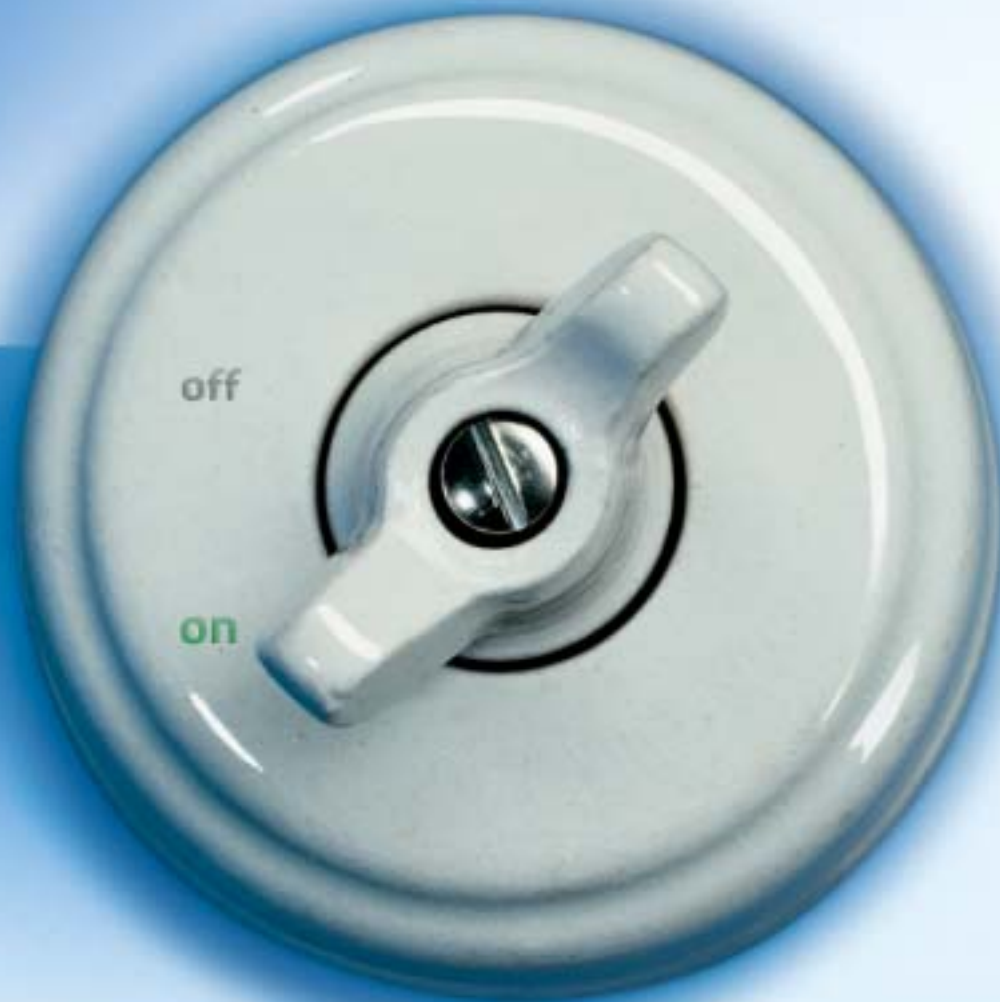

Verantwortung tragen

## Seit gestern denkt Beiersdorf heute schon an morgen

**„Vielfältiger Wandel auf sozialen, ökologischen und gesellschaftlichen Gebieten, sich verändernde Märkte und neue Technologien kennzeichnen die Herausforderung unserer Zeit.“**

Mit diesen Worten beginnt die Präambel unserer Unternehmens-Grundsätze. Sie definieren nicht nur den Rahmen, in dem wir uns mit unserem Unternehmen bewegen, sie formulieren gleichzeitig ganz konkrete Ziele und Aufgaben, die wir erreichen wollen bzw. denen wir uns stellen – von der Qualitäts- über die Personalpolitik bis hin zu Umweltschutz- und Sicherheits-Leitlinien.

Eine Motivation liegt dabei allen Leitlinien zugrunde: verantwortlich zu handeln. Und schon die ersten Worte der Präambel weisen auf die Richtung hin, in die unser verantwortliches Handeln zielt: die Zukunft. Schließlich geht es darum, schon in der Gegenwart die Weichen für eine zukunftsverträgliche nachhaltige Entwicklung zu stellen.

„Sustainable Development“ ist der englische Begriff dafür. Und dazu verpflichten wir uns. Im Spannungsfeld zwischen Ökonomie, Ökologie und sozialen Aspekten kann letzt-

lich nur derjenige verantwortungsvoll handeln, der alle drei Dimensionen berücksichtigt.

Die Begrenztheit natürlicher Ressourcen, die zunehmende Belastung des Ökosystems sowie gesellschaftsrelevante Forderungen wie menschliche Arbeitsbedingungen oder Gleichberechtigung sind ganz wesentliche Faktoren, die das unternehmerische Handeln beeinflussen. Unsere Unternehmens-Grundsätze berücksichtigen das – und schaffen so ein Leitbild für eine positive Zukunft.

## Beiersdorf Unternehmens-Grundsätze

# 1

### Klare Ziele, klare Aufgaben

[www.Beiersdorf.de/go/Nachhaltigkeit](http://www.Beiersdorf.de/go/Nachhaltigkeit)

THEMA: Unternehmens-Grundsätze

- Wir pflegen eine offene Kommunikation und eine verlässliche, langfristige Zusammenarbeit mit unseren Geschäftspartnern und anderen gesellschaftlichen Gruppen.
- Wir richten die Arbeit aller Unternehmensbereiche in allen Teilen der Welt auf die Bedürfnisse unserer Kunden und die Anforderungen der Märkte aus.
- Wir wollen dauerhaft gute Gewinne erwirtschaften, weil dies eine Voraussetzung für die langfristig erfolgreiche Entwicklung des Unternehmens ist.
- Wir handeln ökologisch verantwortlich zum Schutz der Umwelt und unserer natürlichen Lebensgrundlagen.
- Wir bekennen uns zu einem fairen, offensiven Wettbewerb.

„Responsible Care“

## Weltweite Initiative

Beiersdorf engagiert sich als Mitglied der weltweiten Initiative „Responsible Care“, um den Schutz von Gesundheit und Umwelt sowie die Sicherheit von Mitarbeitern und Mitbürgern aus eigener Verantwortung ständig zu verbessern.

Zu den Zielen gehören unter anderem:

- die Sicherheit sowie den Schutz von Mensch und Umwelt als Anliegen von fundamentaler Bedeutung zu betrachten
- das persönliche Verantwortungsbewusstsein aller Mitarbeiter zu schärfen
- ständig an der Erweiterung des Wissens über mögliche Auswirkungen von Produkten, Produktionsverfahren und Abfällen auf Mensch und Umwelt zu arbeiten
- einen offenen Austausch von Erkenntnissen und Erfahrungen mit betroffenen und interessierten Kreisen zu organisieren und zu pflegen

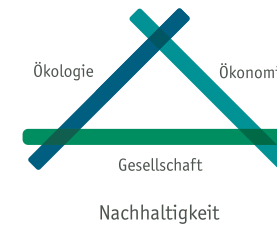

Internationale Verbandsarbeit

## Über den Tellerrand hinausschauen

Beiersdorf beteiligt sich aktiv an der Arbeit von Verbänden, die die kosmetische Industrie vertreten – sowohl auf nationaler Ebene, z. B. in Deutschland im IKW (Industrieverband Körperpflege und Waschmittel) oder in den USA in der CTFA (Cosmetic, Toiletry, and Fragrance Association), als auch auf internationaler Ebene, z. B. in der COLIPA (European Cosmetic Toiletry and Perfumery Association).

Für den Bereich der Medizinprodukte ist Beiersdorf beispielsweise Mitglied im BVMed (Bundesverband Medizintechnologie) und in der Eucomed (European Medical Technology Industry Association).

Alle Verbände stehen in einem ständigen Dialog mit Staat und Gesellschaft. Sie beteiligen sich an der Umsetzung und Weiterentwicklung geltenden Rechts und erarbeiten Empfehlungen oder Standards, die für die Mitgliedsfirmen verbindlich sind. So wurden etwa die „Good Manufacturing Practices“ eingeführt, deren Einhaltung in der Europäischen Kosmetik Richtlinie vorgeschrieben ist.

Darüber hinaus sind wir unter anderem Mitglied im World Environment Center (WEC), einer unabhängigen, industrie- und länderübergreifenden Organisation, die sich intensiv um die Förderung und Stärkung verantwortungsbewussten Handelns bemüht.

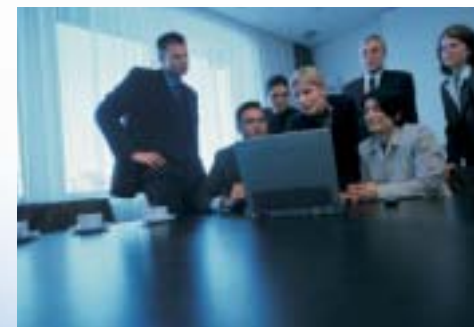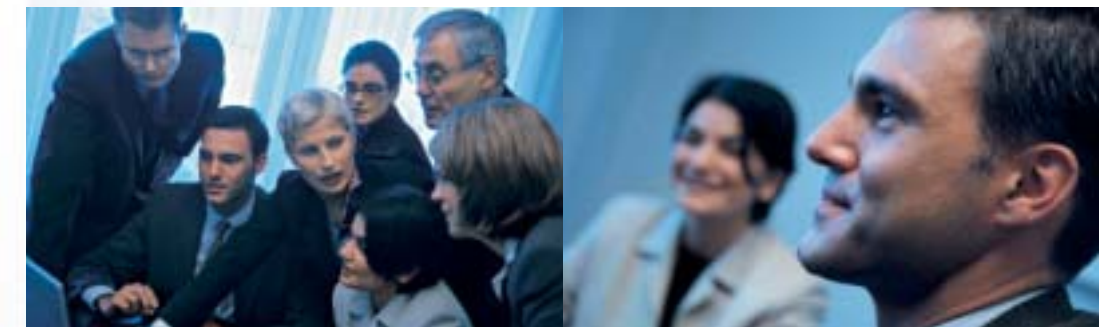

Verantwortungsbewusstes Handeln resultiert aus intensiver Zusammenarbeit



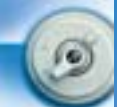

## Hamburg

# Mitarbeiter kommen zum „Treffpunkt Weiterbildung“

Engagement und Qualifikation der Mitarbeiter sind für Beiersdorf entscheidende Erfolgsfaktoren. Um unseren Mitarbeitern die Chance zu bieten, sich persönlich und fachlich weiterzuentwickeln, bieten wir neben vielen anderen Seminaren das Programm „Treffpunkt Weiterbildung“ an. Das Besondere: Die Kosten für die Kurse werden komplett vom Bereich Personalentwicklung übernommen. Im Gegenzug investieren die Mitarbeiter ihre Freizeit, denn die Kurse finden außerhalb der regulären Arbeitszeiten statt.

Alle Interessierten können an den Seminaren ohne direkten Bezug zur eigenen Arbeit und ohne Absprache mit Vorgesetzten teilnehmen. Das Angebot wird jährlich aktualisiert und umfasst ein breites Themenspektrum – von Kommunikation und Arbeitsmethodik über Gesundheit und Arbeit bis hin zu Kursen in englischer Sprache und PC-Kursen.

## Hamburg

# Jugend forscht – mit Beiersdorf

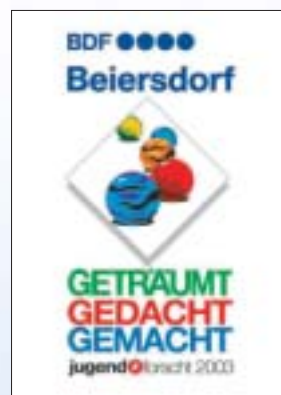

Um Jugendliche für Naturwissenschaften zu begeistern und eine Brücke zwischen Schule und Wirtschaft zu schlagen, unterstützt Beiersdorf seit 1975 den traditionsreichen Wettbewerb Jugend forscht. Das große Interesse und Engagement der Teilnehmerinnen und Teilnehmer und das hohe Niveau der Arbeiten zeigen, dass der Wettbewerb erfolgreich den Forschergeist von Jugendlichen weckt und sie dazu animiert, mit Kreativität und Einfallsreichtum praktischen, alltagsnahen Fragen, aber auch ambitionierten wissenschaftlichen Projekten nachzugehen. Im Rahmen der Partnerschaft fördert und begleitet Beiersdorf Jugend forscht das ganze Jahr über mit viel Einsatz: So stellen wir Teilnehmer für die Jury ab und stiften für den Wettbewerb attraktive Preise.

## Kenia

# Soziale Projekte in Ostafrika

1982 wurde die Beiersdorf East Africa Ltd. gegründet. Inzwischen zum führenden Kosmetik-Unternehmen Ostafrikas avanciert, ist die Beiersdorf-Tochtergesellschaft nicht nur wirtschaftlich erfolgreich, sondern engagiert sich auch in einer Vielzahl von sozialen und gesellschaftlichen Projekten. So gibt es seit dem Jahr 2000 den LIMARA Youth Club, ein schulgestütztes Projekt zur Ausbildung und Unterstützung junger Menschen. Auch das Filmprojekt „Heart & Soul“, das von der UNO initiiert wurde und die Bevölkerung für Themen wie AIDS, Armut oder Umweltschutz sensibilisieren will, wird finanziell gefördert.

Darüber hinaus wurde 2001 der „NIVEA Environmental Run“ ins Leben gerufen, bei dem mittlerweile über 350 Schüler zu einem Rennen durch die Natur starten und sich dabei über verschiedene Umweltaspekte informieren. In Kooperation mit dem Umweltprogramm der Vereinten Nationen (UNEP) und dem Leichtathletik-Weltverband (IAAF) erhalten Jugendliche so die Gelegenheit, auf aktive Art und Weise etwas über die Umwelt und deren Schutz zu lernen.

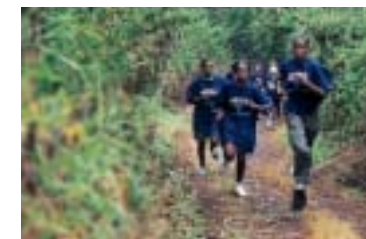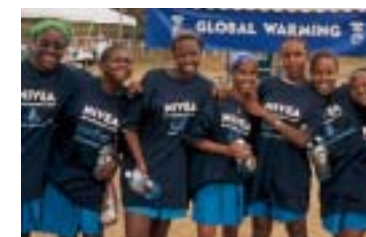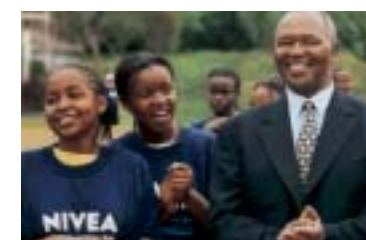

Die Umwelt aktiv erleben: der „NIVEA Environmental Run“

## Indonesien

# Ein Wohnheim für Jakartas Straßenkinder

„Hansaplast Peduli“ (Hansaplast cares) ist das Motto, unter dem Beiersdorf Indonesia einmal im Jahr ein umfangreiches soziales Projekt finanziert. Im Rahmen dieses Engagements wurden zuletzt Projekte der Stiftung „Kampus Diakoneia Modern“ (KDM) unterstützt. Diese Stiftung bringt Straßenkinder in ihren Einrichtungen unter und verschafft ihnen mit einer persönlichen und fachlichen Ausbildung eine viel versprechende Lebensperspektive. Ziel ist es, die Kinder in die Gesellschaft zu integrieren.

Nachdem Beiersdorf Indonesia 2001 in Rawa Kaso, in der Nähe Jakartas, bereits den Bau einer Bücherei finanziert hat, wurde im Jahr 2003 ein Wohnheim eingeweiht. Diese sinnvolle Kombination ergänzt die bestehenden Einrichtungen von KDM in Rawa Kaso.

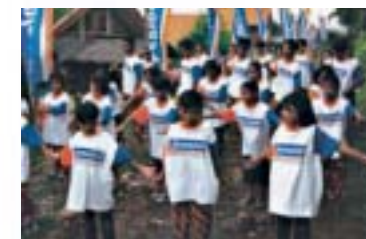

Ein fröhliches Fest: die Einweihung des neuen Wohnheims



Mitarbeiter fördern und fordern

## Der größte Wert eines Unternehmens sind seine Mitarbeiter

**Ein Unternehmen ist kein abstraktes Gebilde.**

**Dahinter stehen immer Menschen – die Mitarbeiter.**

Ihre Qualifikation, ihr Engagement und ihre Leistung sind für Beiersdorf die entscheidenden Erfolgsfaktoren. Die Sicherheit und Gesundheit unserer Mitarbeiter zu gewährleisten ist deshalb eine ganz entscheidende Aufgabe.

„Produktivität und Wirtschaftlichkeit dürfen nicht zu Lasten der Sicherheit gehen. Sichere Anlagen

sind produktive Anlagen. Sichere Arbeit ist effektive Arbeit.“ Diesen Anspruch aus unseren Sicherheits-Leitlinien setzen wir jeden Tag aufs Neue in die Praxis um: durch intensive Schulungen, Seminare zur Aus- und Weiterbildung und Übungen. So fördern wir bei unseren Mitarbeitern das Sicherheitsbewusstsein und geben ihnen die Qualifikation, mit den täglichen Herausforderungen eigenständig und selbstbewusst umzugehen.

Dies ist einer der Grundzüge der Personalpolitik von Beiersdorf. Sie wird geprägt durch eine offene Unternehmenskultur, in der wir unseren Mitarbeitern Raum zur Entfaltung und zur Übernahme von Verantwortung geben. Denn nur dann können wir erwarten, dass unsere Mitarbeiter selbst verantwortungsvoll handeln. Und darauf kommt es an. Um nachhaltige Ziele zu erreichen, ist es unumgänglich, dass jeder Einzelne seinen Beitrag dazu leistet.

Noch ein Wort zur Unternehmenskultur von Beiersdorf. Für uns ist es selbstverständlich, Menschenrechte und gesellschaftliche Werte zu achten; partnerschaftlich mit allen gesellschaftlichen Gruppen unseres Umfeldes zusammenzuarbeiten; die Persönlichkeit des Einzelnen zu respektieren. Diese Prinzipien sind für uns die Richtschnur des täglichen Handelns – jetzt und in Zukunft.



## Betriebliches Vorschlagswesen bei Beiersdorf

## Die besten Ideen sind keine graue Theorie

Aus der Praxis für die Praxis: Das ist der Gedanke, der hinter dem Betrieblichen Vorschlagswesen von Beiersdorf steht, mit dem die Arbeitsbedingungen im Unternehmen kontinuierlich verbessert werden sollen. Und zwar nicht durch „von oben“ verordnete Maßnahmen, sondern durch die aktive Beteiligung aller Mitarbeiter. Schließlich wissen sie aus ihrer täglichen Arbeit am besten, wo es Verbesserungspotenziale gibt.

Dabei gilt: Jede Idee zählt. Es wird nicht unterschieden nach „kleinen“ oder „großen“ Maßnahmen, bestimmte Bereiche sind nicht wichtiger als andere. Entscheidend ist, dass die mögliche Realisierung des Vorschlages eine Verbesserung bringt.

Alle Vorschläge und Ideen werden von den jeweiligen Vorgesetzten, einem Fachexperten und einem speziellen Ausschuss bewertet. Dieser Ausschuss setzt sich aus vier Betriebsangehörigen zusammen, von denen zwei von der Geschäftsleitung und zwei vom Betriebsrat ernannt werden.

Die über die Jahre gleich bleibend hohe Anzahl von Vorschlägen zeigt, dass sich unsere Mitarbeiter konstruktiv für Verbesserungen einsetzen. Mit Vorteilen für beide Seiten: Als Unternehmen profitiert Beiersdorf von den Kosteneinsparungen, effizienteren Arbeitsabläufen sowie der Identifizierung weiterer Verbesserungspotenziale beim Arbeits- und Umweltschutz. Die Mitarbeiter wiederum steigern die Qualität ihres Arbeitsplatzes aus eigener Initiative. Das motiviert und wird auch finanziell belohnt – mit Prämien, deren Höhe sich nach der Einsparung im ersten Nutzenjahr berechnet.

Gute Mitarbeiter sichern den Erfolg von Beiersdorf. Und Beiersdorf sichert den Erfolg guter Mitarbeiter. Das Betriebliche Vorschlagswesen ist dafür ein hochwirksames Instrument.

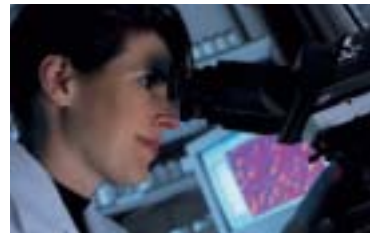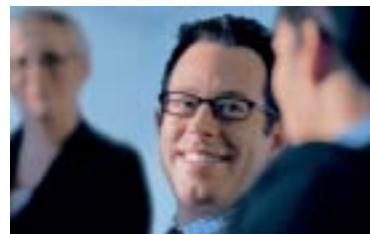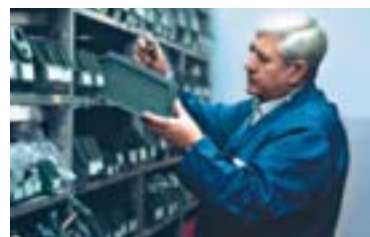

Die Beiersdorf-Mitarbeiter sind immer auf der Suche nach guten Ideen

## 1953: Das Betriebliche Vorschlagswesen startet

## Ein Motto mit Erfolg: „Vorschlagen – Verbessern – Verdienen“

Das Betriebliche Vorschlagswesen wurde 1953 ins Leben gerufen. Seitdem wurden weit über 46.000 Vorschläge eingereicht, die sich zu einer Einsparung von mehr als 31 Millionen Euro addiert haben. Mit einer Realisierungsquote von fast 59 Prozent schneidet Beiersdorf im Vergleich zu anderen Unternehmen der Branche gut ab.

Einige Beispiele für erfolgreiche Mitarbeiter-Vorschläge, die dazu beigetragen haben, die Arbeitswelt von Beiersdorf einfacher, kostengünstiger und sicherer zu machen:

- Durch die Veränderung der Füllköpfe in der Aerosolabfüllung können 25 Millionen Dosen Antitranspirantien direkt im Hamburger cosmed-Produktionszentrum abgefüllt werden und müssen nicht mehr von einem Zulieferer gefertigt werden.
- Das unbeabsichtigte Wegziehen der LKW-Trailer von der Laderampe wird dadurch verhindert, dass Bremskeile mit optischer Anzeige und Stoppschilder am Trailer aufgestellt werden. Sie signalisieren dem Fahrer, dass der Ladevorgang mit dem Gabelstapler noch nicht abgeschlossen ist.
- Die Plätze unter Not-Duschen werden durch gelb schraffierte Flächen auf dem Fußboden eindeutig gekennzeichnet, so dass sie nicht durch Paletten oder einzelne Gebinde voll gestellt werden.

Gerade im Betrieblichen Vorschlagswesen zeigt es sich immer wieder: Es sind die kleinen Dinge, die eine große Wirkung haben.

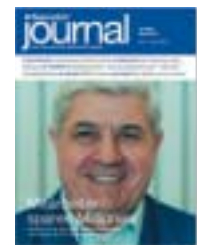

Informieren und unterhalten

## Die vielfältigen Seiten von Beiersdorf

Eine gute interne Kommunikation trägt maßgeblich zum Erfolg eines Unternehmens bei. Ein wichtiges Element bei Beiersdorf ist die internationale Mitarbeiterzeitschrift „Beiersdorf Journal“. Sie erscheint sechsmal jährlich mit einer Auflage von 22.000 Exemplaren und wird in den Sprachen Deutsch, Englisch, Spanisch und Französisch an alle Mitarbeiter weltweit verteilt. Jeder Mitarbeiter bekommt so die Chance, sich schnell und umfassend darüber zu informieren, was im Unternehmen geschieht – rund um den Globus.

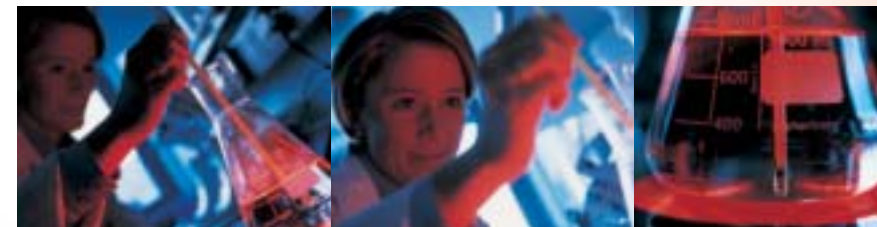

Mit Engagement die Dinge verbessern



## Eine gute Organisation ist nicht alles. Aber die beste Grundlage

**Kann ein Unternehmen ohne eine feste Organisation für Umweltschutz und Arbeitssicherheit verantwortungsvoll handeln? Unsere Antwort ist eindeutig: Nein.**

Zahlreiche Gruppierungen – Aktionäre, Kunden, Versicherer, aber auch Behörden und vor allem die Mitarbeiter – haben ein berechtigtes Interesse an einem funktionierenden Umweltschutz- und Sicherheitsmanagement. Bei Beiersdorf ist dieses Management Teil der Unternehmensstruktur – mit kompetenten Ansprechpartnern und klaren Verantwortlichkeiten.

Wir arbeiten sowohl in Deutschland als auch in unseren internationalen Tochtergesellschaften mit den jeweils zuständigen Behörden eng zusammen. Dabei erfüllen wir alle rechtlichen Grundlagen und Bestimmungen.

Durch unsere Organisation stellen wir nicht nur sicher, dass wir effizient und effektiv auf bestehende und auftretende Problematiken reagieren. Vielmehr können wir aktiv und offensiv die Entwicklung von Umweltschutz- und Sicherheits-

standards vorantreiben und sowohl innerhalb als auch außerhalb des Unternehmens kommunizieren und etablieren. Mit Engagement und Know-how legen wir so das Fundament für erfolgreichen Umweltschutz und möglichst hohe Arbeitssicherheit.

Beraten, motivieren, kontrollieren

„Nur so kann es uns gelingen, die Dinge kontinuierlich weiterzuentwickeln.“

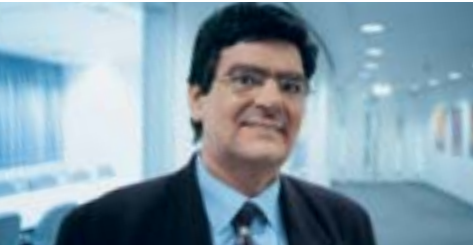

Ein Gespräch mit Dr. Detlef Wiswe,  
Konzernbeauftragter für Umweltschutz  
und Sicherheit.

**Können Sie skizzieren, welche Aufgabengebiete in Ihre Abteilung fallen?**

Kurz gesagt, stellen wir sicher, dass Gesetze und Verordnungen eingehalten werden – und zwar in den Bereichen Umweltschutz, Arbeitsschutz, Gefahrguttransport, Gewässerschutz sowie Kreislaufwirtschaft und Abfall. Das gilt für die Beiersdorf AG. Unsere internationalen Tochtergesellschaften erhalten von uns eine entsprechende fachliche Beratung in diesen Bereichen.

**Was bedeutet das konkret?**

Wir informieren über neue Gesetze und werten die Auswirkungen auf Beiersdorf aus. Wir verfolgen Gesetzesvorhaben, die national und international geplant sind. Wir sorgen für eine rechtssichere Betriebsorganisation und die erforderlichen Genehmigungsverfahren. Wir erarbeiten Managementsysteme für die Umsetzung unserer formulierten Leitlinien. Wir überprüfen die Einhaltung von Maßnahmen, führen aber natürlich auch vorsorgende Schulungen durch, z. B. zur Vermeidung von Arbeitsunfällen. Und wir pflegen den Kontakt zu den zuständigen Behörden, zur Berufsgenossenschaft, zu Versicherungsgesellschaften und Verbänden.

**Das ist ein breit gefächertes Spektrum.**

In der Tat. Aber als Unternehmen können wir den zahlreichen berechtigten Anforderungen, die an uns in Bezug auf ökologisch vernünftiges Handeln gestellt werden, nur mit Kompetenz und Konsequenz gerecht werden. Für jeden der oben genannten Bereiche gibt es Konzernbeauftragte, deren Verantwortlichkeiten klar geregelt sind. Selbstverständlich stehen alle Beauftragten und ihre Mitarbeiter in ständigem Austausch miteinander. Schließlich greifen viele Maßnahmen und Regelungen ineinander und benötigen eine übergeordnete Sicht der Dinge.

**Stichwort „übergeordnete Sicht der Dinge“. Wie arbeiten Sie mit anderen Unternehmensbereichen von Beiersdorf zusammen?**

Die Zusammenarbeit ist sehr gut und intensiv. So sind wir frühzeitig involviert, wenn es um die Einführung von emissionsarmen und ressourcenschonenden Produktionsverfahren geht. Auch bei der Prüfung neuer Rohstoffe gibt es einen engen Kontakt zur Forschung und Entwicklung von Beiersdorf. Außerdem verfolgen wir zusammen mit dem Bereich der Verpackungsentwicklung das Ziel, Materialien sparsam einzusetzen.

**Man könnte fast meinen, dass Sie mit Ihrer Abteilung weniger überprüfen als vielmehr beraten.**

Natürlich ist, wie eingangs schon erwähnt, die Kontrolle darüber, dass Beiersdorf die gesetzlichen Bestimmungen einhält, ein wesentlicher Punkt unserer Arbeit. Aber tatsächlich verstehen wir uns mit unserem Know-how auch als Berater und Begleiter. Wir wollen ein Bewusstsein innerhalb des Unternehmens schaffen, dass Umweltschutz und Sicherheit fester Bestandteil in der Organisation und den Abläufen des Unternehmens sind. Nur so kann es uns gelingen, die Dinge kontinuierlich weiterzuentwickeln.

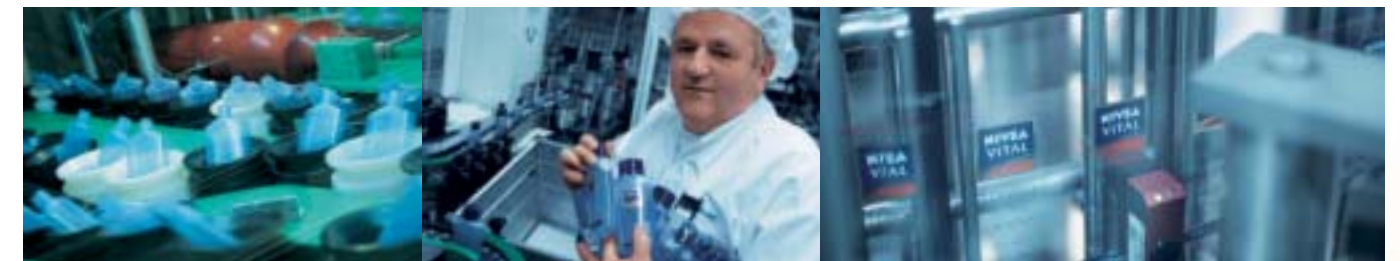

Beraten, motivieren, kontrollieren:  
Umweltschutz und Sicherheit haben viele Facetten

Interne Betriebsprüfung

Bei Audits gehen wir systematisch vor.  
Mit ESMAS

ESMAS – das ist die Abkürzung für „Environmental Protection and Safety Management Audit Scheme“. Dahinter verbirgt sich die interne Umweltschutz-und-Sicherheits-Betriebsprüfung, die Beiersdorf als effizientes Instrument zur Etablierung und Überprüfung hoher Standards entwickelt hat. Ein Kernpunkt ist die Überprüfung der Gesetzeskonformität: Werden gesetzliche Vorgaben eingehalten und konsequent in die Praxis umgesetzt?

Bei der Entwicklung von ESMAS haben wir uns auf zwei international anerkannte Normen gestützt: zum einen auf die „Öko-Audit-Verordnung“ der Europäischen Union, kurz EMAS, zum anderen auf ISO 14001 (Umwelt-Management-Systeme). Ergänzt haben wir diese Normen um für uns bedeutende Aspekte der Sicherheit und vor allem um unsere eigenen langjährigen Erfahrungen.

So können wir die Audits flexibel und individuell den in den Produktionsstandorten unterschiedlichen Bedingungen anpassen. Dadurch steigern wir das Niveau und die Effizienz der Auditierung, weil wir jeweils die für den Standort relevanten Prozesse betrachten können.

Der direkte Kontakt führt zu einem umfassenden und vertraulichen Informations- und Erfahrungsaustausch, mit dem Verbesserungspotenziale erkannt und ausgeschöpft werden können.

Ohnehin ist „Networking“ ein zentraler Bestandteil von ESMAS. Die Kommunikation, die Diskussion, der Austausch von Ideen ist mindestens genauso wichtig wie die tatsächliche Überprüfung der Umweltschutz- und Sicherheitsstandards. Dieser Ideen-Austausch findet regional und international statt, mit einzelnen Produktionsstandorten und Tochtergesellschaften. So können wir weltweit Prozesse kontinuierlich verbessern, um einen möglichst optimalen Umweltschutz und höchstmögliche Arbeitssicherheit zu gewährleisten.

[www.Beiersdorf.de/go/Nachhaltigkeit](http://www.Beiersdorf.de/go/Nachhaltigkeit)

THEMA: ESMAS-Audits

1995: ESMAS startet

Die Audits im Überblick

|    | Standort                                    | Land        | ESMAS-Audit-Modul |      |      |      |
|----|---------------------------------------------|-------------|-------------------|------|------|------|
|    |                                             |             | I                 | II   | III  | IV   |
| EU | Hirtler GmbH, Heitersheim                   | Deutschland | 1995              |      | 1998 | 2000 |
| EU | Beiersdorf AG, cosmed, Hamburg-Billbrook    | Deutschland | 1996              |      | 1999 |      |
| EU | BDF Nivea SA, Tres Cantos                   | Spanien     | 1996              |      | 2000 |      |
| EU | Beiersdorf AG, medical, Hamburg-Hausbruch   | Deutschland | 1997              |      |      |      |
| EU | Beiersdorf SpA, Brembate                    | Italien     | 1998              |      |      |      |
| EU | Beiersdorf SA, Argentona                    | Spanien     | 1999              |      |      |      |
| EU | Beiersdorf NV, Almere                       | Niederlande | 1999              |      |      |      |
| EU | Bode Chemie GmbH & Co, Hamburg              | Deutschland | 1999              |      |      |      |
| EU | Beiersdorf AG, cosmed, Hamburg-Lokstedt     | Deutschland | 2000              |      |      |      |
| AM | BDF México SA, México                       | Mexiko      | 2001              |      |      |      |
| EU | Juvena Produits de Beauté GmbH, Baden-Baden | Deutschland | 2001              |      |      |      |
| AS | Medical-Latex (DUA) SDN BHD, Senai          | Malaysia    | 2002              | 2002 |      |      |

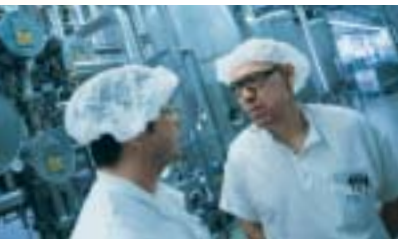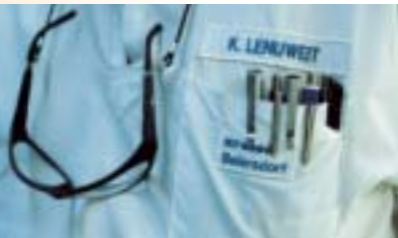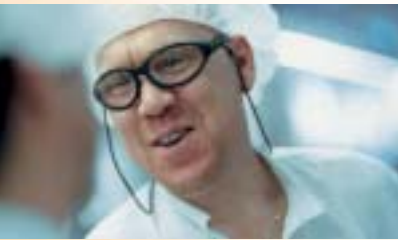

Mit ESMAS werden die Standards vor Ort überprüft

Kontinuierlicher Prozess

Langjährige Erfahrung  
zahlt sich aus

1995 wurde bei der Hirtler GmbH in Heitersheim das erste ESMAS-Audit durchgeführt und bereits ein Jahr später auf das europäische Ausland erweitert. Diesen ersten Pilotprojekten sind inzwischen weitere Audits gefolgt: in Deutschland und Europa, in Mexiko und in Asien. Die vielfältigen Erfahrungen, die wir während der Audits sammeln, fließen in alle nachfolgenden Überprüfungen ein und gewährleisten ein Höchstmaß an Qualität und Effizienz.



## Erstes Audit in Malaysia

# ESMAS goes East

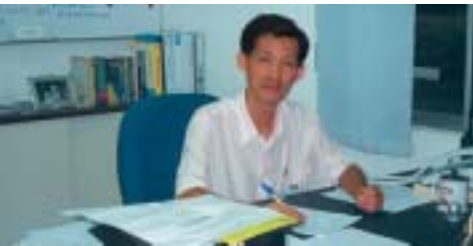

Vom 5. bis 9. November 2002 war es so weit:  
In Malaysia fand bei Medical Latex das erste  
ESMAS-Audit in Asien statt. Ein Gespräch mit  
Gwee Swee Ho, Manufacturing Manager.

### Wie beurteilen Sie ESMAS?

Als sehr gut. Besonders der Aspekt, dass bei ESMAS der Informations- und Erfahrungsaustausch eine große Rolle spielt, hat uns gut gefallen. Das Audit-Team hat viele Standorte überprüft und zahlreiche gute Beispiele gesehen. So können wir von anderen Audits profitieren.

### Natürlich kontrolliert ESMAS auch die Einhaltung gesetzlicher Vorgaben. Welche Ergebnisse hat das Audit gebracht?

Uns wurde bestätigt, dass wir gesetzliche Auflagen vorbildlich einhalten und in wesentlichen Bestandteilen ein funktionierendes Umwelt- und Sicherheitsmanagementsystem geschaffen und umgesetzt haben. Das Zertifikat, das wir erhalten haben, ist für uns sehr wichtig, weil es zeigt, dass wir auf dem richtigen Weg sind.

### Heißt das, dass ESMAS auch eine motivierende Funktion haben kann?

Auf alle Fälle. Die Überprüfung ist für uns Ansporn und Motivation, in unseren Bemühungen nicht nachzulassen und den erreichten Stand zukünftig weiterzuentwickeln. Wenn sich jeder Einzelne seiner Verantwortung bewusst wird, ist schon viel erreicht. ESMAS ist dafür ein geeignetes Instrument.

### Sie haben schon auf den Erfahrungsaustausch hingewiesen. Gibt es bei Ihnen Maßnahmen, von denen andere Standorte profitieren können?

Wir haben einen detaillierten „Emergency Response Plan“ entwickelt – ein für die Mitarbeiter konzipiertes Ablaufschema in kritischen Situationen. Das Audit-Team sieht darin einen Standard, der auch für andere Standorte beispielhaft sein könnte.

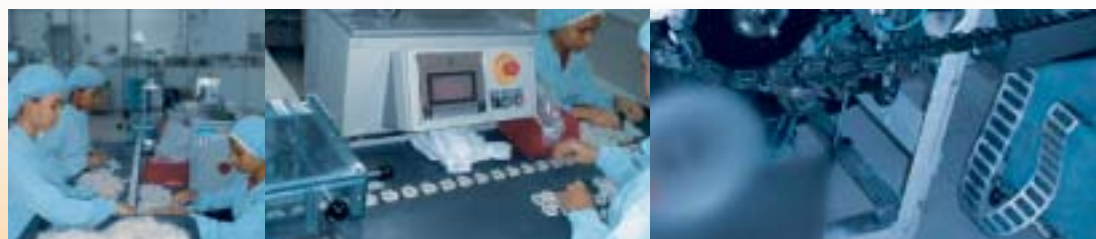

Produktionsbesichtigung beim  
ersten Audit in Malaysia

## 5 Tage volles Programm

# Ein beispielhaftes Audit

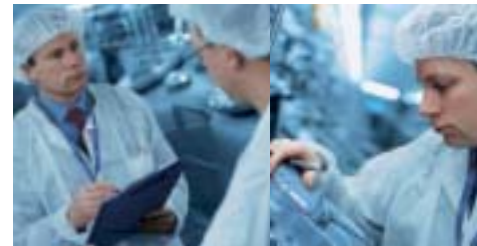

Dr. Michael Schink war Leiter  
des Audit-Teams in Malaysia  
und beschreibt den Ablauf.

### Dienstag:

Ankunft in Singapur. Fahrt über die Grenze nach Malaysia, bekannt für Ananas und Naturkautschuk. Eindruck einer geschäftstüchtigen Welt.

### Mittwoch:

Freundlich werden wir begrüßt: „Selamat Datang in Johor Bahru, der Heimat von Medical-Latex.“ Nach der Einführung und einem ersten Rundgang steht der Nachmittag ganz im Zeichen der ersten Interviews, die uns Einblick geben in die Organisation und relevanten Abläufe zu Umweltschutz und Sicherheit vor Ort.

### Donnerstag:

Die Interviews werden fortgesetzt, danach steht im Rahmen des Modul-I-Audits eine detaillierte Besichtigung der Produktions-, Lager- und Prüfstätten auf dem Programm. Auch die neue Abwasserreinigungsanlage, eine wichtige Umweltschutzmaßnahme des Standorts, ist Teil unserer Begehung. Nachmittags besprechen wir im Audit-Team die ersten Ergebnisse und Erfahrungen.

### Freitag:

Modul II ist an der Reihe. Wir begutachten die Verpackungsanlagen. Hier legen wir unseren Fokus auf die Anlagensicherheit und den Arbeitsschutz. Am Nachmittag heißt es wieder: Auswerten und Beurteilen.

### Samstag:

Wir erarbeiten den vorläufigen Abschlussbericht, der mit allen Beteiligten diskutiert, abgestimmt und schließlich finalisiert wird. In ihm werden sämtliche Feststellungen, beispielhafte Lösungswege und konkrete Empfehlungen zur kontinuierlichen Verbesserung des Standortes in den Bereichen Umweltschutz und Sicherheit zusammengefasst. Das Audit endet mit der Präsentation vor der Geschäftsführung und der Übergabe des ESMAS-Zertifikates, das die erfolgreiche Umsetzung des Umweltschutz- und Sicherheits-Managementsystems vor Ort dokumentiert. Und dann müssen wir leider schon wieder Abschied nehmen. Es waren fünf spannende, interessante und anregende Tage.

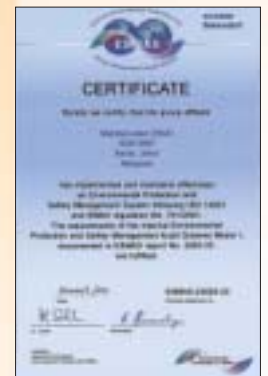

## Vier Module, ein Ziel

# Ständig besser werden

ESMAS besteht aus vier Modulen, die systematisch aufeinander aufbauen. Dadurch wird ein kontinuierlicher Prozess der Überprüfung und Verbesserung sichergestellt.

Modul I: Anhand von Checklisten und verbunden mit einer Besichtigung der Produktionsanlagen wird die Gesamt-Organisation für Umweltschutz und Arbeitssicherheit überprüft.

Modul II: Das Modul fokussiert die Kontrolle spezifischer Anlagen, etwa einer Verpackungsanlage, einer Beschichtungsanlage oder eines Warenlagers.

Modul III: Dieses Modul folgt Modul I nach drei bis vier Jahren und überprüft die Umsetzung der ersten Audit-Ergebnisse.

Modul IV: Nach weiteren drei bis vier Jahren folgt ein vollständig neues Audit.



Beiersdorf Umweltschutz

## Die Umwelt zu schonen liegt in unserer Natur

**Die Umwelt so wenig wie möglich zu belasten – was sich so einfach als Anspruch von Beiersdorf formulieren lässt, erfordert ein integriertes Umweltschutzmanagement, das alle Ebenen des Produktionszyklus berücksichtigt.**

Aus diesem Grund setzen wir beim Umweltschutz weit früher an als am Ende der Produktionskette. Klassischer Umweltschutz beginnt normalerweise erst bei der Entsorgung von Abfall und der Reinigung von Abluft und Abwasser. Natürlich ist und bleibt das eine wichtige Aufgabe, der wir uns bei Beiersdorf konsequent annehmen.

Aber um wirklich verantwortungsvoll zu handeln, beginnen wir mit unseren Maßnahmen bereits bei der Produktentwicklung. Der Einsatz umweltverträglicher und möglichst reiner Rohstoffe steht ebenso im Fokus wie die Herstellungsverfahren. Die Vermeidung von Abfällen, der sparsame Umgang mit Ressourcen und der Schutz von Luft, Boden und Wasser sind dabei vorrangige Ziele.

Umweltschutz am Produkt, Umweltschutz beim Produktionsverfahren und nachsorgender Umweltschutz: Mit diesem dreistufigen Konzept gehen wir nicht nur defensiv mit bereits bestehenden Situationen um, sondern sorgen präventiv dafür, die Belastungen und Auswirkungen unserer Produktion und Produkte so gering wie möglich zu halten. Nur so können wir unseren Anspruch auch tatsächlich in die Tat umsetzen. Es versteht sich von selbst, dass dabei gesetzliche Vorschriften und behördliche Auflagen als Standards eingehalten werden.

Wir verstehen Umweltschutz als die gemeinsame Aufgabe aller Mitarbeiter. Unser Konzept ist deshalb erfolgreich, weil sich jeder Beteiligte den Herausforderungen stellt und aktiv daran mitwirkt, stets noch bessere Lösungen zu realisieren.



## Beiersdorf Umweltschutz-Leitlinien Klare Ziele, klare Aufgaben

2

[www.Beiersdorf.de/go/Nachhaltigkeit](http://www.Beiersdorf.de/go/Nachhaltigkeit)

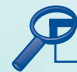

THEMA: Umweltschutz-Leitlinien

- Beiersdorf entwickelt und vertreibt Produkte, die bei Herstellung, Verwendung und Entsorgung die Umwelt so wenig wie möglich belasten.
- Mit knappen Ressourcen, wie Energie und Wasser, wird sparsam umgegangen.
- Beiersdorf betreibt Umweltschutz aus eigener Initiative und Verantwortung und führt die dazu erforderlichen Maßnahmen durch.
- Beiersdorf betreibt eine offene Informationspolitik gegenüber Mitarbeitern, Nachbarn, Kunden, Behörden und Lieferanten.

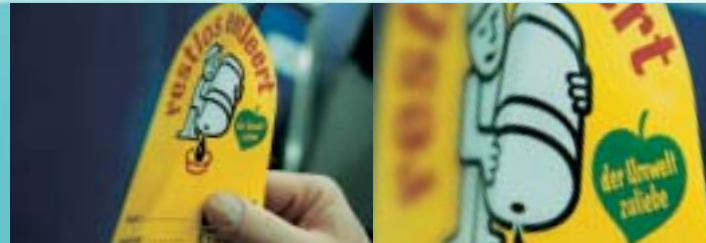

Aktuelle Daten und Fakten zu Projekten, Aufwendungen und Kennzahlen finden Sie im Internet unter:

[www.Beiersdorf.de/go/Nachhaltigkeit](http://www.Beiersdorf.de/go/Nachhaltigkeit)

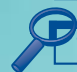

THEMA: Projekte

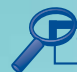

THEMA: Aufwendungen

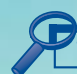

THEMA: Kennzahlen

Im Fokus: Pflegeprodukte

## Qualität ist eine ganz besondere Verantwortung

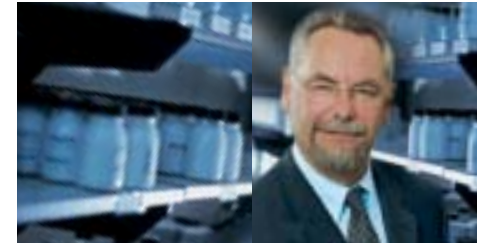

Einige Fragen an Dr. Klaus-Peter Wittern,  
Leiter Forschung und Entwicklung cosmed.

### Die Entwicklung von Pflegeprodukten erfordert besondere Sorgfalt. Welche Maßnahmen ergreift Beiersdorf, um dem gerecht zu werden?

Unsere Produkte zeichnen sich durch eine besonders gute Verträglichkeit für Mensch und Umwelt aus. Seit über 15 Jahren verwenden wir pflanzliche und hautverwandte Rohstoffe, unsere Reinheitsanforderungen gehen weit über die gesetzlichen Forderungen der Kosmetikgesetzgebung hinaus. An unseren Standards in der Rohstoffqualität orientieren sich sogar andere Firmen.

### Wie stellen Sie die hohe Qualität sicher?

Wir erfassen, dokumentieren und bewerten alle Stoffe und Produkte, mit denen wir im Unternehmen umgehen. Die Datenbanken werden kontinuierlich gepflegt und ständig aktualisiert – auf Basis neuer Erkenntnisse der Wissenschaft. Übrigens kontrollieren wir nicht nur penibel die Reinheit der eingesetzten Rohstoffe, sondern auch die genaue Zusammensetzung. Hierfür bedienen wir uns modernster analytischer Methoden.

### Wie überprüfen Sie die Wirksamkeit und Verträglichkeit der Produkte?

Für die Untersuchung der Hautverträglichkeit setzen wir dermatologische Prüfungen und In-vitro-Tests ein. Auf Tierversuche zur Prüfung von Kosmetika verzichten wir schon seit Mitte der 80er Jahre. Außerdem treiben wir aktiv die Weiterentwicklung innovativer Prüf- und Produktkonzepte voran.

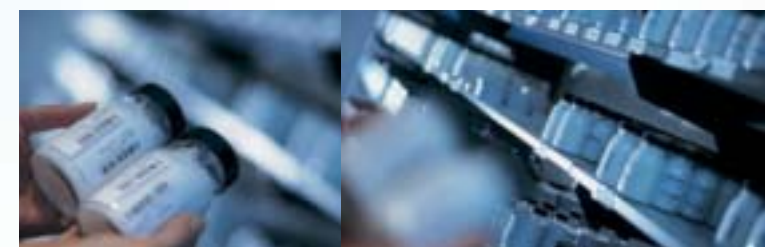

Wirksame und hautverträgliche Qualität:  
die Pflegeprodukte von Beiersdorf



Über 6 % weniger Aluminium

## An der Verpackung gespart

Sie ist auf der ganzen Welt bekannt: die blaue NIVEA-Dose aus Aluminium. Jährlich werden mehr als 120 Mio. Dosen von den Verbrauchern gekauft. Alle Dosen werden im Hamburger cosmed-Werk hergestellt, der größte Teil davon auch direkt dort abgefüllt. Die restliche Menge wird an die Tochtergesellschaften von Beiersdorf exportiert.

Durch eine neue Blechoffset-Druckmaschine konnten die Rüstzeiten verkürzt, die Bedienerfreundlichkeit verbessert und die Druckgeschwindigkeit um ca. 10 % erhöht werden. Darüber hinaus werden durch ein spezielles Anlegesystem Aluminiumbleche im so genannten Scrollformat eingesetzt. Jährlich sparen wir so über 6 % bzw. 120 Tonnen des wertvollen Rohstoffes ein.

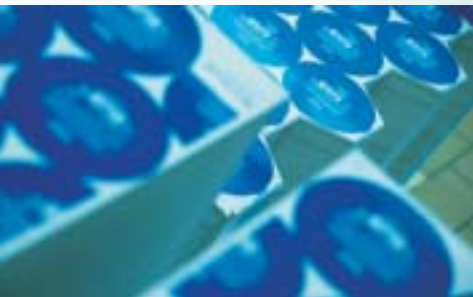

Effiziente Produktion der NIVEA-Dosen im Scrollformat

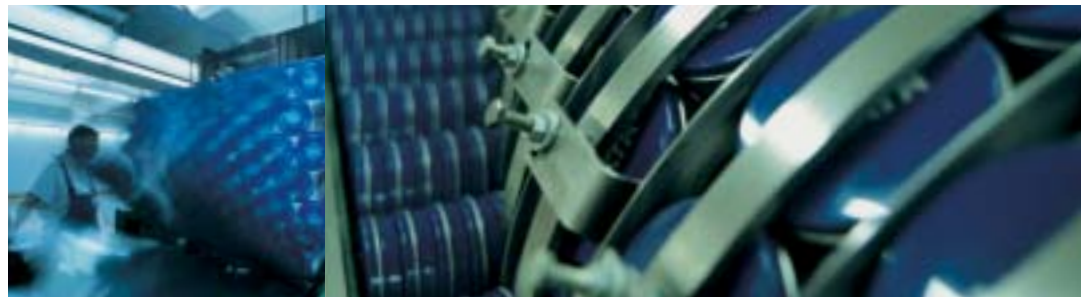

Lösemittelfreie Produktion

## Mit HotMelt schonen Pflaster die Umwelt

Die HotMelt-Beschichtung von Pflastern ist ein wesentlicher Beitrag zum produktionsintegrierten Umweltschutz der medical-Sparte von Beiersdorf. Bei dieser Technologie werden die Klebmassen im heißen Zustand ohne die Verwendung von Lösemitteln aus einer Schmelze auf die Materialbahnen aufgetragen. Die Vorteile: Lösemittel werden vollständig eingespart und Emissionen vermieden, es wird kein Prozesswasser benötigt und der Energieverbrauch erheblich reduziert.

Fast die gesamte Range der in Europa produzierten und in Nordamerika vermarkteten Curad-Pflasterstrips wurde bereits auf HotMelt-Klebmassen umgestellt. Das entspricht etwa einem Drittel der von Beiersdorf in Europa hergestellten Pflaster, der Verbrauch von ca. 110 Tonnen Lösemittel pro Jahr wird dadurch vermieden.

Mit der Investition in modernste Technologien streben wir nicht nur die konsequente Umstellung weiterer Standard-Pflaster an, sondern auch die lösemittelfreie Produktion von arzneimittelhaltigen Pflastern (Hansaplast-ABC-Wärmepflaster u. a.).

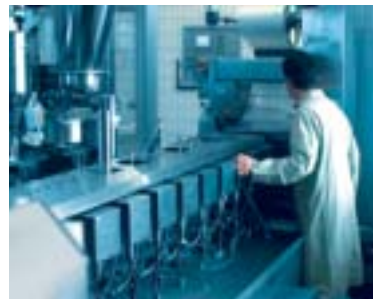

Extruder-Anlage zur lösemittelfreien Pflasterherstellung

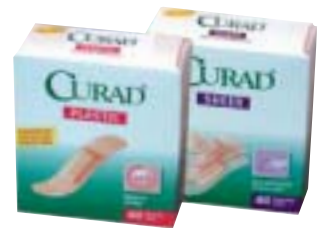

Verbrauch drastisch reduziert

## Mehr Effizienz für weniger Wasser

Wasser ist ein kostbares Gut. Umso wichtiger ist es, so viel wie möglich davon zu sparen. Im Werk Hamburg-Billbrook konnten durch diverse Optimierungsmaßnahmen der Wasserverbrauch und die Abwassereinleitung in der Produktion von Kosmetikrohstoffen drastisch reduziert werden. Während 1990 noch 250.000 m<sup>3</sup> Abwasser in das Schmutzwassersiel eingeleitet wurden, mussten im Jahr 2002 nur noch 35.000 m<sup>3</sup> entsorgt werden. Erreicht wurde dies durch die Umrüstung auf Kreislaufkühlanlagen und die Modernisierung der Anlagen zur Vakuumerzeugung. Auch auf die Förderung von eigenem Brunnenwasser kann seit 2001 komplett verzichtet werden.

## Für unsere Mitarbeiter tun wir alles. Mit Sicherheit

**Wenn es um Arbeitssicherheit geht, hat Beiersdorf eine Vision: „Null Unfälle im Betrieb“. Dieses ehrgeizige Ziel zu erreichen, steht im Mittelpunkt all unserer Bemühungen.**

Dabei verstehen wir sicheres Arbeiten, genau wie Umweltschutz, als eine Herausforderung, der sich das Unternehmen, aber auch alle Mitarbeiter stellen müssen. Als Unternehmen sorgen wir für den Schutz und die Sicherheit unserer Mitarbeiter, indem wir die Ausstattung und Ausrüstung unserer Produktionsstätten immer auf dem Stand der Technik halten. Indem wir Arbeitsabläufe immer wieder kontrollieren

und überprüfen, nach Gefahren und Risiken suchen und sie beseitigen. Und indem wir ein detailliertes Notfall-Management ausgearbeitet haben, mit dem wir im Ernstfall sofort und effizient reagieren können.

Das ist aber nur eine Seite der Medaille. Die andere: Wir sensibilisieren unsere Mitarbeiter und sorgen dafür, dass letztlich jeder Einzelne entscheidenden Einfluss darauf hat, wie sicher sein Arbeitsplatz tatsächlich ist.

Wir fördern unsere Mitarbeiter durch Schulungen und Übungen.

Nur wer weiß, wie man sich in bestimmten Situationen verhalten muss und warum das so ist, kann richtig und verantwortungsbewusst handeln, um sich und andere zu schützen. Dazu gehört auch die Bereitschaft, aus Fehlern zu lernen und sich ständig selbst zu überprüfen.

Unsere Vision ist schon zu einem sehr großen Teil Realität geworden. Wir arbeiten jeden Tag aufs Neue daran, sie vollständig zu verwirklichen.



## Beiersdorf Sicherheits-Leitlinien Klare Ziele, klare Aufgaben

3

[www.Beiersdorf.de/go/Nachhaltigkeit](http://www.Beiersdorf.de/go/Nachhaltigkeit)

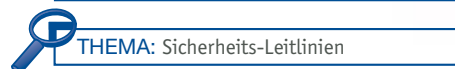

THEMA: Sicherheits-Leitlinien

- Sicherheit und wirtschaftlicher Erfolg sind gleichrangige Unternehmensziele.
- Sicherheit ist die Aufgabe aller Mitarbeiter.
- Unfälle sind vermeidbar.
- Sicheres Arbeiten erfordert ständiges Training.
- Aus Erfahrungen lernen wir.

### Arbeitsschutz-Anerkennung

## Ausgezeichnete Maßnahmen

Beiersdorf hat ein vorbildliches Arbeitsschutzsystem. Das bestätigt das Amt für Arbeitsschutz Hamburg, das regelmäßig Unternehmen überprüft und bewertet. Die Auszeichnung wurde Beiersdorf im Jahr 2000 verliehen und hat sechs Jahre Gültigkeit. Dabei wurde Beiersdorf in die beste Beurteilungsgruppe eingestuft, weil unter anderem folgende Kriterien erfüllt wurden:

- Schriftlich formulierte Unternehmenspolitik mit konkreten Zielen zum Arbeitsschutz
- Fortbildung zum Arbeitsschutz für die Verantwortlichen
- Programme zur Vertiefung von Arbeitsschutzzielen
- Unterdurchschnittliches Unfallgeschehen im Branchenvergleich verbunden mit einer konkreten Zielsetzung in der Unfallverhütung

[www.Beiersdorf.de/go/Nachhaltigkeit](http://www.Beiersdorf.de/go/Nachhaltigkeit)

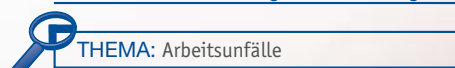

THEMA: Arbeitsunfälle

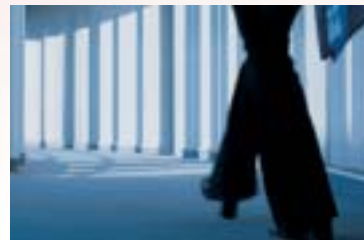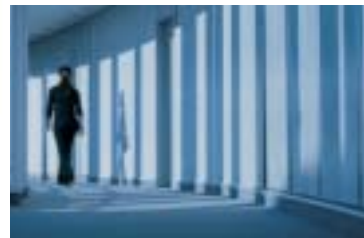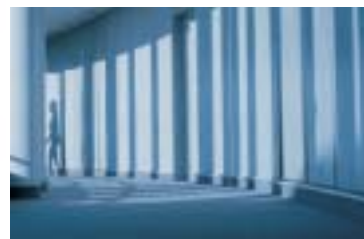

### Gefahrgut-Schulung in Wien

## Internationaler Austausch von Wissen

Auch auf internationaler Ebene schult Beiersdorf seine Mitarbeiter, um sie für den komplexen Bereich der Arbeitssicherheit zu sensibilisieren. Ein Beispiel von vielen: die länderübergreifende Gefahrgut-Schulung in Wien, die im November 2002 stattfand – für Mitarbeiter von Tochtergesellschaften der CEE-Gemeinschaft (Central Eastern Europe) aus Slowenien, Rumänien, Kroatien, Bulgarien und Serbien. Volker Krampe, Konzernbeauftragter von Beiersdorf für Gefahrguttransport, informierte die Mitarbeiter zum Thema „Dangerous Goods Regulations for Cosmetic Products“ mit folgenden Inhalten:

- Klassifizierung von Gefahrgut
- Kennzeichnung
- Verpackungsgruppen
- Spezielle Klassifizierung von Kosmetikartikeln
- Dokumentation
- Spezielle Anforderungen für Straßen-, See- und Lufttransport

Am Ende der Schulung stand ein Wissenstest, bei dessen erfolgreichem Bestehen die Teilnehmer mit einem Zertifikat ausgezeichnet wurden.

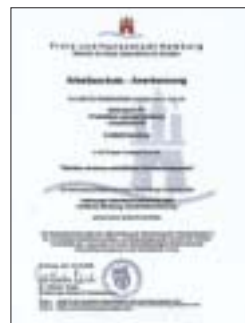

Die Arbeitssicherheit ist ein entscheidender Faktor bei der Produktherstellung

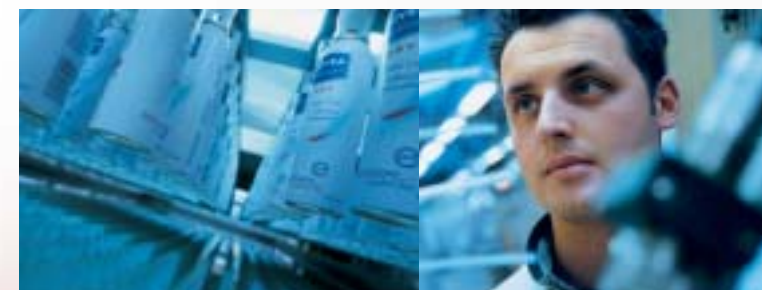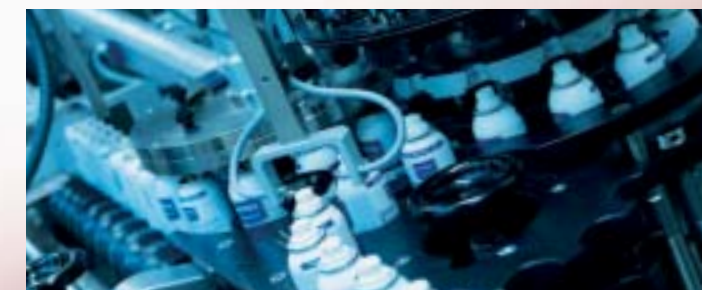



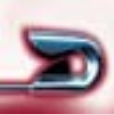

### Mitarbeiterbefragung im Werk Hamburg-Lokstedt

## Ergebnisse bestätigen Beiersdorf-Konzept

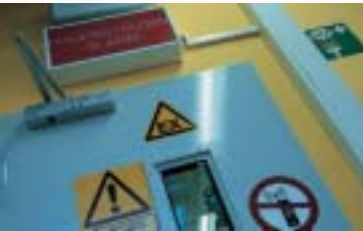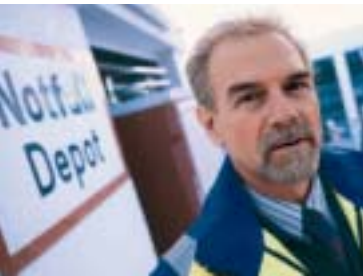

Gefahren und Risiken richtig einzuschätzen, ist für jeden Mitarbeiter wichtig

Schätzen Mitarbeiter die Gefahren und Risiken an ihrem Arbeitsplatz richtig ein? Wissen sie, was im Notfall zu tun ist? Um Antworten auf diese und ähnliche Fragen zu erhalten, wurden Mitarbeiter und Führungskräfte in der Aerosolfertigung von cosmed zu „Sicherheit, Gesundheitsschutz und Umweltschutz“ befragt. Externe Experten standen beratend zur Seite.

Die wichtigsten Ergebnisse:

- Die Mitarbeiter haben ein hohes Gefährdungs- und Risikobewusstsein.
- Das Verhalten im Gefahrfall ist allgemein bekannt.
- Einzelne Optimierungspotenziale gibt es in den Bereichen persönliche Schutzausrüstung, Ersteinweisungen und Unterweisungen von Mitarbeitern sowie beim Umgang mit erkannten Mängeln.

Der Gesamteindruck bestätigt, dass das Konzept der konsequenten und kontinuierlichen Schulung unserer Mitarbeiter erfolgreich ist. Gleichzeitig helfen Instrumente wie die Befragung, Schwachstellen zu erkennen und zu beseitigen.

### Kapselungen und Lichtschranken

## Mehr Sicherheit installieren

Bei der Planung und Umsetzung von neuen Produktionsanlagen werden Sicherheitsaspekte von Anfang an berücksichtigt. Dazu gehören auch Kapselungs-, Einhausungs- oder Abschirmungsmaßnahmen an rotierenden (Füll-Linie für Produkte), laufenden (Förderband) oder schwenkenden Anlagen (Roboter oder Bündelpacker im Verpackungsbereich). Die Integration von Lichtschranken oder Kontaktschaltern, die beispielsweise bei versehentlichem Öffnen von Einhausungen einen sofortigen Stopp der transportierenden Anlage auslösen, gewährleistet zusätzlich ein Höchstmaß an Sicherheit.

### Messung mit modernster Technik

## Belastungen erkennen und reduzieren

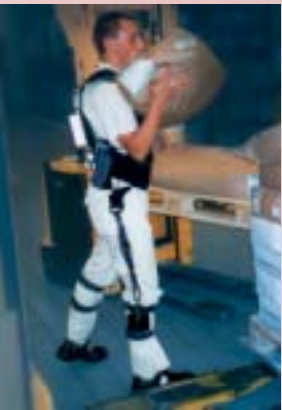

Wie wird der Stütz- und Bewegungsapparat beim Umgang mit Lasten und bei Arbeiten in extremer Körperhaltung belastet? Um das herauszufinden, wurde im Bereich cosmed vom „Berufsgenossenschaftlichen Institut für Arbeitssicherheit“ (BIA) eine Messung durchgeführt. Über ein spezielles computerunterstütztes System werden die Bein- und Körperhaltung sowie durch Druckmess-Sohlen die Bodenreaktionskräfte erfasst.

Die Ergebnisse zeigen, dass durch physiologisch günstiges Bewegungsverhalten die Belastung des Körpers erheblich reduziert werden kann. Insgesamt unterstreicht die Untersuchung die Wichtigkeit eines präventiven Hebe- und Tragetrainings am Arbeitsplatz, bei dem Mitarbeiter entlastende Bewegungsabläufe und vorteilhafte Körperhaltungen erlernen. Ein solches Training wird seit vielen Jahren direkt an den Arbeitsplätzen durchgeführt.

### Übersichtlicher Handschuh-Plan

## Sicheres Arbeiten in guten Händen

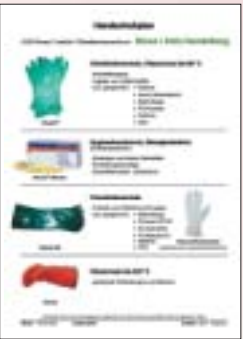

Verletzungen an den Händen nehmen statistisch gesehen eine vordere Position ein. Um dieses Risiko zu minimieren, hat Beiersdorf den so genannten Handschuh-Plan eingeführt. Dieser Plan ist eine klare und übersichtliche, arbeitsplatzbezogene Darstellung aller vorgeschriebenen Schutzhandschuhe. Er zeigt die Eignung für den jeweiligen individuellen Einsatzzweck, der durch eine Gefährdungsbeurteilung sowie Trageversuche in der Praxis ermittelt wurde – für optimalen Schutz vor chemischen, mechanischen und thermischen Risiken.

Der Handschuh-Plan dient der größtmöglichen Sicherheit. Er schafft Transparenz und erhöht so die Trageakzeptanz bei den Mitarbeitern.

### Individuell angepasster Gehörschutz

## Das bleibt im Ohr

Jedes Ohr ist so einzigartig wie der ganze Mensch. Deshalb bekommt jeder Mitarbeiter seinen persönlichen Gehörschutz. So werden anhand von Silikonabdrücken individuelle Otoplasten angefertigt, die dem jeweiligen Gehörgang optimal angepasst sind. Das verbessert den Lärmschutz und führt dazu, dass die Mitarbeiter „ihren“ Gehörschutz auch wirklich tragen.
