# Supplementary material
Source: publisher site journal article supplement (https://www.degruyterbrill.com/publication/isbn/9783110432879/downloadAsset/9783110432879_Elektronischer_Anhang_2.zip)
Supplement: Supplementary file 22 [file Beiersdorf Unser Profil.pdf › Korpustexte/Korpustexte pdf/Beiersdorf/Beiersdorf Unser Profil.pdf]

## **Unser Profil: Globale Marken, globaler Erfolg**

**Dynamisches Wachstum.** Hautpflege ist unsere Leidenschaft. 2009 hat Beiersdorf einen Umsatz von 5,75 Mrd. € erzielt. Unser Ziel ist, unseren Weltmarktanteil kontinuierlich zu steigern.

**Weltweite Präsenz.** Als internationales Markenartikelunternehmen wachsen wir weltweit. Den Schwerpunkt legen wir auf Märkte mit überdurchschnittlichem Wachstumspotenzial. Zu unseren Fokus-Ländern zählen vor allem Westeuropa, China, Russland, Brasilien und Indien.

**Starke Marken.** Unsere Marken sind international erfolgreich. Sie stehen für modernste Hautpflege und vereinen konsequente Verbraucherorientierung, zuverlässige Qualität und erlebbare Markenpersönlichkeit.

**Erfolg durch Nähe.** Wir wissen, was unsere Verbraucher bewegt. Gleichzeitig denken wir weiter und greifen mit unseren Innovationen den Wünschen der Verbraucher vor. Unsere Marken genießen weltweit ein großes Vertrauen, allen voran NIVEA, La Prairie und Eucerin.

**Überzeugende Innovationen.** Die Forschung und Entwicklung von Beiersdorf ist international führend auf dem Gebiet der Hautpflege. Mit über 125 Jahren Erfahrung und modernsten biotechnologischen Methoden entwickeln wir wirkungsvolle kosmetische Lösungen für unsere Verbraucher.

**Engagierte Mitarbeiter.** Erfolg hat viele Gesichter. Bei uns sind es weltweit über 20.000. Mit ihren Leistungen und ihrem Engagement treiben sie die Entwicklung von Beiersdorf voran und prägen die besondere Unternehmenskultur.

**Attraktiver Arbeitgeber.** Uns ist immer beides wichtig: der Erfolg und die Menschen. Grundlage unseres Erfolgs ist die hohe Identifikation unserer Mitarbeiter mit dem Unternehmen, verbunden mit einem hohen Engagement, das wir durch umfangreiche Weiterbildungs- und Trainingsprogramme fördern.
