# Supplementary material
Source: publisher site journal article supplement (https://www.degruyterbrill.com/publication/isbn/9783110432879/downloadAsset/9783110432879_Elektronischer_Anhang_2.zip)
Supplement: Supplementary file 23 [file Commerzbank Die Marke der neuen Commerzbank.pdf › Korpustexte/Korpustexte pdf/Commerzbank/Commerzbank Die Marke der neuen Commerzbank.pdf]

## **Die Marke der neuen Commerzbank - ein Name, ein Zeichen, eine Bank**

Eine Traditionsmarke hat sich neu positioniert, denn durch die Zusammenführung von Commerzbank und Dresdner Bank entsteht eine neue Commerzbank. Die neue Marke vereint die Stärken der beiden Traditionsmarken und setzt so ein sichtbares Zeichen des Zusammenwachsens.

Die Commerzbank versteht sich als die Hausbank für Privat- und Firmenkunden in Deutschland und steht für langfristige Partnerschaft und herausragende Leistung.

Die Einführung der neuen Marke hat im Herbst 2009 über einzelne Maßnahmen wie den neuen Wetterspot oder Bandenwerbung in Fußballstadien begonnen. Seit Juni 2010 hielt die neue Marke bundesweit Einzug. Im September 2010 hat die Commerzbank ihren neuen Marktauftritt erfolgreich umgesetzt. Rund 1.600 Filialen und andere Gebäude, darunter mehr als 700 Standorte der ehemaligen Dresdner Bank, tragen nun das neue Markenzeichen. Darüber hinaus erscheinen alle Onlineportale der ehemaligen Dresdner Bank im neuen Corporate Design, dem äußeren Erscheinungsbild der Commerzbank. An Ostern 2011 haben wir alle Kunden- und Produktdaten in einem einheitlichen IT-System zusammengeführt. Unsere Kunden können nun alle Leistungen der neuen Commerzbank in allen Filialen und online in Anspruch nehmen. Alles zu den Neuerungen erfahren unsere Privatkunden im [Klartext-Portal](#).

Informieren Sie sich auf den folgenden Seiten über die Marke der neuen Commerzbank.

## **Die neue Marke**

### **Unser größter Gewinn ist das Vertrauen unserer Kunden**

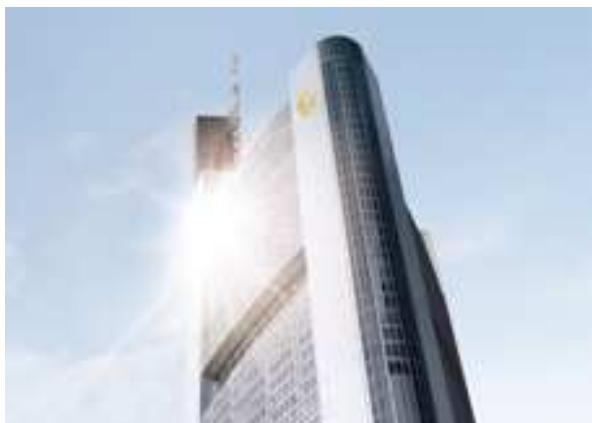

Ein starkes Unternehmen braucht eine starke Marke. Gerade für eine Bank ist dies wichtig, denn hier spielt das Vertrauen der Kunden in die Beratung und die Produkte eine große Rolle.

Mit unserer neuen Marke geben wir der Commerzbank einen modernen und

dynamischen Auftritt. Er unterstreicht unseren hohen Anspruch in allen Bereichen und ist Ausdruck unserer Identität. Eine starke Marke signalisiert verlässliche Qualität und schafft dadurch Vertrauen bei Kunden.

Als Marktführer für Privat- und Firmenkunden mit europäischer Ausrichtung hat die Commerzbank den Anspruch, die beste Bank in Deutschland zu werden. Sie versteht sich als die Hausbank für Deutschland und steht für langfristige Partnerschaft sowie herausragende Leistung. Diese Vision bildet das Fundament des neuen Markenauftritts.

Die neue Commerzbank vereint die traditionellen Stärken von Commerzbank und Dresdner Bank. Sie verbindet als einziges Institut im deutschen Markt glaubwürdig bundesweite lokale Verankerung mit internationaler Reichweite und bietet hohe Leistungsfähigkeit sowie umfassende Kompetenz.

Bei der Arbeit mit unseren Kunden lassen wir uns von Werten leiten, die sowohl in der Commerzbank als auch in der Dresdner Bank seit jeher einen hohen Stellenwert haben: Leistung, Respekt und Partnerschaftlichkeit, Marktorientierung, Teamgeist und Integrität. Diese Werte leben wir im Unternehmen und in unserer Partnerschaft mit unseren Kunden. Auf diesem Weg wollen wir das Ziel erreichen, die beste Bank in Deutschland zu sein.

## Die neue Marke

### Eine starke Bank braucht eine starke Marke

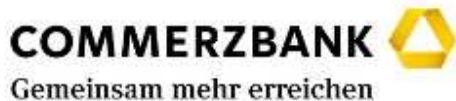

Die neue Commerzbank vereint die traditionellen Stärken von Commerzbank und Dresdner Bank. Das spiegelt sich im neuen, komplett überarbeiteten Markenauftritt wider, der Elemente aus beiden Vorgängerinstituten enthält.

Gleichzeitig verleiht die neue Marke der neuen Commerzbank einen modernen, dynamischen und unverwechselbaren Auftritt. Dieser unterstreicht den hohen Anspruch der neuen Commerzbank und ist Ausdruck ihrer Identität.

Die neue Marke besteht aus:

1) der Markenpositionierung: Sie beschreibt, wofür die neue Commerzbank steht, nämlich Partnerschaftlichkeit und Leistungskraft.

### Markenpositionierung - die Basis des Erfolgs: Partnerschaftlichkeit und Leistungskraft

Mit einem starken Partner kann man mehr erreichen. Deshalb verbindet die Commerzbank in ihrem Markenauftritt Partnerschaftlichkeit und Leistungskraft. Diese Kombination macht die Commerzbank einzigartig und unterstützt die strategische Ausrichtung der neuen Commerzbank.

*Partnerschaftlichkeit* heißt für uns, Sie als Kunden zu begleiten. Wir wollen Ihnen auf Augenhöhe begegnen und gemeinsam die beste Lösung für Sie finden. Mit persönlichem Einsatz sorgen wir dafür, dass Sie ihre Ziele erreichen können. Intern heißt Partnerschaftlichkeit für uns aber auch, dass wir als Mitarbeiter gemeinsam handeln: als starkes, solidarisches und zielorientiertes Team.

*Leistungskraft* bedeutet für uns, dass wir Sie mit Stärke und Erfahrung zum Erfolg führen. Bereits heute gehören wir zu den führenden Banken in Deutschland und bündeln die Kräfte zweier erfolgreicher Institute. Durch unsere Größe sind wir immer ganz nah an unseren Kunden und verbinden so internationale Expertise mit lokaler Verankerung. Mit unserer Kompetenz und Innovationskraft können wir speziell auf Ihre Bedürfnisse eingehen und Lösungen für Sie entwickeln. Dies macht uns zu einem leistungsfähigen Partner.

Auf diese Weise wollen wir uns Ihr Vertrauen verdienen. Ihr Erfolg ist das Ergebnis. Verlässlich, initiativ und konsequent erreichen wir gemeinsam mit Ihnen Ihre finanziellen Ziele.

- 2) dem Markenversprechen "Gemeinsam mehr erreichen": Es bringt die Positionierung in aller Kürze auf den Punkt.

## **Unser Markenversprechen - "Gemeinsam mehr erreichen"**

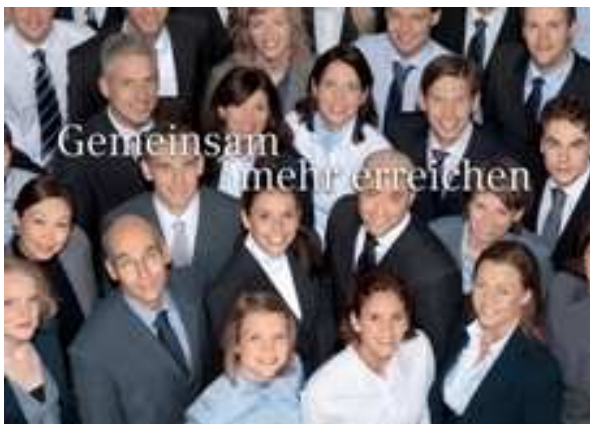

Mit unserem Markenversprechen "Gemeinsam mehr erreichen" verdeutlichen wir unseren Anspruch. Es bringt die Positionierung auf den Punkt und beschreibt, wofür wir stehen und was wir unseren Kunden versprechen.

"Gemeinsam mehr erreichen" gilt für uns alle: nach außen gemeinsam mit Kunden und Geschäftspartnern, nach innen gemeinsam mit Kolleginnen und Kollegen. Das Markenversprechen "Gemeinsam mehr erreichen" sehen Sie unter anderem in unseren Printkampagnen.

- 3) dem Markenzeichen: Es verbildlicht, wie aus der Zusammenführung zweier Traditionsmarken etwas Neues, Wegweisendes und Modernes entsteht.

## Markenzeichen: Nach außen zeigen, wofür wir stehen

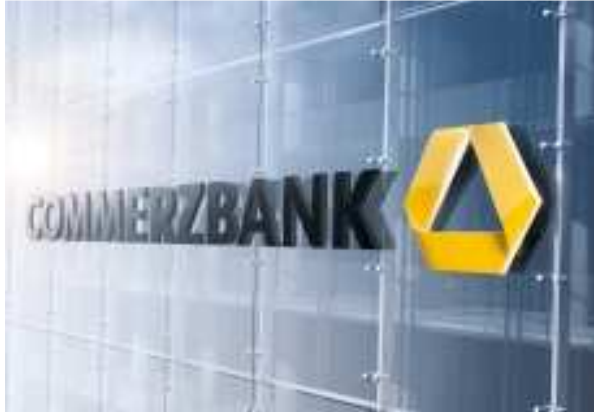

Unser neues Markenzeichen zeigt, wie aus der Zusammenführung zweier Traditionsmarken etwas Neues, Wegweisendes und Modernes entsteht: ein Name, ein Zeichen, eine Bank.

Es symbolisiert das Zusammenwachsen von Dresdner Bank und Commerzbank und steht für die neue Commerzbank. Das neue Markenzeichen besteht aus drei wesentlichen Elementen: dem Namen "Commerzbank" mit neuem Schrifttyp, der Farbe Gelb und dem dreidimensionalen Band.

Die Wortmarke "Commerzbank" ist souverän und klar und drückt mit ihrer neuen Typografie Stabilität und Qualität aus.

Das kraftvolle und lebendige Gelb ist energiegeladen und betont unser Selbstverständnis und unsere Leistungskraft.

Das dreidimensionale Band steht für die partnerschaftliche Verbundenheit von Mitarbeitern, Kunden und Geschäftspartnern. Seine dreidimensionale Umsetzung vermittelt Dynamik, Kontinuität und Stabilität.

4) dem Corporate Design: Es sorgt für ein einheitliches Erscheinungsbild.

## Markendesign: Wie wir uns sehen und sehen lassen

Starke Marken sind mehr als Logos und Markenversprechen. Sie sind ein ganzes System von Farben, Bildwelten und Schrifttypen. In einem harmonischen Zusammenspiel schaffen sie einen einheitlichen und konsequenten Markenauftritt. Das konsistente Gestaltungskonzept erhöht die Wiedererkennbarkeit und Alleinstellung eines Markenauftritts.

Auf diese Weise können wir die Stärke der neuen Commerzbank-Marke über alle Medien hinweg einheitlich visualisieren - von der Visitenkarte über Broschüren und Anzeigen bis hin zum Filialauftritt.

# Markengeschichte

Der aktuelle Markenauftritt der Commerzbank führt zentrale Elemente der Traditionsmarken Commerzbank und Dresdner Bank weiter - sie bilden die Grundlage einer wegweisenden neuen Wort-Bild-Marke. Dieser Übergang ist nichts Ungewöhnliches:

Marken sind etwas Lebendiges und entwickeln sich zusammen mit Strategie und Positionierung des Unternehmens kontinuierlich weiter. Bei diesem Wandel entstehen immer neue, für ihre Zeit prägende Zeichen - dies zeigt die Markengeschichte der Commerzbank und der Dresdner Bank. □ Der Name Commerzbank in moderner Typographie, die Hausfarbe Gelb und die zu einer dynamischen, dreidimensionalen Form weiterentwickelte Bildmarke der Dresdner Bank stehen heute für Partnerschaftlichkeit und Leistungsstärke und setzen ein sichtbares Zeichen für die gemeinsame Zukunft beider Banken.

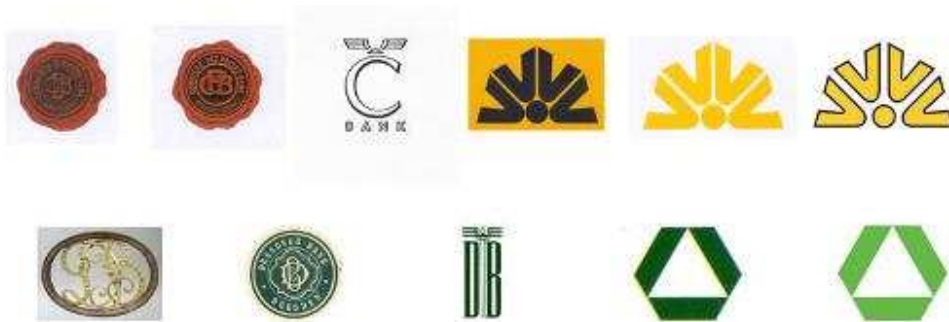

[https://www.commerzbank.de/de/hauptnavigation/konzern/die\\_neue\\_commerzbank/neue\\_marke](https://www.commerzbank.de/de/hauptnavigation/konzern/die_neue_commerzbank/neue_marke)
