# Supplementary material
Source: publisher site journal article supplement (https://www.degruyterbrill.com/publication/isbn/9783110432879/downloadAsset/9783110432879_Elektronischer_Anhang_2.zip)
Supplement: Supplementary file 24 [file Commerzbank Die Unternehmenskultur der Commerzbank.pdf › Korpustexte/Korpustexte pdf/Commerzbank/Commerzbank Die Unternehmenskultur der Commerzbank.pdf]

## Die Unternehmenskultur der Commerzbank

Die Unternehmenswerte (ComWerte) und die historisch gewachsene Unternehmenskultur der Commerzbank bilden die Grundpfeiler unserer Verantwortung - sie beschreiben Geschichte und Gegenwart der Bank, formulieren aber auch einen Anspruch für die Zukunft. Wir sind überzeugt, dass gemeinsame Werte, die sowohl nach innen als auch nach außen gelebt werden, die beste Basis für unser verantwortliches Handeln sind.

### ComWerte als Basis für nachhaltiges Handeln

„Integrität“, „Respekt /Partnerschaftlichkeit“, „Marktorientierung“, „Leistung“ und „Teamgeist“ sind die Werte der Commerzbank. Sie wurden auf Basis der Unternehmenshistorie und der [Stakeholder](#)-Anforderungen im Jahr 2007 von Vorstand und Führungskräften identifiziert und durch einen Arbeitskreis verifiziert, der aus Mitarbeitern aller Ebenen der Bank bestand. Auf eine Ausformulierung der einzelnen Werte hat man ebenso verzichtet wie auf die Produktion einer Hochglanzbroschüre. Vielmehr wurde als wichtiger Erfolgsfaktor eine breite Beteiligung der Mitarbeiter angestrebt - und erreicht.

In über 2 300 Workshops hatten alle Mitarbeiter im Inland die Gelegenheit, sich mit den Werten zu beschäftigen: Was bedeuten die Werte für mich beziehungsweise für unser Team? Was verbinden wir gemeinsam mit den Werten? Was können wir tun, um den Werten Ausdruck zu verleihen? Dieses Angebot nutzten von Juli 2007 bis Dezember 2008 rund 25 000 Mitarbeiter, was einer Beteiligungsquote von 95% entspricht.

Durch das aktive Auseinandersetzen mit den Werten konnten diese tief im Unternehmen verwurzelt werden: Dies zeigte auch die Mitarbeiterbefragung in Zusammenarbeit mit TNS Infratest im September 2008. Rund 84% der Mitarbeiter im Inland, die bis dahin an einem ComWerte-Workshop teilgenommen hatten, fühlten sich „gut“ oder „sehr gut“ über den ComWerte-Prozess informiert.

Zu einer verbindenden und verbindlichen Unternehmenskultur werden die ComWerte jedoch erst dann, wenn sie im täglichen Umgang miteinander gelebt werden. Hierfür ist ausnahmslos jeder Mitarbeiter verantwortlich. Unternehmensleitung und Führungskräfte haben eine besondere Verantwortung für den Prozess – sie sind Vorreiter und Vorbilder. ComWerte betritt auch medial neue Wege: Den ComWerte-Film „Wofür wir stehen.“, der den ComWerte-Prozess seit 2007 dokumentierte, sahen 12 000 Mitarbeiter der Commerzbank, Dresdner Bank und Tochtergesellschaften in 26 Städten in ganz Deutschland.

Das Zusammenwachsen mit der Dresdner Bank stellt auch kulturell eine Herausforderung dar – ComWerte liefert die Basis. Im Mittelpunkt von ComWerte steht nach wie vor der persönliche Dialog. So wurde durch eine eigens für das Integrationsprojekt ins Leben gerufene Arbeitsgruppe eine Kulturanalyse durchgeführt. Die Unternehmenskulturen von Commerzbank und Dresdner Bank lassen eine hohe grundsätzliche Übereinstimmung erkennen. Basierend auf den ComWerten wurden zielgruppenspezifische Workshop-Formate entwickelt, die es den neu entstehenden Bereichen und Teams ermöglichen, im besten Sinne zusammen zu wachsen.
