# Supplementary material
Source: publisher site journal article supplement (https://www.degruyterbrill.com/publication/isbn/9783110432879/downloadAsset/9783110432879_Elektronischer_Anhang_2.zip)
Supplement: Supplementary file 25 [file Commerzbank Die Werte der Commerzbank.pdf › Korpustexte/Korpustexte pdf/Commerzbank/Commerzbank Die Werte der Commerzbank.pdf]

## Die Werte der Commerzbank

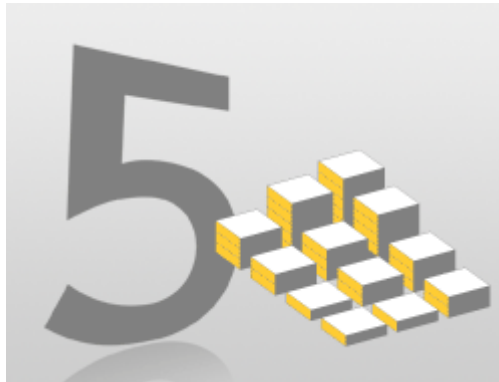

Die Commerzbank steht in einer langen Tradition, die bis in das Jahr 1870 zurückreicht. Gegründet von Hamburger Kaufleuten, fühlen wir uns auch heute noch den Werten des ehrbaren, hanseatischen Kaufmanns verpflichtet. Denn Werte bieten Orientierung in einer globalisierten Welt.

Gemeinsame Wertvorstellungen als Teil einer modernen Unternehmenskultur stiften Identität und sind Basis für Wachstum und nachhaltigen Erfolg. Daher haben wir einen Prozess angestoßen, der die Bedeutung von gelebten Werten verstärkt in das Bewusstsein aller Mitarbeiter rückt: ComWerte. Wir sind davon überzeugt, dass dieser Prozess uns auch dabei hilft, zusätzliche Leistungspotenziale bei unseren Mitarbeitern zu aktivieren.

Bei allem Ehrgeiz, hochgesteckte betriebswirtschaftliche Ziele zu erreichen, wollen wir unsere Verantwortung gegenüber den Menschen, der Gesellschaft und der Umwelt stets wahrnehmen.

### Aufbruch zu einer werteorientierten Unternehmenskultur

Der Vorstand hat 2007 mit ComWerte einen Wandel zu einer mehr werteorientierten Unternehmenskultur angestoßen, natürlich auch mit dem Ziel, Wachstum durch „innere Stärke“ zu schaffen.

In dem breit angelegten Prozess wurde und wird hinterfragt, wofür das Unternehmen im Kern steht, was es stark macht und worauf es stolz sein kann. Gleichzeitig aber auch, was verändert werden muss, um die Zukunft gemeinsam erfolgreich zu gestalten. Mit ComWerte wollen wir die Unternehmenskultur nicht nur beschreiben, sondern alle Mitarbeiter anregen, sich regelmäßig mit der Unternehmenskultur der Bank auseinanderzusetzen. .

Im Übrigen besteht ein wissenschaftlich belegter Zusammenhang zwischen Werten und dem Erfolg eines Unternehmens. Ein Viertel des betriebswirtschaftlichen Erfolgs wird der Wirkung einer gelebten Wertekultur zugeschrieben. Mit ComWerte soll eine lebendige, motivierende, eigenständige und begeisterte Unternehmenskultur etabliert werden. Denn ein Umfeld, das die Mitarbeiter begeistert, schafft Wachstum von innen. Zugleich sendet eine gelebte Unternehmenskultur ein starkes Signal nach außen.

Mit ComWerte schärft die Commerzbank also auch ihr Profil im Bankenmarkt und erhöht damit ihre Attraktivität als Arbeitgeber.

## Der Wertekanon

Unsere Werte sind aus unserer Unternehmenskultur entstanden und formulieren zugleich einen Anspruch an die Zukunft; sie leiten uns im Umgang miteinander und prägen unser Verhalten gegenüber internen und externen Kunden, Marktpartnern und Gesellschaft:

- **Leistung:** Sowohl individuelle als auch teamorientierte Leistung bilden die Grundlage für unseren nachhaltigen Erfolg.
- **Respekt und Partnerschaftlichkeit:** Respekt und Partnerschaftlichkeit prägen unsere Beziehung zu unseren Kunden, Mitarbeitern und Partnern.
- **Marktorientierung:** Wir denken und handeln marktorientiert; entscheidend sind dabei die Bedürfnisse und Ziele unserer Kunden.
- **Teamgeist:** Zusammenarbeit bedeutet für uns Teamgeist. Weil wir uns als Gemeinschaft den Herausforderungen stellen, können wir uns gemeinsam über die Erfolge freuen.
- **Integrität:** Wichtigstes Gut ist unsere Integrität. Sie ist Grundlage des in uns gesetzten Vertrauens und somit von überragender Bedeutung.

Diese Werte leben wir im Unternehmen und in unserer Partnerschaft mit unseren Kunden. Wir sind uns unserer unternehmerischen Verantwortung bewusst und agieren stets verantwortungsvoll und nachhaltig.

## ComWerte als Prozess

Was mit unseren Werten verbunden ist, ist nicht bis ins Detail definiert oder ausformuliert. Vielmehr versteht sich ComWerte als ein permanenter, nachhaltiger Prozess, in dem immer wieder von jedem Einzelnen und auch in der Gruppe überlegt wird: Was bedeuten die Werte für mich beziehungsweise für uns?

- Was bedeuten die Werte für mich beziehungsweise für uns?
- Was verbinden wir gemeinsam mit den Werten?
- Was können wir tun, um den Werten Ausdruck zu verleihen?

Und schließlich:

- Wie kann ich die Anforderungen des Wertekanon in meine tägliche Arbeit integrieren?

ComWerte gibt also eine Art Rahmen vor, der immer wieder neu interpretiert, konkretisiert und mit Leben erfüllt werden soll.

## Der Schlüssel zum Erfolg

Die Voraussetzungen für die Erreichung der mit ComWerte verfolgten Ziele sind vielversprechend, denn:

- Der Vorstand ist Teil des Prozesses und treibt ihn voran
- Der Prozess setzt auf eine breite Beteiligung aller Mitarbeiter
- Die Werte werden laufend ausgestaltet und gelebt
- Der ComWerte-Prozess wird nachhaltig im Unternehmen verankert

## **Die Basis der kulturellen Integration**

Bei der Zusammenführung von Dresdner Bank und Commerzbank geht es nicht nur um die Vereinheitlichung von Produkten, Leistungen und IT. Vielmehr müssen auch die Mitarbeiter beider Häuser kulturell zusammenwachsen. Verhaltensweisen gleichen sich an, Spielregeln werden gelernt oder entwickeln sich neu. Das dauert erfahrungsgemäß fünf bis sieben Jahre, in manchen Fällen auch länger. Dessen ist sich die Bank bewusst und fördert deshalb die kulturelle Integration gezielt, beispielsweise durch Workshops für Führungskräfte und Mitarbeiter. Die Basis dafür: ComWerte.

## **Auf dem Weg zur besten Bank**

Gemeinsame Werte schaffen eine verbindliche und verbindende Unternehmenskultur, und damit Orientierung für unsere tägliche Arbeit. Sie unterstützen uns auf dem Weg zur Erreichung unseres Ziels:

Als Marktführer für Privat- und Firmenkunden mit europäischer Ausrichtung wollen wir die beste Bank in Deutschland werden – und damit erste Wahl für unsere Kunden, Mitarbeiter und Investoren. Wir verstehen uns als die Hausbank für Deutschland und stehen so für langfristige Partnerschaft sowie herausragende Leistung.

<https://www.nachhaltigkeit.commerzbank.de/de/internetportal/mitarbeiter/unternehmenskulturcomwerte/unternehmenskulturcomwerte.html>
